# Supplementary material for: Chirality Matters: Fine-Tuning of Novel Monoamine Reuptake Inhibitors Selectivity through Manipulation of Stereochemistry
Source: MDPI journal article supplement (doi:10.3390/biom13091415), 2023-09-19
Supplement: s1 [file s1]

## Supporting Information

### Chirality matters: Fine-tuning of novel monoamine reuptake inhibitors selectivity through manipulation of stereochemistry

Predrag Kalaba<sup>1</sup>, Katharina Pacher<sup>1</sup>, Philip John Neill<sup>1</sup>, Vladimir Dragacevic<sup>1</sup>, Martin Zehl<sup>2,3</sup>, Judith Wackerlig<sup>1</sup>, Michael Kirchhofer<sup>1</sup>, Simone Sartori<sup>4</sup>, Hubert Gstach<sup>1</sup>, Shima Kouhnavardi<sup>1</sup>, Anna Fabisikova<sup>2</sup>, Matthias Pillwein<sup>1</sup>, Francisco Monje Quiroga<sup>5</sup>, Karl Ebner<sup>4</sup>, Alexander Prado-Roller<sup>6</sup>, Nicolas Singewald<sup>4</sup>, Ernst Urban<sup>1</sup>, Thierry Langer<sup>1</sup>, Christian Pifl<sup>7</sup>, Jana Lubec<sup>8</sup>, Johann Jakob Leban<sup>8</sup>, Gert Lubec<sup>8, #</sup>

Compound analytics (HRESIMS, <sup>1</sup>H, <sup>13</sup>C and 2D NMR, RP-HPLC and chiral-phase HPLC)

Compound brain levels study

In vitro assays

- Binding assays on DAT, NET and SERT
- Neurite Outgrowth Assay

Absolute configuration

- VCD method
- single-crystal X-ray diffraction

**Figure S1.** HRESIMS spectrum of compound **5a**

## Generic Display Report

### Analysis Info

Analysis Name D:\Data\Kalaba\78522000001.d  
Method tune\_low\_MS\_Service\_03\_21.m  
Sample Name PN-20-peak-1  
Comment Kalaba / Zehl  
Ergebnis +/- 5 ppm  
ACN / MeOH + 1% H<sub>2</sub>O

Acquisition Date 26/03/2021 15:41:08

Operator msc  
Instrument maXis

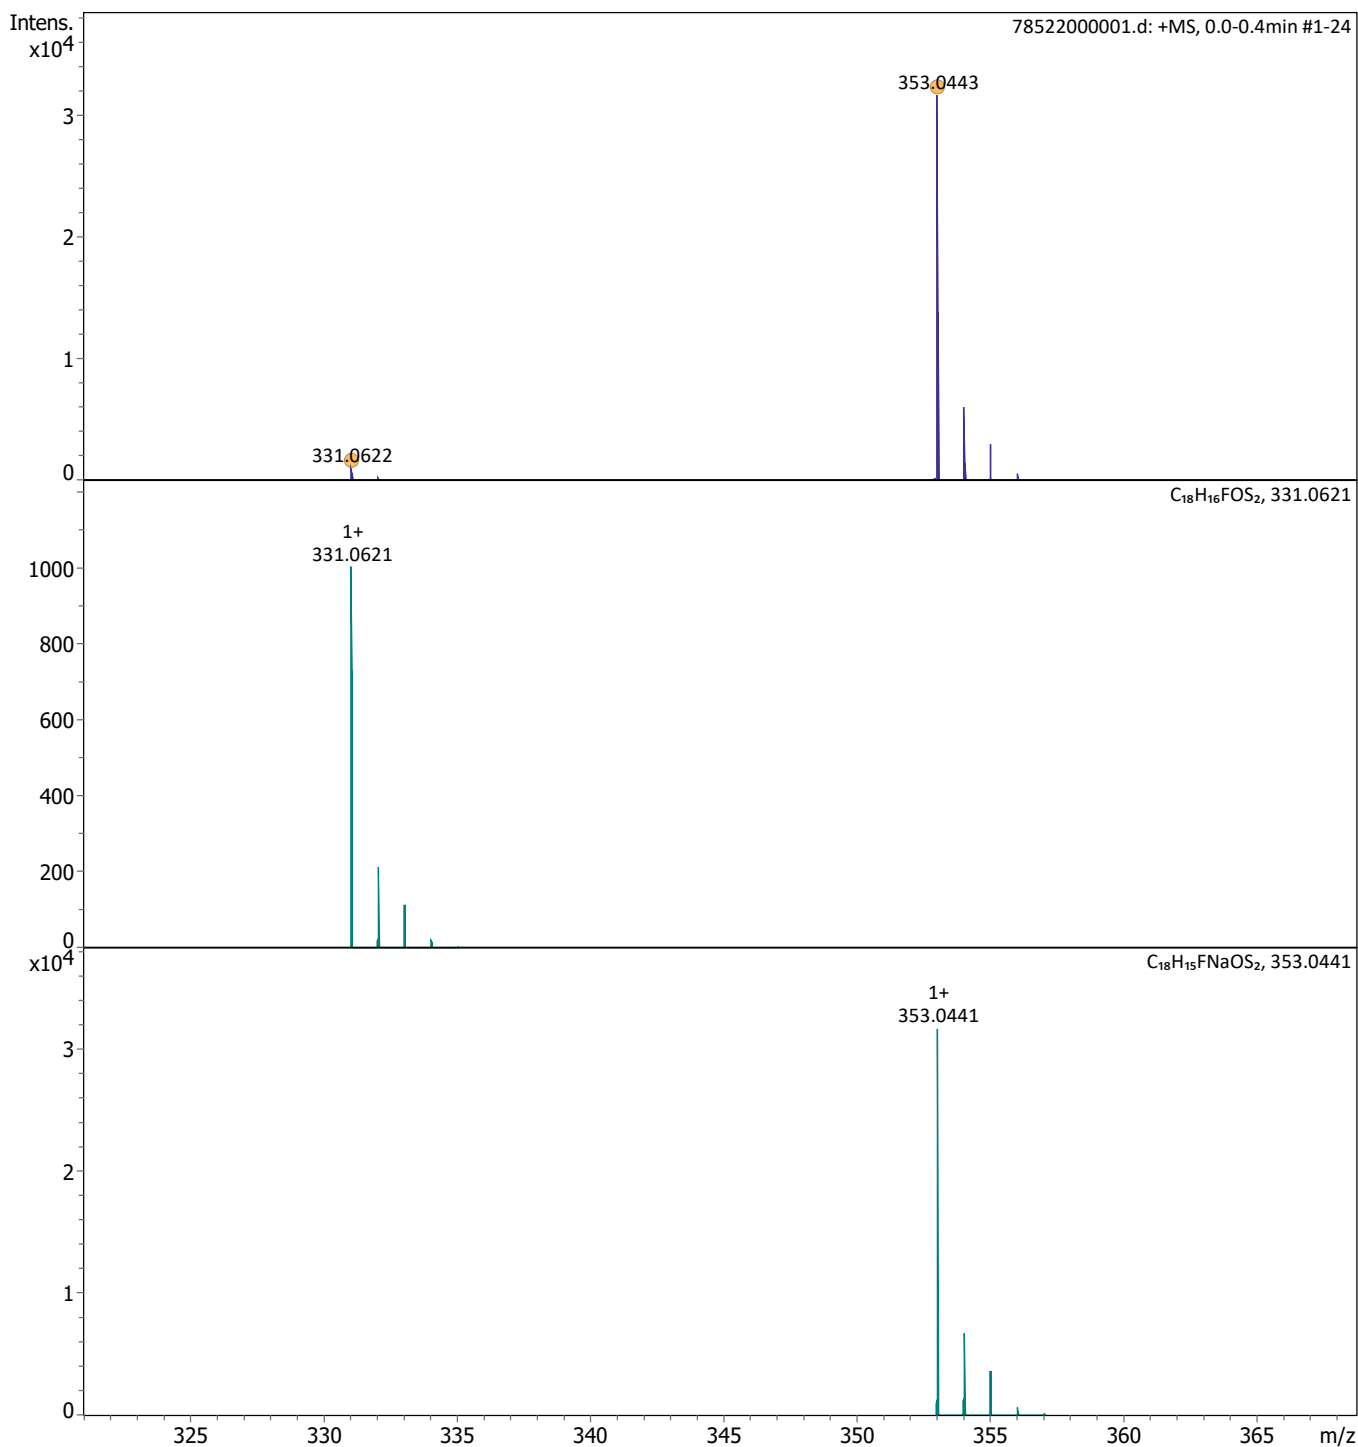



# Mass Spectrum SmartFormula Report

## Analysis Info

Analysis Name D:\Data\Kalaba\78522000001.d  
Method tune\_low\_MS\_Service\_03\_21.m  
Sample Name PN-20-peak-1  
Comment Kalaba / Zehl  
Ergebnis +/- 5 ppm  
ACN / MeOH + 1% H2O

Acquisition Date 26/03/2021 15:41:08

Operator msc  
Instrument maXis 255552.00016

## Acquisition Parameter

|             |            |                      |          |                  |           |
|-------------|------------|----------------------|----------|------------------|-----------|
| Source Type | ESI        | Ion Polarity         | Positive | Set Nebulizer    | 0.4 Bar   |
| Focus       | Not active | Set Capillary        | 4200 V   | Set Dry Heater   | 180 Å°C   |
| Scan Begin  | 80 m/z     | Set End Plate Offset | -500 V   | Set Dry Gas      | 4.0 l/min |
| Scan End    | 1900 m/z   | Set Charging Voltage | 0 V      | Set Divert Valve | Source    |
|             |            | Set Corona           | 0 nA     | Set APCI Heater  | 0 Å°C     |

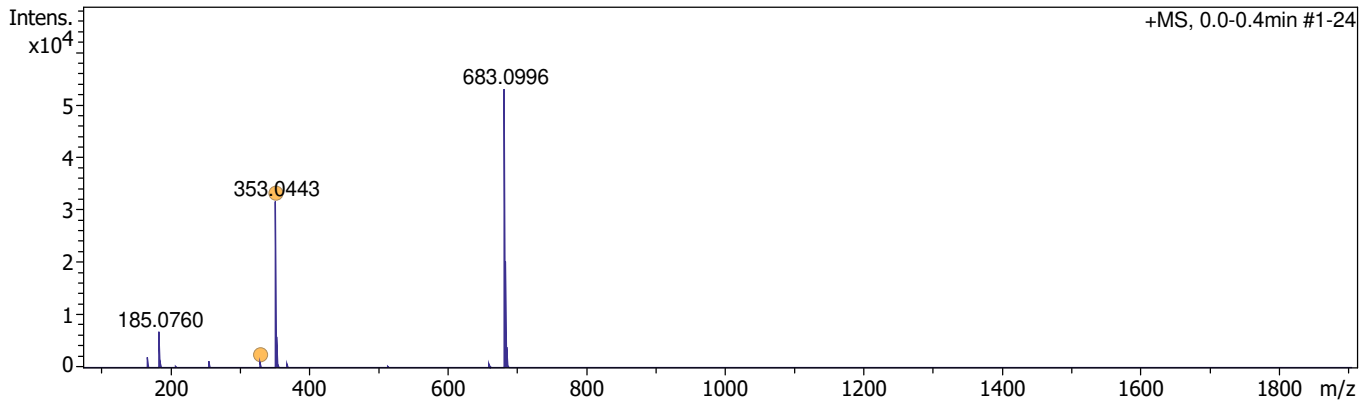

| Meas. m/z | #  | Ion Formula     | Score  | m/z      | err [mDa] | err [ppm] | mSigma | rdb  | eÅ <sup>-</sup> | Conf | N-Rule |
|-----------|----|-----------------|--------|----------|-----------|-----------|--------|------|-----------------|------|--------|
| 331.0622  | 1  | C18H16FOS2      | 100.00 | 331.0621 | -0.1      | -0.3      | 15.1   | 15.0 | even            |      | ok     |
|           | 2  | C15H17F2O2S2    | 49.47  | 331.0633 | 1.1       | 3.2       | 25.7   | 11.0 | even            |      | ok     |
|           | 3  | C15H14F3O3S     | 39.72  | 331.0610 | -1.2      | -3.6      | 31.8   | 10.0 | even            |      | ok     |
|           | 4  | C13H16F5S2      | 31.65  | 331.0608 | -1.4      | -4.2      | 35.4   | 8.0  | even            |      | ok     |
|           | 5  | C11H13F2N6S2    | 26.94  | 331.0606 | -1.6      | -4.9      | 35.5   | 12.0 | even            |      | ok     |
|           | 6  | C13H11F4N4S     | 31.95  | 331.0635 | 1.3       | 3.9       | 37.2   | 11.0 | even            |      | ok     |
|           | 7  | C11H8FN10S      | 36.94  | 331.0633 | 1.1       | 3.2       | 37.2   | 15.0 | even            |      | ok     |
|           | 8  | C18H8FN4O2      | 34.76  | 331.0626 | 0.4       | 1.1       | 42.0   | 17.0 | even            |      | ok     |
|           | 9  | C17H12FO6       | 23.59  | 331.0612 | -1.0      | -2.9      | 45.2   | 12.0 | even            |      | ok     |
|           | 10 | C10H20FN2O3S3   | 43.31  | 331.0615 | -0.7      | -2.2      | 45.9   | 8.0  | even            |      | ok     |
|           | 11 | C12H15F4O4S     | 47.07  | 331.0622 | -0.0      | -0.1      | 46.7   | 6.0  | even            |      | ok     |
|           | 12 | C10H12FN6O4S    | 42.49  | 331.0619 | -0.3      | -0.8      | 46.7   | 10.0 | even            |      | ok     |
|           | 13 | C10H17F6OS2     | 37.77  | 331.0620 | -0.2      | -0.8      | 50.9   | 4.0  | even            |      | ok     |
|           | 14 | C15H9F2N4O3     | 13.82  | 331.0637 | 1.5       | 4.6       | 51.5   | 13.0 | even            |      | ok     |
|           | 15 | C14H13F2O7      | 23.16  | 331.0624 | 0.2       | 0.6       | 58.1   | 8.0  | even            |      | ok     |
|           | 16 | C11H5F2N10O     | 11.91  | 331.0610 | -1.2      | -3.5      | 62.9   | 14.0 | even            |      | ok     |
|           | 17 | C13H8F5N4O      | 13.69  | 331.0613 | -0.9      | -2.8      | 62.9   | 10.0 | even            |      | ok     |
|           | 18 | C11H14F3O8      | 7.41   | 331.0635 | 1.3       | 4.0       | 73.2   | 4.0  | even            |      | ok     |
|           | 19 | C10H9F6N4O2     | 11.49  | 331.0624 | 0.2       | 0.7       | 77.0   | 6.0  | even            |      | ok     |
| 353.0443  | 1  | C15H16F2NaO2S2  | 84.24  | 353.0452 | 0.9       | 2.5       | 8.6    | 11.0 | even            |      | ok     |
|           | 2  | C18H15FN4OS2    | 100.00 | 353.0441 | -0.3      | -0.8      | 15.0   | 15.0 | even            |      | ok     |
|           | 3  | C13H15F5NaS2    | 47.24  | 353.0428 | -1.6      | -4.5      | 16.1   | 8.0  | even            |      | ok     |
|           | 4  | C15H13F3NaO3S   | 53.15  | 353.0430 | -1.4      | -3.9      | 17.3   | 10.0 | even            |      | ok     |
|           | 5  | C11H7FN10NaS    | 62.90  | 353.0452 | 0.9       | 2.5       | 22.8   | 15.0 | even            |      | ok     |
|           | 6  | C13H10F4N4NaS   | 54.82  | 353.0455 | 1.1       | 3.2       | 22.8   | 11.0 | even            |      | ok     |
|           | 7  | C12H14F4NaO4S   | 74.46  | 353.0441 | -0.2      | -0.6      | 29.5   | 6.0  | even            |      | ok     |
|           | 8  | C10H11FN6NaO4S  | 66.75  | 353.0439 | -0.5      | -1.3      | 29.5   | 10.0 | even            |      | ok     |
|           | 9  | C10H16F6NaOS2   | 63.75  | 353.0439 | -0.4      | -1.2      | 31.9   | 4.0  | even            |      | ok     |
|           | 10 | C10H19FN2NaO3S3 | 60.67  | 353.0434 | -0.9      | -2.6      | 32.7   | 8.0  | even            |      | ok     |

78522000001.d

Bruker Compass DataAnalysis 5.1

printed: 31/03/2021 11:02:38

by: admin

Page 1 of 2

## Mass Spectrum SmartFormula Report

| Meas. m/z | #  | Ion Formula   | Score | m/z      | err [mDa] | err [ppm] | mSigma | rdb  | eÅ <sup>-</sup> | Conf | N-Rule |
|-----------|----|---------------|-------|----------|-----------|-----------|--------|------|-----------------|------|--------|
|           | 11 | C10H19F5NaS3  | 34.62 | 353.0461 | 1.8       | 5.1       | 32.9   | 5.0  | even            |      | ok     |
|           | 12 | C17H11FNaO6   | 28.21 | 353.0432 | -1.1      | -3.2      | 37.7   | 12.0 | even            |      | ok     |
|           | 13 | C18H7FN4NaO2  | 41.20 | 353.0445 | 0.2       | 0.5       | 41.6   | 17.0 | even            |      | ok     |
|           | 14 | C15H8F2N4NaO3 | 21.97 | 353.0457 | 1.3       | 3.8       | 42.5   | 13.0 | even            |      | ok     |
|           | 15 | C14H12F2NaO7  | 41.60 | 353.0443 | -0.0      | -0.0      | 44.1   | 8.0  | even            |      | ok     |
|           | 16 | C11H4F2N10NaO | 17.34 | 353.0430 | -1.3      | -3.8      | 50.3   | 14.0 | even            |      | ok     |
|           | 17 | C13H7F5N4NaO  | 20.09 | 353.0432 | -1.1      | -3.1      | 50.3   | 10.0 | even            |      | ok     |
|           | 18 | C11H13F3NaO8  | 16.57 | 353.0455 | 1.1       | 3.2       | 55.8   | 4.0  | even            |      | ok     |
|           | 19 | C10H8F6N4NaO2 | 24.37 | 353.0444 | 0.0       | 0.1       | 60.8   | 6.0  | even            |      | ok     |

**Figure S2.** HRESIMS spectrum of compound **6a**

## Generic Display Report

### Analysis Info

Analysis Name D:\Data\Kalaba\78523000001.d  
Method tune\_low\_MS\_Service\_03\_21.m  
Sample Name PN-20-peak-2  
Comment Kalaba / Zehl  
Ergebnis +/- 5 ppm  
ACN / MeOH + 1% H<sub>2</sub>O

Acquisition Date 26/03/2021 15:50:02

Operator msc  
Instrument maXis

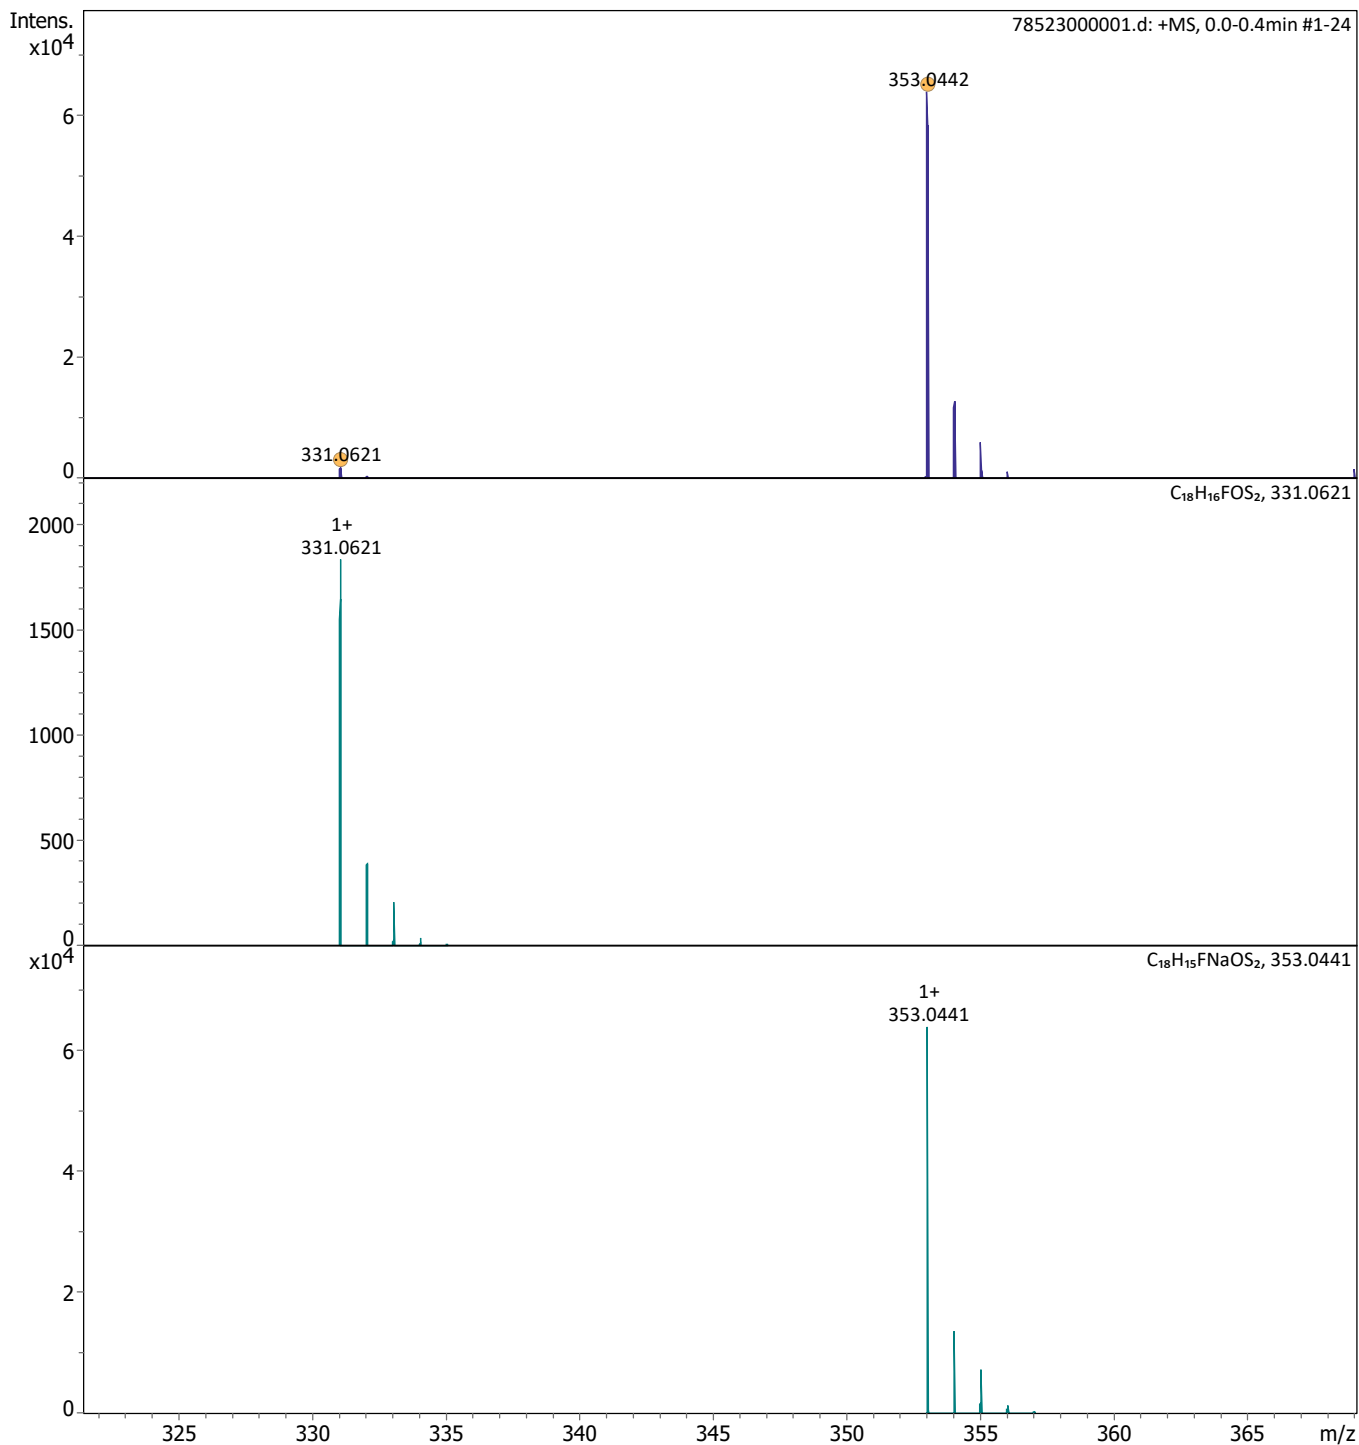

# Mass Spectrum SmartFormula Report

## Analysis Info

Analysis Name D:\Data\Kalaba\78523000001.d  
Method tune\_low\_MS\_Service\_03\_21.m  
Sample Name PN-20-peak-2  
Comment Kalaba / Zehl  
Ergebnis +/- 5 ppm  
ACN / MeOH + 1% H2O

Acquisition Date 26/03/2021 15:50:02

Operator msc  
Instrument maXis 255552.00016

## Acquisition Parameter

|             |            |                      |          |                  |           |
|-------------|------------|----------------------|----------|------------------|-----------|
| Source Type | ESI        | Ion Polarity         | Positive | Set Nebulizer    | 0.4 Bar   |
| Focus       | Not active | Set Capillary        | 4200 V   | Set Dry Heater   | 180 Å°C   |
| Scan Begin  | 80 m/z     | Set End Plate Offset | -500 V   | Set Dry Gas      | 4.0 l/min |
| Scan End    | 1900 m/z   | Set Charging Voltage | 0 V      | Set Divert Valve | Source    |
|             |            | Set Corona           | 0 nA     | Set APCI Heater  | 0 Å°C     |

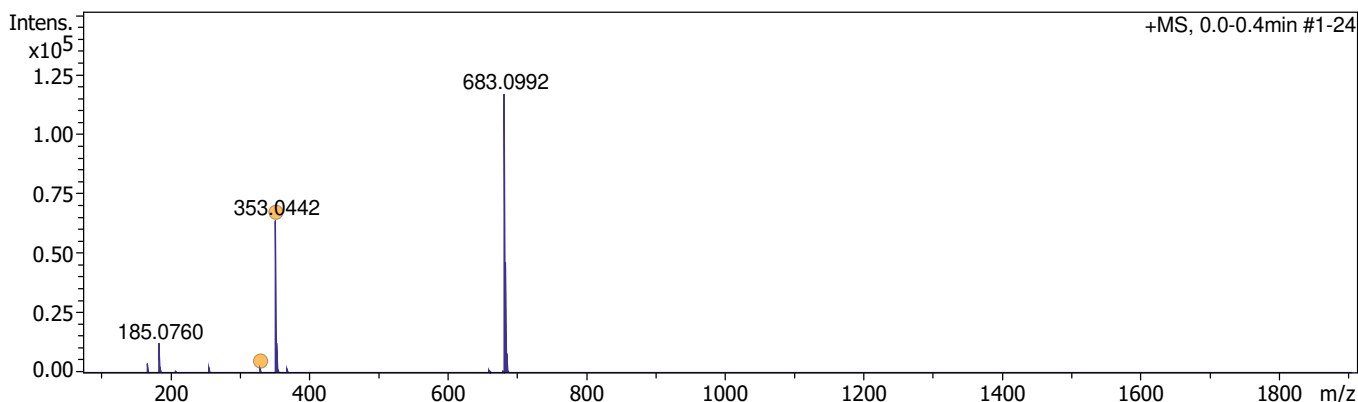

| Meas. m/z | #  | Ion Formula     | Score  | m/z      | err [mDa] | err [ppm] | mSigma | rdB  | eÅ <sup>-</sup> | Conf | N-Rule |
|-----------|----|-----------------|--------|----------|-----------|-----------|--------|------|-----------------|------|--------|
| 331.0621  | 1  | C15H17F2O2S2    | 60.17  | 331.0633 | 1.2       | 3.5       | 12.5   | 11.0 | even            |      | ok     |
|           | 2  | C18H16FOS2      | 100.00 | 331.0621 | 0.0       | 0.1       | 15.8   | 15.0 | even            |      | ok     |
|           | 3  | C13H16F5S2      | 49.04  | 331.0608 | -1.3      | -3.8      | 19.6   | 8.0  | even            |      | ok     |
|           | 4  | C11H13F2N6S2    | 41.98  | 331.0606 | -1.5      | -4.6      | 19.6   | 12.0 | even            |      | ok     |
|           | 5  | C15H14F3O3S     | 55.59  | 331.0610 | -1.1      | -3.2      | 19.8   | 10.0 | even            |      | ok     |
|           | 6  | C11H8FN10S      | 45.89  | 331.0633 | 1.2       | 3.6       | 25.1   | 15.0 | even            |      | ok     |
|           | 7  | C13H11F4N4S     | 39.46  | 331.0635 | 1.4       | 4.3       | 25.1   | 11.0 | even            |      | ok     |
|           | 8  | C12H15F4O4S     | 67.56  | 331.0622 | 0.1       | 0.3       | 32.2   | 6.0  | even            |      | ok     |
|           | 9  | C10H12FN6O4S    | 65.66  | 331.0619 | -0.2      | -0.5      | 32.2   | 10.0 | even            |      | ok     |
|           | 10 | C10H20FN2O3S3   | 62.24  | 331.0615 | -0.6      | -1.9      | 34.5   | 8.0  | even            |      | ok     |
|           | 11 | C10H17F6OS2     | 62.34  | 331.0620 | -0.1      | -0.4      | 34.6   | 4.0  | even            |      | ok     |
|           | 12 | C17H12FO6       | 29.29  | 331.0612 | -0.8      | -2.5      | 39.4   | 12.0 | even            |      | ok     |
|           | 13 | C18H8FN4O2      | 32.16  | 331.0626 | 0.5       | 1.5       | 42.4   | 17.0 | even            |      | ok     |
|           | 14 | C15H9F2N4O3     | 15.52  | 331.0637 | 1.6       | 5.0       | 44.5   | 13.0 | even            |      | ok     |
|           | 15 | C14H13F2O7      | 30.95  | 331.0624 | 0.3       | 0.9       | 46.8   | 8.0  | even            |      | ok     |
|           | 16 | C11H5F2N10O     | 17.62  | 331.0610 | -1.0      | -3.2      | 52.9   | 14.0 | even            |      | ok     |
|           | 17 | C13H8F5N4O      | 20.13  | 331.0613 | -0.8      | -2.4      | 52.9   | 10.0 | even            |      | ok     |
|           | 18 | C11H14F3O8      | 11.31  | 331.0635 | 1.4       | 4.4       | 58.9   | 4.0  | even            |      | ok     |
|           | 19 | C10H9F6N4O2     | 17.62  | 331.0624 | 0.3       | 1.0       | 63.8   | 6.0  | even            |      | ok     |
| 353.0442  | 1  | C15H16F2NaO2S2  | 67.65  | 353.0452 | 1.0       | 2.7       | 11.4   | 11.0 | even            |      | ok     |
|           | 2  | C18H15FN4OS2    | 100.00 | 353.0441 | -0.2      | -0.5      | 11.7   | 15.0 | even            |      | ok     |
|           | 3  | C15H13F3NaO3S   | 47.96  | 353.0430 | -1.3      | -3.6      | 20.1   | 10.0 | even            |      | ok     |
|           | 4  | C13H15F5NaS2    | 41.38  | 353.0428 | -1.5      | -4.2      | 20.5   | 8.0  | even            |      | ok     |
|           | 5  | C11H12F2N6NaS2  | 35.08  | 353.0425 | -1.7      | -4.9      | 20.5   | 12.0 | even            |      | ok     |
|           | 6  | C11H7FN10NaS    | 49.81  | 353.0452 | 1.0       | 2.8       | 25.7   | 15.0 | even            |      | ok     |
|           | 7  | C13H10F4N4NaS   | 43.22  | 353.0455 | 1.2       | 3.5       | 25.7   | 11.0 | even            |      | ok     |
|           | 8  | C12H14F4NaO4S   | 63.23  | 353.0441 | -0.1      | -0.3      | 33.5   | 6.0  | even            |      | ok     |
|           | 9  | C10H11FN6NaO4S  | 56.91  | 353.0439 | -0.4      | -1.0      | 33.5   | 10.0 | even            |      | ok     |
|           | 10 | C10H19FN2NaO3S3 | 53.82  | 353.0434 | -0.8      | -2.3      | 35.3   | 8.0  | even            |      | ok     |

## Mass Spectrum SmartFormula Report

| Meas. m/z | #  | Ion Formula   | Score | m/z      | err [mDa] | err [ppm] | mSigma | rdb  | eÅ <sup>-</sup> | Conf | N-Rule |
|-----------|----|---------------|-------|----------|-----------|-----------|--------|------|-----------------|------|--------|
|           | 11 | C10H16F6NaOS2 | 53.41 | 353.0439 | -0.3      | -0.9      | 36.4   | 4.0  | even            |      | ok     |
|           | 12 | C17H11FNaO6   | 26.26 | 353.0432 | -1.0      | -3.0      | 38.5   | 12.0 | even            |      | ok     |
|           | 13 | C18H7FN4NaO2  | 36.23 | 353.0445 | 0.3       | 0.8       | 40.7   | 17.0 | even            |      | ok     |
|           | 14 | C15H8F2N4NaO3 | 17.74 | 353.0457 | 1.4       | 4.1       | 43.8   | 13.0 | even            |      | ok     |
|           | 15 | C14H12F2NaO7  | 32.96 | 353.0443 | 0.1       | 0.3       | 46.9   | 8.0  | even            |      | ok     |
|           | 16 | C11H4F2N10NaO | 15.34 | 353.0430 | -1.2      | -3.5      | 52.8   | 14.0 | even            |      | ok     |
|           | 17 | C13H7F5N4NaO  | 17.68 | 353.0432 | -1.0      | -2.9      | 52.8   | 10.0 | even            |      | ok     |
|           | 18 | C11H13F3NaO8  | 12.26 | 353.0455 | 1.2       | 3.5       | 59.7   | 4.0  | even            |      | ok     |
|           | 19 | C10H8F6N4NaO2 | 18.47 | 353.0444 | 0.1       | 0.4       | 64.4   | 6.0  | even            |      | ok     |

**Figure S3.** HRESIMS spectrum of compound **7a**

## Generic Display Report

### Analysis Info

Analysis Name D:\Data\Kalaba\71703000001.d  
Method tune\_low\_MS\_Service\_07\_20.m  
Sample Name PN-20-3  
Comment Kalaba/Zehl  
Ergebnis +/- 5ppm  
ACN/MeOH + 1 % H<sub>2</sub>O

Acquisition Date 16/07/2020 12:53:24

Operator msc  
Instrument maXis

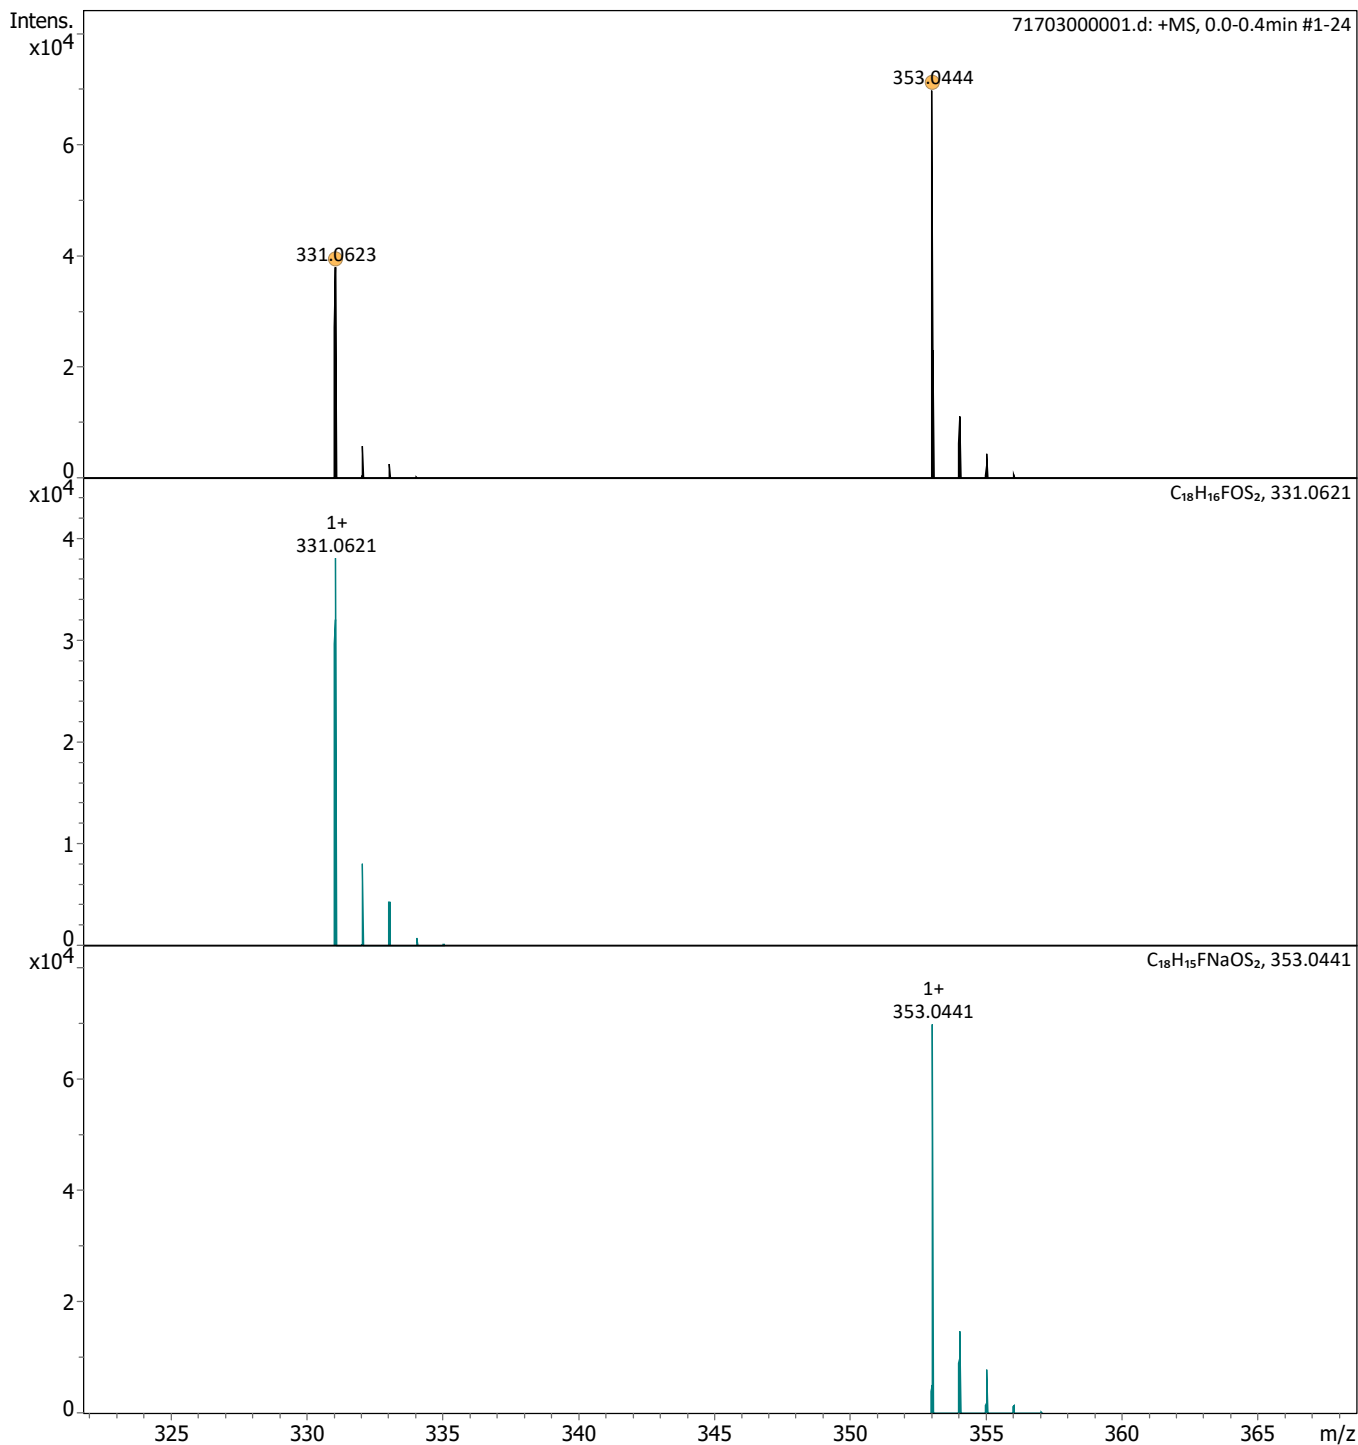

# Mass Spectrum SmartFormula Report

## Analysis Info

Analysis Name D:\Data\Kalaba\71703000001.d  
Method tune\_low\_MS\_Service\_07\_20.m  
Sample Name PN-20-3  
Comment Kalaba/Zehl  
Ergebnis +/- 5ppm  
ACN/MeOH + 1 % H2O

Acquisition Date 16/07/2020 12:53:24

Operator msc  
Instrument maXis 255552.00016

## Acquisition Parameter

|             |            |                      |          |                  |           |
|-------------|------------|----------------------|----------|------------------|-----------|
| Source Type | ESI        | Ion Polarity         | Positive | Set Nebulizer    | 0.4 Bar   |
| Focus       | Not active | Set Capillary        | 4200 V   | Set Dry Heater   | 180 Å°C   |
| Scan Begin  | 50 m/z     | Set End Plate Offset | -500 V   | Set Dry Gas      | 4.0 l/min |
| Scan End    | 1900 m/z   | Set Charging Voltage | 0 V      | Set Divert Valve | Source    |
|             |            | Set Corona           | 0 nA     | Set APCI Heater  | 0 Å°C     |

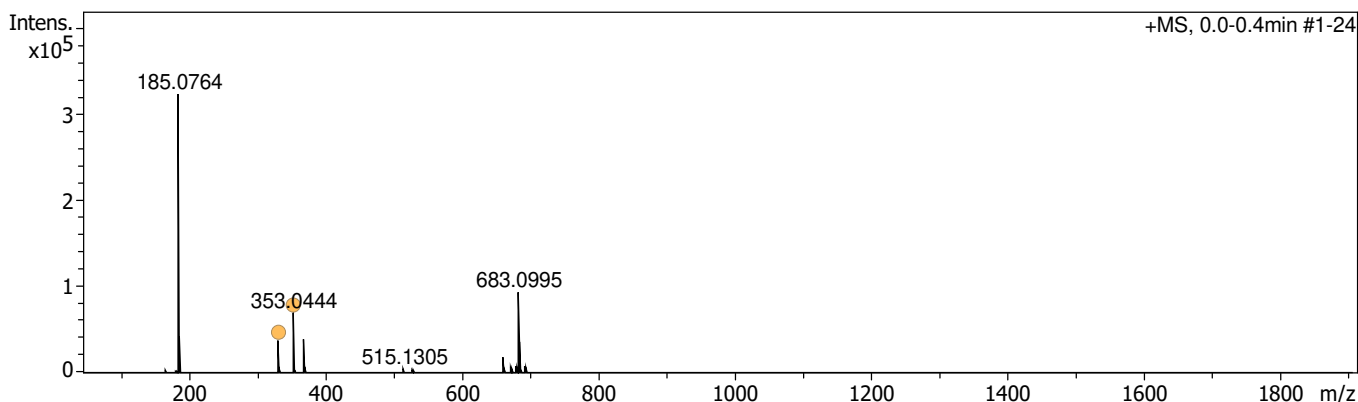

| Meas. m/z | #  | Ion Formula    | m/z      | err [ppm] | mSigma | # mSigma | Score  | rdb  | eÅ <sup>-</sup> | Conf | N-Rule |
|-----------|----|----------------|----------|-----------|--------|----------|--------|------|-----------------|------|--------|
| 331.0623  | 1  | C12H15F4O4S    | 331.0622 | -0.5      | 6.4    | 1        | 100.00 | 6.0  | even            |      | ok     |
|           | 2  | C13H11F4N4S    | 331.0635 | 3.6       | 8.2    | 2        | 57.14  | 11.0 | even            |      | ok     |
|           | 3  | C13H11N6O3S    | 331.0608 | -4.6      | 10.6   | 3        | 43.67  | 14.0 | even            |      | ok     |
|           | 4  | C15H14F3O3S    | 331.0610 | -3.9      | 10.6   | 4        | 51.01  | 10.0 | even            |      | ok     |
|           | 5  | C13H16F5S2     | 331.0608 | -4.6      | 17.3   | 5        | 38.87  | 8.0  | even            |      | ok     |
|           | 6  | C17H15O5S      | 331.0635 | 3.5       | 21.9   | 6        | 44.33  | 13.0 | even            |      | ok     |
|           | 7  | C14H13F2O7     | 331.0624 | 0.2       | 24.1   | 7        | 54.62  | 8.0  | even            |      | ok     |
|           | 8  | C15H17F2O2S2   | 331.0633 | 2.8       | 25.5   | 8        | 46.35  | 11.0 | even            |      | ok     |
|           | 9  | C17H12FO6      | 331.0612 | -3.3      | 30.2   | 9        | 28.62  | 12.0 | even            |      | ok     |
|           | 10 | C15H9F2N4O3    | 331.0637 | 4.2       | 30.8   | 10       | 23.15  | 13.0 | even            |      | ok     |
|           | 11 | C13H8F5N4O     | 331.0613 | -3.2      | 31.1   | 11       | 28.56  | 10.0 | even            |      | ok     |
|           | 12 | C18H16FOS2     | 331.0621 | -0.6      | 38.3   | 12       | 48.22  | 15.0 | even            |      | ok     |
|           | 13 | C18H8FN4O2     | 331.0626 | 0.8       | 41.8   | 13       | 32.17  | 17.0 | even            |      | ok     |
|           | 14 | C21H15S2       | 331.0610 | -4.1      | 53.2   | 14       | 16.99  | 19.0 | even            |      | ok     |
| 353.0444  | 15 | C21H7N4O       | 331.0614 | -2.7      | 56.7   | 15       | 15.04  | 21.0 | even            |      | ok     |
|           | 1  | C13H10F4N4NaS  | 353.0455 | 2.9       | 4.0    | 1        | 75.85  | 11.0 | even            |      | ok     |
|           | 2  | C13H10N6NaO3S  | 353.0427 | -4.8      | 6.7    | 2        | 47.67  | 14.0 | even            |      | ok     |
|           | 3  | C15H13F3NaO3S  | 353.0430 | -4.1      | 6.8    | 3        | 56.08  | 10.0 | even            |      | ok     |
|           | 4  | C12H14F4NaO4S  | 353.0441 | -0.9      | 9.5    | 4        | 100.00 | 6.0  | even            |      | ok     |
|           | 5  | C17H14NaO5S    | 353.0454 | 2.8       | 18.6   | 5        | 58.71  | 13.0 | even            |      | ok     |
|           | 6  | C13H15F5NaS2   | 353.0428 | -4.7      | 19.2   | 6        | 38.11  | 8.0  | even            |      | ok     |
|           | 7  | C14H12F2NaO7   | 353.0443 | -0.2      | 21.7   | 7        | 64.38  | 8.0  | even            |      | ok     |
|           | 8  | C17H11FN4O6    | 353.0432 | -3.5      | 25.5   | 8        | 33.01  | 12.0 | even            |      | ok     |
|           | 9  | C15H16F2NaO2S2 | 353.0452 | 2.2       | 25.5   | 9        | 56.84  | 11.0 | even            |      | ok     |
|           | 10 | C15H8F2N4NaO3  | 353.0457 | 3.5       | 26.6   | 10       | 31.78  | 13.0 | even            |      | ok     |
|           | 11 | C13H7F5N4NaO   | 353.0432 | -3.4      | 28.6   | 11       | 31.31  | 10.0 | even            |      | ok     |
|           | 12 | C18H15FN4OS2   | 353.0441 | -1.0      | 36.8   | 12       | 53.00  | 15.0 | even            |      | ok     |
|           | 13 | C18H7FN4NaO2   | 353.0445 | 0.3       | 36.8   | 13       | 44.36  | 17.0 | even            |      | ok     |
|           | 14 | C21H14NaS2     | 353.0429 | -4.3      | 51.1   | 14       | 18.59  | 19.0 | even            |      | ok     |

---

## Mass Spectrum SmartFormula Report

---

| Meas. m/z | #  | Ion Formula                                       | m/z      | err [ppm] | mSigma | # mSigma | Score | rdb  | e <sup>-</sup> | Conf | N-Rule |
|-----------|----|---------------------------------------------------|----------|-----------|--------|----------|-------|------|----------------|------|--------|
|           | 15 | C <sub>21</sub> H <sub>6</sub> N <sub>4</sub> NaO | 353.0434 | -2.9      | 51.7   | 15       | 18.28 | 21.0 | even           |      | ok     |



**Figure S4.** HRESIMS spectrum of compound **8a**

## Generic Display Report

### Analysis Info

Analysis Name D:\Data\Kalaba\71704000001.d  
Method tune\_low\_MS\_Service\_07\_20.m  
Sample Name PN-20-4  
Comment Kalaba/Zehl  
Ergebnis +/- 5ppm  
ACN/MeOH + 1 % H<sub>2</sub>O

Acquisition Date 16/07/2020 12:55:37

Operator msc  
Instrument maXis

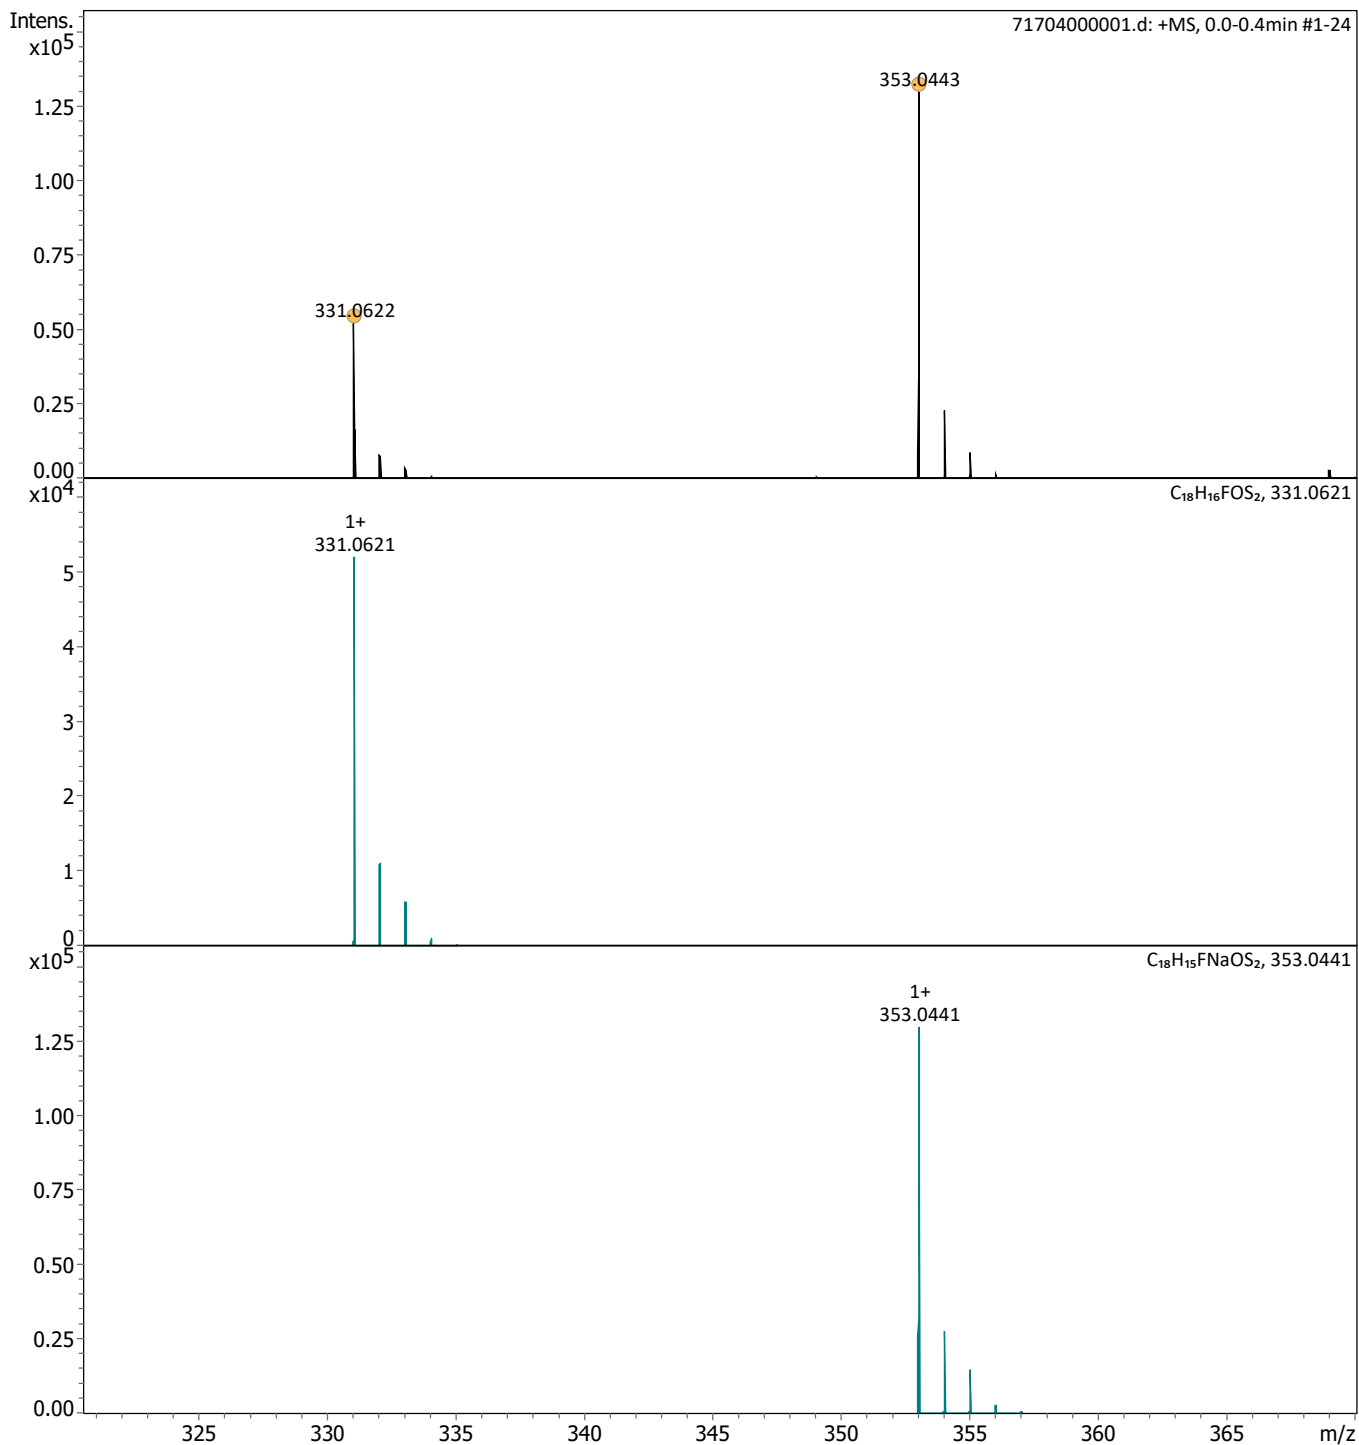

# Mass Spectrum SmartFormula Report

## Analysis Info

Analysis Name D:\Data\Kalaba\71704000001.d  
 Method tune\_low\_MS\_Service\_07\_20.m  
 Sample Name PN-20-4  
 Comment Kalaba/Zehl  
 Ergebnis +/- 5ppm  
 ACN/MeOH + 1 % H2O

Acquisition Date 16/07/2020 12:55:37

Operator msc  
 Instrument maXis 255552.00016

## Acquisition Parameter

|             |            |                      |          |                  |           |
|-------------|------------|----------------------|----------|------------------|-----------|
| Source Type | ESI        | Ion Polarity         | Positive | Set Nebulizer    | 0.4 Bar   |
| Focus       | Not active | Set Capillary        | 4200 V   | Set Dry Heater   | 180 Å°C   |
| Scan Begin  | 50 m/z     | Set End Plate Offset | -500 V   | Set Dry Gas      | 4.0 l/min |
| Scan End    | 1900 m/z   | Set Charging Voltage | 0 V      | Set Divert Valve | Source    |
|             |            | Set Corona           | 0 nA     | Set APCI Heater  | 0 Å°C     |

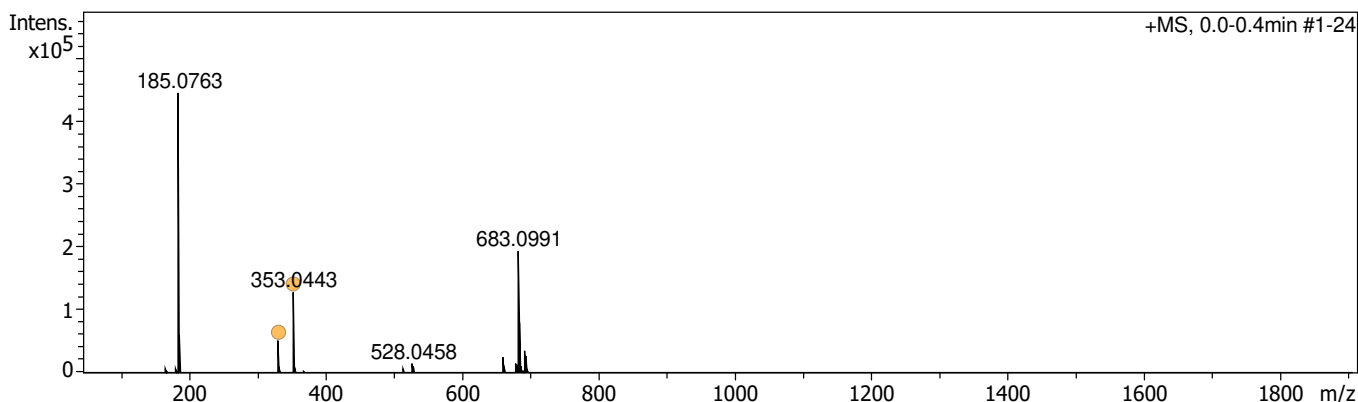

| Meas. m/z | #  | Ion Formula    | m/z      | err [ppm] | mSigma | # mSigma | Score  | rdb  | eÅ <sup>-</sup> | Conf | N-Rule |
|-----------|----|----------------|----------|-----------|--------|----------|--------|------|-----------------|------|--------|
| 331.0622  | 1  | C12H15F4O4S    | 331.0622 | -0.1      | 7.2    | 1        | 100.00 | 6.0  | even            |      | ok     |
|           | 2  | C13H11F4N4S    | 331.0635 | 4.0       | 8.0    | 2        | 50.91  | 11.0 | even            |      | ok     |
|           | 3  | C13H11N6O3S    | 331.0608 | -4.3      | 10.0   | 3        | 46.18  | 14.0 | even            |      | ok     |
|           | 4  | C15H14F3O3S    | 331.0610 | -3.5      | 10.0   | 4        | 53.63  | 10.0 | even            |      | ok     |
|           | 5  | C13H16F5S2     | 331.0608 | -4.2      | 16.7   | 5        | 41.15  | 8.0  | even            |      | ok     |
|           | 6  | C17H15O5S      | 331.0635 | 3.9       | 21.2   | 6        | 40.04  | 13.0 | even            |      | ok     |
|           | 7  | C14H13F2O7     | 331.0624 | 0.6       | 24.6   | 7        | 49.14  | 8.0  | even            |      | ok     |
|           | 8  | C15H17F2O2S2   | 331.0633 | 3.2       | 24.7   | 8        | 42.17  | 11.0 | even            |      | ok     |
|           | 9  | C17H12FO6      | 331.0612 | -2.9      | 30.1   | 9        | 29.65  | 12.0 | even            |      | ok     |
|           | 10 | C15H9F2N4O3    | 331.0637 | 4.6       | 30.9   | 10       | 20.38  | 13.0 | even            |      | ok     |
|           | 11 | C13H8F5N4O     | 331.0613 | -2.8      | 31.7   | 11       | 29.12  | 10.0 | even            |      | ok     |
|           | 12 | C18H16FOS2     | 331.0621 | -0.2      | 37.5   | 12       | 50.02  | 15.0 | even            |      | ok     |
|           | 13 | C18H8FN4O2     | 331.0626 | 1.2       | 41.5   | 13       | 29.40  | 17.0 | even            |      | ok     |
|           | 14 | C21H15S2       | 331.0610 | -3.7      | 52.4   | 14       | 18.15  | 19.0 | even            |      | ok     |
| 353.0443  | 15 | C21H7N4O       | 331.0614 | -2.3      | 56.2   | 15       | 15.72  | 21.0 | even            |      | ok     |
|           | 1  | C15H13F3NaO3S  | 353.0430 | -3.7      | 2.8    | 1        | 73.75  | 10.0 | even            |      | ok     |
|           | 2  | C13H10N6NaO3S  | 353.0427 | -4.4      | 2.8    | 2        | 63.06  | 14.0 | even            |      | ok     |
|           | 3  | C13H10F4N4NaS  | 353.0455 | 3.3       | 8.4    | 3        | 72.72  | 11.0 | even            |      | ok     |
|           | 4  | C17H14NaO5S    | 353.0454 | 3.2       | 9.4    | 4        | 72.95  | 13.0 | even            |      | ok     |
|           | 5  | C12H14F4NaO4S  | 353.0441 | -0.5      | 18.5   | 5        | 100.00 | 6.0  | even            |      | ok     |
|           | 6  | C13H15F5NaS2   | 353.0428 | -4.3      | 19.4   | 6        | 46.87  | 8.0  | even            |      | ok     |
|           | 7  | C15H16F2NaO2S2 | 353.0452 | 2.6       | 21.0   | 7        | 65.56  | 11.0 | even            |      | ok     |
|           | 8  | C17H11FN4O6    | 353.0432 | -3.1      | 23.0   | 8        | 42.60  | 12.0 | even            |      | ok     |
|           | 9  | C15H8F2N4NaO3  | 353.0457 | 3.9       | 26.7   | 9        | 32.65  | 13.0 | even            |      | ok     |
|           | 10 | C14H12F2NaO7   | 353.0443 | 0.1       | 27.2   | 10       | 64.81  | 8.0  | even            |      | ok     |
|           | 11 | C18H15FN4OS2   | 353.0441 | -0.6      | 29.1   | 11       | 76.87  | 15.0 | even            |      | ok     |
|           | 12 | C18H7FN4NaO2   | 353.0445 | 0.7       | 31.2   | 12       | 54.31  | 17.0 | even            |      | ok     |
|           | 13 | C13H7F5N4NaO   | 353.0432 | -3.0      | 33.4   | 13       | 33.99  | 10.0 | even            |      | ok     |
|           | 14 | C21H14NaS2     | 353.0429 | -3.9      | 42.5   | 14       | 29.45  | 19.0 | even            |      | ok     |

---

## Mass Spectrum SmartFormula Report

---

| Meas. m/z | #  | Ion Formula                                       | m/z      | err [ppm] | mSigma | # mSigma | Score | rdb  | e <sup>-</sup> | Conf | N-Rule |
|-----------|----|---------------------------------------------------|----------|-----------|--------|----------|-------|------|----------------|------|--------|
|           | 15 | C <sub>21</sub> H <sub>6</sub> N <sub>4</sub> NaO | 353.0434 | -2.5      | 43.5   | 15       | 28.35 | 21.0 | even           |      | ok     |

**Figure S5.** HRESIMS spectrum of compound **5b**

## Generic Display Report

### Analysis Info

Analysis Name D:\MZ\maXis\_data\temp\60653000001.d  
Method tune\_low\_MS\_Service\_11\_18.m  
Sample Name CE-148-spot1-peak1  
Comment Kalaba/Zehl  
Ergebnis: +/- 5ppm  
ACN/MeOH + 1%H<sub>2</sub>O

Acquisition Date 11/8/2018 1:01:54 PM

Operator msc  
Instrument maXis

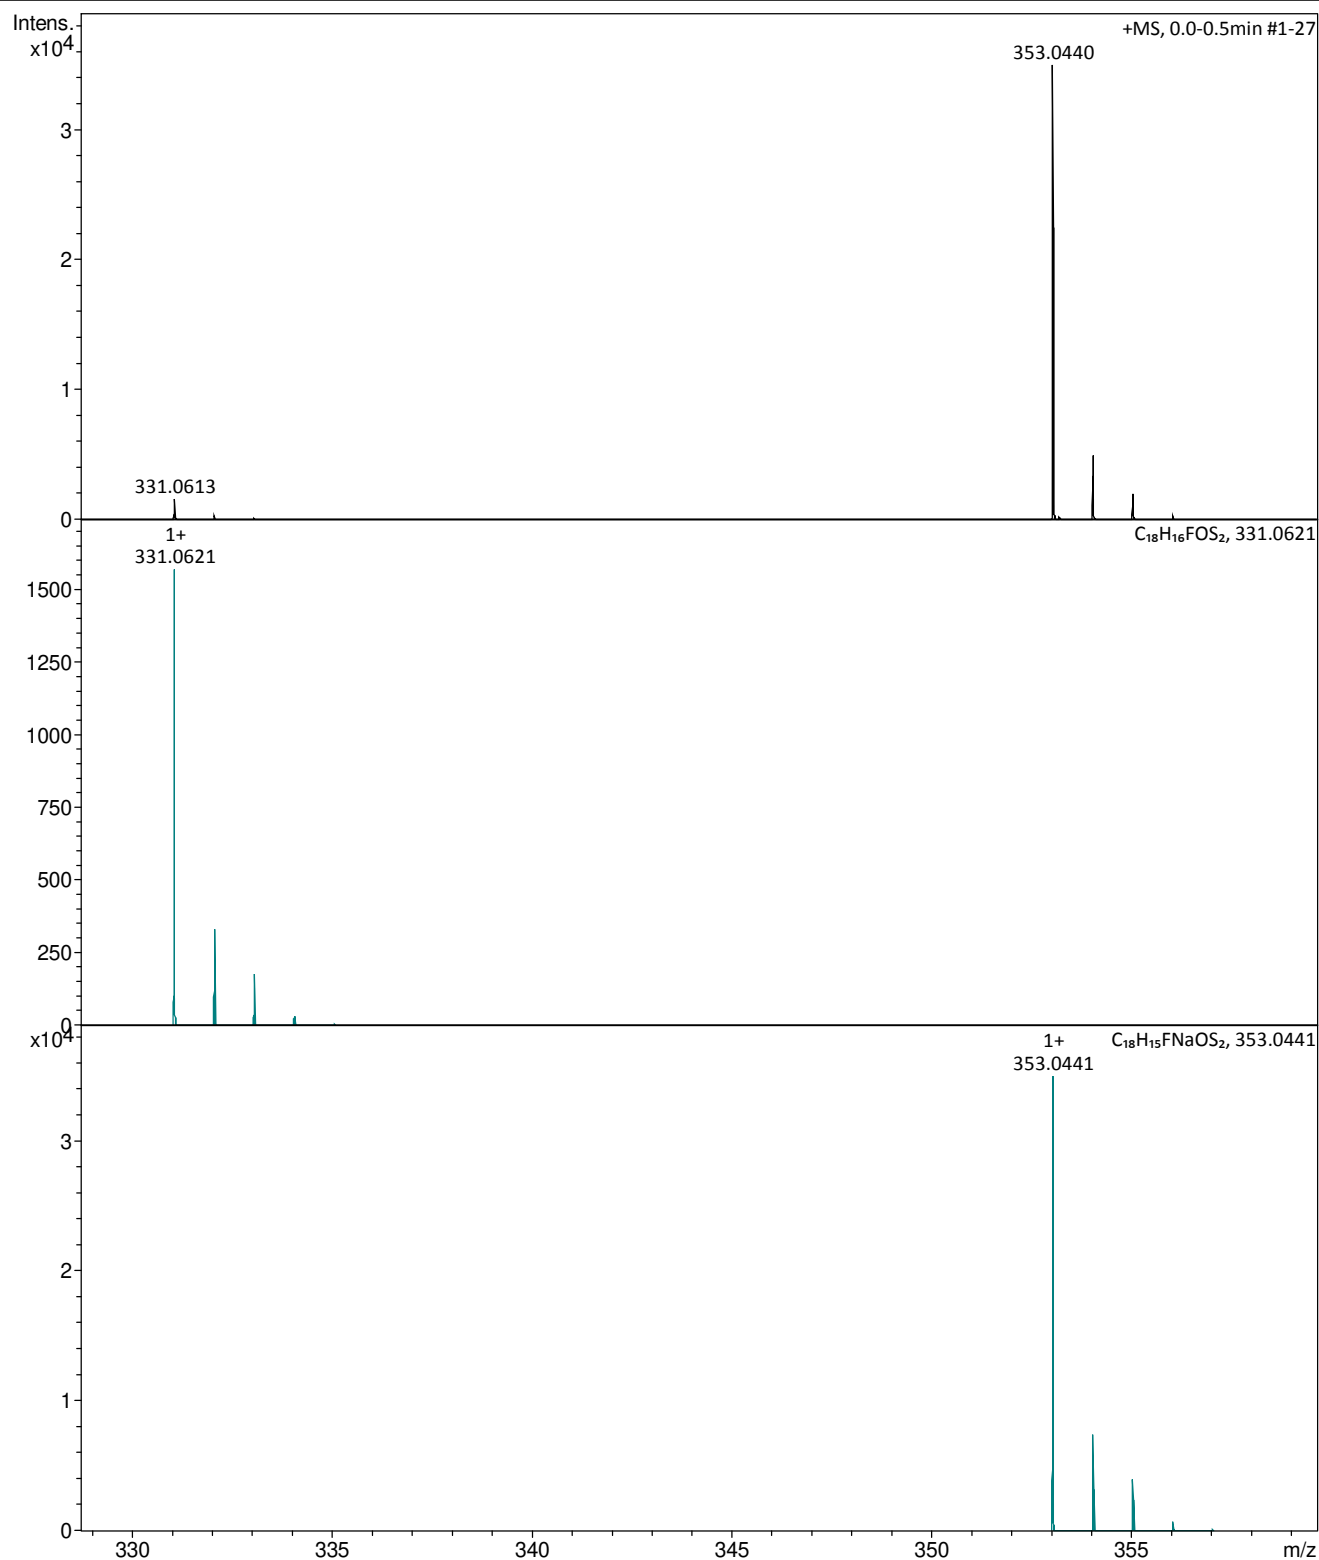

# Mass Spectrum SmartFormula Report

## Analysis Info

Analysis Name D:\MZ\maXis\_data\temp\60653000001.d  
Method tune\_low\_MS\_Service\_11\_18.m  
Sample Name CE-148-spot1-peak1  
Comment Kalaba/Zehl  
Ergebnis: +/- 5ppm  
ACN/MeOH + 1%H2O

Acquisition Date 11/8/2018 1:01:54 PM

Operator msc  
Instrument maXis 255552.00016

## Acquisition Parameter

|             |            |                      |          |                  |           |
|-------------|------------|----------------------|----------|------------------|-----------|
| Source Type | ESI        | Ion Polarity         | Positive | Set Nebulizer    | 0.4 Bar   |
| Focus       | Not active | Set Capillary        | 4500 V   | Set Dry Heater   | 150 °C    |
| Scan Begin  | 50 m/z     | Set End Plate Offset | -500 V   | Set Dry Gas      | 4.0 l/min |
| Scan End    | 1800 m/z   | Set Charging Voltage | 0 V      | Set Divert Valve | Source    |
|             |            | Set Corona           | 0 nA     | Set APCI Heater  | 0 °C      |

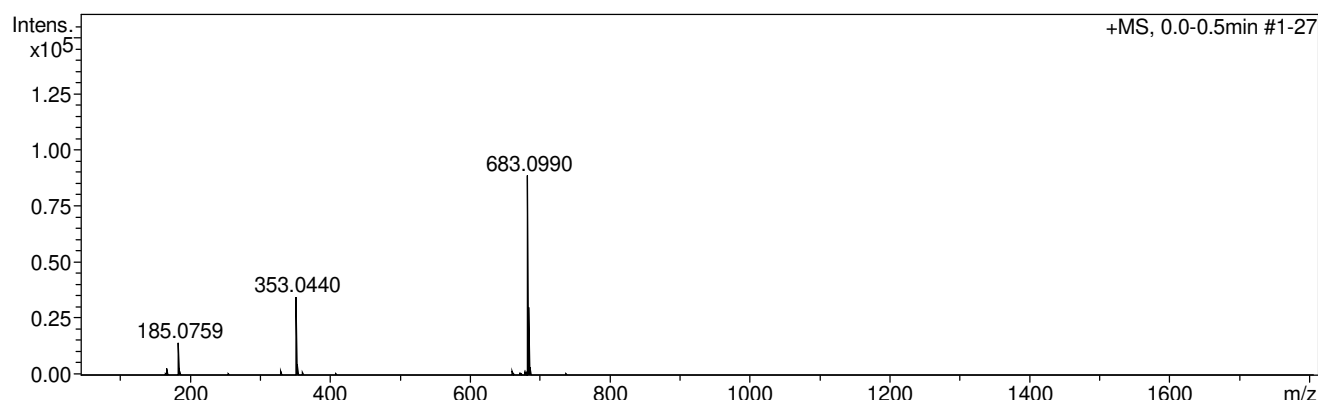

| Meas. m/z | #  | Ion Formula    | Score  | m/z      | err [mDa] | err [ppm] | mSigma | rdb  | e <sup>-</sup> | Conf | N-Rule |
|-----------|----|----------------|--------|----------|-----------|-----------|--------|------|----------------|------|--------|
| 167.9670  | 1  | C5H5NaOS2      | 100.00 | 167.9674 | -0.4      | -2.6      | 7.0    | 3.0  | odd            |      | ok     |
|           | 2  | C4HNaO6        | 61.02  | 167.9665 | -0.4      | -2.6      | 11.7   | 4.0  | odd            |      | ok     |
|           | 3  | C2H3F2NaO3S    | 60.44  | 167.9663 | 0.7       | 3.9       | 26.3   | 0.0  | odd            |      | ok     |
|           | 4  | CH2FNaO7       | 37.21  | 167.9677 | -0.7      | -4.2      | 28.6   | 0.0  | odd            |      | ok     |
| 185.0759  | 1  | C13H10F        | 100.00 | 185.0761 | 0.2       | 1.3       | 14.7   | 8.5  | even           |      | ok     |
|           | 2  | C5H14FN2O2S    | 51.15  | 185.0755 | -0.4      | -2.2      | 39.8   | -0.5 | even           |      | ok     |
| 331.0613  | 1  | C13H11N6O3S    | 89.58  | 331.0608 | -0.5      | -1.4      | 11.9   | 11.5 | even           |      | ok     |
|           | 2  | C15H14F3O3S    | 100.00 | 331.0610 | 0.2       | 0.7       | 11.9   | 7.5  | even           |      | ok     |
|           | 3  | C18H13F2O2S    | 52.51  | 331.0599 | 1.4       | 4.2       | 13.5   | 11.5 | even           |      | ok     |
|           | 4  | C13H16F5S2     | 81.11  | 331.0608 | 0.5       | 1.4       | 17.5   | 3.5  | even           |      | ok     |
|           | 5  | C11H13F2N6S2   | 71.95  | 331.0606 | -0.7      | -2.1      | 17.5   | 7.5  | even           |      | ok     |
|           | 6  | C18H16FOS2     | 62.54  | 331.0621 | 0.8       | 2.6       | 20.4   | 10.5 | even           |      | ok     |
|           | 7  | C20H11O5       | 32.09  | 331.0601 | 1.2       | 3.5       | 24.0   | 15.5 | even           |      | ok     |
|           | 8  | C12H15F4O4S    | 55.04  | 331.0622 | -0.9      | -2.7      | 24.7   | 3.5  | even           |      | ok     |
|           | 9  | C17H12FO6      | 71.38  | 331.0612 | -0.0      | -0.1      | 31.5   | 11.5 | even           |      | ok     |
|           | 10 | C21H15S2       | 61.70  | 331.0610 | -0.3      | -0.9      | 32.7   | 14.5 | even           |      | ok     |
|           | 11 | C13H19N2O2S3   | 43.71  | 331.0603 | 0.9       | 2.9       | 33.3   | 5.5  | even           |      | ok     |
|           | 12 | C18H8FN4O2     | 32.13  | 331.0626 | 1.3       | 4.0       | 36.8   | 16.5 | even           |      | ok     |
|           | 13 | C14H13F2O7     | 35.59  | 331.0624 | 1.1       | 3.4       | 37.4   | 7.5  | even           |      | ok     |
|           | 14 | C21H7N4O       | 38.02  | 331.0614 | 0.2       | 0.5       | 37.8   | 20.5 | even           |      | ok     |
|           | 15 | C14H4FN10      | 29.68  | 331.0599 | 1.4       | 4.1       | 38.5   | 17.5 | even           |      | ok     |
|           | 16 | C16H7F4N4      | 34.39  | 331.0601 | 1.1       | 3.4       | 38.5   | 13.5 | even           |      | ok     |
|           | 17 | C11H5F2N10O    | 47.56  | 331.0610 | 0.2       | 0.7       | 43.5   | 13.5 | even           |      | ok     |
|           | 18 | C13H8F5N4O     | 51.95  | 331.0613 | -0.0      | -0.0      | 43.6   | 9.5  | even           |      | ok     |
|           | 19 | C12H12F5O5     | 23.32  | 331.0599 | 1.3       | 4.0       | 48.0   | 4.5  | even           |      | ok     |
| 353.0440  | 1  | C12H14F4NaO4S  | 100.00 | 353.0441 | -0.1      | -0.2      | 2.5    | 3.5  | even           |      | ok     |
|           | 2  | C10H11FN6NaO4S | 97.08  | 353.0439 | -0.2      | -0.4      | 2.6    | 7.5  | even           |      | ok     |
|           | 3  | C11H7FN10NaS   | 49.11  | 353.0452 | 1.2       | 3.3       | 11.3   | 12.5 | even           |      | ok     |
|           | 4  | C13H10F4N4NaS  | 42.21  | 353.0455 | -1.4      | -4.0      | 11.3   | 8.5  | even           |      | ok     |
|           | 5  | C9H15FN2NaO8S  | 38.91  | 353.0425 | 1.5       | 4.2       | 13.2   | 2.5  | even           |      | ok     |
|           | 6  | C13H10N6NaO3S  | 41.77  | 353.0427 | 1.3       | 3.7       | 15.9   | 11.5 | even           |      | ok     |
|           | 7  | C15H13F3NaO3S  | 48.28  | 353.0430 | -1.1      | -3.0      | 16.0   | 7.5  | even           |      | ok     |
|           | 8  | C9H15F5NaO5S   | 43.04  | 353.0453 | 1.2       | 3.5       | 16.6   | -0.5 | even           |      | ok     |
|           | 9  | C7H12F2N6NaO5S | 49.59  | 353.0450 | 1.0       | 2.8       | 16.6   | 3.5  | even           |      | ok     |
|           | 10 | C14H12F2NaO7   | 48.92  | 353.0443 | -0.3      | -0.9      | 20.1   | 7.5  | even           |      | ok     |

# Mass Spectrum SmartFormula Report

| Meas. m/z | #  | Ion Formula     | Score | m/z      | err [mDa] | err [ppm] | mSigma | rdb  | e <sup>-</sup> Conf | N-Rule |
|-----------|----|-----------------|-------|----------|-----------|-----------|--------|------|---------------------|--------|
|           | 11 | C8H13F3N6NaOS2  | 60.64 | 353.0437 | 0.4       | 1.1       | 22.0   | 3.5  | even                | ok     |
|           | 12 | C9H10N6NaO8     | 28.97 | 353.0452 | -1.2      | -3.4      | 22.4   | 7.5  | even                | ok     |
|           | 13 | C11H13F3NaO8    | 24.88 | 353.0455 | 1.4       | 4.1       | 22.4   | 3.5  | even                | ok     |
|           | 14 | C13H15F5NaS2    | 36.24 | 353.0428 | -1.3      | -3.6      | 23.3   | 3.5  | even                | ok     |
|           | 15 | C11H12F2N6NaS2  | 31.02 | 353.0425 | -1.5      | -4.3      | 23.4   | 7.5  | even                | ok     |
|           | 16 | C9H18N2NaO7S2   | 47.35 | 353.0448 | -0.7      | -2.1      | 25.1   | 1.5  | even                | ok     |
|           | 17 | C11H4F2N10NaO   | 28.75 | 353.0430 | 1.0       | 3.0       | 26.8   | 13.5 | even                | ok     |
|           | 18 | C13H7F5N4NaO    | 32.84 | 353.0432 | -0.8      | -2.3      | 26.9   | 9.5  | even                | ok     |
|           | 19 | C17H14NaO5S     | 30.37 | 353.0454 | 1.4       | 3.9       | 27.9   | 10.5 | even                | ok     |
|           | 20 | C8H5F3N10NaO2   | 44.15 | 353.0441 | 0.1       | 0.3       | 28.6   | 9.5  | even                | ok     |
|           | 21 | C15H16F2NaO2S2  | 33.81 | 353.0452 | -1.2      | -3.3      | 29.0   | 6.5  | even                | ok     |
|           | 22 | C8H14N2NaO12    | 42.89 | 353.0439 | -0.1      | -0.4      | 29.2   | 2.5  | even                | ok     |
|           | 23 | C15H8F2N4NaO3   | 18.27 | 353.0457 | 1.6       | 4.6       | 30.1   | 12.5 | even                | ok     |
|           | 24 | C17H11FNaO6     | 29.05 | 353.0432 | 0.8       | 2.4       | 31.2   | 11.5 | even                | ok     |
|           | 25 | C7H9F3N6NaO6    | 21.91 | 353.0428 | 1.2       | 3.5       | 33.3   | 4.5  | even                | ok     |
|           | 26 | C18H15FNaOS2    | 44.54 | 353.0441 | 0.0       | 0.1       | 40.5   | 10.5 | even                | ok     |
|           | 27 | C10H19FN2NaO3S3 | 33.02 | 353.0434 | 0.6       | 1.8       | 41.6   | 1.5  | even                | ok     |
|           | 28 | C18H7FN4NaO2    | 24.56 | 353.0445 | 0.5       | 1.4       | 44.1   | 16.5 | even                | ok     |
|           | 29 | C21H14NaS2      | 17.60 | 353.0429 | -1.1      | -3.2      | 53.7   | 14.5 | even                | ok     |
|           | 30 | C21H6N4NaO      | 13.67 | 353.0434 | -0.6      | -1.8      | 60.5   | 20.5 | even                | ok     |

**Figure S6.** HRESIMS spectrum of compound **6b**

## Generic Display Report

### Analysis Info

Analysis Name D:\MZ\maXis\_data\temp\60654000001.d  
Method tune\_low\_MS\_Service\_11\_18.m  
Sample Name CE-148-spot1-peak2  
Comment Kalaba/Zehl  
Ergebnis: +/- 5ppm  
ACN/MeOH + 1%H<sub>2</sub>O

Acquisition Date 11/8/2018 1:00:26 PM

Operator msc  
Instrument maXis

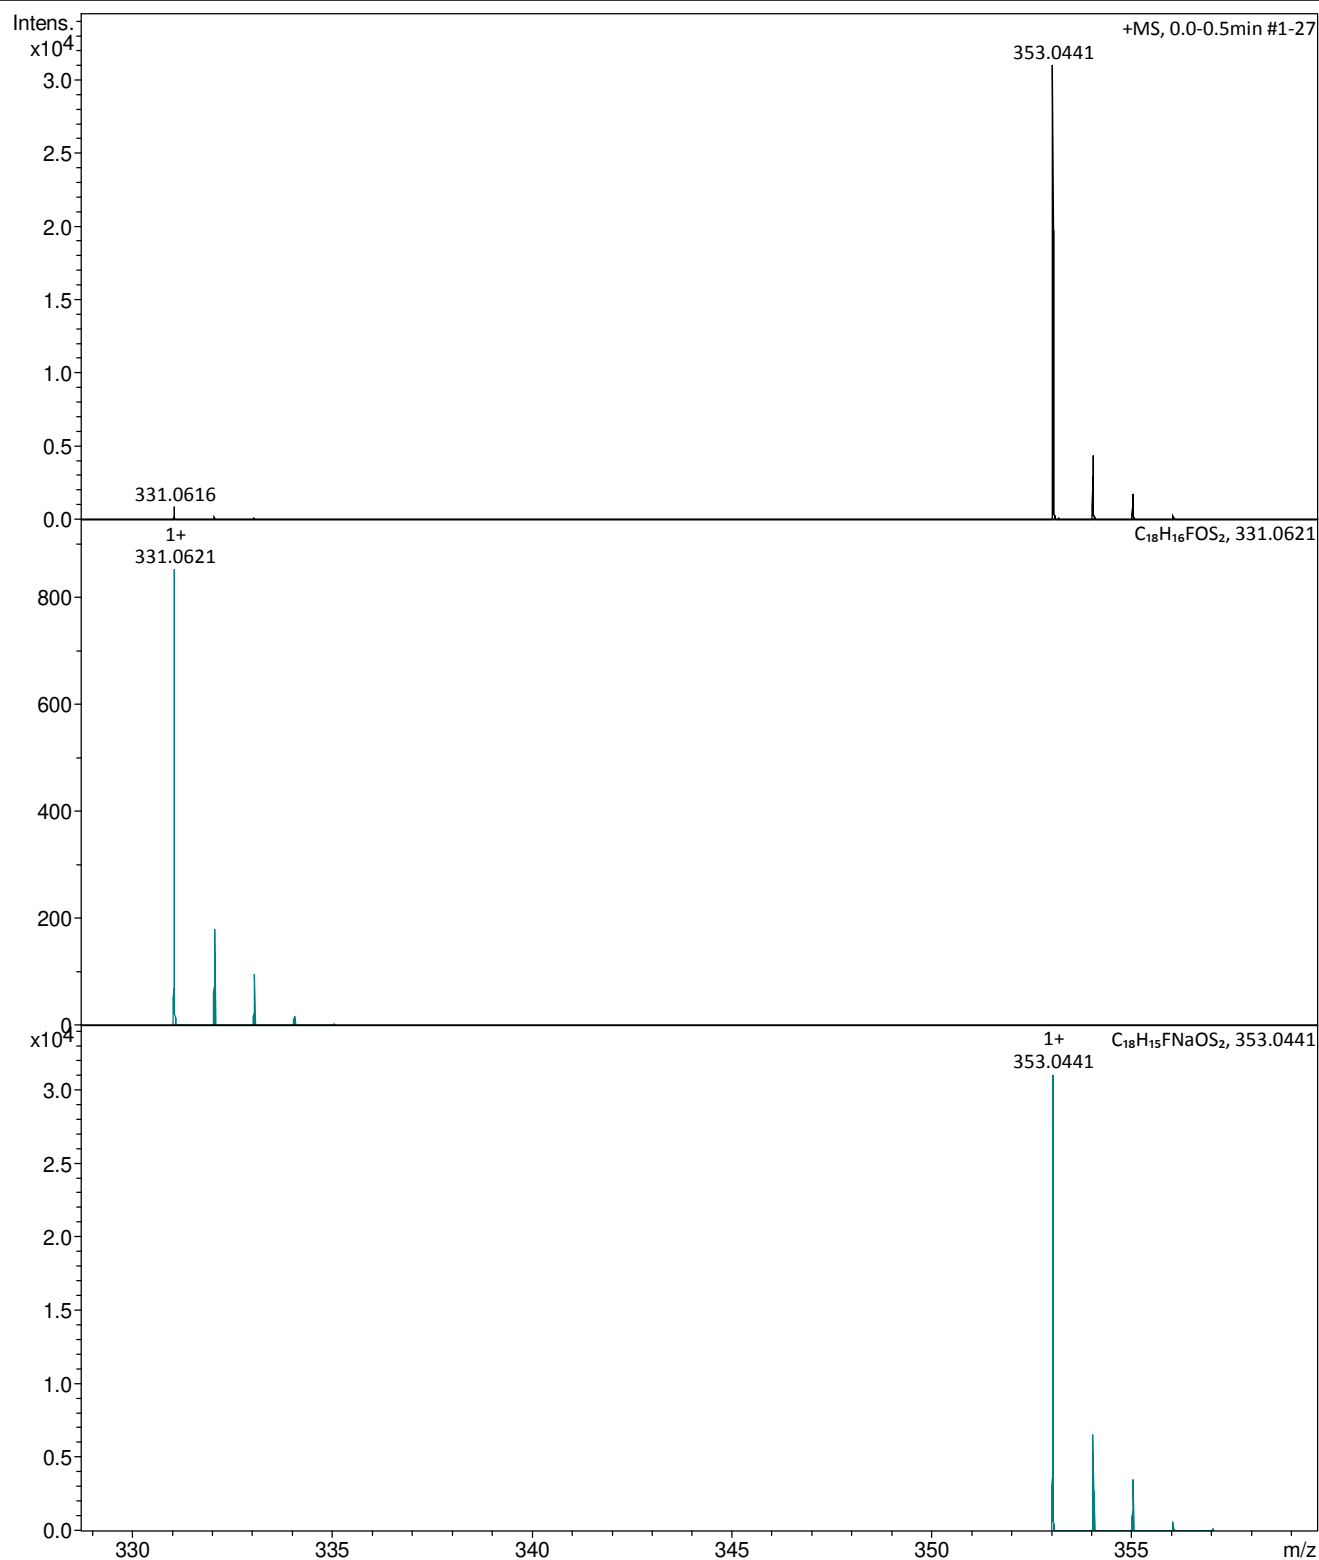

# Mass Spectrum SmartFormula Report

## Analysis Info

Analysis Name D:\MZ\maXis\_data\temp\60654000001.d  
 Method tune\_low\_MS\_Service\_11\_18.m  
 Sample Name CE-148-spot1-peak2  
 Comment Kalaba/Zehl  
 Ergebnis: +/- 5ppm  
 ACN/MeOH + 1%H2O

Acquisition Date 11/8/2018 1:00:26 PM

Operator msc  
 Instrument maXis 255552.00016

## Acquisition Parameter

|             |            |                      |          |                  |           |
|-------------|------------|----------------------|----------|------------------|-----------|
| Source Type | ESI        | Ion Polarity         | Positive | Set Nebulizer    | 0.4 Bar   |
| Focus       | Not active | Set Capillary        | 4500 V   | Set Dry Heater   | 150 °C    |
| Scan Begin  | 50 m/z     | Set End Plate Offset | -500 V   | Set Dry Gas      | 4.0 l/min |
| Scan End    | 1800 m/z   | Set Charging Voltage | 0 V      | Set Divert Valve | Source    |
|             |            | Set Corona           | 0 nA     | Set APCI Heater  | 0 °C      |

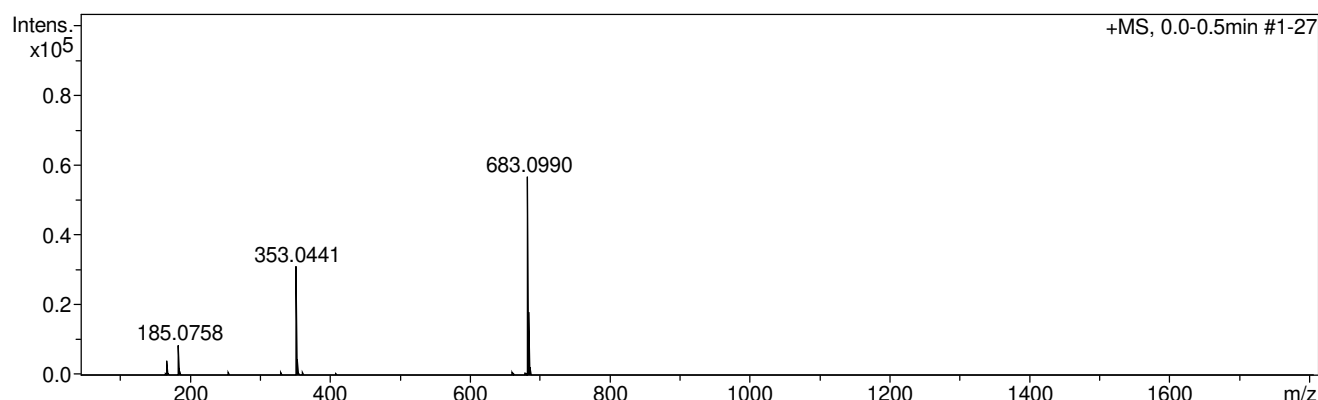

| Meas. m/z | #  | Ion Formula    | Score  | m/z      | err [mDa] | err [ppm] | mSigma | rdb  | e <sup>-</sup> | Conf | N-Rule |
|-----------|----|----------------|--------|----------|-----------|-----------|--------|------|----------------|------|--------|
| 167.9671  | 1  | C5H5NaOS2      | 100.00 | 167.9674 | -0.3      | -2.0      | 6.5    | 3.0  | odd            |      | ok     |
|           | 2  | C4HNaO6        | 55.46  | 167.9665 | 0.5       | 3.2       | 11.2   | 4.0  | odd            |      | ok     |
|           | 3  | C2H3F2NaO3S    | 52.43  | 167.9663 | 0.8       | 4.5       | 27.8   | 0.0  | odd            |      | ok     |
|           | 4  | CH2FNaO7       | 37.61  | 167.9677 | 0.6       | 3.6       | 27.9   | 0.0  | odd            |      | ok     |
| 185.0758  | 1  | C13H10F        | 100.00 | 185.0761 | -0.3      | -1.7      | 10.5   | 8.5  | even           |      | ok     |
| 331.0616  | 1  | C18H16FOS2     | 100.00 | 331.0621 | 0.5       | 1.6       | 17.0   | 10.5 | even           |      | ok     |
|           | 2  | C15H14F3O3S    | 93.65  | 331.0610 | 0.6       | 1.7       | 19.3   | 7.5  | even           |      | ok     |
|           | 3  | C13H11N6O3S    | 82.74  | 331.0608 | -0.8      | -2.4      | 19.3   | 11.5 | even           |      | ok     |
|           | 4  | C20H11O5       | 48.17  | 331.0601 | -1.5      | -4.5      | 25.2   | 15.5 | even           |      | ok     |
|           | 5  | C21H15S2       | 78.52  | 331.0610 | -0.6      | -1.9      | 25.9   | 14.5 | even           |      | ok     |
|           | 6  | C13H16F5S2     | 70.78  | 331.0608 | -0.8      | -2.4      | 26.9   | 3.5  | even           |      | ok     |
|           | 7  | C17H12FO6      | 76.70  | 331.0612 | -0.3      | -1.0      | 32.4   | 11.5 | even           |      | ok     |
|           | 8  | C18H8FN4O2     | 54.65  | 331.0626 | -1.0      | -3.0      | 32.7   | 16.5 | even           |      | ok     |
|           | 9  | C21H7N4O       | 75.24  | 331.0614 | -0.2      | -0.5      | 36.4   | 20.5 | even           |      | ok     |
|           | 10 | C13H19N2O2S3   | 41.88  | 331.0603 | -1.3      | -3.8      | 36.6   | 5.5  | even           |      | ok     |
|           | 11 | C16H7F4N4      | 35.09  | 331.0601 | -1.5      | -4.4      | 38.9   | 13.5 | even           |      | ok     |
|           | 12 | C14H13F2O7     | 45.36  | 331.0624 | 0.8       | 2.4       | 43.6   | 7.5  | even           |      | ok     |
|           | 13 | C13H8F5N4O     | 49.63  | 331.0613 | -0.3      | -0.9      | 48.8   | 9.5  | even           |      | ok     |
| 353.0441  | 1  | C12H14F4NaO4S  | 100.00 | 353.0441 | 0.0       | 0.1       | 2.7    | 3.5  | even           |      | ok     |
|           | 2  | C10H11FN6NaO4S | 92.93  | 353.0439 | -0.2      | -0.6      | 2.8    | 7.5  | even           |      | ok     |
|           | 3  | C11H7FN10NaS   | 49.43  | 353.0452 | -1.1      | -3.2      | 11.7   | 12.5 | even           |      | ok     |
|           | 4  | C13H10F4N4NaS  | 42.58  | 353.0455 | 1.4       | 3.9       | 11.7   | 8.5  | even           |      | ok     |
|           | 5  | C13H10N6NaO3S  | 39.42  | 353.0427 | -1.4      | -3.8      | 16.3   | 11.5 | even           |      | ok     |
|           | 6  | C15H13F3NaO3S  | 45.67  | 353.0430 | 1.1       | 3.1       | 16.3   | 7.5  | even           |      | ok     |
|           | 7  | C14H12F2NaO7   | 49.08  | 353.0443 | 0.2       | 0.7       | 20.2   | 7.5  | even           |      | ok     |
|           | 8  | C11H13F3NaO8   | 25.41  | 353.0455 | -1.4      | -3.9      | 22.2   | 3.5  | even           |      | ok     |
|           | 9  | C13H15F5NaS2   | 34.34  | 353.0428 | -1.3      | -3.8      | 23.5   | 3.5  | even           |      | ok     |
|           | 10 | C11H12F2N6NaS2 | 29.32  | 353.0425 | 1.6       | 4.4       | 23.5   | 7.5  | even           |      | ok     |
|           | 11 | C11H4F2N10NaO  | 27.35  | 353.0430 | -1.1      | -3.1      | 26.9   | 13.5 | even           |      | ok     |
|           | 12 | C13H7F5N4NaO   | 31.31  | 353.0432 | 0.9       | 2.4       | 27.0   | 9.5  | even           |      | ok     |
|           | 13 | C17H14NaO5S    | 30.61  | 353.0454 | -1.3      | -3.8      | 28.2   | 10.5 | even           |      | ok     |
|           | 14 | C15H16F2NaO2S2 | 34.11  | 353.0452 | 1.1       | 3.2       | 29.2   | 6.5  | even           |      | ok     |
|           | 15 | C15H8F2N4NaO3  | 18.50  | 353.0457 | -1.6      | -4.5      | 30.3   | 12.5 | even           |      | ok     |
|           | 16 | C17H11FNaO6    | 27.53  | 353.0432 | -0.9      | -2.5      | 31.5   | 11.5 | even           |      | ok     |
|           | 17 | C18H15FNaOS2   | 43.55  | 353.0441 | 0.0       | 0.1       | 40.8   | 10.5 | even           |      | ok     |

60654000001.d

Bruker Compass DataAnalysis 4.1

printed: 11/13/2018 5:52:17 PM

by: MSC

Page 1 of 2



---

## Mass Spectrum SmartFormula Report

---

| Meas. m/z | #  | Ion Formula     | Score | m/z      | err [mDa] | err [ppm] | mSigma | rdb  | e <sup>-</sup> Conf | N-Rule |
|-----------|----|-----------------|-------|----------|-----------|-----------|--------|------|---------------------|--------|
|           | 18 | C10H19FN2NaO3S3 | 31.57 | 353.0434 | -0.7      | -1.9      | 41.6   | 1.5  | even                | ok     |
|           | 19 | C18H7FN4NaO2    | 24.52 | 353.0445 | -0.4      | -1.3      | 44.4   | 16.5 | even                | ok     |
|           | 20 | C21H14NaS2      | 16.63 | 353.0429 | 1.2       | 3.3       | 54.0   | 14.5 | even                | ok     |
|           | 21 | C21H6N4NaO      | 12.92 | 353.0434 | -0.7      | -2.0      | 60.8   | 20.5 | even                | ok     |

**Figure S7.** HRESIMS spectrum of compound **7b**

## Generic Display Report

### Analysis Info

Analysis Name D:\MZ\maXis\_data\temp\60655000001.d  
Method tune\_low\_MS\_Service\_11\_18.m  
Sample Name CE-148-spot2-peak1  
Comment Kalaba/Zehl  
Ergebnis: +/- 5ppm  
ACN/MeOH + 1%H<sub>2</sub>O

Acquisition Date 11/8/2018 1:11:11 PM

Operator msc  
Instrument maXis

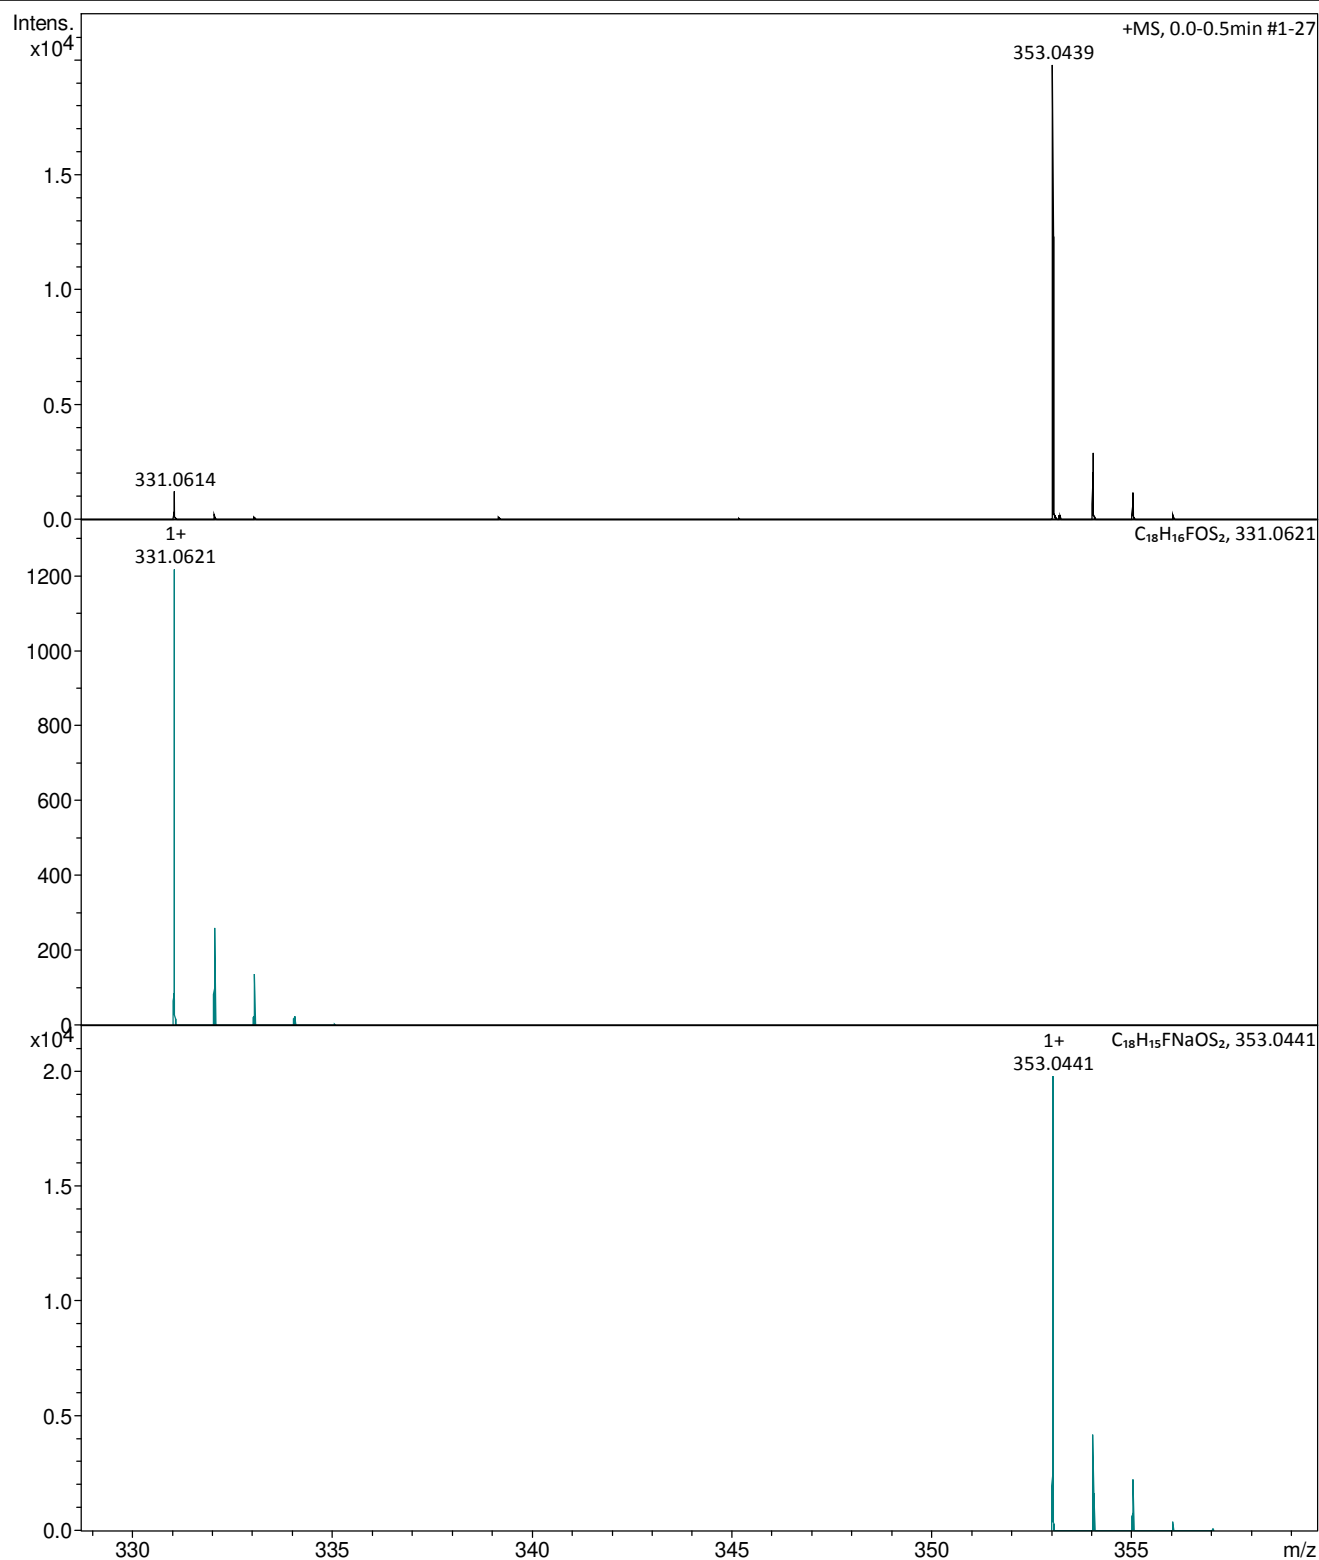

# Mass Spectrum SmartFormula Report

## Analysis Info

Analysis Name D:\MZ\maXis\_data\temp\60655000001.d  
Method tune\_low\_MS\_Service\_11\_18.m  
Sample Name CE-148-spot2-peak1  
Comment Kalaba/Zehl  
Ergebnis: +/- 5ppm  
ACN/MeOH + 1%H2O

Acquisition Date 11/8/2018 1:11:11 PM

Operator msc  
Instrument maXis 255552.00016

## Acquisition Parameter

|             |            |                      |          |                  |           |
|-------------|------------|----------------------|----------|------------------|-----------|
| Source Type | ESI        | Ion Polarity         | Positive | Set Nebulizer    | 0.4 Bar   |
| Focus       | Not active | Set Capillary        | 4500 V   | Set Dry Heater   | 150 °C    |
| Scan Begin  | 50 m/z     | Set End Plate Offset | -500 V   | Set Dry Gas      | 4.0 l/min |
| Scan End    | 1800 m/z   | Set Charging Voltage | 0 V      | Set Divert Valve | Source    |
|             |            | Set Corona           | 0 nA     | Set APCI Heater  | 0 °C      |

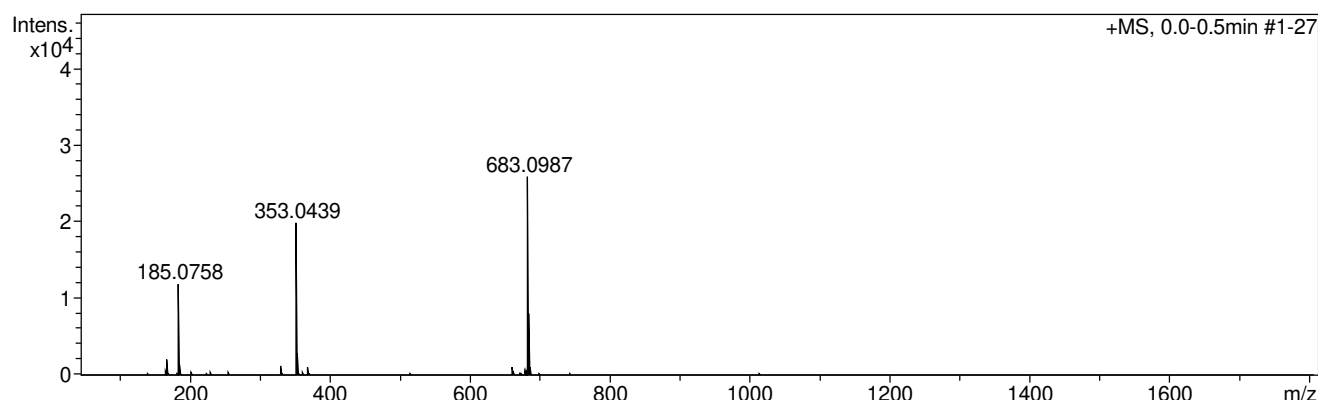

| Meas. m/z | #  | Ion Formula    | Score  | m/z      | err [mDa] | err [ppm] | mSigma | rdb  | e <sup>-</sup> | Conf | N-Rule |
|-----------|----|----------------|--------|----------|-----------|-----------|--------|------|----------------|------|--------|
| 167.9669  | 1  | C3H3N3NaS2     | 92.03  | 167.9661 | 0.8       | 4.8       | 2.6    | 3.5  | even           |      | ok     |
|           | 2  | C5H5NaOS2      | 100.00 | 167.9674 | 0.5       | 3.2       | 5.6    | 3.0  | odd            |      | ok     |
|           | 3  | C4HNaO6        | 65.73  | 167.9665 | -0.3      | -2.0      | 11.8   | 4.0  | odd            |      | ok     |
|           | 4  | CH2FNaO7       | 35.97  | 167.9677 | 0.8       | 4.8       | 28.7   | 0.0  | odd            |      | ok     |
|           | 5  | C2H3F2NaO3S    | 60.83  | 167.9663 | -0.5      | -3.2      | 29.5   | 0.0  | odd            |      | ok     |
| 185.0758  | 1  | C13H10F        | 100.00 | 185.0761 | -0.3      | -1.5      | 13.9   | 8.5  | even           |      | ok     |
|           | 2  | C5H14FN2O2S    | 34.95  | 185.0755 | 0.4       | 2.0       | 39.8   | -0.5 | even           |      | ok     |
| 331.0614  | 1  | C16H7F4N4      | 48.75  | 331.0601 | 1.2       | 3.7       | 12.2   | 13.5 | even           |      | ok     |
|           | 2  | C18H13F2O2S    | 61.31  | 331.0599 | 1.5       | 4.5       | 13.0   | 11.5 | even           |      | ok     |
|           | 3  | C18H16FOS2     | 92.57  | 331.0621 | -0.7      | -2.3      | 14.1   | 10.5 | even           |      | ok     |
|           | 4  | C18H8FN4O2     | 45.90  | 331.0626 | -1.2      | -3.7      | 15.7   | 16.5 | even           |      | ok     |
|           | 5  | C17H12FO6      | 75.86  | 331.0612 | 0.1       | 0.4       | 18.5   | 11.5 | even           |      | ok     |
|           | 6  | C20H11O5       | 41.50  | 331.0601 | -1.3      | -3.8      | 19.1   | 15.5 | even           |      | ok     |
|           | 7  | C13H11N6O3S    | 89.20  | 331.0608 | -0.6      | -1.8      | 20.1   | 11.5 | even           |      | ok     |
|           | 8  | C15H14F3O3S    | 100.00 | 331.0610 | 0.3       | 1.0       | 20.1   | 7.5  | even           |      | ok     |
|           | 9  | C13H16F5S2     | 84.68  | 331.0608 | -0.6      | -1.7      | 23.0   | 3.5  | even           |      | ok     |
|           | 10 | C21H15S2       | 87.27  | 331.0610 | 0.4       | 1.2       | 25.1   | 14.5 | even           |      | ok     |
|           | 11 | C21H7N4O       | 59.96  | 331.0614 | -0.1      | -0.2      | 29.8   | 20.5 | even           |      | ok     |
|           | 12 | C14H13F2O7     | 37.28  | 331.0624 | -1.0      | -3.1      | 30.2   | 7.5  | even           |      | ok     |
|           | 13 | C13H19N2O2S3   | 53.01  | 331.0603 | -1.0      | -3.2      | 31.7   | 5.5  | even           |      | ok     |
|           | 14 | C12H15F4O4S    | 57.63  | 331.0622 | 0.8       | 2.4       | 33.8   | 3.5  | even           |      | ok     |
|           | 15 | C12H12F5O5     | 22.17  | 331.0599 | -1.4      | -4.3      | 40.7   | 4.5  | even           |      | ok     |
|           | 16 | C14H4FN10      | 29.42  | 331.0599 | -1.5      | -4.4      | 44.0   | 17.5 | even           |      | ok     |
|           | 17 | C13H8F5N4O     | 48.19  | 331.0613 | -0.1      | -0.3      | 52.1   | 9.5  | even           |      | ok     |
| 353.0439  | 1  | C12H14F4NaO4S  | 93.39  | 353.0441 | 0.2       | 0.6       | 4.1    | 3.5  | even           |      | ok     |
|           | 2  | C10H11FN6NaO4S | 100.00 | 353.0439 | -0.0      | -0.1      | 4.1    | 7.5  | even           |      | ok     |
|           | 3  | C11H7FN10NaS   | 48.56  | 353.0452 | -1.3      | -3.7      | 8.4    | 12.5 | even           |      | ok     |
|           | 4  | C13H10F4N4NaS  | 41.51  | 353.0455 | 1.5       | 4.4       | 8.4    | 8.5  | even           |      | ok     |
|           | 5  | C13H10N6NaO3S  | 48.34  | 353.0427 | -1.2      | -3.3      | 12.5   | 11.5 | even           |      | ok     |
|           | 6  | C15H13F3NaO3S  | 55.59  | 353.0430 | 0.9       | 2.7       | 12.6   | 7.5  | even           |      | ok     |
|           | 7  | C14H12F2NaO7   | 46.13  | 353.0443 | 0.4       | 1.2       | 20.7   | 7.5  | even           |      | ok     |
|           | 8  | C13H15F5NaS2   | 41.36  | 353.0428 | -1.2      | -3.3      | 20.9   | 3.5  | even           |      | ok     |
|           | 9  | C11H12F2N6NaS2 | 35.59  | 353.0425 | 1.4       | 4.0       | 20.9   | 7.5  | even           |      | ok     |
|           | 10 | C17H14NaO5S    | 30.71  | 353.0454 | -1.5      | -4.3      | 24.4   | 10.5 | even           |      | ok     |
|           | 11 | C11H13F3NaO8   | 21.47  | 353.0455 | -1.6      | -4.4      | 25.8   | 3.5  | even           |      | ok     |

60655000001.d

Bruker Compass DataAnalysis 4.1

printed: 11/13/2018 5:52:18 PM

by: MSC

Page 1 of 2

# Mass Spectrum SmartFormula Report

| Meas. m/z | #  | Ion Formula     | Score | m/z      | err [mDa] | err [ppm] | mSigma | rdb  | e <sup>-</sup> Conf | N-Rule |
|-----------|----|-----------------|-------|----------|-----------|-----------|--------|------|---------------------|--------|
|           | 12 | C15H16F2NaO2S2  | 42.37 | 353.0452 | 1.3       | 3.6       | 26.2   | 6.5  | even                | ok     |
|           | 13 | C11H4F2N10NaO   | 30.37 | 353.0430 | -0.9      | -2.6      | 27.7   | 13.5 | even                | ok     |
|           | 14 | C13H7F5N4NaO    | 34.52 | 353.0432 | 0.7       | 1.9       | 27.7   | 9.5  | even                | ok     |
|           | 15 | C15H8F2N4NaO3   | 17.42 | 353.0457 | -1.8      | -5.0      | 28.9   | 12.5 | even                | ok     |
|           | 16 | C17H11FNaO6     | 32.67 | 353.0432 | -0.7      | -2.1      | 29.2   | 11.5 | even                | ok     |
|           | 17 | C18H15FNaOS2    | 58.17 | 353.0441 | -0.1      | -0.4      | 37.4   | 10.5 | even                | ok     |
|           | 18 | C10H19FN2NaO3S3 | 45.78 | 353.0434 | -0.5      | -1.4      | 40.2   | 1.5  | even                | ok     |
|           | 19 | C18H7FN4NaO2    | 25.04 | 353.0445 | -0.6      | -1.7      | 41.6   | 16.5 | even                | ok     |
|           | 20 | C13H18N2NaO2S3  | 21.52 | 353.0423 | 1.6       | 4.7       | 43.3   | 5.5  | even                | ok     |
|           | 21 | C21H14NaS2      | 26.21 | 353.0429 | 1.0       | 2.8       | 50.5   | 14.5 | even                | ok     |
|           | 22 | C21H6N4NaO      | 16.15 | 353.0434 | -0.5      | -1.5      | 57.5   | 20.5 | even                | ok     |

**Figure S8.** HRESIMS spectrum of compound **8b**

## Generic Display Report

### Analysis Info

Analysis Name D:\MZ\maXis\_data\temp\60656000001.d  
Method tune\_low\_MS\_Service\_11\_18.m  
Sample Name CE-148-spot2-peak2  
Comment Kalaba/Zehl  
Ergebnis: +/- 5ppm  
ACN/MeOH + 1%H<sub>2</sub>O

Acquisition Date 11/8/2018 1:13:17 PM

Operator msc  
Instrument maXis

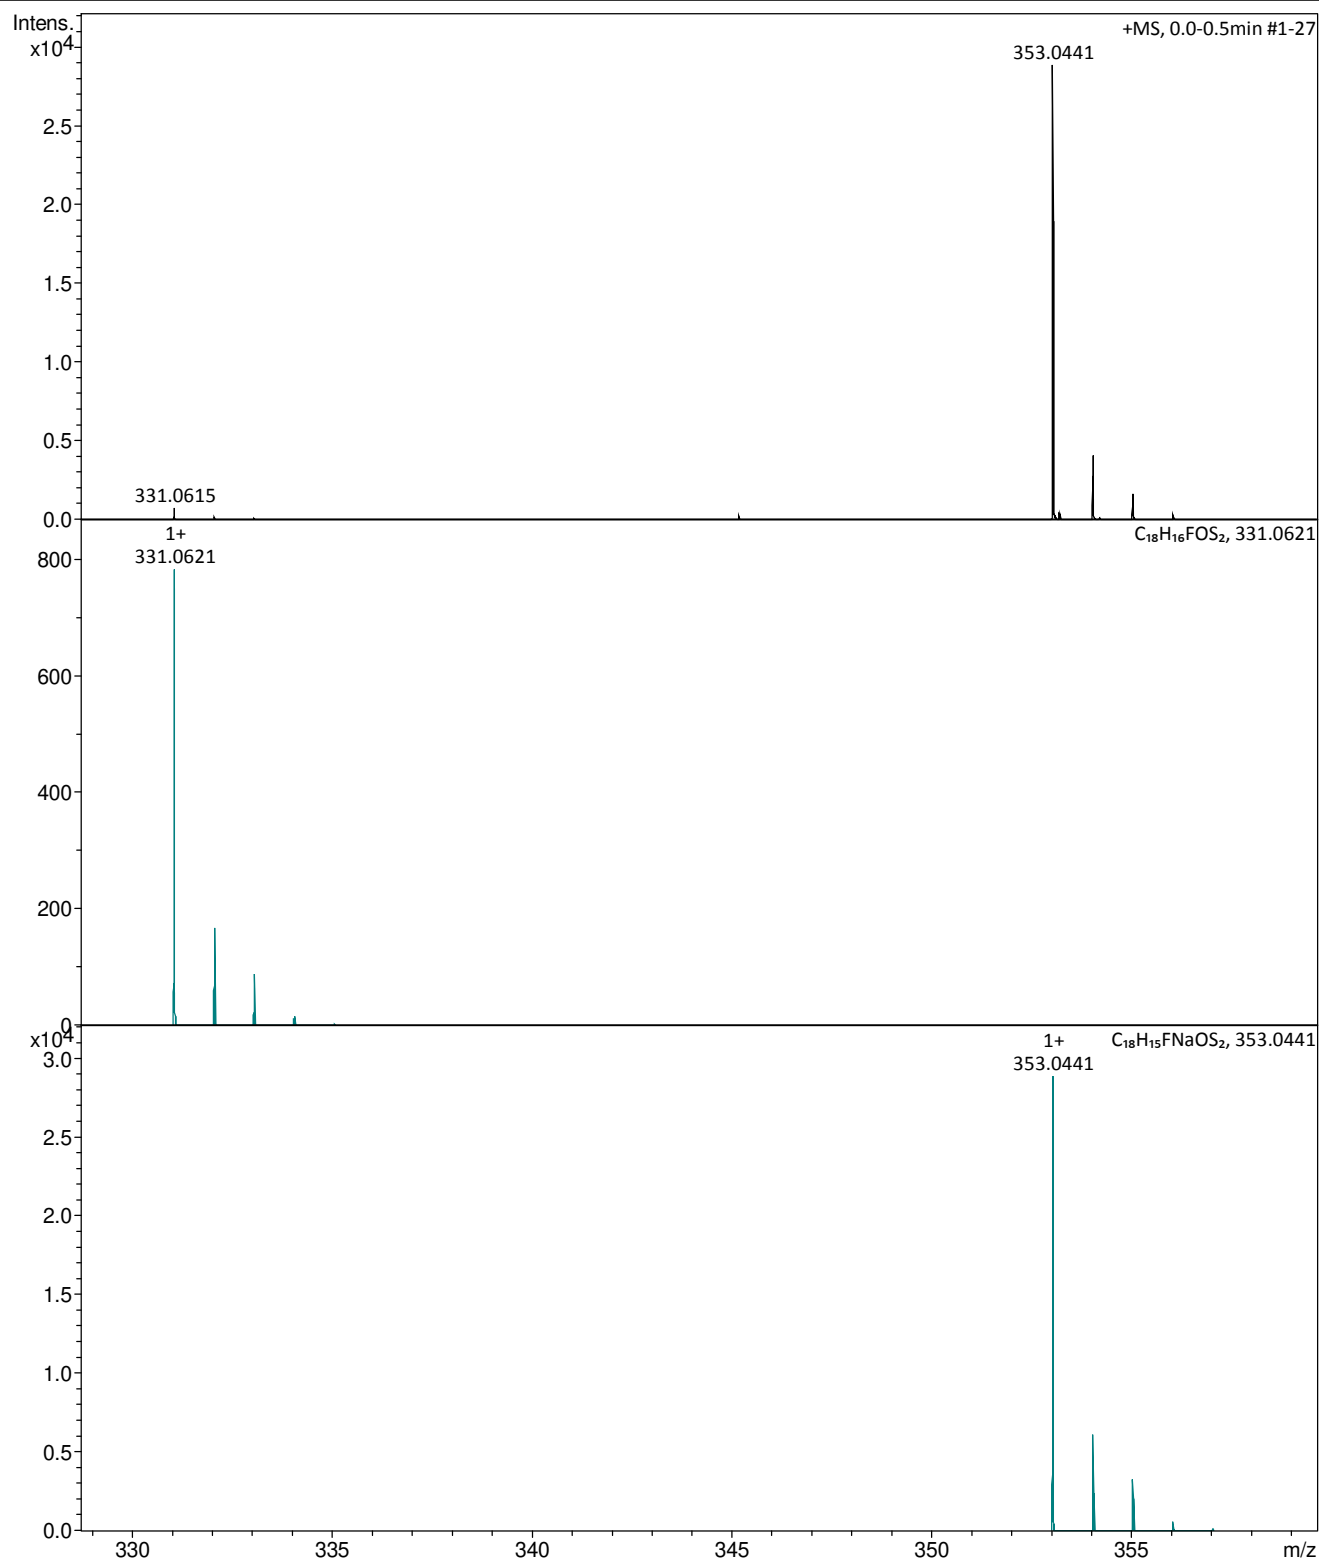

# Mass Spectrum SmartFormula Report

## Analysis Info

Analysis Name D:\MZ\maXis\_data\temp\60656000001.d  
Method tune\_low\_MS\_Service\_11\_18.m  
Sample Name CE-148-spot2-peak2  
Comment Kalaba/Zehl  
Ergebnis: +/- 5ppm  
ACN/MeOH + 1%H2O

Acquisition Date 11/8/2018 1:13:17 PM

Operator msc  
Instrument maXis 255552.00016

## Acquisition Parameter

|             |            |                      |          |                  |           |
|-------------|------------|----------------------|----------|------------------|-----------|
| Source Type | ESI        | Ion Polarity         | Positive | Set Nebulizer    | 0.4 Bar   |
| Focus       | Not active | Set Capillary        | 4500 V   | Set Dry Heater   | 150 °C    |
| Scan Begin  | 50 m/z     | Set End Plate Offset | -500 V   | Set Dry Gas      | 4.0 l/min |
| Scan End    | 1800 m/z   | Set Charging Voltage | 0 V      | Set Divert Valve | Source    |
|             |            | Set Corona           | 0 nA     | Set APCI Heater  | 0 °C      |

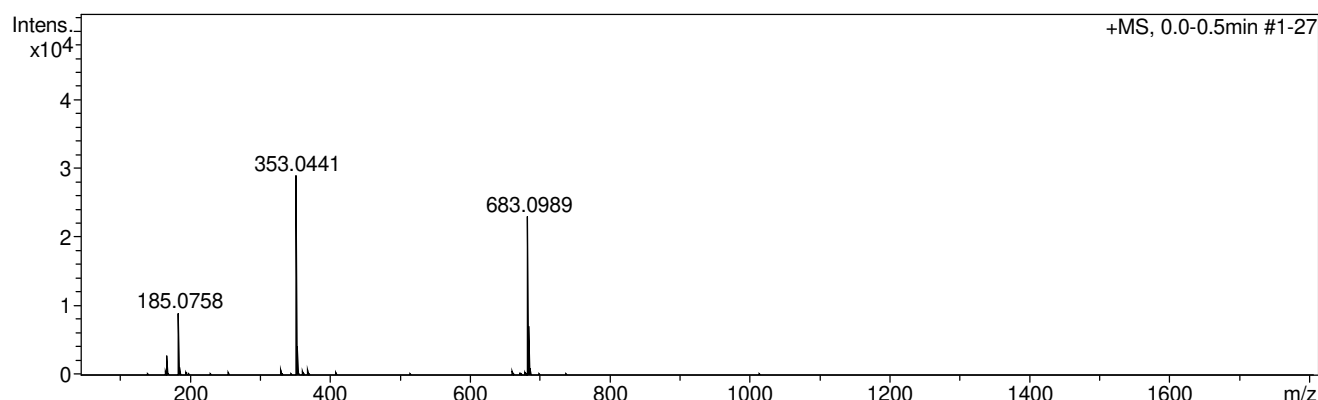

| Meas. m/z | #  | Ion Formula    | Score  | m/z      | err [mDa] | err [ppm] | mSigma | rdb  | e <sup>-</sup> | Conf | N-Rule |
|-----------|----|----------------|--------|----------|-----------|-----------|--------|------|----------------|------|--------|
| 167.9670  | 1  | C5H5NaOS2      | 100.00 | 167.9674 | -0.4      | -2.5      | 7.3    | 3.0  | odd            |      | ok     |
|           | 2  | C4HNaO6        | 62.70  | 167.9665 | -0.4      | -2.6      | 10.2   | 4.0  | odd            |      | ok     |
|           | 3  | CH2FNaO7       | 39.18  | 167.9677 | 0.7       | 4.2       | 26.7   | 0.0  | odd            |      | ok     |
|           | 4  | C2H3F2NaO3S    | 58.52  | 167.9663 | -0.7      | -3.9      | 27.7   | 0.0  | odd            |      | ok     |
| 185.0758  | 1  | C13H10F        | 100.00 | 185.0761 | -0.3      | -1.8      | 12.1   | 8.5  | even           |      | ok     |
| 331.0615  | 1  | C18H13F2O2S    | 56.57  | 331.0599 | -1.6      | -4.8      | 10.9   | 11.5 | even           |      | ok     |
|           | 2  | C15H14F3O3S    | 100.00 | 331.0610 | 0.5       | 1.4       | 15.5   | 7.5  | even           |      | ok     |
|           | 3  | C13H11N6O3S    | 88.76  | 331.0608 | -0.7      | -2.1      | 15.5   | 11.5 | even           |      | ok     |
|           | 4  | C18H16FOS2     | 88.20  | 331.0621 | -0.6      | -1.9      | 17.6   | 10.5 | even           |      | ok     |
|           | 5  | C13H16F5S2     | 79.65  | 331.0608 | -0.7      | -2.0      | 21.3   | 3.5  | even           |      | ok     |
|           | 6  | C20H11O5       | 44.73  | 331.0601 | 1.4       | 4.2       | 28.6   | 15.5 | even           |      | ok     |
|           | 7  | C21H15S2       | 72.52  | 331.0610 | -0.5      | -1.6      | 28.8   | 14.5 | even           |      | ok     |
|           | 8  | C12H15F4O4S    | 65.59  | 331.0622 | 0.7       | 2.1       | 29.5   | 3.5  | even           |      | ok     |
|           | 9  | C17H12FO6      | 75.20  | 331.0612 | 0.2       | 0.7       | 32.5   | 11.5 | even           |      | ok     |
|           | 10 | C13H19N2O2S3   | 45.19  | 331.0603 | 1.2       | 3.5       | 33.7   | 5.5  | even           |      | ok     |
|           | 11 | C18H8FN4O2     | 44.91  | 331.0626 | 1.1       | 3.3       | 35.6   | 16.5 | even           |      | ok     |
|           | 12 | C14H4FN10      | 29.69  | 331.0599 | 1.6       | 4.8       | 39.4   | 17.5 | even           |      | ok     |
|           | 13 | C16H7F4N4      | 34.76  | 331.0601 | -1.3      | -4.1      | 39.4   | 13.5 | even           |      | ok     |
|           | 14 | C14H13F2O7     | 43.42  | 331.0624 | 0.9       | 2.7       | 41.0   | 7.5  | even           |      | ok     |
|           | 15 | C21H7N4O       | 63.62  | 331.0614 | -0.0      | -0.1      | 41.9   | 20.5 | even           |      | ok     |
|           | 16 | C13H8F5N4O     | 51.88  | 331.0613 | 0.2       | 0.6       | 46.7   | 9.5  | even           |      | ok     |
|           | 17 | C12H12F5O5     | 20.98  | 331.0599 | 1.5       | 4.7       | 52.3   | 4.5  | even           |      | ok     |
| 353.0441  | 1  | C12H14F4NaO4S  | 100.00 | 353.0441 | -0.0      | -0.1      | 3.2    | 3.5  | even           |      | ok     |
|           | 2  | C10H11FN6NaO4S | 90.30  | 353.0439 | -0.3      | -0.7      | 3.2    | 7.5  | even           |      | ok     |
|           | 3  | C11H7FN10NaS   | 51.82  | 353.0452 | -1.1      | -3.1      | 10.9   | 12.5 | even           |      | ok     |
|           | 4  | C13H10F4N4NaS  | 44.75  | 353.0455 | 1.3       | 3.7       | 10.9   | 8.5  | even           |      | ok     |
|           | 5  | C13H10N6NaO3S  | 38.76  | 353.0427 | -1.4      | -4.0      | 15.5   | 11.5 | even           |      | ok     |
|           | 6  | C15H13F3NaO3S  | 45.01  | 353.0430 | 1.2       | 3.3       | 15.6   | 7.5  | even           |      | ok     |
|           | 7  | C14H12F2NaO7   | 51.05  | 353.0443 | 0.2       | 0.6       | 19.5   | 7.5  | even           |      | ok     |
|           | 8  | C11H13F3NaO8   | 26.22  | 353.0455 | -1.3      | -3.8      | 22.3   | 3.5  | even           |      | ok     |
|           | 9  | C13H15F5NaS2   | 33.27  | 353.0428 | 1.4       | 3.9       | 23.5   | 3.5  | even           |      | ok     |
|           | 10 | C11H12F2N6NaS2 | 28.34  | 353.0425 | 1.6       | 4.6       | 23.5   | 7.5  | even           |      | ok     |
|           | 11 | C11H4F2N10NaO  | 26.98  | 353.0430 | -1.1      | -3.3      | 26.2   | 13.5 | even           |      | ok     |
|           | 12 | C13H7F5N4NaO   | 30.96  | 353.0432 | -0.9      | -2.6      | 26.3   | 9.5  | even           |      | ok     |
|           | 13 | C17H14NaO5S    | 32.19  | 353.0454 | -1.3      | -3.6      | 27.5   | 10.5 | even           |      | ok     |

## Mass Spectrum SmartFormula Report

| Meas. m/z | #  | Ion Formula     | Score | m/z      | err [mDa] | err [ppm] | mSigma | rdb  | e <sup>-</sup> Conf | N-Rule |
|-----------|----|-----------------|-------|----------|-----------|-----------|--------|------|---------------------|--------|
|           | 14 | C15H16F2NaO2S2  | 44.29 | 353.0452 | 1.1       | 3.0       | 29.0   | 6.5  | even                | ok     |
|           | 15 | C15H8F2N4NaO3   | 19.63 | 353.0457 | -1.5      | -4.3      | 29.3   | 12.5 | even                | ok     |
|           | 16 | C17H11FNaO6     | 27.48 | 353.0432 | 0.9       | 2.7       | 30.5   | 11.5 | even                | ok     |
|           | 17 | C18H15FNaOS2    | 54.03 | 353.0441 | 0.1       | 0.2       | 40.3   | 10.5 | even                | ok     |
|           | 18 | C10H19FN2NaO3S3 | 38.24 | 353.0434 | 0.7       | 2.1       | 41.8   | 1.5  | even                | ok     |
|           | 19 | C18H7FN4NaO2    | 25.90 | 353.0445 | 0.4       | 1.1       | 43.4   | 16.5 | even                | ok     |
|           | 20 | C21H14NaS2      | 20.51 | 353.0429 | 1.2       | 3.5       | 53.4   | 14.5 | even                | ok     |
|           | 21 | C21H6N4NaO      | 8.53  | 353.0434 | -0.8      | -2.1      | 60.4   | 20.5 | even                | ok     |

**Figure S9.** HRESIMS spectrum of compound **5c**

## Generic Display Report

### Analysis Info

Analysis Name E:\Data\MS\_MessService\58959000001.d  
Method tune\_low\_MS\_Service\_08\_18.m  
Sample Name CE-155-SPOT1-PEAK1  
Comment Kalaba/Zehl  
Ergebnis: +/- 5ppm  
ACN/MeOH +0.1% H2O

Acquisition Date 8/14/2018 6:04:02 PM

Operator msc  
Instrument maXis

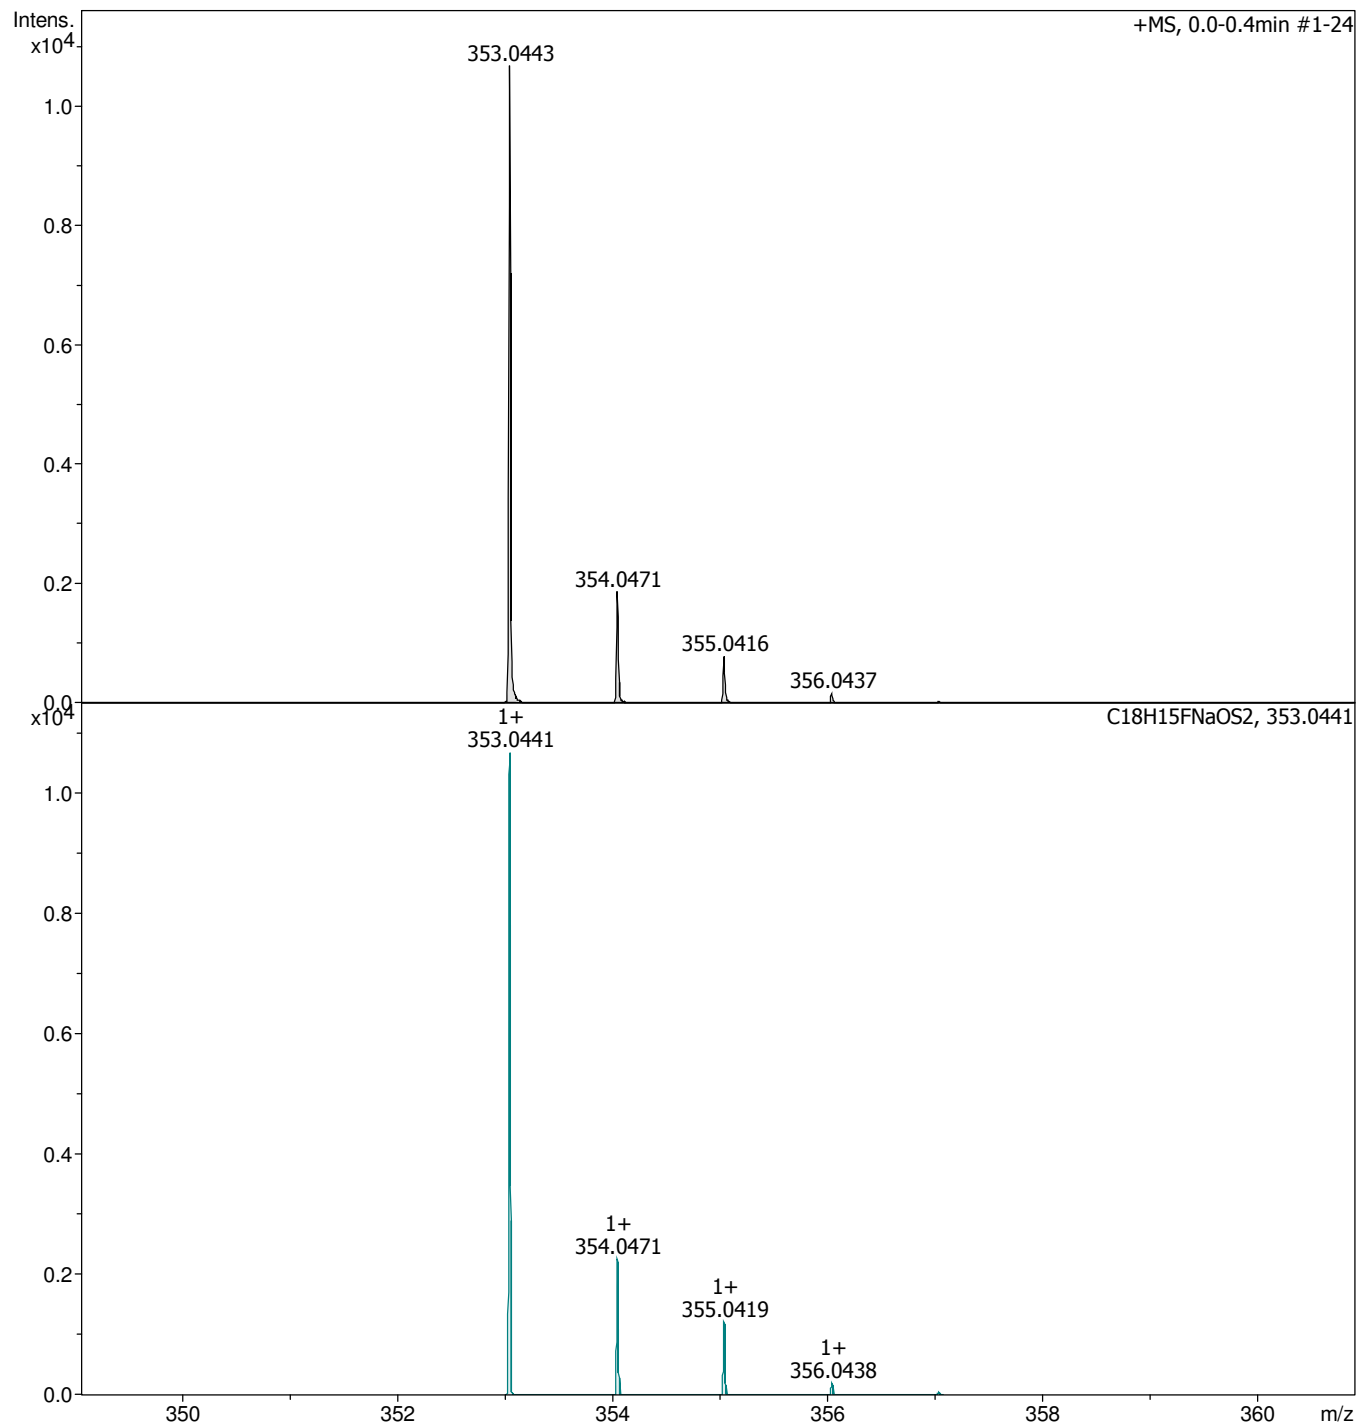



# Mass Spectrum SmartFormula Report

## Analysis Info

Analysis Name E:\Data\MS\_MessService\58959000001.d  
Method tune\_low\_MS\_Service\_08\_18.m  
Sample Name CE-155-SPOT1-PEAK1  
Comment Kalaba/Zehl  
Ergebnis: +/- 5ppm  
ACN/MeOH +0.1% H2O

Acquisition Date 8/14/2018 6:04:02 PM

Operator msc  
Instrument maXis 255552.00016

## Acquisition Parameter

|             |            |                      |          |                  |           |
|-------------|------------|----------------------|----------|------------------|-----------|
| Source Type | ESI        | Ion Polarity         | Positive | Set Nebulizer    | 0.4 Bar   |
| Focus       | Not active | Set Capillary        | 4500 V   | Set Dry Heater   | 180 °C    |
| Scan Begin  | 50 m/z     | Set End Plate Offset | -500 V   | Set Dry Gas      | 4.0 l/min |
| Scan End    | 1900 m/z   | Set Charging Voltage | 0 V      | Set Divert Valve | Source    |
|             |            | Set Corona           | 0 nA     | Set APCI Heater  | 0 °C      |

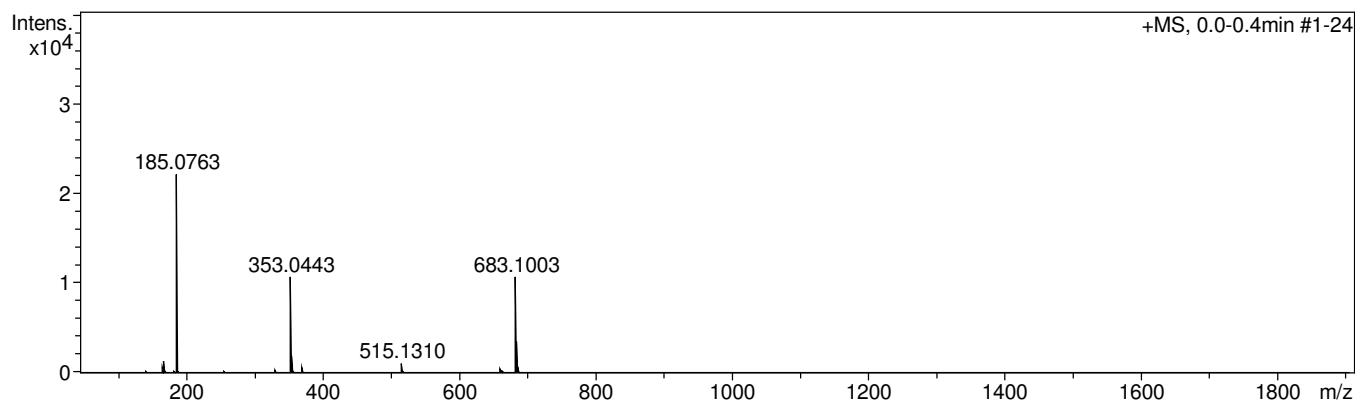

| Meas. m/z  | #  | Ion Formula      | Score  | m/z        | err [mDa] | err [ppm] | mSigma | rdb  | e <sup>-</sup> | Conf | N-Rule |
|------------|----|------------------|--------|------------|-----------|-----------|--------|------|----------------|------|--------|
| 353.044287 | 1  | C13H10N6NaO3S    | 47.99  | 353.042730 | -1.6      | -4.4      | 5.1    | 11.5 | even           |      | ok     |
|            | 2  | C15H13F3NaO3S    | 56.12  | 353.042971 | 1.3       | 3.7       | 5.2    | 7.5  | even           |      | ok     |
|            | 3  | C15H12N3NaO4S    | 100.00 | 353.044073 | -0.2      | -0.6      | 5.5    | 11.0 | odd            |      | ok     |
|            | 4  | C11H7FN10NaS     | 64.73  | 353.045210 | -0.9      | -2.6      | 10.2   | 12.5 | even           |      | ok     |
|            | 5  | C13H10F4N4NaS    | 56.30  | 353.045451 | 1.2       | 3.3       | 10.2   | 8.5  | even           |      | ok     |
|            | 6  | C17H14NaO5S      | 57.43  | 353.045415 | 1.1       | 3.2       | 10.3   | 10.5 | even           |      | ok     |
|            | 7  | C12H13FN3NaO5S   | 61.82  | 353.045215 | -0.9      | -2.6      | 12.5   | 7.0  | odd            |      | ok     |
|            | 8  | C13H14F2N3NaOS2  | 76.61  | 353.043856 | 0.4       | 1.2       | 14.6   | 7.0  | odd            |      | ok     |
|            | 9  | C15H16F2NaO2S2   | 57.81  | 353.045199 | -0.9      | -2.6      | 16.3   | 6.5  | even           |      | ok     |
|            | 10 | C13H15F5NaS2     | 39.51  | 353.042754 | -1.5      | -4.3      | 16.3   | 3.5  | even           |      | ok     |
|            | 11 | C16H8N7NaS       | 50.66  | 353.045410 | 1.1       | 3.2       | 16.9   | 16.0 | odd            |      | ok     |
|            | 12 | C18H11F3NNaS     | 43.65  | 353.045651 | 1.4       | 3.9       | 16.9   | 12.0 | odd            |      | ok     |
|            | 13 | C12H14F4NaO4S    | 79.60  | 353.044114 | -0.2      | -0.5      | 18.3   | 3.5  | even           |      | ok     |
|            | 14 | C10H11FN6NaO4S   | 71.46  | 353.043873 | -0.4      | -1.2      | 18.4   | 7.5  | even           |      | ok     |
|            | 15 | C16H13FN3NaS2    | 35.68  | 353.042713 | 1.6       | 4.5       | 19.9   | 11.0 | odd            |      | ok     |
|            | 16 | C10H15F3N3NaO2S2 | 54.81  | 353.044999 | -0.7      | -2.0      | 23.8   | 3.0  | odd            |      | ok     |
|            | 17 | C10H12F4N3NaO3S  | 33.73  | 353.042771 | 1.5       | 4.3       | 24.2   | 4.0  | odd            |      | ok     |
|            | 18 | C18H15FN4NaOS2   | 67.62  | 353.044056 | 0.2       | 0.7       | 24.7   | 10.5 | even           |      | ok     |
|            | 19 | C17H11FN4NaO6    | 31.15  | 353.043187 | -1.1      | -3.1      | 26.6   | 11.5 | even           |      | ok     |
|            | 20 | C10H16F6NaOS2    | 58.78  | 353.043897 | 0.4       | 1.1       | 27.6   | -0.5 | even           |      | ok     |
|            | 21 | C10H12F8NNaS     | 36.42  | 353.045492 | 1.2       | 3.4       | 29.5   | 1.0  | odd            |      | ok     |
|            | 22 | C14H12F2NaO7     | 48.84  | 353.044330 | 0.0       | 0.1       | 29.7   | 7.5  | even           |      | ok     |
|            | 23 | C15H8F2N4NaO3    | 24.12  | 353.045667 | -1.4      | -3.9      | 30.1   | 12.5 | even           |      | ok     |
|            | 24 | C13H6F2N7NaO2    | 45.63  | 353.044325 | 0.0       | 0.1       | 32.5   | 13.0 | odd            |      | ok     |
|            | 25 | C15H9F5NNaO2     | 41.16  | 353.044565 | -0.3      | -0.8      | 32.5   | 9.0  | odd            |      | ok     |
|            | 26 | C16H5FN7NaO      | 26.35  | 353.043182 | -1.1      | -3.1      | 33.3   | 17.0 | odd            |      | ok     |
|            | 27 | C18H8F4NNaO      | 30.18  | 353.043422 | 0.9       | 2.4       | 33.4   | 13.0 | odd            |      | ok     |
|            | 28 | C12H10F2N3NaO6   | 22.72  | 353.042987 | -1.3      | -3.7      | 34.5   | 8.0  | odd            |      | ok     |
|            | 29 | C18H7FN4NaO2     | 39.83  | 353.044524 | -0.2      | -0.7      | 34.6   | 16.5 | even           |      | ok     |

# Mass Spectrum SmartFormula Report

| Meas. m/z | # | Ion Formula     | Score | m/z        | err [mDa] | err [ppm] | mSigma | rdb  | e <sup>-</sup> Conf | N-Rule |
|-----------|---|-----------------|-------|------------|-----------|-----------|--------|------|---------------------|--------|
| 30        |   | C11H4F2N10NaO   | 21.74 | 353.042982 | -1.3      | -3.7      | 36.1   | 13.5 | even                | ok     |
| 31        |   | C13H7F5N4NaO    | 25.13 | 353.043223 | 1.1       | 3.0       | 36.1   | 9.5  | even                | ok     |
| 32        |   | C20H9FNNaO3     | 17.71 | 353.045867 | -1.6      | -4.5      | 37.0   | 16.0 | odd                 | ok     |
| 33        |   | C21H14NaS2      | 26.88 | 353.042913 | 1.4       | 3.9       | 37.3   | 14.5 | even                | ok     |
| 34        |   | C10H19FN2NaO3S3 | 35.80 | 353.043404 | -0.9      | -2.5      | 37.5   | 1.5  | even                | ok     |
| 35        |   | C10H7F3N7NaO3   | 20.75 | 353.045467 | -1.2      | -3.3      | 40.7   | 9.0  | odd                 | ok     |
| 36        |   | C12H10F6NNaO3   | 17.84 | 353.045708 | 1.4       | 4.0       | 40.7   | 5.0  | odd                 | ok     |
| 37        |   | C11H13F3NaO8    | 20.31 | 353.045473 | -1.2      | -3.4      | 41.3   | 3.5  | even                | ok     |
| 38        |   | C10H8F6N4NaO2   | 30.98 | 353.044366 | 0.1       | 0.2       | 46.2   | 5.5  | even                | ok     |
| 39        |   | C21H6N4NaO      | 20.70 | 353.043382 | 0.9       | 2.6       | 46.3   | 20.5 | even                | ok     |
| 40        |   | C23H8NNaO2      | 23.08 | 353.044724 | 0.4       | 1.2       | 50.7   | 20.0 | odd                 | ok     |
| 41        |   | C10H9F9NNaO     | 16.37 | 353.043264 | 1.0       | 2.9       | 51.9   | 2.0  | odd                 | ok     |
| 42        |   | C10H22N2NaO2S4  | 15.96 | 353.045633 | -1.3      | -3.8      | 55.6   | 0.5  | even                | ok     |

**Figure S10.** HRESIMS spectrum of compound **6c**

## Generic Display Report

### Analysis Info

Analysis Name E:\Data\MS\_MessService\58960000001.d  
Method tune\_low\_MS\_Service\_08\_18.m  
Sample Name CE-155-SPOT1-PEAK2  
Comment Kalaba/Zehl  
Ergebnis: +/- 5ppm  
ACN/MeOH +0.1% H2O

Acquisition Date 8/14/2018 6:07:58 PM

Operator msc  
Instrument maXis

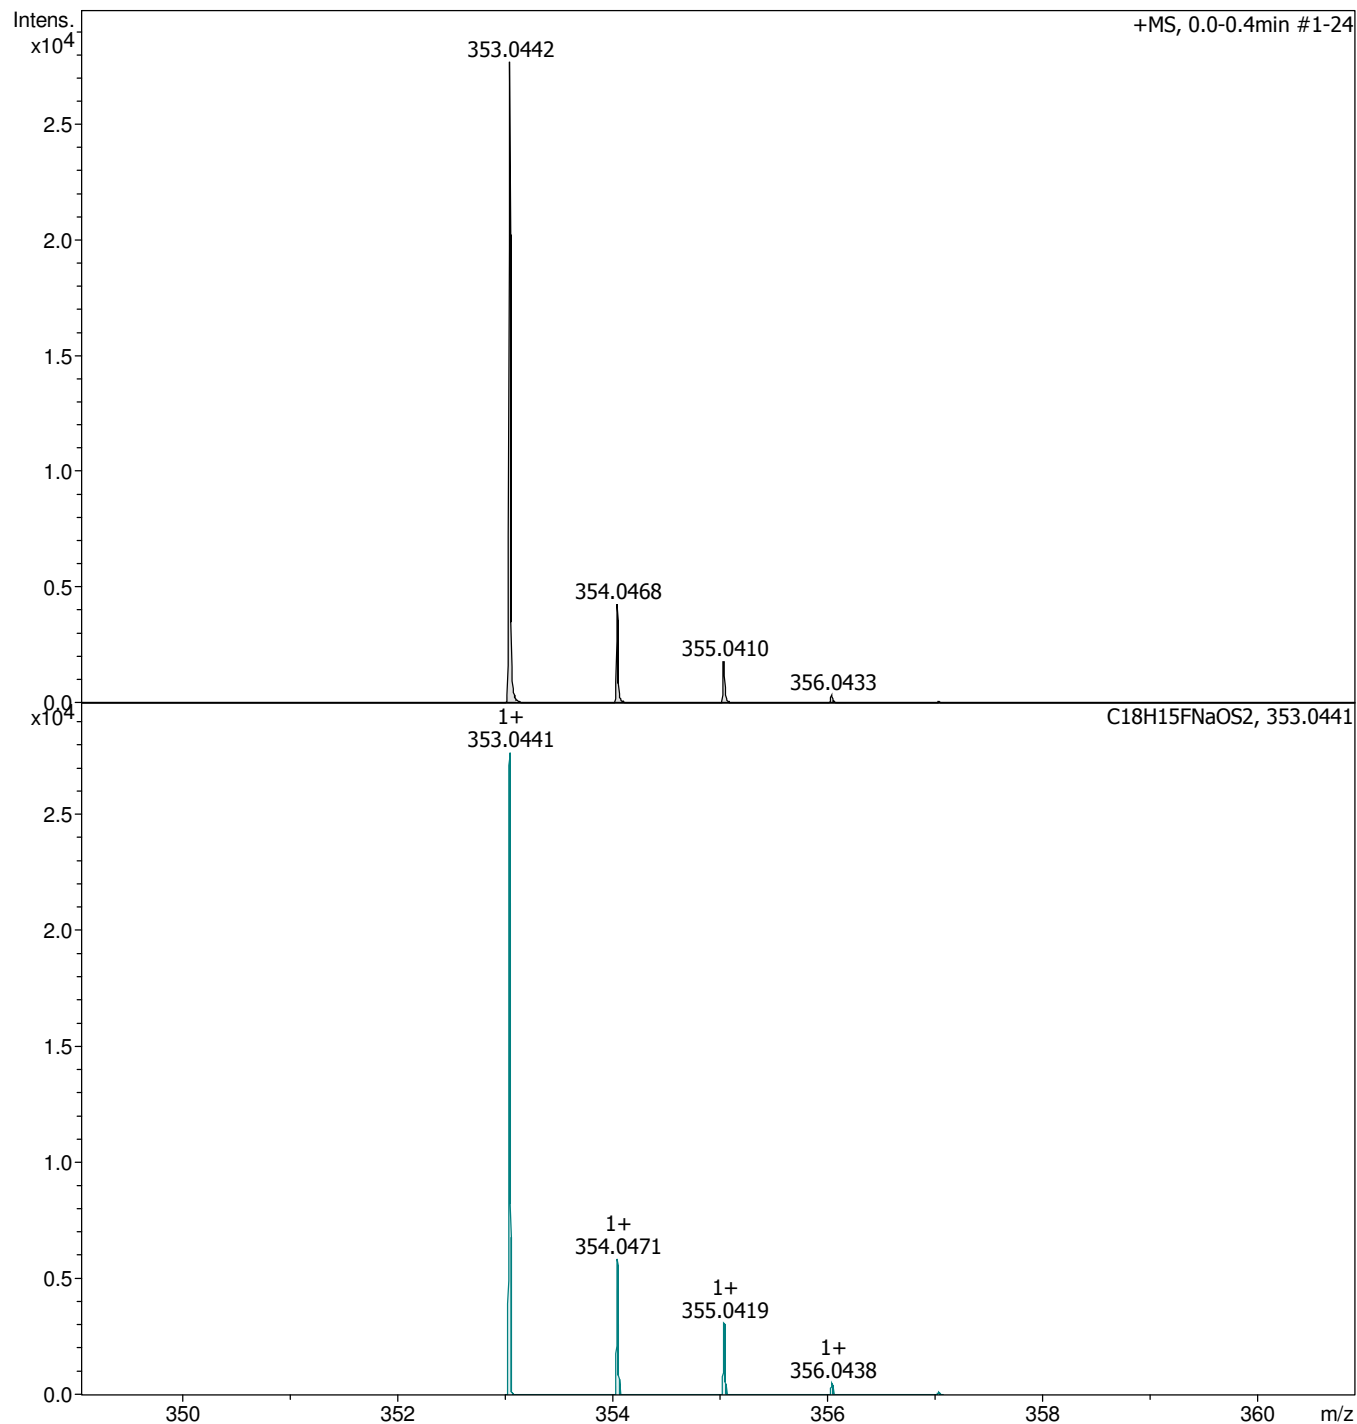

# Mass Spectrum SmartFormula Report

## Analysis Info

Analysis Name E:\Data\MS\_MessService\58960000001.d  
Method tune\_low\_MS\_Service\_08\_18.m  
Sample Name CE-155-SPOT1-PEAK2  
Comment Kalaba/Zehl  
Ergebnis: +/- 5ppm  
ACN/MeOH +0.1% H2O

Acquisition Date 8/14/2018 6:07:58 PM

Operator msc  
Instrument maXis 255552.00016

## Acquisition Parameter

|             |            |                      |          |                  |           |
|-------------|------------|----------------------|----------|------------------|-----------|
| Source Type | ESI        | Ion Polarity         | Positive | Set Nebulizer    | 0.4 Bar   |
| Focus       | Not active | Set Capillary        | 4500 V   | Set Dry Heater   | 180 °C    |
| Scan Begin  | 50 m/z     | Set End Plate Offset | -500 V   | Set Dry Gas      | 4.0 l/min |
| Scan End    | 1900 m/z   | Set Charging Voltage | 0 V      | Set Divert Valve | Source    |
|             |            | Set Corona           | 0 nA     | Set APCI Heater  | 0 °C      |

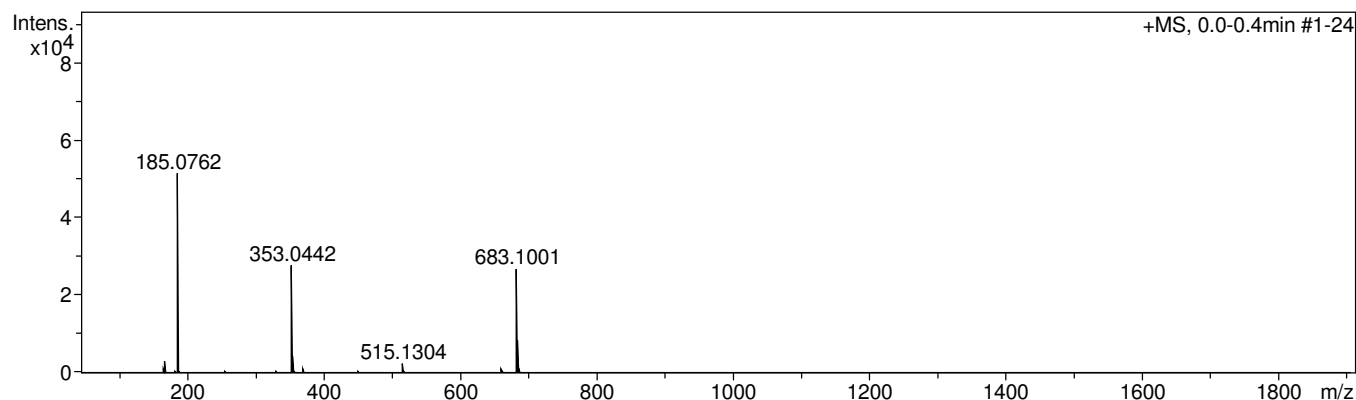

| Meas. m/z  | #  | Ion Formula      | Score  | m/z        | err [mDa] | err [ppm] | mSigma | rdb  | e <sup>-</sup> | Conf | N-Rule |
|------------|----|------------------|--------|------------|-----------|-----------|--------|------|----------------|------|--------|
| 353.044219 | 1  | C12H13FN3NaO5S   | 70.34  | 353.045215 | -1.0      | -2.8      | 1.7    | 7.0  | odd            |      | ok     |
|            | 2  | C12H14F4NaO4S    | 100.00 | 353.044114 | -0.1      | -0.3      | 6.8    | 3.5  | even           |      | ok     |
|            | 3  | C10H11FN6NaO4S   | 90.02  | 353.043873 | 0.3       | 1.0       | 6.8    | 7.5  | even           |      | ok     |
|            | 4  | C11H7FN10NaS     | 64.56  | 353.045210 | -1.0      | -2.8      | 6.9    | 12.5 | even           |      | ok     |
|            | 5  | C13H10F4N4NaS    | 55.95  | 353.045451 | 1.2       | 3.5       | 7.0    | 8.5  | even           |      | ok     |
|            | 6  | C13H10N6NaO3S    | 45.17  | 353.042730 | -1.5      | -4.2      | 9.8    | 11.5 | even           |      | ok     |
|            | 7  | C15H13F3NaO3S    | 52.65  | 353.042971 | 1.2       | 3.5       | 9.8    | 7.5  | even           |      | ok     |
|            | 8  | C10H12F4N3NaO3S  | 43.95  | 353.042771 | 1.4       | 4.1       | 12.6   | 4.0  | odd            |      | ok     |
|            | 9  | C15H12N3NaO4S    | 83.46  | 353.044073 | -0.1      | -0.4      | 15.4   | 11.0 | odd            |      | ok     |
|            | 10 | C10H12F8NNaS     | 44.28  | 353.045492 | 1.3       | 3.6       | 17.8   | 1.0  | odd            |      | ok     |
|            | 11 | C13H15F5NaS2     | 38.88  | 353.042754 | 1.5       | 4.1       | 18.2   | 3.5  | even           |      | ok     |
|            | 12 | C11H12F2N6NaS2   | 32.98  | 353.042514 | 1.7       | 4.8       | 18.2   | 7.5  | even           |      | ok     |
|            | 13 | C13H14F2N3NaOS2  | 70.02  | 353.043856 | -0.4      | -1.0      | 19.3   | 7.0  | odd            |      | ok     |
|            | 14 | C10H15F3N3NaO2S2 | 55.89  | 353.044999 | 0.8       | 2.2       | 20.2   | 3.0  | odd            |      | ok     |
|            | 15 | C17H14NaO5S      | 43.09  | 353.045415 | -1.2      | -3.4      | 21.3   | 10.5 | even           |      | ok     |
|            | 16 | C10H16F6NaOS2    | 67.89  | 353.043897 | -0.3      | -0.9      | 21.6   | -0.5 | even           |      | ok     |
|            | 17 | C14H12F2NaO7     | 54.33  | 353.044330 | 0.1       | 0.3       | 22.9   | 7.5  | even           |      | ok     |
|            | 18 | C15H16F2NaO2S2   | 46.88  | 353.045199 | 1.0       | 2.8       | 23.3   | 6.5  | even           |      | ok     |
|            | 19 | C12H10F2N3NaO6   | 28.81  | 353.042987 | -1.2      | -3.5      | 25.5   | 8.0  | odd            |      | ok     |
|            | 20 | C16H8N7NaS       | 37.99  | 353.045410 | -1.2      | -3.4      | 27.0   | 16.0 | odd            |      | ok     |
|            | 21 | C18H11F3NNaS     | 32.63  | 353.045651 | 1.4       | 4.1       | 27.1   | 12.0 | odd            |      | ok     |
|            | 22 | C17H11FN6NaO6    | 30.08  | 353.043187 | -1.0      | -2.9      | 28.7   | 11.5 | even           |      | ok     |
|            | 23 | C13H6F2N7NaO2    | 47.45  | 353.044325 | -0.1      | -0.3      | 28.8   | 13.0 | odd            |      | ok     |
|            | 24 | C15H9F5NNaO2     | 42.68  | 353.044565 | 0.3       | 1.0       | 28.9   | 9.0  | odd            |      | ok     |
|            | 25 | C16H13FN3NaS2    | 29.57  | 353.042713 | 1.5       | 4.3       | 29.2   | 11.0 | odd            |      | ok     |
|            | 26 | C15H8F2N4NaO3    | 22.95  | 353.045667 | -1.4      | -4.1      | 29.3   | 12.5 | even           |      | ok     |
|            | 27 | C11H13F3NaO8     | 25.78  | 353.045473 | -1.3      | -3.6      | 29.6   | 3.5  | even           |      | ok     |
|            | 28 | C11H4F2N10NaO    | 25.91  | 353.042982 | -1.2      | -3.5      | 29.8   | 13.5 | even           |      | ok     |
|            | 29 | C13H7F5N4NaO     | 29.85  | 353.043223 | -1.0      | -2.8      | 29.9   | 9.5  | even           |      | ok     |

# Mass Spectrum SmartFormula Report

| Meas. m/z | #  | Ion Formula     | Score | m/z        | err [mDa] | err [ppm] | mSigma | rdb  | e <sup>-</sup> Conf | N-Rule |
|-----------|----|-----------------|-------|------------|-----------|-----------|--------|------|---------------------|--------|
|           | 30 | C10H7F3N7NaO3   | 25.10 | 353.045467 | -1.2      | -3.5      | 30.9   | 9.0  | odd                 | ok     |
|           | 31 | C12H10F6NNaO3   | 21.50 | 353.045708 | -1.5      | -4.2      | 30.9   | 5.0  | odd                 | ok     |
|           | 32 | C18H15FNaOS2    | 53.91 | 353.044056 | 0.2       | 0.5       | 34.3   | 10.5 | even                | ok     |
|           | 33 | C10H8F6N4NaO2   | 39.65 | 353.044366 | 0.1       | 0.4       | 35.3   | 5.5  | even                | ok     |
|           | 34 | C16H5FN7NaO     | 24.40 | 353.043182 | -1.0      | -2.9      | 36.9   | 17.0 | odd                 | ok     |
|           | 35 | C18H8F4NNaO     | 27.86 | 353.043422 | 0.8       | 2.3       | 37.0   | 13.0 | odd                 | ok     |
|           | 36 | C10H19FN2NaO3S3 | 35.30 | 353.043404 | 0.8       | 2.3       | 38.5   | 1.5  | even                | ok     |
|           | 37 | C10H9F9NNaO     | 23.28 | 353.043264 | 1.0       | 2.7       | 40.4   | 2.0  | odd                 | ok     |
|           | 38 | C18H7FN4NaO2    | 32.31 | 353.044524 | 0.3       | 0.9       | 40.4   | 16.5 | even                | ok     |
|           | 39 | C20H9FNNaO3     | 13.36 | 353.045867 | -1.6      | -4.7      | 44.7   | 16.0 | odd                 | ok     |
|           | 40 | C21H14NaS2      | 20.59 | 353.042913 | 1.3       | 3.7       | 47.5   | 14.5 | even                | ok     |
|           | 41 | C21H6N4NaO      | 15.86 | 353.043382 | -0.8      | -2.4      | 55.4   | 20.5 | even                | ok     |
|           | 42 | C10H22N2NaO2S4  | 13.70 | 353.045633 | -1.4      | -4.0      | 58.2   | 0.5  | even                | ok     |
|           | 43 | C23H8NNaO2      | 15.79 | 353.044724 | -0.5      | -1.4      | 60.7   | 20.0 | odd                 | ok     |

**Figure S11.** HRESIMS spectrum of compound **7c**

## Generic Display Report

### Analysis Info

Analysis Name E:\Data\MS\_MessService\58961000001.d  
Method tune\_low\_MS\_Service\_08\_18.m  
Sample Name CE-155-SPOT2-PEAK1  
Comment Kalaba/Zehl  
Ergebnis: +/- 5ppm  
ACN/MeOH +0.1% H2O

Acquisition Date 8/14/2018 6:10:41 PM

Operator msc  
Instrument maXis

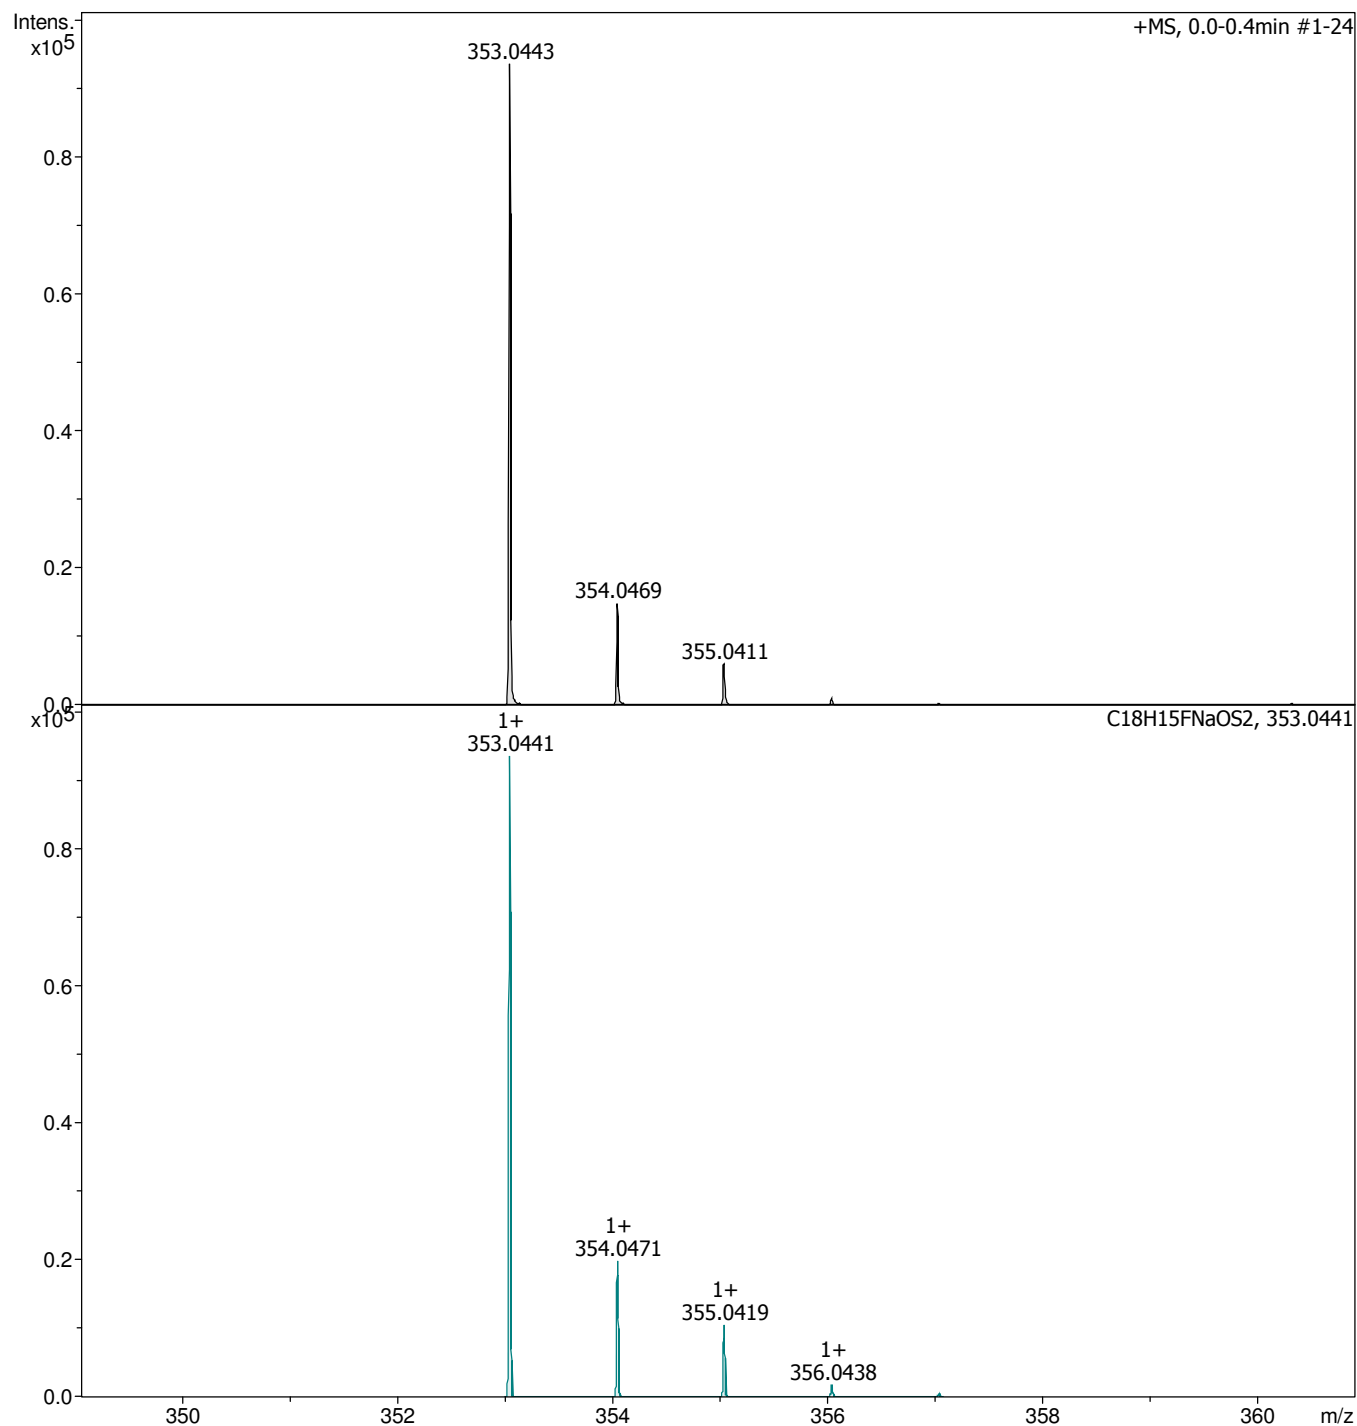

# Mass Spectrum SmartFormula Report

## Analysis Info

Analysis Name E:\Data\MS\_MessService\58961000001.d  
 Method tune\_low\_MS\_Service\_08\_18.m  
 Sample Name CE-155-SPOT2-PEAK1  
 Comment Kalaba/Zehl  
 Ergebnis: +/- 5ppm  
 ACN/MeOH +0.1% H2O

Acquisition Date 8/14/2018 6:10:41 PM  
 Operator msc  
 Instrument maXis 255552.00016

## Acquisition Parameter

|             |            |                      |          |                  |           |
|-------------|------------|----------------------|----------|------------------|-----------|
| Source Type | ESI        | Ion Polarity         | Positive | Set Nebulizer    | 0.4 Bar   |
| Focus       | Not active | Set Capillary        | 4500 V   | Set Dry Heater   | 180 °C    |
| Scan Begin  | 50 m/z     | Set End Plate Offset | -500 V   | Set Dry Gas      | 4.0 l/min |
| Scan End    | 1900 m/z   | Set Charging Voltage | 0 V      | Set Divert Valve | Source    |
|             |            | Set Corona           | 0 nA     | Set APCI Heater  | 0 °C      |

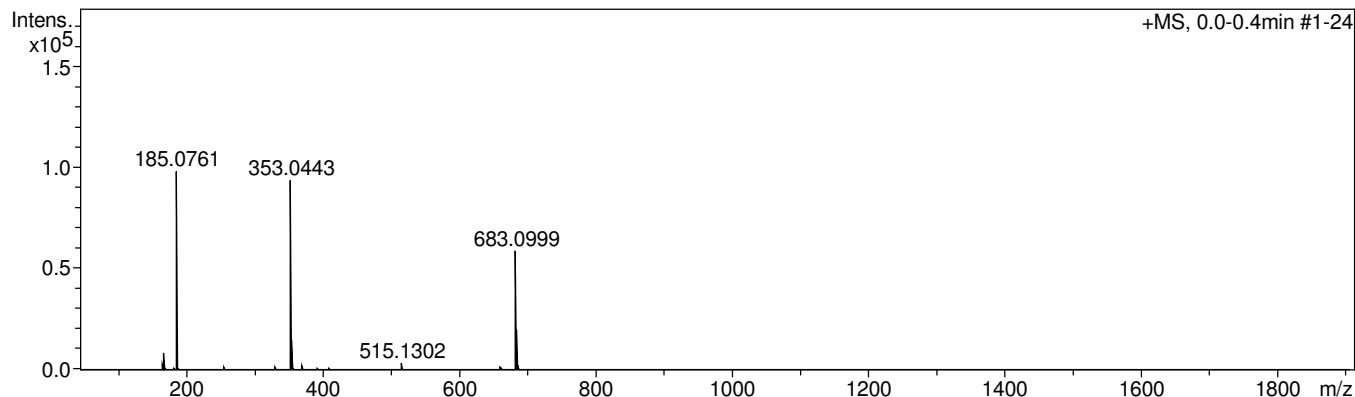

| Meas. m/z  | #  | Ion Formula      | Score  | m/z        | err [mDa] | err [ppm] | mSigma | rdb  | e <sup>-</sup> | Conf | N-Rule |
|------------|----|------------------|--------|------------|-----------|-----------|--------|------|----------------|------|--------|
| 353.044273 | 1  | C12H13FN3NaO5S   | 74.99  | 353.045215 | -0.9      | -2.7      | 3.6    | 7.0  | odd            |      | ok     |
|            | 2  | C11H7FN10NaS     | 73.90  | 353.045210 | 0.9       | 2.7       | 4.6    | 12.5 | even           |      | ok     |
|            | 3  | C13H10F4N4NaS    | 64.20  | 353.045451 | -1.2      | -3.3      | 4.6    | 8.5  | even           |      | ok     |
|            | 4  | C13H10N6NaO3S    | 48.72  | 353.042730 | -1.5      | -4.4      | 7.1    | 11.5 | even           |      | ok     |
|            | 5  | C15H13F3NaO3S    | 56.94  | 353.042971 | -1.3      | -3.7      | 7.2    | 7.5  | even           |      | ok     |
|            | 6  | C12H14F4NaO4S    | 100.00 | 353.044114 | -0.2      | -0.5      | 9.1    | 3.5  | even           |      | ok     |
|            | 7  | C10H11FN6NaO4S   | 89.81  | 353.043873 | -0.4      | -1.1      | 9.1    | 7.5  | even           |      | ok     |
|            | 8  | C15H12N3NaO4S    | 91.35  | 353.044073 | 0.2       | 0.6       | 12.9   | 11.0 | odd            |      | ok     |
|            | 9  | C10H12F4N3NaO3S  | 43.23  | 353.042771 | -1.5      | -4.3      | 14.9   | 4.0  | odd            |      | ok     |
|            | 10 | C13H15F5NaS2     | 39.63  | 353.042754 | 1.5       | 4.3       | 18.6   | 3.5  | even           |      | ok     |
|            | 11 | C11H12F2N6NaS2   | 33.53  | 353.042514 | -1.8      | -5.0      | 18.7   | 7.5  | even           |      | ok     |
|            | 12 | C17H14NaO5S      | 49.97  | 353.045415 | -1.1      | -3.2      | 18.9   | 10.5 | even           |      | ok     |
|            | 13 | C13H14F2N3NaOS2  | 91.50  | 353.043856 | -0.4      | -1.2      | 19.1   | 7.0  | odd            |      | ok     |
|            | 14 | C10H12F8NNaS     | 46.65  | 353.045492 | 1.2       | 3.5       | 20.0   | 1.0  | odd            |      | ok     |
|            | 15 | C10H15F3N3NaO2S2 | 59.10  | 353.044999 | -0.7      | -2.1      | 21.9   | 3.0  | odd            |      | ok     |
|            | 16 | C14H12F2NaO7     | 60.01  | 353.044330 | -0.1      | -0.2      | 22.2   | 7.5  | even           |      | ok     |
|            | 17 | C15H16F2NaO2S2   | 65.37  | 353.045199 | -0.9      | -2.6      | 22.6   | 6.5  | even           |      | ok     |
|            | 18 | C10H16F6NaOS2    | 67.35  | 353.043897 | 0.4       | 1.1       | 23.8   | -0.5 | even           |      | ok     |
|            | 19 | C16H8N7NaS       | 44.41  | 353.045410 | -1.1      | -3.2      | 24.4   | 16.0 | odd            |      | ok     |
|            | 20 | C18H11F3NNaS     | 38.24  | 353.045651 | -1.4      | -3.9      | 24.5   | 12.0 | odd            |      | ok     |
|            | 21 | C12H10F2N3NaO6   | 29.59  | 353.042987 | 1.3       | 3.6       | 25.7   | 8.0  | odd            |      | ok     |
|            | 22 | C17H11FNao6      | 32.94  | 353.043187 | 1.1       | 3.1       | 26.3   | 11.5 | even           |      | ok     |
|            | 23 | C15H8F2N4NaO3    | 26.55  | 353.045667 | 1.4       | 4.0       | 27.4   | 12.5 | even           |      | ok     |
|            | 24 | C13H6F2N7NaO2    | 53.40  | 353.044325 | -0.1      | -0.1      | 27.5   | 13.0 | odd            |      | ok     |
|            | 25 | C15H9F5NNaO2     | 48.13  | 353.044565 | -0.3      | -0.8      | 27.5   | 9.0  | odd            |      | ok     |
|            | 26 | C16H13FN3NaS2    | 39.21  | 353.042713 | -1.6      | -4.4      | 27.9   | 11.0 | odd            |      | ok     |
|            | 27 | C11H4F2N10NaO    | 27.15  | 353.042982 | 1.3       | 3.7       | 29.2   | 13.5 | even           |      | ok     |
|            | 28 | C13H7F5N4NaO     | 31.36  | 353.043223 | -1.1      | -3.0      | 29.2   | 9.5  | even           |      | ok     |
|            | 29 | C11H13F3NaO8     | 27.48  | 353.045473 | 1.2       | 3.4       | 31.0   | 3.5  | even           |      | ok     |

58961000001.d

Bruker Compass DataAnalysis 4.1

printed: 8/16/2018 11:23:28 AM

by: msc

Page 1 of 2

# Mass Spectrum SmartFormula Report

| Meas. m/z | # | Ion Formula     | Score | m/z        | err [mDa] | err [ppm] | mSigma | rdb  | e <sup>-</sup> Conf | N-Rule |
|-----------|---|-----------------|-------|------------|-----------|-----------|--------|------|---------------------|--------|
| 30        |   | C10H7F3N7NaO3   | 27.29 | 353.045467 | 1.2       | 3.4       | 31.4   | 9.0  | odd                 | ok     |
| 31        |   | C12H10F6NNaO3   | 23.44 | 353.045708 | -1.4      | -4.1      | 31.4   | 5.0  | odd                 | ok     |
| 32        |   | C18H15FNaOS2    | 72.76 | 353.044056 | -0.2      | -0.6      | 32.9   | 10.5 | even                | ok     |
| 33        |   | C16H5FN7NaO     | 26.97 | 353.043182 | 1.1       | 3.1       | 34.3   | 17.0 | odd                 | ok     |
| 34        |   | C18H8F4NNaO     | 30.86 | 353.043422 | -0.9      | -2.4      | 34.4   | 13.0 | odd                 | ok     |
| 35        |   | C10H8F6N4NaO2   | 42.15 | 353.044366 | 0.1       | 0.3       | 36.3   | 5.5  | even                | ok     |
| 36        |   | C18H7FN4NaO2    | 38.07 | 353.044524 | 0.3       | 0.7       | 37.6   | 16.5 | even                | ok     |
| 37        |   | C10H19FN2NaO3S3 | 44.69 | 353.043404 | -0.9      | -2.5      | 39.3   | 1.5  | even                | ok     |
| 38        |   | C10H9F9NNaO     | 23.23 | 353.043264 | -1.0      | -2.9      | 41.7   | 2.0  | odd                 | ok     |
| 39        |   | C20H9FNNaO3     | 16.08 | 353.045867 | -1.6      | -4.5      | 41.7   | 16.0 | odd                 | ok     |
| 40        |   | C21H14NaS2      | 27.88 | 353.042913 | 1.4       | 3.9       | 45.8   | 14.5 | even                | ok     |
| 41        |   | C21H6N4NaO      | 18.08 | 353.043382 | 0.9       | 2.5       | 52.4   | 20.5 | even                | ok     |
| 42        |   | C23H8NNaO2      | 19.14 | 353.044724 | 0.5       | 1.3       | 57.6   | 20.0 | odd                 | ok     |
| 43        |   | C10H22N2NaO2S4  | 18.55 | 353.045633 | -1.4      | -3.9      | 58.8   | 0.5  | even                | ok     |



**Figure S12.** HRESIMS spectrum of compound **8c**

## Generic Display Report

### Analysis Info

Analysis Name E:\Data\MS\_MessService\58962000001.d  
Method tune\_low\_MS\_Service\_08\_18.m  
Sample Name CE-155-SPOT2-PEAK2  
Comment Kalaba/Zehl  
Ergebnis: +/- 5ppm  
ACN/MeOH +0.1% H2O

Acquisition Date 8/14/2018 6:12:55 PM

Operator msc  
Instrument maXis

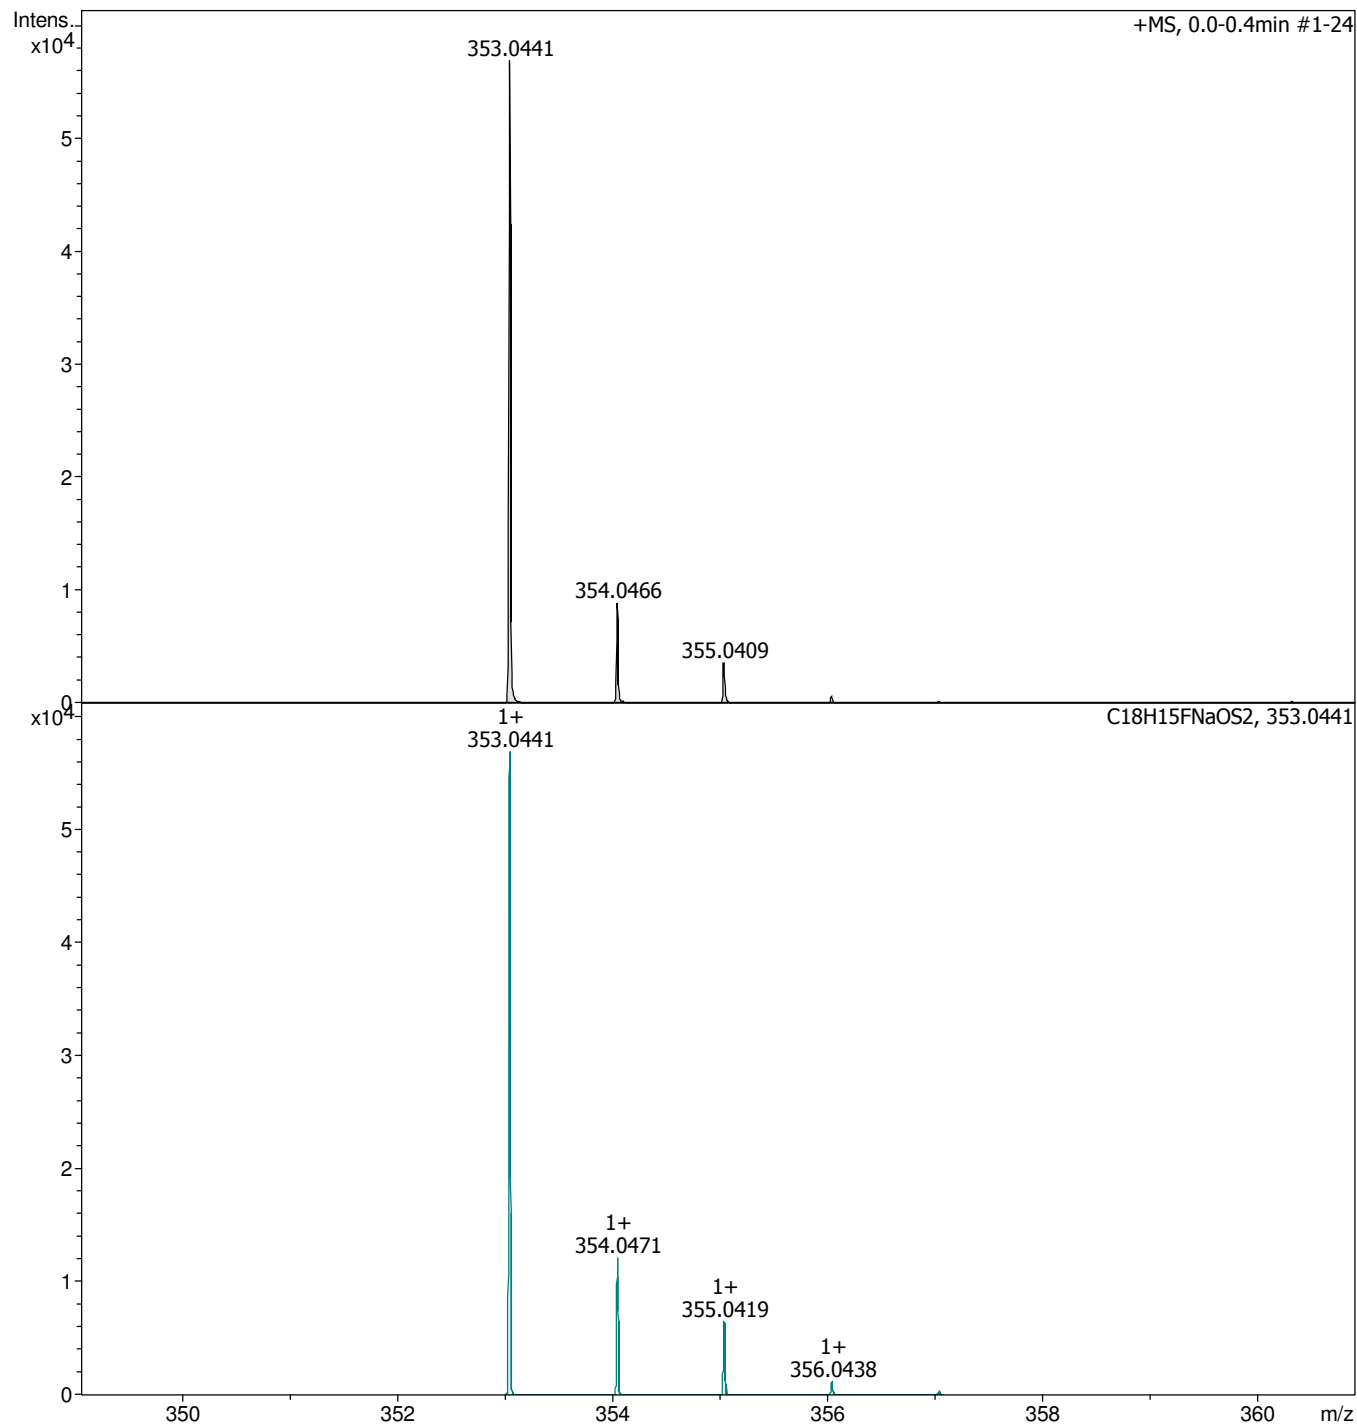

# Mass Spectrum SmartFormula Report

## Analysis Info

Analysis Name E:\Data\MS\_MessService\58962000001.d  
Method tune\_low\_MS\_Service\_08\_18.m  
Sample Name CE-155-SPOT2-PEAK2  
Comment Kalaba/Zehl  
Ergebnis: +/- 5ppm  
ACN/MeOH +0.1% H2O

Acquisition Date 8/14/2018 6:12:55 PM

Operator msc  
Instrument maXis 255552.00016

## Acquisition Parameter

|             |            |                      |          |                  |           |
|-------------|------------|----------------------|----------|------------------|-----------|
| Source Type | ESI        | Ion Polarity         | Positive | Set Nebulizer    | 0.4 Bar   |
| Focus       | Not active | Set Capillary        | 4500 V   | Set Dry Heater   | 180 °C    |
| Scan Begin  | 50 m/z     | Set End Plate Offset | -500 V   | Set Dry Gas      | 4.0 l/min |
| Scan End    | 1900 m/z   | Set Charging Voltage | 0 V      | Set Divert Valve | Source    |
|             |            | Set Corona           | 0 nA     | Set APCI Heater  | 0 °C      |

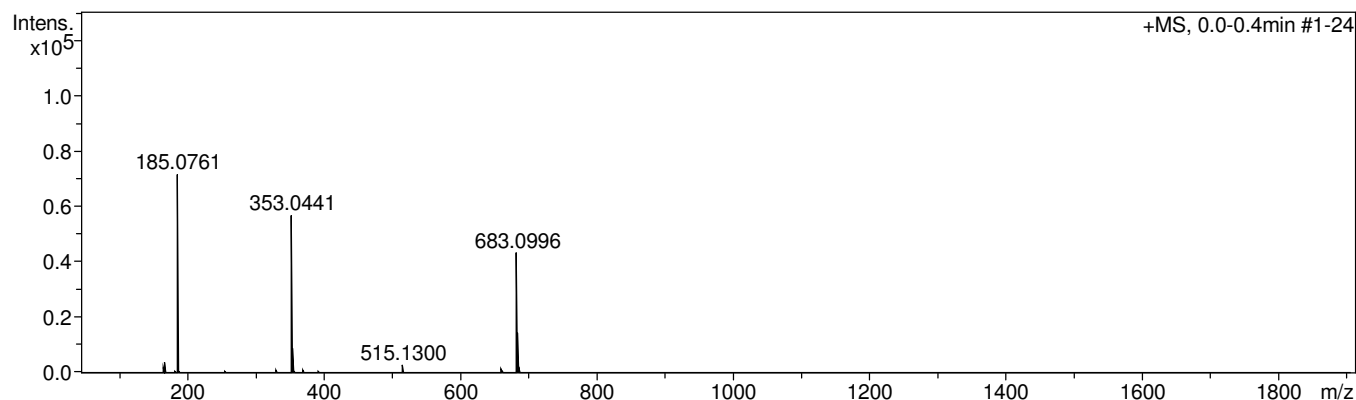

| Meas. m/z  | #  | Ion Formula      | Score  | m/z        | err [mDa] | err [ppm] | mSigma | rdb  | e <sup>-</sup> | Conf | N-Rule |
|------------|----|------------------|--------|------------|-----------|-----------|--------|------|----------------|------|--------|
| 353.044084 | 1  | C12H13FN3NaO5S   | 62.89  | 353.045215 | -1.1      | -3.2      | 2.3    | 7.0  | odd            |      | ok     |
|            | 2  | C11H7FN10NaS     | 59.69  | 353.045210 | -1.1      | -3.2      | 5.6    | 12.5 | even           |      | ok     |
|            | 3  | C13H10F4N4NaS    | 51.42  | 353.045451 | -1.4      | -3.9      | 5.6    | 8.5  | even           |      | ok     |
|            | 4  | C12H14F4NaO4S    | 100.00 | 353.044114 | -0.0      | -0.1      | 7.2    | 3.5  | even           |      | ok     |
|            | 5  | C10H11FN6NaO4S   | 92.64  | 353.043873 | 0.2       | 0.6       | 7.2    | 7.5  | even           |      | ok     |
|            | 6  | C13H10N6NaO3S    | 48.81  | 353.042730 | -1.4      | -3.8      | 9.0    | 11.5 | even           |      | ok     |
|            | 7  | C15H13F3NaO3S    | 56.56  | 353.042971 | -1.1      | -3.2      | 9.1    | 7.5  | even           |      | ok     |
|            | 8  | C10H12F4N3NaO3S  | 46.47  | 353.042771 | -1.3      | -3.7      | 13.0   | 4.0  | odd            |      | ok     |
|            | 9  | C15H12N3NaO4S    | 87.16  | 353.044073 | -0.0      | -0.0      | 14.9   | 11.0 | odd            |      | ok     |
|            | 10 | C10H12F8NNaS     | 39.54  | 353.045492 | 1.4       | 4.0       | 18.0   | 1.0  | odd            |      | ok     |
|            | 11 | C13H15F5NaS2     | 40.47  | 353.042754 | 1.3       | 3.8       | 19.3   | 3.5  | even           |      | ok     |
|            | 12 | C11H12F2N6NaS2   | 34.55  | 353.042514 | -1.6      | -4.4      | 19.3   | 7.5  | even           |      | ok     |
|            | 13 | C13H14F2N3NaOS2  | 89.40  | 353.043856 | 0.2       | 0.6       | 20.1   | 7.0  | odd            |      | ok     |
|            | 14 | C17H14NaO5S      | 39.11  | 353.045415 | -1.3      | -3.8      | 20.8   | 10.5 | even           |      | ok     |
|            | 15 | C14H12F2NaO7     | 51.64  | 353.044330 | -0.2      | -0.7      | 21.5   | 7.5  | even           |      | ok     |
|            | 16 | C10H15F3N3NaO2S2 | 49.23  | 353.044999 | -0.9      | -2.6      | 21.6   | 3.0  | odd            |      | ok     |
|            | 17 | C10H16F6NaOS2    | 68.26  | 353.043897 | 0.2       | 0.5       | 23.0   | -0.5 | even           |      | ok     |
|            | 18 | C15H16F2NaO2S2   | 52.28  | 353.045199 | -1.1      | -3.2      | 23.8   | 6.5  | even           |      | ok     |
|            | 19 | C12H10F2N3NaO6   | 31.32  | 353.042987 | 1.1       | 3.1       | 24.4   | 8.0  | odd            |      | ok     |
|            | 20 | C16H8N7NaS       | 34.72  | 353.045410 | -1.3      | -3.8      | 26.3   | 16.0 | odd            |      | ok     |
|            | 21 | C18H11F3NNaS     | 29.64  | 353.045651 | -1.6      | -4.4      | 26.3   | 12.0 | odd            |      | ok     |
|            | 22 | C17H11FNao6      | 32.91  | 353.043187 | -0.9      | -2.5      | 27.1   | 11.5 | even           |      | ok     |
|            | 23 | C13H6F2N7NaO2    | 45.39  | 353.044325 | -0.2      | -0.7      | 27.3   | 13.0 | odd            |      | ok     |
|            | 24 | C15H9F5NNaO2     | 40.60  | 353.044565 | 0.5       | 1.4       | 27.3   | 9.0  | odd            |      | ok     |
|            | 25 | C15H8F2N4NaO3    | 21.28  | 353.045667 | -1.6      | -4.5      | 27.7   | 12.5 | even           |      | ok     |
|            | 26 | C11H4F2N10NaO    | 28.39  | 353.042982 | 1.1       | 3.1       | 28.5   | 13.5 | even           |      | ok     |
|            | 27 | C13H7F5N4NaO     | 32.51  | 353.043223 | 0.9       | 2.4       | 28.5   | 9.5  | even           |      | ok     |
|            | 28 | C11H13F3NaO8     | 23.44  | 353.045473 | 1.4       | 3.9       | 29.1   | 3.5  | even           |      | ok     |
|            | 29 | C16H13FN3NaS2    | 39.21  | 353.042713 | -1.4      | -3.9      | 29.4   | 11.0 | odd            |      | ok     |

# Mass Spectrum SmartFormula Report

| Meas. m/z | #  | Ion Formula     | Score | m/z        | err [mDa] | err [ppm] | mSigma | rdb  | e <sup>-</sup> Conf | N-Rule |
|-----------|----|-----------------|-------|------------|-----------|-----------|--------|------|---------------------|--------|
|           | 30 | C10H7F3N7NaO3   | 23.06 | 353.045467 | 1.4       | 3.9       | 29.9   | 9.0  | odd                 | ok     |
|           | 31 | C12H10F6NNaO3   | 19.64 | 353.045708 | -1.6      | -4.6      | 29.9   | 5.0  | odd                 | ok     |
|           | 32 | C18H15FNaOS2    | 69.31 | 353.044056 | -0.0      | -0.1      | 34.5   | 10.5 | even                | ok     |
|           | 33 | C10H8F6N4NaO2   | 37.25 | 353.044366 | -0.3      | -0.8      | 34.6   | 5.5  | even                | ok     |
|           | 34 | C16H5FN7NaO     | 26.80 | 353.043182 | 0.9       | 2.6       | 35.4   | 17.0 | odd                 | ok     |
|           | 35 | C18H8F4NNaO     | 30.42 | 353.043422 | -0.7      | -1.9      | 35.4   | 13.0 | odd                 | ok     |
|           | 36 | C18H7FN4NaO2    | 30.88 | 353.044524 | 0.4       | 1.2       | 38.9   | 16.5 | even                | ok     |
|           | 37 | C10H19FN2NaO3S3 | 44.94 | 353.043404 | -0.7      | -1.9      | 39.6   | 1.5  | even                | ok     |
|           | 38 | C10H9F9NNaO     | 24.90 | 353.043264 | -0.8      | -2.3      | 39.8   | 2.0  | odd                 | ok     |
|           | 39 | C21H14NaS2      | 27.33 | 353.042913 | 1.2       | 3.3       | 47.5   | 14.5 | even                | ok     |
|           | 40 | C21H6N4NaO      | 17.34 | 353.043382 | 0.7       | 2.0       | 54.1   | 20.5 | even                | ok     |
|           | 41 | C10H22N2NaO2S4  | 14.80 | 353.045633 | -1.5      | -4.4      | 59.2   | 0.5  | even                | ok     |
|           | 42 | C23H8NNaO2      | 15.03 | 353.044724 | 0.6       | 1.8       | 59.5   | 20.0 | odd                 | ok     |

**Figure S13.** HRESIMS spectrum of compound **5d**

## Generic Display Report

### Analysis Info

Analysis Name D:\Data\Kalaba\71582000001.d  
Method tune\_low\_MS\_Service\_07\_20.m  
Sample Name PN-18-1  
Comment Kalaba/Zehl  
Ergebnis +/- 5ppm  
ACN/MeOH + 1 % H<sub>2</sub>O

Acquisition Date 10/07/2020 17:54:47

Operator msc  
Instrument maXis

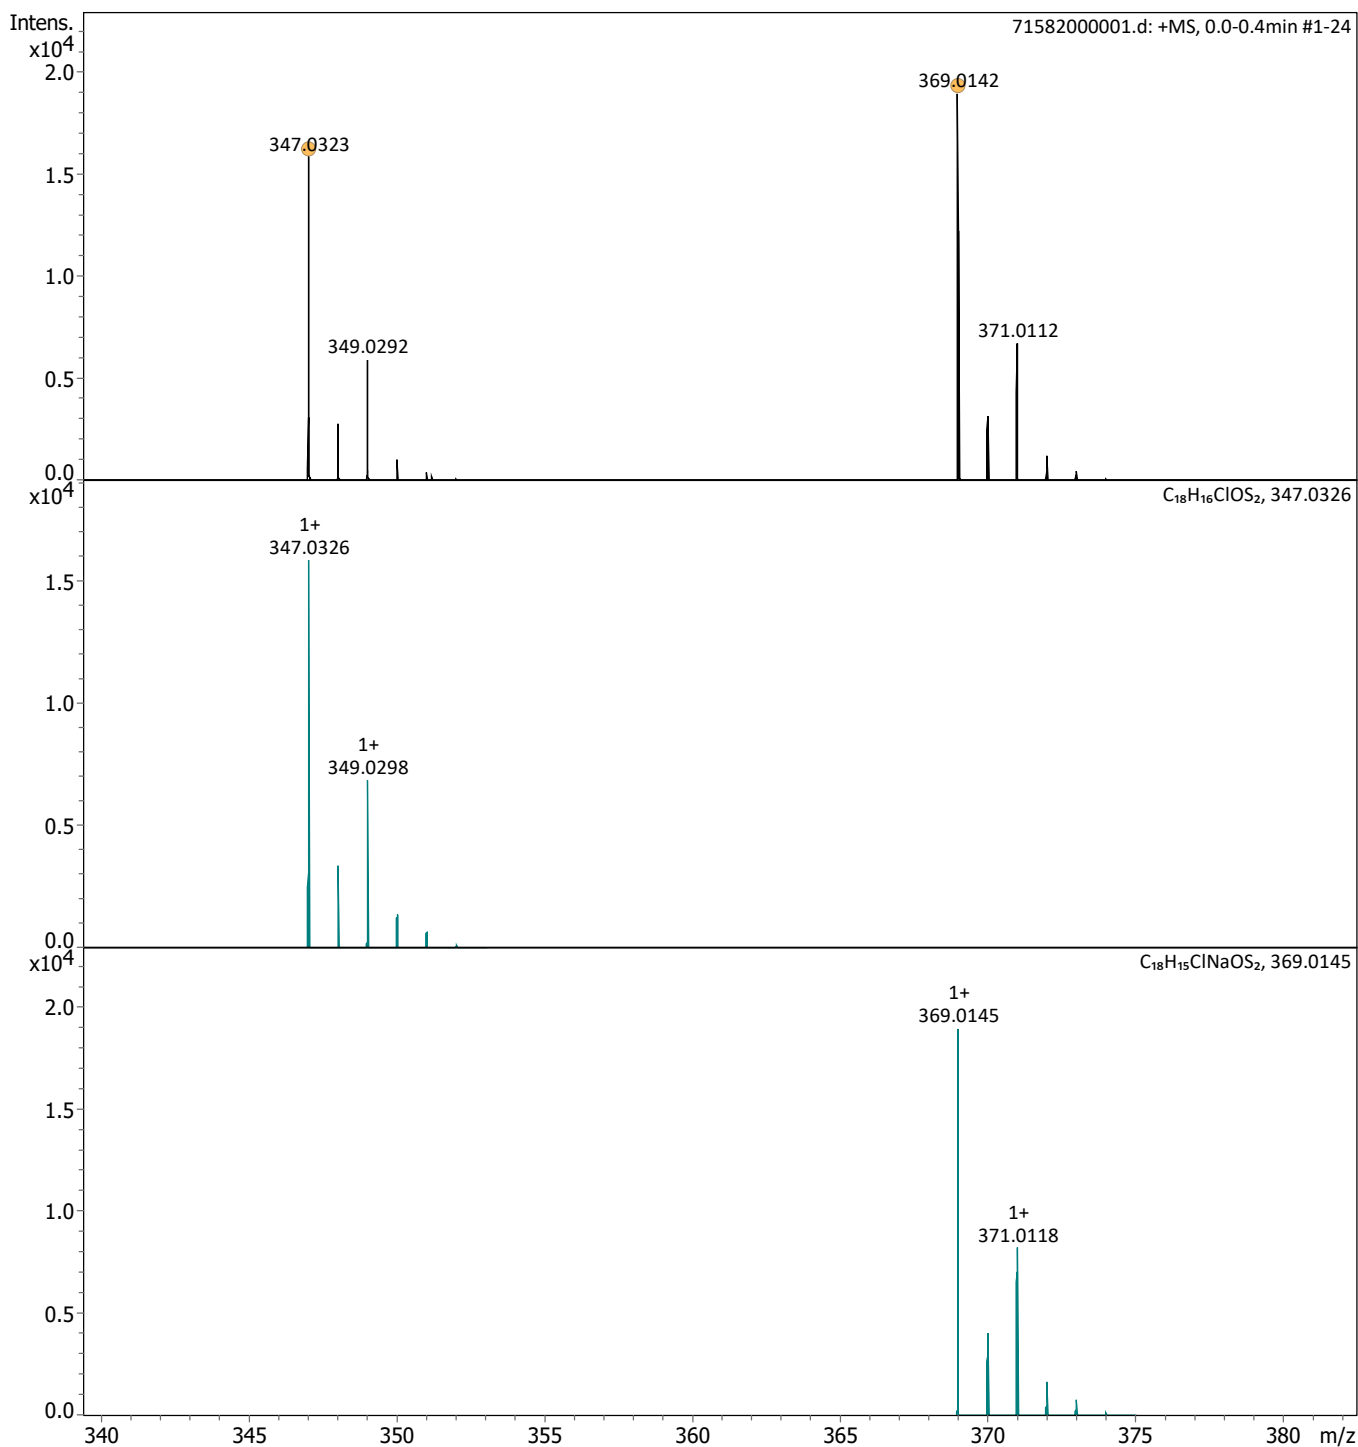

# Mass Spectrum SmartFormula Report

## Analysis Info

Analysis Name D:\Data\Kalaba\71582000001.d  
 Method tune\_low\_MS\_Service\_07\_20.m  
 Sample Name PN-18-1  
 Comment Kalaba/Zehl  
 Ergebnis +/- 5ppm  
 ACN/MeOH + 1 % H2O

Acquisition Date 10/07/2020 17:54:47

Operator msc  
 Instrument maXis 255552.00016

## Acquisition Parameter

|             |            |                      |          |                  |           |
|-------------|------------|----------------------|----------|------------------|-----------|
| Source Type | ESI        | Ion Polarity         | Positive | Set Nebulizer    | 0.4 Bar   |
| Focus       | Not active | Set Capillary        | 4200 V   | Set Dry Heater   | 180 Å°C   |
| Scan Begin  | 50 m/z     | Set End Plate Offset | -500 V   | Set Dry Gas      | 4.0 l/min |
| Scan End    | 1900 m/z   | Set Charging Voltage | 0 V      | Set Divert Valve | Source    |
|             |            | Set Corona           | 0 nA     | Set APCI Heater  | 0 Å°C     |

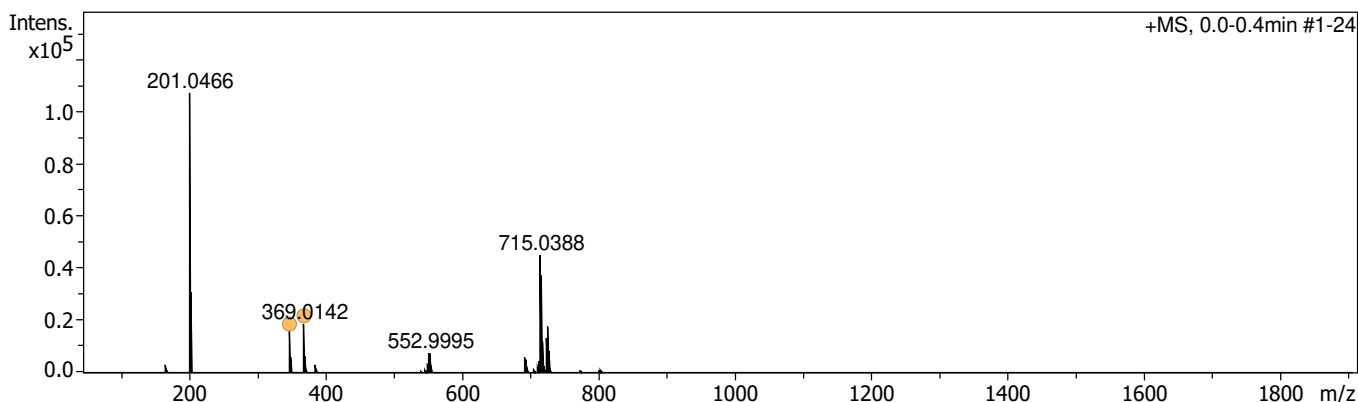

| Meas. m/z | #  | Ion Formula      | m/z      | err [ppm] | mSigma | # mSigma | Score  | rdB  | eÅ <sup>-</sup> | Conf | N-Rule |
|-----------|----|------------------|----------|-----------|--------|----------|--------|------|-----------------|------|--------|
| 347.0323  | 1  | C11H8ClN10S      | 347.0337 | 4.1       | 6.7    | 1        | 60.51  | 18.0 | even            |      | ok     |
|           | 2  | C17H12ClO6       | 347.0317 | -1.8      | 14.7   | 2        | 82.46  | 15.0 | even            |      | ok     |
|           | 3  | C10H12ClN6O4S    | 347.0324 | 0.2       | 17.2   | 3        | 100.00 | 13.0 | even            |      | ok     |
|           | 4  | C18H8ClN4O2      | 347.0330 | 2.1       | 22.1   | 4        | 66.60  | 20.0 | even            |      | ok     |
|           | 5  | C18H16ClOS2      | 347.0326 | 0.7       | 33.2   | 5        | 64.19  | 18.0 | even            |      | ok     |
|           | 6  | C10H20ClN2O3S3   | 347.0319 | -1.1      | 43.1   | 6        | 55.52  | 11.0 | even            |      | ok     |
|           | 7  | C13H9Cl2N8       | 347.0322 | -0.4      | 120.8  | 7        | 2.52   | 19.0 | even            |      | ok     |
|           | 8  | C12H13Cl2N4O4    | 347.0308 | -4.2      | 122.7  | 8        | 1.11   | 14.0 | even            |      | ok     |
|           | 9  | C12H14Cl3N6      | 347.0340 | 4.9       | 254.0  | 9        | 0.00   | 17.0 | even            |      | ok     |
|           | 10 | C11H18Cl3N2O4    | 347.0327 | 1.0       | 255.9  | 10       | 0.00   | 12.0 | even            |      | ok     |
| 369.0142  | 1  | C11H7ClN10NaS    | 369.0157 | 4.1       | 9.8    | 1        | 55.87  | 18.0 | even            |      | ok     |
|           | 2  | C17H11ClNaO6     | 369.0136 | -1.4      | 11.6   | 2        | 95.16  | 15.0 | even            |      | ok     |
|           | 3  | C14H3ClN10Na     | 369.0123 | -5.1      | 14.5   | 3        | 31.68  | 21.0 | even            |      | ok     |
|           | 4  | C10H11ClN6NaO4S  | 369.0143 | 0.5       | 17.2   | 4        | 100.00 | 13.0 | even            |      | ok     |
|           | 5  | C18H7ClN4NaO2    | 369.0150 | 2.2       | 21.6   | 5        | 66.56  | 20.0 | even            |      | ok     |
|           | 6  | C9H15ClN2NaO8S   | 369.0130 | -3.2      | 27.5   | 6        | 47.65  | 8.0  | even            |      | ok     |
|           | 7  | C18H15ClNaOS2    | 369.0145 | 0.9       | 42.2   | 7        | 50.33  | 18.0 | even            |      | ok     |
|           | 8  | C10H19ClN2NaO3S3 | 369.0139 | -0.8      | 49.4   | 8        | 50.04  | 11.0 | even            |      | ok     |
|           | 9  | C13H8Cl2N8Na     | 369.0141 | -0.1      | 128.3  | 9        | 1.79   | 19.0 | even            |      | ok     |
|           | 10 | C12H12Cl2N4NaO4  | 369.0128 | -3.7      | 129.9  | 10       | 0.81   | 14.0 | even            |      | ok     |
|           | 11 | C12H20Cl2NaO3S2  | 369.0123 | -5.0      | 159.3  | 11       | 0.11   | 12.0 | even            |      | ok     |
|           | 12 | C9H24Cl2NaO3S3   | 369.0157 | 4.1       | 178.4  | 12       | 0.03   | 9.0  | even            |      | ok     |
|           | 13 | C12H13Cl3N6Na    | 369.0159 | 4.9       | 260.6  | 13       | 0.00   | 17.0 | even            |      | ok     |
|           | 14 | C11H17Cl3N2NaO4  | 369.0146 | 1.2       | 262.4  | 14       | 0.00   | 12.0 | even            |      | ok     |

**Figure S14.** HRESIMS spectrum of compound **6d**

## Generic Display Report

### Analysis Info

Analysis Name D:\Data\Kalaba\78520000001.d  
Method tune\_low\_MS\_Service\_03\_21.m  
Sample Name PN-18-peak-2  
Comment Kalaba / Zehl  
Ergebnis +/- 5 ppm  
ACN / MeOH + 1% H<sub>2</sub>O

Acquisition Date 26/03/2021 15:27:38

Operator msc  
Instrument maXis

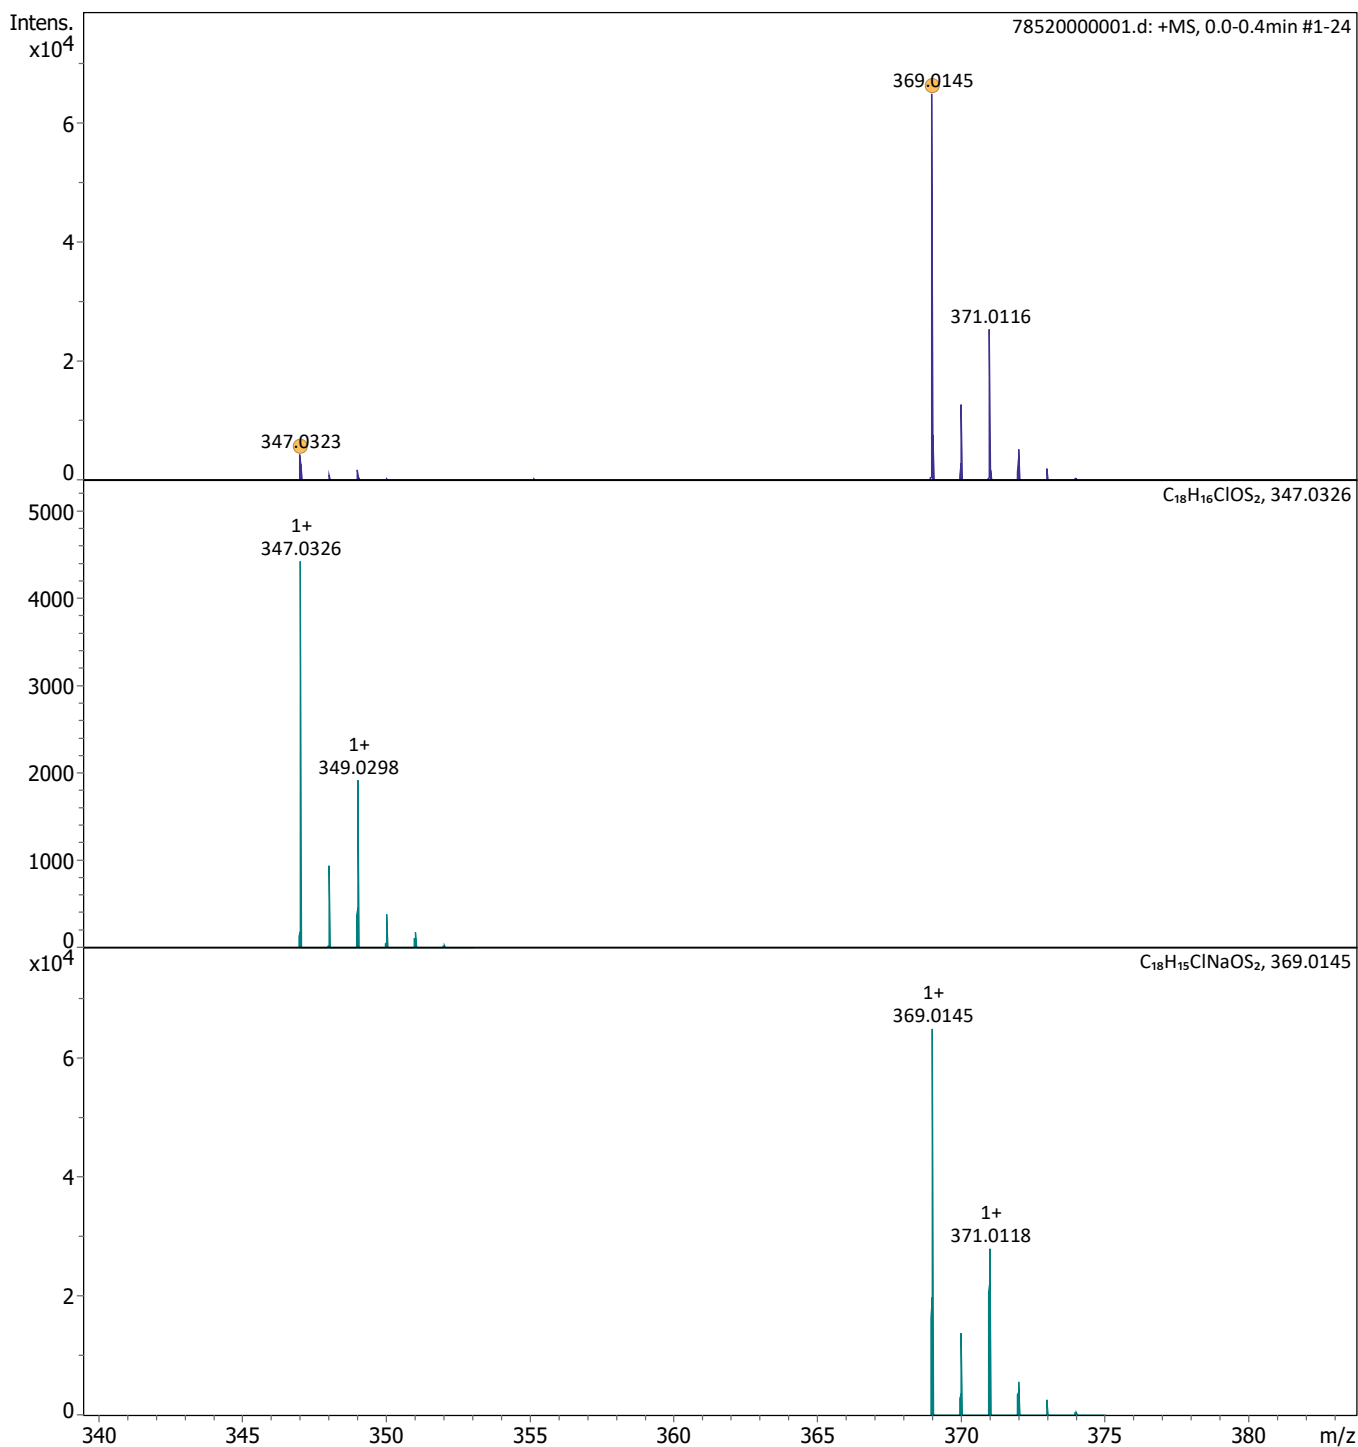

# Mass Spectrum SmartFormula Report

## Analysis Info

Analysis Name D:\Data\Kalaba\78520000001.d  
 Method tune\_low\_MS\_Service\_03\_21.m  
 Sample Name PN-18-peak-2  
 Comment Kalaba / Zehl  
 Ergebnis +/- 5 ppm  
 ACN / MeOH + 1% H2O

Acquisition Date 26/03/2021 15:27:38

Operator msc  
 Instrument maXis 255552.00016

## Acquisition Parameter

|             |            |                      |          |                  |           |
|-------------|------------|----------------------|----------|------------------|-----------|
| Source Type | ESI        | Ion Polarity         | Positive | Set Nebulizer    | 0.4 Bar   |
| Focus       | Not active | Set Capillary        | 4200 V   | Set Dry Heater   | 180 Å°C   |
| Scan Begin  | 80 m/z     | Set End Plate Offset | -500 V   | Set Dry Gas      | 4.0 l/min |
| Scan End    | 1900 m/z   | Set Charging Voltage | 0 V      | Set Divert Valve | Source    |
|             |            | Set Corona           | 0 nA     | Set APCI Heater  | 0 Å°C     |

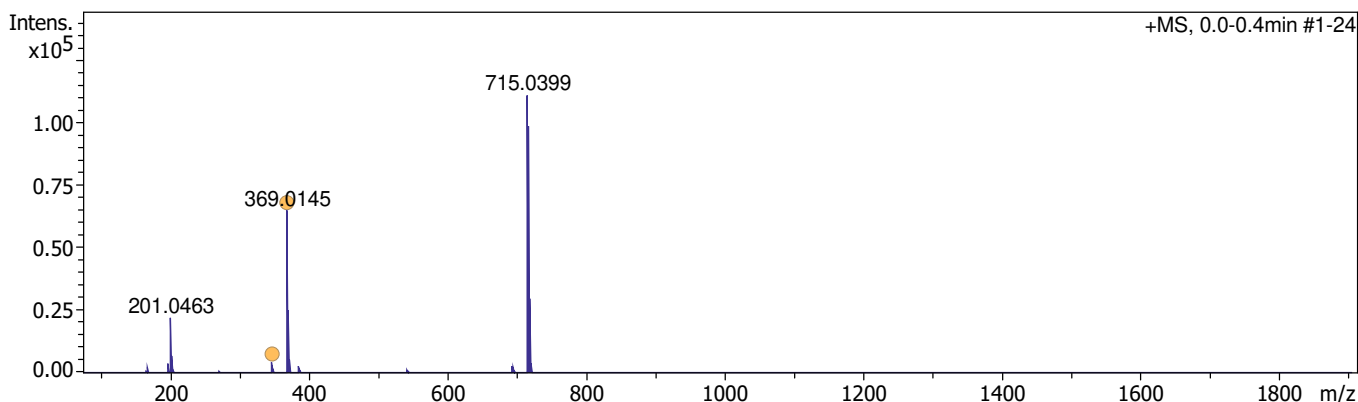

| Meas. m/z | #  | Ion Formula      | Score  | m/z      | err [mDa] | err [ppm] | mSigma | rdb  | eÅ <sup>-</sup> | Conf | N-Rule |
|-----------|----|------------------|--------|----------|-----------|-----------|--------|------|-----------------|------|--------|
| 347.0323  | 1  | C18H16ClOS2      | 100.00 | 347.0326 | 0.2       | 0.7       | 7.7    | 18.0 | even            |      | ok     |
|           | 2  | C11H8ClN10S      | 32.08  | 347.0337 | 1.4       | 4.0       | 31.9   | 18.0 | even            |      | ok     |
|           | 3  | C10H20ClN2O3S3   | 58.23  | 347.0319 | -0.4      | -1.2      | 36.8   | 11.0 | even            |      | ok     |
|           | 4  | C18H8ClN4O2      | 41.69  | 347.0330 | 0.7       | 2.0       | 37.2   | 20.0 | even            |      | ok     |
|           | 5  | C17H12ClO6       | 42.71  | 347.0317 | -0.6      | -1.8      | 37.6   | 15.0 | even            |      | ok     |
|           | 6  | C10H12ClN6O4S    | 52.89  | 347.0324 | 0.1       | 0.1       | 39.5   | 13.0 | even            |      | ok     |
|           | 7  | C13H9Cl2N8       | 5.84   | 347.0322 | -0.2      | -0.4      | 102.1  | 19.0 | even            |      | ok     |
|           | 8  | C12H13Cl2N4O4    | 2.37   | 347.0308 | -1.5      | -4.3      | 105.8  | 14.0 | even            |      | ok     |
|           | 9  | C12H14Cl3N6      | 0.00   | 347.0340 | 1.7       | 4.8       | 236.9  | 17.0 | even            |      | ok     |
|           | 10 | C11H18Cl3N2O4    | 0.00   | 347.0327 | 0.3       | 1.0       | 239.7  | 12.0 | even            |      | ok     |
| 369.0145  | 1  | C11H7ClN10NaS    | 59.26  | 369.0157 | 1.1       | 3.0       | 19.3   | 18.0 | even            |      | ok     |
|           | 2  | C18H15ClNaOS2    | 100.00 | 369.0145 | -0.0      | -0.1      | 20.1   | 18.0 | even            |      | ok     |
|           | 3  | C17H11ClNaO6     | 61.01  | 369.0136 | -0.9      | -2.4      | 23.7   | 15.0 | even            |      | ok     |
|           | 4  | C18H7ClN4NaO2    | 75.22  | 369.0150 | 0.4       | 1.2       | 25.1   | 20.0 | even            |      | ok     |
|           | 5  | C10H11ClN6NaO4S  | 76.01  | 369.0143 | -0.2      | -0.6      | 28.8   | 13.0 | even            |      | ok     |
|           | 6  | C10H19ClN2NaO3S3 | 54.36  | 369.0139 | -0.7      | -1.9      | 40.3   | 11.0 | even            |      | ok     |
|           | 7  | C13H8Cl2N8Na     | 3.58   | 369.0141 | -0.4      | -1.1      | 112.6  | 19.0 | even            |      | ok     |
|           | 8  | C12H12Cl2N4NaO4  | 1.40   | 369.0128 | -1.8      | -4.8      | 115.6  | 14.0 | even            |      | ok     |
|           | 9  | C12H13Cl3N6Na    | 0.00   | 369.0159 | 1.4       | 3.8       | 246.6  | 17.0 | even            |      | ok     |
|           | 10 | C11H17Cl3N2NaO4  | 0.00   | 369.0146 | 0.1       | 0.2       | 249.0  | 12.0 | even            |      | ok     |

**Figure S15.** HRESIMS spectrum of compound **7d**

## Generic Display Report

### Analysis Info

Analysis Name D:\Data\Kalaba\78521000001.d  
Method tune\_low\_MS\_Service\_03\_21.m  
Sample Name PN-18-peak-3  
Comment Kalaba / Zehl  
Ergebnis +/- 5 ppm  
ACN / MeOH + 1% H<sub>2</sub>O

Acquisition Date 26/03/2021 15:29:31

Operator msc  
Instrument maXis

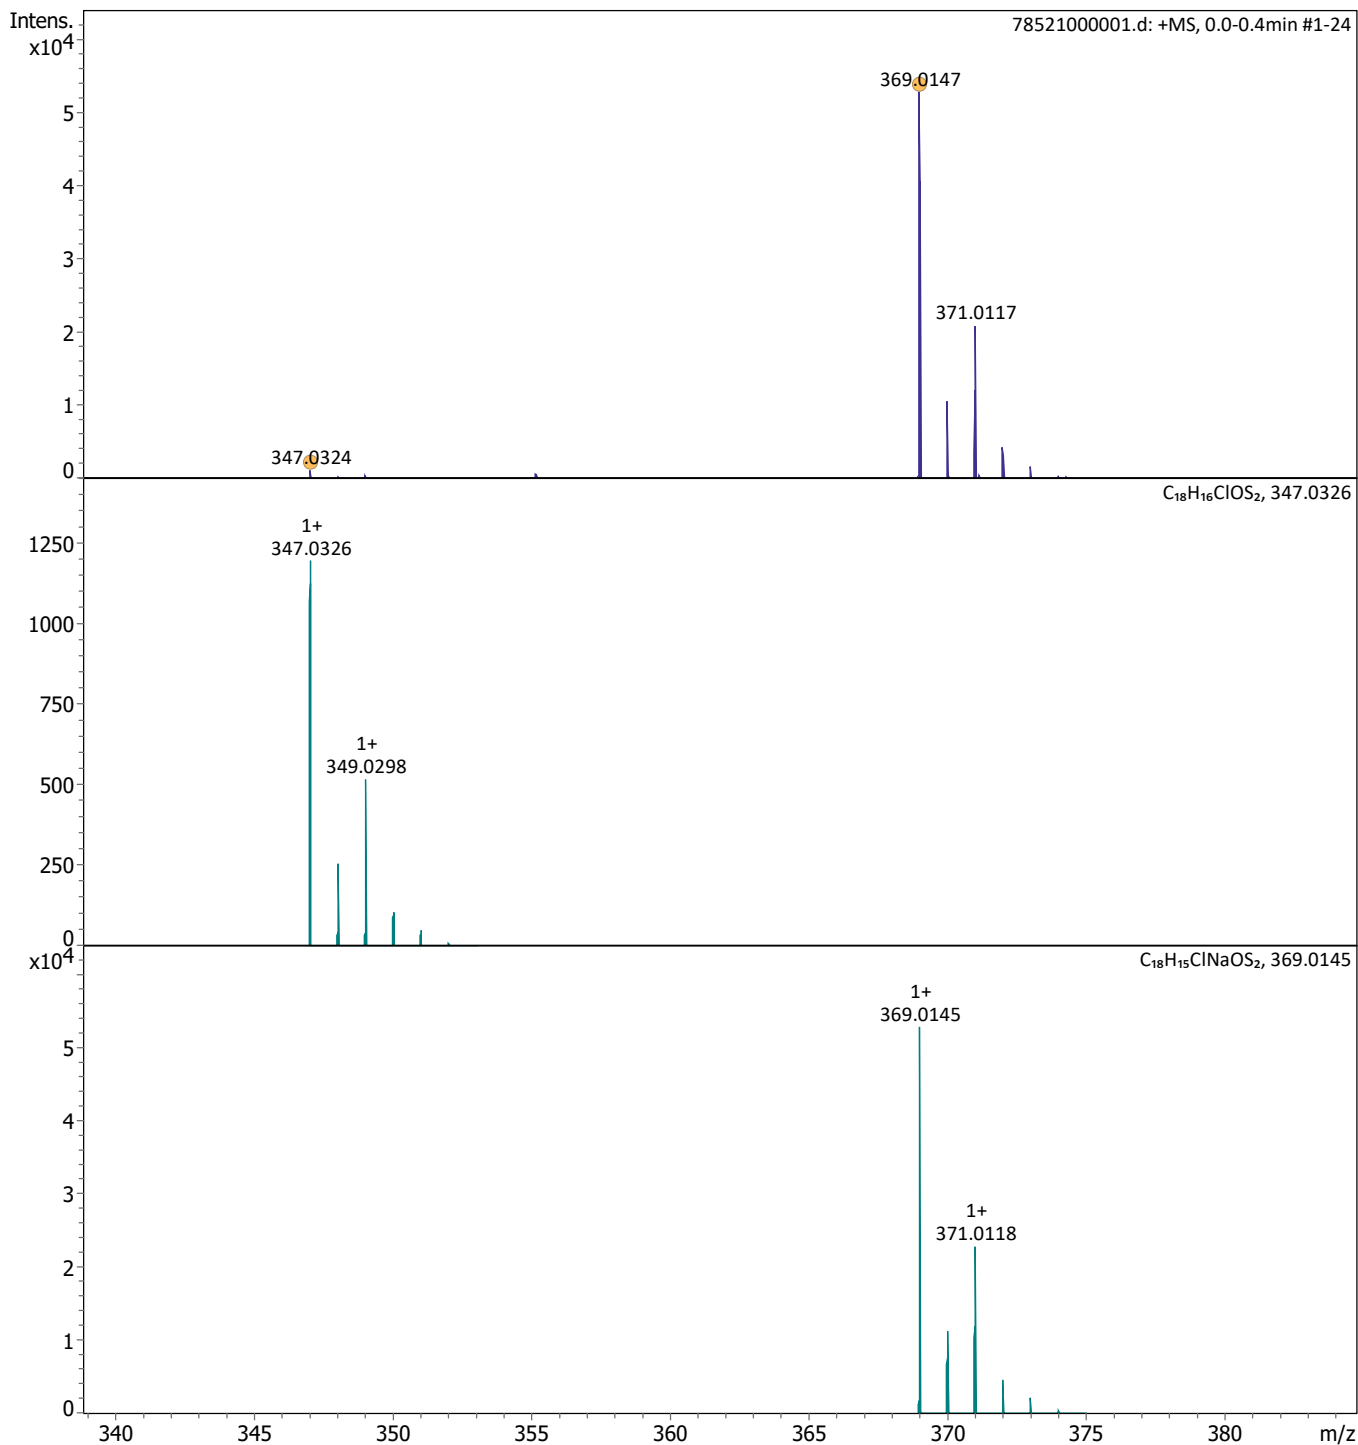



# Mass Spectrum SmartFormula Report

## Analysis Info

Analysis Name D:\Data\Kalaba\78521000001.d  
Method tune\_low\_MS\_Service\_03\_21.m  
Sample Name PN-18-peak-3  
Comment Kalaba / Zehl  
Ergebnis +/- 5 ppm  
ACN / MeOH + 1% H2O

Acquisition Date 26/03/2021 15:29:31

Operator msc  
Instrument maXis 255552.00016

## Acquisition Parameter

|             |            |                      |          |                  |           |
|-------------|------------|----------------------|----------|------------------|-----------|
| Source Type | ESI        | Ion Polarity         | Positive | Set Nebulizer    | 0.4 Bar   |
| Focus       | Not active | Set Capillary        | 4200 V   | Set Dry Heater   | 180 Å°C   |
| Scan Begin  | 80 m/z     | Set End Plate Offset | -500 V   | Set Dry Gas      | 4.0 l/min |
| Scan End    | 1900 m/z   | Set Charging Voltage | 0 V      | Set Divert Valve | Source    |
|             |            | Set Corona           | 0 nA     | Set APCI Heater  | 0 Å°C     |

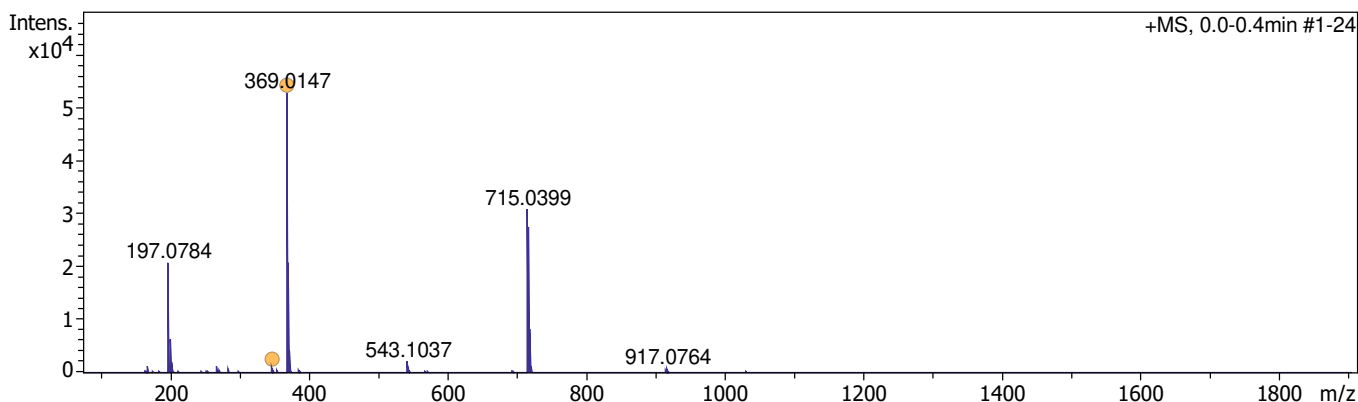

| Meas. m/z | #  | Ion Formula      | Score  | m/z      | err [mDa] | err [ppm] | mSigma | rdb  | eÅ <sup>-</sup> | Conf | N-Rule |
|-----------|----|------------------|--------|----------|-----------|-----------|--------|------|-----------------|------|--------|
| 347.0324  | 1  | C18H16ClOS2      | 100.00 | 347.0326 | 0.1       | 0.4       | 19.4   | 18.0 | even            |      | ok     |
|           | 2  | C11H8ClN10S      | 39.74  | 347.0337 | 1.3       | 3.7       | 33.4   | 18.0 | even            |      | ok     |
|           | 3  | C18H8ClN4O2      | 55.88  | 347.0330 | 0.6       | 1.7       | 35.1   | 20.0 | even            |      | ok     |
|           | 4  | C17H12ClO6       | 49.92  | 347.0317 | -0.7      | -2.1      | 36.4   | 15.0 | even            |      | ok     |
|           | 5  | C10H12ClN6O4S    | 59.63  | 347.0324 | -0.1      | -0.2      | 41.6   | 13.0 | even            |      | ok     |
|           | 6  | C10H20ClN2O3S3   | 54.49  | 347.0319 | -0.5      | -1.5      | 43.9   | 11.0 | even            |      | ok     |
|           | 7  | C13H9Cl2N8       | 5.03   | 347.0322 | -0.3      | -0.8      | 107.8  | 19.0 | even            |      | ok     |
|           | 8  | C12H13Cl2N4O4    | 1.96   | 347.0308 | -1.6      | -4.6      | 111.6  | 14.0 | even            |      | ok     |
|           | 9  | C12H14Cl3N6      | 0.00   | 347.0340 | 1.6       | 4.5       | 243.6  | 17.0 | even            |      | ok     |
|           | 10 | C11H18Cl3N2O4    | 0.00   | 347.0327 | 0.2       | 0.7       | 246.4  | 12.0 | even            |      | ok     |
| 369.0147  | 1  | C18H15ClNaOS2    | 100.00 | 369.0145 | -0.2      | -0.4      | 18.1   | 18.0 | even            |      | ok     |
|           | 2  | C11H7ClN10NaS    | 62.07  | 369.0157 | 1.0       | 2.7       | 21.3   | 18.0 | even            |      | ok     |
|           | 3  | C17H11ClNaO6     | 55.49  | 369.0136 | -1.0      | -2.8      | 25.2   | 15.0 | even            |      | ok     |
|           | 4  | C18H7ClN4NaO2    | 79.55  | 369.0150 | 0.3       | 0.8       | 25.8   | 20.0 | even            |      | ok     |
|           | 5  | C10H11ClN6NaO4S  | 69.33  | 369.0143 | -0.3      | -0.9      | 30.7   | 13.0 | even            |      | ok     |
|           | 6  | C10H19ClN2NaO3S3 | 51.35  | 369.0139 | -0.8      | -2.2      | 40.4   | 11.0 | even            |      | ok     |
|           | 7  | C13H8Cl2N8Na     | 3.59   | 369.0141 | -0.6      | -1.5      | 111.6  | 19.0 | even            |      | ok     |
|           | 8  | C12H13Cl3N6Na    | 0.00   | 369.0159 | 1.3       | 3.5       | 245.7  | 17.0 | even            |      | ok     |
|           | 9  | C11H17Cl3N2NaO4  | 0.00   | 369.0146 | -0.1      | -0.2      | 248.2  | 12.0 | even            |      | ok     |
|           | 10 | C10H22Cl4NaO4    | 0.00   | 369.0164 | 1.8       | 4.8       | 285.9  | 10.0 | even            |      | ok     |

**Figure S16.** HRESIMS spectrum of compound **8d**

## Generic Display Report

### Analysis Info

Analysis Name D:\Data\Kalaba\71583000001.d  
Method tune\_low\_MS\_Service\_07\_20.m  
Sample Name PN-18-4  
Comment Kalaba/Zehl  
Ergebnis +/- 5ppm  
ACN/MeOH + 1 % H<sub>2</sub>O

Acquisition Date 10/07/2020 17:56:30

Operator msc  
Instrument maXis

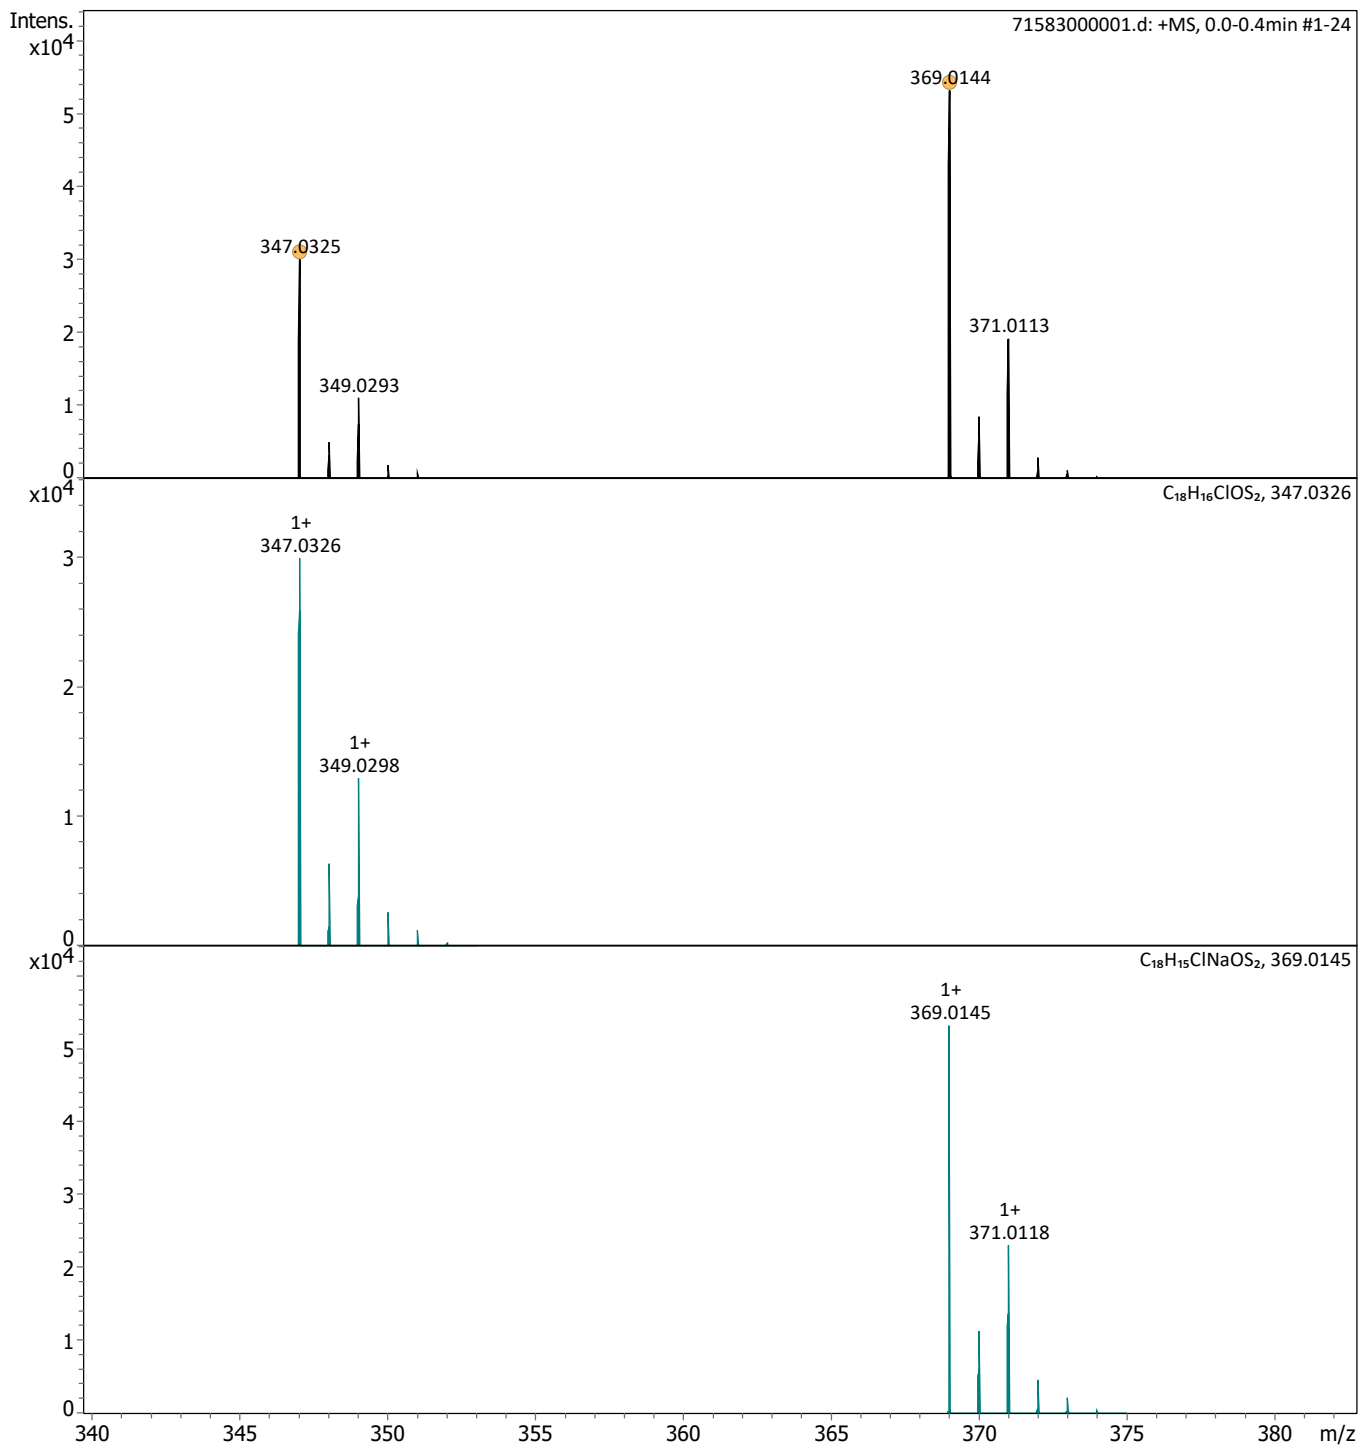

# Mass Spectrum SmartFormula Report

## Analysis Info

Analysis Name D:\Data\Kalaba\71583000001.d  
 Method tune\_low\_MS\_Service\_07\_20.m  
 Sample Name PN-18-4  
 Comment Kalaba/Zehl  
 Ergebnis +/- 5ppm  
 ACN/MeOH + 1 % H2O

Acquisition Date 10/07/2020 17:56:30

Operator msc  
 Instrument maXis 255552.00016

## Acquisition Parameter

|             |            |                      |          |                  |           |
|-------------|------------|----------------------|----------|------------------|-----------|
| Source Type | ESI        | Ion Polarity         | Positive | Set Nebulizer    | 0.4 Bar   |
| Focus       | Not active | Set Capillary        | 4200 V   | Set Dry Heater   | 180 Å°C   |
| Scan Begin  | 50 m/z     | Set End Plate Offset | -500 V   | Set Dry Gas      | 4.0 l/min |
| Scan End    | 1900 m/z   | Set Charging Voltage | 0 V      | Set Divert Valve | Source    |
|             |            | Set Corona           | 0 nA     | Set APCI Heater  | 0 Å°C     |

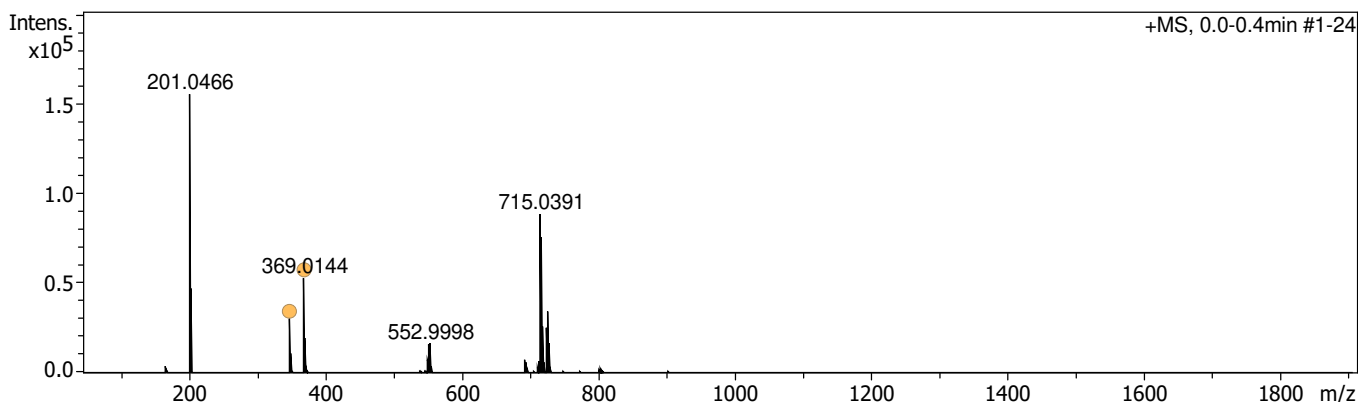

| Meas. m/z | #  | Ion Formula      | m/z      | err [ppm] | mSigma | # mSigma | Score  | rdB  | eÅ <sup>-</sup> | Conf | N-Rule |
|-----------|----|------------------|----------|-----------|--------|----------|--------|------|-----------------|------|--------|
| 347.0325  | 1  | C11H8ClN10S      | 347.0337 | 3.6       | 4.6    | 1        | 66.09  | 18.0 | even            |      | ok     |
|           | 2  | C17H12ClO6       | 347.0317 | -2.2      | 14.1   | 2        | 73.00  | 15.0 | even            |      | ok     |
|           | 3  | C10H12ClN6O4S    | 347.0324 | -0.2      | 14.5   | 3        | 100.00 | 13.0 | even            |      | ok     |
|           | 4  | C18H8ClN4O2      | 347.0330 | 1.6       | 23.1   | 4        | 67.16  | 20.0 | even            |      | ok     |
|           | 5  | C18H16ClOS2      | 347.0326 | 0.3       | 36.9   | 5        | 59.39  | 18.0 | even            |      | ok     |
|           | 6  | C10H20ClN2O3S3   | 347.0319 | -1.6      | 44.3   | 6        | 47.30  | 11.0 | even            |      | ok     |
|           | 7  | C13H9Cl2N8       | 347.0322 | -0.8      | 122.9  | 7        | 1.99   | 19.0 | even            |      | ok     |
|           | 8  | C12H13Cl2N4O4    | 347.0308 | -4.7      | 124.5  | 8        | 0.85   | 14.0 | even            |      | ok     |
|           | 9  | C12H14Cl3N6      | 347.0340 | 4.4       | 255.9  | 9        | 0.00   | 17.0 | even            |      | ok     |
|           | 10 | C11H18Cl3N2O4    | 347.0327 | 0.6       | 257.7  | 10       | 0.00   | 12.0 | even            |      | ok     |
| 369.0144  | 1  | C11H7ClN10NaS    | 369.0157 | 3.4       | 7.5    | 1        | 60.95  | 18.0 | even            |      | ok     |
|           | 2  | C10H11ClN6NaO4S  | 369.0143 | -0.2      | 13.0   | 2        | 100.00 | 13.0 | even            |      | ok     |
|           | 3  | C17H11ClNaO6     | 369.0136 | -2.1      | 14.2   | 3        | 70.77  | 15.0 | even            |      | ok     |
|           | 4  | C9H15ClN2NaO8S   | 369.0130 | -3.9      | 23.3   | 4        | 39.82  | 8.0  | even            |      | ok     |
|           | 5  | C18H7ClN4NaO2    | 369.0150 | 1.5       | 24.8   | 5        | 62.77  | 20.0 | even            |      | ok     |
|           | 6  | C18H15ClNaOS2    | 369.0145 | 0.3       | 42.9   | 6        | 48.88  | 18.0 | even            |      | ok     |
|           | 7  | C10H19ClN2NaO3S3 | 369.0139 | -1.5      | 47.4   | 7        | 41.97  | 11.0 | even            |      | ok     |
|           | 8  | C13H8Cl2N8Na     | 369.0141 | -0.8      | 127.1  | 8        | 1.53   | 19.0 | even            |      | ok     |
|           | 9  | C12H12Cl2N4NaO4  | 369.0128 | -4.4      | 128.4  | 9        | 0.67   | 14.0 | even            |      | ok     |
|           | 10 | C9H16Cl2N4NaO4S  | 369.0162 | 4.7       | 148.2  | 10       | 0.18   | 11.0 | even            |      | ok     |
|           | 11 | C9H24Cl2NaO3S3   | 369.0157 | 3.5       | 177.1  | 11       | 0.04   | 9.0  | even            |      | ok     |
|           | 12 | C12H13Cl3N6Na    | 369.0159 | 4.2       | 259.6  | 12       | 0.00   | 17.0 | even            |      | ok     |
|           | 13 | C11H17Cl3N2NaO4  | 369.0146 | 0.6       | 261.2  | 13       | 0.00   | 12.0 | even            |      | ok     |

Figure S17. HRESIMS spectrum of compound 5e

## Generic Display Report

### Analysis Info

Analysis Name D:\Data\Kalaba\72415000001.d  
Method tune\_low\_MS\_Service\_08\_20.m  
Sample Name CE-167-1-1-b2  
Comment Kalaba/Zehl  
Ergebnis +/- 5ppm  
ACN / MeOH + 1% H2O

Acquisition Date 20/08/2020 16:56:28

Operator msc  
Instrument maXis

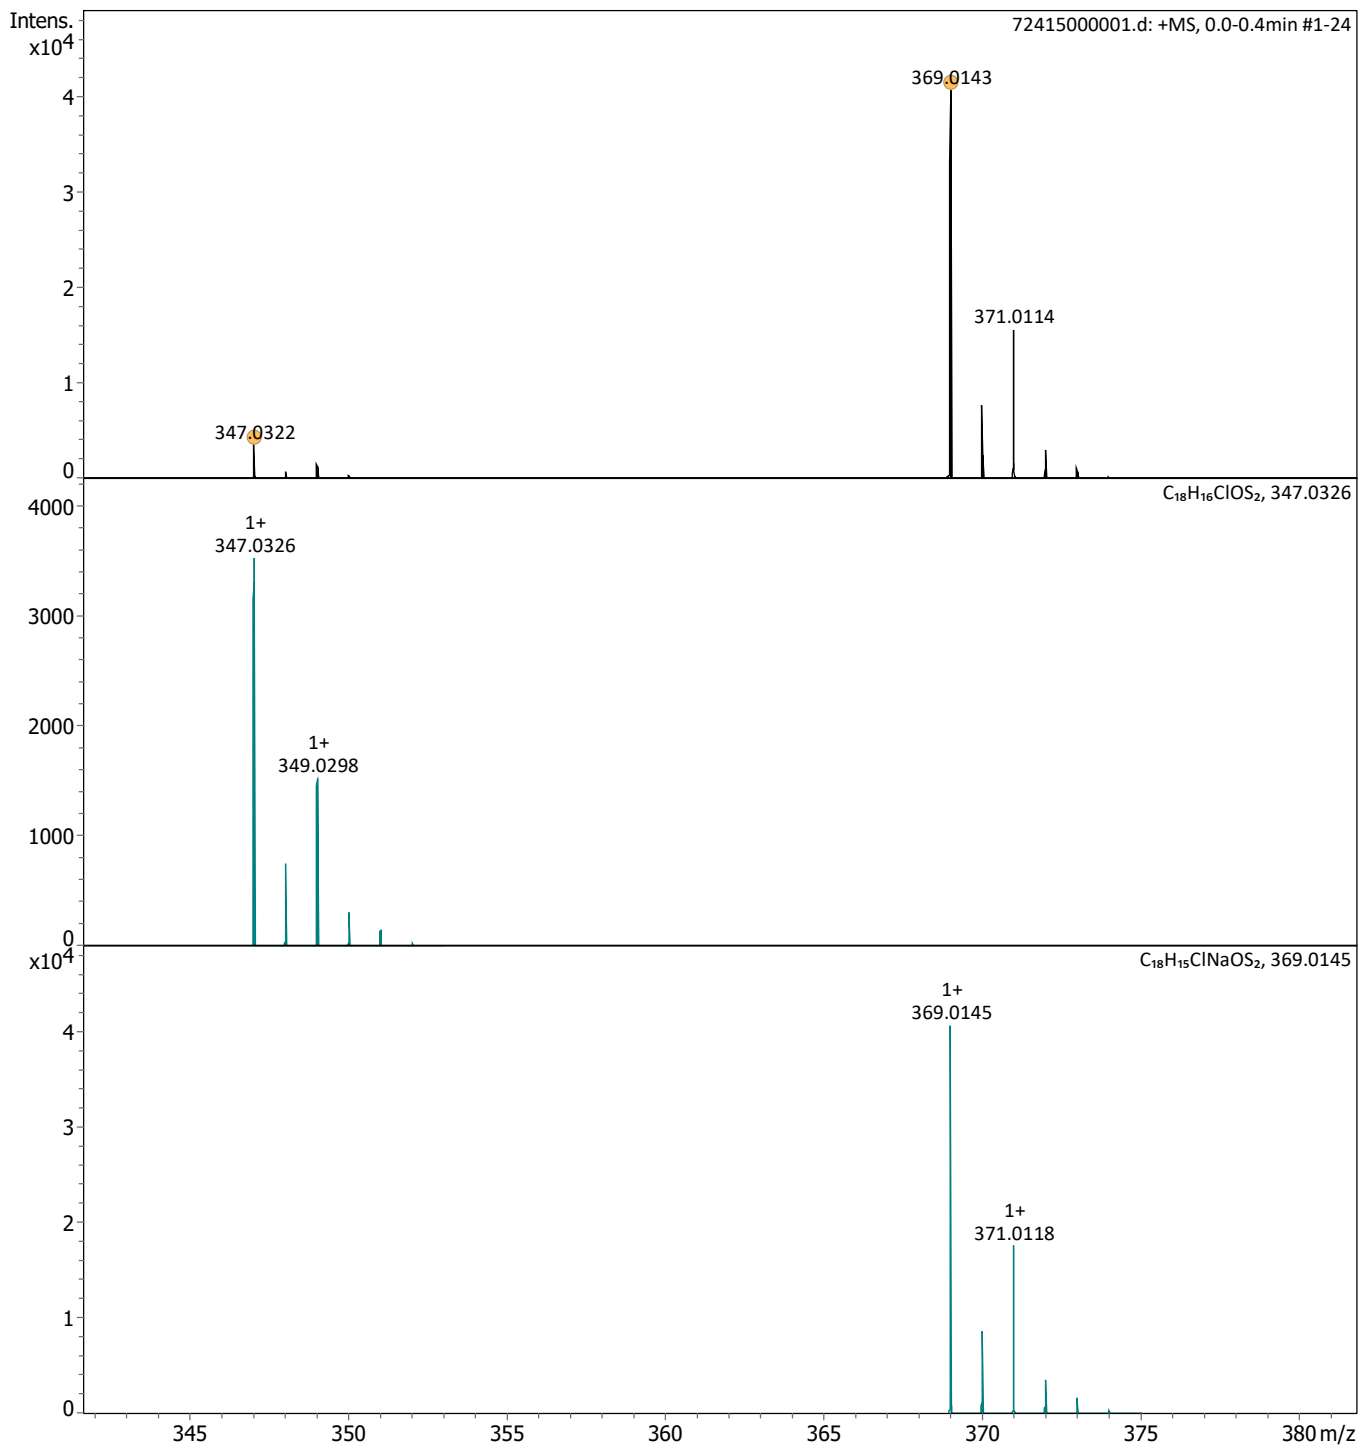

# Mass Spectrum SmartFormula Report

## Analysis Info

Analysis Name D:\Data\Kalaba\72415000001.d  
Method tune\_low\_MS\_Service\_08\_20.m  
Sample Name CE-167-1-1-b2  
Comment Kalaba/Zehl  
Ergebnis +/- 5ppm  
ACN / MeOH + 1% H2O

Acquisition Date 20/08/2020 16:56:28

Operator msc  
Instrument maXis 255552.00016

## Acquisition Parameter

|             |            |                      |          |                  |           |
|-------------|------------|----------------------|----------|------------------|-----------|
| Source Type | ESI        | Ion Polarity         | Positive | Set Nebulizer    | 0.4 Bar   |
| Focus       | Not active | Set Capillary        | 4200 V   | Set Dry Heater   | 180 Å°C   |
| Scan Begin  | 50 m/z     | Set End Plate Offset | -500 V   | Set Dry Gas      | 4.0 l/min |
| Scan End    | 1900 m/z   | Set Charging Voltage | 0 V      | Set Divert Valve | Source    |
|             |            | Set Corona           | 0 nA     | Set APCI Heater  | 0 Å°C     |

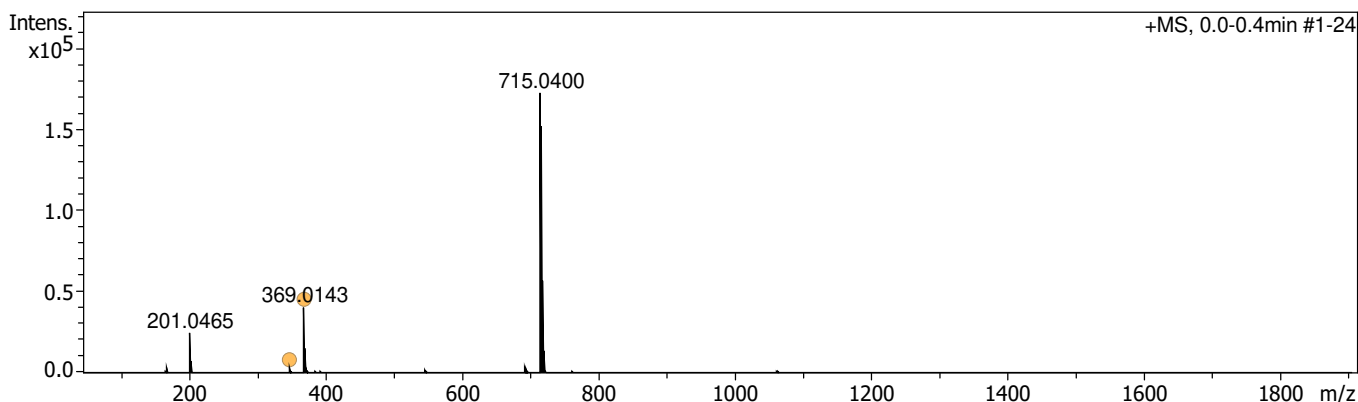

| Meas. m/z | # | Ion Formula      | m/z      | err [ppm] | mSigma | # mSigma | Score  | rdb  | eÅ <sup>-</sup> | Conf | N-Rule |
|-----------|---|------------------|----------|-----------|--------|----------|--------|------|-----------------|------|--------|
| 347.0322  | 1 | C18H16ClOS2      | 347.0326 | 1.1       | 19.5   | 1        | 100.00 | 18.0 | even            |      | ok     |
|           | 2 | C11H8ClN10S      | 347.0337 | 4.4       | 30.3   | 2        | 40.79  | 18.0 | even            |      | ok     |
|           | 3 | C18H8ClN4O2      | 347.0330 | 2.4       | 34.4   | 3        | 55.79  | 20.0 | even            |      | ok     |
|           | 4 | C17H12ClO6       | 347.0317 | -1.4      | 34.6   | 4        | 66.71  | 15.0 | even            |      | ok     |
|           | 5 | C10H12ClN6O4S    | 347.0324 | 0.6       | 38.1   | 5        | 69.53  | 13.0 | even            |      | ok     |
|           | 6 | C10H20ClN2O3S3   | 347.0319 | -0.8      | 41.5   | 6        | 73.67  | 11.0 | even            |      | ok     |
| 369.0143  | 1 | C11H7ClN10NaS    | 369.0157 | 3.6       | 13.5   | 1        | 63.81  | 18.0 | even            |      | ok     |
|           | 2 | C17H11ClNaO6     | 369.0136 | -1.9      | 18.7   | 2        | 80.98  | 15.0 | even            |      | ok     |
|           | 3 | C18H7ClN4NaO2    | 369.0150 | 1.7       | 22.3   | 3        | 78.21  | 20.0 | even            |      | ok     |
|           | 4 | C10H11ClN6NaO4S  | 369.0143 | -0.1      | 23.6   | 4        | 100.00 | 13.0 | even            |      | ok     |
|           | 5 | C18H15ClNaOS2    | 369.0145 | 0.4       | 25.5   | 5        | 90.45  | 18.0 | even            |      | ok     |
|           | 6 | C10H19ClN2NaO3S3 | 369.0139 | -1.3      | 41.2   | 6        | 62.80  | 11.0 | even            |      | ok     |

Figure S18. HRESIMS spectrum of compound 6e

## Generic Display Report

### Analysis Info

Analysis Name D:\Data\Kalaba\72416000001.d  
Method tune\_low\_MS\_Service\_08\_20.m  
Sample Name CE-167-1-2-b2  
Comment Kalaba/Zehl  
Ergebnis +/- 5ppm  
ACN / MeOH + 1% H2O

Acquisition Date 20/08/2020 16:59:35

Operator msc  
Instrument maXis

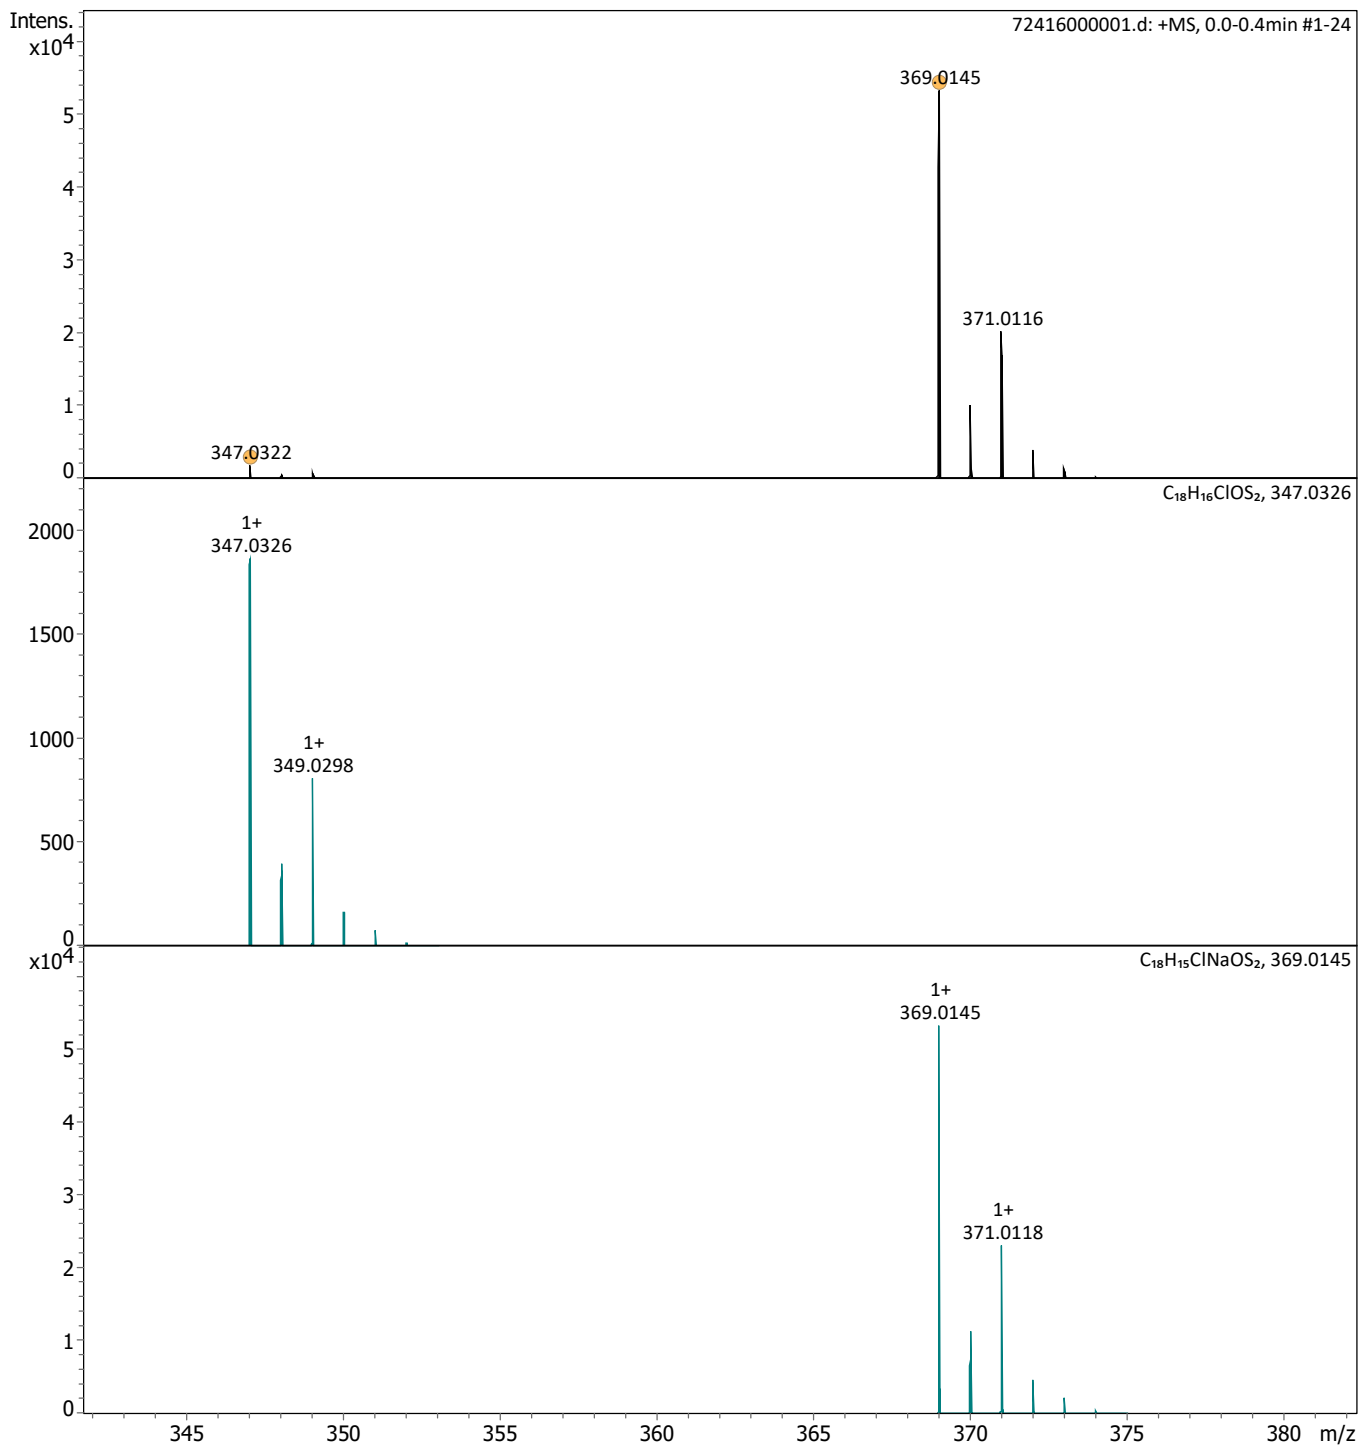

# Mass Spectrum SmartFormula Report

## Analysis Info

Analysis Name D:\Data\Kalaba\72416000001.d  
Method tune\_low\_MS\_Service\_08\_20.m  
Sample Name CE-167-1-2-b2  
Comment Kalaba/Zehl  
Ergebnis +/- 5ppm  
ACN / MeOH + 1% H2O

Acquisition Date 20/08/2020 16:59:35

Operator msc  
Instrument maXis 255552.00016

## Acquisition Parameter

|             |            |                      |          |                  |           |
|-------------|------------|----------------------|----------|------------------|-----------|
| Source Type | ESI        | Ion Polarity         | Positive | Set Nebulizer    | 0.4 Bar   |
| Focus       | Not active | Set Capillary        | 4200 V   | Set Dry Heater   | 180 Å°C   |
| Scan Begin  | 50 m/z     | Set End Plate Offset | -500 V   | Set Dry Gas      | 4.0 l/min |
| Scan End    | 1900 m/z   | Set Charging Voltage | 0 V      | Set Divert Valve | Source    |
|             |            | Set Corona           | 0 nA     | Set APCI Heater  | 0 Å°C     |

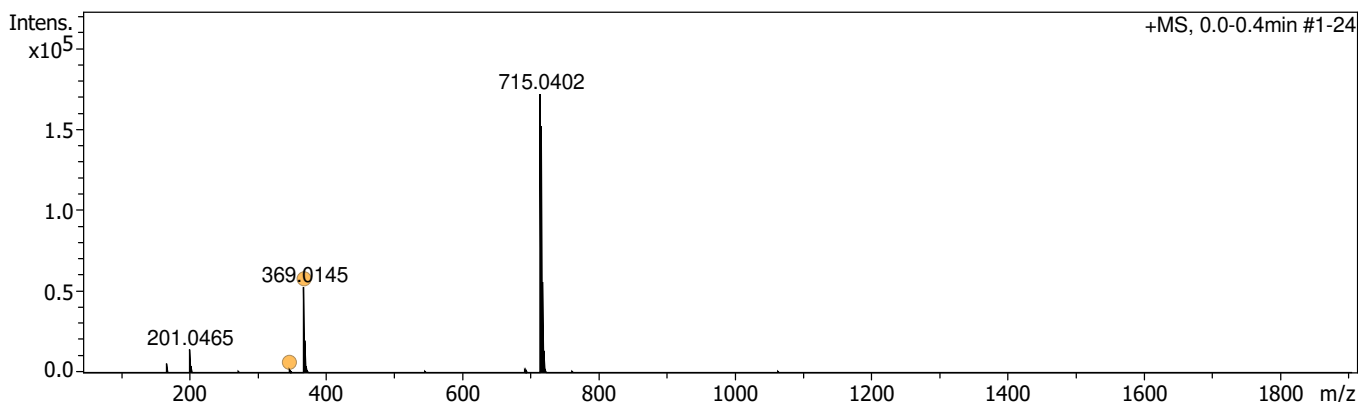

| Meas. m/z | # | Ion Formula      | m/z      | err [ppm] | mSigma | # mSigma | Score  | rdb  | eÅ <sup>-</sup> | Conf | N-Rule |
|-----------|---|------------------|----------|-----------|--------|----------|--------|------|-----------------|------|--------|
| 347.0322  | 1 | C18H16ClOS2      | 347.0326 | 1.0       | 43.4   | 1        | 93.74  | 18.0 | even            |      | ok     |
|           | 2 | C11H8ClN10S      | 347.0337 | 4.3       | 43.7   | 2        | 48.73  | 18.0 | even            |      | ok     |
|           | 3 | C10H12ClN6O4S    | 347.0324 | 0.5       | 47.3   | 3        | 90.86  | 13.0 | even            |      | ok     |
|           | 4 | C10H20ClN2O3S3   | 347.0319 | -0.9      | 48.3   | 4        | 100.00 | 11.0 | even            |      | ok     |
|           | 5 | C17H12ClO6       | 347.0317 | -1.5      | 48.7   | 5        | 74.43  | 15.0 | even            |      | ok     |
|           | 6 | C18H8ClN4O2      | 347.0330 | 2.4       | 50.2   | 6        | 60.82  | 20.0 | even            |      | ok     |
| 369.0145  | 1 | C11H7ClN10NaS    | 369.0157 | 3.1       | 13.3   | 1        | 76.94  | 18.0 | even            |      | ok     |
|           | 2 | C17H11ClNaO6     | 369.0136 | -2.4      | 17.2   | 2        | 81.82  | 15.0 | even            |      | ok     |
|           | 3 | C18H7ClN4NaO2    | 369.0150 | 1.2       | 20.8   | 3        | 95.14  | 20.0 | even            |      | ok     |
|           | 4 | C10H11ClN6NaO4S  | 369.0143 | -0.6      | 23.8   | 4        | 99.49  | 13.0 | even            |      | ok     |
|           | 5 | C18H15ClNaOS2    | 369.0145 | -0.1      | 26.9   | 5        | 100.00 | 18.0 | even            |      | ok     |
|           | 6 | C10H19ClN2NaO3S3 | 369.0139 | -1.8      | 42.7   | 6        | 59.33  | 11.0 | even            |      | ok     |

**Figure S19.** HRESIMS spectrum of compound **7e**

## Generic Display Report

### Analysis Info

Analysis Name D:\Data\Kalaba\72417000001.d  
Method tune\_low\_MS\_Service\_08\_20.m  
Sample Name CE-167-2-1-b2  
Comment Kalaba/Zehl  
Ergebnis +/- 5ppm  
ACN / MeOH + 1% H<sub>2</sub>O

Acquisition Date 20/08/2020 17:00:59

Operator msc  
Instrument maXis

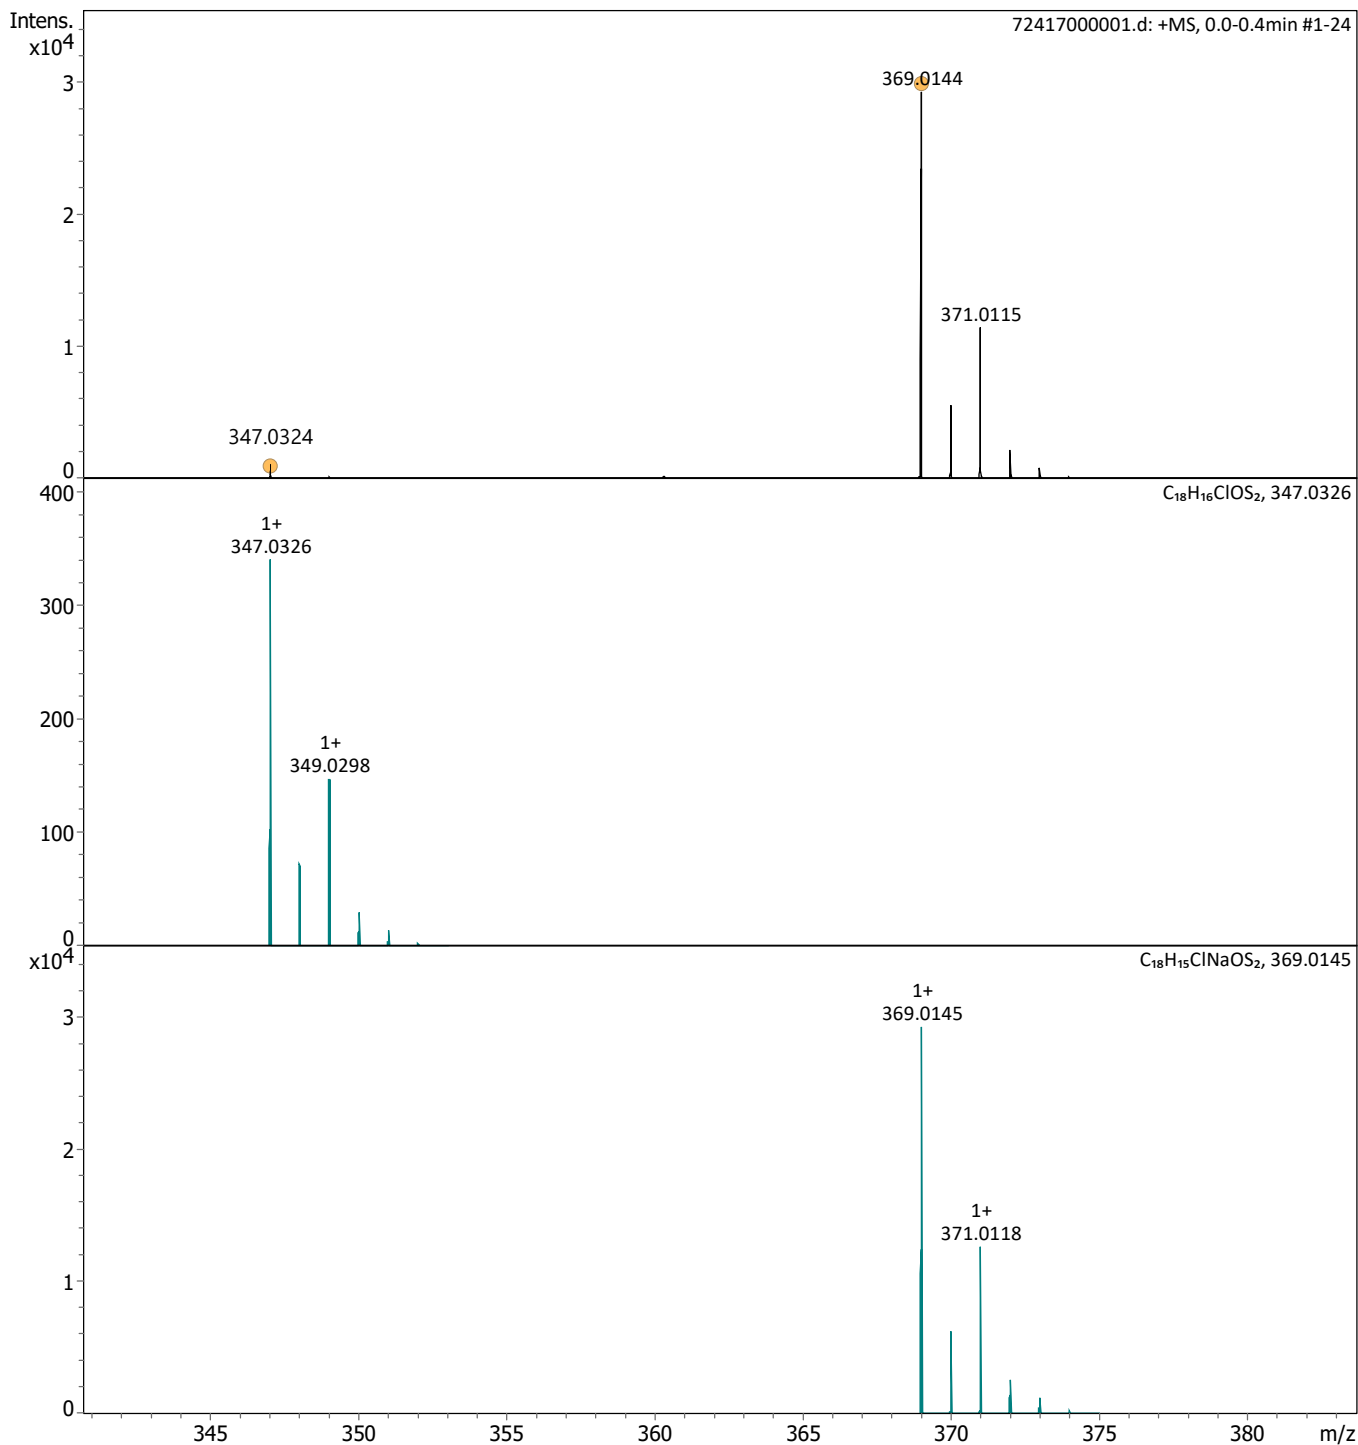



# Mass Spectrum SmartFormula Report

## Analysis Info

Analysis Name D:\Data\Kalaba\72417000001.d  
 Method tune\_low\_MS\_Service\_08\_20.m  
 Sample Name CE-167-2-1-b2  
 Comment Kalaba/Zehl  
 Ergebnis +/- 5ppm  
 ACN / MeOH + 1% H2O

Acquisition Date 20/08/2020 17:00:59

Operator msc  
 Instrument maXis 255552.00016

## Acquisition Parameter

|             |            |                      |          |                  |           |
|-------------|------------|----------------------|----------|------------------|-----------|
| Source Type | ESI        | Ion Polarity         | Positive | Set Nebulizer    | 0.4 Bar   |
| Focus       | Not active | Set Capillary        | 4200 V   | Set Dry Heater   | 180 Å°C   |
| Scan Begin  | 50 m/z     | Set End Plate Offset | -500 V   | Set Dry Gas      | 4.0 l/min |
| Scan End    | 1900 m/z   | Set Charging Voltage | 0 V      | Set Divert Valve | Source    |
|             |            | Set Corona           | 0 nA     | Set APCI Heater  | 0 Å°C     |

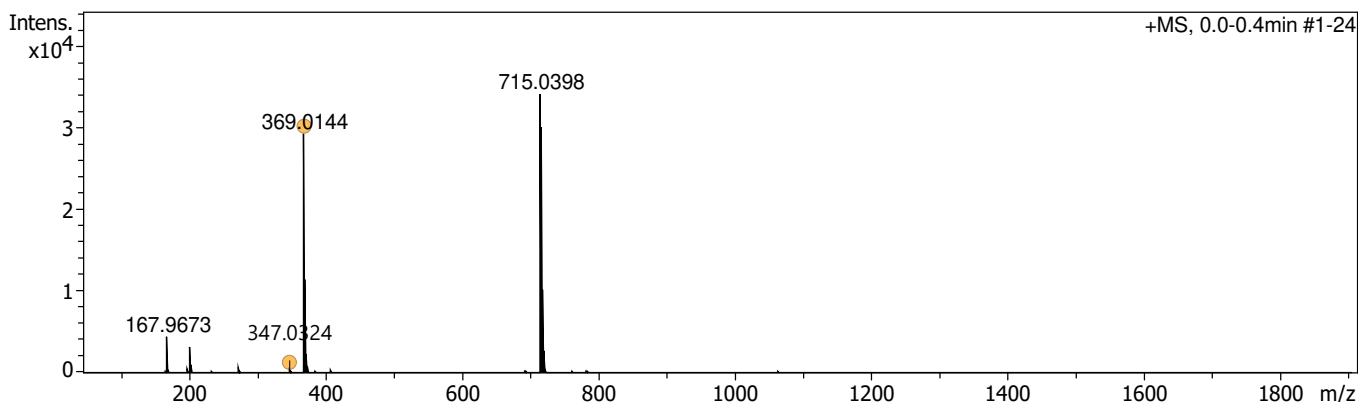

| Meas. m/z | # | Ion Formula      | m/z      | err [ppm] | mSigma | # mSigma | Score  | rdb  | eÅ <sup>-</sup> | Conf | N-Rule |
|-----------|---|------------------|----------|-----------|--------|----------|--------|------|-----------------|------|--------|
| 347.0324  | 1 | C10H20CIN2O3S3   | 347.0319 | -1.5      | 68.1   | 1        | 100.00 | 11.0 | even            |      | ok     |
|           | 2 | C10H12CIN6O4S    | 347.0324 | -0.2      | 79.1   | 2        | 67.28  | 13.0 | even            |      | ok     |
|           | 3 | C11H8CIN10S      | 347.0337 | 3.7       | 89.6   | 3        | 23.45  | 18.0 | even            |      | ok     |
|           | 4 | C17H12CIO6       | 347.0317 | -2.2      | 104.6  | 4        | 15.69  | 15.0 | even            |      | ok     |
|           | 5 | C18H16C IOS2     | 347.0326 | 0.3       | 106.1  | 5        | 19.70  | 18.0 | even            |      | ok     |
|           | 6 | C18H8CIN4O2      | 347.0330 | 1.7       | 114.7  | 6        | 10.23  | 20.0 | even            |      | ok     |
| 369.0144  | 1 | C11H7CIN10NaS    | 369.0157 | 3.5       | 15.7   | 1        | 63.73  | 18.0 | even            |      | ok     |
|           | 2 | C17H11CINaO6     | 369.0136 | -2.0      | 21.3   | 2        | 76.81  | 15.0 | even            |      | ok     |
|           | 3 | C18H15CINaOS2    | 369.0145 | 0.3       | 22.6   | 3        | 100.00 | 18.0 | even            |      | ok     |
|           | 4 | C18H7CIN4NaO2    | 369.0150 | 1.6       | 24.1   | 4        | 78.19  | 20.0 | even            |      | ok     |
|           | 5 | C10H11CIN6NaO4S  | 369.0143 | -0.2      | 25.3   | 5        | 96.70  | 13.0 | even            |      | ok     |
|           | 6 | C10H19CIN2NaO3S3 | 369.0139 | -1.4      | 39.8   | 6        | 65.35  | 11.0 | even            |      | ok     |

Figure S20. HRESIMS spectrum of compound **8e**

## Generic Display Report

### Analysis Info

Analysis Name D:\Data\Kalaba\72418000001.d  
Method tune\_low\_MS\_Service\_08\_20.m  
Sample Name CE-167-2-2-b2  
Comment Kalaba/Zehl  
Ergebnis +/- 5ppm  
ACN / MeOH + 1% H<sub>2</sub>O

Acquisition Date 20/08/2020 17:03:35

Operator msc  
Instrument maXis

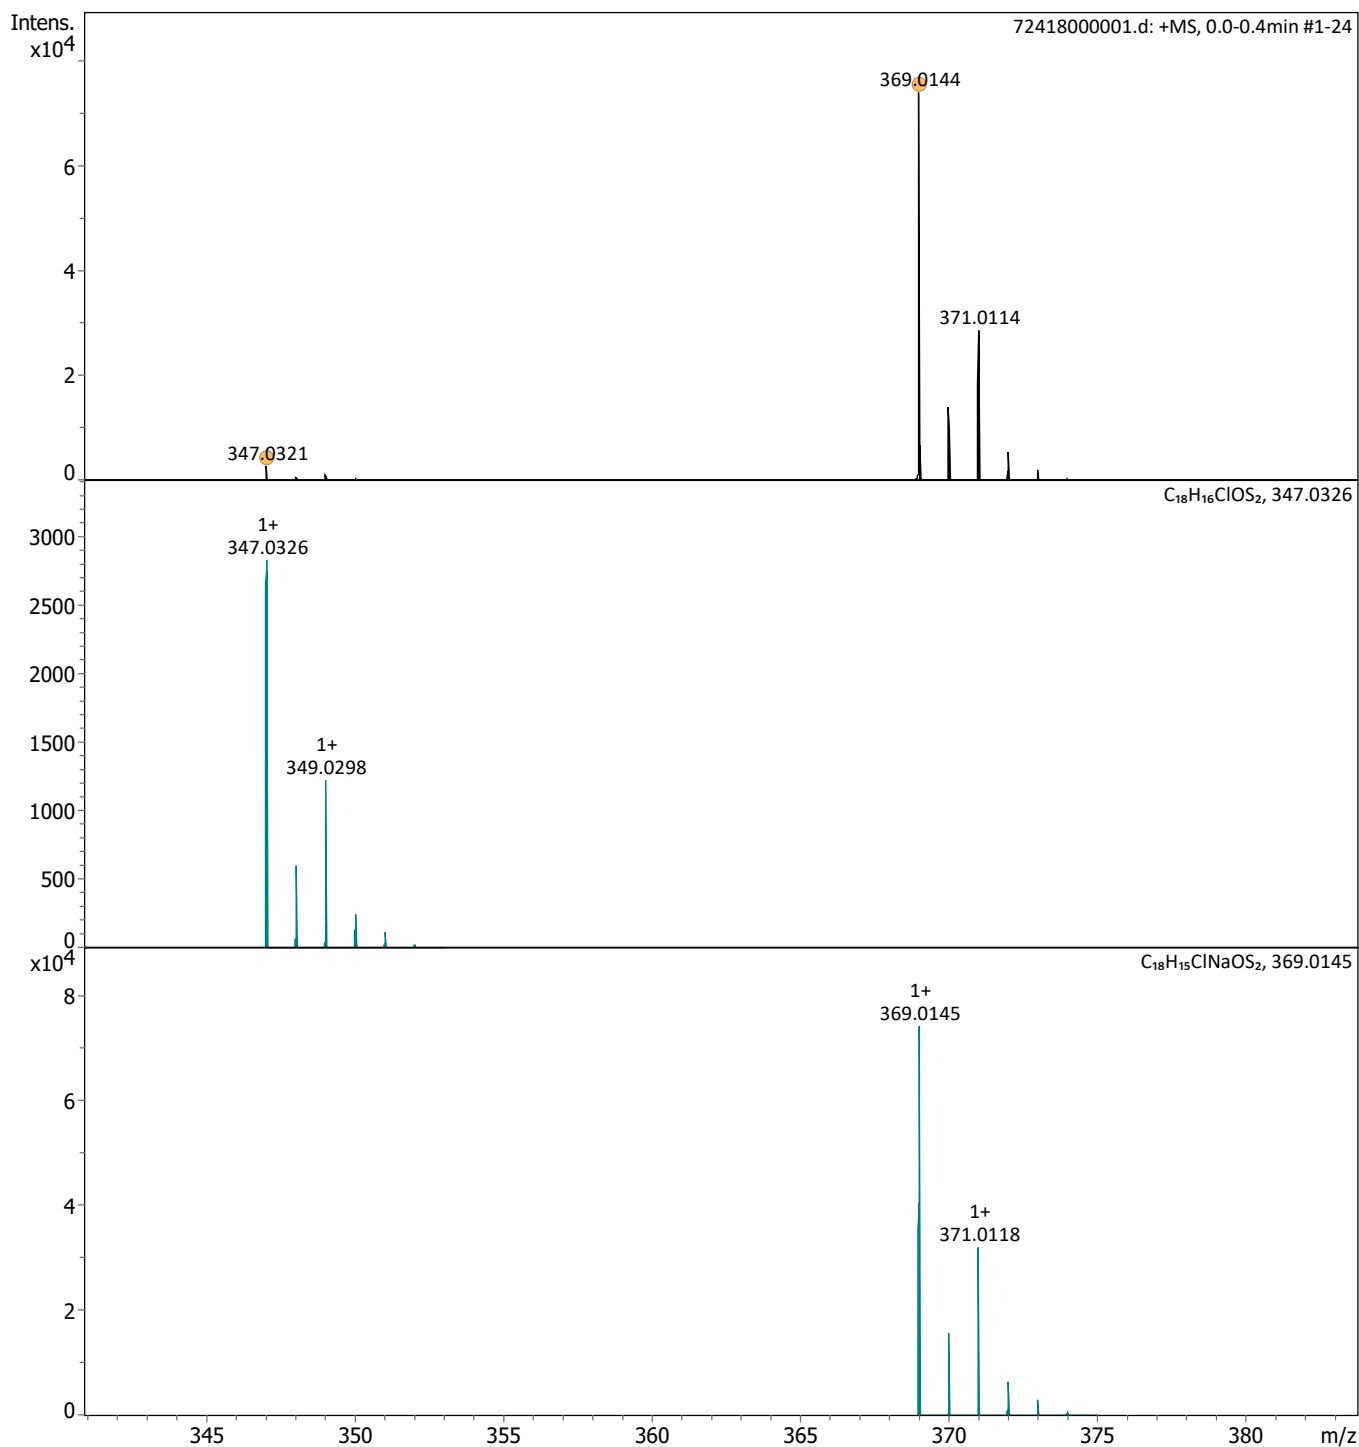

# Mass Spectrum SmartFormula Report

## Analysis Info

Analysis Name D:\Data\Kalaba\72418000001.d  
 Method tune\_low\_MS\_Service\_08\_20.m  
 Sample Name CE-167-2-2-b2  
 Comment Kalaba/Zehl  
 Ergebnis +/- 5ppm  
 ACN / MeOH + 1% H2O

Acquisition Date 20/08/2020 17:03:35

Operator msc  
 Instrument maXis 255552.00016

## Acquisition Parameter

|             |            |                      |          |                  |           |
|-------------|------------|----------------------|----------|------------------|-----------|
| Source Type | ESI        | Ion Polarity         | Positive | Set Nebulizer    | 0.4 Bar   |
| Focus       | Not active | Set Capillary        | 4200 V   | Set Dry Heater   | 180 Å°C   |
| Scan Begin  | 50 m/z     | Set End Plate Offset | -500 V   | Set Dry Gas      | 4.0 l/min |
| Scan End    | 1900 m/z   | Set Charging Voltage | 0 V      | Set Divert Valve | Source    |
|             |            | Set Corona           | 0 nA     | Set APCI Heater  | 0 Å°C     |

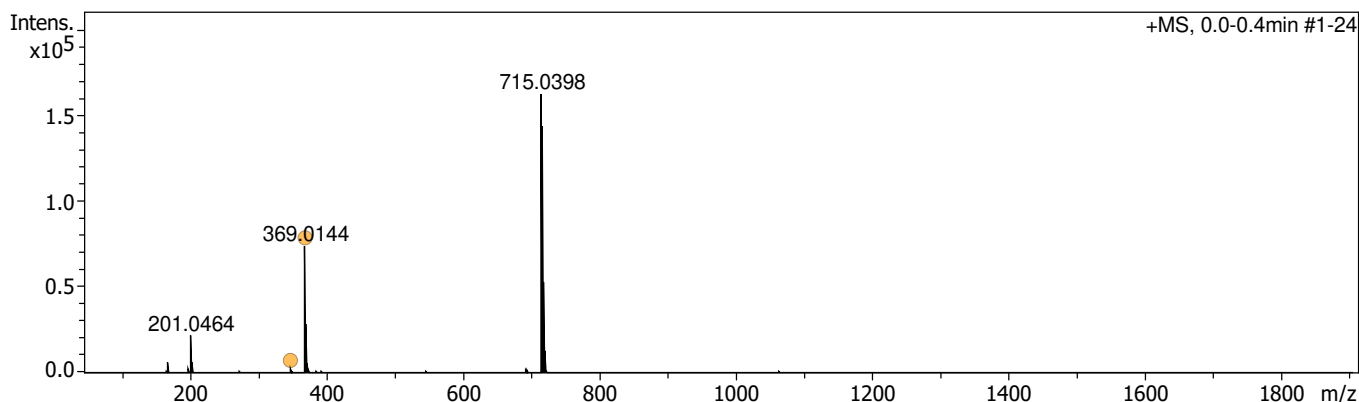

| Meas. m/z | # | Ion Formula    | m/z      | err [ppm] | mSigma | # mSigma | Score  | rdB  | eÅ <sup>-</sup> | Conf | N-Rule |
|-----------|---|----------------|----------|-----------|--------|----------|--------|------|-----------------|------|--------|
| 347.0321  | 1 | C18H16ClOS2    | 347.0326 | 1.3       | 19.9   | 1        | 100.00 | 18.0 | even            |      | ok     |
|           | 2 | C18H8ClN4O2    | 347.0330 | 2.6       | 33.5   | 2        | 57.32  | 20.0 | even            |      | ok     |
|           | 3 | C11H8ClN10S    | 347.0337 | 4.6       | 34.4   | 3        | 36.71  | 18.0 | even            |      | ok     |
|           | 4 | C17H12ClO6     | 347.0317 | -1.2      | 35.9   | 4        | 68.62  | 15.0 | even            |      | ok     |
|           | 5 | C10H12ClN6O4S  | 347.0324 | 0.7       | 43.2   | 5        | 61.01  | 13.0 | even            |      | ok     |
| 369.0144  | 6 | C10H20ClN2O3S3 | 347.0319 | -0.6      | 46.1   | 6        | 68.41  | 11.0 | even            |      | ok     |
|           | 1 | C11H7ClN10NaS  | 369.0157 | 3.5       | 14.3   | 1        | 67.89  | 18.0 | even            |      | ok     |
|           | 2 | C17H11ClNaO6   | 369.0136 | -2.0      | 19.6   | 2        | 83.24  | 15.0 | even            |      | ok     |
|           | 3 | C18H7ClN4NaO2  | 369.0150 | 1.6       | 22.7   | 3        | 83.69  | 20.0 | even            |      | ok     |
|           | 4 | C18H15ClNaOS2  | 369.0145 | 0.3       | 24.3   | 4        | 100.00 | 18.0 | even            |      | ok     |

**Figure S21.** HRESIMS spectrum of compound **5f**

## Generic Display Report

### Analysis Info

Analysis Name E:\Data\MS\_MessService\58951000001.d  
Method tune\_low\_MS\_Service\_08\_18.m  
Sample Name CE-140-SPOT1-PEAK1  
Comment Kalaba/Zehl  
Ergebnis: +/- 5ppm  
ACN/MeOH +0.1% H2O

Acquisition Date 8/14/2018 5:17:54 PM

Operator msc  
Instrument maXis

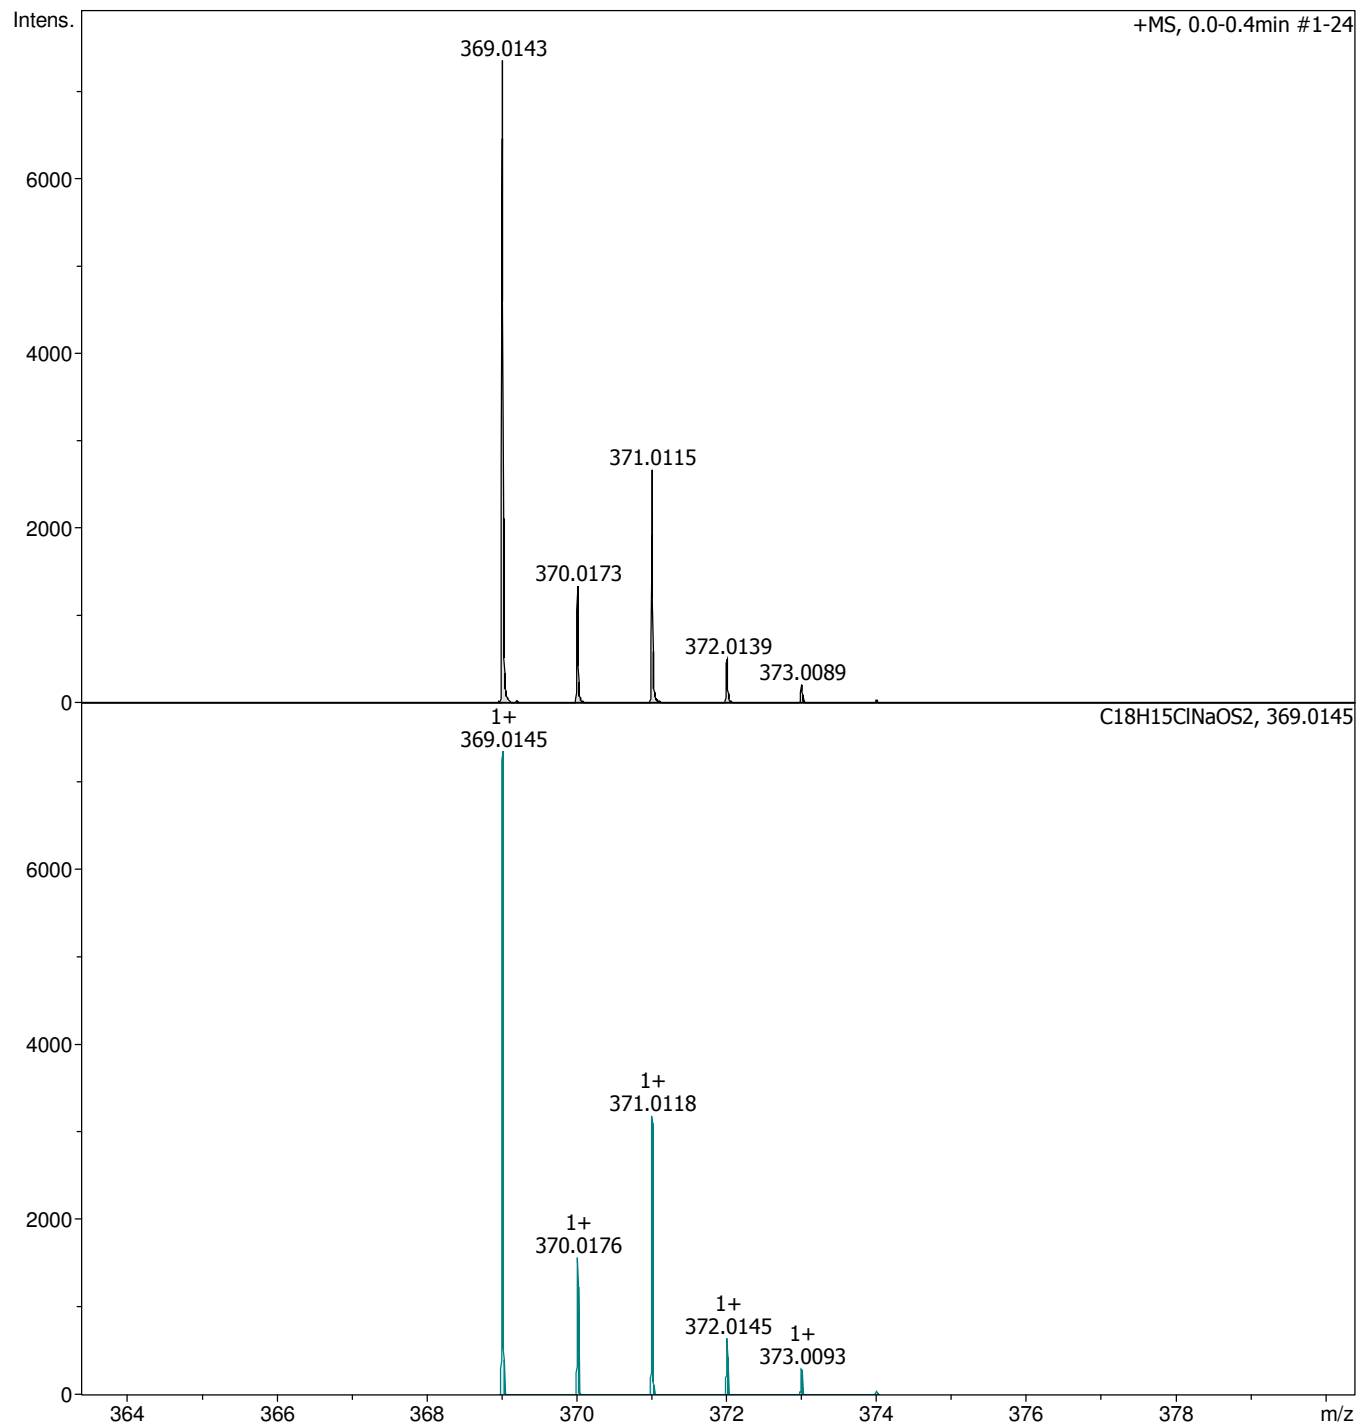

# Mass Spectrum SmartFormula Report

## Analysis Info

Analysis Name E:\Data\MS\_MessService\58951000001.d  
 Method tune\_low\_MS\_Service\_08\_18.m  
 Sample Name CE-140-SPOT1-PEAK1  
 Comment Kalaba/Zehl  
 Ergebnis: +/- 5ppm  
 ACN/MeOH +0.1% H2O

Acquisition Date 8/14/2018 5:17:54 PM

Operator msc  
 Instrument maXis 255552.00016

## Acquisition Parameter

|             |            |                      |          |                  |           |
|-------------|------------|----------------------|----------|------------------|-----------|
| Source Type | ESI        | Ion Polarity         | Positive | Set Nebulizer    | 0.4 Bar   |
| Focus       | Not active | Set Capillary        | 4500 V   | Set Dry Heater   | 180 °C    |
| Scan Begin  | 50 m/z     | Set End Plate Offset | -500 V   | Set Dry Gas      | 4.0 l/min |
| Scan End    | 1900 m/z   | Set Charging Voltage | 0 V      | Set Divert Valve | Source    |
|             |            | Set Corona           | 0 nA     | Set APCI Heater  | 0 °C      |

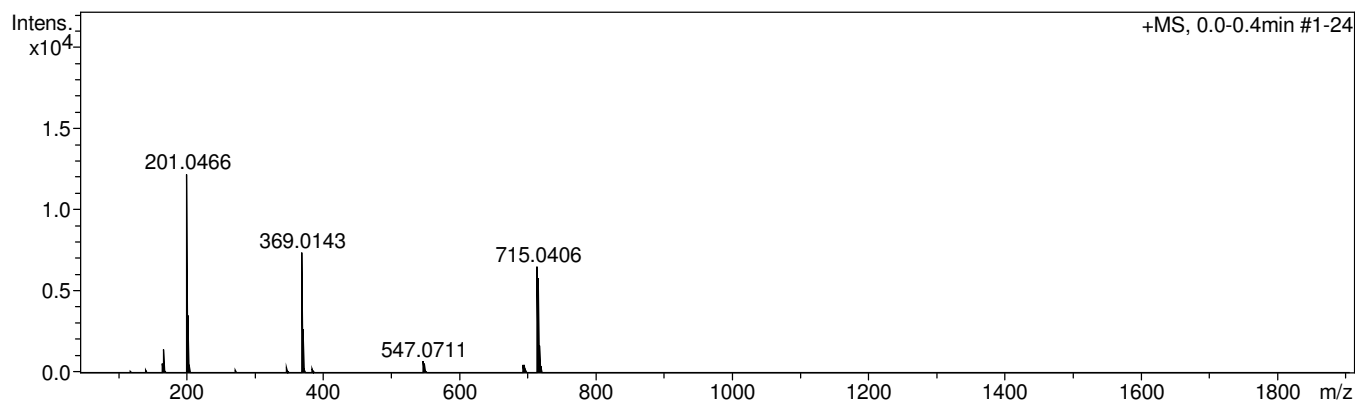

| Meas. m/z  | # | Ion Formula     | Score  | m/z        | err [mDa] | err [ppm] | mSigma | rdb  | e <sup>-</sup> | Conf | N-Rule |
|------------|---|-----------------|--------|------------|-----------|-----------|--------|------|----------------|------|--------|
| 369.014277 | 1 | C17H11ClNaO6    | 100.00 | 369.013636 | -0.6      | -1.7      | 10.8   | 11.5 | even           |      | ok     |
|            | 2 | C11H7ClN10NaS   | 64.20  | 369.015660 | -1.4      | -3.7      | 11.7   | 12.5 | even           |      | ok     |
|            | 3 | C16H5ClN7NaO    | 90.72  | 369.013631 | 0.6       | 1.8       | 15.6   | 17.0 | odd            |      | ok     |
|            | 4 | C18H7ClN4NaO2   | 85.42  | 369.014974 | 0.7       | 1.9       | 17.3   | 16.5 | even           |      | ok     |
|            | 5 | C12H13ClN3NaO5S | 56.56  | 369.015665 | -1.4      | -3.8      | 17.9   | 7.0  | odd            |      | ok     |
|            | 6 | C16H13ClN3NaS2  | 52.29  | 369.013163 | -1.1      | -3.0      | 29.0   | 11.0 | odd            |      | ok     |
|            | 7 | C18H15ClNaOS2   | 75.20  | 369.014505 | 0.2       | 0.6       | 32.7   | 10.5 | even           |      | ok     |

**Figure S22.** HRESIMS spectrum of compound **6f**

## Generic Display Report

### Analysis Info

Analysis Name E:\Data\MS\_MessService\58952000001.d  
Method tune\_low\_MS\_Service\_08\_18.m  
Sample Name CE-140-SPOT1-PEAK2  
Comment Kalaba/Zehl  
Ergebnis: +/- 5ppm  
ACN/MeOH +0.1% H<sub>2</sub>O

Acquisition Date 8/14/2018 5:19:55 PM

Operator msc  
Instrument maXis

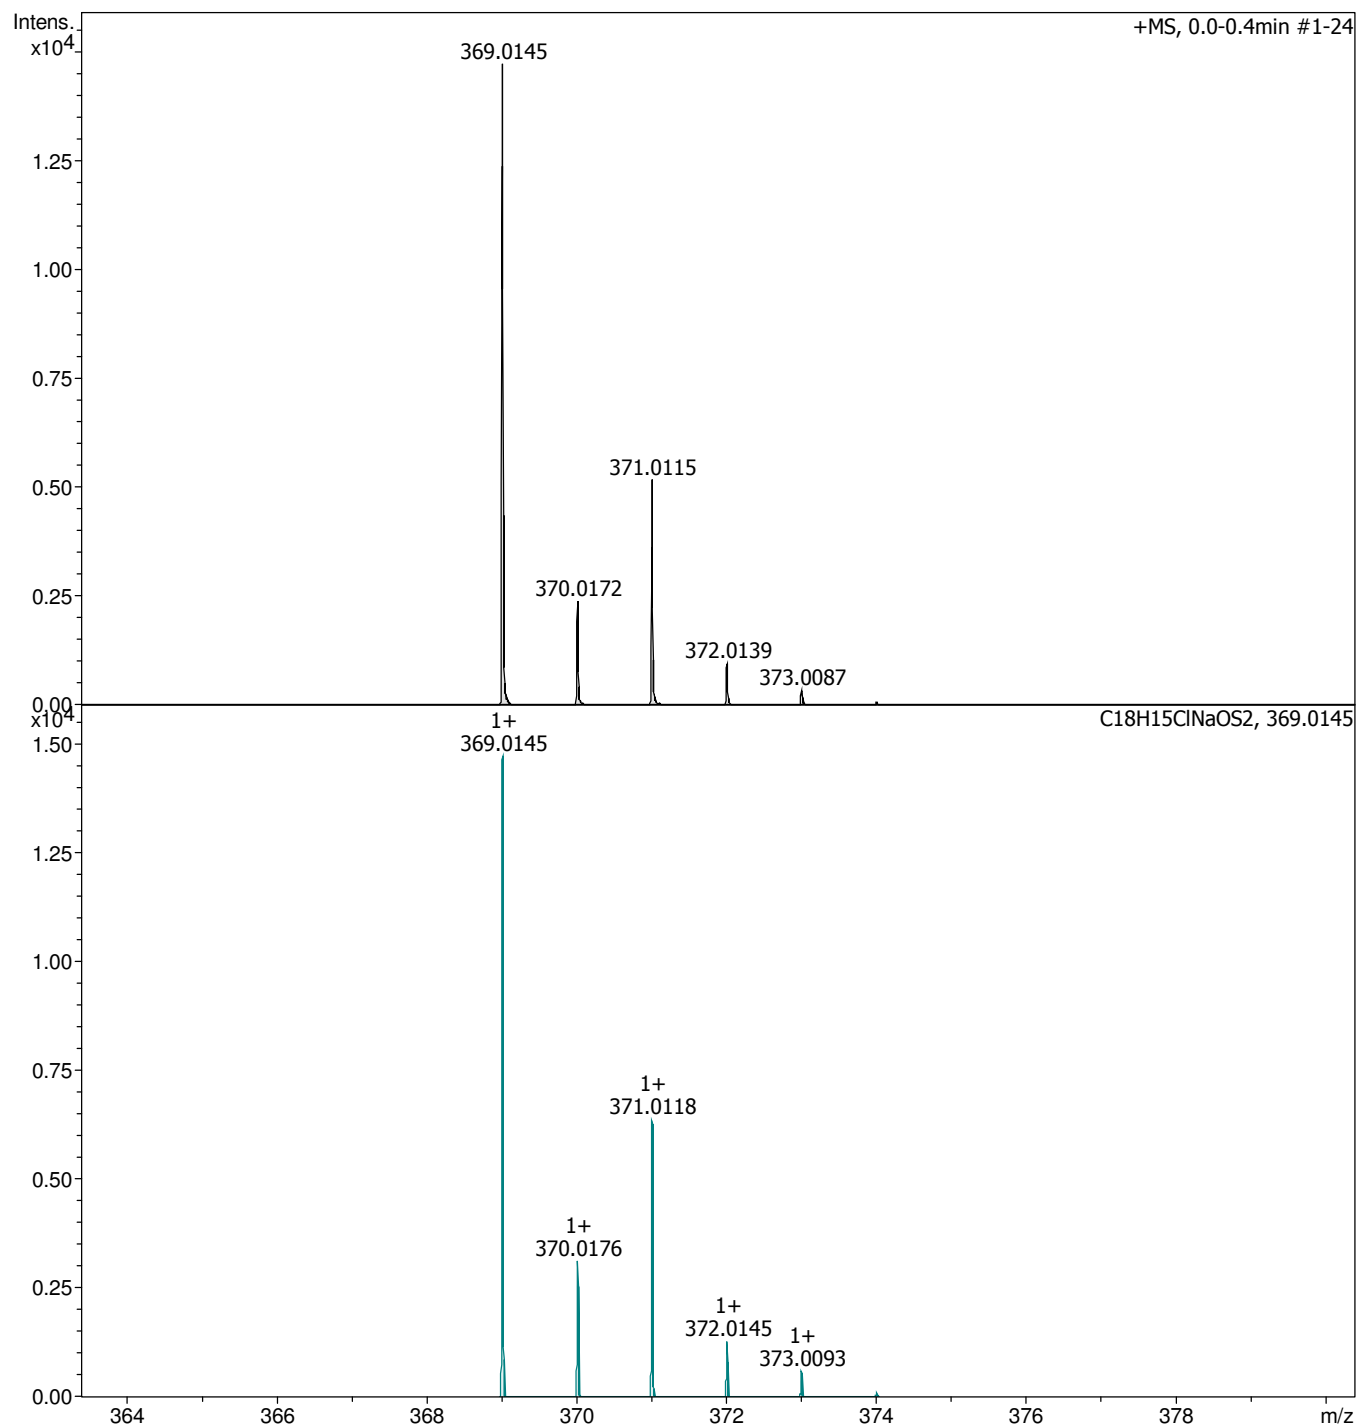

# Mass Spectrum SmartFormula Report

## Analysis Info

Analysis Name E:\Data\MS\_MessService\58952000001.d  
 Method tune\_low\_MS\_Service\_08\_18.m  
 Sample Name CE-140-SPOT1-PEAK2  
 Comment Kalaba/Zehl  
 Ergebnis: +/- 5ppm  
 ACN/MeOH +0.1% H2O

Acquisition Date 8/14/2018 5:19:55 PM

Operator msc  
 Instrument maXis 255552.00016

## Acquisition Parameter

|             |            |                      |          |                  |           |
|-------------|------------|----------------------|----------|------------------|-----------|
| Source Type | ESI        | Ion Polarity         | Positive | Set Nebulizer    | 0.4 Bar   |
| Focus       | Not active | Set Capillary        | 4500 V   | Set Dry Heater   | 180 °C    |
| Scan Begin  | 50 m/z     | Set End Plate Offset | -500 V   | Set Dry Gas      | 4.0 l/min |
| Scan End    | 1900 m/z   | Set Charging Voltage | 0 V      | Set Divert Valve | Source    |
|             |            | Set Corona           | 0 nA     | Set APCI Heater  | 0 °C      |

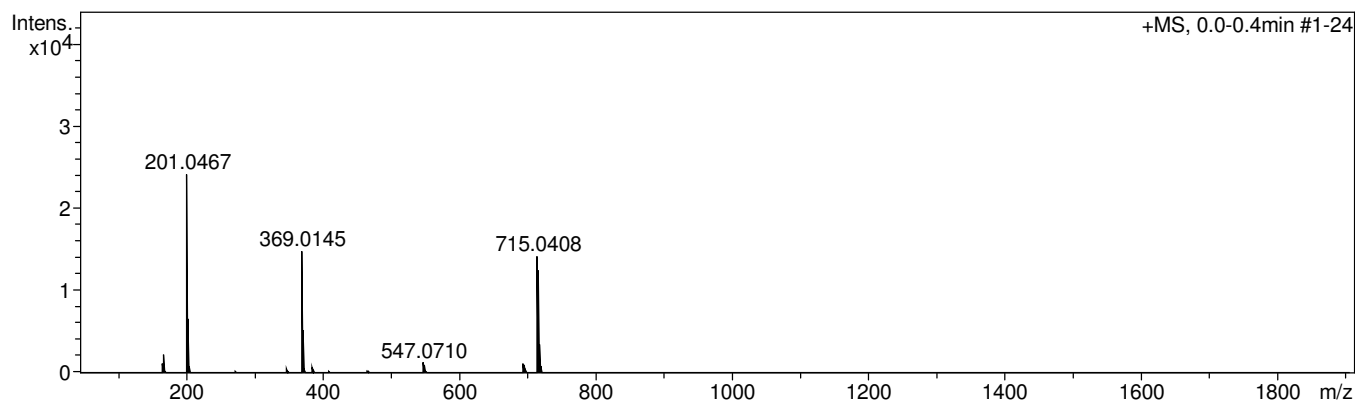

| Meas. m/z  | # | Ion Formula     | Score  | m/z        | err [mDa] | err [ppm] | mSigma | rdb  | e <sup>-</sup> | Conf | N-Rule |
|------------|---|-----------------|--------|------------|-----------|-----------|--------|------|----------------|------|--------|
| 369.014535 | 1 | C11H7ClN10NaS   | 87.10  | 369.015660 | -1.1      | -3.0      | 11.8   | 12.5 | even           |      | ok     |
|            | 2 | C17H11ClNaO6    | 97.55  | 369.013636 | 0.9       | 2.4       | 12.7   | 11.5 | even           |      | ok     |
|            | 3 | C12H13ClN3NaO5S | 79.47  | 369.015665 | -1.1      | -3.1      | 16.3   | 7.0  | odd            |      | ok     |
|            | 4 | C16H5ClN7NaO    | 86.24  | 369.013631 | 0.9       | 2.4       | 18.7   | 17.0 | odd            |      | ok     |
|            | 5 | C18H7ClN4NaO2   | 100.00 | 369.014974 | -0.4      | -1.2      | 22.8   | 16.5 | even           |      | ok     |
|            | 6 | C20H9ClNNaO3    | 40.52  | 369.016317 | -1.8      | -4.8      | 27.5   | 16.0 | odd            |      | ok     |
|            | 7 | C16H13ClN3NaS2  | 42.85  | 369.013163 | 1.4       | 3.7       | 36.5   | 11.0 | odd            |      | ok     |
|            | 8 | C18H15ClNaOS2   | 76.70  | 369.014505 | -0.0      | -0.1      | 40.7   | 10.5 | even           |      | ok     |

**Figure S23.** HRESIMS spectrum of compound **7f**

## Generic Display Report

### Analysis Info

Analysis Name E:\Data\MS\_MessService\58953000001.d  
Method tune\_low\_MS\_Service\_08\_18.m  
Sample Name CE-140-SPOT2-PEAK1  
Comment Kalaba/Zehl  
Ergebnis: +/- 5ppm  
ACN/MeOH +0.1% H2O

Acquisition Date 8/14/2018 5:21:38 PM

Operator msc  
Instrument maXis

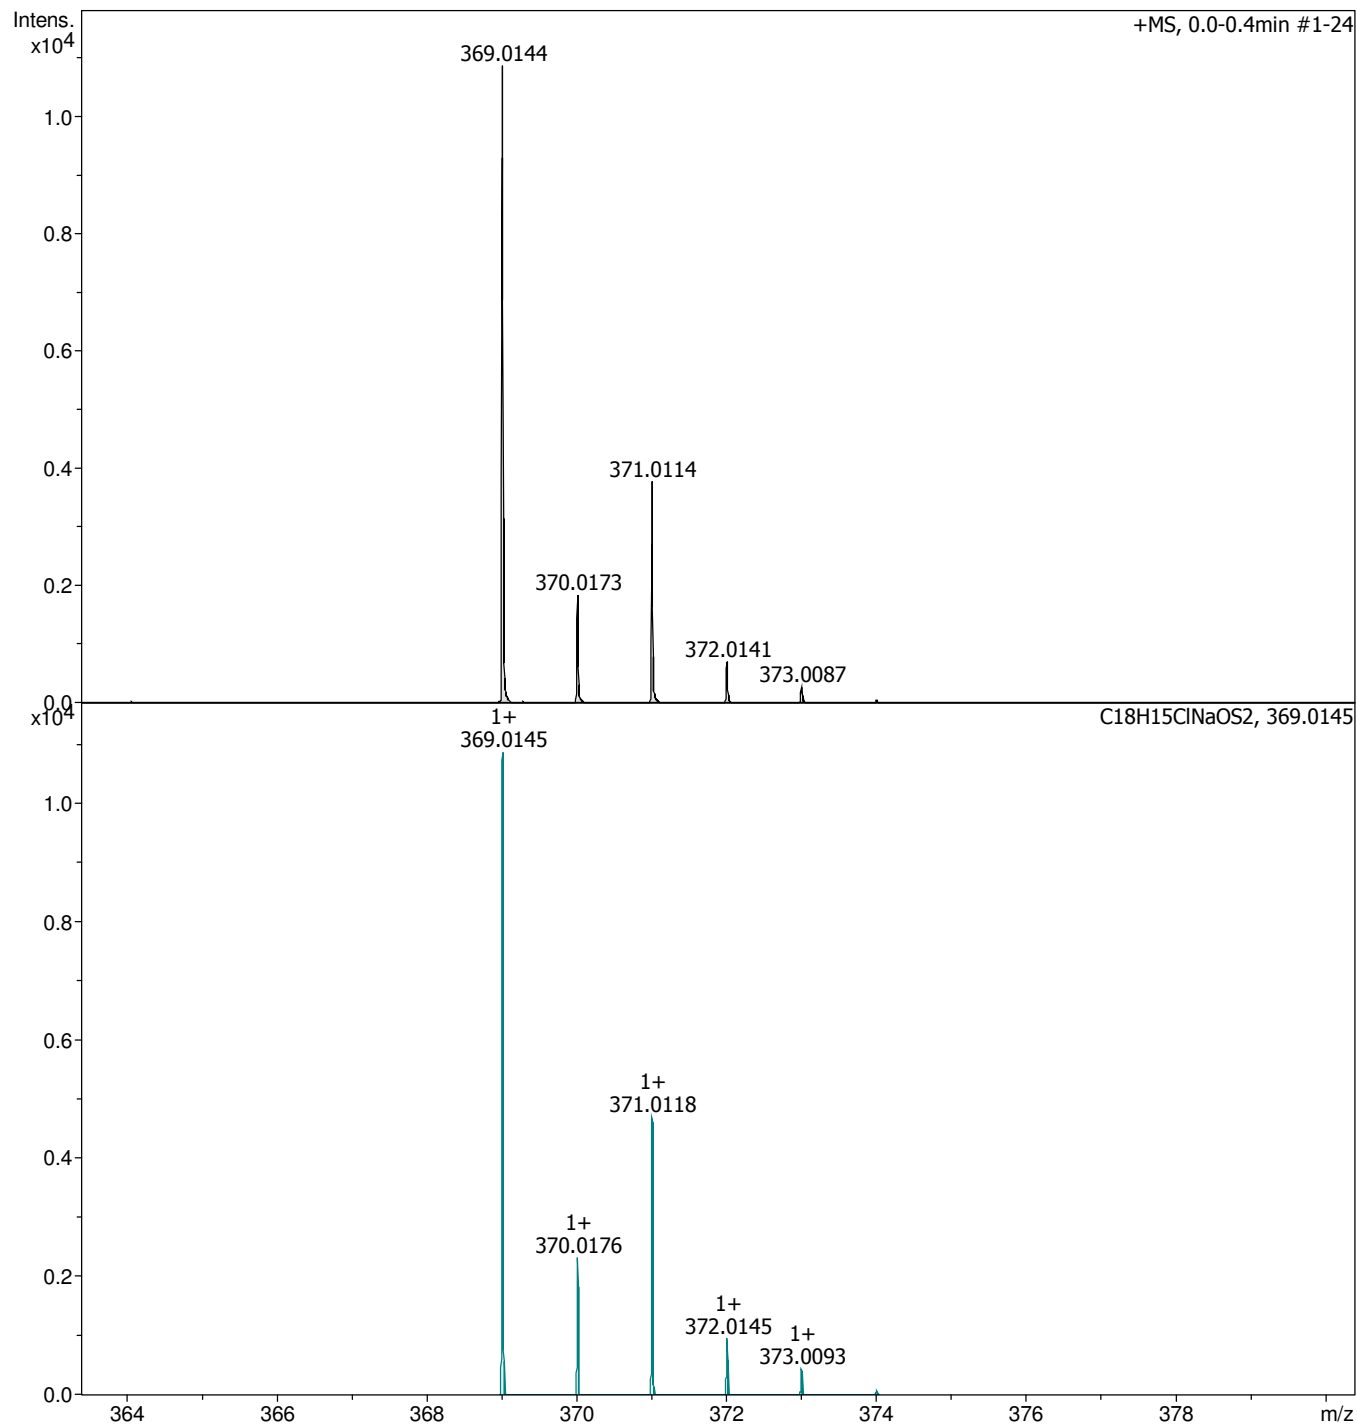



# Mass Spectrum SmartFormula Report

## Analysis Info

Analysis Name E:\Data\MS\_MessService\58953000001.d  
Method tune\_low\_MS\_Service\_08\_18.m  
Sample Name CE-140-SPOT2-PEAK1  
Comment Kalaba/Zehl  
Ergebnis: +/- 5ppm  
ACN/MeOH +0.1% H2O

Acquisition Date 8/14/2018 5:21:38 PM

Operator msc  
Instrument maXis 255552.00016

## Acquisition Parameter

|             |            |                      |          |                  |           |
|-------------|------------|----------------------|----------|------------------|-----------|
| Source Type | ESI        | Ion Polarity         | Positive | Set Nebulizer    | 0.4 Bar   |
| Focus       | Not active | Set Capillary        | 4500 V   | Set Dry Heater   | 180 °C    |
| Scan Begin  | 50 m/z     | Set End Plate Offset | -500 V   | Set Dry Gas      | 4.0 l/min |
| Scan End    | 1900 m/z   | Set Charging Voltage | 0 V      | Set Divert Valve | Source    |
|             |            | Set Corona           | 0 nA     | Set APCI Heater  | 0 °C      |

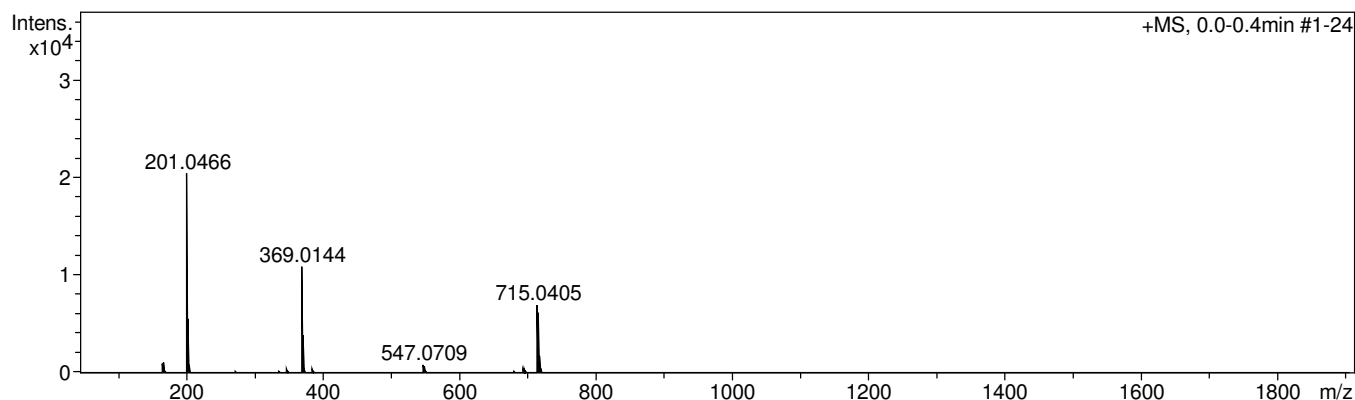

| Meas. m/z  | # | Ion Formula     | Score  | m/z        | err [mDa] | err [ppm] | mSigma | rdb  | e <sup>-</sup> | Conf | N-Rule |
|------------|---|-----------------|--------|------------|-----------|-----------|--------|------|----------------|------|--------|
| 369.014397 | 1 | C17H11ClNaO6    | 100.00 | 369.013636 | -0.8      | -2.1      | 11.1   | 11.5 | even           |      | ok     |
|            | 2 | C11H7ClN10NaS   | 70.58  | 369.015660 | 1.3       | 3.4       | 14.3   | 12.5 | even           |      | ok     |
|            | 3 | C16H5ClN7NaO    | 89.82  | 369.013631 | -0.8      | -2.1      | 16.4   | 17.0 | odd            |      | ok     |
|            | 4 | C12H13ClN3NaO5S | 63.52  | 369.015665 | 1.3       | 3.4       | 19.2   | 7.0  | odd            |      | ok     |
|            | 5 | C18H7ClN4NaO2   | 90.63  | 369.014974 | -0.6      | -1.6      | 20.6   | 16.5 | even           |      | ok     |
|            | 6 | C16H13ClN3NaS2  | 42.21  | 369.013163 | -1.2      | -3.3      | 37.3   | 11.0 | odd            |      | ok     |
|            | 7 | C18H15ClNaOS2   | 67.50  | 369.014505 | 0.1       | 0.3       | 41.3   | 10.5 | even           |      | ok     |

**Figure S24.** HRESIMS spectrum of compound **8f**

## Generic Display Report

### Analysis Info

Analysis Name E:\Data\MS\_MessService\58954000001.d  
Method tune\_low\_MS\_Service\_08\_18.m  
Sample Name CE-140-SPOT2-PEAK2  
Comment Kalaba/Zehl  
Ergebnis: +/- 5ppm  
ACN/MeOH +0.1% H2O

Acquisition Date 8/14/2018 5:23:13 PM

Operator msc  
Instrument maXis

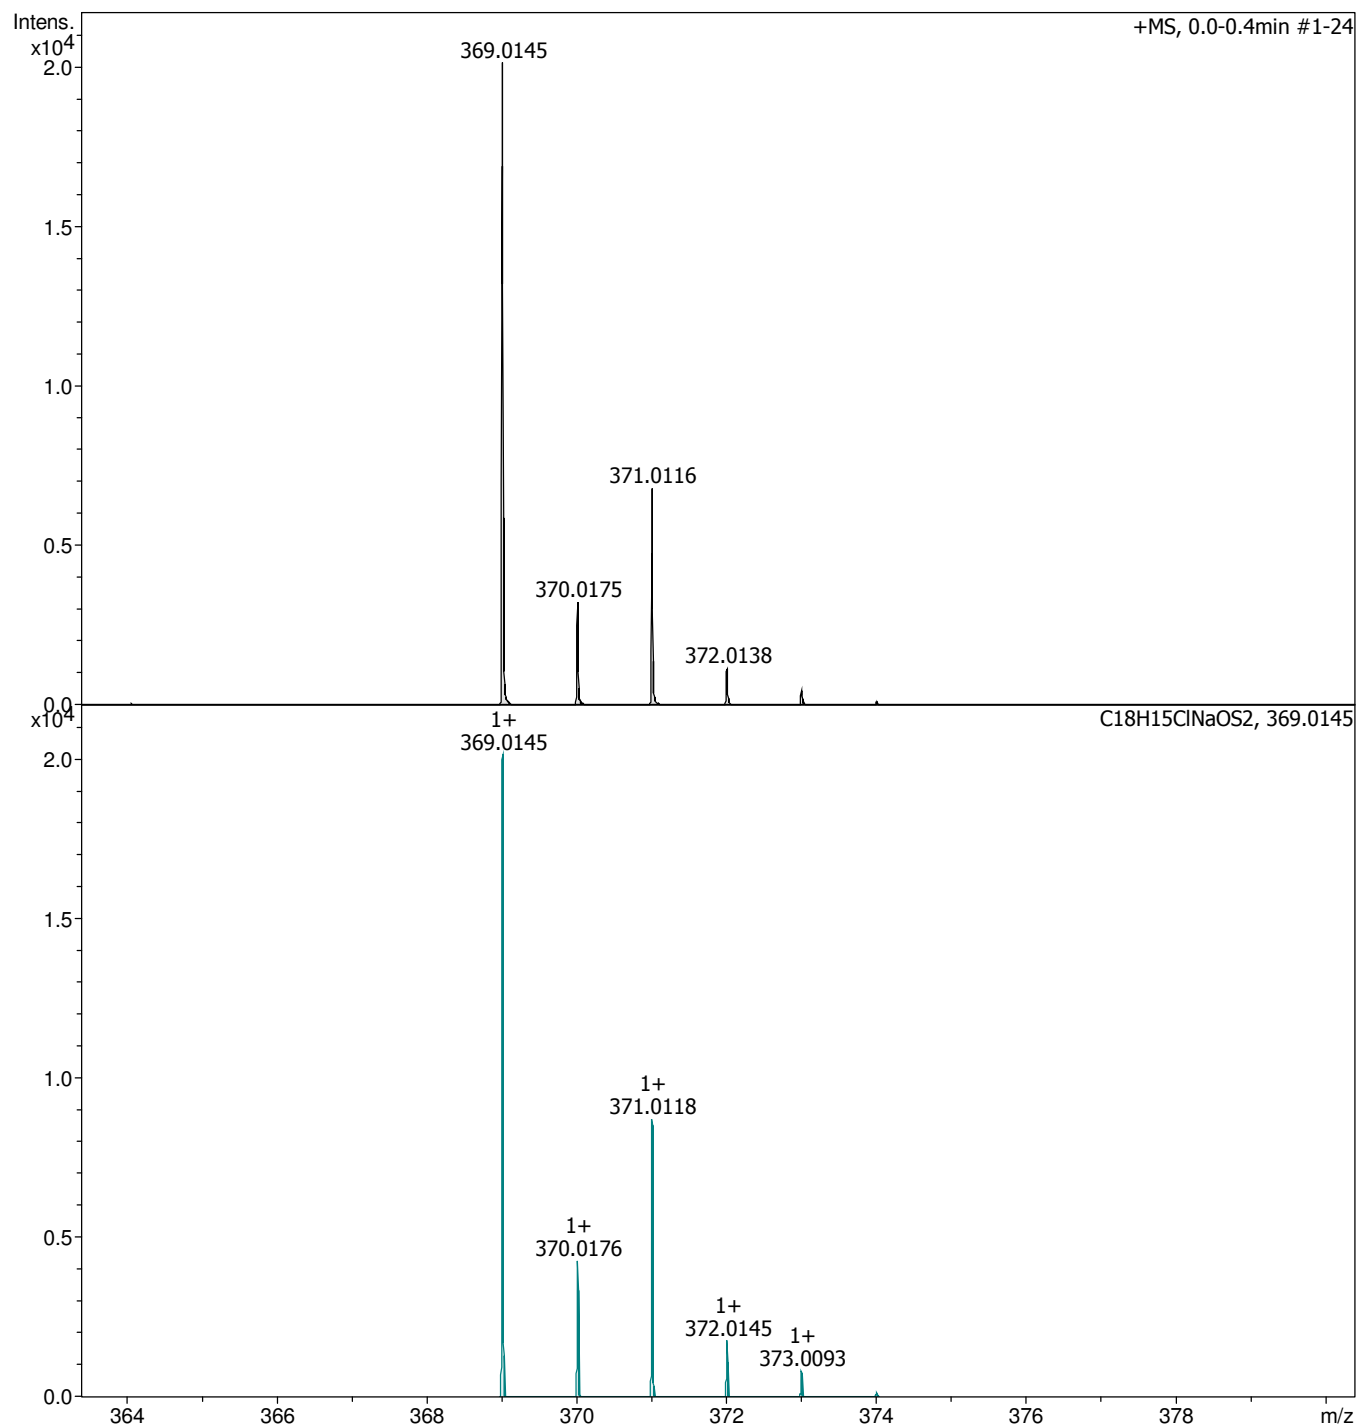

# Mass Spectrum SmartFormula Report

## Analysis Info

Analysis Name E:\Data\MS\_MessService\58954000001.d  
 Method tune\_low\_MS\_Service\_08\_18.m  
 Sample Name CE-140-SPOT2-PEAK2  
 Comment Kalaba/Zehl  
 Ergebnis: +/- 5ppm  
 ACN/MeOH +0.1% H2O

Acquisition Date 8/14/2018 5:23:13 PM

Operator msc  
 Instrument maXis 255552.00016

## Acquisition Parameter

|             |            |                      |          |                  |           |
|-------------|------------|----------------------|----------|------------------|-----------|
| Source Type | ESI        | Ion Polarity         | Positive | Set Nebulizer    | 0.4 Bar   |
| Focus       | Not active | Set Capillary        | 4500 V   | Set Dry Heater   | 180 °C    |
| Scan Begin  | 50 m/z     | Set End Plate Offset | -500 V   | Set Dry Gas      | 4.0 l/min |
| Scan End    | 1900 m/z   | Set Charging Voltage | 0 V      | Set Divert Valve | Source    |
|             |            | Set Corona           | 0 nA     | Set APCI Heater  | 0 °C      |

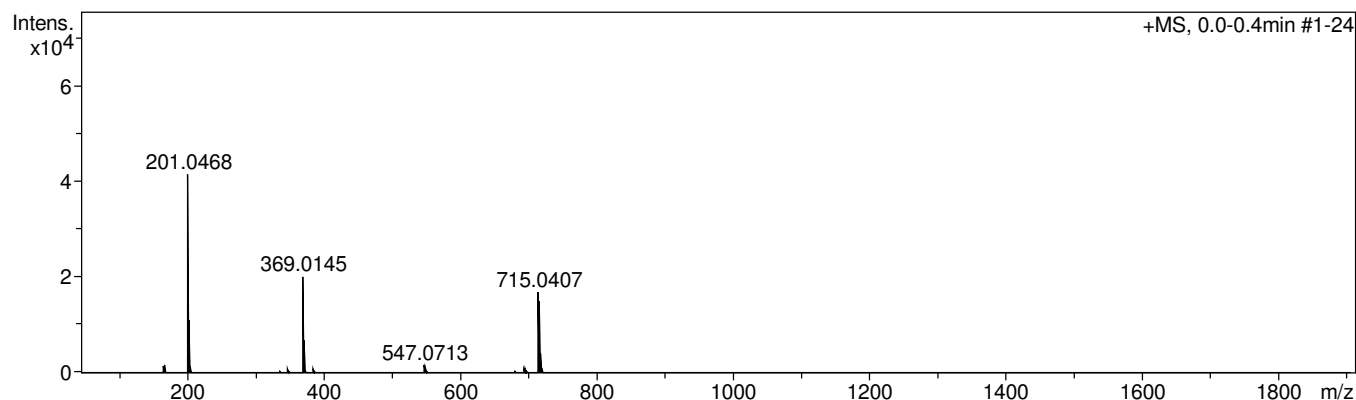

| Meas. m/z  | # | Ion Formula     | Score  | m/z        | err [mDa] | err [ppm] | mSigma | rdb  | e <sup>-</sup> | Conf | N-Rule |
|------------|---|-----------------|--------|------------|-----------|-----------|--------|------|----------------|------|--------|
| 369.014529 | 1 | C17H11ClNaO6    | 97.86  | 369.013636 | -0.9      | -2.4      | 14.6   | 11.5 | even           |      | ok     |
|            | 2 | C11H7ClN10NaS   | 79.69  | 369.015660 | -1.1      | -3.1      | 18.0   | 12.5 | even           |      | ok     |
|            | 3 | C16H5ClN7NaO    | 88.56  | 369.013631 | -0.9      | -2.4      | 19.3   | 17.0 | odd            |      | ok     |
|            | 4 | C12H13ClN3NaO5S | 73.18  | 369.015665 | -1.1      | -3.1      | 21.9   | 7.0  | odd            |      | ok     |
|            | 5 | C18H7ClN4NaO2   | 100.00 | 369.014974 | -0.4      | -1.2      | 24.4   | 16.5 | even           |      | ok     |
|            | 6 | C20H9ClNNaO3    | 39.80  | 369.016317 | -1.8      | -4.8      | 29.7   | 16.0 | odd            |      | ok     |
|            | 7 | C16H13ClN3NaS2  | 37.71  | 369.013163 | 1.4       | 3.7       | 42.7   | 11.0 | odd            |      | ok     |
|            | 8 | C18H15ClNaOS2   | 67.06  | 369.014505 | 0.0       | 0.1       | 46.8   | 10.5 | even           |      | ok     |

Figure S25. HRESIMS spectrum of compound **5g**

## Generic Display Report

### Analysis Info

Analysis Name D:\Data\Kalaba\71580000001.d  
Method tune\_low\_MS\_Service\_07\_20.m  
Sample Name PN-14-1  
Comment Kalaba/Zehl  
Ergebnis +/- 5ppm  
ACN/MeOH + 1 % H<sub>2</sub>O

Acquisition Date 10/07/2020 17:47:41

Operator msc  
Instrument maXis

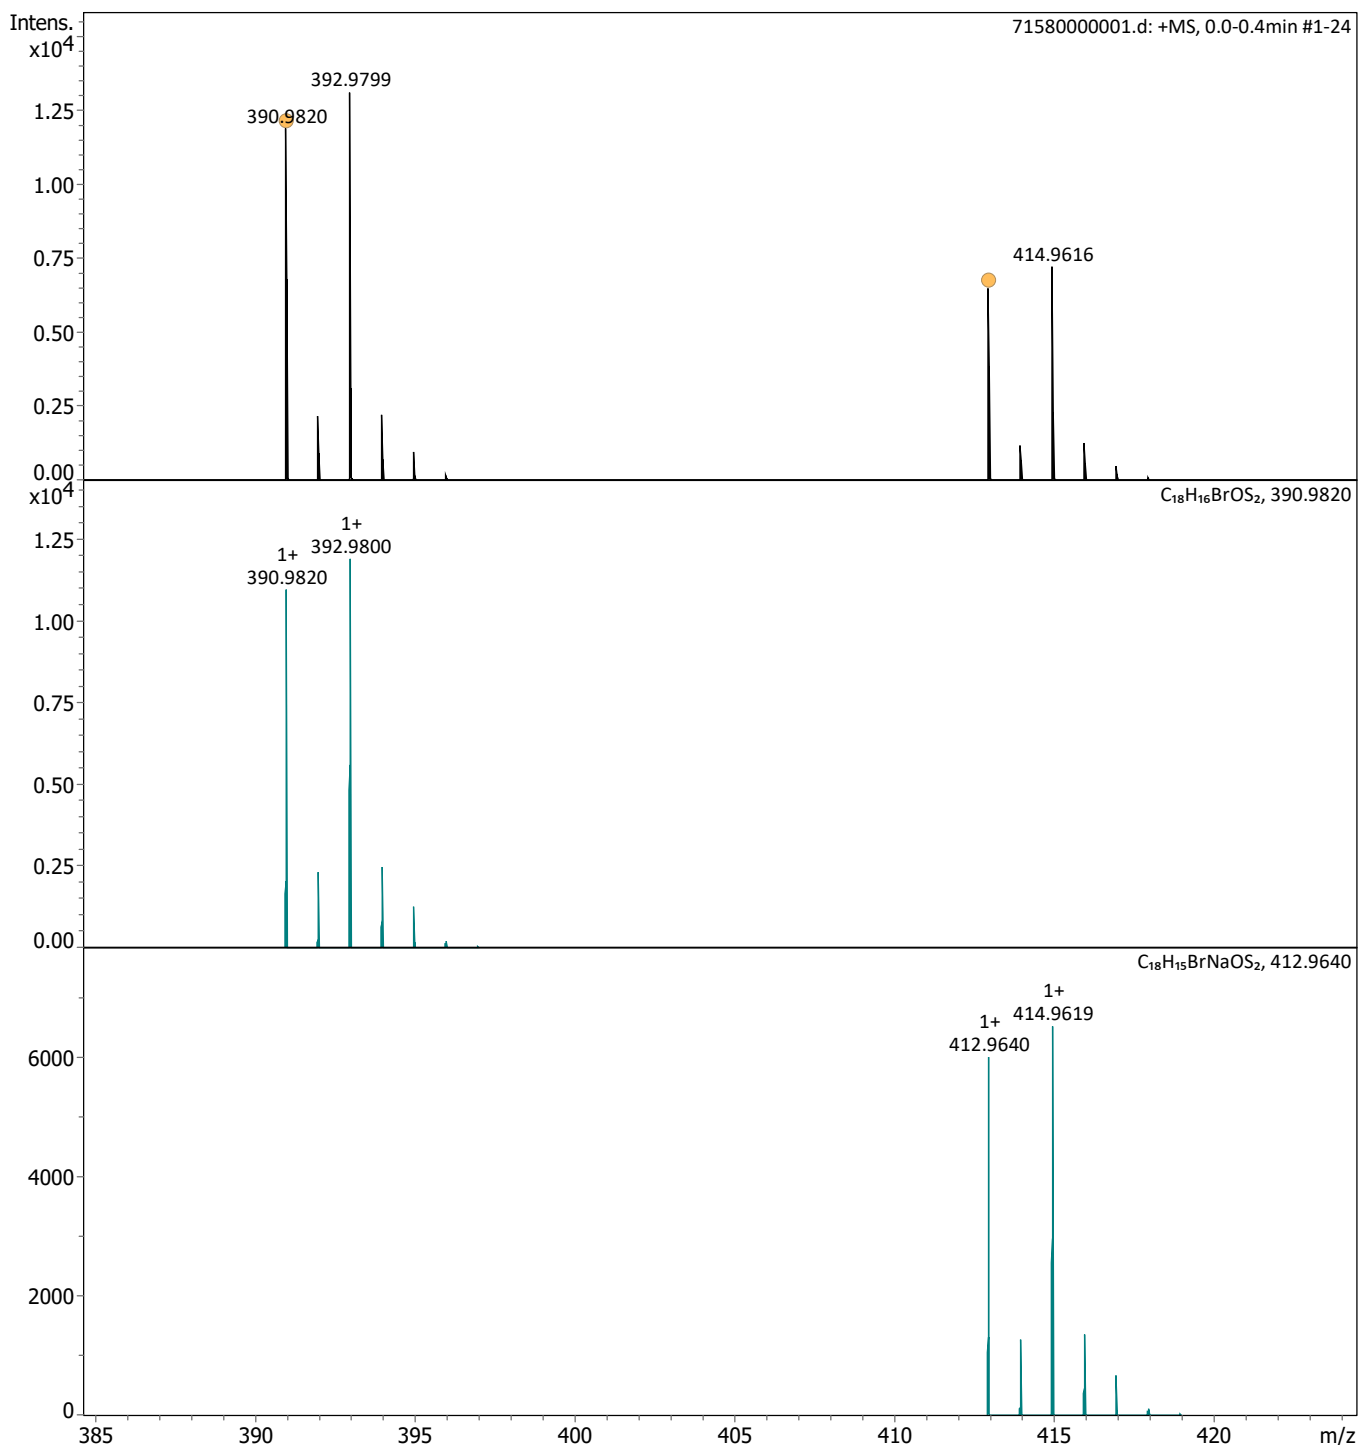

# Mass Spectrum SmartFormula Report

## Analysis Info

Analysis Name D:\Data\Kalaba\71580000001.d  
 Method tune\_low\_MS\_Service\_07\_20.m  
 Sample Name PN-14-1  
 Comment Kalaba/Zehl  
 Ergebnis +/- 5ppm  
 ACN/MeOH + 1 % H2O

Acquisition Date 10/07/2020 17:47:41

Operator msc  
 Instrument maXis 255552.00016

## Acquisition Parameter

|             |            |                      |          |                  |           |
|-------------|------------|----------------------|----------|------------------|-----------|
| Source Type | ESI        | Ion Polarity         | Positive | Set Nebulizer    | 0.4 Bar   |
| Focus       | Not active | Set Capillary        | 4200 V   | Set Dry Heater   | 180 Å°C   |
| Scan Begin  | 50 m/z     | Set End Plate Offset | -500 V   | Set Dry Gas      | 4.0 l/min |
| Scan End    | 1900 m/z   | Set Charging Voltage | 0 V      | Set Divert Valve | Source    |
|             |            | Set Corona           | 0 nA     | Set APCI Heater  | 0 Å°C     |

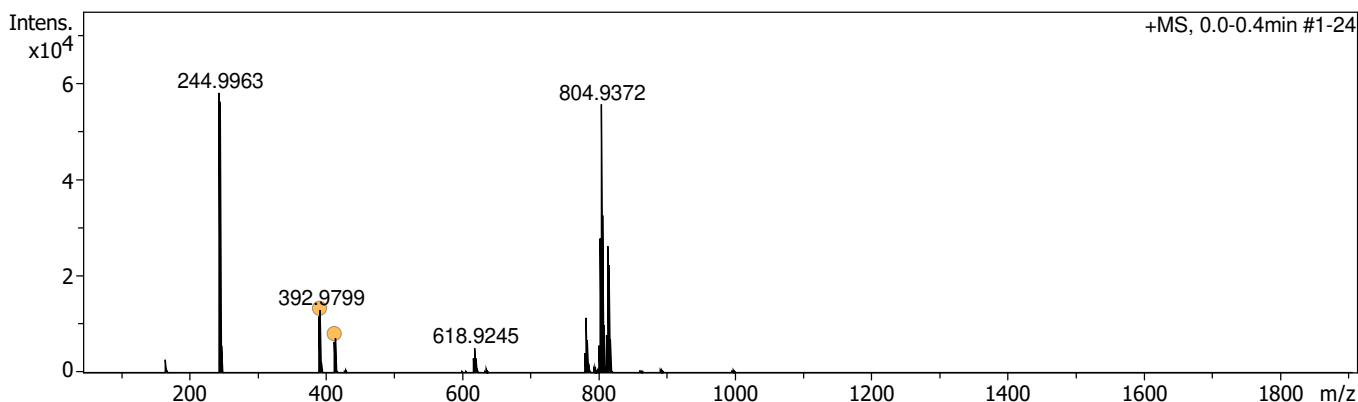

| Meas. m/z | # | Ion Formula   | m/z      | err [ppm] | mSigma | # mSigma | Score  | rdb  | eÅ <sup>-</sup> | Conf | N-Rule |
|-----------|---|---------------|----------|-----------|--------|----------|--------|------|-----------------|------|--------|
| 390.9820  | 1 | C18H16BrOS2   | 390.9820 | 0.1       | 24.2   | 1        | 100.00 | 17.0 | even            |      | ok     |
|           | 2 | C11H8BrN10S   | 390.9832 | 3.1       | 30.3   | 2        | 40.23  | 17.0 | even            |      | ok     |
|           | 3 | C17H12BrO6    | 390.9812 | -2.1      | 47.5   | 3        | 31.80  | 14.0 | even            |      | ok     |
|           | 4 | C18H8BrN4O2   | 390.9825 | 1.3       | 54.2   | 4        | 29.92  | 19.0 | even            |      | ok     |
| 412.9635  | 1 | C18H15BrNaOS2 | 412.9640 | 1.1       | 24.0   | 1        | 100.00 | 17.0 | even            |      | ok     |
|           | 2 | C11H7BrN10NaS | 412.9651 | 3.9       | 32.4   | 2        | 34.90  | 17.0 | even            |      | ok     |
|           | 3 | C17H11BrNaO6  | 412.9631 | -1.0      | 48.4   | 3        | 45.60  | 14.0 | even            |      | ok     |
|           | 4 | C14H3BrN10Na  | 412.9618 | -4.2      | 51.7   | 4        | 18.75  | 20.0 | even            |      | ok     |
|           | 5 | C18H7BrN4NaO2 | 412.9645 | 2.3       | 54.5   | 5        | 28.57  | 19.0 | even            |      | ok     |

Figure S26. HRESIMS spectrum of compound **6g**

## Generic Display Report

### Analysis Info

Analysis Name D:\Data\Kalaba\78518000001.d  
Method tune\_low\_MS\_Service\_03\_21.m  
Sample Name PN-14-peak-2  
Comment Kalaba / Zehl  
Ergebnis +/- 5 ppm  
ACN / MeOH + 1% H<sub>2</sub>O

Acquisition Date 26/03/2021 13:40:00

Operator msc  
Instrument maXis

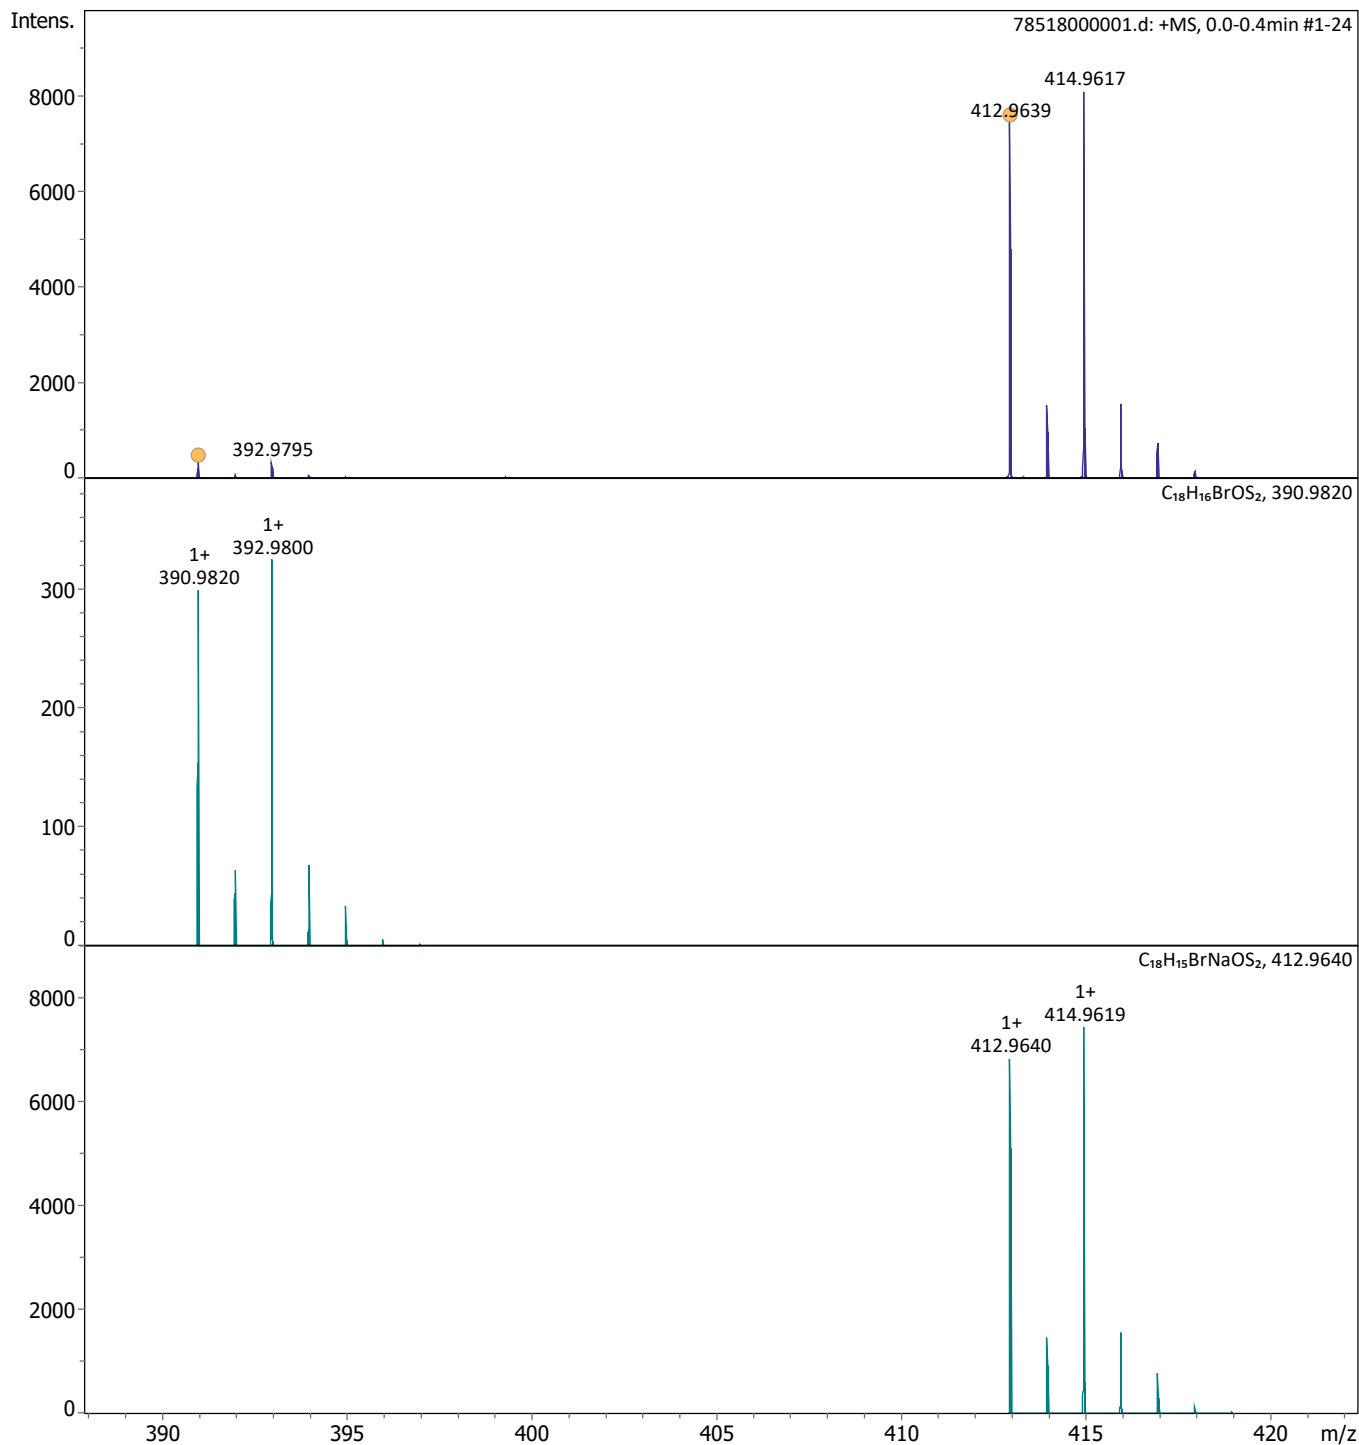

# Mass Spectrum SmartFormula Report

## Analysis Info

Analysis Name D:\Data\Kalaba\78518000001.d  
 Method tune\_low\_MS\_Service\_03\_21.m  
 Sample Name PN-14-peak-2  
 Comment Kalaba / Zehl  
 Ergebnis +/- 5 ppm  
 ACN / MeOH + 1% H2O

Acquisition Date 26/03/2021 13:40:00

Operator msc  
 Instrument maXis 255552.00016

## Acquisition Parameter

|             |            |                      |          |                  |           |
|-------------|------------|----------------------|----------|------------------|-----------|
| Source Type | ESI        | Ion Polarity         | Positive | Set Nebulizer    | 0.4 Bar   |
| Focus       | Not active | Set Capillary        | 4200 V   | Set Dry Heater   | 180 Å°C   |
| Scan Begin  | 80 m/z     | Set End Plate Offset | -500 V   | Set Dry Gas      | 4.0 l/min |
| Scan End    | 1900 m/z   | Set Charging Voltage | 0 V      | Set Divert Valve | Source    |
|             |            | Set Corona           | 0 nA     | Set APCI Heater  | 0 Å°C     |

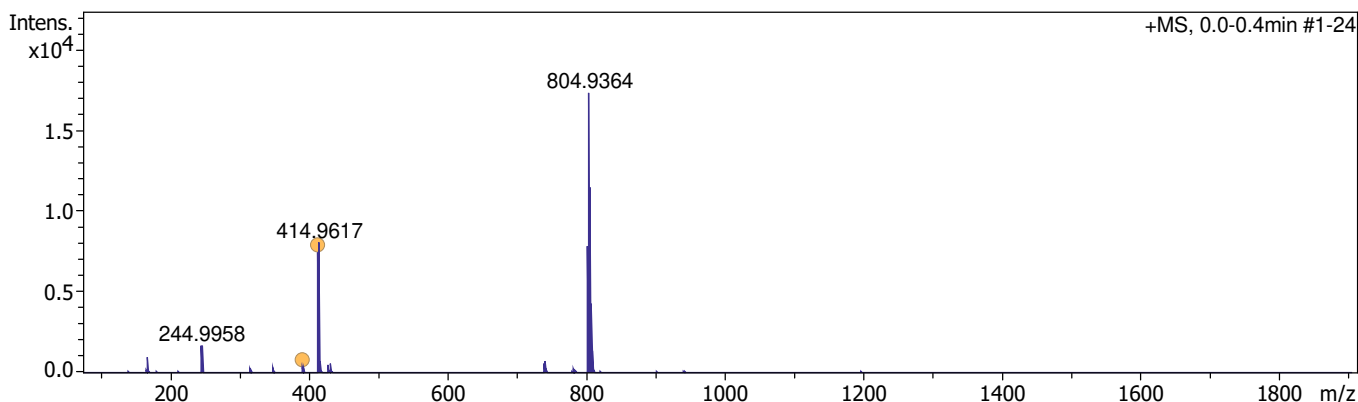

| Meas. m/z | # | Ion Formula      | Score  | m/z      | err [mDa] | err [ppm] | mSigma | rdb  | eÅ <sup>-</sup> | Conf | N-Rule |
|-----------|---|------------------|--------|----------|-----------|-----------|--------|------|-----------------|------|--------|
| 390.9817  | 1 | C18H16BrOS2      | 100.00 | 390.9820 | 0.4       | 0.9       | 24.4   | 17.0 | even            |      | ok     |
|           | 2 | C18H8BrN4O2      | 56.20  | 390.9825 | 0.8       | 2.1       | 31.2   | 19.0 | even            |      | ok     |
|           | 3 | C17H12BrO6       | 57.54  | 390.9812 | -0.5      | -1.3      | 36.5   | 14.0 | even            |      | ok     |
|           | 4 | C14H4BrN10       | 22.69  | 390.9798 | -1.9      | -4.8      | 40.7   | 20.0 | even            |      | ok     |
|           | 5 | C11H8BrN10S      | 28.85  | 390.9832 | 1.5       | 3.9       | 40.9   | 17.0 | even            |      | ok     |
|           | 6 | C10H12BrN6O4S    | 39.65  | 390.9819 | 0.2       | 0.4       | 54.7   | 12.0 | even            |      | ok     |
|           | 7 | C10H20BrN2O3S3   | 32.80  | 390.9814 | -0.3      | -0.8      | 64.1   | 10.0 | even            |      | ok     |
| 412.9639  | 1 | C18H15BrNaOS2    | 100.00 | 412.9640 | 0.1       | 0.3       | 9.7    | 17.0 | even            |      | ok     |
|           | 2 | C11H7BrN10NaS    | 27.10  | 412.9651 | 1.3       | 3.1       | 33.6   | 17.0 | even            |      | ok     |
|           | 3 | C10H19BrN2NaO3S3 | 42.41  | 412.9633 | -0.5      | -1.3      | 39.8   | 10.0 | even            |      | ok     |
|           | 4 | C10H11BrN6NaO4S  | 41.20  | 412.9638 | -0.0      | -0.1      | 41.8   | 12.0 | even            |      | ok     |
|           | 5 | C17H11BrNaO6     | 27.30  | 412.9631 | -0.7      | -1.8      | 45.1   | 14.0 | even            |      | ok     |
|           | 6 | C18H7BrN4NaO2    | 26.72  | 412.9645 | 0.6       | 1.5       | 48.1   | 19.0 | even            |      | ok     |
|           | 7 | C14H3BrN10Na     | 10.05  | 412.9618 | -2.1      | -5.0      | 49.3   | 20.0 | even            |      | ok     |

**Figure S27.** HRESIMS spectrum of compound **7g**

## Generic Display Report

### Analysis Info

Analysis Name D:\Data\Kalaba\78519000001.d  
Method tune\_low\_MS\_Service\_03\_21.m  
Sample Name PN-14-peak-3  
Comment Kalaba / Zehl  
Ergebnis +/- 5 ppm  
ACN / MeOH + 1% H<sub>2</sub>O

Acquisition Date 26/03/2021 15:25:17

Operator msc  
Instrument maXis

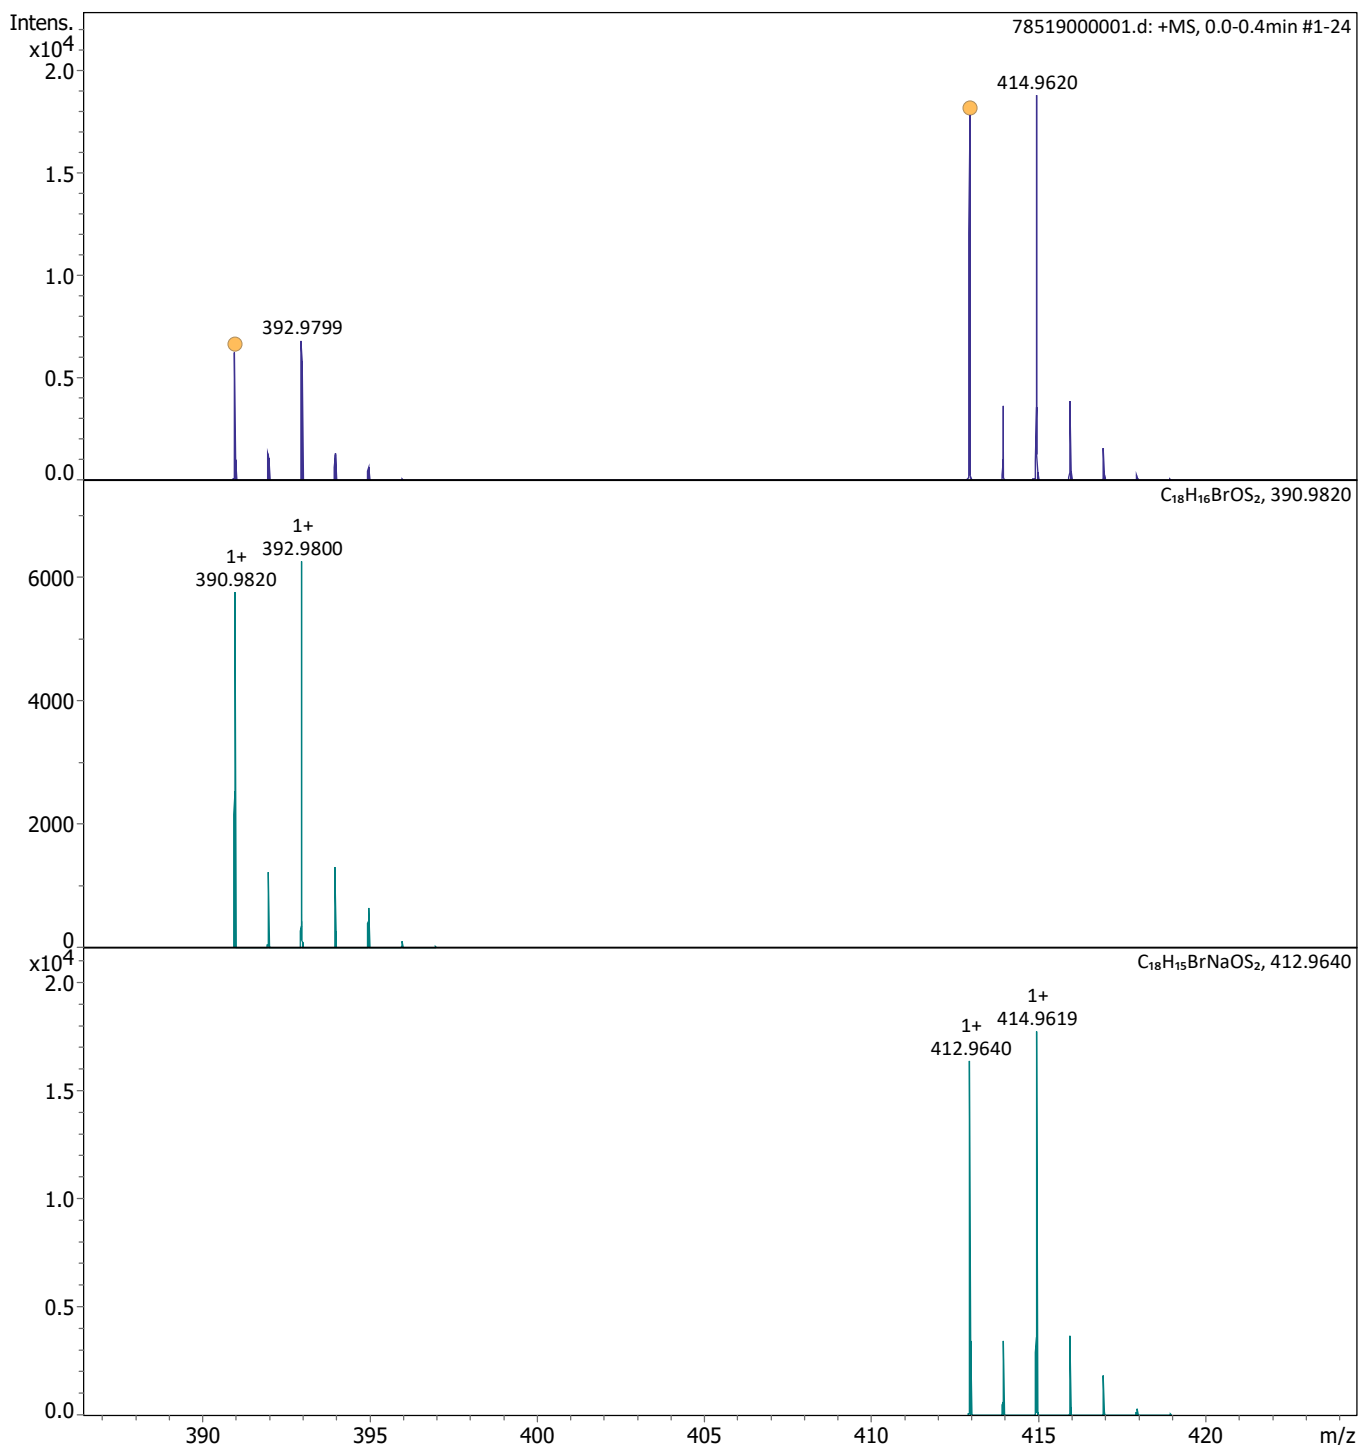



# Mass Spectrum SmartFormula Report

## Analysis Info

Analysis Name D:\Data\Kalaba\78519000001.d  
Method tune\_low\_MS\_Service\_03\_21.m  
Sample Name PN-14-peak-3  
Comment Kalaba / Zehl  
Ergebnis +/- 5 ppm  
ACN / MeOH + 1% H2O

Acquisition Date 26/03/2021 15:25:17

Operator msc  
Instrument maXis 255552.00016

## Acquisition Parameter

|             |            |                      |          |                  |           |
|-------------|------------|----------------------|----------|------------------|-----------|
| Source Type | ESI        | Ion Polarity         | Positive | Set Nebulizer    | 0.4 Bar   |
| Focus       | Not active | Set Capillary        | 4200 V   | Set Dry Heater   | 180 Å°C   |
| Scan Begin  | 80 m/z     | Set End Plate Offset | -500 V   | Set Dry Gas      | 4.0 l/min |
| Scan End    | 1900 m/z   | Set Charging Voltage | 0 V      | Set Divert Valve | Source    |
|             |            | Set Corona           | 0 nA     | Set APCI Heater  | 0 Å°C     |

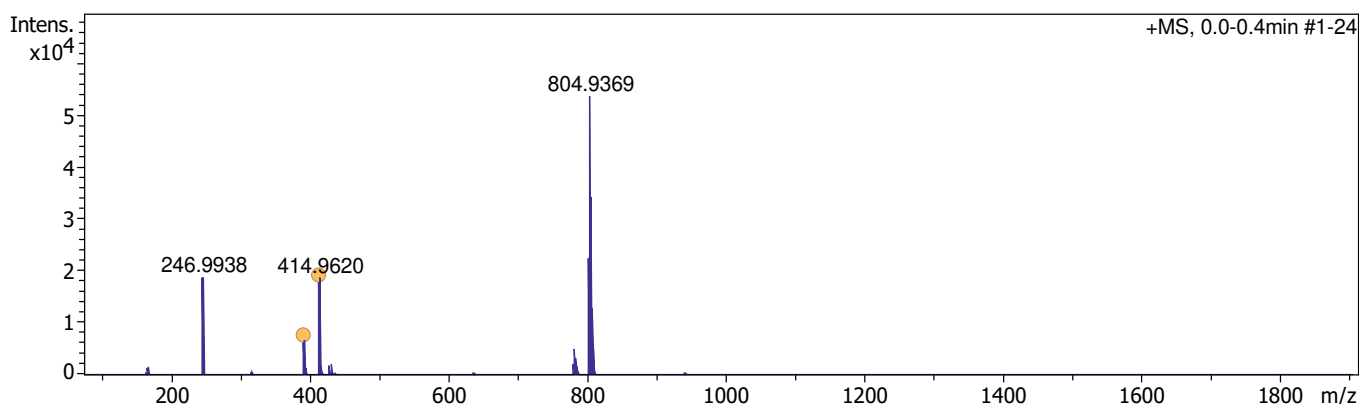

| Meas. m/z | # | Ion Formula      | Score  | m/z      | err [mDa] | err [ppm] | mSigma | rdb  | eÅ <sup>-</sup> | Conf | N-Rule |
|-----------|---|------------------|--------|----------|-----------|-----------|--------|------|-----------------|------|--------|
| 390.9819  | 1 | C18H16BrOS2      | 100.00 | 390.9820 | 0.1       | 0.3       | 6.8    | 17.0 | even            |      | ok     |
|           | 2 | C11H8BrN10S      | 23.84  | 390.9832 | 1.3       | 3.2       | 36.8   | 17.0 | even            |      | ok     |
|           | 3 | C10H20BrN2O3S3   | 36.58  | 390.9814 | -0.5      | -1.4      | 42.3   | 10.0 | even            |      | ok     |
|           | 4 | C10H12BrN6O4S    | 34.30  | 390.9819 | -0.1      | -0.2      | 45.6   | 12.0 | even            |      | ok     |
|           | 5 | C17H12BrO6       | 24.23  | 390.9812 | -0.8      | -1.9      | 46.5   | 14.0 | even            |      | ok     |
|           | 6 | C18H8BrN4O2      | 25.26  | 390.9825 | 0.6       | 1.5       | 48.3   | 19.0 | even            |      | ok     |
| 412.9641  | 1 | C18H15BrNaOS2    | 100.00 | 412.9640 | -0.1      | -0.2      | 13.5   | 17.0 | even            |      | ok     |
|           | 2 | C11H7BrN10NaS    | 35.57  | 412.9651 | 1.1       | 2.6       | 30.3   | 17.0 | even            |      | ok     |
|           | 3 | C17H11BrNaO6     | 33.08  | 412.9631 | -1.0      | -2.3      | 35.5   | 14.0 | even            |      | ok     |
|           | 4 | C18H7BrN4NaO2    | 43.42  | 412.9645 | 0.4       | 0.9       | 36.6   | 19.0 | even            |      | ok     |
|           | 5 | C10H11BrN6NaO4S  | 39.07  | 412.9638 | -0.3      | -0.7      | 42.2   | 12.0 | even            |      | ok     |
|           | 6 | C10H19BrN2NaO3S3 | 30.07  | 412.9633 | -0.7      | -1.8      | 49.6   | 10.0 | even            |      | ok     |

Figure S28. HRESIMS spectrum of compound 8g

## Generic Display Report

### Analysis Info

Analysis Name D:\Data\Kalaba\71581000001.d  
Method tune\_low\_MS\_Service\_07\_20.m  
Sample Name PN-14-4  
Comment Kalaba/Zehl  
Ergebnis +/- 5ppm  
ACN/MeOH + 1 % H2O

Acquisition Date 10/07/2020 17:52:35

Operator msc  
Instrument maXis

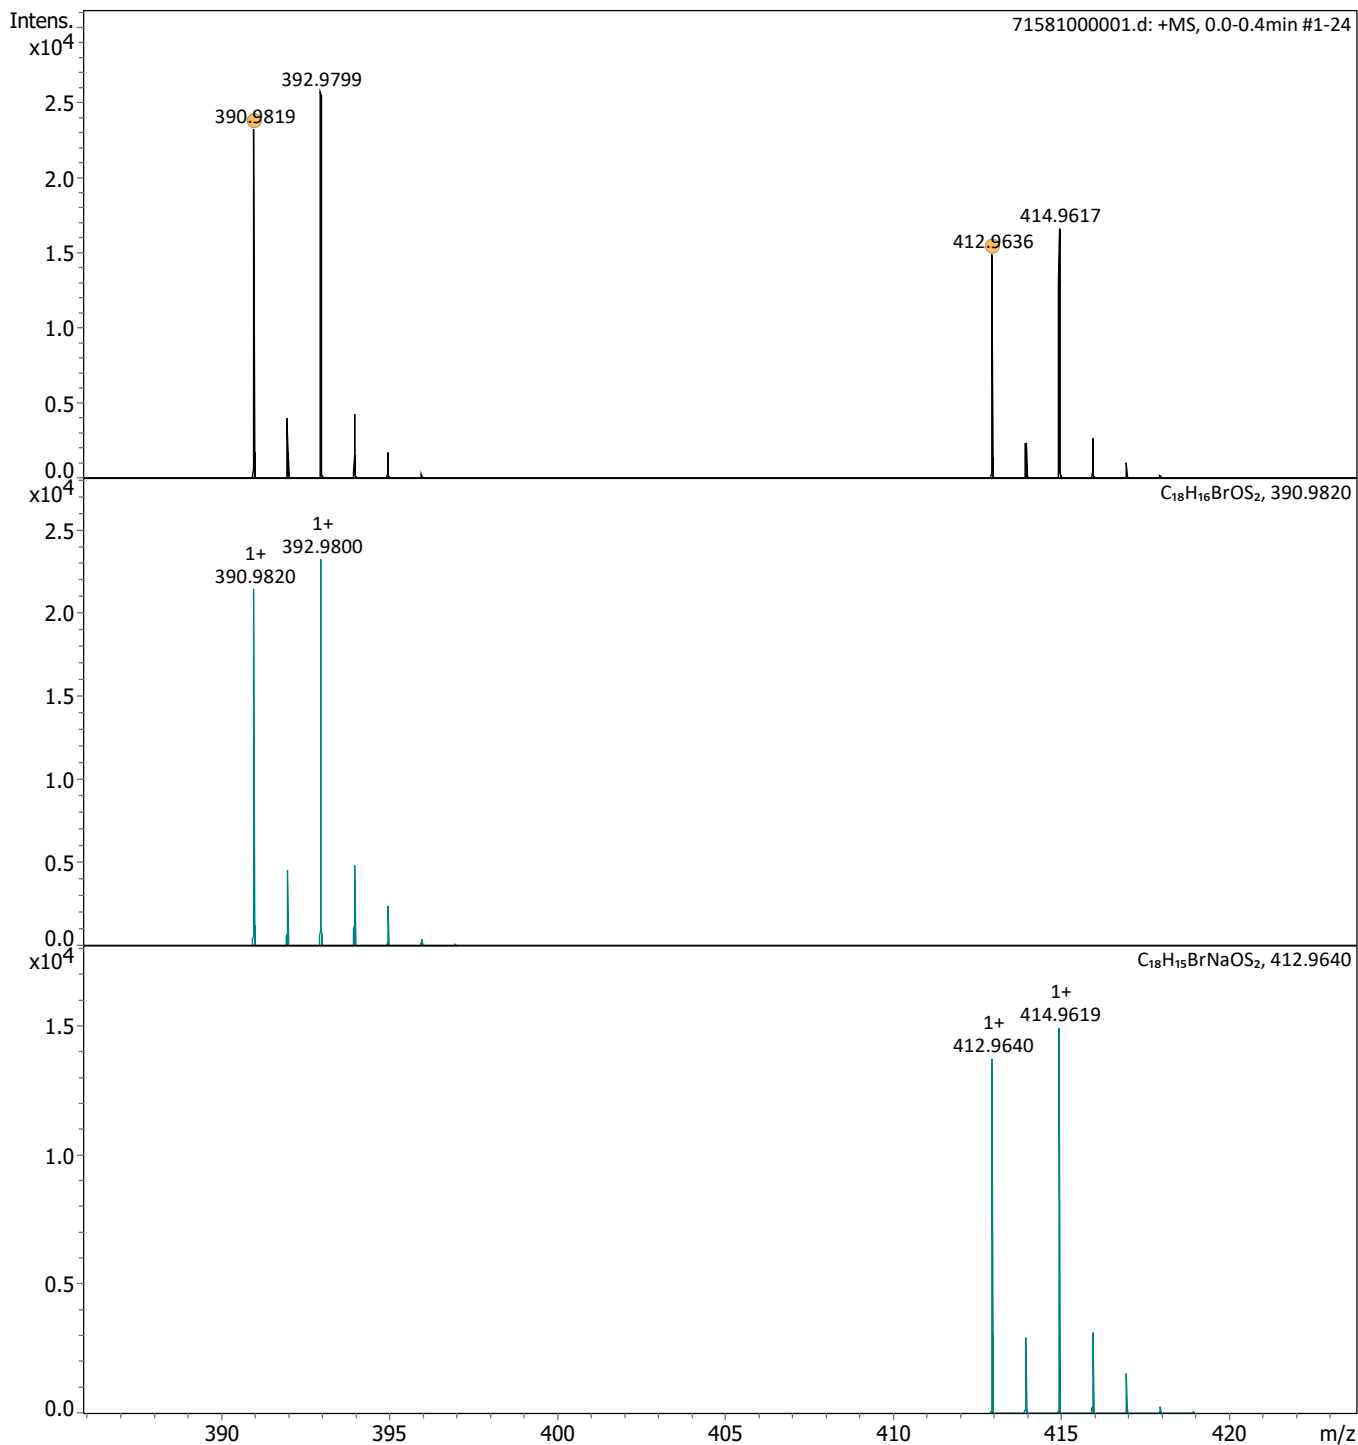

# Mass Spectrum SmartFormula Report

## Analysis Info

Analysis Name D:\Data\Kalaba\71581000001.d  
Method tune\_low\_MS\_Service\_07\_20.m  
Sample Name PN-14-4  
Comment Kalaba/Zehl  
Ergebnis +/- 5ppm  
ACN/MeOH + 1 % H2O

Acquisition Date 10/07/2020 17:52:35

Operator msc  
Instrument maXis 255552.00016

## Acquisition Parameter

|             |            |                      |          |                  |           |
|-------------|------------|----------------------|----------|------------------|-----------|
| Source Type | ESI        | Ion Polarity         | Positive | Set Nebulizer    | 0.4 Bar   |
| Focus       | Not active | Set Capillary        | 4200 V   | Set Dry Heater   | 180 Å°C   |
| Scan Begin  | 50 m/z     | Set End Plate Offset | -500 V   | Set Dry Gas      | 4.0 l/min |
| Scan End    | 1900 m/z   | Set Charging Voltage | 0 V      | Set Divert Valve | Source    |
|             |            | Set Corona           | 0 nA     | Set APCI Heater  | 0 Å°C     |

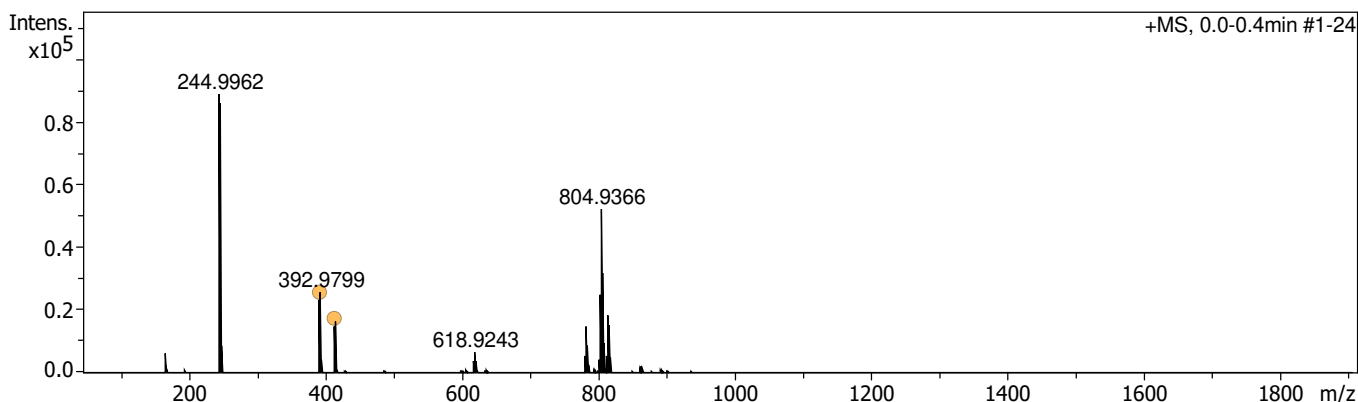

| Meas. m/z | # | Ion Formula      | m/z      | err [ppm] | mSigma | # mSigma | Score  | rdb  | eÅ <sup>-</sup> | Conf | N-Rule |
|-----------|---|------------------|----------|-----------|--------|----------|--------|------|-----------------|------|--------|
| 390.9819  | 1 | C18H16BrOS2      | 390.9820 | 0.3       | 29.0   | 1        | 100.00 | 17.0 | even            |      | ok     |
|           | 2 | C11H8BrN10S      | 390.9832 | 3.2       | 30.2   | 2        | 44.74  | 17.0 | even            |      | ok     |
|           | 3 | C10H12BrN6O4S    | 390.9819 | -0.2      | 31.4   | 3        | 79.95  | 12.0 | even            |      | ok     |
|           | 4 | C10H20BrN2O3S3   | 390.9814 | -1.4      | 32.4   | 4        | 75.75  | 10.0 | even            |      | ok     |
|           | 5 | C17H12BrO6       | 390.9812 | -1.9      | 48.5   | 5        | 36.33  | 14.0 | even            |      | ok     |
|           | 6 | C18H8BrN4O2      | 390.9825 | 1.5       | 56.2   | 6        | 31.29  | 19.0 | even            |      | ok     |
| 412.9636  | 1 | C10H19BrN2NaO3S3 | 412.9633 | -0.7      | 31.2   | 1        | 100.00 | 10.0 | even            |      | ok     |
|           | 2 | C10H11BrN6NaO4S  | 412.9638 | 0.4       | 32.3   | 2        | 85.42  | 12.0 | even            |      | ok     |
|           | 3 | C11H7BrN10NaS    | 412.9651 | 3.7       | 33.9   | 3        | 39.58  | 17.0 | even            |      | ok     |
|           | 4 | C18H15BrNaOS2    | 412.9640 | 0.9       | 35.2   | 4        | 87.69  | 17.0 | even            |      | ok     |
|           | 5 | C9H15BrN2NaO8S   | 412.9625 | -2.8      | 36.9   | 5        | 45.67  | 7.0  | even            |      | ok     |
|           | 6 | C17H11BrNaO6     | 412.9631 | -1.2      | 53.3   | 6        | 40.48  | 14.0 | even            |      | ok     |
|           | 7 | C14H3BrN10Na     | 412.9618 | -4.5      | 56.1   | 7        | 16.34  | 20.0 | even            |      | ok     |
|           | 8 | C18H7BrN4NaO2    | 412.9645 | 2.0       | 61.9   | 8        | 25.99  | 19.0 | even            |      | ok     |
|           | 9 | C9H20Br2N4NaOS   | 412.9617 | -4.7      | 233.3  | 9        | 0.00   | 7.0  | even            |      | ok     |

**Figure S29.** HRESIMS spectrum of compound **5h**

## Generic Display Report

### Analysis Info

Analysis Name D:\MZ\maXis\_data\temp\64021000001.d  
Method tune\_low\_MS\_Service\_05\_19.m  
Sample Name CE-196 spot 1 peak 1  
Comment Predrag Kalaba  
Ergebnis: +/- 5ppm  
ACN / MeOH + 1% H<sub>2</sub>O

Acquisition Date 20/05/2019 15:54:18

Operator msc  
Instrument maXis

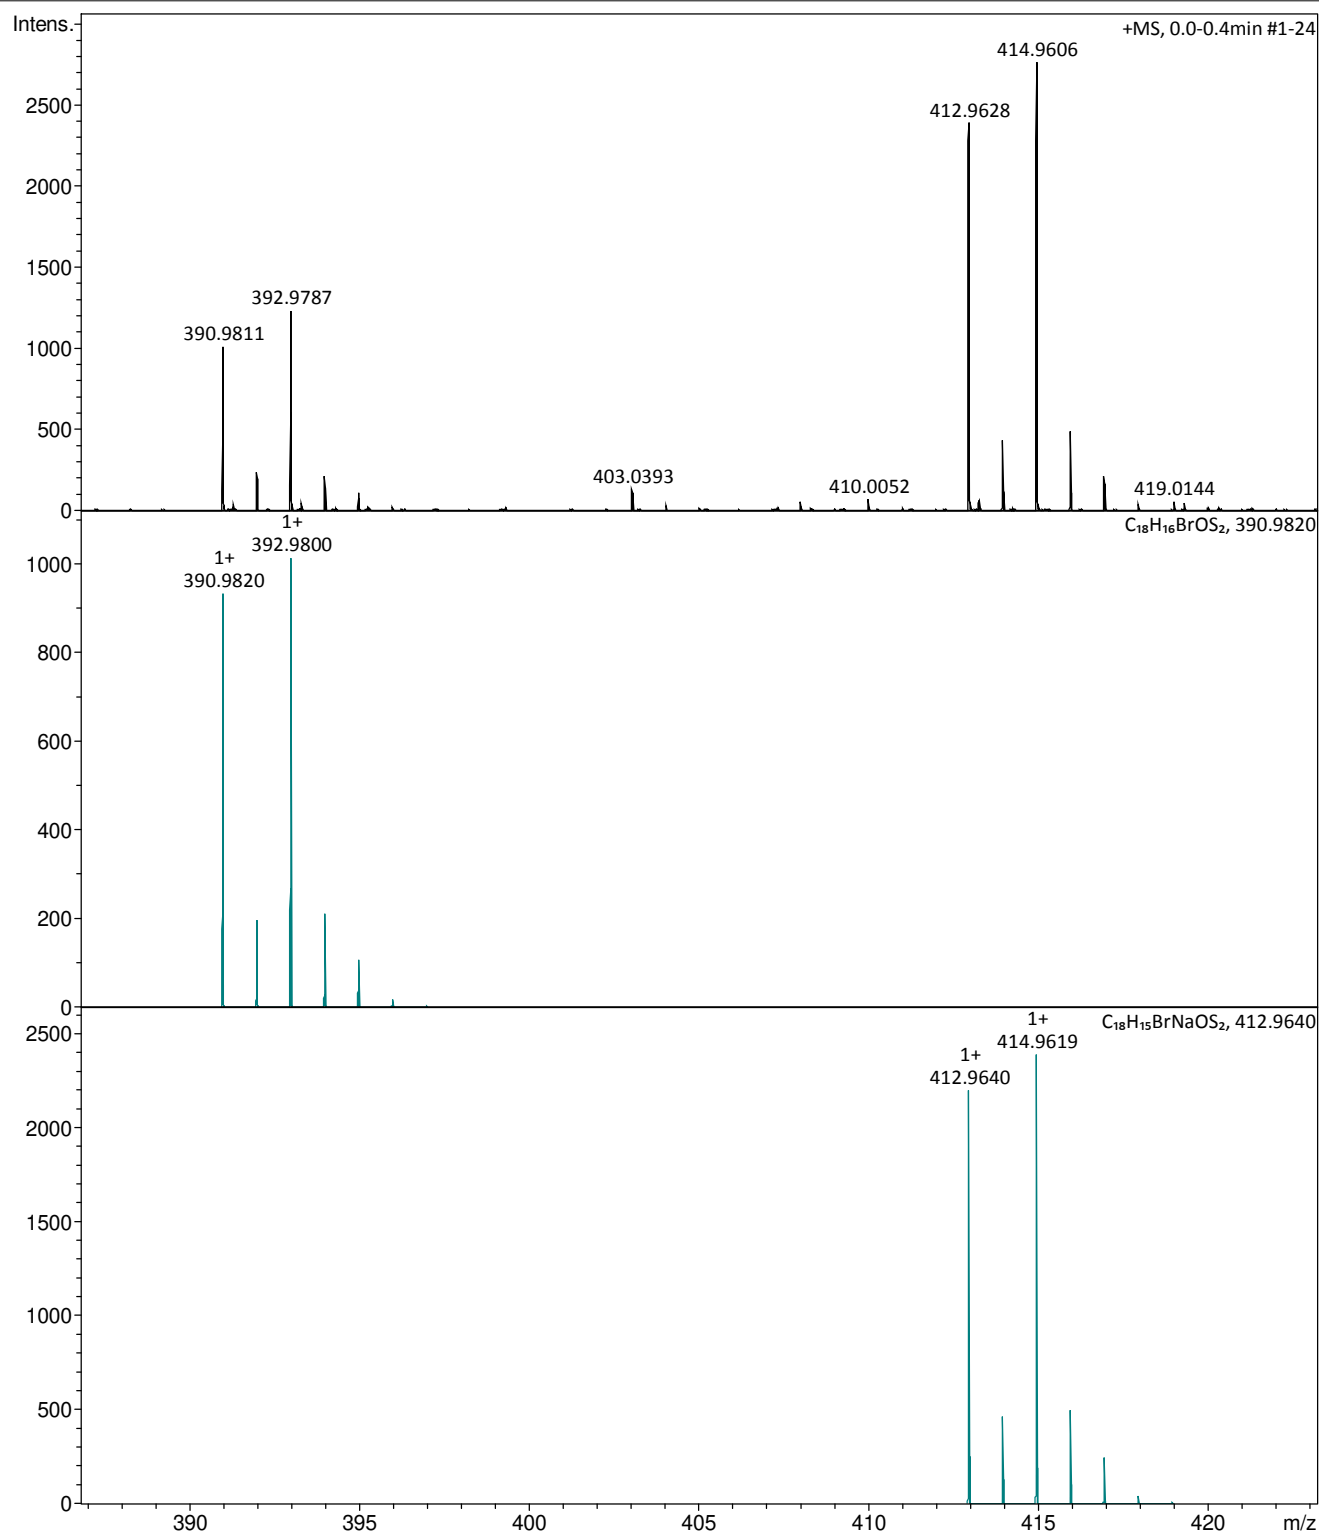

# Mass Spectrum SmartFormula Report

## Analysis Info

Analysis Name D:\MZ\maXis\_data\temp\64021000001.d  
Method tune\_low\_MS\_Service\_05\_19.m  
Sample Name CE-196 spot 1 peak 1  
Comment Predrag Kalaba  
Ergebnis: +/- 5ppm  
ACN / MeOH + 1% H2O

Acquisition Date 20/05/2019 15:54:18

Operator msc  
Instrument maXis 255552.00016

## Acquisition Parameter

|             |            |                      |          |                  |           |
|-------------|------------|----------------------|----------|------------------|-----------|
| Source Type | ESI        | Ion Polarity         | Positive | Set Nebulizer    | 0.4 Bar   |
| Focus       | Not active | Set Capillary        | 4500 V   | Set Dry Heater   | 150 °C    |
| Scan Begin  | 50 m/z     | Set End Plate Offset | -500 V   | Set Dry Gas      | 4.0 l/min |
| Scan End    | 1900 m/z   | Set Charging Voltage | 0 V      | Set Divert Valve | Source    |
|             |            | Set Corona           | 0 nA     | Set APCI Heater  | 0 °C      |

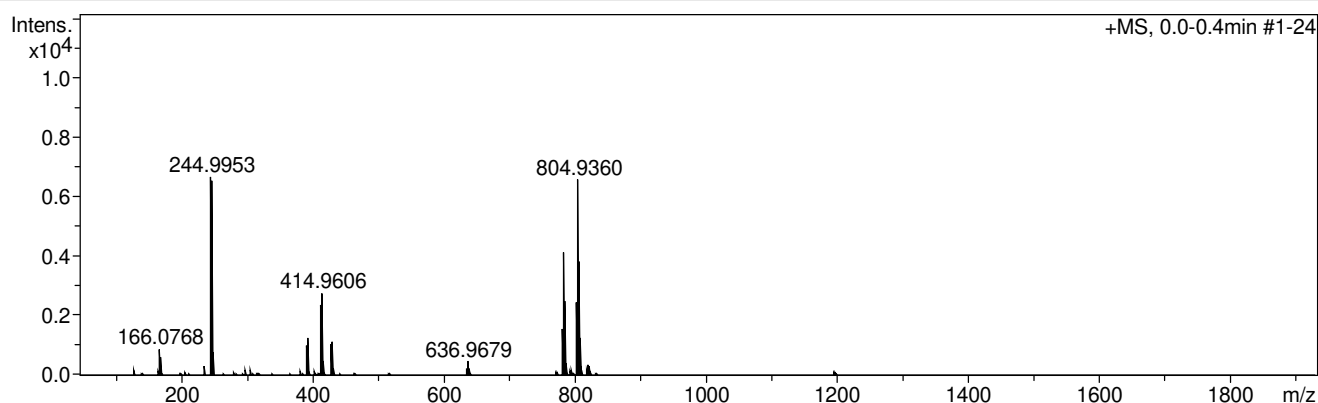

| Meas. m/z | #  | Ion Formula    | Score  | m/z      | err [mDa] | err [ppm] | mSigma | rdb  | e <sup>-</sup> Conf | N-Rule |
|-----------|----|----------------|--------|----------|-----------|-----------|--------|------|---------------------|--------|
| 390.9811  | 1  | C18H16BrOS2    | 78.22  | 390.9820 | 0.9       | 2.3       | 39.9   | 10.5 | even                | ok     |
|           | 2  | C10H20BrN2O3S3 | 100.00 | 390.9814 | -0.2      | -0.6      | 42.7   | 1.5  | even                | ok     |
|           | 3  | C10H12BrN6O4S  | 37.01  | 390.9819 | 0.7       | 1.8       | 66.7   | 7.5  | even                | ok     |
|           | 4  | C9H16BrN2O8S   | 32.77  | 390.9805 | 0.6       | 1.6       | 71.3   | 2.5  | even                | ok     |
|           | 5  | C9H21Br2N4OS   | 0.00   | 390.9797 | -1.4      | -3.6      | 212.4  | 0.5  | even                | ok     |
|           | 6  | C15H19S6       | 0.00   | 390.9806 | 0.6       | 1.5       | 303.9  | 6.5  | even                | ok     |
|           | 7  | C11H19O5S5     | 0.00   | 390.9831 | -1.9      | -4.9      | 353.4  | 2.5  | even                | ok     |
|           | 8  | C14H15O5S4     | 0.00   | 390.9797 | 1.5       | 3.7       | 371.0  | 7.5  | even                | ok     |
|           | 9  | C15H11N4OS4    | 0.00   | 390.9810 | -0.1      | -0.3      | 372.4  | 12.5 | even                | ok     |
|           | 10 | C10H15O10S3    | 0.00   | 390.9822 | -1.0      | -2.7      | 391.2  | 3.5  | even                | ok     |
|           | 11 | C14H7N4O6S2    | 0.00   | 390.9802 | -1.0      | -2.5      | 410.3  | 13.5 | even                | ok     |
|           | 12 | C15H3N8O2S2    | 0.00   | 390.9815 | -0.3      | -0.9      | 411.9  | 18.5 | even                | ok     |
|           | 13 | C22H3N2O4S     | 0.00   | 390.9808 | -0.3      | -0.9      | 474.4  | 22.5 | even                | ok     |
|           | 14 | C9H11O15S      | 0.00   | 390.9813 | 0.2       | 0.4       | 477.2  | 4.5  | even                | ok     |
|           | 15 | C10H7N4O11S    | 0.00   | 390.9827 | 1.5       | 3.9       | 478.8  | 9.5  | even                | ok     |
| 412.9628  | 1  | C18H15BrNaOS2  | 100.00 | 412.9640 | -1.2      | -2.8      | 30.5   | 10.5 | even                | ok     |
|           | 2  | C15H18NaS6     | 0.00   | 412.9625 | 0.3       | 0.8       | 300.5  | 6.5  | even                | ok     |
|           | 3  | C14H14NaO5S4   | 0.00   | 412.9616 | -1.2      | -2.9      | 367.1  | 7.5  | even                | ok     |
|           | 4  | C15H10N4NaOS4  | 0.00   | 412.9630 | -0.1      | -0.3      | 369.0  | 12.5 | even                | ok     |
|           | 5  | C14H6N4NaO6S2  | 0.00   | 412.9621 | -0.7      | -1.8      | 406.7  | 13.5 | even                | ok     |
|           | 6  | C15H2N8NaO2S2  | 0.00   | 412.9634 | -0.6      | -1.5      | 408.7  | 18.5 | even                | ok     |
|           | 7  | C22H2N2NaO4S   | 0.00   | 412.9627 | 0.1       | 0.2       | 472.4  | 22.5 | even                | ok     |

**Figure S30.** HRESIMS spectrum of compound **6h**

## Generic Display Report

### Analysis Info

Analysis Name D:\MZ\maXis\_data\temp\64022000001.d  
Method tune\_low\_MS\_Service\_05\_19.m  
Sample Name CE-196 spot 1 peak 2  
Comment Predrag Kalaba  
Ergebnis: +/- 5ppm  
ACN / MeOH + 1% H<sub>2</sub>O

Acquisition Date 20/05/2019 15:58:19

Operator msc  
Instrument maXis

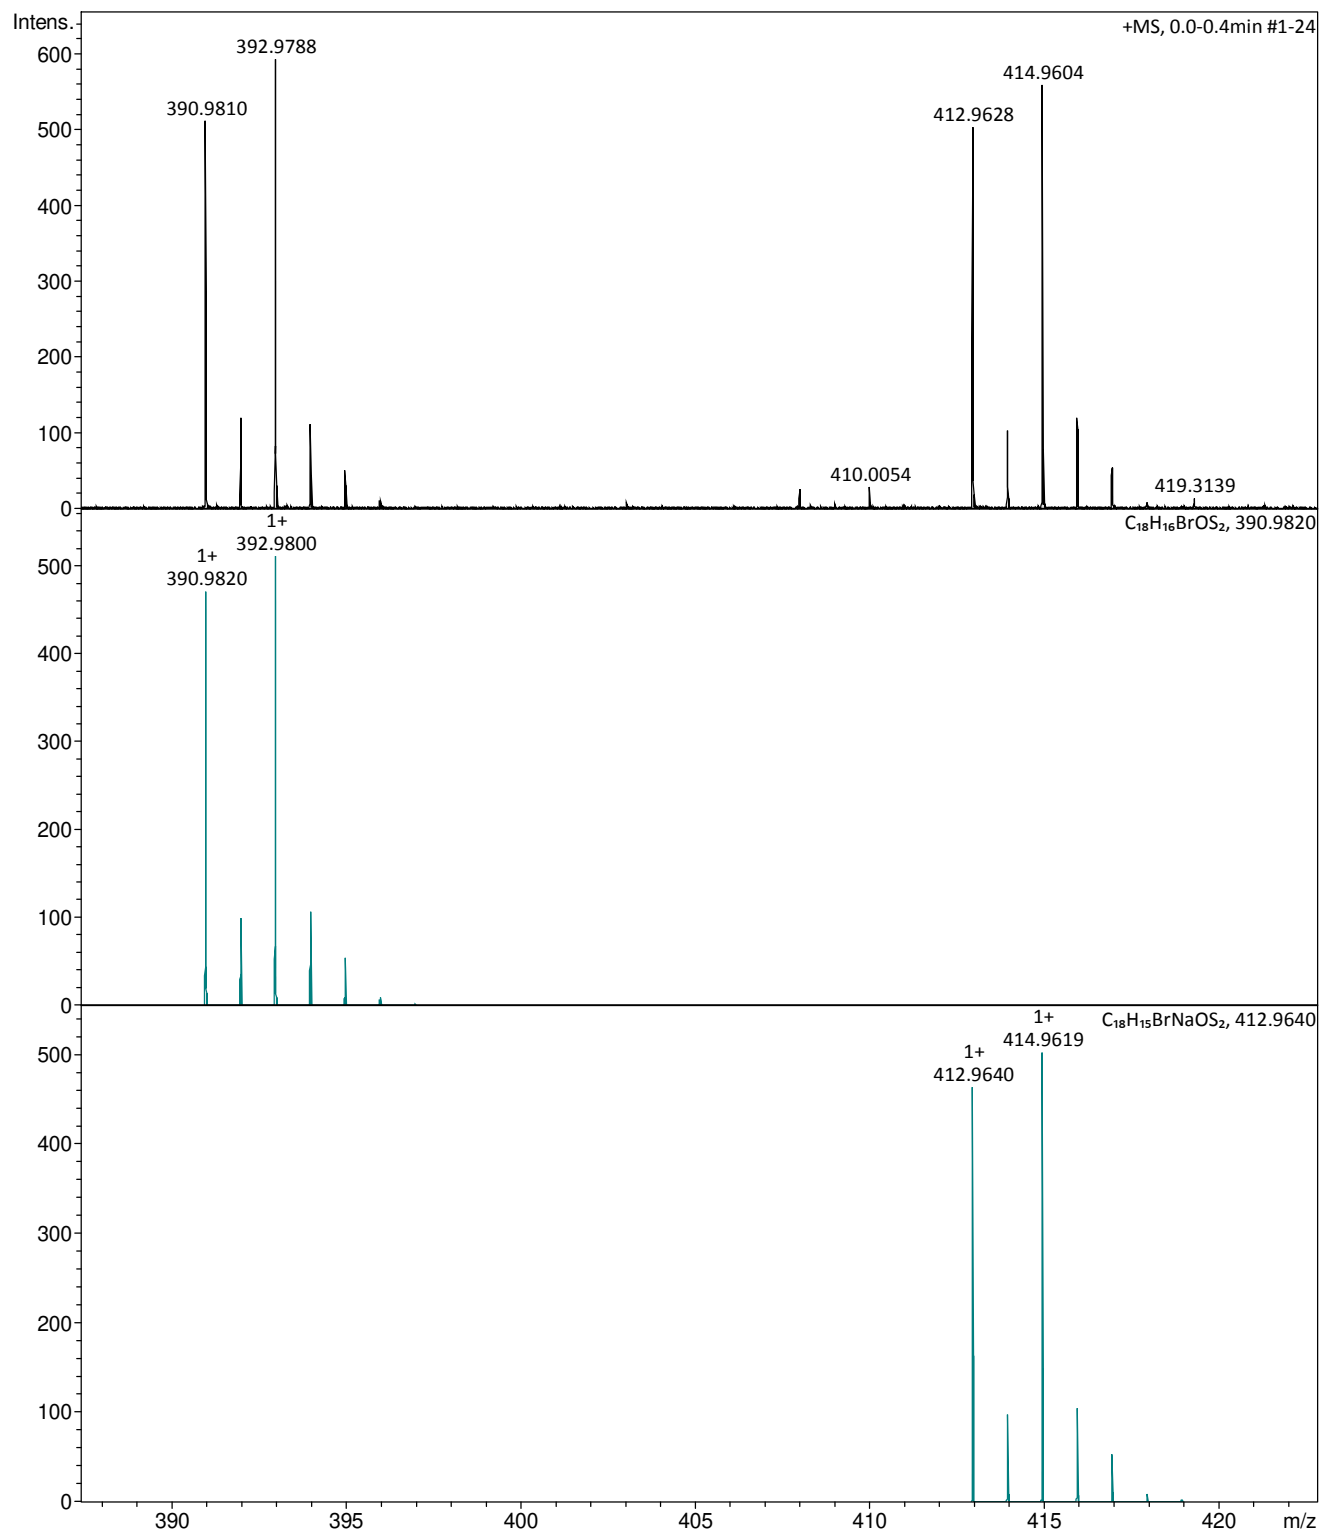

# Mass Spectrum SmartFormula Report

## Analysis Info

Analysis Name D:\MZ\maXis\_data\temp\64022000001.d  
Method tune\_low\_MS\_Service\_05\_19.m  
Sample Name CE-196 spot 1 peak 2  
Comment Predrag Kalaba  
Ergebnis: +/- 5ppm  
ACN / MeOH + 1% H2O

Acquisition Date 20/05/2019 15:58:19

Operator msc  
Instrument maXis 255552.00016

## Acquisition Parameter

|             |            |                      |          |                  |           |
|-------------|------------|----------------------|----------|------------------|-----------|
| Source Type | ESI        | Ion Polarity         | Positive | Set Nebulizer    | 0.4 Bar   |
| Focus       | Not active | Set Capillary        | 4500 V   | Set Dry Heater   | 150 °C    |
| Scan Begin  | 50 m/z     | Set End Plate Offset | -500 V   | Set Dry Gas      | 4.0 l/min |
| Scan End    | 1900 m/z   | Set Charging Voltage | 0 V      | Set Divert Valve | Source    |
|             |            | Set Corona           | 0 nA     | Set APCI Heater  | 0 °C      |

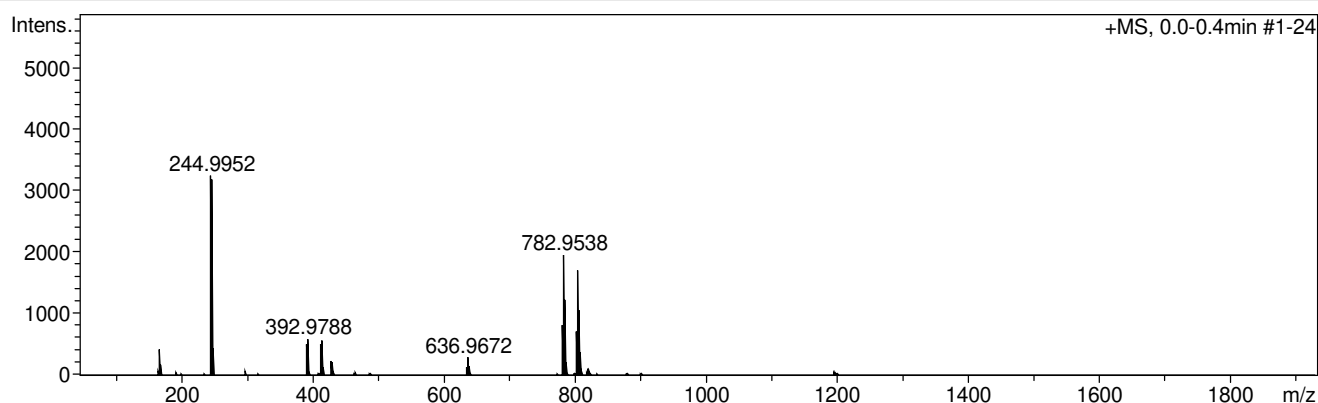

| Meas. m/z | #  | Ion Formula      | Score  | m/z      | err [mDa] | err [ppm] | mSigma | rdb  | e <sup>-</sup> | Conf | N-Rule |
|-----------|----|------------------|--------|----------|-----------|-----------|--------|------|----------------|------|--------|
| 390.9810  | 1  | C18H16BrOS2      | 100.00 | 390.9820 | 1.1       | 2.7       | 24.9   | 10.5 | even           |      | ok     |
|           | 2  | C10H20BrN2O3S3   | 95.17  | 390.9814 | 0.4       | 1.0       | 40.4   | 1.5  | even           |      | ok     |
|           | 3  | C10H12BrN6O4S    | 47.96  | 390.9819 | -0.9      | -2.2      | 55.4   | 7.5  | even           |      | ok     |
|           | 4  | C9H16BrN2O8S     | 46.18  | 390.9805 | 0.5       | 1.2       | 62.7   | 2.5  | even           |      | ok     |
|           | 5  | C9H21Br2N4OS     | 0.00   | 390.9797 | -1.3      | -3.2      | 224.0  | 0.5  | even           |      | ok     |
|           | 6  | C15H19S6         | 0.00   | 390.9806 | 0.4       | 1.1       | 301.0  | 6.5  | even           |      | ok     |
|           | 7  | C14H15O5S4       | 0.00   | 390.9797 | 1.3       | 3.3       | 368.4  | 7.5  | even           |      | ok     |
|           | 8  | C15H11N4OS4      | 0.00   | 390.9810 | -0.0      | -0.1      | 369.7  | 12.5 | even           |      | ok     |
|           | 9  | C10H15O10S3      | 0.00   | 390.9822 | -1.2      | -3.1      | 389.1  | 3.5  | even           |      | ok     |
|           | 10 | C14H7N4O6S2      | 0.00   | 390.9802 | -0.8      | -2.1      | 408.1  | 13.5 | even           |      | ok     |
|           | 11 | C15H3N8O2S2      | 0.00   | 390.9815 | -0.5      | -1.3      | 409.5  | 18.5 | even           |      | ok     |
|           | 12 | C22H3N2O4S       | 0.00   | 390.9808 | 0.2       | 0.5       | 471.8  | 22.5 | even           |      | ok     |
|           | 13 | C9H11O15S        | 0.00   | 390.9813 | -0.3      | -0.8      | 475.3  | 4.5  | even           |      | ok     |
|           | 14 | C10H7N4O11S      | 0.00   | 390.9827 | 1.7       | 4.3       | 476.9  | 9.5  | even           |      | ok     |
| 412.9628  | 1  | C18H15BrNaOS2    | 100.00 | 412.9640 | 1.2       | 2.9       | 12.4   | 10.5 | even           |      | ok     |
|           | 2  | C10H19BrN2NaO3S3 | 77.14  | 412.9633 | -0.5      | -1.3      | 39.1   | 1.5  | even           |      | ok     |
|           | 3  | C10H11BrN6NaO4S  | 46.98  | 412.9638 | -1.0      | -2.5      | 47.8   | 7.5  | even           |      | ok     |
|           | 4  | C9H15BrN2NaO8S   | 50.35  | 412.9625 | -0.3      | -0.8      | 56.9   | 2.5  | even           |      | ok     |
|           | 5  | C9H20Br2N4NaOS   | 0.00   | 412.9617 | -1.1      | -2.7      | 230.5  | 0.5  | even           |      | ok     |
|           | 6  | C15H18NaS6       | 0.00   | 412.9625 | -0.3      | -0.7      | 301.1  | 6.5  | even           |      | ok     |
|           | 7  | C14H14NaO5S4     | 0.00   | 412.9616 | 1.2       | 2.8       | 368.6  | 7.5  | even           |      | ok     |
|           | 8  | C15H10N4NaOS4    | 0.00   | 412.9630 | -0.2      | -0.4      | 370.1  | 12.5 | even           |      | ok     |
|           | 9  | C10H14NaO10S3    | 0.00   | 412.9641 | -1.3      | -3.2      | 389.1  | 3.5  | even           |      | ok     |
|           | 10 | C13H10NaO10S2    | 0.00   | 412.9608 | 2.0       | 4.9       | 406.9  | 8.5  | even           |      | ok     |
|           | 11 | C14H6N4NaO6S2    | 0.00   | 412.9621 | -0.7      | -1.7      | 408.5  | 13.5 | even           |      | ok     |
|           | 12 | C15H2N8NaO2S2    | 0.00   | 412.9634 | 0.6       | 1.6       | 410.2  | 18.5 | even           |      | ok     |
|           | 13 | C22H2N2NaO4S     | 0.00   | 412.9627 | 0.0       | 0.1       | 472.6  | 22.5 | even           |      | ok     |
|           | 14 | C9H10NaO15S      | 0.00   | 412.9633 | -0.5      | -1.1      | 474.8  | 4.5  | even           |      | ok     |
|           | 15 | C10H6N4NaO11S    | 0.00   | 412.9646 | -1.8      | -4.4      | 476.6  | 9.5  | even           |      | ok     |

**Figure S31.** HRESIMS spectrum of compound **7h**

## Generic Display Report

### Analysis Info

Analysis Name D:\MZ\maXis\_data\temp\64023000002.d  
Method tune\_low\_MS\_Service\_05\_19.m  
Sample Name CE-196 spot 2 peak 1  
Comment Predrag Kalaba  
Ergebnis: +/- 5ppm  
ACN / MeOH + 1% H<sub>2</sub>O

Acquisition Date 20/05/2019 16:04:05

Operator msc  
Instrument maXis

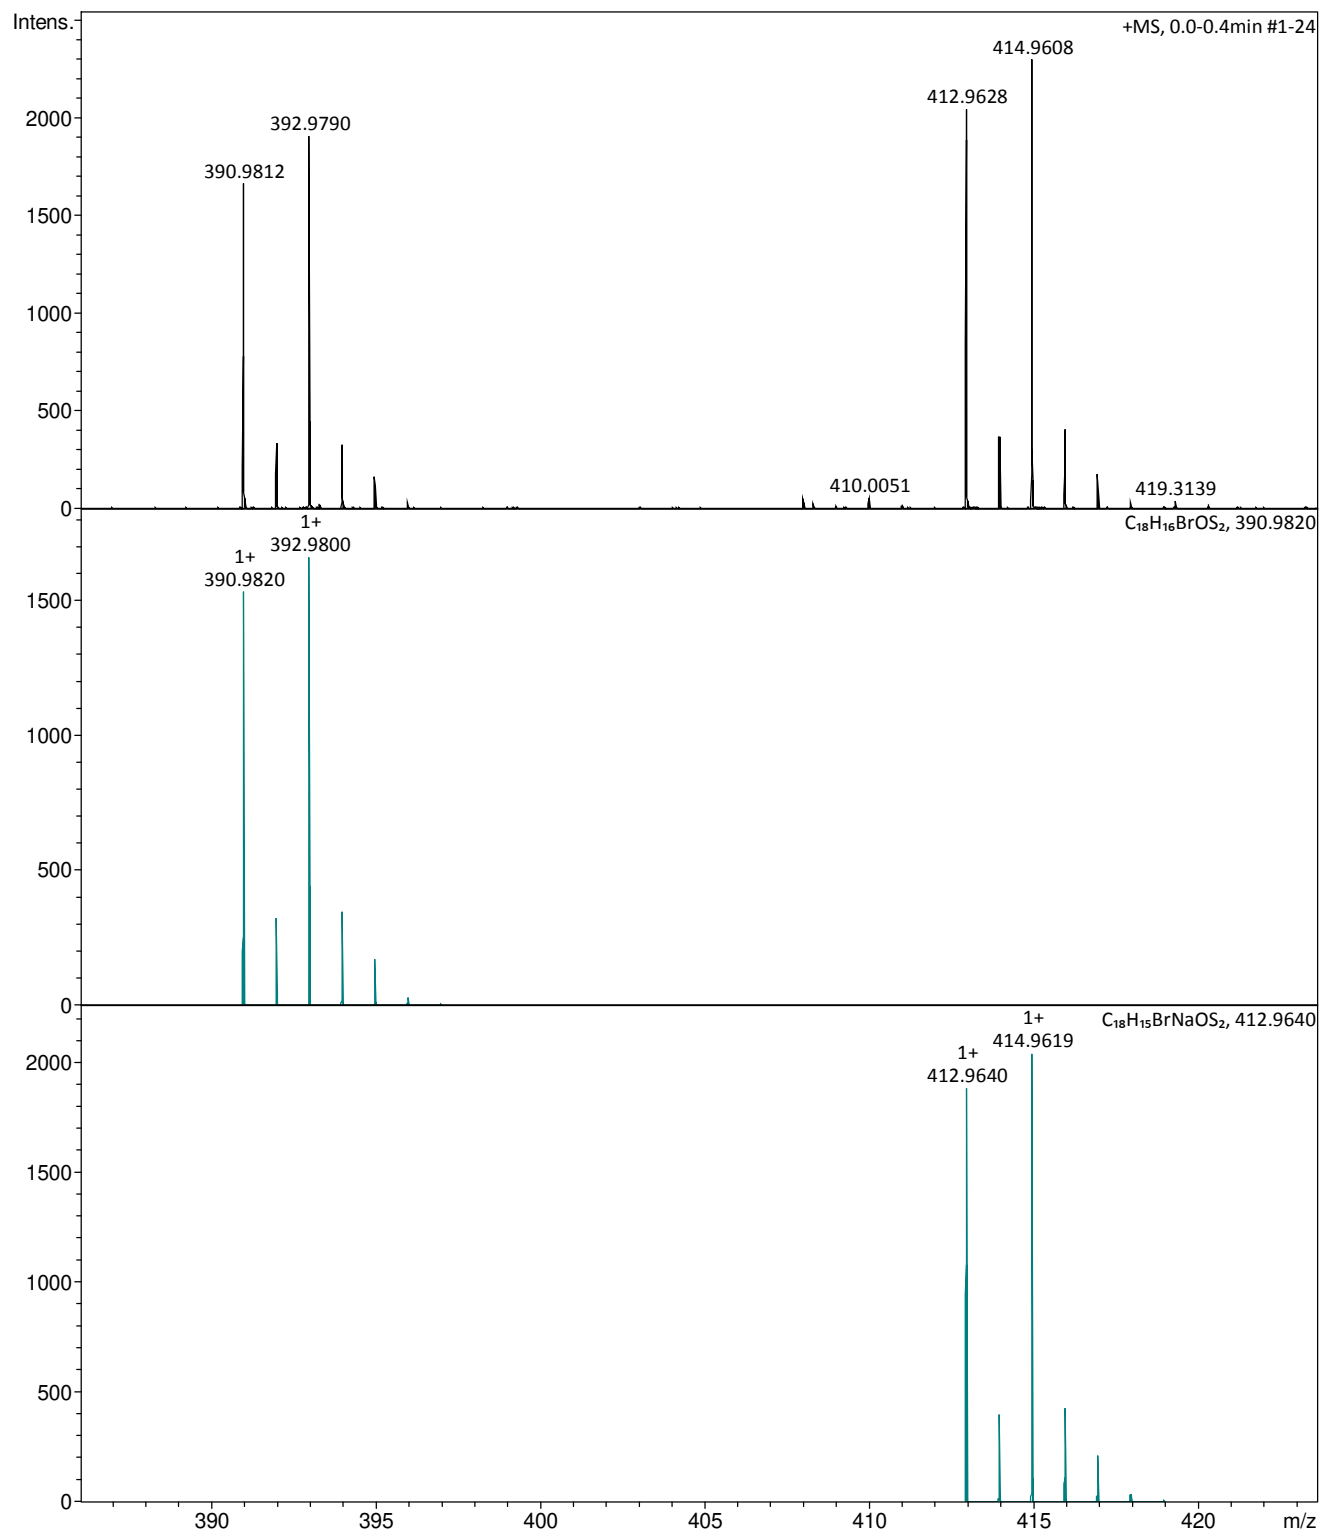



# Mass Spectrum SmartFormula Report

## Analysis Info

Analysis Name D:\MZ\maXis\_data\temp\64023000002.d  
Method tune\_low\_MS\_Service\_05\_19.m  
Sample Name CE-196 spot 2 peak 1  
Comment Predrag Kalaba  
Ergebnis: +/- 5ppm  
ACN / MeOH + 1% H2O

Acquisition Date 20/05/2019 16:04:05

Operator msc  
Instrument maXis 255552.00016

## Acquisition Parameter

|             |            |                      |          |                  |           |
|-------------|------------|----------------------|----------|------------------|-----------|
| Source Type | ESI        | Ion Polarity         | Positive | Set Nebulizer    | 0.4 Bar   |
| Focus       | Not active | Set Capillary        | 4500 V   | Set Dry Heater   | 150 °C    |
| Scan Begin  | 50 m/z     | Set End Plate Offset | -500 V   | Set Dry Gas      | 4.0 l/min |
| Scan End    | 1900 m/z   | Set Charging Voltage | 0 V      | Set Divert Valve | Source    |
|             |            | Set Corona           | 0 nA     | Set APCI Heater  | 0 °C      |

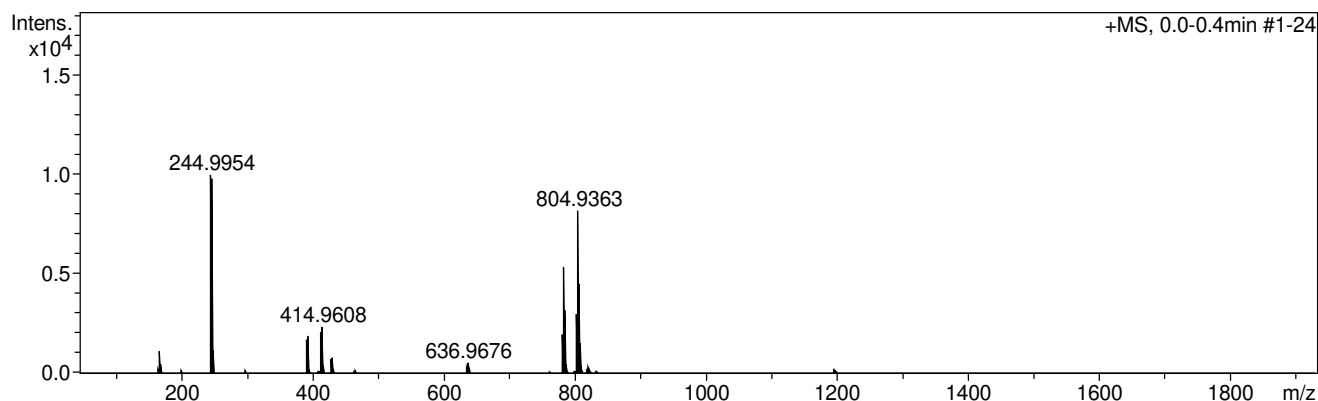

| Meas. m/z | #  | Ion Formula      | Score  | m/z      | err [mDa] | err [ppm] | mSigma | rdb  | e <sup>-</sup> | Conf | N-Rule |
|-----------|----|------------------|--------|----------|-----------|-----------|--------|------|----------------|------|--------|
| 390.9812  | 1  | C18H16BrOS2      | 82.64  | 390.9820 | 0.9       | 2.2       | 25.3   | 10.5 | even           |      | ok     |
|           | 2  | C10H20BrN2O3S3   | 100.00 | 390.9814 | 0.2       | 0.5       | 30.7   | 1.5  | even           |      | ok     |
|           | 3  | C10H12BrN6O4S    | 53.89  | 390.9819 | 0.7       | 1.7       | 45.5   | 7.5  | even           |      | ok     |
|           | 4  | C9H16BrN2O8S     | 45.92  | 390.9805 | 0.7       | 1.7       | 51.3   | 2.5  | even           |      | ok     |
|           | 5  | C9H21Br2N4OS     | 0.00   | 390.9797 | -1.4      | -3.7      | 223.9  | 0.5  | even           |      | ok     |
|           | 6  | C15H19S6         | 0.00   | 390.9806 | 0.6       | 1.6       | 299.5  | 6.5  | even           |      | ok     |
|           | 7  | C11H19O5S5       | 0.00   | 390.9831 | 1.9       | 4.8       | 348.3  | 2.5  | even           |      | ok     |
|           | 8  | C14H15O5S4       | 0.00   | 390.9797 | -1.5      | -3.8      | 366.4  | 7.5  | even           |      | ok     |
|           | 9  | C15H11N4OS4      | 0.00   | 390.9810 | 0.2       | 0.4       | 368.1  | 12.5 | even           |      | ok     |
|           | 10 | C10H15O10S3      | 0.00   | 390.9822 | 1.0       | 2.6       | 386.4  | 3.5  | even           |      | ok     |
|           | 11 | C14H7N4O6S2      | 0.00   | 390.9802 | 1.0       | 2.6       | 406.1  | 13.5 | even           |      | ok     |
|           | 12 | C15H3N8O2S2      | 0.00   | 390.9815 | 0.3       | 0.8       | 407.9  | 18.5 | even           |      | ok     |
|           | 13 | C22H3N2O4S       | 0.00   | 390.9808 | 0.4       | 1.0       | 470.7  | 22.5 | even           |      | ok     |
|           | 14 | C9H11O15S        | 0.00   | 390.9813 | 0.1       | 0.4       | 472.2  | 4.5  | even           |      | ok     |
|           | 15 | C10H7N4O11S      | 0.00   | 390.9827 | -1.5      | -3.8      | 474.1  | 9.5  | even           |      | ok     |
| 412.9628  | 1  | C18H15BrNaOS2    | 79.87  | 412.9640 | 1.2       | 2.9       | 24.0   | 10.5 | even           |      | ok     |
|           | 2  | C10H19BrN2NaO3S3 | 100.00 | 412.9633 | -0.6      | -1.4      | 29.7   | 1.5  | even           |      | ok     |
|           | 3  | C10H11BrN6NaO4S  | 63.26  | 412.9638 | -1.0      | -2.5      | 37.9   | 7.5  | even           |      | ok     |
|           | 4  | C9H15BrN2NaO8S   | 76.60  | 412.9625 | 0.3       | 0.8       | 44.2   | 2.5  | even           |      | ok     |
|           | 5  | C9H20Br2N4NaOS   | 0.00   | 412.9617 | -1.1      | -2.7      | 229.1  | 0.5  | even           |      | ok     |
|           | 6  | C15H18NaS6       | 0.00   | 412.9625 | 0.3       | 0.7       | 298.9  | 6.5  | even           |      | ok     |
|           | 7  | C14H14NaO5S4     | 0.00   | 412.9616 | 1.2       | 2.8       | 365.6  | 7.5  | even           |      | ok     |
|           | 8  | C15H10N4NaOS4    | 0.00   | 412.9630 | -0.2      | -0.5      | 367.5  | 12.5 | even           |      | ok     |
|           | 9  | C10H14NaO10S3    | 0.00   | 412.9641 | -1.4      | -3.3      | 385.3  | 3.5  | even           |      | ok     |
|           | 10 | C13H10NaO10S2    | 0.00   | 412.9608 | -2.0      | -4.9      | 403.5  | 8.5  | even           |      | ok     |
|           | 11 | C14H6N4NaO6S2    | 0.00   | 412.9621 | -0.7      | -1.7      | 405.4  | 13.5 | even           |      | ok     |
|           | 12 | C15H2N8NaO2S2    | 0.00   | 412.9634 | -0.7      | -1.6      | 407.3  | 18.5 | even           |      | ok     |
|           | 13 | C22H2N2NaO4S     | 0.00   | 412.9627 | 0.0       | 0.1       | 470.8  | 22.5 | even           |      | ok     |
|           | 14 | C9H10NaO15S      | 0.00   | 412.9633 | 0.5       | 1.2       | 471.1  | 4.5  | even           |      | ok     |
|           | 15 | C10H6N4NaO11S    | 0.00   | 412.9646 | 1.8       | 4.4       | 473.2  | 9.5  | even           |      | ok     |

**Figure S32.** HRESIMS spectrum of compound **8h**

## Generic Display Report

### Analysis Info

Analysis Name D:\MZ\maXis\_data\temp\64024000002.d  
Method tune\_low\_MS\_Service\_05\_19.m  
Sample Name CE-196 spot 2 peak 2  
Comment Predrag Kalaba  
Ergebnis: +/- 5ppm  
ACN / MeOH + 1% H<sub>2</sub>O

Acquisition Date 20/05/2019 16:08:36

Operator msc  
Instrument maXis

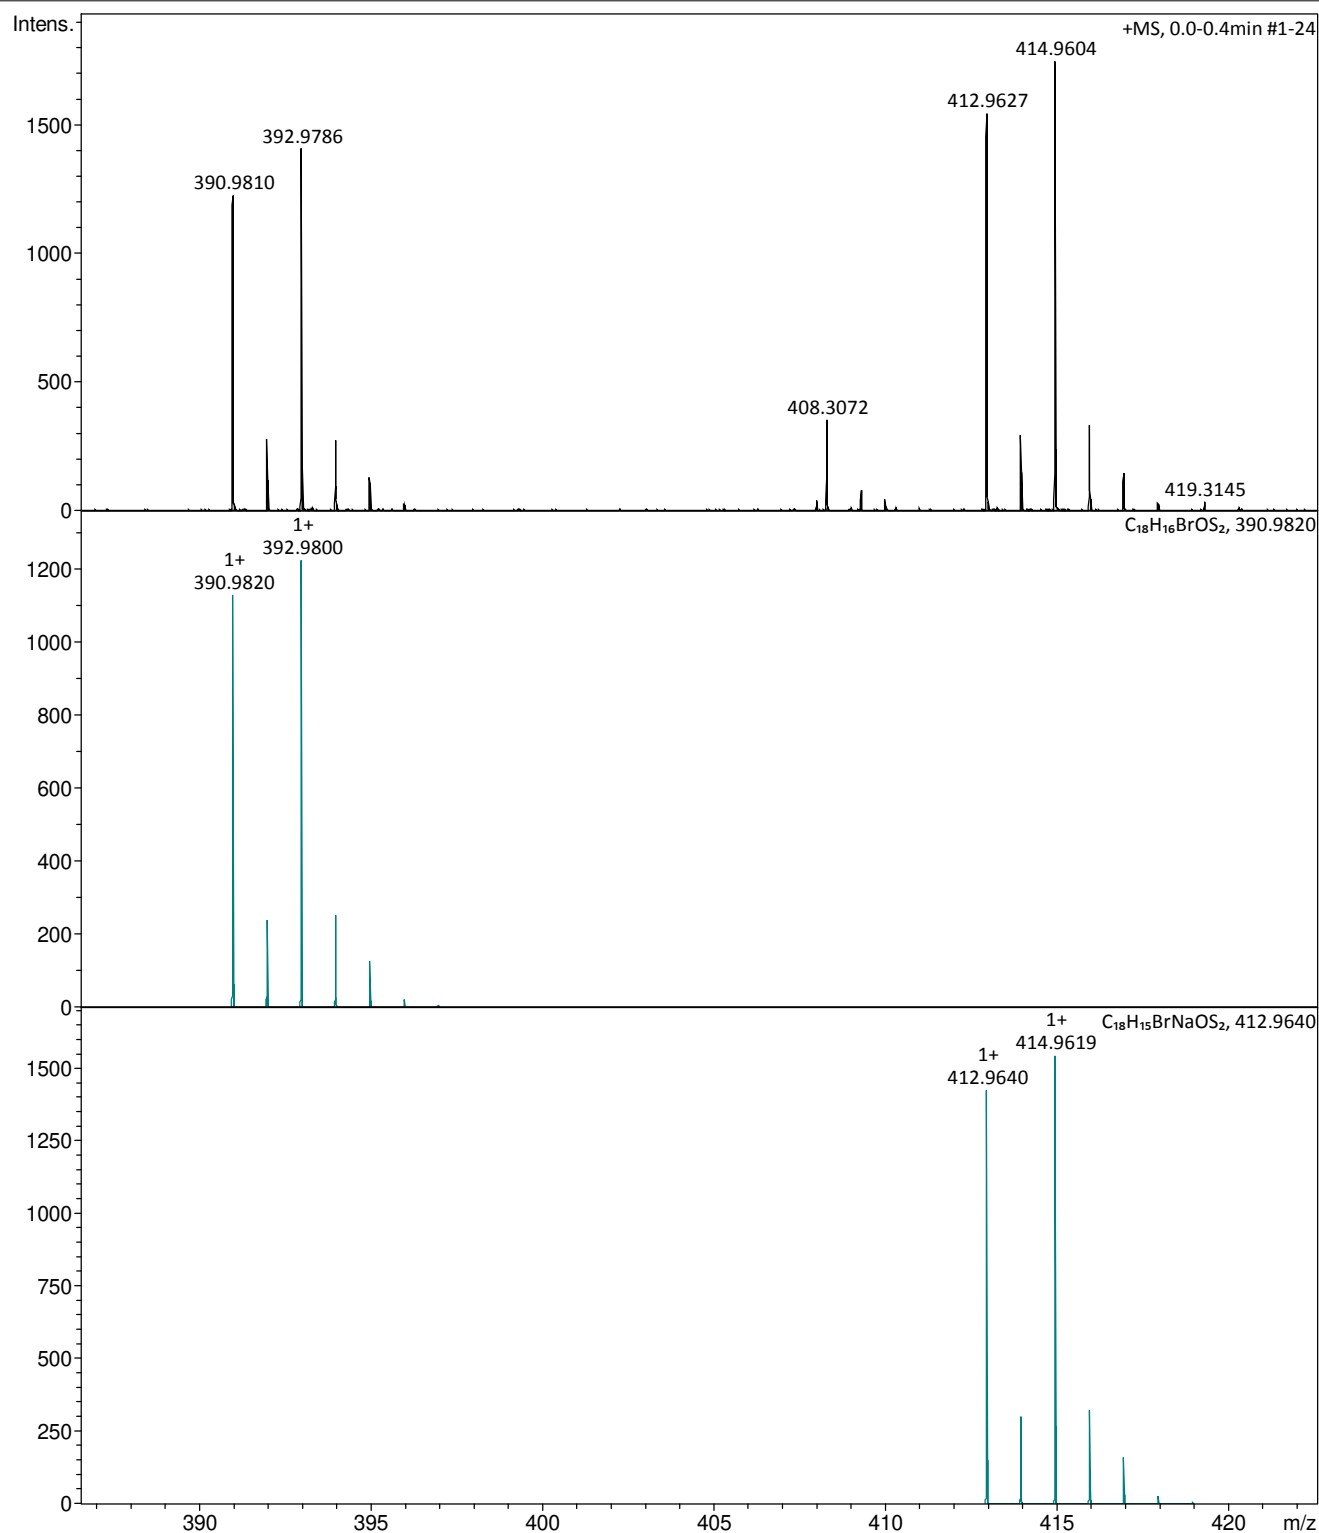

# Mass Spectrum SmartFormula Report

## Analysis Info

Analysis Name D:\MZ\maXis\_data\temp\64024000002.d  
Method tune\_low\_MS\_Service\_05\_19.m  
Sample Name CE-196 spot 2 peak 2  
Comment Predrag Kalaba  
Ergebnis: +/- 5ppm  
ACN / MeOH + 1% H2O

Acquisition Date 20/05/2019 16:08:36

Operator msc  
Instrument maXis 255552.00016

## Acquisition Parameter

|             |            |                      |          |                  |           |
|-------------|------------|----------------------|----------|------------------|-----------|
| Source Type | ESI        | Ion Polarity         | Positive | Set Nebulizer    | 0.4 Bar   |
| Focus       | Not active | Set Capillary        | 4500 V   | Set Dry Heater   | 150 °C    |
| Scan Begin  | 50 m/z     | Set End Plate Offset | -500 V   | Set Dry Gas      | 4.0 l/min |
| Scan End    | 1900 m/z   | Set Charging Voltage | 0 V      | Set Divert Valve | Source    |
|             |            | Set Corona           | 0 nA     | Set APCI Heater  | 0 °C      |

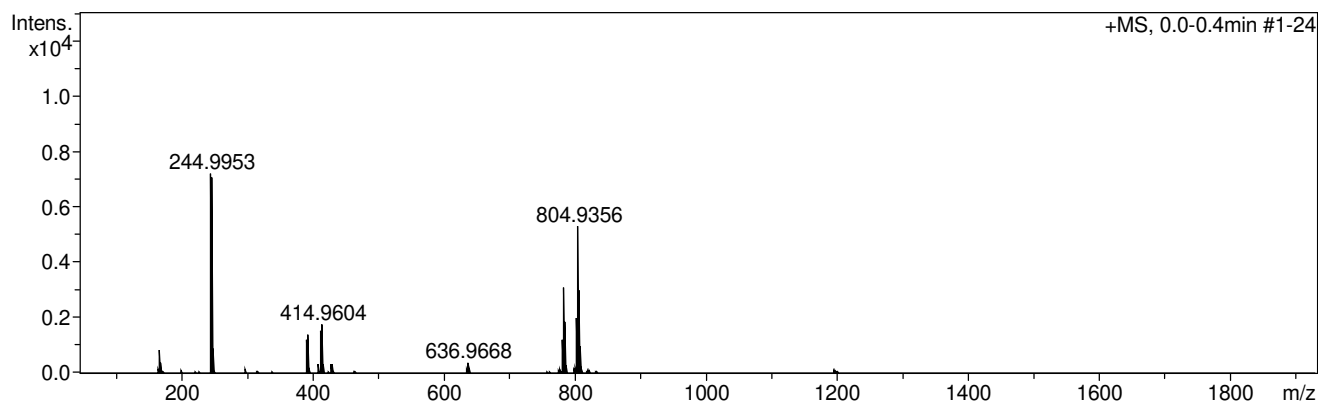

| Meas. m/z | #  | Ion Formula      | Score  | m/z      | err [mDa] | err [ppm] | mSigma | rdb  | e <sup>-</sup> | Conf | N-Rule |
|-----------|----|------------------|--------|----------|-----------|-----------|--------|------|----------------|------|--------|
| 390.9810  | 1  | C18H16BrOS2      | 100.00 | 390.9820 | -1.0      | -2.6      | 20.2   | 10.5 | even           |      | ok     |
|           | 2  | C10H20BrN2O3S3   | 90.19  | 390.9814 | 0.4       | 1.0       | 38.4   | 1.5  | even           |      | ok     |
|           | 3  | C10H12BrN6O4S    | 45.45  | 390.9819 | 0.8       | 2.2       | 53.8   | 7.5  | even           |      | ok     |
|           | 4  | C9H16BrN2O8S     | 42.14  | 390.9805 | 0.5       | 1.3       | 61.5   | 2.5  | even           |      | ok     |
|           | 5  | C9H21Br2N4OS     | 0.00   | 390.9797 | 1.3       | 3.3       | 223.7  | 0.5  | even           |      | ok     |
|           | 6  | C15H19S6         | 0.00   | 390.9806 | 0.5       | 1.2       | 301.1  | 6.5  | even           |      | ok     |
|           | 7  | C14H15O5S4       | 0.00   | 390.9797 | -1.3      | -3.4      | 368.6  | 7.5  | even           |      | ok     |
|           | 8  | C15H11N4OS4      | 0.00   | 390.9810 | -0.0      | -0.0      | 369.9  | 12.5 | even           |      | ok     |
|           | 9  | C10H15O10S3      | 0.00   | 390.9822 | 1.2       | 3.0       | 389.2  | 3.5  | even           |      | ok     |
|           | 10 | C14H7N4O6S2      | 0.00   | 390.9802 | 0.9       | 2.2       | 408.3  | 13.5 | even           |      | ok     |
|           | 11 | C15H3N8O2S2      | 0.00   | 390.9815 | -0.5      | -1.2      | 409.8  | 18.5 | even           |      | ok     |
|           | 12 | C22H3N2O4S       | 0.00   | 390.9808 | 0.2       | 0.6       | 471.9  | 22.5 | even           |      | ok     |
|           | 13 | C9H11O15S        | 0.00   | 390.9813 | -0.3      | -0.8      | 475.1  | 4.5  | even           |      | ok     |
|           | 14 | C10H7N4O11S      | 0.00   | 390.9827 | -1.6      | -4.2      | 476.7  | 9.5  | even           |      | ok     |
| 412.9627  | 1  | C18H15BrNaOS2    | 90.97  | 412.9640 | 1.3       | 3.2       | 20.5   | 10.5 | even           |      | ok     |
|           | 2  | C10H19BrN2NaO3S3 | 100.00 | 412.9633 | 0.7       | 1.6       | 32.4   | 1.5  | even           |      | ok     |
|           | 3  | C21H11BrNaOS     | 32.31  | 412.9606 | -2.1      | -5.0      | 41.5   | 15.5 | even           |      | ok     |
|           | 4  | C10H11BrN6NaO4S  | 58.18  | 412.9638 | -1.1      | -2.7      | 43.0   | 7.5  | even           |      | ok     |
|           | 5  | C9H15BrN2NaO8S   | 75.86  | 412.9625 | 0.2       | 0.5       | 50.1   | 2.5  | even           |      | ok     |
|           | 6  | C9H20Br2N4NaOS   | 0.00   | 412.9617 | -1.0      | -2.4      | 227.7  | 0.5  | even           |      | ok     |
|           | 7  | C15H18NaS6       | 0.00   | 412.9625 | 0.2       | 0.4       | 300.1  | 6.5  | even           |      | ok     |
|           | 8  | C14H14NaO5S4     | 0.00   | 412.9616 | 1.0       | 2.5       | 367.0  | 7.5  | even           |      | ok     |
|           | 9  | C15H10N4NaOS4    | 0.00   | 412.9630 | -0.3      | -0.7      | 368.7  | 12.5 | even           |      | ok     |
|           | 10 | C10H14NaO10S3    | 0.00   | 412.9641 | -1.5      | -3.5      | 386.9  | 3.5  | even           |      | ok     |
|           | 11 | C13H10NaO10S2    | 0.00   | 412.9608 | 1.9       | 4.6       | 405.0  | 8.5  | even           |      | ok     |
|           | 12 | C14H6N4NaO6S2    | 0.00   | 412.9621 | 0.6       | 1.4       | 406.8  | 13.5 | even           |      | ok     |
|           | 13 | C15H2N8NaO2S2    | 0.00   | 412.9634 | 0.8       | 1.8       | 408.6  | 18.5 | even           |      | ok     |
|           | 14 | C22H2N2NaO4S     | 0.00   | 412.9627 | -0.1      | -0.2      | 471.8  | 22.5 | even           |      | ok     |
|           | 15 | C9H10NaO15S      | 0.00   | 412.9633 | 0.6       | 1.4       | 472.8  | 4.5  | even           |      | ok     |
|           | 16 | C10H6N4NaO11S    | 0.00   | 412.9646 | 1.9       | 4.7       | 474.8  | 9.5  | even           |      | ok     |

## Generic Display Report

### Analysis Info

Analysis Name D:\Data\Kalaba\72419000001.d  
 Method tune\_low\_MS\_Service\_08\_20.m  
 Sample Name MK-31-p1  
 Comment Kalaba/Zehl  
 Ergebnis +/- 5ppm  
 ACN / MeOH + 1% H<sub>2</sub>O

Acquisition Date 20/08/2020 17:11:14

Operator msc  
 Instrument maXis

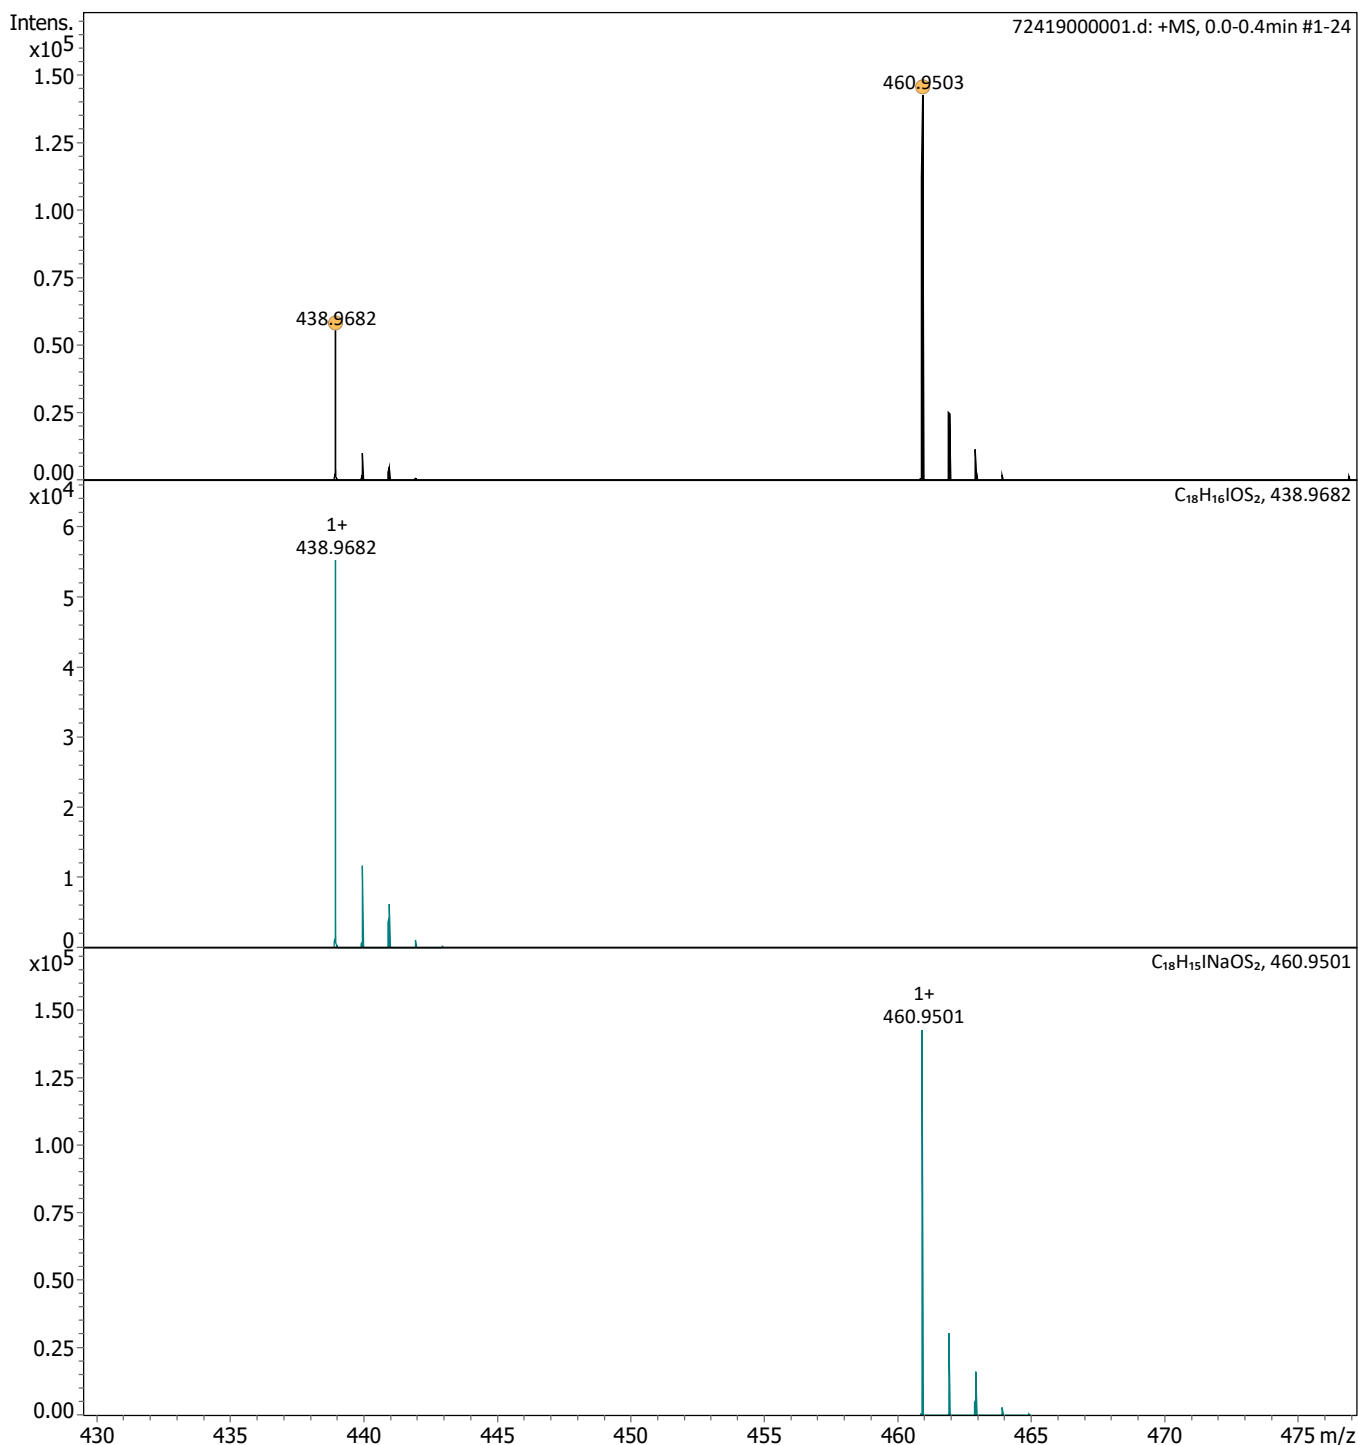

# Mass Spectrum SmartFormula Report

## Analysis Info

Analysis Name D:\Data\Kalaba\72419000001.d  
 Method tune\_low\_MS\_Service\_08\_20.m  
 Sample Name MK-31-p1  
 Comment Kalaba/Zehl  
 Ergebnis +/- 5ppm  
 ACN / MeOH + 1% H2O

Acquisition Date 20/08/2020 17:11:14

Operator msc  
 Instrument maXis 255552.00016

## Acquisition Parameter

|             |            |                      |          |                  |           |
|-------------|------------|----------------------|----------|------------------|-----------|
| Source Type | ESI        | Ion Polarity         | Positive | Set Nebulizer    | 0.4 Bar   |
| Focus       | Not active | Set Capillary        | 4200 V   | Set Dry Heater   | 180 Å°C   |
| Scan Begin  | 50 m/z     | Set End Plate Offset | -500 V   | Set Dry Gas      | 4.0 l/min |
| Scan End    | 1900 m/z   | Set Charging Voltage | 0 V      | Set Divert Valve | Source    |
|             |            | Set Corona           | 0 nA     | Set APCI Heater  | 0 Å°C     |

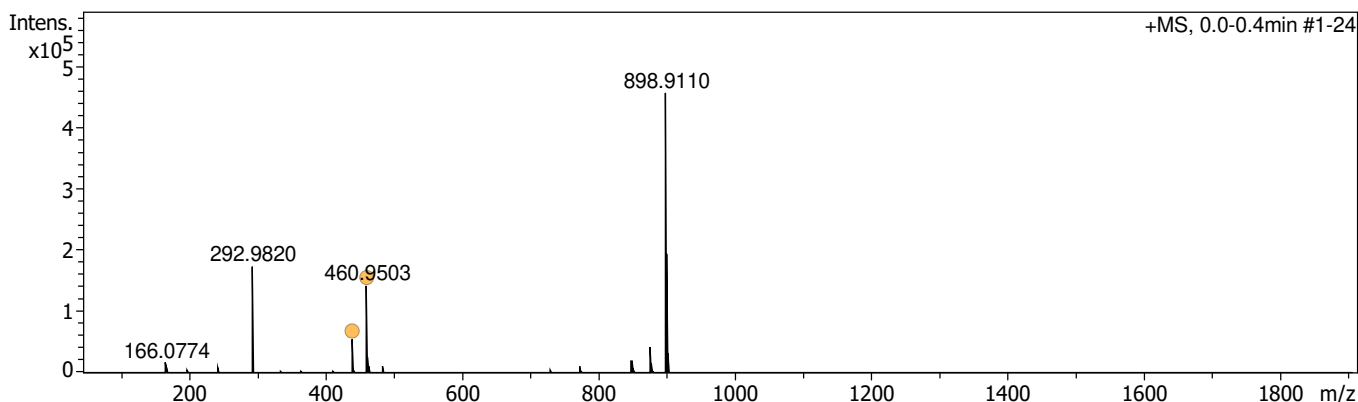

| Meas. m/z | #  | Ion Formula    | m/z      | err [ppm] | mSigma | # mSigma | Score  | rdb  | eÅ <sup>-</sup> | Conf | N-Rule |
|-----------|----|----------------|----------|-----------|--------|----------|--------|------|-----------------|------|--------|
| 438.9682  | 1  | C11H3N8O10S    | 438.9687 | 1.2       | 11.0   | 1        | 100.00 | 17.0 | even            |      | ok     |
|           | 2  | C11H8IN10S     | 438.9693 | 2.5       | 16.9   | 2        | 64.64  | 18.0 | even            |      | ok     |
|           | 3  | C18H16IOS2     | 438.9682 | -0.1      | 21.3   | 3        | 99.92  | 18.0 | even            |      | ok     |
|           | 4  | C10H7N4O14S    | 438.9674 | -1.9      | 21.8   | 4        | 68.39  | 12.0 | even            |      | ok     |
|           | 5  | C15H3N8O5S2    | 438.9662 | -4.5      | 22.9   | 5        | 31.38  | 23.0 | even            |      | ok     |
|           | 6  | C10H12IN6O4S   | 438.9680 | -0.5      | 23.3   | 6        | 88.55  | 13.0 | even            |      | ok     |
|           | 7  | C18H3N2O12     | 438.9680 | -0.4      | 25.2   | 7        | 86.72  | 19.0 | even            |      | ok     |
|           | 8  | C19H7N2O7S2    | 438.9689 | 1.6       | 30.8   | 8        | 74.40  | 22.0 | even            |      | ok     |
|           | 9  | C10H20IN2O3S3  | 438.9675 | -1.6      | 33.1   | 9        | 70.08  | 11.0 | even            |      | ok     |
|           | 10 | C17H12IO6      | 438.9673 | -2.1      | 33.5   | 10       | 37.05  | 15.0 | even            |      | ok     |
|           | 11 | C12H7N8O5S3    | 438.9696 | 3.1       | 34.0   | 11       | 46.13  | 20.0 | even            |      | ok     |
|           | 12 | C11H11N4O9S3   | 438.9683 | 0.1       | 36.6   | 12       | 86.59  | 15.0 | even            |      | ok     |
|           | 13 | C18H8IN4O2     | 438.9686 | 1.0       | 39.6   | 13       | 40.52  | 20.0 | even            |      | ok     |
|           | 14 | C10H15O13S3    | 438.9669 | -2.9      | 42.0   | 14       | 39.33  | 10.0 | even            |      | ok     |
|           | 15 | C20H3N6O3S2    | 438.9703 | 4.6       | 43.3   | 15       | 18.17  | 27.0 | even            |      | ok     |
|           | 16 | C16H7N8S4      | 438.9671 | -2.6      | 60.3   | 16       | 24.85  | 26.0 | even            |      | ok     |
|           | 17 | C27H3O5S       | 438.9696 | 3.1       | 61.6   | 17       | 16.59  | 29.0 | even            |      | ok     |
|           | 18 | C23H7N2O2S3    | 438.9664 | -4.1      | 62.0   | 18       | 14.93  | 28.0 | even            |      | ok     |
|           | 19 | C20H11N2O2S4   | 438.9698 | 3.6       | 69.1   | 19       | 13.73  | 25.0 | even            |      | ok     |
|           | 20 | C28H7S3        | 438.9704 | 5.0       | 81.2   | 20       | 5.31   | 32.0 | even            |      | ok     |
| 460.9503  | 21 | C31H3S2        | 438.9671 | -2.6      | 82.4   | 21       | 10.61  | 35.0 | even            |      | ok     |
|           | 1  | C11H2N8NaO10S  | 460.9507 | 0.9       | 9.3    | 1        | 100.00 | 17.0 | even            |      | ok     |
|           | 2  | C14H15INaO6S   | 460.9526 | 5.1       | 9.8    | 2        | 28.40  | 12.0 | even            |      | ok     |
|           | 3  | C11H7IN10NaS   | 460.9513 | 2.2       | 14.3   | 3        | 66.73  | 18.0 | even            |      | ok     |
|           | 4  | C10H6N4NaO14S  | 460.9493 | -2.0      | 20.7   | 4        | 60.24  | 12.0 | even            |      | ok     |
|           | 5  | C10H11IN6NaO4S | 460.9499 | -0.7      | 21.3   | 5        | 80.65  | 13.0 | even            |      | ok     |
|           | 6  | C18H15INaOS2   | 460.9501 | -0.3      | 23.5   | 6        | 83.16  | 18.0 | even            |      | ok     |
|           | 7  | C18H2N2NaO12   | 460.9500 | -0.6      | 23.7   | 7        | 78.20  | 19.0 | even            |      | ok     |
|           | 8  | C15H2N8NaO5S2  | 460.9482 | -4.6      | 25.3   | 8        | 24.94  | 23.0 | even            |      | ok     |

# Mass Spectrum SmartFormula Report

| Meas. m/z | #  | Ion Formula     | m/z      | err [ppm] | mSigma | # mSigma | Score | rdb  | eÅ <sup>-</sup> | Conf | N-Rule |
|-----------|----|-----------------|----------|-----------|--------|----------|-------|------|-----------------|------|--------|
|           | 9  | C17H11INaO6     | 460.9493 | -2.2      | 31.0   | 9        | 33.93 | 15.0 | even            |      | ok     |
|           | 10 | C19H6N2NaO7S2   | 460.9509 | 1.3       | 32.8   | 10       | 68.85 | 22.0 | even            |      | ok     |
|           | 11 | C10H19IN2NaO3S3 | 460.9495 | -1.8      | 34.6   | 11       | 58.28 | 11.0 | even            |      | ok     |
|           | 12 | C12H6N8NaO5S3   | 460.9515 | 2.7       | 36.2   | 12       | 43.01 | 20.0 | even            |      | ok     |
|           | 13 | C18H7IN4NaO2    | 460.9506 | 0.7       | 37.7   | 13       | 41.26 | 20.0 | even            |      | ok     |
|           | 14 | C11H10N4NaO9S3  | 460.9502 | -0.2      | 38.5   | 14       | 74.58 | 15.0 | even            |      | ok     |
|           | 15 | C10H14NaO13S3   | 460.9489 | -3.1      | 43.6   | 15       | 32.06 | 10.0 | even            |      | ok     |
|           | 16 | C20H2N6NaO3S2   | 460.9522 | 4.2       | 45.3   | 16       | 17.19 | 27.0 | even            |      | ok     |
|           | 17 | C16H6N8NaS4     | 460.9490 | -2.7      | 62.6   | 17       | 19.68 | 26.0 | even            |      | ok     |
|           | 18 | C27H2NaO5S      | 460.9515 | 2.7       | 62.8   | 18       | 15.70 | 29.0 | even            |      | ok     |
|           | 19 | C23H6N2NaO2S3   | 460.9484 | -4.2      | 64.0   | 19       | 11.73 | 28.0 | even            |      | ok     |
|           | 20 | C20H10N2NaO2S4  | 460.9517 | 3.1       | 71.4   | 20       | 12.52 | 25.0 | even            |      | ok     |
|           | 21 | C28H6NaS3       | 460.9524 | 4.6       | 83.1   | 21       | 4.94  | 32.0 | even            |      | ok     |
|           | 22 | C31H2NaS2       | 460.9490 | -2.8      | 83.9   | 22       | 8.51  | 35.0 | even            |      | ok     |

Figure S34. HRESIMS spectrum of compound **6i**

## Generic Display Report

### Analysis Info

Analysis Name D:\Data\Kalaba\72420000001.d  
Method tune\_low\_MS\_Service\_08\_20.m  
Sample Name MK-31-p2  
Comment Kalaba/Zehl  
Ergebnis +/- 5ppm  
ACN / MeOH + 1% H<sub>2</sub>O

Acquisition Date 20/08/2020 17:13:58

Operator msc  
Instrument maXis

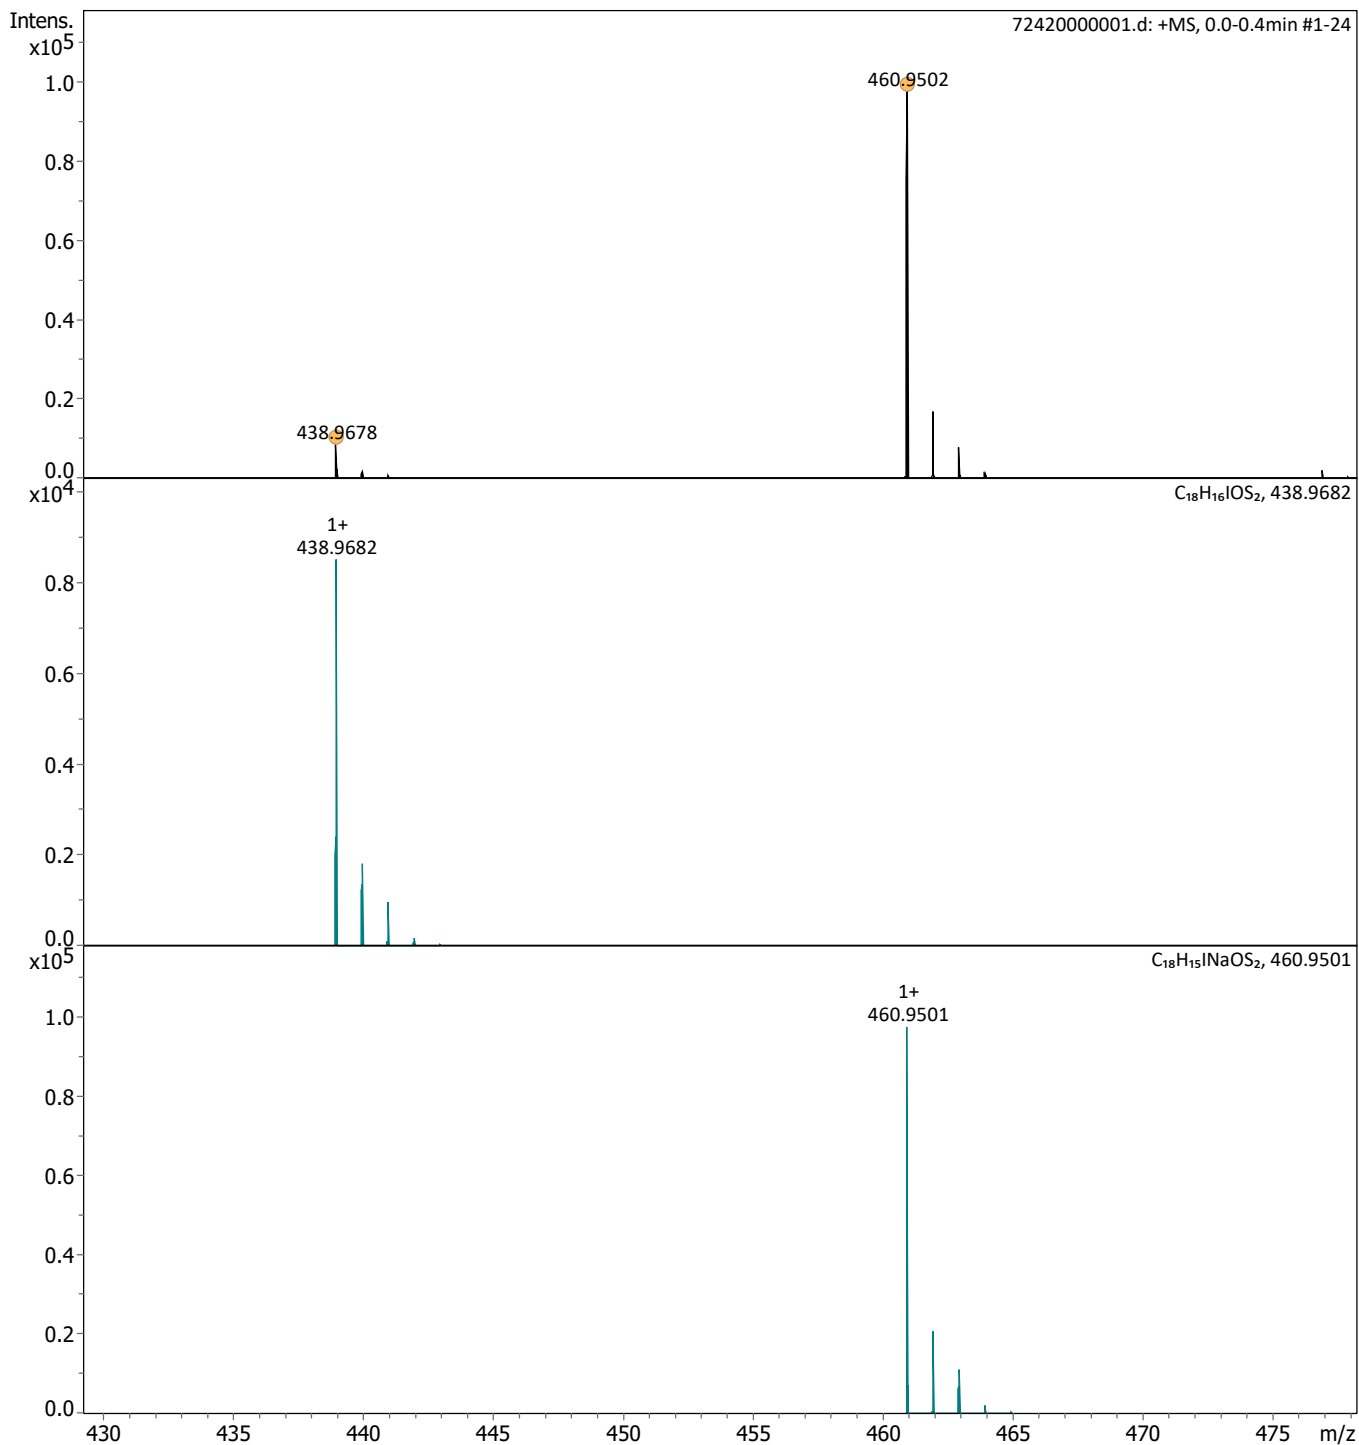

# Mass Spectrum SmartFormula Report

## Analysis Info

Analysis Name D:\Data\Kalaba\72420000001.d  
 Method tune\_low\_MS\_Service\_08\_20.m  
 Sample Name MK-31-p2  
 Comment Kalaba/Zehl  
 Ergebnis +/- 5ppm  
 ACN / MeOH + 1% H2O

Acquisition Date 20/08/2020 17:13:58

Operator msc  
 Instrument maXis 255552.00016

## Acquisition Parameter

|             |            |                      |          |                  |           |
|-------------|------------|----------------------|----------|------------------|-----------|
| Source Type | ESI        | Ion Polarity         | Positive | Set Nebulizer    | 0.4 Bar   |
| Focus       | Not active | Set Capillary        | 4200 V   | Set Dry Heater   | 180 Å°C   |
| Scan Begin  | 50 m/z     | Set End Plate Offset | -500 V   | Set Dry Gas      | 4.0 l/min |
| Scan End    | 1900 m/z   | Set Charging Voltage | 0 V      | Set Divert Valve | Source    |
|             |            | Set Corona           | 0 nA     | Set APCI Heater  | 0 Å°C     |

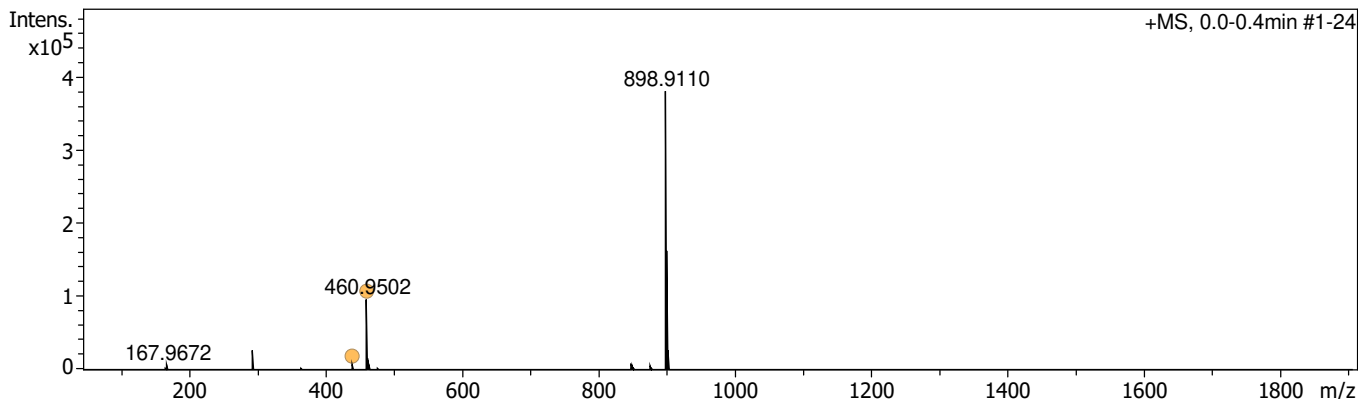

| Meas. m/z | #  | Ion Formula     | m/z      | err [ppm] | mSigma | # mSigma | Score  | rdb  | eÅ <sup>-</sup> | Conf | N-Rule |
|-----------|----|-----------------|----------|-----------|--------|----------|--------|------|-----------------|------|--------|
| 438.9678  | 1  | C18H16IOS2      | 438.9682 | 0.8       | 16.4   | 1        | 100.00 | 18.0 | even            |      | ok     |
|           | 2  | C15H3N8O5S2     | 438.9662 | -3.6      | 18.4   | 2        | 47.01  | 23.0 | even            |      | ok     |
|           | 3  | C19H7N2O7S2     | 438.9689 | 2.5       | 25.7   | 3        | 69.56  | 22.0 | even            |      | ok     |
|           | 4  | C18H3N2O12      | 438.9680 | 0.5       | 26.0   | 4        | 86.05  | 19.0 | even            |      | ok     |
|           | 5  | C12H7N8O5S3     | 438.9696 | 4.0       | 32.3   | 5        | 37.96  | 20.0 | even            |      | ok     |
|           | 6  | C17H12IO6       | 438.9673 | -1.2      | 38.3   | 6        | 41.11  | 15.0 | even            |      | ok     |
|           | 7  | C18H8IN4O2      | 438.9686 | 1.9       | 41.4   | 7        | 32.64  | 20.0 | even            |      | ok     |
|           | 8  | C14H4IN10       | 438.9660 | -4.3      | 45.2   | 8        | 14.94  | 21.0 | even            |      | ok     |
|           | 9  | C15H11N4O4S4    | 438.9658 | -4.7      | 54.8   | 9        | 15.98  | 21.0 | even            |      | ok     |
|           | 10 | C27H3O5S        | 438.9696 | 4.0       | 54.9   | 10       | 16.34  | 29.0 | even            |      | ok     |
|           | 11 | C16H7N8S4       | 438.9671 | -1.7      | 56.4   | 11       | 36.07  | 26.0 | even            |      | ok     |
|           | 12 | C23H7N2O2S3     | 438.9664 | -3.2      | 56.7   | 12       | 23.96  | 28.0 | even            |      | ok     |
|           | 13 | C20H11N2O2S4    | 438.9698 | 4.4       | 64.8   | 13       | 12.48  | 25.0 | even            |      | ok     |
|           | 14 | C31H3S2         | 438.9671 | -1.7      | 76.3   | 14       | 17.36  | 35.0 | even            |      | ok     |
| 460.9502  | 1  | C11H2N8NaO10S   | 460.9507 | 1.0       | 7.5    | 1        | 100.00 | 17.0 | even            |      | ok     |
|           | 2  | C11H7IN10NaS    | 460.9513 | 2.3       | 13.0   | 2        | 65.71  | 18.0 | even            |      | ok     |
|           | 3  | C10H6N4NaO14S   | 460.9493 | -1.9      | 19.0   | 3        | 65.80  | 12.0 | even            |      | ok     |
|           | 4  | C10H11IN6NaO4S  | 460.9499 | -0.6      | 19.4   | 4        | 87.57  | 13.0 | even            |      | ok     |
|           | 5  | C18H2N2NaO12    | 460.9500 | -0.5      | 24.3   | 5        | 80.42  | 19.0 | even            |      | ok     |
|           | 6  | C18H15INaOS2    | 460.9501 | -0.2      | 25.3   | 6        | 83.17  | 18.0 | even            |      | ok     |
|           | 7  | C15H2N8NaO5S2   | 460.9482 | -4.4      | 26.9   | 7        | 25.74  | 23.0 | even            |      | ok     |
|           | 8  | C17H11INaO6     | 460.9493 | -2.1      | 30.7   | 8        | 36.03  | 15.0 | even            |      | ok     |
|           | 9  | C19H6N2NaO7S2   | 460.9509 | 1.4       | 34.3   | 9        | 63.83  | 22.0 | even            |      | ok     |
|           | 10 | C10H19IN2NaO3S3 | 460.9495 | -1.6      | 34.5   | 10       | 61.46  | 11.0 | even            |      | ok     |
|           | 11 | C12H6N8NaO5S3   | 460.9515 | 2.9       | 37.0   | 11       | 40.25  | 20.0 | even            |      | ok     |
|           | 12 | C14H3IN10Na     | 460.9479 | -5.0      | 37.6   | 12       | 11.94  | 21.0 | even            |      | ok     |
|           | 13 | C18H7IN4NaO2    | 460.9506 | 0.8       | 38.2   | 13       | 39.49  | 20.0 | even            |      | ok     |
|           | 14 | C11H10N4NaO9S3  | 460.9502 | 0.0       | 38.8   | 14       | 76.25  | 15.0 | even            |      | ok     |
|           | 15 | C10H14NaO13S3   | 460.9489 | -2.9      | 43.5   | 15       | 34.05  | 10.0 | even            |      | ok     |



## Mass Spectrum SmartFormula Report

| Meas. m/z | # | Ion Formula    | m/z      | err [ppm] | mSigma | # mSigma | Score | rdb  | e <sup>-</sup> | Conf | N-Rule |
|-----------|---|----------------|----------|-----------|--------|----------|-------|------|----------------|------|--------|
| 16        |   | C20H2N6NaO3S2  | 460.9522 | 4.3       | 47.1   | 16       | 15.39 | 27.0 | even           |      | ok     |
| 17        |   | C16H6N8NaS4    | 460.9490 | -2.5      | 63.7   | 17       | 19.96 | 26.0 | even           |      | ok     |
| 18        |   | C27H2NaO5S     | 460.9515 | 2.8       | 64.6   | 18       | 14.06 | 29.0 | even           |      | ok     |
| 19        |   | C23H6N2NaO2S3  | 460.9484 | -4.0      | 65.6   | 19       | 11.86 | 28.0 | even           |      | ok     |
| 20        |   | C20H10N2NaO2S4 | 460.9517 | 3.3       | 72.7   | 20       | 11.35 | 25.0 | even           |      | ok     |
| 21        |   | C28H6NaS3      | 460.9524 | 4.7       | 84.7   | 21       | 4.35  | 32.0 | even           |      | ok     |
| 22        |   | C31H2NaS2      | 460.9490 | -2.6      | 85.6   | 22       | 8.39  | 35.0 | even           |      | ok     |

Figure S35. HRESIMS spectrum of compound 7i

## Generic Display Report

### Analysis Info

Analysis Name D:\Data\Kalaba\72421000001.d  
Method tune\_low\_MS\_Service\_08\_20.m  
Sample Name MK-31-p3  
Comment Kalaba/Zehl  
Ergebnis +/- 5ppm  
ACN / MeOH + 1% H<sub>2</sub>O

Acquisition Date 20/08/2020 17:15:38

Operator msc  
Instrument maXis

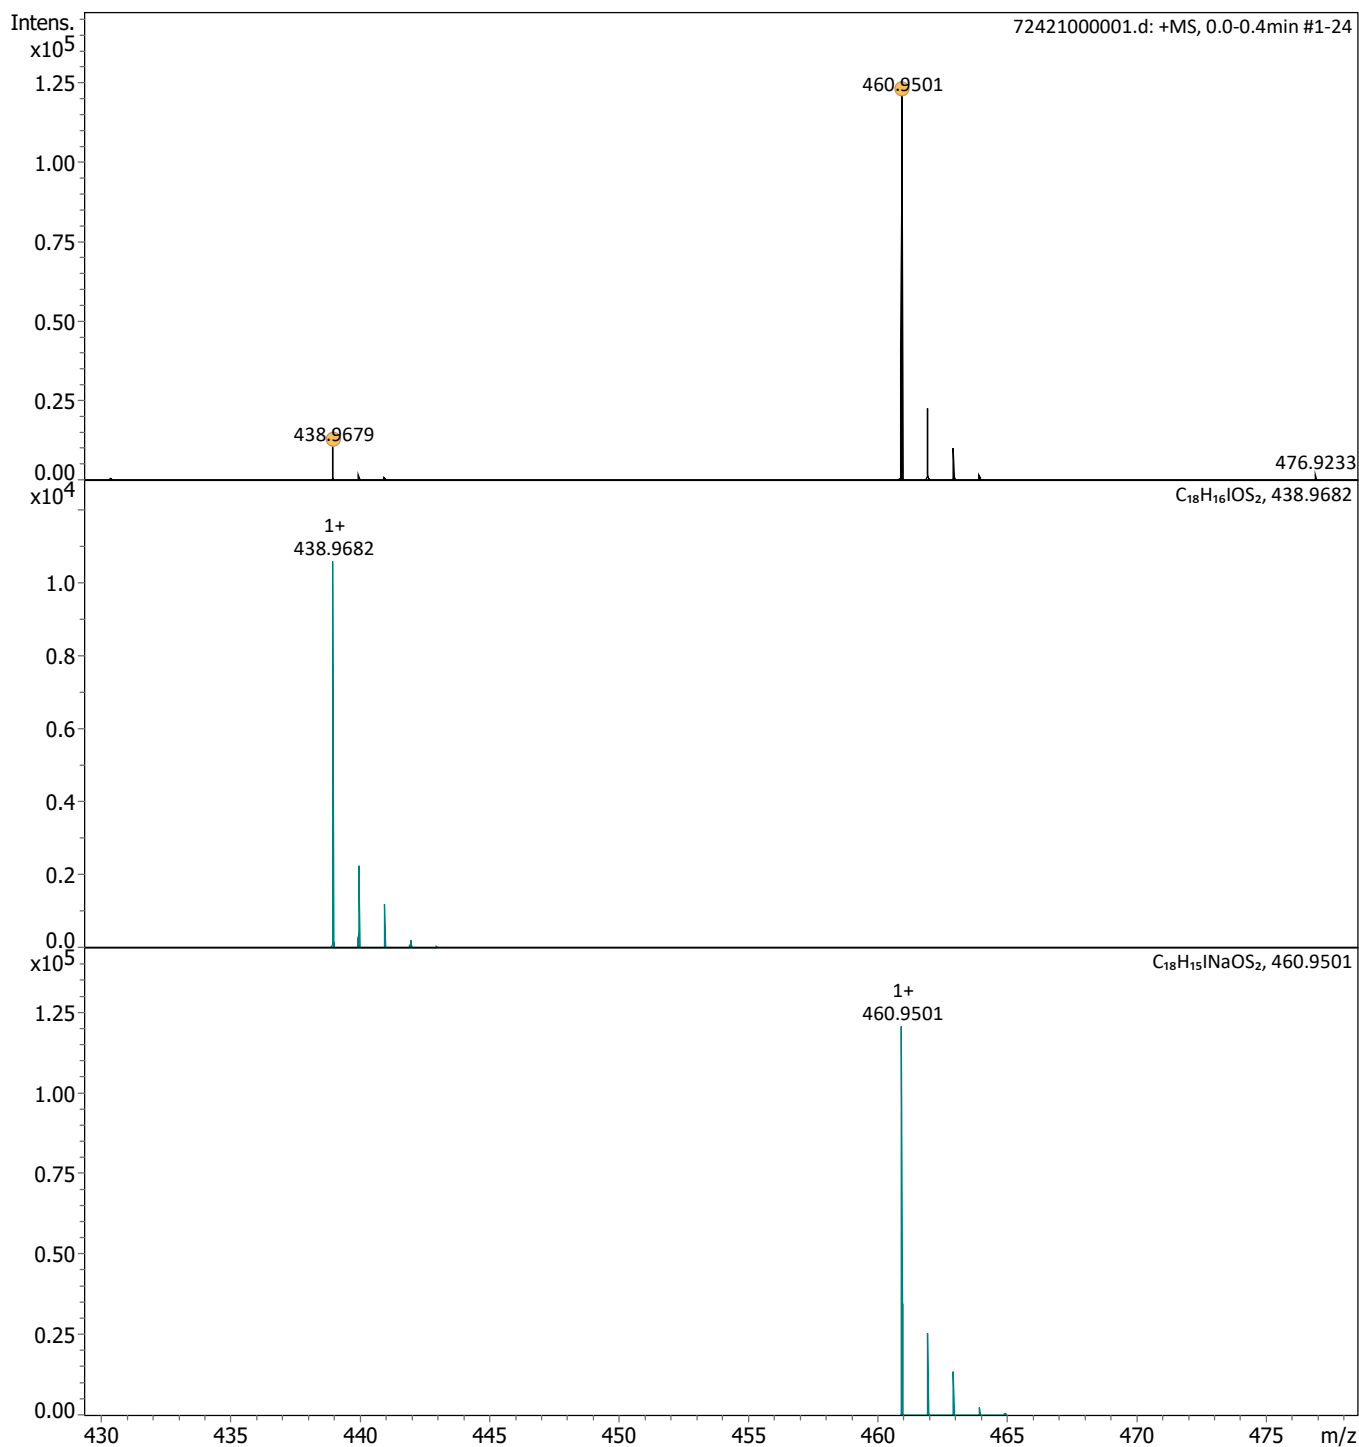

# Mass Spectrum SmartFormula Report

## Analysis Info

Analysis Name D:\Data\Kalaba\72421000001.d  
 Method tune\_low\_MS\_Service\_08\_20.m  
 Sample Name MK-31-p3  
 Comment Kalaba/Zehl  
 Ergebnis +/- 5ppm  
 ACN / MeOH + 1% H2O

Acquisition Date 20/08/2020 17:15:38

Operator msc  
 Instrument maXis 255552.00016

## Acquisition Parameter

|             |            |                      |          |                  |           |
|-------------|------------|----------------------|----------|------------------|-----------|
| Source Type | ESI        | Ion Polarity         | Positive | Set Nebulizer    | 0.4 Bar   |
| Focus       | Not active | Set Capillary        | 4200 V   | Set Dry Heater   | 180 Å°C   |
| Scan Begin  | 50 m/z     | Set End Plate Offset | -500 V   | Set Dry Gas      | 4.0 l/min |
| Scan End    | 1900 m/z   | Set Charging Voltage | 0 V      | Set Divert Valve | Source    |
|             |            | Set Corona           | 0 nA     | Set APCI Heater  | 0 Å°C     |

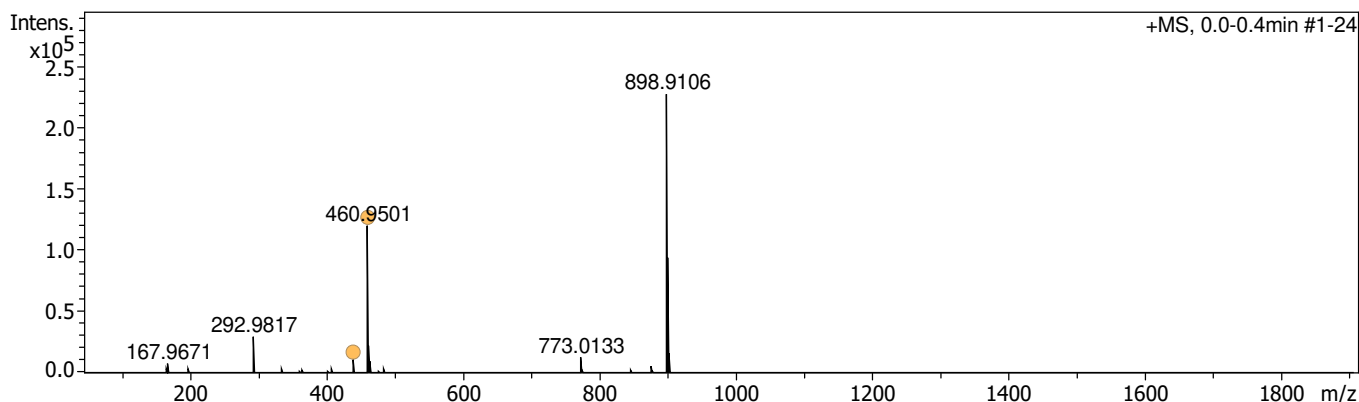

| Meas. m/z | #  | Ion Formula    | m/z      | err [ppm] | mSigma | # mSigma | Score  | rdb  | eÅ   | Conf | N-Rule |
|-----------|----|----------------|----------|-----------|--------|----------|--------|------|------|------|--------|
| 438.9679  | 1  | C11H3N8O10S    | 438.9687 | 2.0       | 16.8   | 1        | 79.38  | 17.0 | even |      | ok     |
|           | 2  | C18H16IOS2     | 438.9682 | 0.8       | 19.0   | 2        | 100.00 | 18.0 | even |      | ok     |
|           | 3  | C15H3N8O5S2    | 438.9662 | -3.7      | 21.0   | 3        | 46.20  | 23.0 | even |      | ok     |
|           | 4  | C11H8IN10S     | 438.9693 | 3.4       | 21.2   | 4        | 50.38  | 18.0 | even |      | ok     |
|           | 5  | C18H3N2O12     | 438.9680 | 0.5       | 24.9   | 5        | 93.13  | 19.0 | even |      | ok     |
|           | 6  | C19H7N2O7S2    | 438.9689 | 2.4       | 28.3   | 6        | 69.26  | 22.0 | even |      | ok     |
|           | 7  | C12H7N8O5S3    | 438.9696 | 4.0       | 33.7   | 7        | 38.90  | 20.0 | even |      | ok     |
|           | 8  | C17H12IO6      | 438.9673 | -1.2      | 35.9   | 8        | 45.67  | 15.0 | even |      | ok     |
|           | 9  | C11H11N4O9S3   | 438.9683 | 0.9       | 37.2   | 9        | 78.07  | 15.0 | even |      | ok     |
|           | 10 | C18H8IN4O2     | 438.9686 | 1.8       | 40.0   | 10       | 35.83  | 20.0 | even |      | ok     |
|           | 11 | C14H4IN10      | 438.9660 | -4.3      | 42.8   | 11       | 16.58  | 21.0 | even |      | ok     |
|           | 12 | C15H11N4O4S4   | 438.9658 | -4.8      | 56.8   | 12       | 15.53  | 21.0 | even |      | ok     |
|           | 13 | C27H3O5S       | 438.9696 | 3.9       | 57.6   | 13       | 15.88  | 29.0 | even |      | ok     |
|           | 14 | C16H7N8S4      | 438.9671 | -1.7      | 58.7   | 14       | 34.79  | 26.0 | even |      | ok     |
|           | 15 | C23H7N2O2S3    | 438.9664 | -3.3      | 59.4   | 15       | 22.71  | 28.0 | even |      | ok     |
|           | 16 | C20H11N2O2S4   | 438.9698 | 4.4       | 67.3   | 16       | 12.13  | 25.0 | even |      | ok     |
|           | 17 | C31H3S2        | 438.9671 | -1.8      | 79.0   | 17       | 16.20  | 35.0 | even |      | ok     |
| 460.9501  | 1  | C11H2N8NaO10S  | 460.9507 | 1.3       | 13.8   | 1        | 87.56  | 17.0 | even |      | ok     |
|           | 2  | C11H7IN10NaS   | 460.9513 | 2.6       | 17.7   | 2        | 58.00  | 18.0 | even |      | ok     |
|           | 3  | C18H15INaOS2   | 460.9501 | 0.1       | 19.6   | 3        | 100.00 | 18.0 | even |      | ok     |
|           | 4  | C15H2N8NaO5S2  | 460.9482 | -4.1      | 21.8   | 4        | 33.67  | 23.0 | even |      | ok     |
|           | 5  | C18H2N2NaO12   | 460.9500 | -0.2      | 22.4   | 5        | 93.63  | 19.0 | even |      | ok     |
|           | 6  | C19H6N2NaO7S2  | 460.9509 | 1.7       | 29.2   | 6        | 71.20  | 22.0 | even |      | ok     |
|           | 7  | C17H11INaO6    | 460.9493 | -1.8      | 31.9   | 7        | 39.64  | 15.0 | even |      | ok     |
|           | 8  | C12H6N8NaO5S3  | 460.9515 | 3.2       | 34.9   | 8        | 40.99  | 20.0 | even |      | ok     |
|           | 9  | C18H7IN4NaO2   | 460.9506 | 1.1       | 36.7   | 9        | 40.50  | 20.0 | even |      | ok     |
|           | 10 | C11H10N4NaO9S3 | 460.9502 | 0.3       | 38.3   | 10       | 77.05  | 15.0 | even |      | ok     |
|           | 11 | C14H3IN10Na    | 460.9479 | -4.7      | 38.9   | 11       | 13.54  | 21.0 | even |      | ok     |
|           | 12 | C20H2N6NaO3S2  | 460.9522 | 4.6       | 40.9   | 12       | 17.40  | 27.0 | even |      | ok     |

---

## Mass Spectrum SmartFormula Report

---

| Meas. m/z | # | Ion Formula    | m/z      | err [ppm] | mSigma | # mSigma | Score | rdb  | e <sup>-</sup> Conf | N-Rule |
|-----------|---|----------------|----------|-----------|--------|----------|-------|------|---------------------|--------|
| 13        |   | C27H2NaO5S     | 460.9515 | 3.1       | 58.3   | 13       | 16.86 | 29.0 | even                | ok     |
| 14        |   | C16H6N8NaS4    | 460.9490 | -2.2      | 60.0   | 14       | 25.89 | 26.0 | even                | ok     |
| 15        |   | C23H6N2NaO2S3  | 460.9484 | -3.7      | 60.4   | 15       | 16.44 | 28.0 | even                | ok     |
| 16        |   | C20H10N2NaO2S4 | 460.9517 | 3.6       | 68.5   | 16       | 12.74 | 25.0 | even                | ok     |
| 17        |   | C28H6NaS3      | 460.9524 | 5.0       | 79.3   | 17       | 5.13  | 32.0 | even                | ok     |
| 18        |   | C31H2NaS2      | 460.9490 | -2.3      | 79.9   | 18       | 12.12 | 35.0 | even                | ok     |

**Figure S36.** HRESIMS spectrum of compound **8i**

## Generic Display Report

### Analysis Info

Analysis Name D:\Data\Kalaba\72422000001.d  
Method tune\_low\_MS\_Service\_08\_20.m  
Sample Name MK-31-p4  
Comment Kalaba/Zehl  
Ergebnis +/- 5ppm  
ACN / MeOH + 1% H2O

Acquisition Date 20/08/2020 17:27:15

Operator msc  
Instrument maXis

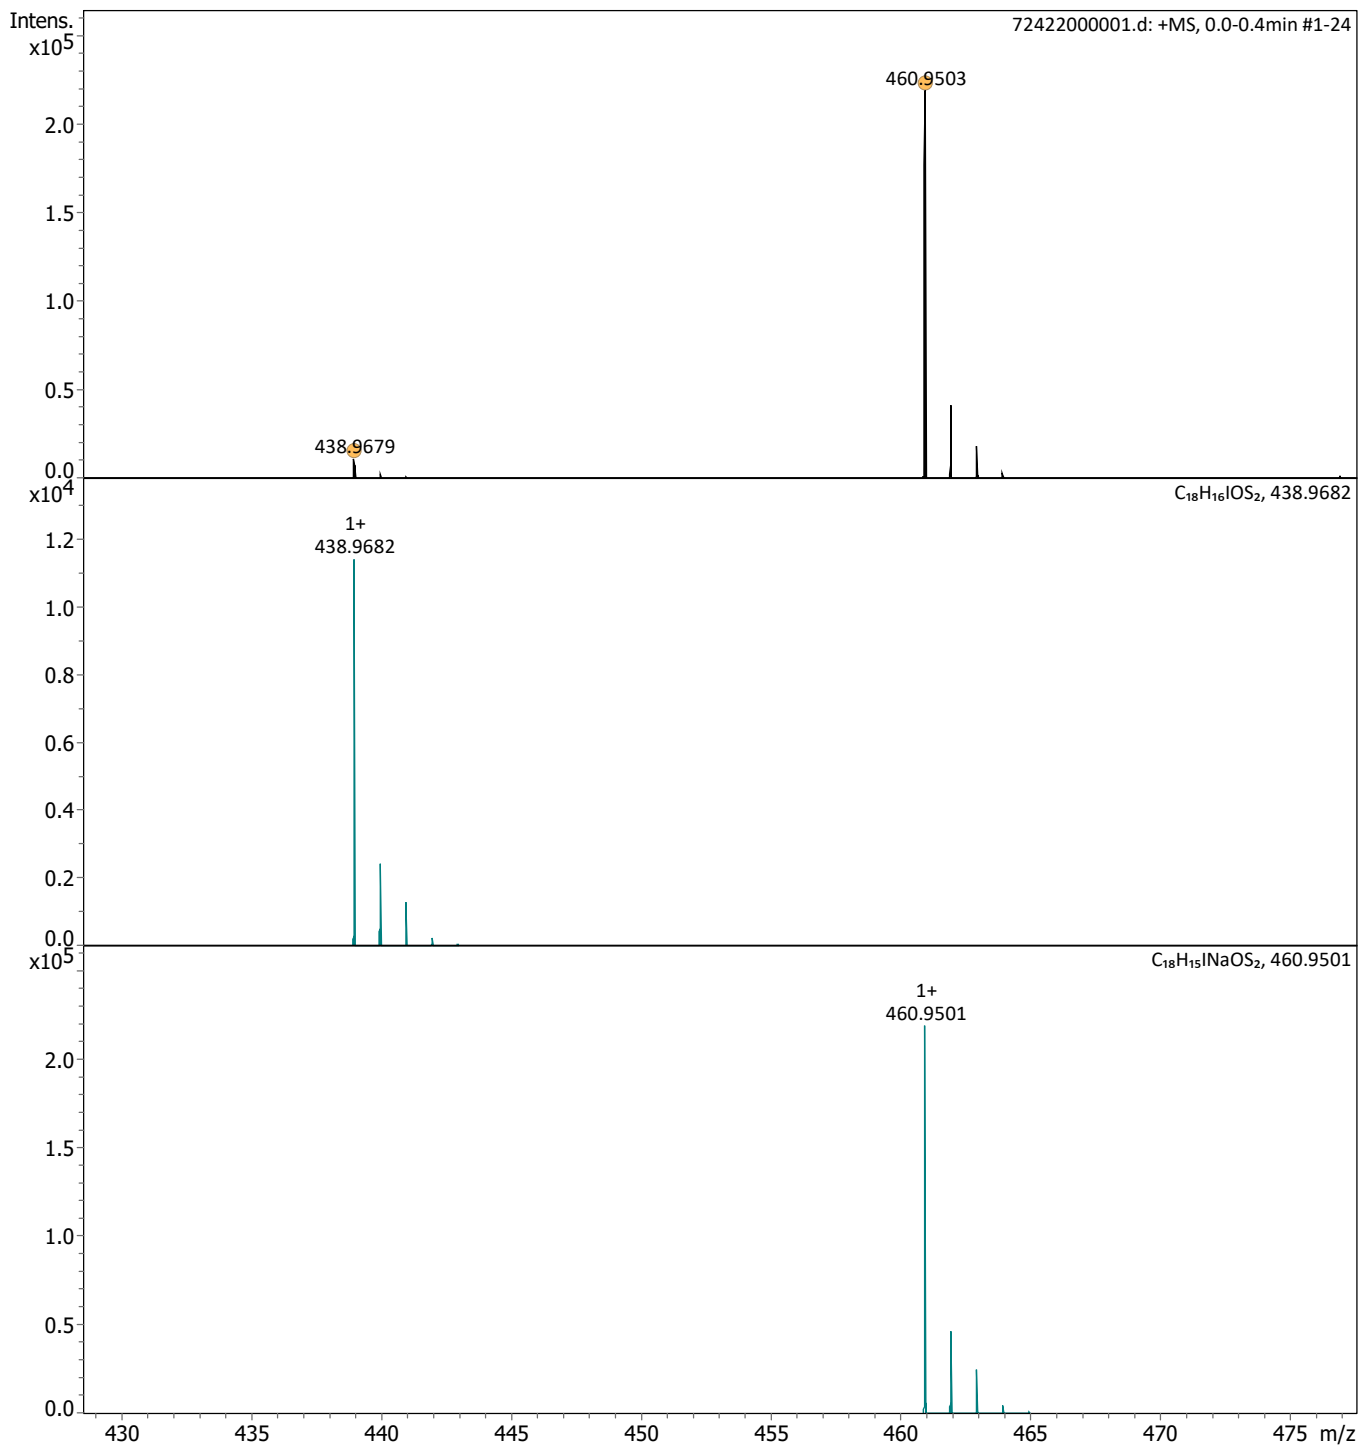

# Mass Spectrum SmartFormula Report

## Analysis Info

Analysis Name D:\Data\Kalaba\72422000001.d  
 Method tune\_low\_MS\_Service\_08\_20.m  
 Sample Name MK-31-p4  
 Comment Kalaba/Zehl  
 Ergebnis +/- 5ppm  
 ACN / MeOH + 1% H2O

Acquisition Date 20/08/2020 17:27:15

Operator msc  
 Instrument maXis 255552.00016

## Acquisition Parameter

|             |            |                      |          |                  |           |
|-------------|------------|----------------------|----------|------------------|-----------|
| Source Type | ESI        | Ion Polarity         | Positive | Set Nebulizer    | 0.4 Bar   |
| Focus       | Not active | Set Capillary        | 4200 V   | Set Dry Heater   | 180 Å°C   |
| Scan Begin  | 50 m/z     | Set End Plate Offset | -500 V   | Set Dry Gas      | 4.0 l/min |
| Scan End    | 1900 m/z   | Set Charging Voltage | 0 V      | Set Divert Valve | Source    |
|             |            | Set Corona           | 0 nA     | Set APCI Heater  | 0 Å°C     |

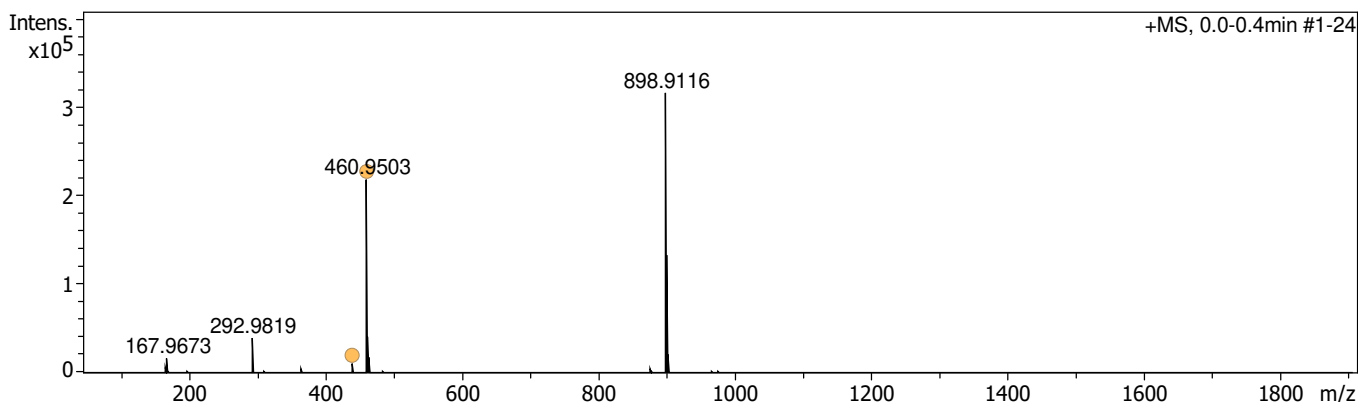

| Meas. m/z | #  | Ion Formula    | m/z      | err [ppm] | mSigma | # mSigma | Score  | rdb  | eÅ   | Conf | N-Rule |
|-----------|----|----------------|----------|-----------|--------|----------|--------|------|------|------|--------|
| 438.9679  | 1  | C18H16IOS2     | 438.9682 | 0.5       | 16.1   | 1        | 100.00 | 18.0 | even |      | ok     |
|           | 2  | C15H3N8O5S2    | 438.9662 | -3.9      | 18.6   | 2        | 41.26  | 23.0 | even |      | ok     |
|           | 3  | C18H3N2O12     | 438.9680 | 0.2       | 24.4   | 3        | 88.52  | 19.0 | even |      | ok     |
|           | 4  | C19H7N2O7S2    | 438.9689 | 2.2       | 25.3   | 4        | 70.78  | 22.0 | even |      | ok     |
|           | 5  | C12H7N8O5S3    | 438.9696 | 3.8       | 33.5   | 5        | 37.70  | 20.0 | even |      | ok     |
|           | 6  | C17H12IO6      | 438.9673 | -1.4      | 37.2   | 6        | 38.11  | 15.0 | even |      | ok     |
|           | 7  | C18H8IN4O2     | 438.9686 | 1.6       | 39.6   | 7        | 34.42  | 20.0 | even |      | ok     |
|           | 8  | C14H4IN10      | 438.9660 | -4.5      | 44.1   | 8        | 13.54  | 21.0 | even |      | ok     |
|           | 9  | C27H3O5S       | 438.9696 | 3.7       | 53.2   | 9        | 17.65  | 29.0 | even |      | ok     |
|           | 10 | C15H11N4O4S4   | 438.9658 | -5.0      | 55.6   | 10       | 13.60  | 21.0 | even |      | ok     |
|           | 11 | C23H7N2O2S3    | 438.9664 | -3.5      | 56.3   | 11       | 21.47  | 28.0 | even |      | ok     |
|           | 12 | C16H7N8S4      | 438.9671 | -1.9      | 56.9   | 12       | 31.89  | 26.0 | even |      | ok     |
|           | 13 | C20H11N2O2S4   | 438.9698 | 4.2       | 65.0   | 13       | 12.73  | 25.0 | even |      | ok     |
|           | 14 | C31H3S2        | 438.9671 | -2.0      | 75.2   | 14       | 16.26  | 35.0 | even |      | ok     |
| 460.9503  | 1  | C11H2N8NaO10S  | 460.9507 | 0.7       | 14.5   | 1        | 100.00 | 17.0 | even |      | ok     |
|           | 2  | C14H15INaO6S   | 460.9526 | 4.9       | 14.6   | 2        | 29.24  | 12.0 | even |      | ok     |
|           | 3  | C11H7IN10NaS   | 460.9513 | 2.0       | 18.3   | 3        | 68.41  | 18.0 | even |      | ok     |
|           | 4  | C18H15INaOS2   | 460.9501 | -0.5      | 19.1   | 4        | 95.68  | 18.0 | even |      | ok     |
|           | 5  | C15H2N8NaO5S2  | 460.9482 | -4.7      | 21.4   | 5        | 27.81  | 23.0 | even |      | ok     |
|           | 6  | C18H2N2NaO12   | 460.9500 | -0.8      | 22.2   | 6        | 84.37  | 19.0 | even |      | ok     |
|           | 7  | C19H6N2NaO7S2  | 460.9509 | 1.1       | 28.6   | 7        | 84.20  | 22.0 | even |      | ok     |
|           | 8  | C17H11INaO6    | 460.9493 | -2.4      | 32.0   | 8        | 34.22  | 15.0 | even |      | ok     |
|           | 9  | C12H6N8NaO5S3  | 460.9515 | 2.6       | 34.8   | 9        | 49.72  | 20.0 | even |      | ok     |
|           | 10 | C18H7IN4NaO2   | 460.9506 | 0.5       | 36.6   | 10       | 46.90  | 20.0 | even |      | ok     |
|           | 11 | C11H10N4NaO9S3 | 460.9502 | -0.3      | 38.3   | 11       | 78.28  | 15.0 | even |      | ok     |
|           | 12 | C20H2N6NaO3S2  | 460.9522 | 4.0       | 40.3   | 12       | 22.20  | 27.0 | even |      | ok     |
|           | 13 | C27H2NaO5S     | 460.9515 | 2.5       | 57.6   | 13       | 20.83  | 29.0 | even |      | ok     |
|           | 14 | C16H6N8NaS4    | 460.9490 | -2.8      | 59.6   | 14       | 22.43  | 26.0 | even |      | ok     |
|           | 15 | C23H6N2NaO2S3  | 460.9484 | -4.3      | 59.9   | 15       | 13.82  | 28.0 | even |      | ok     |

---

## Mass Spectrum SmartFormula Report

---

| Meas. m/z | #  | Ion Formula    | m/z      | err [ppm] | mSigma | # mSigma | Score | rdb  | e <sup>-</sup> | Conf | N-Rule |
|-----------|----|----------------|----------|-----------|--------|----------|-------|------|----------------|------|--------|
|           | 16 | C20H10N2NaO2S4 | 460.9517 | 3.0       | 68.1   | 16       | 15.78 | 25.0 | even           |      | ok     |
|           | 17 | C28H6NaS3      | 460.9524 | 4.4       | 78.7   | 17       | 6.65  | 32.0 | even           |      | ok     |
|           | 18 | C31H2NaS2      | 460.9490 | -2.9      | 79.3   | 18       | 10.63 | 35.0 | even           |      | ok     |

**Figure S37.** HRESIMS spectrum of compound **5j**

## Generic Display Report

### Analysis Info

Analysis Name D:\Data\Kalaba\71415000001.d  
Method tune\_low\_MS\_Service\_07\_20.m  
Sample Name MK-30-1-1  
Comment Kalaba/Zehl  
Ergebnis +/- 5 ppm  
ACN/MeOH + 1 % H<sub>2</sub>O

Acquisition Date 06/07/2020 18:06:20

Operator msc  
Instrument maXis

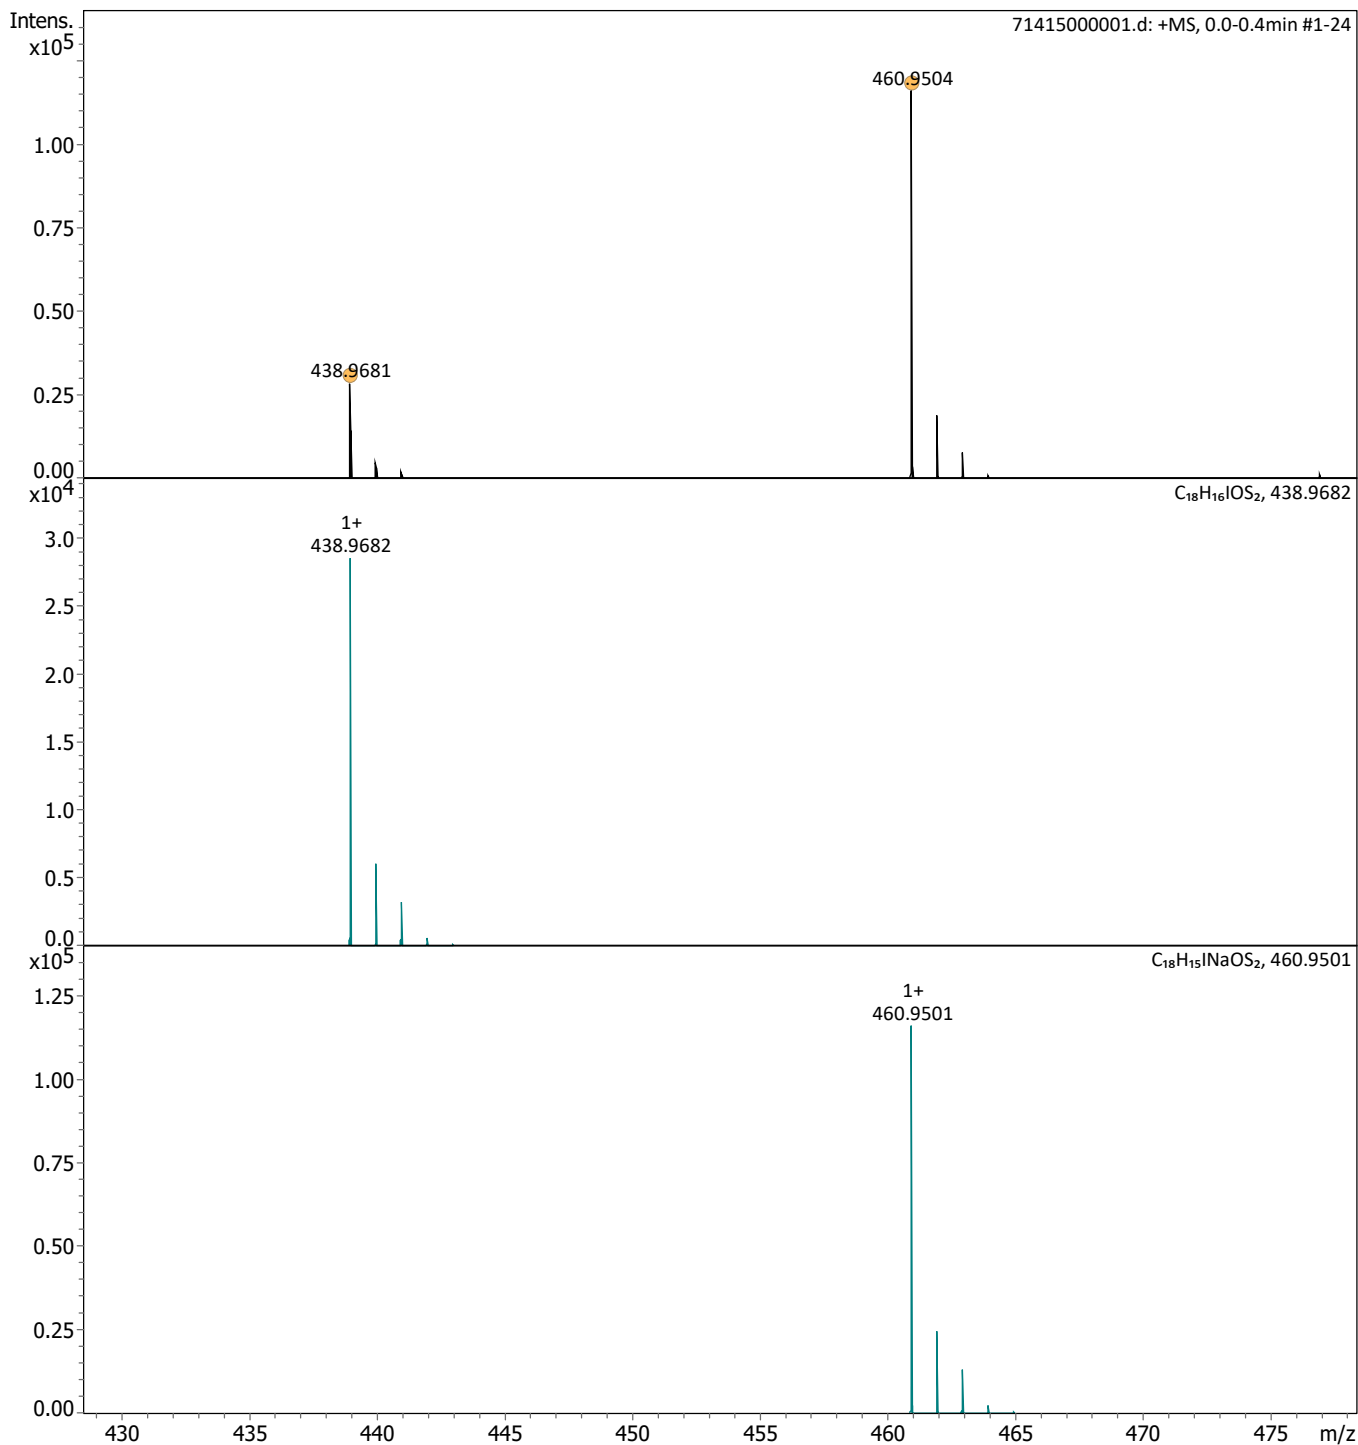



# Mass Spectrum SmartFormula Report

## Analysis Info

Analysis Name D:\Data\Kalaba\71415000001.d  
 Method tune\_low\_MS\_Service\_07\_20.m  
 Sample Name MK-30-1-1  
 Comment Kalaba/Zehl  
 Ergebnis +/- 5 ppm  
 ACN/MeOH + 1 % H2O

Acquisition Date 06/07/2020 18:06:20

Operator msc  
 Instrument maXis 255552.00016

## Acquisition Parameter

|             |            |                      |          |                  |           |
|-------------|------------|----------------------|----------|------------------|-----------|
| Source Type | ESI        | Ion Polarity         | Positive | Set Nebulizer    | 0.4 Bar   |
| Focus       | Not active | Set Capillary        | 4200 V   | Set Dry Heater   | 180 Å°C   |
| Scan Begin  | 50 m/z     | Set End Plate Offset | -500 V   | Set Dry Gas      | 4.0 l/min |
| Scan End    | 1900 m/z   | Set Charging Voltage | 0 V      | Set Divert Valve | Source    |
|             |            | Set Corona           | 0 nA     | Set APCI Heater  | 0 Å°C     |

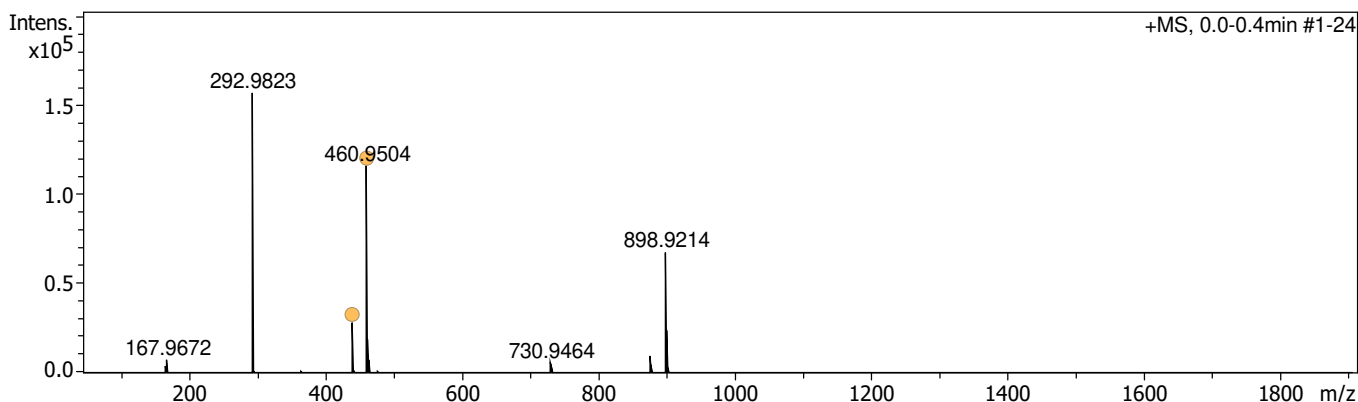

| Meas. m/z | # | Ion Formula     | m/z      | err [ppm] | mSigma | # mSigma | Score  | rdB  | eÅ <sup>-</sup> | Conf | N-Rule |
|-----------|---|-----------------|----------|-----------|--------|----------|--------|------|-----------------|------|--------|
| 438.9681  | 1 | C11H8IN10S      | 438.9693 | 2.9       | 5.6    | 1        | 59.62  | 18.0 | even            |      | ok     |
|           | 2 | C10H12IN6O4S    | 438.9680 | -0.2      | 10.9   | 2        | 100.00 | 13.0 | even            |      | ok     |
|           | 3 | C9H16IN2O8S     | 438.9667 | -3.2      | 22.2   | 3        | 39.34  | 8.0  | even            |      | ok     |
|           | 4 | C17H12IO6       | 438.9673 | -1.7      | 26.9   | 4        | 38.89  | 15.0 | even            |      | ok     |
|           | 5 | C14H4IN10       | 438.9660 | -4.8      | 33.1   | 5        | 13.87  | 21.0 | even            |      | ok     |
|           | 6 | C18H16IOS2      | 438.9682 | 0.3       | 34.5   | 6        | 58.25  | 18.0 | even            |      | ok     |
|           | 7 | C18H8IN4O2      | 438.9686 | 1.3       | 37.5   | 7        | 32.59  | 20.0 | even            |      | ok     |
|           | 8 | C10H20IN2O3S3   | 438.9675 | -1.2      | 38.1   | 8        | 54.59  | 11.0 | even            |      | ok     |
| 460.9504  | 1 | C14H15INaO6S    | 460.9526 | 4.8       | 1.0    | 1        | 39.92  | 12.0 | even            |      | ok     |
|           | 2 | C11H7IN10NaS    | 460.9513 | 1.9       | 5.3    | 2        | 91.83  | 18.0 | even            |      | ok     |
|           | 3 | C10H11IN6NaO4S  | 460.9499 | -1.0      | 11.2   | 3        | 100.00 | 13.0 | even            |      | ok     |
|           | 4 | C9H15IN2NaO8S   | 460.9486 | -3.9      | 22.6   | 4        | 35.53  | 8.0  | even            |      | ok     |
|           | 5 | C17H11INaO6     | 460.9493 | -2.5      | 26.7   | 5        | 37.37  | 15.0 | even            |      | ok     |
|           | 6 | C18H15INaOS2    | 460.9501 | -0.6      | 34.2   | 6        | 65.36  | 18.0 | even            |      | ok     |
|           | 7 | C18H7IN4NaO2    | 460.9506 | 0.4       | 37.2   | 7        | 47.90  | 20.0 | even            |      | ok     |
|           | 8 | C10H19IN2NaO3S3 | 460.9495 | -2.1      | 38.1   | 8        | 53.10  | 11.0 | even            |      | ok     |

**Figure S38.** HRESIMS spectrum of compound **6j**

## Generic Display Report

### Analysis Info

Analysis Name D:\Data\Kalaba\71416000001.d  
Method tune\_low\_MS\_Service\_07\_20.m  
Sample Name MK-30-1-2  
Comment Kalaba/Zehl  
Ergebnis +/- 5 ppm  
ACN/MeOH + 1 % H<sub>2</sub>O

Acquisition Date 06/07/2020 18:30:37

Operator msc  
Instrument maXis

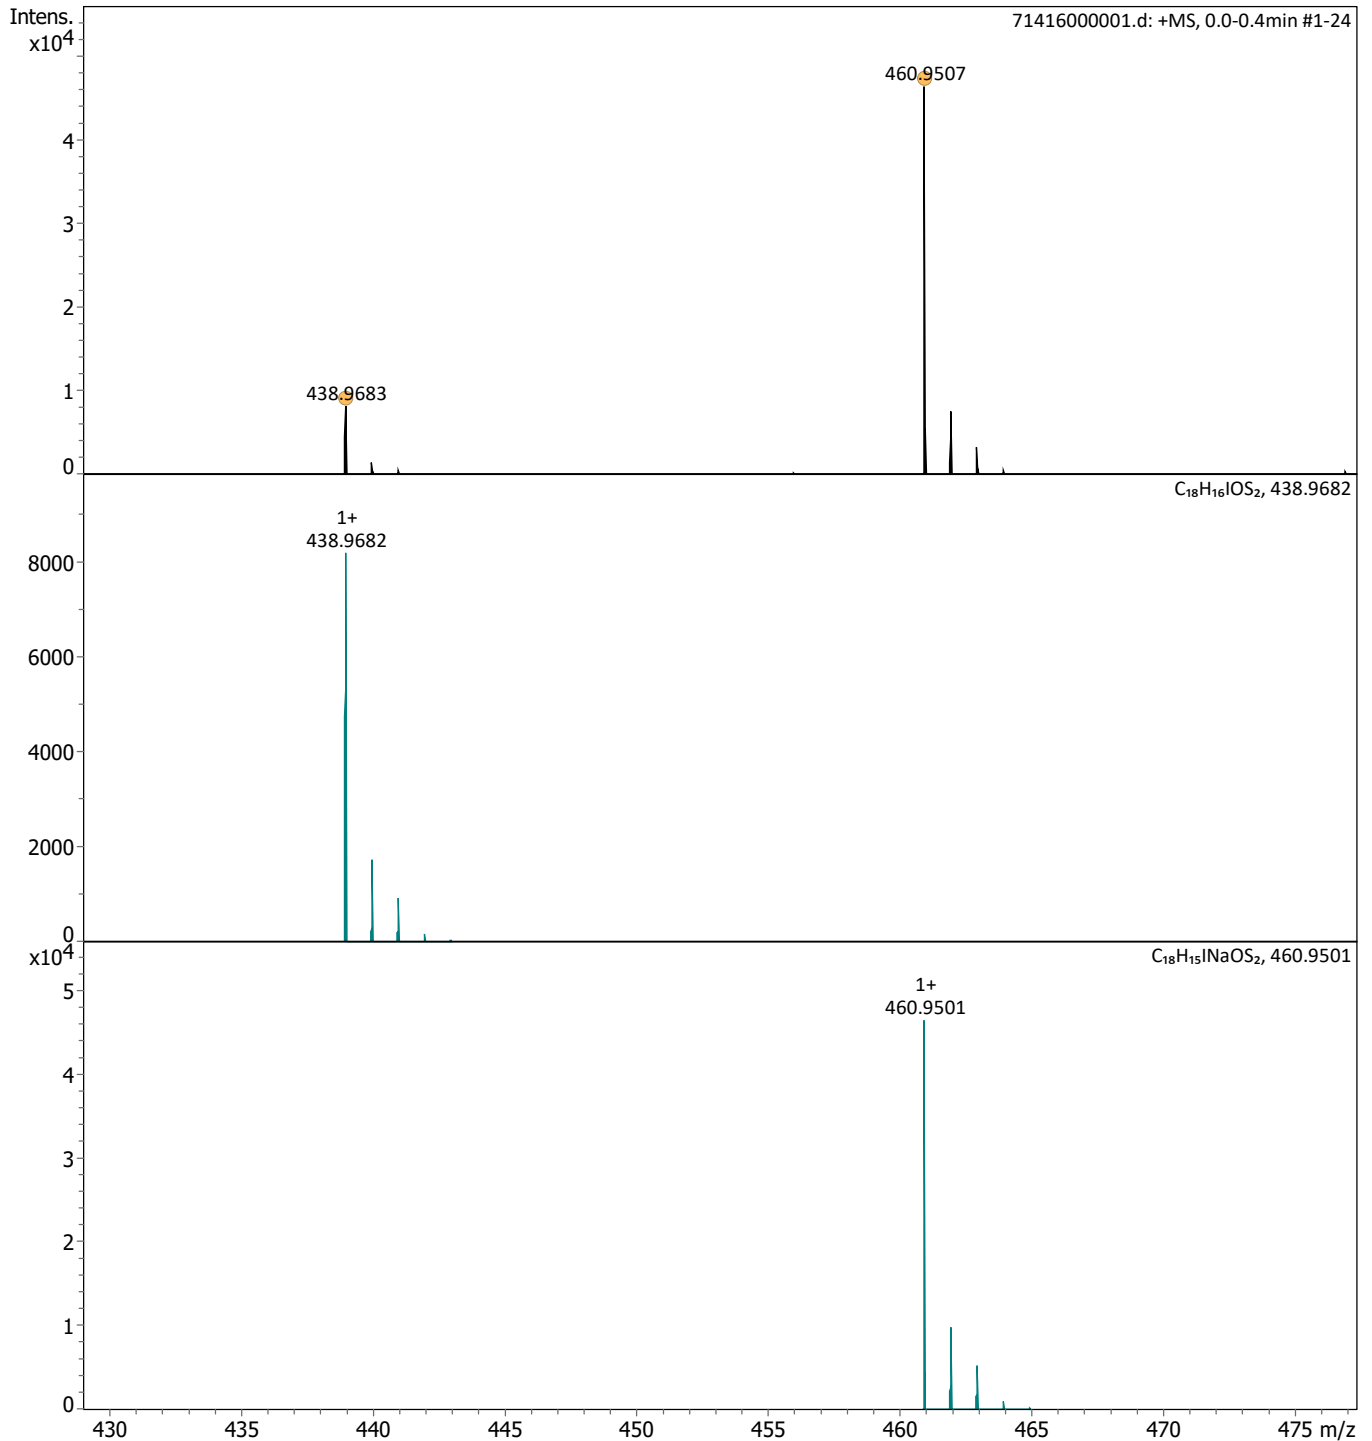

# Mass Spectrum SmartFormula Report

## Analysis Info

Analysis Name D:\Data\Kalaba\71416000001.d  
Method tune\_low\_MS\_Service\_07\_20.m  
Sample Name MK-30-1-2  
Comment Kalaba/Zehl  
Ergebnis +/- 5 ppm  
ACN/MeOH + 1 % H2O

Acquisition Date 06/07/2020 18:30:37

Operator msc  
Instrument maXis 255552.00016

## Acquisition Parameter

|             |            |                      |          |                  |           |
|-------------|------------|----------------------|----------|------------------|-----------|
| Source Type | ESI        | Ion Polarity         | Positive | Set Nebulizer    | 0.4 Bar   |
| Focus       | Not active | Set Capillary        | 4200 V   | Set Dry Heater   | 180 Å°C   |
| Scan Begin  | 50 m/z     | Set End Plate Offset | -500 V   | Set Dry Gas      | 4.0 l/min |
| Scan End    | 1900 m/z   | Set Charging Voltage | 0 V      | Set Divert Valve | Source    |
|             |            | Set Corona           | 0 nA     | Set APCI Heater  | 0 Å°C     |

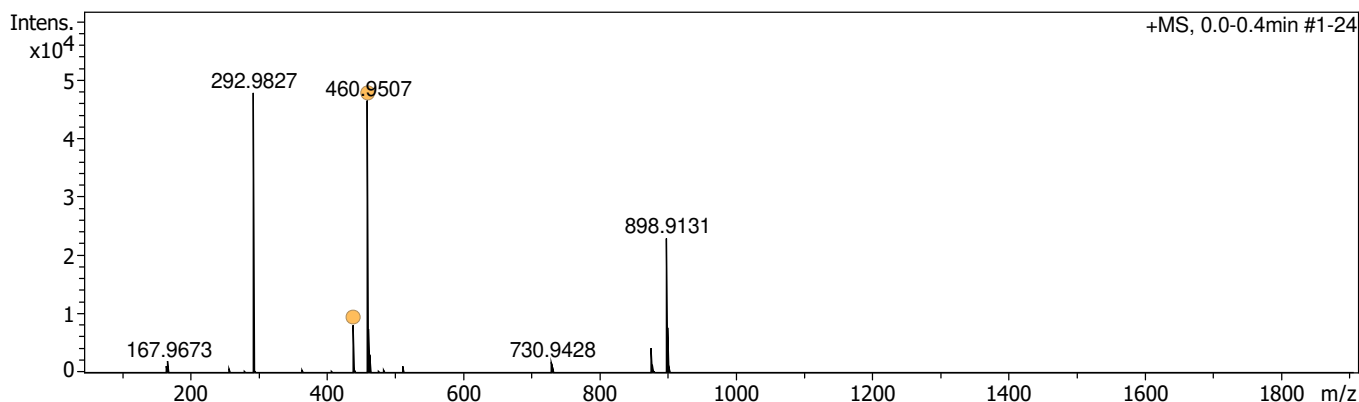

| Meas. m/z | # | Ion Formula     | m/z      | err [ppm] | mSigma | # mSigma | Score  | rdB  | eÅ <sup>-</sup> | Conf | N-Rule |
|-----------|---|-----------------|----------|-----------|--------|----------|--------|------|-----------------|------|--------|
| 438.9683  | 1 | C11H8IN10S      | 438.9693 | 2.3       | 7.3    | 1        | 81.26  | 18.0 | even            |      | ok     |
|           | 2 | C10H12IN6O4S    | 438.9680 | -0.7      | 15.4   | 2        | 100.00 | 13.0 | even            |      | ok     |
|           | 3 | C17H12IO6       | 438.9673 | -2.3      | 25.7   | 3        | 42.31  | 15.0 | even            |      | ok     |
|           | 4 | C18H16IOS2      | 438.9682 | -0.3      | 30.5   | 4        | 77.41  | 18.0 | even            |      | ok     |
|           | 5 | C18H8IN4O2      | 438.9686 | 0.8       | 34.9   | 5        | 47.56  | 20.0 | even            |      | ok     |
|           | 6 | C10H20IN2O3S3   | 438.9675 | -1.8      | 38.1   | 6        | 58.42  | 11.0 | even            |      | ok     |
| 460.9507  | 1 | C14H15INaO6S    | 460.9526 | 4.3       | 0.8    | 1        | 46.99  | 12.0 | even            |      | ok     |
|           | 2 | C11H7IN10NaS    | 460.9513 | 1.3       | 6.2    | 2        | 100.00 | 18.0 | even            |      | ok     |
|           | 3 | C10H11IN6NaO4S  | 460.9499 | -1.6      | 12.3   | 3        | 85.08  | 13.0 | even            |      | ok     |
|           | 4 | C9H15IN2NaO8S   | 460.9486 | -4.5      | 23.4   | 4        | 28.52  | 8.0  | even            |      | ok     |
|           | 5 | C17H11INaO6     | 460.9493 | -3.0      | 27.0   | 5        | 31.32  | 15.0 | even            |      | ok     |
|           | 6 | C18H15INaOS2    | 460.9501 | -1.2      | 33.0   | 6        | 58.98  | 18.0 | even            |      | ok     |
|           | 7 | C18H7IN4NaO2    | 460.9506 | -0.1      | 37.1   | 7        | 49.02  | 20.0 | even            |      | ok     |
|           | 8 | C10H19IN2NaO3S3 | 460.9495 | -2.6      | 37.7   | 8        | 45.80  | 11.0 | even            |      | ok     |

Figure S39. HRESIMS spectrum of compound 7j

## Generic Display Report

### Analysis Info

Analysis Name D:\Data\Kalaba\71417000001.d  
Method tune\_low\_MS\_Service\_07\_20.m  
Sample Name MK-30-2-1  
Comment Kalaba/Zehl  
Ergebnis +/- 5 ppm  
ACN/MeOH + 1 % H<sub>2</sub>O

Acquisition Date 06/07/2020 18:34:09

Operator msc  
Instrument maXis

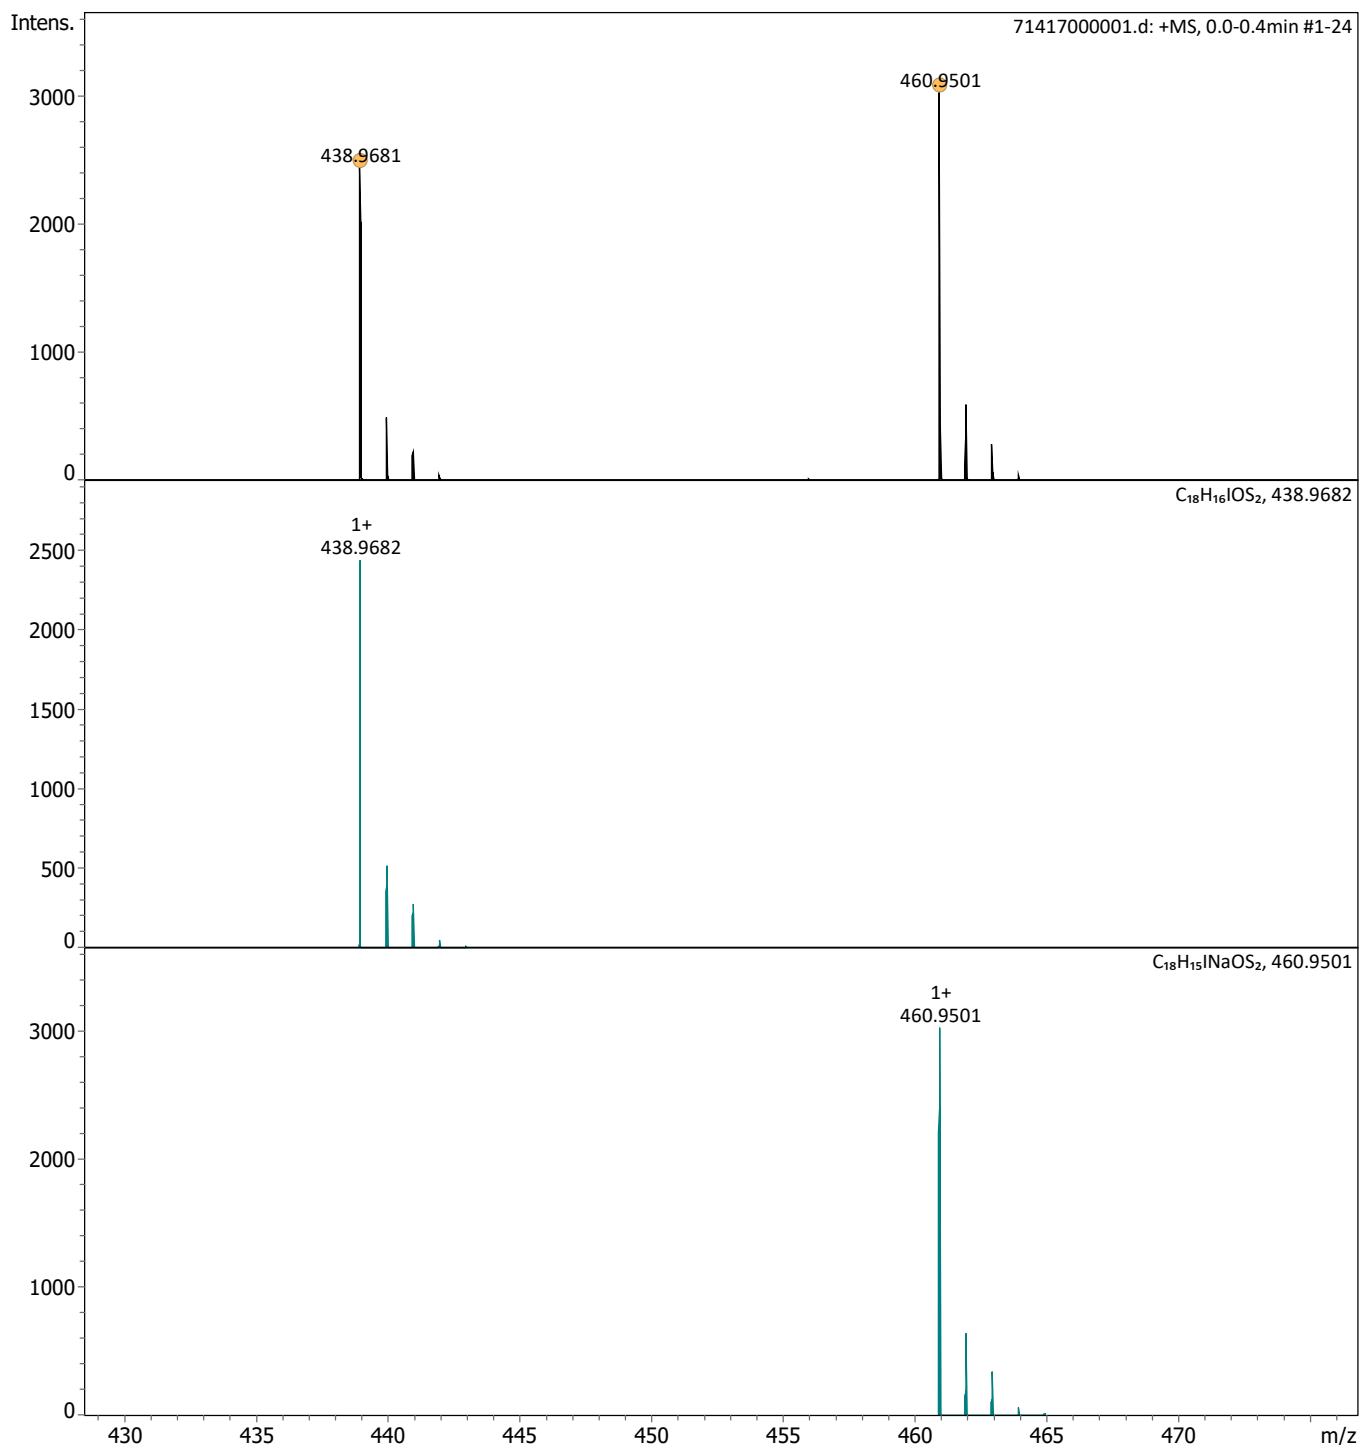

# Mass Spectrum SmartFormula Report

## Analysis Info

Analysis Name D:\Data\Kalaba\71417000001.d  
 Method tune\_low\_MS\_Service\_07\_20.m  
 Sample Name MK-30-2-1  
 Comment Kalaba/Zehl  
 Ergebnis +/- 5 ppm  
 ACN/MeOH + 1 % H2O

Acquisition Date 06/07/2020 18:34:09

Operator msc  
 Instrument maXis 255552.00016

## Acquisition Parameter

|             |            |                      |          |                  |           |
|-------------|------------|----------------------|----------|------------------|-----------|
| Source Type | ESI        | Ion Polarity         | Positive | Set Nebulizer    | 0.4 Bar   |
| Focus       | Not active | Set Capillary        | 4200 V   | Set Dry Heater   | 180 Å°C   |
| Scan Begin  | 50 m/z     | Set End Plate Offset | -500 V   | Set Dry Gas      | 4.0 l/min |
| Scan End    | 1900 m/z   | Set Charging Voltage | 0 V      | Set Divert Valve | Source    |
|             |            | Set Corona           | 0 nA     | Set APCI Heater  | 0 Å°C     |

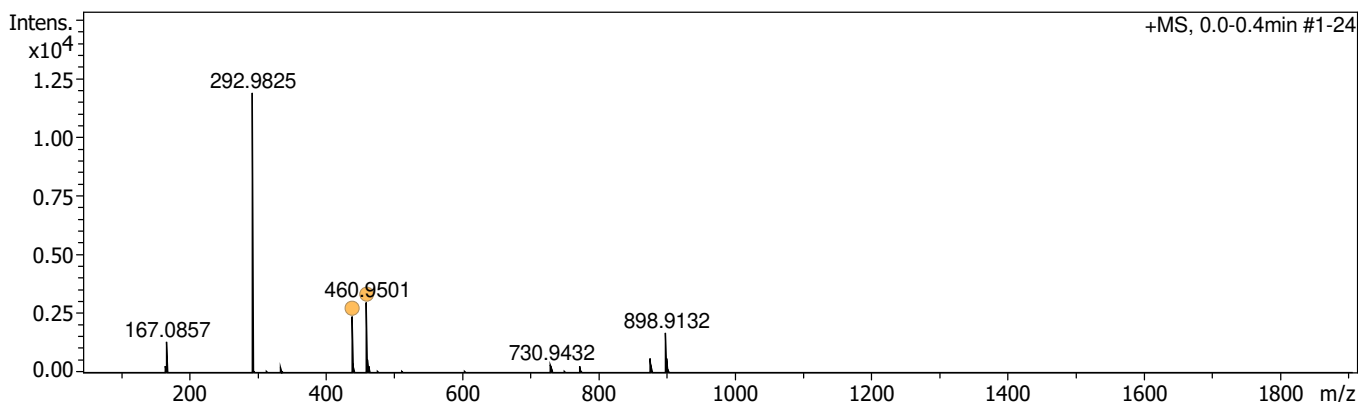

| Meas. m/z | # | Ion Formula  | Score  | m/z      | err [mDa] | err [ppm] | mSigma | rdb  | eÅ <sup>-</sup> | Conf | N-Rule |
|-----------|---|--------------|--------|----------|-----------|-----------|--------|------|-----------------|------|--------|
| 438.9681  | 1 | C18H16IOS2   | 100.00 | 438.9682 | 0.0       | 0.1       | 11.8   | 18.0 | even            |      | ok     |
|           | 2 | C17H12IO6    | 28.58  | 438.9673 | -0.8      | -1.9      | 37.7   | 15.0 | even            |      | ok     |
|           | 3 | C18H8IN4O2   | 32.32  | 438.9686 | 0.5       | 1.1       | 39.3   | 20.0 | even            |      | ok     |
|           | 4 | C14H4IN10    | 9.65   | 438.9660 | -2.2      | -5.0      | 44.4   | 21.0 | even            |      | ok     |
| 460.9501  | 1 | C18H15INaOS2 | 100.00 | 460.9501 | 0.0       | 0.0       | 12.4   | 18.0 | even            |      | ok     |
|           | 2 | C17H11INaO6  | 27.95  | 460.9493 | -0.8      | -1.8      | 38.4   | 15.0 | even            |      | ok     |
|           | 3 | C18H7IN4NaO2 | 31.36  | 460.9506 | 0.5       | 1.1       | 40.9   | 20.0 | even            |      | ok     |
|           | 4 | C14H3IN10Na  | 9.36   | 460.9479 | -2.2      | -4.8      | 45.2   | 21.0 | even            |      | ok     |

**Figure S40.** HRESIMS spectrum of compound **8j**

## Generic Display Report

### Analysis Info

Analysis Name D:\Data\Kalaba\71418000001.d  
Method tune\_low\_MS\_Service\_07\_20.m  
Sample Name MK-30-2-2  
Comment Kalaba/Zehl  
Ergebnis +/- 5 ppm  
ACN/MeOH + 1 % H<sub>2</sub>O

Acquisition Date 06/07/2020 18:36:02

Operator msc  
Instrument maXis

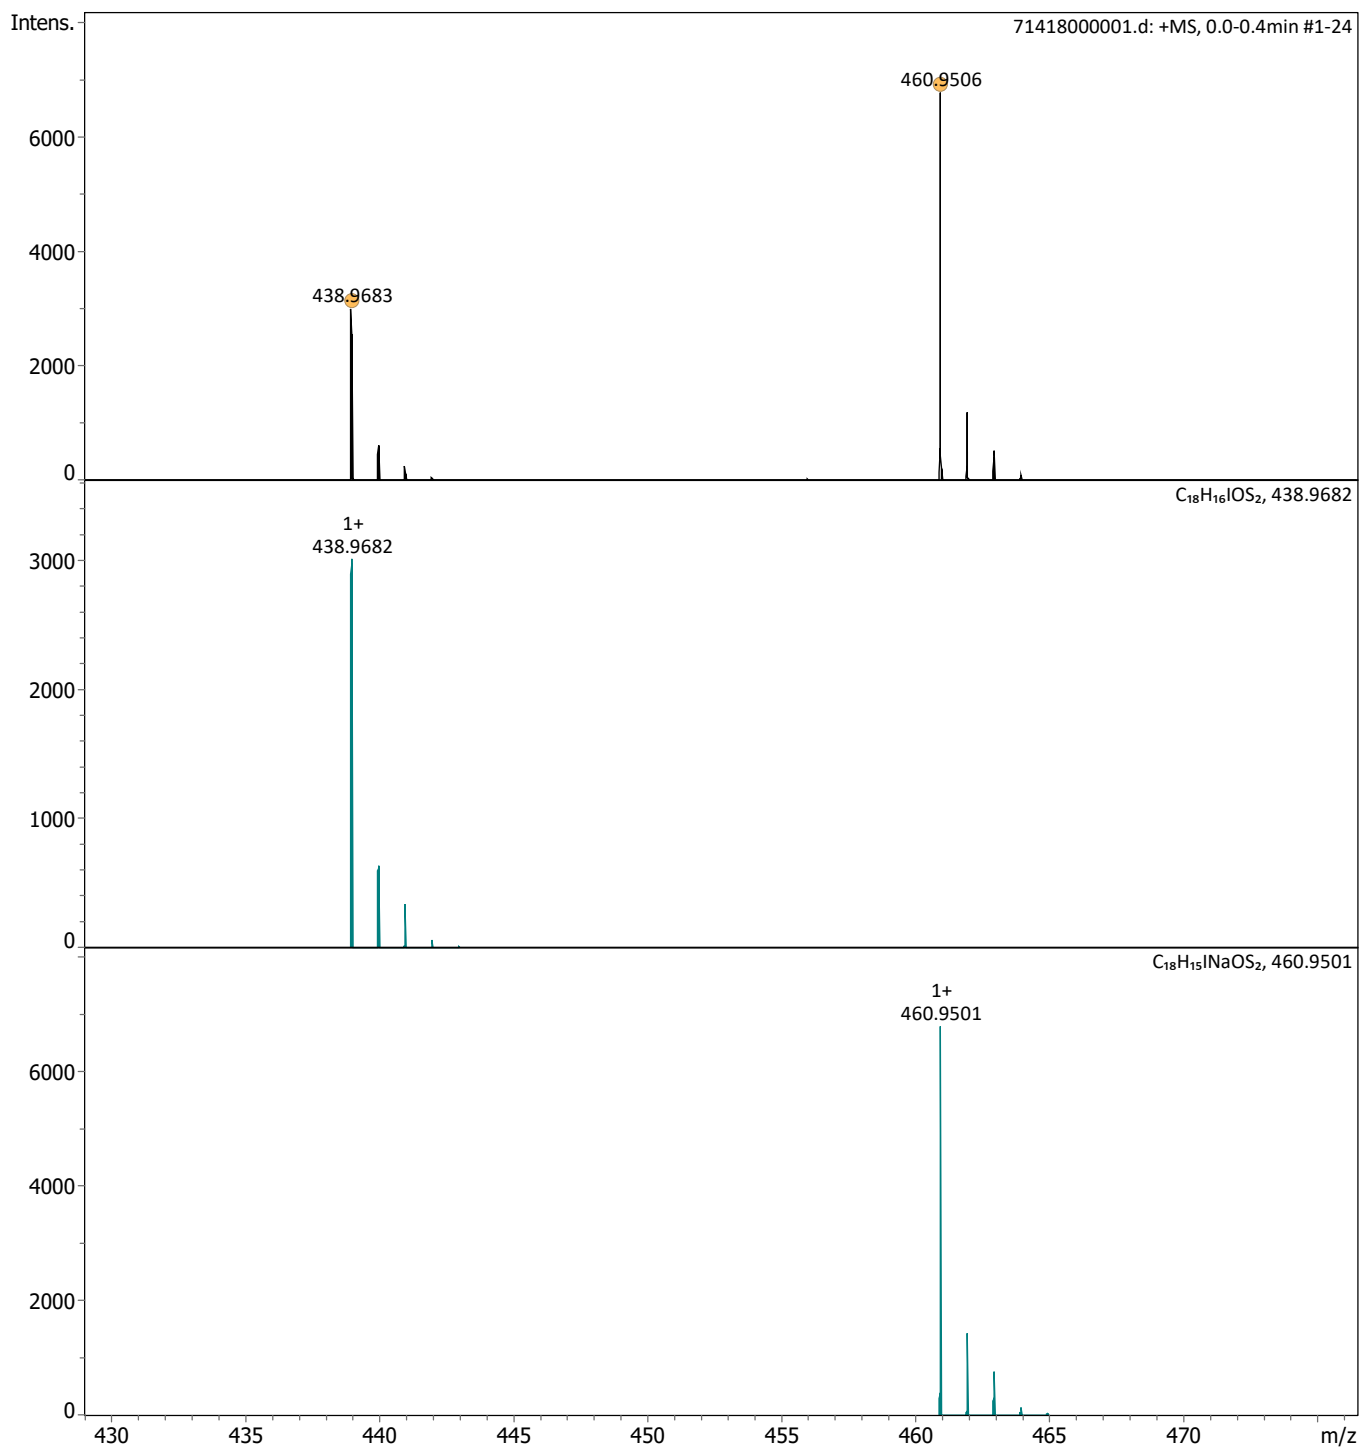

# Mass Spectrum SmartFormula Report

## Analysis Info

Analysis Name D:\Data\Kalaba\71418000001.d  
 Method tune\_low\_MS\_Service\_07\_20.m  
 Sample Name MK-30-2-2  
 Comment Kalaba/Zehl  
 Ergebnis +/- 5 ppm  
 ACN/MeOH + 1 % H2O

Acquisition Date 06/07/2020 18:36:02

Operator msc  
 Instrument maXis 255552.00016

## Acquisition Parameter

|             |            |                      |          |                  |           |
|-------------|------------|----------------------|----------|------------------|-----------|
| Source Type | ESI        | Ion Polarity         | Positive | Set Nebulizer    | 0.4 Bar   |
| Focus       | Not active | Set Capillary        | 4200 V   | Set Dry Heater   | 180 Å°C   |
| Scan Begin  | 50 m/z     | Set End Plate Offset | -500 V   | Set Dry Gas      | 4.0 l/min |
| Scan End    | 1900 m/z   | Set Charging Voltage | 0 V      | Set Divert Valve | Source    |
|             |            | Set Corona           | 0 nA     | Set APCI Heater  | 0 Å°C     |

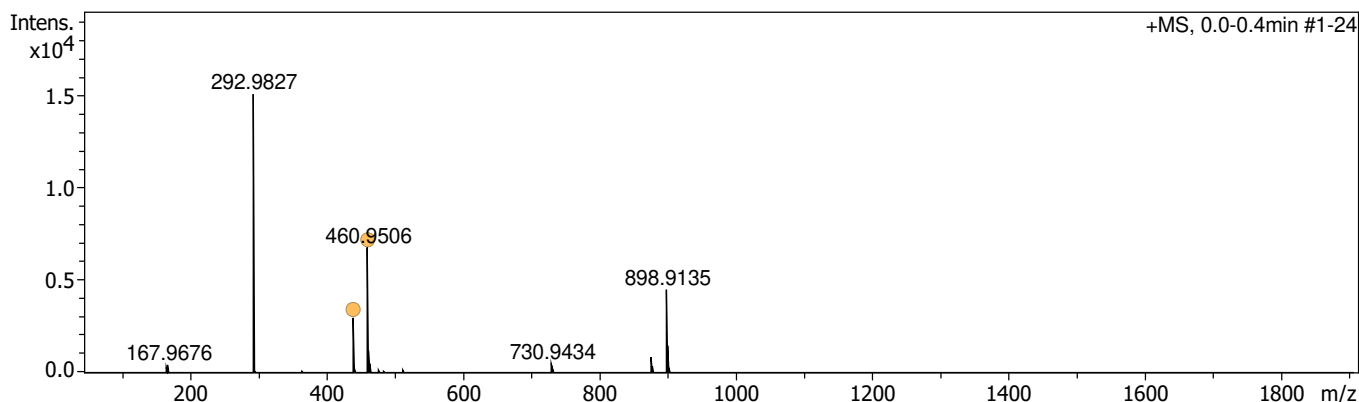

| Meas. m/z | # | Ion Formula     | Score  | m/z      | err [mDa] | err [ppm] | mSigma | rdb  | eÅ <sup>-</sup> | Conf | N-Rule |
|-----------|---|-----------------|--------|----------|-----------|-----------|--------|------|-----------------|------|--------|
| 438.9683  | 1 | C18H16IOS2      | 100.00 | 438.9682 | -0.1      | -0.3      | 14.7   | 18.0 | even            |      | ok     |
|           | 2 | C17H12IO6       | 31.67  | 438.9673 | -1.0      | -2.3      | 33.9   | 15.0 | even            |      | ok     |
|           | 3 | C18H8IN4O2      | 42.72  | 438.9686 | 0.3       | 0.8       | 35.1   | 20.0 | even            |      | ok     |
| 460.9506  | 1 | C14H15INaO6S    | 46.07  | 460.9526 | 2.0       | 4.4       | 7.8    | 12.0 | even            |      | ok     |
|           | 2 | C11H7IN10NaS    | 100.00 | 460.9513 | 0.7       | 1.5       | 12.4   | 18.0 | even            |      | ok     |
|           | 3 | C10H11IN6NaO4S  | 88.04  | 460.9499 | -0.7      | -1.4      | 19.3   | 13.0 | even            |      | ok     |
|           | 4 | C18H15INaOS2    | 83.72  | 460.9501 | -0.5      | -1.0      | 25.7   | 18.0 | even            |      | ok     |
|           | 5 | C17H11INaO6     | 35.35  | 460.9493 | -1.3      | -2.9      | 29.6   | 15.0 | even            |      | ok     |
|           | 6 | C10H19IN2NaO3S3 | 58.56  | 460.9495 | -1.1      | -2.4      | 35.2   | 11.0 | even            |      | ok     |
|           | 7 | C18H7IN4NaO2    | 58.04  | 460.9506 | -0.0      | -0.0      | 37.1   | 20.0 | even            |      | ok     |

**Figure S41.** HRESIMS spectrum of compound **5k**

## Generic Display Report

### Analysis Info

Analysis Name D:\Data\Kalaba\74278000001.d  
Method tune\_low\_MS\_Service\_11\_20.m  
Sample Name SB2-Spot1-P1  
Comment Kalaba/Zehl  
Ergebnis: +/- 5ppm  
ACN/MeOH + 1% H2O

Acquisition Date 03/11/2020 14:09:14

Operator msc  
Instrument maXis

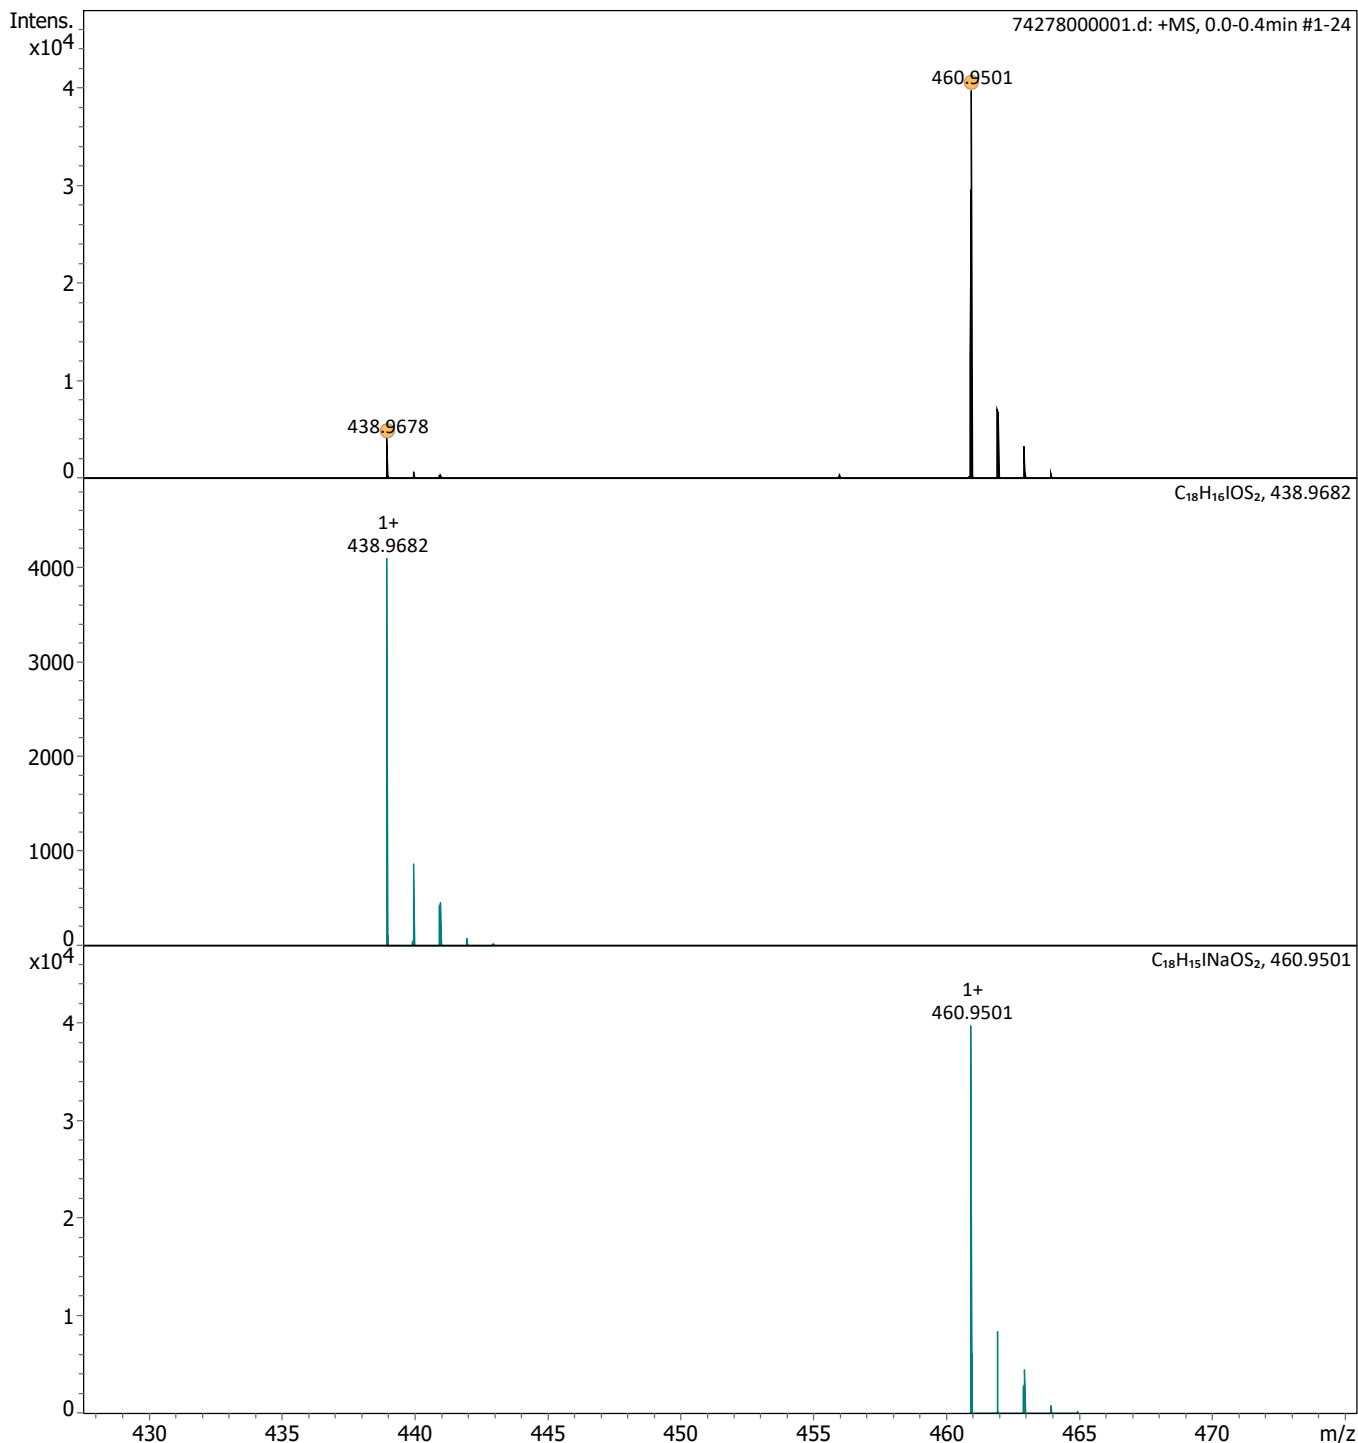



# Mass Spectrum SmartFormula Report

## Analysis Info

Analysis Name D:\Data\Kalaba\74278000001.d  
Method tune\_low\_MS\_Service\_11\_20.m  
Sample Name SB2-Spot1-P1  
Comment Kalaba/Zehl  
Ergebnis: +/- 5ppm  
ACN/MeOH + 1% H2O

Acquisition Date 03/11/2020 14:09:14

Operator msc  
Instrument maXis 255552.00016

## Acquisition Parameter

|             |            |                      |          |                  |           |
|-------------|------------|----------------------|----------|------------------|-----------|
| Source Type | ESI        | Ion Polarity         | Positive | Set Nebulizer    | 0.4 Bar   |
| Focus       | Not active | Set Capillary        | 4200 V   | Set Dry Heater   | 180 Å°C   |
| Scan Begin  | 50 m/z     | Set End Plate Offset | -500 V   | Set Dry Gas      | 4.0 l/min |
| Scan End    | 1900 m/z   | Set Charging Voltage | 0 V      | Set Divert Valve | Source    |
|             |            | Set Corona           | 0 nA     | Set APCI Heater  | 0 Å°C     |

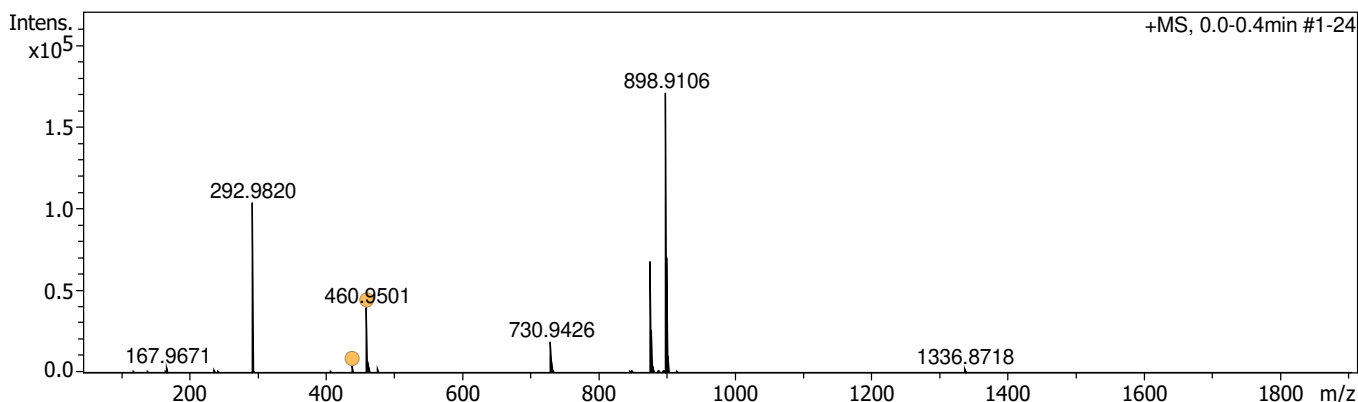

| Meas. m/z | #  | Ion Formula    | Score  | m/z      | err [mDa] | err [ppm] | mSigma | rdb  | eÅ <sup>-</sup> | Conf | N-Rule |
|-----------|----|----------------|--------|----------|-----------|-----------|--------|------|-----------------|------|--------|
| 438.9678  | 1  | C18H16IOS2     | 100.00 | 438.9682 | 0.4       | 0.9       | 17.7   | 18.0 | even            |      | ok     |
|           | 2  | C11H3N8O10S    | 74.74  | 438.9687 | 1.0       | 2.2       | 18.0   | 17.0 | even            |      | ok     |
|           | 3  | C15H3N8O5S2    | 50.57  | 438.9662 | -1.5      | -3.5      | 19.6   | 23.0 | even            |      | ok     |
|           | 4  | C11H8IN10S     | 46.52  | 438.9693 | 1.6       | 3.6       | 22.8   | 18.0 | even            |      | ok     |
|           | 5  | C18H3N2O12     | 88.08  | 438.9680 | 0.3       | 0.6       | 26.2   | 19.0 | even            |      | ok     |
|           | 6  | C19H7N2O7S2    | 68.75  | 438.9689 | 1.1       | 2.6       | 27.1   | 22.0 | even            |      | ok     |
|           | 7  | C12H7N8O5S3    | 38.36  | 438.9696 | 1.8       | 4.2       | 32.4   | 20.0 | even            |      | ok     |
|           | 8  | C22H3N2O7S     | 21.65  | 438.9655 | -2.2      | -5.1      | 34.1   | 25.0 | even            |      | ok     |
|           | 9  | C11H11N4O9S3   | 78.13  | 438.9683 | 0.5       | 1.1       | 36.1   | 15.0 | even            |      | ok     |
|           | 10 | C17H12IO6      | 45.39  | 438.9673 | -0.5      | -1.1      | 37.8   | 15.0 | even            |      | ok     |
|           | 11 | C18H8IN4O2     | 33.17  | 438.9686 | 0.9       | 2.0       | 41.6   | 20.0 | even            |      | ok     |
|           | 12 | C14H4IN10      | 16.73  | 438.9660 | -1.8      | -4.1      | 44.7   | 21.0 | even            |      | ok     |
|           | 13 | C15H11N4O4S4   | 17.40  | 438.9658 | -2.0      | -4.6      | 55.4   | 21.0 | even            |      | ok     |
|           | 14 | C27H3O5S       | 15.51  | 438.9696 | 1.8       | 4.1       | 56.9   | 29.0 | even            |      | ok     |
|           | 15 | C16H7N8S4      | 38.28  | 438.9671 | -0.7      | -1.5      | 57.3   | 26.0 | even            |      | ok     |
|           | 16 | C23H7N2O2S3    | 25.12  | 438.9664 | -1.4      | -3.1      | 58.1   | 28.0 | even            |      | ok     |
|           | 17 | C20H11N2O2S4   | 12.16  | 438.9698 | 2.0       | 4.6       | 65.9   | 25.0 | even            |      | ok     |
|           | 18 | C12H15N4O4S5   | 15.03  | 438.9691 | 1.4       | 3.1       | 72.5   | 18.0 | even            |      | ok     |
|           | 19 | C11H19O8S5     | 27.46  | 438.9678 | 0.0       | 0.1       | 74.8   | 13.0 | even            |      | ok     |
|           | 20 | C31H3S2        | 17.68  | 438.9671 | -0.7      | -1.6      | 78.1   | 35.0 | even            |      | ok     |
| 460.9501  | 21 | C12H23O3S7     | 6.17   | 438.9687 | 0.9       | 2.0       | 103.7  | 16.0 | even            |      | ok     |
|           | 1  | C11H2N8NaO10S  | 100.00 | 460.9507 | 0.6       | 1.3       | 10.1   | 17.0 | even            |      | ok     |
|           | 2  | C11H7IN10NaS   | 64.96  | 460.9513 | 1.2       | 2.6       | 15.4   | 18.0 | even            |      | ok     |
|           | 3  | C10H6N4NaO14S  | 72.90  | 460.9493 | -0.8      | -1.6      | 21.2   | 12.0 | even            |      | ok     |
|           | 4  | C10H11IN6NaO4S | 94.97  | 460.9499 | -0.2      | -0.3      | 22.1   | 13.0 | even            |      | ok     |
|           | 5  | C18H15INaOS2   | 99.40  | 460.9501 | 0.0       | 0.1       | 22.6   | 18.0 | even            |      | ok     |
|           | 6  | C18H2N2NaO12   | 92.53  | 460.9500 | -0.1      | -0.2      | 24.3   | 19.0 | even            |      | ok     |
|           | 7  | C15H2N8NaO5S2  | 32.47  | 460.9482 | -1.9      | -4.2      | 24.3   | 23.0 | even            |      | ok     |
|           | 8  | C17H11INaO6    | 40.71  | 460.9493 | -0.8      | -1.8      | 31.9   | 15.0 | even            |      | ok     |

# Mass Spectrum SmartFormula Report

| Meas. m/z | #  | Ion Formula     | Score | m/z      | err [mDa] | err [ppm] | mSigma | rdb  | e <sup>-</sup> | Conf | N-Rule |
|-----------|----|-----------------|-------|----------|-----------|-----------|--------|------|----------------|------|--------|
|           | 9  | C19H6N2NaO7S2   | 70.86 | 460.9509 | 0.8       | 1.7       | 31.9   | 22.0 | even           |      | ok     |
|           | 10 | C10H19IN2NaO3S3 | 71.92 | 460.9495 | -0.6      | -1.4      | 34.1   | 11.0 | even           |      | ok     |
|           | 11 | C12H6N8NaO5S3   | 43.32 | 460.9515 | 1.4       | 3.1       | 35.4   | 20.0 | even           |      | ok     |
|           | 12 | C11H10N4NaO9S3  | 82.86 | 460.9502 | 0.1       | 0.2       | 37.8   | 15.0 | even           |      | ok     |
|           | 13 | C18H7IN4NaO2    | 41.25 | 460.9506 | 0.5       | 1.1       | 38.4   | 20.0 | even           |      | ok     |
|           | 14 | C14H3IN10Na     | 13.79 | 460.9479 | -2.2      | -4.8      | 38.8   | 21.0 | even           |      | ok     |
|           | 15 | C10H14NaO13S3   | 40.48 | 460.9489 | -1.2      | -2.7      | 43.0   | 10.0 | even           |      | ok     |
|           | 16 | C20H2N6NaO3S2   | 16.95 | 460.9522 | 2.1       | 4.6       | 44.4   | 27.0 | even           |      | ok     |
|           | 17 | C16H6N8NaS4     | 25.09 | 460.9490 | -1.1      | -2.3      | 61.6   | 26.0 | even           |      | ok     |
|           | 18 | C27H2NaO5S      | 15.77 | 460.9515 | 1.4       | 3.1       | 62.2   | 29.0 | even           |      | ok     |
|           | 19 | C23H6N2NaO2S3   | 15.28 | 460.9484 | -1.7      | -3.8      | 63.2   | 28.0 | even           |      | ok     |
|           | 20 | C20H10N2NaO2S4  | 12.68 | 460.9517 | 1.6       | 3.5       | 70.5   | 25.0 | even           |      | ok     |
|           | 21 | C13H10N8NaS5    | 6.17  | 460.9524 | 2.3       | 5.0       | 75.7   | 23.0 | even           |      | ok     |
|           | 22 | C12H14N4NaO4S5  | 15.58 | 460.9511 | 1.0       | 2.1       | 75.8   | 18.0 | even           |      | ok     |
|           | 23 | C11H18NaO8S5    | 19.93 | 460.9497 | -0.4      | -0.8      | 77.6   | 13.0 | even           |      | ok     |
|           | 24 | C28H6NaS3       | 4.89  | 460.9524 | 2.3       | 5.0       | 82.2   | 32.0 | even           |      | ok     |
|           | 25 | C31H2NaS2       | 10.82 | 460.9490 | -1.1      | -2.4      | 83.3   | 35.0 | even           |      | ok     |
|           | 26 | C12H22NaO3S7    | 6.04  | 460.9506 | 0.5       | 1.1       | 106.8  | 16.0 | even           |      | ok     |

**Figure S42.** HRESIMS spectrum of compound **6k**

## Generic Display Report

### Analysis Info

Analysis Name D:\Data\Kalaba\74279000001.d  
Method tune\_low\_MS\_Service\_11\_20.m  
Sample Name SB2-spot1-p2  
Comment Kalaba/Zehl  
Ergebnis: +/- 5ppm  
ACN/MeOH + 1% H2O

Acquisition Date 03/11/2020 14:14:26

Operator msc  
Instrument maXis

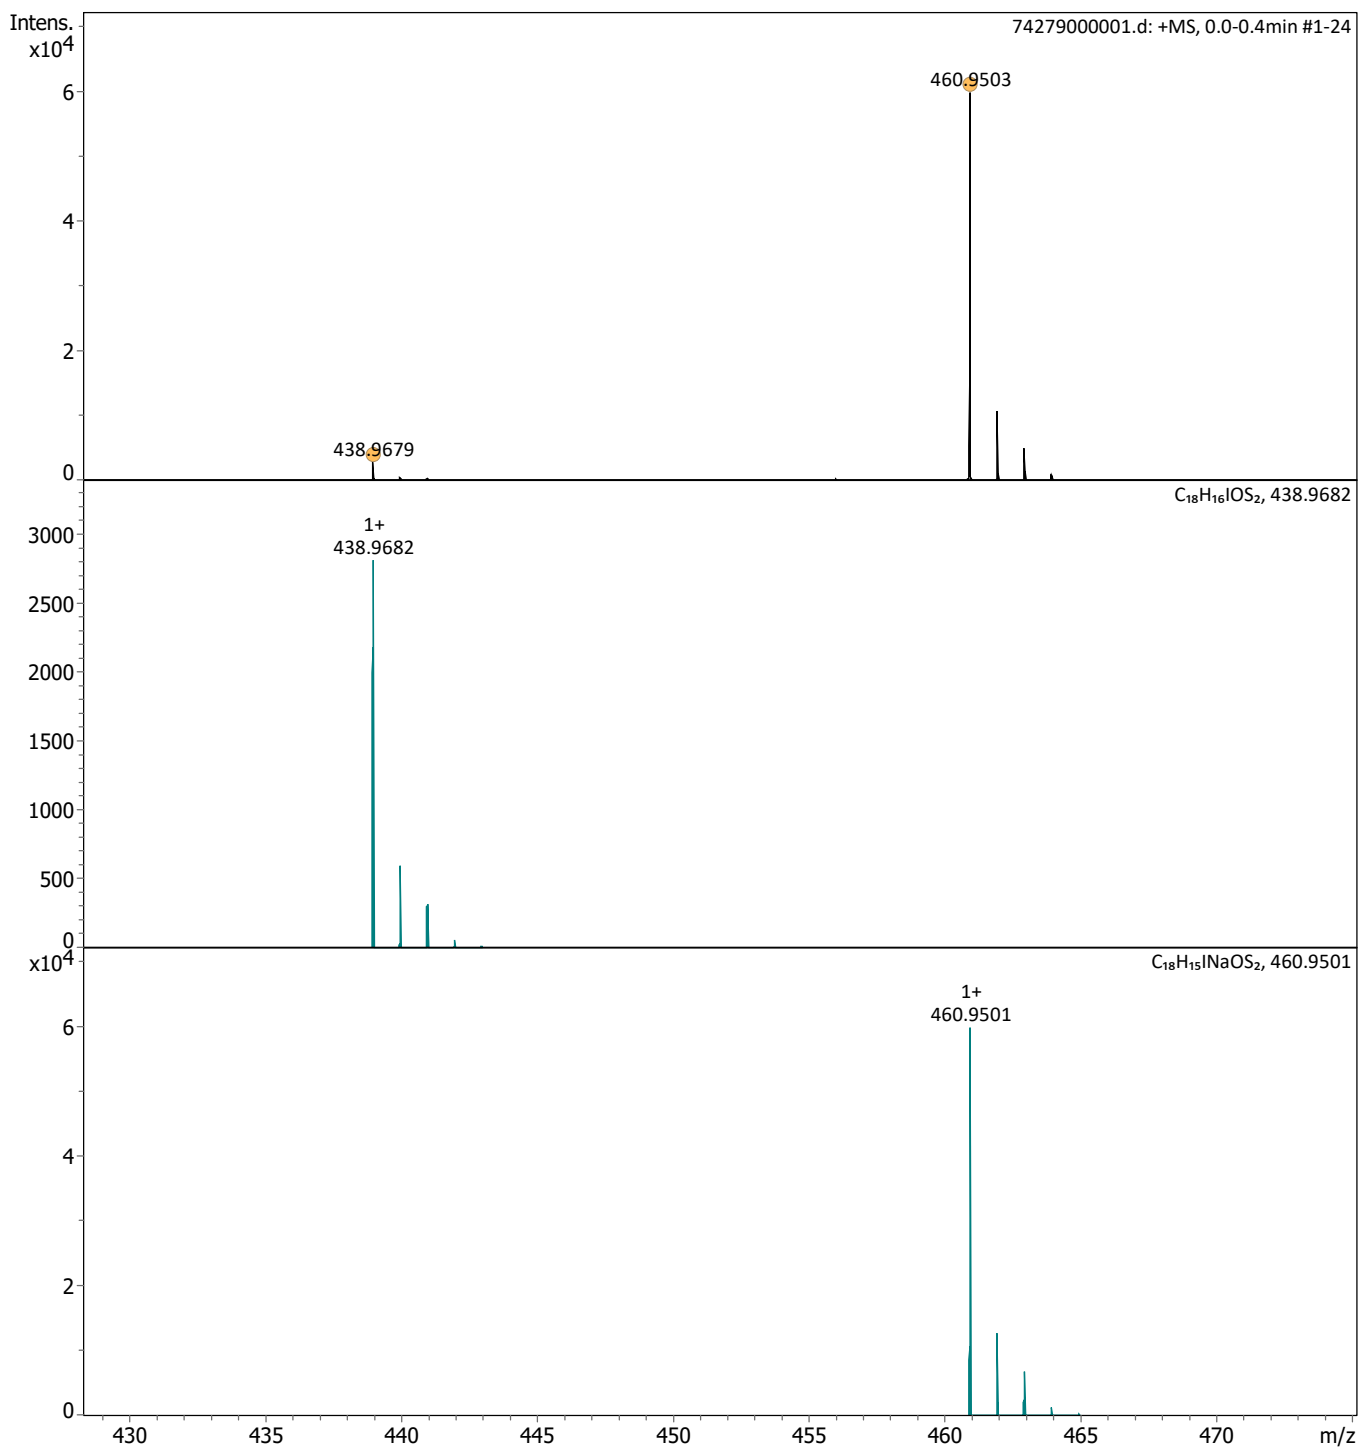

# Mass Spectrum SmartFormula Report

## Analysis Info

Analysis Name D:\Data\Kalaba\74279000001.d  
Method tune\_low\_MS\_Service\_11\_20.m  
Sample Name SB2-spot1-p2  
Comment Kalaba/Zehl  
Ergebnis: +/- 5ppm  
ACN/MeOH + 1% H2O

Acquisition Date 03/11/2020 14:14:26

Operator msc  
Instrument maXis 255552.00016

## Acquisition Parameter

|             |            |                      |          |                  |           |
|-------------|------------|----------------------|----------|------------------|-----------|
| Source Type | ESI        | Ion Polarity         | Positive | Set Nebulizer    | 0.4 Bar   |
| Focus       | Not active | Set Capillary        | 4200 V   | Set Dry Heater   | 180 Å°C   |
| Scan Begin  | 50 m/z     | Set End Plate Offset | -500 V   | Set Dry Gas      | 4.0 l/min |
| Scan End    | 1900 m/z   | Set Charging Voltage | 0 V      | Set Divert Valve | Source    |
|             |            | Set Corona           | 0 nA     | Set APCI Heater  | 0 Å°C     |

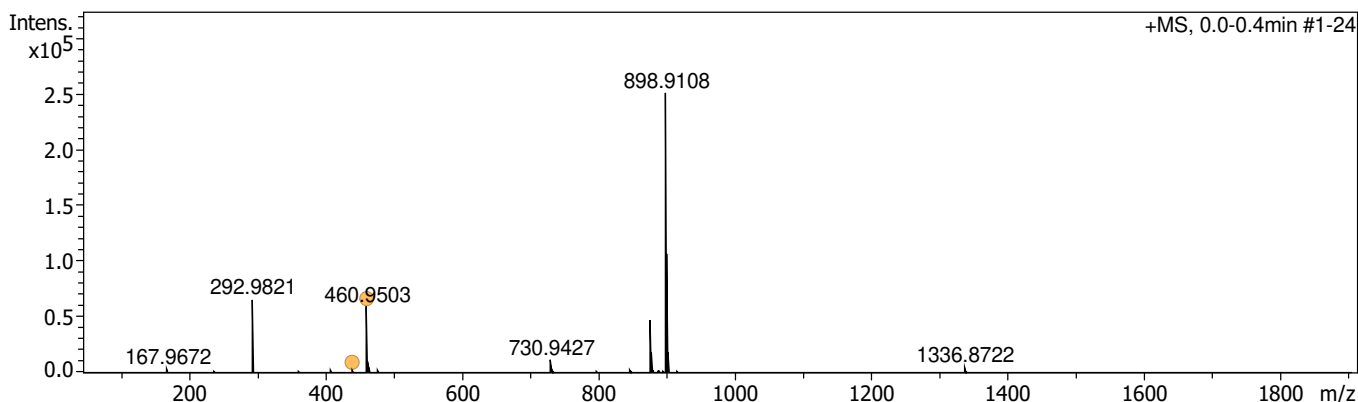

| Meas. m/z | #  | Ion Formula   | Score  | m/z      | err [mDa] | err [ppm] | mSigma | rdb  | eÅ <sup>-</sup> | Conf | N-Rule |
|-----------|----|---------------|--------|----------|-----------|-----------|--------|------|-----------------|------|--------|
| 438.9679  | 1  | C18H16IOS2    | 100.00 | 438.9682 | 0.3       | 0.7       | 16.5   | 18.0 | even            |      | ok     |
|           | 2  | C15H3N8O5S2   | 45.68  | 438.9662 | -1.6      | -3.7      | 18.6   | 23.0 | even            |      | ok     |
|           | 3  | C11H3N8O10S   | 71.09  | 438.9687 | 0.9       | 2.0       | 19.6   | 17.0 | even            |      | ok     |
|           | 4  | C11H8IN10S    | 44.92  | 438.9693 | 1.5       | 3.4       | 24.1   | 18.0 | even            |      | ok     |
|           | 5  | C19H7N2O7S2   | 69.75  | 438.9689 | 1.1       | 2.4       | 25.9   | 22.0 | even            |      | ok     |
|           | 6  | C18H3N2O12    | 86.19  | 438.9680 | 0.2       | 0.4       | 26.0   | 19.0 | even            |      | ok     |
|           | 7  | C12H7N8O5S3   | 38.37  | 438.9696 | 1.7       | 4.0       | 32.3   | 20.0 | even            |      | ok     |
|           | 8  | C11H11N4O9S3  | 75.62  | 438.9683 | 0.4       | 0.9       | 36.4   | 15.0 | even            |      | ok     |
|           | 9  | C17H12IO6     | 40.32  | 438.9673 | -0.5      | -1.3      | 38.3   | 15.0 | even            |      | ok     |
|           | 10 | C18H8IN4O2    | 32.77  | 438.9686 | 0.8       | 1.8       | 41.4   | 20.0 | even            |      | ok     |
|           | 11 | C14H4IN10     | 14.55  | 438.9660 | -1.9      | -4.3      | 45.2   | 21.0 | even            |      | ok     |
|           | 12 | C15H11N4O4S4  | 15.51  | 438.9658 | -2.1      | -4.8      | 54.9   | 21.0 | even            |      | ok     |
|           | 13 | C27H3O5S      | 16.36  | 438.9696 | 1.7       | 3.9       | 55.2   | 29.0 | even            |      | ok     |
|           | 14 | C16H7N8S4     | 35.19  | 438.9671 | -0.8      | -1.7      | 56.5   | 26.0 | even            |      | ok     |
|           | 15 | C23H7N2O2S3   | 23.22  | 438.9664 | -1.4      | -3.3      | 56.9   | 28.0 | even            |      | ok     |
|           | 16 | C20H11N2O2S4  | 12.56  | 438.9698 | 1.9       | 4.4       | 64.9   | 25.0 | even            |      | ok     |
|           | 17 | C12H15N4O4S5  | 15.00  | 438.9691 | 1.3       | 2.9       | 72.3   | 18.0 | even            |      | ok     |
|           | 18 | C11H19O8S5    | 25.36  | 438.9678 | -0.1      | -0.1      | 74.8   | 13.0 | even            |      | ok     |
|           | 19 | C31H3S2       | 16.83  | 438.9671 | -0.8      | -1.8      | 76.5   | 35.0 | even            |      | ok     |
| 460.9503  | 20 | C12H23O3S7    | 6.12   | 438.9687 | 0.8       | 1.8       | 103.5  | 16.0 | even            |      | ok     |
|           | 1  | C11H2N8NaO10S | 100.00 | 460.9507 | 0.4       | 0.8       | 10.9   | 17.0 | even            |      | ok     |
|           | 2  | C14H15INaO6S  | 28.54  | 460.9526 | 2.3       | 5.0       | 11.5   | 12.0 | even            |      | ok     |
|           | 3  | C11H7IN10NaS  | 66.68  | 460.9513 | 1.0       | 2.1       | 16.0   | 18.0 | even            |      | ok     |
|           | 4  | C18H15INaOS2  | 87.29  | 460.9501 | -0.2      | -0.4      | 21.8   | 18.0 | even            |      | ok     |
|           | 5  | C15H2N8NaO5S2 | 25.98  | 460.9482 | -2.1      | -4.6      | 23.6   | 23.0 | even            |      | ok     |
|           | 6  | C18H2N2NaO12  | 78.70  | 460.9500 | -0.3      | -0.7      | 23.9   | 19.0 | even            |      | ok     |
|           | 7  | C19H6N2NaO7S2 | 73.73  | 460.9509 | 0.6       | 1.2       | 31.2   | 22.0 | even            |      | ok     |
|           | 8  | C17H11INaO6   | 33.31  | 460.9493 | -1.1      | -2.3      | 32.0   | 15.0 | even            |      | ok     |
|           | 9  | C12H6N8NaO5S3 | 45.72  | 460.9515 | 1.2       | 2.7       | 35.1   | 20.0 | even            |      | ok     |

# Mass Spectrum SmartFormula Report

| Meas. m/z | #  | Ion Formula    | Score | m/z      | err [mDa] | err [ppm] | mSigma | rdb  | eÅ <sup>-</sup> | Conf | N-Rule |
|-----------|----|----------------|-------|----------|-----------|-----------|--------|------|-----------------|------|--------|
|           | 10 | C11H10N4NaO9S3 | 76.86 | 460.9502 | -0.1      | -0.2      | 37.8   | 15.0 | even            |      | ok     |
|           | 11 | C18H7IN4NaO2   | 42.04 | 460.9506 | 0.3       | 0.6       | 38.1   | 20.0 | even            |      | ok     |
|           | 12 | C20H2N6NaO3S2  | 18.71 | 460.9522 | 1.9       | 4.1       | 43.6   | 27.0 | even            |      | ok     |
|           | 13 | C16H6N8NaS4    | 20.77 | 460.9490 | -1.3      | -2.7      | 61.2   | 26.0 | even            |      | ok     |
|           | 14 | C27H2NaO5S     | 17.06 | 460.9515 | 1.2       | 2.6       | 61.3   | 29.0 | even            |      | ok     |
|           | 15 | C23H6N2NaO2S3  | 12.41 | 460.9484 | -1.9      | -4.2      | 62.5   | 28.0 | even            |      | ok     |
|           | 16 | C20H10N2NaO2S4 | 13.66 | 460.9517 | 1.4       | 3.1       | 69.9   | 25.0 | even            |      | ok     |
|           | 17 | C13H10N8NaS5   | 6.79  | 460.9524 | 2.1       | 4.6       | 75.4   | 23.0 | even            |      | ok     |
|           | 18 | C12H14N4NaO4S5 | 16.18 | 460.9511 | 0.8       | 1.7       | 75.6   | 18.0 | even            |      | ok     |
|           | 19 | C11H18NaO8S5   | 16.72 | 460.9497 | -0.6      | -1.2      | 77.5   | 13.0 | even            |      | ok     |
|           | 20 | C28H6NaS3      | 5.46  | 460.9524 | 2.1       | 4.5       | 81.5   | 32.0 | even            |      | ok     |
|           | 21 | C31H2NaS2      | 9.10  | 460.9490 | -1.3      | -2.8      | 82.5   | 35.0 | even            |      | ok     |
|           | 22 | C12H22NaO3S7   | 6.17  | 460.9506 | 0.3       | 0.7       | 106.6  | 16.0 | even            |      | ok     |

Figure S43. HRESIMS spectrum of compound 7k

## Generic Display Report

### Analysis Info

Analysis Name D:\Data\Kalaba\74280000001.d  
Method tune\_low\_MS\_Service\_11\_20.m  
Sample Name SB2-spot2-p1  
Comment Kalaba/Zehl  
Ergebnis: +/- 5ppm  
ACN/MeOH + 1% H<sub>2</sub>O

Acquisition Date 03/11/2020 14:17:10

Operator msc  
Instrument maXis

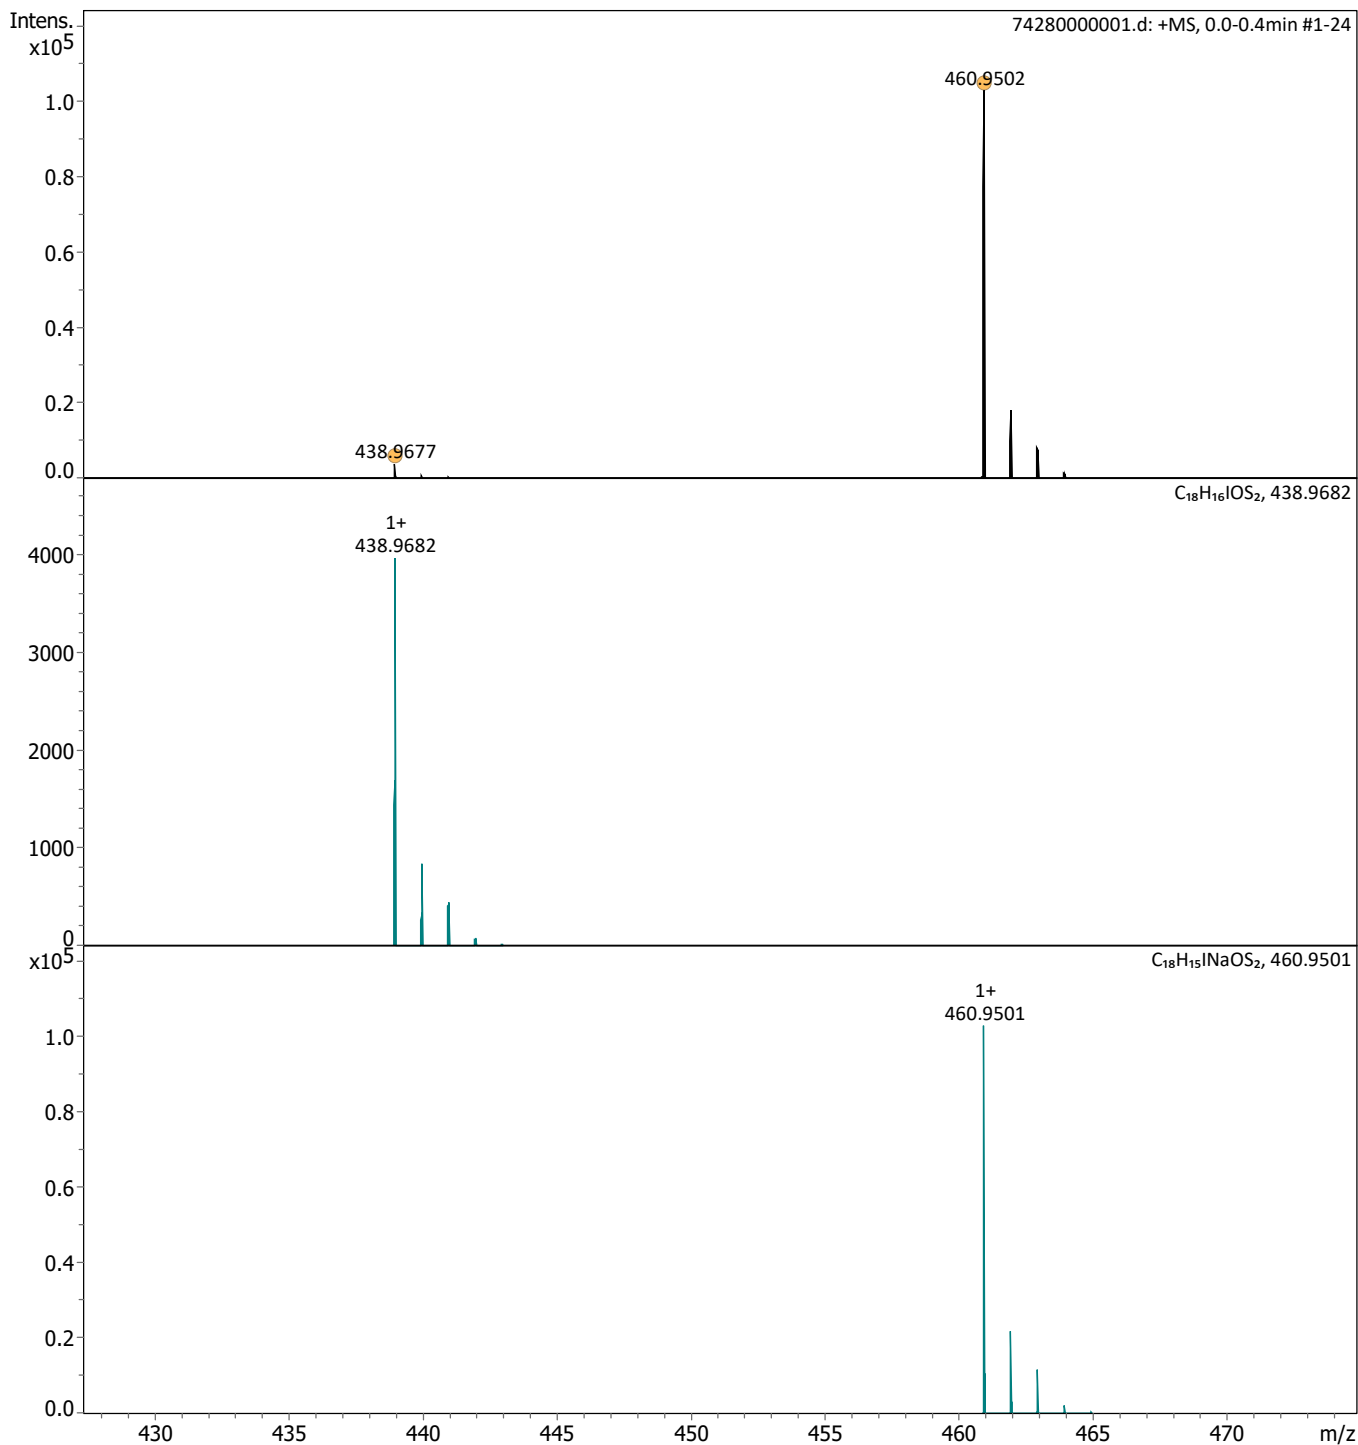

# Mass Spectrum SmartFormula Report

## Analysis Info

Analysis Name D:\Data\Kalaba\74280000001.d  
 Method tune\_low\_MS\_Service\_11\_20.m  
 Sample Name SB2-spot2-p1  
 Comment Kalaba/Zehl  
 Ergebnis: +/- 5ppm  
 ACN/MeOH + 1% H2O

Acquisition Date 03/11/2020 14:17:10

Operator msc  
 Instrument maXis 255552.00016

## Acquisition Parameter

|             |            |                      |          |                  |           |
|-------------|------------|----------------------|----------|------------------|-----------|
| Source Type | ESI        | Ion Polarity         | Positive | Set Nebulizer    | 0.4 Bar   |
| Focus       | Not active | Set Capillary        | 4200 V   | Set Dry Heater   | 180 Å°C   |
| Scan Begin  | 50 m/z     | Set End Plate Offset | -500 V   | Set Dry Gas      | 4.0 l/min |
| Scan End    | 1900 m/z   | Set Charging Voltage | 0 V      | Set Divert Valve | Source    |
|             |            | Set Corona           | 0 nA     | Set APCI Heater  | 0 Å°C     |

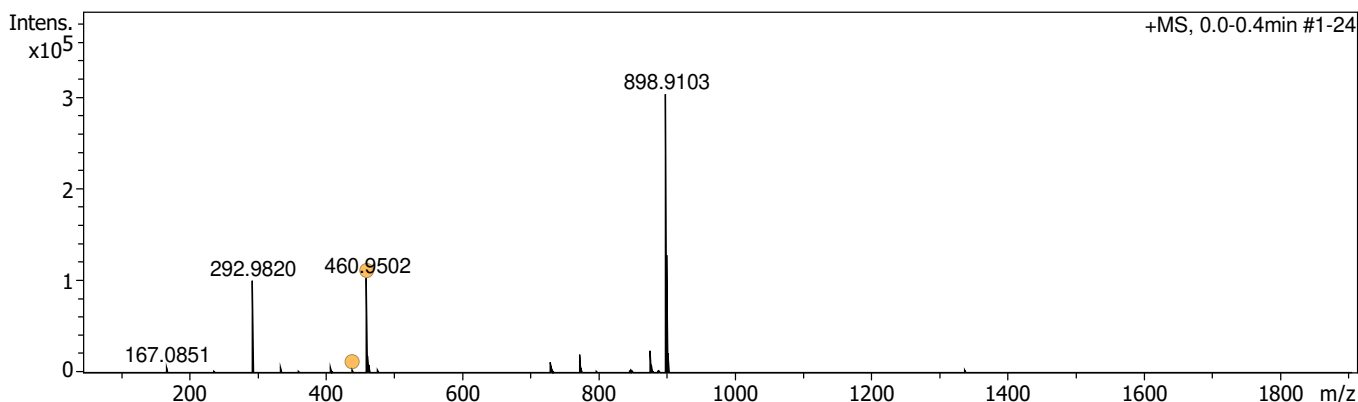

| Meas. m/z | #  | Ion Formula    | Score  | m/z      | err [mDa] | err [ppm] | mSigma | rdb  | eÅ <sup>-</sup> | Conf | N-Rule |
|-----------|----|----------------|--------|----------|-----------|-----------|--------|------|-----------------|------|--------|
| 438.9677  | 1  | C18H16IOS2     | 100.00 | 438.9682 | 0.5       | 1.2       | 17.2   | 18.0 | even            |      | ok     |
|           | 2  | C11H3N8O10S    | 72.08  | 438.9687 | 1.1       | 2.4       | 18.8   | 17.0 | even            |      | ok     |
|           | 3  | C15H3N8O5S2    | 56.49  | 438.9662 | -1.4      | -3.3      | 19.2   | 23.0 | even            |      | ok     |
|           | 4  | C11H8IN10S     | 44.57  | 438.9693 | 1.7       | 3.8       | 23.3   | 18.0 | even            |      | ok     |
|           | 5  | C18H3N2O12     | 87.98  | 438.9680 | 0.4       | 0.9       | 25.9   | 19.0 | even            |      | ok     |
|           | 6  | C19H7N2O7S2    | 67.94  | 438.9689 | 1.2       | 2.8       | 26.6   | 22.0 | even            |      | ok     |
|           | 7  | C12H7N8O5S3    | 36.85  | 438.9696 | 1.9       | 4.4       | 32.5   | 20.0 | even            |      | ok     |
|           | 8  | C22H3N2O7S     | 24.87  | 438.9655 | -2.1      | -4.8      | 33.2   | 25.0 | even            |      | ok     |
|           | 9  | C11H11N4O9S3   | 76.49  | 438.9683 | 0.6       | 1.3       | 36.4   | 15.0 | even            |      | ok     |
|           | 10 | C17H12IO6      | 49.32  | 438.9673 | -0.4      | -0.8      | 37.8   | 15.0 | even            |      | ok     |
|           | 11 | C18H8IN4O2     | 32.86  | 438.9686 | 1.0       | 2.2       | 41.3   | 20.0 | even            |      | ok     |
|           | 12 | C14H4IN10      | 18.65  | 438.9660 | -1.7      | -3.9      | 44.7   | 21.0 | even            |      | ok     |
|           | 13 | C15H11N4O4S4   | 19.51  | 438.9658 | -1.9      | -4.4      | 55.3   | 21.0 | even            |      | ok     |
|           | 14 | C27H3O5S       | 15.40  | 438.9696 | 1.9       | 4.3       | 56.0   | 29.0 | even            |      | ok     |
|           | 15 | C16H7N8S4      | 42.06  | 438.9671 | -0.6      | -1.3      | 57.0   | 26.0 | even            |      | ok     |
|           | 16 | C23H7N2O2S3    | 28.23  | 438.9664 | -1.3      | -2.9      | 57.6   | 28.0 | even            |      | ok     |
|           | 17 | C20H11N2O2S4   | 11.80  | 438.9698 | 2.1       | 4.8       | 65.5   | 25.0 | even            |      | ok     |
|           | 18 | C12H15N4O4S5   | 14.58  | 438.9691 | 1.5       | 3.3       | 72.6   | 18.0 | even            |      | ok     |
|           | 19 | C11H19O8S5     | 27.15  | 438.9678 | 0.1       | 0.3       | 75.0   | 13.0 | even            |      | ok     |
|           | 20 | C31H3S2        | 19.86  | 438.9671 | -0.6      | -1.4      | 77.3   | 35.0 | even            |      | ok     |
|           | 21 | C12H23O3S7     | 6.03   | 438.9687 | 1.0       | 2.3       | 103.7  | 16.0 | even            |      | ok     |
| 460.9502  | 1  | C11H2N8NaO10S  | 100.00 | 460.9507 | 0.5       | 1.1       | 9.1    | 17.0 | even            |      | ok     |
|           | 2  | C11H7IN10NaS   | 65.35  | 460.9513 | 1.1       | 2.4       | 14.5   | 18.0 | even            |      | ok     |
|           | 3  | C10H6N4NaO14S  | 68.97  | 460.9493 | -0.8      | -1.8      | 20.4   | 12.0 | even            |      | ok     |
|           | 4  | C10H11IN6NaO4S | 90.70  | 460.9499 | -0.2      | -0.5      | 21.1   | 13.0 | even            |      | ok     |
|           | 5  | C18H15INaOS2   | 92.76  | 460.9501 | -0.0      | -0.1      | 23.6   | 18.0 | even            |      | ok     |
|           | 6  | C18H2N2NaO12   | 86.58  | 460.9500 | -0.2      | -0.4      | 24.2   | 19.0 | even            |      | ok     |
|           | 7  | C15H2N8NaO5S2  | 29.18  | 460.9482 | -2.0      | -4.3      | 25.3   | 23.0 | even            |      | ok     |
|           | 8  | C17H11INaO6    | 38.19  | 460.9493 | -0.9      | -2.0      | 31.4   | 15.0 | even            |      | ok     |

74280000001.d

Bruker Compass DataAnalysis 5.1

printed: 11/11/2020 19:06:06

by: admin

Page 1 of 2

# Mass Spectrum SmartFormula Report

| Meas. m/z | #  | Ion Formula     | Score | m/z      | err [mDa] | err [ppm] | mSigma | rdb  | e <sup>-</sup> | Conf | N-Rule |
|-----------|----|-----------------|-------|----------|-----------|-----------|--------|------|----------------|------|--------|
|           | 9  | C19H6N2NaO7S2   | 68.19 | 460.9509 | 0.7       | 1.5       | 32.8   | 22.0 | even           |      | ok     |
|           | 10 | C10H19IN2NaO3S3 | 66.72 | 460.9495 | -0.7      | -1.5      | 34.2   | 11.0 | even           |      | ok     |
|           | 11 | C12H6N8NaO5S3   | 42.26 | 460.9515 | 1.4       | 3.0       | 35.9   | 20.0 | even           |      | ok     |
|           | 12 | C11H10N4NaO9S3  | 80.22 | 460.9502 | 0.1       | 0.1       | 38.1   | 15.0 | even           |      | ok     |
|           | 13 | C18H7IN4NaO2    | 40.55 | 460.9506 | 0.4       | 0.9       | 38.3   | 20.0 | even           |      | ok     |
|           | 14 | C14H3IN10Na     | 12.77 | 460.9479 | -2.2      | -4.9      | 38.4   | 21.0 | even           |      | ok     |
|           | 15 | C10H14NaO13S3   | 37.26 | 460.9489 | -1.3      | -2.8      | 43.2   | 10.0 | even           |      | ok     |
|           | 16 | C20H2N6NaO3S2   | 16.43 | 460.9522 | 2.0       | 4.4       | 45.4   | 27.0 | even           |      | ok     |
|           | 17 | C16H6N8NaS4     | 22.63 | 460.9490 | -1.1      | -2.4      | 62.4   | 26.0 | even           |      | ok     |
|           | 18 | C27H2NaO5S      | 15.16 | 460.9515 | 1.4       | 2.9       | 63.1   | 29.0 | even           |      | ok     |
|           | 19 | C23H6N2NaO2S3   | 13.63 | 460.9484 | -1.8      | -3.9      | 64.1   | 28.0 | even           |      | ok     |
|           | 20 | C20H10N2NaO2S4  | 12.20 | 460.9517 | 1.6       | 3.4       | 71.3   | 25.0 | even           |      | ok     |
|           | 21 | C12H14N4NaO4S5  | 15.02 | 460.9511 | 0.9       | 2.0       | 76.4   | 18.0 | even           |      | ok     |
|           | 22 | C13H10N8NaS5    | 6.01  | 460.9524 | 2.3       | 4.9       | 76.4   | 23.0 | even           |      | ok     |
|           | 23 | C11H18NaO8S5    | 18.25 | 460.9497 | -0.4      | -0.9      | 78.1   | 13.0 | even           |      | ok     |
|           | 24 | C28H6NaS3       | 4.71  | 460.9524 | 2.2       | 4.8       | 83.1   | 32.0 | even           |      | ok     |
|           | 25 | C31H2NaS2       | 9.67  | 460.9490 | -1.1      | -2.5      | 84.1   | 35.0 | even           |      | ok     |
|           | 26 | C12H22NaO3S7    | 5.78  | 460.9506 | 0.5       | 1.0       | 107.3  | 16.0 | even           |      | ok     |



**Figure S44.** HRESIMS spectrum of compound **8k**

## Generic Display Report

### Analysis Info

Analysis Name D:\Data\Kalaba\74281000001.d  
Method tune\_low\_MS\_Service\_11\_20.m  
Sample Name SB2-spot2-p2  
Comment Kalaba/Zehl  
Ergebnis: +/- 5ppm  
ACN/MeOH + 1% H2O

Acquisition Date 03/11/2020 14:36:01

Operator msc  
Instrument maXis

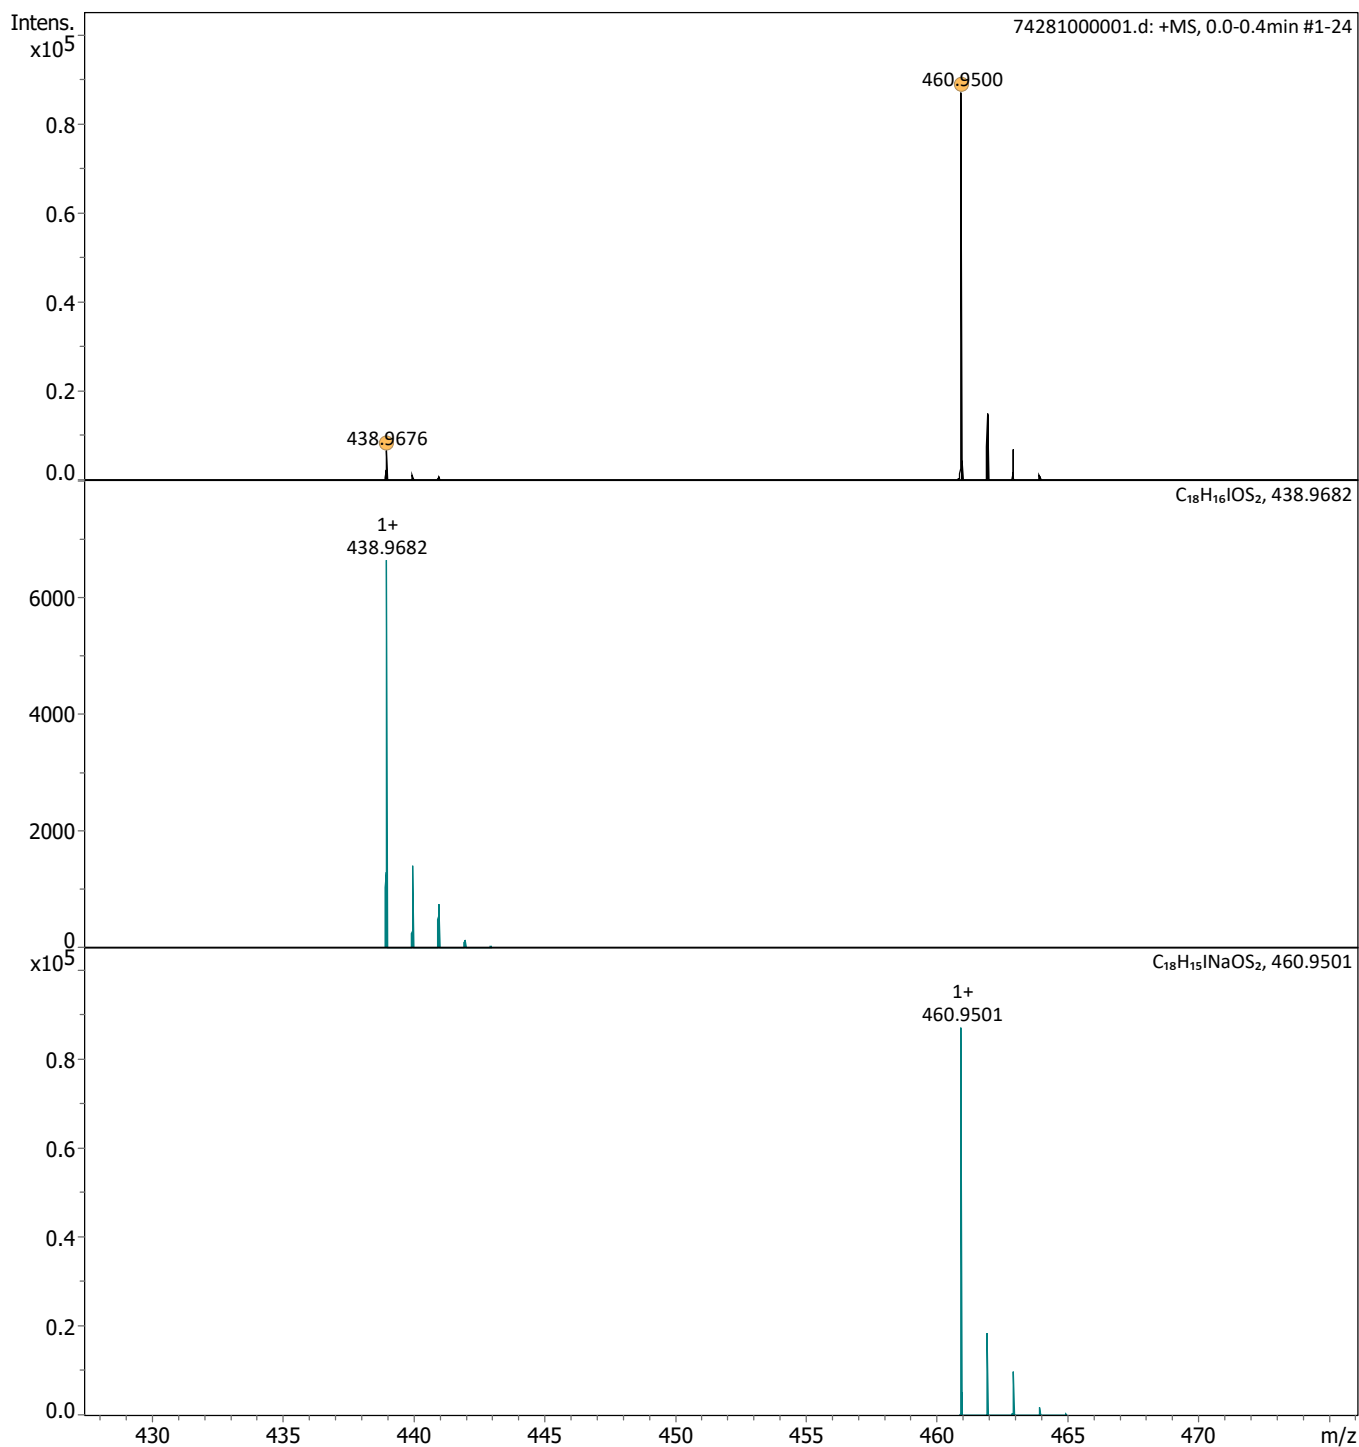

# Mass Spectrum SmartFormula Report

## Analysis Info

Analysis Name D:\Data\Kalaba\74281000001.d  
Method tune\_low\_MS\_Service\_11\_20.m  
Sample Name SB2-spot2-p2  
Comment Kalaba/Zehl  
Ergebnis: +/- 5ppm  
ACN/MeOH + 1% H2O

Acquisition Date 03/11/2020 14:36:01

Operator msc  
Instrument maXis 255552.00016

## Acquisition Parameter

|             |            |                      |          |                  |           |
|-------------|------------|----------------------|----------|------------------|-----------|
| Source Type | ESI        | Ion Polarity         | Positive | Set Nebulizer    | 0.4 Bar   |
| Focus       | Not active | Set Capillary        | 4200 V   | Set Dry Heater   | 180 Å°C   |
| Scan Begin  | 50 m/z     | Set End Plate Offset | -500 V   | Set Dry Gas      | 4.0 l/min |
| Scan End    | 1900 m/z   | Set Charging Voltage | 0 V      | Set Divert Valve | Source    |
|             |            | Set Corona           | 0 nA     | Set APCI Heater  | 0 Å°C     |

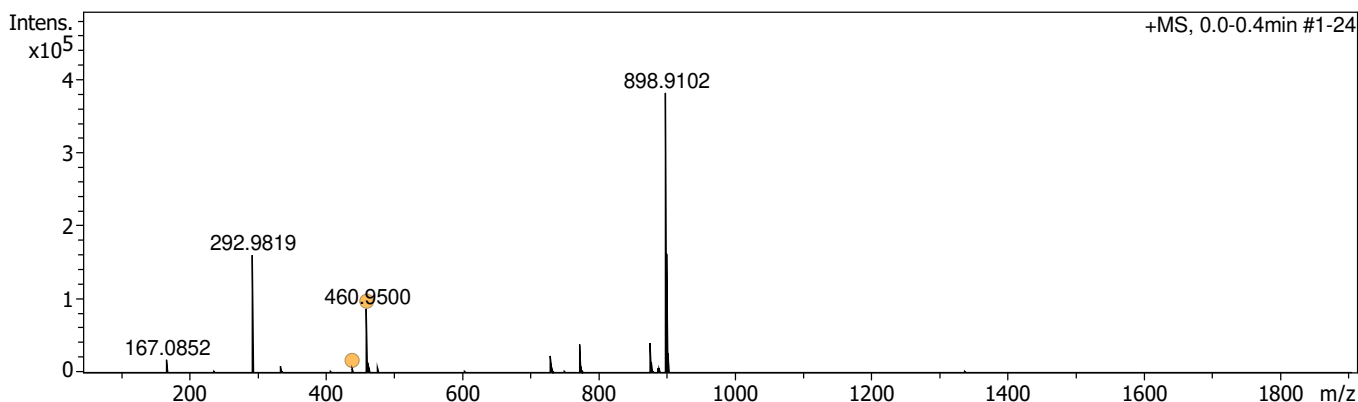

| Meas. m/z | #  | Ion Formula    | Score  | m/z      | err [mDa] | err [ppm] | mSigma | rdb  | eÅ <sup>-</sup> | Conf | N-Rule |
|-----------|----|----------------|--------|----------|-----------|-----------|--------|------|-----------------|------|--------|
| 438.9676  | 1  | C11H3N8O10S    | 83.40  | 438.9687 | 1.1       | 2.5       | 15.0   | 17.0 | even            |      | ok     |
|           | 2  | C11H8IN10S     | 51.51  | 438.9693 | 1.7       | 3.9       | 19.6   | 18.0 | even            |      | ok     |
|           | 3  | C18H16IOS2     | 100.00 | 438.9682 | 0.5       | 1.2       | 20.6   | 18.0 | even            |      | ok     |
|           | 4  | C15H3N8O5S2    | 58.90  | 438.9662 | -1.4      | -3.2      | 22.4   | 23.0 | even            |      | ok     |
|           | 5  | C18H3N2O12     | 96.48  | 438.9680 | 0.4       | 0.9       | 25.0   | 19.0 | even            |      | ok     |
|           | 6  | C19H7N2O7S2    | 67.19  | 438.9689 | 1.3       | 2.9       | 29.8   | 22.0 | even            |      | ok     |
|           | 7  | C12H7N8O5S3    | 37.53  | 438.9696 | 2.0       | 4.5       | 34.3   | 20.0 | even            |      | ok     |
|           | 8  | C17H12IO6      | 58.75  | 438.9673 | -0.3      | -0.7      | 35.1   | 15.0 | even            |      | ok     |
|           | 9  | C22H3N2O7S     | 25.72  | 438.9655 | -2.1      | -4.8      | 36.5   | 25.0 | even            |      | ok     |
|           | 10 | C11H11N4O9S3   | 80.36  | 438.9683 | 0.6       | 1.4       | 37.2   | 15.0 | even            |      | ok     |
|           | 11 | C18H8IN4O2     | 36.41  | 438.9686 | 1.0       | 2.3       | 40.0   | 20.0 | even            |      | ok     |
|           | 12 | C14H4IN10      | 22.50  | 438.9660 | -1.7      | -3.8      | 42.1   | 21.0 | even            |      | ok     |
|           | 13 | C15H11N4O4S4   | 20.24  | 438.9658 | -1.9      | -4.3      | 57.7   | 21.0 | even            |      | ok     |
|           | 14 | C27H3O5S       | 14.63  | 438.9696 | 1.9       | 4.4       | 59.5   | 29.0 | even            |      | ok     |
|           | 15 | C16H7N8S4      | 42.60  | 438.9671 | -0.5      | -1.2      | 59.8   | 26.0 | even            |      | ok     |
|           | 16 | C23H7N2O2S3    | 28.15  | 438.9664 | -1.2      | -2.8      | 61.0   | 28.0 | even            |      | ok     |
|           | 17 | C20H11N2O2S4   | 11.24  | 438.9698 | 2.1       | 4.9       | 68.6   | 25.0 | even            |      | ok     |
|           | 18 | C12H15N4O4S5   | 14.47  | 438.9691 | 1.5       | 3.4       | 74.5   | 18.0 | even            |      | ok     |
|           | 19 | C11H19O8S5     | 27.59  | 438.9678 | 0.2       | 0.4       | 76.5   | 13.0 | even            |      | ok     |
|           | 20 | C31H3S2        | 19.25  | 438.9671 | -0.6      | -1.3      | 80.7   | 35.0 | even            |      | ok     |
| 460.9500  | 21 | C12H23O3S7     | 5.93   | 438.9687 | 1.0       | 2.3       | 105.5  | 16.0 | even            |      | ok     |
|           | 1  | C11H2N8NaO10S  | 94.62  | 460.9507 | 0.7       | 1.5       | 7.6    | 17.0 | even            |      | ok     |
|           | 2  | C11H7IN10NaS   | 60.30  | 460.9513 | 1.3       | 2.8       | 13.5   | 18.0 | even            |      | ok     |
|           | 3  | C10H6N4NaO14S  | 77.27  | 460.9493 | -0.7      | -1.4      | 18.9   | 12.0 | even            |      | ok     |
|           | 4  | C10H11IN6NaO4S | 100.00 | 460.9499 | -0.1      | -0.1      | 19.7   | 13.0 | even            |      | ok     |
|           | 5  | C18H2N2NaO12   | 91.18  | 460.9500 | 0.0       | 0.0       | 24.8   | 19.0 | even            |      | ok     |
|           | 6  | C18H15INaOS2   | 86.24  | 460.9501 | 0.1       | 0.3       | 24.9   | 18.0 | even            |      | ok     |
|           | 7  | C15H2N8NaO5S2  | 31.93  | 460.9482 | -1.8      | -3.9      | 26.5   | 23.0 | even            |      | ok     |
|           | 8  | C17H11INaO6    | 41.72  | 460.9493 | -0.7      | -1.6      | 31.3   | 15.0 | even            |      | ok     |

# Mass Spectrum SmartFormula Report

| Meas. m/z | #  | Ion Formula     | Score | m/z      | err [mDa] | err [ppm] | mSigma | rdb  | e <sup>-</sup> | Conf | N-Rule |
|-----------|----|-----------------|-------|----------|-----------|-----------|--------|------|----------------|------|--------|
|           | 9  | C10H19IN2NaO3S3 | 72.69 | 460.9495 | -0.5      | -1.1      | 34.0   | 11.0 | even           |      | ok     |
|           | 10 | C19H6N2NaO7S2   | 60.64 | 460.9509 | 0.9       | 1.9       | 34.0   | 22.0 | even           |      | ok     |
|           | 11 | C12H6N8NaO5S3   | 37.45 | 460.9515 | 1.6       | 3.4       | 36.5   | 20.0 | even           |      | ok     |
|           | 12 | C14H3IN10Na     | 14.57 | 460.9479 | -2.1      | -4.5      | 38.2   | 21.0 | even           |      | ok     |
|           | 13 | C11H10N4NaO9S3  | 74.59 | 460.9502 | 0.2       | 0.5       | 38.3   | 15.0 | even           |      | ok     |
|           | 14 | C18H7IN4NaO2    | 36.99 | 460.9506 | 0.6       | 1.3       | 38.8   | 20.0 | even           |      | ok     |
|           | 15 | C10H14NaO13S3   | 41.26 | 460.9489 | -1.1      | -2.4      | 43.0   | 10.0 | even           |      | ok     |
|           | 16 | C20H2N6NaO3S2   | 13.86 | 460.9522 | 2.2       | 4.8       | 46.8   | 27.0 | even           |      | ok     |
|           | 17 | C15H10N4NaO4S4  | 10.51 | 460.9477 | -2.3      | -5.0      | 60.6   | 21.0 | even           |      | ok     |
|           | 18 | C16H6N8NaS4     | 24.08 | 460.9490 | -0.9      | -2.1      | 63.3   | 26.0 | even           |      | ok     |
|           | 19 | C27H2NaO5S      | 12.94 | 460.9515 | 1.5       | 3.3       | 64.6   | 29.0 | even           |      | ok     |
|           | 20 | C23H6N2NaO2S3   | 14.64 | 460.9484 | -1.6      | -3.5      | 65.2   | 28.0 | even           |      | ok     |
|           | 21 | C20H10N2NaO2S4  | 10.51 | 460.9517 | 1.7       | 3.8       | 72.2   | 25.0 | even           |      | ok     |
|           | 22 | C12H14N4NaO4S5  | 13.45 | 460.9511 | 1.1       | 2.4       | 76.8   | 18.0 | even           |      | ok     |
|           | 23 | C11H18NaO8S5    | 19.41 | 460.9497 | -0.3      | -0.5      | 78.3   | 13.0 | even           |      | ok     |
|           | 24 | C31H2NaS2       | 10.04 | 460.9490 | -1.0      | -2.1      | 85.4   | 35.0 | even           |      | ok     |
|           | 25 | C12H22NaO3S7    | 5.23  | 460.9506 | 0.6       | 1.3       | 107.7  | 16.0 | even           |      | ok     |

**Figure S45.** HRESIMS spectrum of compound **5I**

## Generic Display Report

### Analysis Info

Analysis Name D:\Data\Kalaba\78516000001.d  
Method tune\_low\_MS\_Service\_03\_21.m  
Sample Name PN-6-peak-1  
Comment Kalaba / Zehl  
Ergebnis +/- 5 ppm  
ACN / MeOH + 1% H<sub>2</sub>O

Acquisition Date 26/03/2021 13:37:22

Operator msc  
Instrument maXis

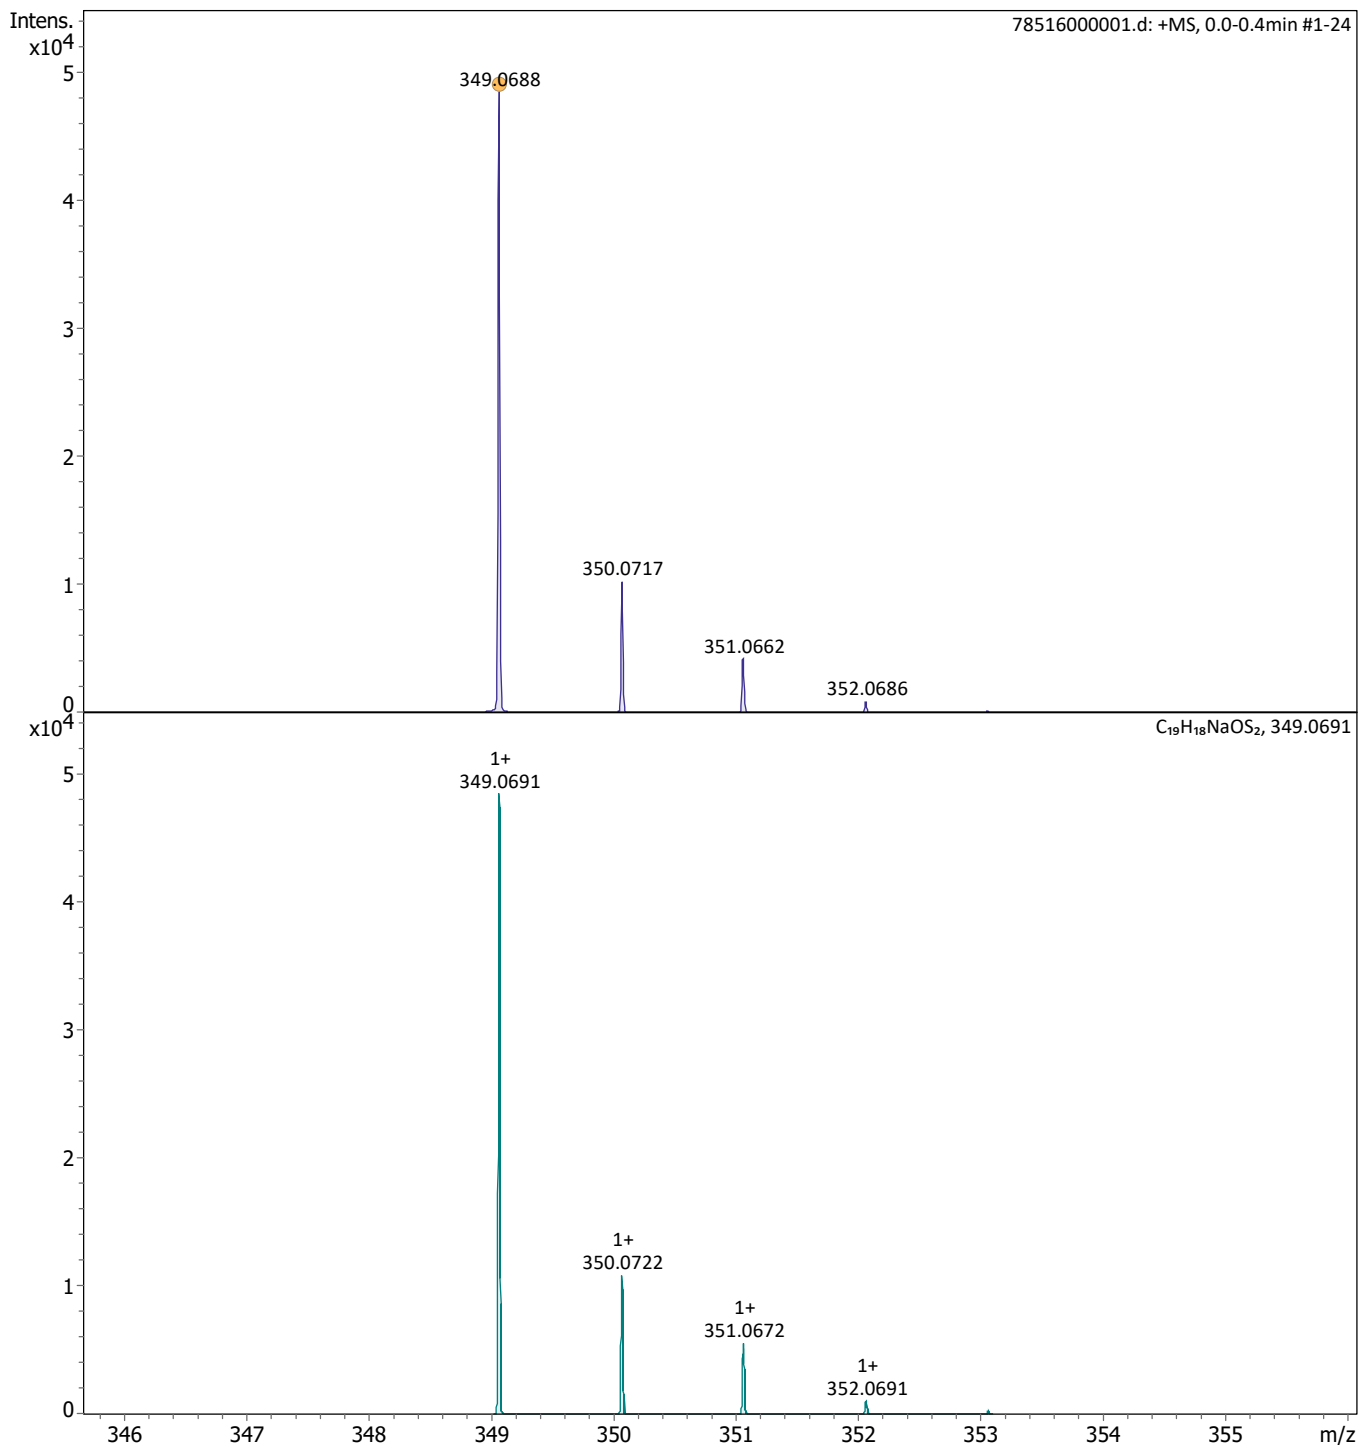

# Mass Spectrum SmartFormula Report

## Analysis Info

Analysis Name D:\Data\Kalaba\78516000001.d  
 Method tune\_low\_MS\_Service\_03\_21.m  
 Sample Name PN-6-peak-1  
 Comment Kalaba / Zehl  
 Ergebnis +/- 5 ppm  
 ACN / MeOH + 1% H2O

Acquisition Date 26/03/2021 13:37:22

Operator msc  
 Instrument maXis 255552.00016

## Acquisition Parameter

|             |            |                      |          |                  |           |
|-------------|------------|----------------------|----------|------------------|-----------|
| Source Type | ESI        | Ion Polarity         | Positive | Set Nebulizer    | 0.4 Bar   |
| Focus       | Not active | Set Capillary        | 4200 V   | Set Dry Heater   | 180 Å°C   |
| Scan Begin  | 80 m/z     | Set End Plate Offset | -500 V   | Set Dry Gas      | 4.0 l/min |
| Scan End    | 1900 m/z   | Set Charging Voltage | 0 V      | Set Divert Valve | Source    |
|             |            | Set Corona           | 0 nA     | Set APCI Heater  | 0 Å°C     |

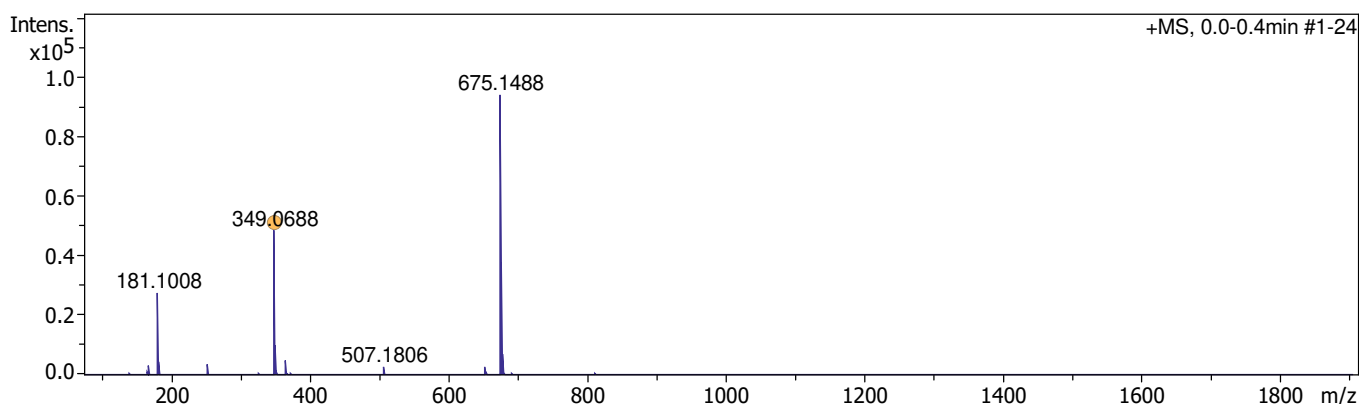

| Meas. m/z | # | Ion Formula    | Score  | m/z      | err [mDa] | err [ppm] | mSigma | rdb  | eÅ <sup>-</sup> | Conf | N-Rule |
|-----------|---|----------------|--------|----------|-----------|-----------|--------|------|-----------------|------|--------|
| 349.0688  | 1 | C19H18NaOS2    | 100.00 | 349.0691 | 0.4       | 1.1       | 15.4   | 15.0 | even            |      | ok     |
|           | 2 | C12H10N10NaS   | 44.01  | 349.0703 | 1.5       | 4.4       | 23.4   | 15.0 | even            |      | ok     |
|           | 3 | C11H14N6NaO4S  | 73.76  | 349.0689 | 0.2       | 0.5       | 32.5   | 10.0 | even            |      | ok     |
|           | 4 | C18H14NaO6     | 47.06  | 349.0683 | -0.5      | -1.4      | 33.4   | 12.0 | even            |      | ok     |
|           | 5 | C19H10N4NaO2   | 37.87  | 349.0696 | 0.8       | 2.4       | 35.0   | 17.0 | even            |      | ok     |
|           | 6 | C11H22N2NaO3S3 | 75.34  | 349.0685 | -0.3      | -0.8      | 38.8   | 8.0  | even            |      | ok     |
|           | 7 | C10H18N2NaO8S  | 34.21  | 349.0676 | -1.1      | -3.3      | 42.9   | 5.0  | even            |      | ok     |

**Figure S46.** HRESIMS spectrum of compound **6I**

## Generic Display Report

### Analysis Info

Analysis Name D:\Data\Kalaba\78517000001.d  
Method tune\_low\_MS\_Service\_03\_21.m  
Sample Name PN-6-peak-2  
Comment Kalaba / Zehl  
Ergebnis +/- 5 ppm  
ACN / MeOH + 1% H<sub>2</sub>O

Acquisition Date 26/03/2021 13:38:44

Operator msc  
Instrument maXis

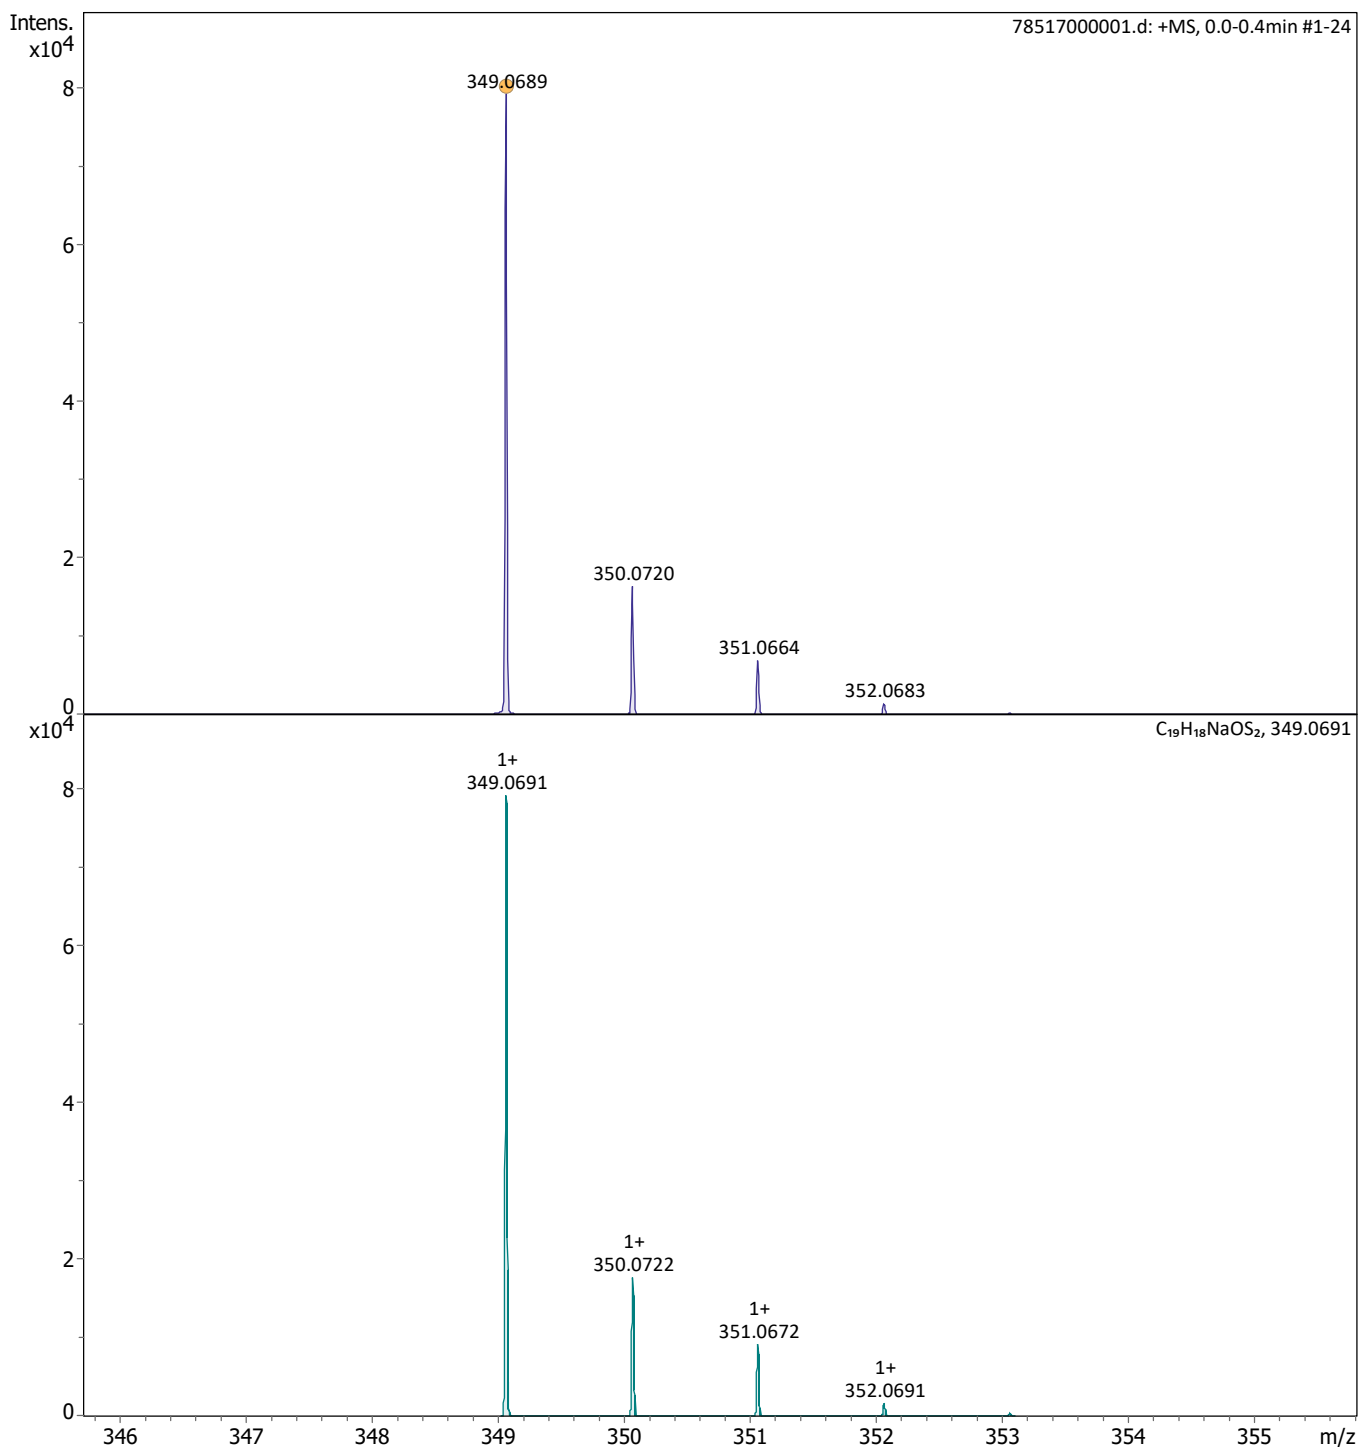

# Mass Spectrum SmartFormula Report

## Analysis Info

Analysis Name D:\Data\Kalaba\78517000001.d  
 Method tune\_low\_MS\_Service\_03\_21.m  
 Sample Name PN-6-peak-2  
 Comment Kalaba / Zehl  
 Ergebnis +/- 5 ppm  
 ACN / MeOH + 1% H2O

Acquisition Date 26/03/2021 13:38:44

Operator msc  
 Instrument maXis 255552.00016

## Acquisition Parameter

|             |            |                      |          |                  |           |
|-------------|------------|----------------------|----------|------------------|-----------|
| Source Type | ESI        | Ion Polarity         | Positive | Set Nebulizer    | 0.4 Bar   |
| Focus       | Not active | Set Capillary        | 4200 V   | Set Dry Heater   | 180 Å°C   |
| Scan Begin  | 80 m/z     | Set End Plate Offset | -500 V   | Set Dry Gas      | 4.0 l/min |
| Scan End    | 1900 m/z   | Set Charging Voltage | 0 V      | Set Divert Valve | Source    |
|             |            | Set Corona           | 0 nA     | Set APCI Heater  | 0 Å°C     |

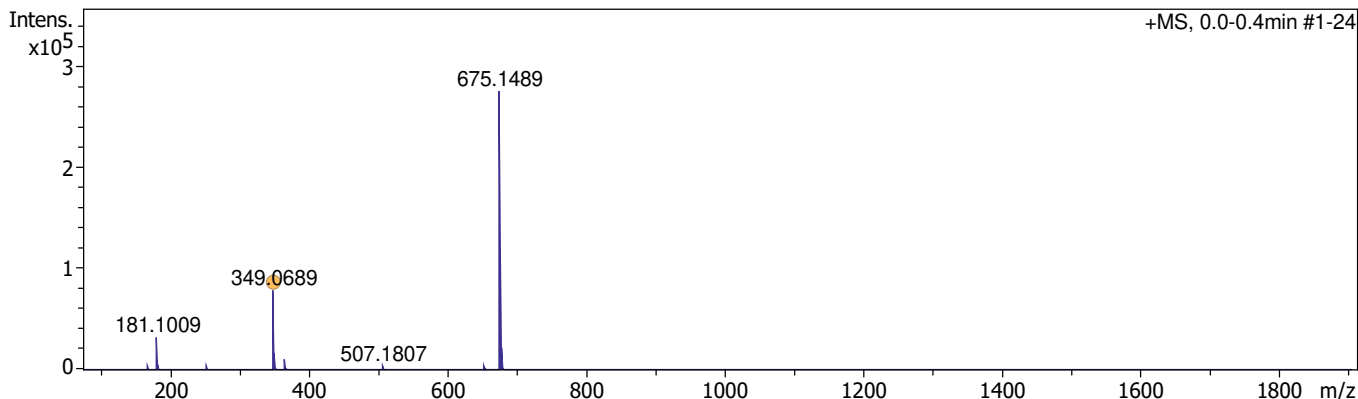

| Meas. m/z | # | Ion Formula    | Score  | m/z      | err [mDa] | err [ppm] | mSigma | rdb  | e <sup>-</sup> | Conf | N-Rule |
|-----------|---|----------------|--------|----------|-----------|-----------|--------|------|----------------|------|--------|
| 349.0689  | 1 | C19H18NaOS2    | 100.00 | 349.0691 | 0.2       | 0.6       | 16.1   | 15.0 | even           |      | ok     |
|           | 2 | C12H10N10NaS   | 47.62  | 349.0703 | 1.4       | 3.9       | 22.1   | 15.0 | even           |      | ok     |
|           | 3 | C11H14N6NaO4S  | 77.75  | 349.0689 | 0.0       | 0.1       | 30.7   | 10.0 | even           |      | ok     |
|           | 4 | C18H14NaO6     | 41.07  | 349.0683 | -0.7      | -1.9      | 33.2   | 12.0 | even           |      | ok     |
|           | 5 | C19H10N4NaO2   | 38.17  | 349.0696 | 0.7       | 1.9       | 35.7   | 17.0 | even           |      | ok     |
|           | 6 | C11H22N2NaO3S3 | 68.07  | 349.0685 | -0.4      | -1.3      | 37.6   | 8.0  | even           |      | ok     |
|           | 7 | C10H18N2NaO8S  | 30.76  | 349.0676 | -1.3      | -3.8      | 41.0   | 5.0  | even           |      | ok     |

**Figure S47.** HRESIMS spectrum of compound **7I**

## Generic Display Report

### Analysis Info

Analysis Name W:\MS\_MessService\80201000001.d  
Method tune\_low\_MS\_Service\_04\_21.m  
Sample Name PN-6-PEAK-3  
Comment Kalaba / Zehl  
Ergebnis +/- 5 ppm  
ACN / MeOH + 1% H<sub>2</sub>O

Acquisition Date 18/05/2021 19:50:55

Operator msc  
Instrument maXis

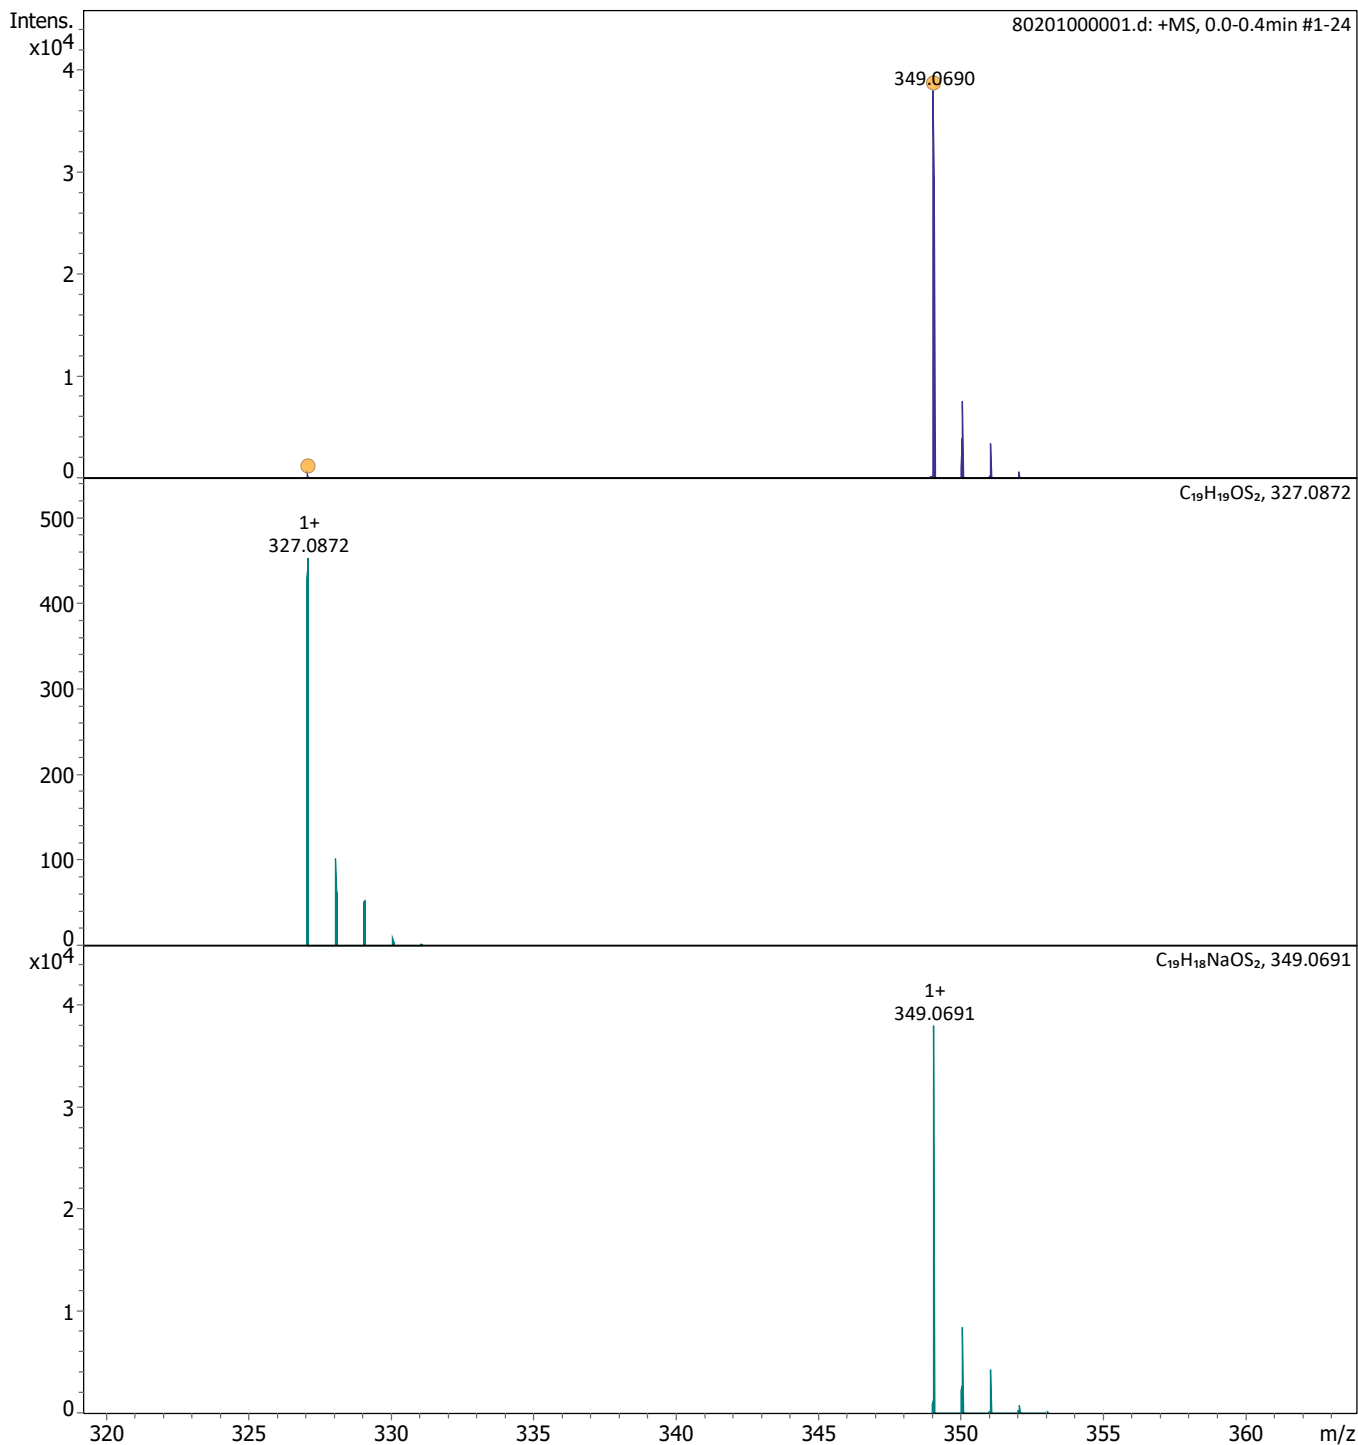



# Mass Spectrum SmartFormula Report

## Analysis Info

Analysis Name W:\MS\_MessService\80201000001.d  
 Method tune\_low\_MS\_Service\_04\_21.m  
 Sample Name PN-6-PEAK-3  
 Comment Kalaba / Zehl  
 Ergebnis +/- 5 ppm  
 ACN / MeOH + 1% H2O

Acquisition Date 18/05/2021 19:50:55

Operator msc  
 Instrument maXis 255552.00016

## Acquisition Parameter

|             |            |                      |          |                  |           |
|-------------|------------|----------------------|----------|------------------|-----------|
| Source Type | ESI        | Ion Polarity         | Positive | Set Nebulizer    | 0.4 Bar   |
| Focus       | Not active | Set Capillary        | 4200 V   | Set Dry Heater   | 180 Å°C   |
| Scan Begin  | 50 m/z     | Set End Plate Offset | -500 V   | Set Dry Gas      | 4.0 l/min |
| Scan End    | 1900 m/z   | Set Charging Voltage | 0 V      | Set Divert Valve | Source    |
|             |            | Set Corona           | 0 nA     | Set APCI Heater  | 0 Å°C     |

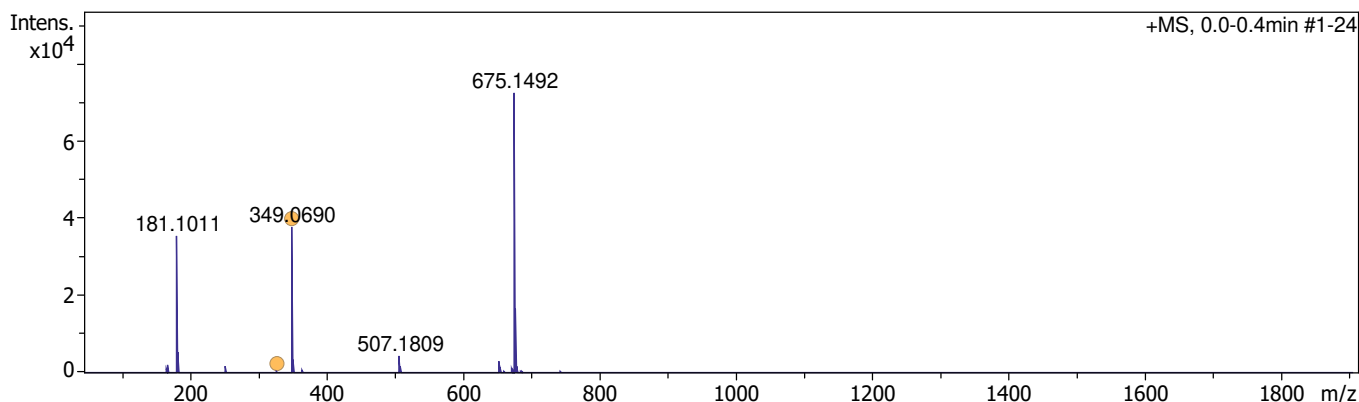

| Meas. m/z | # | Ion Formula  | Score  | m/z      | err [mDa] | err [ppm] | mSigma | rdB  | eÅ <sup>-</sup> | Conf | N-Rule |
|-----------|---|--------------|--------|----------|-----------|-----------|--------|------|-----------------|------|--------|
| 327.0871  | 1 | C19H11N4O2   | 100.00 | 327.0877 | 0.6       | 1.7       | 18.0   | 17.0 | even            |      | ok     |
|           | 2 | C18H15O6     | 70.75  | 327.0863 | -0.8      | -2.4      | 28.2   | 12.0 | even            |      | ok     |
|           | 3 | C12H11N10S   | 49.85  | 327.0883 | 1.2       | 3.8       | 42.7   | 15.0 | even            |      | ok     |
|           | 4 | C11H15N6O4S  | 65.72  | 327.0870 | -0.1      | -0.3      | 53.1   | 10.0 | even            |      | ok     |
|           | 5 | C19H19OS2    | 54.43  | 327.0872 | 0.1       | 0.3       | 59.0   | 15.0 | even            |      | ok     |
|           | 6 | C10H19N2O8S  | 22.41  | 327.0857 | -1.4      | -4.4      | 64.1   | 5.0  | even            |      | ok     |
|           | 7 | C11H23N2O3S3 | 27.52  | 327.0865 | -0.6      | -1.7      | 77.8   | 8.0  | even            |      | ok     |
| 349.0690  | 1 | C19H18NaOS2  | 100.00 | 349.0691 | 0.1       | 0.3       | 17.3   | 15.0 | even            |      | ok     |
|           | 2 | C12H10N10NaS | 51.68  | 349.0703 | 1.2       | 3.6       | 20.6   | 15.0 | even            |      | ok     |
|           | 3 | C18H14NaO6   | 35.85  | 349.0683 | -0.8      | -2.2      | 35.1   | 12.0 | even            |      | ok     |
|           | 4 | C19H10N4NaO2 | 35.81  | 349.0696 | 0.6       | 1.6       | 39.4   | 17.0 | even            |      | ok     |

**Figure S48.** HRESIMS spectrum of compound **8I**

## Generic Display Report

### Analysis Info

Analysis Name W:\MS\_MessService\80202000001.d  
Method tune\_low\_MS\_Service\_04\_21.m  
Sample Name PN-6-PEAK-4  
Comment Kalaba / Zehl  
Ergebnis +/- 5 ppm  
ACN / MeOH + 1% H<sub>2</sub>O

Acquisition Date 21/05/2021 16:31:28

Operator msc  
Instrument maXis

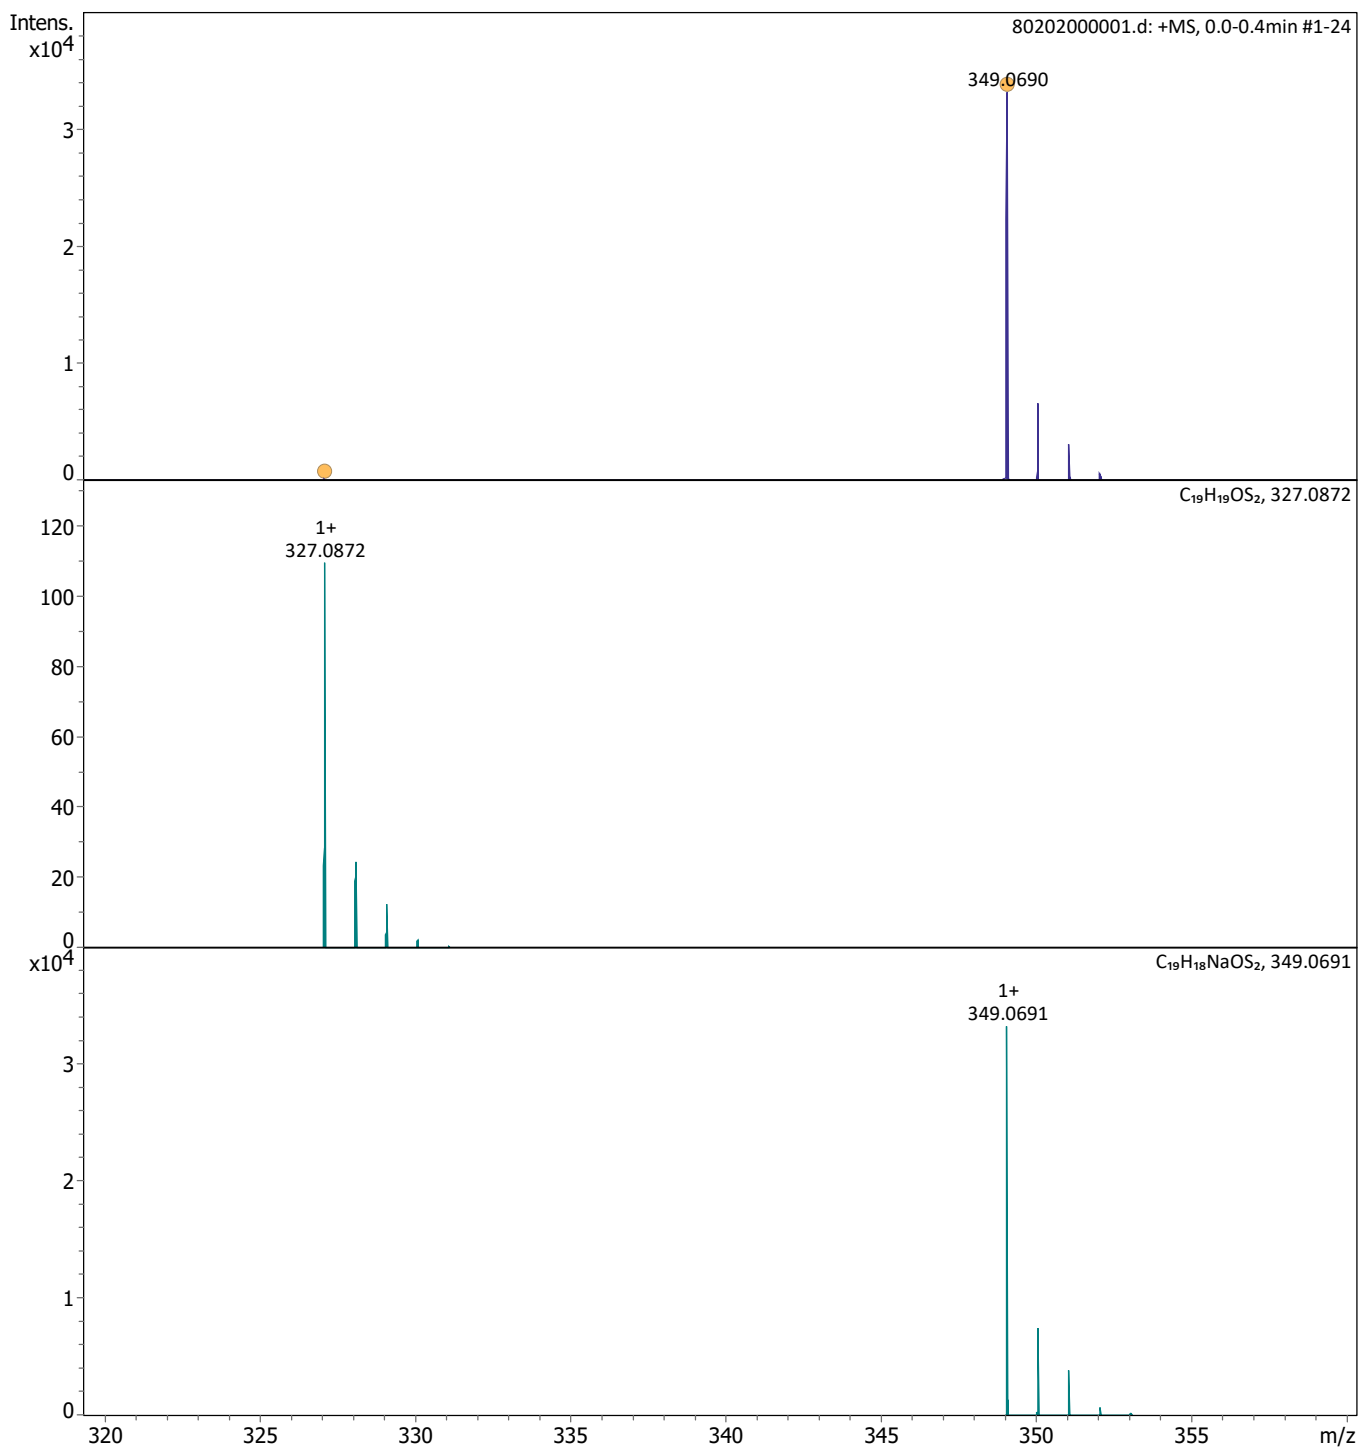

# Mass Spectrum SmartFormula Report

## Analysis Info

Analysis Name W:\MS\_MessService\80202000001.d  
Method tune\_low\_MS\_Service\_04\_21.m  
Sample Name PN-6-PEAK-4  
Comment Kalaba / Zehl  
Ergebnis +/- 5 ppm  
ACN / MeOH + 1% H2O

Acquisition Date 21/05/2021 16:31:28

Operator msc  
Instrument maXis 255552.00016

## Acquisition Parameter

|             |            |                      |          |                  |           |
|-------------|------------|----------------------|----------|------------------|-----------|
| Source Type | ESI        | Ion Polarity         | Positive | Set Nebulizer    | 0.4 Bar   |
| Focus       | Not active | Set Capillary        | 4200 V   | Set Dry Heater   | 180 Å°C   |
| Scan Begin  | 50 m/z     | Set End Plate Offset | -500 V   | Set Dry Gas      | 4.0 l/min |
| Scan End    | 1900 m/z   | Set Charging Voltage | 0 V      | Set Divert Valve | Source    |
|             |            | Set Corona           | 0 nA     | Set APCI Heater  | 0 Å°C     |

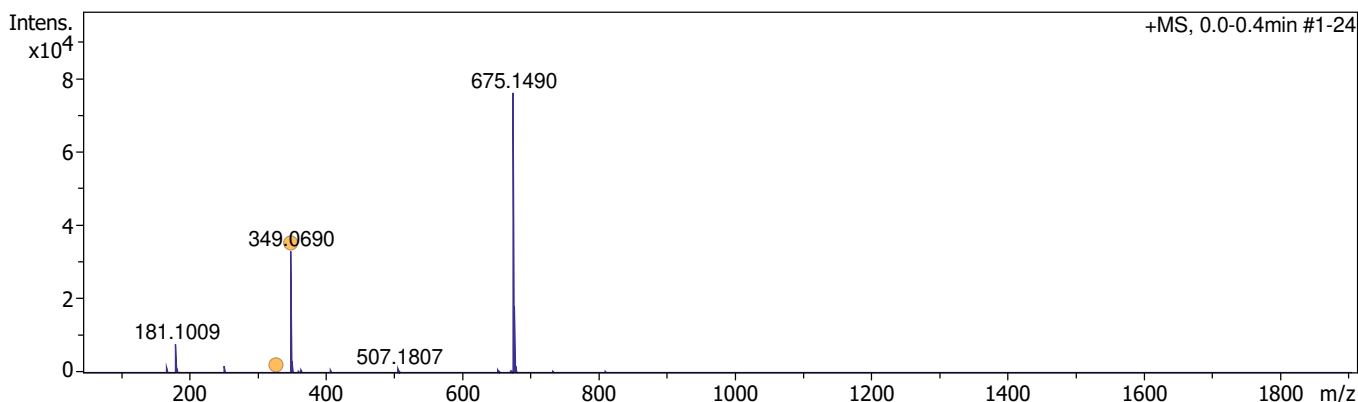

| Meas. m/z | # | Ion Formula    | Score  | m/z      | err [mDa] | err [ppm] | mSigma | rdb  | eÅ <sup>-</sup> | Conf | N-Rule |
|-----------|---|----------------|--------|----------|-----------|-----------|--------|------|-----------------|------|--------|
| 327.0869  | 1 | C11H15N6O4S    | 86.28  | 327.0870 | 0.1       | 0.5       | n.a.   | 10.0 | even            |      | ok     |
|           | 2 | C11H23N2O3S3   | 100.00 | 327.0865 | -0.3      | -1.0      | n.a.   | 8.0  | even            |      | ok     |
|           | 3 | C19H19OS2      | 79.62  | 327.0872 | 0.3       | 1.0       | n.a.   | 15.0 | even            |      | ok     |
|           | 4 | C18H15O6       | 54.16  | 327.0863 | -0.5      | -1.6      | n.a.   | 12.0 | even            |      | ok     |
|           | 5 | C19H11N4O2     | 47.40  | 327.0877 | 0.8       | 2.4       | n.a.   | 17.0 | even            |      | ok     |
|           | 6 | C10H19N2O8S    | 50.59  | 327.0857 | -1.2      | -3.6      | n.a.   | 5.0  | even            |      | ok     |
|           | 7 | C12H11N10S     | 41.96  | 327.0883 | 1.5       | 4.5       | n.a.   | 15.0 | even            |      | ok     |
| 349.0690  | 1 | C19H18NaOS2    | 100.00 | 349.0691 | 0.2       | 0.4       | 15.9   | 15.0 | even            |      | ok     |
|           | 2 | C12H10N10NaS   | 48.04  | 349.0703 | 1.3       | 3.8       | 22.0   | 15.0 | even            |      | ok     |
|           | 3 | C11H14N6NaO4S  | 78.89  | 349.0689 | -0.0      | -0.1      | 29.0   | 10.0 | even            |      | ok     |
|           | 4 | C11H22N2NaO3S3 | 72.37  | 349.0685 | -0.5      | -1.4      | 33.2   | 8.0  | even            |      | ok     |
|           | 5 | C18H14NaO6     | 35.84  | 349.0683 | -0.7      | -2.0      | 36.4   | 12.0 | even            |      | ok     |
|           | 6 | C10H18N2NaO8S  | 31.05  | 349.0676 | -1.4      | -3.9      | 38.5   | 5.0  | even            |      | ok     |
|           | 7 | C19H10N4NaO2   | 33.78  | 349.0696 | 0.6       | 1.8       | 40.3   | 17.0 | even            |      | ok     |

**Figure S49.** HRESIMS spectrum of compound **5m**

## Generic Display Report

### Analysis Info

Analysis Name D:\MZ\temp\64677000001.d  
Method tune\_low\_MS\_Service\_06\_19.m  
Sample Name PN\_16\_spot\_1peak\_1  
Comment Kalaba / Zehl  
Ergebnis: +/- 5ppm  
ACN / MeOH + 1% H<sub>2</sub>O

Acquisition Date 01/07/2019 16:05:39

Operator msc  
Instrument maXis

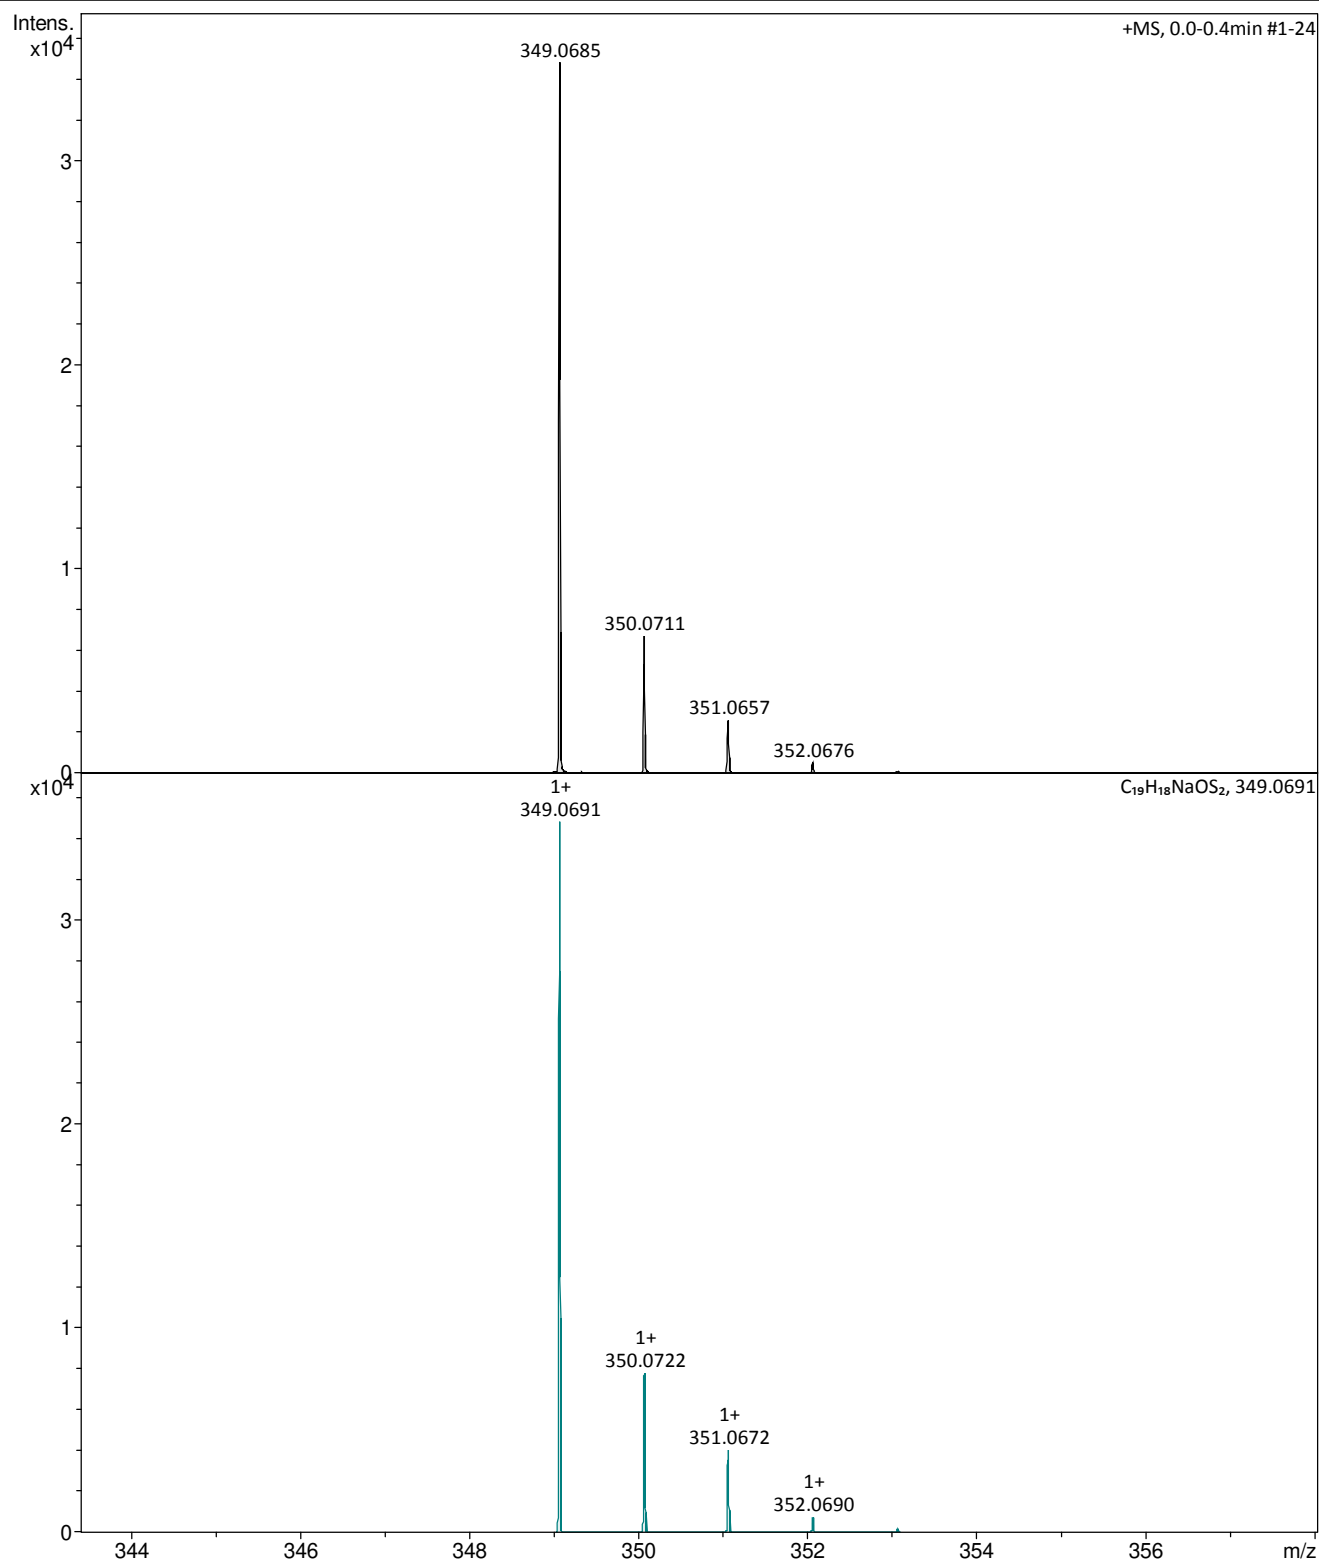

# Mass Spectrum SmartFormula Report

## Analysis Info

Analysis Name D:\MZ\temp\64677000001.d  
Method tune\_low\_MS\_Service\_06\_19.m  
Sample Name PN\_16\_spot\_1peak\_1  
Comment Kalaba / Zehl  
Ergebnis: +/- 5ppm  
ACN / MeOH + 1% H2O

Acquisition Date 01/07/2019 16:05:39

Operator msc  
Instrument maXis 255552.00016

## Acquisition Parameter

|             |            |                      |          |                  |           |
|-------------|------------|----------------------|----------|------------------|-----------|
| Source Type | ESI        | Ion Polarity         | Positive | Set Nebulizer    | 0.4 Bar   |
| Focus       | Not active | Set Capillary        | 4200 V   | Set Dry Heater   | 150 °C    |
| Scan Begin  | 50 m/z     | Set End Plate Offset | -500 V   | Set Dry Gas      | 4.0 l/min |
| Scan End    | 1900 m/z   | Set Charging Voltage | 0 V      | Set Divert Valve | Source    |
|             |            | Set Corona           | 0 nA     | Set APCI Heater  | 0 °C      |

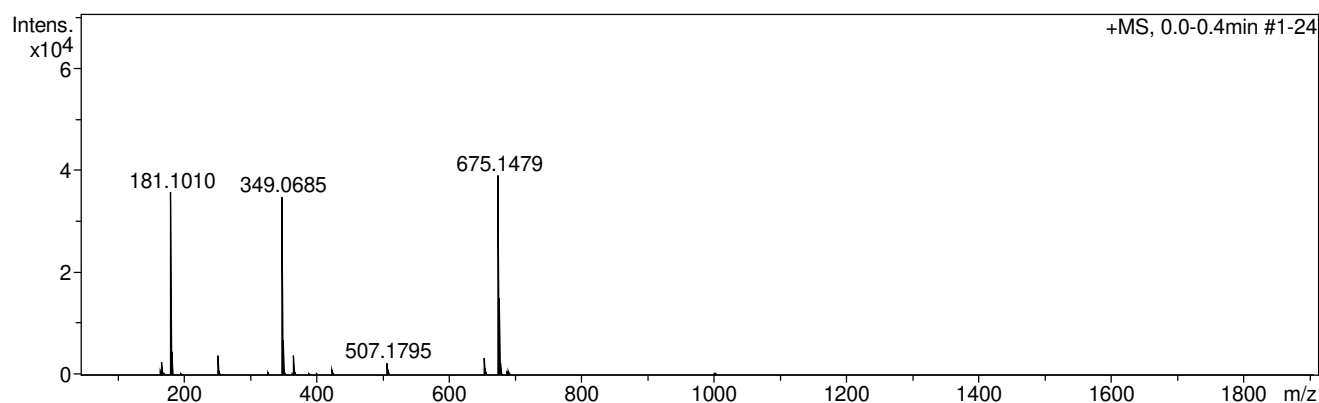

| Meas. m/z | # | Ion Formula    | m/z      | err [ppm] | mSigma | # Sigma | Score  | rdb  | e <sup>-</sup> Conf | N-Rule |
|-----------|---|----------------|----------|-----------|--------|---------|--------|------|---------------------|--------|
| 349.0685  | 1 | C11H14N6NaO4S  | 349.0689 | 1.2       | 21.1   | 1       | 100.00 | 7.5  | even                | ok     |
|           | 2 | C18H14NaO6     | 349.0683 | 0.8       | 21.8   | 2       | 78.87  | 11.5 | even                | ok     |
|           | 3 | C19H18NaOS2    | 349.0691 | 1.7       | 23.5   | 3       | 86.88  | 10.5 | even                | ok     |
|           | 4 | C19H10N4NaO2   | 349.0696 | 3.1       | 31.8   | 4       | 41.61  | 16.5 | even                | ok     |
|           | 5 | C15H6N10Na     | 349.0669 | 4.6       | 32.1   | 5       | 29.09  | 17.5 | even                | ok     |
|           | 6 | C10H18N2NaO8S  | 349.0676 | -2.6      | 32.3   | 6       | 59.47  | 2.5  | even                | ok     |
|           | 7 | C11H22N2NaO3S3 | 349.0685 | 0.2       | 39.0   | 7       | 75.72  | 1.5  | even                | ok     |

Figure S50. HRESIMS spectrum of compound 6m

## Generic Display Report

### Analysis Info

Analysis Name D:\MZ\temp\64678000002.d  
Method tune\_low\_MS\_Service\_06\_19.m  
Sample Name PN\_16\_spot\_1peak\_2  
Comment Kalaba / Zehl  
Ergebnis: +/- 5ppm  
ACN / MeOH + 1% H<sub>2</sub>O

Acquisition Date 01/07/2019 16:12:29

Operator msc  
Instrument maXis

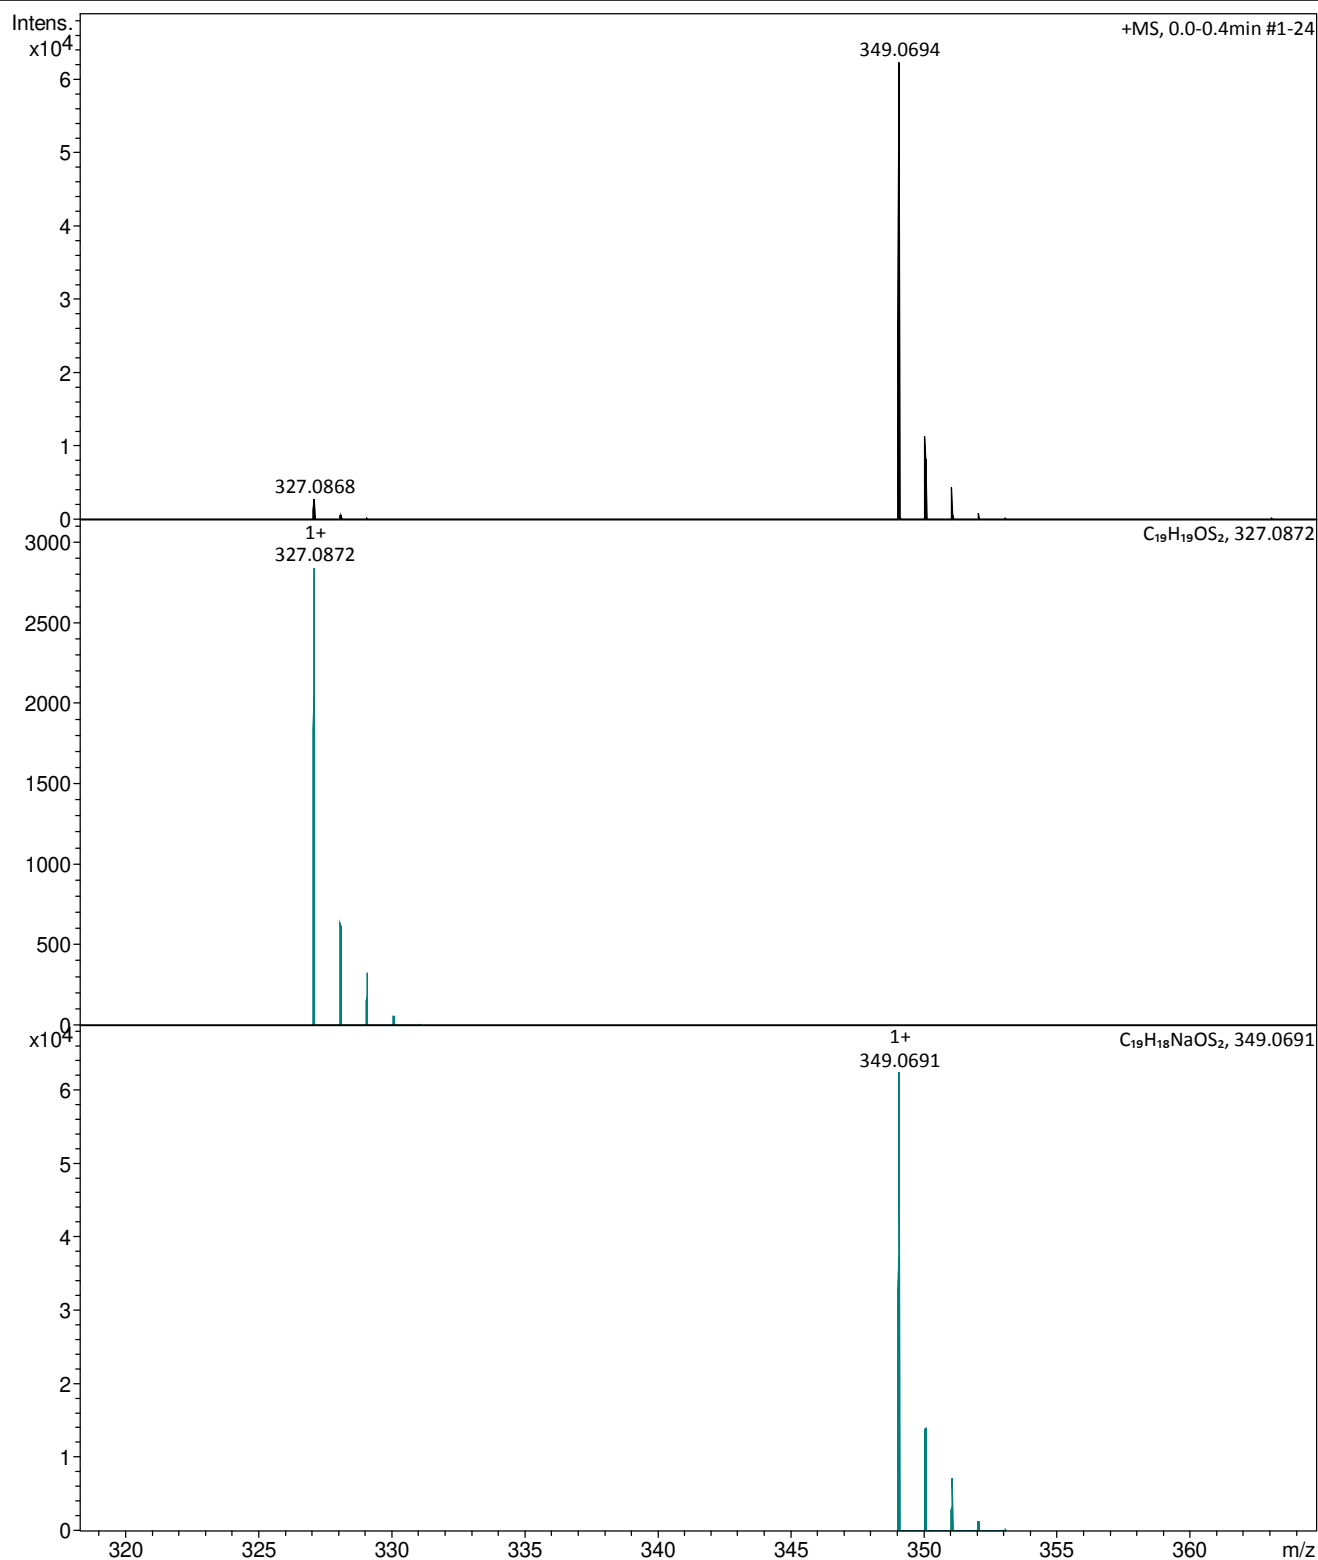

# Mass Spectrum SmartFormula Report

## Analysis Info

Analysis Name D:\MZ\temp\64678000002.d  
Method tune\_low\_MS\_Service\_06\_19.m  
Sample Name PN\_16\_spot\_1peak\_2  
Comment Kalaba / Zehl  
Ergebnis: +/- 5ppm  
ACN / MeOH + 1% H2O

Acquisition Date 01/07/2019 16:12:29

Operator msc  
Instrument maXis 255552.00016

## Acquisition Parameter

|             |            |                      |          |                  |           |
|-------------|------------|----------------------|----------|------------------|-----------|
| Source Type | ESI        | Ion Polarity         | Positive | Set Nebulizer    | 0.4 Bar   |
| Focus       | Not active | Set Capillary        | 4200 V   | Set Dry Heater   | 150 °C    |
| Scan Begin  | 50 m/z     | Set End Plate Offset | -500 V   | Set Dry Gas      | 4.0 l/min |
| Scan End    | 1900 m/z   | Set Charging Voltage | 0 V      | Set Divert Valve | Source    |
|             |            | Set Corona           | 0 nA     | Set APCI Heater  | 0 °C      |

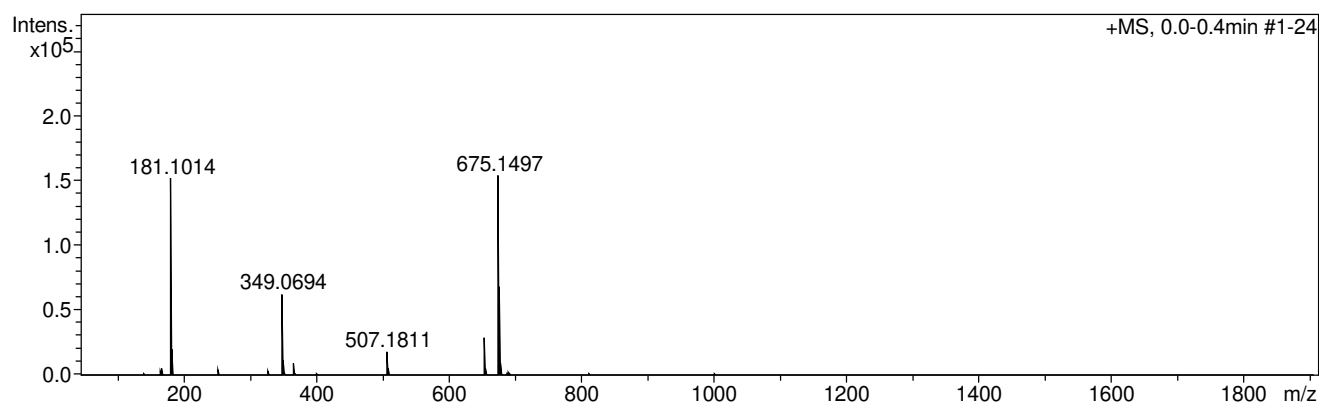

| Meas. m/z | # | Ion Formula    | m/z      | err [ppm] | mSigma | # Sigma | Score  | rdB  | e <sup>-</sup> Conf | N-Rule |
|-----------|---|----------------|----------|-----------|--------|---------|--------|------|---------------------|--------|
| 327.0868  | 1 | C19H19OS2      | 327.0872 | 1.1       | 11.5   | 1       | 100.00 | 10.5 | even                | ok     |
|           | 2 | C12H11N10S     | 327.0883 | -4.7      | 30.5   | 2       | 34.58  | 12.5 | even                | ok     |
|           | 3 | C11H23N2O3S3   | 327.0865 | -0.9      | 36.3   | 3       | 59.68  | 1.5  | even                | ok     |
|           | 4 | C18H15O6       | 327.0863 | 1.5       | 37.7   | 4       | 51.95  | 11.5 | even                | ok     |
|           | 5 | C11H15N6O4S    | 327.0870 | 0.6       | 38.1   | 5       | 59.25  | 7.5  | even                | ok     |
|           | 6 | C19H11N4O2     | 327.0877 | 2.6       | 44.5   | 6       | 36.14  | 16.5 | even                | ok     |
|           | 7 | C10H19N2O8S    | 327.0857 | 3.5       | 47.3   | 7       | 27.95  | 2.5  | even                | ok     |
| 349.0694  | 1 | C12H10N10NaS   | 349.0703 | 2.6       | 6.7    | 1       | 89.88  | 12.5 | even                | ok     |
|           | 2 | C11H14N6NaO4S  | 349.0689 | -1.2      | 15.6   | 2       | 96.38  | 7.5  | even                | ok     |
|           | 3 | C18H14NaO6     | 349.0683 | 3.2       | 21.1   | 3       | 44.75  | 11.5 | even                | ok     |
|           | 4 | C19H18NaOS2    | 349.0691 | -0.7      | 27.9   | 4       | 100.00 | 10.5 | even                | ok     |
|           | 5 | C19H10N4NaO2   | 349.0696 | 0.6       | 33.5   | 5       | 53.19  | 16.5 | even                | ok     |
|           | 6 | C11H22N2NaO3S3 | 349.0685 | -2.6      | 39.0   | 6       | 54.71  | 1.5  | even                | ok     |

**Figure S51.** HRESIMS spectrum of compound **7m**

## Generic Display Report

### Analysis Info

Analysis Name D:\MZ\temp\64679000001.d  
Method tune\_low\_MS\_Service\_06\_19.m  
Sample Name PN\_16\_spot\_2\_peak\_1  
Comment Kalaba / Zehl  
Ergebnis: +/- 5ppm  
ACN / MeOH + 1% H<sub>2</sub>O

Acquisition Date 01/07/2019 16:14:23

Operator msc  
Instrument maXis

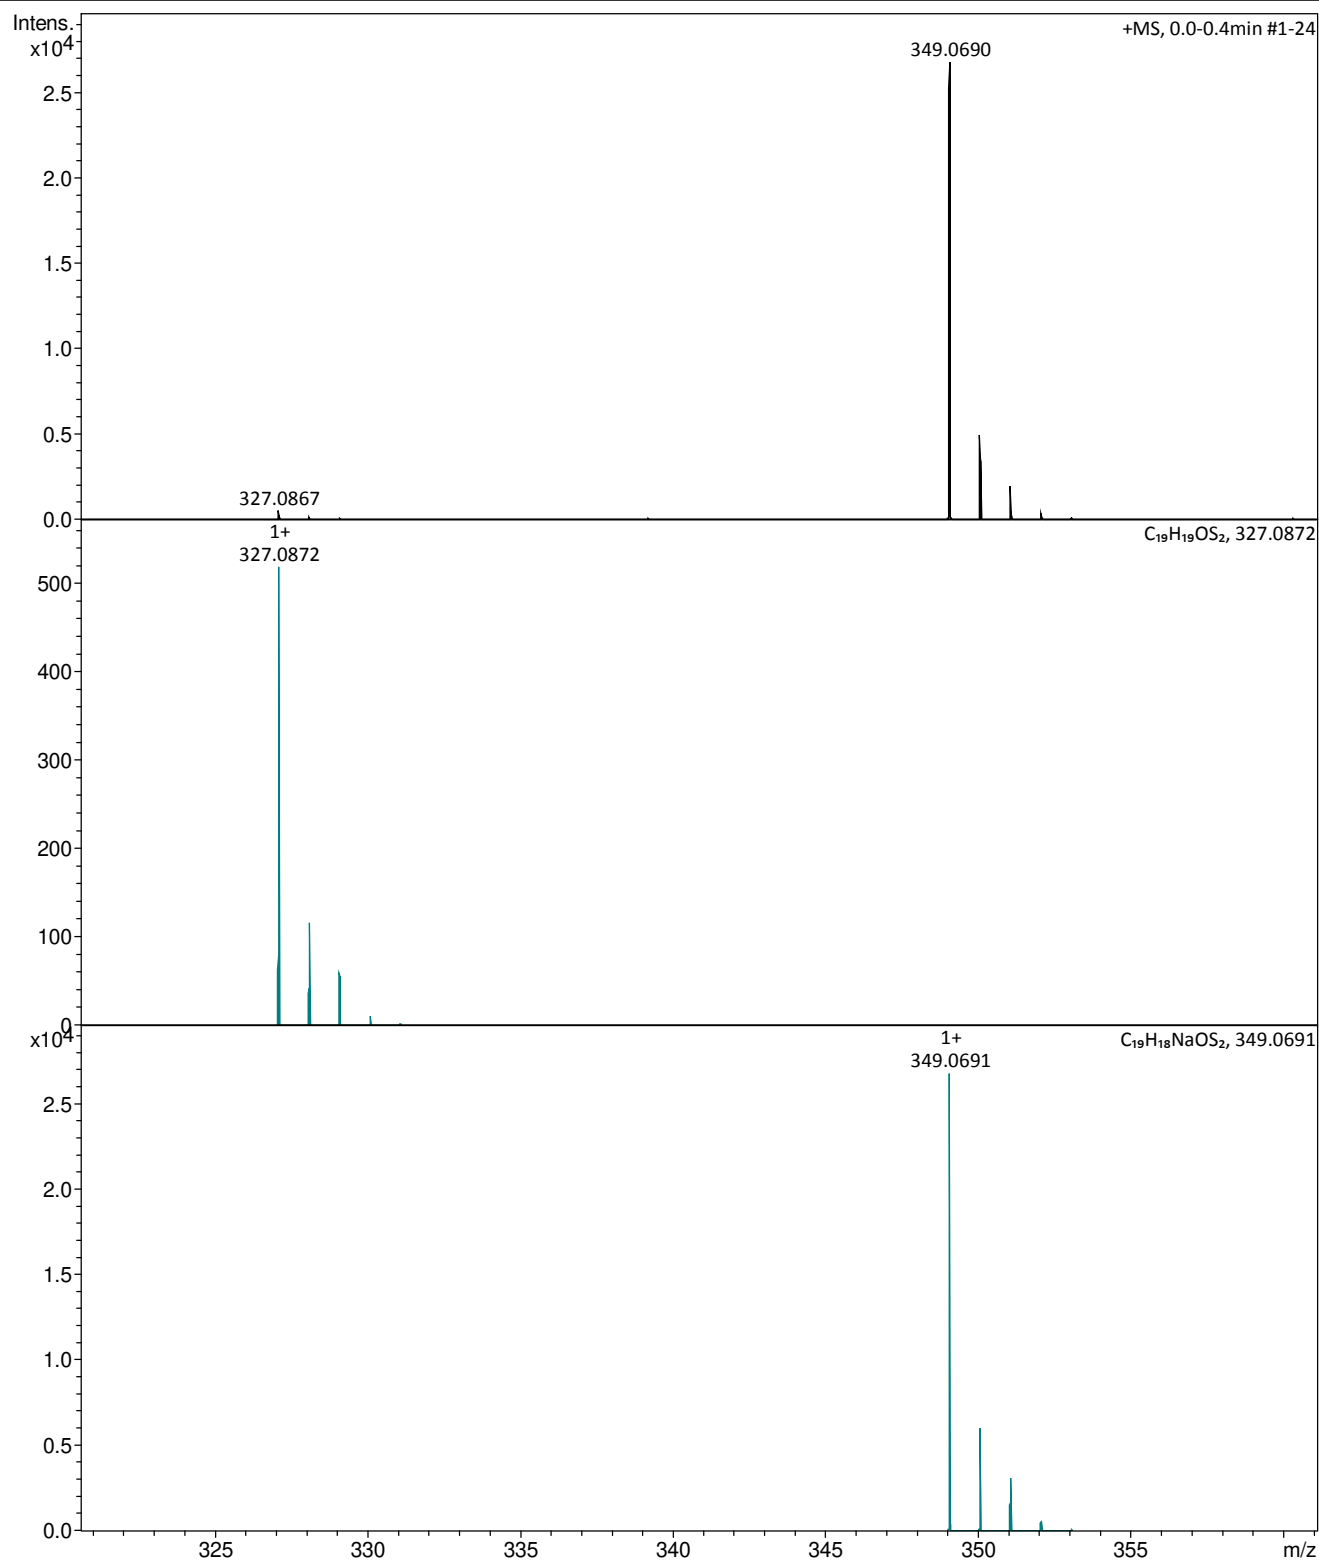



# Mass Spectrum SmartFormula Report

## Analysis Info

Analysis Name D:\MZ\temp\64679000001.d  
Method tune\_low\_MS\_Service\_06\_19.m  
Sample Name PN\_16\_spot\_2\_peak\_1  
Comment Kalaba / Zehl  
Ergebnis: +/- 5ppm  
ACN / MeOH + 1% H2O

Acquisition Date 01/07/2019 16:14:23

Operator msc  
Instrument maXis 255552.00016

## Acquisition Parameter

|             |            |                      |          |                  |           |
|-------------|------------|----------------------|----------|------------------|-----------|
| Source Type | ESI        | Ion Polarity         | Positive | Set Nebulizer    | 0.4 Bar   |
| Focus       | Not active | Set Capillary        | 4200 V   | Set Dry Heater   | 150 °C    |
| Scan Begin  | 50 m/z     | Set End Plate Offset | -500 V   | Set Dry Gas      | 4.0 l/min |
| Scan End    | 1900 m/z   | Set Charging Voltage | 0 V      | Set Divert Valve | Source    |
|             |            | Set Corona           | 0 nA     | Set APCI Heater  | 0 °C      |

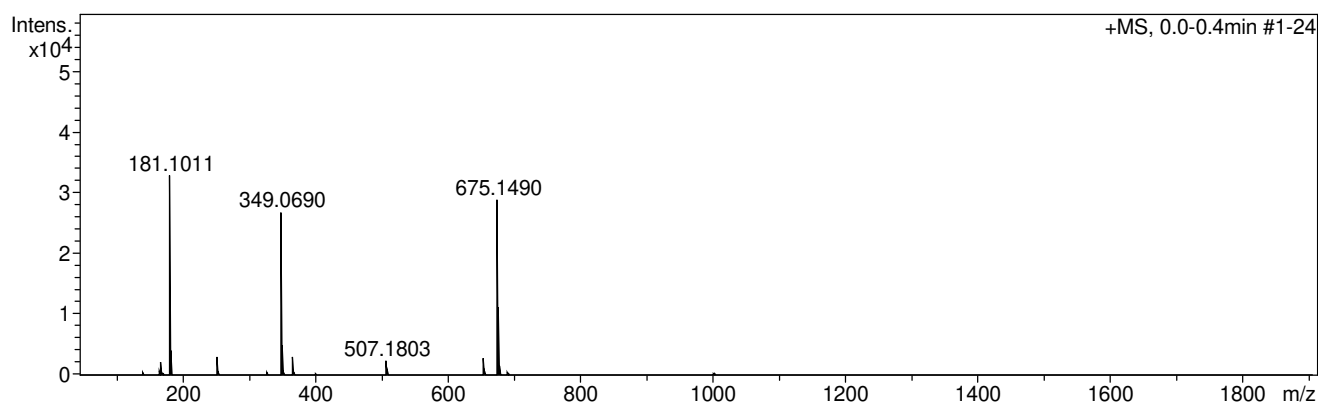

| Meas. m/z | # | Ion Formula    | m/z      | err [ppm] | mSigma | # Sigma | Score  | rdb  | e <sup>-</sup> Conf | N-Rule |
|-----------|---|----------------|----------|-----------|--------|---------|--------|------|---------------------|--------|
| 327.0867  | 1 | C19H11N4O2     | 327.0877 | 3.0       | 29.8   | 1       | 88.29  | 16.5 | even                | ok     |
|           | 2 | C18H15O6       | 327.0863 | 1.1       | 37.0   | 2       | 100.00 | 11.5 | even                | ok     |
|           | 3 | C19H19OS2      | 327.0872 | 1.5       | 55.8   | 3       | 54.16  | 10.5 | even                | ok     |
|           | 4 | C11H15N6O4S    | 327.0870 | -1.0      | 65.3   | 4       | 42.67  | 7.5  | even                | ok     |
|           | 5 | C10H19N2O8S    | 327.0857 | -3.1      | 76.8   | 5       | 19.34  | 2.5  | even                | ok     |
|           | 6 | C11H23N2O3S3   | 327.0865 | -0.5      | 84.8   | 6       | 21.49  | 1.5  | even                | ok     |
| 349.0690  | 1 | C12H10N10NaS   | 349.0703 | 3.7       | 9.4    | 1       | 62.43  | 12.5 | even                | ok     |
|           | 2 | C11H14N6NaO4S  | 349.0689 | -0.1      | 18.2   | 2       | 100.00 | 7.5  | even                | ok     |
|           | 3 | C18H14NaO6     | 349.0683 | -2.1      | 21.9   | 3       | 50.46  | 11.5 | even                | ok     |
|           | 4 | C19H18NaOS2    | 349.0691 | -0.4      | 25.5   | 4       | 81.66  | 10.5 | even                | ok     |
|           | 5 | C10H18N2NaO8S  | 349.0676 | -4.0      | 29.3   | 5       | 38.88  | 2.5  | even                | ok     |
|           | 6 | C19H10N4NaO2   | 349.0696 | 1.7       | 33.3   | 6       | 40.97  | 16.5 | even                | ok     |
|           | 7 | C11H22N2NaO3S3 | 349.0685 | -1.5      | 38.3   | 7       | 50.26  | 1.5  | even                | ok     |

**Figure S52.** HRESIMS spectrum of compound **8m**

## Generic Display Report

### Analysis Info

Analysis Name D:\MZ\temp\64680000001.d  
Method tune\_low\_MS\_Service\_06\_19.m  
Sample Name PN\_16\_spot\_2\_peak\_2  
Comment Kalaba / Zehl  
Ergebnis: +/- 5ppm  
ACN / MeOH + 1% H<sub>2</sub>O

Acquisition Date 01/07/2019 16:16:19

Operator msc  
Instrument maXis

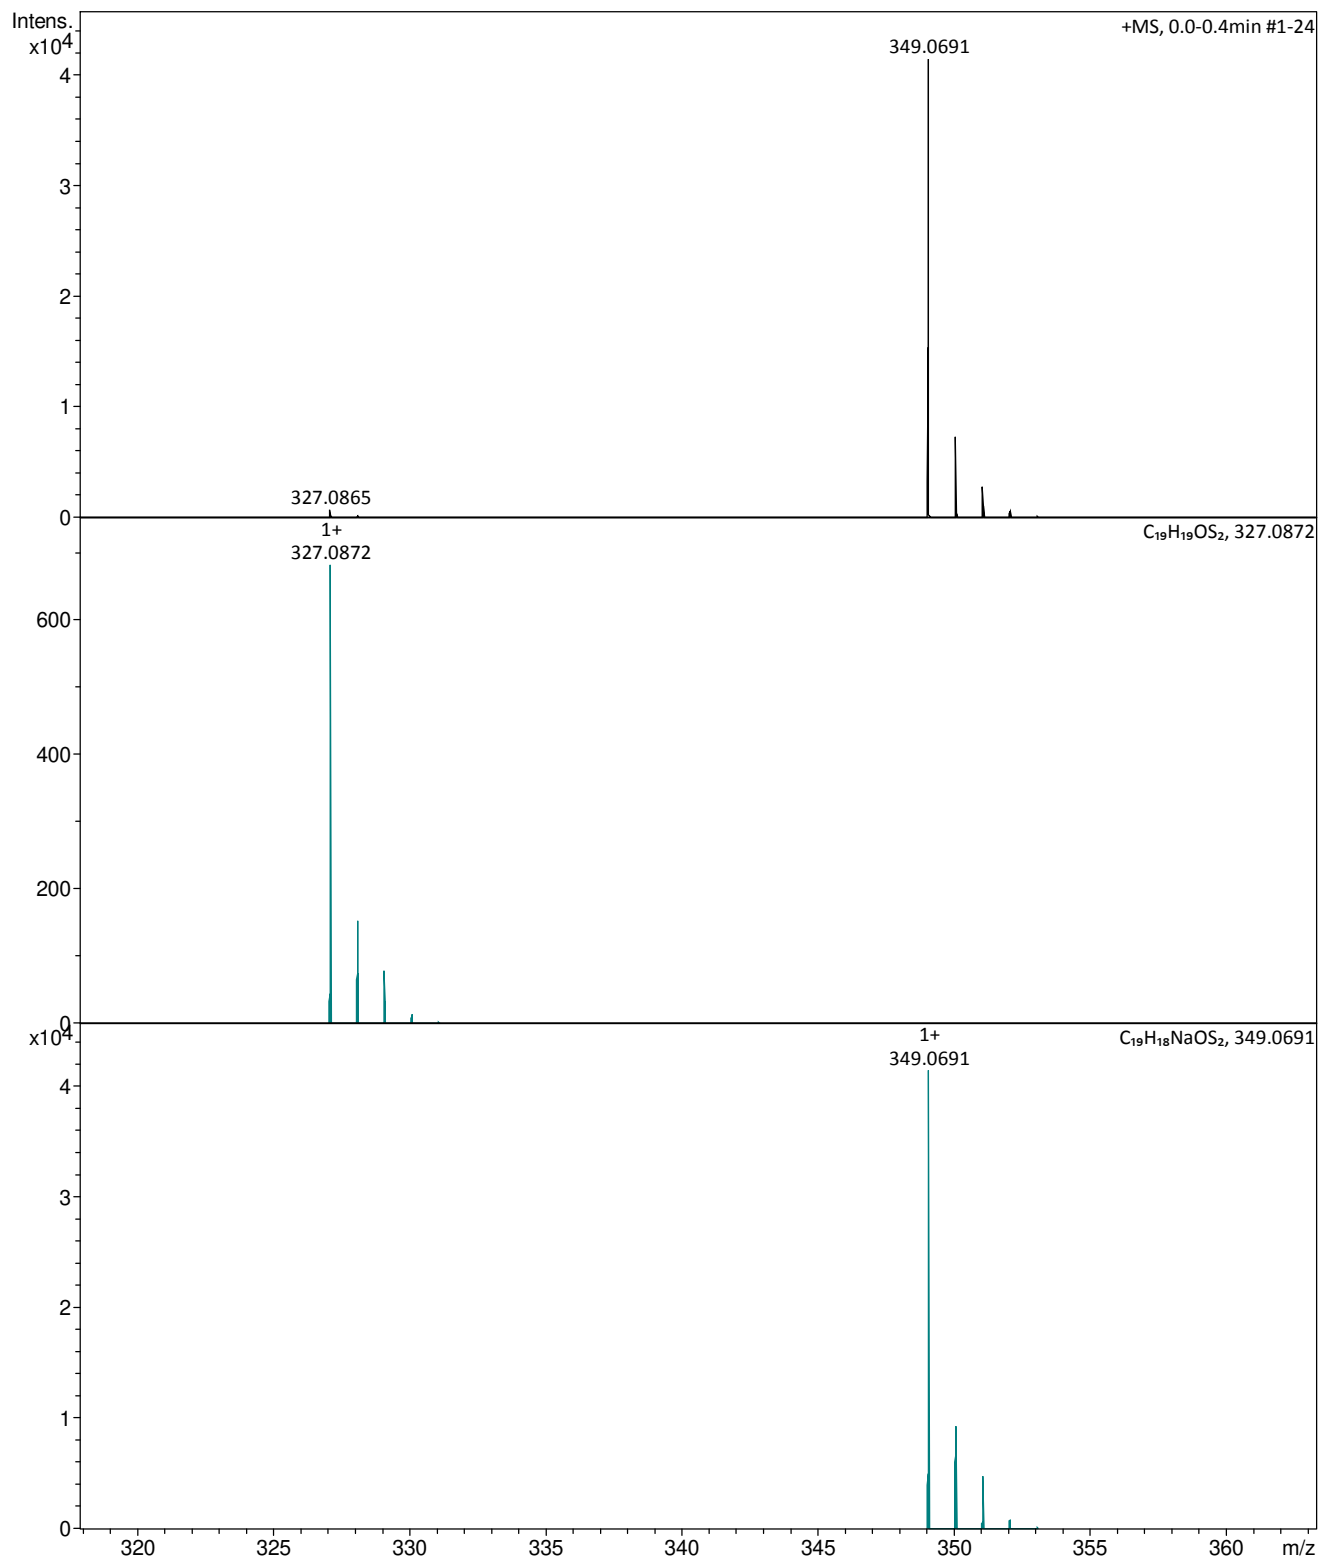

# Mass Spectrum SmartFormula Report

## Analysis Info

Analysis Name D:\MZ\temp\64680000001.d  
Method tune\_low\_MS\_Service\_06\_19.m  
Sample Name PN\_16\_spot\_2\_peak\_2  
Comment Kalaba / Zehl  
Ergebnis: +/- 5ppm  
ACN / MeOH + 1% H2O

Acquisition Date 01/07/2019 16:16:19

Operator msc  
Instrument maXis 255552.00016

## Acquisition Parameter

|             |            |                      |          |                  |           |
|-------------|------------|----------------------|----------|------------------|-----------|
| Source Type | ESI        | Ion Polarity         | Positive | Set Nebulizer    | 0.4 Bar   |
| Focus       | Not active | Set Capillary        | 4200 V   | Set Dry Heater   | 150 °C    |
| Scan Begin  | 50 m/z     | Set End Plate Offset | -500 V   | Set Dry Gas      | 4.0 l/min |
| Scan End    | 1900 m/z   | Set Charging Voltage | 0 V      | Set Divert Valve | Source    |
|             |            | Set Corona           | 0 nA     | Set APCI Heater  | 0 °C      |

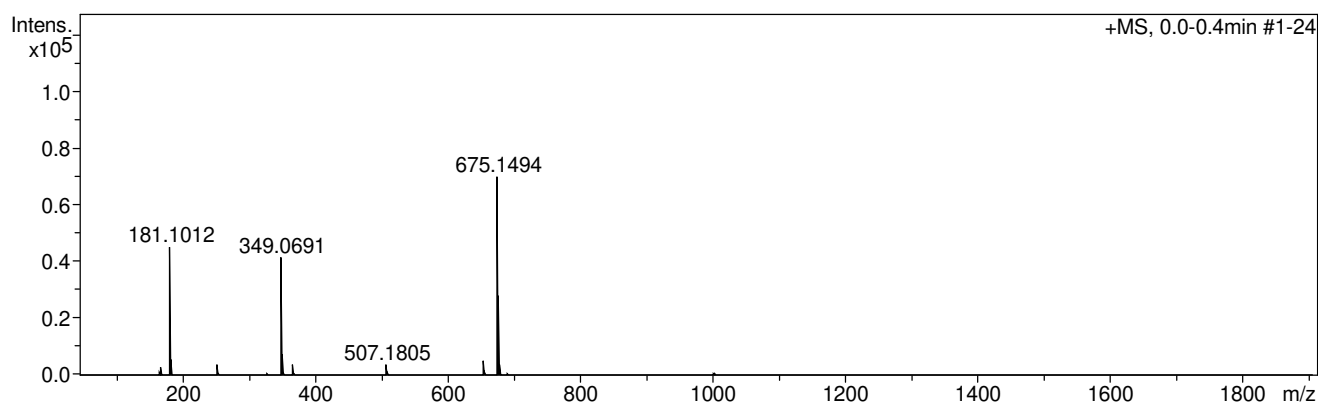

| Meas. m/z | # | Ion Formula    | m/z      | err [ppm] | mSigma | # Sigma | Score  | rdb  | e <sup>-</sup> Conf | N-Rule |
|-----------|---|----------------|----------|-----------|--------|---------|--------|------|---------------------|--------|
| 327.0865  | 1 | C19H11N4O2     | 327.0877 | -3.5      | 18.2   | 1       | 71.90  | 16.5 | even                | ok     |
|           | 2 | C15H7N10       | 327.0850 | 4.7       | 24.5   | 2       | 48.10  | 17.5 | even                | ok     |
|           | 3 | C18H15O6       | 327.0863 | -0.6      | 24.9   | 3       | 100.00 | 11.5 | even                | ok     |
|           | 4 | C19H19OS2      | 327.0872 | 2.0       | 52.9   | 4       | 37.79  | 10.5 | even                | ok     |
|           | 5 | C11H15N6O4S    | 327.0870 | -1.5      | 53.5   | 5       | 40.62  | 7.5  | even                | ok     |
|           | 6 | C10H19N2O8S    | 327.0857 | -2.6      | 64.5   | 6       | 23.17  | 2.5  | even                | ok     |
|           | 7 | C11H23N2O3S3   | 327.0865 | 0.0       | 78.1   | 7       | 20.75  | 1.5  | even                | ok     |
| 349.0691  | 1 | C12H10N10NaS   | 349.0703 | -3.3      | 5.1    | 1       | 71.52  | 12.5 | even                | ok     |
|           | 2 | C11H14N6NaO4S  | 349.0689 | 0.6       | 12.9   | 2       | 100.00 | 7.5  | even                | ok     |
|           | 3 | C18H14NaO6     | 349.0683 | 2.5       | 21.5   | 3       | 44.91  | 11.5 | even                | ok     |
|           | 4 | C10H18N2NaO8S  | 349.0676 | 4.4       | 24.4   | 4       | 37.76  | 2.5  | even                | ok     |
|           | 5 | C19H18NaOS2    | 349.0691 | 0.1       | 30.1   | 5       | 74.16  | 10.5 | even                | ok     |
|           | 6 | C19H10N4NaO2   | 349.0696 | 1.3       | 35.0   | 6       | 40.79  | 16.5 | even                | ok     |
|           | 7 | C11H22N2NaO3S3 | 349.0685 | -1.9      | 39.1   | 7       | 43.76  | 1.5  | even                | ok     |

**Figure S53.** HRESIMS spectrum of compound **5n**

## Generic Display Report

### Analysis Info

Analysis Name D:\MZ\temp\64681000001.d  
Method tune\_low\_MS\_Service\_06\_19.m  
Sample Name PN\_22\_spot\_1\_peak\_1  
Comment Kalaba / Zehl  
Ergebnis: +/- 5ppm  
ACN / MeOH + 1% H<sub>2</sub>O

Acquisition Date 01/07/2019 16:18:40

Operator msc  
Instrument maXis

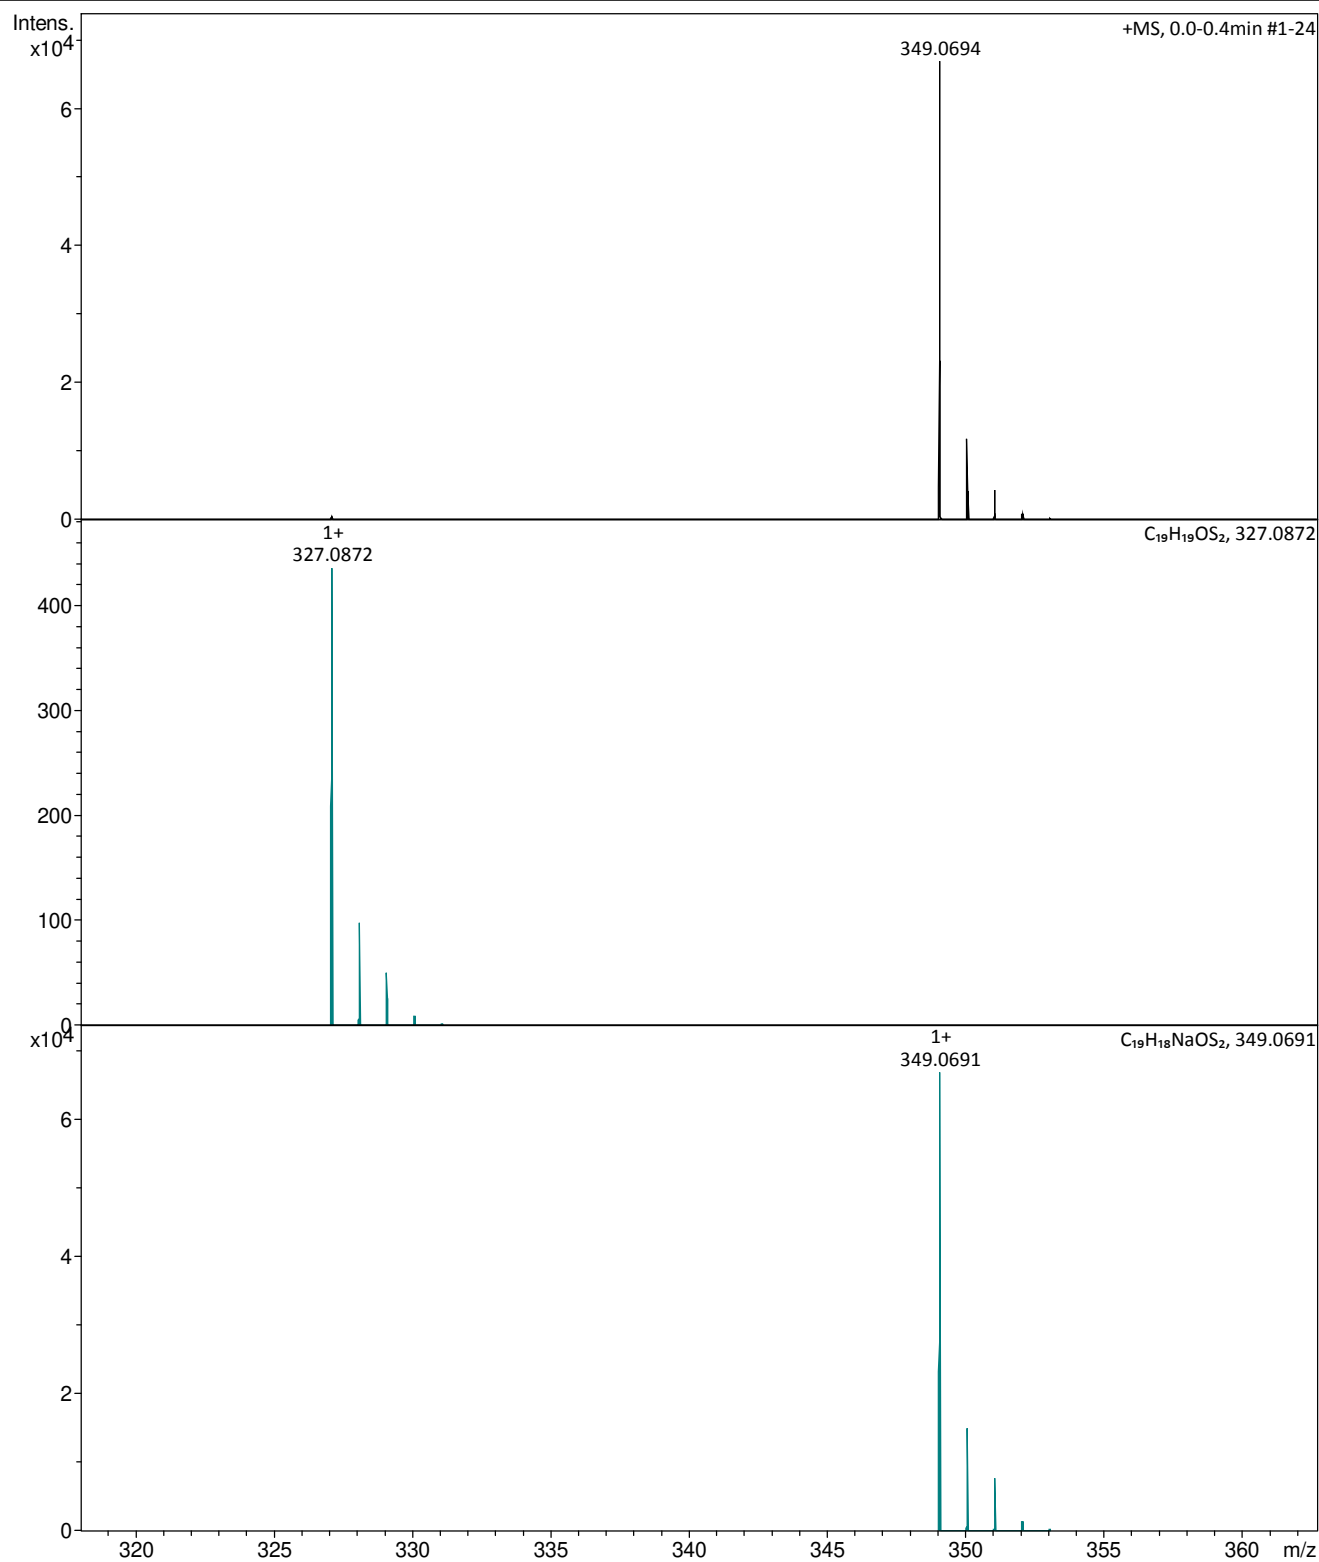

# Mass Spectrum SmartFormula Report

## Analysis Info

Analysis Name D:\MZ\temp\64681000001.d  
Method tune\_low\_MS\_Service\_06\_19.m  
Sample Name PN\_22\_spot\_1\_peak\_1  
Comment Kalaba / Zehl  
Ergebnis: +/- 5ppm  
ACN / MeOH + 1% H2O

Acquisition Date 01/07/2019 16:18:40

Operator msc  
Instrument maXis 255552.00016

## Acquisition Parameter

|             |            |                      |          |                  |           |
|-------------|------------|----------------------|----------|------------------|-----------|
| Source Type | ESI        | Ion Polarity         | Positive | Set Nebulizer    | 0.4 Bar   |
| Focus       | Not active | Set Capillary        | 4200 V   | Set Dry Heater   | 150 °C    |
| Scan Begin  | 50 m/z     | Set End Plate Offset | -500 V   | Set Dry Gas      | 4.0 l/min |
| Scan End    | 1900 m/z   | Set Charging Voltage | 0 V      | Set Divert Valve | Source    |
|             |            | Set Corona           | 0 nA     | Set APCI Heater  | 0 °C      |

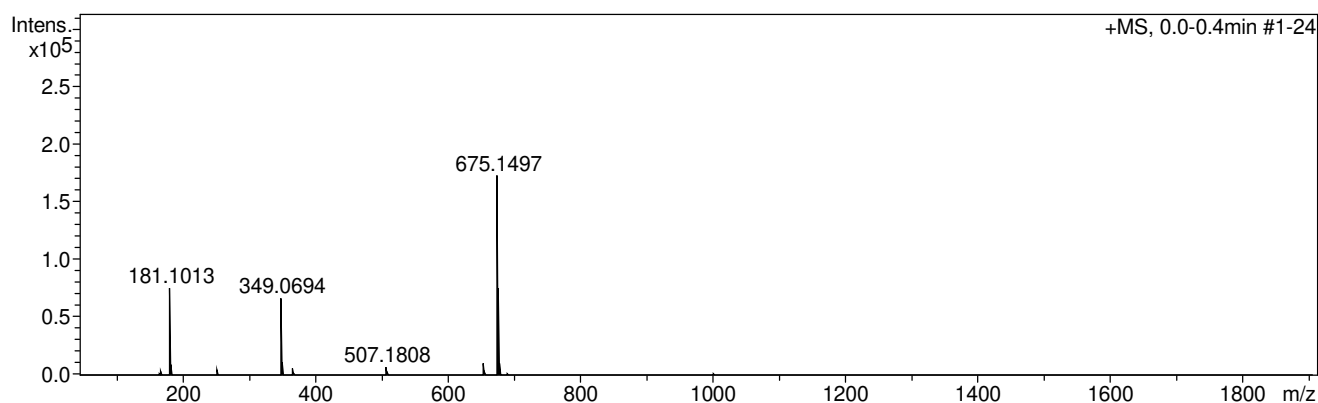

| Meas. m/z | # | Ion Formula    | m/z      | err [ppm] | mSigma | # Sigma | Score  | rdb  | e <sup>-</sup> Conf | N-Rule |
|-----------|---|----------------|----------|-----------|--------|---------|--------|------|---------------------|--------|
| 327.0867  | 1 | C19H11N4O2     | 327.0877 | 3.1       | 718.9  | 1       | -1.#J  | 16.5 | even                | ok     |
|           | 2 | C18H15O6       | 327.0863 | -1.0      | 802.2  | 2       | -1.#J  | 11.5 | even                | ok     |
|           | 3 | C11H15N6O4S    | 327.0870 | 1.1       | 803.0  | 3       | -1.#J  | 7.5  | even                | ok     |
|           | 4 | C10H19N2O8S    | 327.0857 | -3.0      | 807.9  | 4       | -1.#J  | 2.5  | even                | ok     |
|           | 5 | C19H19OS2      | 327.0872 | 1.6       | 816.5  | 5       | -1.#J  | 10.5 | even                | ok     |
|           | 6 | C11H23N2O3S3   | 327.0865 | -0.4      | 821.9  | 6       | -1.#J  | 1.5  | even                | ok     |
| 349.0694  | 1 | C12H10N10NaS   | 349.0703 | 2.7       | 3.8    | 1       | 90.64  | 12.5 | even                | ok     |
|           | 2 | C11H14N6NaO4S  | 349.0689 | -1.2      | 13.0   | 2       | 100.00 | 7.5  | even                | ok     |
|           | 3 | C18H14NaO6     | 349.0683 | -3.1      | 20.3   | 3       | 44.98  | 11.5 | even                | ok     |
|           | 4 | C19H18NaOS2    | 349.0691 | -0.6      | 30.7   | 4       | 73.60  | 10.5 | even                | ok     |
|           | 5 | C19H10N4NaO2   | 349.0696 | -0.7      | 33.8   | 5       | 50.82  | 16.5 | even                | ok     |
|           | 6 | C11H22N2NaO3S3 | 349.0685 | 2.5       | 40.2   | 6       | 41.76  | 1.5  | even                | ok     |

**Figure S54.** HRESIMS spectrum of compound **6n**

## Generic Display Report

### Analysis Info

Analysis Name D:\MZ\temp\64682000001.d  
Method tune\_low\_MS\_Service\_06\_19.m  
Sample Name PN\_22\_spot\_1\_peak\_2  
Comment Kalaba / Zehl  
Ergebnis: +/- 5ppm  
ACN / MeOH + 1% H<sub>2</sub>O

Acquisition Date 01/07/2019 16:20:33

Operator msc  
Instrument maXis

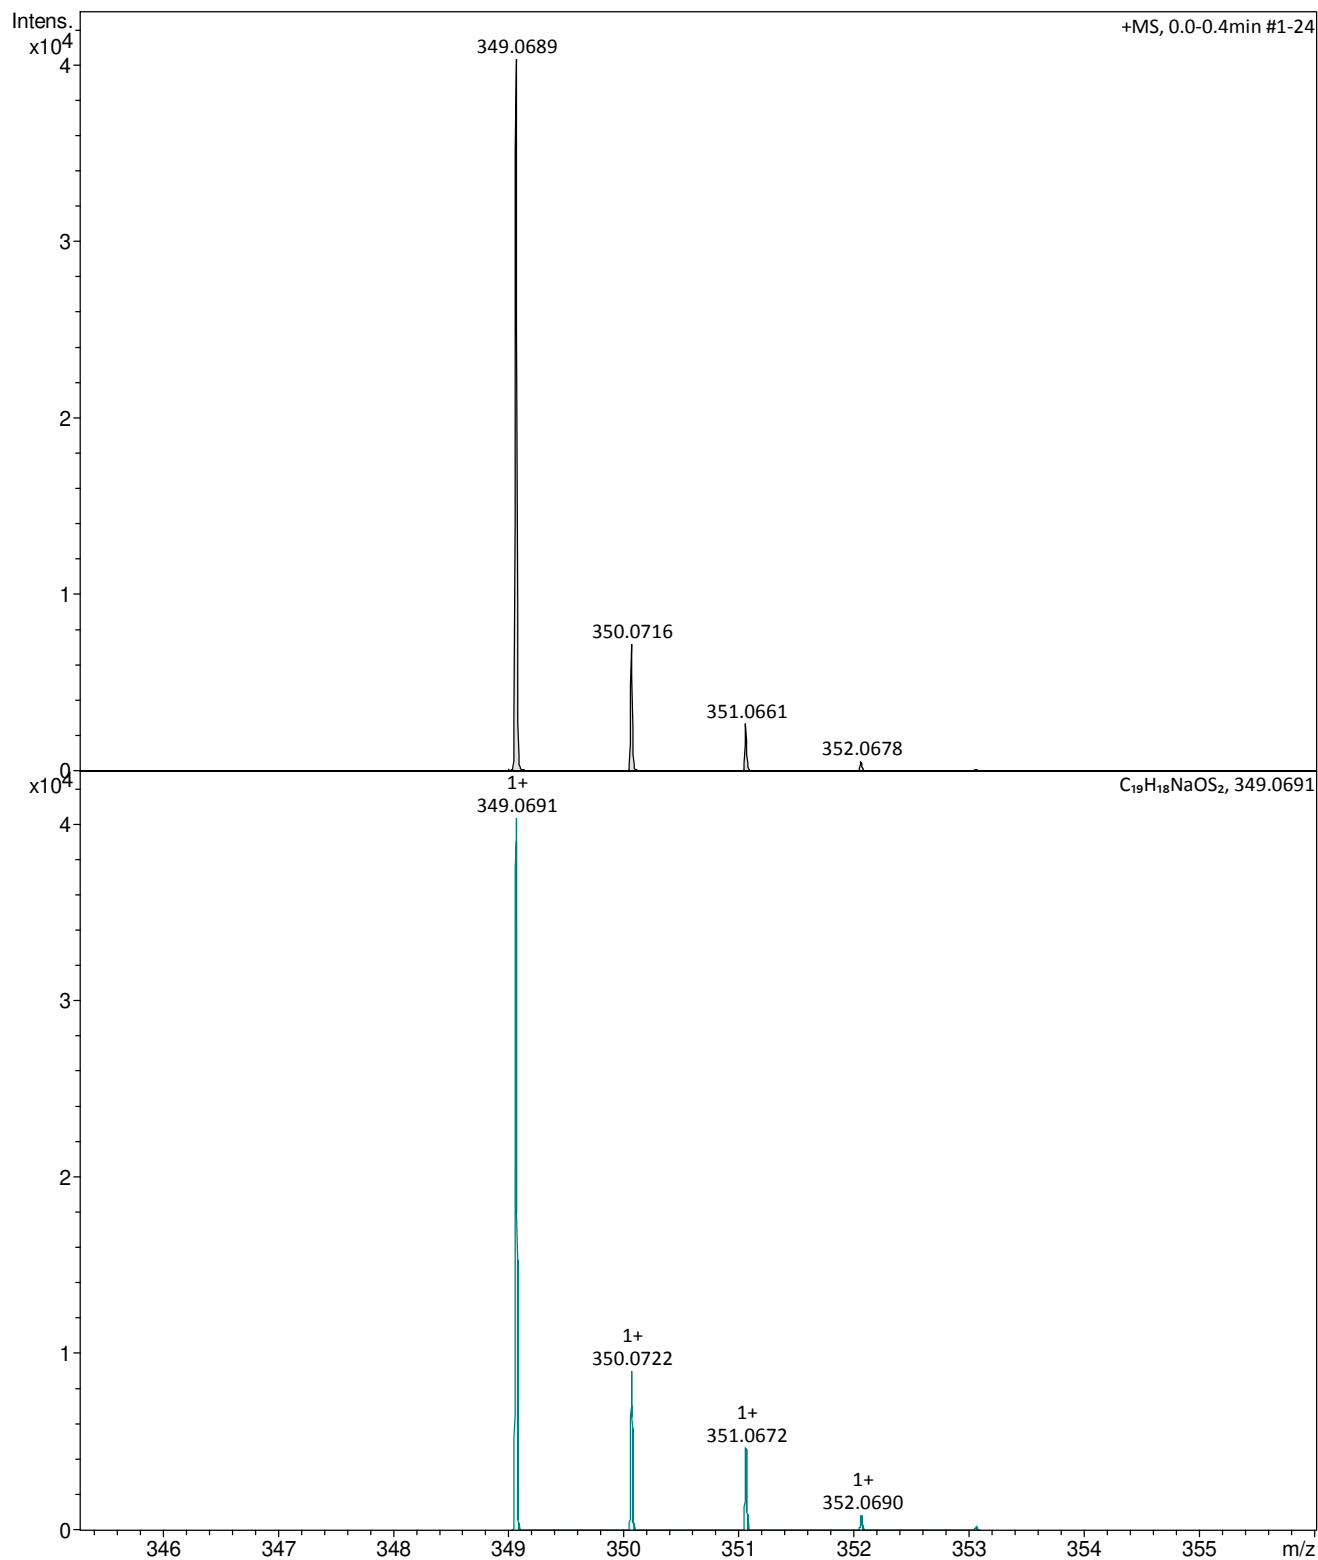

# Mass Spectrum SmartFormula Report

## Analysis Info

Analysis Name D:\MZ\temp\64682000001.d  
Method tune\_low\_MS\_Service\_06\_19.m  
Sample Name PN\_22\_spot\_1\_peak\_2  
Comment Kalaba / Zehl  
Ergebnis: +/- 5ppm  
ACN / MeOH + 1% H2O

Acquisition Date 01/07/2019 16:20:33

Operator msc  
Instrument maXis 255552.00016

## Acquisition Parameter

|             |            |                      |          |                  |           |
|-------------|------------|----------------------|----------|------------------|-----------|
| Source Type | ESI        | Ion Polarity         | Positive | Set Nebulizer    | 0.4 Bar   |
| Focus       | Not active | Set Capillary        | 4200 V   | Set Dry Heater   | 150 °C    |
| Scan Begin  | 50 m/z     | Set End Plate Offset | -500 V   | Set Dry Gas      | 4.0 l/min |
| Scan End    | 1900 m/z   | Set Charging Voltage | 0 V      | Set Divert Valve | Source    |
|             |            | Set Corona           | 0 nA     | Set APCI Heater  | 0 °C      |

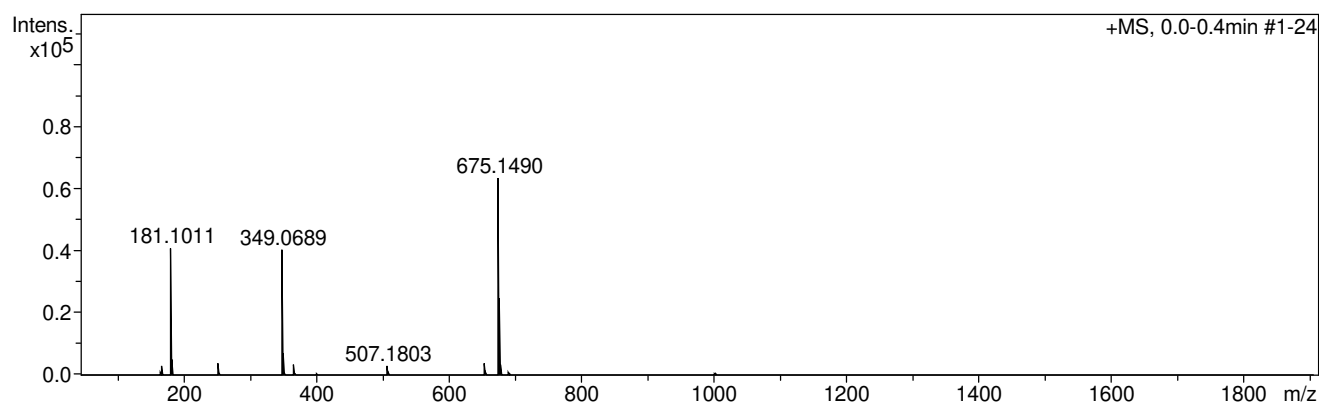

| Meas. m/z | # | Ion Formula    | m/z      | err [ppm] | mSigma | # Sigma | Score  | rdb  | e <sup>-</sup> Conf | N-Rule |
|-----------|---|----------------|----------|-----------|--------|---------|--------|------|---------------------|--------|
| 349.0689  | 1 | C12H10N10NaS   | 349.0703 | -3.8      | 4.5    | 1       | 59.30  | 12.5 | even                | ok     |
|           | 2 | C11H14N6NaO4S  | 349.0689 | -0.0      | 13.4   | 2       | 100.00 | 7.5  | even                | ok     |
|           | 3 | C18H14NaO6     | 349.0683 | 2.0       | 20.4   | 3       | 47.73  | 11.5 | even                | ok     |
|           | 4 | C10H18N2NaO8S  | 349.0676 | -3.8      | 25.0   | 4       | 39.58  | 2.5  | even                | ok     |
|           | 5 | C19H18NaOS2    | 349.0691 | 0.5       | 30.3   | 5       | 64.11  | 10.5 | even                | ok     |
|           | 6 | C19H10N4NaO2   | 349.0696 | -1.9      | 33.7   | 6       | 35.41  | 16.5 | even                | ok     |
|           | 7 | C11H22N2NaO3S3 | 349.0685 | -1.3      | 40.0   | 7       | 43.99  | 1.5  | even                | ok     |

**Figure S55.** HRESIMS spectrum of compound **7n**

## Generic Display Report

### Analysis Info

Analysis Name D:\MZ\temp\64695000001.d  
Method tune\_low\_MS\_Service\_06\_19.m  
Sample Name PN-22\_spot-2\_peak-1  
Comment Kalaba/Zehl  
Ergebnis: +/- 5ppm  
ACN/MeOH + 1% H<sub>2</sub>O

Acquisition Date 02/07/2019 17:05:50

Operator msc  
Instrument maXis

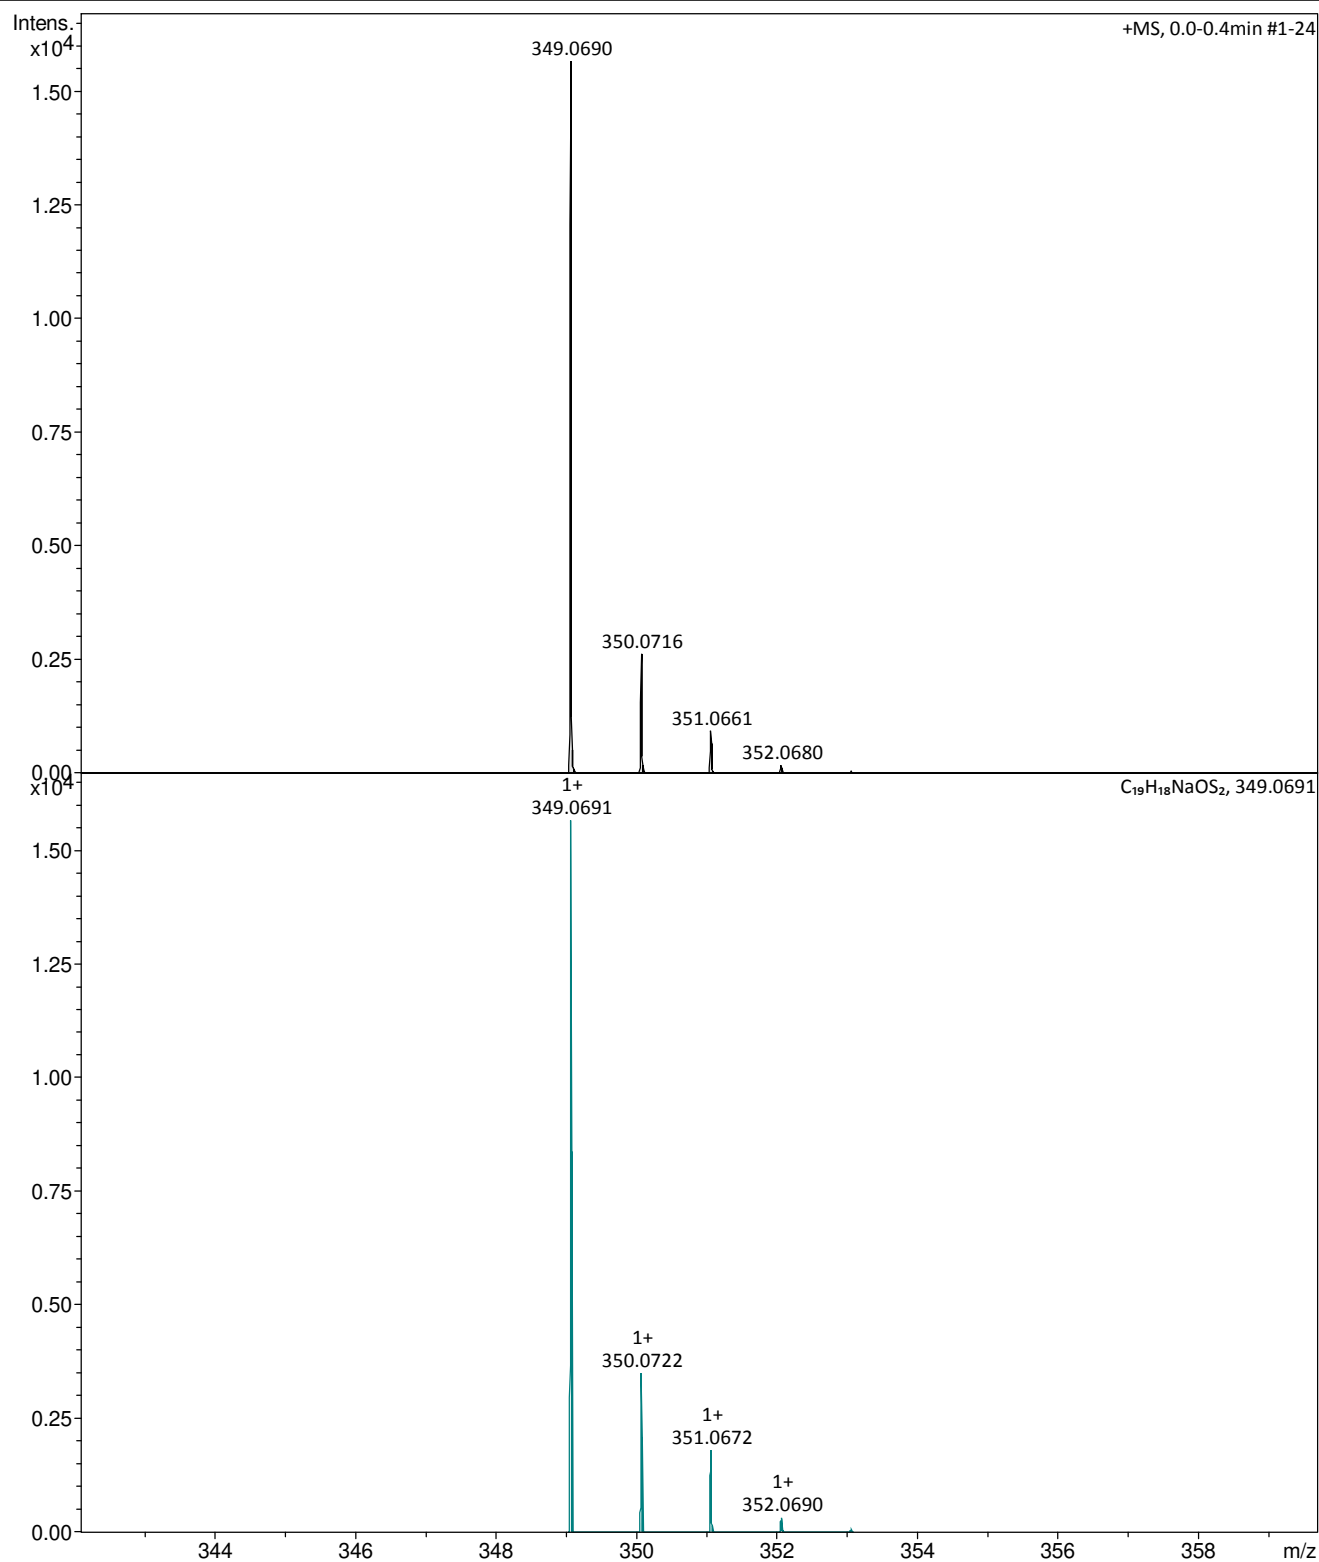



# Mass Spectrum SmartFormula Report

## Analysis Info

Analysis Name D:\MZ\temp\64695000001.d  
Method tune\_low\_MS\_Service\_06\_19.m  
Sample Name PN-22\_spot-2\_peak-1  
Comment Kalaba/Zehl  
Ergebnis: +/- 5ppm  
ACN/MeOH + 1% H2O

Acquisition Date 02/07/2019 17:05:50

Operator msc  
Instrument maXis 255552.00016

## Acquisition Parameter

|             |            |                      |          |                  |           |
|-------------|------------|----------------------|----------|------------------|-----------|
| Source Type | ESI        | Ion Polarity         | Positive | Set Nebulizer    | 0.4 Bar   |
| Focus       | Not active | Set Capillary        | 4200 V   | Set Dry Heater   | 150 °C    |
| Scan Begin  | 50 m/z     | Set End Plate Offset | -500 V   | Set Dry Gas      | 4.0 l/min |
| Scan End    | 1900 m/z   | Set Charging Voltage | 0 V      | Set Divert Valve | Source    |
|             |            | Set Corona           | 0 nA     | Set APCI Heater  | 0 °C      |

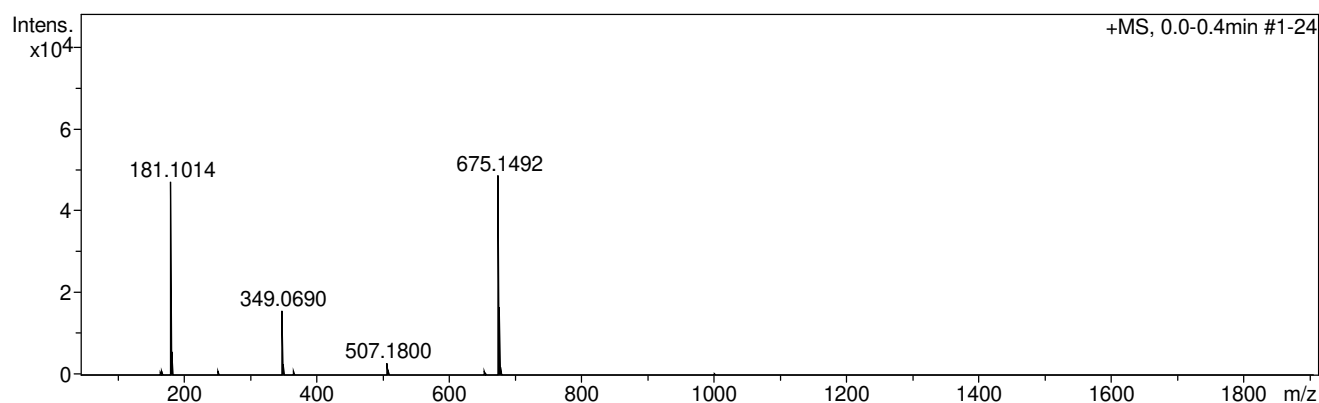

| Meas. m/z | # | Ion Formula    | m/z      | err [ppm] | mSigma | # Sigma | Score  | rdb  | e <sup>-</sup> Conf | N-Rule |
|-----------|---|----------------|----------|-----------|--------|---------|--------|------|---------------------|--------|
| 349.0690  | 1 | C12H10N10NaS   | 349.0703 | 3.8       | 4.3    | 1       | 55.41  | 12.5 | even                | ok     |
|           | 2 | C11H14N6NaO4S  | 349.0689 | 0.1       | 8.4    | 2       | 100.00 | 7.5  | even                | ok     |
|           | 3 | C10H18N2NaO8S  | 349.0676 | 3.9       | 20.3   | 3       | 39.62  | 2.5  | even                | ok     |
|           | 4 | C18H14NaO6     | 349.0683 | -2.0      | 21.1   | 4       | 42.47  | 11.5 | even                | ok     |
|           | 5 | C19H18NaOS2    | 349.0691 | 0.5       | 35.7   | 5       | 51.80  | 10.5 | even                | ok     |
|           | 6 | C19H10N4NaO2   | 349.0696 | -1.8      | 36.4   | 6       | 30.67  | 16.5 | even                | ok     |
|           | 7 | C11H22N2NaO3S3 | 349.0685 | -1.4      | 41.9   | 7       | 37.71  | 1.5  | even                | ok     |

**Figure S56.** HRESIMS spectrum of compound **8n**

## Generic Display Report

### Analysis Info

Analysis Name D:\MZ\temp\64696000001.d  
Method tune\_low\_MS\_Service\_06\_19.m  
Sample Name PN-22\_spot-2\_peak-2  
Comment Kalaba/Zehl  
Ergebnis: +/- 5ppm  
ACN/MeOH + 1% H<sub>2</sub>O

Acquisition Date 02/07/2019 17:07:57

Operator msc  
Instrument maXis

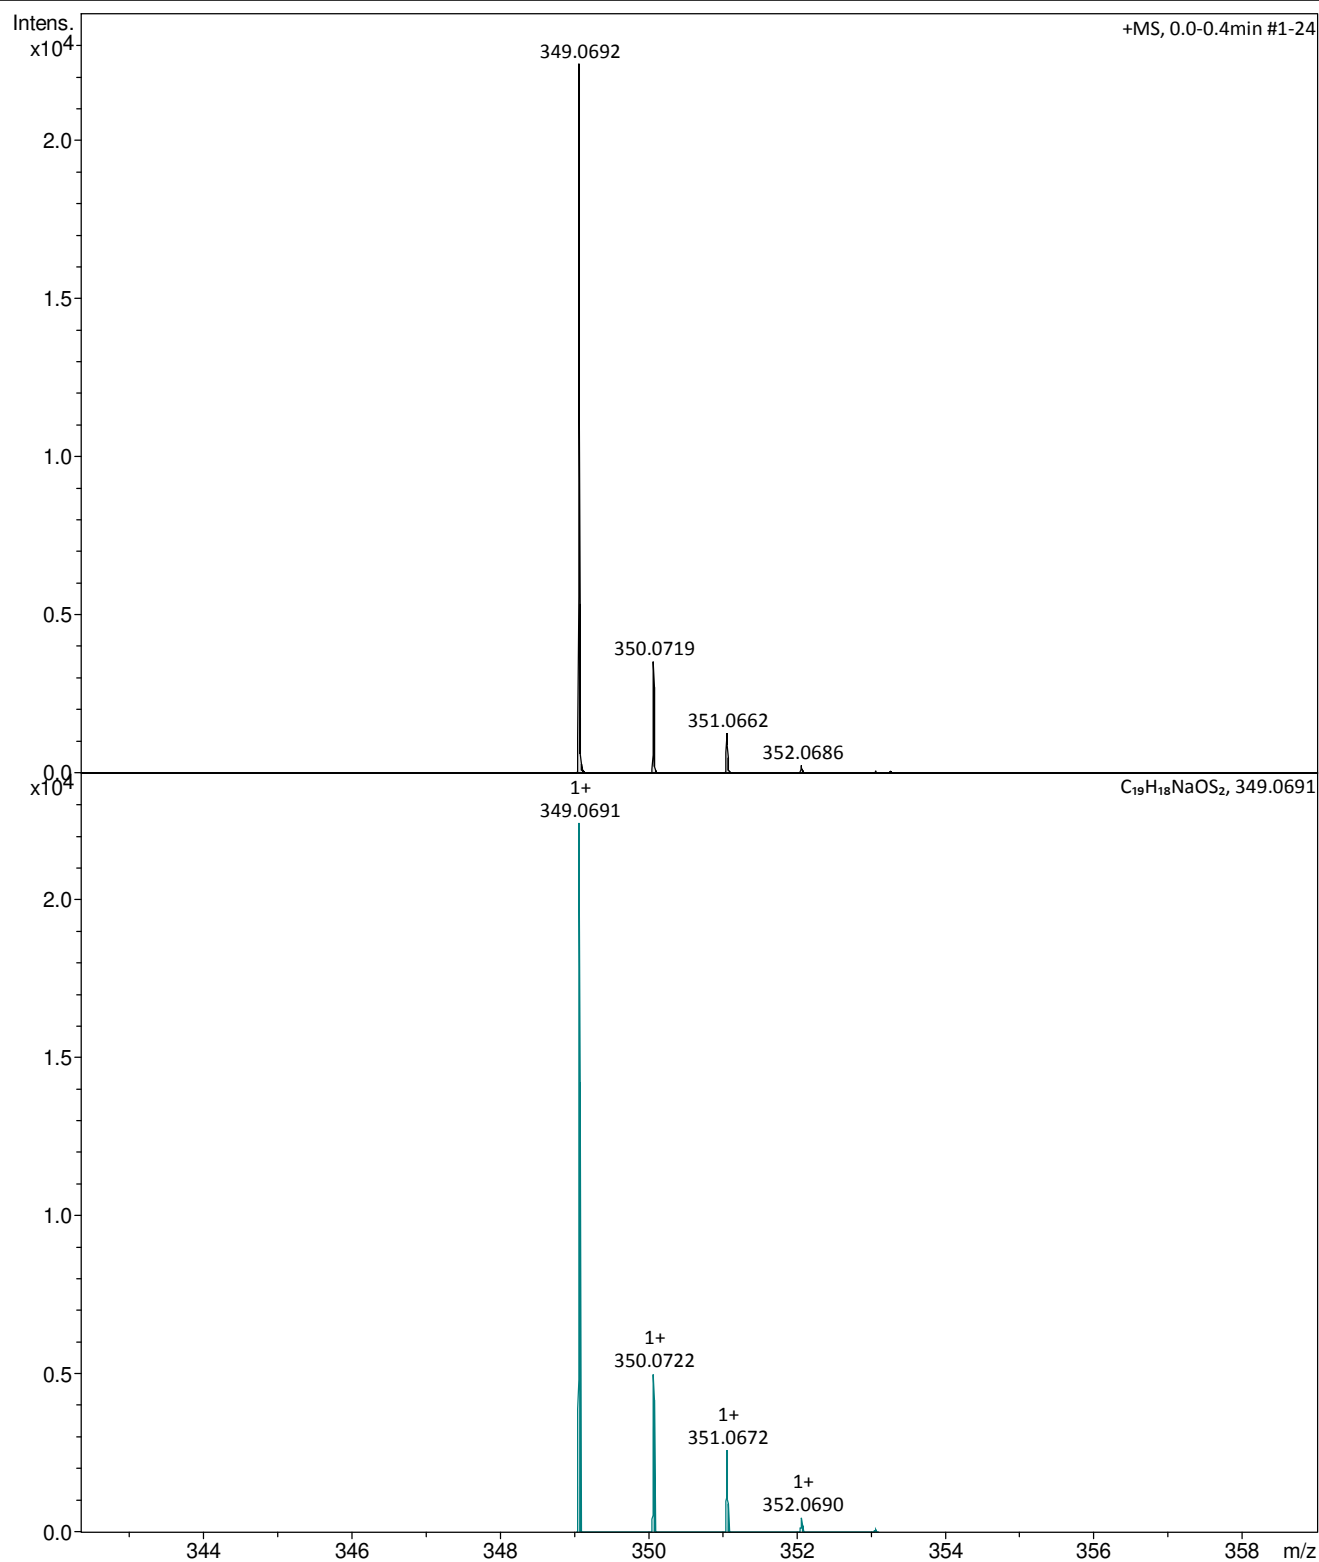

# Mass Spectrum SmartFormula Report

## Analysis Info

Analysis Name D:\MZ\temp\64696000001.d  
Method tune\_low\_MS\_Service\_06\_19.m  
Sample Name PN-22\_spot-2\_peak-2  
Comment Kalaba/Zehl  
Ergebnis: +/- 5ppm  
ACN/MeOH + 1% H2O

Acquisition Date 02/07/2019 17:07:57

Operator msc  
Instrument maXis 255552.00016

## Acquisition Parameter

|             |            |                      |          |                  |           |
|-------------|------------|----------------------|----------|------------------|-----------|
| Source Type | ESI        | Ion Polarity         | Positive | Set Nebulizer    | 0.4 Bar   |
| Focus       | Not active | Set Capillary        | 4200 V   | Set Dry Heater   | 150 °C    |
| Scan Begin  | 50 m/z     | Set End Plate Offset | -500 V   | Set Dry Gas      | 4.0 l/min |
| Scan End    | 1900 m/z   | Set Charging Voltage | 0 V      | Set Divert Valve | Source    |
|             |            | Set Corona           | 0 nA     | Set APCI Heater  | 0 °C      |

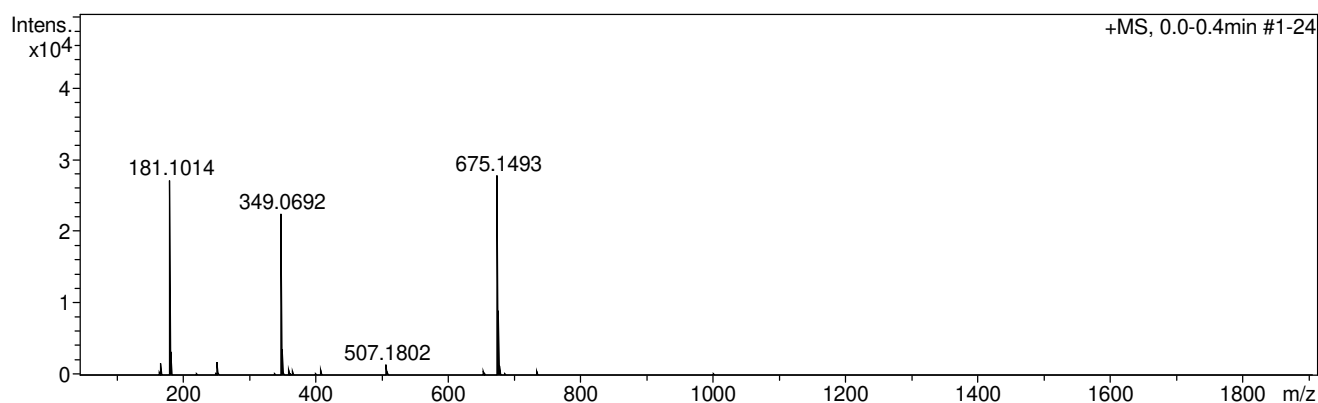

| Meas. m/z | # | Ion Formula    | m/z      | err [ppm] | mSigma | # Sigma | Score  | rdb  | e <sup>-</sup> Conf | N-Rule |
|-----------|---|----------------|----------|-----------|--------|---------|--------|------|---------------------|--------|
| 349.0692  | 1 | C11H14N6NaO4S  | 349.0689 | -0.8      | 4.8    | 1       | 100.00 | 7.5  | even                | ok     |
|           | 2 | C12H10N10NaS   | 349.0703 | 3.0       | 9.0    | 2       | 62.66  | 12.5 | even                | ok     |
|           | 3 | C10H18N2NaO8S  | 349.0676 | 4.6       | 15.9   | 3       | 38.20  | 2.5  | even                | ok     |
|           | 4 | C18H14NaO6     | 349.0683 | -2.8      | 24.2   | 4       | 36.08  | 11.5 | even                | ok     |
|           | 5 | C19H18NaOS2    | 349.0691 | 0.3       | 39.7   | 5       | 50.05  | 10.5 | even                | ok     |
|           | 6 | C19H10N4NaO2   | 349.0696 | -1.1      | 40.7   | 6       | 32.46  | 16.5 | even                | ok     |
|           | 7 | C11H22N2NaO3S3 | 349.0685 | -2.2      | 42.7   | 7       | 33.92  | 1.5  | even                | ok     |

**Figure S57.** HRESIMS spectrum of compound **5o**

## Generic Display Report

### Analysis Info

Analysis Name D:\MZ\maXis\_data\temp\64013000001.d  
Method tune\_low\_MS\_Service\_05\_19.m  
Sample Name PN-12 spot 1 peak 1  
Comment Predrag Kalaba  
Ergebnis: +/- 5ppm  
ACN / MeOH + 1% H<sub>2</sub>O

Acquisition Date 20/05/2019 14:59:37

Operator msc  
Instrument maXis

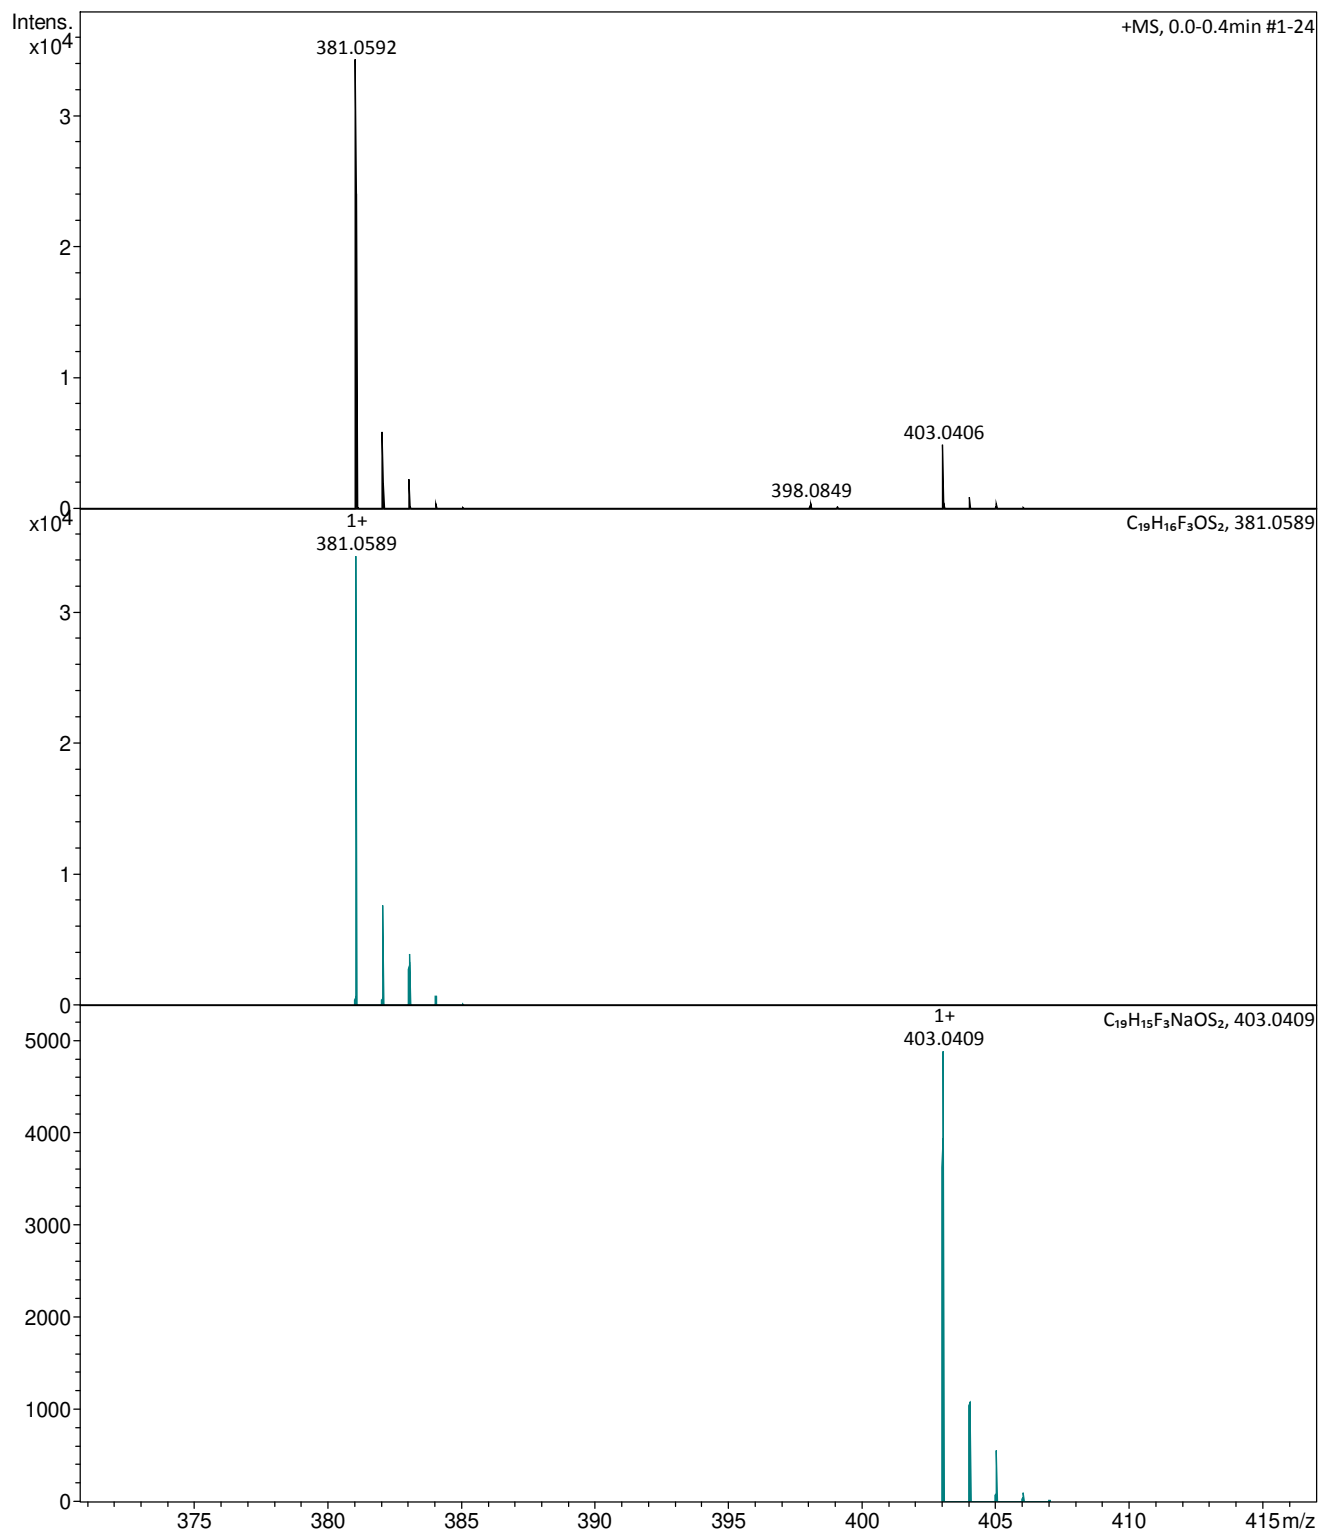

# Mass Spectrum SmartFormula Report

## Analysis Info

Analysis Name D:\MZ\maXis\_data\temp\64013000001.d  
Method tune\_low\_MS\_Service\_05\_19.m  
Sample Name PN-12 spot 1 peak 1  
Comment Predrag Kalaba  
Ergebnis: +/- 5ppm  
ACN / MeOH + 1% H2O

Acquisition Date 20/05/2019 14:59:37

Operator msc  
Instrument maXis 255552.00016

## Acquisition Parameter

|             |            |                      |          |                  |           |
|-------------|------------|----------------------|----------|------------------|-----------|
| Source Type | ESI        | Ion Polarity         | Positive | Set Nebulizer    | 0.4 Bar   |
| Focus       | Not active | Set Capillary        | 4500 V   | Set Dry Heater   | 150 °C    |
| Scan Begin  | 50 m/z     | Set End Plate Offset | -500 V   | Set Dry Gas      | 4.0 l/min |
| Scan End    | 1900 m/z   | Set Charging Voltage | 0 V      | Set Divert Valve | Source    |
|             |            | Set Corona           | 0 nA     | Set APCI Heater  | 0 °C      |

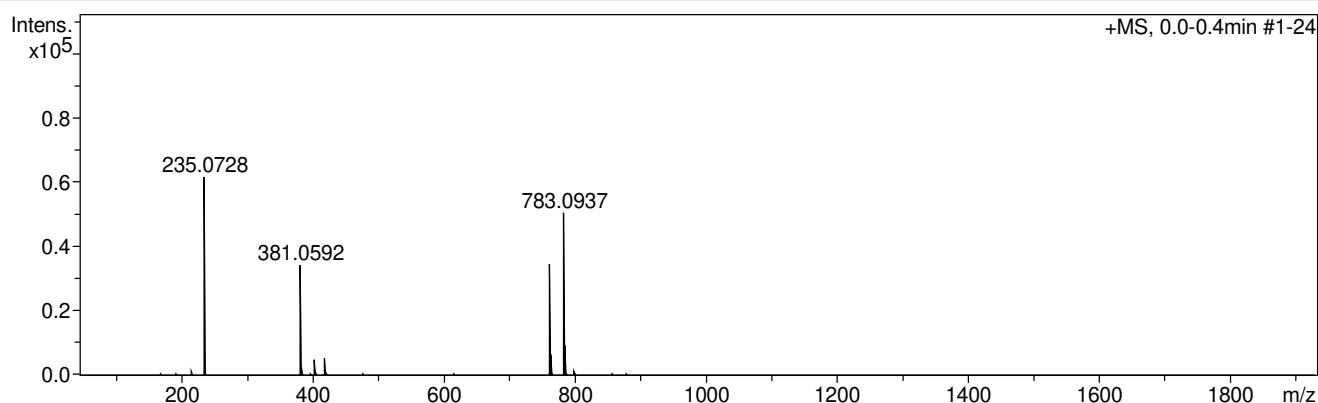

| Meas. m/z | #  | Ion Formula     | Score  | m/z      | err [mDa] | err [ppm] | mSigma | rdb  | e <sup>-</sup> | Conf | N-Rule |
|-----------|----|-----------------|--------|----------|-----------|-----------|--------|------|----------------|------|--------|
| 381.0592  | 1  | C12H8F3N10S     | 75.08  | 381.0601 | 0.9       | 2.4       | 5.1    | 12.5 | even           |      | ok     |
|           | 2  | C14H11F6N4S     | 65.27  | 381.0603 | 1.2       | 3.1       | 5.2    | 8.5  | even           |      | ok     |
|           | 3  | C14H11F2N6O3S   | 49.24  | 381.0576 | 1.6       | 4.1       | 6.9    | 11.5 | even           |      | ok     |
|           | 4  | C16H14F5O3S     | 57.58  | 381.0578 | 1.3       | 3.5       | 6.9    | 7.5  | even           |      | ok     |
|           | 5  | C13H15F6O4S     | 100.00 | 381.0590 | 0.2       | 0.5       | 9.6    | 3.5  | even           |      | ok     |
|           | 6  | C11H12F3N6O4S   | 89.76  | 381.0587 | -0.4      | -1.1      | 9.6    | 7.5  | even           |      | ok     |
|           | 7  | C14H16F7S2      | 40.49  | 381.0576 | -1.5      | -4.0      | 17.9   | 3.5  | even           |      | ok     |
|           | 8  | C12H13F4N6S2    | 34.23  | 381.0574 | -1.8      | -4.7      | 17.9   | 7.5  | even           |      | ok     |
|           | 9  | C18H15F2O5S     | 51.74  | 381.0603 | 1.1       | 3.0       | 18.5   | 10.5 | even           |      | ok     |
|           | 10 | C11H15F2N6O3S2  | 40.93  | 381.0610 | -1.8      | -4.8      | 18.7   | 6.5  | even           |      | ok     |
|           | 11 | C10H16F3N2O8S   | 32.50  | 381.0574 | 1.8       | 4.6       | 21.1   | 2.5  | even           |      | ok     |
|           | 12 | C13H18FN2O6S2   | 78.02  | 381.0585 | 0.7       | 1.8       | 21.6   | 5.5  | even           |      | ok     |
|           | 13 | C16H17F4O2S2    | 67.97  | 381.0601 | 0.9       | 2.4       | 21.9   | 6.5  | even           |      | ok     |
|           | 14 | C14H14FN6O2S2   | 77.25  | 381.0598 | -0.7      | -1.8      | 22.0   | 10.5 | even           |      | ok     |
|           | 15 | C11H17F8OS2     | 68.63  | 381.0588 | 0.4       | 1.0       | 23.4   | -0.5 | even           |      | ok     |
|           | 16 | C10H19F2N2O7S2  | 78.81  | 381.0596 | -0.5      | -1.2      | 25.3   | 1.5  | even           |      | ok     |
|           | 17 | C10H16F7O5S     | 48.60  | 381.0601 | -1.0      | -2.5      | 25.5   | -0.5 | even           |      | ok     |
|           | 18 | C19H16F3OS2     | 74.39  | 381.0589 | 0.2       | 0.6       | 32.4   | 10.5 | even           |      | ok     |
|           | 19 | C21H14FO4S      | 61.59  | 381.0591 | 0.0       | 0.0       | 34.6   | 14.5 | even           |      | ok     |
|           | 20 | C11H20F3N2O3S3  | 45.85  | 381.0583 | 0.9       | 2.3       | 38.7   | 1.5  | even           |      | ok     |
|           | 21 | C22H15F2S2      | 28.38  | 381.0578 | -1.4      | -3.6      | 45.4   | 14.5 | even           |      | ok     |
|           | 22 | C22H10FN4S      | 23.05  | 381.0605 | 1.3       | 3.5       | 46.0   | 19.5 | even           |      | ok     |
|           | 23 | C11H23F2N2O2S4  | 19.46  | 381.0605 | 1.3       | 3.5       | 58.2   | 0.5  | even           |      | ok     |
| 403.0406  | 24 | C14H22FN2OS4    | 32.63  | 381.0594 | 0.2       | 0.5       | 60.8   | 4.5  | even           |      | ok     |
|           | 1  | C14H10F2N6NaO3S | 75.87  | 403.0395 | 1.0       | 2.6       | 6.3    | 11.5 | even           |      | ok     |
|           | 2  | C16H13F5NaO3S   | 86.71  | 403.0398 | 0.8       | 2.0       | 6.3    | 7.5  | even           |      | ok     |
|           | 3  | C12H7F3N10NaS   | 55.96  | 403.0420 | 1.4       | 3.6       | 10.0   | 12.5 | even           |      | ok     |
|           | 4  | C14H10F6N4NaS   | 47.56  | 403.0423 | -1.7      | -4.2      | 10.0   | 8.5  | even           |      | ok     |
|           | 5  | C18H14F2NaO5S   | 46.04  | 403.0422 | 1.6       | 4.1       | 13.0   | 10.5 | even           |      | ok     |
|           | 6  | C14H15F7NaS2    | 65.25  | 403.0396 | 1.0       | 2.5       | 15.0   | 3.5  | even           |      | ok     |
|           | 7  | C12H12F4N6NaS2  | 56.46  | 403.0393 | -1.3      | -3.1      | 15.1   | 7.5  | even           |      | ok     |
|           | 8  | C13H14F6NaO4S   | 90.10  | 403.0409 | -0.3      | -0.8      | 16.6   | 3.5  | even           |      | ok     |
|           | 9  | C11H11F3N6NaO4S | 100.00 | 403.0407 | -0.1      | -0.2      | 16.6   | 7.5  | even           |      | ok     |
|           | 10 | C16H16F4NaO2S2  | 49.51  | 403.0420 | -1.4      | -3.5      | 16.7   | 6.5  | even           |      | ok     |

## Mass Spectrum SmartFormula Report

| Meas. m/z | #  | Ion Formula      | Score | m/z      | err [mDa] | err [ppm] | mSigma | rdb  | e <sup>-</sup> Conf | N-Rule |
|-----------|----|------------------|-------|----------|-----------|-----------|--------|------|---------------------|--------|
|           | 11 | C14H13FN6NaO2S2  | 57.54 | 403.0418 | -1.2      | -2.9      | 16.7   | 10.5 | even                | ok     |
|           | 12 | C19H12F4NaO2S    | 33.35 | 403.0386 | 2.0       | 4.8       | 17.9   | 11.5 | even                | ok     |
|           | 13 | C13H17FN2NaO6S2  | 93.09 | 403.0404 | -0.2      | -0.4      | 18.8   | 5.5  | even                | ok     |
|           | 14 | C11H16F8NaOS2    | 81.83 | 403.0407 | 0.1       | 0.3       | 25.4   | -0.5 | even                | ok     |
|           | 15 | C19H15F3NaOS2    | 74.93 | 403.0409 | 0.3       | 0.7       | 26.2   | 10.5 | even                | ok     |
|           | 16 | C21H13FNaO4S     | 63.77 | 403.0411 | 0.5       | 1.2       | 28.8   | 14.5 | even                | ok     |
|           | 17 | C14H18F2N2NaO2S3 | 29.83 | 403.0391 | -1.5      | -3.8      | 35.8   | 5.5  | even                | ok     |
|           | 18 | C11H19F3N2NaO3S3 | 55.88 | 403.0402 | 0.4       | 0.9       | 36.3   | 1.5  | even                | ok     |
|           | 19 | C22H14F2NaS2     | 40.48 | 403.0397 | -0.9      | -2.1      | 39.2   | 14.5 | even                | ok     |
|           | 20 | C22H9FN4NaS      | 21.14 | 403.0424 | -1.8      | -4.5      | 40.4   | 19.5 | even                | ok     |
|           | 21 | C11H22F2N2NaO2S4 | 13.51 | 403.0424 | 1.9       | 4.6       | 54.9   | 0.5  | even                | ok     |
|           | 22 | C14H21FN2NaOS4   | 26.36 | 403.0413 | -0.7      | -1.8      | 56.3   | 4.5  | even                | ok     |

**Figure S58.** HRESIMS spectrum of compound **6o**

## Generic Display Report

### Analysis Info

Analysis Name D:\MZ\maXis\_data\temp\64014000001.d  
Method tune\_low\_MS\_Service\_05\_19.m  
Sample Name PN-12 spot 1 peak 2  
Comment Predrag Kalaba  
Ergebnis: +/- 5ppm  
ACN / MeOH + 1% H2O

Acquisition Date 20/05/2019 15:14:03

Operator msc  
Instrument maXis

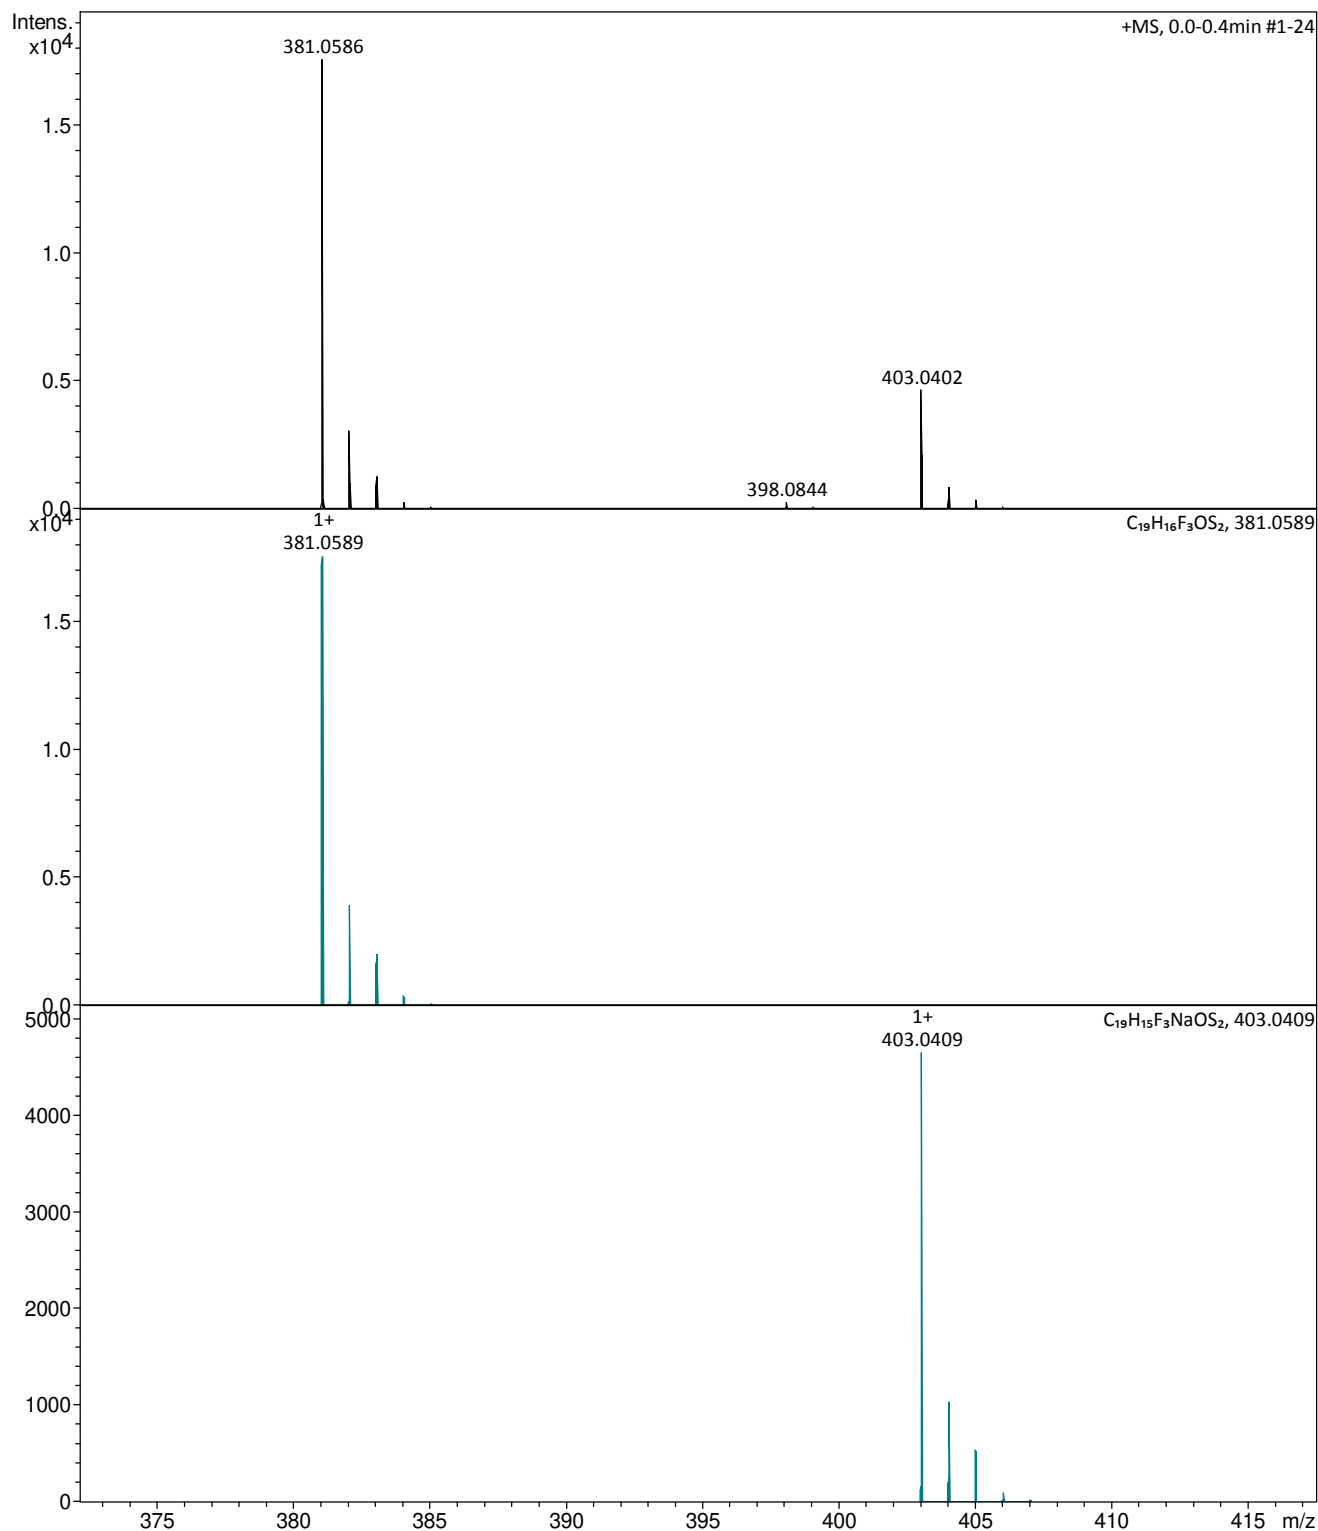

# Mass Spectrum SmartFormula Report

## Analysis Info

Analysis Name D:\MZ\maXis\_data\temp\64014000001.d  
Method tune\_low\_MS\_Service\_05\_19.m  
Sample Name PN-12 spot 1 peak 2  
Comment Predrag Kalaba  
Ergebnis: +/- 5ppm  
ACN / MeOH + 1% H2O

Acquisition Date 20/05/2019 15:14:03

Operator msc  
Instrument maXis 255552.00016

## Acquisition Parameter

|             |            |                      |          |                  |           |
|-------------|------------|----------------------|----------|------------------|-----------|
| Source Type | ESI        | Ion Polarity         | Positive | Set Nebulizer    | 0.4 Bar   |
| Focus       | Not active | Set Capillary        | 4500 V   | Set Dry Heater   | 150 °C    |
| Scan Begin  | 50 m/z     | Set End Plate Offset | -500 V   | Set Dry Gas      | 4.0 l/min |
| Scan End    | 1900 m/z   | Set Charging Voltage | 0 V      | Set Divert Valve | Source    |
|             |            | Set Corona           | 0 nA     | Set APCI Heater  | 0 °C      |

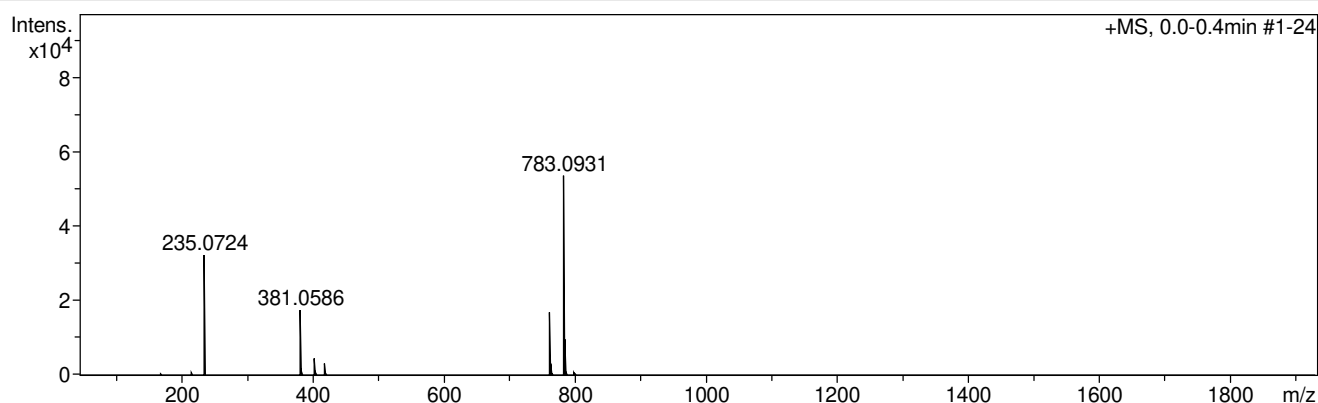

| Meas. m/z | #  | Ion Formula     | Score  | m/z      | err [mDa] | err [ppm] | mSigma | rdb  | e <sup>-</sup> | Conf | N-Rule |
|-----------|----|-----------------|--------|----------|-----------|-----------|--------|------|----------------|------|--------|
| 381.0586  | 1  | C14H11F2N6O3S   | 73.93  | 381.0576 | 1.0       | 2.7       | 5.3    | 11.5 | even           |      | ok     |
|           | 2  | C16H14F5O3S     | 84.38  | 381.0578 | 0.8       | 2.0       | 5.3    | 7.5  | even           |      | ok     |
|           | 3  | C12H8F3N10S     | 54.52  | 381.0601 | 1.5       | 3.8       | 7.1    | 12.5 | even           |      | ok     |
|           | 4  | C14H11F6N4S     | 46.25  | 381.0603 | -1.7      | -4.5      | 7.1    | 8.5  | even           |      | ok     |
|           | 5  | C13H15F6O4S     | 90.00  | 381.0590 | -0.4      | -1.0      | 12.9   | 3.5  | even           |      | ok     |
|           | 6  | C11H12F3N6O4S   | 100.00 | 381.0587 | -0.1      | -0.3      | 12.9   | 7.5  | even           |      | ok     |
|           | 7  | C18H15F2O5S     | 40.48  | 381.0603 | 1.7       | 4.4       | 15.5   | 10.5 | even           |      | ok     |
|           | 8  | C14H16F7S2      | 61.79  | 381.0576 | 1.0       | 2.6       | 15.6   | 3.5  | even           |      | ok     |
|           | 9  | C12H13F4N6S2    | 53.54  | 381.0574 | -1.2      | -3.2      | 15.7   | 7.5  | even           |      | ok     |
|           | 10 | C10H10FN12S2    | 45.90  | 381.0571 | 1.5       | 3.9       | 15.7   | 11.5 | even           |      | ok     |
|           | 11 | C16H17F4O2S2    | 43.65  | 381.0601 | -1.5      | -3.8      | 18.9   | 6.5  | even           |      | ok     |
|           | 12 | C14H14FN6O2S2   | 50.80  | 381.0598 | -1.2      | -3.2      | 18.9   | 10.5 | even           |      | ok     |
|           | 13 | C13H18FN2O6S2   | 87.27  | 381.0585 | -0.1      | -0.3      | 19.6   | 5.5  | even           |      | ok     |
|           | 14 | C11H17F8OS2     | 78.98  | 381.0588 | -0.1      | -0.4      | 23.7   | -0.5 | even           |      | ok     |
|           | 15 | C10H16F3N2O8S   | 45.58  | 381.0574 | 1.2       | 3.2       | 23.8   | 2.5  | even           |      | ok     |
|           | 16 | C10H19F2N2O7S2  | 49.65  | 381.0596 | 1.0       | 2.7       | 25.2   | 1.5  | even           |      | ok     |
|           | 17 | C10H16F7O5S     | 33.83  | 381.0601 | -1.5      | -4.0      | 28.6   | -0.5 | even           |      | ok     |
|           | 18 | C19H16F3OS2     | 65.00  | 381.0589 | 0.3       | 0.8       | 29.1   | 10.5 | even           |      | ok     |
|           | 19 | C21H14FO4S      | 55.30  | 381.0591 | 0.5       | 1.4       | 31.6   | 14.5 | even           |      | ok     |
|           | 20 | C11H20F3N2O3S3  | 52.37  | 381.0583 | 0.3       | 0.9       | 37.1   | 1.5  | even           |      | ok     |
|           | 21 | C14H19F2N2O2S3  | 27.30  | 381.0571 | -1.5      | -3.9      | 37.6   | 5.5  | even           |      | ok     |
|           | 22 | C22H15F2S2      | 35.68  | 381.0578 | -0.8      | -2.2      | 42.2   | 14.5 | even           |      | ok     |
|           | 23 | C22H10FN4S      | 18.05  | 381.0605 | -1.9      | -4.9      | 43.2   | 19.5 | even           |      | ok     |
|           | 24 | C11H23F2N2O2S4  | 11.95  | 381.0605 | 1.9       | 4.9       | 56.2   | 0.5  | even           |      | ok     |
|           | 25 | C14H22FN2OS4    | 22.91  | 381.0594 | -0.7      | -1.9      | 58.3   | 4.5  | even           |      | ok     |
| 403.0402  | 1  | C14H10F2N6NaO3S | 89.02  | 403.0395 | -0.6      | -1.6      | 5.6    | 11.5 | even           |      | ok     |
|           | 2  | C16H13F5NaO3S   | 100.00 | 403.0398 | 0.4       | 1.0       | 5.6    | 7.5  | even           |      | ok     |
|           | 3  | C12H7F3N10NaS   | 38.45  | 403.0420 | -1.8      | -4.6      | 10.8   | 12.5 | even           |      | ok     |
|           | 4  | C13H14F2N2NaO7S | 32.76  | 403.0382 | -2.0      | -4.9      | 14.2   | 6.5  | even           |      | ok     |
|           | 5  | C17H9FN6NaO2S   | 37.61  | 403.0384 | 1.8       | 4.4       | 14.5   | 15.5 | even           |      | ok     |
|           | 6  | C19H12F4NaO2S   | 44.43  | 403.0386 | -1.5      | -3.8      | 14.5   | 11.5 | even           |      | ok     |
|           | 7  | C16H16F4NaO2S2  | 34.64  | 403.0420 | 1.8       | 4.6       | 16.5   | 6.5  | even           |      | ok     |
|           | 8  | C14H13FN6NaO2S2 | 41.03  | 403.0418 | -1.6      | -4.0      | 16.5   | 10.5 | even           |      | ok     |
|           | 9  | C14H15F7NaS2    | 72.74  | 403.0396 | -0.6      | -1.5      | 16.9   | 3.5  | even           |      | ok     |



## Mass Spectrum SmartFormula Report

| Meas. m/z | #  | Ion Formula      | Score | m/z      | err [mDa] | err [ppm] | mSigma | rdb  | e <sup>-</sup> Conf | N-Rule |
|-----------|----|------------------|-------|----------|-----------|-----------|--------|------|---------------------|--------|
|           | 10 | C12H12F4N6NaS2   | 64.09 | 403.0393 | 0.9       | 2.1       | 17.0   | 7.5  | even                | ok     |
|           | 11 | C13H14F6NaO4S    | 64.63 | 403.0409 | 0.7       | 1.9       | 19.2   | 3.5  | even                | ok     |
|           | 12 | C11H11F3N6NaO4S  | 72.95 | 403.0407 | 0.5       | 1.3       | 19.2   | 7.5  | even                | ok     |
|           | 13 | C13H17FN2NaO6S2  | 80.18 | 403.0404 | 0.3       | 0.6       | 20.2   | 5.5  | even                | ok     |
|           | 14 | C19H15F3NaOS2    | 59.22 | 403.0409 | -0.7      | -1.7      | 24.5   | 10.5 | even                | ok     |
|           | 15 | C21H13FNaO4S     | 51.50 | 403.0411 | -0.9      | -2.3      | 25.6   | 14.5 | even                | ok     |
|           | 16 | C11H16F8NaOS2    | 58.67 | 403.0407 | -0.5      | -1.3      | 28.4   | -0.5 | even                | ok     |
|           | 17 | C11H13F9NaO2S    | 27.69 | 403.0385 | -1.7      | -4.2      | 30.9   | 0.5  | even                | ok     |
|           | 18 | C14H18F2N2NaO2S3 | 35.47 | 403.0391 | 1.1       | 2.7       | 36.2   | 5.5  | even                | ok     |
|           | 19 | C22H14F2NaS2     | 49.10 | 403.0397 | 0.5       | 1.1       | 37.0   | 14.5 | even                | ok     |
|           | 20 | C11H19F3N2NaO3S3 | 57.54 | 403.0402 | -0.0      | -0.1      | 37.8   | 1.5  | even                | ok     |
|           | 21 | C14H21FN2NaOS4   | 19.24 | 403.0413 | 1.1       | 2.8       | 56.6   | 4.5  | even                | ok     |

**Figure S59.** HRESIMS spectrum of compound **7o**

## Generic Display Report

### Analysis Info

Analysis Name D:\MZ\maXis\_data\temp\64015000001.d  
Method tune\_low\_MS\_Service\_05\_19.m  
Sample Name PN-12 spot 2 peak 1  
Comment Predrag Kalaba  
Ergebnis: +/- 5ppm  
ACN / MeOH + 1% H<sub>2</sub>O

Acquisition Date 20/05/2019 15:19:27

Operator msc  
Instrument maXis

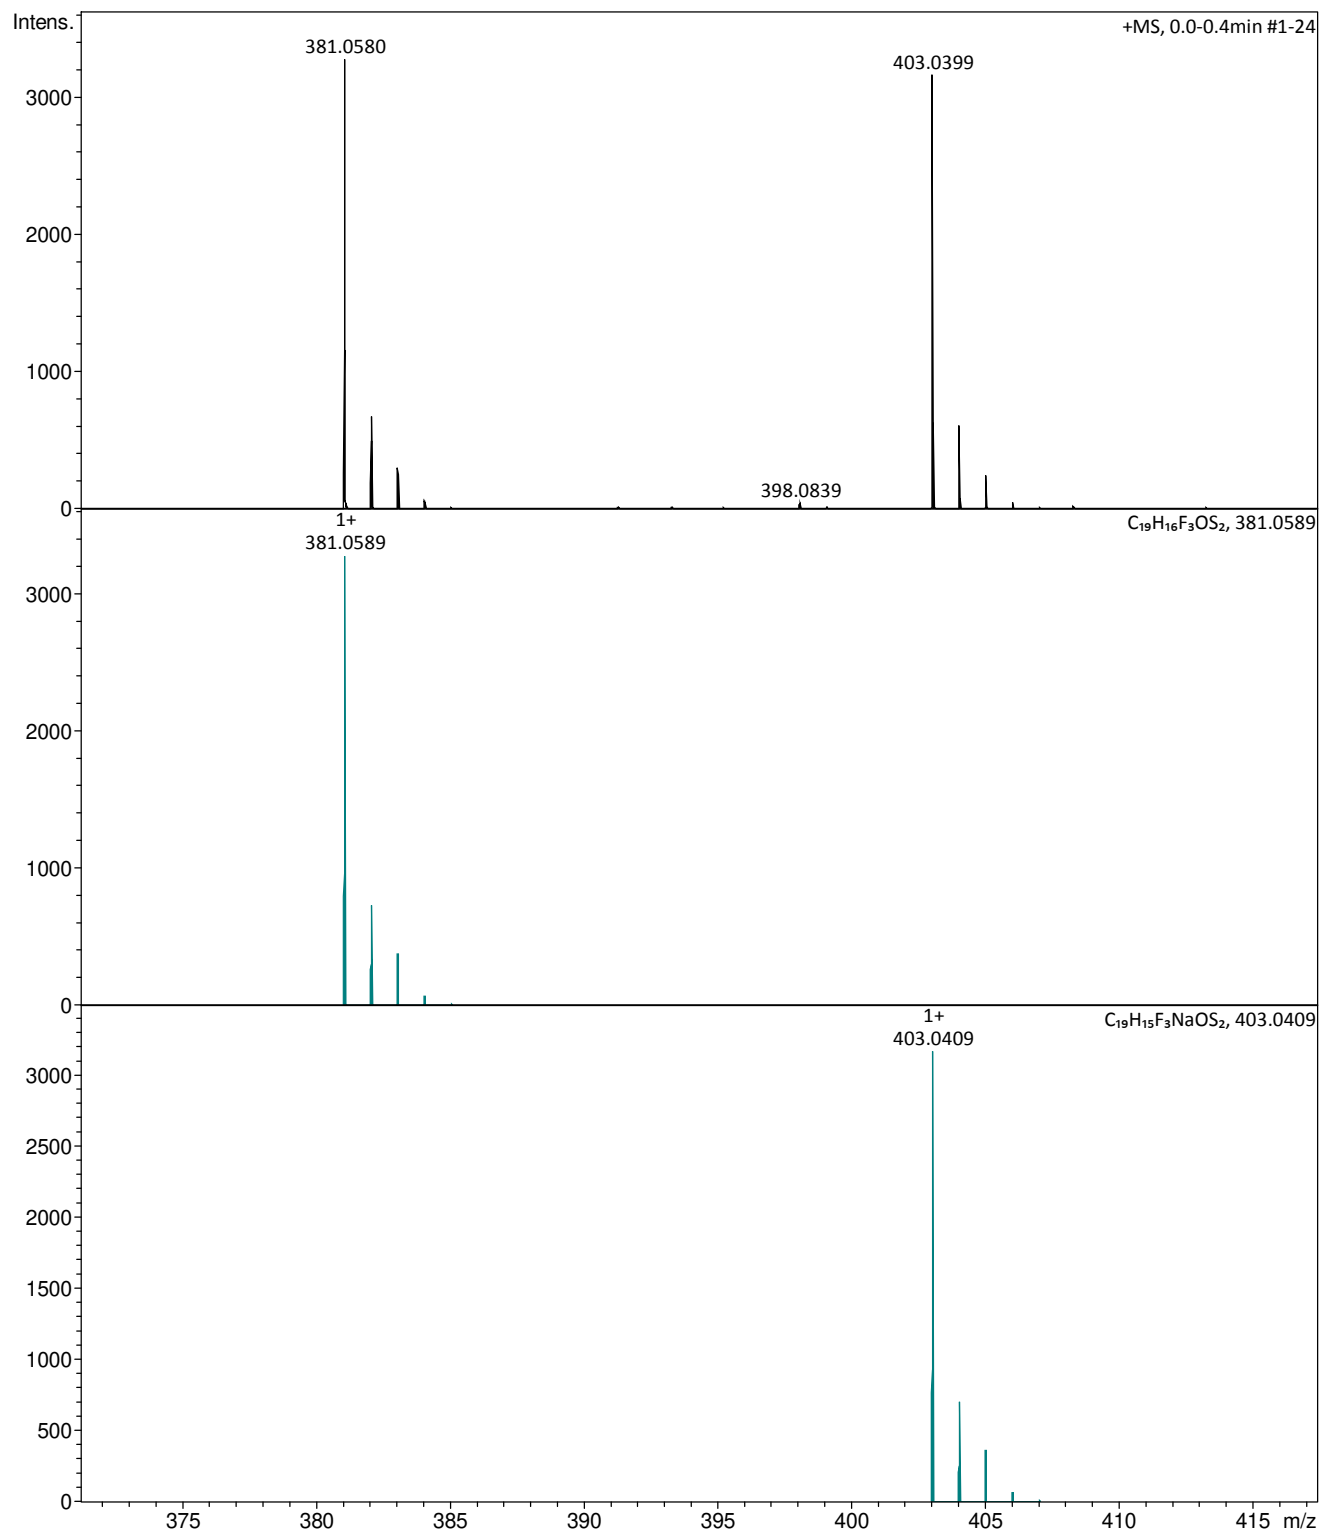

# Mass Spectrum SmartFormula Report

## Analysis Info

Analysis Name D:\MZ\maXis\_data\temp\64015000001.d  
Method tune\_low\_MS\_Service\_05\_19.m  
Sample Name PN-12 spot 2 peak 1  
Comment Predrag Kalaba  
Ergebnis: +/- 5ppm  
ACN / MeOH + 1% H2O

Acquisition Date 20/05/2019 15:19:27

Operator msc  
Instrument maXis 255552.00016

## Acquisition Parameter

|             |            |                      |          |                  |           |
|-------------|------------|----------------------|----------|------------------|-----------|
| Source Type | ESI        | Ion Polarity         | Positive | Set Nebulizer    | 0.4 Bar   |
| Focus       | Not active | Set Capillary        | 4500 V   | Set Dry Heater   | 150 °C    |
| Scan Begin  | 50 m/z     | Set End Plate Offset | -500 V   | Set Dry Gas      | 4.0 l/min |
| Scan End    | 1900 m/z   | Set Charging Voltage | 0 V      | Set Divert Valve | Source    |
|             |            | Set Corona           | 0 nA     | Set APCI Heater  | 0 °C      |

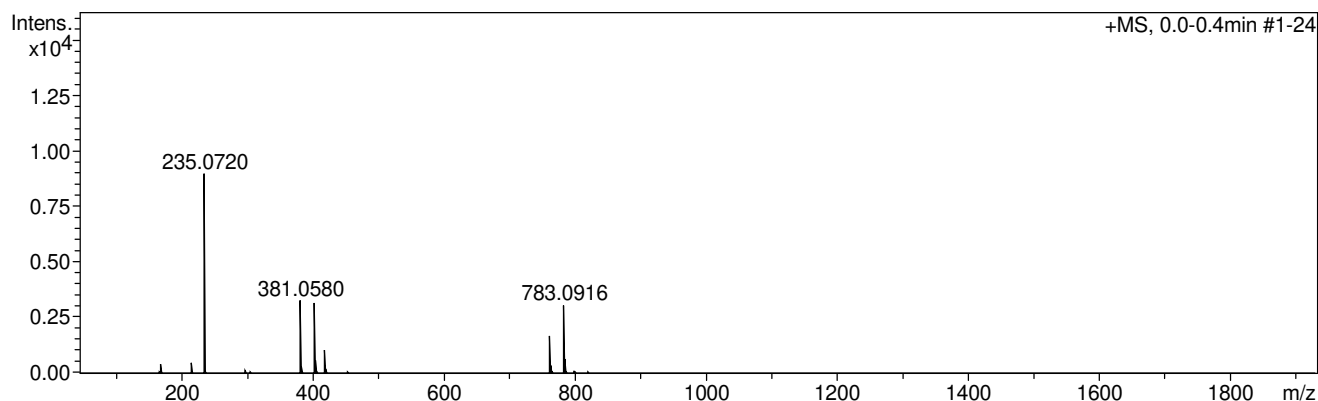

| Meas. m/z | #  | Ion Formula      | Score  | m/z      | err [mDa] | err [ppm] | mSigma | rdb  | e <sup>-</sup> | Conf | N-Rule |
|-----------|----|------------------|--------|----------|-----------|-----------|--------|------|----------------|------|--------|
| 381.0580  | 1  | C14H14FN6O2S2    | 53.36  | 381.0598 | -1.8      | -4.8      | 10.6   | 10.5 | even           |      | ok     |
|           | 2  | C17H10FN6O2S     | 50.73  | 381.0564 | 1.5       | 4.0       | 12.1   | 15.5 | even           |      | ok     |
|           | 3  | C19H13F4O2S      | 59.26  | 381.0567 | 1.3       | 3.4       | 12.1   | 11.5 | even           |      | ok     |
|           | 4  | C19H16F3OS2      | 89.22  | 381.0589 | -0.9      | -2.4      | 13.9   | 10.5 | even           |      | ok     |
|           | 5  | C14H11F2N6O3S    | 88.86  | 381.0576 | 0.4       | 1.0       | 16.5   | 11.5 | even           |      | ok     |
|           | 6  | C16H14F5O3S      | 98.87  | 381.0578 | -0.2      | -0.4      | 16.5   | 7.5  | even           |      | ok     |
|           | 7  | C21H14FO4S       | 58.02  | 381.0591 | 1.1       | 3.0       | 18.0   | 14.5 | even           |      | ok     |
|           | 8  | C14H16F7S2       | 85.94  | 381.0576 | -0.4      | -1.0      | 18.6   | 3.5  | even           |      | ok     |
|           | 9  | C12H13F4N6S2     | 76.49  | 381.0574 | -0.6      | -1.6      | 18.6   | 7.5  | even           |      | ok     |
|           | 10 | C13H18FN2O6S2    | 100.00 | 381.0585 | 0.5       | 1.3       | 19.4   | 5.5  | even           |      | ok     |
|           | 11 | C13H15F2N2O7S    | 34.17  | 381.0563 | -1.7      | -4.6      | 24.5   | 6.5  | even           |      | ok     |
|           | 12 | C22H15F2S2       | 96.53  | 381.0578 | 0.2       | 0.6       | 26.7   | 14.5 | even           |      | ok     |
|           | 13 | C14H19F2N2O2S3   | 65.03  | 381.0571 | -0.9      | -2.3      | 29.9   | 5.5  | even           |      | ok     |
|           | 14 | C13H15F6O4S      | 48.55  | 381.0590 | 1.0       | 2.6       | 30.0   | 3.5  | even           |      | ok     |
|           | 15 | C14H22FN2OS4     | 28.71  | 381.0594 | 1.4       | 3.6       | 49.2   | 4.5  | even           |      | ok     |
| 403.0399  | 1  | C14H10F2N6NaO3S  | 90.02  | 403.0395 | -0.4      | -0.9      | 8.0    | 11.5 | even           |      | ok     |
|           | 2  | C16H13F5NaO3S    | 100.00 | 403.0398 | 0.1       | 0.3       | 8.0    | 7.5  | even           |      | ok     |
|           | 3  | C17H9FN6NaO2S    | 43.45  | 403.0384 | 1.5       | 3.7       | 12.8   | 15.5 | even           |      | ok     |
|           | 4  | C19H12F4NaO2S    | 50.67  | 403.0386 | 1.3       | 3.1       | 12.8   | 11.5 | even           |      | ok     |
|           | 5  | C14H13FN6NaO2S2  | 32.49  | 403.0418 | -1.9      | -4.6      | 14.5   | 10.5 | even           |      | ok     |
|           | 6  | C14H15F7NaS2     | 77.23  | 403.0396 | 0.3       | 0.8       | 16.6   | 3.5  | even           |      | ok     |
|           | 7  | C12H12F4N6NaS2   | 68.84  | 403.0393 | 0.6       | 1.4       | 16.6   | 7.5  | even           |      | ok     |
|           | 8  | C13H14F2N2NaO7S  | 35.25  | 403.0382 | 1.7       | 4.2       | 16.6   | 6.5  | even           |      | ok     |
|           | 9  | C13H17FN2NaO6S2  | 66.25  | 403.0404 | 0.5       | 1.3       | 19.5   | 5.5  | even           |      | ok     |
|           | 10 | C19H15F3NaOS2    | 50.11  | 403.0409 | 1.0       | 2.4       | 21.8   | 10.5 | even           |      | ok     |
|           | 11 | C13H14F6NaO4S    | 48.49  | 403.0409 | 1.0       | 2.5       | 21.8   | 3.5  | even           |      | ok     |
|           | 12 | C11H11F3N6NaO4S  | 55.38  | 403.0407 | 0.8       | 1.9       | 21.8   | 7.5  | even           |      | ok     |
|           | 13 | C21H13FN4O4S     | 42.80  | 403.0411 | 1.2       | 2.9       | 23.2   | 14.5 | even           |      | ok     |
|           | 14 | C11H16F4N2NaO4S2 | 25.48  | 403.0380 | 1.9       | 4.7       | 24.4   | 2.5  | even           |      | ok     |
|           | 15 | C11H16F8NaOS2    | 45.89  | 403.0407 | 0.8       | 2.0       | 29.4   | -0.5 | even           |      | ok     |
|           | 16 | C11H13F9NaO2S    | 28.82  | 403.0385 | -1.4      | -3.5      | 33.6   | 0.5  | even           |      | ok     |
|           | 17 | C22H14F2NaS2     | 55.05  | 403.0397 | 0.2       | 0.4       | 34.4   | 14.5 | even           |      | ok     |
|           | 18 | C14H18F2N2NaO2S3 | 40.09  | 403.0391 | 0.8       | 2.1       | 34.5   | 5.5  | even           |      | ok     |
|           | 19 | C11H19F3N2NaO3S3 | 48.39  | 403.0402 | 0.3       | 0.8       | 37.0   | 1.5  | even           |      | ok     |

---

## Mass Spectrum SmartFormula Report

---

| Meas. m/z | #  | Ion Formula    | Score | m/z      | err [mDa] | err [ppm] | mSigma | rdb | e <sup>-</sup> Conf | N-Rule |
|-----------|----|----------------|-------|----------|-----------|-----------|--------|-----|---------------------|--------|
|           | 20 | C17H17FN2NaOS3 | 17.35 | 403.0379 | 2.0       | 4.9       | 38.2   | 9.5 | even                | ok     |
|           | 21 | C14H21FN2NaOS4 | 15.96 | 403.0413 | 1.4       | 3.5       | 54.7   | 4.5 | even                | ok     |

**Figure S60.** HRESIMS spectrum of compound **8o**

## Generic Display Report

### Analysis Info

Analysis Name D:\MZ\maXis\_data\temp\64016000001.d  
Method tune\_low\_MS\_Service\_05\_19.m  
Sample Name PN-12 spot 2 peak 2  
Comment Predrag Kalaba  
Ergebnis: +/- 5ppm  
ACN / MeOH + 1% H<sub>2</sub>O

Acquisition Date 20/05/2019 15:22:44

Operator msc  
Instrument maXis

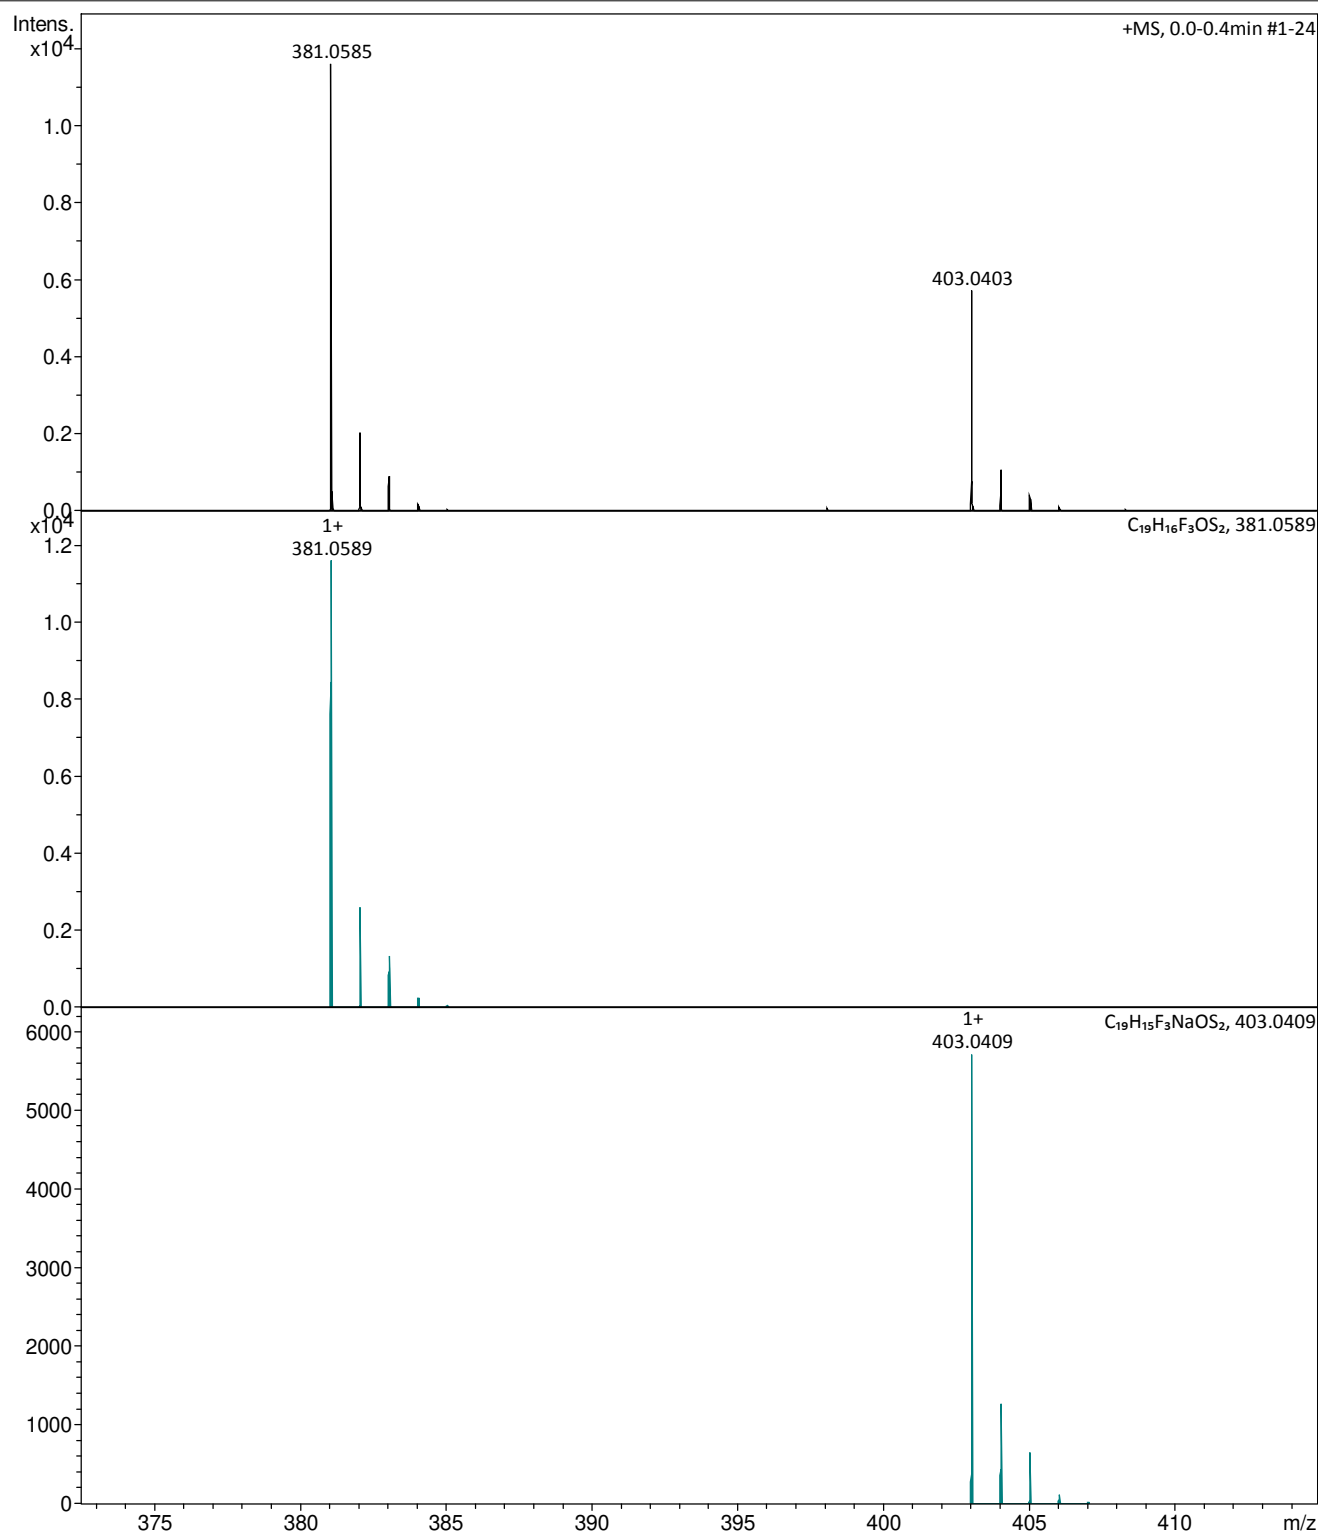

# Mass Spectrum SmartFormula Report

## Analysis Info

Analysis Name D:\MZ\maXis\_data\temp\64016000001.d  
Method tune\_low\_MS\_Service\_05\_19.m  
Sample Name PN-12 spot 2 peak 2  
Comment Predrag Kalaba  
Ergebnis: +/- 5ppm  
ACN / MeOH + 1% H2O

Acquisition Date 20/05/2019 15:22:44

Operator msc  
Instrument maXis 255552.00016

## Acquisition Parameter

|             |            |                      |          |                  |           |
|-------------|------------|----------------------|----------|------------------|-----------|
| Source Type | ESI        | Ion Polarity         | Positive | Set Nebulizer    | 0.4 Bar   |
| Focus       | Not active | Set Capillary        | 4500 V   | Set Dry Heater   | 150 °C    |
| Scan Begin  | 50 m/z     | Set End Plate Offset | -500 V   | Set Dry Gas      | 4.0 l/min |
| Scan End    | 1900 m/z   | Set Charging Voltage | 0 V      | Set Divert Valve | Source    |
|             |            | Set Corona           | 0 nA     | Set APCI Heater  | 0 °C      |

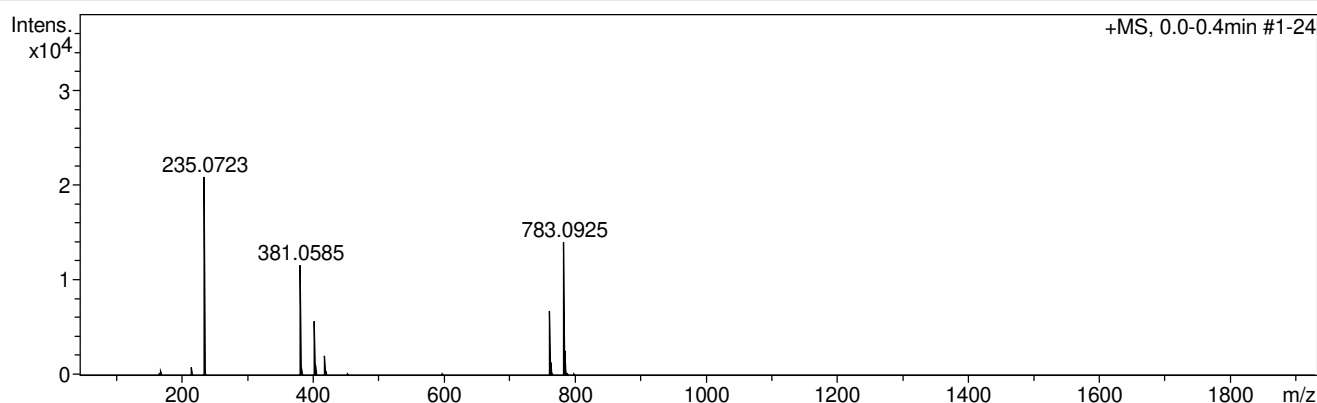

| Meas. m/z | #  | Ion Formula     | Score  | m/z      | err [mDa] | err [ppm] | mSigma | rdb  | e <sup>-</sup> | Conf | N-Rule |
|-----------|----|-----------------|--------|----------|-----------|-----------|--------|------|----------------|------|--------|
| 381.0585  | 1  | C14H11F2N6O3S   | 64.20  | 381.0576 | 0.9       | 2.5       | 6.6    | 11.5 | even           |      | ok     |
|           | 2  | C16H14F5O3S     | 73.04  | 381.0578 | -0.7      | -1.9      | 6.6    | 7.5  | even           |      | ok     |
|           | 3  | C12H8F3N10S     | 42.58  | 381.0601 | 1.5       | 4.0       | 9.4    | 12.5 | even           |      | ok     |
|           | 4  | C14H11F6N4S     | 36.01  | 381.0603 | 1.8       | 4.7       | 9.4    | 8.5  | even           |      | ok     |
|           | 5  | C14H16F7S2      | 57.19  | 381.0576 | -0.9      | -2.4      | 13.5   | 3.5  | even           |      | ok     |
|           | 6  | C12H13F4N6S2    | 49.72  | 381.0574 | 1.2       | 3.1       | 13.6   | 7.5  | even           |      | ok     |
|           | 7  | C10H10FN12S2    | 42.75  | 381.0571 | 1.4       | 3.7       | 13.6   | 11.5 | even           |      | ok     |
|           | 8  | C13H15F6O4S     | 72.19  | 381.0590 | 0.4       | 1.1       | 14.4   | 3.5  | even           |      | ok     |
|           | 9  | C11H12F3N6O4S   | 80.45  | 381.0587 | 0.2       | 0.5       | 14.4   | 7.5  | even           |      | ok     |
|           | 10 | C18H15F2O5S     | 33.25  | 381.0603 | 1.7       | 4.6       | 14.9   | 10.5 | even           |      | ok     |
|           | 11 | C16H17F4O2S2    | 46.50  | 381.0601 | -1.5      | -4.0      | 16.7   | 6.5  | even           |      | ok     |
|           | 12 | C14H14FN6O2S2   | 54.30  | 381.0598 | 1.3       | 3.4       | 16.8   | 10.5 | even           |      | ok     |
|           | 13 | C13H18FN2O6S2   | 100.00 | 381.0585 | -0.1      | -0.1      | 17.6   | 5.5  | even           |      | ok     |
|           | 14 | C19H13F4O2S     | 27.70  | 381.0567 | -1.8      | -4.9      | 19.8   | 11.5 | even           |      | ok     |
|           | 15 | C11H17F8OS2     | 66.55  | 381.0588 | -0.2      | -0.6      | 23.0   | -0.5 | even           |      | ok     |
|           | 16 | C10H19F2N2O7S2  | 52.15  | 381.0596 | 1.1       | 2.9       | 24.1   | 1.5  | even           |      | ok     |
|           | 17 | C10H16F3N2O8S   | 39.80  | 381.0574 | 1.1       | 3.0       | 24.7   | 2.5  | even           |      | ok     |
|           | 18 | C19H16F3OS2     | 70.09  | 381.0589 | 0.4       | 1.0       | 27.3   | 10.5 | even           |      | ok     |
|           | 19 | C10H16F7O5S     | 26.82  | 381.0601 | 1.6       | 4.1       | 29.7   | -0.5 | even           |      | ok     |
|           | 20 | C21H14FO4S      | 46.44  | 381.0591 | 0.6       | 1.6       | 30.9   | 14.5 | even           |      | ok     |
|           | 21 | C11H20F3N2O3S3  | 60.67  | 381.0583 | 0.3       | 0.7       | 35.1   | 1.5  | even           |      | ok     |
|           | 22 | C14H19F2N2O2S3  | 32.34  | 381.0571 | -1.4      | -3.7      | 35.4   | 5.5  | even           |      | ok     |
|           | 23 | C22H15F2S2      | 41.24  | 381.0578 | 0.8       | 2.0       | 40.6   | 14.5 | even           |      | ok     |
|           | 24 | C14H22FN2OS4    | 25.35  | 381.0594 | 0.8       | 2.1       | 56.0   | 4.5  | even           |      | ok     |
| 403.0403  | 1  | C14H10F2N6NaO3S | 88.36  | 403.0395 | -0.8      | -2.0      | 4.4    | 11.5 | even           |      | ok     |
|           | 2  | C16H13F5NaO3S   | 100.00 | 403.0398 | -0.6      | -1.4      | 4.4    | 7.5  | even           |      | ok     |
|           | 3  | C12H7F3N10NaS   | 47.94  | 403.0420 | 1.7       | 4.1       | 9.1    | 12.5 | even           |      | ok     |
|           | 4  | C14H10F6Na4NaS  | 40.30  | 403.0423 | -1.9      | -4.7      | 9.2    | 8.5  | even           |      | ok     |
|           | 5  | C18H14F2NaO5S   | 40.15  | 403.0422 | -1.9      | -4.6      | 10.8   | 10.5 | even           |      | ok     |
|           | 6  | C17H9FN6NaO2S   | 34.63  | 403.0384 | -2.0      | -4.9      | 15.3   | 15.5 | even           |      | ok     |
|           | 7  | C19H12F4NaO2S   | 41.25  | 403.0386 | 1.7       | 4.3       | 15.3   | 11.5 | even           |      | ok     |
|           | 8  | C14H15F7NaS2    | 69.46  | 403.0396 | 0.8       | 2.0       | 17.8   | 3.5  | even           |      | ok     |
|           | 9  | C12H12F4N6NaS2  | 60.73  | 403.0393 | -1.0      | -2.6      | 17.9   | 7.5  | even           |      | ok     |
|           | 10 | C13H14F6NaO4S   | 77.43  | 403.0409 | 0.6       | 1.4       | 17.9   | 3.5  | even           |      | ok     |

## Mass Spectrum SmartFormula Report

| Meas. m/z | #  | Ion Formula      | Score | m/z      | err [mDa] | err [ppm] | mSigma | rdb  | e <sup>-</sup> Conf | N-Rule |
|-----------|----|------------------|-------|----------|-----------|-----------|--------|------|---------------------|--------|
|           | 11 | C11H11F3N6NaO4S  | 86.75 | 403.0407 | -0.3      | -0.8      | 17.9   | 7.5  | even                | ok     |
|           | 12 | C16H16F4NaO2S2   | 40.64 | 403.0420 | -1.7      | -4.1      | 18.0   | 6.5  | even                | ok     |
|           | 13 | C14H13FN6NaO2S2  | 47.75 | 403.0418 | -1.4      | -3.5      | 18.0   | 10.5 | even                | ok     |
|           | 14 | C13H17FN2NaO6S2  | 90.33 | 403.0404 | -0.1      | -0.2      | 21.2   | 5.5  | even                | ok     |
|           | 15 | C19H15F3NaOS2    | 66.53 | 403.0409 | -0.5      | -1.3      | 26.1   | 10.5 | even                | ok     |
|           | 16 | C21H13FNaO4S     | 58.87 | 403.0411 | 0.7       | 1.8       | 26.7   | 14.5 | even                | ok     |
|           | 17 | C11H16F8NaOS2    | 68.09 | 403.0407 | 0.4       | 0.9       | 28.3   | -0.5 | even                | ok     |
|           | 18 | C11H13F9NaO2S    | 26.80 | 403.0385 | 1.9       | 4.6       | 29.6   | 0.5  | even                | ok     |
|           | 19 | C14H18F2N2NaO2S3 | 32.74 | 403.0391 | -1.3      | -3.2      | 37.6   | 5.5  | even                | ok     |
|           | 20 | C22H14F2NaS2     | 46.15 | 403.0397 | -0.6      | -1.6      | 38.5   | 14.5 | even                | ok     |
|           | 21 | C11H19F3N2NaO3S3 | 57.42 | 403.0402 | 0.1       | 0.3       | 38.8   | 1.5  | even                | ok     |
|           | 22 | C14H21FN2NaOS4   | 21.69 | 403.0413 | 0.9       | 2.4       | 58.0   | 4.5  | even                | ok     |

Figure S61. HRESIMS spectrum of compound 5p

## Generic Display Report

### Analysis Info

Analysis Name D:\Data\Kalaba\72423000001.d  
Method tune\_low\_MS\_Service\_08\_20.m  
Sample Name PN-2-1-1-b2  
Comment Kalaba/Zehl  
Ergebnis +/- 5ppm  
ACN / MeOH + 1% H<sub>2</sub>O

Acquisition Date 20/08/2020 17:45:02

Operator msc  
Instrument maXis

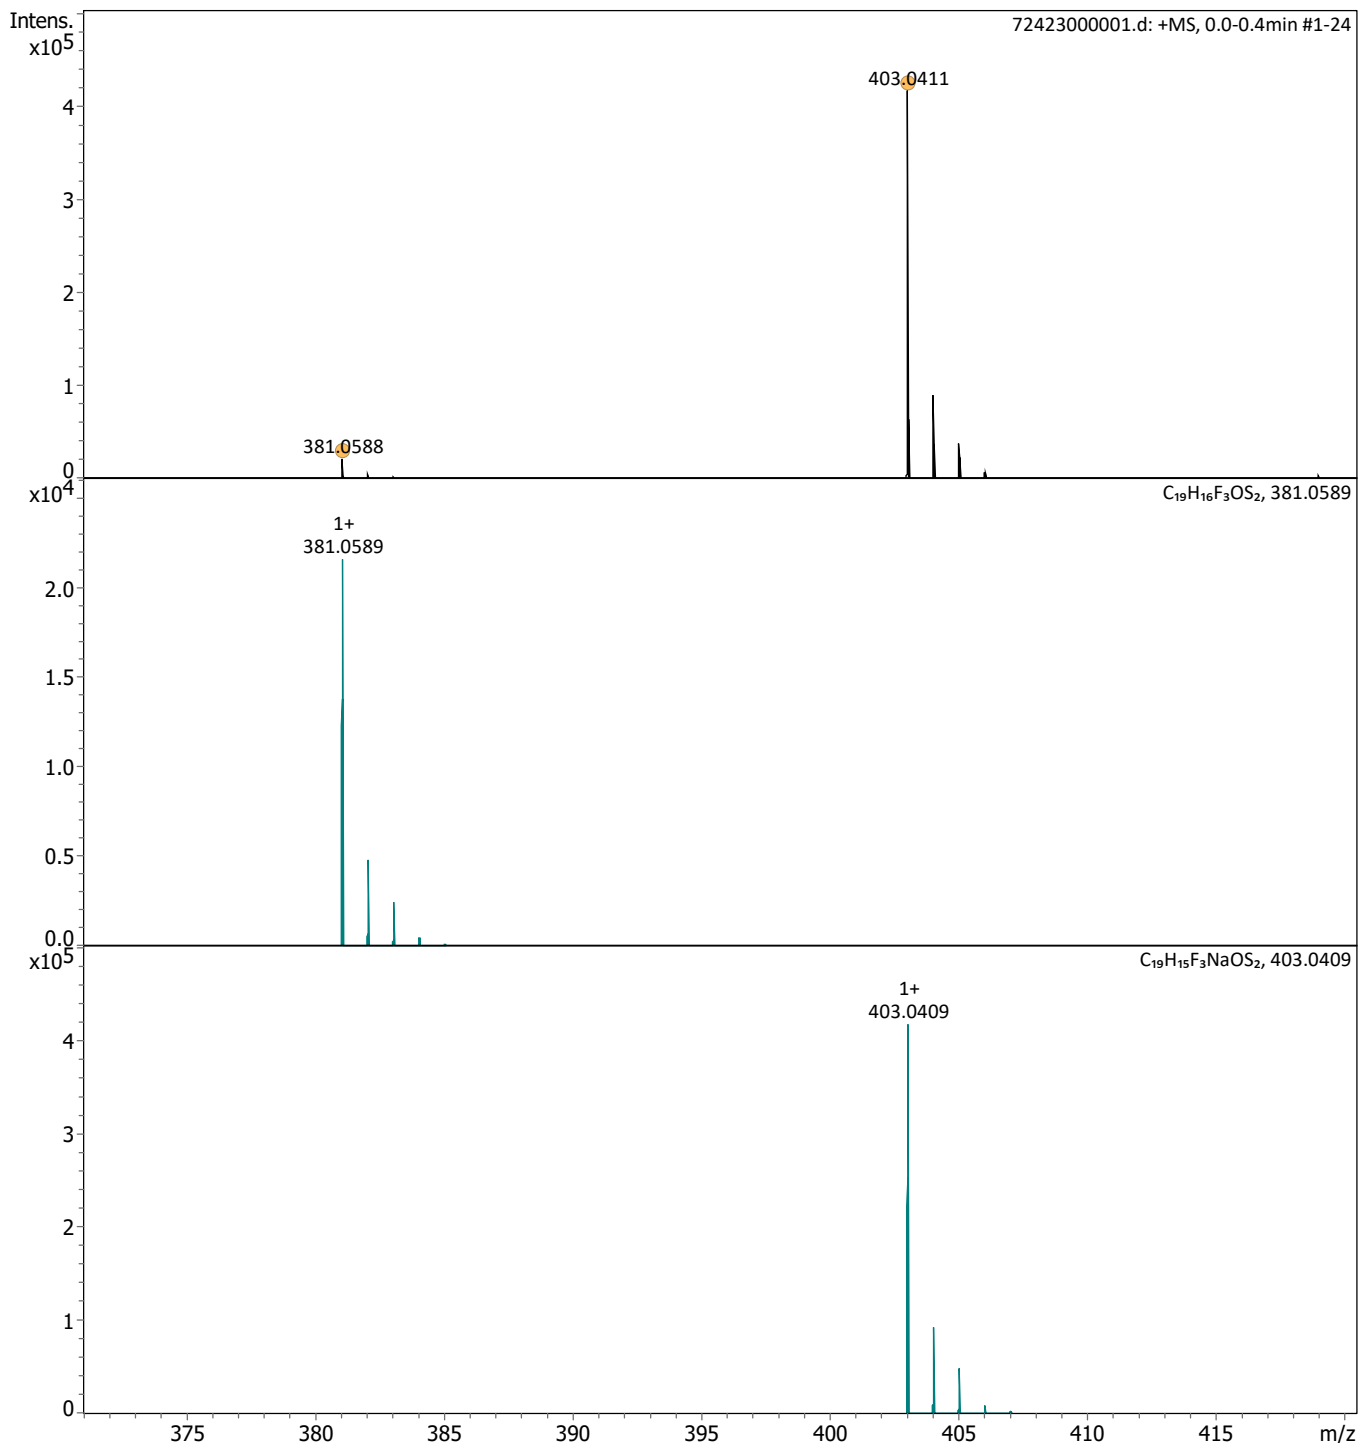



# Mass Spectrum SmartFormula Report

## Analysis Info

Analysis Name D:\Data\Kalaba\72423000001.d  
 Method tune\_low\_MS\_Service\_08\_20.m  
 Sample Name PN-2-1-1-b2  
 Comment Kalaba/Zehl  
 Ergebnis +/- 5ppm  
 ACN / MeOH + 1% H2O

Acquisition Date 20/08/2020 17:45:02

Operator msc  
 Instrument maXis 255552.00016

## Acquisition Parameter

|             |            |                      |          |                  |           |
|-------------|------------|----------------------|----------|------------------|-----------|
| Source Type | ESI        | Ion Polarity         | Positive | Set Nebulizer    | 0.4 Bar   |
| Focus       | Not active | Set Capillary        | 4200 V   | Set Dry Heater   | 180 Å°C   |
| Scan Begin  | 50 m/z     | Set End Plate Offset | -500 V   | Set Dry Gas      | 4.0 l/min |
| Scan End    | 1900 m/z   | Set Charging Voltage | 0 V      | Set Divert Valve | Source    |
|             |            | Set Corona           | 0 nA     | Set APCI Heater  | 0 Å°C     |

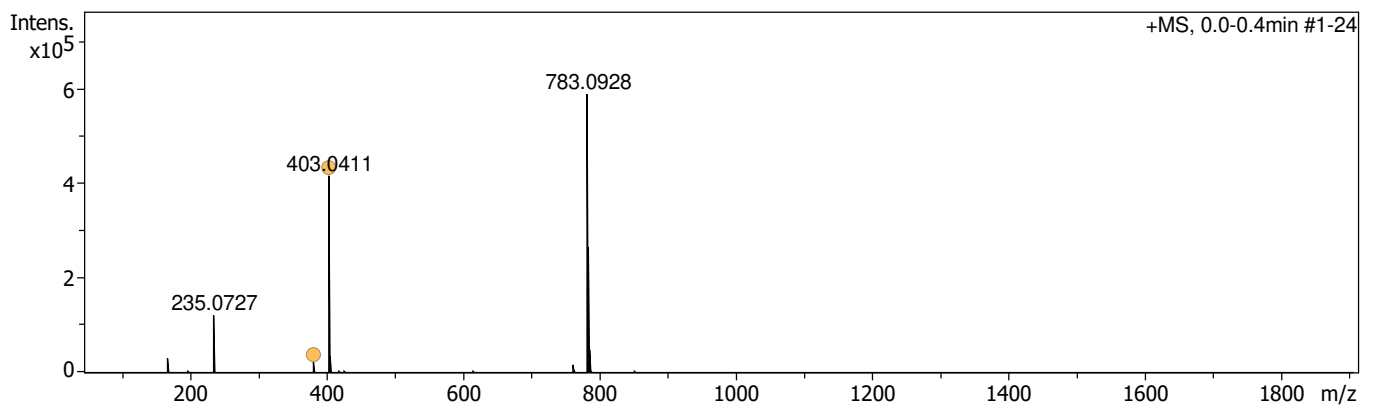

| Meas. m/z | #  | Ion Formula    | m/z      | err [ppm] | mSigma | # mSigma | Score  | rdb  | eÅ <sup>-</sup> | Conf | N-Rule |
|-----------|----|----------------|----------|-----------|--------|----------|--------|------|-----------------|------|--------|
| 381.0588  | 1  | C18H15F2O5S    | 381.0603 | 3.8       | 12.1   | 1        | 52.15  | 13.0 | even            |      | ok     |
|           | 2  | C19H16F3OS2    | 381.0589 | 0.2       | 15.7   | 2        | 100.00 | 15.0 | even            |      | ok     |
|           | 3  | C17H13N6OS2    | 381.0587 | -0.4      | 15.7   | 3        | 97.42  | 19.0 | even            |      | ok     |
|           | 4  | C21H14FO4S     | 381.0591 | 0.8       | 16.0   | 4        | 90.39  | 17.0 | even            |      | ok     |
|           | 5  | C16H17F4O2S2   | 381.0601 | 3.2       | 16.4   | 5        | 54.98  | 11.0 | even            |      | ok     |
|           | 6  | C14H14FN6O2S2  | 381.0598 | 2.6       | 16.4   | 6        | 63.33  | 15.0 | even            |      | ok     |
|           | 7  | C16H17N2O5S2   | 381.0573 | -3.9      | 17.1   | 7        | 45.99  | 14.0 | even            |      | ok     |
|           | 8  | C14H11F2N6O3S  | 381.0576 | -3.2      | 21.0   | 8        | 49.74  | 14.0 | even            |      | ok     |
|           | 9  | C13H18FN2O6S2  | 381.0585 | -0.9      | 26.3   | 9        | 71.07  | 10.0 | even            |      | ok     |
|           | 10 | C22H10FN4S     | 381.0605 | 4.3       | 26.5   | 10       | 33.71  | 22.0 | even            |      | ok     |
|           | 11 | C22H15F2S2     | 381.0578 | -2.8      | 27.6   | 11       | 47.80  | 19.0 | even            |      | ok     |
|           | 12 | C24H13O3S      | 381.0580 | -2.2      | 29.8   | 12       | 51.18  | 21.0 | even            |      | ok     |
|           | 13 | C14H19F2N2O2S3 | 381.0571 | -4.5      | 31.9   | 13       | 35.43  | 12.0 | even            |      | ok     |
|           | 14 | C20H13O8       | 381.0605 | 4.4       | 32.1   | 14       | 21.76  | 15.0 | even            |      | ok     |
|           | 15 | C13H21N2O5S3   | 381.0607 | 4.9       | 35.4   | 15       | 28.51  | 11.0 | even            |      | ok     |
|           | 16 | C21H11F2O5     | 381.0569 | -5.0      | 35.5   | 16       | 16.55  | 16.0 | even            |      | ok     |
|           | 17 | C16H9N6O6      | 381.0578 | -2.7      | 37.8   | 17       | 28.25  | 16.0 | even            |      | ok     |
|           | 18 | C18H12F3O6     | 381.0580 | -2.0      | 37.9   | 18       | 32.24  | 12.0 | even            |      | ok     |
|           | 19 | C17H5N10O2     | 381.0591 | 0.8       | 39.1   | 19       | 39.18  | 21.0 | even            |      | ok     |
|           | 20 | C19H8F3N4O2    | 381.0594 | 1.5       | 39.1   | 20       | 34.94  | 17.0 | even            |      | ok     |
|           | 21 | C22H7F2N4O     | 381.0582 | -1.5      | 42.6   | 21       | 31.27  | 21.0 | even            |      | ok     |
|           | 22 | C14H6FN10O3    | 381.0603 | 3.8       | 43.5   | 22       | 18.46  | 17.0 | even            |      | ok     |
|           | 23 | C16H9F4N4O3    | 381.0605 | 4.5       | 43.5   | 23       | 15.66  | 13.0 | even            |      | ok     |
|           | 24 | C13H10FN6O7    | 381.0590 | 0.3       | 47.5   | 24       | 33.61  | 12.0 | even            |      | ok     |
|           | 25 | C15H13F4O7     | 381.0592 | 1.0       | 47.5   | 25       | 30.23  | 8.0  | even            |      | ok     |
|           | 26 | C14H22FN2OS4   | 381.0594 | 1.4       | 50.3   | 26       | 42.85  | 13.0 | even            |      | ok     |
|           | 27 | C17H21N2S4     | 381.0582 | -1.6      | 52.5   | 27       | 38.15  | 17.0 | even            |      | ok     |
|           | 28 | C25H6FN4       | 381.0571 | -4.5      | 52.6   | 28       | 11.71  | 25.0 | even            |      | ok     |
| 403.0411  | 1  | C18H14F2NaO5S  | 403.0422 | 2.7       | 9.0    | 1        | 64.41  | 13.0 | even            |      | ok     |

# Mass Spectrum SmartFormula Report

| Meas. m/z | #  | Ion Formula     | m/z      | err [ppm] | mSigma | # mSigma | Score  | rdb  | e <sup>-</sup> | Conf | N-Rule |
|-----------|----|-----------------|----------|-----------|--------|----------|--------|------|----------------|------|--------|
|           | 2  | C21H13FNaO4S    | 403.0411 | -0.1      | 12.8   | 2        | 100.00 | 17.0 | even           |      | ok     |
|           | 3  | C19H15F3NaOS2   | 403.0409 | -0.7      | 13.5   | 3        | 90.06  | 15.0 | even           |      | ok     |
|           | 4  | C17H12N6NaOS2   | 403.0406 | -1.3      | 13.5   | 4        | 80.53  | 19.0 | even           |      | ok     |
|           | 5  | C16H16F4NaO2S2  | 403.0420 | 2.2       | 15.6   | 5        | 64.16  | 11.0 | even           |      | ok     |
|           | 6  | C14H13FN6NaO2S2 | 403.0418 | 1.6       | 15.6   | 6        | 72.74  | 15.0 | even           |      | ok     |
|           | 7  | C16H16N2NaO5S2  | 403.0393 | -4.6      | 16.1   | 7        | 34.00  | 14.0 | even           |      | ok     |
|           | 8  | C14H10F2N6NaO3S | 403.0395 | -4.0      | 19.8   | 8        | 37.66  | 14.0 | even           |      | ok     |
|           | 9  | C13H12N6NaO6S   | 403.0431 | 4.9       | 22.6   | 9        | 26.65  | 13.0 | even           |      | ok     |
|           | 10 | C22H9FN4NaS     | 403.0424 | 3.2       | 24.3   | 10       | 41.87  | 22.0 | even           |      | ok     |
|           | 11 | C22H14F2NaS2    | 403.0397 | -3.5      | 25.7   | 11       | 37.31  | 19.0 | even           |      | ok     |
|           | 12 | C13H17FN2NaO6S2 | 403.0404 | -1.8      | 26.4   | 12       | 55.37  | 10.0 | even           |      | ok     |
|           | 13 | C24H12NaO3S     | 403.0399 | -3.0      | 27.7   | 13       | 40.76  | 21.0 | even           |      | ok     |
|           | 14 | C20H12NaO8      | 403.0424 | 3.2       | 29.5   | 14       | 27.42  | 15.0 | even           |      | ok     |
|           | 15 | C19H18F2NaS3    | 403.0431 | 4.9       | 32.8   | 15       | 26.84  | 16.0 | even           |      | ok     |
|           | 16 | C16H8N6NaO6     | 403.0398 | -3.4      | 35.6   | 16       | 22.44  | 16.0 | even           |      | ok     |
|           | 17 | C18H11F3NaO6    | 403.0400 | -2.8      | 35.6   | 17       | 26.02  | 12.0 | even           |      | ok     |
|           | 18 | C13H20N2NaO5S3  | 403.0427 | 3.8       | 35.7   | 18       | 33.99  | 11.0 | even           |      | ok     |
|           | 19 | C17H4N10NaO2    | 403.0411 | -0.1      | 36.5   | 19       | 43.99  | 21.0 | even           |      | ok     |
|           | 20 | C19H7F3N4NaO2   | 403.0413 | 0.5       | 36.5   | 20       | 41.20  | 17.0 | even           |      | ok     |
|           | 21 | C22H6F2N4NaO    | 403.0402 | -2.3      | 40.1   | 21       | 25.86  | 21.0 | even           |      | ok     |
|           | 22 | C14H5FN10NaO3   | 403.0422 | 2.7       | 41.4   | 22       | 22.84  | 17.0 | even           |      | ok     |
|           | 23 | C16H8F4N4NaO3   | 403.0425 | 3.3       | 41.4   | 23       | 19.70  | 13.0 | even           |      | ok     |
|           | 24 | C13H9FN6NaO7    | 403.0409 | -0.6      | 45.9   | 24       | 31.21  | 12.0 | even           |      | ok     |
|           | 25 | C15H12F4NaO7    | 403.0411 | 0.0       | 45.9   | 25       | 34.42  | 8.0  | even           |      | ok     |
|           | 26 | C14H21FN2NaOS4  | 403.0413 | 0.4       | 50.4   | 26       | 46.88  | 13.0 | even           |      | ok     |
|           | 27 | C17H20N2NaS4    | 403.0402 | -2.4      | 52.2   | 27       | 29.67  | 17.0 | even           |      | ok     |

**Figure S62.** HRESIMS spectrum of compound **6p**

## Generic Display Report

### Analysis Info

Analysis Name D:\Data\Kalaba\72424000001.d  
Method tune\_low\_MS\_Service\_08\_20.m  
Sample Name PN-2-1-2-b2  
Comment Kalaba/Zehl  
Ergebnis +/- 5ppm  
ACN / MeOH + 1% H<sub>2</sub>O

Acquisition Date 20/08/2020 17:50:07

Operator msc  
Instrument maXis

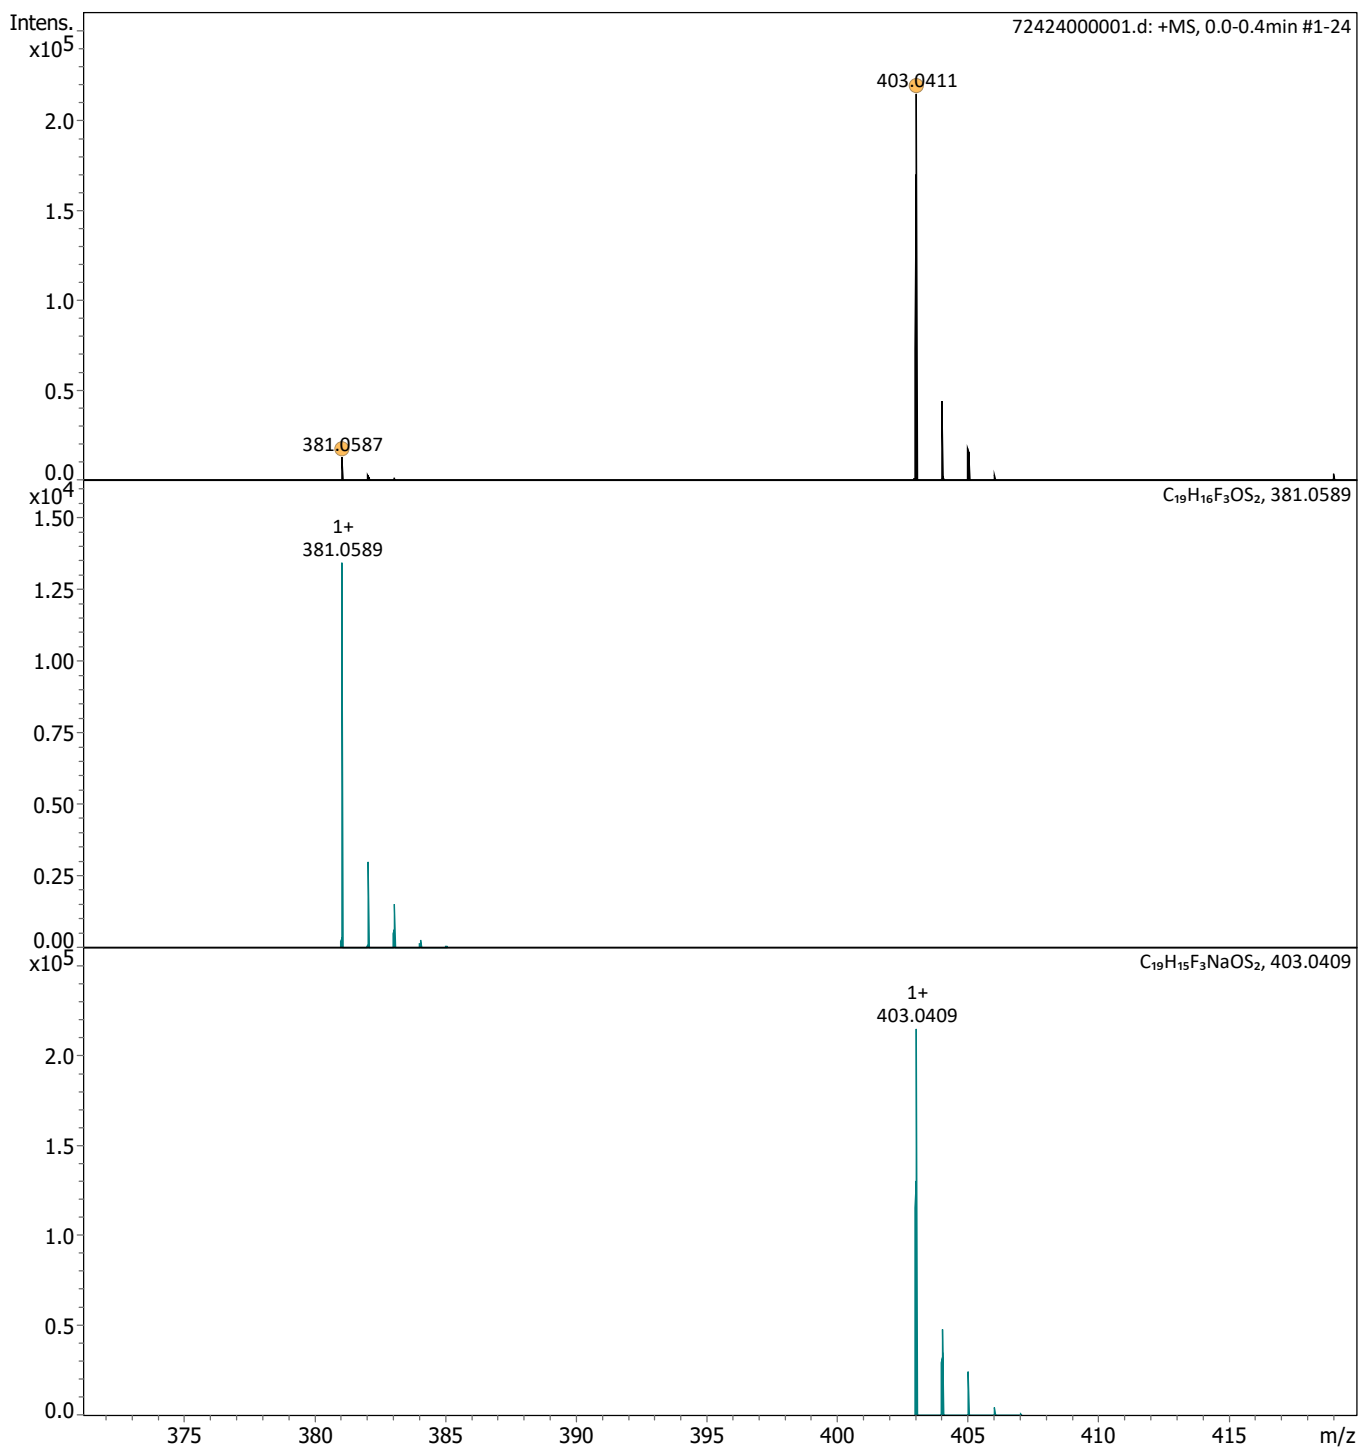

# Mass Spectrum SmartFormula Report

## Analysis Info

Analysis Name D:\Data\Kalaba\72424000001.d  
 Method tune\_low\_MS\_Service\_08\_20.m  
 Sample Name PN-2-1-2-b2  
 Comment Kalaba/Zehl  
 Ergebnis +/- 5ppm  
 ACN / MeOH + 1% H2O

Acquisition Date 20/08/2020 17:50:07

Operator msc  
 Instrument maXis 255552.00016

## Acquisition Parameter

|             |            |                      |          |                  |           |
|-------------|------------|----------------------|----------|------------------|-----------|
| Source Type | ESI        | Ion Polarity         | Positive | Set Nebulizer    | 0.4 Bar   |
| Focus       | Not active | Set Capillary        | 4200 V   | Set Dry Heater   | 180 Å°C   |
| Scan Begin  | 50 m/z     | Set End Plate Offset | -500 V   | Set Dry Gas      | 4.0 l/min |
| Scan End    | 1900 m/z   | Set Charging Voltage | 0 V      | Set Divert Valve | Source    |
|             |            | Set Corona           | 0 nA     | Set APCI Heater  | 0 Å°C     |

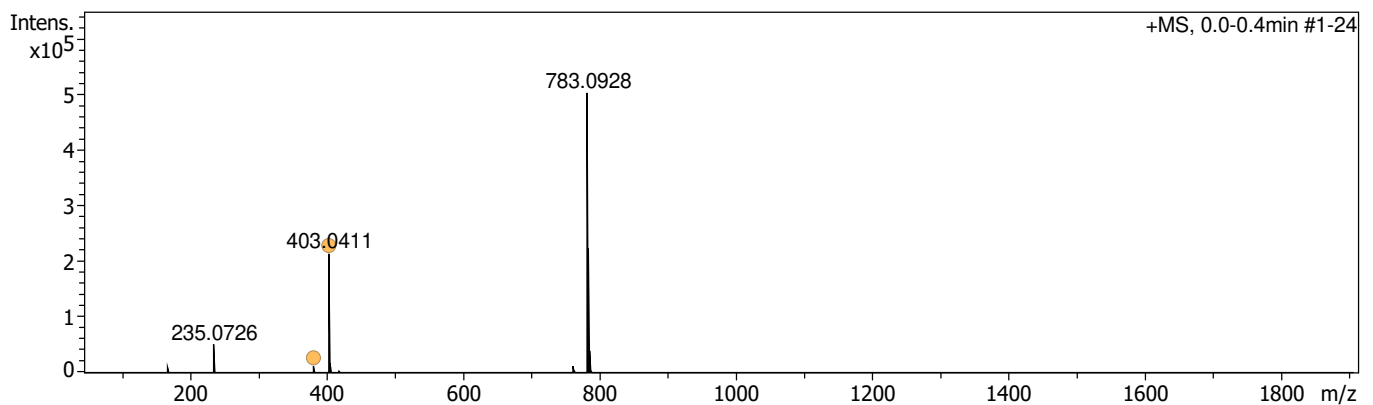

| Meas. m/z | #  | Ion Formula     | m/z      | err [ppm] | mSigma | # mSigma | Score  | rdb  | eÅ <sup>-</sup> | Conf | N-Rule |
|-----------|----|-----------------|----------|-----------|--------|----------|--------|------|-----------------|------|--------|
| 381.0587  | 1  | C21H14FO4S      | 381.0591 | 1.1       | 13.3   | 1        | 85.30  | 17.0 | even            |      | ok     |
|           | 2  | C19H16F3OS2     | 381.0589 | 0.5       | 14.0   | 2        | 92.88  | 15.0 | even            |      | ok     |
|           | 3  | C17H13N6OS2     | 381.0587 | -0.1      | 14.0   | 3        | 100.00 | 19.0 | even            |      | ok     |
|           | 4  | C18H15F2O5S     | 381.0603 | 4.1       | 15.3   | 4        | 42.68  | 13.0 | even            |      | ok     |
|           | 5  | C16H17N2O5S2    | 381.0573 | -3.6      | 18.9   | 5        | 45.23  | 14.0 | even            |      | ok     |
|           | 6  | C16H17F4O2S2    | 381.0601 | 3.5       | 19.7   | 6        | 45.01  | 11.0 | even            |      | ok     |
|           | 7  | C14H14FN6O2S2   | 381.0598 | 2.9       | 19.7   | 7        | 52.13  | 15.0 | even            |      | ok     |
|           | 8  | C22H10FN4S      | 381.0605 | 4.6       | 22.5   | 8        | 32.05  | 22.0 | even            |      | ok     |
|           | 9  | C22H15F2S2      | 381.0578 | -2.5      | 23.3   | 9        | 53.38  | 19.0 | even            |      | ok     |
|           | 10 | C24H13O3S       | 381.0580 | -1.9      | 25.3   | 10       | 57.33  | 21.0 | even            |      | ok     |
|           | 11 | C14H11F2N6O3S   | 381.0576 | -2.9      | 25.6   | 11       | 45.58  | 14.0 | even            |      | ok     |
|           | 12 | C14H19F2N2O2S3  | 381.0571 | -4.2      | 33.1   | 12       | 35.32  | 12.0 | even            |      | ok     |
|           | 13 | C20H13O8        | 381.0605 | 4.7       | 33.3   | 13       | 18.32  | 15.0 | even            |      | ok     |
|           | 14 | C21H11F2O5      | 381.0569 | -4.7      | 35.9   | 14       | 16.94  | 16.0 | even            |      | ok     |
|           | 15 | C17H5N10O2      | 381.0591 | 1.1       | 40.3   | 15       | 33.92  | 21.0 | even            |      | ok     |
|           | 16 | C19H8F3N4O2     | 381.0594 | 1.8       | 40.3   | 16       | 30.10  | 17.0 | even            |      | ok     |
|           | 17 | C16H9N6O6       | 381.0578 | -2.4      | 41.0   | 17       | 26.22  | 16.0 | even            |      | ok     |
|           | 18 | C18H12F3O6      | 381.0580 | -1.7      | 41.0   | 18       | 29.77  | 12.0 | even            |      | ok     |
|           | 19 | C22H7F2N4O      | 381.0582 | -1.2      | 41.0   | 19       | 32.73  | 21.0 | even            |      | ok     |
|           | 20 | C14H6FN10O3     | 381.0603 | 4.1       | 47.0   | 20       | 14.54  | 17.0 | even            |      | ok     |
|           | 21 | C16H9F4N4O3     | 381.0605 | 4.8       | 47.0   | 21       | 12.27  | 13.0 | even            |      | ok     |
|           | 22 | C25H6FN4        | 381.0571 | -4.2      | 49.1   | 22       | 13.40  | 25.0 | even            |      | ok     |
|           | 23 | C14H22FN2OS4    | 381.0594 | 1.7       | 50.3   | 23       | 38.17  | 13.0 | even            |      | ok     |
|           | 24 | C17H21N2S4      | 381.0582 | -1.3      | 51.2   | 24       | 39.83  | 17.0 | even            |      | ok     |
| 403.0411  | 25 | C15H13F4O7      | 381.0592 | 1.3       | 52.2   | 25       | 23.39  | 8.0  | even            |      | ok     |
|           | 1  | C18H14F2NaO5S   | 403.0422 | 2.8       | 5.1    | 1        | 71.32  | 13.0 | even            |      | ok     |
|           | 2  | C14H10F2N6NaO3S | 403.0395 | -3.9      | 14.7   | 2        | 45.16  | 14.0 | even            |      | ok     |
|           | 3  | C16H16F4NaO2S2  | 403.0420 | 2.2       | 15.1   | 3        | 66.94  | 11.0 | even            |      | ok     |
|           | 4  | C14H13FN6NaO2S2 | 403.0418 | 1.7       | 15.2   | 4        | 76.02  | 15.0 | even            |      | ok     |

# Mass Spectrum SmartFormula Report

| Meas. m/z | #  | Ion Formula      | m/z      | err [ppm] | mSigma | # mSigma | Score  | rdB  | eÅ <sup>-</sup> | Conf | N-Rule |
|-----------|----|------------------|----------|-----------|--------|----------|--------|------|-----------------|------|--------|
|           | 5  | C21H13FNaO4S     | 403.0411 | -0.0      | 16.2   | 5        | 100.00 | 17.0 | even            |      | ok     |
|           | 6  | C16H16N2NaO5S2   | 403.0393 | -4.5      | 17.5   | 6        | 35.73  | 14.0 | even            |      | ok     |
|           | 7  | C13H12N6NaO6S    | 403.0431 | 5.0       | 17.5   | 7        | 30.51  | 13.0 | even            |      | ok     |
|           | 8  | C19H15F3NaOS2    | 403.0409 | -0.6      | 17.9   | 8        | 88.21  | 15.0 | even            |      | ok     |
|           | 9  | C17H12N6NaOS2    | 403.0406 | -1.2      | 17.9   | 9        | 78.99  | 19.0 | even            |      | ok     |
|           | 10 | C13H17FN2NaO6S2  | 403.0404 | -1.7      | 24.4   | 10       | 62.21  | 10.0 | even            |      | ok     |
|           | 11 | C20H12NaO8       | 403.0424 | 3.3       | 27.3   | 11       | 29.84  | 15.0 | even            |      | ok     |
|           | 12 | C22H9FN4NaS      | 403.0424 | 3.3       | 27.9   | 12       | 39.69  | 22.0 | even            |      | ok     |
|           | 13 | C22H14F2NaS2     | 403.0397 | -3.4      | 30.9   | 13       | 35.57  | 19.0 | even            |      | ok     |
|           | 14 | C16H8N6NaO6      | 403.0398 | -3.3      | 31.2   | 14       | 26.99  | 16.0 | even            |      | ok     |
|           | 15 | C18H11F3NaO6     | 403.0400 | -2.7      | 31.3   | 15       | 31.25  | 12.0 | even            |      | ok     |
|           | 16 | C24H12NaO3S      | 403.0399 | -2.9      | 32.0   | 16       | 39.59  | 21.0 | even            |      | ok     |
|           | 17 | C14H18F2N2NaO2S3 | 403.0391 | -5.0      | 33.1   | 17       | 26.60  | 12.0 | even            |      | ok     |
|           | 18 | C17H4N10NaO2     | 403.0411 | -0.0      | 34.1   | 18       | 50.03  | 21.0 | even            |      | ok     |
|           | 19 | C19H7F3N4NaO2    | 403.0413 | 0.6       | 34.1   | 19       | 45.52  | 17.0 | even            |      | ok     |
|           | 20 | C19H18F2NaS3     | 403.0431 | 4.9       | 36.3   | 20       | 25.21  | 16.0 | even            |      | ok     |
|           | 21 | C13H20N2NaO5S3   | 403.0427 | 3.9       | 36.4   | 21       | 34.41  | 11.0 | even            |      | ok     |
|           | 22 | C14H5FN10NaO3    | 403.0422 | 2.8       | 36.6   | 22       | 26.82  | 17.0 | even            |      | ok     |
|           | 23 | C16H8F4N4NaO3    | 403.0425 | 3.4       | 36.6   | 23       | 23.10  | 13.0 | even            |      | ok     |
|           | 24 | C13H9FN6NaO7     | 403.0409 | -0.5      | 40.2   | 24       | 39.21  | 12.0 | even            |      | ok     |
|           | 25 | C15H12F4NaO7     | 403.0411 | 0.1       | 40.2   | 25       | 42.02  | 8.0  | even            |      | ok     |
|           | 26 | C22H6F2N4NaO     | 403.0402 | -2.3      | 40.5   | 26       | 27.45  | 21.0 | even            |      | ok     |
|           | 27 | C14H21FN2NaOS4   | 403.0413 | 0.5       | 52.4   | 27       | 45.84  | 13.0 | even            |      | ok     |
|           | 28 | C25H5FN4Na       | 403.0390 | -5.1      | 52.8   | 28       | 8.97   | 25.0 | even            |      | ok     |
|           | 29 | C17H20N2NaS4     | 403.0402 | -2.3      | 55.2   | 29       | 28.99  | 17.0 | even            |      | ok     |

**Figure S63.** HRESIMS spectrum of compound **7p**

## Generic Display Report

### Analysis Info

Analysis Name D:\Data\Kalaba\72425000001.d  
Method tune\_low\_MS\_Service\_08\_20.m  
Sample Name PN-2-2-1-b2  
Comment Kalaba/Zehl  
Ergebnis +/- 5ppm  
ACN / MeOH + 1% H<sub>2</sub>O

Acquisition Date 20/08/2020 17:54:56

Operator msc  
Instrument maXis

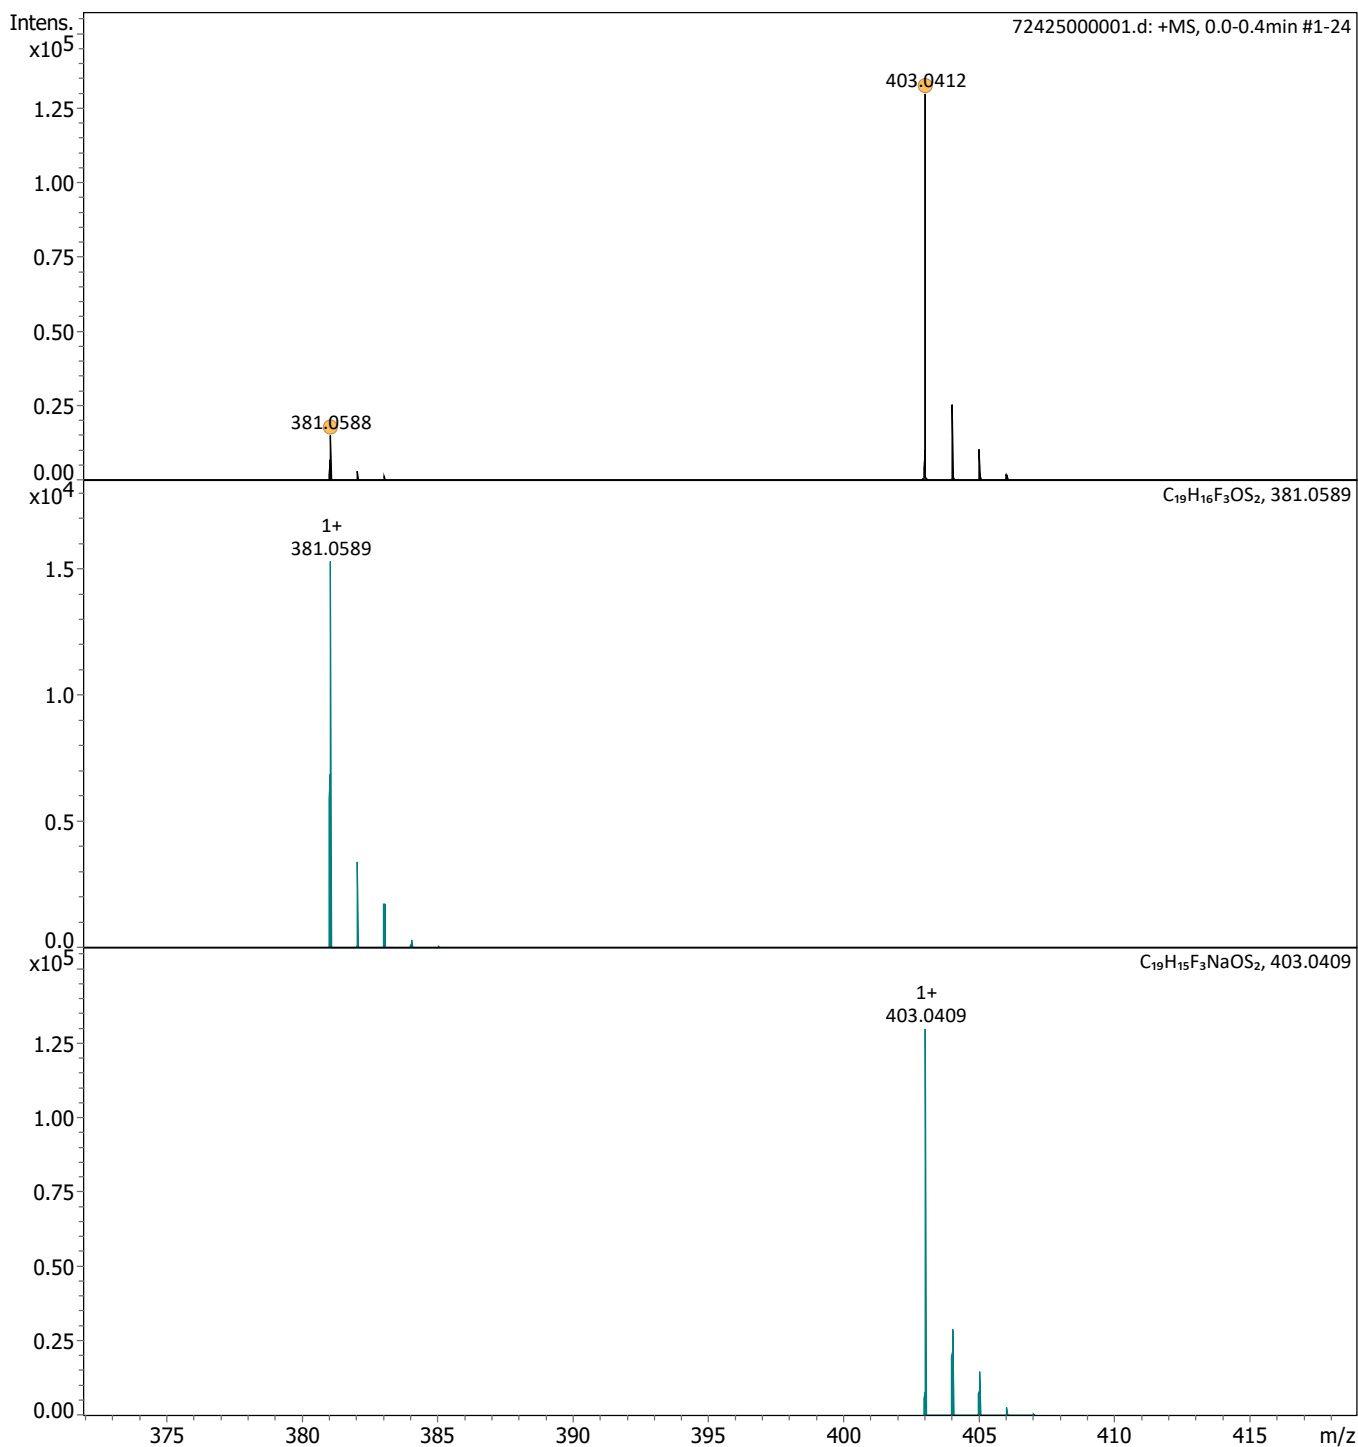

# Mass Spectrum SmartFormula Report

## Analysis Info

Analysis Name D:\Data\Kalaba\72425000001.d  
Method tune\_low\_MS\_Service\_08\_20.m  
Sample Name PN-2-2-1-b2  
Comment Kalaba/Zehl  
Ergebnis +/- 5ppm  
ACN / MeOH + 1% H2O

Acquisition Date 20/08/2020 17:54:56

Operator msc  
Instrument maXis 255552.00016

## Acquisition Parameter

|             |            |                      |          |                  |           |
|-------------|------------|----------------------|----------|------------------|-----------|
| Source Type | ESI        | Ion Polarity         | Positive | Set Nebulizer    | 0.4 Bar   |
| Focus       | Not active | Set Capillary        | 4200 V   | Set Dry Heater   | 180 Å°C   |
| Scan Begin  | 50 m/z     | Set End Plate Offset | -500 V   | Set Dry Gas      | 4.0 l/min |
| Scan End    | 1900 m/z   | Set Charging Voltage | 0 V      | Set Divert Valve | Source    |
|             |            | Set Corona           | 0 nA     | Set APCI Heater  | 0 Å°C     |

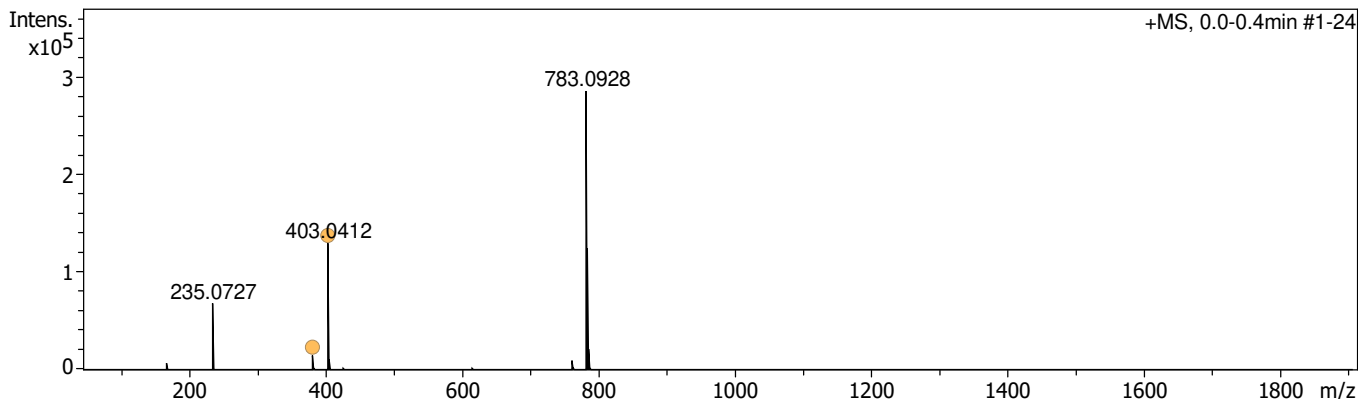

| Meas. m/z | #  | Ion Formula     | m/z      | err [ppm] | mSigma | # mSigma | Score  | rdb  | eÅ <sup>-</sup> | Conf | N-Rule |
|-----------|----|-----------------|----------|-----------|--------|----------|--------|------|-----------------|------|--------|
| 381.0588  | 1  | C19H16F3OS2     | 381.0589 | 0.3       | 13.8   | 1        | 100.00 | 15.0 | even            |      | ok     |
|           | 2  | C17H13N6OS2     | 381.0587 | -0.3      | 13.8   | 2        | 99.63  | 19.0 | even            |      | ok     |
|           | 3  | C18H15F2O5S     | 381.0603 | 3.9       | 14.7   | 3        | 47.43  | 13.0 | even            |      | ok     |
|           | 4  | C21H14FO4S      | 381.0591 | 0.9       | 14.9   | 4        | 88.97  | 17.0 | even            |      | ok     |
|           | 5  | C16H17N2O5S2    | 381.0573 | -3.8      | 17.4   | 5        | 45.36  | 14.0 | even            |      | ok     |
|           | 6  | C16H17F4O2S2    | 381.0601 | 3.3       | 17.8   | 6        | 51.16  | 11.0 | even            |      | ok     |
|           | 7  | C14H14FN6O2S2   | 381.0598 | 2.7       | 17.8   | 7        | 59.00  | 15.0 | even            |      | ok     |
|           | 8  | C14H11F2N6O3S   | 381.0576 | -3.2      | 24.4   | 8        | 45.72  | 14.0 | even            |      | ok     |
|           | 9  | C22H15F2S2      | 381.0578 | -2.7      | 24.5   | 9        | 50.80  | 19.0 | even            |      | ok     |
|           | 10 | C22H10FN4S      | 381.0605 | 4.4       | 24.5   | 10       | 33.72  | 22.0 | even            |      | ok     |
|           | 11 | C24H13O3S       | 381.0580 | -2.1      | 27.3   | 11       | 53.66  | 21.0 | even            |      | ok     |
|           | 12 | C14H19F2N2O2S3  | 381.0571 | -4.4      | 31.8   | 12       | 35.31  | 12.0 | even            |      | ok     |
|           | 13 | C20H13O8        | 381.0605 | 4.4       | 33.9   | 13       | 19.86  | 15.0 | even            |      | ok     |
|           | 14 | C21H11F2O5      | 381.0569 | -5.0      | 36.8   | 14       | 15.90  | 16.0 | even            |      | ok     |
|           | 15 | C16H9N6O6       | 381.0578 | -2.6      | 40.8   | 15       | 25.79  | 16.0 | even            |      | ok     |
|           | 16 | C18H12F3O6      | 381.0580 | -2.0      | 40.8   | 16       | 29.40  | 12.0 | even            |      | ok     |
|           | 17 | C17H5N10O2      | 381.0591 | 0.9       | 40.9   | 17       | 35.85  | 21.0 | even            |      | ok     |
|           | 18 | C19H8F3N4O2     | 381.0594 | 1.5       | 40.9   | 18       | 31.94  | 17.0 | even            |      | ok     |
|           | 19 | C22H7F2N4O      | 381.0582 | -1.5      | 42.7   | 19       | 30.81  | 21.0 | even            |      | ok     |
|           | 20 | C14H6FN10O3     | 381.0603 | 3.9       | 46.6   | 20       | 16.12  | 17.0 | even            |      | ok     |
|           | 21 | C16H9F4N4O3     | 381.0605 | 4.5       | 46.7   | 21       | 13.66  | 13.0 | even            |      | ok     |
|           | 22 | C14H22FN2OS4    | 381.0594 | 1.4       | 49.4   | 22       | 42.39  | 13.0 | even            |      | ok     |
|           | 23 | C17H21N2S4      | 381.0582 | -1.6      | 50.8   | 23       | 39.72  | 17.0 | even            |      | ok     |
|           | 24 | C15H13F4O7      | 381.0592 | 1.0       | 51.2   | 24       | 25.97  | 8.0  | even            |      | ok     |
| 403.0412  | 25 | C25H6FN4        | 381.0571 | -4.5      | 51.3   | 25       | 12.11  | 25.0 | even            |      | ok     |
|           | 1  | C18H14F2NaO5S   | 403.0422 | 2.6       | 5.6    | 1        | 83.68  | 13.0 | even            |      | ok     |
|           | 2  | C14H10F2N6NaO3S | 403.0395 | -4.1      | 10.9   | 2        | 51.43  | 14.0 | even            |      | ok     |
|           | 3  | C13H12N6NaO6S   | 403.0431 | 4.8       | 13.4   | 3        | 39.91  | 13.0 | even            |      | ok     |
|           | 4  | C16H16F4NaO2S2  | 403.0420 | 2.0       | 14.9   | 4        | 79.40  | 11.0 | even            |      | ok     |

# Mass Spectrum SmartFormula Report

| Meas. m/z | #  | Ion Formula     | m/z      | err [ppm] | mSigma | # mSigma | Score  | rdb  | e <sup>-</sup> | Conf | N-Rule |
|-----------|----|-----------------|----------|-----------|--------|----------|--------|------|----------------|------|--------|
|           | 5  | C14H13FN6NaO2S2 | 403.0418 | 1.4       | 14.9   | 5        | 89.83  | 15.0 | even           |      | ok     |
|           | 6  | C12H7F3N10NaS   | 403.0420 | 2.1       | 16.6   | 6        | 76.25  | 15.0 | even           |      | ok     |
|           | 7  | C12H12F4N6NaS2  | 403.0393 | -4.6      | 18.0   | 7        | 38.31  | 12.0 | even           |      | ok     |
|           | 8  | C16H16N2NaO5S2  | 403.0393 | -4.7      | 18.5   | 8        | 36.86  | 14.0 | even           |      | ok     |
|           | 9  | C21H13FN4O4S    | 403.0411 | -0.3      | 20.1   | 9        | 100.00 | 17.0 | even           |      | ok     |
|           | 10 | C19H15F3NaOS2   | 403.0409 | -0.8      | 21.1   | 10       | 88.97  | 15.0 | even           |      | ok     |
|           | 11 | C17H12N6NaOS2   | 403.0406 | -1.4      | 21.2   | 11       | 79.40  | 19.0 | even           |      | ok     |
|           | 12 | C13H17FN2NaO6S2 | 403.0404 | -1.9      | 22.4   | 12       | 70.00  | 10.0 | even           |      | ok     |
|           | 13 | C12H16N2NaO10S  | 403.0418 | 1.5       | 24.1   | 13       | 73.21  | 8.0  | even           |      | ok     |
|           | 14 | C20H12NaO8      | 403.0424 | 3.1       | 27.7   | 14       | 35.09  | 15.0 | even           |      | ok     |
|           | 15 | C16H8N6NaO6     | 403.0398 | -3.6      | 29.4   | 15       | 30.00  | 16.0 | even           |      | ok     |
|           | 16 | C18H11F3NaO6    | 403.0400 | -3.0      | 29.4   | 16       | 34.87  | 12.0 | even           |      | ok     |
|           | 17 | C22H9FN4NaS     | 403.0424 | 3.0       | 31.8   | 17       | 42.91  | 22.0 | even           |      | ok     |
|           | 18 | C17H4N10NaO2    | 403.0411 | -0.2      | 34.2   | 18       | 54.10  | 21.0 | even           |      | ok     |
|           | 19 | C14H5FN10NaO3   | 403.0422 | 2.6       | 34.2   | 19       | 33.84  | 17.0 | even           |      | ok     |
|           | 20 | C16H8F4N4NaO3   | 403.0425 | 3.2       | 34.2   | 20       | 29.25  | 13.0 | even           |      | ok     |
|           | 21 | C19H7F3N4NaO2   | 403.0413 | 0.4       | 34.2   | 21       | 53.01  | 17.0 | even           |      | ok     |
|           | 22 | C22H14F2NaS2    | 403.0397 | -3.6      | 34.9   | 22       | 34.14  | 19.0 | even           |      | ok     |
|           | 23 | C24H12NaO3S     | 403.0399 | -3.1      | 36.1   | 23       | 38.01  | 21.0 | even           |      | ok     |
|           | 24 | C13H20N2NaO5S3  | 403.0427 | 3.6       | 36.3   | 24       | 41.15  | 11.0 | even           |      | ok     |
|           | 25 | C13H9FN6NaO7    | 403.0409 | -0.7      | 36.4   | 25       | 46.97  | 12.0 | even           |      | ok     |
|           | 26 | C15H12F4NaO7    | 403.0411 | -0.1      | 36.4   | 26       | 52.02  | 8.0  | even           |      | ok     |
|           | 27 | C19H18F2NaS3    | 403.0431 | 4.7       | 38.6   | 27       | 28.49  | 16.0 | even           |      | ok     |
|           | 28 | C12H4F4N10NaO   | 403.0398 | -3.5      | 42.4   | 28       | 21.87  | 14.0 | even           |      | ok     |
|           | 29 | C22H6F2N4NaO    | 403.0402 | -2.5      | 42.8   | 29       | 27.56  | 21.0 | even           |      | ok     |
|           | 30 | C12H13FN2NaO11  | 403.0396 | -4.0      | 42.9   | 30       | 18.48  | 7.0  | even           |      | ok     |
|           | 31 | C14H21FN2NaOS4  | 403.0413 | 0.3       | 53.2   | 31       | 52.11  | 13.0 | even           |      | ok     |
|           | 32 | C17H20N2NaS4    | 403.0402 | -2.6      | 57.0   | 32       | 29.28  | 17.0 | even           |      | ok     |



**Figure S64.** HRESIMS spectrum of compound **8p**

## Generic Display Report

### Analysis Info

Analysis Name D:\Data\Kalaba\72426000001.d  
Method tune\_low\_MS\_Service\_08\_20.m  
Sample Name PN-2-2-2-b2  
Comment Kalaba/Zehl  
Ergebnis +/- 5ppm  
ACN / MeOH + 1% H<sub>2</sub>O

Acquisition Date 20/08/2020 18:02:57

Operator msc  
Instrument maXis

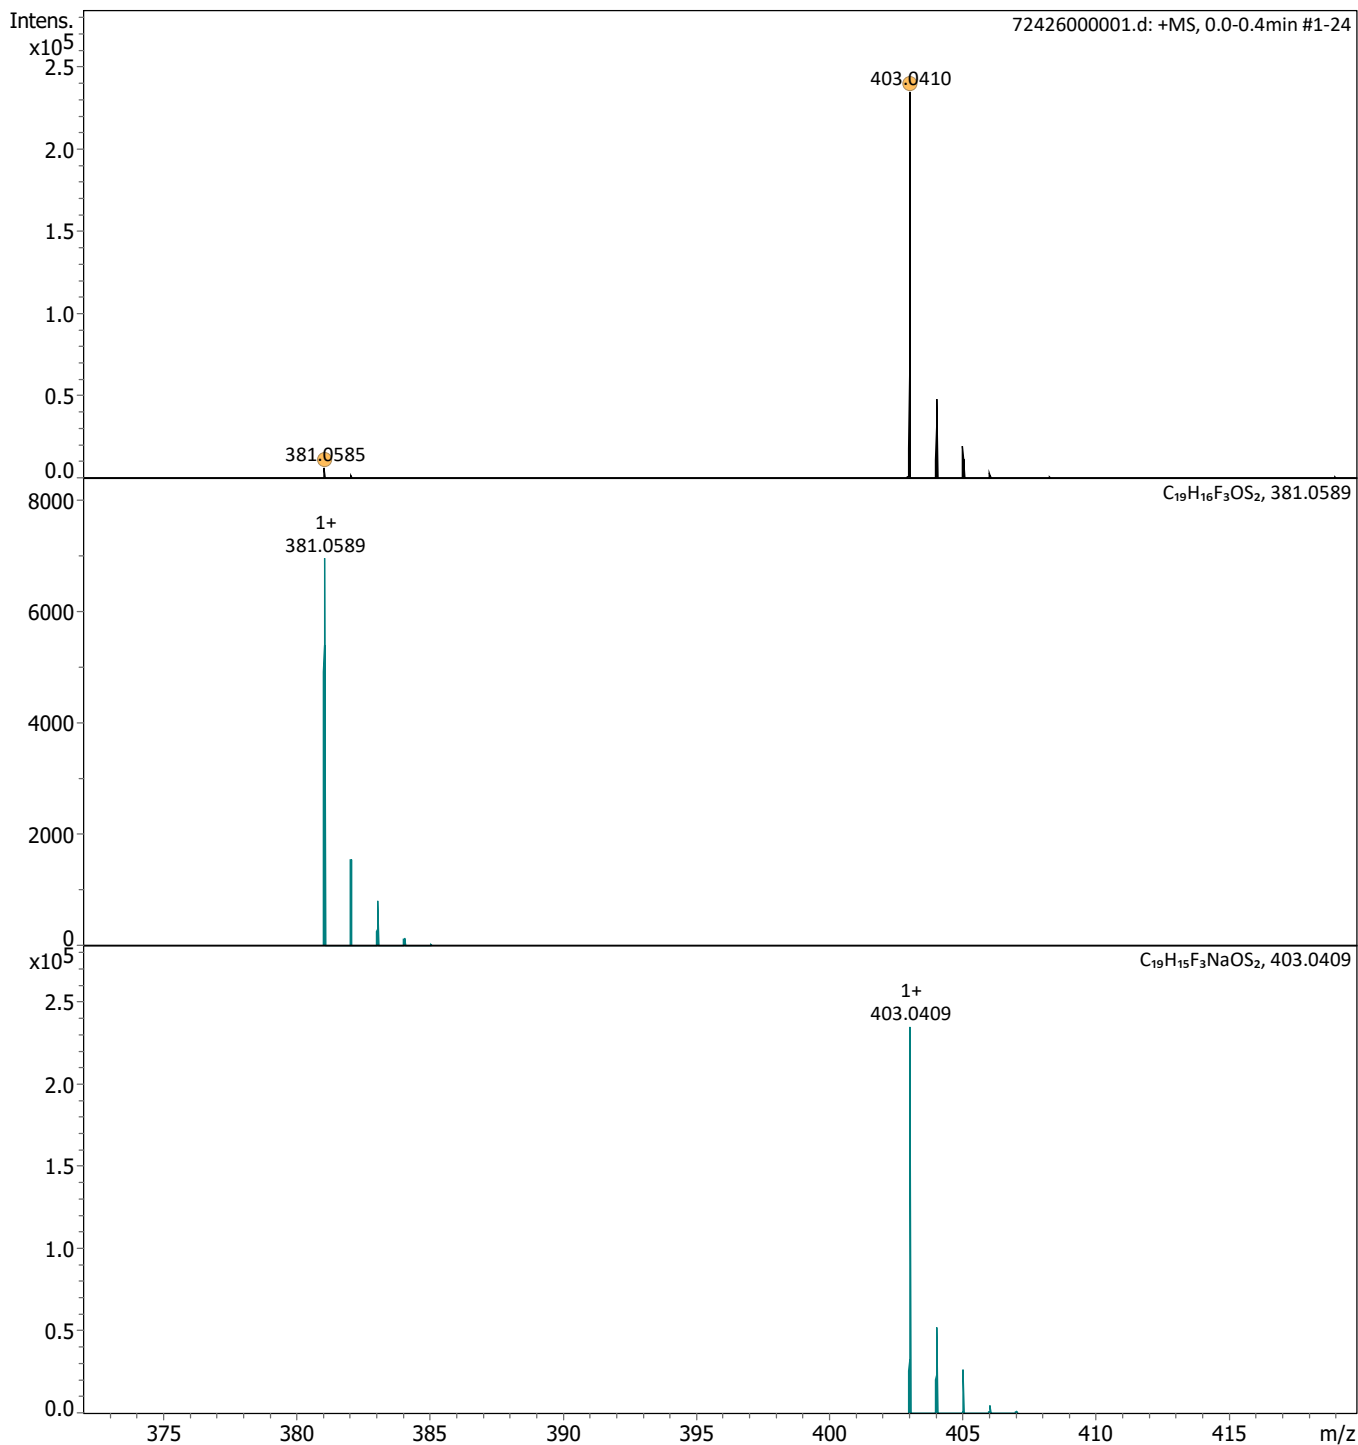

# Mass Spectrum SmartFormula Report

## Analysis Info

Analysis Name D:\Data\Kalaba\72426000001.d  
 Method tune\_low\_MS\_Service\_08\_20.m  
 Sample Name PN-2-2-2-b2  
 Comment Kalaba/Zehl  
 Ergebnis +/- 5ppm  
 ACN / MeOH + 1% H2O

Acquisition Date 20/08/2020 18:02:57

Operator msc  
 Instrument maXis 255552.00016

## Acquisition Parameter

|             |            |                      |          |                  |           |
|-------------|------------|----------------------|----------|------------------|-----------|
| Source Type | ESI        | Ion Polarity         | Positive | Set Nebulizer    | 0.4 Bar   |
| Focus       | Not active | Set Capillary        | 4200 V   | Set Dry Heater   | 180 Å°C   |
| Scan Begin  | 50 m/z     | Set End Plate Offset | -500 V   | Set Dry Gas      | 4.0 l/min |
| Scan End    | 1900 m/z   | Set Charging Voltage | 0 V      | Set Divert Valve | Source    |
|             |            | Set Corona           | 0 nA     | Set APCI Heater  | 0 Å°C     |

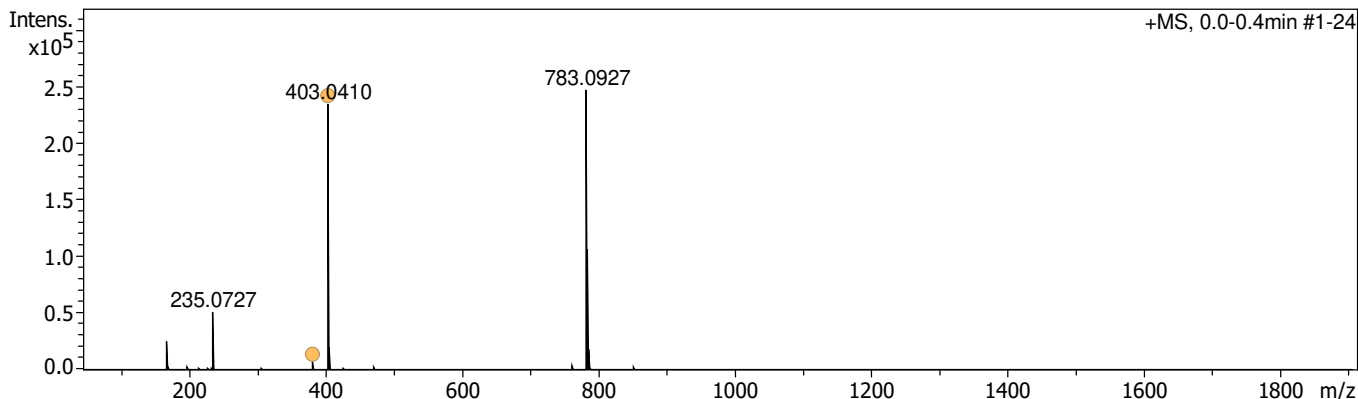

| Meas. m/z | #  | Ion Formula     | m/z      | err [ppm] | mSigma | # mSigma | Score  | rdb  | eÅ <sup>-</sup> | Conf | N-Rule |
|-----------|----|-----------------|----------|-----------|--------|----------|--------|------|-----------------|------|--------|
| 381.0585  | 1  | C19H16F3OS2     | 381.0589 | 1.2       | 13.2   | 1        | 89.69  | 15.0 | even            |      | ok     |
|           | 2  | C17H13N6OS2     | 381.0587 | 0.6       | 13.2   | 2        | 100.00 | 19.0 | even            |      | ok     |
|           | 3  | C21H14FO4S      | 381.0591 | 1.8       | 13.4   | 3        | 80.30  | 17.0 | even            |      | ok     |
|           | 4  | C19H13F4O2S     | 381.0567 | -4.6      | 17.6   | 4        | 37.85  | 14.0 | even            |      | ok     |
|           | 5  | C18H15F2O5S     | 381.0603 | 4.8       | 18.5   | 5        | 35.75  | 13.0 | even            |      | ok     |
|           | 6  | C16H17N2O5S2    | 381.0573 | -2.9      | 20.0   | 6        | 55.01  | 14.0 | even            |      | ok     |
|           | 7  | C22H15F2S2      | 381.0578 | -1.8      | 20.4   | 7        | 69.45  | 19.0 | even            |      | ok     |
|           | 8  | C16H17F4O2S2    | 381.0601 | 4.2       | 21.7   | 8        | 38.92  | 11.0 | even            |      | ok     |
|           | 9  | C24H13O3S       | 381.0580 | -1.2      | 23.1   | 9        | 72.81  | 21.0 | even            |      | ok     |
|           | 10 | C21H11F2O5      | 381.0569 | -4.1      | 37.8   | 10       | 20.45  | 16.0 | even            |      | ok     |
|           | 11 | C22H7F2N4O      | 381.0582 | -0.6      | 41.7   | 11       | 38.39  | 21.0 | even            |      | ok     |
|           | 12 | C17H5N10O2      | 381.0591 | 1.8       | 42.7   | 12       | 29.88  | 21.0 | even            |      | ok     |
|           | 13 | C19H8F3N4O2     | 381.0594 | 2.4       | 42.7   | 13       | 26.24  | 17.0 | even            |      | ok     |
|           | 14 | C16H9N6O6       | 381.0578 | -1.7      | 44.3   | 14       | 29.09  | 16.0 | even            |      | ok     |
|           | 15 | C18H12F3O6      | 381.0580 | -1.1      | 44.3   | 15       | 32.68  | 12.0 | even            |      | ok     |
|           | 16 | C25H6FN4        | 381.0571 | -3.6      | 48.2   | 16       | 17.34  | 25.0 | even            |      | ok     |
|           | 17 | C17H21N2S4      | 381.0582 | -0.6      | 49.7   | 17       | 49.96  | 17.0 | even            |      | ok     |
|           | 18 | C15H4F3N10      | 381.0567 | -4.6      | 50.6   | 18       | 12.30  | 18.0 | even            |      | ok     |
|           | 19 | C15H13F4O7      | 381.0592 | 1.9       | 56.1   | 19       | 19.42  | 8.0  | even            |      | ok     |
| 403.0410  | 1  | C18H14F2NaO5S   | 403.0422 | 3.1       | 5.2    | 1        | 67.95  | 13.0 | even            |      | ok     |
|           | 2  | C14H10F2N6NaO3S | 403.0395 | -3.5      | 14.9   | 2        | 51.12  | 14.0 | even            |      | ok     |
|           | 3  | C16H16F4NaO2S2  | 403.0420 | 2.6       | 15.1   | 3        | 64.26  | 11.0 | even            |      | ok     |
|           | 4  | C14H13FN6NaO2S2 | 403.0418 | 2.0       | 15.2   | 4        | 73.40  | 15.0 | even            |      | ok     |
|           | 5  | C21H13FN4O4S    | 403.0411 | 0.3       | 16.0   | 5        | 100.00 | 17.0 | even            |      | ok     |
|           | 6  | C16H16N2NaO5S2  | 403.0393 | -4.2      | 17.4   | 6        | 40.95  | 14.0 | even            |      | ok     |
|           | 7  | C19H15F3NaOS2   | 403.0409 | -0.2      | 17.7   | 7        | 97.40  | 15.0 | even            |      | ok     |
|           | 8  | C17H12N6NaOS2   | 403.0406 | -0.8      | 17.7   | 8        | 87.70  | 19.0 | even            |      | ok     |
|           | 9  | C13H17FN2NaO6S2 | 403.0404 | -1.3      | 24.5   | 9        | 69.02  | 10.0 | even            |      | ok     |
|           | 10 | C20H12NaO8      | 403.0424 | 3.7       | 27.3   | 10       | 28.29  | 15.0 | even            |      | ok     |

# Mass Spectrum SmartFormula Report

| Meas. m/z | #  | Ion Formula      | m/z      | err [ppm] | mSigma | # mSigma | Score | rdB  | e <sup>-</sup> | Conf | N-Rule |
|-----------|----|------------------|----------|-----------|--------|----------|-------|------|----------------|------|--------|
|           | 11 | C22H9FN4NaS      | 403.0424 | 3.6       | 27.8   | 11       | 37.84 | 22.0 | even           |      | ok     |
|           | 12 | C22H14F2NaS2     | 403.0397 | -3.1      | 30.7   | 12       | 40.44 | 19.0 | even           |      | ok     |
|           | 13 | C16H8N6NaO6      | 403.0398 | -3.0      | 31.4   | 13       | 30.40 | 16.0 | even           |      | ok     |
|           | 14 | C18H11F3NaO6     | 403.0400 | -2.4      | 31.4   | 14       | 34.98 | 12.0 | even           |      | ok     |
|           | 15 | C24H12NaO3S      | 403.0399 | -2.5      | 31.8   | 15       | 44.73 | 21.0 | even           |      | ok     |
|           | 16 | C14H18F2N2NaO2S3 | 403.0391 | -4.7      | 33.0   | 16       | 30.65 | 12.0 | even           |      | ok     |
|           | 17 | C17H4N10NaO2     | 403.0411 | 0.3       | 34.1   | 17       | 49.34 | 21.0 | even           |      | ok     |
|           | 18 | C19H7F3N4NaO2    | 403.0413 | 0.9       | 34.2   | 18       | 44.34 | 17.0 | even           |      | ok     |
|           | 19 | C13H20N2NaO5S3   | 403.0427 | 4.2       | 36.3   | 19       | 32.49 | 11.0 | even           |      | ok     |
|           | 20 | C14H5FN10NaO3    | 403.0422 | 3.2       | 36.8   | 20       | 25.48 | 17.0 | even           |      | ok     |
|           | 21 | C16H8F4N4NaO3    | 403.0425 | 3.8       | 36.8   | 21       | 21.81 | 13.0 | even           |      | ok     |
|           | 22 | C13H9FN6NaO7     | 403.0409 | -0.2      | 40.4   | 22       | 42.85 | 12.0 | even           |      | ok     |
|           | 23 | C15H12F4NaO7     | 403.0411 | 0.4       | 40.4   | 23       | 40.93 | 8.0  | even           |      | ok     |
|           | 24 | C22H6F2N4NaO     | 403.0402 | -1.9      | 40.5   | 24       | 30.72 | 21.0 | even           |      | ok     |
|           | 25 | C14H21FN2NaOS4   | 403.0413 | 0.8       | 52.3   | 25       | 44.84 | 13.0 | even           |      | ok     |
|           | 26 | C25H5FN4Na       | 403.0390 | -4.8      | 52.7   | 26       | 10.37 | 25.0 | even           |      | ok     |
|           | 27 | C17H20N2NaS4     | 403.0402 | -2.0      | 55.1   | 27       | 32.55 | 17.0 | even           |      | ok     |

**Figure S65.** HRESIMS spectrum of compound **5q**

## Generic Display Report

### Analysis Info

Analysis Name D:\MZ\maXis\_data\temp\64017000001.d  
Method tune\_low\_MS\_Service\_05\_19.m  
Sample Name PN-10 spot 1 peak 1  
Comment Predrag Kalaba  
Ergebnis: +/- 5ppm  
ACN / MeOH + 1% H<sub>2</sub>O

Acquisition Date 20/05/2019 14:29:36

Operator msc  
Instrument maXis

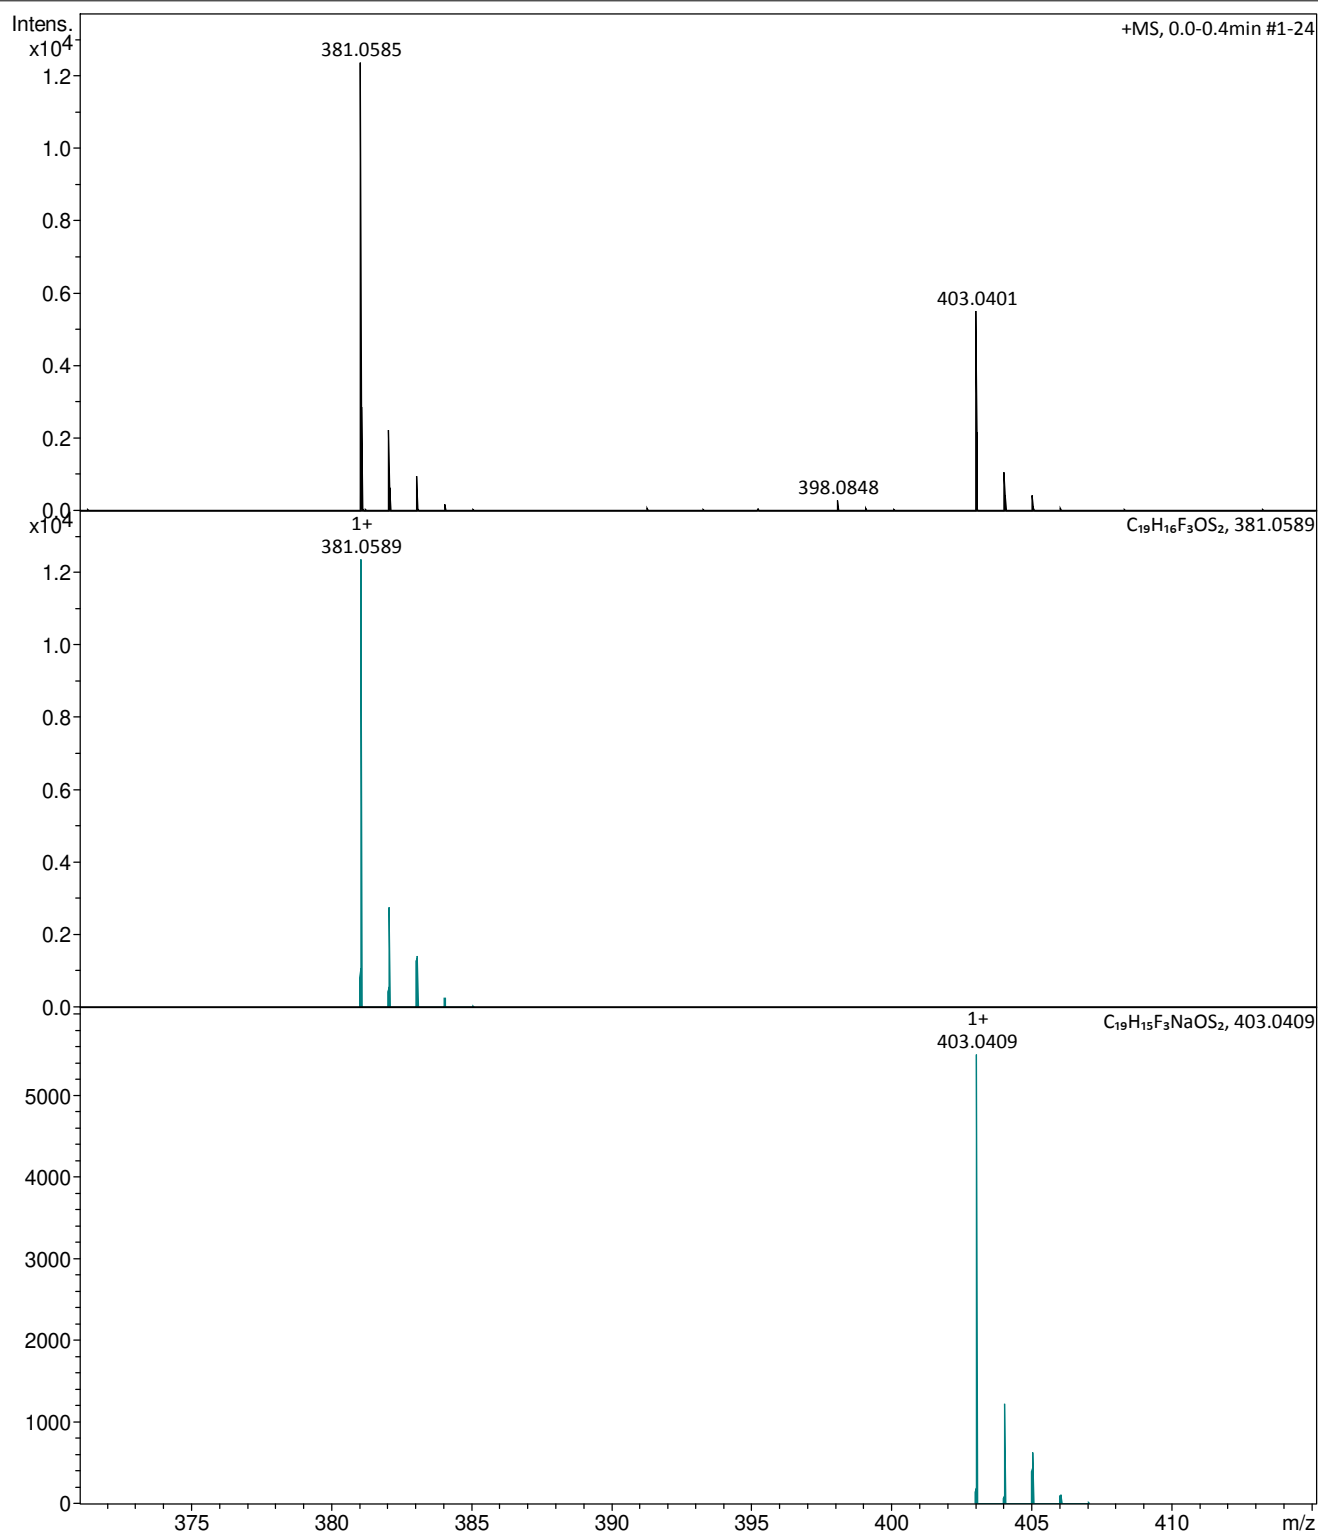

# Mass Spectrum SmartFormula Report

## Analysis Info

Analysis Name D:\MZ\maXis\_data\temp\64017000001.d  
Method tune\_low\_MS\_Service\_05\_19.m  
Sample Name PN-10 spot 1 peak 1  
Comment Predrag Kalaba  
Ergebnis: +/- 5ppm  
ACN / MeOH + 1% H2O

Acquisition Date 20/05/2019 14:29:36

Operator msc  
Instrument maXis 255552.00016

## Acquisition Parameter

|             |            |                      |          |                  |           |
|-------------|------------|----------------------|----------|------------------|-----------|
| Source Type | ESI        | Ion Polarity         | Positive | Set Nebulizer    | 0.4 Bar   |
| Focus       | Not active | Set Capillary        | 4500 V   | Set Dry Heater   | 150 °C    |
| Scan Begin  | 50 m/z     | Set End Plate Offset | -500 V   | Set Dry Gas      | 4.0 l/min |
| Scan End    | 1900 m/z   | Set Charging Voltage | 0 V      | Set Divert Valve | Source    |
|             |            | Set Corona           | 0 nA     | Set APCI Heater  | 0 °C      |

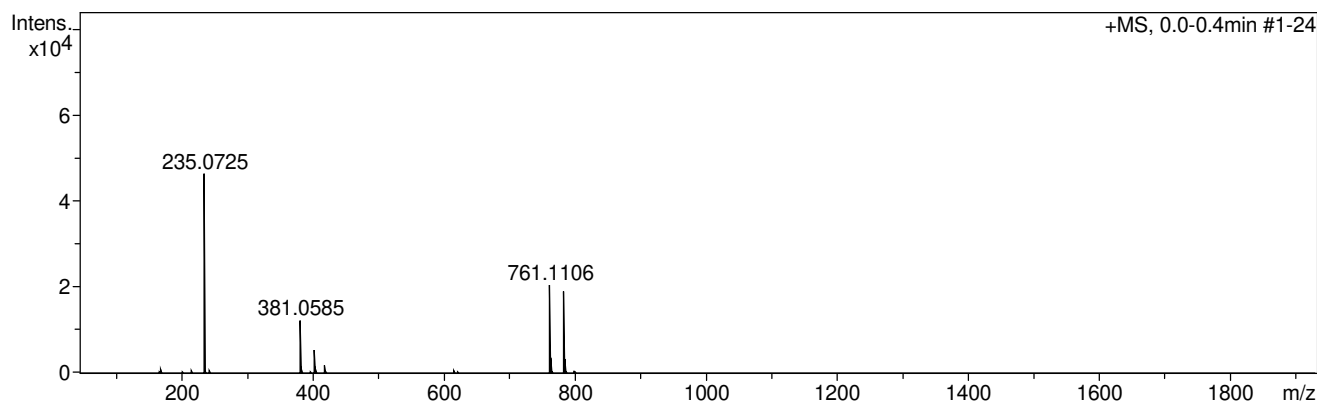

| Meas. m/z | #  | Ion Formula     | Score  | m/z      | err [mDa] | err [ppm] | mSigma | rdb  | e <sup>-</sup> | Conf | N-Rule |
|-----------|----|-----------------|--------|----------|-----------|-----------|--------|------|----------------|------|--------|
| 381.0585  | 1  | C14H11F2N6O3S   | 84.18  | 381.0576 | -0.9      | -2.3      | 5.7    | 11.5 | even           |      | ok     |
|           | 2  | C16H14F5O3S     | 95.52  | 381.0578 | 0.6       | 1.7       | 5.7    | 7.5  | even           |      | ok     |
|           | 3  | C12H8F3N10S     | 50.14  | 381.0601 | -1.6      | -4.2      | 10.0   | 12.5 | even           |      | ok     |
|           | 4  | C14H11F6N4S     | 42.28  | 381.0603 | 1.8       | 4.8       | 10.0   | 8.5  | even           |      | ok     |
|           | 5  | C18H15F2O5S     | 41.49  | 381.0603 | -1.8      | -4.7      | 12.4   | 10.5 | even           |      | ok     |
|           | 6  | C14H16F7S2      | 72.49  | 381.0576 | 0.9       | 2.3       | 14.4   | 3.5  | even           |      | ok     |
|           | 7  | C12H13F4N6S2    | 63.19  | 381.0574 | 1.1       | 2.9       | 14.5   | 7.5  | even           |      | ok     |
|           | 8  | C16H17F4O2S2    | 44.93  | 381.0601 | 1.6       | 4.2       | 16.0   | 6.5  | even           |      | ok     |
|           | 9  | C14H14FN6O2S2   | 52.62  | 381.0598 | 1.3       | 3.5       | 16.0   | 10.5 | even           |      | ok     |
|           | 10 | C13H15F6O4S     | 83.13  | 381.0590 | 0.5       | 1.3       | 16.7   | 3.5  | even           |      | ok     |
|           | 11 | C11H12F3N6O4S   | 92.88  | 381.0587 | 0.3       | 0.7       | 16.7   | 7.5  | even           |      | ok     |
|           | 12 | C19H13F4O2S     | 38.11  | 381.0567 | -1.8      | -4.7      | 17.3   | 11.5 | even           |      | ok     |
|           | 13 | C13H18FN2O6S2   | 100.00 | 381.0585 | -0.0      | -0.0      | 18.3   | 5.5  | even           |      | ok     |
|           | 14 | C11H17F8OS2     | 76.49  | 381.0588 | -0.3      | -0.7      | 25.2   | -0.5 | even           |      | ok     |
|           | 15 | C19H16F3OS2     | 70.35  | 381.0589 | 0.4       | 1.2       | 25.6   | 10.5 | even           |      | ok     |
|           | 16 | C21H14FO4S      | 59.47  | 381.0591 | 0.7       | 1.7       | 28.3   | 14.5 | even           |      | ok     |
|           | 17 | C14H19F2N2O2S3  | 33.65  | 381.0571 | 1.4       | 3.5       | 35.3   | 5.5  | even           |      | ok     |
|           | 18 | C11H20F3N2O3S3  | 60.83  | 381.0583 | 0.2       | 0.5       | 35.9   | 1.5  | even           |      | ok     |
|           | 19 | C22H15F2S2      | 44.79  | 381.0578 | -0.7      | -1.8      | 38.7   | 14.5 | even           |      | ok     |
|           | 20 | C14H22FN2OS4    | 24.47  | 381.0594 | -0.9      | -2.3      | 55.9   | 4.5  | even           |      | ok     |
| 403.0401  | 1  | C14H10F2N6NaO3S | 89.23  | 403.0395 | -0.6      | -1.4      | 7.4    | 11.5 | even           |      | ok     |
|           | 2  | C16H13F5NaO3S   | 100.00 | 403.0398 | -0.3      | -0.8      | 7.4    | 7.5  | even           |      | ok     |
|           | 3  | C17H9FN6NaO2S   | 41.02  | 403.0384 | 1.7       | 4.3       | 12.4   | 15.5 | even           |      | ok     |
|           | 4  | C19H12F4NaO2S   | 48.31  | 403.0386 | 1.5       | 3.7       | 12.5   | 11.5 | even           |      | ok     |
|           | 5  | C12H7F3N10NaS   | 35.40  | 403.0420 | 1.9       | 4.7       | 12.9   | 12.5 | even           |      | ok     |
|           | 6  | C16H16F4NaO2S2  | 33.80  | 403.0420 | -1.9      | -4.7      | 15.6   | 6.5  | even           |      | ok     |
|           | 7  | C14H13FN6NaO2S2 | 40.16  | 403.0418 | -1.7      | -4.1      | 15.6   | 10.5 | even           |      | ok     |
|           | 8  | C13H14F2N2NaO7S | 32.78  | 403.0382 | -1.9      | -4.7      | 16.6   | 6.5  | even           |      | ok     |
|           | 9  | C14H15F7NaS2    | 74.11  | 403.0396 | 0.5       | 1.4       | 17.6   | 3.5  | even           |      | ok     |
|           | 10 | C12H12F4N6NaS2  | 65.47  | 403.0393 | -0.8      | -2.0      | 17.7   | 7.5  | even           |      | ok     |
|           | 11 | C13H17FN2NaO6S2 | 77.72  | 403.0404 | 0.3       | 0.8       | 20.5   | 5.5  | even           |      | ok     |
|           | 12 | C13H14F6NaO4S   | 59.51  | 403.0409 | 0.8       | 2.0       | 21.6   | 3.5  | even           |      | ok     |
|           | 13 | C11H11F3N6NaO4S | 67.34  | 403.0407 | -0.6      | -1.4      | 21.6   | 7.5  | even           |      | ok     |
|           | 14 | C19H15F3NaOS2   | 60.08  | 403.0409 | -0.8      | -1.9      | 22.6   | 10.5 | even           |      | ok     |

## Mass Spectrum SmartFormula Report

| Meas. m/z | #  | Ion Formula      | Score | m/z      | err [mDa] | err [ppm] | mSigma | rdb  | e <sup>-</sup> Conf | N-Rule |
|-----------|----|------------------|-------|----------|-----------|-----------|--------|------|---------------------|--------|
|           | 15 | C21H13FNaO4S     | 52.68 | 403.0411 | 1.0       | 2.4       | 23.2   | 14.5 | even                | ok     |
|           | 16 | C11H16F8NaOS2    | 54.74 | 403.0407 | 0.6       | 1.5       | 30.1   | -0.5 | even                | ok     |
|           | 17 | C11H13F9NaO2S    | 27.24 | 403.0385 | 1.6       | 4.1       | 33.4   | 0.5  | even                | ok     |
|           | 18 | C22H14F2NaS2     | 53.60 | 403.0397 | -0.4      | -1.0      | 34.9   | 14.5 | even                | ok     |
|           | 19 | C14H18F2N2NaO2S3 | 37.52 | 403.0391 | -1.0      | -2.6      | 35.6   | 5.5  | even                | ok     |
|           | 20 | C11H19F3N2NaO3S3 | 56.00 | 403.0402 | -0.1      | -0.3      | 38.0   | 1.5  | even                | ok     |
|           | 21 | C14H21FN2NaOS4   | 19.12 | 403.0413 | 1.2       | 2.9       | 55.7   | 4.5  | even                | ok     |

Figure S66. HRESIMS spectrum of compound 6q

## Generic Display Report

### Analysis Info

Analysis Name D:\MZ\maXis\_data\temp\64018000001.d  
Method tune\_low\_MS\_Service\_05\_19.m  
Sample Name PN-10 spot 1 peak 2  
Comment Predrag Kalaba  
Ergebnis: +/- 5ppm  
ACN / MeOH + 1% H2O

Acquisition Date 20/05/2019 14:33:22

Operator msc  
Instrument maXis

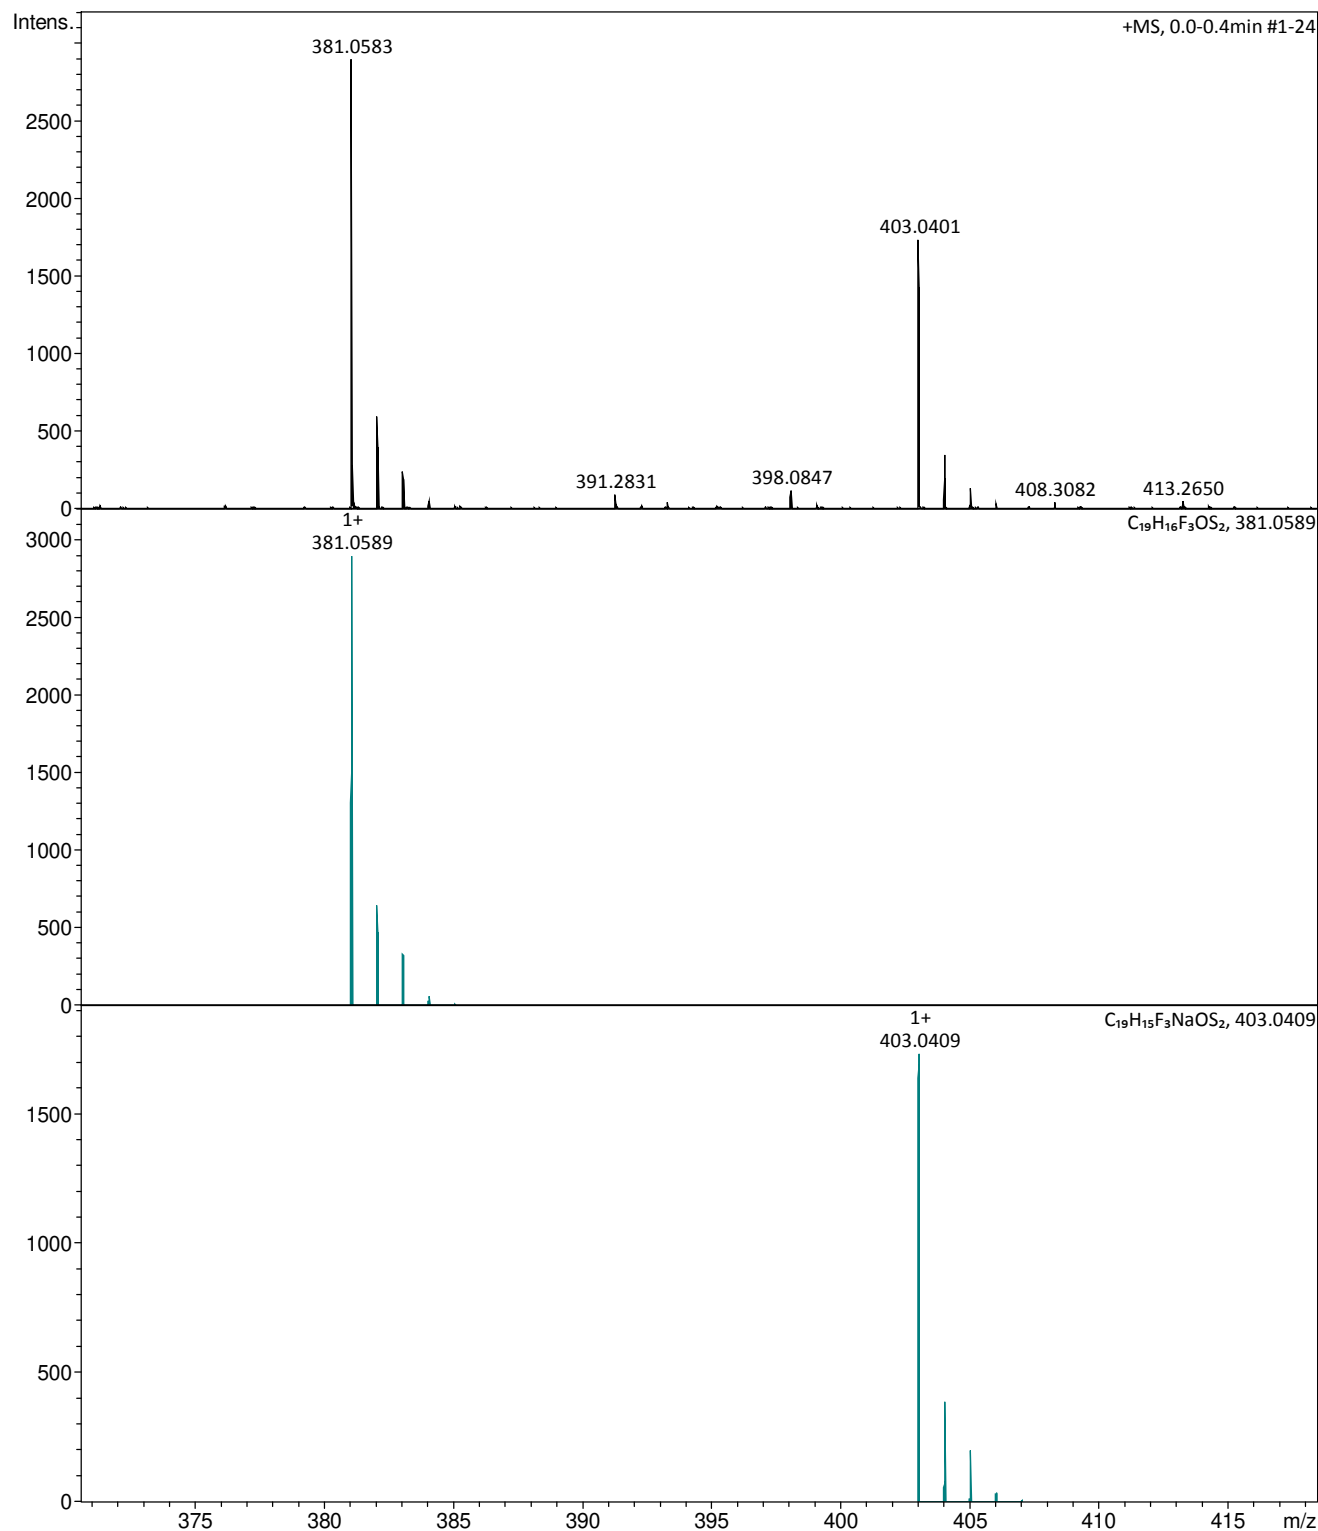

# Mass Spectrum SmartFormula Report

## Analysis Info

Analysis Name D:\MZ\maXis\_data\temp\64018000001.d  
 Method tune\_low\_MS\_Service\_05\_19.m  
 Sample Name PN-10 spot 1 peak 2  
 Comment Predrag Kalaba  
 Ergebnis: +/- 5ppm  
 ACN / MeOH + 1% H2O

Acquisition Date 20/05/2019 14:33:22

Operator msc  
 Instrument maXis 255552.00016

## Acquisition Parameter

|             |            |                      |          |                  |           |
|-------------|------------|----------------------|----------|------------------|-----------|
| Source Type | ESI        | Ion Polarity         | Positive | Set Nebulizer    | 0.4 Bar   |
| Focus       | Not active | Set Capillary        | 4500 V   | Set Dry Heater   | 150 °C    |
| Scan Begin  | 50 m/z     | Set End Plate Offset | -500 V   | Set Dry Gas      | 4.0 l/min |
| Scan End    | 1900 m/z   | Set Charging Voltage | 0 V      | Set Divert Valve | Source    |
|             |            | Set Corona           | 0 nA     | Set APCI Heater  | 0 °C      |

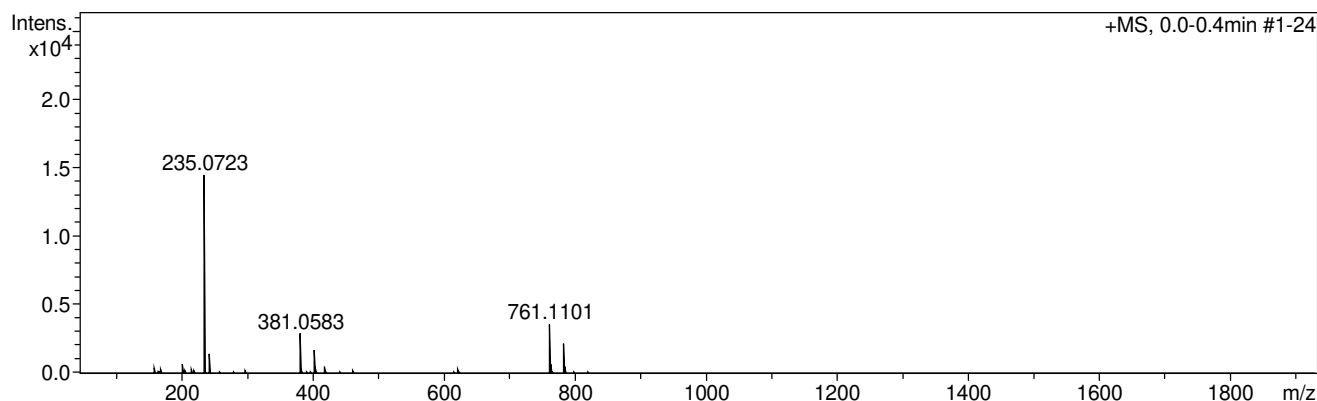

| Meas. m/z | #  | Ion Formula     | Score  | m/z      | err [mDa] | err [ppm] | mSigma | rdb  | e <sup>-</sup> | Conf | N-Rule |
|-----------|----|-----------------|--------|----------|-----------|-----------|--------|------|----------------|------|--------|
| 381.0583  | 1  | C17H10FN6O2S    | 39.57  | 381.0564 | -1.8      | -4.8      | 8.5    | 15.5 | even           |      | ok     |
|           | 2  | C19H13F4O2S     | 46.86  | 381.0567 | -1.6      | -4.2      | 8.5    | 11.5 | even           |      | ok     |
|           | 3  | C16H17F4O2S2    | 46.28  | 381.0601 | 1.8       | 4.7       | 13.9   | 6.5  | even           |      | ok     |
|           | 4  | C14H14FN6O2S2   | 54.68  | 381.0598 | 1.5       | 4.0       | 13.9   | 10.5 | even           |      | ok     |
|           | 5  | C16H14F5O3S     | 80.12  | 381.0578 | 0.4       | 1.2       | 14.9   | 7.5  | even           |      | ok     |
|           | 6  | C14H11F2N6O3S   | 71.14  | 381.0576 | -0.7      | -1.8      | 14.9   | 11.5 | even           |      | ok     |
|           | 7  | C16H17N2O5S2    | 76.02  | 381.0573 | 0.9       | 2.5       | 15.9   | 9.5  | even           |      | ok     |
|           | 8  | C21H14FO4S      | 63.63  | 381.0591 | 0.9       | 2.2       | 16.0   | 14.5 | even           |      | ok     |
|           | 9  | C19H16F3OS2     | 89.01  | 381.0589 | -0.6      | -1.7      | 16.1   | 10.5 | even           |      | ok     |
|           | 10 | C17H13N6OS2     | 100.00 | 381.0587 | -0.4      | -1.0      | 16.1   | 14.5 | even           |      | ok     |
|           | 11 | C14H16F7S2      | 63.24  | 381.0576 | 0.7       | 1.7       | 21.1   | 3.5  | even           |      | ok     |
|           | 12 | C13H18FN2O6S2   | 95.85  | 381.0585 | 0.2       | 0.5       | 22.2   | 5.5  | even           |      | ok     |
|           | 13 | C22H15F2S2      | 73.95  | 381.0578 | -0.5      | -1.3      | 27.5   | 14.5 | even           |      | ok     |
|           | 14 | C13H15F6O4S     | 51.15  | 381.0590 | 0.7       | 1.8       | 29.6   | 3.5  | even           |      | ok     |
|           | 15 | C24H13O3S       | 59.03  | 381.0580 | -0.3      | -0.8      | 31.8   | 18.5 | even           |      | ok     |
|           | 16 | C14H19F2N2O2S3  | 45.25  | 381.0571 | 1.2       | 3.0       | 33.2   | 5.5  | even           |      | ok     |
|           | 17 | C14H22FN2OS4    | 27.63  | 381.0594 | -1.1      | -2.8      | 52.5   | 4.5  | even           |      | ok     |
| 403.0401  | 18 | C17H21N2S4      | 41.62  | 381.0582 | -0.1      | -0.2      | 55.2   | 8.5  | even           |      | ok     |
|           | 1  | C17H9FN6NaO2S   | 46.37  | 403.0384 | 1.8       | 4.3       | 9.2    | 15.5 | even           |      | ok     |
|           | 2  | C19H12F4NaO2S   | 54.71  | 403.0386 | -1.5      | -3.8      | 9.3    | 11.5 | even           |      | ok     |
|           | 3  | C16H13F5NaO3S   | 100.00 | 403.0398 | -0.4      | -0.9      | 11.3   | 7.5  | even           |      | ok     |
|           | 4  | C14H10F2N6NaO3S | 89.08  | 403.0395 | -0.6      | -1.5      | 11.3   | 11.5 | even           |      | ok     |
|           | 5  | C16H16F4NaO2S2  | 37.96  | 403.0420 | 1.9       | 4.6       | 15.6   | 6.5  | even           |      | ok     |
|           | 6  | C14H13FN6NaO2S2 | 45.01  | 403.0418 | -1.6      | -4.0      | 15.6   | 10.5 | even           |      | ok     |
|           | 7  | C12H7F3N10NaS   | 36.73  | 403.0420 | -1.9      | -4.6      | 16.8   | 12.5 | even           |      | ok     |
|           | 8  | C16H16N2NaO5S2  | 67.58  | 403.0393 | -0.9      | -2.1      | 18.5   | 9.5  | even           |      | ok     |
|           | 9  | C21H13FNaO4S    | 64.27  | 403.0411 | -0.9      | -2.3      | 19.0   | 14.5 | even           |      | ok     |
|           | 10 | C19H15F3NaOS2   | 70.99  | 403.0409 | -0.7      | -1.8      | 19.8   | 10.5 | even           |      | ok     |
|           | 11 | C17H12N6NaOS2   | 80.03  | 403.0406 | 0.5       | 1.2       | 19.9   | 14.5 | even           |      | ok     |
|           | 12 | C14H15F7NaS2    | 75.04  | 403.0396 | 0.6       | 1.5       | 20.4   | 3.5  | even           |      | ok     |
|           | 13 | C12H12F4N6NaS2  | 66.19  | 403.0393 | 0.8       | 2.0       | 20.4   | 7.5  | even           |      | ok     |
|           | 14 | C13H14F2N2NaO7S | 31.68  | 403.0382 | 1.9       | 4.8       | 21.1   | 6.5  | even           |      | ok     |
|           | 15 | C13H17FN2NaO6S2 | 82.93  | 403.0404 | -0.3      | -0.7      | 22.3   | 5.5  | even           |      | ok     |
|           | 16 | C12H16N2NaO10S  | 35.86  | 403.0418 | -1.6      | -4.1      | 25.5   | 5.5  | even           |      | ok     |



## Mass Spectrum SmartFormula Report

| Meas. m/z | #  | Ion Formula      | Score | m/z      | err [mDa] | err [ppm] | mSigma | rdb  | e <sup>-</sup> Conf | N-Rule |
|-----------|----|------------------|-------|----------|-----------|-----------|--------|------|---------------------|--------|
|           | 17 | C13H14F6NaO4S    | 59.92 | 403.0409 | 0.8       | 1.9       | 26.1   | 3.5  | even                | ok     |
|           | 18 | C22H14F2NaS2     | 62.91 | 403.0397 | -0.4      | -1.1      | 31.3   | 14.5 | even                | ok     |
|           | 19 | C24H12NaO3S      | 63.17 | 403.0399 | 0.2       | 0.5       | 35.0   | 18.5 | even                | ok     |
|           | 20 | C14H18F2N2NaO2S3 | 40.29 | 403.0391 | 1.1       | 2.7       | 35.4   | 5.5  | even                | ok     |
|           | 21 | C14H21FN2NaOS4   | 21.79 | 403.0413 | 1.2       | 2.9       | 55.1   | 4.5  | even                | ok     |
|           | 22 | C17H20N2NaS4     | 34.51 | 403.0402 | 0.0       | 0.0       | 58.4   | 8.5  | even                | ok     |

**Figure S67.** HRESIMS spectrum of compound **7q**

## Generic Display Report

### Analysis Info

Analysis Name D:\MZ\maXis\_data\temp\64019000001.d  
Method tune\_low\_MS\_Service\_05\_19.m  
Sample Name PN-10 spot 2 peak 1  
Comment Predrag Kalaba  
Ergebnis: +/- 5ppm  
ACN / MeOH + 1% H<sub>2</sub>O

Acquisition Date 20/05/2019 14:38:15

Operator msc  
Instrument maXis

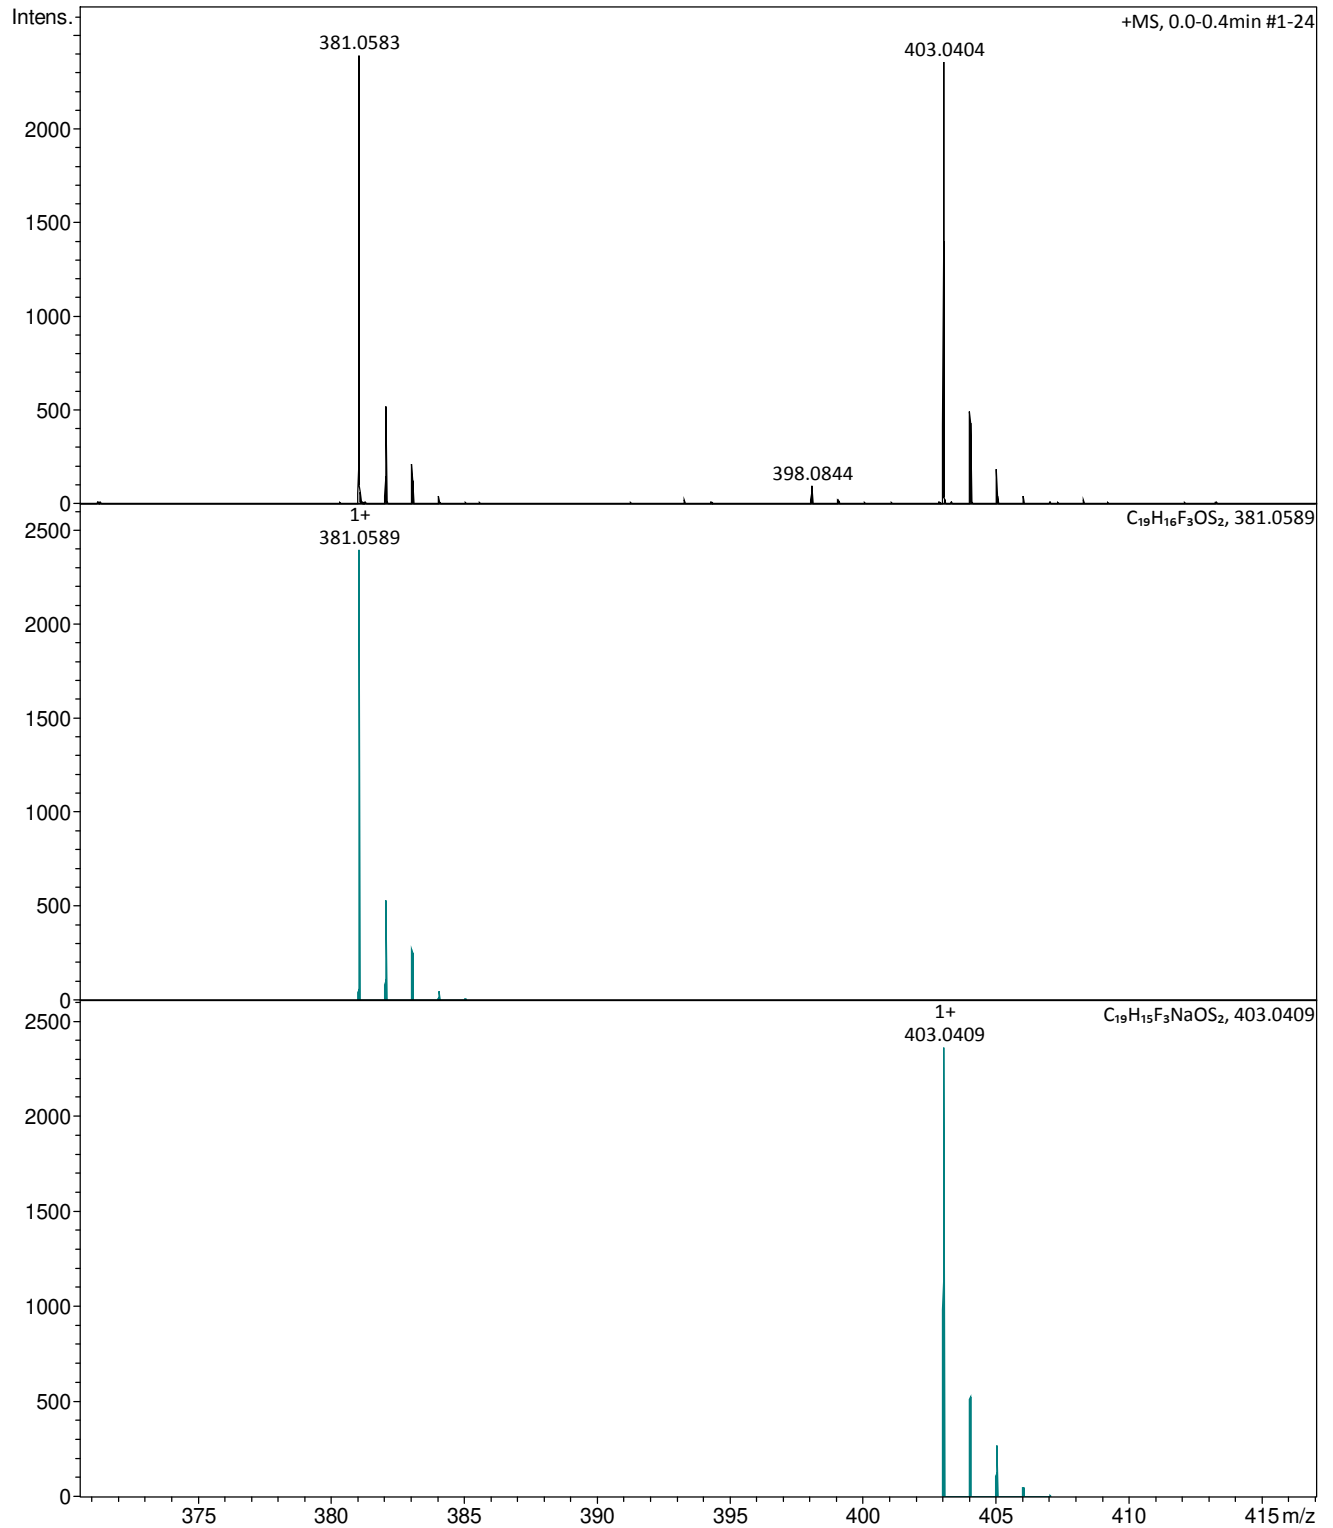

# Mass Spectrum SmartFormula Report

## Analysis Info

Analysis Name D:\MZ\maXis\_data\temp\64019000001.d  
Method tune\_low\_MS\_Service\_05\_19.m  
Sample Name PN-10 spot 2 peak 1  
Comment Predrag Kalaba  
Ergebnis: +/- 5ppm  
ACN / MeOH + 1% H2O

Acquisition Date 20/05/2019 14:38:15

Operator msc  
Instrument maXis 255552.00016

## Acquisition Parameter

|             |            |                      |          |                  |           |
|-------------|------------|----------------------|----------|------------------|-----------|
| Source Type | ESI        | Ion Polarity         | Positive | Set Nebulizer    | 0.4 Bar   |
| Focus       | Not active | Set Capillary        | 4500 V   | Set Dry Heater   | 150 °C    |
| Scan Begin  | 50 m/z     | Set End Plate Offset | -500 V   | Set Dry Gas      | 4.0 l/min |
| Scan End    | 1900 m/z   | Set Charging Voltage | 0 V      | Set Divert Valve | Source    |
|             |            | Set Corona           | 0 nA     | Set APCI Heater  | 0 °C      |

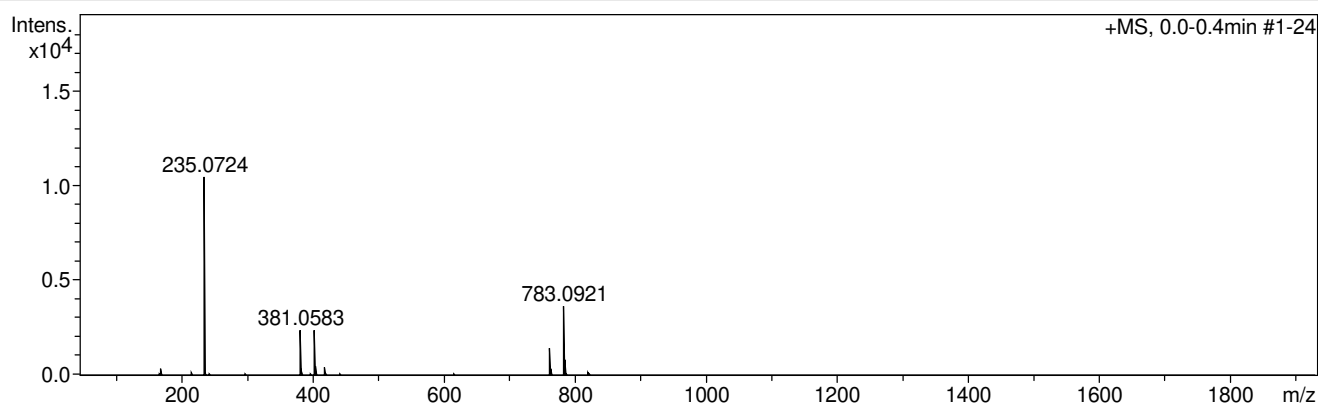

| Meas. m/z | #  | Ion Formula      | Score  | m/z      | err [mDa] | err [ppm] | mSigma | rdb  | e <sup>-</sup> | Conf | N-Rule |
|-----------|----|------------------|--------|----------|-----------|-----------|--------|------|----------------|------|--------|
| 381.0583  | 1  | C17H10FN6O2S     | 43.29  | 381.0564 | 1.9       | 4.9       | 9.4    | 15.5 | even           |      | ok     |
|           | 2  | C19H13F4O2S      | 51.37  | 381.0567 | 1.6       | 4.3       | 9.4    | 11.5 | even           |      | ok     |
|           | 3  | C21H14FO4S       | 81.26  | 381.0591 | 0.8       | 2.1       | 11.7   | 14.5 | even           |      | ok     |
|           | 4  | C19H16F3OS2      | 89.17  | 381.0589 | 0.6       | 1.6       | 12.6   | 10.5 | even           |      | ok     |
|           | 5  | C17H13N6OS2      | 100.00 | 381.0587 | 0.4       | 0.9       | 12.7   | 14.5 | even           |      | ok     |
|           | 6  | C16H17F4O2S2     | 42.54  | 381.0601 | 1.7       | 4.6       | 15.3   | 6.5  | even           |      | ok     |
|           | 7  | C14H14FN6O2S2    | 50.16  | 381.0598 | -1.5      | -3.9      | 15.3   | 10.5 | even           |      | ok     |
|           | 8  | C16H17N2O5S2     | 68.41  | 381.0573 | -1.0      | -2.6      | 15.7   | 9.5  | even           |      | ok     |
|           | 9  | C16H14F5O3S      | 80.57  | 381.0578 | -0.5      | -1.3      | 20.2   | 7.5  | even           |      | ok     |
|           | 10 | C14H11F2N6O3S    | 71.41  | 381.0576 | 0.7       | 1.9       | 20.2   | 11.5 | even           |      | ok     |
|           | 11 | C22H15F2S2       | 74.05  | 381.0578 | 0.5       | 1.4       | 22.8   | 14.5 | even           |      | ok     |
|           | 12 | C14H16F7S2       | 65.06  | 381.0576 | 0.7       | 1.8       | 25.0   | 3.5  | even           |      | ok     |
|           | 13 | C24H13O3S        | 75.07  | 381.0580 | 0.3       | 0.9       | 26.7   | 18.5 | even           |      | ok     |
|           | 14 | C14H19F2N2O2S3   | 40.55  | 381.0571 | 1.2       | 3.1       | 33.2   | 5.5  | even           |      | ok     |
|           | 15 | C14H22FN2OS4     | 26.78  | 381.0594 | 1.0       | 2.7       | 51.5   | 4.5  | even           |      | ok     |
| 403.0404  | 16 | C17H21N2S4       | 40.30  | 381.0582 | -0.1      | -0.3      | 52.9   | 8.5  | even           |      | ok     |
|           | 1  | C18H14F2NaO5S    | 50.35  | 403.0422 | -1.8      | -4.5      | 4.6    | 10.5 | even           |      | ok     |
|           | 2  | C17H9FN6NaO2S    | 42.94  | 403.0384 | -2.0      | -5.0      | 6.4    | 15.5 | even           |      | ok     |
|           | 3  | C19H12F4NaO2S    | 51.26  | 403.0386 | -1.8      | -4.4      | 6.4    | 11.5 | even           |      | ok     |
|           | 4  | C21H13FNaO4S     | 85.52  | 403.0411 | -0.7      | -1.7      | 14.3   | 14.5 | even           |      | ok     |
|           | 5  | C16H13F5NaO3S    | 86.51  | 403.0398 | 0.6       | 1.5       | 15.4   | 7.5  | even           |      | ok     |
|           | 6  | C14H10F2N6NaO3S  | 76.26  | 403.0395 | 0.9       | 2.1       | 15.4   | 11.5 | even           |      | ok     |
|           | 7  | C16H16F4NaO2S2   | 47.02  | 403.0420 | 1.6       | 4.0       | 16.4   | 6.5  | even           |      | ok     |
|           | 8  | C14H13FN6NaO2S2  | 55.11  | 403.0418 | -1.4      | -3.4      | 16.5   | 10.5 | even           |      | ok     |
|           | 9  | C19H15F3NaOS2    | 89.64  | 403.0409 | -0.5      | -1.2      | 17.2   | 10.5 | even           |      | ok     |
|           | 10 | C17H12N6NaOS2    | 100.00 | 403.0406 | 0.2       | 0.6       | 17.3   | 14.5 | even           |      | ok     |
|           | 11 | C16H16N2NaO5S2   | 62.38  | 403.0393 | -1.1      | -2.8      | 18.3   | 9.5  | even           |      | ok     |
|           | 12 | C14H10F6Na4NaS   | 35.74  | 403.0423 | 1.9       | 4.6       | 21.0   | 8.5  | even           |      | ok     |
|           | 13 | C14H15F7NaS2     | 64.78  | 403.0396 | -0.8      | -2.1      | 23.7   | 3.5  | even           |      | ok     |
|           | 14 | C13H17FN2NaO6S2  | 92.26  | 403.0404 | 0.0       | 0.1       | 24.7   | 5.5  | even           |      | ok     |
|           | 15 | C22H14F2NaS2     | 64.42  | 403.0397 | -0.7      | -1.7      | 27.6   | 14.5 | even           |      | ok     |
|           | 16 | C24H12NaO3S      | 67.33  | 403.0399 | -0.5      | -1.1      | 30.2   | 18.5 | even           |      | ok     |
|           | 17 | C13H14F6NaO4S    | 64.28  | 403.0409 | -0.5      | -1.3      | 30.8   | 3.5  | even           |      | ok     |
|           | 18 | C14H18F2N2NaO2S3 | 36.34  | 403.0391 | 1.3       | 3.3       | 35.7   | 5.5  | even           |      | ok     |

---

## Mass Spectrum SmartFormula Report

---

| Meas. m/z | #  | Ion Formula    | Score | m/z      | err [mDa] | err [ppm] | mSigma | rdb | e <sup>-</sup> Conf | N-Rule |
|-----------|----|----------------|-------|----------|-----------|-----------|--------|-----|---------------------|--------|
|           | 19 | C14H21FN2NaOS4 | 26.88 | 403.0413 | -0.9      | -2.2      | 54.7   | 4.5 | even                | ok     |
|           | 20 | C17H20N2NaS4   | 34.66 | 403.0402 | 0.2       | 0.6       | 57.0   | 8.5 | even                | ok     |

Figure S68. HRESIMS spectrum of compound 8q

## Generic Display Report

### Analysis Info

Analysis Name D:\MZ\maXis\_data\temp\64020000001.d  
Method tune\_low\_MS\_Service\_05\_19.m  
Sample Name PN-10 spot 2 peak 2  
Comment Predrag Kalaba  
Ergebnis: +/- 5ppm  
ACN / MeOH + 1% H2O

Acquisition Date 20/05/2019 14:41:57

Operator msc  
Instrument maXis

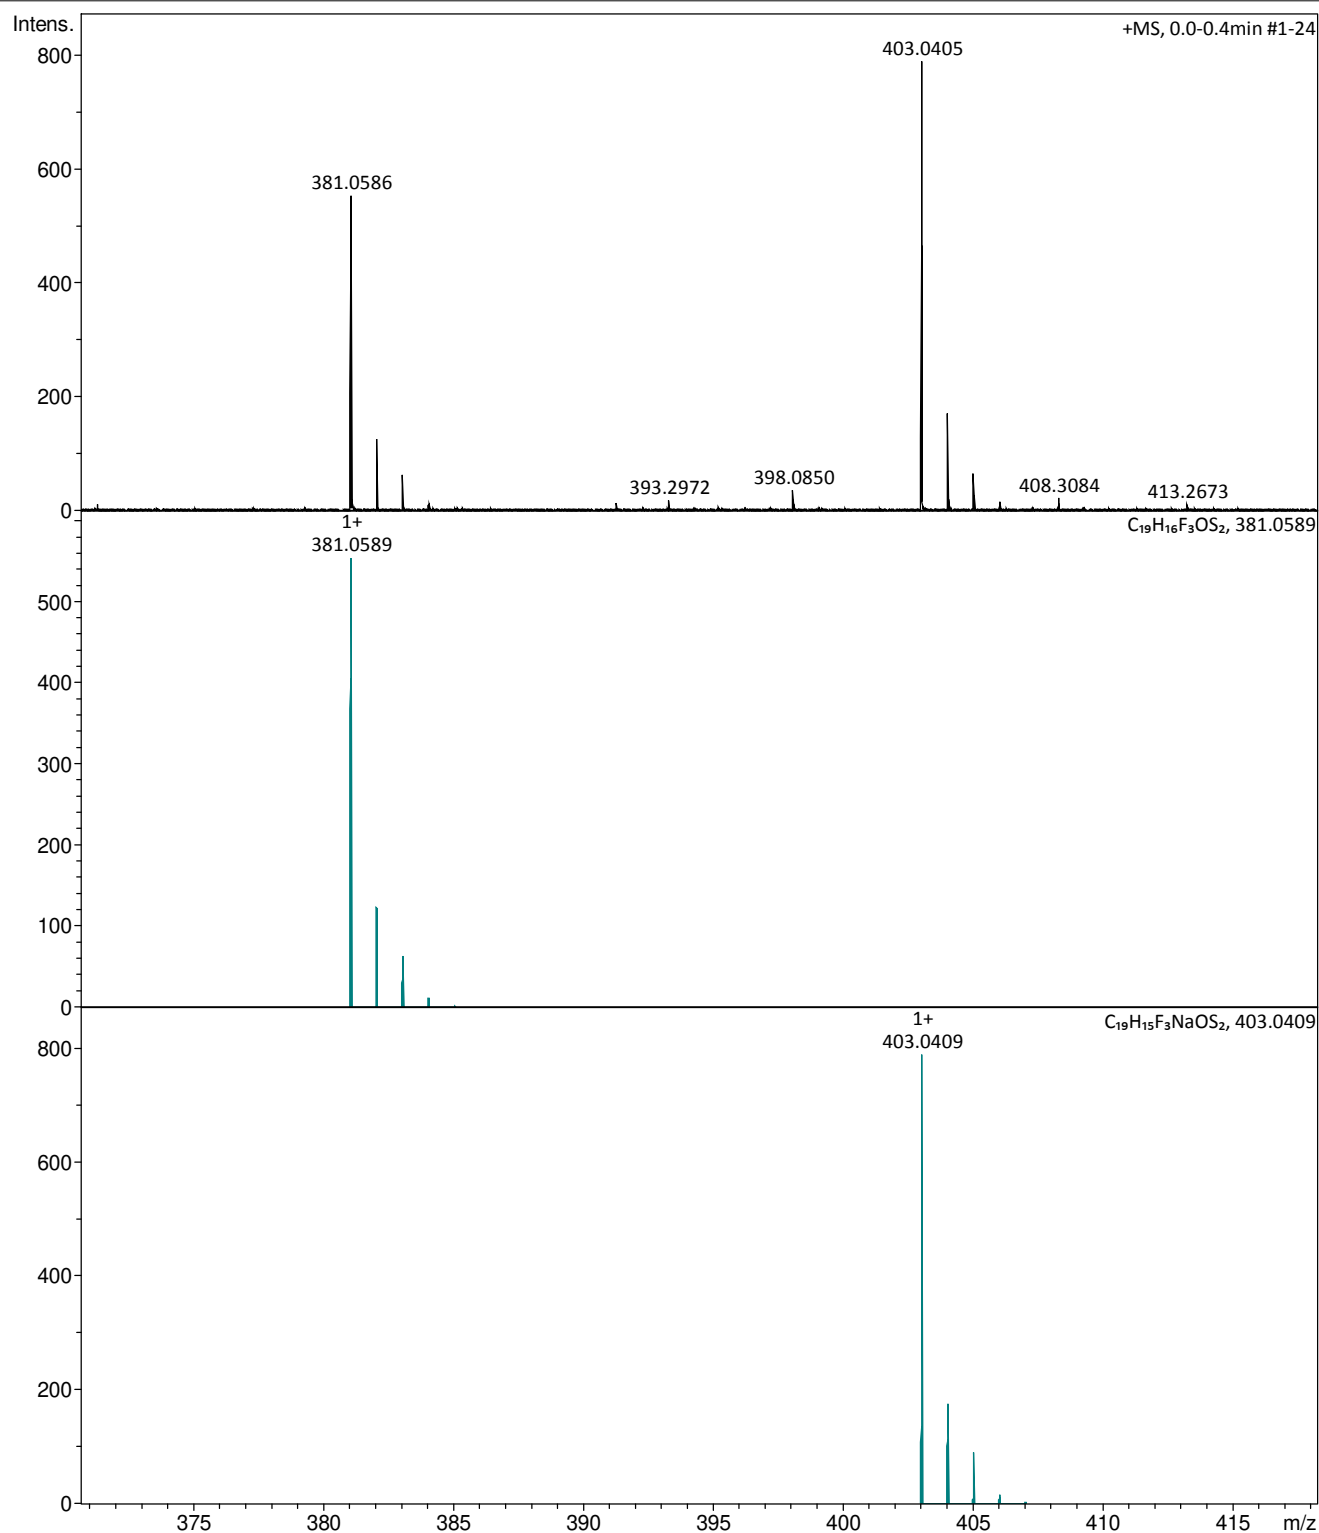

# Mass Spectrum SmartFormula Report

## Analysis Info

Analysis Name D:\MZ\maXis\_data\temp\64020000001.d  
 Method tune\_low\_MS\_Service\_05\_19.m  
 Sample Name PN-10 spot 2 peak 2  
 Comment Predrag Kalaba  
 Ergebnis: +/- 5ppm  
 ACN / MeOH + 1% H2O

Acquisition Date 20/05/2019 14:41:57

Operator msc  
 Instrument maXis 255552.00016

## Acquisition Parameter

|             |            |                      |          |                  |           |
|-------------|------------|----------------------|----------|------------------|-----------|
| Source Type | ESI        | Ion Polarity         | Positive | Set Nebulizer    | 0.4 Bar   |
| Focus       | Not active | Set Capillary        | 4500 V   | Set Dry Heater   | 150 °C    |
| Scan Begin  | 50 m/z     | Set End Plate Offset | -500 V   | Set Dry Gas      | 4.0 l/min |
| Scan End    | 1900 m/z   | Set Charging Voltage | 0 V      | Set Divert Valve | Source    |
|             |            | Set Corona           | 0 nA     | Set APCI Heater  | 0 °C      |

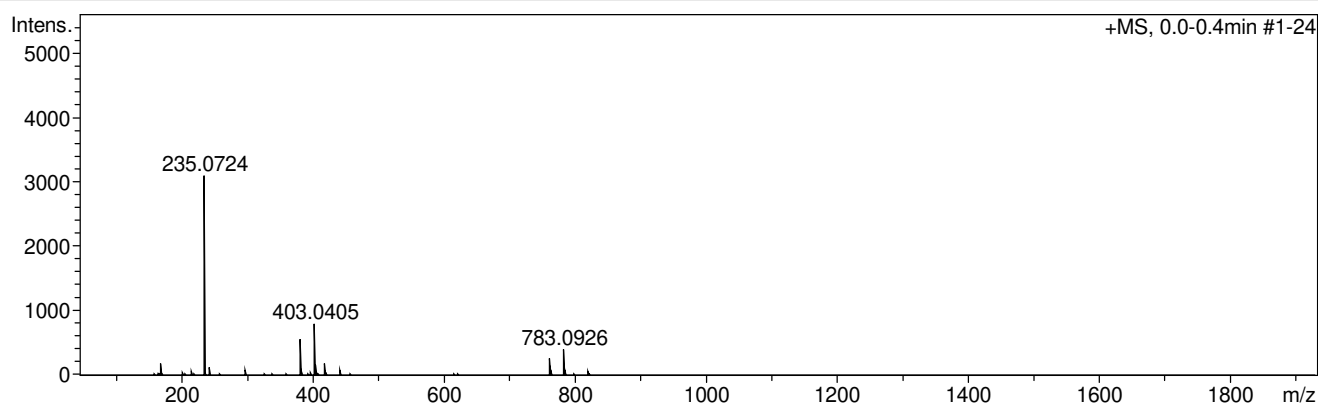

| Meas. m/z | #  | Ion Formula     | Score  | m/z      | err [mDa] | err [ppm] | mSigma | rdb  | e <sup>-</sup> | Conf | N-Rule |
|-----------|----|-----------------|--------|----------|-----------|-----------|--------|------|----------------|------|--------|
| 381.0586  | 1  | C19H16F3OS2     | 90.36  | 381.0589 | 0.3       | 0.7       | 2.9    | 10.5 | even           |      | ok     |
|           | 2  | C17H13N6OS2     | 100.00 | 381.0587 | -0.0      | -0.1      | 2.9    | 14.5 | even           |      | ok     |
|           | 3  | C16H17N2O5S2    | 43.49  | 381.0573 | -1.3      | -3.4      | 12.7   | 9.5  | even           |      | ok     |
|           | 4  | C22H15F2S2      | 55.59  | 381.0578 | -0.9      | -2.3      | 13.3   | 14.5 | even           |      | ok     |
|           | 5  | C16H17F4O2S2    | 37.95  | 381.0601 | 1.4       | 3.7       | 16.3   | 6.5  | even           |      | ok     |
|           | 6  | C14H14FN6O2S2   | 44.09  | 381.0598 | -1.2      | -3.1      | 16.3   | 10.5 | even           |      | ok     |
|           | 7  | C21H14FO4S      | 61.88  | 381.0591 | -0.5      | -1.3      | 17.8   | 14.5 | even           |      | ok     |
|           | 8  | C18H15F2O5S     | 28.91  | 381.0603 | -1.6      | -4.3      | 22.3   | 10.5 | even           |      | ok     |
|           | 9  | C22H10FN4S      | 23.73  | 381.0605 | 1.8       | 4.8       | 24.9   | 19.5 | even           |      | ok     |
|           | 10 | C24H13O3S       | 48.14  | 381.0580 | 0.7       | 1.7       | 25.4   | 18.5 | even           |      | ok     |
|           | 11 | C13H18FN2O6S2   | 58.77  | 381.0585 | 0.2       | 0.4       | 26.7   | 5.5  | even           |      | ok     |
|           | 12 | C14H19F2N2O2S3  | 28.04  | 381.0571 | 1.5       | 4.0       | 26.7   | 5.5  | even           |      | ok     |
|           | 13 | C14H16F7S2      | 35.41  | 381.0576 | -1.0      | -2.7      | 29.8   | 3.5  | even           |      | ok     |
|           | 14 | C12H13F4N6S2    | 30.64  | 381.0574 | 1.3       | 3.3       | 29.8   | 7.5  | even           |      | ok     |
|           | 15 | C14H11F2N6O3S   | 32.74  | 381.0576 | -1.1      | -2.8      | 32.4   | 11.5 | even           |      | ok     |
|           | 16 | C16H14F5O3S     | 37.45  | 381.0578 | 0.8       | 2.1       | 32.4   | 7.5  | even           |      | ok     |
|           | 17 | C11H20F3N2O3S3  | 40.89  | 381.0583 | 0.4       | 1.0       | 37.4   | 1.5  | even           |      | ok     |
|           | 18 | C12H8F3N10S     | 22.51  | 381.0601 | -1.4      | -3.7      | 38.2   | 12.5 | even           |      | ok     |
|           | 19 | C14H11F6N4S     | 19.14  | 381.0603 | 1.7       | 4.4       | 38.2   | 8.5  | even           |      | ok     |
|           | 20 | C17H21N2S4      | 35.34  | 381.0582 | -0.4      | -1.2      | 41.8   | 8.5  | even           |      | ok     |
|           | 21 | C14H22FN2OS4    | 30.69  | 381.0594 | -0.7      | -1.8      | 42.2   | 4.5  | even           |      | ok     |
|           | 22 | C12H17N2O10S    | 22.74  | 381.0598 | -1.2      | -3.1      | 43.1   | 5.5  | even           |      | ok     |
|           | 23 | C13H15F6O4S     | 33.26  | 381.0590 | 0.3       | 0.9       | 45.7   | 3.5  | even           |      | ok     |
|           | 24 | C11H12F3N6O4S   | 36.90  | 381.0587 | -0.1      | -0.2      | 45.8   | 7.5  | even           |      | ok     |
|           | 25 | C11H17F8OS2     | 36.40  | 381.0588 | 0.1       | 0.3       | 45.9   | -0.5 | even           |      | ok     |
|           | 26 | C11H23F2N2O2S4  | 12.84  | 381.0605 | -1.8      | -4.8      | 47.7   | 0.5  | even           |      | ok     |
| 403.0405  | 1  | C19H12F4NaO2S   | 41.65  | 403.0386 | -1.9      | -4.7      | 7.4    | 11.5 | even           |      | ok     |
|           | 2  | C18H14F2NaO5S   | 46.92  | 403.0422 | -1.7      | -4.2      | 7.8    | 10.5 | even           |      | ok     |
|           | 3  | C21H13FN4O4S    | 87.57  | 403.0411 | -0.6      | -1.4      | 10.9   | 14.5 | even           |      | ok     |
|           | 4  | C19H15F3NaOS2   | 90.08  | 403.0409 | 0.3       | 0.9       | 14.8   | 10.5 | even           |      | ok     |
|           | 5  | C17H12N6NaOS2   | 100.00 | 403.0406 | -0.1      | -0.3      | 14.8   | 14.5 | even           |      | ok     |
|           | 6  | C16H16F4NaO2S2  | 45.57  | 403.0420 | 1.5       | 3.7       | 17.0   | 6.5  | even           |      | ok     |
|           | 7  | C14H13FN6NaO2S2 | 53.11  | 403.0418 | -1.2      | -3.1      | 17.0   | 10.5 | even           |      | ok     |
|           | 8  | C16H16N2NaO5S2  | 52.90  | 403.0393 | -1.2      | -3.1      | 17.8   | 9.5  | even           |      | ok     |

# Mass Spectrum SmartFormula Report

| Meas. m/z | #  | Ion Formula      | Score | m/z      | err [mDa] | err [ppm] | mSigma | rdb  | e <sup>-</sup> Conf | N-Rule |
|-----------|----|------------------|-------|----------|-----------|-----------|--------|------|---------------------|--------|
|           | 9  | C16H13F5NaO3S    | 67.75 | 403.0398 | 0.7       | 1.8       | 19.3   | 7.5  | even                | ok     |
|           | 10 | C14H10F2N6NaO3S  | 59.41 | 403.0395 | -1.0      | -2.4      | 19.3   | 11.5 | even                | ok     |
|           | 11 | C22H9FN4NaS      | 30.34 | 403.0424 | -1.9      | -4.7      | 22.5   | 19.5 | even                | ok     |
|           | 12 | C22H14F2NaS2     | 59.15 | 403.0397 | -0.8      | -2.0      | 24.1   | 14.5 | even                | ok     |
|           | 13 | C14H10F6N4NaS    | 32.30 | 403.0423 | 1.7       | 4.3       | 24.9   | 8.5  | even                | ok     |
|           | 14 | C12H7F3N10NaS    | 38.11 | 403.0420 | -1.5      | -3.7      | 24.9   | 12.5 | even                | ok     |
|           | 15 | C14H15F7NaS2     | 51.82 | 403.0396 | -1.0      | -2.4      | 26.1   | 3.5  | even                | ok     |
|           | 16 | C12H12F4N6NaS2   | 44.98 | 403.0393 | 1.2       | 3.0       | 26.2   | 7.5  | even                | ok     |
|           | 17 | C13H17FN2NaO6S2  | 78.62 | 403.0404 | -0.1      | -0.2      | 26.3   | 5.5  | even                | ok     |
|           | 18 | C24H12NaO3S      | 62.61 | 403.0399 | -0.6      | -1.4      | 26.5   | 18.5 | even                | ok     |
|           | 19 | C12H16N2NaO10S   | 35.66 | 403.0418 | 1.3       | 3.2       | 33.8   | 5.5  | even                | ok     |
|           | 20 | C13H14F6NaO4S    | 55.77 | 403.0409 | 0.4       | 1.0       | 34.7   | 3.5  | even                | ok     |
|           | 21 | C11H11F3N6NaO4S  | 62.06 | 403.0407 | 0.2       | 0.4       | 34.7   | 7.5  | even                | ok     |
|           | 22 | C14H18F2N2NaO2S3 | 30.70 | 403.0391 | 1.4       | 3.6       | 35.3   | 5.5  | even                | ok     |
|           | 23 | C11H16F8NaOS2    | 51.70 | 403.0407 | 0.2       | 0.5       | 41.1   | -0.5 | even                | ok     |
|           | 24 | C11H19F3N2NaO3S3 | 48.05 | 403.0402 | -0.3      | -0.8      | 41.9   | 1.5  | even                | ok     |
|           | 25 | C14H21FN2NaOS4   | 26.86 | 403.0413 | -0.8      | -1.9      | 53.6   | 4.5  | even                | ok     |
|           | 26 | C17H20N2NaS4     | 31.58 | 403.0402 | -0.4      | -0.9      | 55.0   | 8.5  | even                | ok     |
|           | 27 | C11H22F2N2NaO2S4 | 11.80 | 403.0424 | -1.9      | -4.8      | 56.6   | 0.5  | even                | ok     |

**Figure S69.** HRESIMS spectrum of compound **5r**

## Generic Display Report

### Analysis Info

Analysis Name D:\MZ\maXis\_data\temp\63398000001.d  
Method tune\_low\_MS\_Service\_04\_19.m  
Sample Name CE-166 SPOT1 PEAK1  
Comment Kalaba/Zehl  
Ergebnis: +/- 5ppm  
ACN/MeOH + 1% H2O

Acquisition Date 4/11/2019 6:26:30 PM

Operator msc  
Instrument maXis

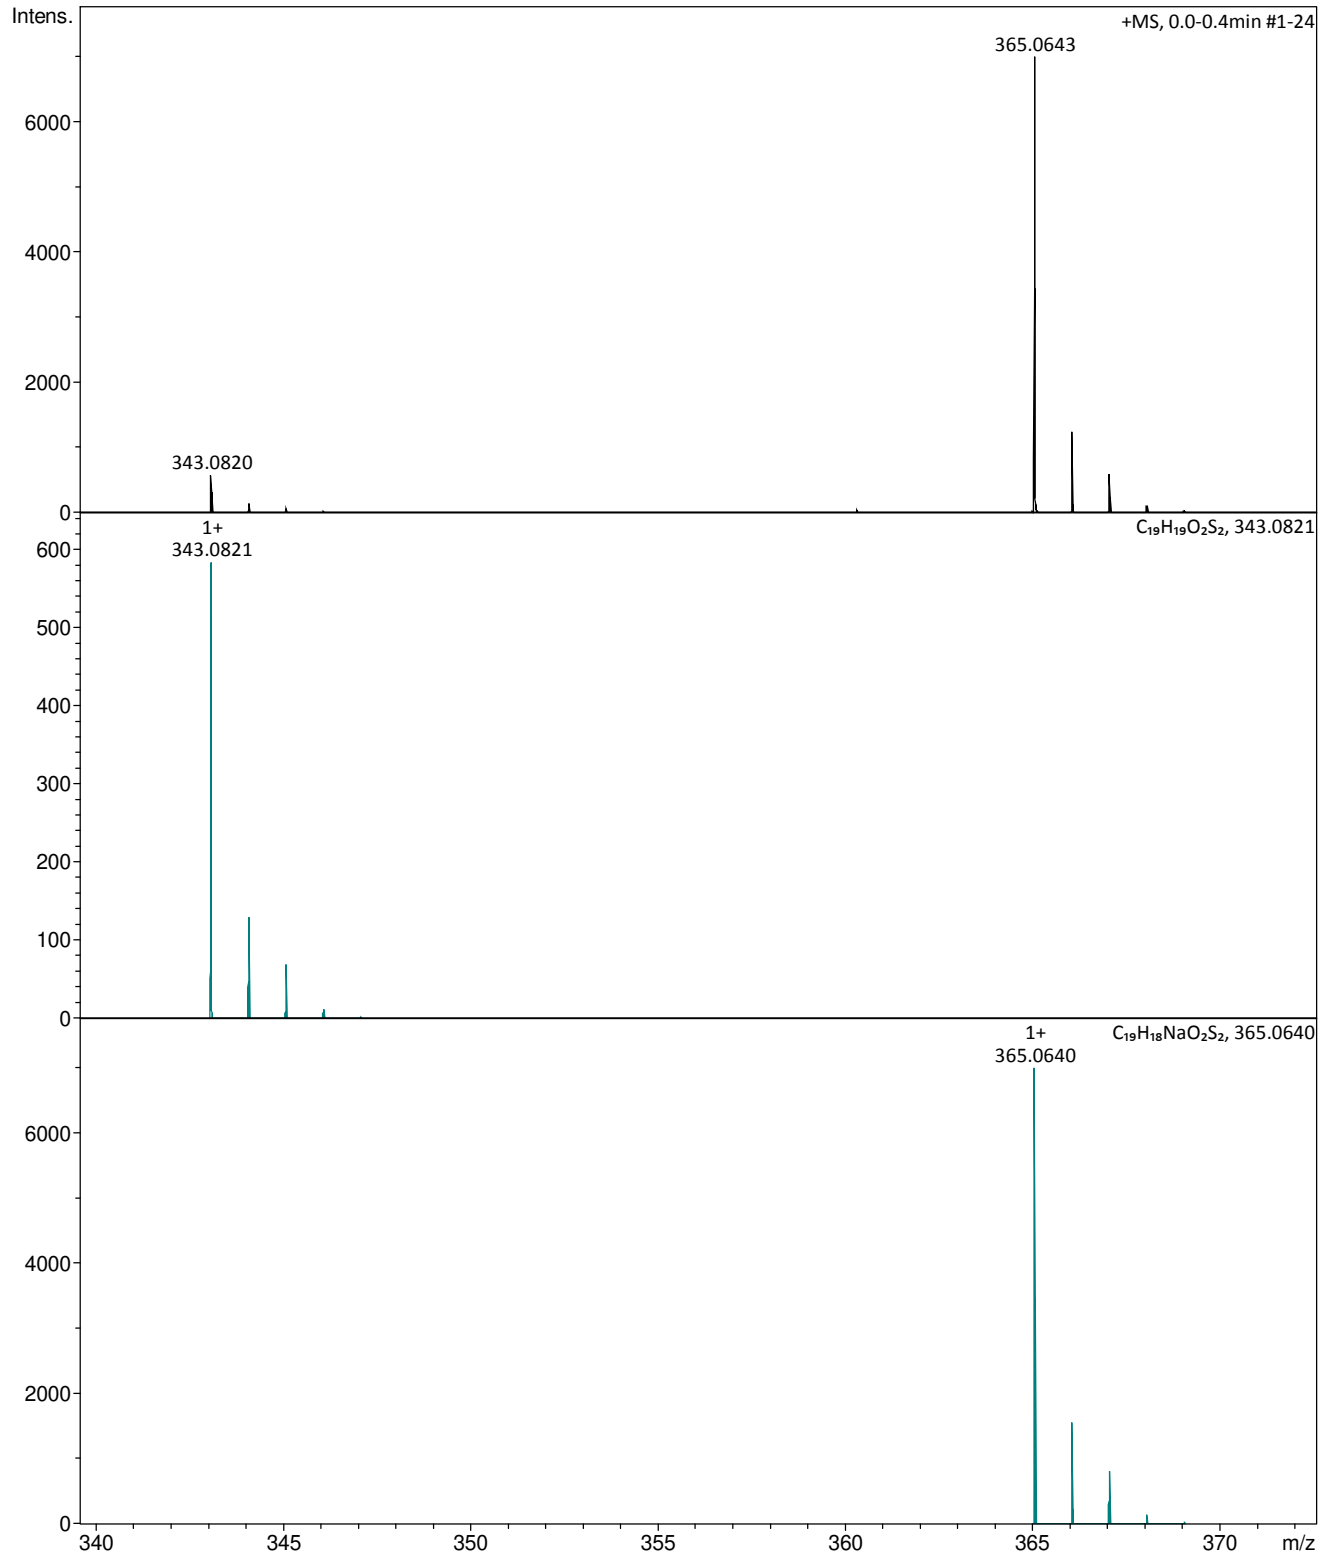



# Mass Spectrum SmartFormula Report

## Analysis Info

Analysis Name D:\MZ\maXis\_data\temp\63398000001.d  
Method tune\_low\_MS\_Service\_04\_19.m  
Sample Name CE-166 SPOT1 PEAK1  
Comment Kalaba/Zehl  
Ergebnis: +/- 5ppm  
ACN/MeOH + 1% H2O

Acquisition Date 4/11/2019 6:26:30 PM

Operator msc  
Instrument maXis 255552.00016

## Acquisition Parameter

|             |            |                      |          |                  |           |
|-------------|------------|----------------------|----------|------------------|-----------|
| Source Type | ESI        | Ion Polarity         | Positive | Set Nebulizer    | 0.4 Bar   |
| Focus       | Not active | Set Capillary        | 4500 V   | Set Dry Heater   | 150 °C    |
| Scan Begin  | 50 m/z     | Set End Plate Offset | -500 V   | Set Dry Gas      | 4.0 l/min |
| Scan End    | 1900 m/z   | Set Charging Voltage | 0 V      | Set Divert Valve | Source    |
|             |            | Set Corona           | 0 nA     | Set APCI Heater  | 0 °C      |

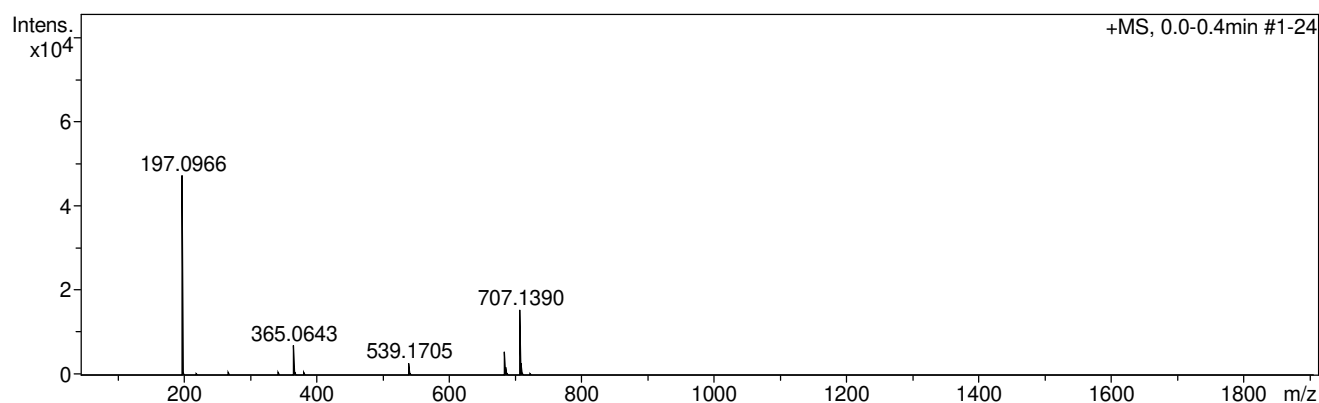

| Meas. m/z | # | Ion Formula    | Score  | m/z      | err [mDa] | err [ppm] | mSigma | rdb  | e <sup>-</sup> | Conf | N-Rule |
|-----------|---|----------------|--------|----------|-----------|-----------|--------|------|----------------|------|--------|
| 197.0966  | 1 | C14H13O        | 100.00 | 197.0961 | -0.5      | -2.8      | 22.4   | 8.5  | even           |      | ok     |
| 343.0820  | 1 | C19H19O2S2     | 100.00 | 343.0821 | -0.1      | -0.4      | 12.5   | 10.5 | even           |      | ok     |
|           | 2 | C18H15O7       | 37.40  | 343.0812 | -0.7      | -2.1      | 42.3   | 11.5 | even           |      | ok     |
|           | 3 | C19H11N4O3     | 35.76  | 343.0826 | -0.6      | -1.8      | 46.2   | 16.5 | even           |      | ok     |
| 365.0643  | 1 | C12H10N10NaOS  | 86.81  | 365.0652 | -0.9      | -2.4      | 13.0   | 12.5 | even           |      | ok     |
|           | 2 | C11H14N6NaO5S  | 100.00 | 365.0639 | -0.5      | -1.3      | 16.4   | 7.5  | even           |      | ok     |
|           | 3 | C19H18NaO2S2   | 89.43  | 365.0640 | -0.3      | -0.8      | 25.5   | 10.5 | even           |      | ok     |
|           | 4 | C10H18N2NaO9S  | 36.96  | 365.0625 | 1.8       | 4.9       | 25.6   | 2.5  | even           |      | ok     |
|           | 5 | C12H18N6NaS3   | 78.60  | 365.0647 | -0.4      | -1.1      | 28.5   | 6.5  | even           |      | ok     |
|           | 6 | C18H14NaO7     | 51.96  | 365.0632 | 1.1       | 3.1       | 29.4   | 11.5 | even           |      | ok     |
|           | 7 | C11H22N2NaO4S3 | 55.08  | 365.0634 | -0.9      | -2.5      | 32.1   | 1.5  | even           |      | ok     |
|           | 8 | C19H10N4NaO3   | 45.99  | 365.0645 | -0.2      | -0.5      | 41.9   | 16.5 | even           |      | ok     |

**Figure S70.** HRESIMS spectrum of compound **6r**

## Generic Display Report

### Analysis Info

Analysis Name D:\MZ\maXis\_data\temp\63399000001.d  
Method tune\_low\_MS\_Service\_04\_19.m  
Sample Name CE-166 SPOT1 PEAK2  
Comment Kalaba/Zehl  
Ergebnis: +/- 5ppm  
ACN/MeOH + 1% H2O

Acquisition Date 4/11/2019 6:31:45 PM

Operator msc  
Instrument maXis

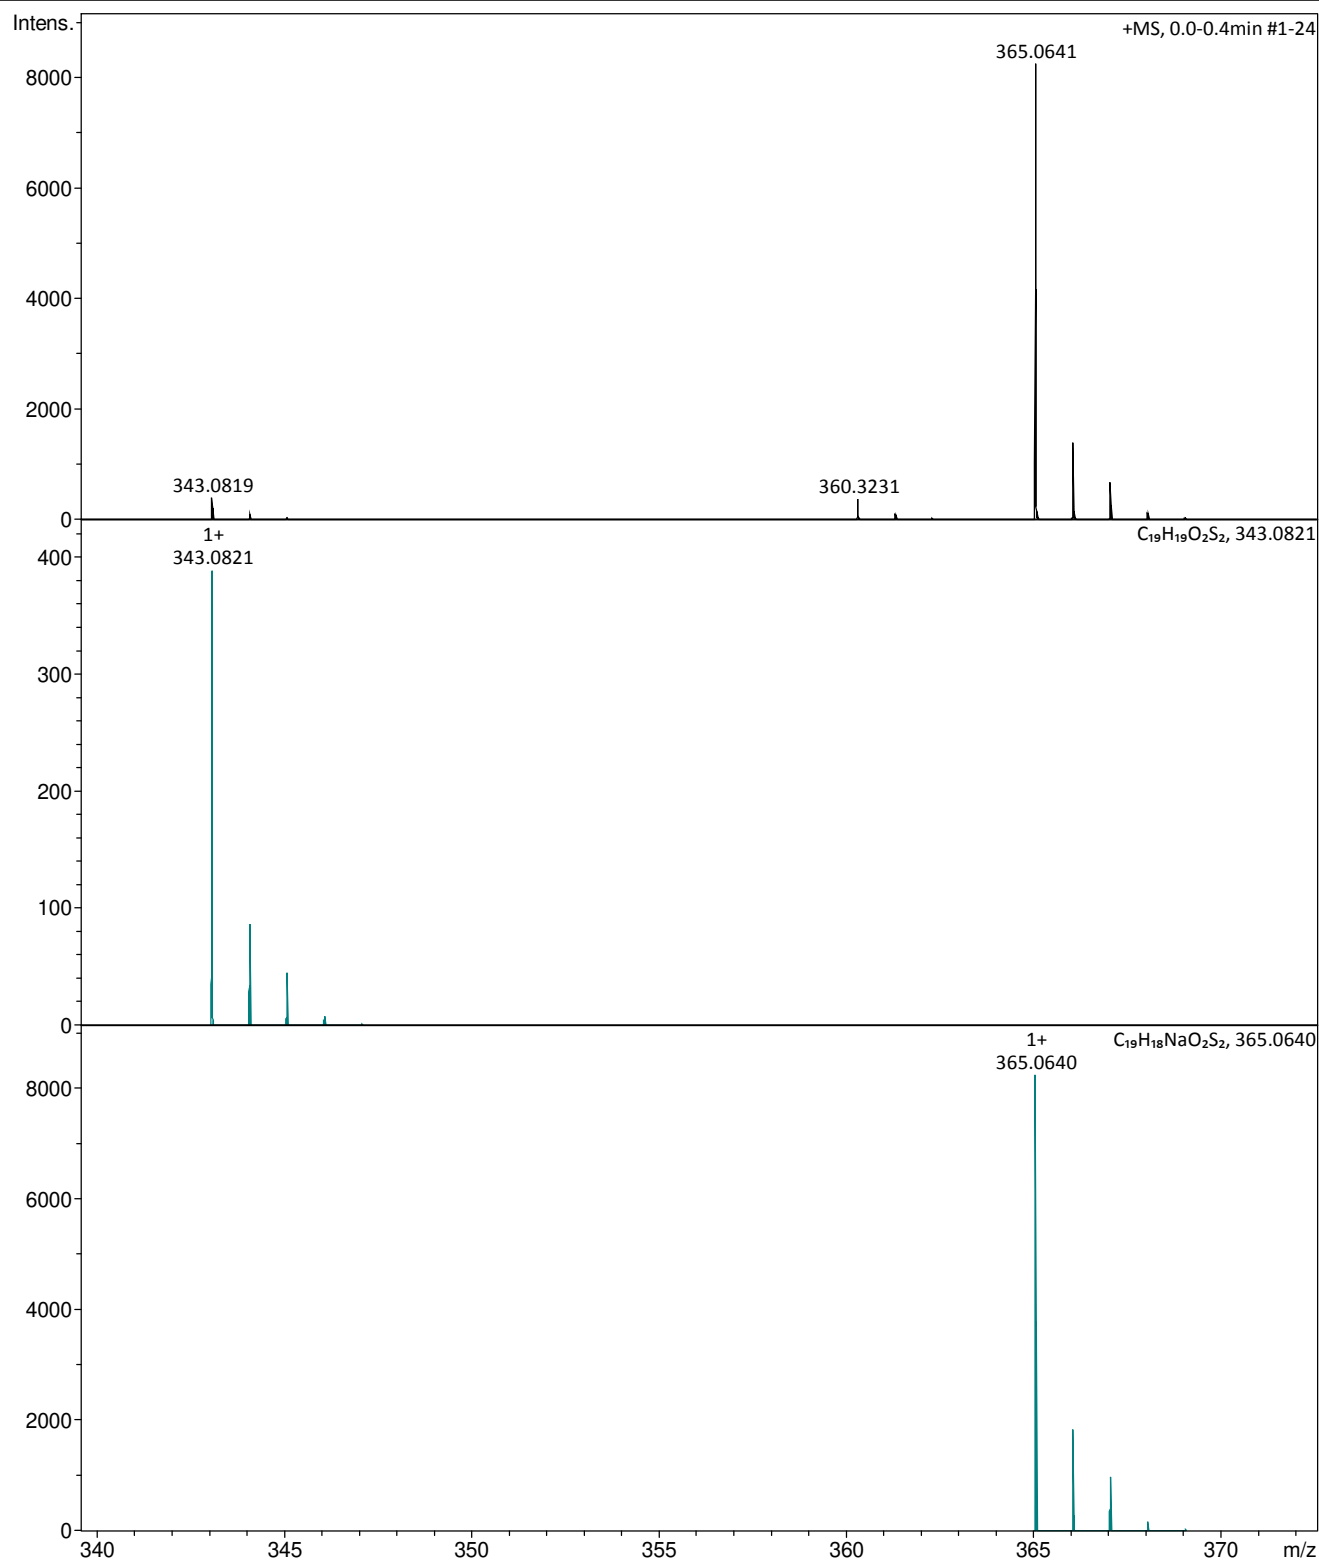

# Mass Spectrum SmartFormula Report

## Analysis Info

Analysis Name D:\MZ\maXis\_data\temp\63399000001.d  
Method tune\_low\_MS\_Service\_04\_19.m  
Sample Name CE-166 SPOT1 PEAK2  
Comment Kalaba/Zehl  
Ergebnis: +/- 5ppm  
ACN/MeOH + 1% H2O

Acquisition Date 4/11/2019 6:31:45 PM

Operator msc  
Instrument maXis 255552.00016

## Acquisition Parameter

|             |            |                      |          |                  |           |
|-------------|------------|----------------------|----------|------------------|-----------|
| Source Type | ESI        | Ion Polarity         | Positive | Set Nebulizer    | 0.4 Bar   |
| Focus       | Not active | Set Capillary        | 4500 V   | Set Dry Heater   | 150 °C    |
| Scan Begin  | 50 m/z     | Set End Plate Offset | -500 V   | Set Dry Gas      | 4.0 l/min |
| Scan End    | 1900 m/z   | Set Charging Voltage | 0 V      | Set Divert Valve | Source    |
|             |            | Set Corona           | 0 nA     | Set APCI Heater  | 0 °C      |

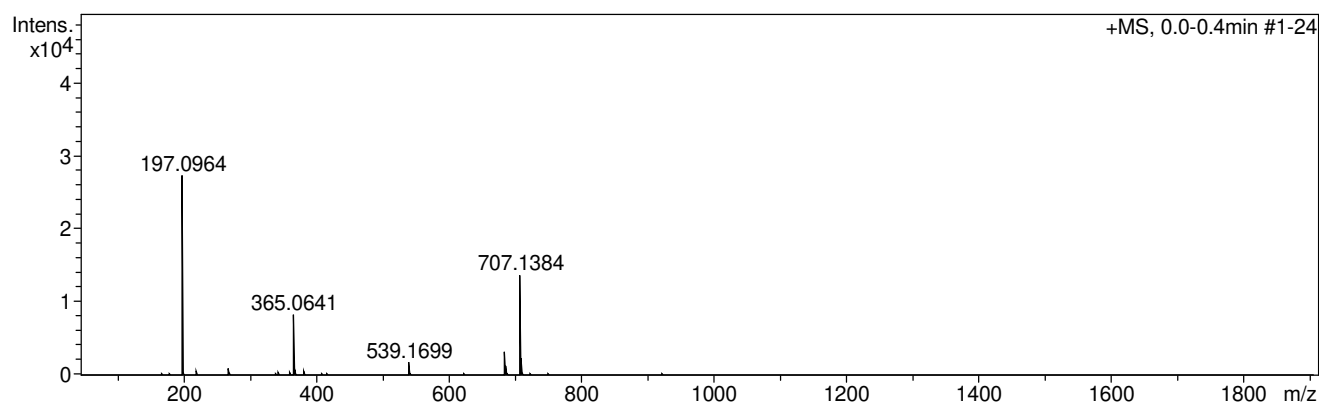

| Meas. m/z | # | Ion Formula    | Score  | m/z      | err [mDa] | err [ppm] | mSigma | rdb  | e <sup>-</sup> | Conf | N-Rule |
|-----------|---|----------------|--------|----------|-----------|-----------|--------|------|----------------|------|--------|
| 197.0964  | 1 | C14H13O        | 100.00 | 197.0961 | -0.3      | -1.5      | 21.4   | 8.5  | even           |      | ok     |
| 343.0819  | 1 | C19H19O2S2     | 100.00 | 343.0821 | -0.2      | -0.5      | 12.3   | 10.5 | even           |      | ok     |
|           | 2 | C19H11N4O3     | 40.50  | 343.0826 | -0.6      | -1.8      | 41.6   | 16.5 | even           |      | ok     |
| 365.0641  | 1 | C11H14N6NaO5S  | 100.00 | 365.0639 | -0.2      | -0.6      | 12.0   | 7.5  | even           |      | ok     |
|           | 2 | C19H18NaO2S2   | 73.93  | 365.0640 | 0.1       | 0.1       | 29.6   | 10.5 | even           |      | ok     |
|           | 3 | C12H18N6NaS3   | 54.93  | 365.0647 | 0.6       | 1.7       | 30.8   | 6.5  | even           |      | ok     |
|           | 4 | C11H22N2NaO4S3 | 50.02  | 365.0634 | 0.7       | 1.9       | 33.2   | 1.5  | even           |      | ok     |
|           | 5 | C19H10N4NaO3   | 33.28  | 365.0645 | -0.4      | -1.1      | 42.9   | 16.5 | even           |      | ok     |

**Figure S71.** HRESIMS spectrum of compound **7r**

## Generic Display Report

### Analysis Info

Analysis Name D:\MZ\maXis\_data\temp\59192000001.d  
Method tune\_low\_MS\_Service\_08\_18.m  
Sample Name CE-166-spot2-peak1  
Comment Kalaba/Zehl  
Ergebnis: +/- 5ppm  
ACN/MeOH +1%H<sub>2</sub>O

Acquisition Date 8/24/2018 3:43:18 PM

Operator msc  
Instrument maXis

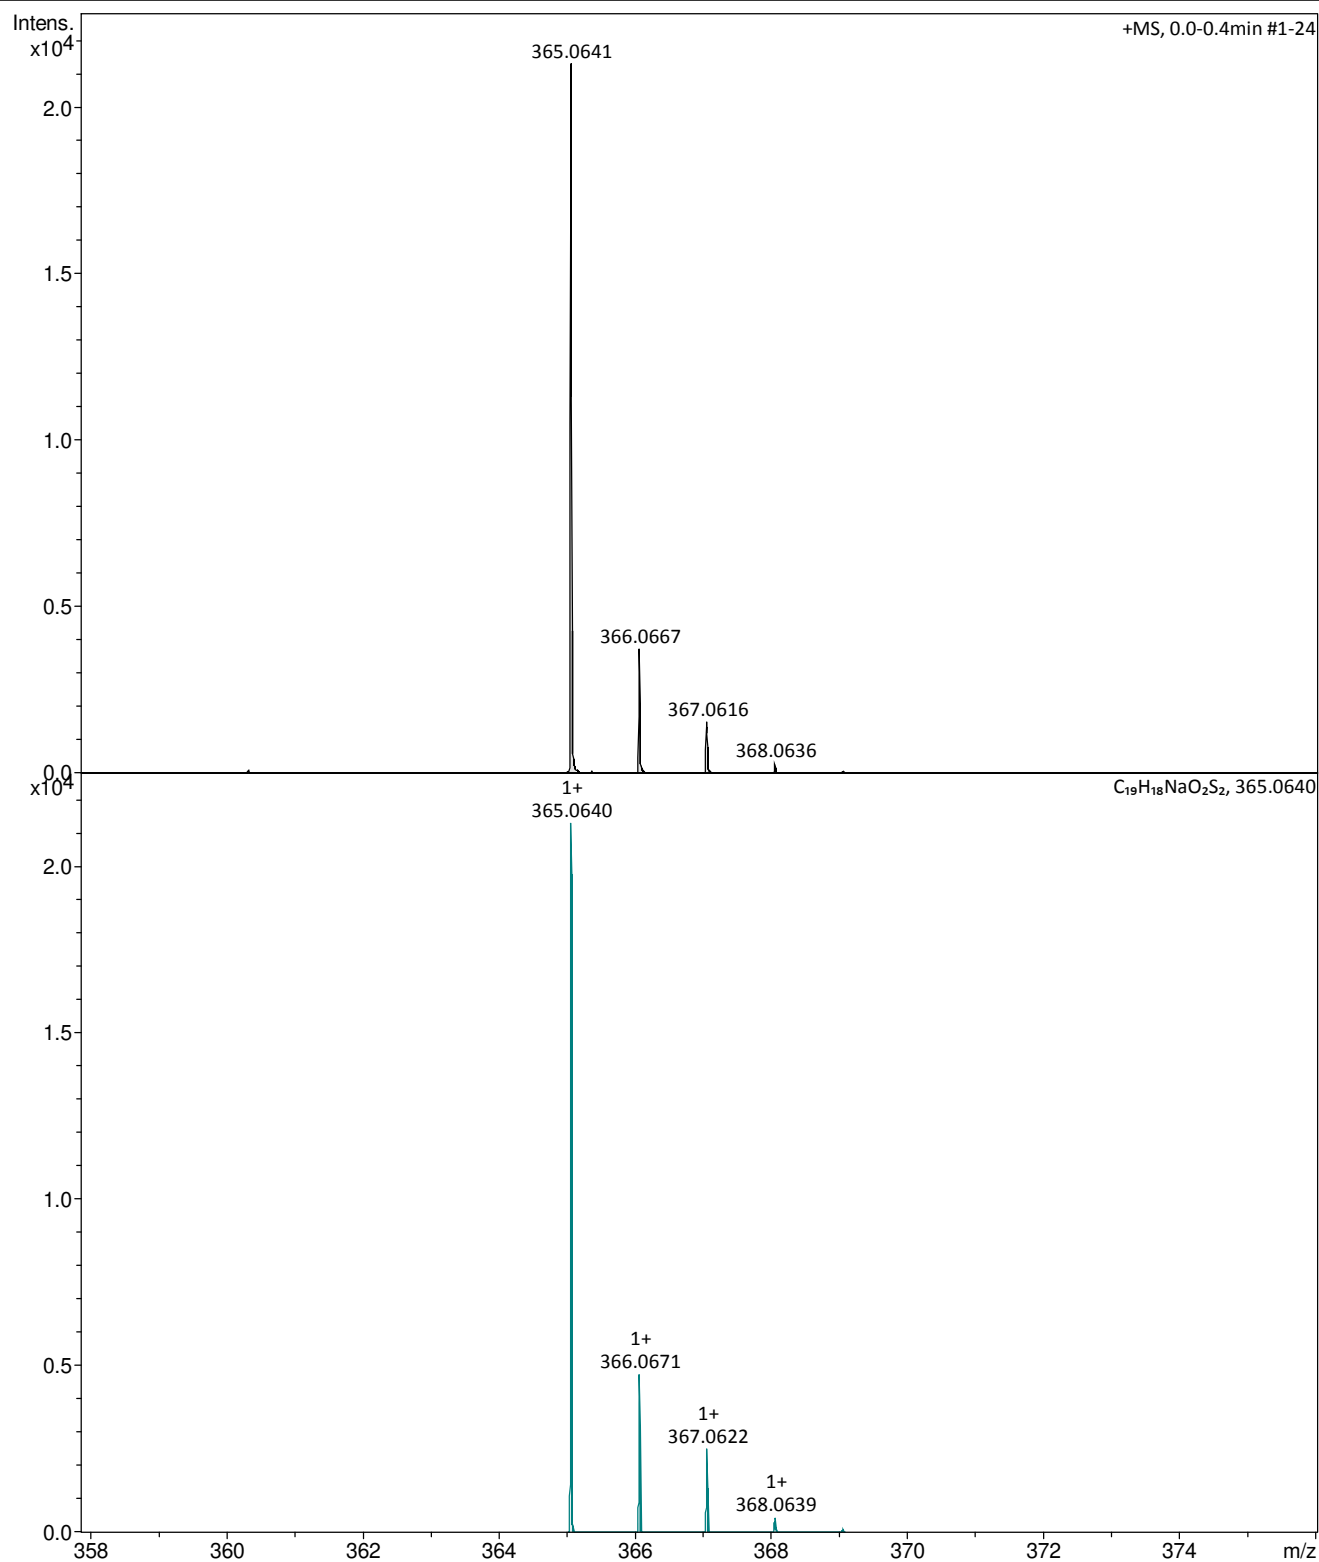

# Mass Spectrum SmartFormula Report

## Analysis Info

Analysis Name D:\MZ\maXis\_data\temp\59192000001.d  
Method tune\_low\_MS\_Service\_08\_18.m  
Sample Name CE-166-spot2-peak1  
Comment Kalaba/Zehl  
Ergebnis: +/- 5ppm  
ACN/MeOH +1%H2O

Acquisition Date 8/24/2018 3:43:18 PM

Operator msc  
Instrument maXis 255552.00016

## Acquisition Parameter

|             |            |                      |          |                  |           |
|-------------|------------|----------------------|----------|------------------|-----------|
| Source Type | ESI        | Ion Polarity         | Positive | Set Nebulizer    | 0.4 Bar   |
| Focus       | Not active | Set Capillary        | 4500 V   | Set Dry Heater   | 180 °C    |
| Scan Begin  | 50 m/z     | Set End Plate Offset | -500 V   | Set Dry Gas      | 4.0 l/min |
| Scan End    | 1900 m/z   | Set Charging Voltage | 0 V      | Set Divert Valve | Source    |
|             |            | Set Corona           | 0 nA     | Set APCI Heater  | 0 °C      |

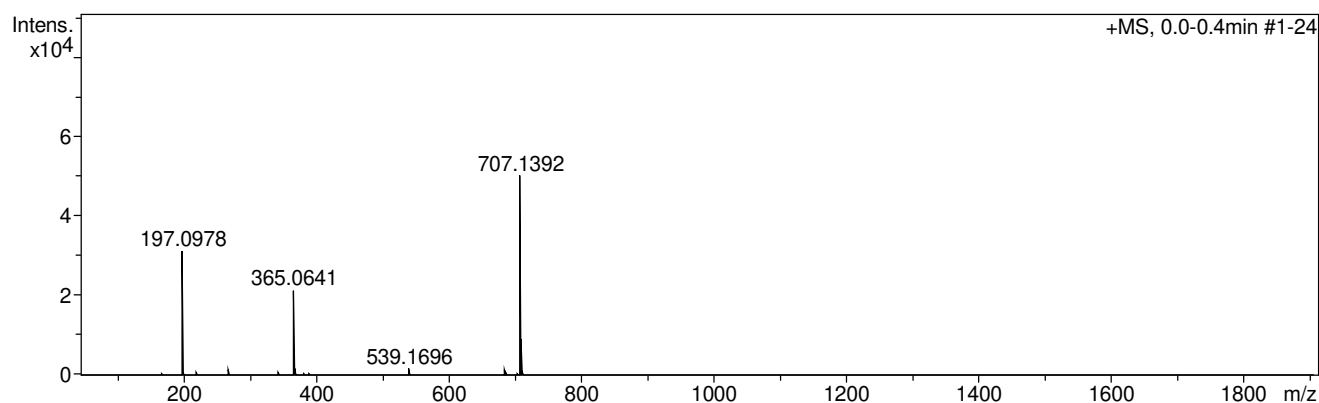

| Meas. m/z | # | Ion Formula    | Score  | m/z      | err [mDa] | err [ppm] | mSigma | rdb  | e <sup>-</sup> | Conf | N-Rule |
|-----------|---|----------------|--------|----------|-----------|-----------|--------|------|----------------|------|--------|
| 365.0641  | 1 | C12H10N10NaOS  | 72.28  | 365.0652 | 1.1       | 3.0       | 6.1    | 12.5 | even           |      | ok     |
|           | 2 | C11H14N6NaO5S  | 100.00 | 365.0639 | 0.2       | 0.7       | 12.0   | 7.5  | even           |      | ok     |
|           | 3 | C10H18N2NaO9S  | 37.72  | 365.0625 | 1.6       | 4.3       | 23.2   | 2.5  | even           |      | ok     |
|           | 4 | C18H14NaO7     | 55.85  | 365.0632 | 0.9       | 2.6       | 23.6   | 11.5 | even           |      | ok     |
|           | 5 | C19H18NaO2S2   | 91.24  | 365.0640 | 0.1       | 0.2       | 30.1   | 10.5 | even           |      | ok     |
|           | 6 | C12H18N6NaS3   | 63.12  | 365.0647 | 0.6       | 1.7       | 34.6   | 6.5  | even           |      | ok     |
|           | 7 | C19H10N4NaO3   | 39.60  | 365.0645 | -0.4      | -1.1      | 37.0   | 16.5 | even           |      | ok     |
|           | 8 | C11H22N2NaO4S3 | 55.66  | 365.0634 | 0.7       | 2.0       | 37.7   | 1.5  | even           |      | ok     |

**Figure S72.** HRESIMS spectrum of compound **8r**

## Generic Display Report

### Analysis Info

Analysis Name D:\MZ\maXis\_data\temp\59193000001.d  
Method tune\_low\_MS\_Service\_08\_18.m  
Sample Name CE-166-spot2-peak2  
Comment Kalaba/Zehl  
Ergebnis: +/- 5ppm  
ACN/MeOH +1%H<sub>2</sub>O

Acquisition Date 8/24/2018 3:45:14 PM

Operator msc  
Instrument maXis

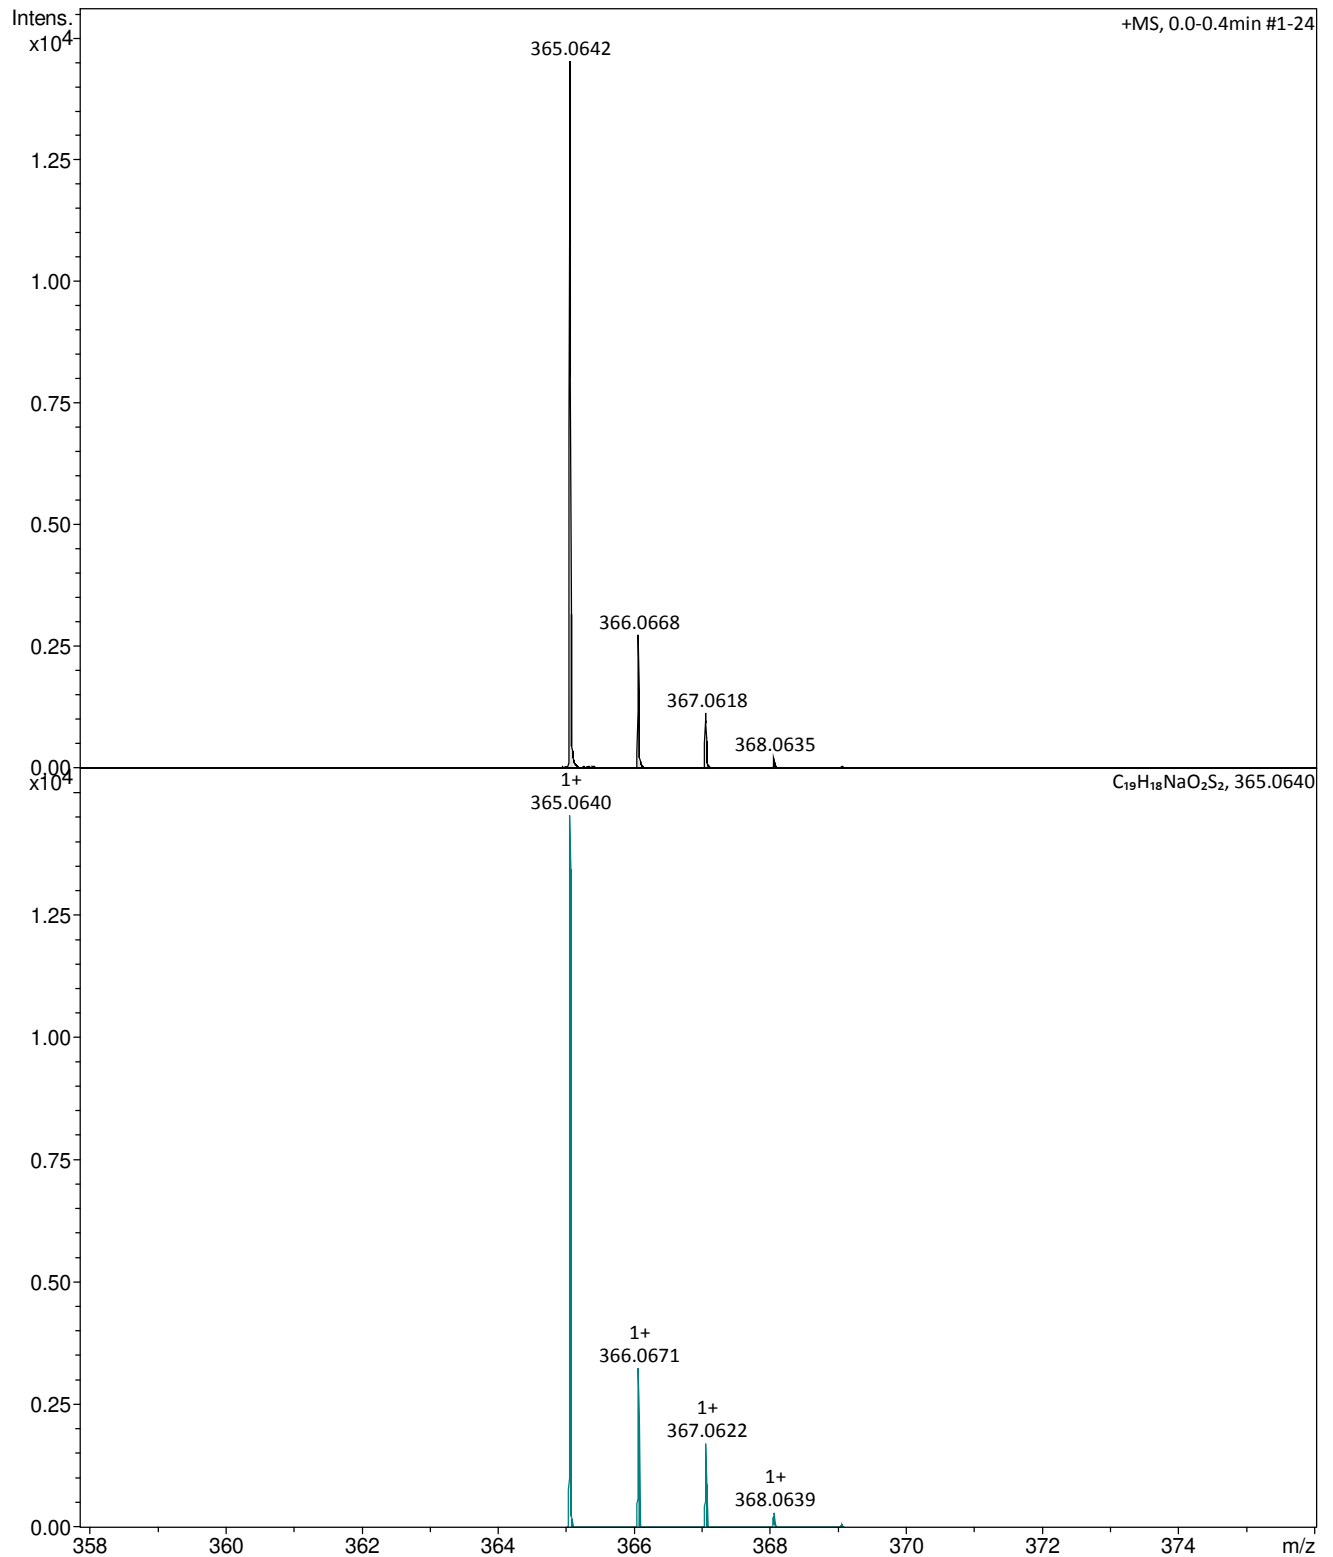

# Mass Spectrum SmartFormula Report

## Analysis Info

Analysis Name D:\MZ\maXis\_data\temp\59193000001.d  
Method tune\_low\_MS\_Service\_08\_18.m  
Sample Name CE-166-spot2-peak2  
Comment Kalaba/Zehl  
Ergebnis: +/- 5ppm  
ACN/MeOH +1%H2O

Acquisition Date 8/24/2018 3:45:14 PM

Operator msc  
Instrument maXis 255552.00016

## Acquisition Parameter

|             |            |                      |          |                  |           |
|-------------|------------|----------------------|----------|------------------|-----------|
| Source Type | ESI        | Ion Polarity         | Positive | Set Nebulizer    | 0.4 Bar   |
| Focus       | Not active | Set Capillary        | 4500 V   | Set Dry Heater   | 180 °C    |
| Scan Begin  | 50 m/z     | Set End Plate Offset | -500 V   | Set Dry Gas      | 4.0 l/min |
| Scan End    | 1900 m/z   | Set Charging Voltage | 0 V      | Set Divert Valve | Source    |
|             |            | Set Corona           | 0 nA     | Set APCI Heater  | 0 °C      |

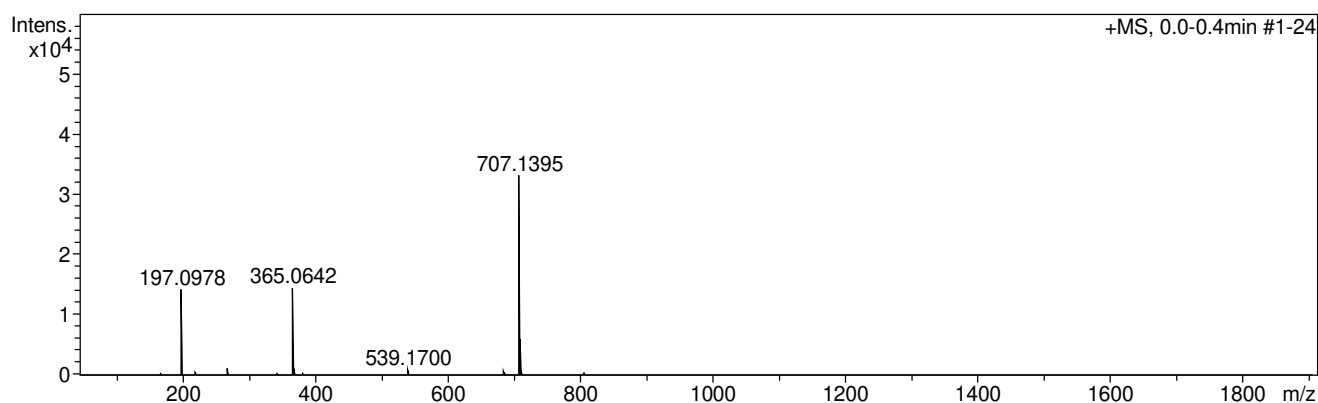

| Meas. m/z  | # | Ion Formula   | Score  | m/z        | err [mDa] | err [ppm] | mSigma | rdB  | e <sup>-</sup> | Conf | N-Rule |
|------------|---|---------------|--------|------------|-----------|-----------|--------|------|----------------|------|--------|
| 365.064234 | 1 | C12H17N2O9S   | 96.18  | 365.064928 | 0.7       | 1.9       | 19.1   | 5.5  | even           |      | ok     |
|            | 2 | C17H13N6S2    | 100.00 | 365.063763 | 0.5       | 1.3       | 22.4   | 14.5 | even           |      | ok     |
|            | 3 | C17H5N10O     | 66.35  | 365.064231 | 0.0       | 0.0       | 36.0   | 20.5 | even           |      | ok     |
|            | 1 | C11H14N6NaO5S | 100.00 | 365.063859 | 0.4       | 1.0       | 19.2   | 7.5  | even           |      | ok     |
|            | 2 | C19H18NaO2S2  | 97.26  | 365.064043 | -0.2      | -0.5      | 24.2   | 10.5 | even           |      | ok     |
|            | 3 | C12H18N6NaS3  | 69.58  | 365.064728 | -0.5      | -1.4      | 32.5   | 6.5  | even           |      | ok     |
|            | 4 | C19H10N4NaO3  | 55.06  | 365.064511 | -0.3      | -0.8      | 34.3   | 16.5 | even           |      | ok     |

**Figure S73.** HRESIMS spectrum of compound **5s**

## Generic Display Report

### Analysis Info

Analysis Name D:\MZ\temp\64725000001.d  
Method tune\_low\_MS\_Service\_06\_19.m  
Sample Name PN\_8\_spot\_1\_peak\_1  
Comment Kalaba/Zehl  
Ergebnis: +/- 5ppm  
ACN / MeOH + 1% H<sub>2</sub>O

Acquisition Date 04/07/2019 14:10:01

Operator msc  
Instrument maXis

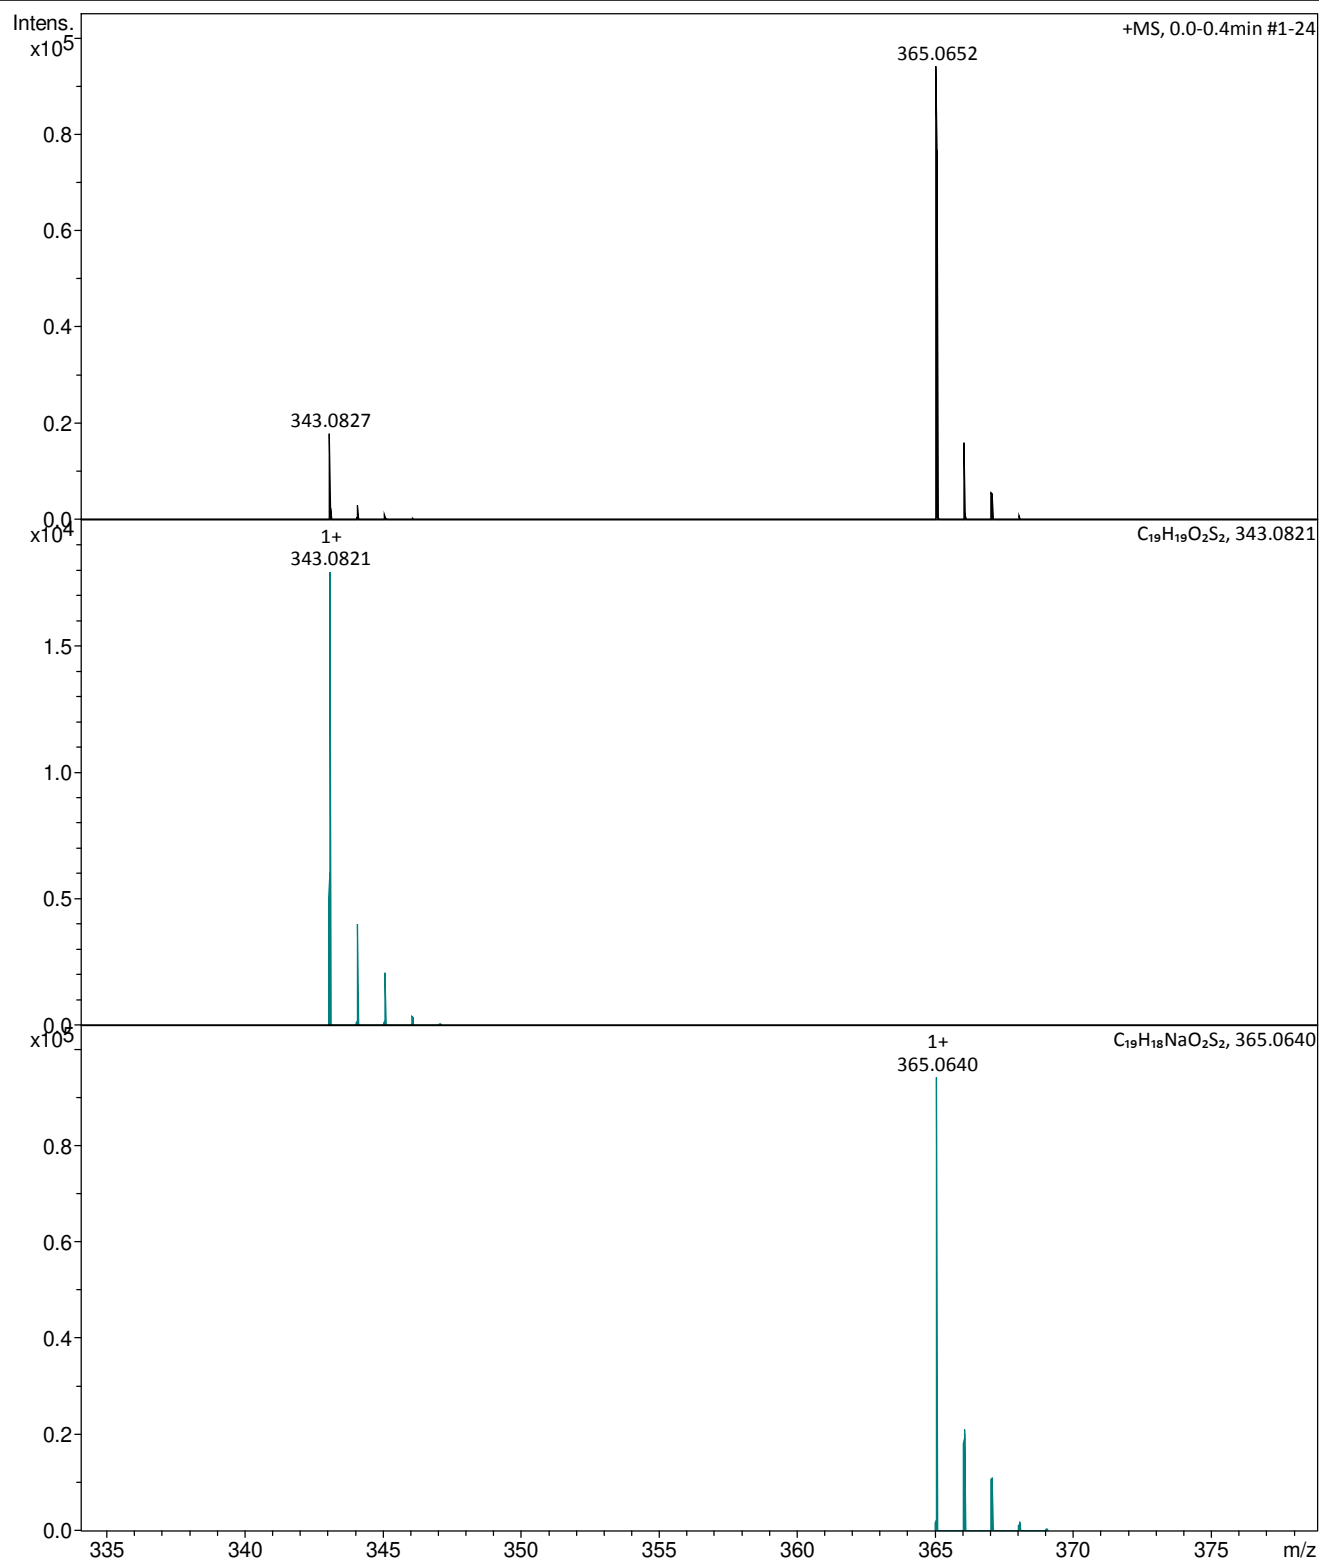



# Mass Spectrum SmartFormula Report

## Analysis Info

Analysis Name D:\MZ\temp\64725000001.d  
Method tune\_low\_MS\_Service\_06\_19.m  
Sample Name PN\_8\_spot\_1\_peak\_1  
Comment Kalaba/Zehl  
Ergebnis: +/- 5ppm  
ACN / MeOH + 1% H2O

Acquisition Date 04/07/2019 14:10:01

Operator msc  
Instrument maXis 255552.00016

## Acquisition Parameter

|             |            |                      |          |                  |           |
|-------------|------------|----------------------|----------|------------------|-----------|
| Source Type | ESI        | Ion Polarity         | Positive | Set Nebulizer    | 0.4 Bar   |
| Focus       | Not active | Set Capillary        | 4200 V   | Set Dry Heater   | 150 °C    |
| Scan Begin  | 50 m/z     | Set End Plate Offset | -500 V   | Set Dry Gas      | 4.0 l/min |
| Scan End    | 1900 m/z   | Set Charging Voltage | 0 V      | Set Divert Valve | Source    |
|             |            | Set Corona           | 0 nA     | Set APCI Heater  | 0 °C      |

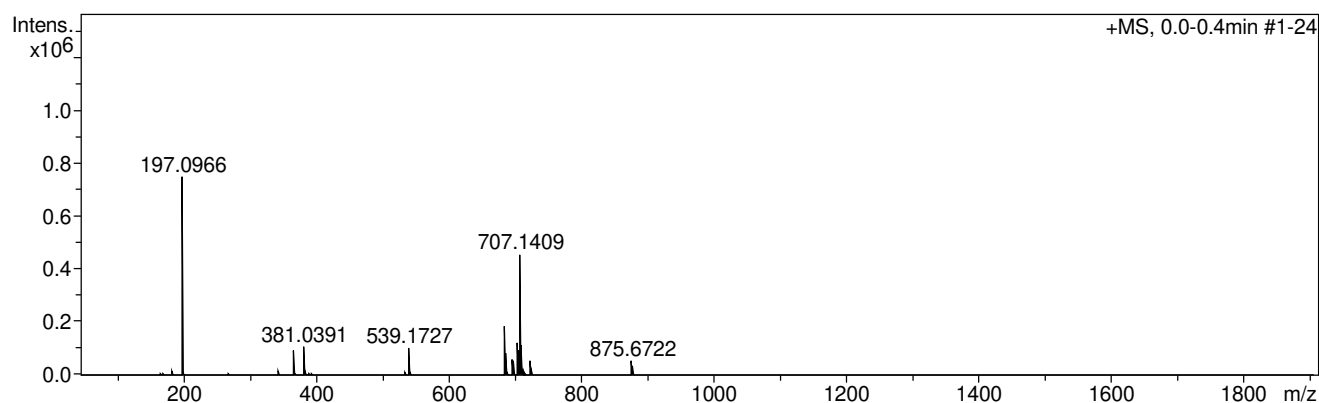

| Meas. m/z | # | Ion Formula    | Score  | m/z      | err [mDa] | err [ppm] | mSigma | rdb  | e <sup>-</sup> | Conf | N-Rule |
|-----------|---|----------------|--------|----------|-----------|-----------|--------|------|----------------|------|--------|
| 343.0827  | 1 | C11H15N6O5S    | 90.13  | 343.0819 | 0.8       | 2.3       | 7.9    | 7.5  | even           |      | ok     |
|           | 2 | C12H11N10OOS   | 100.00 | 343.0833 | -0.6      | -1.6      | 8.2    | 12.5 | even           |      | ok     |
|           | 3 | C18H15O7       | 42.14  | 343.0812 | -1.5      | -4.3      | 25.2   | 11.5 | even           |      | ok     |
|           | 4 | C19H19O2S2     | 54.31  | 343.0821 | 0.6       | 1.7       | 35.4   | 10.5 | even           |      | ok     |
|           | 5 | C12H19N6S3     | 64.49  | 343.0828 | -0.1      | -0.3      | 37.5   | 6.5  | even           |      | ok     |
|           | 6 | C11H23N2O4S3   | 34.32  | 343.0814 | -1.2      | -3.6      | 39.0   | 1.5  | even           |      | ok     |
|           | 7 | C19H11N4O3     | 58.55  | 343.0826 | 0.1       | 0.4       | 40.6   | 16.5 | even           |      | ok     |
| 365.0652  | 1 | C12H10N10NaOS  | 100.00 | 365.0652 | 0.0       | 0.0       | 3.6    | 12.5 | even           |      | ok     |
|           | 2 | C15H18NaO7S    | 46.92  | 365.0665 | 1.3       | 3.7       | 7.6    | 6.5  | even           |      | ok     |
|           | 3 | C11H14N6NaO5S  | 45.73  | 365.0639 | 1.3       | 3.7       | 9.0    | 7.5  | even           |      | ok     |
|           | 4 | C19H10N4NaO3   | 27.94  | 365.0645 | 0.7       | 1.9       | 35.3   | 16.5 | even           |      | ok     |
|           | 5 | C19H18NaO2S2   | 27.97  | 365.0640 | -1.2      | -3.2      | 36.3   | 10.5 | even           |      | ok     |
|           | 6 | C5H2N20Na      | 19.98  | 365.0664 | -1.1      | -3.1      | 38.4   | 14.5 | even           |      | ok     |
|           | 7 | C12H18N6NaS3   | 35.70  | 365.0647 | 0.5       | 1.3       | 40.9   | 6.5  | even           |      | ok     |
|           | 8 | C7H14N6NaO10   | 17.54  | 365.0664 | -1.2      | -3.2      | 42.9   | 3.5  | even           |      | ok     |
|           | 9 | C11H22N2NaO4S3 | 15.08  | 365.0634 | -1.8      | -5.0      | 43.1   | 1.5  | even           |      | ok     |

**Figure S74.** HRESIMS spectrum of compound **6s**

## Generic Display Report

### Analysis Info

Analysis Name D:\MZ\temp\64726000001.d  
Method tune\_low\_MS\_Service\_06\_19.m  
Sample Name PN\_8\_spot\_1\_peak\_2  
Comment Kalaba/Zehl  
Ergebnis: +/- 5ppm  
ACN / MeOH + 1% H<sub>2</sub>O

Acquisition Date 04/07/2019 14:13:06

Operator msc  
Instrument maXis

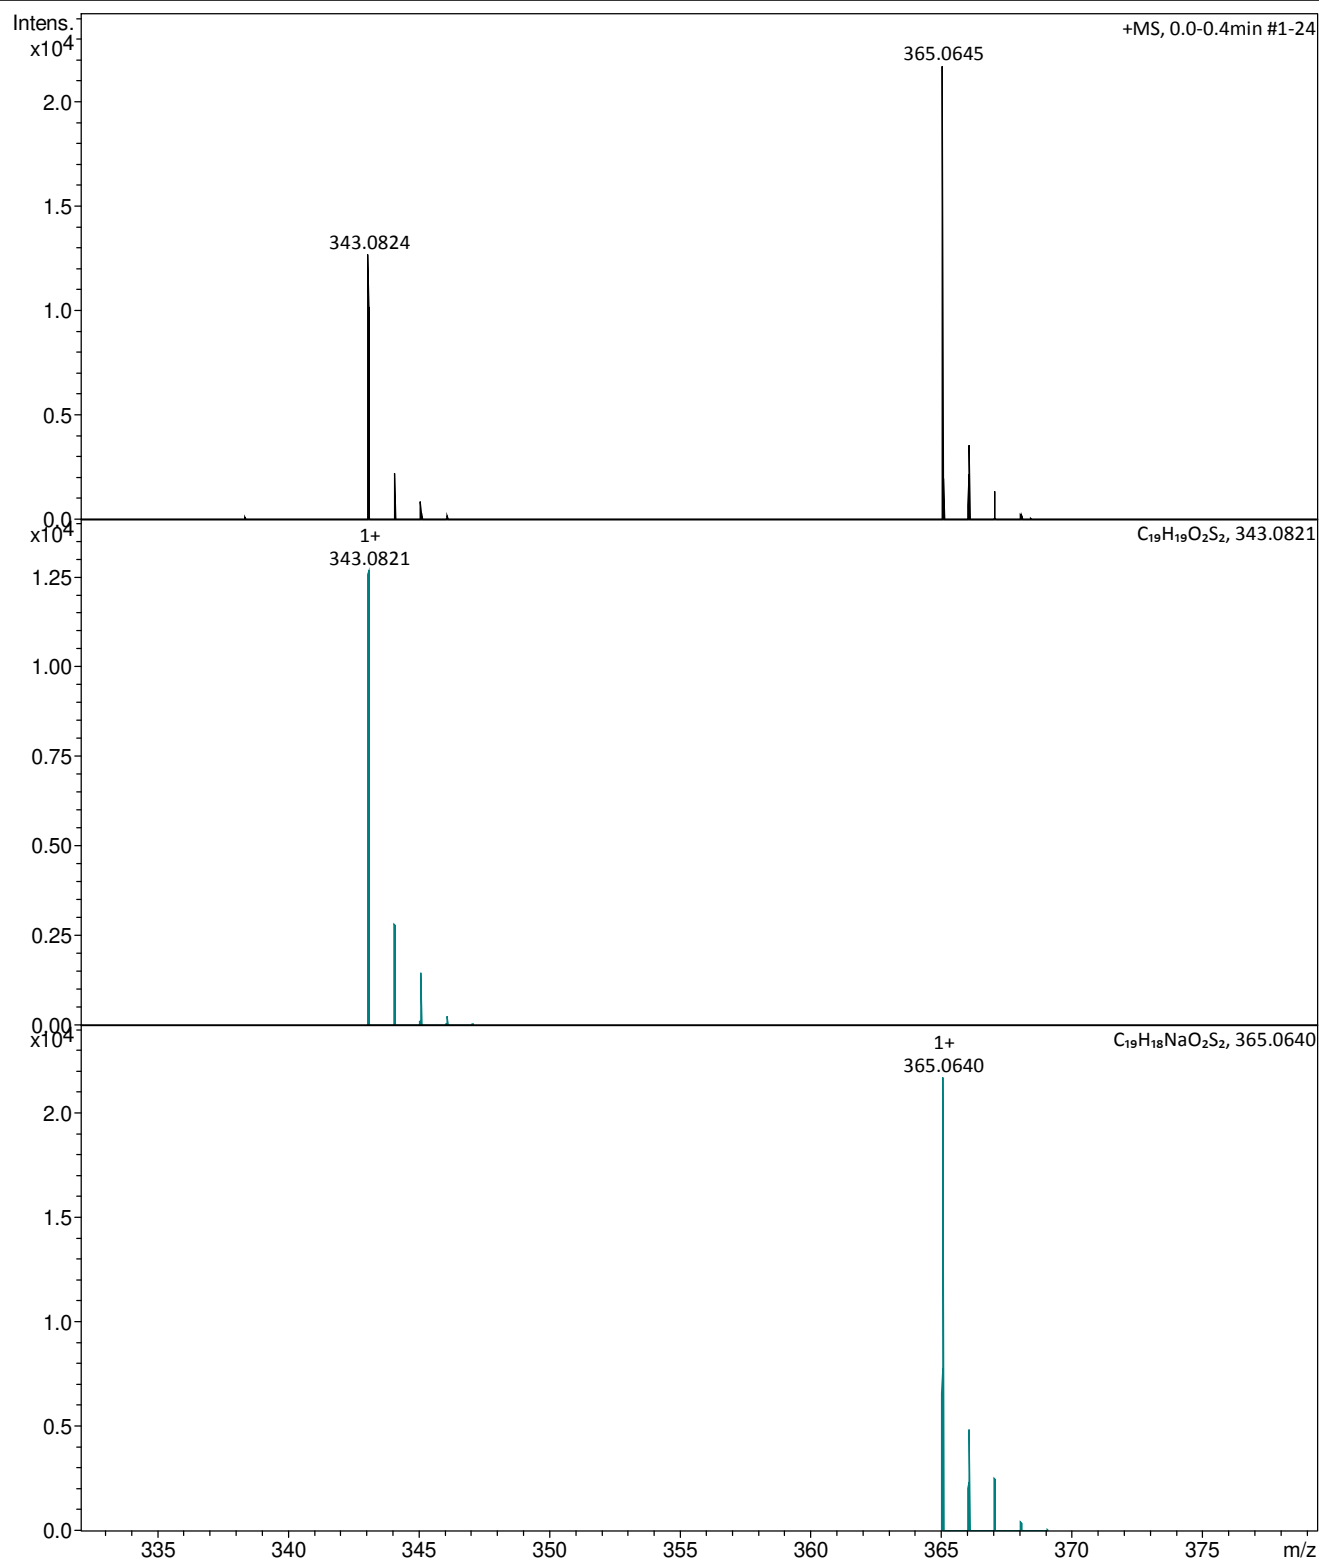

# Mass Spectrum SmartFormula Report

## Analysis Info

Analysis Name D:\MZ\temp\64726000001.d  
Method tune\_low\_MS\_Service\_06\_19.m  
Sample Name PN\_8\_spot\_1\_peak\_2  
Comment Kalaba/Zehl  
Ergebnis: +/- 5ppm  
ACN / MeOH + 1% H2O

Acquisition Date 04/07/2019 14:13:06

Operator msc  
Instrument maXis 255552.00016

## Acquisition Parameter

|             |            |                      |          |                  |           |
|-------------|------------|----------------------|----------|------------------|-----------|
| Source Type | ESI        | Ion Polarity         | Positive | Set Nebulizer    | 0.4 Bar   |
| Focus       | Not active | Set Capillary        | 4200 V   | Set Dry Heater   | 150 °C    |
| Scan Begin  | 50 m/z     | Set End Plate Offset | -500 V   | Set Dry Gas      | 4.0 l/min |
| Scan End    | 1900 m/z   | Set Charging Voltage | 0 V      | Set Divert Valve | Source    |
|             |            | Set Corona           | 0 nA     | Set APCI Heater  | 0 °C      |

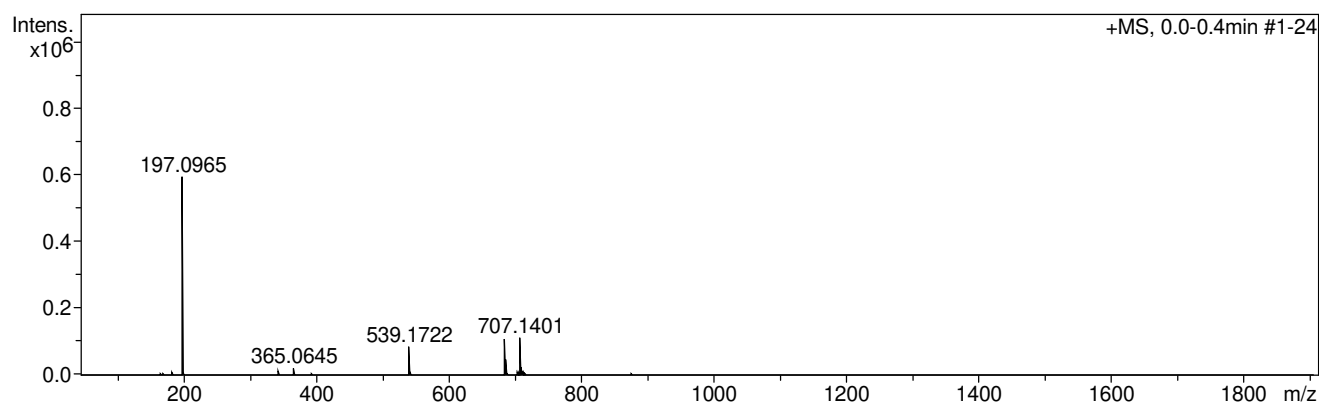

| Meas. m/z | # | Ion Formula    | Score  | m/z      | err [mDa] | err [ppm] | mSigma | rdb  | e <sup>-</sup> | Conf | N-Rule |
|-----------|---|----------------|--------|----------|-----------|-----------|--------|------|----------------|------|--------|
| 343.0824  | 1 | C12H11N10OS    | 90.55  | 343.0833 | 0.9       | 2.5       | 6.3    | 12.5 | even           |      | ok     |
|           | 2 | C11H15N6O5S    | 100.00 | 343.0819 | -0.5      | -1.4      | 12.1   | 7.5  | even           |      | ok     |
|           | 3 | C18H15O7       | 55.93  | 343.0812 | -1.2      | -3.4      | 22.4   | 11.5 | even           |      | ok     |
|           | 4 | C19H19O2S2     | 69.92  | 343.0821 | -0.3      | -0.8      | 32.2   | 10.5 | even           |      | ok     |
|           | 5 | C19H11N4O3     | 65.71  | 343.0826 | -0.2      | -0.5      | 36.3   | 16.5 | even           |      | ok     |
|           | 6 | C12H19N6S3     | 58.70  | 343.0828 | -0.4      | -1.2      | 36.9   | 6.5  | even           |      | ok     |
|           | 7 | C11H23N2O4S3   | 41.54  | 343.0814 | 0.9       | 2.7       | 39.6   | 1.5  | even           |      | ok     |
| 365.0645  | 1 | C11H14N6NaO5S  | 100.00 | 365.0639 | -0.6      | -1.8      | 7.1    | 7.5  | even           |      | ok     |
|           | 2 | C12H10N10NaOS  | 96.98  | 365.0652 | -0.7      | -1.9      | 7.6    | 12.5 | even           |      | ok     |
|           | 3 | C18H14NaO7     | 48.79  | 365.0632 | 1.3       | 3.7       | 23.4   | 11.5 | even           |      | ok     |
|           | 4 | C19H18NaO2S2   | 55.49  | 365.0640 | -0.5      | -1.3      | 37.8   | 10.5 | even           |      | ok     |
|           | 5 | C19H10N4NaO3   | 65.31  | 365.0645 | -0.0      | -0.0      | 39.2   | 16.5 | even           |      | ok     |
|           | 6 | C12H18N6NaS3   | 57.63  | 365.0647 | 0.2       | 0.6       | 40.5   | 6.5  | even           |      | ok     |
|           | 7 | C11H22N2NaO4S3 | 35.06  | 365.0634 | 1.1       | 3.1       | 41.9   | 1.5  | even           |      | ok     |

**Figure S75.** HRESIMS spectrum of compound **7s**

## Generic Display Report

### Analysis Info

Analysis Name D:\MZ\temp\64727000001.d  
Method tune\_low\_MS\_Service\_06\_19.m  
Sample Name PN\_8\_spot\_2\_peak\_1  
Comment Kalaba/ Zehl  
Ergebnis: +/- 5ppm  
ACN / MeOH + 1% H<sub>2</sub>O

Acquisition Date 04/07/2019 14:16:07

Operator msc  
Instrument maXis

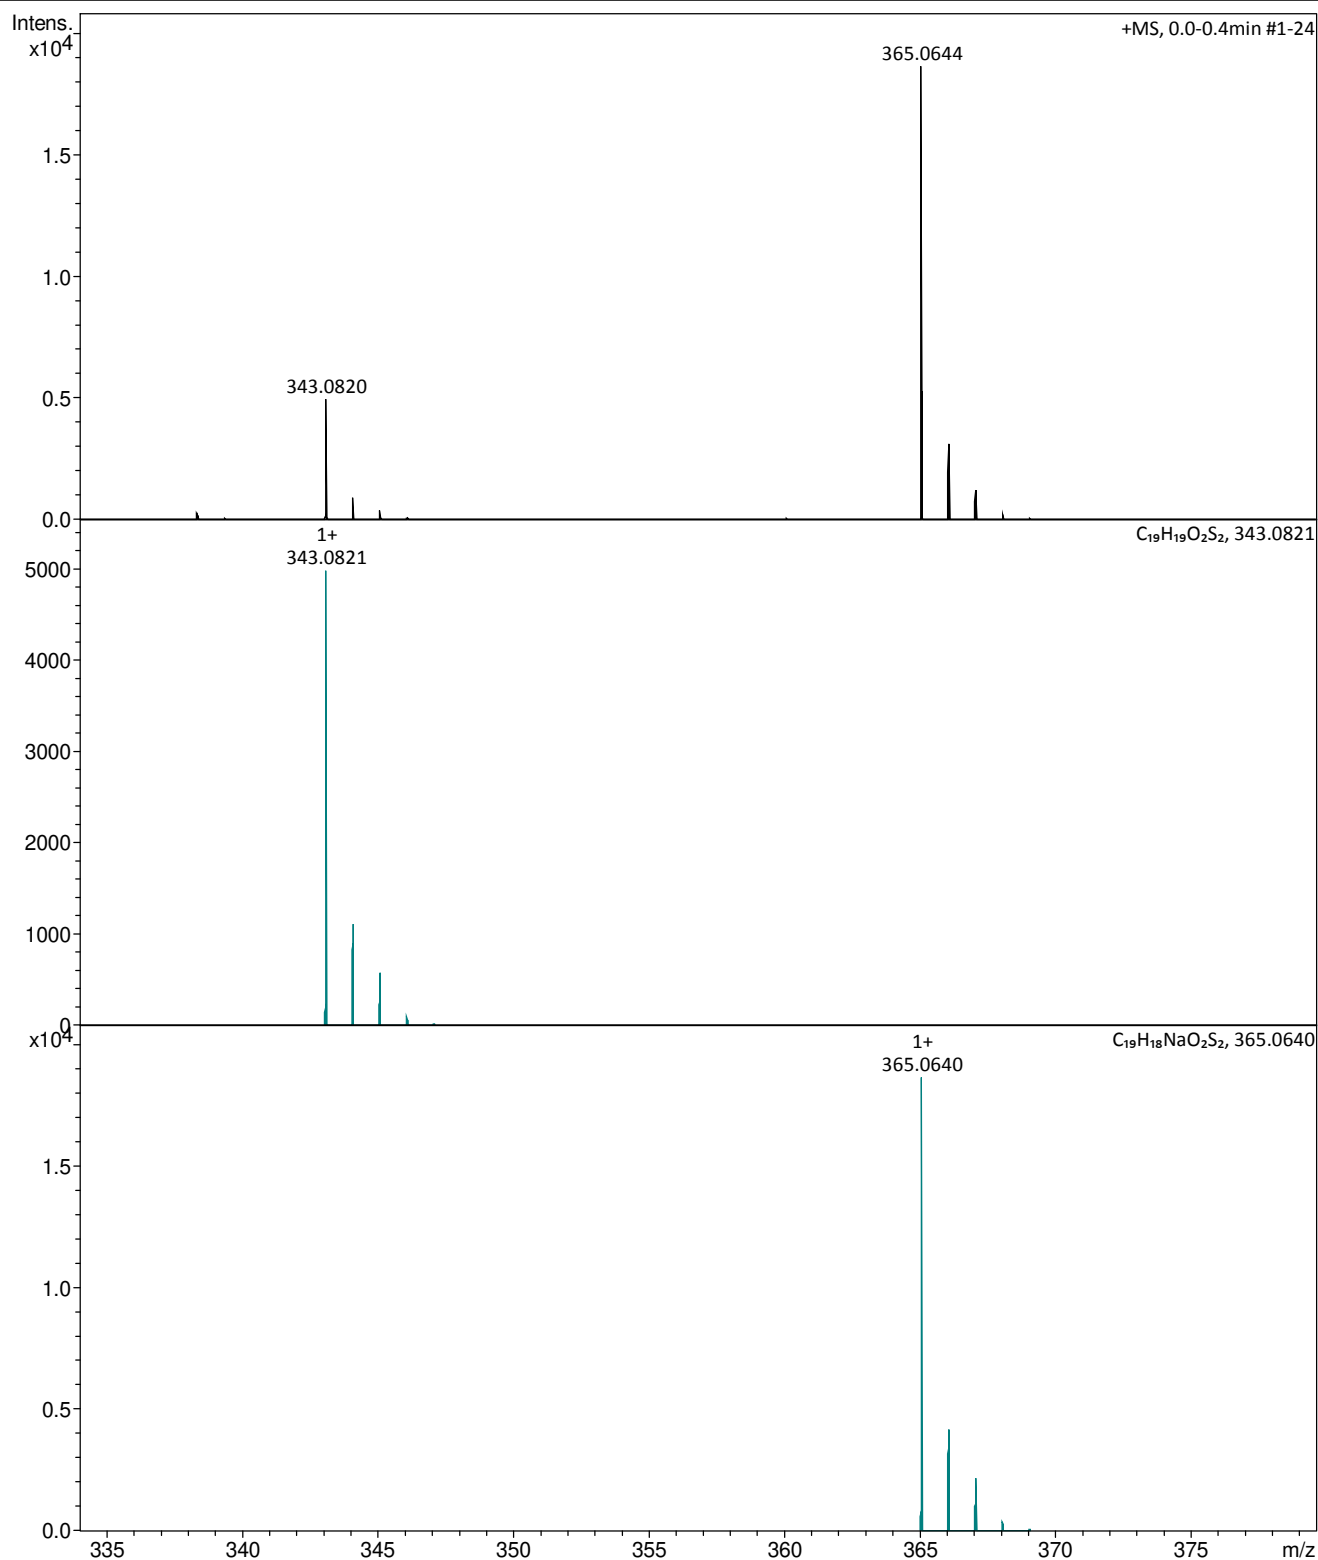

# Mass Spectrum SmartFormula Report

## Analysis Info

Analysis Name D:\MZ\temp\64727000001.d  
Method tune\_low\_MS\_Service\_06\_19.m  
Sample Name PN\_8\_spot\_2\_peak\_1  
Comment Kalaba/ Zehl  
Ergebnis: +/- 5ppm  
ACN / MeOH + 1% H2O

Acquisition Date 04/07/2019 14:16:07

Operator msc  
Instrument maXis 255552.00016

## Acquisition Parameter

|             |            |                      |          |                  |           |
|-------------|------------|----------------------|----------|------------------|-----------|
| Source Type | ESI        | Ion Polarity         | Positive | Set Nebulizer    | 0.4 Bar   |
| Focus       | Not active | Set Capillary        | 4200 V   | Set Dry Heater   | 150 °C    |
| Scan Begin  | 50 m/z     | Set End Plate Offset | -500 V   | Set Dry Gas      | 4.0 l/min |
| Scan End    | 1900 m/z   | Set Charging Voltage | 0 V      | Set Divert Valve | Source    |
|             |            | Set Corona           | 0 nA     | Set APCI Heater  | 0 °C      |

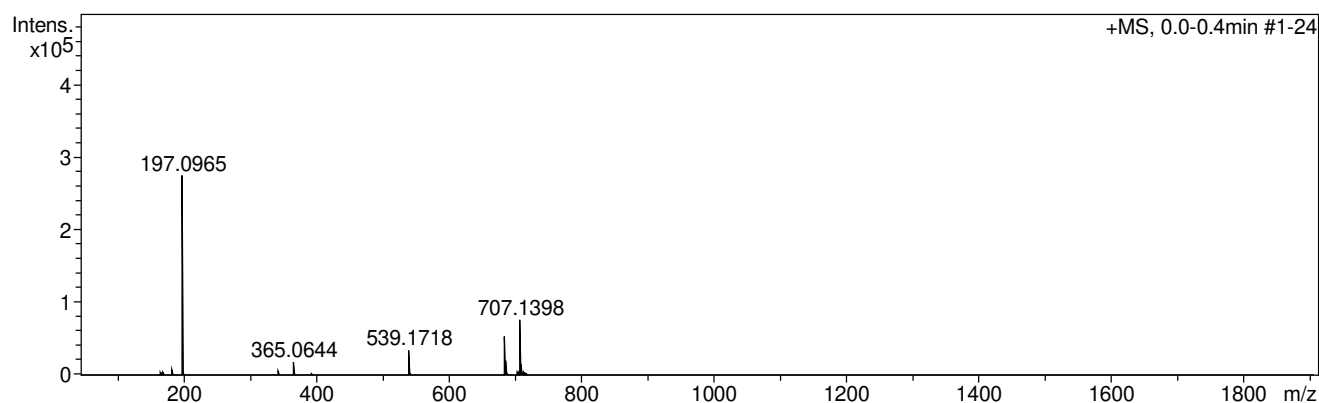

| Meas. m/z | # | Ion Formula    | Score  | m/z      | err [mDa] | err [ppm] | mSigma | rdb  | e <sup>-</sup> | Conf | N-Rule |
|-----------|---|----------------|--------|----------|-----------|-----------|--------|------|----------------|------|--------|
| 343.0820  | 1 | C12H11N10OS    | 62.76  | 343.0833 | -1.2      | -3.6      | 11.6   | 12.5 | even           |      | ok     |
|           | 2 | C11H15N6O5S    | 100.00 | 343.0819 | 0.1       | 0.3       | 17.8   | 7.5  | even           |      | ok     |
|           | 3 | C18H15O7       | 60.92  | 343.0812 | 0.8       | 2.3       | 25.7   | 11.5 | even           |      | ok     |
|           | 4 | C19H19O2S2     | 83.00  | 343.0821 | 0.1       | 0.3       | 26.4   | 10.5 | even           |      | ok     |
|           | 5 | C10H19N2O9S    | 39.36  | 343.0806 | -1.4      | -4.2      | 27.9   | 2.5  | even           |      | ok     |
|           | 6 | C12H19N6S3     | 52.18  | 343.0828 | 0.8       | 2.3       | 32.2   | 6.5  | even           |      | ok     |
|           | 7 | C11H23N2O4S3   | 52.62  | 343.0814 | 0.6       | 1.6       | 36.1   | 1.5  | even           |      | ok     |
|           | 8 | C19H11N4O3     | 50.69  | 343.0826 | 0.6       | 1.6       | 37.7   | 16.5 | even           |      | ok     |
| 365.0644  | 1 | C12H10N10NaOS  | 87.79  | 365.0652 | 0.8       | 2.3       | 6.1    | 12.5 | even           |      | ok     |
|           | 2 | C11H14N6NaO5S  | 100.00 | 365.0639 | 0.5       | 1.3       | 8.8    | 7.5  | even           |      | ok     |
|           | 3 | C18H14NaO7     | 52.84  | 365.0632 | 1.2       | 3.2       | 22.1   | 11.5 | even           |      | ok     |
|           | 4 | C19H18NaO2S2   | 59.52  | 365.0640 | 0.3       | 0.8       | 36.1   | 10.5 | even           |      | ok     |
|           | 5 | C19H10N4NaO3   | 61.62  | 365.0645 | 0.2       | 0.4       | 37.3   | 16.5 | even           |      | ok     |
|           | 6 | C12H18N6NaS3   | 52.30  | 365.0647 | 0.4       | 1.0       | 39.8   | 6.5  | even           |      | ok     |
|           | 7 | C11H22N2NaO4S3 | 36.80  | 365.0634 | -1.0      | -2.6      | 41.7   | 1.5  | even           |      | ok     |

Figure S76. HRESIMS spectrum of compound 8s

## Generic Display Report

### Analysis Info

Analysis Name D:\MZ\temp\64728000001.d  
Method tune\_low\_MS\_Service\_06\_19.m  
Sample Name PN\_8\_spot\_2\_peak\_2  
Comment Kalaba/ Zehl  
Ergebnis: +/- 5ppm  
ACN / MeOH + 1% H<sub>2</sub>O

Acquisition Date 04/07/2019 14:18:28

Operator msc  
Instrument maXis

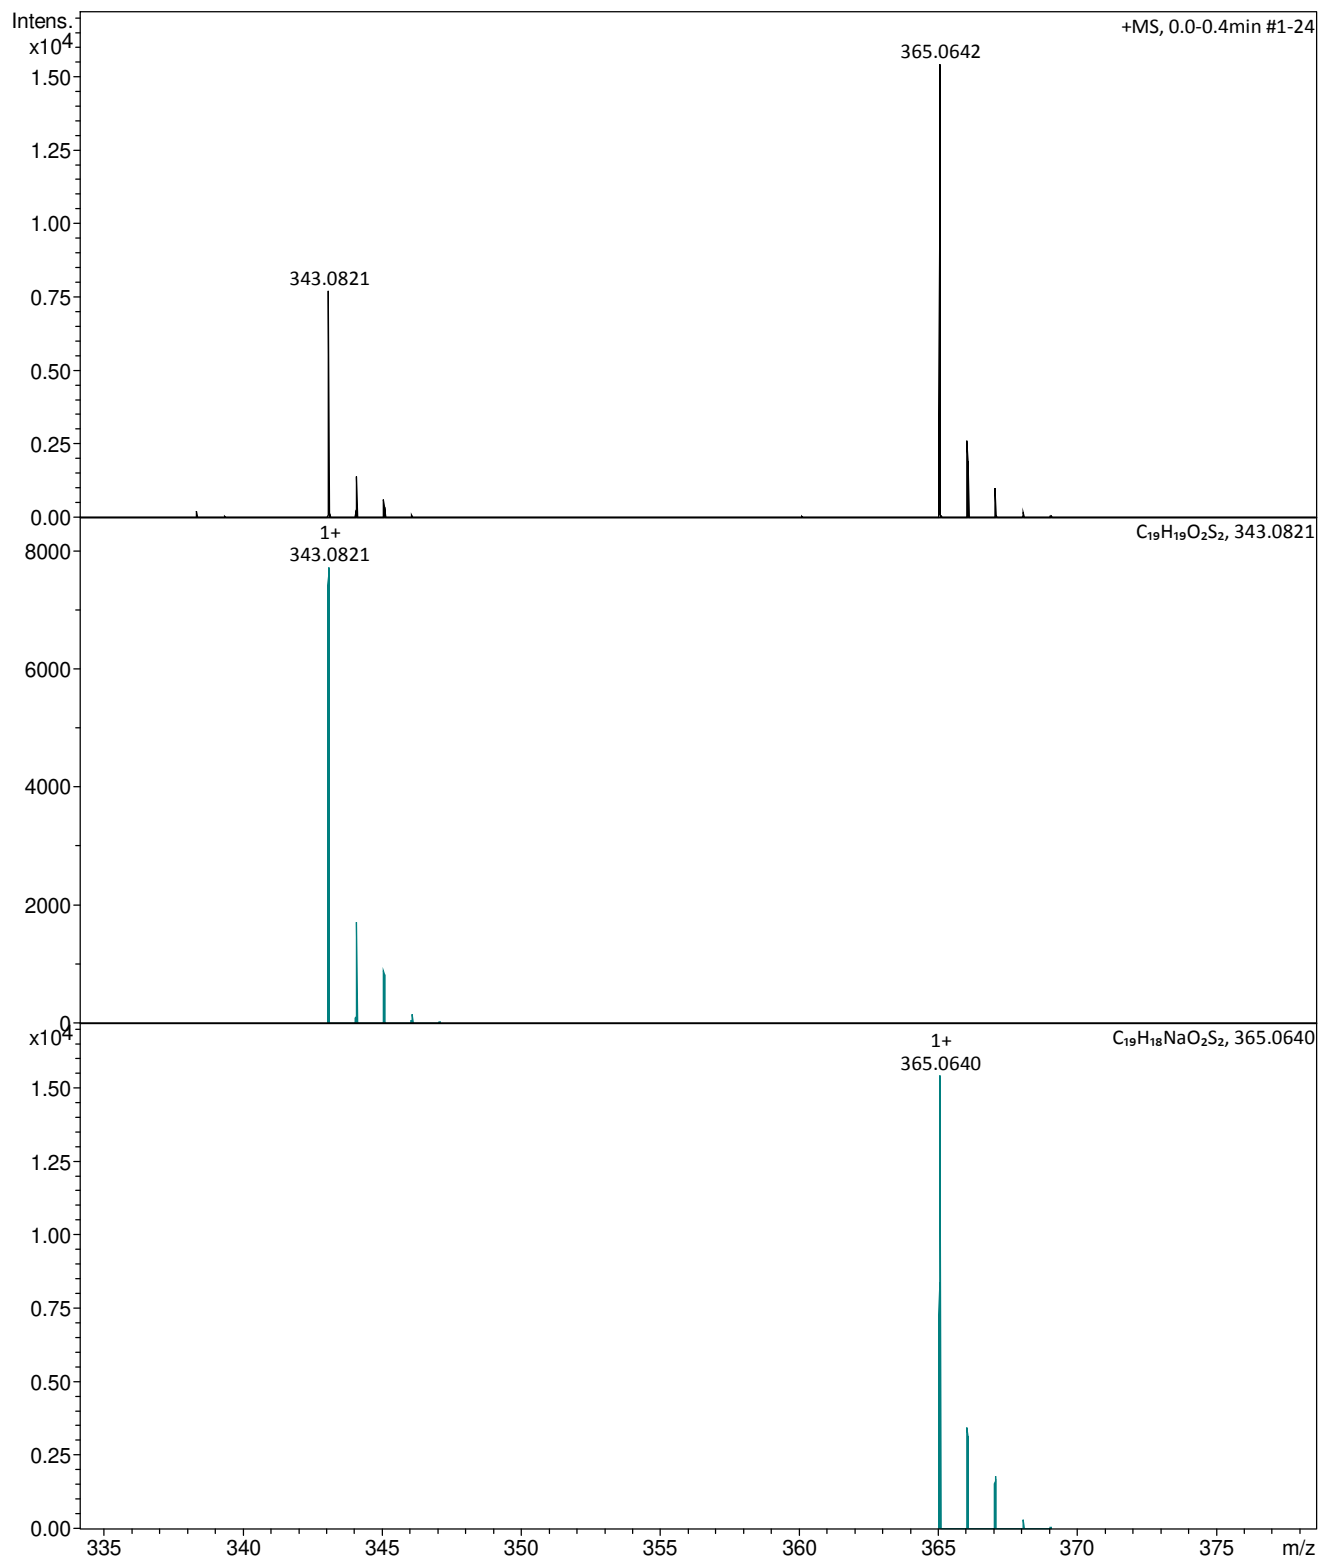

# Mass Spectrum SmartFormula Report

## Analysis Info

Analysis Name D:\MZ\temp\64728000001.d  
Method tune\_low\_MS\_Service\_06\_19.m  
Sample Name PN\_8\_spot\_2\_peak\_2  
Comment Kalaba/ Zehl  
Ergebnis: +/- 5ppm  
ACN / MeOH + 1% H2O

Acquisition Date 04/07/2019 14:18:28

Operator msc  
Instrument maXis 255552.00016

## Acquisition Parameter

|             |            |                      |          |                  |           |
|-------------|------------|----------------------|----------|------------------|-----------|
| Source Type | ESI        | Ion Polarity         | Positive | Set Nebulizer    | 0.4 Bar   |
| Focus       | Not active | Set Capillary        | 4200 V   | Set Dry Heater   | 150 °C    |
| Scan Begin  | 50 m/z     | Set End Plate Offset | -500 V   | Set Dry Gas      | 4.0 l/min |
| Scan End    | 1900 m/z   | Set Charging Voltage | 0 V      | Set Divert Valve | Source    |
|             |            | Set Corona           | 0 nA     | Set APCI Heater  | 0 °C      |

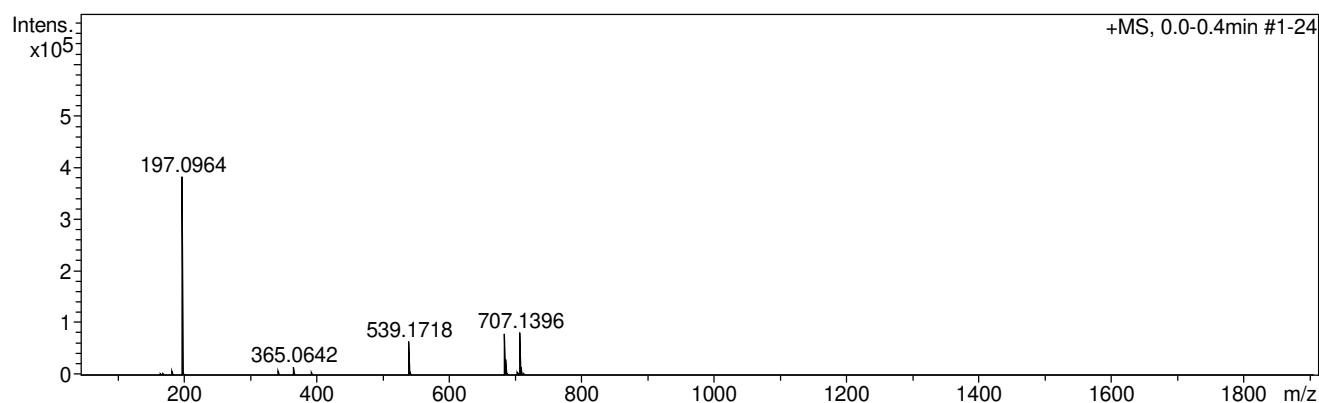

| Meas. m/z | # | Ion Formula    | Score  | m/z      | err [mDa] | err [ppm] | mSigma | rdb  | e <sup>-</sup> Conf | N-Rule |
|-----------|---|----------------|--------|----------|-----------|-----------|--------|------|---------------------|--------|
| 343.0821  | 1 | C12H11N10OS    | 69.38  | 343.0833 | 1.2       | 3.4       | 10.3   | 12.5 | even                | ok     |
|           | 2 | C11H15N6O5S    | 100.00 | 343.0819 | -0.2      | -0.5      | 17.8   | 7.5  | even                | ok     |
|           | 3 | C18H15O7       | 63.55  | 343.0812 | -0.9      | -2.5      | 23.5   | 11.5 | even                | ok     |
|           | 4 | C19H19O2S2     | 87.01  | 343.0821 | 0.0       | 0.0       | 26.9   | 10.5 | even                | ok     |
|           | 5 | C10H19N2O9S    | 38.18  | 343.0806 | -1.5      | -4.4      | 28.5   | 2.5  | even                | ok     |
|           | 6 | C12H19N6S3     | 53.48  | 343.0828 | -0.7      | -2.0      | 34.0   | 6.5  | even                | ok     |
|           | 7 | C19H11N4O3     | 57.84  | 343.0826 | 0.5       | 1.4       | 35.2   | 16.5 | even                | ok     |
|           | 8 | C11H23N2O4S3   | 49.80  | 343.0814 | -0.6      | -1.9      | 38.0   | 1.5  | even                | ok     |
| 365.0642  | 1 | C12H10N10NaOS  | 75.99  | 365.0652 | 1.0       | 2.8       | 5.5    | 12.5 | even                | ok     |
|           | 2 | C11H14N6NaO5S  | 100.00 | 365.0639 | -0.3      | -0.9      | 10.1   | 7.5  | even                | ok     |
|           | 3 | C10H18N2NaO9S  | 37.14  | 365.0625 | 1.7       | 4.5       | 21.4   | 2.5  | even                | ok     |
|           | 4 | C18H14NaO7     | 55.51  | 365.0632 | 1.0       | 2.8       | 21.8   | 11.5 | even                | ok     |
|           | 5 | C19H18NaO2S2   | 62.80  | 365.0640 | -0.1      | -0.4      | 34.7   | 10.5 | even                | ok     |
|           | 6 | C19H10N4NaO3   | 55.06  | 365.0645 | -0.3      | -0.9      | 36.5   | 16.5 | even                | ok     |
|           | 7 | C12H18N6NaS3   | 46.63  | 365.0647 | 0.5       | 1.5       | 38.9   | 6.5  | even                | ok     |
|           | 8 | C11H22N2NaO4S3 | 38.78  | 365.0634 | 0.8       | 2.2       | 41.2   | 1.5  | even                | ok     |

**Figure S77.** HRESIMS spectrum of compound **5t**

## Generic Display Report

### Analysis Info

Analysis Name E:\Data\MS\_MessService\58955000001.d  
Method tune\_low\_MS\_Service\_08\_18.m  
Sample Name CE-149-SPOT1-PEAK1  
Comment Kalaba/Zehl  
Ergebnis: +/- 5ppm  
ACN/MeOH +0.1% H2O

Acquisition Date 8/14/2018 5:33:13 PM

Operator msc  
Instrument maXis

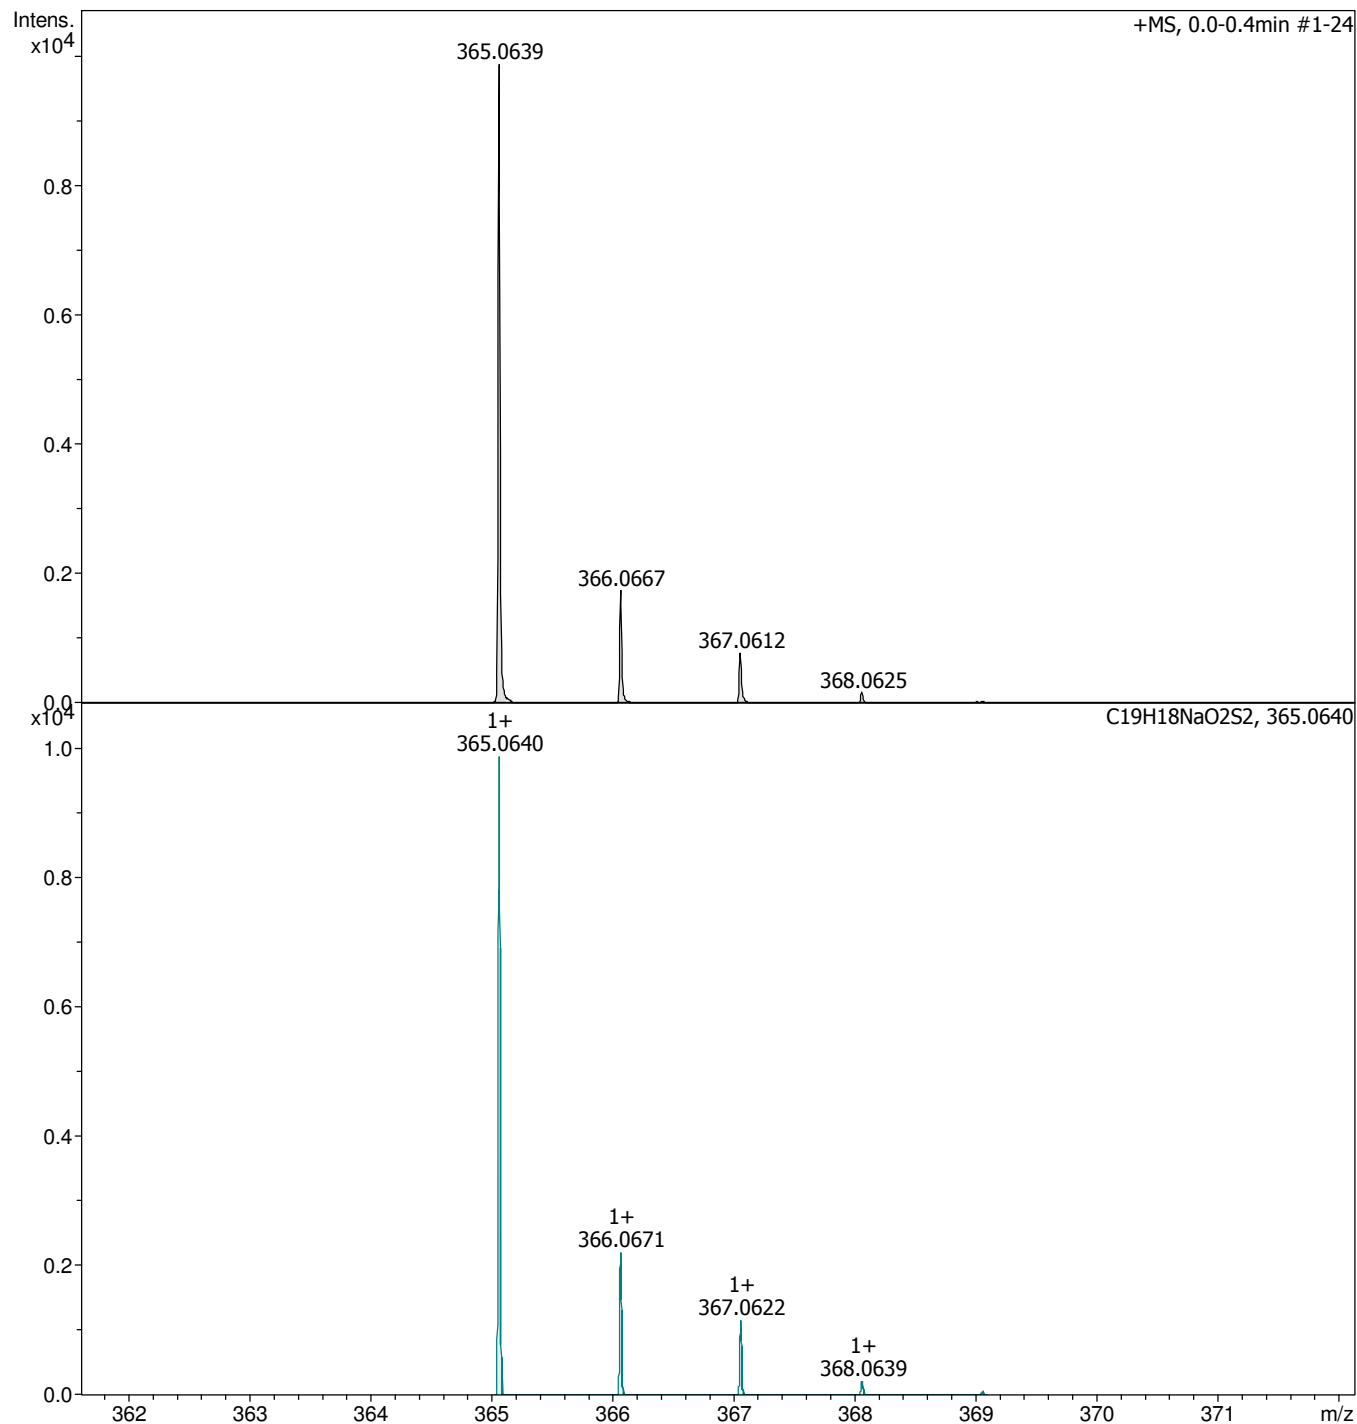



# Mass Spectrum SmartFormula Report

## Analysis Info

Analysis Name E:\Data\MS\_MessService\58955000001.d  
 Method tune\_low\_MS\_Service\_08\_18.m  
 Sample Name CE-149-SPOT1-PEAK1  
 Comment Kalaba/Zehl  
 Ergebnis: +/- 5ppm  
 ACN/MeOH +0.1% H2O

Acquisition Date 8/14/2018 5:33:13 PM

Operator msc  
 Instrument maXis 255552.00016

## Acquisition Parameter

|             |            |                      |          |                  |           |
|-------------|------------|----------------------|----------|------------------|-----------|
| Source Type | ESI        | Ion Polarity         | Positive | Set Nebulizer    | 0.4 Bar   |
| Focus       | Not active | Set Capillary        | 4500 V   | Set Dry Heater   | 180 °C    |
| Scan Begin  | 50 m/z     | Set End Plate Offset | -500 V   | Set Dry Gas      | 4.0 l/min |
| Scan End    | 1900 m/z   | Set Charging Voltage | 0 V      | Set Divert Valve | Source    |
|             |            | Set Corona           | 0 nA     | Set APCI Heater  | 0 °C      |

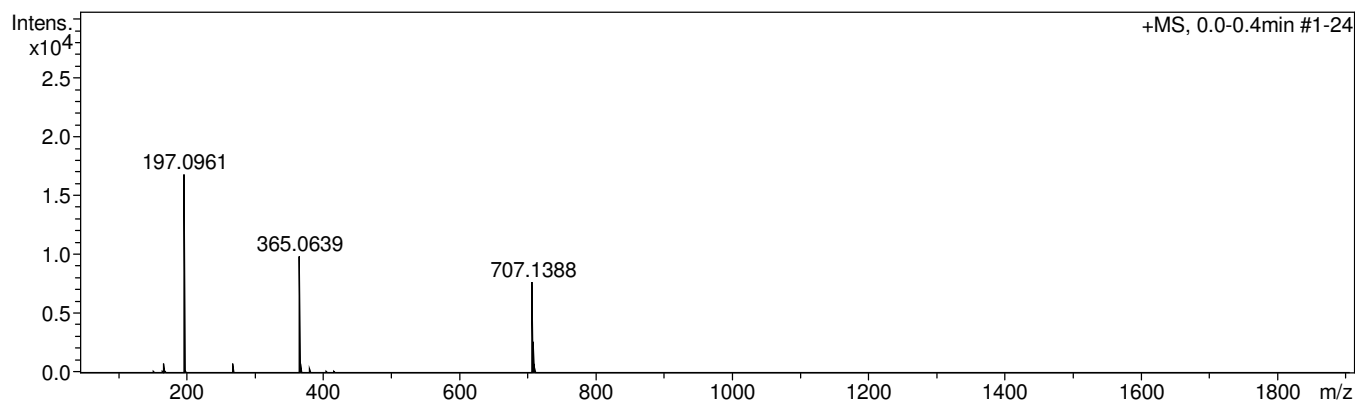

| Meas. m/z  | #  | Ion Formula    | Score  | m/z        | err [mDa] | err [ppm] | mSigma | rdB  | e <sup>-</sup> | Conf | N-Rule |
|------------|----|----------------|--------|------------|-----------|-----------|--------|------|----------------|------|--------|
| 365.063889 | 1  | C13H16N3NaO6S  | 56.16  | 365.065202 | 1.3       | 3.6       | 8.3    | 7.0  | odd            |      | ok     |
|            | 2  | C12H10N10NaOS  | 55.50  | 365.065197 | 1.3       | 3.6       | 9.1    | 12.5 | even           |      | ok     |
|            | 3  | C10H8N13NaS    | 100.00 | 365.063854 | -0.0      | -0.1      | 12.5   | 13.0 | odd            |      | ok     |
|            | 4  | C11H14N6NaO5S  | 97.51  | 365.063859 | 0.0       | 0.1       | 13.9   | 7.5  | even           |      | ok     |
|            | 5  | C17H16N3NaOS2  | 45.20  | 365.062700 | -1.2      | -3.3      | 22.9   | 11.0 | odd            |      | ok     |
|            | 6  | C10H18N2NaO9S  | 39.20  | 365.062522 | 1.4       | 3.7       | 24.3   | 2.5  | even           |      | ok     |
|            | 7  | C18H14NaO7     | 41.99  | 365.063173 | -0.7      | -2.0      | 25.2   | 11.5 | even           |      | ok     |
|            | 8  | C19H18NaO2S2   | 68.31  | 365.064043 | 0.2       | 0.4       | 28.0   | 10.5 | even           |      | ok     |
|            | 9  | C12H18N6NaS3   | 44.30  | 365.064728 | -0.8      | -2.3      | 32.2   | 6.5  | even           |      | ok     |
|            | 10 | C11H22N2NaO4S3 | 48.47  | 365.063391 | -0.5      | -1.4      | 35.6   | 1.5  | even           |      | ok     |
|            | 11 | C17H8N7NaO2    | 31.78  | 365.063168 | -0.7      | -2.0      | 36.4   | 17.0 | odd            |      | ok     |
|            | 12 | C19H10N4NaO3   | 31.61  | 365.064511 | -0.6      | -1.7      | 38.5   | 16.5 | even           |      | ok     |

**Figure S78.** HRESIMS spectrum of compound **6t**

## Generic Display Report

### Analysis Info

Analysis Name E:\Data\MS\_MessService\58956000001.d  
Method tune\_low\_MS\_Service\_08\_18.m  
Sample Name CE-149-SPOT1-PEAK2  
Comment Kalaba/Zehl  
Ergebnis: +/- 5ppm  
ACN/MeOH +0.1% H2O

Acquisition Date 8/14/2018 5:38:55 PM

Operator msc  
Instrument maXis

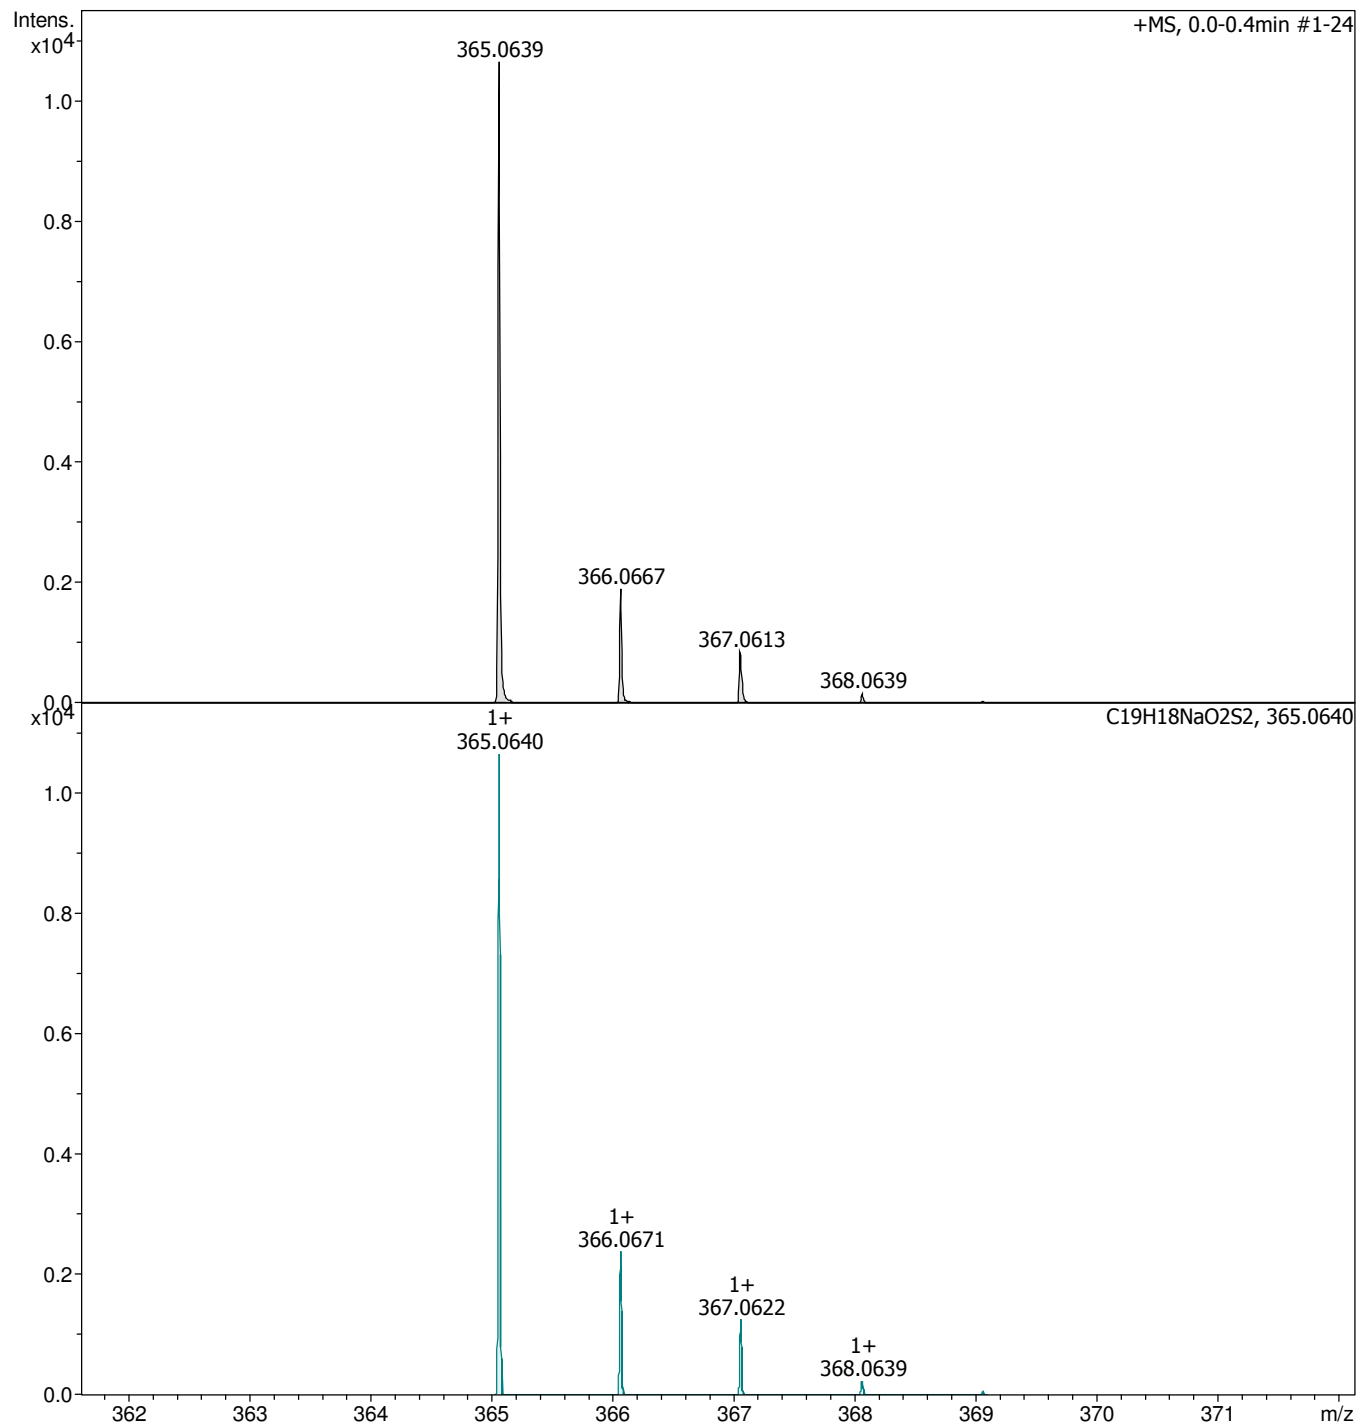

# Mass Spectrum SmartFormula Report

## Analysis Info

Analysis Name E:\Data\MS\_MessService\58956000001.d  
 Method tune\_low\_MS\_Service\_08\_18.m  
 Sample Name CE-149-SPOT1-PEAK2  
 Comment Kalaba/Zehl  
 Ergebnis: +/- 5ppm  
 ACN/MeOH +0.1% H2O

Acquisition Date 8/14/2018 5:38:55 PM

Operator msc  
 Instrument maXis 255552.00016

## Acquisition Parameter

|             |            |                      |          |                  |           |
|-------------|------------|----------------------|----------|------------------|-----------|
| Source Type | ESI        | Ion Polarity         | Positive | Set Nebulizer    | 0.4 Bar   |
| Focus       | Not active | Set Capillary        | 4500 V   | Set Dry Heater   | 180 °C    |
| Scan Begin  | 50 m/z     | Set End Plate Offset | -500 V   | Set Dry Gas      | 4.0 l/min |
| Scan End    | 1900 m/z   | Set Charging Voltage | 0 V      | Set Divert Valve | Source    |
|             |            | Set Corona           | 0 nA     | Set APCI Heater  | 0 °C      |

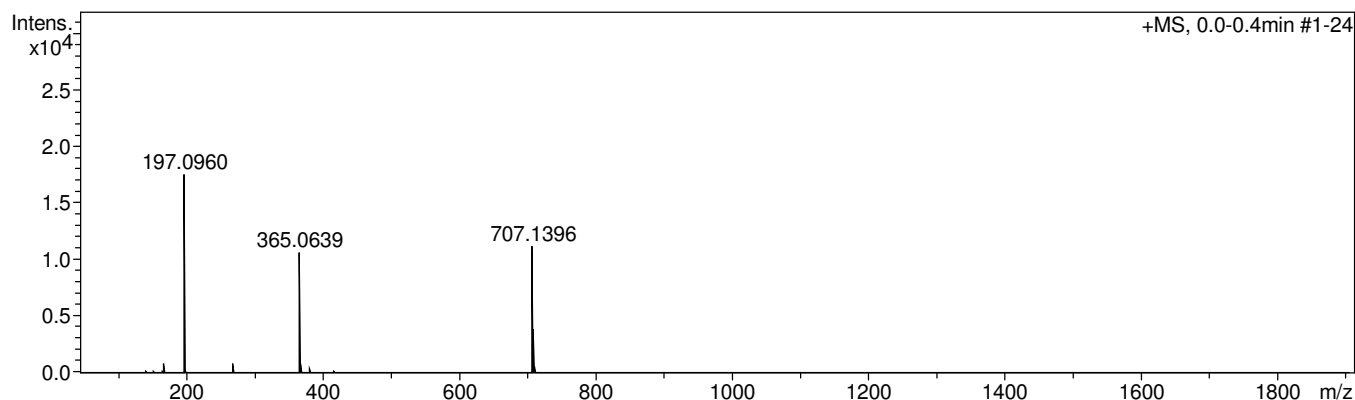

| Meas. m/z  | #  | Ion Formula    | Score  | m/z        | err [mDa] | err [ppm] | mSigma | rdb  | e <sup>-</sup> | Conf | N-Rule |
|------------|----|----------------|--------|------------|-----------|-----------|--------|------|----------------|------|--------|
| 365.063943 | 1  | C13H16N3NaO6S  | 59.55  | 365.065202 | -1.3      | -3.4      | 8.8    | 7.0  | odd            |      | ok     |
|            | 2  | C12H10N10NaOS  | 58.89  | 365.065197 | -1.3      | -3.4      | 9.6    | 12.5 | even           |      | ok     |
|            | 3  | C10H8N13NaS    | 100.00 | 365.063854 | 0.1       | 0.2       | 13.1   | 13.0 | odd            |      | ok     |
|            | 4  | C11H14N6NaO5S  | 97.59  | 365.063859 | 0.1       | 0.2       | 14.5   | 7.5  | even           |      | ok     |
|            | 5  | C17H16N3NaOS2  | 45.90  | 365.062700 | 1.2       | 3.4       | 22.2   | 11.0 | odd            |      | ok     |
|            | 6  | C10H18N2NaO9S  | 38.75  | 365.062522 | -1.4      | -3.9      | 24.7   | 2.5  | even           |      | ok     |
|            | 7  | C18H14NaO7     | 55.03  | 365.063173 | -0.8      | -2.1      | 26.2   | 11.5 | even           |      | ok     |
|            | 8  | C19H18NaO2S2   | 73.38  | 365.064043 | 0.1       | 0.3       | 27.4   | 10.5 | even           |      | ok     |
|            | 9  | C12H18N6NaS3   | 47.83  | 365.064728 | -0.8      | -2.2      | 31.7   | 6.5  | even           |      | ok     |
|            | 10 | C11H22N2NaO4S3 | 49.38  | 365.063391 | -0.6      | -1.5      | 35.1   | 1.5  | even           |      | ok     |
|            | 11 | C17H8N7NaO2    | 31.62  | 365.063168 | -0.8      | -2.1      | 36.8   | 17.0 | odd            |      | ok     |
|            | 12 | C19H10N4NaO3   | 33.38  | 365.064511 | -0.6      | -1.6      | 38.8   | 16.5 | even           |      | ok     |

**Figure S79.** HRESIMS spectrum of compound **7t**

## Generic Display Report

### Analysis Info

Analysis Name E:\Data\MS\_MessService\58957000001.d  
Method tune\_low\_MS\_Service\_08\_18.m  
Sample Name CE-149-SPOT2-PEAK1  
Comment Kalaba/Zehl  
Ergebnis: +/- 5ppm  
ACN/MeOH +0.1% H<sub>2</sub>O

Acquisition Date 8/14/2018 5:41:18 PM

Operator msc  
Instrument maXis

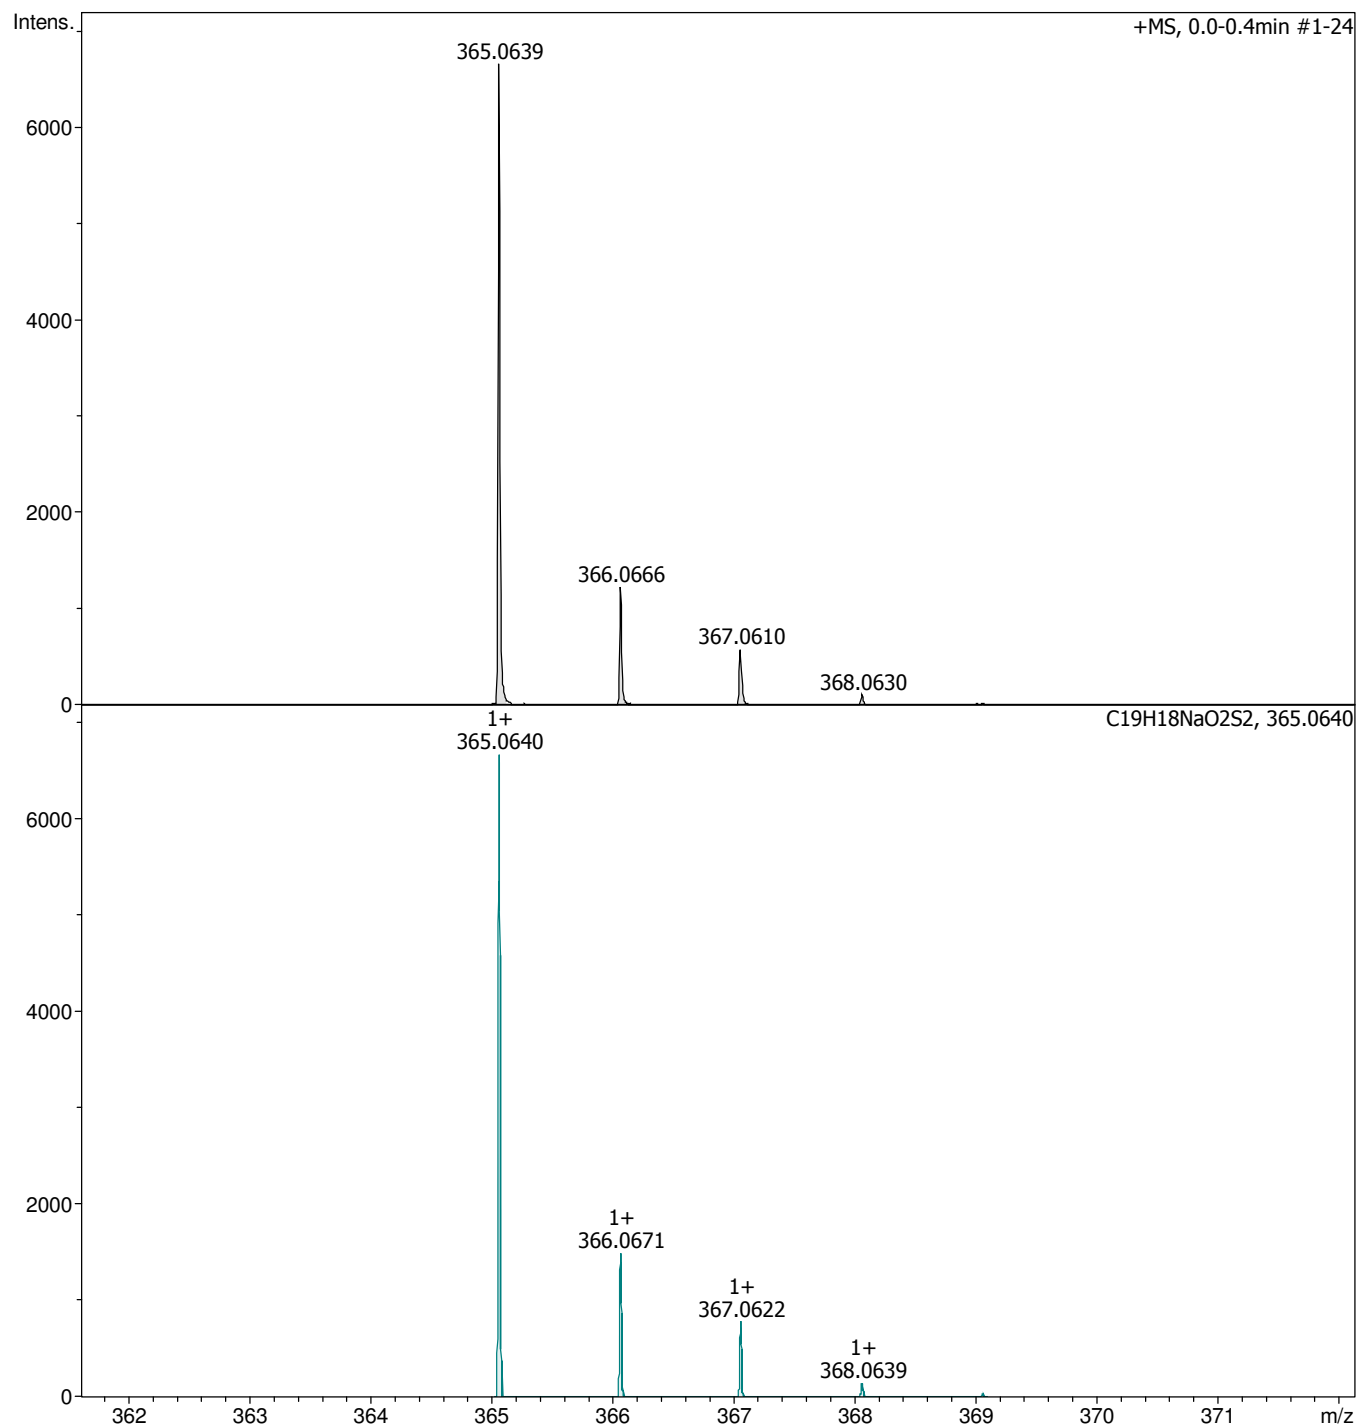

# Mass Spectrum SmartFormula Report

## Analysis Info

Analysis Name E:\Data\MS\_MessService\58957000001.d  
Method tune\_low\_MS\_Service\_08\_18.m  
Sample Name CE-149-SPOT2-PEAK1  
Comment Kalaba/Zehl  
Ergebnis: +/- 5ppm  
ACN/MeOH +0.1% H2O

Acquisition Date 8/14/2018 5:41:18 PM

Operator msc  
Instrument maXis 255552.00016

## Acquisition Parameter

|             |            |                      |          |                  |           |
|-------------|------------|----------------------|----------|------------------|-----------|
| Source Type | ESI        | Ion Polarity         | Positive | Set Nebulizer    | 0.4 Bar   |
| Focus       | Not active | Set Capillary        | 4500 V   | Set Dry Heater   | 180 °C    |
| Scan Begin  | 50 m/z     | Set End Plate Offset | -500 V   | Set Dry Gas      | 4.0 l/min |
| Scan End    | 1900 m/z   | Set Charging Voltage | 0 V      | Set Divert Valve | Source    |
|             |            | Set Corona           | 0 nA     | Set APCI Heater  | 0 °C      |

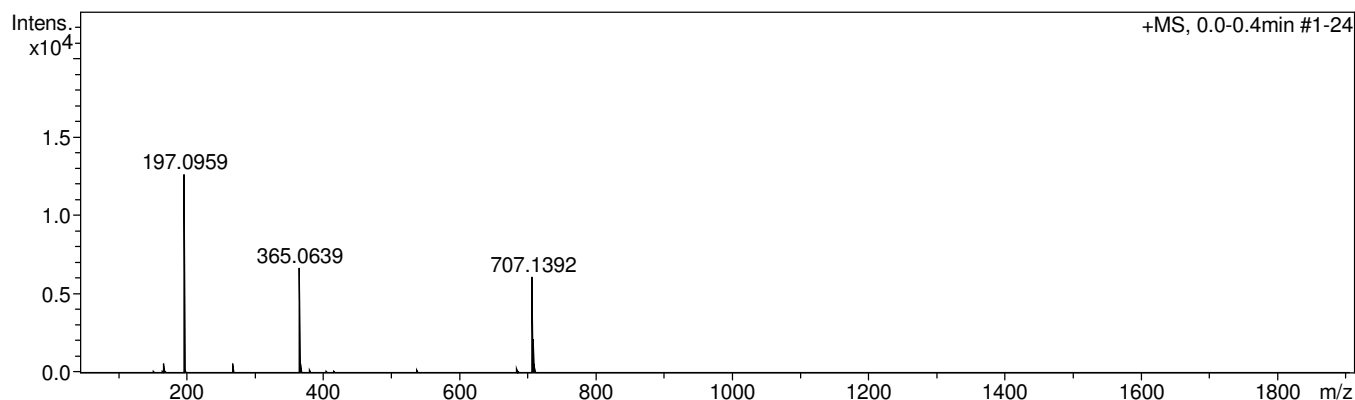

| Meas. m/z  | #  | Ion Formula    | Score  | m/z        | err [mDa] | err [ppm] | mSigma | rdb  | e <sup>-</sup> | Conf | N-Rule |
|------------|----|----------------|--------|------------|-----------|-----------|--------|------|----------------|------|--------|
| 365.063898 | 1  | C13H16N3NaO6S  | 57.17  | 365.065202 | -1.3      | -3.6      | 13.8   | 7.0  | odd            |      | ok     |
|            | 2  | C12H10N10NaOS  | 57.32  | 365.065197 | -1.3      | -3.6      | 13.9   | 12.5 | even           |      | ok     |
|            | 3  | C17H16N3NaOS2  | 56.58  | 365.062700 | 1.2       | 3.3       | 17.6   | 11.0 | odd            |      | ok     |
|            | 4  | C10H8N13NaS    | 100.00 | 365.063854 | -0.0      | -0.1      | 18.2   | 13.0 | odd            |      | ok     |
|            | 5  | C11H14N6NaO5S  | 97.45  | 365.063859 | -0.0      | -0.1      | 19.5   | 7.5  | even           |      | ok     |
|            | 6  | C19H18NaO2S2   | 86.95  | 365.064043 | 0.1       | 0.4       | 22.7   | 10.5 | even           |      | ok     |
|            | 7  | C18H14NaO7     | 44.13  | 365.063173 | 0.7       | 2.0       | 27.9   | 11.5 | even           |      | ok     |
|            | 8  | C12H18N6NaS3   | 54.80  | 365.064728 | 0.8       | 2.3       | 28.5   | 6.5  | even           |      | ok     |
|            | 9  | C10H18N2NaO9S  | 39.10  | 365.062522 | -1.4      | -3.8      | 29.1   | 2.5  | even           |      | ok     |
|            | 10 | C11H22N2NaO4S3 | 57.66  | 365.063391 | 0.5       | 1.4       | 33.1   | 1.5  | even           |      | ok     |
|            | 11 | C17H8N7NaO2    | 33.48  | 365.063168 | 0.7       | 2.0       | 38.7   | 17.0 | odd            |      | ok     |
|            | 12 | C19H10N4NaO3   | 34.71  | 365.064511 | 0.6       | 1.7       | 39.6   | 16.5 | even           |      | ok     |

**Figure S80.** HRESIMS spectrum of compound **8t**

## Generic Display Report

### Analysis Info

Analysis Name E:\Data\MS\_MessService\58958000001.d  
Method tune\_low\_MS\_Service\_08\_18.m  
Sample Name CE-149-SPOT2-PEAK2  
Comment Kalaba/Zehl  
Ergebnis: +/- 5ppm  
ACN/MeOH +0.1% H<sub>2</sub>O

Acquisition Date 8/14/2018 5:46:28 PM

Operator msc  
Instrument maXis

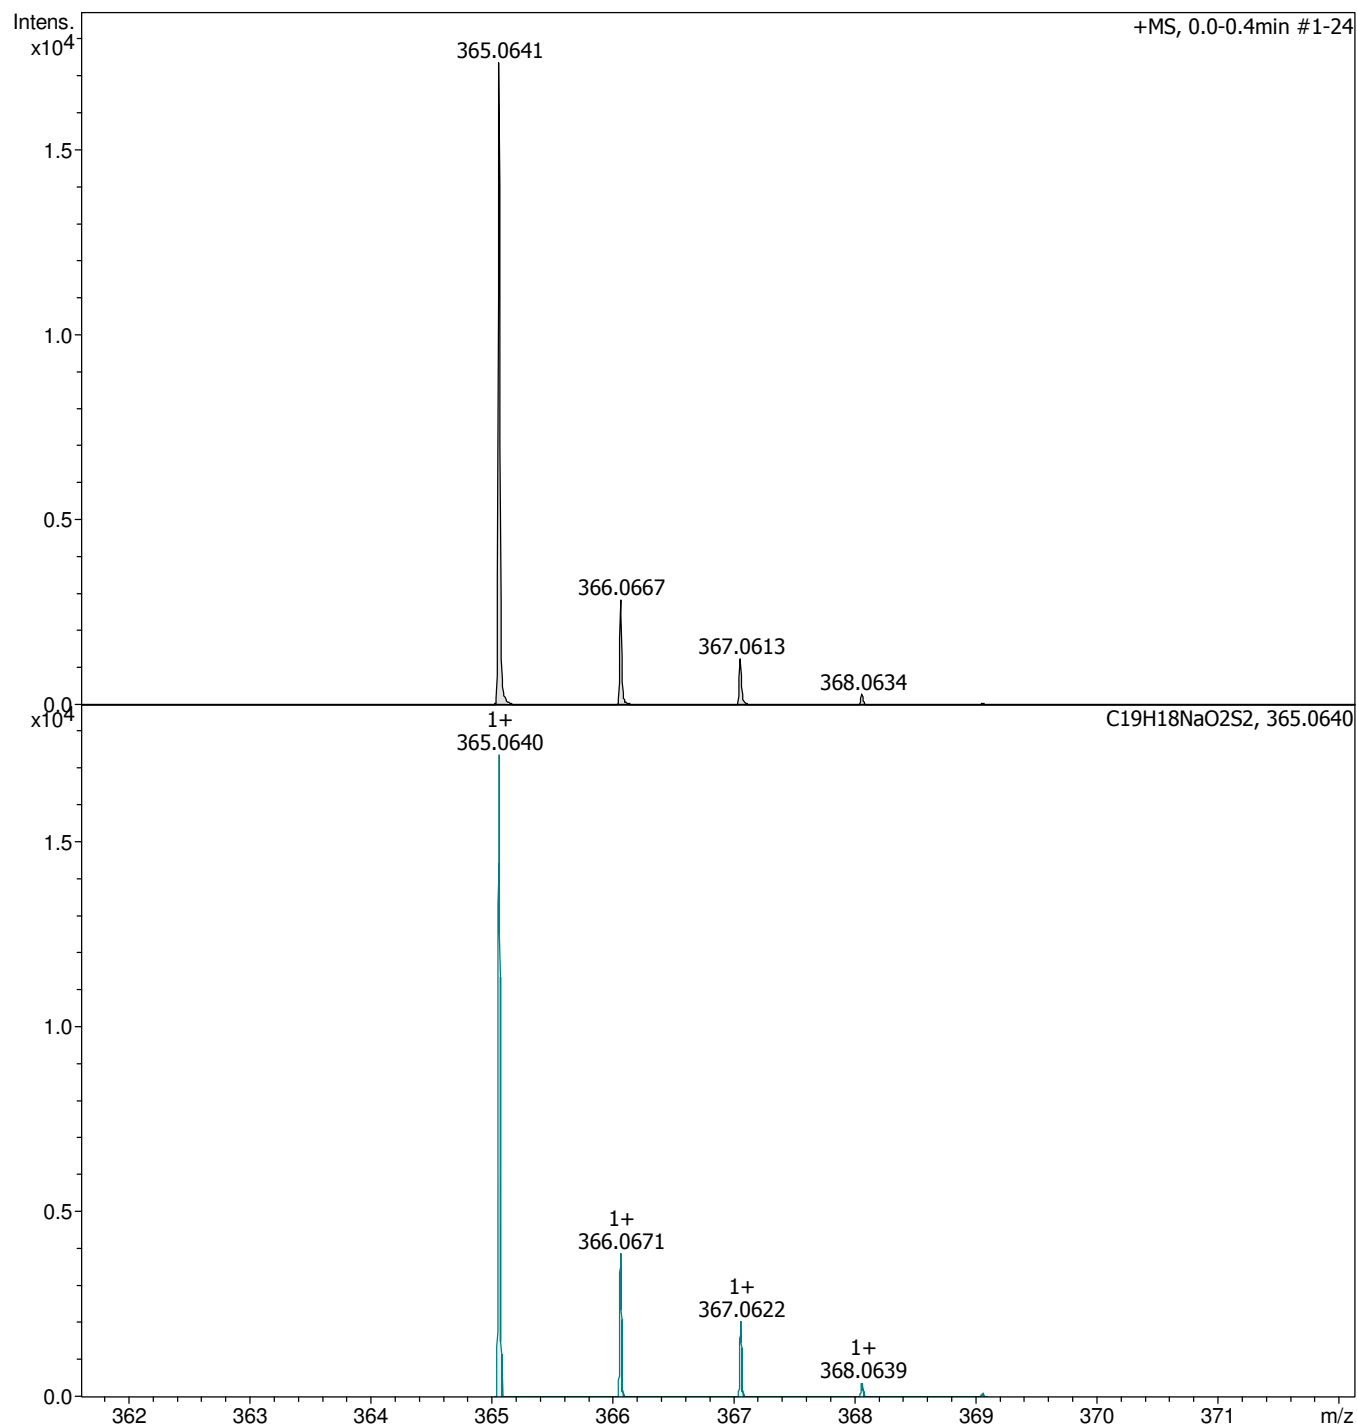

# Mass Spectrum SmartFormula Report

## Analysis Info

Analysis Name E:\Data\MS\_MessService\58958000001.d  
 Method tune\_low\_MS\_Service\_08\_18.m  
 Sample Name CE-149-SPOT2-PEAK2  
 Comment Kalaba/Zehl  
 Ergebnis: +/- 5ppm  
 ACN/MeOH +0.1% H2O

Acquisition Date 8/14/2018 5:46:28 PM

Operator msc  
 Instrument maXis 255552.00016

## Acquisition Parameter

|             |            |                      |          |                  |           |
|-------------|------------|----------------------|----------|------------------|-----------|
| Source Type | ESI        | Ion Polarity         | Positive | Set Nebulizer    | 0.4 Bar   |
| Focus       | Not active | Set Capillary        | 4500 V   | Set Dry Heater   | 180 °C    |
| Scan Begin  | 50 m/z     | Set End Plate Offset | -500 V   | Set Dry Gas      | 4.0 l/min |
| Scan End    | 1900 m/z   | Set Charging Voltage | 0 V      | Set Divert Valve | Source    |
|             |            | Set Corona           | 0 nA     | Set APCI Heater  | 0 °C      |

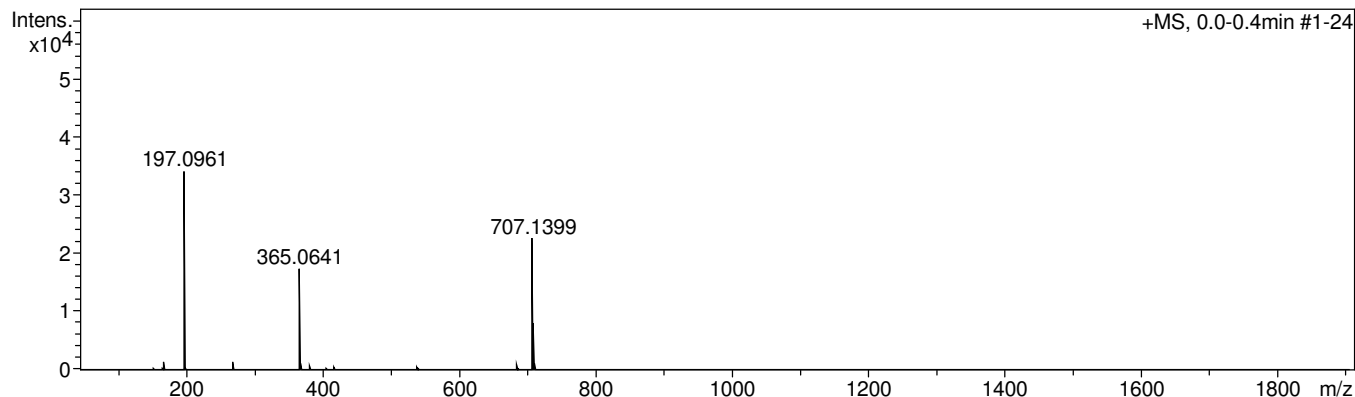

| Meas. m/z  | #  | Ion Formula    | Score  | m/z        | err [mDa] | err [ppm] | mSigma | rdB  | e <sup>-</sup> | Conf | N-Rule |
|------------|----|----------------|--------|------------|-----------|-----------|--------|------|----------------|------|--------|
| 365.064114 | 1  | C13H16N3NaO6S  | 69.70  | 365.065202 | 1.1       | 3.0       | 3.1    | 7.0  | odd            |      | ok     |
|            | 2  | C11H14N6NaO5S  | 100.00 | 365.063859 | 0.3       | 0.7       | 6.9    | 7.5  | even           |      | ok     |
|            | 3  | C10H8N13NaS    | 97.87  | 365.063854 | 0.3       | 0.7       | 8.0    | 13.0 | odd            |      | ok     |
|            | 4  | C12H10N10NaOS  | 63.26  | 365.065197 | 1.1       | 3.0       | 8.8    | 12.5 | even           |      | ok     |
|            | 5  | C10H18N2NaO9S  | 38.74  | 365.062522 | 1.6       | 4.4       | 17.4   | 2.5  | even           |      | ok     |
|            | 6  | C18H14NaO7     | 35.78  | 365.063173 | 0.9       | 2.6       | 26.3   | 11.5 | even           |      | ok     |
|            | 7  | C17H16N3NaOS2  | 33.44  | 365.062700 | -1.4      | -3.9      | 29.3   | 11.0 | odd            |      | ok     |
|            | 8  | C19H18NaO2S2   | 59.50  | 365.064043 | 0.1       | 0.2       | 34.5   | 10.5 | even           |      | ok     |
|            | 9  | C12H18N6NaS3   | 44.97  | 365.064728 | 0.6       | 1.7       | 35.8   | 6.5  | even           |      | ok     |
|            | 10 | C11H22N2NaO4S3 | 40.86  | 365.063391 | 0.7       | 2.0       | 37.3   | 1.5  | even           |      | ok     |
|            | 11 | C17H8N7NaO2    | 26.33  | 365.063168 | 0.9       | 2.6       | 38.5   | 17.0 | odd            |      | ok     |
|            | 12 | C21H12NNaO4    | 15.27  | 365.065854 | 1.7       | 4.8       | 40.0   | 16.0 | odd            |      | ok     |
|            | 13 | C19H10N4NaO3   | 31.74  | 365.064511 | -0.4      | -1.1      | 41.9   | 16.5 | even           |      | ok     |

**Figure S81.** HRESIMS spectrum of compound **5u**

## Generic Display Report

### Analysis Info

Analysis Name D:\MZ\maXis\_data\temp\60657000001.d  
Method tune\_low\_MS\_Service\_11\_18.m  
Sample Name CE-156-spot1-peak1  
Comment Kalaba/Zehl  
Ergebnis: +/- 5ppm  
ACN/MeOH + 1%H<sub>2</sub>O

Acquisition Date 11/8/2018 1:20:02 PM

Operator msc  
Instrument maXis

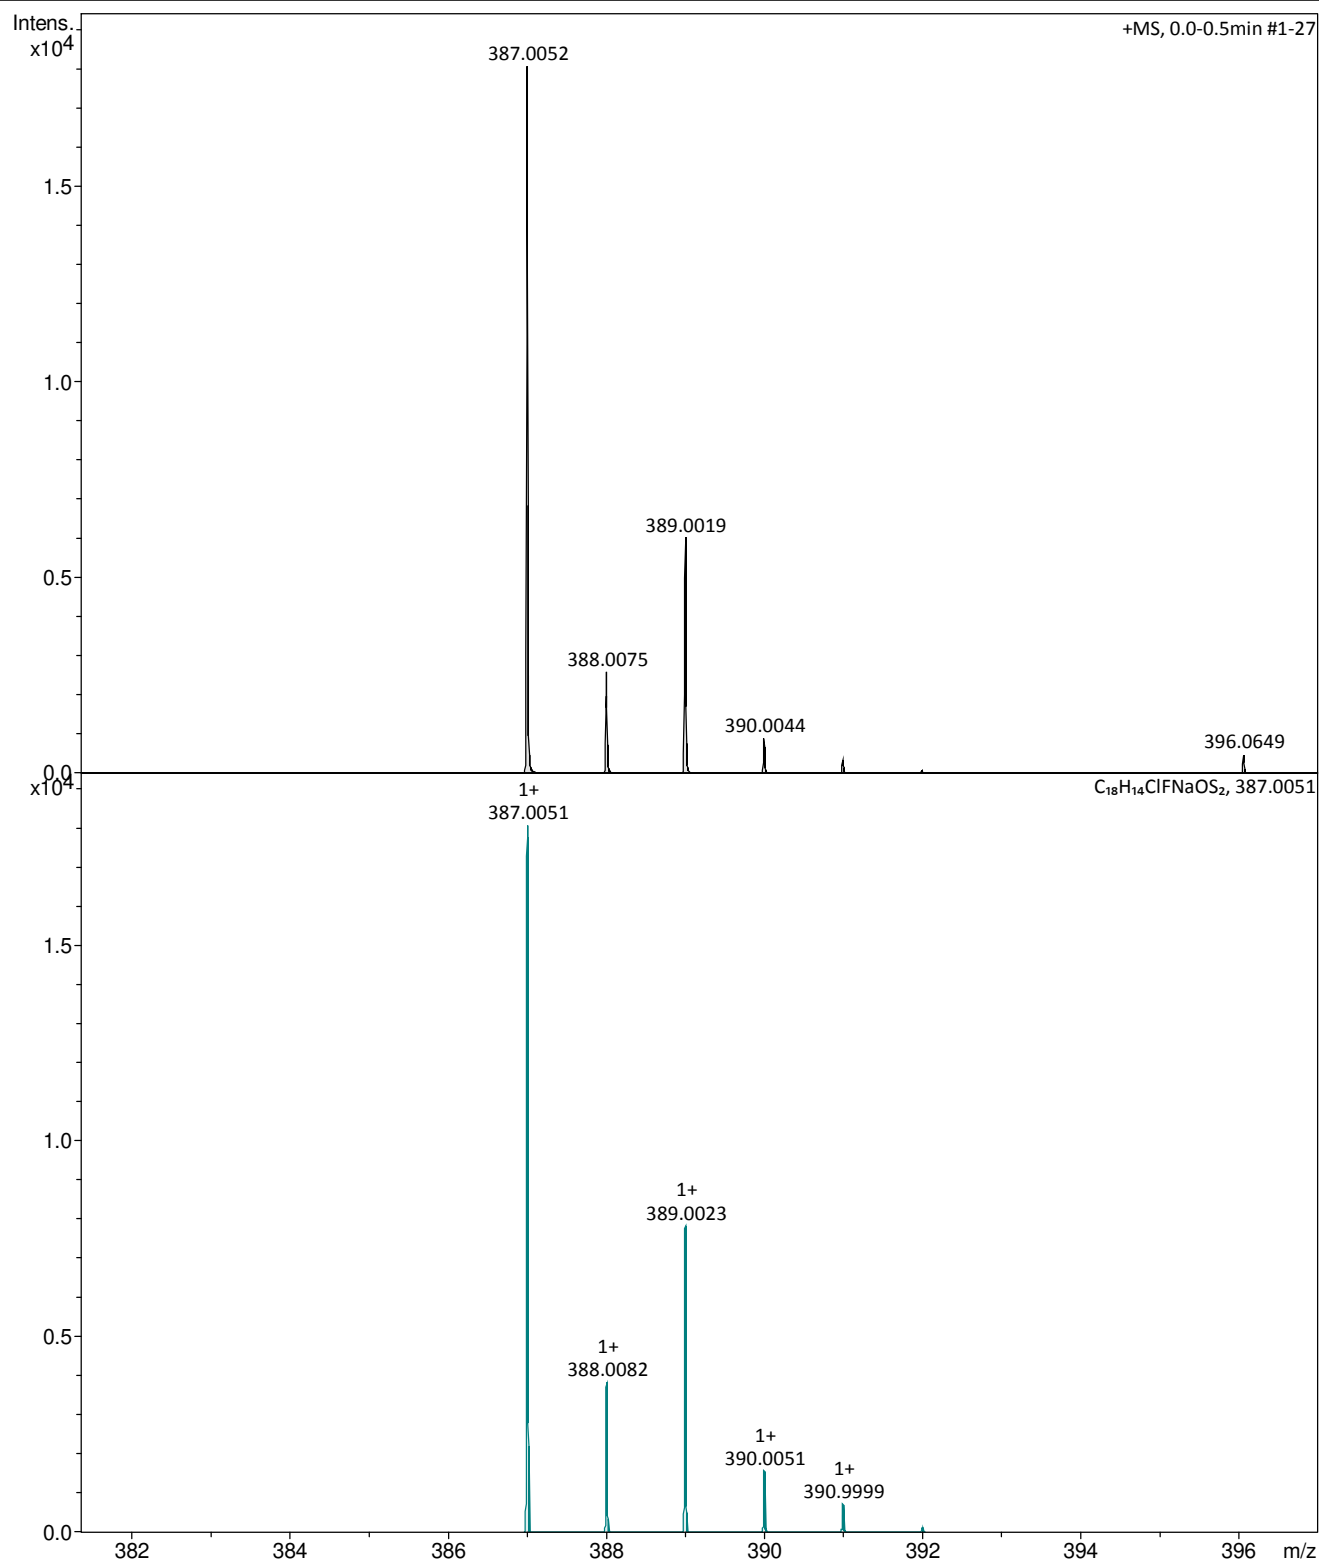



# Mass Spectrum SmartFormula Report

## Analysis Info

Analysis Name D:\MZ\maXis\_data\temp\60657000001.d  
 Method tune\_low\_MS\_Service\_11\_18.m  
 Sample Name CE-156-spot1-peak1  
 Comment Kalaba/Zehl  
 Ergebnis: +/- 5ppm  
 ACN/MeOH + 1%H2O

Acquisition Date 11/8/2018 1:20:02 PM

Operator msc  
 Instrument maXis 255552.00016

## Acquisition Parameter

|             |            |                      |          |                  |           |
|-------------|------------|----------------------|----------|------------------|-----------|
| Source Type | ESI        | Ion Polarity         | Positive | Set Nebulizer    | 0.4 Bar   |
| Focus       | Not active | Set Capillary        | 4500 V   | Set Dry Heater   | 150 °C    |
| Scan Begin  | 50 m/z     | Set End Plate Offset | -500 V   | Set Dry Gas      | 4.0 l/min |
| Scan End    | 1800 m/z   | Set Charging Voltage | 0 V      | Set Divert Valve | Source    |
|             |            | Set Corona           | 0 nA     | Set APCI Heater  | 0 °C      |

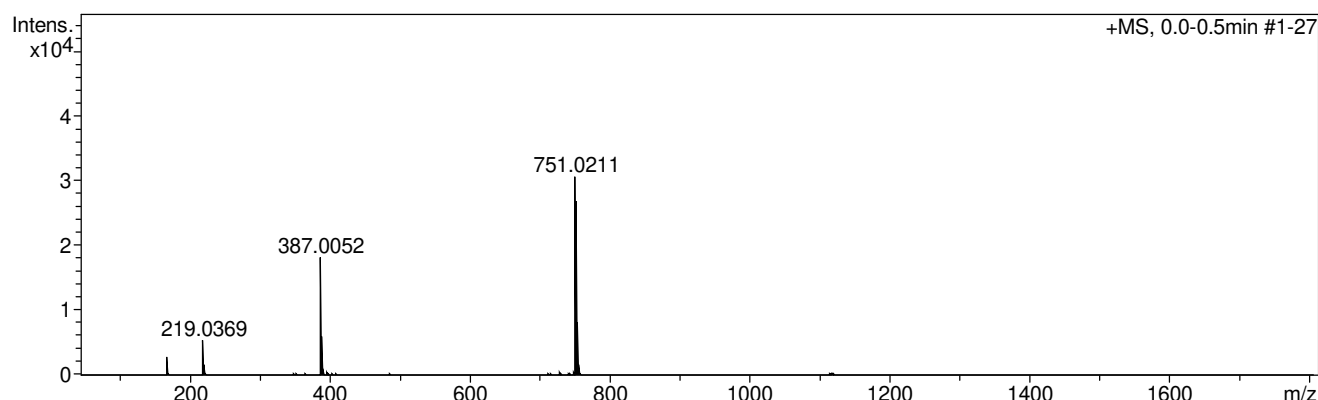

| Meas. m/z | #  | Ion Formula       | Score  | m/z      | err [mDa] | err [ppm] | mSigma | rdb  | e <sup>-</sup> | Conf | N-Rule |
|-----------|----|-------------------|--------|----------|-----------|-----------|--------|------|----------------|------|--------|
| 167.9670  | 1  | C5H5NaOS2         | 100.00 | 167.9674 | 0.4       | 2.2       | 8.0    | 3.0  | odd            |      | ok     |
|           | 2  | C4HNaO6           | 58.81  | 167.9665 | -0.5      | -3.0      | 11.2   | 4.0  | odd            |      | ok     |
|           | 3  | C2H3F2NaO3S       | 59.33  | 167.9663 | 0.7       | 4.3       | 25.0   | 0.0  | odd            |      | ok     |
|           | 4  | CH2FNaO7          | 38.55  | 167.9677 | 0.6       | 3.8       | 28.0   | 0.0  | odd            |      | ok     |
| 219.0369  | 1  | C13H9ClF          | 100.00 | 219.0371 | -0.2      | -1.0      | 17.8   | 8.5  | even           |      | ok     |
| 387.0052  | 1  | C11H3ClF2N10NaO   | 59.81  | 387.0040 | 1.2       | 3.0       | 8.5    | 13.5 | even           |      | ok     |
|           | 2  | C13H6ClF5N4NaO    | 68.73  | 387.0043 | -0.9      | -2.4      | 8.6    | 9.5  | even           |      | ok     |
|           | 3  | C14H11ClF2NaO7    | 98.41  | 387.0054 | 0.2       | 0.5       | 9.0    | 7.5  | even           |      | ok     |
|           | 4  | C8H4ClF3N10NaO2   | 100.00 | 387.0052 | -0.0      | -0.1      | 11.6   | 9.5  | even           |      | ok     |
|           | 5  | C11H12ClF3NaO8    | 51.24  | 387.0065 | 1.3       | 3.4       | 11.7   | 3.5  | even           |      | ok     |
|           | 6  | C9H9ClN6NaO8      | 59.28  | 387.0063 | -1.1      | -2.8      | 11.7   | 7.5  | even           |      | ok     |
|           | 7  | C15H7ClF2N4NaO3   | 40.21  | 387.0067 | 1.5       | 3.9       | 17.5   | 12.5 | even           |      | ok     |
|           | 8  | C7H8ClF3N6NaO6    | 41.17  | 387.0038 | 1.4       | 3.5       | 21.2   | 4.5  | even           |      | ok     |
|           | 9  | C12H13ClF4NaO4S   | 80.50  | 387.0051 | 0.0       | 0.1       | 22.0   | 3.5  | even           |      | ok     |
|           | 10 | C10H10ClFNa6NaO4S | 72.63  | 387.0049 | -0.3      | -0.7      | 22.0   | 7.5  | even           |      | ok     |
|           | 11 | C17H10ClFNaO6     | 51.39  | 387.0042 | 1.0       | 2.5       | 22.1   | 11.5 | even           |      | ok     |
|           | 12 | C8H13ClN2NaO12    | 73.09  | 387.0049 | 0.3       | 0.7       | 22.2   | 2.5  | even           |      | ok     |
|           | 13 | C13H9ClF4N4NaS    | 41.76  | 387.0065 | -1.3      | -3.4      | 22.3   | 8.5  | even           |      | ok     |
|           | 14 | C11H6ClFN10NaS    | 48.28  | 387.0062 | 1.1       | 2.7       | 22.3   | 12.5 | even           |      | ok     |
|           | 15 | C9H14ClF5NaO5S    | 42.75  | 387.0063 | 1.1       | 2.9       | 26.5   | -0.5 | even           |      | ok     |
|           | 16 | C7H11ClF2N6NaO5S  | 48.97  | 387.0060 | 0.9       | 2.2       | 26.6   | 3.5  | even           |      | ok     |
|           | 17 | C9H14ClFN2NaO8S   | 30.49  | 387.0036 | 1.6       | 4.2       | 27.1   | 2.5  | even           |      | ok     |
|           | 18 | C15H12ClF3NaO3S   | 40.11  | 387.0040 | -1.2      | -3.0      | 27.4   | 7.5  | even           |      | ok     |
|           | 19 | C13H9ClN6NaO3S    | 34.49  | 387.0038 | 1.4       | 3.7       | 27.4   | 11.5 | even           |      | ok     |
|           | 20 | C18H6ClFN4NaO2    | 54.73  | 387.0056 | 0.4       | 1.0       | 32.2   | 16.5 | even           |      | ok     |
|           | 21 | C17H13ClNaO5S     | 38.96  | 387.0064 | 1.3       | 3.3       | 33.9   | 10.5 | even           |      | ok     |
|           | 22 | C8H12ClF3N6NaOS2  | 55.89  | 387.0047 | 0.5       | 1.3       | 36.3   | 3.5  | even           |      | ok     |
|           | 23 | C13H14ClF5NaS2    | 32.62  | 387.0038 | -1.4      | -3.6      | 37.5   | 3.5  | even           |      | ok     |
|           | 24 | C11H11ClF2N6NaS2  | 27.76  | 387.0035 | -1.6      | -4.2      | 37.6   | 7.5  | even           |      | ok     |
|           | 25 | C9H17ClN2NaO7S2   | 45.66  | 387.0058 | -0.6      | -1.6      | 41.6   | 1.5  | even           |      | ok     |
|           | 26 | C15H15ClF2NaO2S2  | 33.78  | 387.0062 | -1.0      | -2.7      | 43.9   | 6.5  | even           |      | ok     |
|           | 27 | C21H5ClN4NaO      | 29.90  | 387.0044 | -0.8      | -2.0      | 47.2   | 20.5 | even           |      | ok     |
|           | 28 | C18H14ClFNaOS2    | 41.66  | 387.0051 | -0.1      | -0.2      | 52.7   | 10.5 | even           |      | ok     |
|           | 29 | C8H15ClF2N6NaS3   | 15.54  | 387.0069 | 1.7       | 4.5       | 55.0   | 2.5  | even           |      | ok     |
|           | 30 | C10H18ClFN2NaO3S3 | 25.72  | 387.0044 | 0.7       | 1.9       | 58.2   | 1.5  | even           |      | ok     |

---

## Mass Spectrum SmartFormula Report

---

| Meas. m/z | #  | Ion Formula      | Score | m/z      | err [mDa] | err [ppm] | mSigma | rdb  | e <sup>-</sup> | Conf | N-Rule |
|-----------|----|------------------|-------|----------|-----------|-----------|--------|------|----------------|------|--------|
|           | 31 | C13H17ClN2NaO2S3 | 11.13 | 387.0033 | -1.9      | -4.9      | 61.7   | 5.5  | even           |      | ok     |
|           | 32 | C21H13ClNaS2     | 16.05 | 387.0039 | -1.2      | -3.2      | 63.9   | 14.5 | even           |      | ok     |
|           | 33 | C10H21ClN2NaO2S4 | 10.04 | 387.0067 | 1.5       | 3.8       | 72.4   | 0.5  | even           |      | ok     |

**Figure S82.** HRESIMS spectrum of compound **6u**

## Generic Display Report

### Analysis Info

Analysis Name D:\MZ\maXis\_data\temp\60658000001.d  
Method tune\_low\_MS\_Service\_11\_18.m  
Sample Name CE-156-spot1-peak2  
Comment Kalaba/Zehl  
Ergebnis: +/- 5ppm  
ACN/MeOH + 1%H<sub>2</sub>O

Acquisition Date 11/8/2018 1:24:10 PM

Operator msc  
Instrument maXis

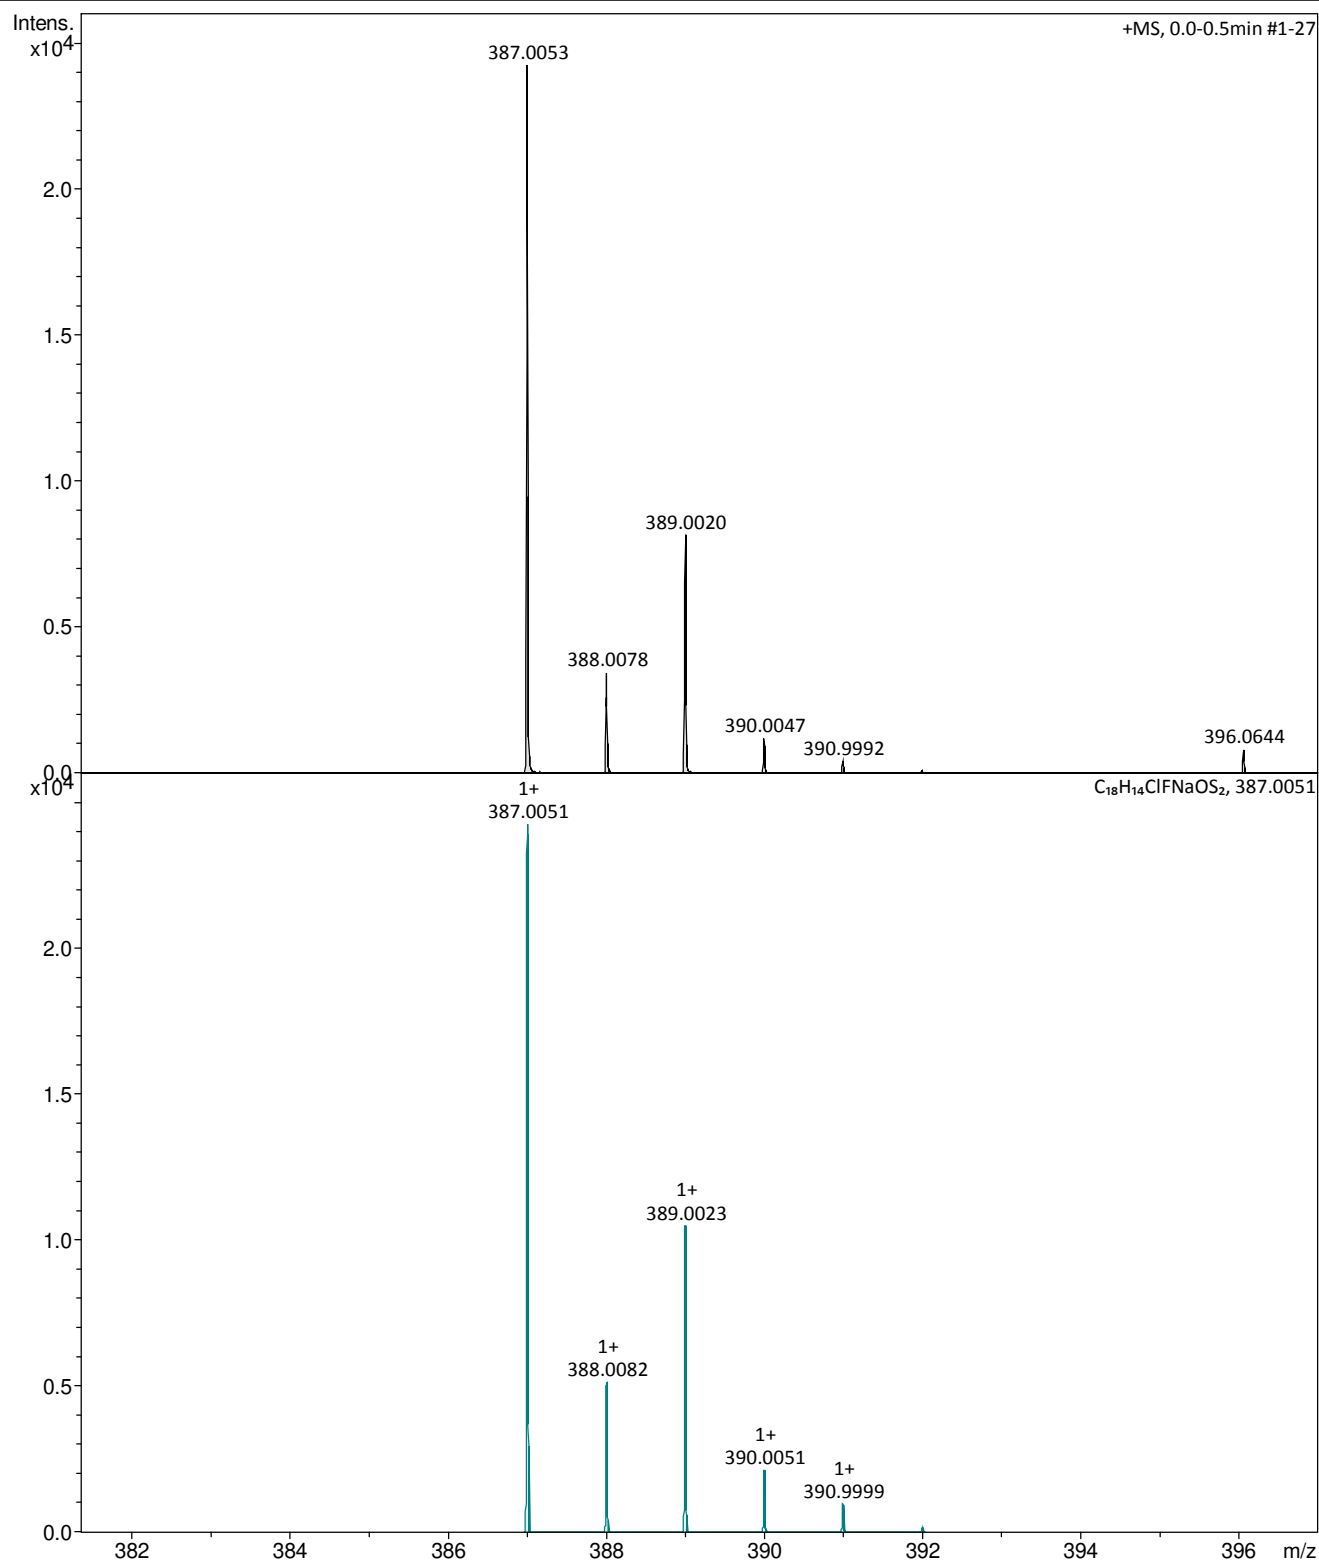

# Mass Spectrum SmartFormula Report

## Analysis Info

Analysis Name D:\MZ\maXis\_data\temp\60658000001.d  
Method tune\_low\_MS\_Service\_11\_18.m  
Sample Name CE-156-spot1-peak2  
Comment Kalaba/Zehl  
Ergebnis: +/- 5ppm  
ACN/MeOH + 1%H2O

Acquisition Date 11/8/2018 1:24:10 PM

Operator msc  
Instrument maXis 255552.00016

## Acquisition Parameter

|             |            |                      |          |                  |           |
|-------------|------------|----------------------|----------|------------------|-----------|
| Source Type | ESI        | Ion Polarity         | Positive | Set Nebulizer    | 0.4 Bar   |
| Focus       | Not active | Set Capillary        | 4500 V   | Set Dry Heater   | 150 °C    |
| Scan Begin  | 50 m/z     | Set End Plate Offset | -500 V   | Set Dry Gas      | 4.0 l/min |
| Scan End    | 1800 m/z   | Set Charging Voltage | 0 V      | Set Divert Valve | Source    |
|             |            | Set Corona           | 0 nA     | Set APCI Heater  | 0 °C      |

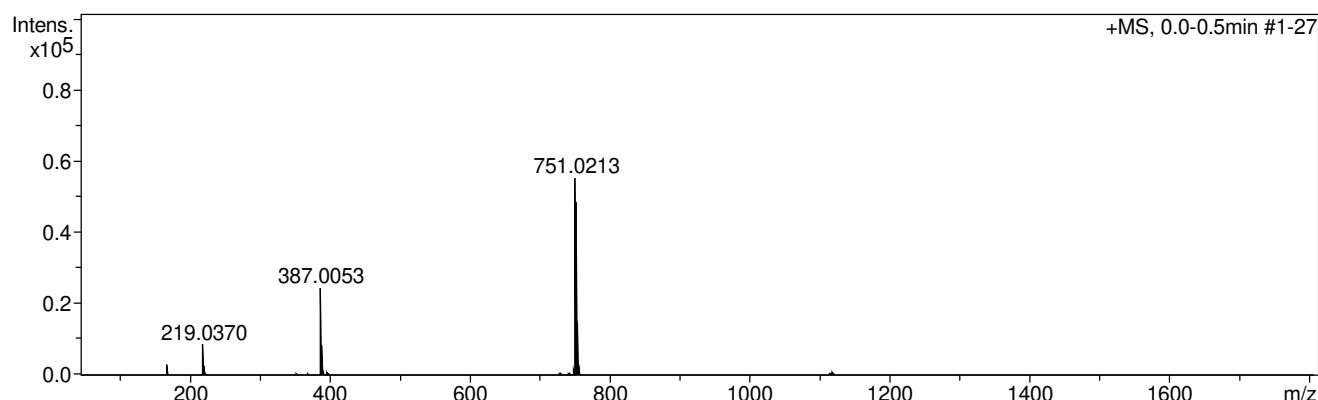

| Meas. m/z | #  | Ion Formula      | Score  | m/z      | err [mDa] | err [ppm] | mSigma | rdb  | e <sup>-</sup> | Conf | N-Rule |
|-----------|----|------------------|--------|----------|-----------|-----------|--------|------|----------------|------|--------|
| 167.9670  | 1  | C5H5NaOS2        | 100.00 | 167.9674 | -0.4      | -2.3      | 9.7    | 3.0  | odd            |      | ok     |
|           | 2  | C4HNaO6          | 62.02  | 167.9665 | -0.5      | -2.9      | 11.1   | 4.0  | odd            |      | ok     |
|           | 3  | C2H3F2NaO3S      | 65.42  | 167.9663 | -0.7      | -4.2      | 23.0   | 0.0  | odd            |      | ok     |
|           | 4  | CH2FNaO7         | 39.92  | 167.9677 | 0.7       | 3.9       | 27.8   | 0.0  | odd            |      | ok     |
| 219.0370  | 1  | C13H9ClF         | 100.00 | 219.0371 | -0.2      | -0.8      | 24.4   | 8.5  | even           |      | ok     |
|           | 2  | C5H13ClFN2O2S    | 52.04  | 219.0365 | 0.5       | 2.2       | 44.3   | -0.5 | even           |      | ok     |
| 387.0053  | 1  | C14H11ClF2NaO7   | 100.00 | 387.0054 | -0.1      | -0.3      | 8.3    | 7.5  | even           |      | ok     |
|           | 2  | C11H3ClF2N10NaO  | 55.26  | 387.0040 | 1.2       | 3.2       | 8.5    | 13.5 | even           |      | ok     |
|           | 3  | C13H6ClF5N4NaO   | 63.72  | 387.0043 | 1.0       | 2.6       | 8.6    | 9.5  | even           |      | ok     |
|           | 4  | C11H12ClF3NaO8   | 53.42  | 387.0065 | 1.2       | 3.2       | 10.6   | 3.5  | even           |      | ok     |
|           | 5  | C9H9ClN6NaO8     | 61.58  | 387.0063 | -1.0      | -2.6      | 10.6   | 7.5  | even           |      | ok     |
|           | 6  | C8H4ClF3N10NaO2  | 94.97  | 387.0052 | -0.1      | -0.3      | 11.0   | 9.5  | even           |      | ok     |
|           | 7  | C15H7ClF2N4NaO3  | 41.06  | 387.0067 | 1.4       | 3.7       | 17.7   | 12.5 | even           |      | ok     |
|           | 8  | C7H8ClF3N6NaO6   | 38.52  | 387.0038 | -1.4      | -3.7      | 20.5   | 4.5  | even           |      | ok     |
|           | 9  | C12H13ClF4NaO4S  | 77.58  | 387.0051 | 0.1       | 0.3       | 20.8   | 3.5  | even           |      | ok     |
|           | 10 | C10H10ClFN6NaO4S | 69.77  | 387.0049 | -0.4      | -0.9      | 20.8   | 7.5  | even           |      | ok     |
|           | 11 | C8H13ClN2NaO12   | 69.87  | 387.0049 | -0.3      | -0.9      | 21.2   | 2.5  | even           |      | ok     |
|           | 12 | C13H9ClF4N4NaS   | 43.37  | 387.0065 | -1.2      | -3.2      | 21.5   | 8.5  | even           |      | ok     |
|           | 13 | C11H6ClFN10NaS   | 49.97  | 387.0062 | 1.0       | 2.5       | 21.5   | 12.5 | even           |      | ok     |
|           | 14 | C17H10ClFNaO6    | 47.59  | 387.0042 | 1.0       | 2.7       | 22.1   | 11.5 | even           |      | ok     |
|           | 15 | C9H14ClF5NaO5S   | 44.78  | 387.0063 | 1.0       | 2.7       | 25.2   | -0.5 | even           |      | ok     |
|           | 16 | C7H11ClF2N6NaO5S | 51.11  | 387.0060 | 0.8       | 2.0       | 25.3   | 3.5  | even           |      | ok     |
|           | 17 | C9H14ClFN2NaO8S  | 28.82  | 387.0036 | 1.7       | 4.4       | 25.9   | 2.5  | even           |      | ok     |
|           | 18 | C15H12ClF3NaO3S  | 37.67  | 387.0040 | -1.3      | -3.3      | 26.7   | 7.5  | even           |      | ok     |
|           | 19 | C13H9ClN6NaO3S   | 32.27  | 387.0038 | 1.5       | 3.9       | 26.7   | 11.5 | even           |      | ok     |
|           | 20 | C18H6ClFN4NaO2   | 54.75  | 387.0056 | -0.3      | -0.8      | 32.4   | 16.5 | even           |      | ok     |
|           | 21 | C17H13ClNaO5S    | 40.15  | 387.0064 | 1.2       | 3.1       | 33.4   | 10.5 | even           |      | ok     |
|           | 22 | C8H12ClF3N6NaOS2 | 53.60  | 387.0047 | 0.6       | 1.5       | 35.3   | 3.5  | even           |      | ok     |
|           | 23 | C13H14ClF5NaS2   | 30.73  | 387.0038 | -1.5      | -3.8      | 36.7   | 3.5  | even           |      | ok     |
|           | 24 | C11H11ClF2N6NaS2 | 26.05  | 387.0035 | -1.7      | -4.4      | 36.7   | 7.5  | even           |      | ok     |
|           | 25 | C10H13ClN6NaO3S2 | 22.46  | 387.0071 | -1.9      | -4.8      | 38.1   | 6.5  | even           |      | ok     |
|           | 26 | C9H17ClN2NaO7S2  | 47.45  | 387.0058 | 0.5       | 1.4       | 40.6   | 1.5  | even           |      | ok     |
|           | 27 | C15H15ClF2NaO2S2 | 35.02  | 387.0062 | 1.0       | 2.5       | 43.3   | 6.5  | even           |      | ok     |
|           | 28 | C21H5ClN4NaO     | 27.55  | 387.0044 | -0.8      | -2.2      | 47.5   | 20.5 | even           |      | ok     |
|           | 29 | C18H14ClFNaOS2   | 39.66  | 387.0051 | 0.2       | 0.5       | 52.3   | 10.5 | even           |      | ok     |

## Mass Spectrum SmartFormula Report

| Meas. m/z | #  | Ion Formula       | Score | m/z      | err [mDa] | err [ppm] | mSigma | rdb  | e <sup>-</sup> | Conf | N-Rule |
|-----------|----|-------------------|-------|----------|-----------|-----------|--------|------|----------------|------|--------|
|           | 30 | C8H15ClF2N6NaS3   | 16.46 | 387.0069 | 1.7       | 4.3       | 54.0   | 2.5  | even           |      | ok     |
|           | 31 | C10H18ClFN2NaO3S3 | 24.64 | 387.0044 | 0.8       | 2.1       | 57.3   | 1.5  | even           |      | ok     |
|           | 32 | C21H13ClNaS2      | 14.97 | 387.0039 | -1.3      | -3.4      | 63.5   | 14.5 | even           |      | ok     |
|           | 33 | C10H21ClN2NaO2S4  | 10.58 | 387.0067 | 1.4       | 3.6       | 71.6   | 0.5  | even           |      | ok     |

**Figure S83.** HRESIMS spectrum of compound **7u**

## Generic Display Report

### Analysis Info

Analysis Name D:\MZ\maXis\_data\temp\60659000001.d  
Method tune\_low\_MS\_Service\_11\_18.m  
Sample Name CE-156-spot2-peak1  
Comment Kalaba/Zehl  
Ergebnis: +/- 5ppm  
ACN/MeOH + 1%H<sub>2</sub>O

Acquisition Date 11/8/2018 1:27:05 PM

Operator msc  
Instrument maXis

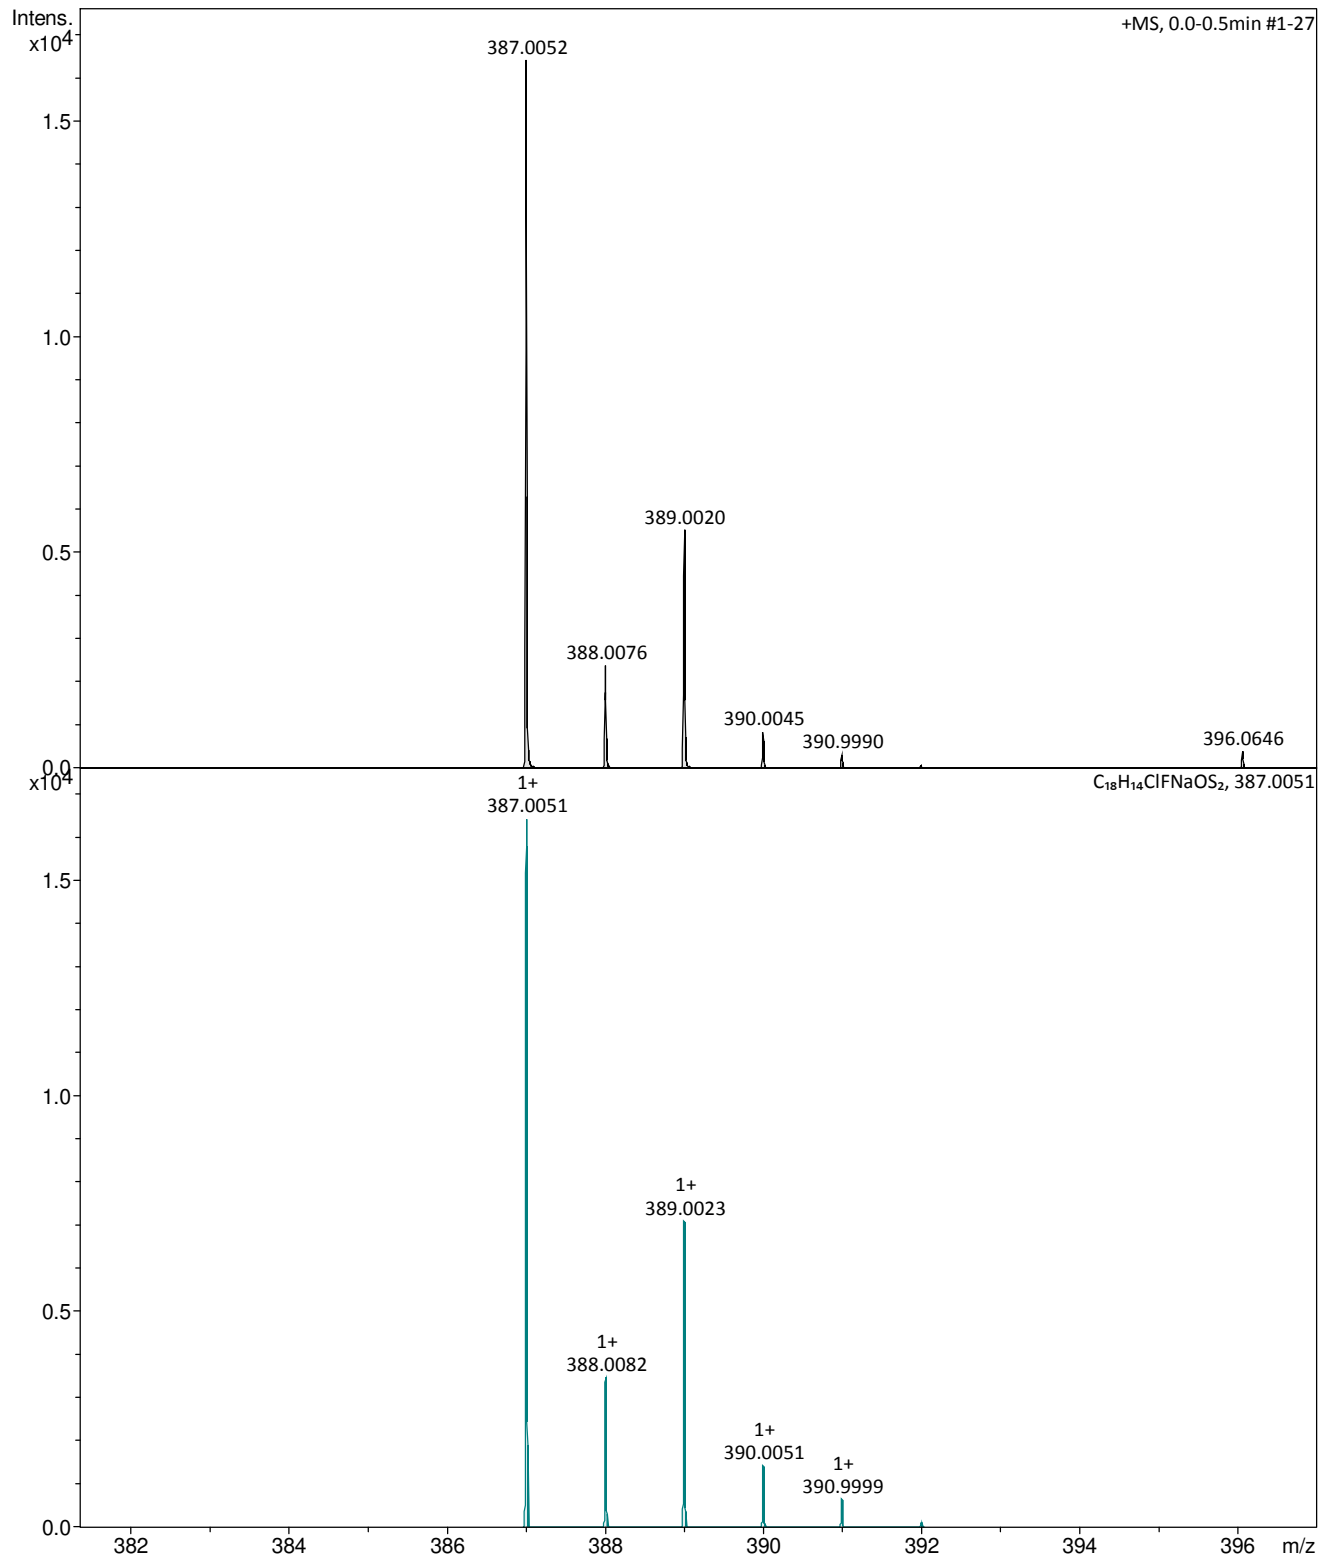

# Mass Spectrum SmartFormula Report

## Analysis Info

Analysis Name D:\MZ\maXis\_data\temp\60659000001.d  
 Method tune\_low\_MS\_Service\_11\_18.m  
 Sample Name CE-156-spot2-peak1  
 Comment Kalaba/Zehl  
 Ergebnis: +/- 5ppm  
 ACN/MeOH + 1%H2O

Acquisition Date 11/8/2018 1:27:05 PM

Operator msc  
 Instrument maXis 255552.00016

## Acquisition Parameter

|             |            |                      |          |                  |           |
|-------------|------------|----------------------|----------|------------------|-----------|
| Source Type | ESI        | Ion Polarity         | Positive | Set Nebulizer    | 0.4 Bar   |
| Focus       | Not active | Set Capillary        | 4500 V   | Set Dry Heater   | 150 °C    |
| Scan Begin  | 50 m/z     | Set End Plate Offset | -500 V   | Set Dry Gas      | 4.0 l/min |
| Scan End    | 1800 m/z   | Set Charging Voltage | 0 V      | Set Divert Valve | Source    |
|             |            | Set Corona           | 0 nA     | Set APCI Heater  | 0 °C      |

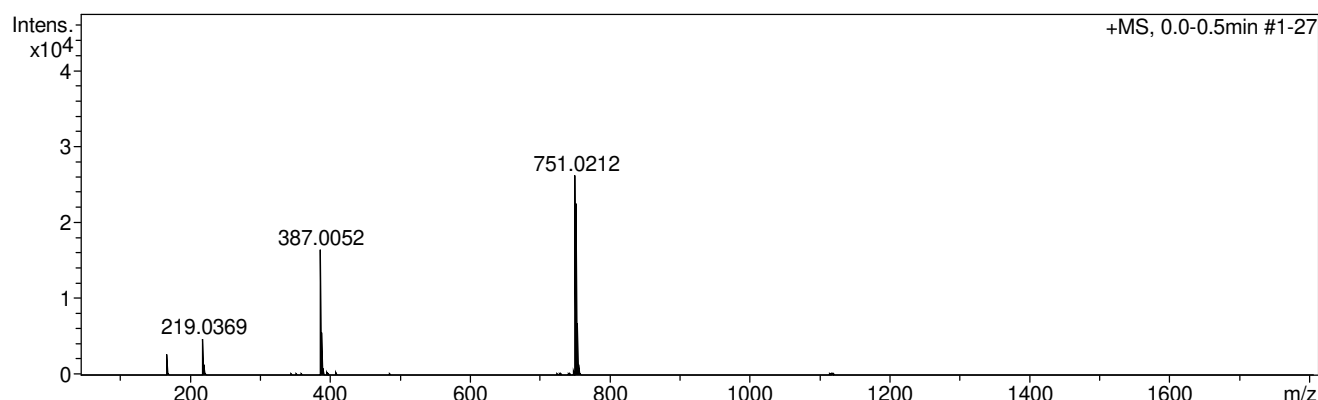

| Meas. m/z | #  | Ion Formula       | Score  | m/z      | err [mDa] | err [ppm] | mSigma | rdb  | e <sup>-</sup> | Conf | N-Rule |
|-----------|----|-------------------|--------|----------|-----------|-----------|--------|------|----------------|------|--------|
| 167.9670  | 1  | C5H5NaOS2         | 100.00 | 167.9674 | -0.4      | -2.3      | 5.8    | 3.0  | odd            |      | ok     |
|           | 2  | C4HNaO6           | 57.13  | 167.9665 | -0.5      | -2.9      | 11.9   | 4.0  | odd            |      | ok     |
|           | 3  | C2H3F2NaO3S       | 54.17  | 167.9663 | -0.7      | -4.1      | 28.3   | 0.0  | odd            |      | ok     |
|           | 4  | CH2FNaO7          | 36.26  | 167.9677 | 0.7       | 3.9       | 28.9   | 0.0  | odd            |      | ok     |
| 219.0369  | 1  | C13H9ClF          | 100.00 | 219.0371 | 0.2       | 1.0       | 18.3   | 8.5  | even           |      | ok     |
| 387.0052  | 1  | C14H11ClF2NaO7    | 100.00 | 387.0054 | 0.2       | 0.4       | 7.7    | 7.5  | even           |      | ok     |
|           | 2  | C11H3ClF2N10NaO   | 59.22  | 387.0040 | -1.2      | -3.0      | 8.2    | 13.5 | even           |      | ok     |
|           | 3  | C13H6ClF5Na4NaO   | 68.07  | 387.0043 | -0.9      | -2.4      | 8.2    | 9.5  | even           |      | ok     |
|           | 4  | C11H12ClF3NaO8    | 50.54  | 387.0065 | -1.3      | -3.4      | 12.1   | 3.5  | even           |      | ok     |
|           | 5  | C9H9ClN6NaO8      | 58.46  | 387.0063 | 1.1       | 2.8       | 12.2   | 7.5  | even           |      | ok     |
|           | 6  | C8H4ClF3N10NaO2   | 96.58  | 387.0052 | -0.0      | -0.1      | 12.7   | 9.5  | even           |      | ok     |
|           | 7  | C15H7ClF2N4NaO3   | 40.89  | 387.0067 | -1.5      | -3.9      | 16.5   | 12.5 | even           |      | ok     |
|           | 8  | C12H13ClF4NaO4S   | 81.70  | 387.0051 | -0.0      | -0.1      | 20.6   | 3.5  | even           |      | ok     |
|           | 9  | C13H9ClF4N4NaS    | 43.08  | 387.0065 | 1.3       | 3.3       | 20.6   | 8.5  | even           |      | ok     |
|           | 10 | C11H6ClFN10NaS    | 49.79  | 387.0062 | -1.1      | -2.7      | 20.7   | 12.5 | even           |      | ok     |
|           | 11 | C10H10ClFN6NaO4S  | 73.69  | 387.0049 | -0.3      | -0.7      | 20.7   | 7.5  | even           |      | ok     |
|           | 12 | C17H10ClFNaO6     | 52.00  | 387.0042 | 1.0       | 2.5       | 20.8   | 11.5 | even           |      | ok     |
|           | 13 | C8H13ClN2NaO12    | 71.18  | 387.0049 | 0.3       | 0.7       | 22.7   | 2.5  | even           |      | ok     |
|           | 14 | C15H12ClF3NaO3S   | 41.06  | 387.0040 | 1.2       | 3.1       | 25.7   | 7.5  | even           |      | ok     |
|           | 15 | C13H9ClN6NaO3S    | 35.29  | 387.0038 | -1.4      | -3.7      | 25.7   | 11.5 | even           |      | ok     |
|           | 16 | C9H14ClF5NaO5S    | 42.99  | 387.0063 | -1.1      | -2.8      | 26.0   | -0.5 | even           |      | ok     |
|           | 17 | C9H14ClFN2NaO8S   | 30.54  | 387.0036 | -1.6      | -4.2      | 26.3   | 2.5  | even           |      | ok     |
|           | 18 | C18H6ClFN4NaO2    | 55.86  | 387.0056 | 0.4       | 0.9       | 31.1   | 16.5 | even           |      | ok     |
|           | 19 | C17H13ClNaO5S     | 40.27  | 387.0064 | -1.3      | -3.2      | 32.3   | 10.5 | even           |      | ok     |
|           | 20 | C8H12ClF3N6NaOS2  | 56.63  | 387.0047 | 0.5       | 1.3       | 35.2   | 3.5  | even           |      | ok     |
|           | 21 | C13H14ClF5NaS2    | 33.31  | 387.0038 | 1.4       | 3.6       | 36.1   | 3.5  | even           |      | ok     |
|           | 22 | C11H11ClF2N6NaS2  | 28.34  | 387.0035 | 1.6       | 4.2       | 36.1   | 7.5  | even           |      | ok     |
|           | 23 | C9H17ClN2NaO7S2   | 46.76  | 387.0058 | -0.6      | -1.6      | 40.5   | 1.5  | even           |      | ok     |
|           | 24 | C15H15ClF2NaO2S2  | 35.06  | 387.0062 | 1.0       | 2.7       | 42.4   | 6.5  | even           |      | ok     |
|           | 25 | C21H5ClN4NaO      | 30.43  | 387.0044 | -0.8      | -2.0      | 46.1   | 20.5 | even           |      | ok     |
|           | 26 | C18H14ClFNaoS2    | 43.08  | 387.0051 | -0.1      | -0.3      | 51.2   | 10.5 | even           |      | ok     |
|           | 27 | C8H15ClF2N6NaS3   | 16.08  | 387.0069 | -1.7      | -4.5      | 53.8   | 2.5  | even           |      | ok     |
|           | 28 | C10H18ClFN2NaO3S3 | 26.41  | 387.0044 | 0.8       | 1.9       | 56.9   | 1.5  | even           |      | ok     |
|           | 29 | C13H17ClN2NaO2S3  | 11.49  | 387.0033 | 1.9       | 4.9       | 60.3   | 5.5  | even           |      | ok     |
|           | 30 | C21H13ClNaS2      | 16.64  | 387.0039 | 1.2       | 3.2       | 62.3   | 14.5 | even           |      | ok     |

---

## Mass Spectrum SmartFormula Report

---

| Meas. m/z | #  | Ion Formula      | Score | m/z      | err [mDa] | err [ppm] | mSigma | rdb | e <sup>-</sup> | Conf | N-Rule |
|-----------|----|------------------|-------|----------|-----------|-----------|--------|-----|----------------|------|--------|
|           | 31 | C10H21ClN2NaO2S4 | 10.45 | 387.0067 | -1.5      | -3.8      | 71.2   | 0.5 |                | even | ok     |



**Figure S84.** HRESIMS spectrum of compound **8u**

## Generic Display Report

### Analysis Info

Analysis Name D:\MZ\maXis\_data\temp\60660000001.d  
Method tune\_low\_MS\_Service\_11\_18.m  
Sample Name CE-156-spot2-peak2  
Comment Kalaba/Zehl  
Ergebnis: +/- 5ppm  
ACN/MeOH + 1%H<sub>2</sub>O

Acquisition Date 11/8/2018 1:31:08 PM

Operator msc  
Instrument maXis

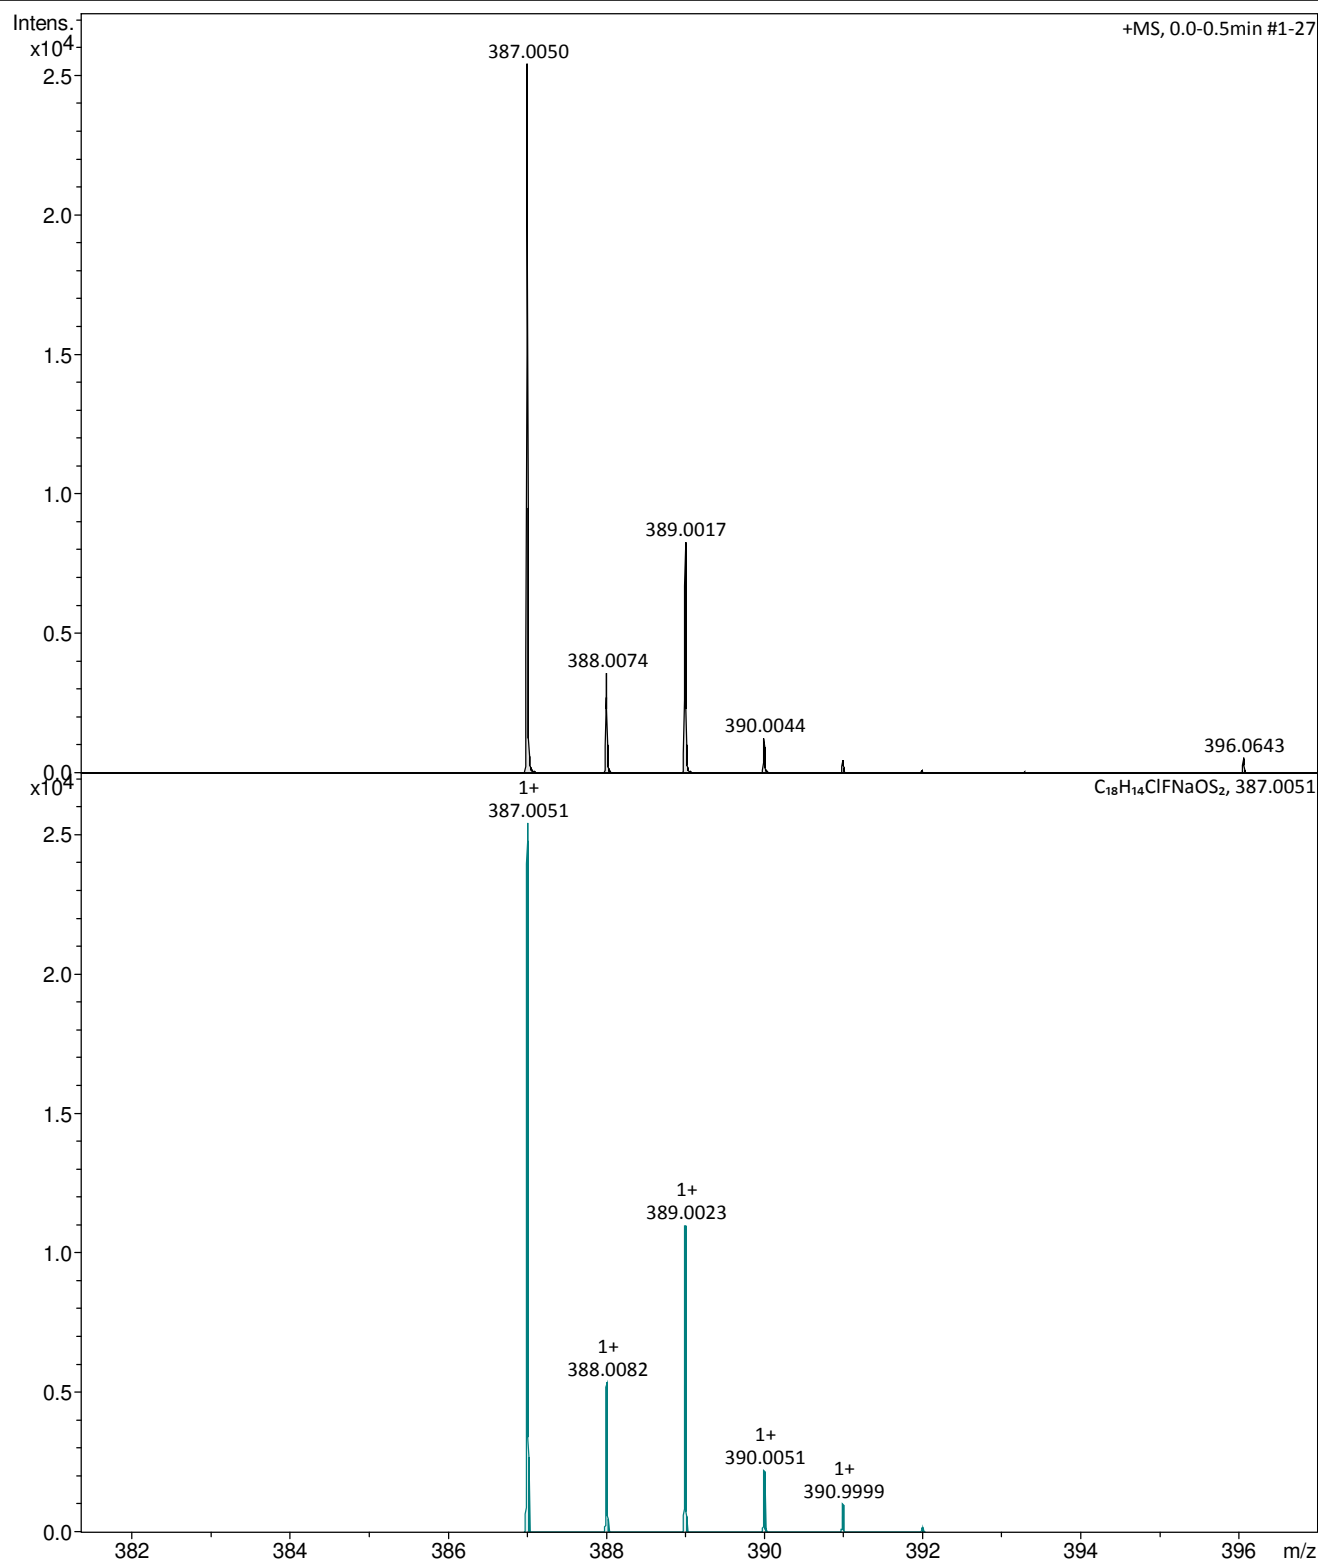

# Mass Spectrum SmartFormula Report

## Analysis Info

Analysis Name D:\MZ\maXis\_data\temp\60660000001.d  
 Method tune\_low\_MS\_Service\_11\_18.m  
 Sample Name CE-156-spot2-peak2  
 Comment Kalaba/Zehl  
 Ergebnis: +/- 5ppm  
 ACN/MeOH + 1%H2O

Acquisition Date 11/8/2018 1:31:08 PM

Operator msc  
 Instrument maXis 255552.00016

## Acquisition Parameter

|             |            |                      |          |                  |           |
|-------------|------------|----------------------|----------|------------------|-----------|
| Source Type | ESI        | Ion Polarity         | Positive | Set Nebulizer    | 0.4 Bar   |
| Focus       | Not active | Set Capillary        | 4500 V   | Set Dry Heater   | 150 °C    |
| Scan Begin  | 50 m/z     | Set End Plate Offset | -500 V   | Set Dry Gas      | 4.0 l/min |
| Scan End    | 1800 m/z   | Set Charging Voltage | 0 V      | Set Divert Valve | Source    |
|             |            | Set Corona           | 0 nA     | Set APCI Heater  | 0 °C      |

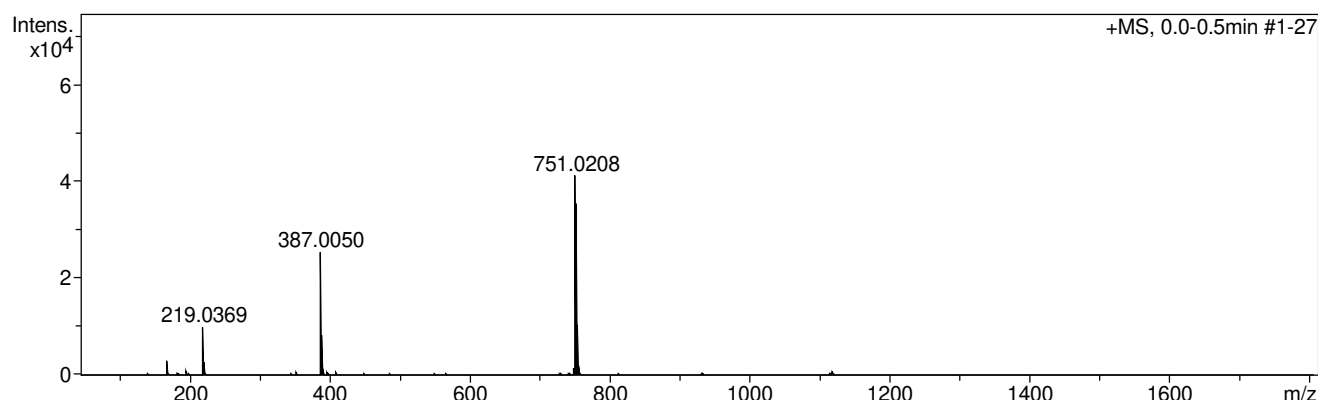

| Meas. m/z | #  | Ion Formula      | Score  | m/z      | err [mDa] | err [ppm] | mSigma | rdb  | e <sup>-</sup> | Conf | N-Rule |
|-----------|----|------------------|--------|----------|-----------|-----------|--------|------|----------------|------|--------|
| 167.9669  | 1  | C5H5NaOS2        | 100.00 | 167.9674 | 0.5       | 2.9       | 7.5    | 3.0  | odd            |      | ok     |
|           | 2  | C4HNaO6          | 64.65  | 167.9665 | 0.4       | 2.3       | 11.8   | 4.0  | odd            |      | ok     |
|           | 3  | C2H3F2NaO3S      | 65.31  | 167.9663 | 0.6       | 3.6       | 25.7   | 0.0  | odd            |      | ok     |
|           | 4  | CH2FNaO7         | 37.30  | 167.9677 | 0.8       | 4.5       | 28.7   | 0.0  | odd            |      | ok     |
| 219.0369  | 1  | C13H9ClF         | 100.00 | 219.0371 | 0.2       | 1.0       | 23.3   | 8.5  | even           |      | ok     |
| 387.0050  | 1  | C11H3ClF2N10NaO  | 65.56  | 387.0040 | 1.0       | 2.6       | 9.7    | 13.5 | even           |      | ok     |
|           | 2  | C13H6ClF5N4NaO   | 74.87  | 387.0043 | -0.8      | -2.0      | 9.8    | 9.5  | even           |      | ok     |
|           | 3  | C8H4ClF3N10NaO2  | 100.00 | 387.0052 | -0.1      | -0.3      | 10.9   | 9.5  | even           |      | ok     |
|           | 4  | C14H11ClF2NaO7   | 89.80  | 387.0054 | -0.3      | -0.8      | 11.8   | 7.5  | even           |      | ok     |
|           | 5  | C11H12ClF3NaO8   | 47.06  | 387.0065 | 1.5       | 3.8       | 12.5   | 3.5  | even           |      | ok     |
|           | 6  | C9H9ClN6NaO8     | 54.82  | 387.0063 | -1.2      | -3.2      | 12.6   | 7.5  | even           |      | ok     |
|           | 7  | C15H7ClF2N4NaO3  | 35.90  | 387.0067 | 1.7       | 4.3       | 19.4   | 12.5 | even           |      | ok     |
|           | 8  | C7H8ClF3N6NaO6   | 46.92  | 387.0038 | 1.2       | 3.1       | 20.7   | 4.5  | even           |      | ok     |
|           | 9  | C8H13ClN2NaO12   | 79.42  | 387.0049 | -0.1      | -0.3      | 22.5   | 2.5  | even           |      | ok     |
|           | 10 | C16H5ClF4N4Na    | 27.62  | 387.0031 | -1.9      | -5.0      | 23.0   | 13.5 | even           |      | ok     |
|           | 11 | C17H10ClFNaO6    | 54.56  | 387.0042 | 0.8       | 2.1       | 24.2   | 11.5 | even           |      | ok     |
|           | 12 | C12H13ClF4NaO4S  | 74.33  | 387.0051 | -0.1      | -0.3      | 25.3   | 3.5  | even           |      | ok     |
|           | 13 | C10H10ClFNaO4S   | 73.79  | 387.0049 | -0.1      | -0.3      | 25.4   | 7.5  | even           |      | ok     |
|           | 14 | C13H9ClF4N4NaS   | 36.07  | 387.0065 | -1.4      | -3.7      | 25.8   | 8.5  | even           |      | ok     |
|           | 15 | C11H6ClFN10NaS   | 41.97  | 387.0062 | 1.2       | 3.1       | 25.8   | 12.5 | even           |      | ok     |
|           | 16 | C9H14ClF5NaO5S   | 38.13  | 387.0063 | 1.3       | 3.2       | 28.7   | -0.5 | even           |      | ok     |
|           | 17 | C7H11ClF2N6NaO5S | 43.97  | 387.0060 | 1.0       | 2.6       | 28.7   | 3.5  | even           |      | ok     |
|           | 18 | C9H14ClFN2NaO8S  | 32.48  | 387.0036 | 1.5       | 3.8       | 29.8   | 2.5  | even           |      | ok     |
|           | 19 | C15H12ClF3NaO3S  | 41.42  | 387.0040 | -1.0      | -2.7      | 30.8   | 7.5  | even           |      | ok     |
|           | 20 | C13H9ClN6NaO3S   | 35.85  | 387.0038 | 1.3       | 3.3       | 30.8   | 11.5 | even           |      | ok     |
|           | 21 | C18H6ClFN4NaO2   | 50.19  | 387.0056 | 0.5       | 1.4       | 33.9   | 16.5 | even           |      | ok     |
|           | 22 | C17H13ClNaO5S    | 33.76  | 387.0064 | 1.4       | 3.7       | 36.8   | 10.5 | even           |      | ok     |
|           | 23 | C8H12ClF3N6NaOS2 | 57.04  | 387.0047 | 0.3       | 0.9       | 39.2   | 3.5  | even           |      | ok     |
|           | 24 | C13H14ClF5NaS2   | 33.76  | 387.0038 | -1.2      | -3.2      | 40.7   | 3.5  | even           |      | ok     |
|           | 25 | C11H11ClF2N6NaS2 | 28.93  | 387.0035 | -1.5      | -3.8      | 40.7   | 7.5  | even           |      | ok     |
|           | 26 | C9H17ClN2NaO7S2  | 40.07  | 387.0058 | -0.8      | -2.0      | 44.5   | 1.5  | even           |      | ok     |
|           | 27 | C15H15ClF2NaO2S2 | 28.98  | 387.0062 | -1.2      | -3.1      | 47.1   | 6.5  | even           |      | ok     |
|           | 28 | C21H5ClN4NaO     | 31.54  | 387.0044 | -0.6      | -1.6      | 48.9   | 20.5 | even           |      | ok     |
|           | 29 | C18H14ClFN4NaOS2 | 39.50  | 387.0051 | -0.1      | -0.1      | 55.7   | 10.5 | even           |      | ok     |
|           | 30 | C8H15ClF2N6NaS3  | 13.01  | 387.0069 | 1.9       | 4.9       | 58.0   | 2.5  | even           |      | ok     |

## Mass Spectrum SmartFormula Report

| Meas. m/z | #  | Ion Formula       | Score | m/z      | err [mDa] | err [ppm] | mSigma | rdb  | e <sup>-</sup> | Conf | N-Rule |
|-----------|----|-------------------|-------|----------|-----------|-----------|--------|------|----------------|------|--------|
|           | 31 | C10H18ClFN2NaO3S3 | 25.73 | 387.0044 | 0.6       | 1.5       | 61.3   | 1.5  | even           |      | ok     |
|           | 32 | C13H17ClN2NaO2S3  | 11.41 | 387.0033 | -1.7      | -4.5      | 64.8   | 5.5  | even           |      | ok     |
|           | 33 | C21H13ClNaS2      | 16.31 | 387.0039 | -1.1      | -2.8      | 66.7   | 14.5 | even           |      | ok     |
|           | 34 | C10H21ClN2NaO2S4  | 8.37  | 387.0067 | 1.6       | 4.2       | 75.2   | 0.5  | even           |      | ok     |

**Figure S1a.** RP-Chromatogram of analogue **5a**.

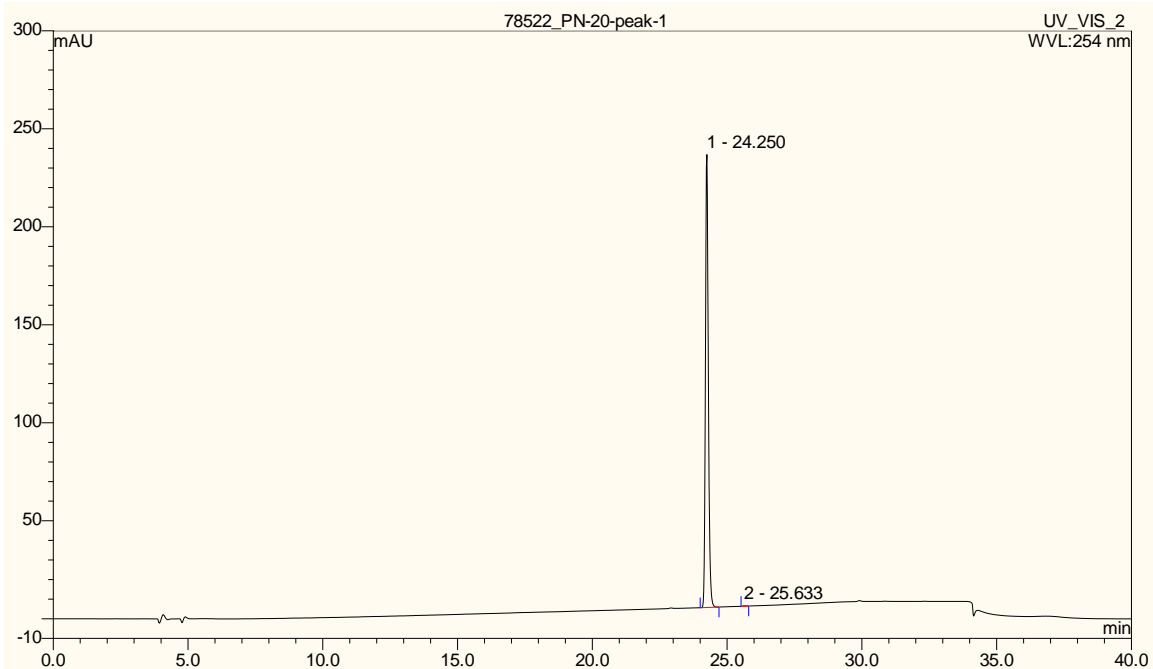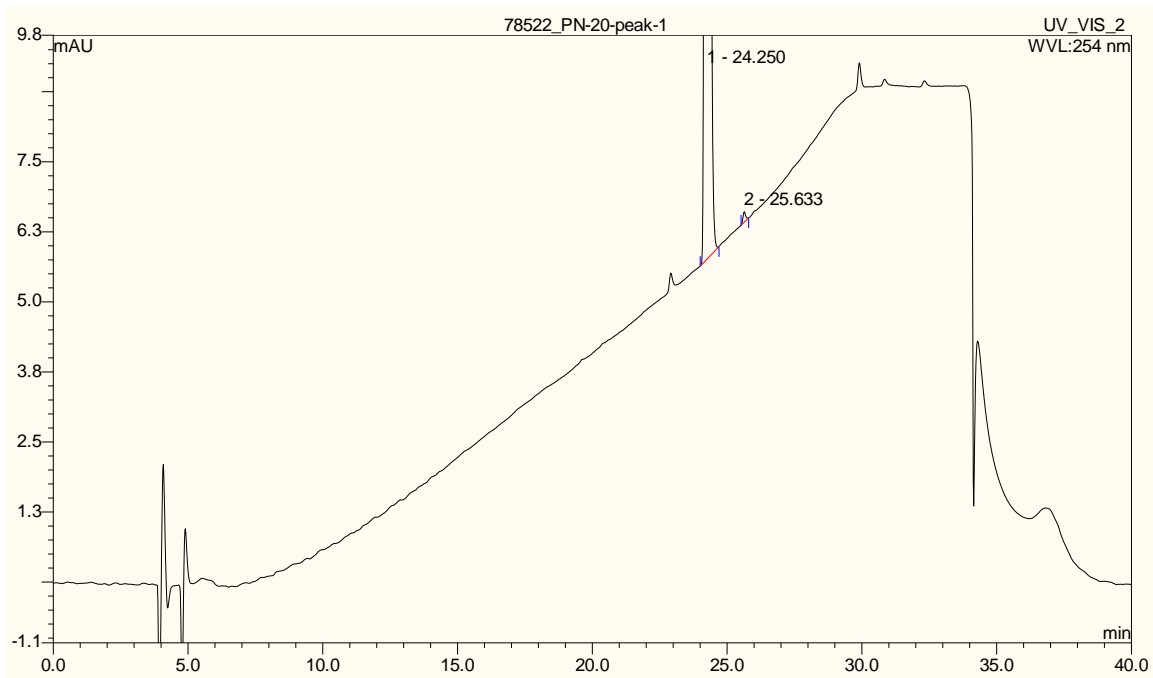

Retention Time: **24.25 min**

Relative Peak Area: **99.93 %**

**Figure S2a.** RP-Chromatogram of analogue **6a**.

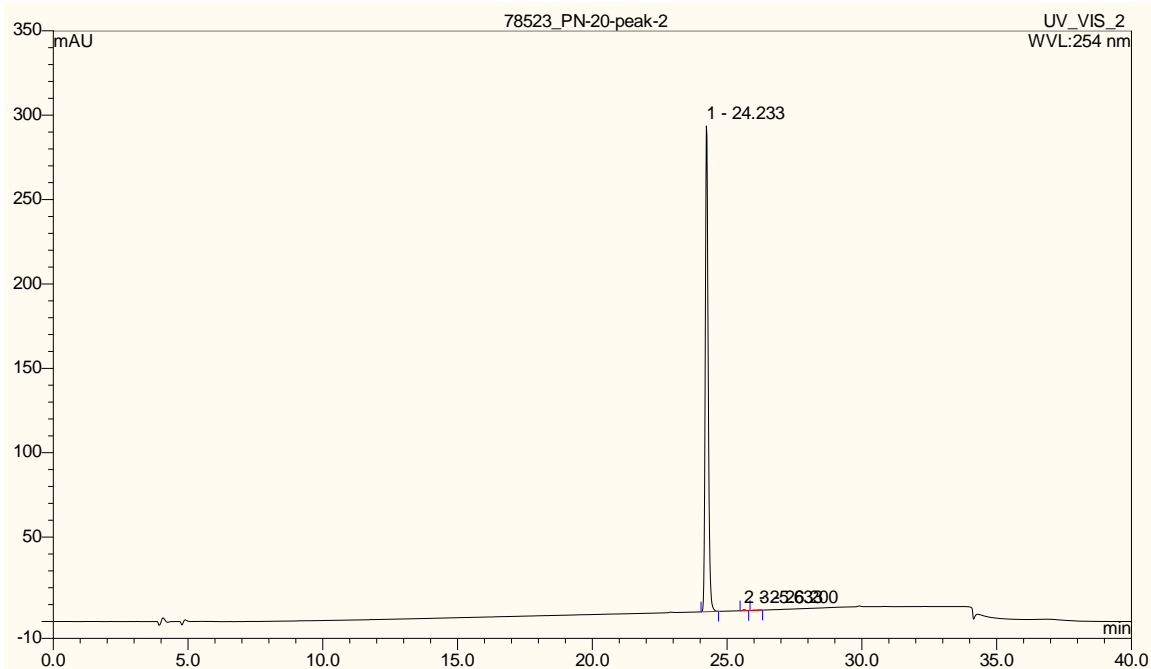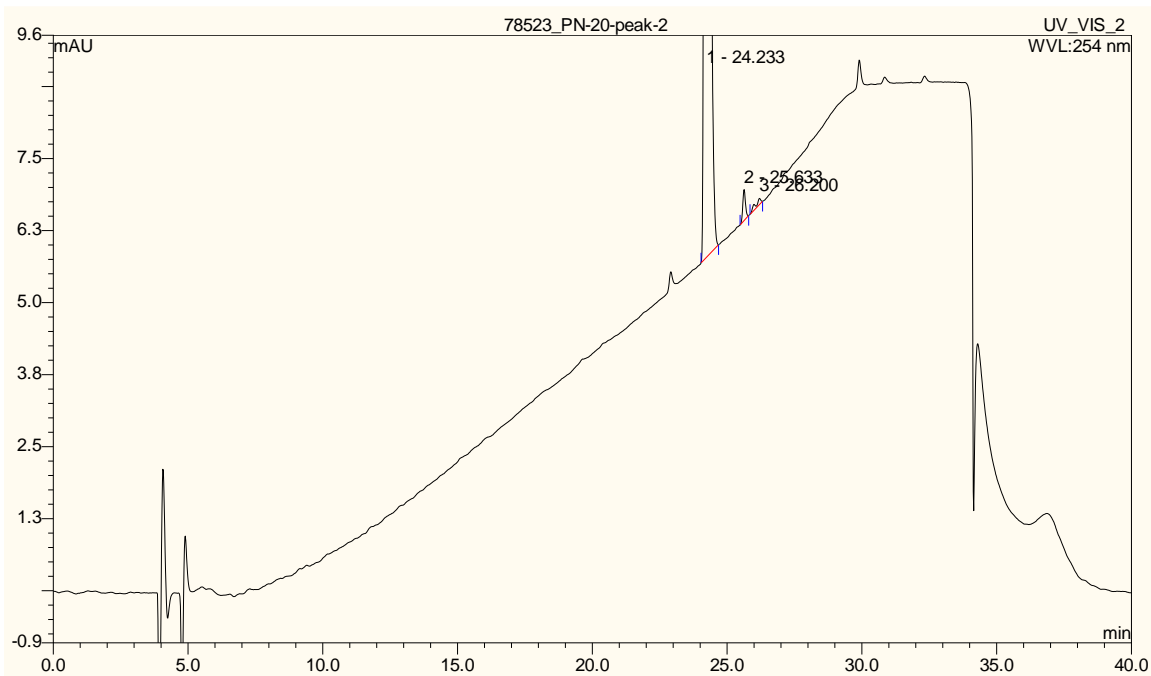

Retention Time: **24.23 min**

Relative Peak Area: **99.76 %**

**Figure S3a.** RP-Chromatogram of analogue **7a**.

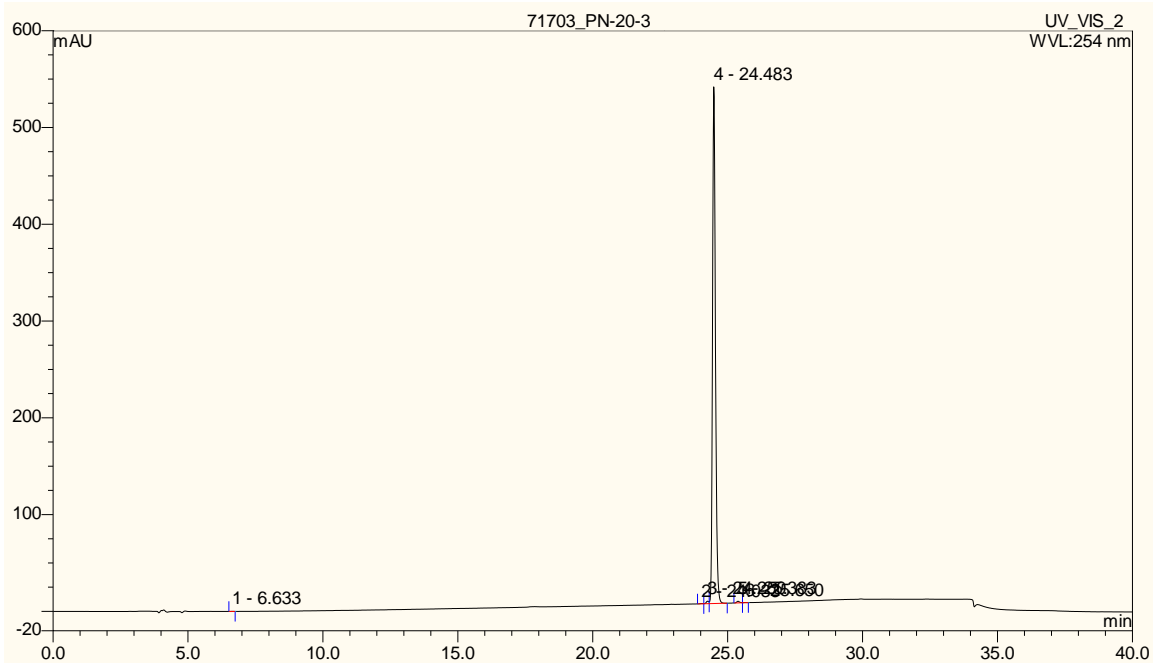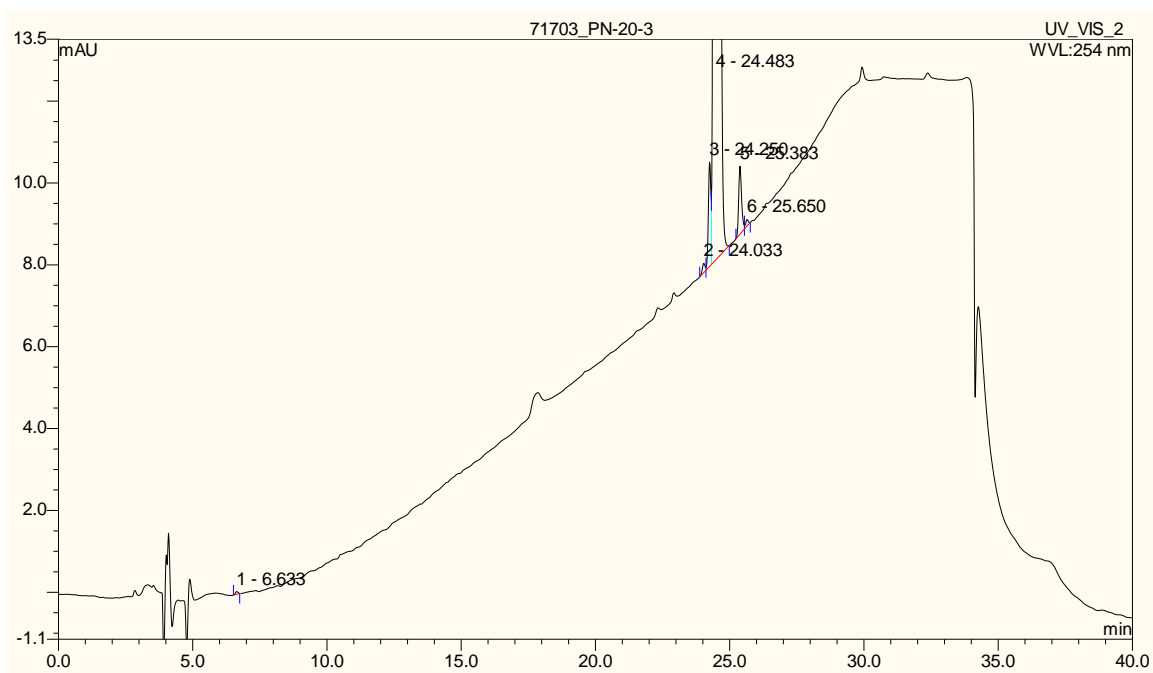

Retention Time: **24.48 min**

Relative Peak Area: **99.22 %**

**Figure S4a.** RP-Chromatogram of analogue **8a**.

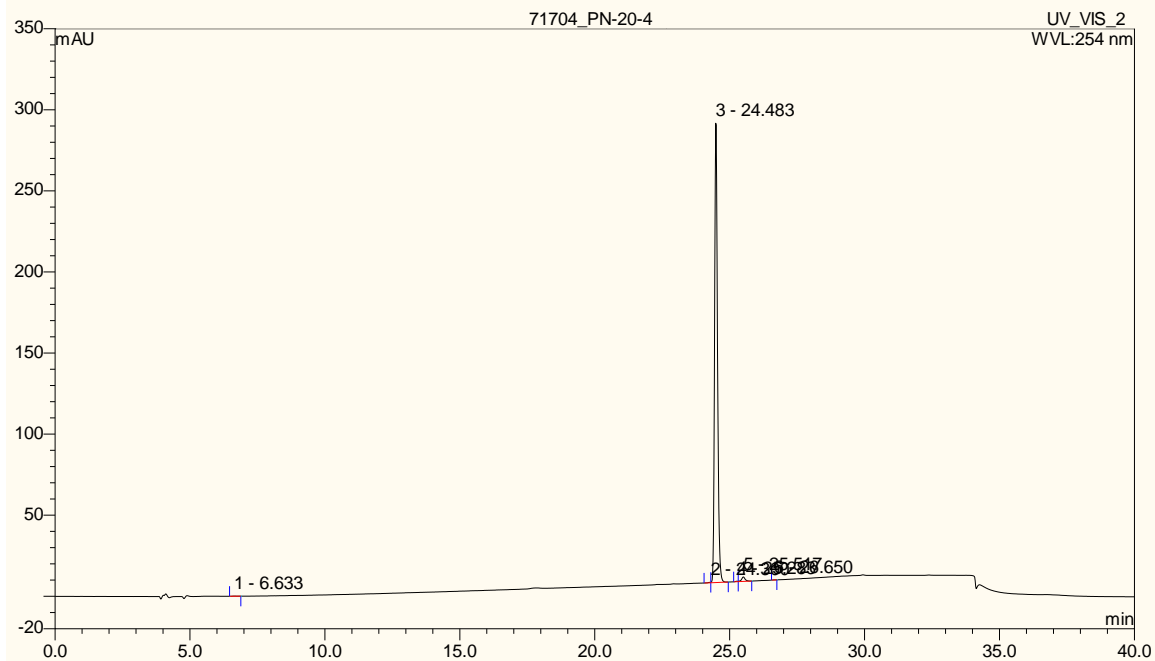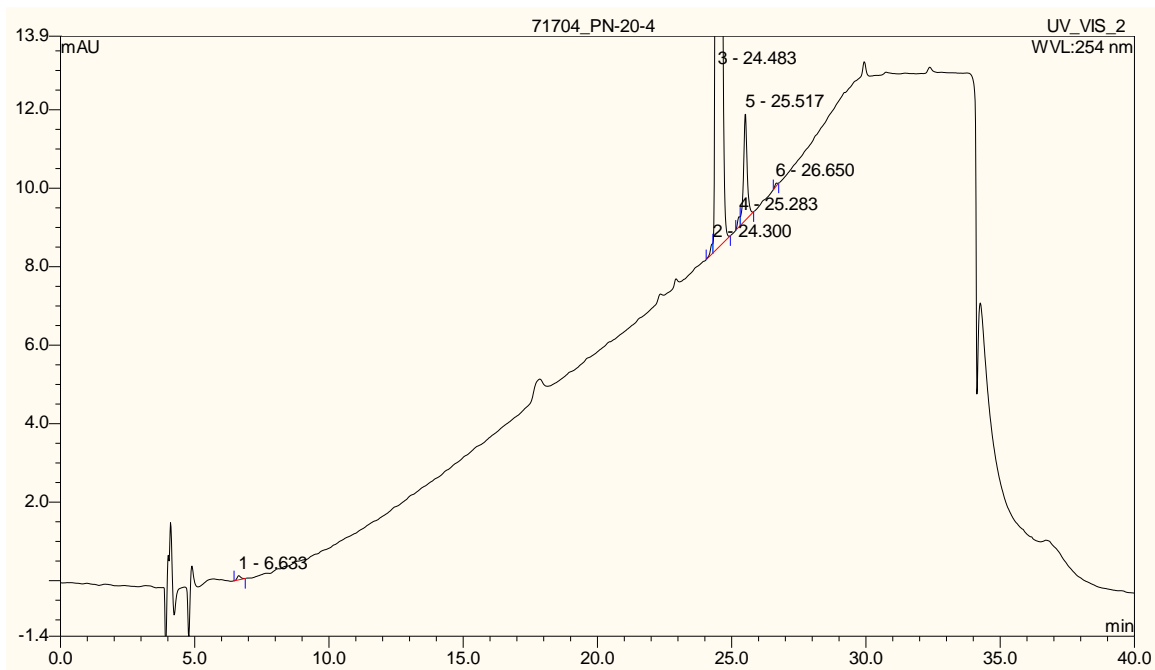

Retention Time: **24.48 min**

Relative Peak Area: **98.62 %**

**Figure S5a.** RP-Chromatogram of analogue **5b**.

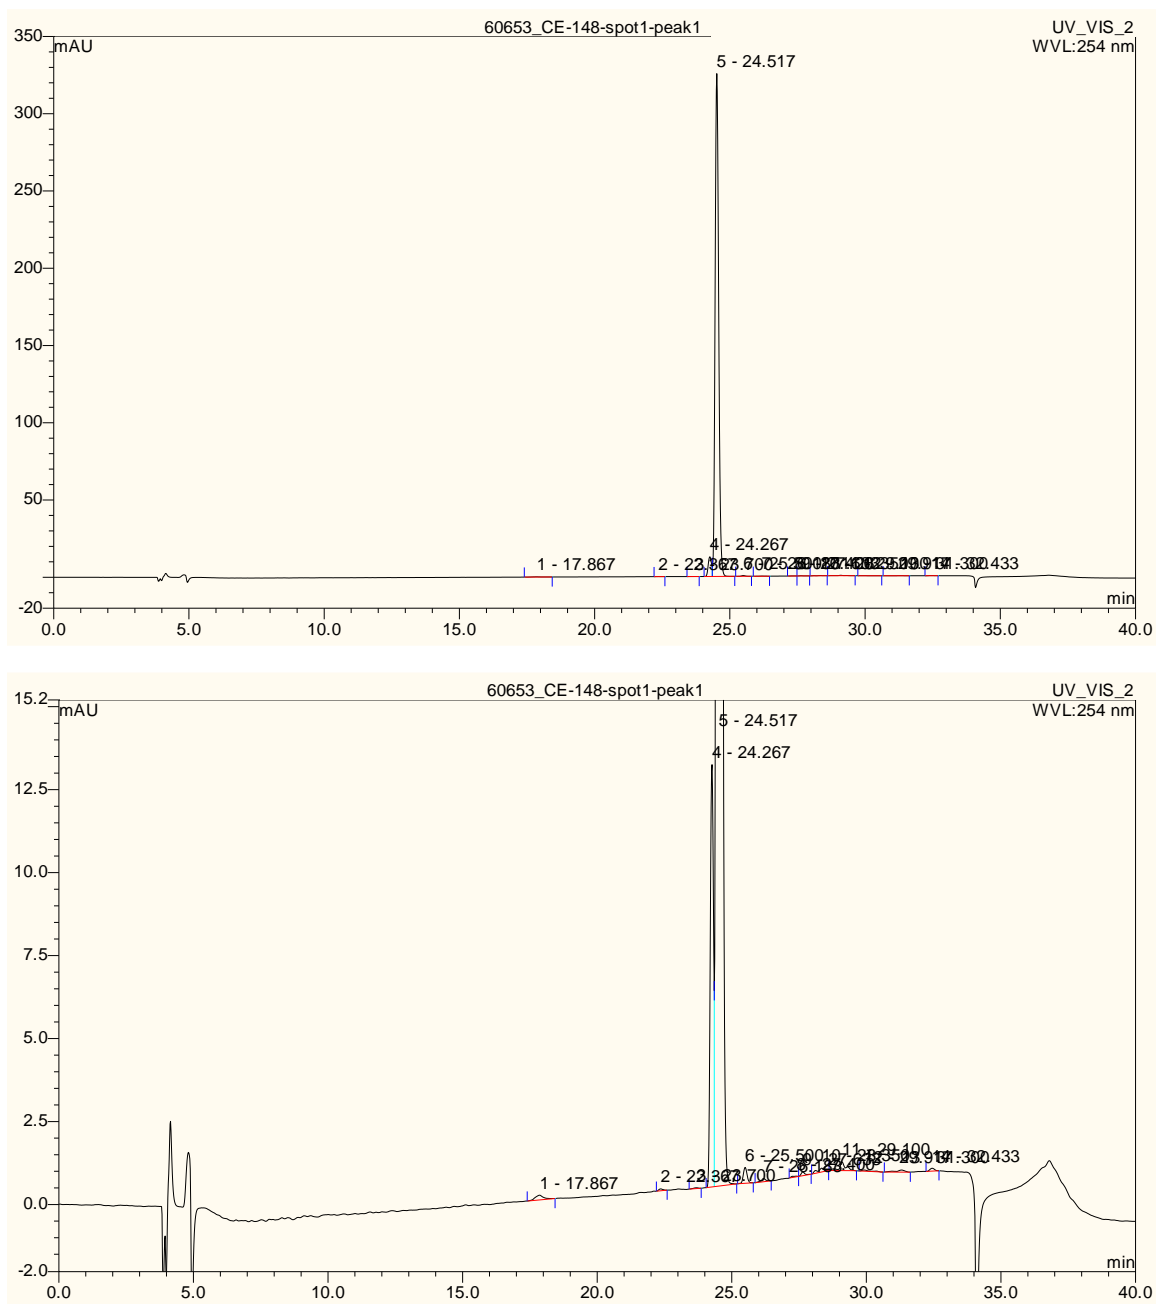

Retention Time: **24.52 min**

Relative Peak Area: **95.97 %**



**Figure S6a.** RP-Chromatogram of analogue **6b**.

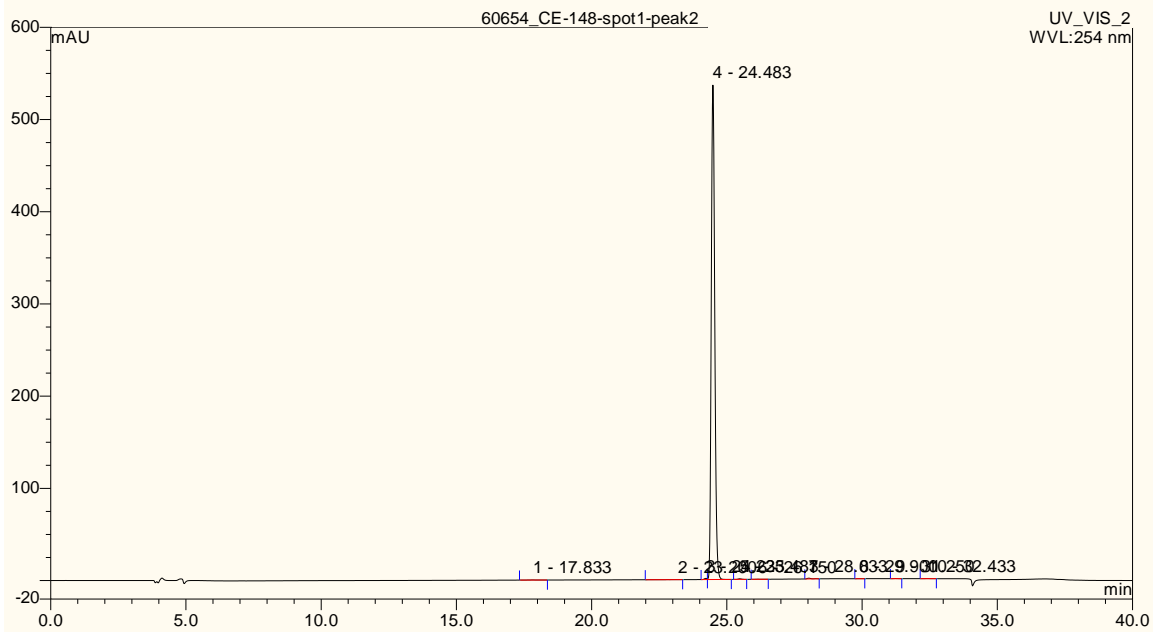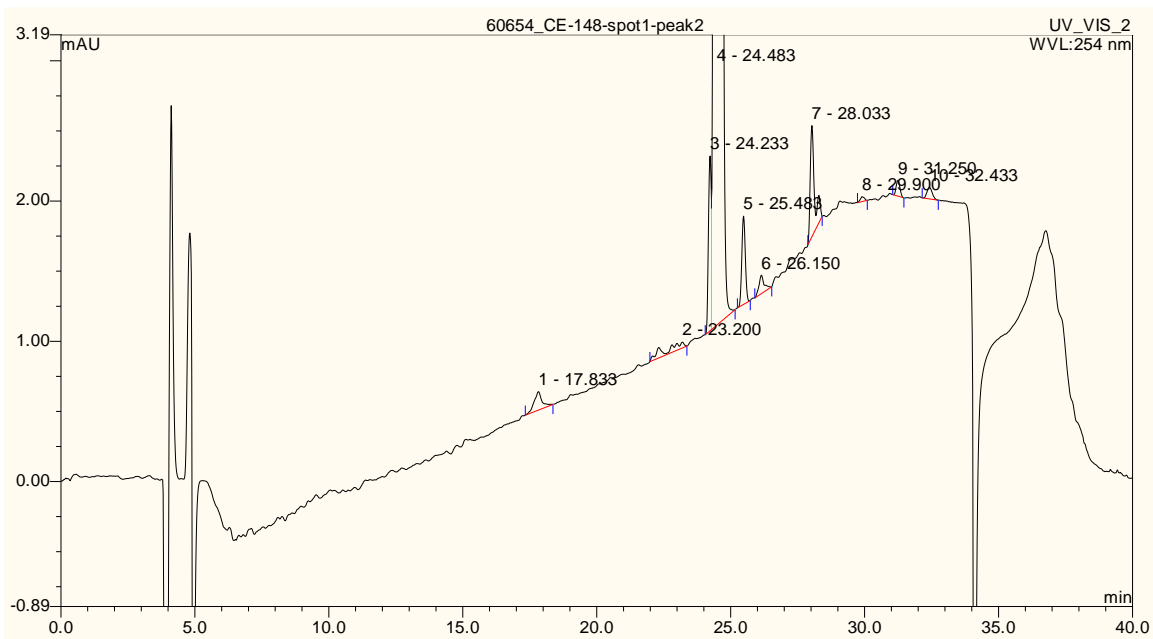

Retention Time: **24.48 min**

Relative Peak Area: **99.32 %**

**Figure S7a.** RP-Chromatogram of analogue **7b**.

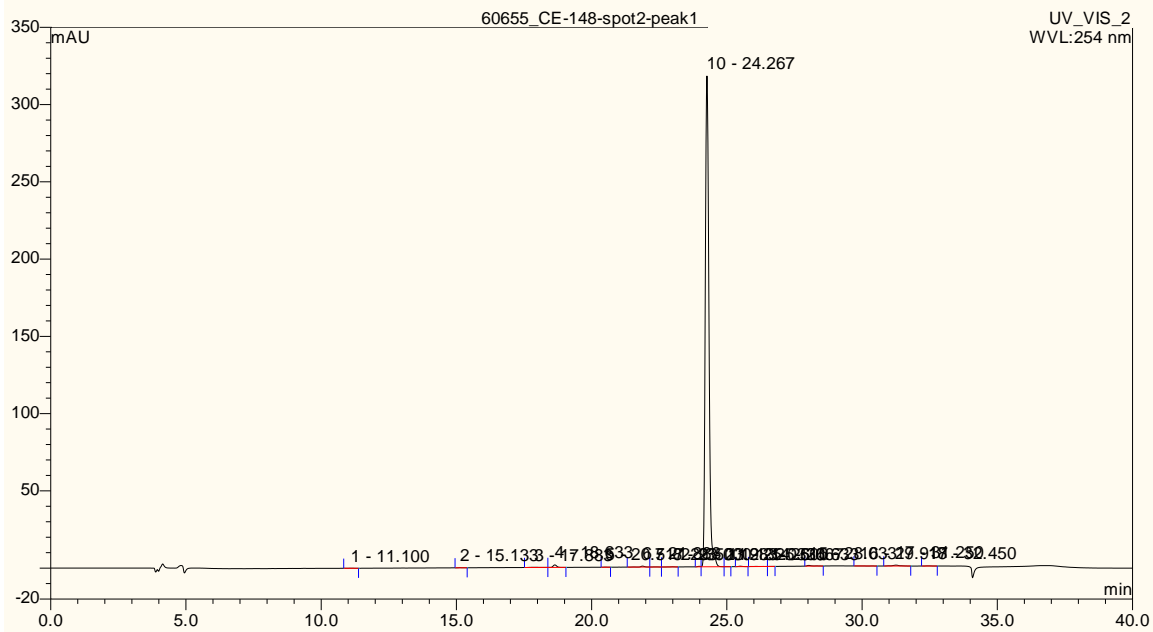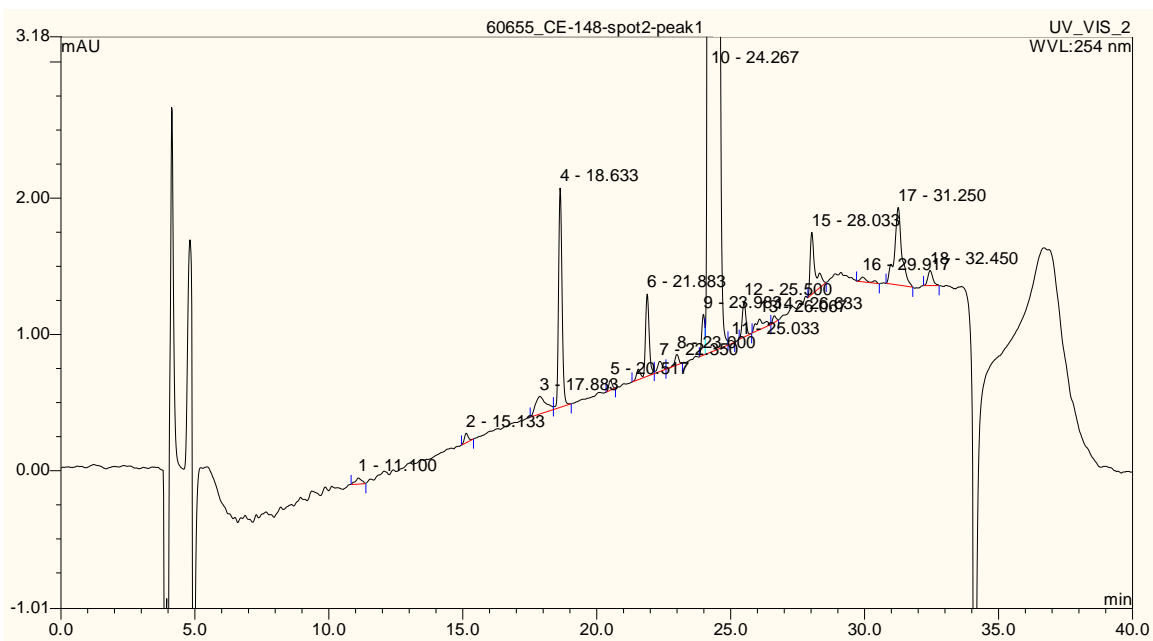

Retention Time: **24.27 min**

Relative Peak Area: **98.20 %**

**Figure S8a.** RP-Chromatogram of analogue **8b**.

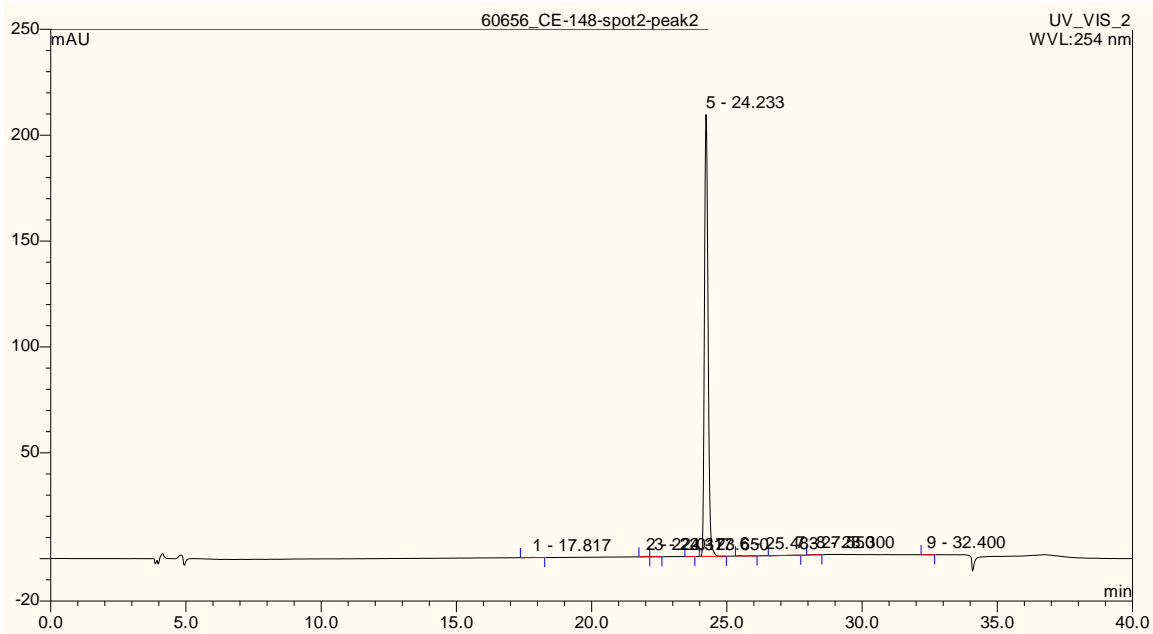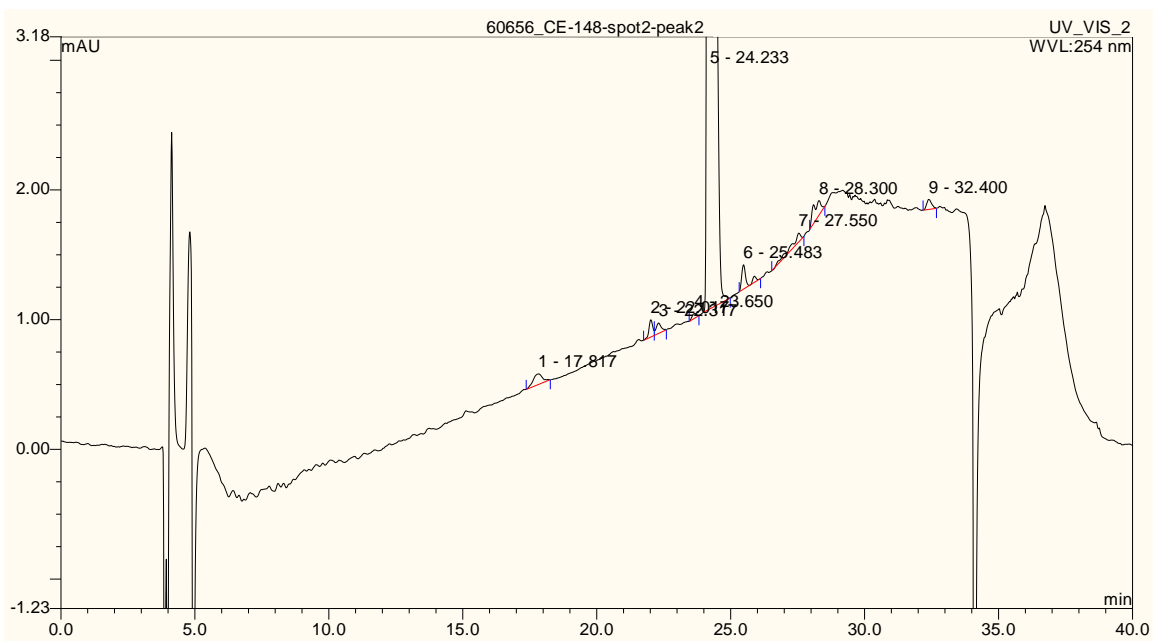

Retention Time: **24.23 min**

Relative Peak Area: **99.37 %**

**Figure S9a.** RP-Chromatogram of analogue **5c**.

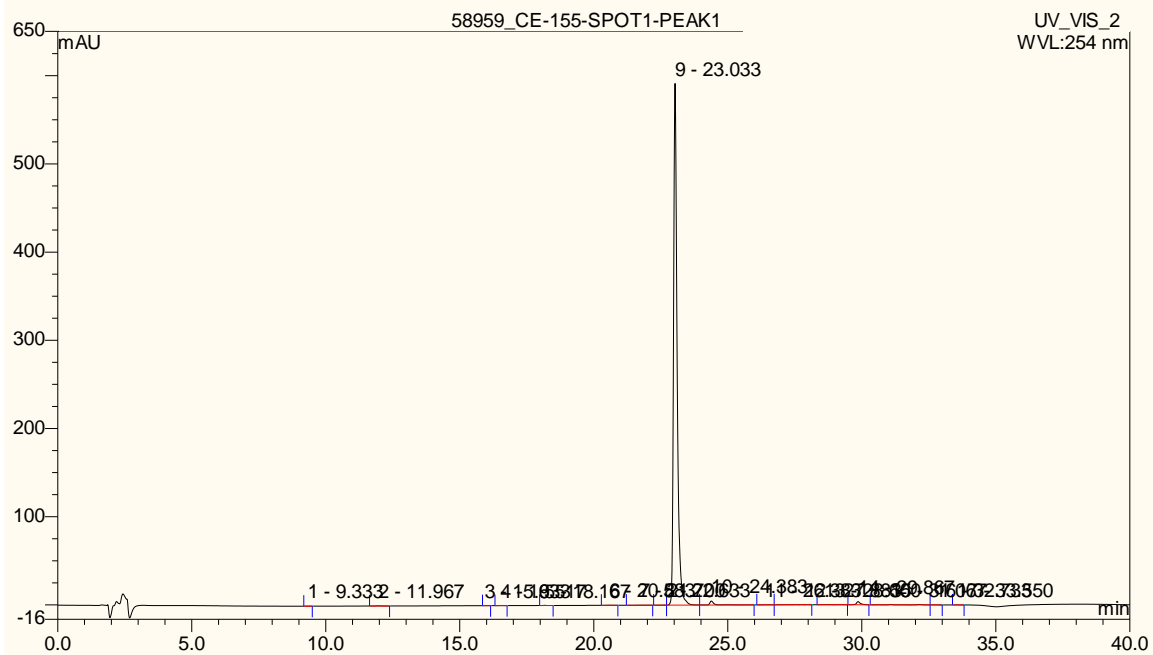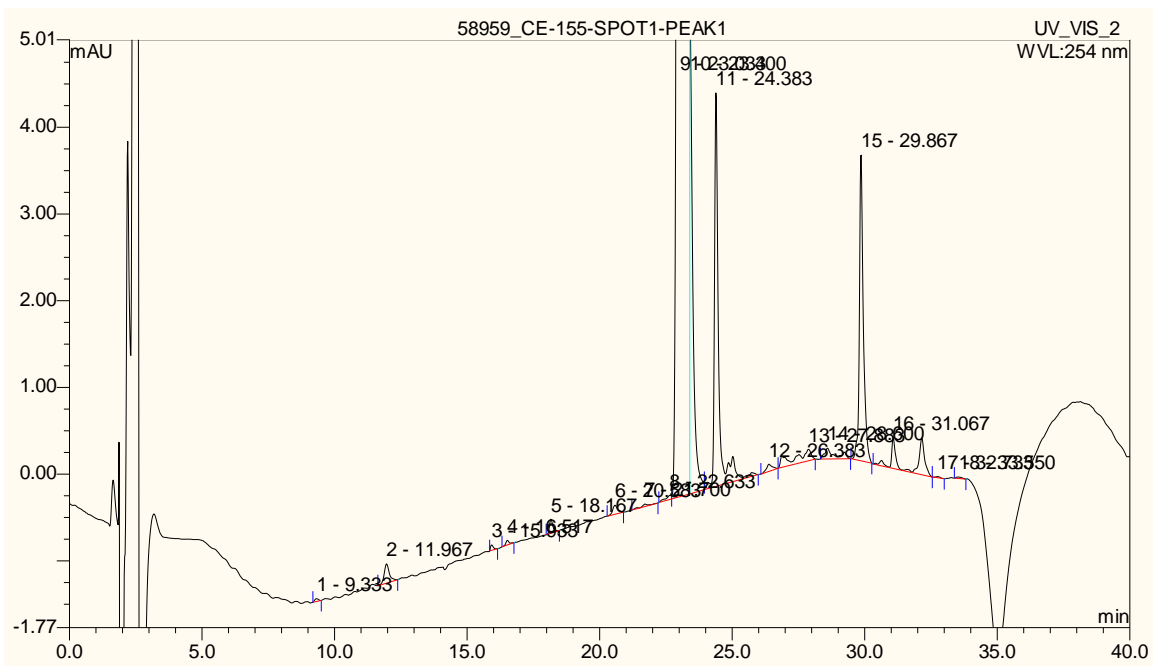

Retention Time: **23.03 min**

Relative Peak Area: **97.17 %**

**Figure S10a.** RP-Chromatogram of analogue **6c**.

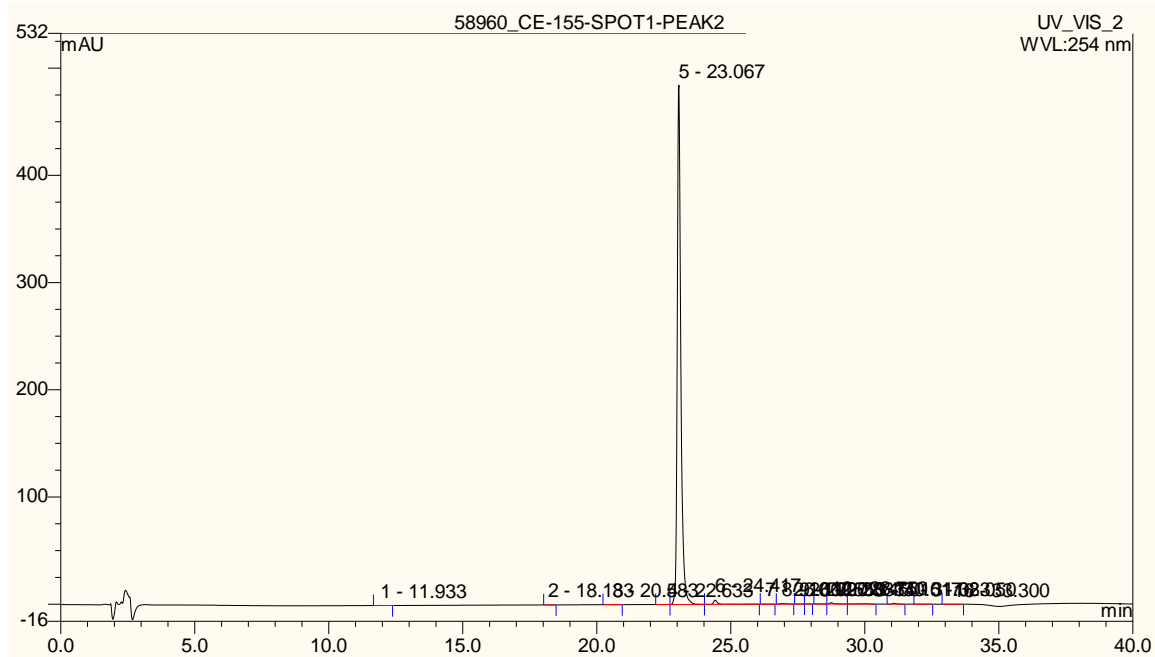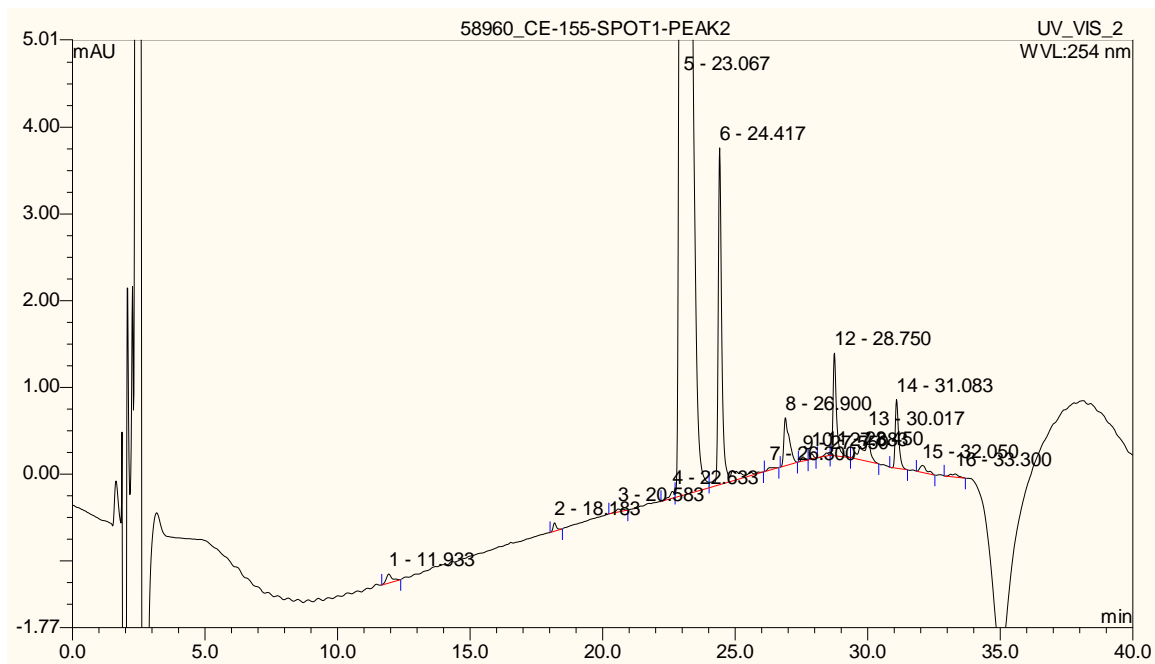

Retention Time: **23.07 min**

Relative Peak Area: **98.29 %**

**Figure S11a.** RP-Chromatogram of analogue **7c**.

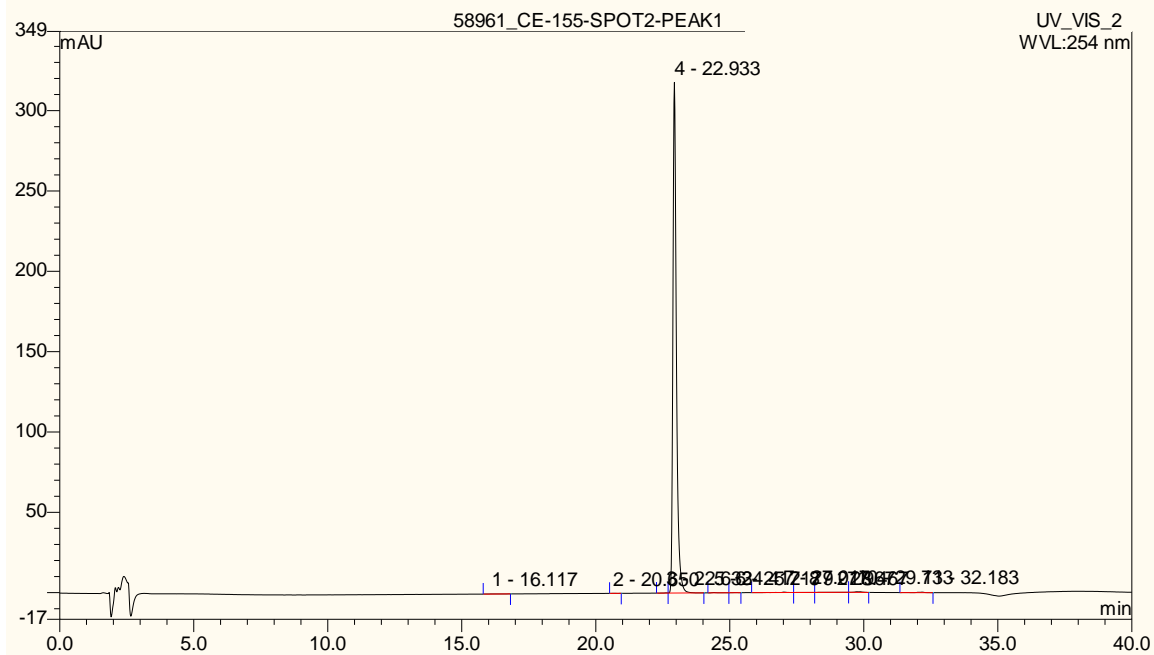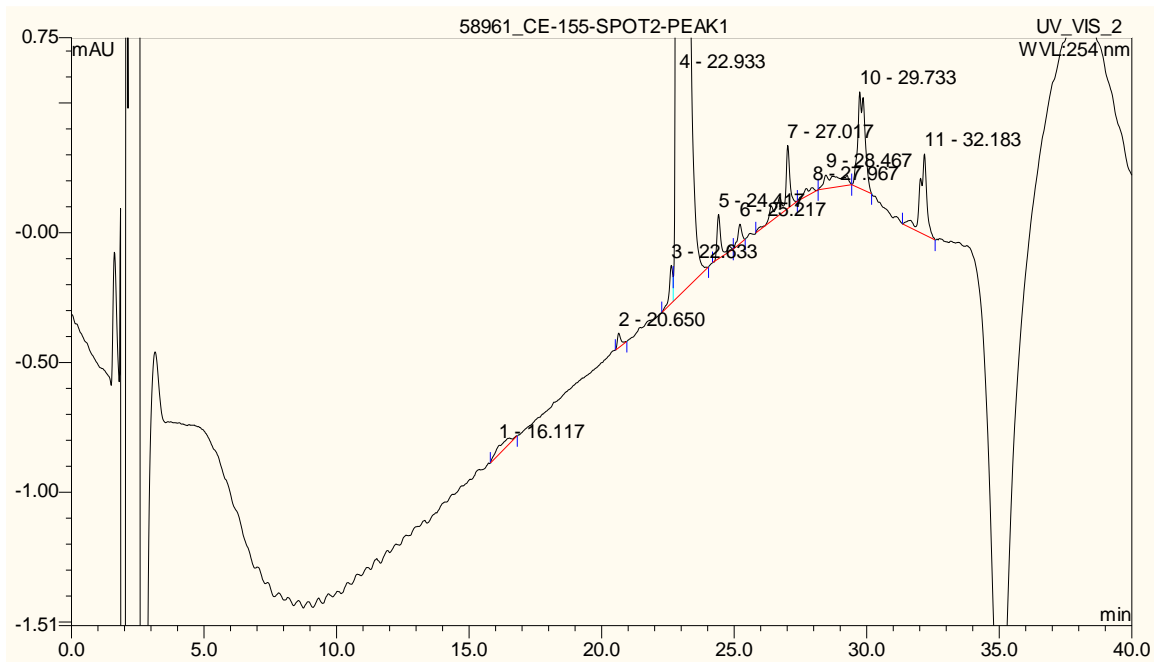

Retention Time: **22.93 min**

Relative Peak Area: **99.15 %**

**Figure S12a.** RP-Chromatogram of analogue **8c**.

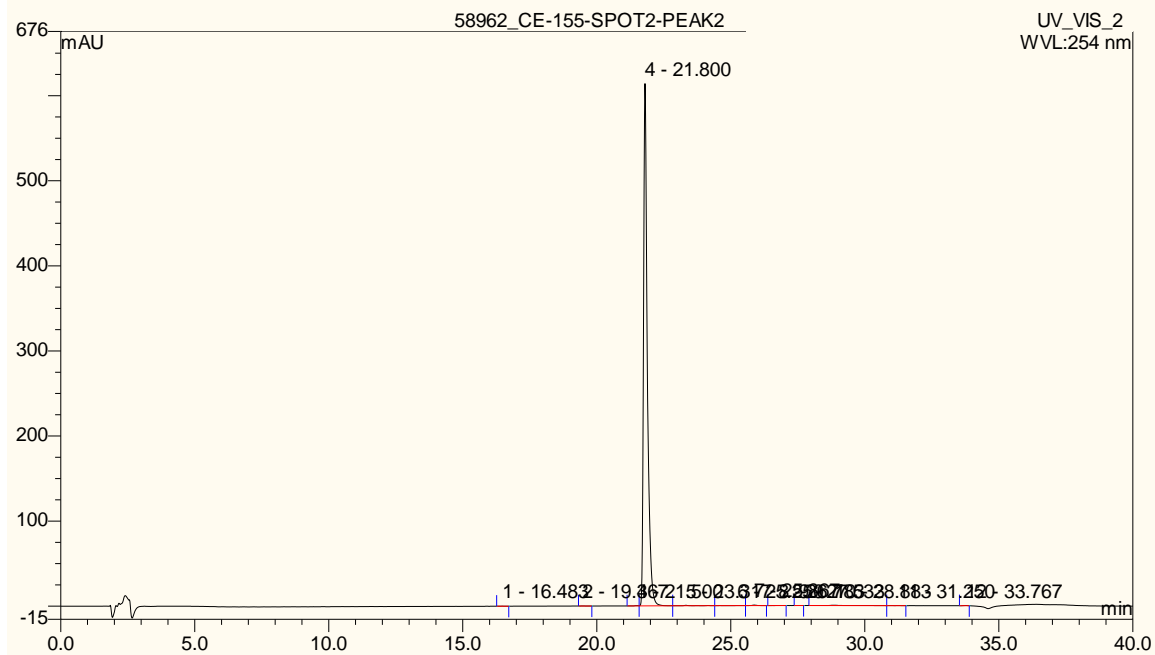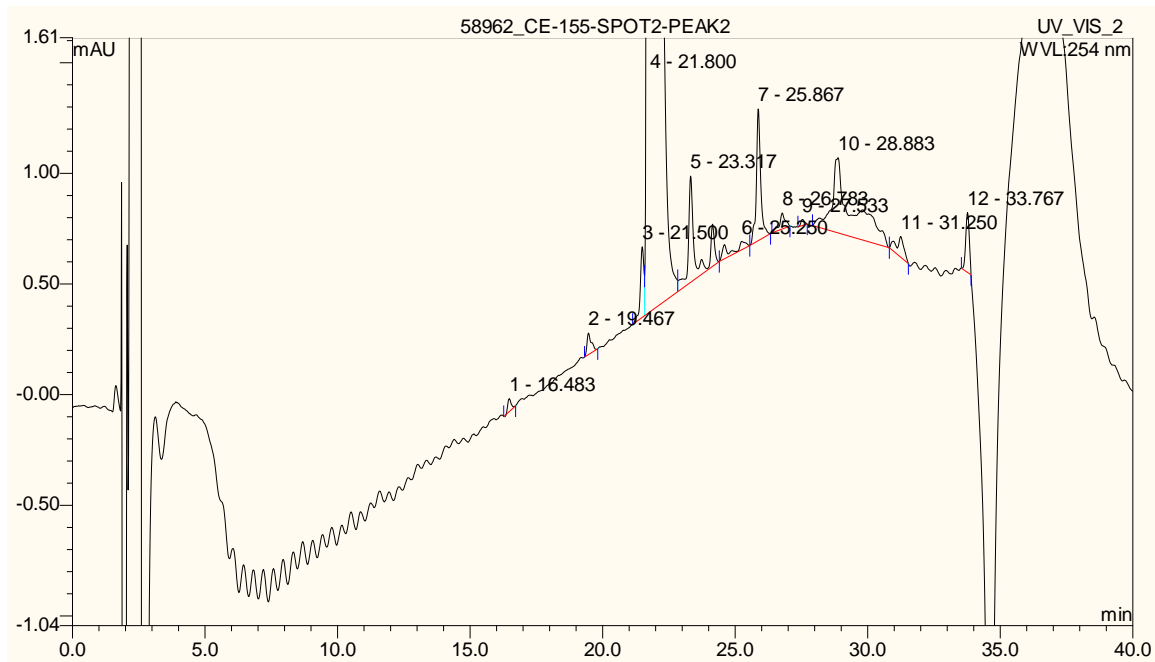

Retention Time: **21.80 min**

Relative Peak Area: **99.27 %**

**Figure S13a.** RP-Chromatogram of analogue **5d**.

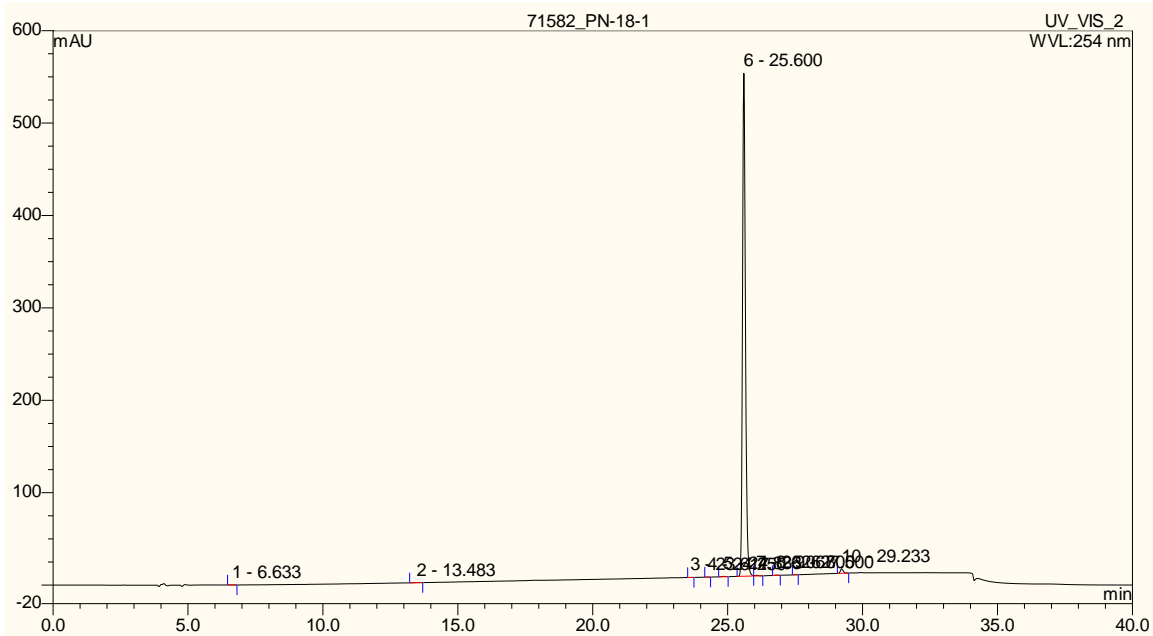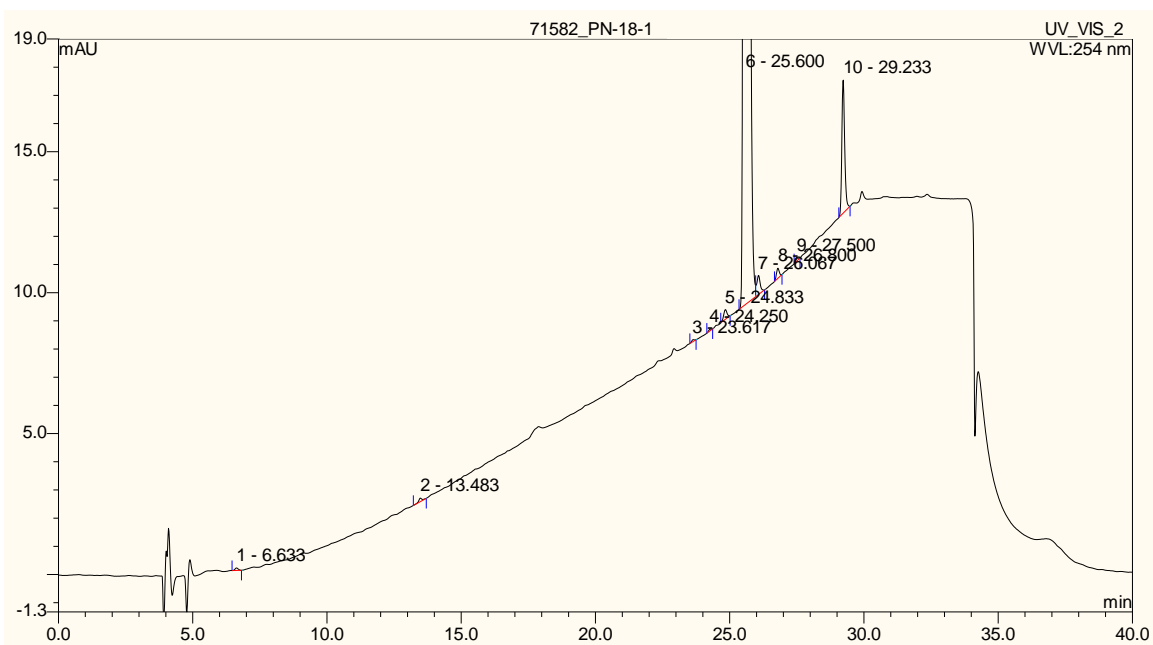

Retention Time: **25.60 min**

Relative Peak Area: **98.81 %**



**Figure S14a.** RP-Chromatogram of analogue **6d**.

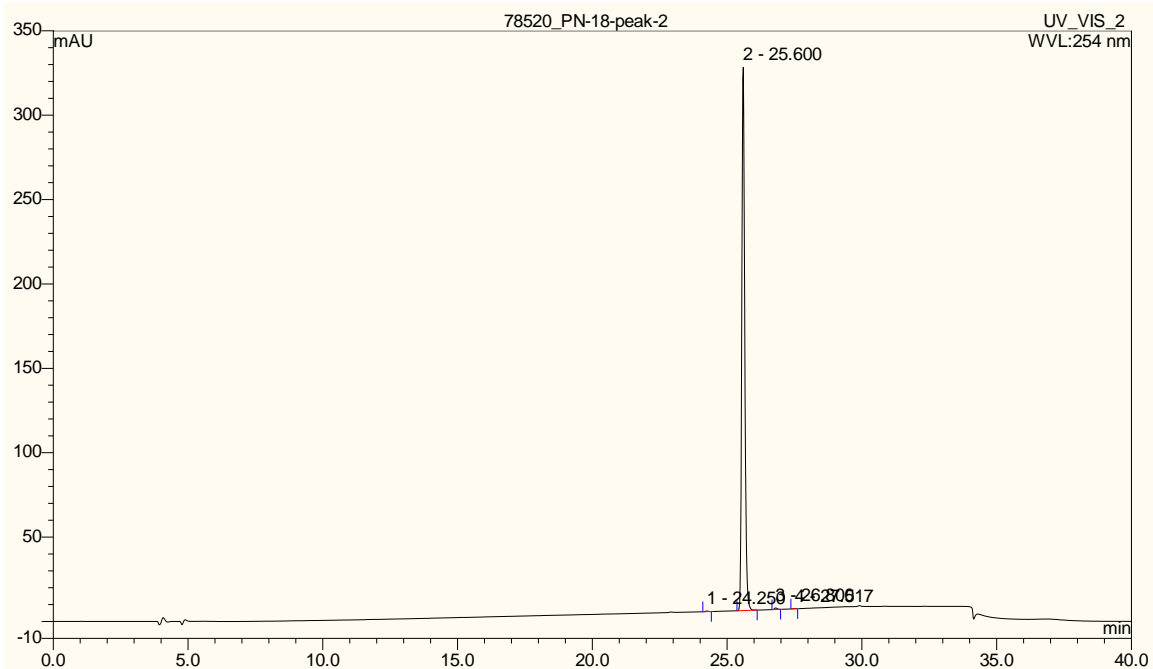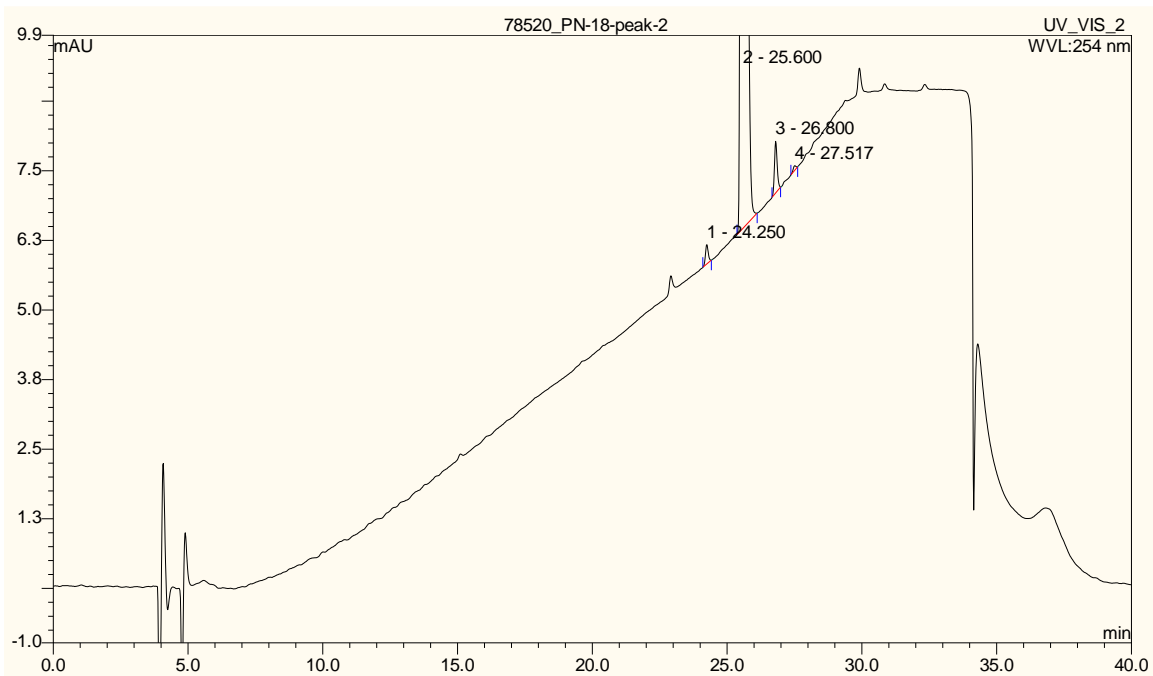

Retention Time: **25.60 min**

Relative Peak Area: **99.61 %**

**Figure S15a.** RP-Chromatogram of analogue **7d**.

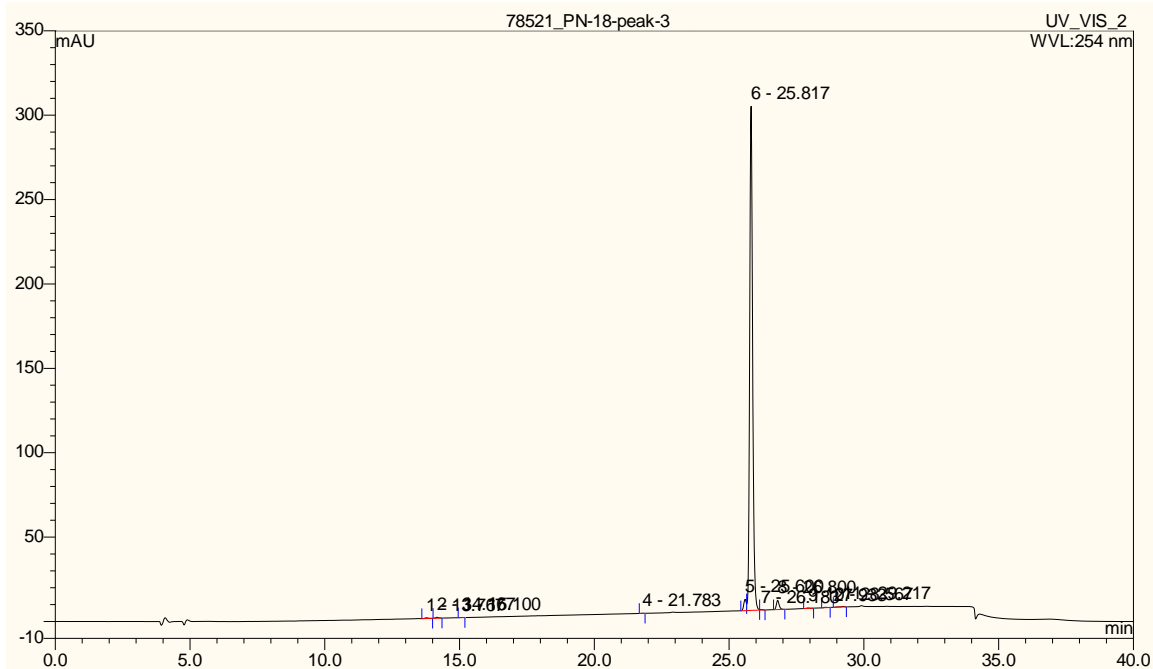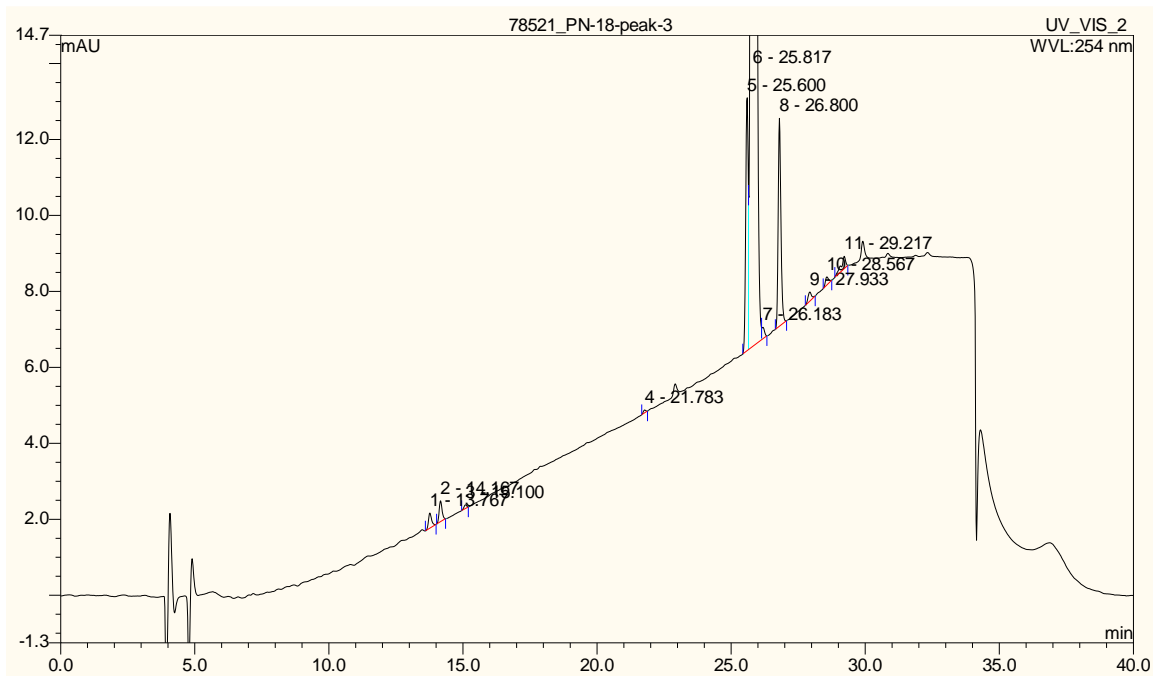

Retention Time: **25.82 min**

Relative Peak Area: **95.86 %**

**Figure S16a.** RP-Chromatogram of analogue **8d**.

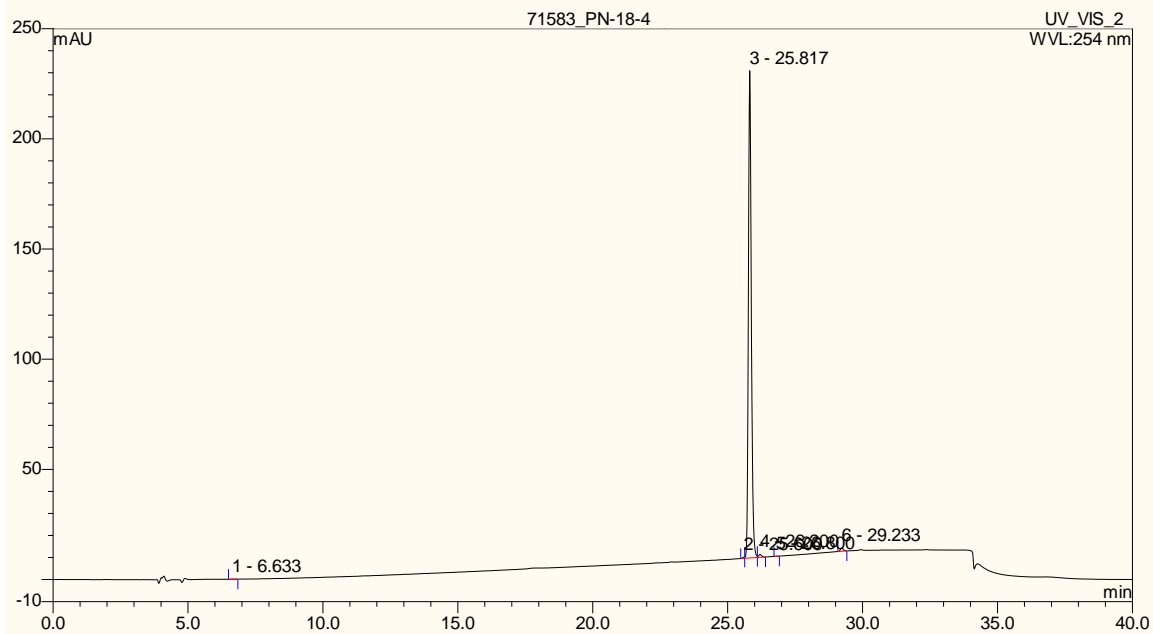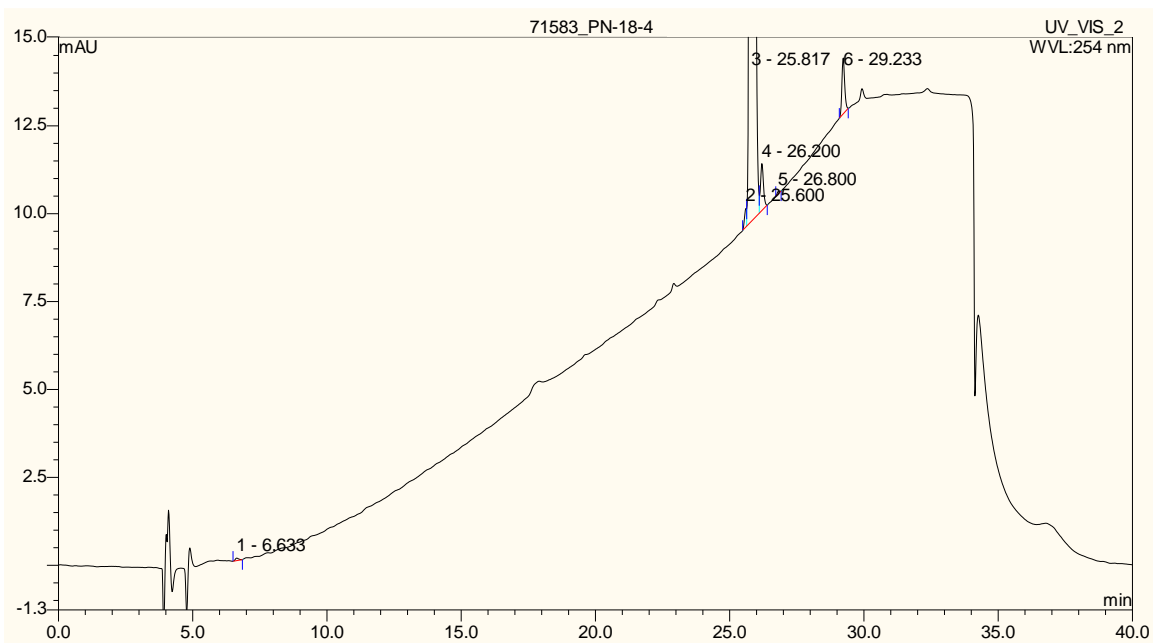

Retention Time: **25.82 min**

Relative Peak Area: **98.49 %**

**Figure S17a.** RP-Chromatogram of analogue **5e**.

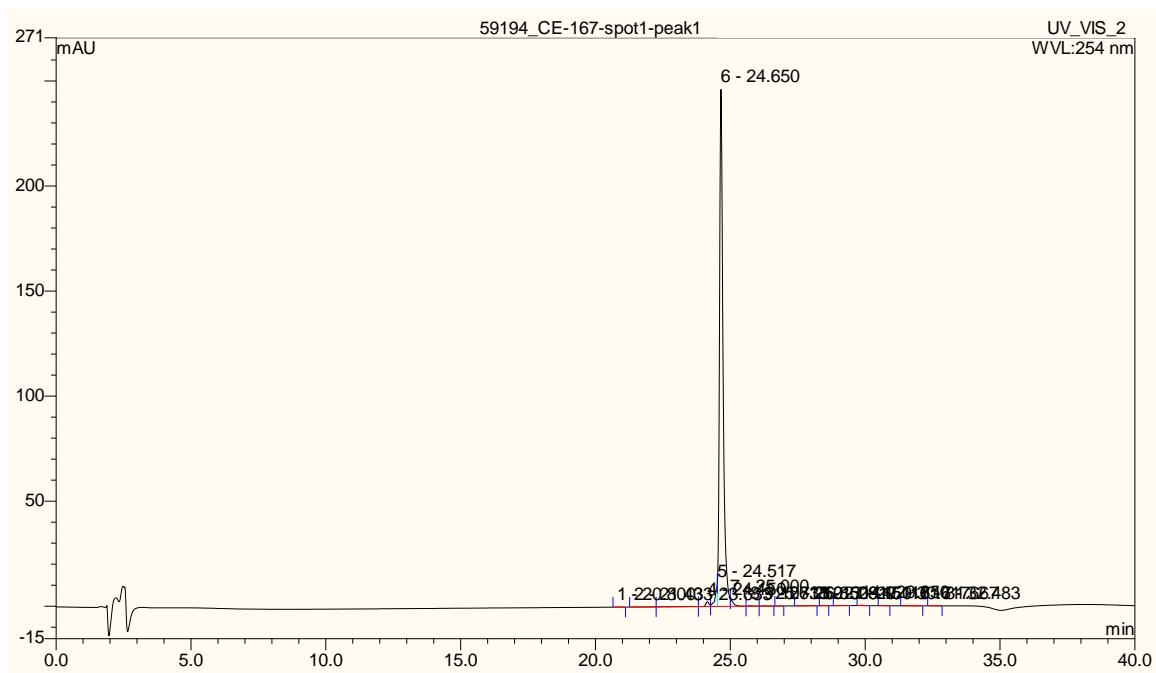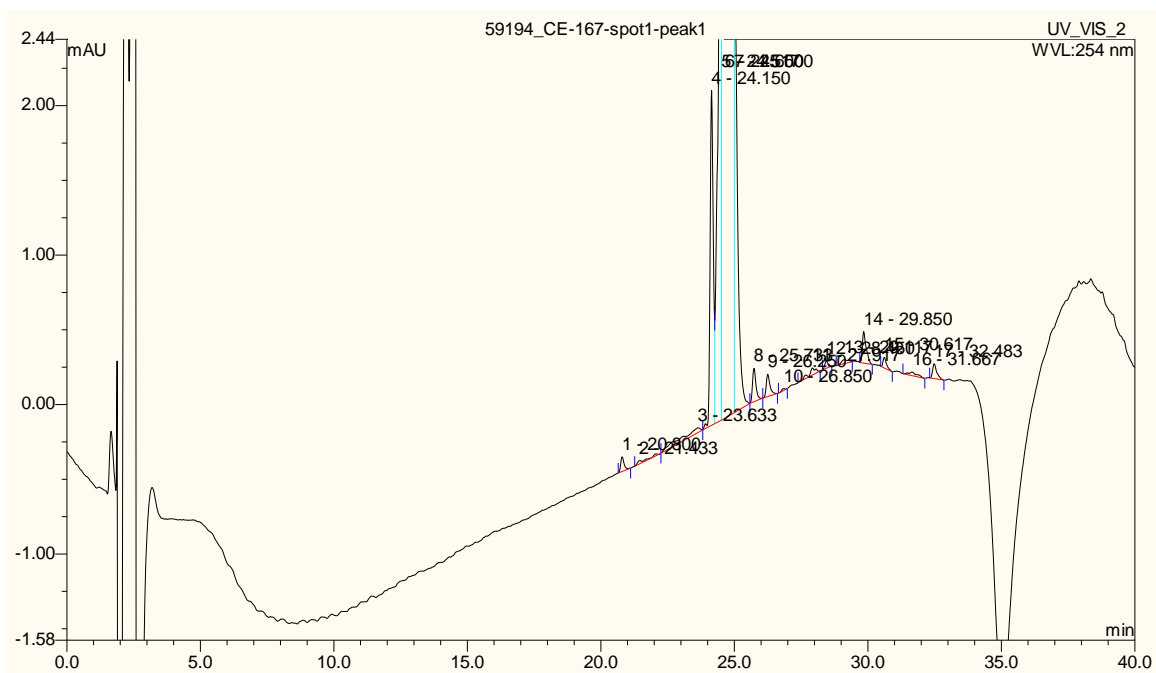

Retention Time: **24.65 min**

Relative Peak Area: **95.31 %**

**Figure S18a.** RP-Chromatogram of analogue **6e**.

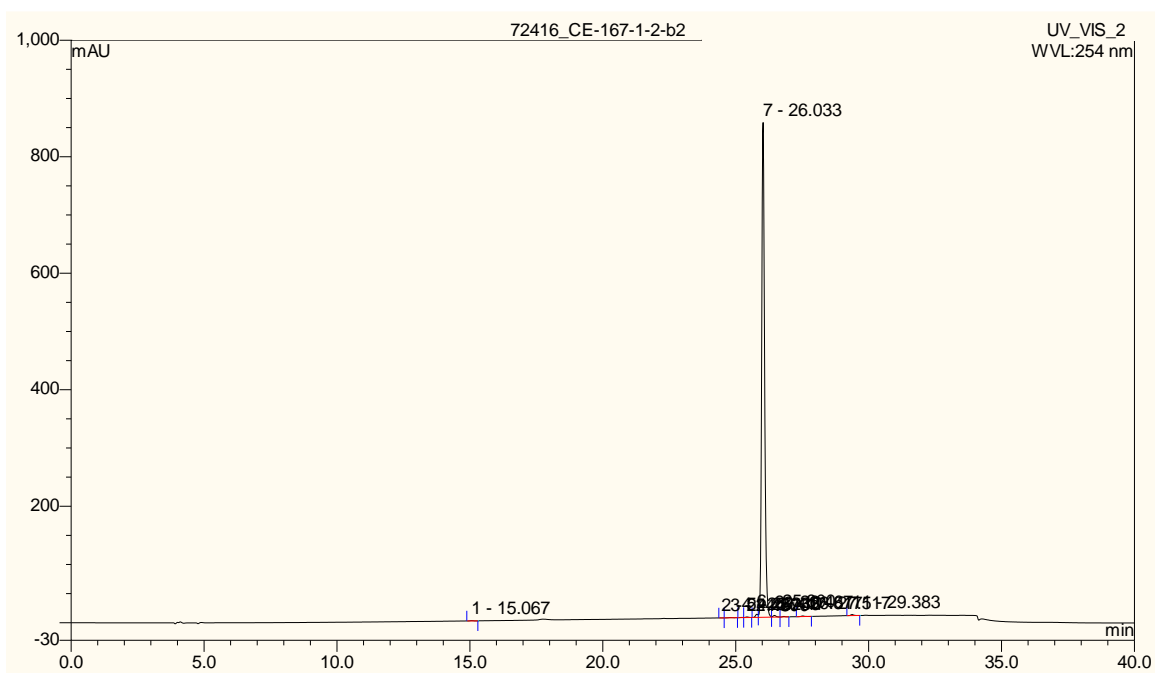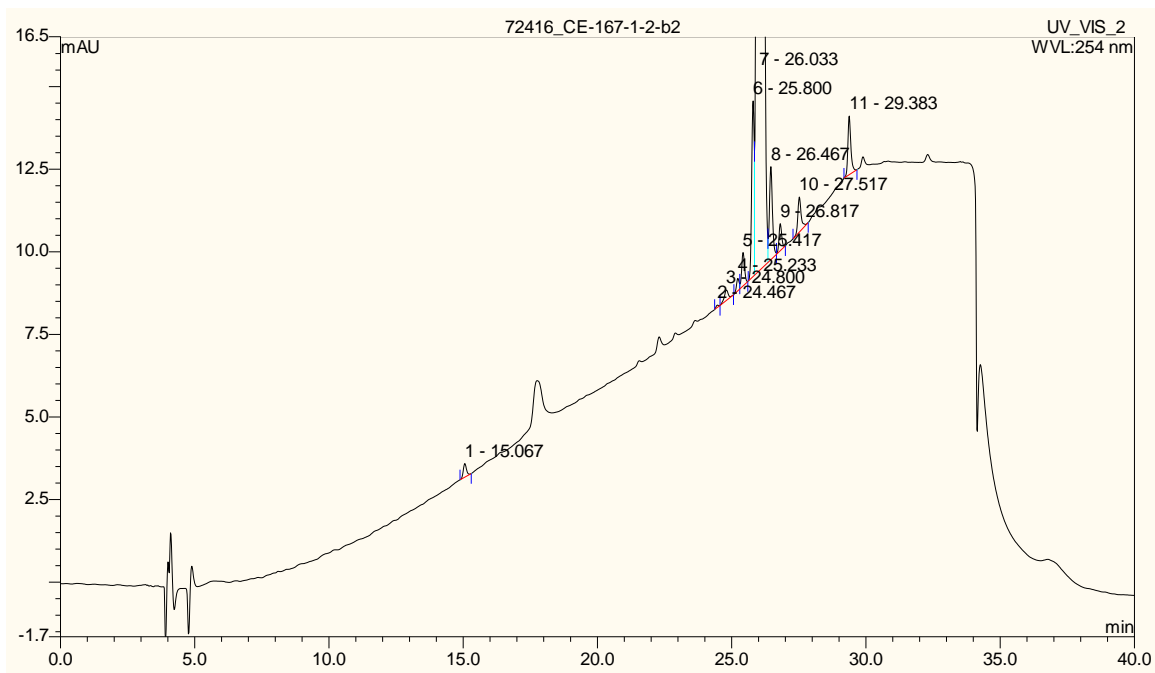

Retention Time: **26.03 min**

Relative Peak Area: **98.46 %**

**Figure S19a.** RP-Chromatogram of analogue **7e**.

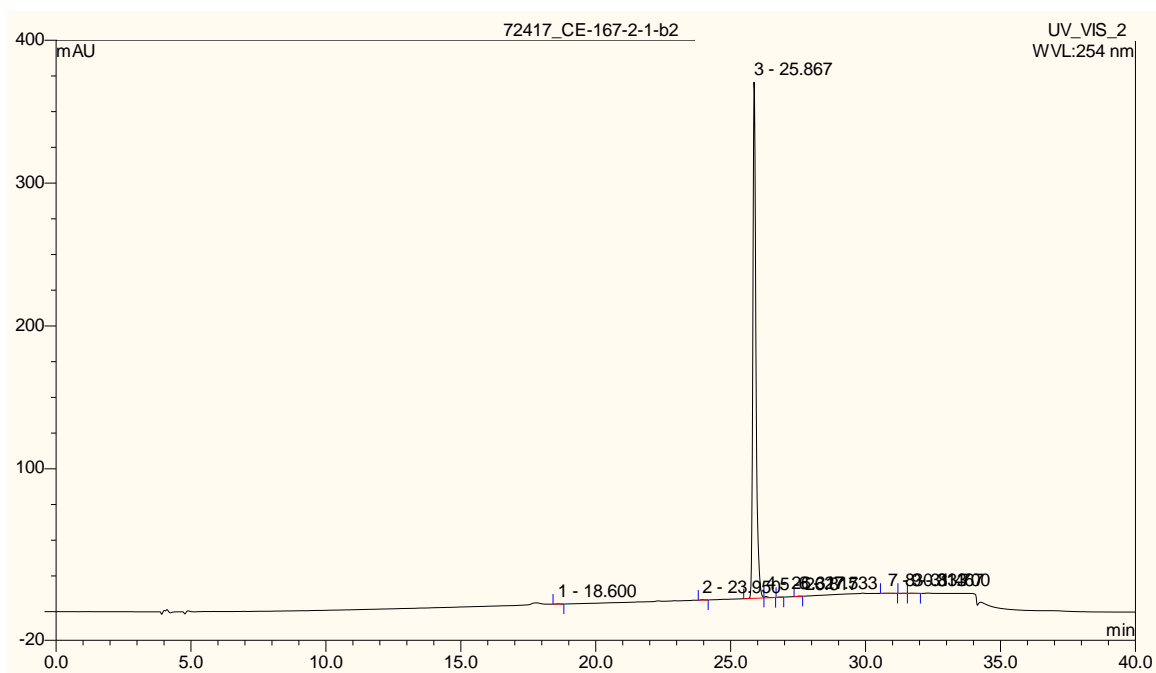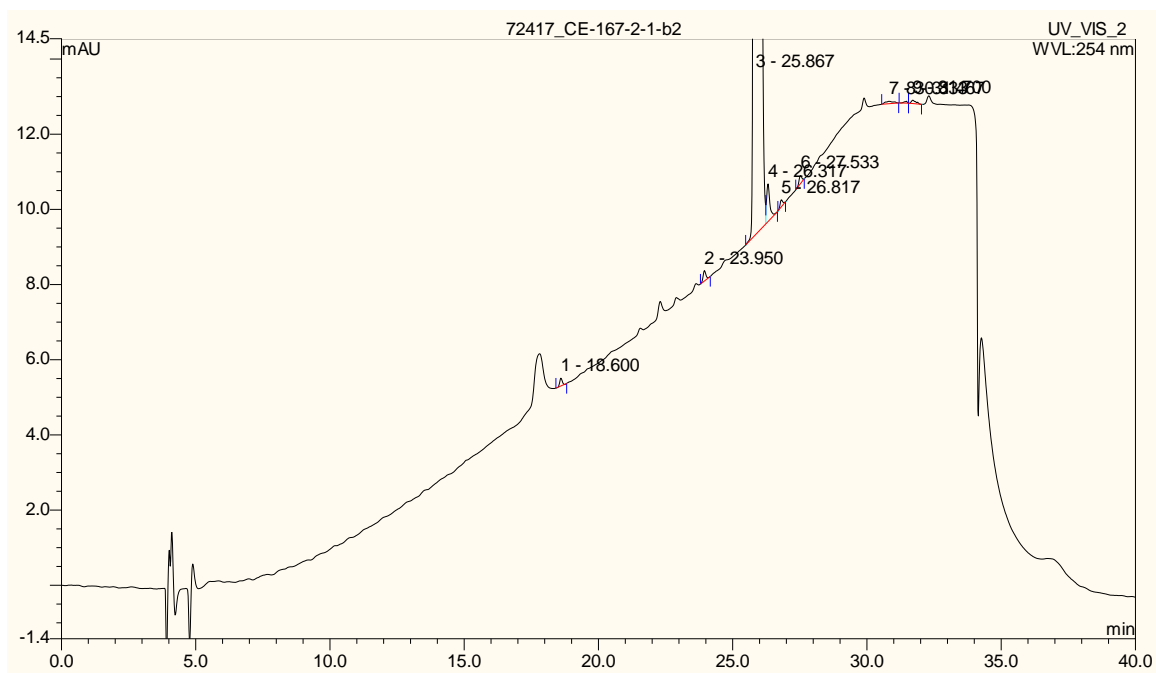

Retention Time: **25.87 min**

Relative Peak Area: **99.41 %**

**Figure S20a.** RP-Chromatogram of analogue **8e**.

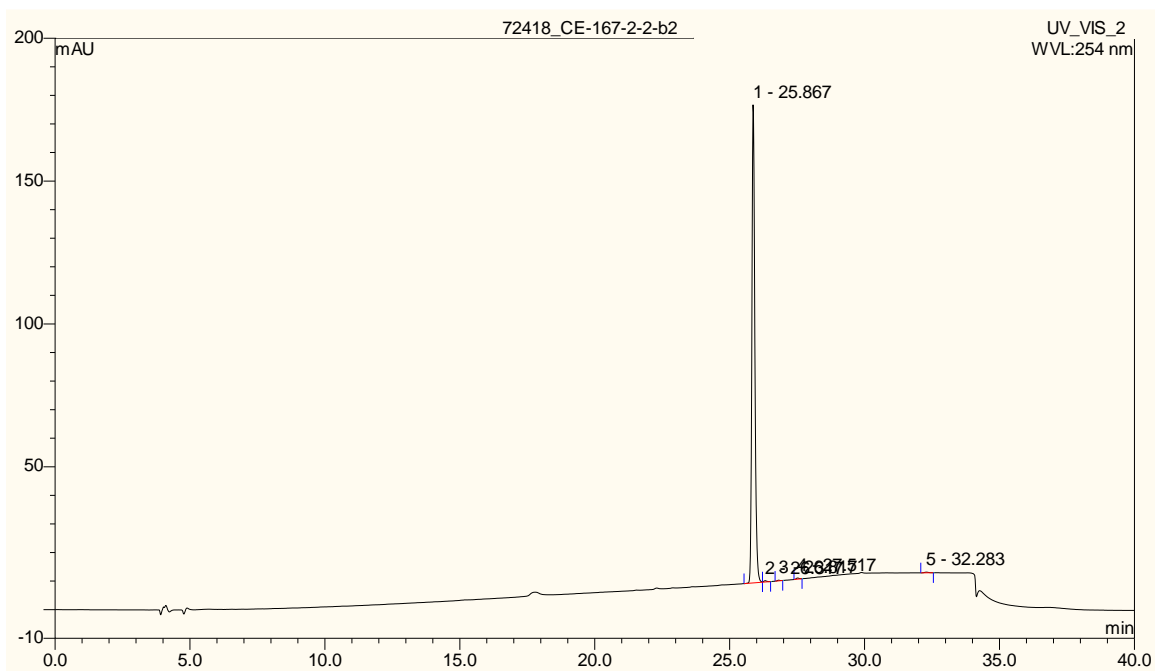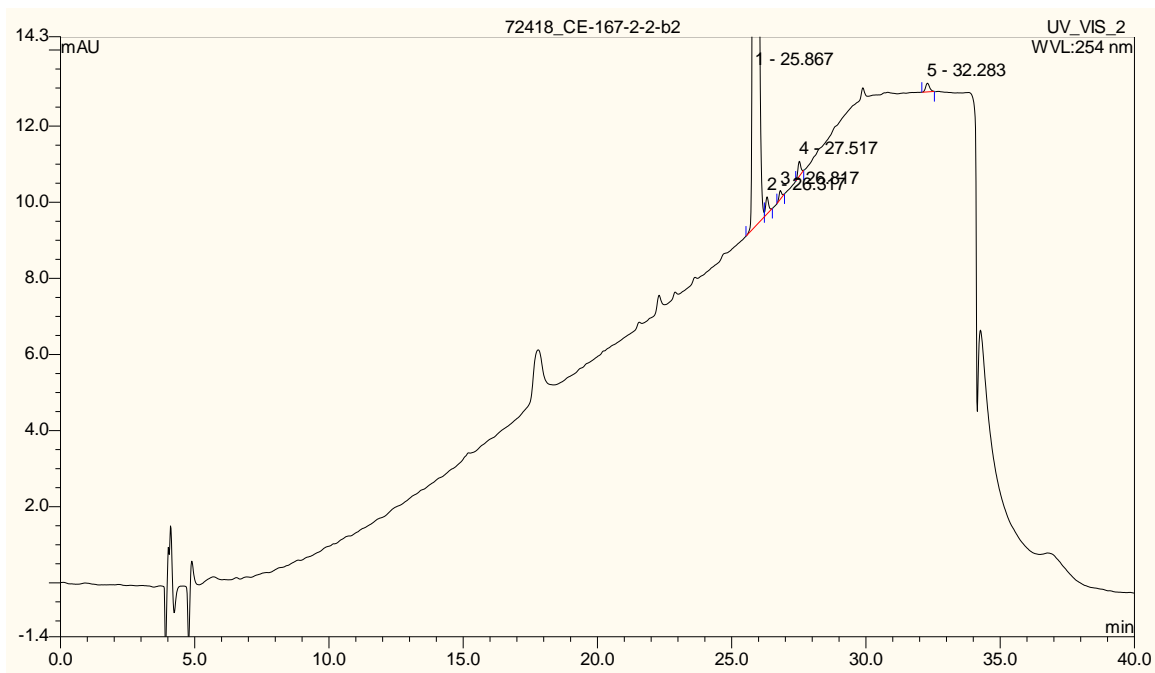

Retention Time: **25.87 min**

Relative Peak Area: **99.21 %**

**Figure S21a.** RP-Chromatogram of analogue **5f**.

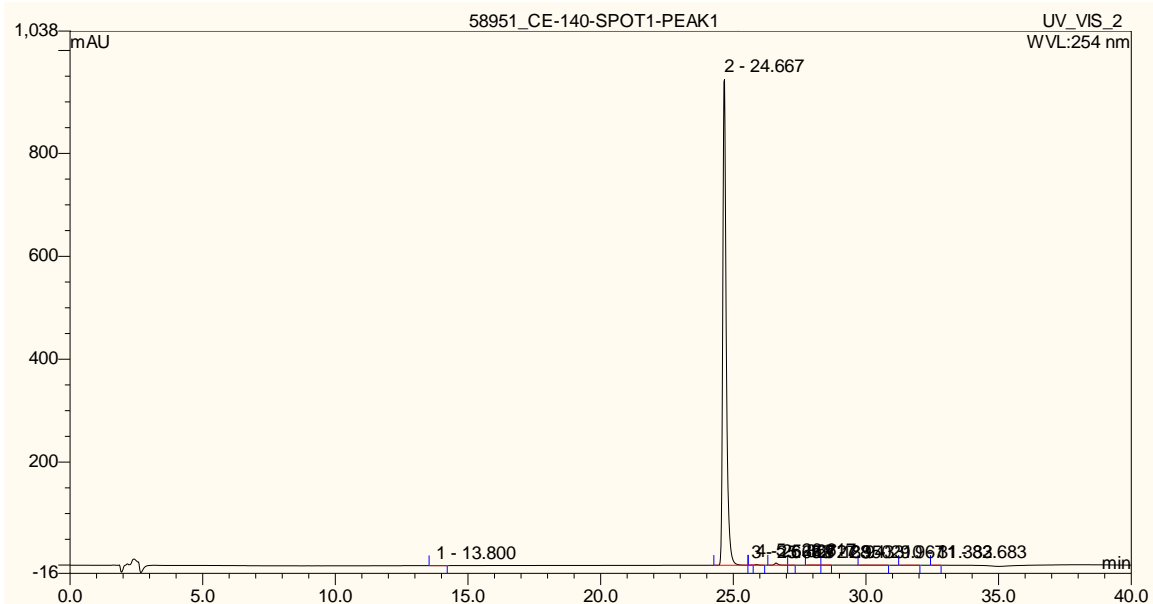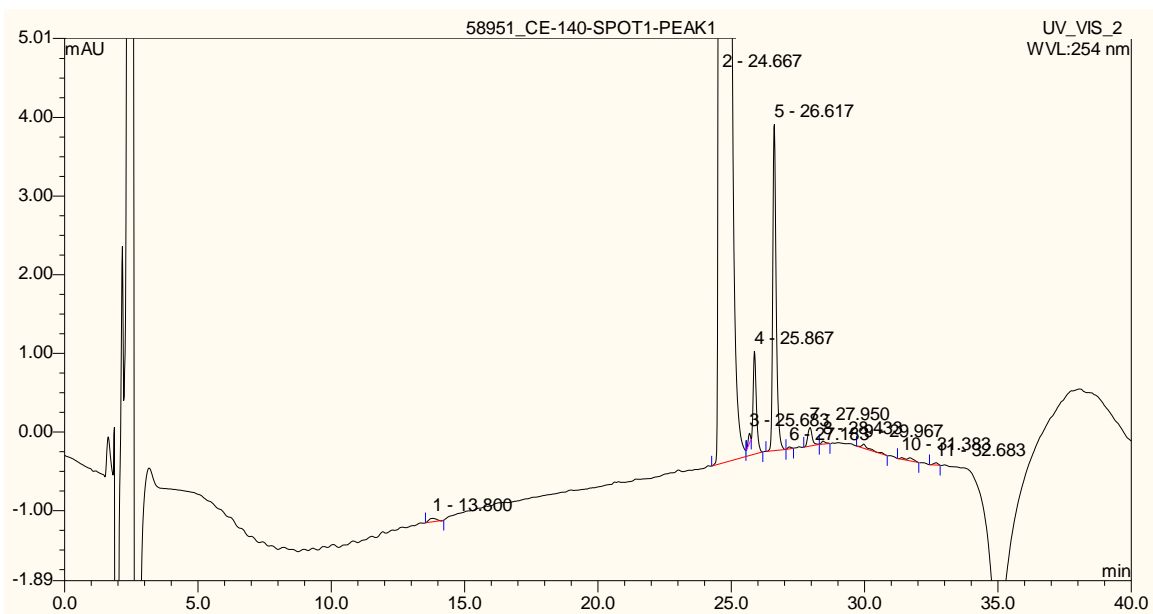

Retention Time: **24.67 min**

Relative Peak Area: **99.34 %**



**Figure S22a.** RP-Chromatogram of analogue **6f**.

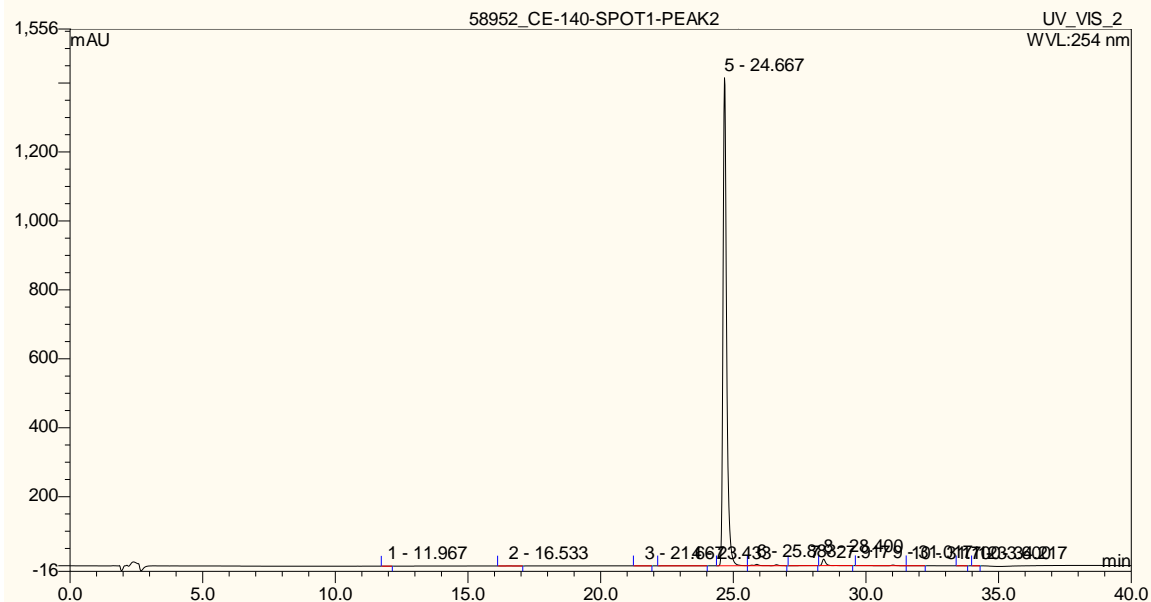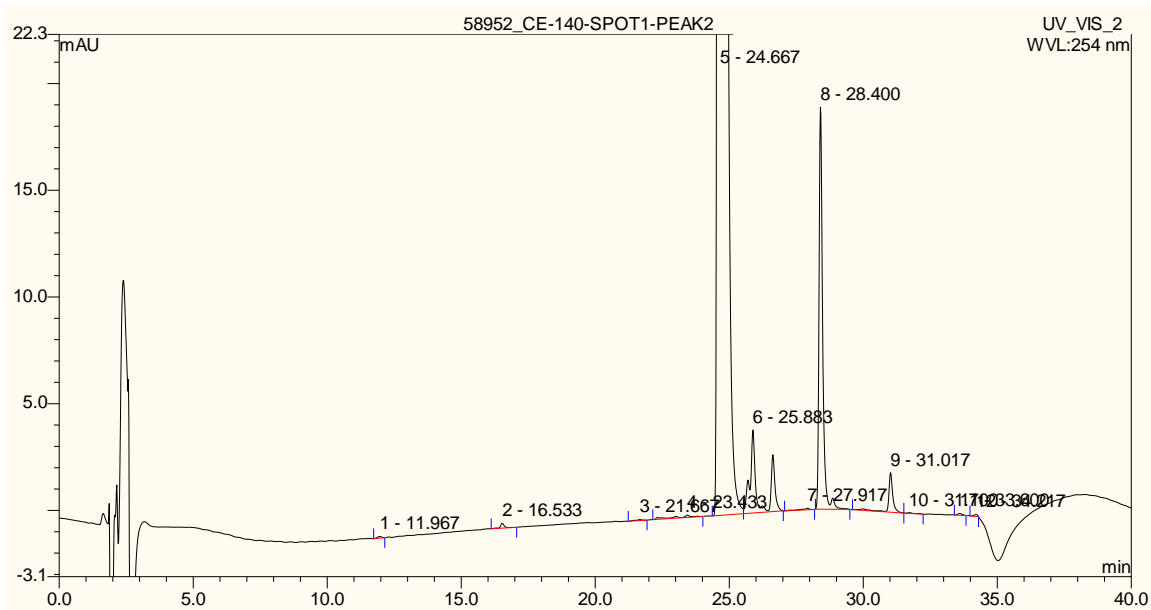

Retention Time: **24.67 min**

Relative Peak Area: **97.90 %**

**Figure S23a.** RP-Chromatogram of analogue **7f**.

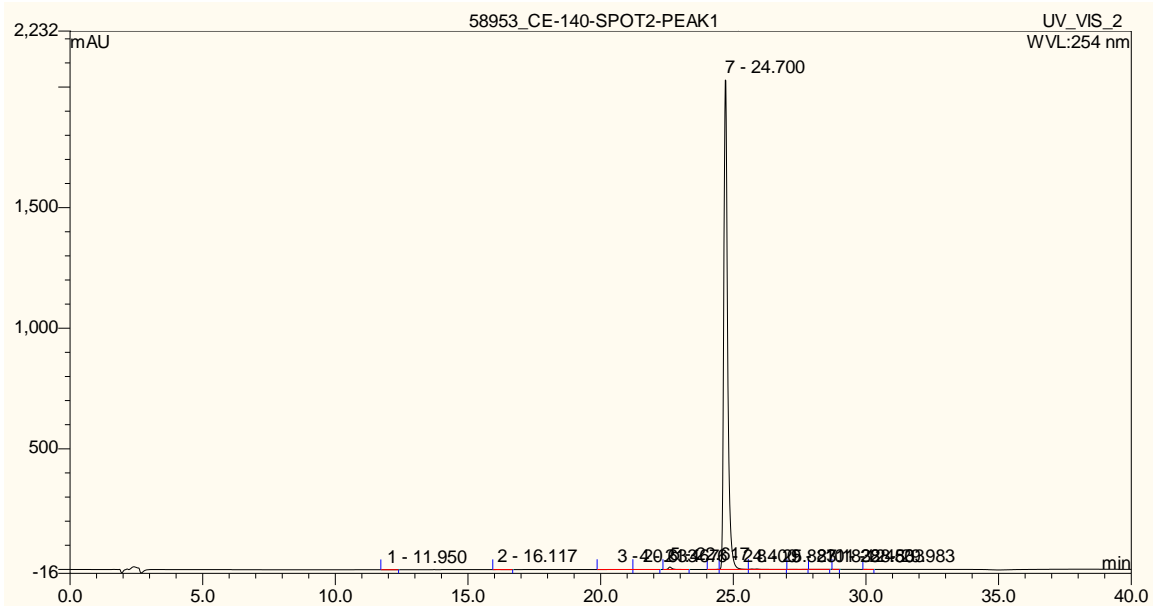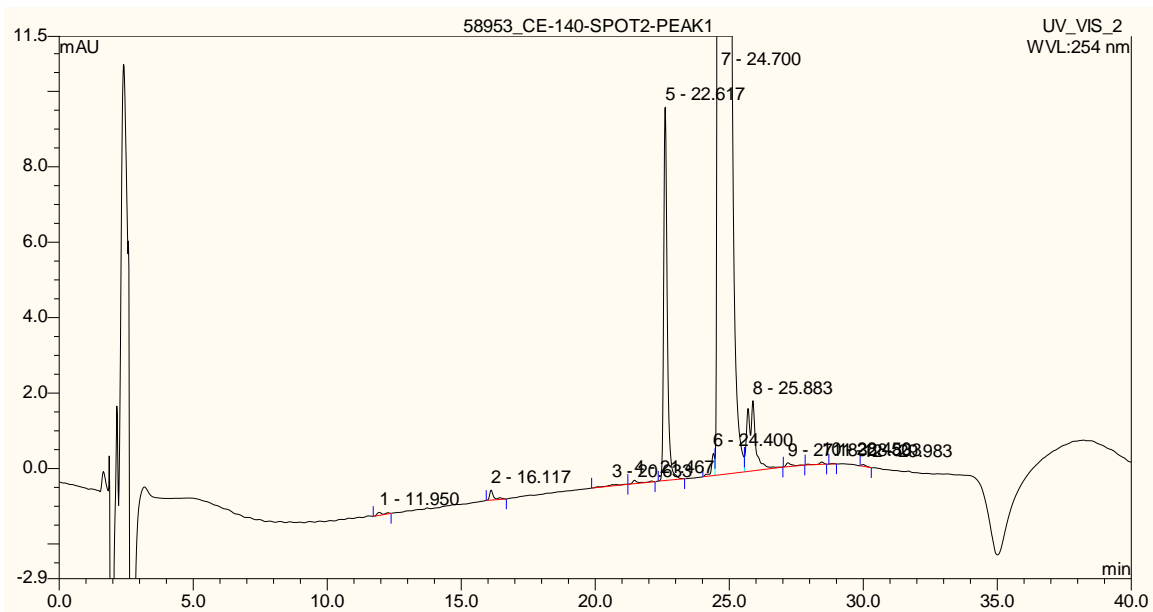

Retention Time: **24.70 min**

Relative Peak Area: **99.31 %**

**Figure S24a.** RP-Chromatogram of analogue **8f**.

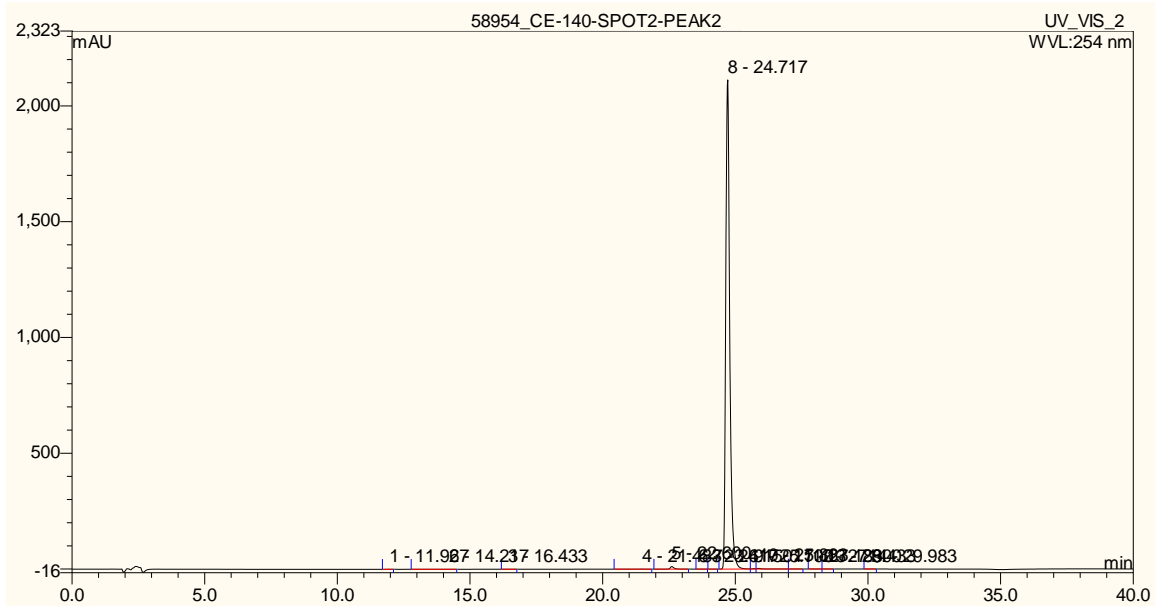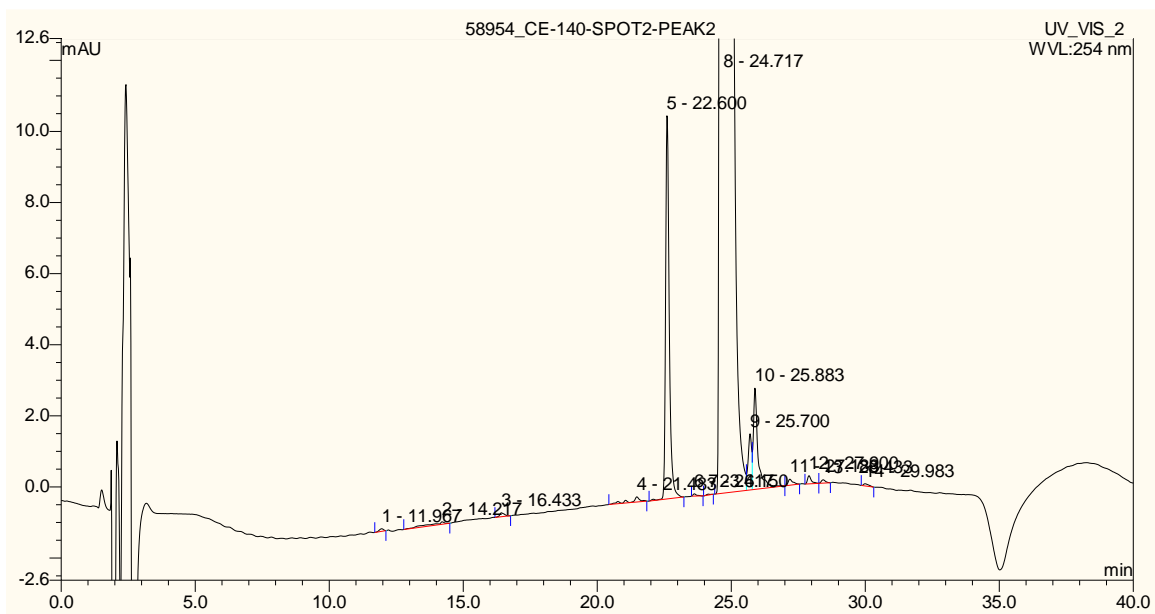

Retention Time: **24.72 min**

Relative Peak Area: **99.26 %**

**Figure S25a.** RP-Chromatogram of analogue **5g**.

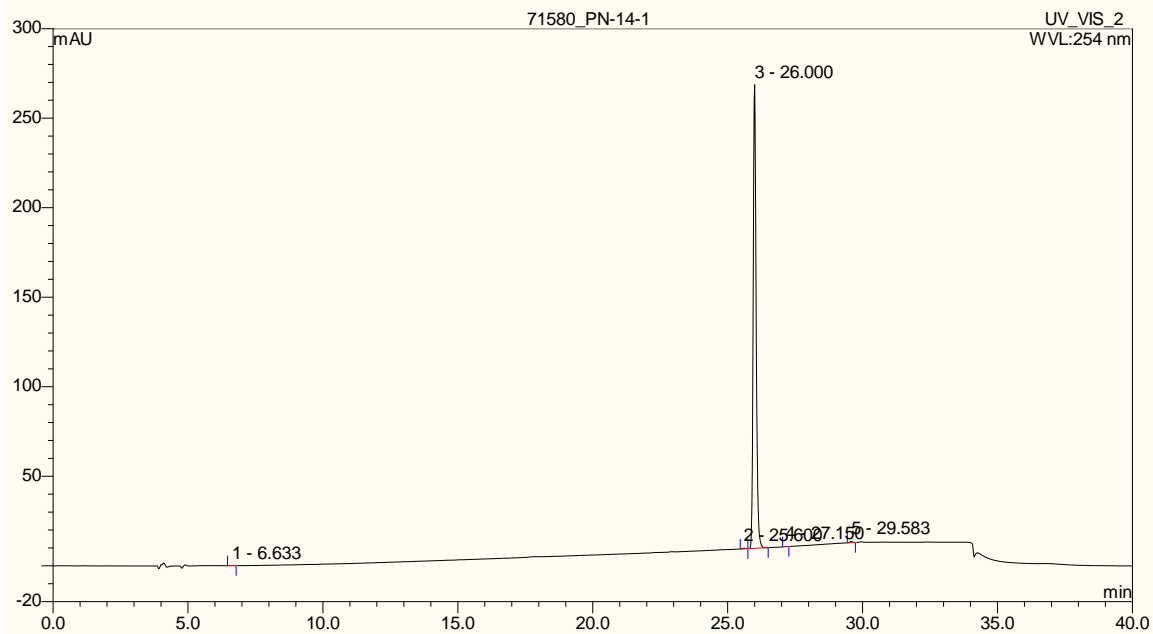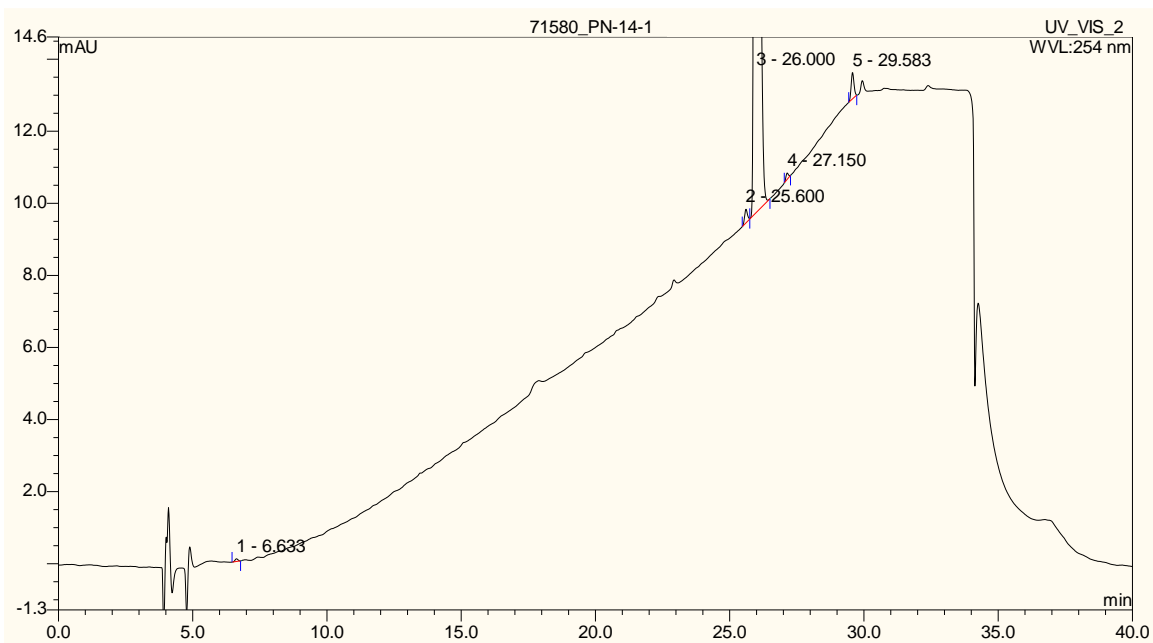

Retention Time: **26.00 min**

Relative Peak Area: **99.51 %**

**Figure S26a.** RP-Chromatogram of analogue **6g**.

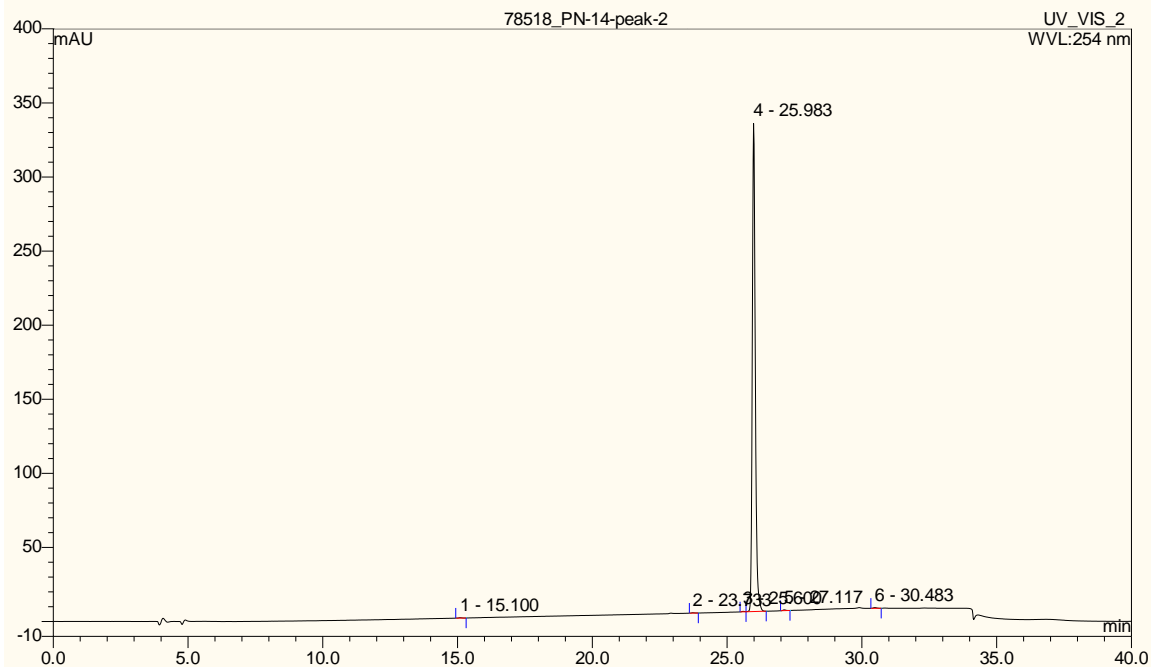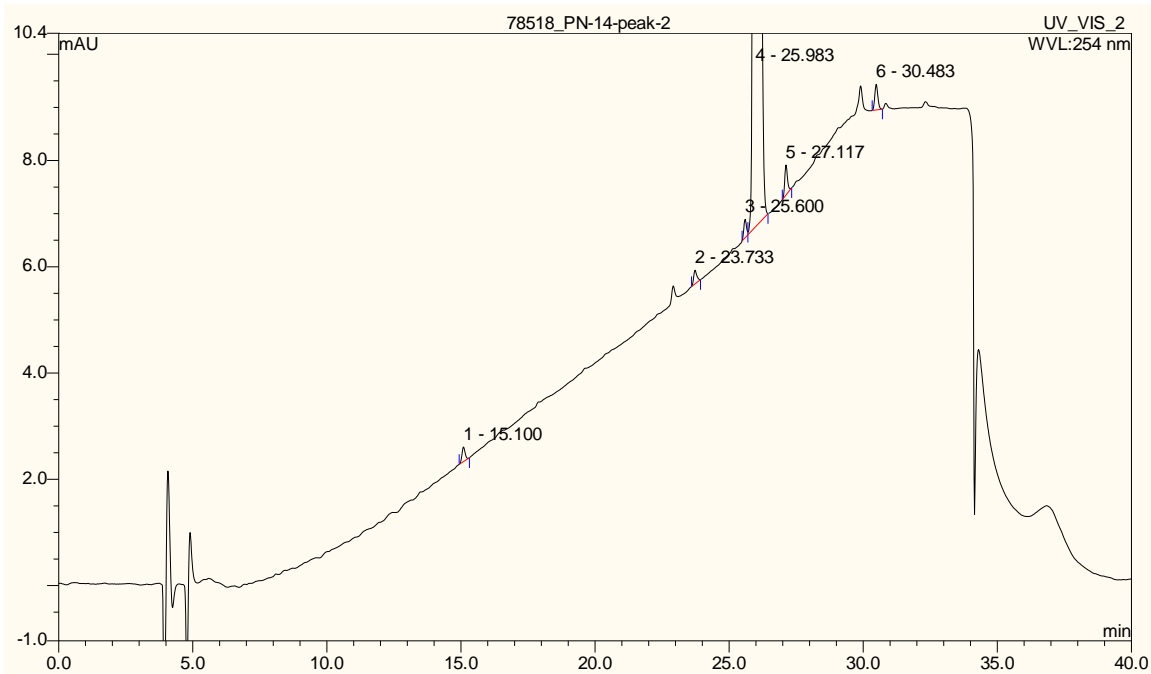

Retention Time: **25.98 min**

Relative Peak Area: **99.44 %**

**Figure S27a.** RP-Chromatogram of analogue **7g**.

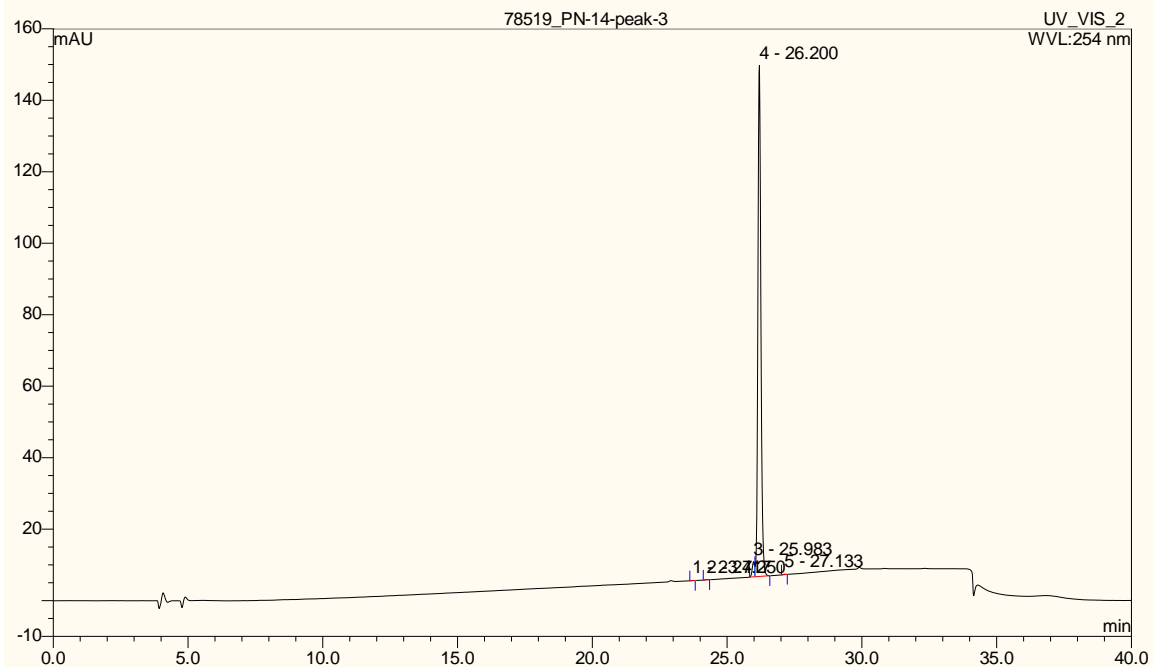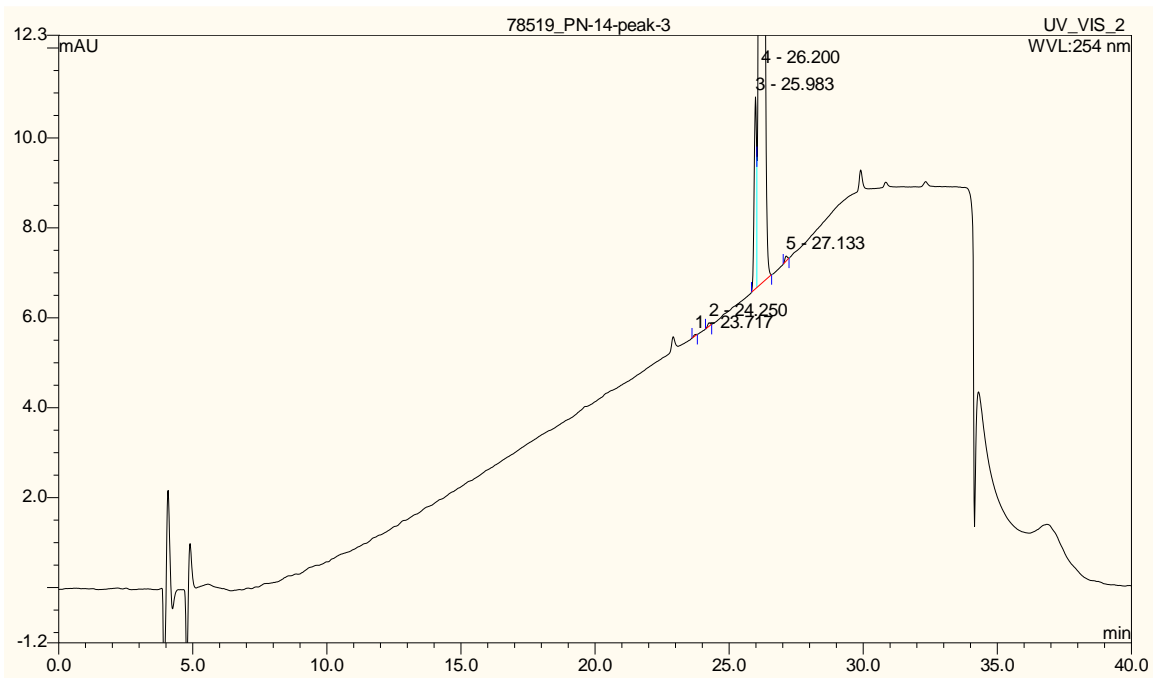

Retention Time: **26.20 min**

Relative Peak Area: **97.61 %**

**Figure S28a.** RP-Chromatogram of analogue **8g**.

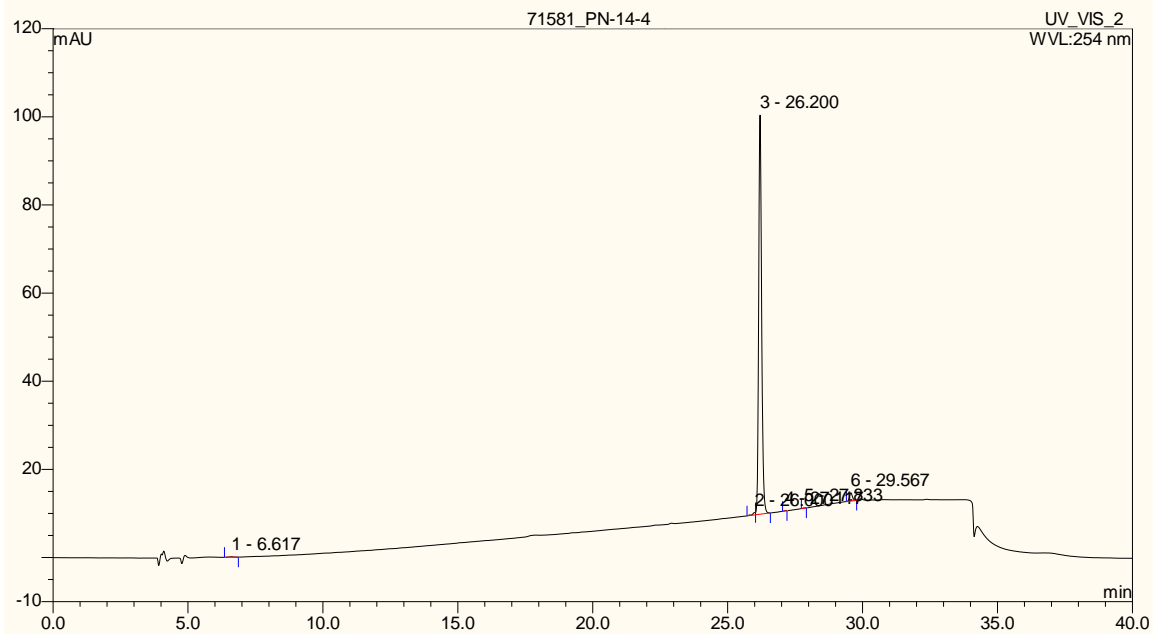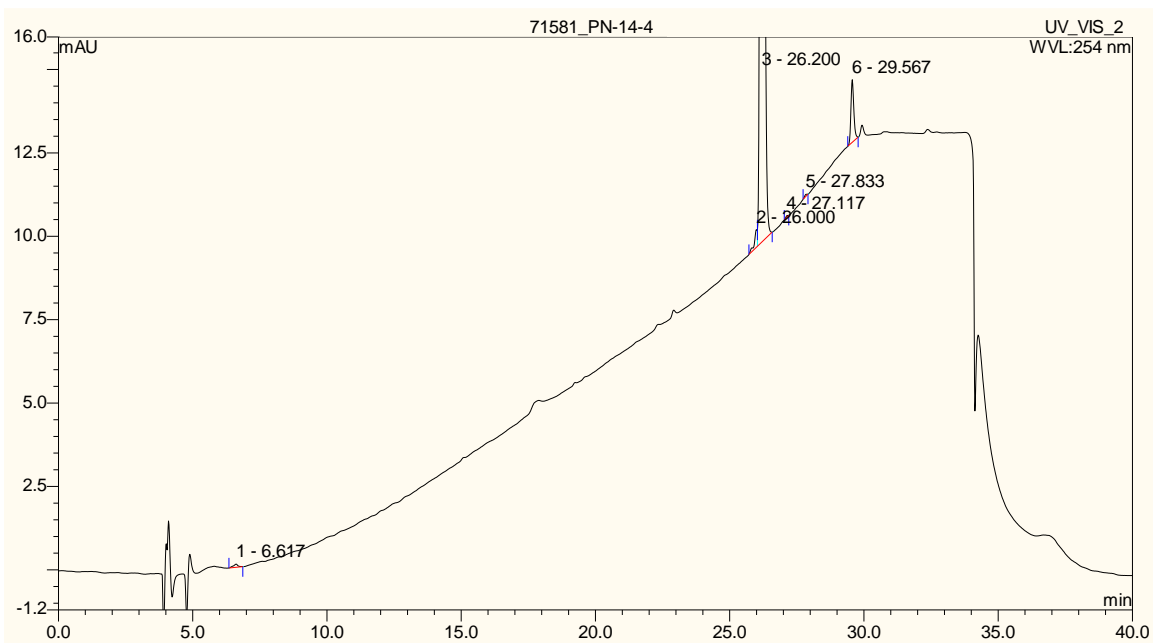

Retention Time: **26.20 min**

Relative Peak Area: **97.24 %**

**Figure S29a.** RP-Chromatogram of analogue **5h**.

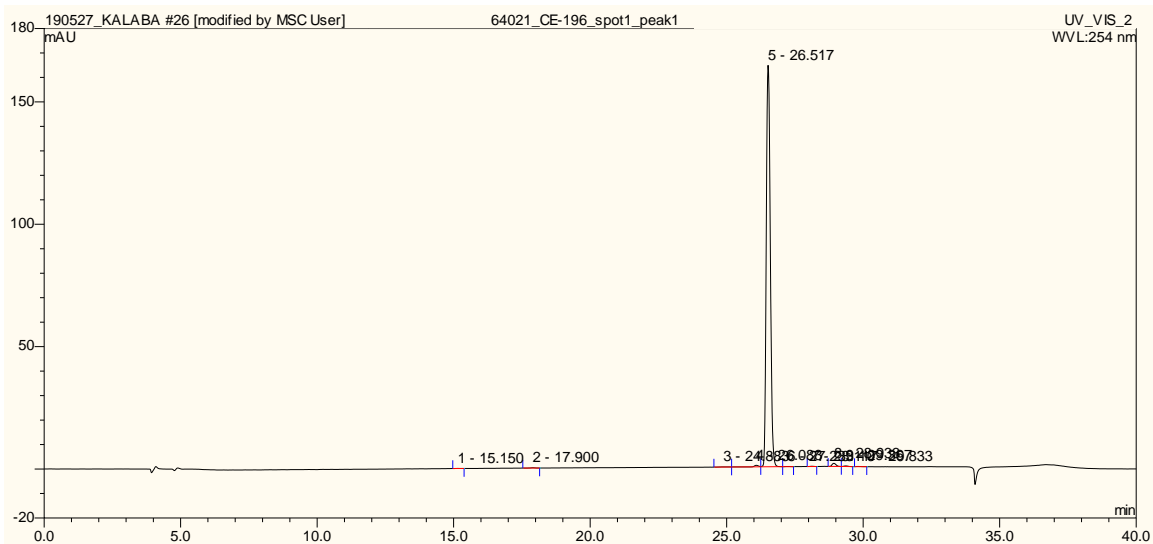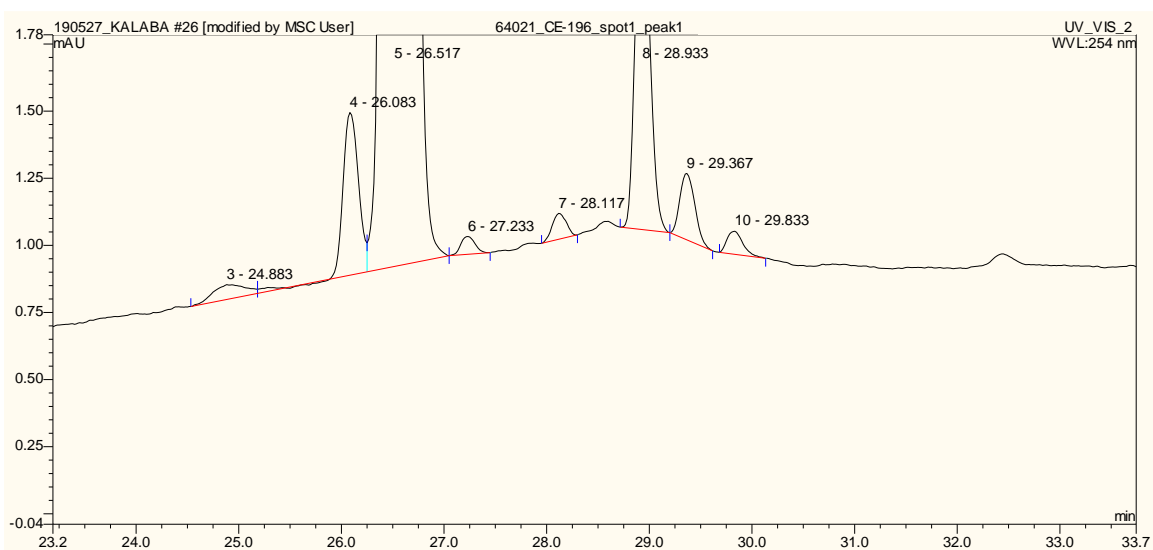

Retention Time: **28.23 min**

Relative Peak Area: **98.42 %**



**Figure S30a.** RP-Chromatogram of analogue **6h**.

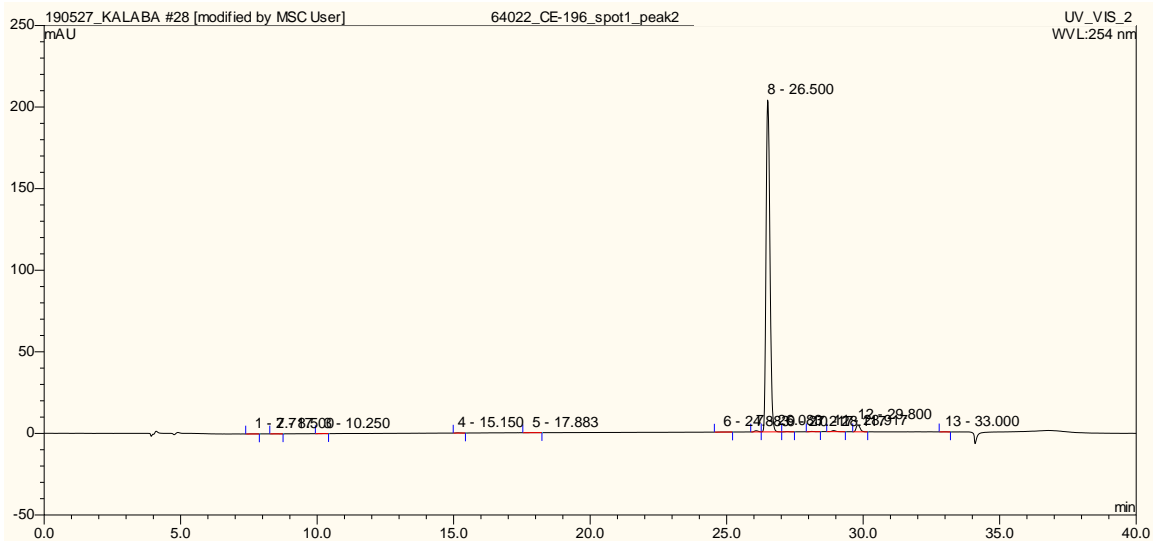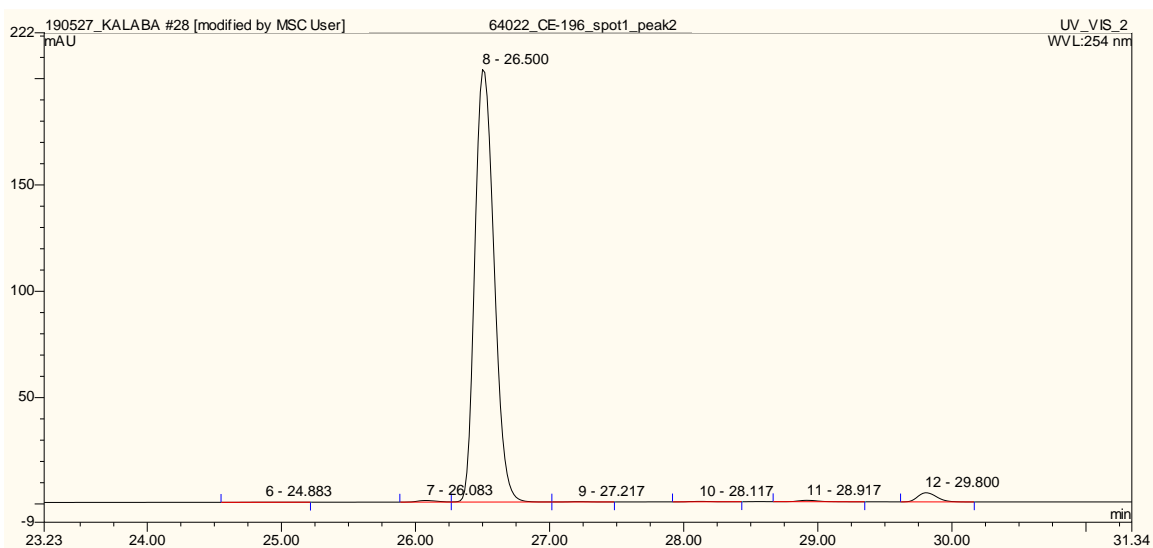

Retention Time: **26.5 min**

Relative Peak Area: **96.86 %**

**Figure S31a.** RP-Chromatogram of analogue **7h**.

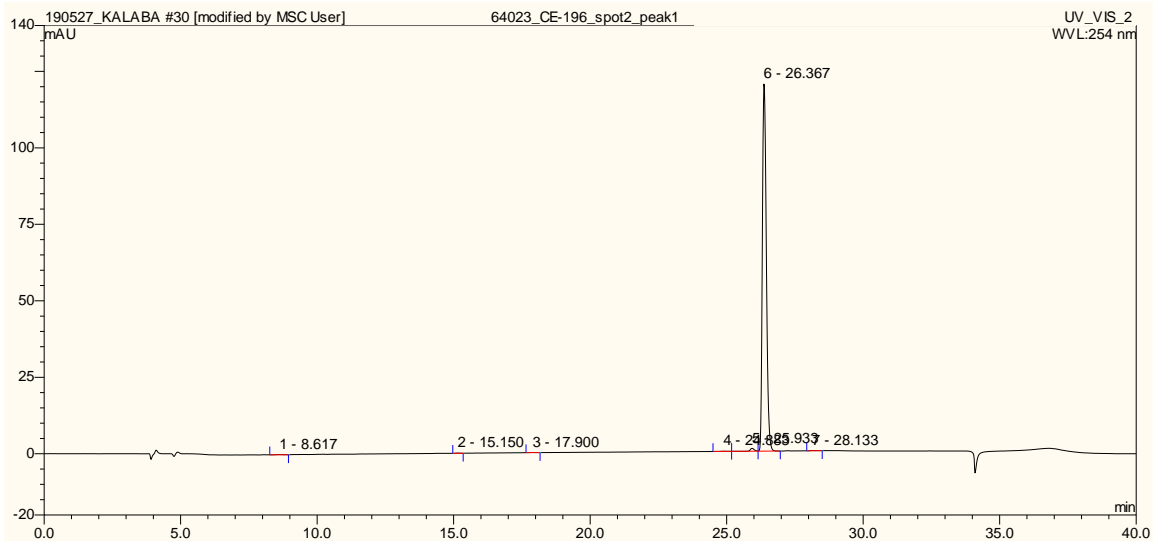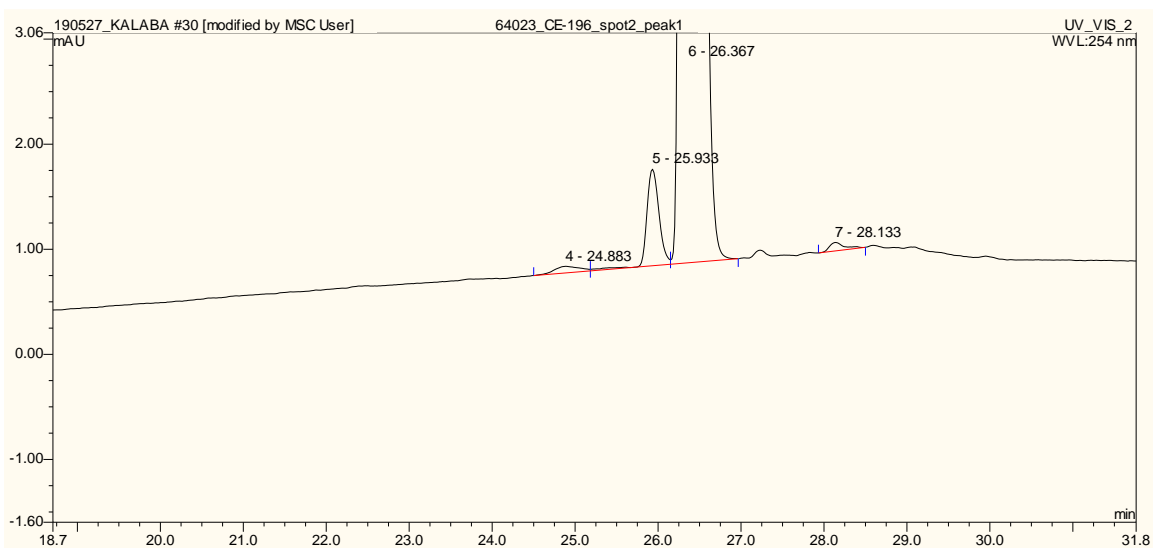

Retention Time: **26.36 min**

Relative Peak Area: **96.83 %**

**Figure S32a.** RP-Chromatogram of analogue **8h**.

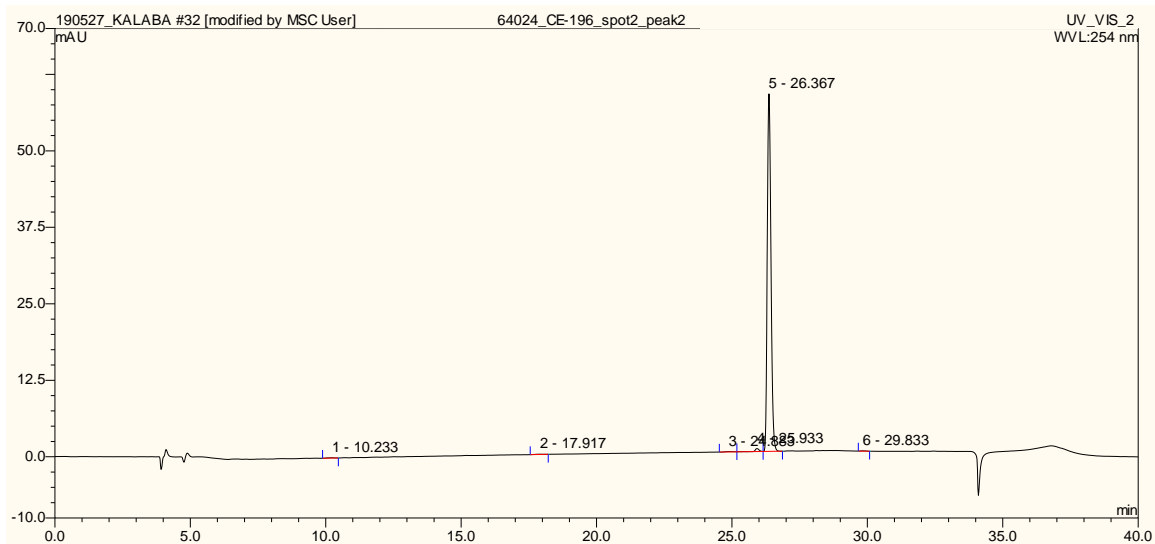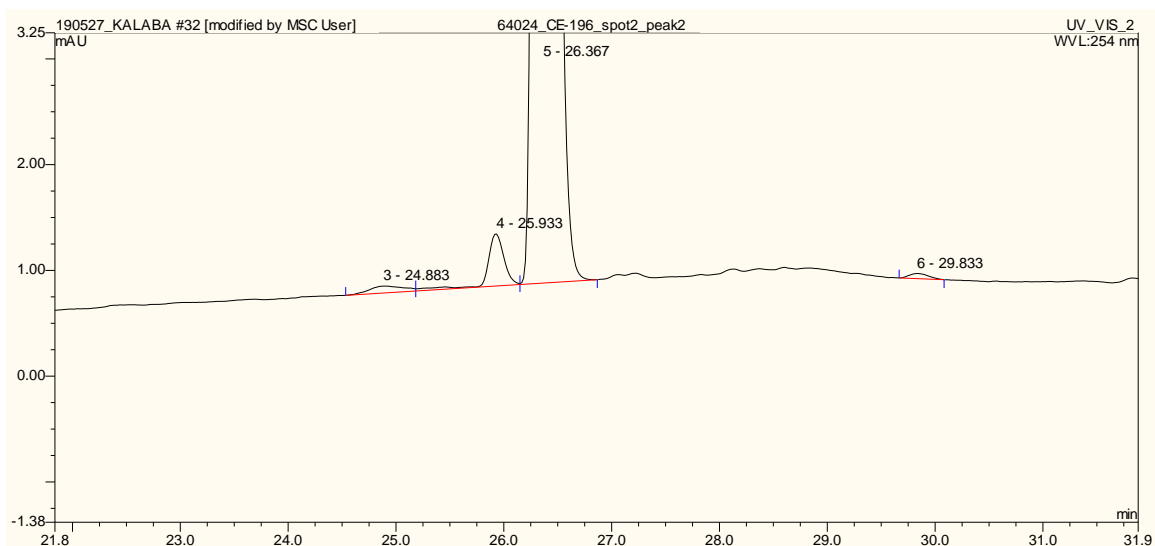

Retention Time: **26.36 min**

Relative Peak Area: **96.4 %**

**Figure S33a.** RP-Chromatogram of analogue **5i**.

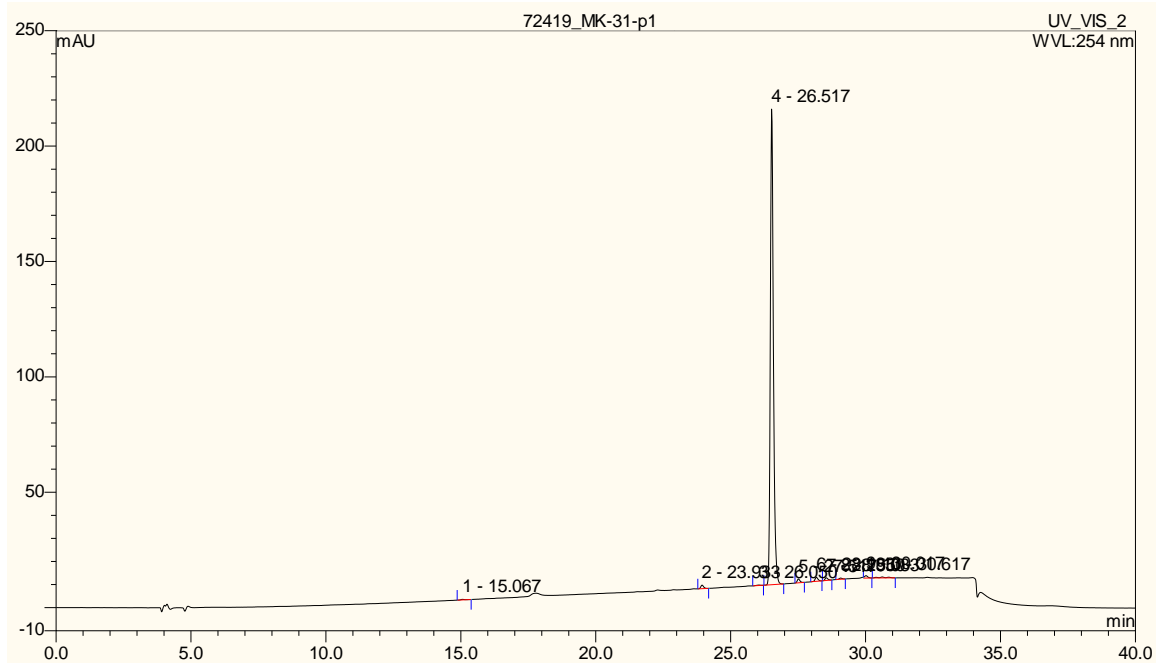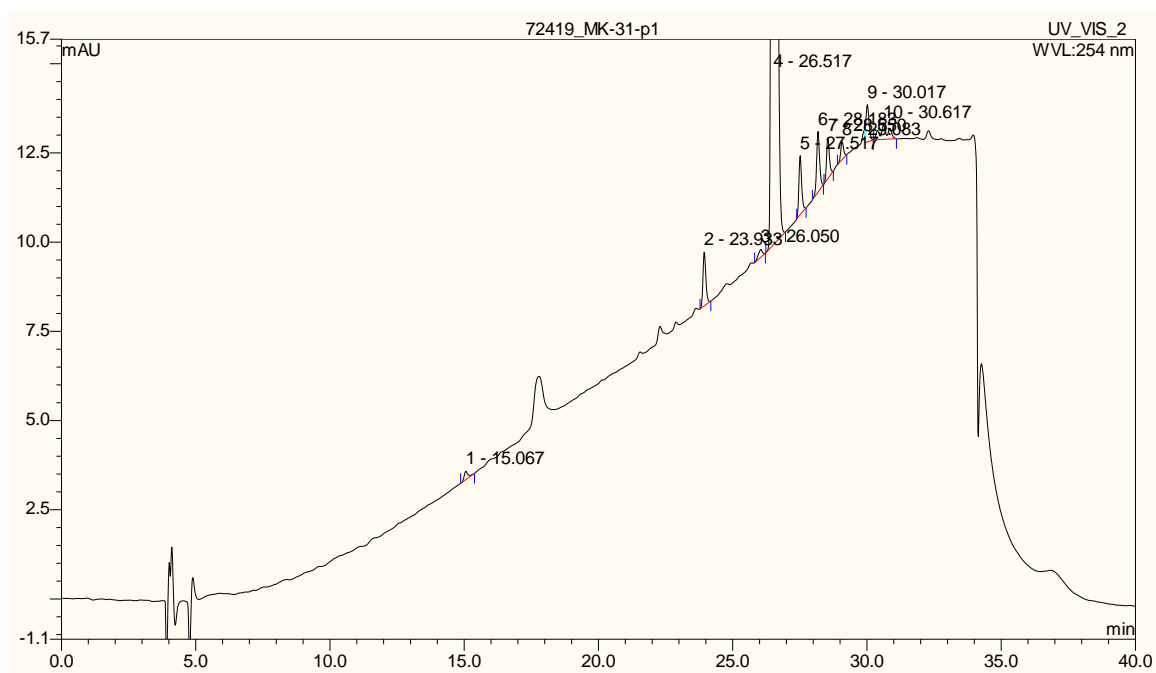

Retention Time: **26.52 min**

Relative Peak Area: **95.88 %**

**Figure S34a.** RP-Chromatogram of analogue **6i**.

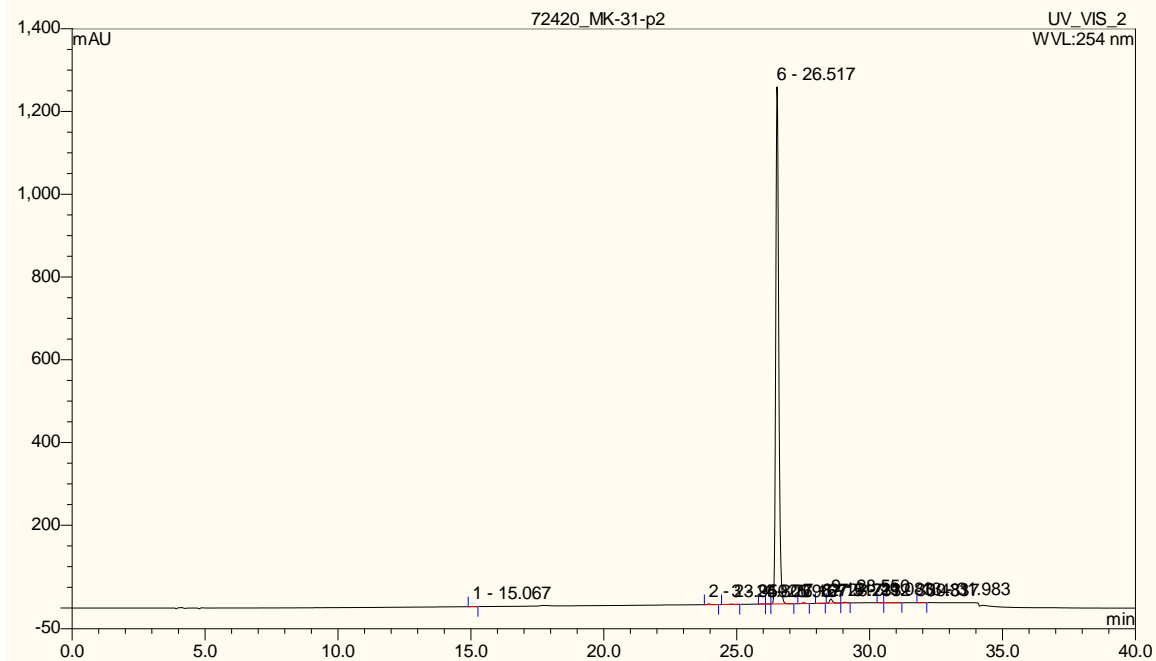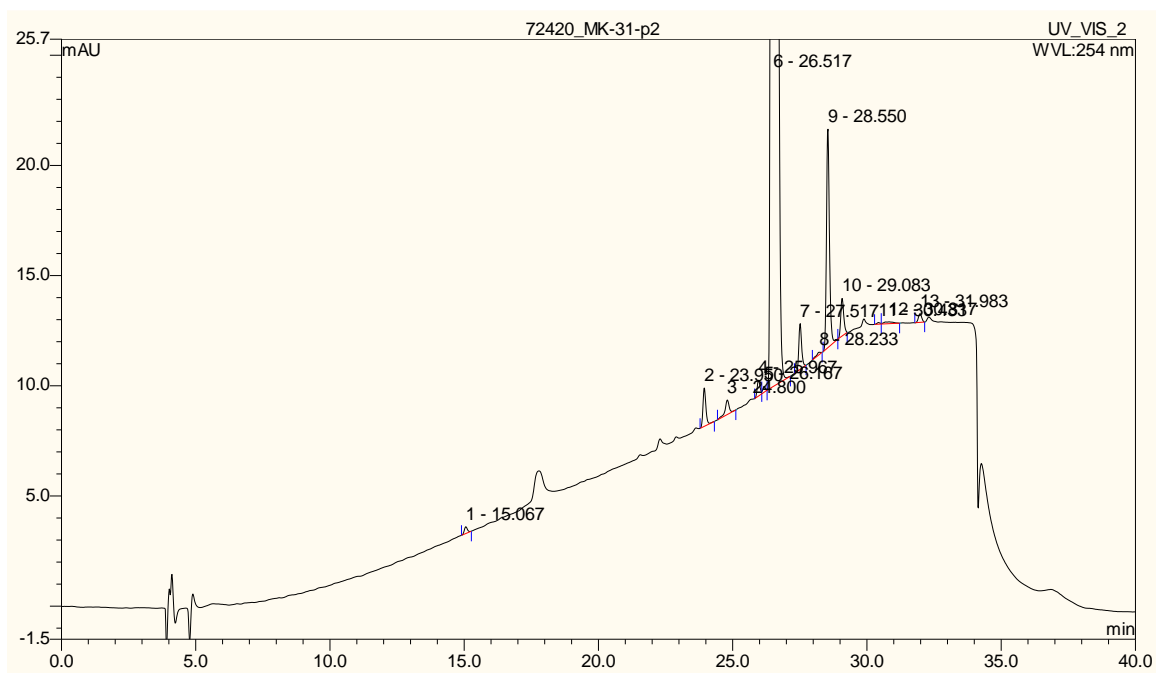

Retention Time: **26.52 min**

Relative Peak Area: **98.58 %**

**Figure S35a.** RP-Chromatogram of analogue **7i**.

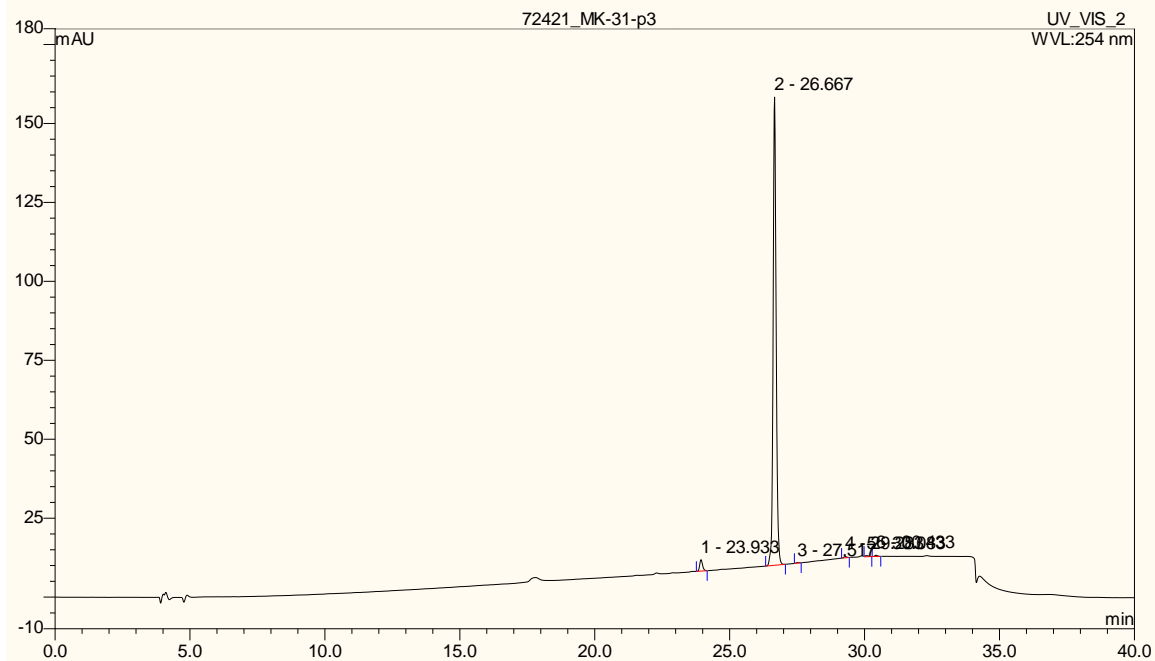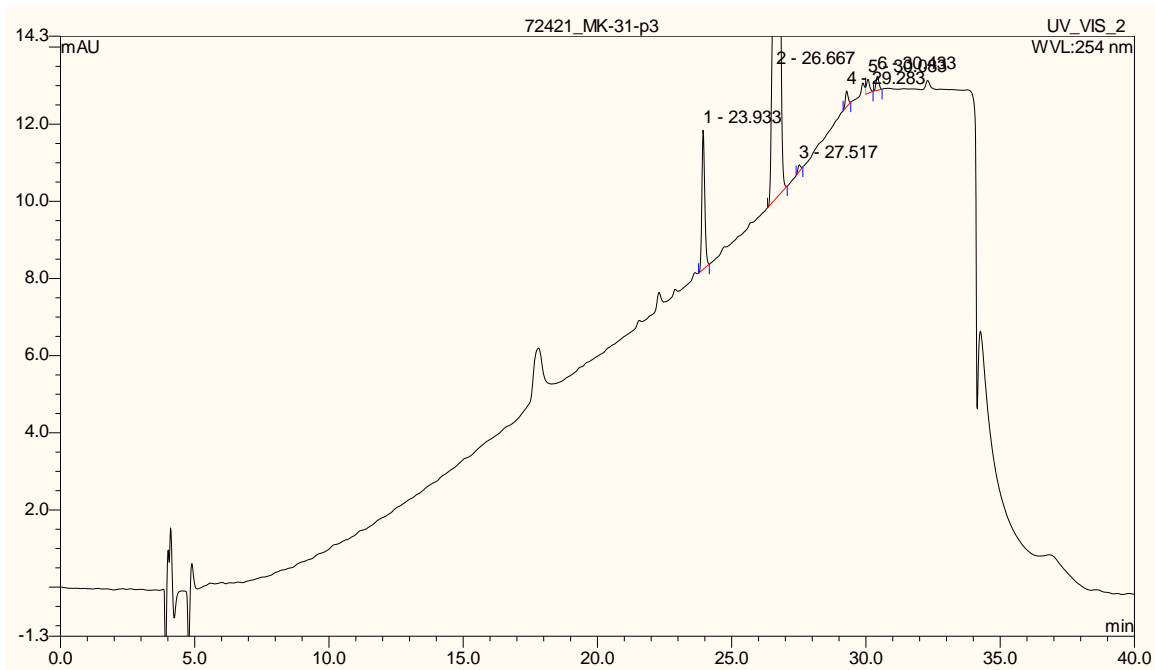

Retention Time: **26.67 min**

Relative Peak Area: **96.96 %**

**Figure S36a.** RP-Chromatogram of analogue **8i**.

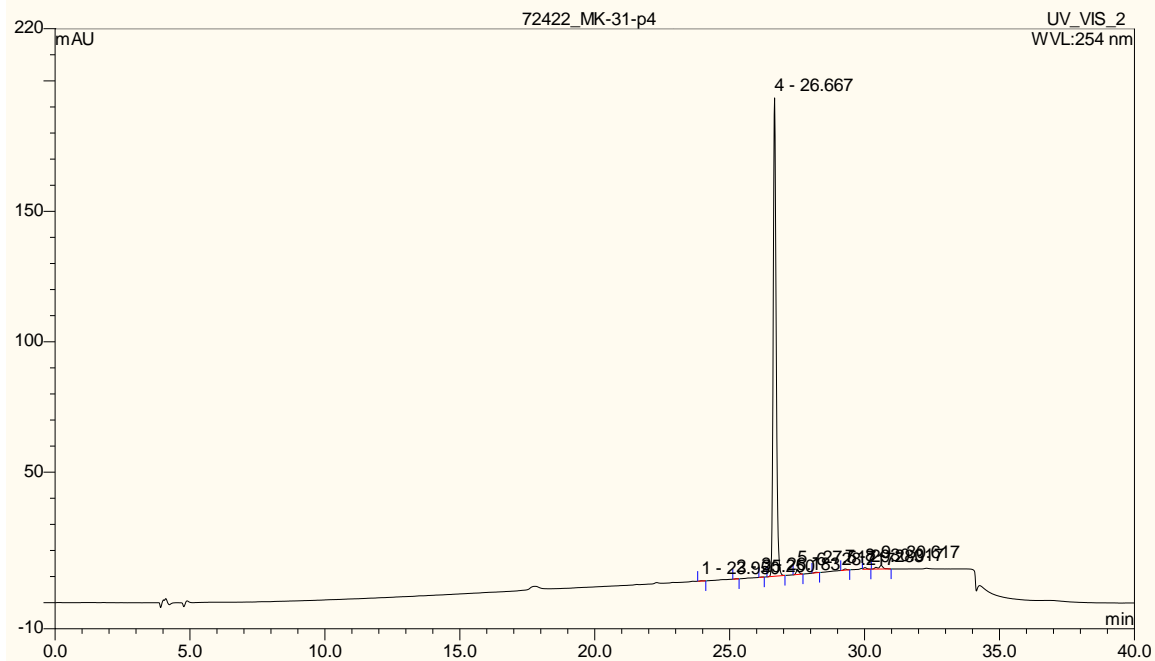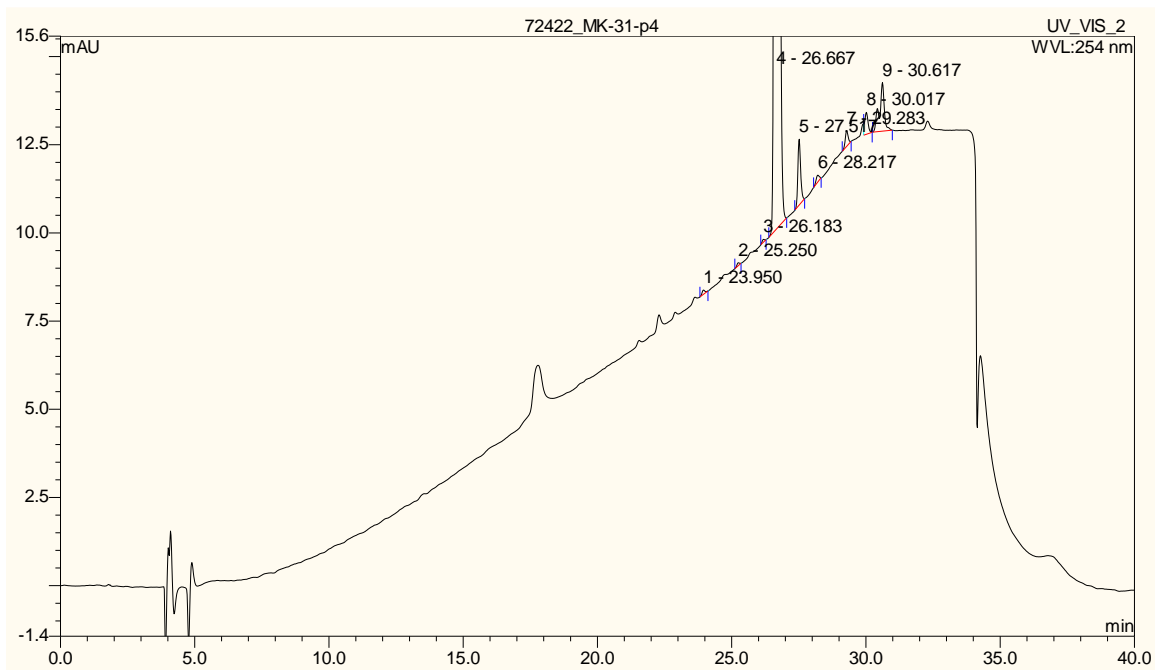

Retention Time: **26.67 min**

Relative Peak Area: **97.04 %**

**Figure S37a.** RP-Chromatogram of analogue **5j**.

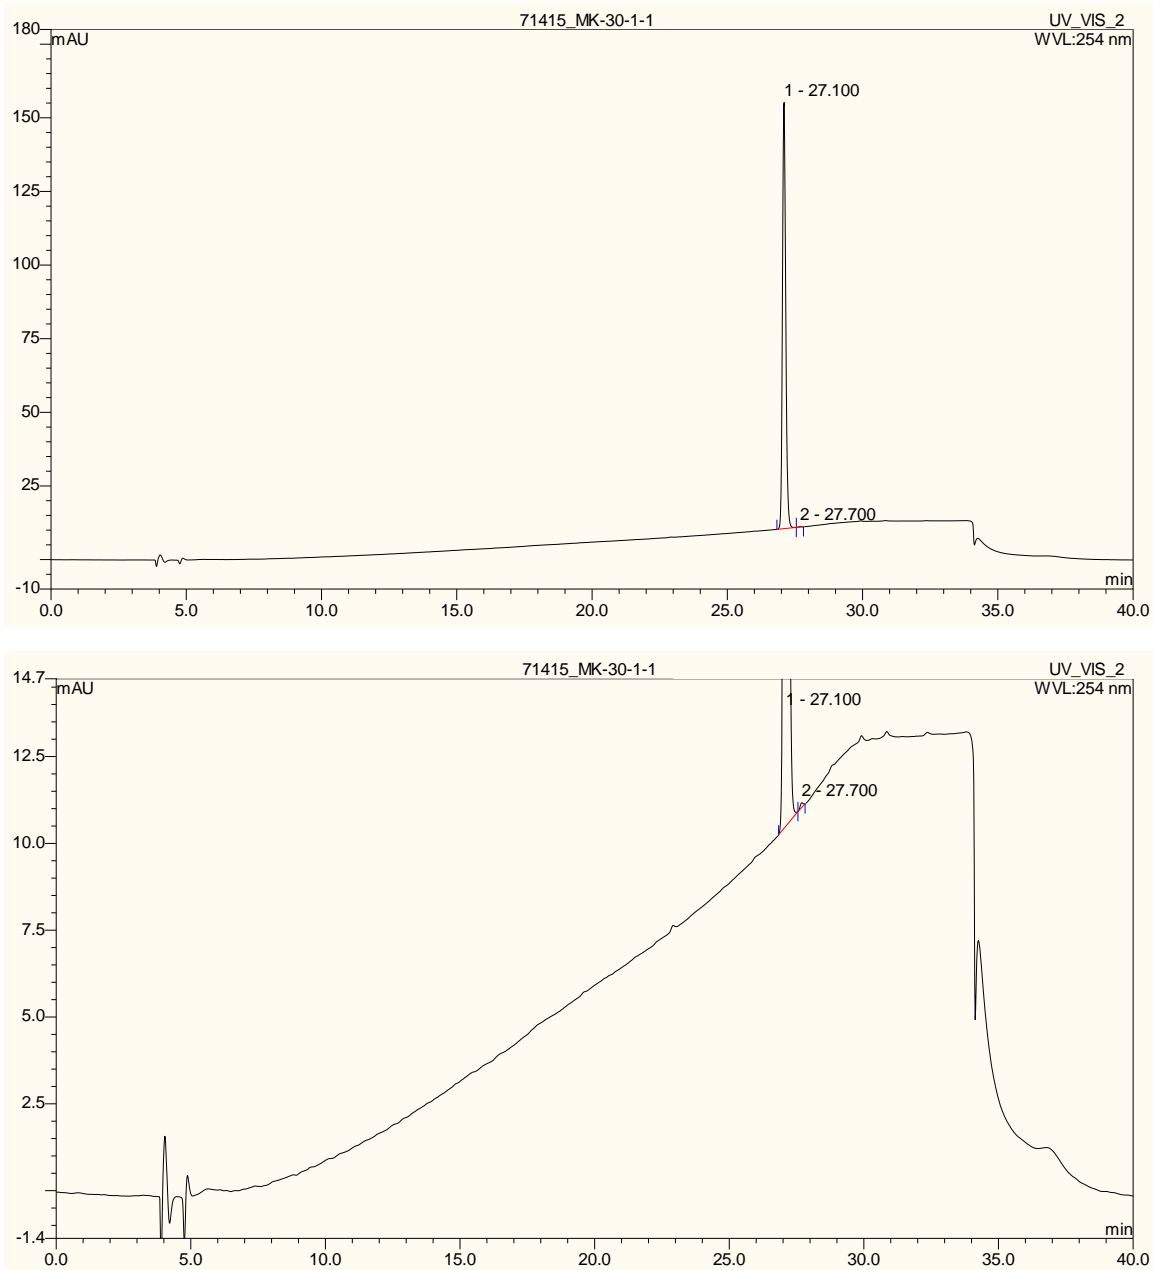

Retention Time: **27.10 min**

Relative Peak Area: **99.92 %**



**Figure S38a.** RP-Chromatogram of analogue **6j**.

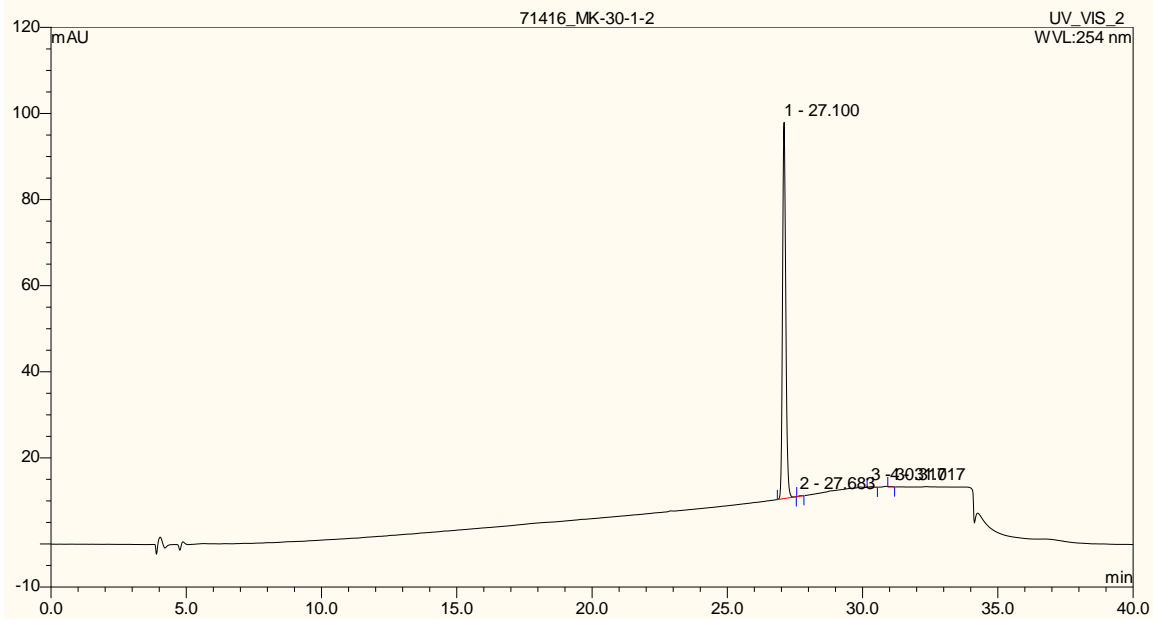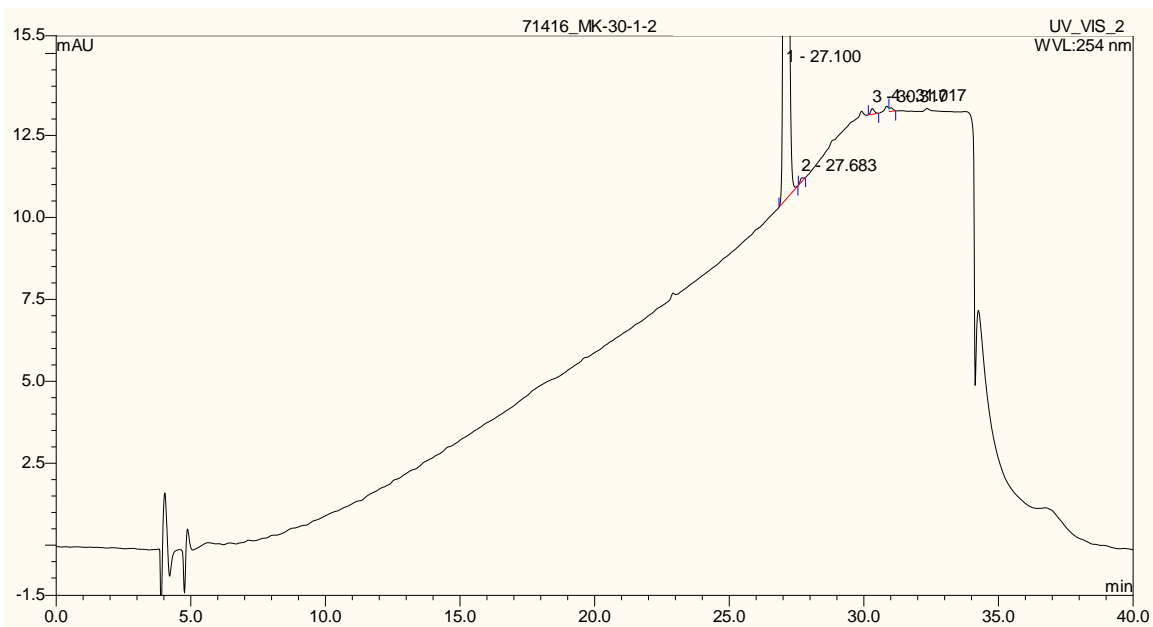

Retention Time: **27.10 min**

Relative Peak Area: **99.52 %**

**Figure S39a.** RP-Chromatogram of analogue **7j**.

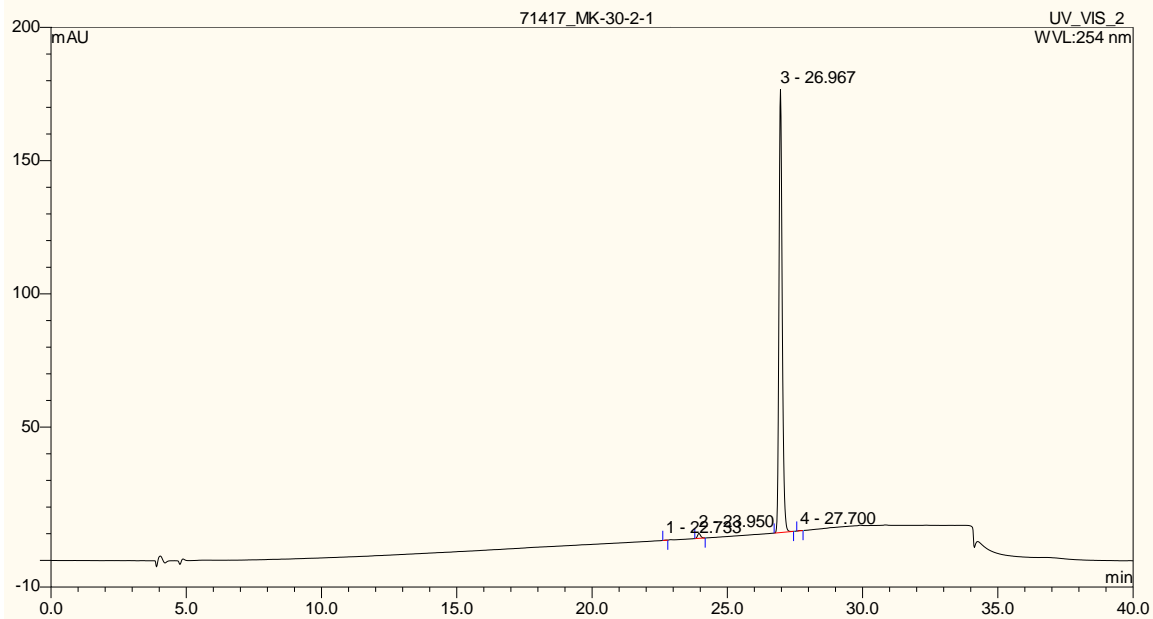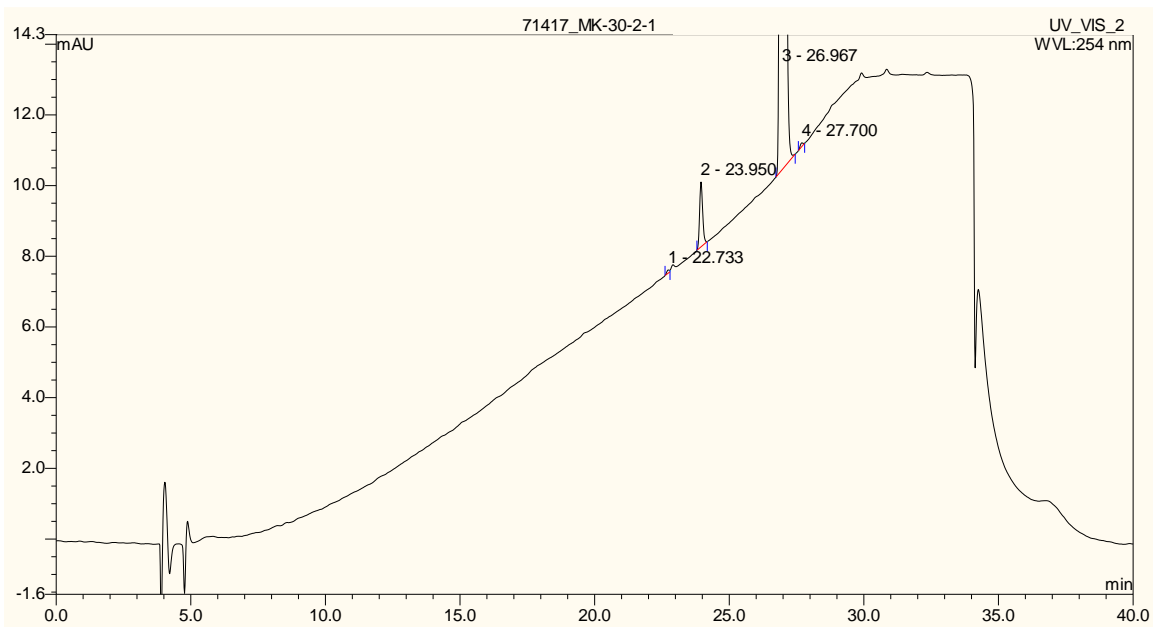

Retention Time: **26.97 min**

Relative Peak Area: **98.87 %**

**Figure S40a.** RP-Chromatogram of analogue **8j**.

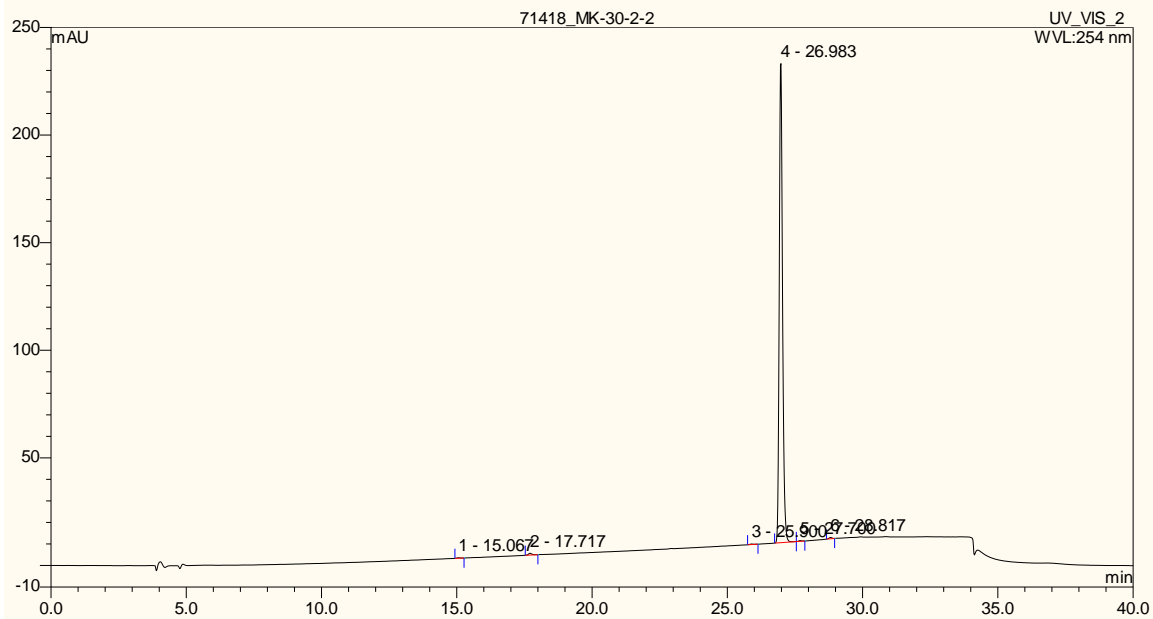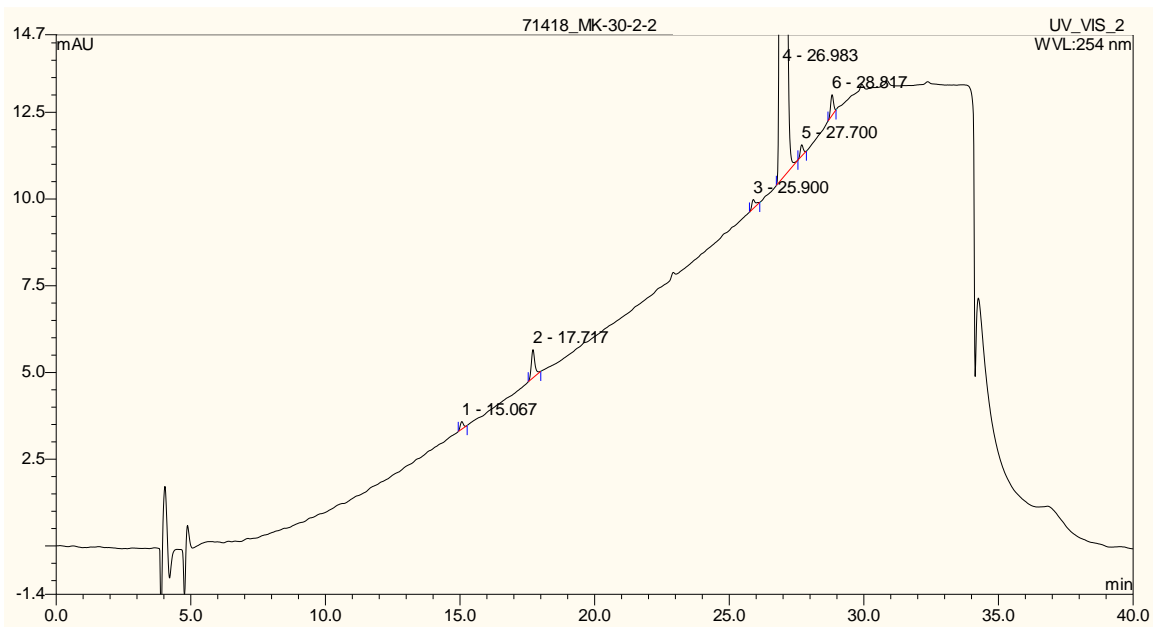

Retention Time: **26.98 min**

Relative Peak Area: **99.03 %**

**Figure S41a.** RP-Chromatogram of analogue **5k**.

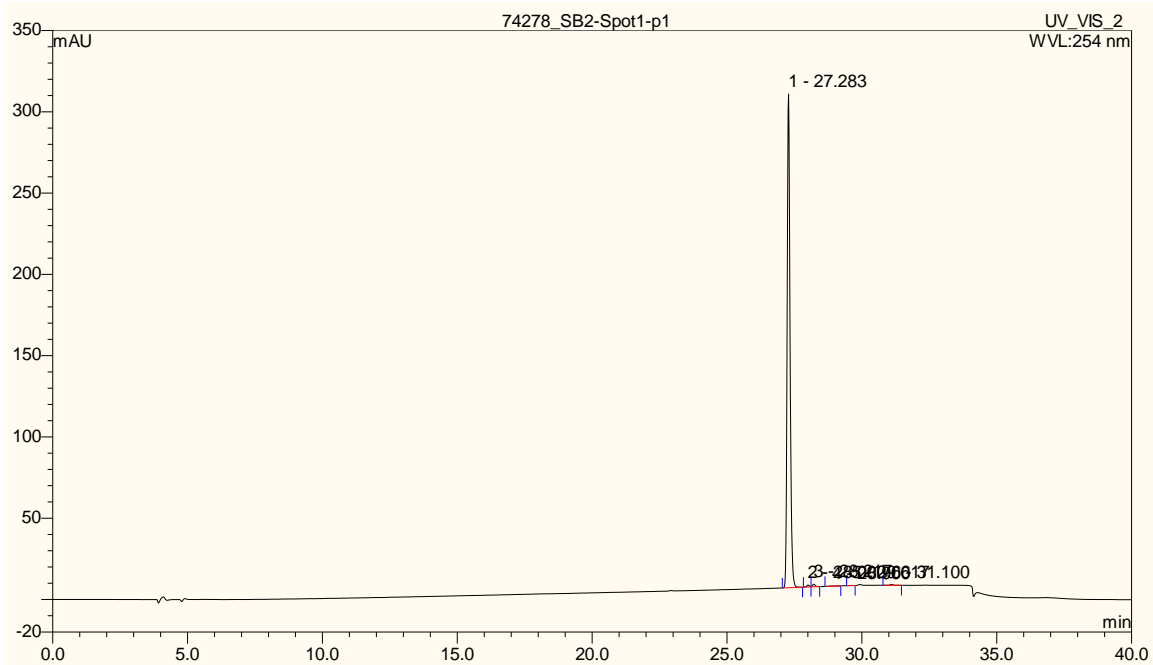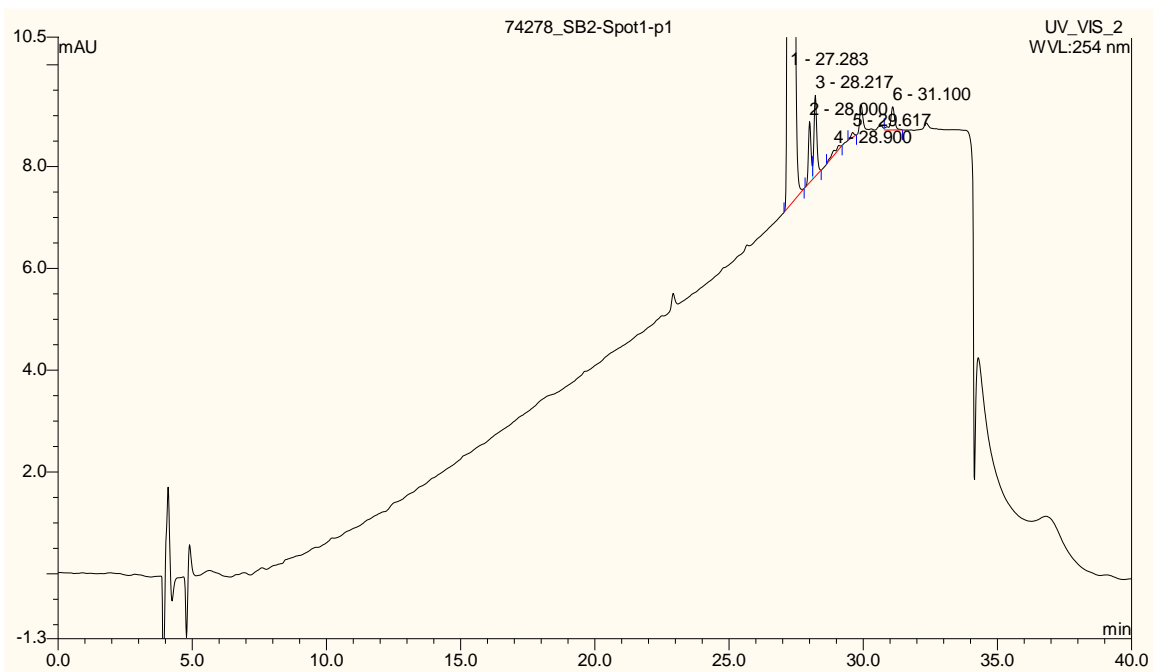

Retention Time: **27.28 min**

Relative Peak Area: **98.82 %**

**Figure S42a.** RP-Chromatogram of analogue **6k**.

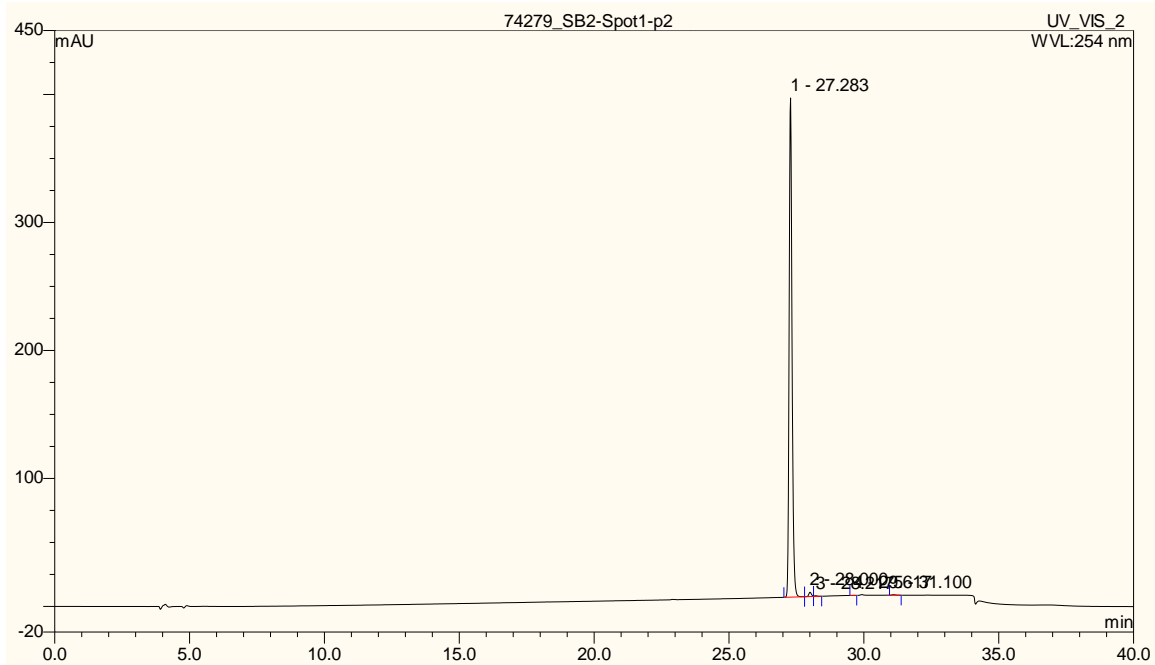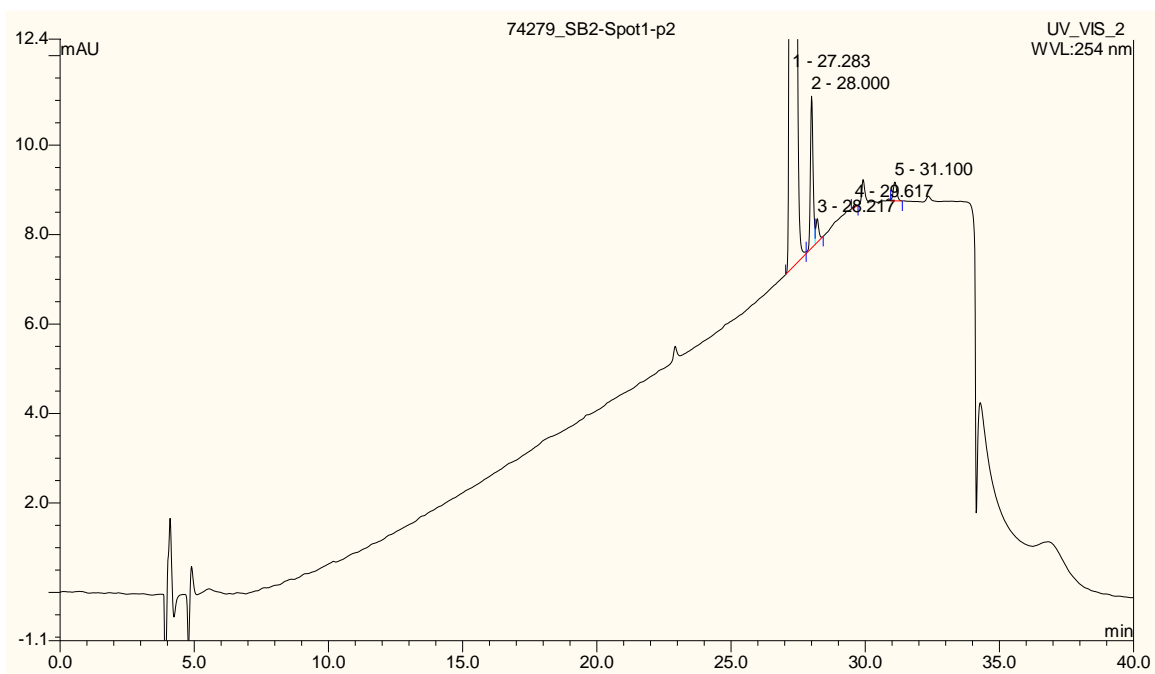

Retention Time: **27.28 min**

Relative Peak Area: **98.92 %**

**Figure S43a.** RP-Chromatogram of analogue **7k**.

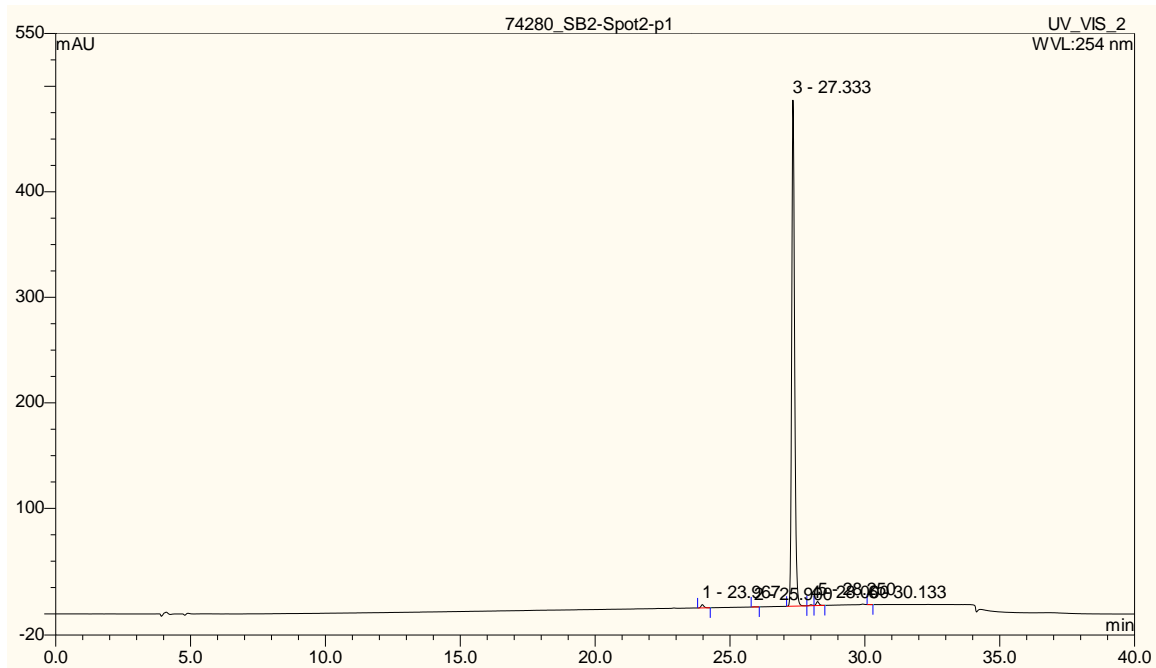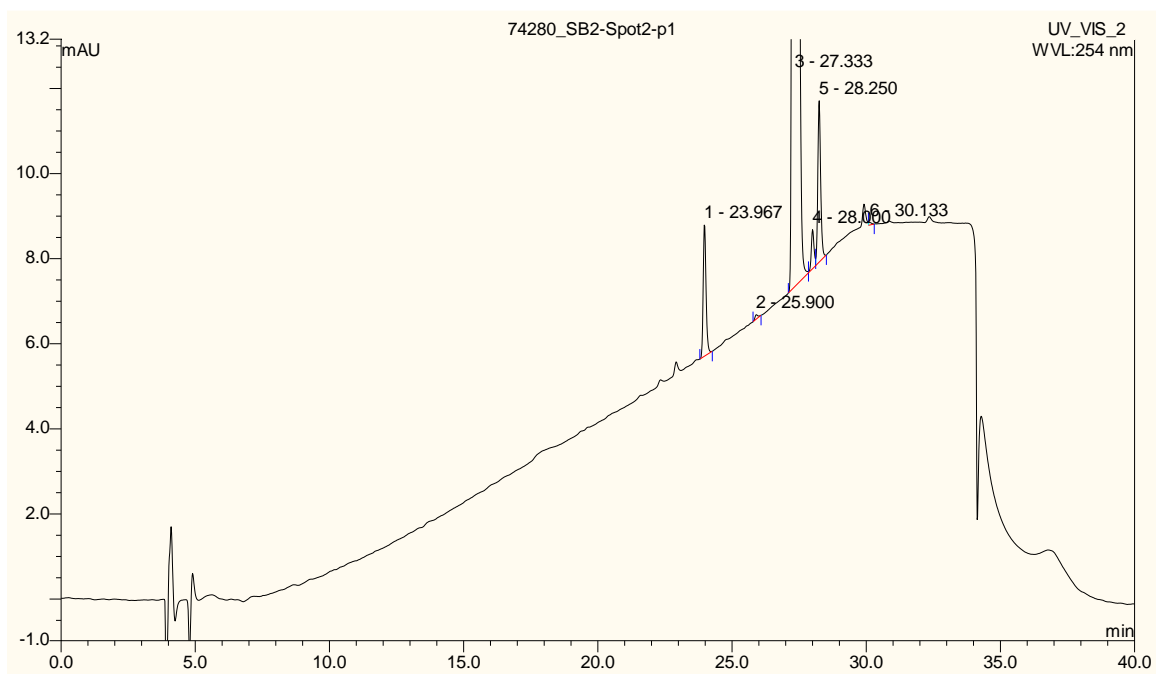

Retention Time: **27.33 min**

Relative Peak Area: **98.41 %**

**Figure S44a.** RP-Chromatogram of analogue **8k**.

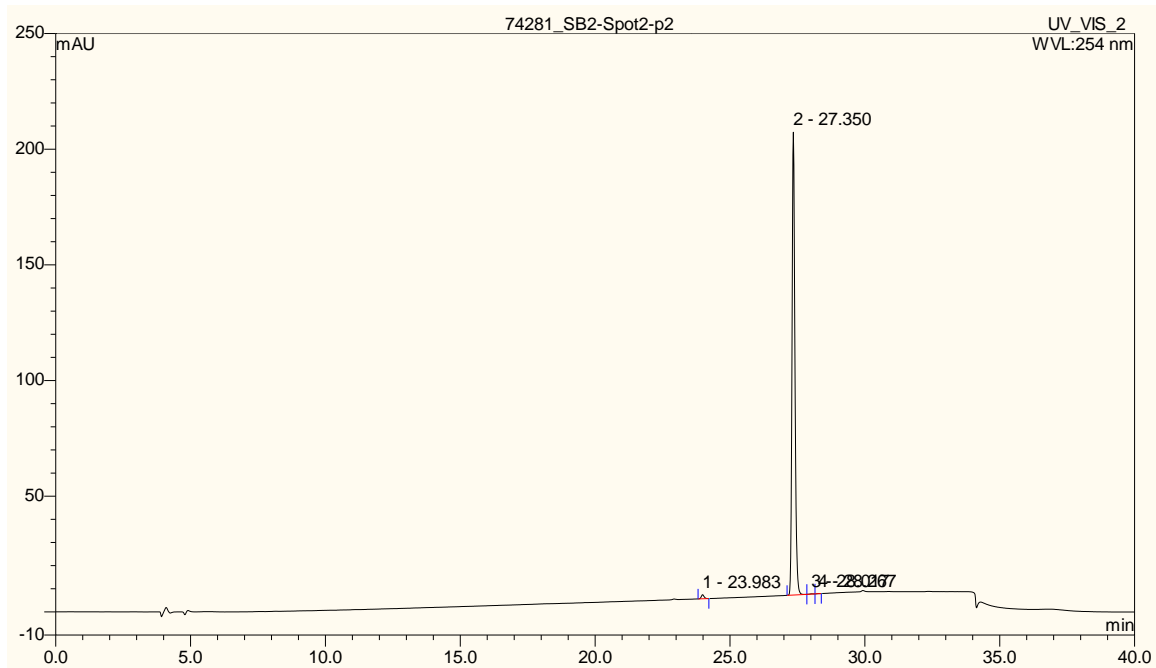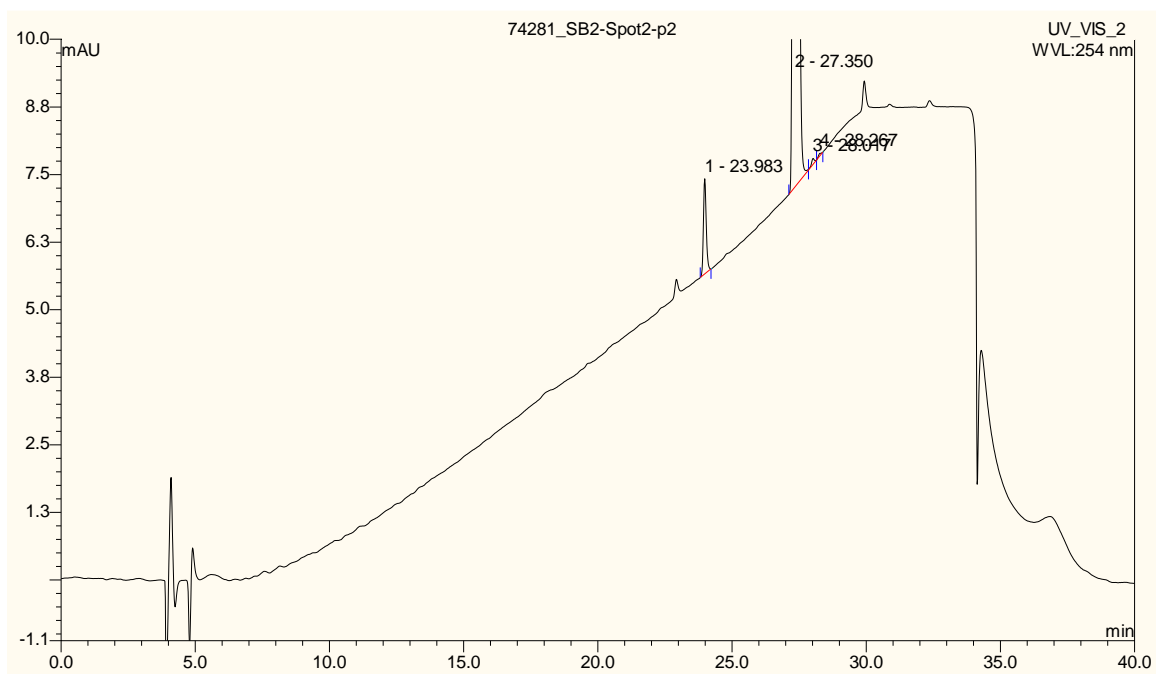

Retention Time: **27.35 min**

Relative Peak Area: **99.08 %**

**Figure S45a.** RP-Chromatogram of analogue **5l**.

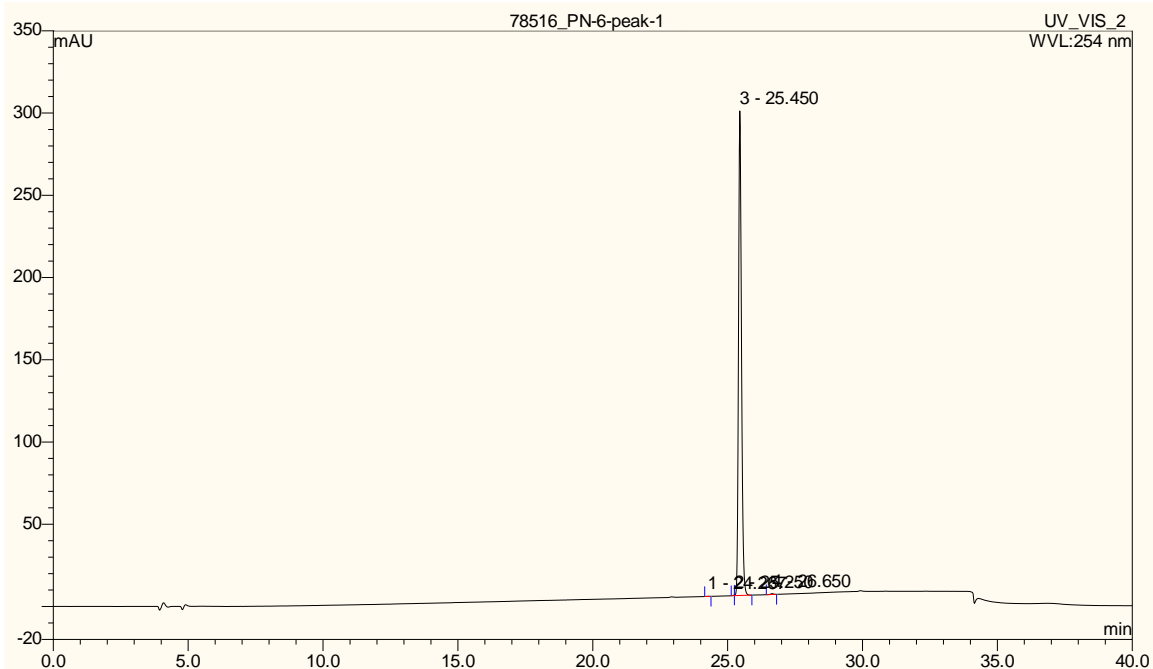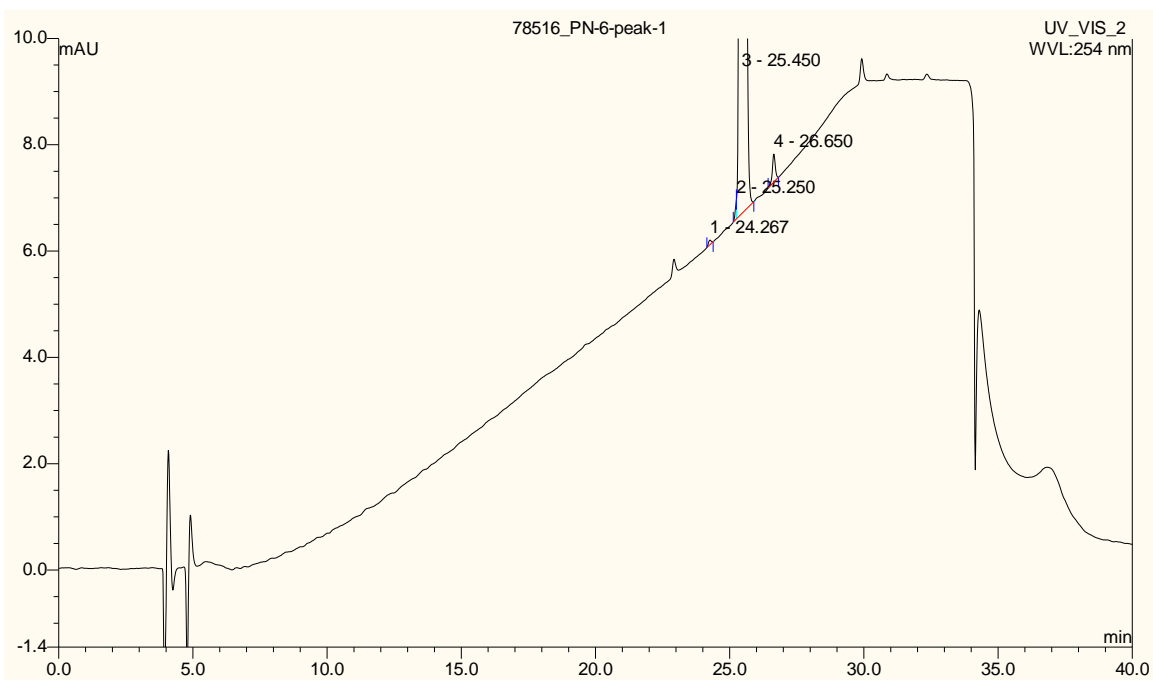

Retention Time: **25.45 min**

Relative Peak Area: **99.75 %**



**Figure S46a.** RP-Chromatogram of analogue **6l**.

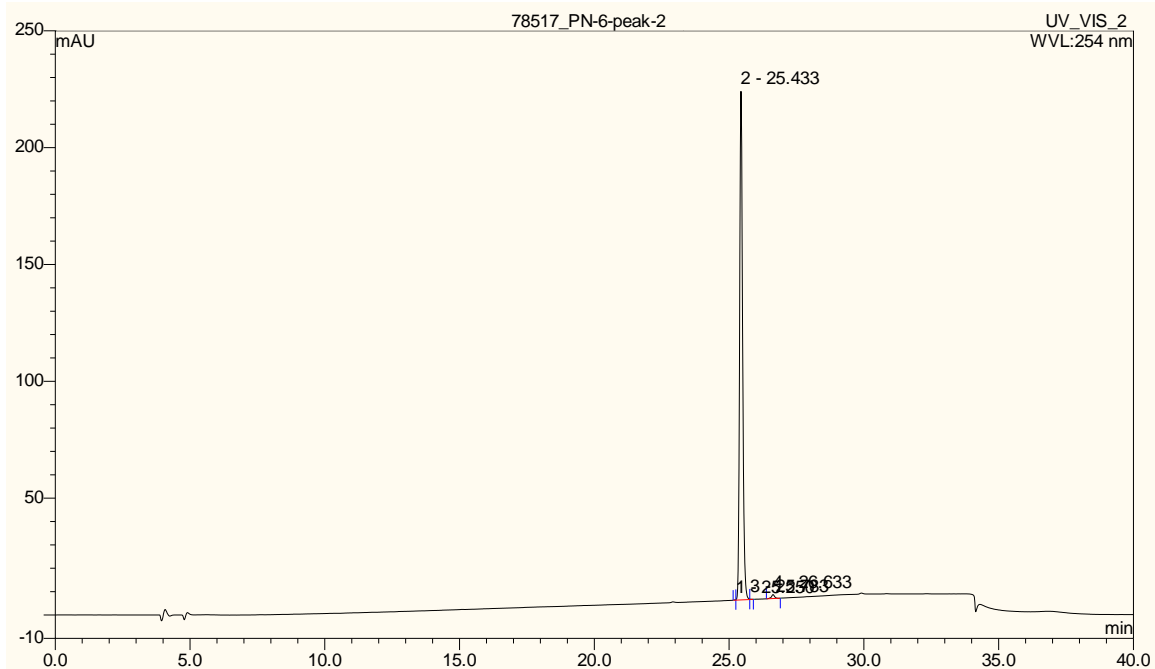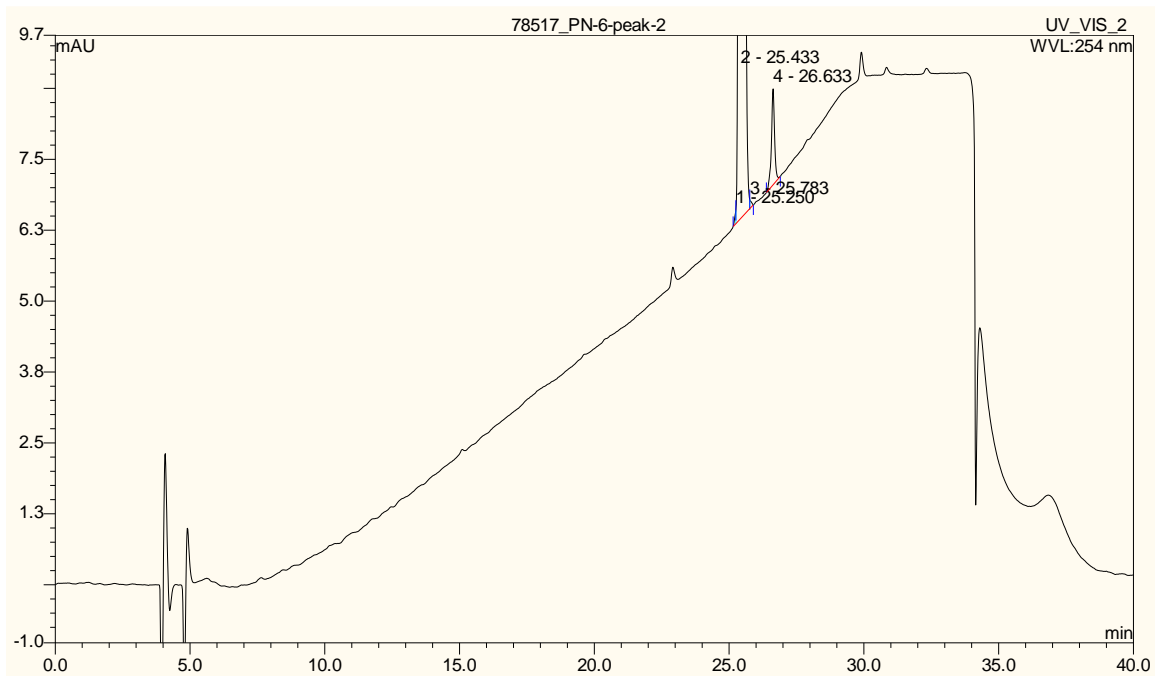

Retention Time: **25.43 min**

Relative Peak Area: **99.12 %**

**Figure S47a.** RP-Chromatogram of analogue **7l**.

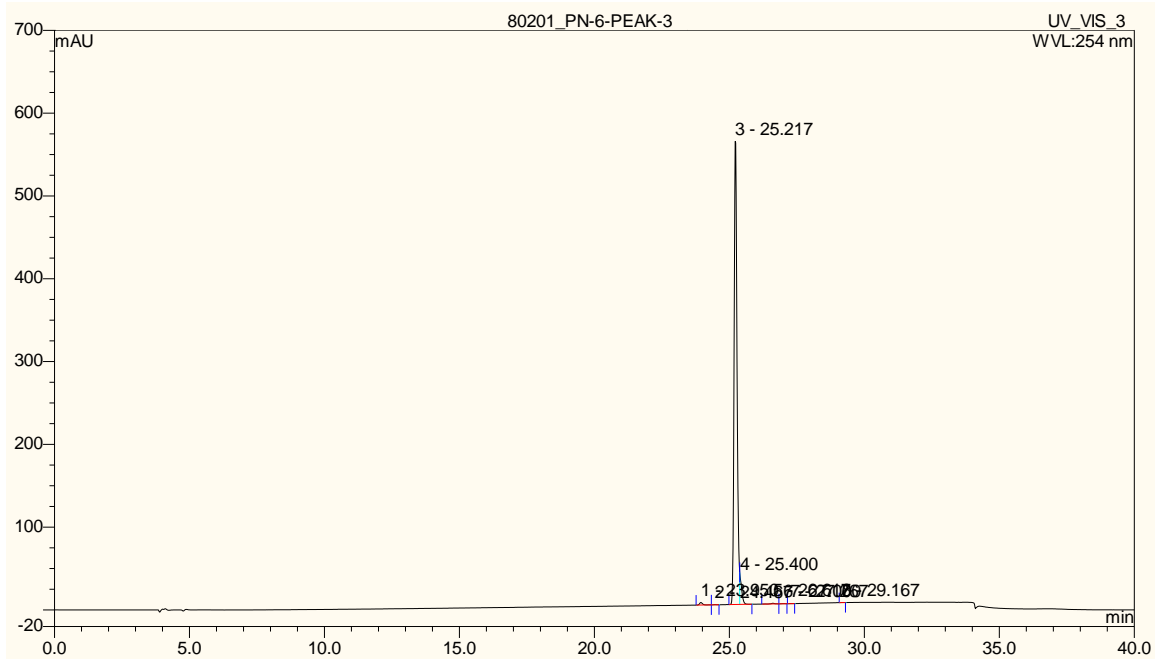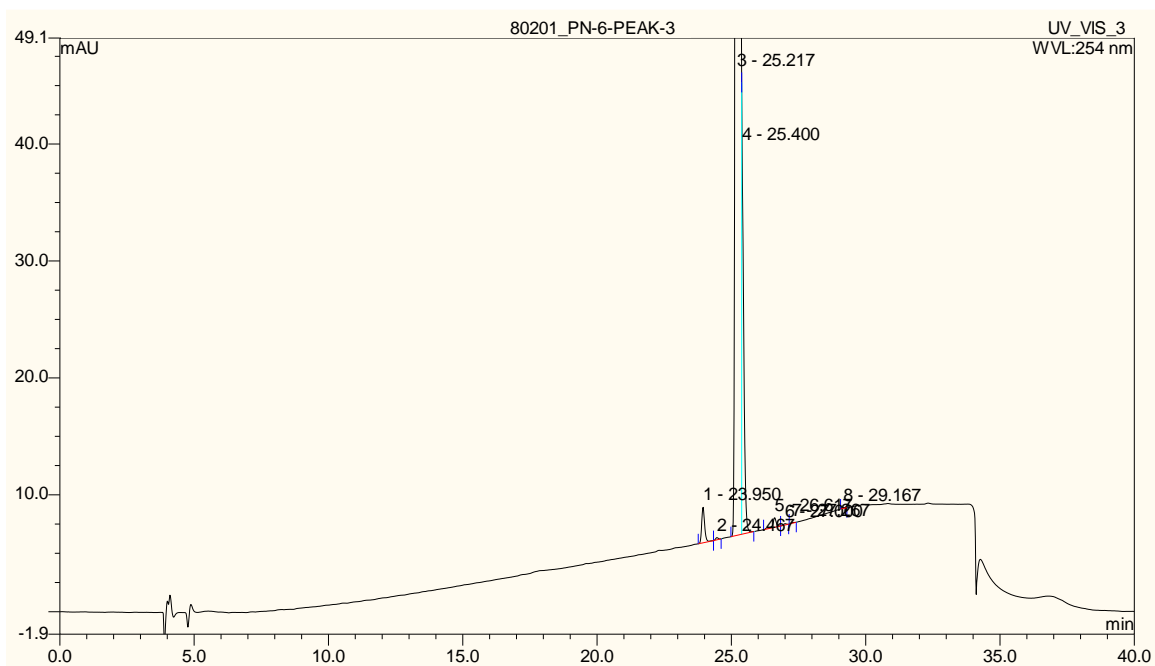

Retention Time: **25.22 min**

Relative Peak Area: **95.32 %**

**Figure S48a.** RP-Chromatogram of analogue **8l**.

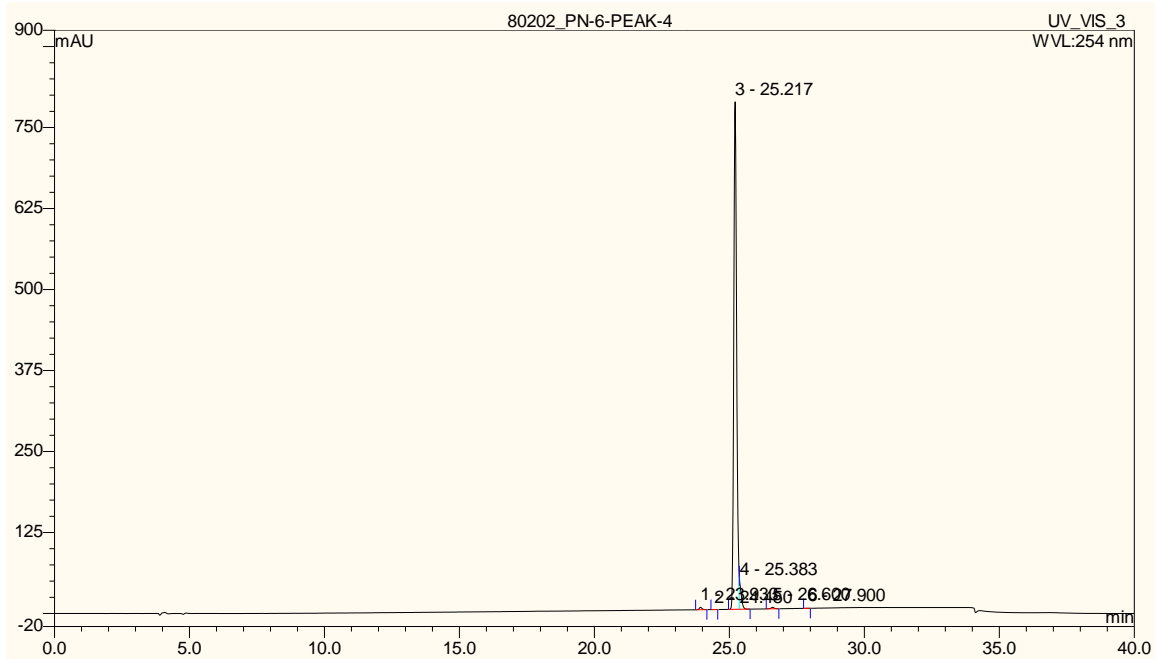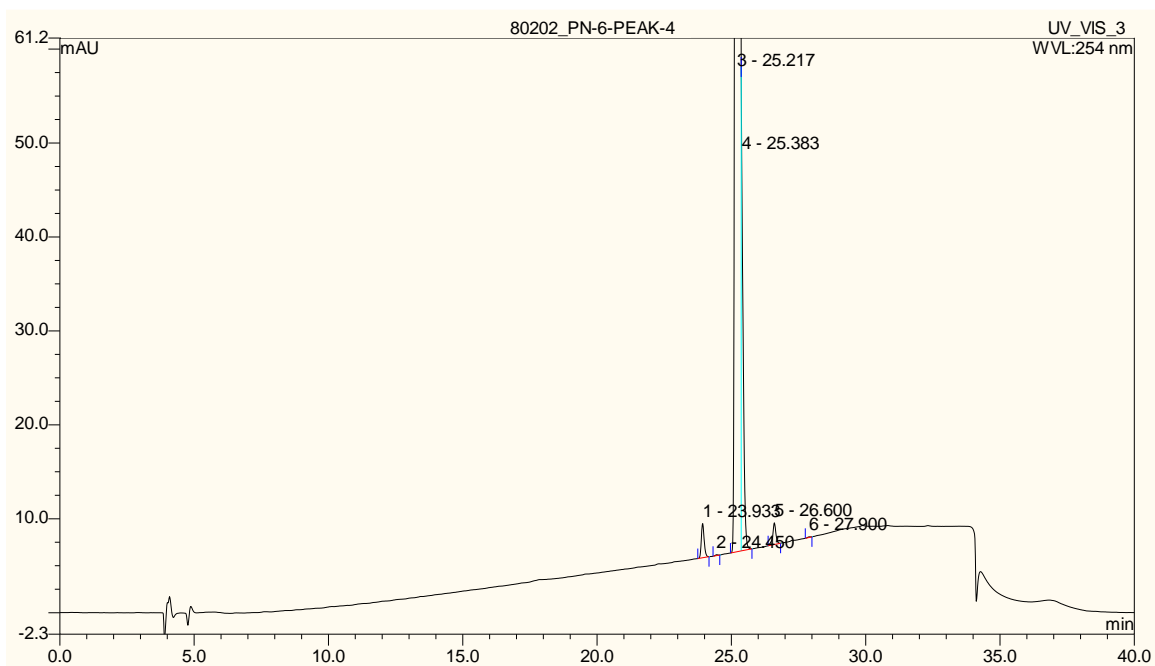

Retention Time: **25.22 min**

Relative Peak Area: **95.68 %**

**Figure S49a.** RP-Chromatogram of analogue **5m**.

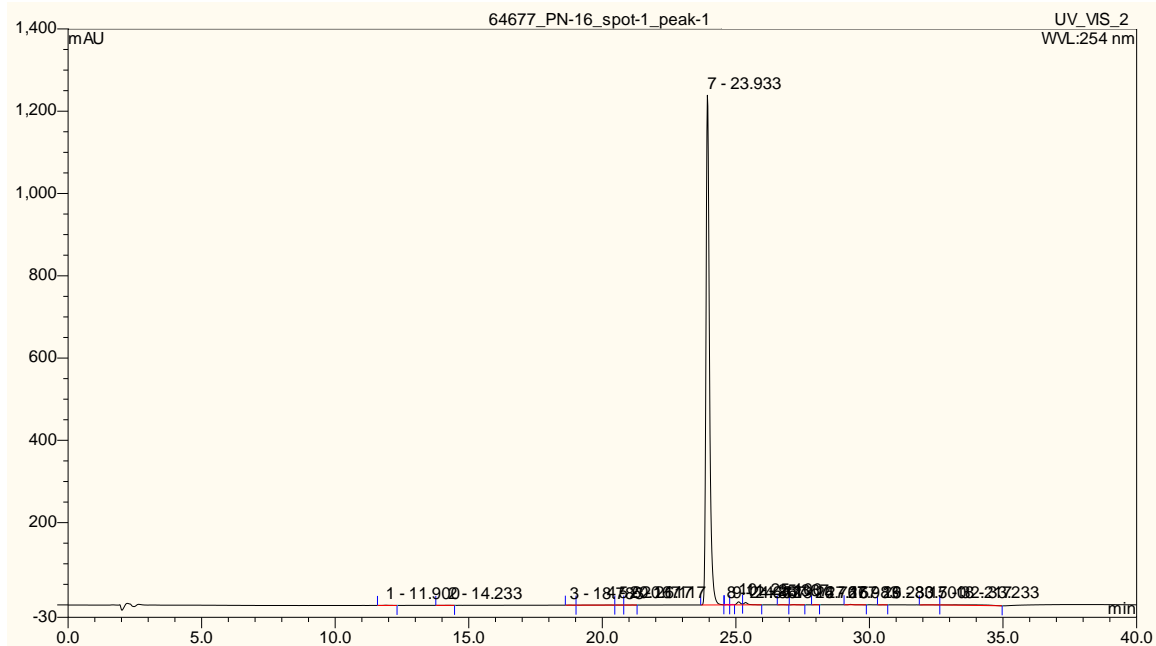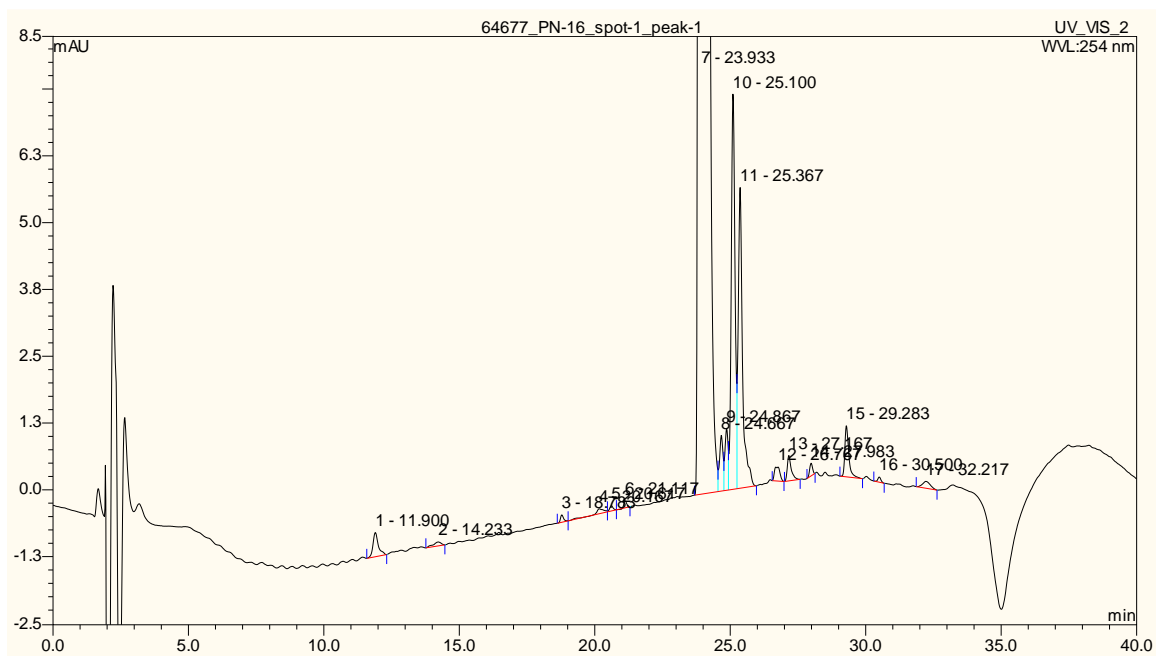

Retention Time: **23.93 min**

Relative Peak Area: **98.36 %**

**Figure S50a.** RP-Chromatogram of analogue **6m**.

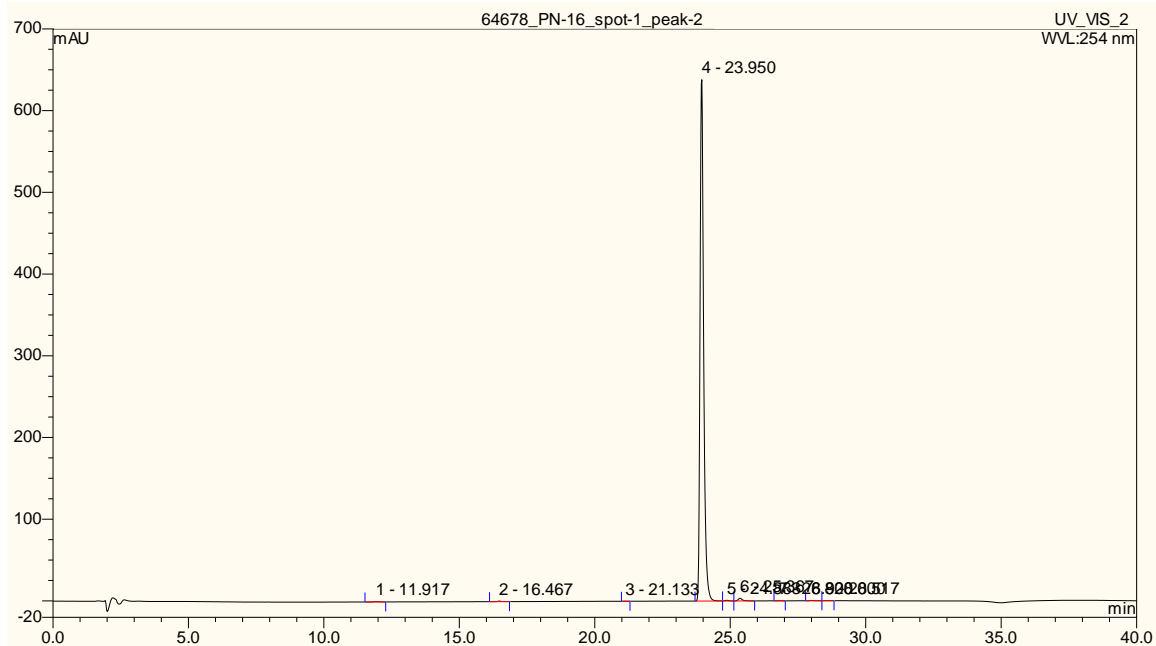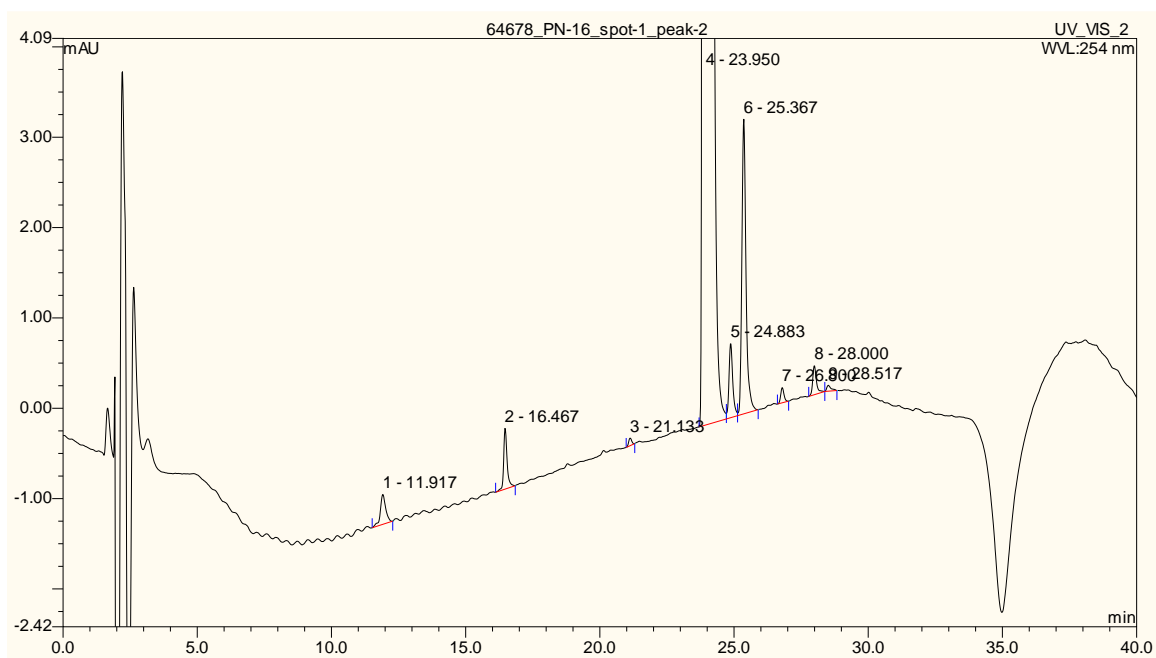

Retention Time: **23.95 min**

Relative Peak Area: **99.00 %**

**Figure S51a.** RP-Chromatogram of analogue **7m**.

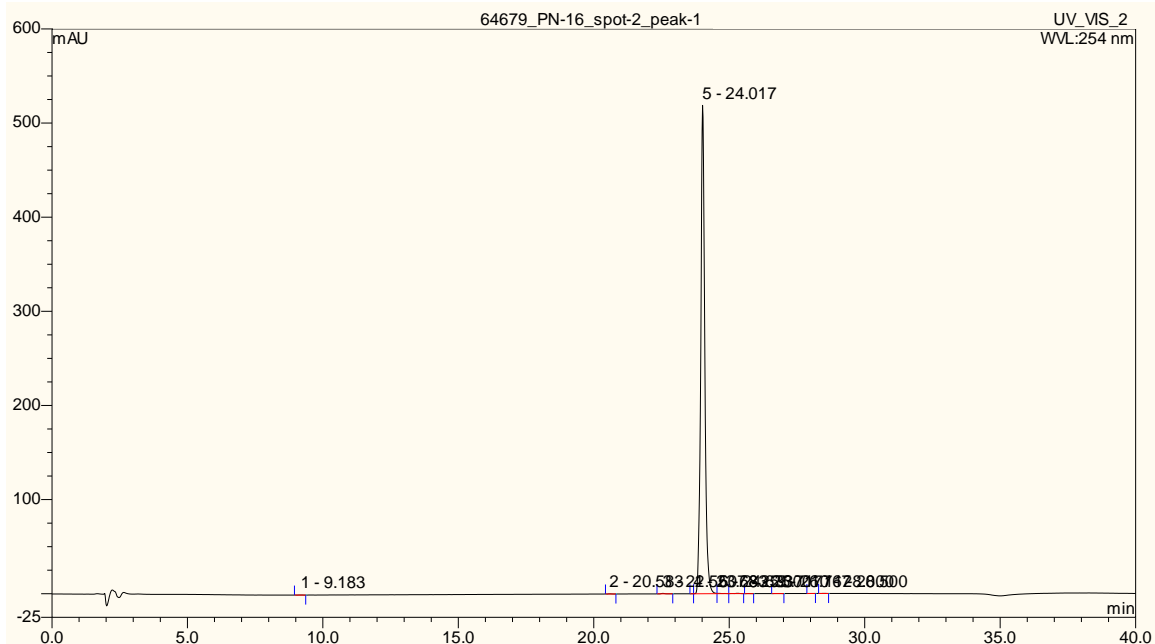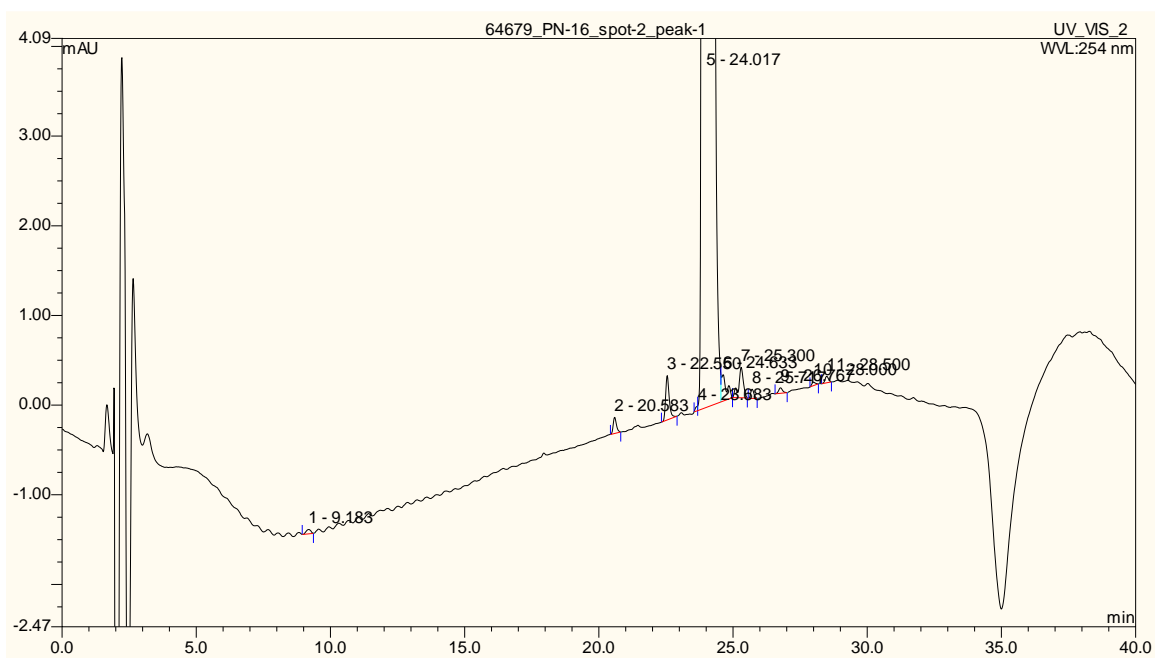

Retention Time: **24.02 min**

Relative Peak Area: **99.67 %**

**Figure S52a.** RP-Chromatogram of analogue **8m**.

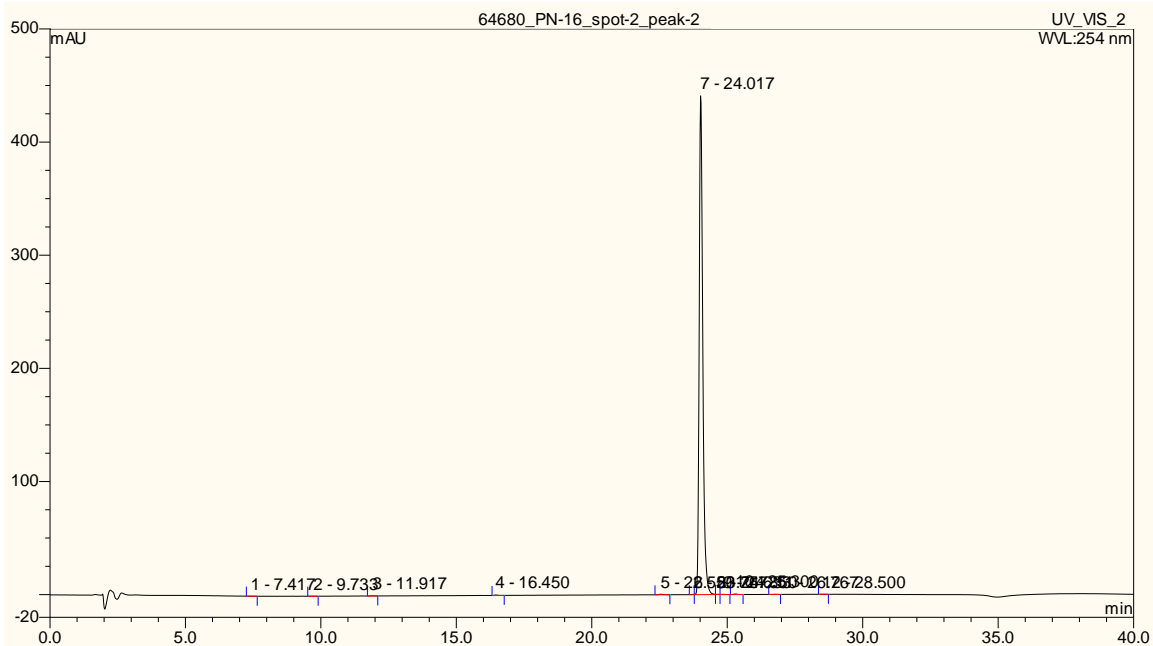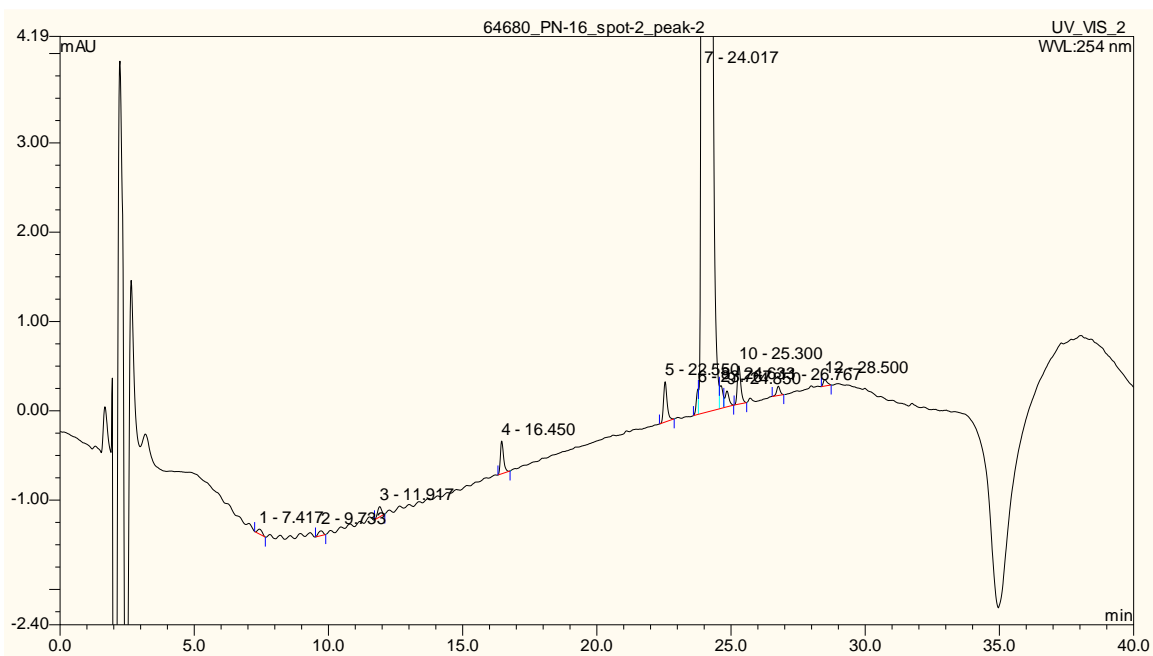

Retention Time: **24.02 min**

Relative Peak Area: **99.50 %**

**Figure S53a.** RP-Chromatogram of analogue **5n**.

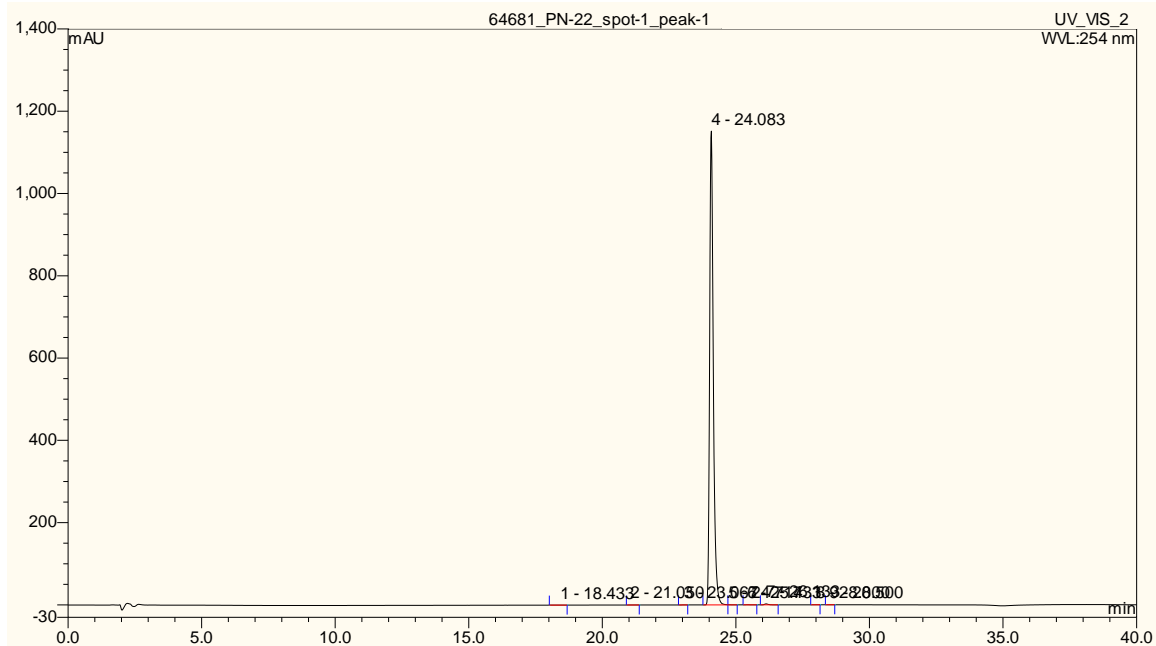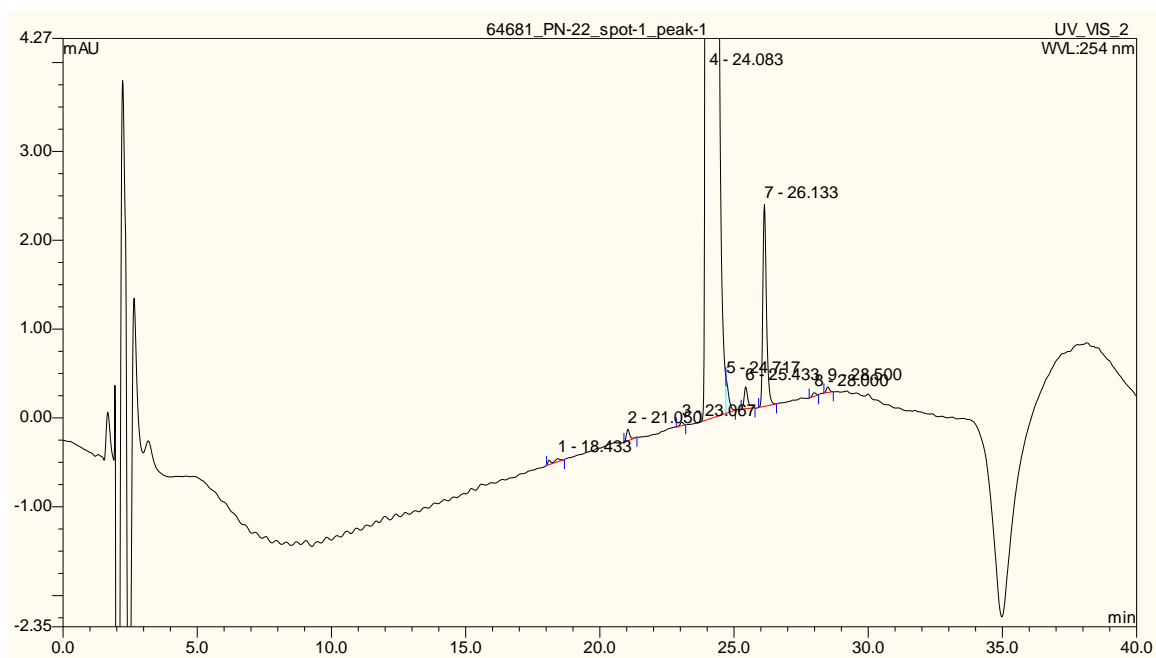

Retention Time: **24.08 min**

Relative Peak Area: **99.73 %**



**Figure S54a.** RP-Chromatogram of analogue **6n**.

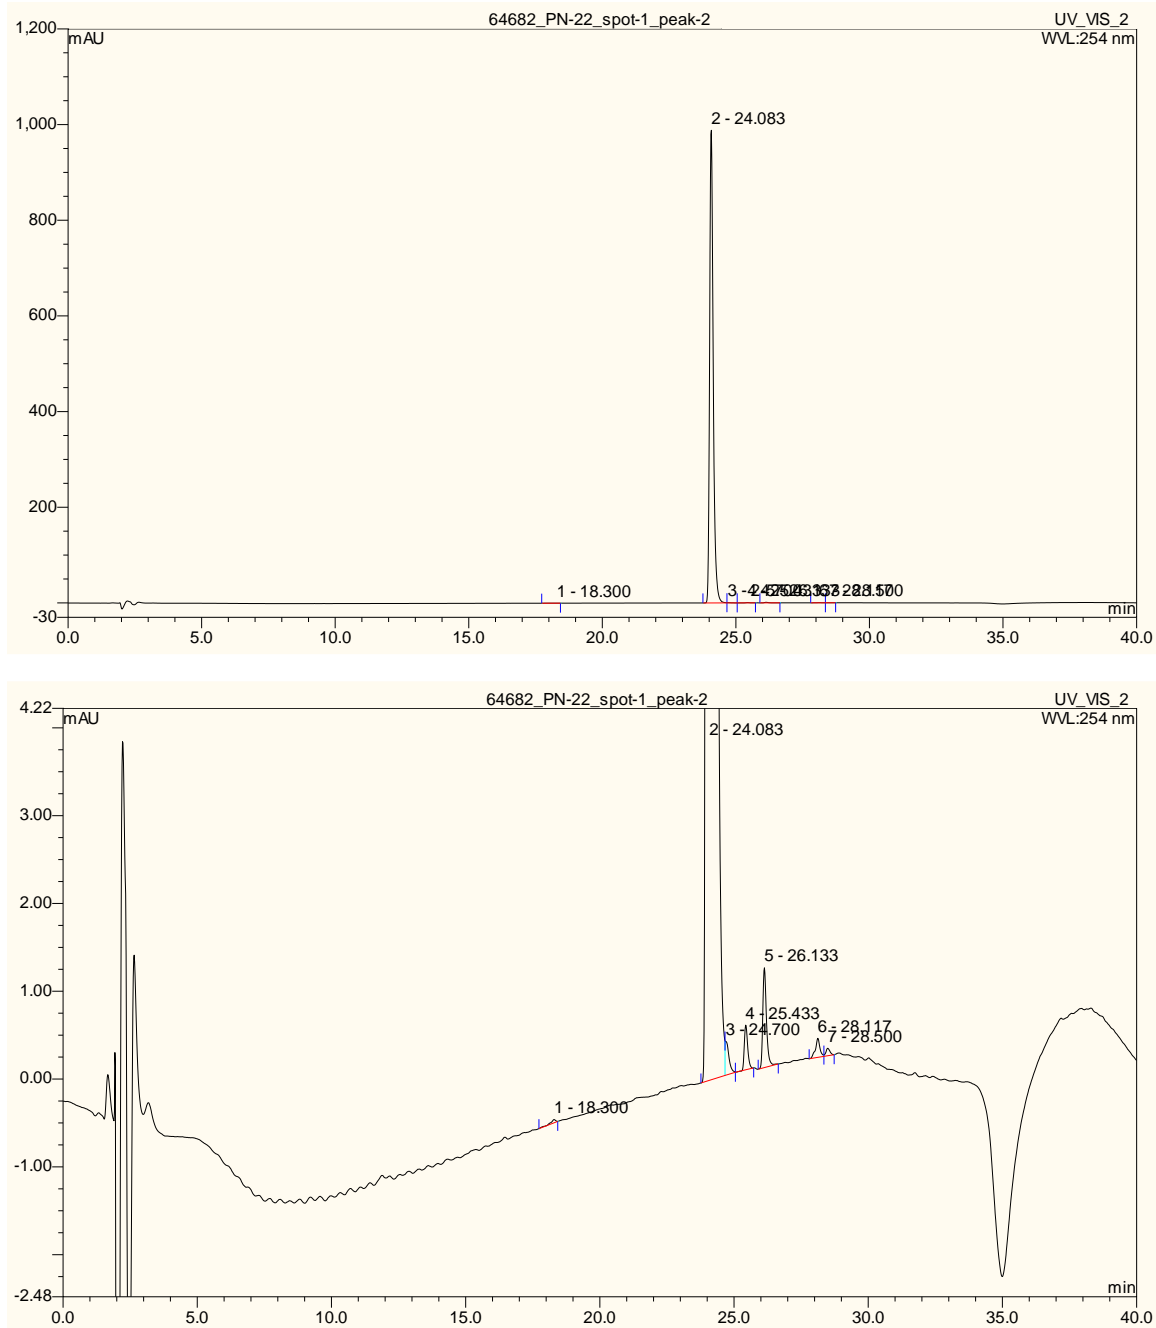

Retention Time: **24.08 min**

Relative Peak Area: **99.76 %**

**Figure S55a.** RP-Chromatogram of analogue **7n**.

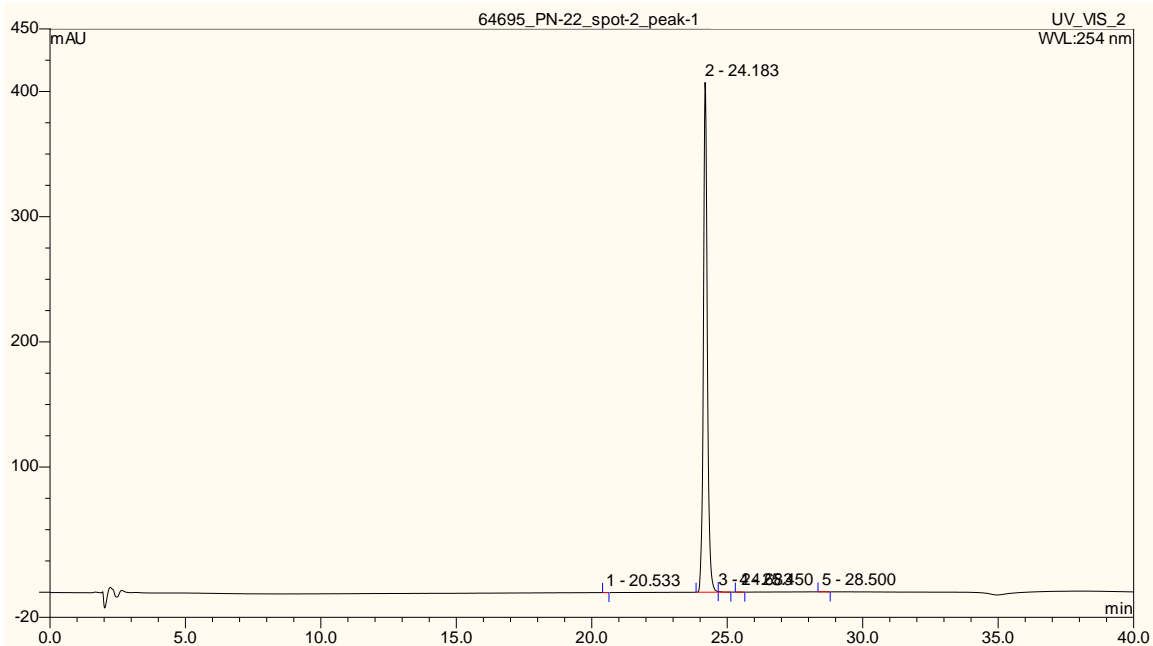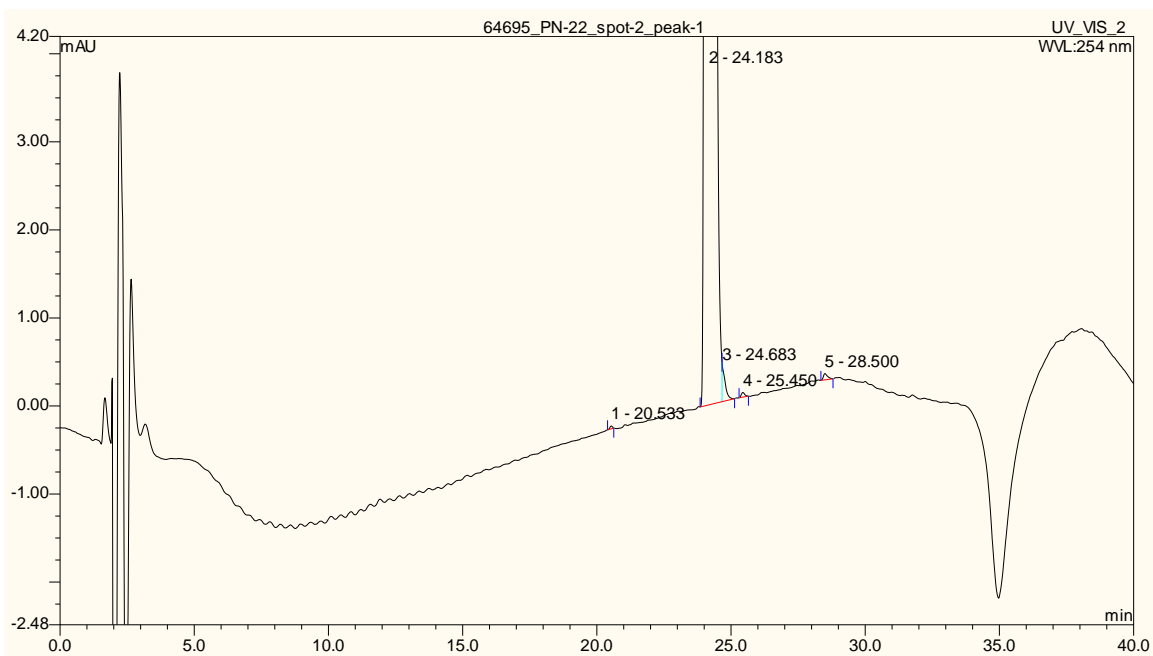

Retention Time: **24.18 min**

Relative Peak Area: **99.89 %**

**Figure S56a.** RP-Chromatogram of analogue **8n**.

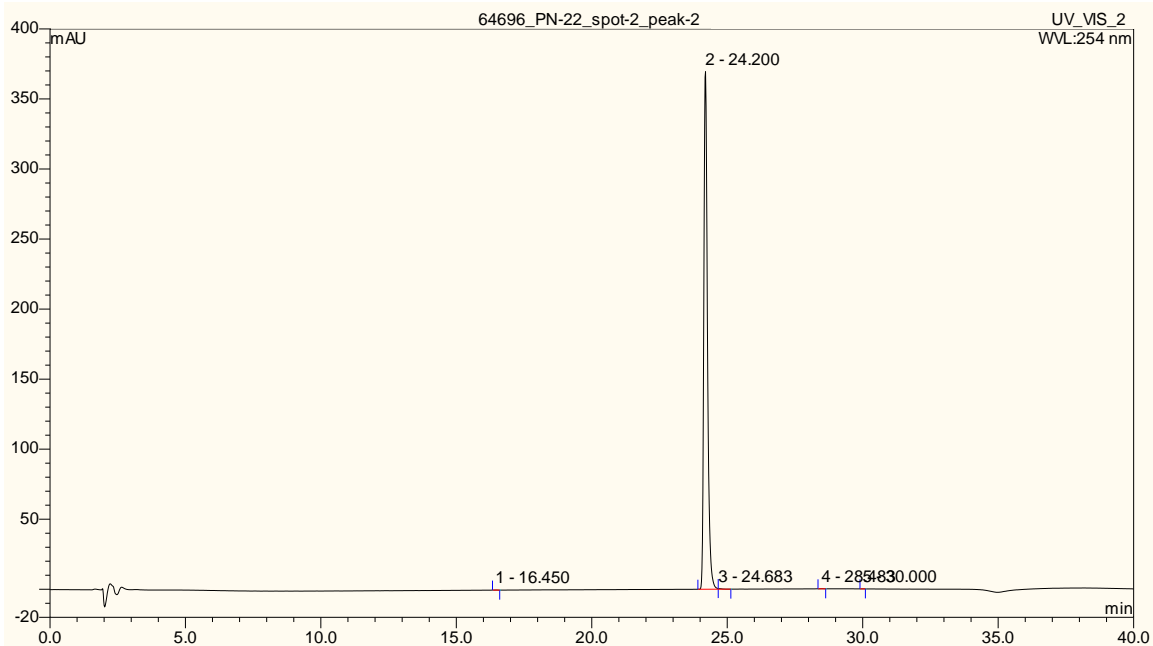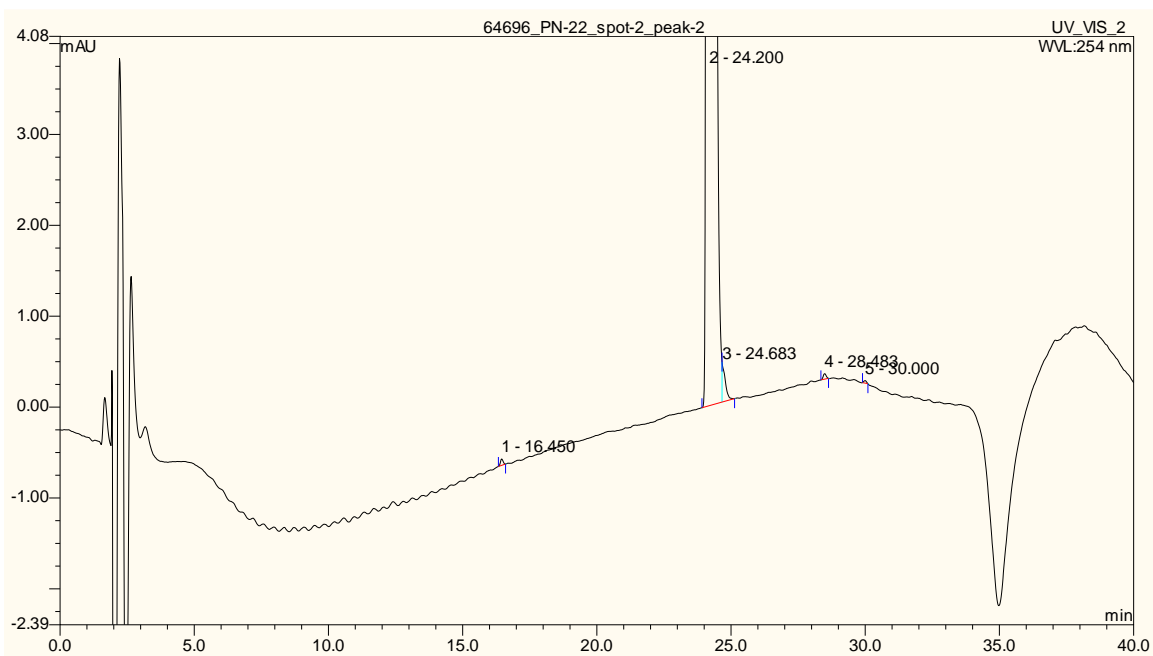

Retention Time: **24.20 min**

Relative Peak Area: **99.87 %**

**Figure S57a.** RP-Chromatogram of analogue **5o**.

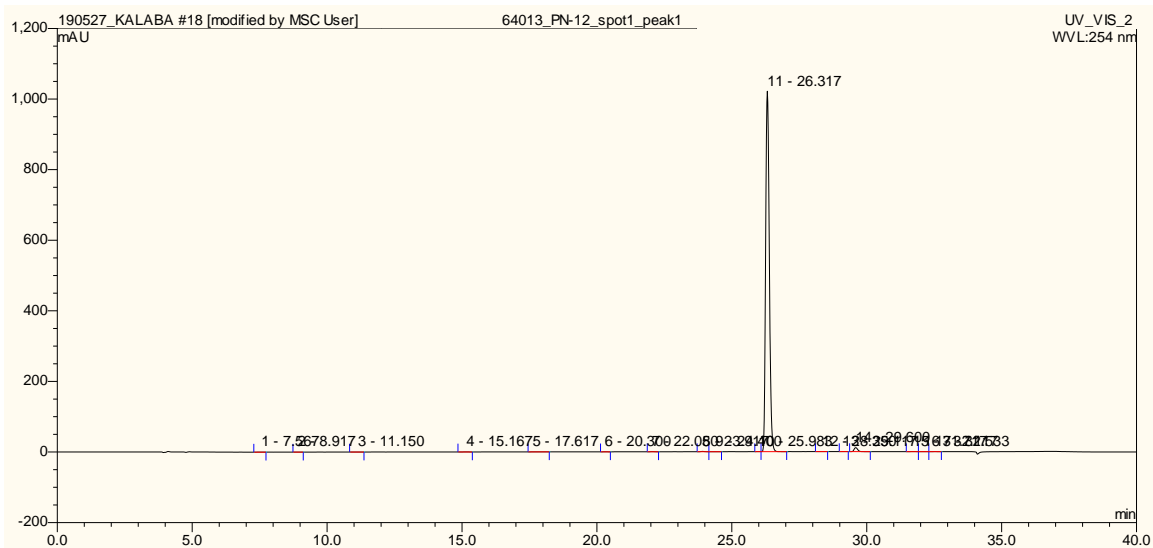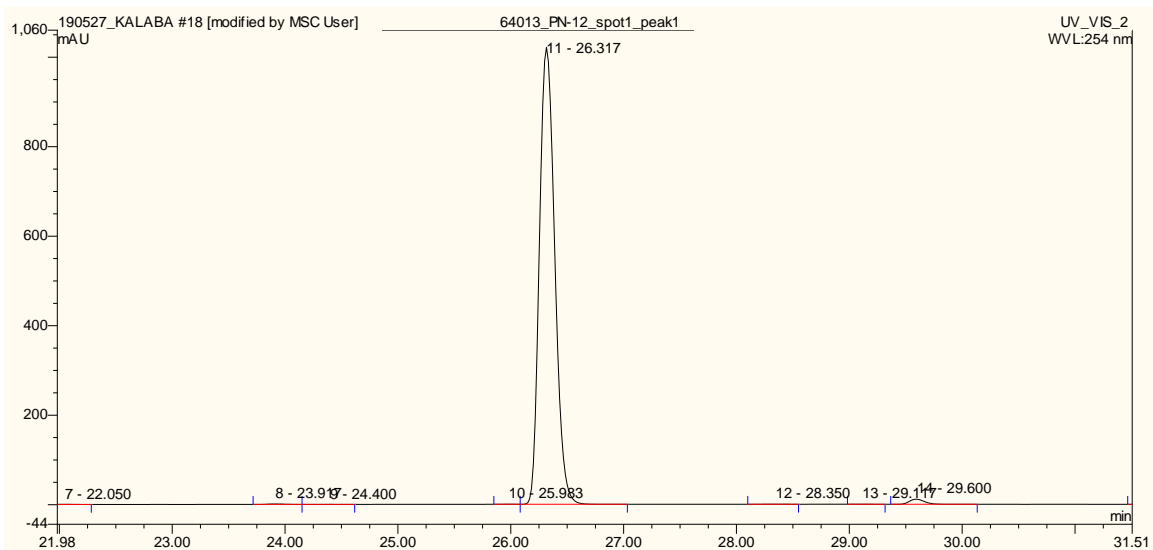

Retention Time: **26.31 min**

Relative Peak Area: **98.66 %**

**Figure S58a.** RP-Chromatogram of analogue **6o**.

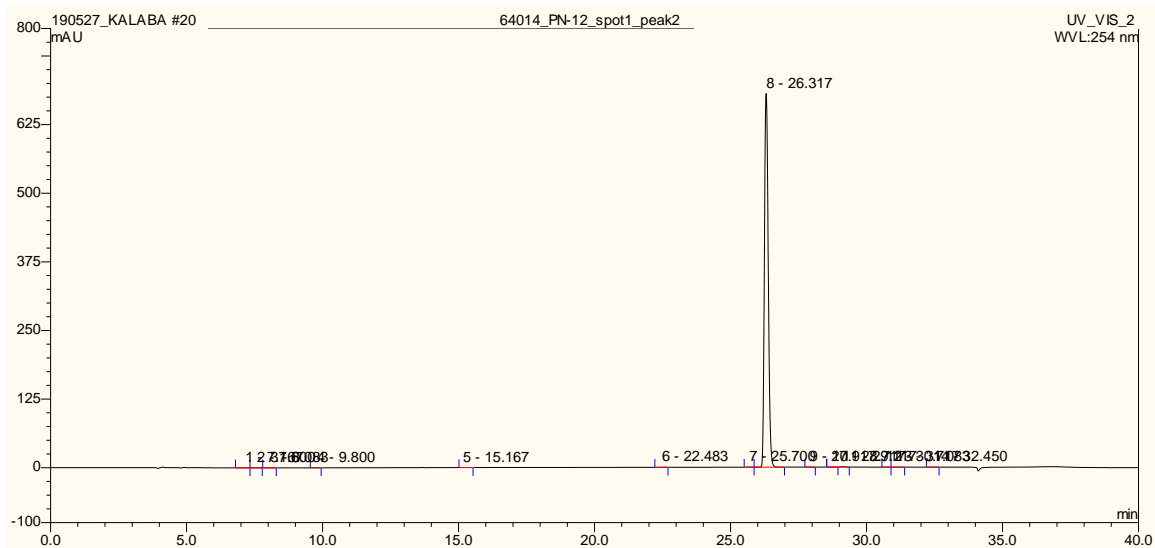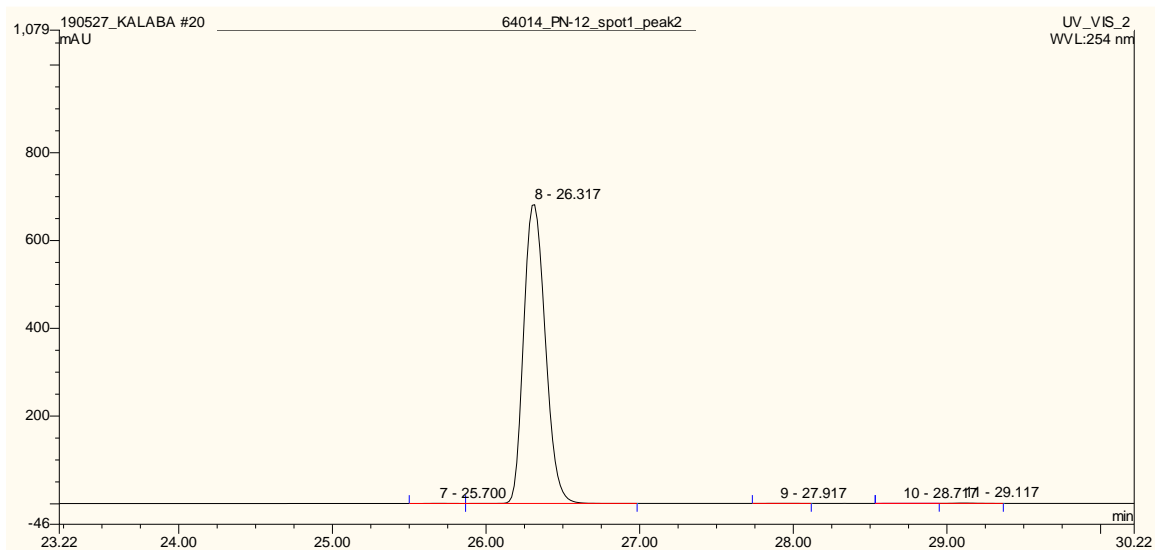

Retention Time: **26.31 min**

Relative Peak Area: **99.66 %**

**Figure S59a.** RP-Chromatogram of analogue **7o**.

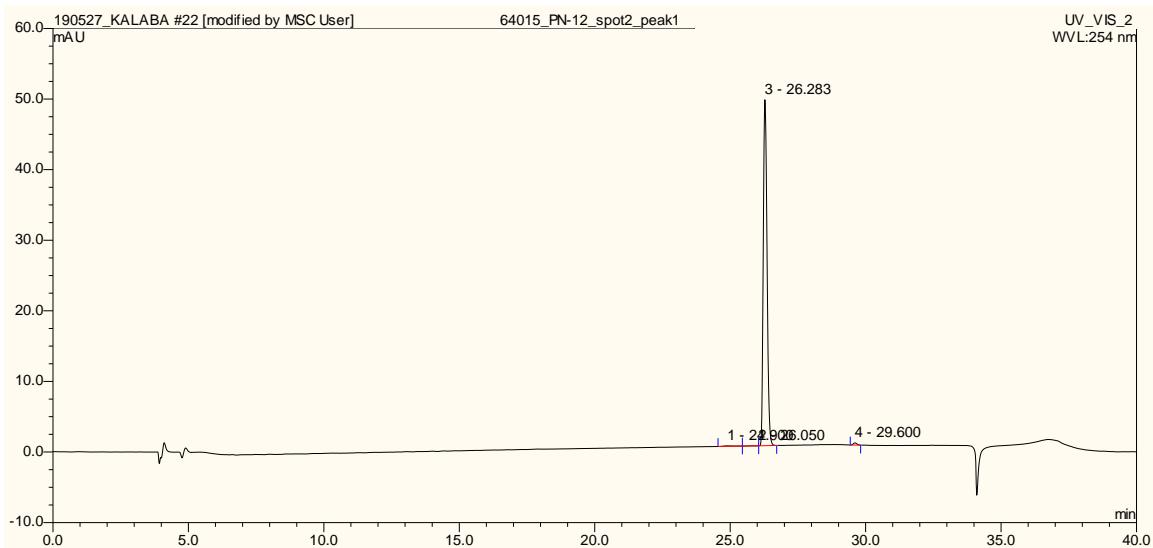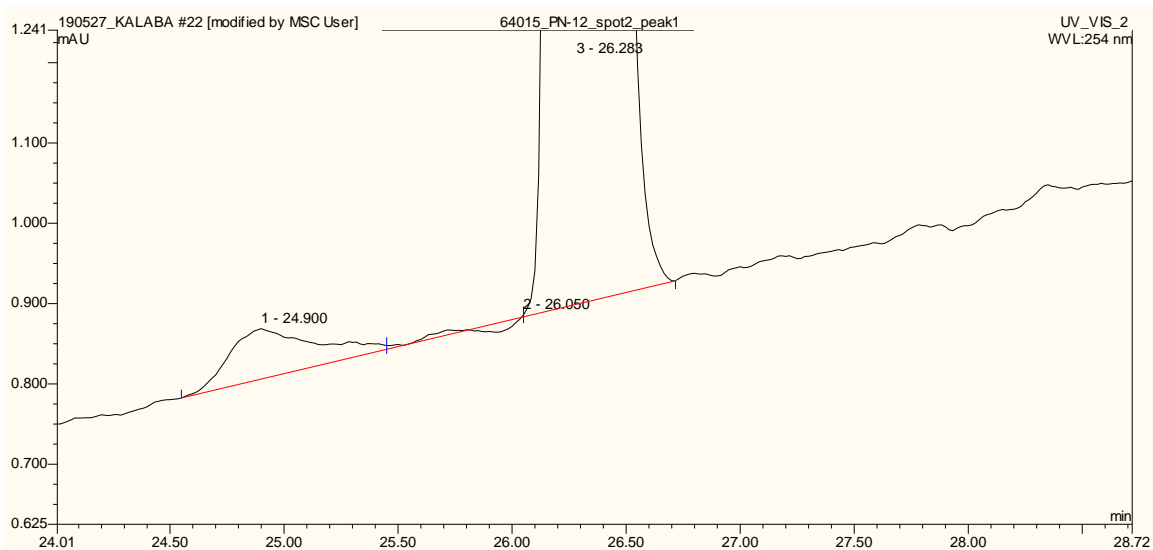

Retention Time: **26.28 min**

Relative Peak Area: **99.09 %**

**Figure S60a.** RP-Chromatogram of analogue **8o**.

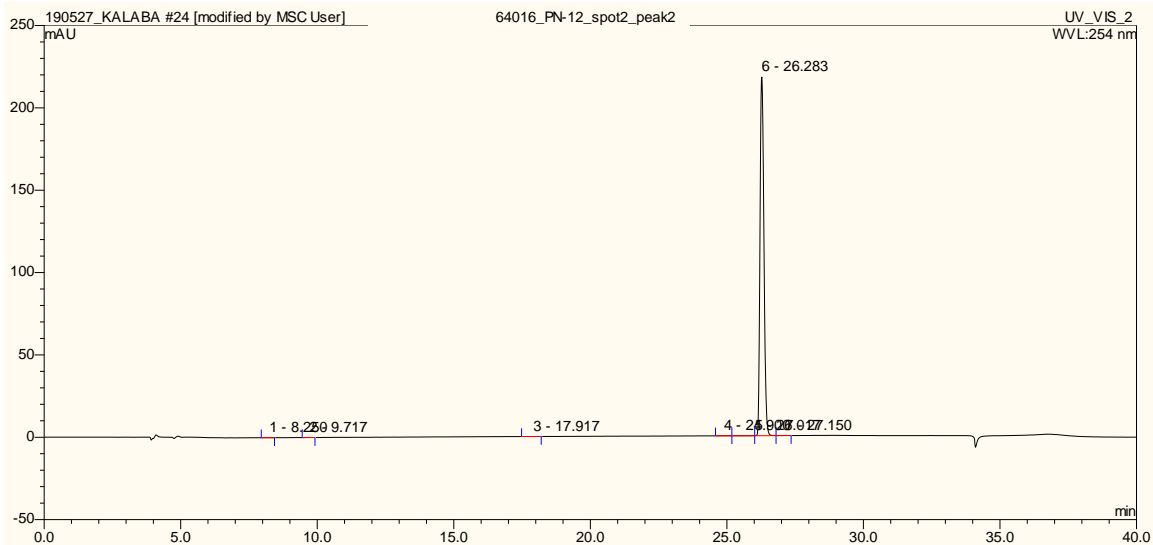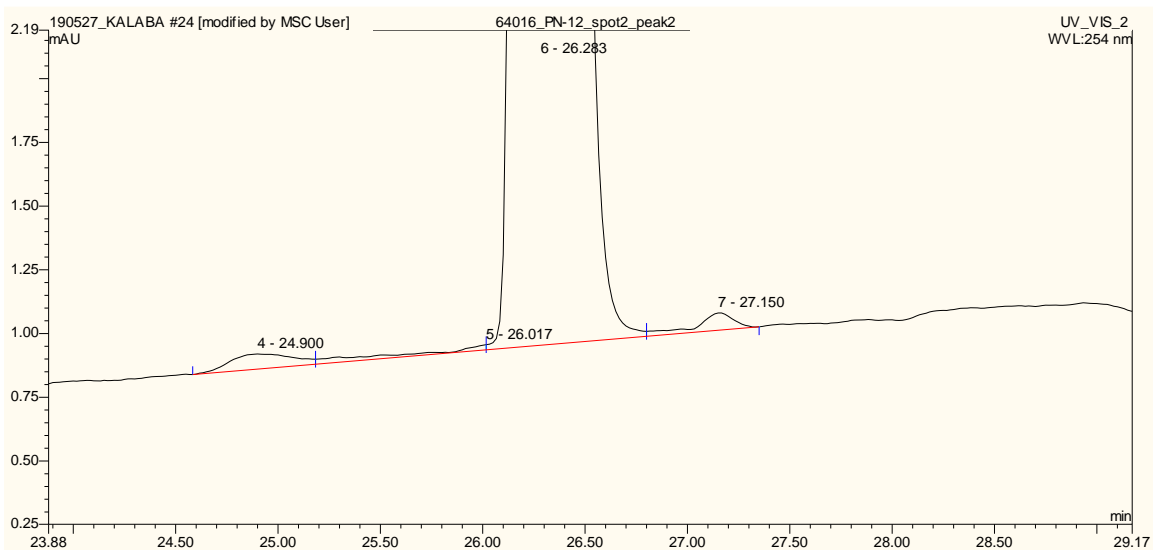

Retention Time: **26.28 min**

Relative Peak Area: **99.76 %**

**Figure S61a.** RP-Chromatogram of analogue **5p**.

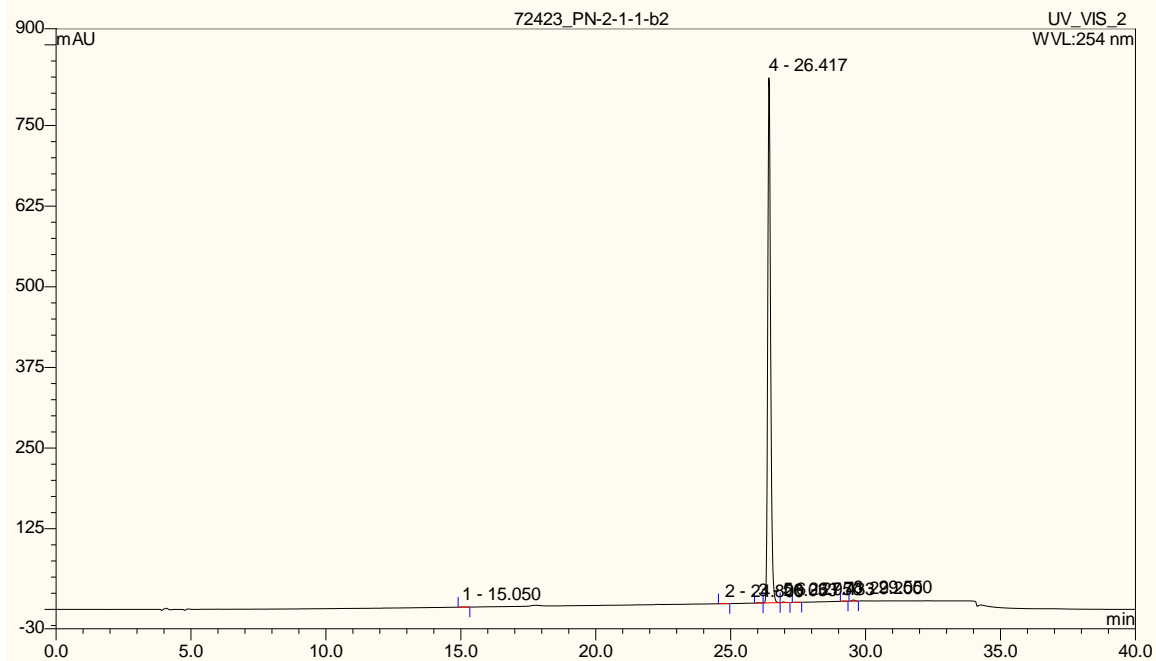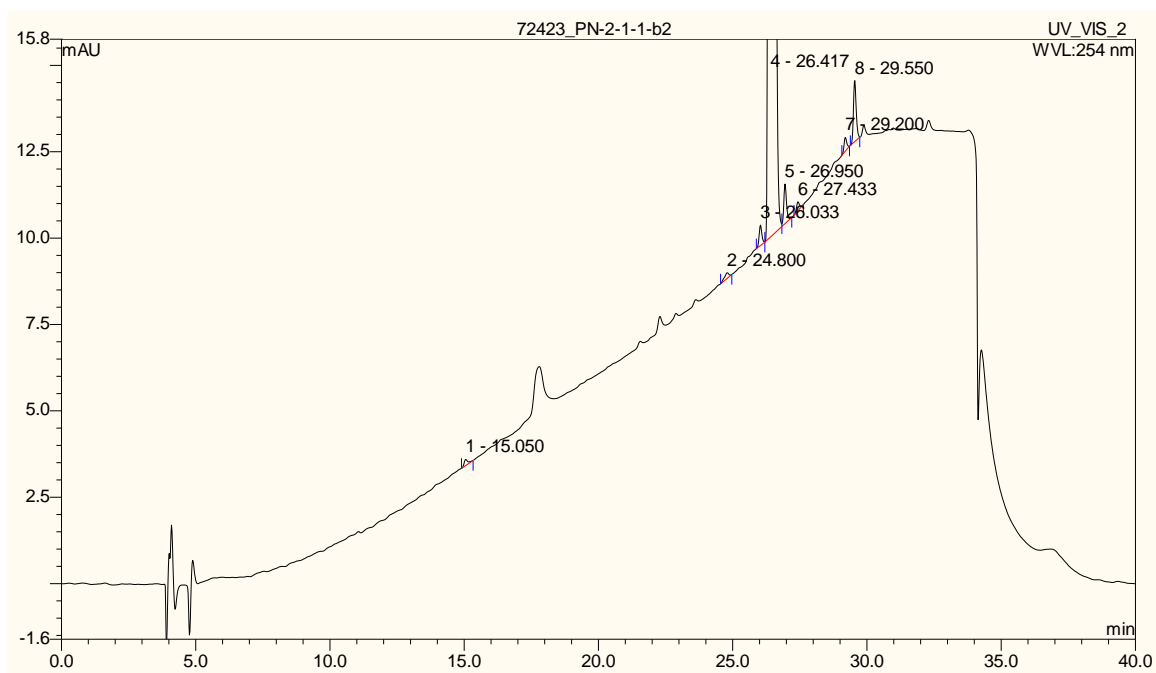

Retention Time: **26.42 min**

Relative Peak Area: **99.46 %**



**Figure S62a.** RP-Chromatogram of analogue **6p**.

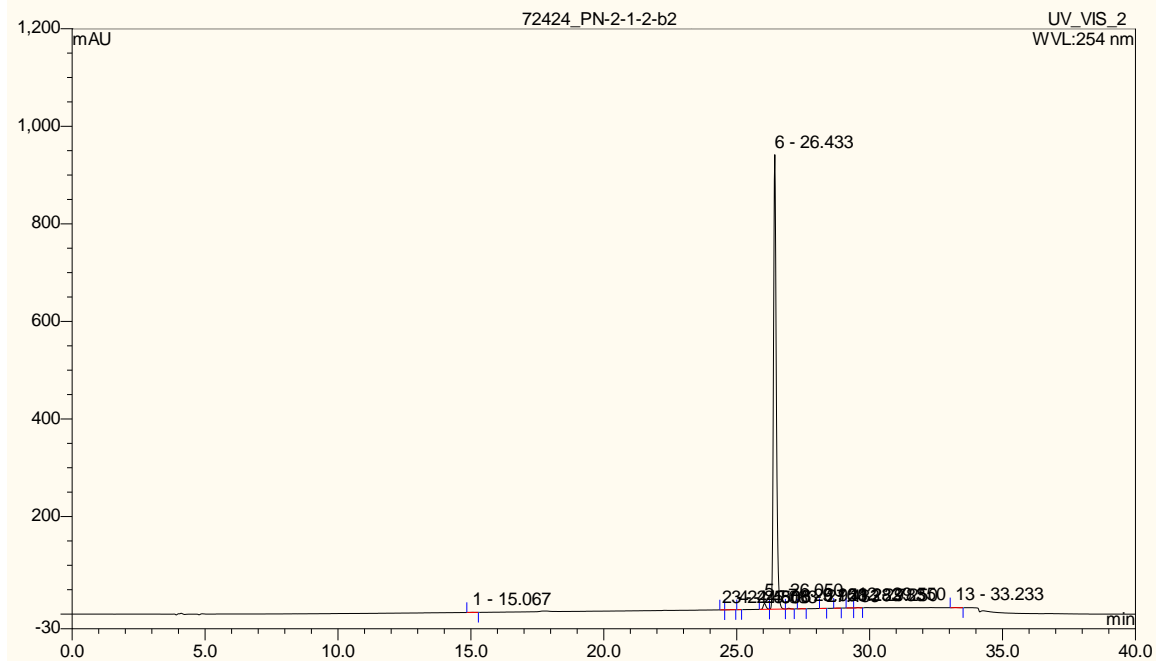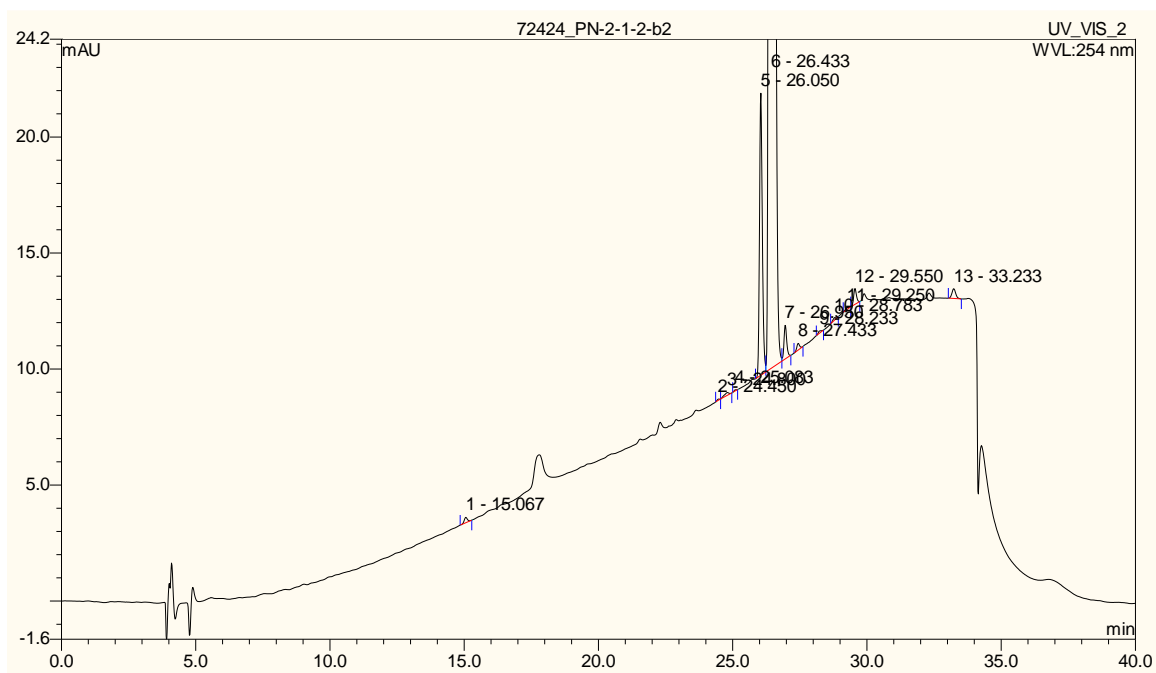

Retention Time: **26.43 min**

Relative Peak Area: **98.34 %**

**Figure S63a.** RP-Chromatogram of analogue **7p**.

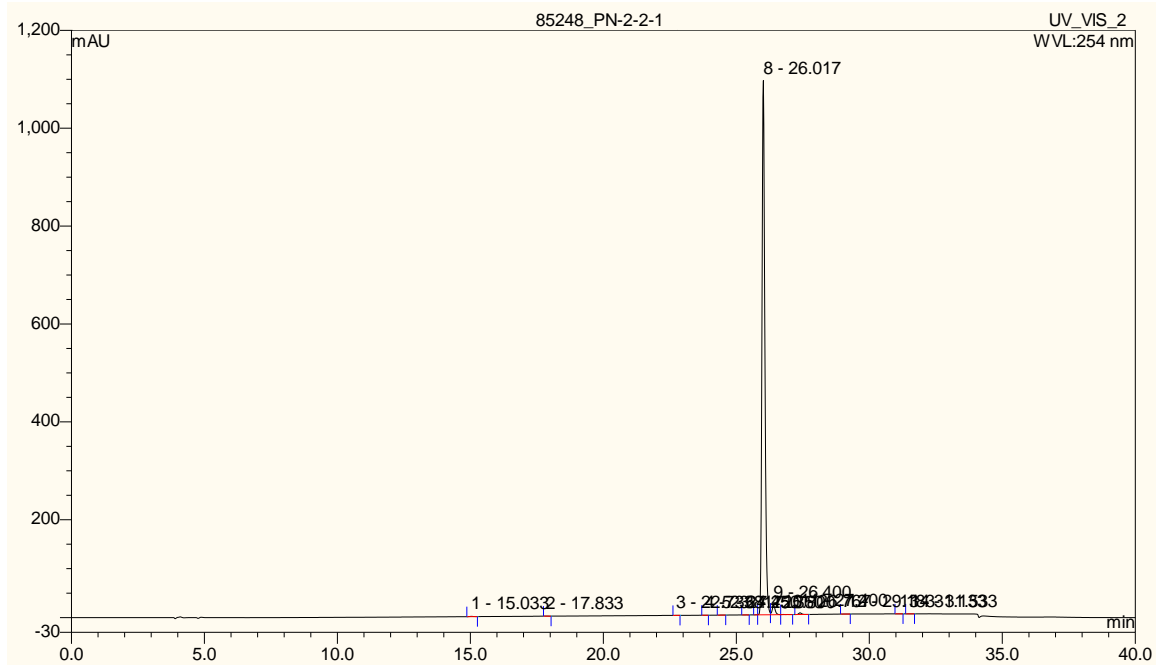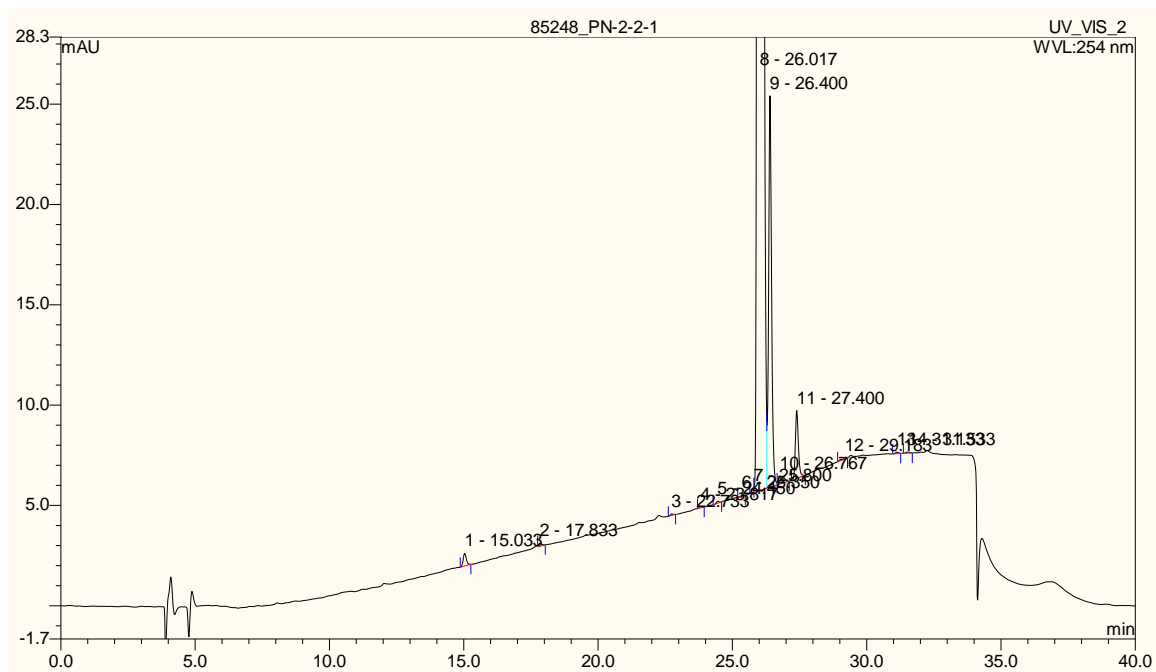

Retention Time: **26.02 min**

Relative Peak Area: **97.72 %**

**Figure S64a.** RP-Chromatogram of analogue **8p**.

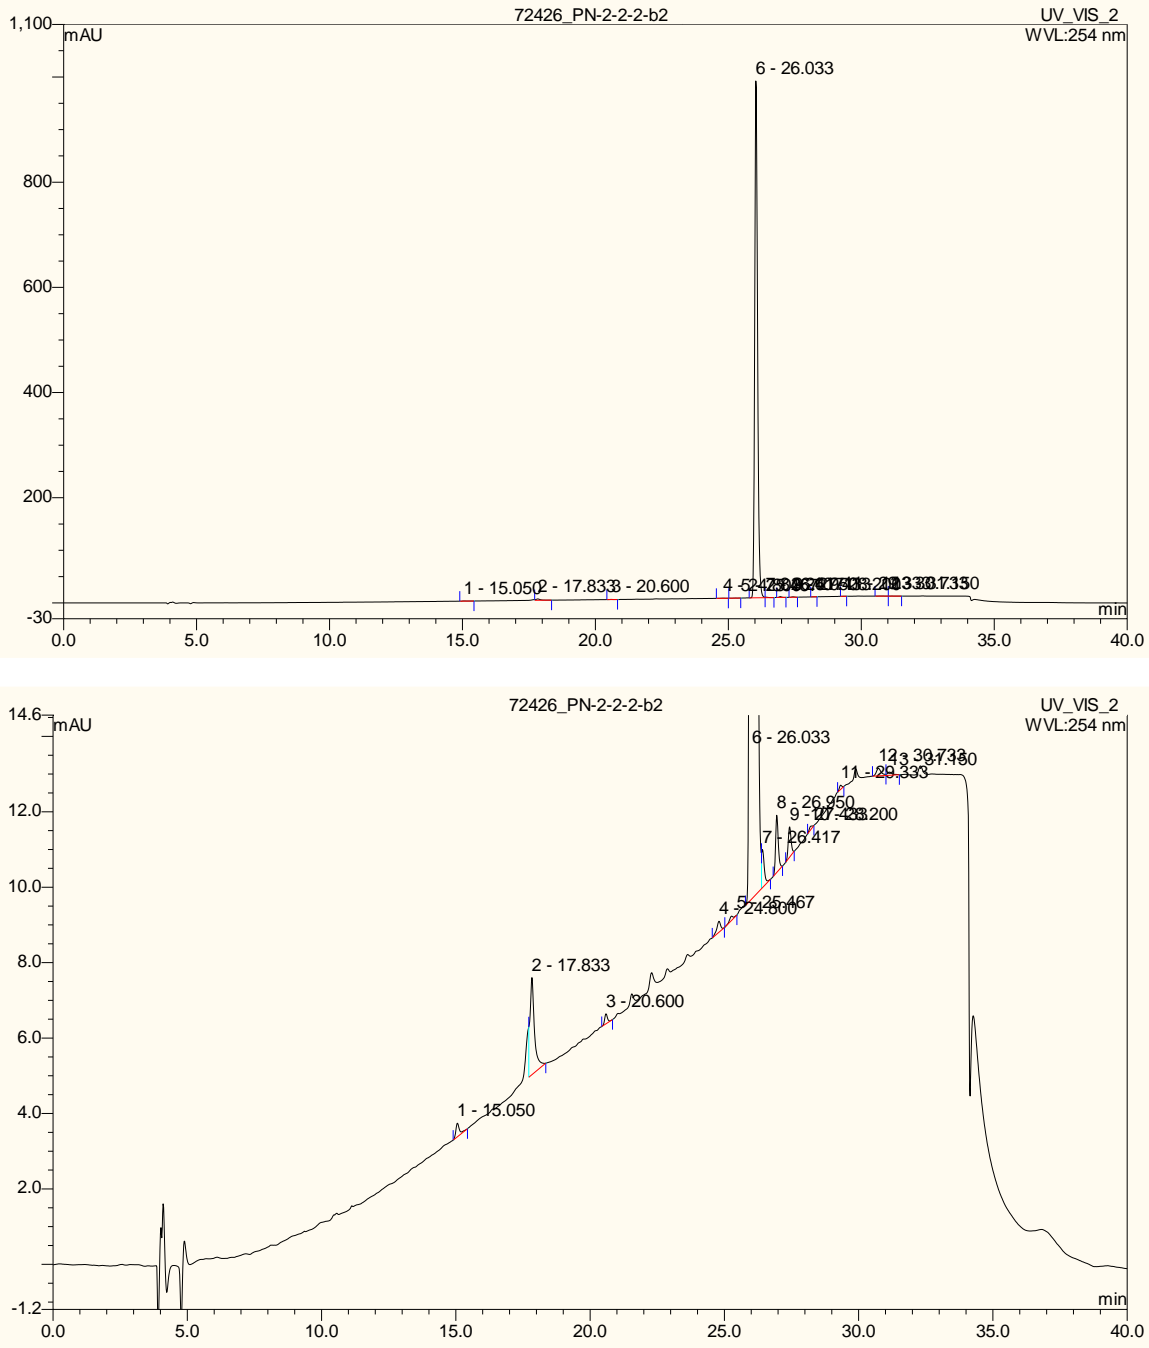

Retention Time: **26.03 min**

Relative Peak Area: **99.09 %**

**Figure S65a.** RP-Chromatogram of analogue **5q**.

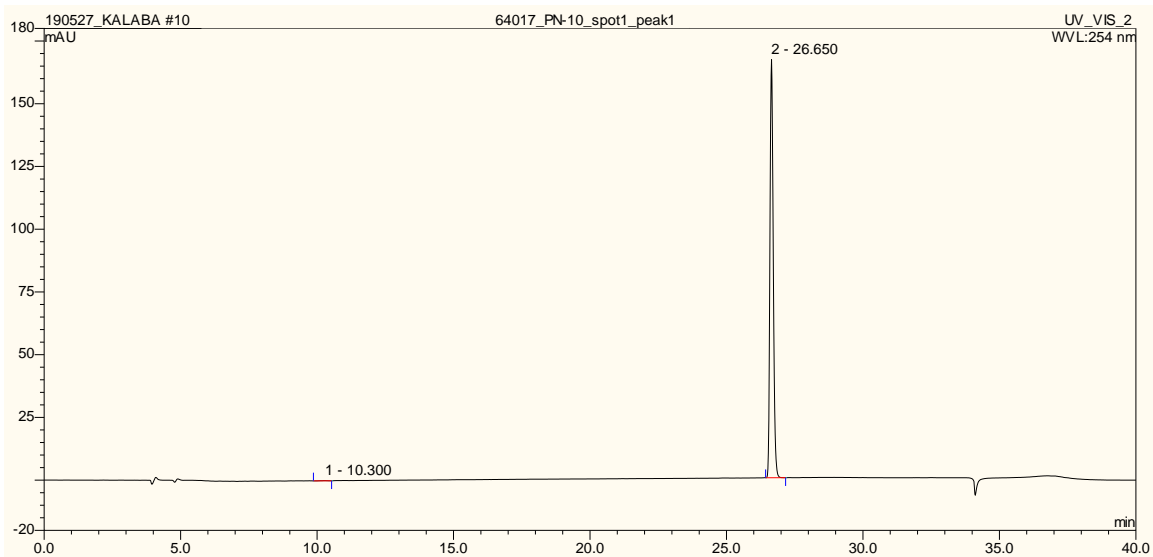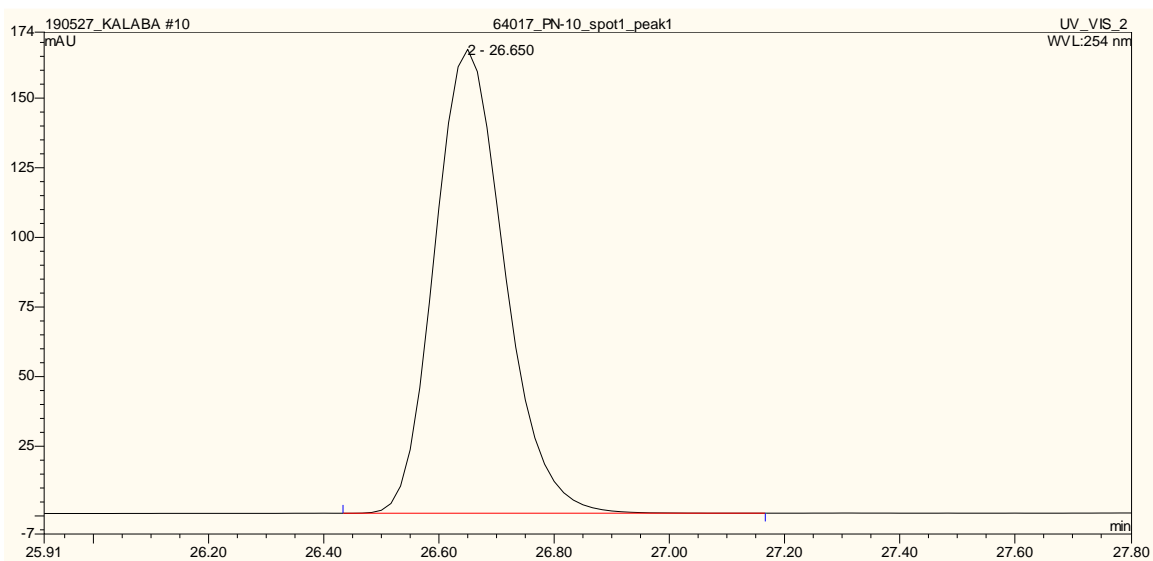

Retention Time: **26.65 min**

Relative Peak Area: **99.89 %**

**Figure S66a.** RP-Chromatogram of analogue **6q**.

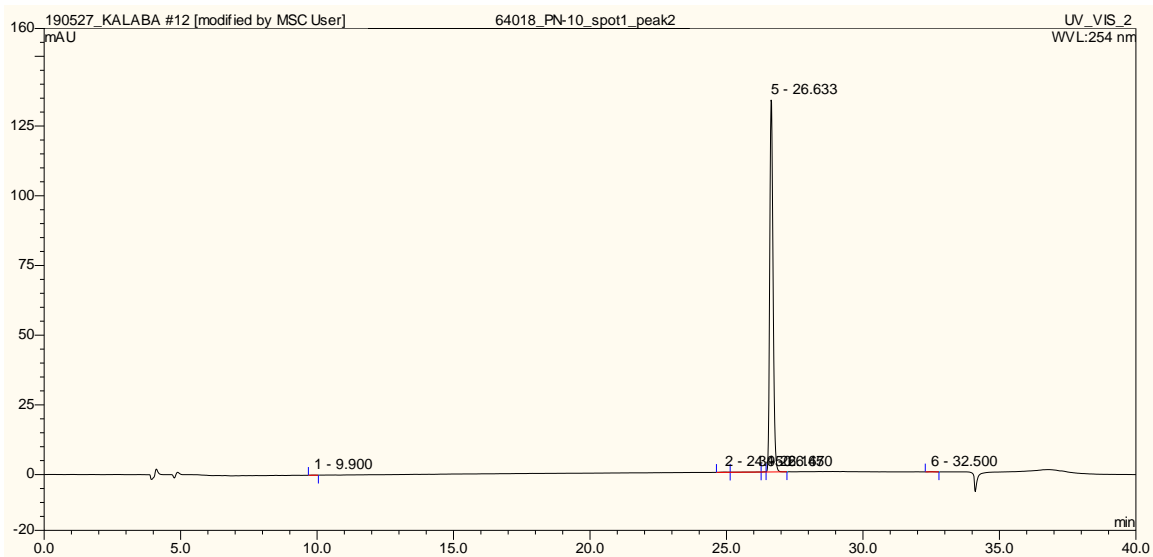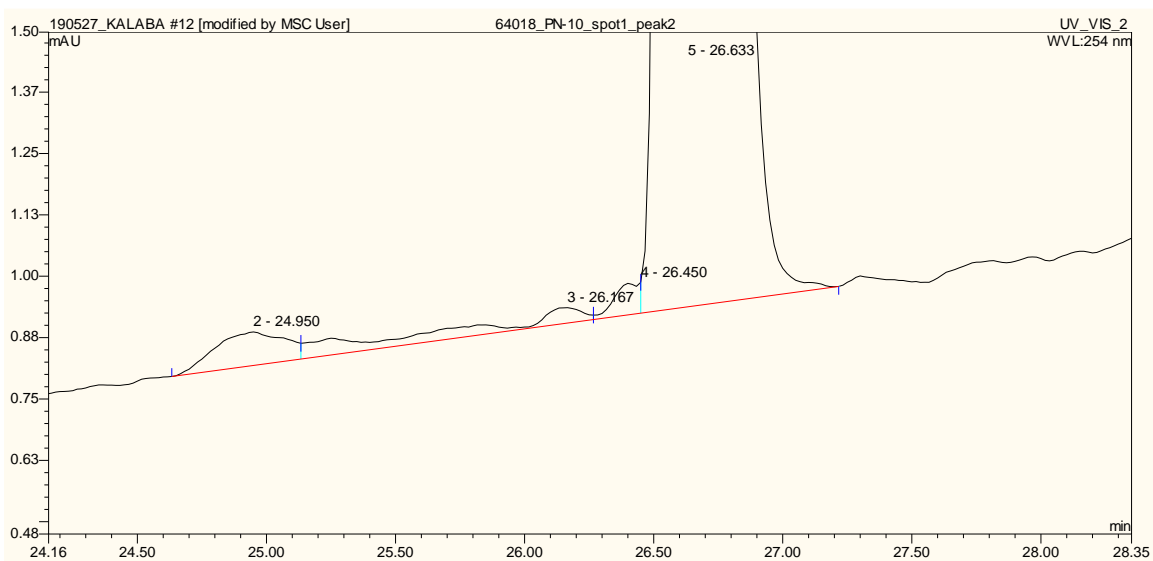

Retention Time: **26.63 min**

Relative Peak Area: **99.61 %**

**Figure S67a.** RP-Chromatogram of analogue **7q**.

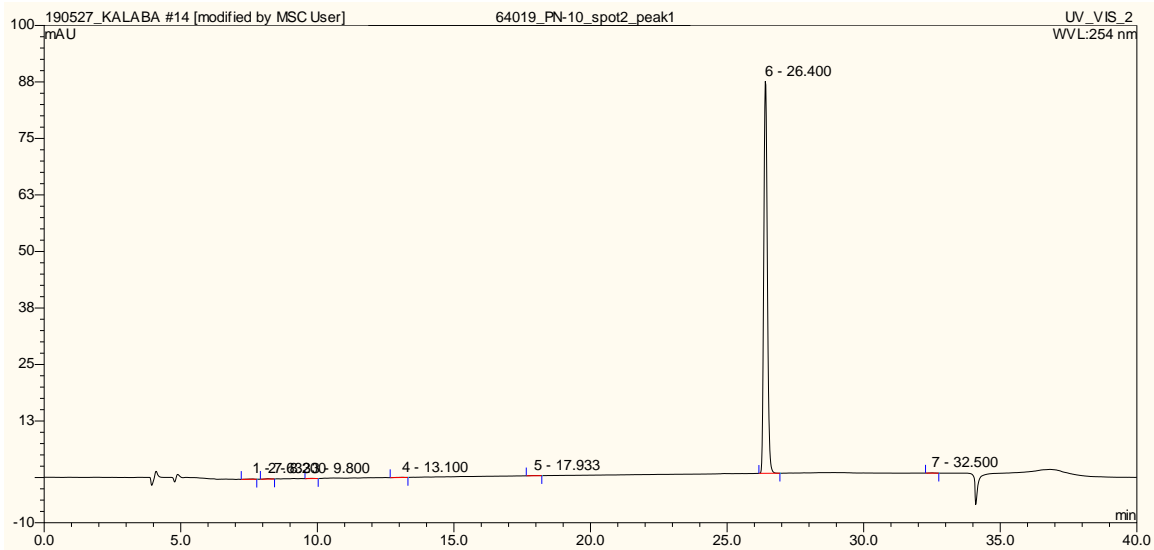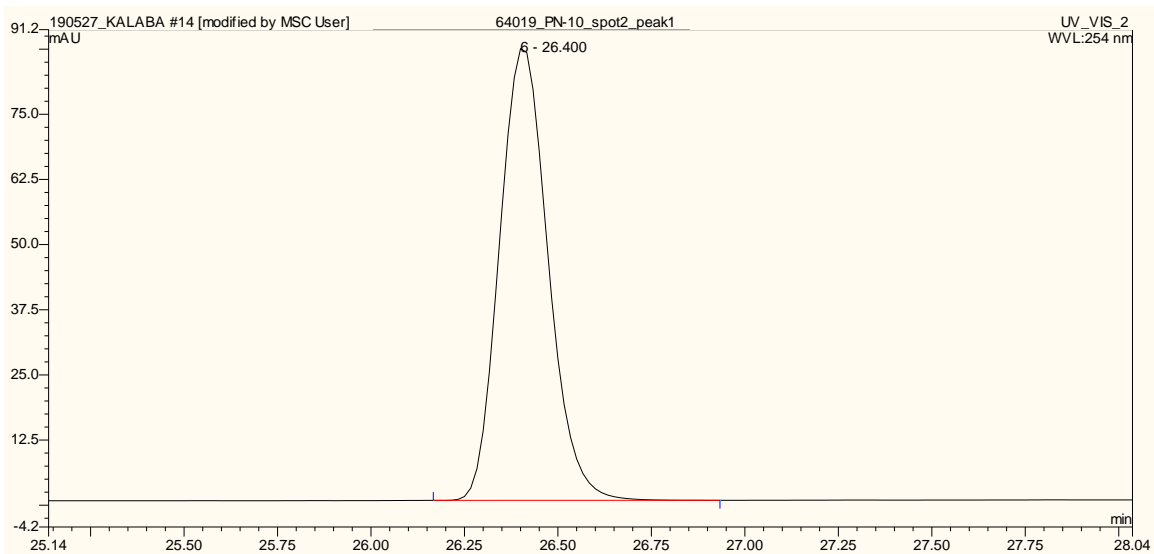

Retention Time: **26.4 min**

Relative Peak Area: **99.29%**

**Figure S68a.** RP-Chromatogram of analogue **8q**.

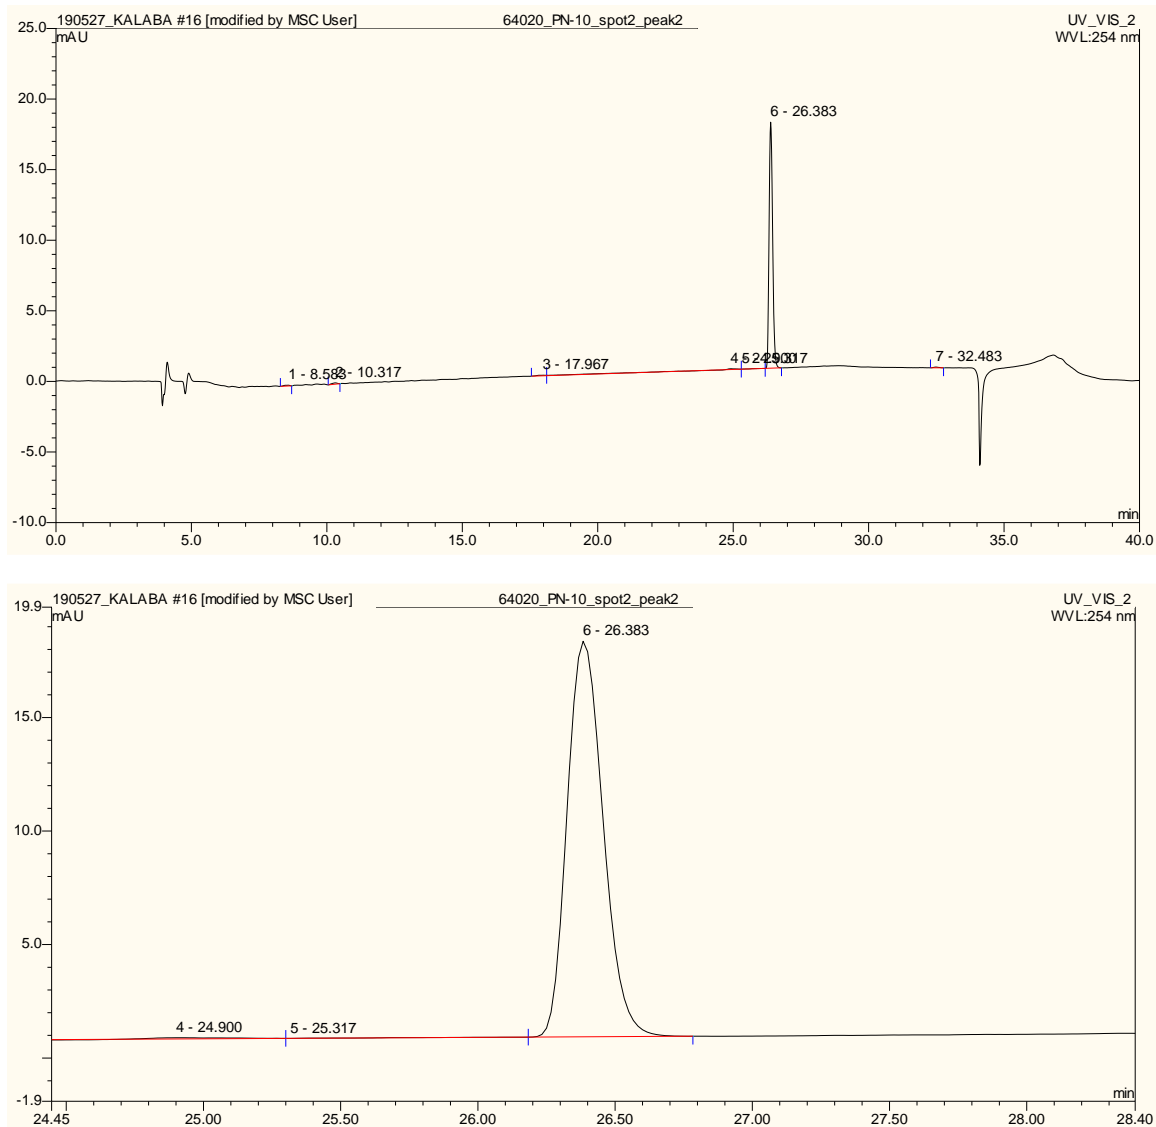

Retention Time: **26.38 min**

Relative Peak Area: **95.74 %**

**Figure S69a.** RP-Chromatogram of analogue **5r**.

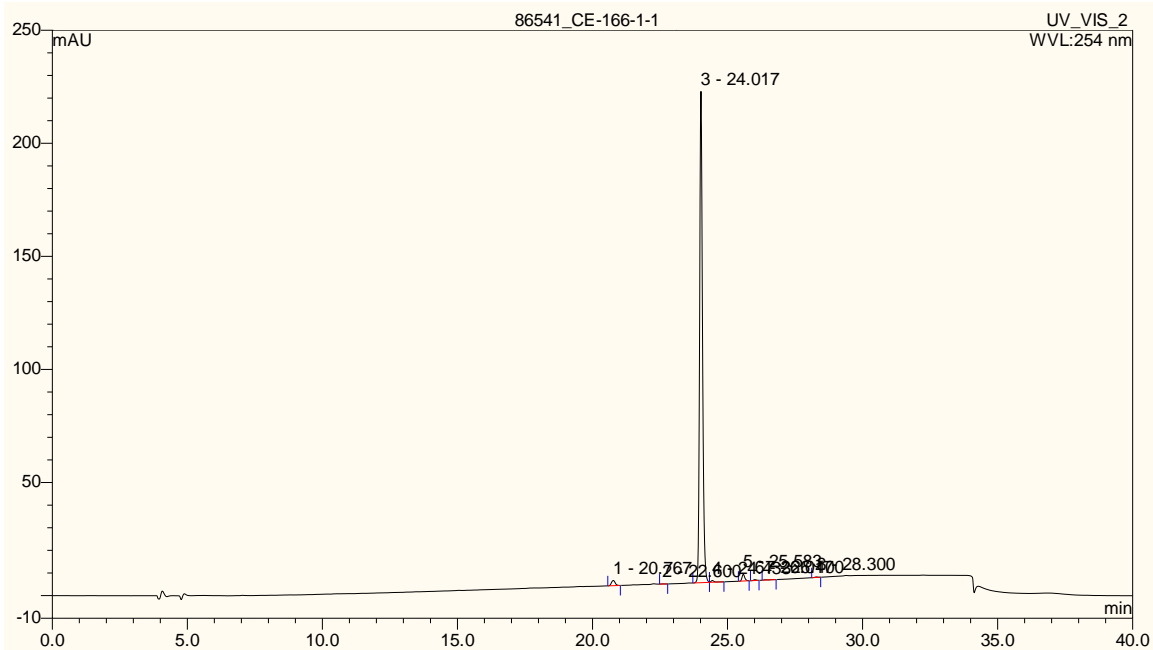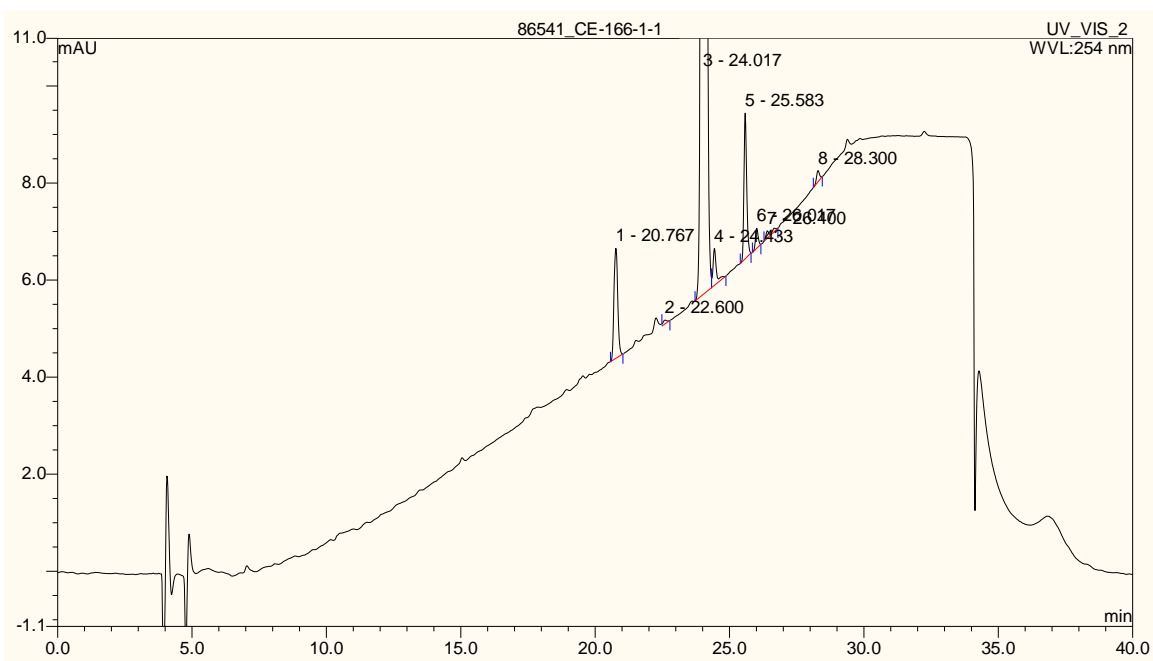

Retention Time: **24.02 min**

Relative Peak Area: **96.62 %**



**Figure S70a.** RP-Chromatogram of analogue **6r**.

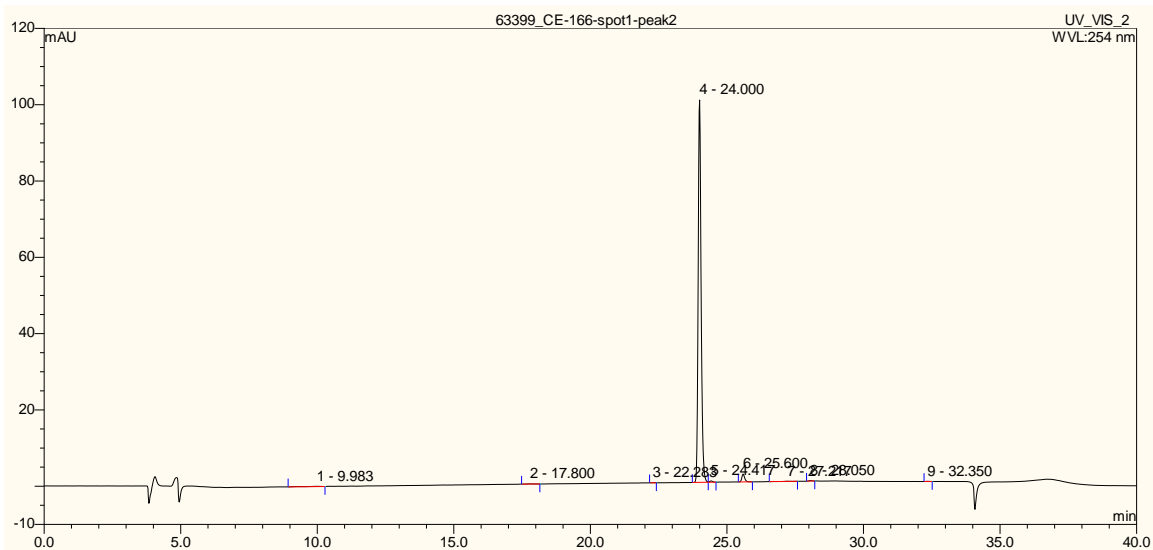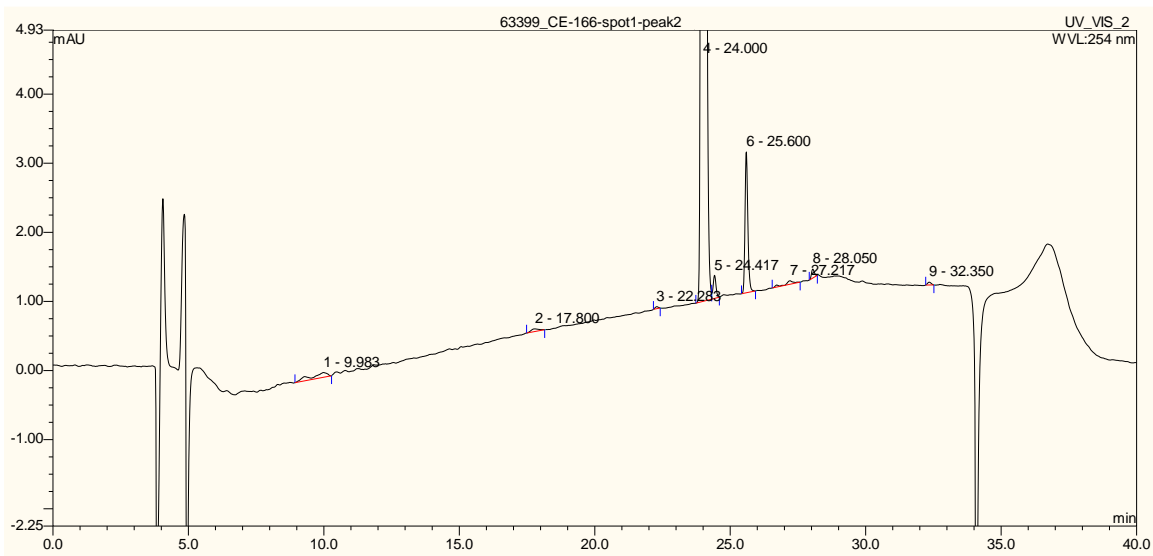

Retention Time: **24.00 min**

Relative Peak Area: **96.94 %**

**Figure S71a.** RP-Chromatogram of analogue **7r**.

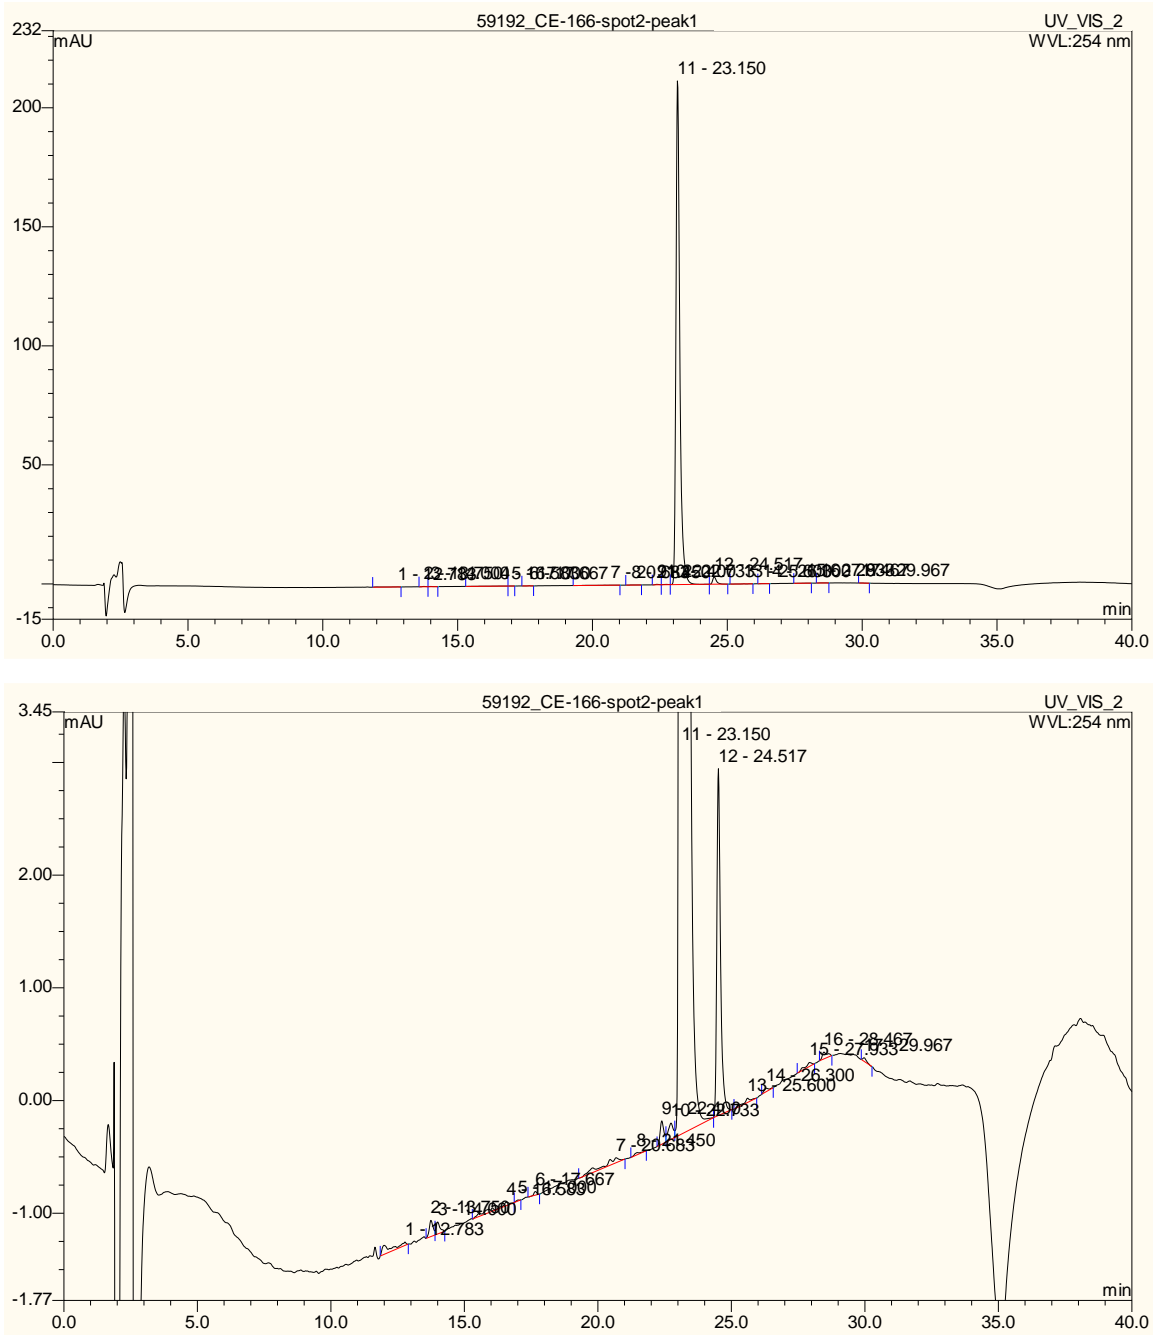

Retention Time: **23.15 min**

Relative Peak Area: **97.94 %**

**Figure S72a.** RP-Chromatogram of analogue **8r**.

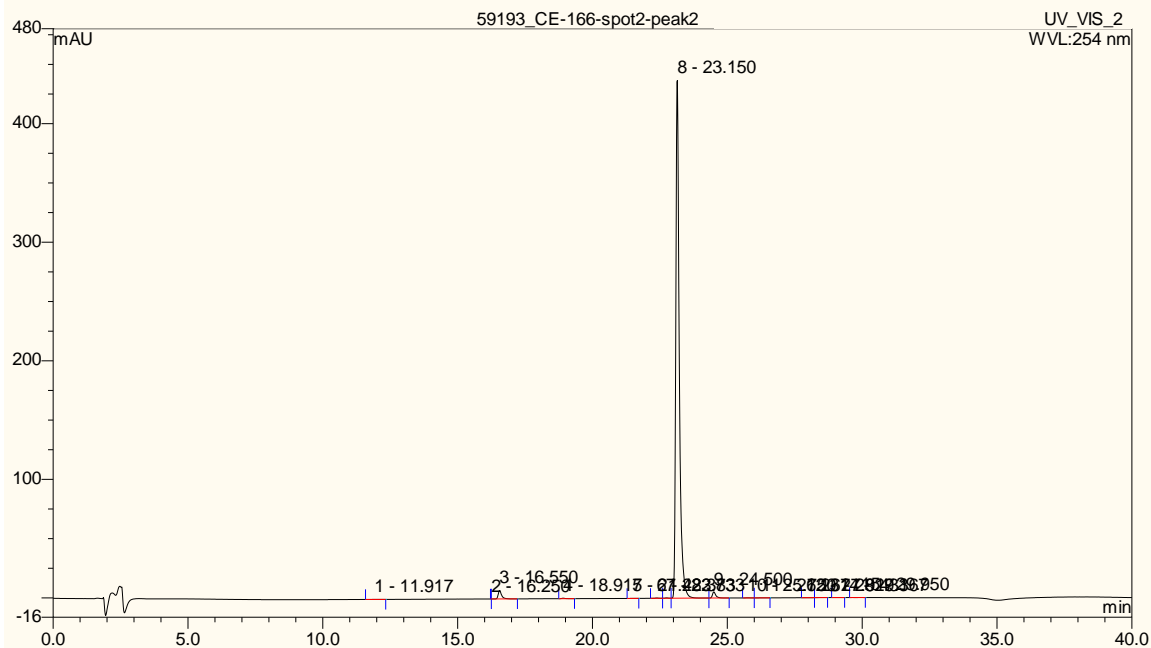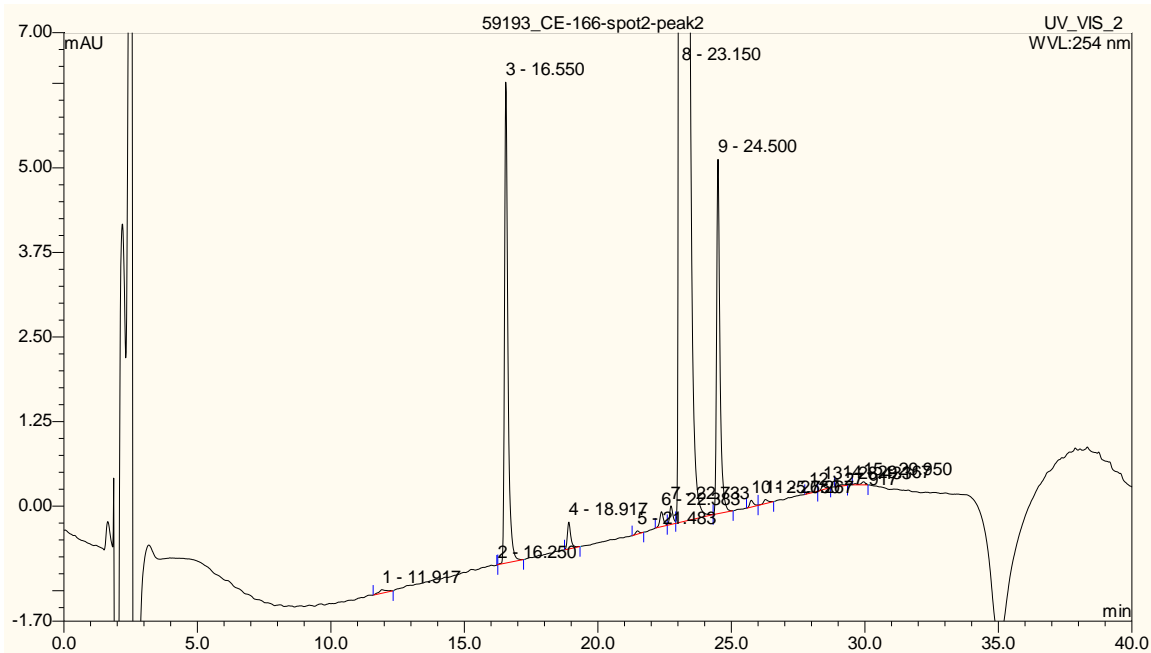

Retention Time: **23.15 min**

Relative Peak Area: **97.04 %**

**Figure S73a.** RP-Chromatogram of analogue **5s**.

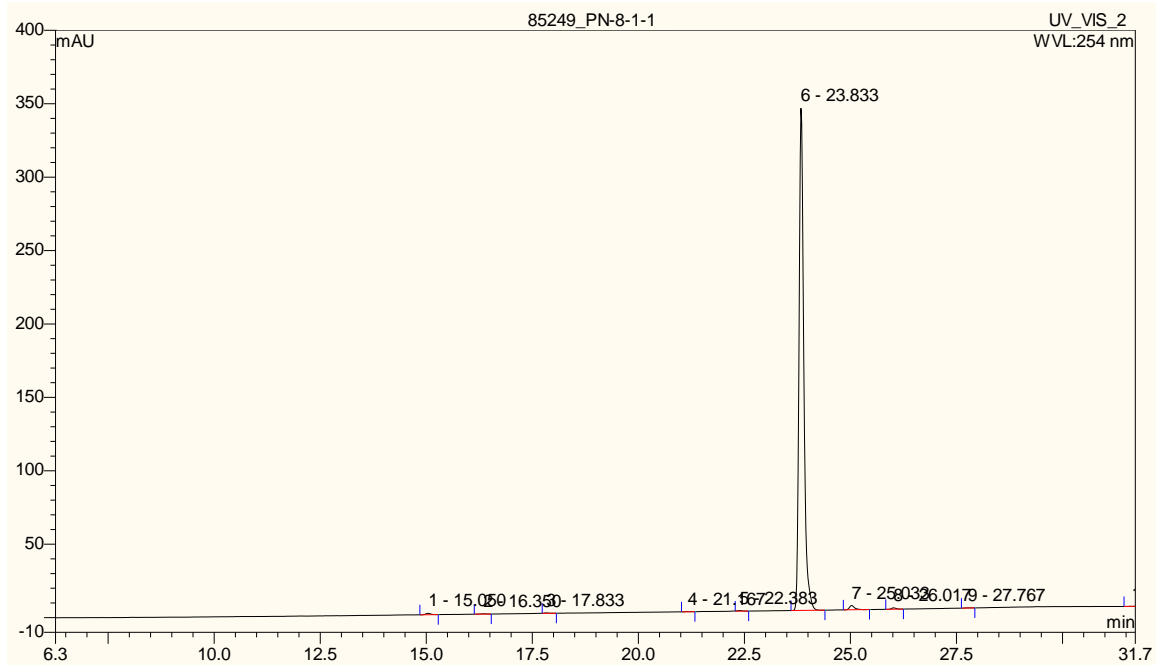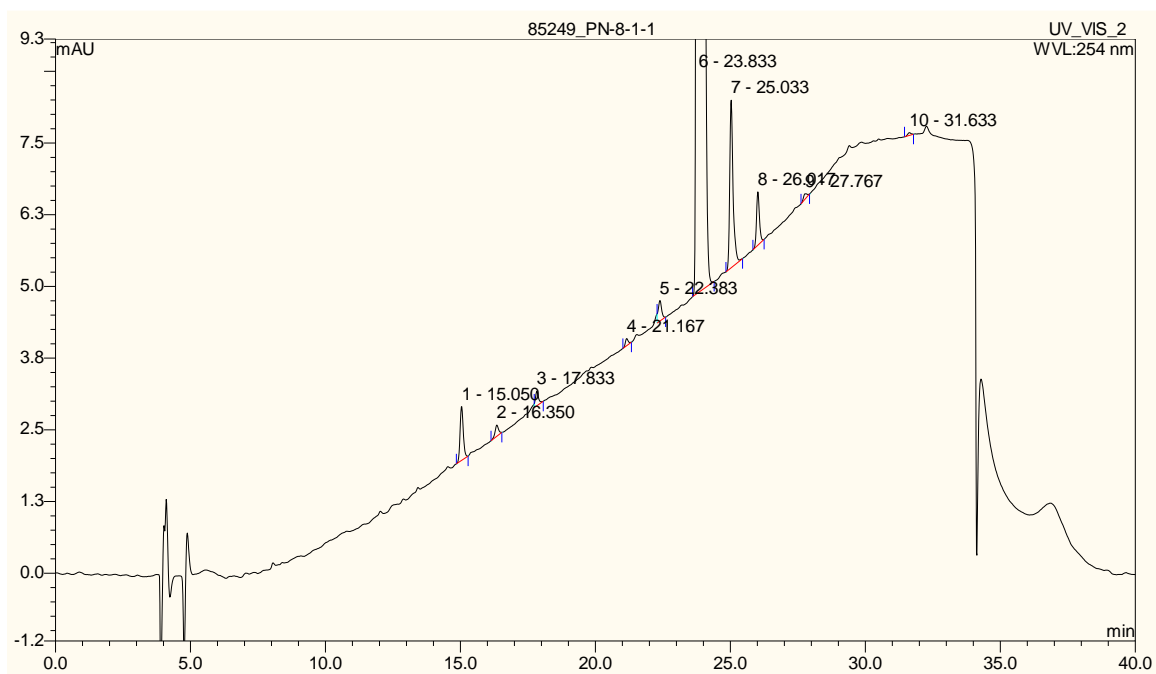

Retention Time: **23.83 min**

Relative Peak Area: **98.20 %**

**Figure S74a.** RP-Chromatogram of analogue **6s**.

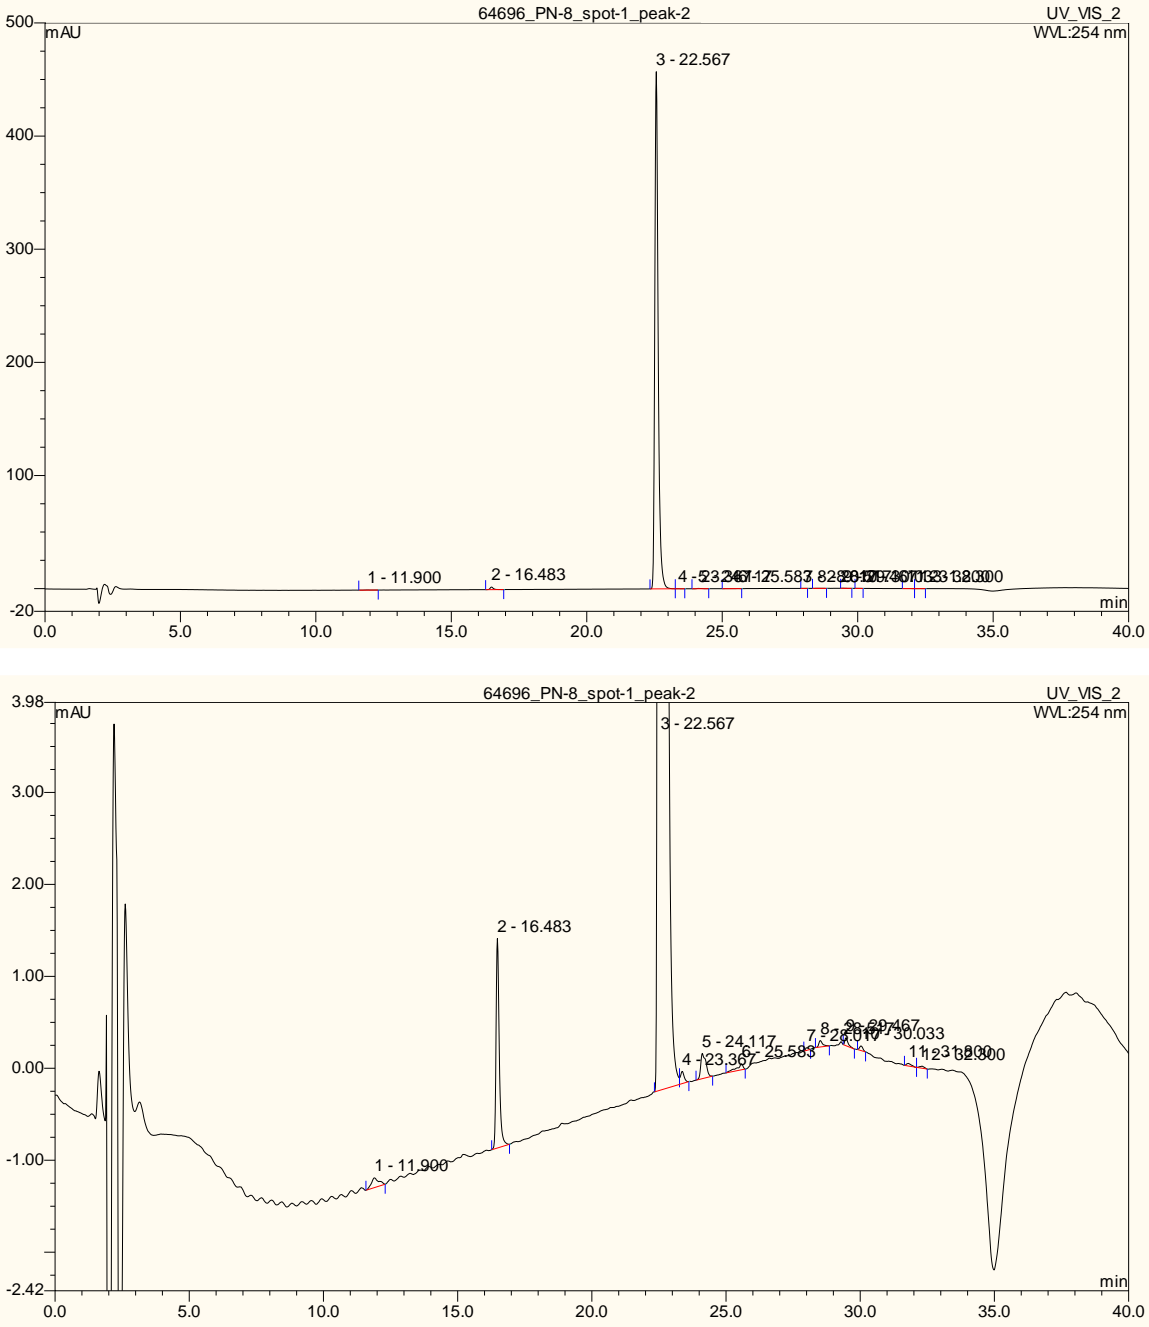

Retention Time: **22.57 min**

Relative Peak Area: **99.26 %**

**Figure S75a.** RP-Chromatogram of analogue **7s**.

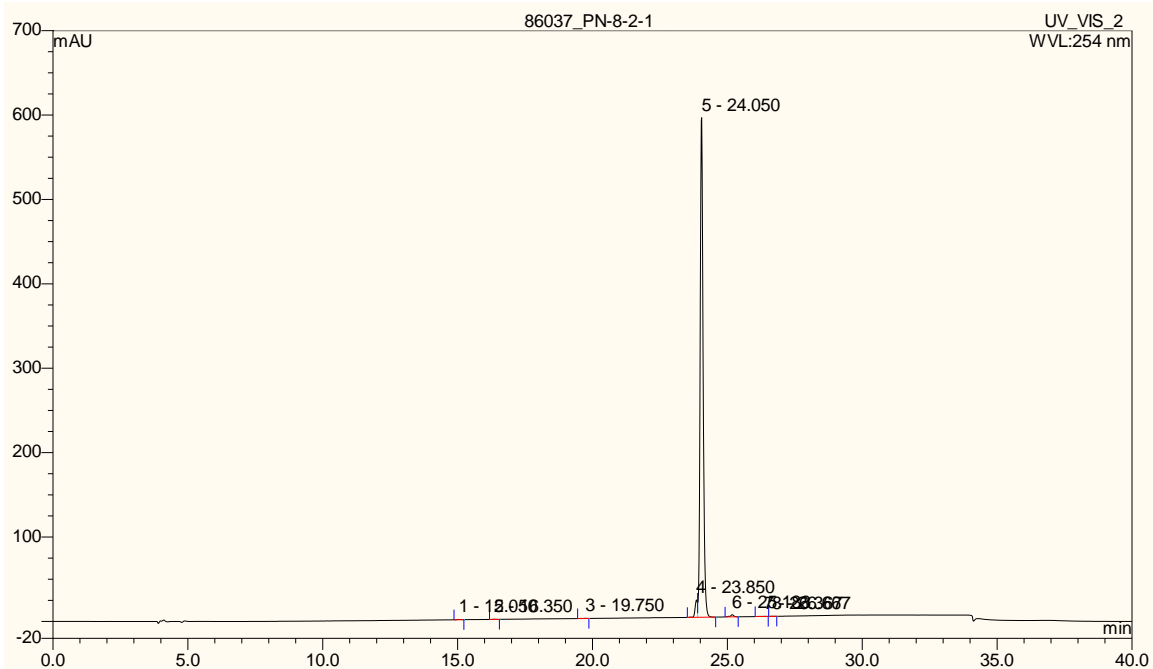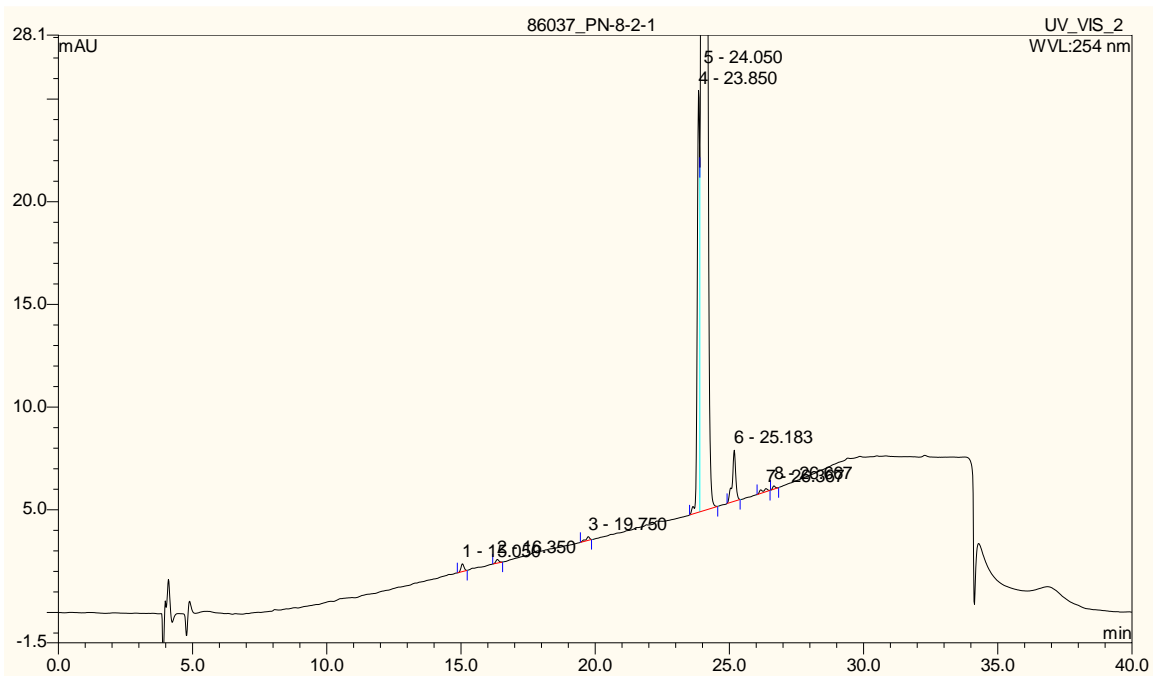

Retention Time: **24.05 min**

Relative Peak Area: **96.70 %**

**Figure S76a.** RP-Chromatogram of analogue **8s**.

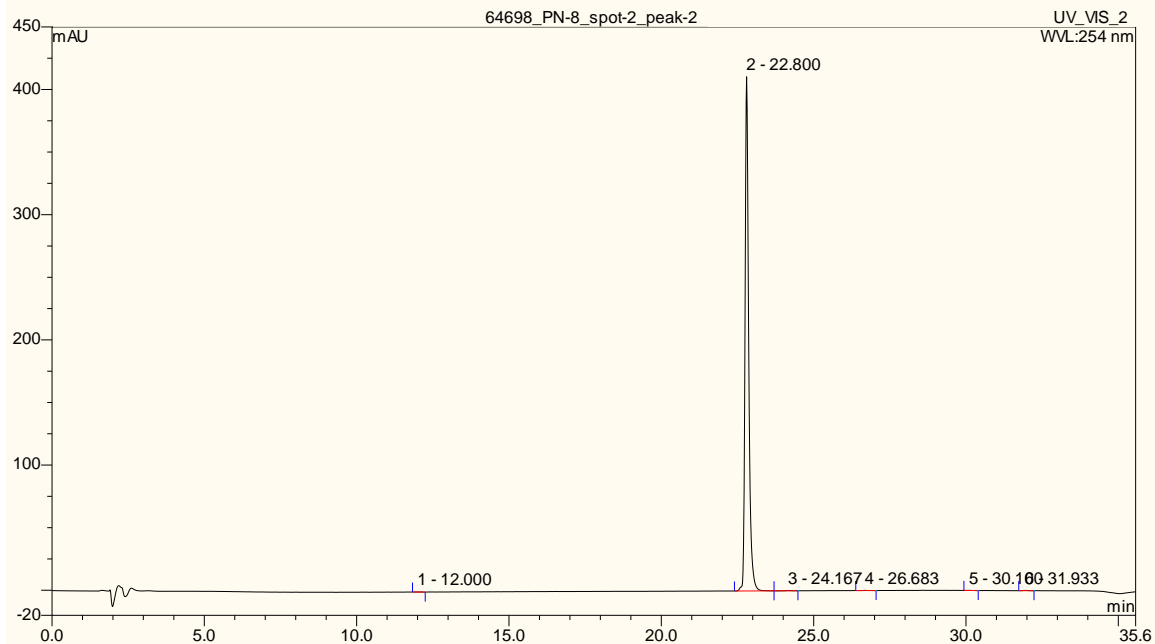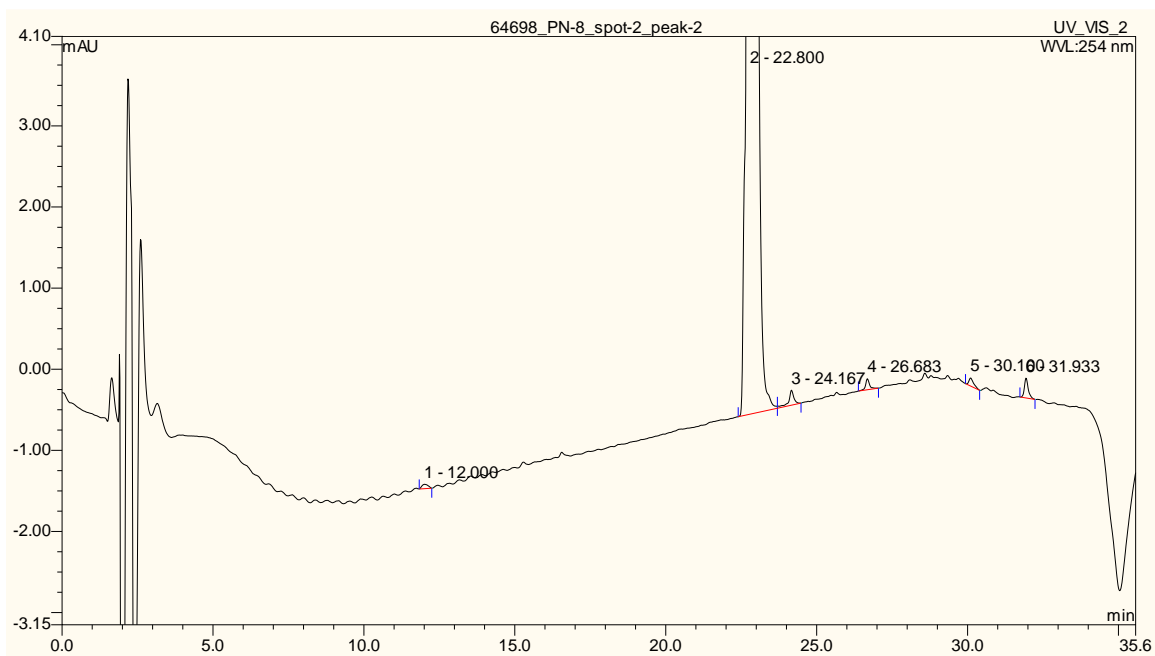

Retention Time: **22.80 min**

Relative Peak Area: **99.78 %**

**Figure S77a.** RP-Chromatogram of analogue **5t**.

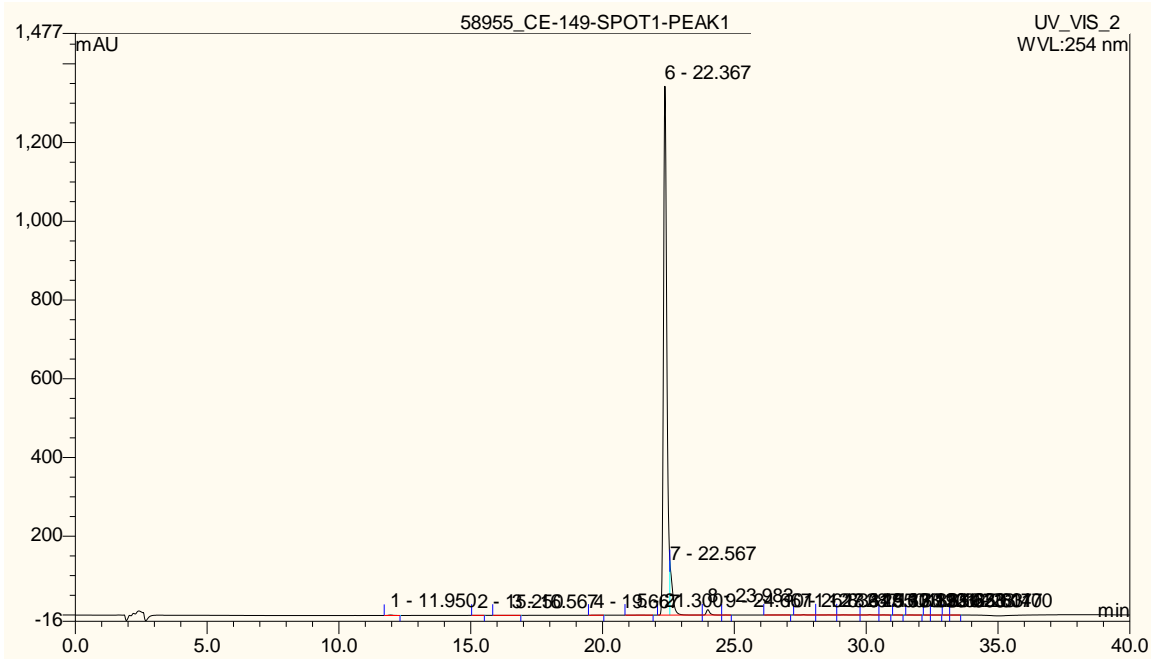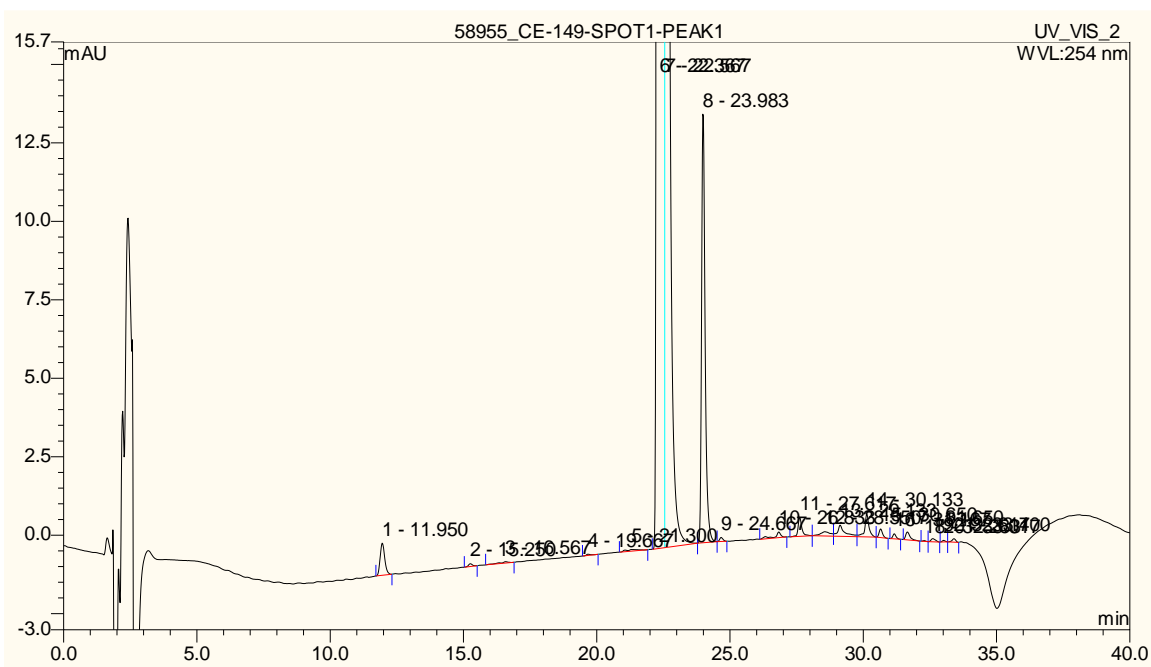

Retention Time: 22.37 min

Relative Peak Area: **91.68 %**



**Figure S78a.** RP-Chromatogram of analogue **6t**.

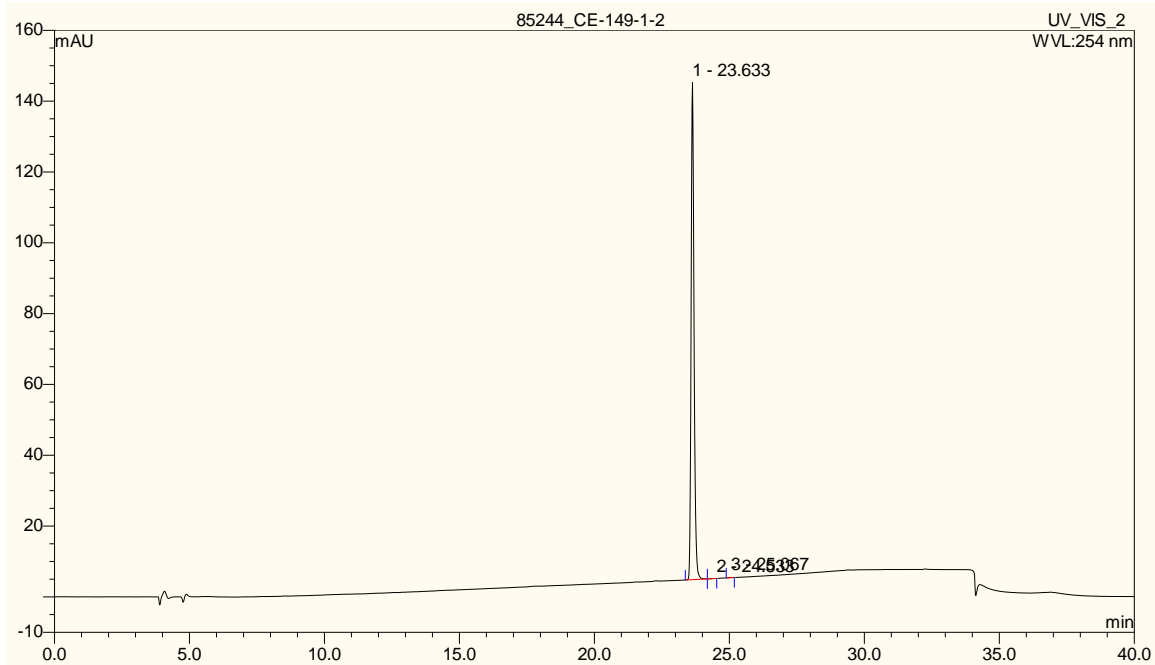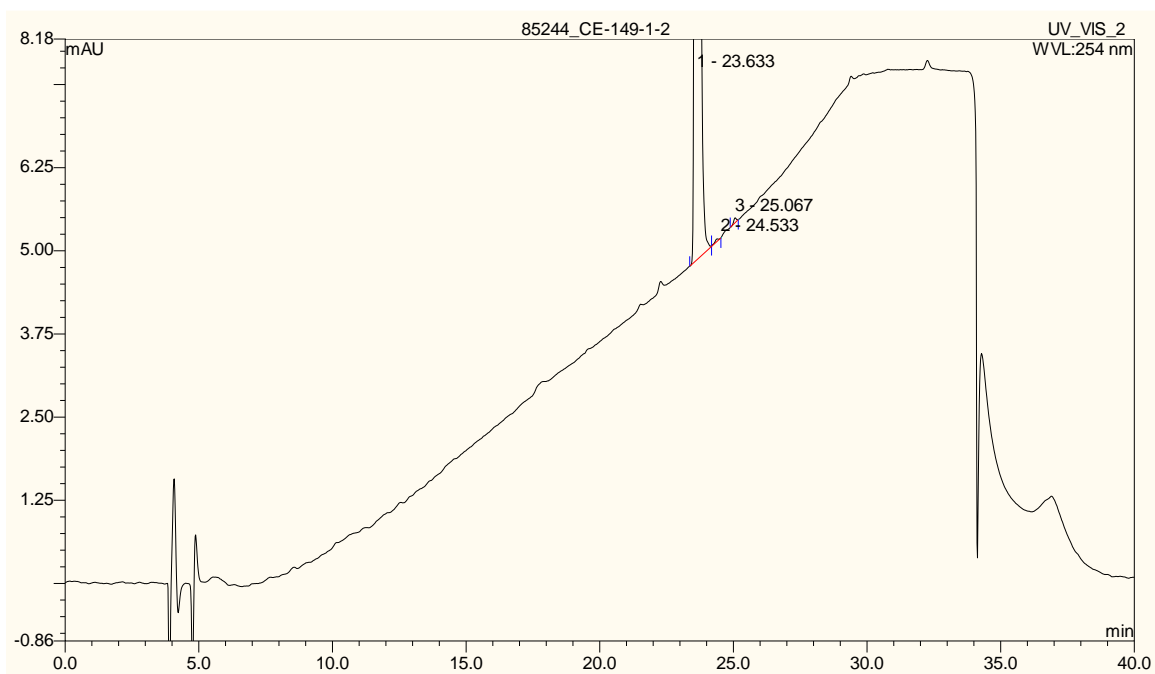

Retention Time: **23.63 min**

Relative Peak Area: **99.92 %**

**Figure S79a.** RP-Chromatogram of analogue **7t**.

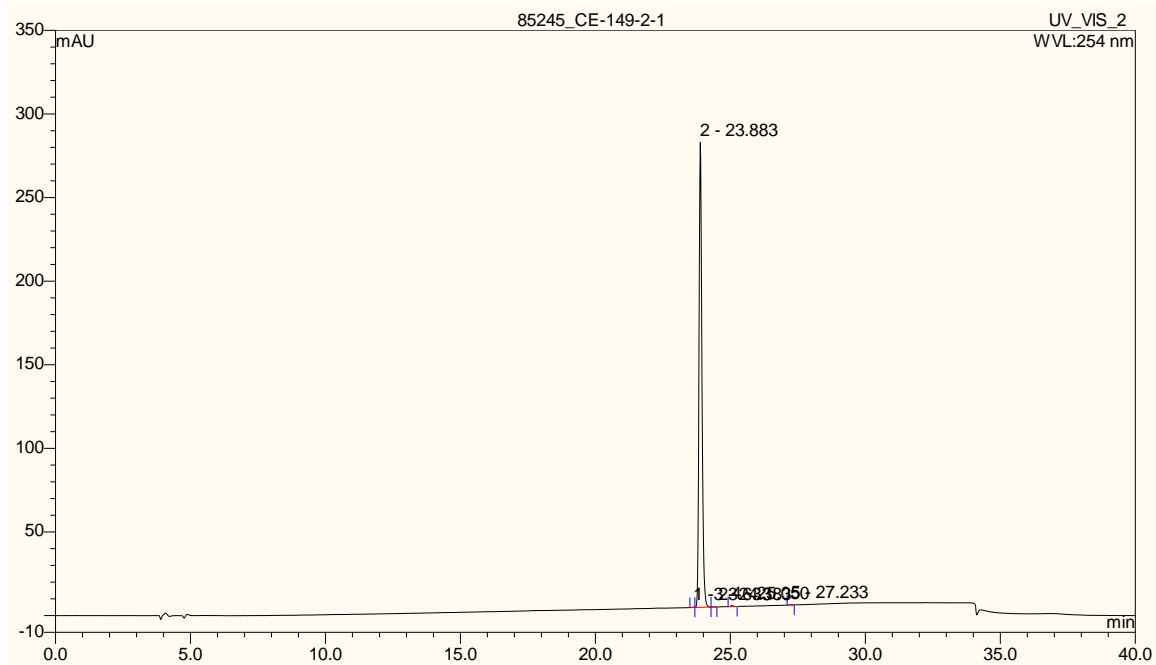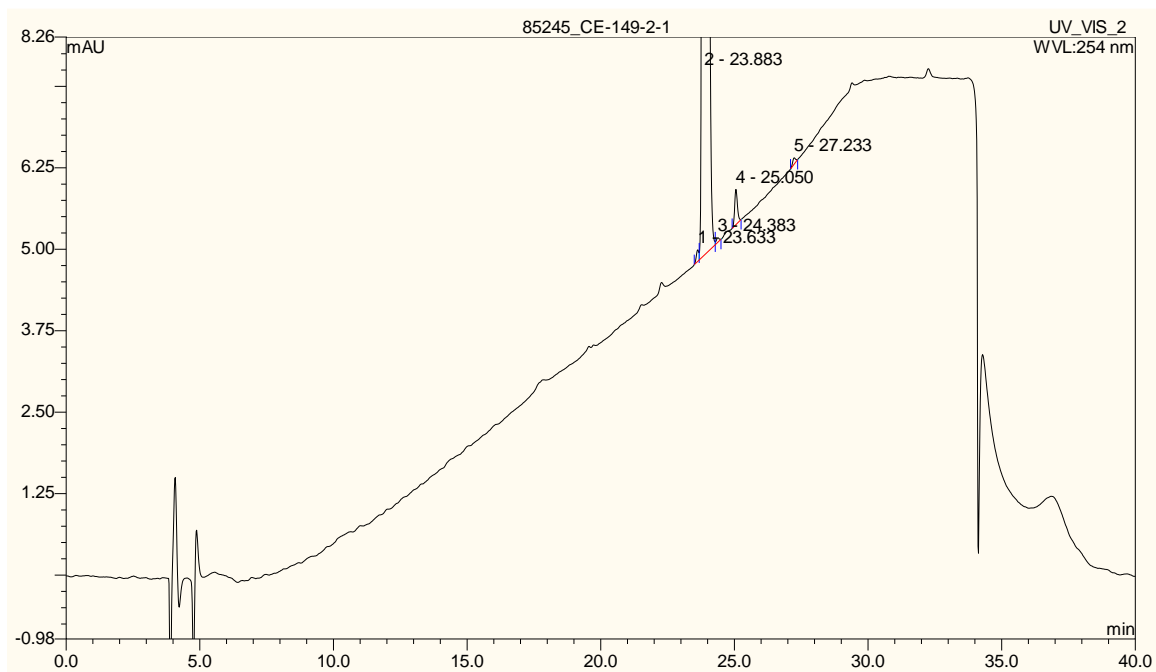

Retention Time: **23.88 min**

Relative Peak Area: **99.70 %**

**Figure S80a.** RP-Chromatogram of analogue **8t**.

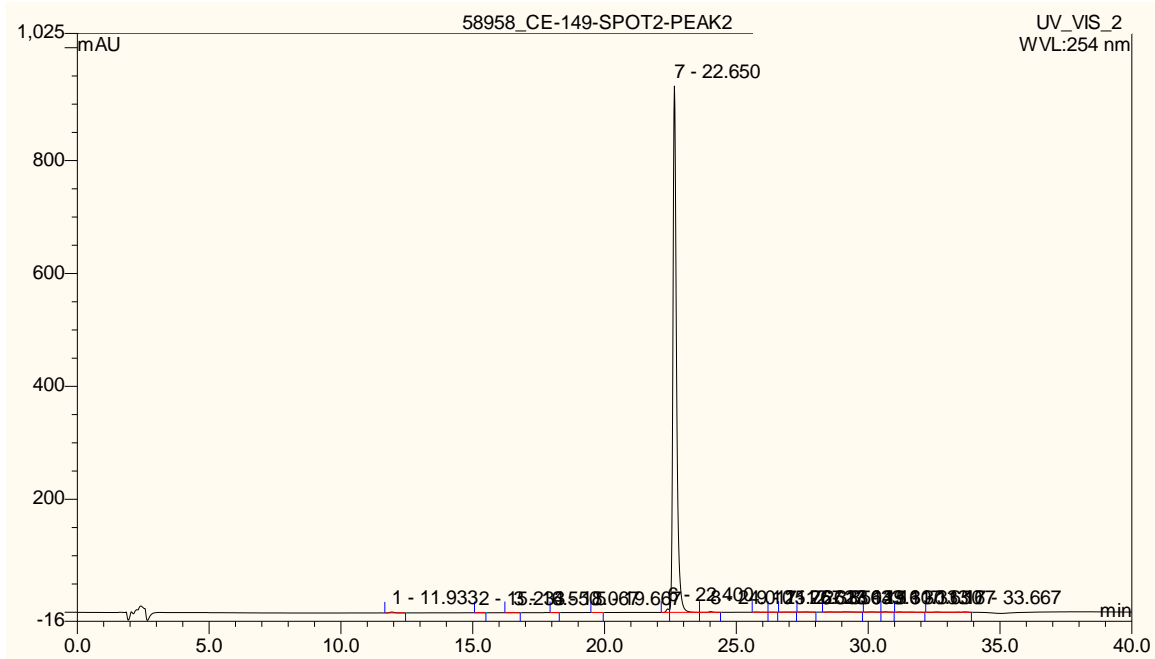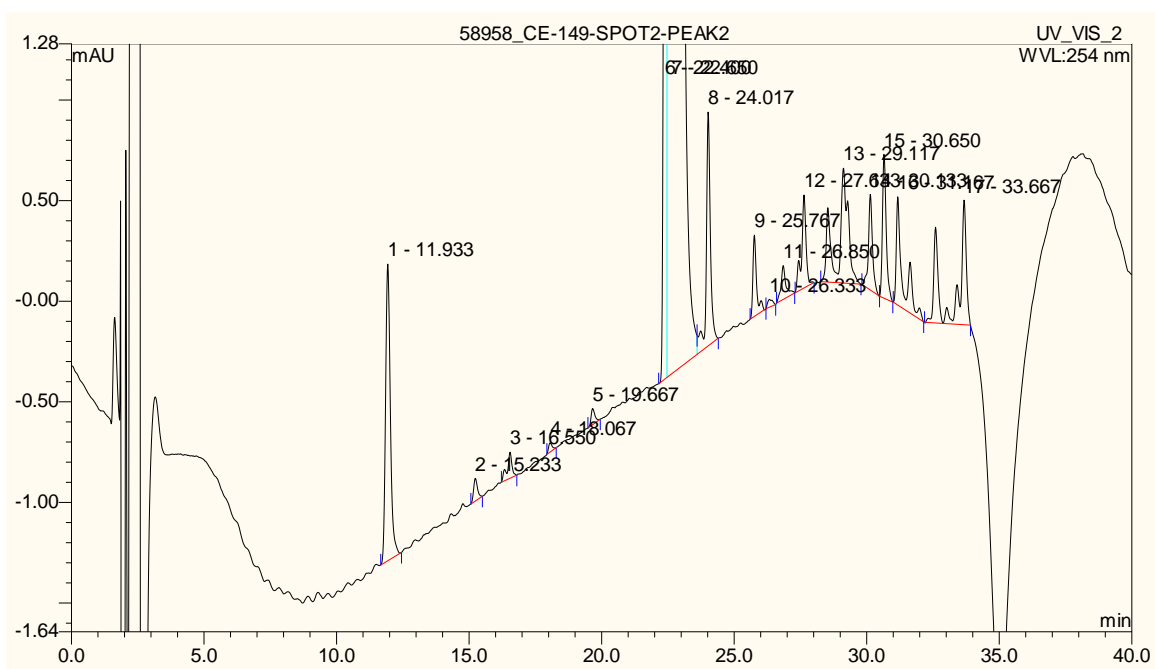

Retention Time: **22.65 min**

Relative Peak Area: **98.42 %**

**Figure S81a.** RP-Chromatogram of analogue **5u**.

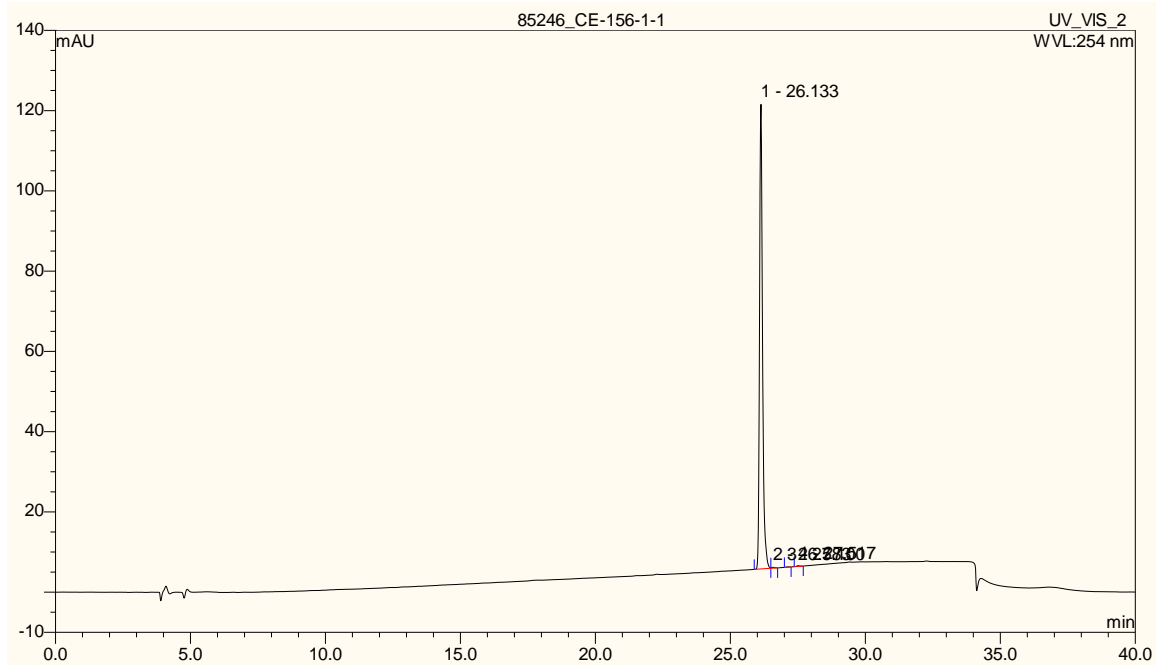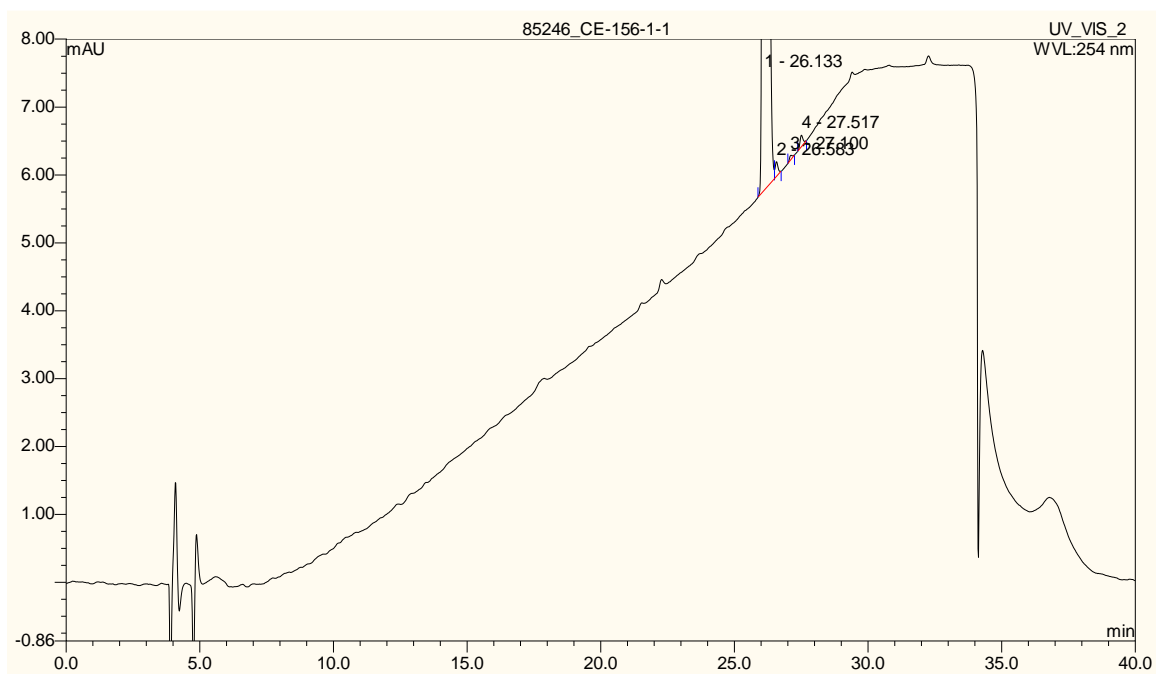

**Figure S82a.** RP-Chromatogram of analogue **6u**.

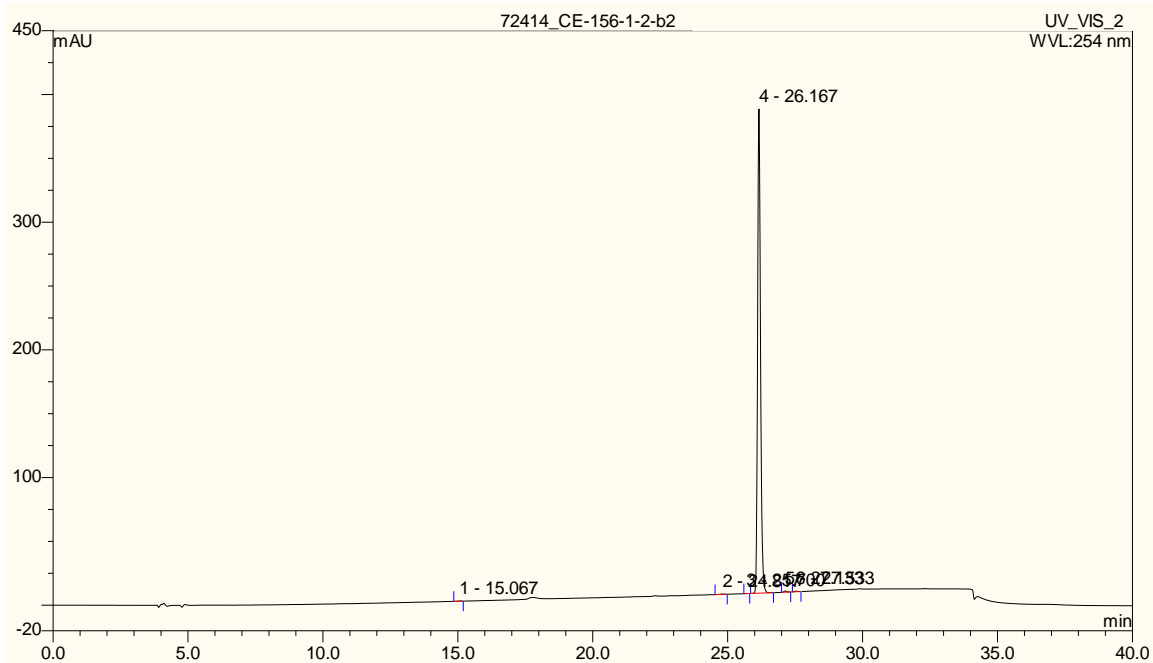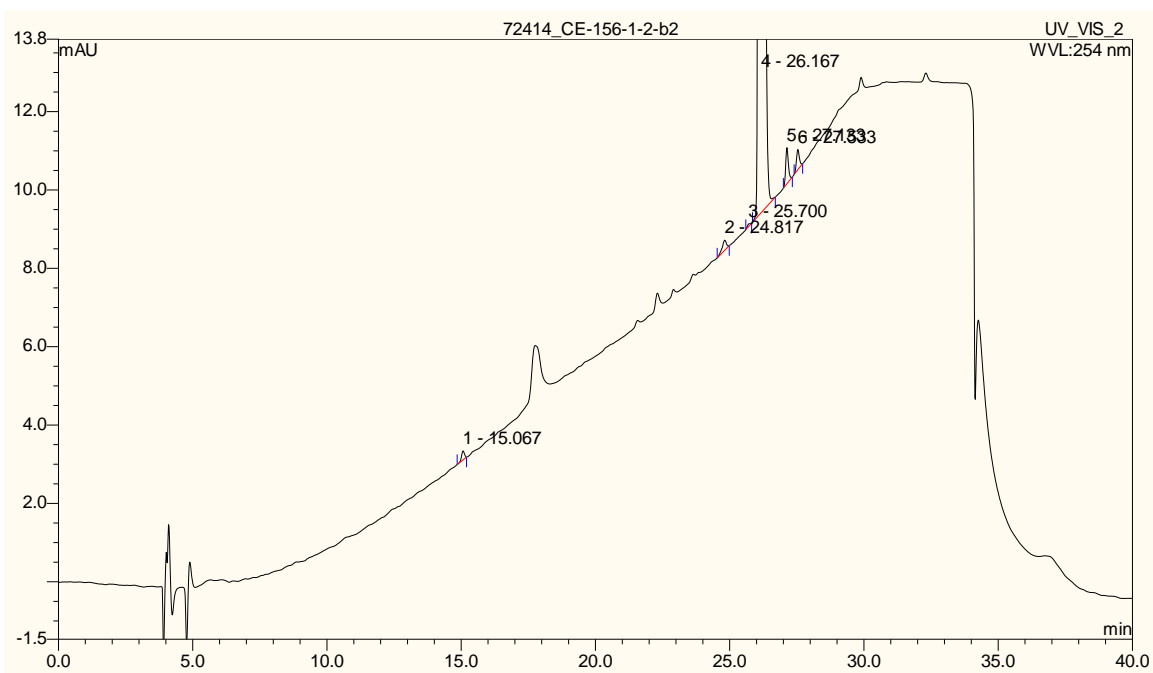

Retention Time: **26.17 min**

Relative Peak Area: **99.47 %**

**Figure S83a.** RP-Chromatogram of analogue **7u**.

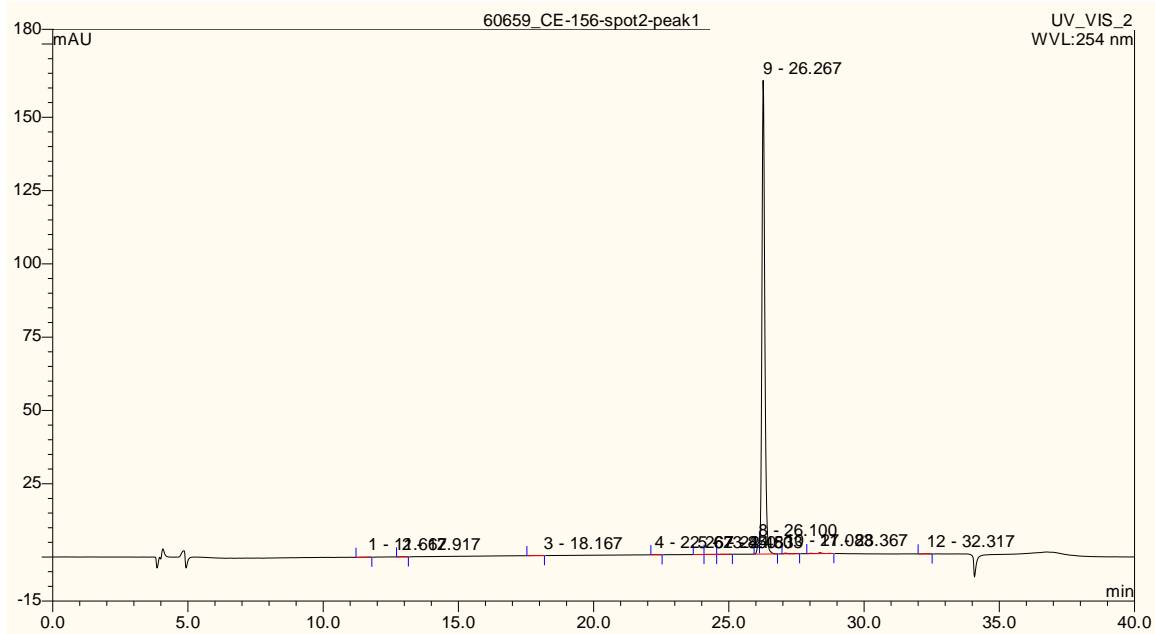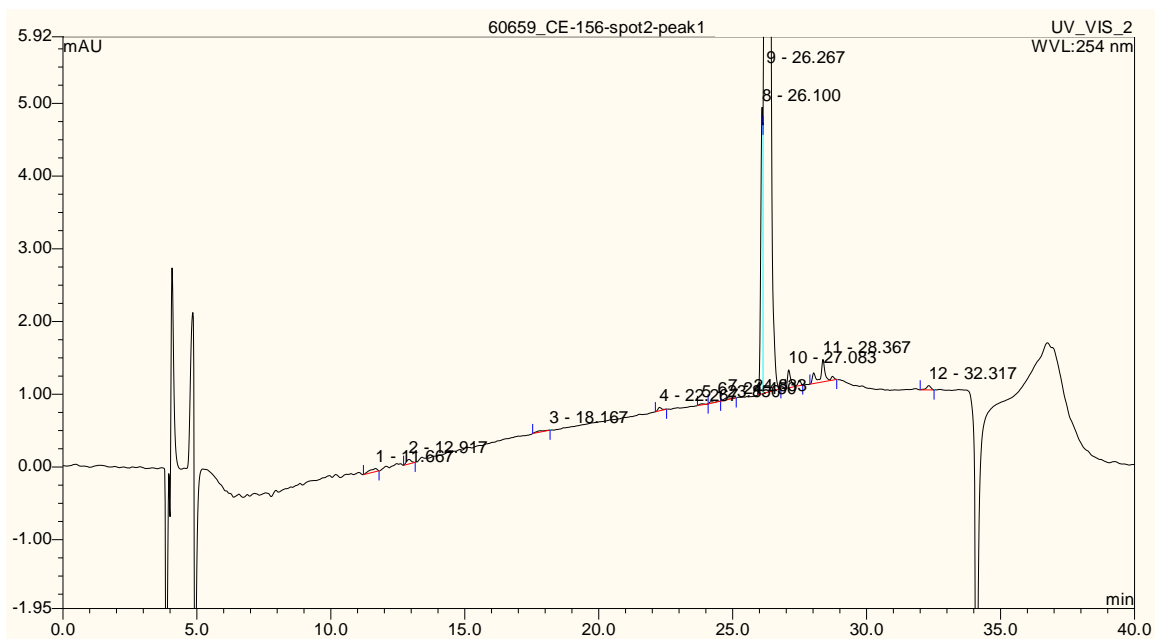

Retention Time: **26.27 min**

Relative Peak Area: **97.35 %**

**Figure S84a.** RP-Chromatogram of analogue **8u**.

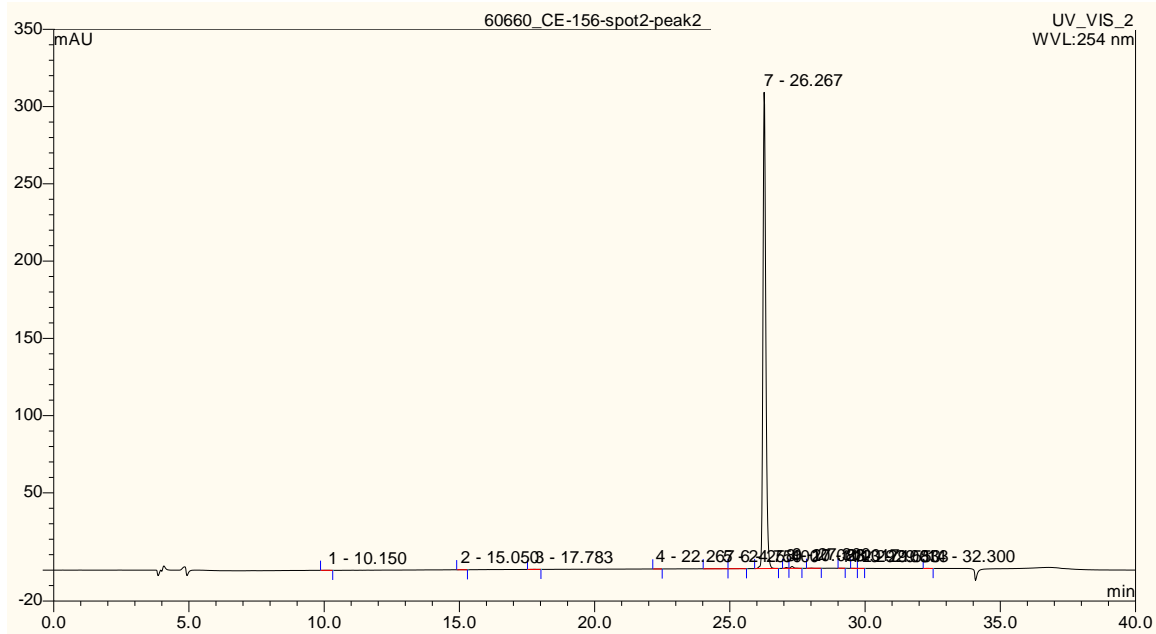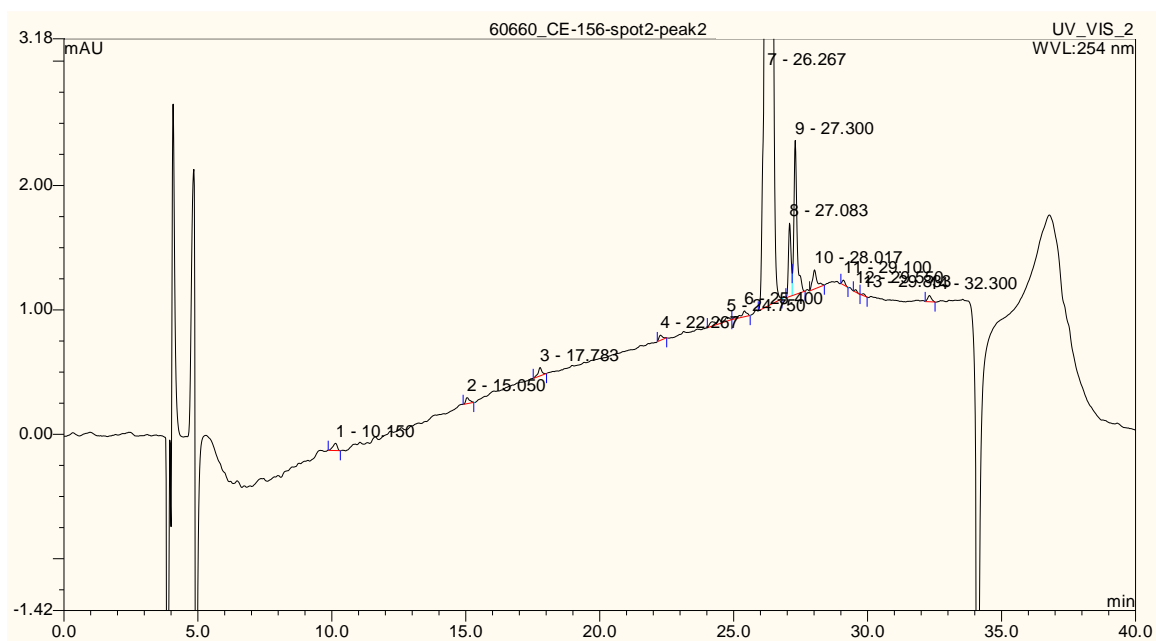

Retention Time: **26.27 min**

Relative Peak Area: **99.09 %**

**Figure S1b.** Chiral chromatogram of **5a**.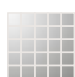

SHIMADZU

LabSolutions

# Analysis Report

## <Sample Information>

Sample Name : PN-20\_Peak\_1\_  
 Sample ID : PN-20\_Peak\_1\_  
 Data Filename : PN-20\_Peak\_1\_01.lcd  
 Method Filename : Chiralpak\_IA\_50Hexan\_50EtOAc\_mind3bar\_.lcm  
 Batch Filename :  
 Vial # : 1-1  
 Injection Volume : 20 uL  
 Date Acquired : 11.02.2021 11:00:31  
 Date Processed : 15.02.2021 11:50:45

Sample Type : Unknown  
 Acquired by : HPLC - Natascha  
 Processed by : HPLC - Natascha

## <Chromatogram>

mV

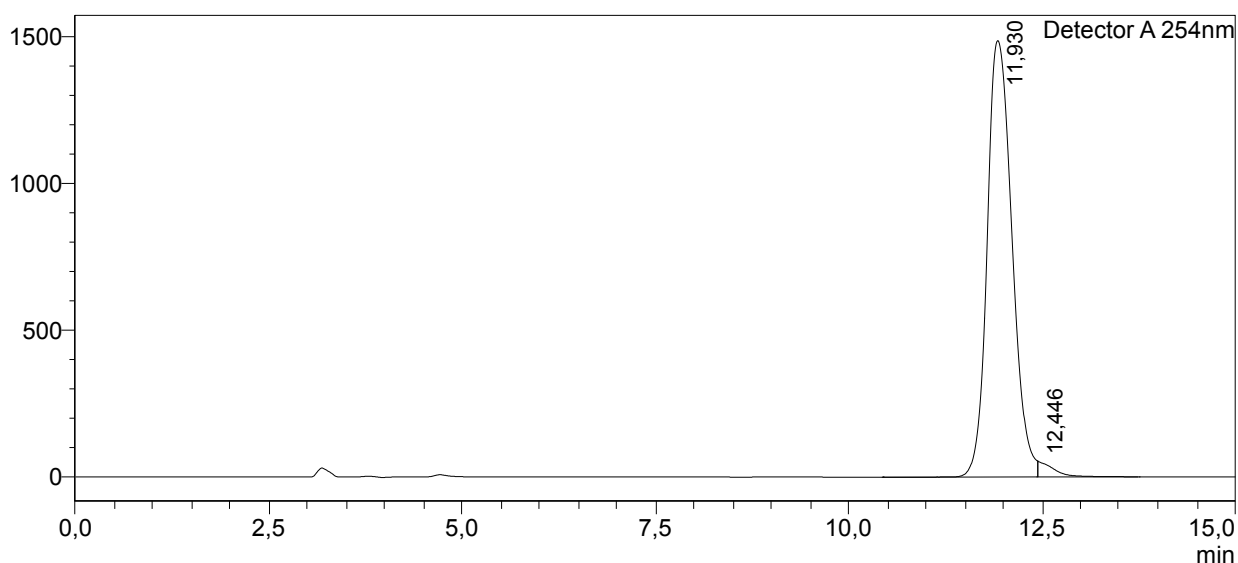

## <Peak Table>

Detector A 254nm

| Peak# | Ret. Time | Area     | Area%   |
|-------|-----------|----------|---------|
| 1     | 11,930    | 33321625 | 97,676  |
| 2     | 12,446    | 792929   | 2,324   |
| Total |           | 34114554 | 100,000 |



**Figure S2b.** Chiral chromatogram of **6a**.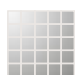

SHIMADZU

LabSolutions

# Analysis Report

## <Sample Information>

Sample Name : PN-20\_Peak\_2\_final\_  
 Sample ID : PN-20\_Peak\_2\_final\_  
 Data Filename : PN-20\_Peak\_2\_final\_02.lcd  
 Method Filename : Chiralpak\_IA\_50Hex\_50EtOAc\_.lcm  
 Batch Filename :  
 Vial # : 1-20  
 Injection Volume : 20 µL  
 Date Acquired : 19.03.2021 14:20:18  
 Date Processed : 19.03.2021 14:35:19

Sample Type : Unknown  
 Acquired by : HPLC - Natascha  
 Processed by : HPLC - Natascha

## <Chromatogram>

mV

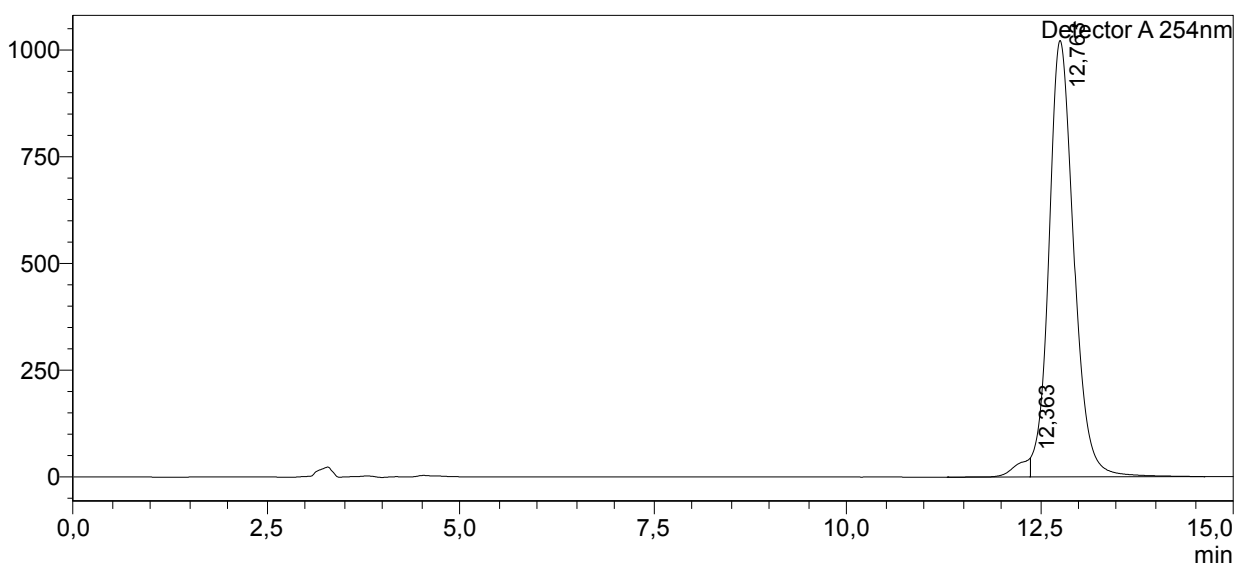

## <Peak Table>

Detector A 254nm

| Peak# | Ret. Time | Area     | Area%   |
|-------|-----------|----------|---------|
| 1     | 12,363    | 546571   | 2,322   |
| 2     | 12,763    | 22989200 | 97,678  |
| Total |           | 23535771 | 100,000 |

**Figure S3b.** Chiral chromatogram of **7a**.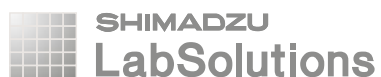

# Analysis Report

## <Sample Information>

Sample Name : PN-20-3\_  
 Sample ID : PN-20-3\_  
 Data Filename : PN-20-3\_01.lcd  
 Method Filename : Chiralpak\_IA\_EtOAc\_.lcm  
 Batch Filename :  
 Vial # : 1-2  
 Injection Volume : 15 uL  
 Date Acquired : 14.07.2020 13:03:49  
 Date Processed : 13.10.2020 12:51:17

Sample Type : Unknown  
 Acquired by : HPLC - Natascha  
 Processed by : HPLC - Natascha

## <Chromatogram>

mV

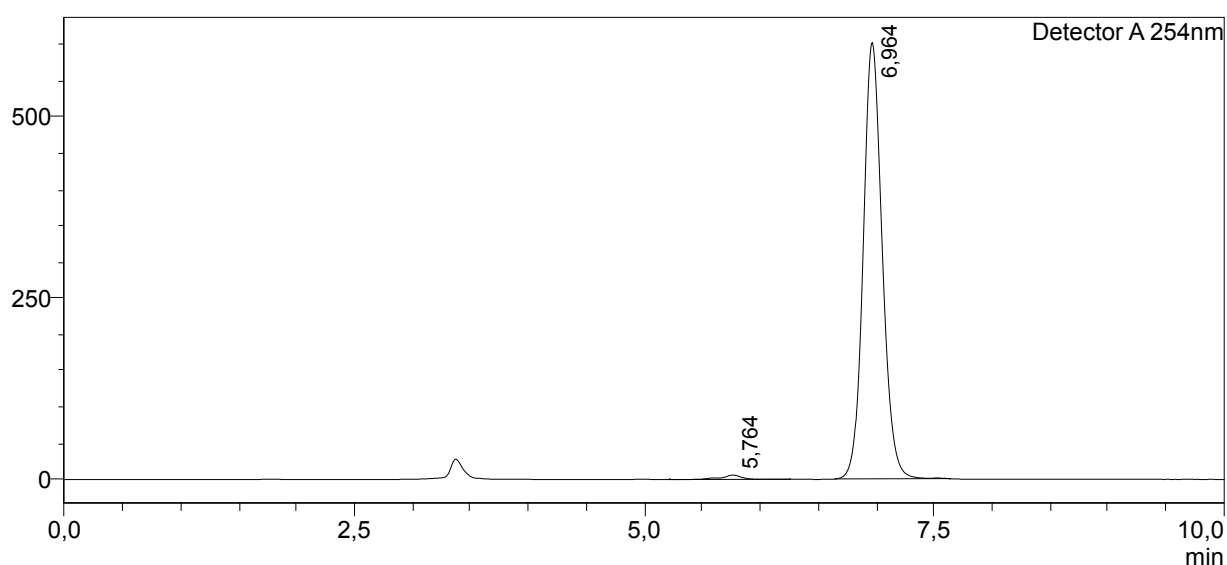

## <Peak Table>

Detector A 254nm

| Ret. Time | Area    | Area%   |
|-----------|---------|---------|
| 5,764     | 72784   | 1,045   |
| 6,964     | 6889583 | 98,955  |
|           | 6962367 | 100,000 |

**Figure S4b.** Chiral chromatogram of **8a**.

# Analysis Report

## <Sample Information>

Sample Name : PN-20-4\_B\_  
 Sample ID : PN-20-4\_B\_  
 Data Filename : PN-20-4\_B\_03.lcd  
 Method Filename : Chiralpak\_IA\_EtOAc\_.lcm  
 Batch Filename :  
 Vial # : 1-31  
 Injection Volume : 15 uL  
 Date Acquired : 15.07.2020 13:30:38  
 Date Processed : 01.10.2020 16:58:31

Sample Type : Unknown  
 Acquired by : HPLC - Natascha  
 Processed by : HPLC - Natascha

## <Chromatogram>

mV

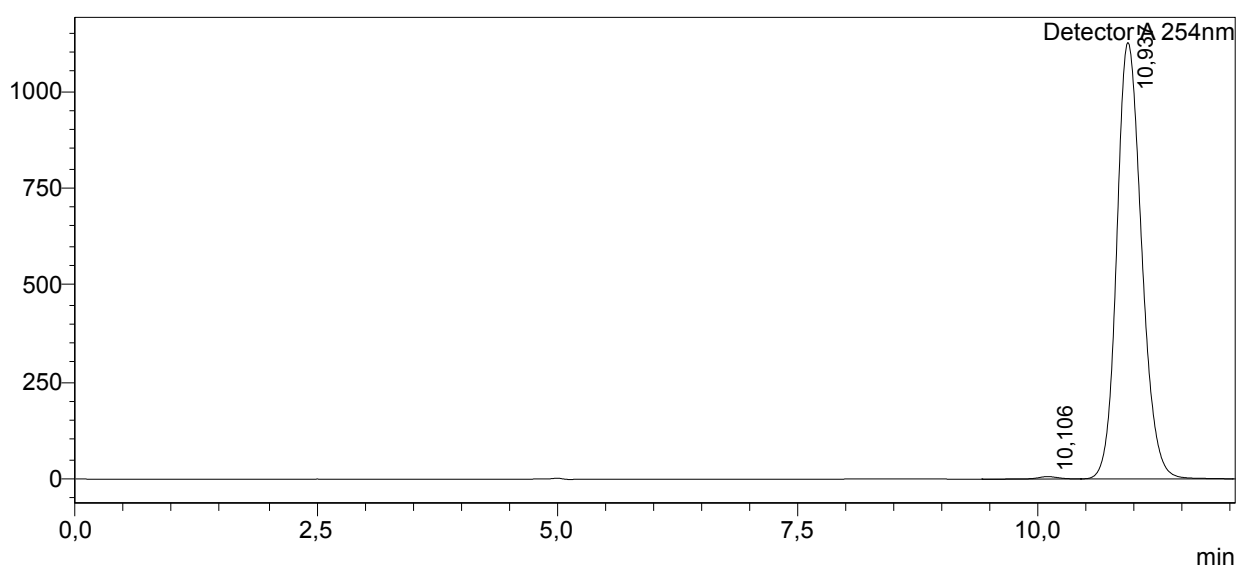

## <Peak Table>

Detector A 254nm

| Ret. Time | Area     | Area%   |
|-----------|----------|---------|
| 10,106    | 96642    | 0,477   |
| 10,937    | 20183771 | 99,523  |
|           | 20280413 | 100,000 |

**Figure S5b.** Chiral chromatogram of **5b**.

# Analysis Report

## <Sample Information>

Sample Name : CE-148\_spot\_1\_peak\_1  
 Sample ID : CE-148\_spot\_1\_peak\_1  
 Data Filename : CE-148\_spot\_1\_peak\_1\_01.lcd  
 Method Filename : Method\_12.03.2019.lcm  
 Batch Filename :  
 Vial # : 1-1  
 Injection Volume : 10 uL  
 Date Acquired : 12.03.2019 11:08:57  
 Date Processed : 12.03.2019 15:22:34

Sample Type : Unknown  
 Acquired by : HPLC - Natascha  
 Processed by : HPLC - Natascha

## <Chromatogram>

mV

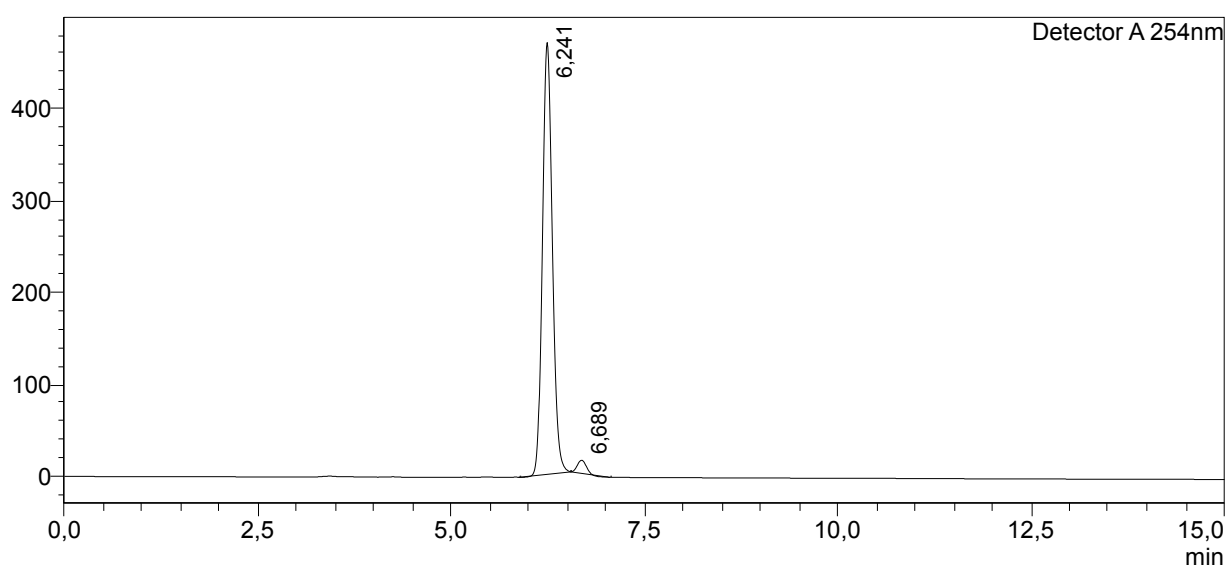

## <Peak Table>

Detector A 254nm

| Ret. Time | Area    | Area%   |
|-----------|---------|---------|
| 6,241     | 4178035 | 97,568  |
| 6,689     | 104148  | 2,432   |
|           | 4282183 | 100,000 |

**Figure S6b.** Chiral chromatogram of **6b**.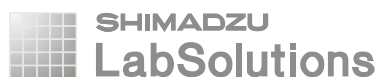

# Analysis Report

## <Sample Information>

|                  |                               |              |                   |
|------------------|-------------------------------|--------------|-------------------|
| Sample Name      | : CE-148_spot_1_peak_2        |              |                   |
| Sample ID        | : CE-148_spot_1_peak_2        |              |                   |
| Data Filename    | : CE-148_spot_1_peak_2_01.lcd |              |                   |
| Method Filename  | : Method_12.03.2019.lcm       |              |                   |
| Batch Filename   | :                             |              |                   |
| Vial #           | : 1-2                         | Sample Type  | : Unknown         |
| Injection Volume | : 10 uL                       |              |                   |
| Date Acquired    | : 12.03.2019 11:24:58         | Acquired by  | : HPLC - Natascha |
| Date Processed   | : 12.03.2019 11:45:39         | Processed by | : HPLC - Natascha |

## <Chromatogram>

mV

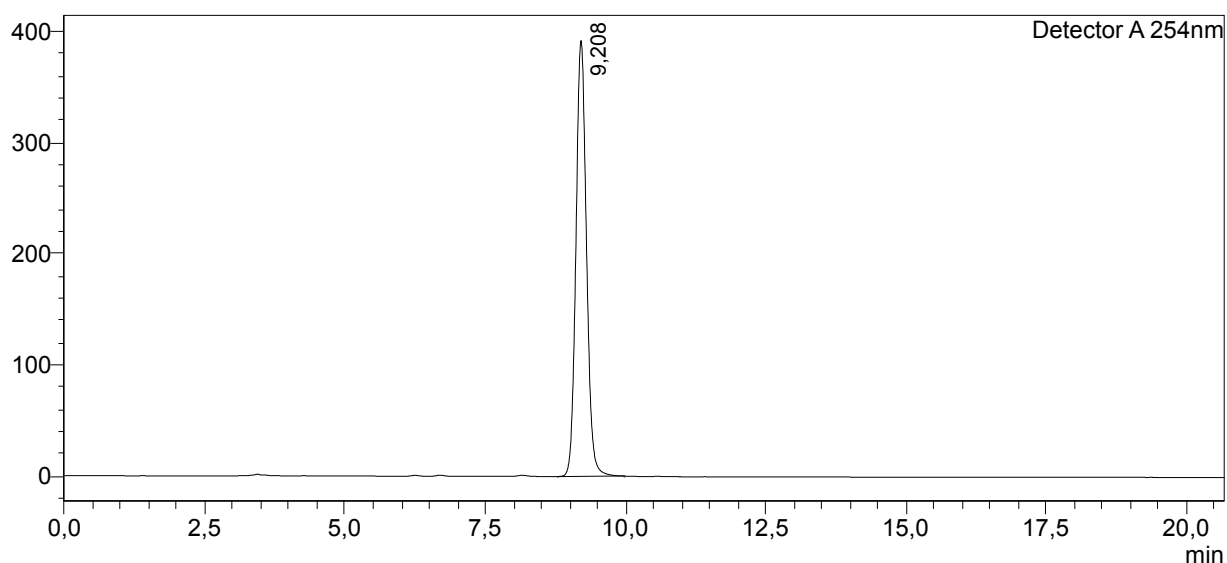

## <Peak Table>

Detector A 254nm

| Ret. Time | Area    | Area%   |
|-----------|---------|---------|
| 9.208     | 5123309 | 100,000 |
|           | 5123309 | 100,000 |

**Figure S7b.** Chiral chromatogram of **7b**.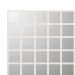

SHIMADZU

LabSolutions

# Analysis Report

## <Sample Information>

Sample Name : CE-148\_spot\_2\_peak\_1  
 Sample ID : CE-148\_spot\_2\_peak\_1  
 Data Filename : CE-148\_spot\_2\_peak\_1\_2nd\_meas\_01.lcd  
 Method Filename : Method\_12.03.2019.lcm  
 Batch Filename :  
 Vial # : 1-3  
 Injection Volume : 20 uL  
 Date Acquired : 12.03.2019 18:57:46  
 Date Processed : 12.03.2019 19:48:36

Sample Type : Unknown  
 Acquired by : HPLC - Natascha  
 Processed by : HPLC - Natascha

## <Chromatogram>

mV

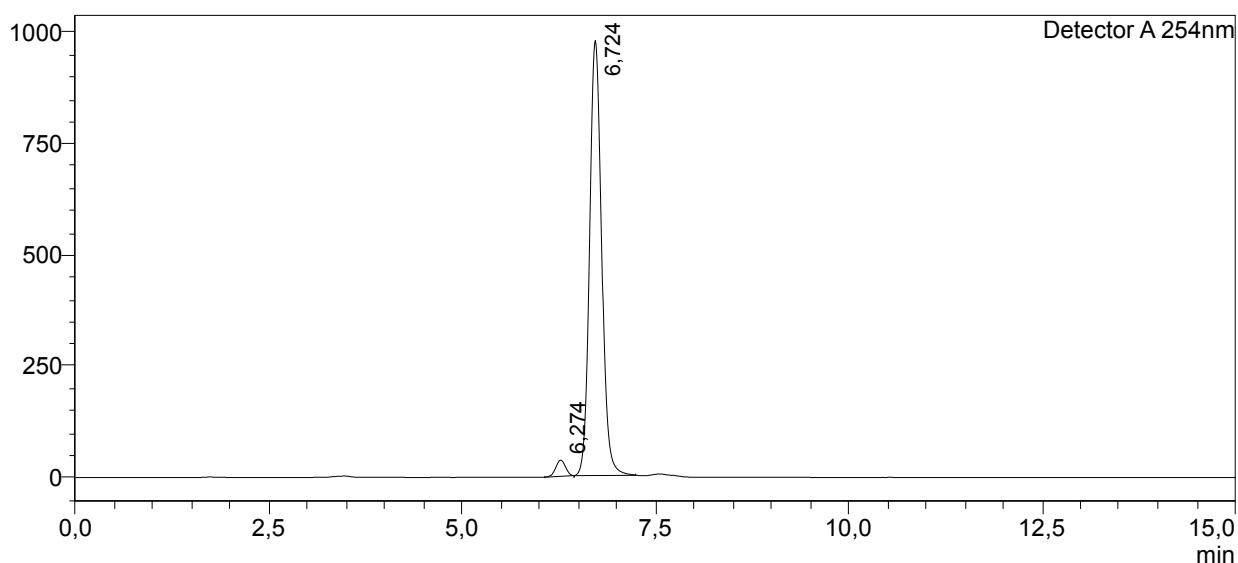

## <Peak Table>

Detector A 254nm

| Ret. Time | Area     | Area%   |
|-----------|----------|---------|
| 6,274     | 318610   | 2,930   |
| 6,724     | 10555740 | 97,070  |
|           | 10874350 | 100,000 |

**Figure S8b.** Chiral chromatogram of **8b**.

# Analysis Report

## <Sample Information>

Sample Name : CE-148\_spot\_2\_peak\_2  
Sample ID : CE-148\_spot\_2\_peak\_2  
Data Filename : CE-148\_spot\_2\_peak\_2\_01.lcd  
Method Filename : Method\_12.03.2019.lcm  
Batch Filename :  
Vial # : 1-4  
Injection Volume : 10 uL  
Date Acquired : 12.03.2019 12:04:51  
Date Processed : 12.03.2019 15:25:22

Sample Type : Unknown  
Acquired by : HPLC - Natascha  
Processed by : HPLC - Natascha

## <Chromatogram>

mV

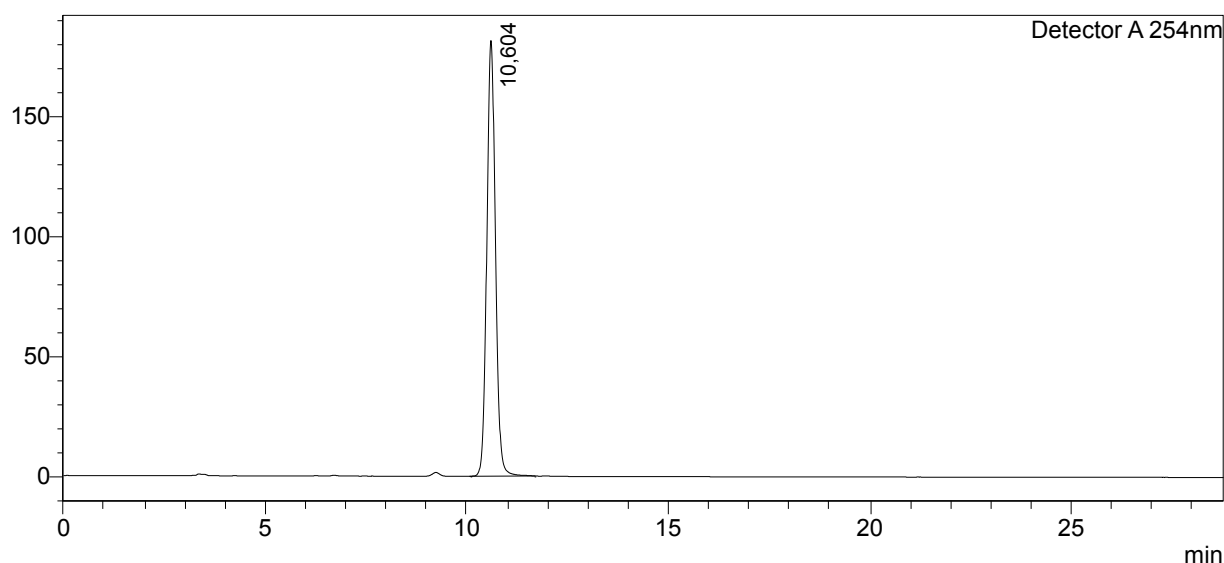

## <Peak Table>

Detector A 254nm

| Ret. Time | Area    | Area%   |
|-----------|---------|---------|
| 10,604    | 2716739 | 100,000 |
|           | 2716739 | 100,000 |

**Figure S9b.** Chiral chromatogram of **5c**.

# Analysis Report

## <Sample Information>

|                  |                              |              |                   |
|------------------|------------------------------|--------------|-------------------|
| Sample Name      | : CE_155N_spot_1_peak_1_     |              |                   |
| Sample ID        | : CE_155N_spot_1_peak_1_     |              |                   |
| Data Filename    | : CE_155N_spot_1_peak_1_.lcd |              |                   |
| Method Filename  | : 100%_EtOAc.lcm             |              |                   |
| Batch Filename   | :                            |              |                   |
| Vial #           | : 1-21                       | Sample Type  | : Unknown         |
| Injection Volume | : 15 uL                      |              |                   |
| Date Acquired    | : 09.08.2018 19:49:44        | Acquired by  | : HPLC - Natascha |
| Date Processed   | : 09.08.2018 20:04:45        | Processed by | : HPLC - Natascha |

## <Chromatogram>

mV

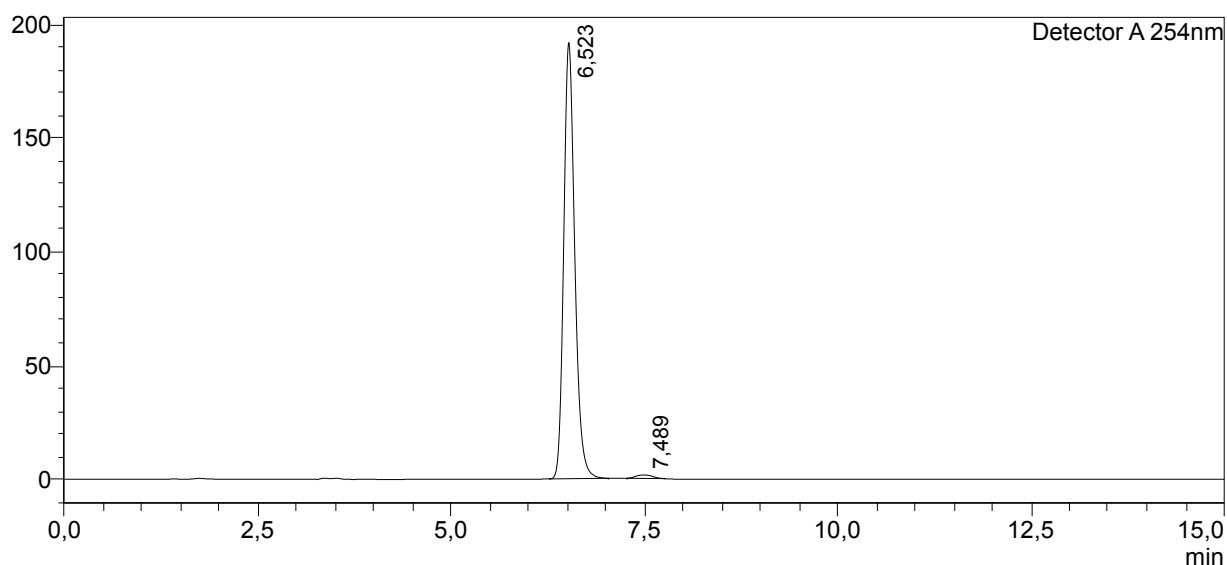

## <Peak Table>

Detector A 254nm

| Ret. Time | Area    | Area%   |
|-----------|---------|---------|
| 6,523     | 1911721 | 98,866  |
| 7,489     | 21928   | 1,134   |
|           | 1933649 | 100,000 |



**Figure S10b.** Chiral chromatogram of **6c**.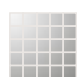

SHIMADZU

LabSolutions

# Analysis Report

## <Sample Information>

Sample Name : CE-155\_Spot1\_Peak2\_  
 Sample ID : CE-155\_Spot1\_Peak2\_  
 Data Filename : CE-155\_Spot1\_Peak2\_01.lcd  
 Method Filename : Chiralpak\_IA\_100EtOAc\_.lcm  
 Batch Filename :  
 Vial # : 1-1  
 Injection Volume : 20 uL  
 Date Acquired : 29.04.2022 15:38:54  
 Date Processed : 29.04.2022 15:53:55

Sample Type : Unknown

Acquired by : HPLC - Natascha  
 Processed by : HPLC - Natascha

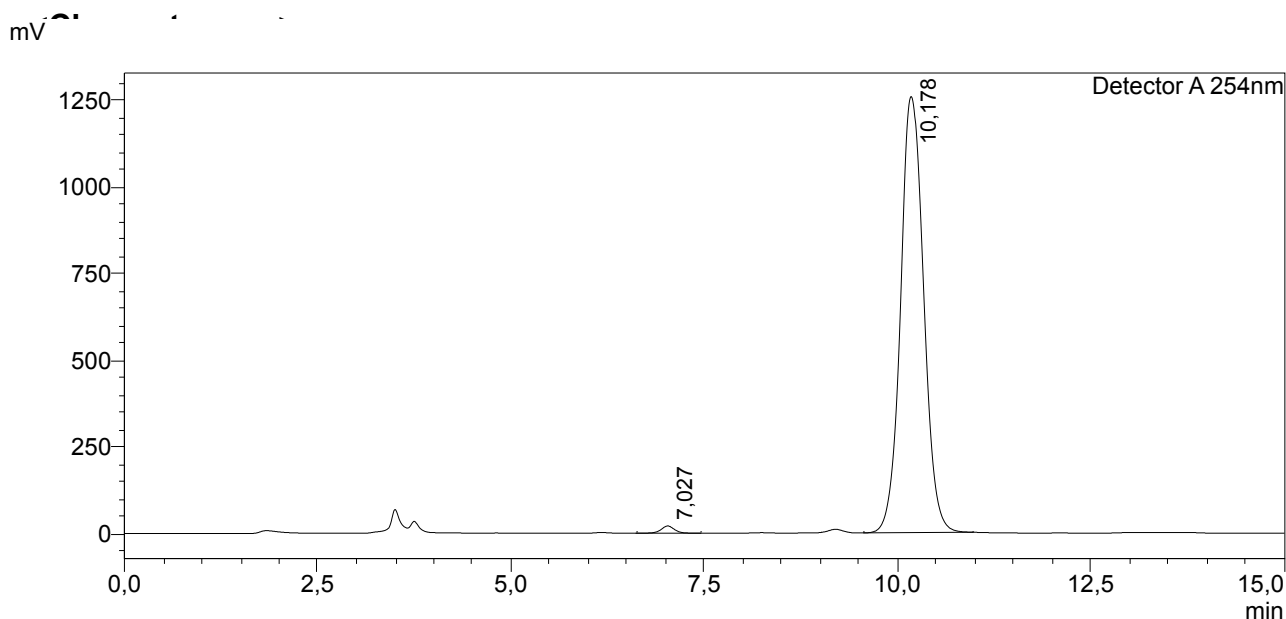

## <Peak Table>

Detector A 254nm

| Peak# | Ret. Time | Area     | Area%   |
|-------|-----------|----------|---------|
| 1     | 7,027     | 248765   | 0,947   |
| 2     | 10,178    | 26020184 | 99,053  |
| Total |           | 26268949 | 100,000 |

**Figure S11b.** Chiral chromatogram of **7c**.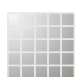

SHIMADZU

LabSolutions

# Analysis Report

## <Sample Information>

Sample Name : CE\_155\_spot\_2\_peak\_1\_  
 Sample ID : CE\_155\_spot\_2\_peak\_1\_  
 Data Filename : CE\_155\_spot\_2\_peak\_1\_01.lcd  
 Method Filename : 100%\_EtOAc.lcm  
 Batch Filename :  
 Vial # : 1-21  
 Injection Volume : 15 uL  
 Date Acquired : 09.08.2018 20:21:30  
 Date Processed : 09.08.2018 20:36:31

Sample Type : Unknown  
 Acquired by : HPLC - Natascha  
 Processed by : HPLC - Natascha

## <Chromatogram>

mV

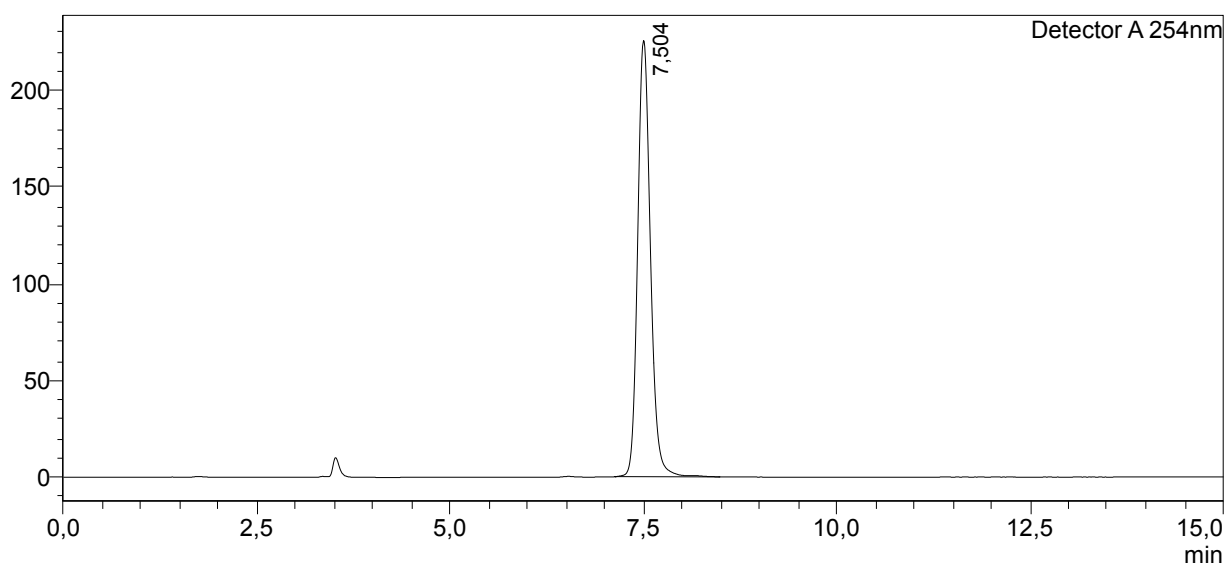

## <Peak Table>

Detector A 254nm

| Ret. Time | Area    | Area%   |
|-----------|---------|---------|
| 7,504     | 2553559 | 100,000 |
|           | 2553559 | 100,000 |

**Figure S12b.** Chiral chromatogram of **8c**.

# Analysis Report

## <Sample Information>

Sample Name : CE\_155\_spot\_2\_peak\_2\_  
 Sample ID : CE\_155\_spot\_2\_peak\_2\_  
 Data Filename : CE\_155\_spot\_2\_peak\_2\_01.lcd  
 Method Filename : 100%\_EtOAc.lcm  
 Batch Filename :  
 Vial # : 1-22  
 Injection Volume : 15 uL  
 Date Acquired : 09.08.2018 20:37:27  
 Date Processed : 09.08.2018 20:52:28

Sample Type : Unknown  
 Acquired by : HPLC - Natascha  
 Processed by : HPLC - Natascha

## <Chromatogram>

mV

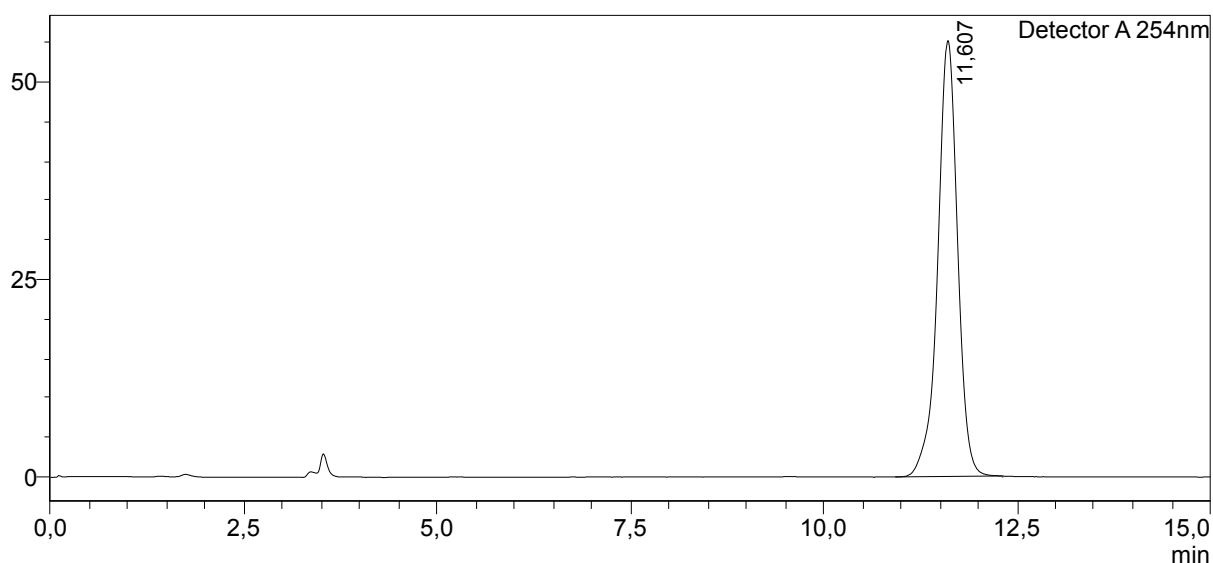

## <Peak Table>

Detector A 254nm

| Ret. Time | Area   | Area%   |
|-----------|--------|---------|
| 11,607    | 977301 | 100,000 |
|           | 977301 | 100,000 |

**Figure S13b.** Chiral chromatogram of **5d**.

# Analysis Report

## <Sample Information>

Sample Name : PN-18\_Spot1\_Peak1\_  
 Sample ID : PN-18\_Spot1\_Peak1\_  
 Data Filename : PN-18\_Spot1\_Peak1\_01.lcd  
 Method Filename : Chiralpak\_IA\_100EtOAc\_.lcm  
 Batch Filename :  
 Vial # : 1-1  
 Injection Volume : 1 uL  
 Date Acquired : 29.04.2022 15:24:36  
 Date Processed : 29.04.2022 15:37:07

Sample Type : Unknown  
 Acquired by : HPLC - Natascha  
 Processed by : HPLC - Natascha

## <Chromatogram>

mV

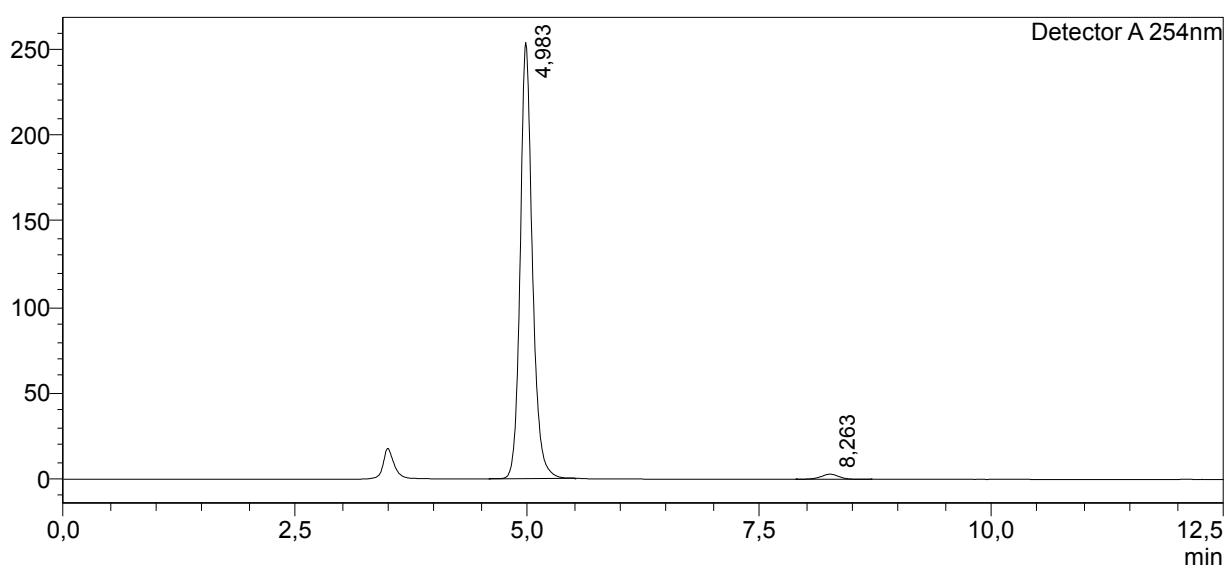

## <Peak Table>

Detector A 254nm

| Peak# | Ret. Time | Area    | Area%   |
|-------|-----------|---------|---------|
| 1     | 4,983     | 2311423 | 98,257  |
| 2     | 8,263     | 41011   | 1,743   |
| Total |           | 2352434 | 100,000 |

**Figure S14b.** Chiral chromatogram of **6d**.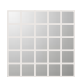

SHIMADZU

LabSolutions

# Analysis Report

## <Sample Information>

Sample Name : PN-18\_Peak\_2\_  
 Sample ID : PN-18\_Peak\_2\_  
 Data Filename : PN-18\_Peak\_2\_01.lcd  
 Method Filename : Chiralpak\_IA\_80HexinC\_20THFinD\_.lcm  
 Batch Filename :  
 Vial # : 1-18  
 Injection Volume : 10 uL  
 Date Acquired : 16.03.2021 11:18:26  
 Date Processed : 16.03.2021 11:48:26

Sample Type : Unknown  
 Acquired by : HPLC - Natascha  
 Processed by : HPLC - Natascha

## <Chromatogram>

mV

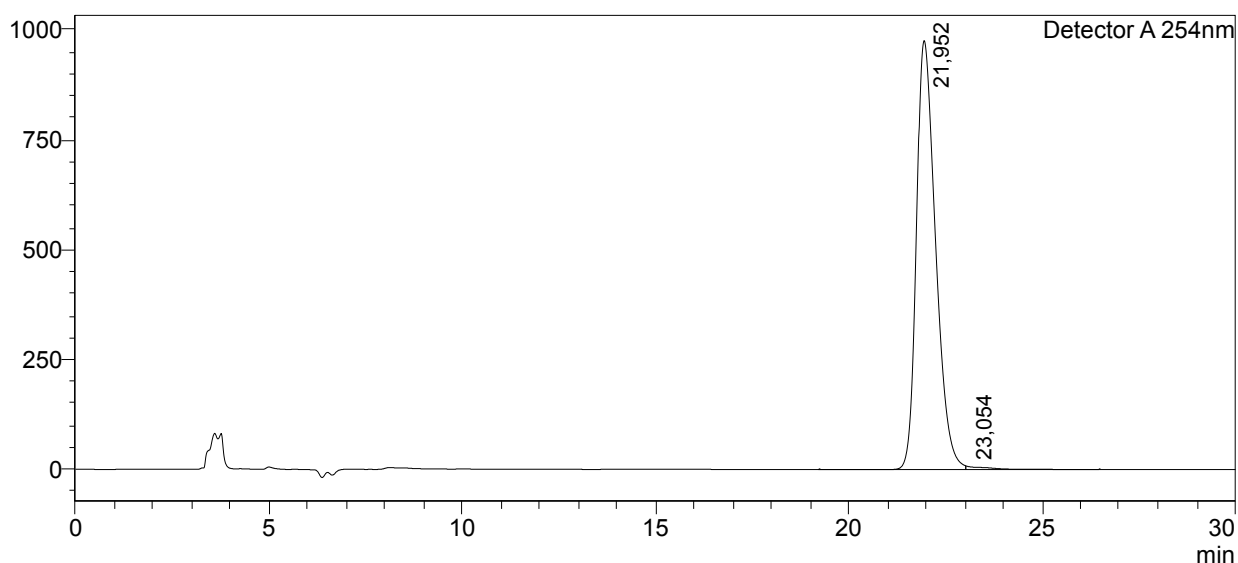

## <Peak Table>

Detector A 254nm

| Peak# | Ret. Time | Area     | Area%   |
|-------|-----------|----------|---------|
| 1     | 21,952    | 33537115 | 99,089  |
| 2     | 23,054    | 308425   | 0,911   |
| Total |           | 33845540 | 100,000 |

**Figure S15b.** Chiral chromatogram of **7d**.

# Analysis Report

## <Sample Information>

Sample Name : PN-18\_Peak\_3\_final\_  
 Sample ID : PN-18\_Peak\_3\_final\_  
 Data Filename : PN-18\_Peak\_3\_final\_01.lcd  
 Method Filename : Chiralpak\_IA\_80HexinC\_20THFinD\_.lcm  
 Batch Filename :  
 Vial # : 1-21  
 Injection Volume : 20 uL  
 Date Acquired : 19.03.2021 09:41:02  
 Date Processed : 19.03.2021 10:11:04

Sample Type : Unknown  
 Acquired by : HPLC - Natascha  
 Processed by : HPLC - Natascha

## <Chromatogram>

mV

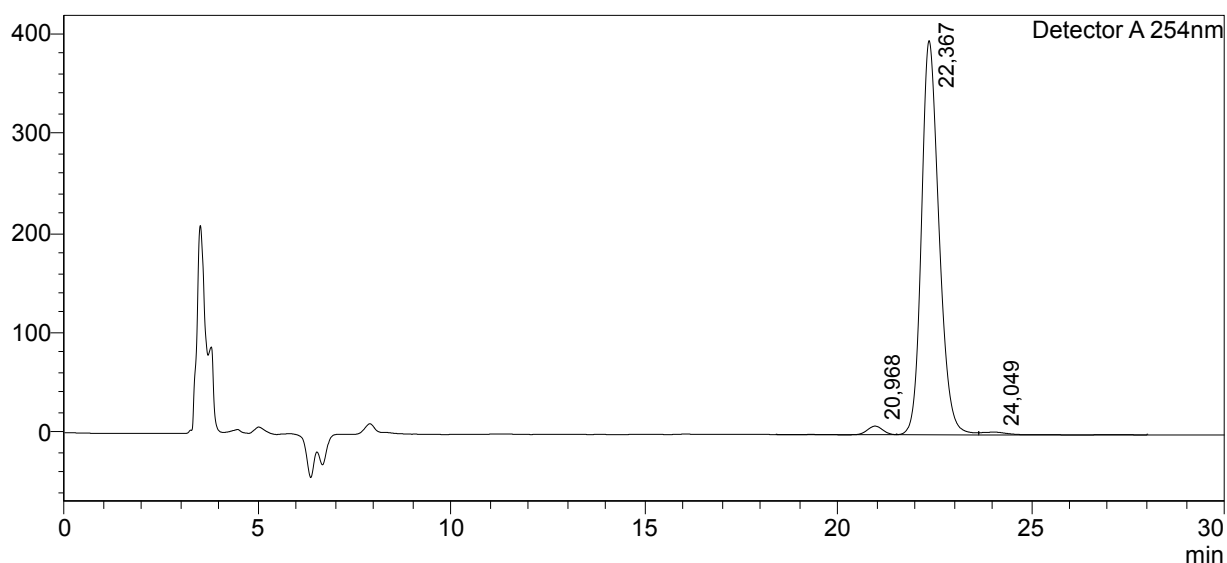

## <Peak Table>

Detector A 254nm

| Peak# | Ret. Time | Area     | Area%   |
|-------|-----------|----------|---------|
| 1     | 20,968    | 240528   | 1,860   |
| 2     | 22,367    | 12537365 | 96,957  |
| 3     | 24,049    | 152921   | 1,183   |
| Total |           | 12930815 | 100,000 |

**Figure S16b.** Chiral chromatogram of **8d**.

# Analysis Report

## <Sample Information>

Sample Name : PN-18-4\_  
 Sample ID : PN-18-4\_  
 Data Filename : PN-18-4\_01.lcd  
 Method Filename : Chiralpak\_IA\_EtOAc\_.lcm  
 Batch Filename :  
 Vial # : 1-33  
 Injection Volume : 15 uL  
 Date Acquired : 09.07.2020 12:48:49  
 Date Processed : 01.10.2020 16:49:10

Sample Type : Unknown  
 Acquired by : HPLC - Natascha  
 Processed by : HPLC - Natascha

## <Chromatogram>

mV

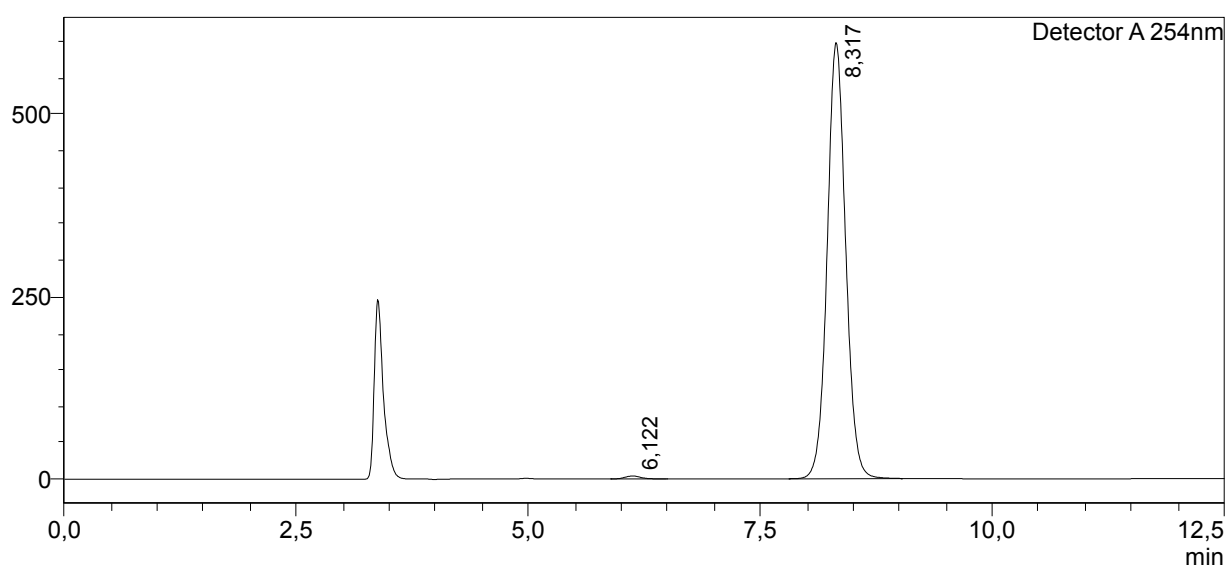

## <Peak Table>

Detector A 254nm

| Ret. Time | Area    | Area%   |
|-----------|---------|---------|
| 6,122     | 46300   | 0,556   |
| 8,317     | 8274233 | 99,444  |
|           | 8320533 | 100,000 |

**Figure S17b.** Chiral chromatogram of **5e**.

SHIMADZU

LabSolutions

# Analysis Report

## <Sample Information>

Sample Name : CE\_167\_spot\_1\_peak\_1\_final  
 Sample ID : CE\_167\_spot\_1\_peak\_1\_final  
 Data Filename : 21.08.2020.lcd  
 Method Filename : 100%\_EtOAc.lcm  
 Batch Filename :  
 Vial # : 1-21  
 Injection Volume : 15 uL  
 Date Acquired : 21.08.2018 16:06:14  
 Date Processed : 21.08.2018 16:39:24

Sample Type : Unknown

Acquired by : HPLC - Natascha  
 Processed by : HPLC - Natascha

## <Chromatogram>

mV

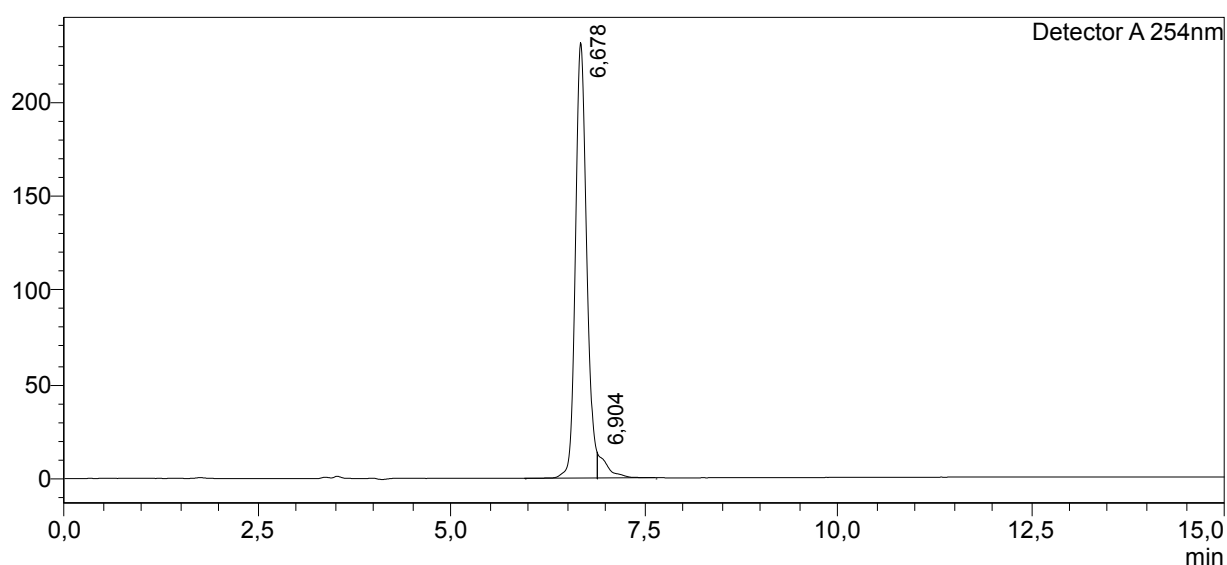

## <Peak Table>

Detector A 254nm

| Ret. Time | Area    | Area%   |
|-----------|---------|---------|
| 6,678     | 2341299 | 95,319  |
| 6,904     | 114971  | 4,681   |
|           | 2456269 | 100,000 |



**Figure S18b.** Chiral chromatogram of **6e**.

# Analysis Report

## <Sample Information>

Sample Name : CE\_167\_spot\_1\_peak\_2\_final  
 Sample ID : CE\_167\_spot\_1\_peak\_2\_final  
 Data Filename : CE\_167\_spot\_1\_peak\_2\_final01.lcd  
 Method Filename : 100%\_EtOAc.lcm  
 Batch Filename :  
 Vial # : 1-22  
 Injection Volume : 15 uL  
 Date Acquired : 21.08.2018 16:23:42  
 Date Processed : 21.08.2018 16:38:43

Sample Type : Unknown  
 Acquired by : HPLC - Natascha  
 Processed by : HPLC - Natascha

## <Chromatogram>

mV

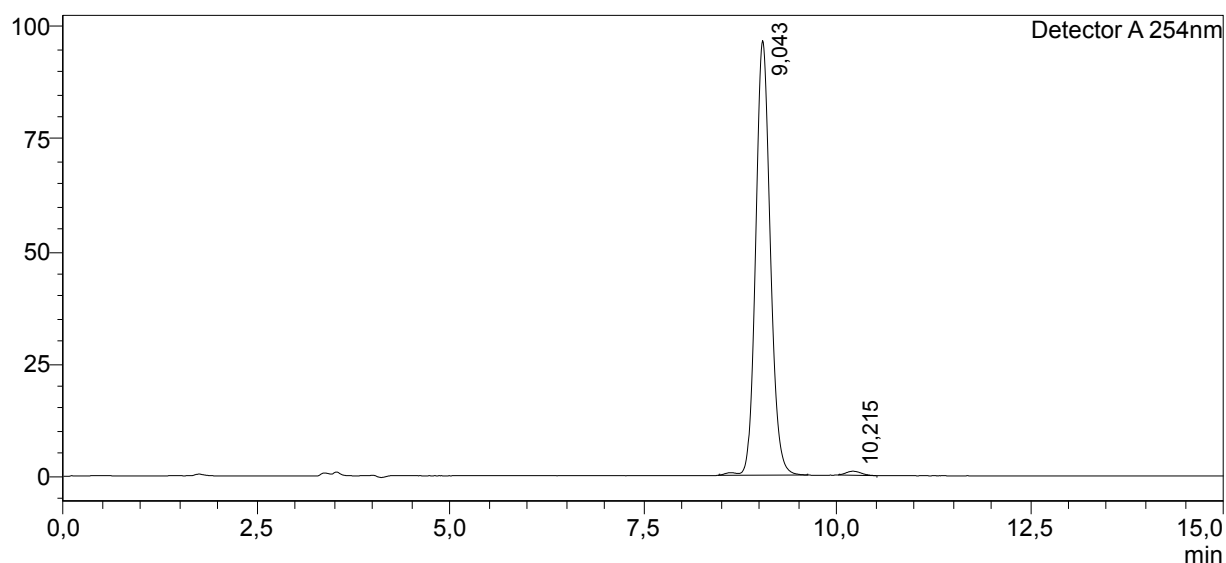

## <Peak Table>

Detector A 254nm

| Ret. Time | Area    | Area%   |
|-----------|---------|---------|
| 9,043     | 1278506 | 99,124  |
| 10,215    | 11300   | 0,876   |
|           | 1289806 | 100,000 |

**Figure S19b.** Chiral chromatogram of **7e**.

# Analysis Report

## <Sample Information>

Sample Name : CE\_167\_spot\_2\_peak\_1\_final  
 Sample ID : CE\_167\_spot\_2\_peak\_1\_final  
 Data Filename : CE\_167\_spot\_2\_peak\_1\_final01.lcd  
 Method Filename : 100%\_EtOAc.lcm  
 Batch Filename :  
 Vial # : 1-21  
 Injection Volume : 15 uL  
 Date Acquired : 21.08.2018 16:47:59  
 Date Processed : 21.08.2018 17:03:00

Sample Type : Unknown  
 Acquired by : HPLC - Natascha  
 Processed by : HPLC - Natascha

## <Chromatogram>

mV

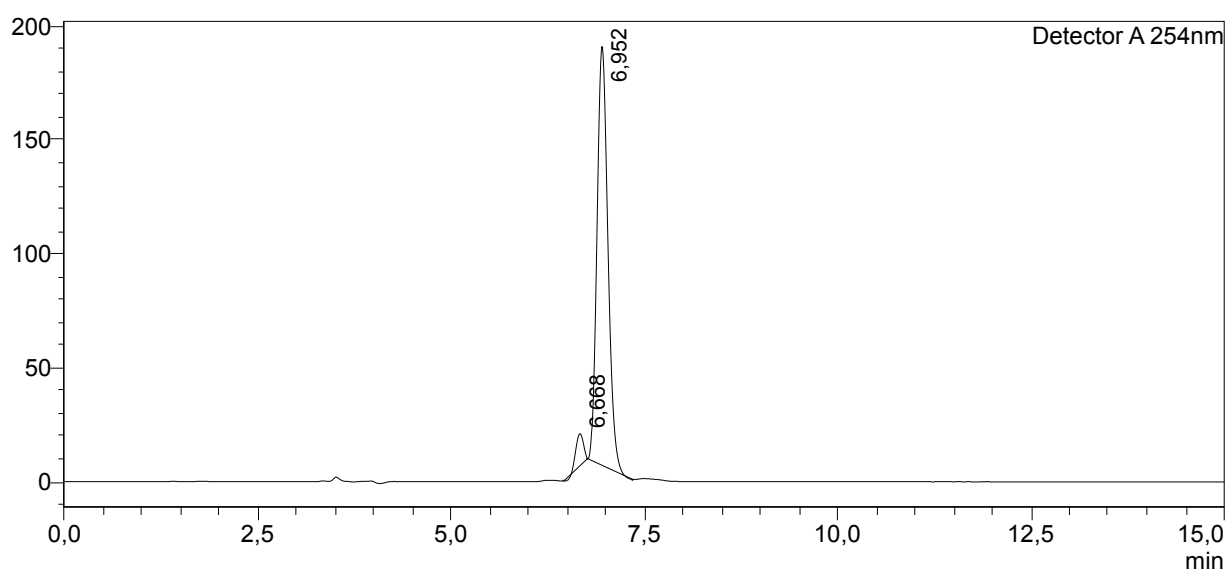

## <Peak Table>

Detector A 254nm

| Ret. Time | Area    | Area%   |
|-----------|---------|---------|
| 6,668     | 95916   | 5,040   |
| 6,952     | 1807345 | 94,960  |
|           | 1903261 | 100,000 |

**Figure S20b.** Chiral chromatogram of **8e**.

**SHIMADZU**  
**LabSolutions**

# Analysis Report

**<Sample Information>**

Sample Name : CE-167\_Spot2\_Peak2\_  
 Sample ID : CE-167\_Spot2\_Peak2\_  
 Data Filename : CE-167\_Spot2\_Peak2\_01.lcd  
 Method Filename : Chiralpak\_IA\_100EtOAc\_.lcm  
 Batch Filename :  
 Vial # : 1-1  
 Injection Volume : 17 uL  
 Date Acquired : 29.04.2022 12:02:31  
 Date Processed : 29.04.2022 12:17:32

Sample Type : Unknown  
 Acquired by : HPLC - Natascha  
 Processed by : HPLC - Natascha

**<Chromatogram>**

mV

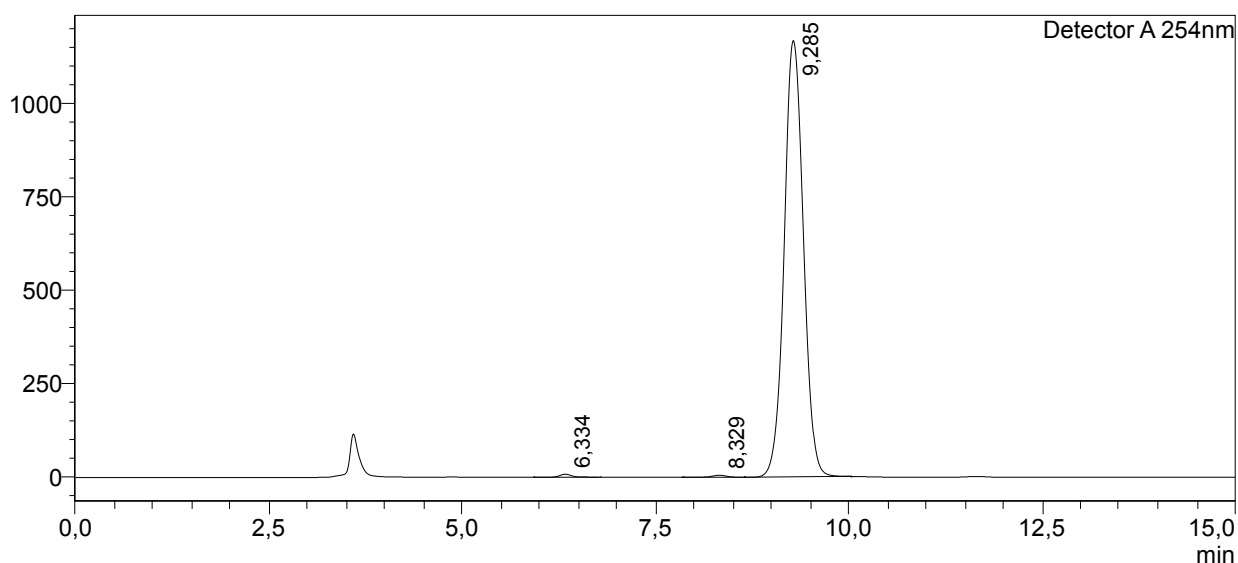**<Peak Table>**

Detector A 254nm

| Peak# | Ret. Time | Area     | Area%   |
|-------|-----------|----------|---------|
| 1     | 6,334     | 92866    | 0,454   |
| 2     | 8,329     | 75040    | 0,367   |
| 3     | 9,285     | 20291438 | 99,179  |
| Total |           | 20459344 | 100,000 |

**Figure S21b.** Chiral chromatogram of **5f**.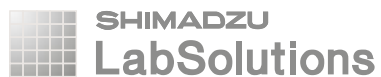

# Analysis Report

## <Sample Information>

Sample Name : CE\_140\_mix\_1\_peak\_1\_final\_check  
 Sample ID : CE\_140\_mix\_1\_peak\_1\_final\_chec  
 Data Filename : CE\_140\_mix\_1\_peak\_1\_final\_check01.lcd  
 Method Filename : 100%\_EtOAc.lcm  
 Batch Filename :  
 Vial # : 1-21  
 Injection Volume : 15 uL  
 Date Acquired : 25.07.2018 14:52:20  
 Date Processed : 27.07.2018 17:46:51

Sample Type : Unknown  
 Acquired by : HPLC - Natascha  
 Processed by : HPLC - Natascha

## <Chromatogram>

mV

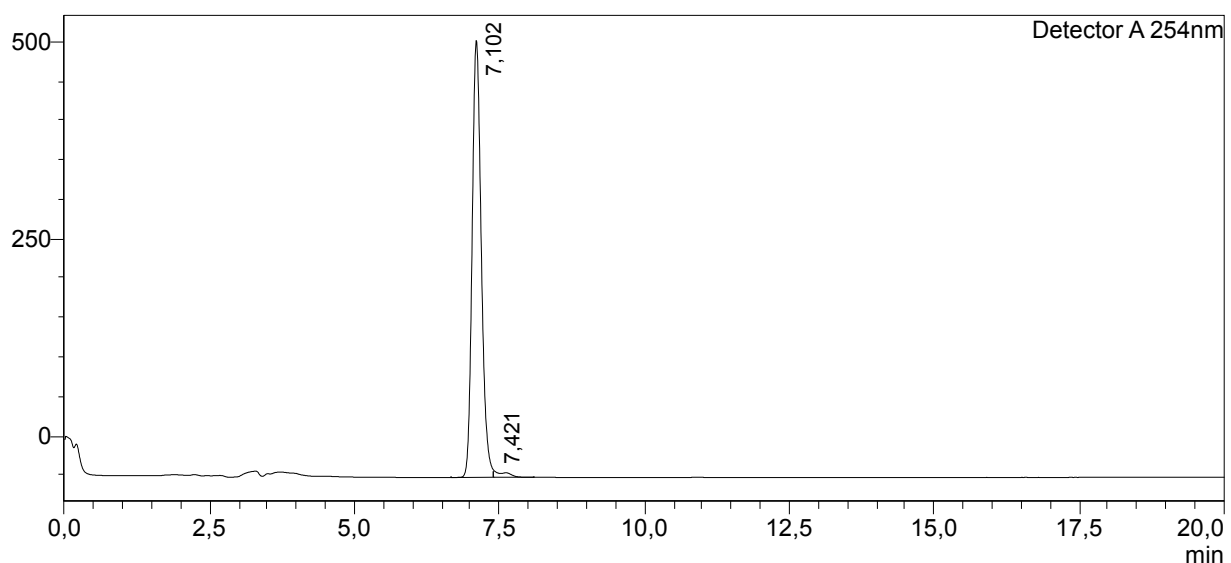

## <Peak Table>

Detector A 254nm

| Ret. Time | Area    | Area%   |
|-----------|---------|---------|
| 7,102     | 6100611 | 98,222  |
| 7,421     | 110429  | 1,778   |
|           | 6211039 | 100,000 |

**Figure S22b.** Chiral chromatogram of **6f**.

# Analysis Report

## <Sample Information>

Sample Name : CE\_140\_mix\_1\_peak\_2\_final\_check  
 Sample ID : CE\_140\_mix\_1\_peak\_2\_final\_chec  
 Data Filename : CE\_140\_mix\_1\_peak\_2\_final\_check01.lcd  
 Method Filename : 100%\_EtOAc.lcm  
 Batch Filename :  
 Vial # : 1-22  
 Injection Volume : 15 uL  
 Date Acquired : 25.07.2018 15:18:00  
 Date Processed : 25.07.2018 15:38:01

Sample Type : Unknown  
 Acquired by : HPLC - Natascha  
 Processed by : HPLC - Natascha

## <Chromatogram>

mV

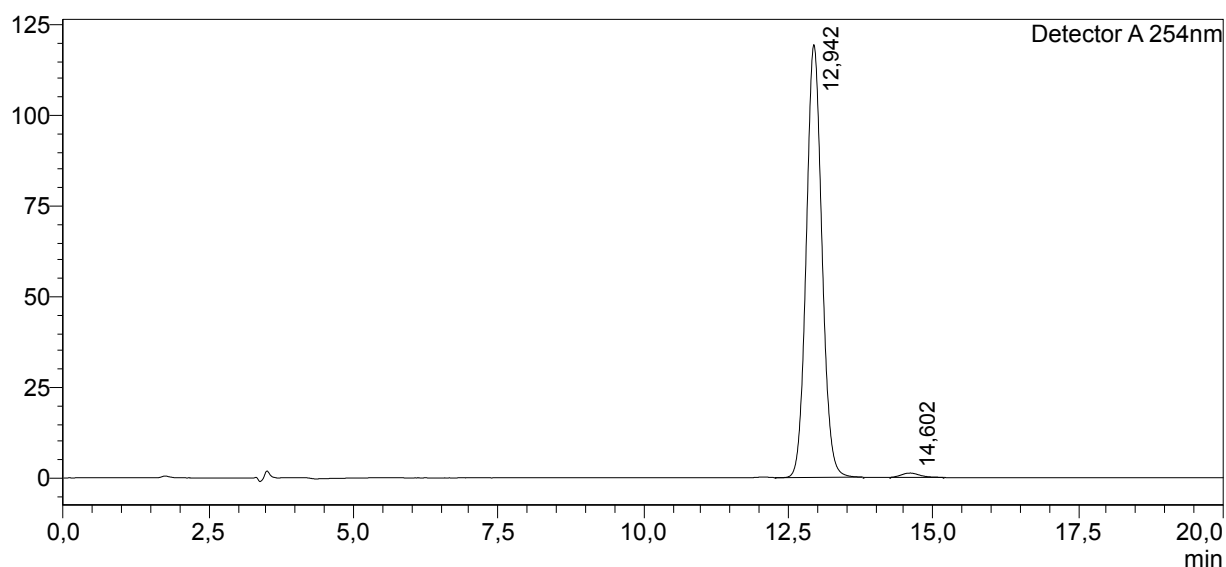

## <Peak Table>

Detector A 254nm

| Ret. Time | Area    | Area%   |
|-----------|---------|---------|
| 12,942    | 2248794 | 98,859  |
| 14,602    | 25965   | 1,141   |
|           | 2274759 | 100,000 |

**Figure S23b.** Chiral chromatogram of **7f**.

# Analysis Report

## <Sample Information>

Sample Name : CE\_140\_spot\_2\_peak\_1\_final\_check  
 Sample ID : CE\_140\_spot\_2\_peak\_1\_final\_che  
 Data Filename : CE\_140\_spot\_2\_peak\_1\_final\_check01.lcd  
 Method Filename : 100%\_EtOAc.lcm  
 Batch Filename :  
 Vial # : 1-21  
 Injection Volume : 15 uL  
 Date Acquired : 25.07.2018 17:21:51  
 Date Processed : 25.07.2018 17:41:52

Sample Type : Unknown  
 Acquired by : HPLC - Natascha  
 Processed by : HPLC - Natascha

## <Chromatogram>

mV

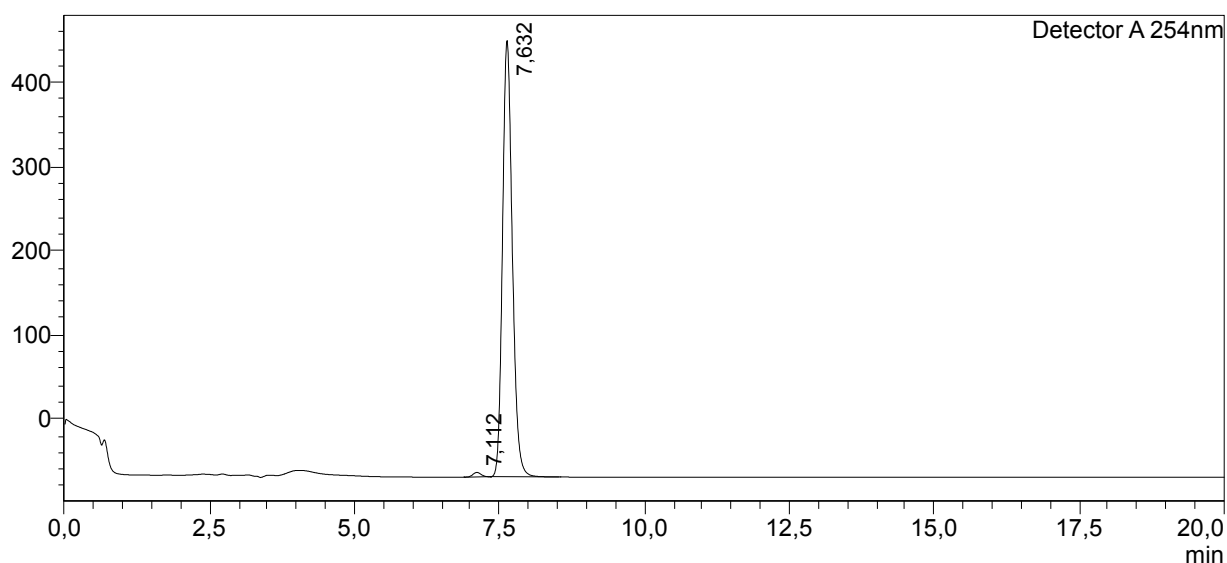

## <Peak Table>

Detector A 254nm

| Ret. Time | Area    | Area%   |
|-----------|---------|---------|
| 7,112     | 53208   | 0,863   |
| 7,632     | 6110382 | 99,137  |
|           | 6163591 | 100,000 |

**Figure S24b.** Chiral chromatogram of **8f**.

# Analysis Report

## <Sample Information>

Sample Name : CE\_140\_spot\_2\_peak\_2\_final\_check  
 Sample ID : CE\_140\_spot\_2\_peak\_2\_final\_che  
 Data Filename : CE\_140\_spot\_2\_peak\_2\_final\_check01.lcd  
 Method Filename : 100%\_EtOAc.lcm  
 Batch Filename :  
 Vial # : 1-22  
 Injection Volume : 15 uL  
 Date Acquired : 25.07.2018 17:45:42  
 Date Processed : 25.07.2018 18:05:43

Sample Type : Unknown  
 Acquired by : HPLC - Natascha  
 Processed by : HPLC - Natascha

## <Chromatogram>

mV

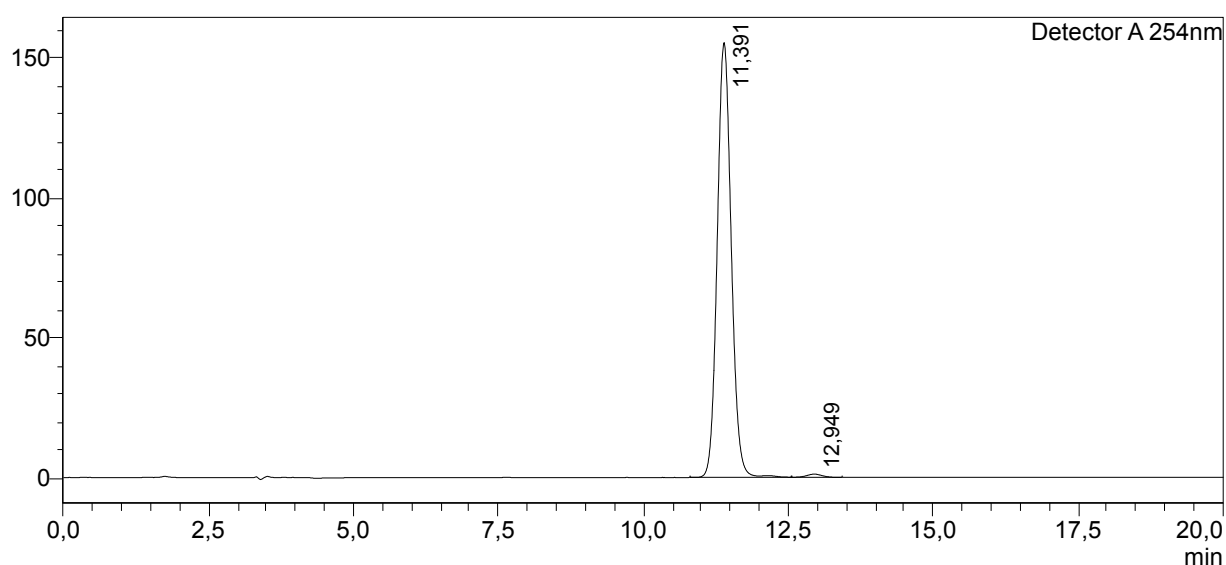

## <Peak Table>

Detector A 254nm

| Ret. Time | Area    | Area%   |
|-----------|---------|---------|
| 11,391    | 2598260 | 99,224  |
| 12,949    | 20327   | 0,776   |
|           | 2618587 | 100,000 |

**Figure S25b.** Chiral chromatogram of **5g**.

# Analysis Report

## <Sample Information>

Sample Name : PN-14-1\_  
 Sample ID : PN-14-1\_  
 Data Filename : PN-14-1\_01.lcd  
 Method Filename : Chiralpak\_IA\_EtOAc\_.lcm  
 Batch Filename :  
 Vial # : 1-22  
 Injection Volume : 15 uL  
 Date Acquired : 07.07.2020 15:33:48  
 Date Processed : 01.10.2020 16:42:51

Sample Type : Unknown  
 Acquired by : HPLC - Natascha  
 Processed by : HPLC - Natascha

## <Chromatogram>

mV

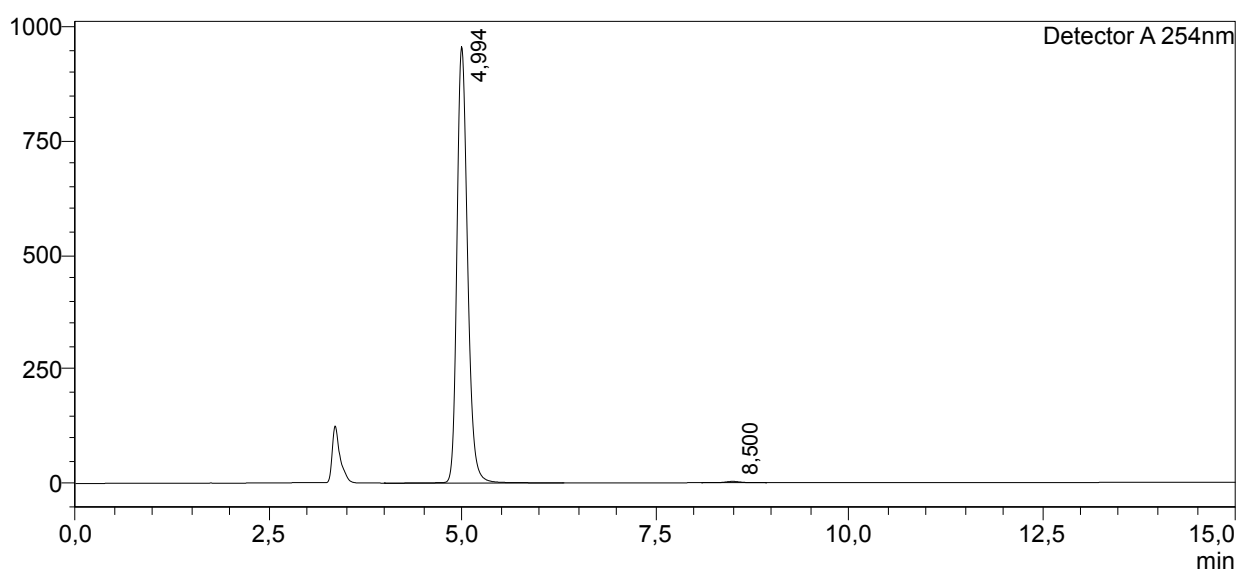

## <Peak Table>

Detector A 254nm

| Ret. Time | Area    | Area%   |
|-----------|---------|---------|
| 4,994     | 9202879 | 99,593  |
| 8,500     | 37639   | 0,407   |
|           | 9240518 | 100,000 |



**Figure S26b.** Chiral chromatogram of **6g**.

# Analysis Report

## <Sample Information>

Sample Name : PN-14\_Peak\_2\_  
 Sample ID : PN-14\_Peak\_2\_  
 Data Filename : PN-14\_Peak\_2\_01.lcd  
 Method Filename : Chiralpak\_IA\_70Heptan\_30EtOAc\_mind3bar.lcm  
 Batch Filename :  
 Vial # : 1-1  
 Injection Volume : 20 uL  
 Date Acquired : 22.01.2021 10:38:55  
 Date Processed : 22.01.2021 11:08:56

Sample Type : Unknown  
 Acquired by : HPLC - Natascha  
 Processed by : HPLC - Natascha

## <Chromatogram>

mV

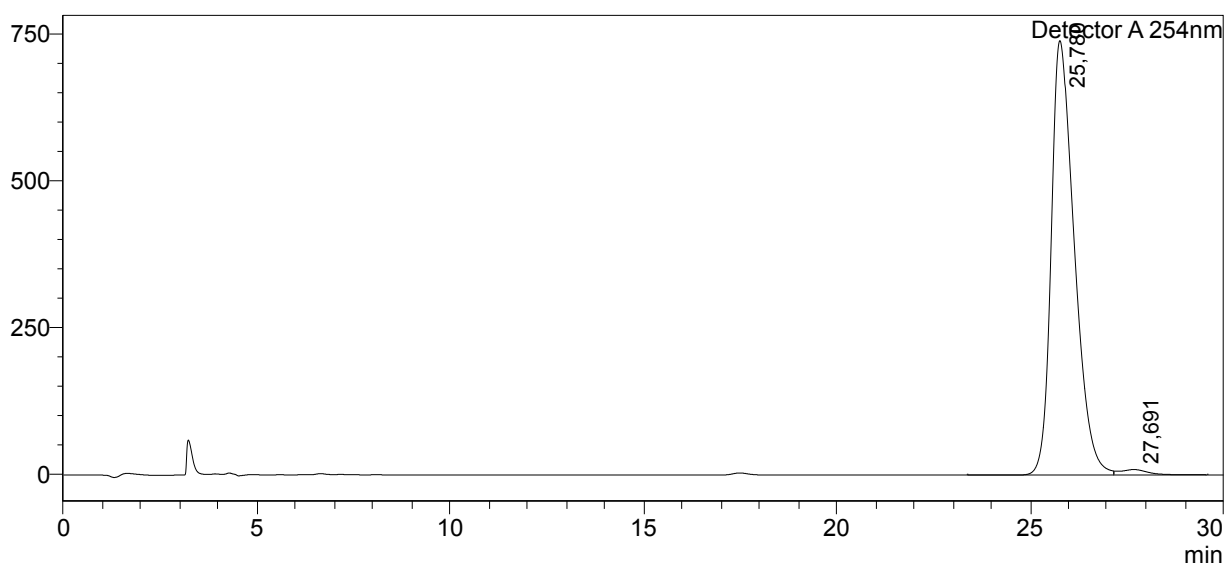

## <Peak Table>

Detector A 254nm

| Peak# | Ret. Time | Area     | Area%   |
|-------|-----------|----------|---------|
| 1     | 25,780    | 30566879 | 98,508  |
| 2     | 27,691    | 462866   | 1,492   |
| Total |           | 31029746 | 100,000 |

**Figure S27b.** Chiral chromatogram of **7g**.

# Analysis Report

## <Sample Information>

Sample Name : PN-14\_Peak\_3\_  
 Sample ID : PN-14\_Peak\_3\_  
 Data Filename : PN-14\_Peak\_3\_01.lcd  
 Method Filename : Chiralpak\_IA\_70Heptan\_30EtOAc\_mind3bar.lcm  
 Batch Filename :  
 Vial # : 1-2 Sample Type : Unknown  
 Injection Volume : 20 uL  
 Date Acquired : 22.01.2021 11:12:06 Acquired by : HPLC - Natascha  
 Date Processed : 22.01.2021 11:42:07 Processed by : HPLC - Natascha

## <Chromatogram>

mV

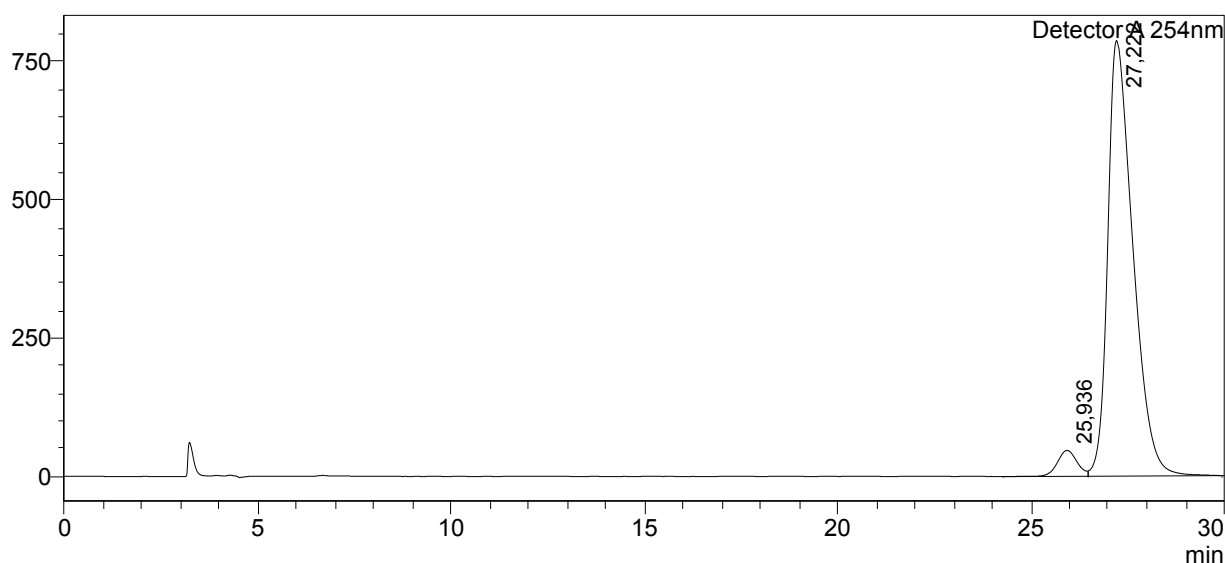

## <Peak Table>

Detector A 254nm

| Peak# | Ret. Time | Area     | Area%   |
|-------|-----------|----------|---------|
| 1     | 25.936    | 1629543  | 4.395   |
| 2     | 27.222    | 35448746 | 95.605  |
| Total |           | 37078289 | 100.000 |

**Figure S28b.** Chiral chromatogram of **8g**.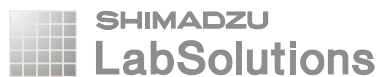

# Analysis Report

## <Sample Information>

Sample Name : PN-14-4\_  
 Sample ID : PN-14-4\_  
 Data Filename : PN-14-4\_01.lcd  
 Method Filename : Chiralpak\_IA\_EtOAc\_.lcm  
 Batch Filename :  
 Vial # : 1-24  
 Injection Volume : 10 uL  
 Date Acquired : 07.07.2020 16:08:20  
 Date Processed : 01.10.2020 16:44:44

Sample Type : Unknown  
 Acquired by : HPLC - Natascha  
 Processed by : HPLC - Natascha

## <Chromatogram>

mV

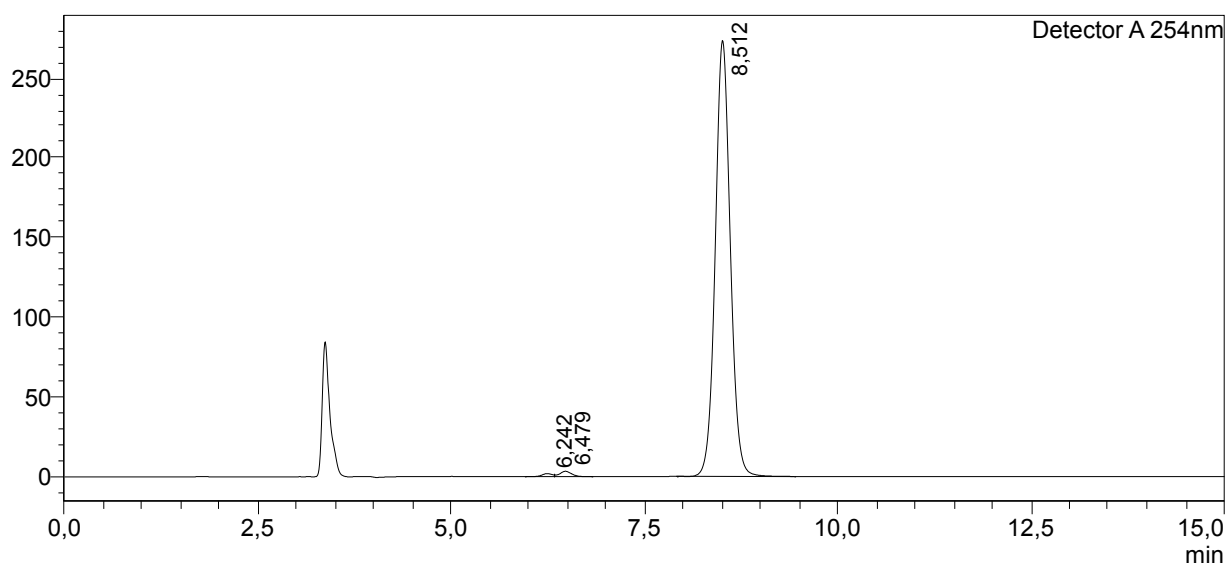

## <Peak Table>

Detector A 254nm

| Ret. Time | Area    | Area%   |
|-----------|---------|---------|
| 6,242     | 18264   | 0,485   |
| 6,479     | 35811   | 0,951   |
| 8,512     | 3712718 | 98,564  |
|           | 3766792 | 100,000 |

**Figure S29b.** Chiral chromatogram of **5h**.

# Analysis Report

## <Sample Information>

Sample Name : CE-196\_spot\_1\_peak\_1  
 Sample ID : CE-196\_spot\_1\_peak\_1  
 Data Filename : CE-196\_spot\_1\_peak\_1\_01.lcd  
 Method Filename : Method\_12.03.2019.lcm  
 Batch Filename :  
 Vial # : 1-1  
 Injection Volume : 15 uL  
 Date Acquired : 15.05.2019 18:23:40  
 Date Processed : 15.05.2019 18:36:11

Sample Type : Unknown  
 Acquired by : HPLC - Natascha  
 Processed by : HPLC - Natascha

## <Chromatogram>

mV

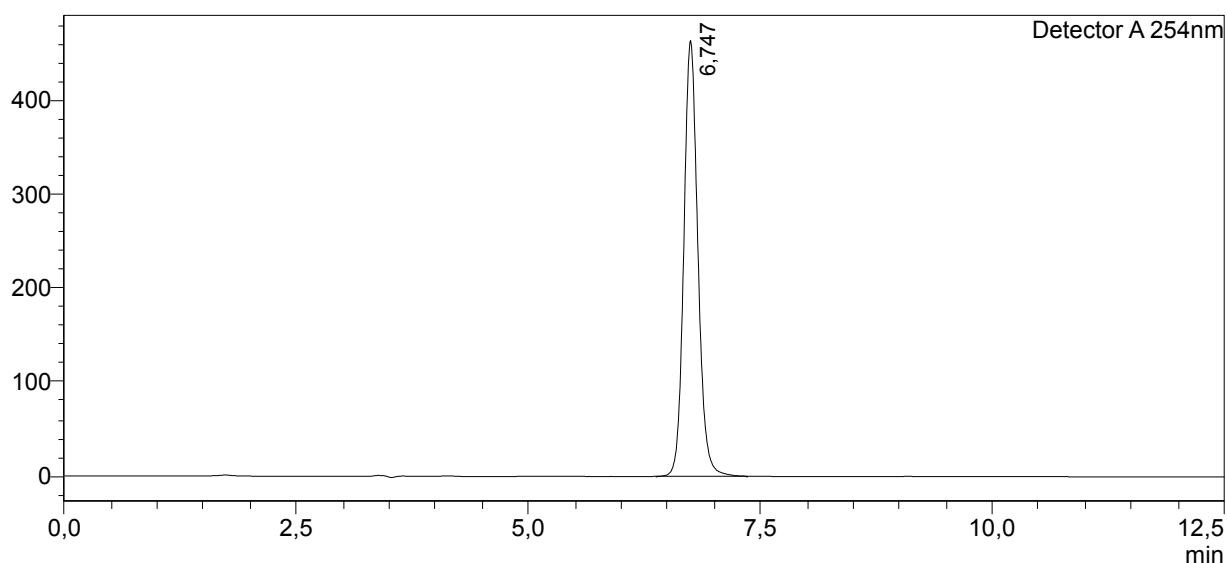

## <Peak Table>

Detector A 254nm

| Ret. Time | Area    | Area%   |
|-----------|---------|---------|
| 6,747     | 4881634 | 100,000 |
|           | 4881634 | 100,000 |

**Figure S30b.** Chiral chromatogram of **6h**.

# Analysis Report

## <Sample Information>

|                  |                               |              |                   |
|------------------|-------------------------------|--------------|-------------------|
| Sample Name      | : CE-196_spot_1_peak_2        |              |                   |
| Sample ID        | : CE-196_spot_1_peak_2        |              |                   |
| Data Filename    | : CE-196_spot_1_peak_2_01.lcd |              |                   |
| Method Filename  | : Method_12.03.2019.lcm       |              |                   |
| Batch Filename   | :                             |              |                   |
| Vial #           | : 1-2                         | Sample Type  | : Unknown         |
| Injection Volume | : 15 uL                       |              |                   |
| Date Acquired    | : 15.05.2019 18:37:21         | Acquired by  | : HPLC - Natascha |
| Date Processed   | : 15.05.2019 18:49:52         | Processed by | : HPLC - Natascha |

## <Chromatogram>

mV

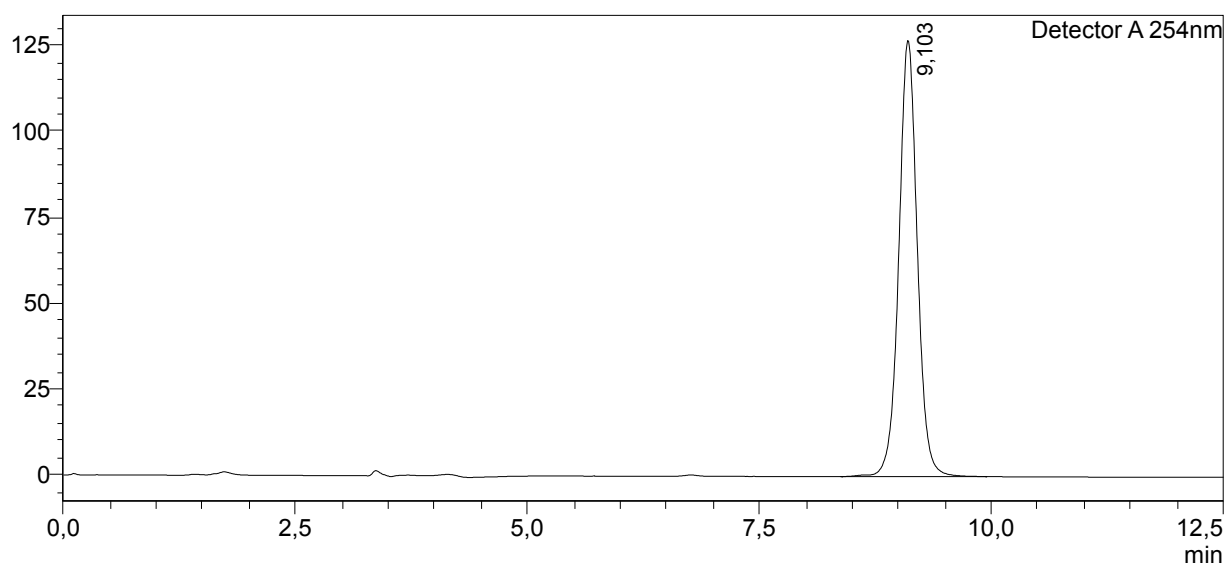

## <Peak Table>

Detector A 254nm

| Ret. Time | Area    | Area%   |
|-----------|---------|---------|
| 9,103     | 1760441 | 100,000 |
|           | 1760441 | 100,000 |

**Figure S31b.** Chiral chromatogram of 7h.

SHIMADZU

LabSolutions

# Analysis Report

## <Sample Information>

Sample Name : CE-196\_spot\_2\_peak\_1  
 Sample ID : CE-196\_spot\_2\_peak\_1  
 Data Filename : CE-196\_spot\_2\_peak\_1\_02.lcd  
 Method Filename : Method\_12.03.2019.lcm  
 Batch Filename :  
 Vial # : 1-3  
 Injection Volume : 20 uL  
 Date Acquired : 15.05.2019 19:04:23  
 Date Processed : 15.05.2019 19:16:55

Sample Type : Unknown  
 Acquired by : HPLC - Natascha  
 Processed by : HPLC - Natascha

## <Chromatogram>

mV

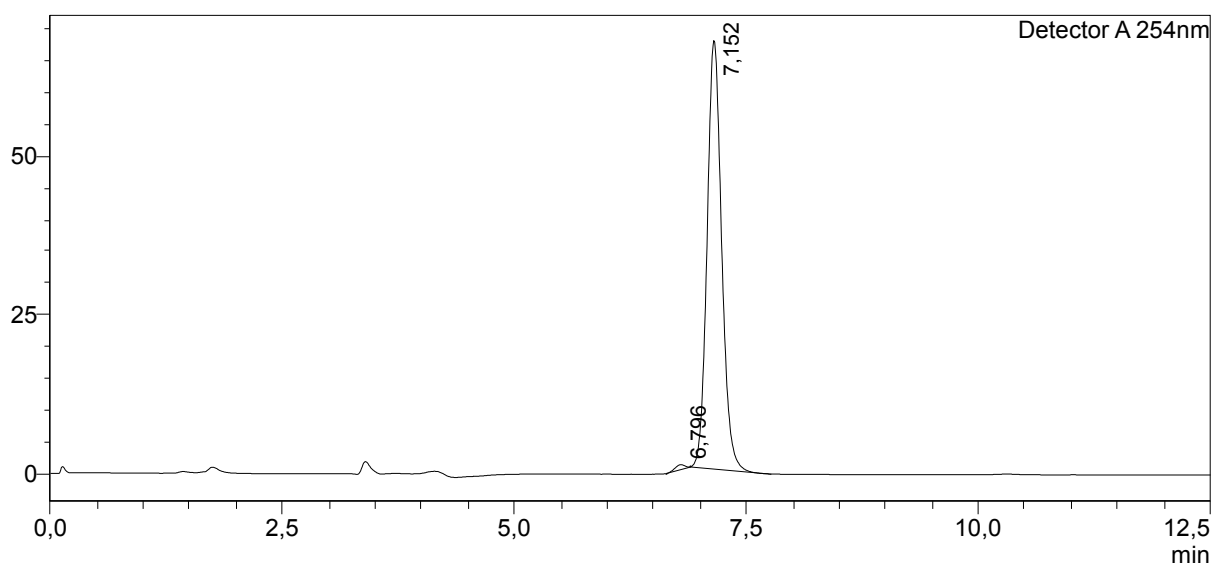

## <Peak Table>

Detector A 254nm

| Ret. Time | Area   | Area%   |
|-----------|--------|---------|
| 6,796     | 5886   | 0,794   |
| 7,152     | 735162 | 99,206  |
|           | 741047 | 100,000 |

**Figure S32b.** Chiral chromatogram of **8h**.

# Analysis Report

## <Sample Information>

|                  |                               |              |                   |
|------------------|-------------------------------|--------------|-------------------|
| Sample Name      | : CE-196_spot_2_peak_2        |              |                   |
| Sample ID        | : CE-196_spot_2_peak_2        |              |                   |
| Data Filename    | : CE-196_spot_2_peak_2_01.lcd |              |                   |
| Method Filename  | : Method_12.03.2019.lcm       |              |                   |
| Batch Filename   | :                             |              |                   |
| Vial #           | : 1-4                         | Sample Type  | : Unknown         |
| Injection Volume | : 15 uL                       |              |                   |
| Date Acquired    | : 15.05.2019 19:18:22         | Acquired by  | : HPLC - Natascha |
| Date Processed   | : 15.05.2019 19:30:53         | Processed by | : HPLC - Natascha |

## <Chromatogram>

mV

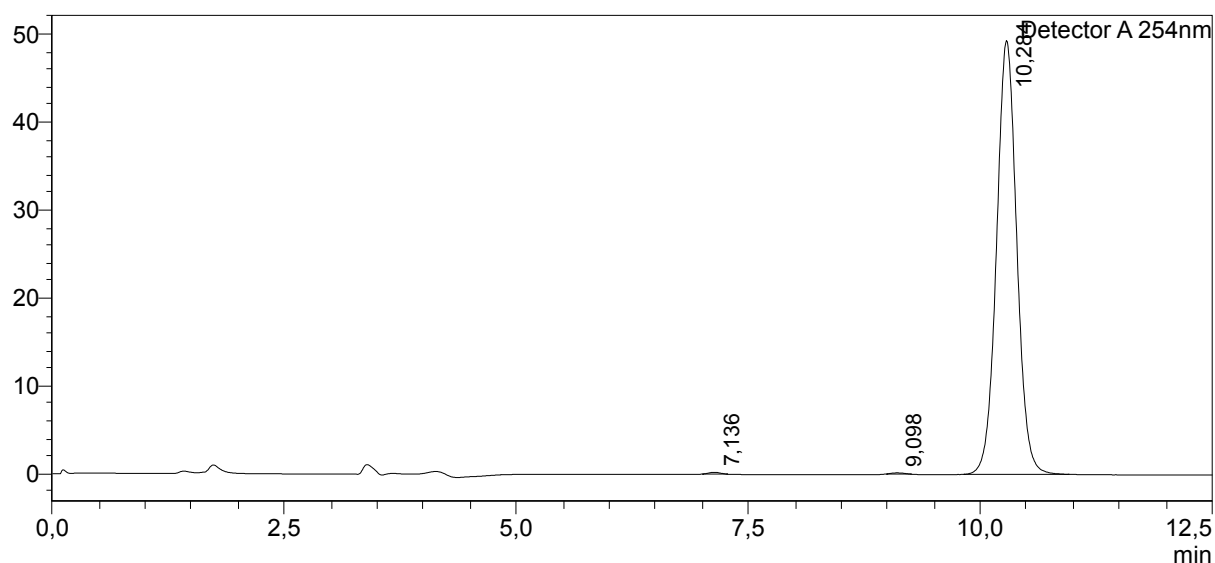

## <Peak Table>

Detector A 254nm

| Ret. Time | Area   | Area%   |
|-----------|--------|---------|
| 7,136     | 1734   | 0,231   |
| 9,098     | 1187   | 0,158   |
| 10,284    | 748198 | 99,611  |
|           | 751118 | 100,000 |

**Figure S33b.** Chiral chromatogram of **5i**.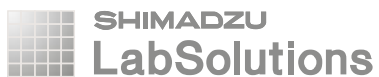

# Analysis Report

## <Sample Information>

Sample Name : MK-31\_peak\_1\_  
 Sample ID : MK-31\_peak\_1\_  
 Data Filename : MK-31\_peak\_1\_01.lcd  
 Method Filename : Chiralpak\_IA\_EtOAc\_.lcm  
 Batch Filename :  
 Vial # : 1-31  
 Injection Volume : 20 uL  
 Date Acquired : 14.08.2020 10:11:48  
 Date Processed : 14.08.2020 10:26:49

Sample Type : Unknown  
 Acquired by : HPLC - Natascha  
 Processed by : HPLC - Natascha

## <Chromatogram>

mV

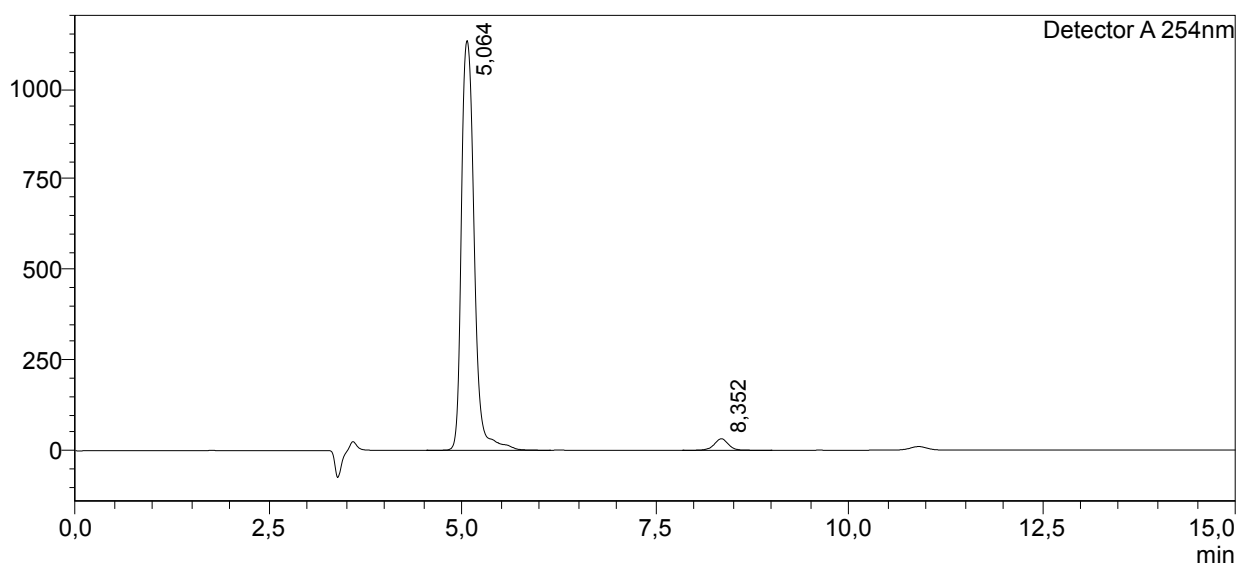

## <Peak Table>

Detector A 254nm

| Ret. Time | Area     | Area%   |
|-----------|----------|---------|
| 5,064     | 13145498 | 96,972  |
| 8,352     | 410405   | 3,028   |
|           | 13555903 | 100,000 |



**Figure S34b.** Chiral chromatogram of **6i**.

# Analysis Report

## <Sample Information>

Sample Name : MK-31\_peak\_2\_  
 Sample ID : MK-31\_peak\_2\_  
 Data Filename : MK-31\_peak\_2\_01.lcd  
 Method Filename : Chiralpak\_IA\_EtOAc\_.lcm  
 Batch Filename :  
 Vial # : 1-32  
 Injection Volume : 20 uL  
 Date Acquired : 14.08.2020 10:28:33  
 Date Processed : 14.08.2020 10:48:35

Sample Type : Unknown  
 Acquired by : HPLC - Natascha  
 Processed by : HPLC - Natascha

## <Chromatogram>

mV

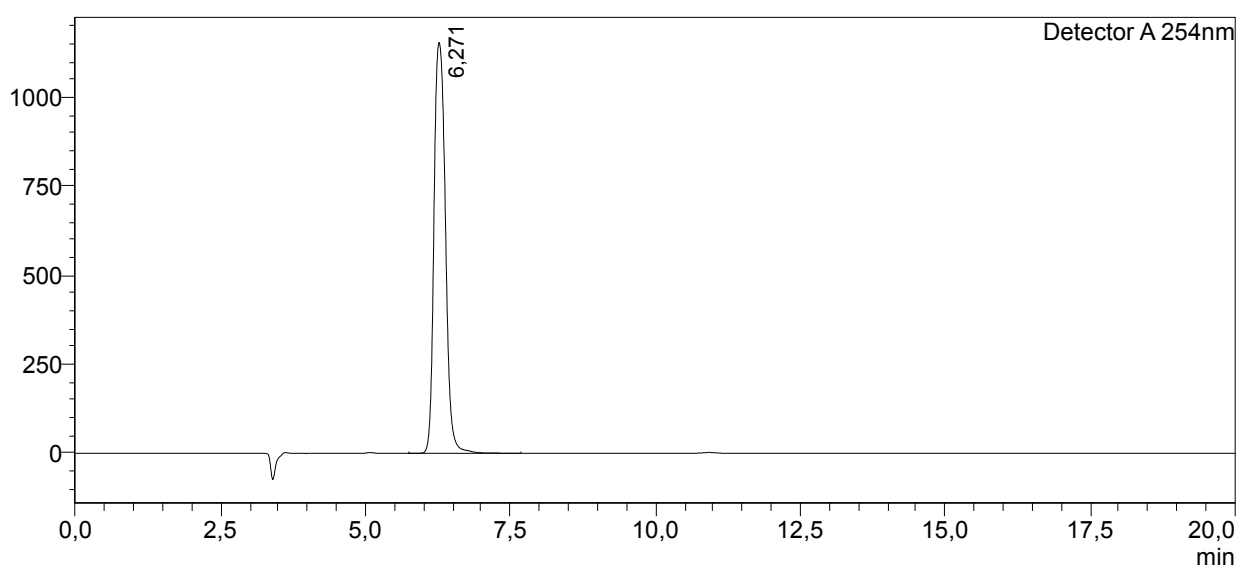

## <Peak Table>

Detector A 254nm

| Ret. Time | Area     | Area%   |
|-----------|----------|---------|
| 6,271     | 15758232 | 100,000 |
|           | 15758232 | 100,000 |

**Figure S35b.** Chiral chromatogram of **7i**.

# Analysis Report

## <Sample Information>

Sample Name : MK-31\_Peak\_3\_  
 Sample ID : MK-31\_Peak\_3\_  
 Data Filename : MK-31\_Peak\_3\_02.lcd  
 Method Filename : Chiralpak\_IA\_100%\_EtOAc\_mind3bar.lcm  
 Batch Filename :  
 Vial # : 1-6  
 Injection Volume : 25 uL  
 Date Acquired : 29.03.2021 14:43:34  
 Date Processed : 29.03.2021 14:55:43

Sample Type : Unknown  
 Acquired by : HPLC - Natascha  
 Processed by : HPLC - Natascha

## <Chromatogram>

mV

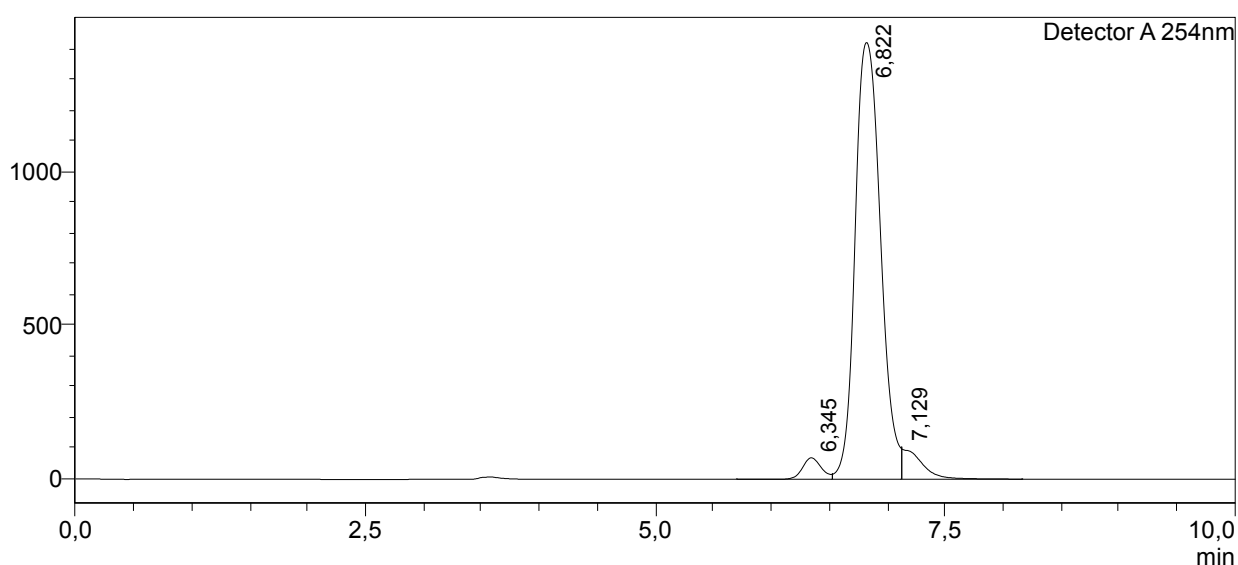

## <Peak Table>

Detector A 254nm

| Peak# | Ret. Time | Area     | Area%   |
|-------|-----------|----------|---------|
| 1     | 6,345     | 778225   | 3,301   |
| 2     | 6,822     | 21586326 | 91,553  |
| 3     | 7,129     | 1213302  | 5,146   |
| Total |           | 23577853 | 100,000 |

**Figure S36b.** Chiral chromatogram of **8i**.

# Analysis Report

## <Sample Information>

Sample Name : MK-31\_peak\_4\_  
 Sample ID : MK-31\_peak\_4\_  
 Data Filename : MK-31\_peak\_4\_01.lcd  
 Method Filename : Chiralpak\_IA\_EtOAc\_.lcm  
 Batch Filename :  
 Vial # : 1-34  
 Injection Volume : 20 uL  
 Date Acquired : 14.08.2020 11:06:40  
 Date Processed : 14.08.2020 11:21:42

Sample Type : Unknown  
 Acquired by : HPLC - Natascha  
 Processed by : HPLC - Natascha

## <Chromatogram>

mV

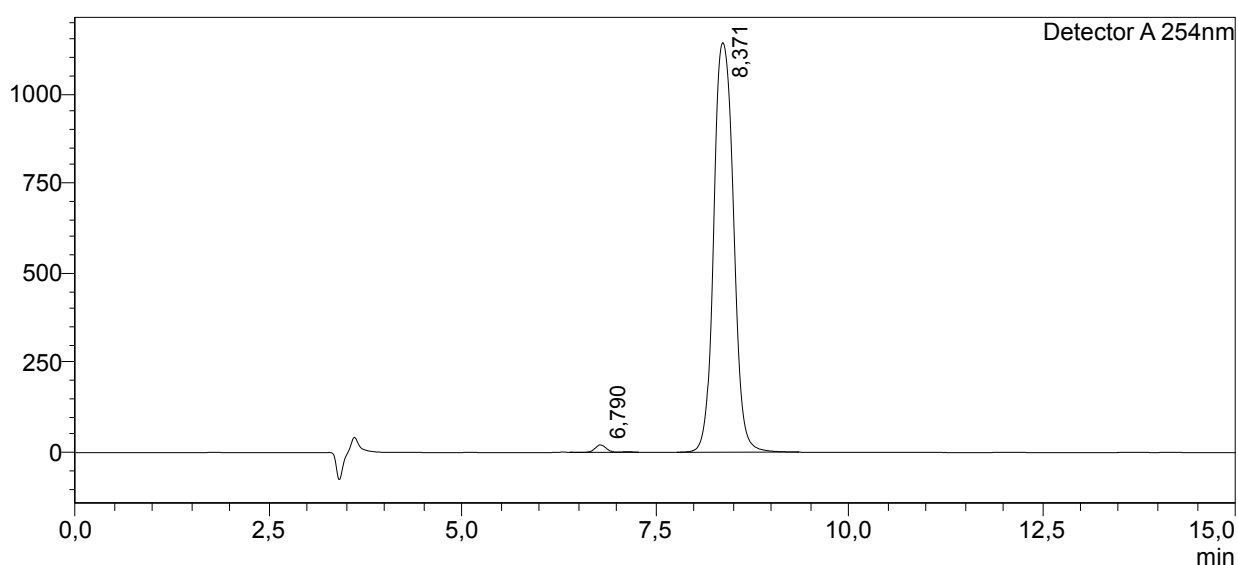

## <Peak Table>

Detector A 254nm

| Ret. Time | Area     | Area%   |
|-----------|----------|---------|
| 6,790     | 216162   | 1,047   |
| 8,371     | 20422562 | 98,953  |
|           | 20638724 | 100,000 |

**Figure S37b.** Chiral chromatogram of **5j**.

# Analysis Report

## <Sample Information>

|                  |                              |              |                   |
|------------------|------------------------------|--------------|-------------------|
| Sample Name      | : MK-30_spot_1_peak_1_       | Sample Type  | : Unknown         |
| Sample ID        | : MK-30_spot_1_peak_1_       |              |                   |
| Data Filename    | : MK-30_spot_1_peak_1_01.lcd | Acquired by  | : HPLC - Natascha |
| Method Filename  | : Chiralpak_IA_EtOAc_.lcm    | Processed by | : HPLC - Natascha |
| Batch Filename   | :                            |              |                   |
| Vial #           | : 1-18                       |              |                   |
| Injection Volume | : 15 uL                      |              |                   |
| Date Acquired    | : 26.06.2020 11:17:05        |              |                   |
| Date Processed   | : 26.06.2020 11:29:36        |              |                   |

## <Chromatogram>

mV

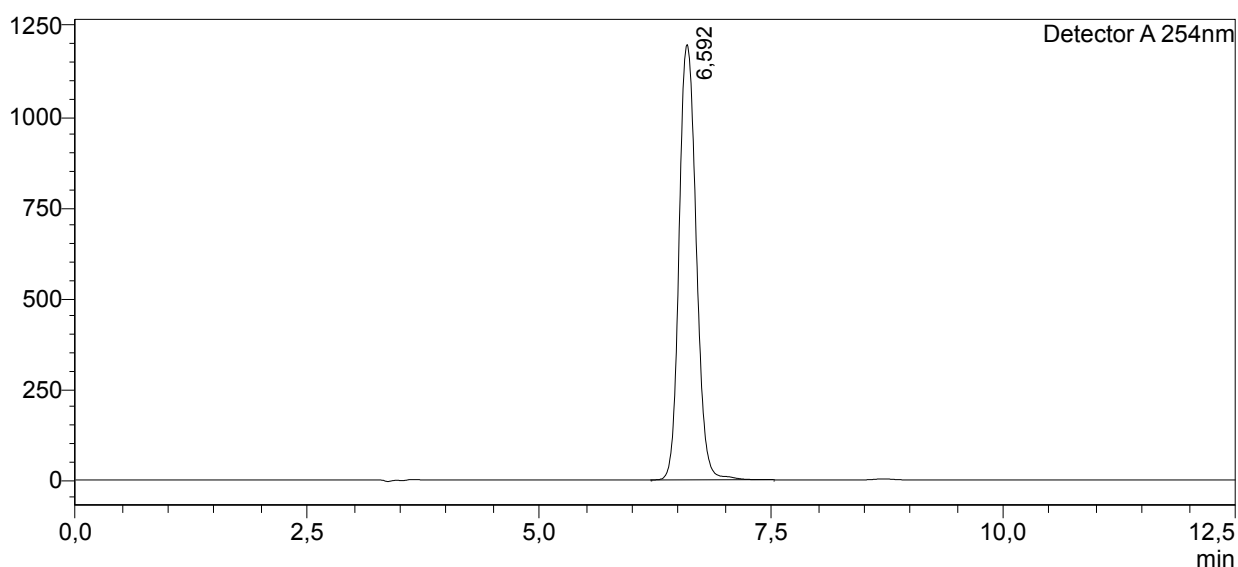

## <Peak Table>

Detector A 254nm

| Ret. Time | Area     | Area%   |
|-----------|----------|---------|
| 6.592     | 15404992 | 100,000 |
|           | 15404992 | 100,000 |

**Figure S38b.** Chiral chromatogram of **6j**.

# Analysis Report

## <Sample Information>

Sample Name : MK-30\_spot\_1\_peak\_2\_  
 Sample ID : MK-30\_spot\_1\_peak\_2\_  
 Data Filename : MK-30\_spot\_1\_peak\_2\_01.lcd  
 Method Filename : Chiralpak\_IA\_EtOAc\_.lcm  
 Batch Filename :  
 Vial # : 1-19  
 Injection Volume : 15 uL  
 Date Acquired : 26.06.2020 11:32:20  
 Date Processed : 26.06.2020 11:44:51

Sample Type : Unknown  
 Acquired by : HPLC - Natascha  
 Processed by : HPLC - Natascha

## <Chromatogram>

mV

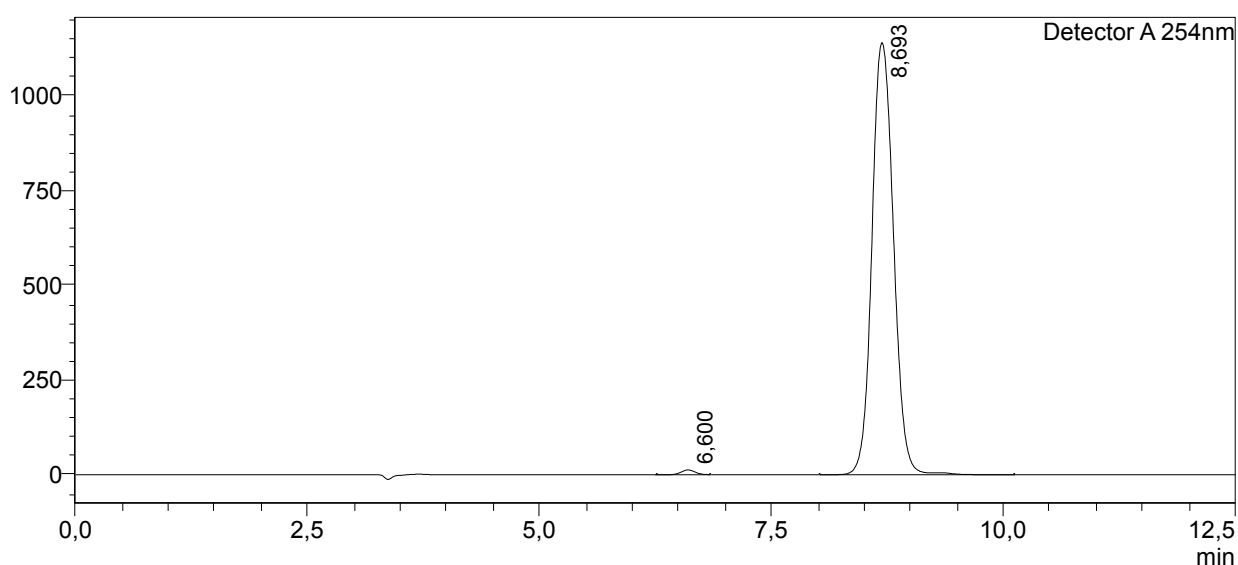

## <Peak Table>

Detector A 254nm

| Ret. Time | Area     | Area%   |
|-----------|----------|---------|
| 6,600     | 131220   | 0,708   |
| 8,693     | 18414644 | 99,292  |
|           | 18545863 | 100,000 |

**Figure S39b.** Chiral chromatogram of **7j**.

# Analysis Report

## <Sample Information>

|                  |                                    |              |                   |
|------------------|------------------------------------|--------------|-------------------|
| Sample Name      | : MK-30_spot_2_peak_1_final        |              |                   |
| Sample ID        | : MK-30_spot_2_peak_1_final        |              |                   |
| Data Filename    | : MK-30_spot_2_peak_1_final_01.lcd |              |                   |
| Method Filename  | : Chiralpak_IA_EtOAc_.lcm          |              |                   |
| Batch Filename   | :                                  |              |                   |
| Vial #           | : 1-11                             | Sample Type  | : Unknown         |
| Injection Volume | : 20 uL                            |              |                   |
| Date Acquired    | : 25.06.2020 17:54:30              | Acquired by  | : HPLC - Natascha |
| Date Processed   | : 25.06.2020 18:07:02              | Processed by | : HPLC - Natascha |

## <Chromatogram>

mV

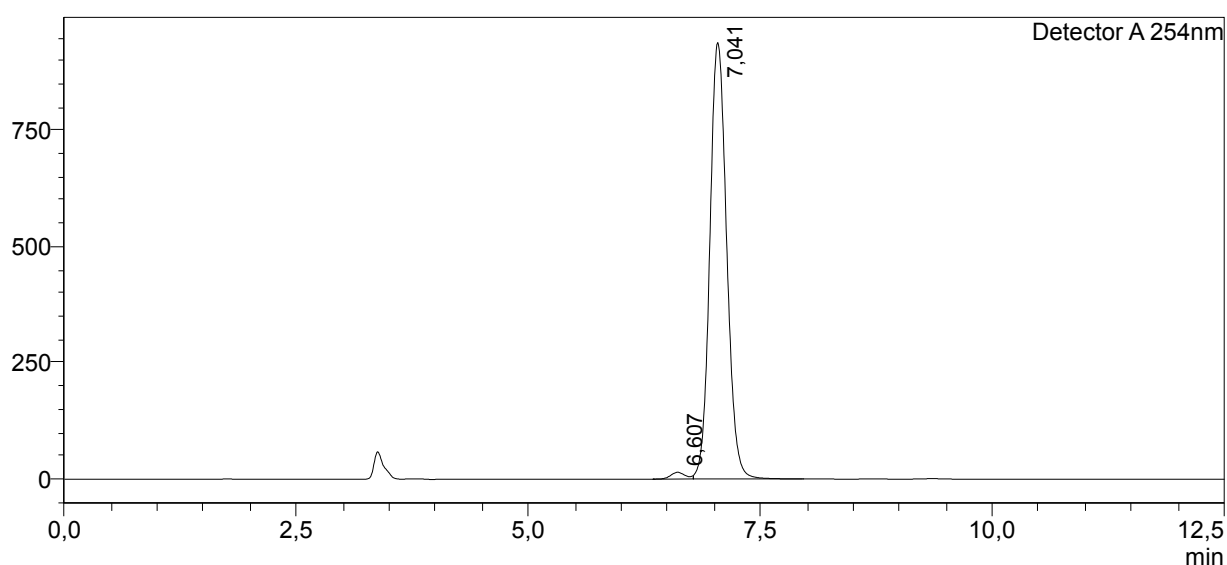

## <Peak Table>

Detector A 254nm

| Ret. Time | Area     | Area%   |
|-----------|----------|---------|
| 6,607     | 165617   | 1,375   |
| 7,041     | 11882094 | 98,625  |
|           | 12047711 | 100,000 |

**Figure S40b.** Chiral chromatogram of **8j**.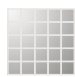

SHIMADZU

LabSolutions

# Analysis Report

## <Sample Information>

Sample Name : MK-30\_spot\_2\_peak\_2\_final\_  
 Sample ID : MK-30\_spot\_2\_peak\_2\_final\_  
 Data Filename : MK-30\_spot\_2\_peak\_2\_final\_01.lcd  
 Method Filename : Chiralpak\_IA\_EtOAc\_.lcm  
 Batch Filename :  
 Vial # : 1-13  
 Injection Volume : 20 uL  
 Date Acquired : 25.06.2020 18:07:54  
 Date Processed : 25.06.2020 18:20:26

Sample Type : Unknown  
 Acquired by : HPLC - Natascha  
 Processed by : HPLC - Natascha

## <Chromatogram>

mV

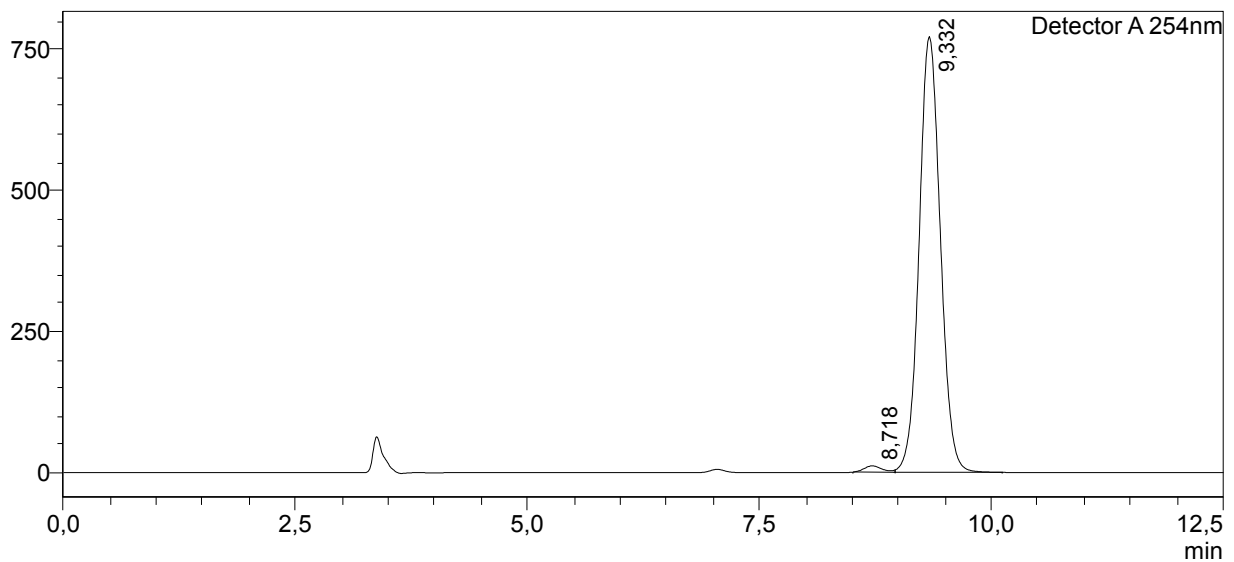

## <Peak Table>

Detector A 254nm

| Ret. Time | Area     | Area%   |
|-----------|----------|---------|
| 8,718     | 147169   | 1,186   |
| 9,332     | 12262662 | 98,814  |
|           | 12409831 | 100,000 |

**Figure S41b.** Chiral chromatogram of **5k**.

SHIMADZU

LabSolutions

# Analysis Report

## <Sample Information>

Sample Name : SB\_1\_1\_  
 Sample ID : 001  
 Data Filename : SB\_alle4Peaks\_\_12.01.2021\_001.lcd  
 Method Filename : Chiralpak\_IA\_100\_EtOAc\_mind3bar.lcm  
 Batch Filename : SB\_alle4Peaks\_.lcb  
 Vial # : 1-1  
 Injection Volume : 20 uL  
 Date Acquired : 12.01.2021 13:36:41  
 Date Processed : 12.01.2021 13:56:43

Sample Type : Unknown  
 Acquired by : HPLC - Natascha  
 Processed by : HPLC - Natascha

## <Chromatogram>

mV

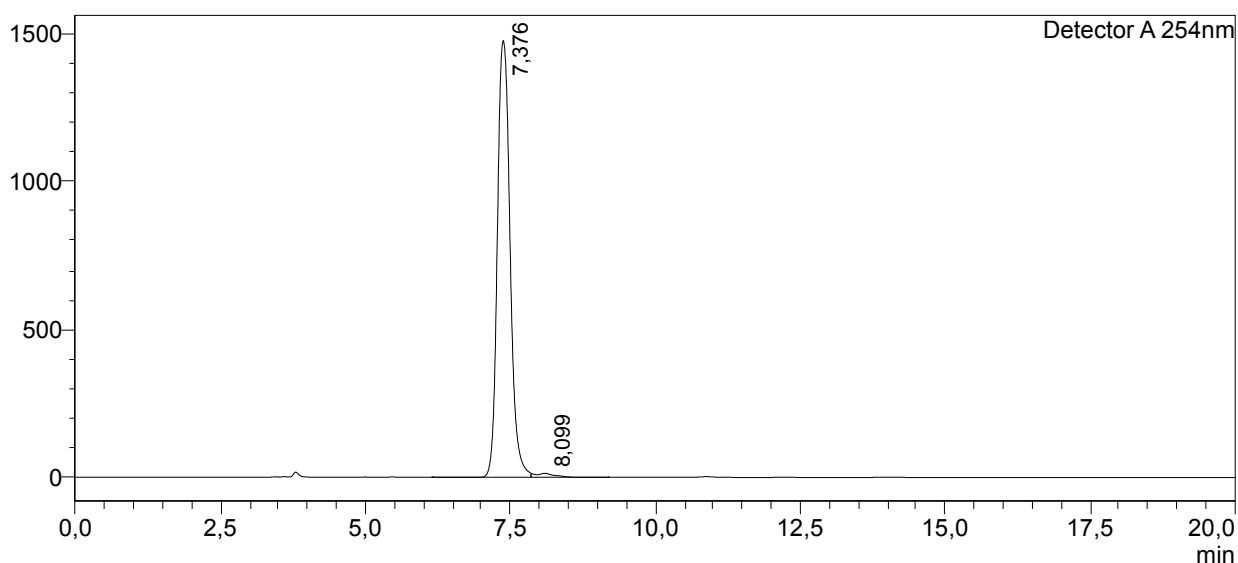

## <Peak Table>

Detector A 254nm

| Ret. Time | Area     | Area%   |
|-----------|----------|---------|
| 7,376     | 22438082 | 98,591  |
| 8,099     | 320663   | 1,409   |
|           | 22758745 | 100,000 |



**Figure S42b.** Chiral chromatogram of **6k**.

# Analysis Report

## <Sample Information>

Sample Name : SB\_1\_2\_  
 Sample ID : 001  
 Data Filename : SB\_alle4Peaks\_\_12.01.2021\_002.lcd  
 Method Filename : Chiralpak\_IA\_100\_EtOAc\_mind3bar.lcm  
 Batch Filename : SB\_alle4Peaks\_.lcb  
 Vial # : 1-2  
 Injection Volume : 20 uL  
 Date Acquired : 12.01.2021 13:57:06  
 Date Processed : 12.01.2021 14:17:07

Sample Type : Unknown  
 Acquired by : HPLC - Natascha  
 Processed by : HPLC - Natascha

## <Chromatogram>

mV

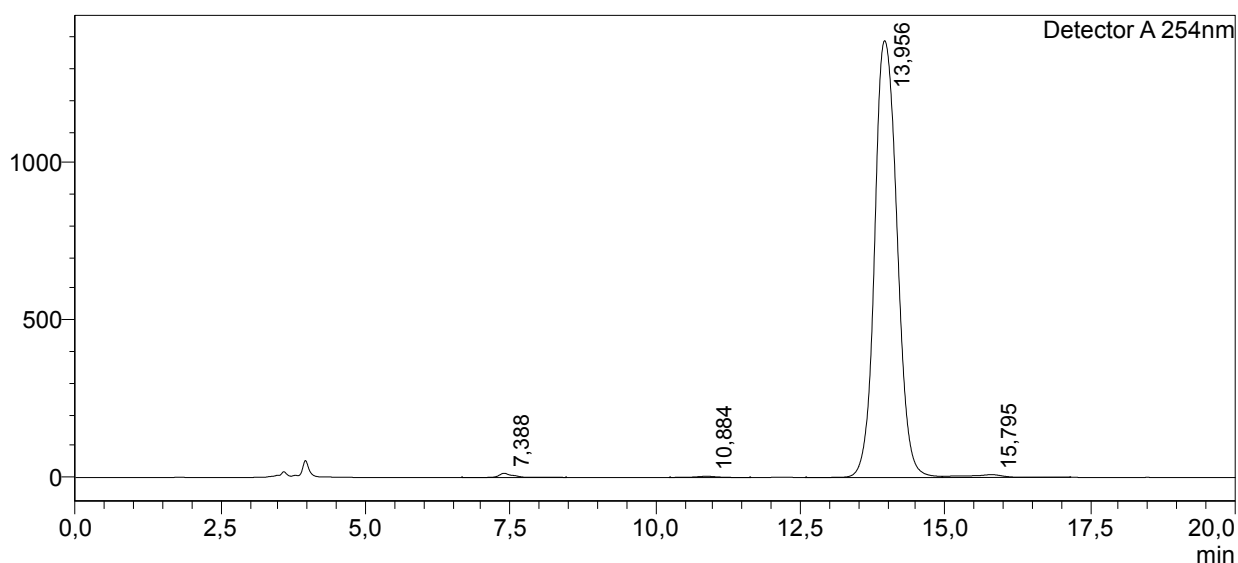

## <Peak Table>

Detector A 254nm

| Ret. Time | Area     | Area%   |
|-----------|----------|---------|
| 7,388     | 219346   | 0,577   |
| 10,884    | 86961    | 0,229   |
| 13,956    | 37330799 | 98,157  |
| 15,795    | 394575   | 1,037   |
|           | 38031681 | 100,000 |

**Figure S43b.** Chiral chromatogram of **7k**.

# Analysis Report

## <Sample Information>

Sample Name : SB\_2\_1\_  
 Sample ID : 001  
 Data Filename : SB\_alle4Peaks\_\_12.01.2021\_003.lcd  
 Method Filename : Chiralpak\_IA\_100\_EtOAc\_mind3bar.lcm  
 Batch Filename : SB\_alle4Peaks\_.lcb  
 Vial # : 1-3  
 Injection Volume : 20 uL  
 Date Acquired : 12.01.2021 14:17:31  
 Date Processed : 12.01.2021 14:37:32

Sample Type : Unknown  
 Acquired by : HPLC - Natascha  
 Processed by : HPLC - Natascha

## <Chromatogram>

mV

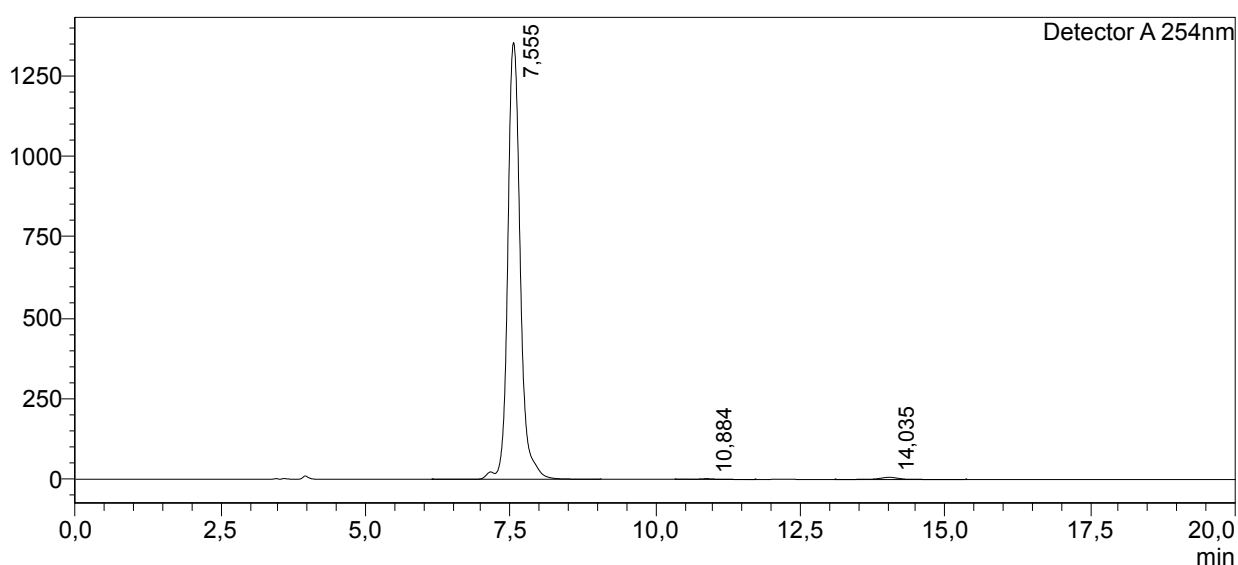

## <Peak Table>

Detector A 254nm

| Ret. Time | Area     | Area%   |
|-----------|----------|---------|
| 7,555     | 20360642 | 99,124  |
| 10,884    | 36821    | 0,179   |
| 14,035    | 143022   | 0,696   |
|           | 20540485 | 100,000 |

**Figure S44b.** Chiral chromatogram of **8k**.

# Analysis Report

## <Sample Information>

Sample Name : SB\_2\_2\_  
 Sample ID : 001  
 Data Filename : SB\_alle4Peaks\_\_12.01.2021\_004.lcd  
 Method Filename : Chiralpak\_IA\_100\_EtOAc\_mind3bar.lcm  
 Batch Filename : SB\_alle4Peaks\_.lcb  
 Vial # : 1-4  
 Injection Volume : 20 µL  
 Date Acquired : 12.01.2021 14:37:55  
 Date Processed : 12.01.2021 14:57:56

Sample Type : Unknown  
 Acquired by : HPLC - Natascha  
 Processed by : HPLC - Natascha

## <Chromatogram>

mV

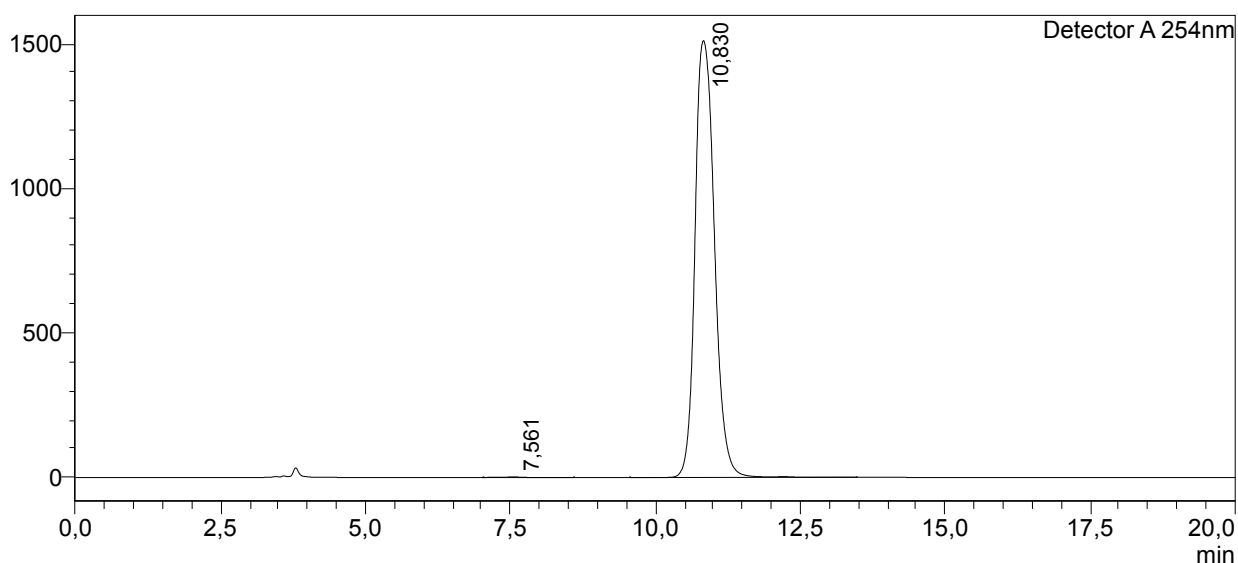

## <Peak Table>

Detector A 254nm

| Ret. Time | Area     | Area%   |
|-----------|----------|---------|
| 7,561     | 38461    | 0,109   |
| 10,830    | 35181813 | 99,891  |
|           | 35220274 | 100,000 |

**Figure S45b.** Chiral chromatogram of **5l**.

# Analysis Report

## <Sample Information>

Sample Name : PN-6\_Peak\_1\_  
 Sample ID : PN-6\_Peak\_1\_  
 Data Filename : PN-6\_Peak\_1\_01.lcd  
 Method Filename : Chiralpak\_IA\_50Hex\_50EtOAc\_.lcm  
 Batch Filename :  
 Vial # : 1-6  
 Injection Volume : 20 uL  
 Date Acquired : 19.03.2021 16:12:14  
 Date Processed : 19.03.2021 16:27:15

Sample Type : Unknown  
 Acquired by : HPLC - Natascha  
 Processed by : HPLC - Natascha

## <Chromatogram>

mV

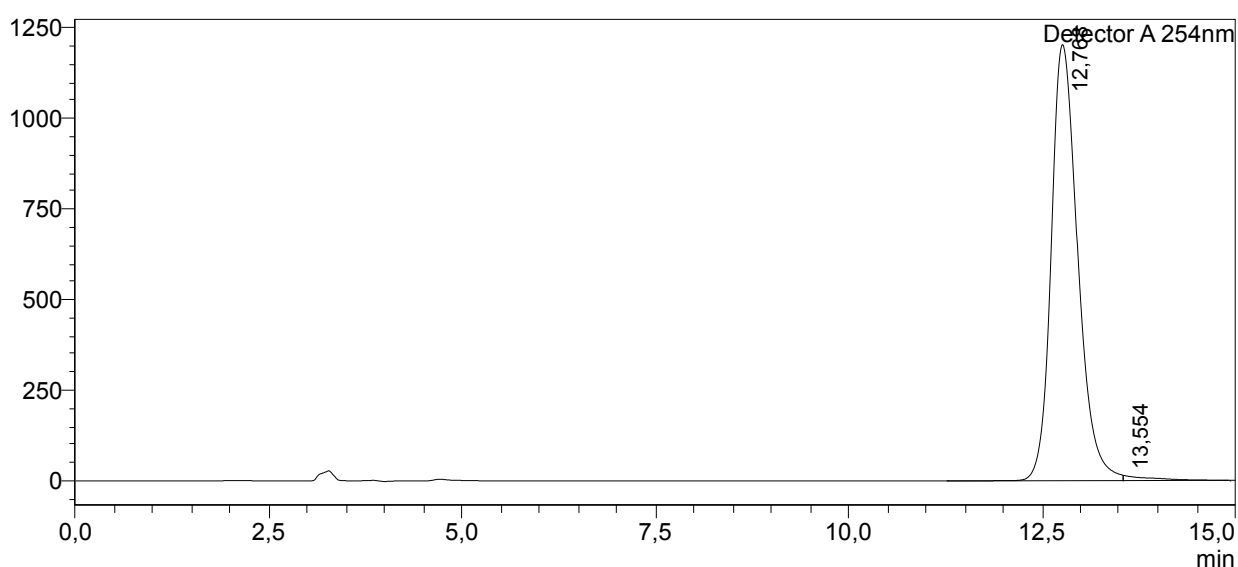

## <Peak Table>

Detector A 254nm

| Peak# | Ret. Time | Area     | Area%   |
|-------|-----------|----------|---------|
| 1     | 12,768    | 28737649 | 98,815  |
| 2     | 13,554    | 344705   | 1,185   |
| Total |           | 29082354 | 100,000 |

**Figure S46b.** Chiral chromatogram of **6l**.

# Analysis Report

## <Sample Information>

Sample Name : PN-6\_Peak\_2\_  
 Sample ID : PN-6\_Peak\_2\_  
 Data Filename : PN-6\_Peak\_2\_01.lcd  
 Method Filename : Chiralpak\_IA\_50Hex\_50EtOAc\_.lcm  
 Batch Filename :  
 Vial # : 1-6  
 Injection Volume : 20 uL  
 Date Acquired : 22.03.2021 14:45:30  
 Date Processed : 22.03.2021 15:00:31

Sample Type : Unknown  
 Acquired by : HPLC - Natascha  
 Processed by : HPLC - Natascha

## <Chromatogram>

mV

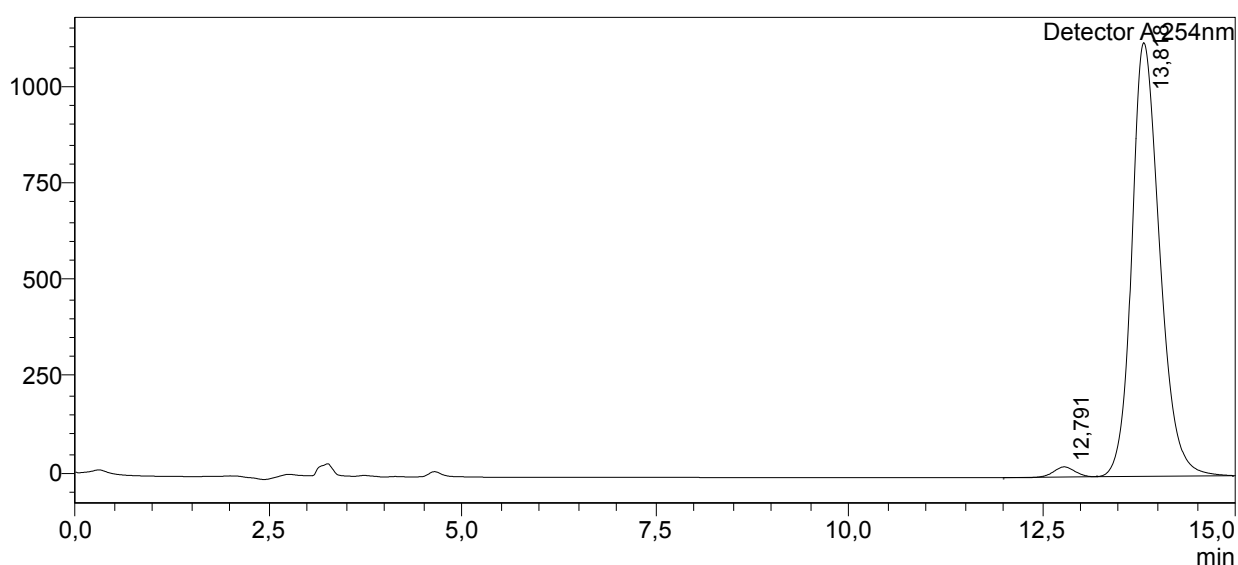

## <Peak Table>

Detector A 254nm

| Peak# | Ret. Time | Area     | Area%   |
|-------|-----------|----------|---------|
| 1     | 12,791    | 508264   | 1,771   |
| 2     | 13,818    | 28185217 | 98,229  |
| Total |           | 28693481 | 100,000 |

**Figure S47b.** Chiral chromatogram of 7l.

# Analysis Report

## <Sample Information>

Sample Name : PN-6\_Peak\_3\_  
 Sample ID : PN-6\_Peak\_3\_  
 Data Filename : PN-6\_Peak\_3\_01.lcd  
 Method Filename : Chiralpak\_IA\_100%\_EtOAc\_mind3bar.lcm  
 Batch Filename :  
 Vial # : 1-1  
 Injection Volume : 20 uL  
 Date Acquired : 28.05.2021 13:51:17  
 Date Processed : 28.05.2021 14:11:19

Sample Type : Unknown  
 Acquired by : HPLC - Natascha  
 Processed by : HPLC - Natascha

## <Chromatogram>

mV

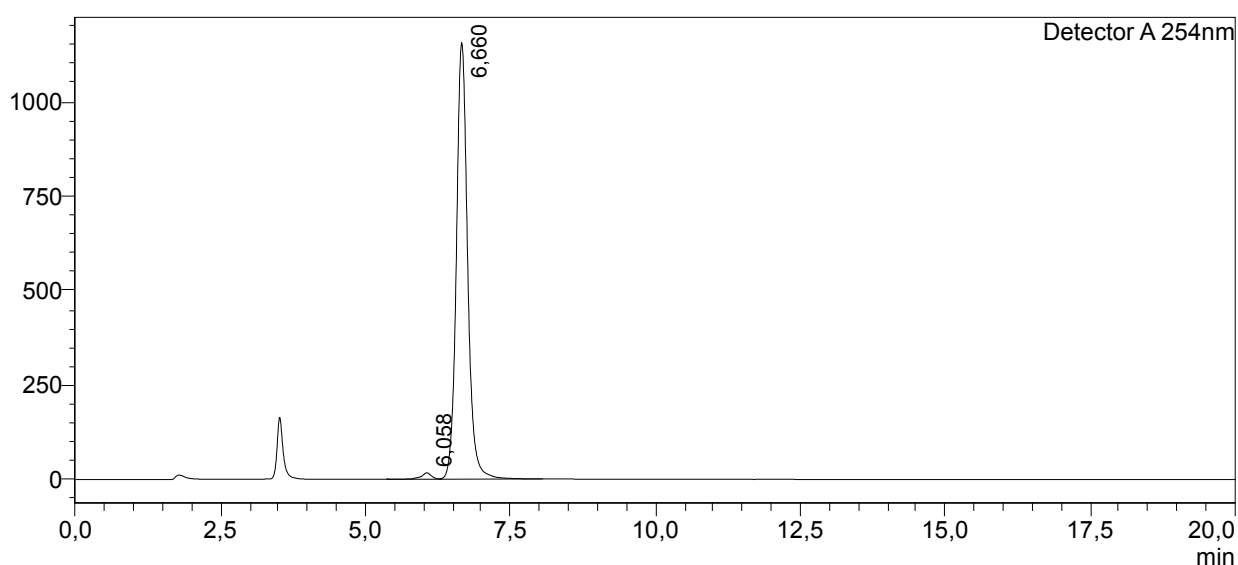

## <Peak Table>

Detector A 254nm

| Peak# | Ret. Time | Area     | Area%   |
|-------|-----------|----------|---------|
| 1     | 6,058     | 216979   | 1,366   |
| 2     | 6,660     | 15667698 | 98,634  |
| Total |           | 15884678 | 100,000 |

**Figure S48b.** Chiral chromatogram of **8l**.SHIMADZU  
LabSolutions

# Analysis Report

## <Sample Information>

Sample Name : PN-6\_peak\_4\_  
 Sample ID : PN-6\_peak\_4\_  
 Data Filename : PN-6\_peak\_4\_01.lcd  
 Method Filename : Chiralpak\_IA\_EtOAc\_.lcm  
 Batch Filename :  
 Vial # : 1-8  
 Injection Volume : 20 uL  
 Date Acquired : 21.07.2020 12:31:39  
 Date Processed : 21.07.2020 12:47:26

Sample Type : Unknown  
 Acquired by : HPLC - Natascha  
 Processed by : HPLC - Natascha

## <Chromatogram>

mV

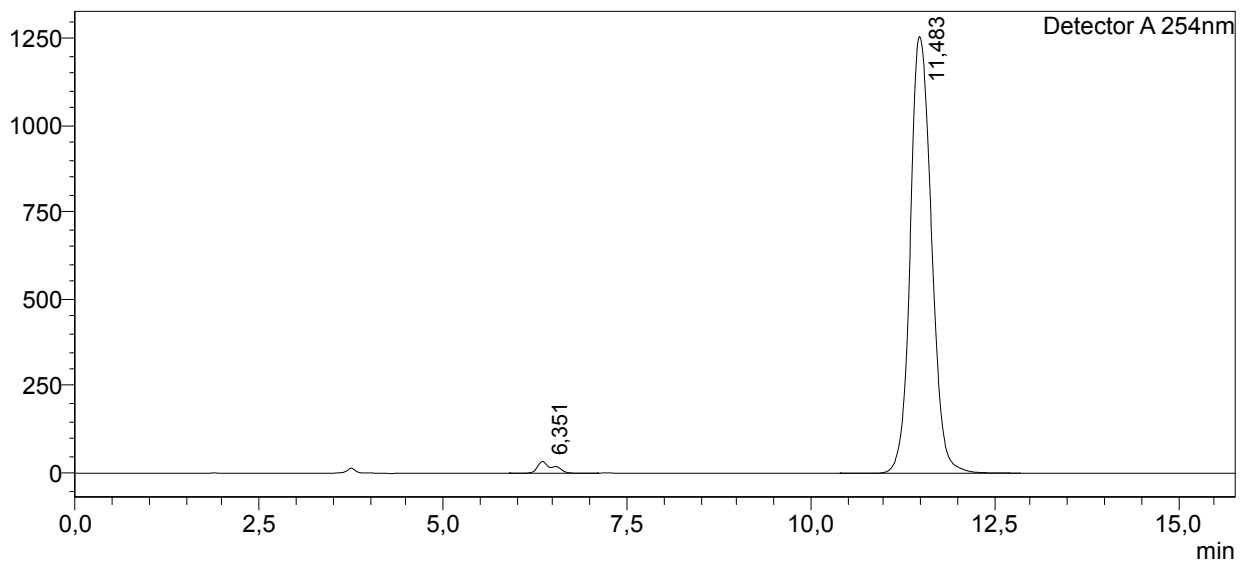

## <Peak Table>

Detector A 254nm

| Ret. Time | Area     | Area%   |
|-----------|----------|---------|
| 6,351     | 502740   | 1,955   |
| 11,483    | 25216908 | 98,045  |
|           | 25719648 | 100,000 |

**Figure S49b.** Chiral chromatogram of **5m**.

# Analysis Report

## <Sample Information>

Sample Name : PN-16\_spot1\_peak1\_  
 Sample ID : PN-16\_spot1\_peak1\_  
 Data Filename : PN-16\_spot1\_peak1\_01.lcd  
 Method Filename : 100EtOAc\_.lcm  
 Batch Filename :  
 Vial # : 1-1  
 Injection Volume : 10 uL  
 Date Acquired : 02.07.2019 11:26:21  
 Date Processed : 02.07.2019 11:46:22

Sample Type : Unknown  
 Acquired by : HPLC - Natascha  
 Processed by : HPLC - Natascha

## <Chromatogram>

mV

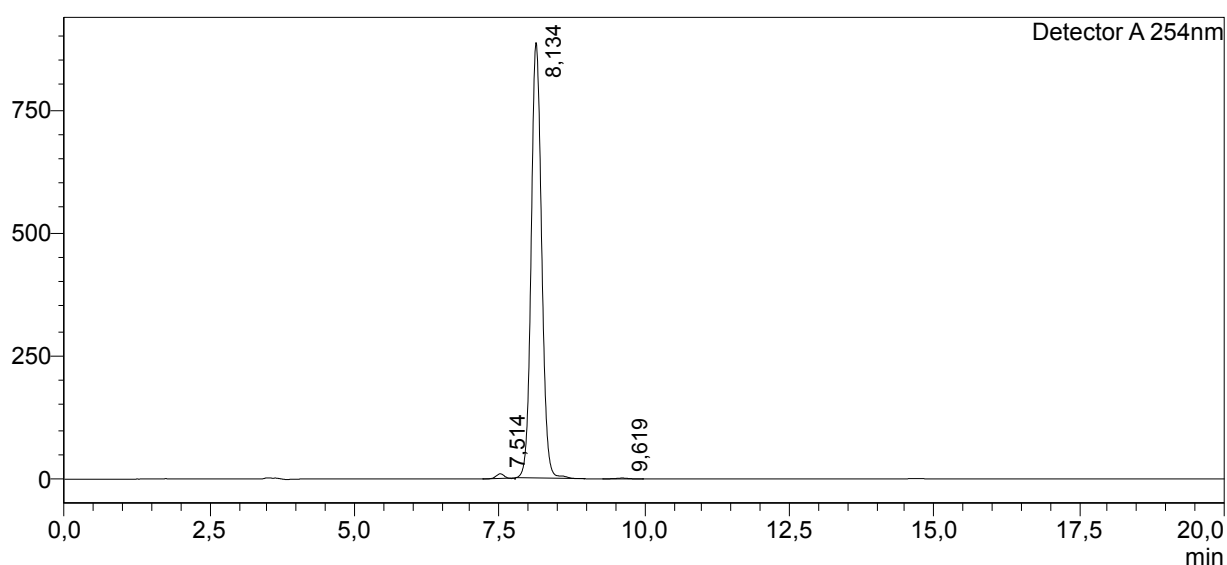

## <Peak Table>

Detector A 254nm

| Peak# | Ret. Time | Area     | Height | Area%   | Height% |
|-------|-----------|----------|--------|---------|---------|
| 1     | 7,514     | 81294    | 9265   | 0,731   | 1,035   |
| 2     | 8,134     | 11012292 | 883931 | 99,071  | 98,782  |
| 3     | 9,619     | 21961    | 1631   | 0,198   | 0,182   |
| Total |           | 11115546 | 894827 | 100,000 | 100,000 |



**Figure S50b.** Chiral chromatogram of **6m**.

# Analysis Report

## <Sample Information>

Sample Name : PN-16\_spot1\_peak2\_  
 Sample ID : PN-16\_spot1\_peak2\_  
 Data Filename : PN-16\_spot1\_peak2\_.lcd  
 Method Filename : 100EtOAc\_.lcm  
 Batch Filename : batch\_.lcb  
 Vial # : 1-2  
 Injection Volume : 10 uL  
 Date Acquired : 02.07.2019 11:57:46  
 Date Processed : 02.07.2019 12:17:47

Sample Type : Unknown

Acquired by : HPLC - Natascha  
 Processed by : HPLC - Natascha

## <Chromatogram>

mV

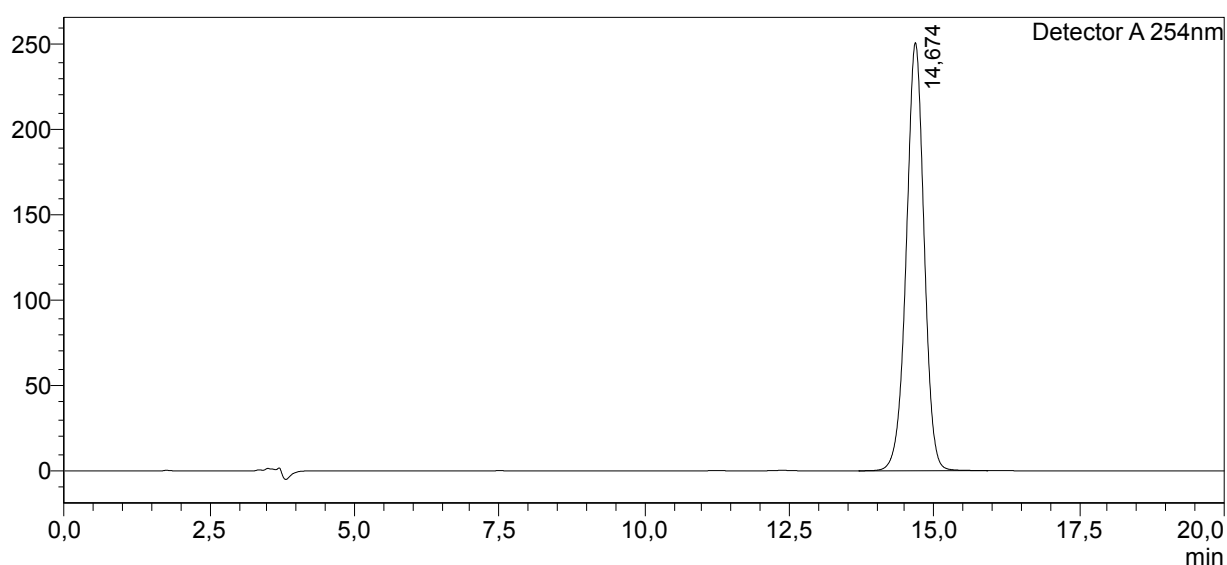

## <Peak Table>

Detector A 254nm

| Peak# | Ret. Time | Area    | Height | Area%   | Height% |
|-------|-----------|---------|--------|---------|---------|
| 1     | 14,674    | 5358008 | 250870 | 100,000 | 100,000 |
| Total |           | 5358008 | 250870 | 100,000 | 100,000 |

**Figure S51b.** Chiral chromatogram of 7m.

# Analysis Report

## <Sample Information>

Sample Name : PN-16\_spot2\_peak1\_  
 Sample ID : PN-16\_spot2\_peak1\_  
 Data Filename : PN-16\_spot2\_peak1\_.lcd  
 Method Filename : 100EtOAc\_.lcm  
 Batch Filename : batch\_.lcb  
 Vial # : 1-3  
 Injection Volume : 10 uL  
 Date Acquired : 02.07.2019 12:18:10  
 Date Processed : 02.07.2019 13:50:27

Sample Type : Unknown

Acquired by : HPLC - Natascha  
 Processed by : HPLC - Natascha

## <Chromatogram>

mV

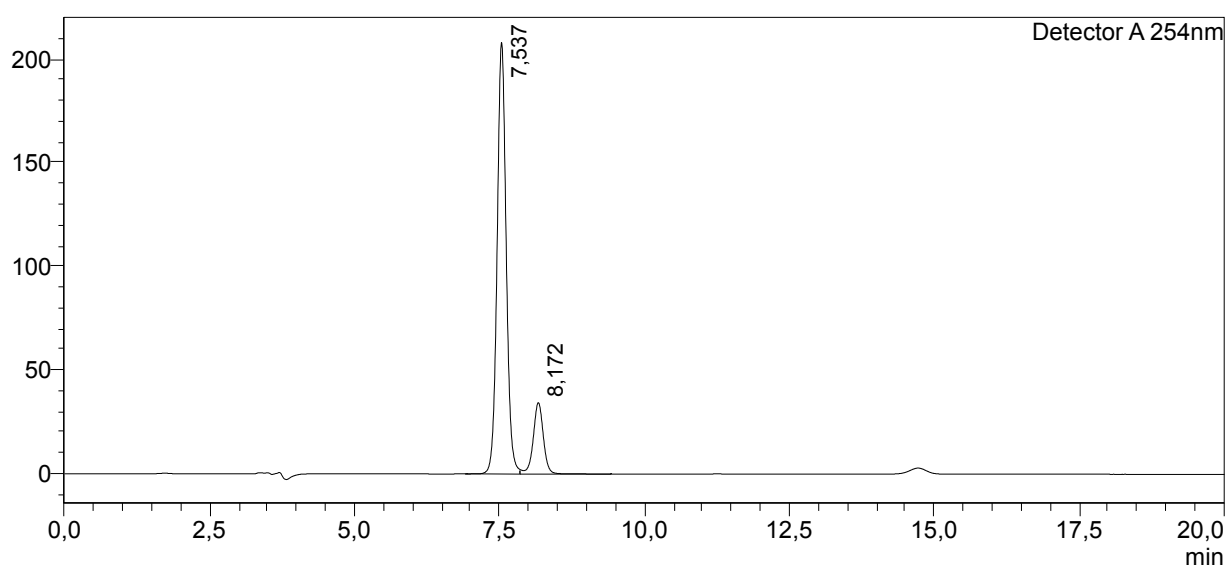

## <Peak Table>

Detector A 254nm

| Peak# | Ret. Time | Area    | Height | Area%   | Height% |
|-------|-----------|---------|--------|---------|---------|
| 1     | 7,537     | 2275678 | 208003 | 84,487  | 85,828  |
| 2     | 8,172     | 417833  | 34346  | 15,513  | 14,172  |
| Total |           | 2693511 | 242349 | 100,000 | 100,000 |

**Figure S52b.** Chiral chromatogram of **8m**.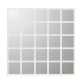SHIMADZU  
LabSolutions

# Analysis Report

## <Sample Information>

Sample Name : PN-16\_spot2\_peak2\_  
 Sample ID : PN-16\_spot2\_peak2\_  
 Data Filename : PN-16\_spot2\_peak2\_.lcd  
 Method Filename : 100EtOAc\_.lcm  
 Batch Filename : batch\_.lcb  
 Vial # : 1-4  
 Injection Volume : 10 uL  
 Date Acquired : 02.07.2019 12:38:33  
 Date Processed : 02.07.2019 12:58:34

Sample Type : Unknown

Acquired by : HPLC - Natascha  
 Processed by : HPLC - Natascha

## <Chromatogram>

mV

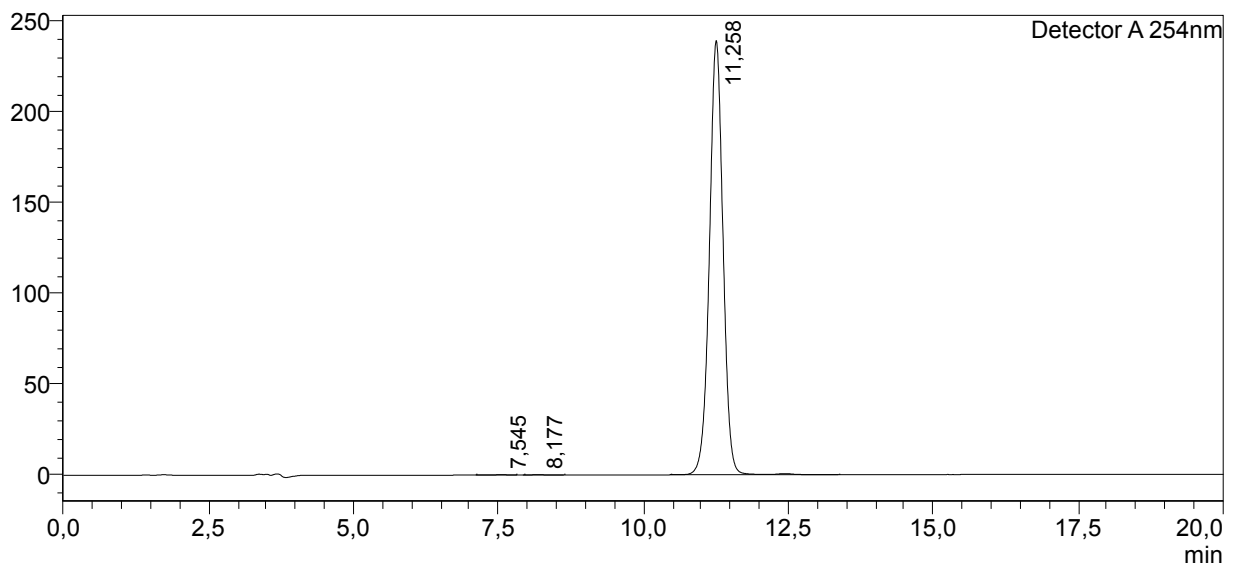

## <Peak Table>

Detector A 254nm

| Peak# | Ret. Time | Area    | Height | Area%   | Height% |
|-------|-----------|---------|--------|---------|---------|
| 1     | 7,545     | 3188    | 314    | 0,081   | 0,131   |
| 2     | 8,177     | 3153    | 275    | 0,080   | 0,114   |
| 3     | 11,258    | 3910182 | 239325 | 99,838  | 99,755  |
| Total |           | 3916523 | 239913 | 100,000 | 100,000 |

**Figure S53b.** Chiral chromatogram of **5n**.

# Analysis Report

## <Sample Information>

Sample Name : PN-22\_spot1\_peak1\_  
 Sample ID : PN-22\_spot1\_peak1\_  
 Data Filename : PN-22\_spot1\_peak1\_.lcd  
 Method Filename : 100EtOAc\_.lcm  
 Batch Filename : batch\_.lcb  
 Vial # : 1-5  
 Injection Volume : 10 uL  
 Date Acquired : 02.07.2019 12:58:58  
 Date Processed : 02.07.2019 13:18:59

Sample Type : Unknown  
 Acquired by : HPLC - Natascha  
 Processed by : HPLC - Natascha

## <Chromatogram>

mV

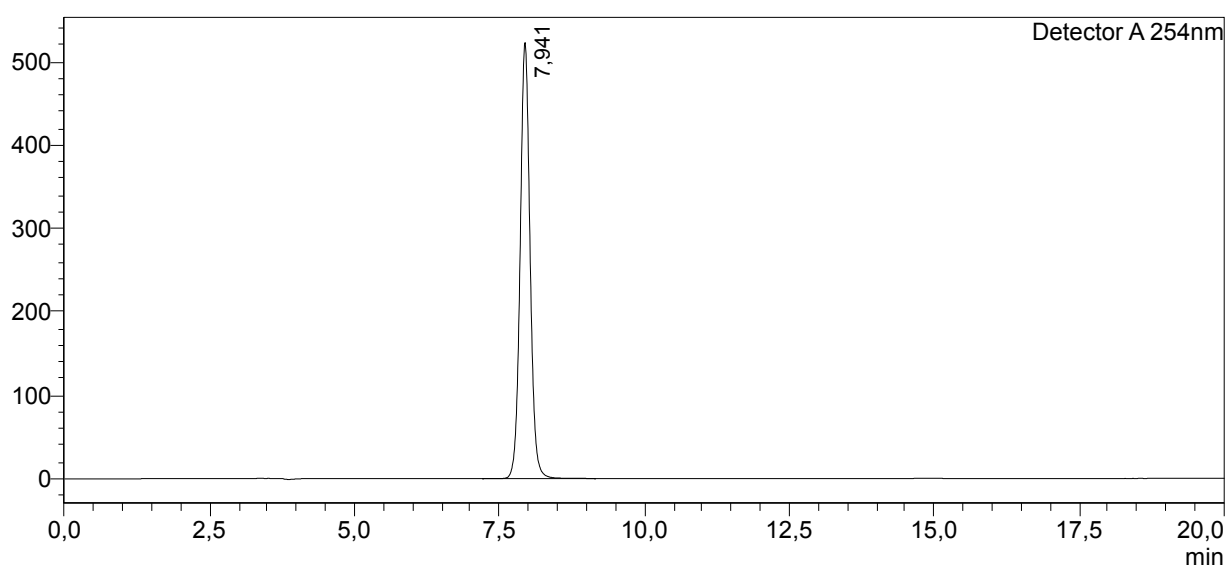

## <Peak Table>

Detector A 254nm

| Peak# | Ret. Time | Area    | Height | Area%   | Height% |
|-------|-----------|---------|--------|---------|---------|
| 1     | 7,941     | 6236918 | 522311 | 100,000 | 100,000 |
| Total |           | 6236918 | 522311 | 100,000 | 100,000 |

**Figure S54b.** Chiral chromatogram of **6n**.

# Analysis Report

## <Sample Information>

Sample Name : PN-22\_spot1\_peak2\_  
 Sample ID : PN-22\_spot1\_peak2\_  
 Data Filename : PN-22\_spot1\_peak2\_.lcd  
 Method Filename : 100EtOAc\_.lcm  
 Batch Filename : batch\_.lcb  
 Vial # : 1-6  
 Injection Volume : 10 uL  
 Date Acquired : 02.07.2019 13:19:23  
 Date Processed : 02.07.2019 13:39:25

Sample Type : Unknown

Acquired by : HPLC - Natascha  
 Processed by : HPLC - Natascha

## <Chromatogram>

mV

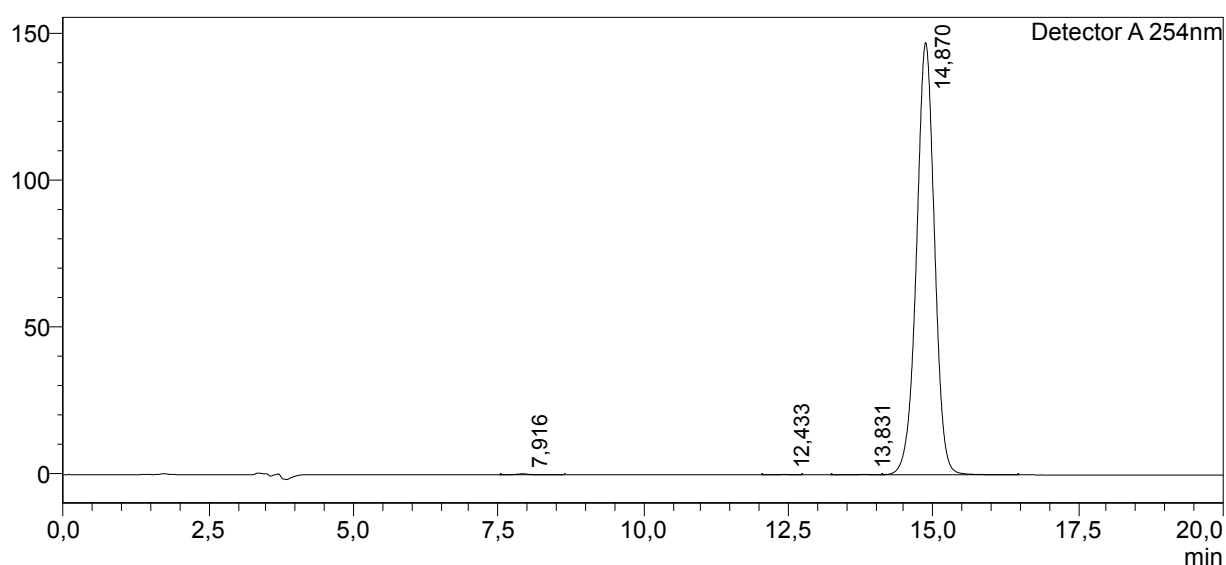

## <Peak Table>

Detector A 254nm

| Peak# | Ret. Time | Area    | Height | Area%   | Height% |
|-------|-----------|---------|--------|---------|---------|
| 1     | 7,916     | 4104    | 321    | 0,129   | 0,218   |
| 2     | 12,433    | 1993    | 109    | 0,063   | 0,074   |
| 3     | 13,831    | 1270    | 93     | 0,040   | 0,063   |
| 4     | 14,870    | 3174198 | 146822 | 99,768  | 99,645  |
| Total |           | 3181565 | 147345 | 100,000 | 100,000 |

**Figure S55b.** Chiral chromatogram of **7n**.

SHIMADZU

LabSolutions

# Analysis Report

## <Sample Information>

Sample Name : PN-22\_spot2\_peak1\_  
 Sample ID : PN-22\_spot2\_peak1\_  
 Data Filename : PN-22\_spot2\_peak1\_.lcd  
 Method Filename : 100EtOAc\_.lcm  
 Batch Filename : batch\_.lcb  
 Vial # : 1-7  
 Injection Volume : 10 uL  
 Date Acquired : 02.07.2019 13:39:48  
 Date Processed : 02.07.2019 13:59:49

Sample Type : Unknown

Acquired by : HPLC - Natascha  
 Processed by : HPLC - Natascha

## <Chromatogram>

mV

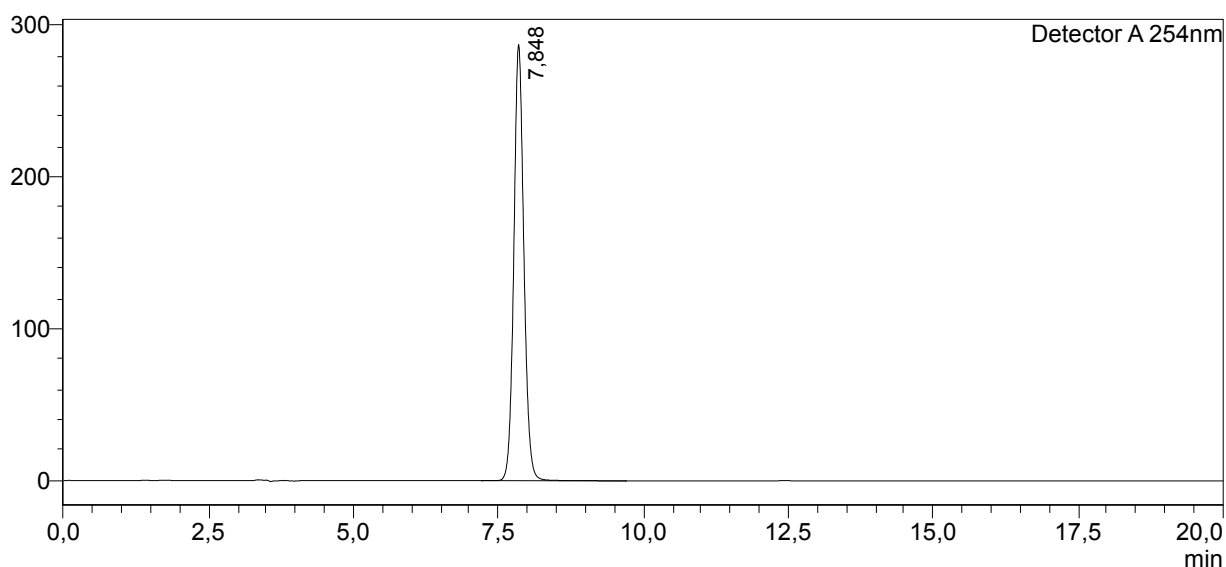

## <Peak Table>

Detector A 254nm

| Peak# | Ret. Time | Area    | Height | Area%   | Height% |
|-------|-----------|---------|--------|---------|---------|
| 1     | 7,848     | 3473579 | 287178 | 100,000 | 100,000 |
| Total |           | 3473579 | 287178 | 100,000 | 100,000 |

**Figure S56b.** Chiral chromatogram of **8n**.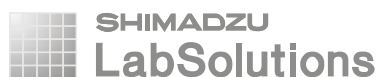

# Analysis Report

## <Sample Information>

Sample Name : PN-22\_spot2\_peak2\_  
 Sample ID : PN-22\_spot2\_peak2\_  
 Data Filename : PN-22\_spot2\_peak2\_.lcd  
 Method Filename : 100EtOAc\_.lcm  
 Batch Filename : batch\_.lcb  
 Vial # : 1-8  
 Injection Volume : 10 uL  
 Date Acquired : 02.07.2019 14:00:13  
 Date Processed : 02.07.2019 14:20:14

Sample Type : Unknown

Acquired by : HPLC - Natascha  
 Processed by : HPLC - Natascha

## <Chromatogram>

mV

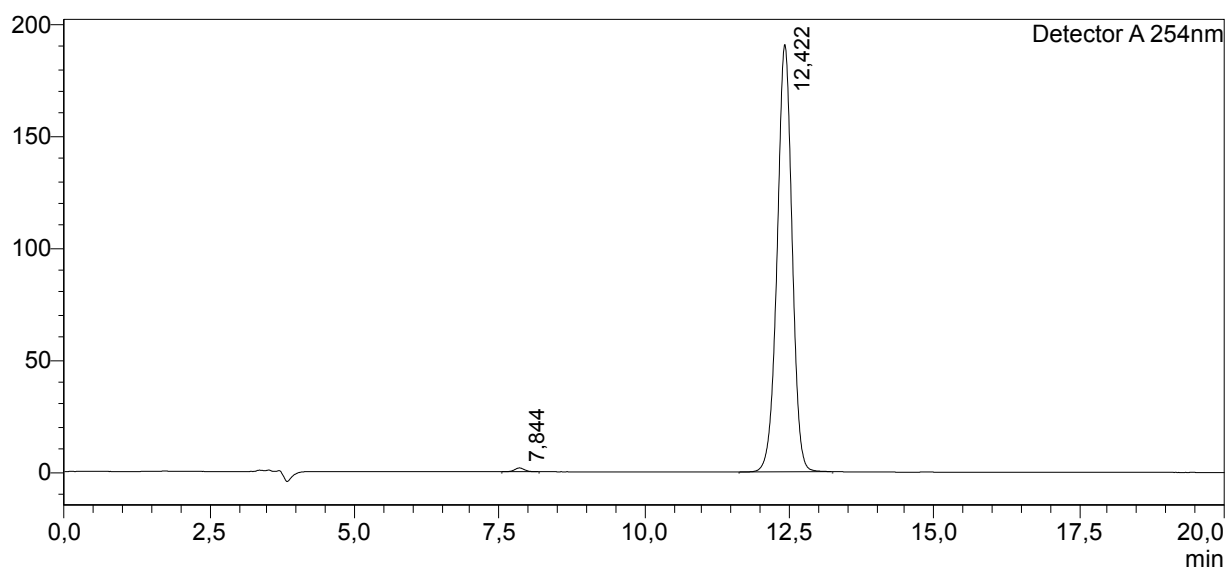

## <Peak Table>

Detector A 254nm

| Ret. Time | Area    | Area%   |
|-----------|---------|---------|
| 7,844     | 20162   | 0,585   |
| 12,422    | 3427245 | 99,415  |
|           | 3447407 | 100,000 |

**Figure S57b.** Chiral chromatogram of **5o**.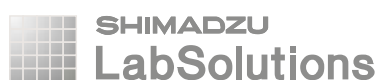

# Analysis Report

## <Sample Information>

Sample Name : PN-12\_spot\_1\_peak\_1  
 Sample ID : PN-12\_spot\_1\_peak\_1  
 Data Filename : PN-12\_spot\_1\_peak\_1\_01.lcd  
 Method Filename : Method\_12.03.2019.lcm  
 Batch Filename :  
 Vial # : 1-1  
 Injection Volume : 20 uL  
 Date Acquired : 16.05.2019 17:24:44  
 Date Processed : 16.05.2019 17:31:45

Sample Type : Unknown  
 Acquired by : HPLC - Natascha  
 Processed by : HPLC - Natascha

## <Chromatogram>

mV

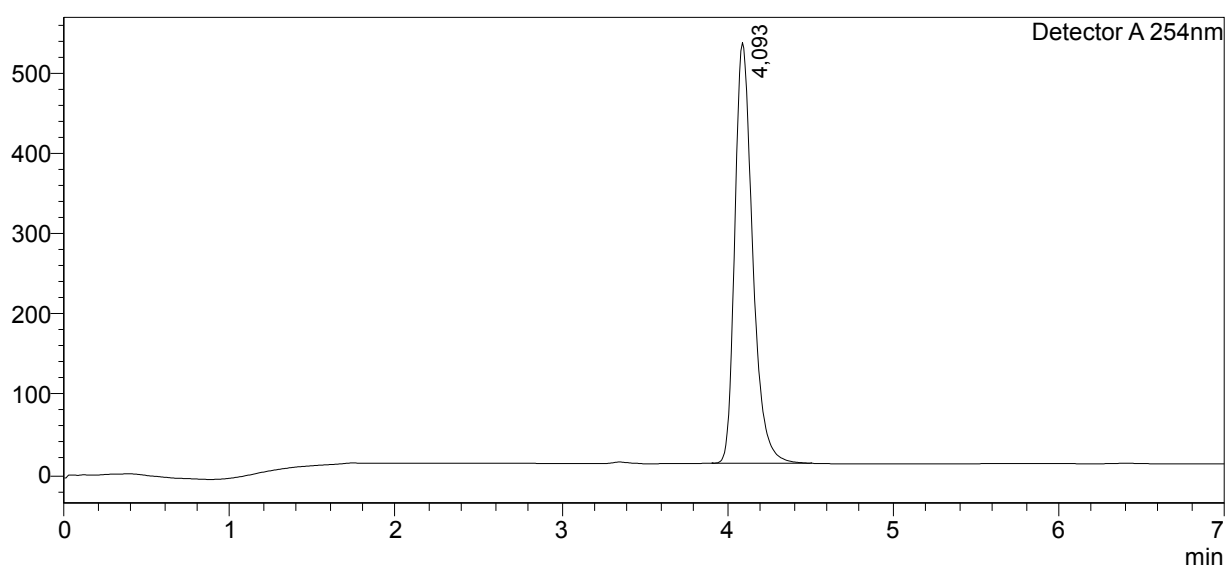

## <Peak Table>

Detector A 254nm

| Ret. Time | Area    | Area%   |
|-----------|---------|---------|
| 4,093     | 3912668 | 100,000 |
|           | 3912668 | 100,000 |



**Figure S58b.** Chiral chromatogram of **6o**.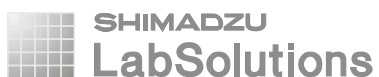

# Analysis Report

## <Sample Information>

Sample Name : PN-12\_spot\_1\_peak\_2  
 Sample ID : PN-12\_spot\_1\_peak\_2  
 Data Filename : PN-12\_spot\_1\_peak\_2\_01.lcd  
 Method Filename : Method\_12.03.2019.lcm  
 Batch Filename :  
 Vial # : 1-2  
 Injection Volume : 20 uL  
 Date Acquired : 16.05.2019 17:32:47  
 Date Processed : 16.05.2019 17:39:49

Sample Type : Unknown  
 Acquired by : HPLC - Natascha  
 Processed by : HPLC - Natascha

## <Chromatogram>

mV

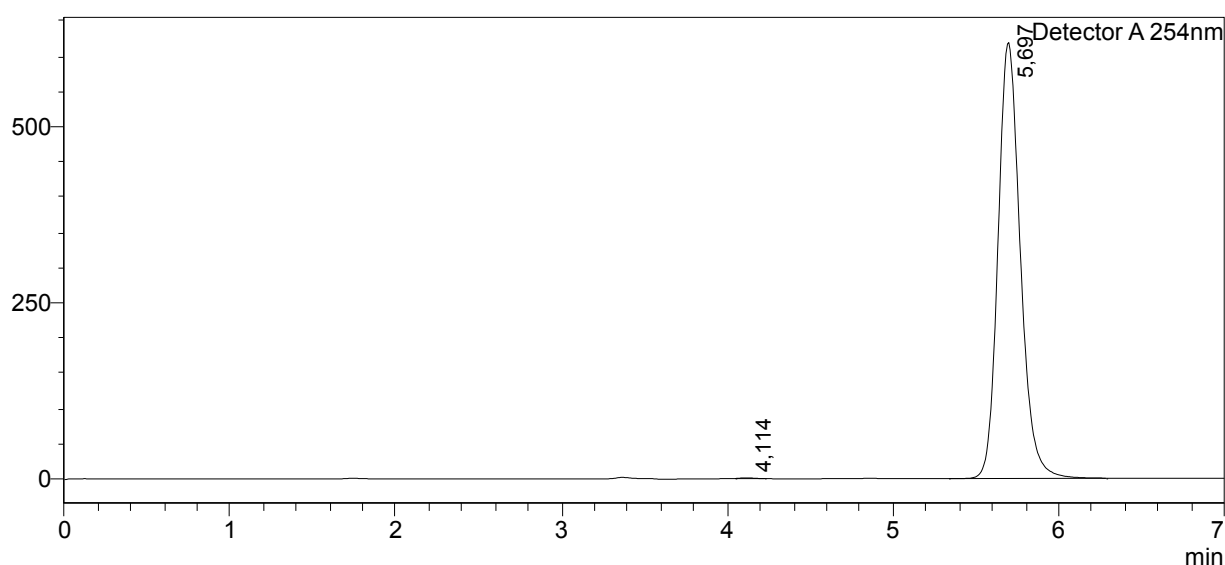

## <Peak Table>

Detector A 254nm

| Ret. Time | Area    | Area%   |
|-----------|---------|---------|
| 4,114     | 5134    | 0,089   |
| 5,697     | 5783638 | 99,911  |
|           | 5788772 | 100,000 |

**Figure S59b.** Chiral chromatogram of **7o**.

# Analysis Report

## <Sample Information>

Sample Name : PN-12\_spot\_2\_peak\_1\_2nd\_meas  
 Sample ID : PN-12\_spot\_2\_peak\_1\_2nd\_meas  
 Data Filename : PN-12\_spot\_2\_peak\_1\_2nd\_meas02.lcd  
 Method Filename : Method\_12.03.2019.lcm  
 Batch Filename :  
 Vial # : 1-3  
 Injection Volume : 8 uL  
 Date Acquired : 30.05.2019 14:18:22  
 Date Processed : 30.05.2019 14:26:23

Sample Type : Unknown  
 Acquired by : HPLC - Natascha  
 Processed by : HPLC - Natascha

## <Chromatogram>

mV

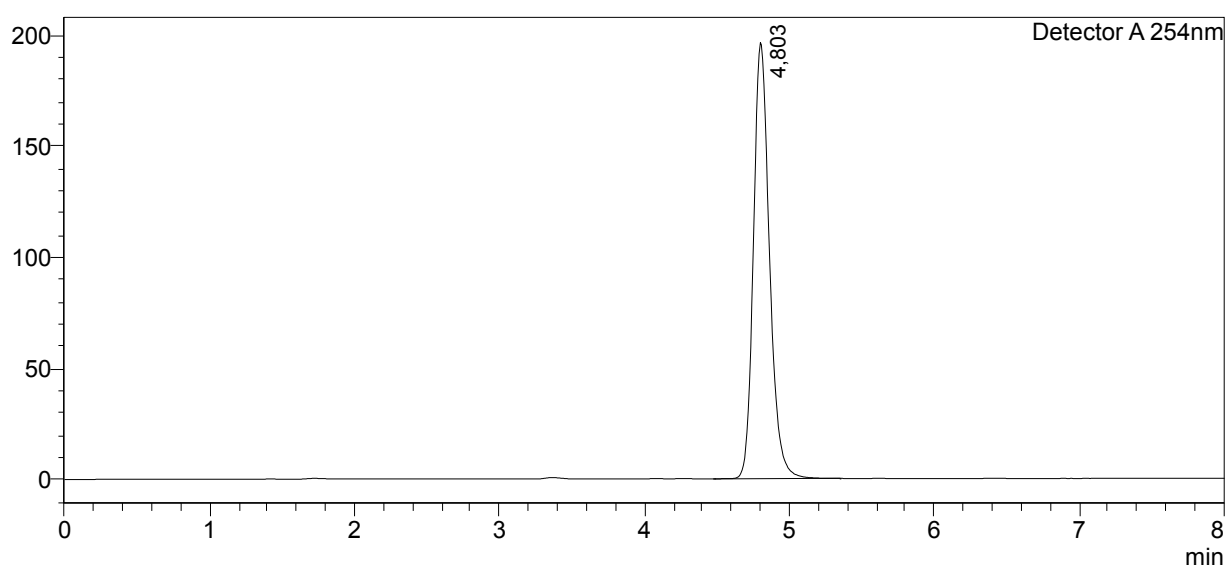

## <Peak Table>

Detector A 254nm

| Ret. Time | Area    | Area%   |
|-----------|---------|---------|
| 4,803     | 1512257 | 100,000 |
|           | 1512257 | 100,000 |

**Figure S60b.** Chiral chromatogram of **8o**.

SHIMADZU

LabSolutions

# Analysis Report

## <Sample Information>

Sample Name : PN-12\_spot\_2\_peak\_2  
 Sample ID : PN-12\_spot\_2\_peak\_2  
 Data Filename : PN-12\_spot\_2\_peak\_2\_01.lcd  
 Method Filename : Method\_12.03.2019.lcm  
 Batch Filename :  
 Vial # : 1-4  
 Injection Volume : 20 uL  
 Date Acquired : 16.05.2019 17:49:32  
 Date Processed : 16.05.2019 17:57:03

Sample Type : Unknown  
 Acquired by : HPLC - Natascha  
 Processed by : HPLC - Natascha

## <Chromatogram>

mV

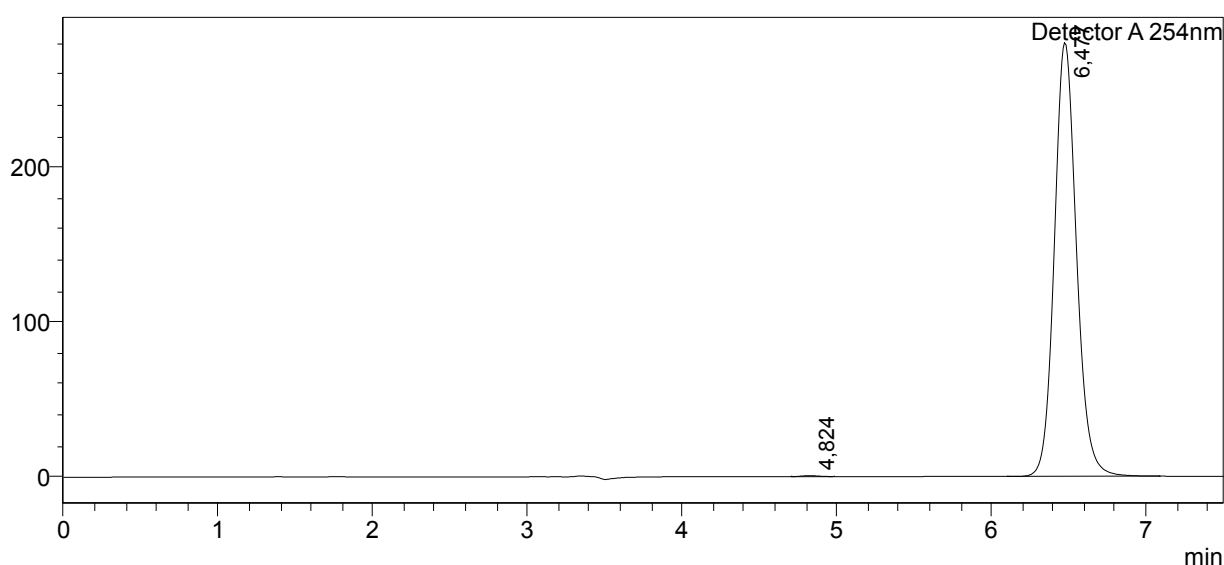

## <Peak Table>

Detector A 254nm

| Ret. Time | Area    | Area%   |
|-----------|---------|---------|
| 4,824     | 4624    | 0,167   |
| 6,477     | 2761610 | 99,833  |
|           | 2766234 | 100,000 |

**Figure S61b.** Chiral chromatogram of **5p**.

# Analysis Report

## <Sample Information>

Sample Name : PN-2\_spot\_1\_peak\_1  
 Sample ID : PN-2\_spot\_1\_peak\_1  
 Data Filename : PN-2\_spot\_1\_peak\_1\_02.lcd  
 Method Filename : Method\_12.03.2019.lcm  
 Batch Filename :  
 Vial # : 1-5  
 Injection Volume : 20 uL  
 Date Acquired : 15.05.2019 20:05:51  
 Date Processed : 15.05.2019 20:18:22

Sample Type : Unknown  
 Acquired by : HPLC - Natascha  
 Processed by : HPLC - Natascha

## <Chromatogram>

mV

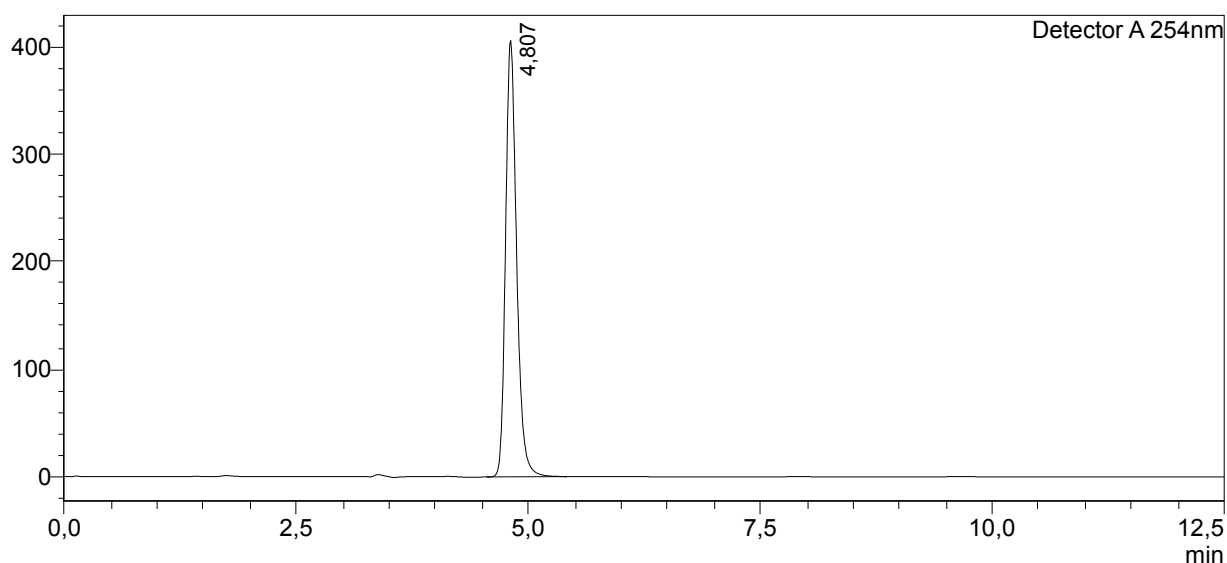

## <Peak Table>

Detector A 254nm

| Ret. Time | Area    | Area%   |
|-----------|---------|---------|
| 4,807     | 3363236 | 100,000 |
|           | 3363236 | 100,000 |

**Figure S62b.** Chiral chromatogram of **6p**.

# Analysis Report

## <Sample Information>

Sample Name : PN-2\_spot\_1\_peak\_2  
 Sample ID : PN-2\_spot\_1\_peak\_2  
 Data Filename : PN-2\_spot\_1\_peak\_2\_01.lcd  
 Method Filename : Method\_12.03.2019.lcm  
 Batch Filename :  
 Vial # : 1-6  
 Injection Volume : 20 uL  
 Date Acquired : 15.05.2019 20:19:29  
 Date Processed : 15.05.2019 20:32:01

Sample Type : Unknown  
 Acquired by : HPLC - Natascha  
 Processed by : HPLC - Natascha

## <Chromatogram>

mV

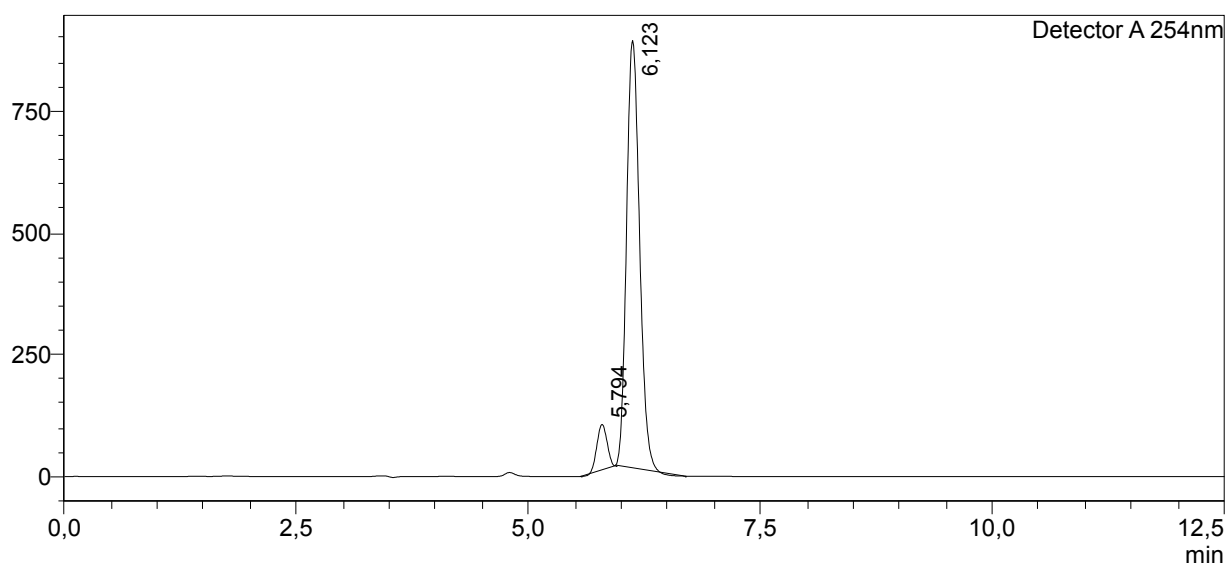

## <Peak Table>

Detector A 254nm

| Ret. Time | Area    | Area%   |
|-----------|---------|---------|
| 5,794     | 700693  | 7,597   |
| 6,123     | 8522006 | 92,403  |
|           | 9222699 | 100,000 |

**Figure S63b.** Chiral chromatogram of **7p**.

# Analysis Report

## <Sample Information>

|                  |                              |              |                   |
|------------------|------------------------------|--------------|-------------------|
| Sample Name      | : PN-2_Spot2_Peak1_          | Sample Type  | : Unknown         |
| Sample ID        | : PN-2_Spot2_Peak1_          |              |                   |
| Data Filename    | : PN-2_Spot2_Peak1_04.lcd    |              |                   |
| Method Filename  | : Chiralpak_IA_100EtOAc_.lcm |              |                   |
| Batch Filename   | :                            |              |                   |
| Vial #           | : 1-1                        |              |                   |
| Injection Volume | : 1 uL                       |              |                   |
| Date Acquired    | : 29.04.2022 15:10:41        | Acquired by  | : HPLC - Natascha |
| Date Processed   | : 29.04.2022 15:23:12        | Processed by | : HPLC - Natascha |

## <Chromatogram>

mV

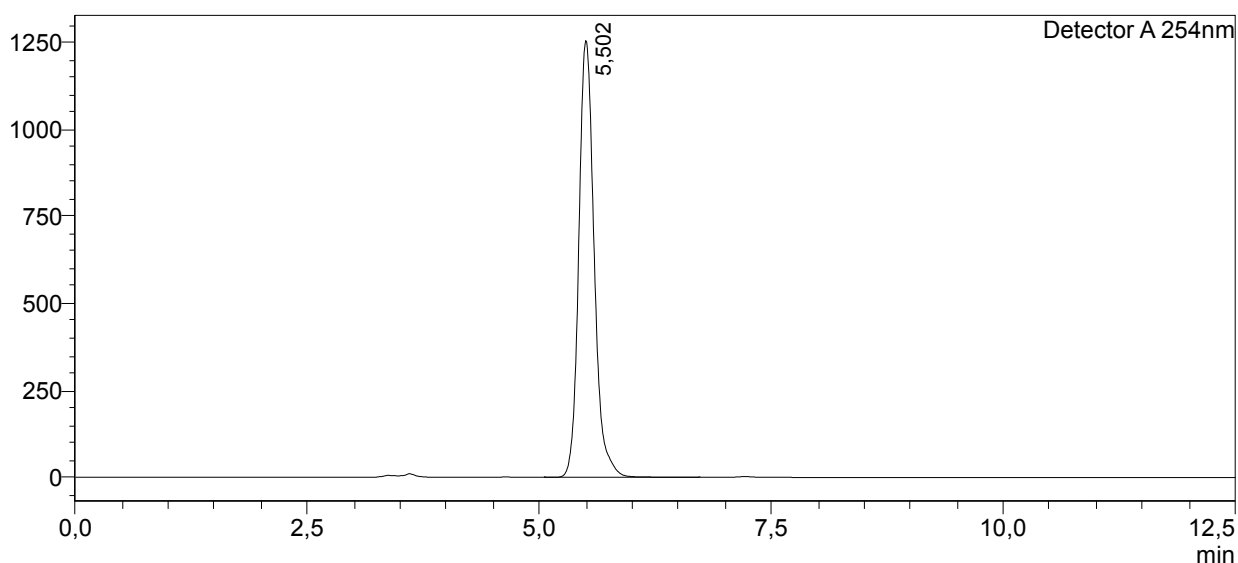

## <Peak Table>

Detector A 254nm

| Peak# | Ret. Time | Area     | Area%   |
|-------|-----------|----------|---------|
| 1     | 5,502     | 14486571 | 100,000 |
| Total |           | 14486571 | 100,000 |

**Figure S64b.** Chiral chromatogram of **8p**.

# Analysis Report

## <Sample Information>

Sample Name : PN-2\_spot\_2\_peak\_2  
 Sample ID : PN-2\_spot\_2\_peak\_2  
 Data Filename : PN-2\_spot\_2\_peak\_2\_01.lcd  
 Method Filename : Method\_12.03.2019.lcm  
 Batch Filename :  
 Vial # : 1-8  
 Injection Volume : 20 uL  
 Date Acquired : 15.05.2019 20:58:53  
 Date Processed : 15.05.2019 21:11:24

Sample Type : Unknown  
 Acquired by : HPLC - Natascha  
 Processed by : HPLC - Natascha

## <Chromatogram>

mV

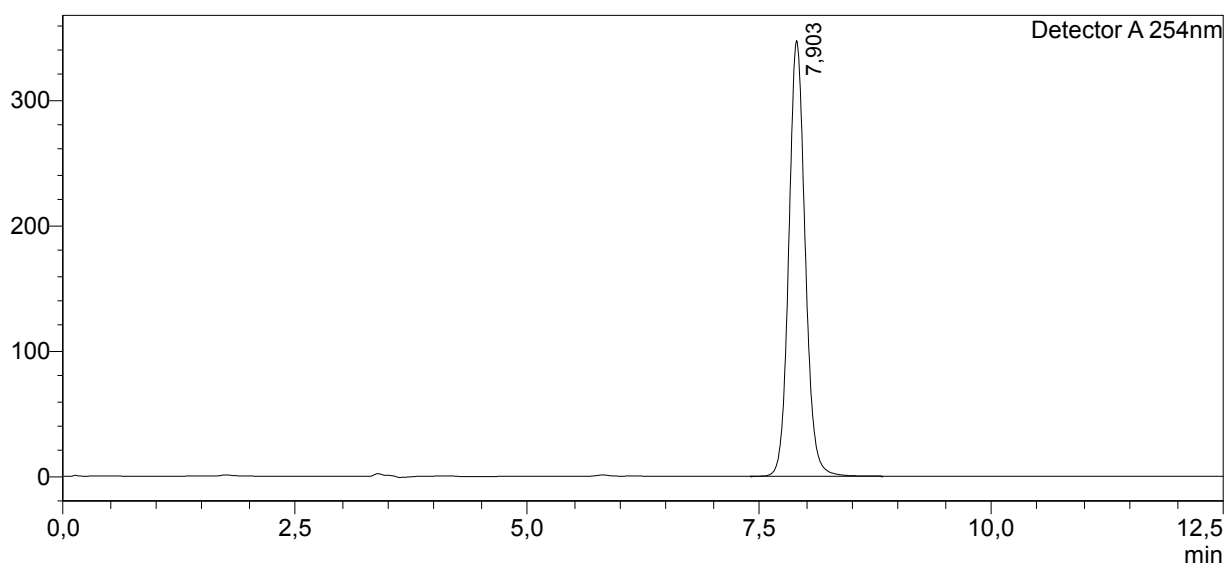

## <Peak Table>

Detector A 254nm

| Ret. Time | Area    | Area%   |
|-----------|---------|---------|
| 7,903     | 4260781 | 100,000 |
|           | 4260781 | 100,000 |

**Figure S65b.** Chiral chromatogram of **5q**.

# Analysis Report

## <Sample Information>

Sample Name : PN-10\_spot\_1\_peak\_1  
 Sample ID : PN-10\_spot\_1\_peak\_1  
 Data Filename : PN-10\_spot\_1\_peak\_1\_03.lcd  
 Method Filename : Method\_12.03.2019.lcm  
 Batch Filename :  
 Vial # : 1-9  
 Injection Volume : 20 uL  
 Date Acquired : 15.05.2019 22:02:47  
 Date Processed : 15.05.2019 22:15:18

Sample Type : Unknown  
 Acquired by : HPLC - Natascha  
 Processed by : HPLC - Natascha

## <Chromatogram>

mV

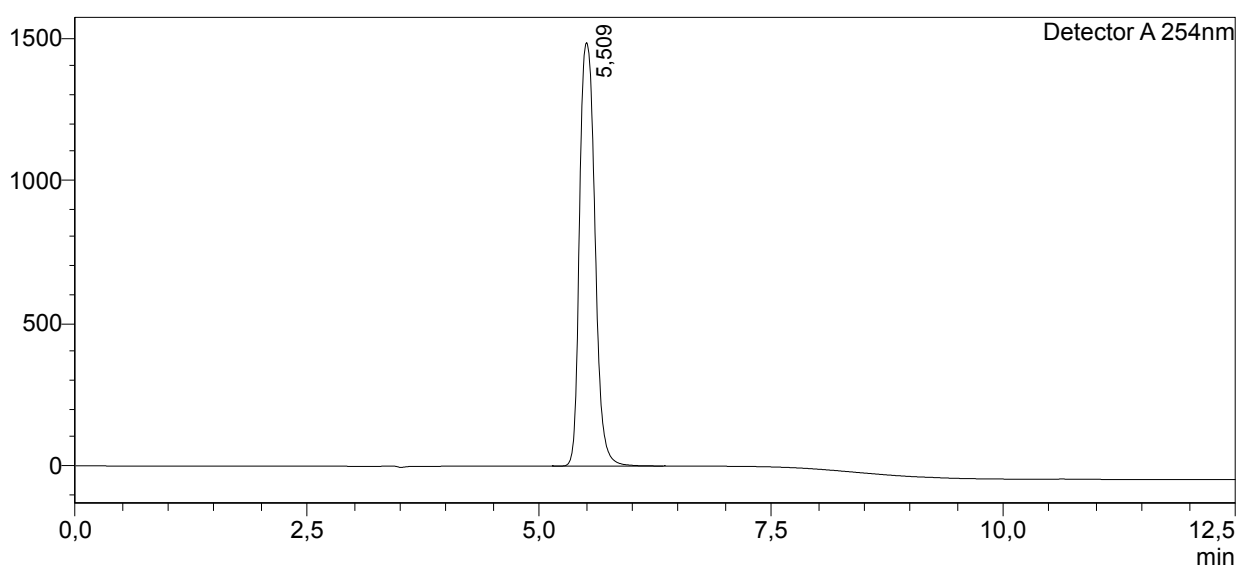

## <Peak Table>

Detector A 254nm

| Ret. Time | Area     | Area%   |
|-----------|----------|---------|
| 5,509     | 17144785 | 100,000 |
|           | 17144785 | 100,000 |



**Figure S66b.** Chiral chromatogram of **6q**.

SHIMADZU

LabSolutions

# Analysis Report

## <Sample Information>

Sample Name : PN-10\_spot\_1\_peak\_2  
 Sample ID : PN-10\_spot\_1\_peak\_2  
 Data Filename : PN-10\_spot\_1\_peak\_2\_01.lcd  
 Method Filename : Method\_12.03.2019.lcm  
 Batch Filename :  
 Vial # : 1-10  
 Injection Volume : 20 uL  
 Date Acquired : 15.05.2019 22:17:24  
 Date Processed : 15.05.2019 22:29:55

Sample Type : Unknown  
 Acquired by : HPLC - Natascha  
 Processed by : HPLC - Natascha

## <Chromatogram>

mV

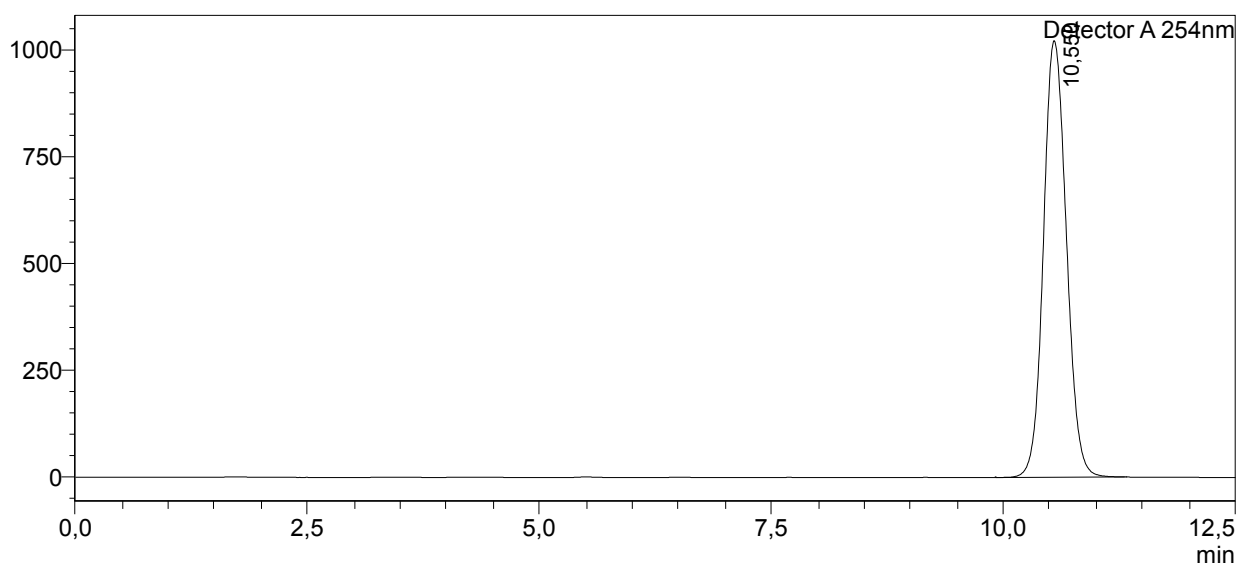

## <Peak Table>

Detector A 254nm

| Ret. Time | Area     | Area%   |
|-----------|----------|---------|
| 10,550    | 17550294 | 100,000 |
|           | 17550294 | 100,000 |

**Figure S67b.** Chiral chromatogram of **7q**.

# Analysis Report

## <Sample Information>

Sample Name : PN-10\_spot\_2\_peak\_1  
 Sample ID : PN-10\_spot\_2\_peak\_1  
 Data Filename : PN-10\_spot\_2\_peak\_1\_01.lcd  
 Method Filename : Method\_12.03.2019.lcm  
 Batch Filename :  
 Vial # : 1-11  
 Injection Volume : 20 uL  
 Date Acquired : 15.05.2019 21:33:17  
 Date Processed : 15.05.2019 21:45:48

Sample Type : Unknown  
 Acquired by : HPLC - Natascha  
 Processed by : HPLC - Natascha

## <Chromatogram>

mV

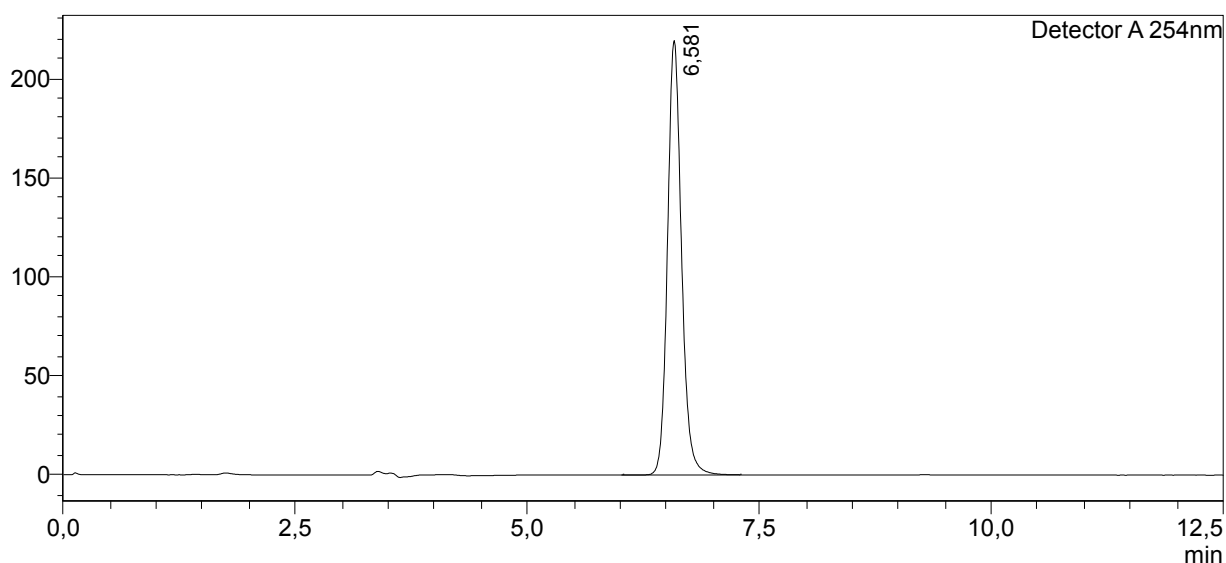

## <Peak Table>

Detector A 254nm

| Ret. Time | Area    | Area%   |
|-----------|---------|---------|
| 6,581     | 2298964 | 100,000 |
|           | 2298964 | 100,000 |

**Figure S68b.** Chiral chromatogram of **8q**.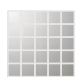

SHIMADZU

LabSolutions

# Analysis Report

## <Sample Information>

Sample Name : PN-10\_spot\_2\_peak\_2  
 Sample ID : PN-10\_spot\_2\_peak\_2  
 Data Filename : PN-10\_spot\_2\_peak\_2\_01.lcd  
 Method Filename : Method\_12.03.2019.lcm  
 Batch Filename :  
 Vial # : 1-12  
 Injection Volume : 20 uL  
 Date Acquired : 15.05.2019 21:47:05  
 Date Processed : 15.05.2019 21:59:36

Sample Type : Unknown

Acquired by : HPLC - Natascha  
 Processed by : HPLC - Natascha

## <Chromatogram>

mV

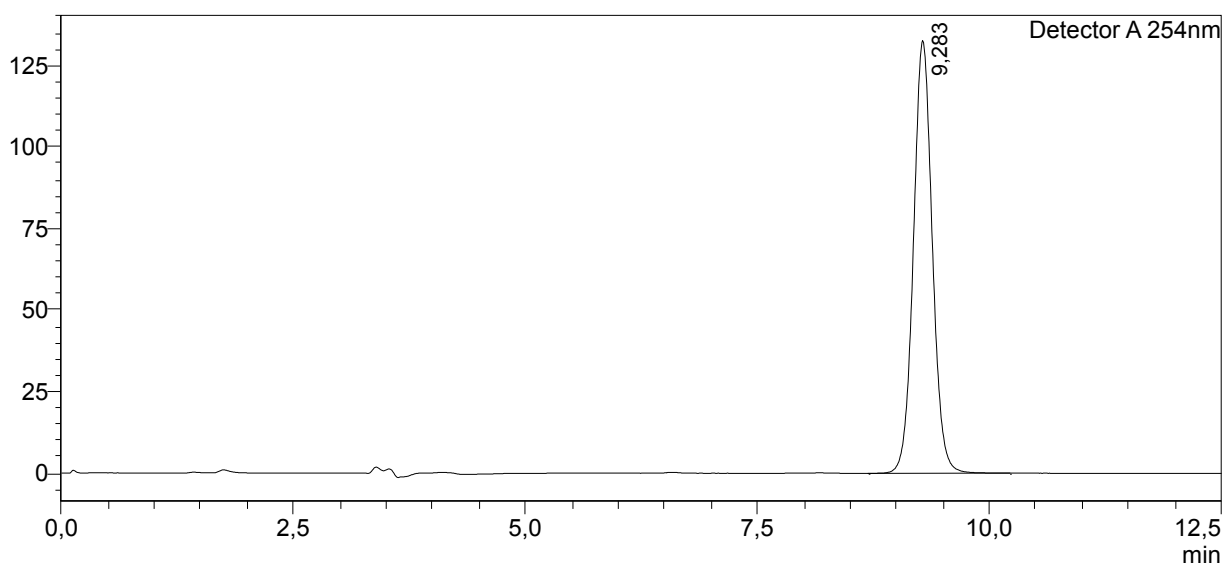

## <Peak Table>

Detector A 254nm

| Ret. Time | Area    | Area%   |
|-----------|---------|---------|
| 9.283     | 1874465 | 100.000 |
|           | 1874465 | 100.000 |

**Figure S69b.** Chiral chromatogram of **5r**.

# Analysis Report

## <Sample Information>

Sample Name : CE-166\_spot\_1\_peak\_1  
 Sample ID : CE-166\_spot\_1\_peak\_1  
 Data Filename : CE-166\_spot\_1\_peak\_1\_01.lcd  
 Method Filename : Method\_12.03.2019.lcm  
 Batch Filename :  
 Vial # : 1-1  
 Injection Volume : 20 uL  
 Date Acquired : 31.05.2019 17:51:24  
 Date Processed : 20.02.2020 09:46:12

Sample Type : Unknown  
 Acquired by : HPLC - Natascha  
 Processed by : HPLC - Natascha

## <Chromatogram>

mV

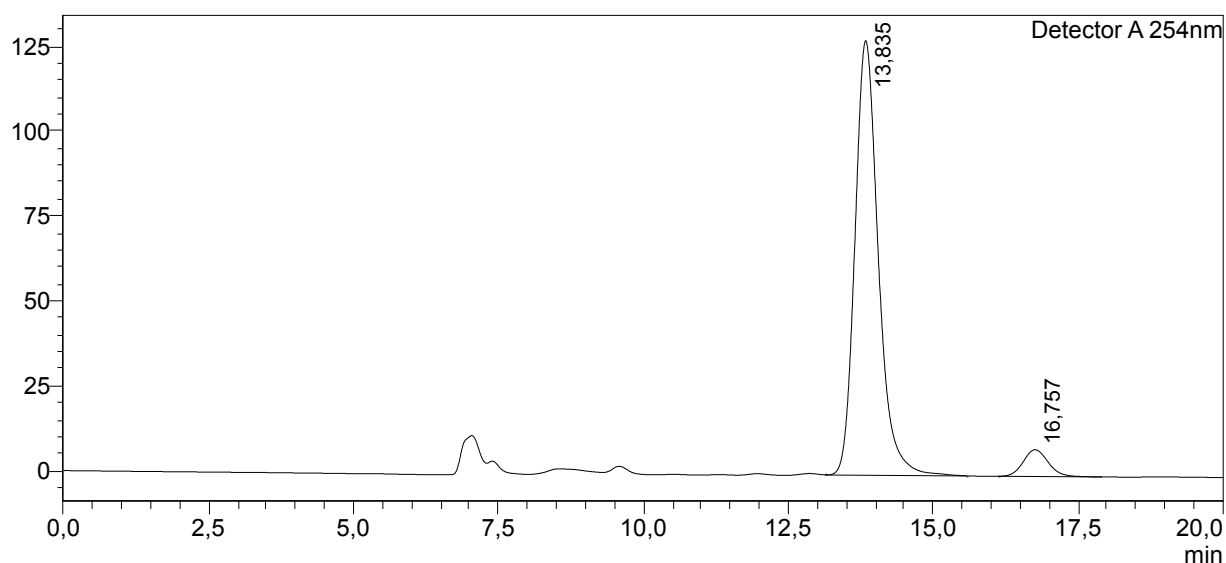

## <Peak Table>

Detector A 254nm

| Ret. Time | Area    | Area%   |
|-----------|---------|---------|
| 13,835    | 3589073 | 93,810  |
| 16,757    | 236836  | 6,190   |
|           | 3825910 | 100,000 |

**Figure S70b.** Chiral chromatogram of **6r**.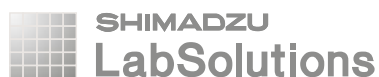

# Analysis Report

## <Sample Information>

|                  |                               |              |                   |
|------------------|-------------------------------|--------------|-------------------|
| Sample Name      | : CE-166_spot_1_peak_2        |              |                   |
| Sample ID        | : CE-166_spot_1_peak_2        |              |                   |
| Data Filename    | : CE-166_spot_1_peak_2_01.lcd |              |                   |
| Method Filename  | : Method_12.03.2019.lcm       |              |                   |
| Batch Filename   | :                             |              |                   |
| Vial #           | : 1-2                         | Sample Type  | : Unknown         |
| Injection Volume | : 20 uL                       |              |                   |
| Date Acquired    | : 31.05.2019 18:17:40         | Acquired by  | : HPLC - Natascha |
| Date Processed   | : 31.05.2019 18:37:41         | Processed by | : HPLC - Natascha |

## <Chromatogram>

mV

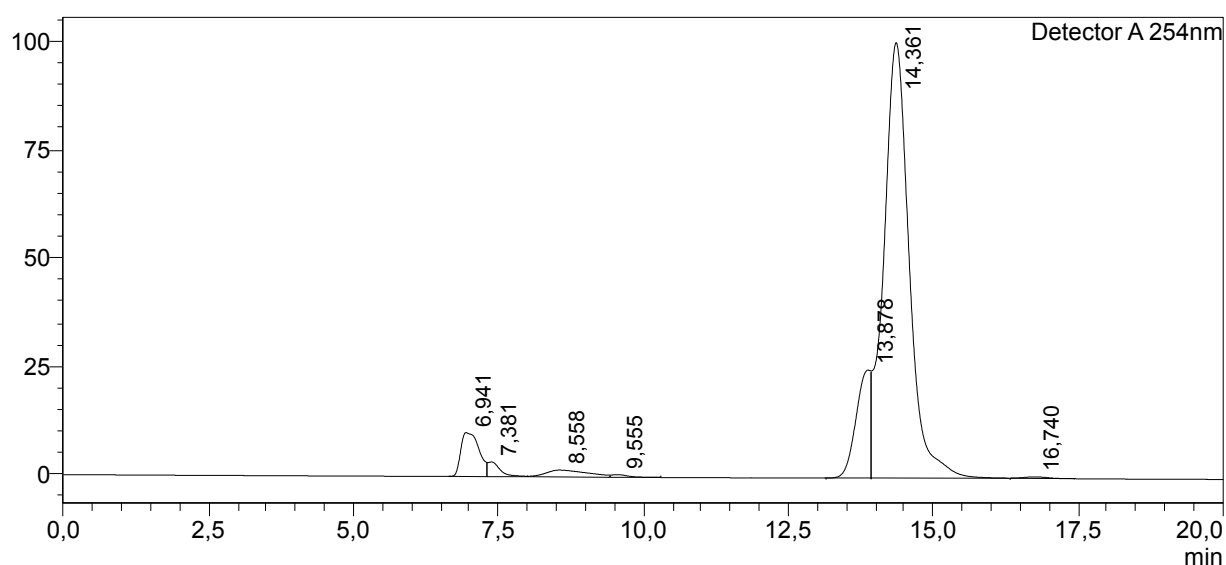

## <Peak Table>

Detector A 254nm

| Ret. Time | Area    | Area%   |
|-----------|---------|---------|
| 6,941     | 225372  | 5,807   |
| 7,381     | 48400   | 1,247   |
| 8,558     | 79146   | 2,039   |
| 9,555     | 12357   | 0,318   |
| 13,878    | 442291  | 11,397  |
| 14,361    | 3063880 | 78,949  |
| 16,740    | 9394    | 0,242   |
|           | 3880840 | 100,000 |

**Figure S71b.** Chiral chromatogram of **7r**.

# Analysis Report

## <Sample Information>

Sample Name : CE\_166\_spot\_2\_peak\_1\_final  
 Sample ID : CE\_166\_spot\_2\_peak\_1\_final  
 Data Filename : CE\_166\_spot\_2\_peak\_1\_final01.lcd  
 Method Filename : 100%\_EtOAc.lcm  
 Batch Filename :  
 Vial # : 1-21  
 Injection Volume : 15 µL  
 Date Acquired : 22.08.2018 15:28:07  
 Date Processed : 22.08.2018 15:48:08

Sample Type : Unknown  
 Acquired by : HPLC - Natascha  
 Processed by : HPLC - Natascha

## <Chromatogram>

mV

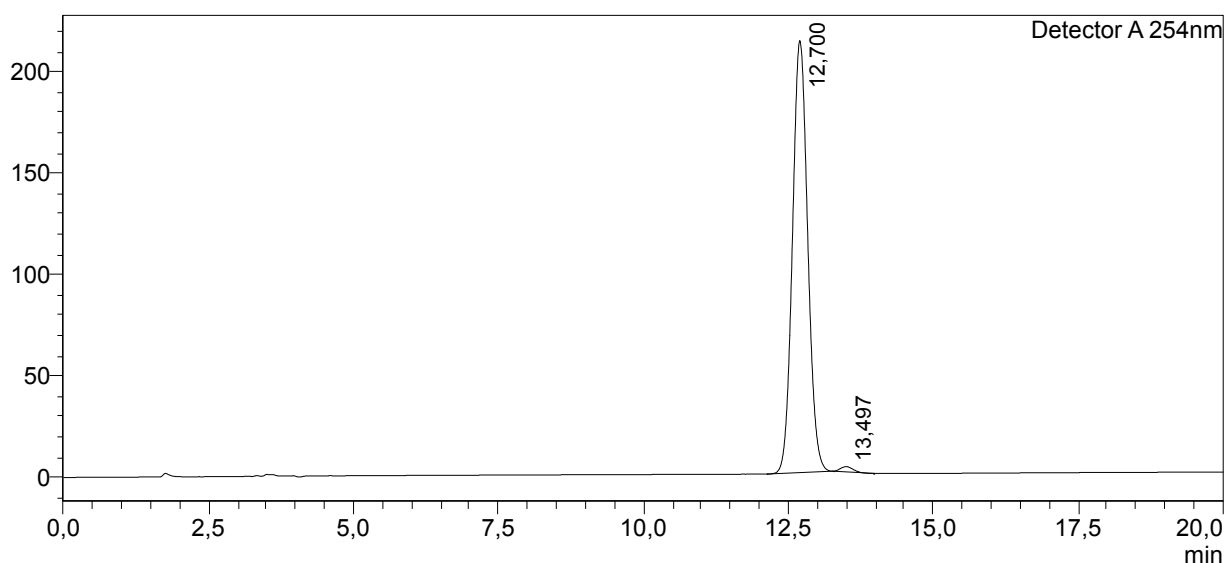

## <Peak Table>

Detector A 254nm

| Ret. Time | Area    | Area%   |
|-----------|---------|---------|
| 12,700    | 3886124 | 99,026  |
| 13,497    | 38207   | 0,974   |
|           | 3924331 | 100,000 |

**Figure S72b.** Chiral chromatogram of **8r**.

# Analysis Report

## <Sample Information>

Sample Name : CE-166\_Spot2\_Peak2\_  
 Sample ID : CE-166\_Spot2\_Peak2\_  
 Data Filename : CE-166\_Spot2\_Peak2\_01.lcd  
 Method Filename : Chiralpak\_IA\_100EtOAc\_.lcm  
 Batch Filename :  
 Vial # : 1-1  
 Injection Volume : 18 uL  
 Date Acquired : 29.04.2022 11:40:10  
 Date Processed : 29.04.2022 12:00:11

Sample Type : Unknown  
 Acquired by : HPLC - Natascha  
 Processed by : HPLC - Natascha

## <Chromatogram>

mV

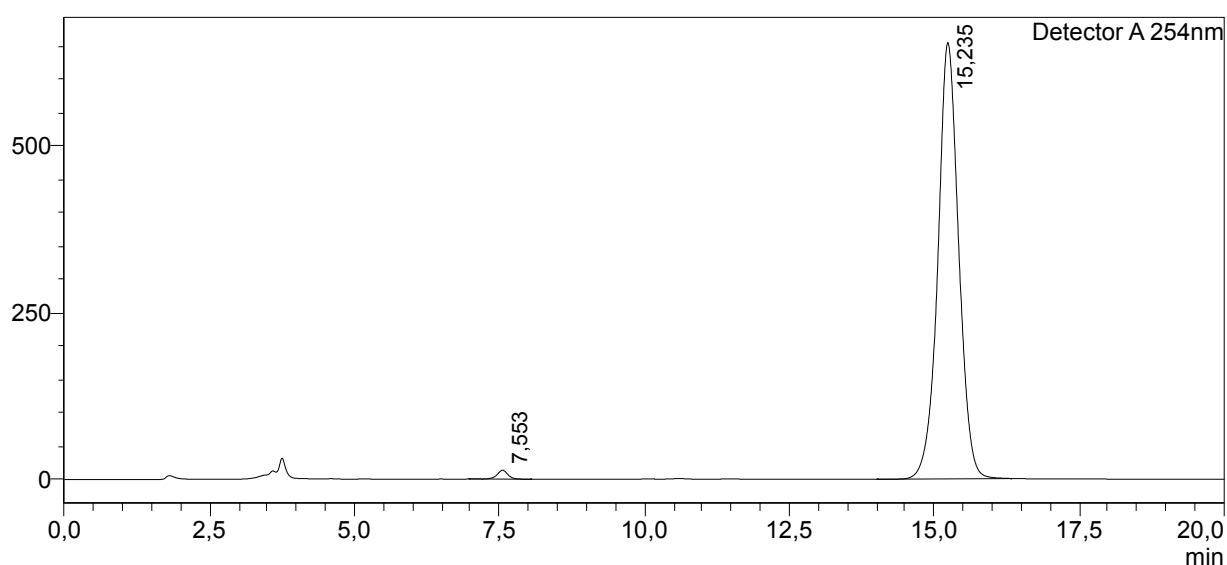

## <Peak Table>

Detector A 254nm

| Peak# | Ret. Time | Area     | Area%   |
|-------|-----------|----------|---------|
| 1     | 7,553     | 172475   | 1,046   |
| 2     | 15,235    | 16315900 | 98,954  |
| Total |           | 16488375 | 100,000 |

**Figure S73b.** Chiral chromatogram of **5s**.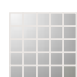

SHIMADZU

LabSolutions

# Analysis Report

## <Sample Information>

Sample Name : PN-8\_spot1\_peak1\_  
 Sample ID : PN-8\_spot1\_peak1\_  
 Data Filename : PN-8\_spot1\_peak1\_.lcd  
 Method Filename : 100EtOAc\_.lcm  
 Batch Filename : batch\_.lcb  
 Vial # : 1-1  
 Injection Volume : 10 uL  
 Date Acquired : 03.07.2019 12:42:47  
 Date Processed : 03.07.2019 13:07:48

Sample Type : Unknown

Acquired by : HPLC - Natascha  
 Processed by : HPLC - Natascha

## <Chromatogram>

mV

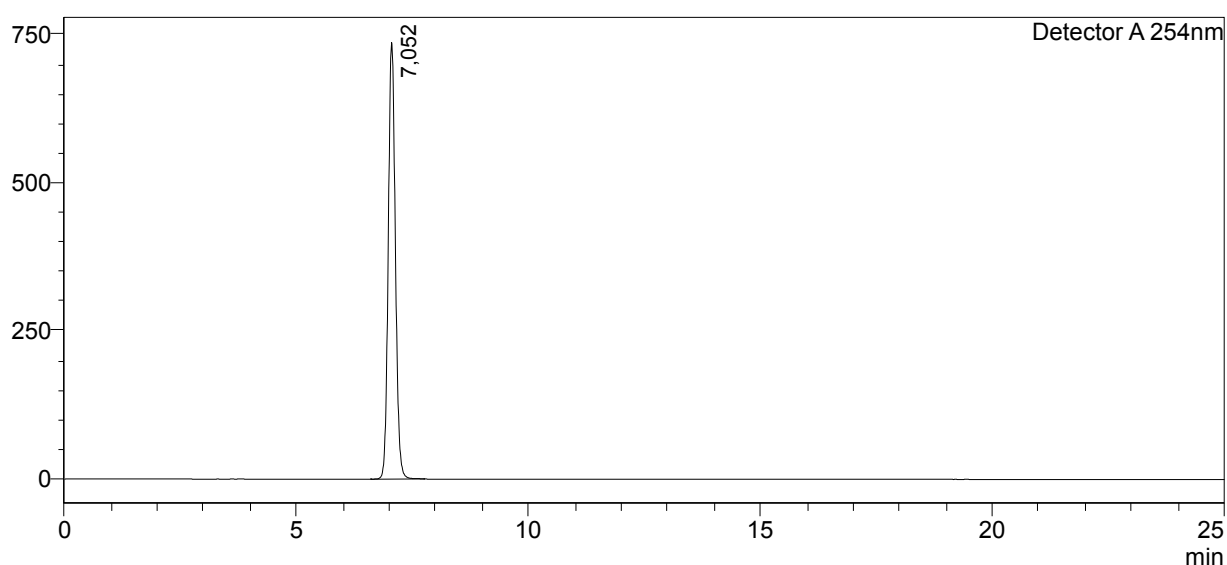

## <Peak Table>

Detector A 254nm

| Ret. Time | Area    | Area%   |
|-----------|---------|---------|
| 7,052     | 7846370 | 100,000 |
|           | 7846370 | 100,000 |



**Figure S74b.** Chiral chromatogram of **6s**.

# Analysis Report

## <Sample Information>

Sample Name : PN-8\_spot1\_peak2\_  
 Sample ID : PN-8\_spot1\_peak2\_  
 Data Filename : PN-8\_spot1\_peak2\_.lcd  
 Method Filename : 100EtOAc\_.lcm  
 Batch Filename : batch\_.lcb  
 Vial # : 1-2  
 Injection Volume : 10 uL  
 Date Acquired : 03.07.2019 13:08:10  
 Date Processed : 03.07.2019 13:33:11

Sample Type : Unknown  
 Acquired by : HPLC - Natascha  
 Processed by : HPLC - Natascha

## <Chromatogram>

mV

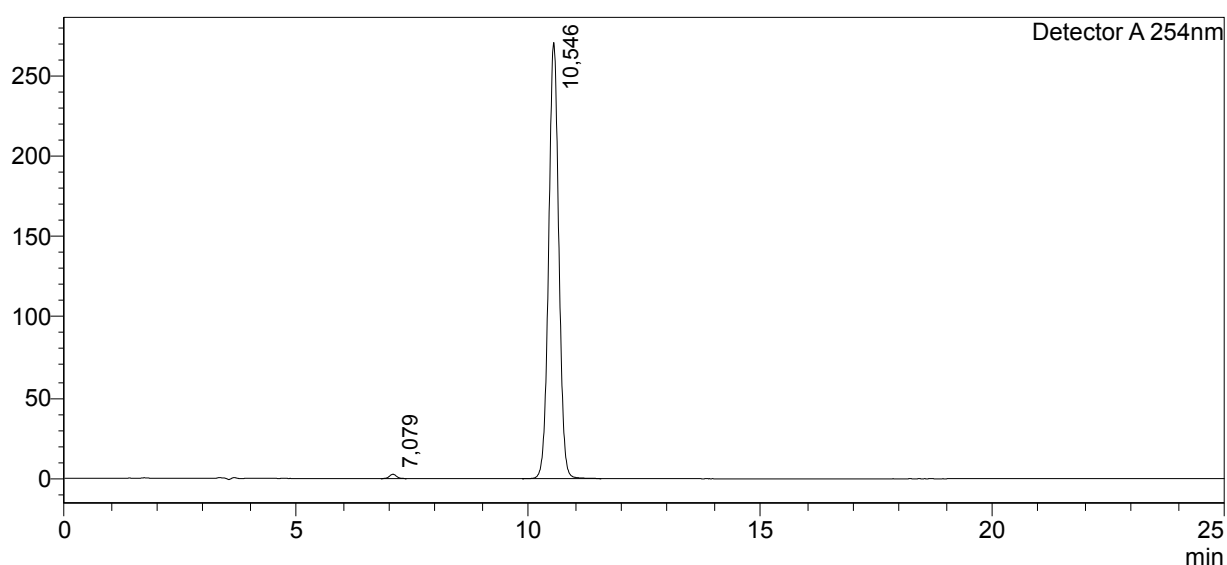

## <Peak Table>

Detector A 254nm

| Ret. Time | Area    | Area%   |
|-----------|---------|---------|
| 7,079     | 26516   | 0,642   |
| 10,546    | 4103369 | 99,358  |
|           | 4129885 | 100,000 |

**Figure S75b.** Chiral chromatogram of **7s**.

# Analysis Report

## <Sample Information>

Sample Name : PN-8\_spot2\_peak1\_  
 Sample ID : PN-8\_spot2\_peak1\_  
 Data Filename : PN-8\_spot2\_peak1\_.lcd  
 Method Filename : 100EtOAc\_.lcm  
 Batch Filename : batch\_.lcb  
 Vial # : 1-3  
 Injection Volume : 10 uL  
 Date Acquired : 03.07.2019 13:33:33  
 Date Processed : 03.07.2019 13:58:34

Sample Type : Unknown  
 Acquired by : HPLC - Natascha  
 Processed by : HPLC - Natascha

## <Chromatogram>

mV

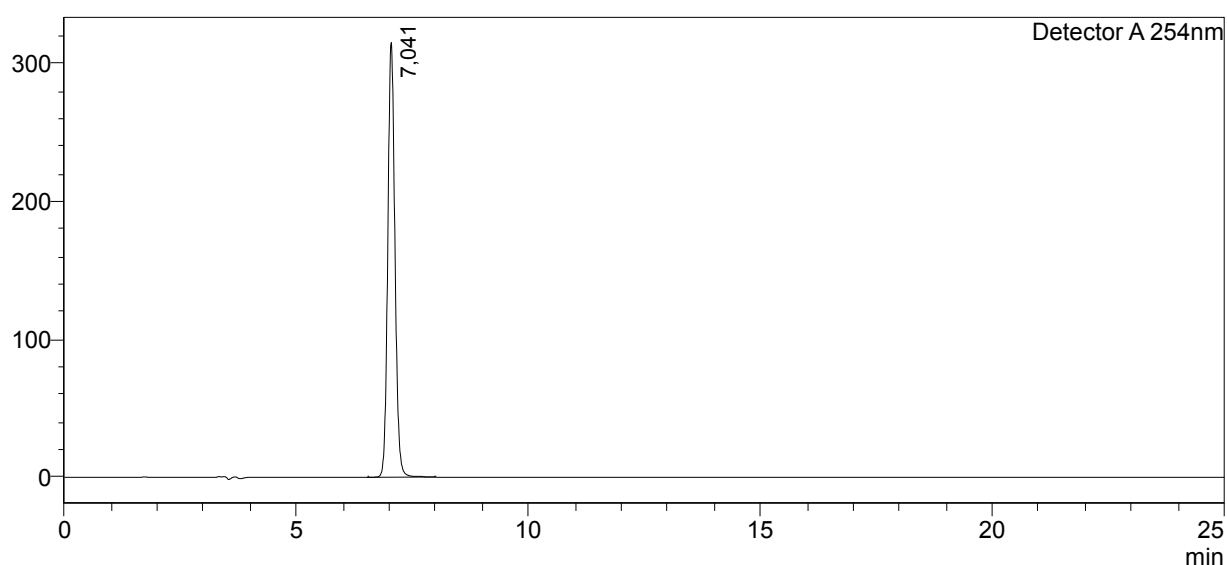

## <Peak Table>

Detector A 254nm

| Ret. Time | Area    | Area%   |
|-----------|---------|---------|
| 7,041     | 3384511 | 100,000 |
|           | 3384511 | 100,000 |

**Figure S76b.** Chiral chromatogram of **8s**.

# Analysis Report

## <Sample Information>

Sample Name : PN-8\_spot2\_peak2\_  
 Sample ID : PN-8\_spot2\_peak2\_  
 Data Filename : PN-8\_spot2\_peak2\_.lcd  
 Method Filename : 100EtOAc\_.lcm  
 Batch Filename : batch\_.lcb  
 Vial # : 1-4  
 Injection Volume : 10 uL  
 Date Acquired : 03.07.2019 13:58:56  
 Date Processed : 03.07.2019 14:23:57

Sample Type : Unknown  
 Acquired by : HPLC - Natascha  
 Processed by : HPLC - Natascha

## <Chromatogram>

mV

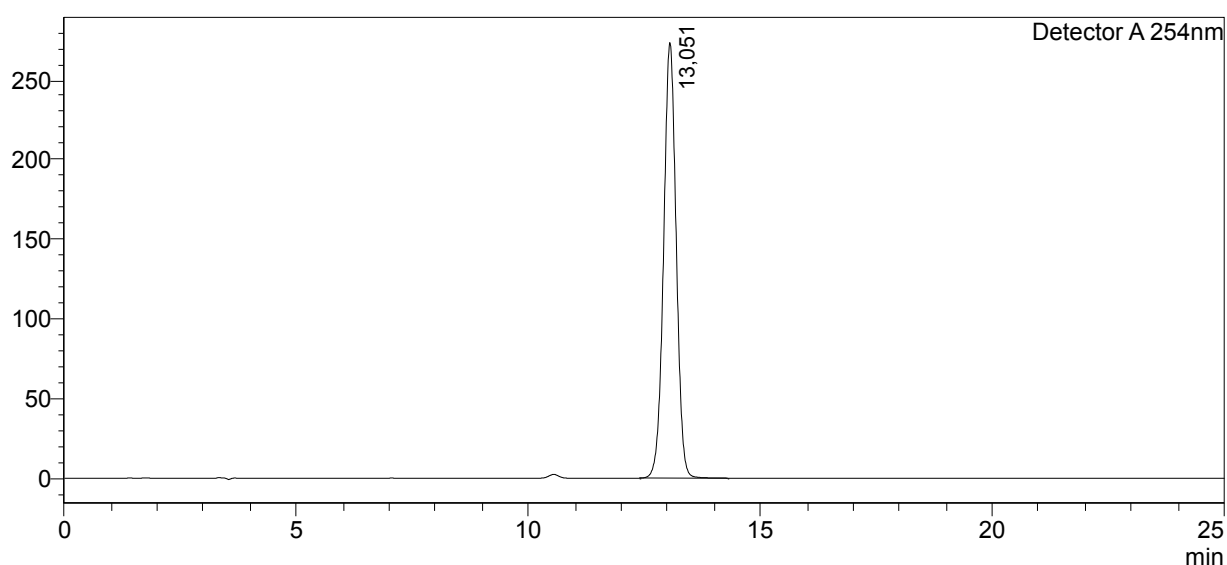

## <Peak Table>

Detector A 254nm

| Ret. Time | Area    | Area%   |
|-----------|---------|---------|
| 13,051    | 5153827 | 100,000 |
|           | 5153827 | 100,000 |

**Figure S77b.** Chiral chromatogram of **5t**.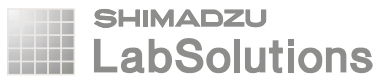

# Analysis Report

## <Sample Information>

Sample Name : CE\_149\_spot\_1\_peak\_1\_final\_check  
 Sample ID : CE\_149\_spot\_1\_peak\_1\_final\_che  
 Data Filename : CE\_149\_spot\_1\_peak\_1\_final\_check01.lcd  
 Method Filename : 100%\_EtOAc.lcm  
 Batch Filename :  
 Vial # : 1-21  
 Injection Volume : 15 uL  
 Date Acquired : 25.07.2018 18:49:53  
 Date Processed : 25.07.2018 19:09:55

Sample Type : Unknown  
 Acquired by : HPLC - Natascha  
 Processed by : HPLC - Natascha

## <Chromatogram>

mV

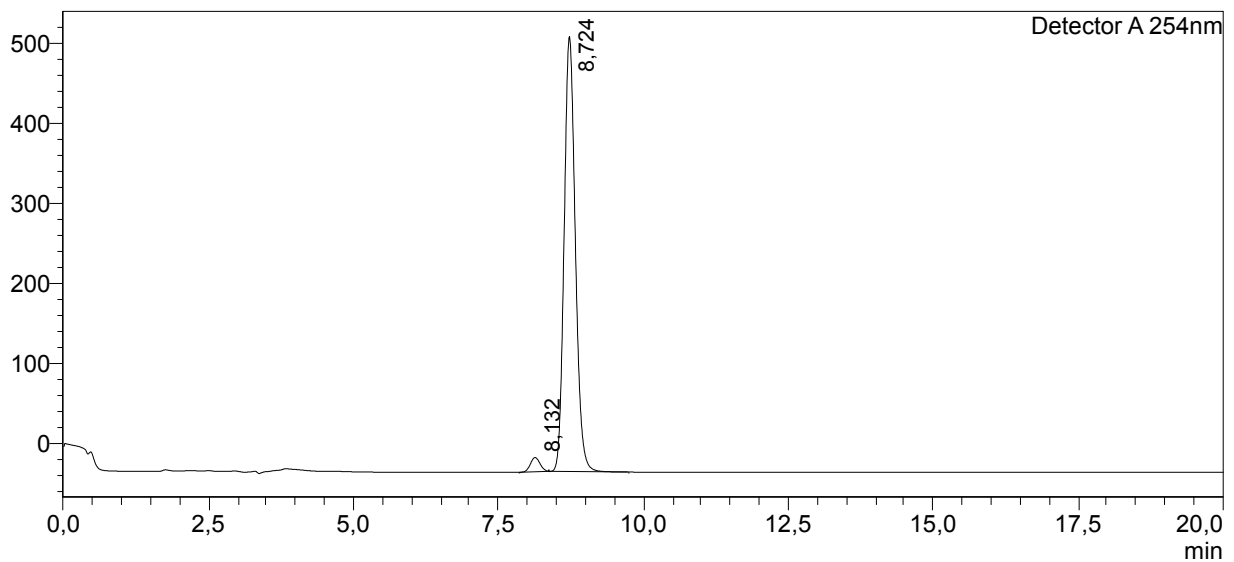

## <Peak Table>

Detector A 254nm

| Ret. Time | Area    | Area%   |
|-----------|---------|---------|
| 8,132     | 206660  | 2,759   |
| 8,724     | 7283846 | 97,241  |
|           | 7490506 | 100,000 |

**Figure S78b.** Chiral chromatogram of **6t**.

SHIMADZU

LabSolutions

# Analysis Report

## <Sample Information>

|                  |                                          |              |                   |
|------------------|------------------------------------------|--------------|-------------------|
| Sample Name      | : CE_149_spot_1_peak_2_final_check       |              |                   |
| Sample ID        | : CE_149_spot_1_peak_2_final_che         |              |                   |
| Data Filename    | : CE_149_spot_1_peak_2_final_check02.lcd |              |                   |
| Method Filename  | : 100%_EtOAc.lcm                         |              |                   |
| Batch Filename   | :                                        |              |                   |
| Vial #           | : 1-22                                   | Sample Type  | : Unknown         |
| Injection Volume | : 15 uL                                  |              |                   |
| Date Acquired    | : 26.07.2018 17:53:32                    | Acquired by  | : HPLC - Natascha |
| Date Processed   | : 26.07.2018 18:13:34                    | Processed by | : HPLC - Natascha |

## <Chromatogram>

mV

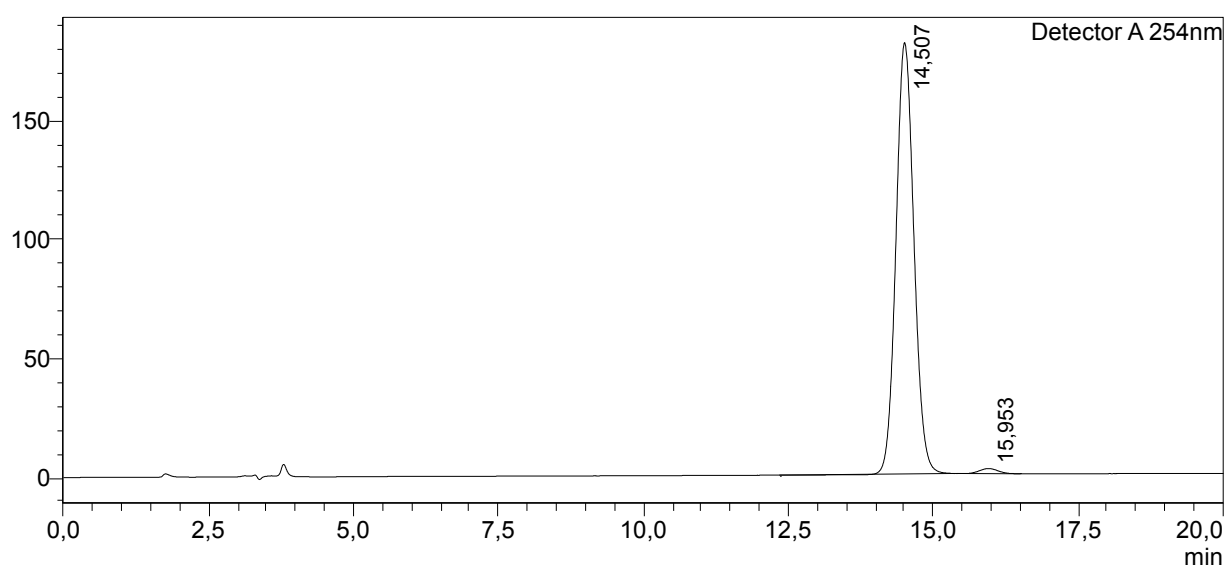

## <Peak Table>

Detector A 254nm

| Ret. Time | Area    | Area%   |
|-----------|---------|---------|
| 14,507    | 3880254 | 98,778  |
| 15,953    | 47986   | 1,222   |
|           | 3928240 | 100,000 |

**Figure S79b.** Chiral chromatogram of **7t**.

# Analysis Report

## <Sample Information>

Sample Name : CE\_149\_spot\_2\_peak\_1\_final\_check  
 Sample ID : CE\_149\_spot\_2\_peak\_1\_final\_che  
 Data Filename : CE\_149\_spot\_2\_peak\_1\_final\_check01.lcd  
 Method Filename : 100%\_EtOAc.lcm  
 Batch Filename :  
 Vial # : 1-21  
 Injection Volume : 15 uL  
 Date Acquired : 26.07.2018 18:56:53  
 Date Processed : 26.07.2018 19:16:53

Sample Type : Unknown  
 Acquired by : HPLC - Natascha  
 Processed by : HPLC - Natascha

## <Chromatogram>

mV

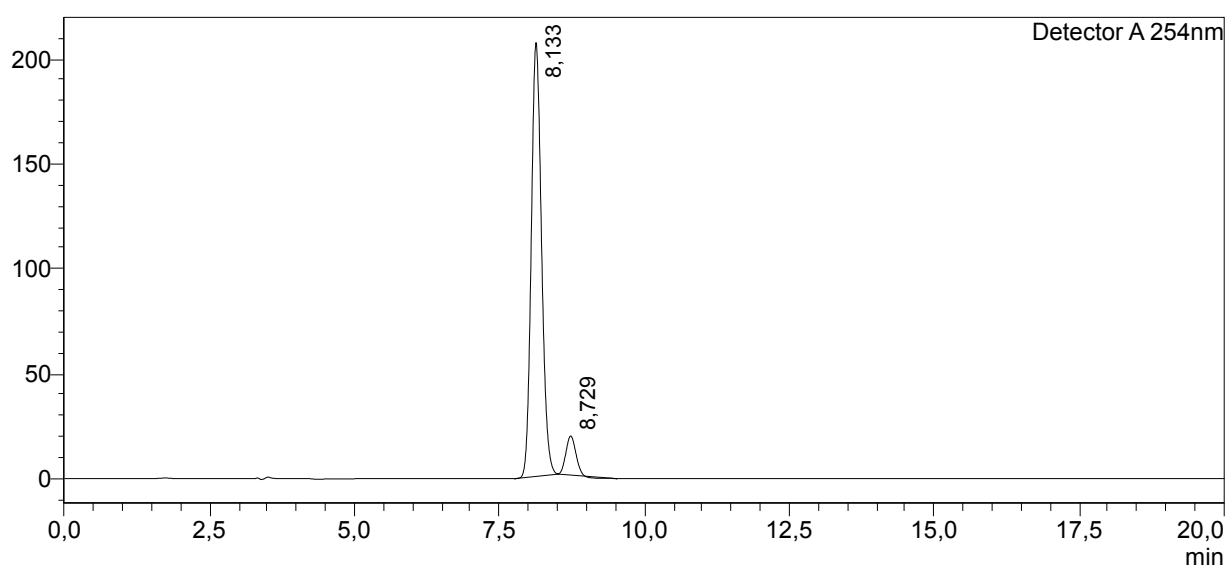

## <Peak Table>

Detector A 254nm

| Ret. Time | Area    | Area%   |
|-----------|---------|---------|
| 8,133     | 2526976 | 92,357  |
| 8,729     | 209109  | 7,643   |
|           | 2736085 | 100,000 |

**Figure S80b.** Chiral chromatogram of **8t**.

SHIMADZU

LabSolutions

# Analysis Report

## <Sample Information>

Sample Name : CE-149\_Spot2\_Peak2\_  
 Sample ID : CE-149\_Spot2\_Peak2\_  
 Data Filename : CE-149\_Spot2\_Peak2\_01.lcd  
 Method Filename : Chiralpak\_IA\_100EtOAc\_.lcm  
 Batch Filename :  
 Vial # : 1-1  
 Injection Volume : 15 uL  
 Date Acquired : 29.04.2022 14:30:08  
 Date Processed : 29.04.2022 14:52:58

Sample Type : Unknown  
 Acquired by : HPLC - Natascha  
 Processed by : HPLC - Natascha

## <Chromatogram>

mV

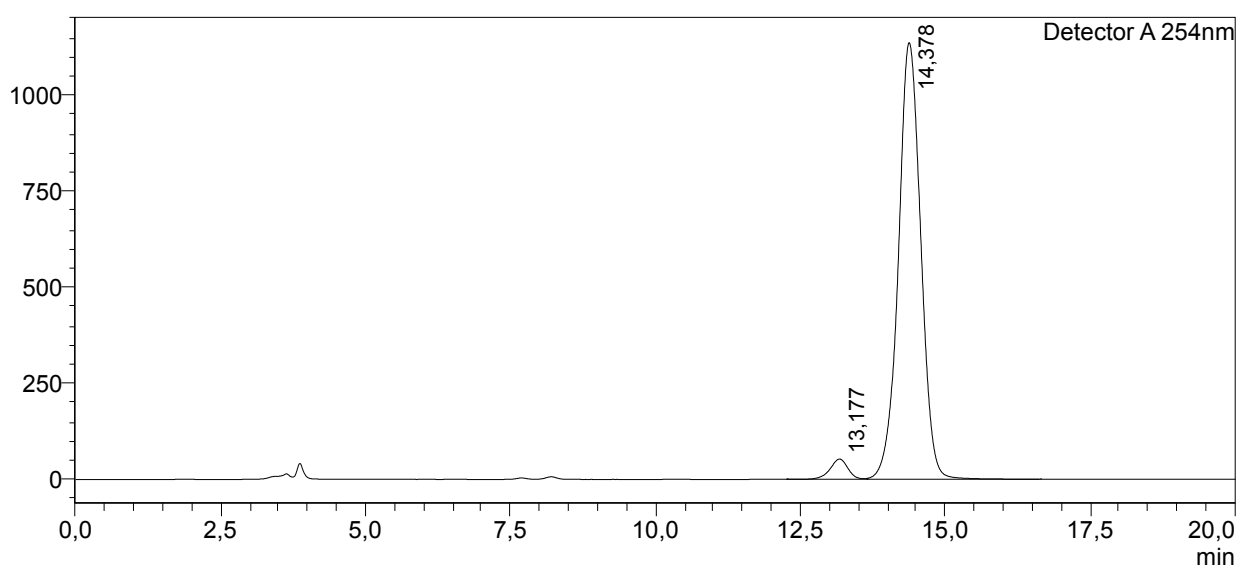

## <Peak Table>

Detector A 254nm

| Peak# | Ret. Time | Area     | Area%   |
|-------|-----------|----------|---------|
| 1     | 13,177    | 1134420  | 3,584   |
| 2     | 14,378    | 30516332 | 96,416  |
| Total |           | 31650752 | 100,000 |

**Figure S81b.** Chiral chromatogram of **5u**.

**SHIMADZU**  
**LabSolutions**

# Analysis Report

**<Sample Information>**

|                  |                               |              |                   |
|------------------|-------------------------------|--------------|-------------------|
| Sample Name      | : CE-156_spot_1_peak_1        |              |                   |
| Sample ID        | : CE-156_spot_1_peak_1        |              |                   |
| Data Filename    | : CE-156_spot_1_peak_1_01.lcd |              |                   |
| Method Filename  | : Method_12.03.2019.lcm       |              |                   |
| Batch Filename   | :                             |              |                   |
| Vial #           | : 1-5                         | Sample Type  | : Unknown         |
| Injection Volume | : 10 uL                       |              |                   |
| Date Acquired    | : 12.03.2019 12:34:52         | Acquired by  | : HPLC - Natascha |
| Date Processed   | : 28.04.2022 13:25:59         | Processed by | : HPLC - Natascha |

**<Chromatogram>**

mV

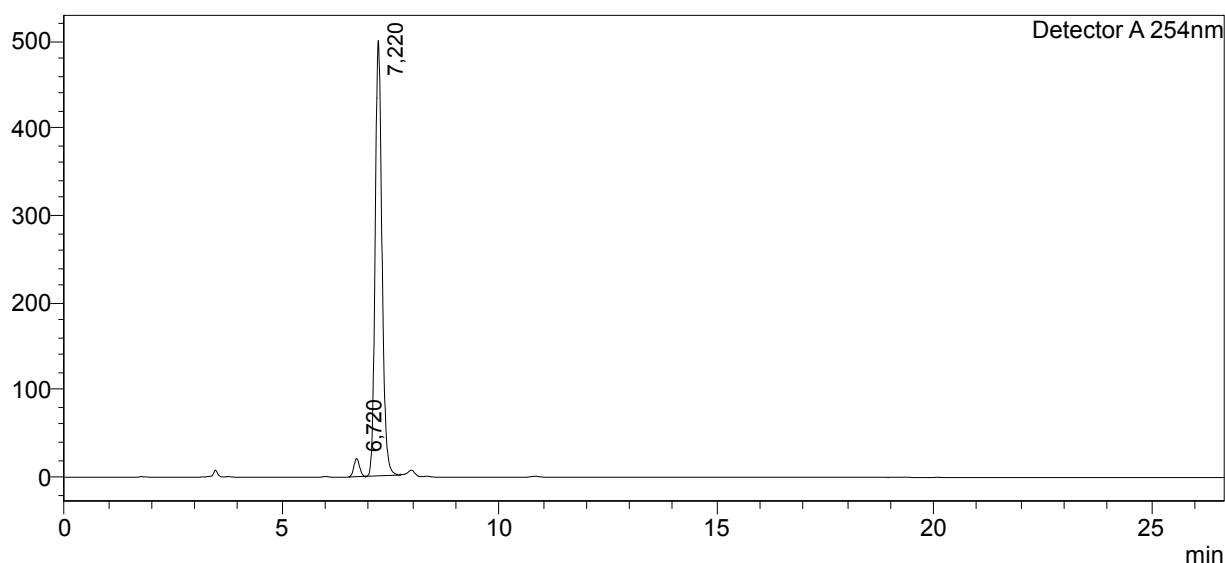**<Peak Table>**

Detector A 254nm

| Ret. Time | Area    | Area%   |
|-----------|---------|---------|
| 6,720     | 189918  | 3,358   |
| 7,220     | 5465756 | 96,642  |
|           | 5655673 | 100,000 |



**Figure S82b.** Chiral chromatogram of **6u**.

# Analysis Report

## <Sample Information>

Sample Name : CE-156\_spot\_1\_peak\_2  
 Sample ID : CE-156\_spot\_1\_peak\_2  
 Data Filename : CE-156\_spot\_1\_peak\_2\_01.lcd  
 Method Filename : Method\_12.03.2019.lcm  
 Batch Filename :  
 Vial # : 1-6  
 Injection Volume : 10 uL  
 Date Acquired : 12.03.2019 13:02:15  
 Date Processed : 12.03.2019 13:30:19

Sample Type : Unknown  
 Acquired by : HPLC - Natascha  
 Processed by : HPLC - Natascha

## <Chromatogram>

mV

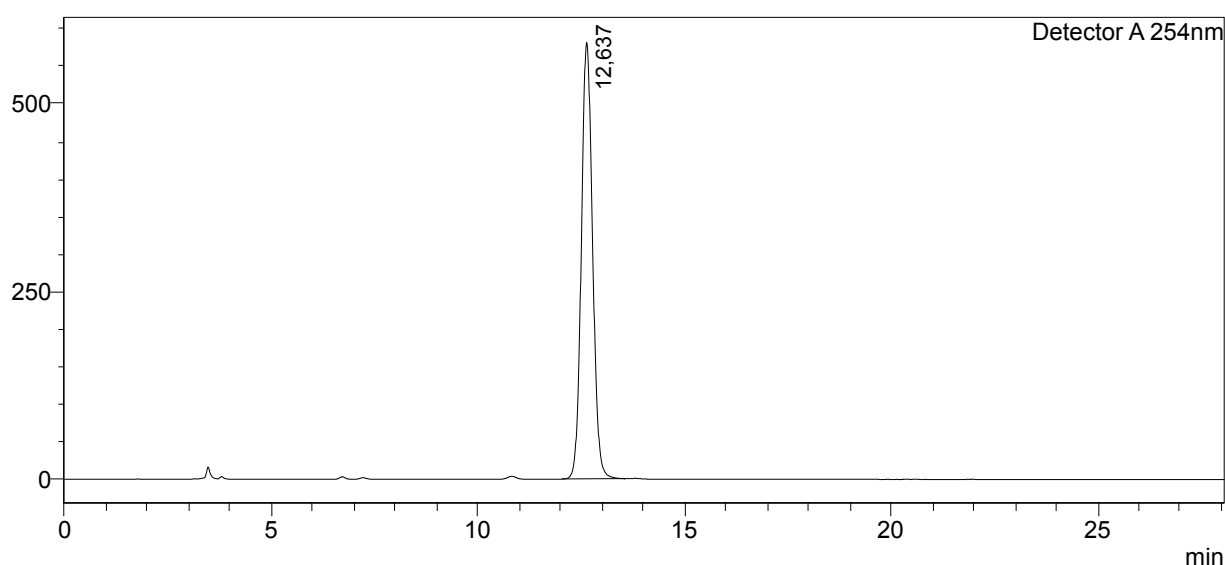

## <Peak Table>

Detector A 254nm

| Ret. Time | Area     | Area%   |
|-----------|----------|---------|
| 12.637    | 10991654 | 100.000 |
|           | 10991654 | 100.000 |

**Figure S83b.** Chiral chromatogram of **7u**.SHIMADZU  
LabSolutions

# Analysis Report

## <Sample Information>

Sample Name : CE-156\_Spot2\_Peak1\_  
 Sample ID : CE-156\_Spot2\_Peak1\_  
 Data Filename : CE-156\_Spot2\_Peak1\_02.lcd  
 Method Filename : Chiralpak\_IA\_100EtOAc\_.lcm  
 Batch Filename :  
 Vial # : 1-1  
 Injection Volume : 7 uL  
 Date Acquired : 29.04.2022 11:18:02  
 Date Processed : 29.04.2022 11:30:04

Sample Type : Unknown  
 Acquired by : HPLC - Natascha  
 Processed by : HPLC - Natascha

## <Chromatogram>

mV

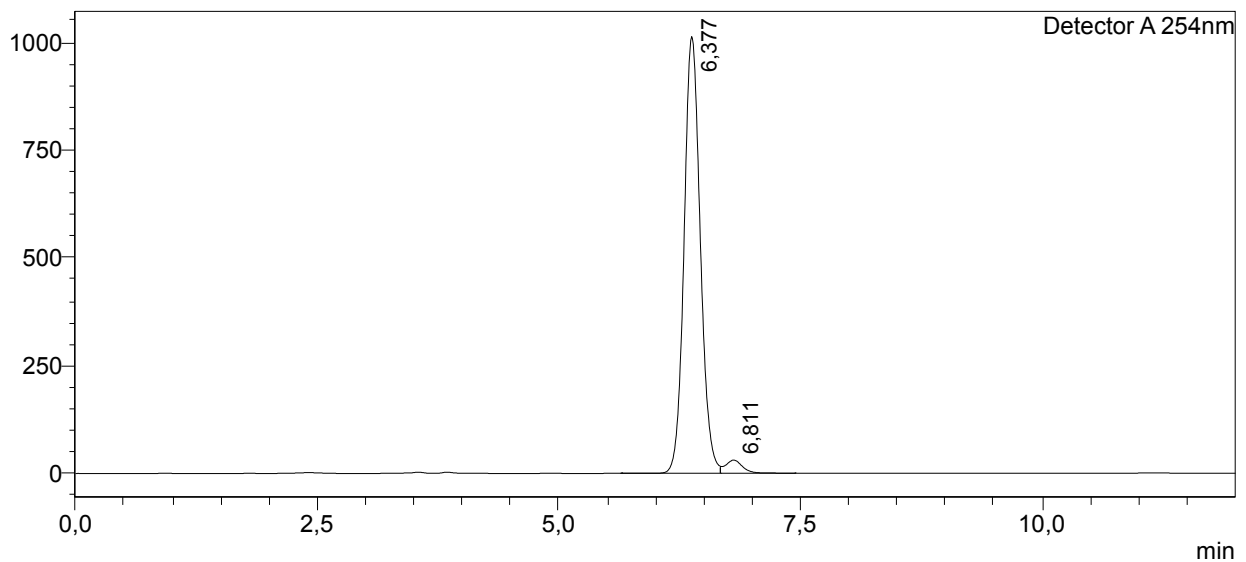

## <Peak Table>

Detector A 254nm

| Peak# | Ret. Time | Area     | Area%   |
|-------|-----------|----------|---------|
| 1     | 6,377     | 11867874 | 97,004  |
| 2     | 6,811     | 366540   | 2,996   |
| Total |           | 12234415 | 100,000 |

**Figure S84b.** Chiral chromatogram of **8u**.

# Analysis Report

## <Sample Information>

|                  |                               |              |                   |
|------------------|-------------------------------|--------------|-------------------|
| Sample Name      | : CE-156_spot_2_peak_2        |              |                   |
| Sample ID        | : CE-156_spot_2_peak_2        |              |                   |
| Data Filename    | : CE-156_spot_2_peak_2_01.lcd |              |                   |
| Method Filename  | : Method_12.03.2019.lcm       |              |                   |
| Batch Filename   | :                             |              |                   |
| Vial #           | : 1-8                         | Sample Type  | : Unknown         |
| Injection Volume | : 10 uL                       |              |                   |
| Date Acquired    | : 12.03.2019 14:57:37         | Acquired by  | : HPLC - Natascha |
| Date Processed   | : 12.03.2019 15:12:38         | Processed by | : HPLC - Natascha |

## <Chromatogram>

mV

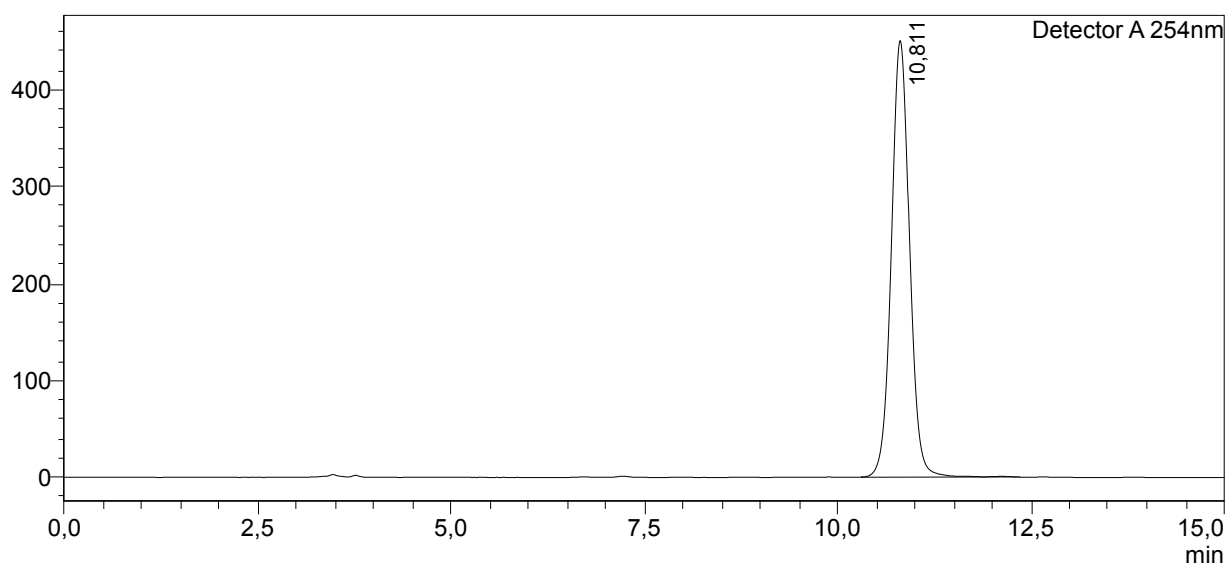

## <Peak Table>

Detector A 254nm

| Ret. Time | Area    | Area%   |
|-----------|---------|---------|
| 10,811    | 7355659 | 100,000 |
|           | 7355659 | 100,000 |

PN020p1 in cdc13 (Proton) 11.3.2021

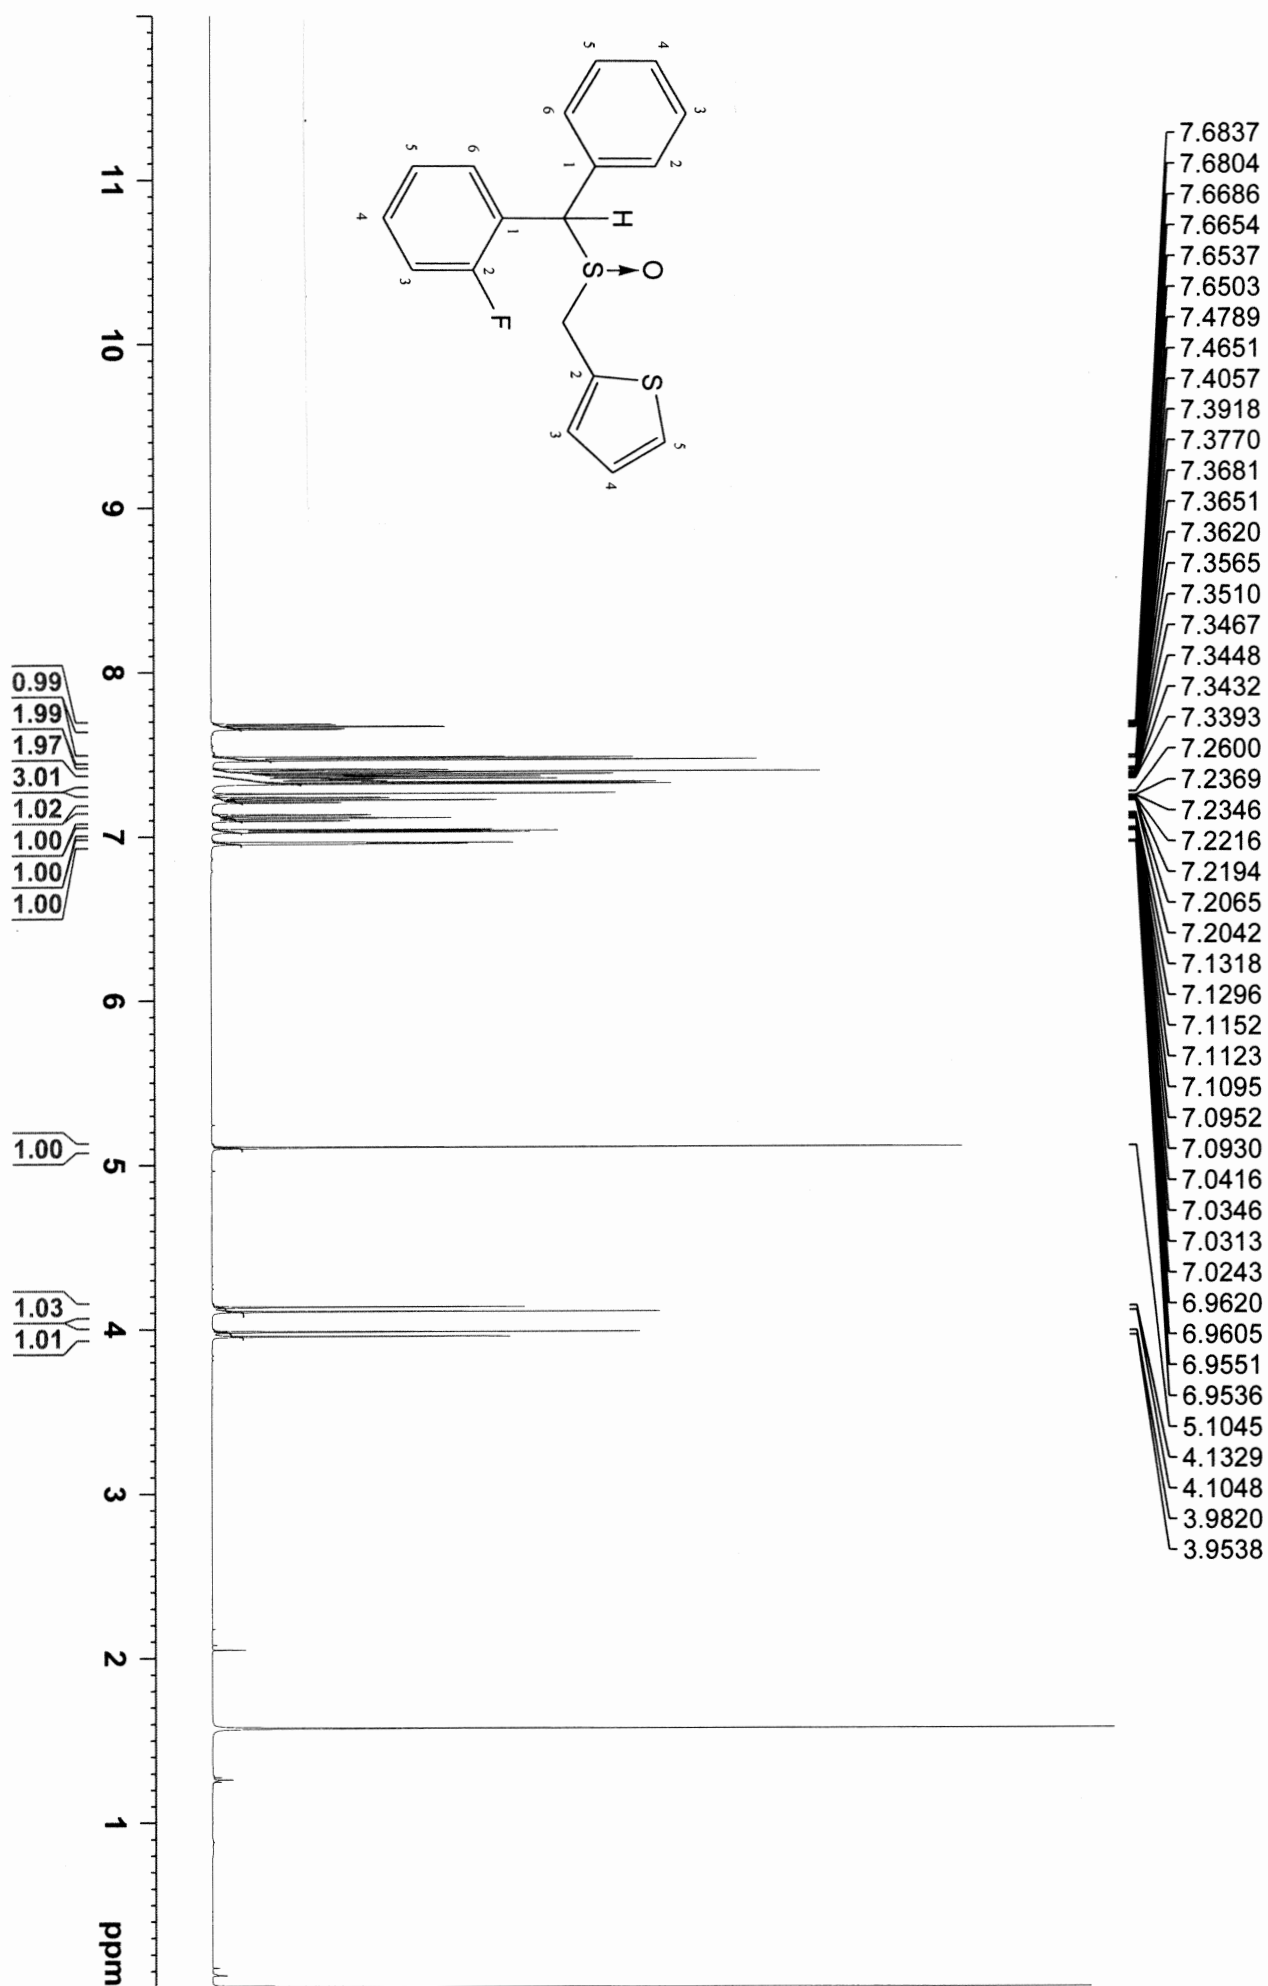

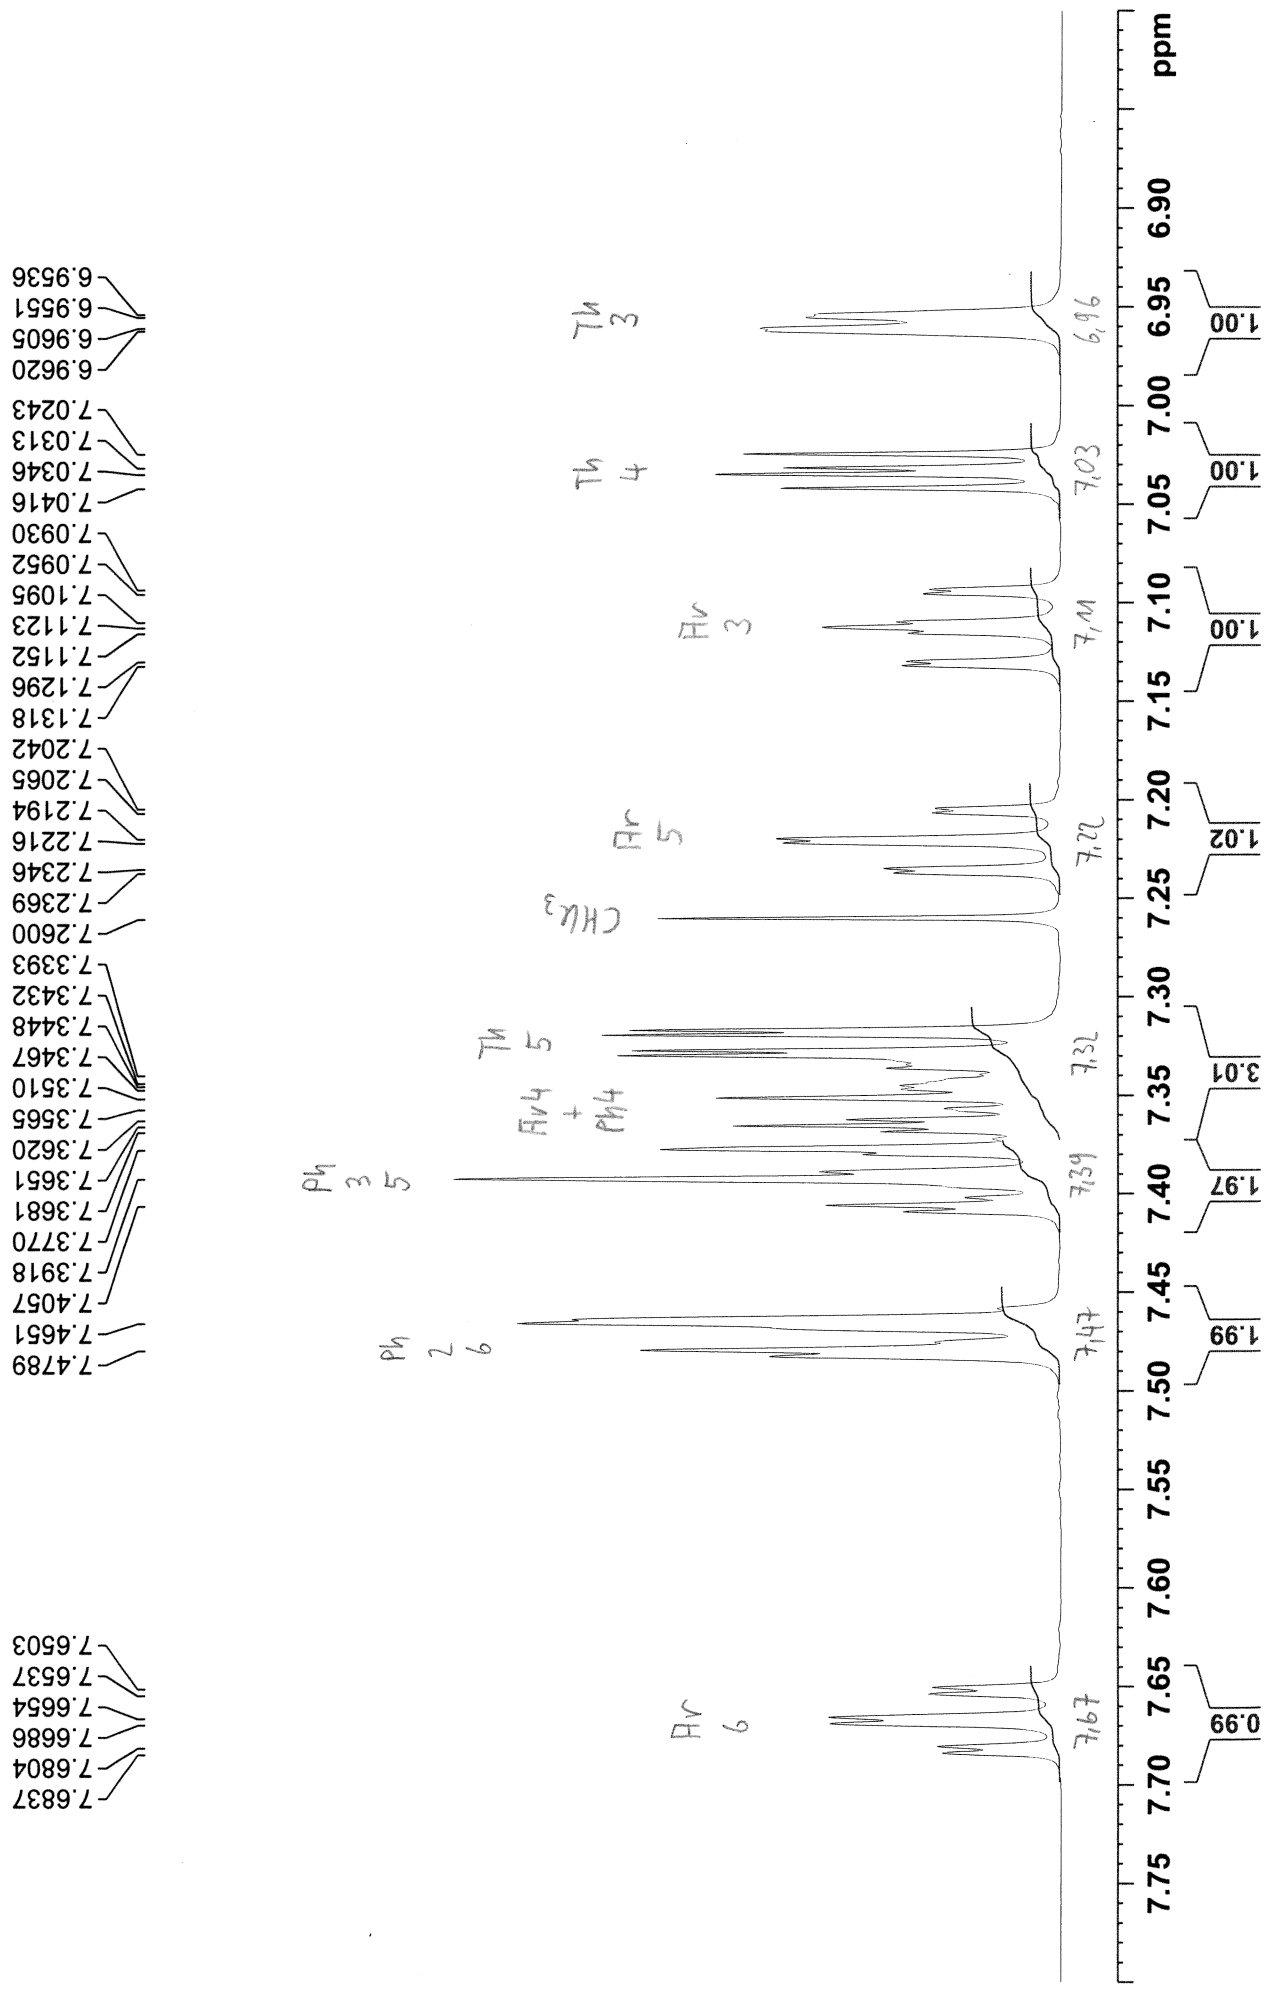

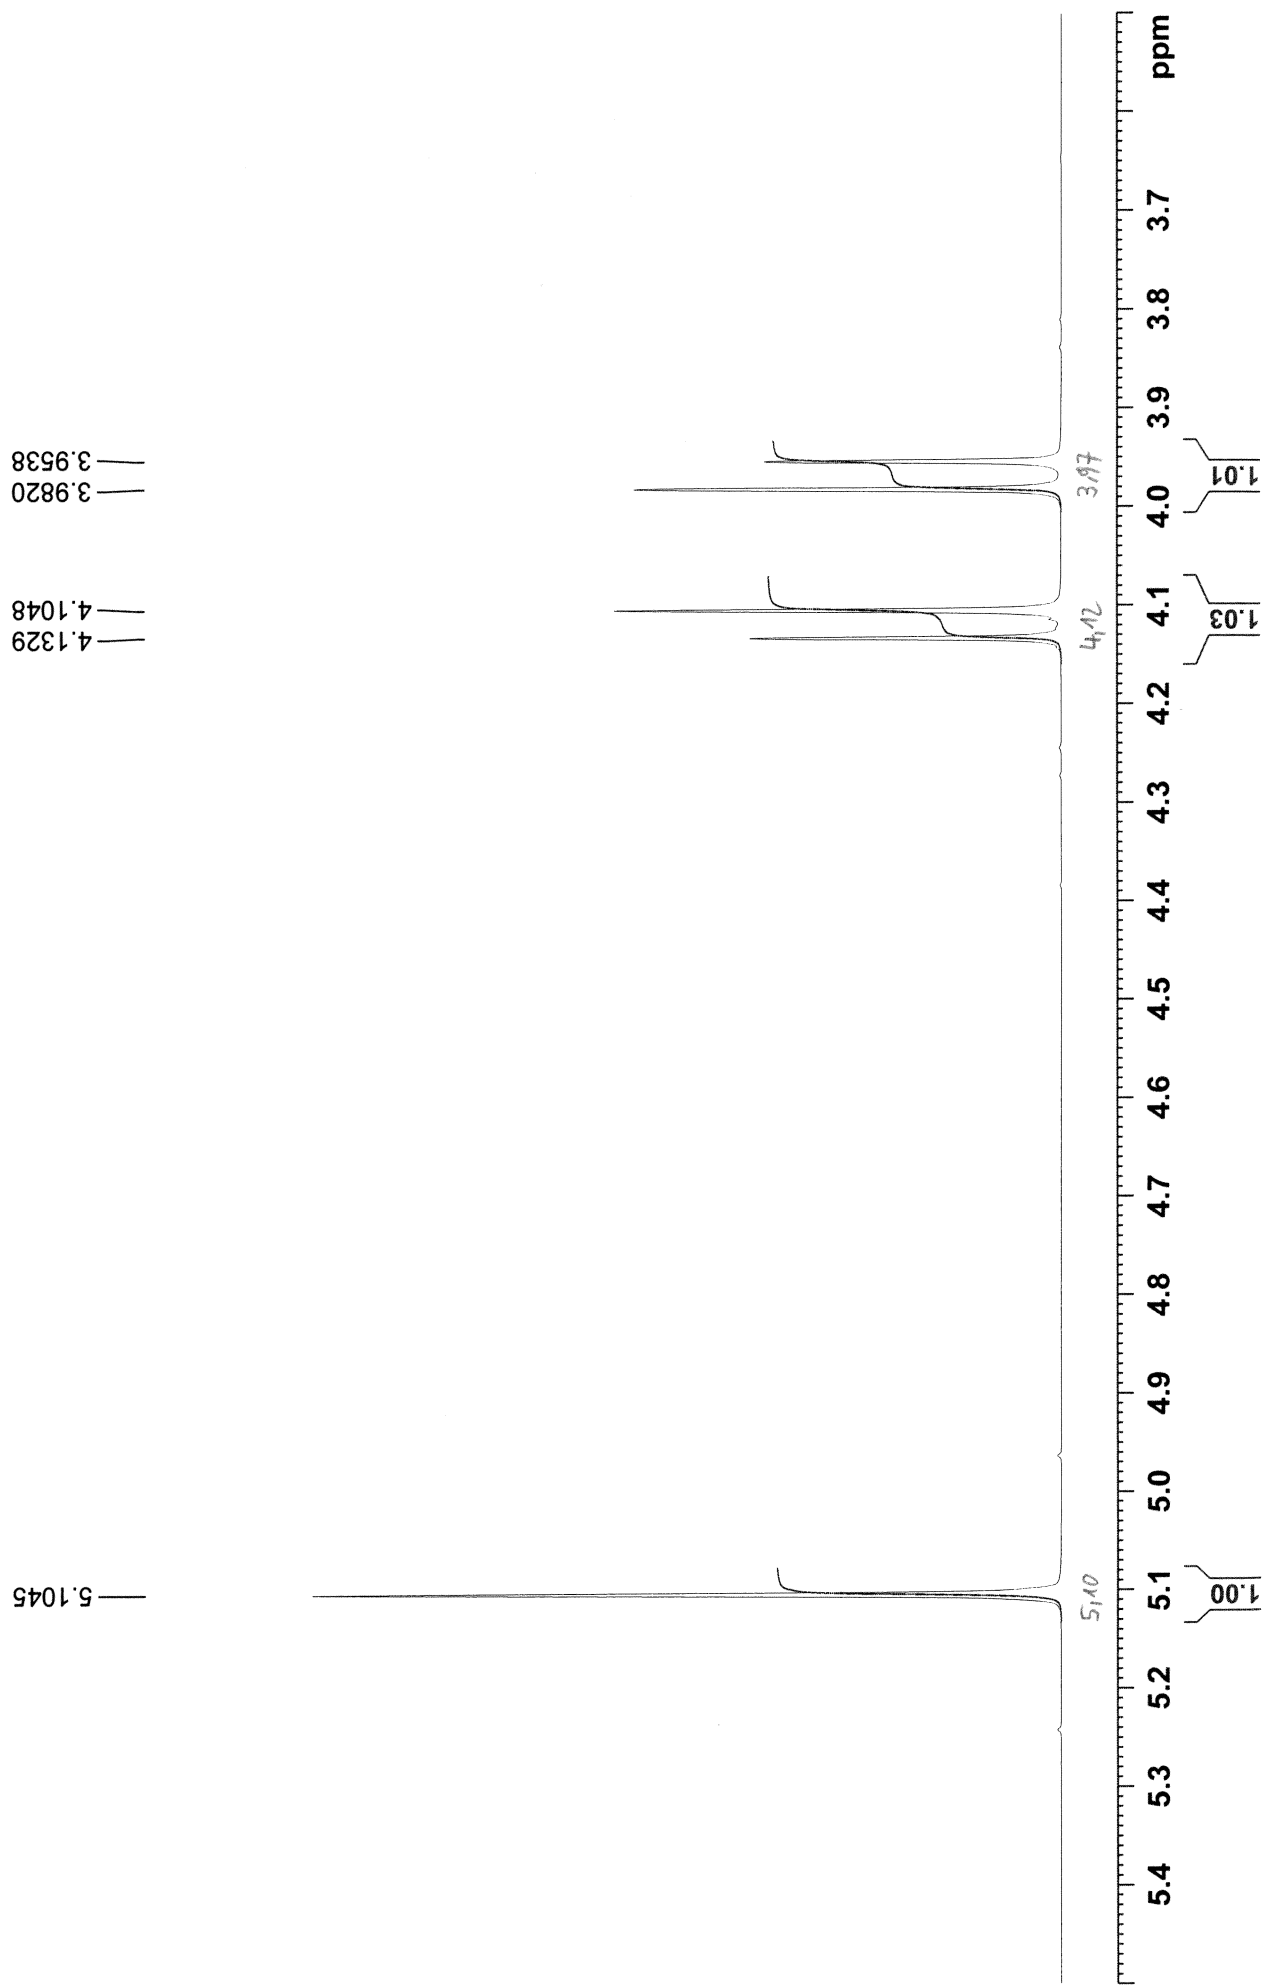

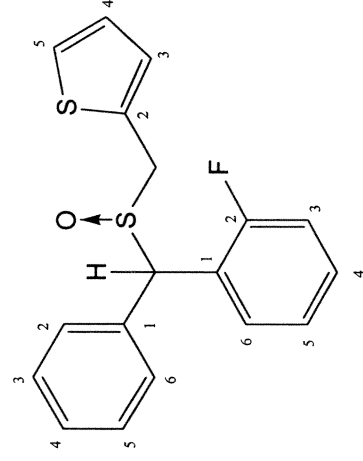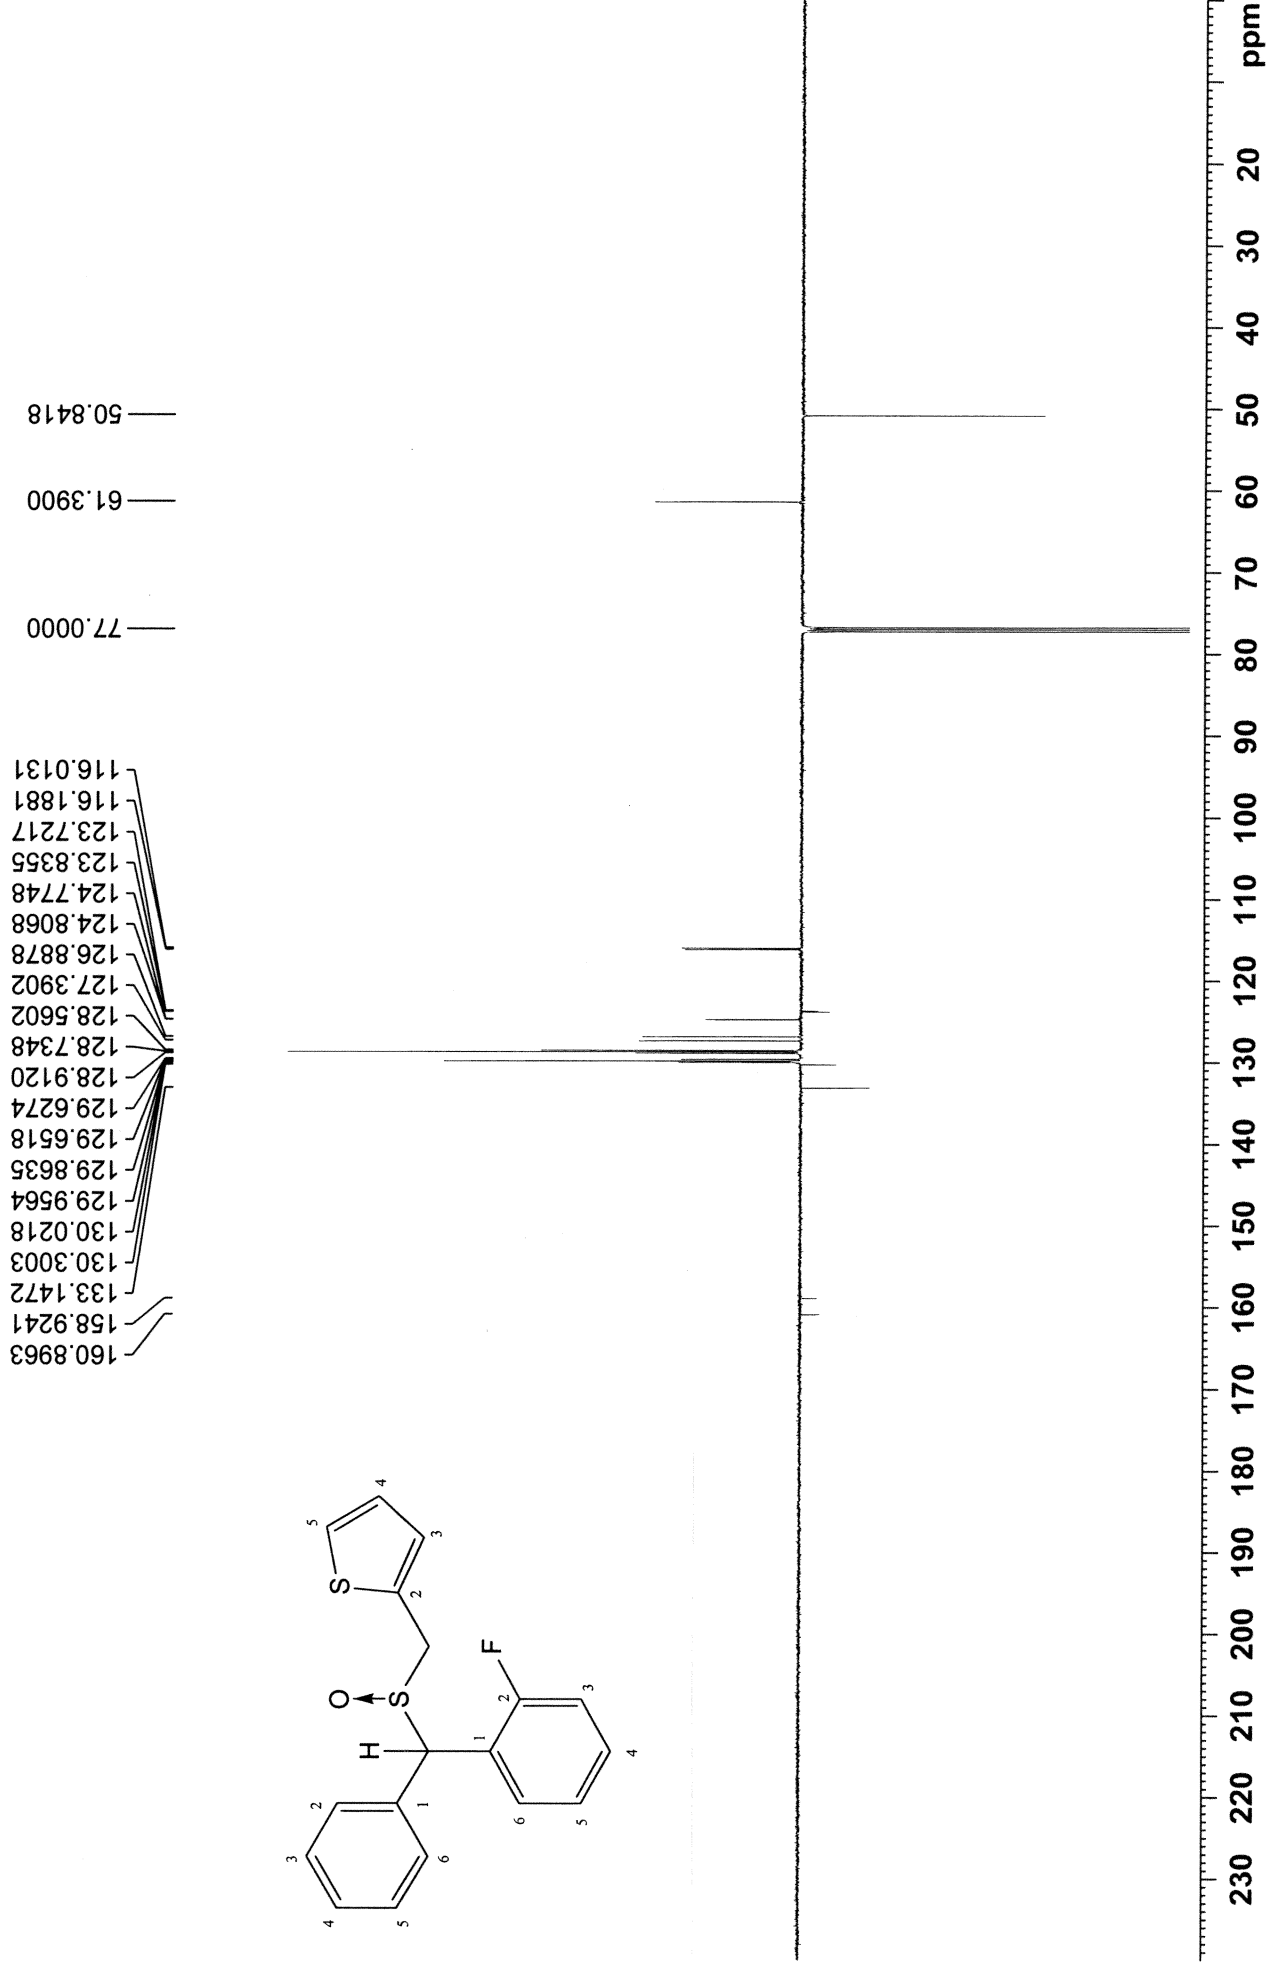

160.8963

158.9241

d

246,5

H<sub>2</sub>

158,91

ppm

ArZ

164 163 162 161 160 159 158 157 156 ppm



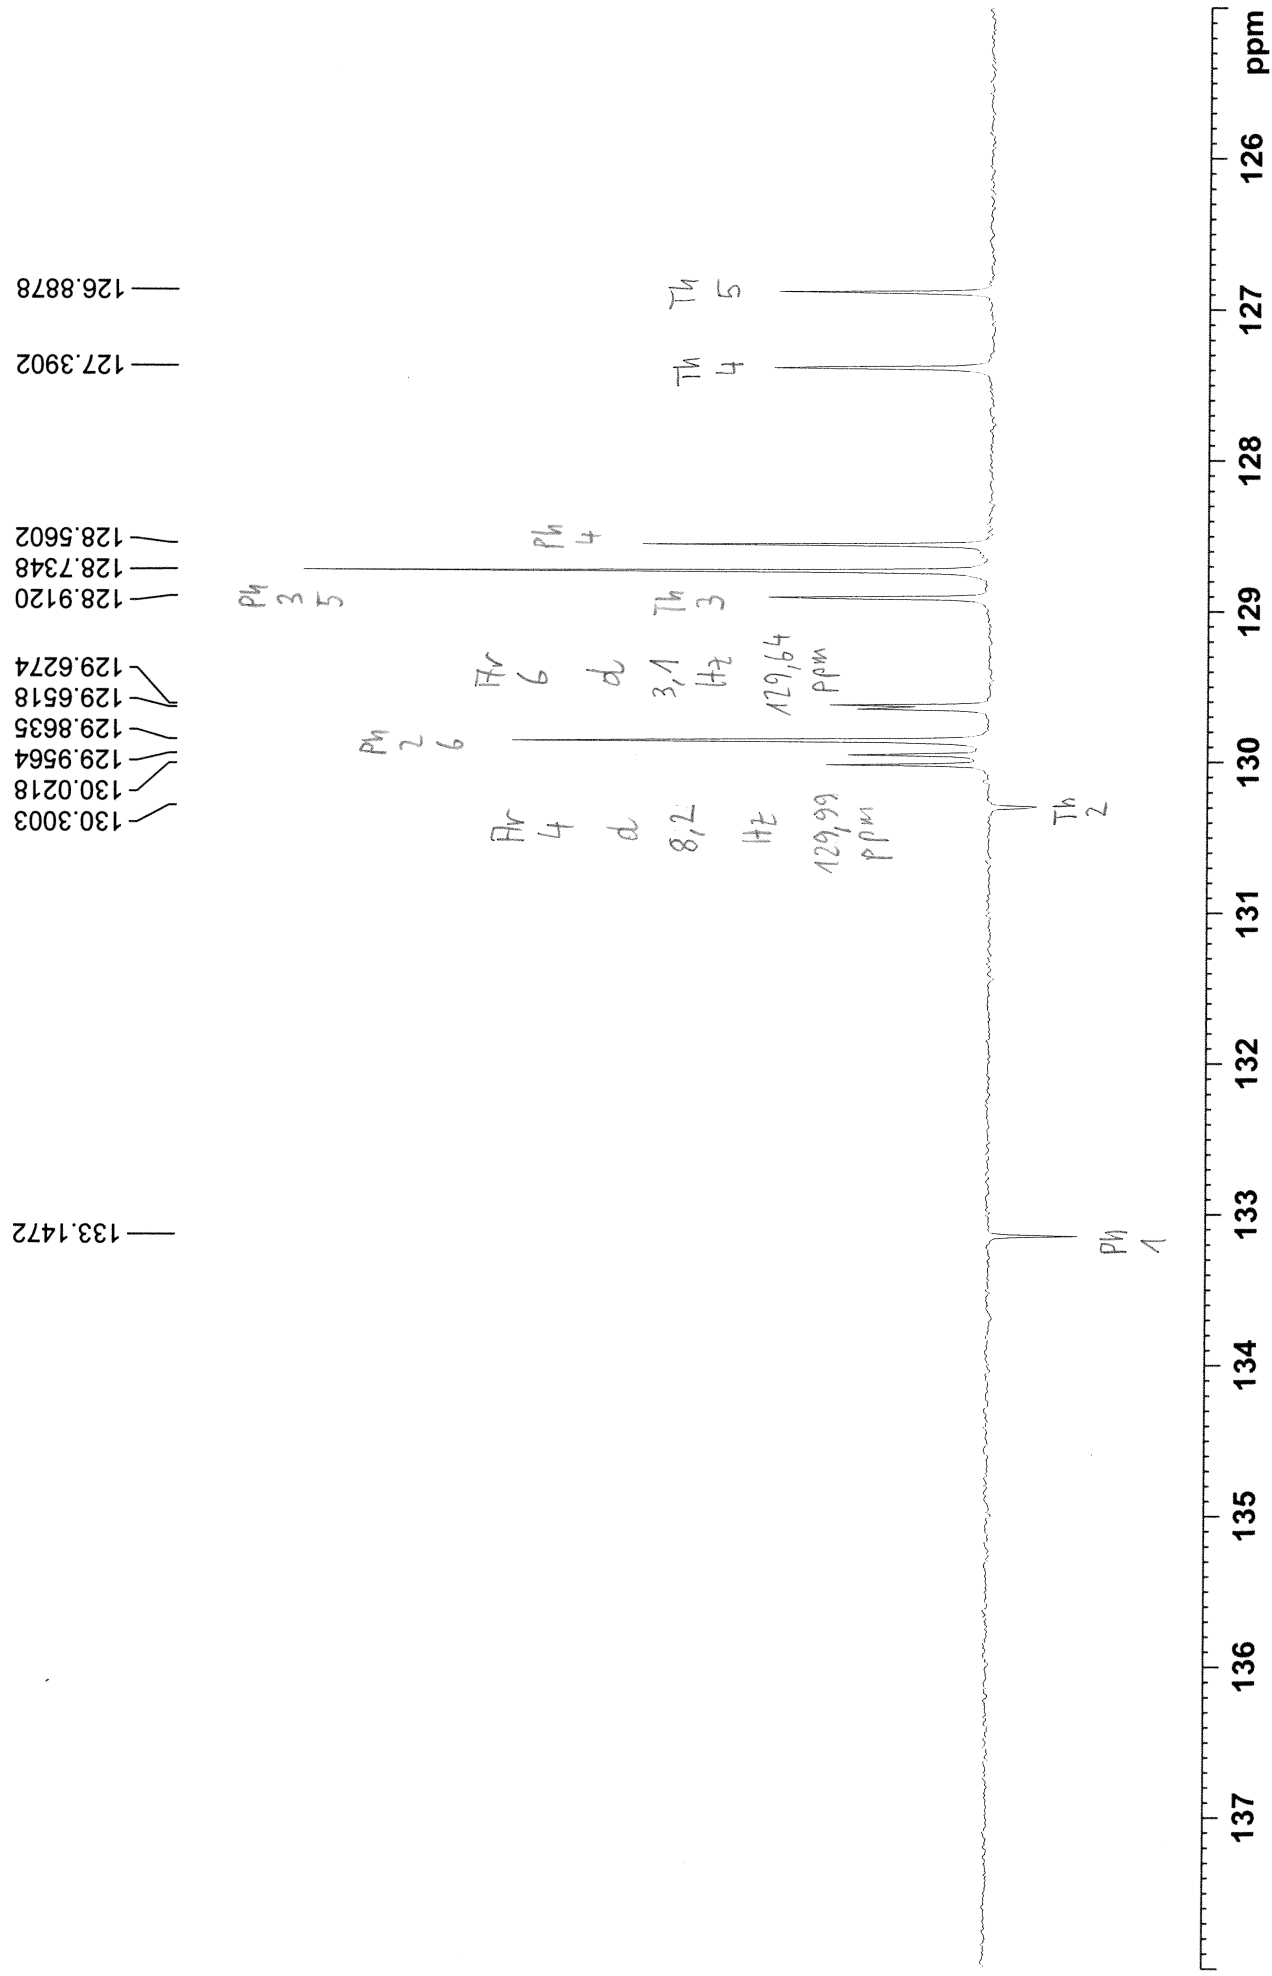

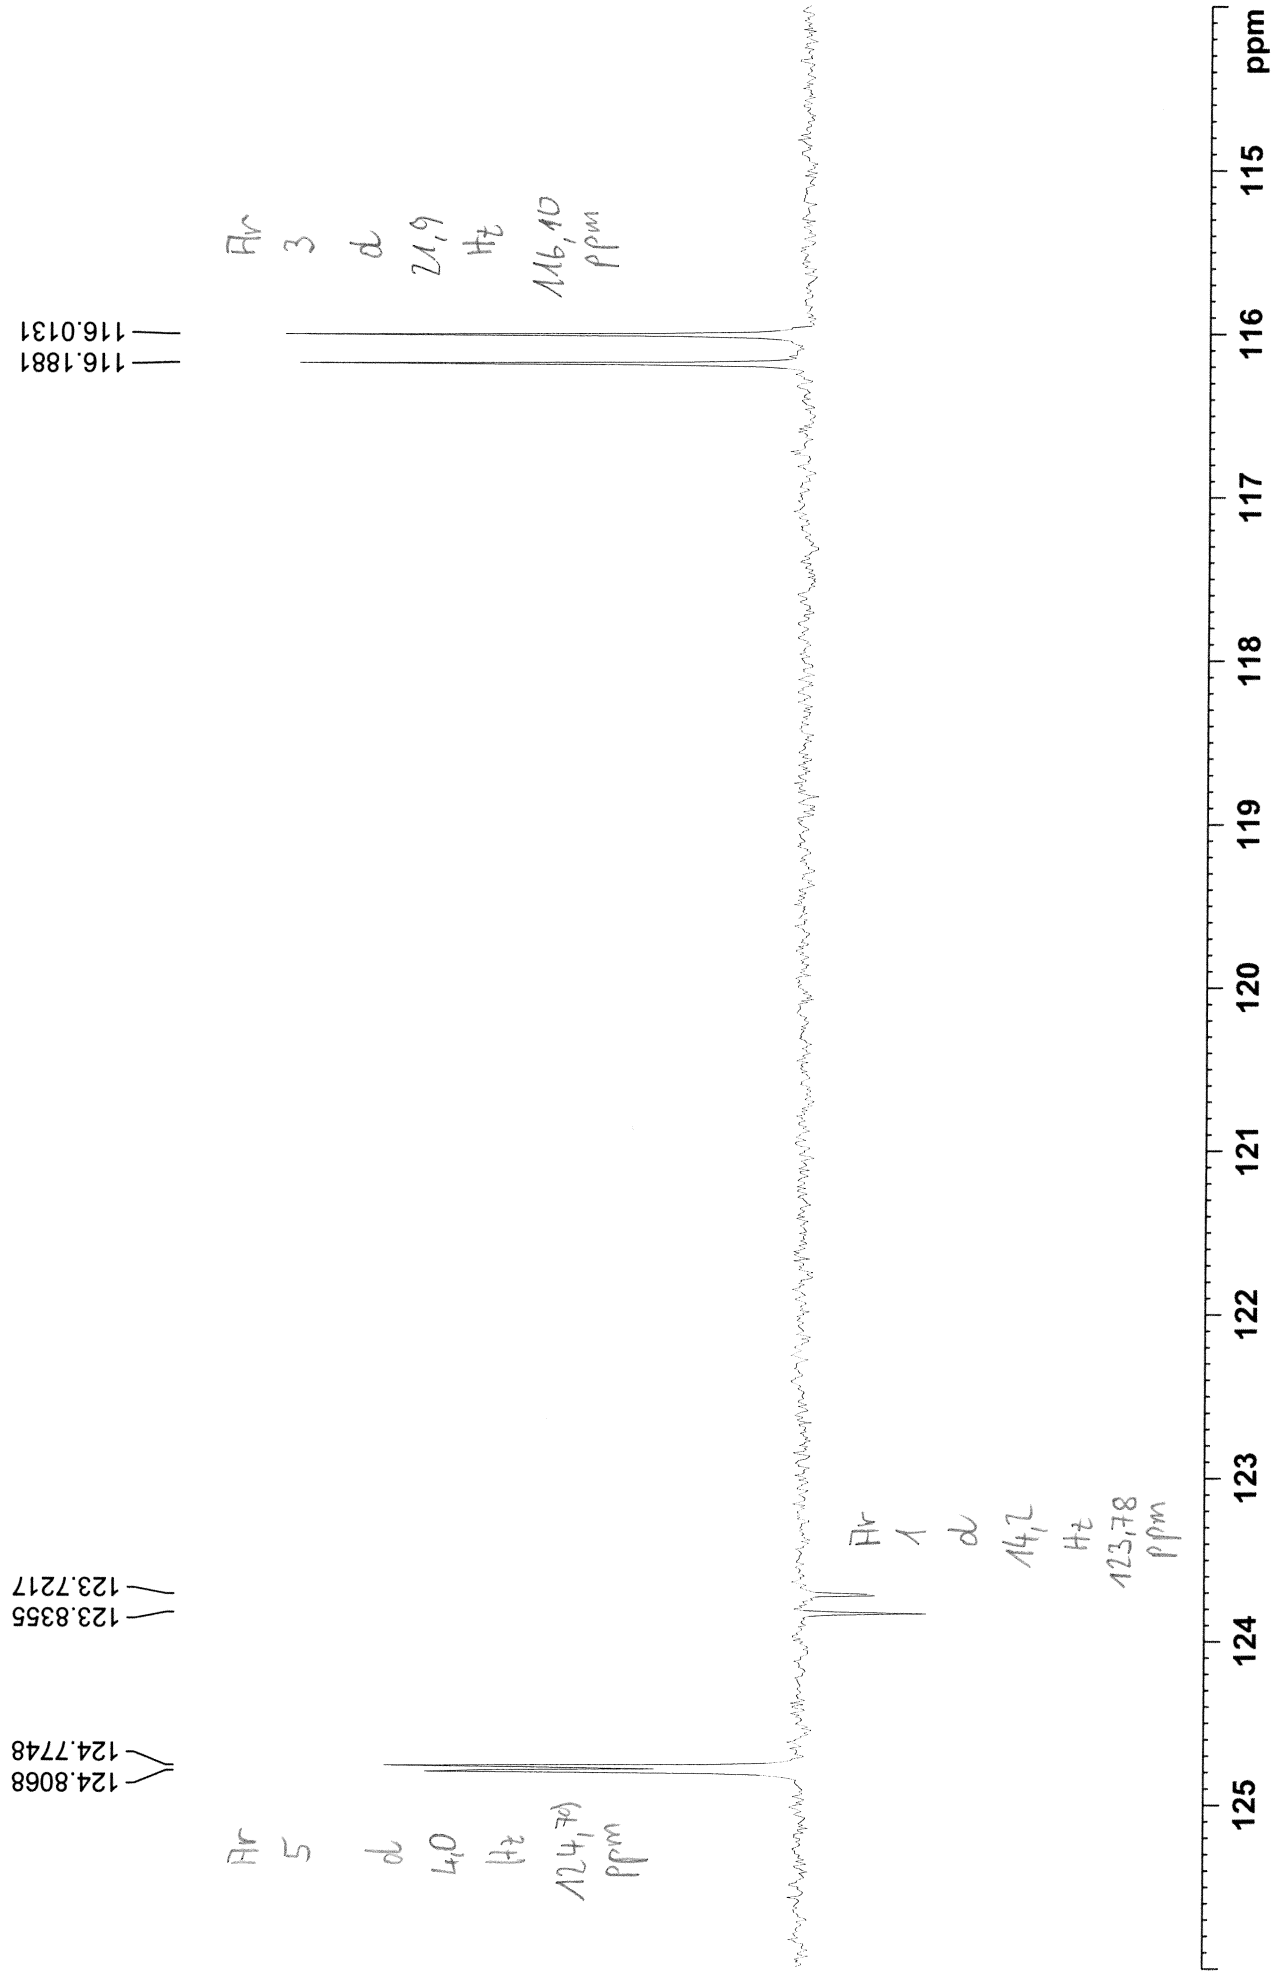

PN020p1 in cdcl3 (APT) 11.3.2021

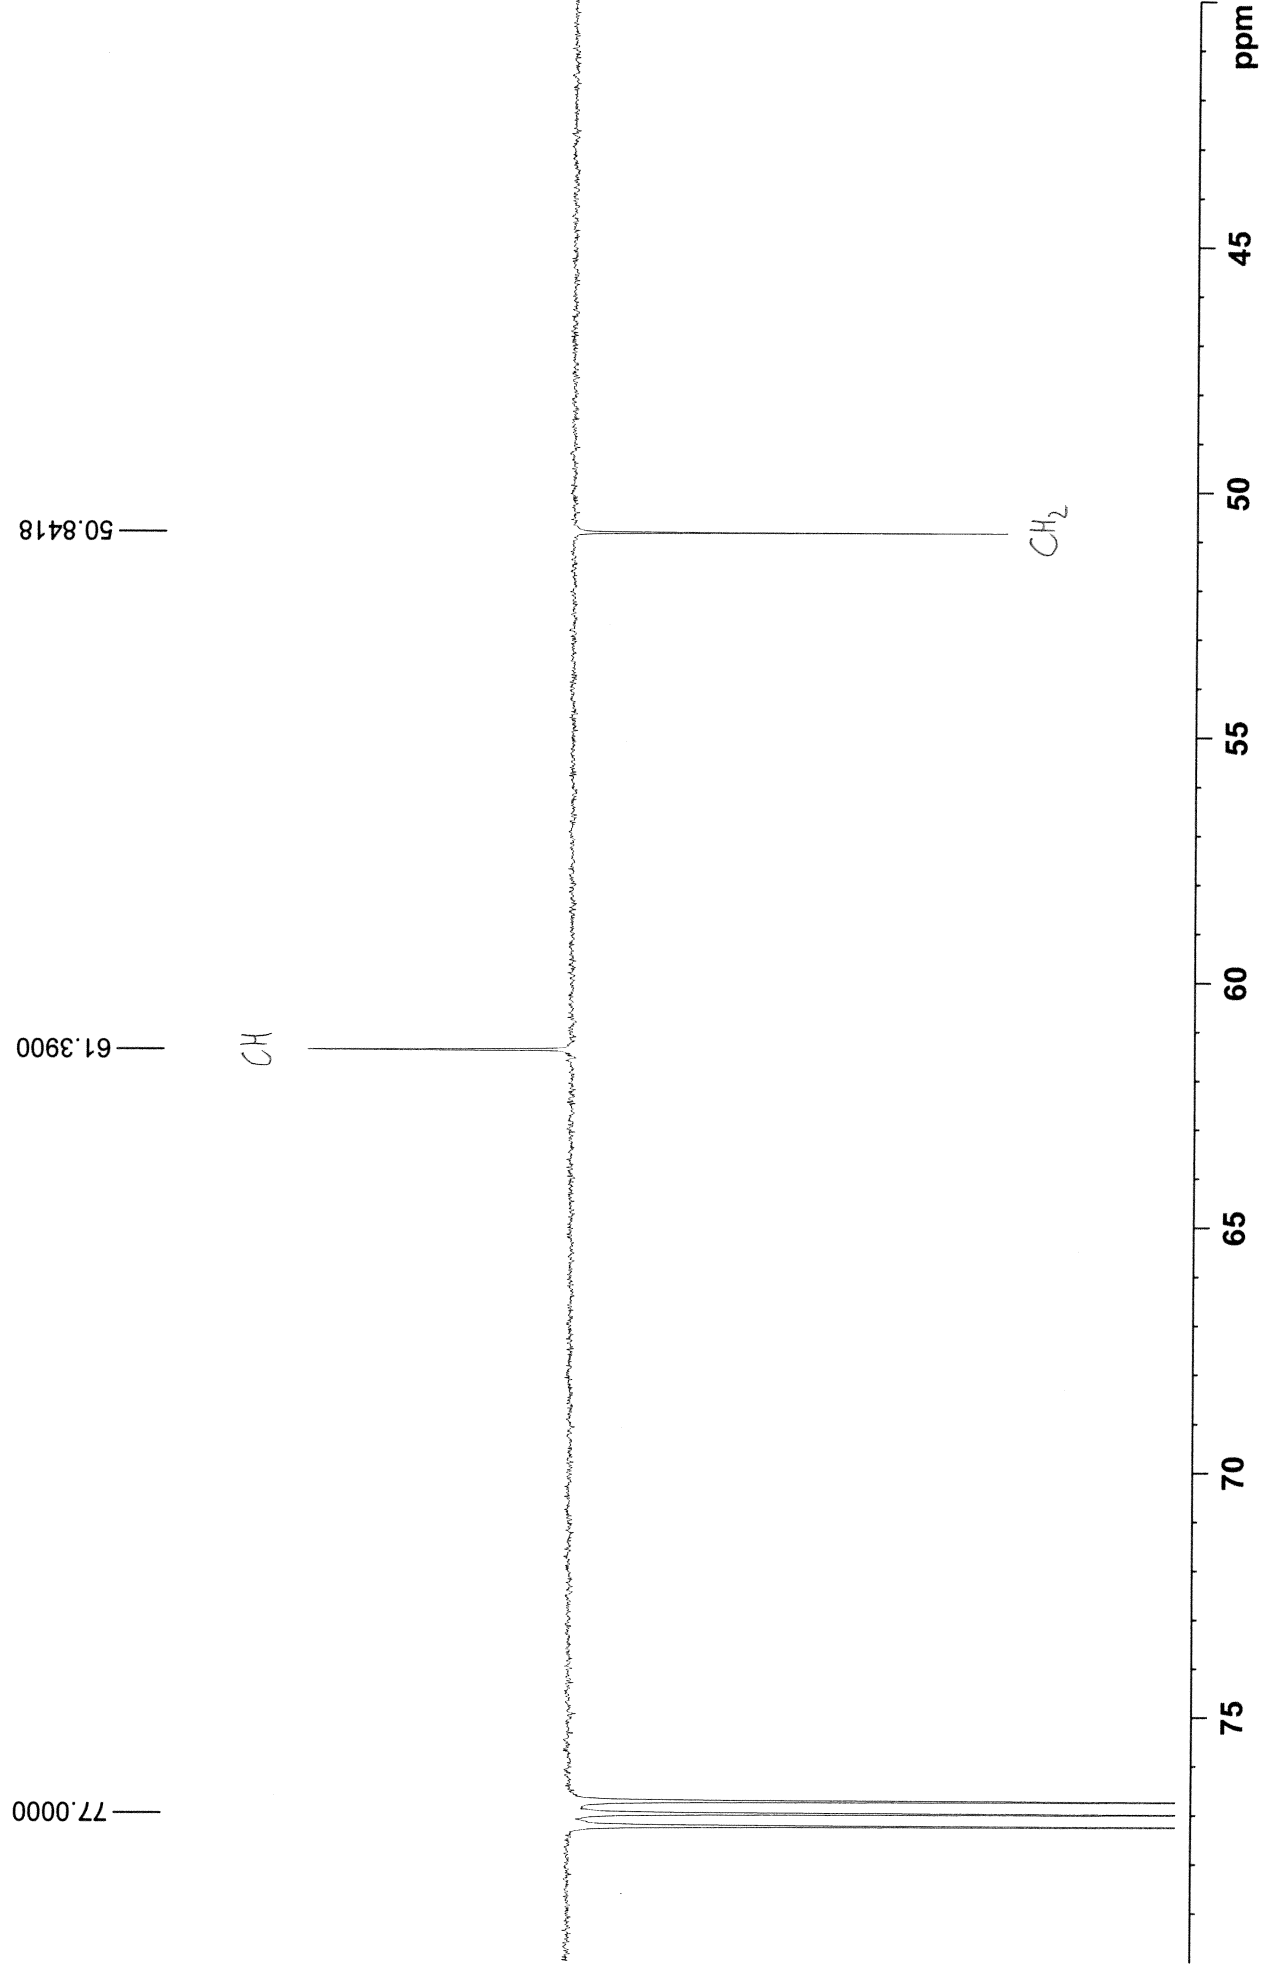

PN020p1 in cdcl3 (COSY) 11.3.2021

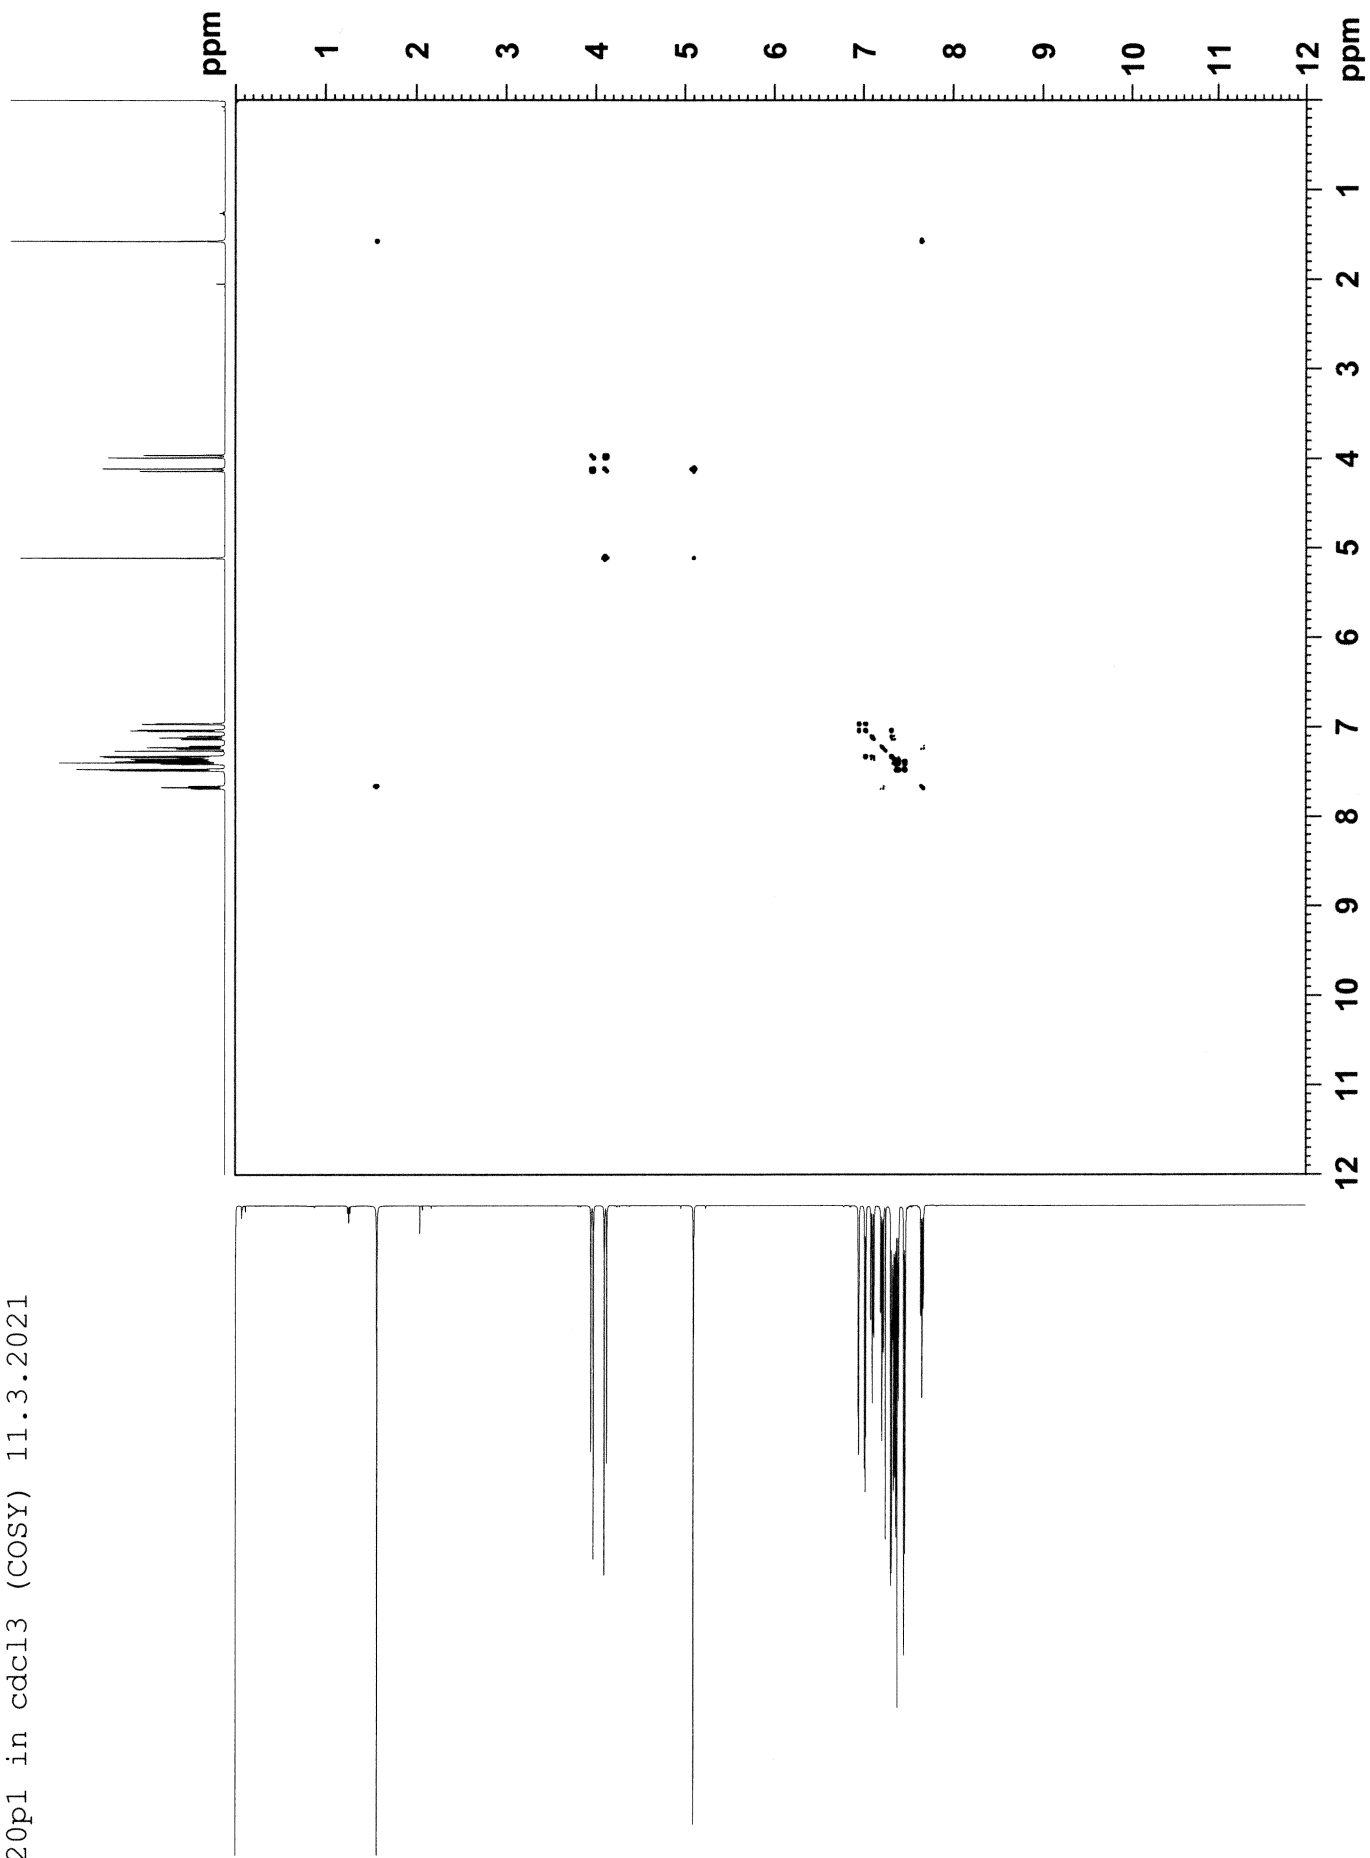

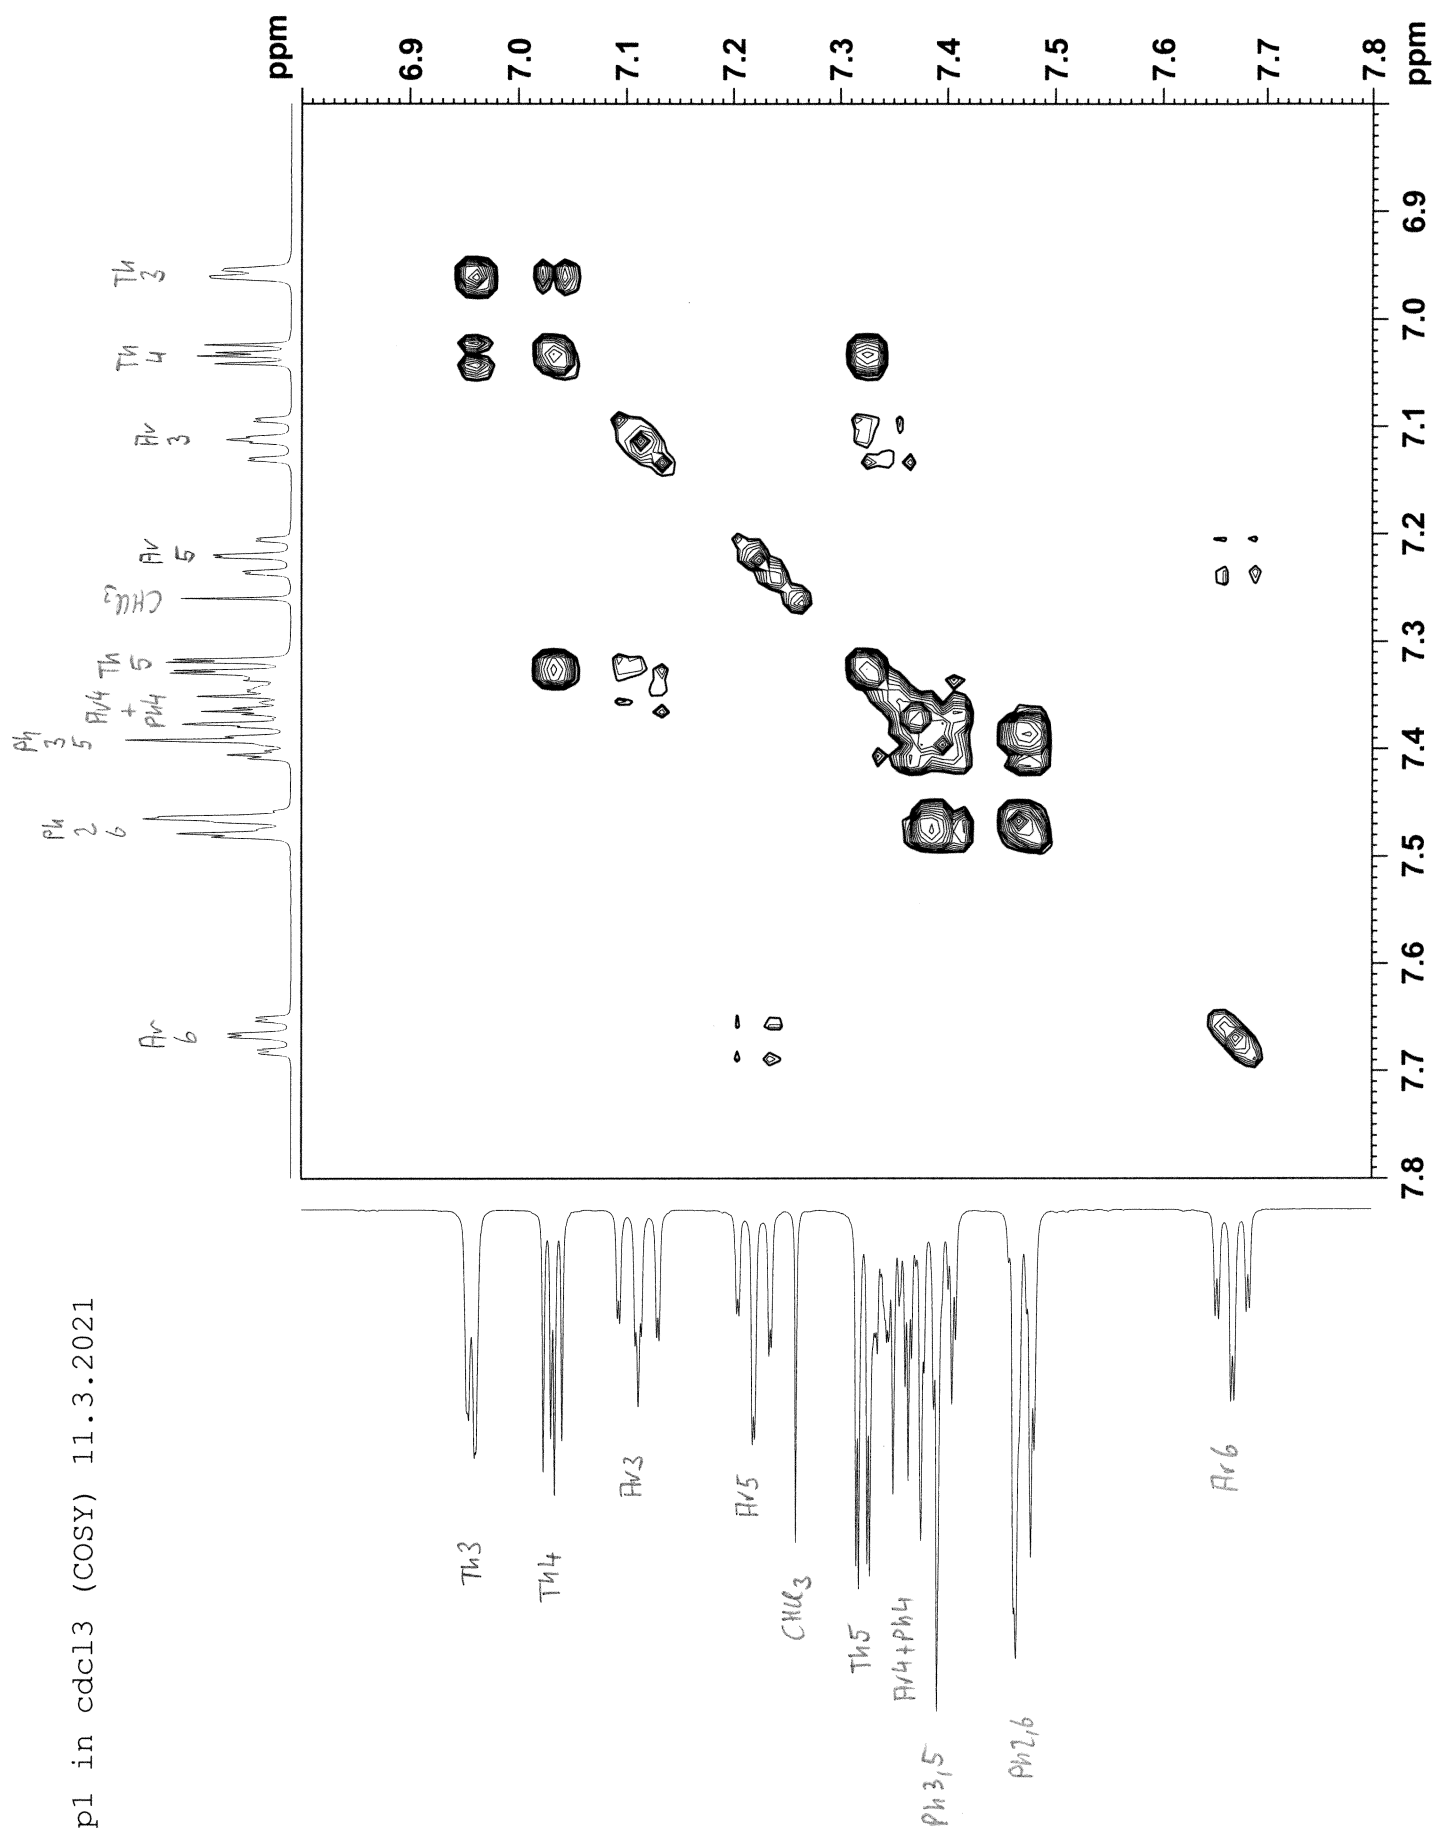

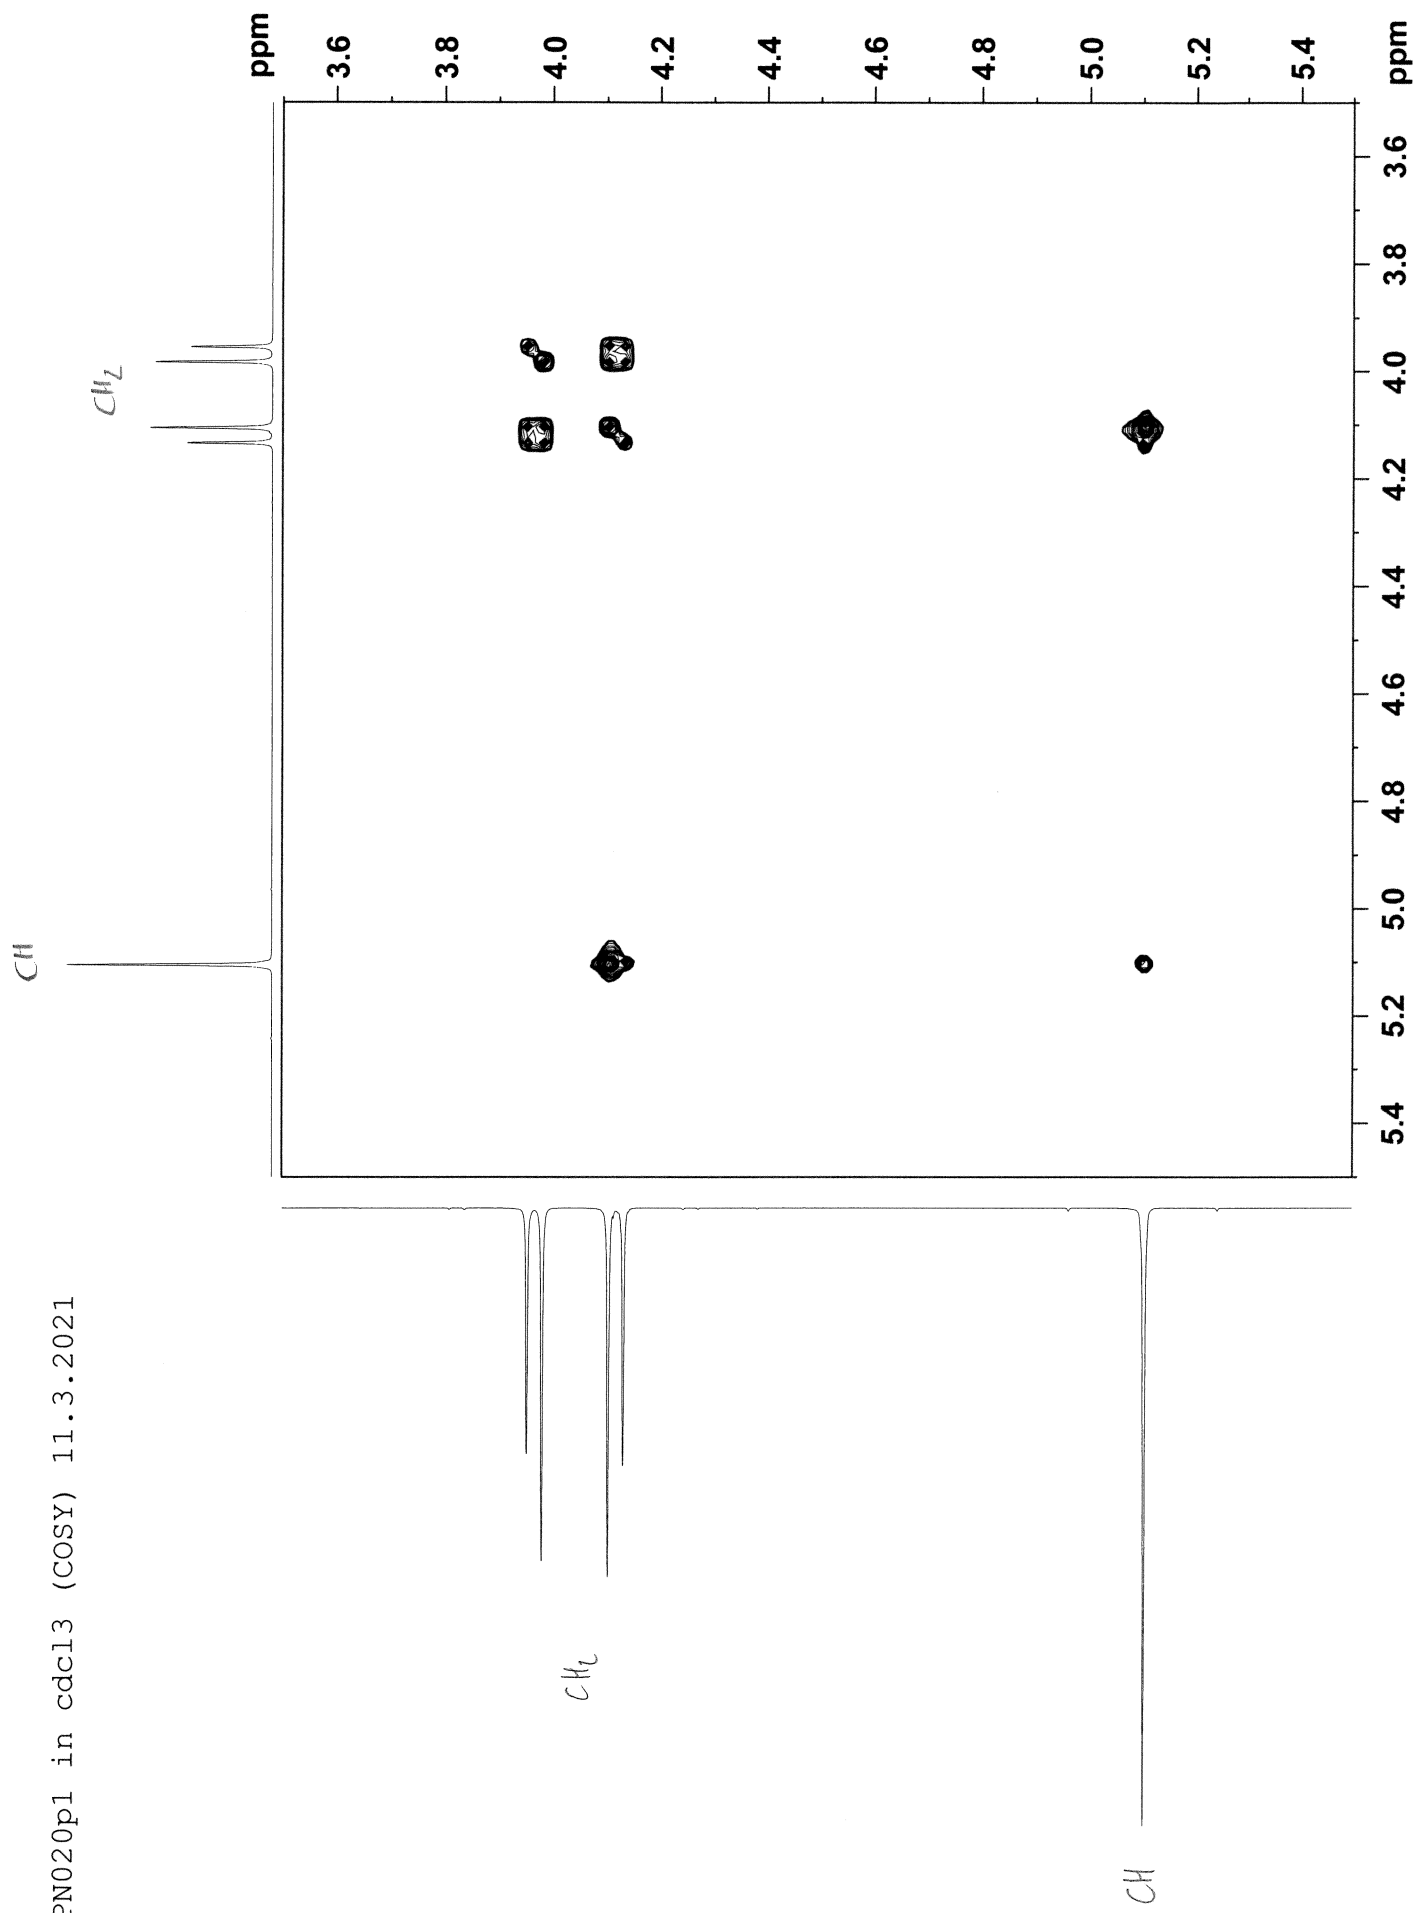

PN020p1 in cdcl3 (HSQC) 11.3.2021

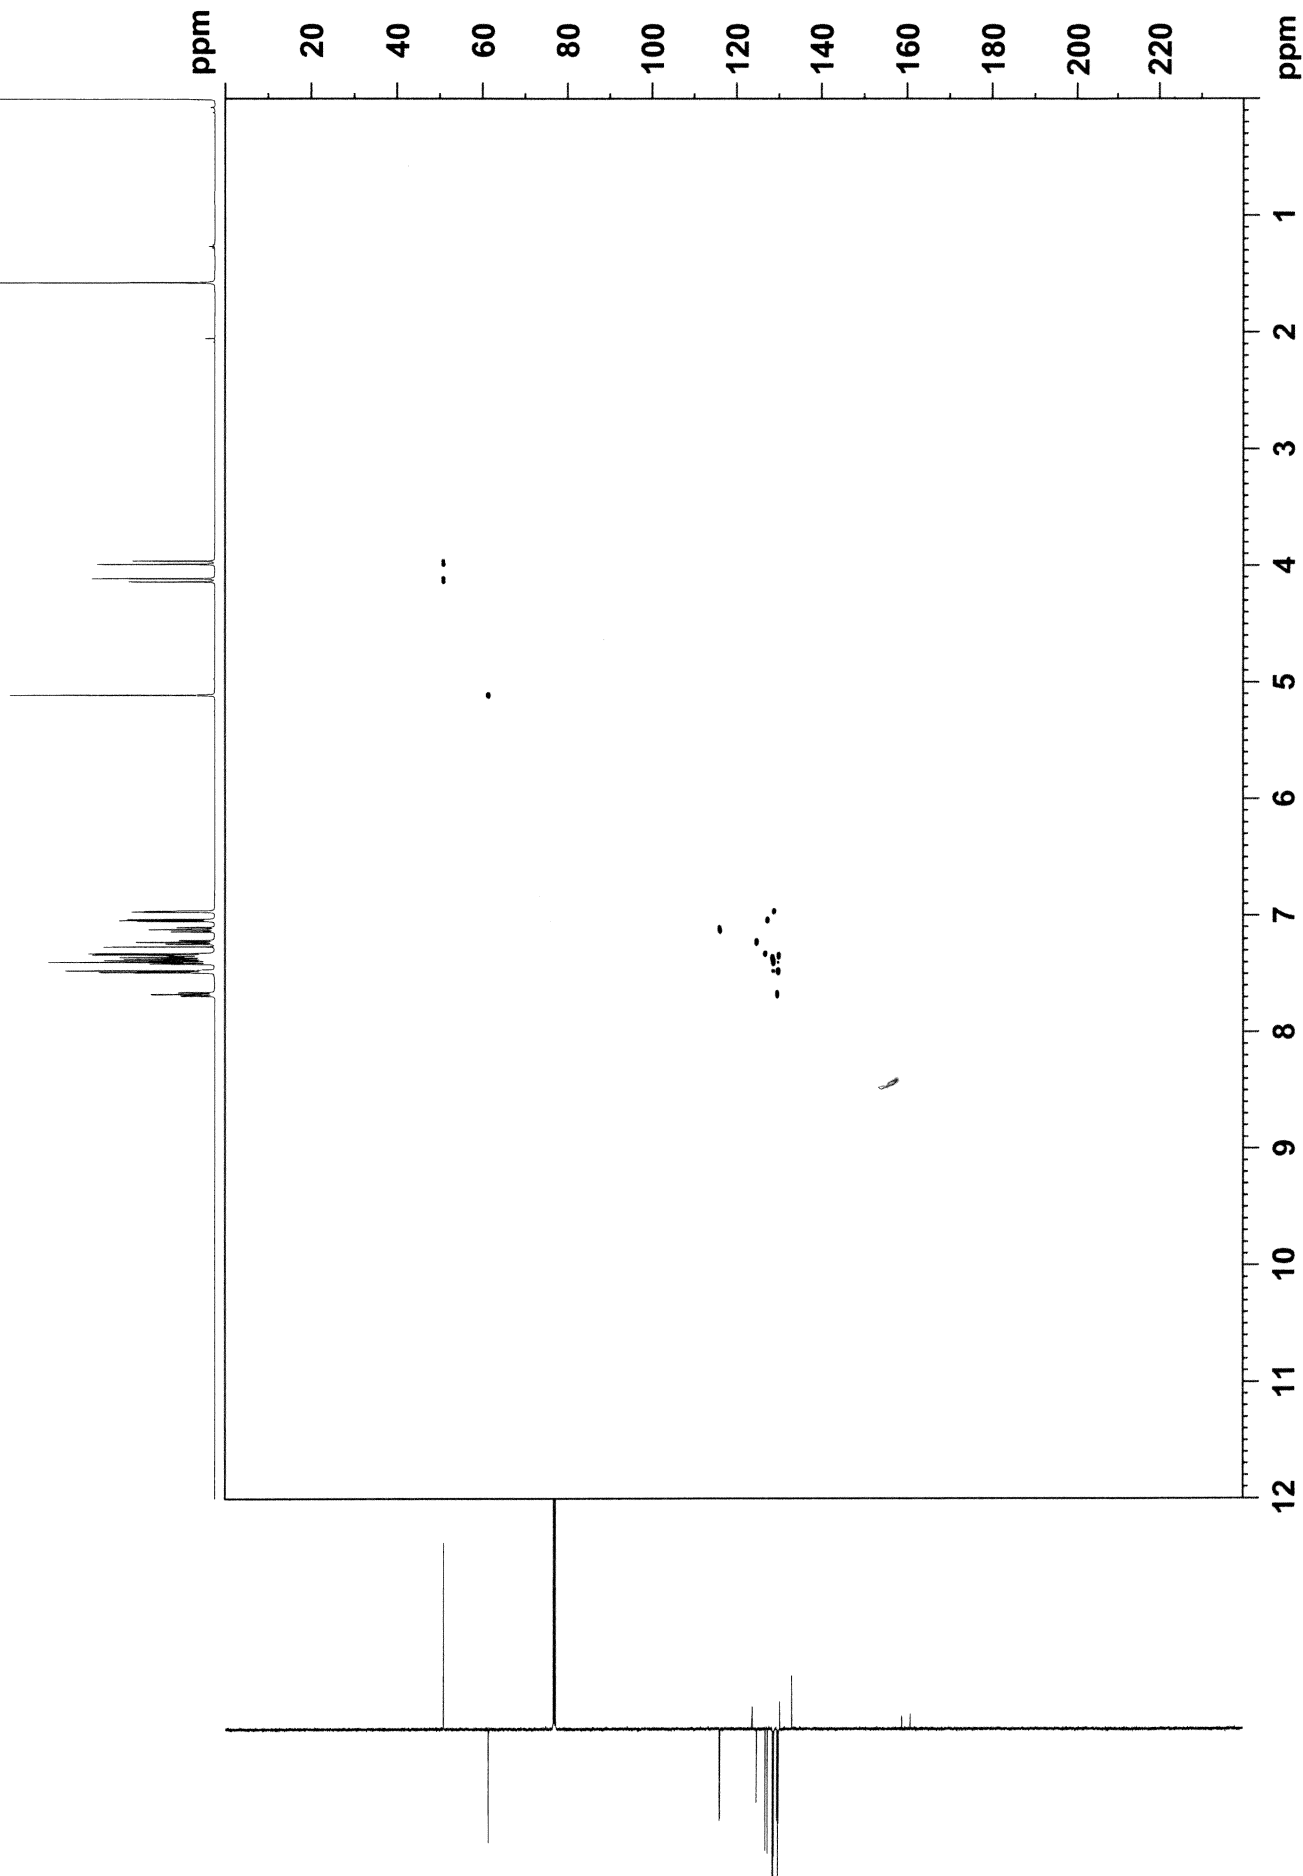

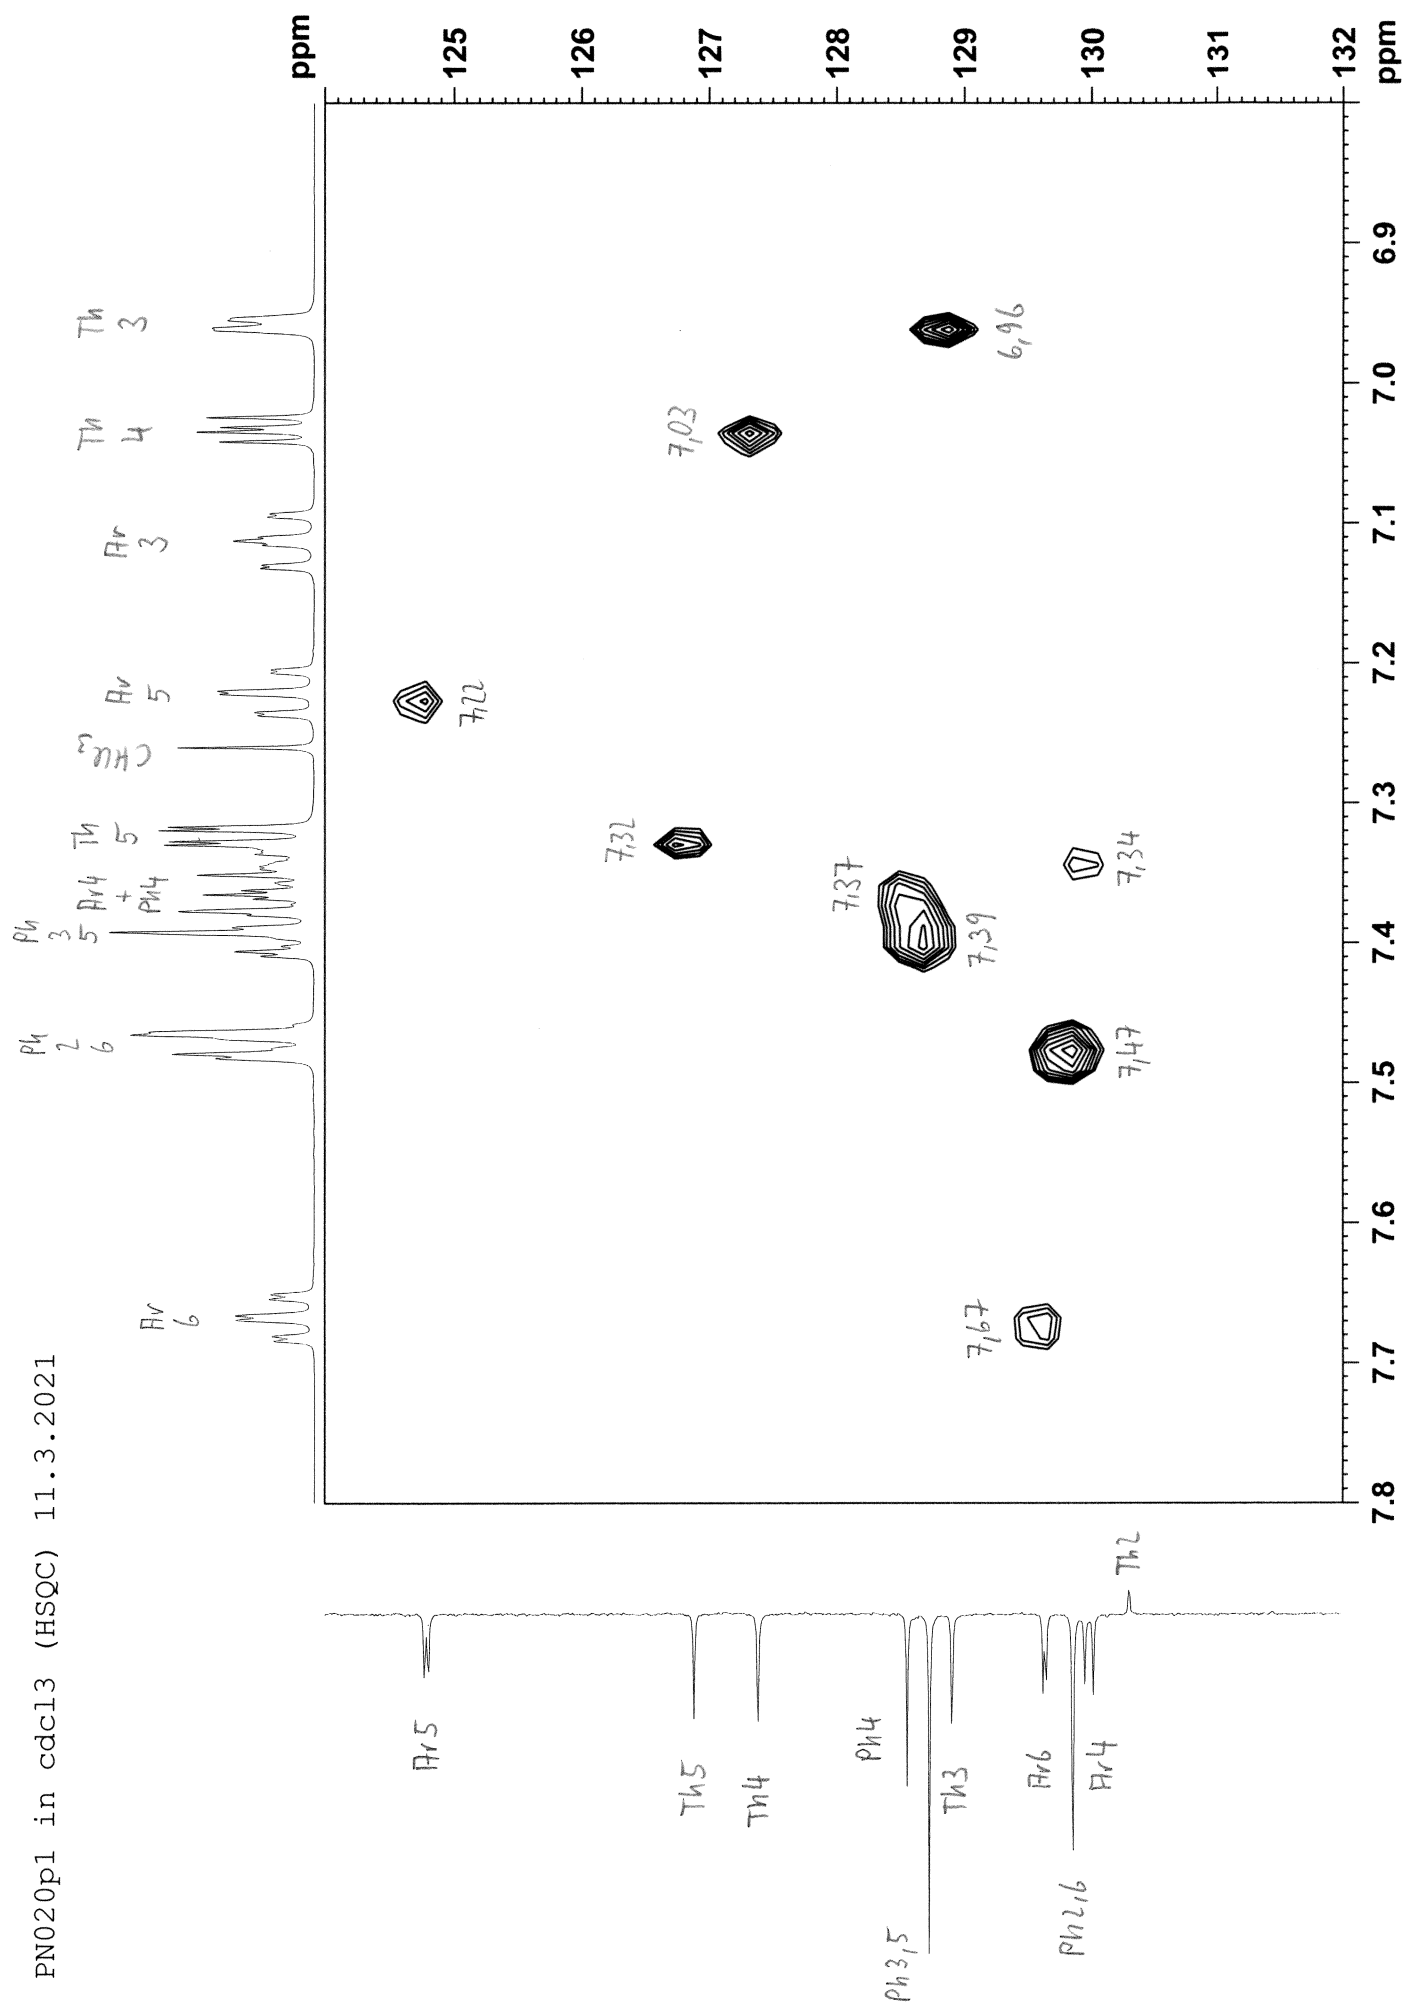



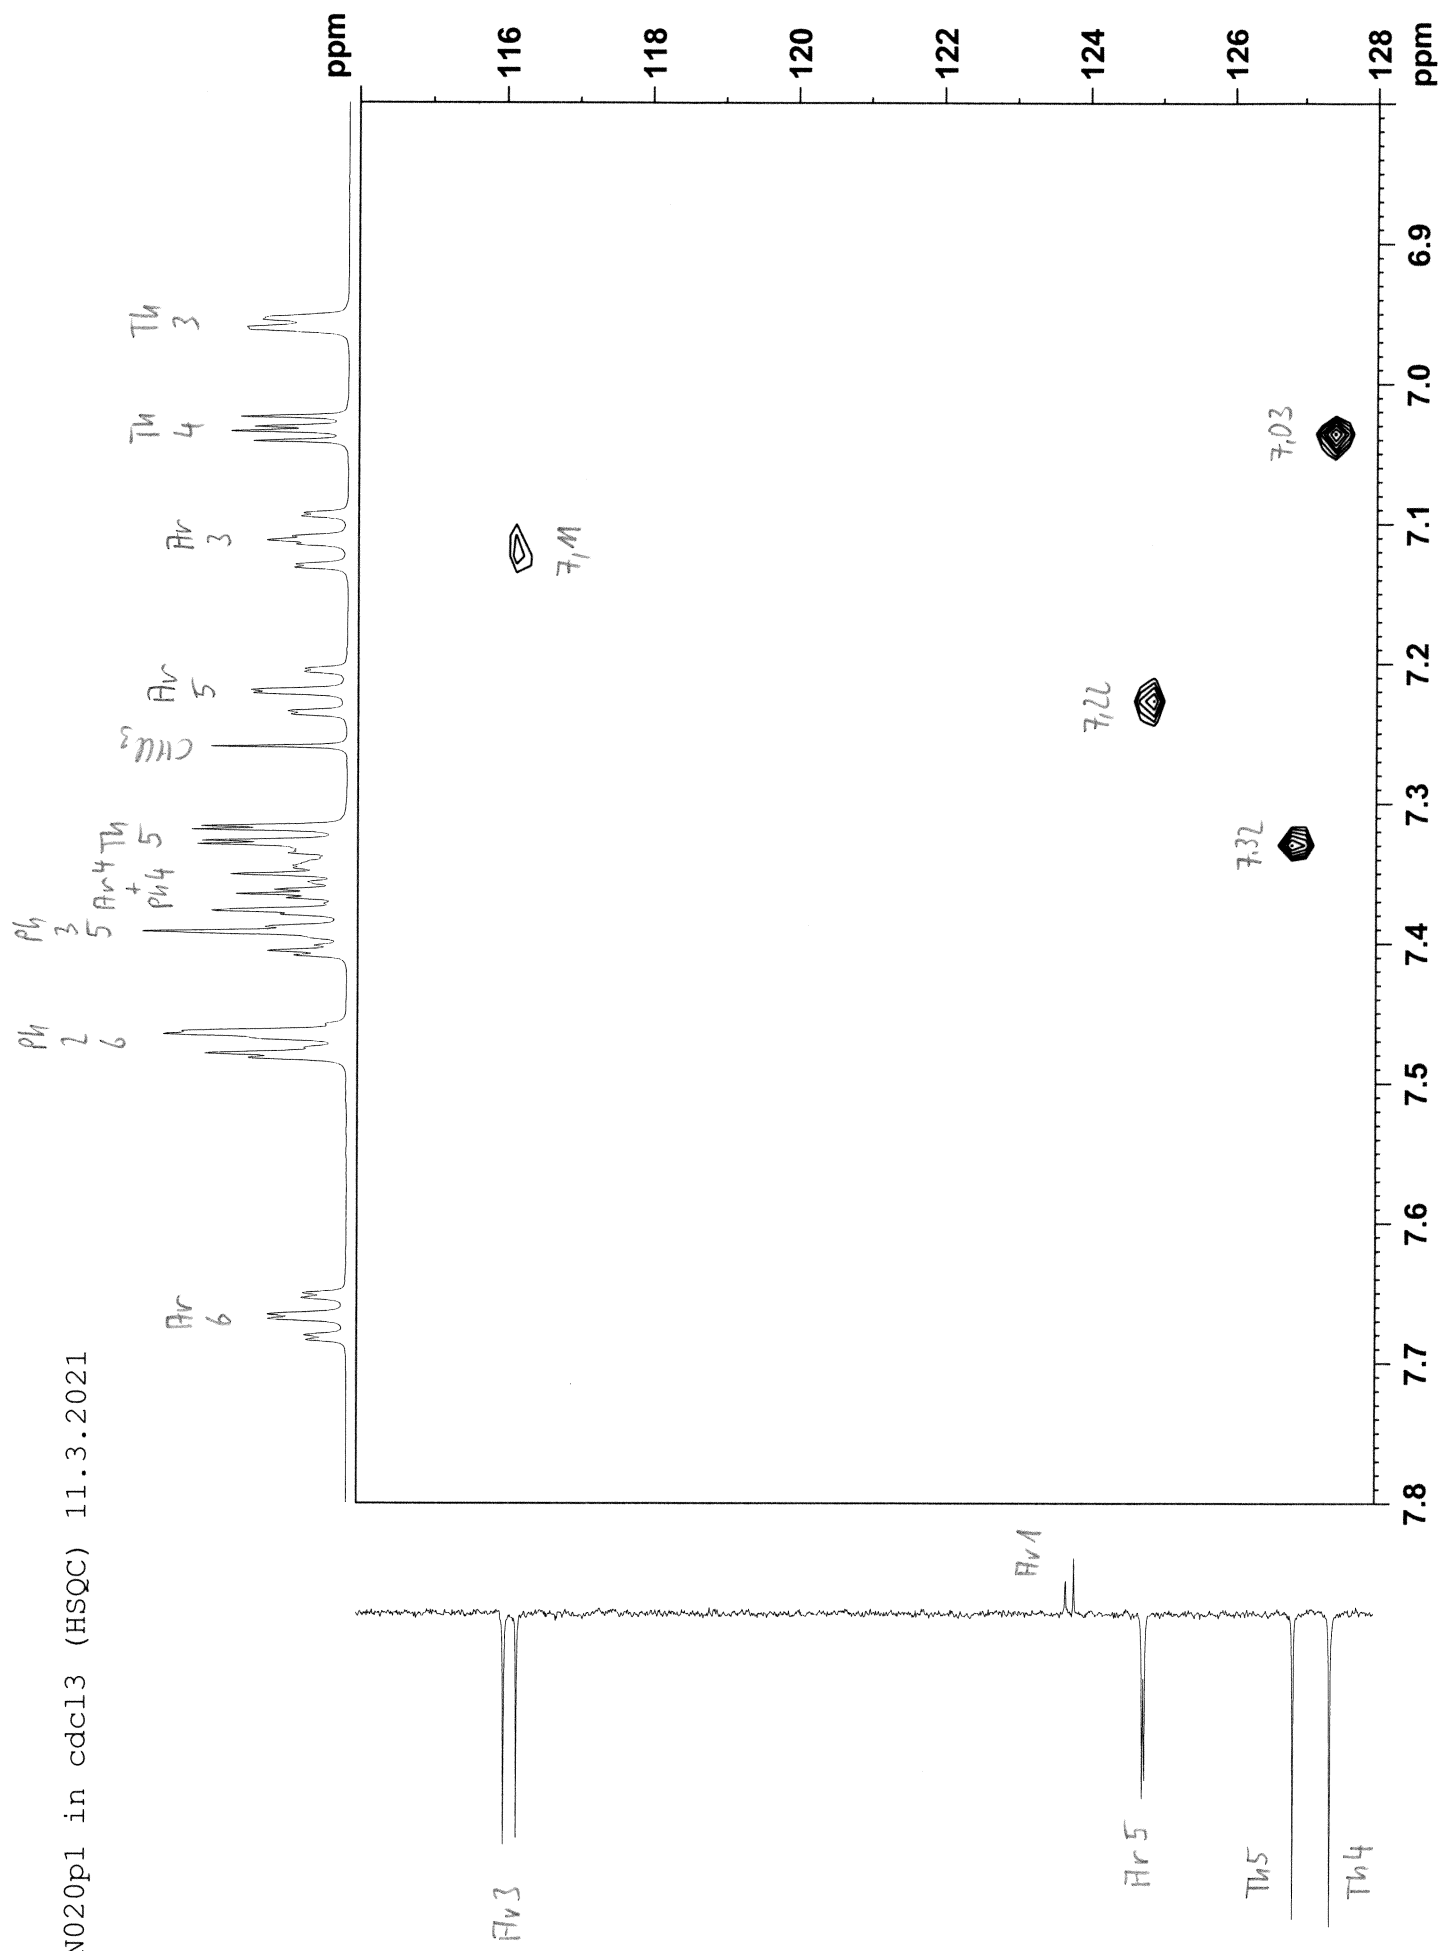

CH

CH<sub>2</sub>

CH<sub>2</sub>

CH

5,10

4,12

3,9,7

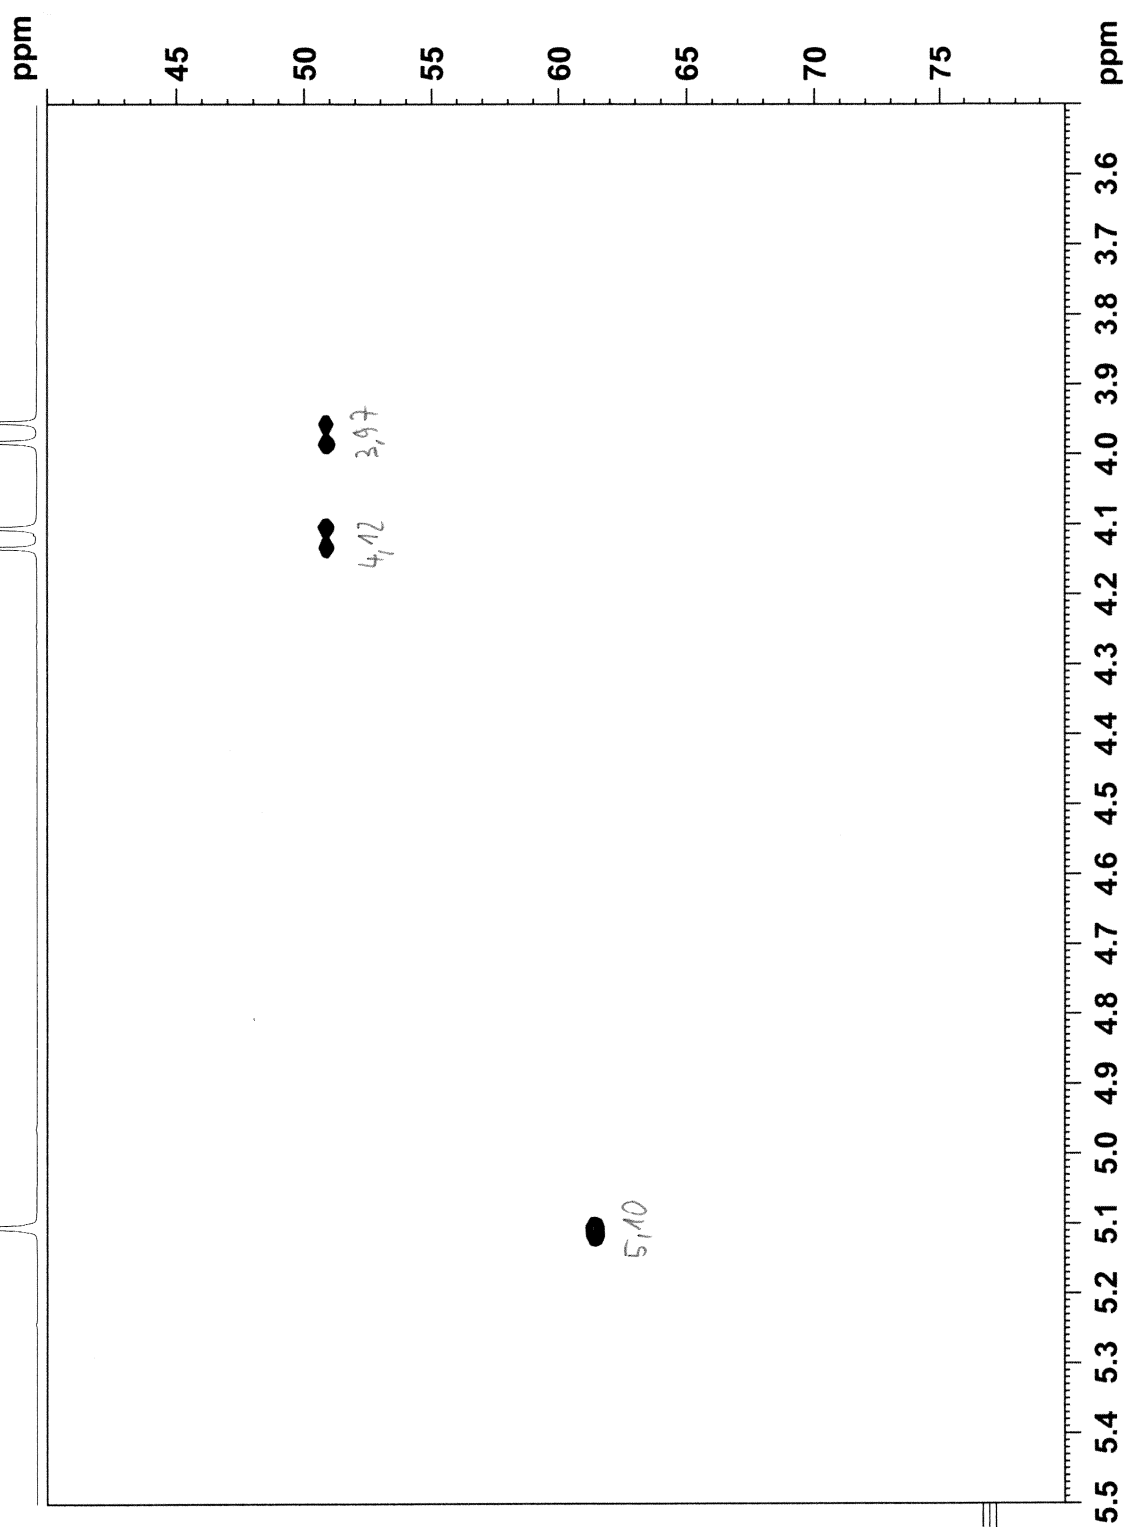

PN020p1 in cdcl3 (HMBC) 11.3.2021

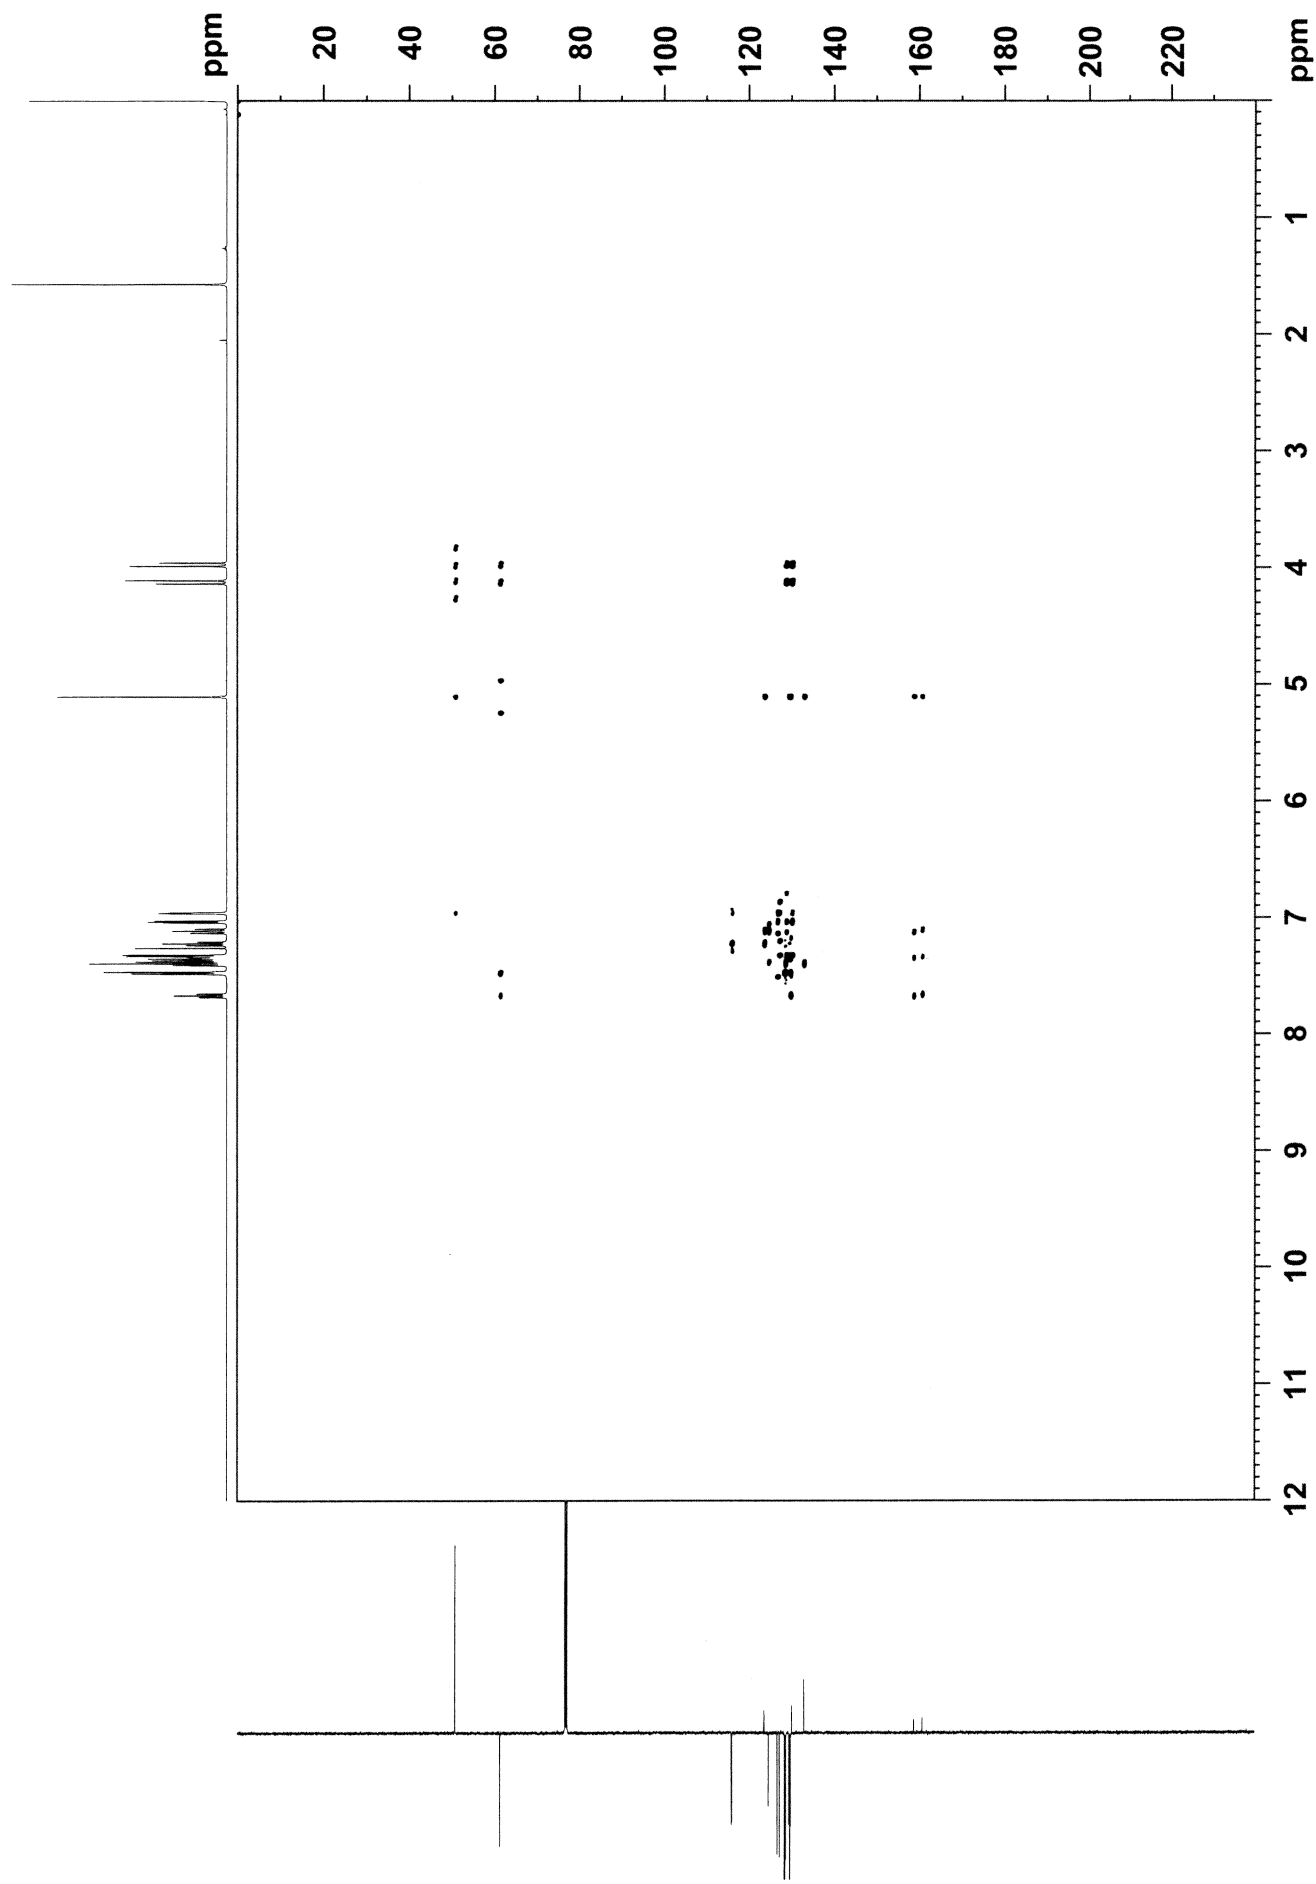

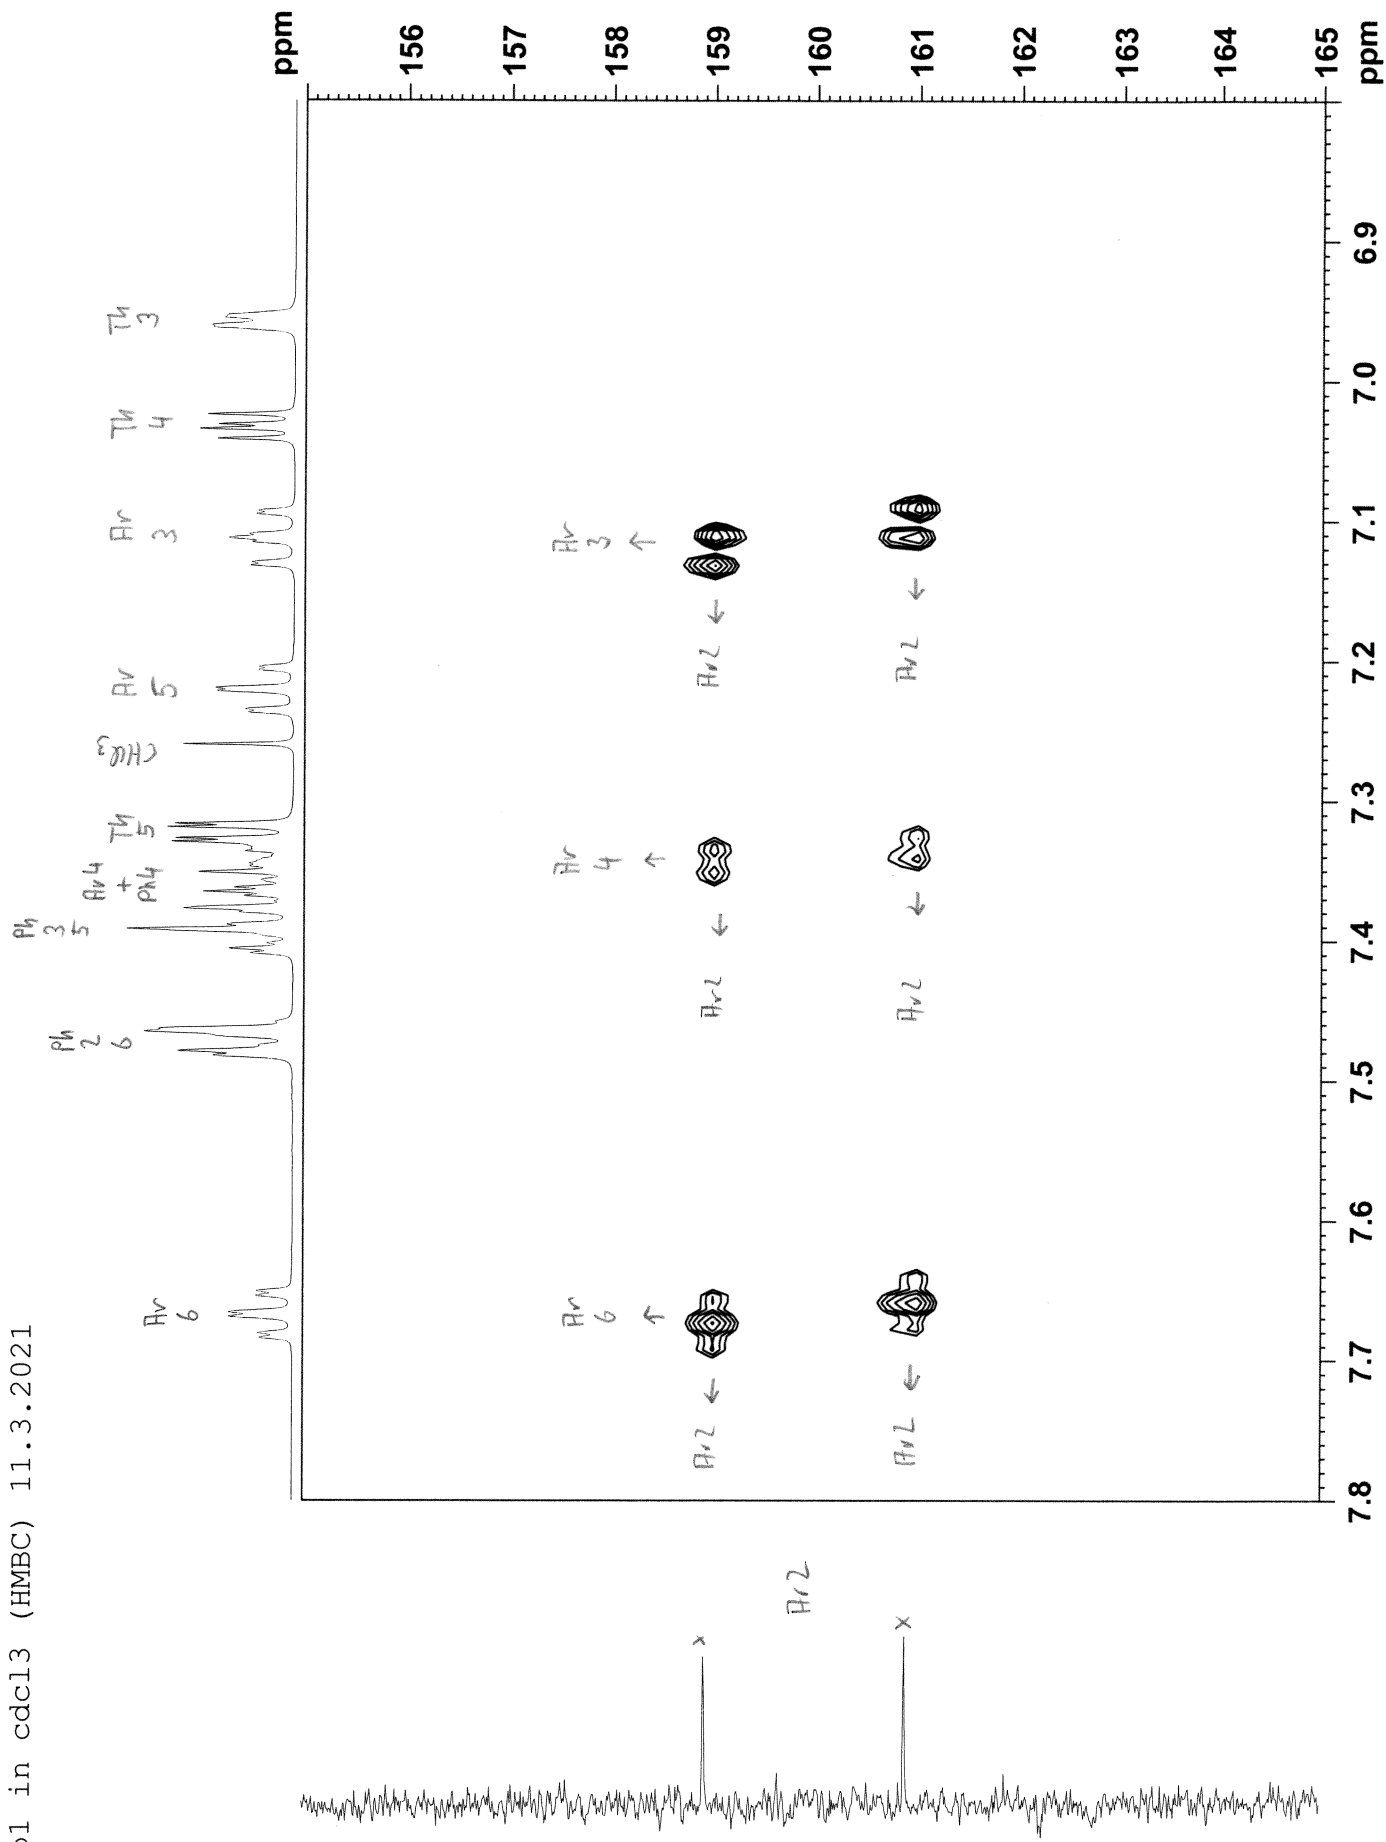

PN020p1 in cdcl3 (HMBC) 11.3.2021

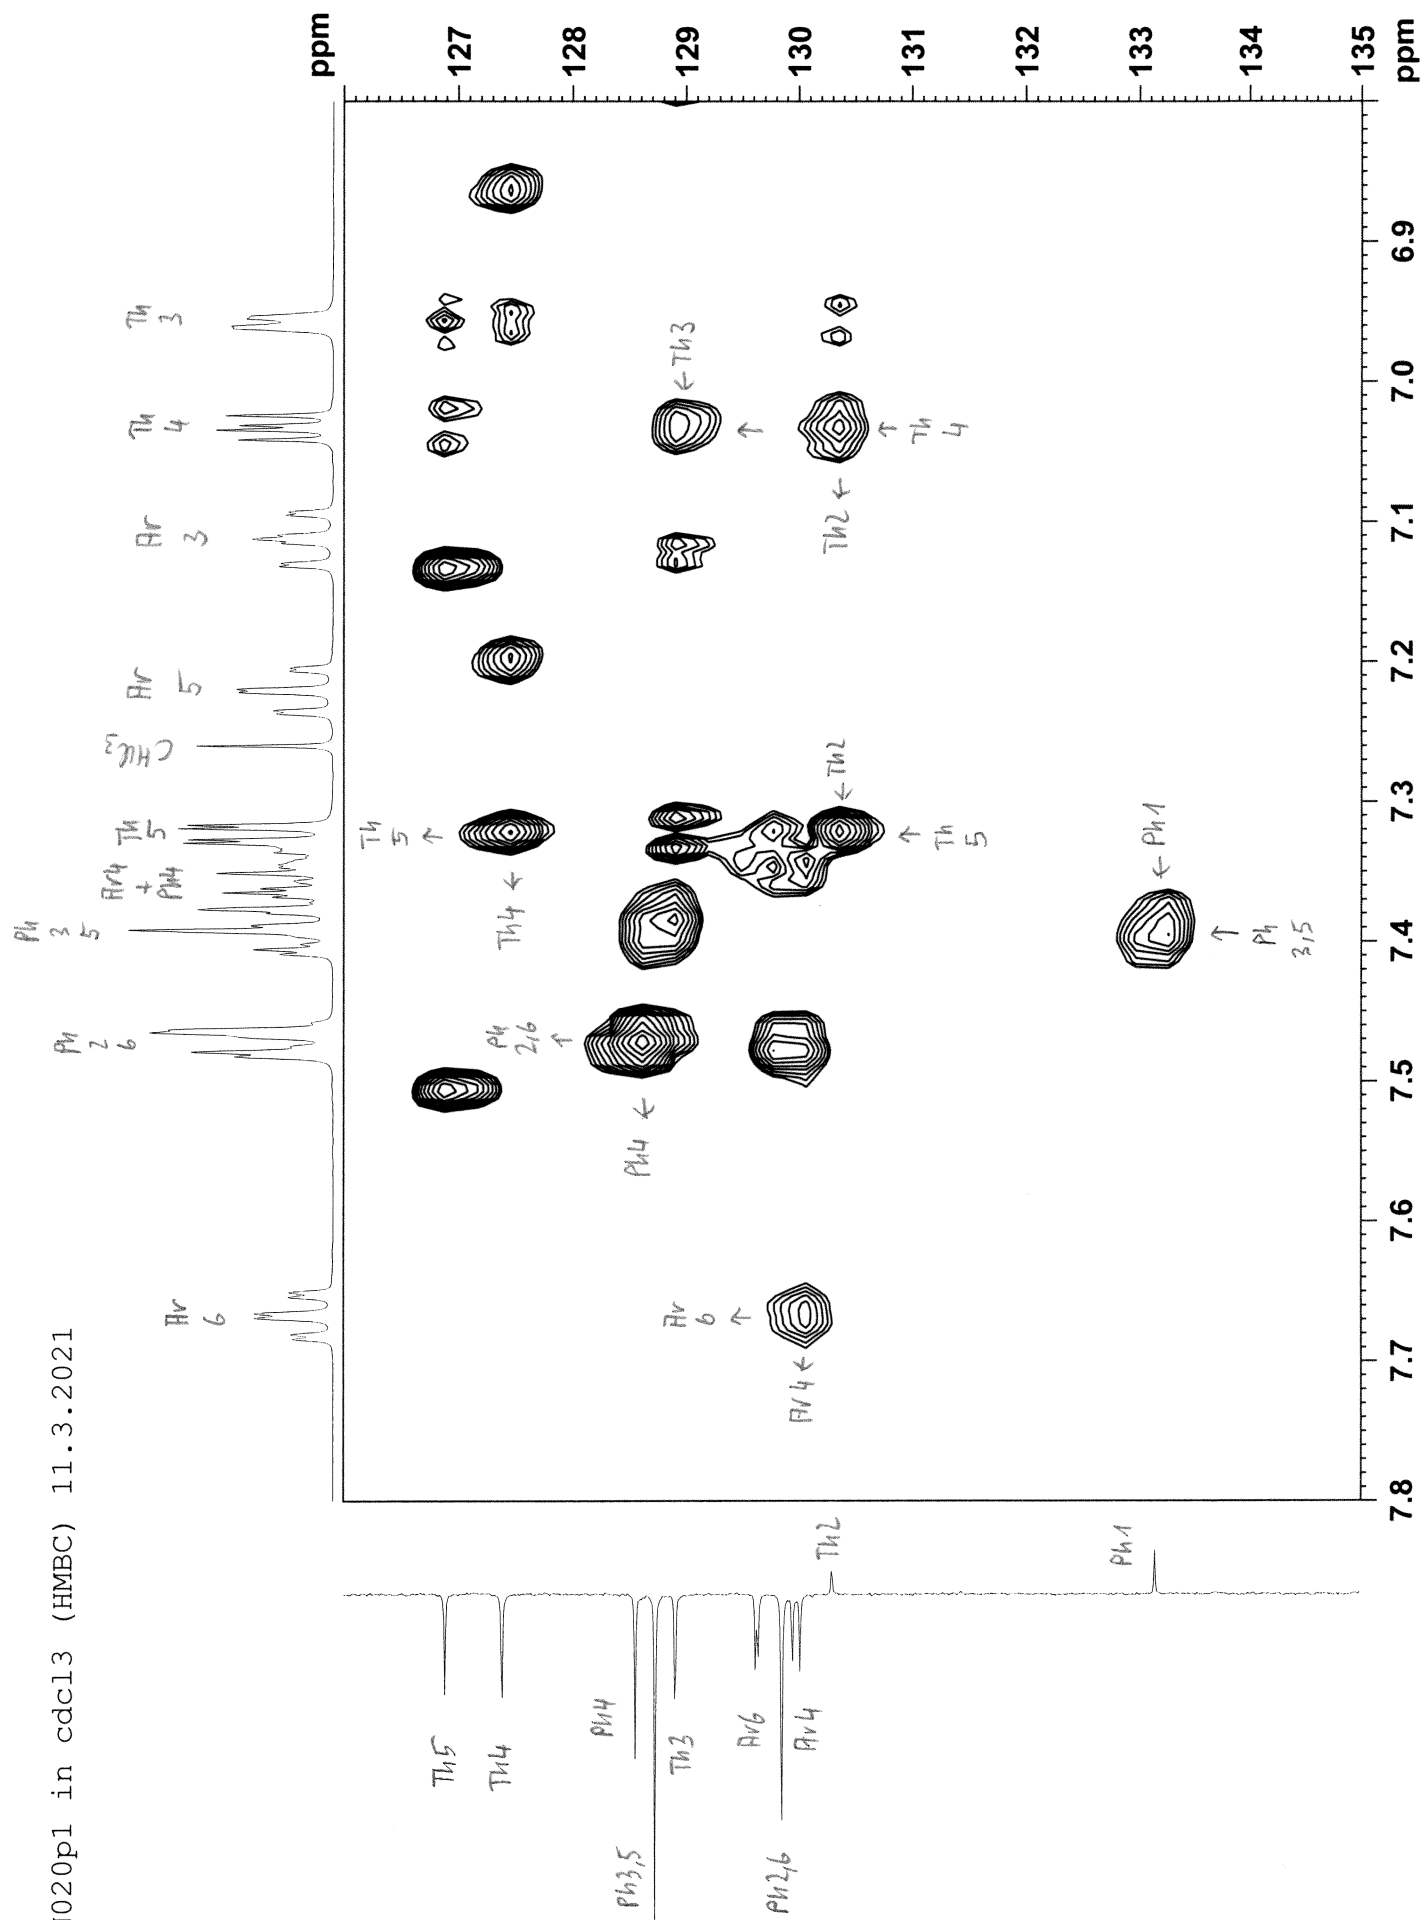

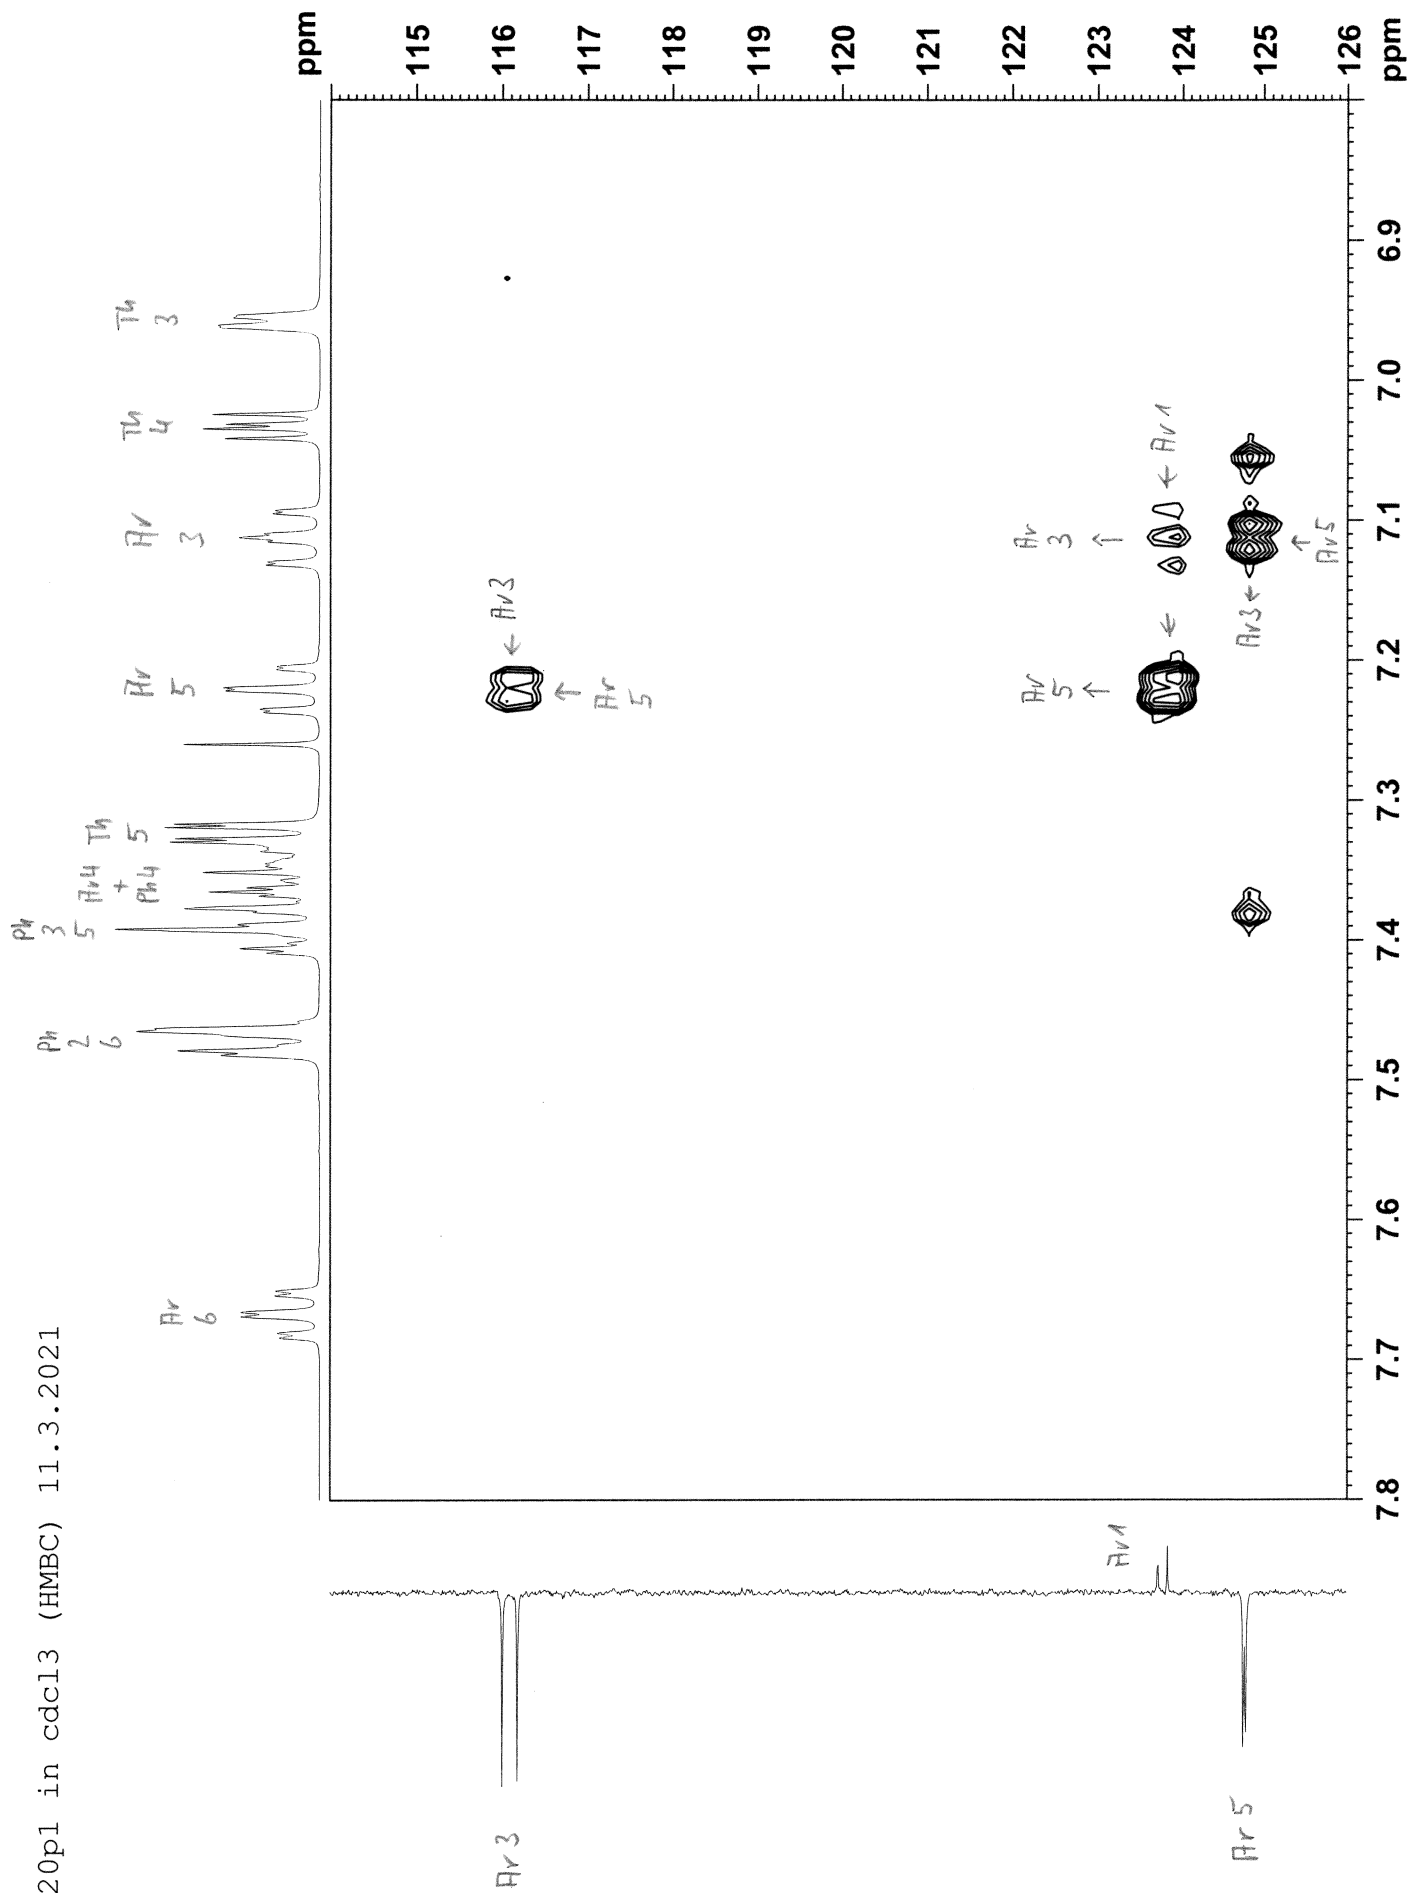

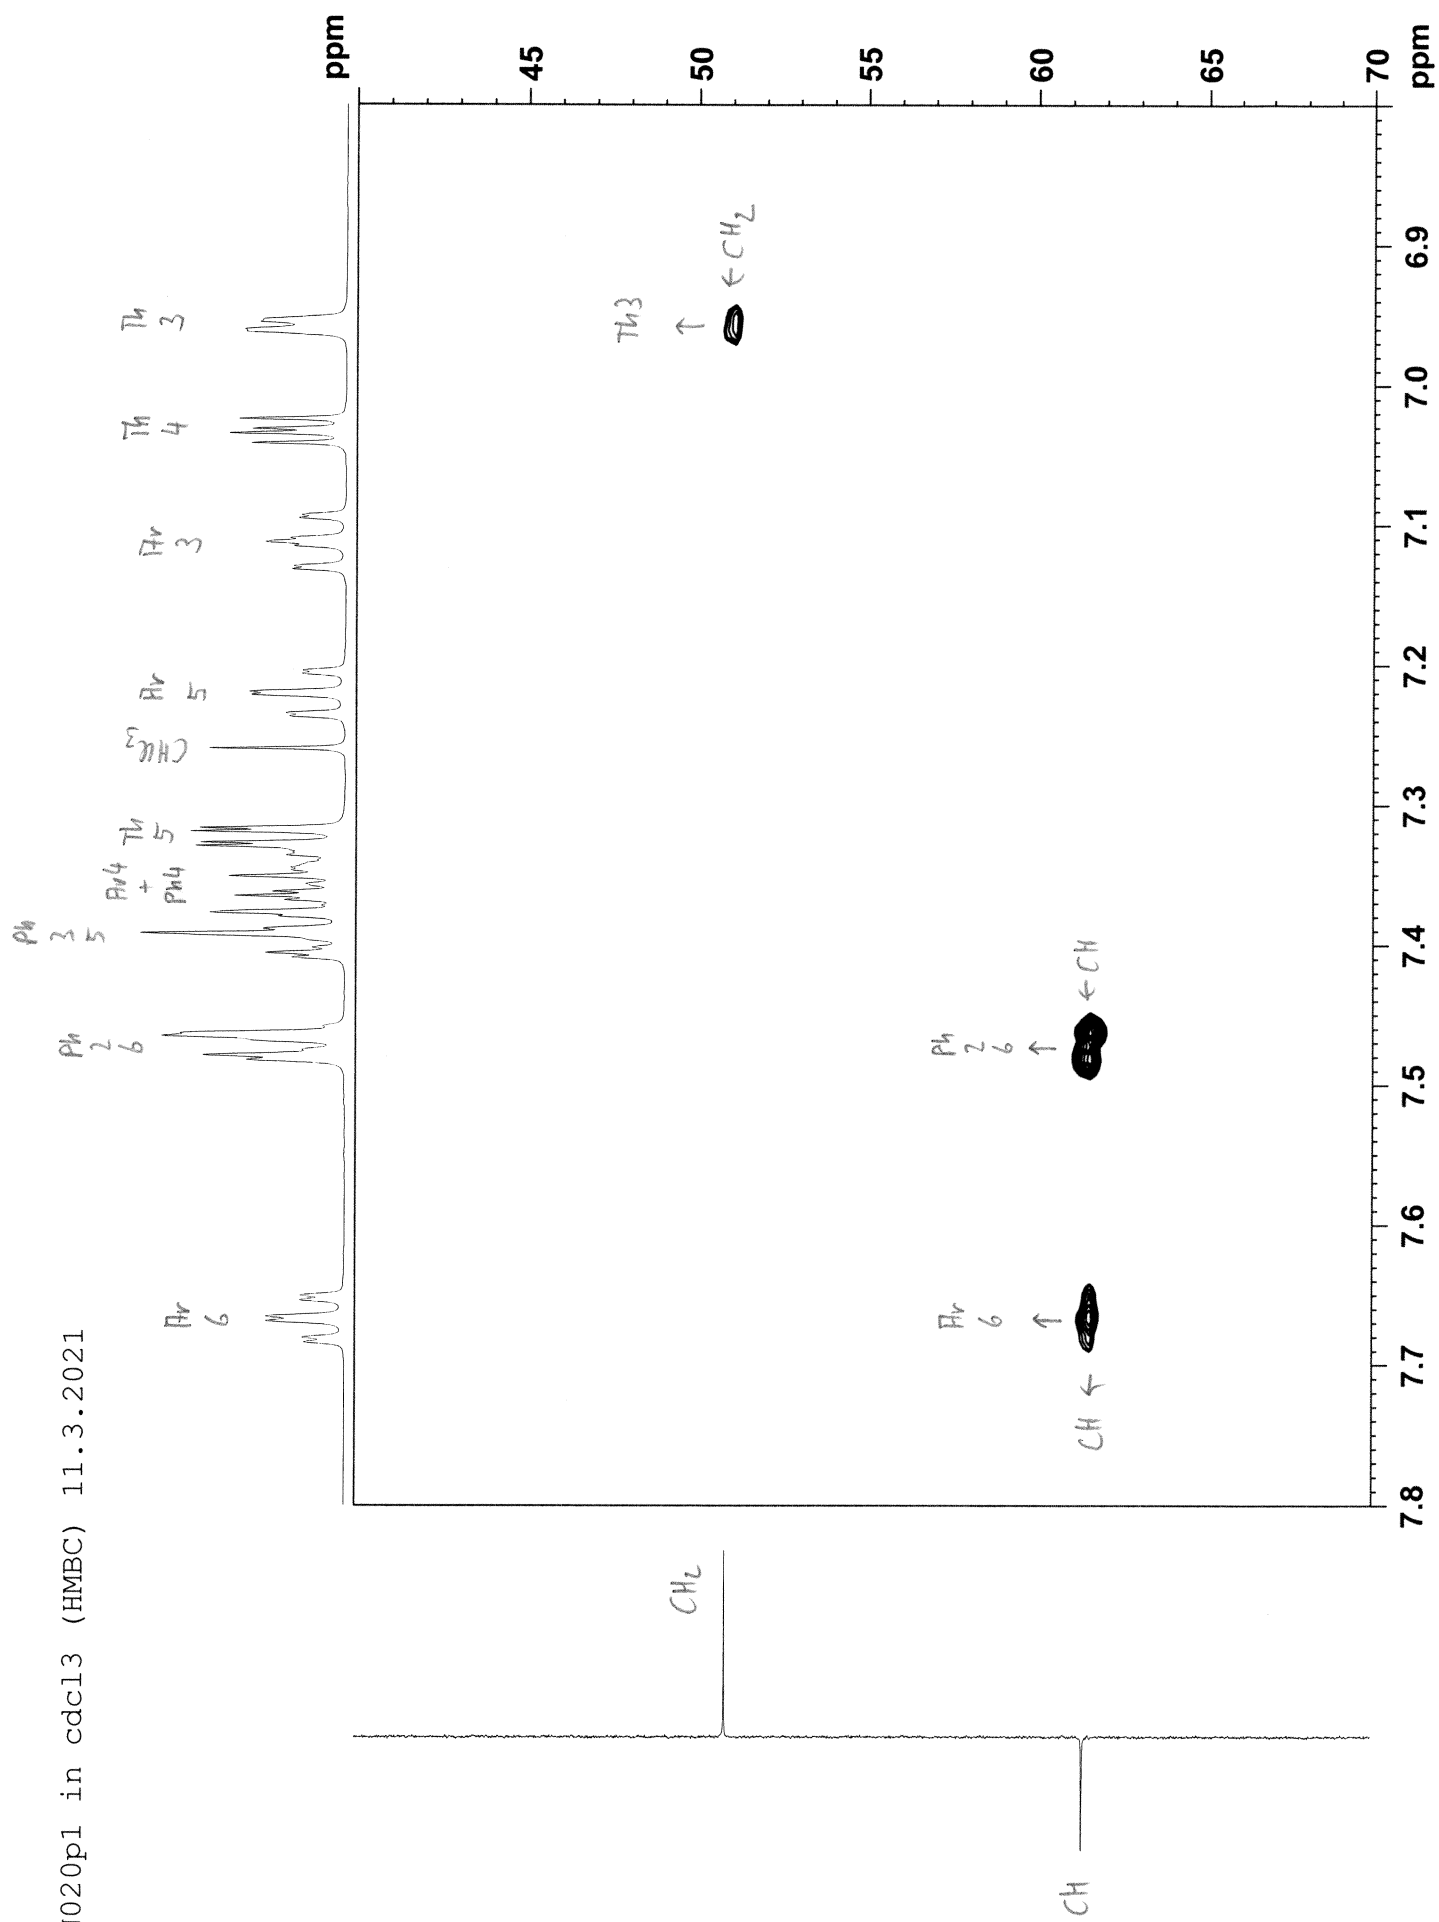

CH

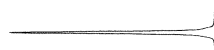

CH<sub>2</sub>

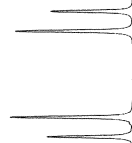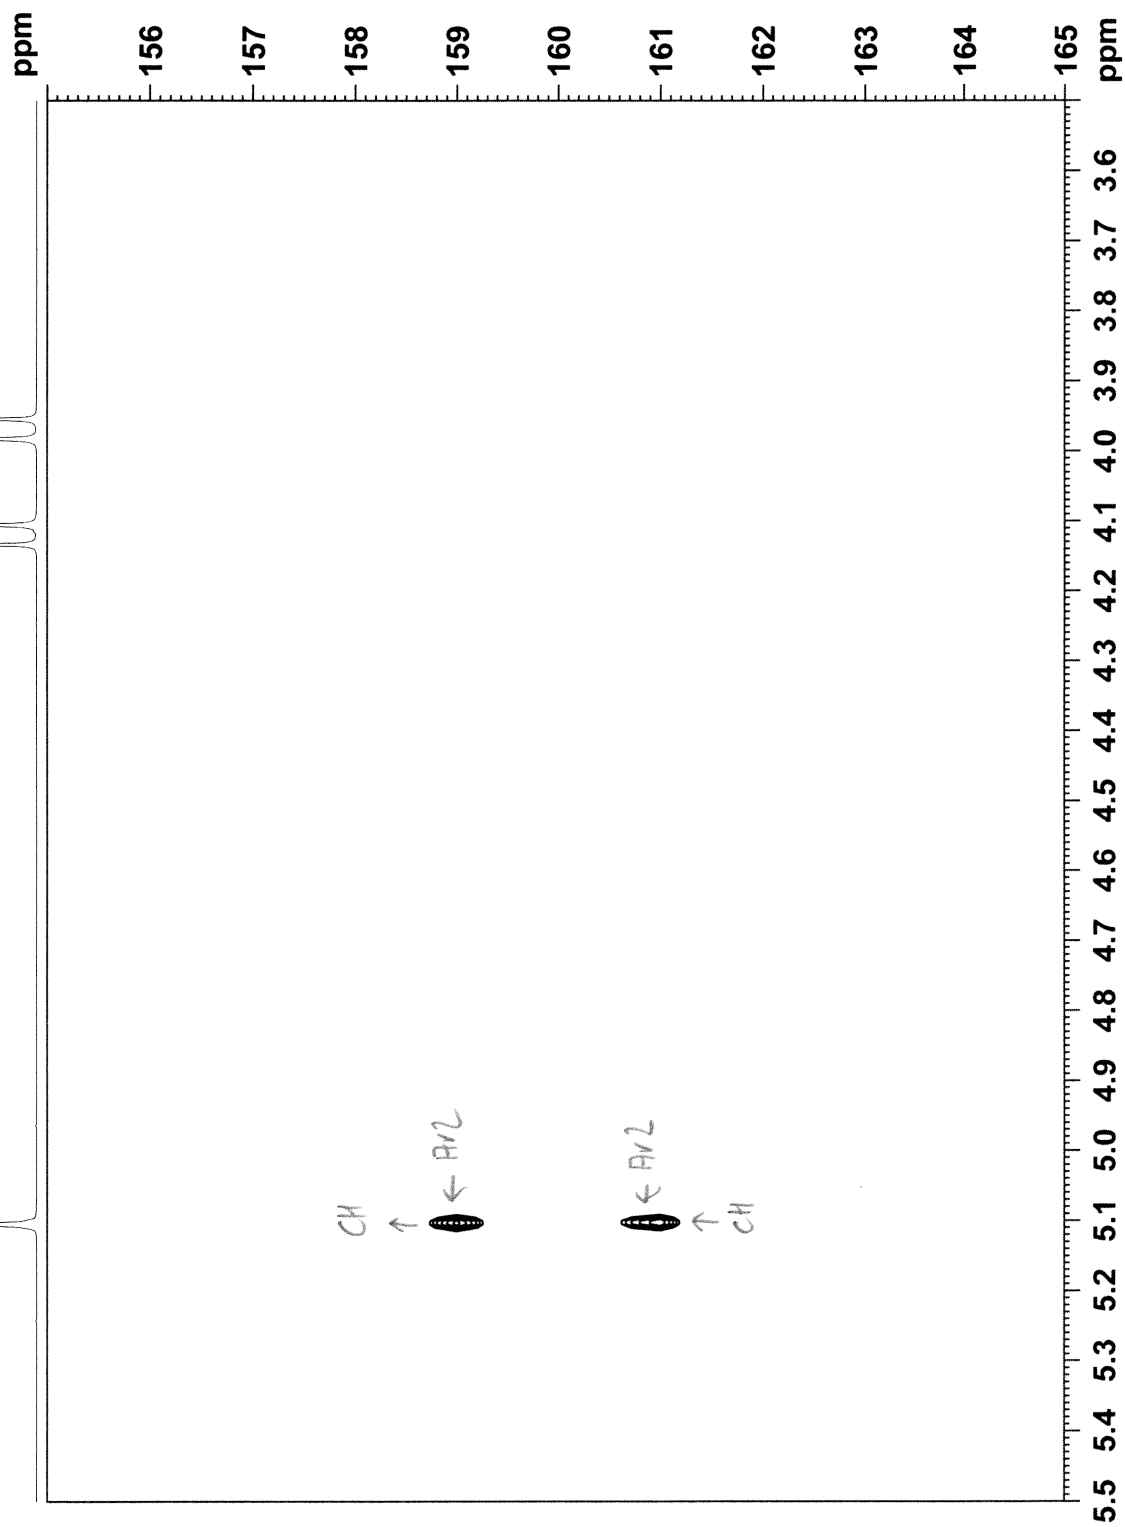

CH

↑

← RVZ

CH

↑

← RVZ

RVZ

x

x



PN020p1 in cdcl3 (HMBC) 11.3.2021

CH

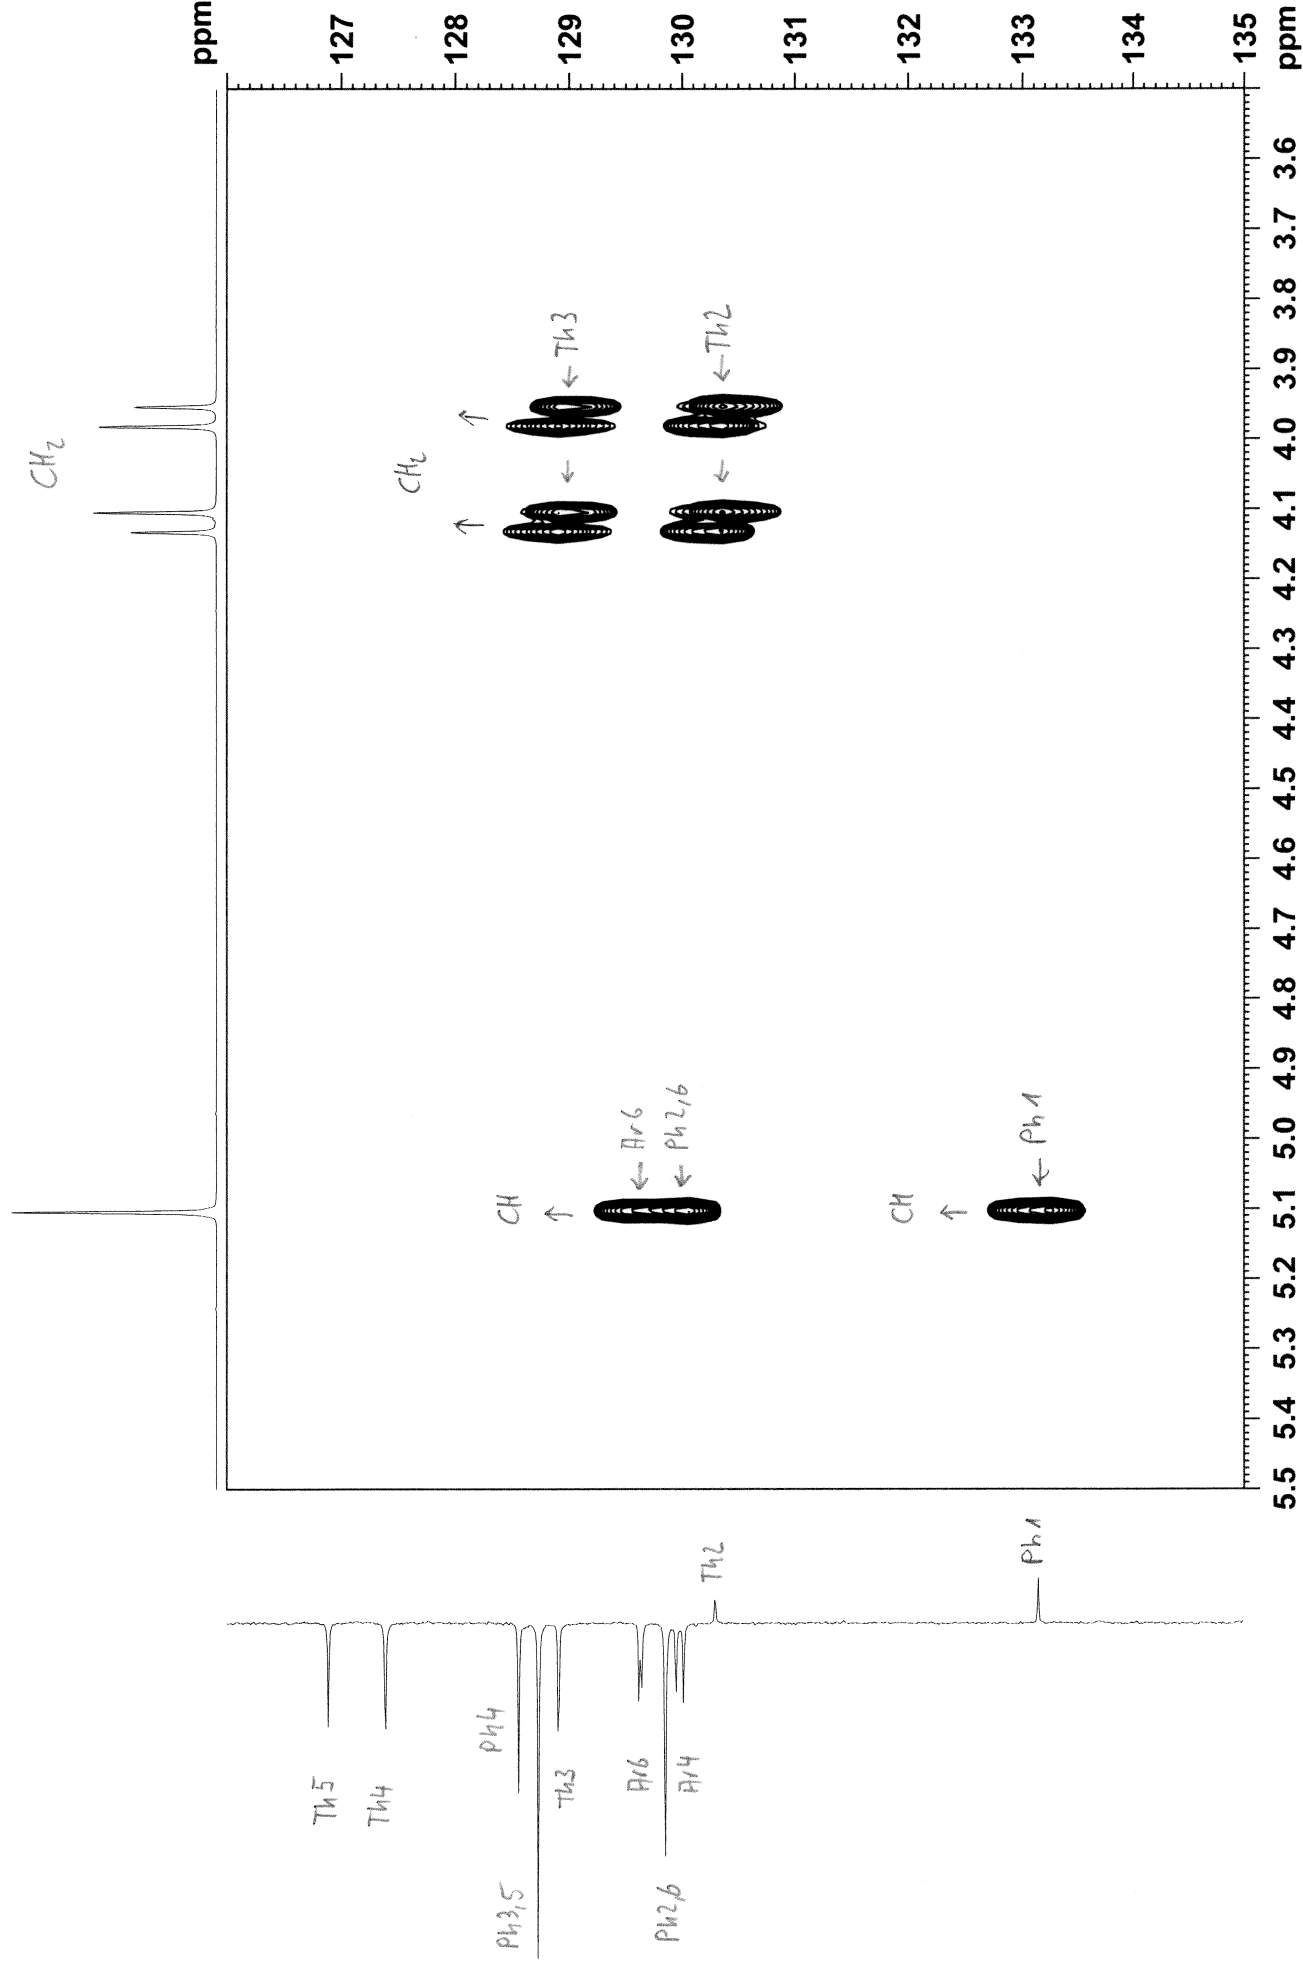

PN020p1 in cdcl3 (HMBC) 11.3.2021

CH

CH<sub>2</sub>

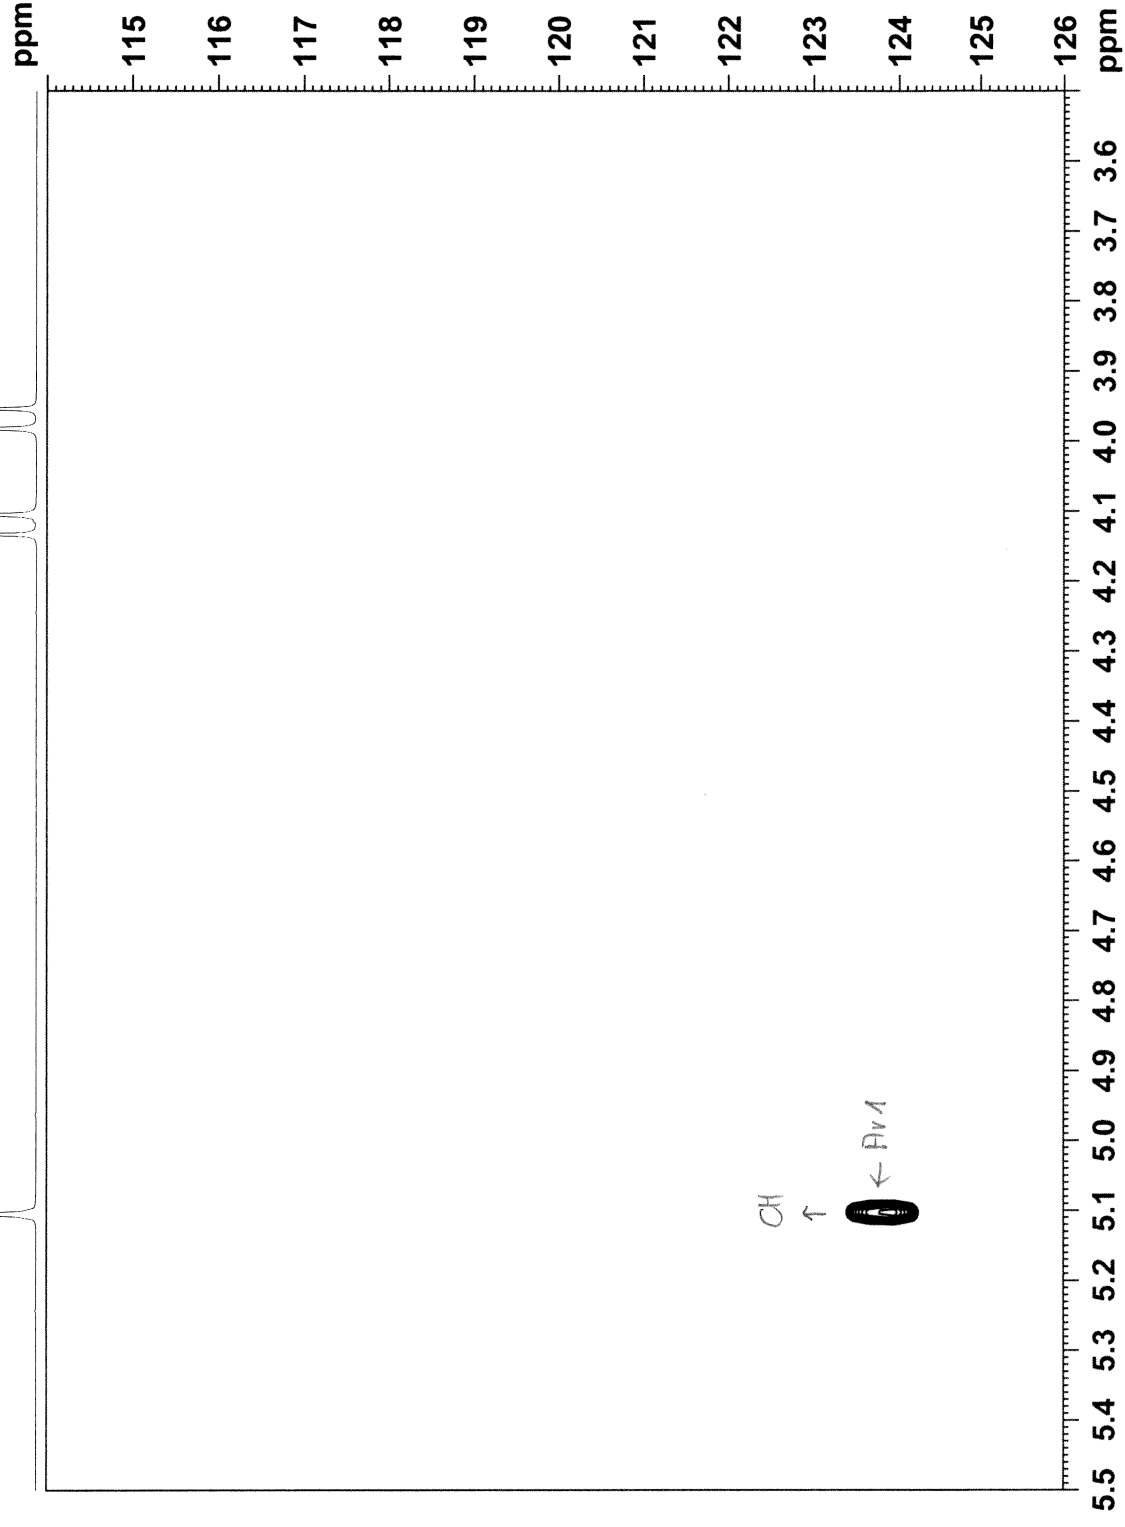

CH

↑

← Av1

Av1

Av5

Av3

CH

CH<sub>2</sub>

ppm

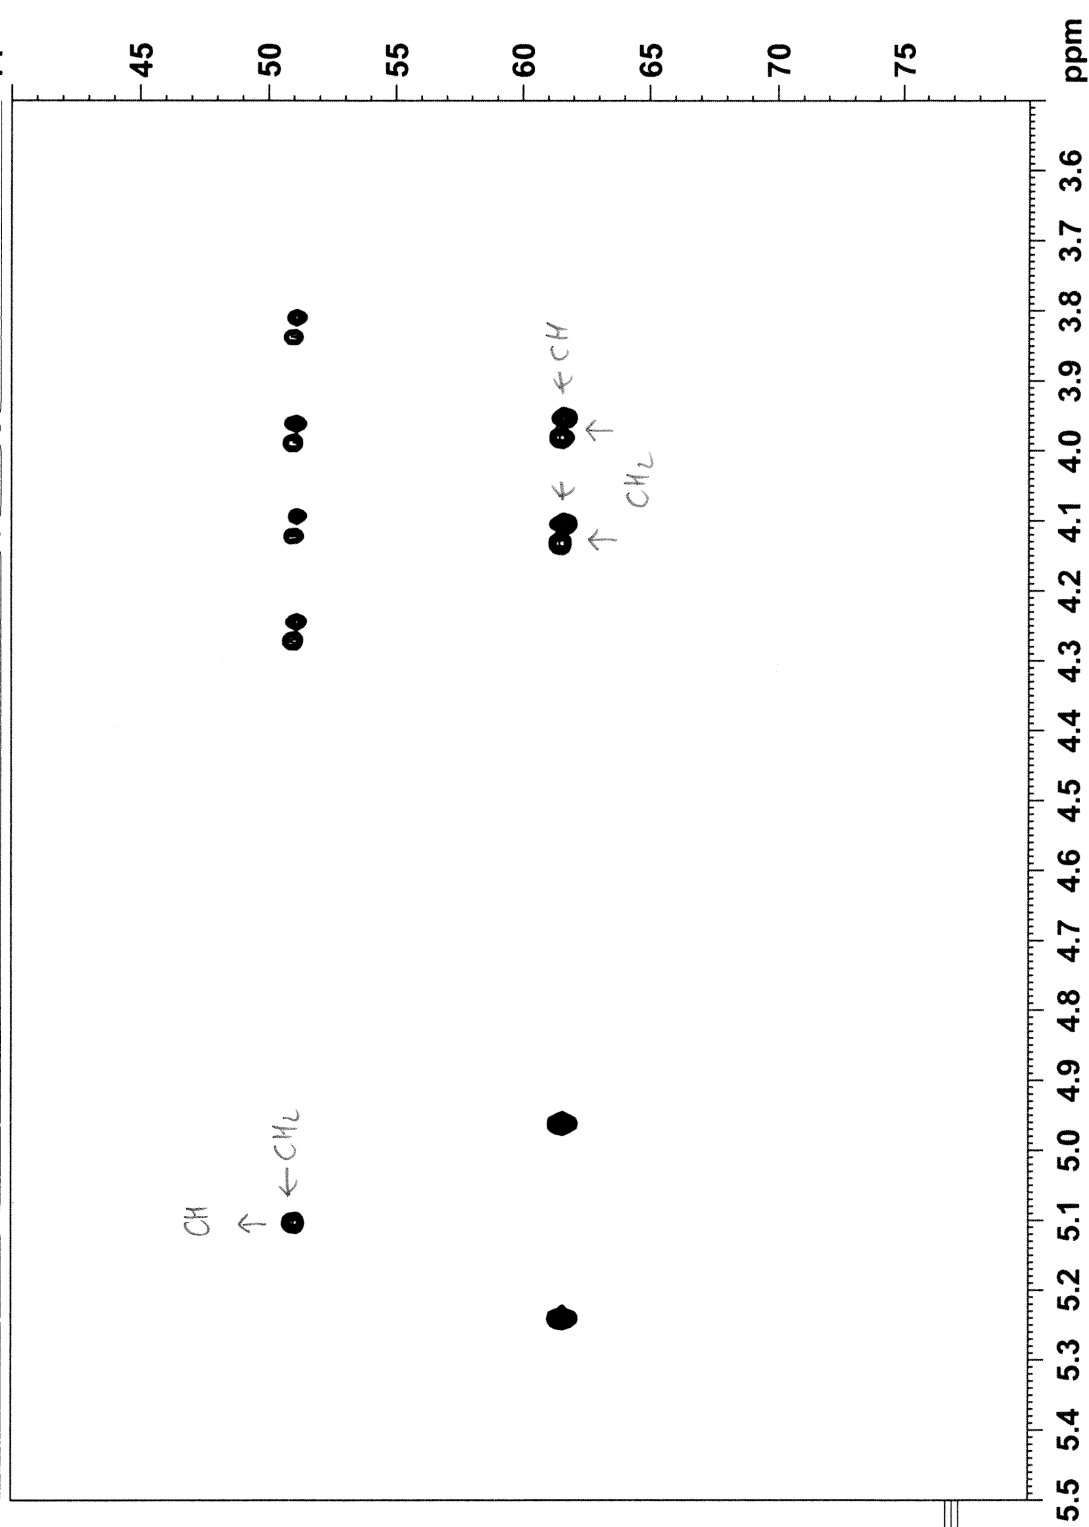

ppm

PN020p2 in cdcl3 (Proton) 11.3.2021

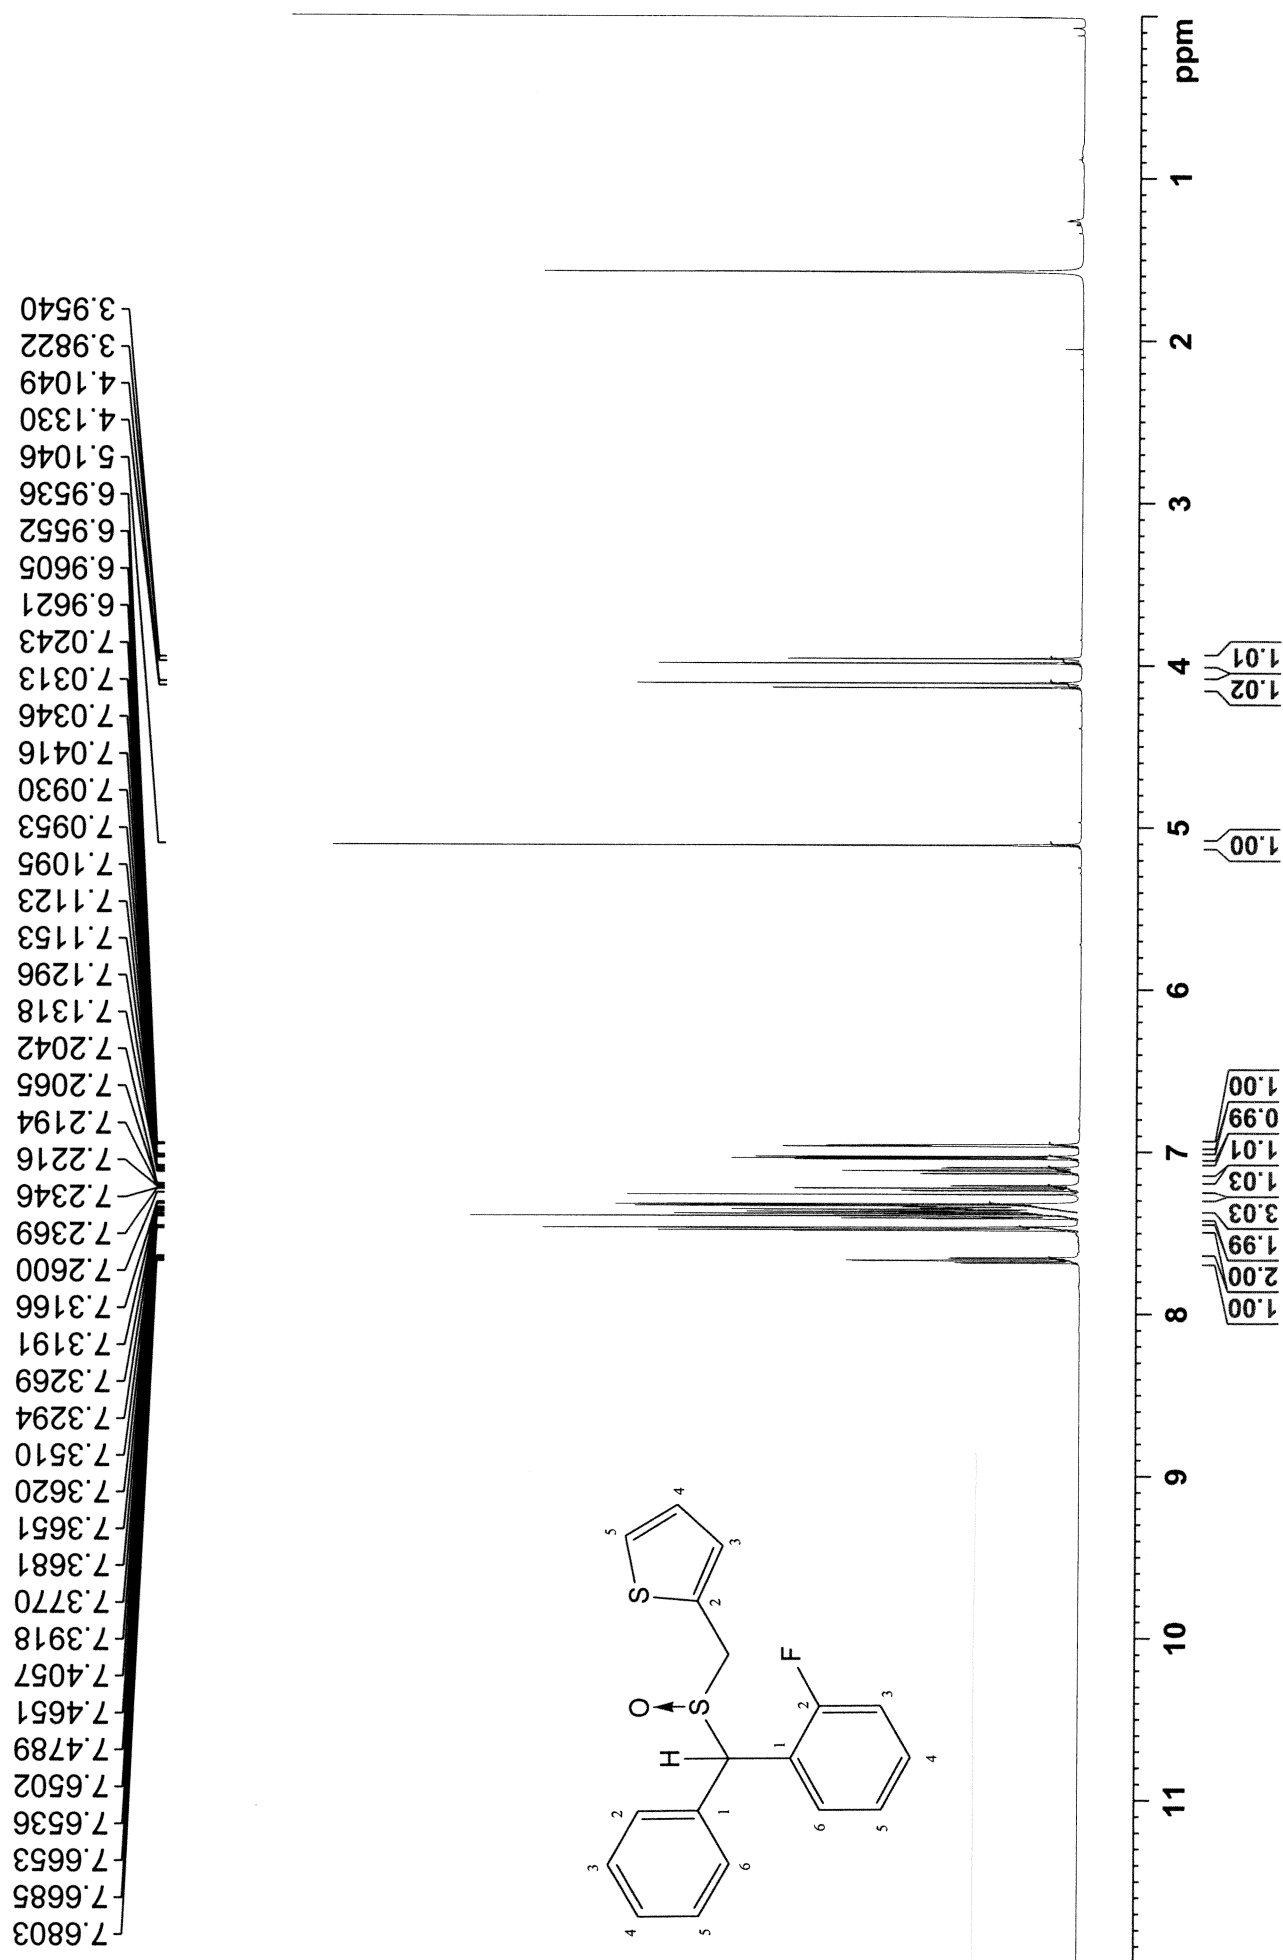

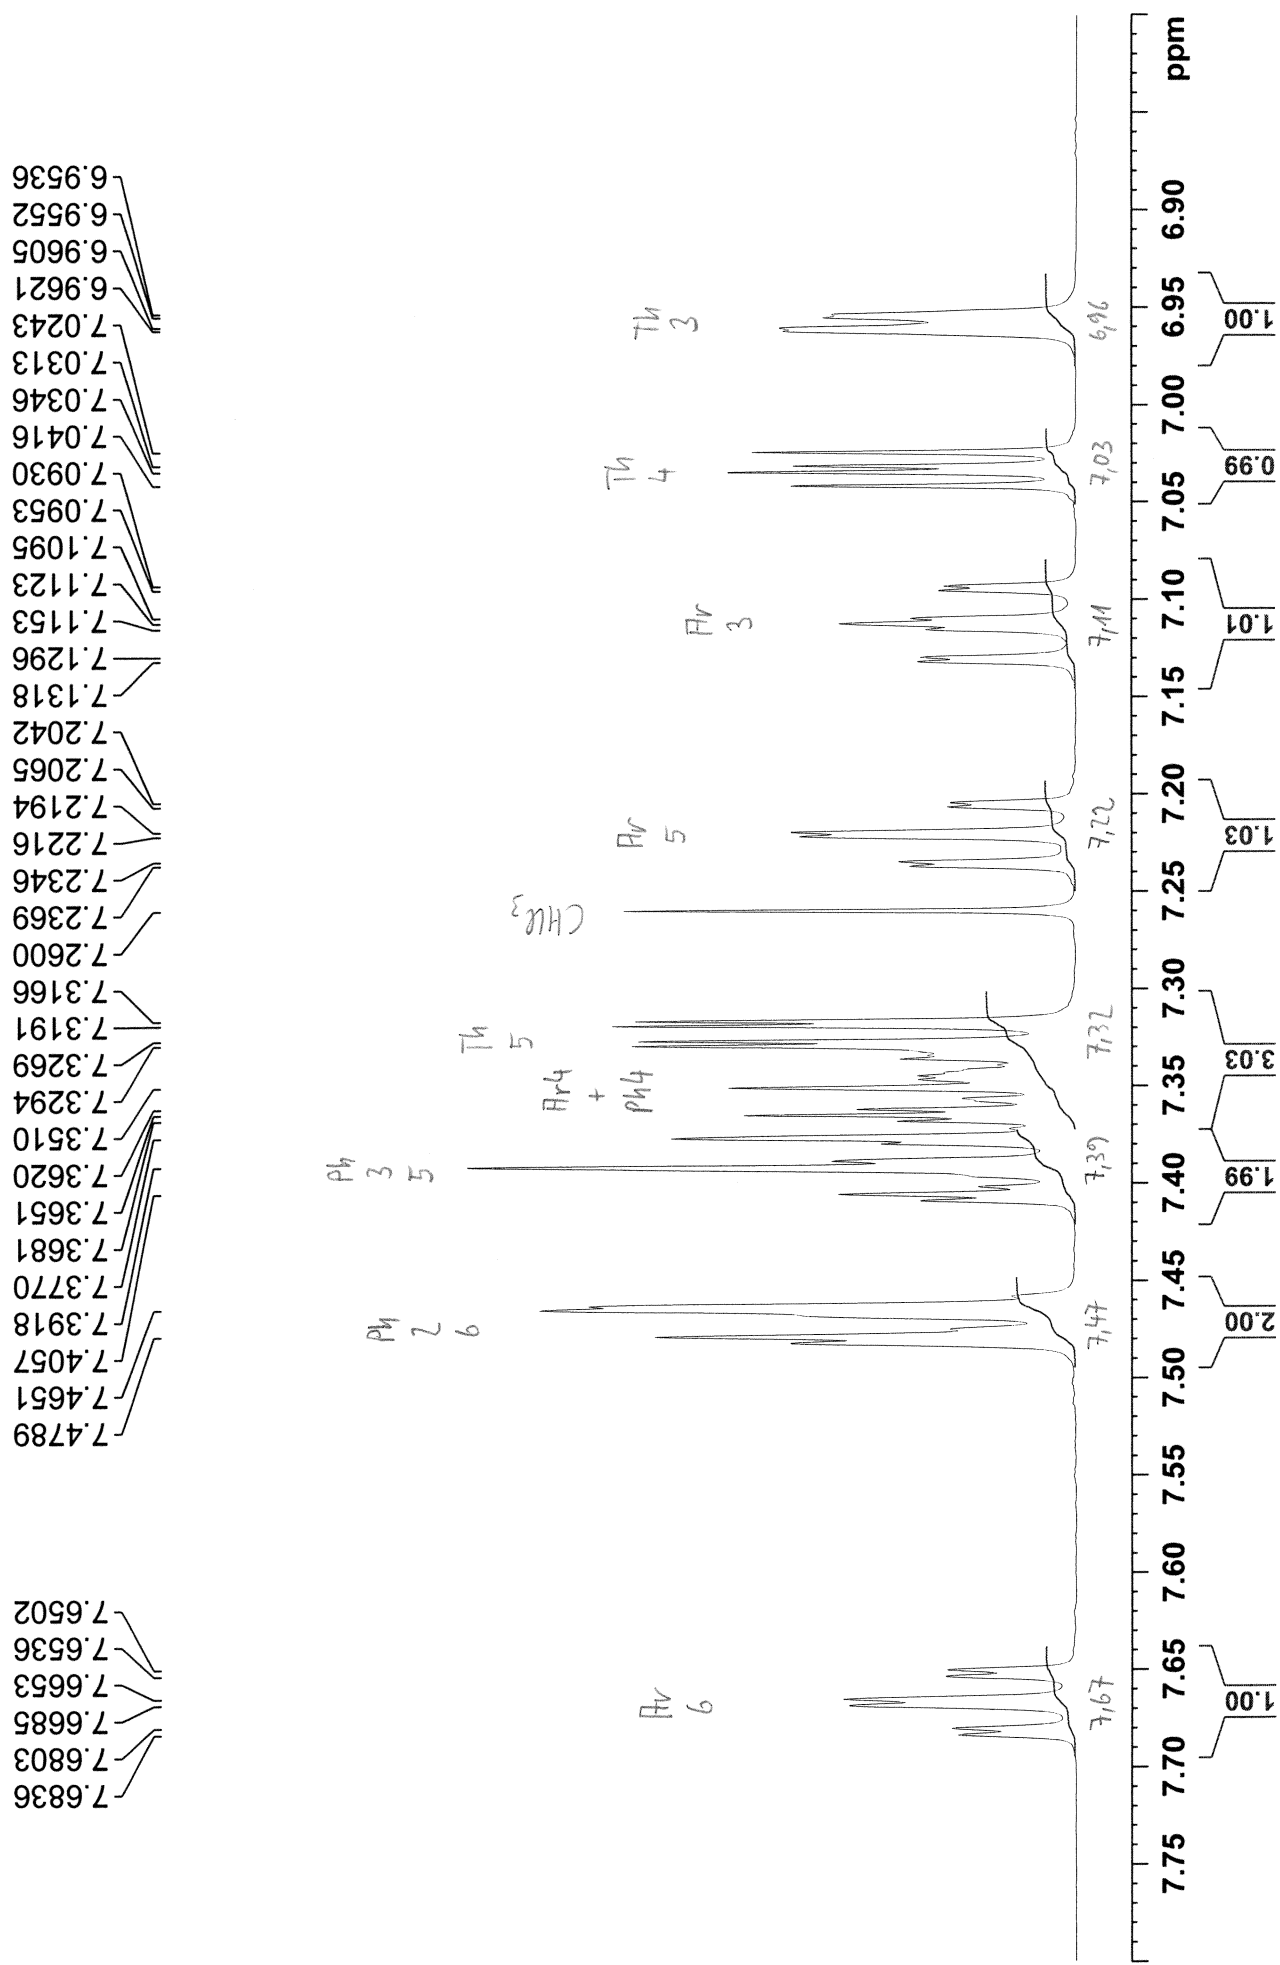

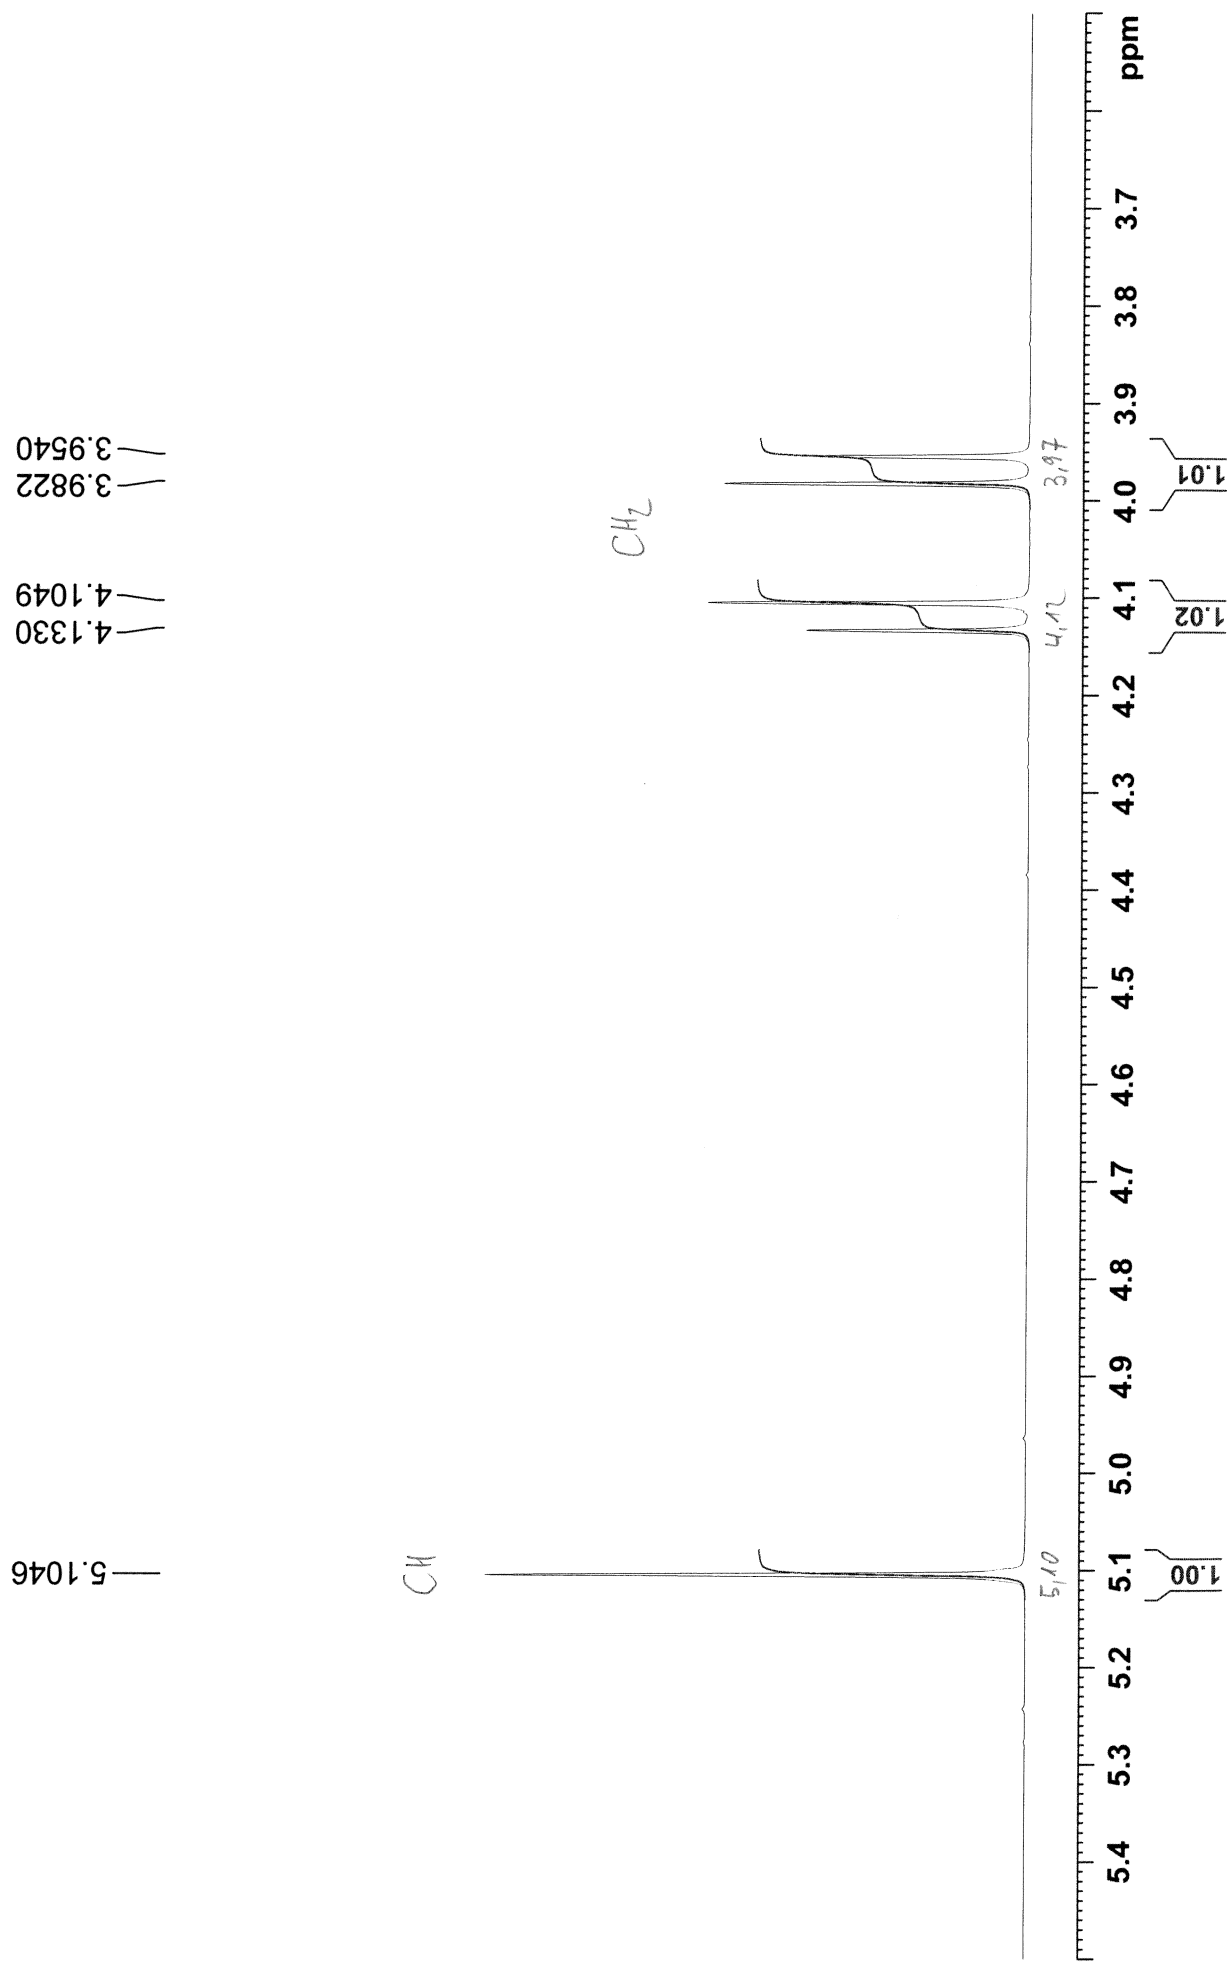

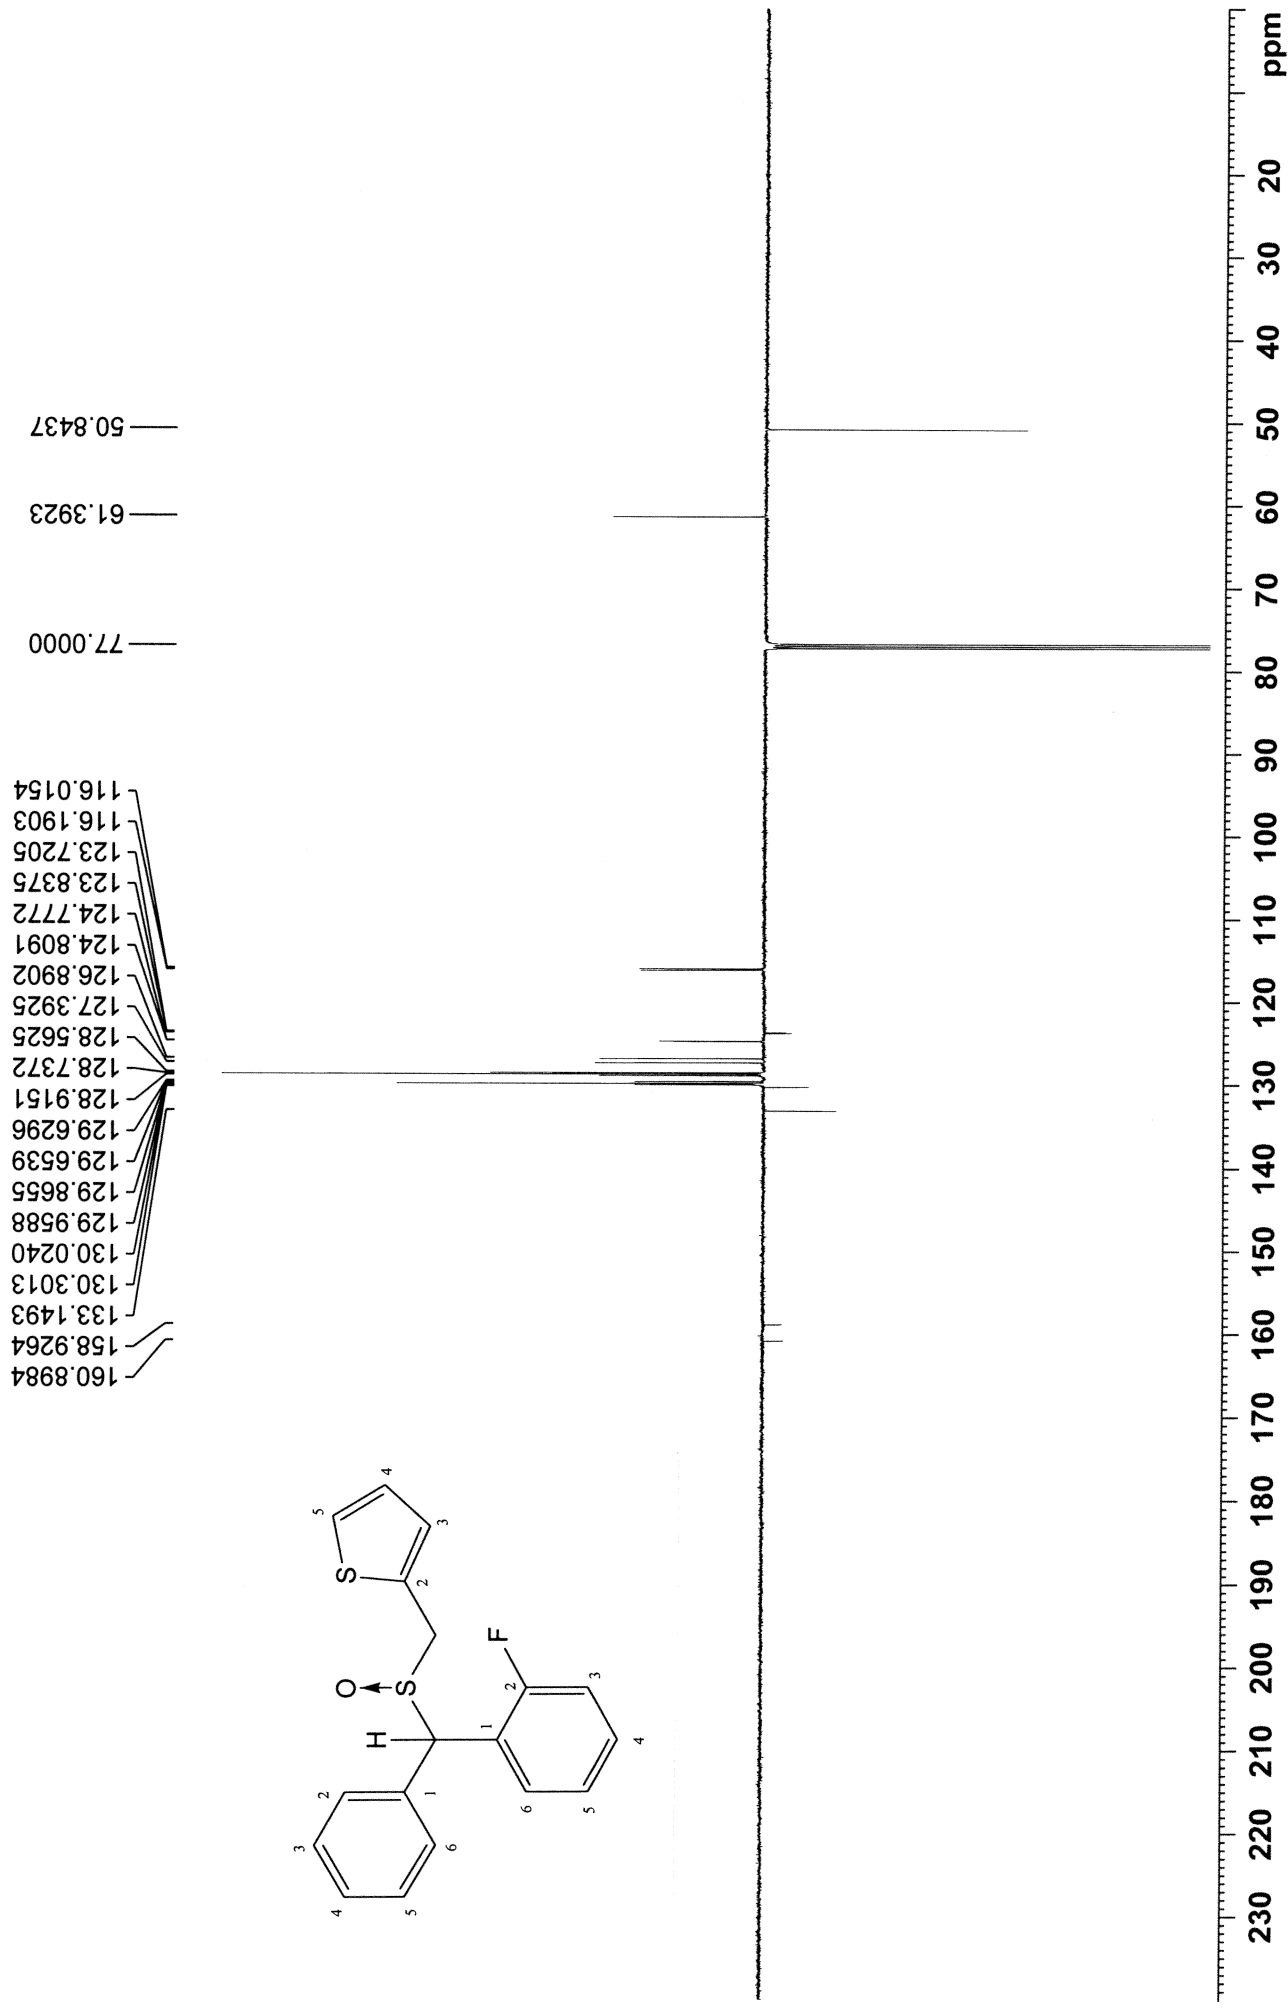

PN020p2 in cdcl3 (APT) 11.3.2021

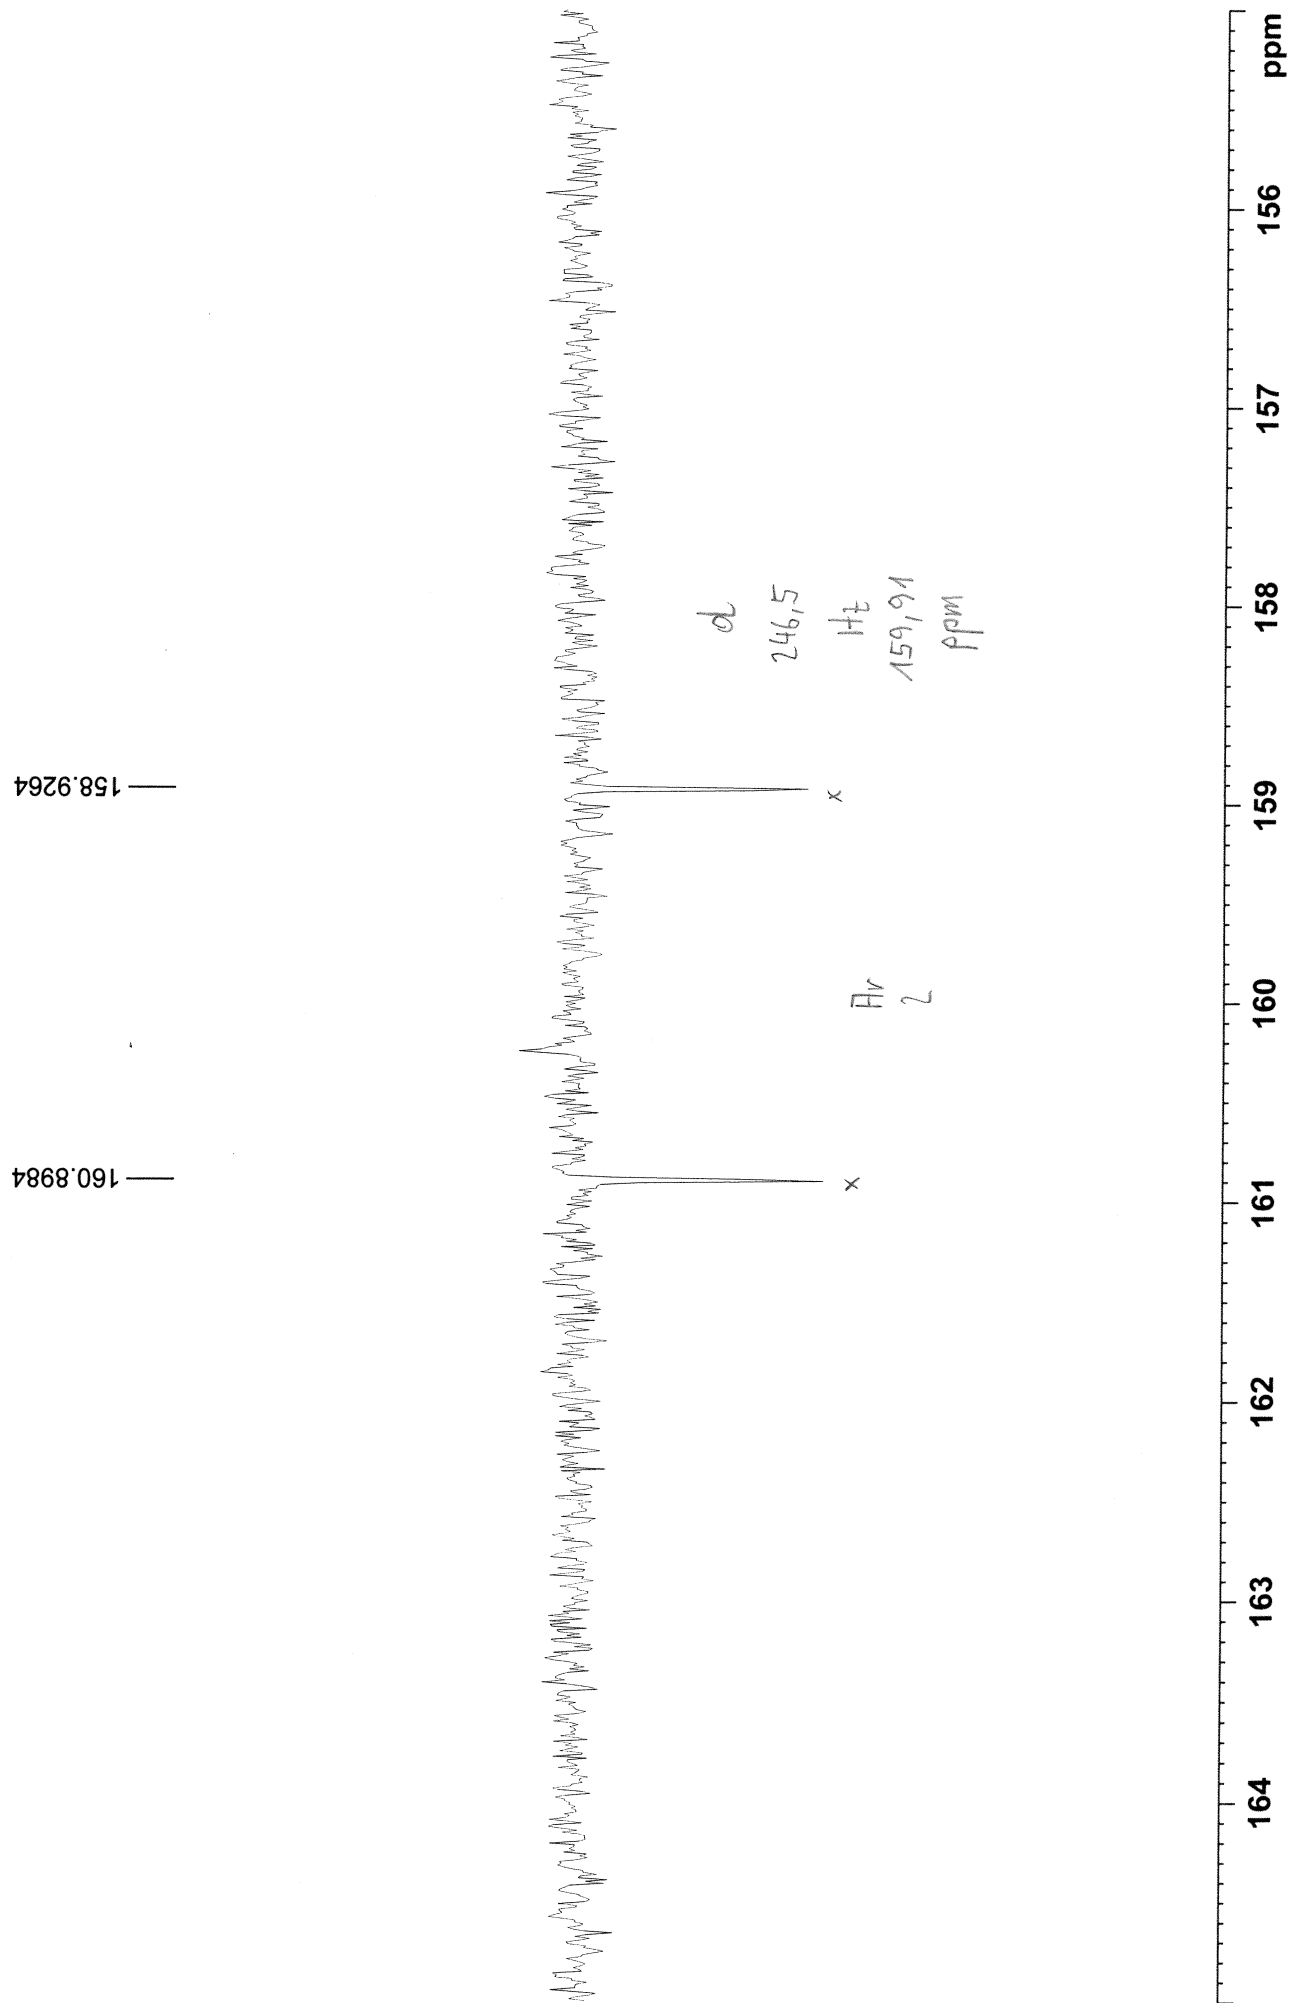



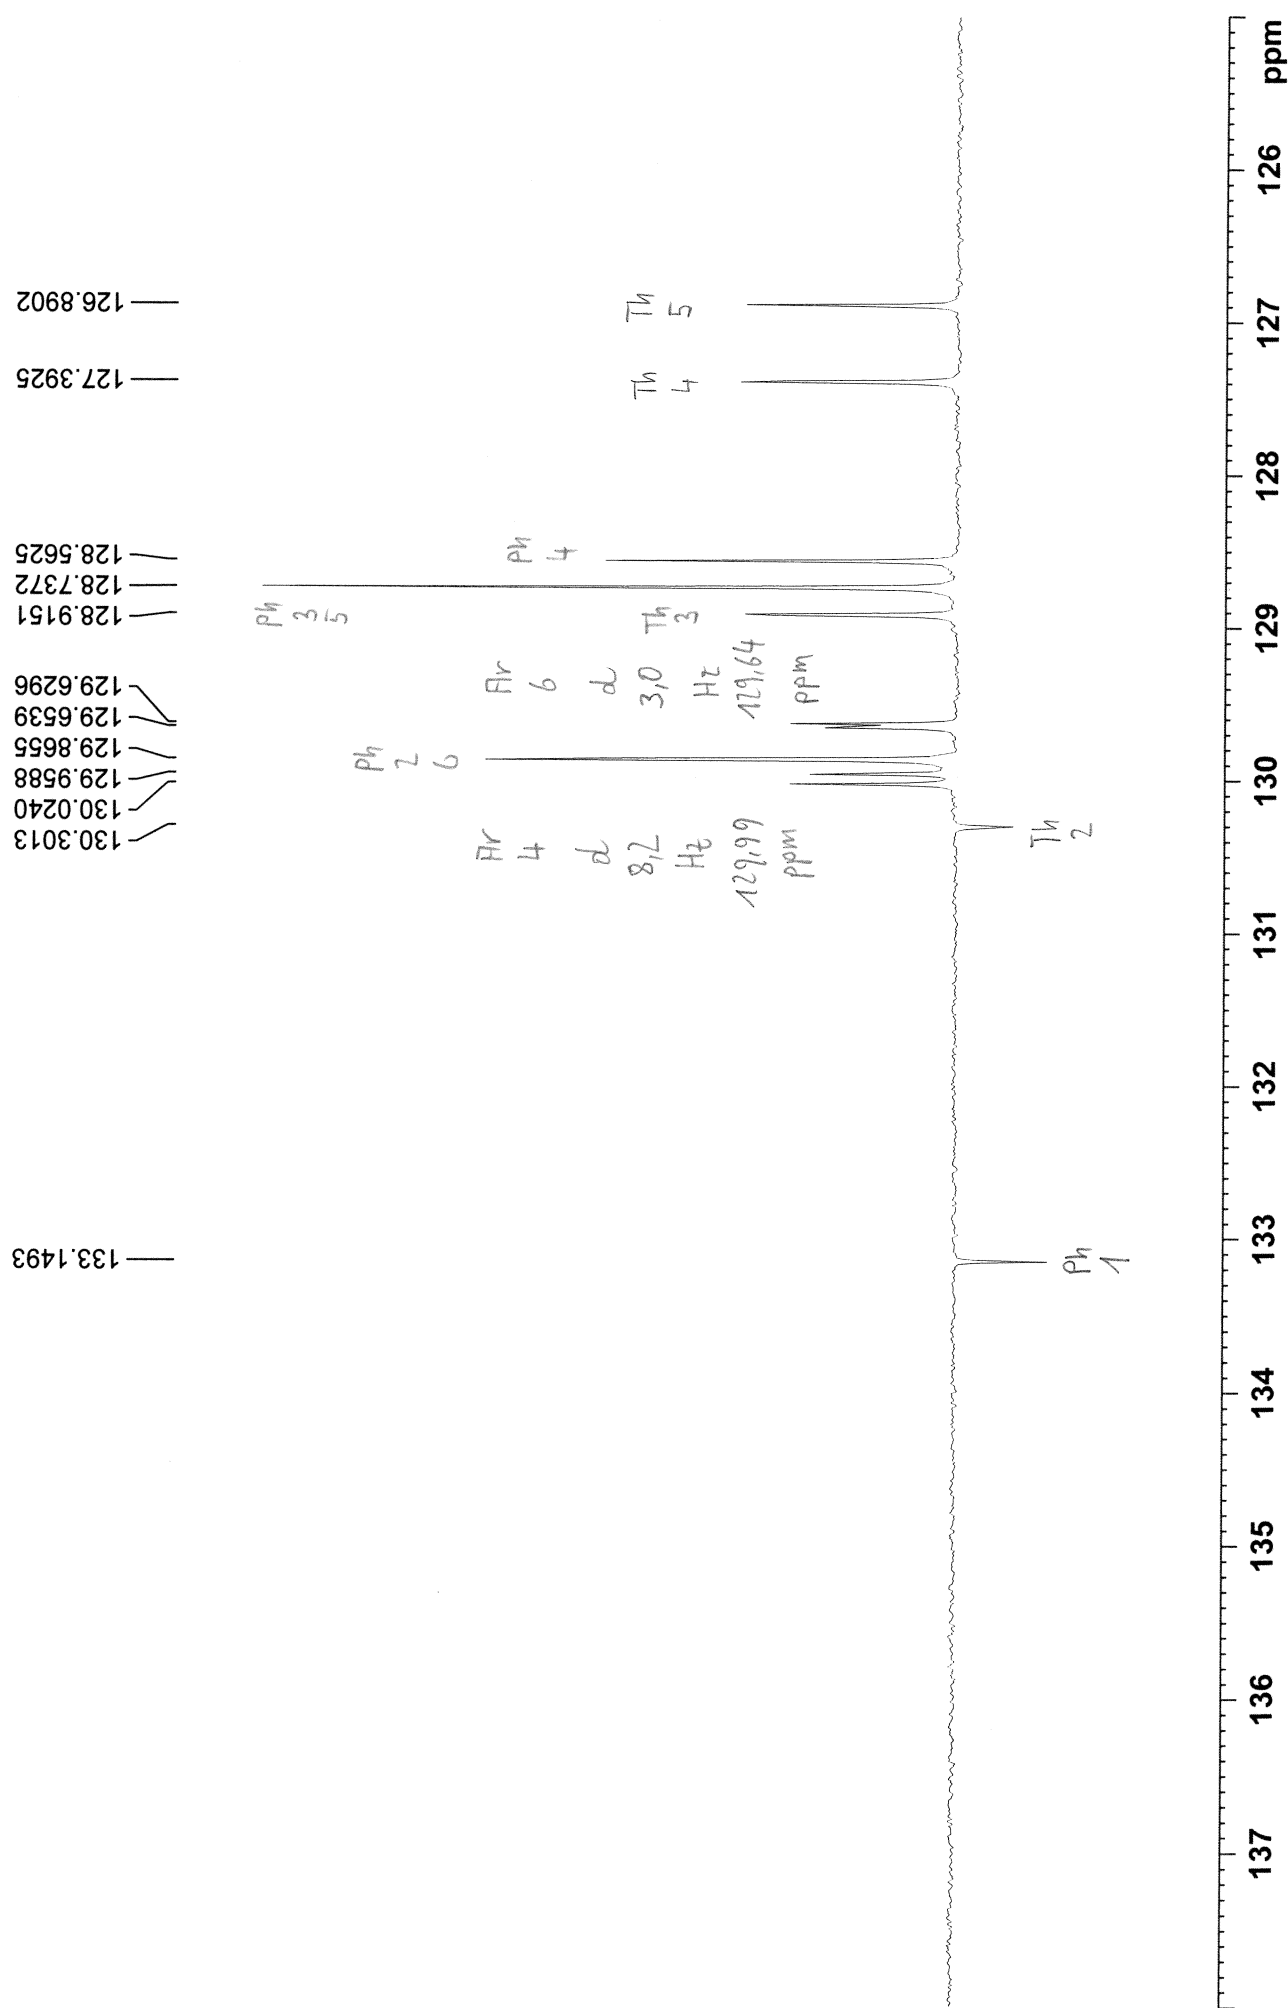

PN020p2 in cdcl3 (APT) 11.3.2021

124.8091  
124.7772

123.8375  
123.7205

Ar  
5  
d  
40  
Hz  
124.79  
ppm

Ar  
1  
d  
14.6  
Hz  
123.78  
ppm

116.1903  
116.0154

Ar  
3  
d  
21.9  
Hz  
116.10  
ppm

125 124 123 122 121 120 119 118 117 116 115 ppm

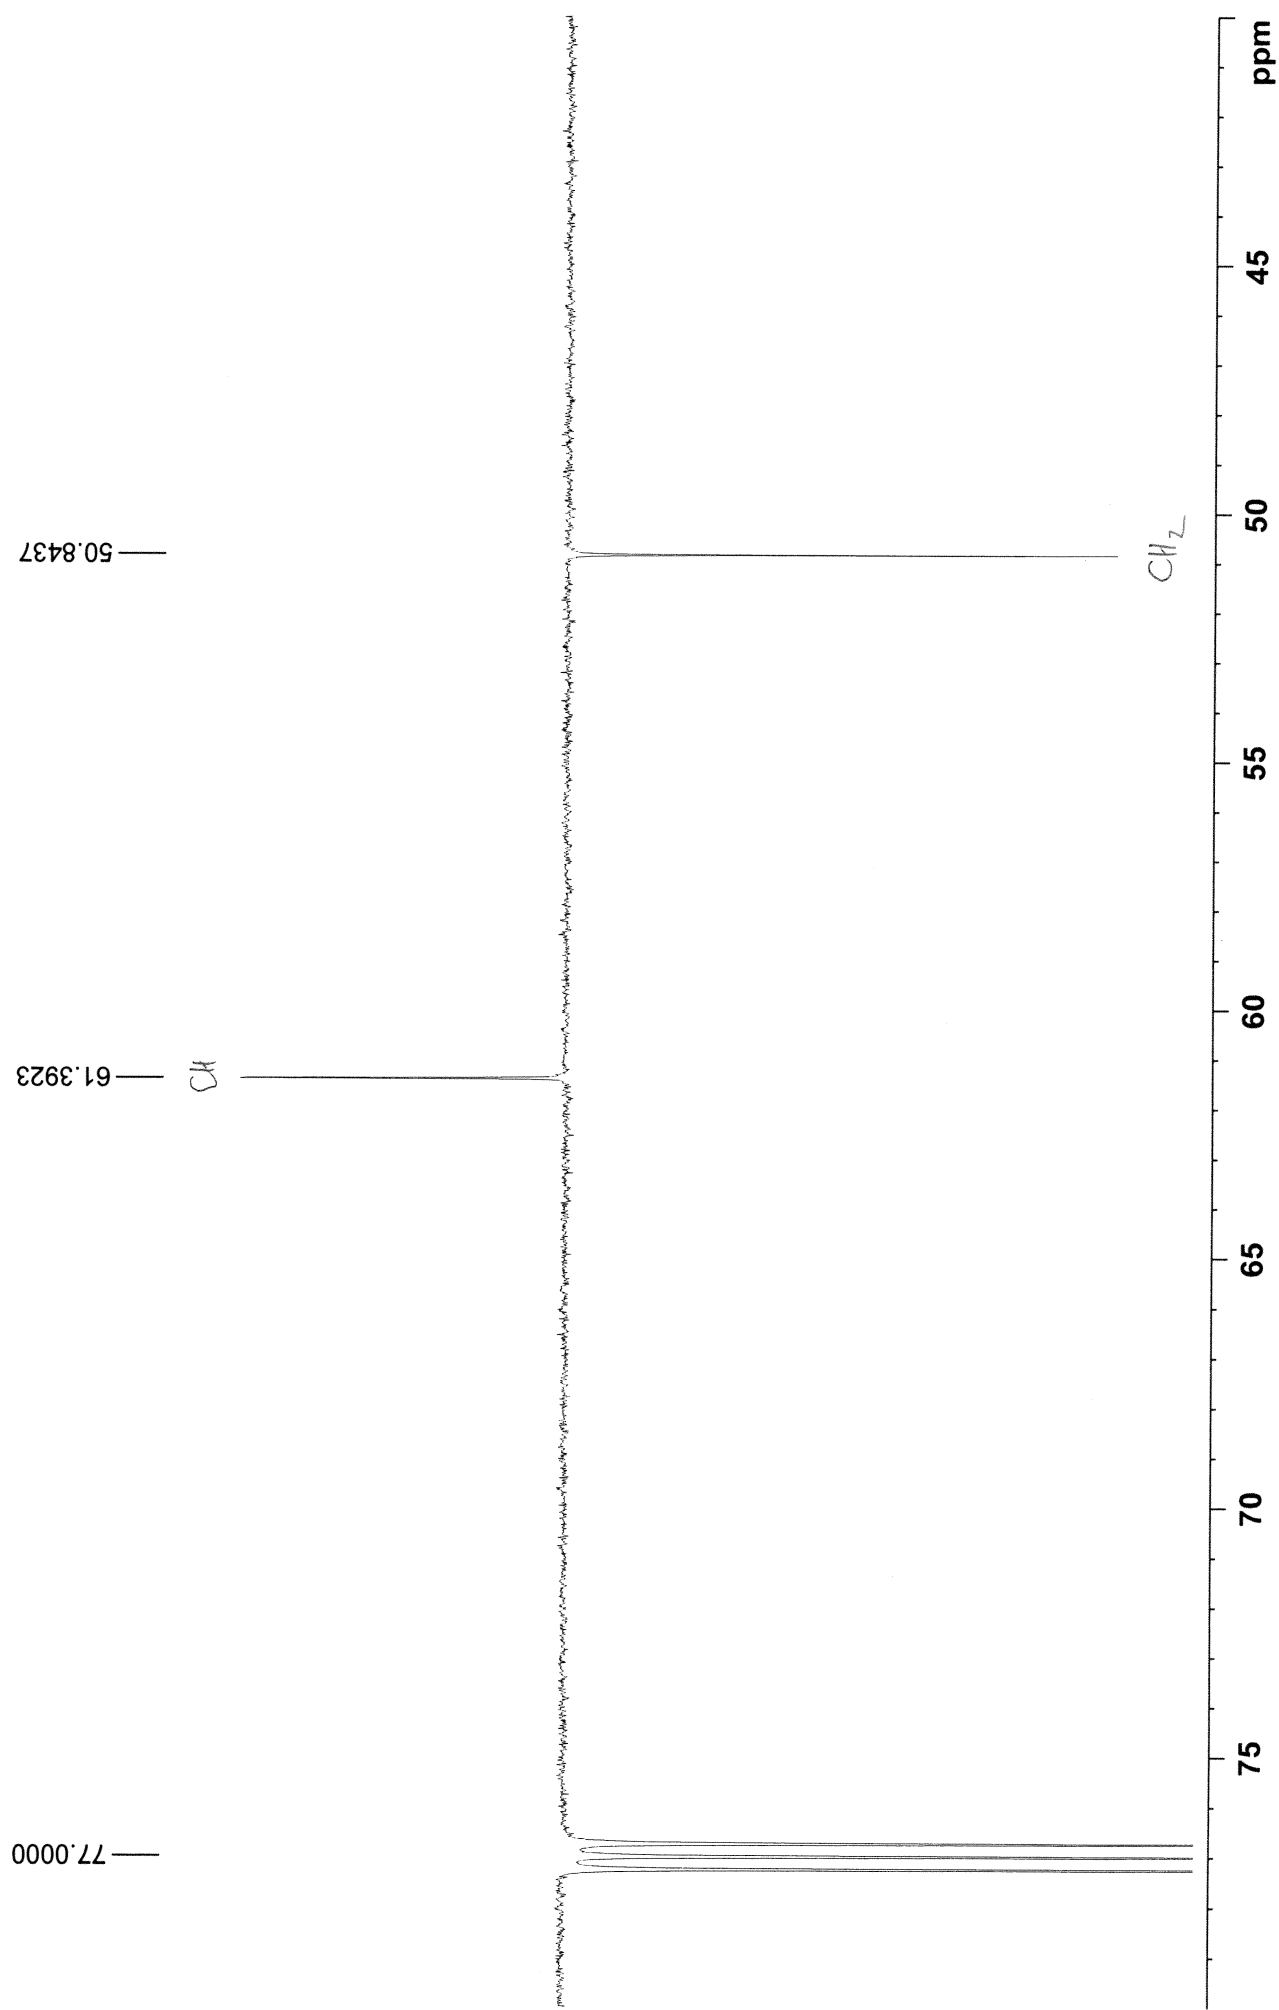

PN020p2 in cdcl3 (COSY) 11.3.2021

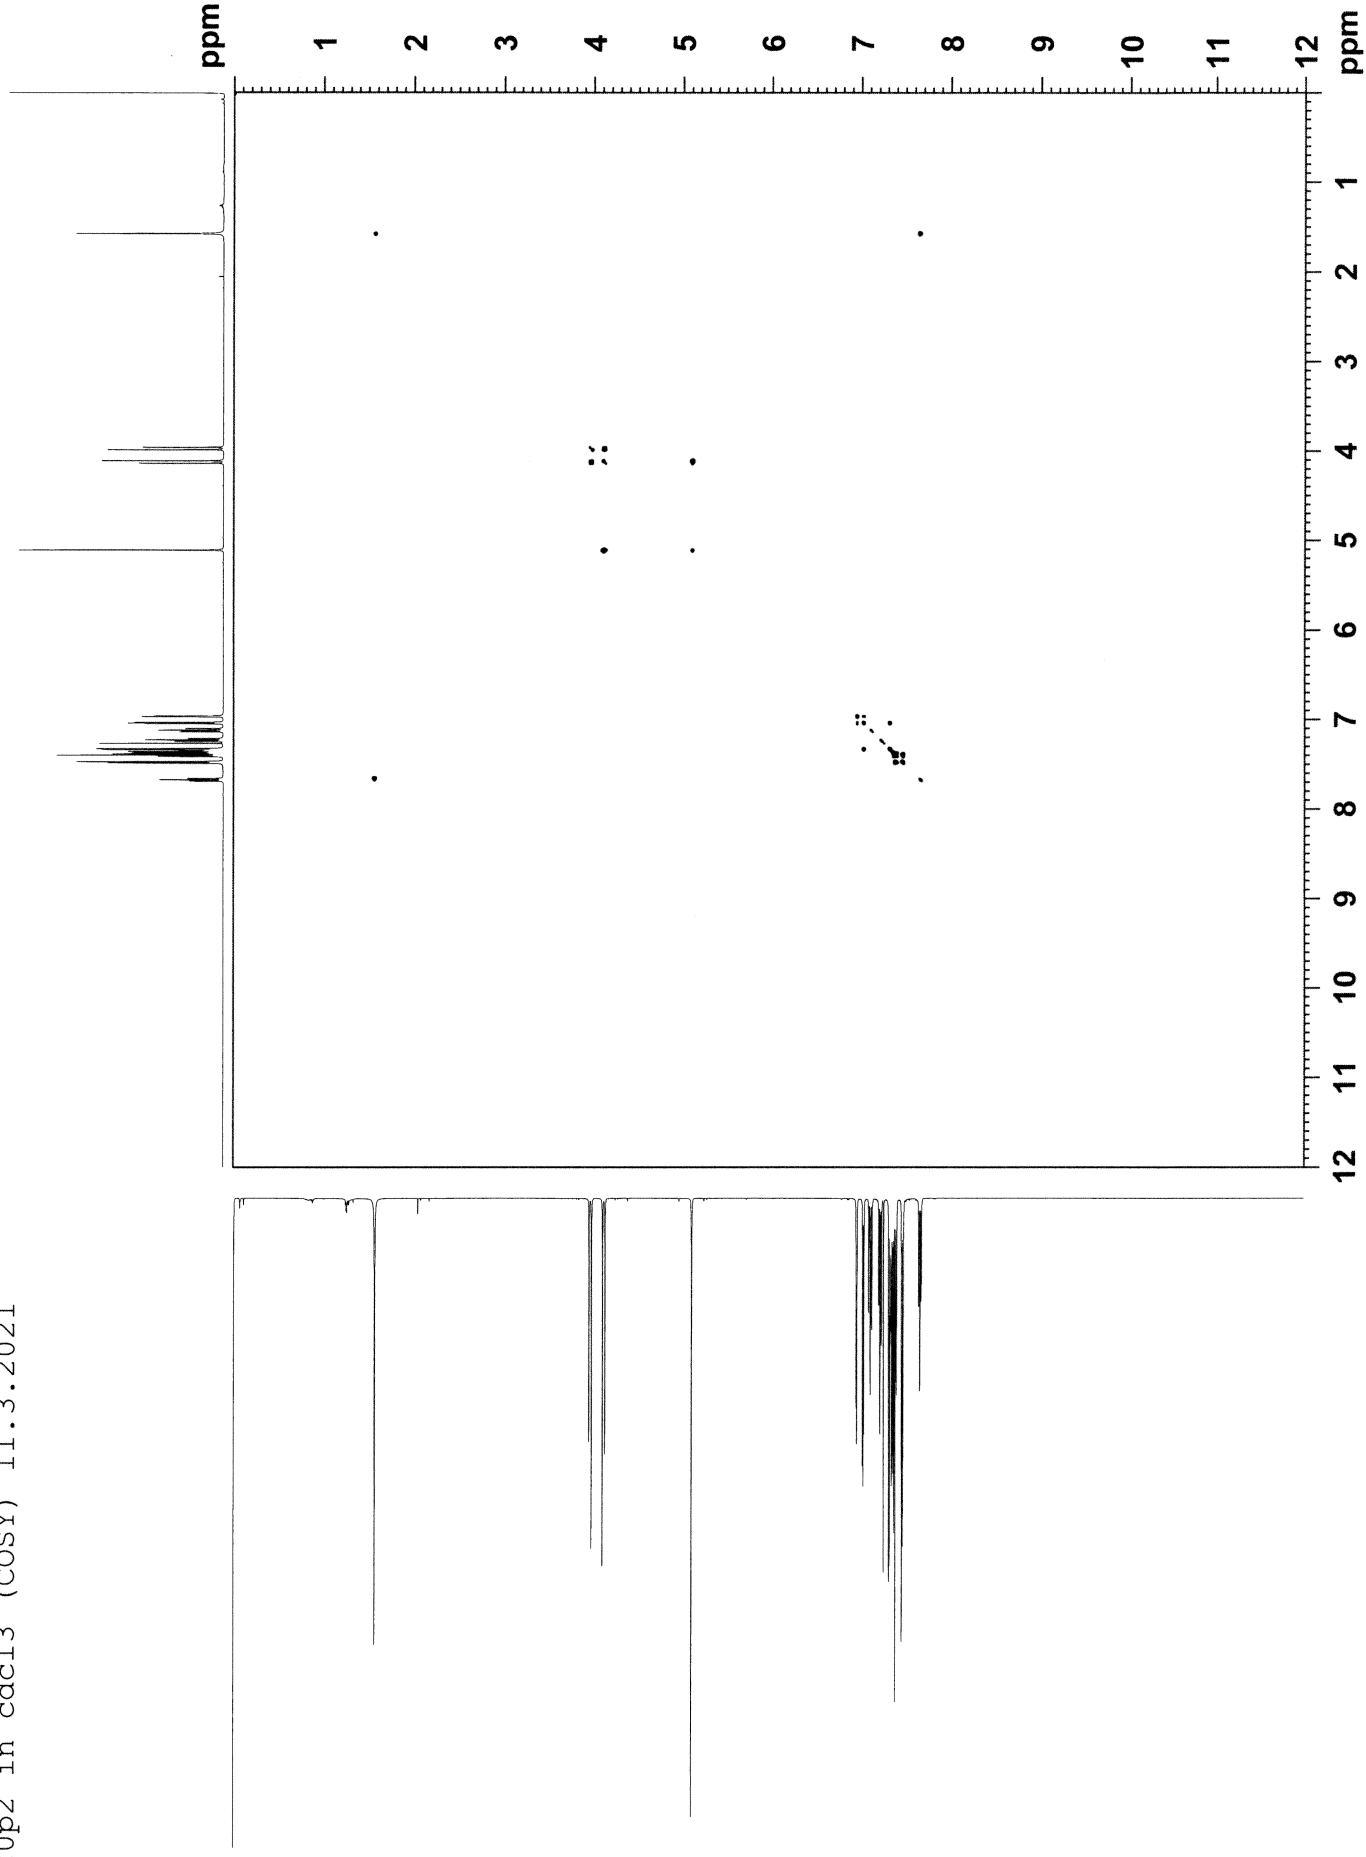

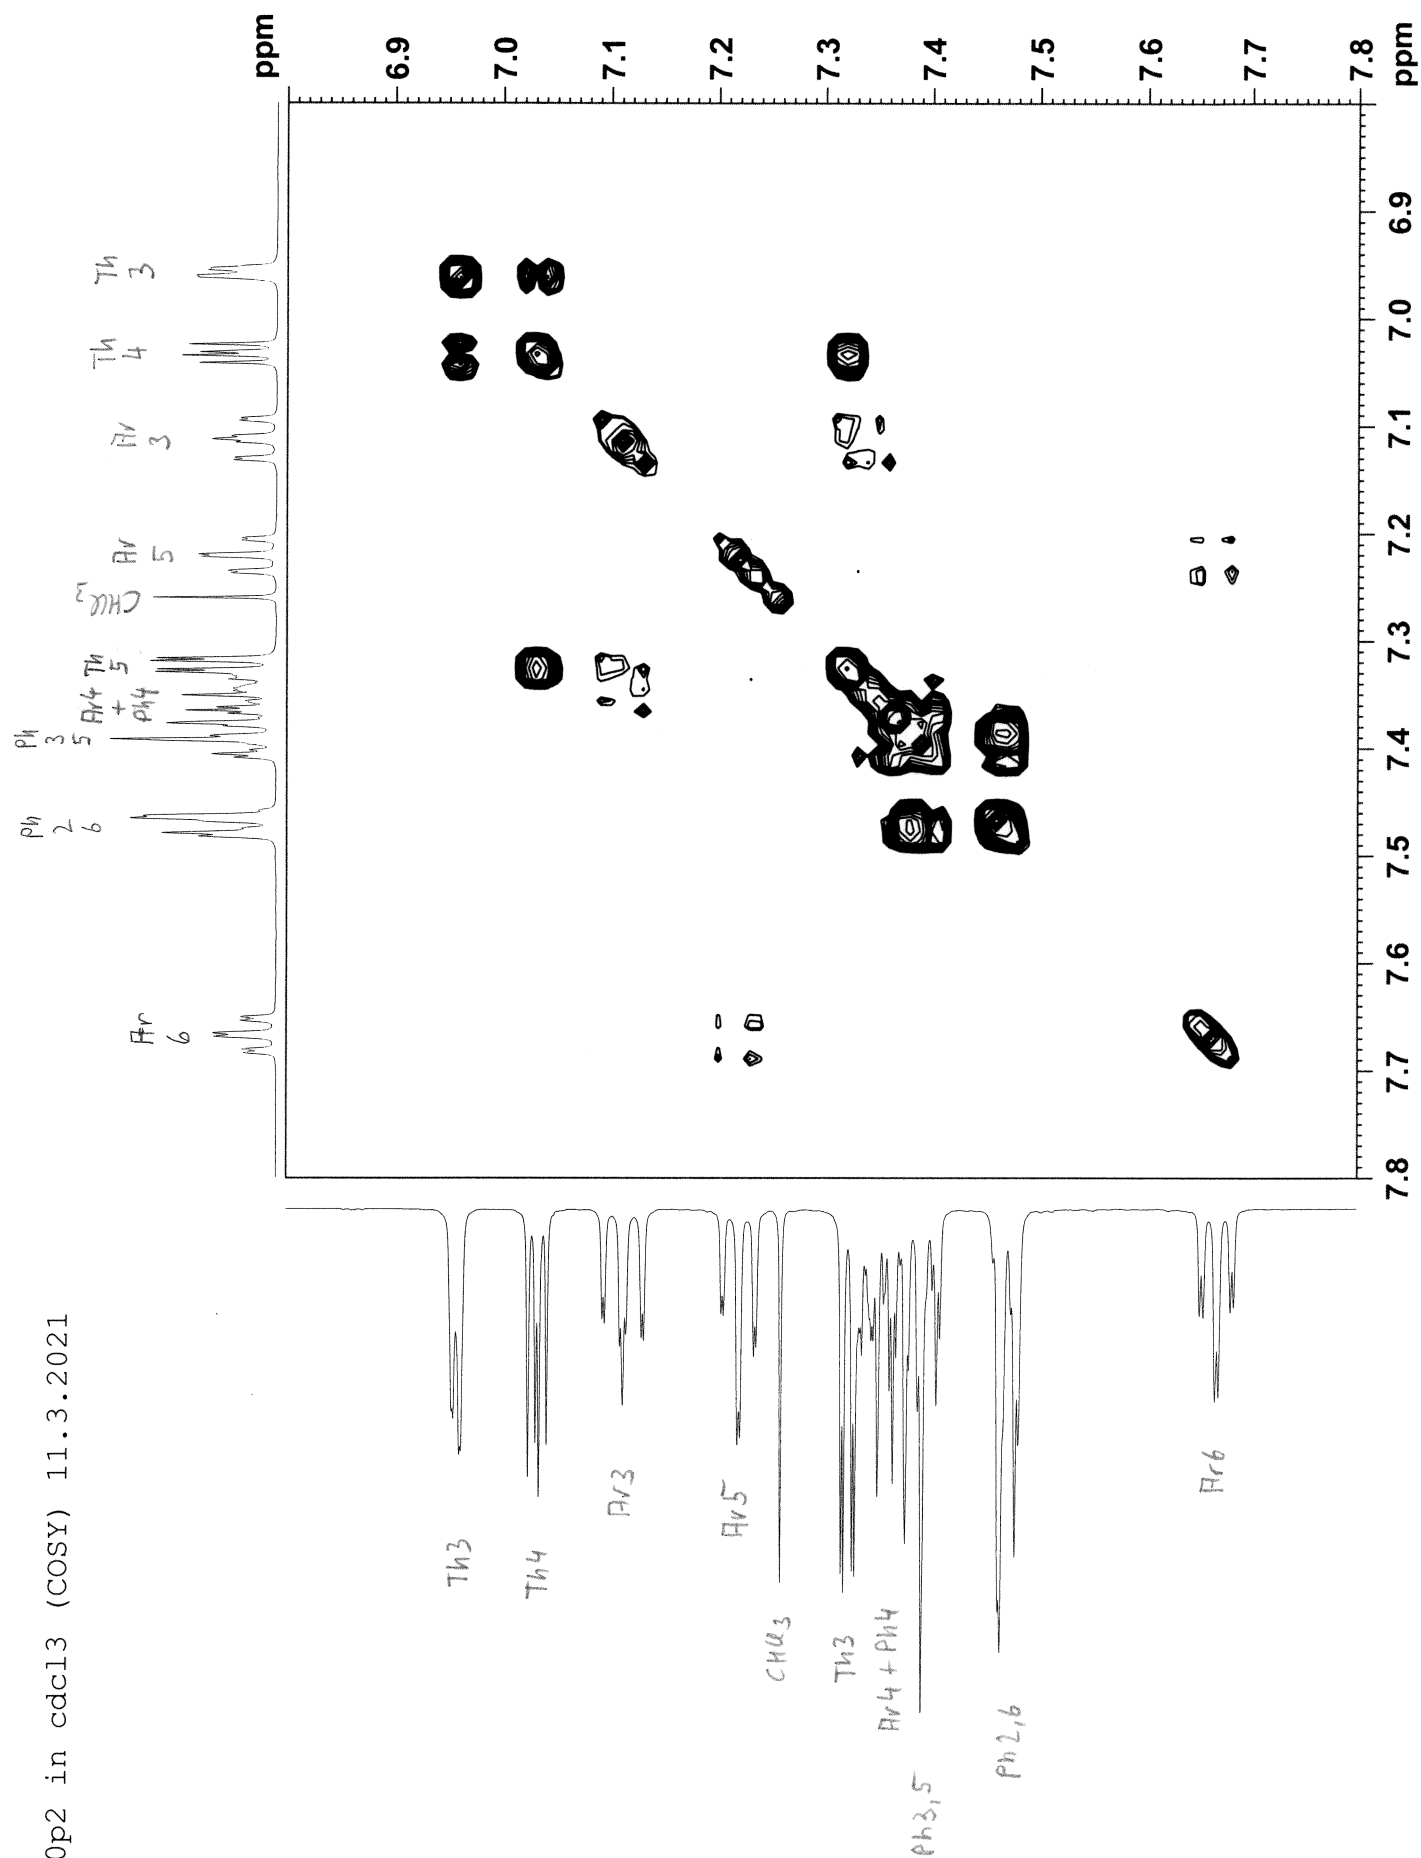

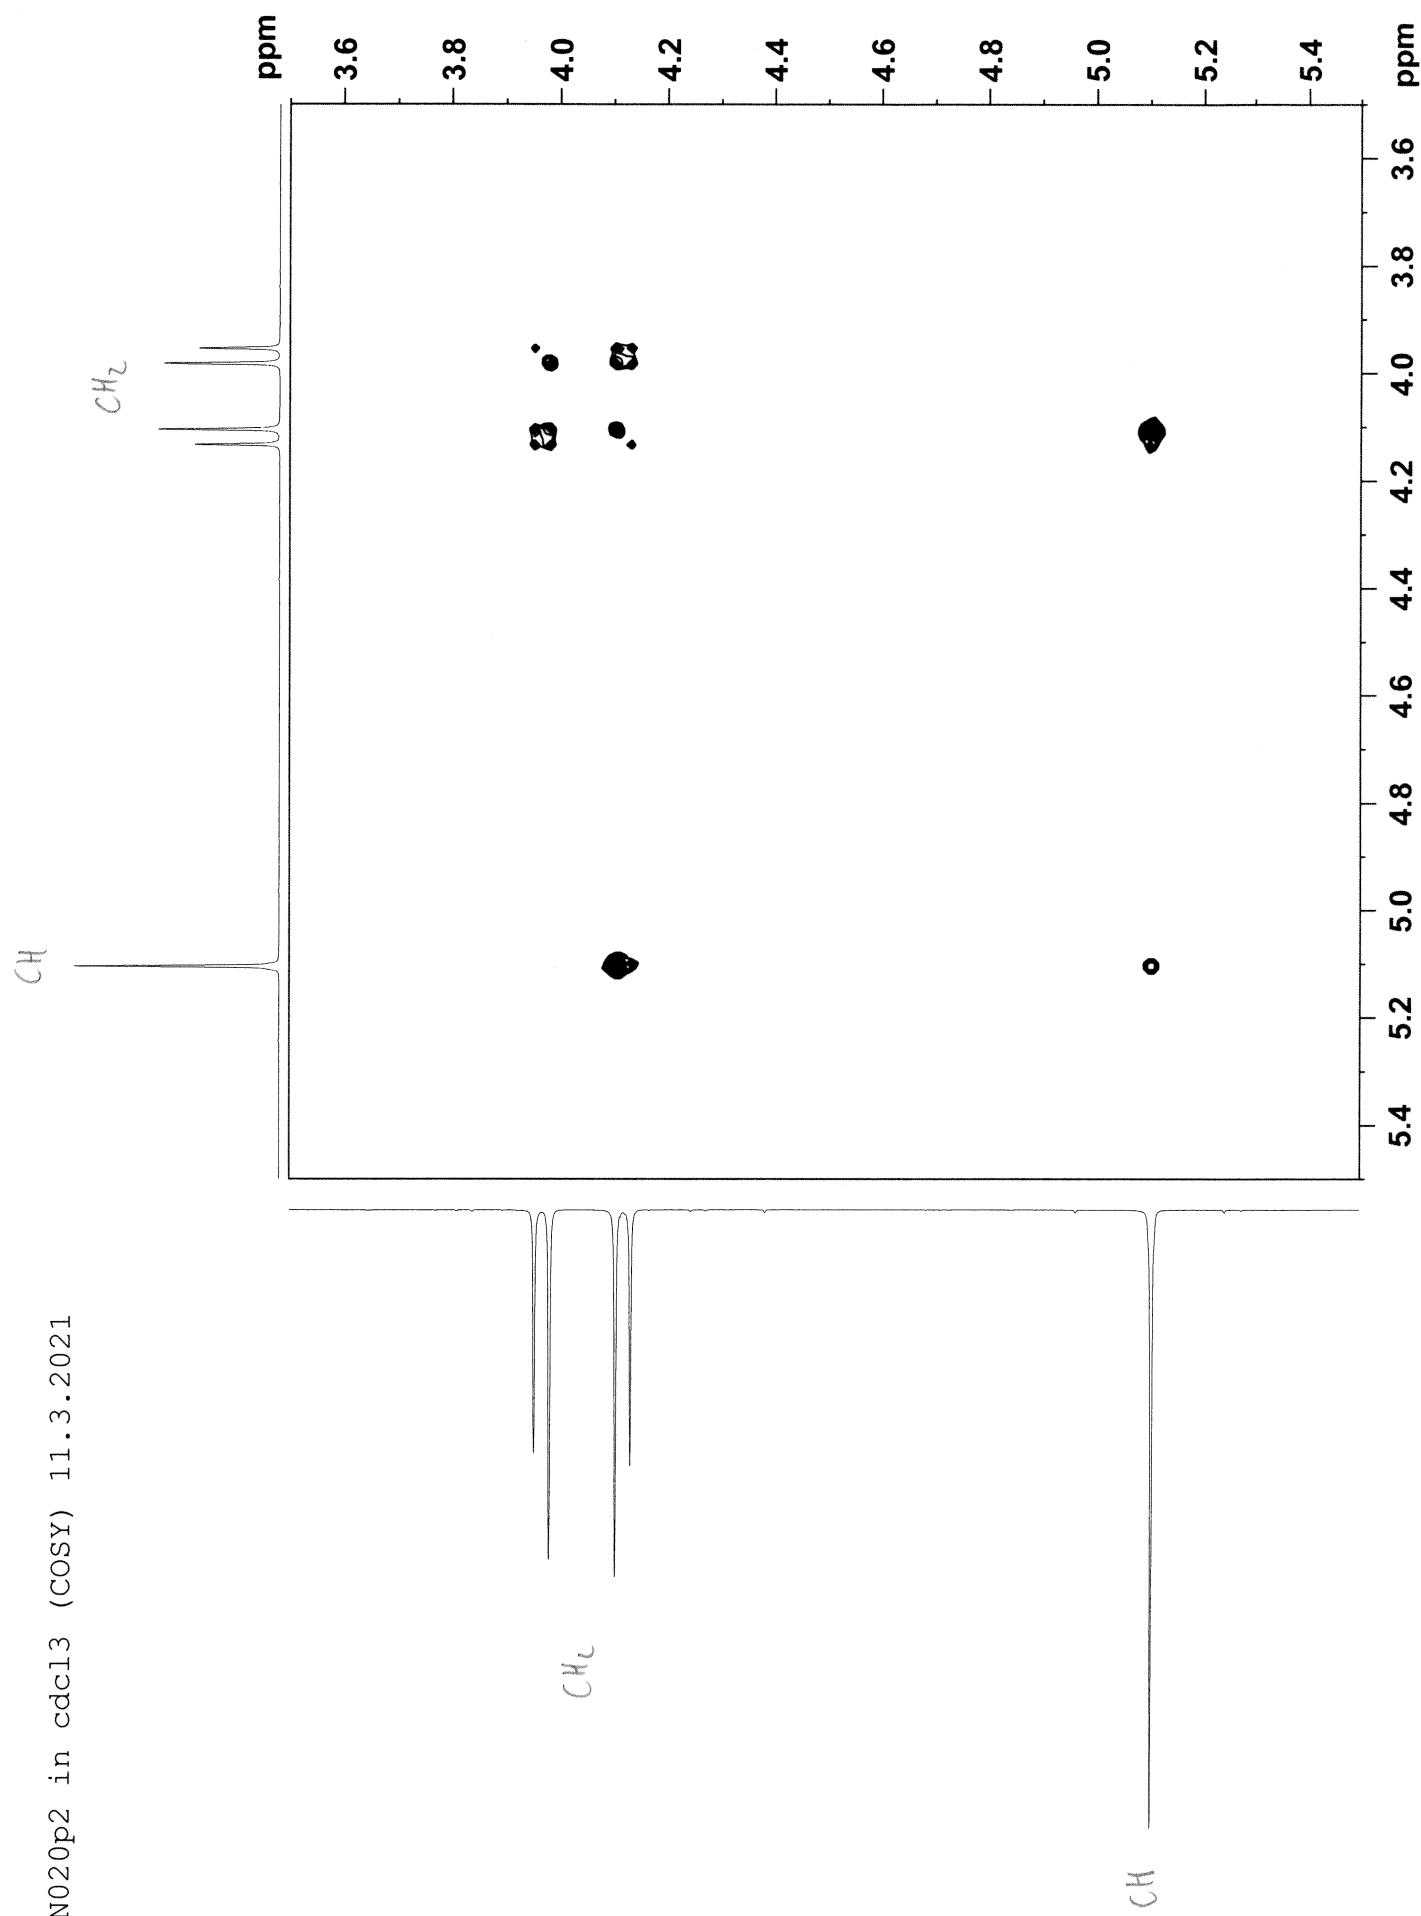

PN020p2 in cdcl3 (HSQC) 11.3.2021

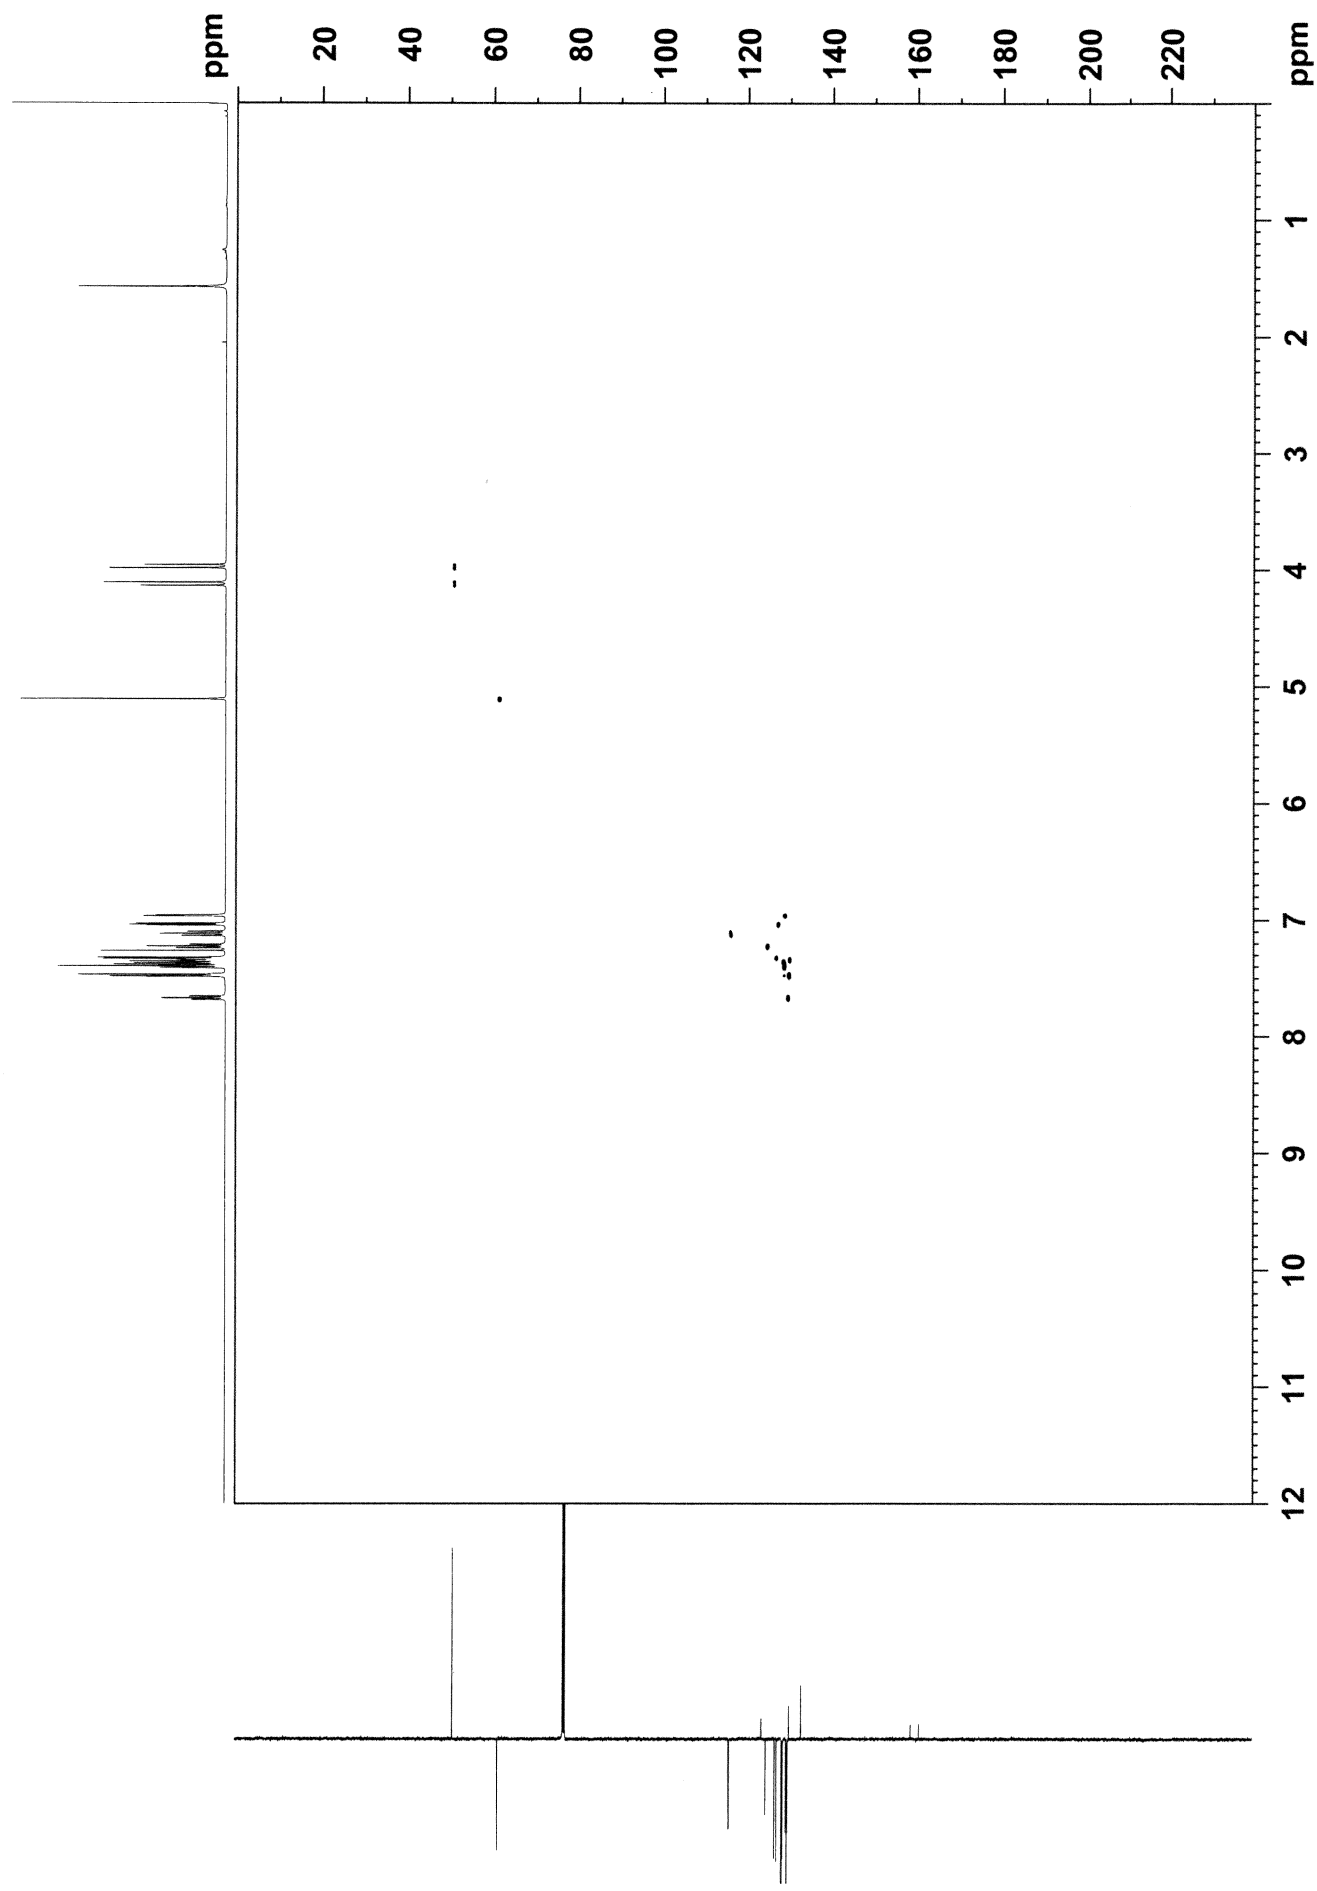

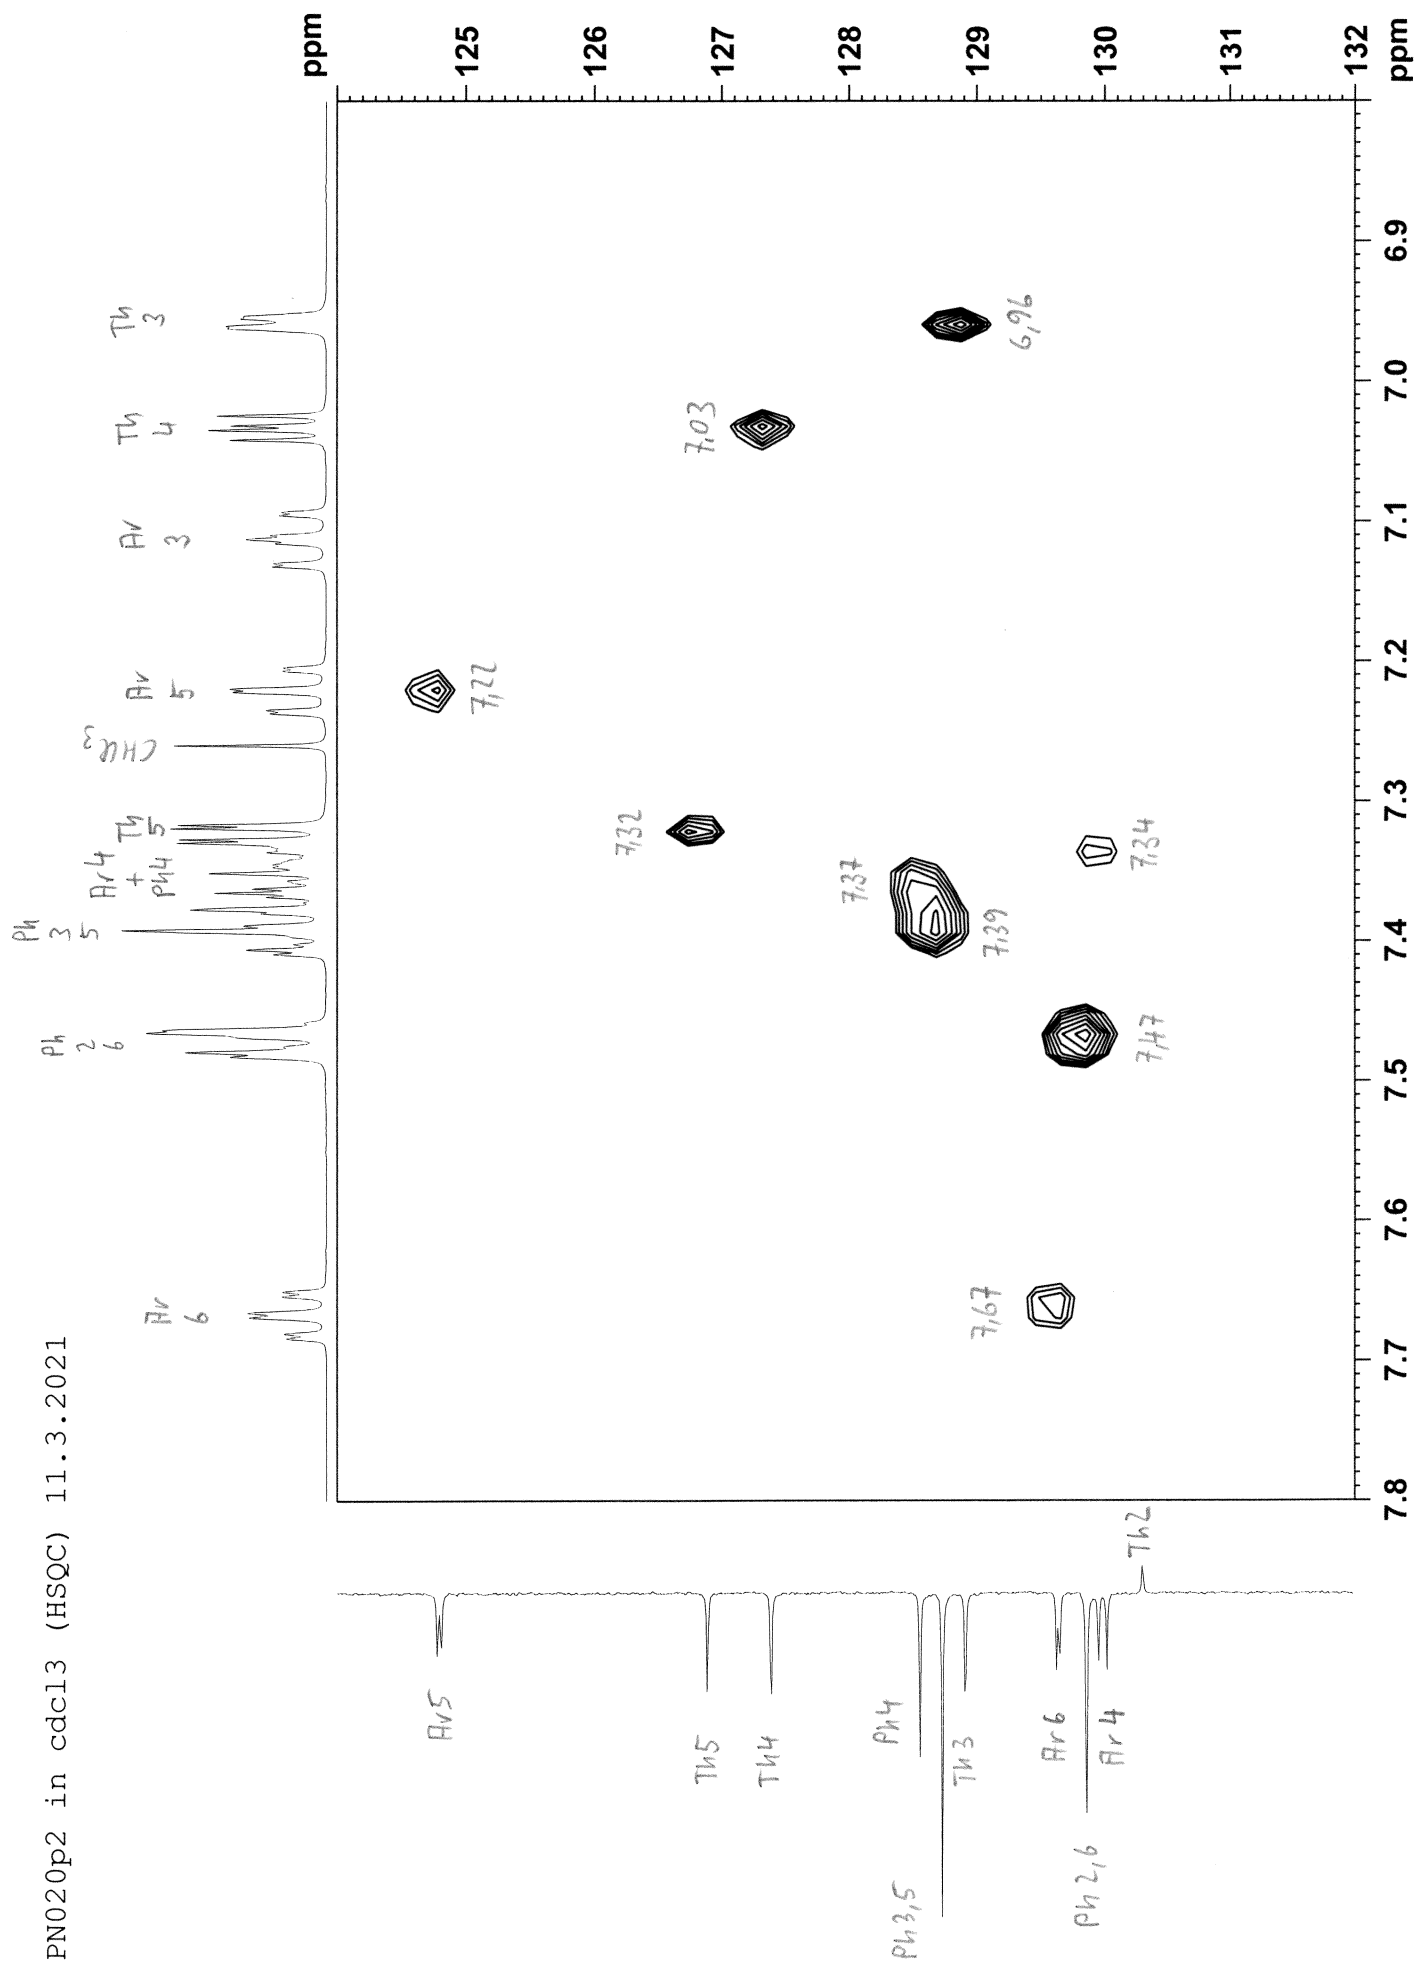



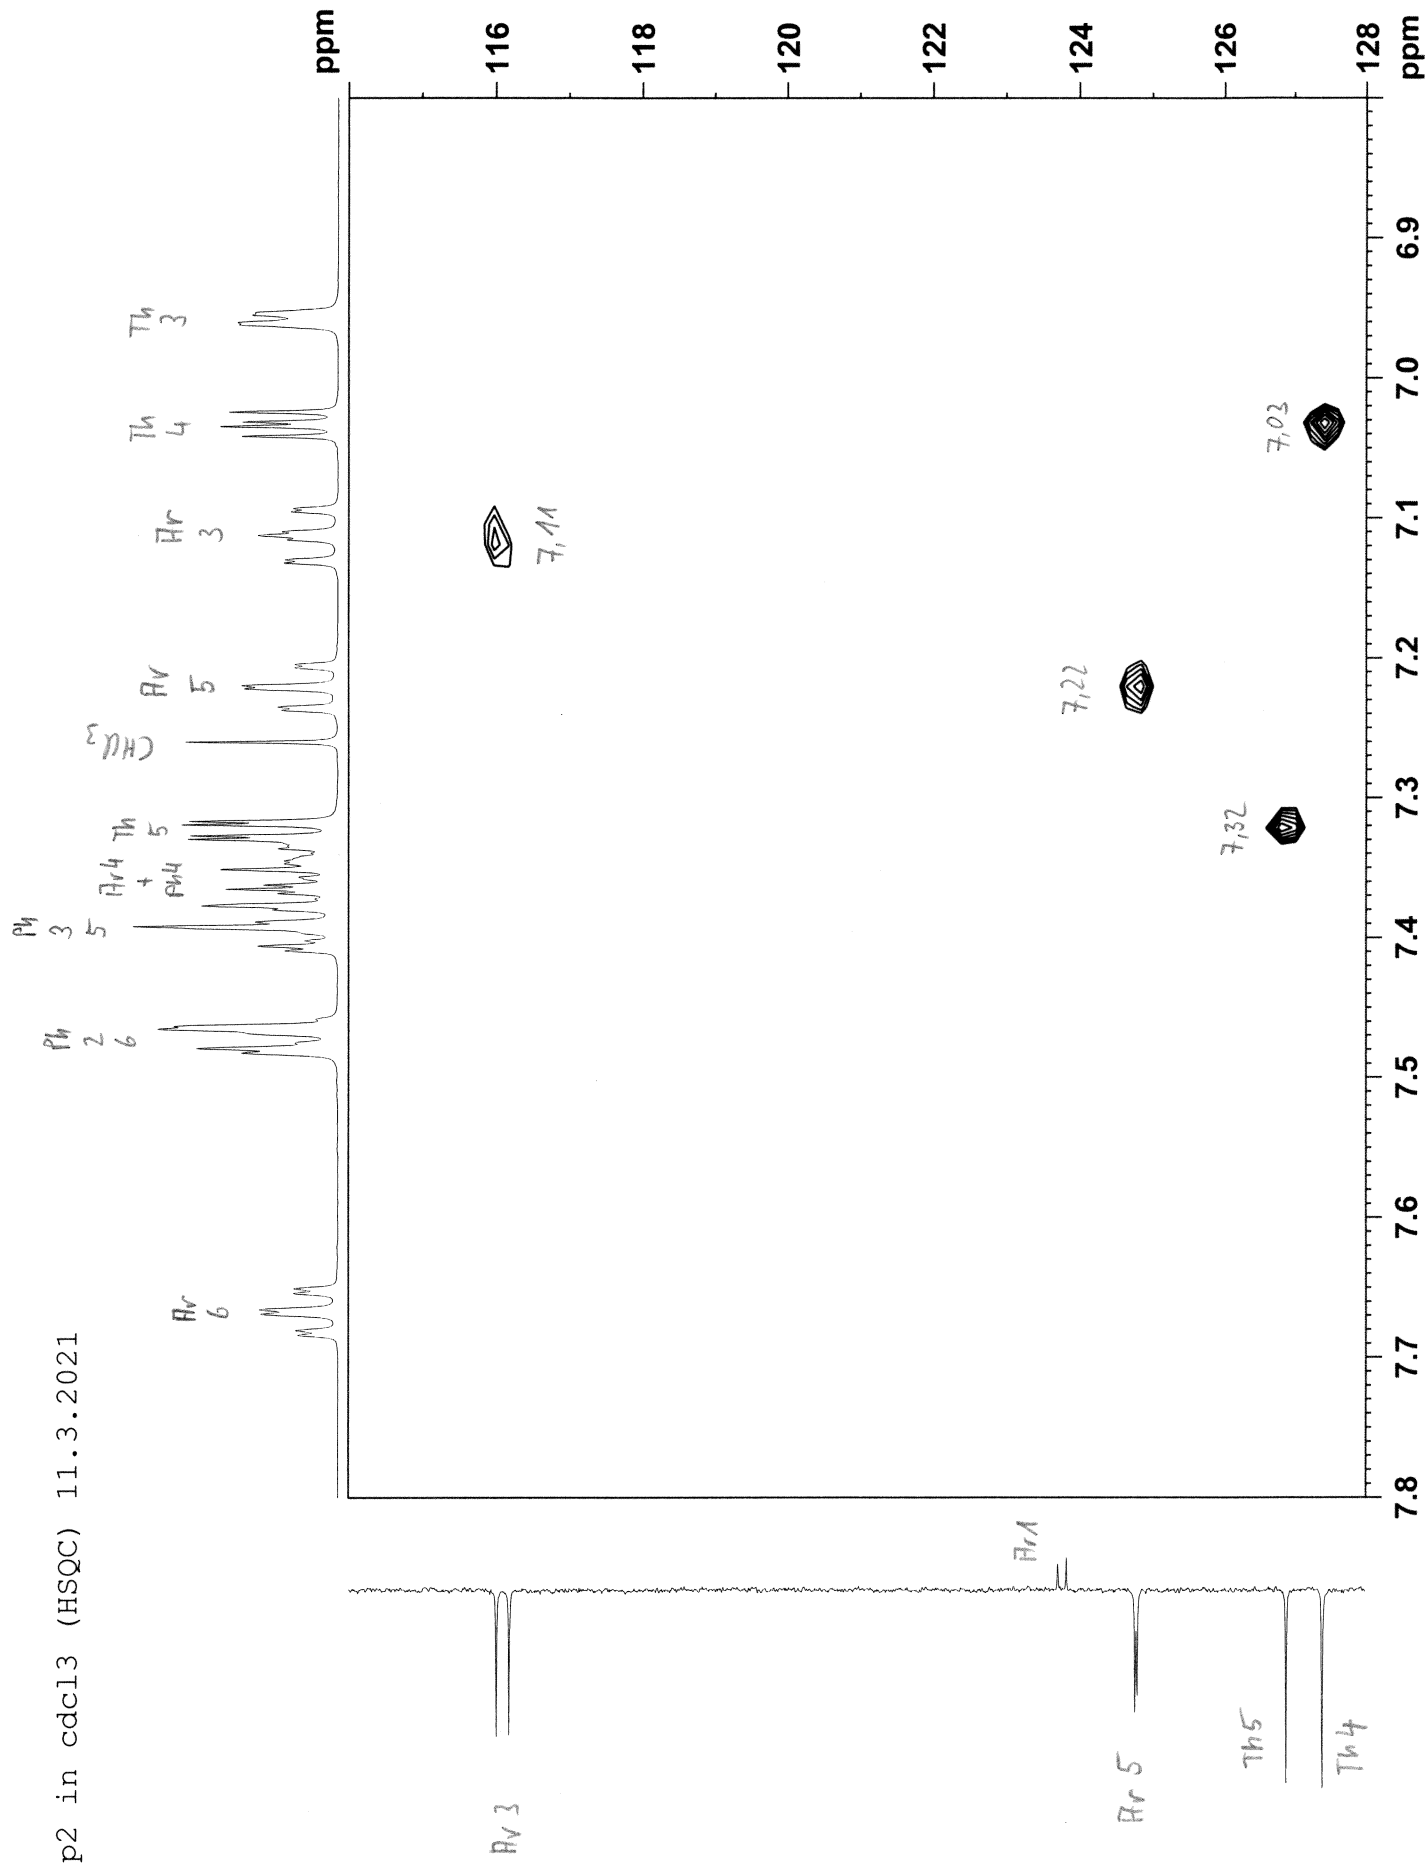

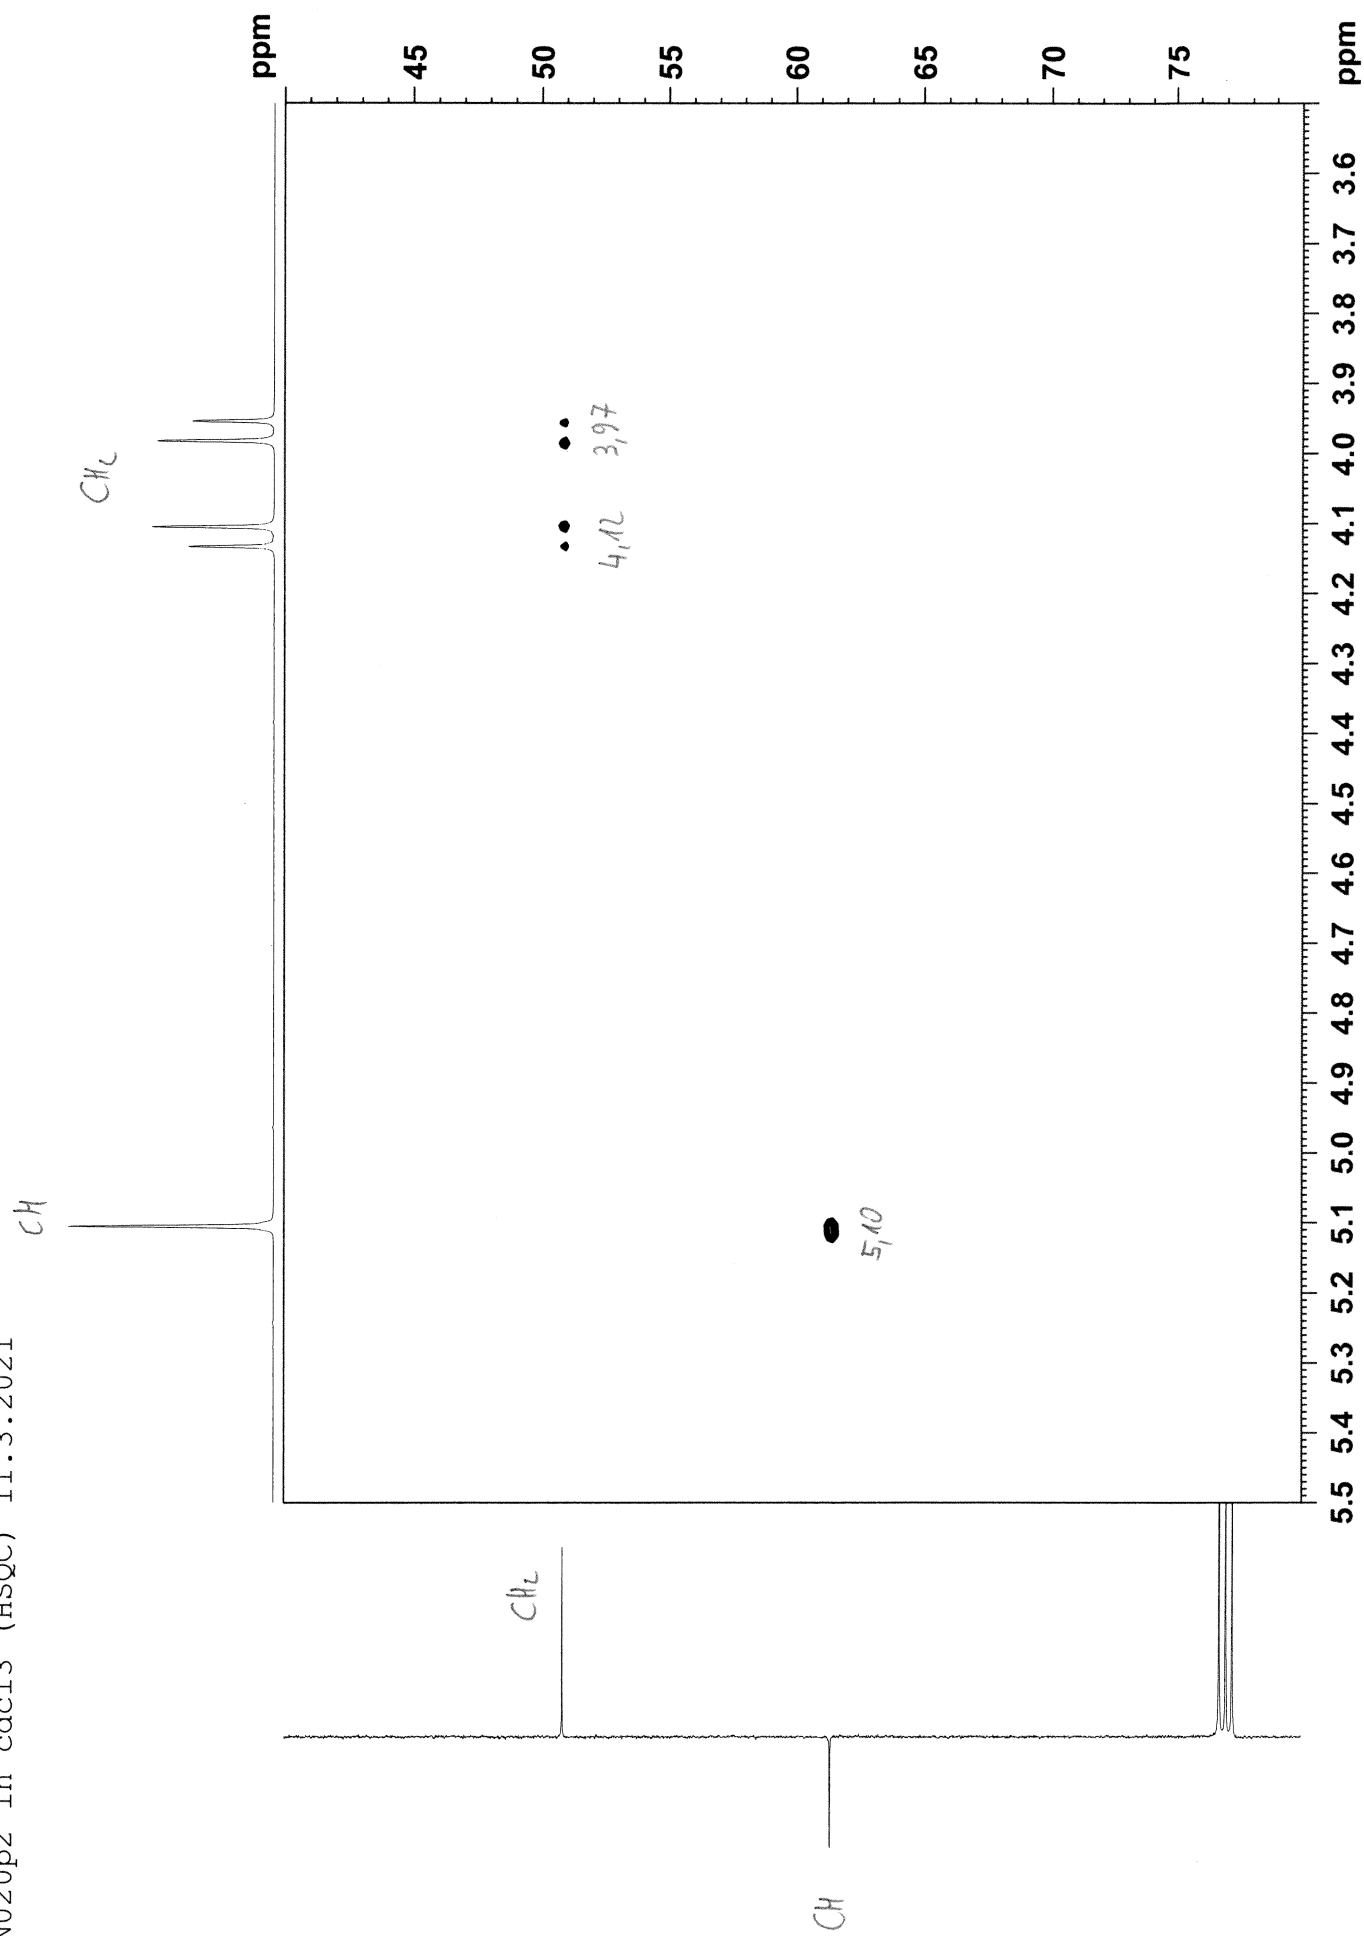

PN020p2 in cdcl3 (HMBC) 11.3.2021

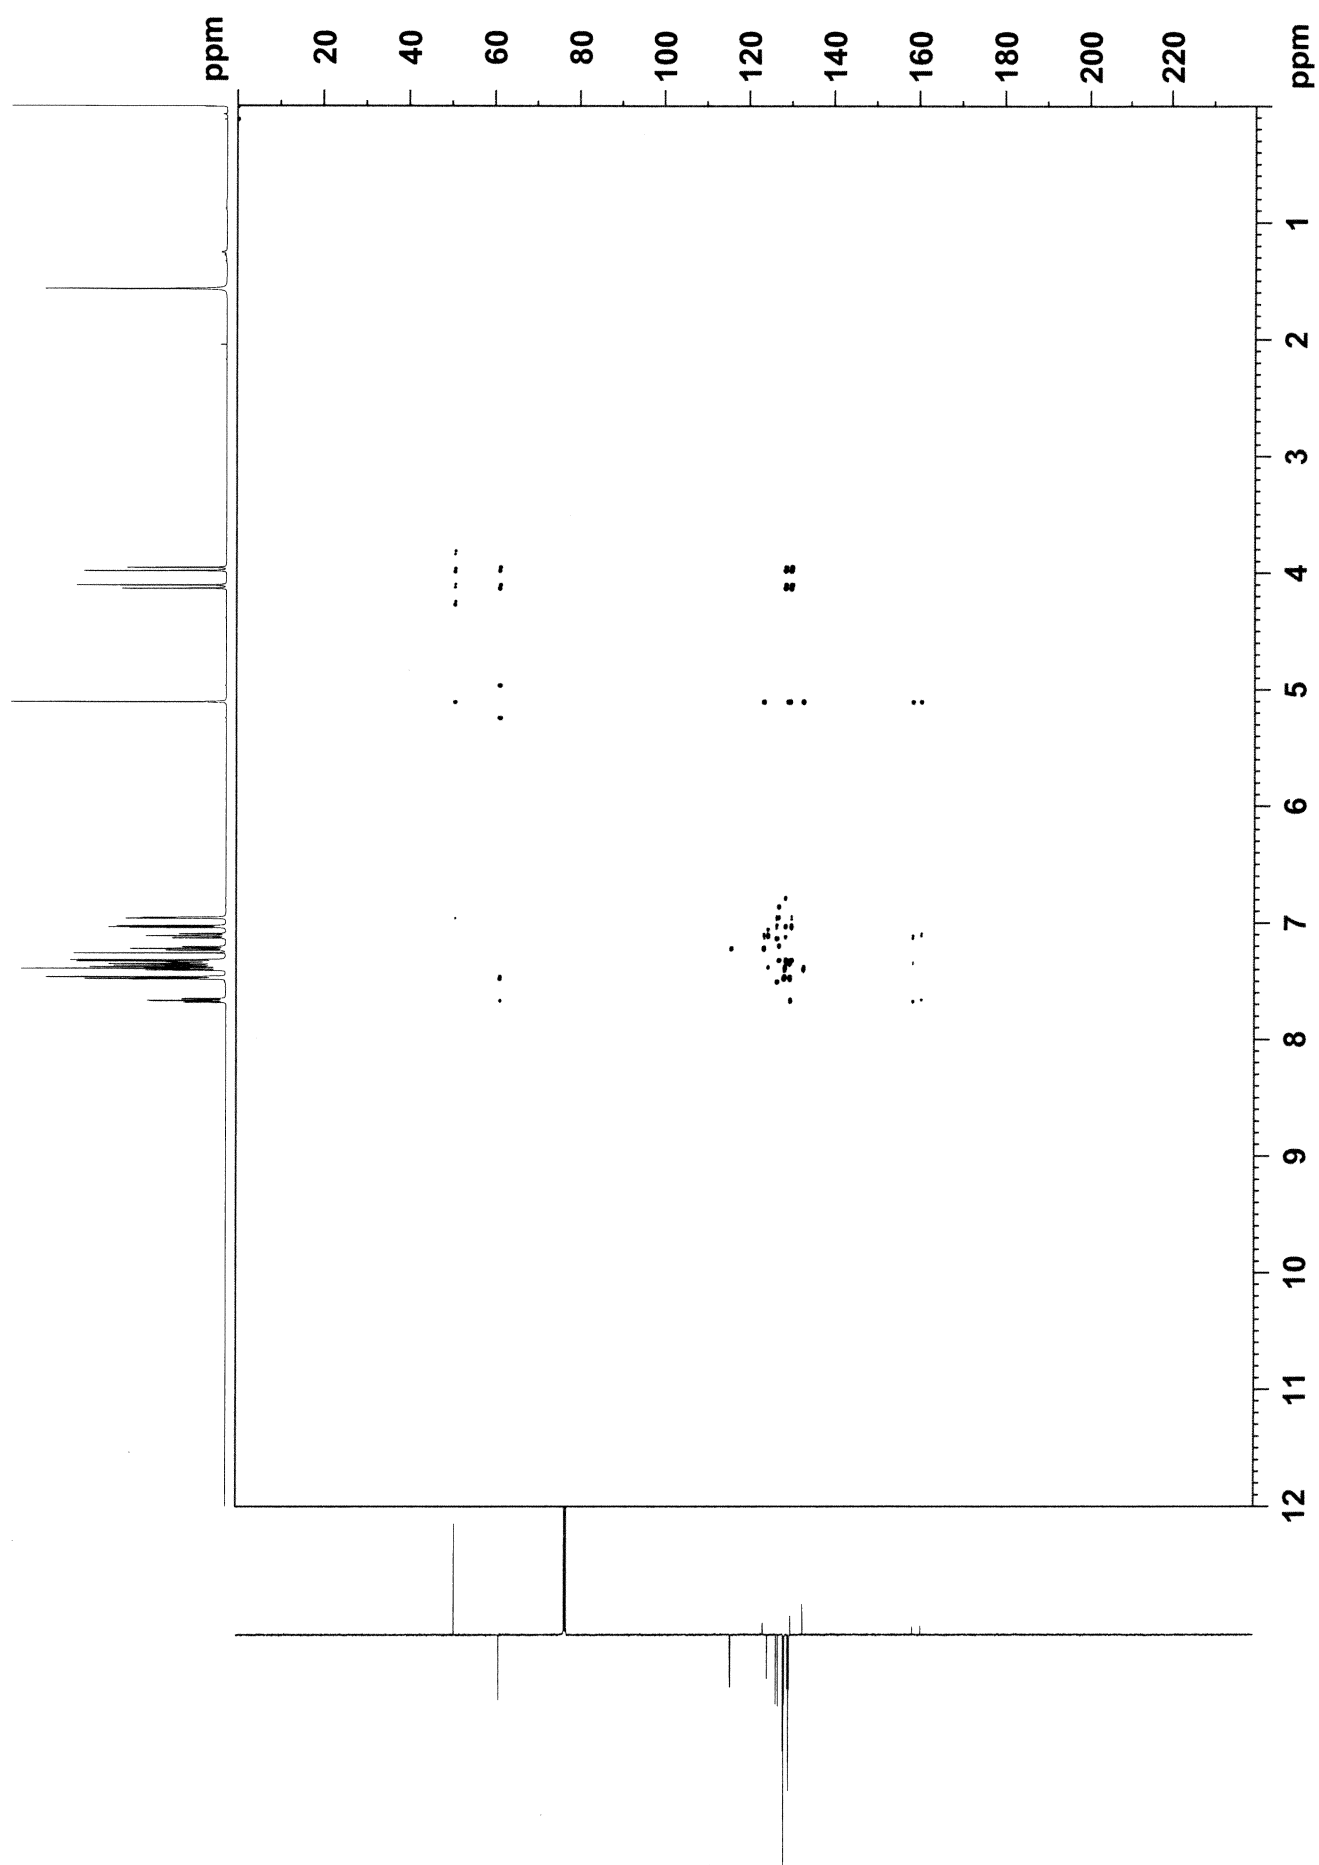

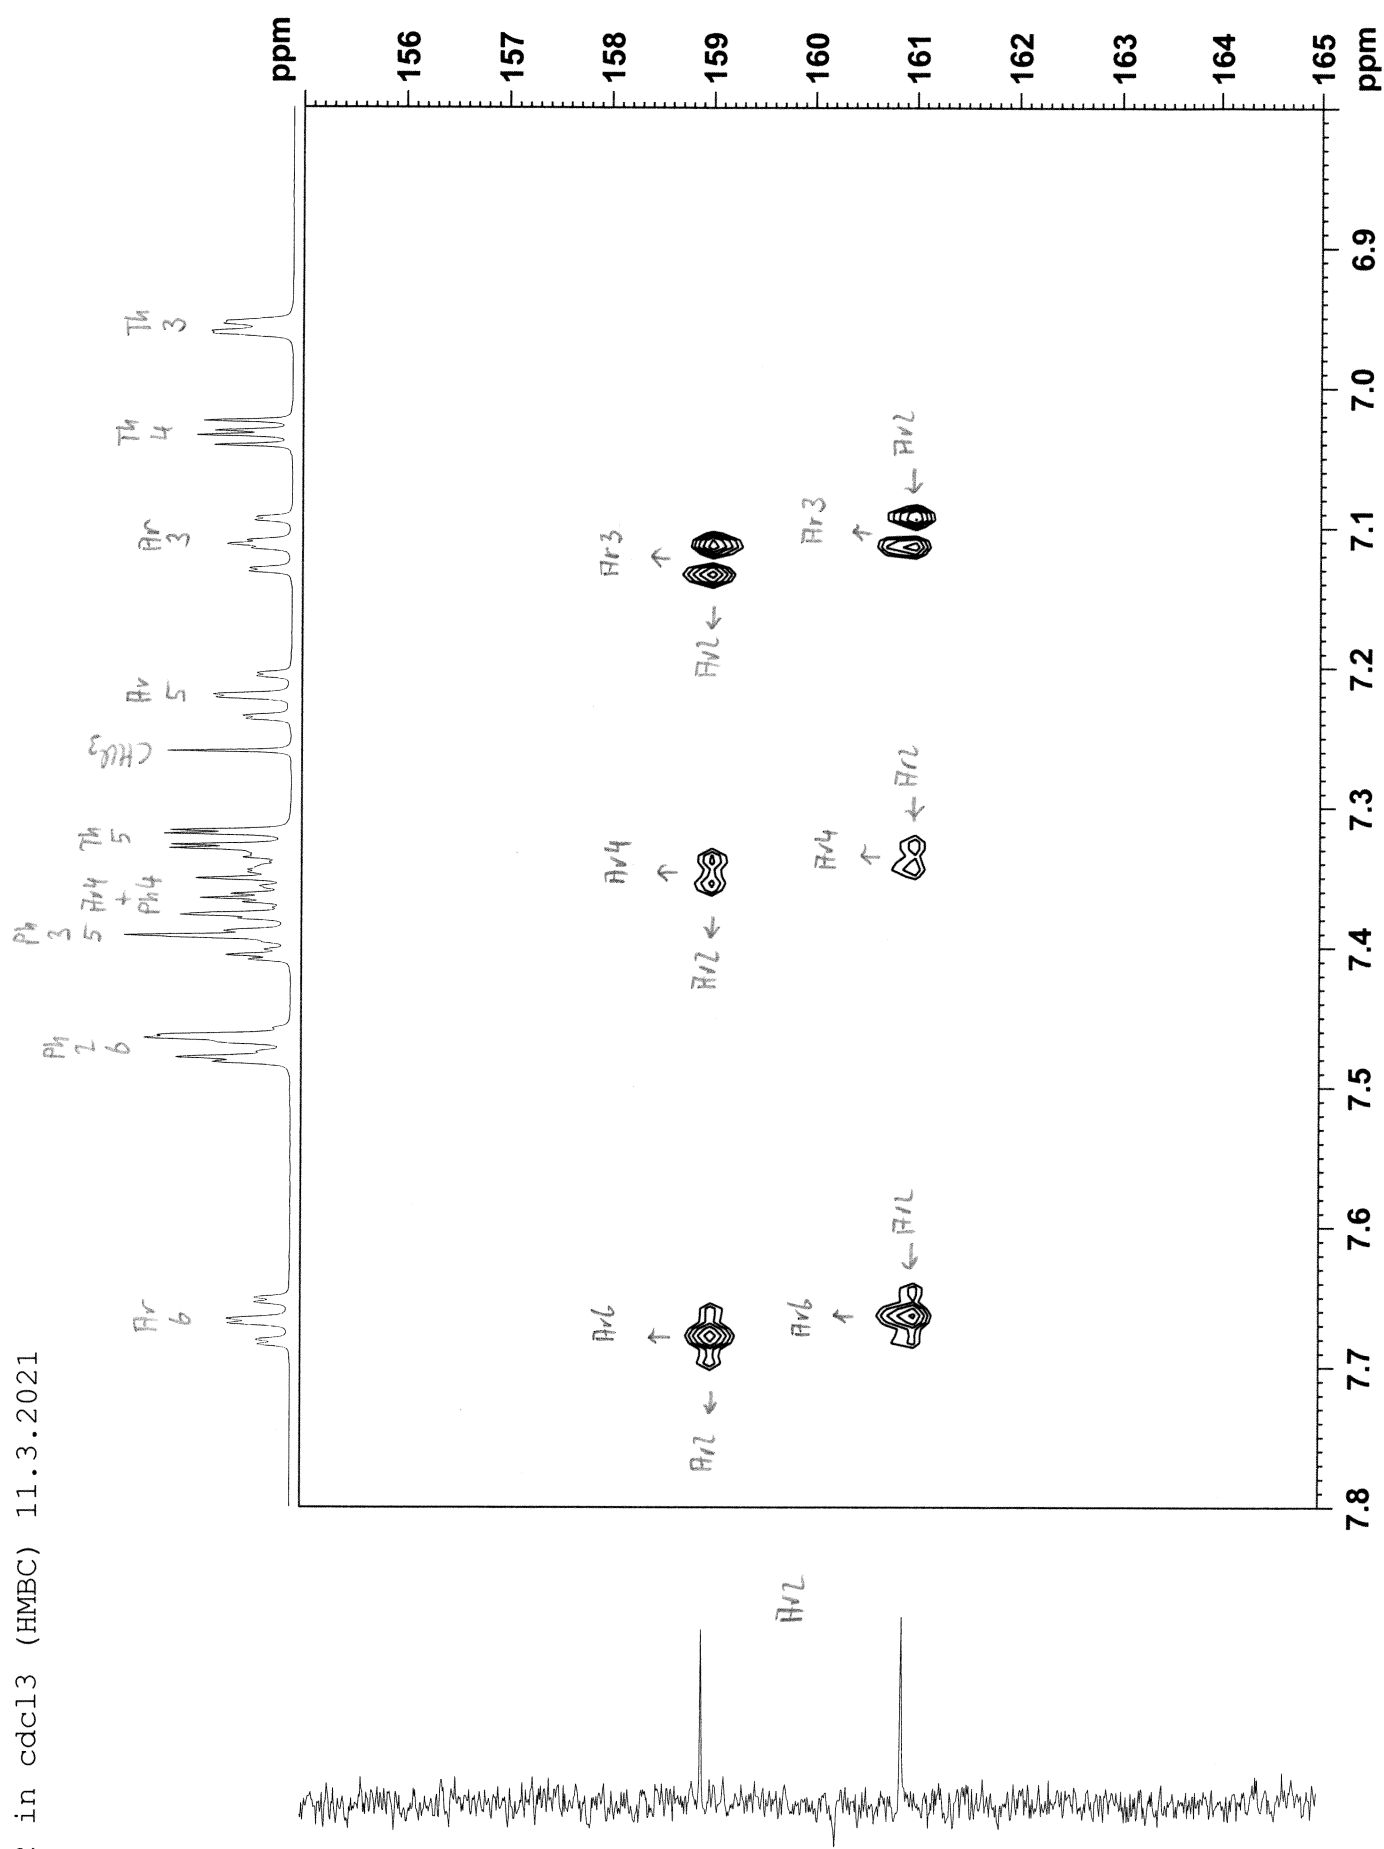

PN020p2 in cdc13 (HMBC) 11.3.2021

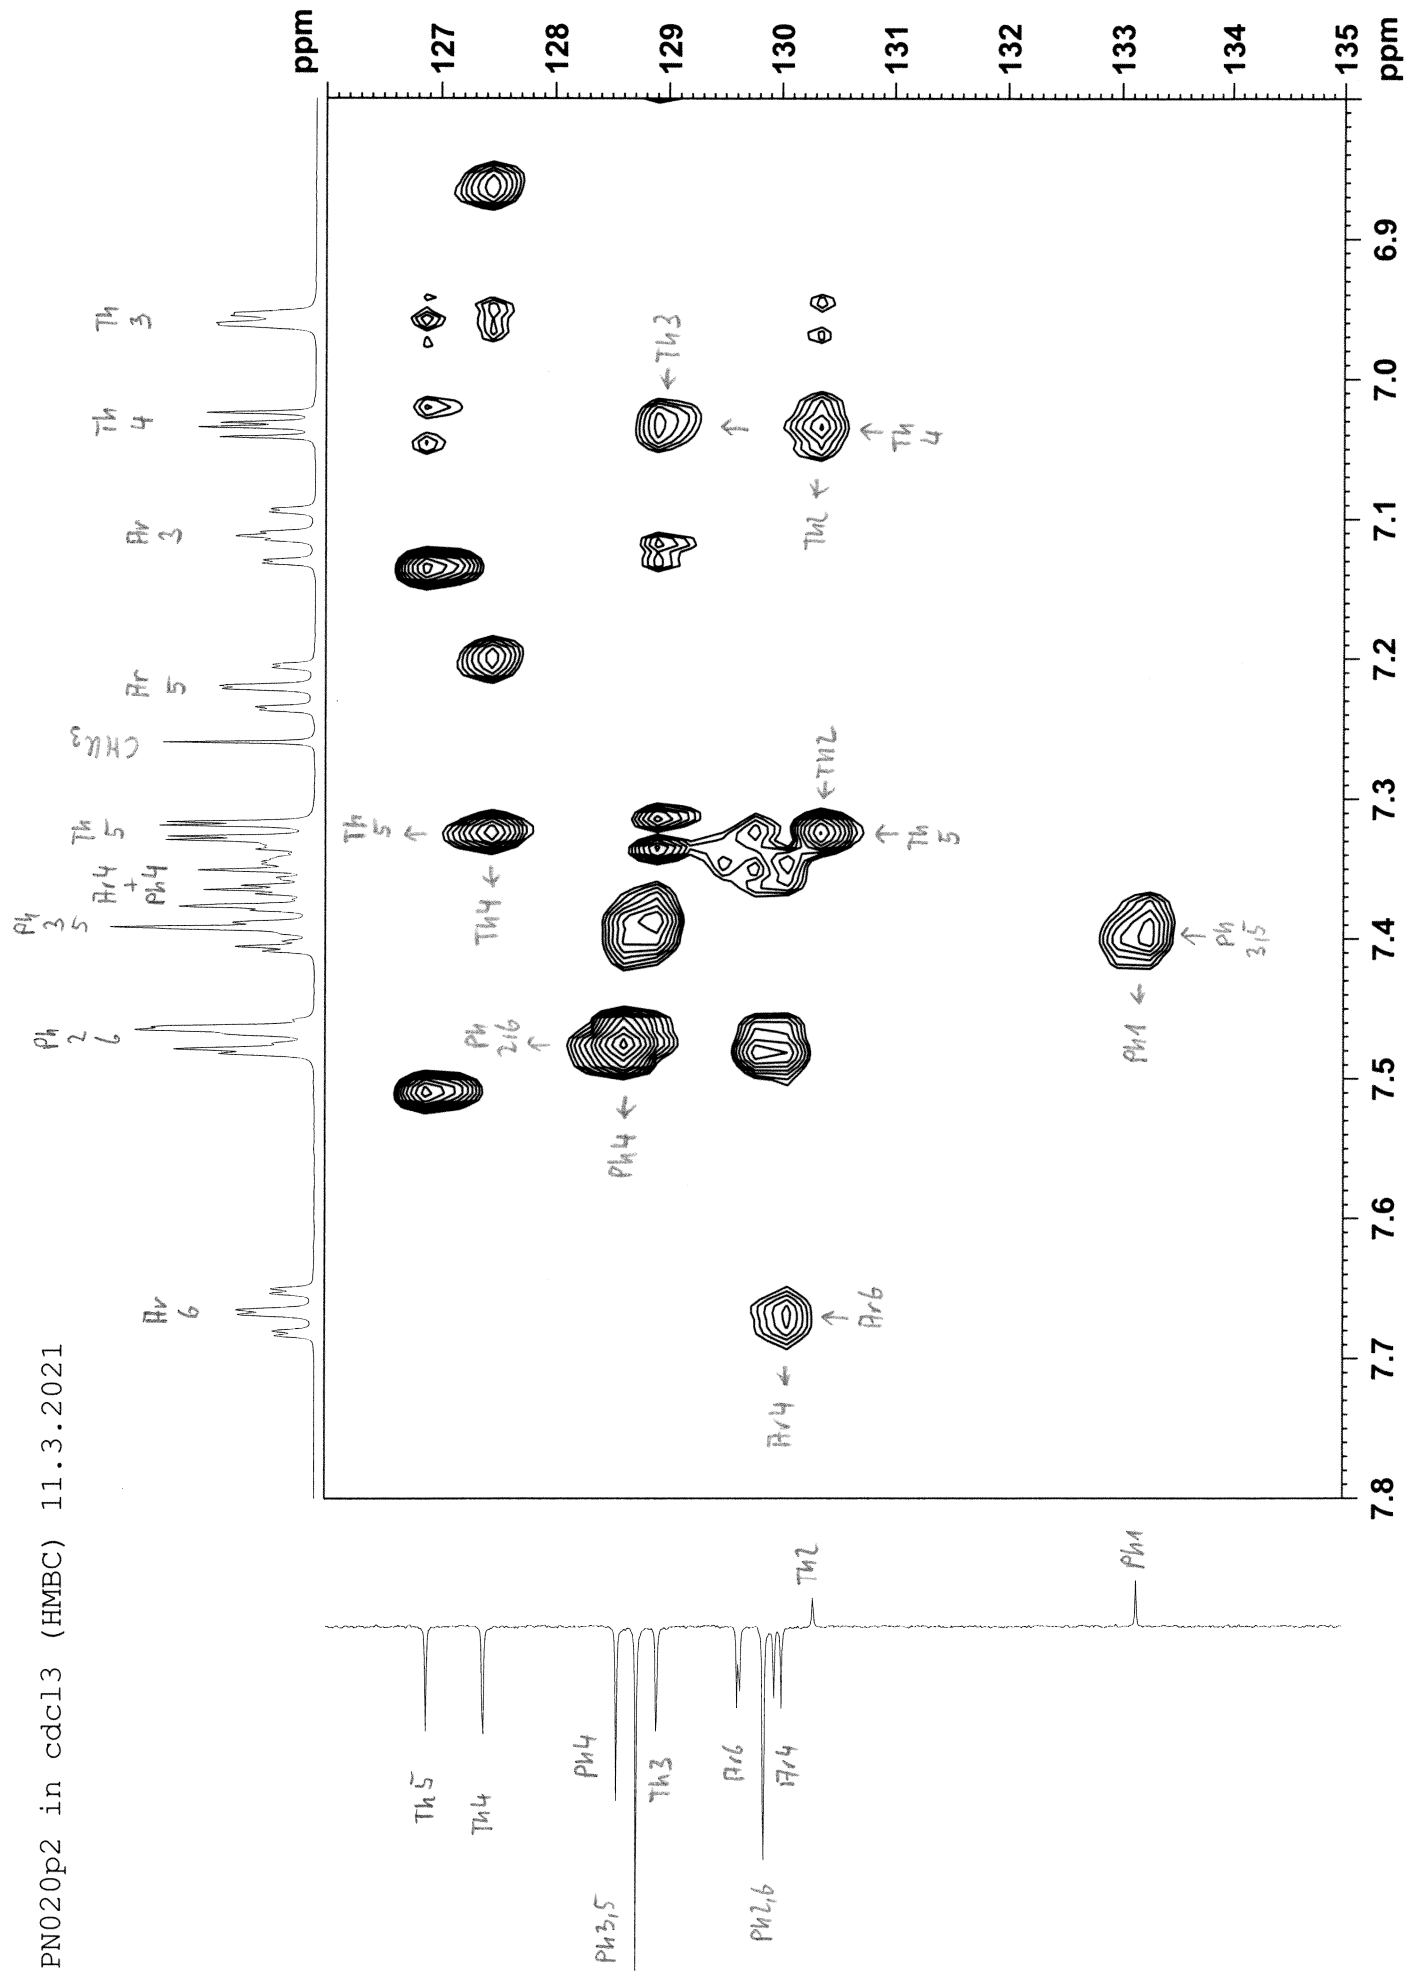

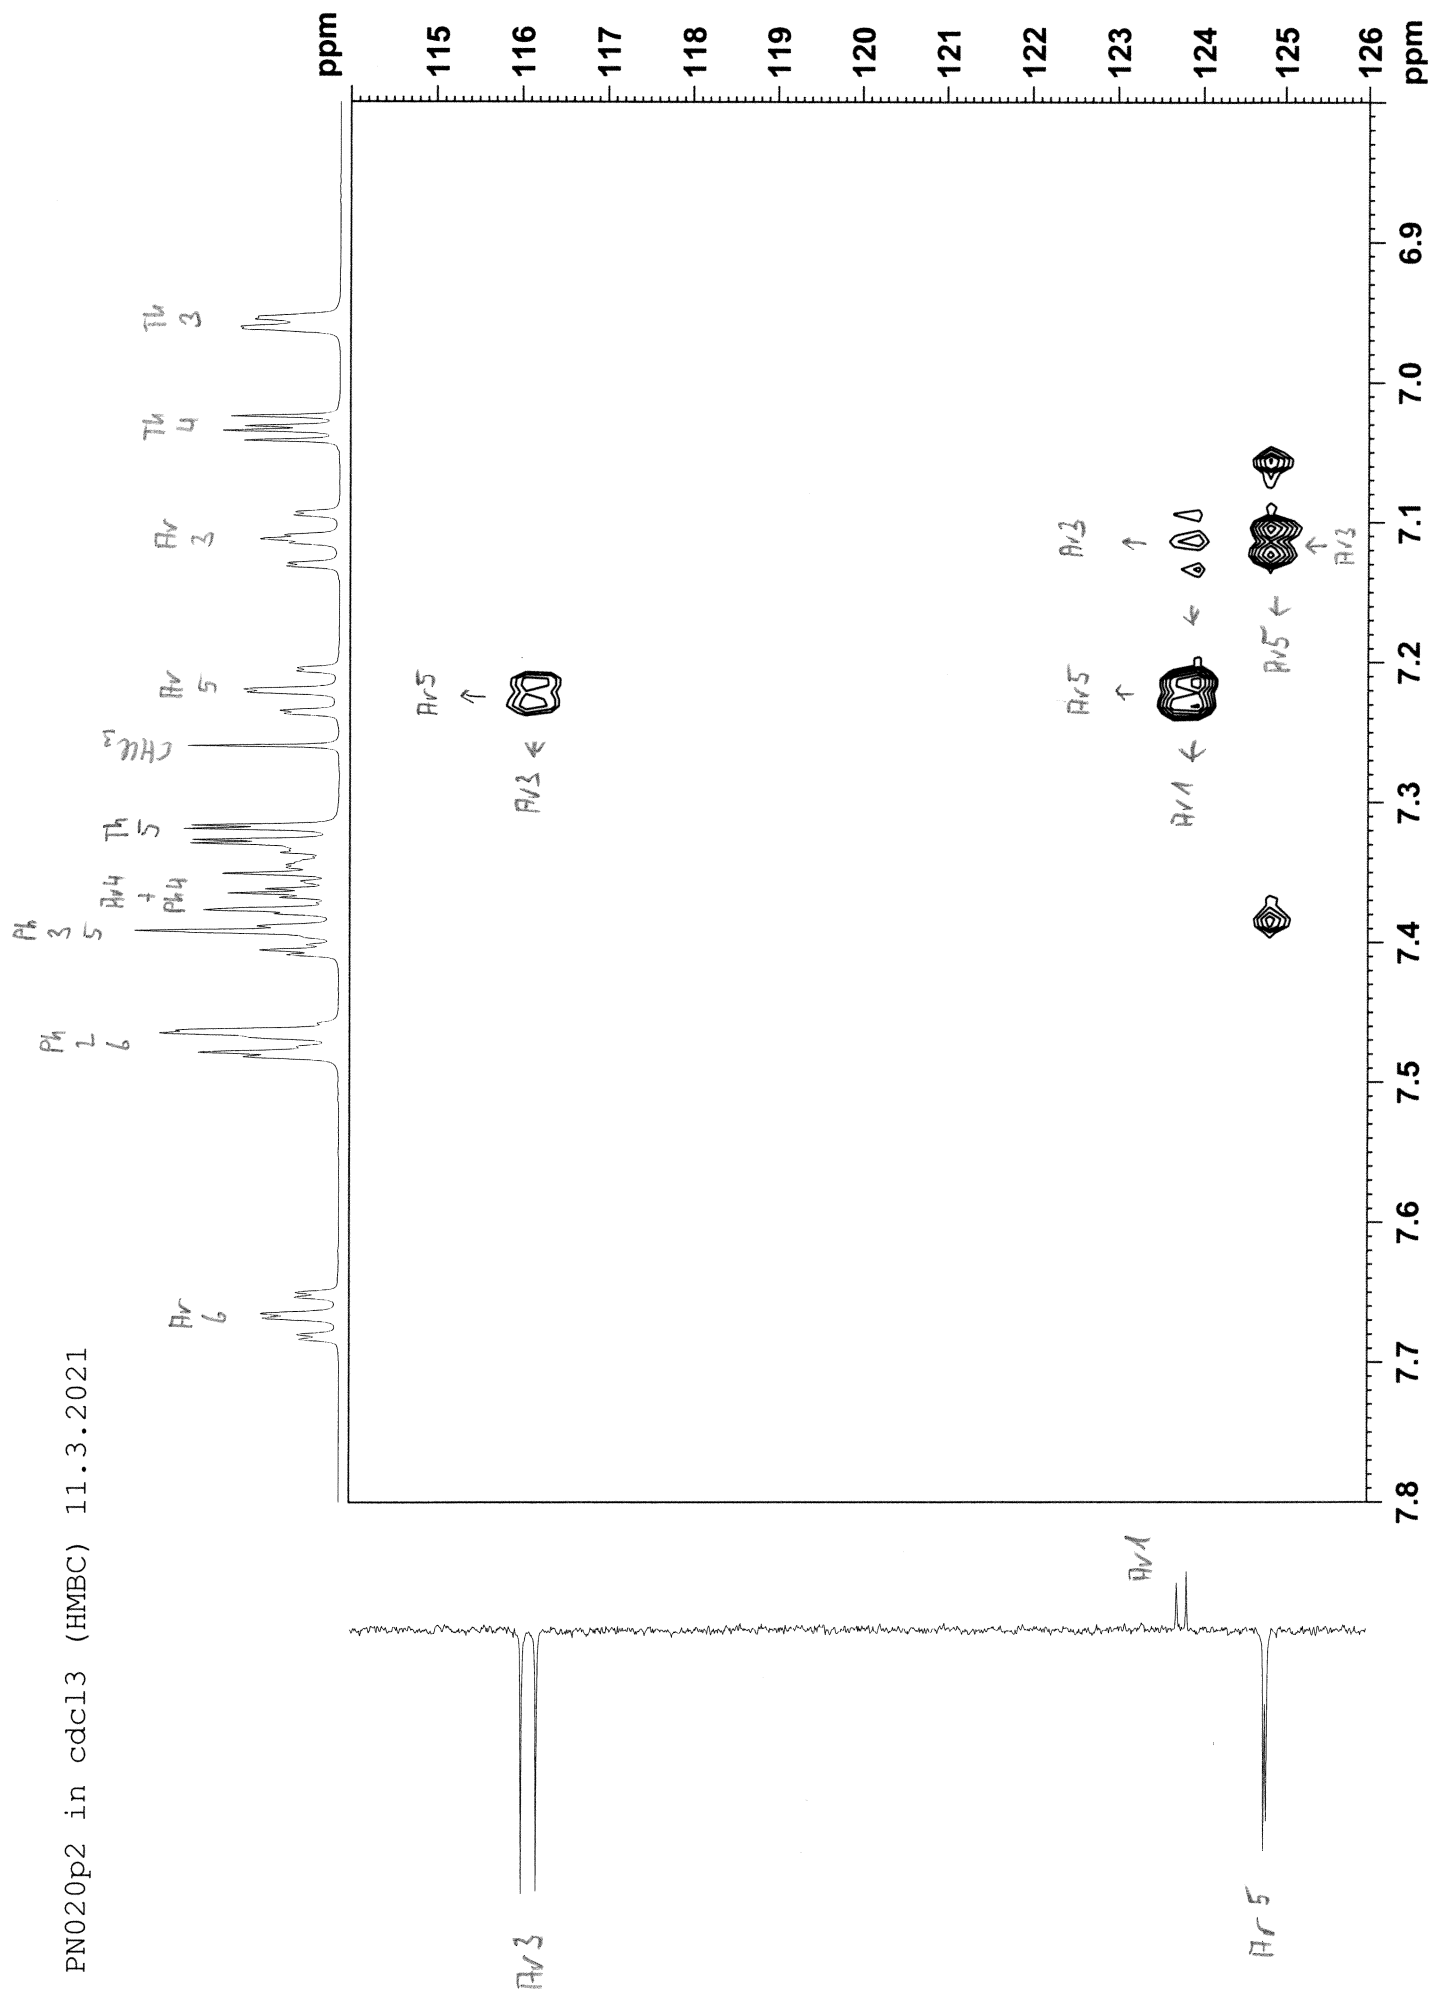

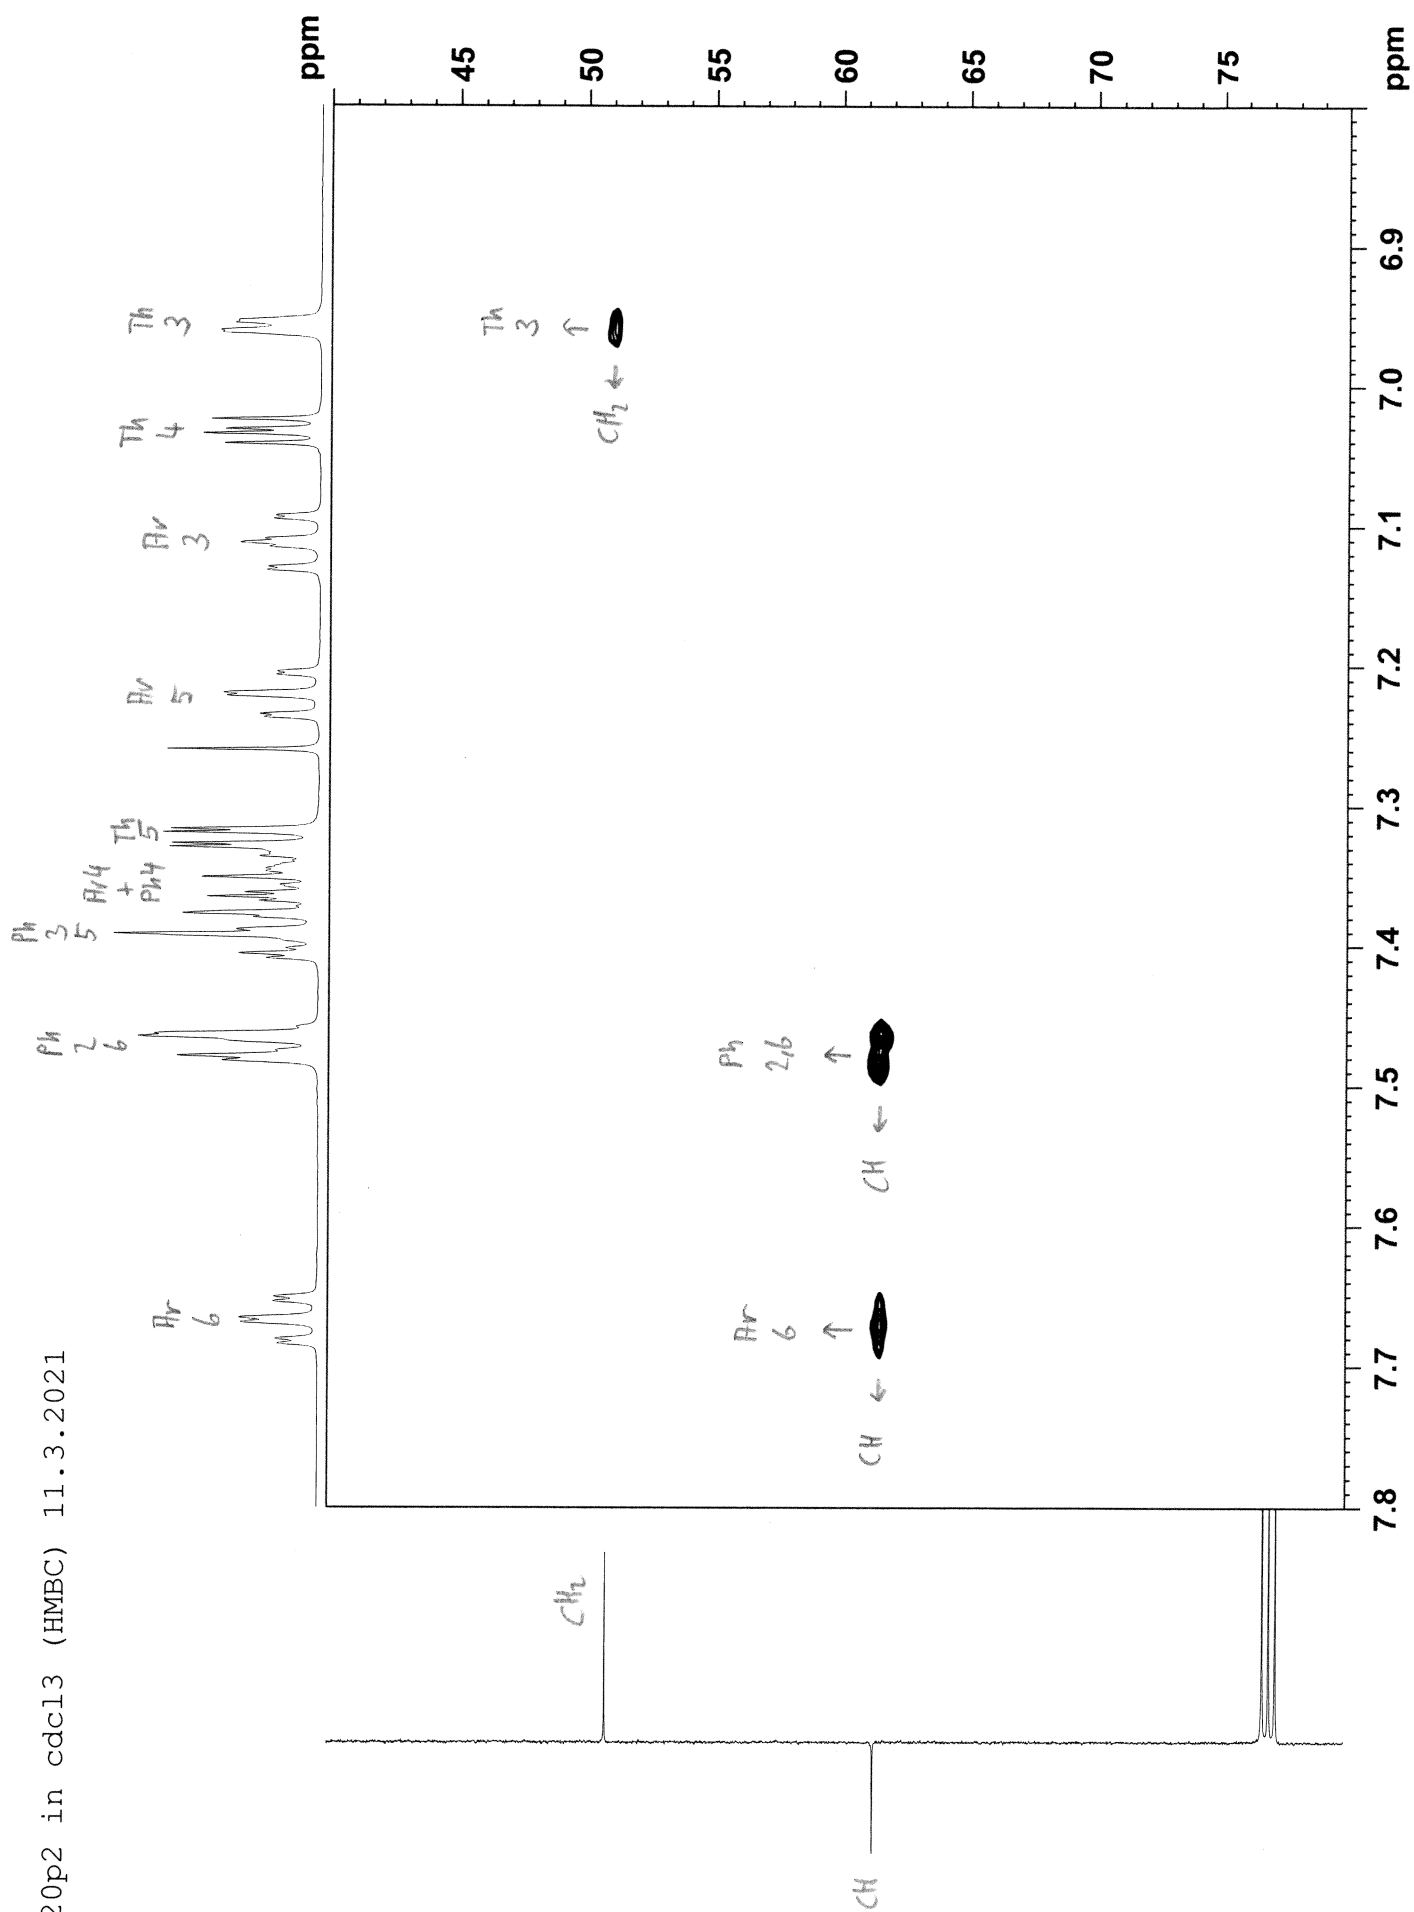

PN020p2 in cdcl3 (HMBC) 11.3.2021

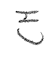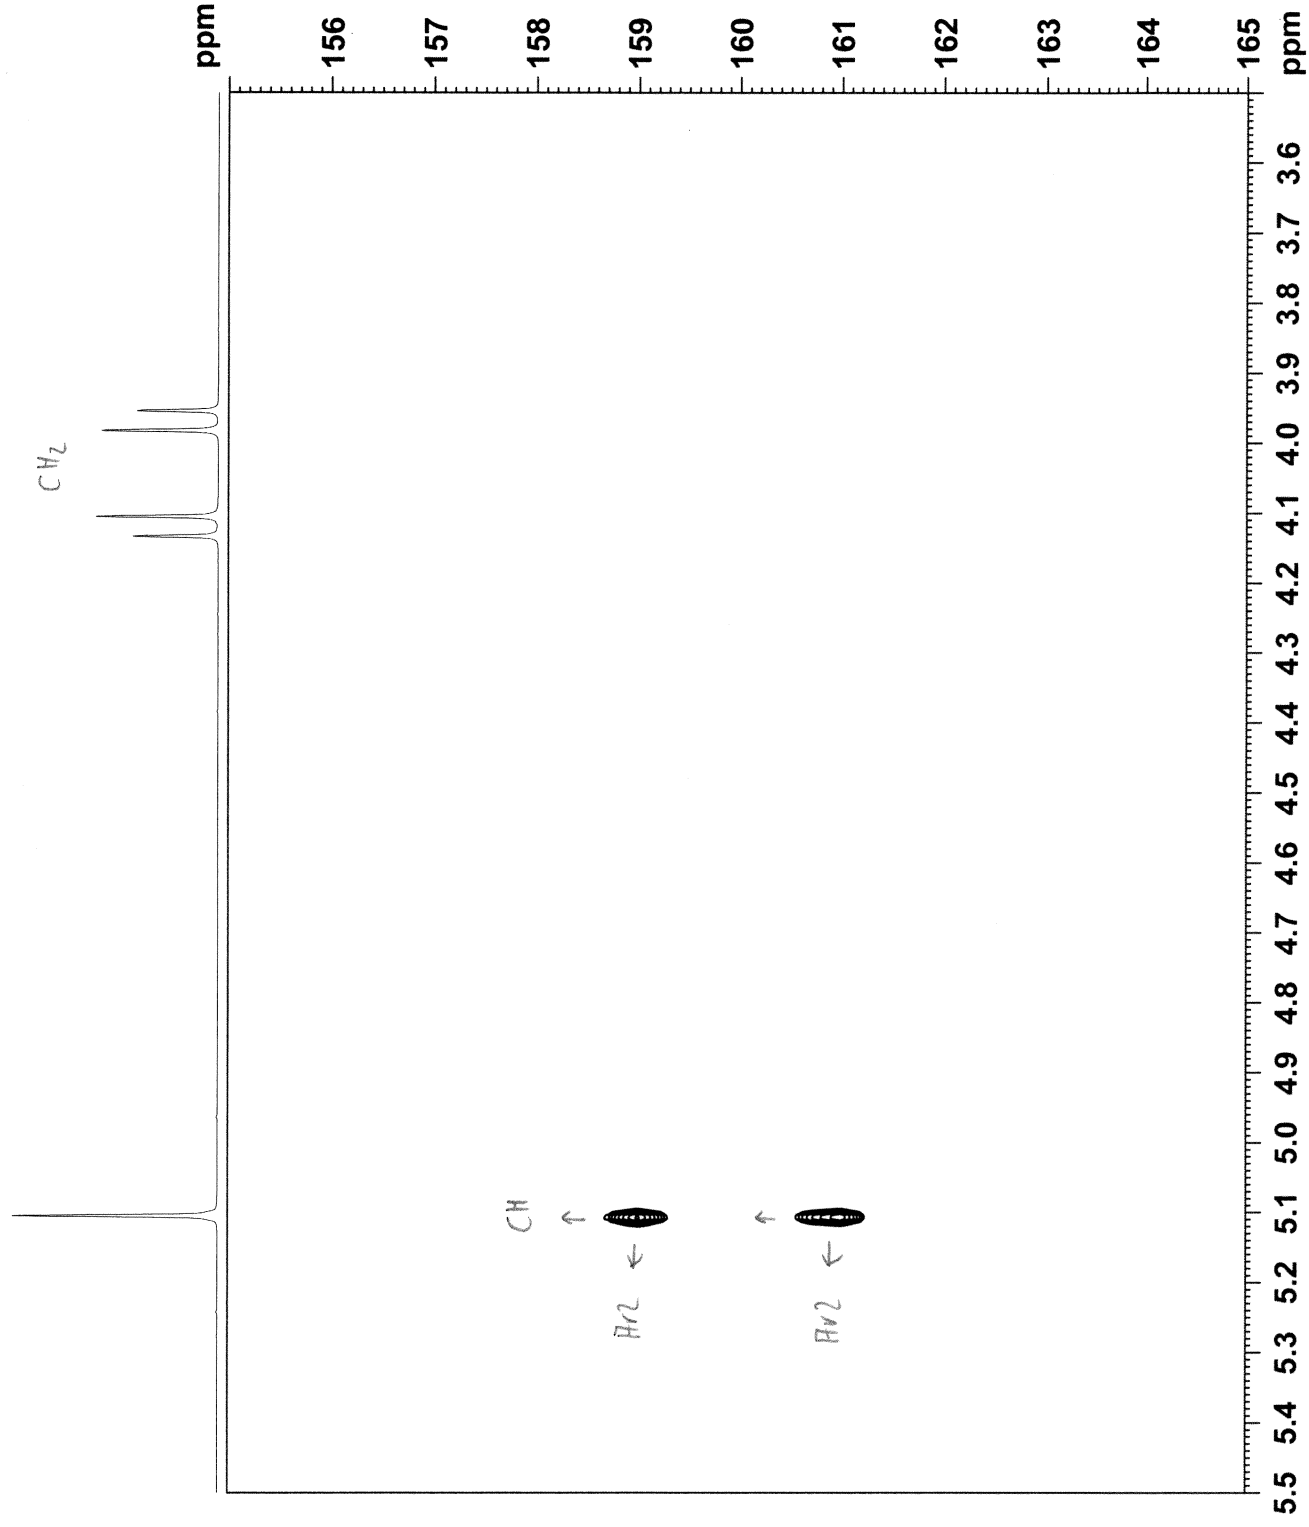

7v2



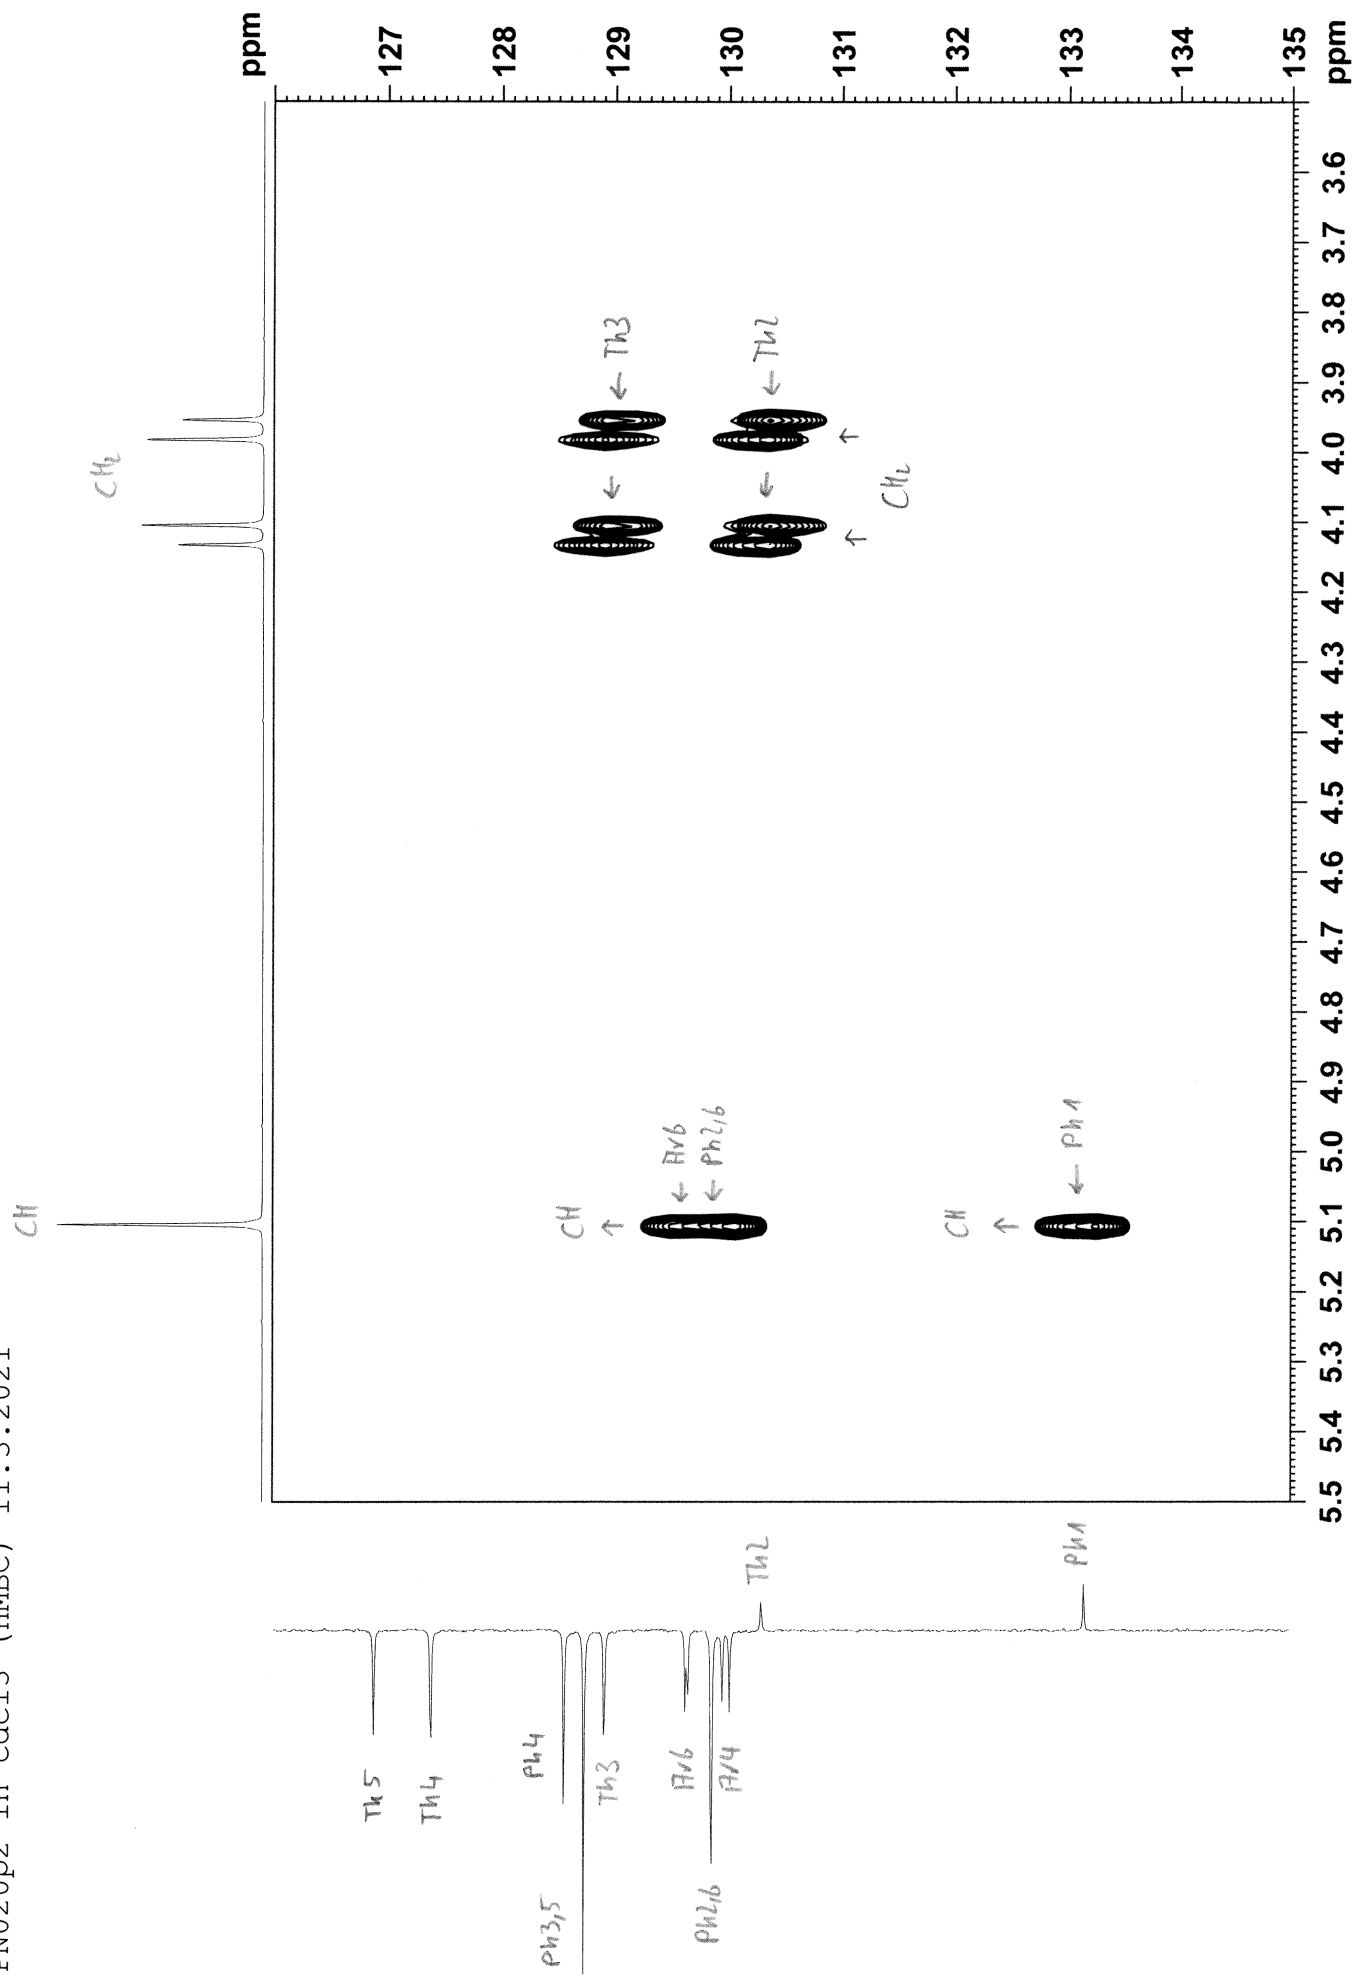

PN020p2 in cdcl3 (HMBC) 11.3.2021

CH

CH<sub>2</sub>

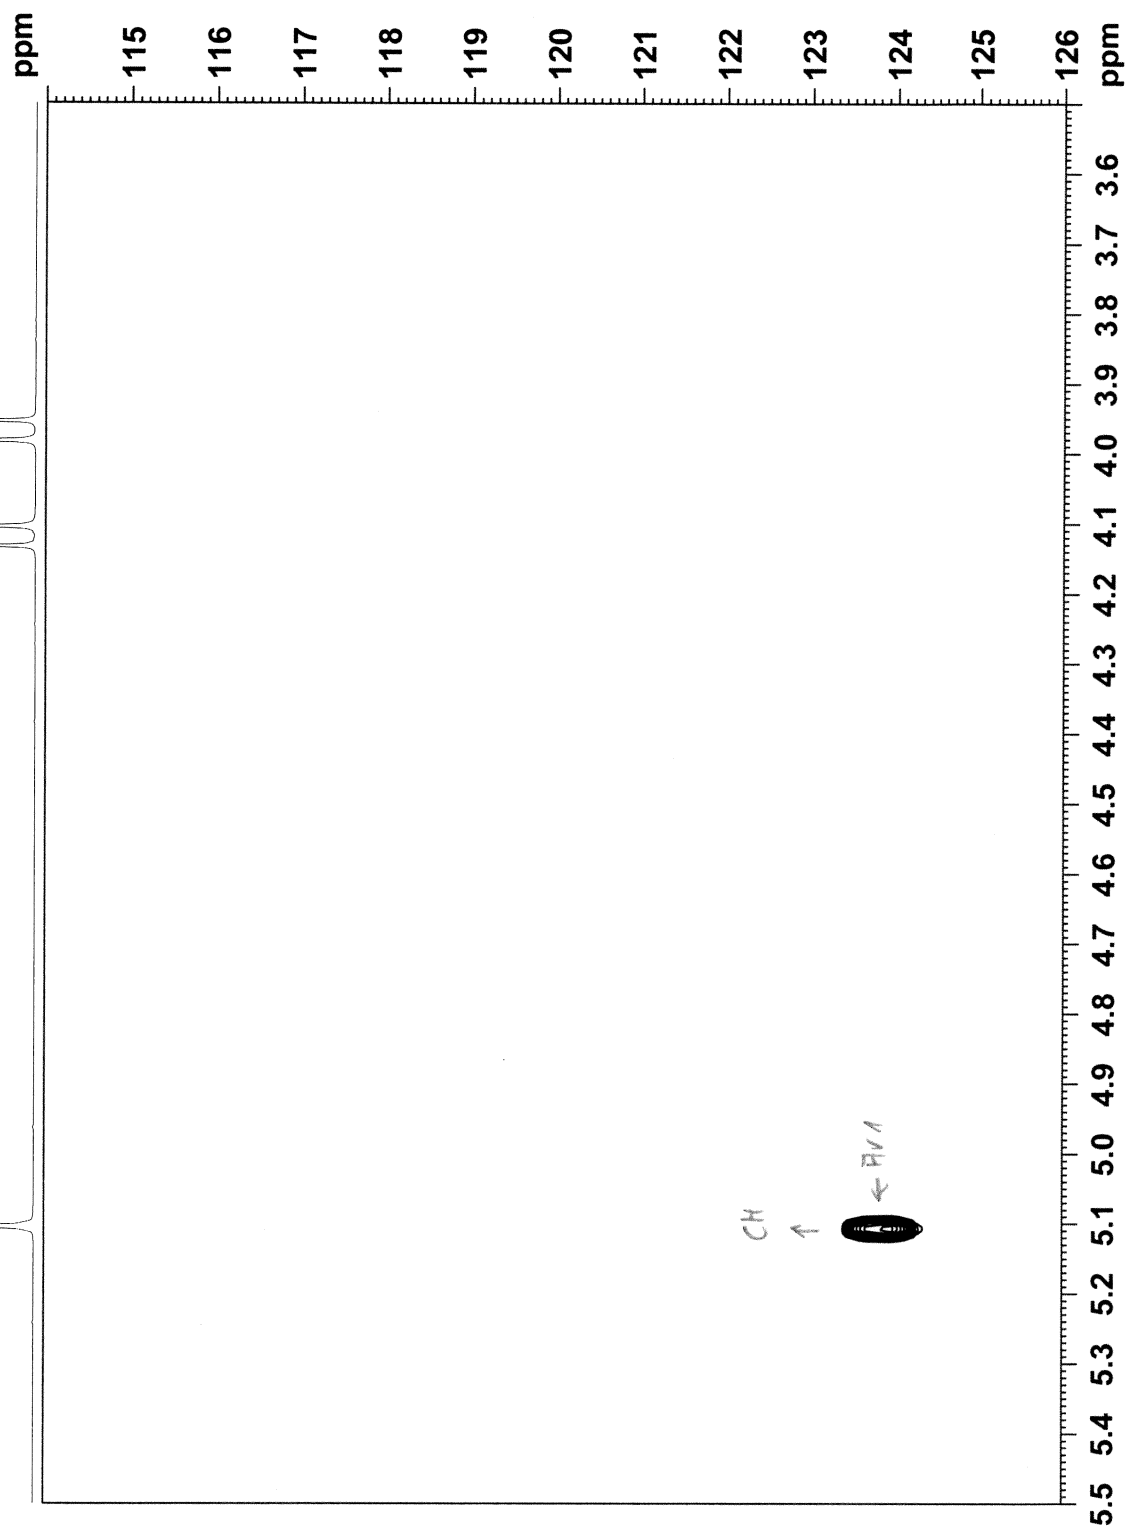

R1 3

R1 5

PN020p2 in cdcl3 (HMBC) 11.3.2021

CH

CH<sub>2</sub>

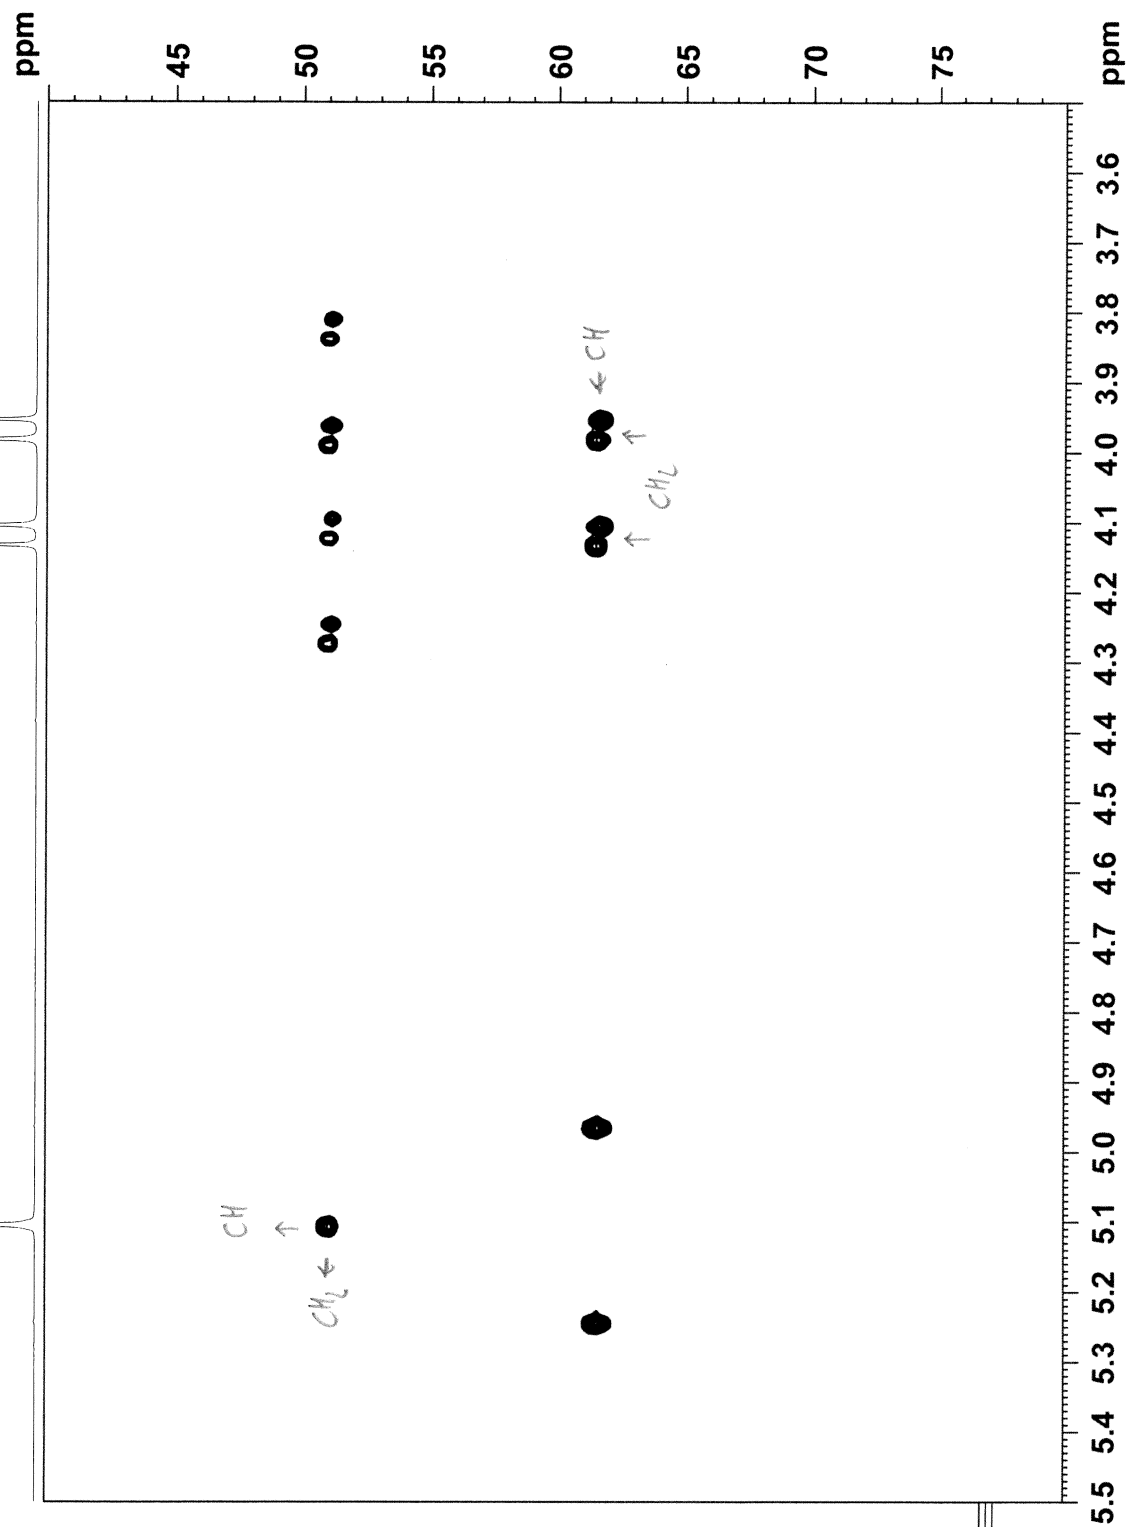

**Figure S3c.** NMR spectra of compound 7a.

PN020-3 in cdcl3 (Proton) 29.7.2020

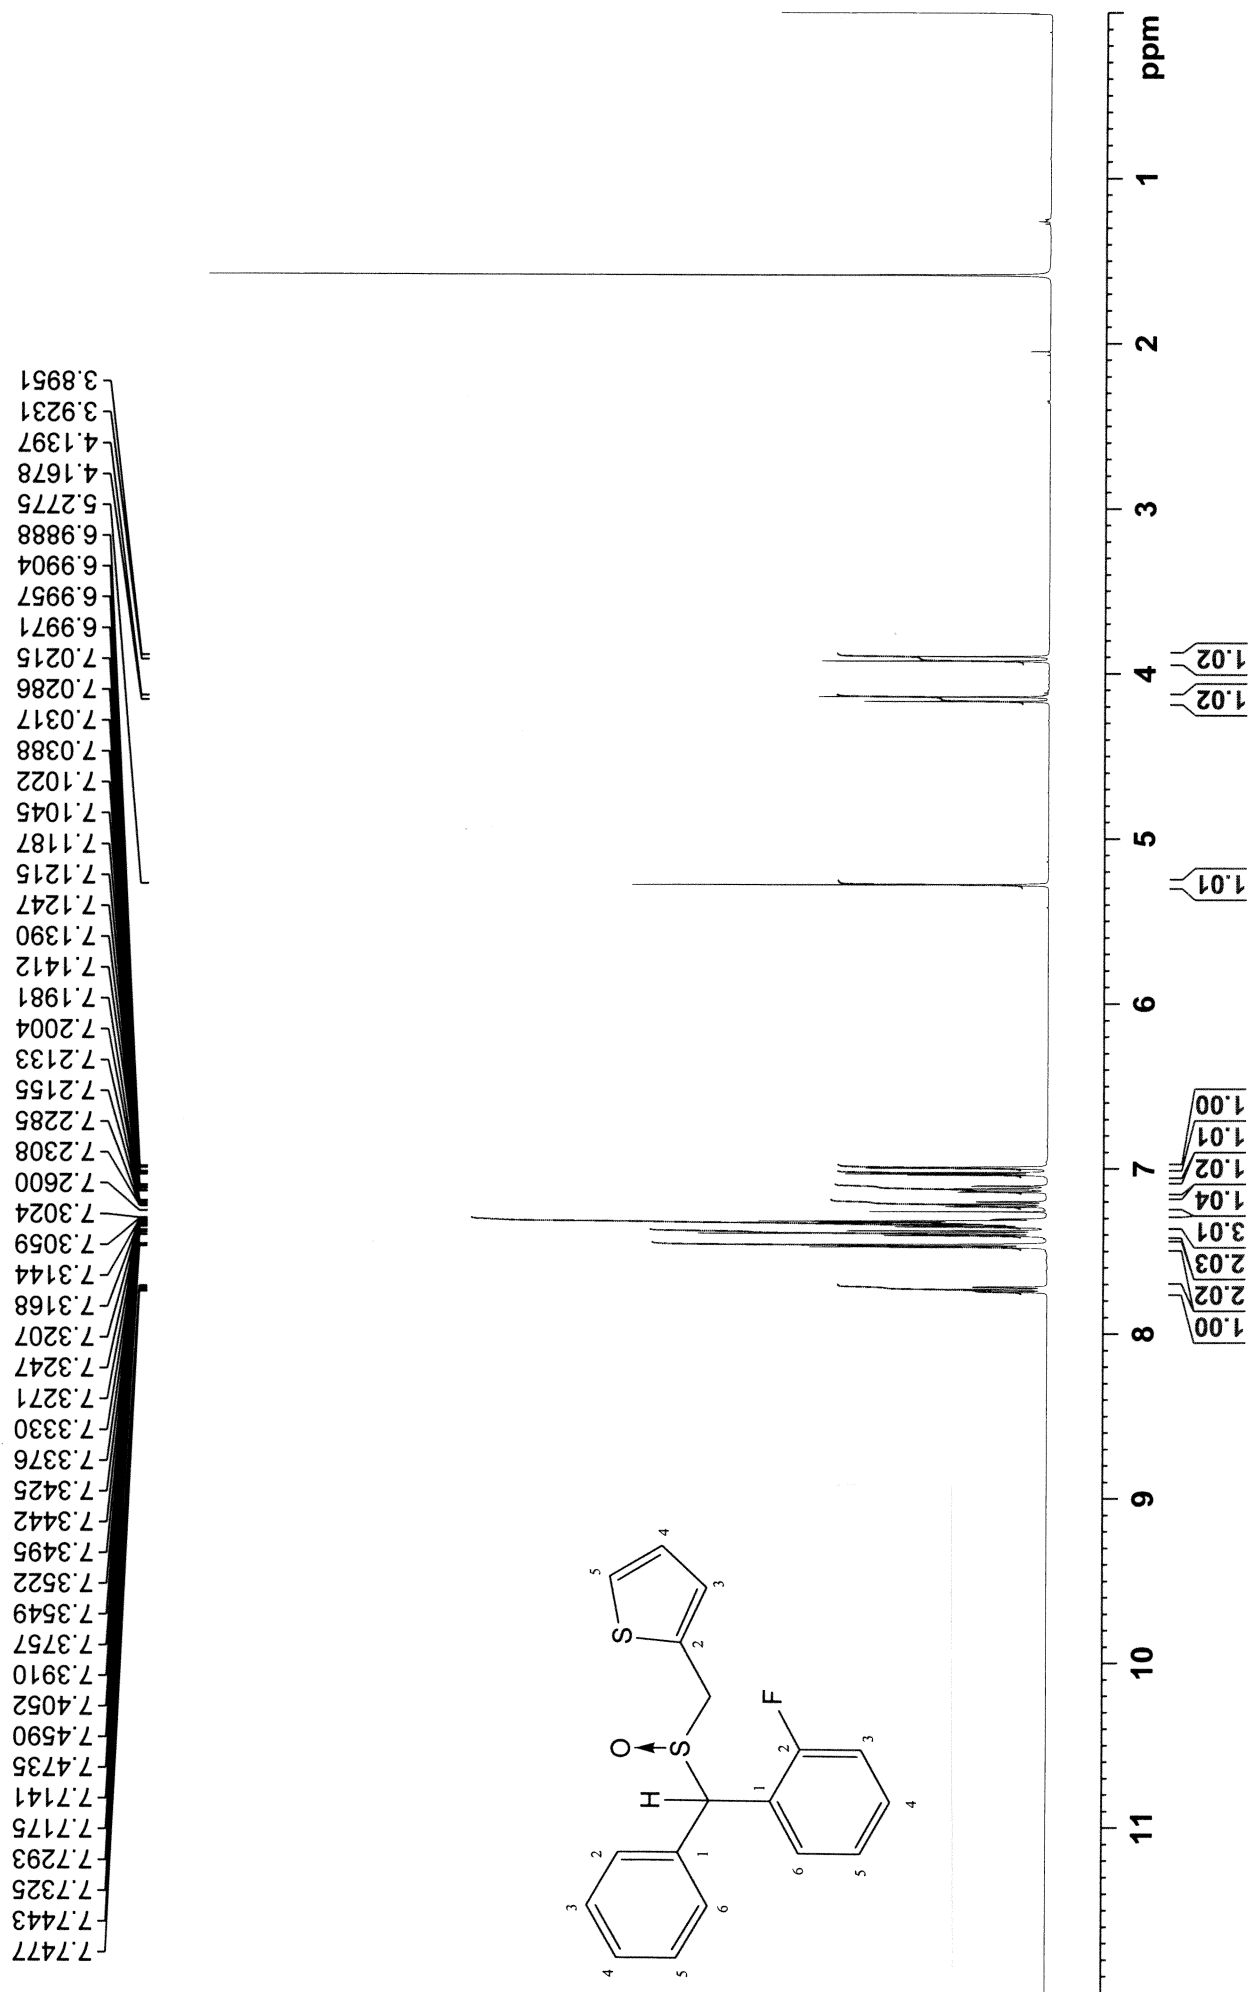

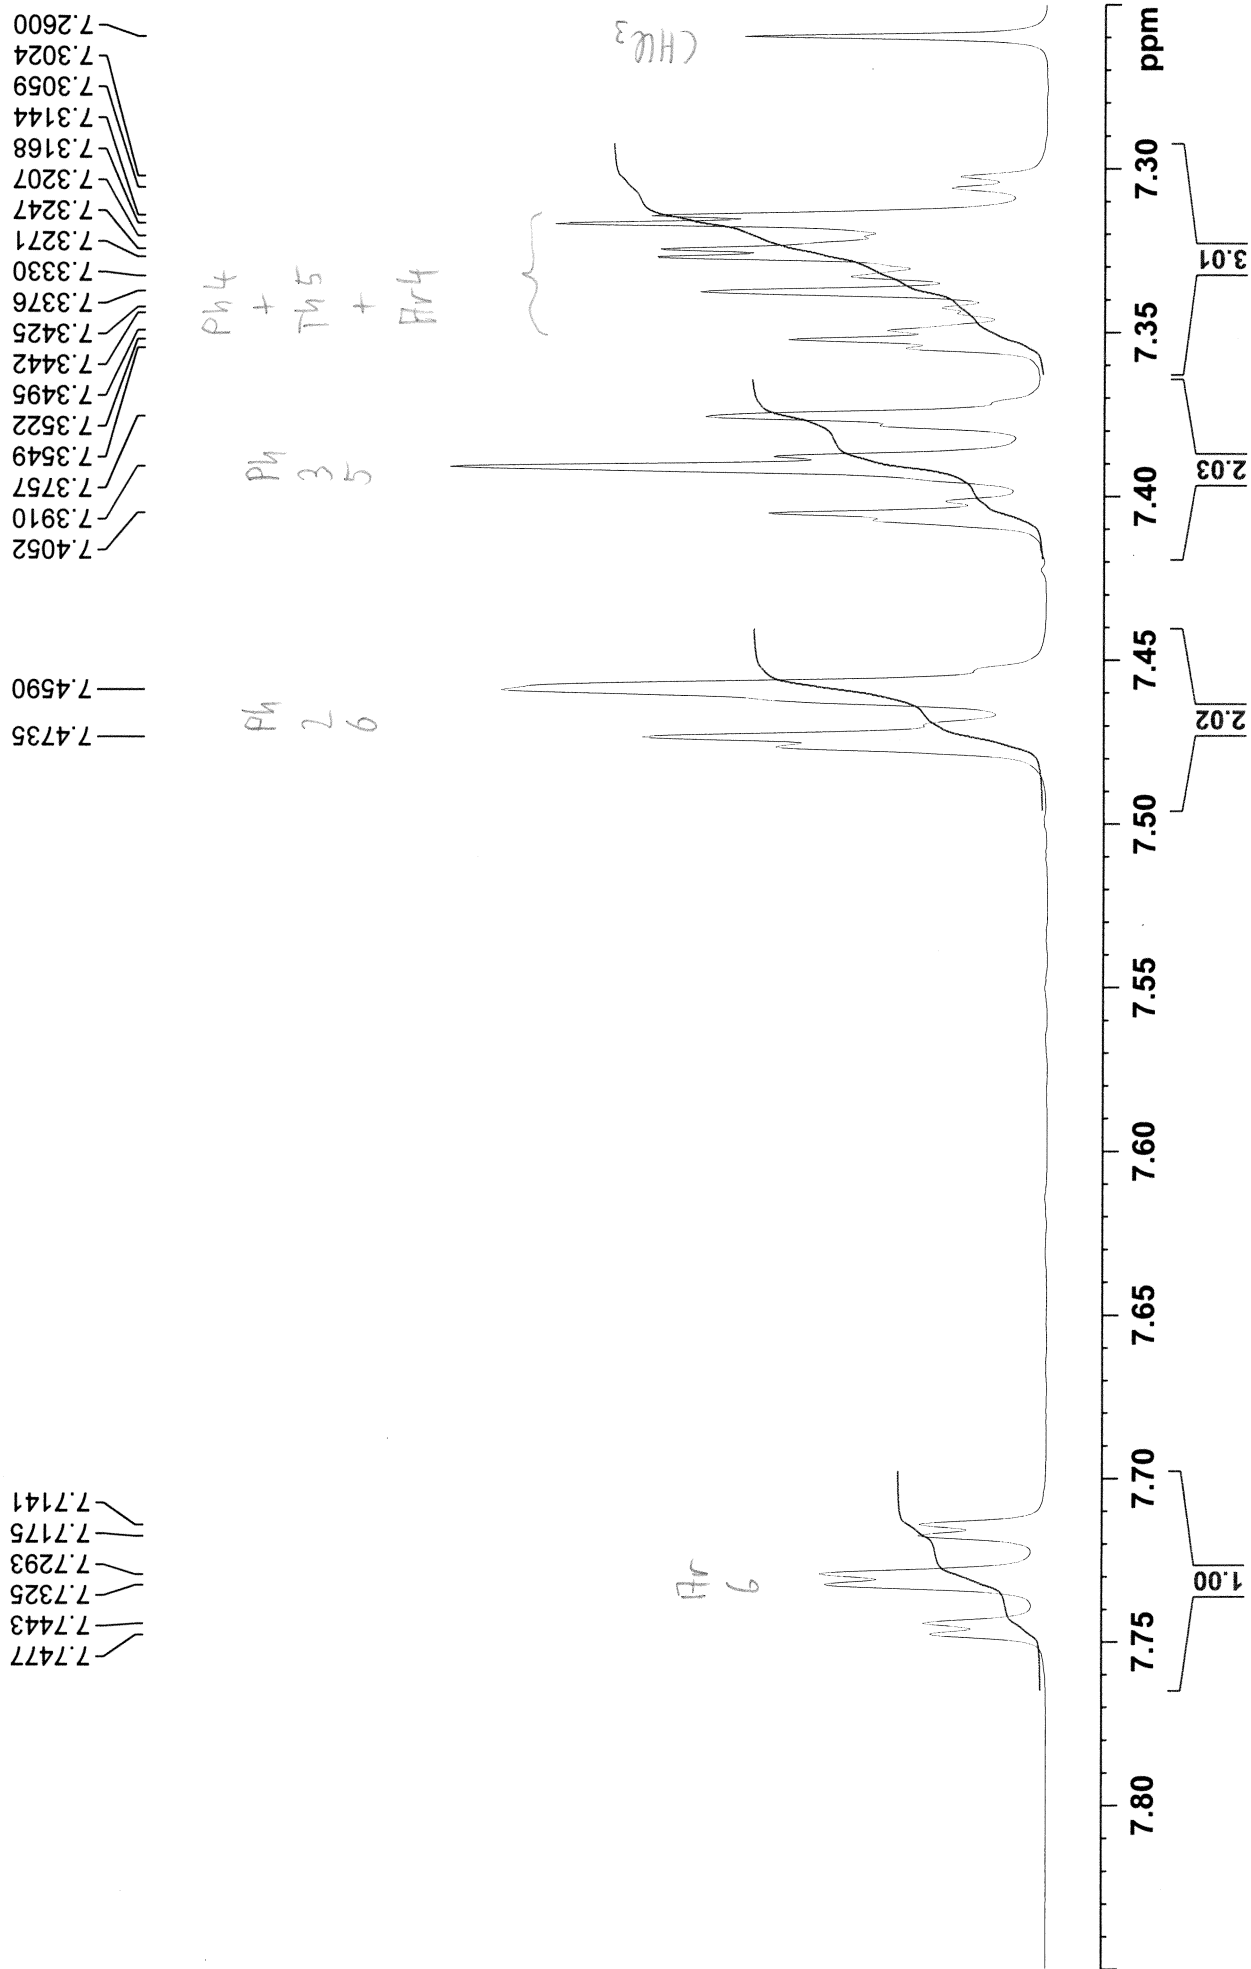

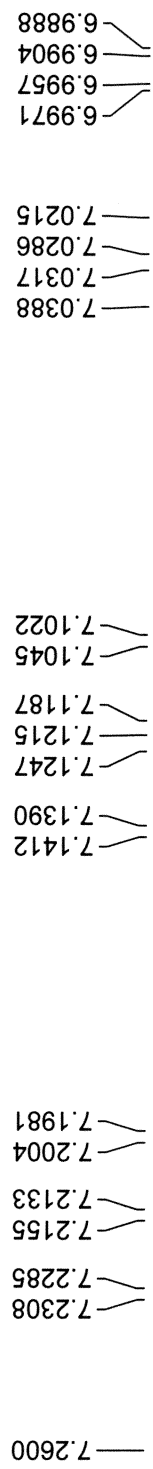

4H  
3H

Ar  
3

5H

CH<sub>3</sub>

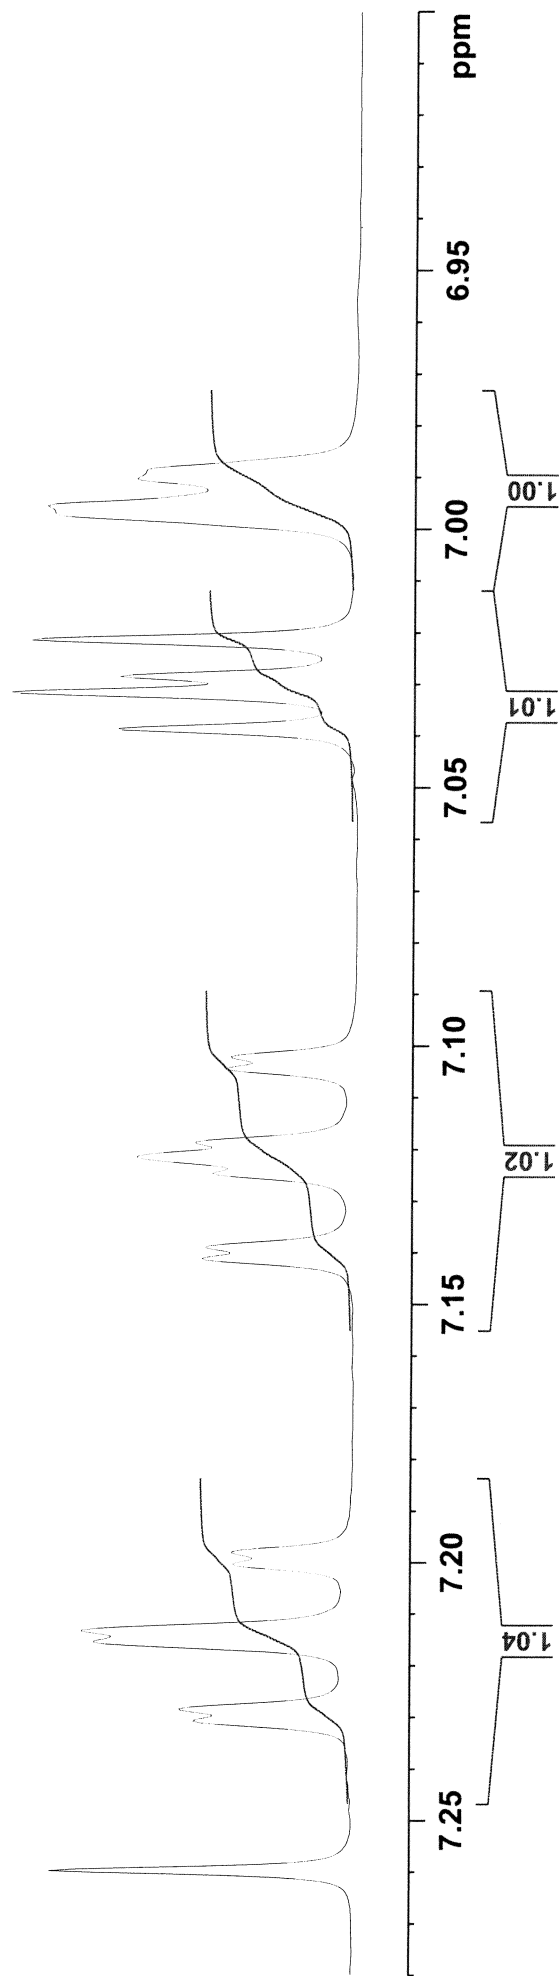

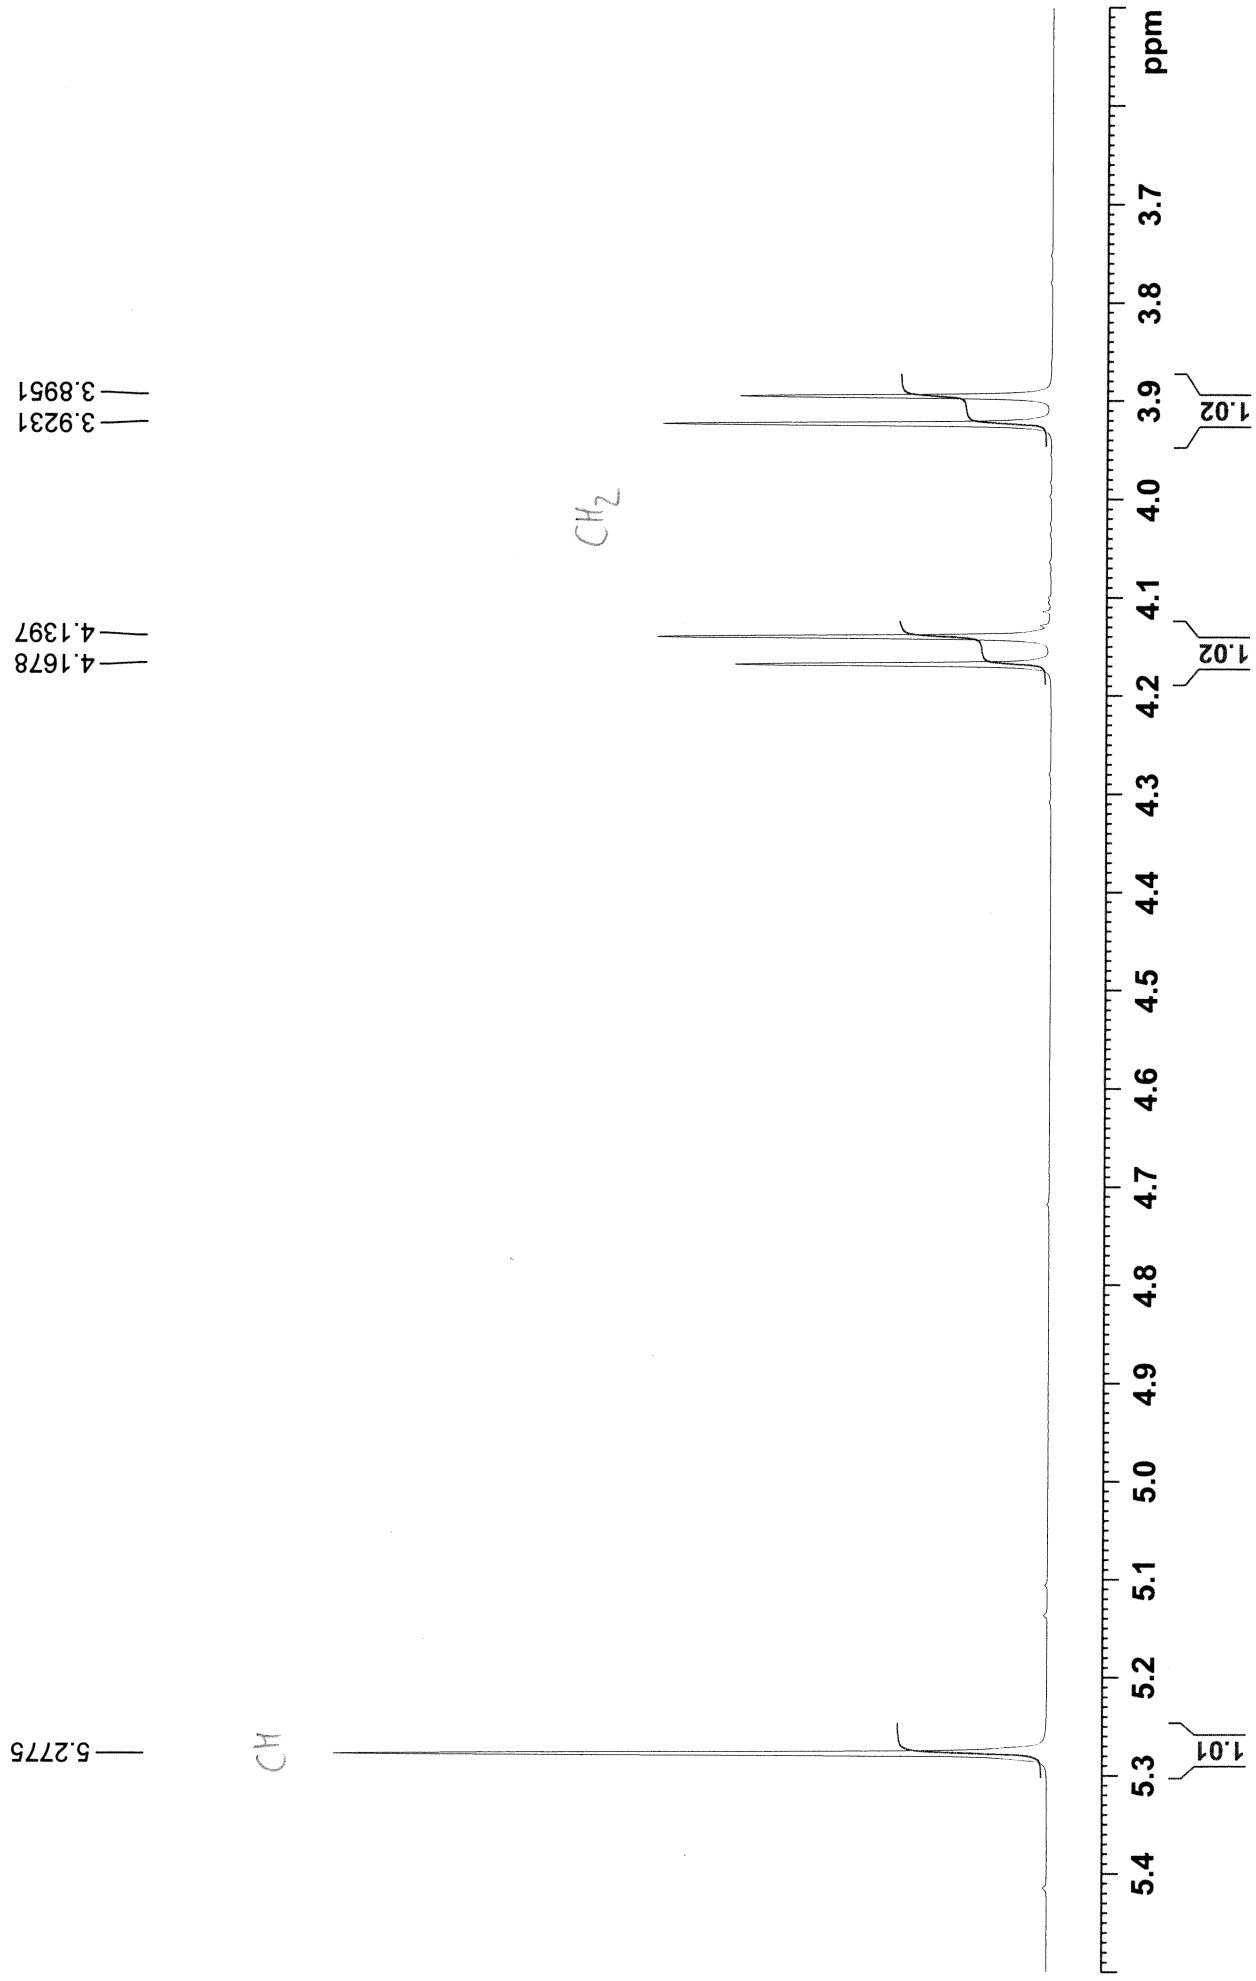

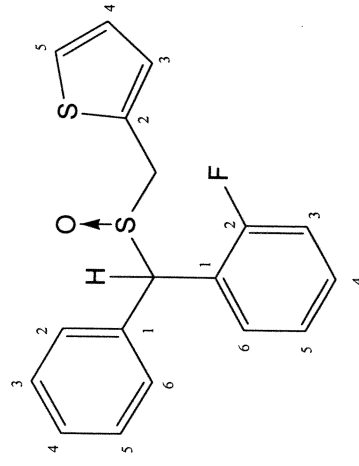

161.8235  
159.8577  
135.4692  
130.4969  
130.4756  
130.3962  
129.9294  
129.8635  
129.2388  
129.0644  
128.8071  
128.4563  
127.4003  
126.9126  
124.5679  
124.5401  
121.9861  
121.8761  
115.7636  
115.5873

77.0000  
61.3056  
50.8214

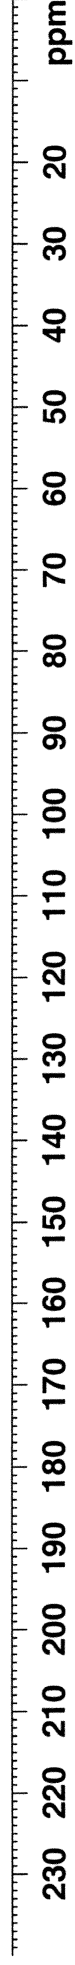



161.8235 —  
159.8577 —

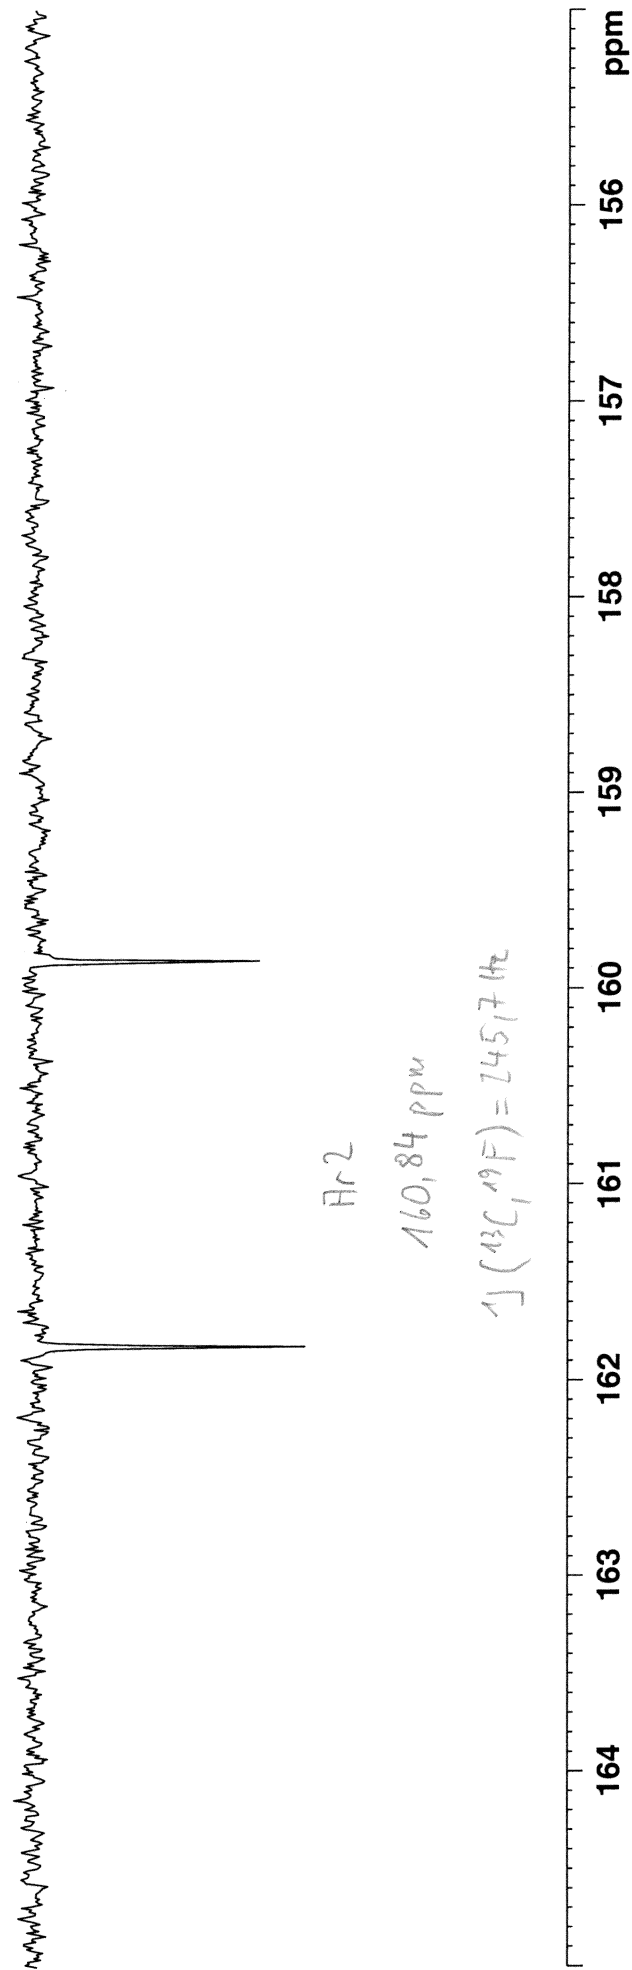

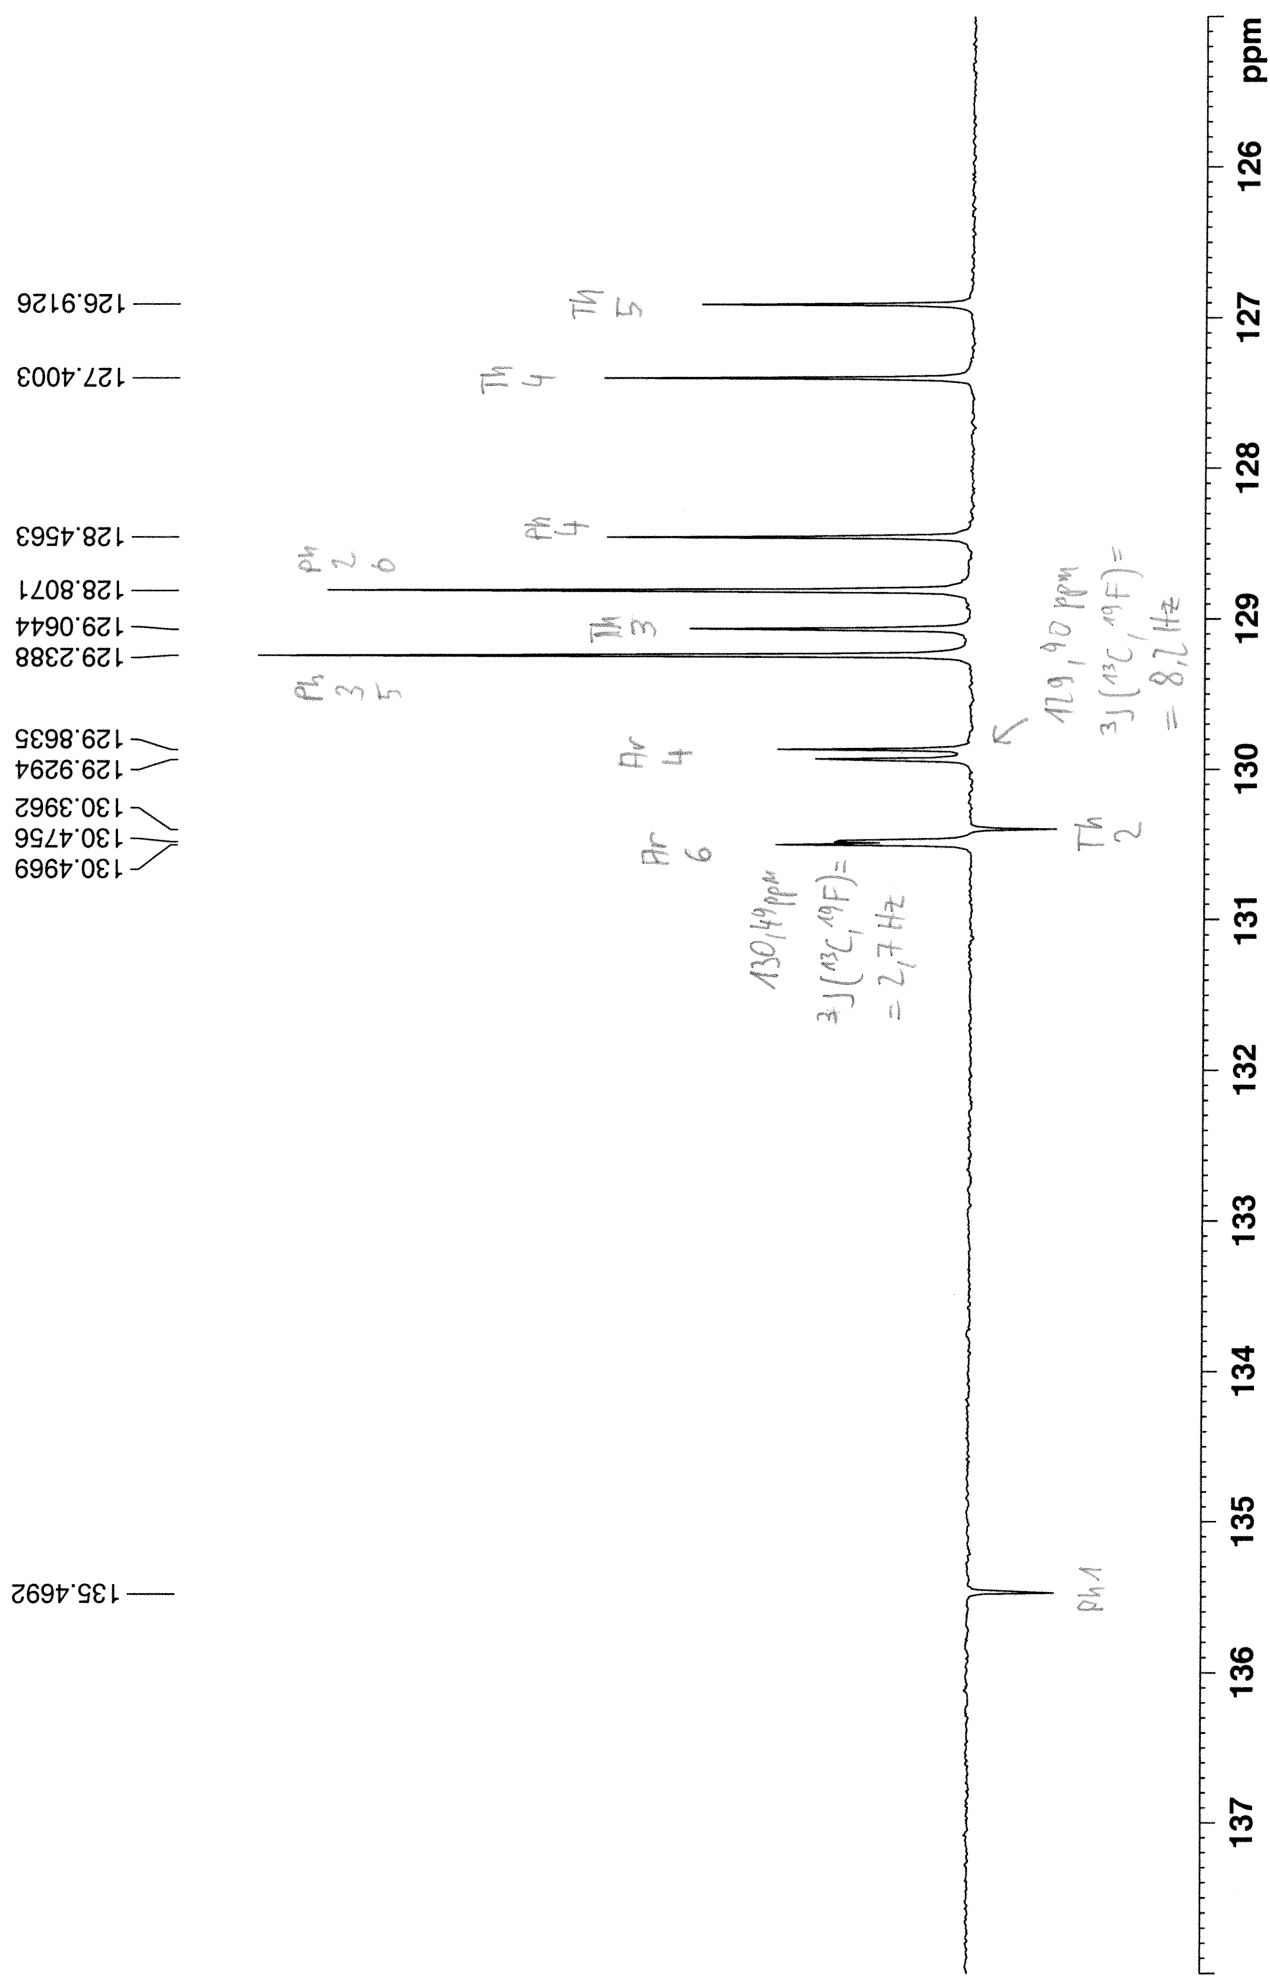

124.5679  
124.5401

121.9861  
121.8761

115.7636  
115.5873

Ar 5

124.55 ppm  
 $4J(^{13}\text{C}, ^{19}\text{F}) =$   
 $= 3.5 \text{ Hz}$

Ar 3

115.68 ppm  
 $2J(^{13}\text{C}, ^{19}\text{F}) =$   
 $= 22.0 \text{ Hz}$

Ar 1

121.93 ppm  
 $2J(^{13}\text{C}, ^{19}\text{F}) = 13.8 \text{ Hz}$

125 124 123 122 121 120 119 118 117 116 115 ppm

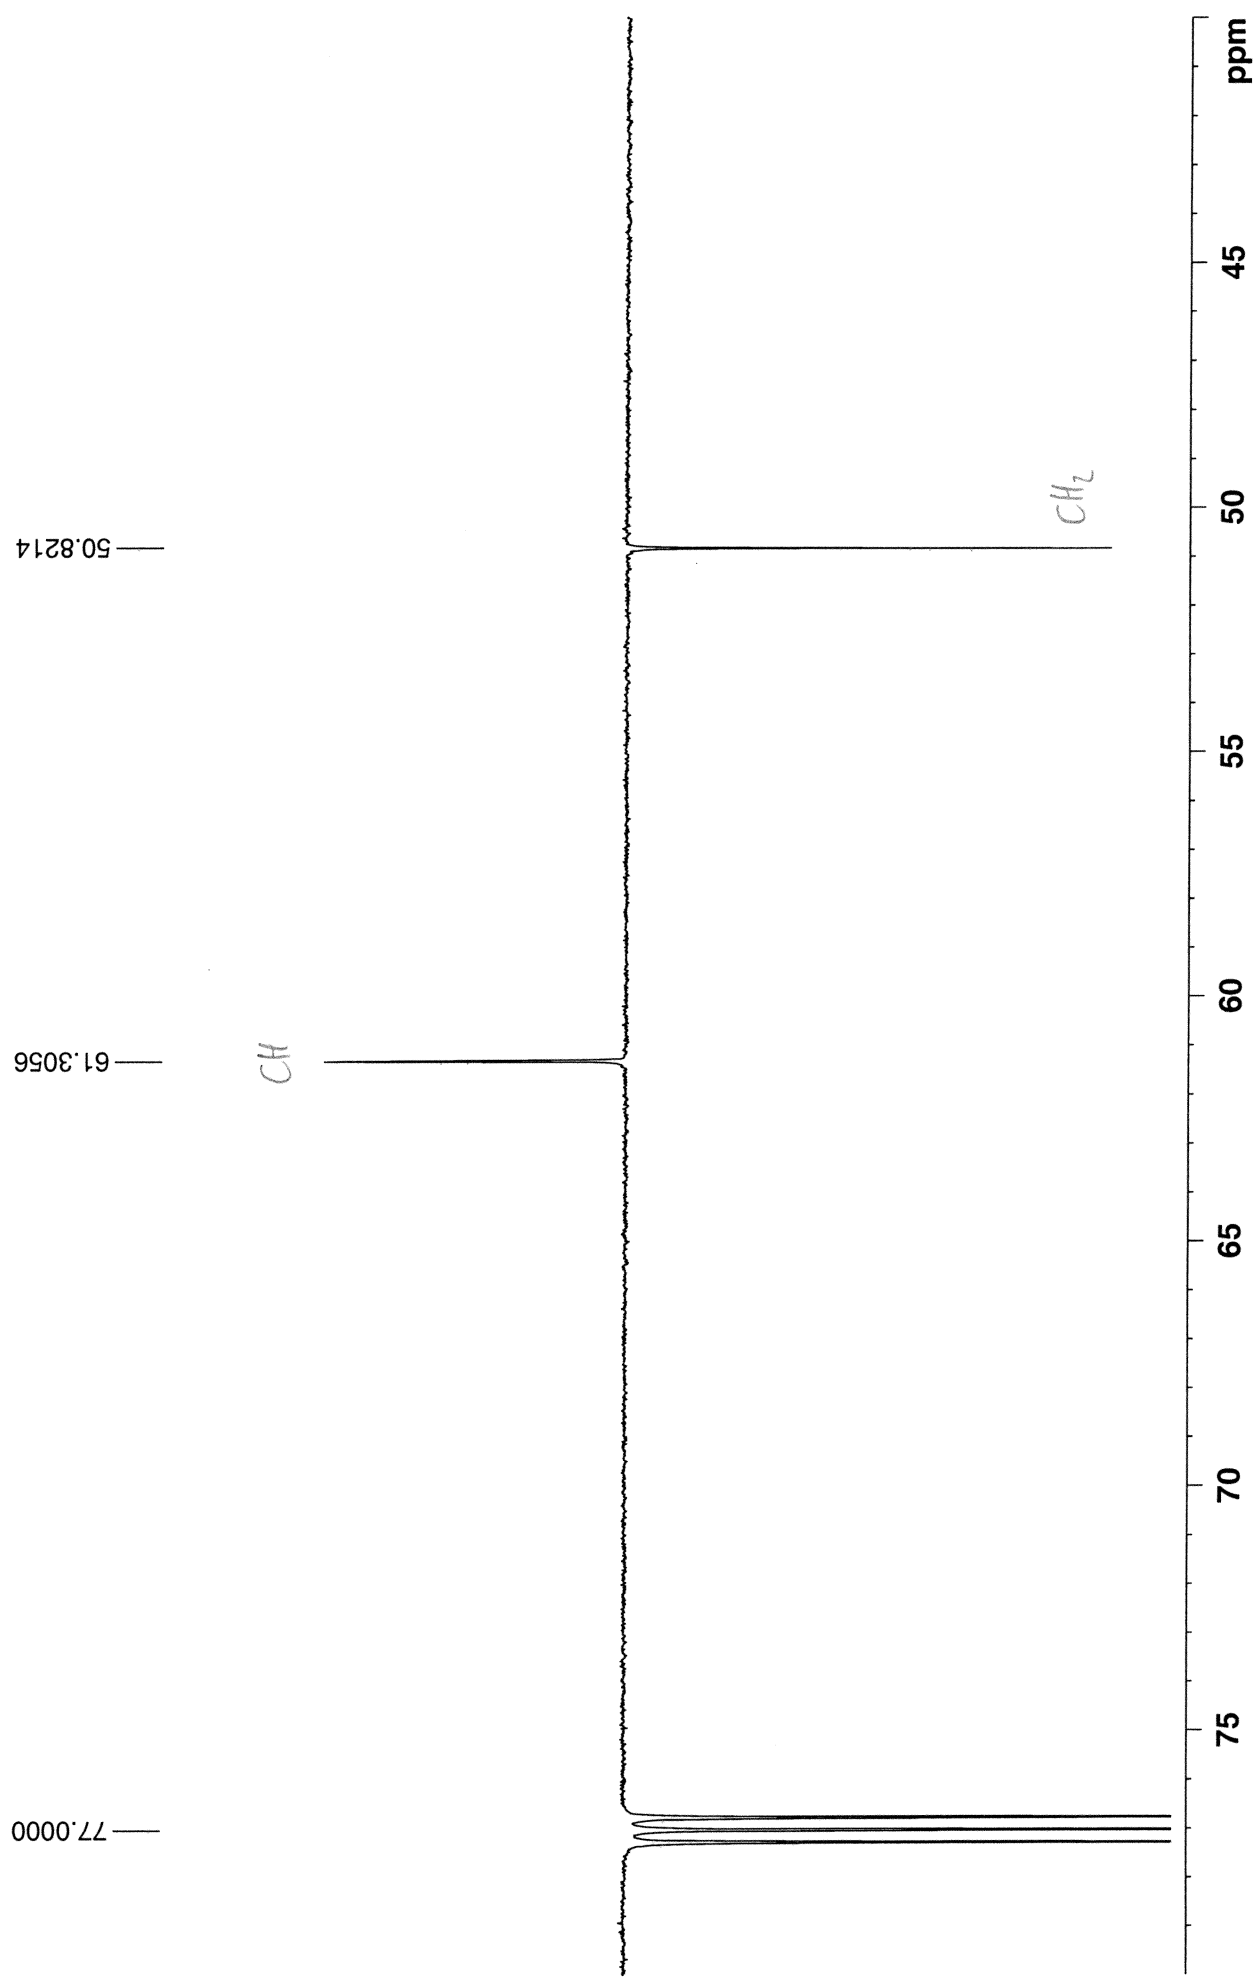

PN020-3 in cdcl3 (COSY) 29.7.2020

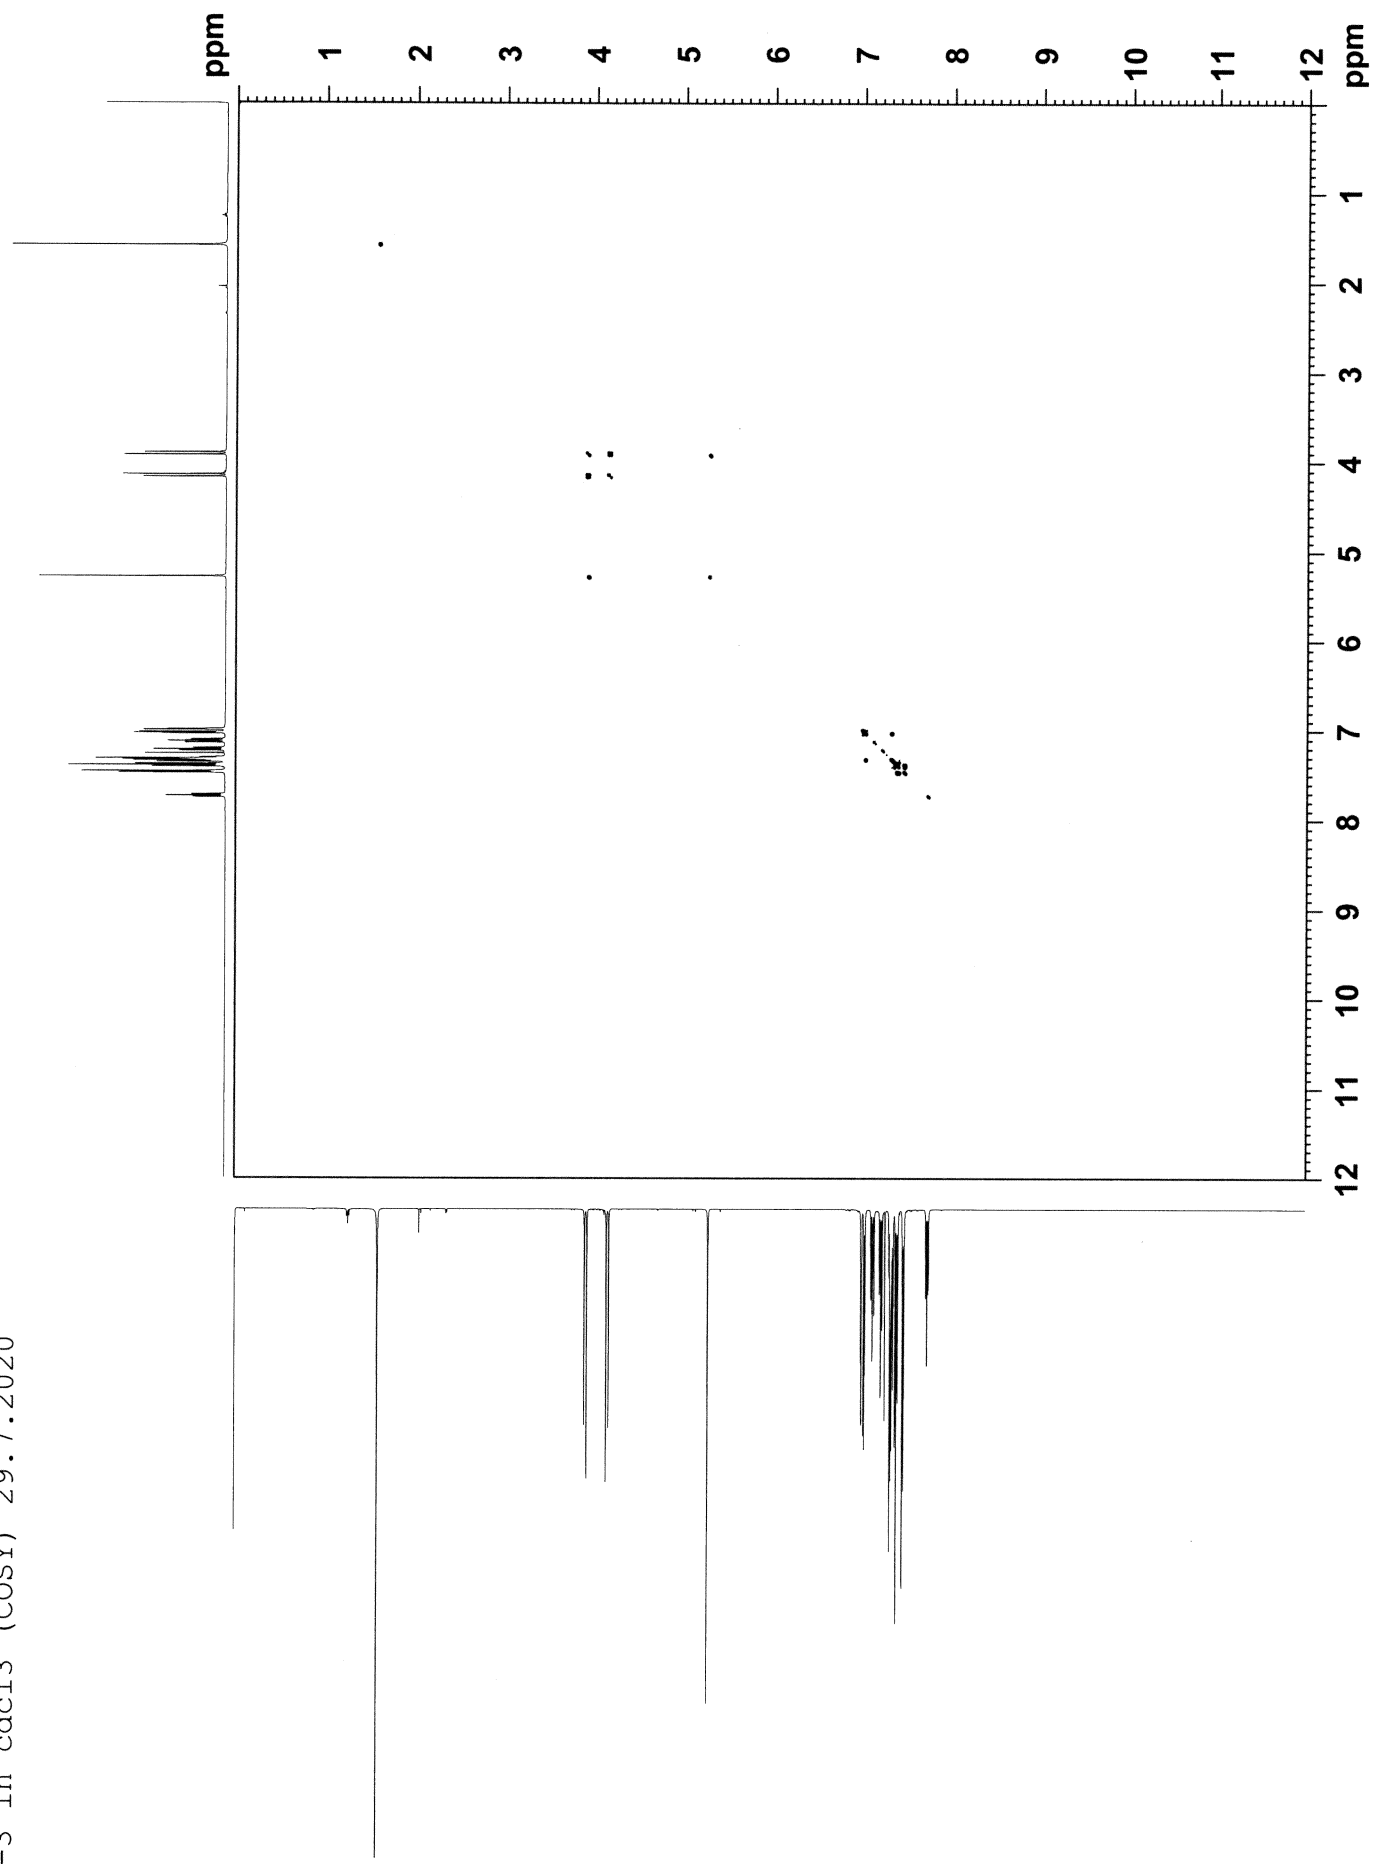

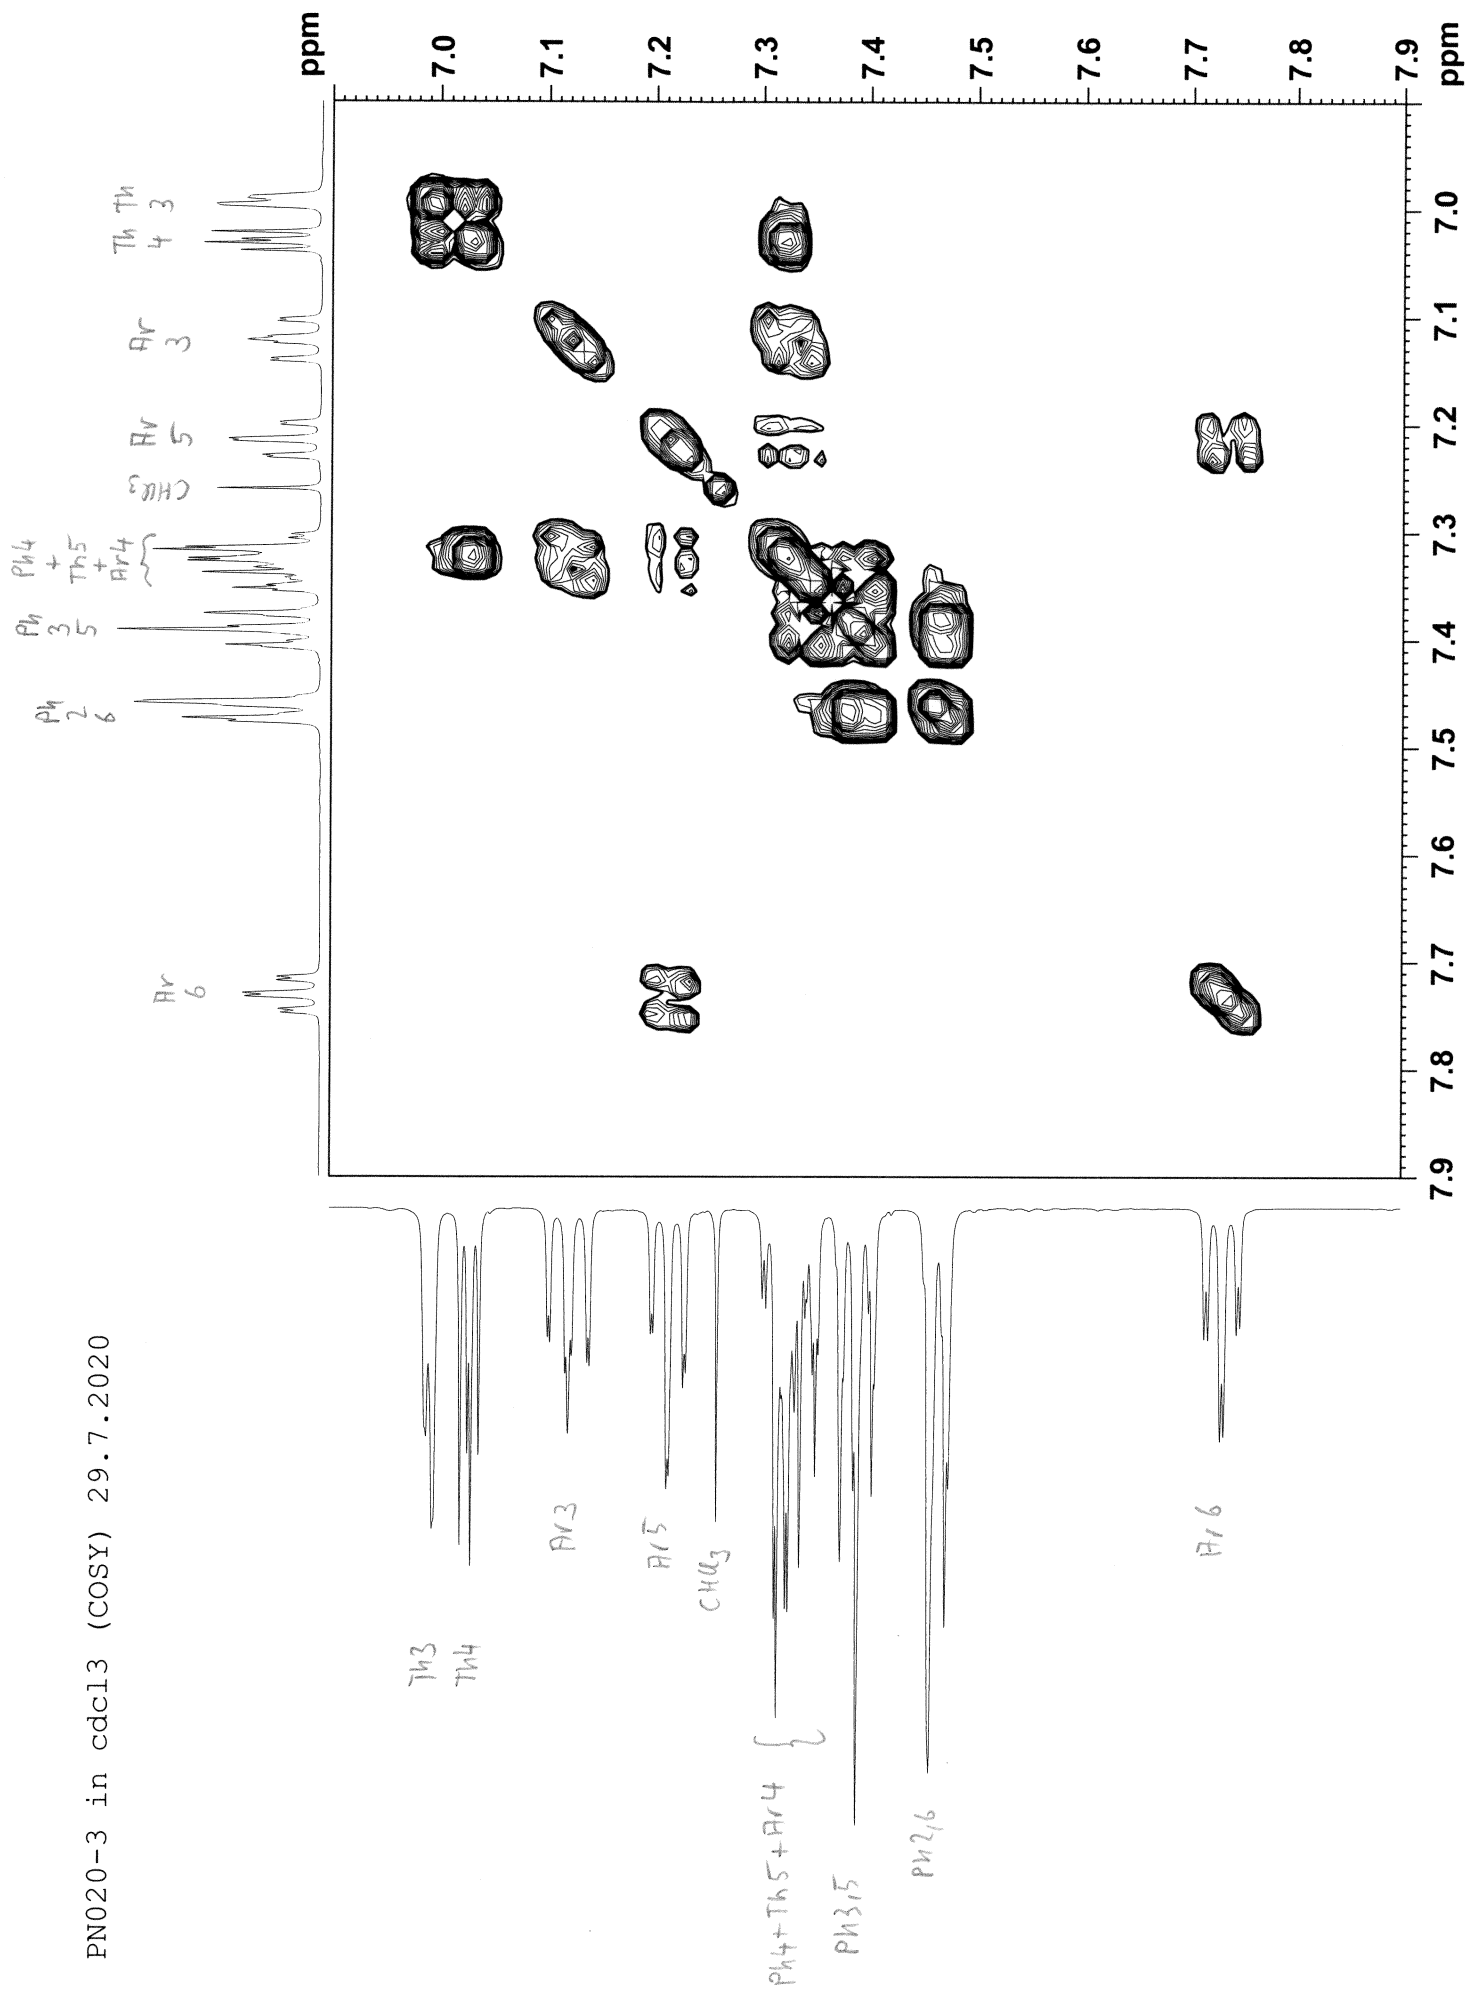

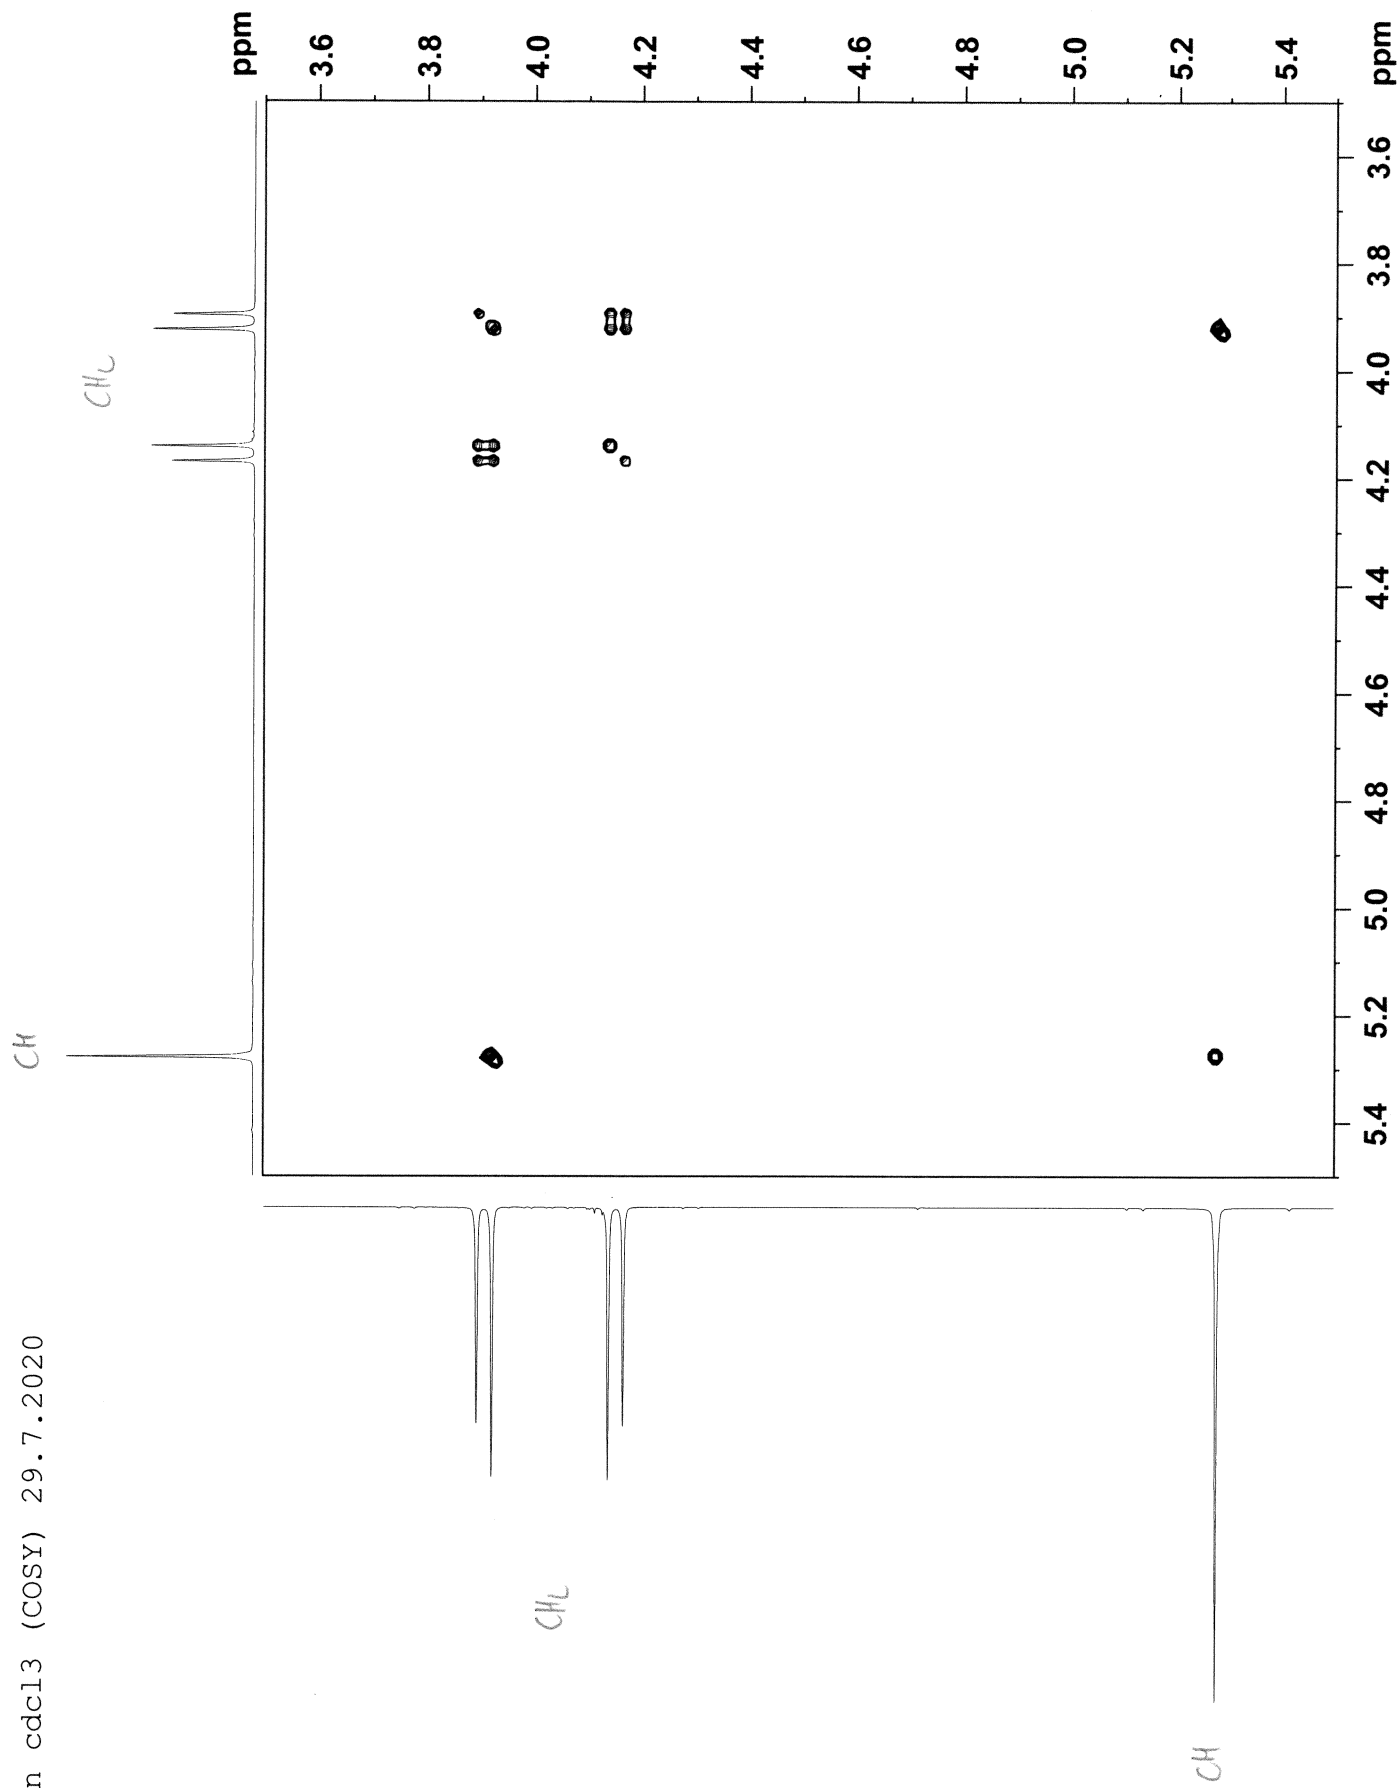

PN020-3 in cdcl3 (HSQC) 29.7.2020

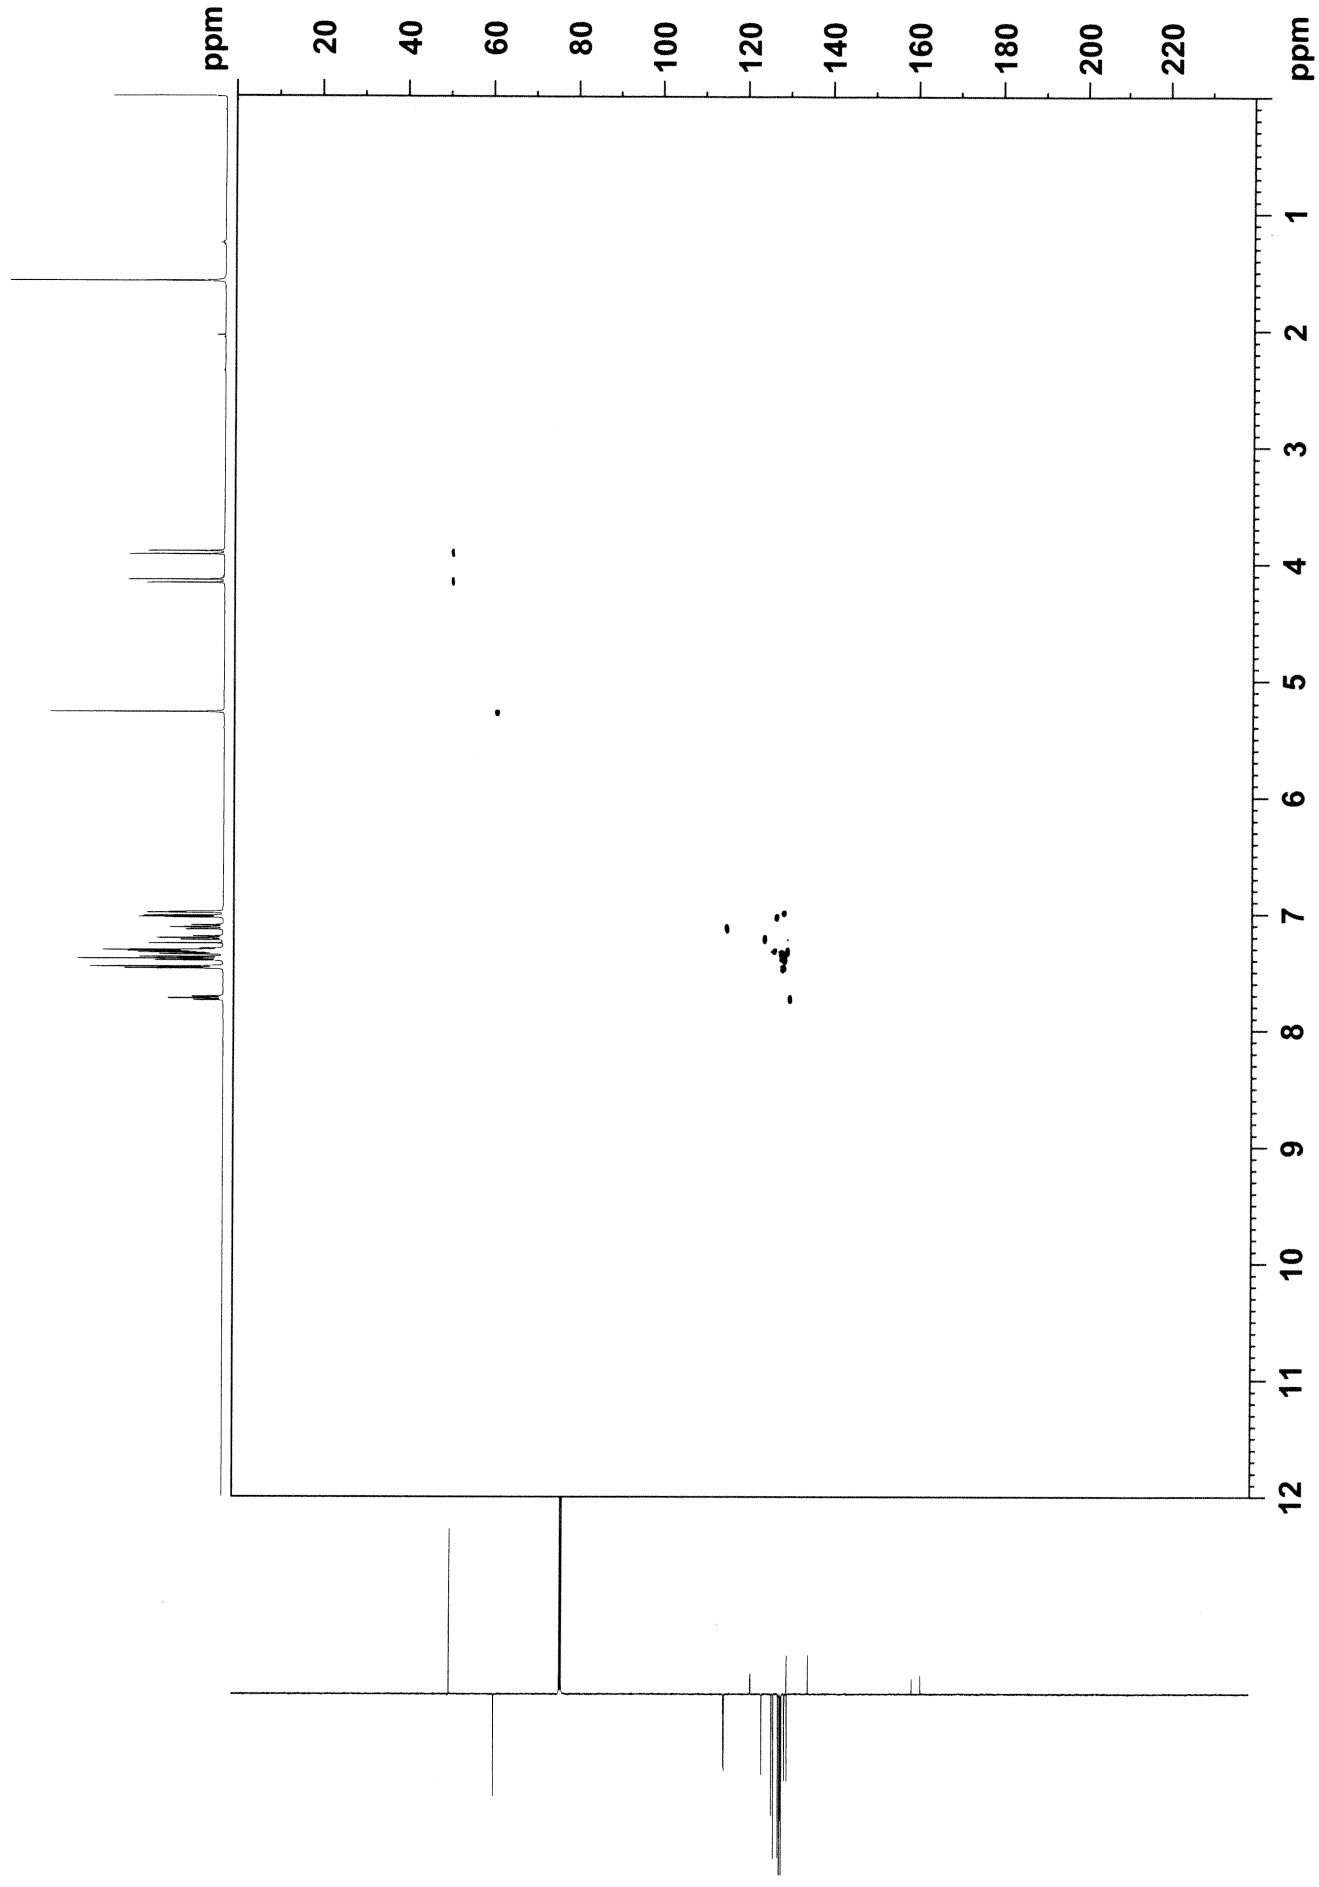



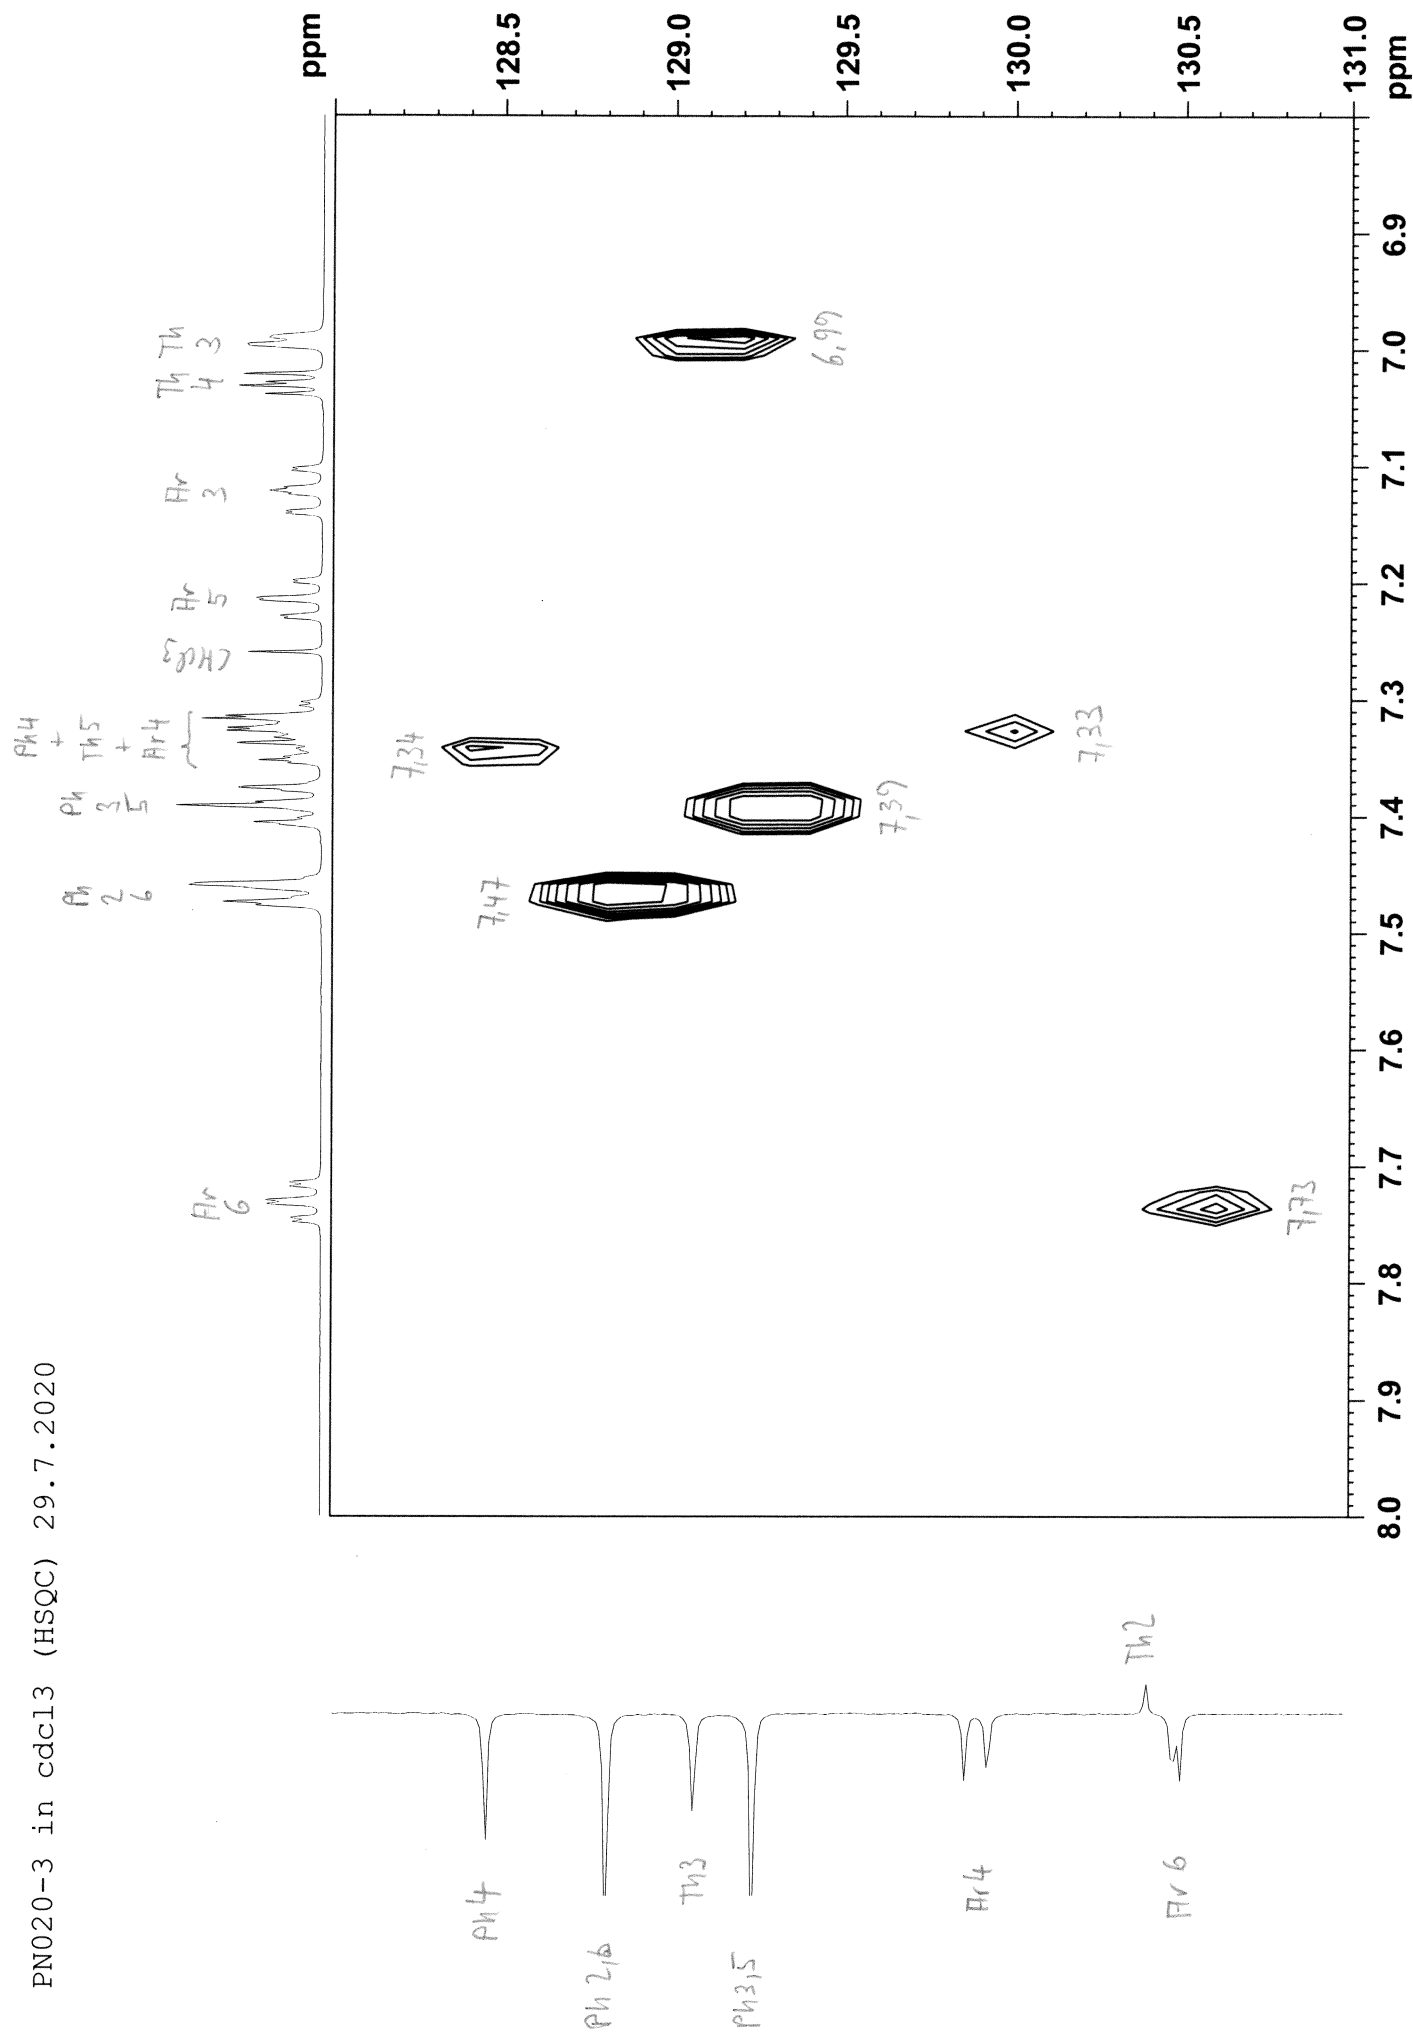

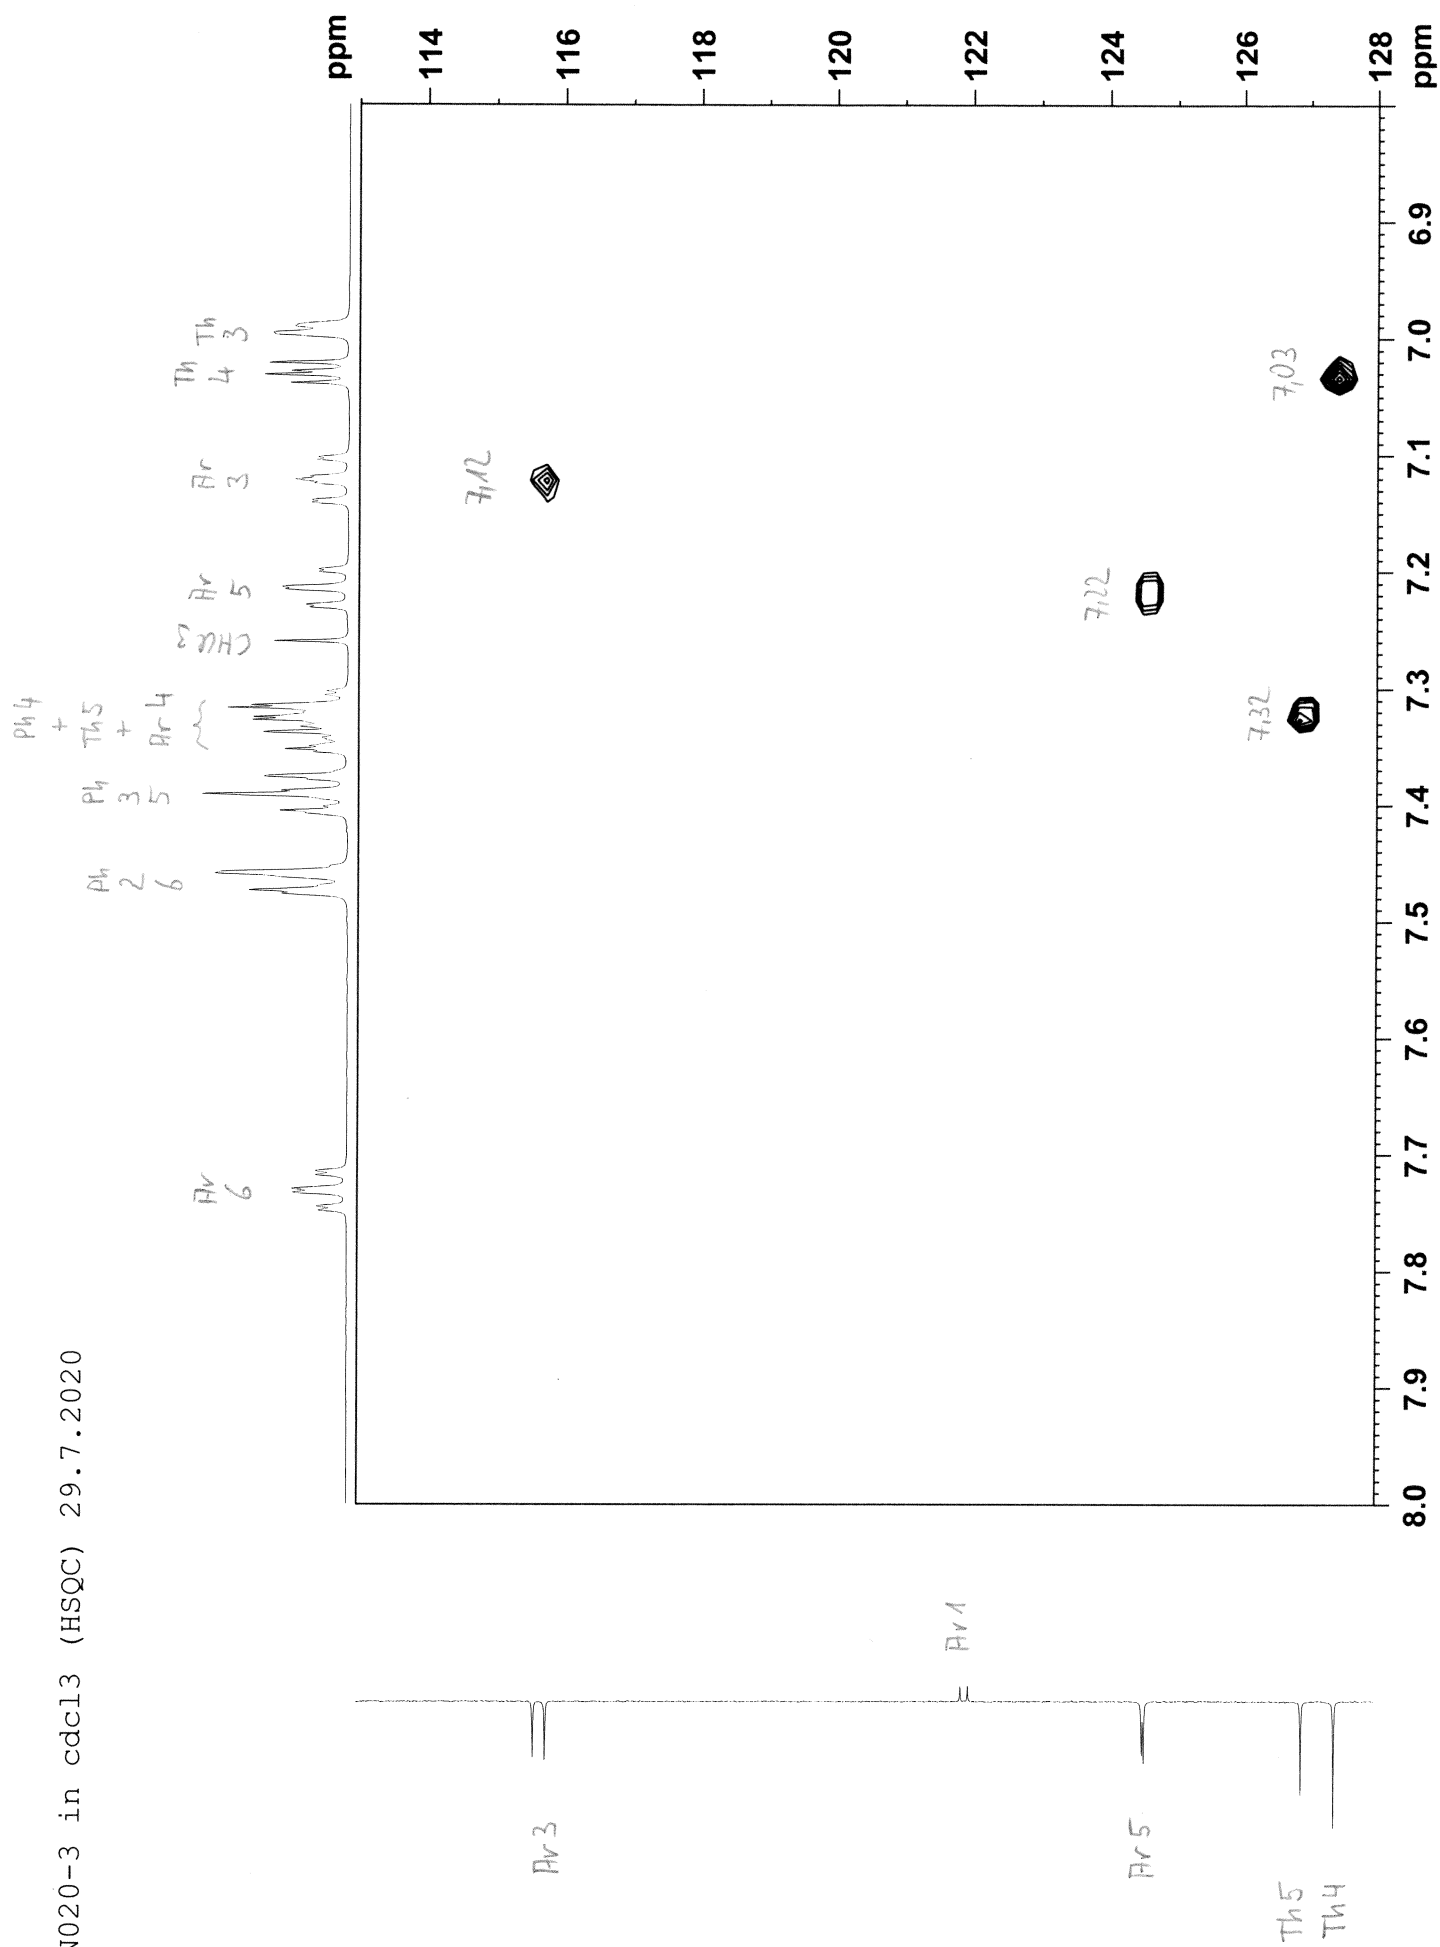

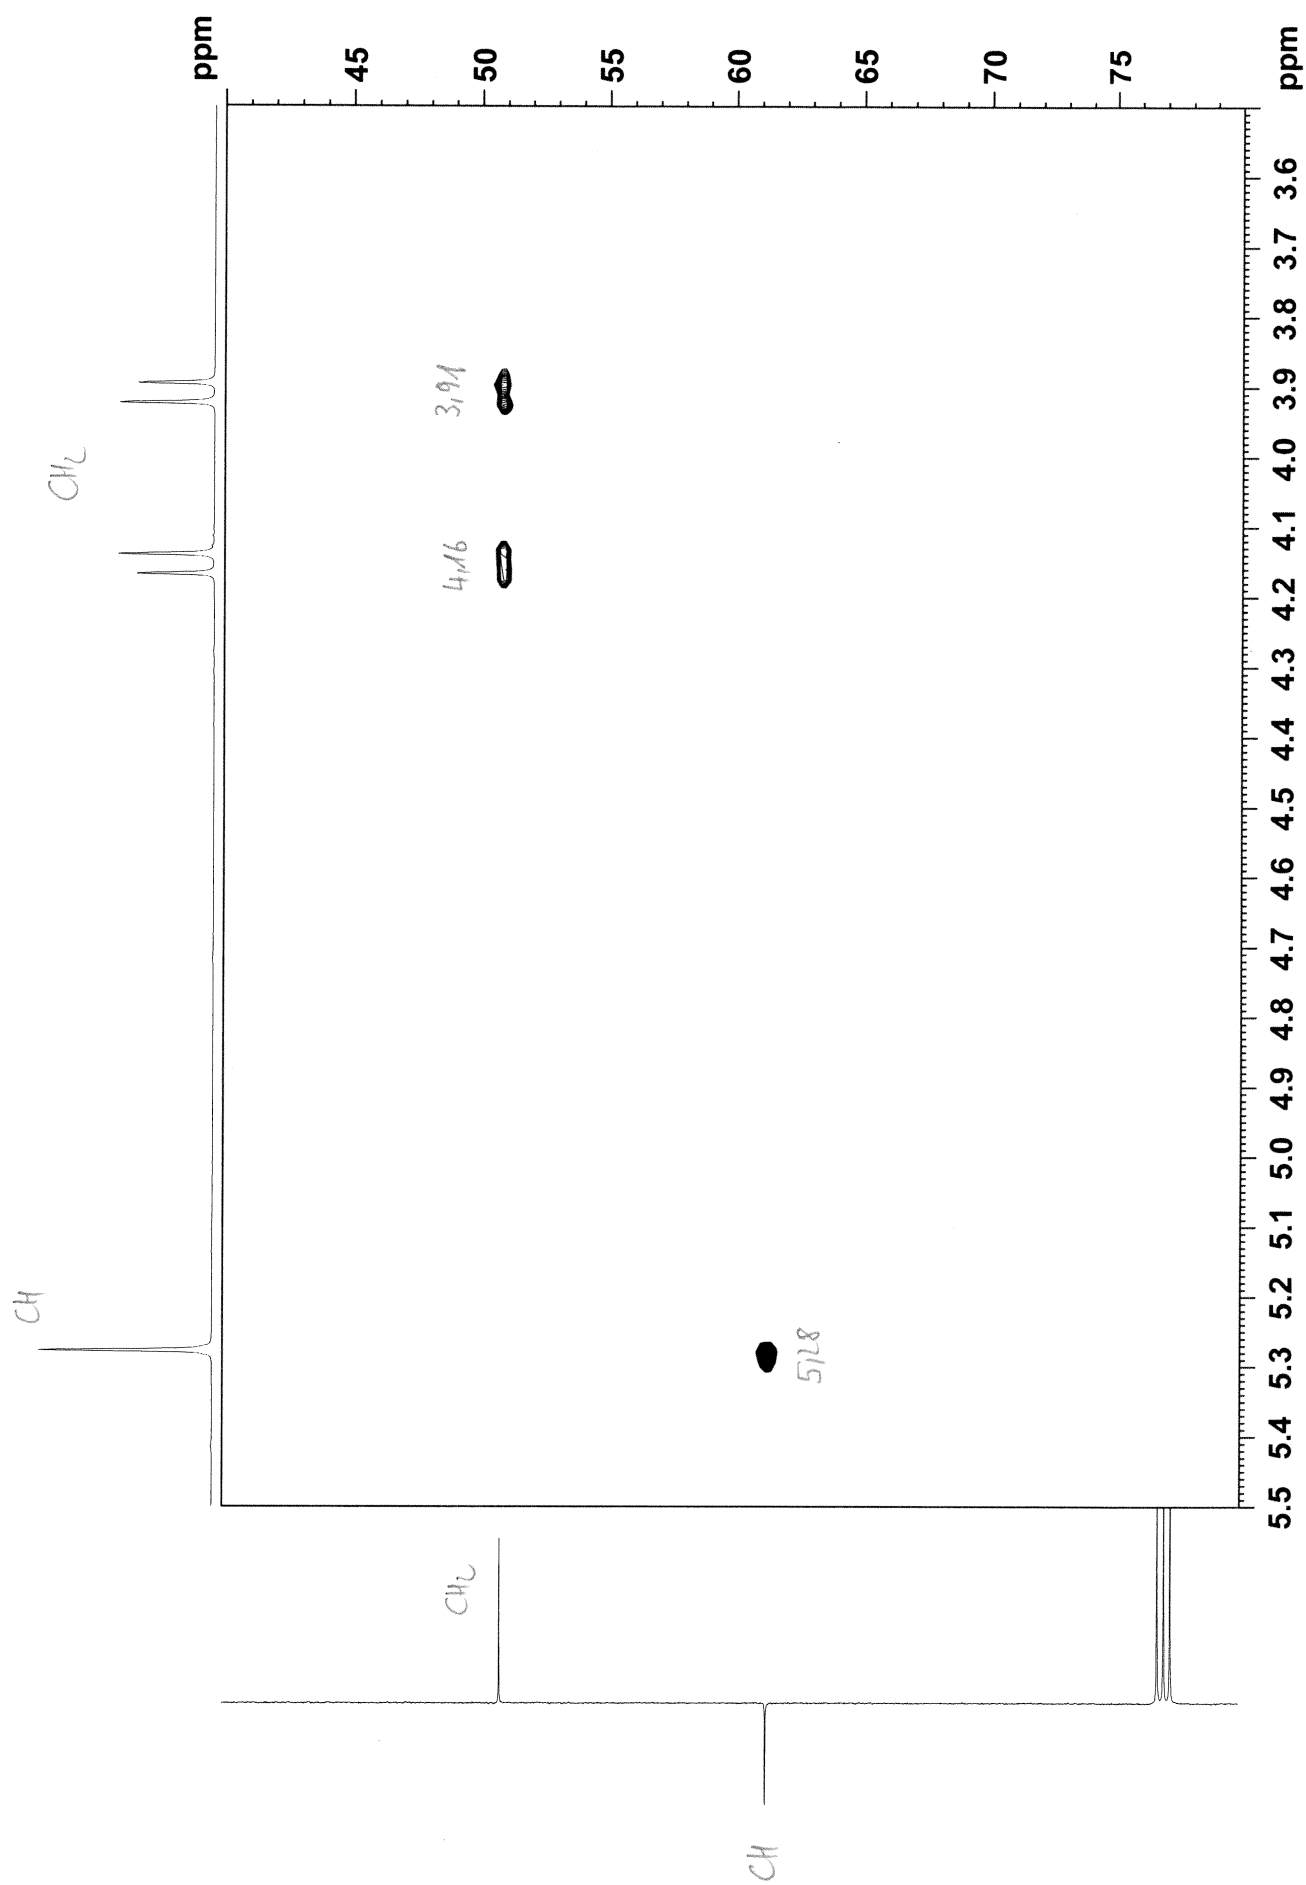

PN020-3 in cdcl3 (HMBC) 29.7.2020

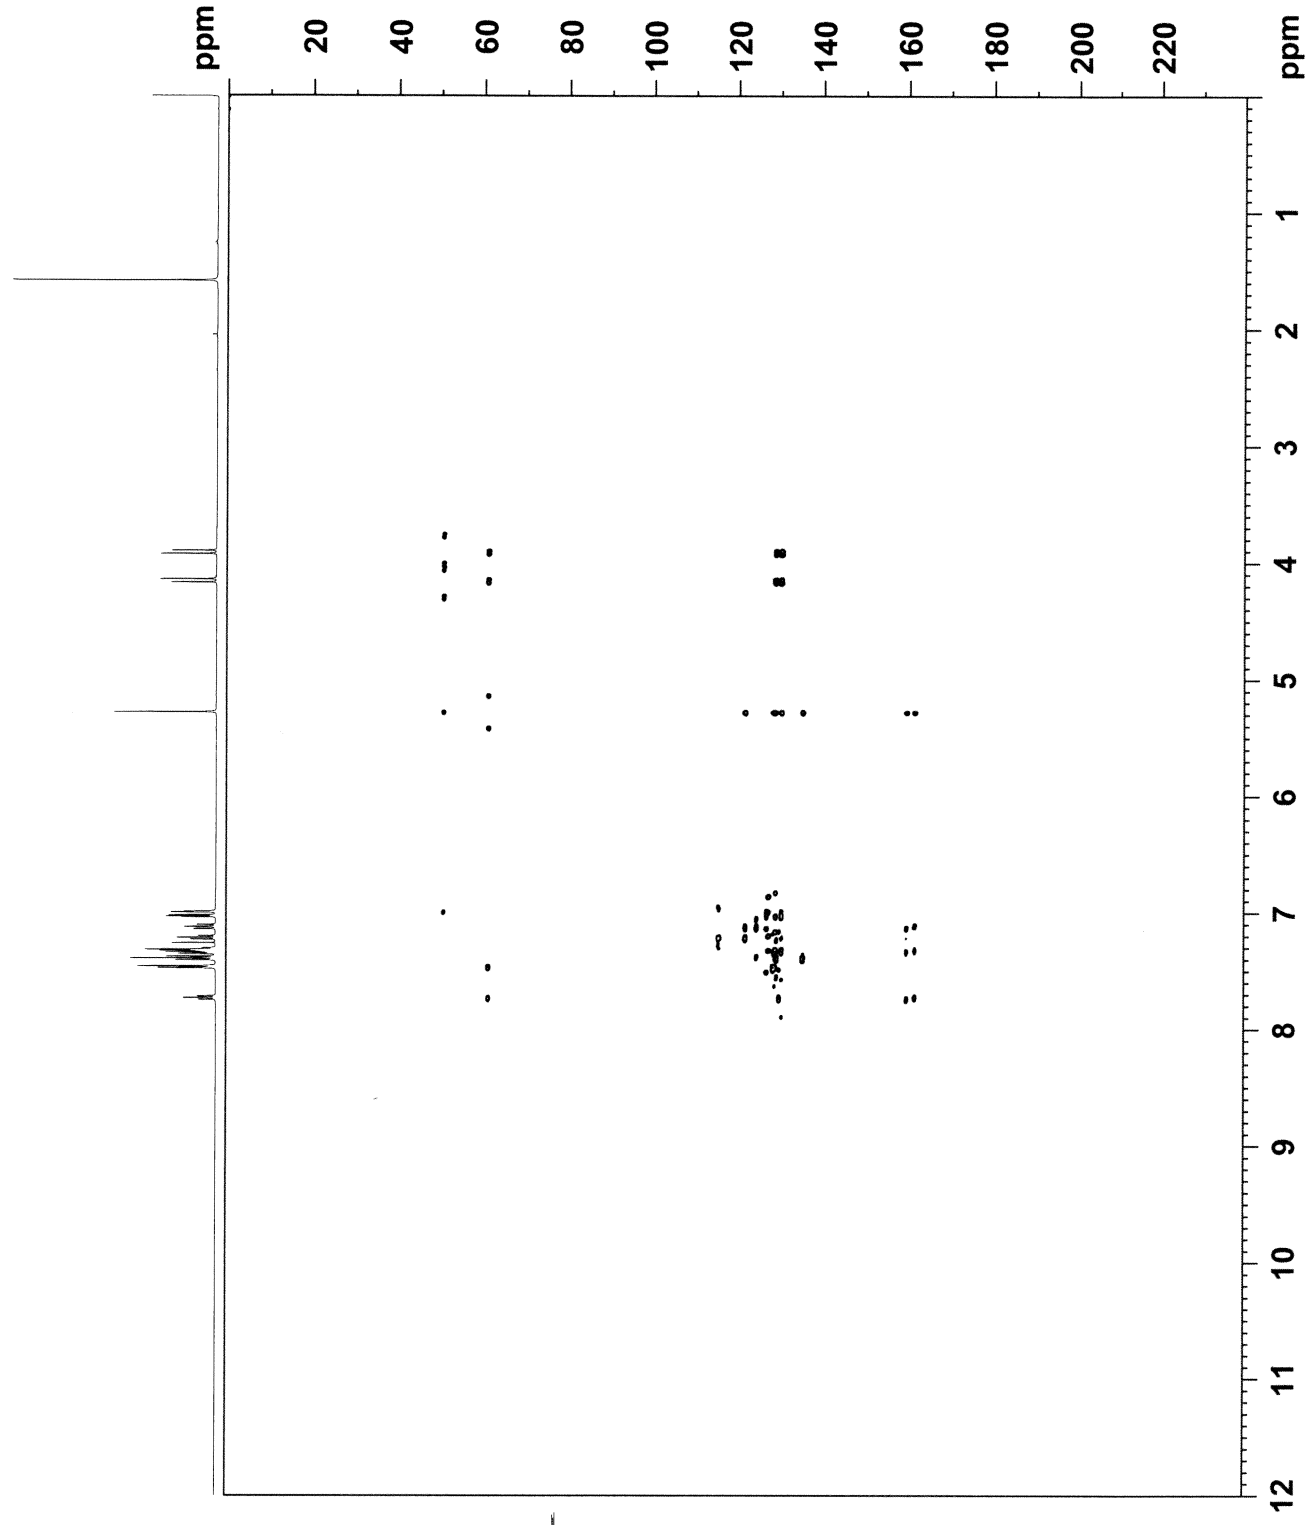

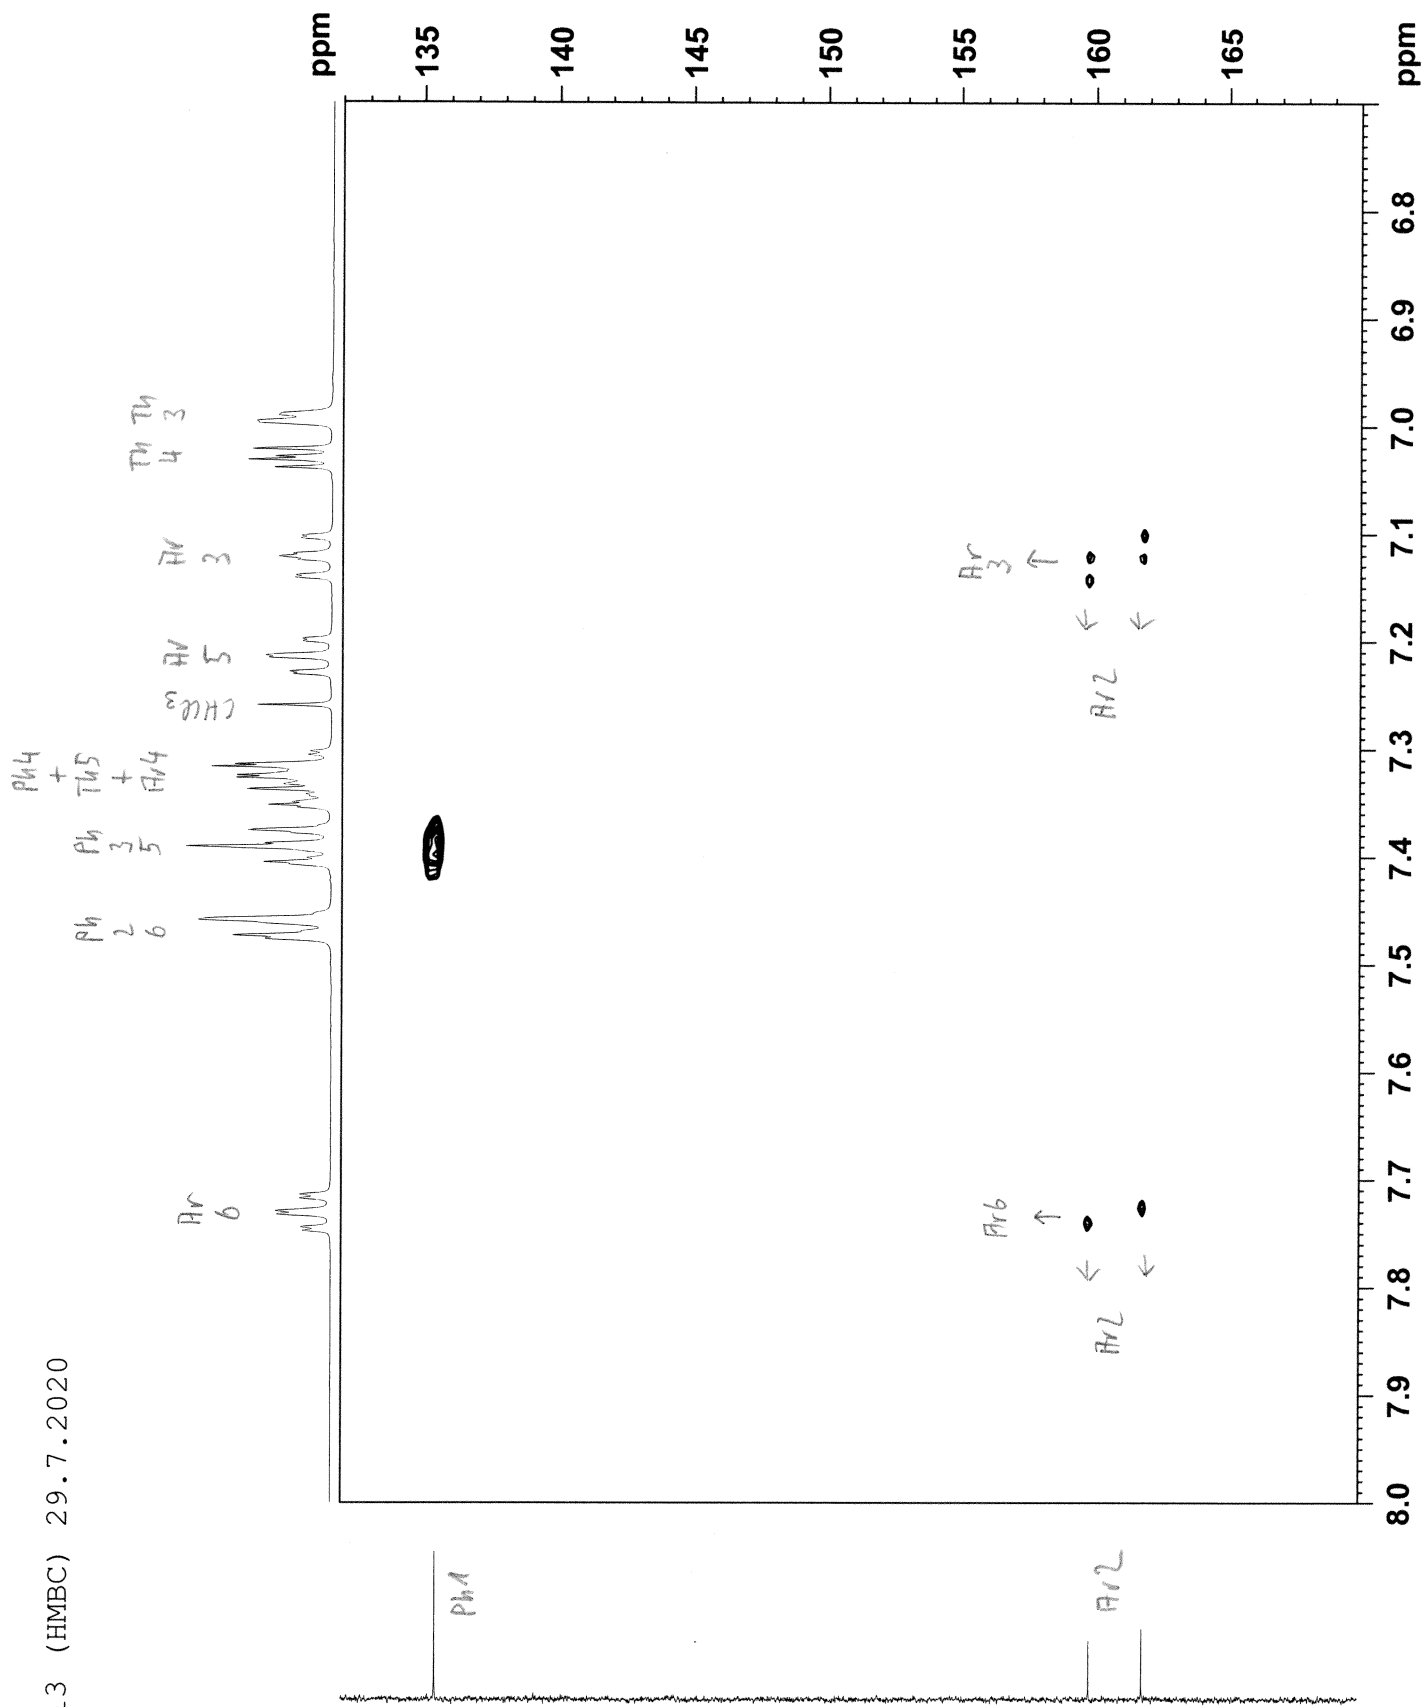

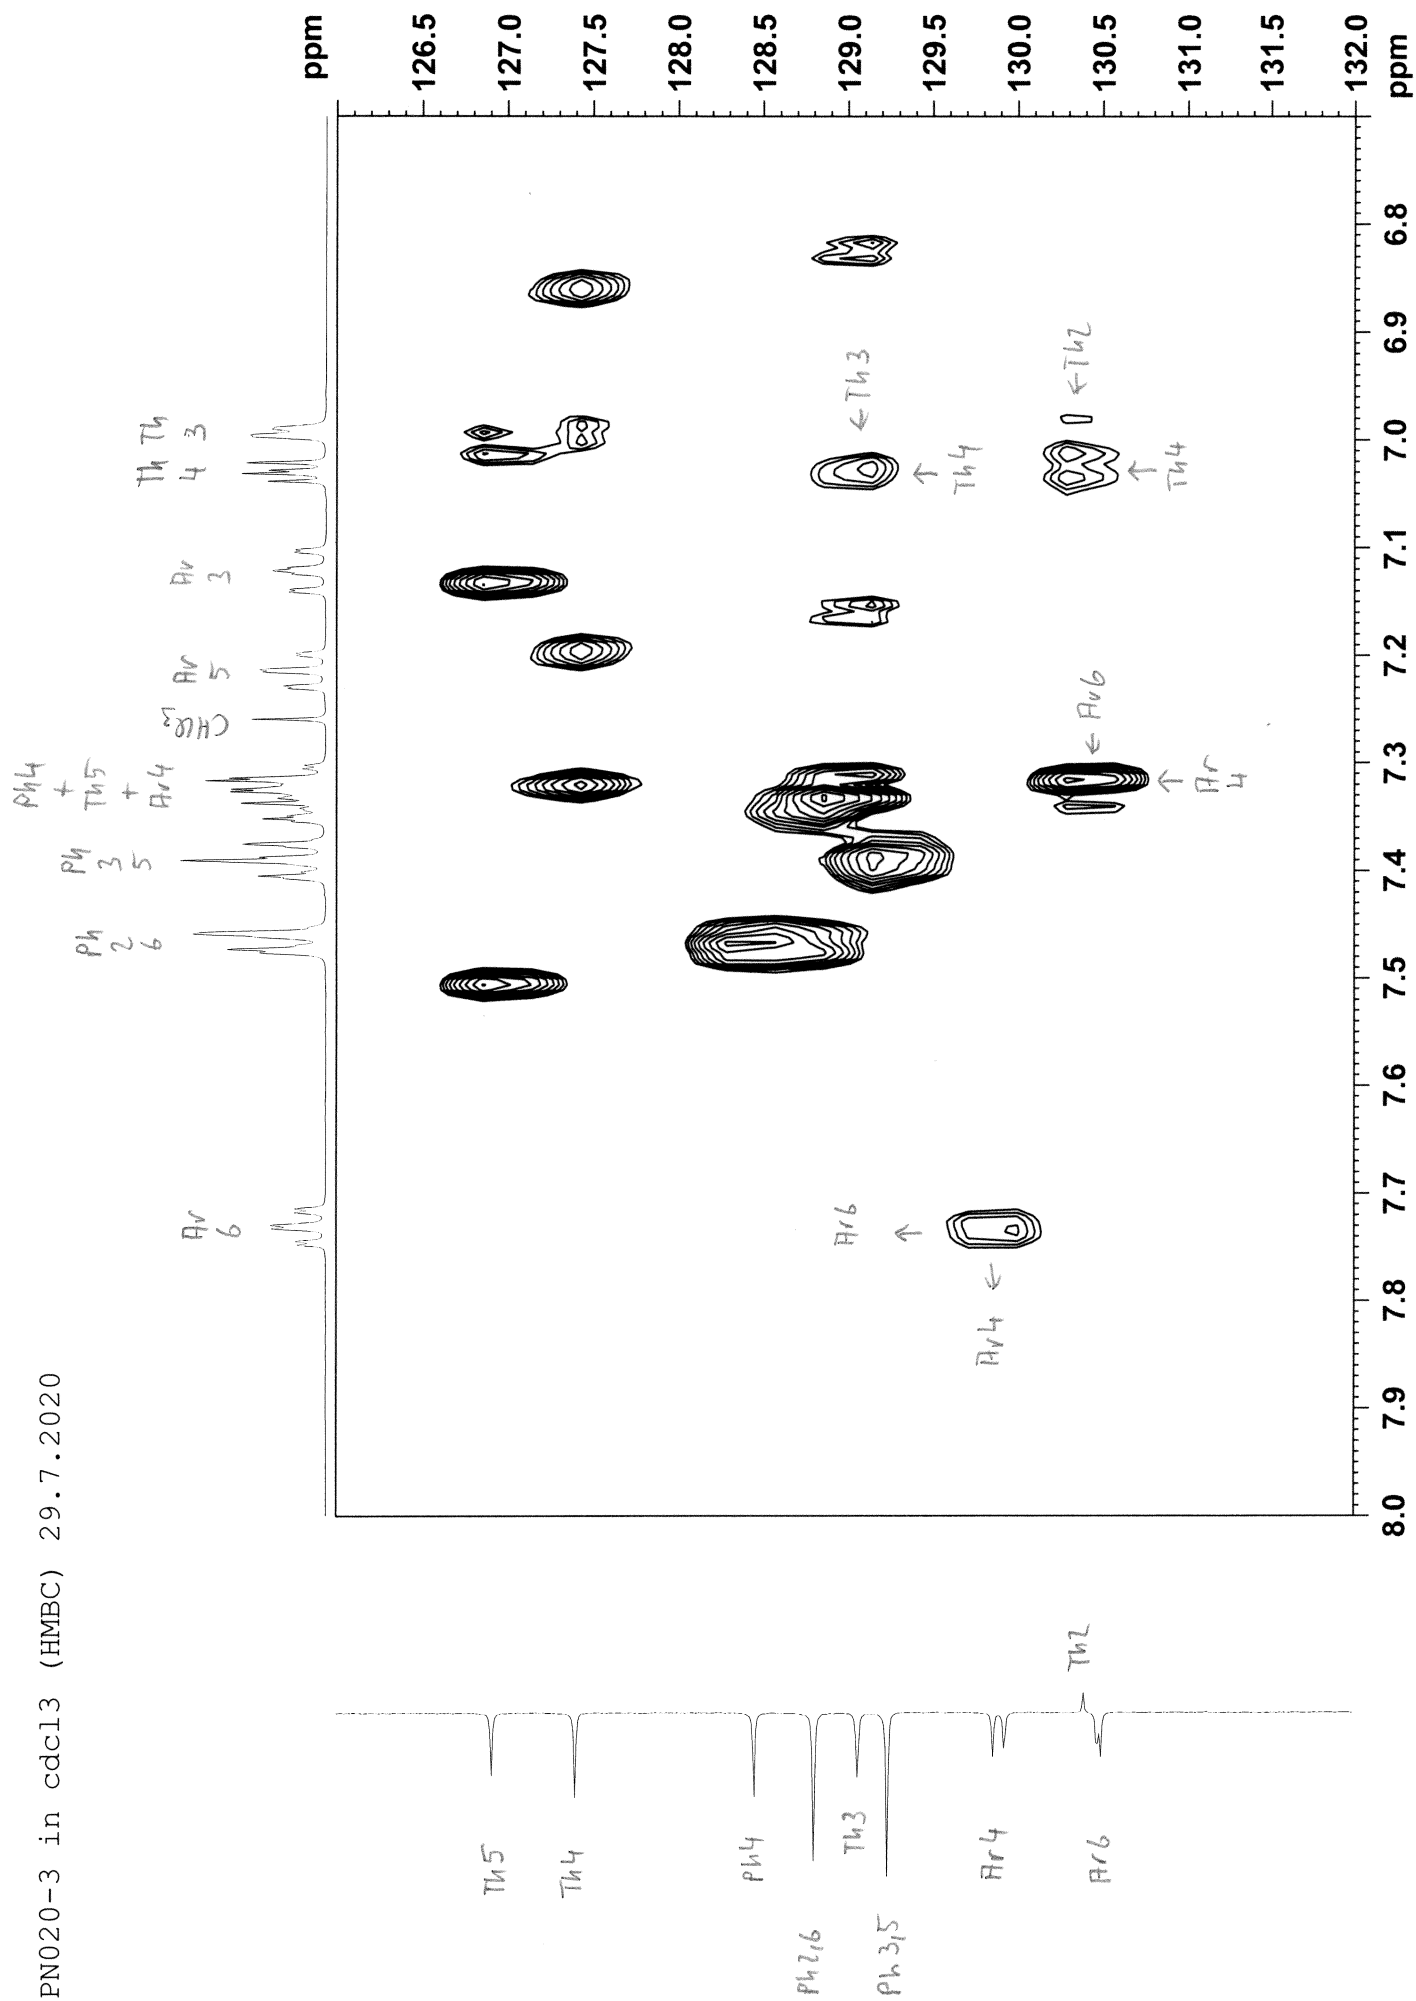

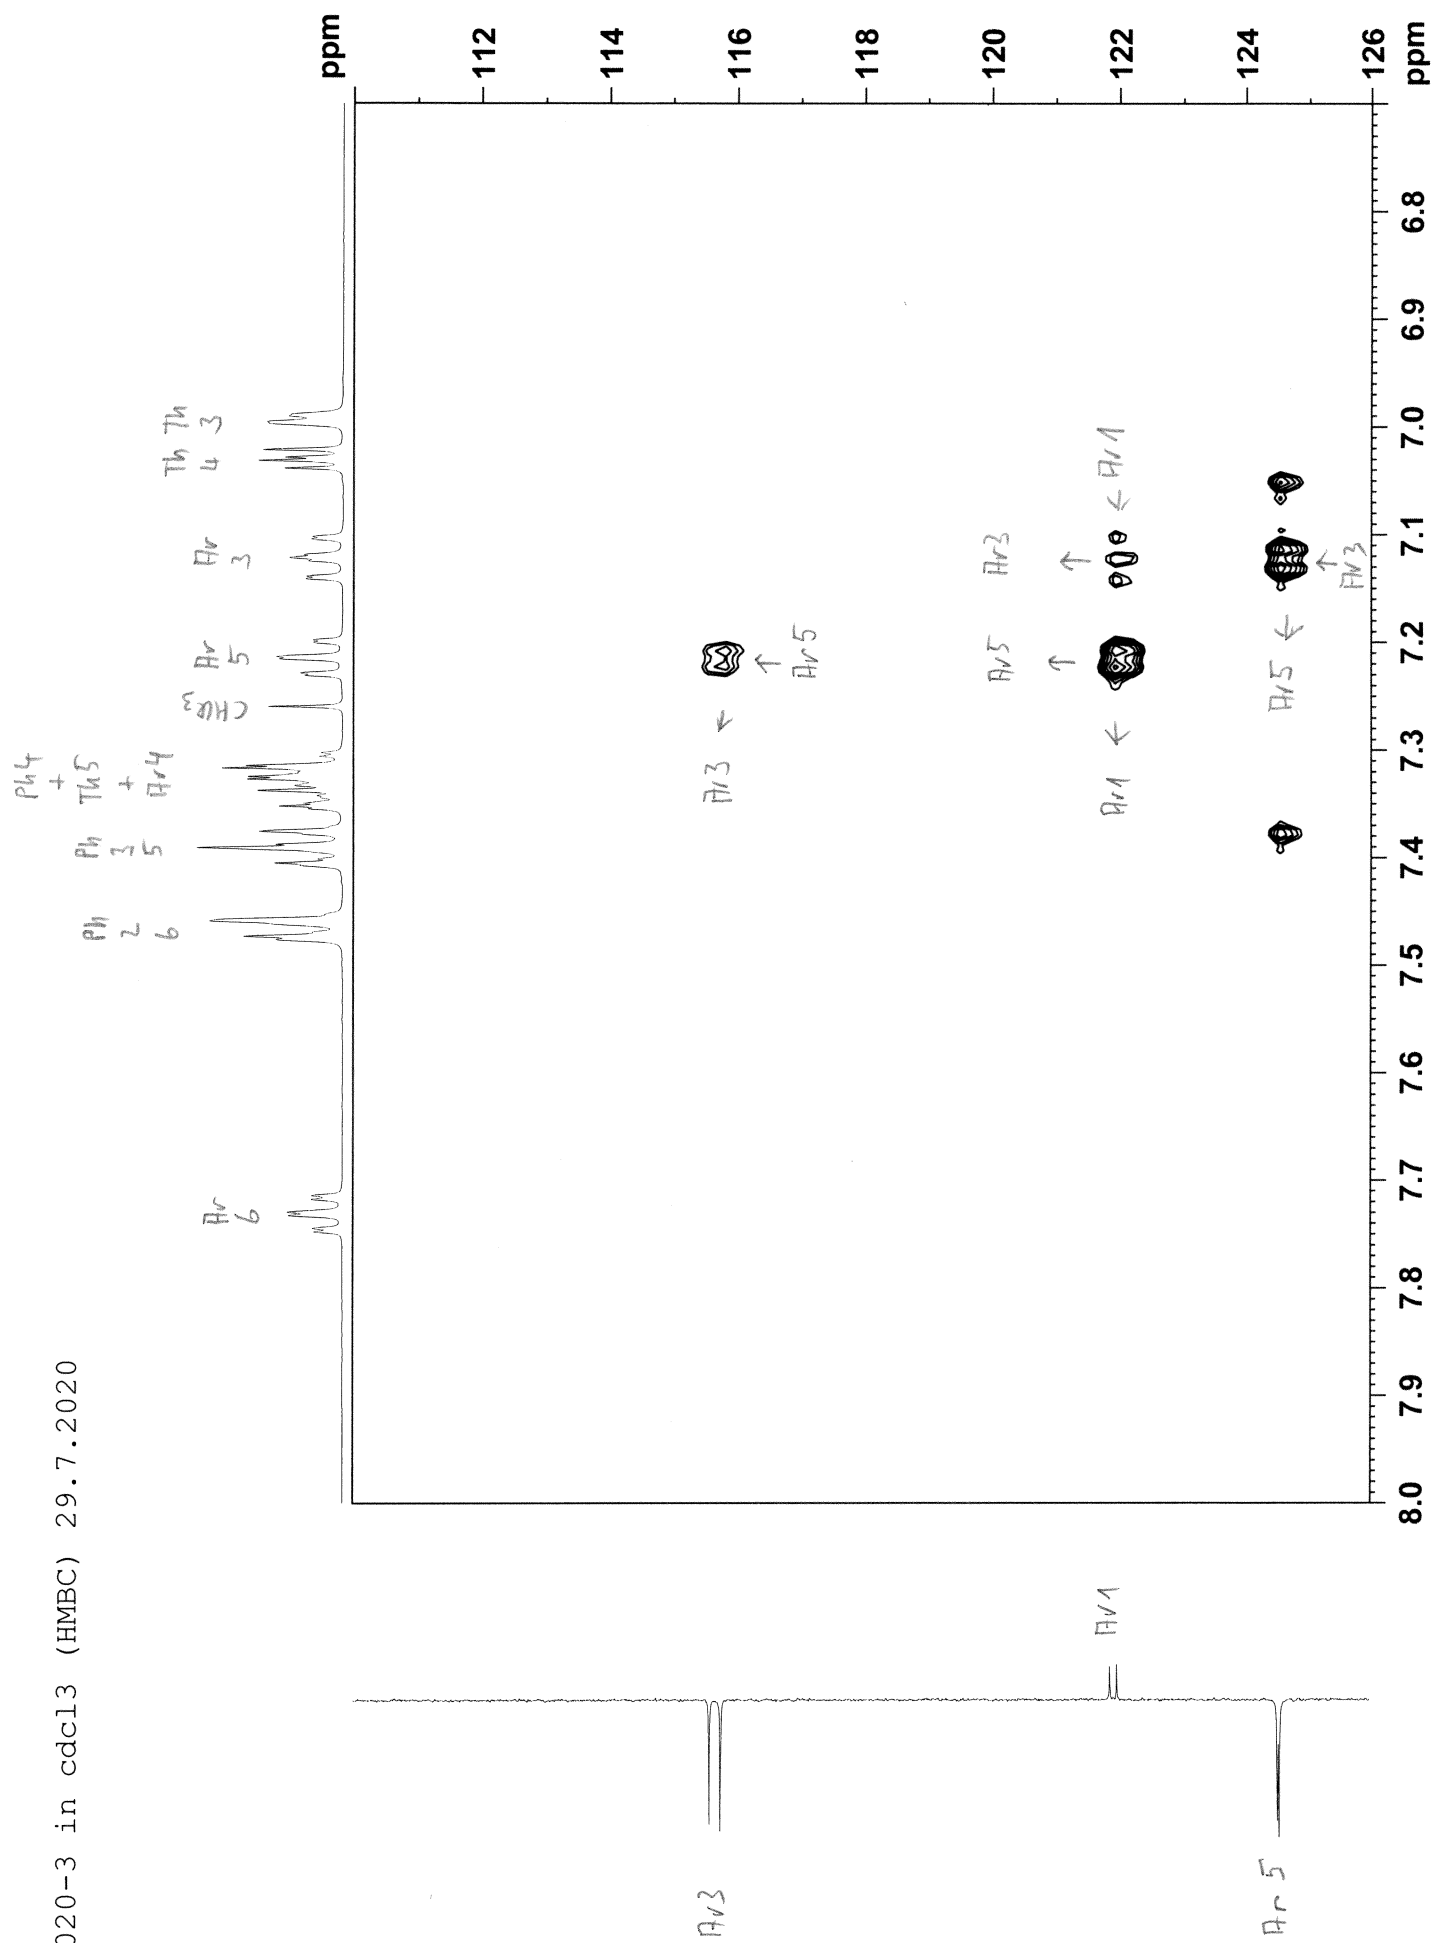





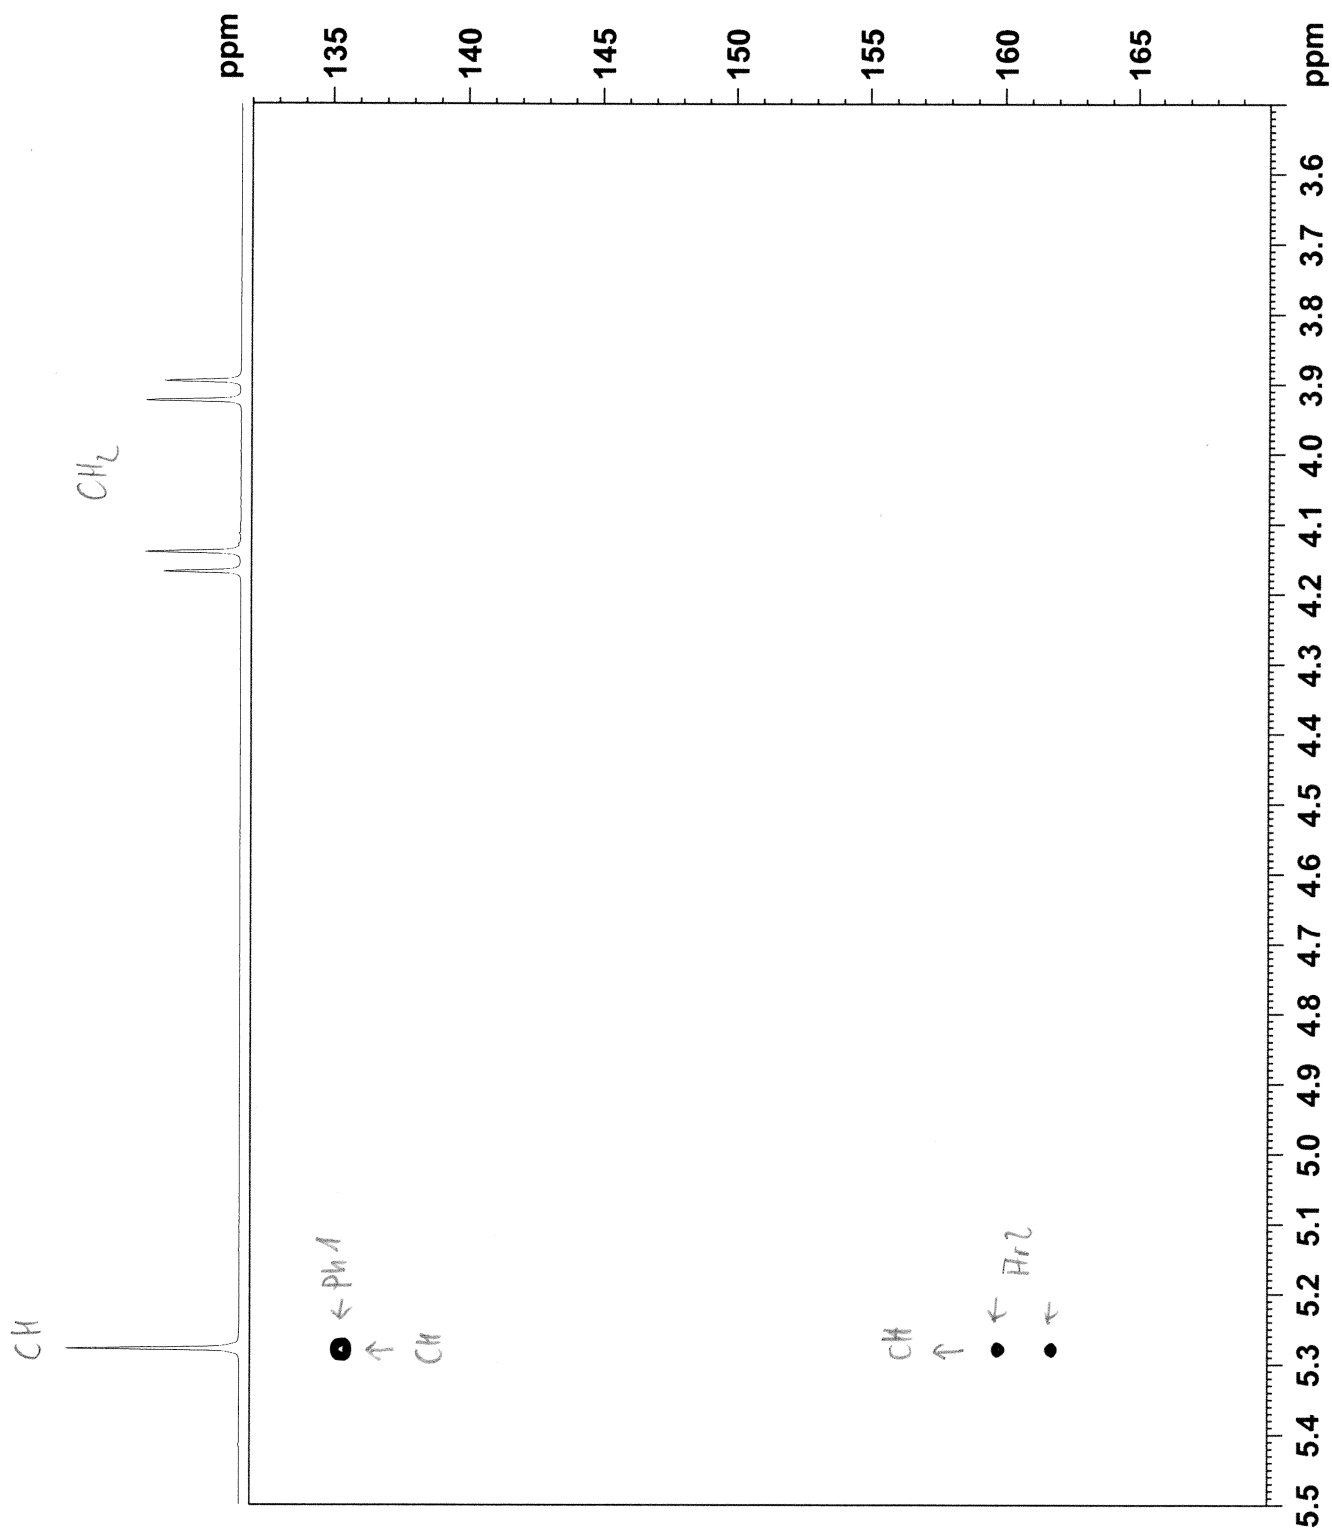

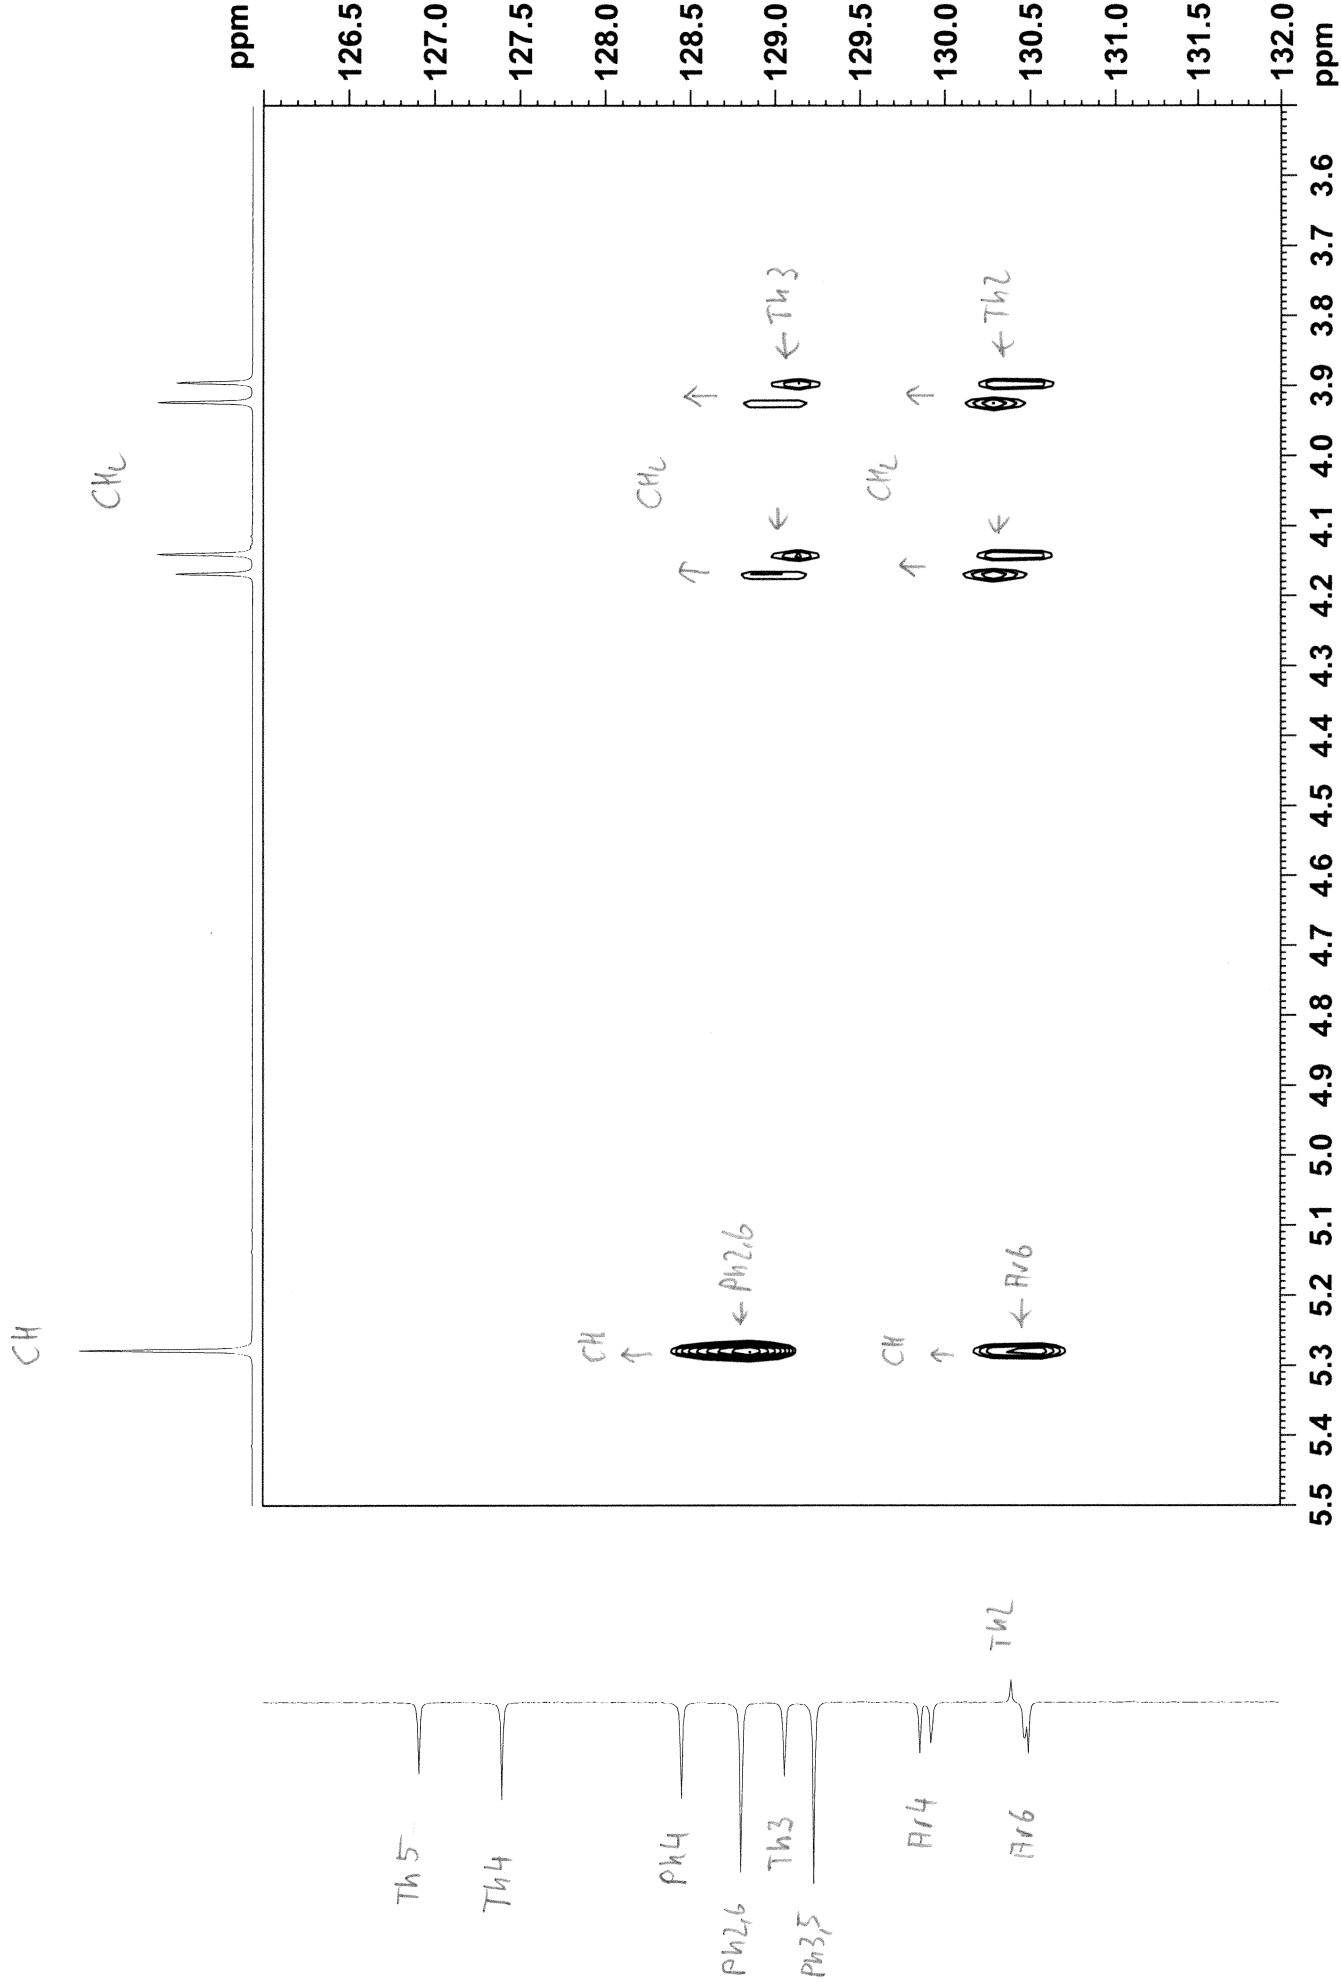

CH

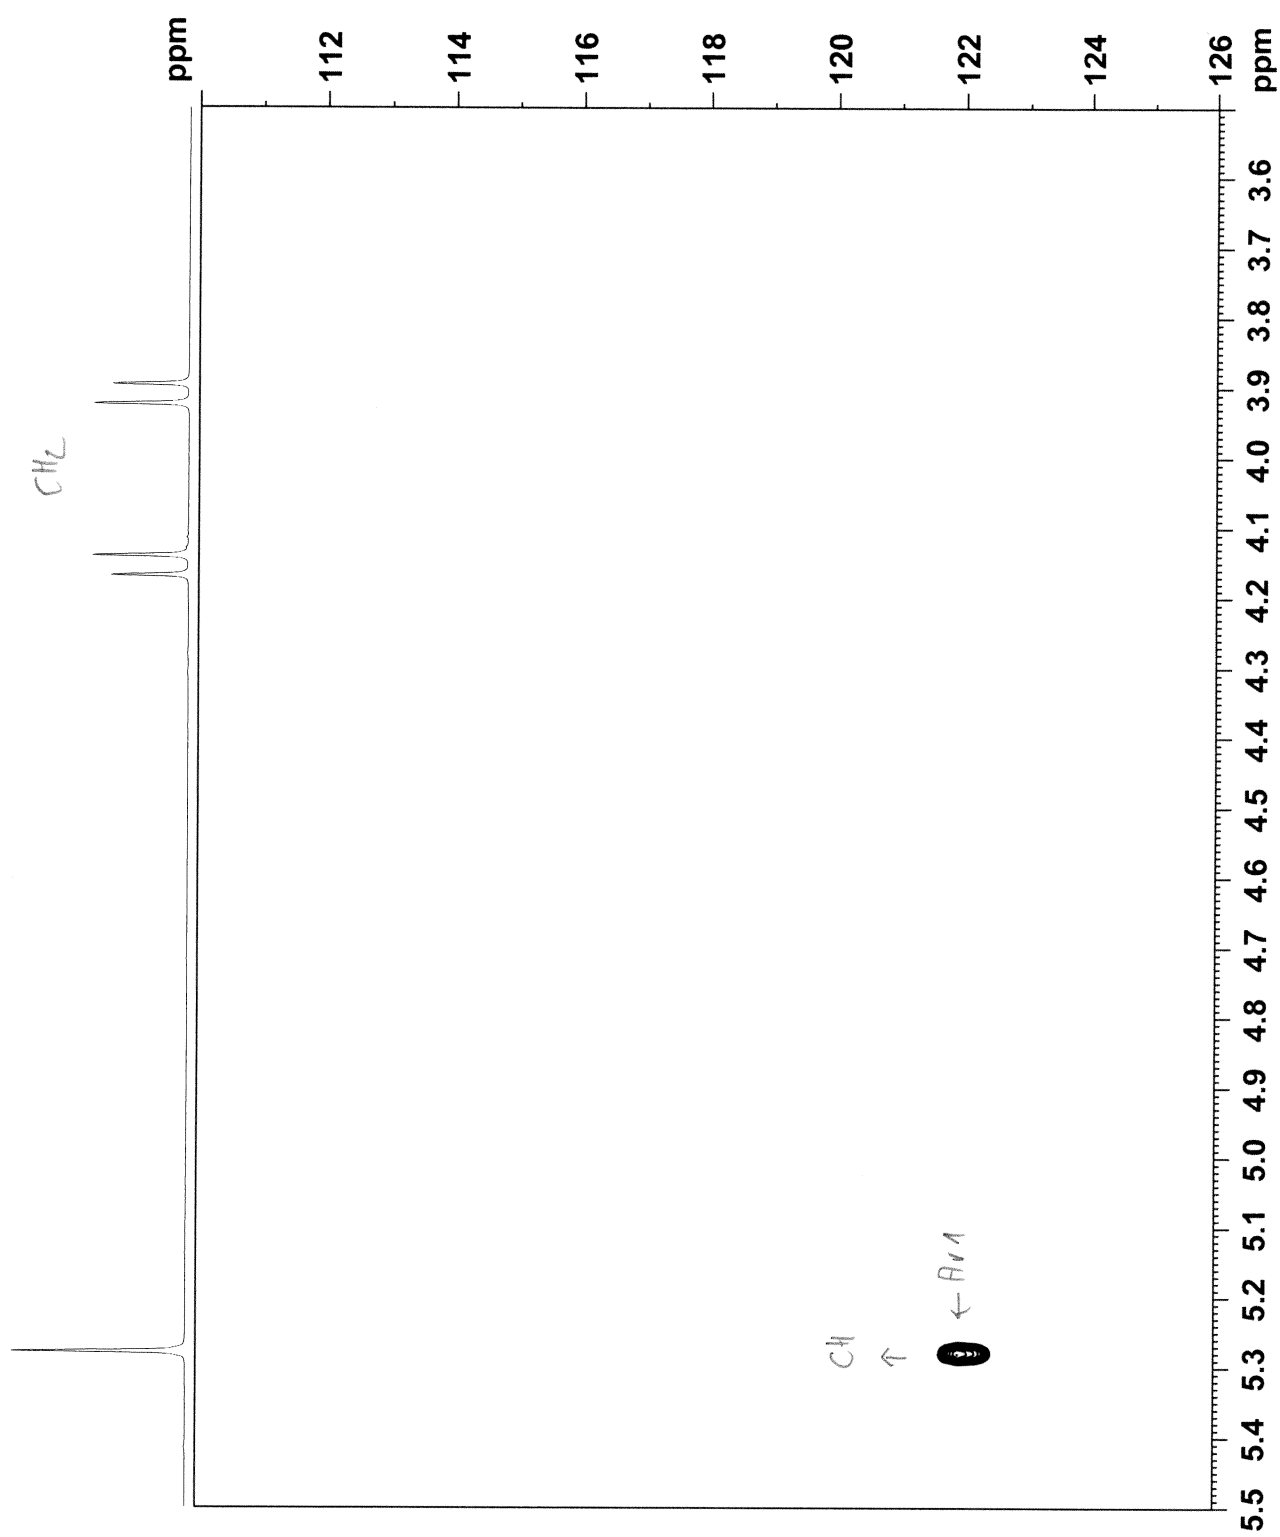

R13

R1

R15

PN020-3 in cdcl3 (HMBC) 29.7.2020

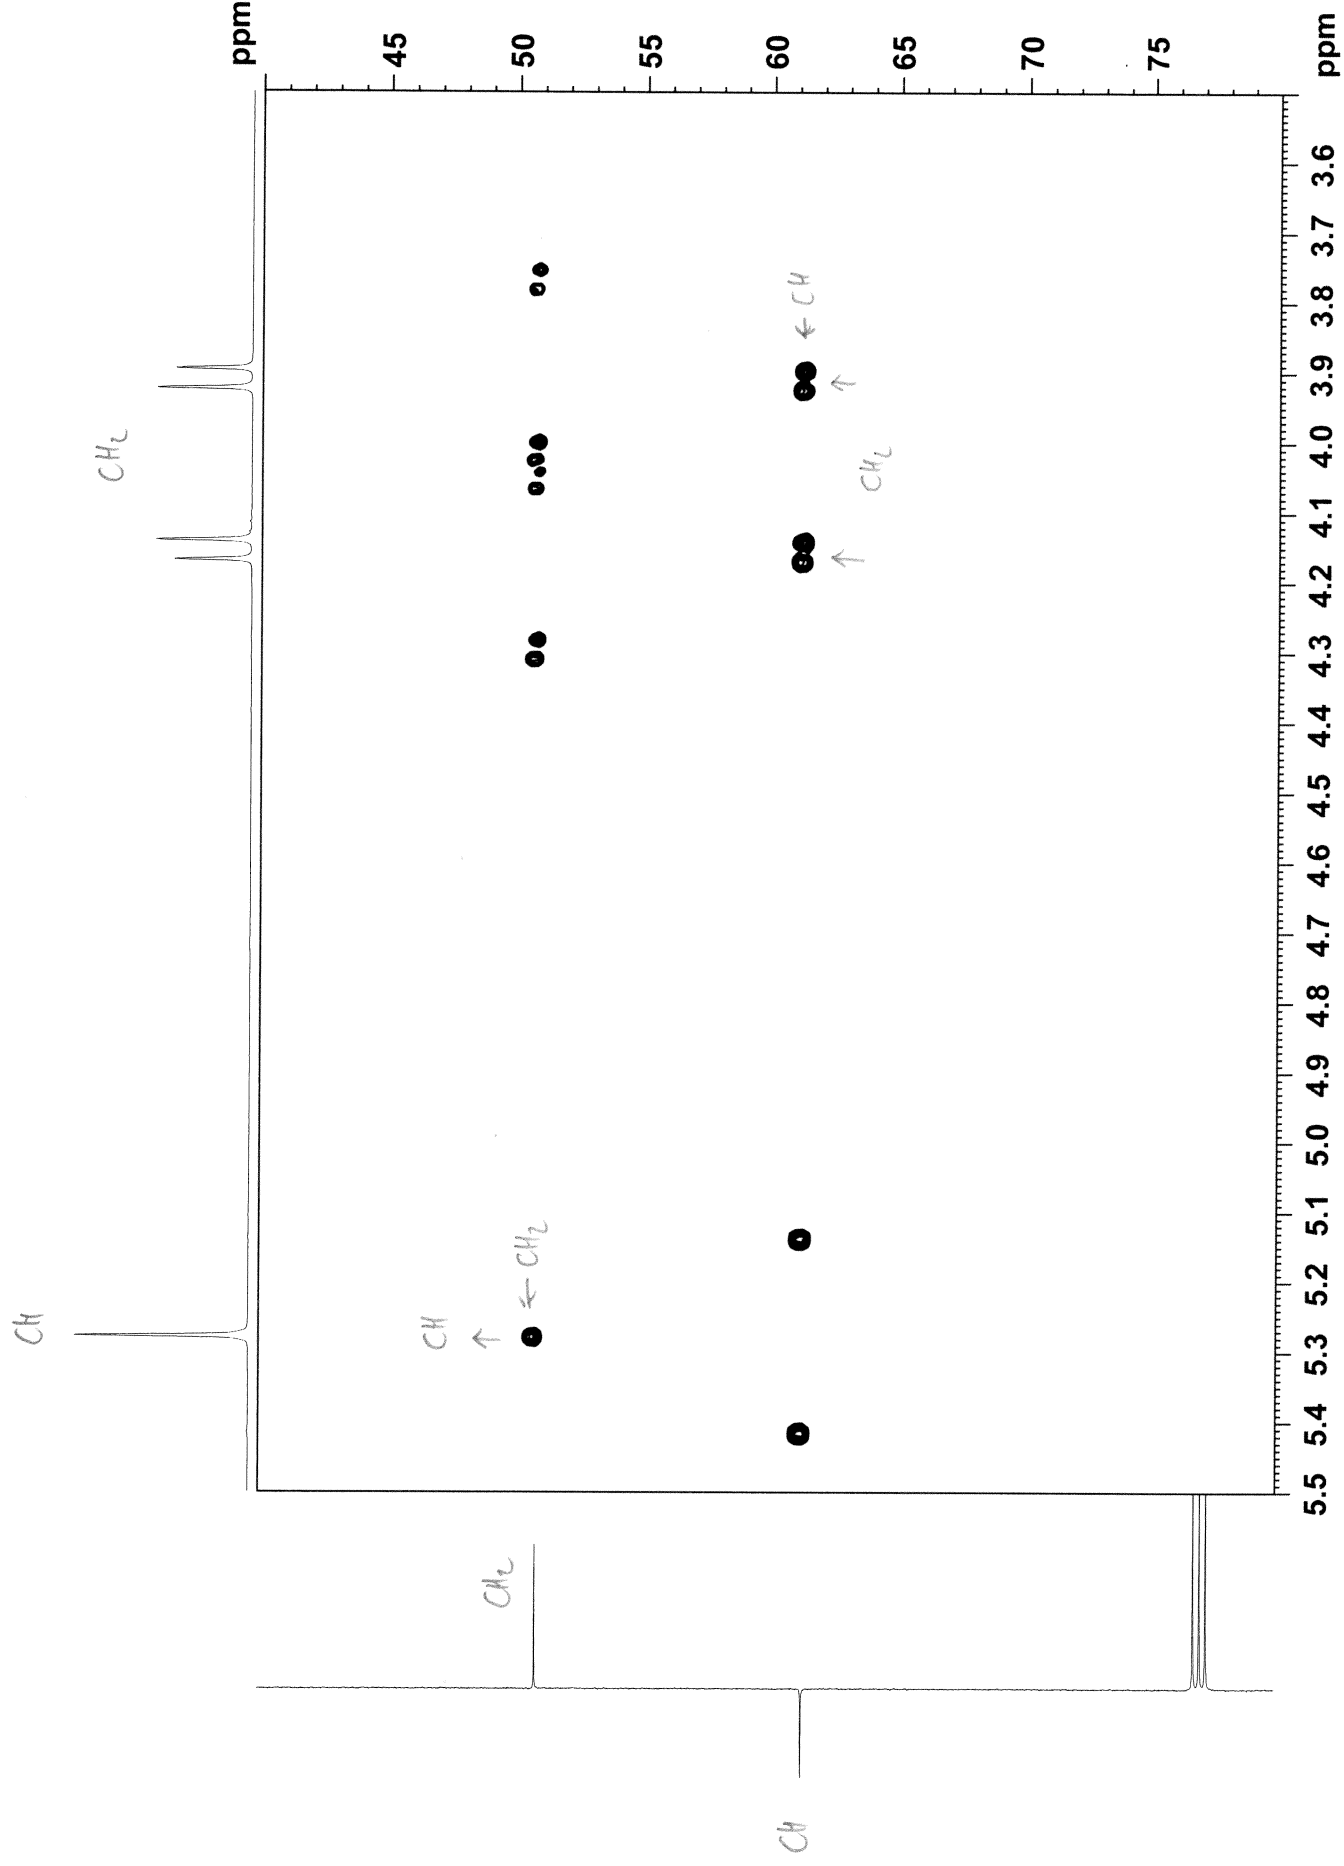

**Figure S4c.** NMR spectra of compound **8a**.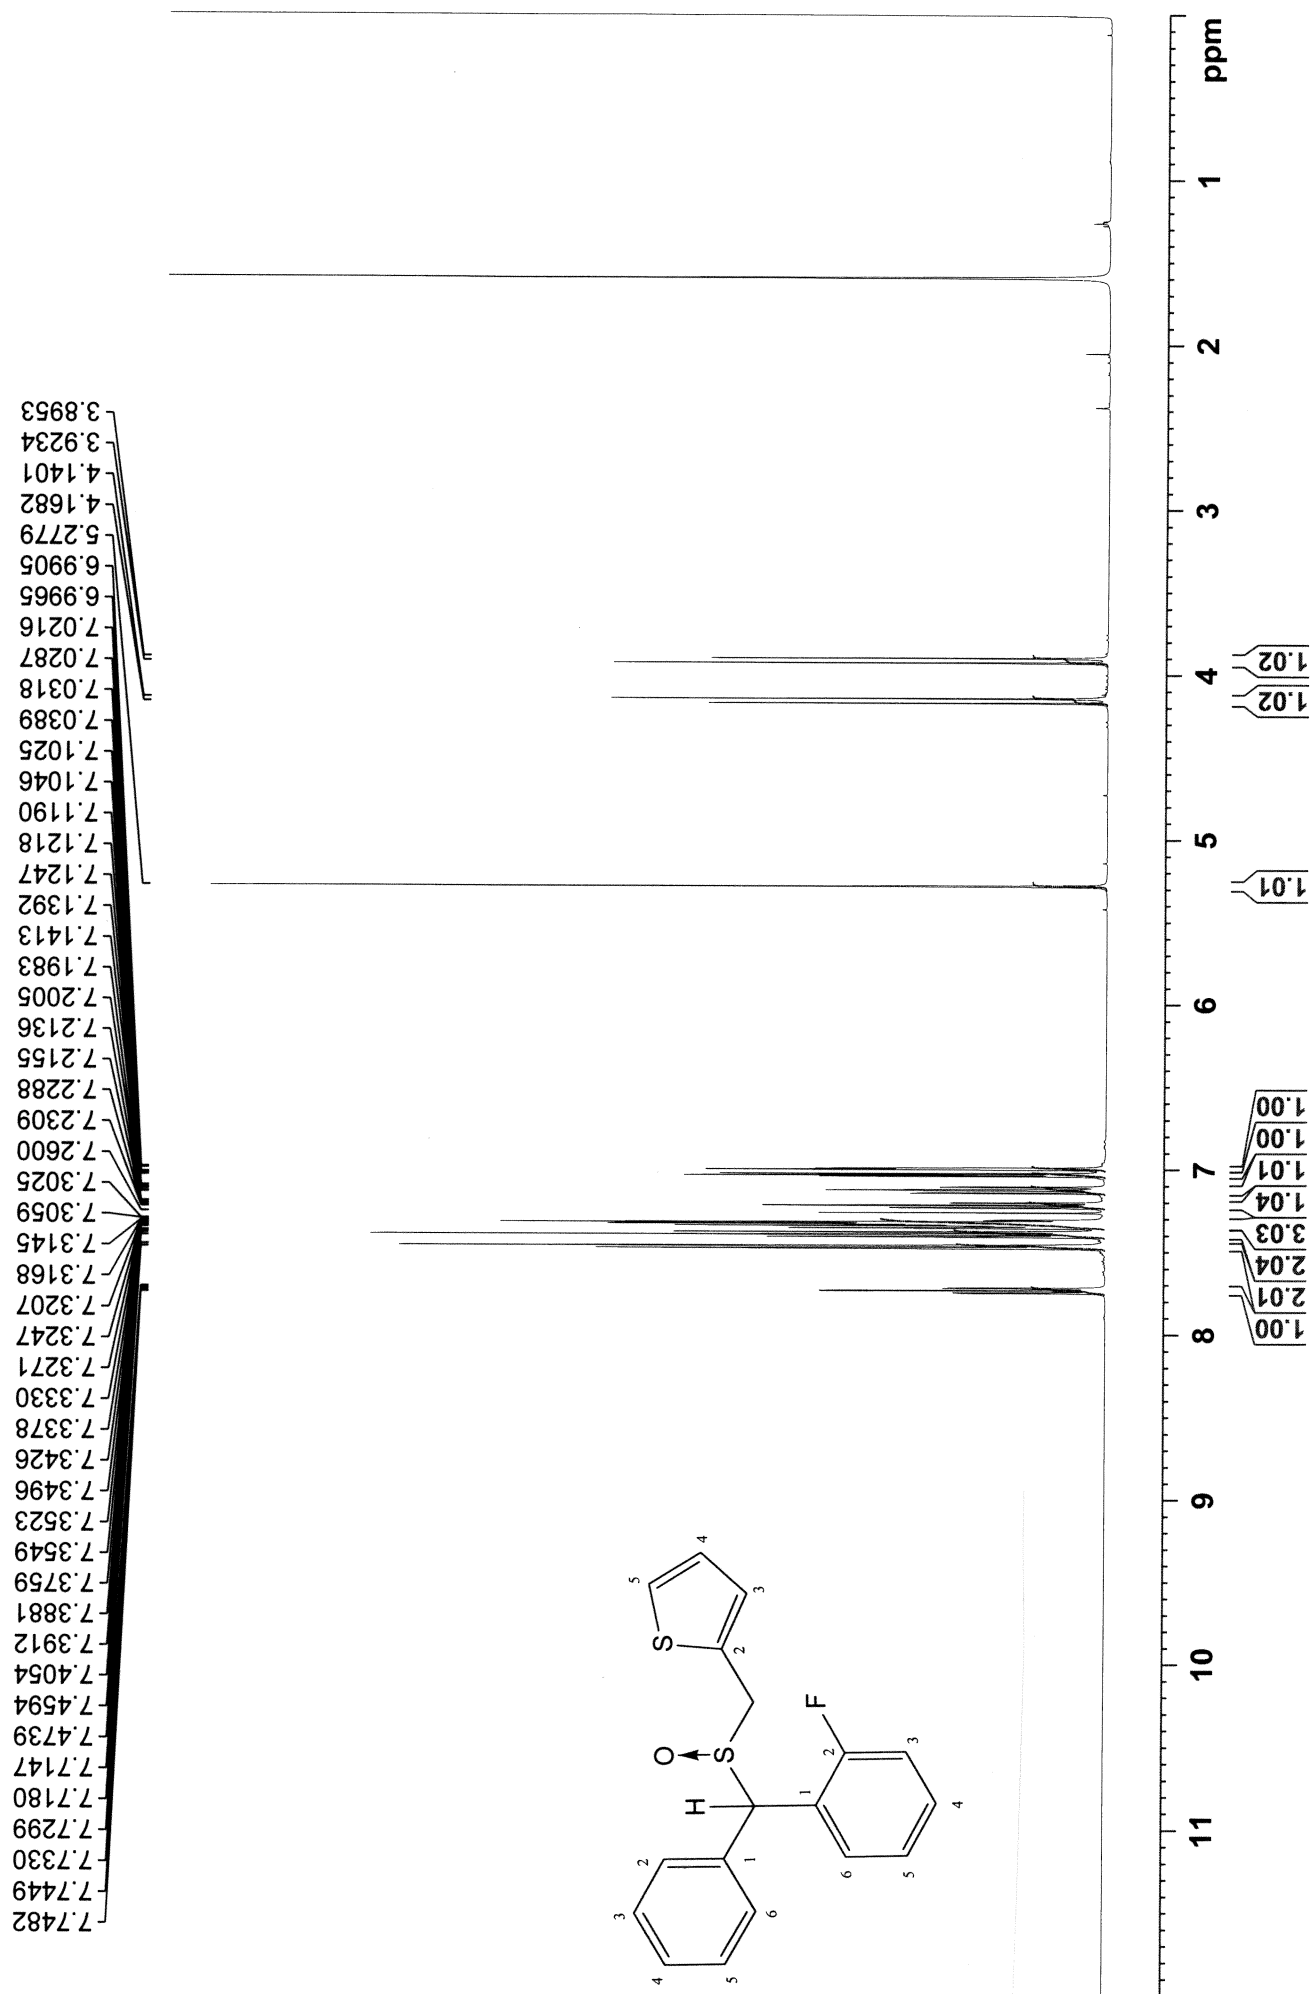

7.7482  
7.7449  
7.7330  
7.7299  
7.7180  
7.7147

7.4739  
7.4594

7.4054  
7.3912  
7.3881  
7.3759  
7.3549  
7.3523  
7.3496  
7.3426  
7.3378  
7.3330  
7.3271  
7.3247  
7.3207  
7.3168  
7.3145  
7.3059  
7.3025

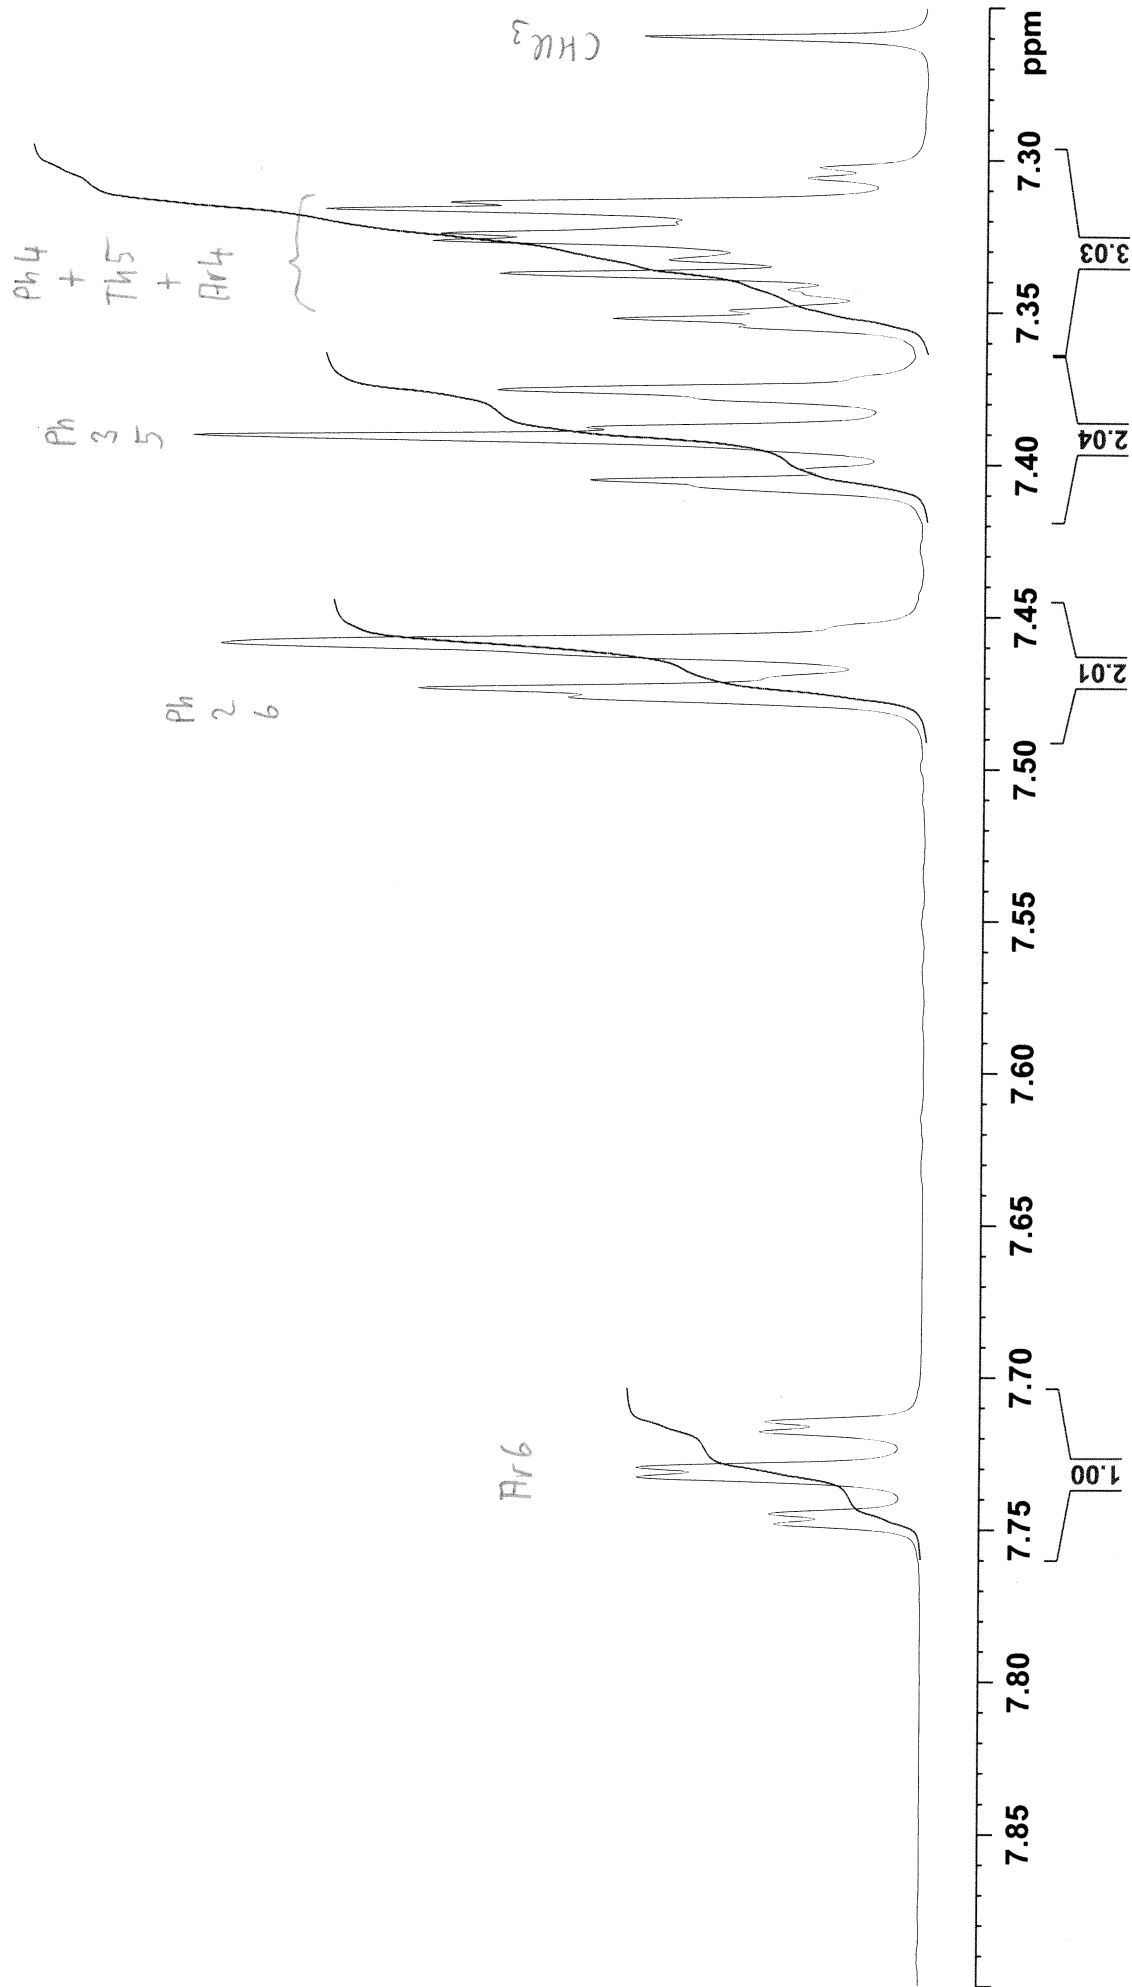

7.2600 —  
 7.2309 —  
 7.2288 —  
 7.2155 —  
 7.2136 —  
 7.2005 —  
 7.1983 —  
 7.1413 —  
 7.1392 —  
 7.1247 —  
 7.1218 —  
 7.1190 —  
 7.1046 —  
 7.1025 —  
 7.0389 —  
 7.0318 —  
 7.0287 —  
 7.0216 —  
 6.9965 —  
 6.9905 —

TH 4  
 TH 3

Ar 3

Ar 5

CH<sub>3</sub>

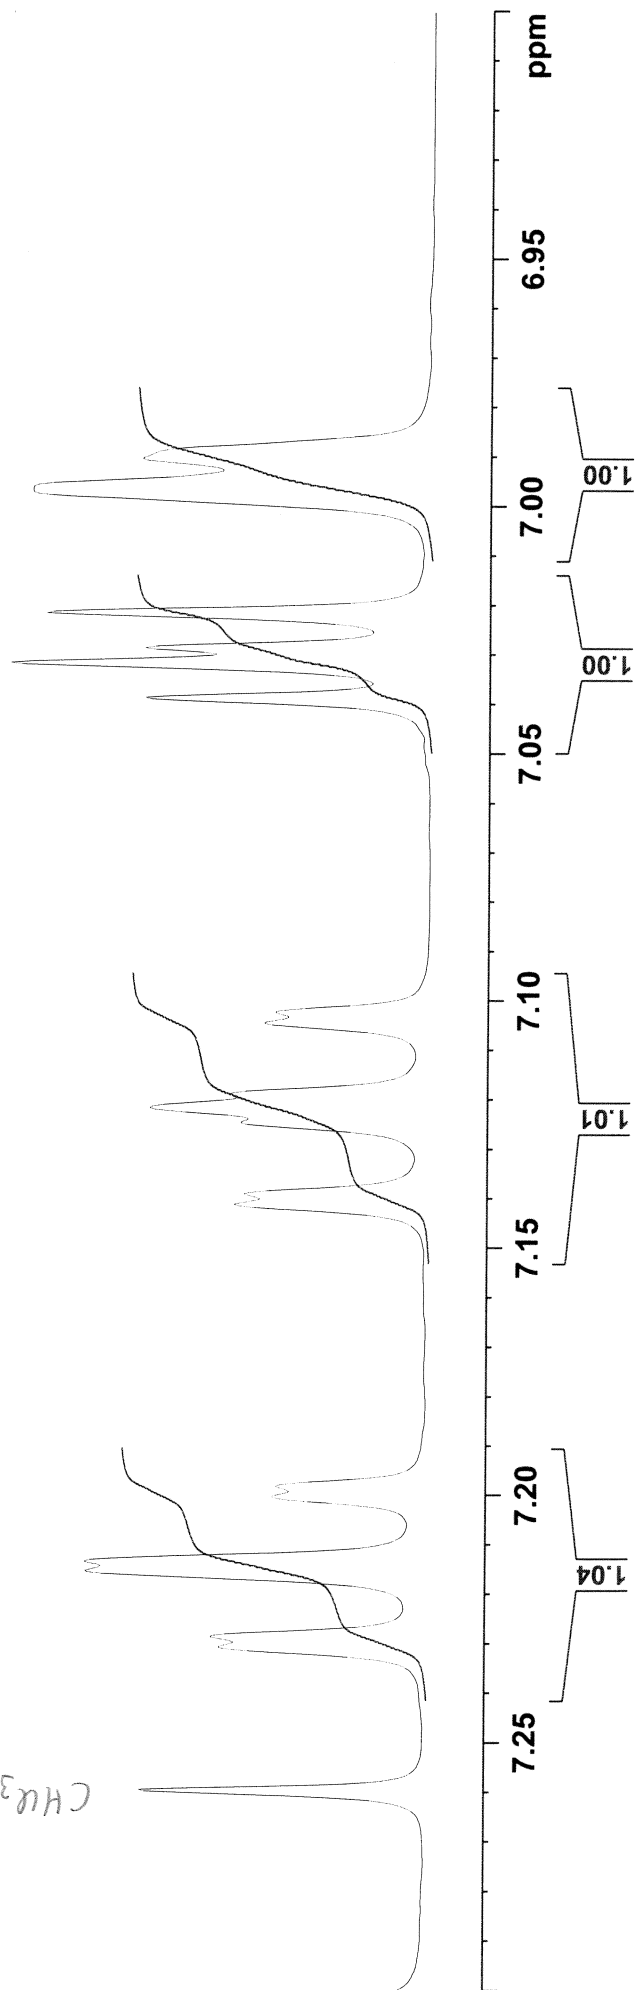

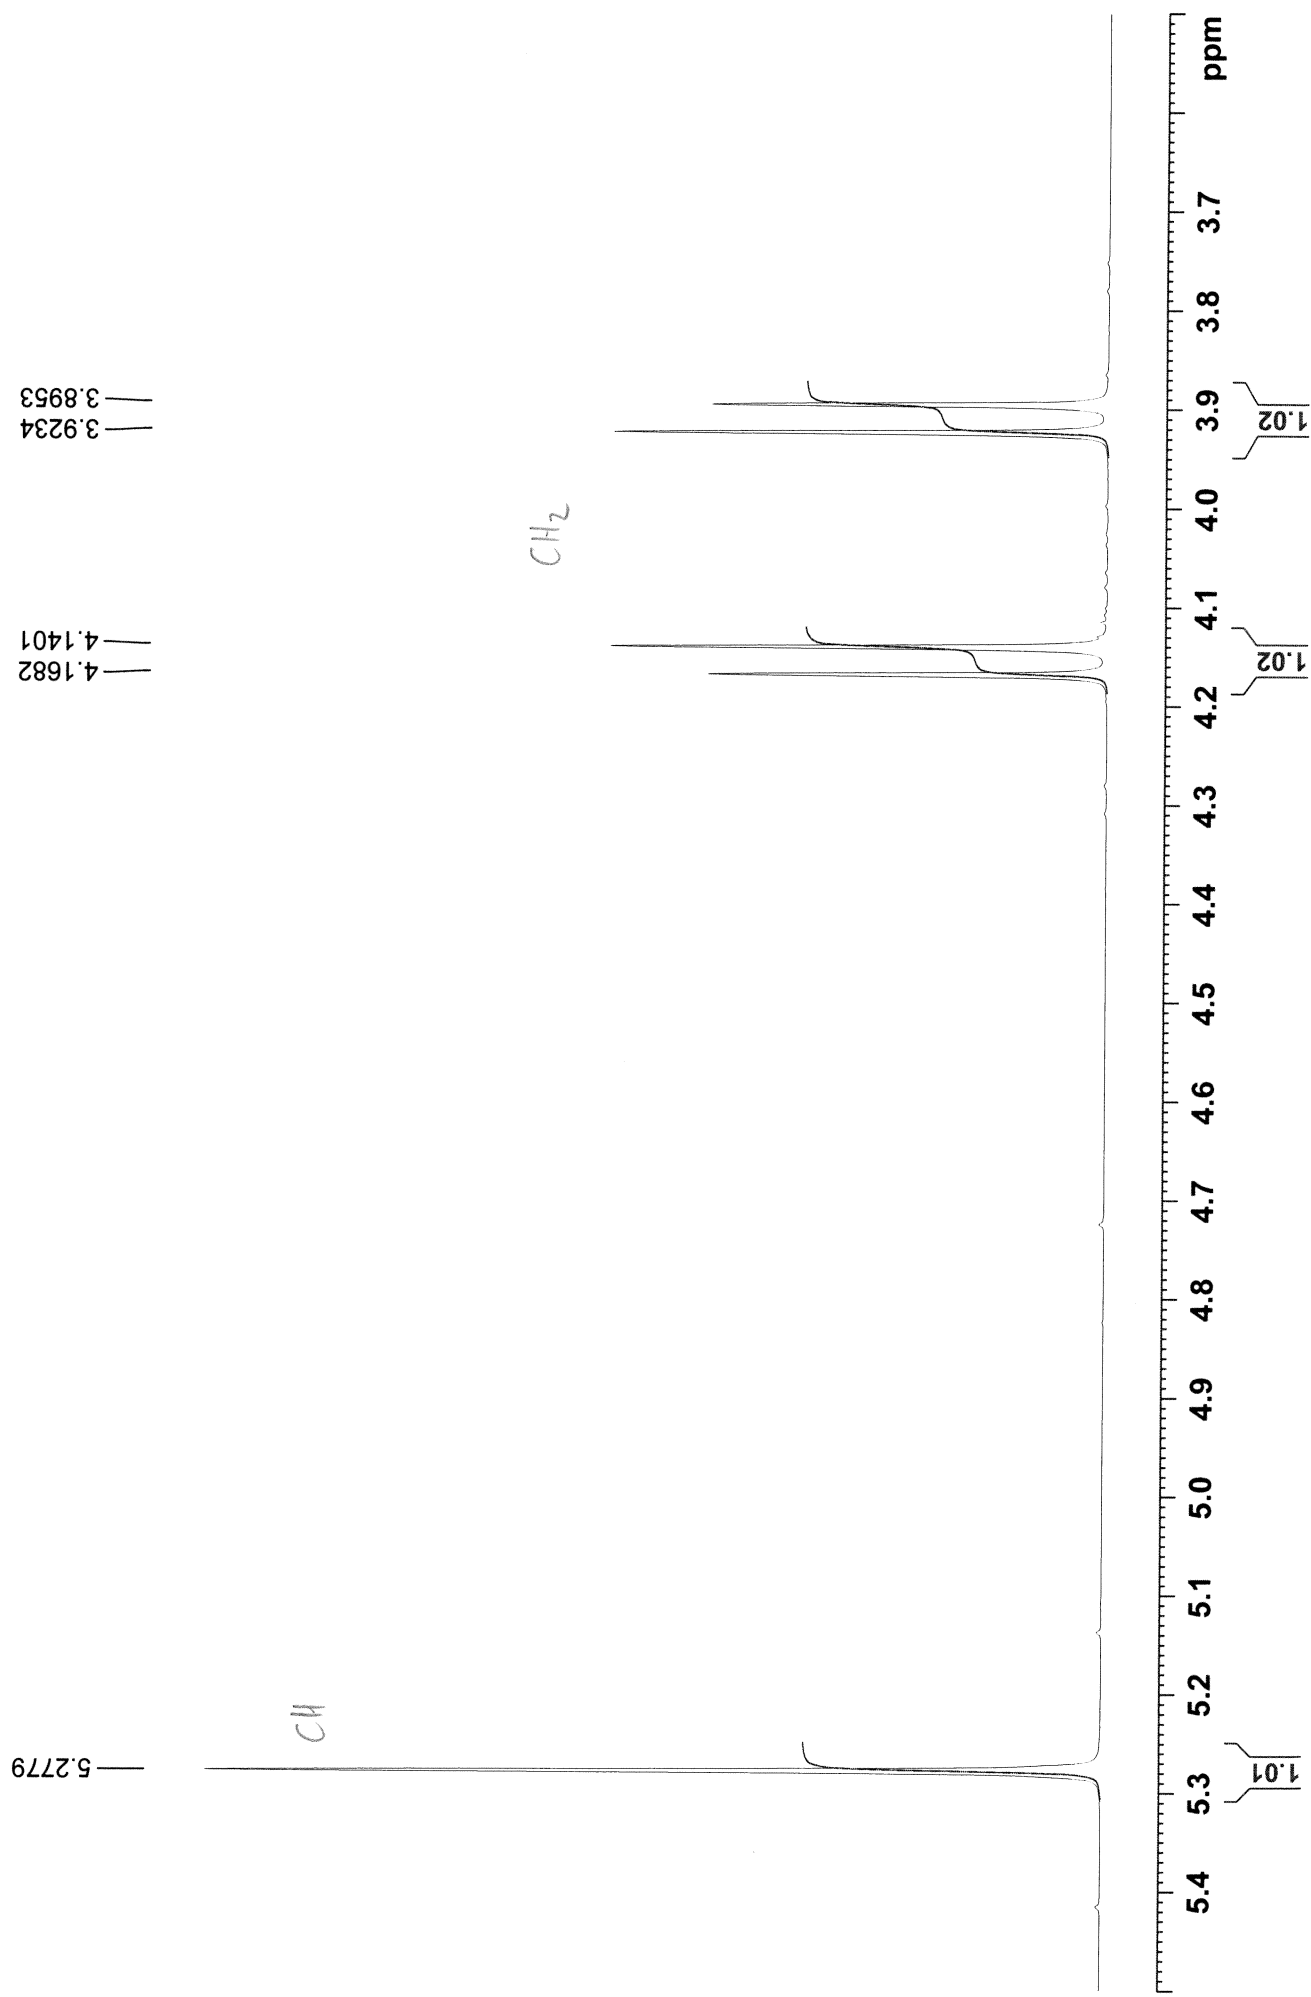



161.8191  
159.8537  
135.4654  
130.4925  
130.4731  
130.3928  
129.9248  
129.8589  
129.2343  
129.0599  
128.8028  
128.4518  
127.3958  
126.9080  
124.5635  
124.5359  
121.9819  
121.8720  
115.7590  
115.5828

77.0000  
61.3010  
50.8169

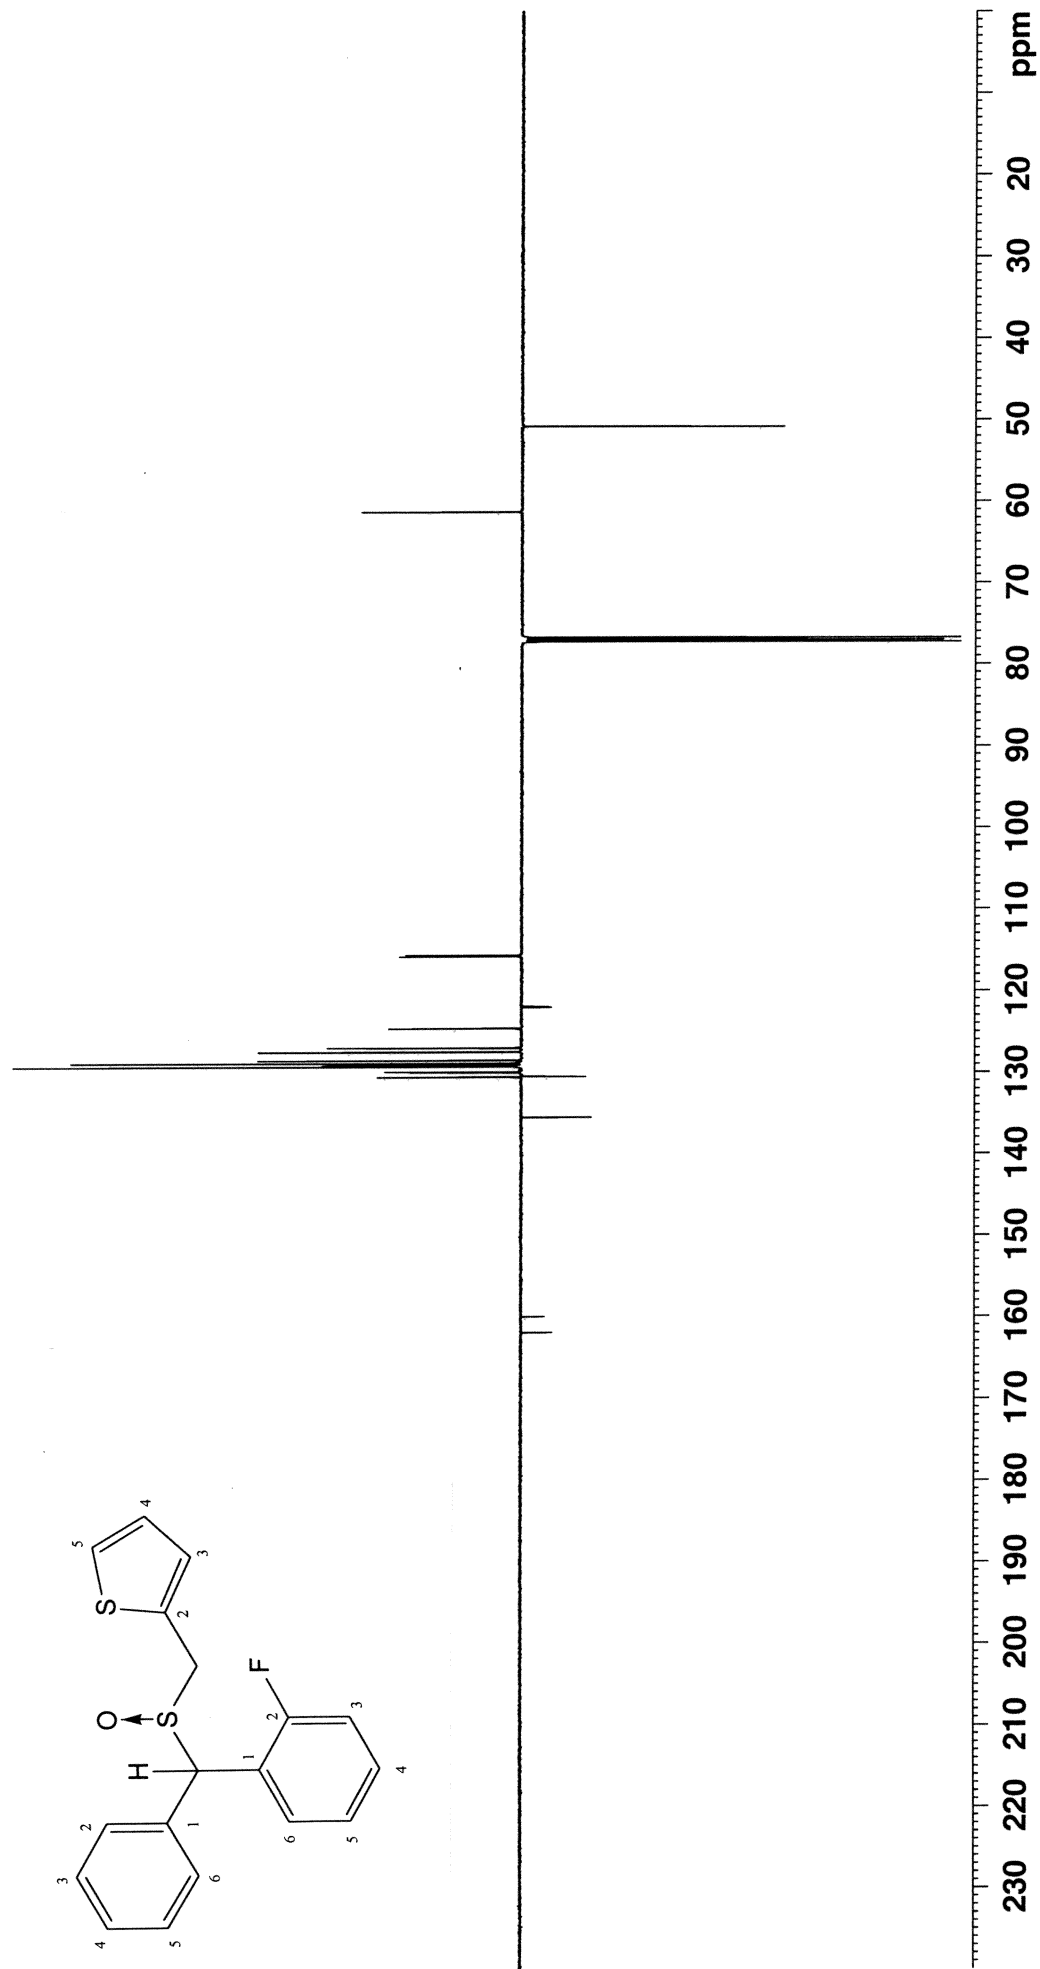

PN020-4 in cdcl3 (APT) 29.7.2020

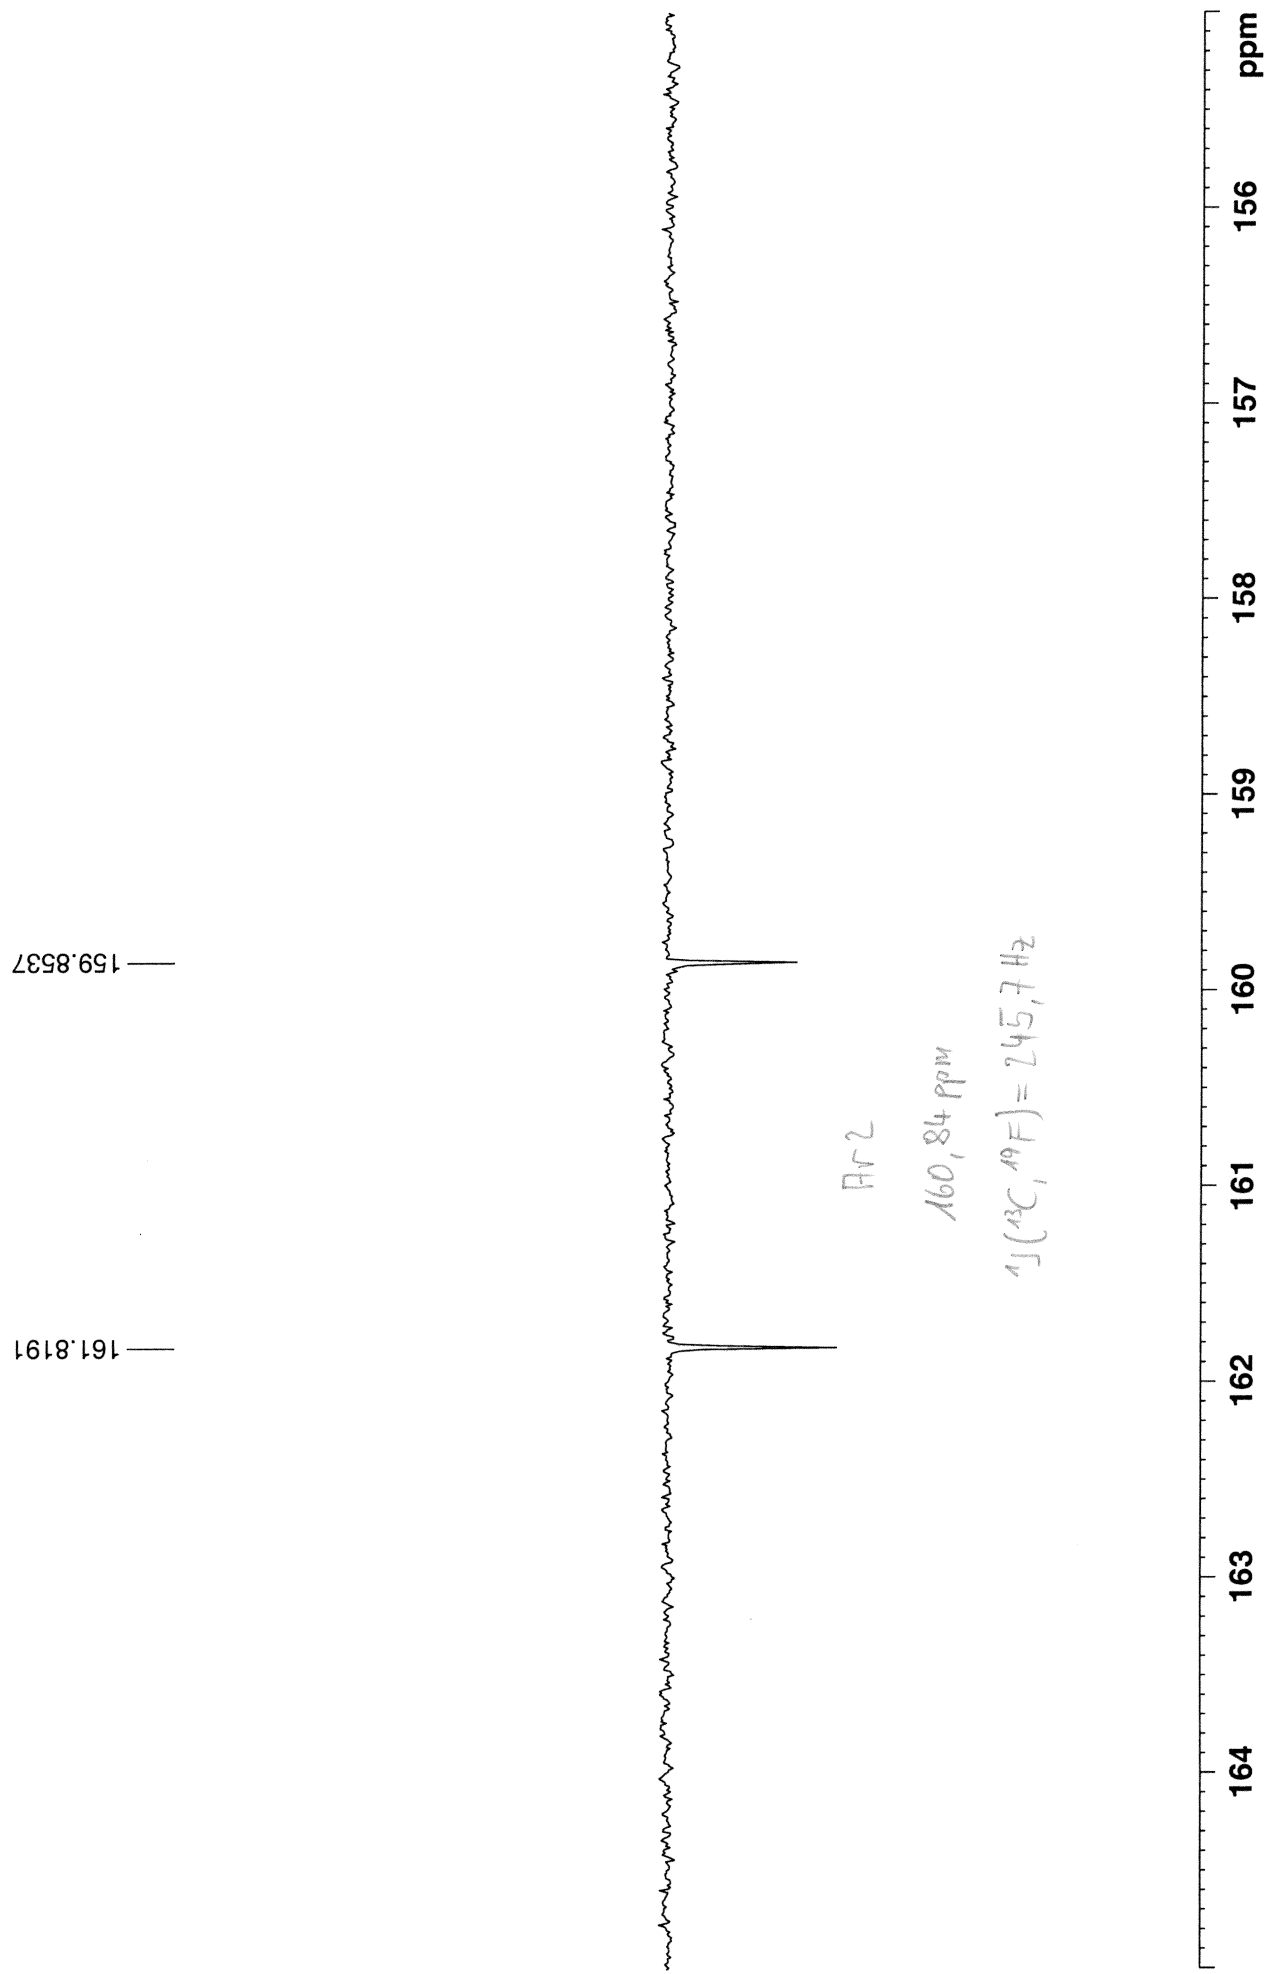

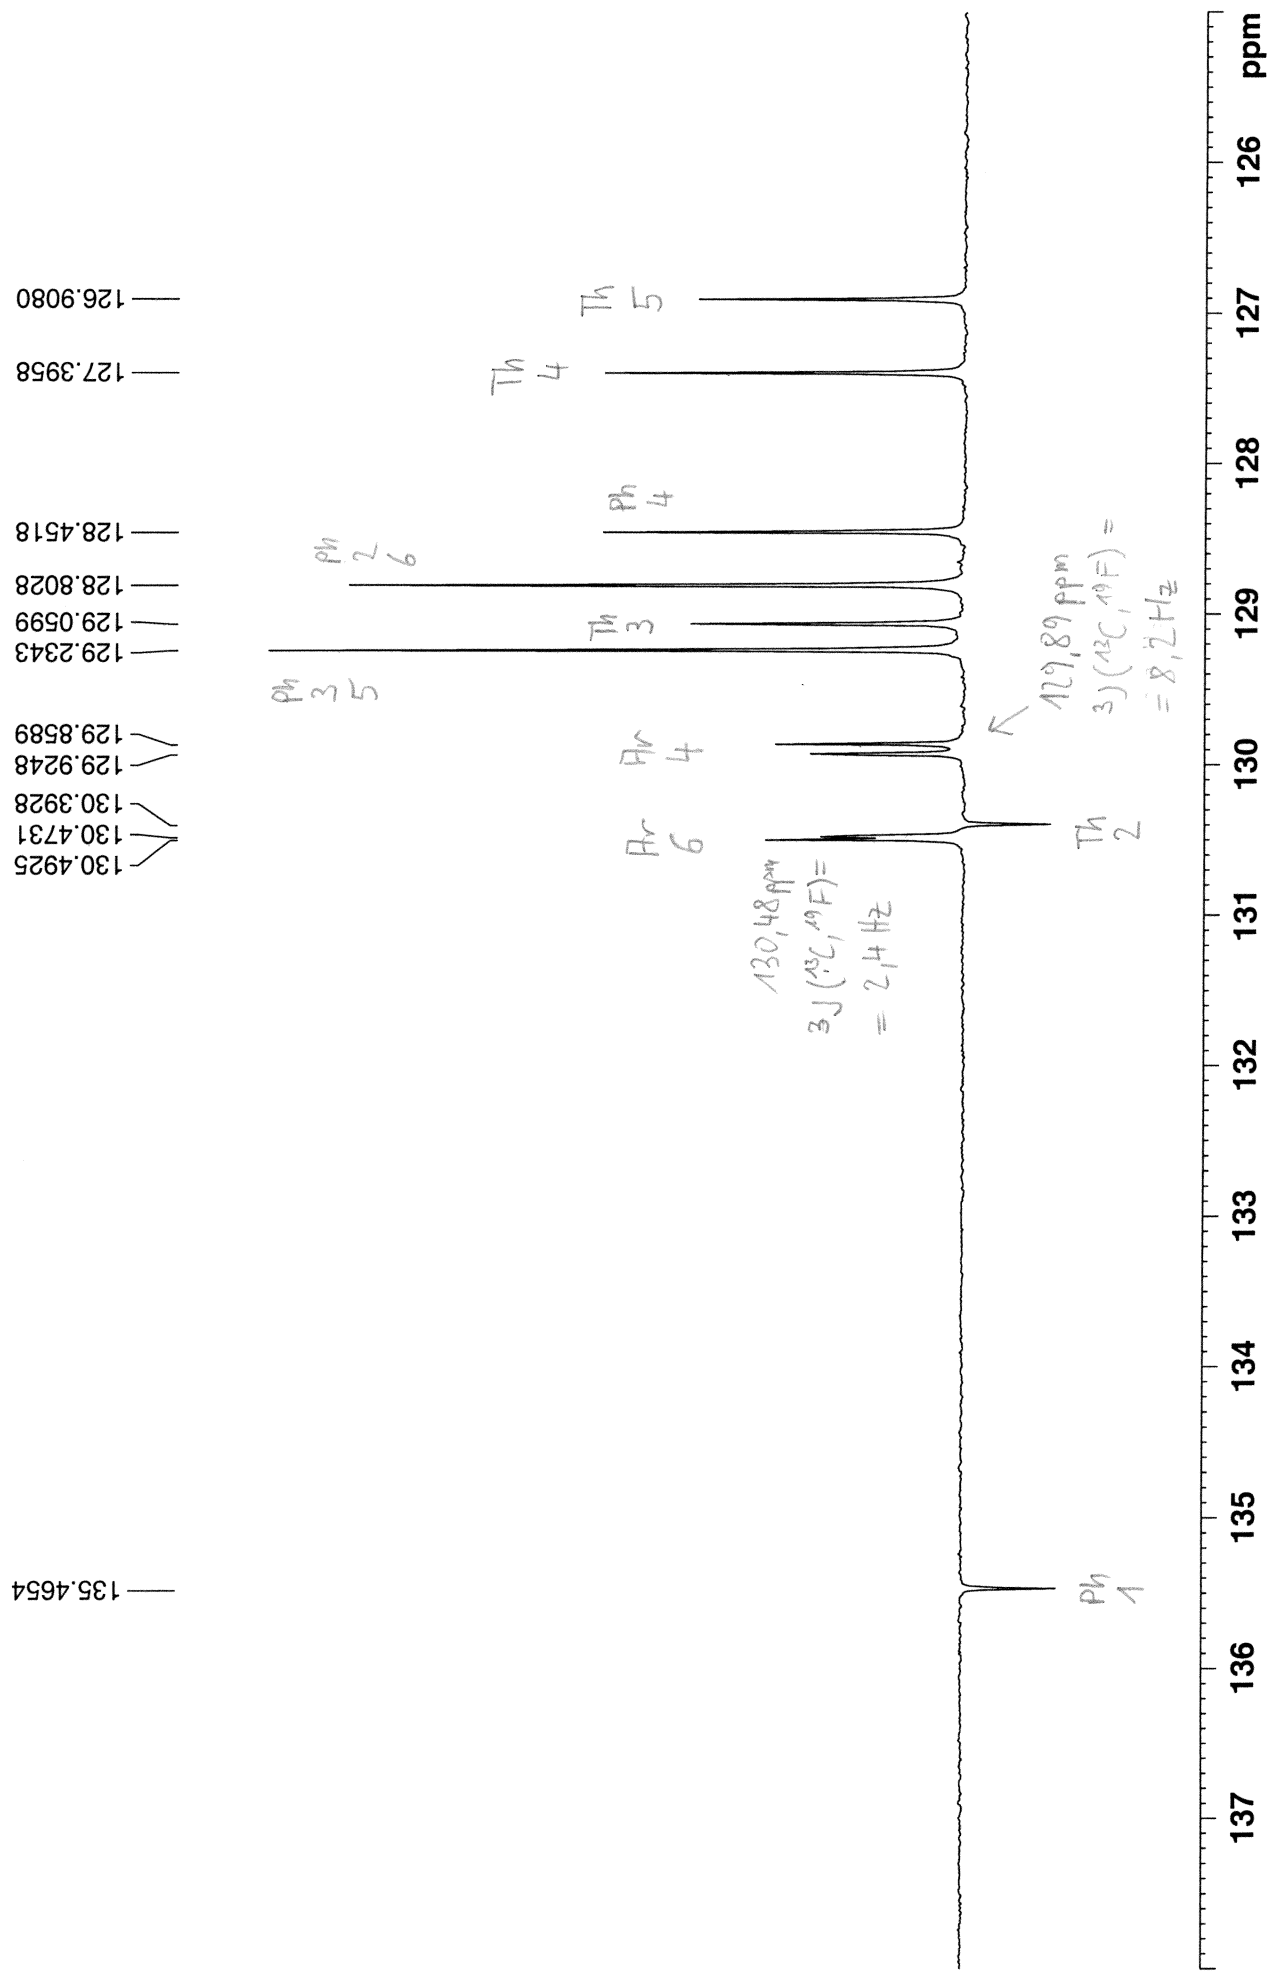

124.5635  
124.5359

121.9819  
121.8720

115.7590  
115.5828

4r

5

17.3

124.55 ppm

$^4J(^{13}C, ^{19}F) =$   
 $= 3.5 \text{ Hz}$

115.67 ppm

$^2J(^{13}C, ^{19}F) =$   
 $= 22.0 \text{ Hz}$

$^2J(^{13}C, ^{19}F) = 13.7 \text{ Hz}$

4r1

121.93 ppm

125

124

123

122

121

120

119

118

117

116

115

ppm

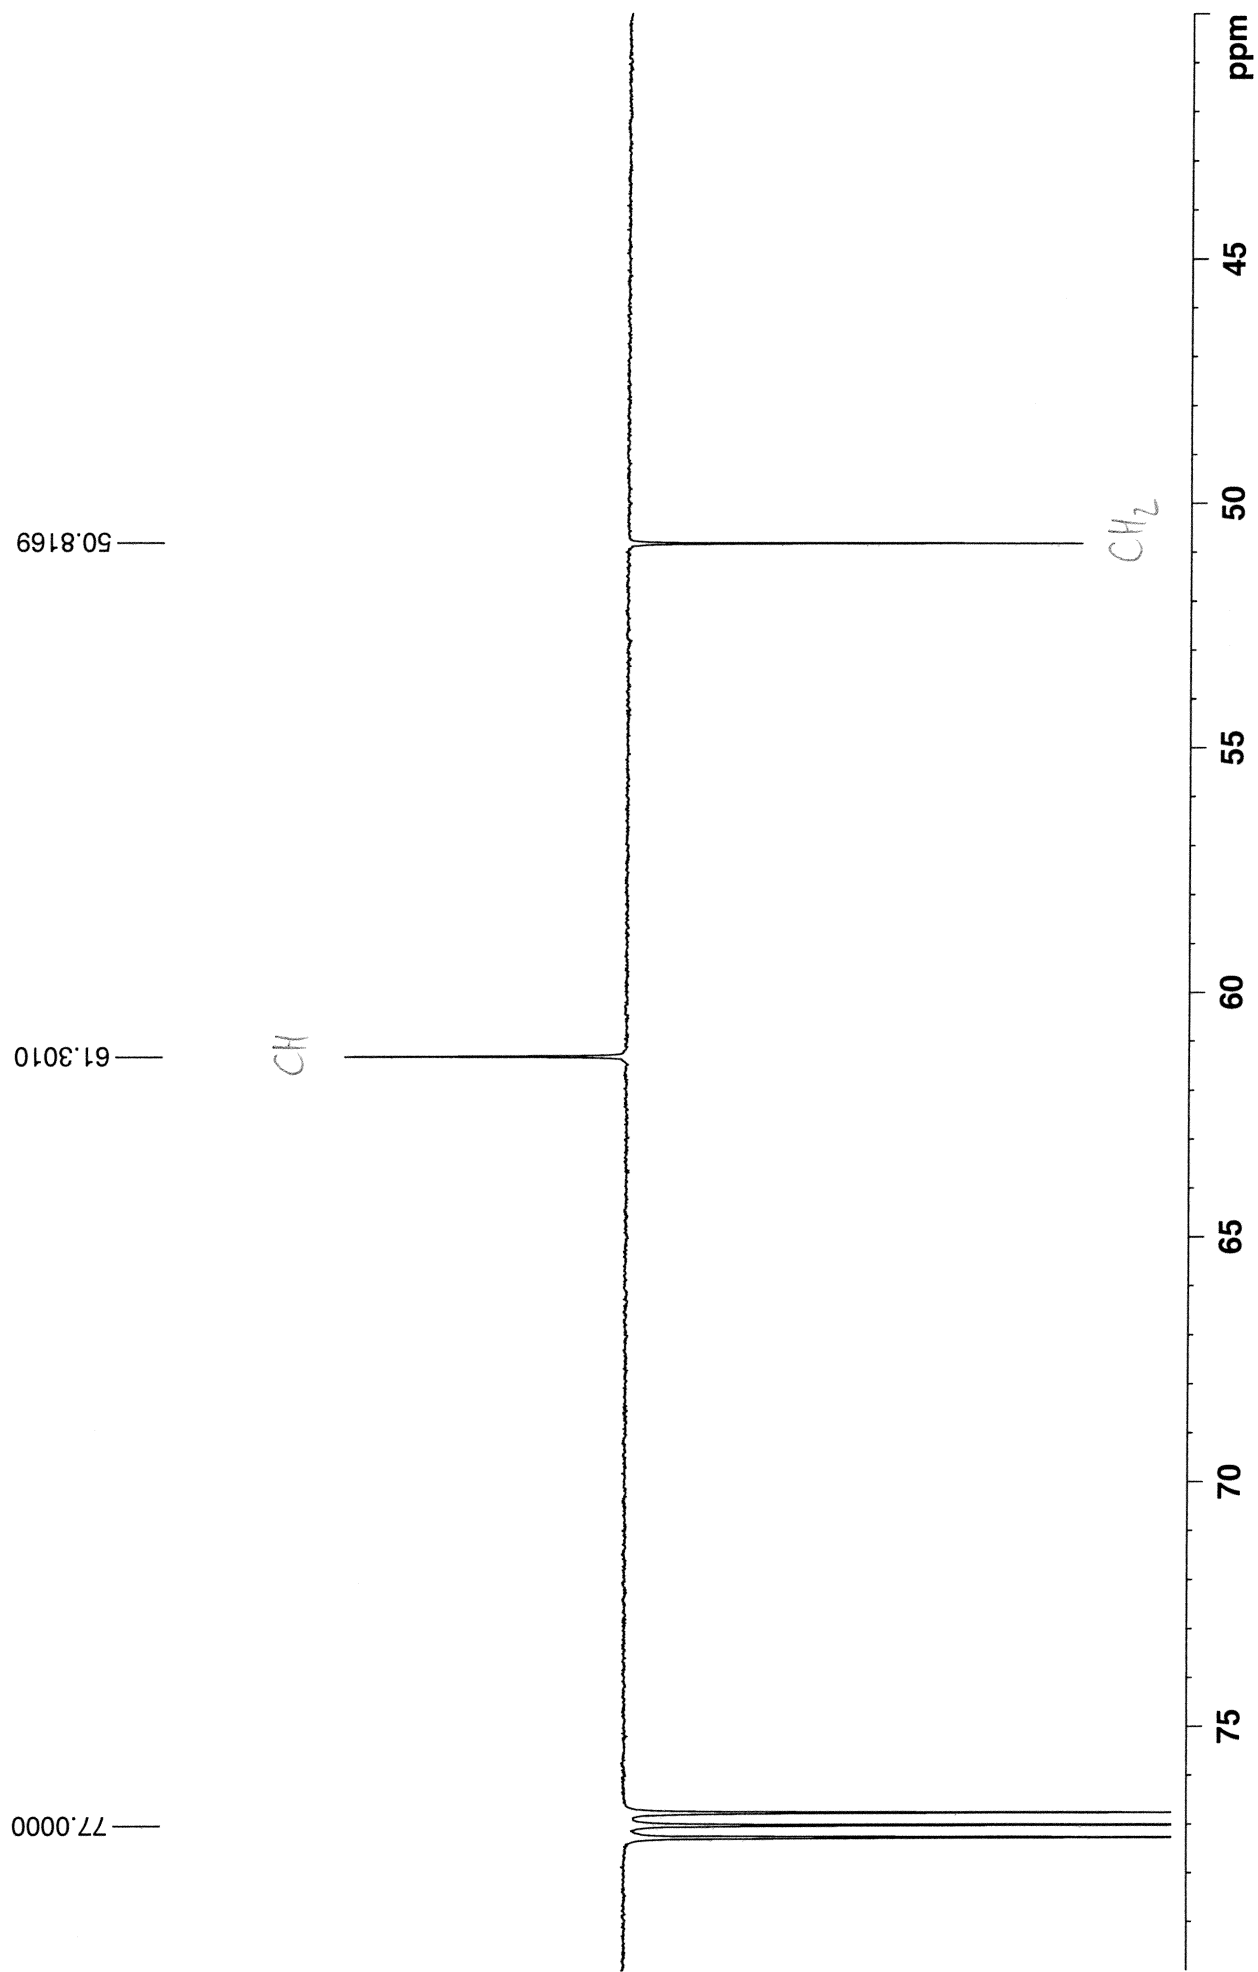

**Figure S5c.** NMR spectra of compound **5b**.

CE148S1P1 in cdcl3 (Proton) 5.2.2019

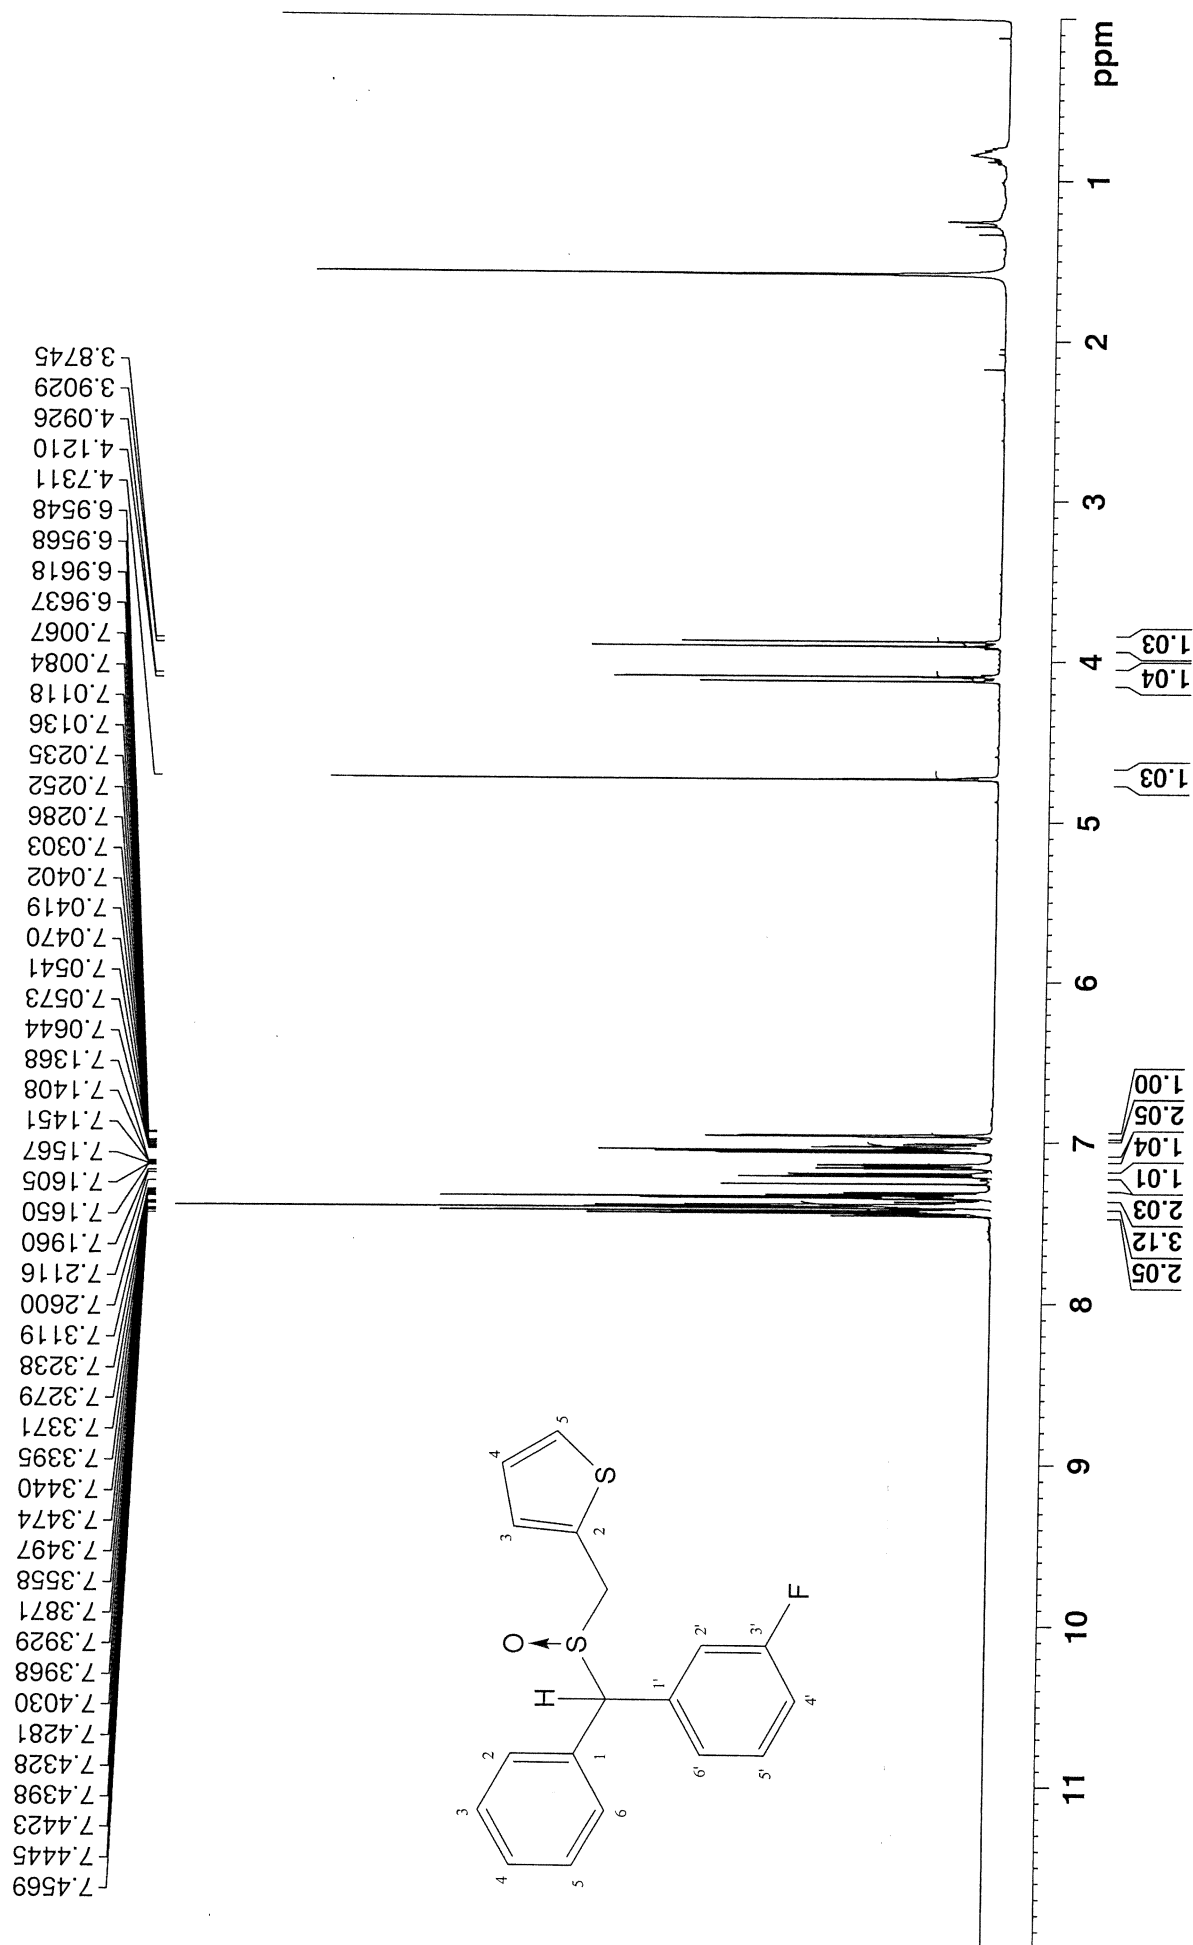

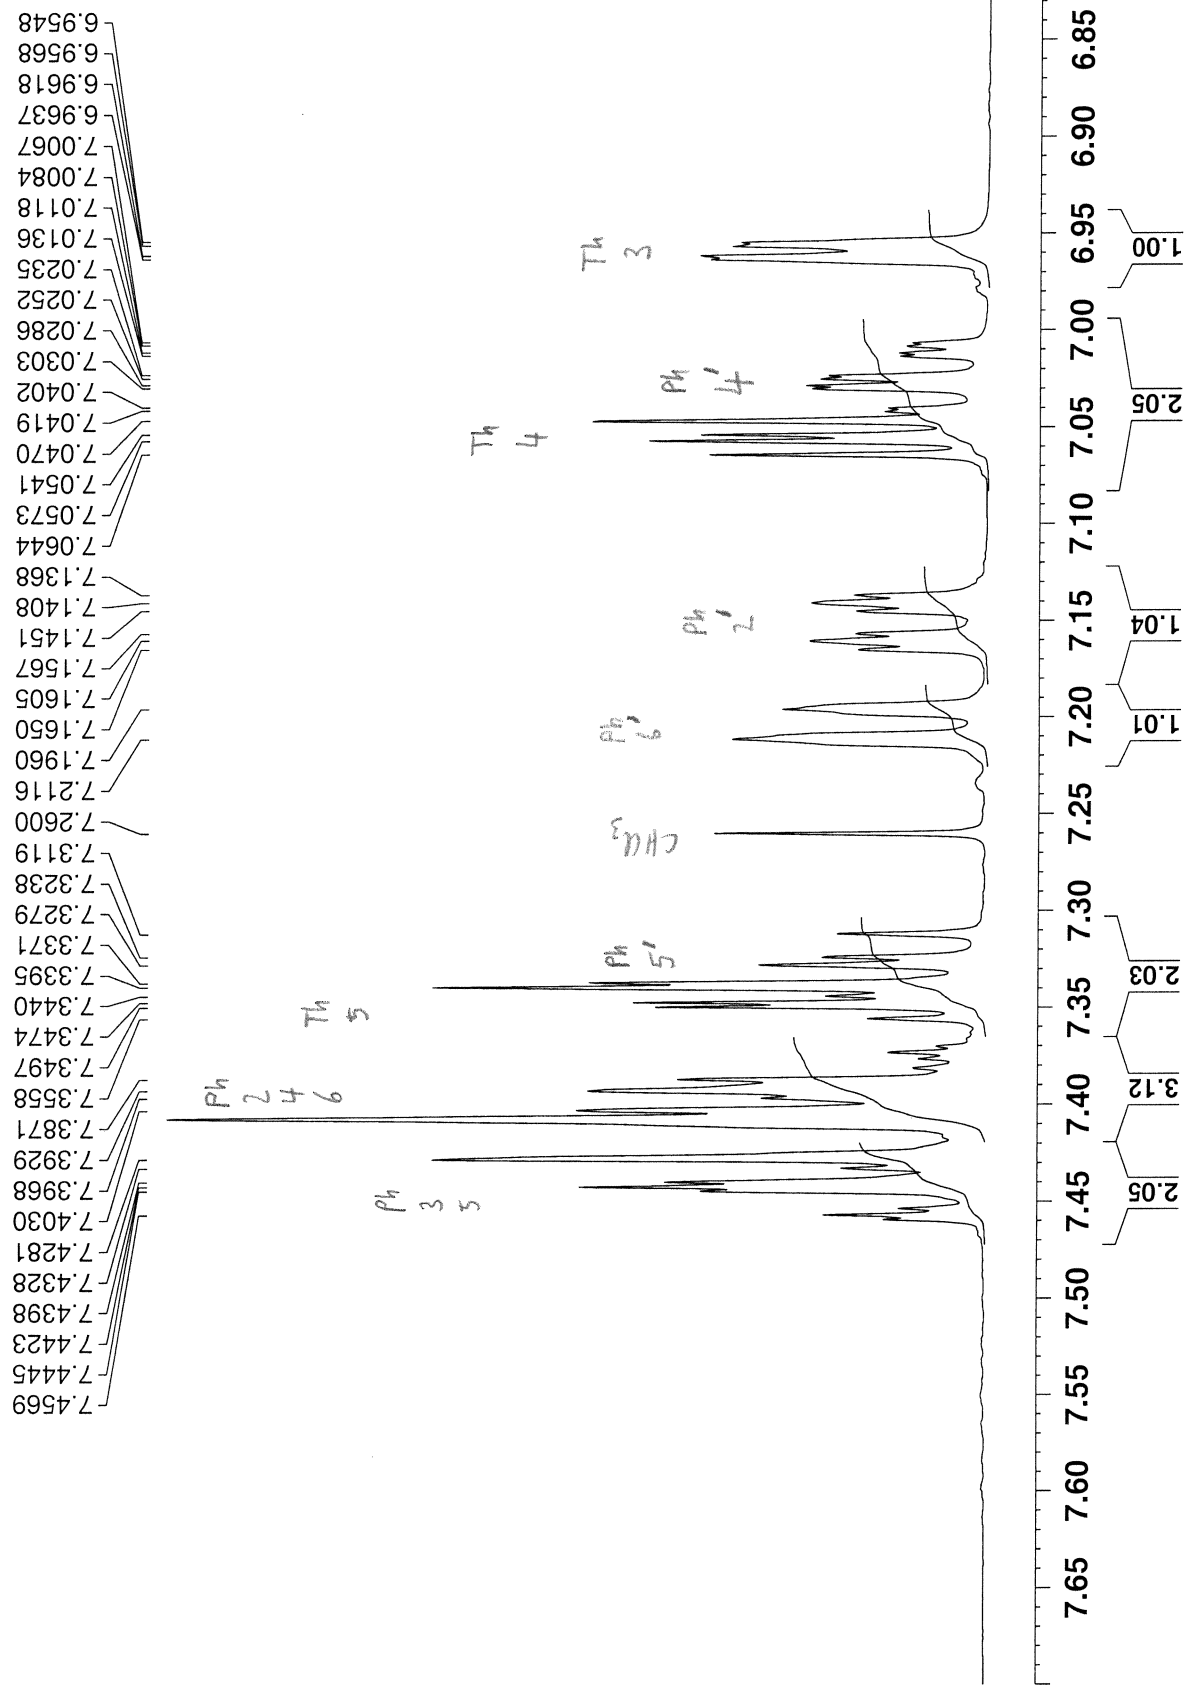

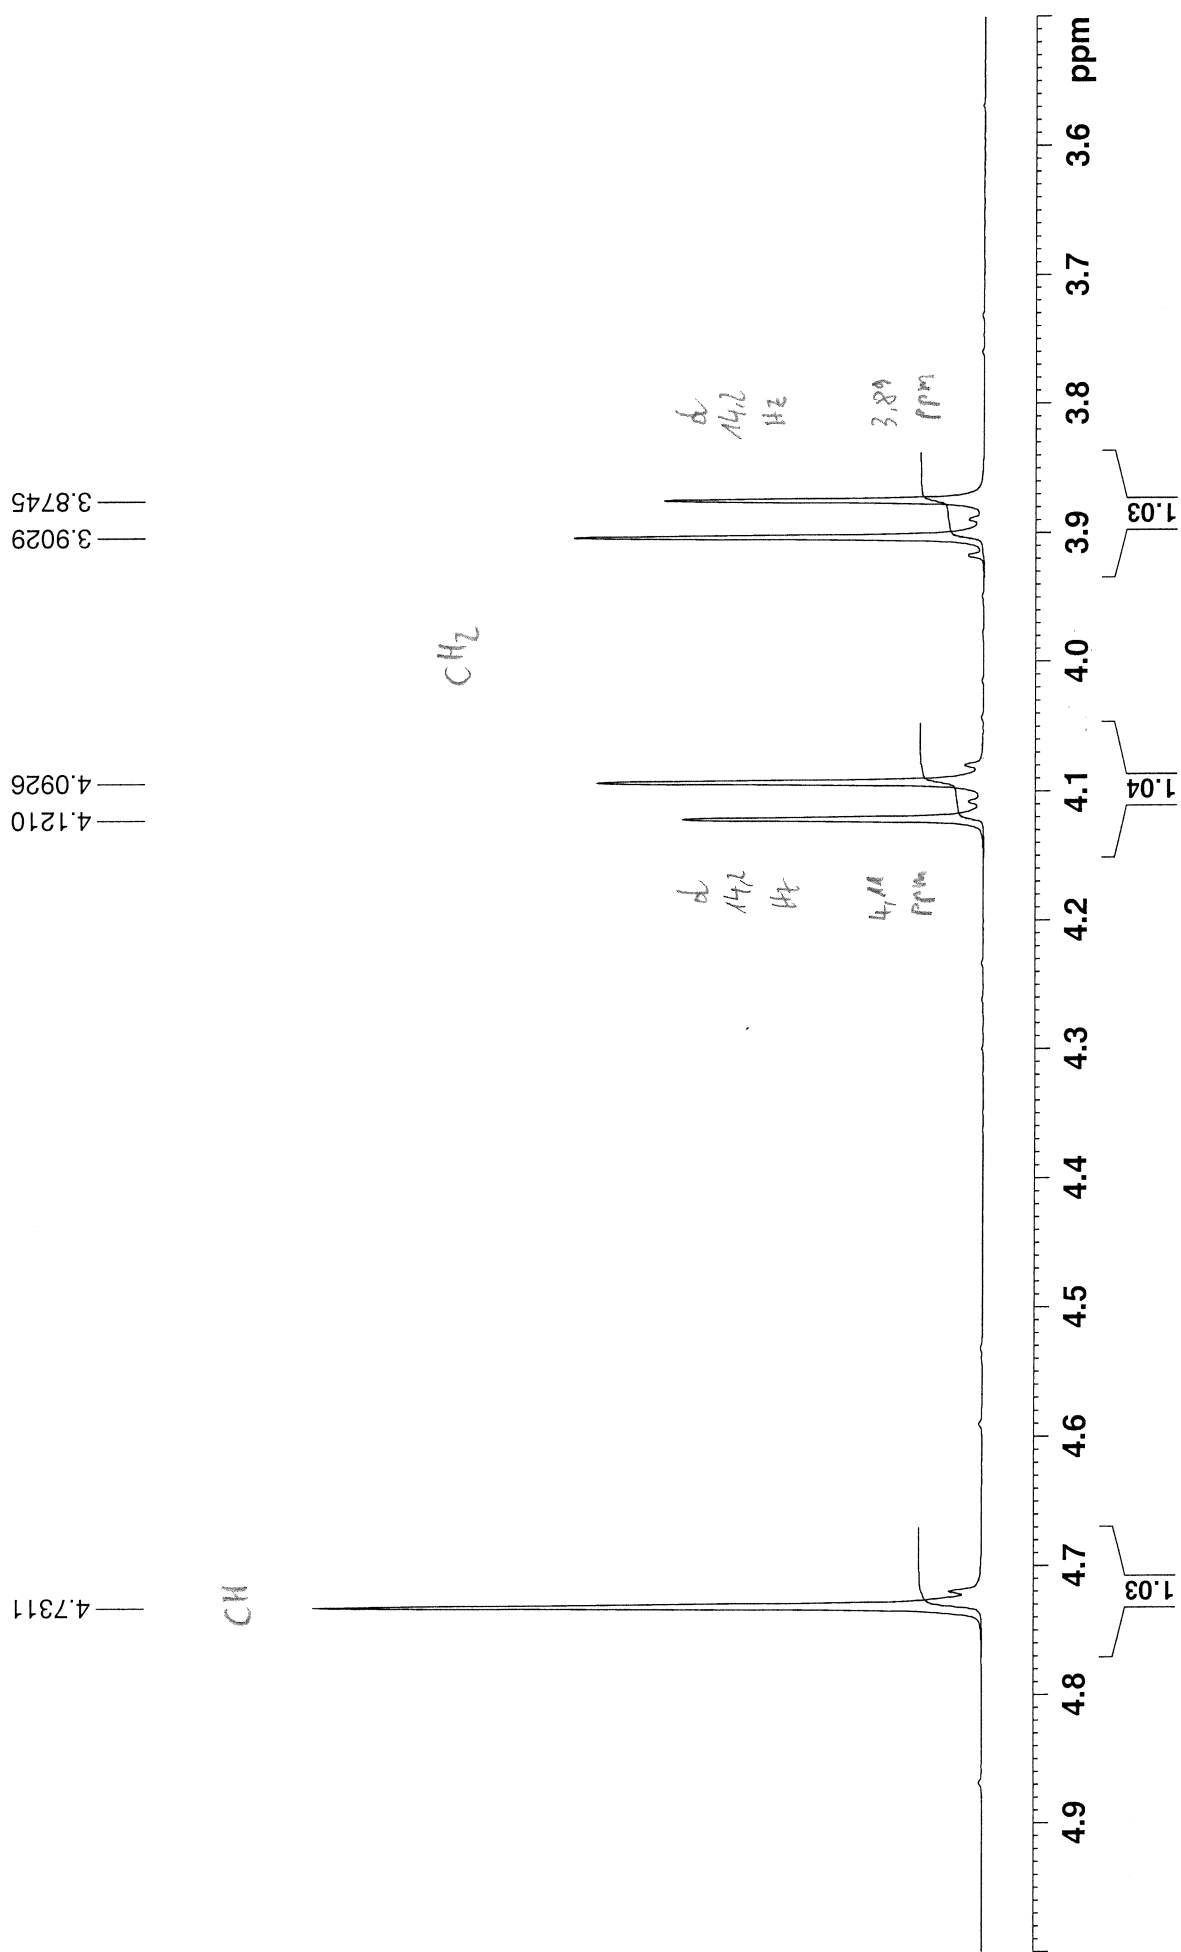



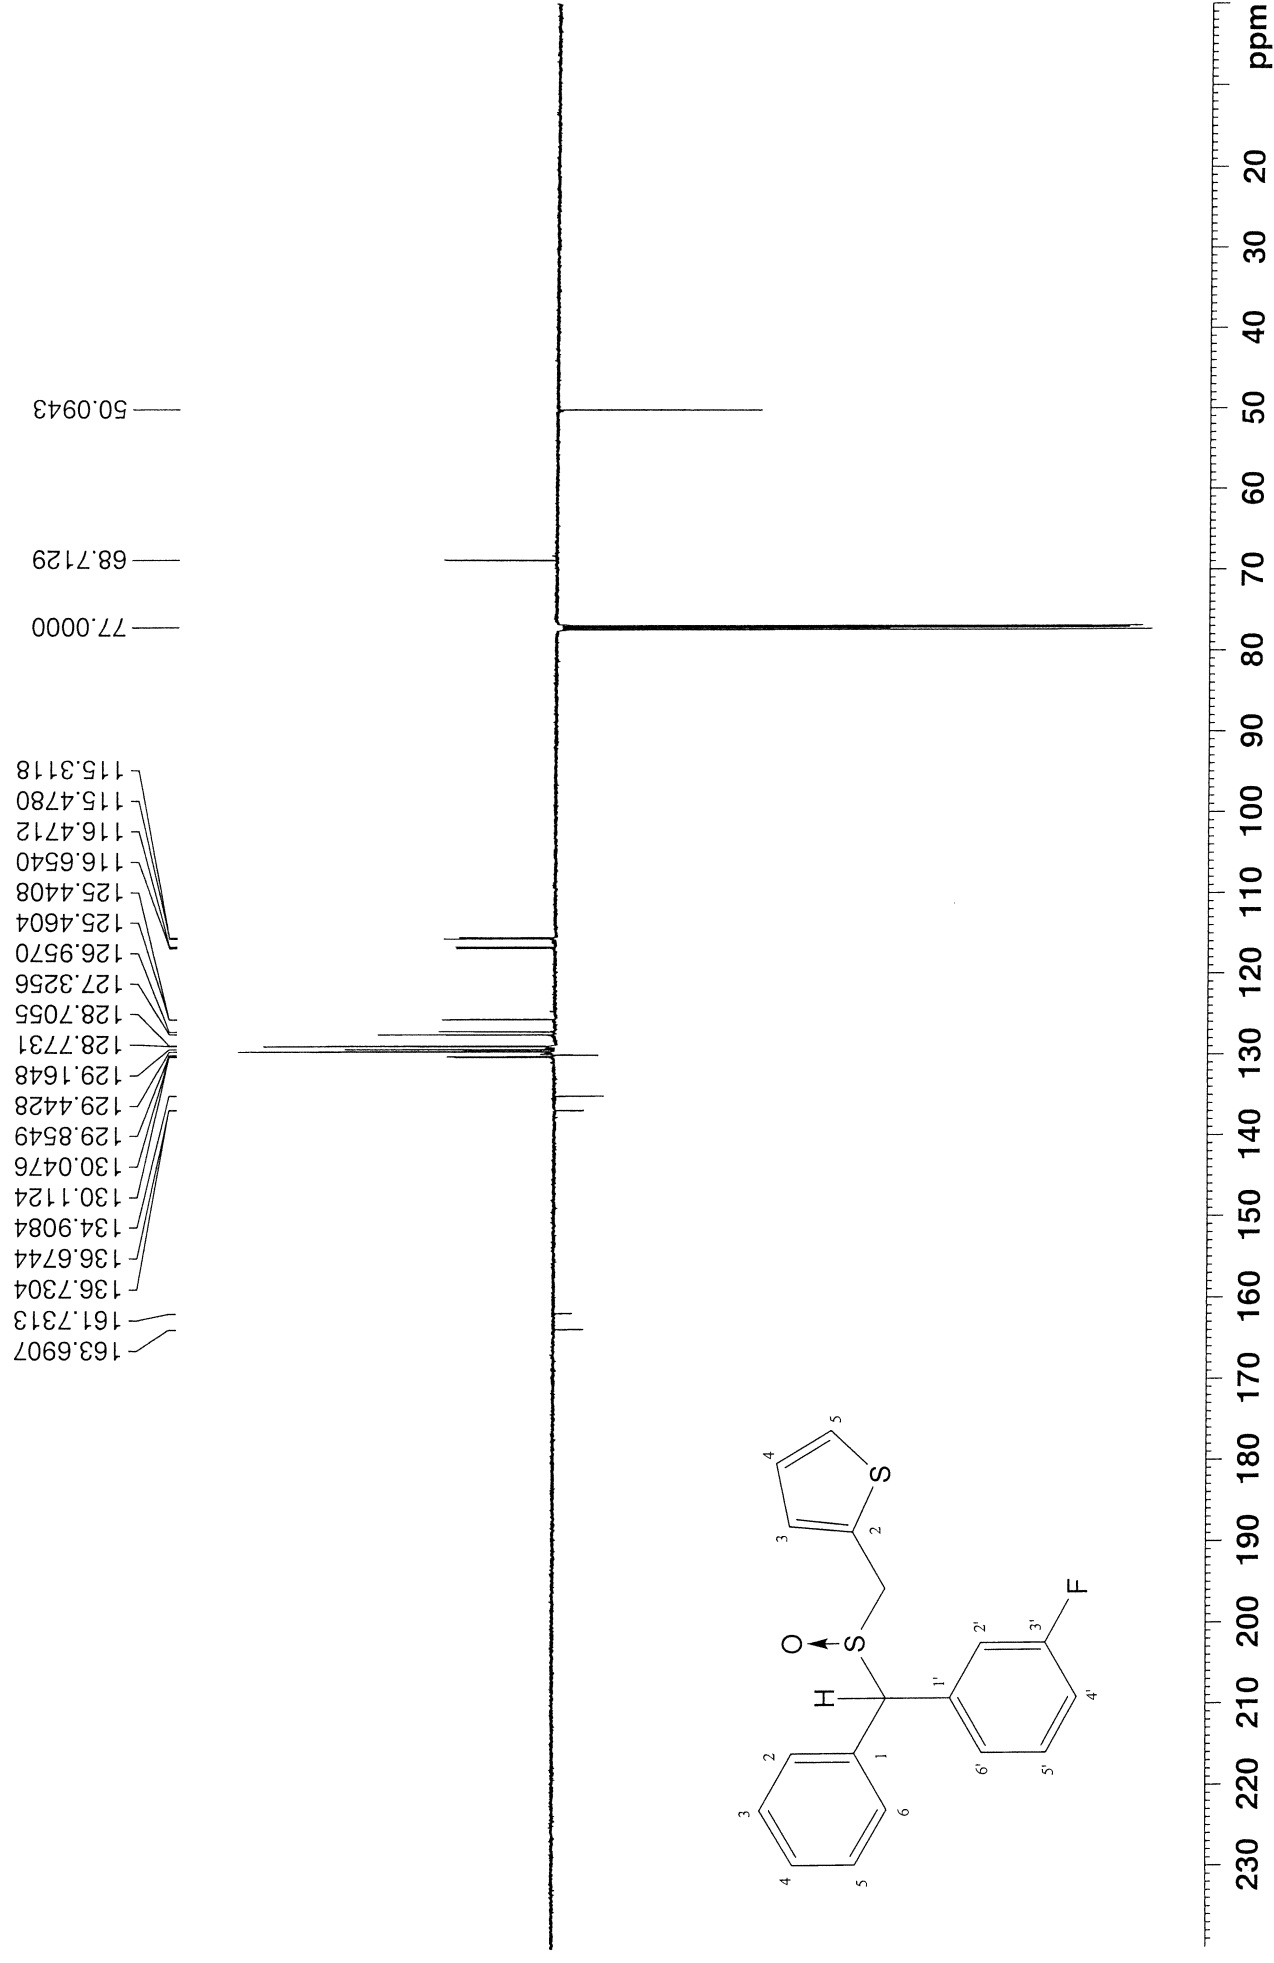

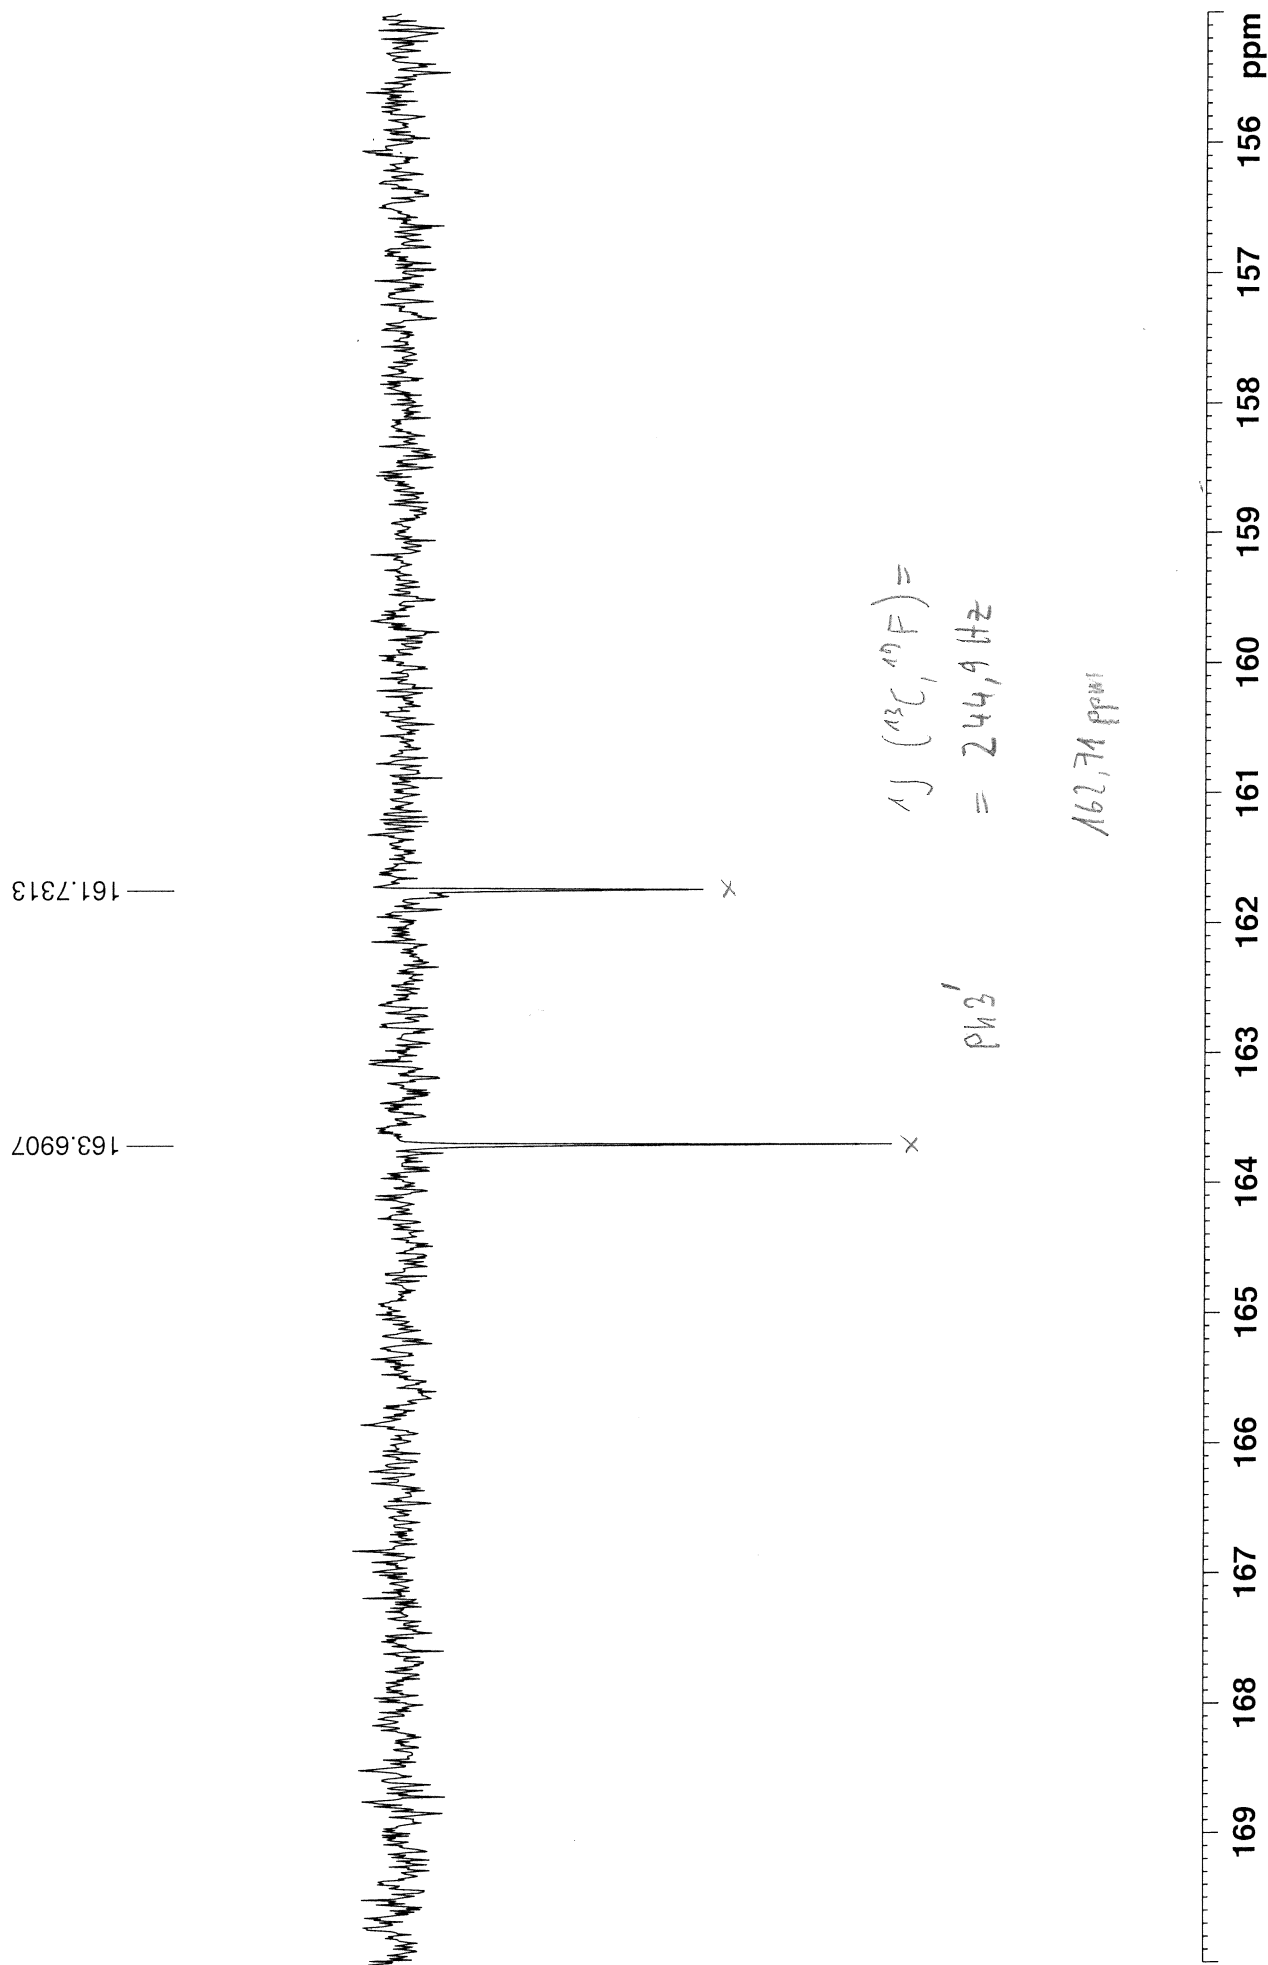

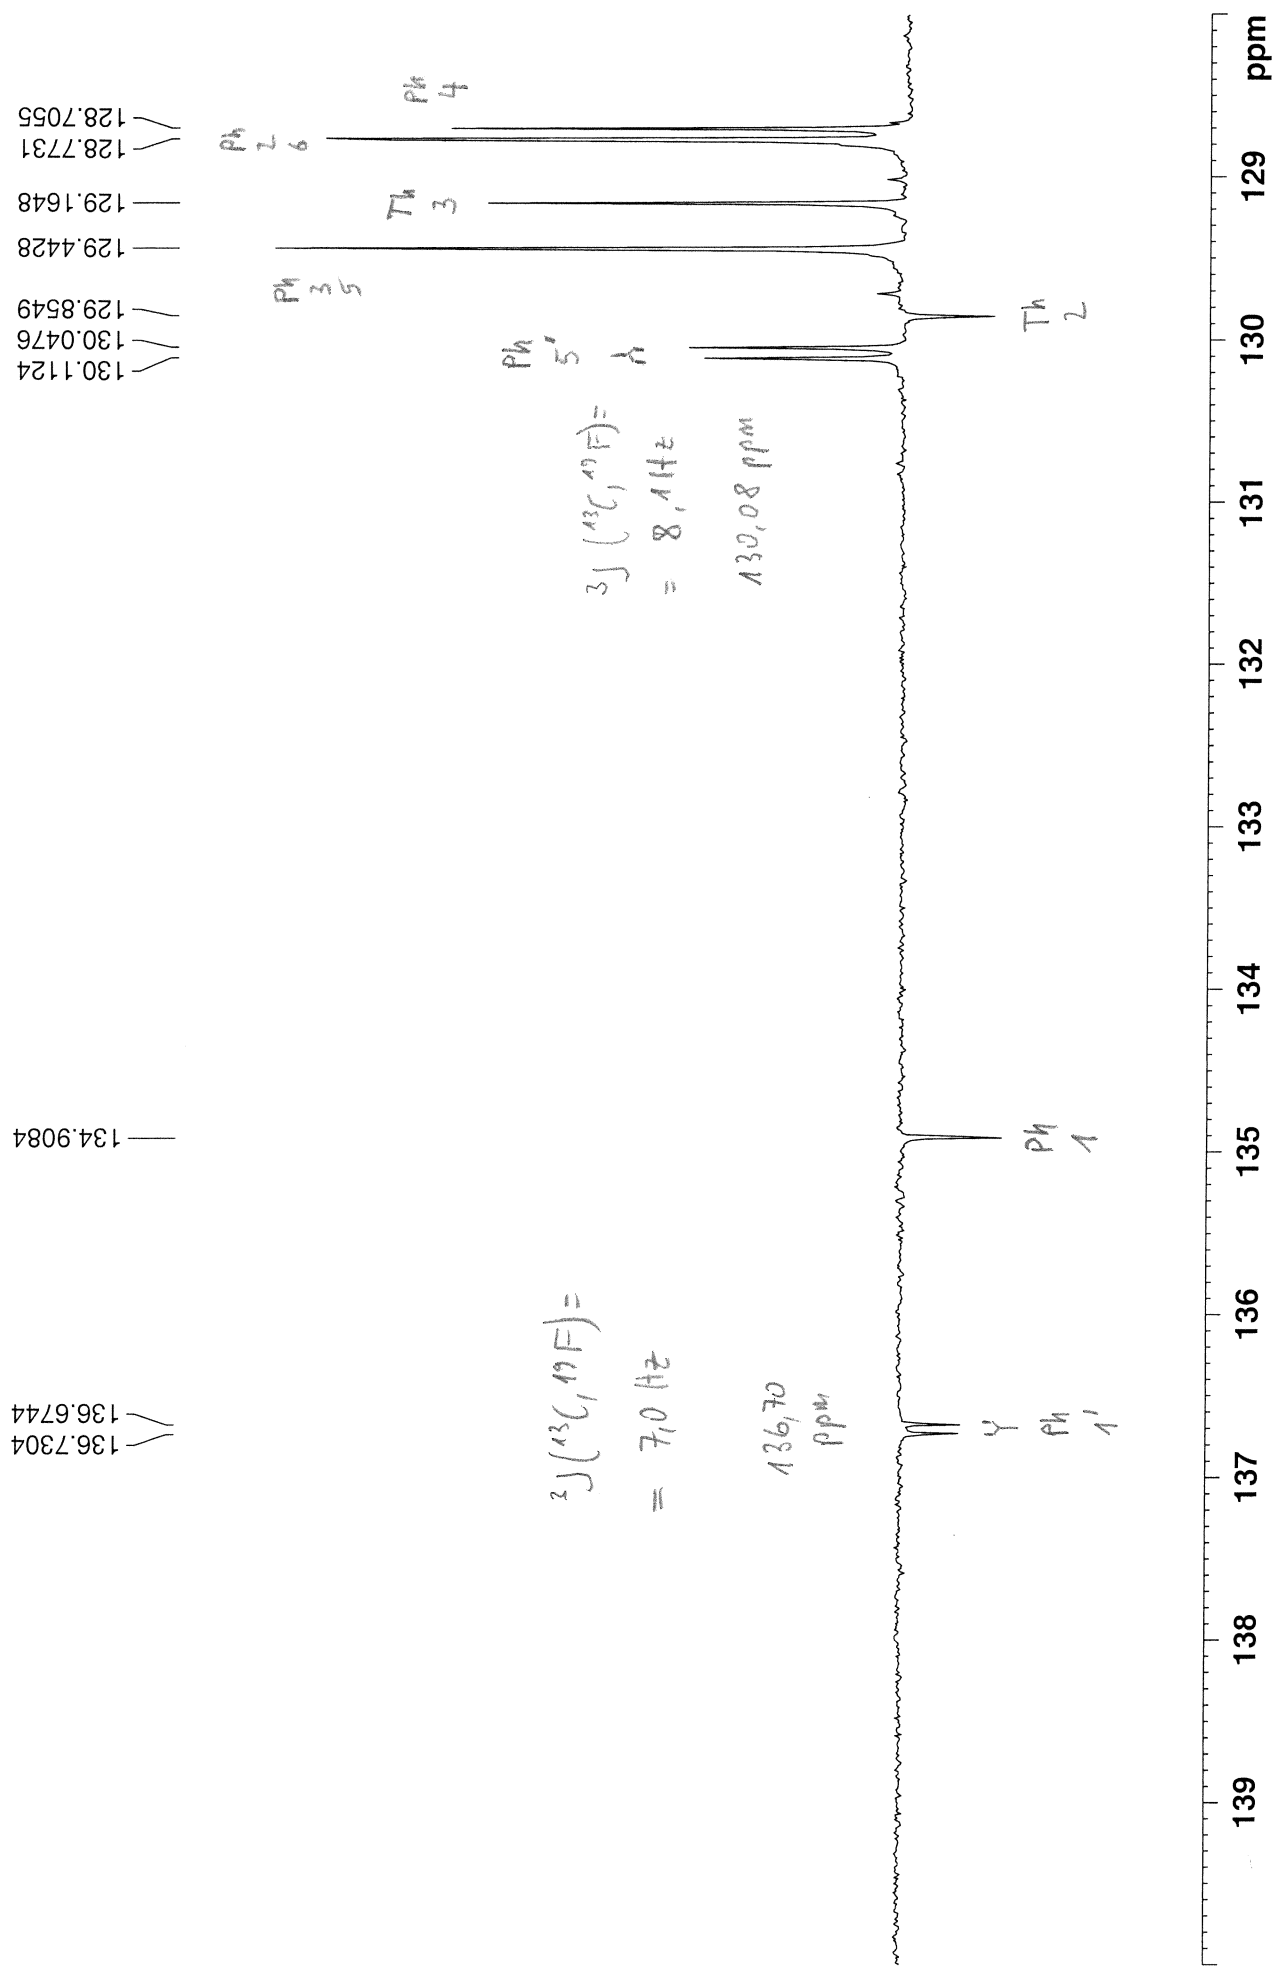

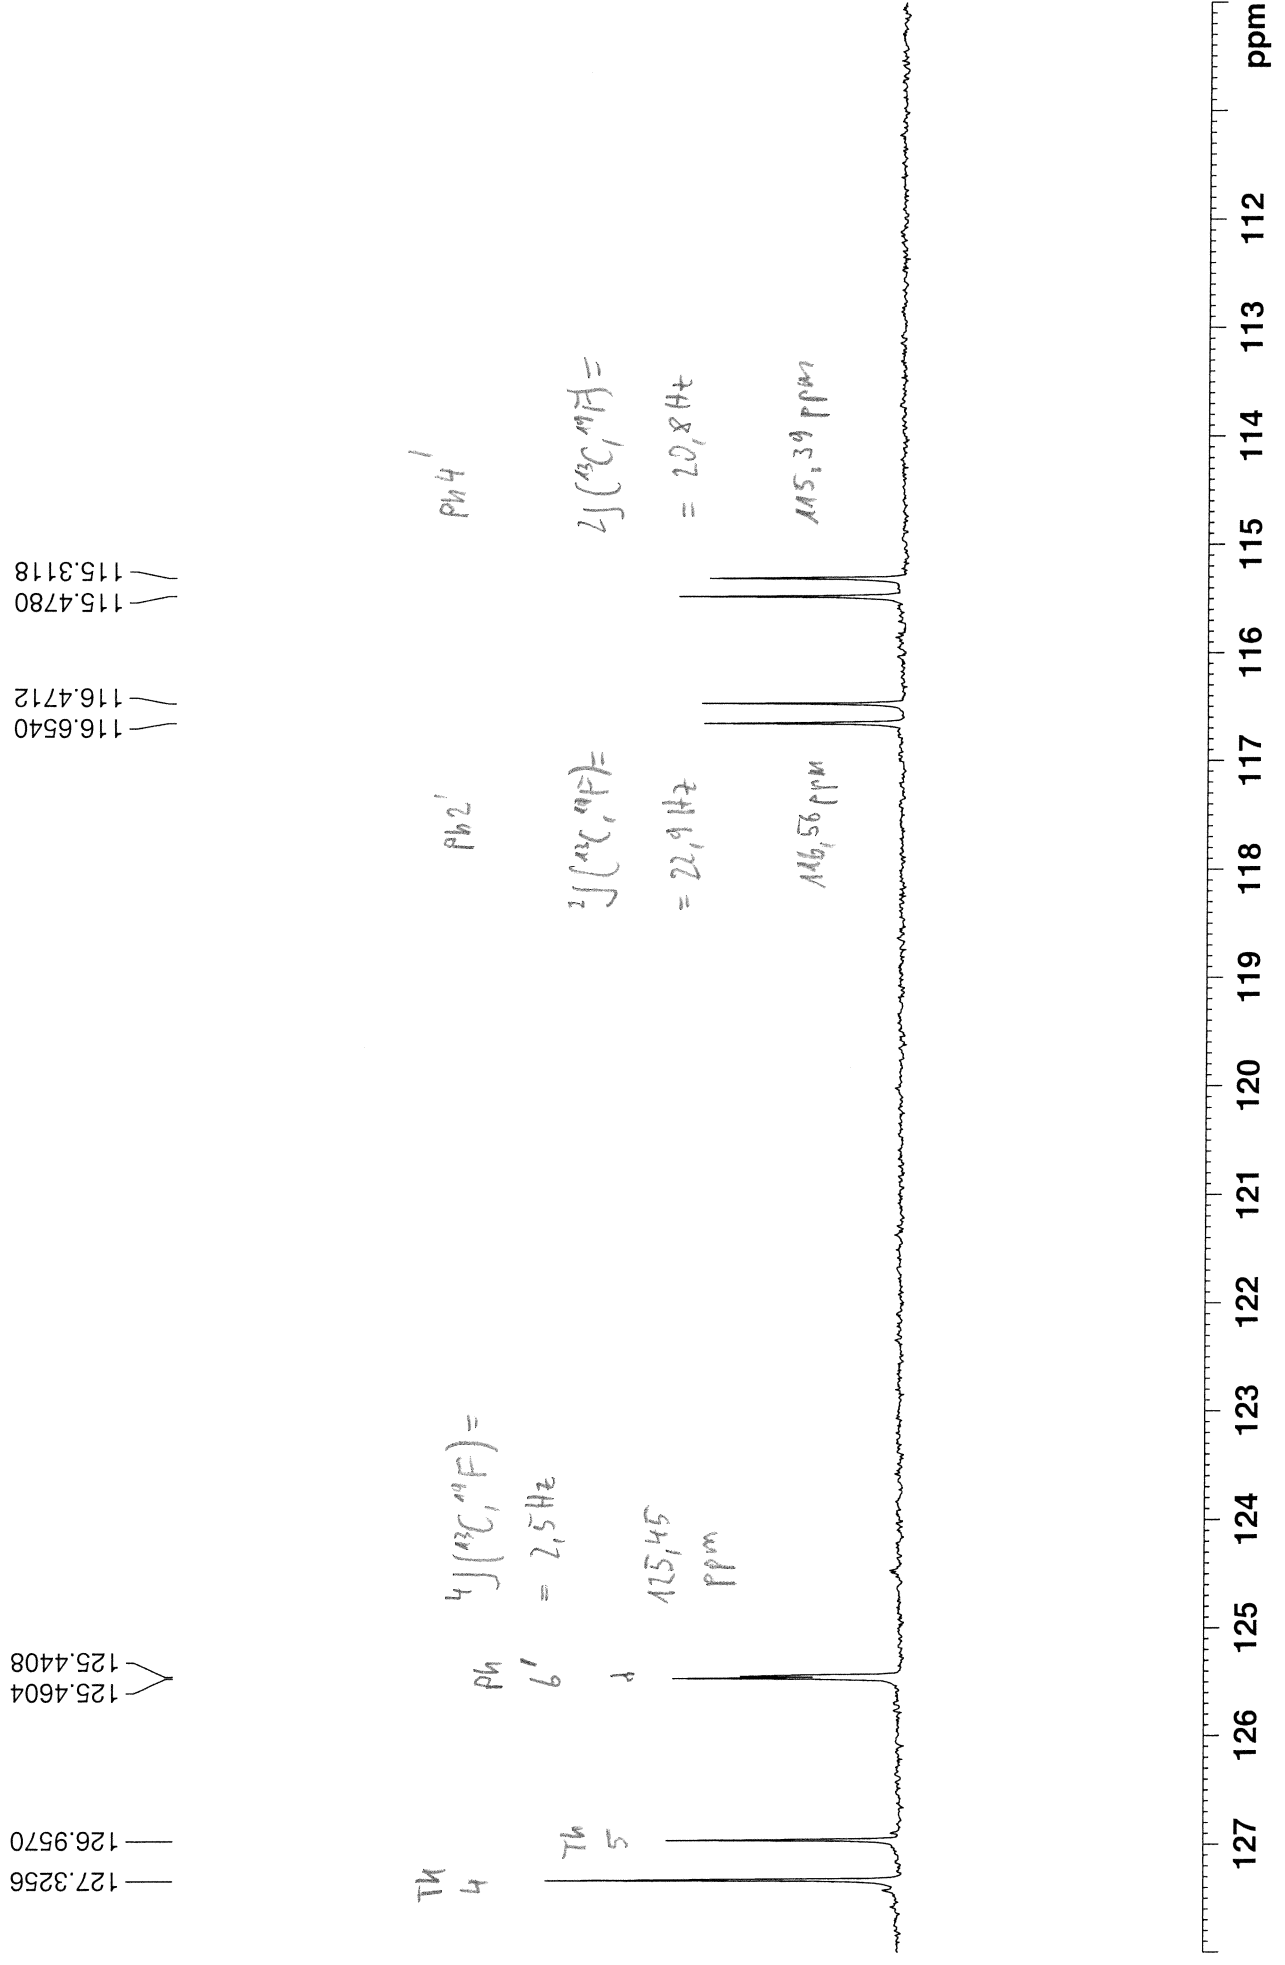

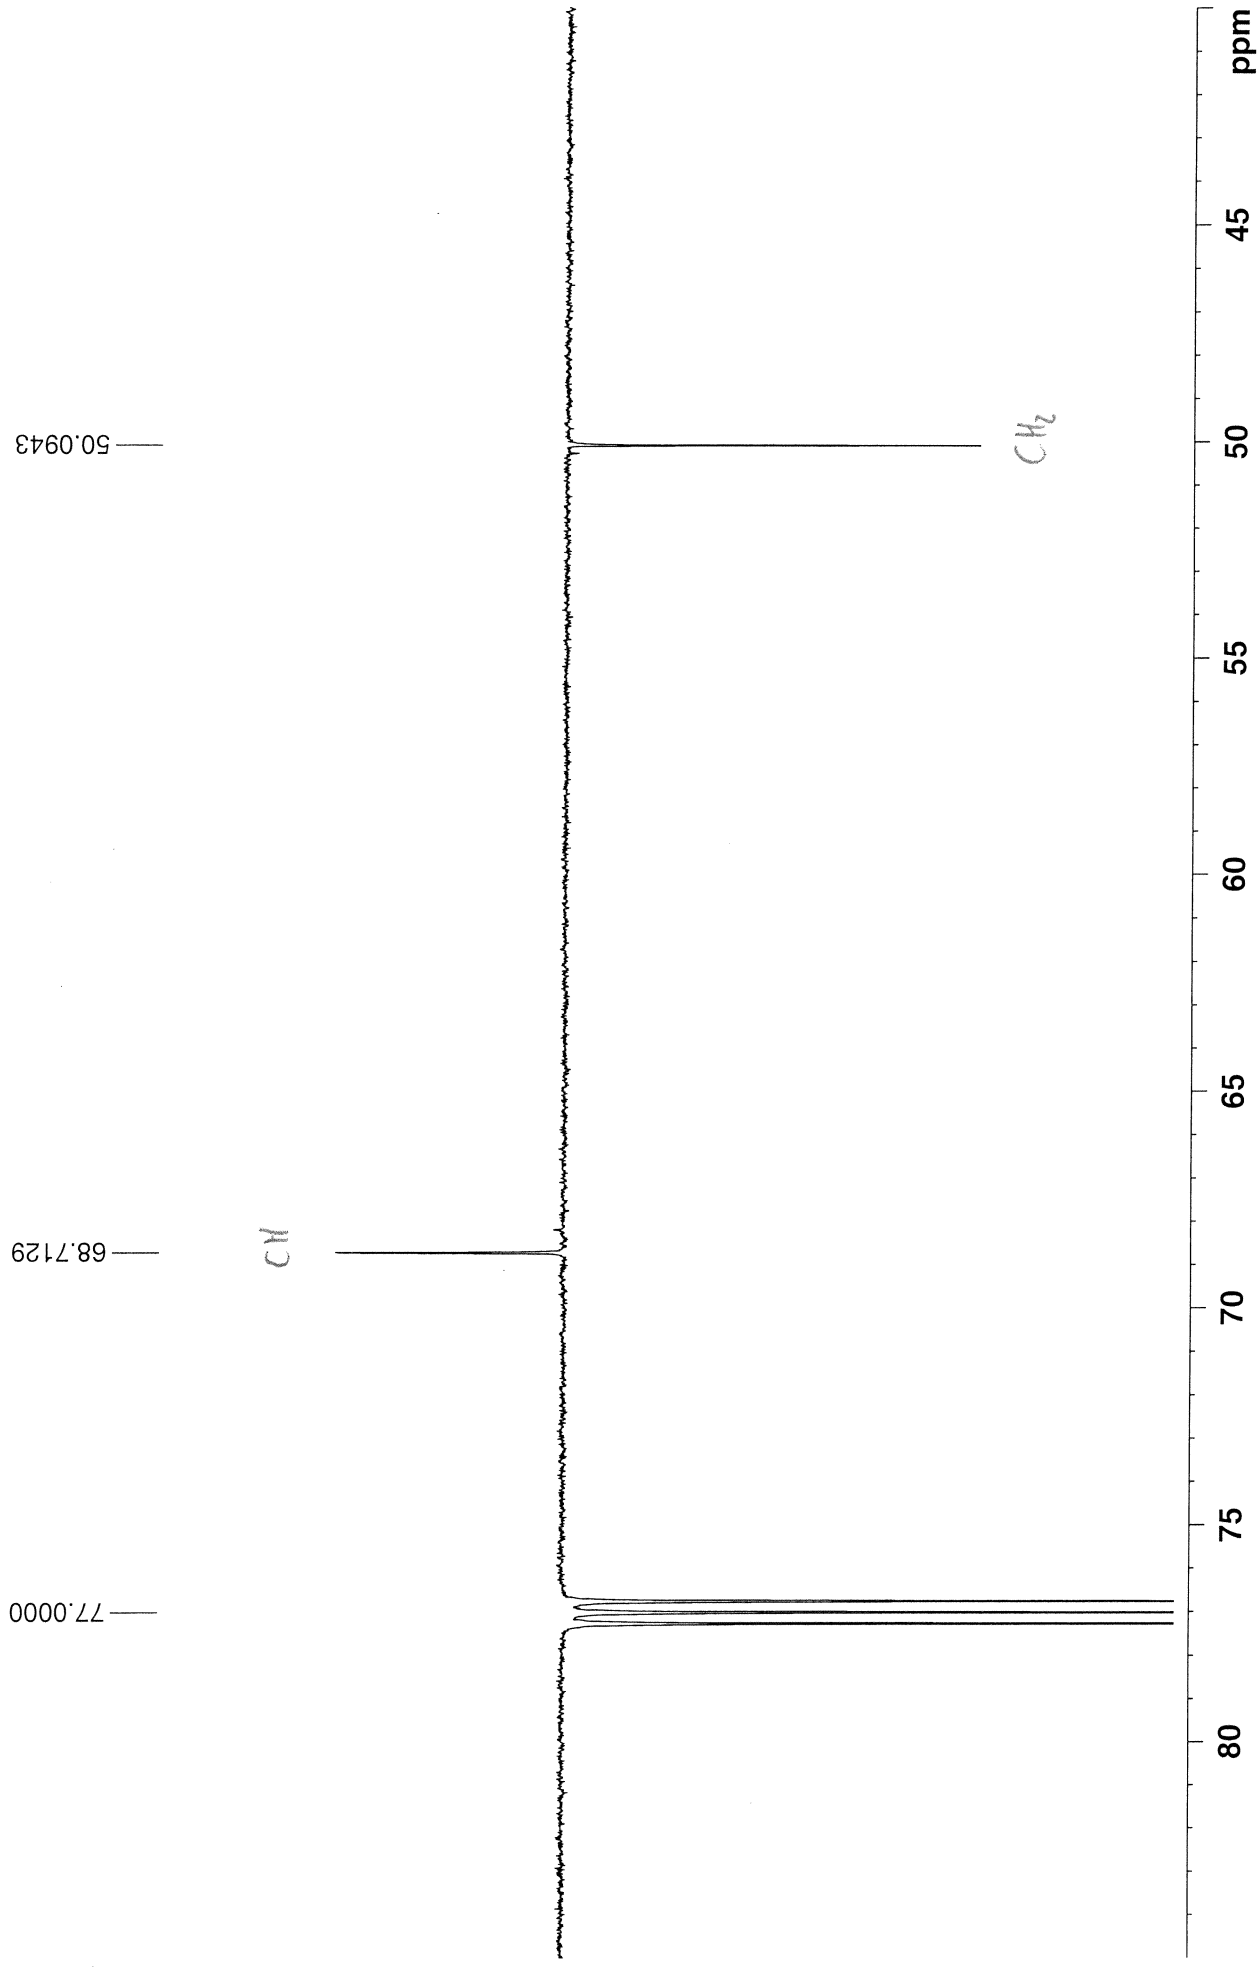

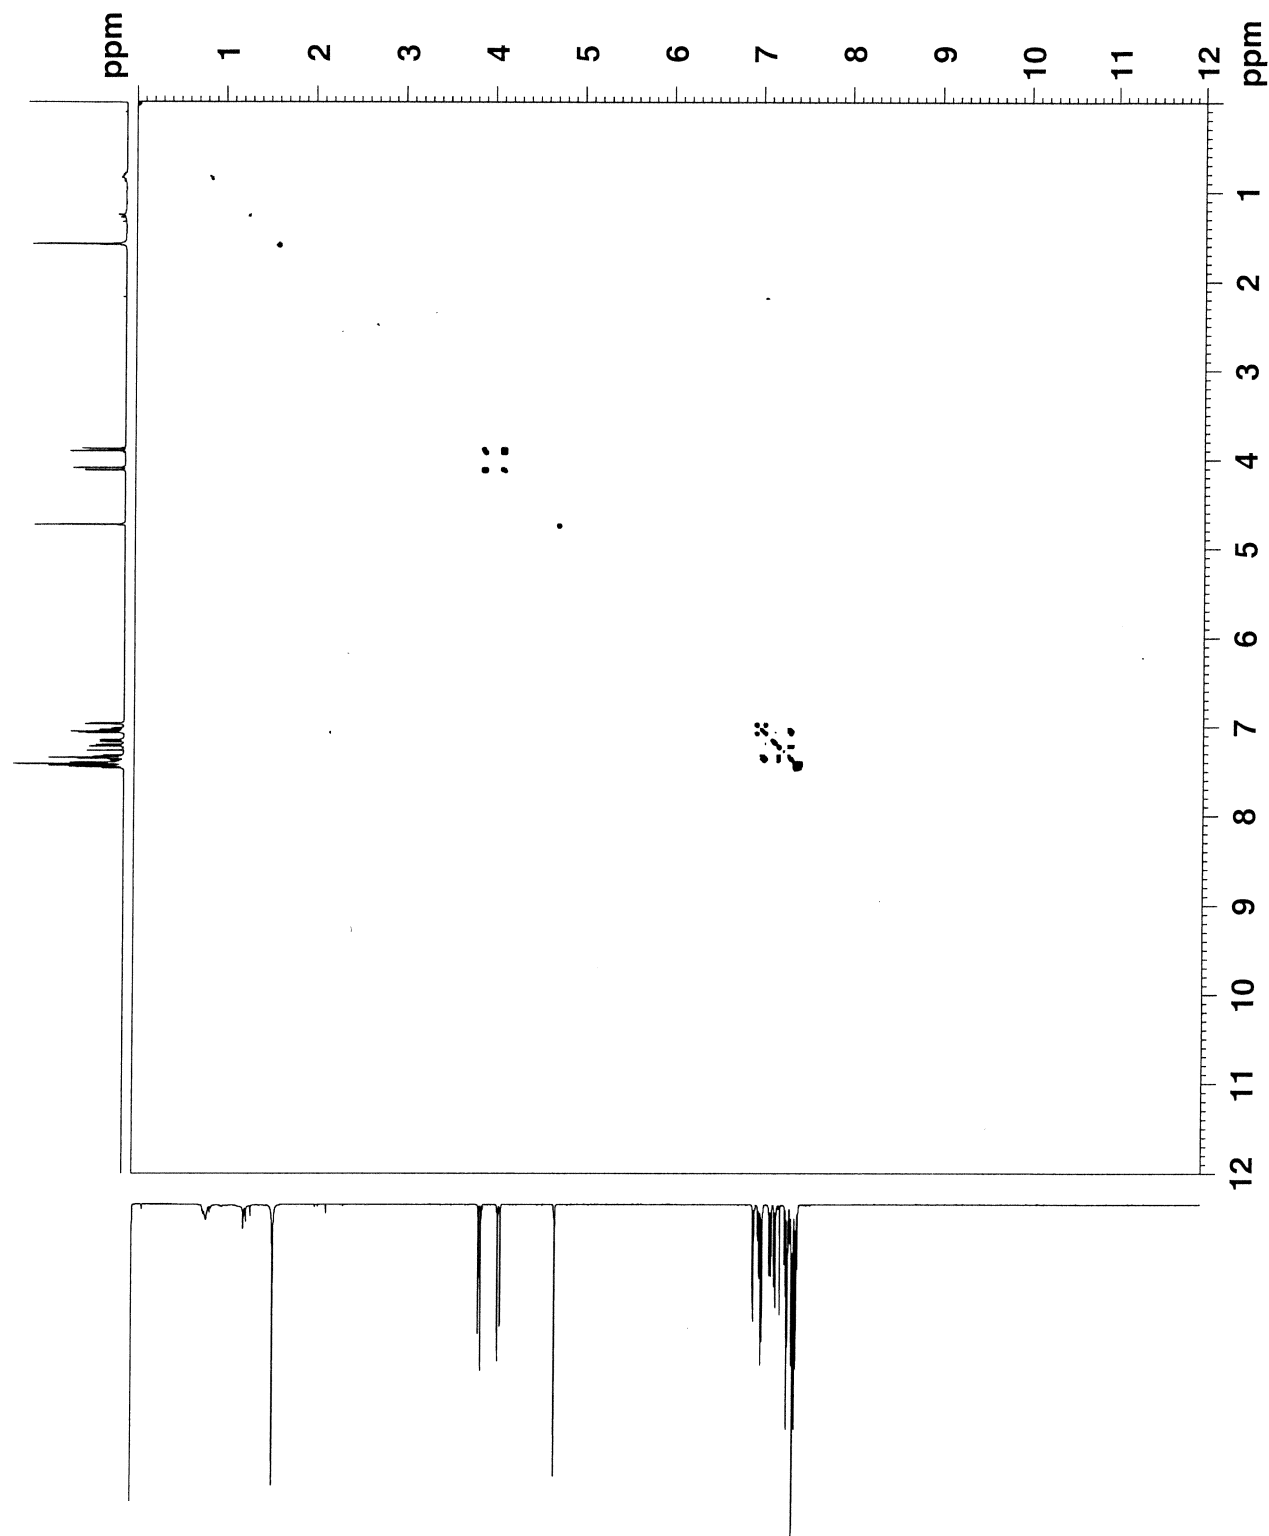

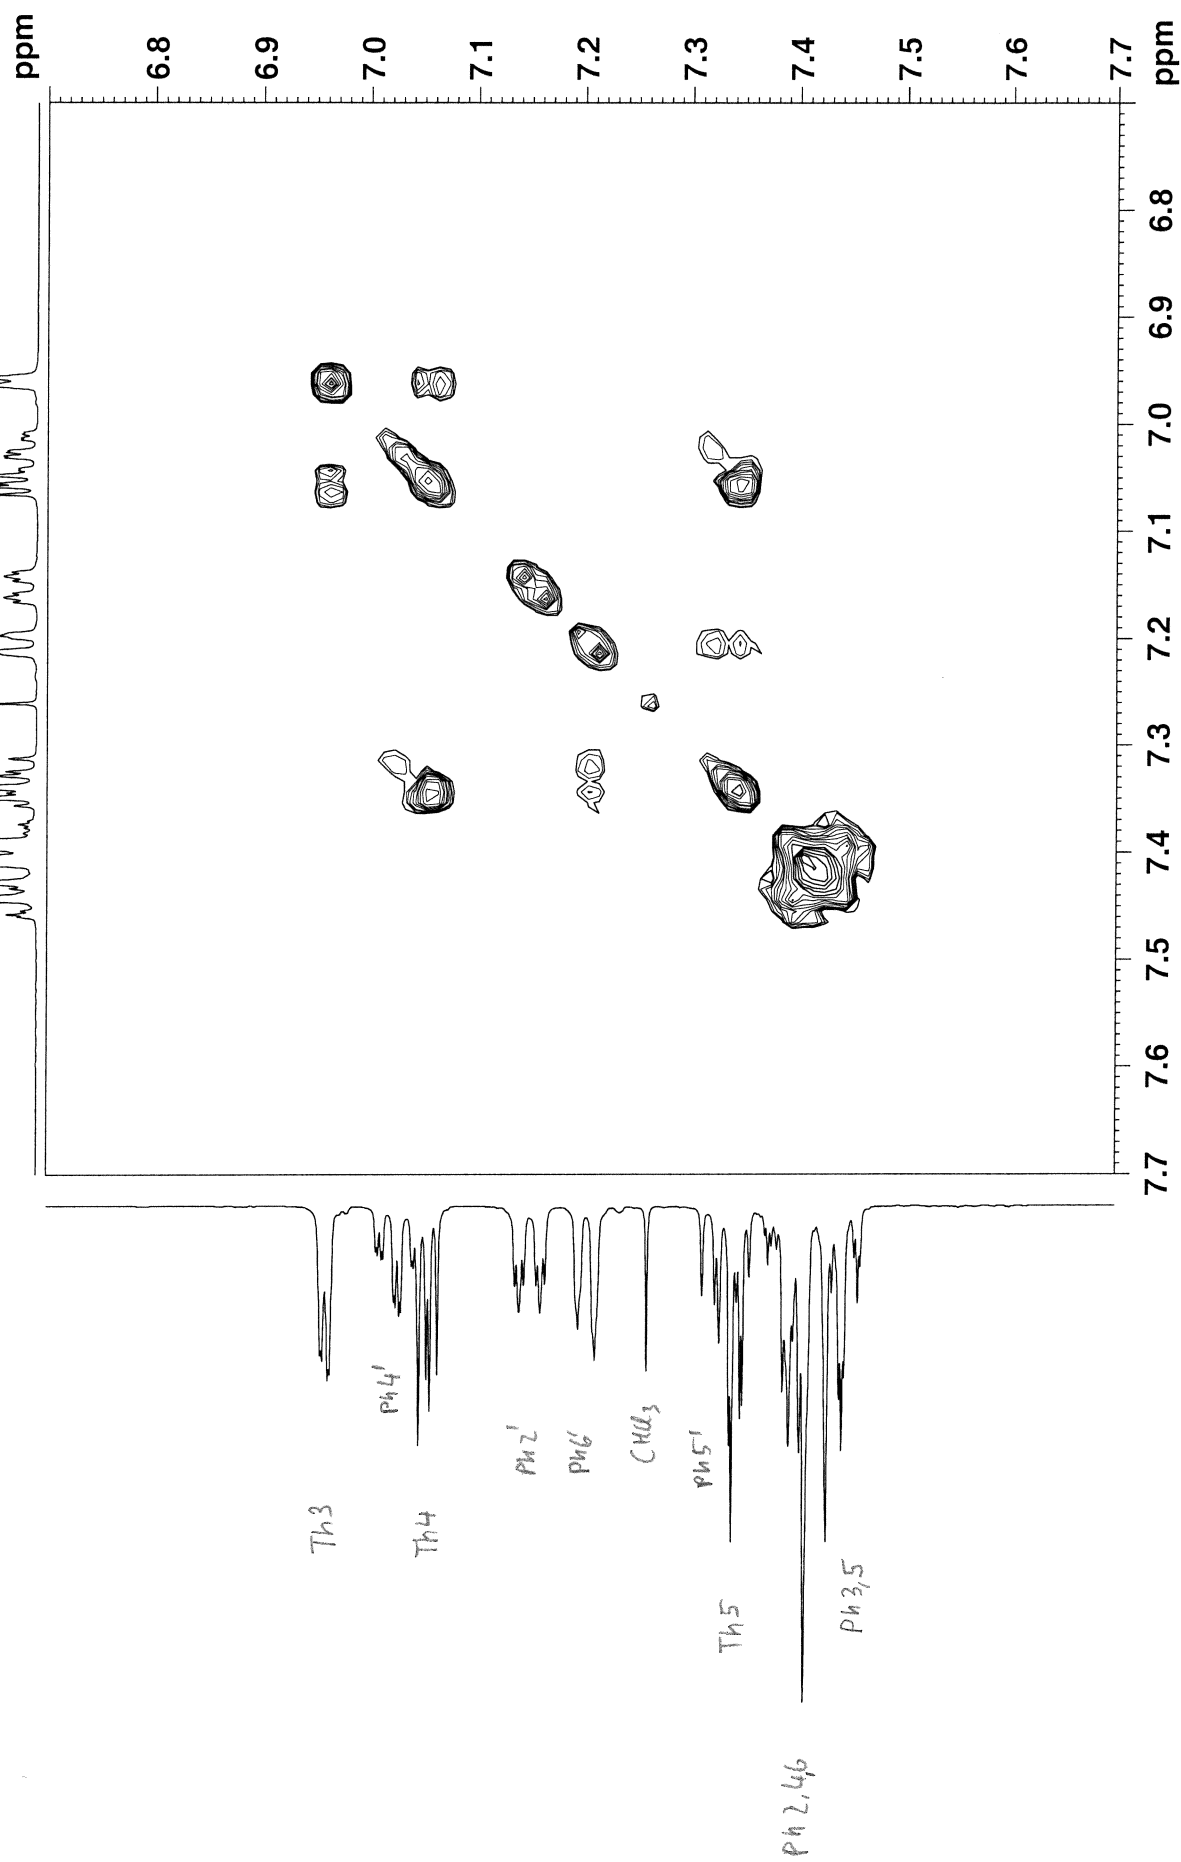

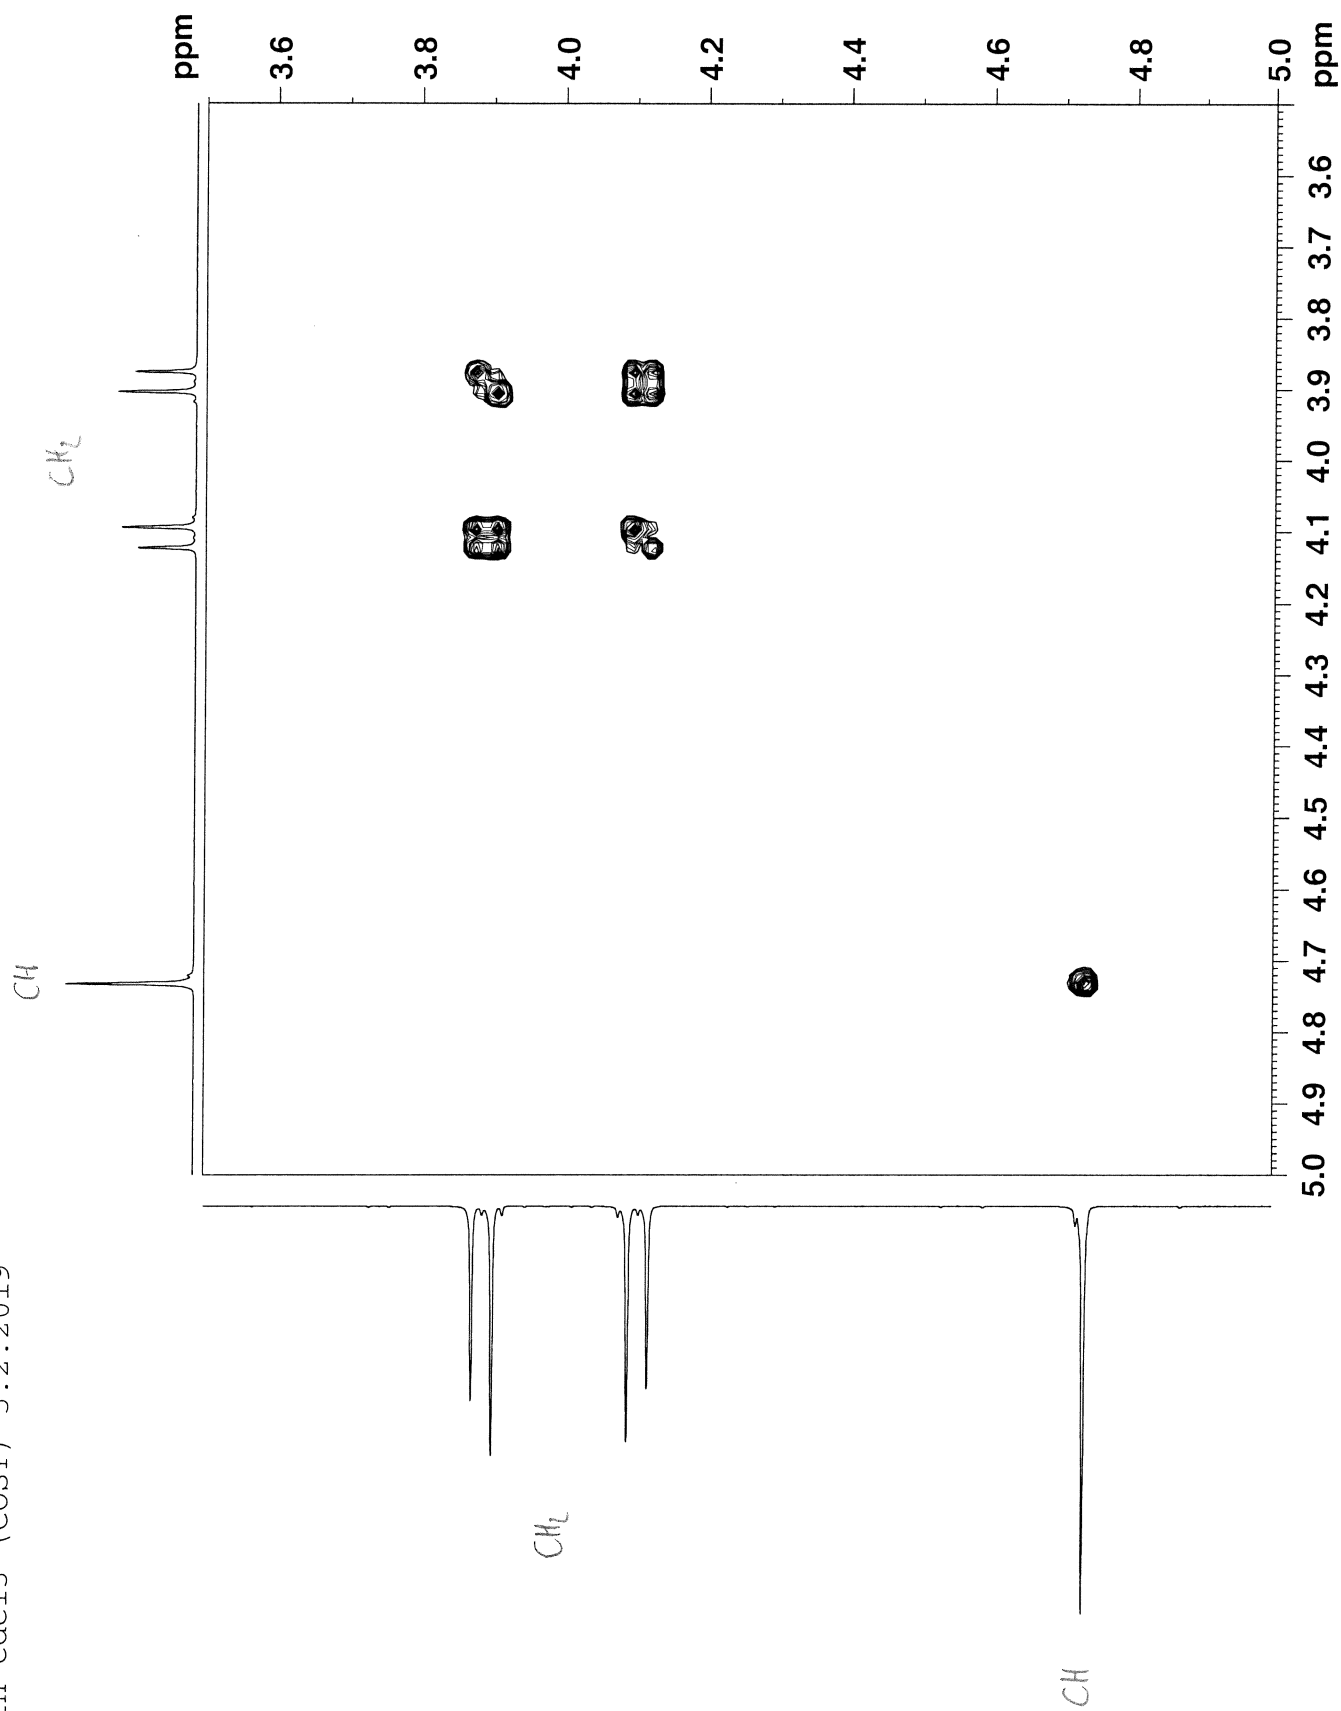



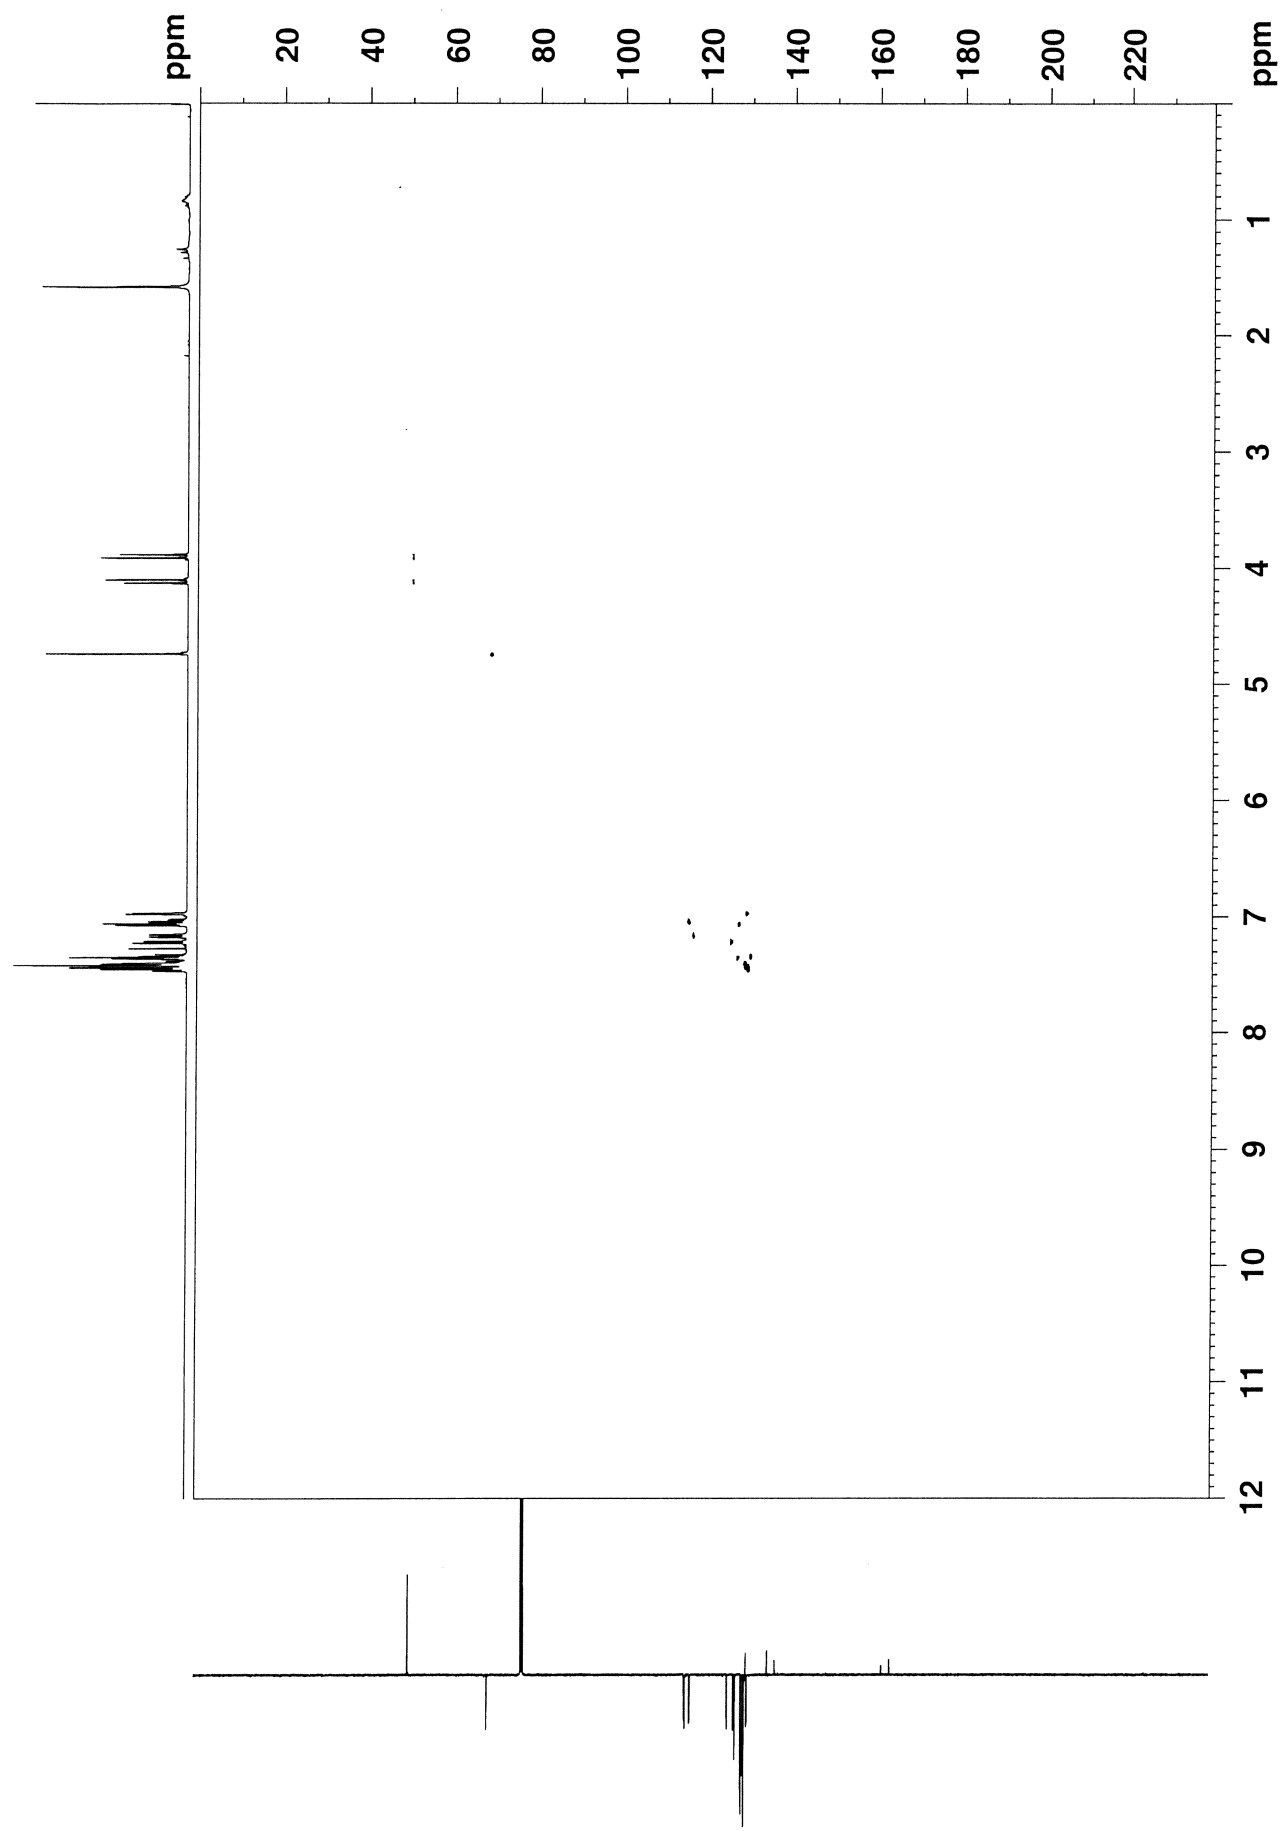

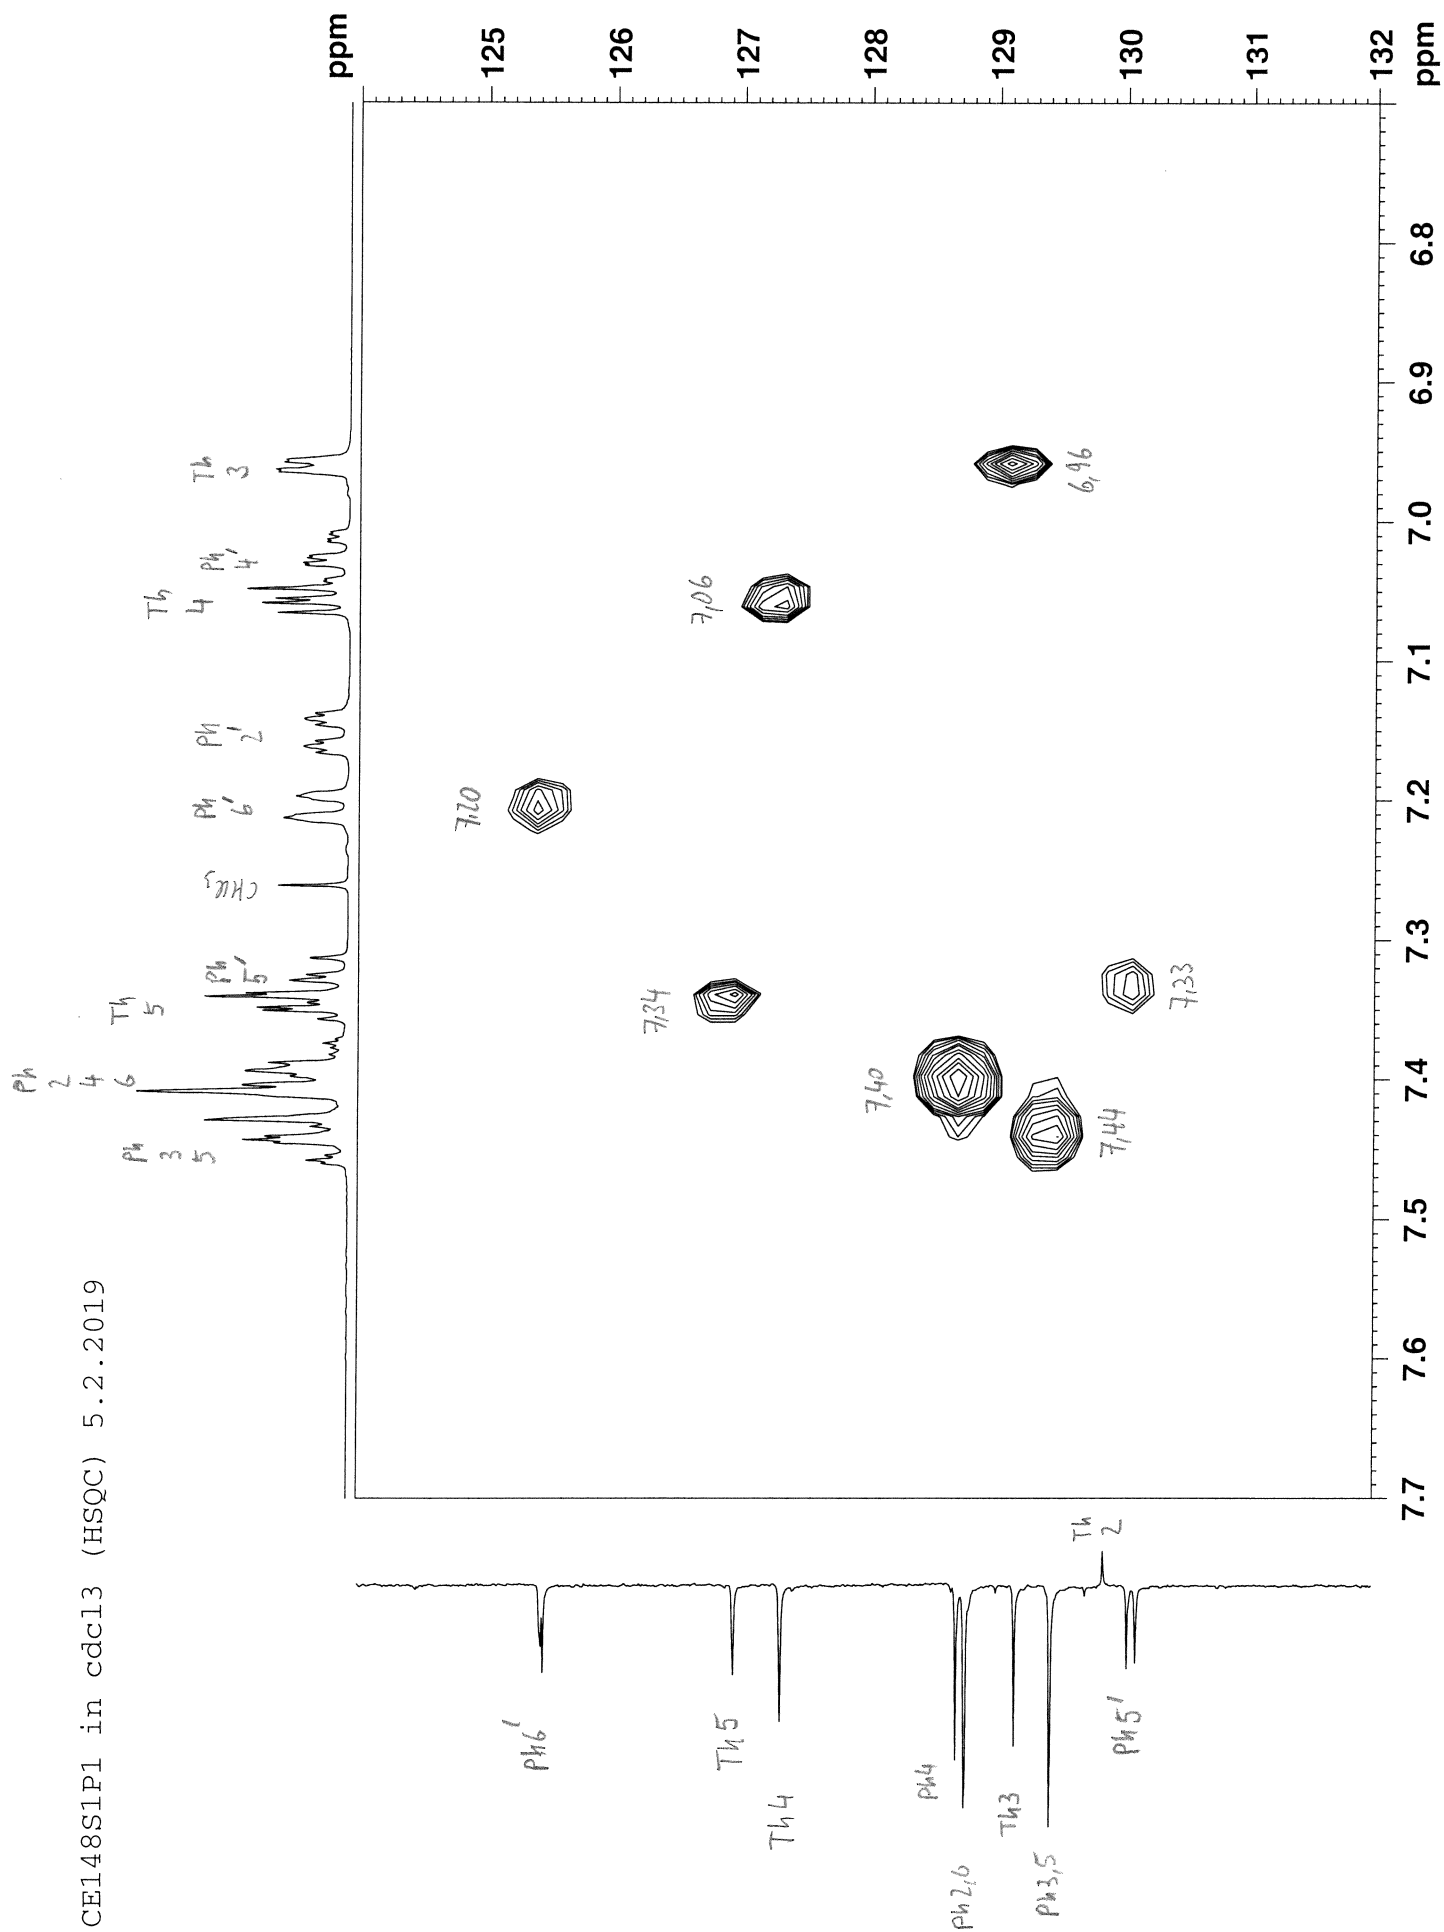

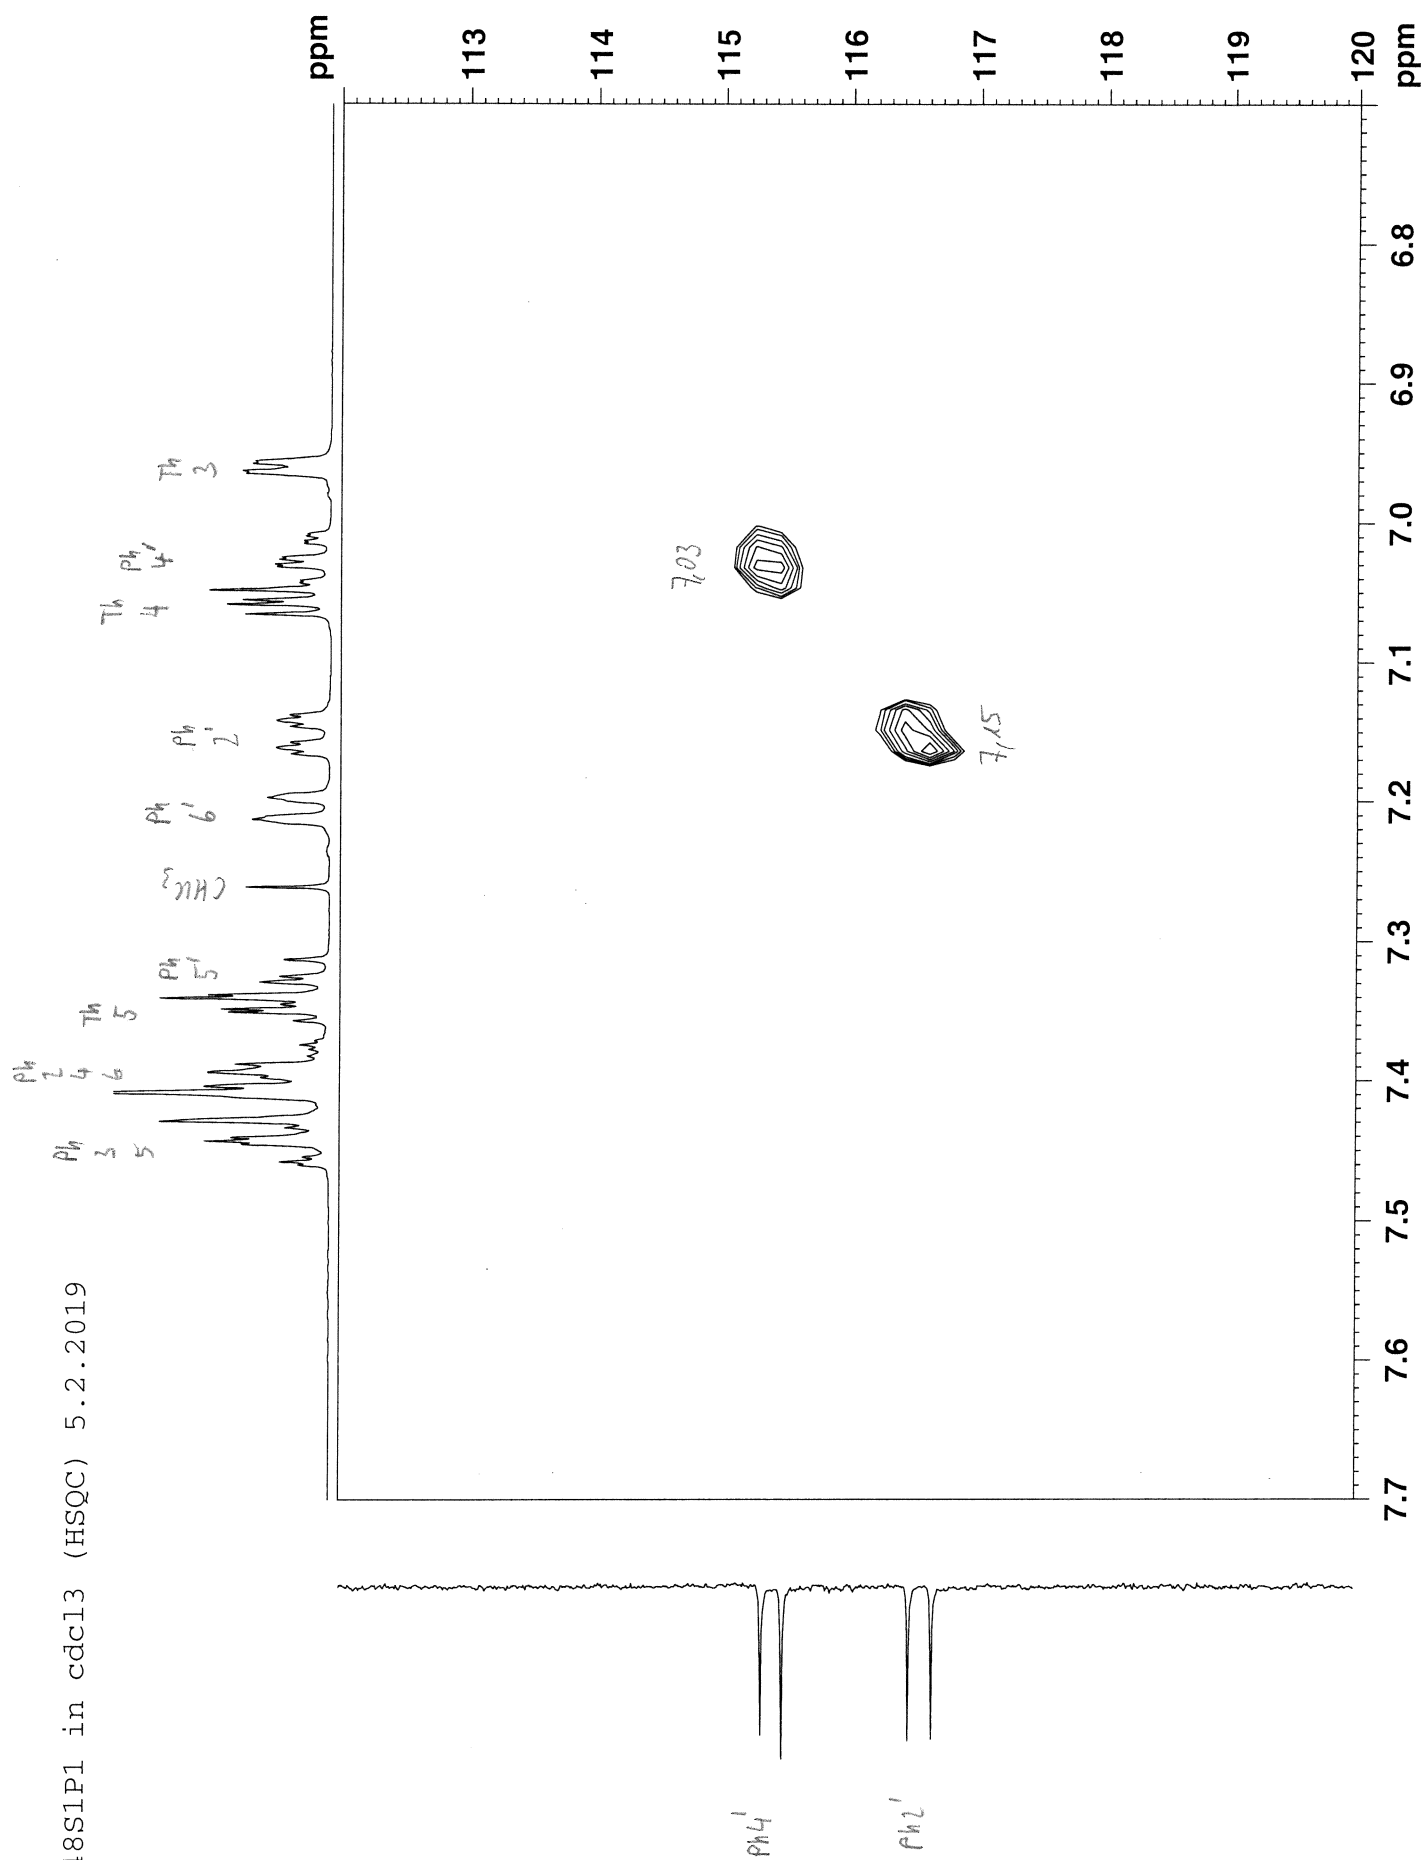

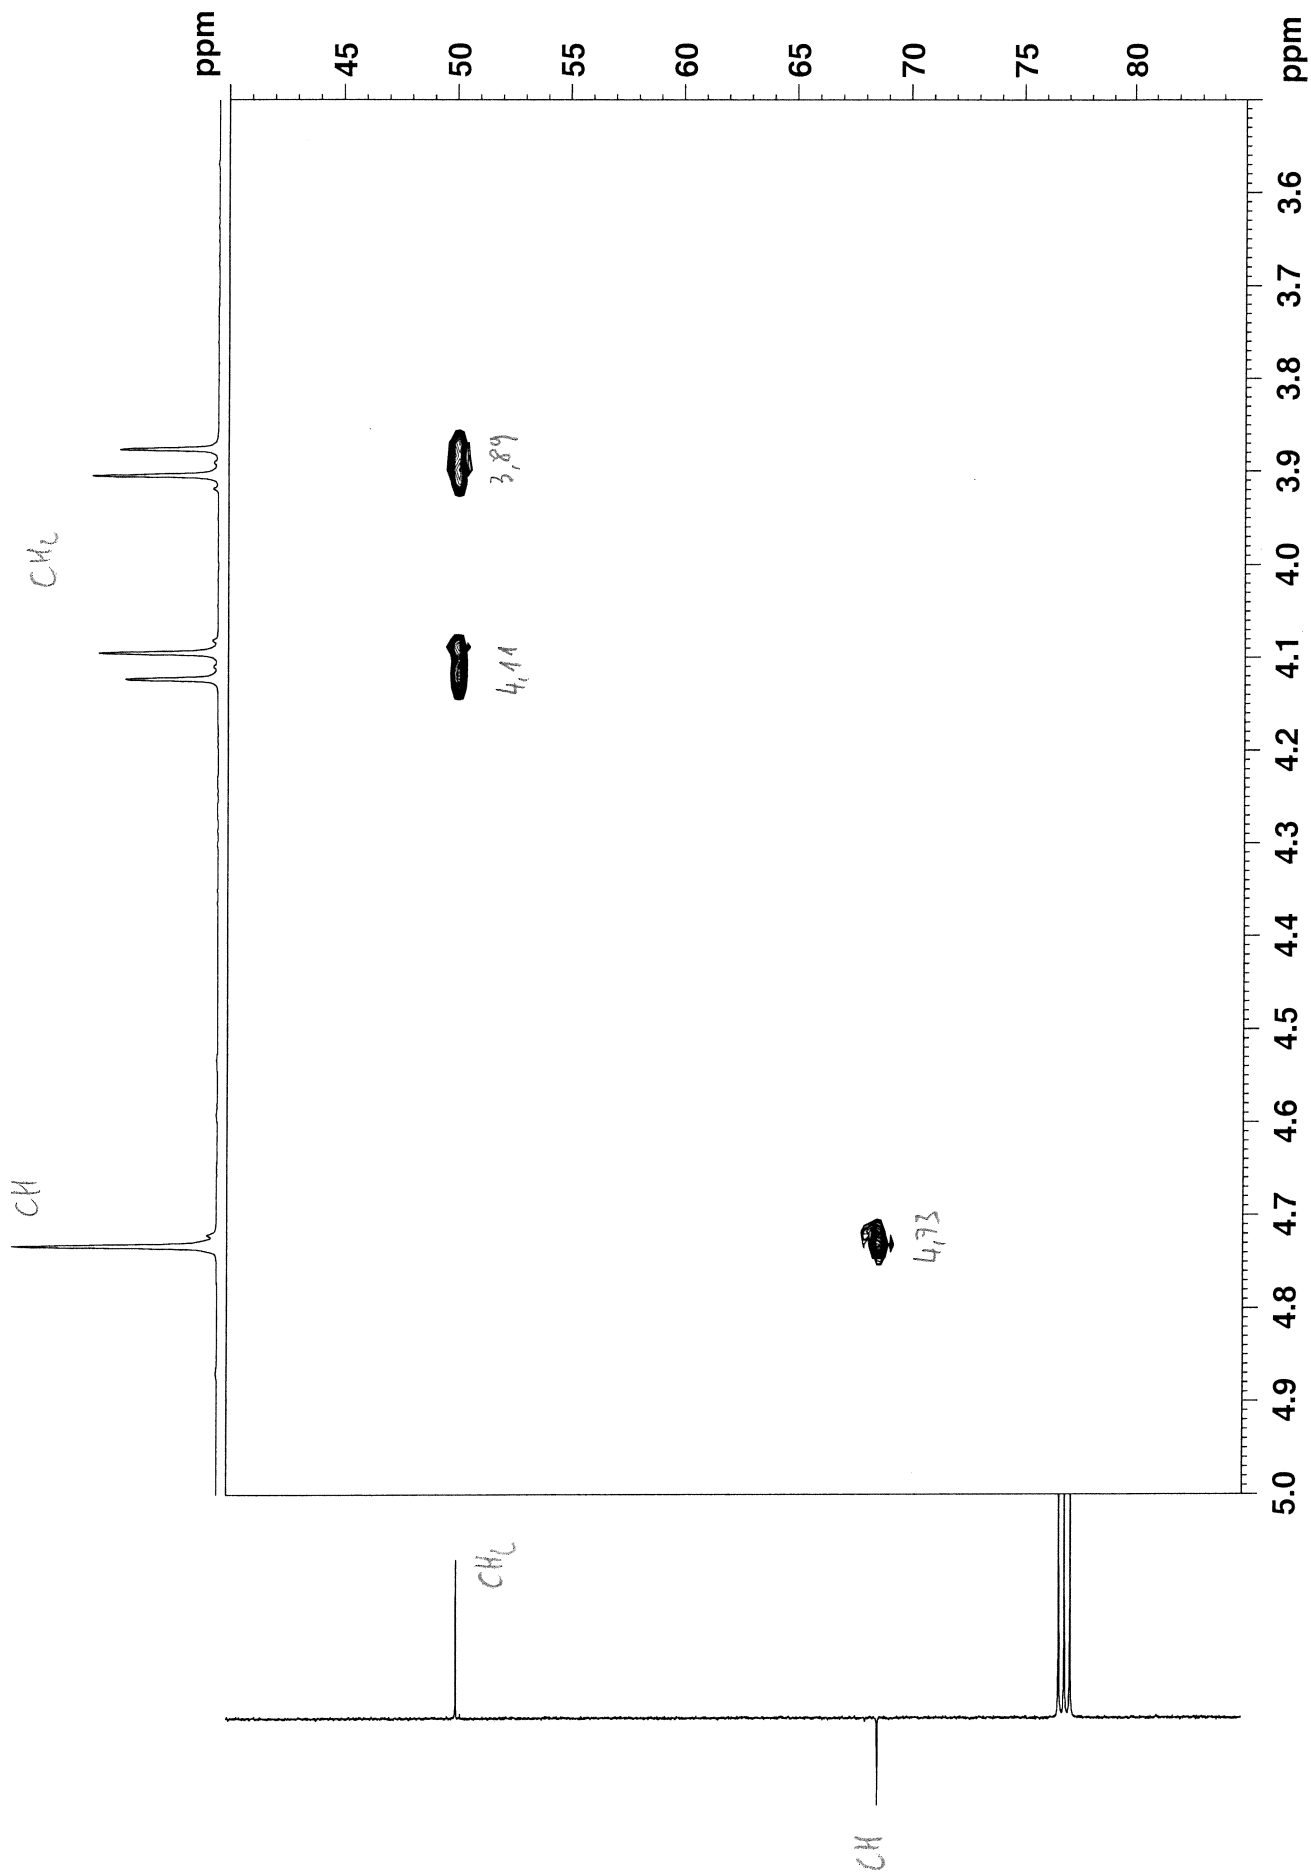

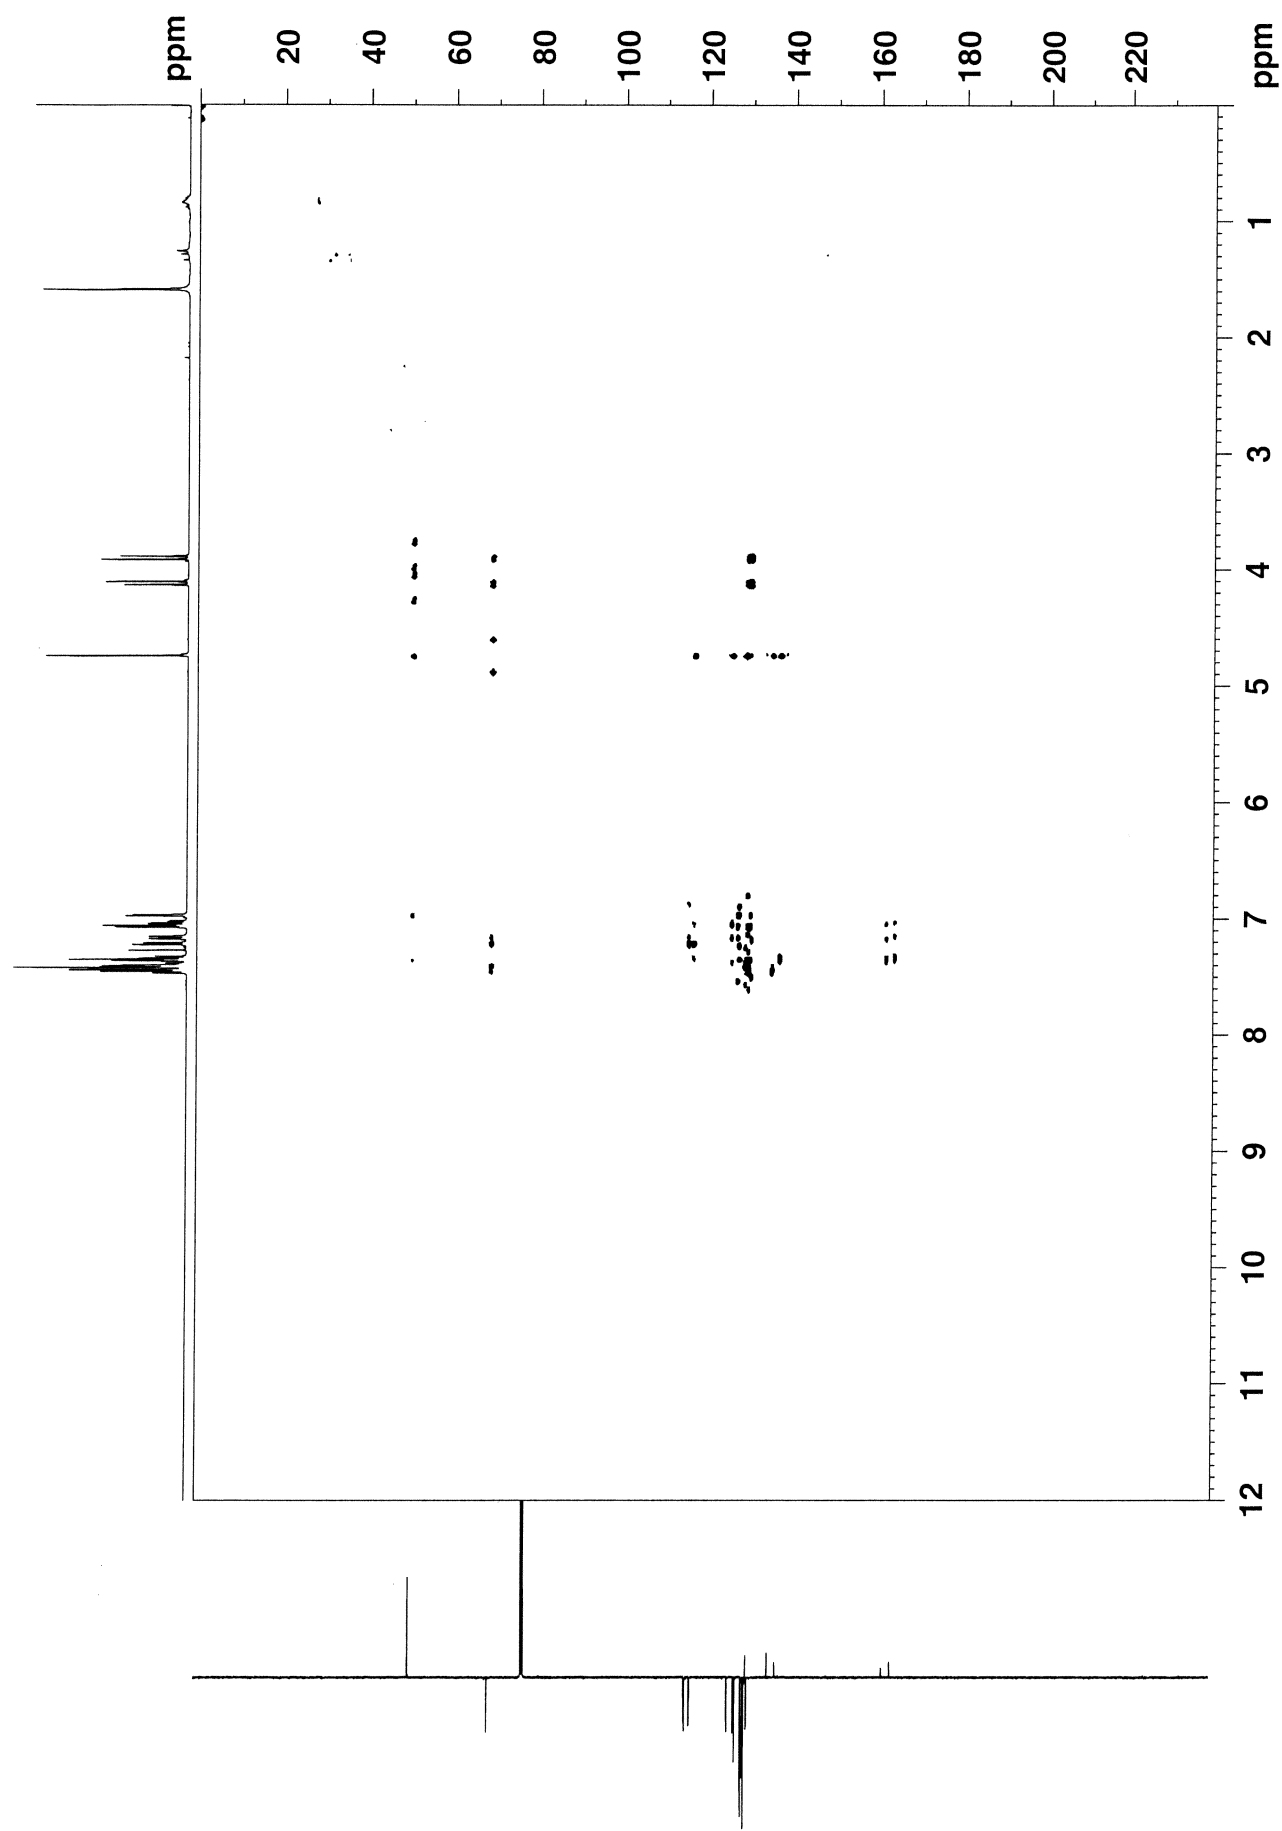

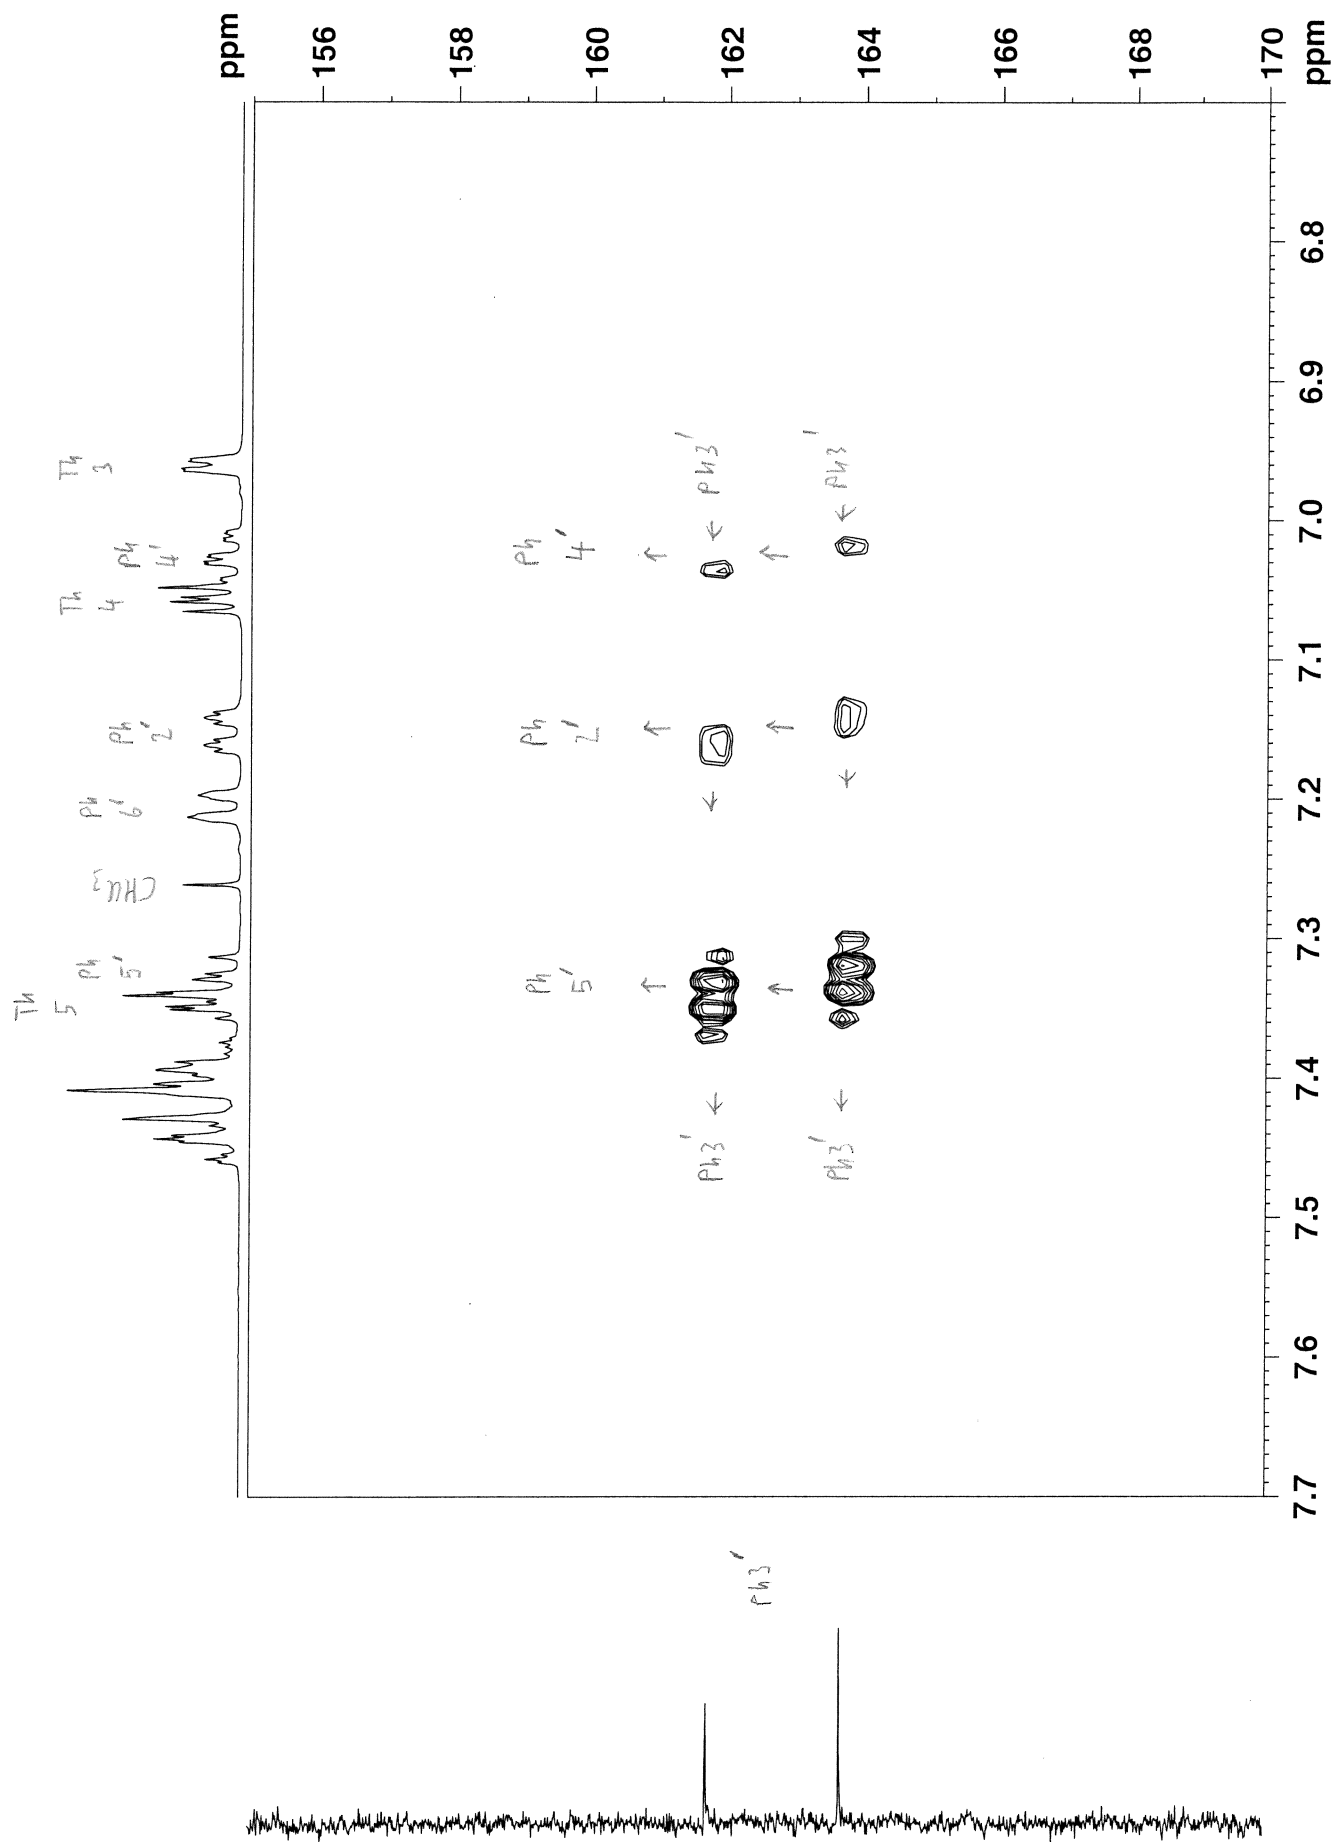

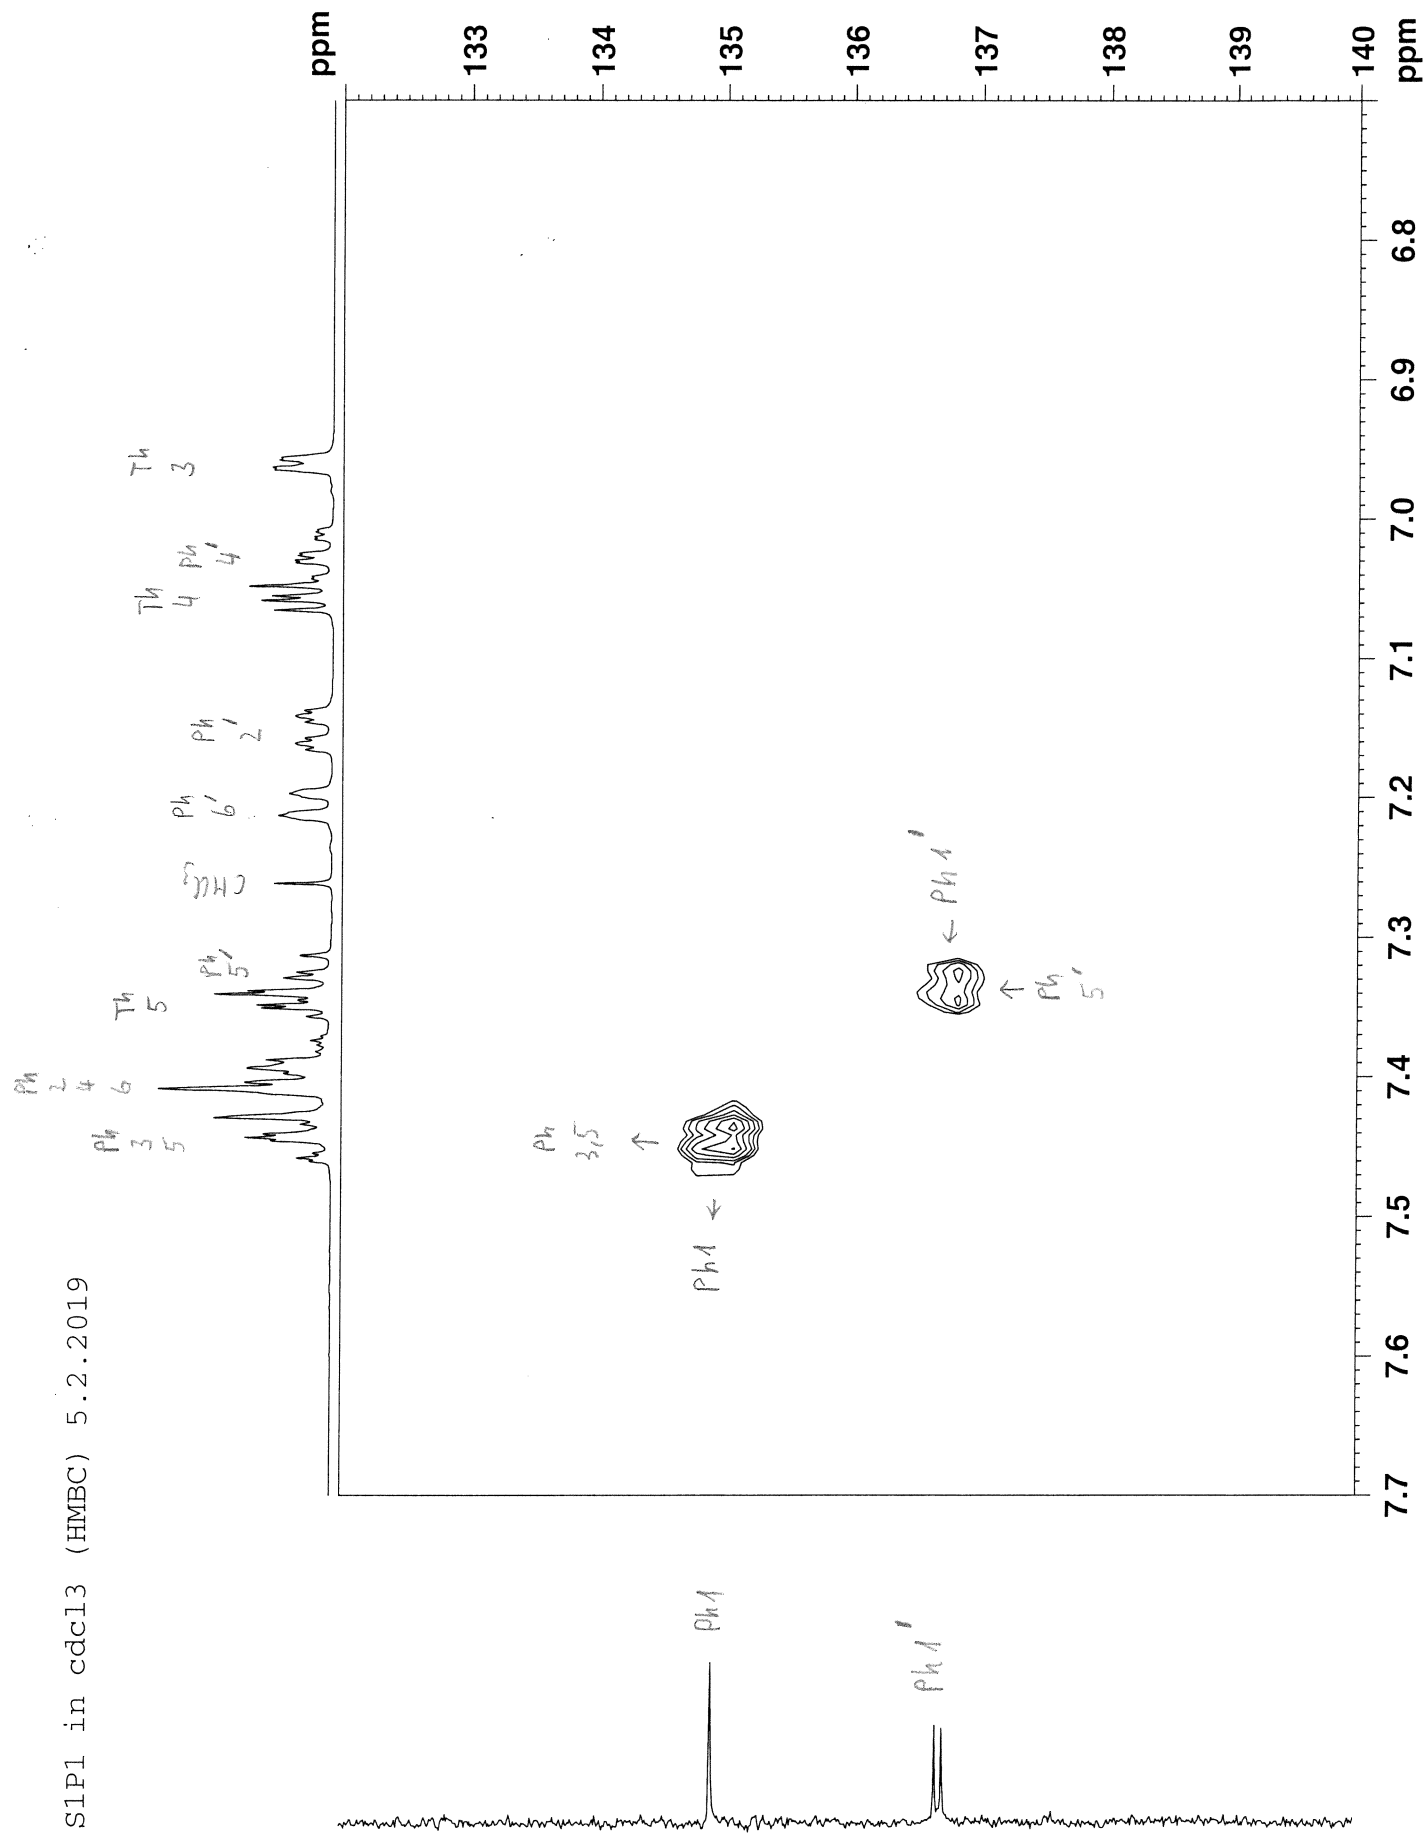

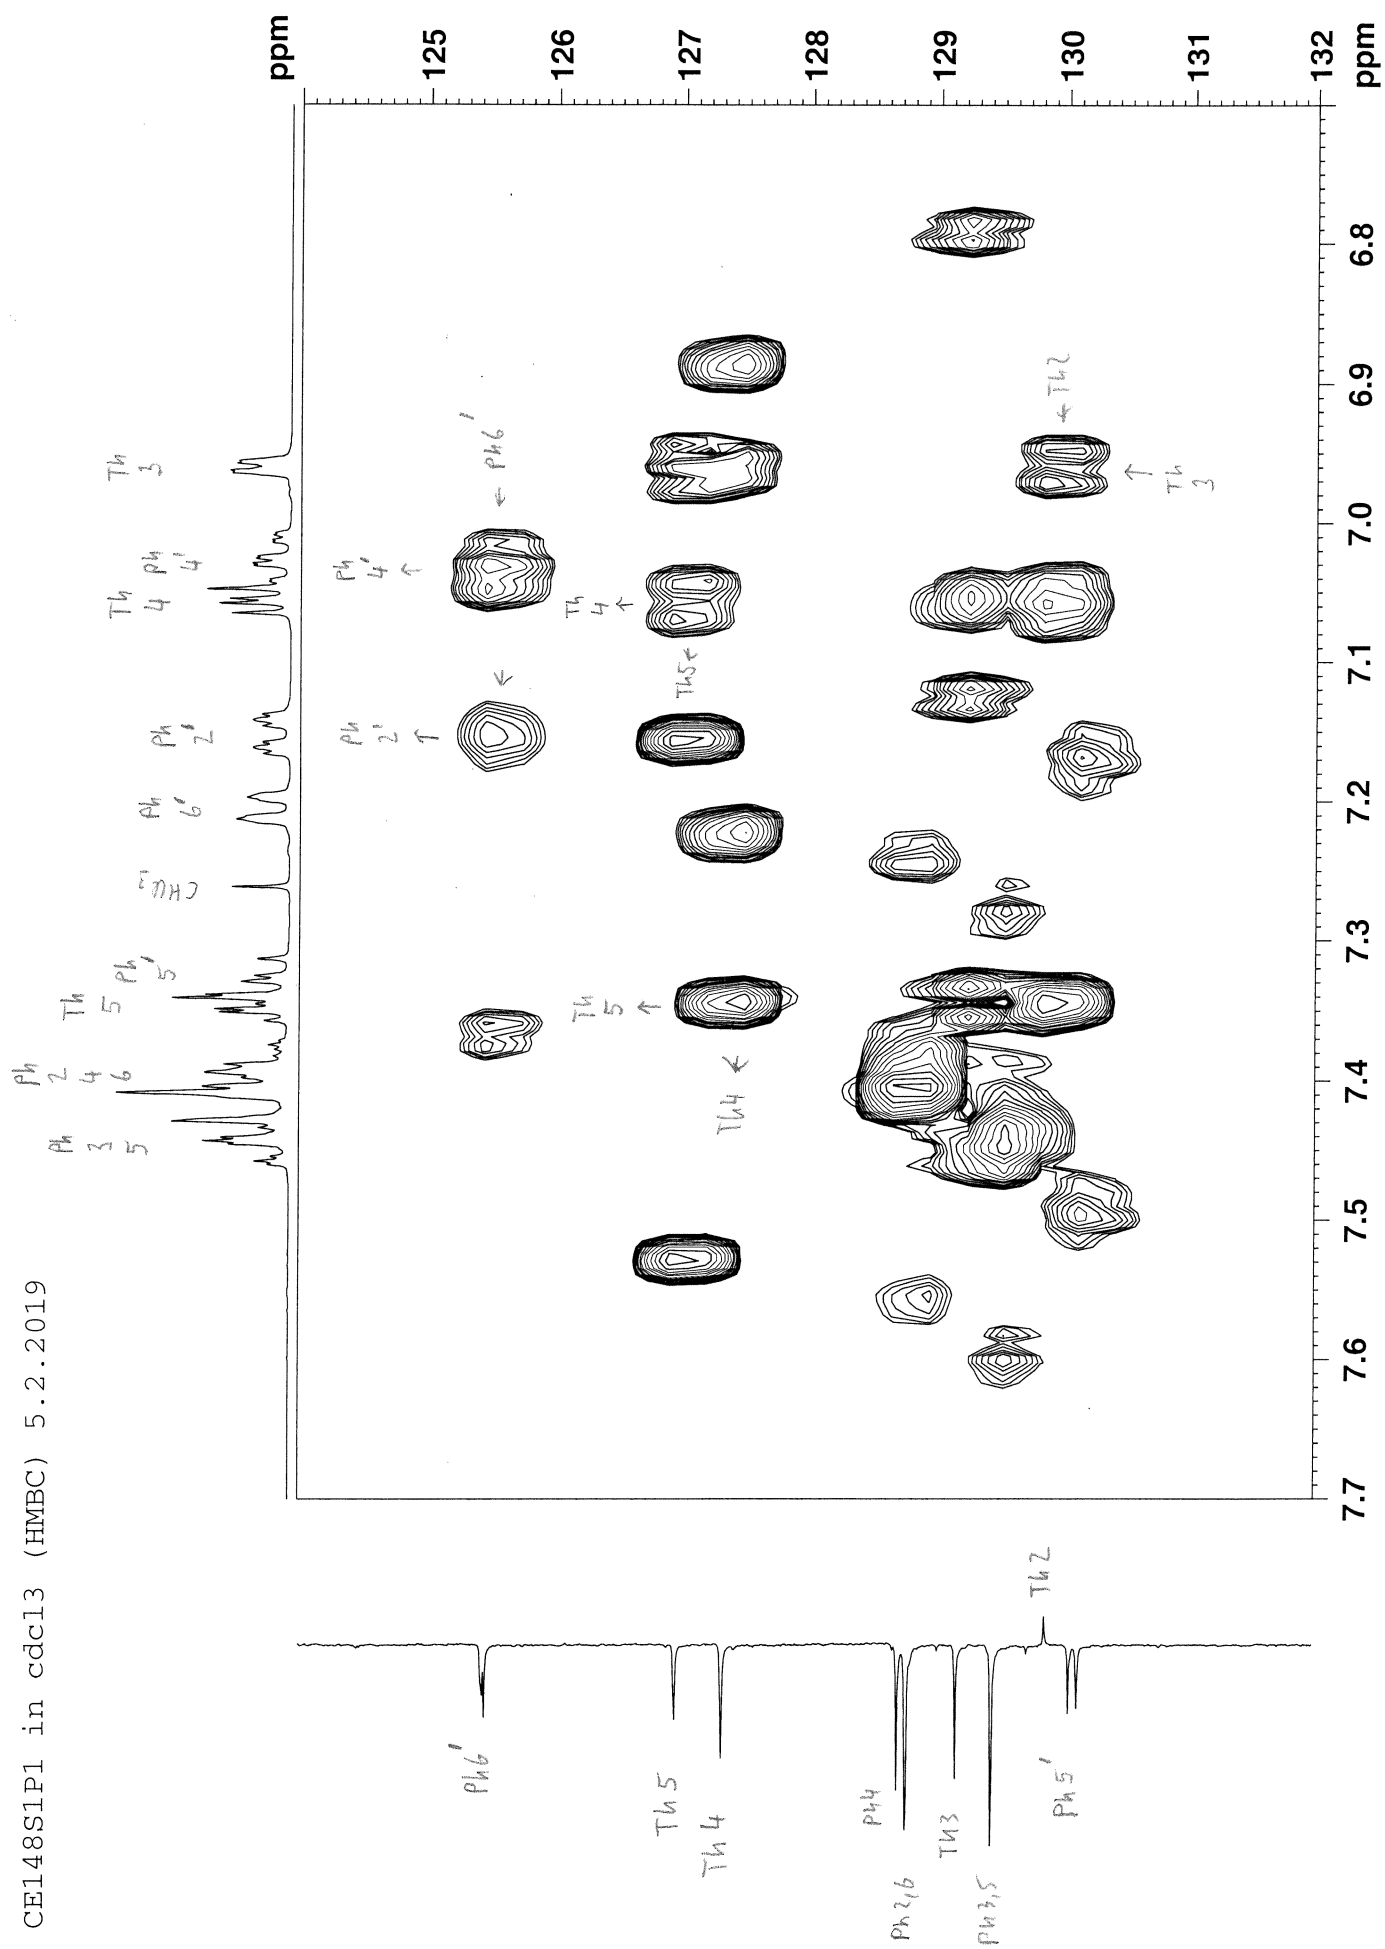



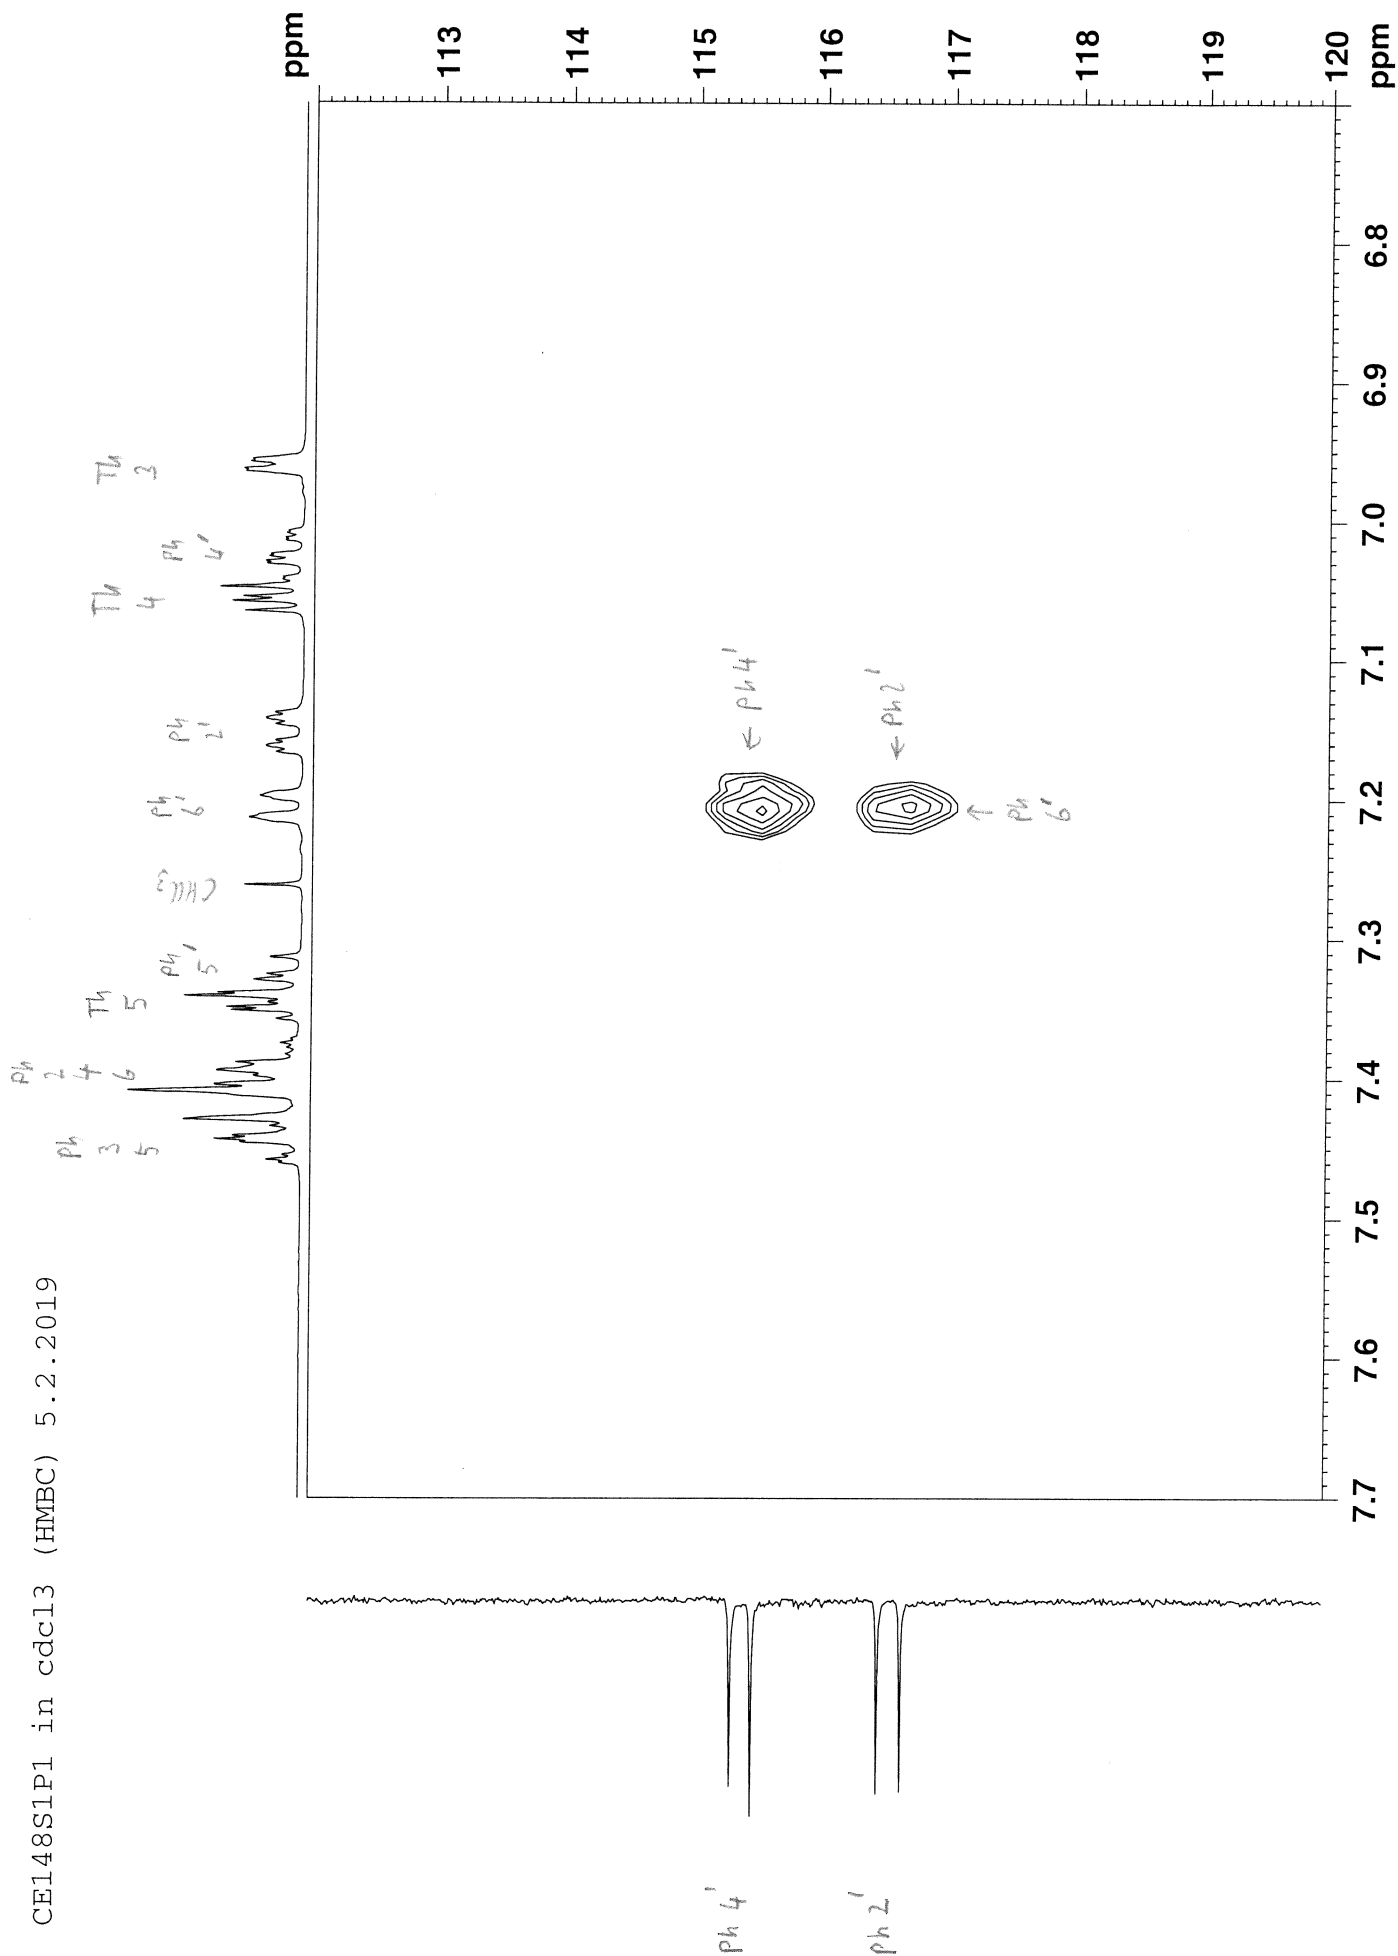

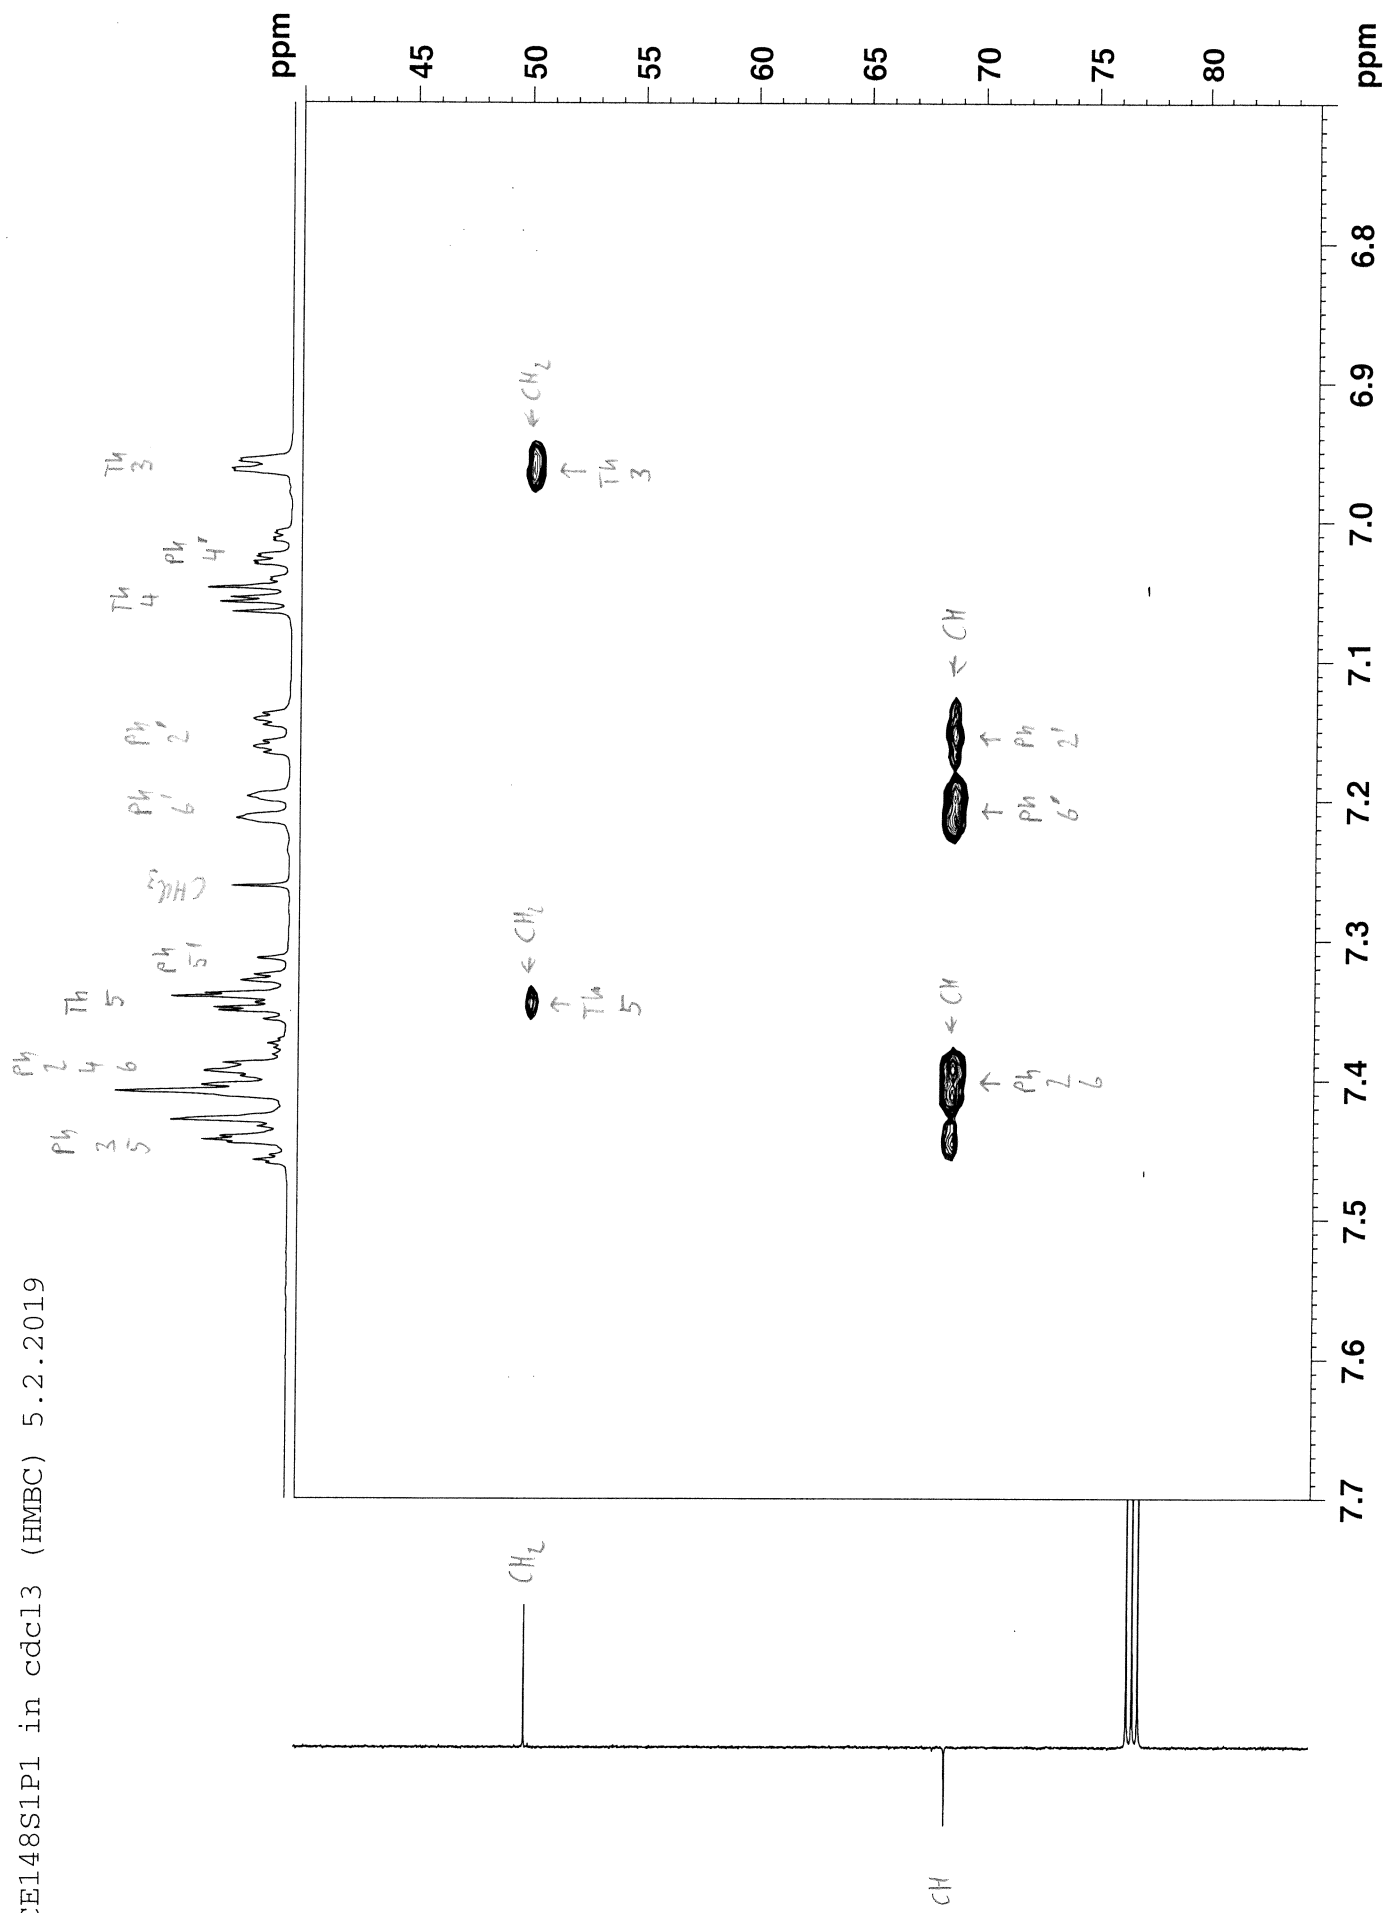

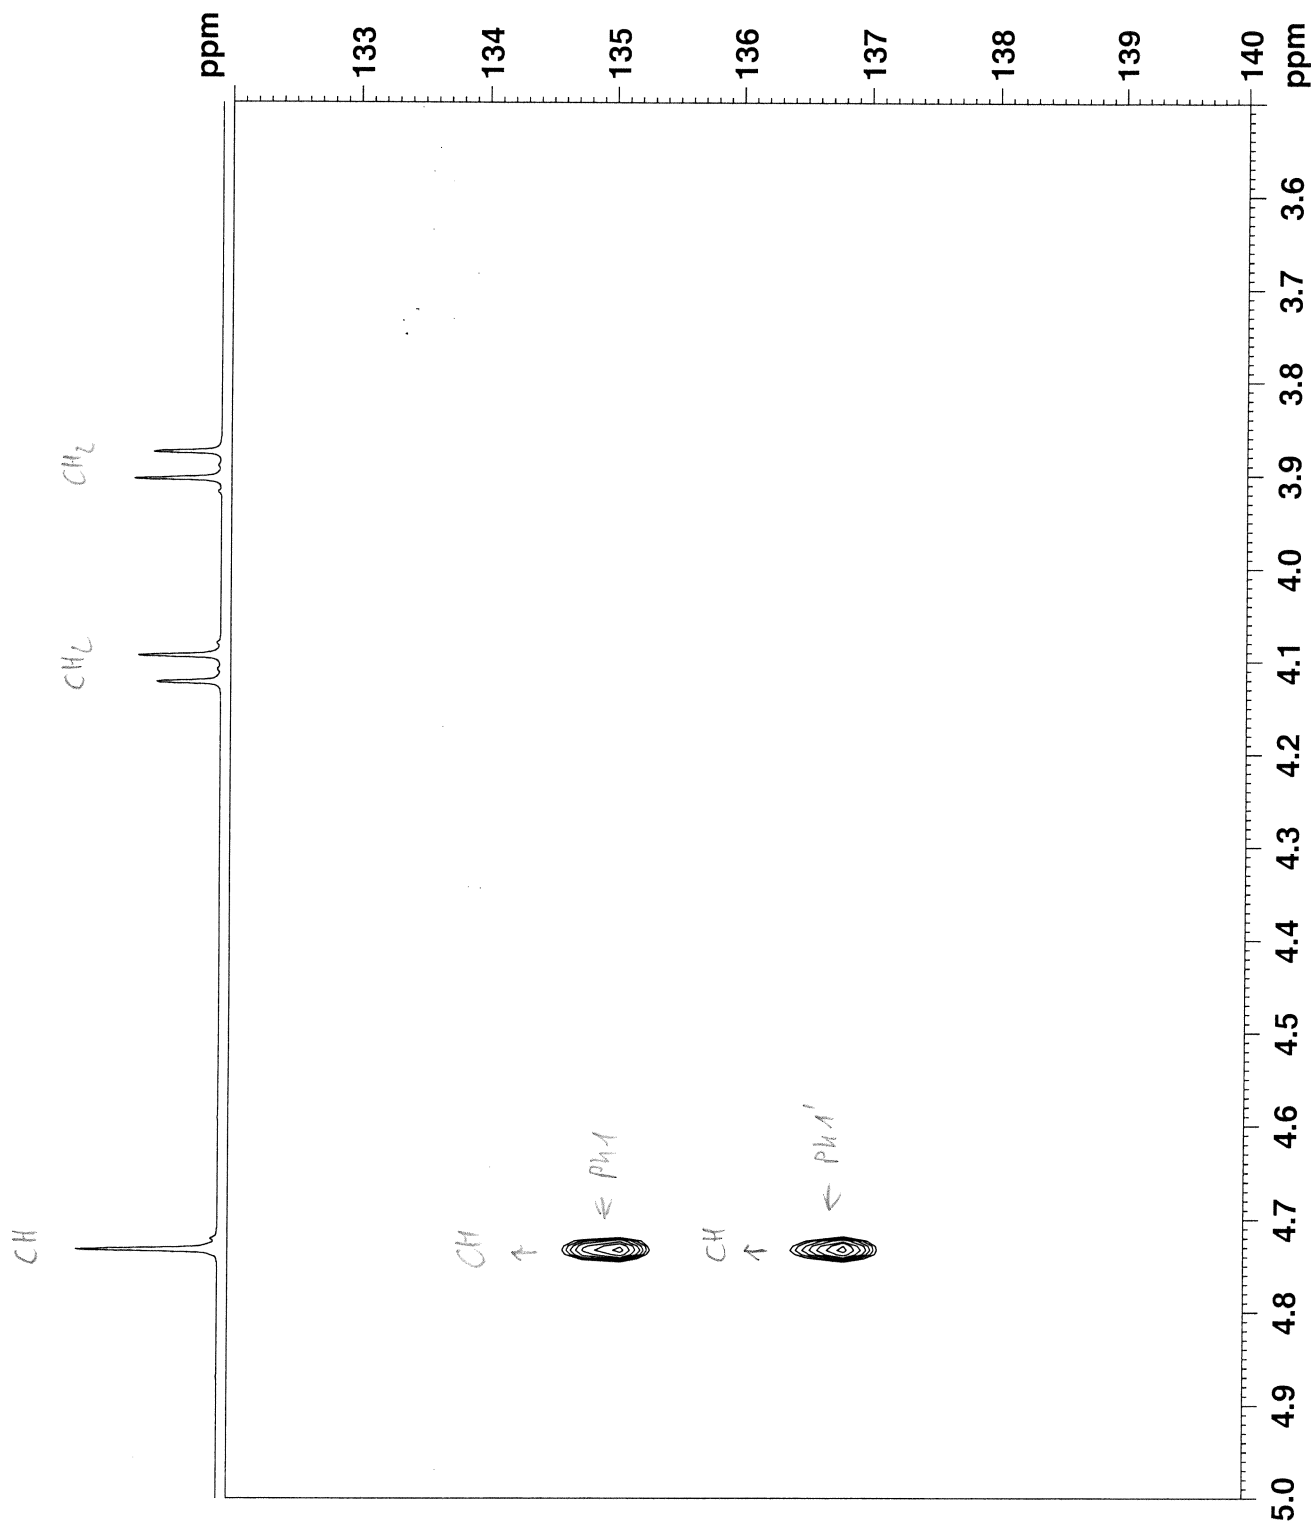

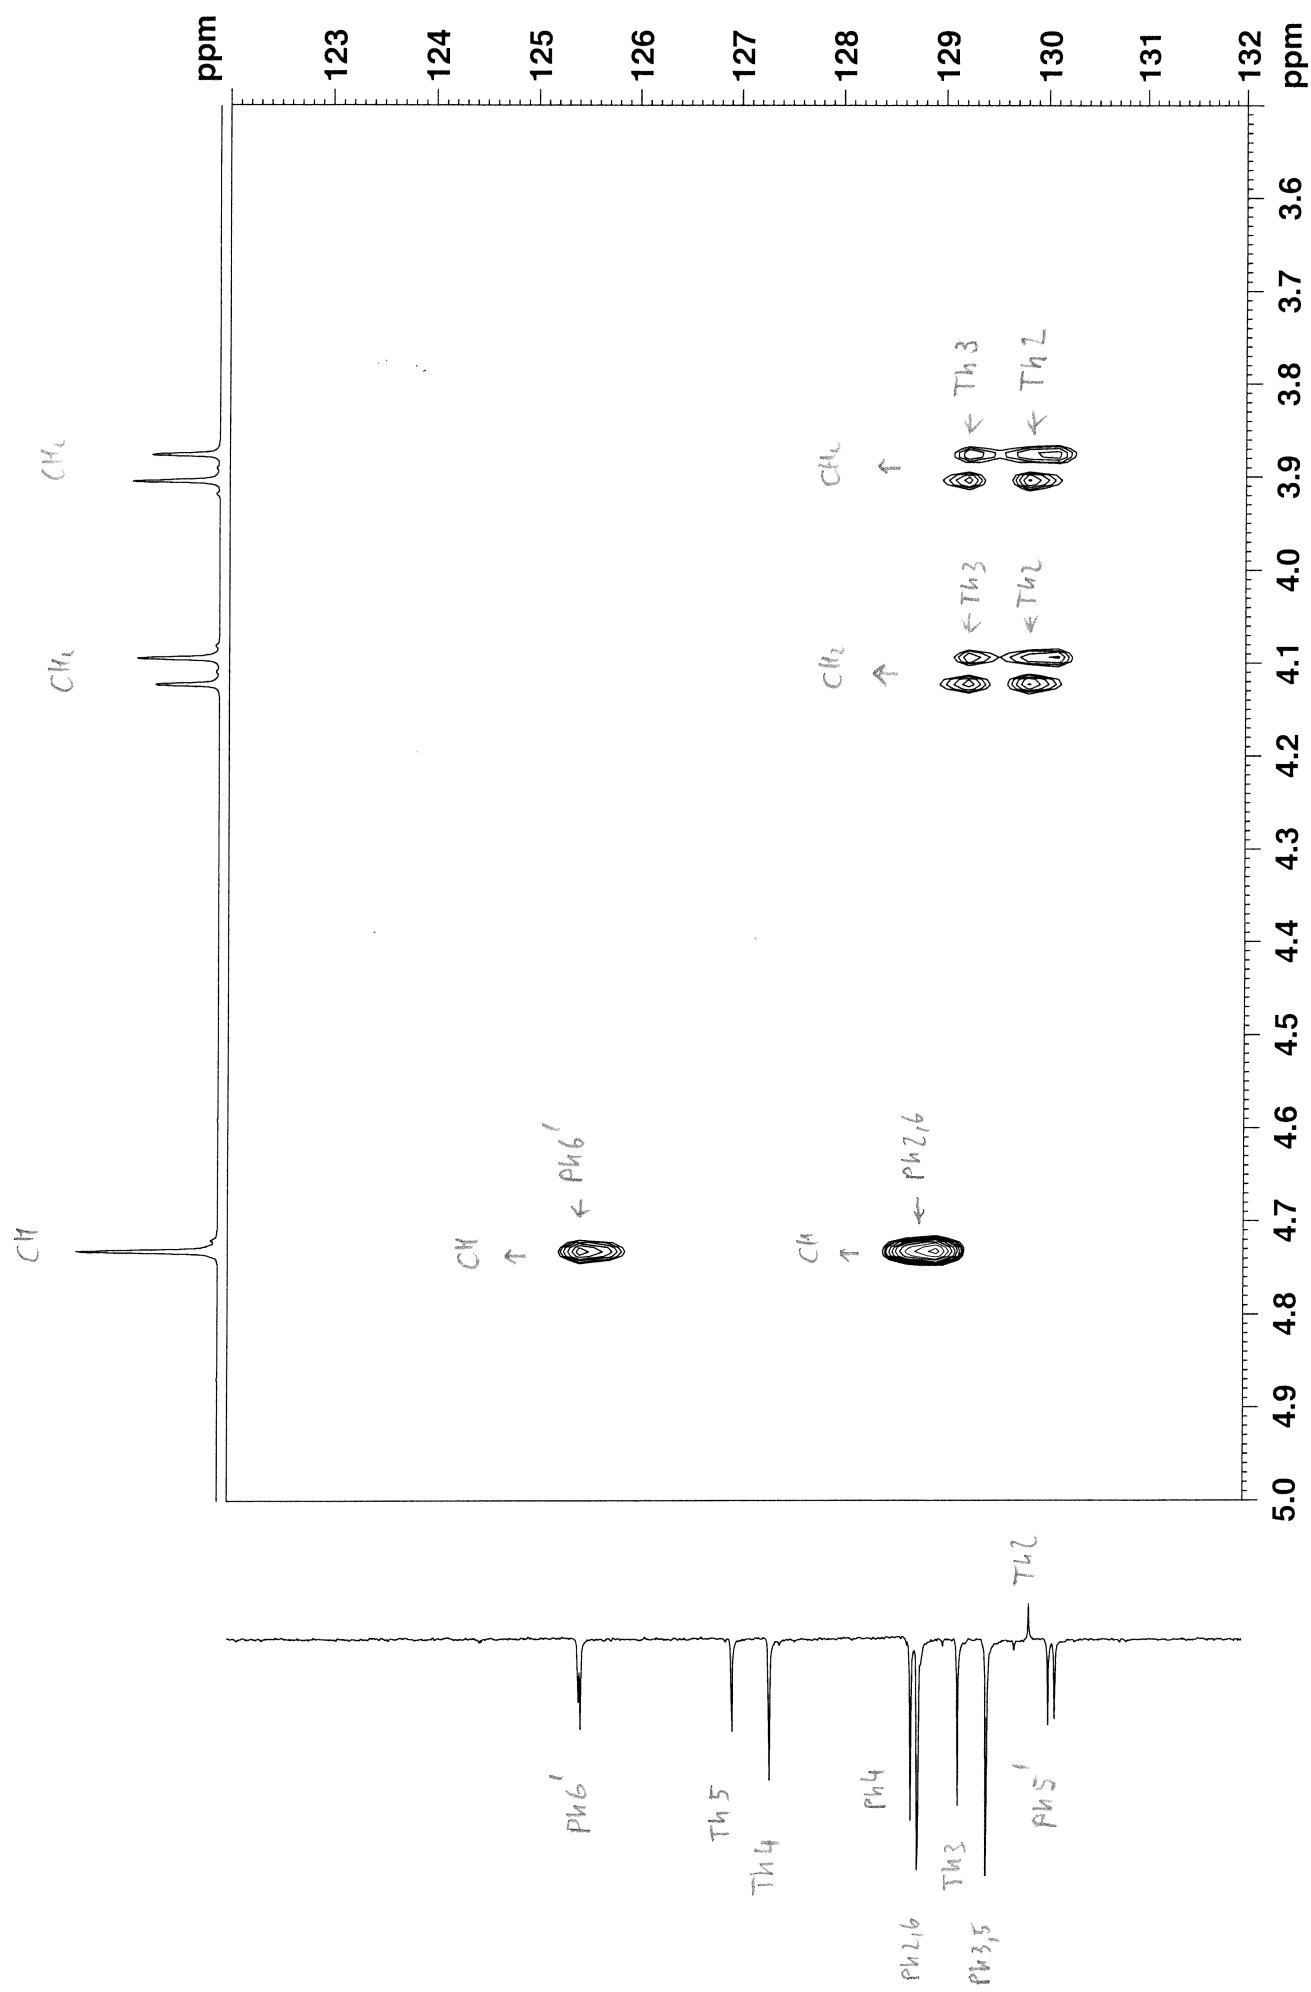

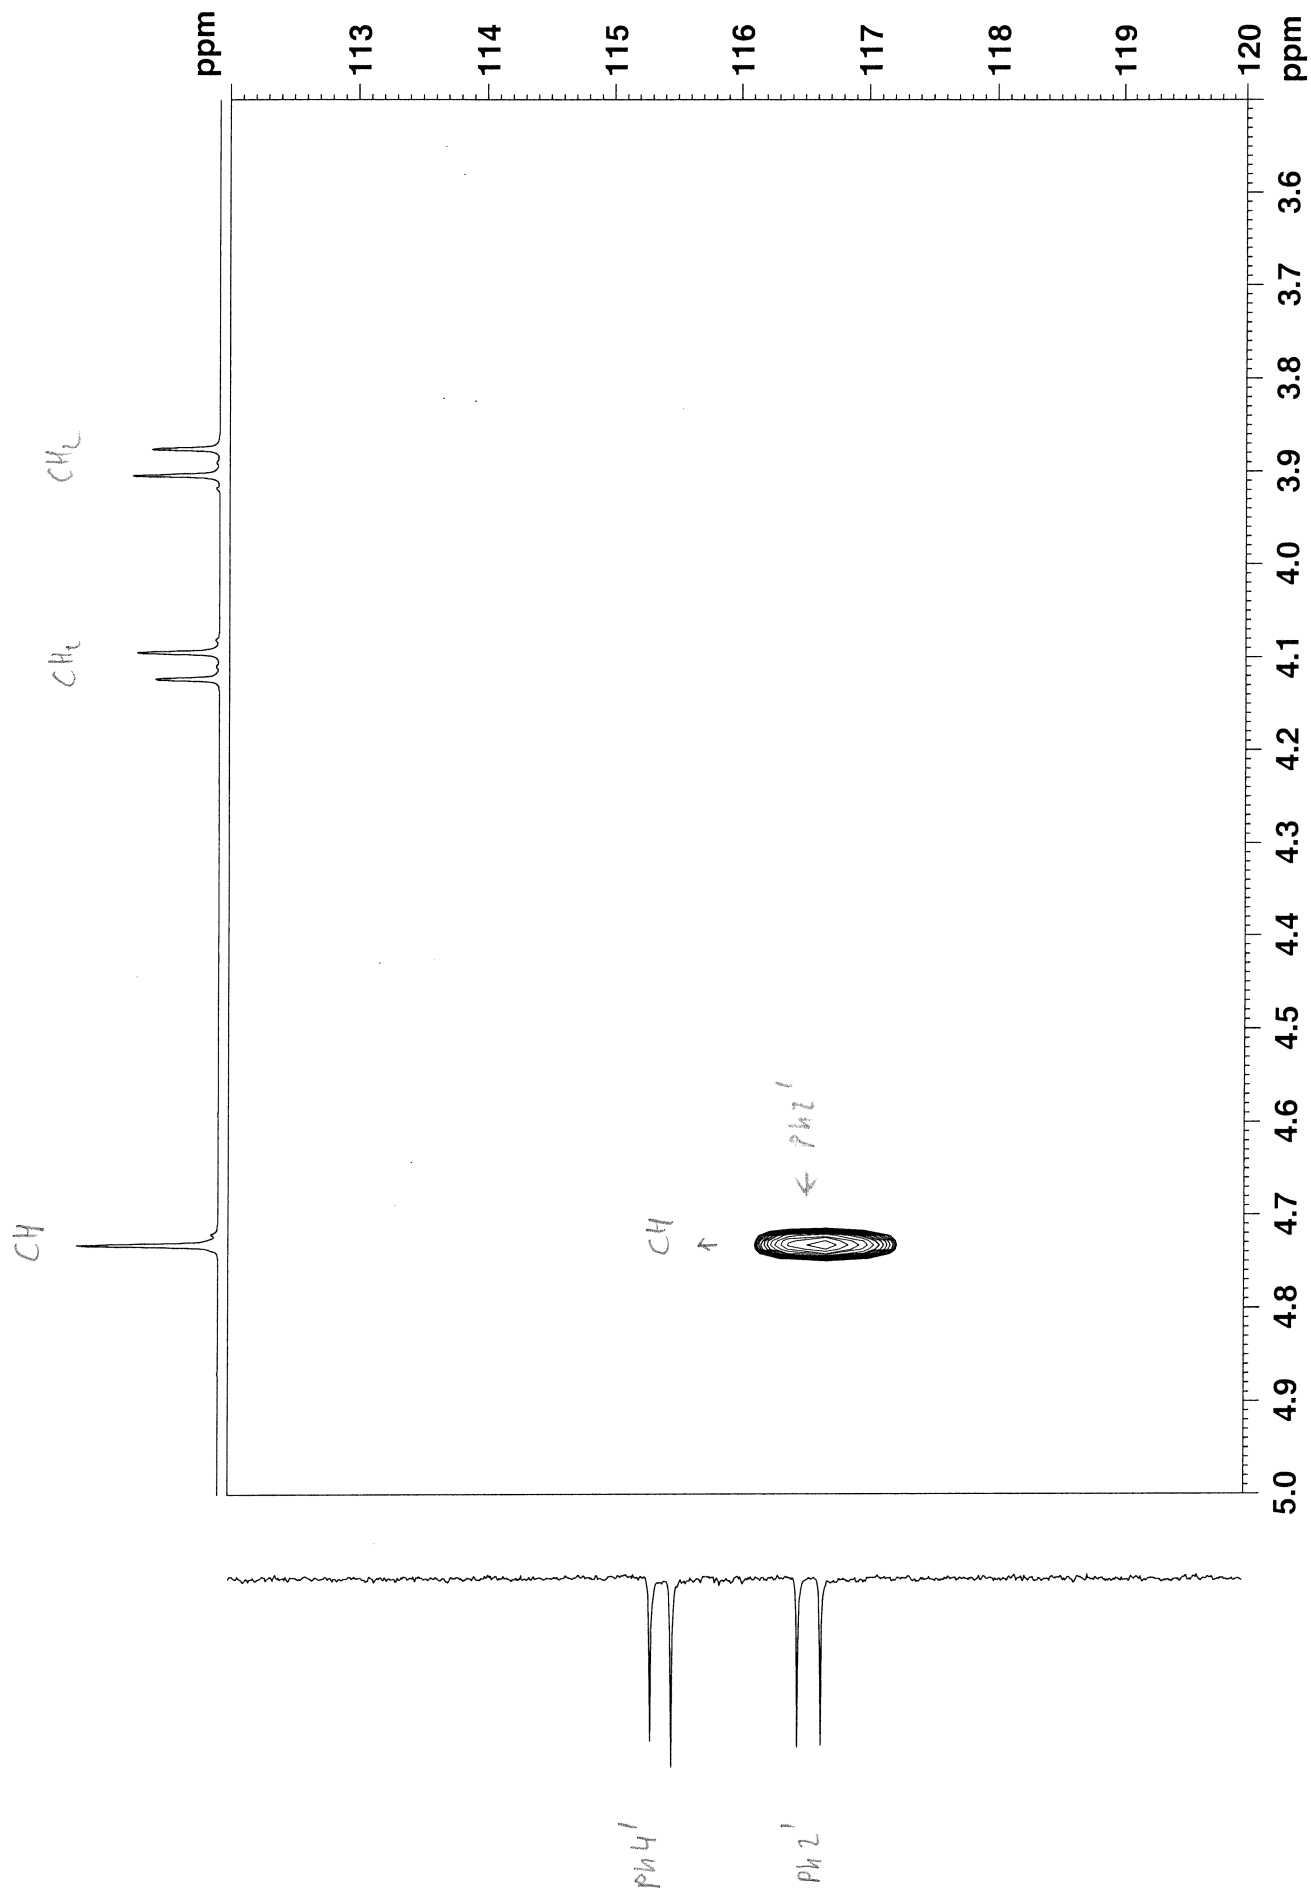

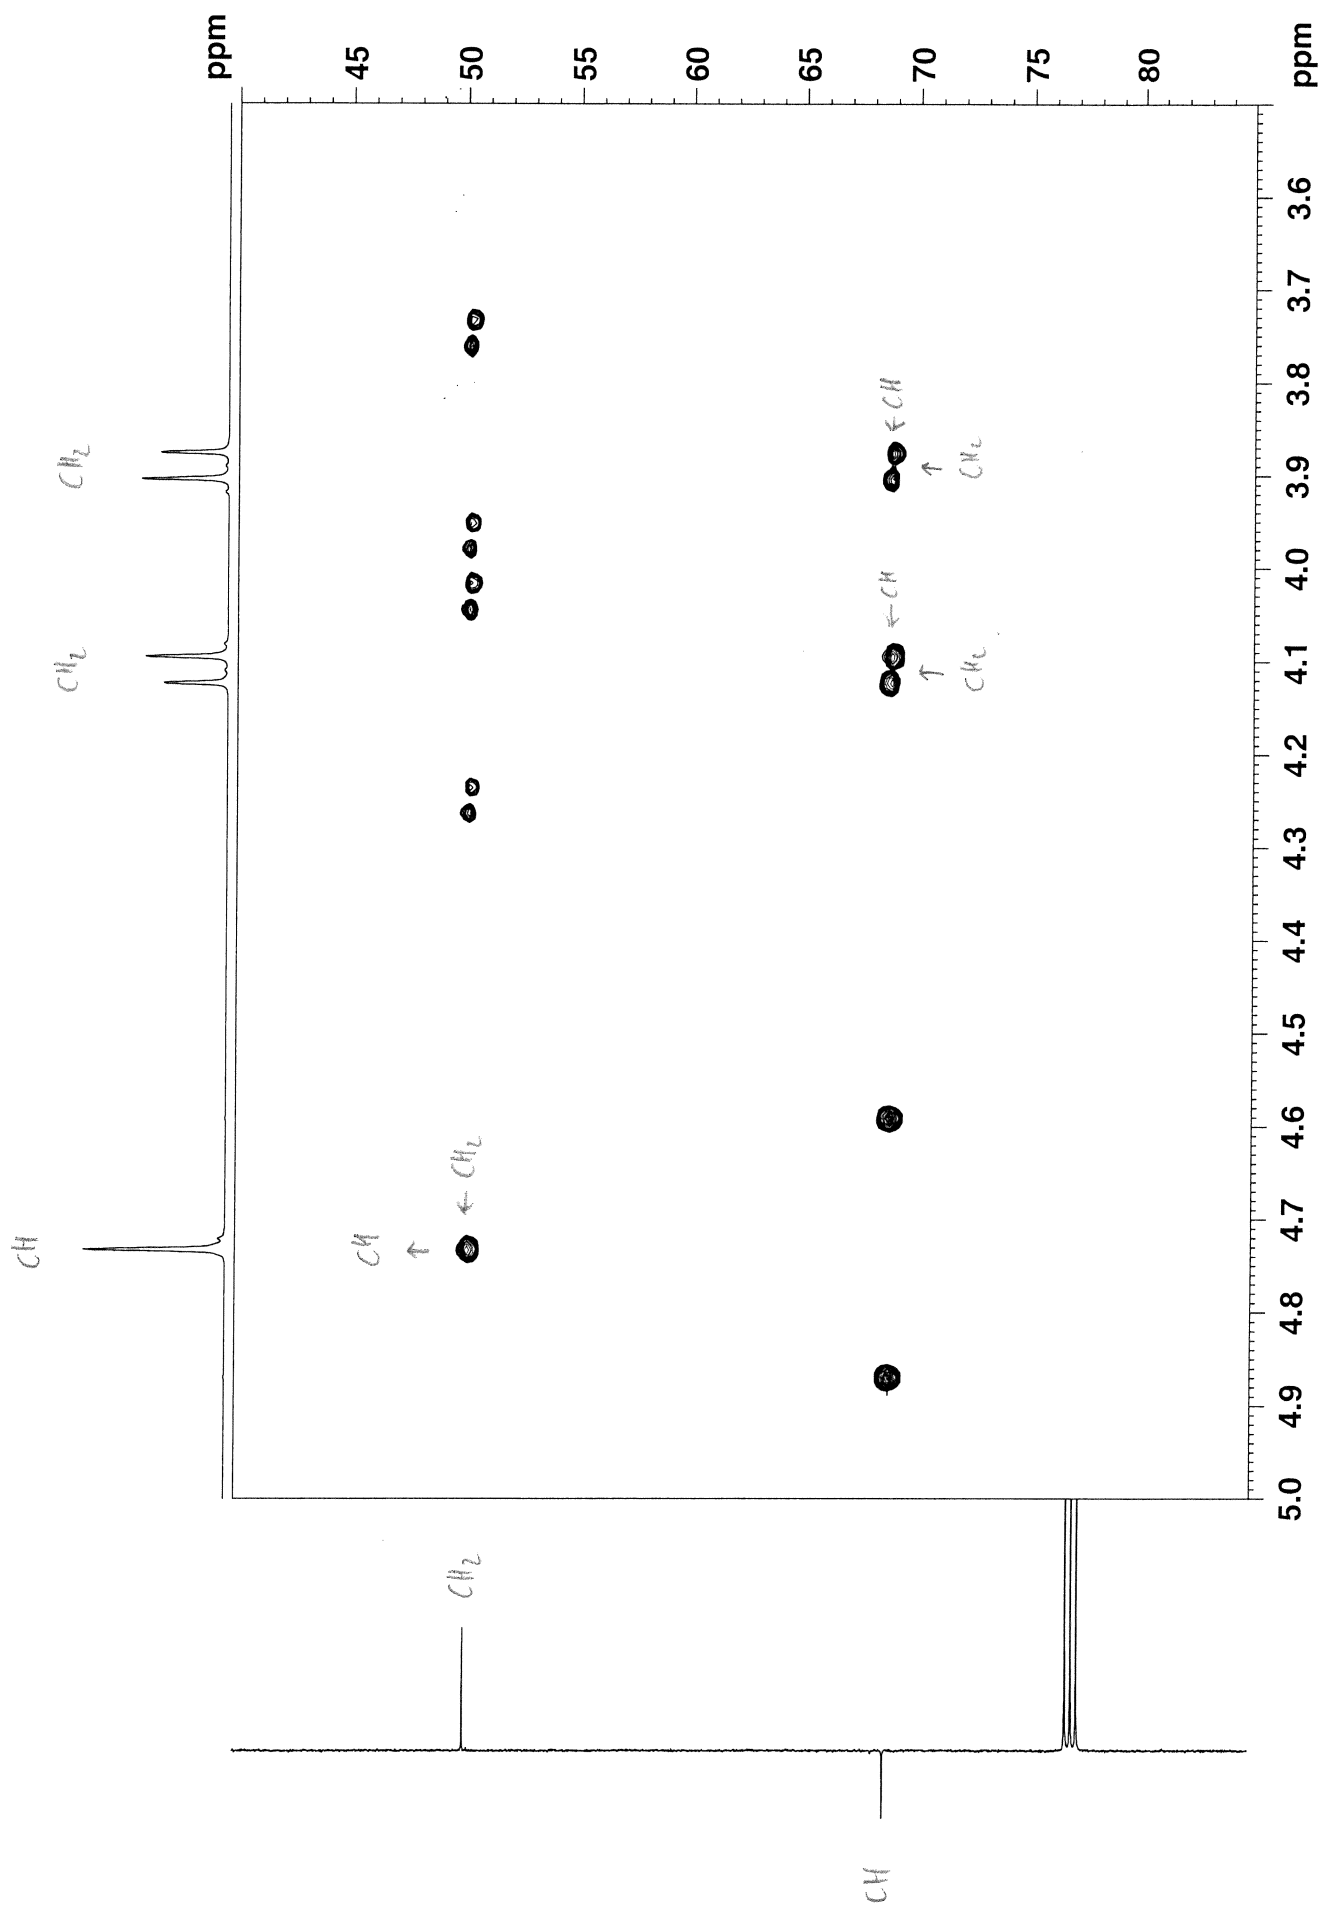

**Figure S6c.** NMR spectra of compound **6b**.

CE148S1P2 in cdcl3 (Proton) 5.2.2019

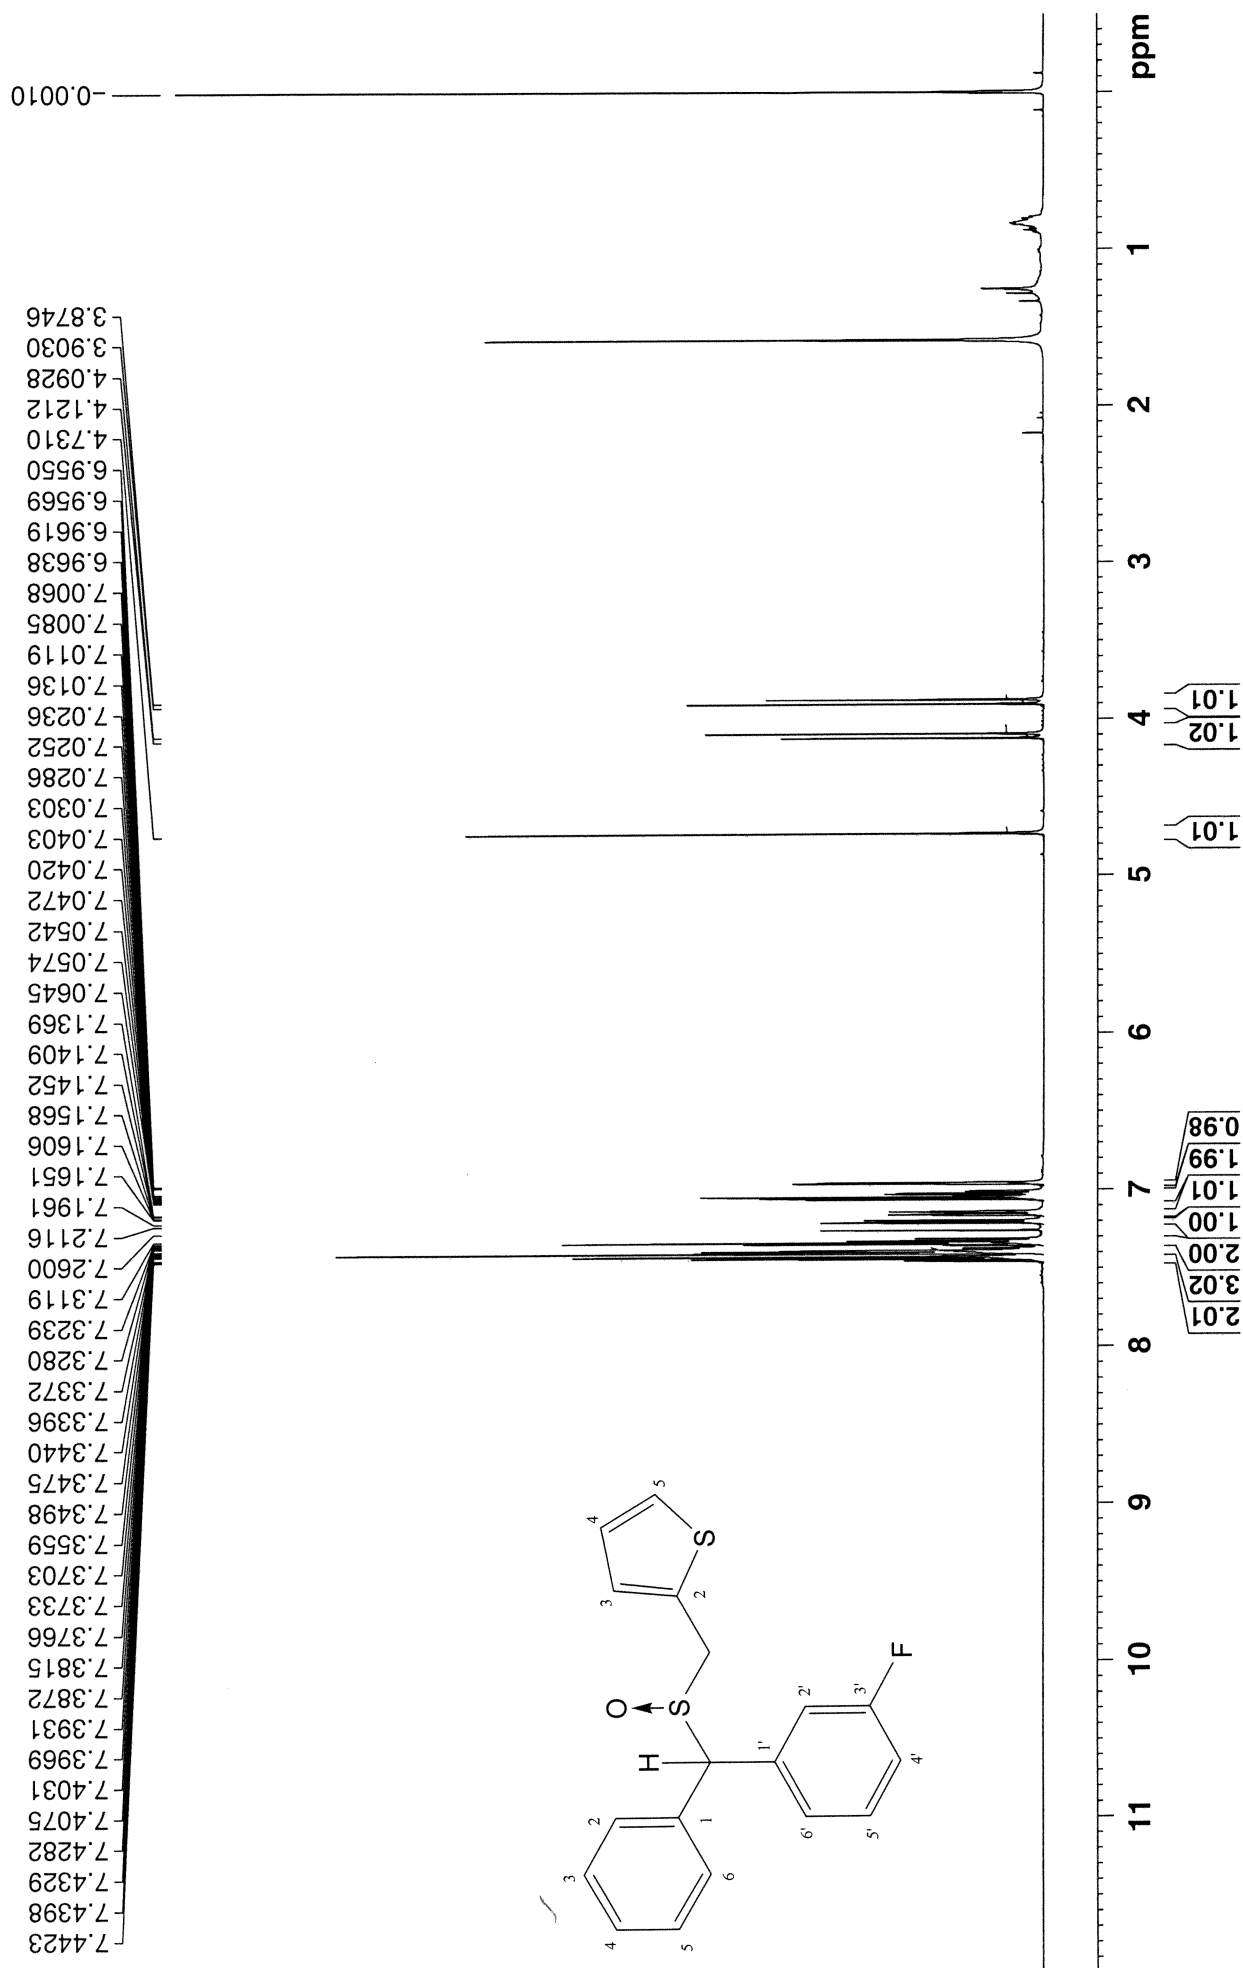

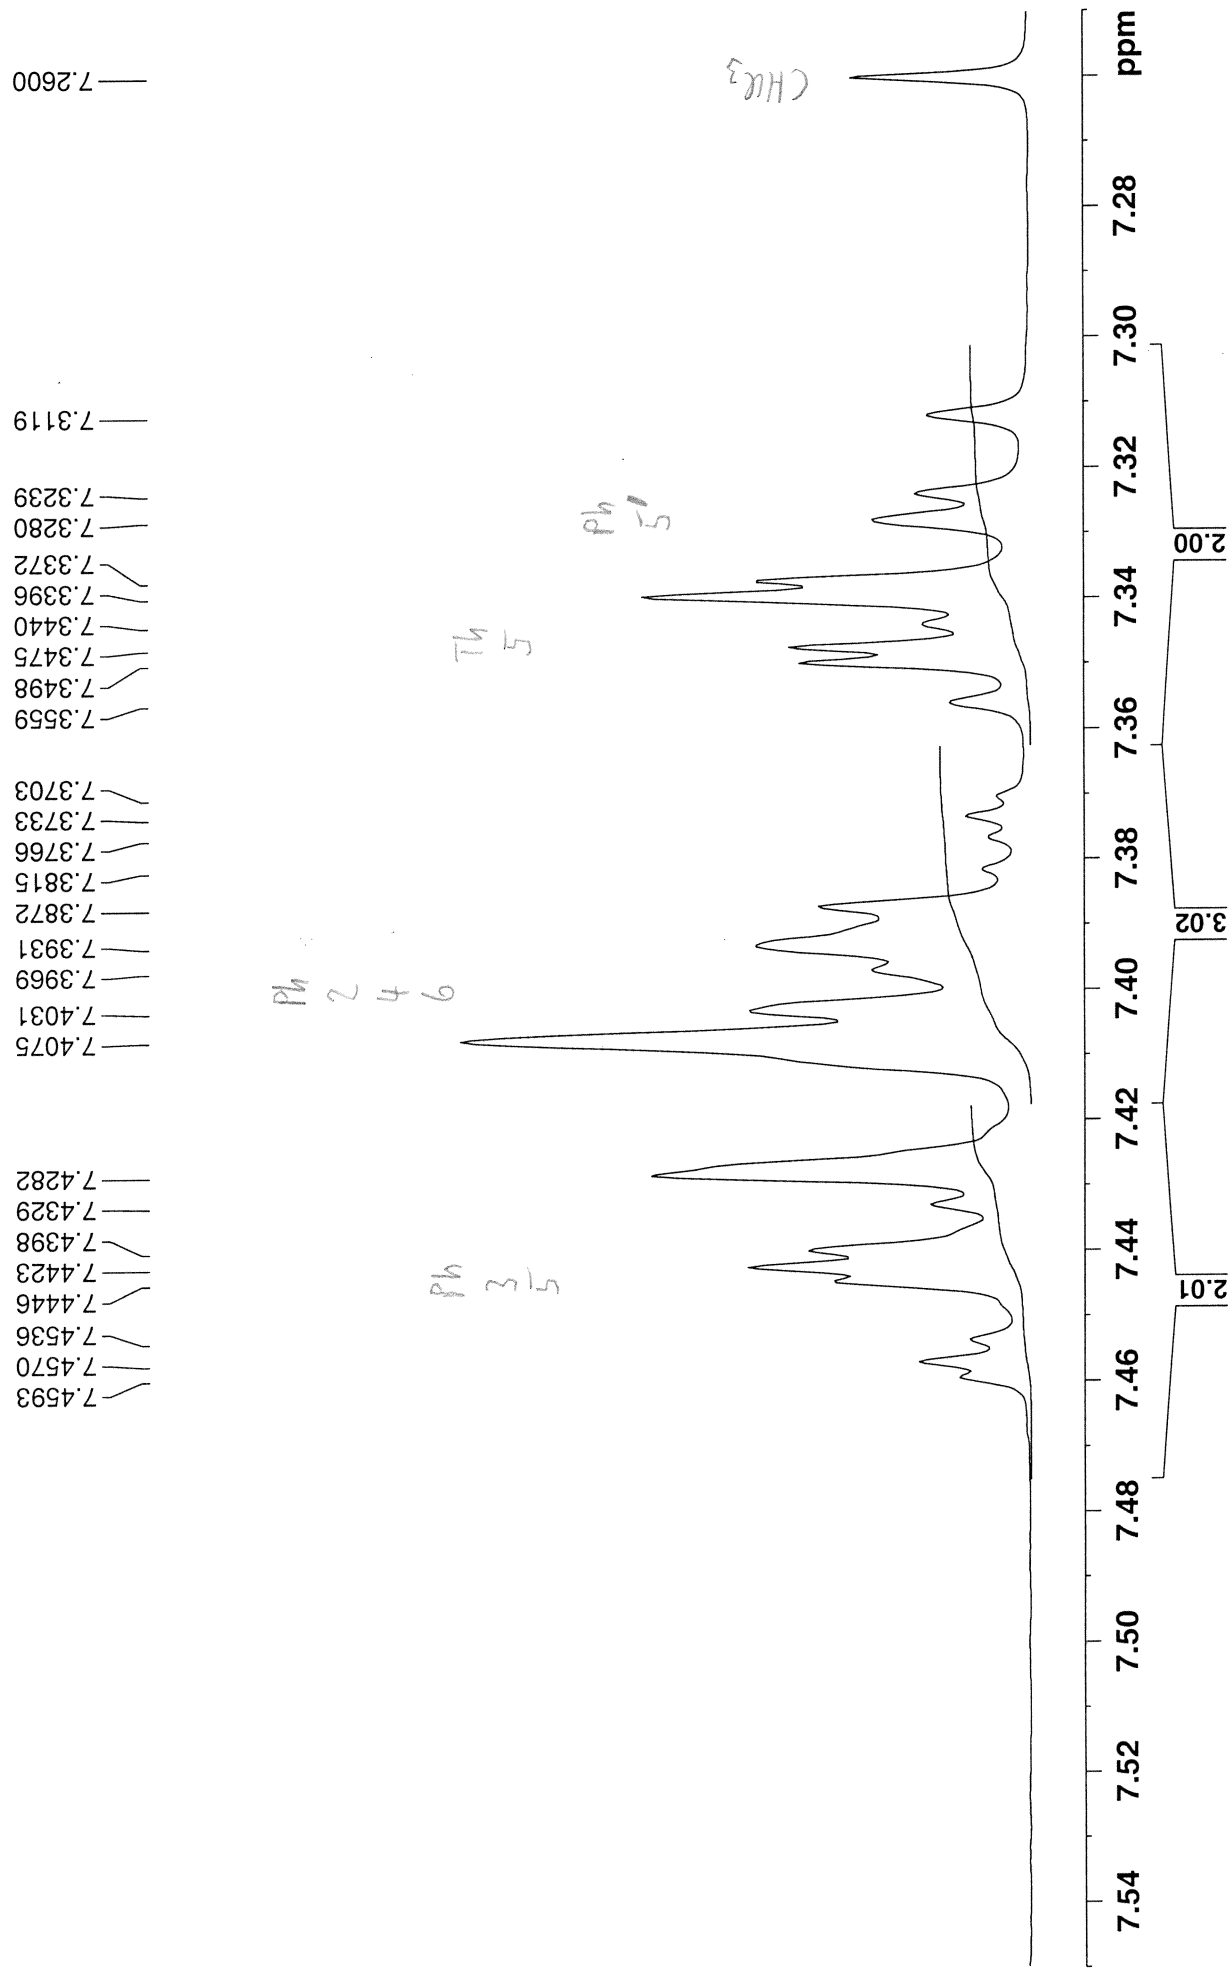



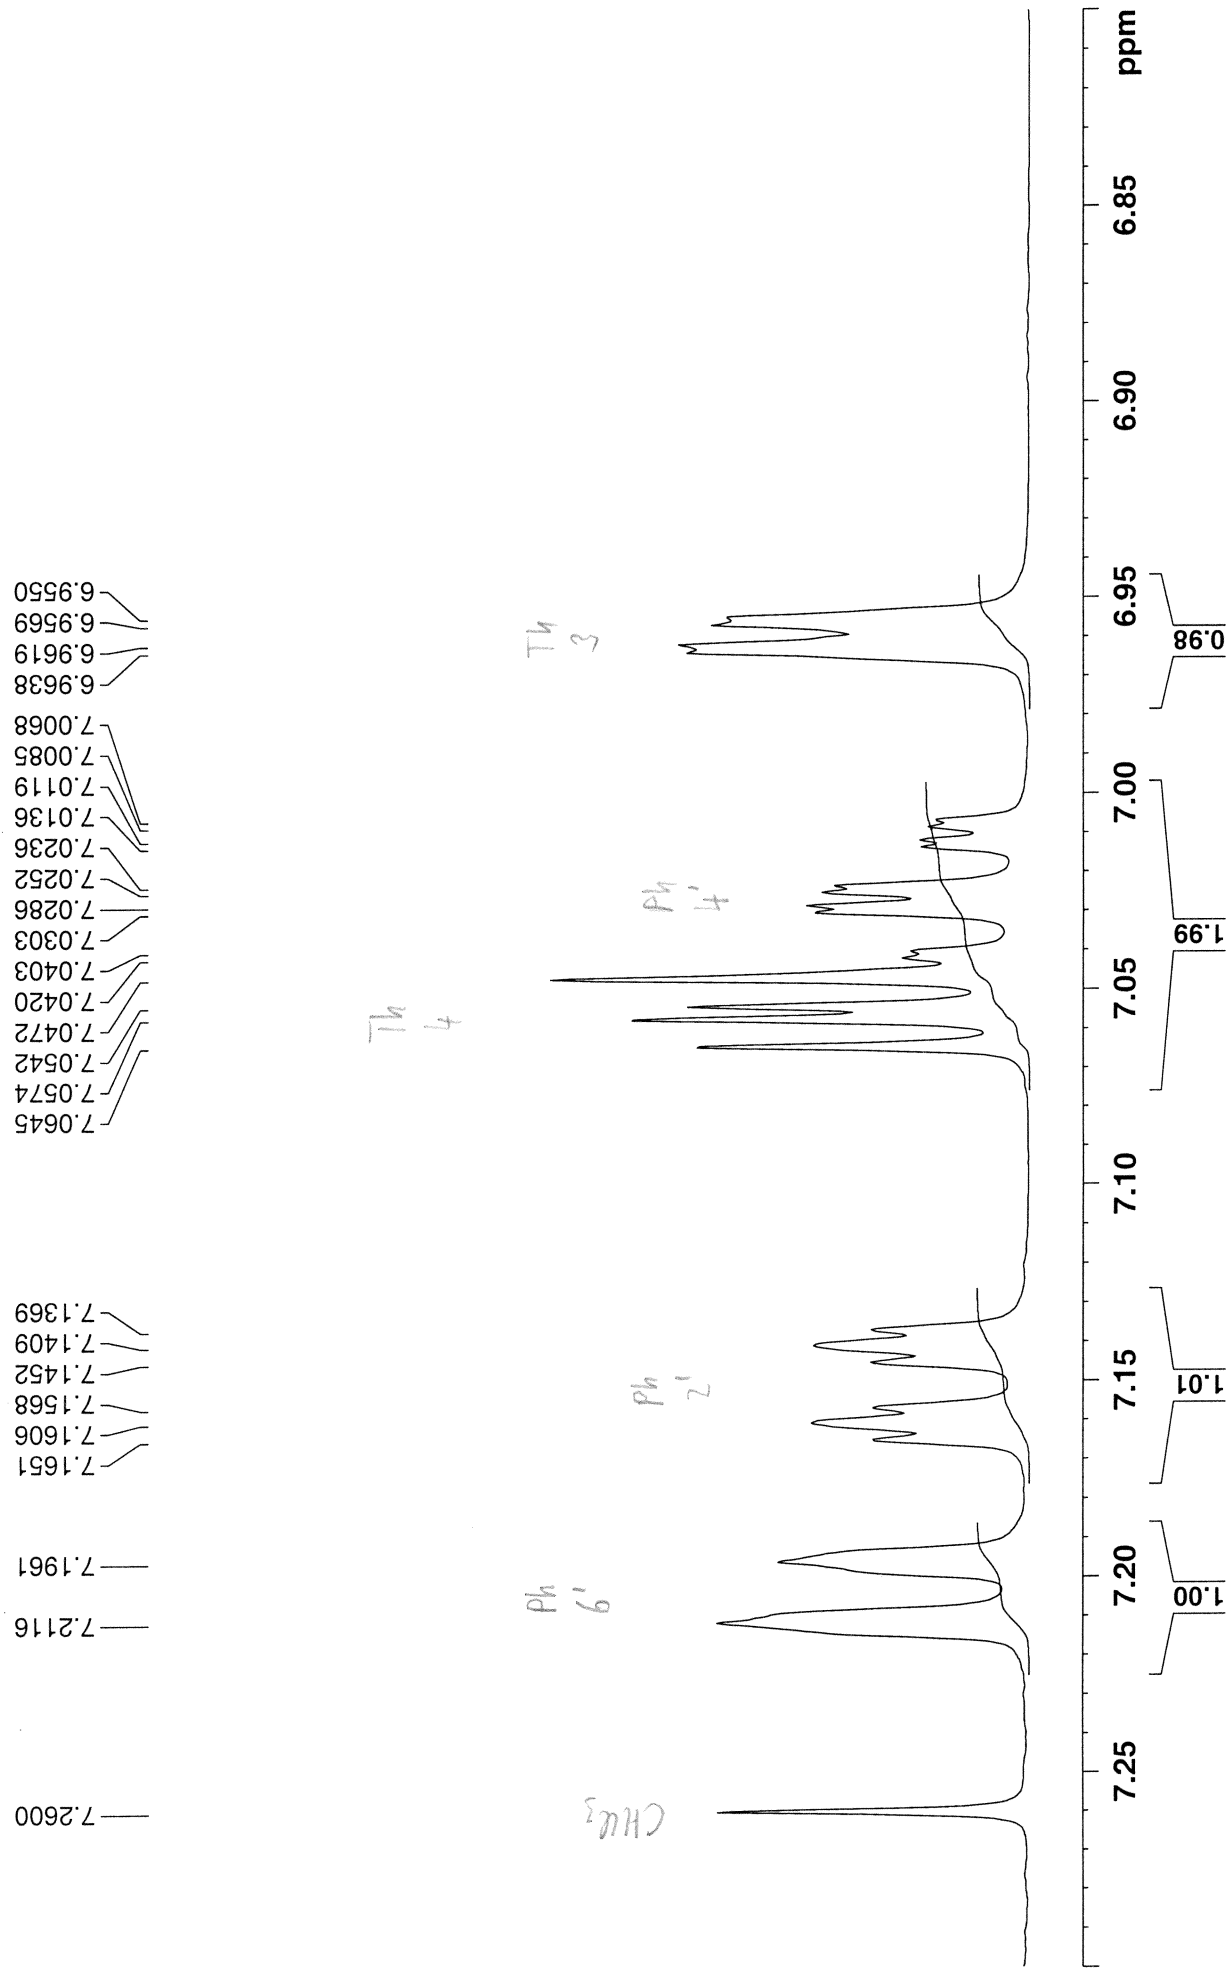

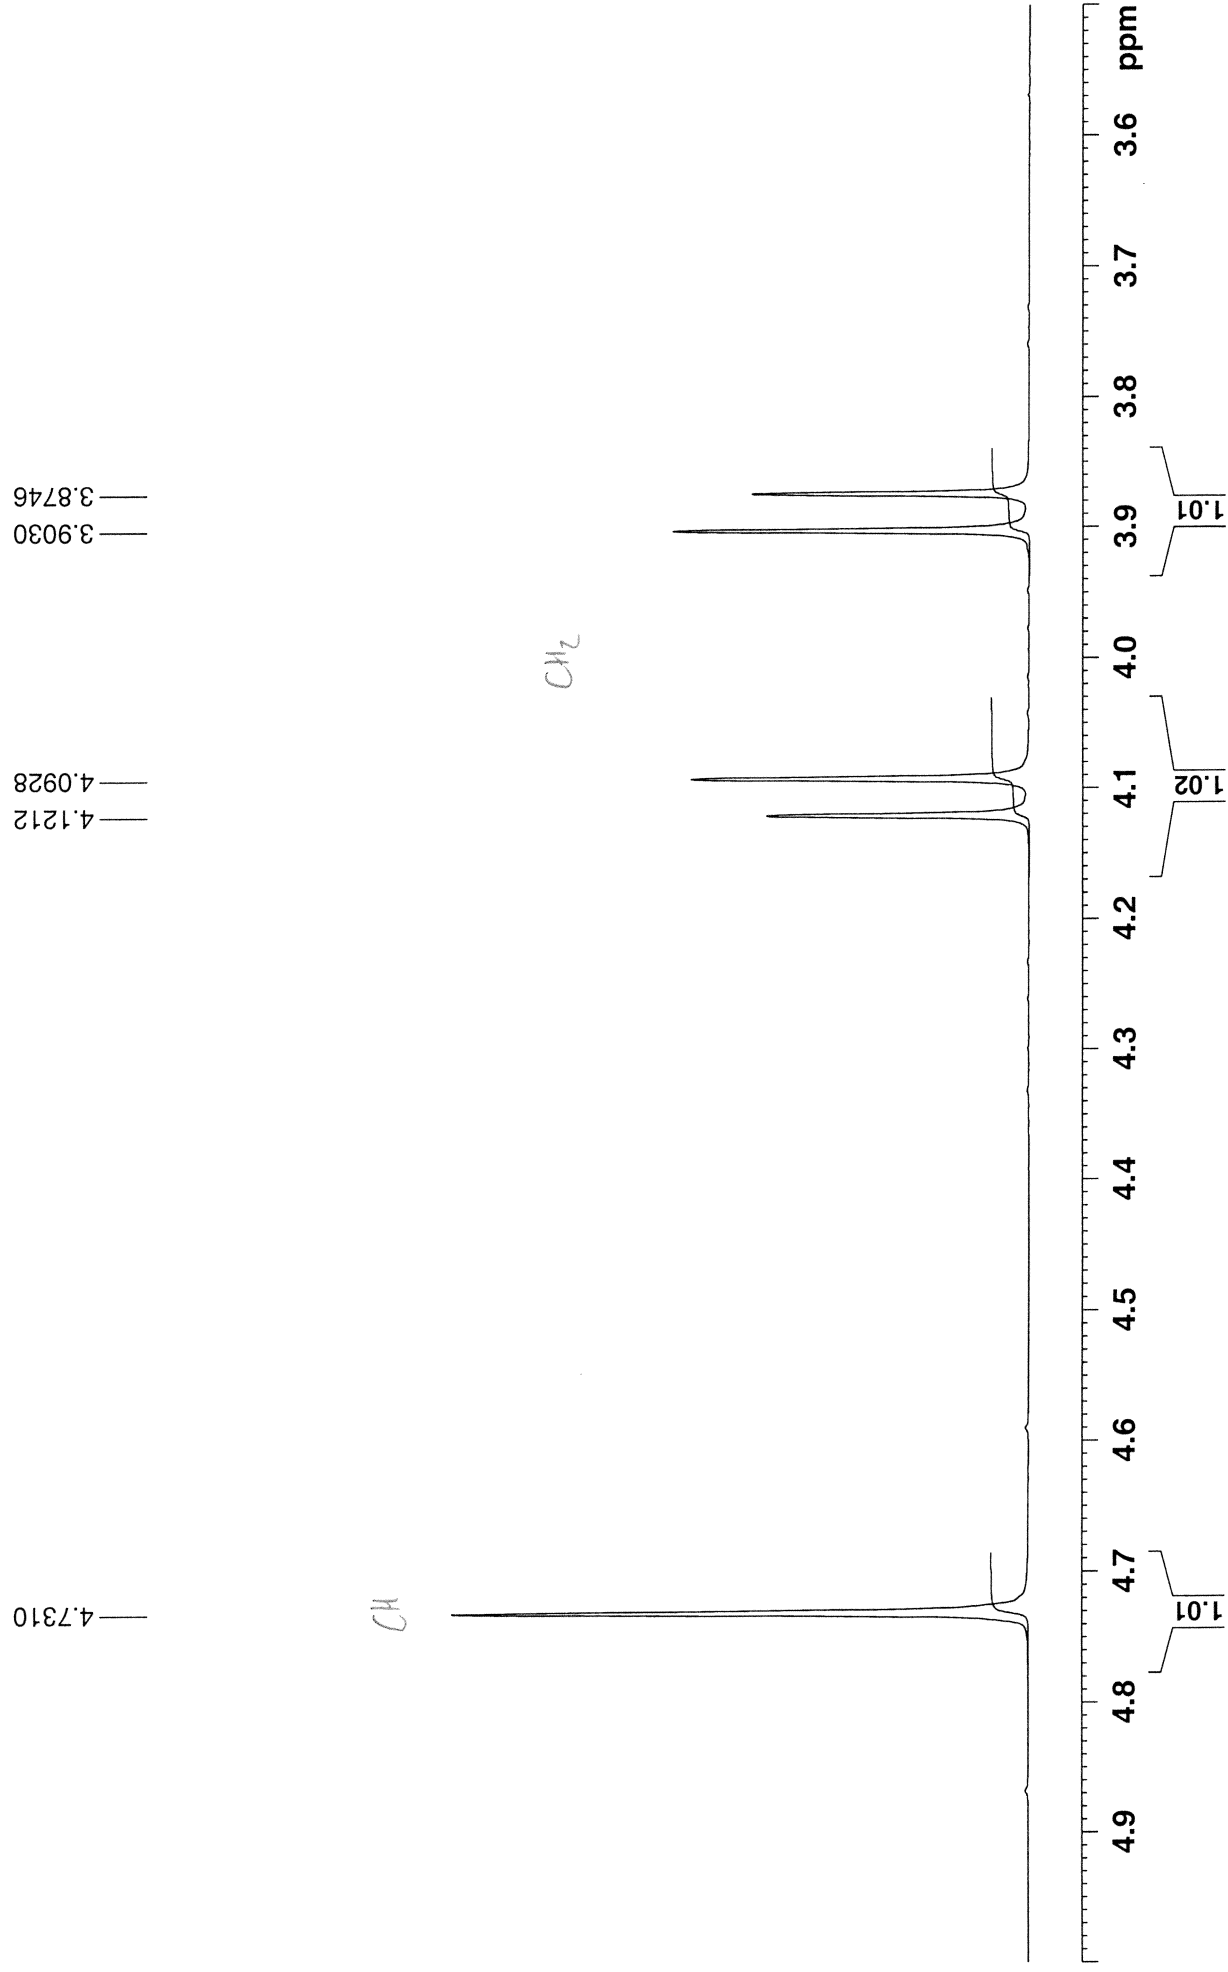

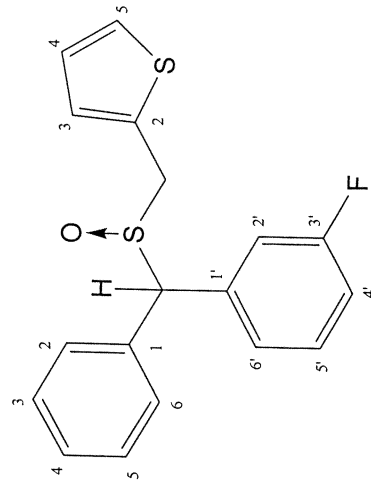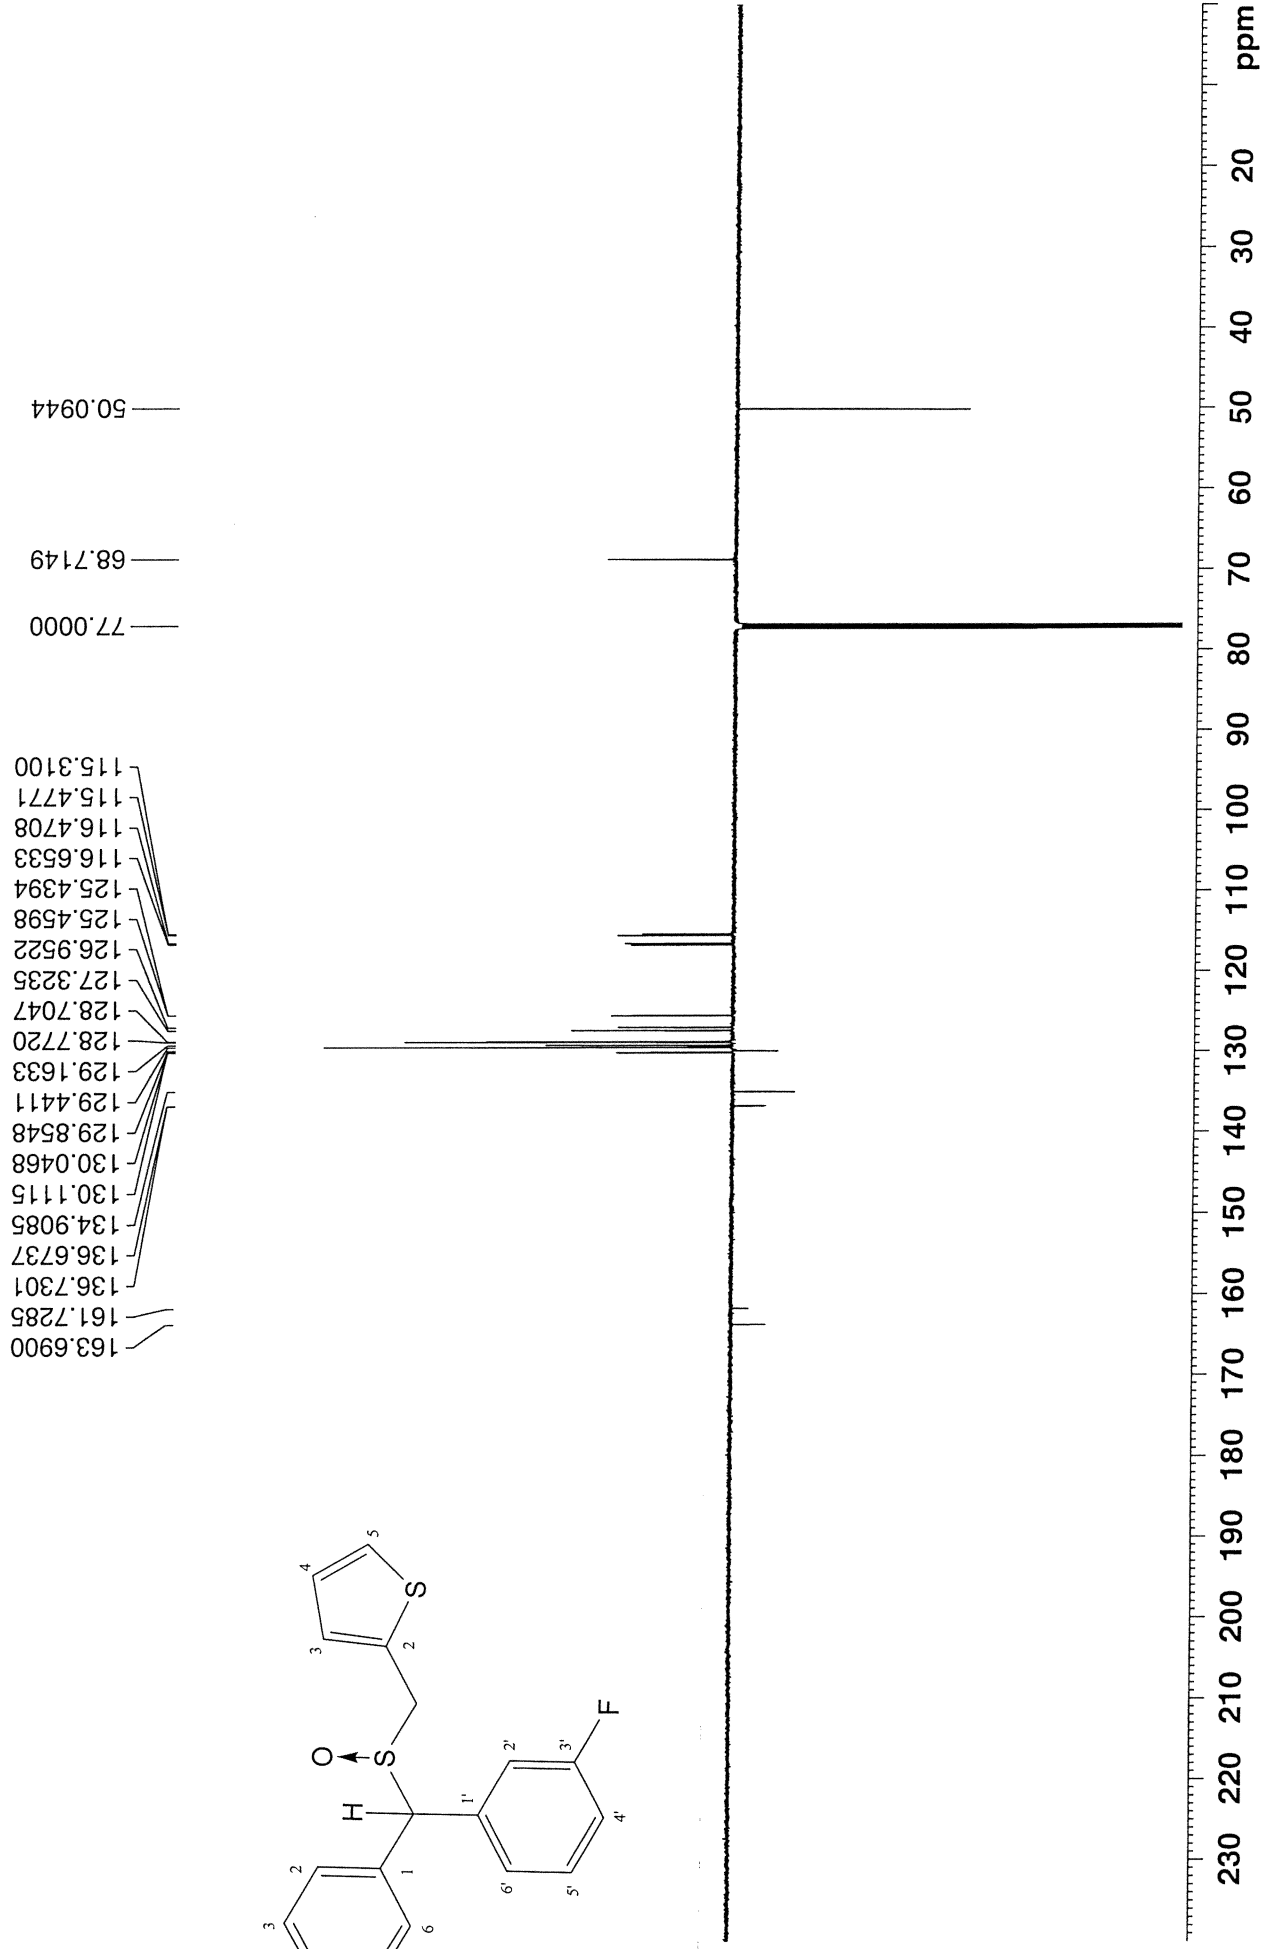

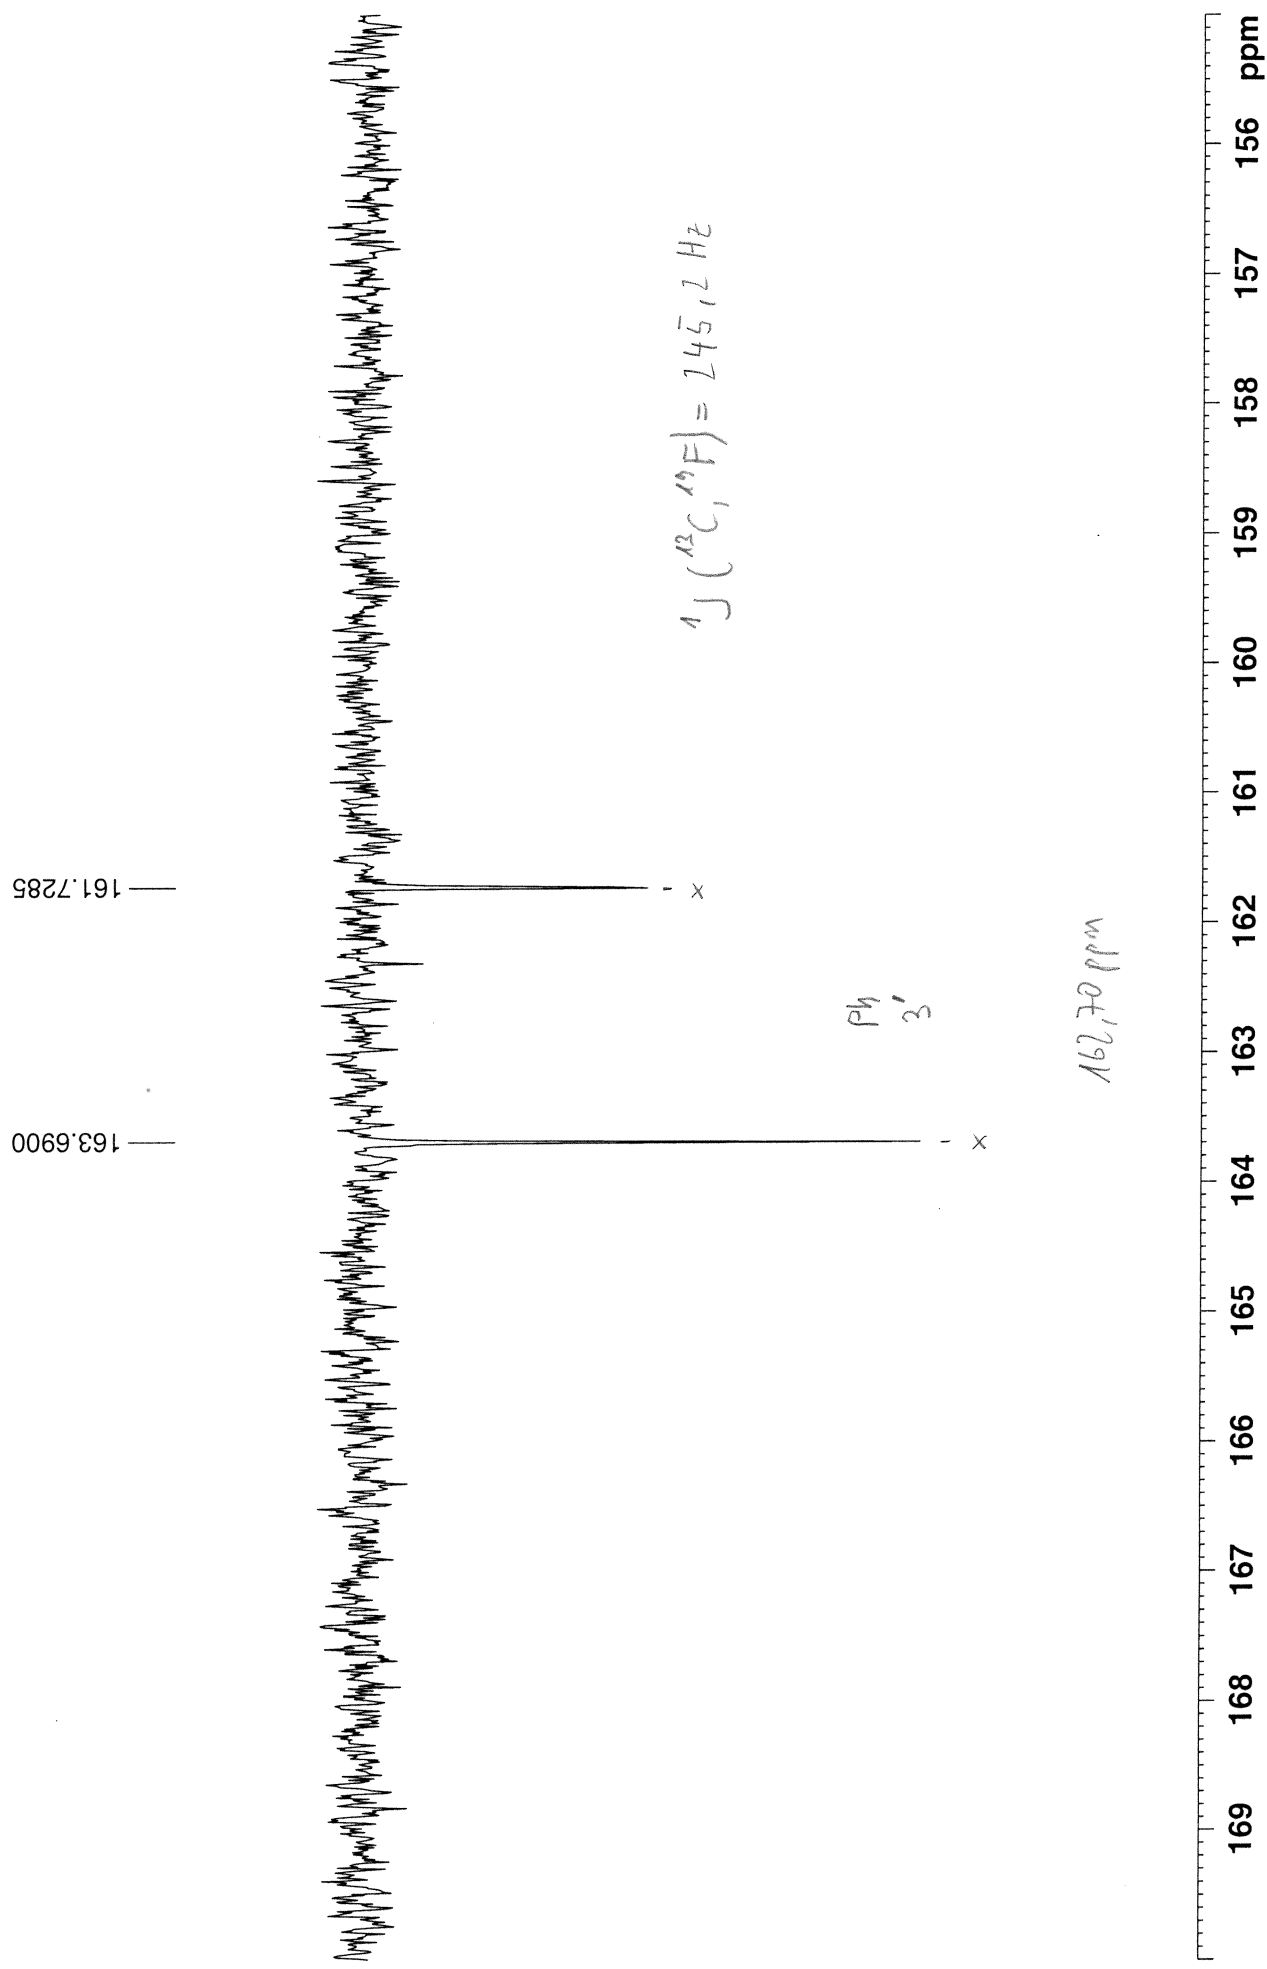

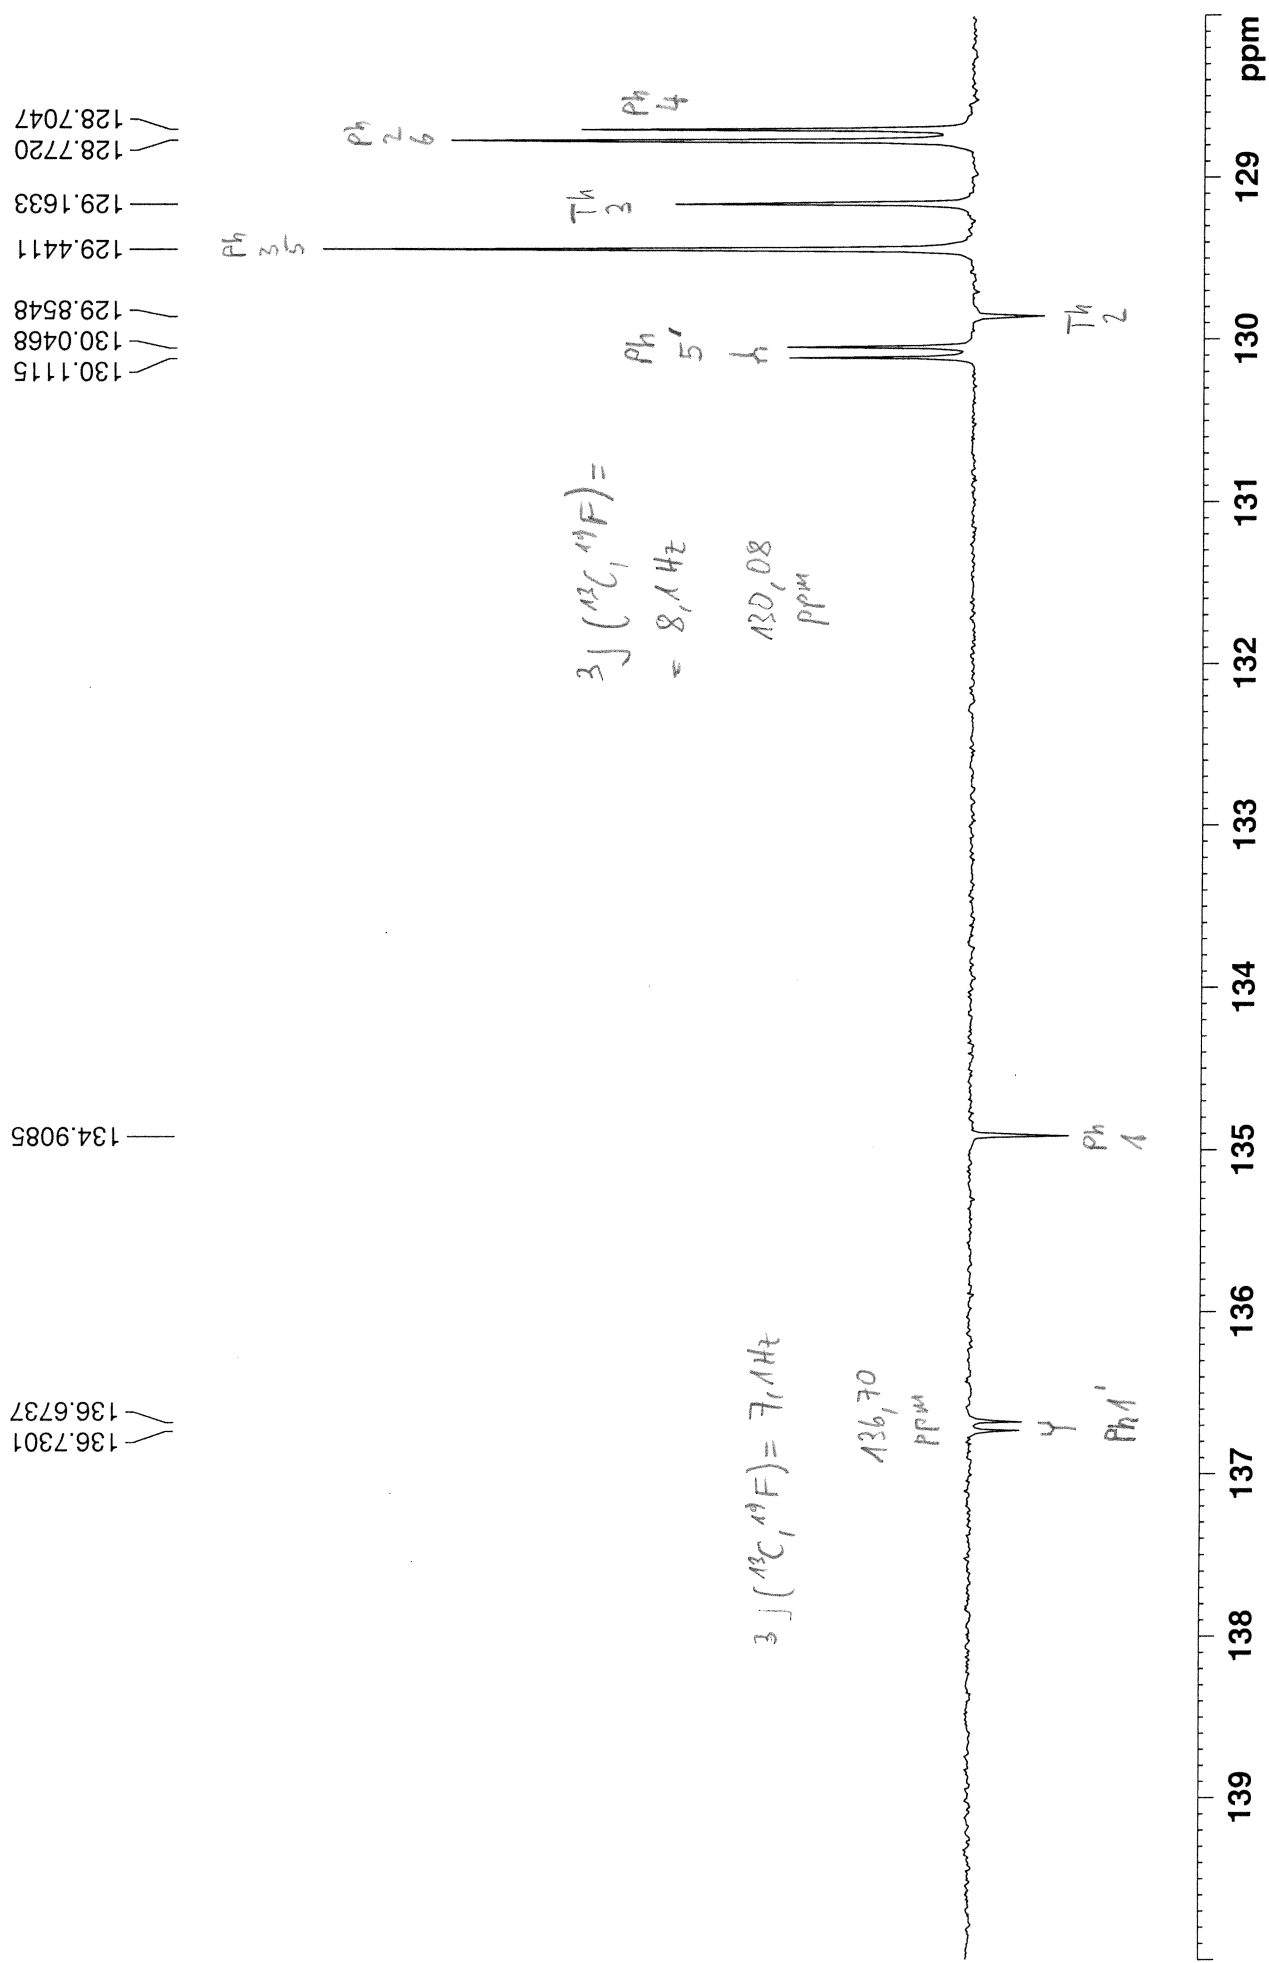

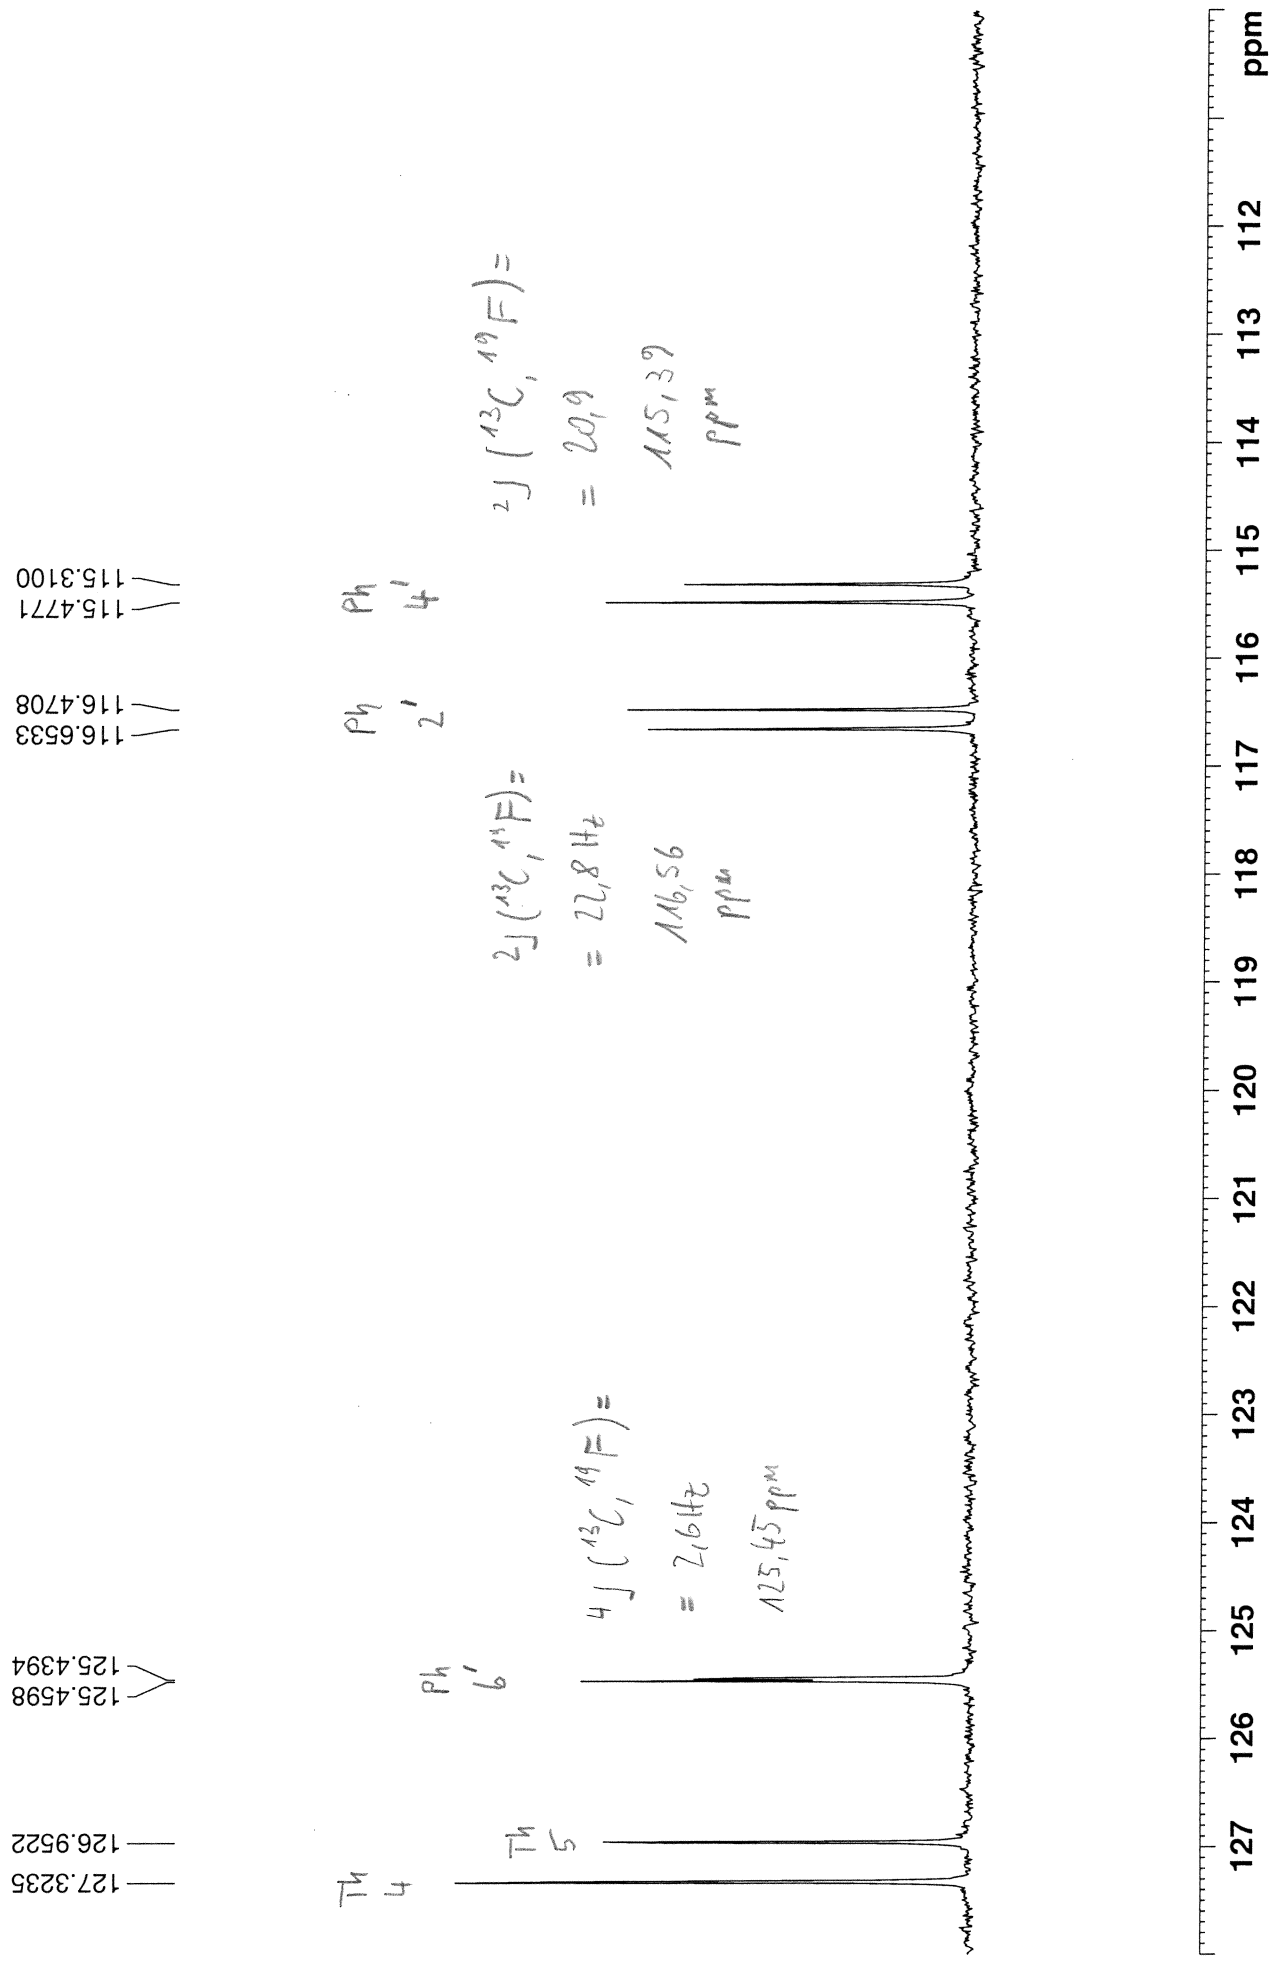

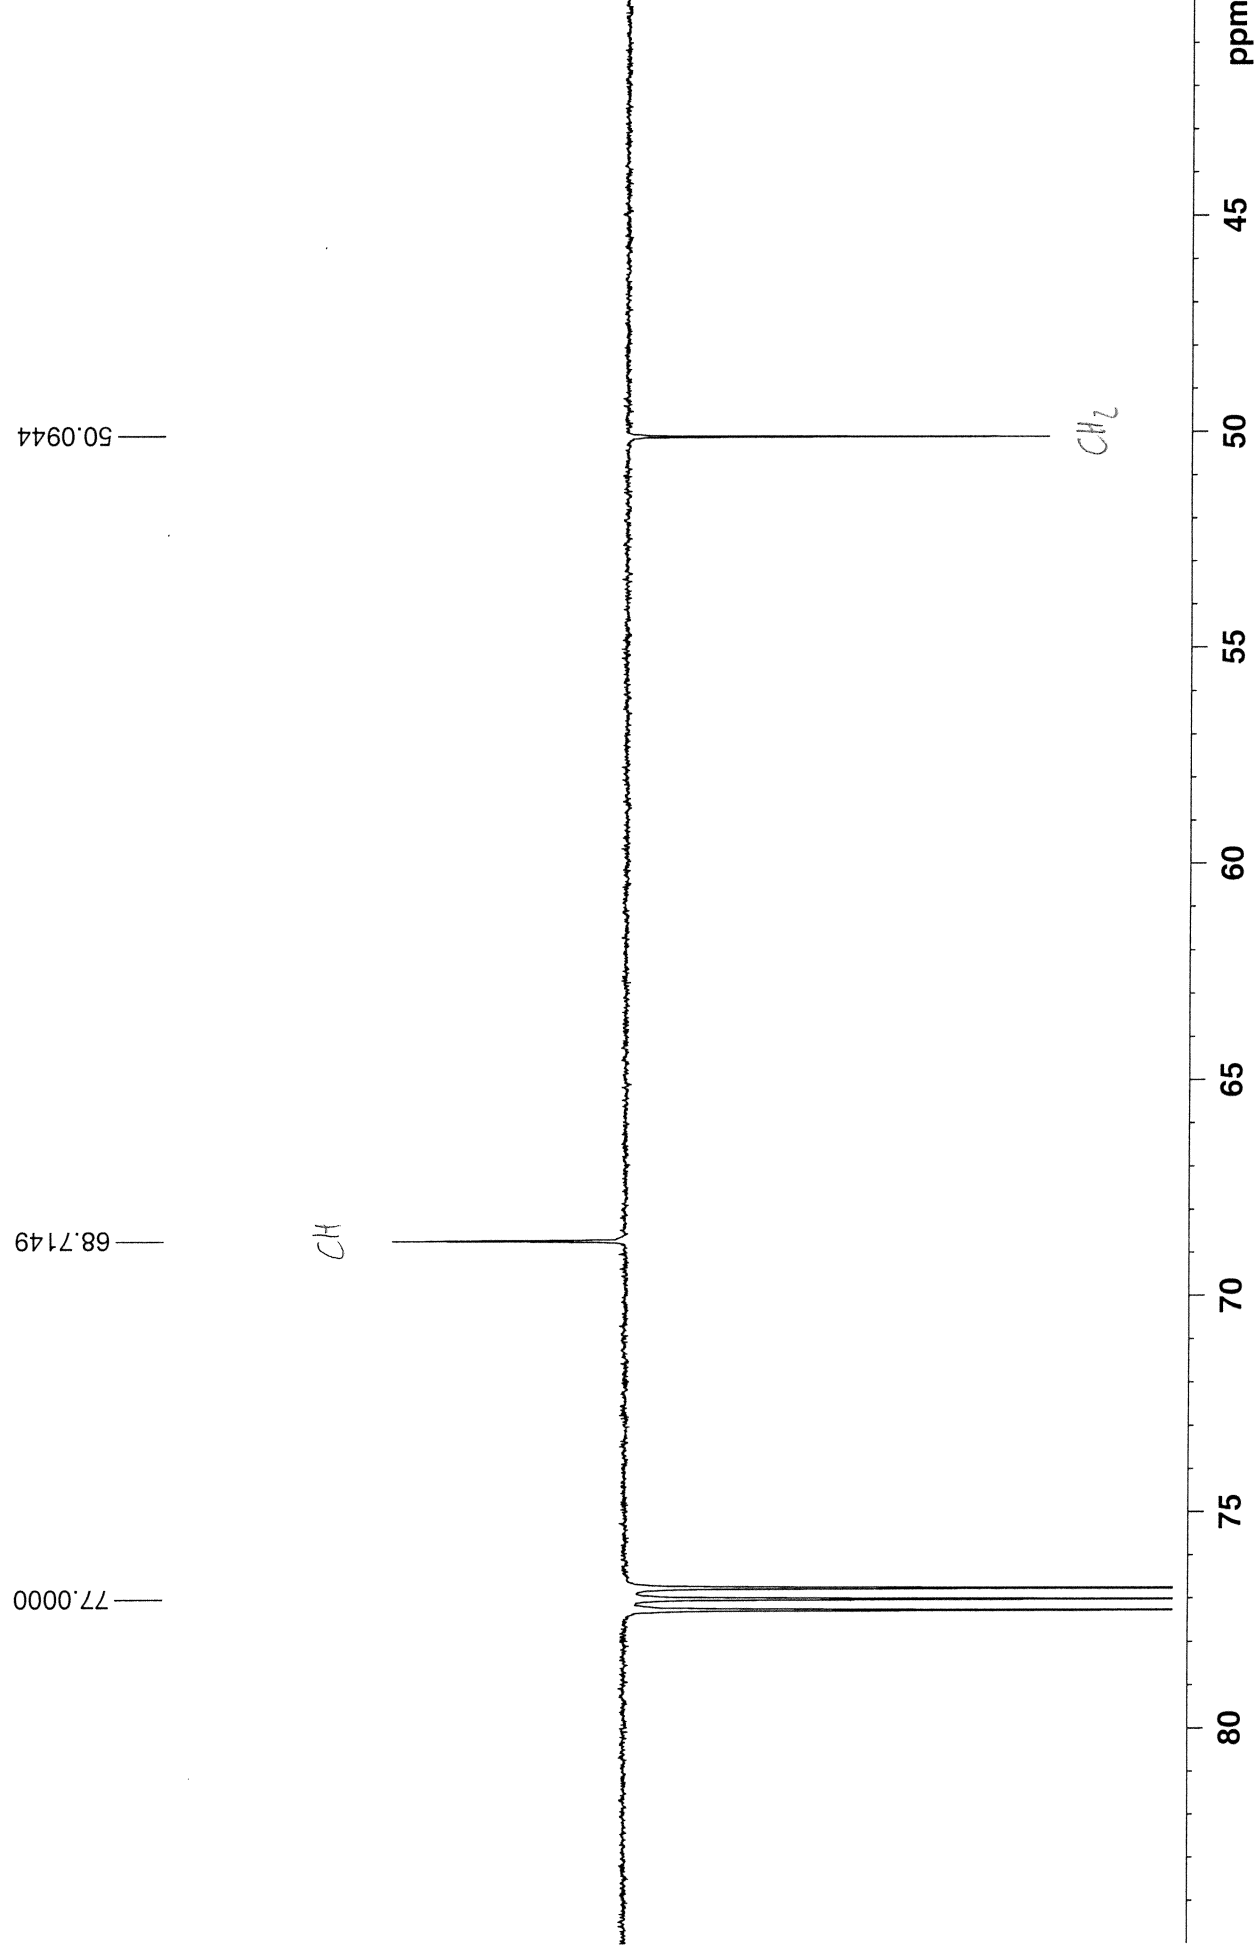

**Figure S7c.** NMR spectra of compound **7b**.

CE148S2P1 in cdcl3 (Proton) 5.2.2019

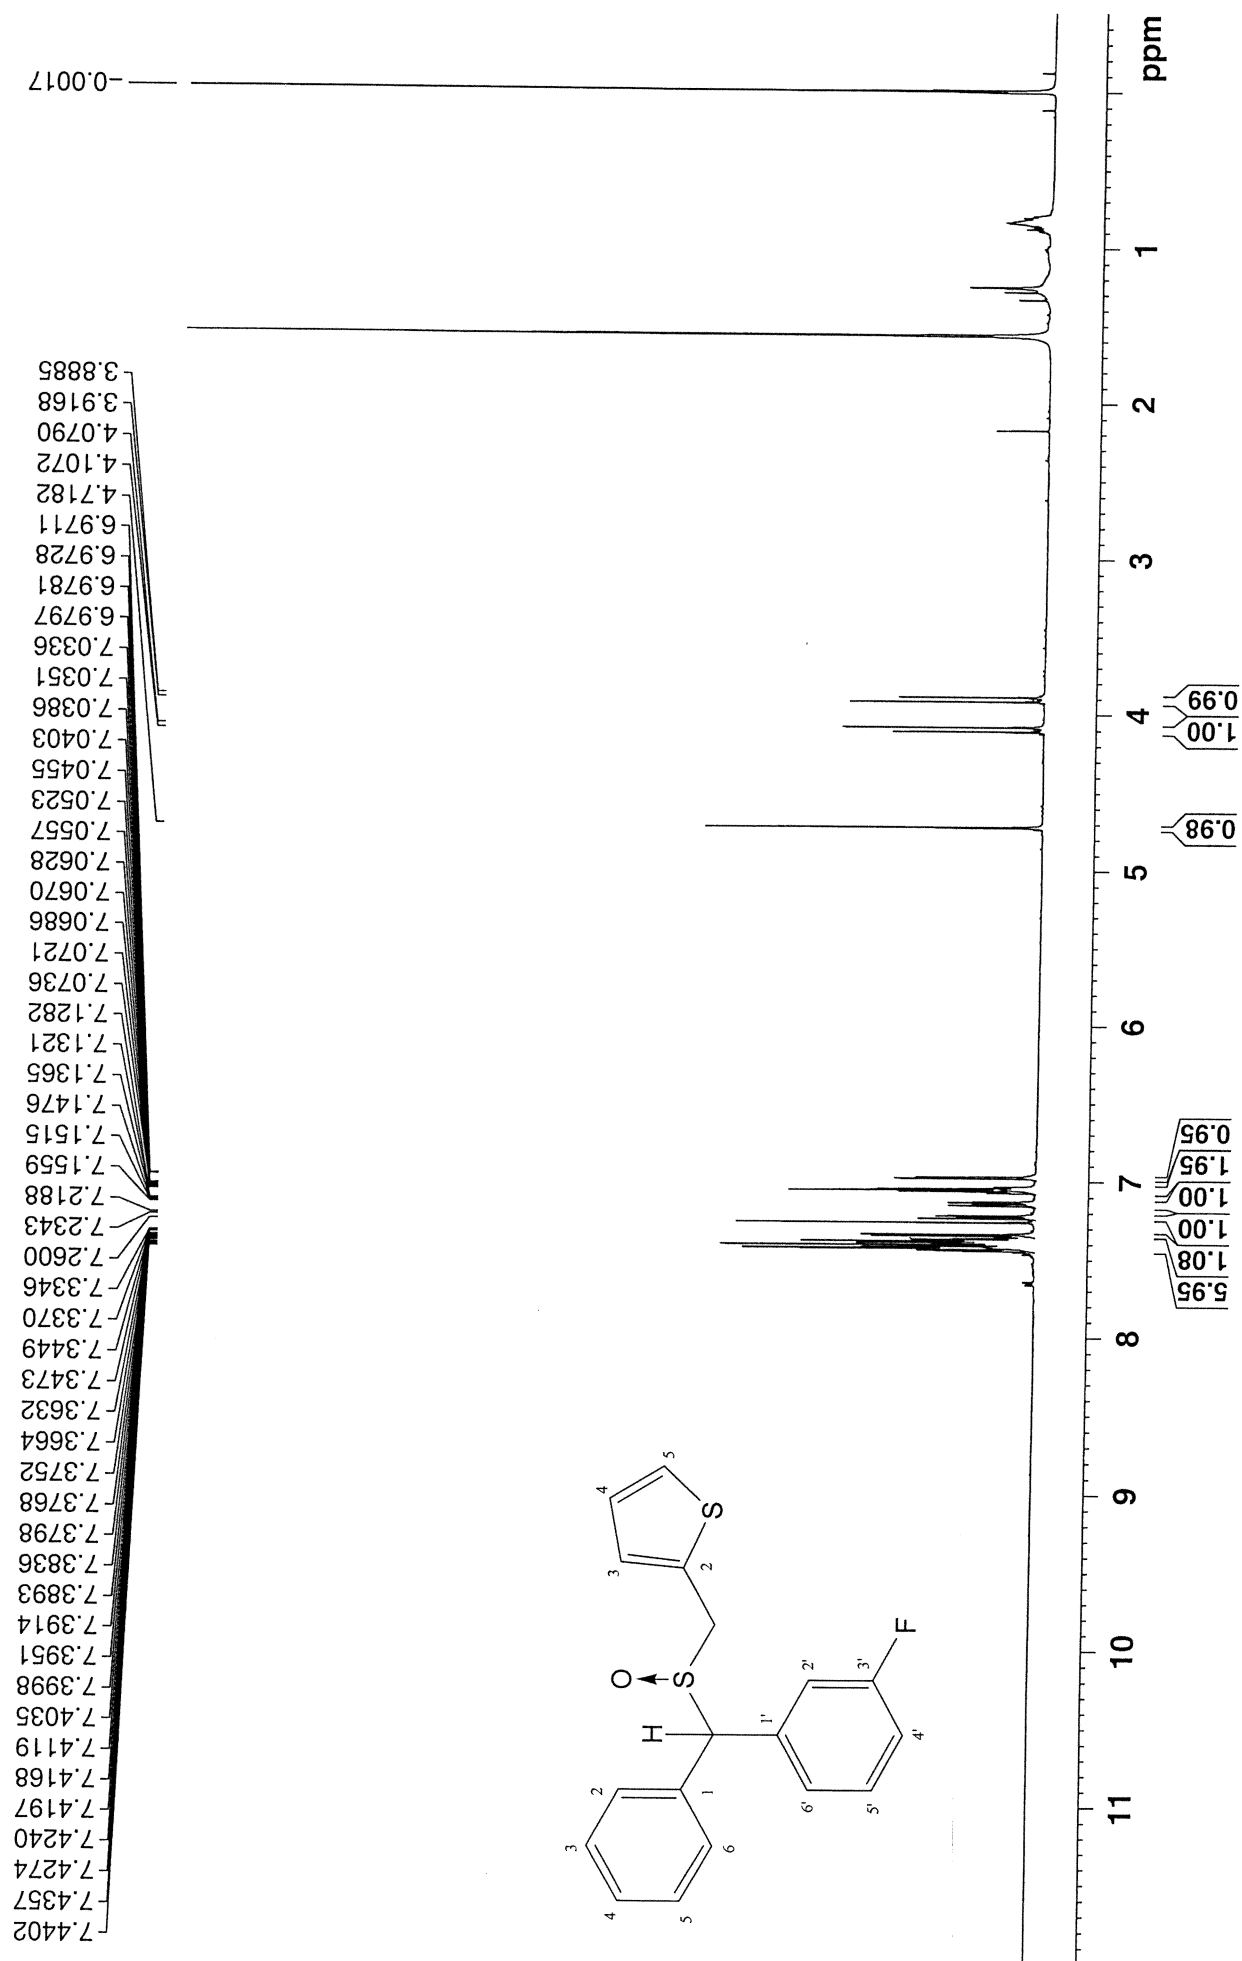



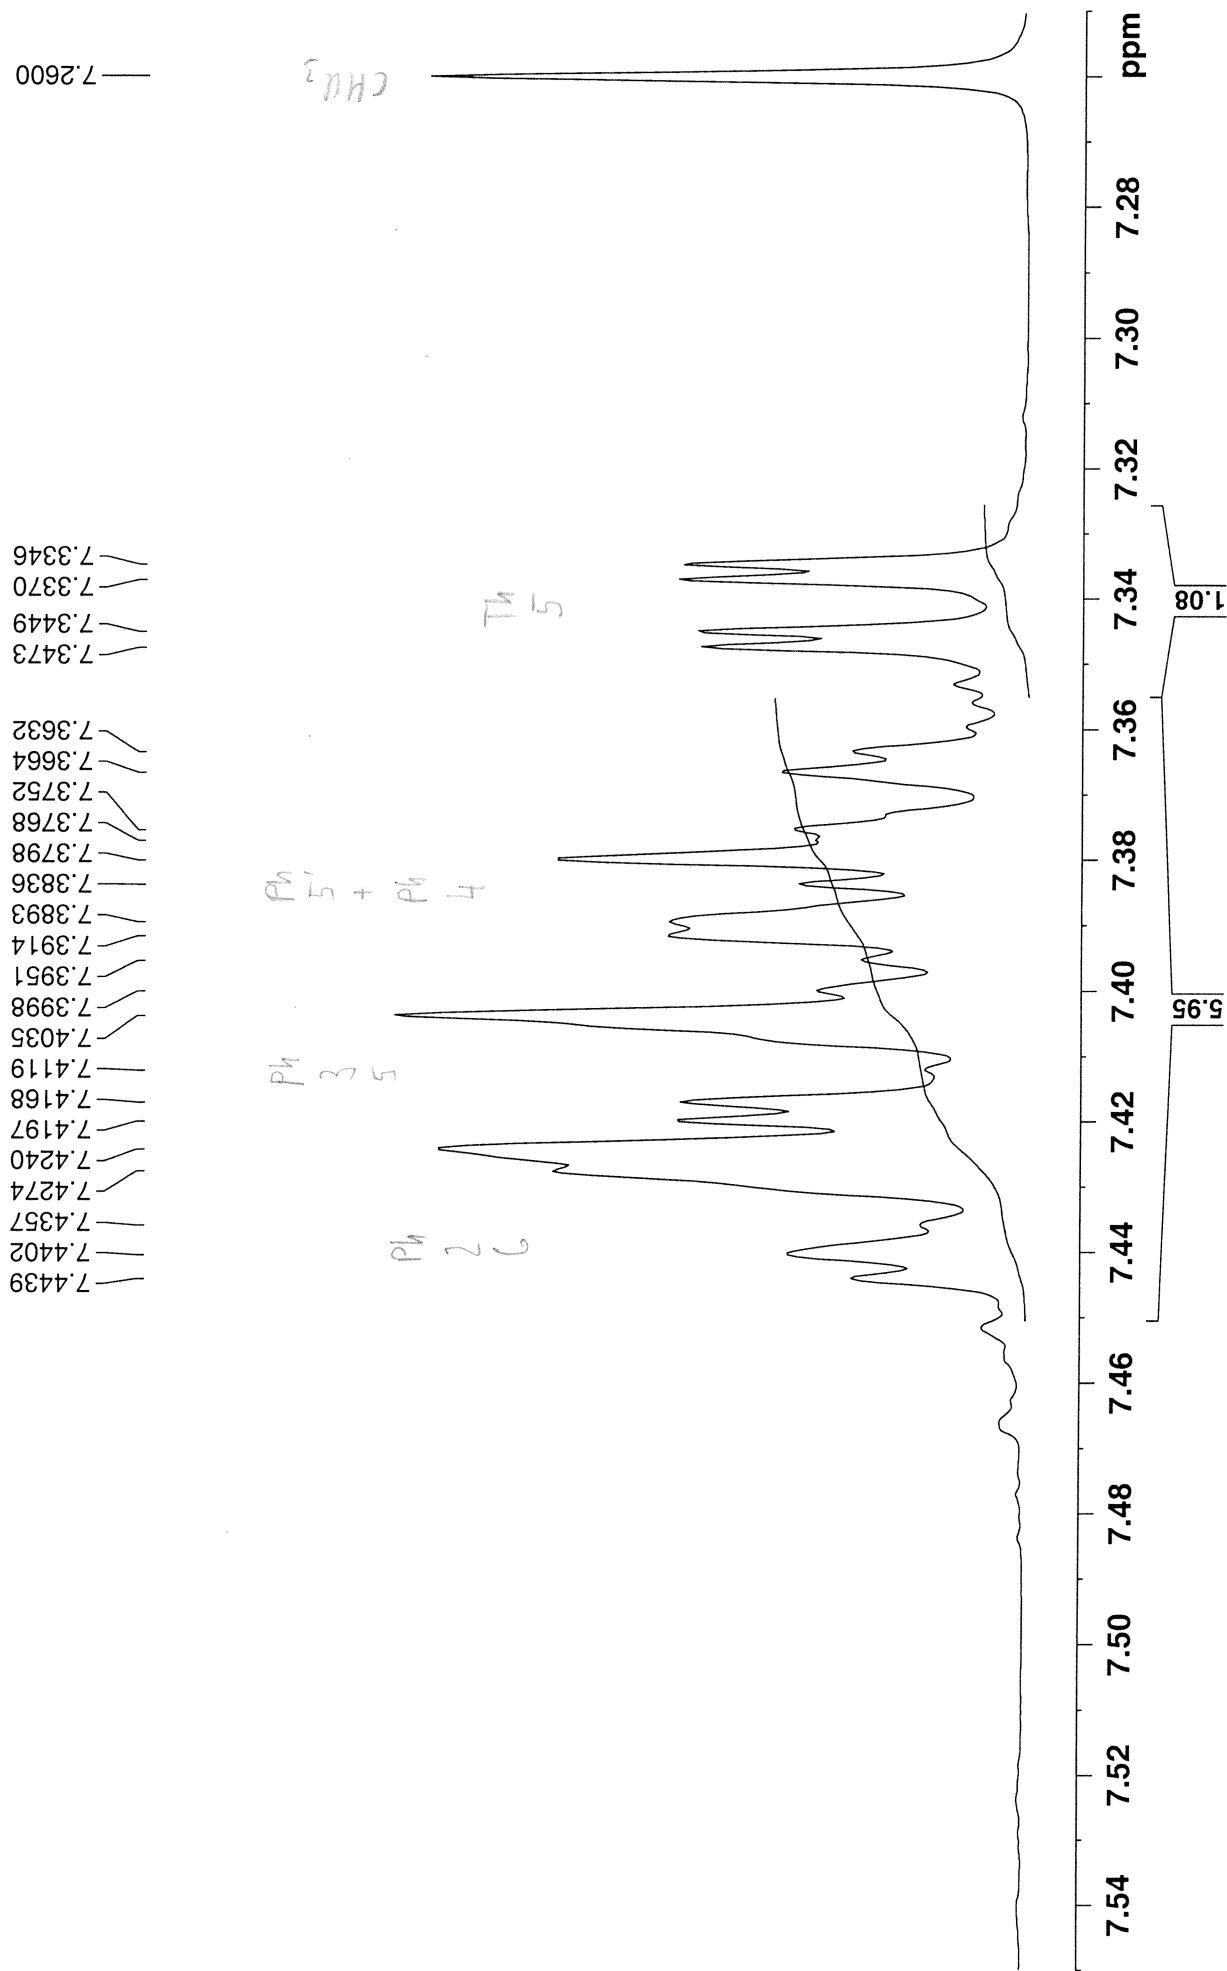

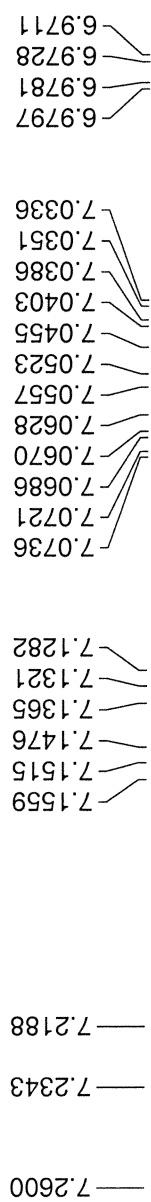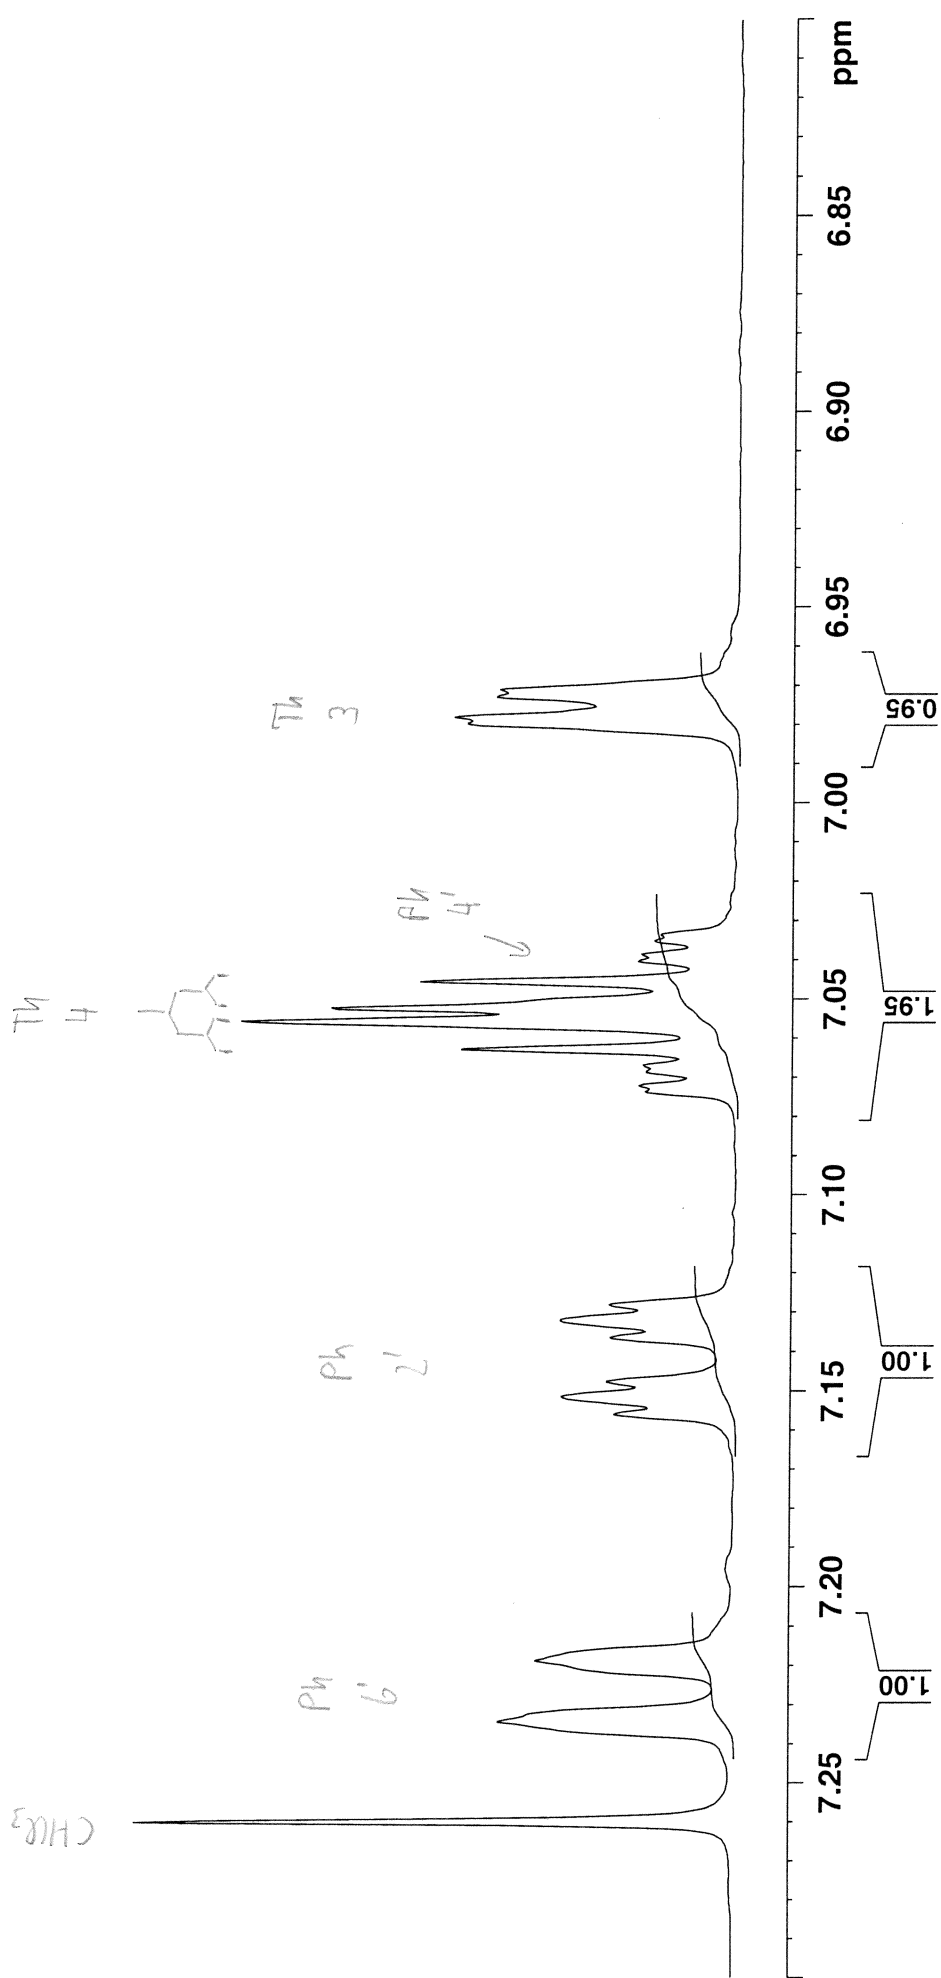

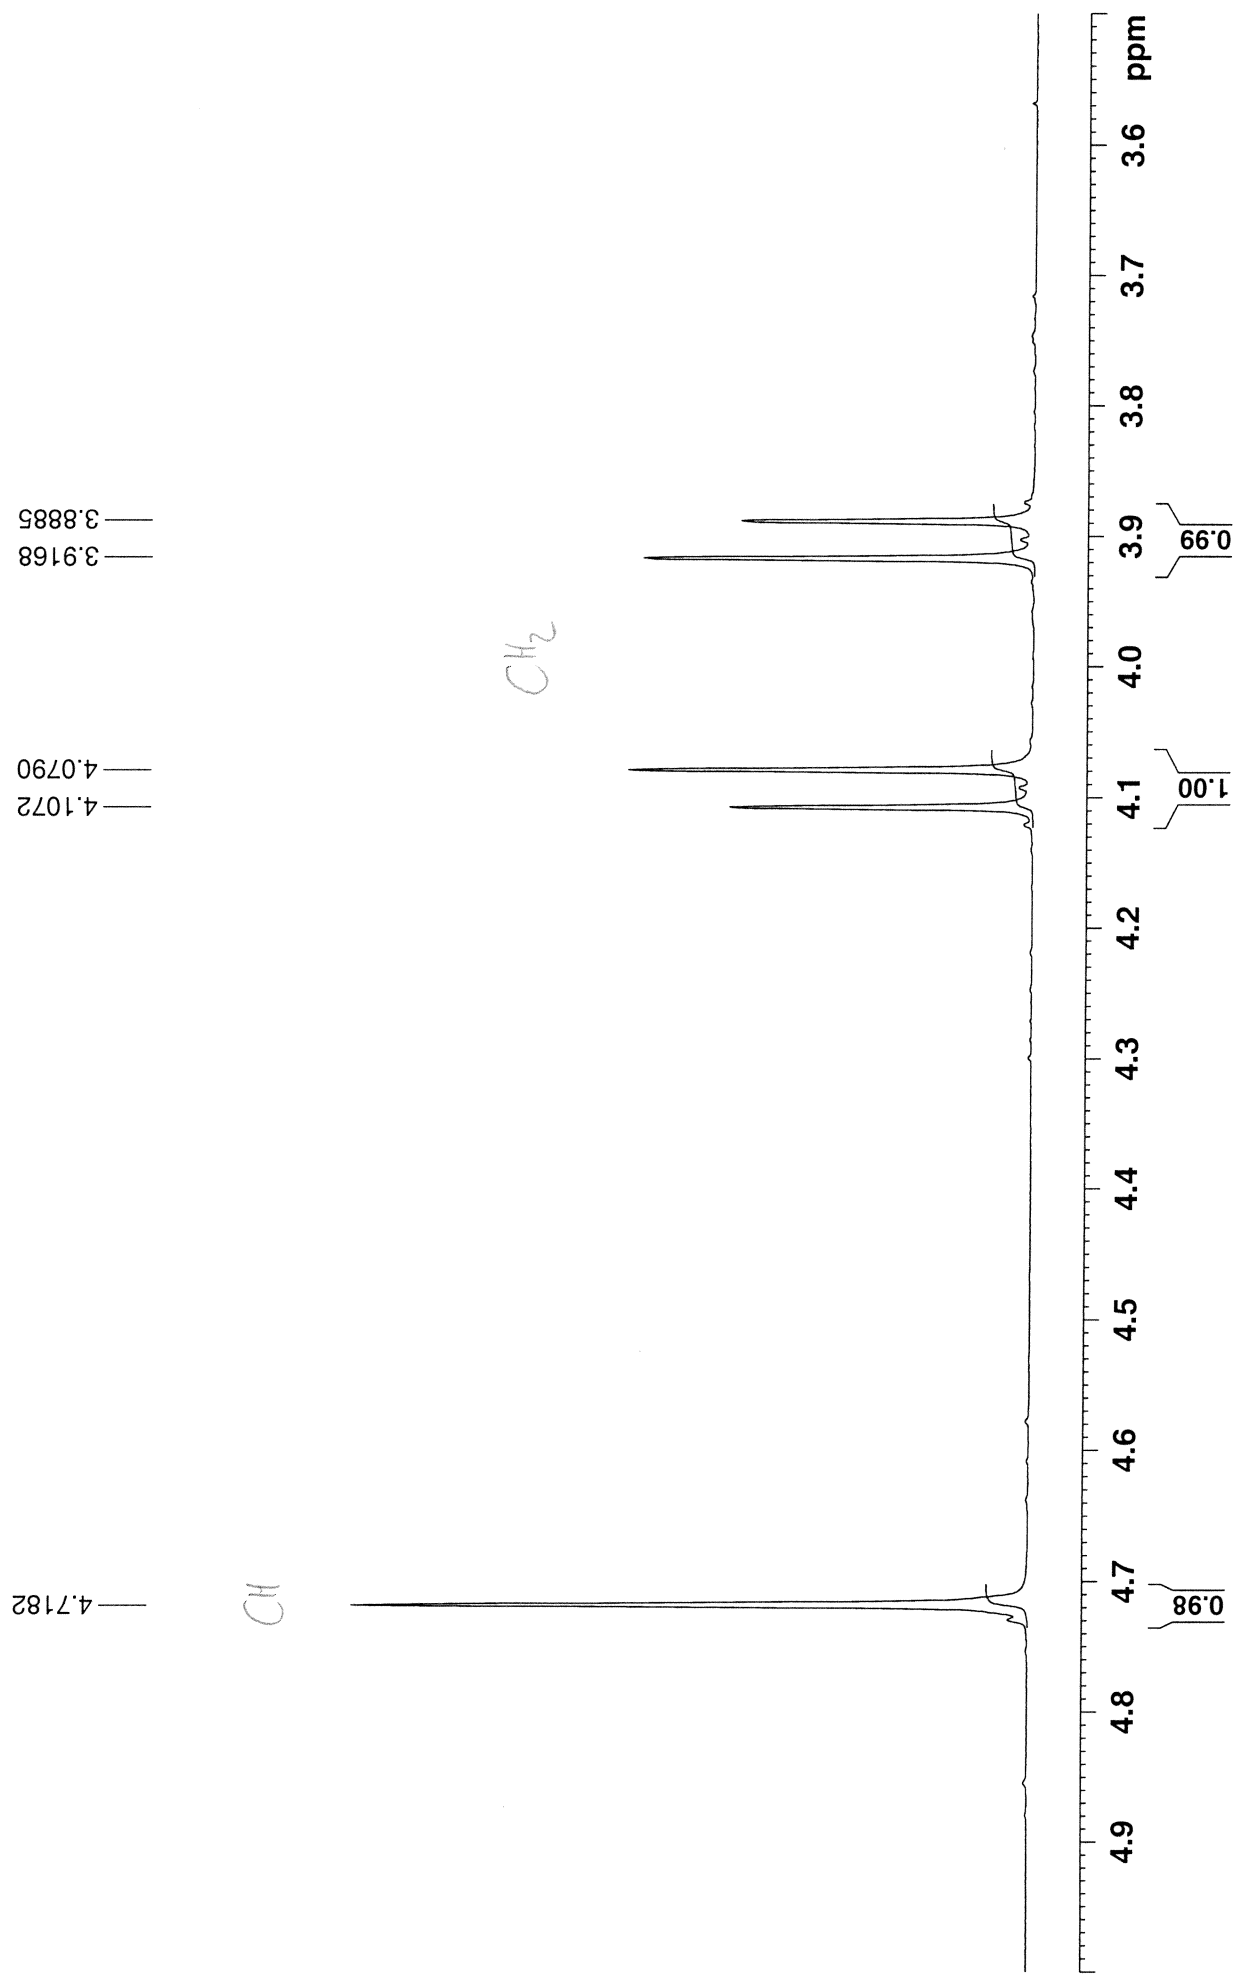

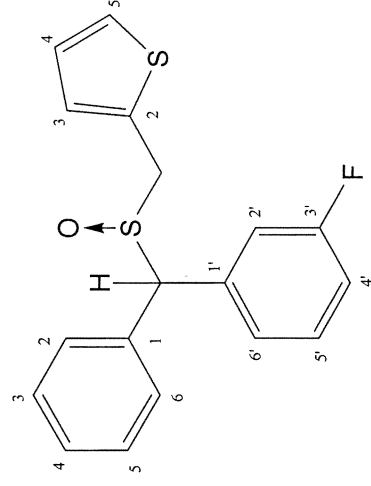

163.9593  
161.9853  
138.1503  
138.0941  
133.3315  
130.8287  
130.7606  
130.0883  
129.7174  
129.0206  
128.8111  
128.6716  
127.4233  
126.8903  
124.4900  
124.4665  
116.0372  
115.8592  
115.5002  
115.3335

77.0000  
68.1861  
50.2842

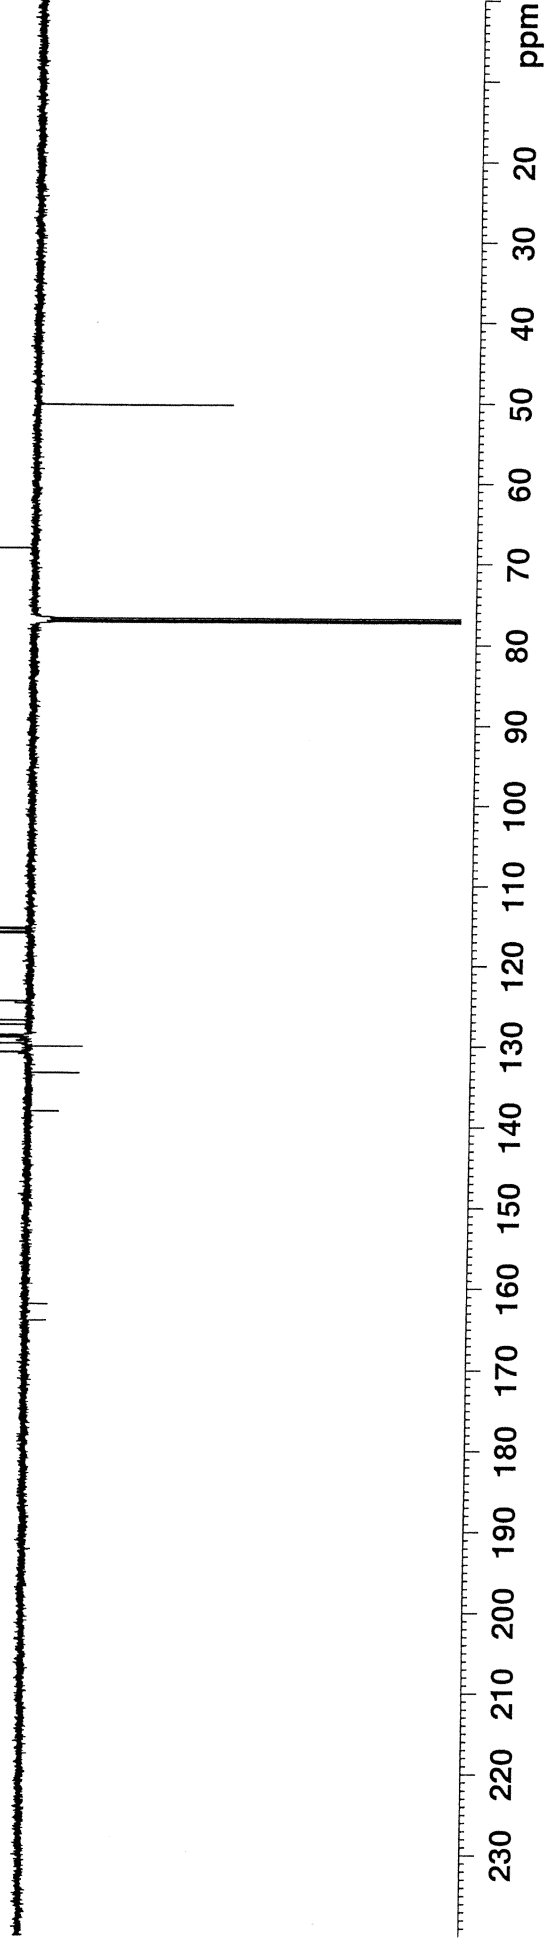

163.9593

161.9853

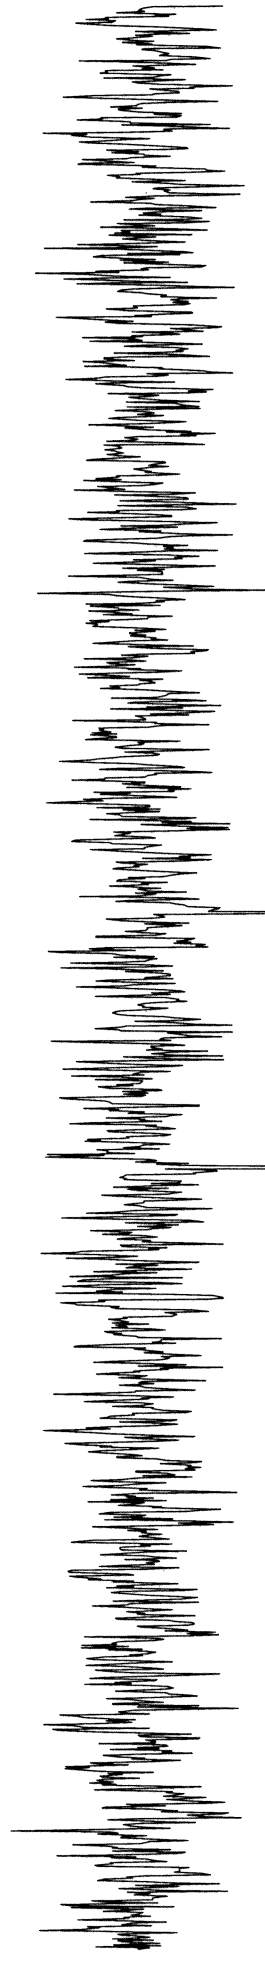

$$J(^{13}\text{C}, ^{19}\text{F}) = 246,8 \text{ Hz}$$

162,97 ppm

ph  
,  
3

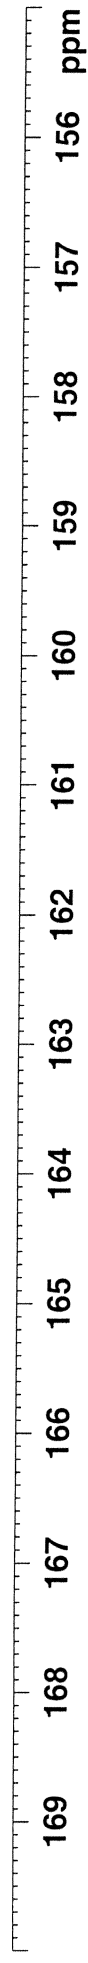

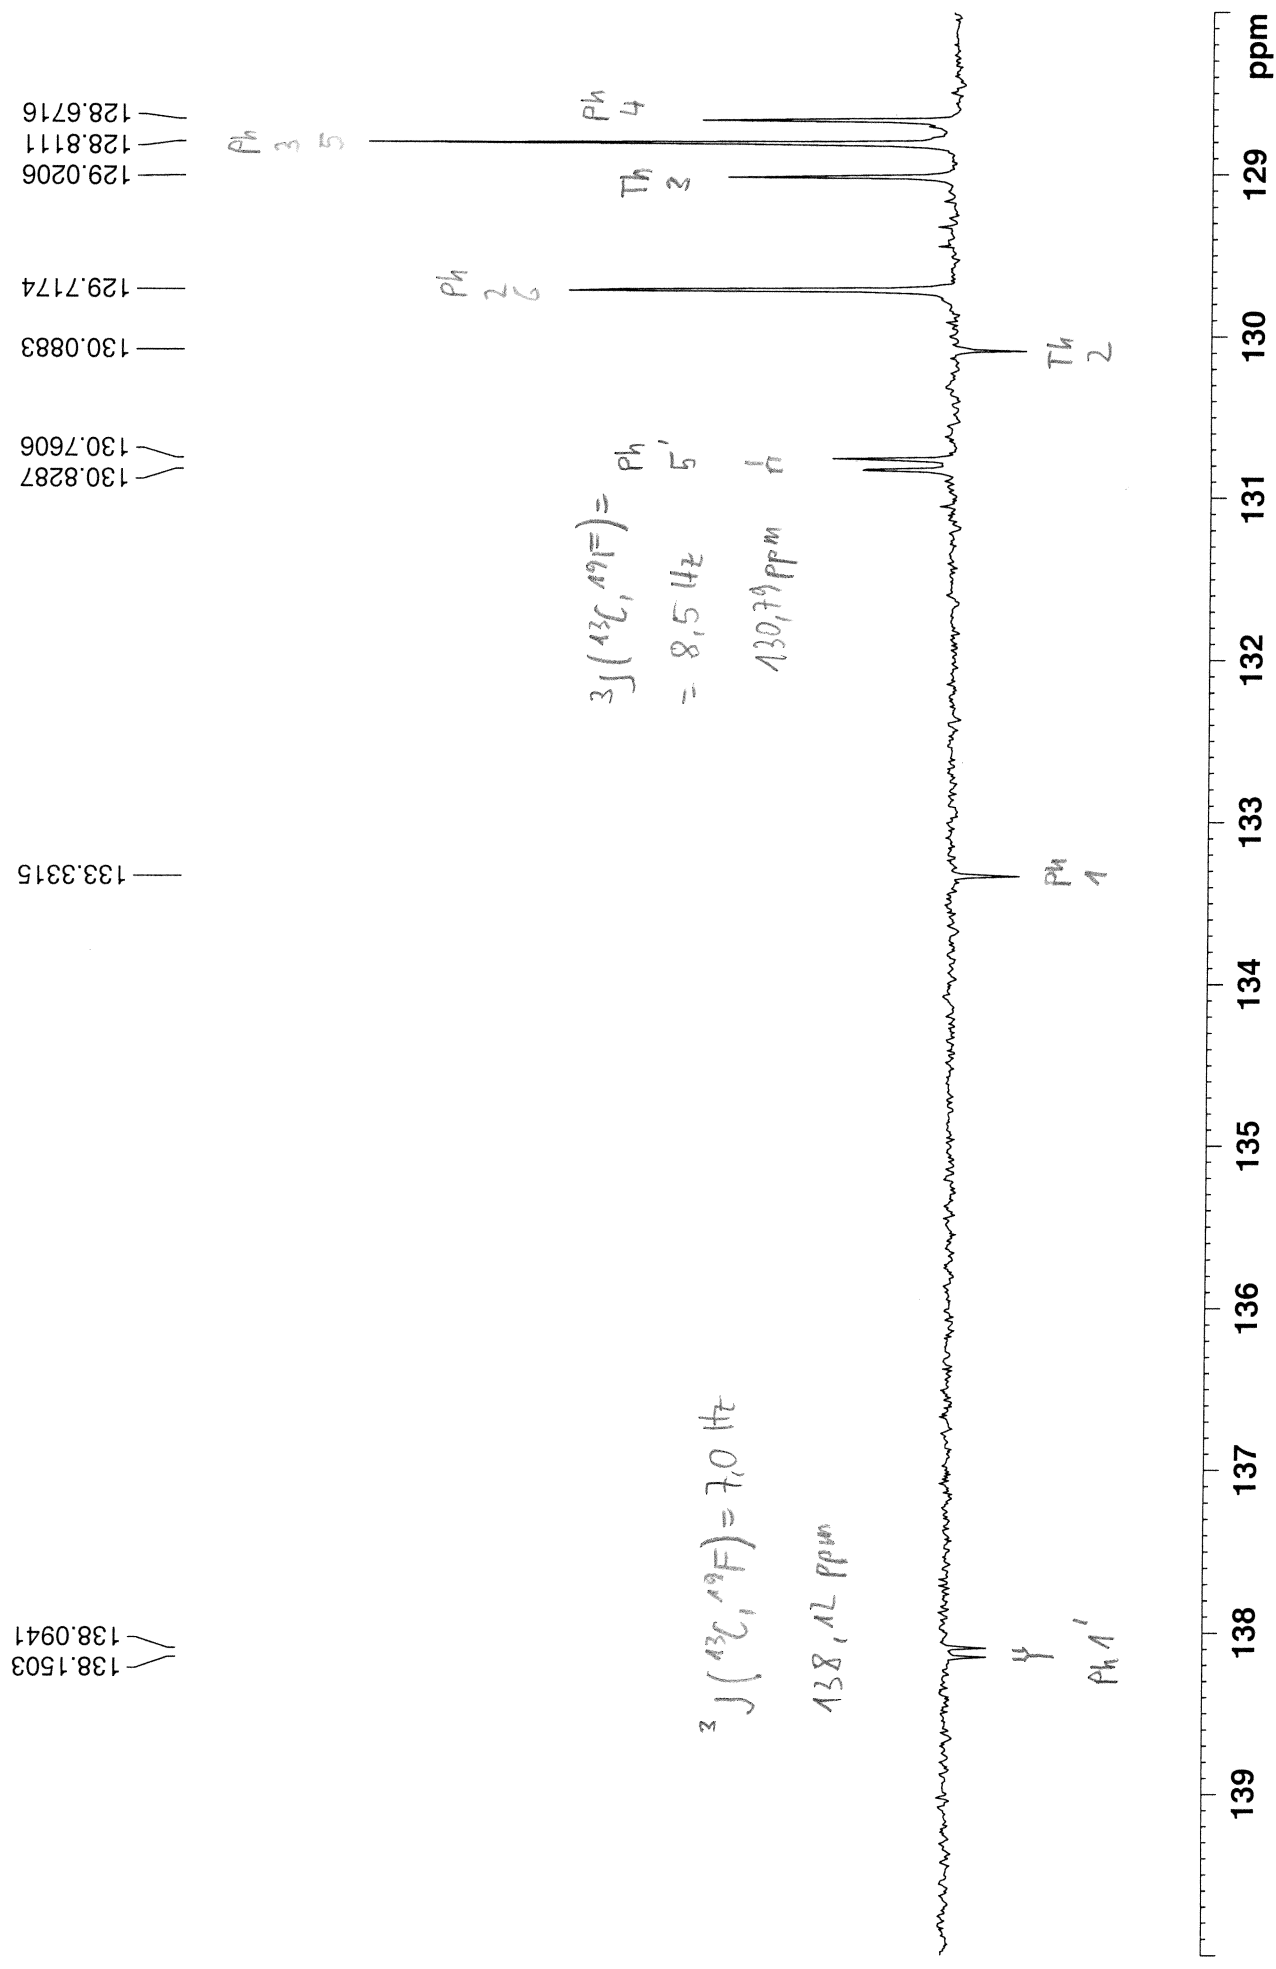

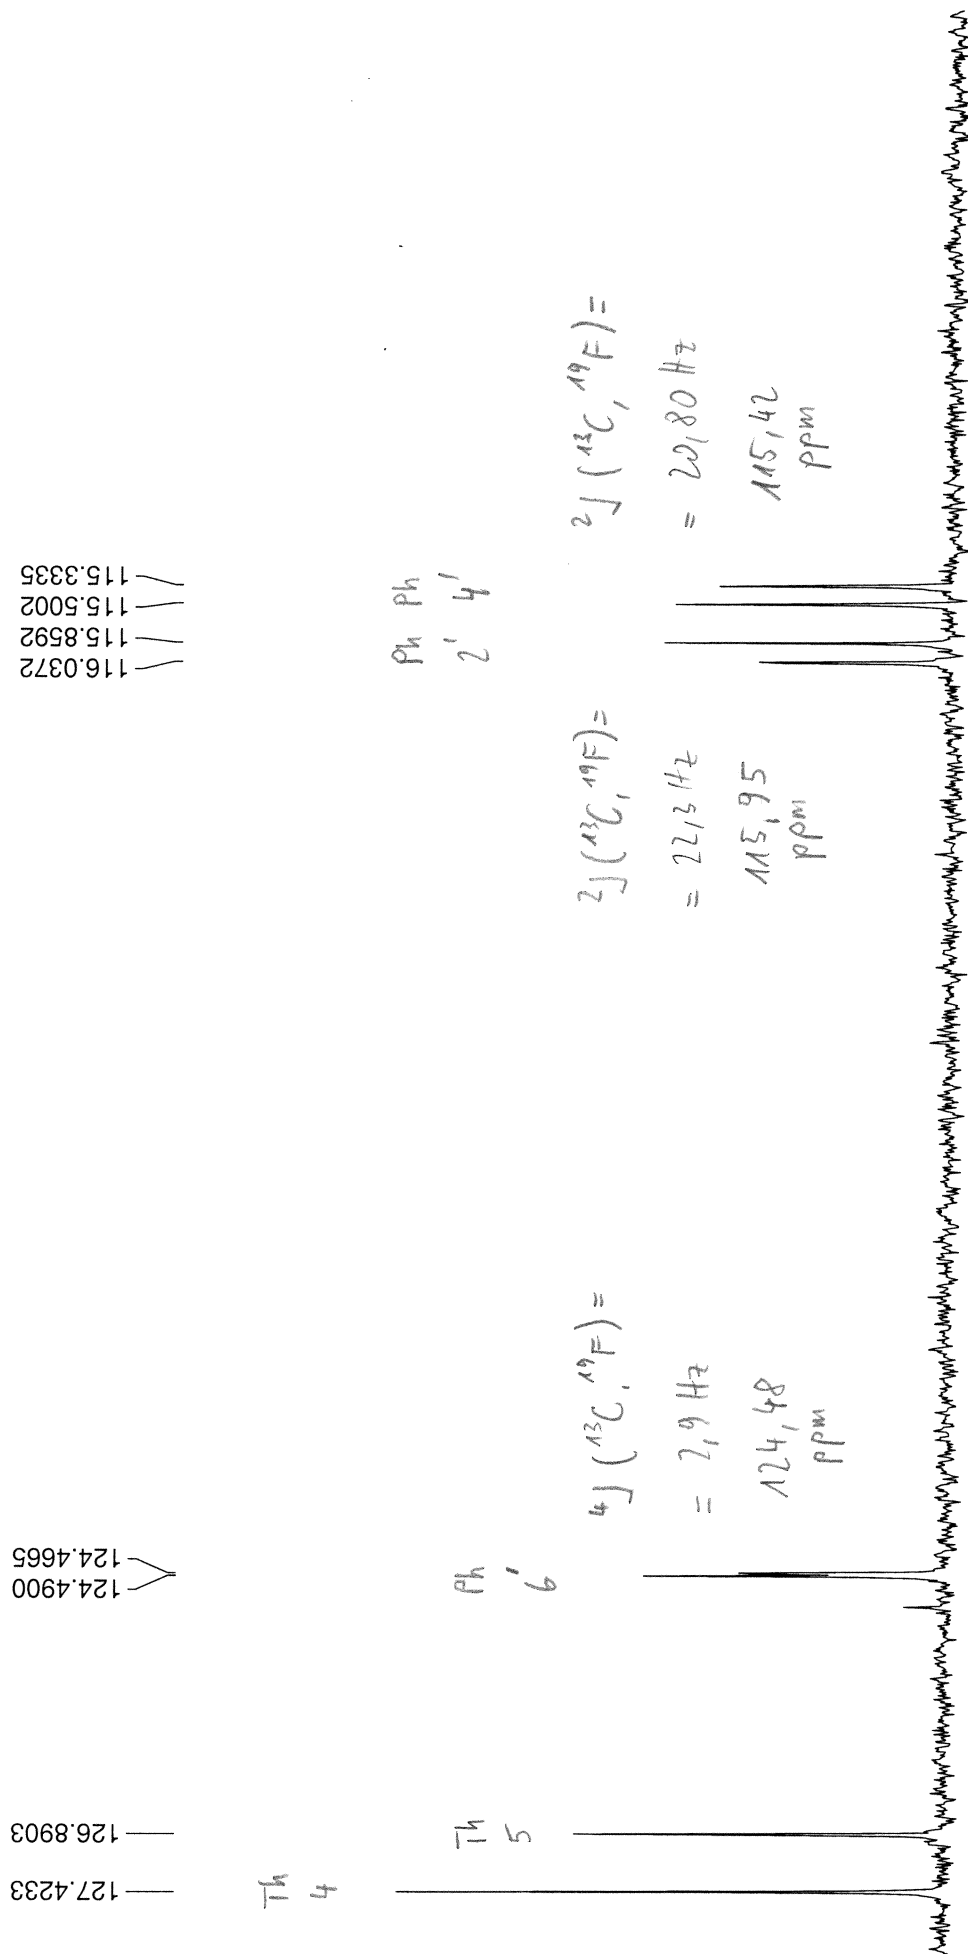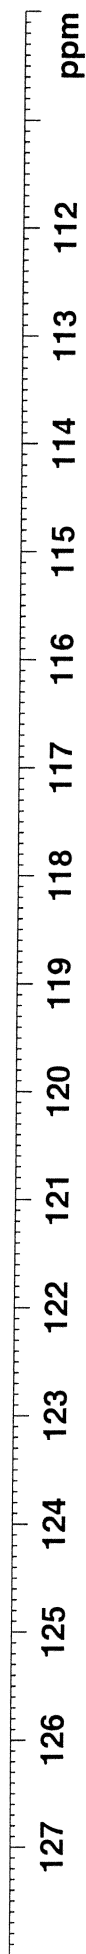

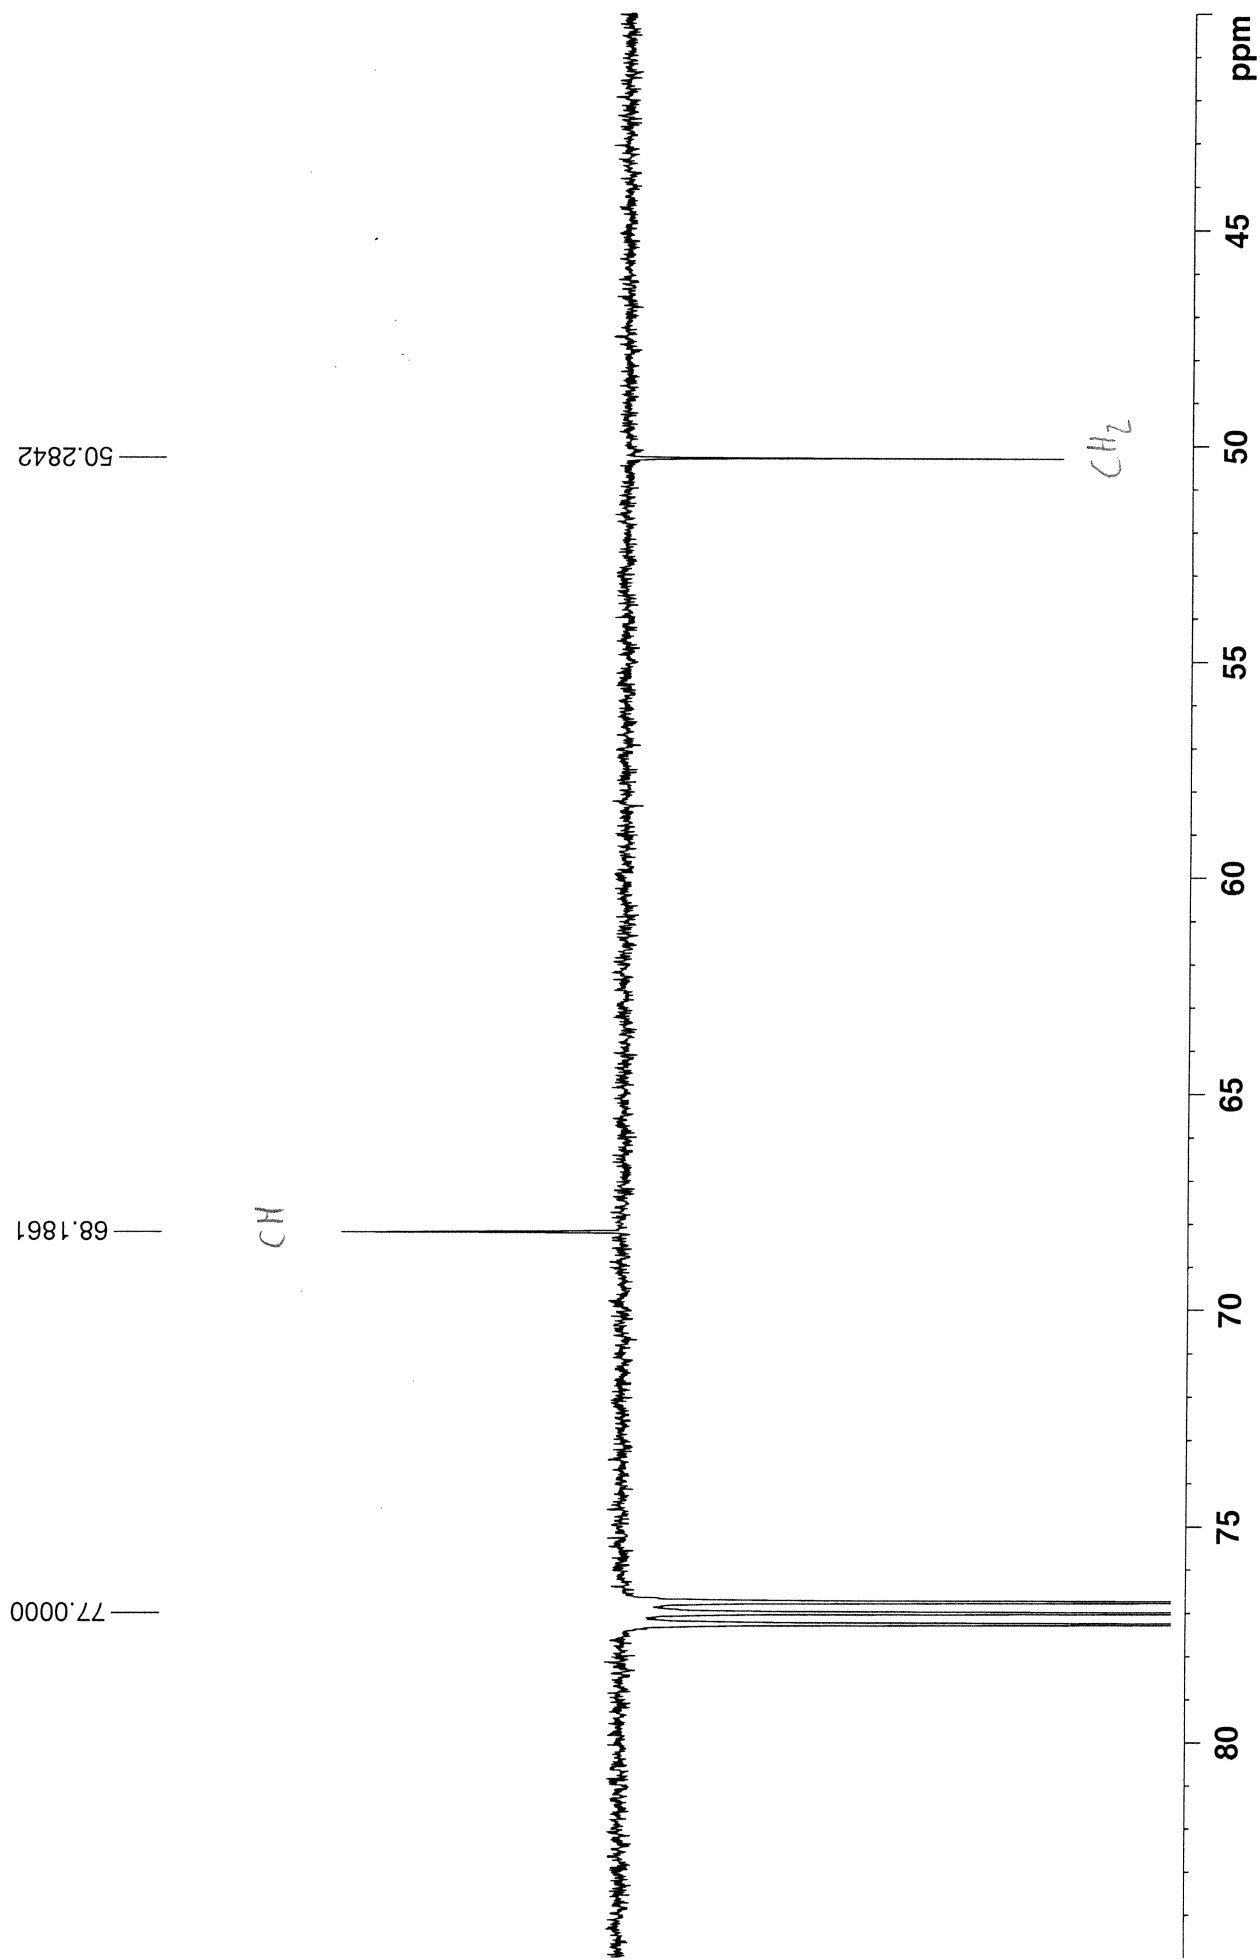



CE148S2P1 in cdcl3 (COSY) 5.2.2019

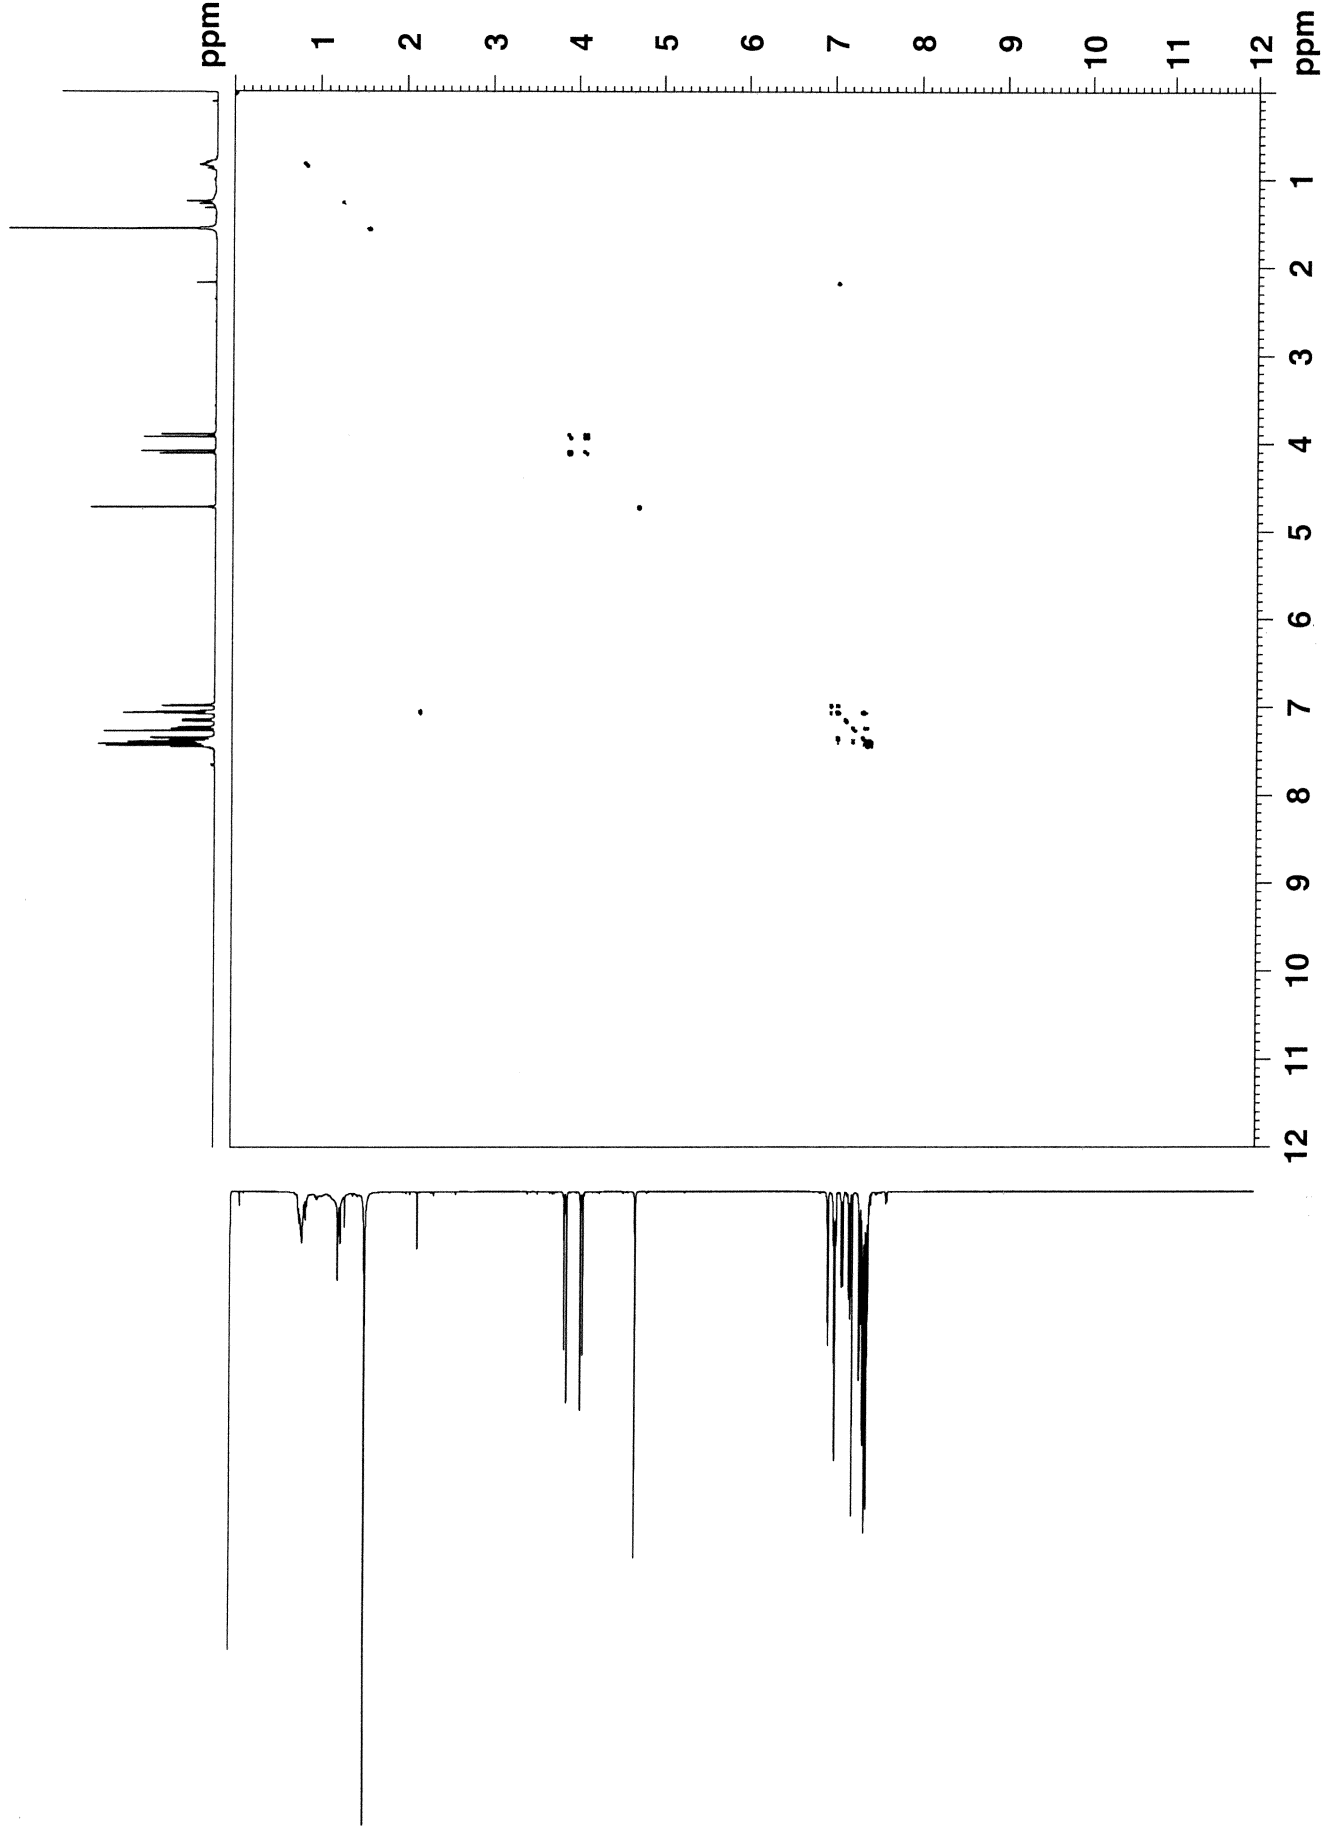

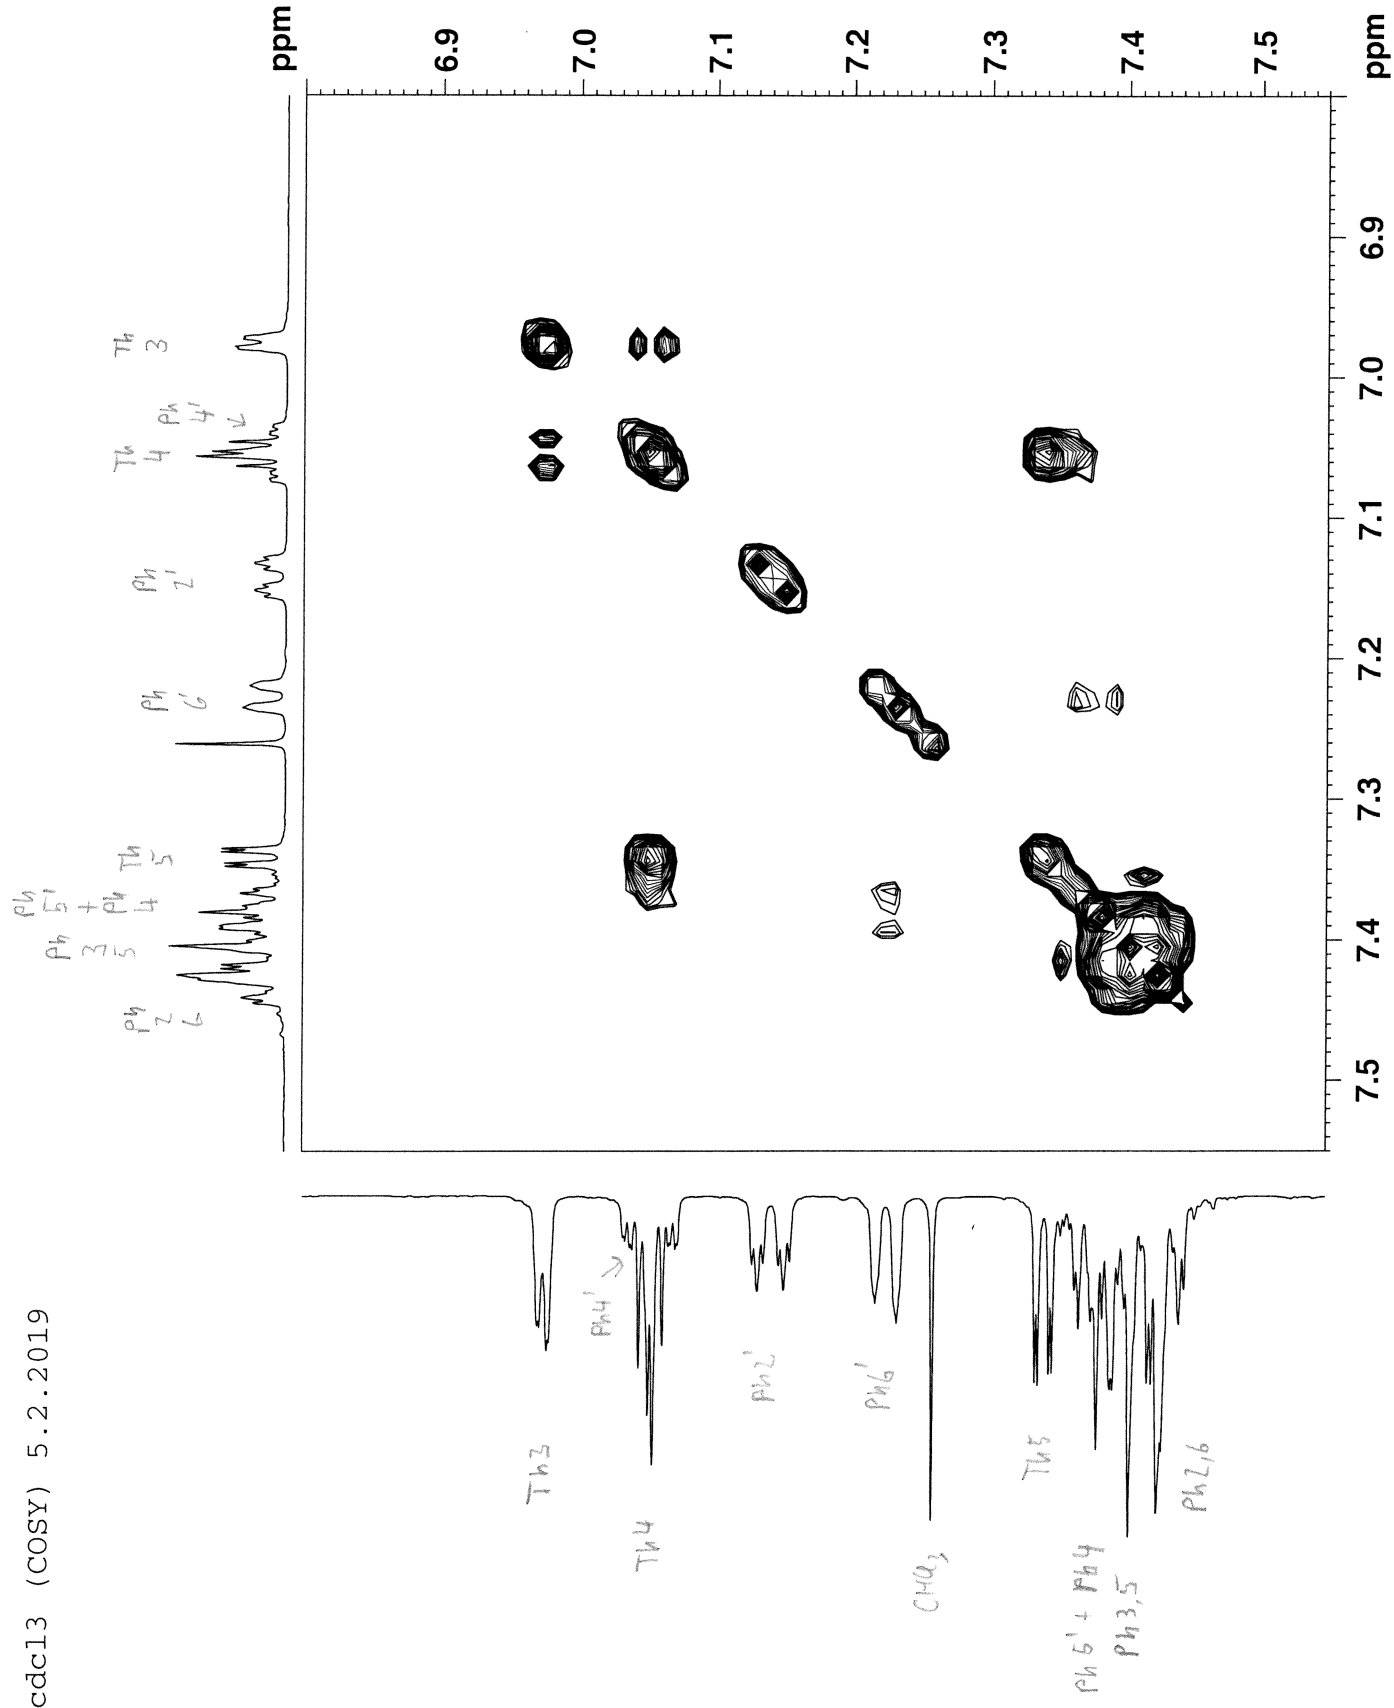

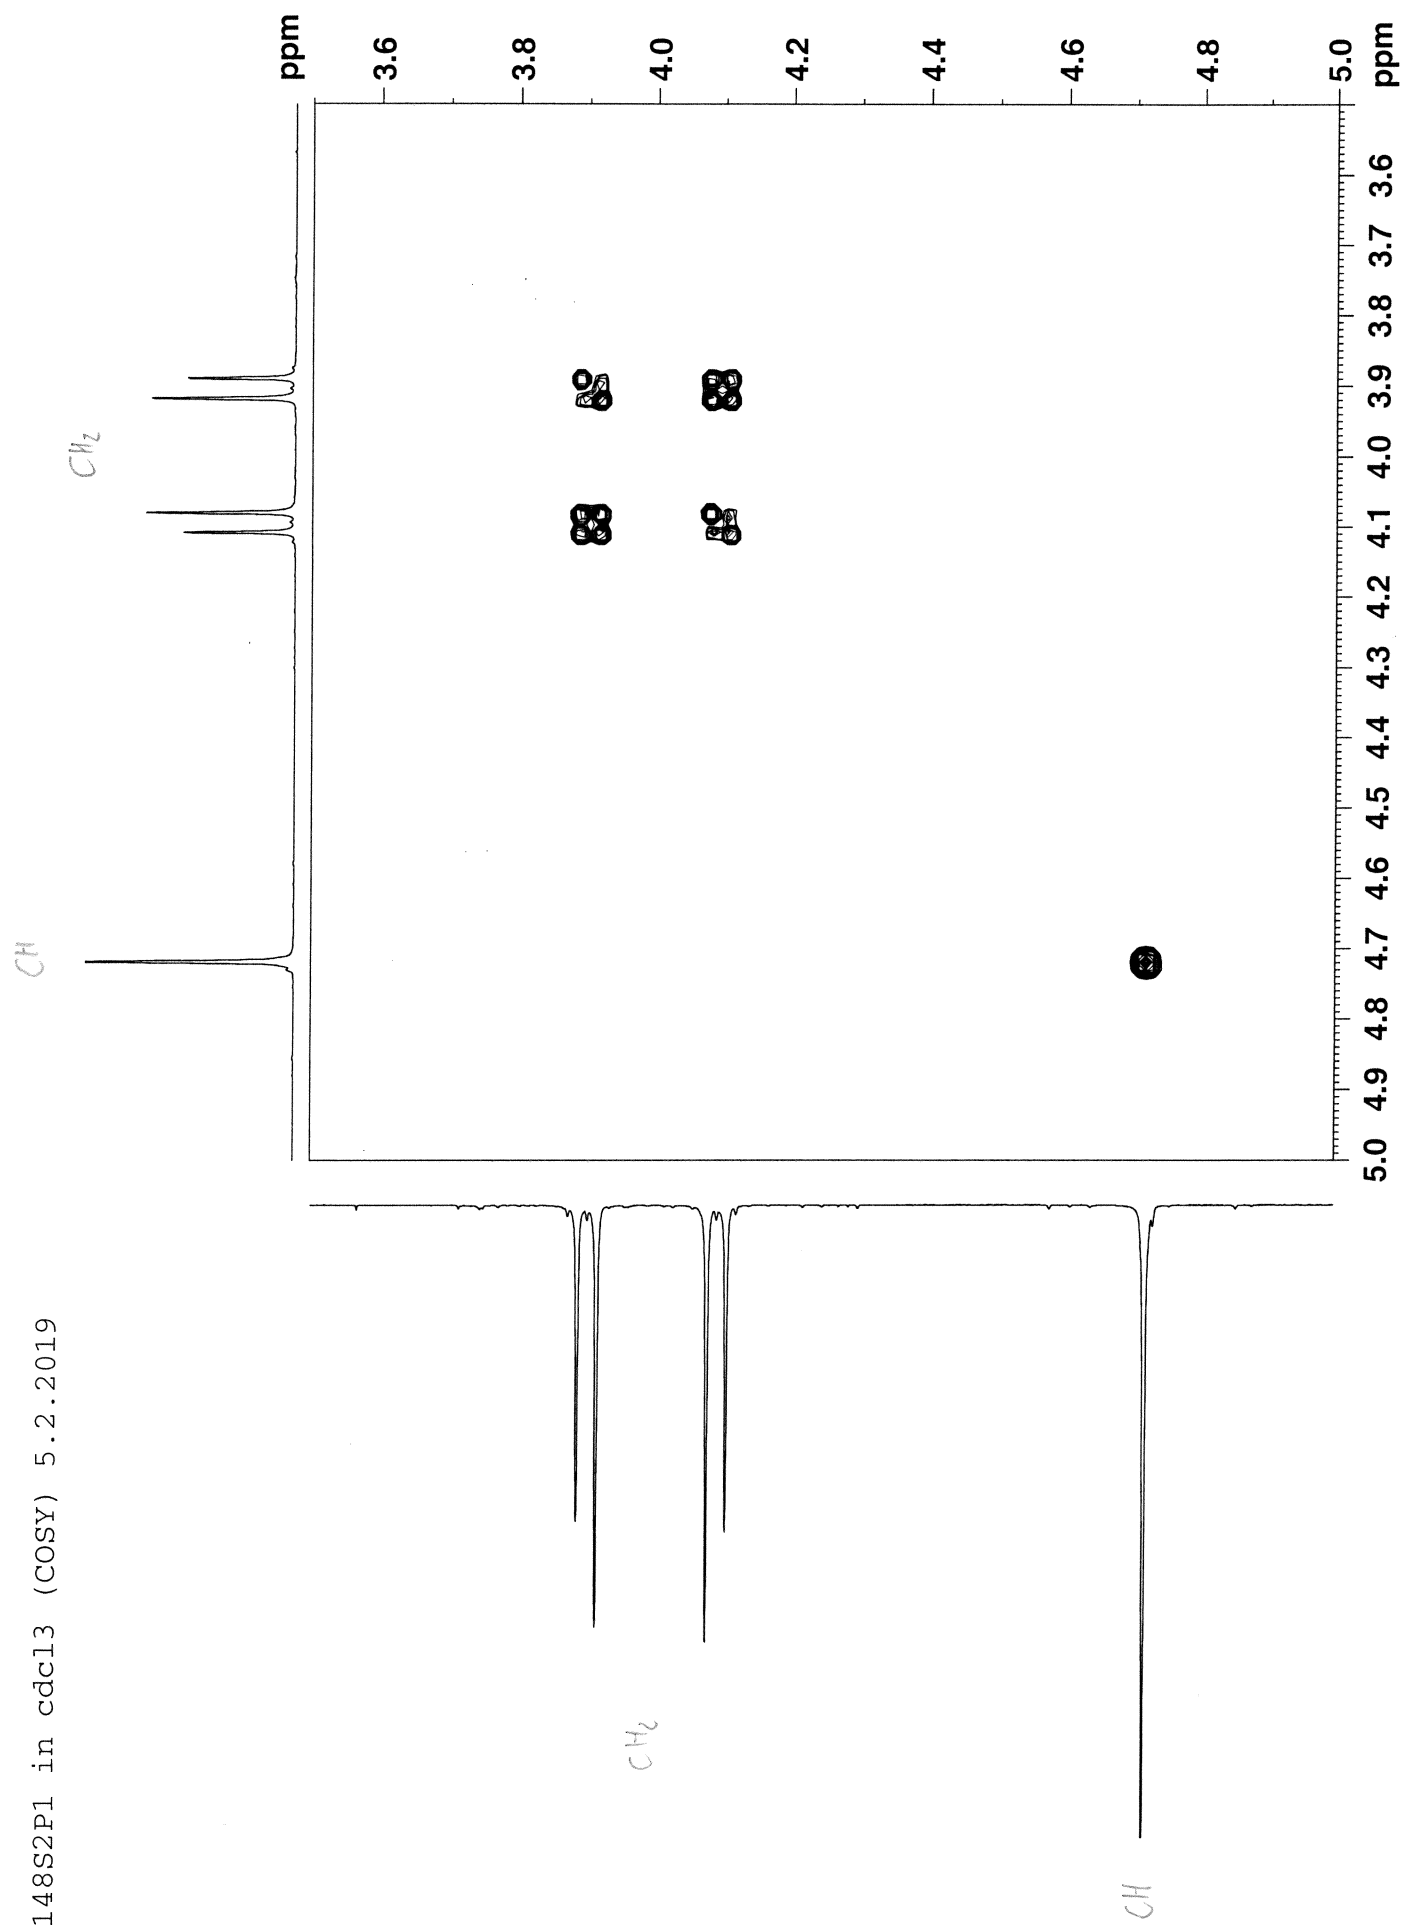

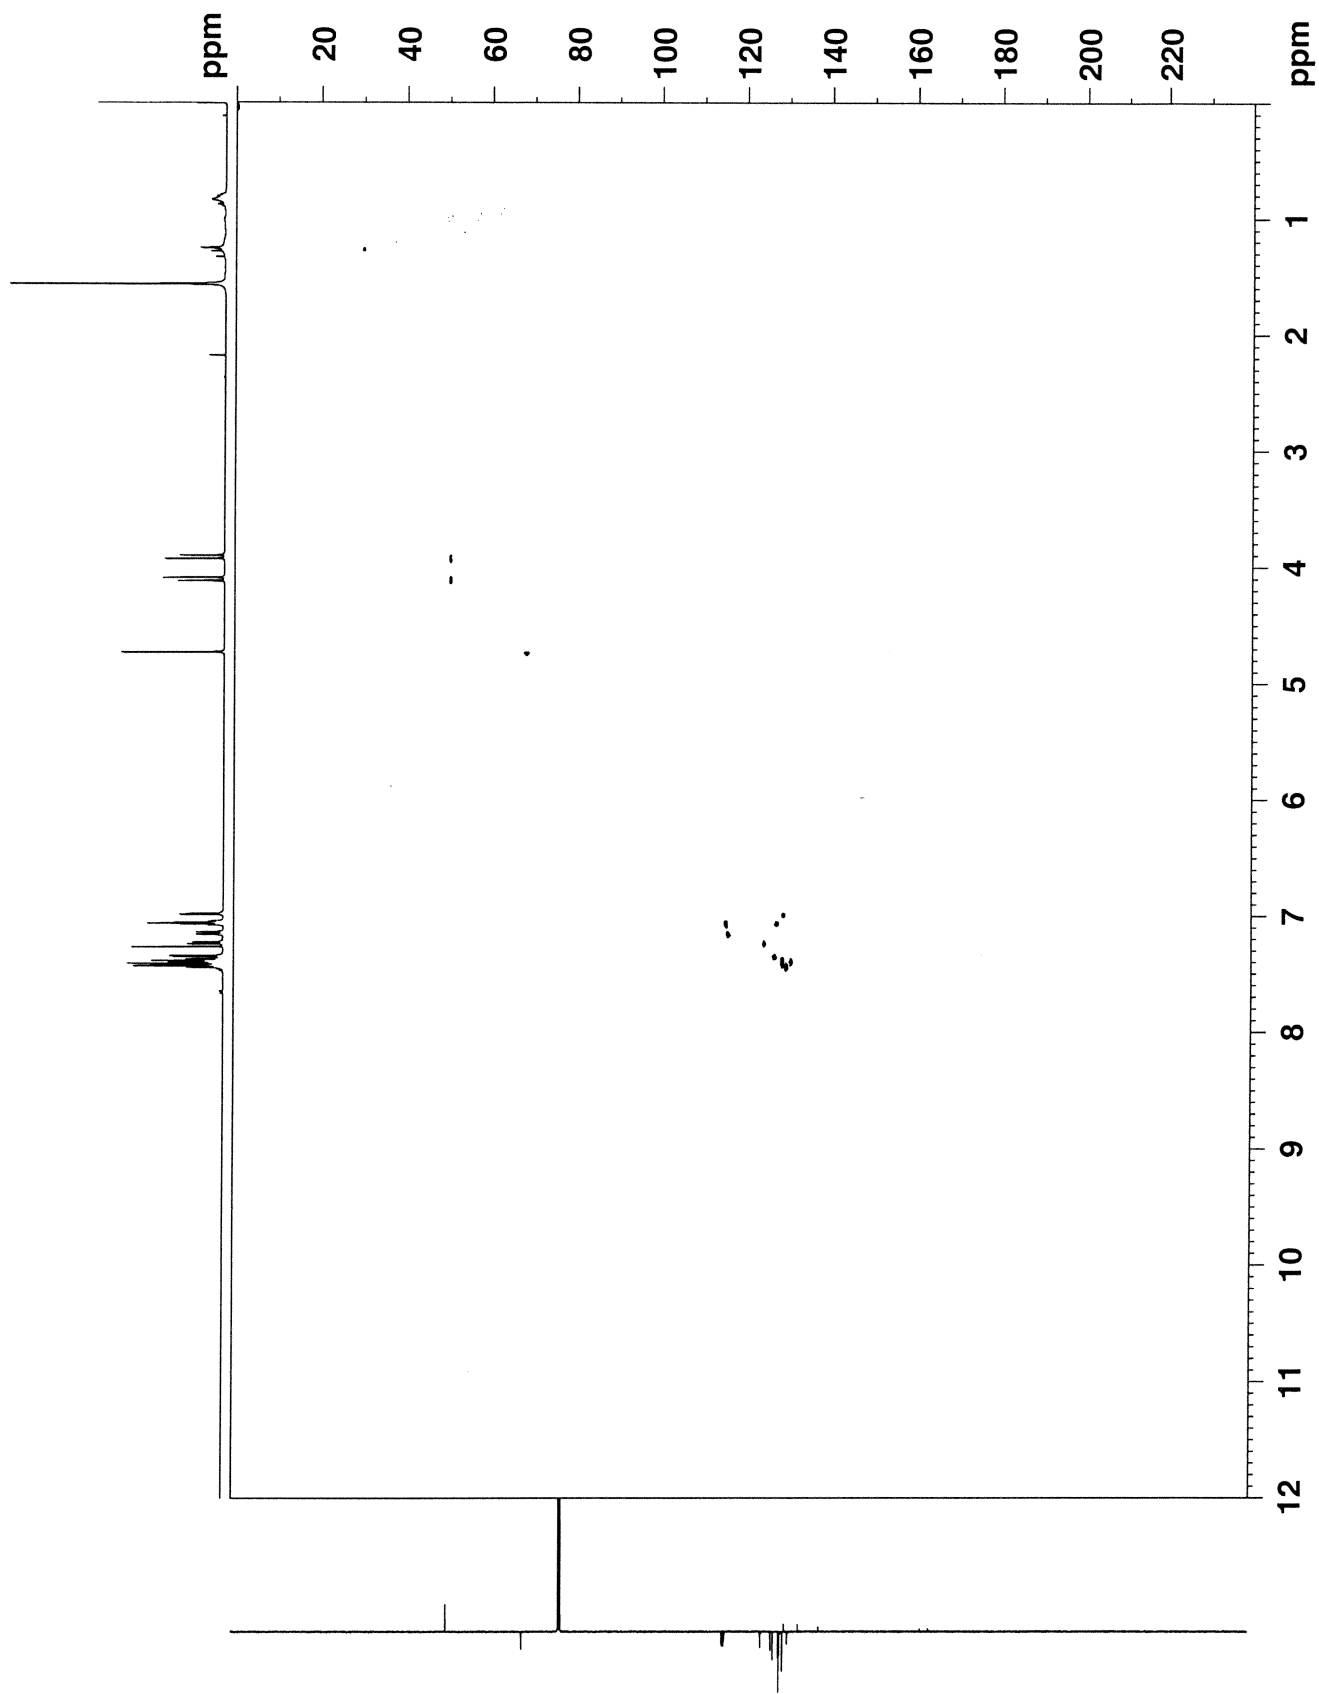

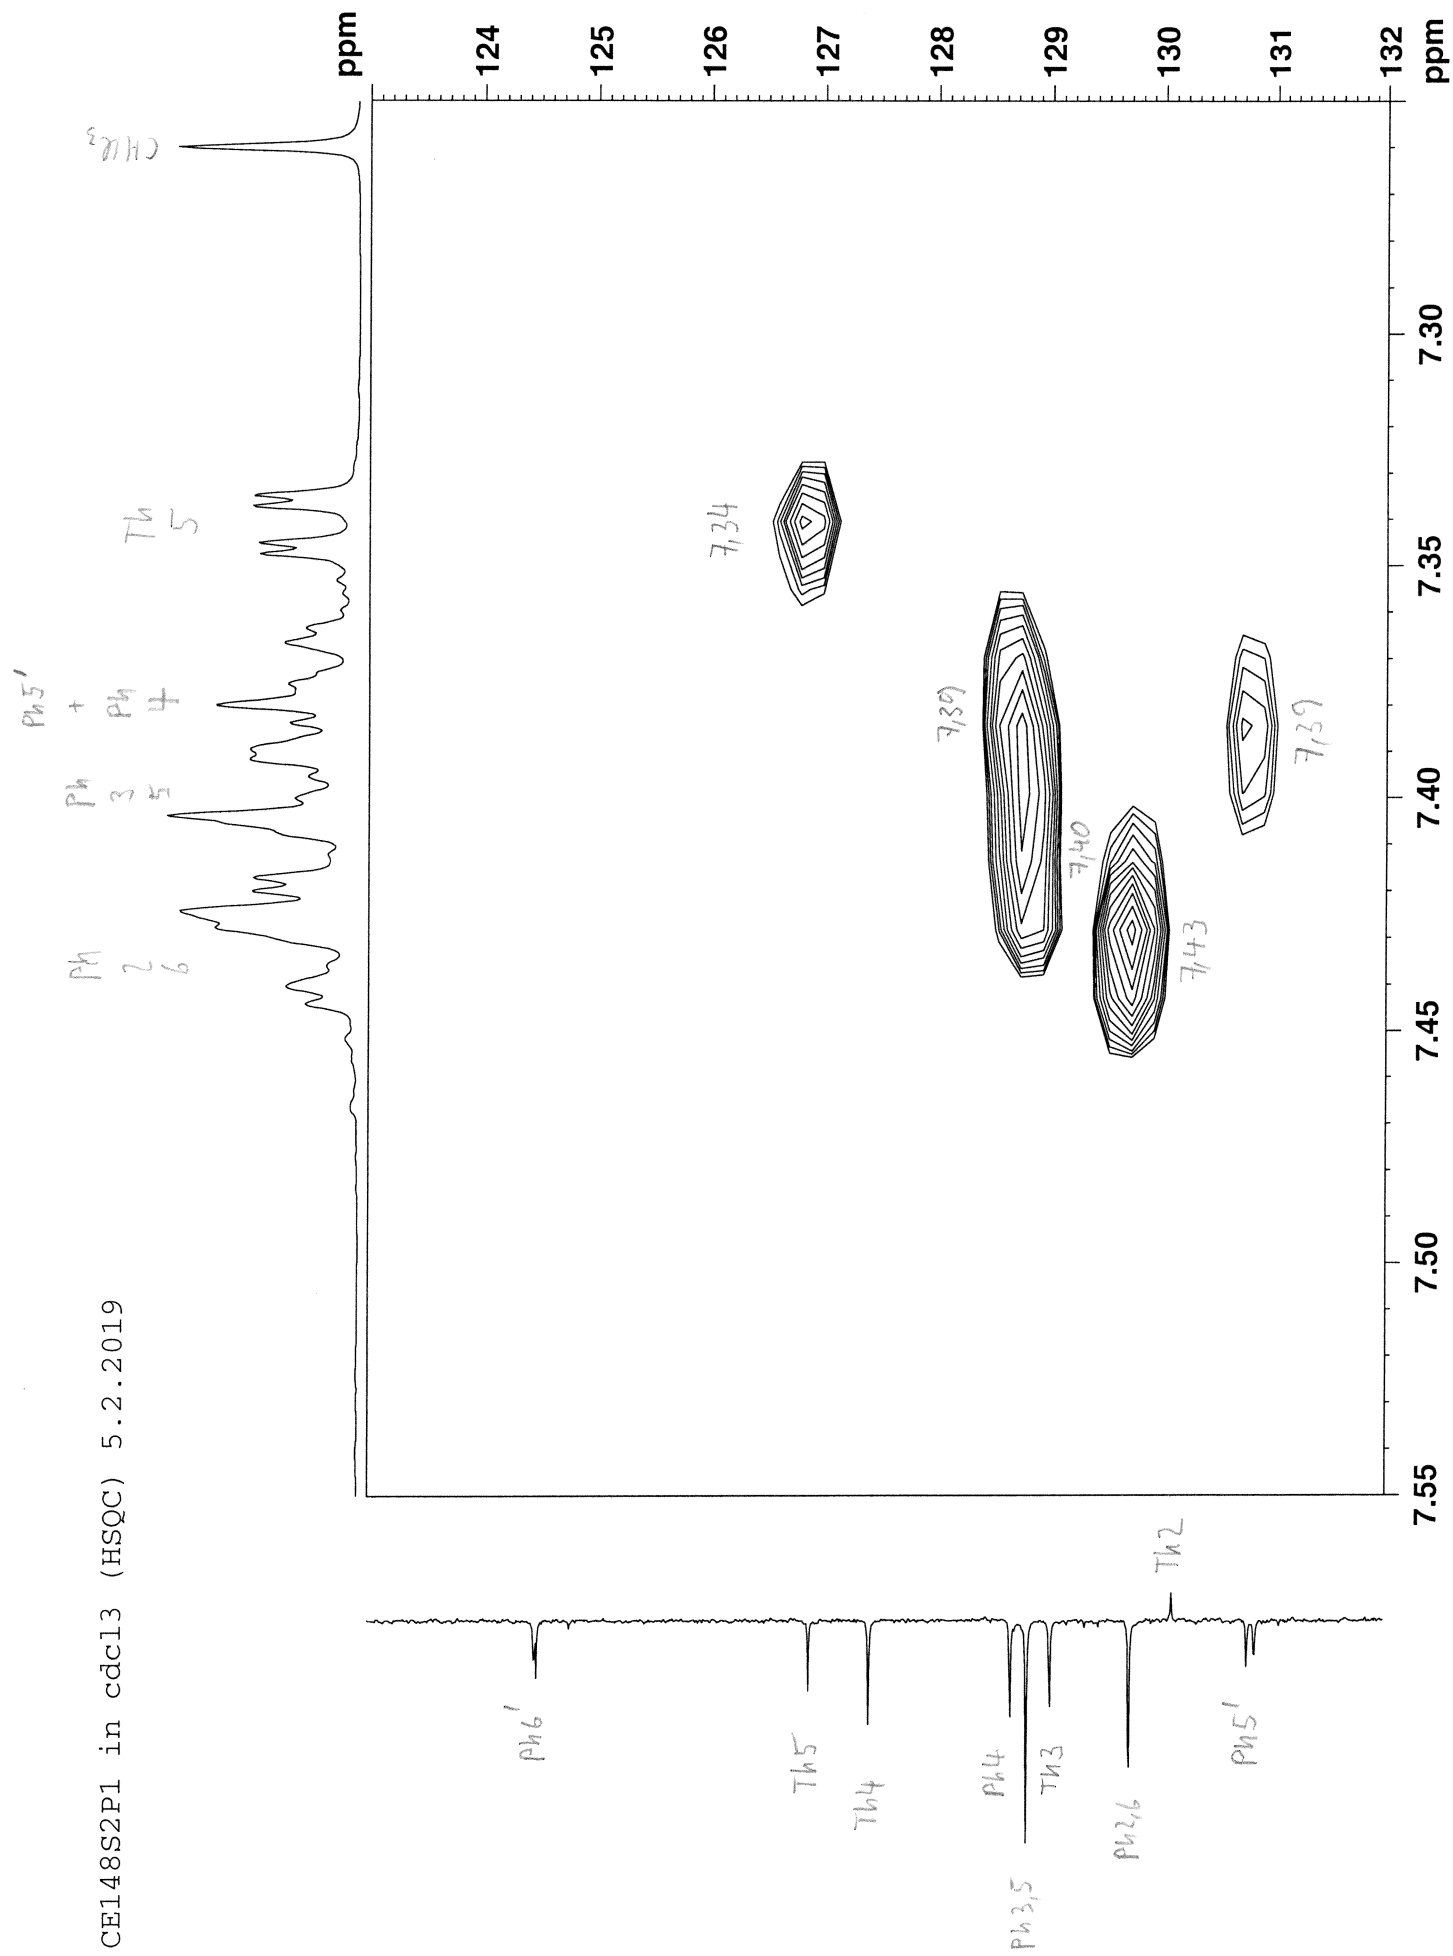

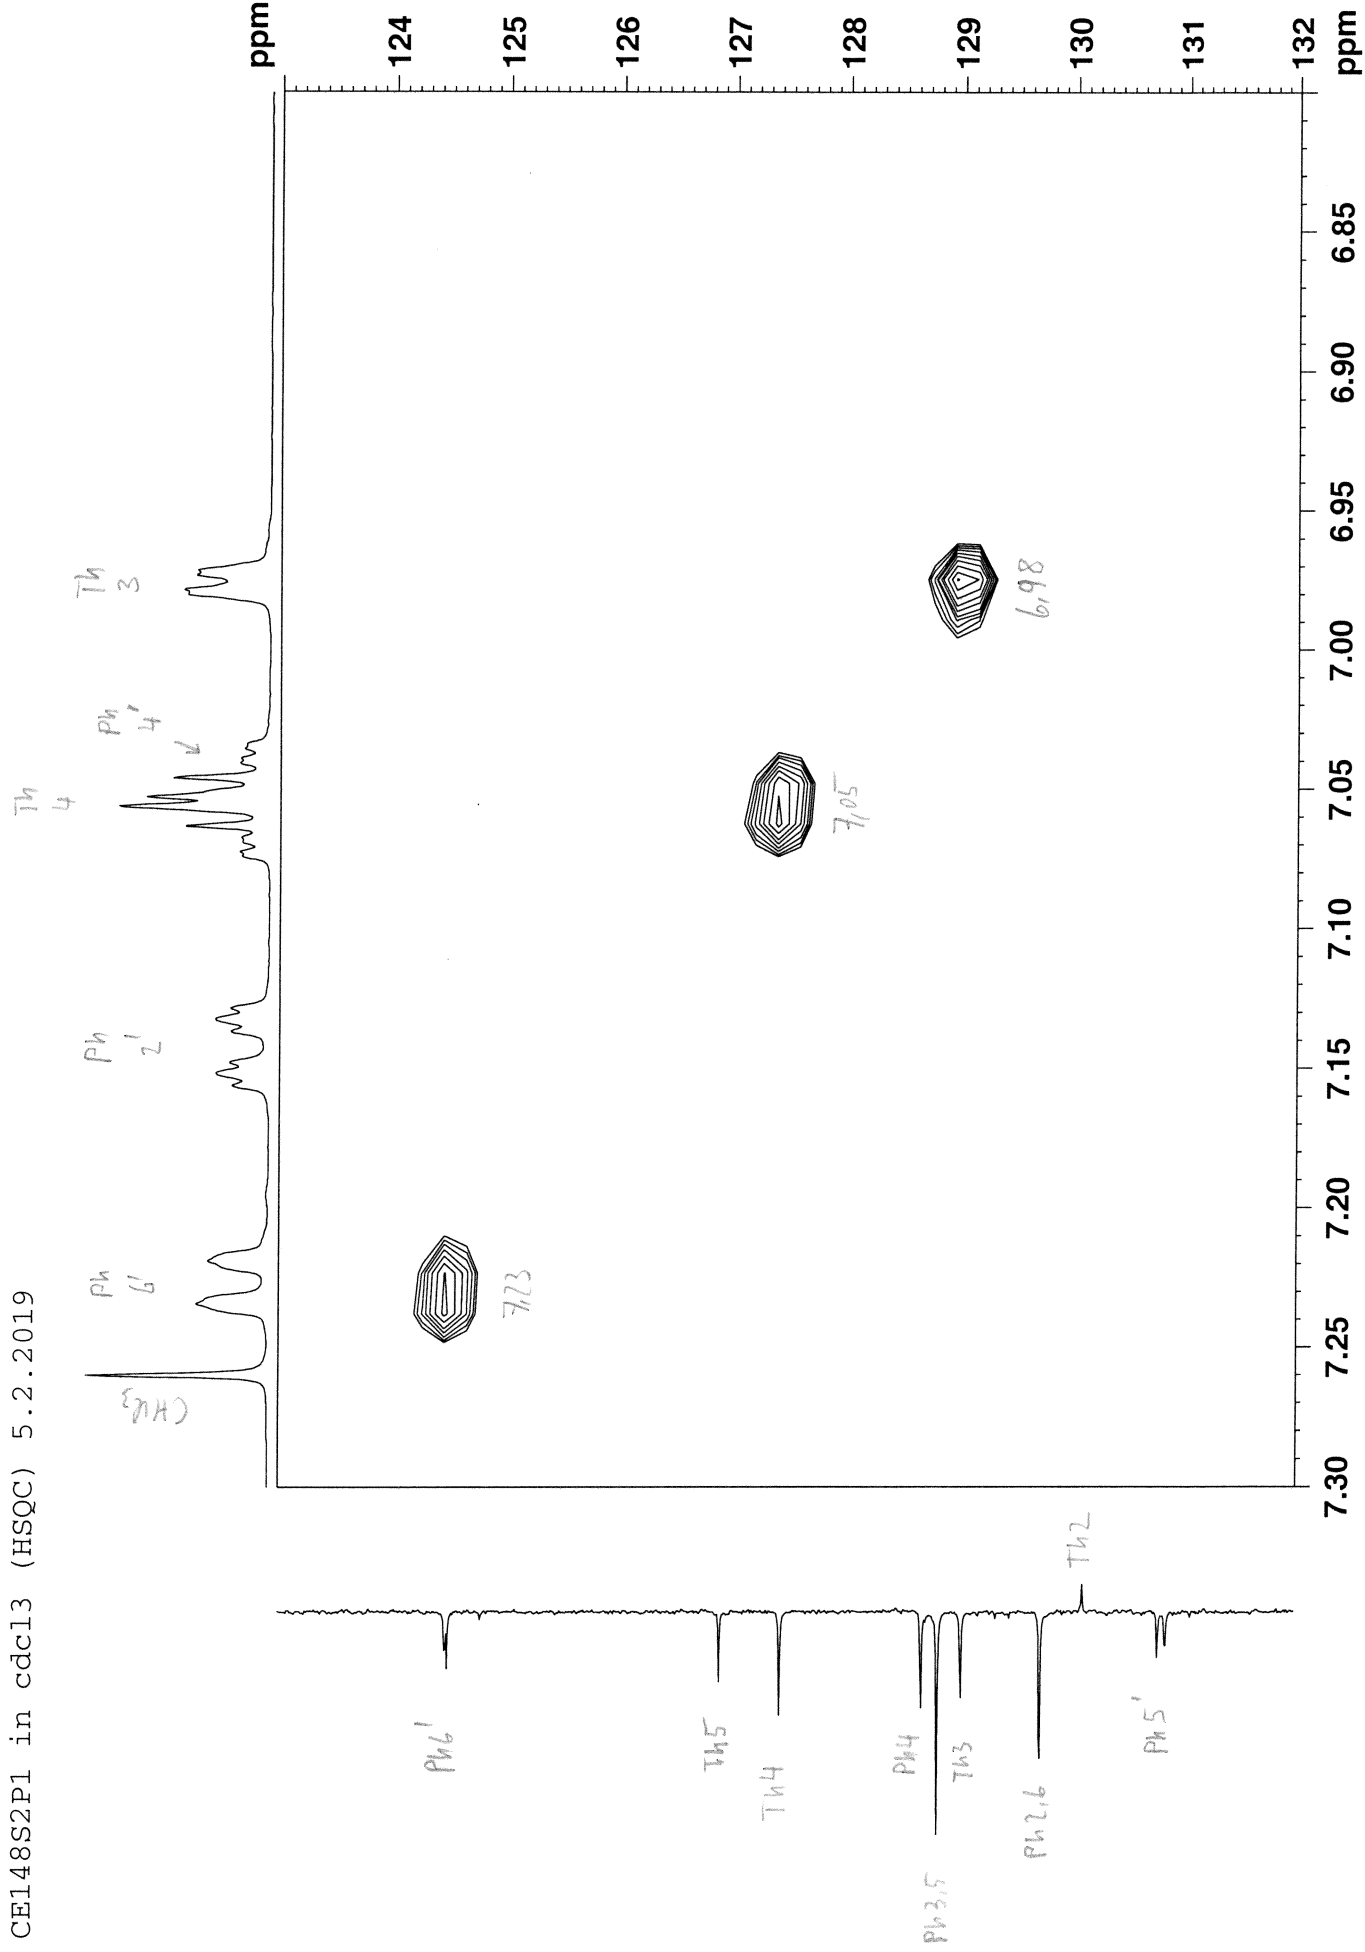

CE148S2P1 in cdcl3 (HSQC) 5.2.2019

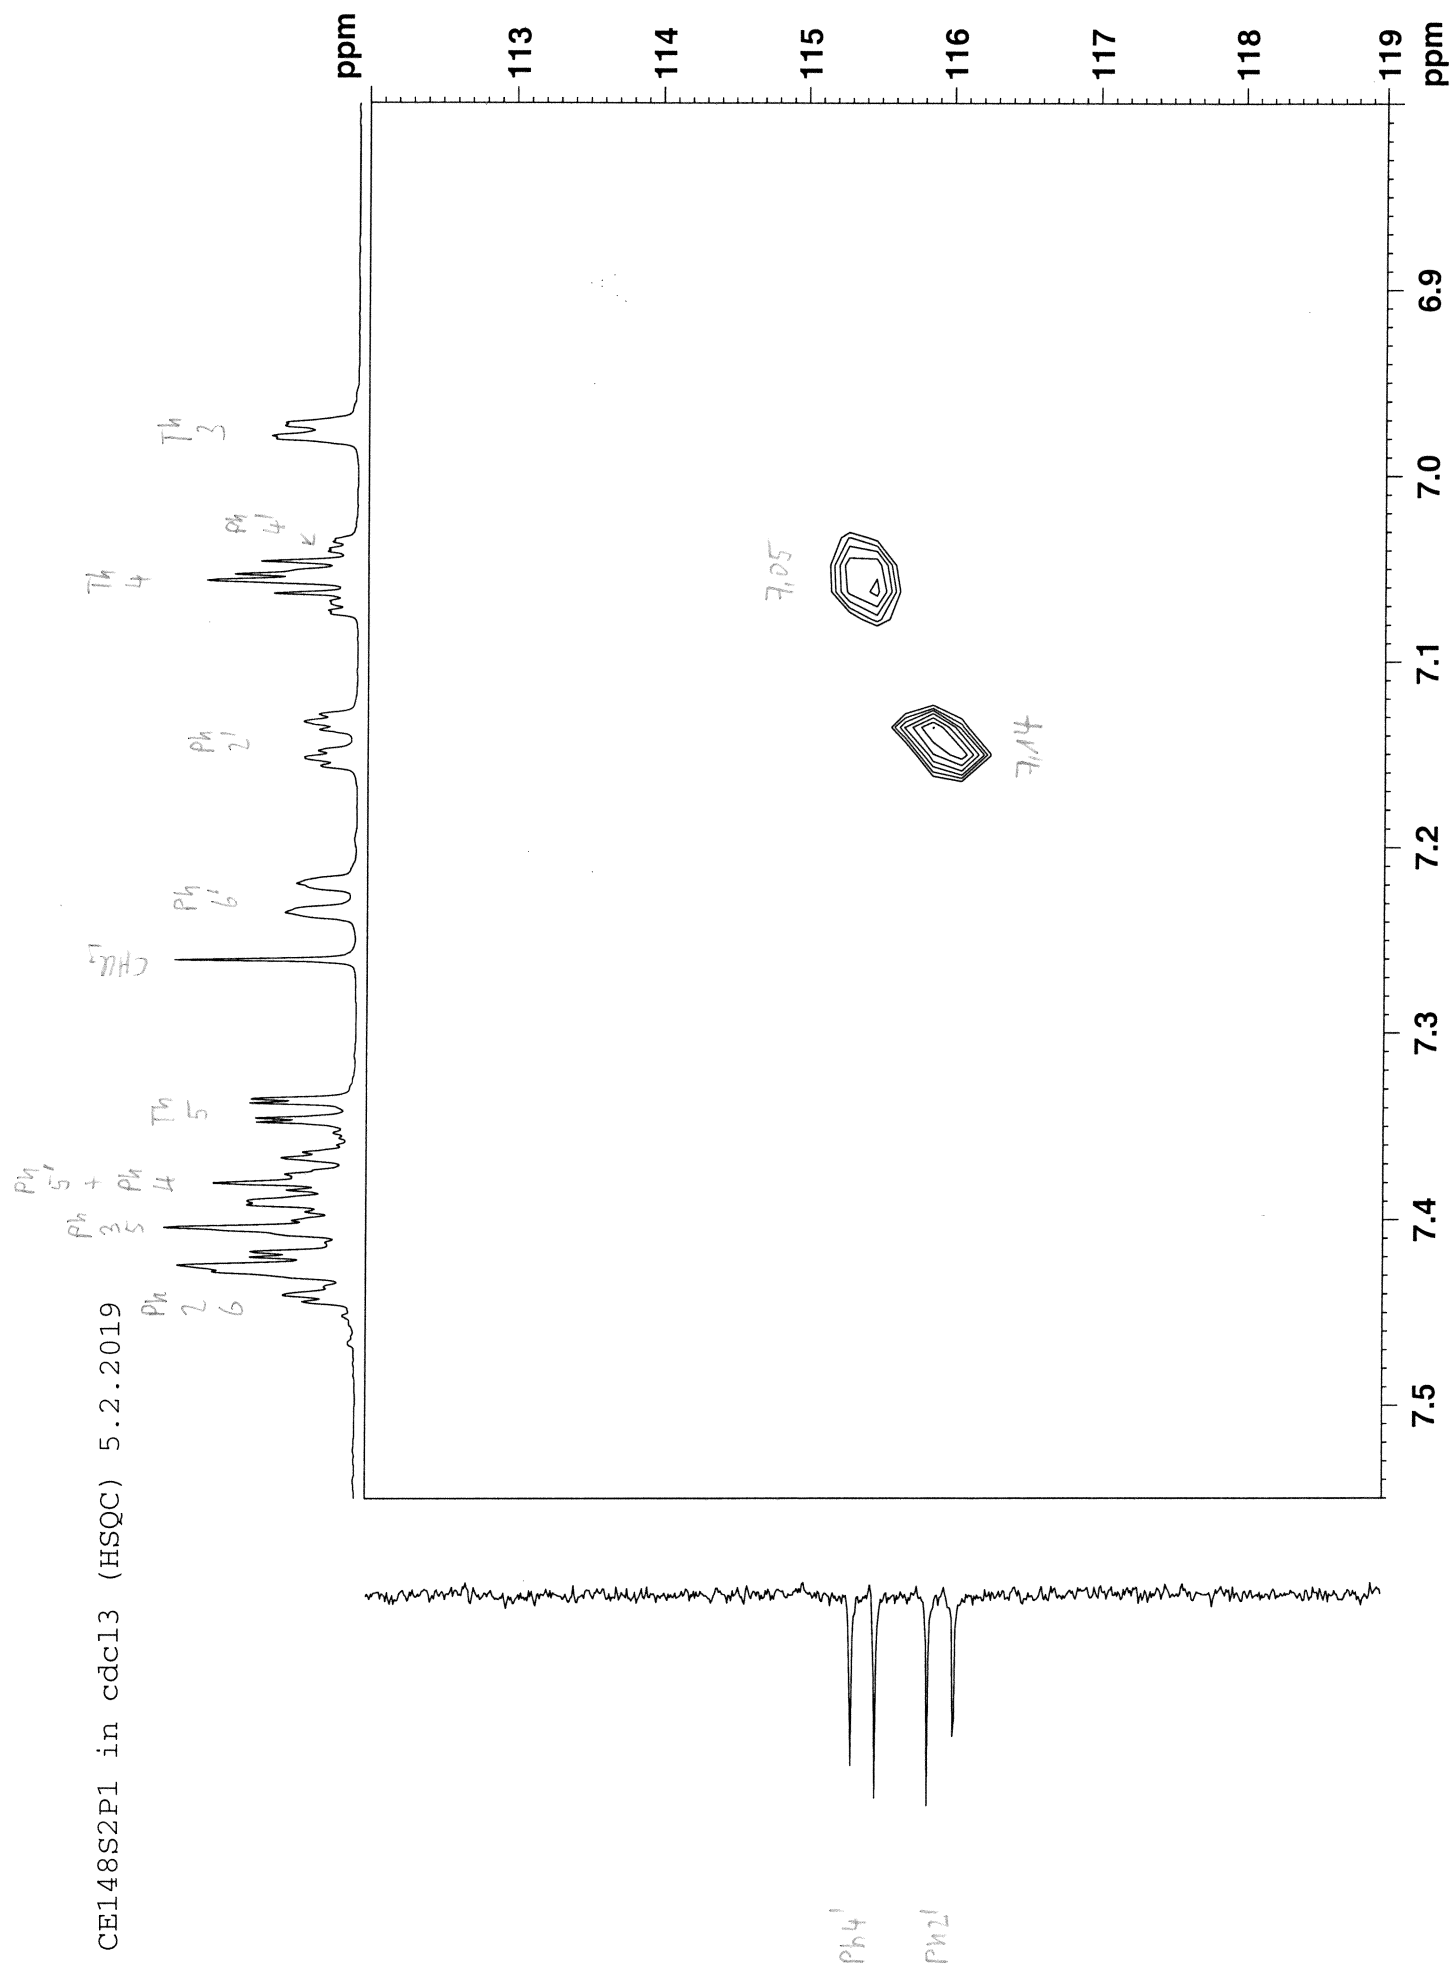

CE148S2P1 in cdcl3 (HSQC) 5.2.2019 CH

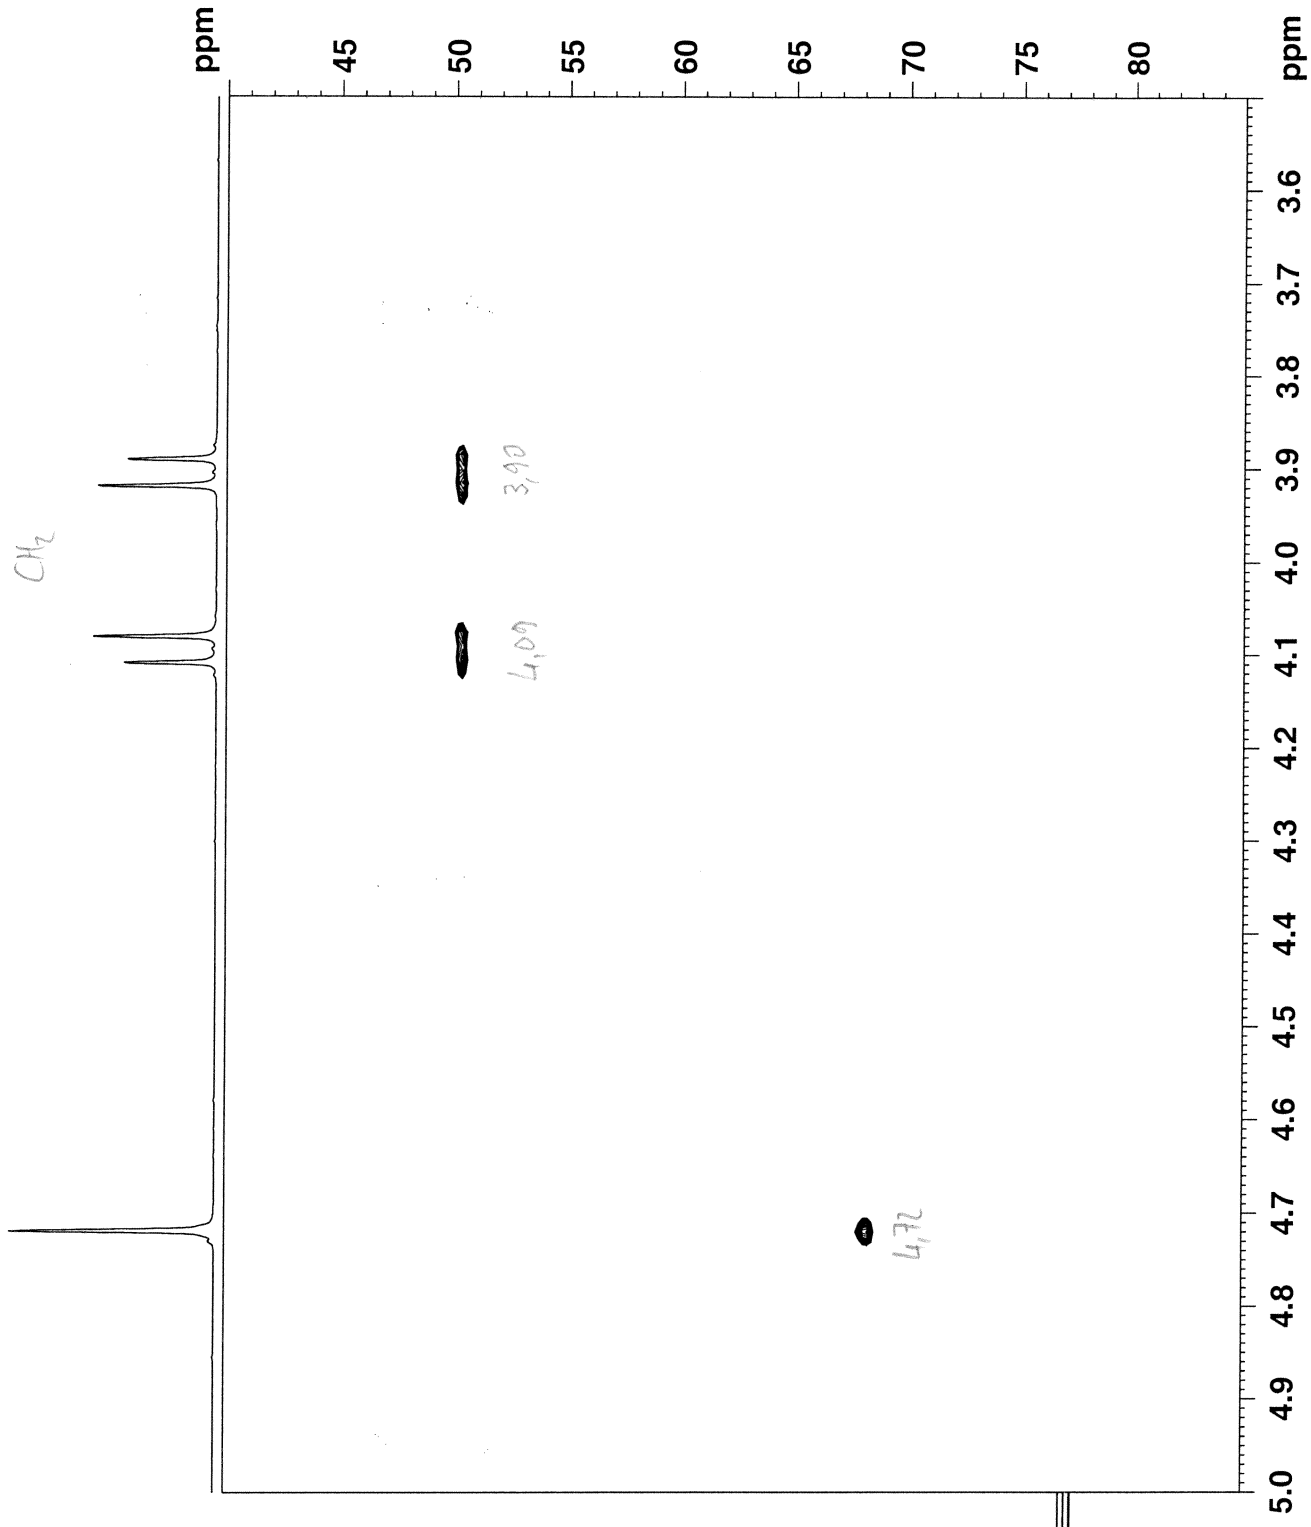



CE148S2P1 in cdcl3 (HMBC) 5.2.2019

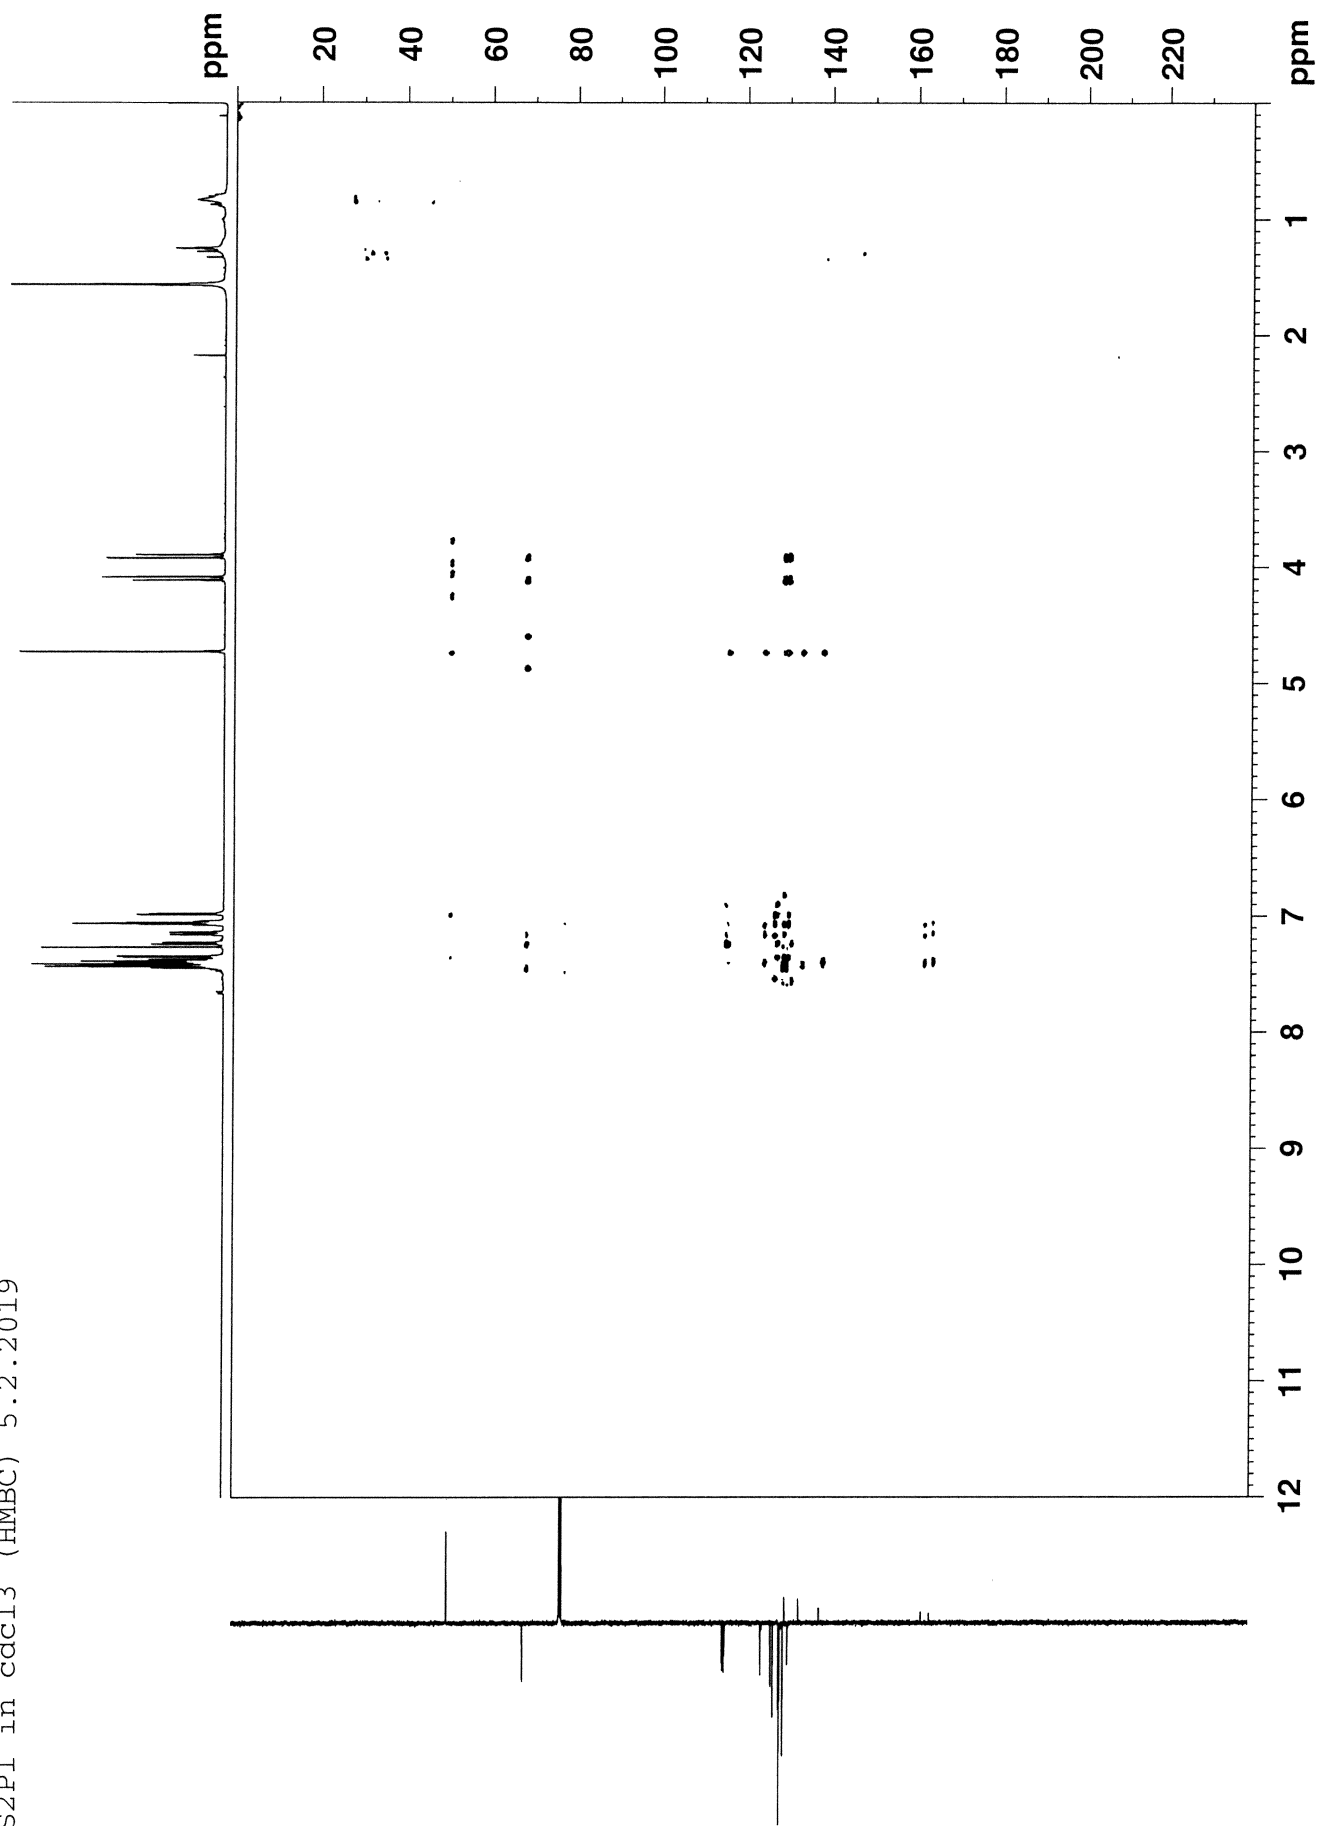

CE148S2P1 in cdcl3 (HMBC) 5.2.2019

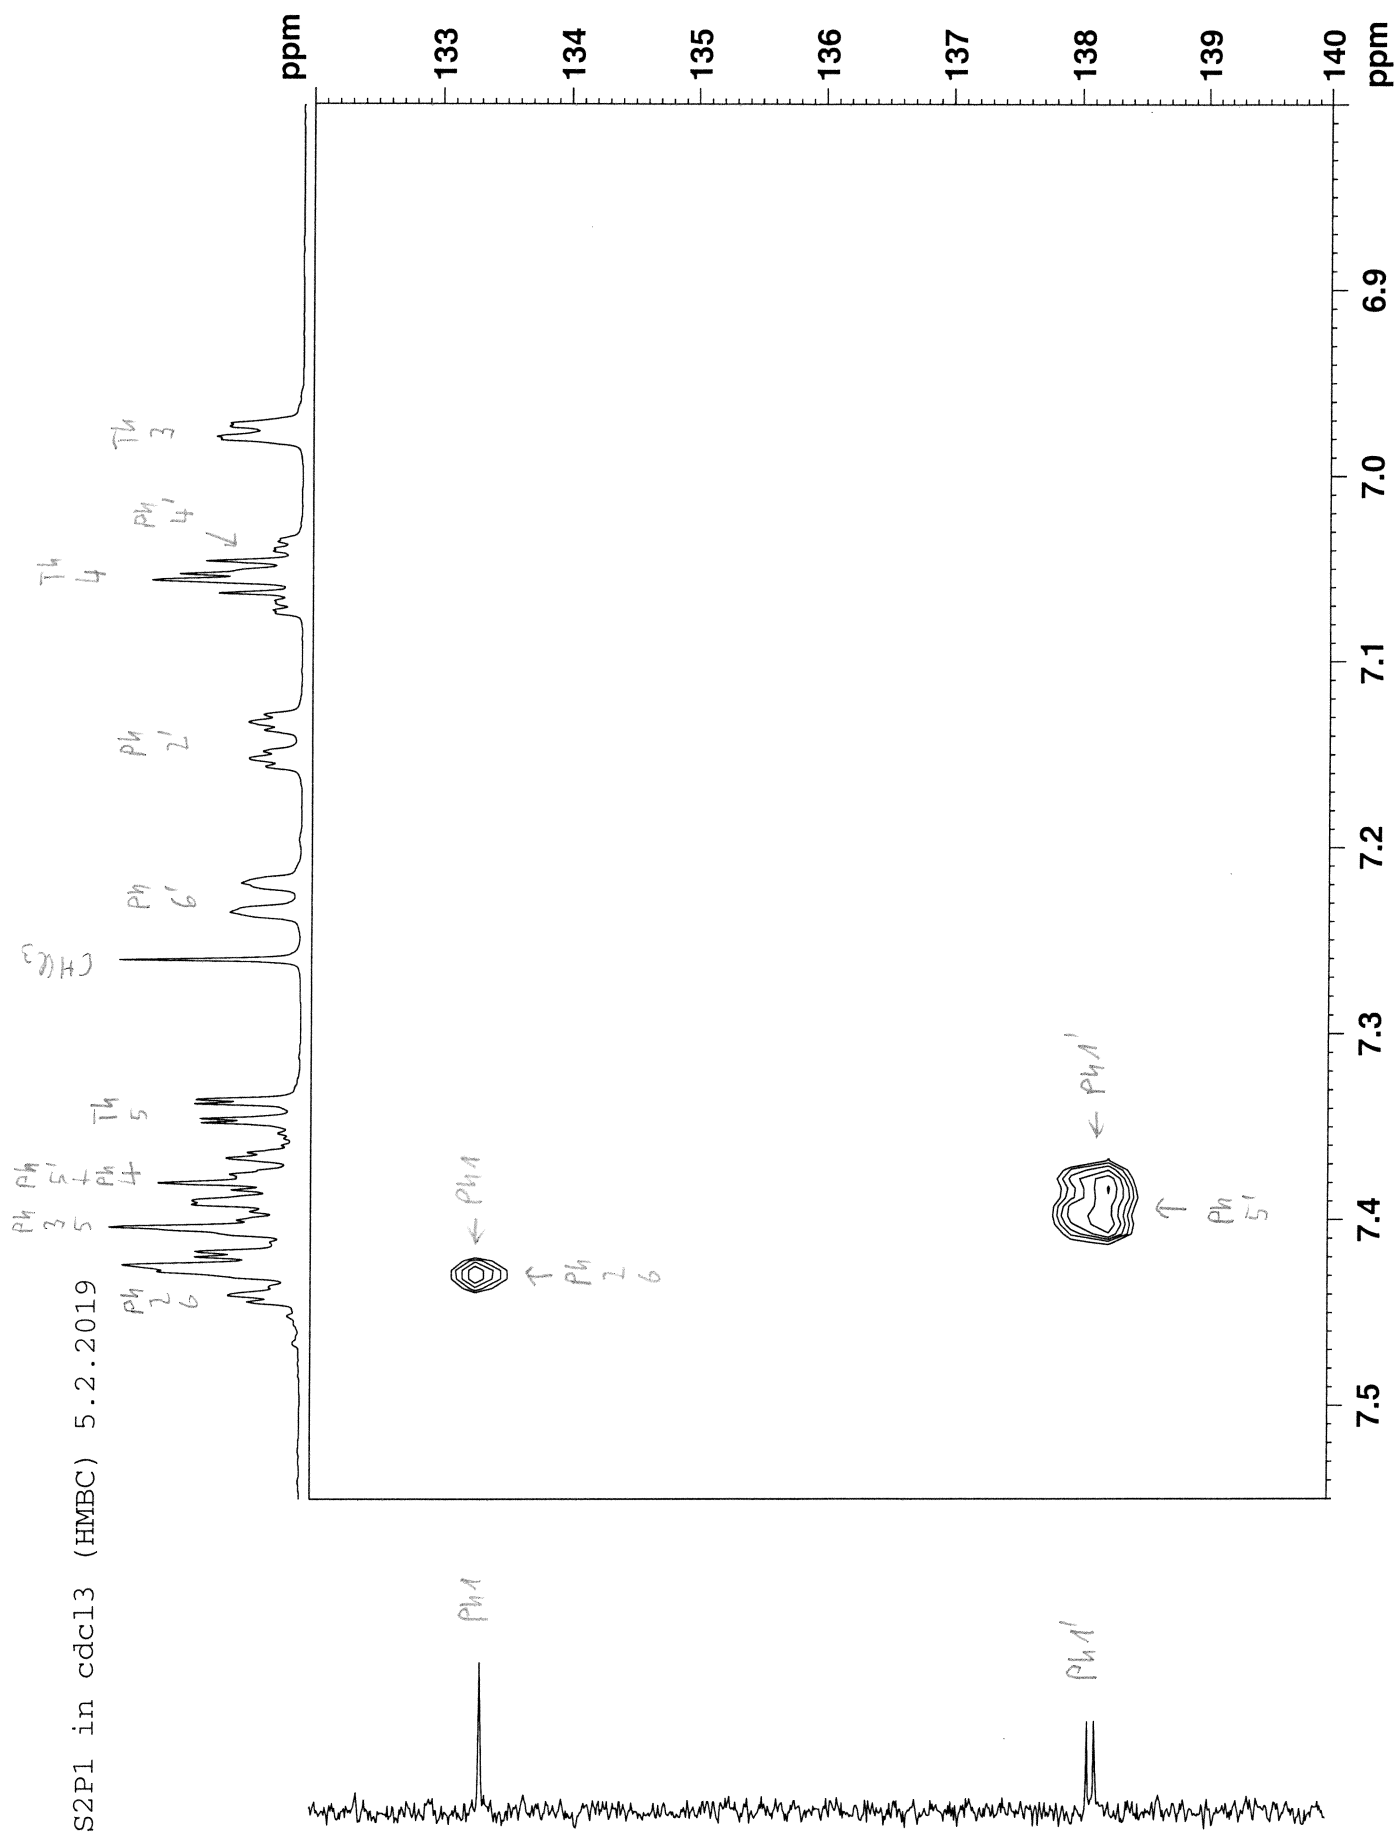

CE148S2P1 in cdcl3 (HMBC) 5.2.2019

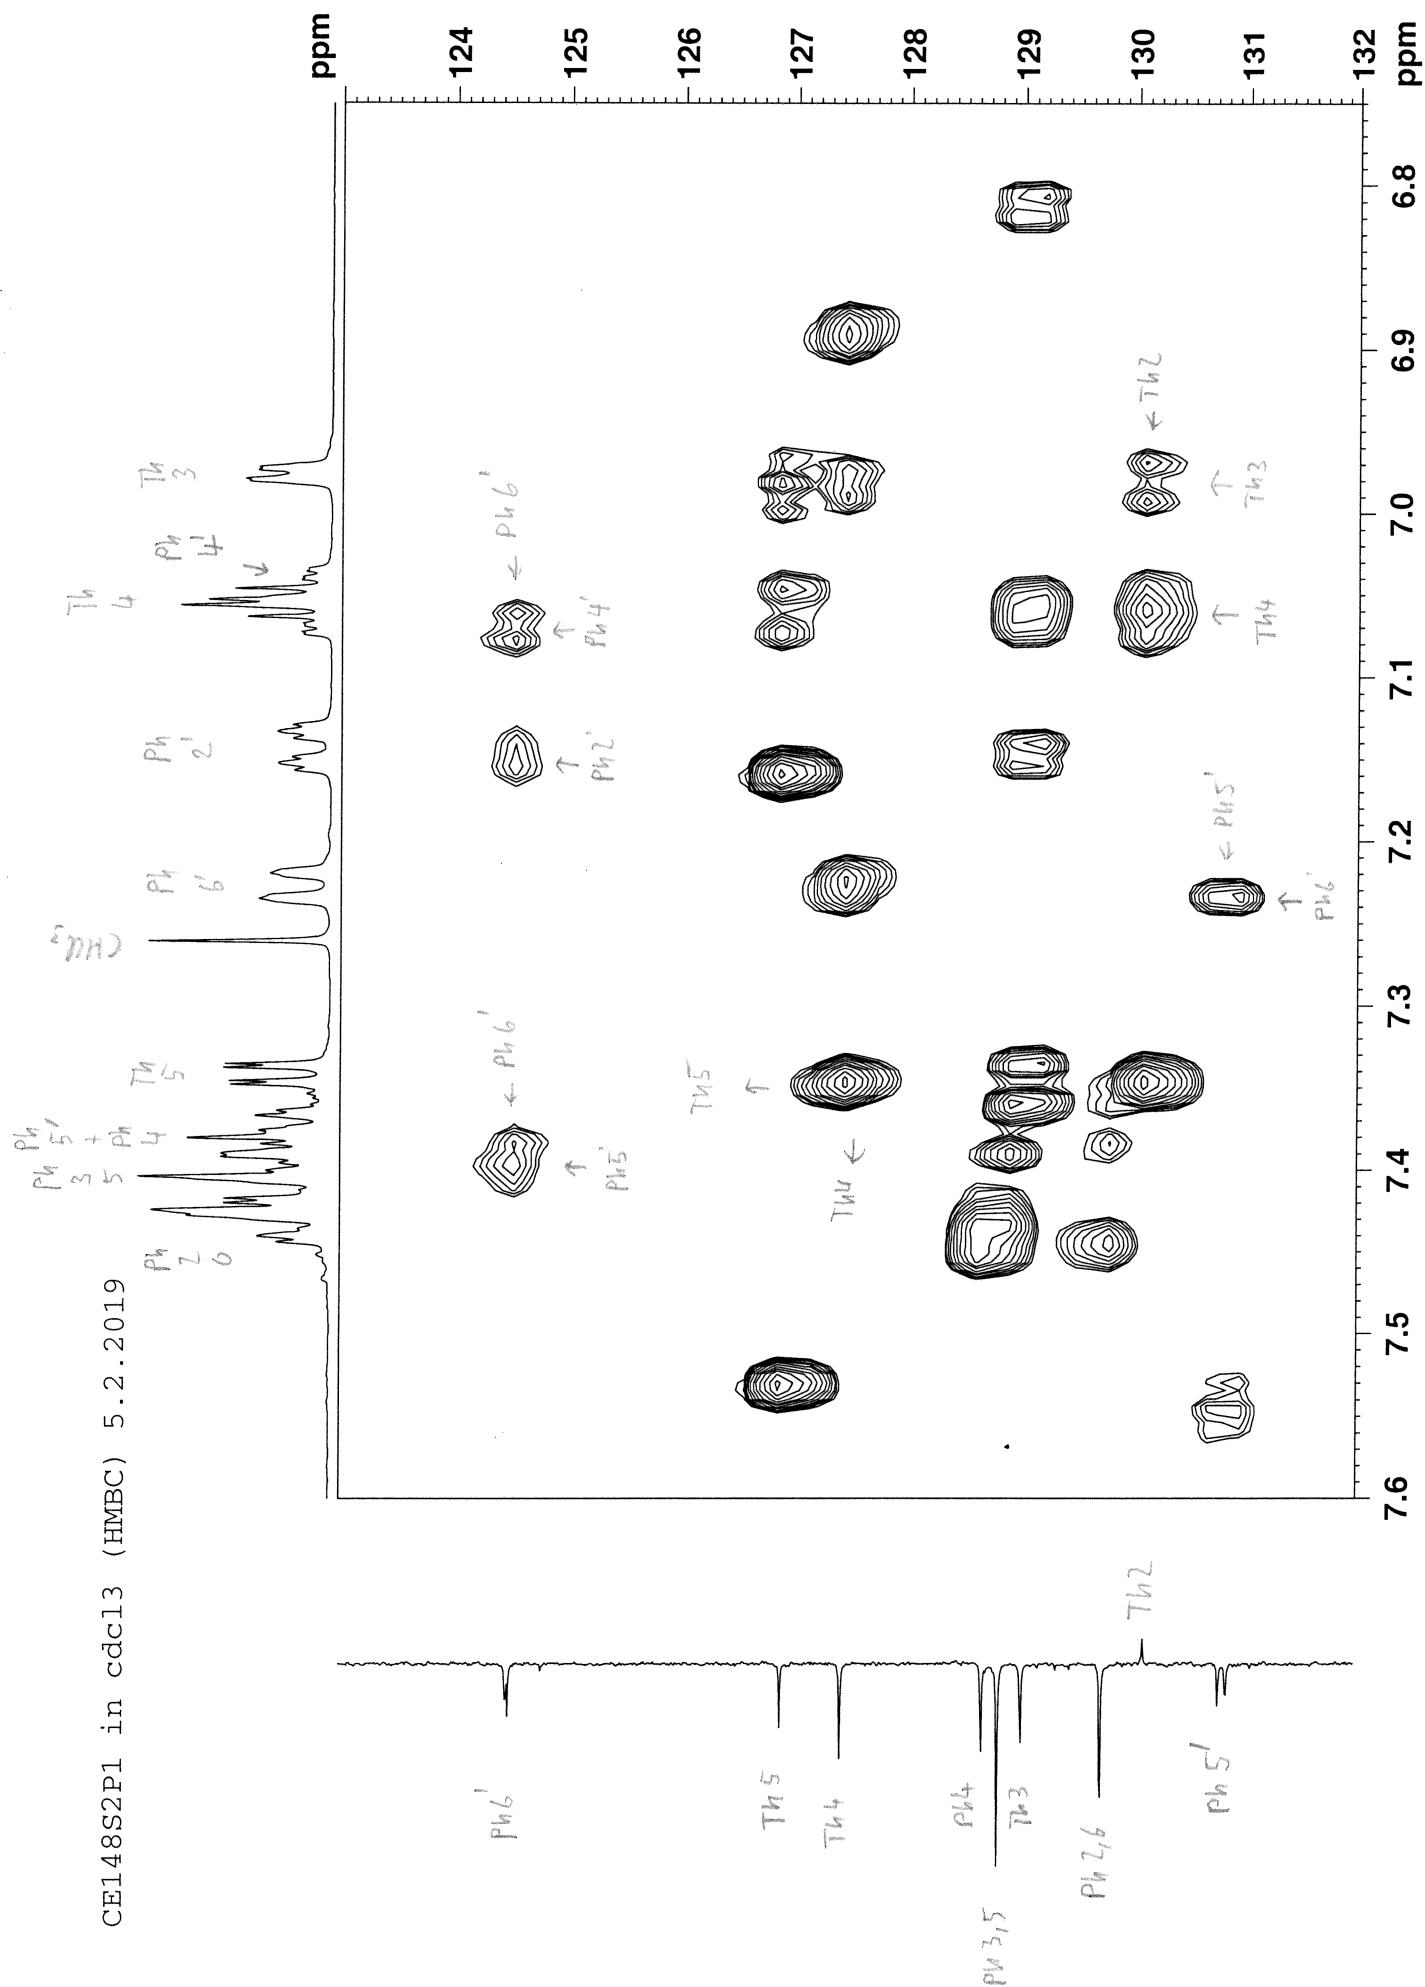

CE148S2P1 in cdcl3 (HMBC) 5.2.2019

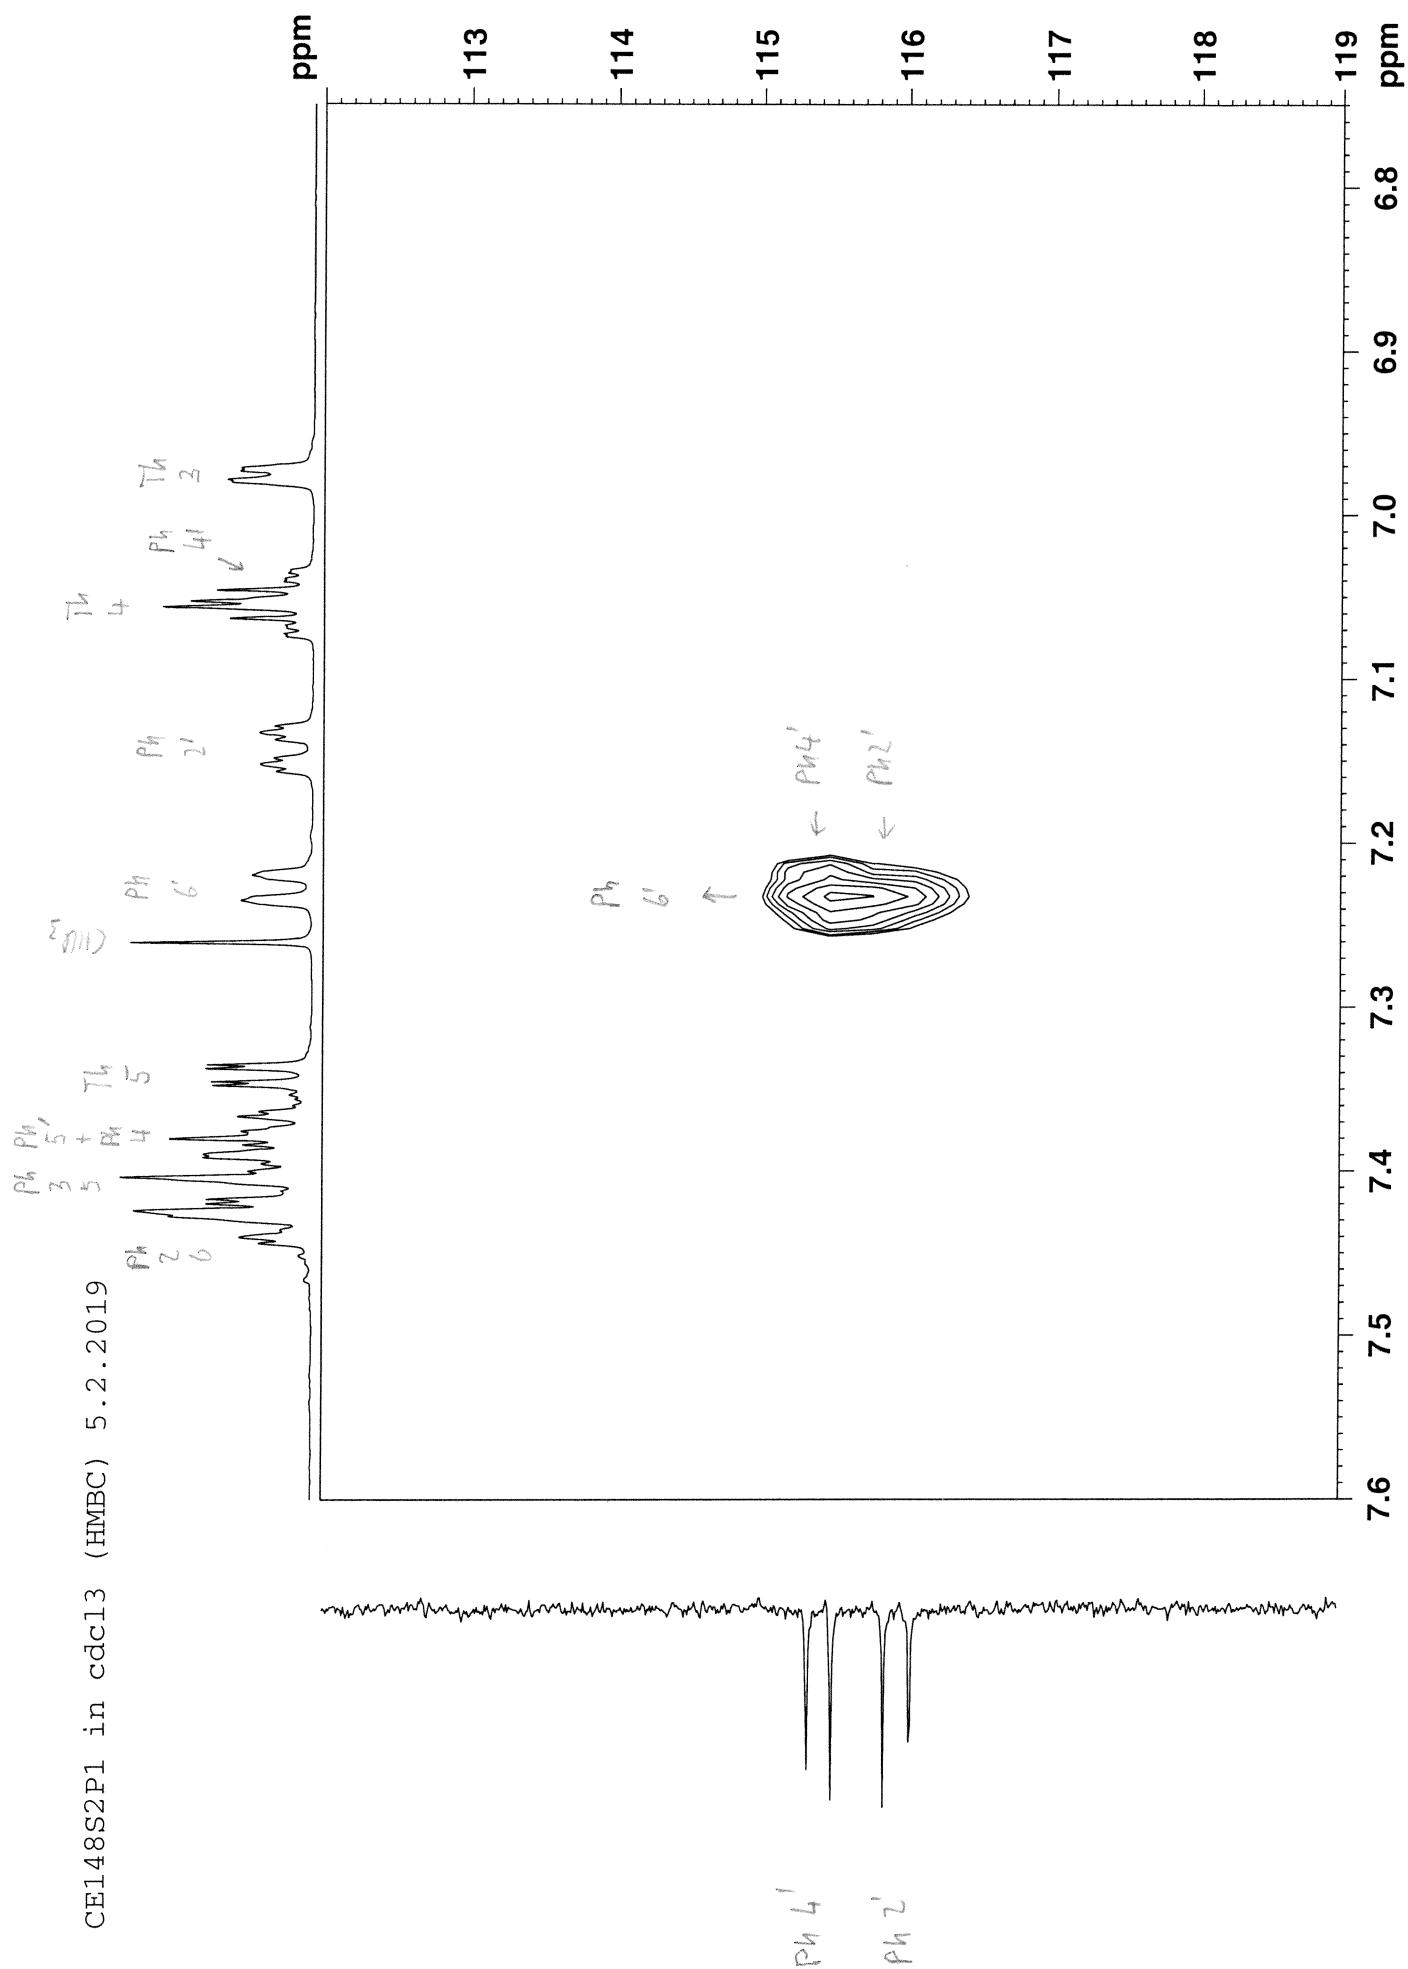

CE148S2P1 in cdcl3 (HMBC) 5.2.2019

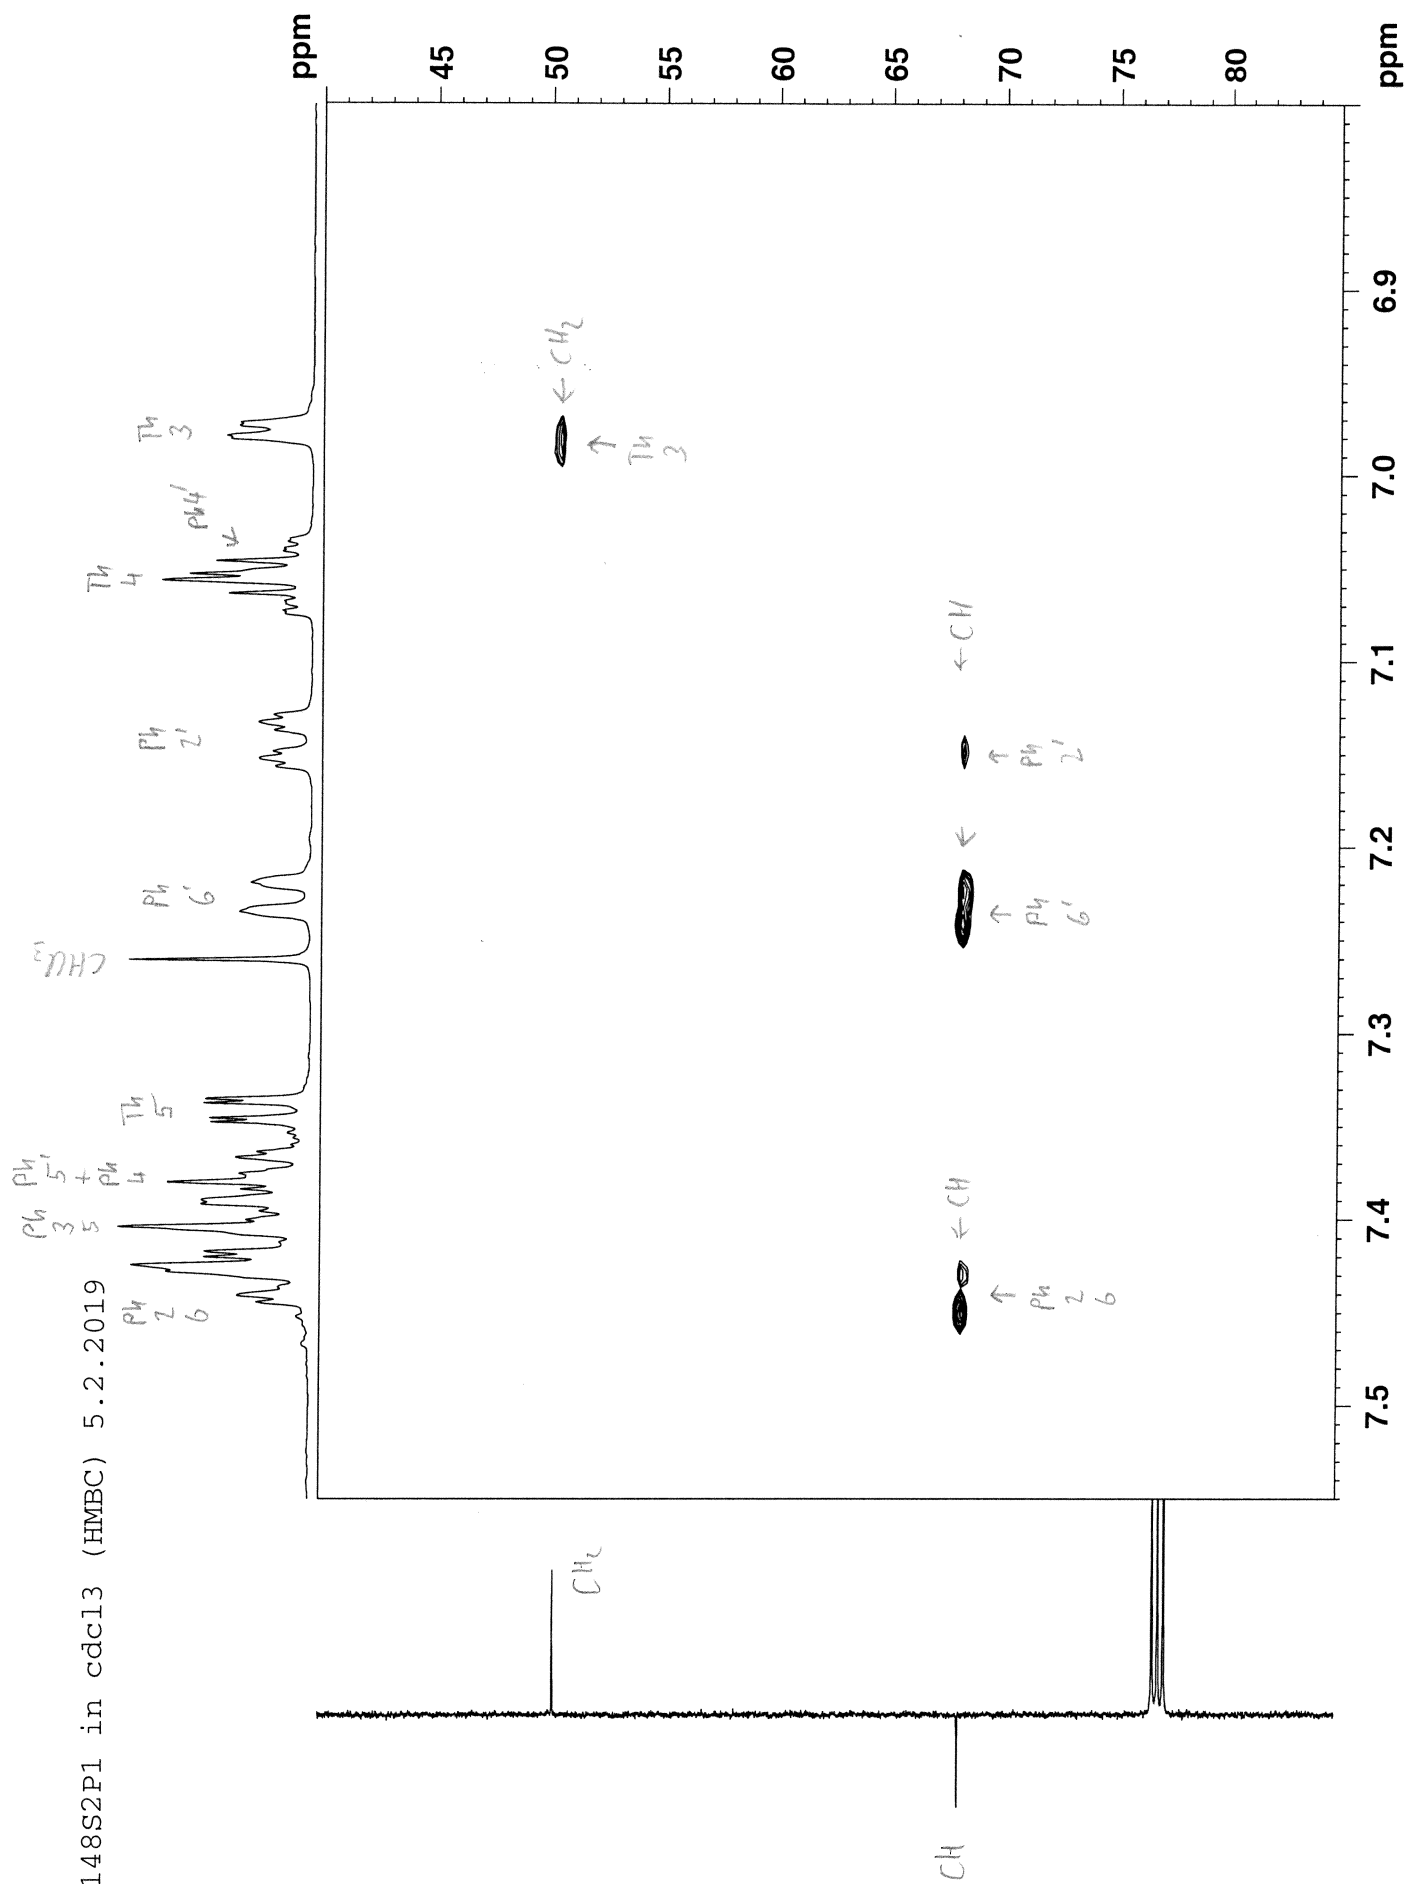

CE148S2P1 in cdcl3 (HMBC) 5.2.2019

CH

CH<sub>2</sub>

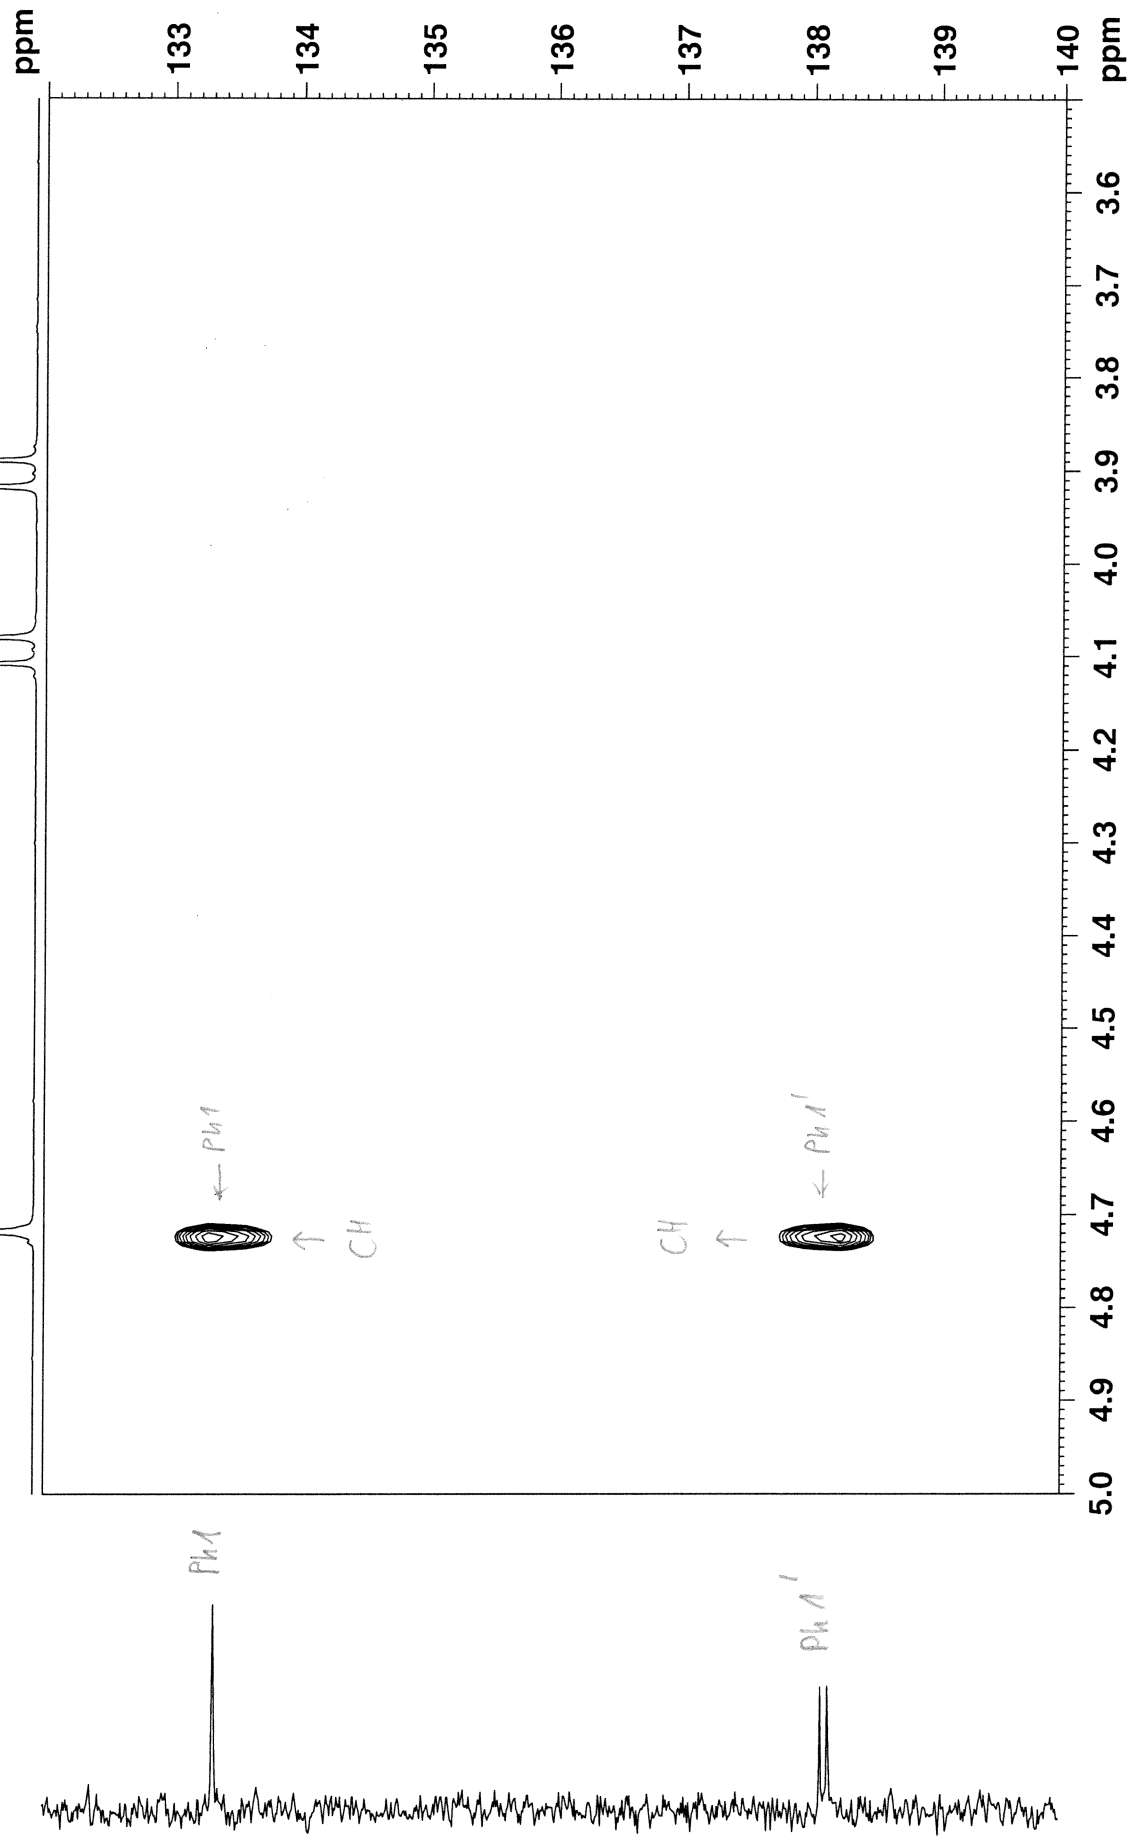

CH

CE148S2P1 in cdcl3 (HMBC) 5.2.2019

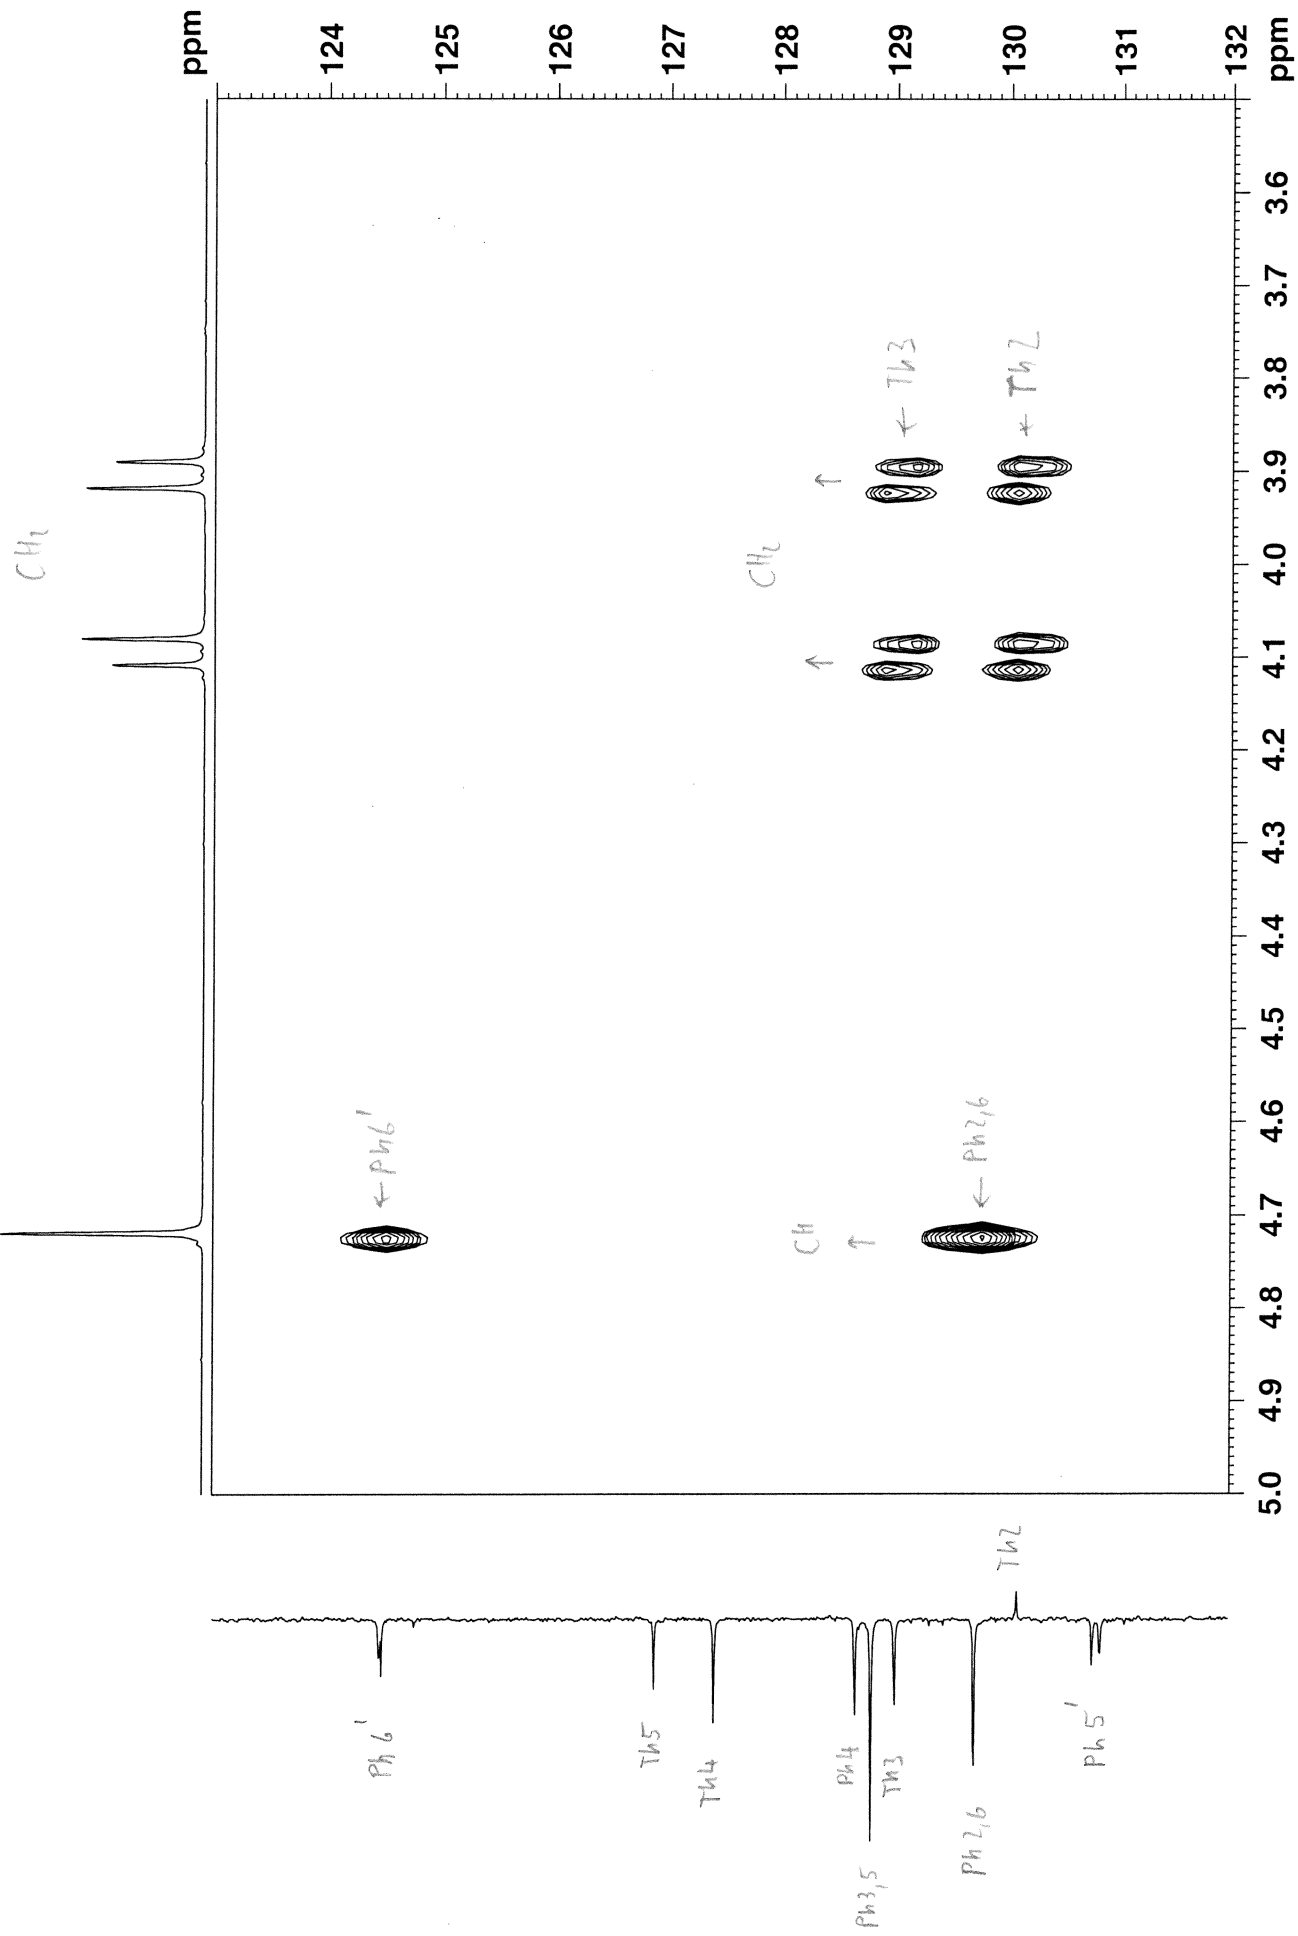

CE148S2P1 in cdcl3 (HMBC) 5.2.2019

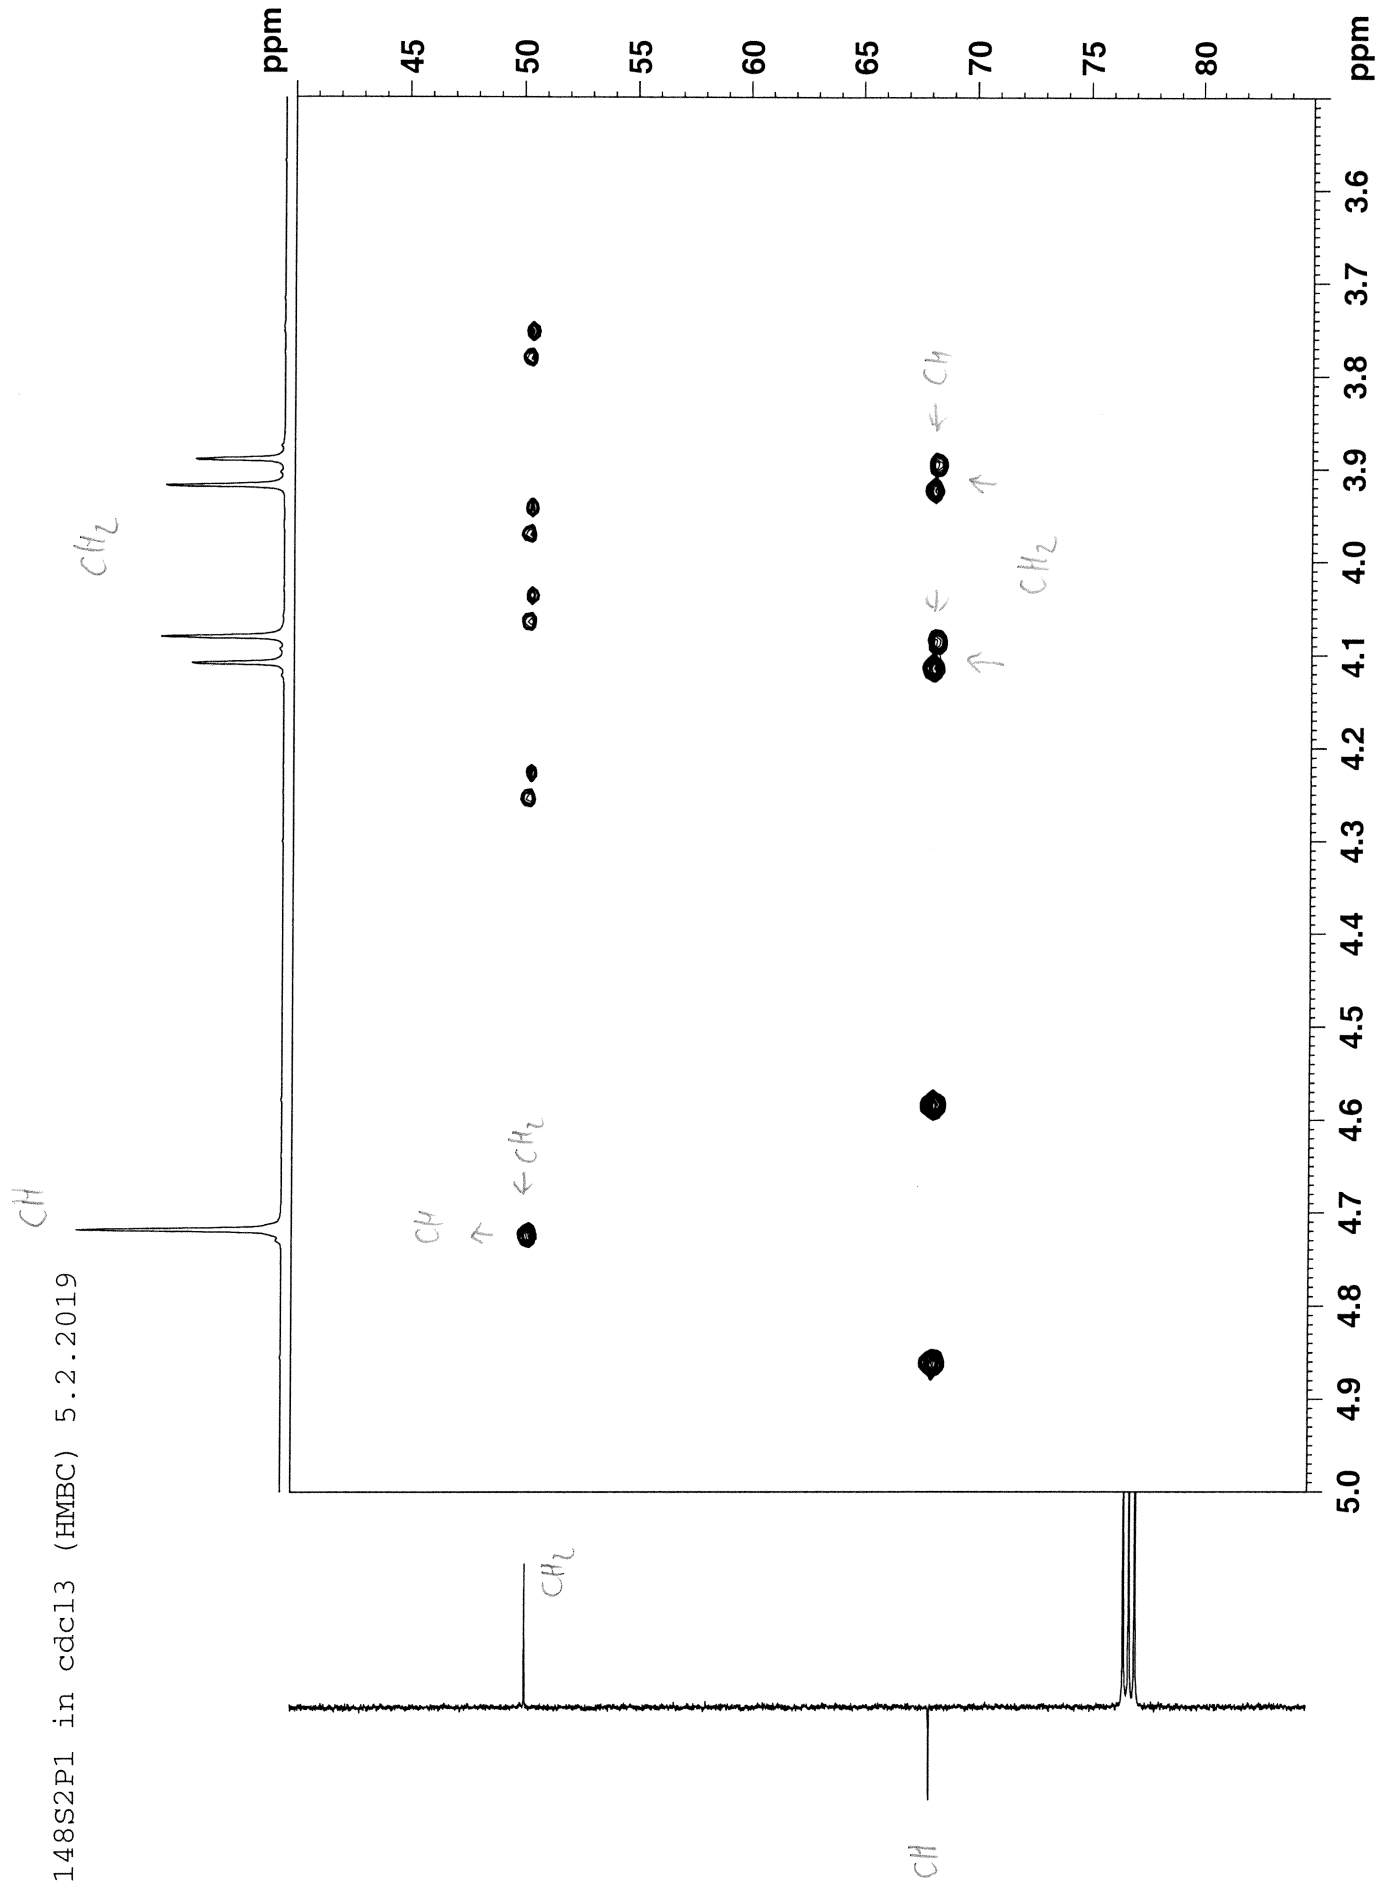



Figure S8c. NMR spectra of compound 8b.

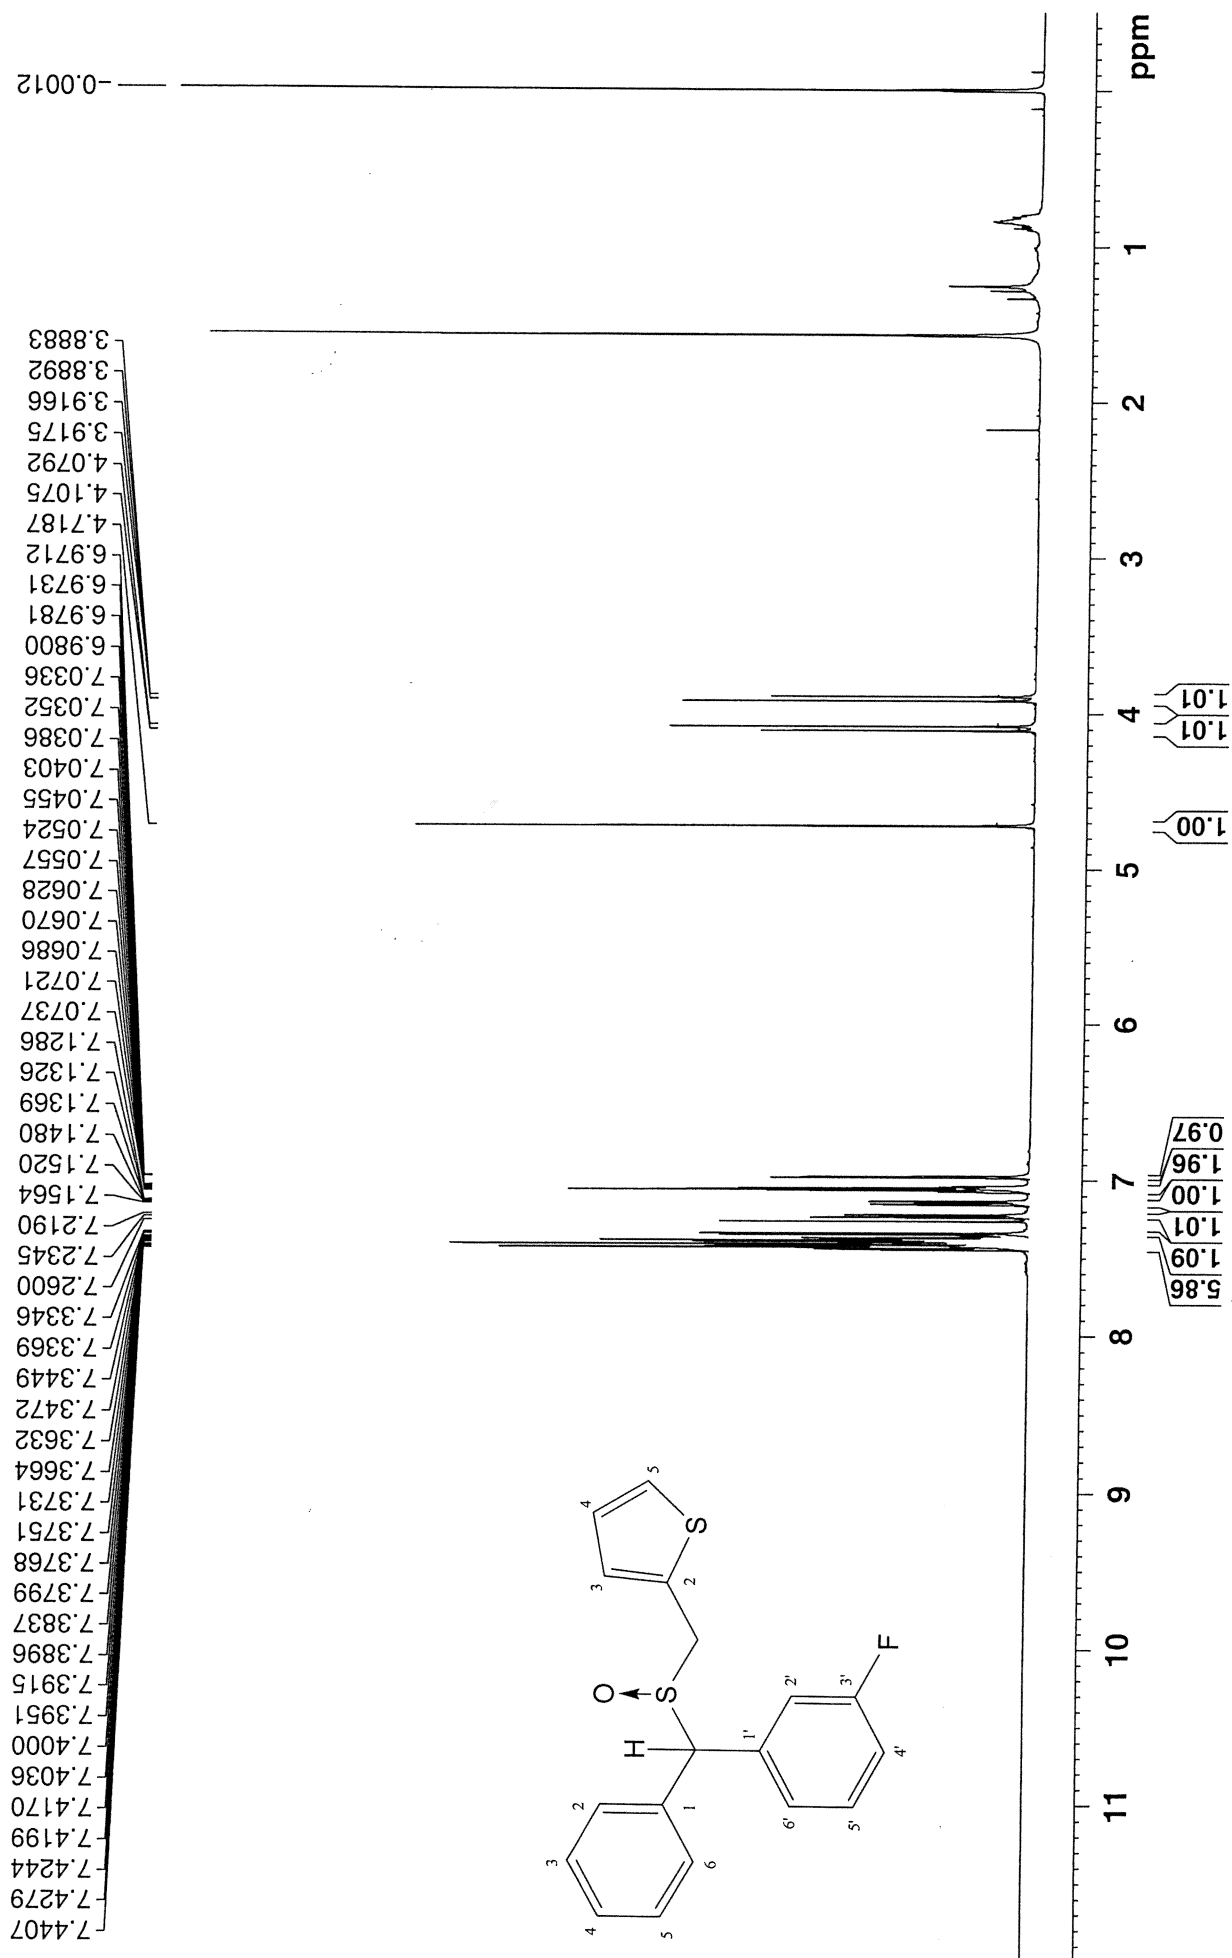

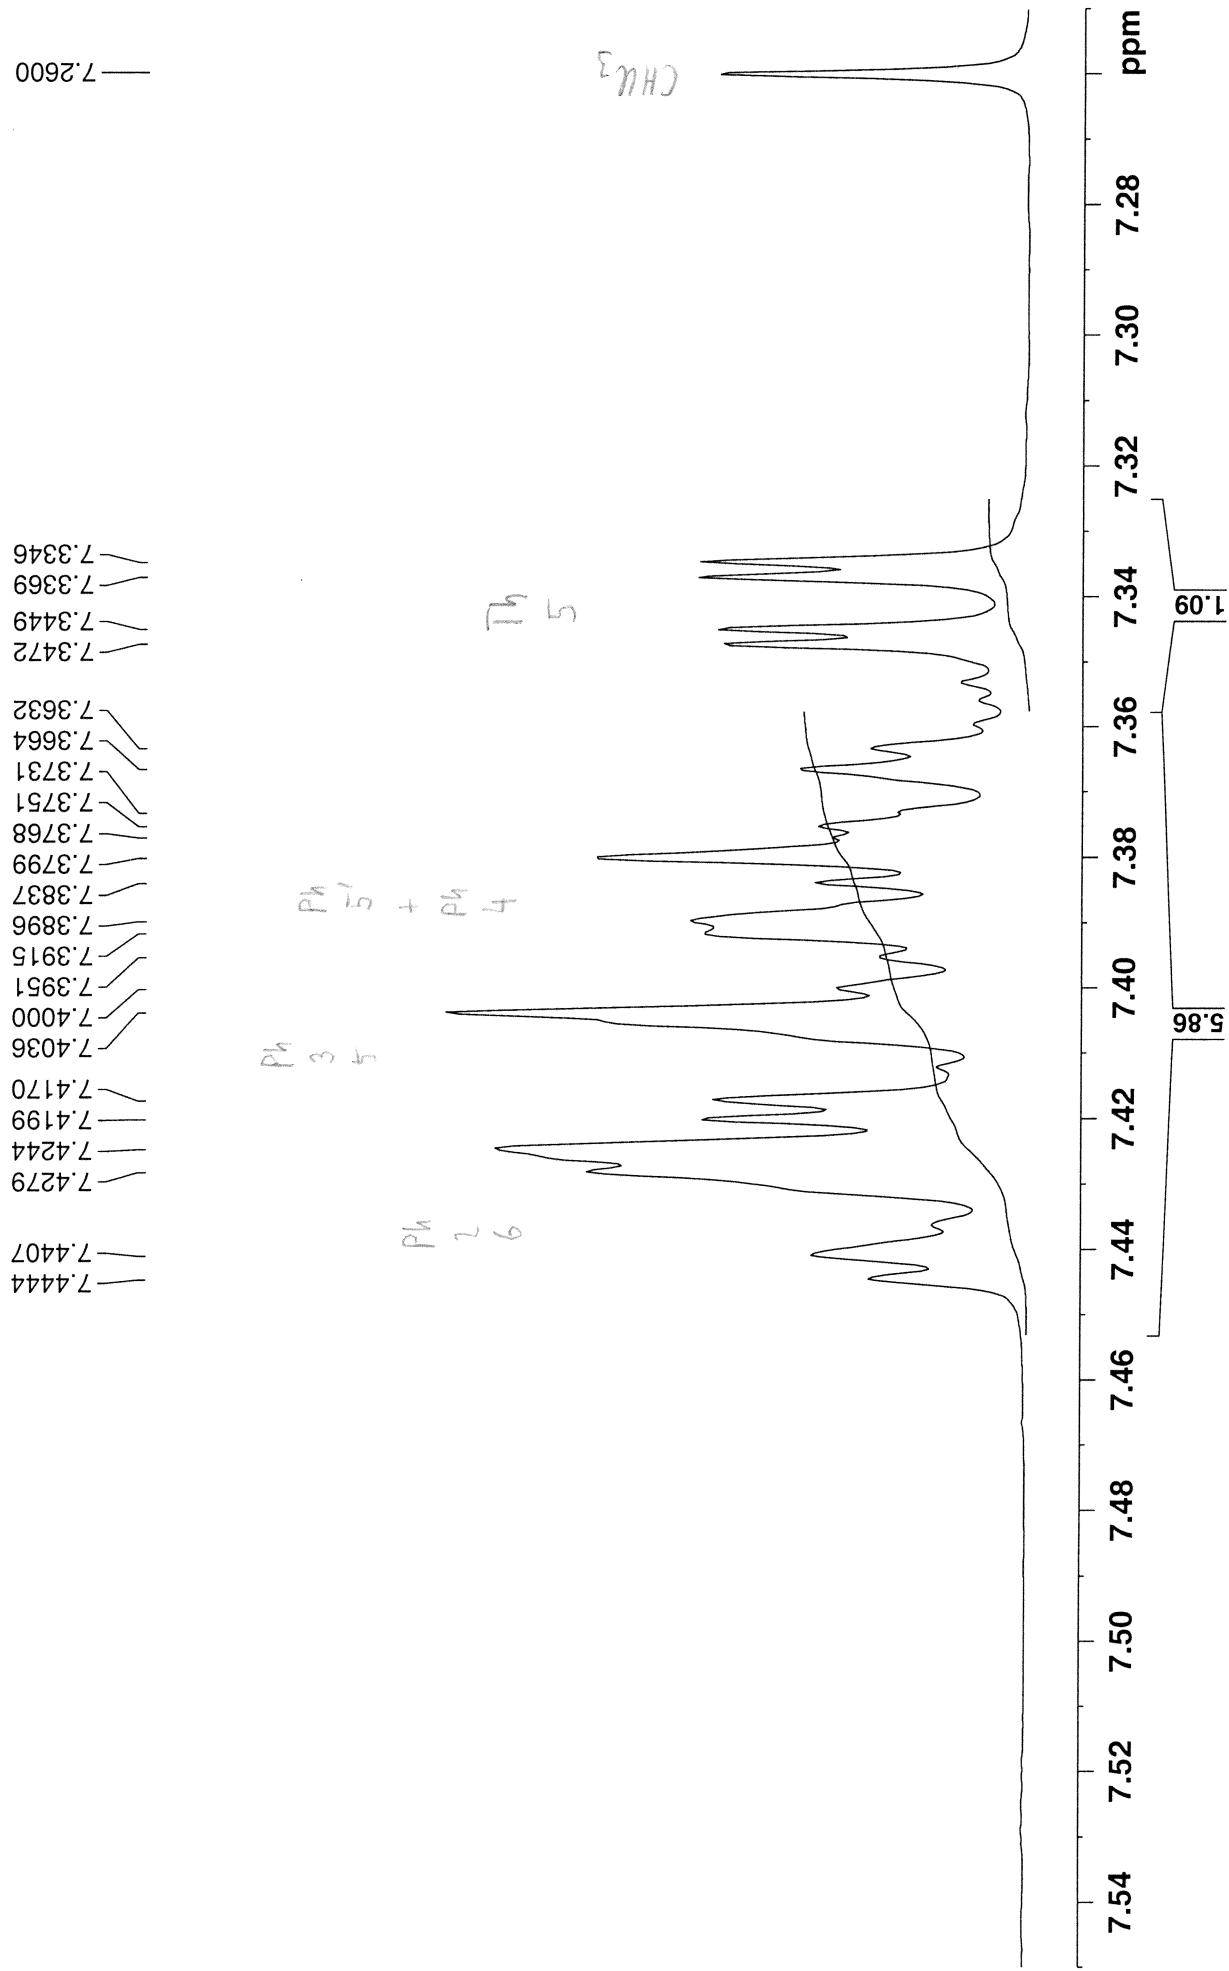

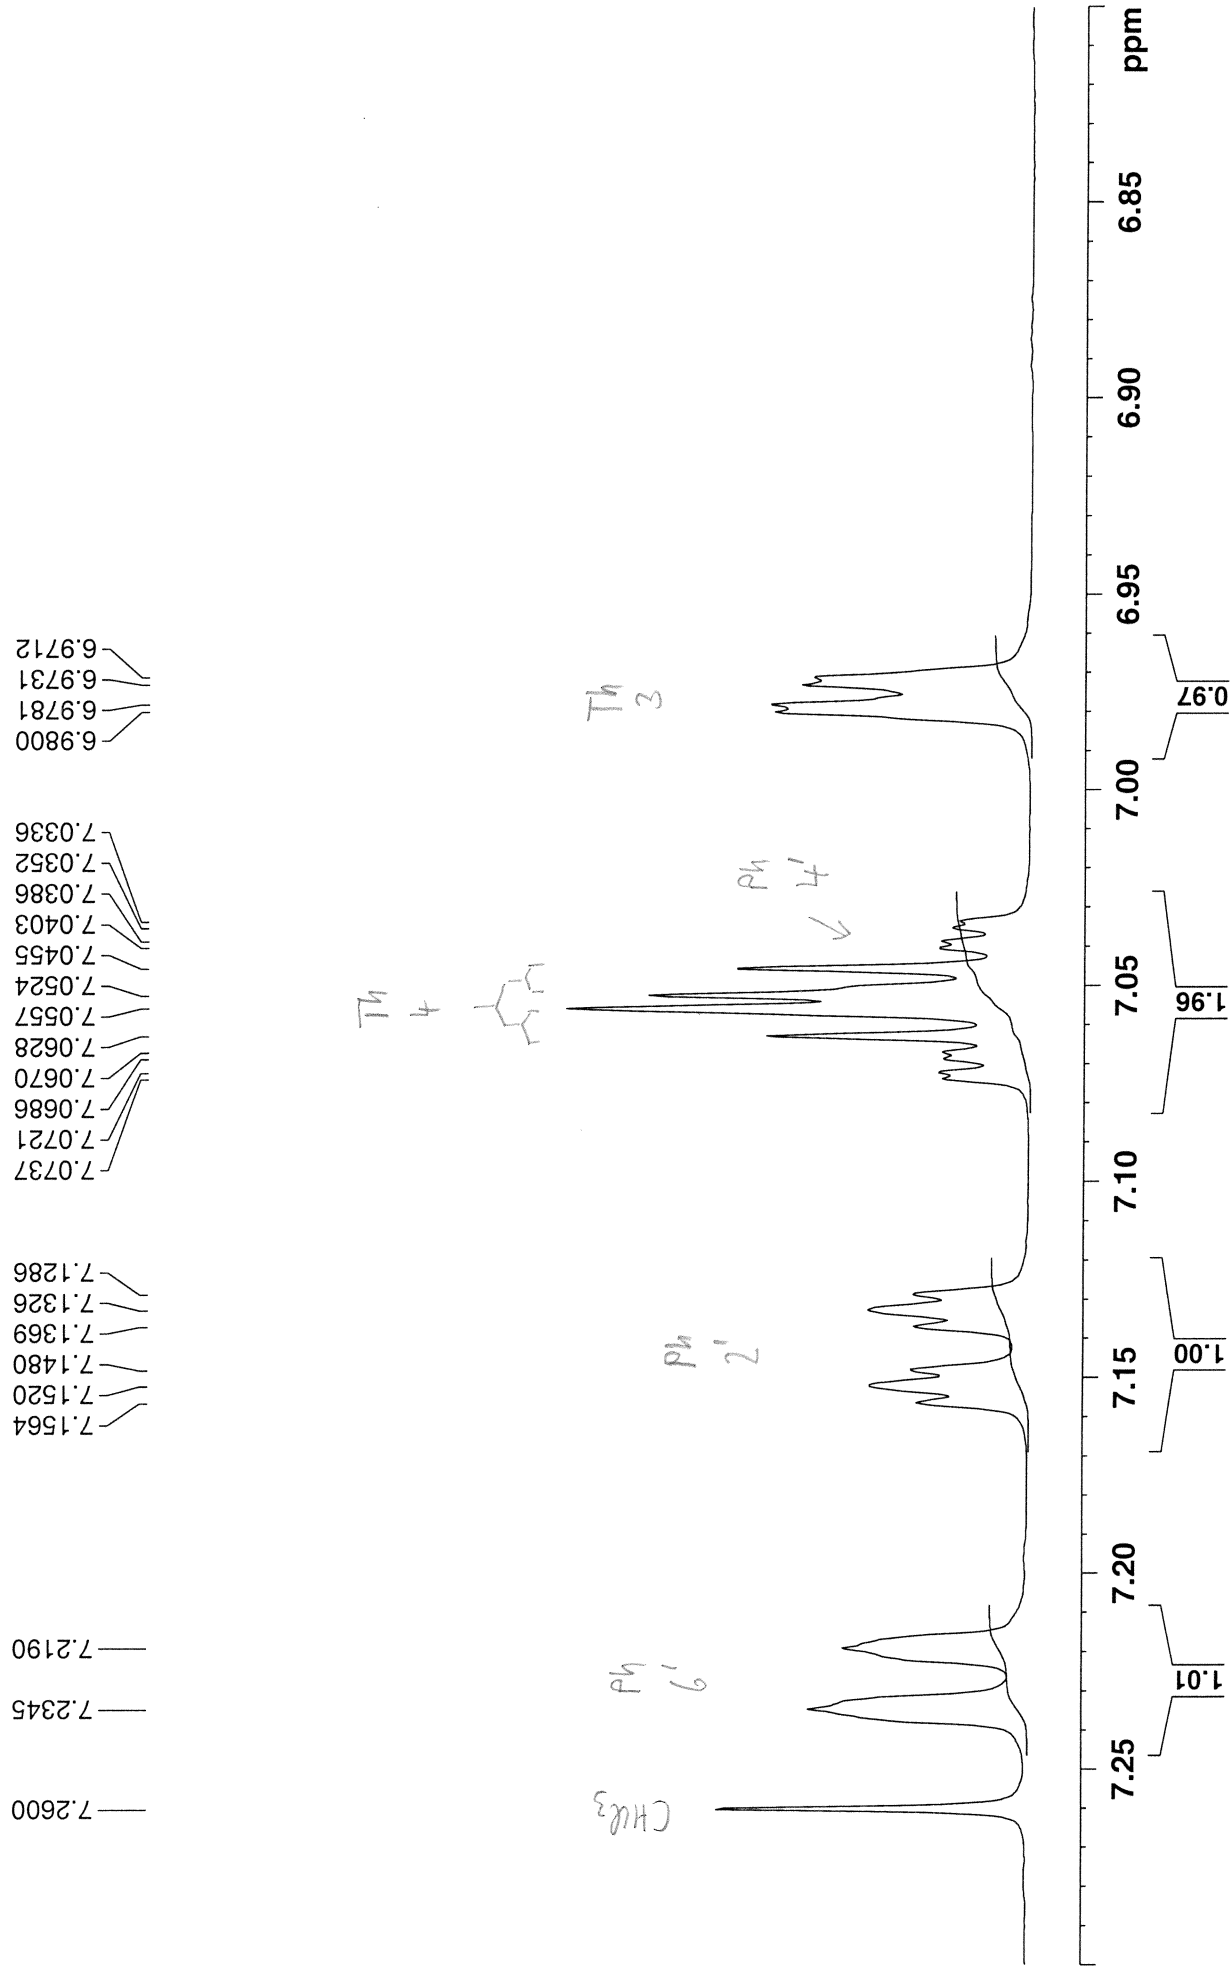

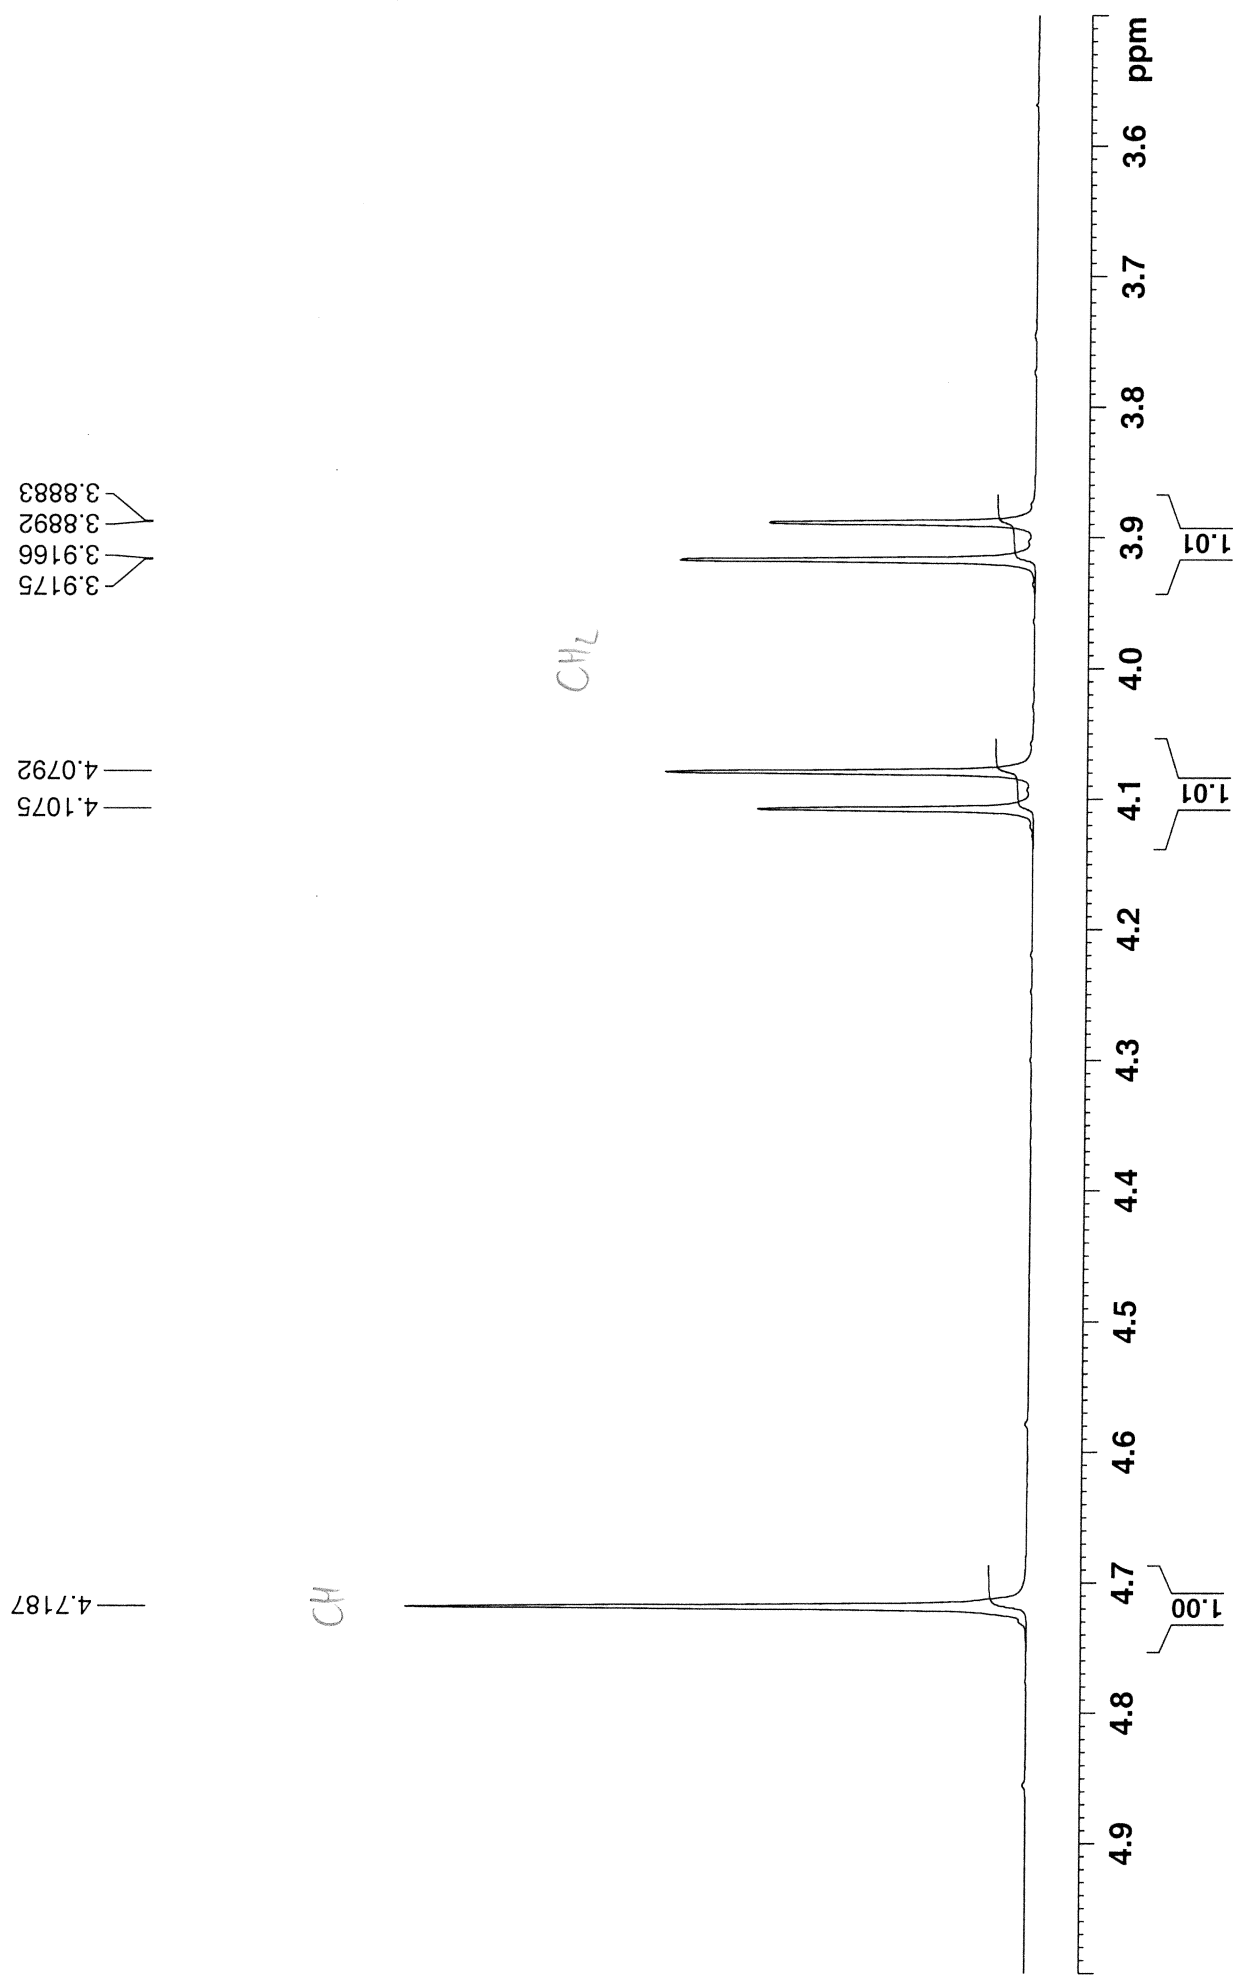

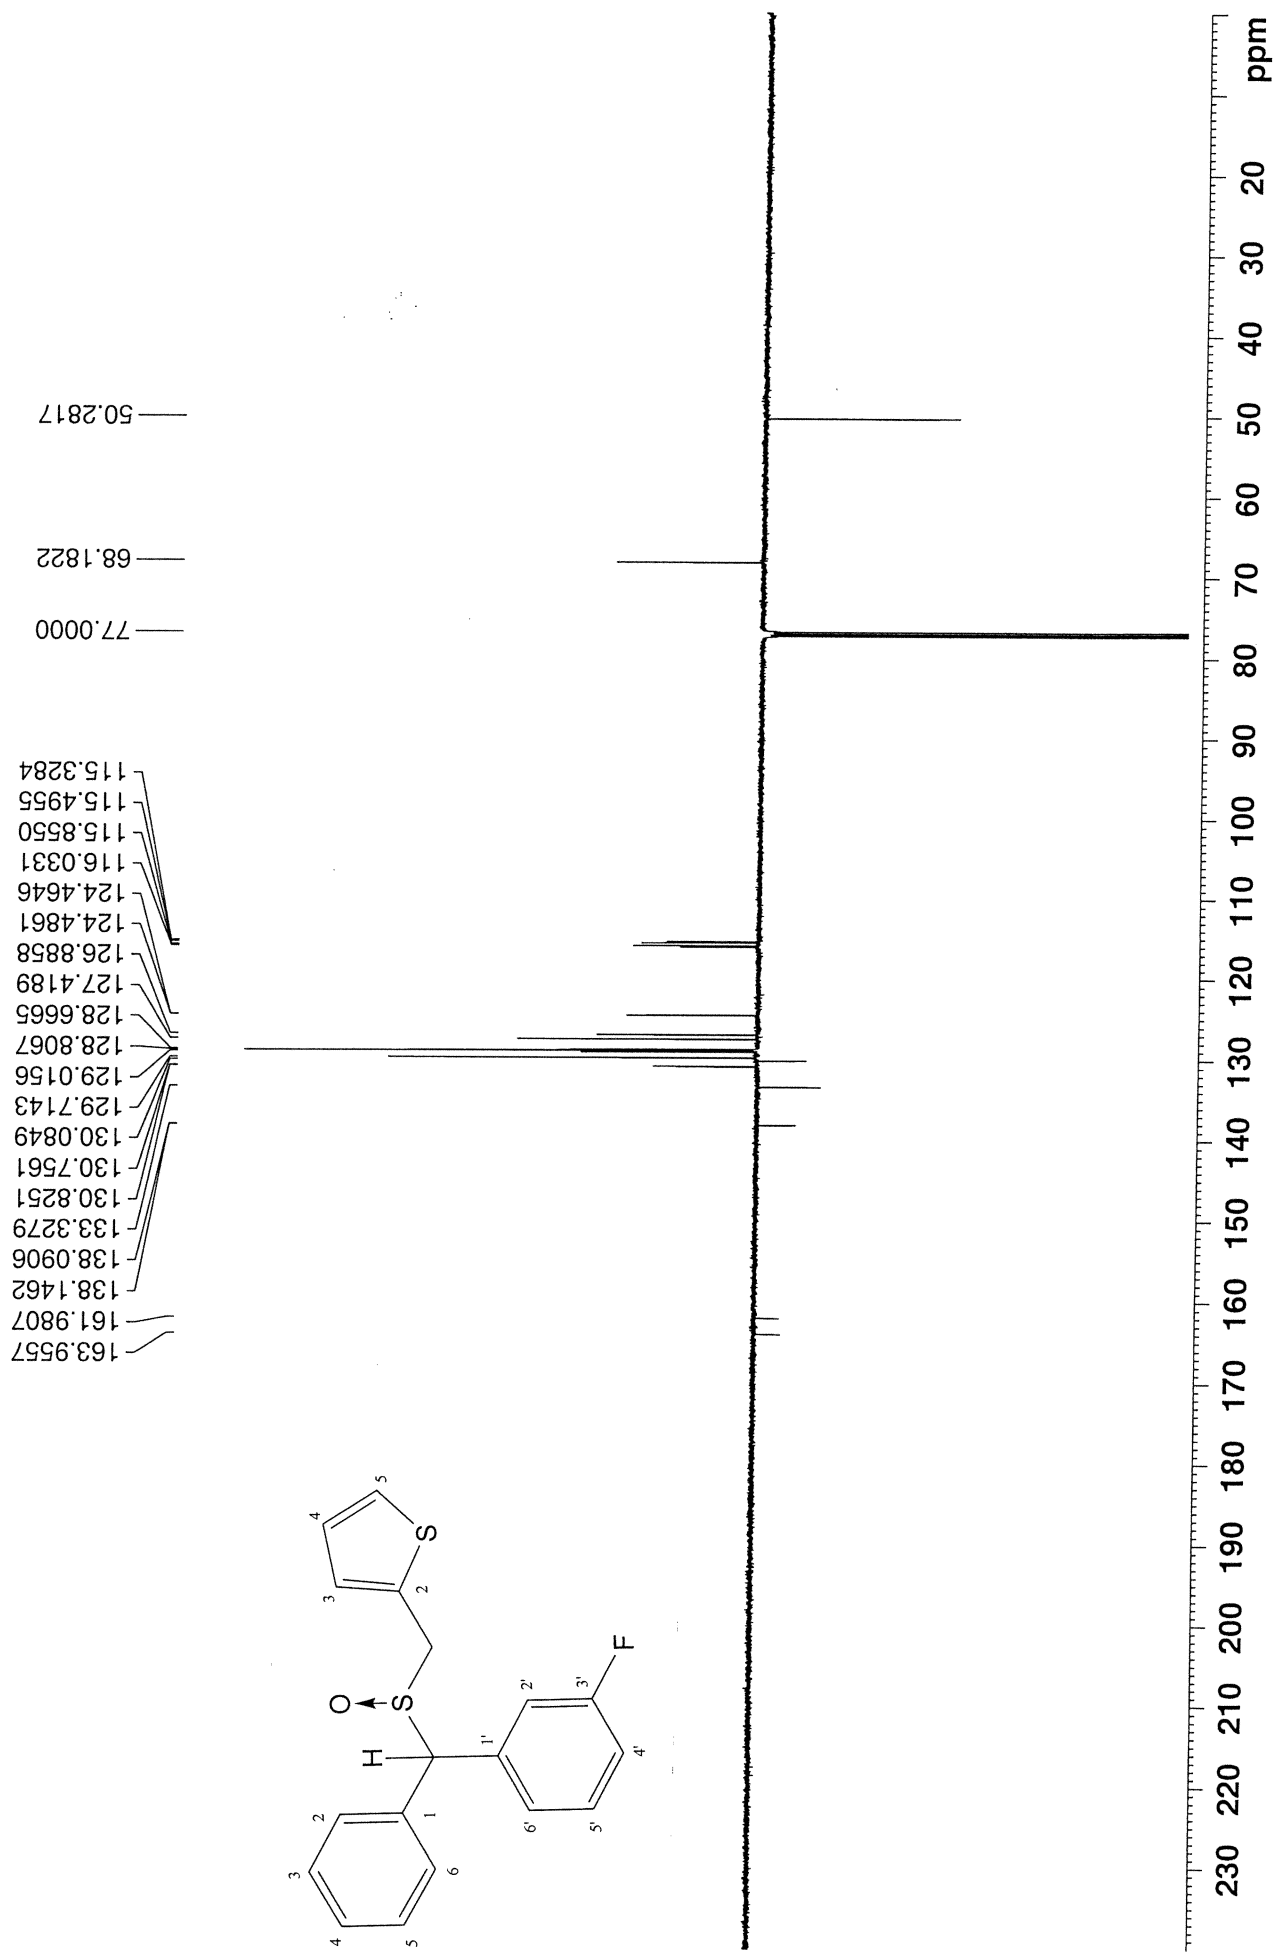

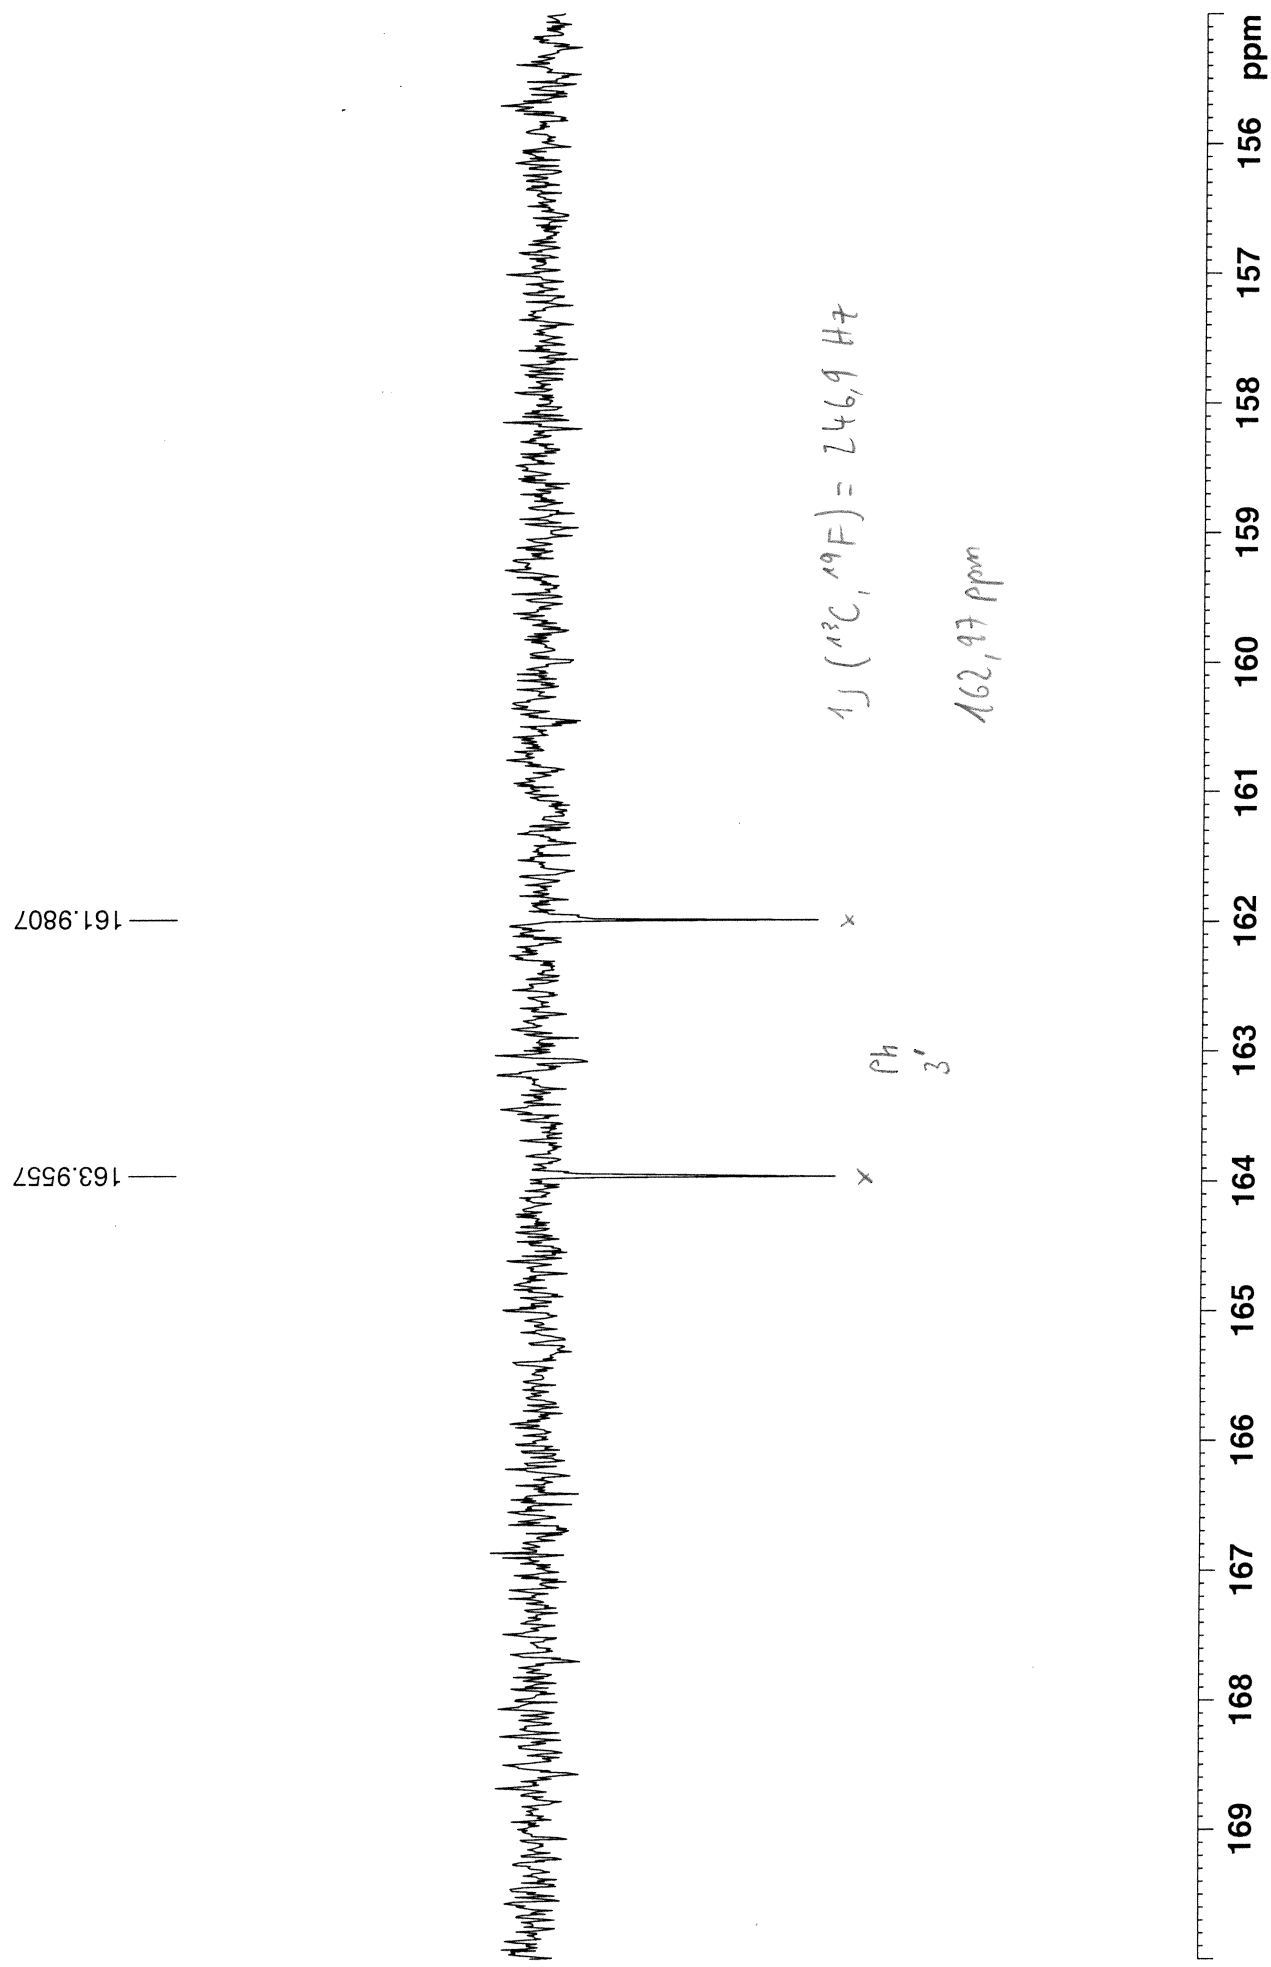

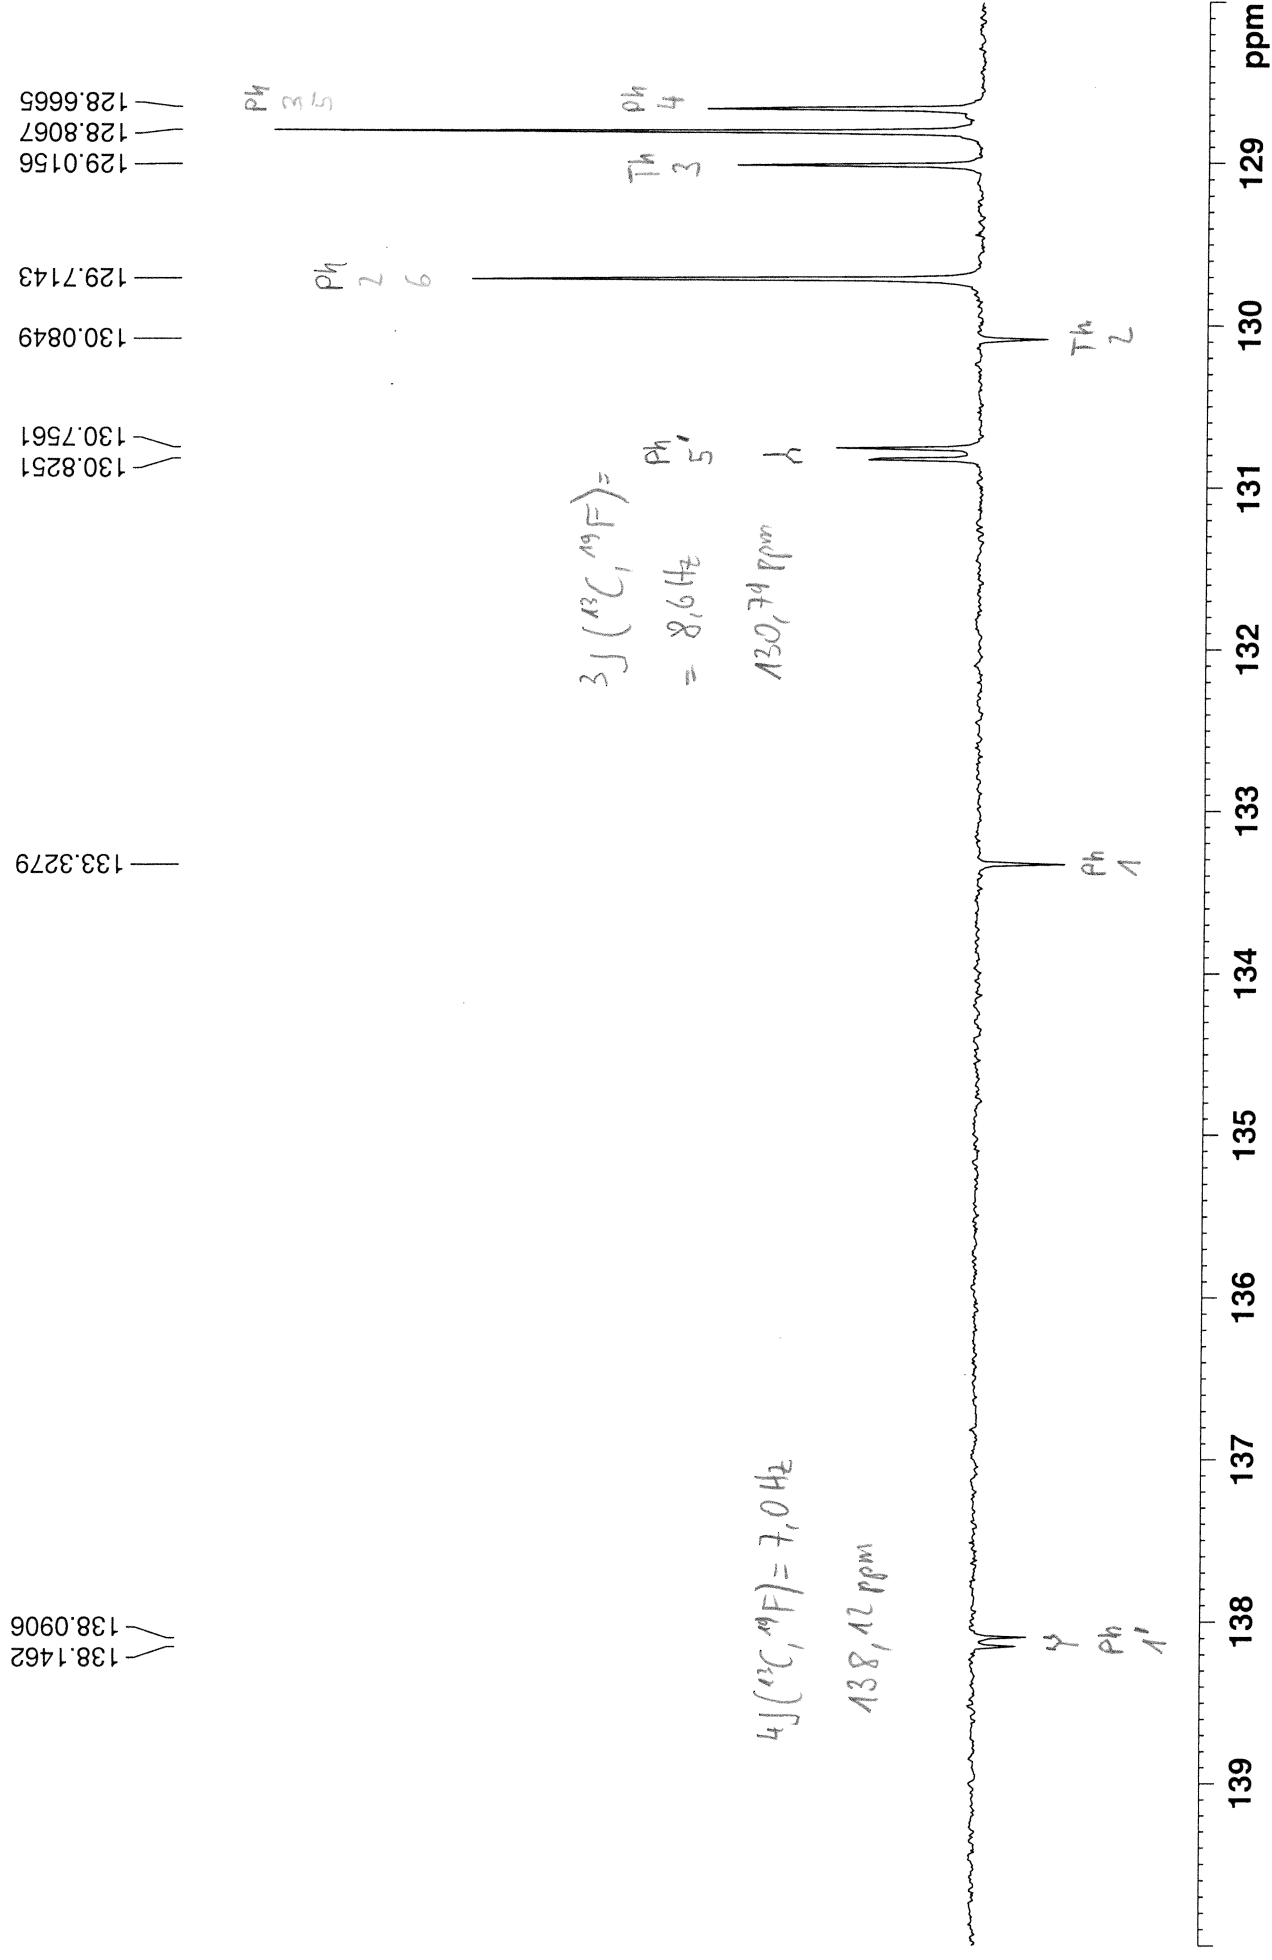

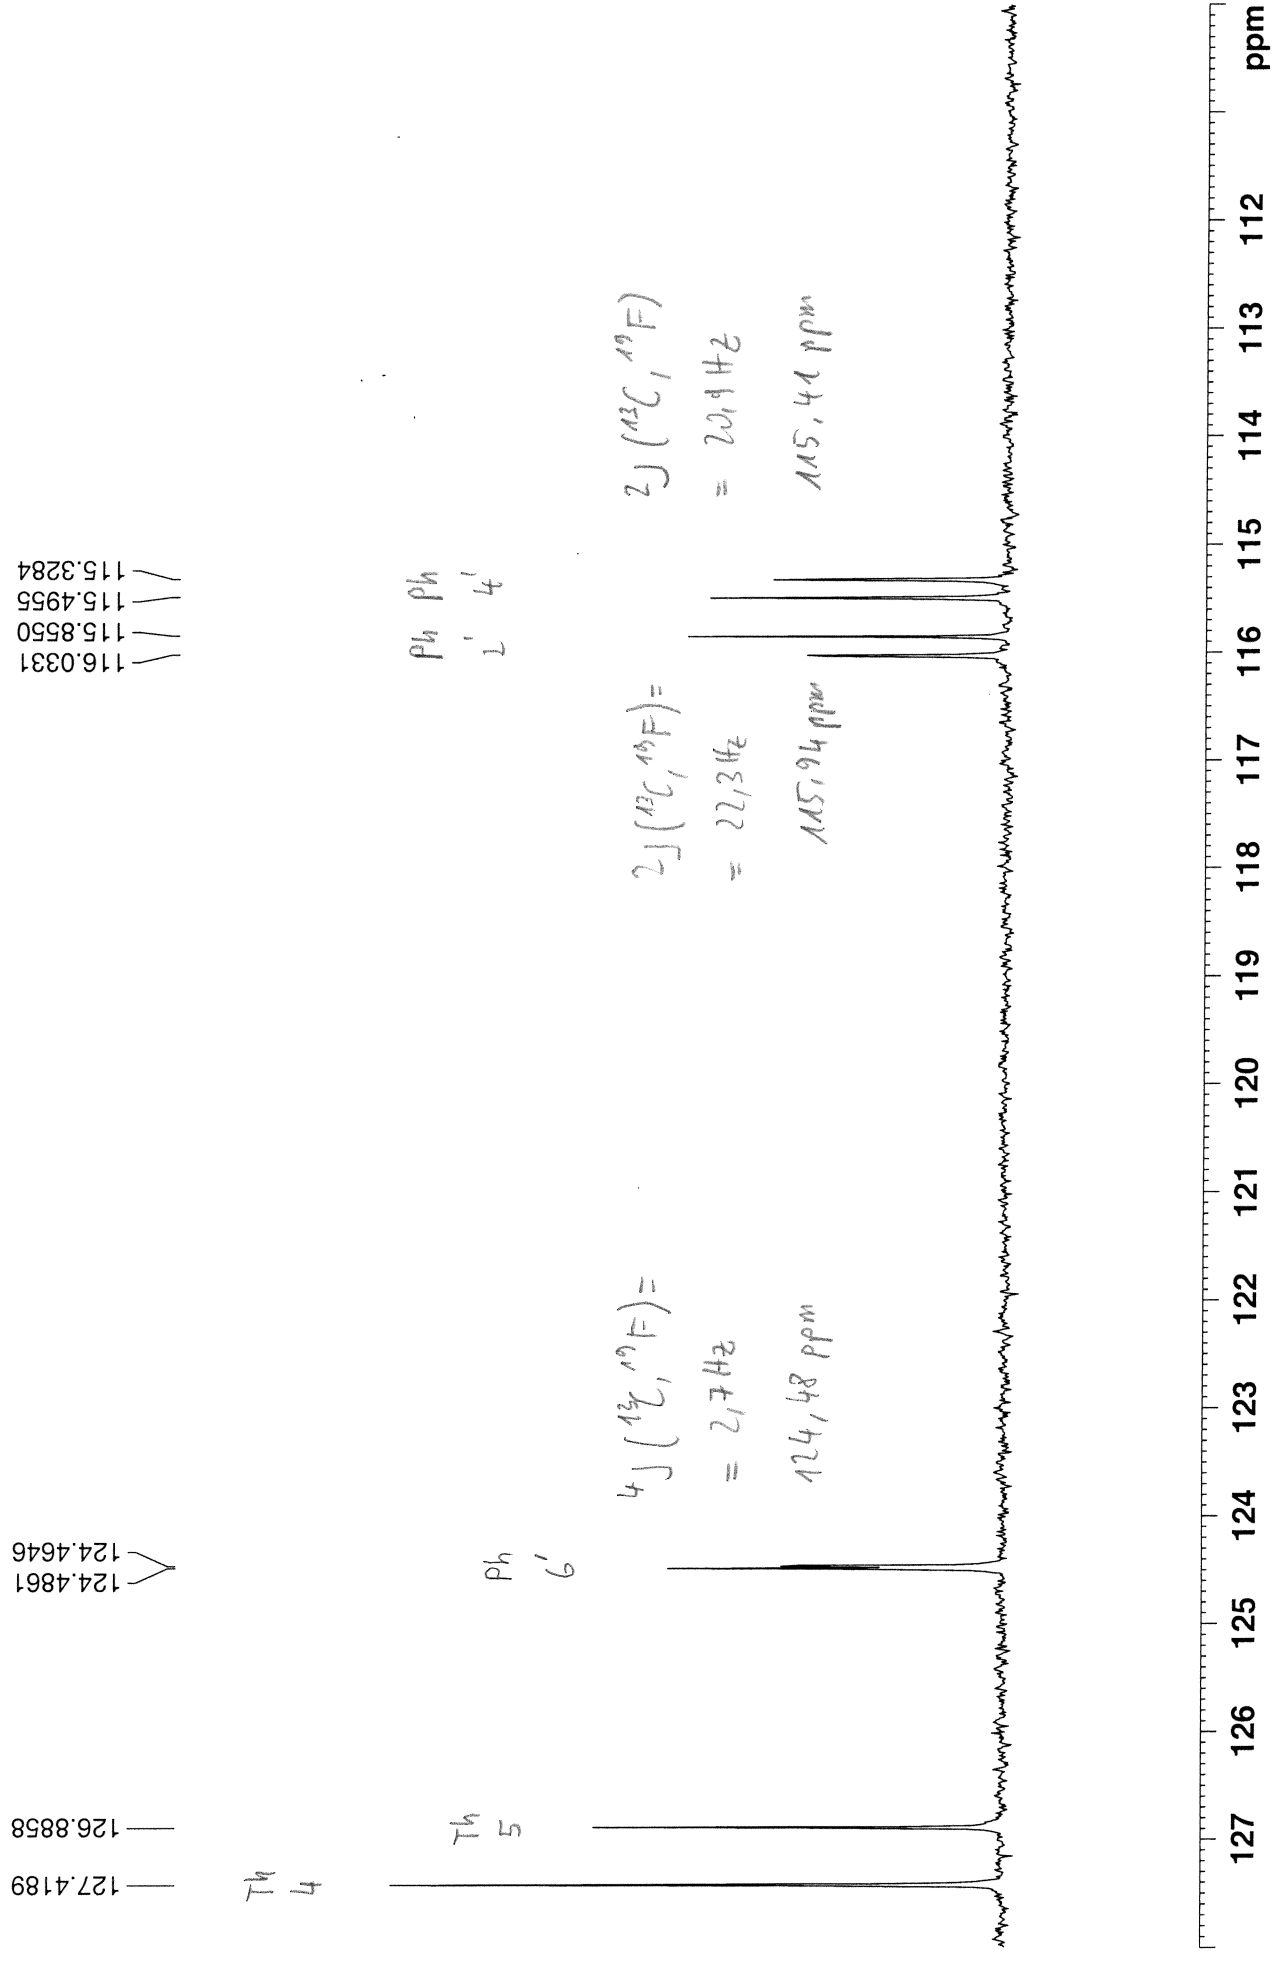



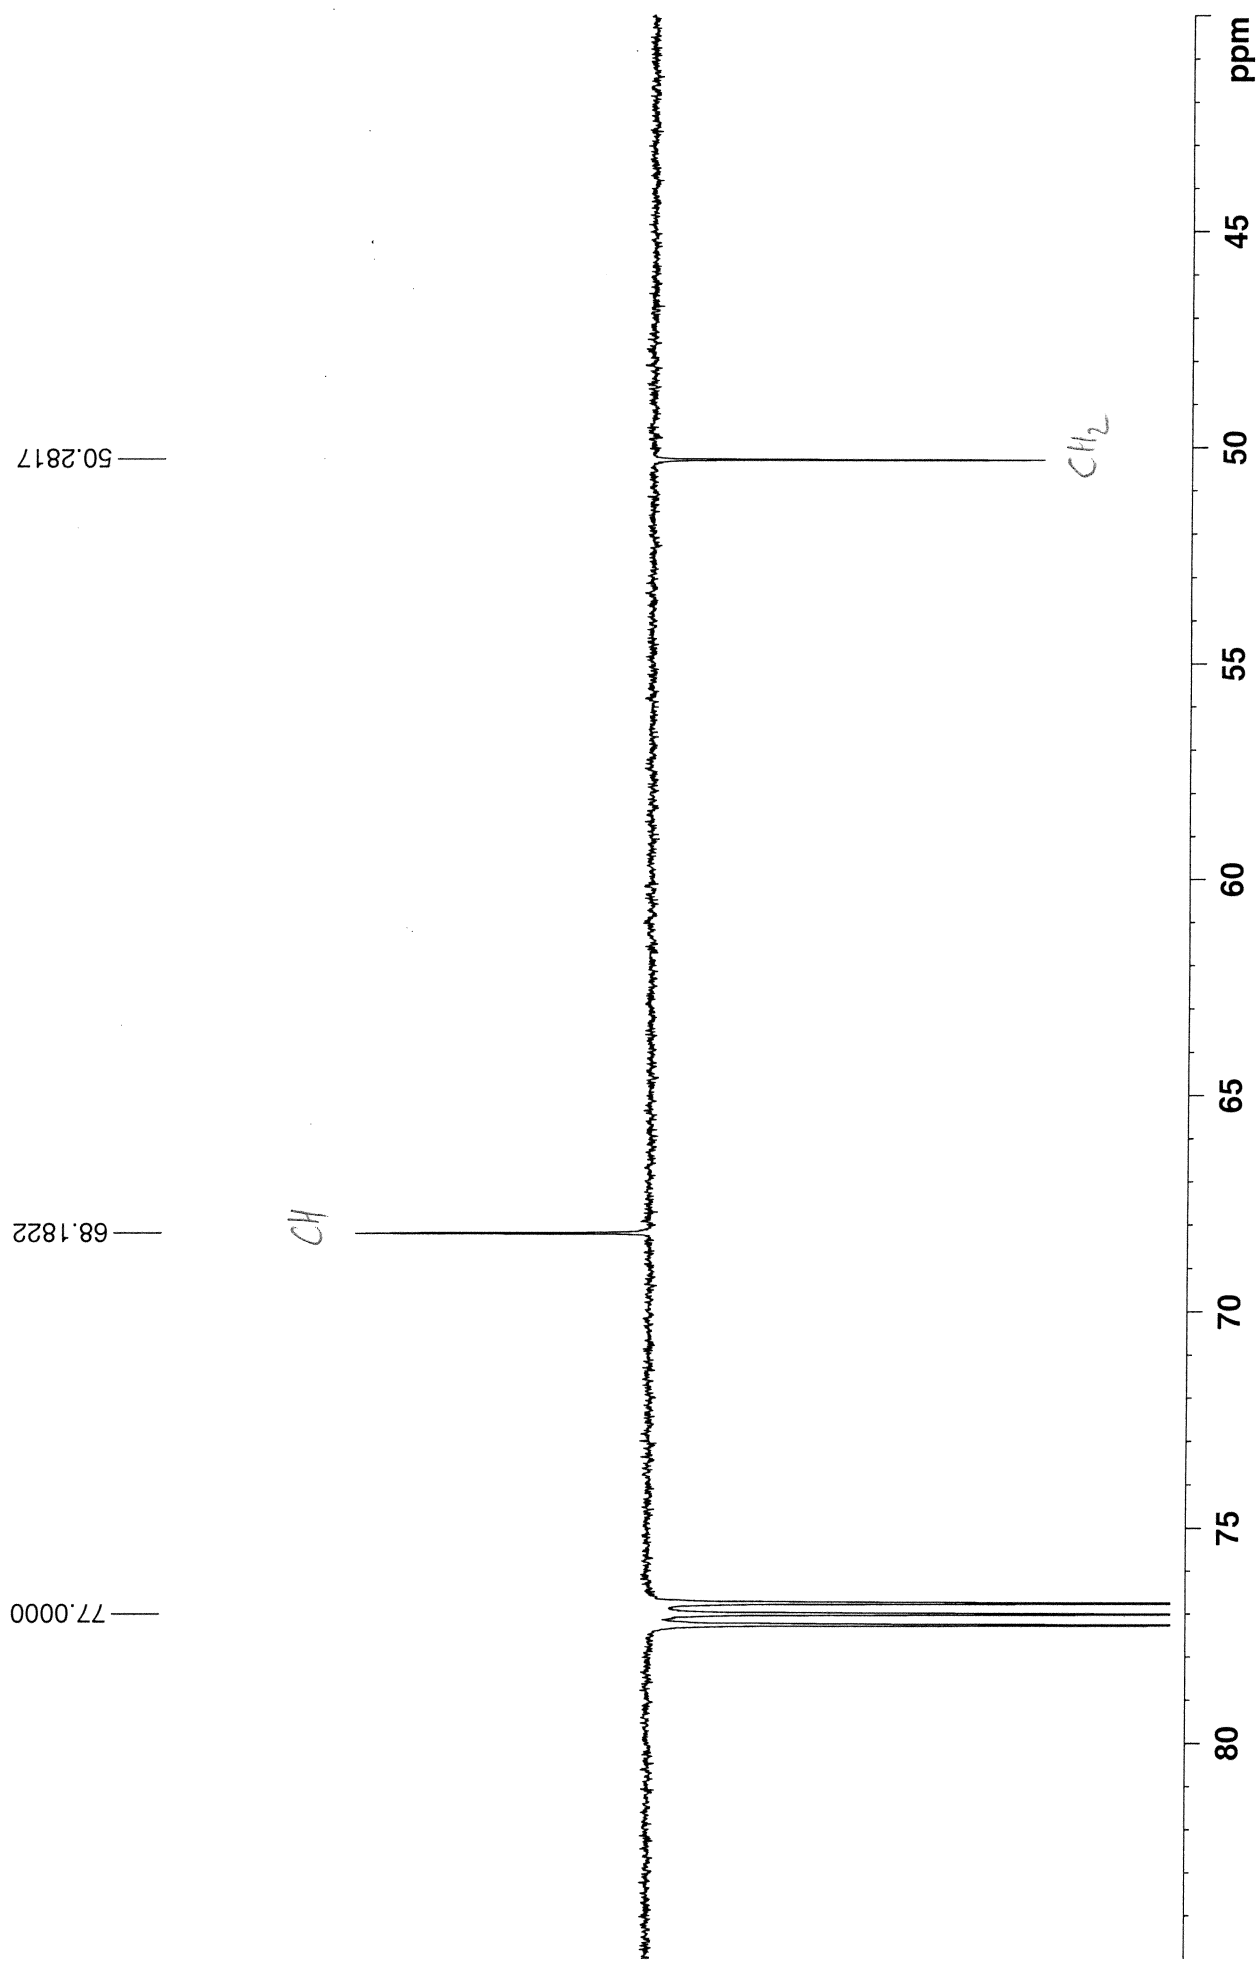

**Figure S9c.** NMR spectra of compound **5c**.

CE155-S1P1 in cdcl3 (Proton) 29.8.2018

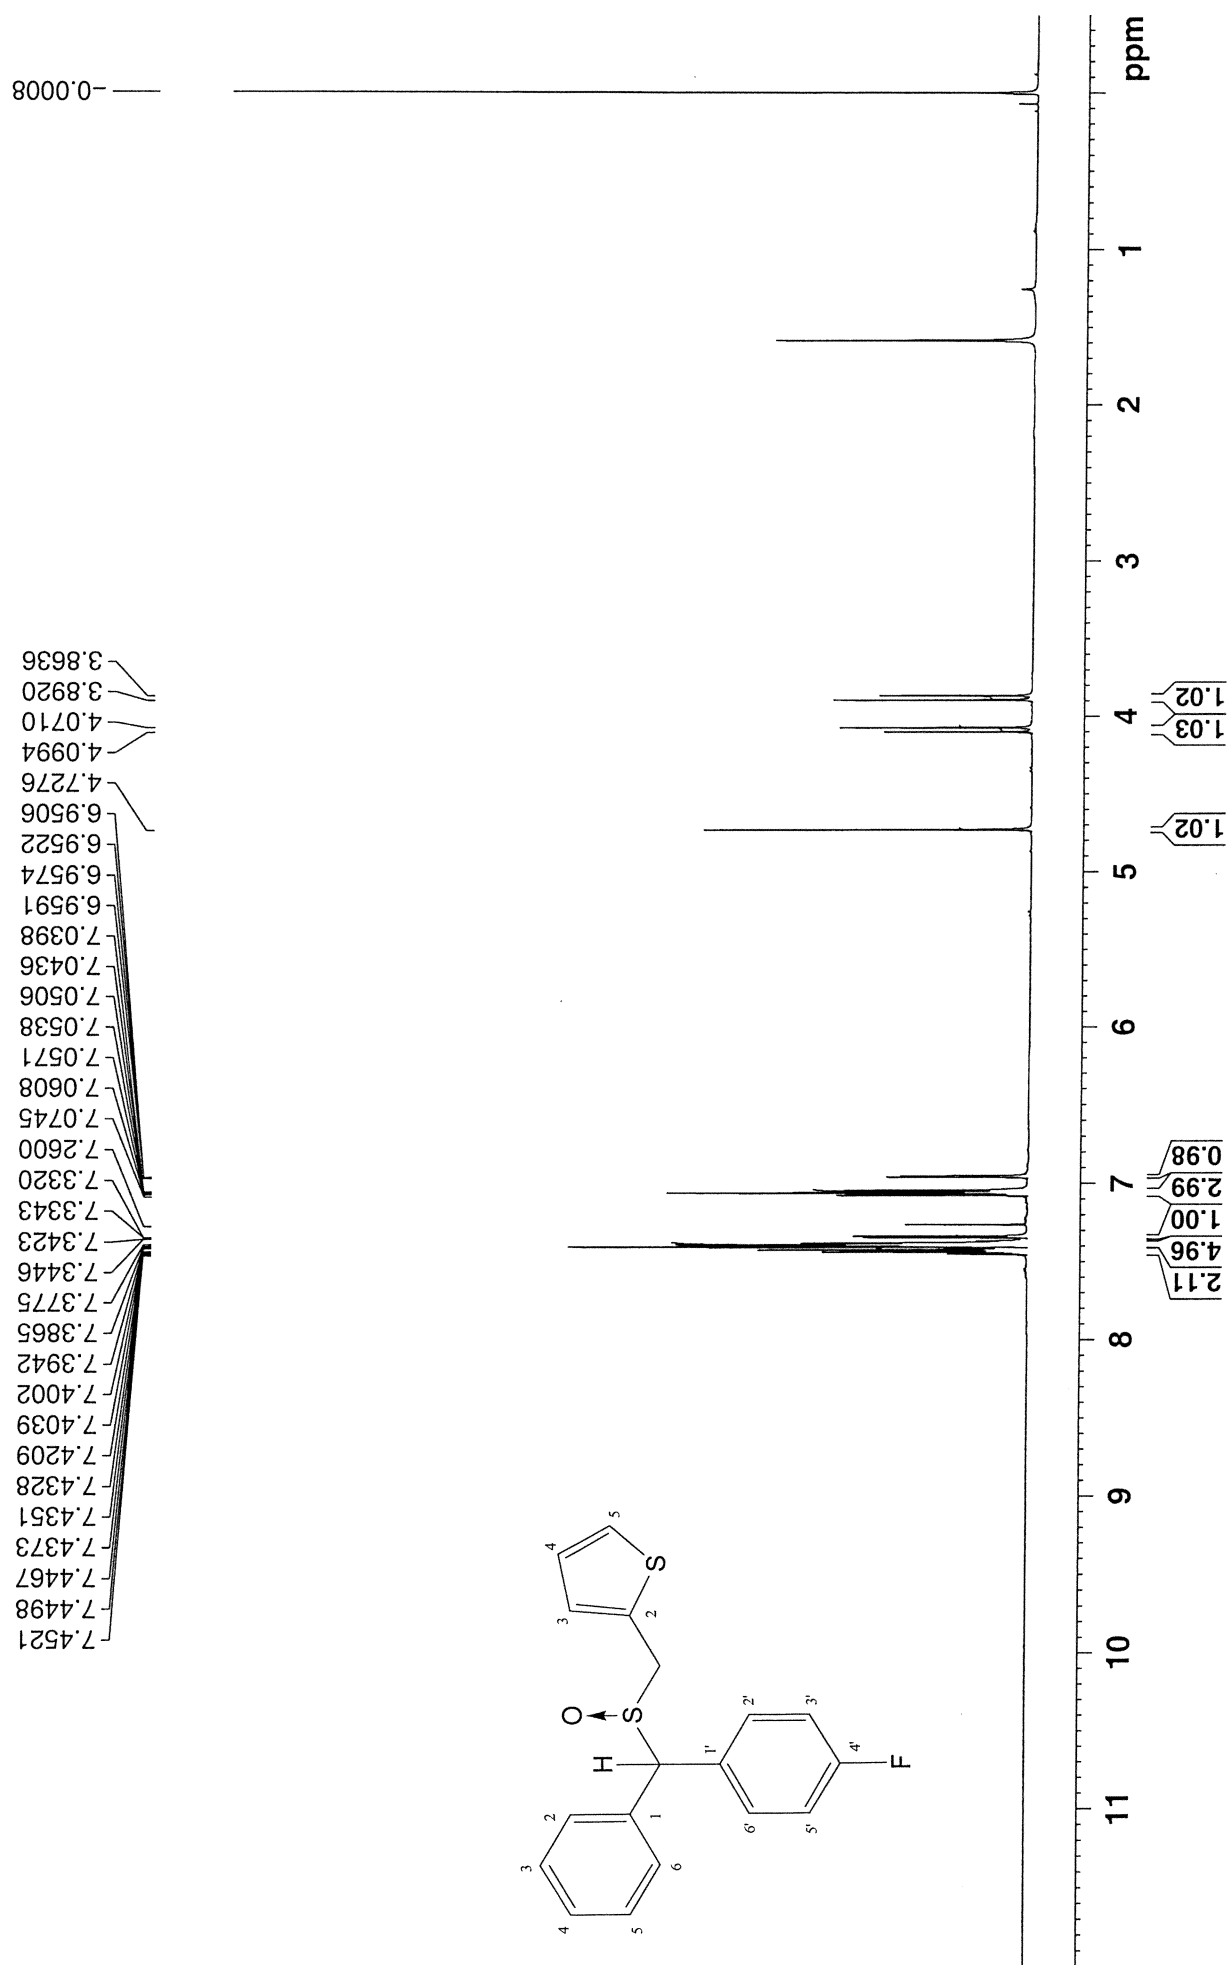

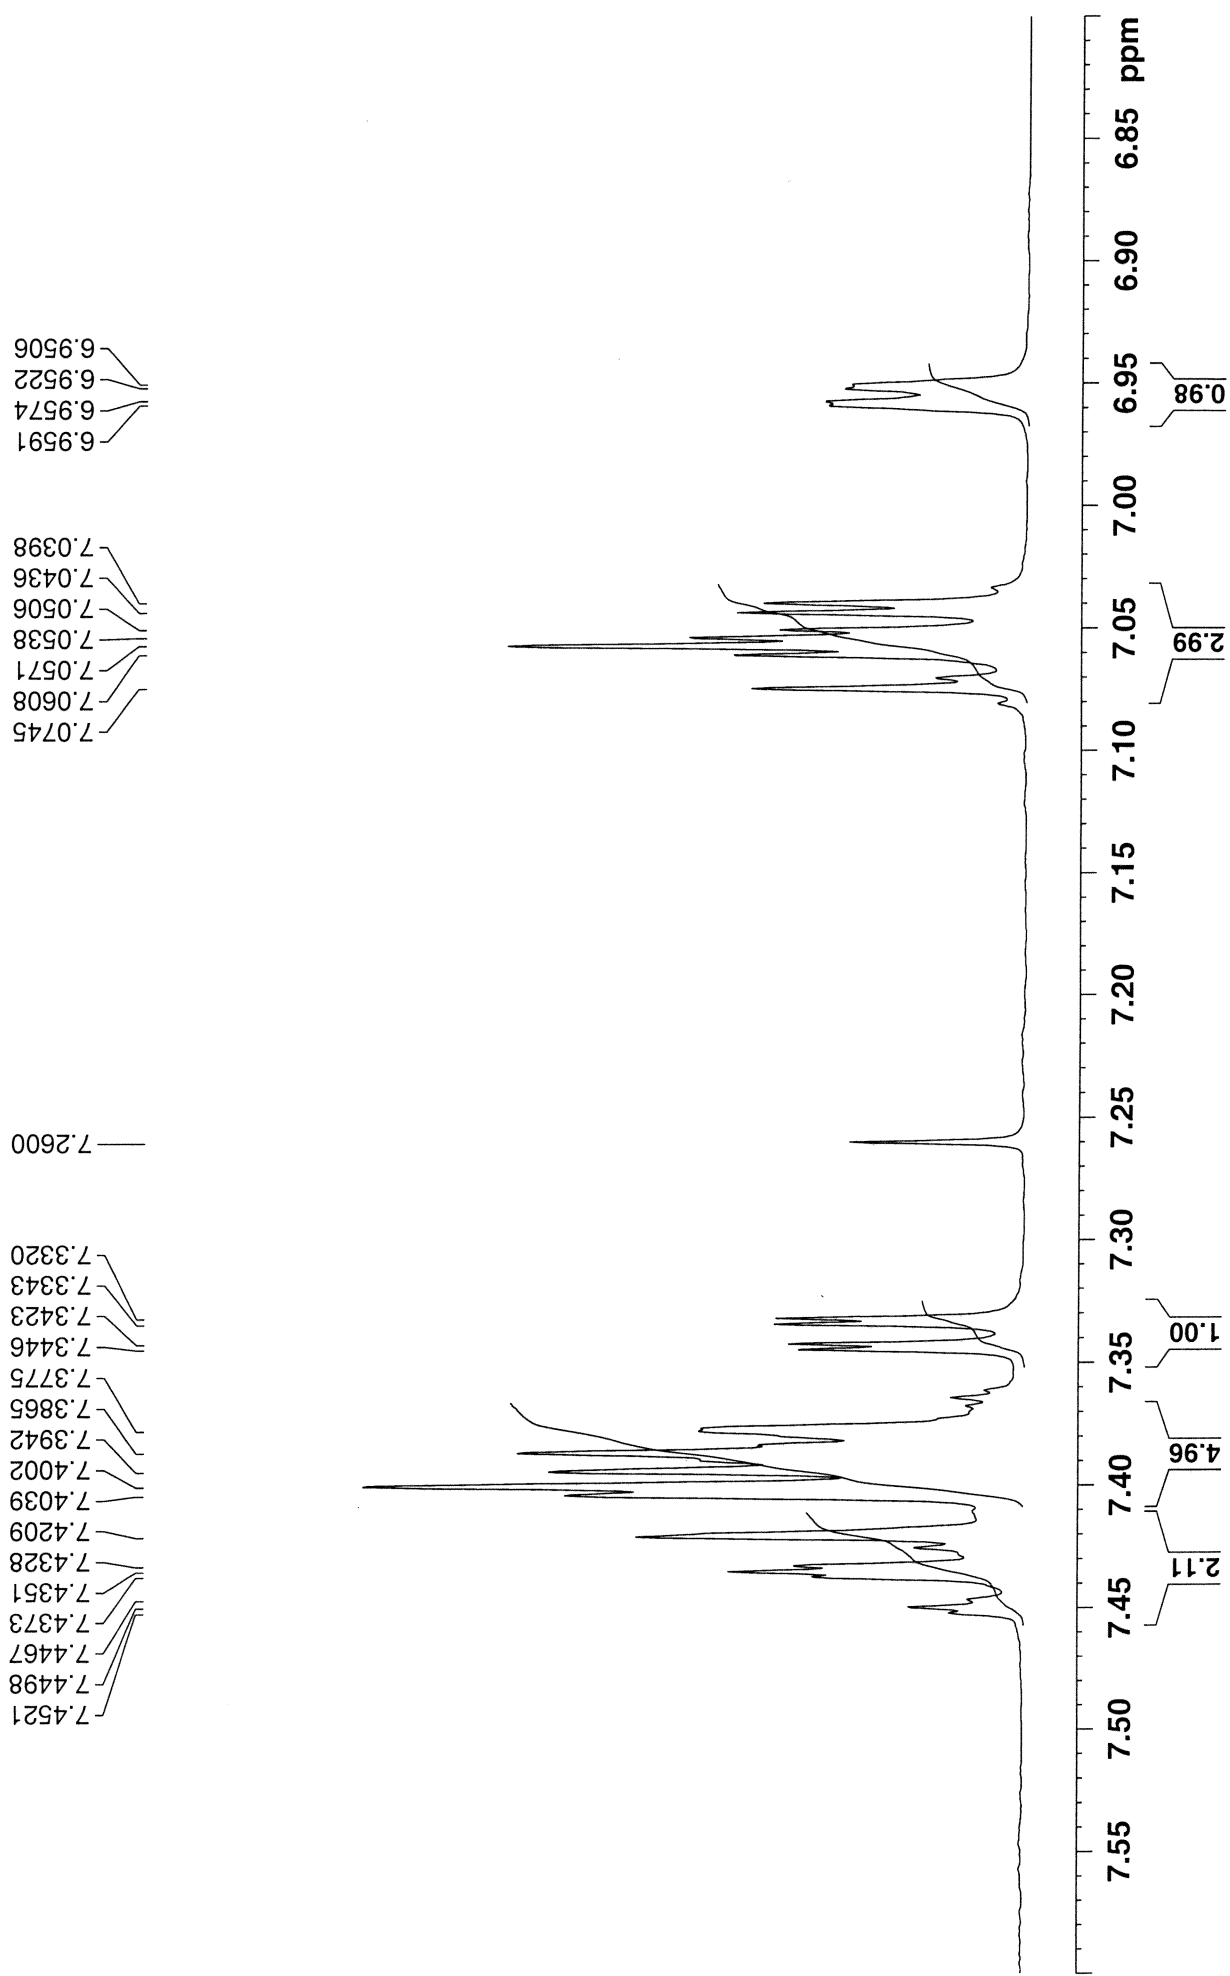

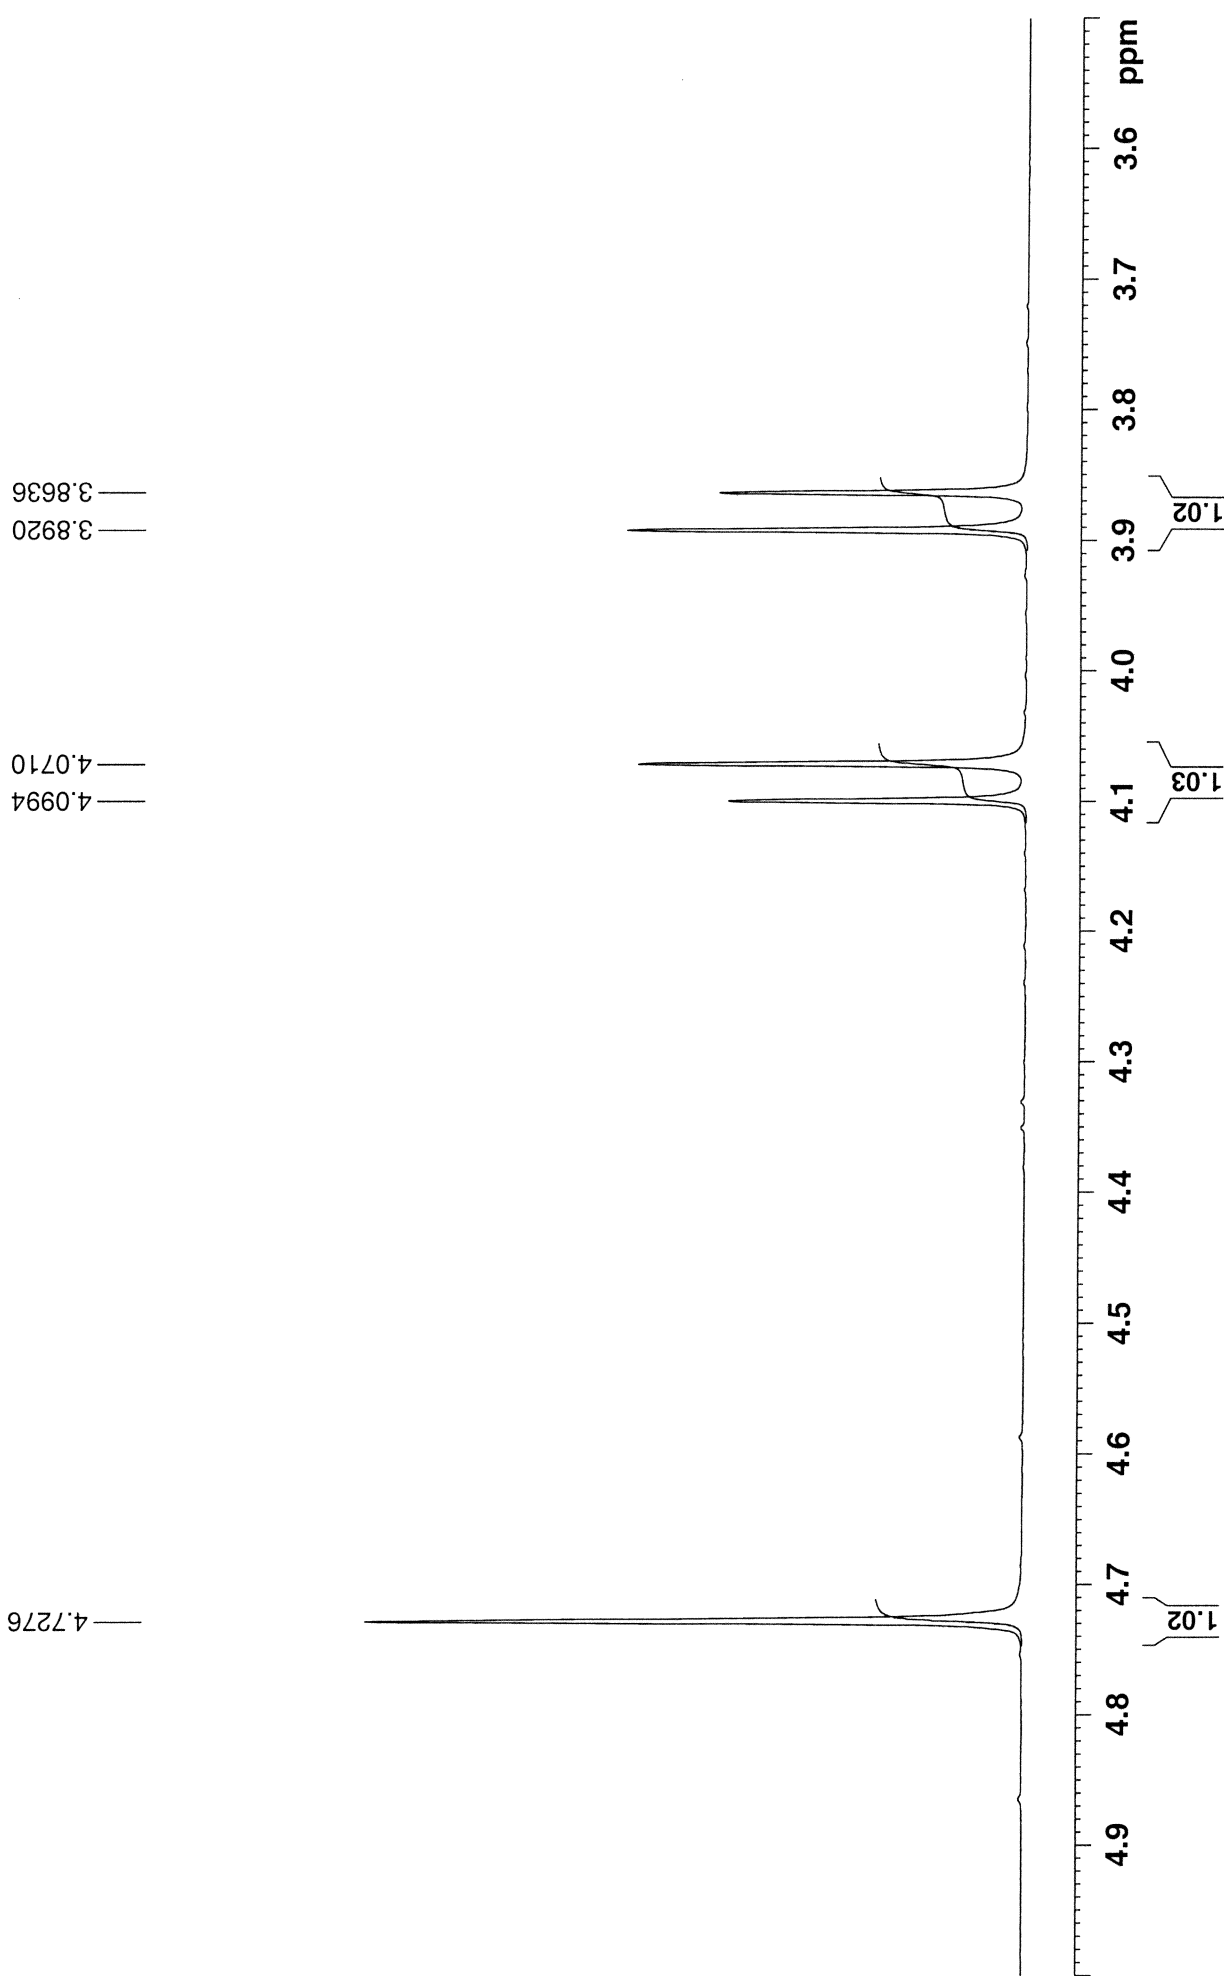

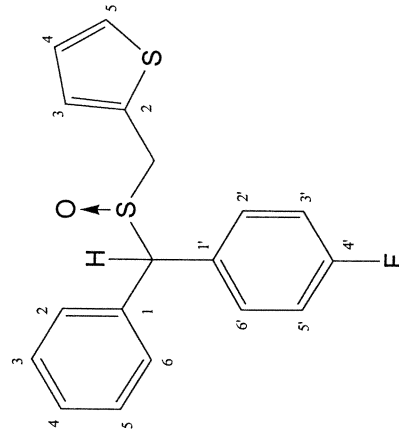

163.8090  
161.8346

135.2872  
131.4071  
131.3422  
129.9819  
129.9347  
129.9088  
129.3875  
129.0763  
128.7693  
128.5707  
127.3182  
126.8851  
115.6985  
115.5271

77.0000  
68.2003  
50.0189

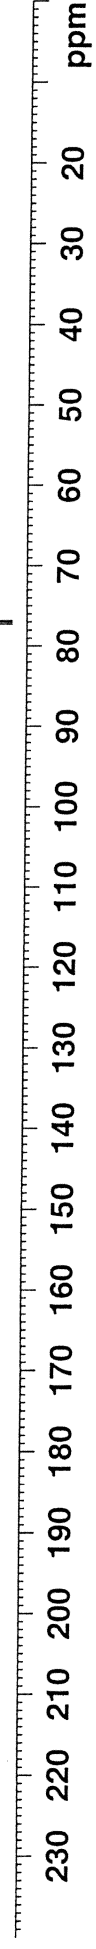

163.8090 —  
161.8346 —

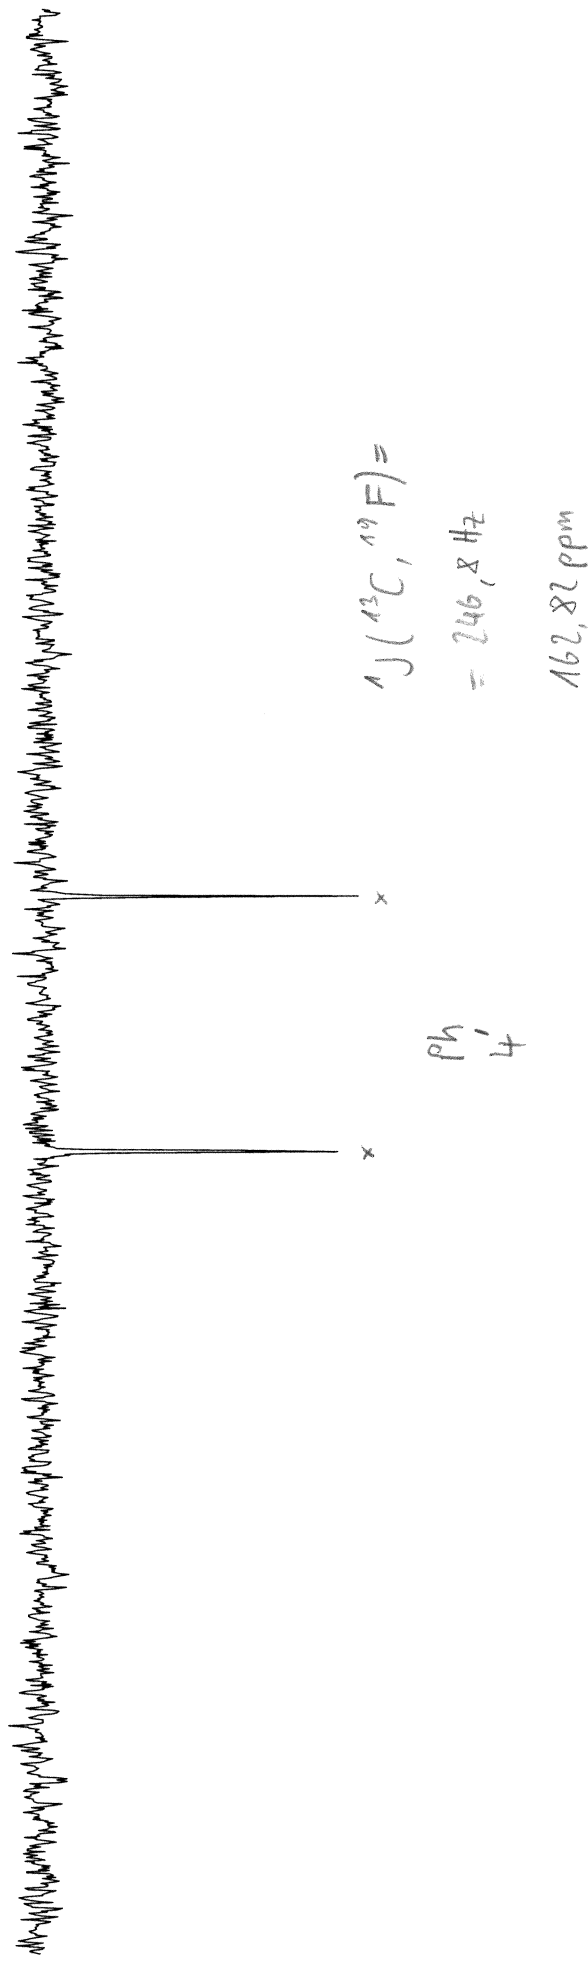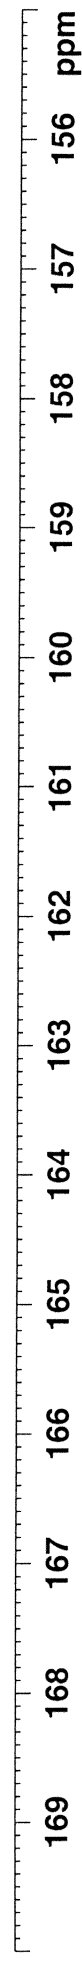

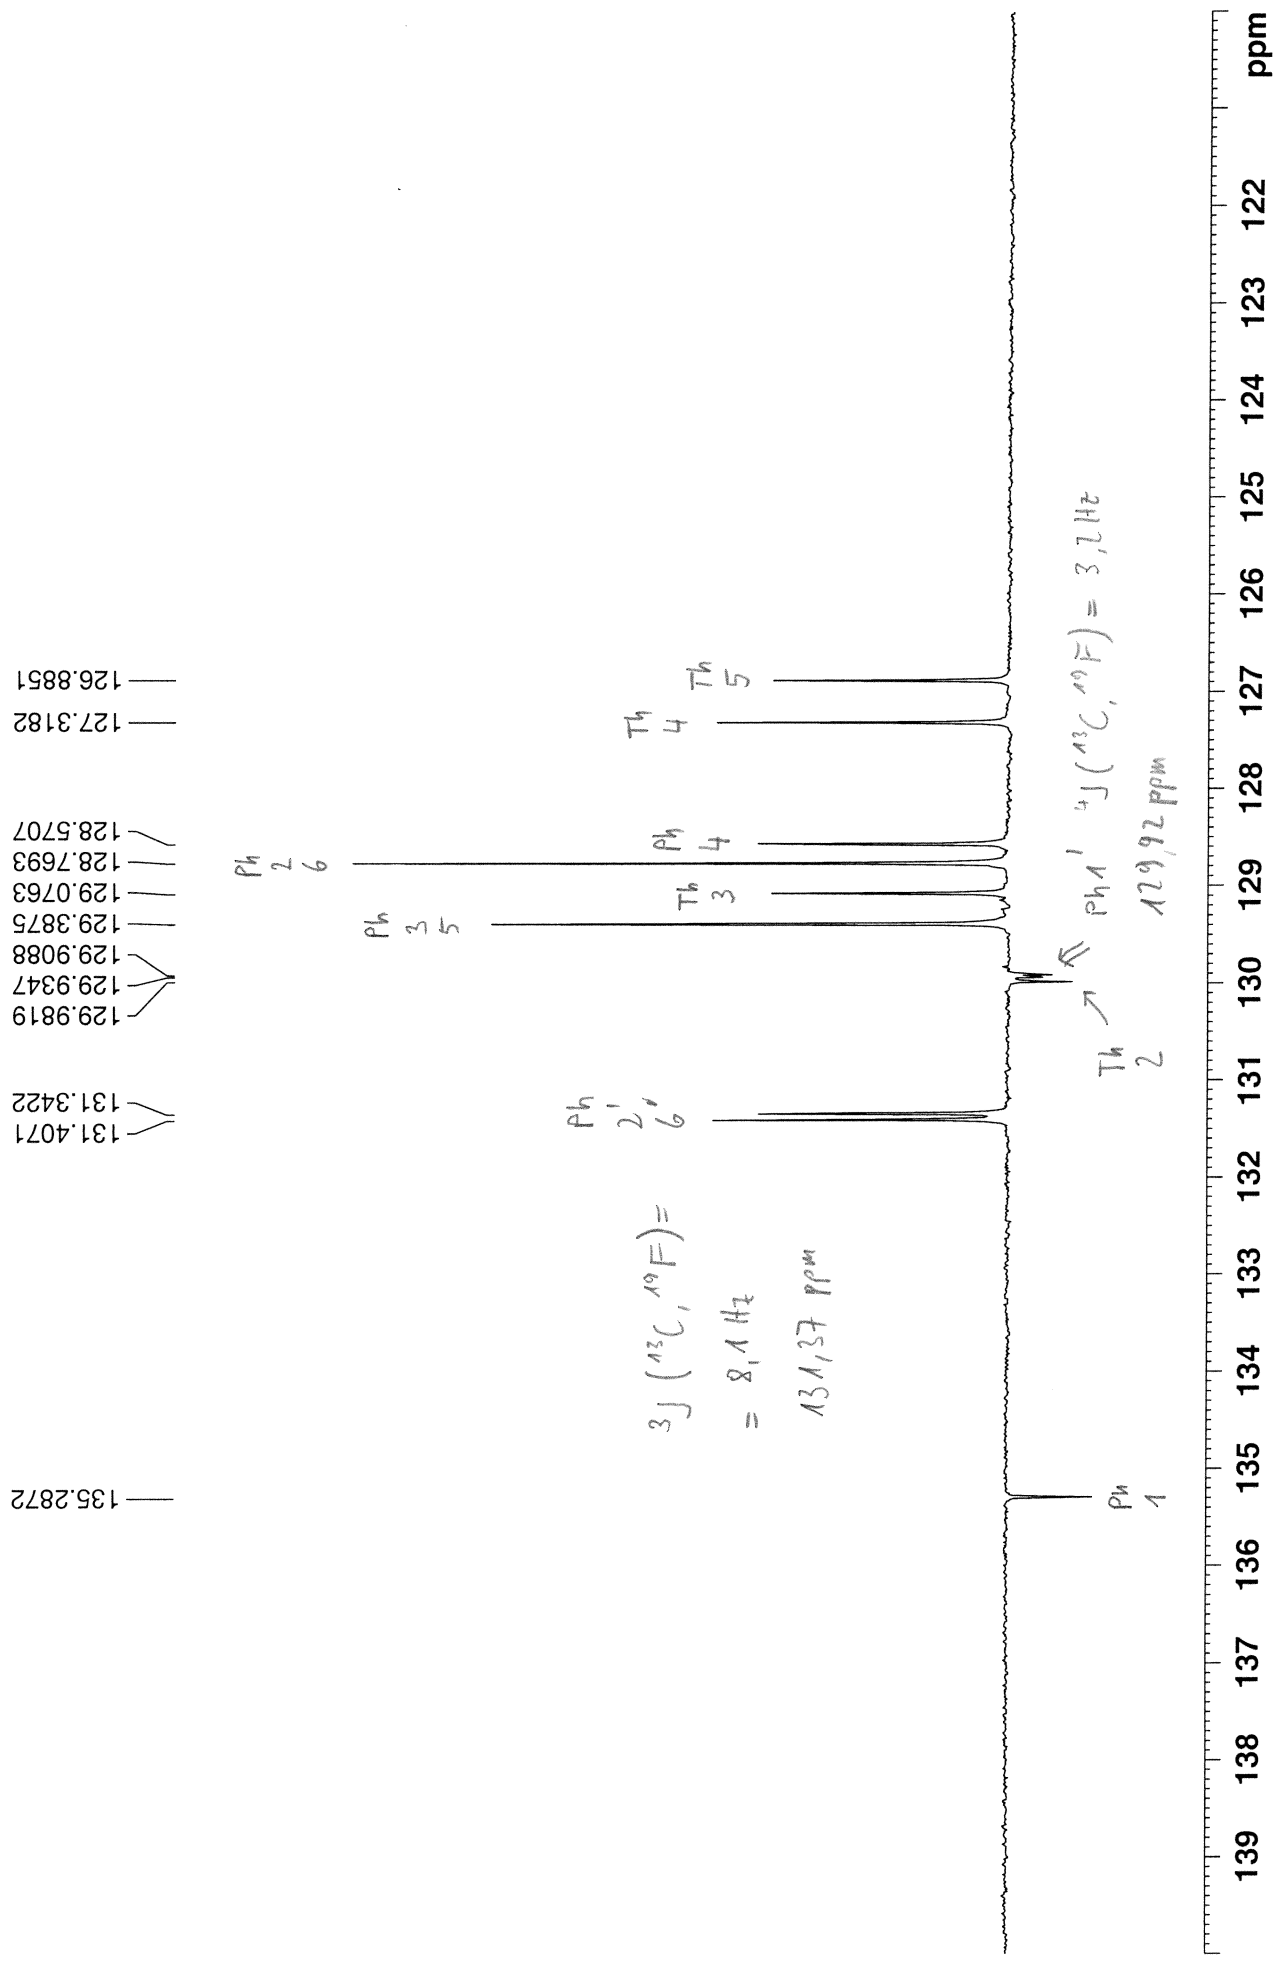

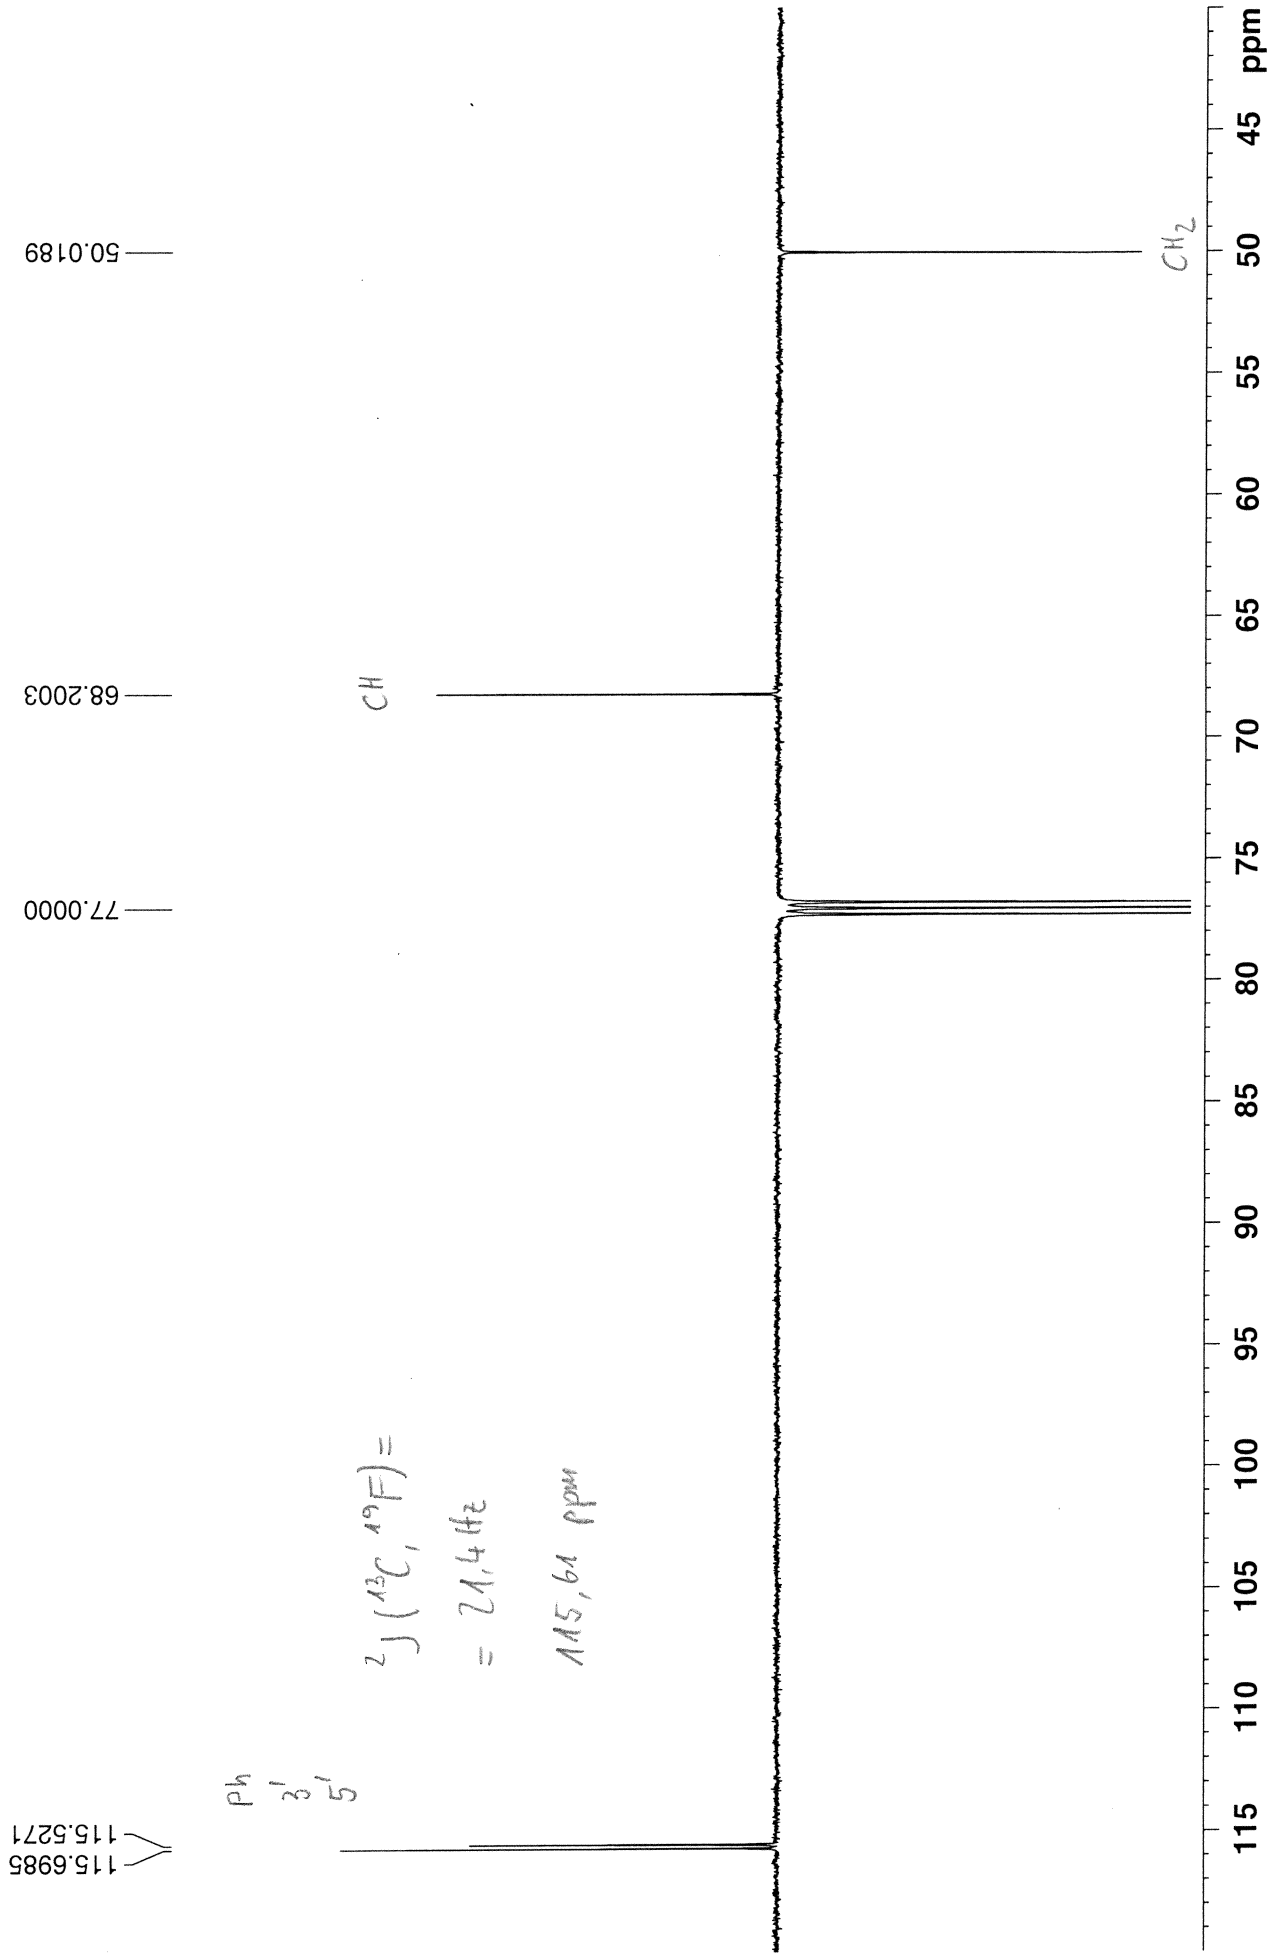



Figure S10c. NMR spectra of compound 6c.

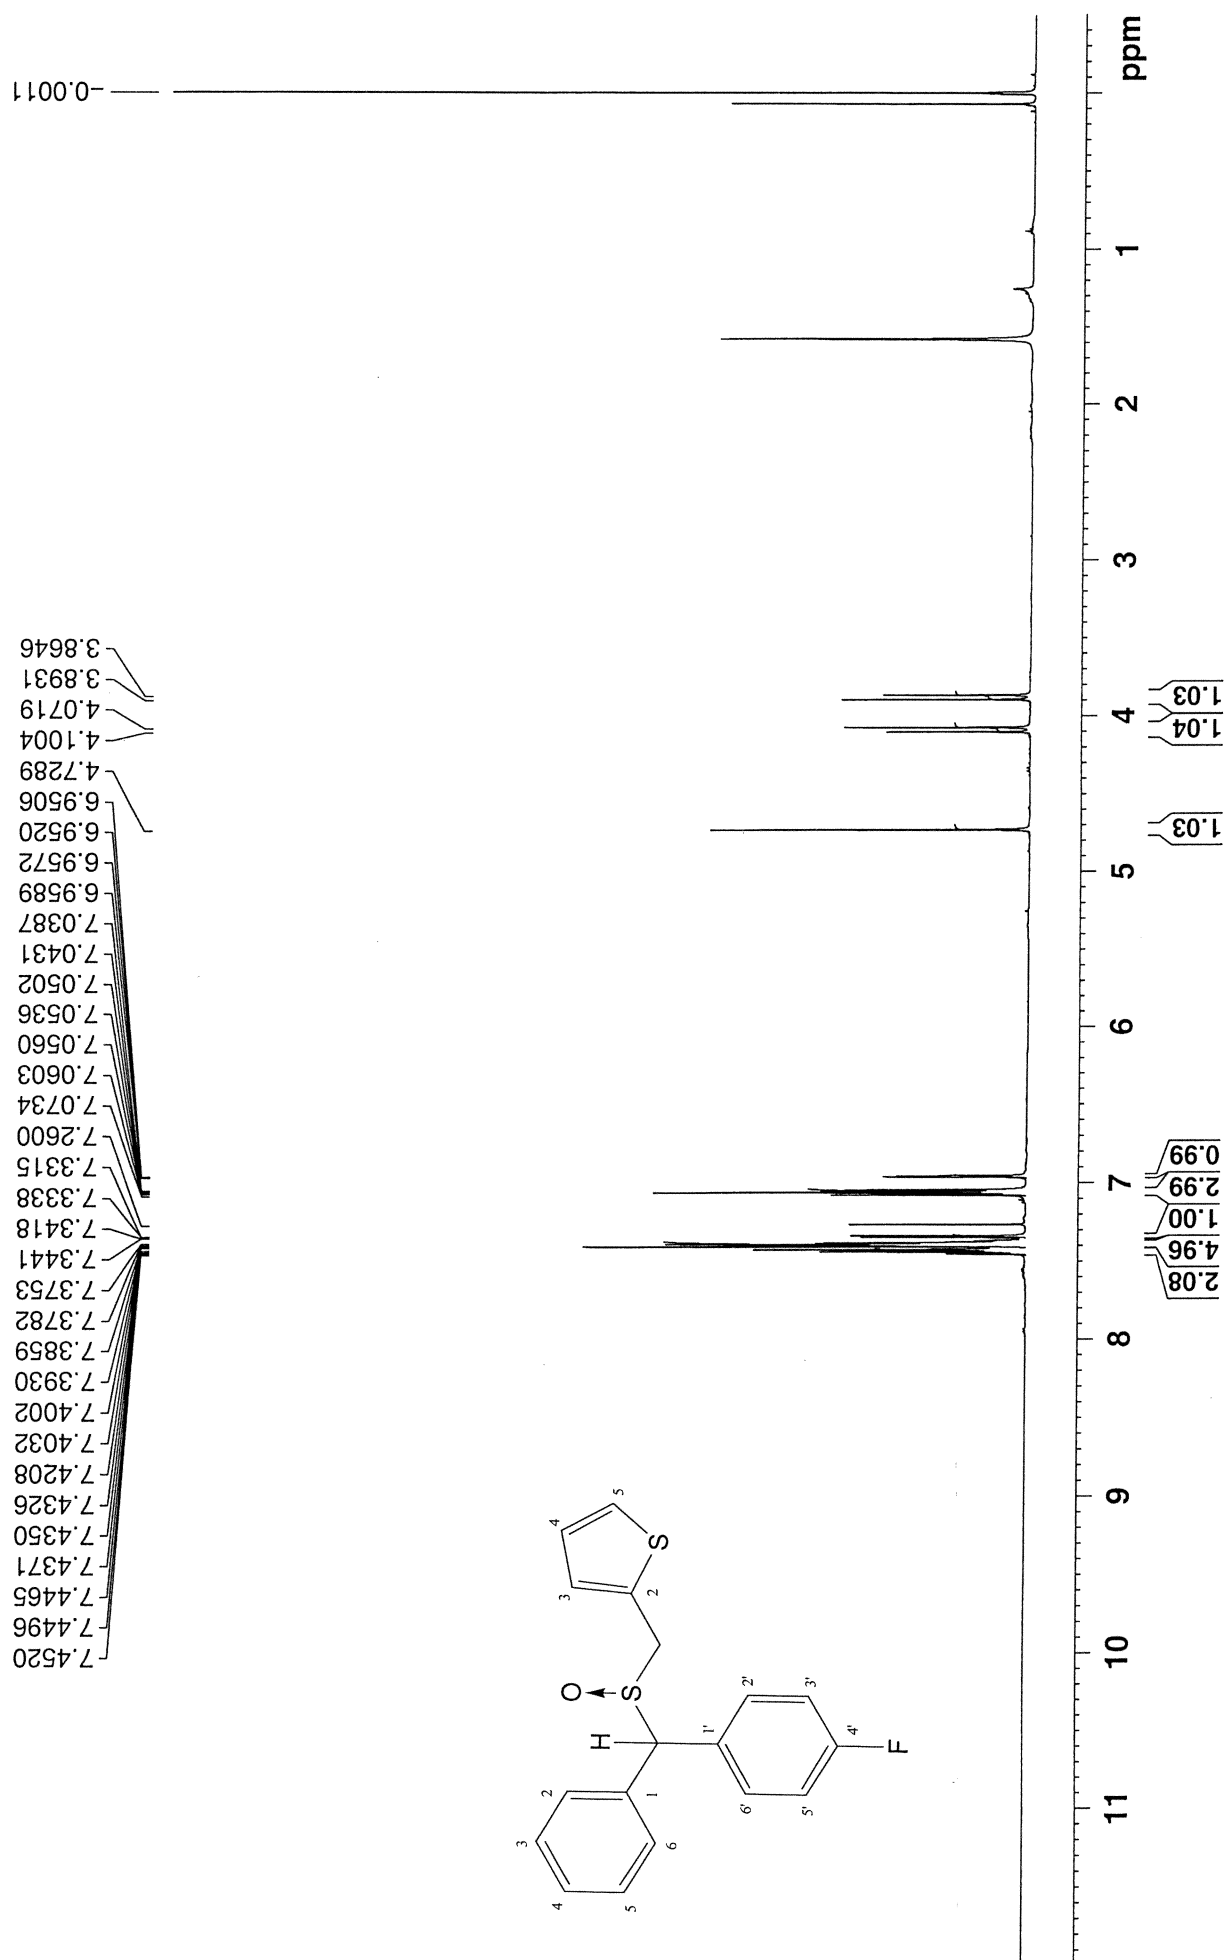

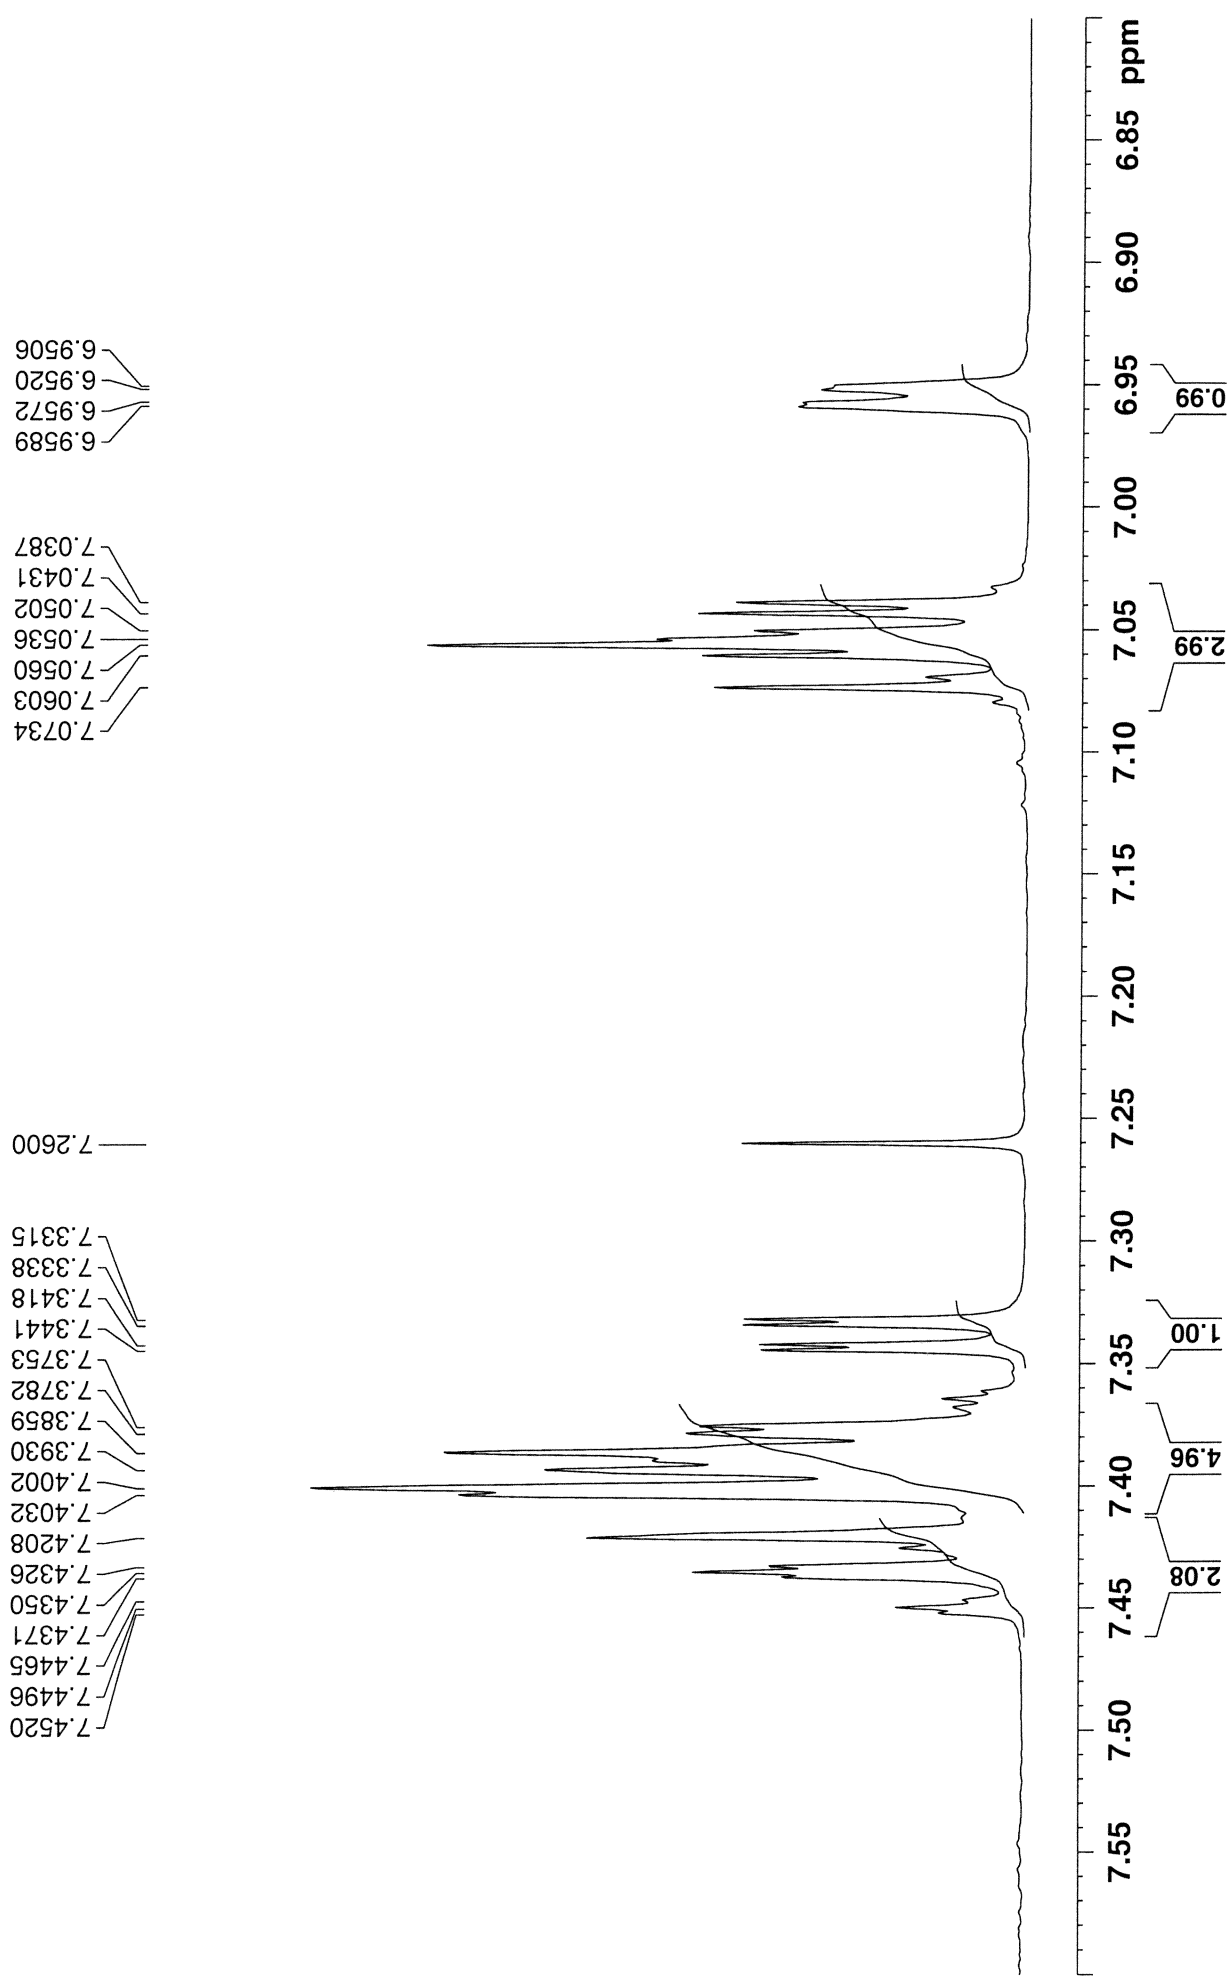

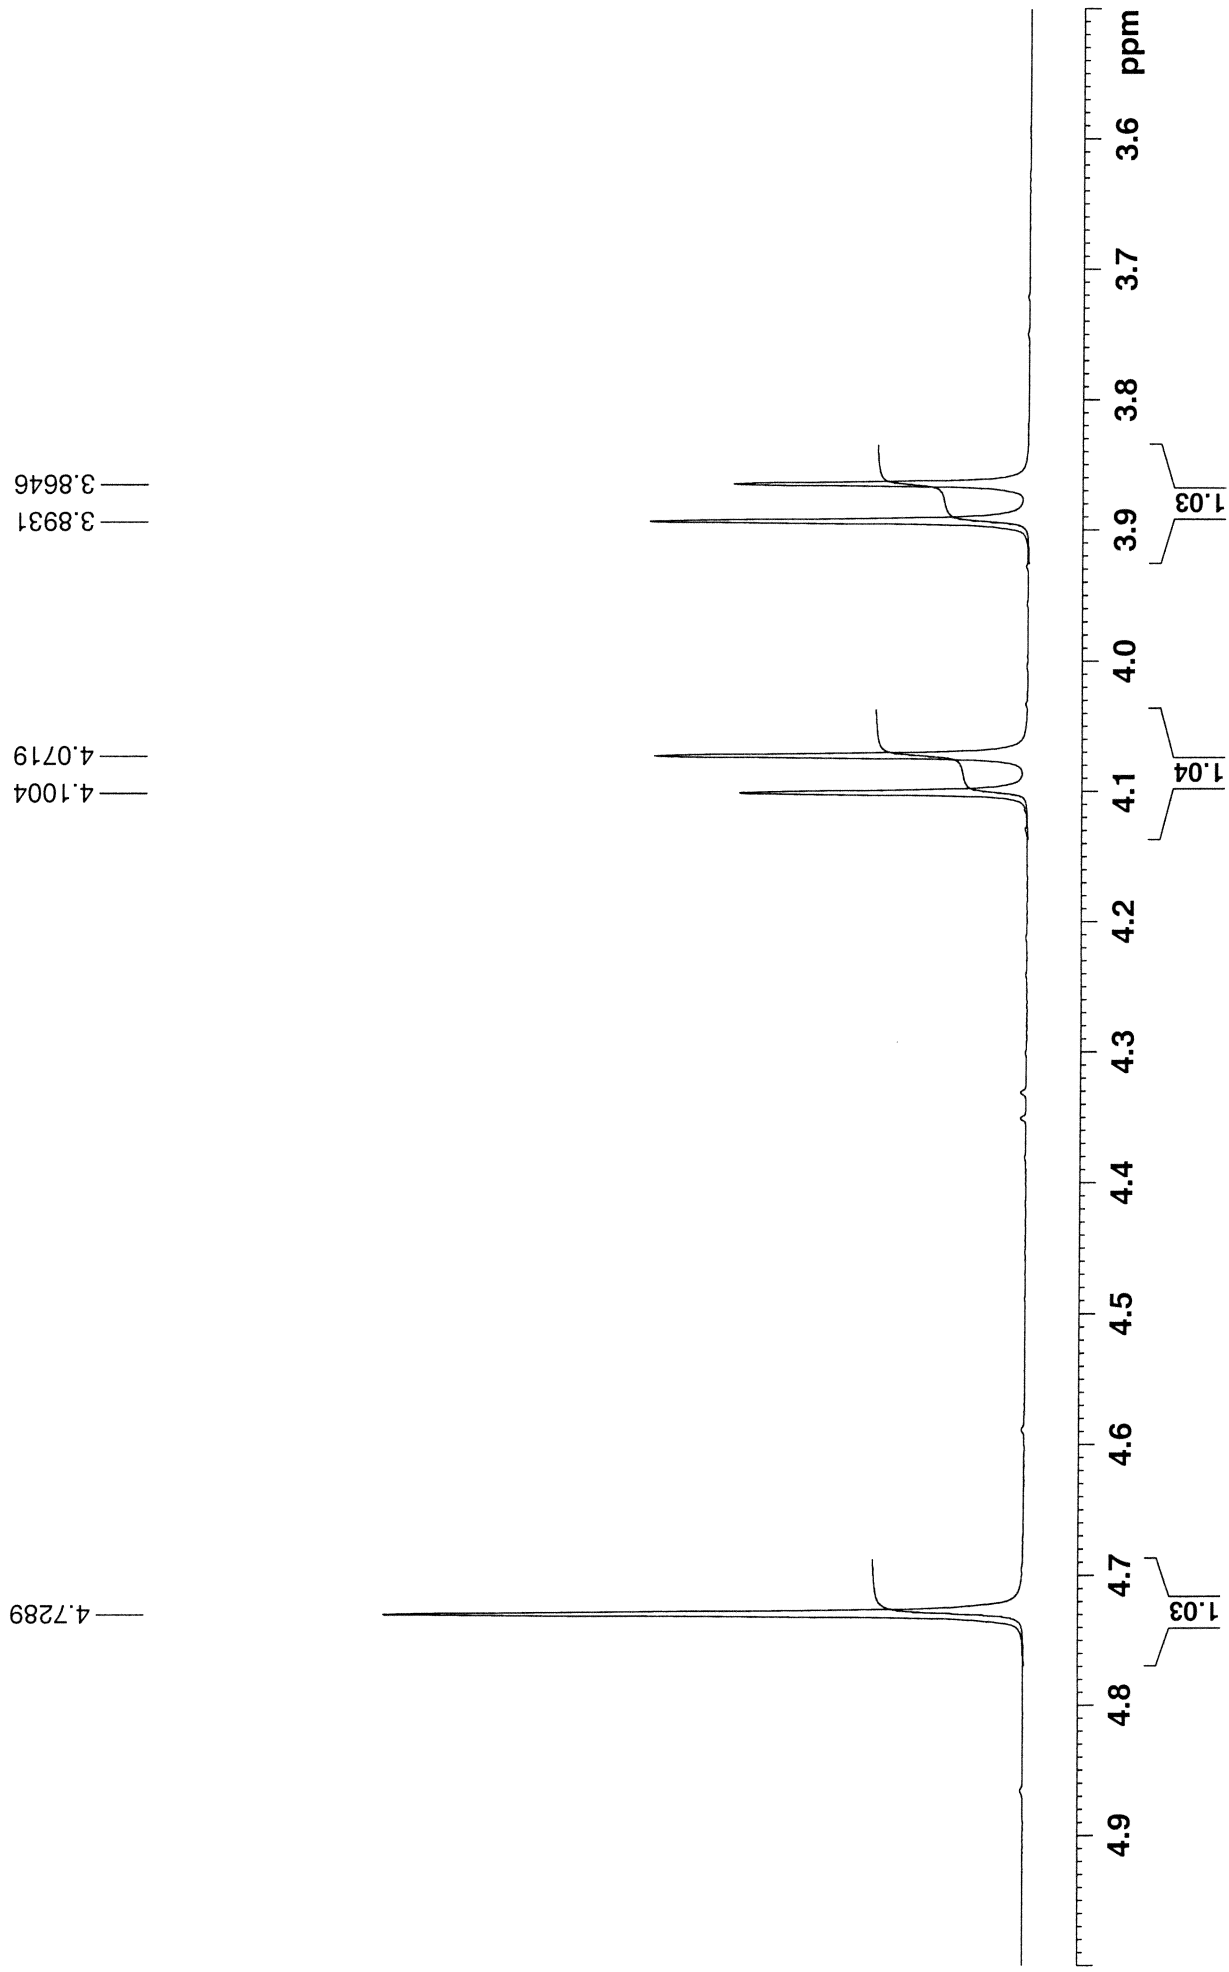

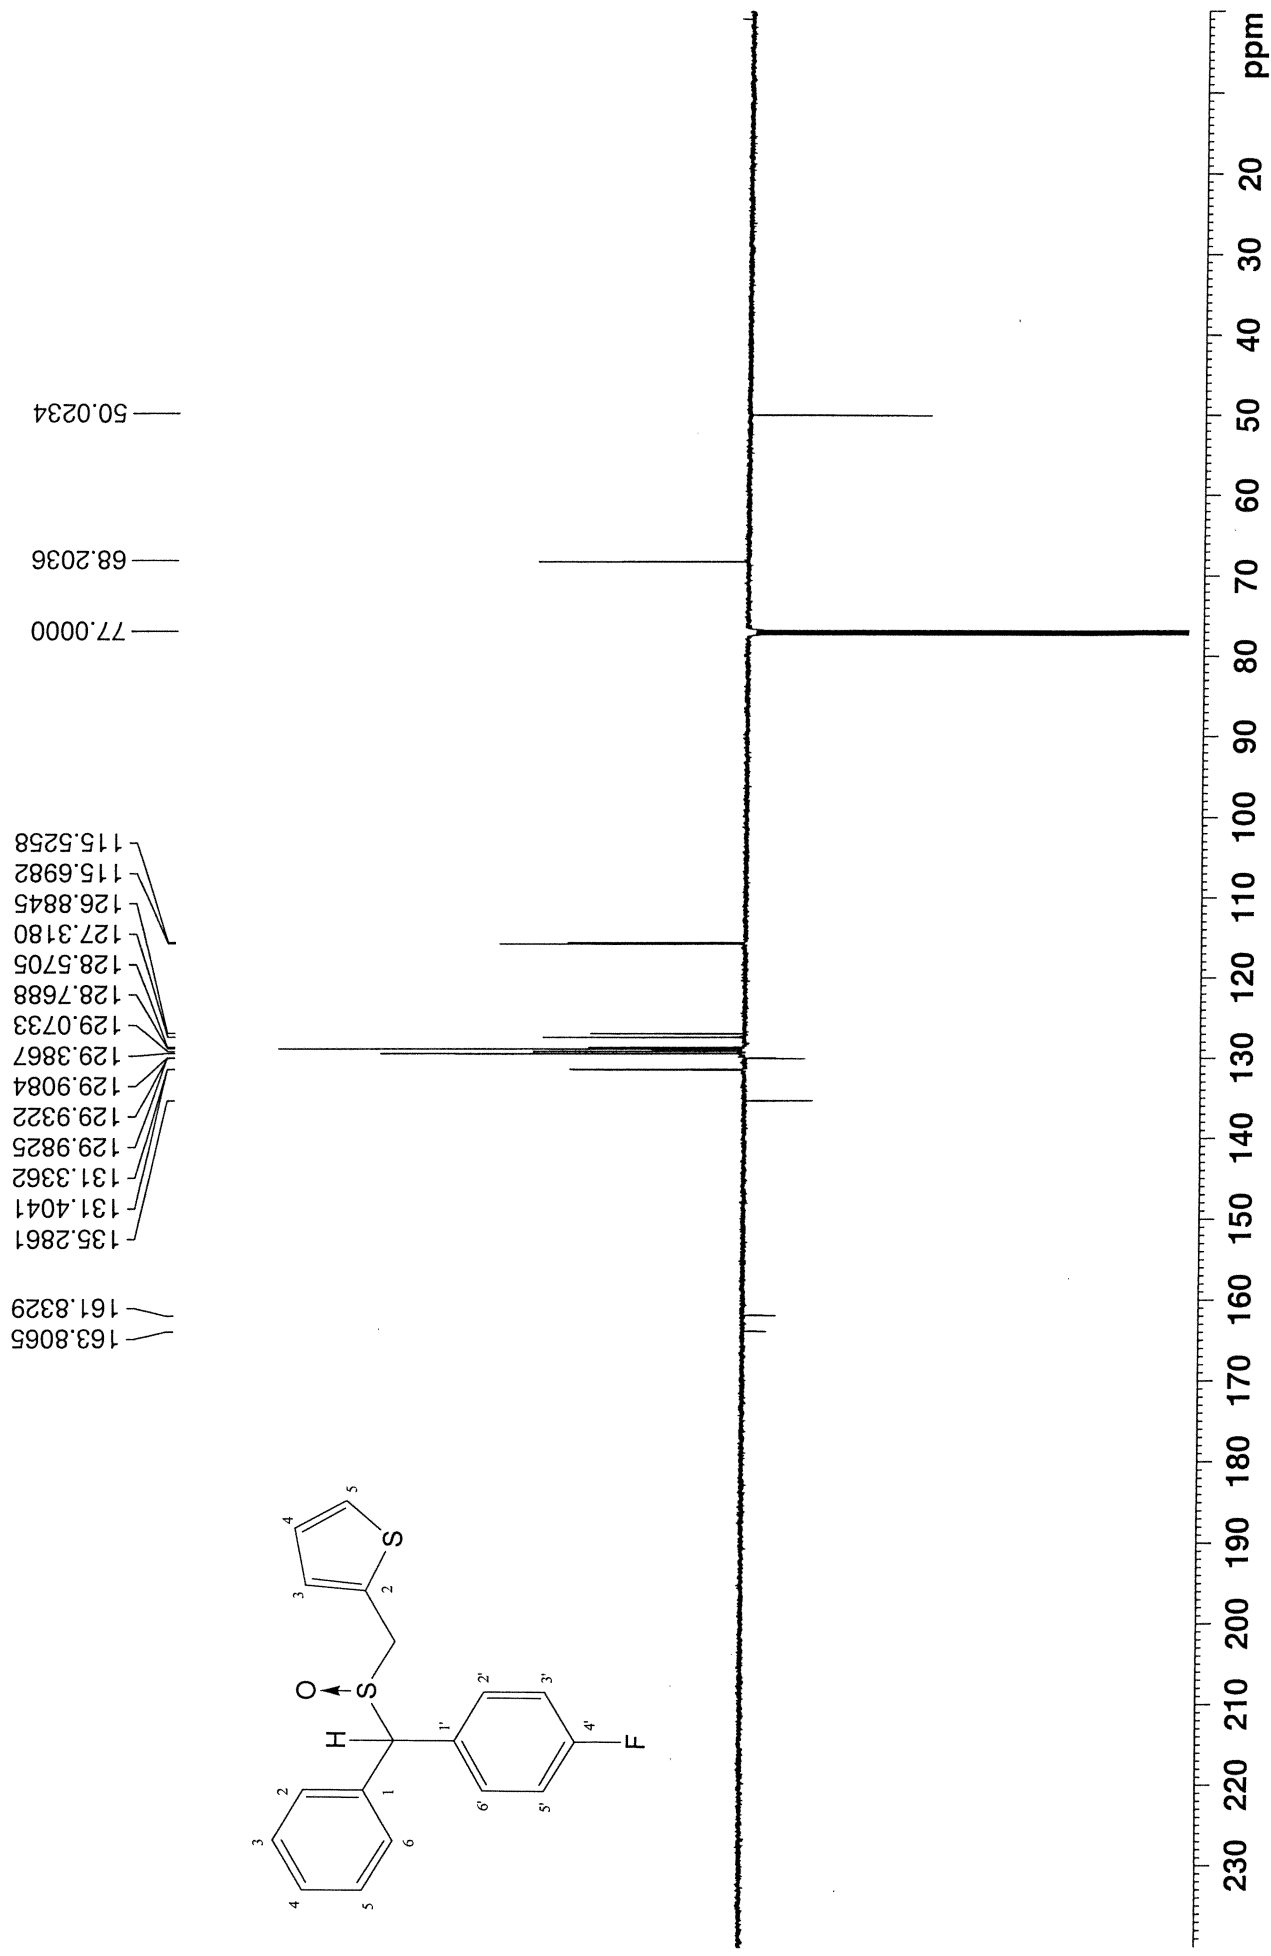

163.8065 —  
161.8329 —

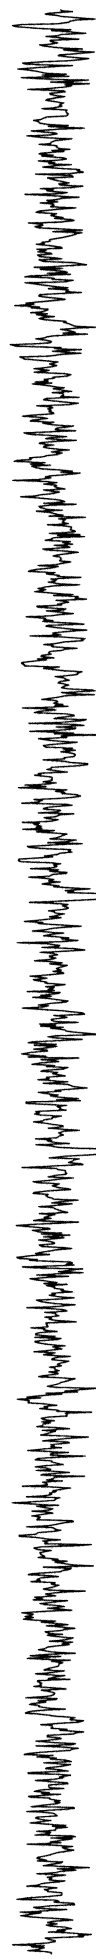

$^1J(^{13}\text{C}, ^{19}\text{F}) =$   
 $246.7 \text{ Hz}$   
 $162.82 \text{ ppm}$

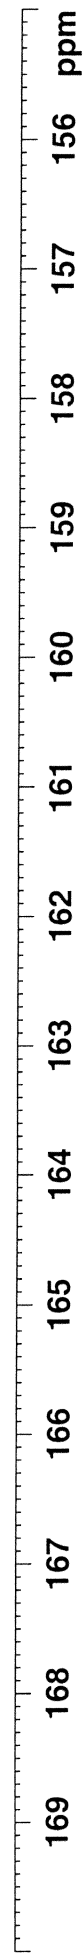

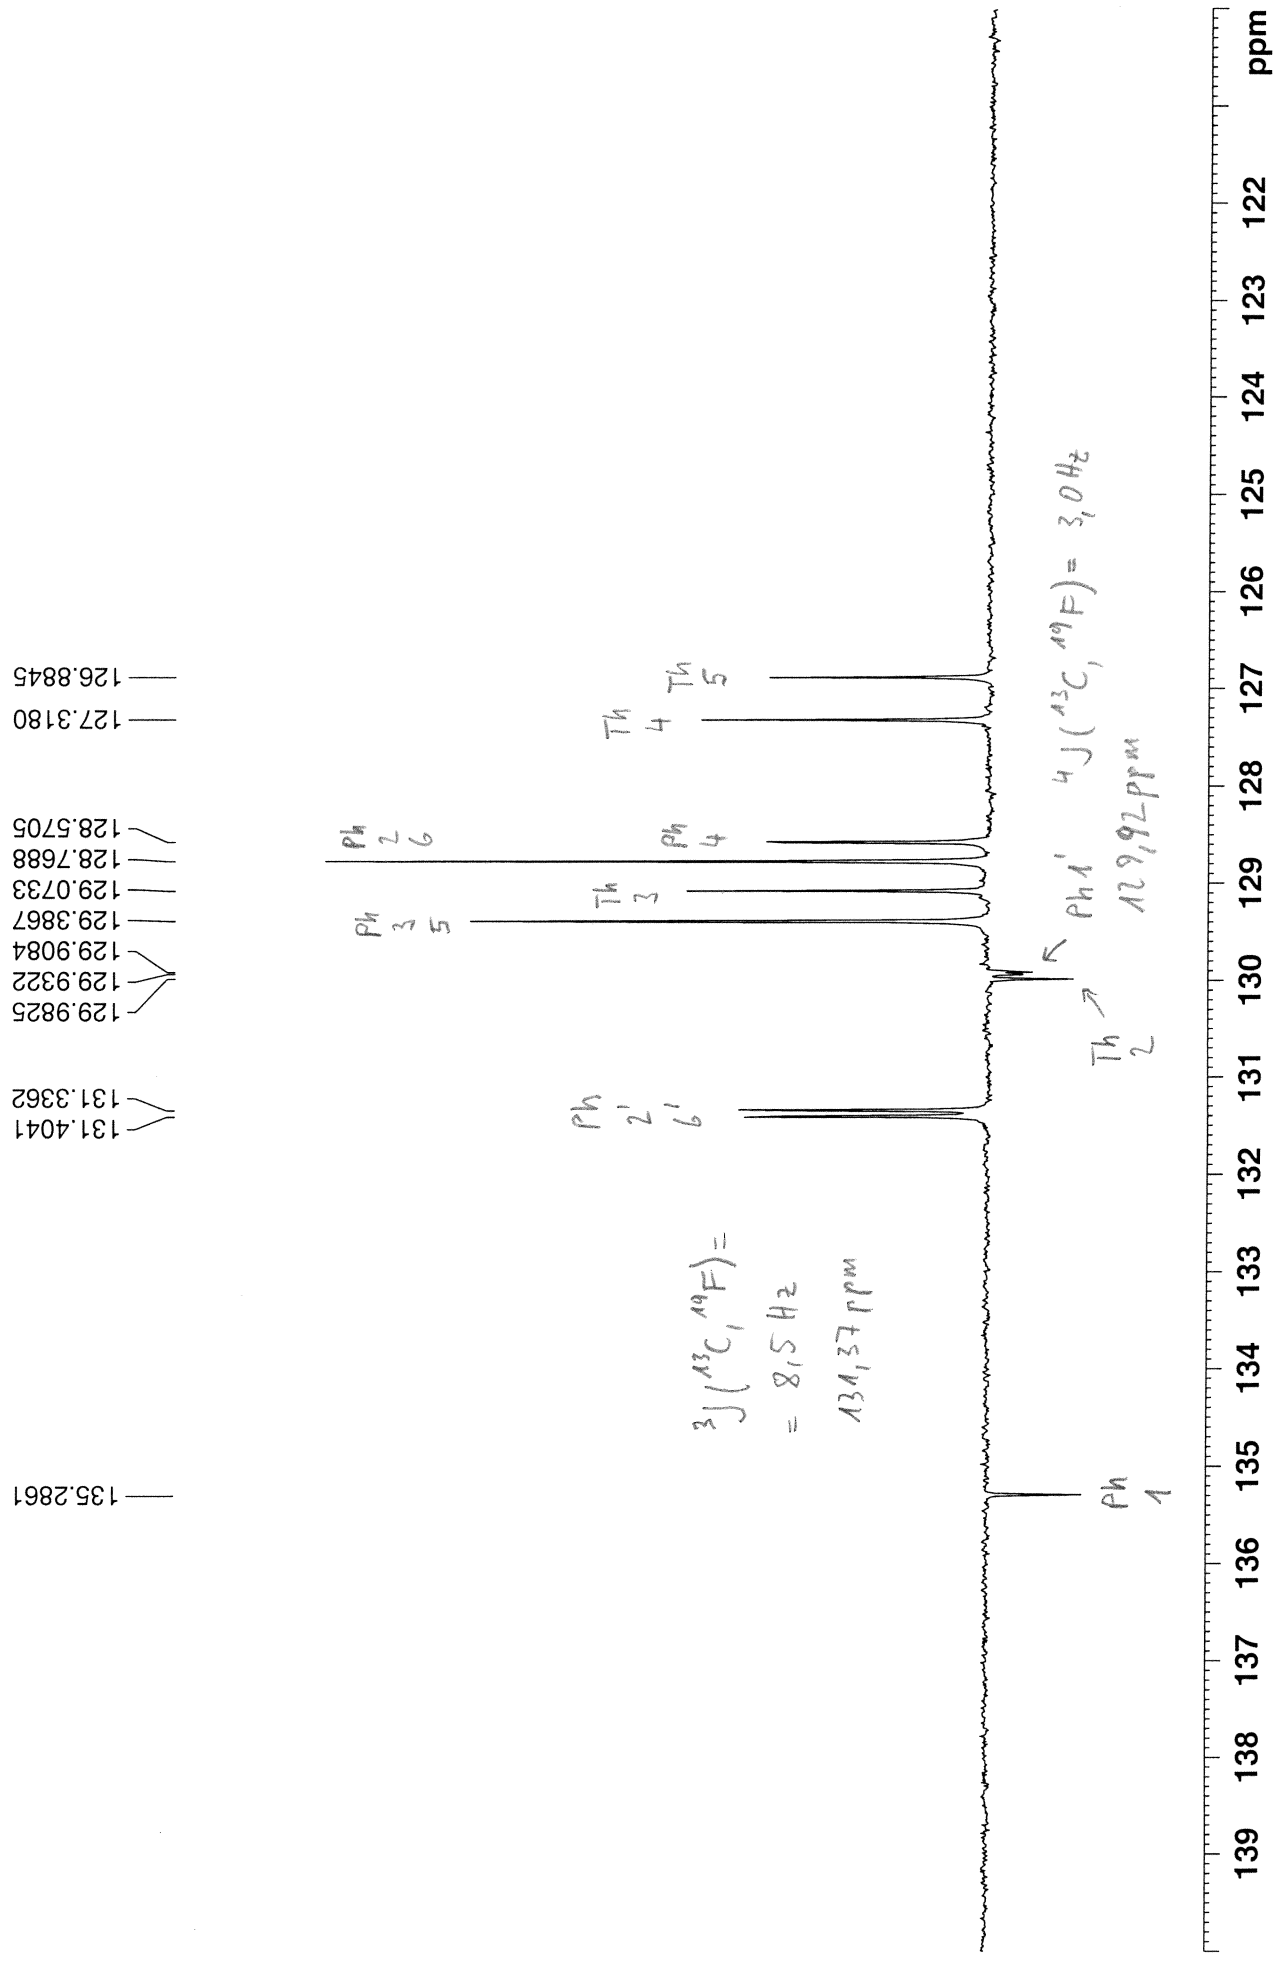

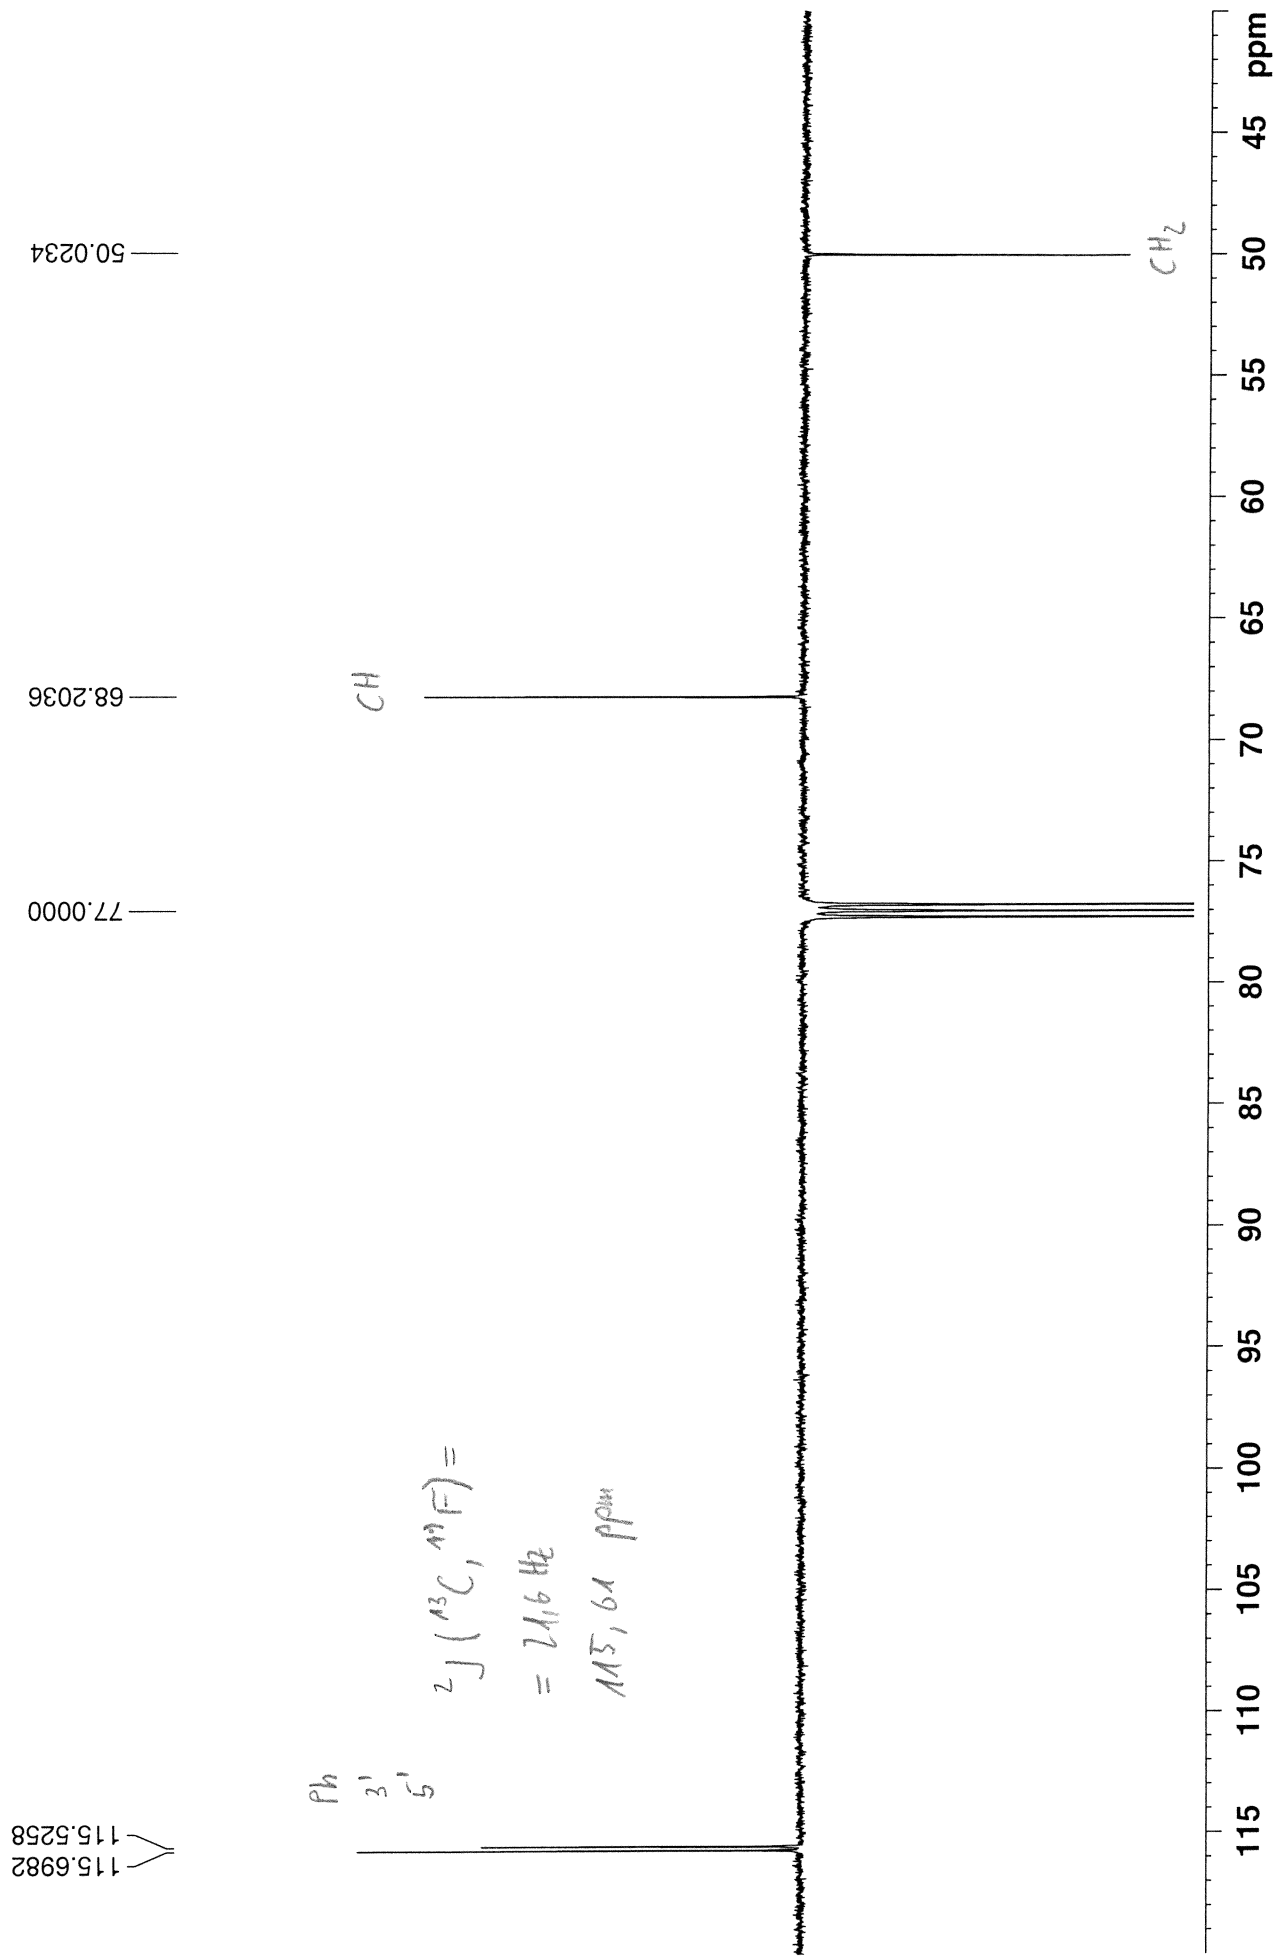

**Figure S11c.** NMR spectra of compound 7c.

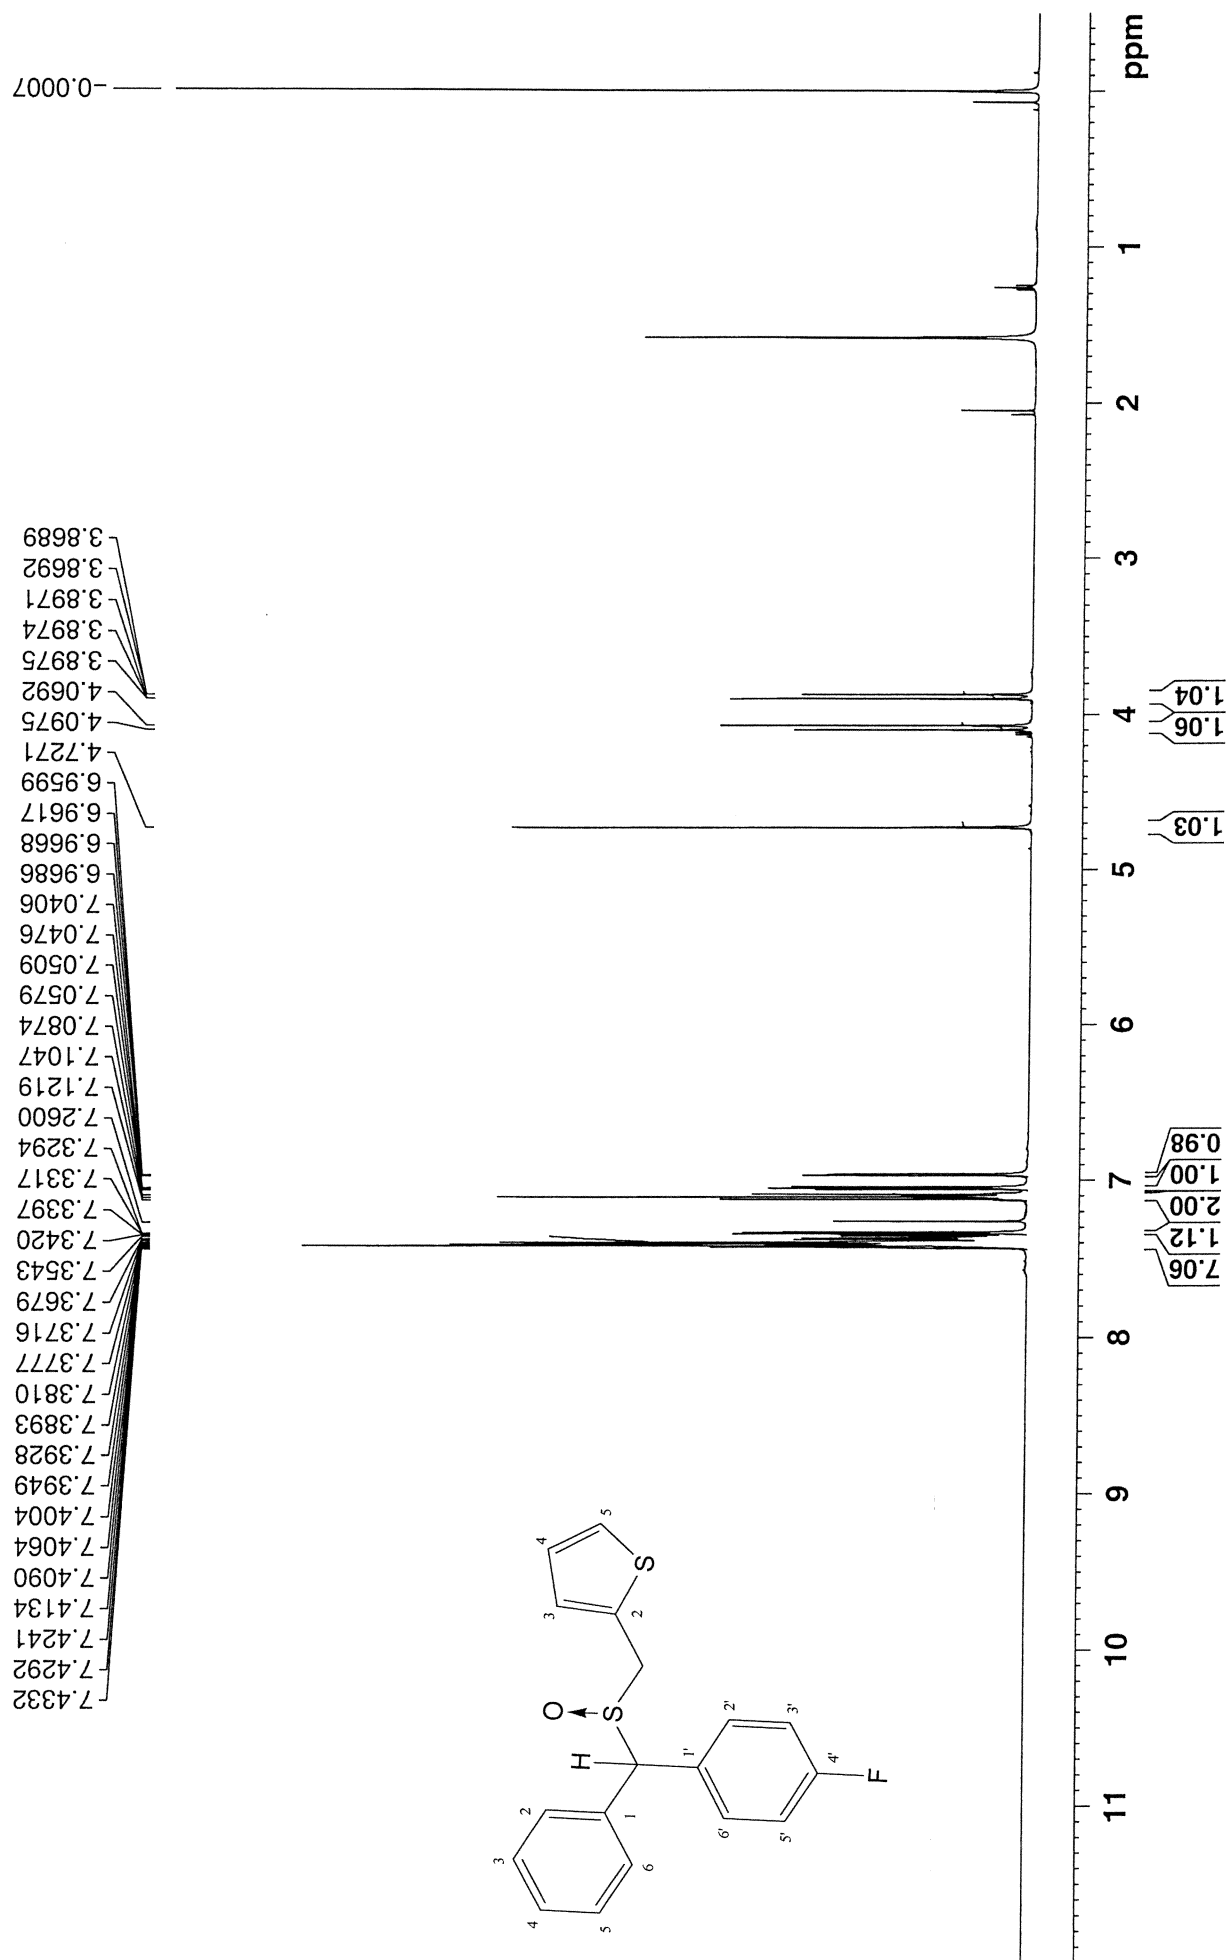



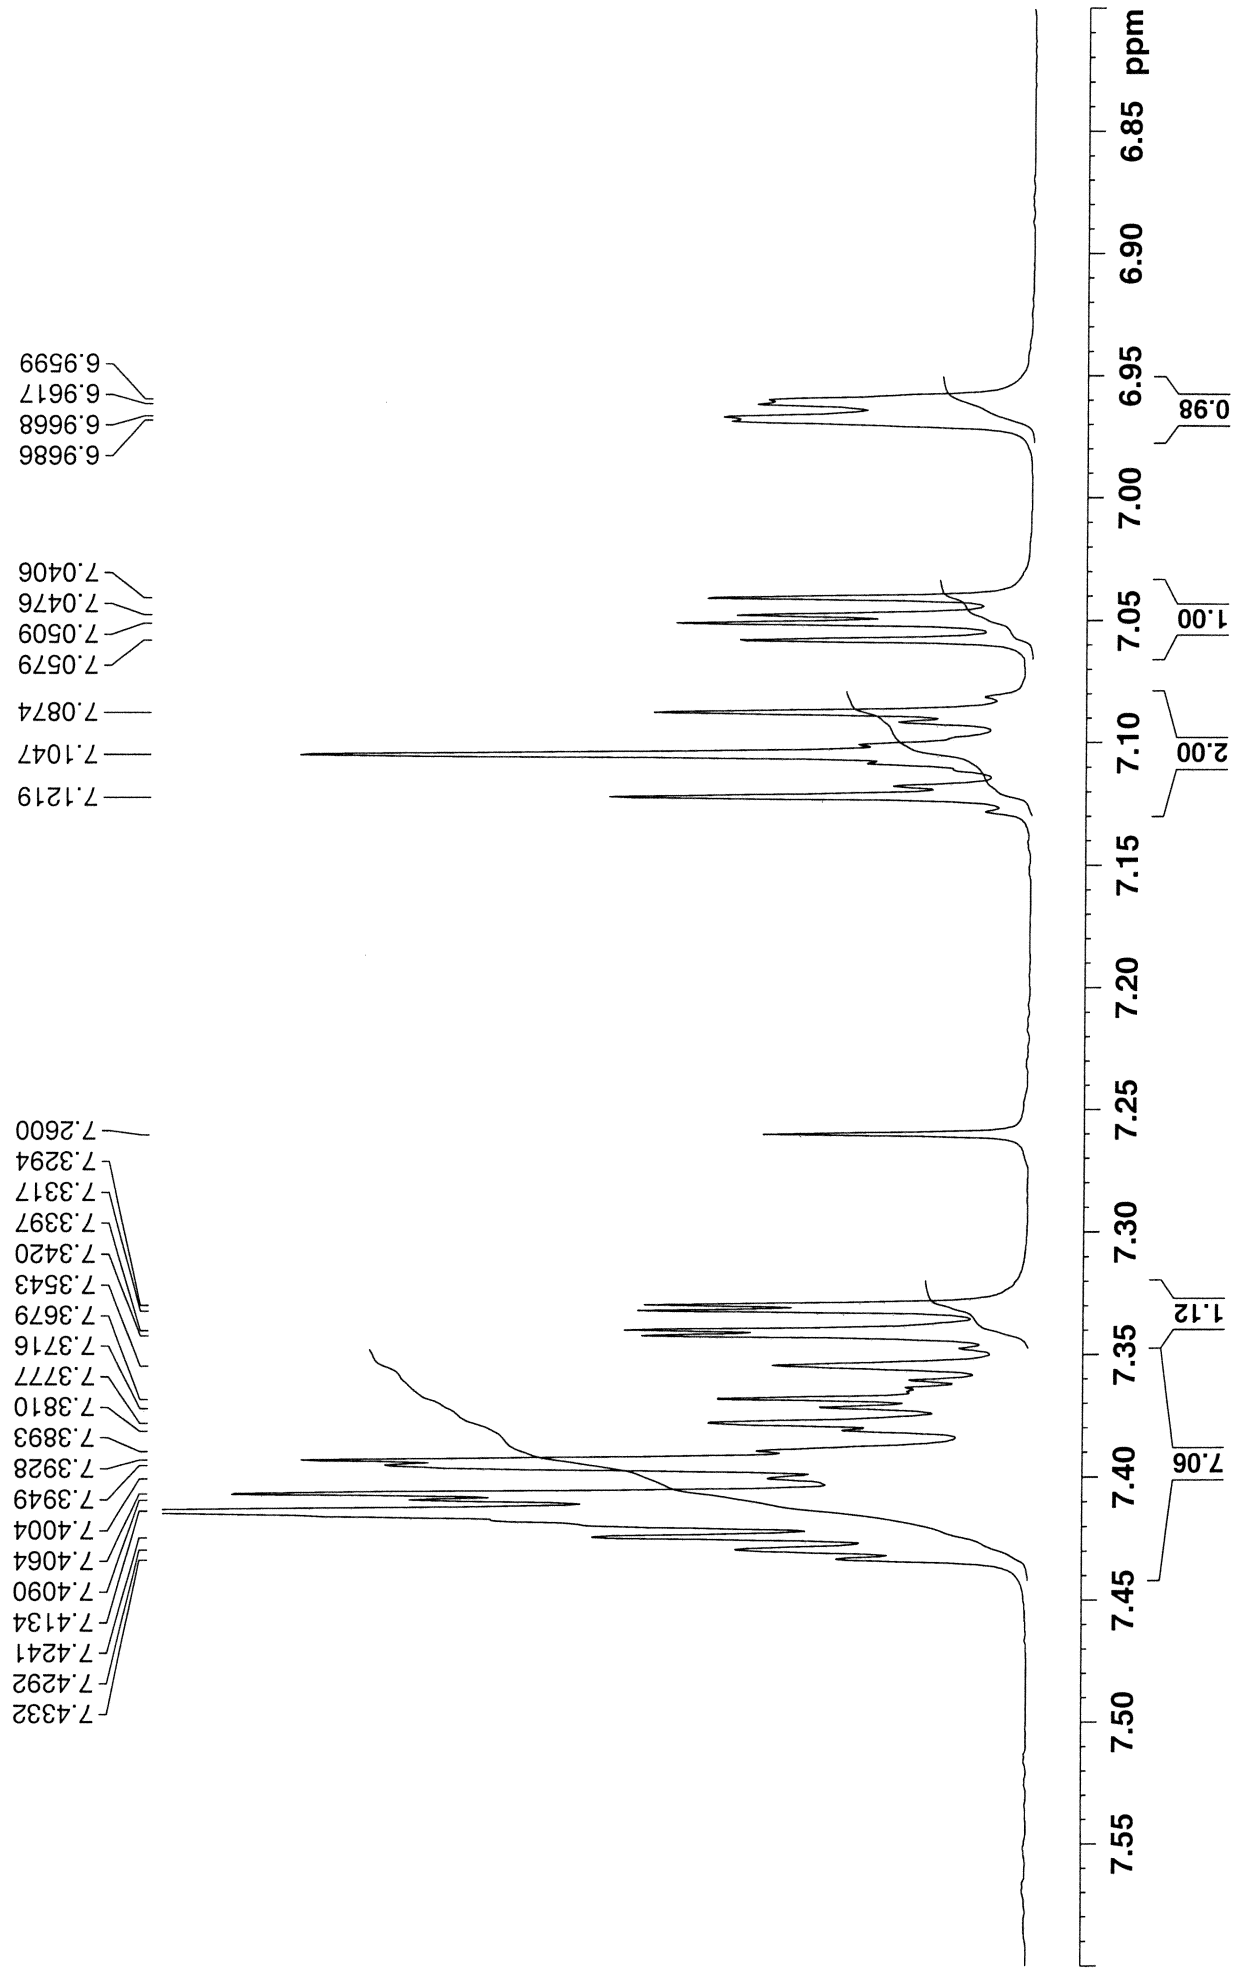

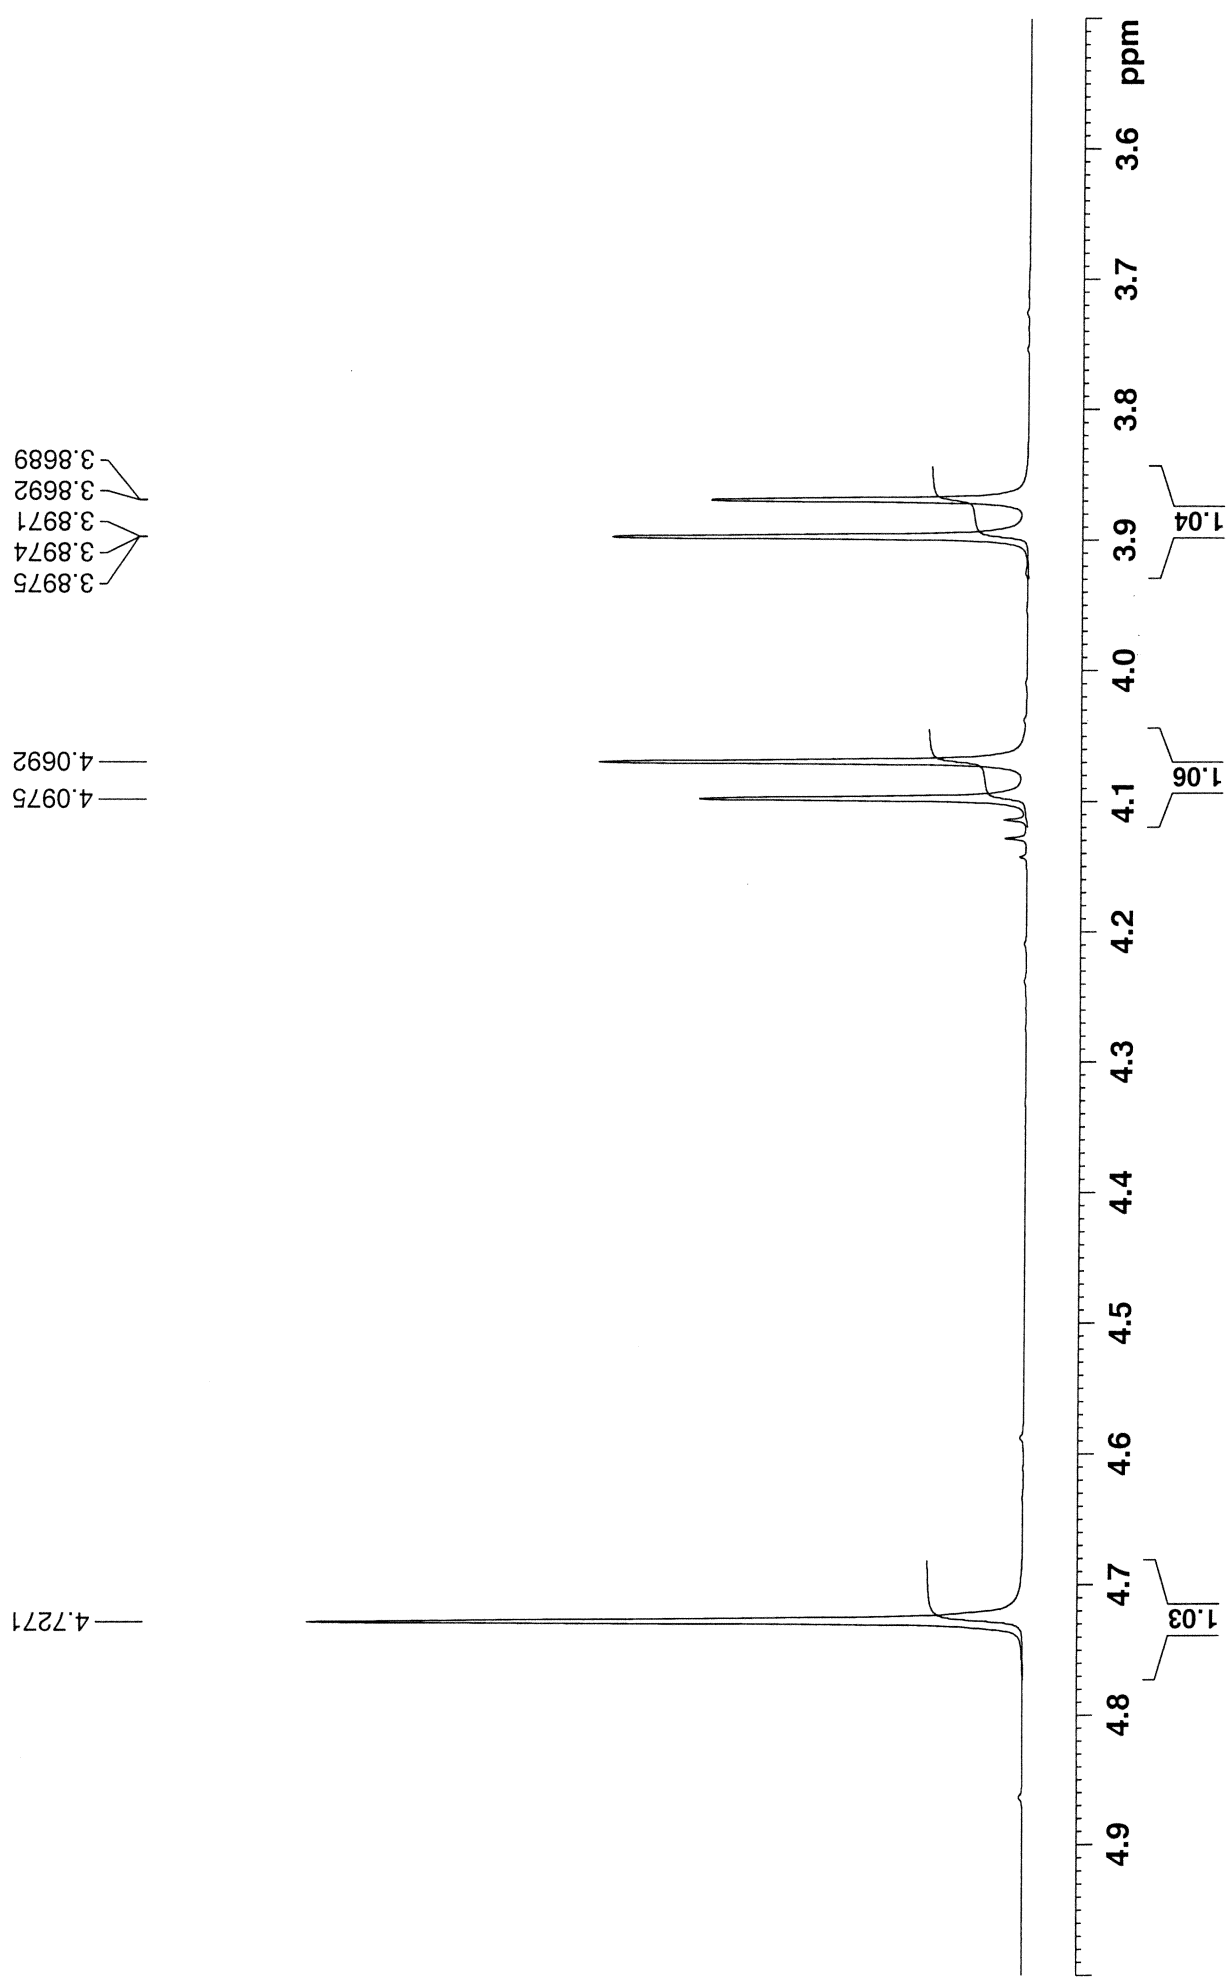

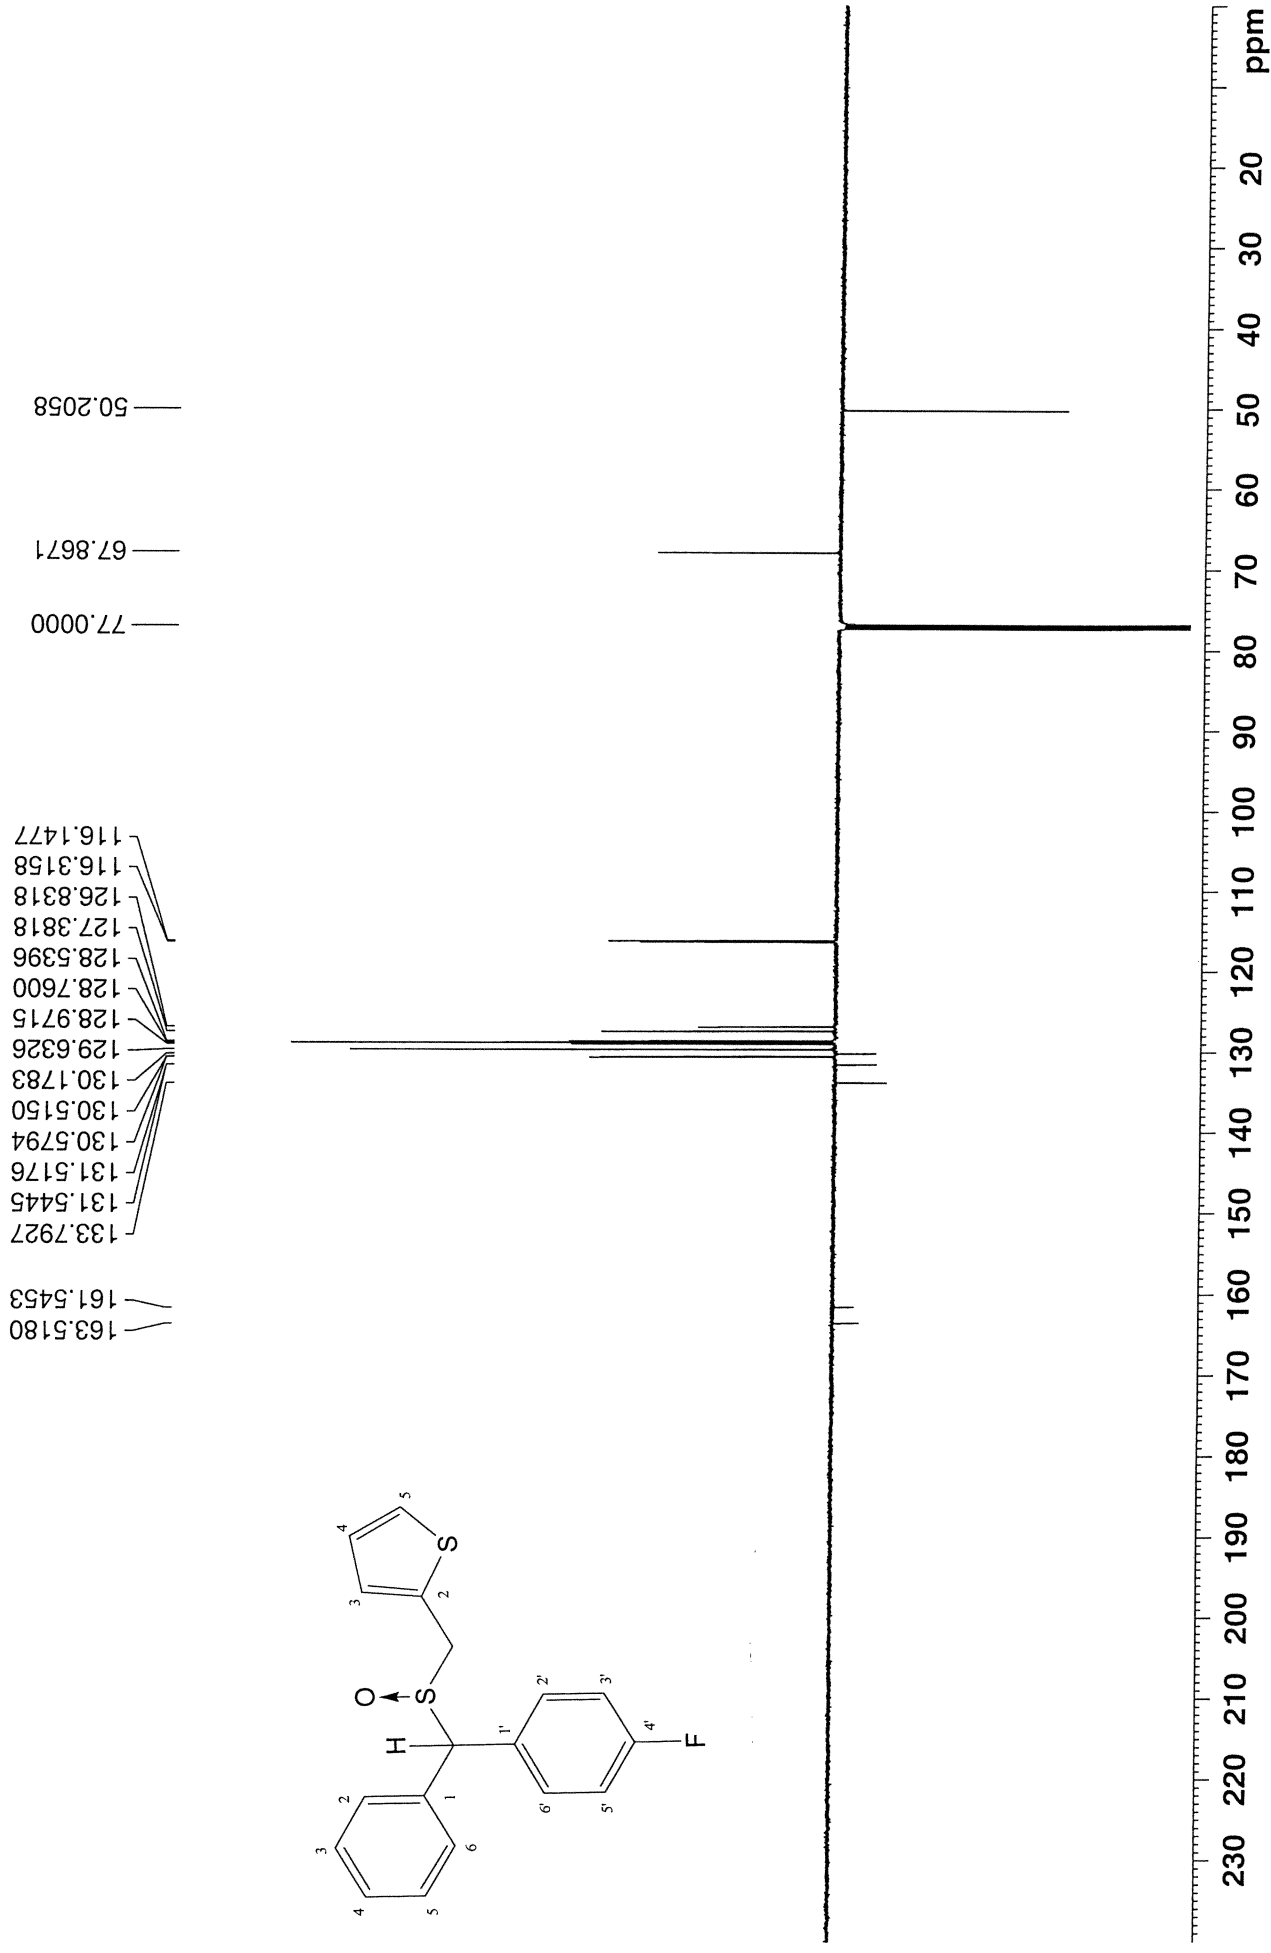

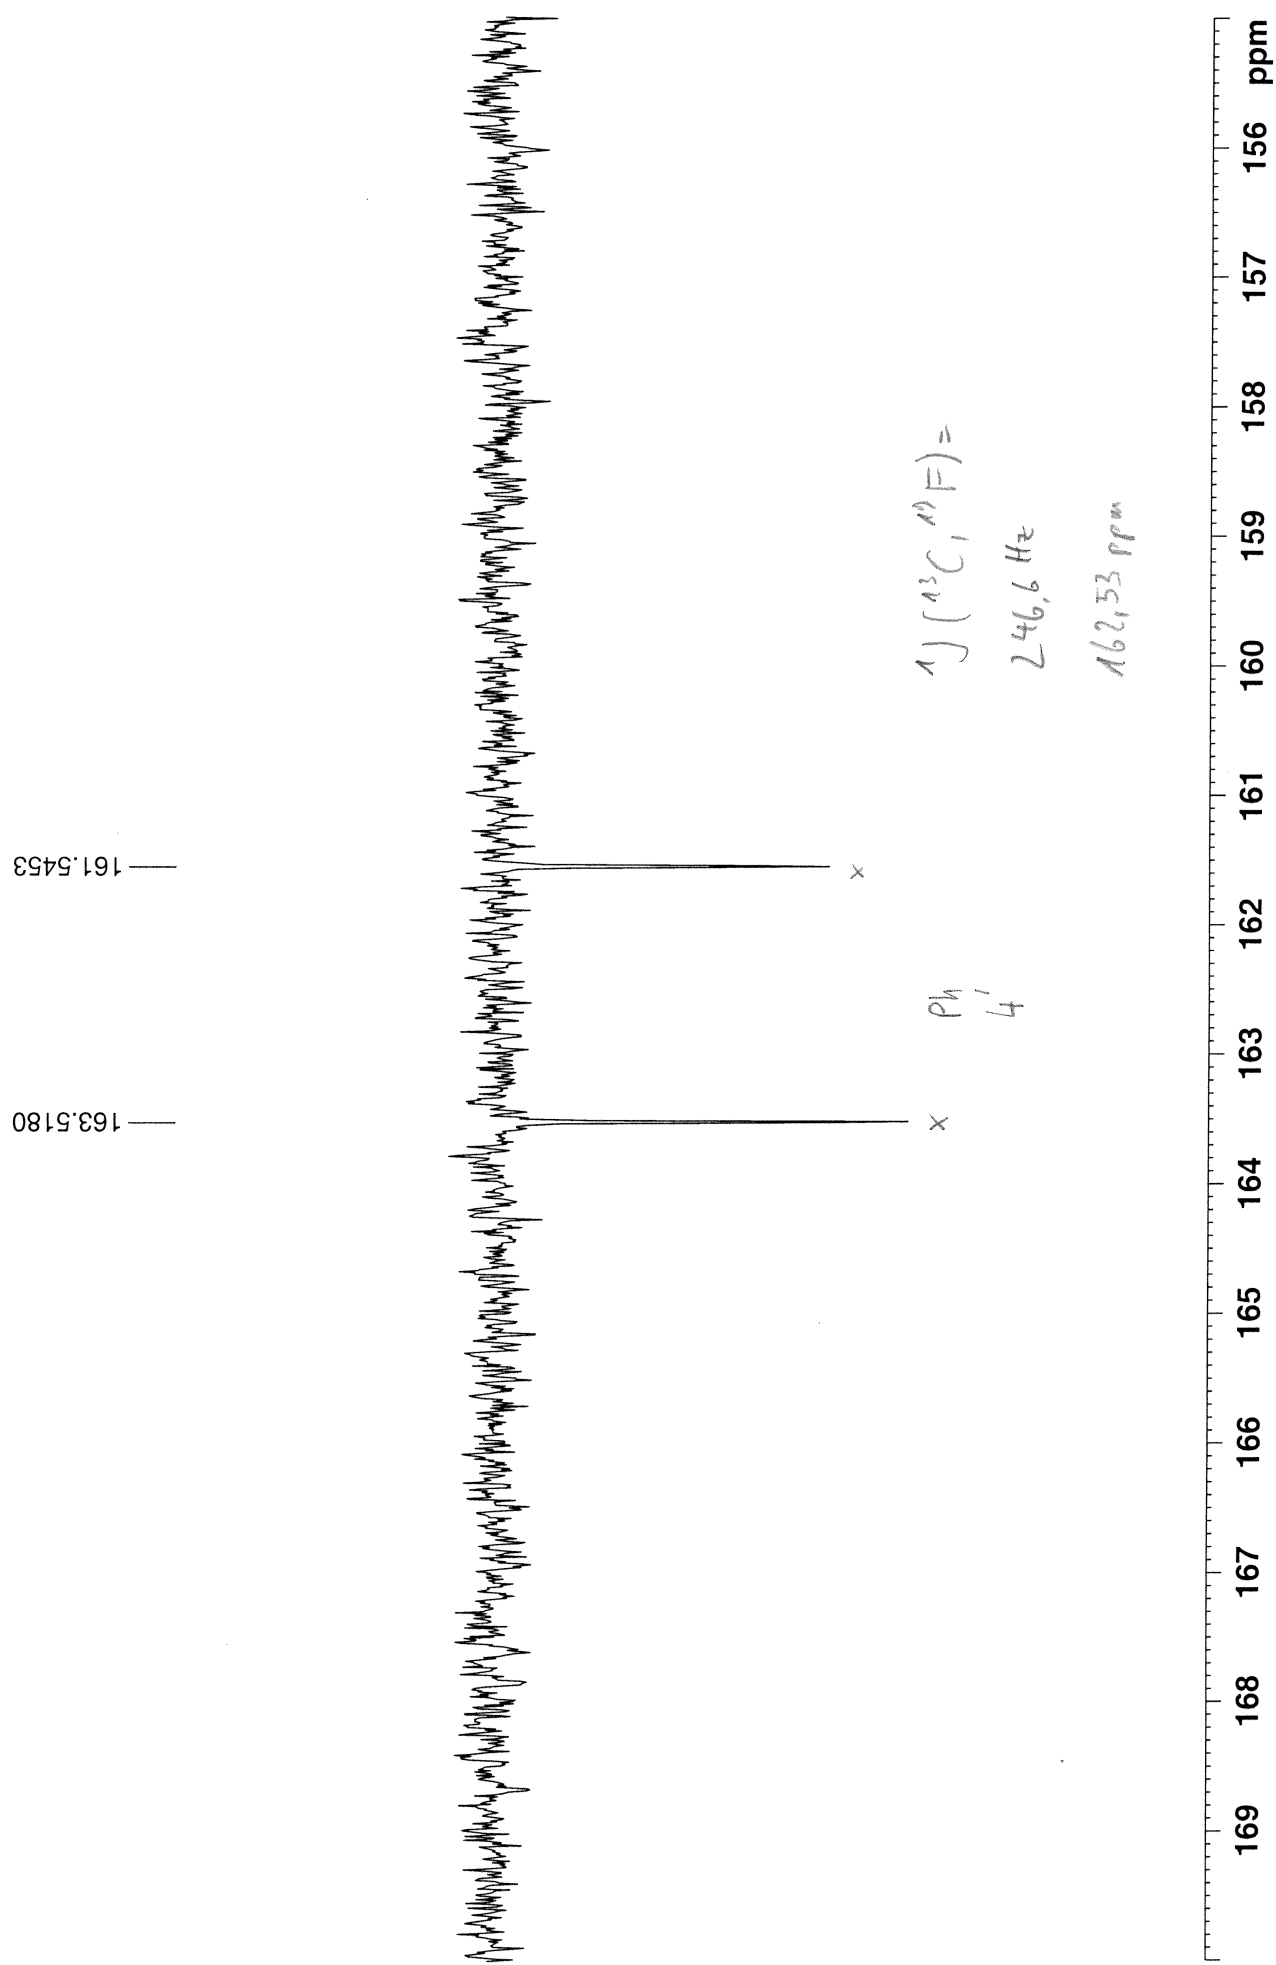

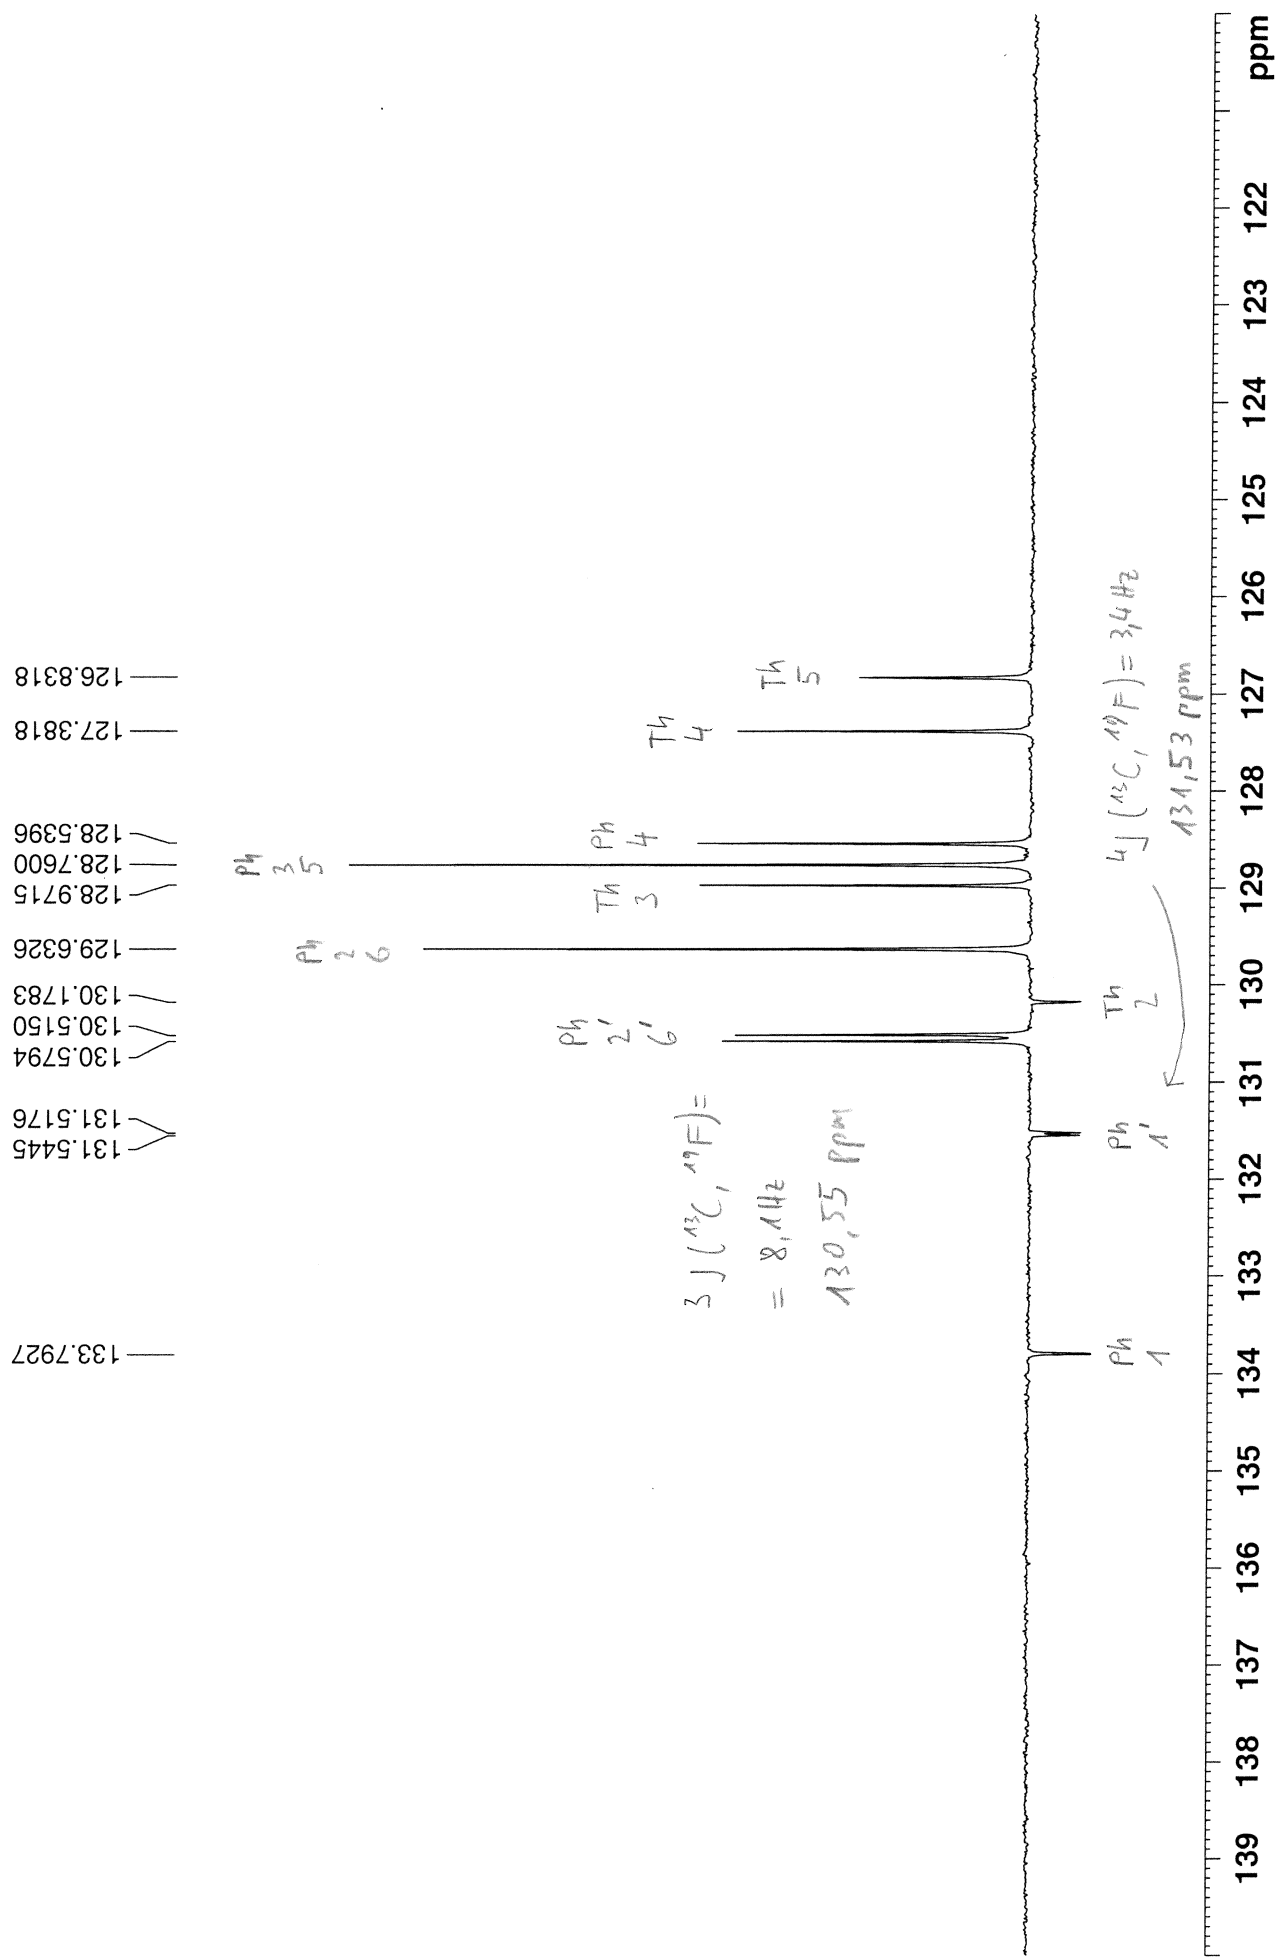

116.3158  
116.1477

Ph  
3'  
5'

$2J(^{13}C, ^{19}F) =$   
= 21.0 Hz  
116, 23 ppm

77.0000  
67.8671  
50.2058

CH

CH<sub>2</sub>

115 110 105 100 95 90 85 80 75 70 65 60 55 50 45 ppm

Figure S12c. NMR spectra of compound 8c.

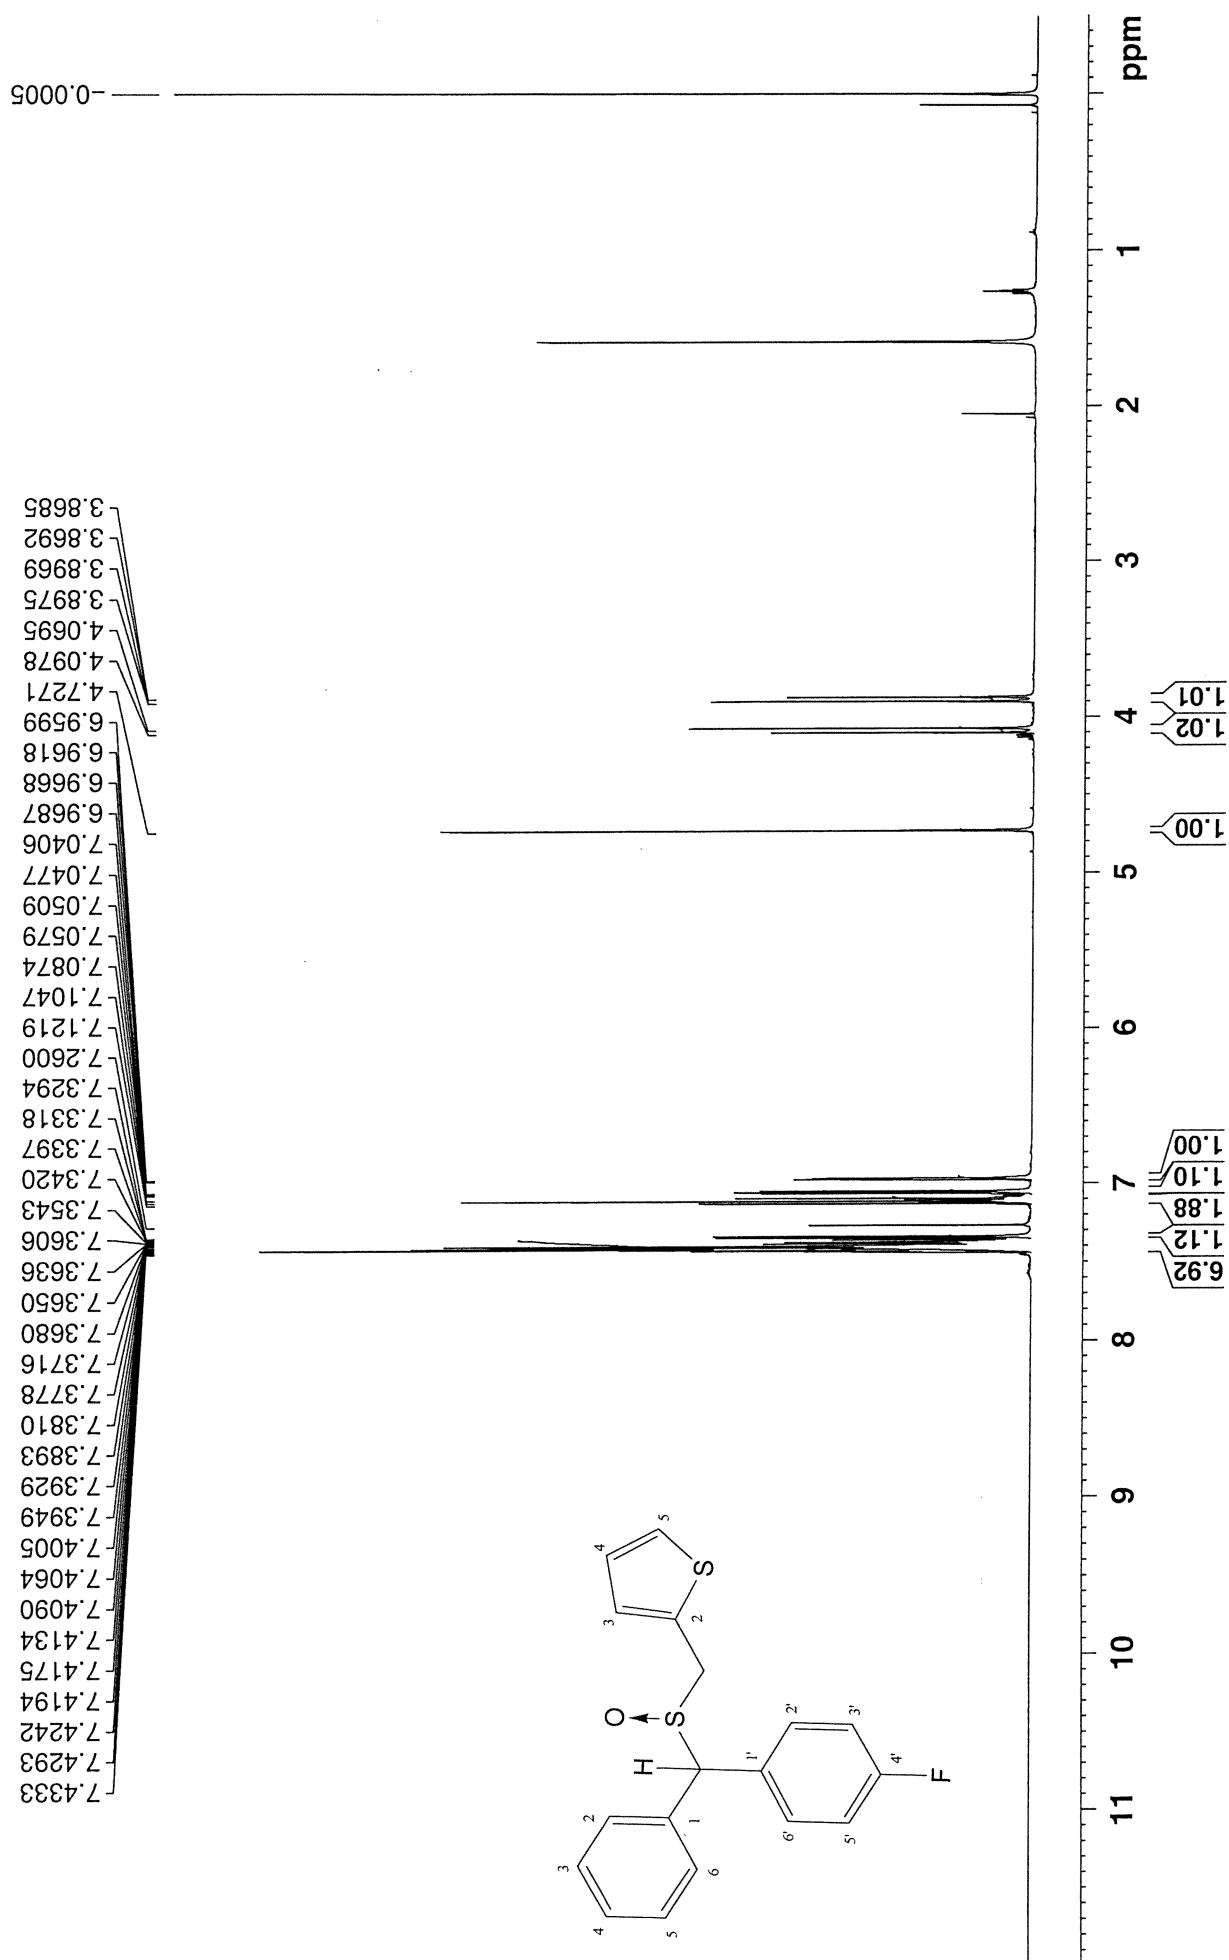

7.4333  
7.4293  
7.4242  
7.4194  
7.4175  
7.4134  
7.4090  
7.4064  
7.4005  
7.3949  
7.3929  
7.3893  
7.3810  
7.3778  
7.3716  
7.3680  
7.3650  
7.3636  
7.3606  
7.3543  
7.3420  
7.3397  
7.3318  
7.3294  
7.2600

7.1219  
7.1047  
7.0874  
7.0579  
7.0509  
7.0477  
7.0406

6.9687  
6.9668  
6.9618  
6.9599

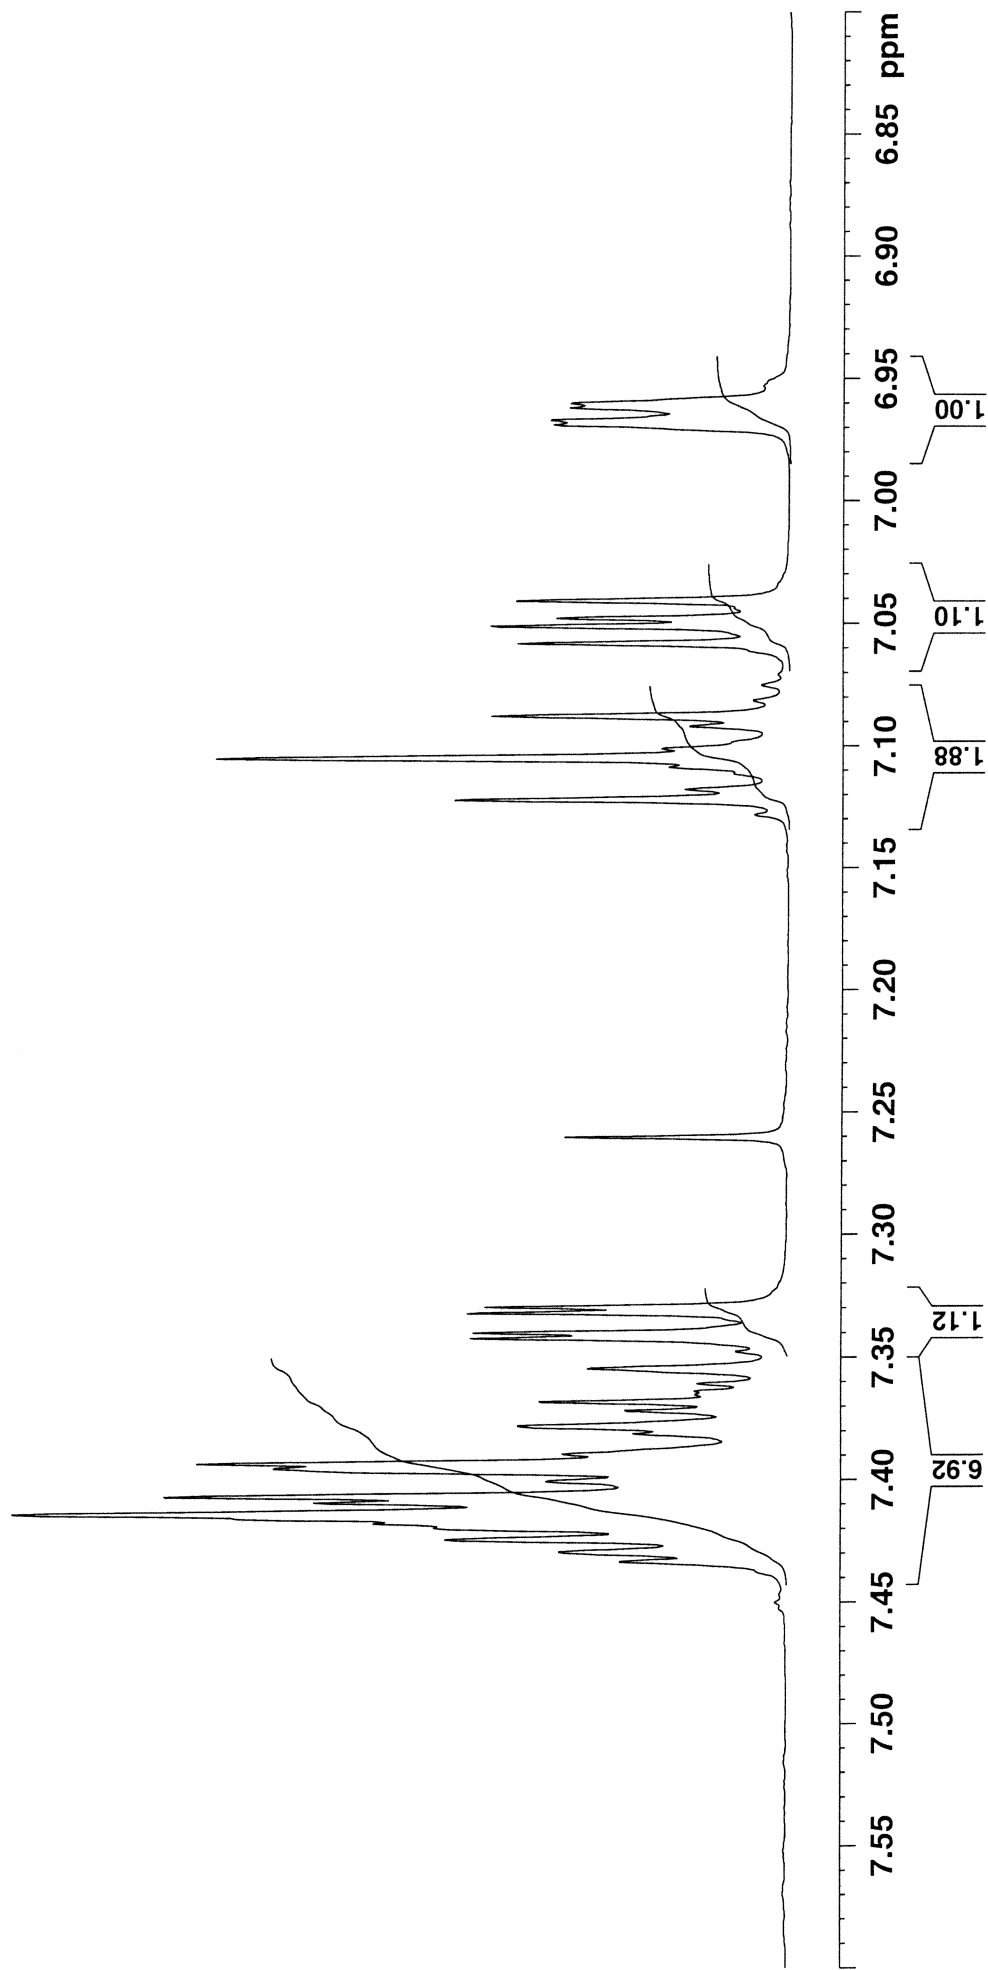



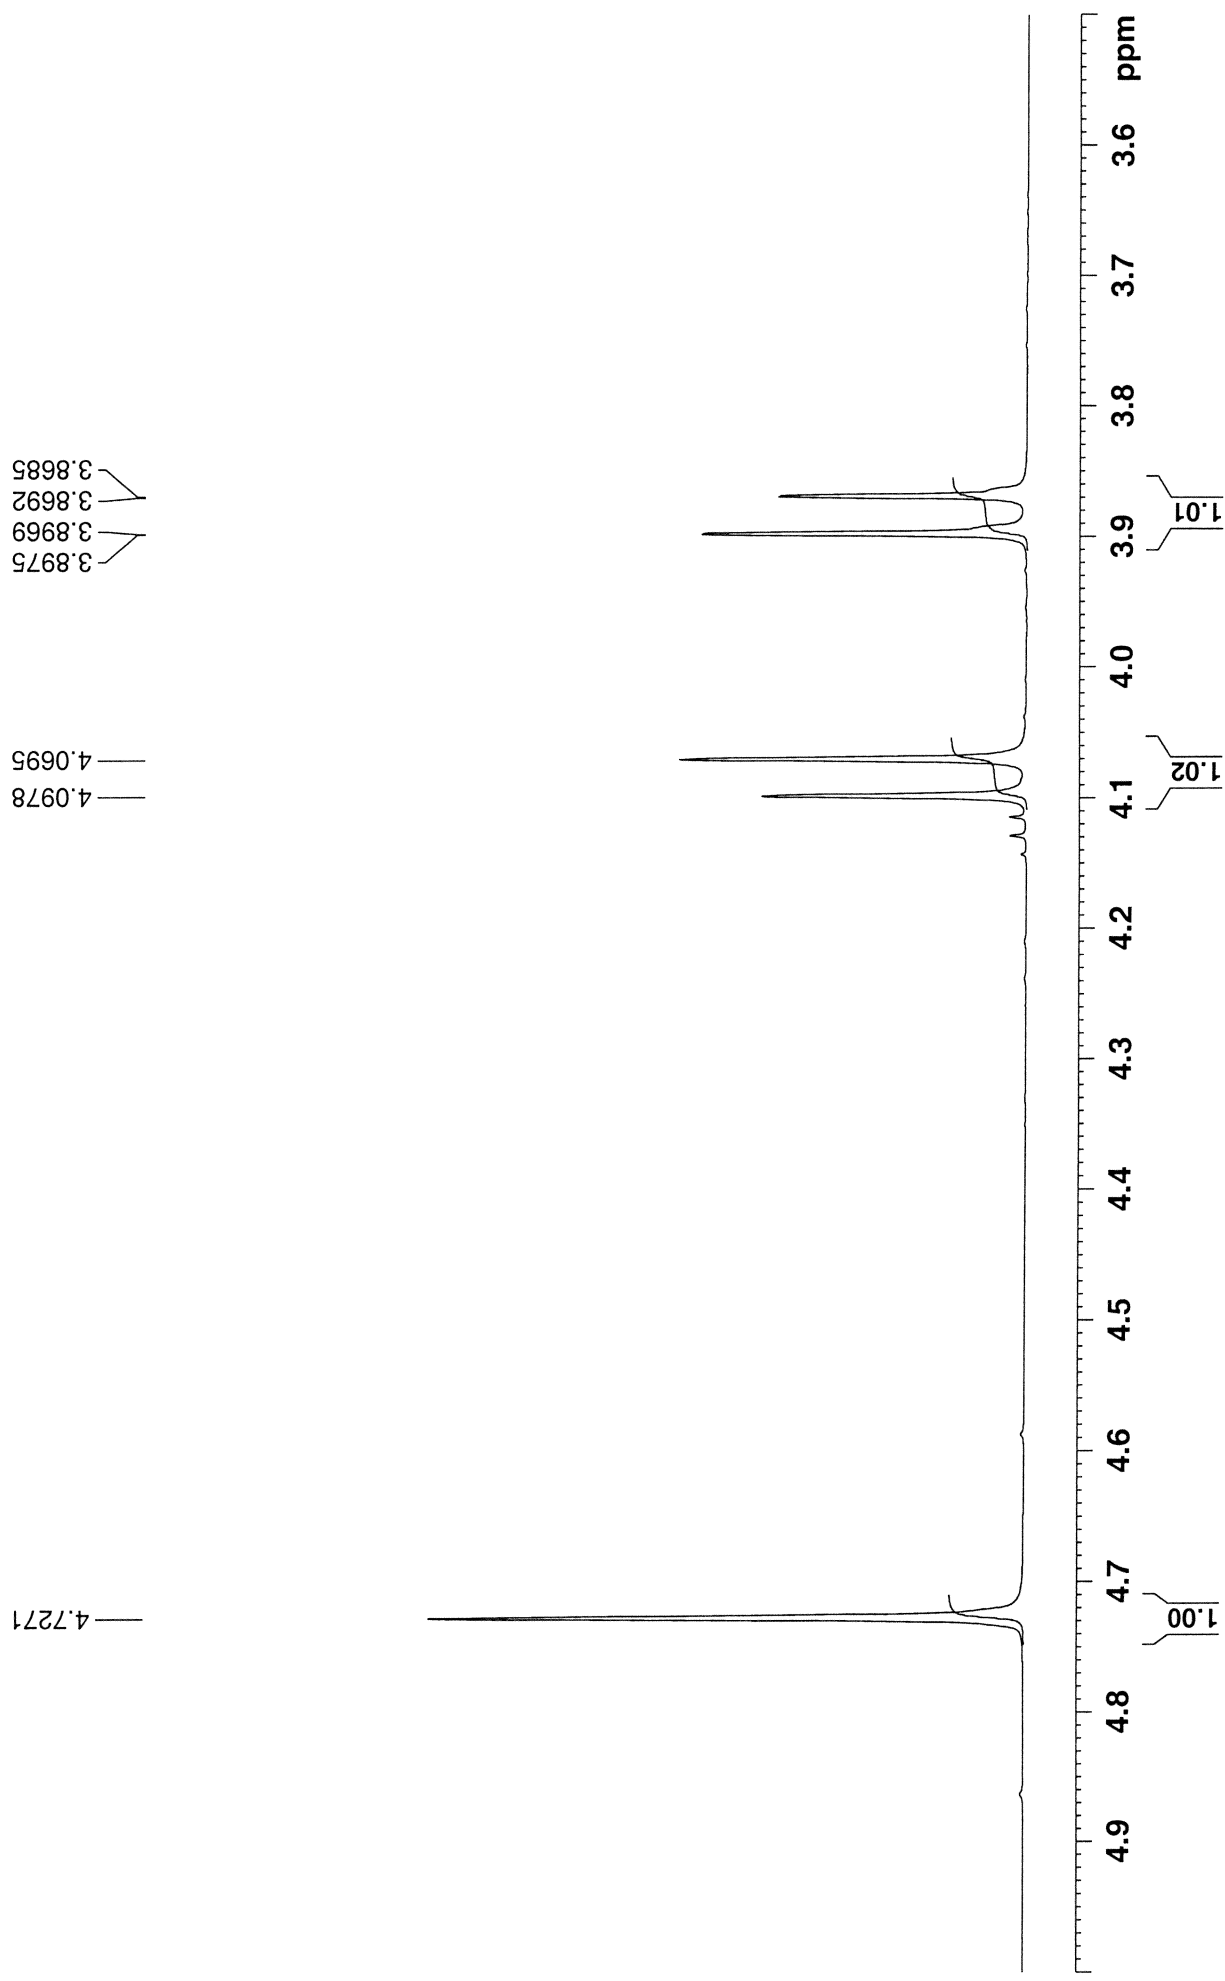

163.5135  
161.5410

133.7897  
131.5410  
131.5138  
130.5756  
130.5112  
130.1785  
129.6289  
128.9675  
128.7564  
128.5358  
127.3784  
126.8308  
116.3127  
116.1440

50.2039

67.8642

77.0000

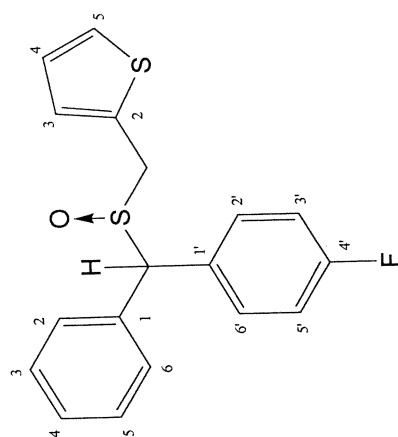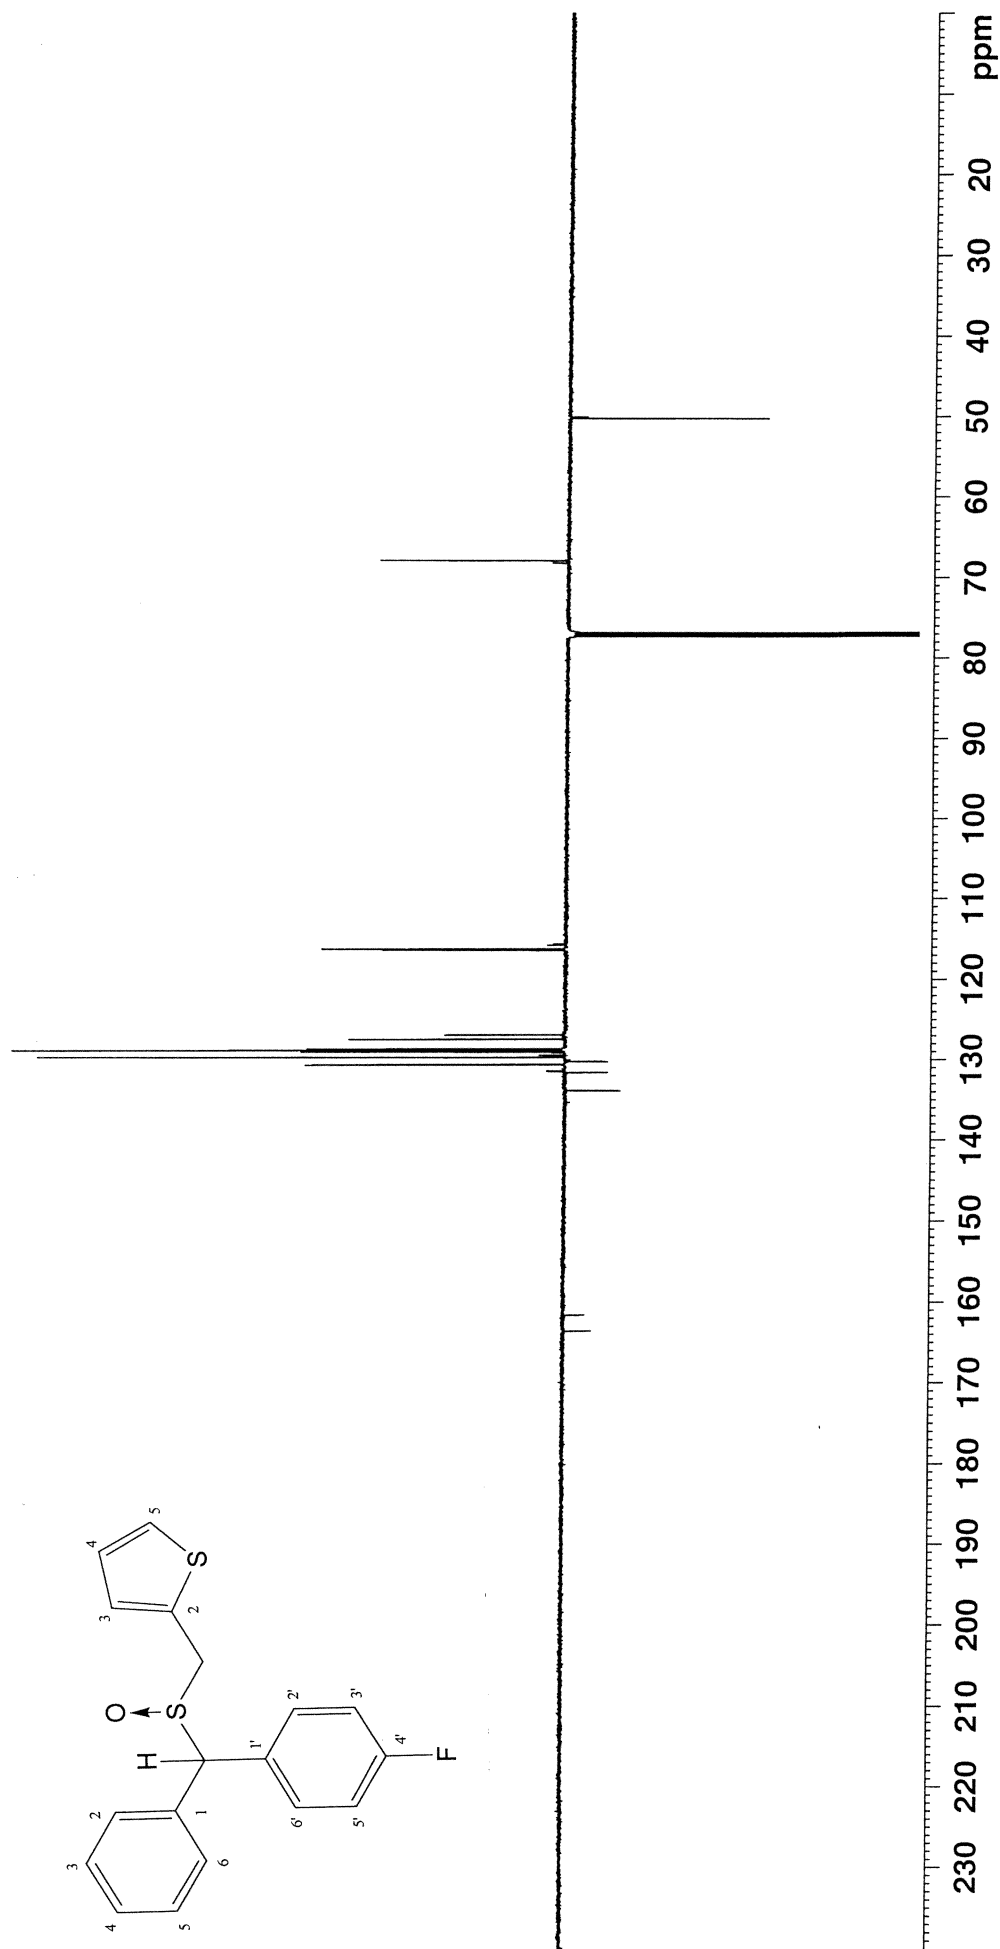

163.5135 —  
161.5410 —

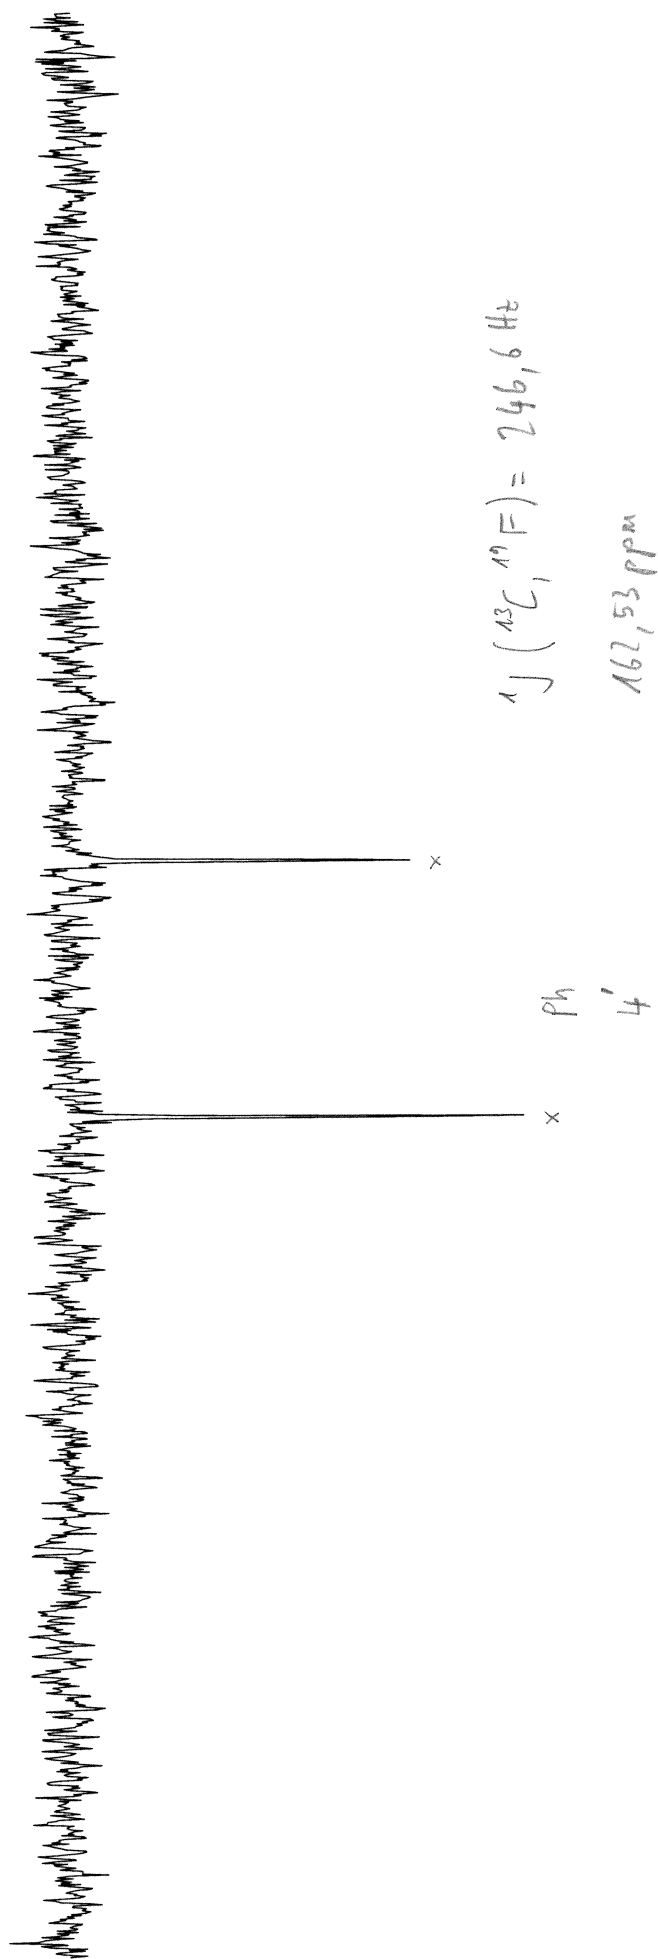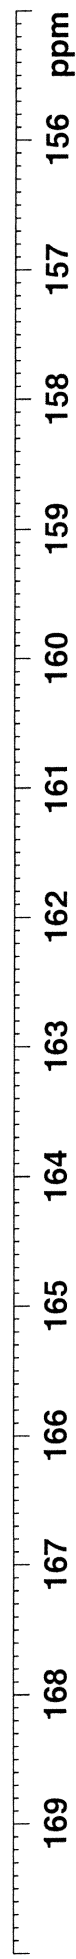

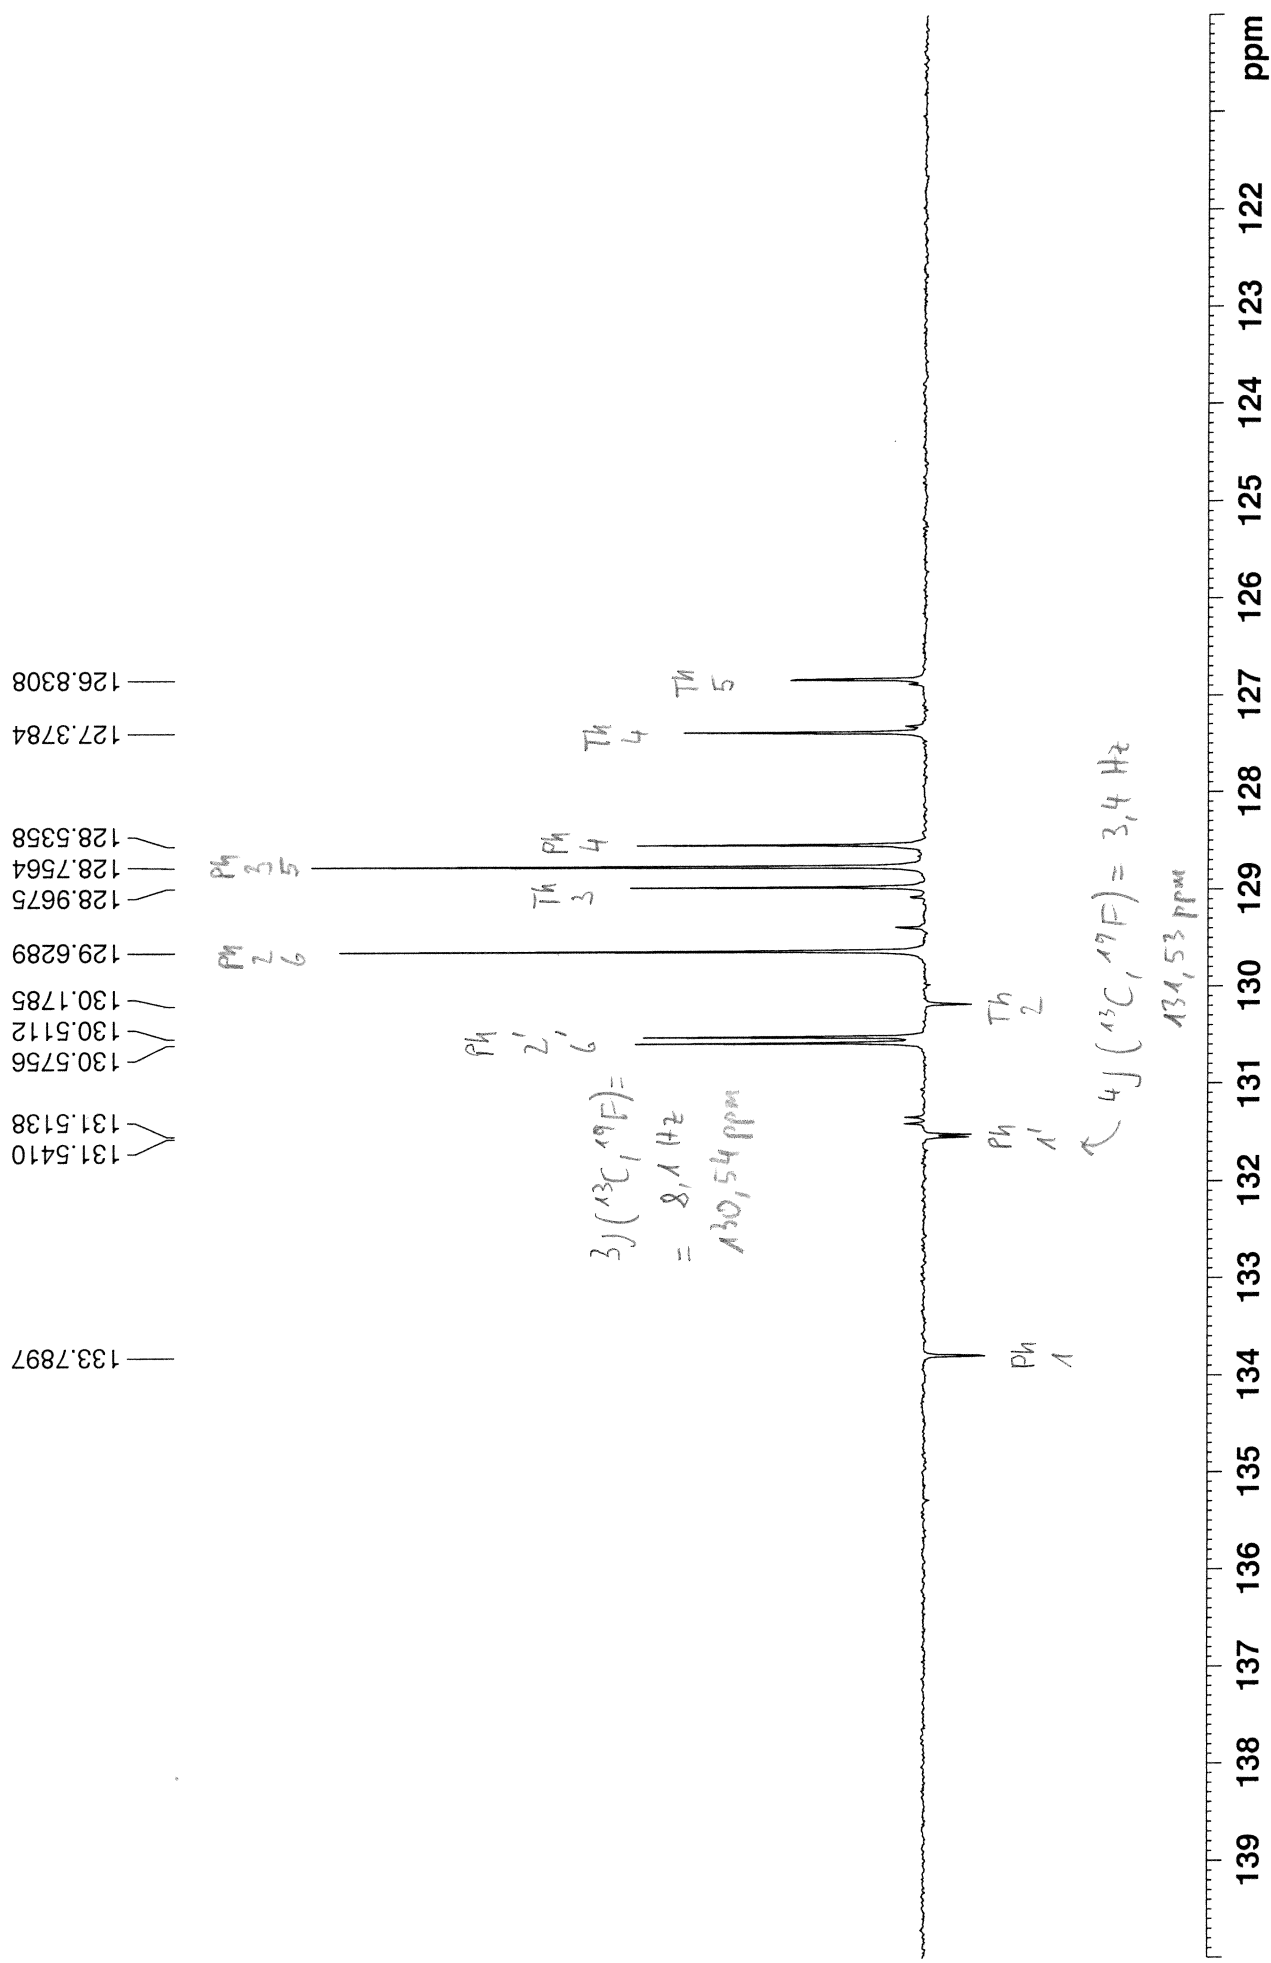

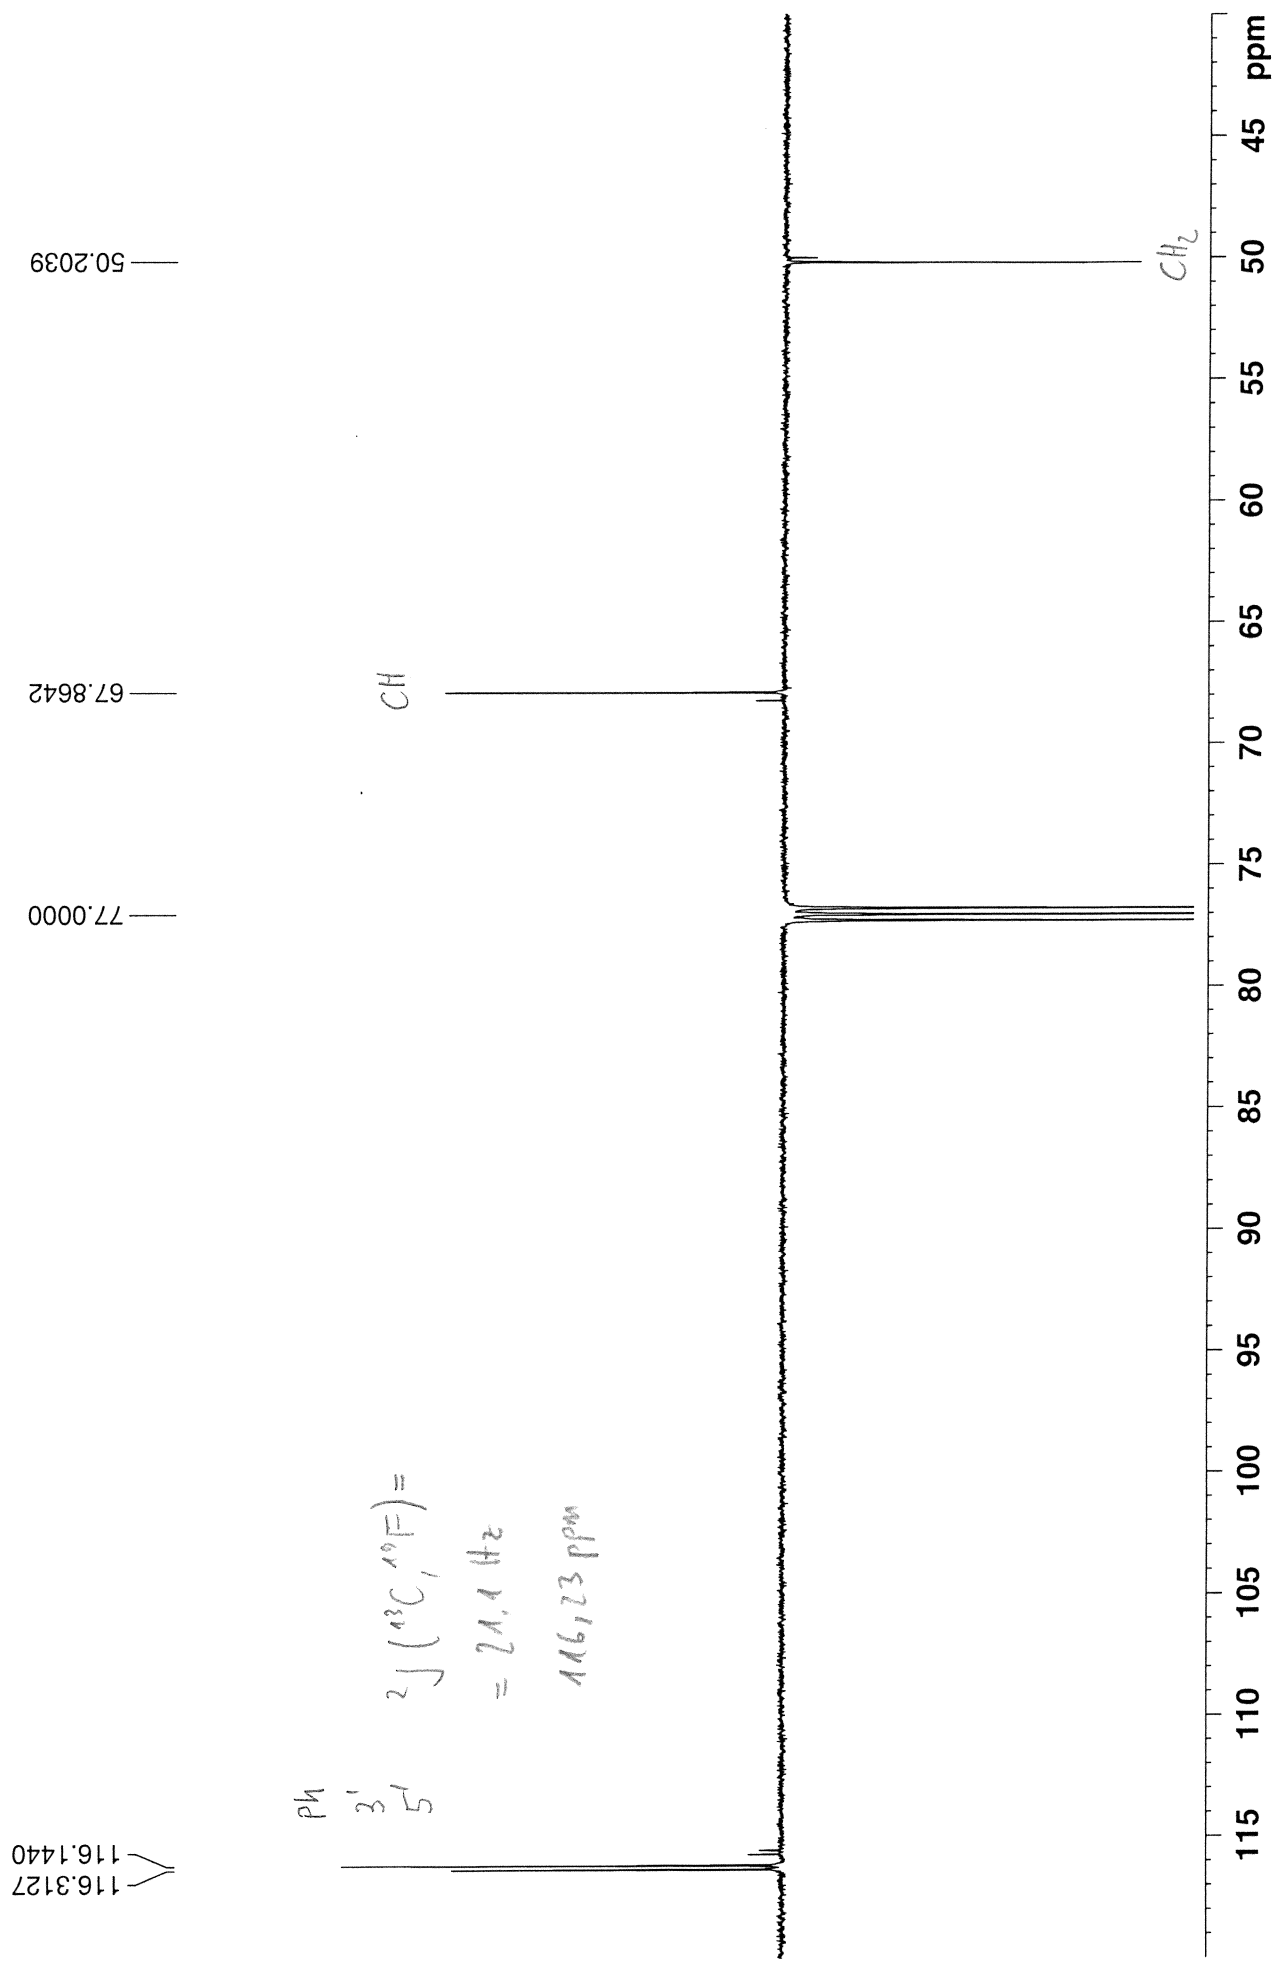

**Figure S13c.** NMR spectra of compound **5d**.

PN018-1 in cdcl3 (Proton) 29.7.2020

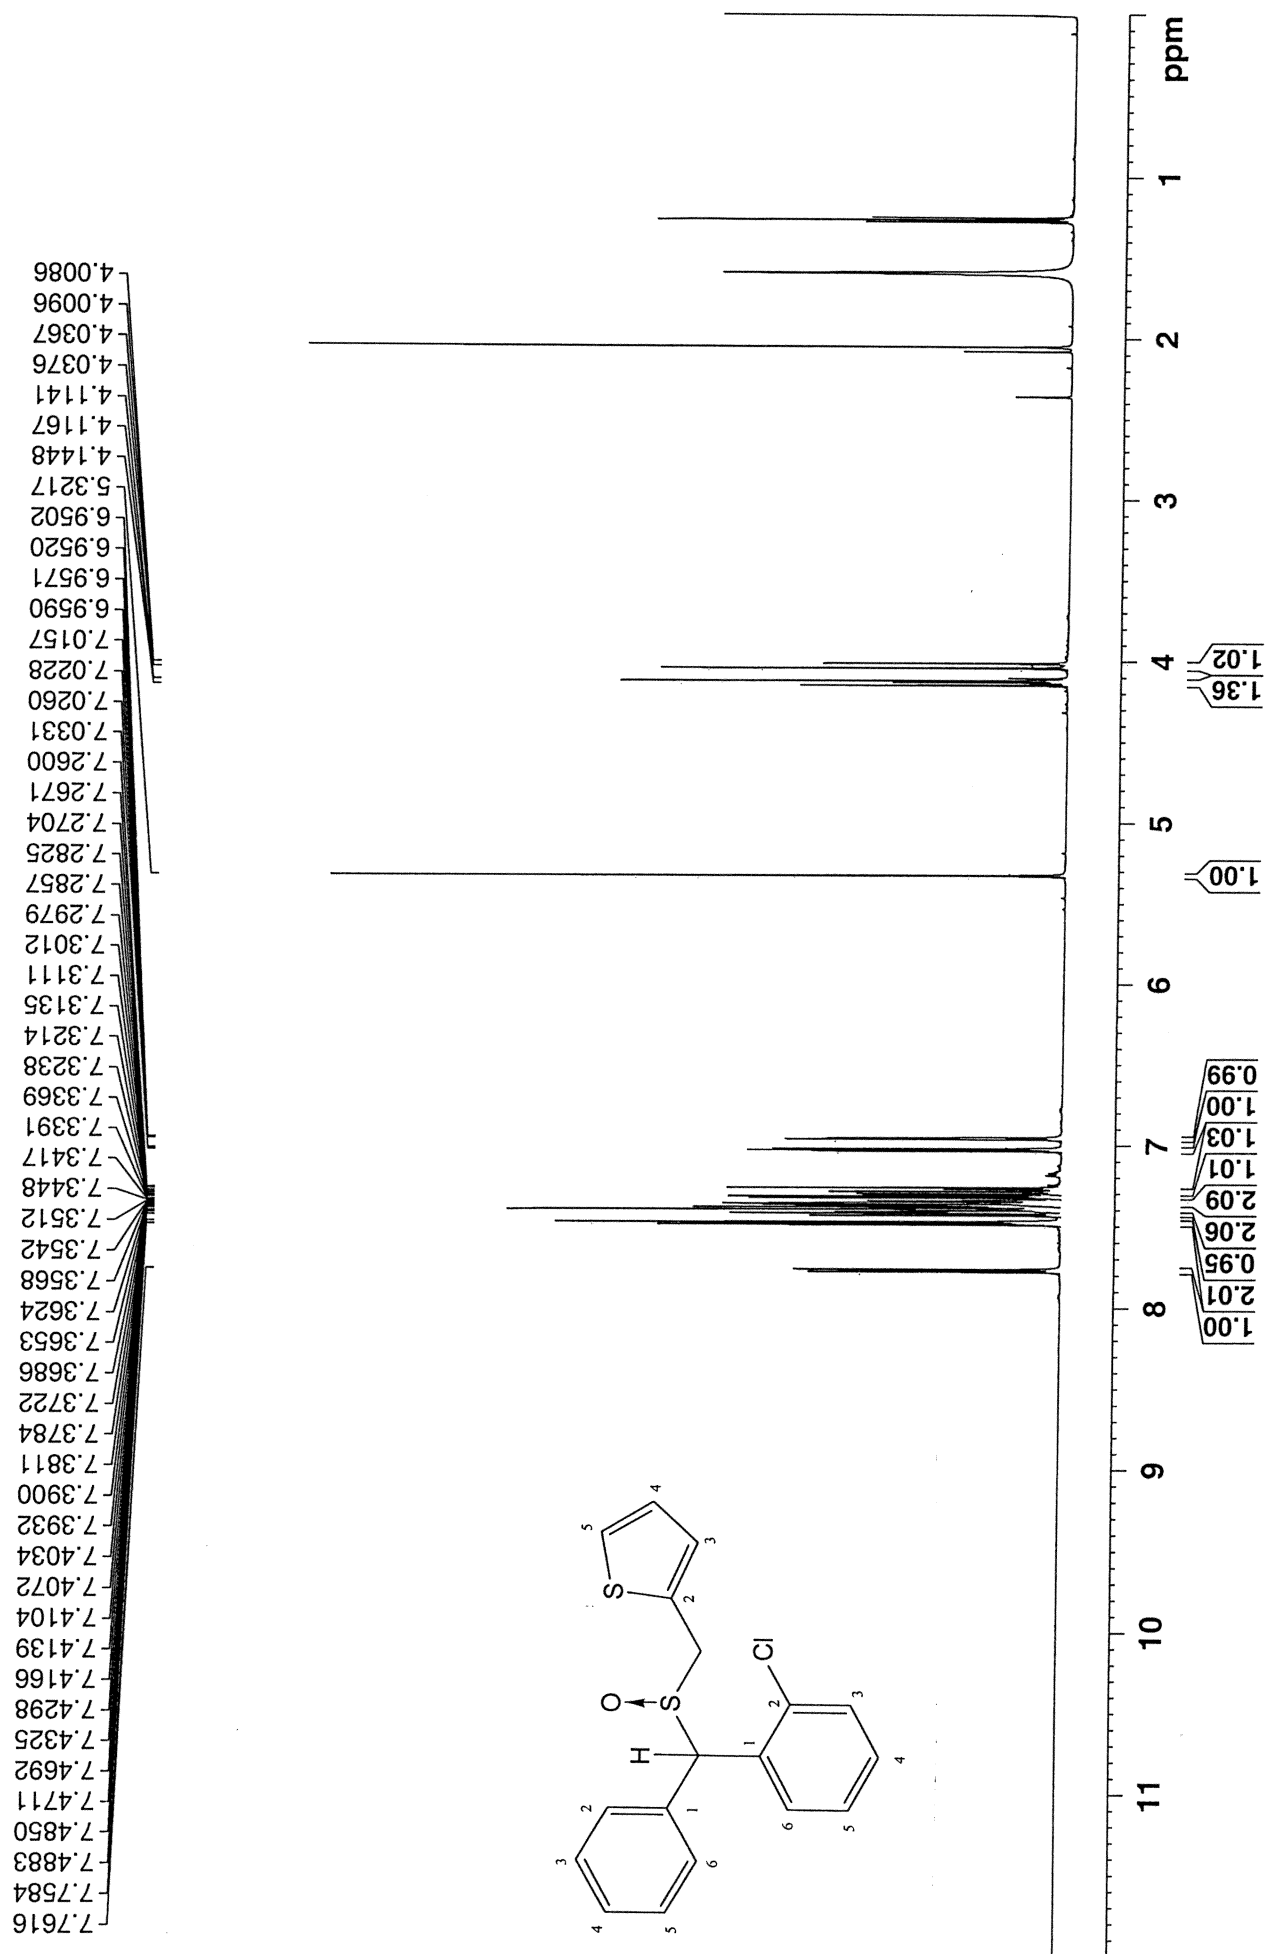

7.7772  
7.7739  
7.7616  
7.7584  
7.4883  
7.4850  
7.4711  
7.4692  
7.4325  
7.4298  
7.4166  
7.4139  
7.4104  
7.4072  
7.4034  
7.3932  
7.3900  
7.3811  
7.3784  
7.3722  
7.3686  
7.3653  
7.3624  
7.3568  
7.3542  
7.3512  
7.3448  
7.3417  
7.3391  
7.3369  
7.3238  
7.3214  
7.3135  
7.3111  
7.3012  
7.2979  
7.2857  
7.2825  
7.2704  
7.2671  
7.2600  
7.0331  
7.0260  
7.0228  
7.0157  
6.9590  
6.9571  
6.9520  
6.9502

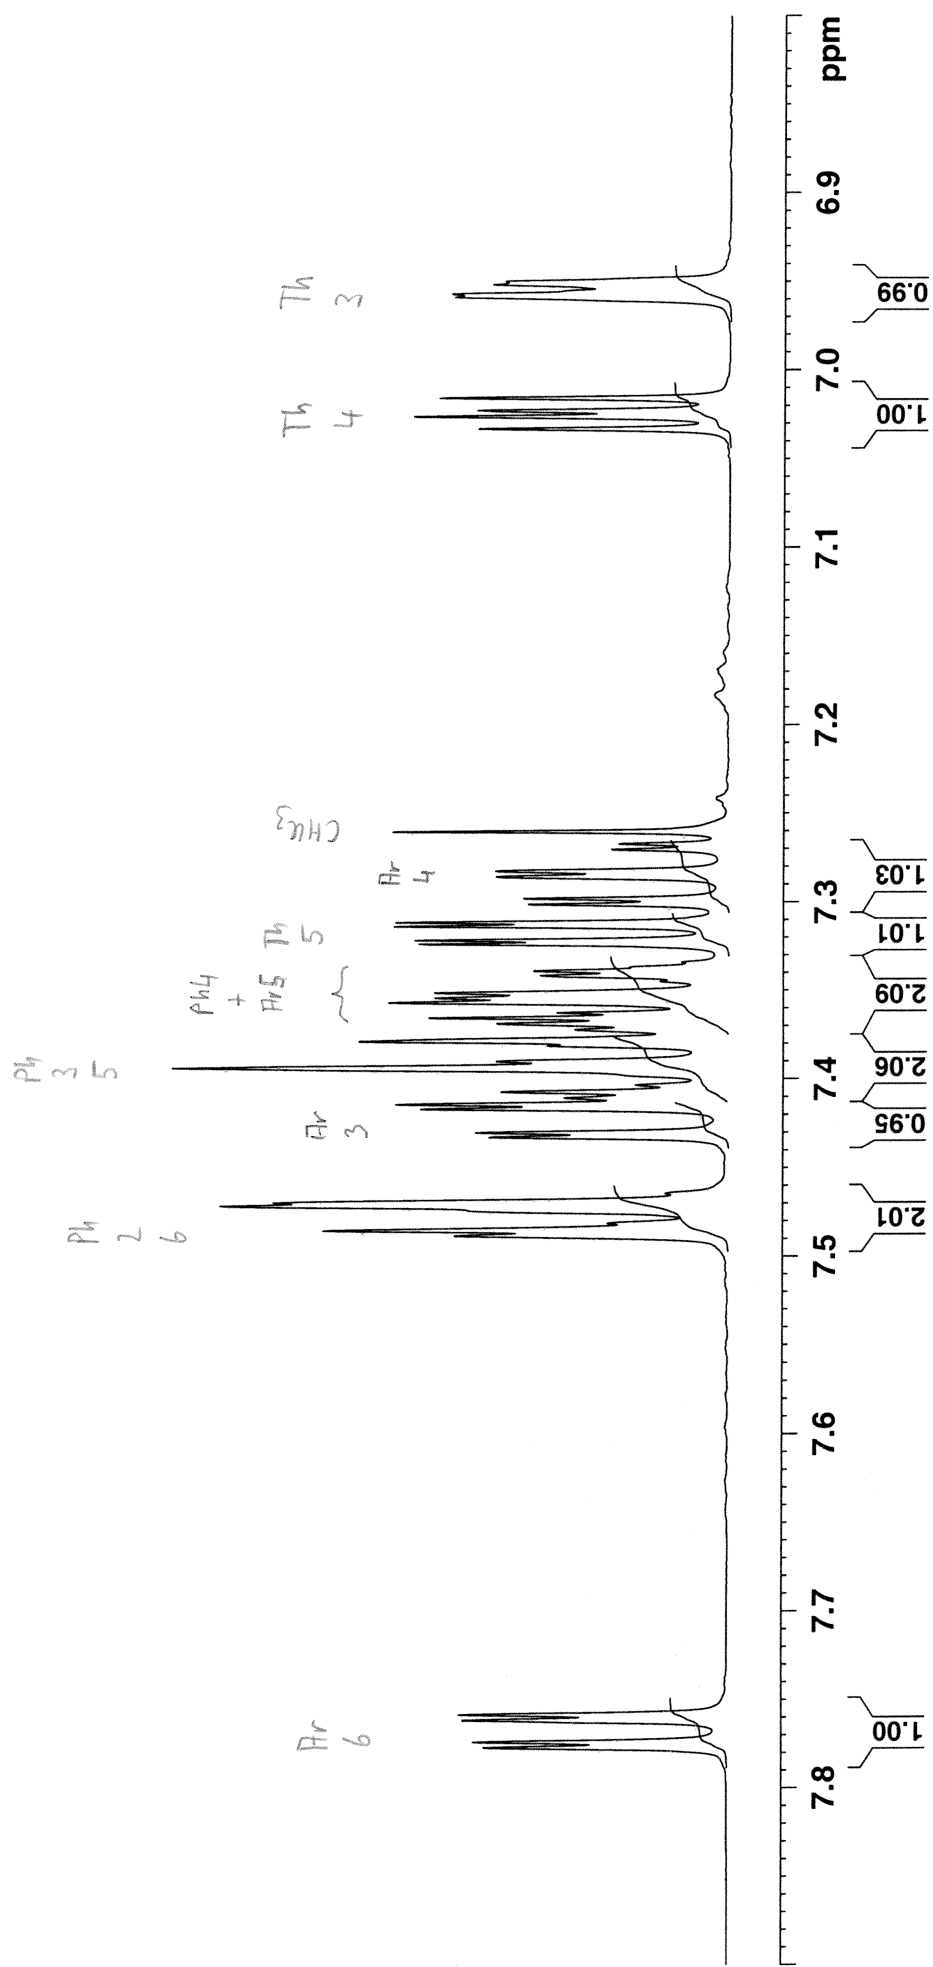

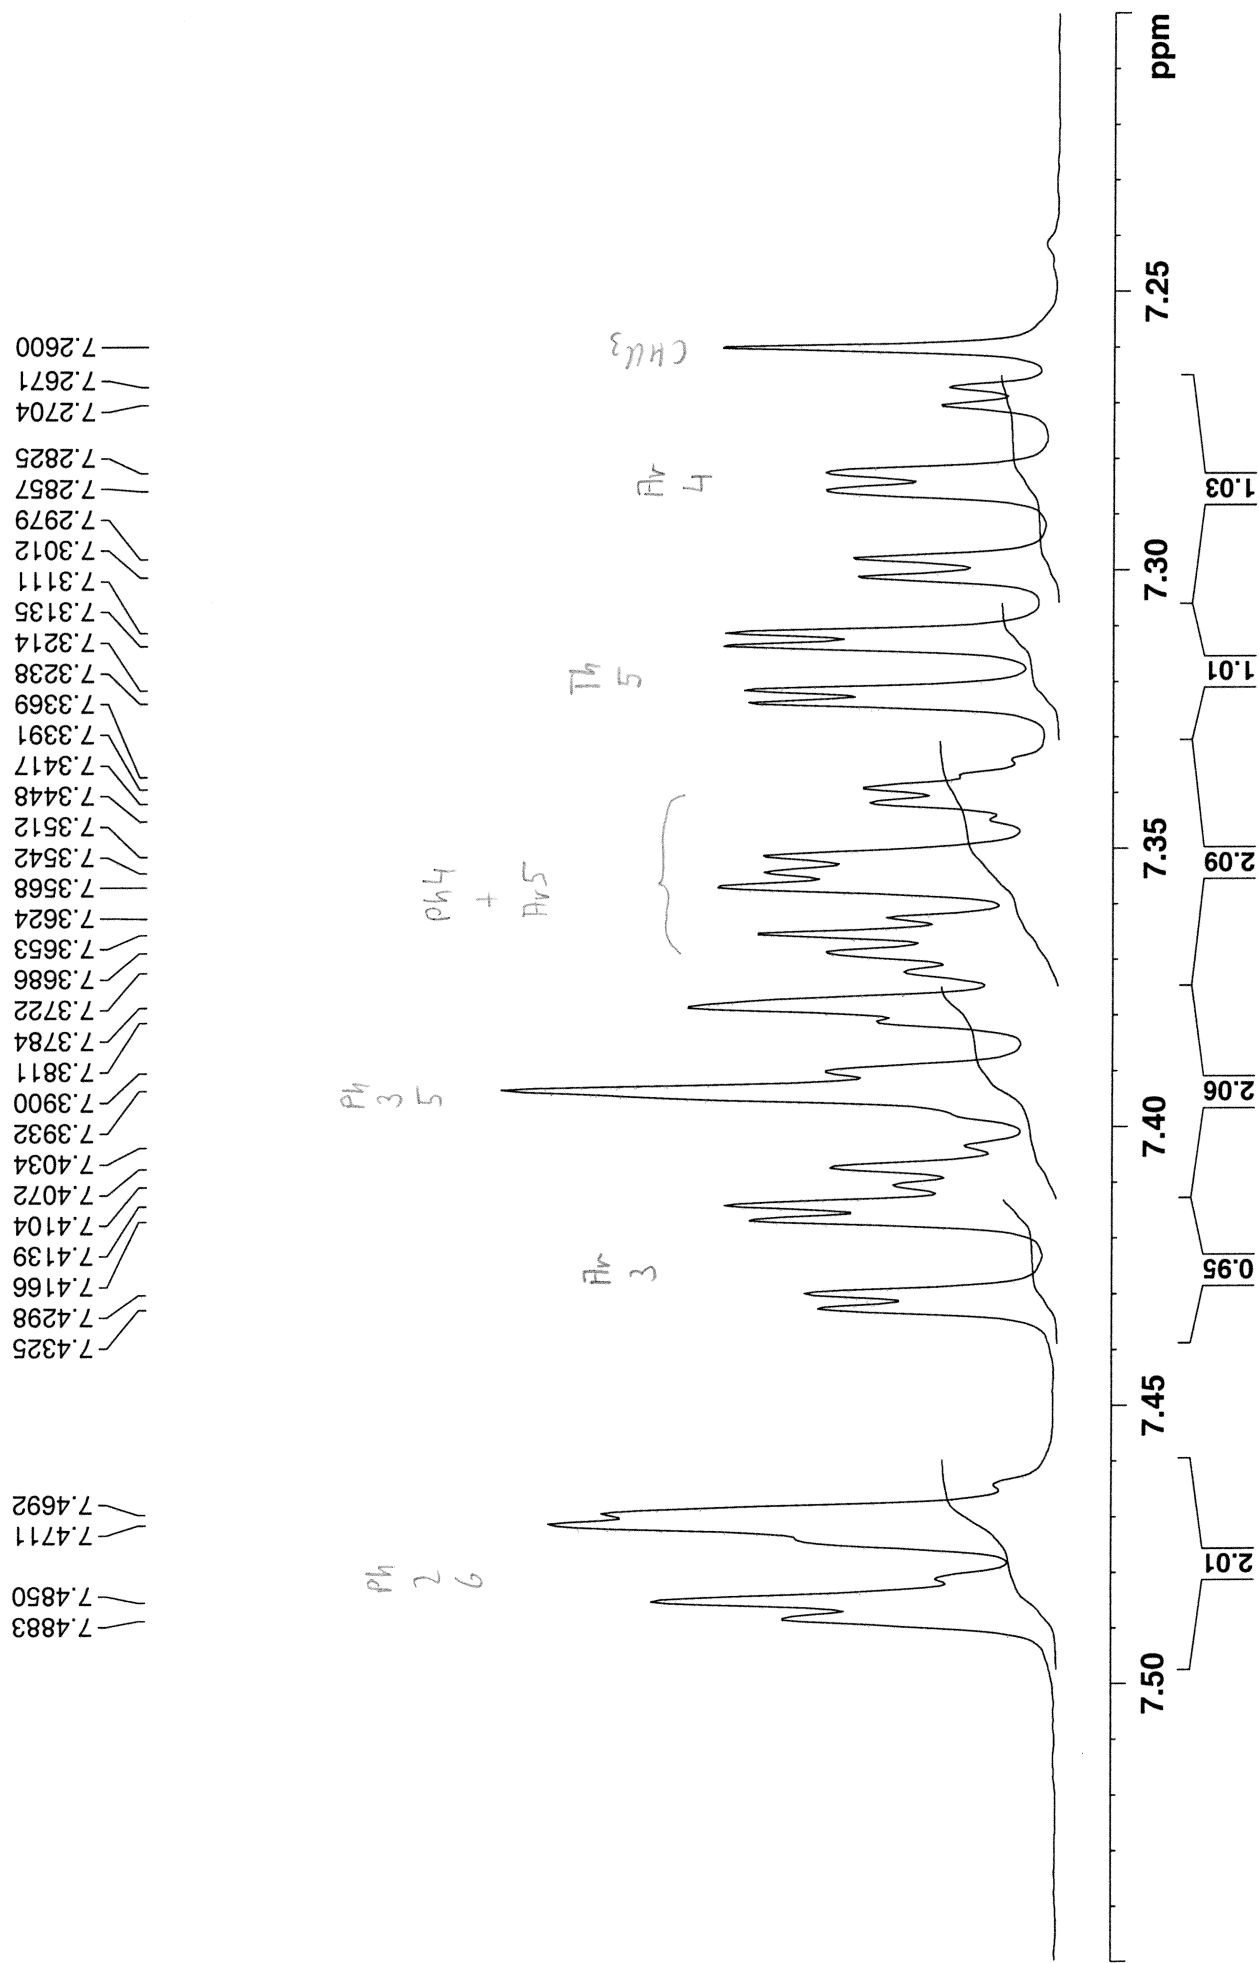



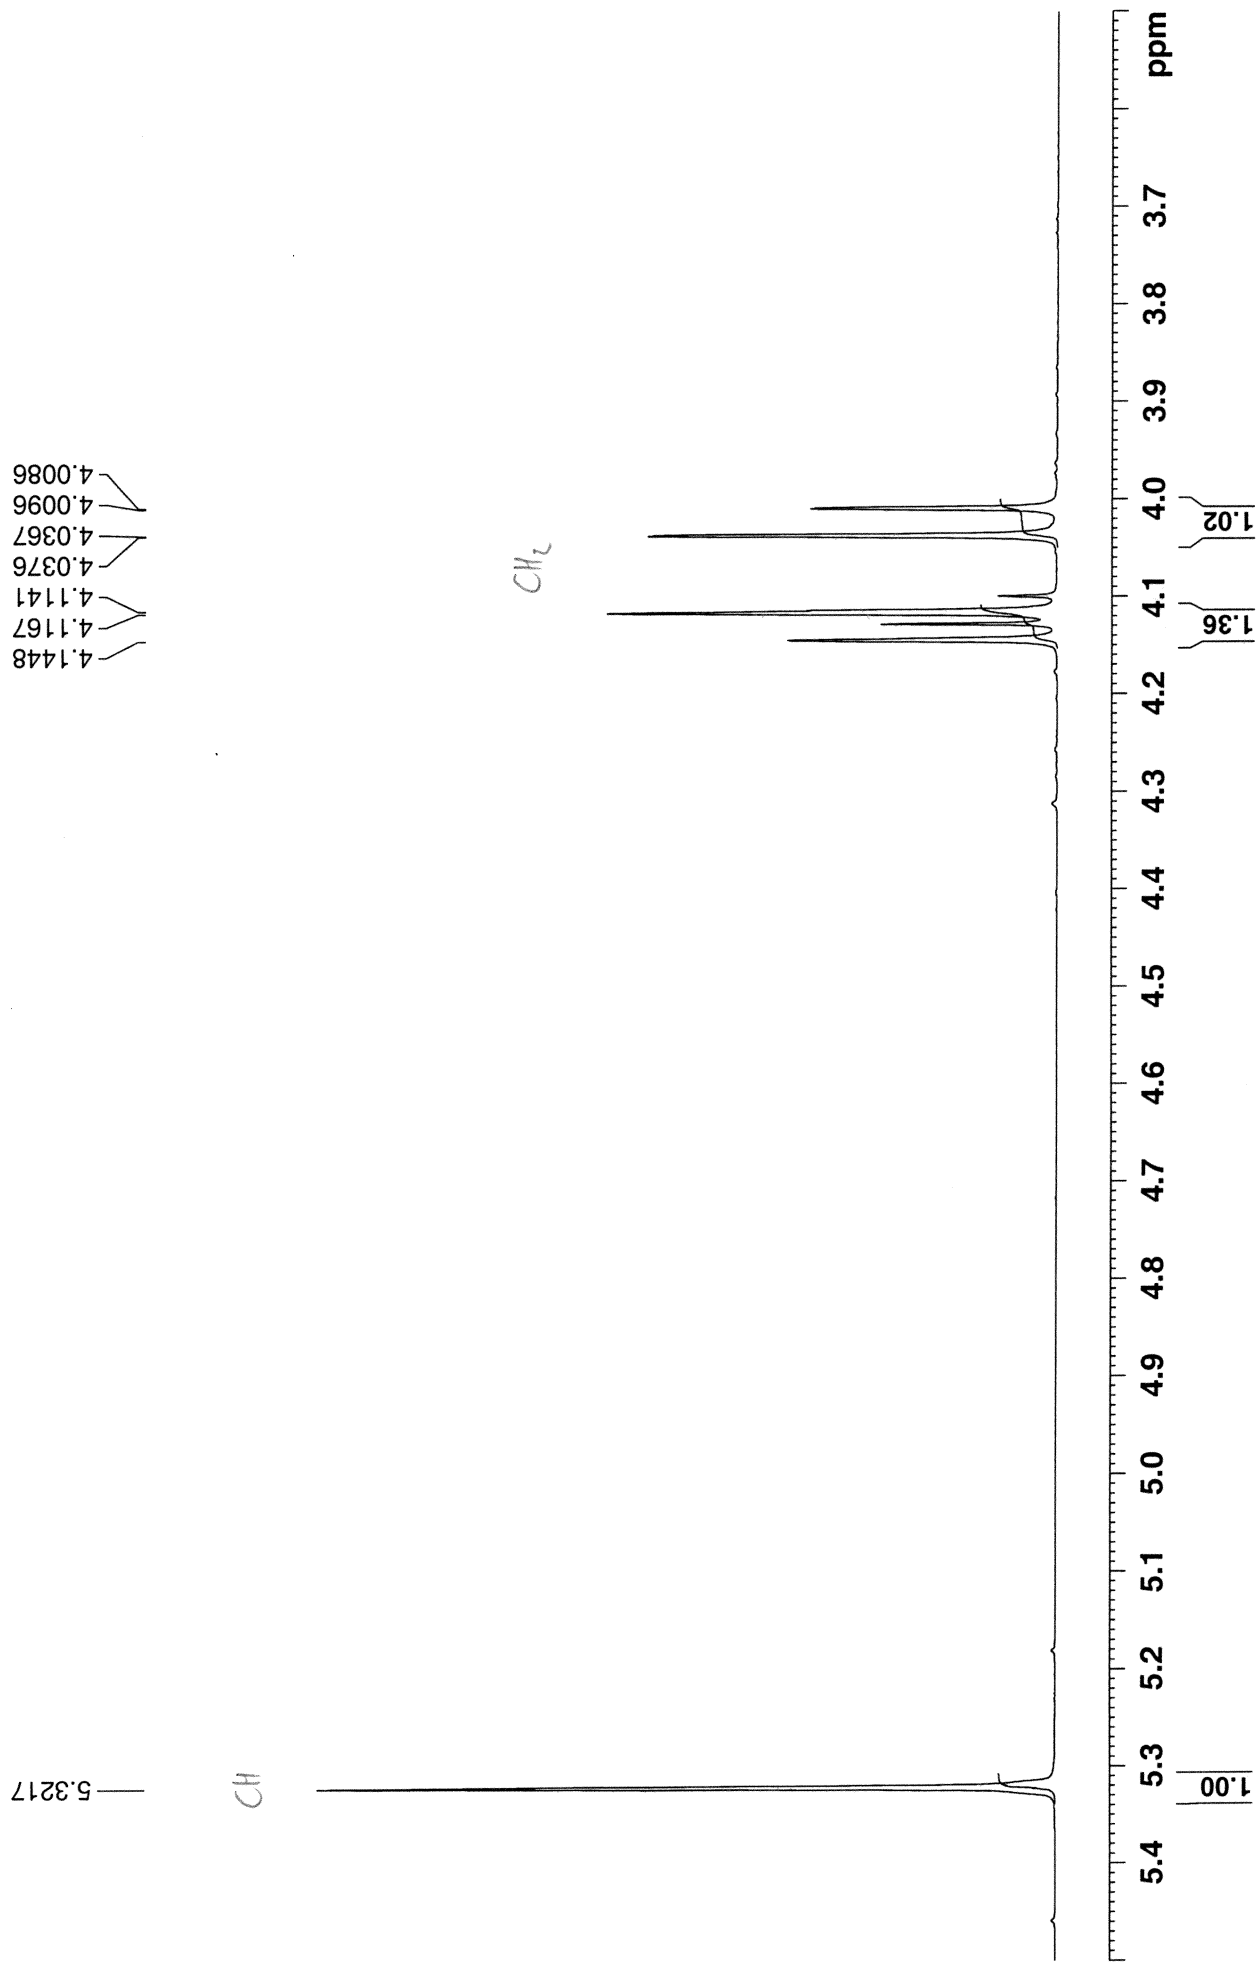

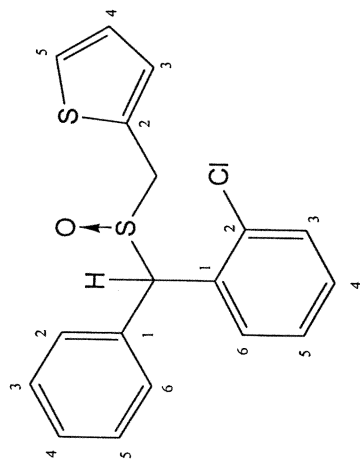

134.3901  
134.0358  
132.7813  
130.4740  
130.3349  
130.0884  
129.5285  
129.3893  
128.9191  
128.6826  
128.5617  
127.4771  
127.4498  
126.8800

77.0000  
64.7690  
50.9914

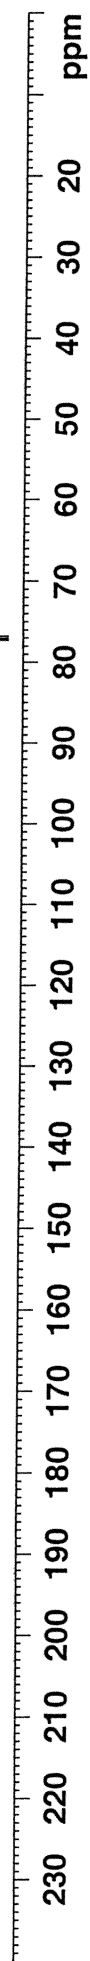

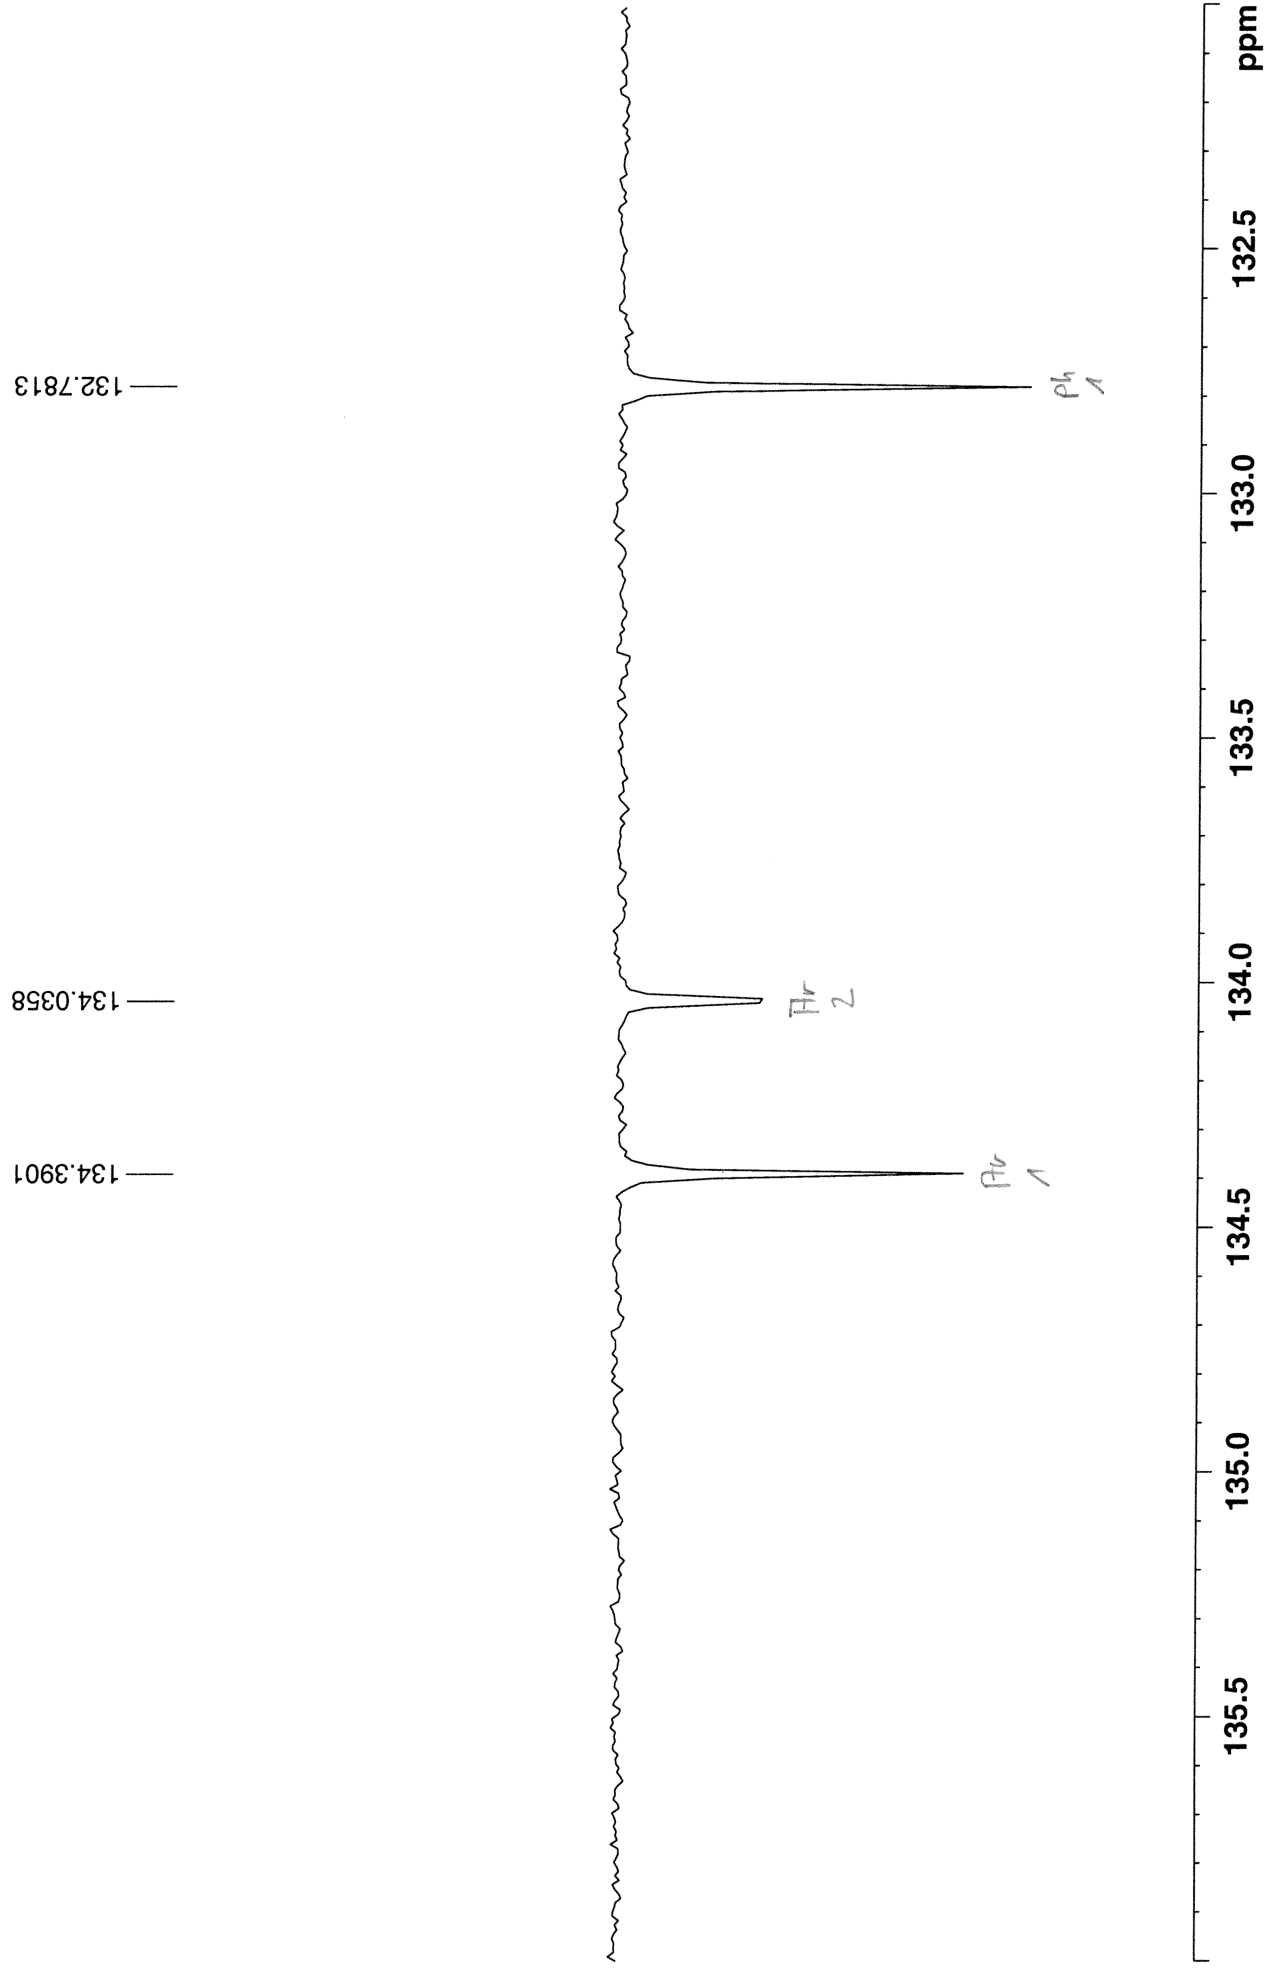

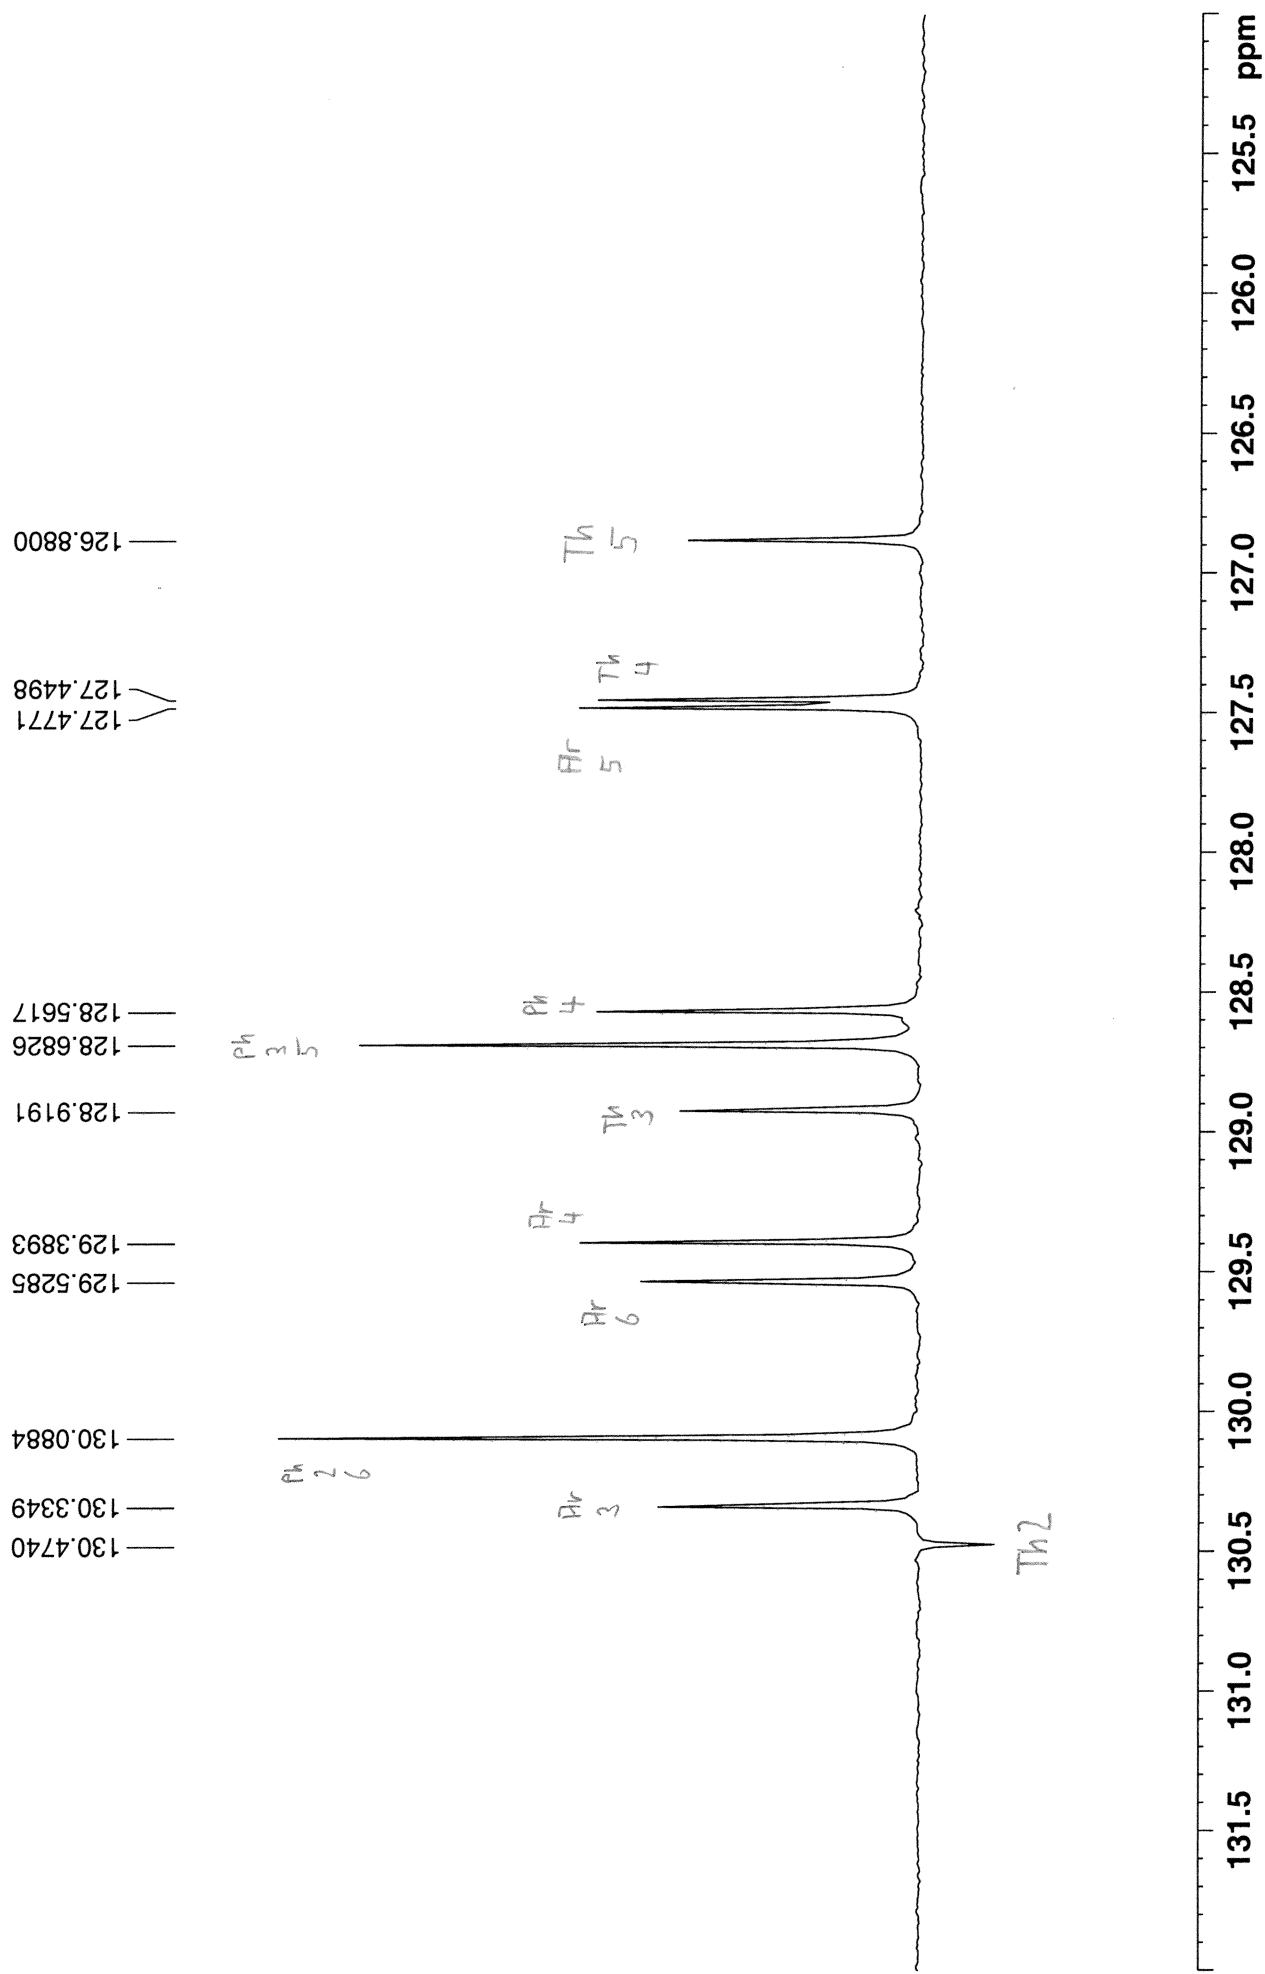

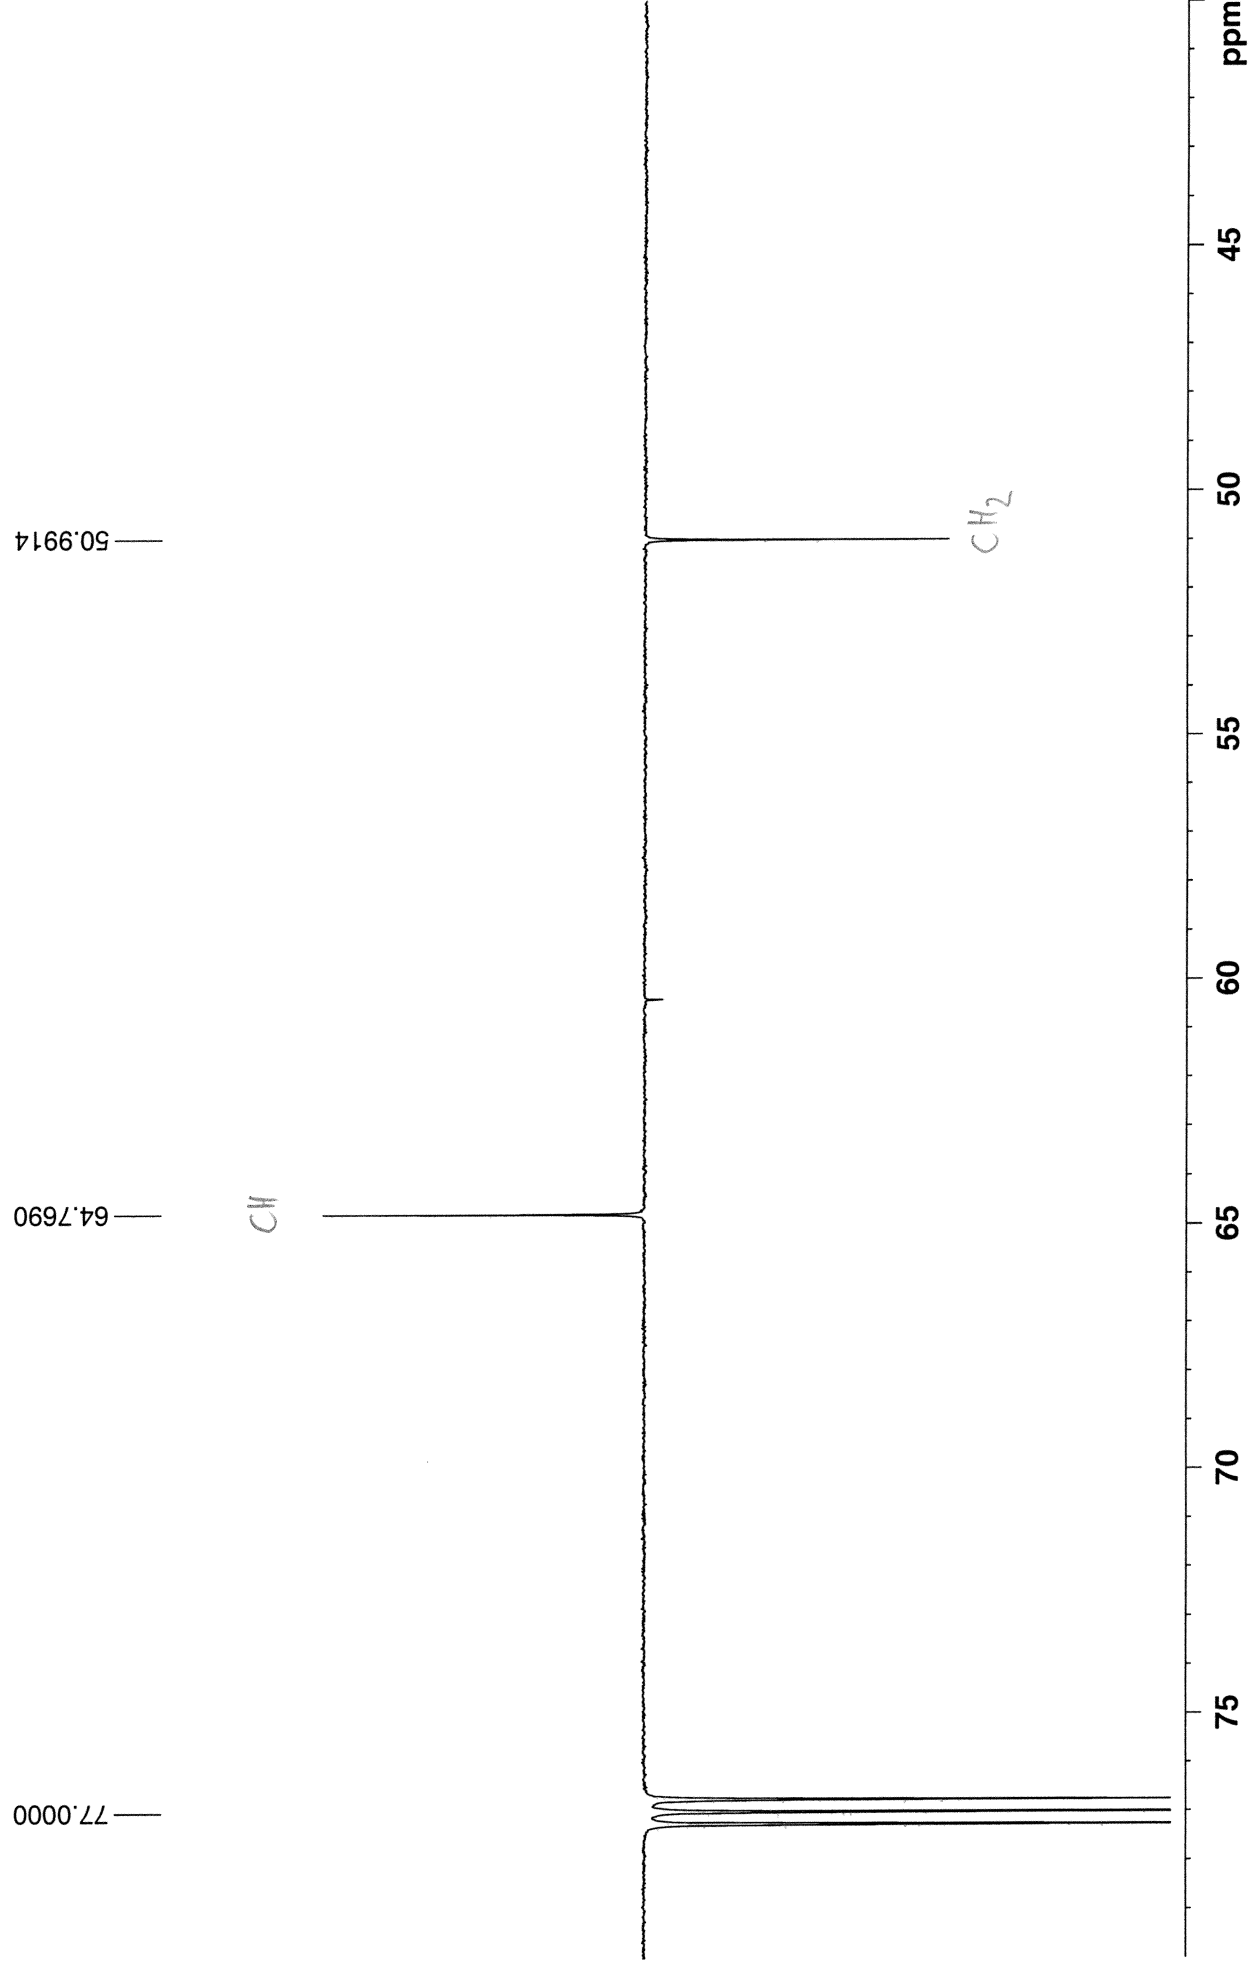

PN018-1 in cdcl3 (COSY) 29.7.2020

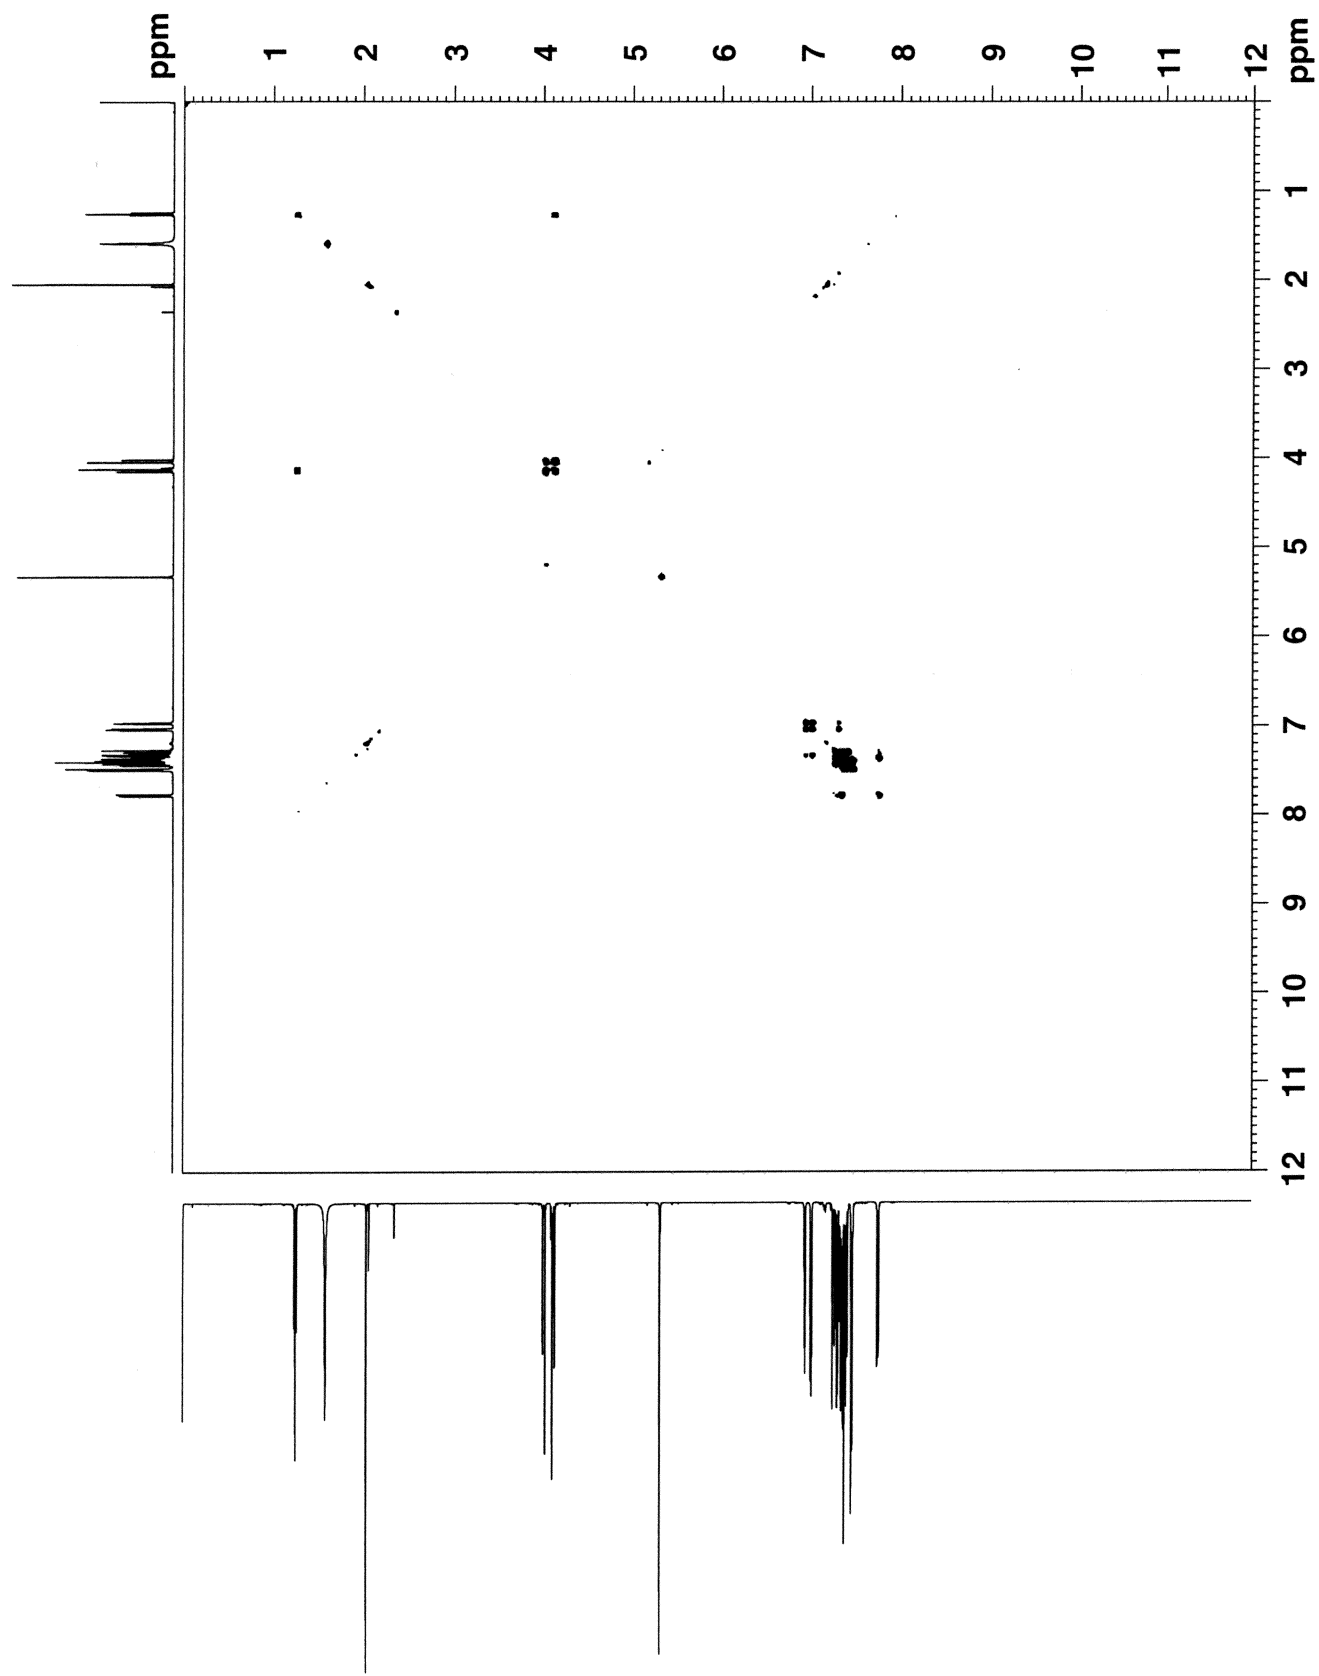

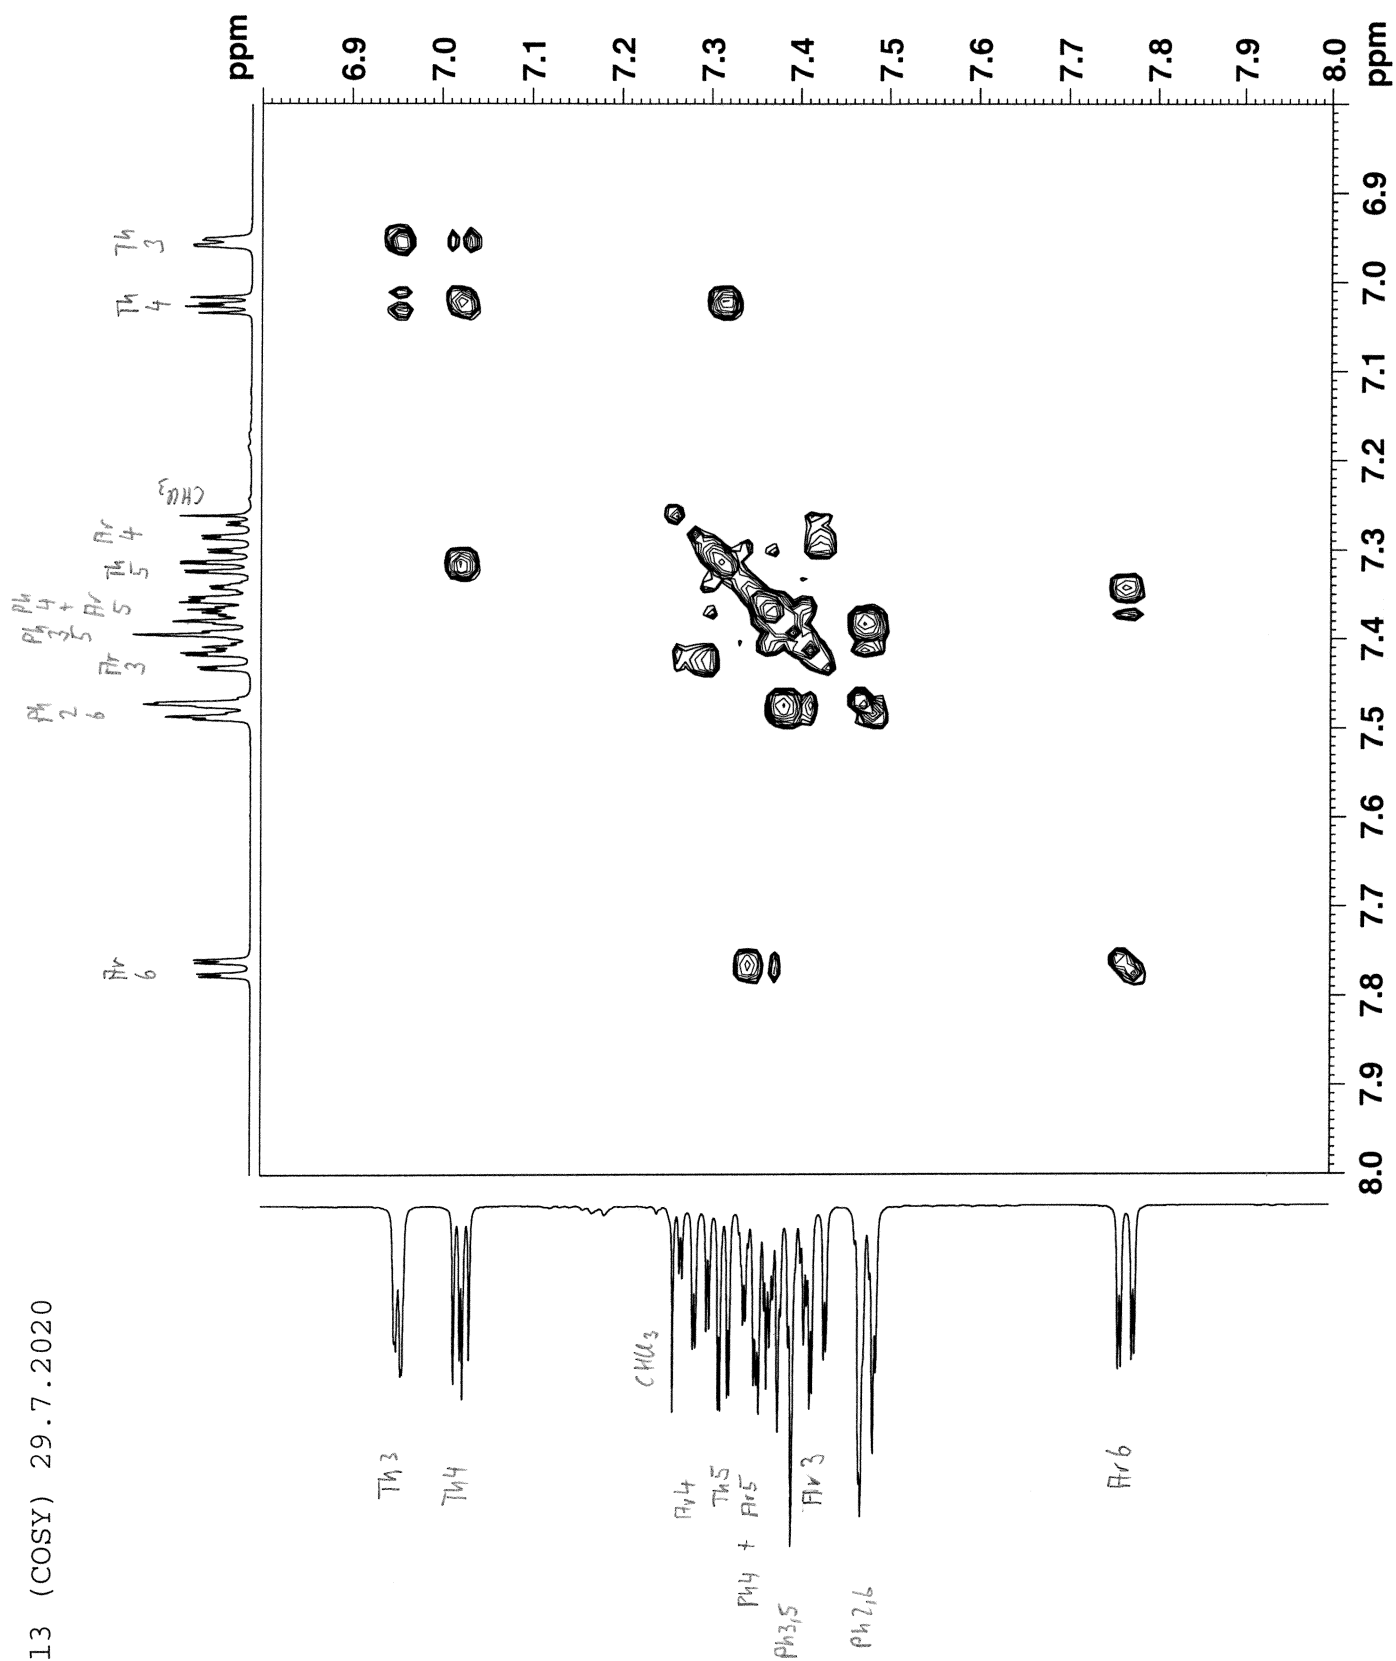

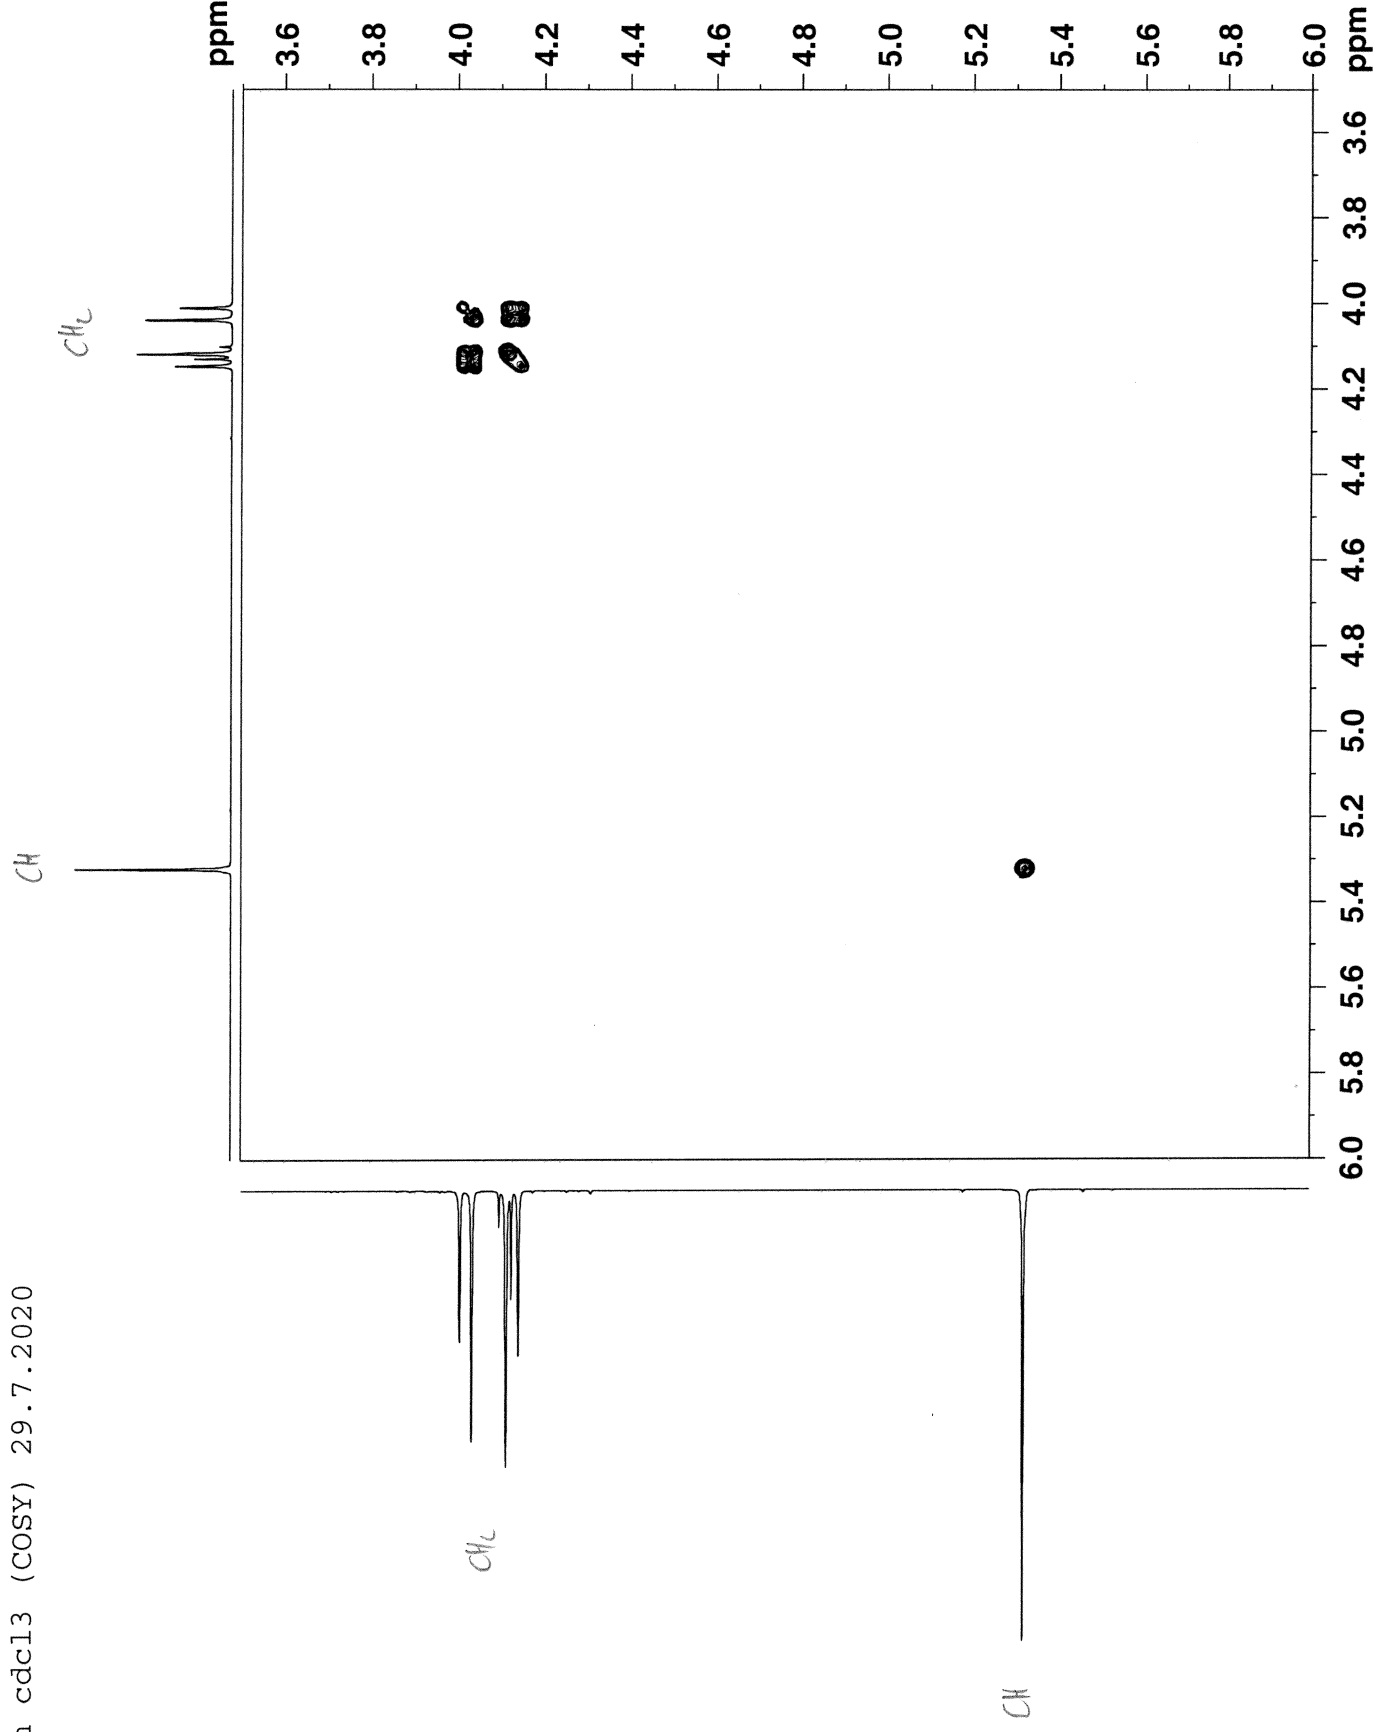



PN018-1 in cdcl3 (HSQC) 29.7.2020

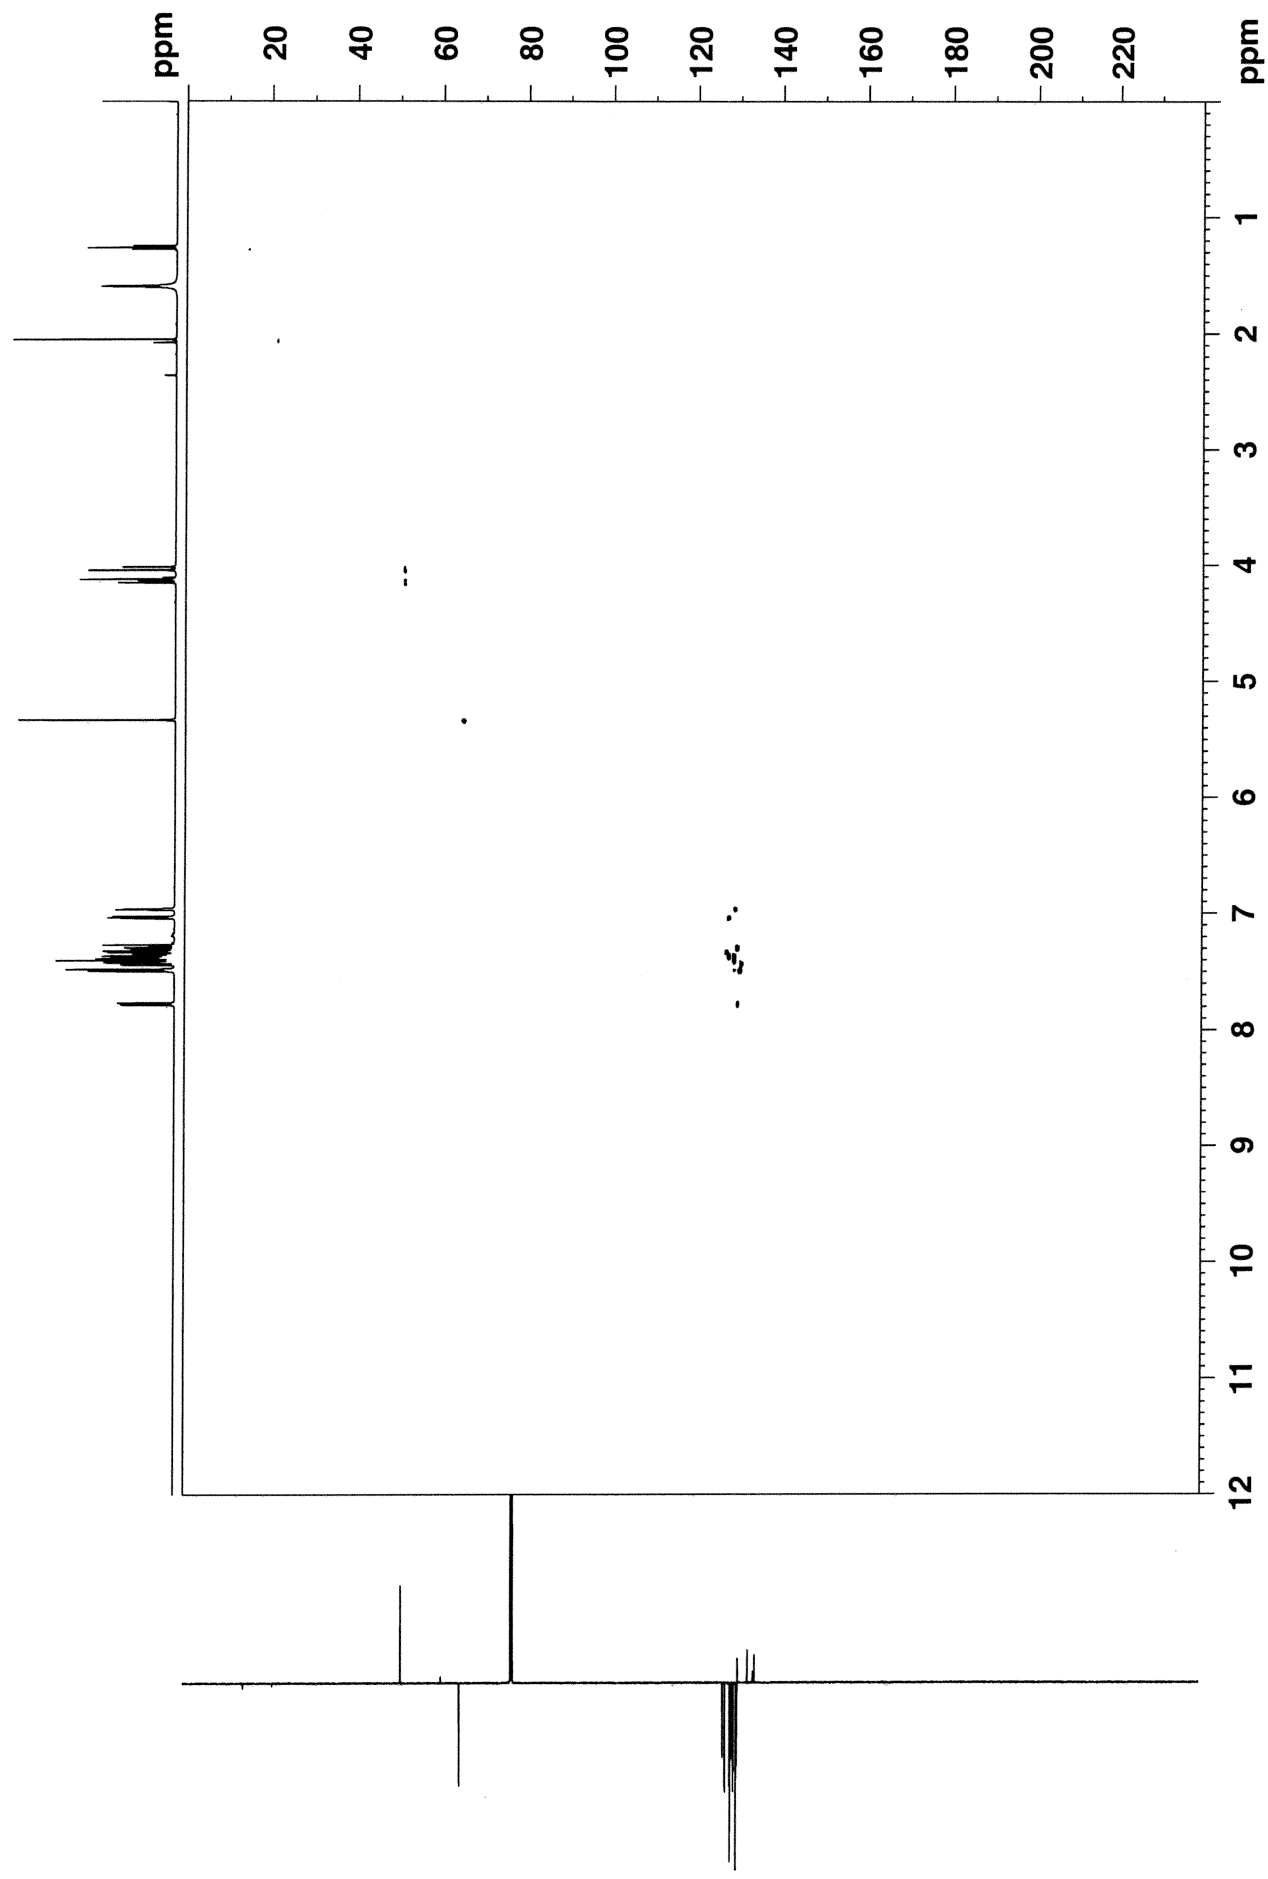

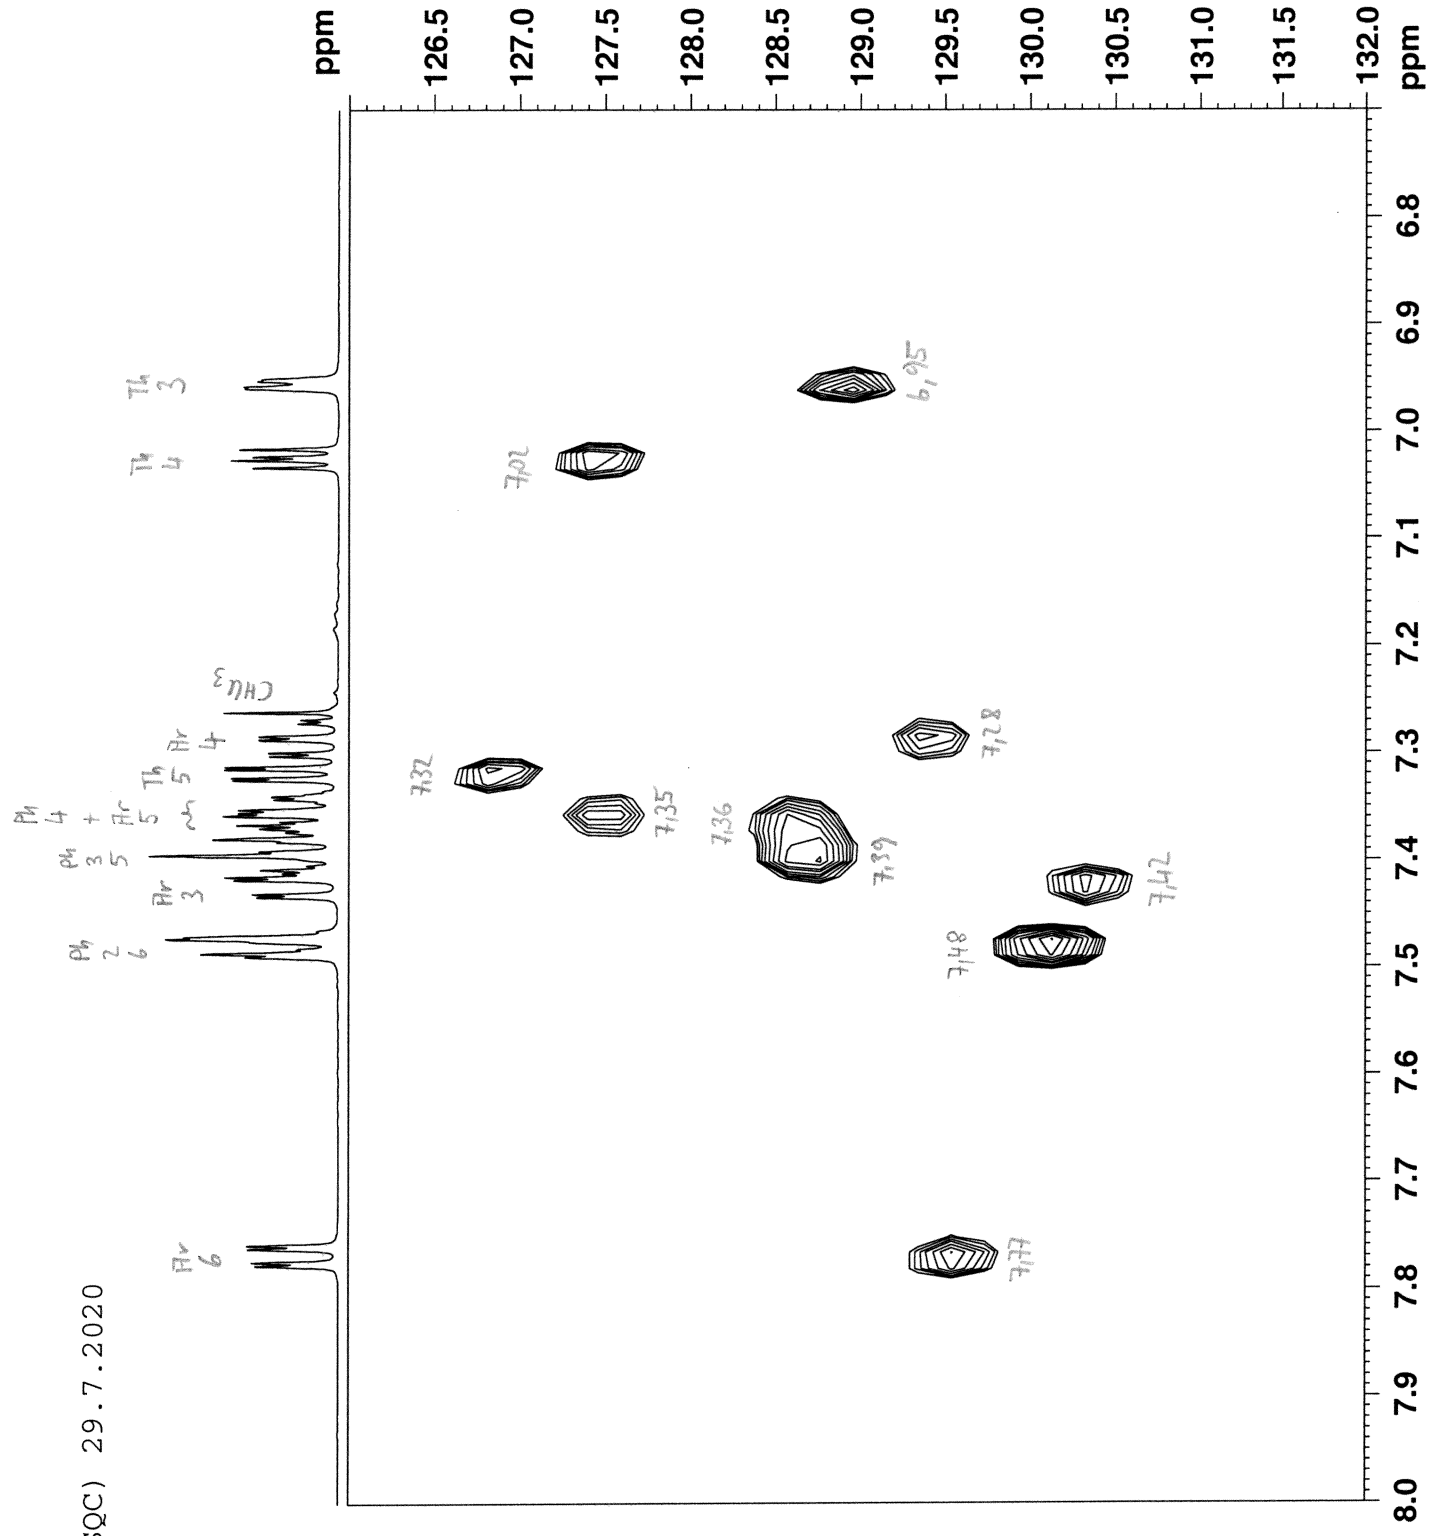

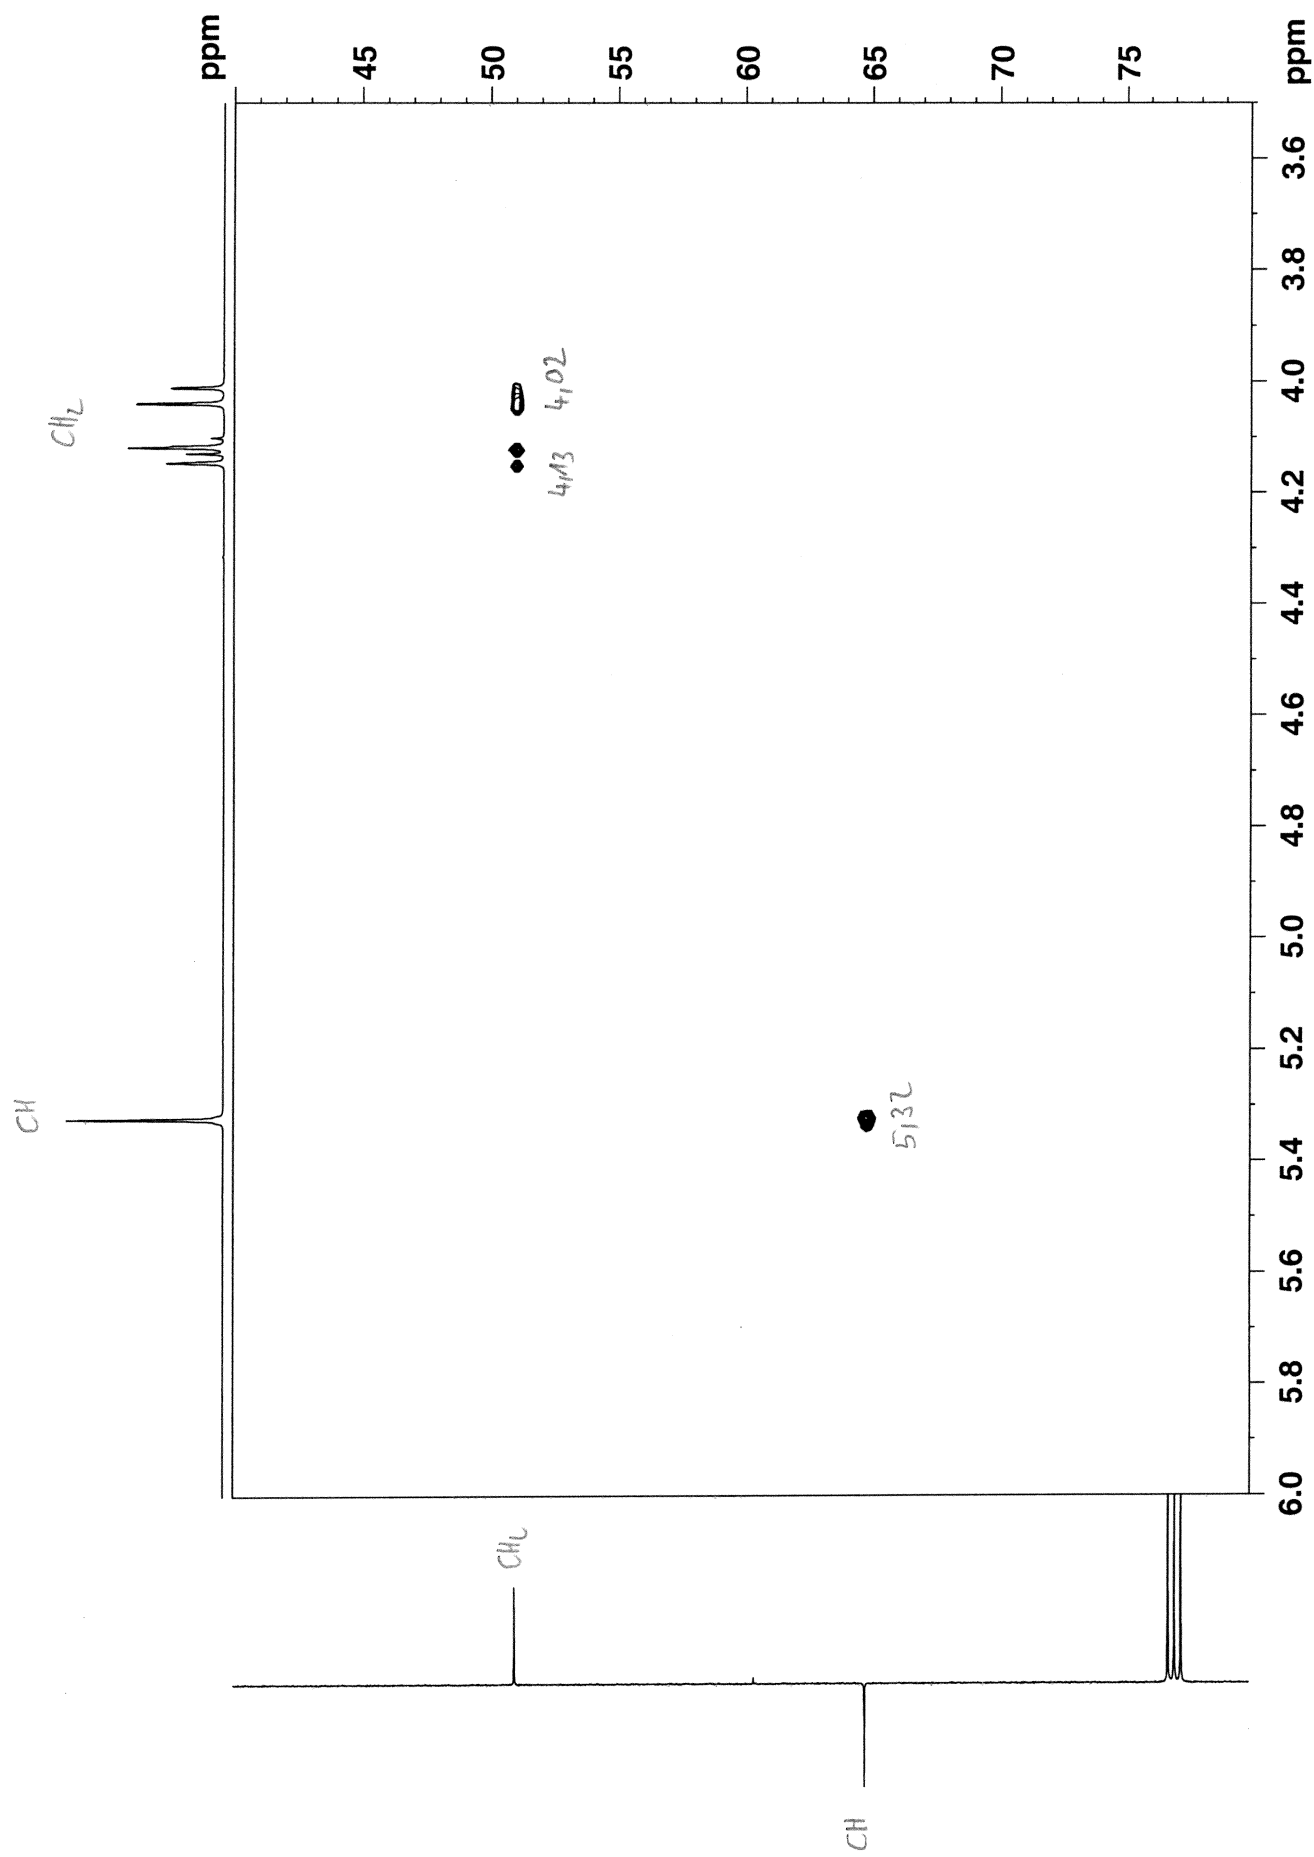

PN018-1 in cdcl3 (HMBC) 29.7.2020

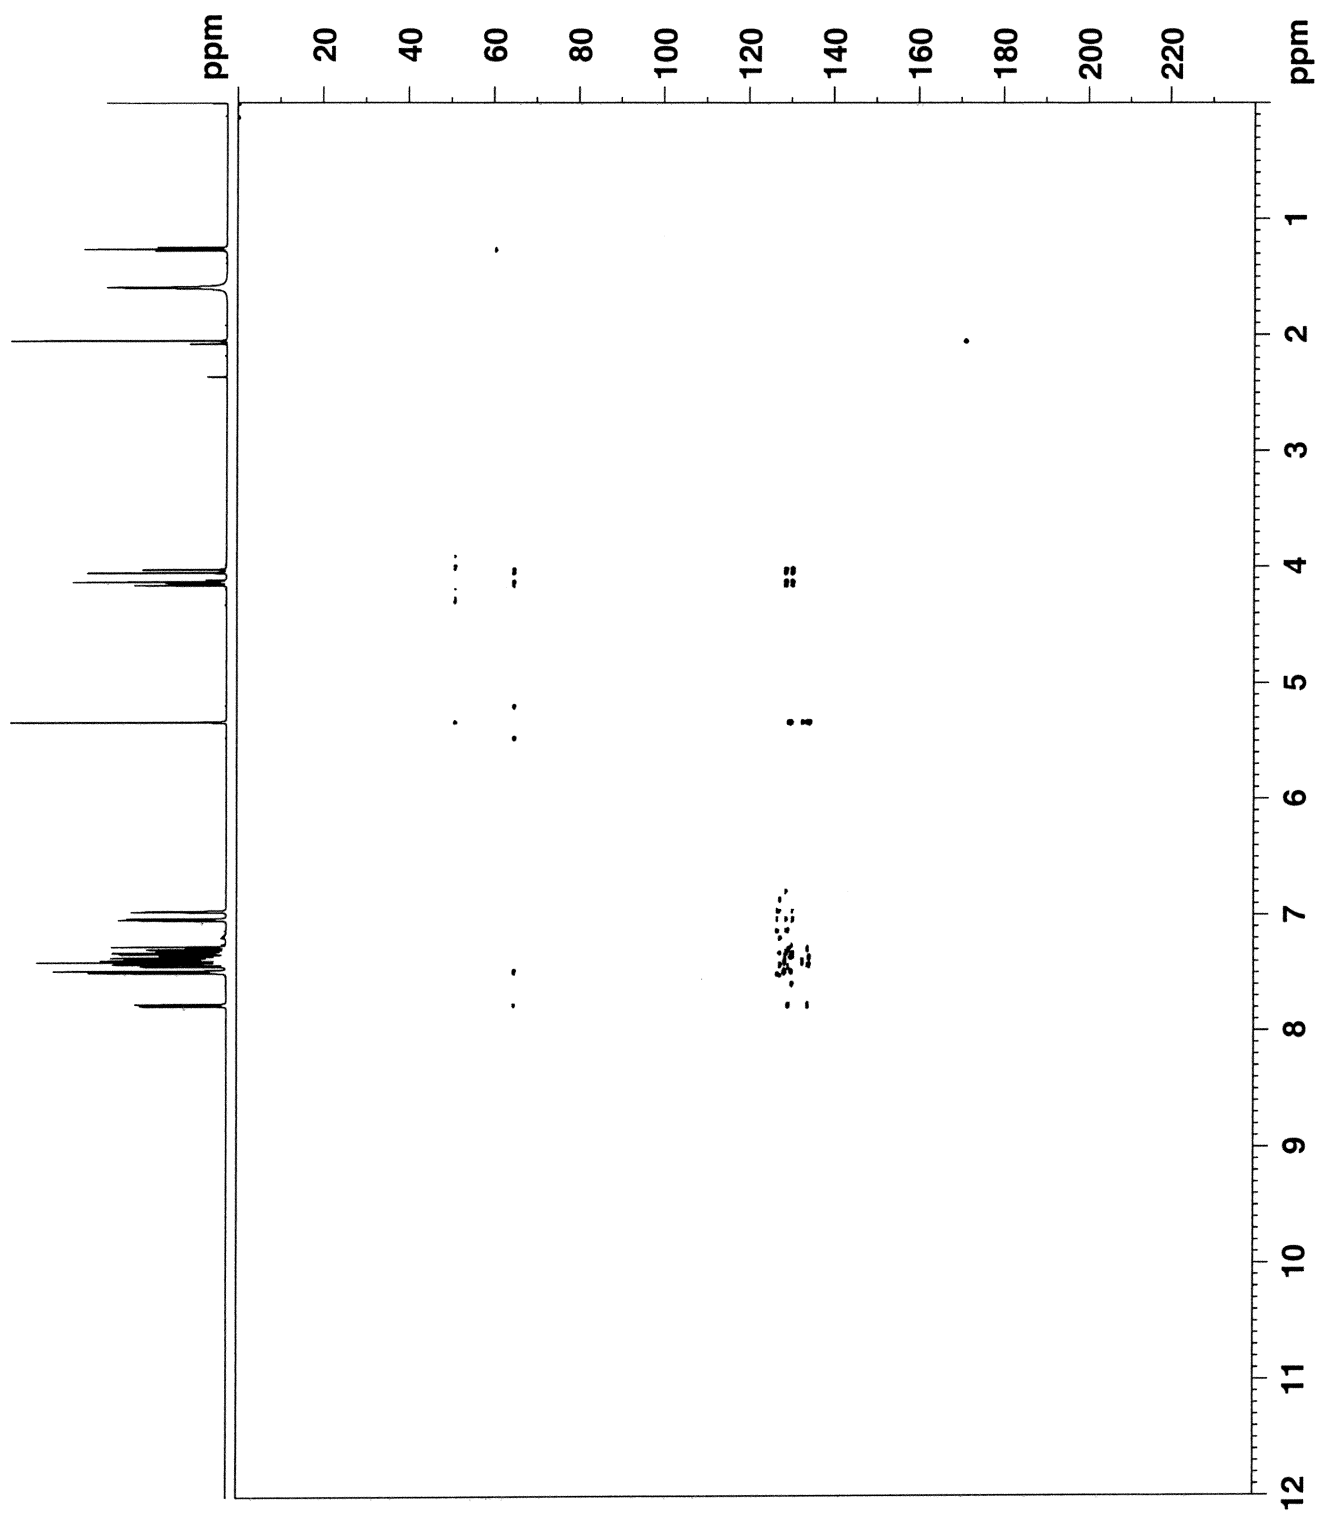

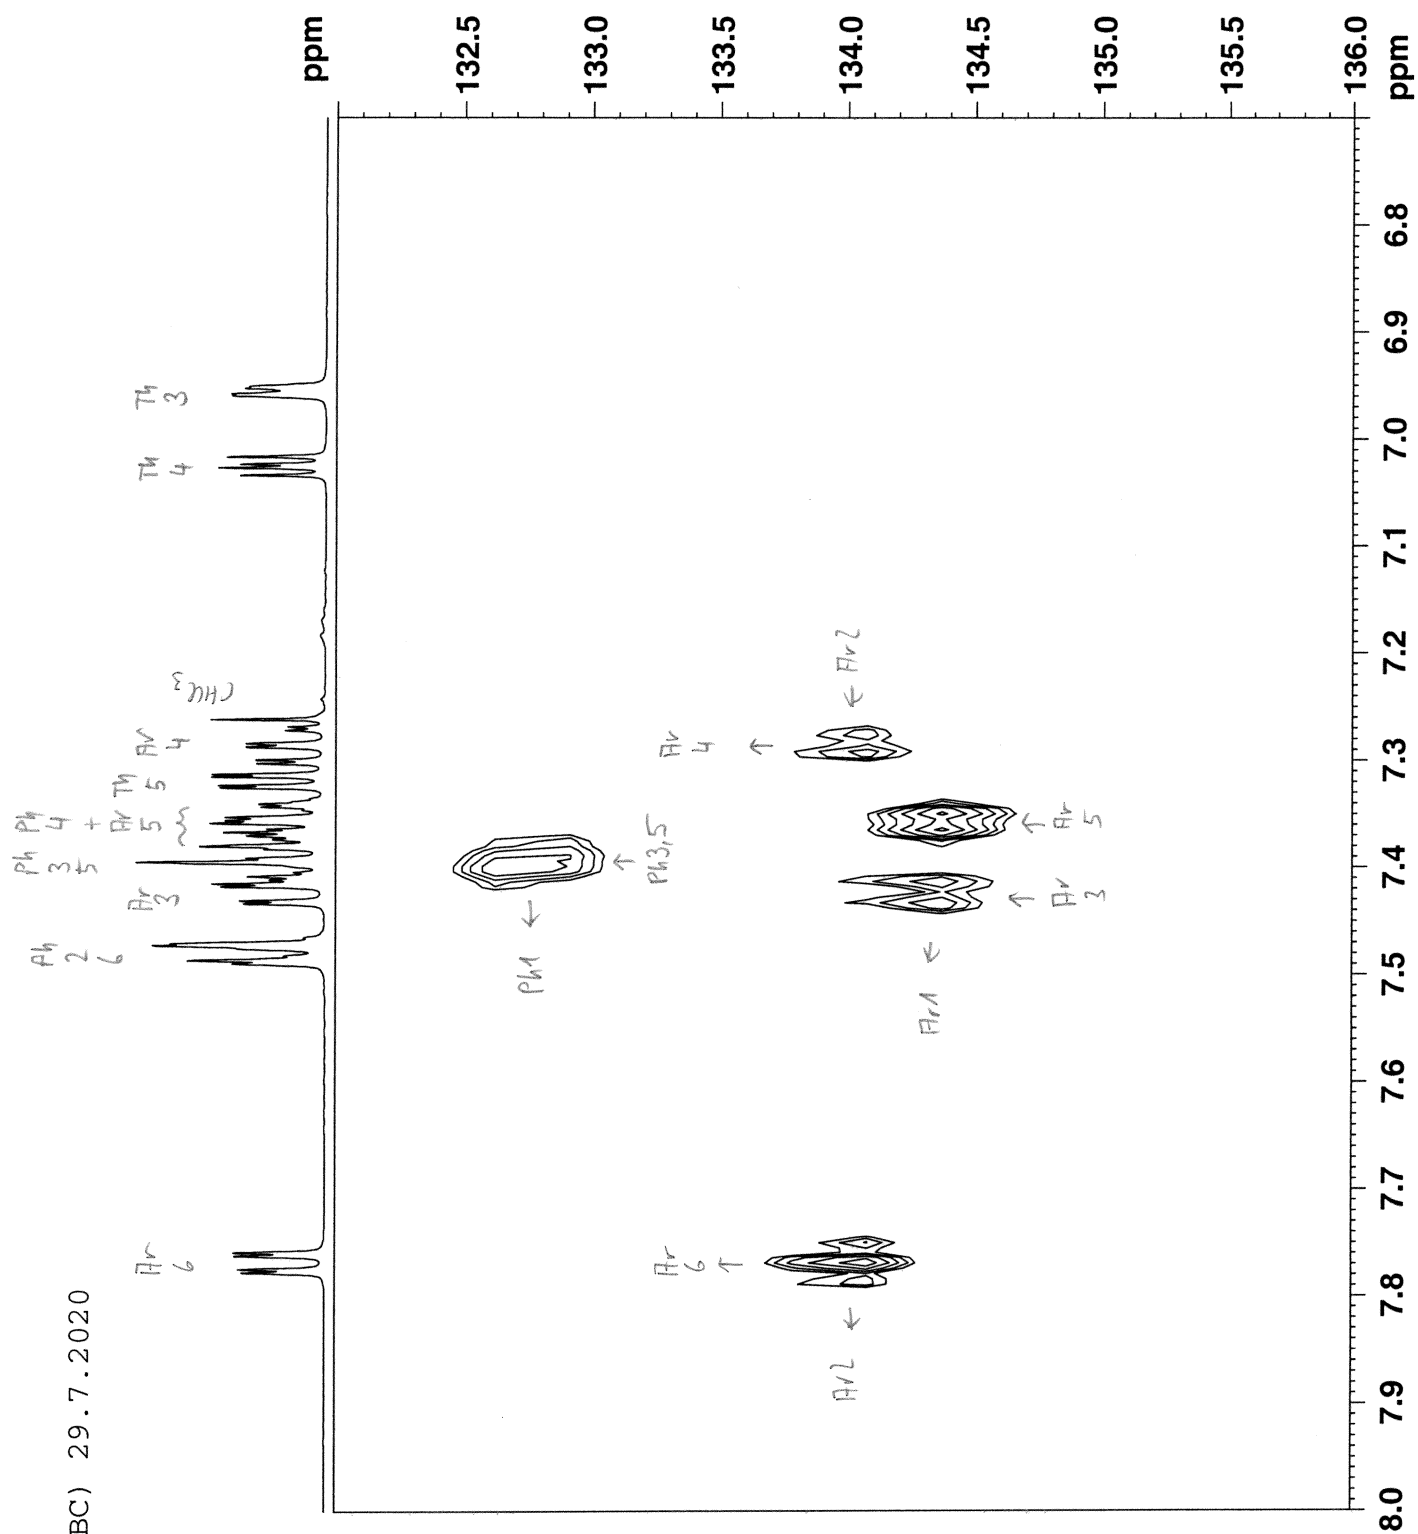

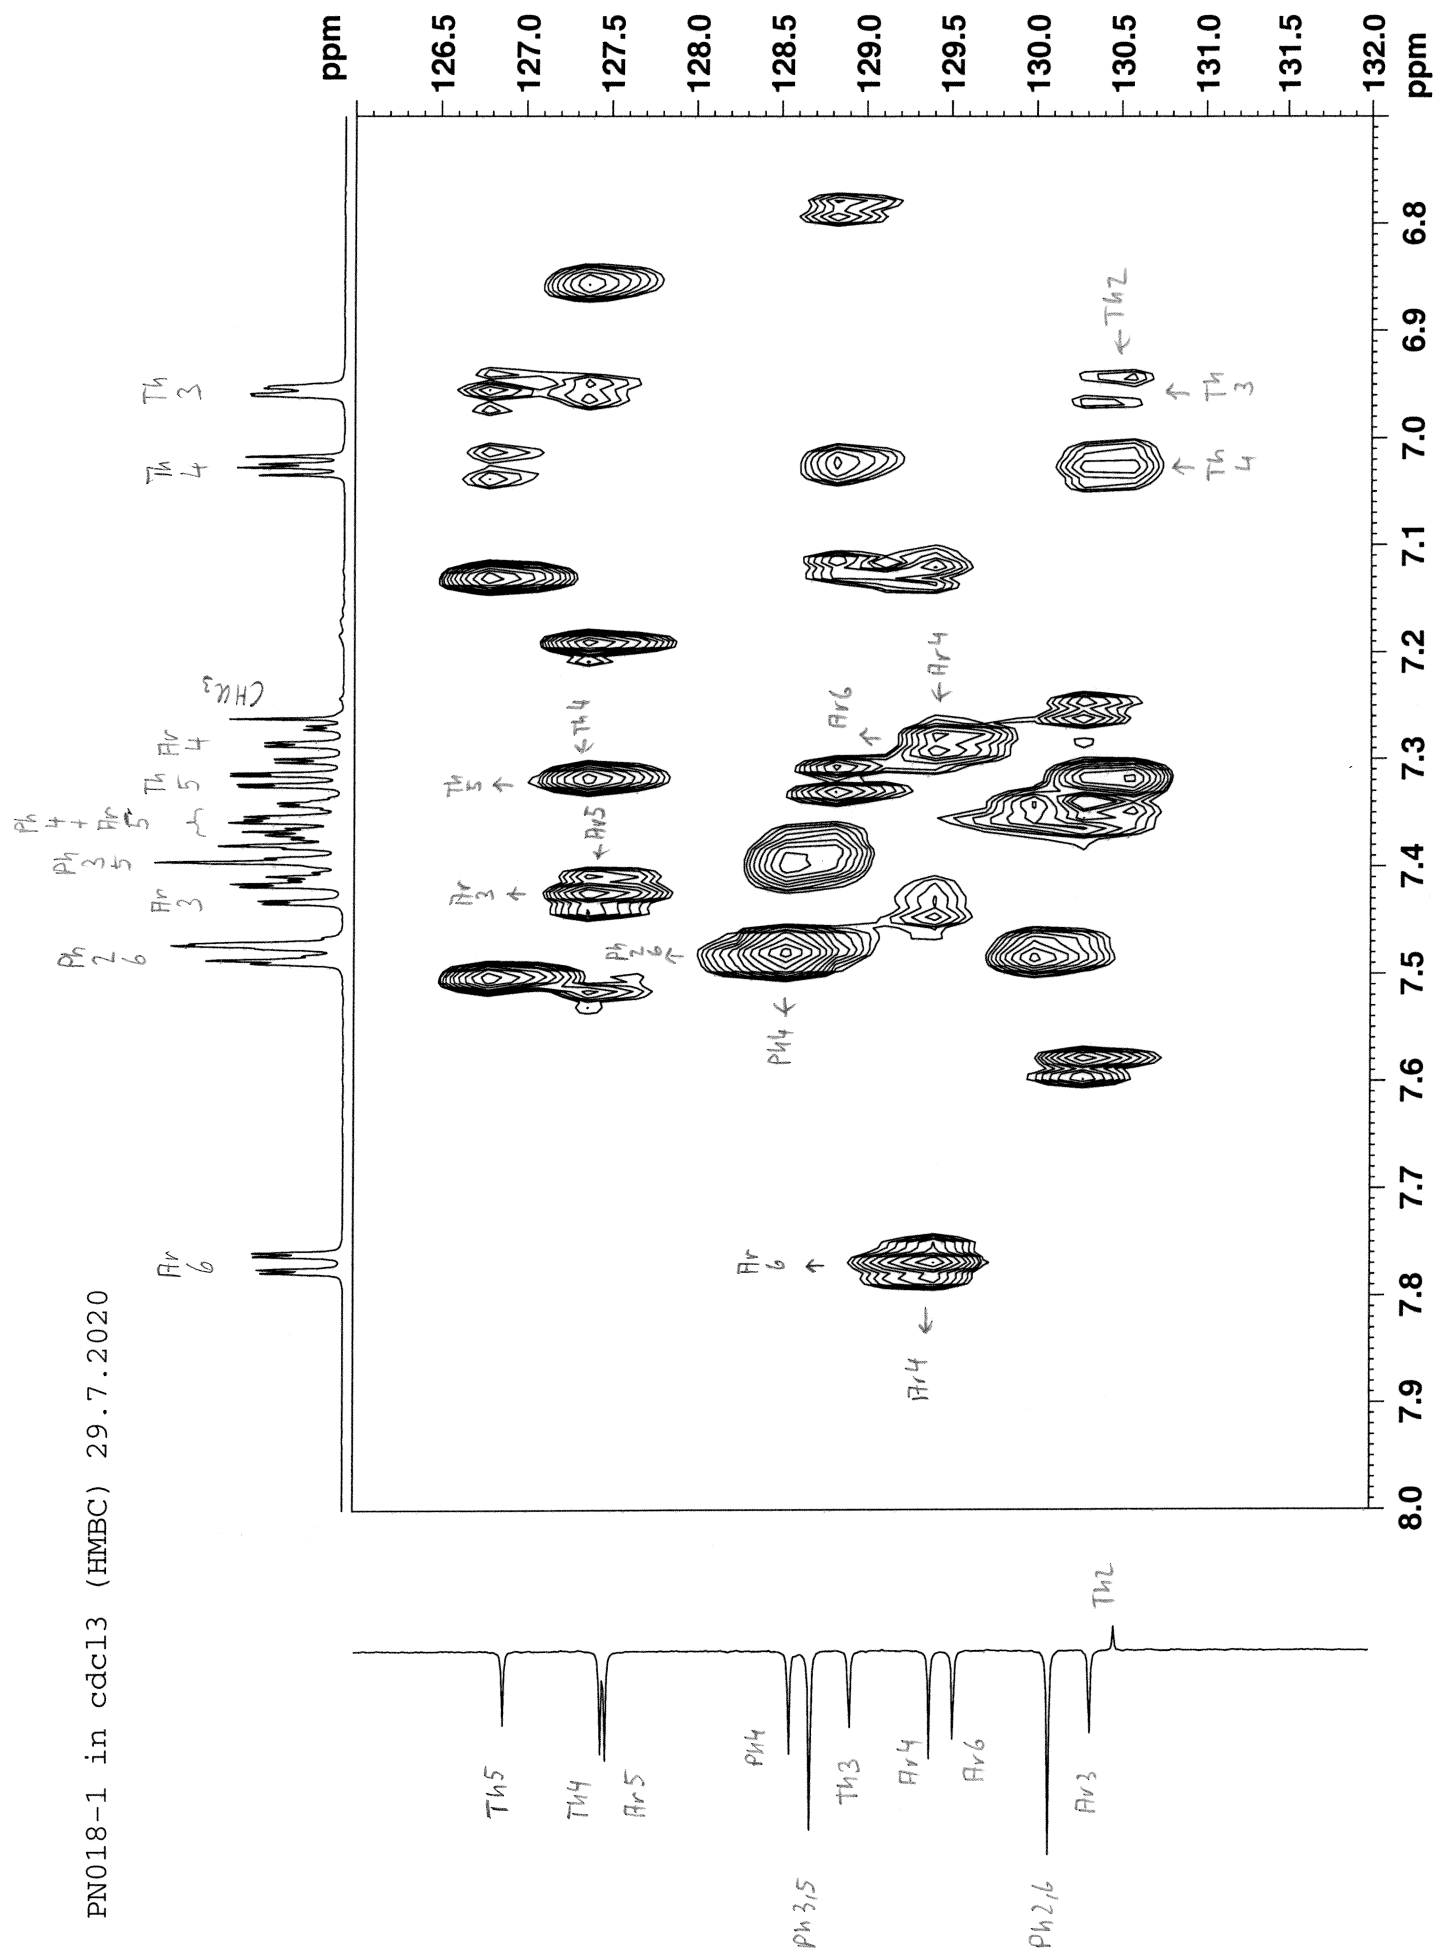

PN018-1 in cdcl3 (HMBC) 29.7.2020

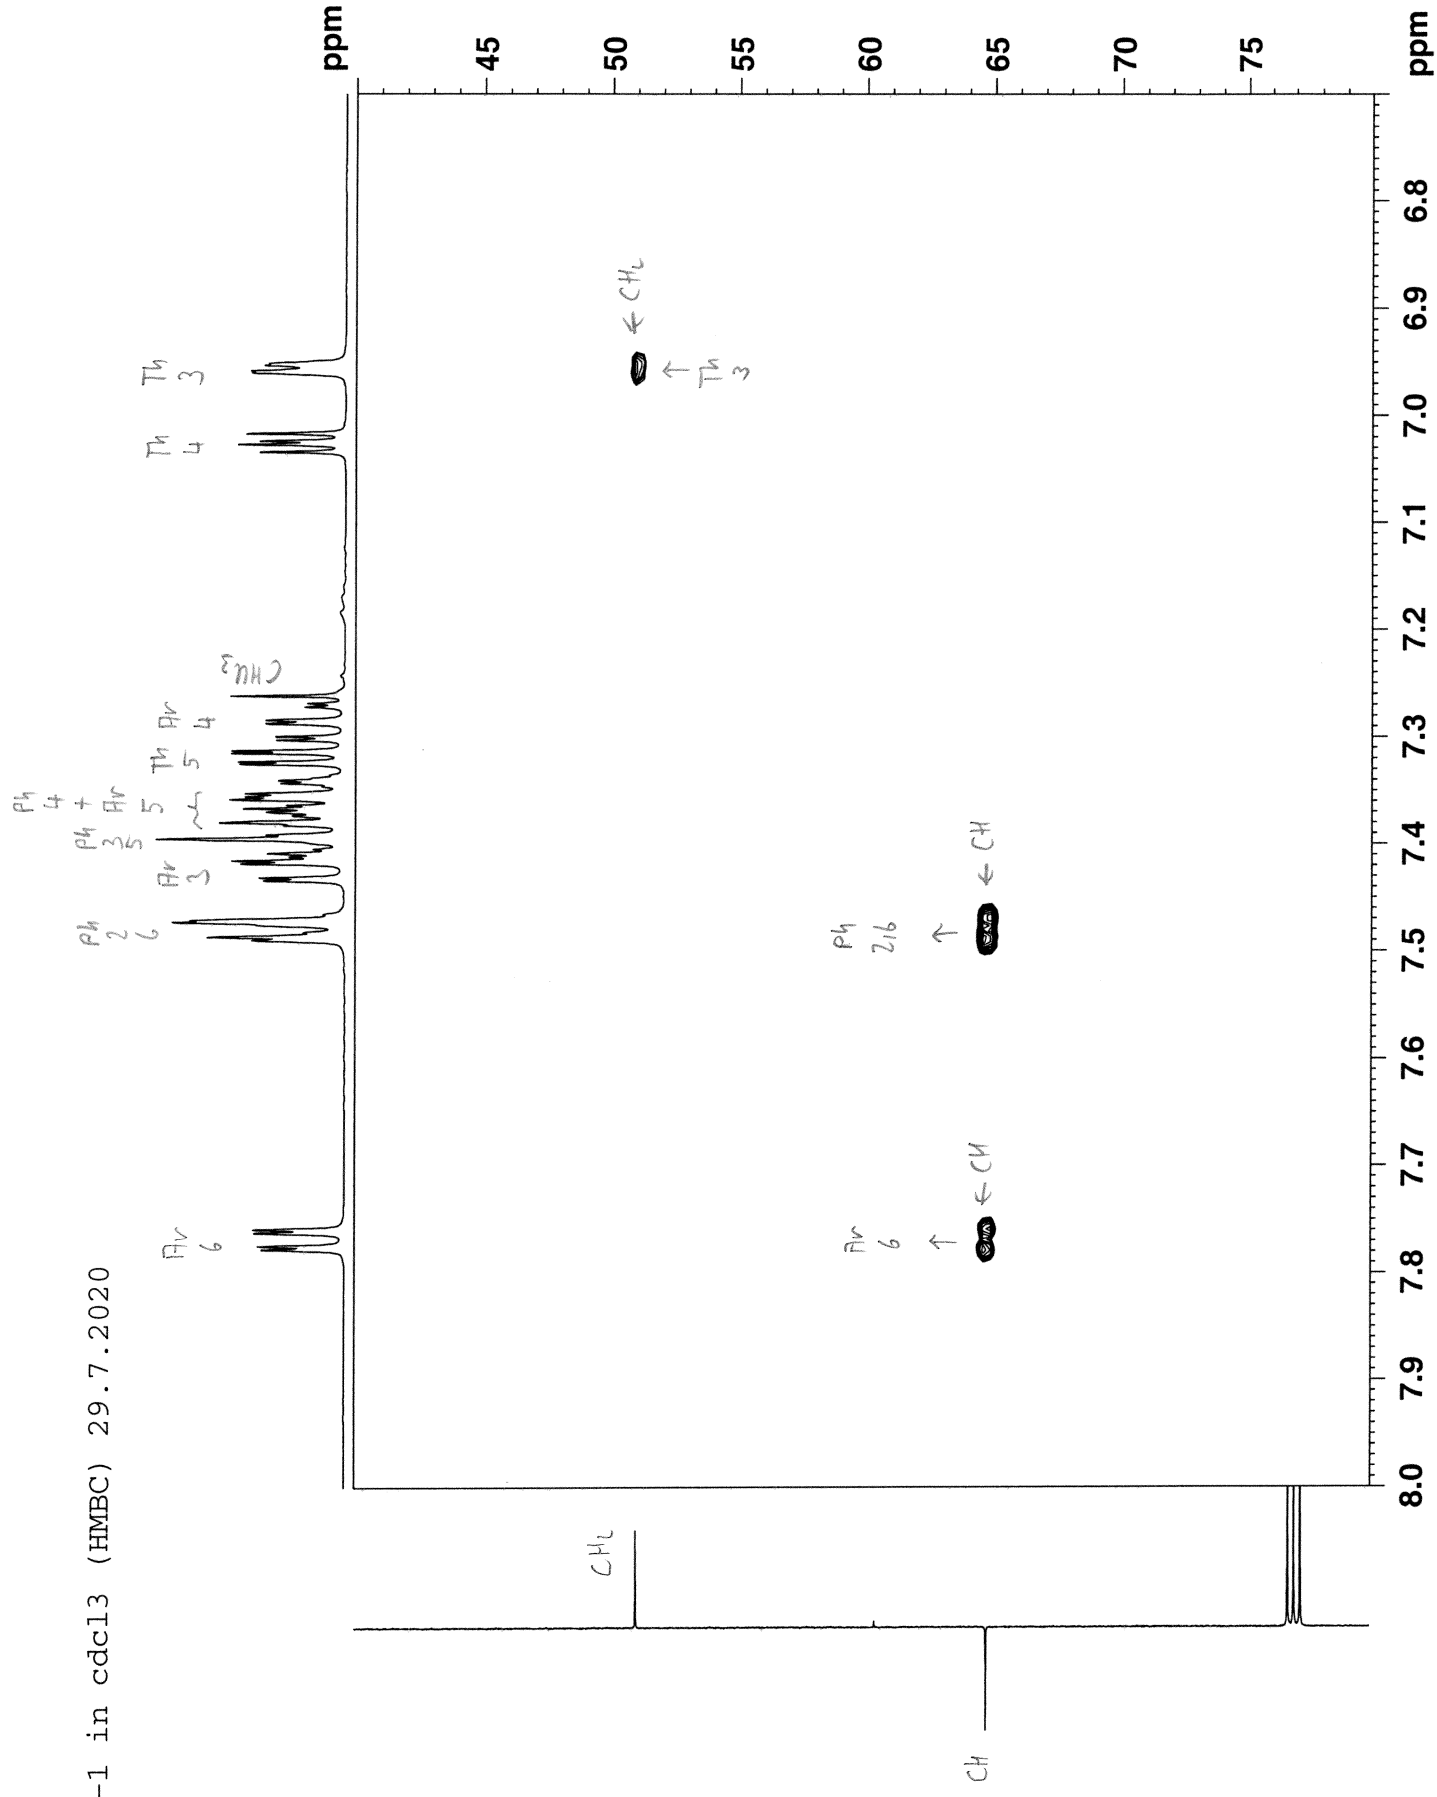

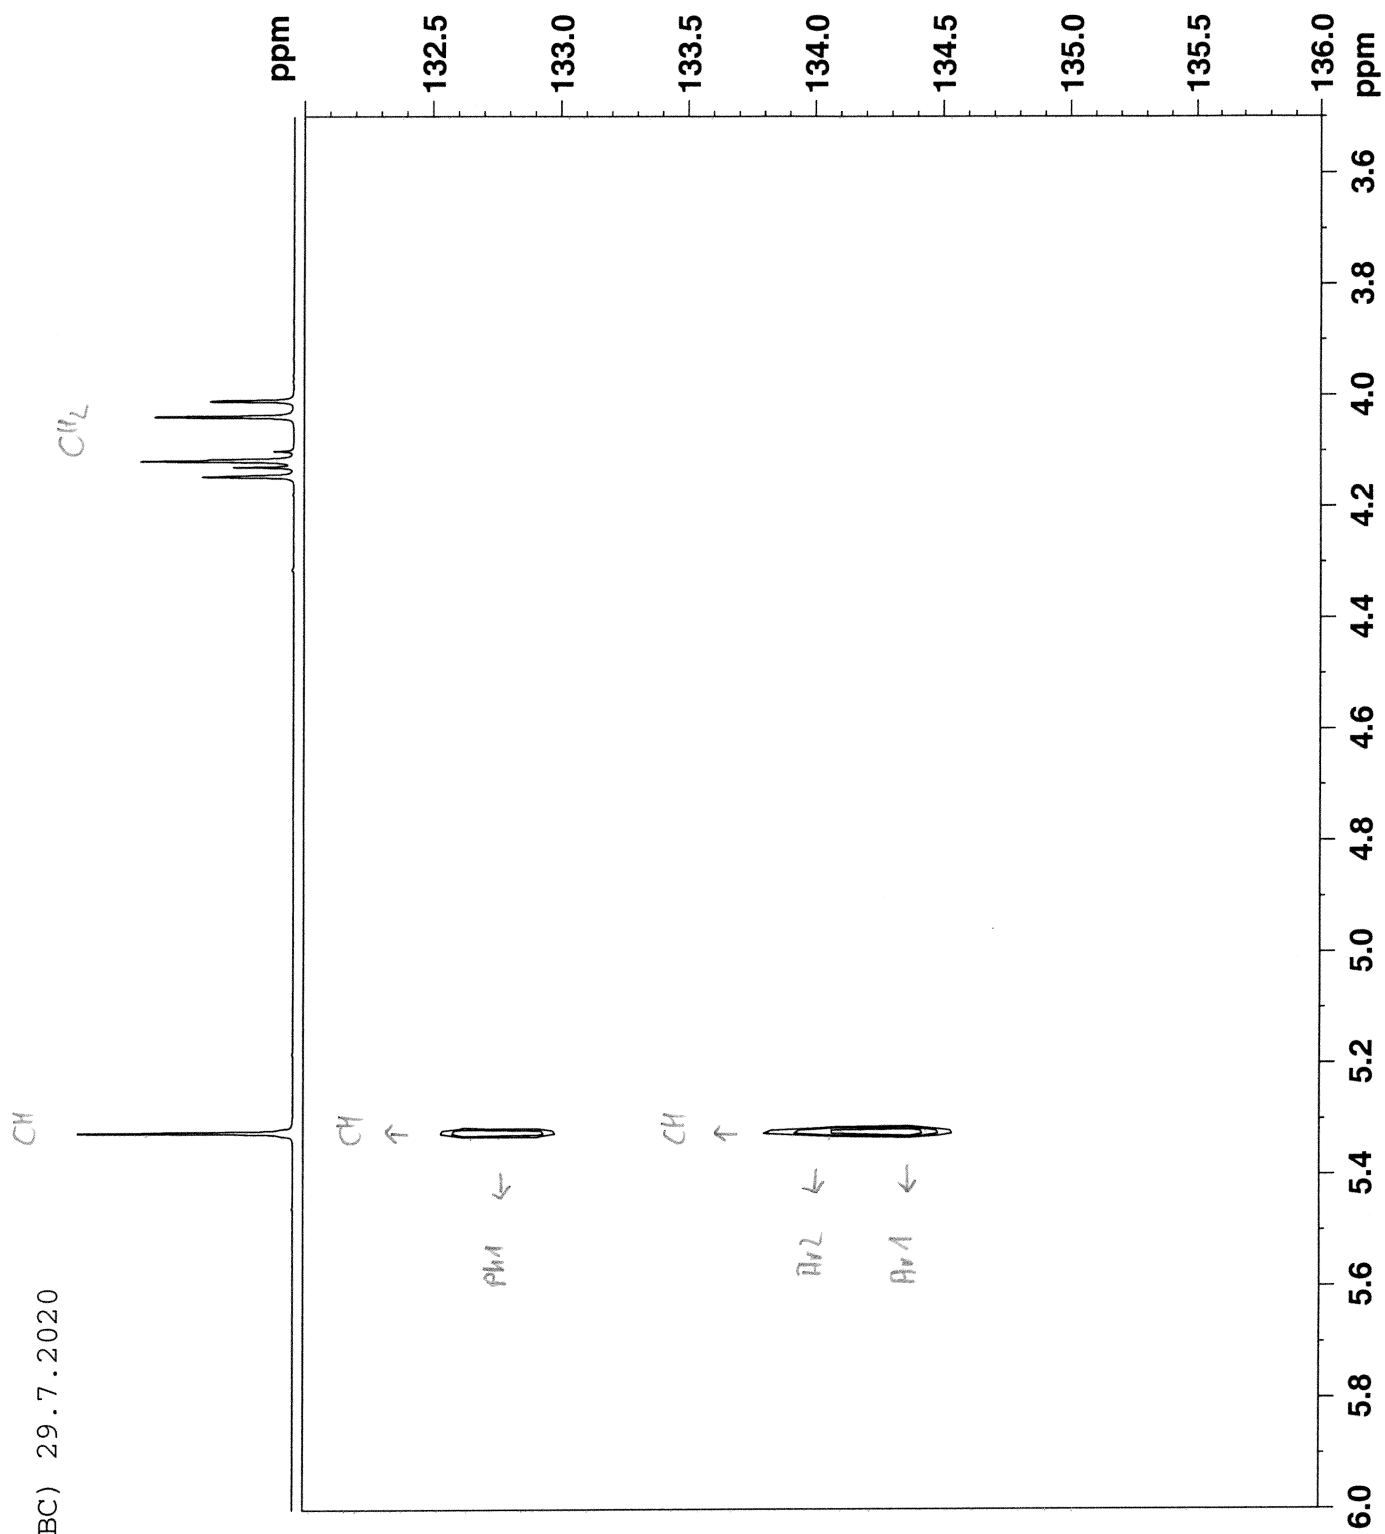



PN018-1 in cdcl3 (HMBC) 29.7.2020

CH

CH<sub>2</sub>

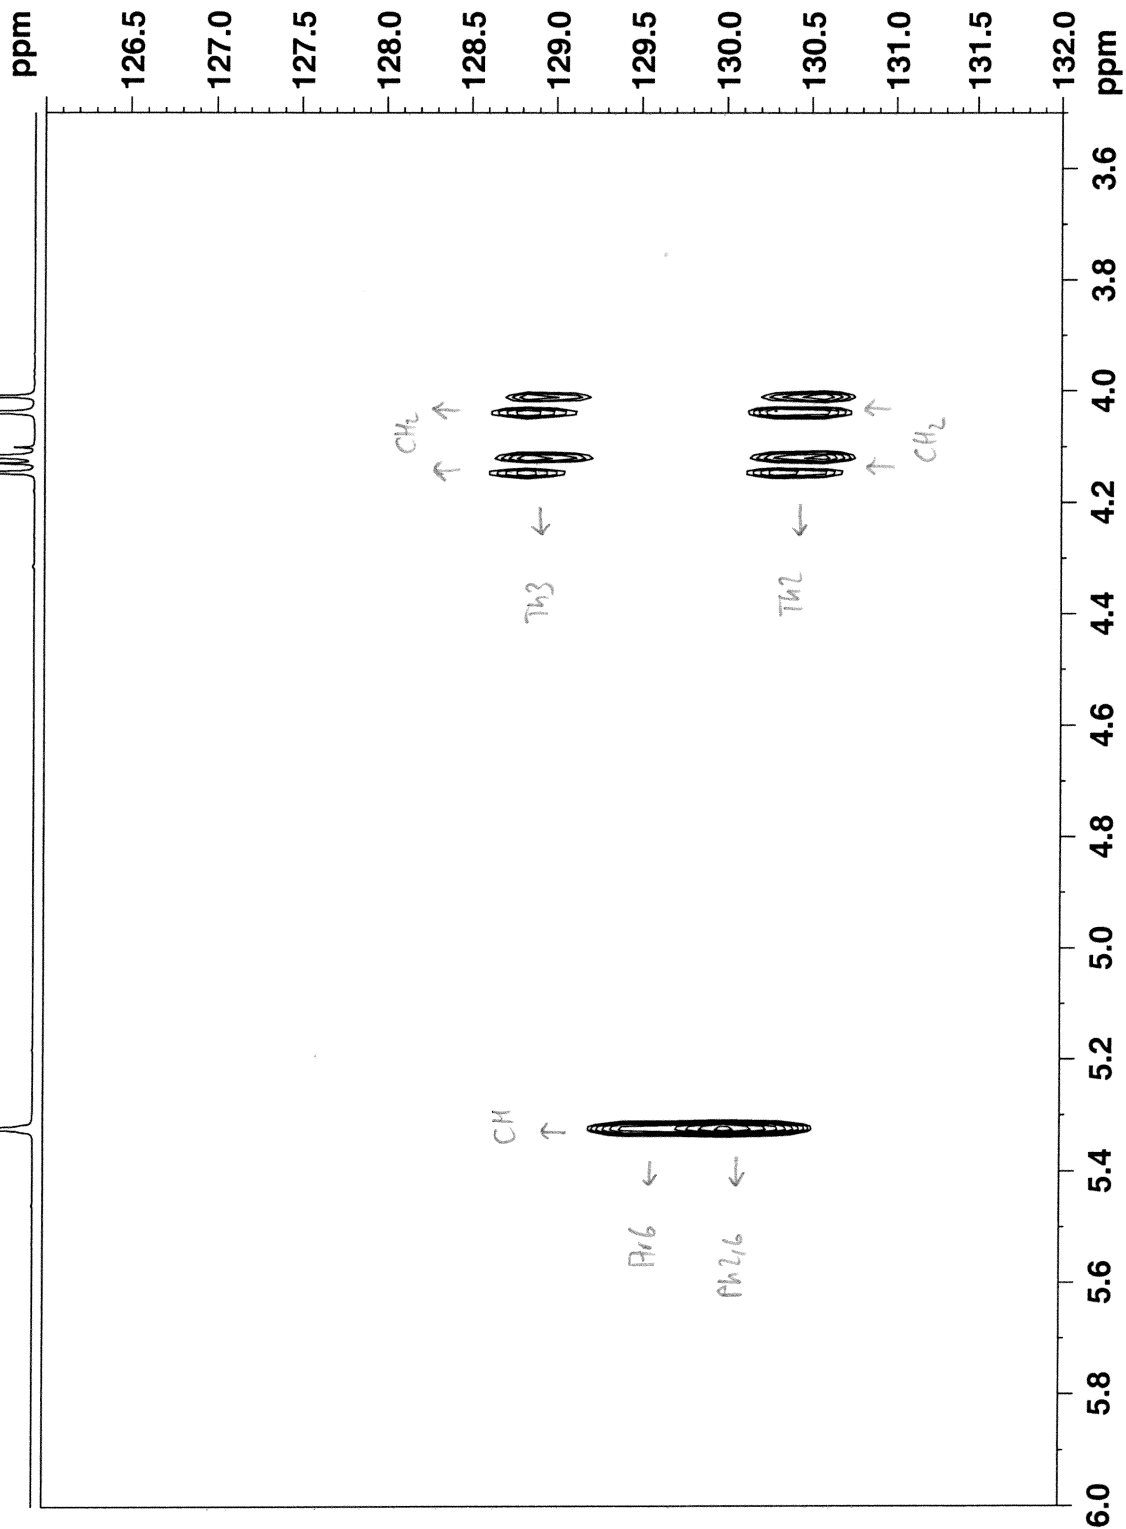

PN018-1 in cdcl3 (HMBC) 29.7.2020

CH

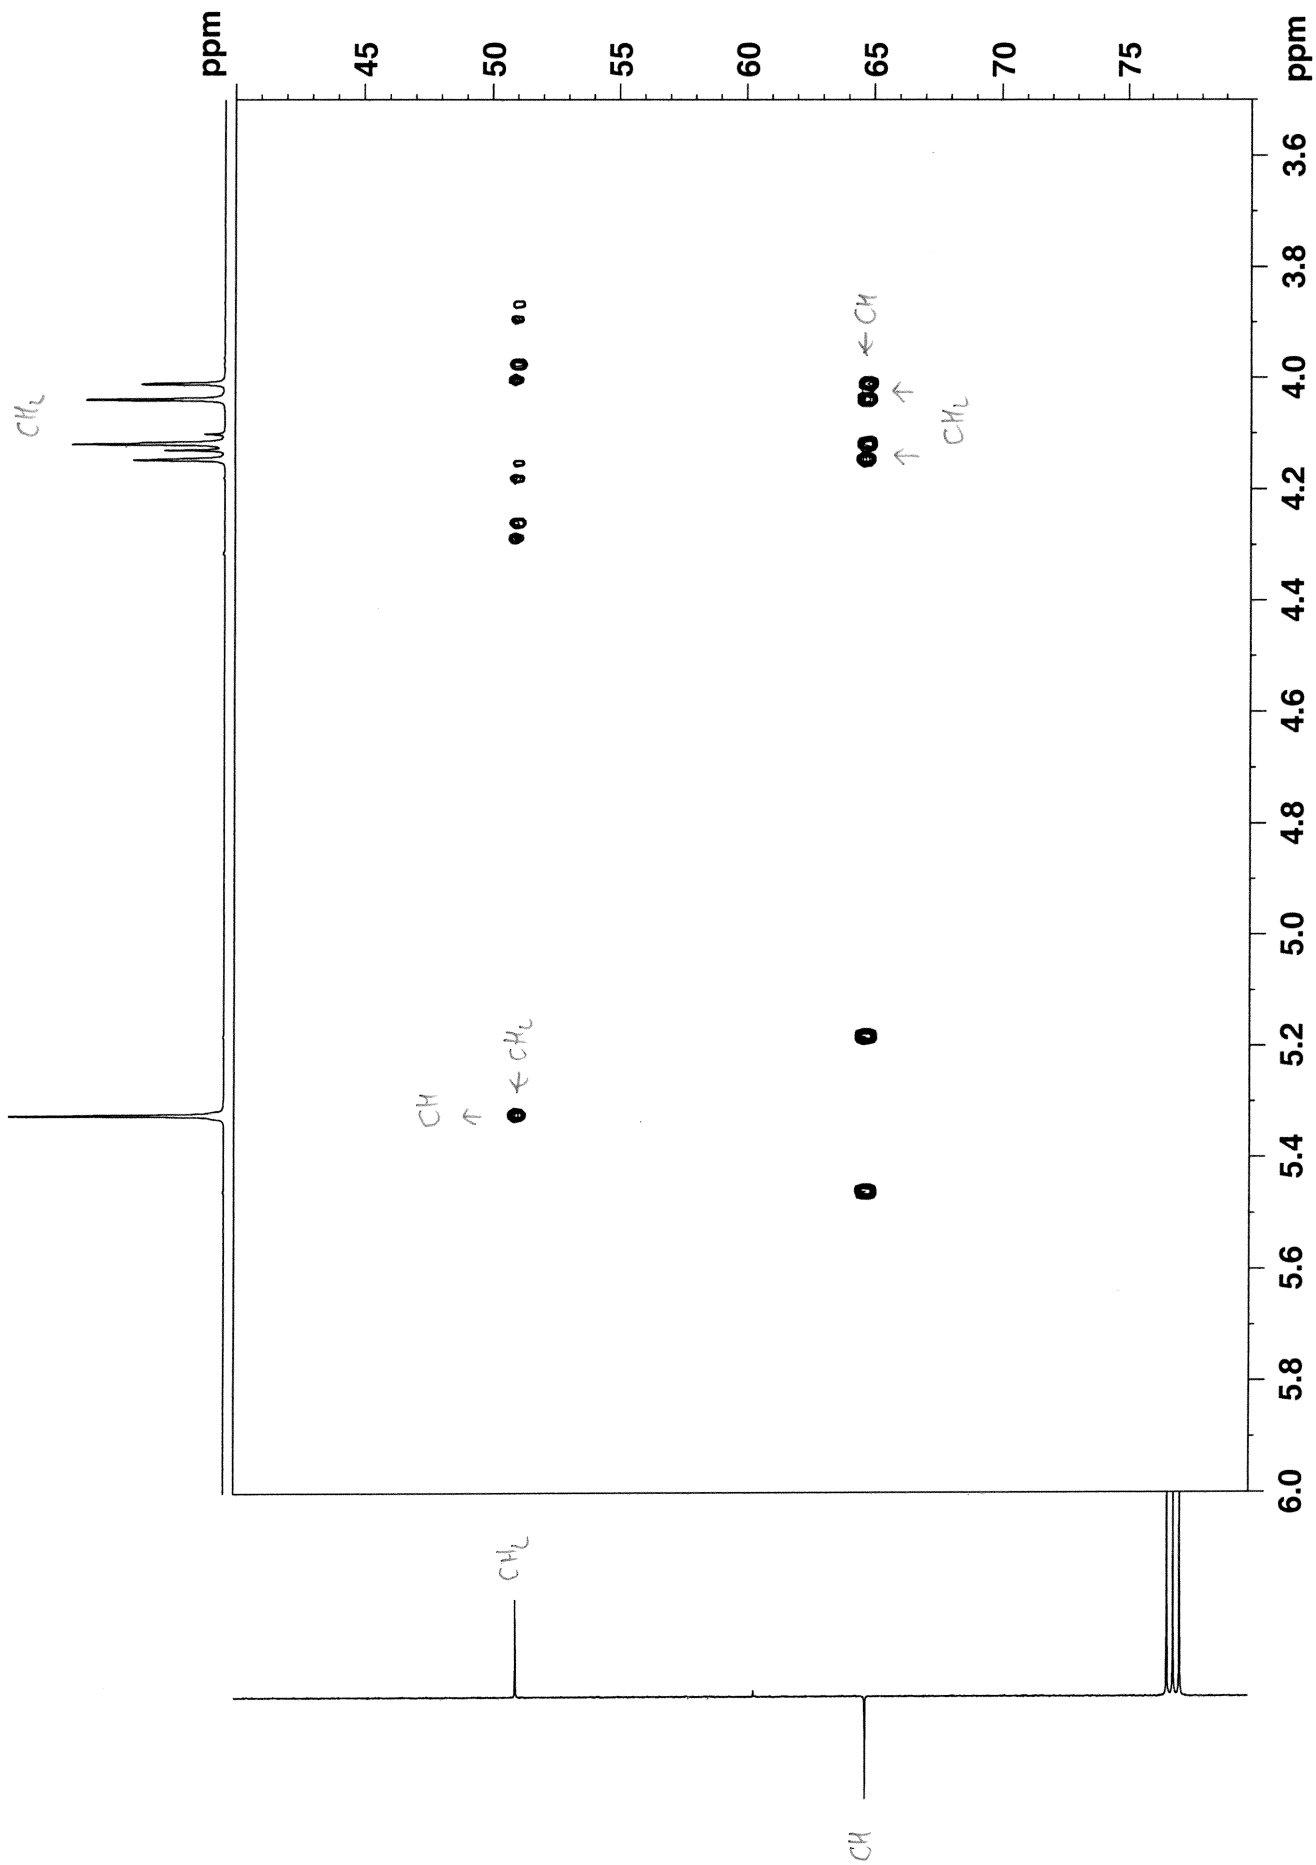

**Figure S14c.** NMR spectra of compound **6d**.

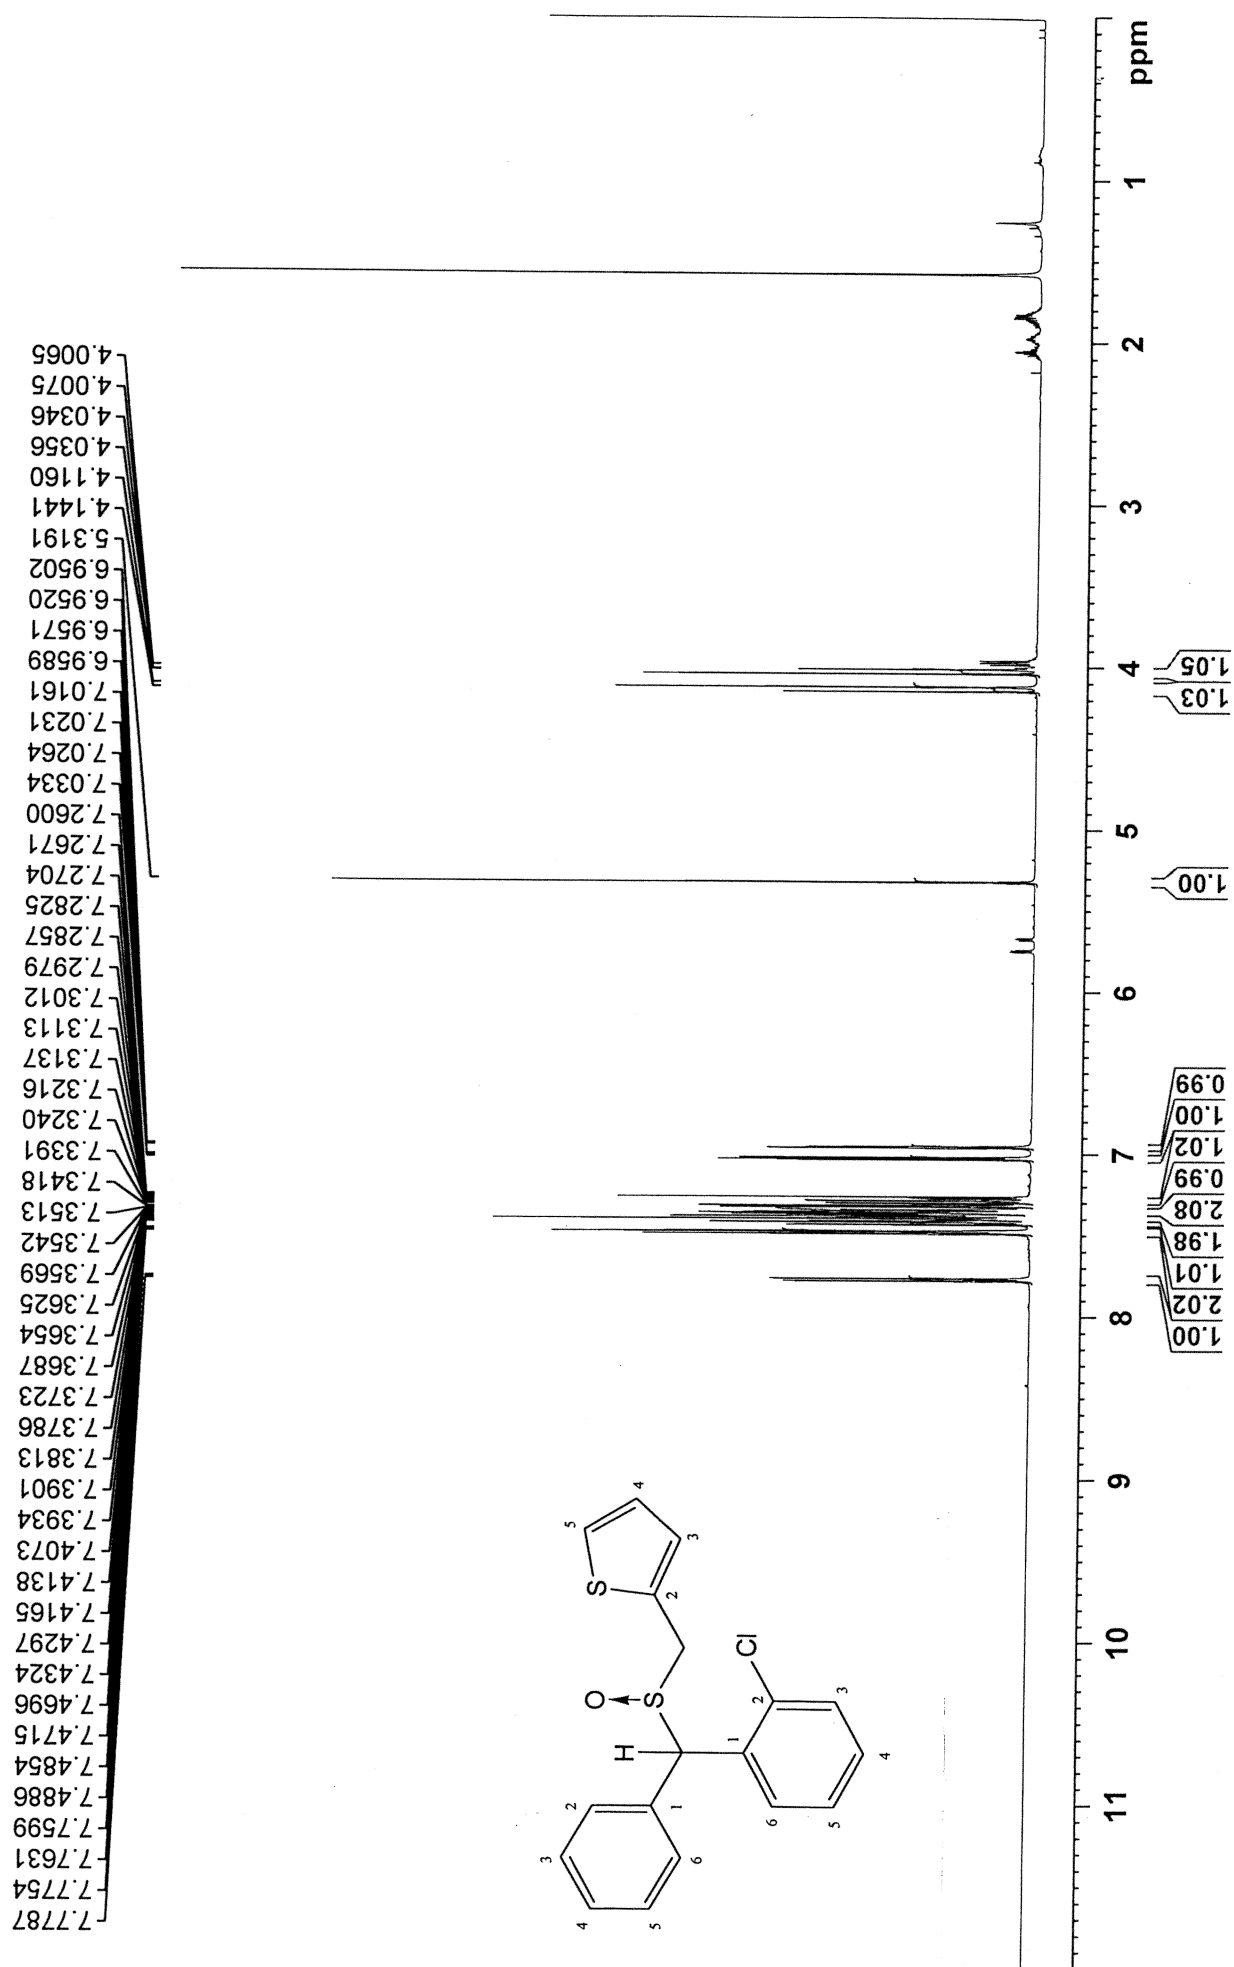

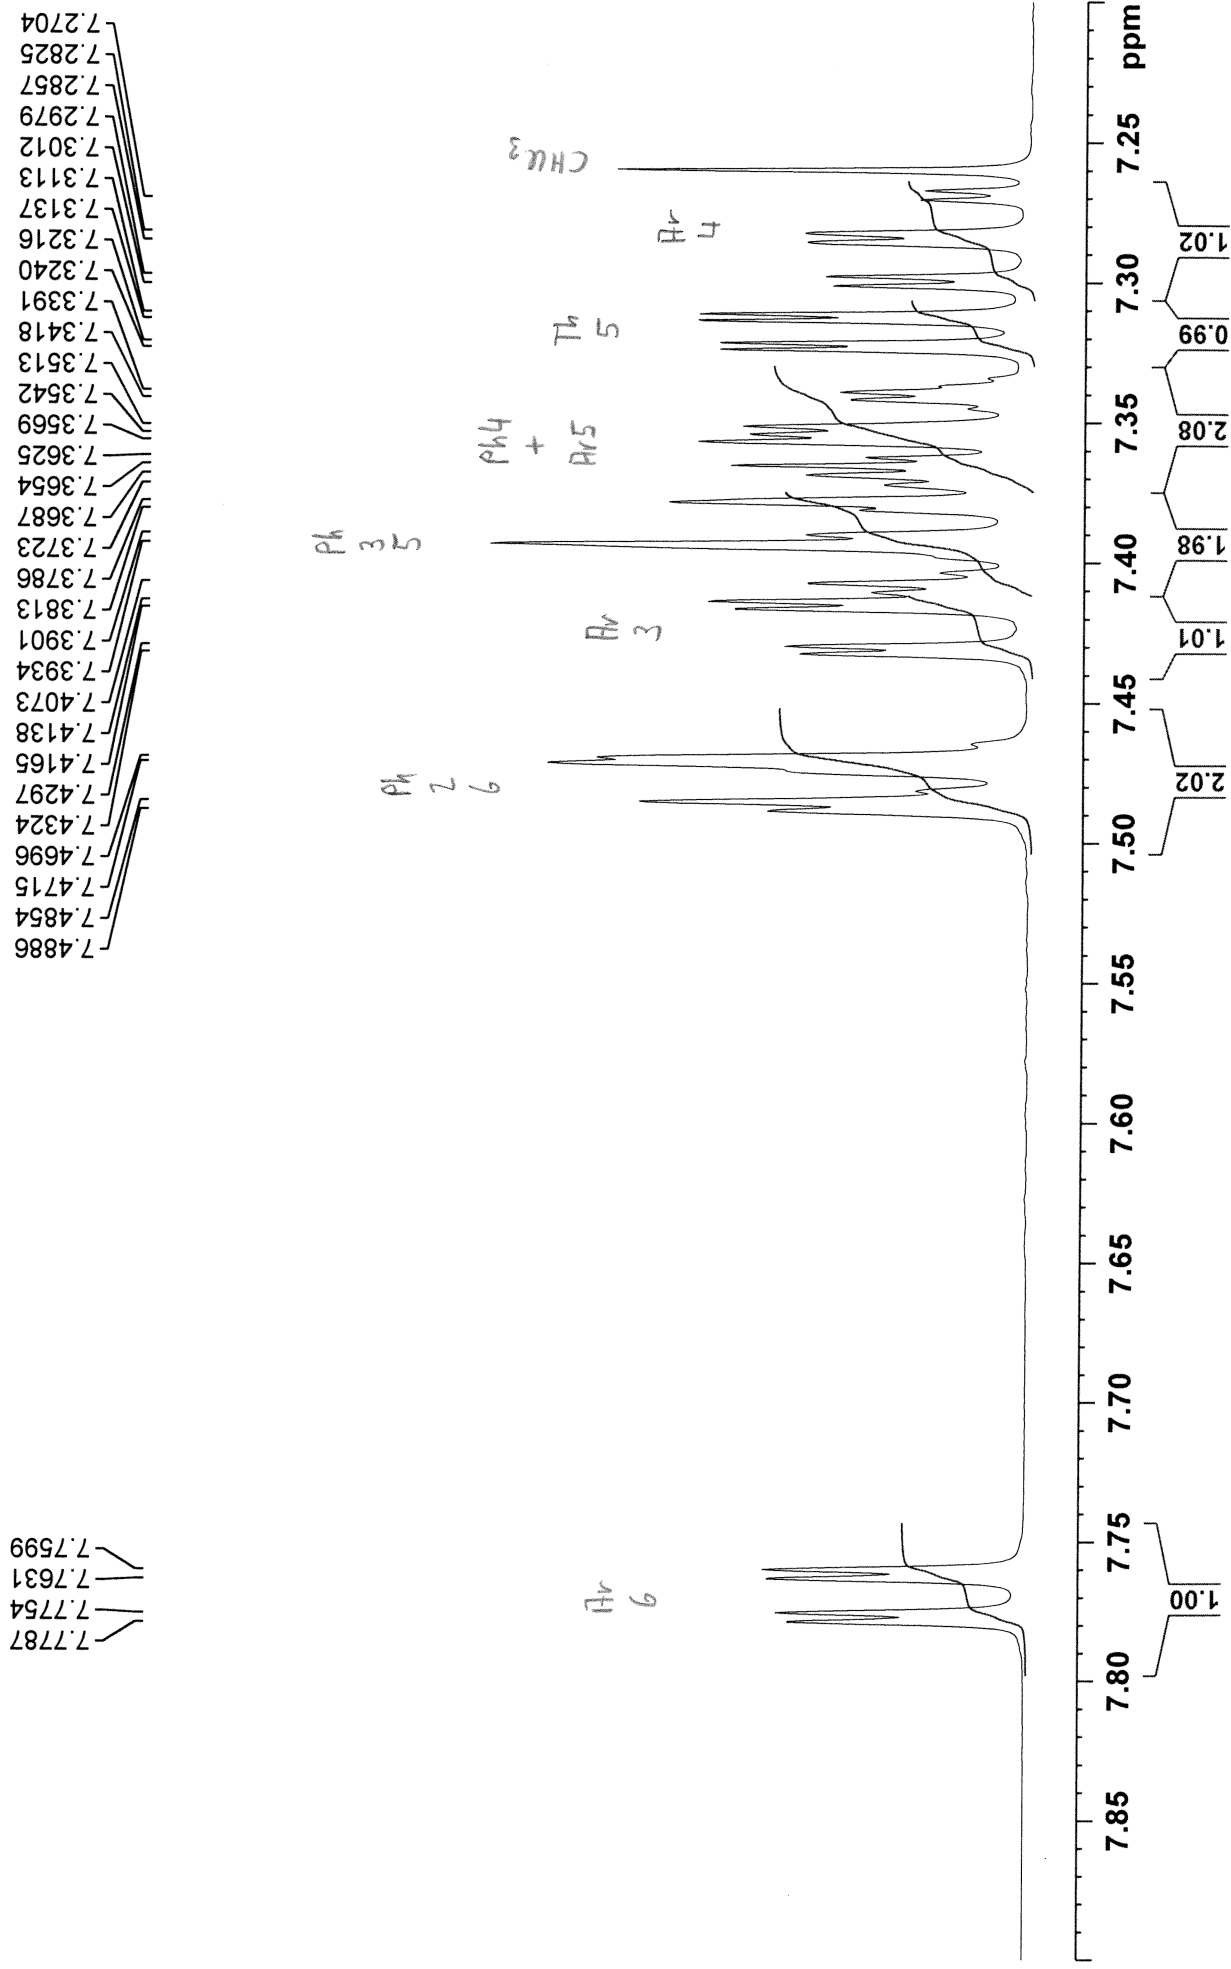

7.0334  
7.0264  
7.0231  
7.0161

6.9589  
6.9571  
6.9520  
6.9502

4h

3h

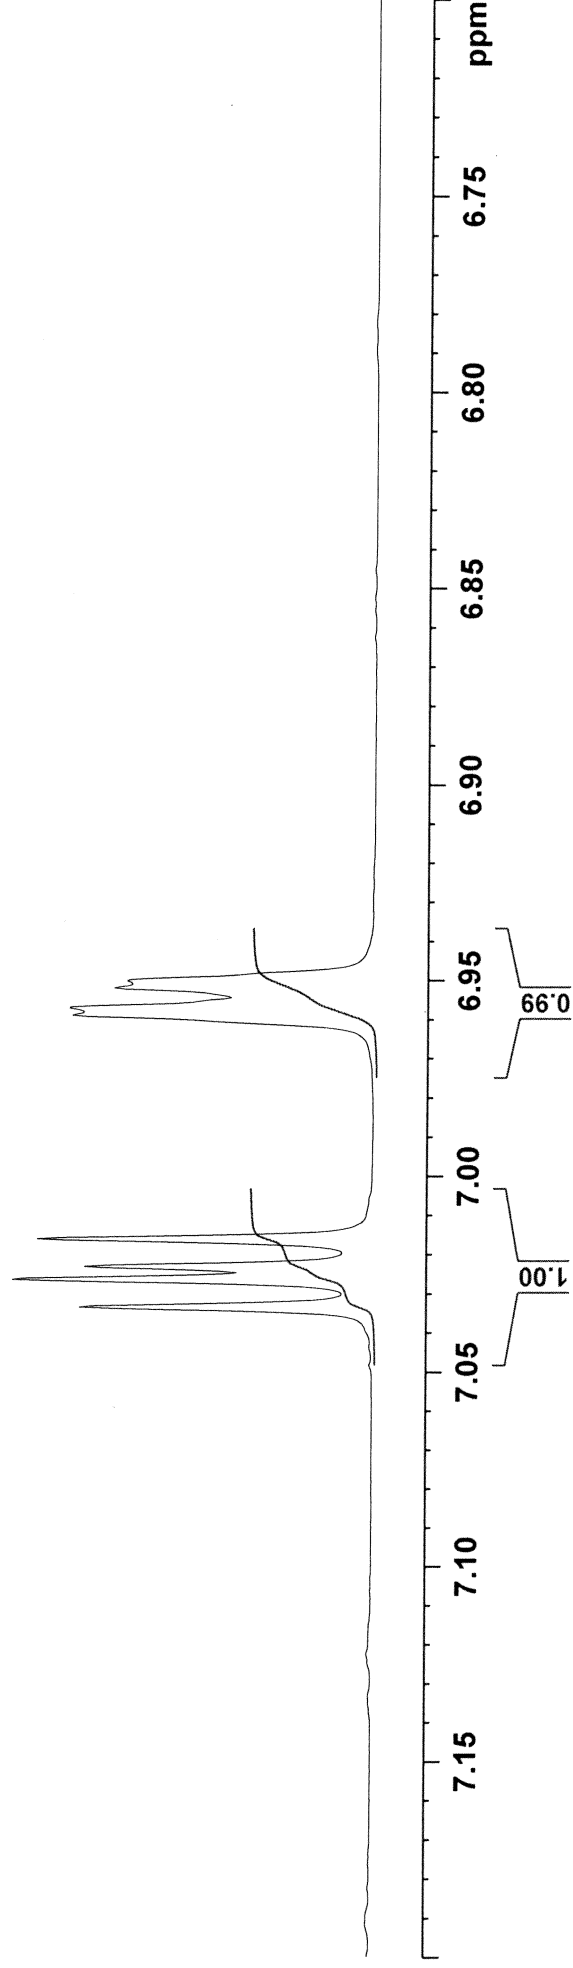

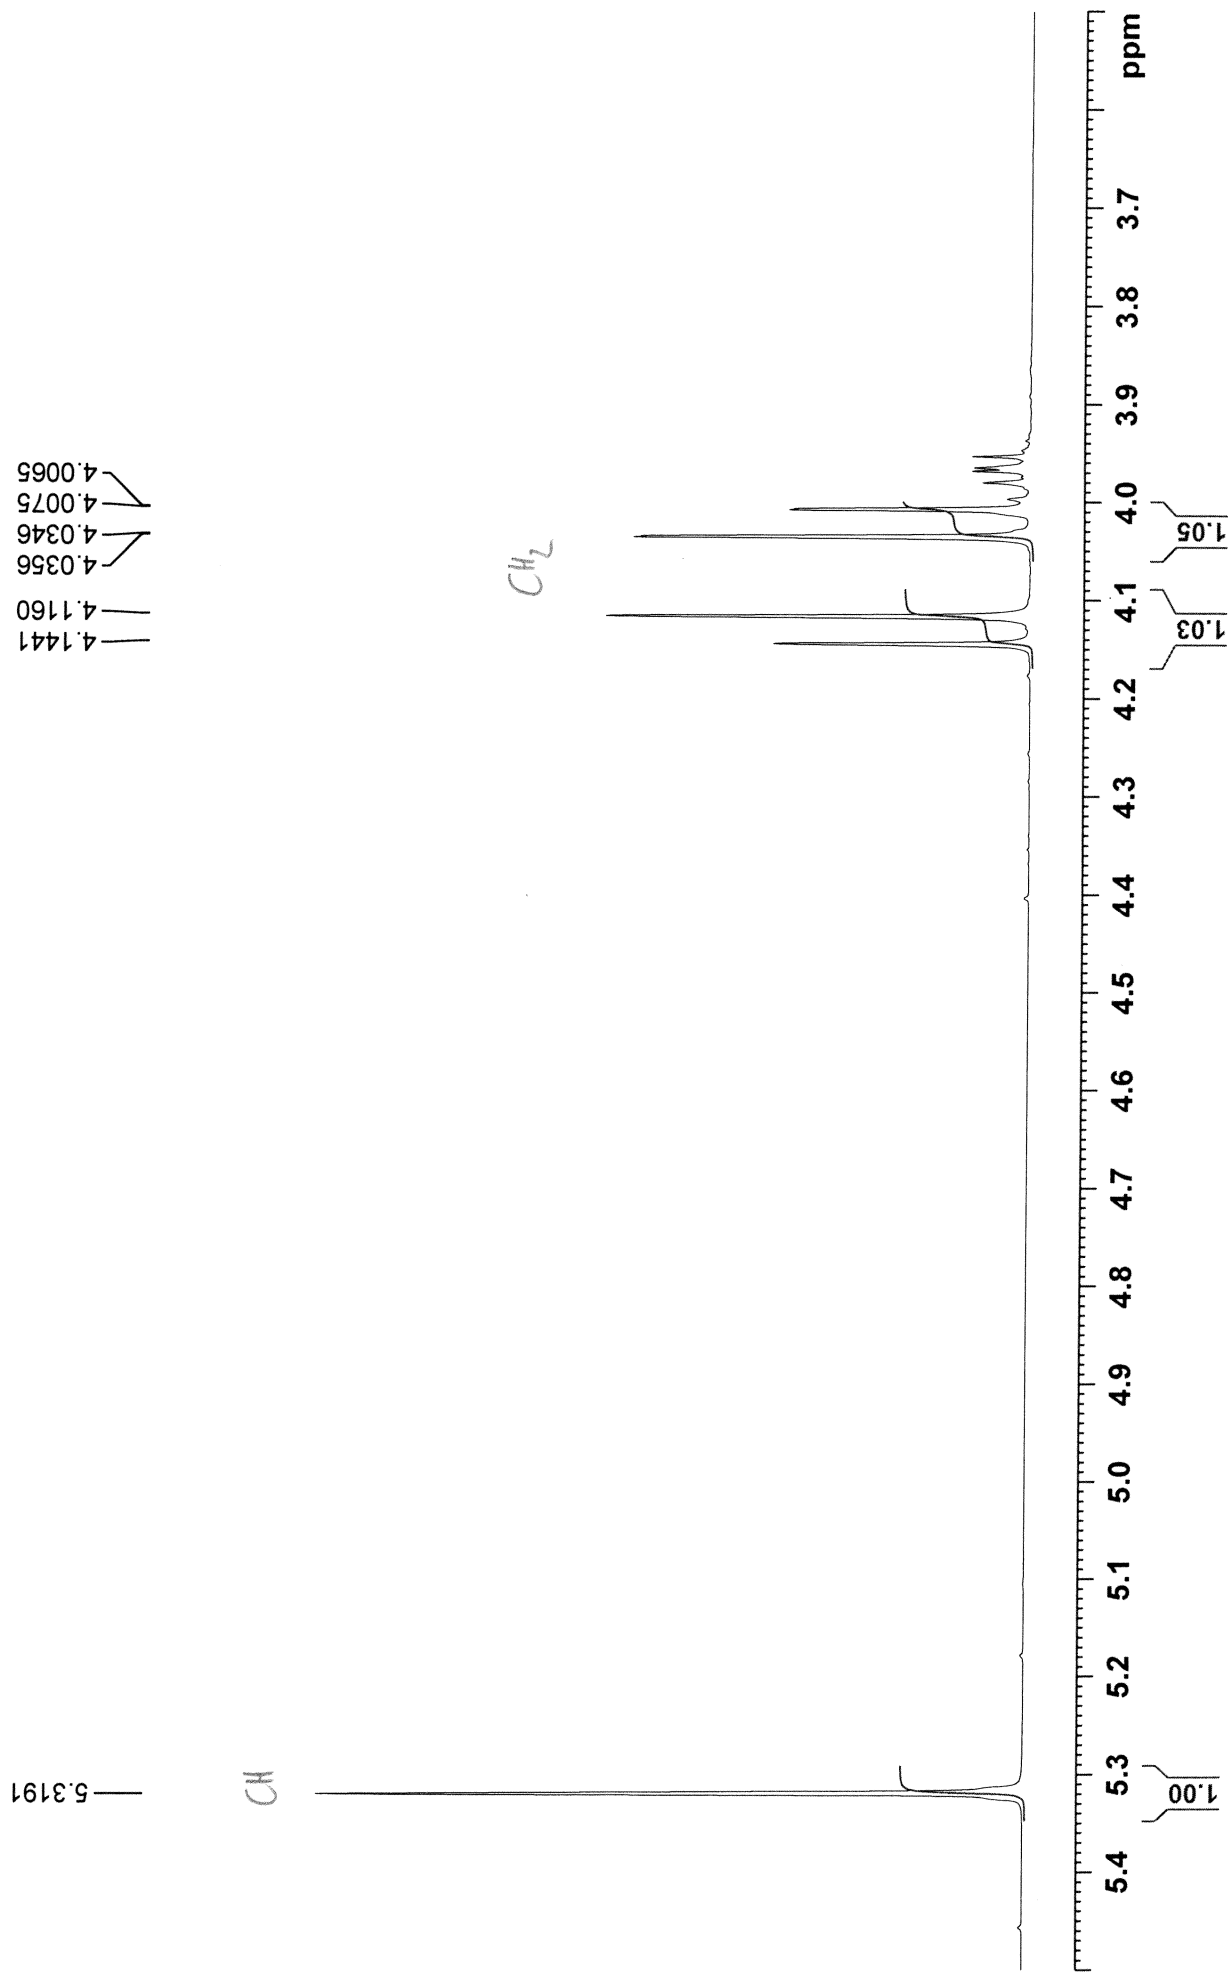

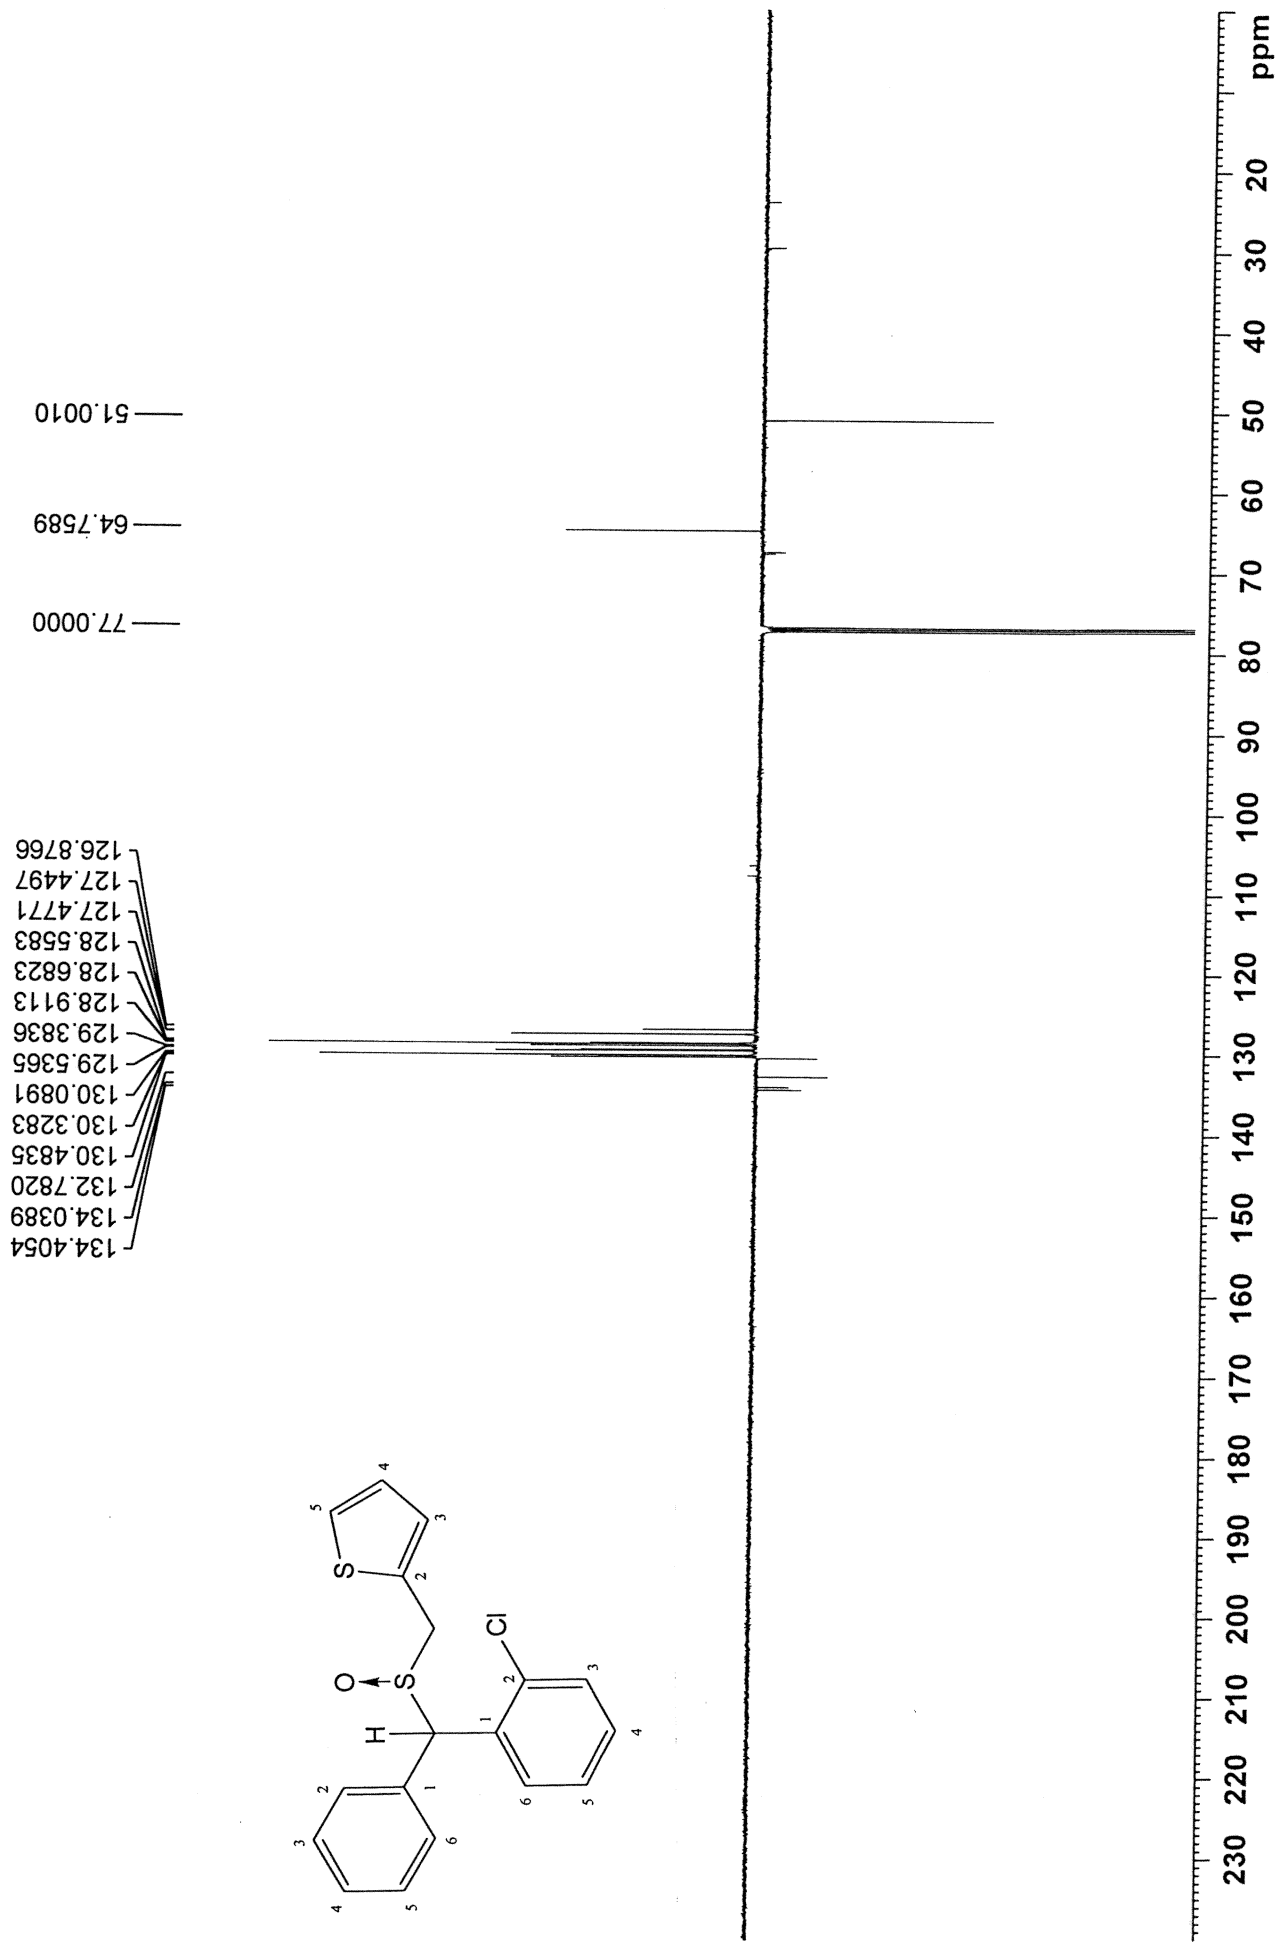

— 132.7820

— 134.0389

— 134.4054

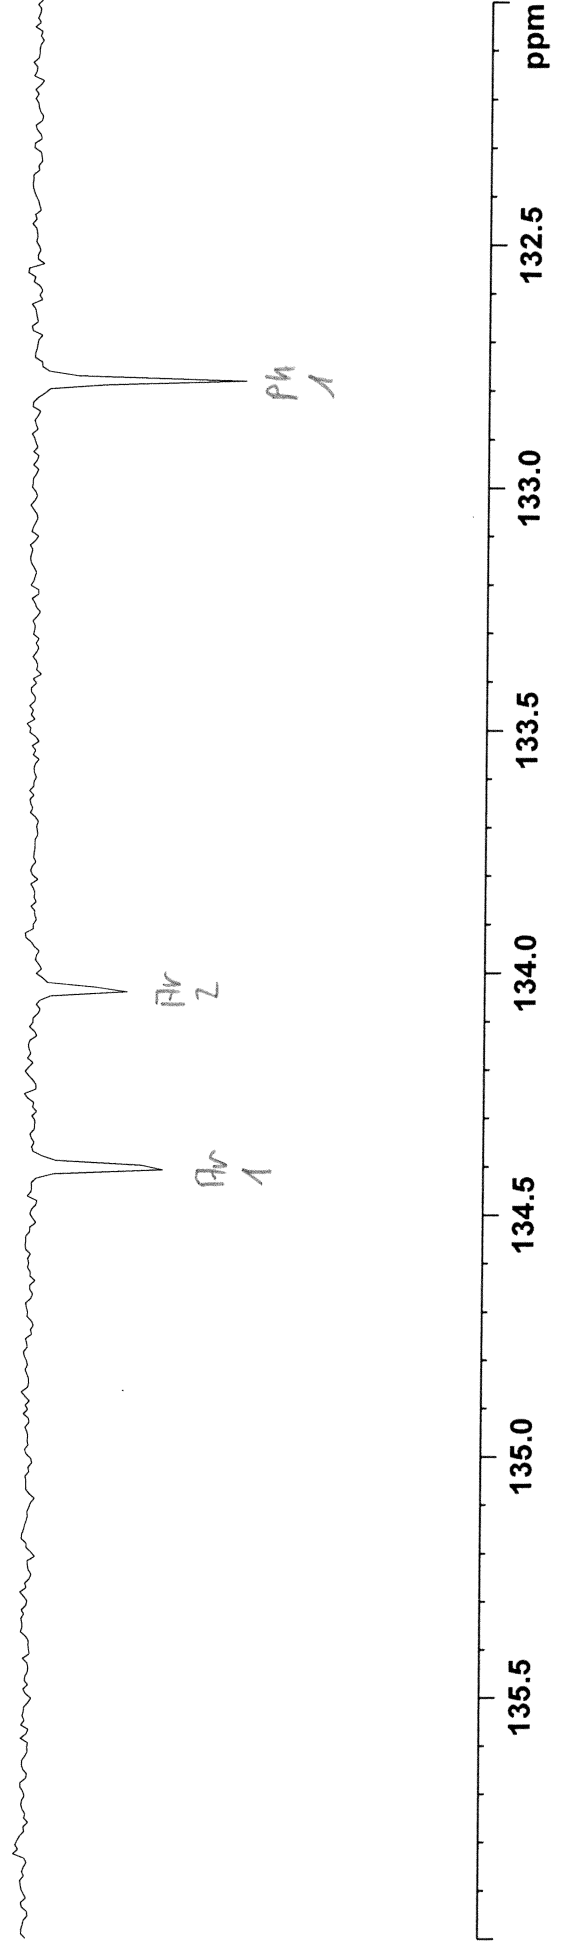



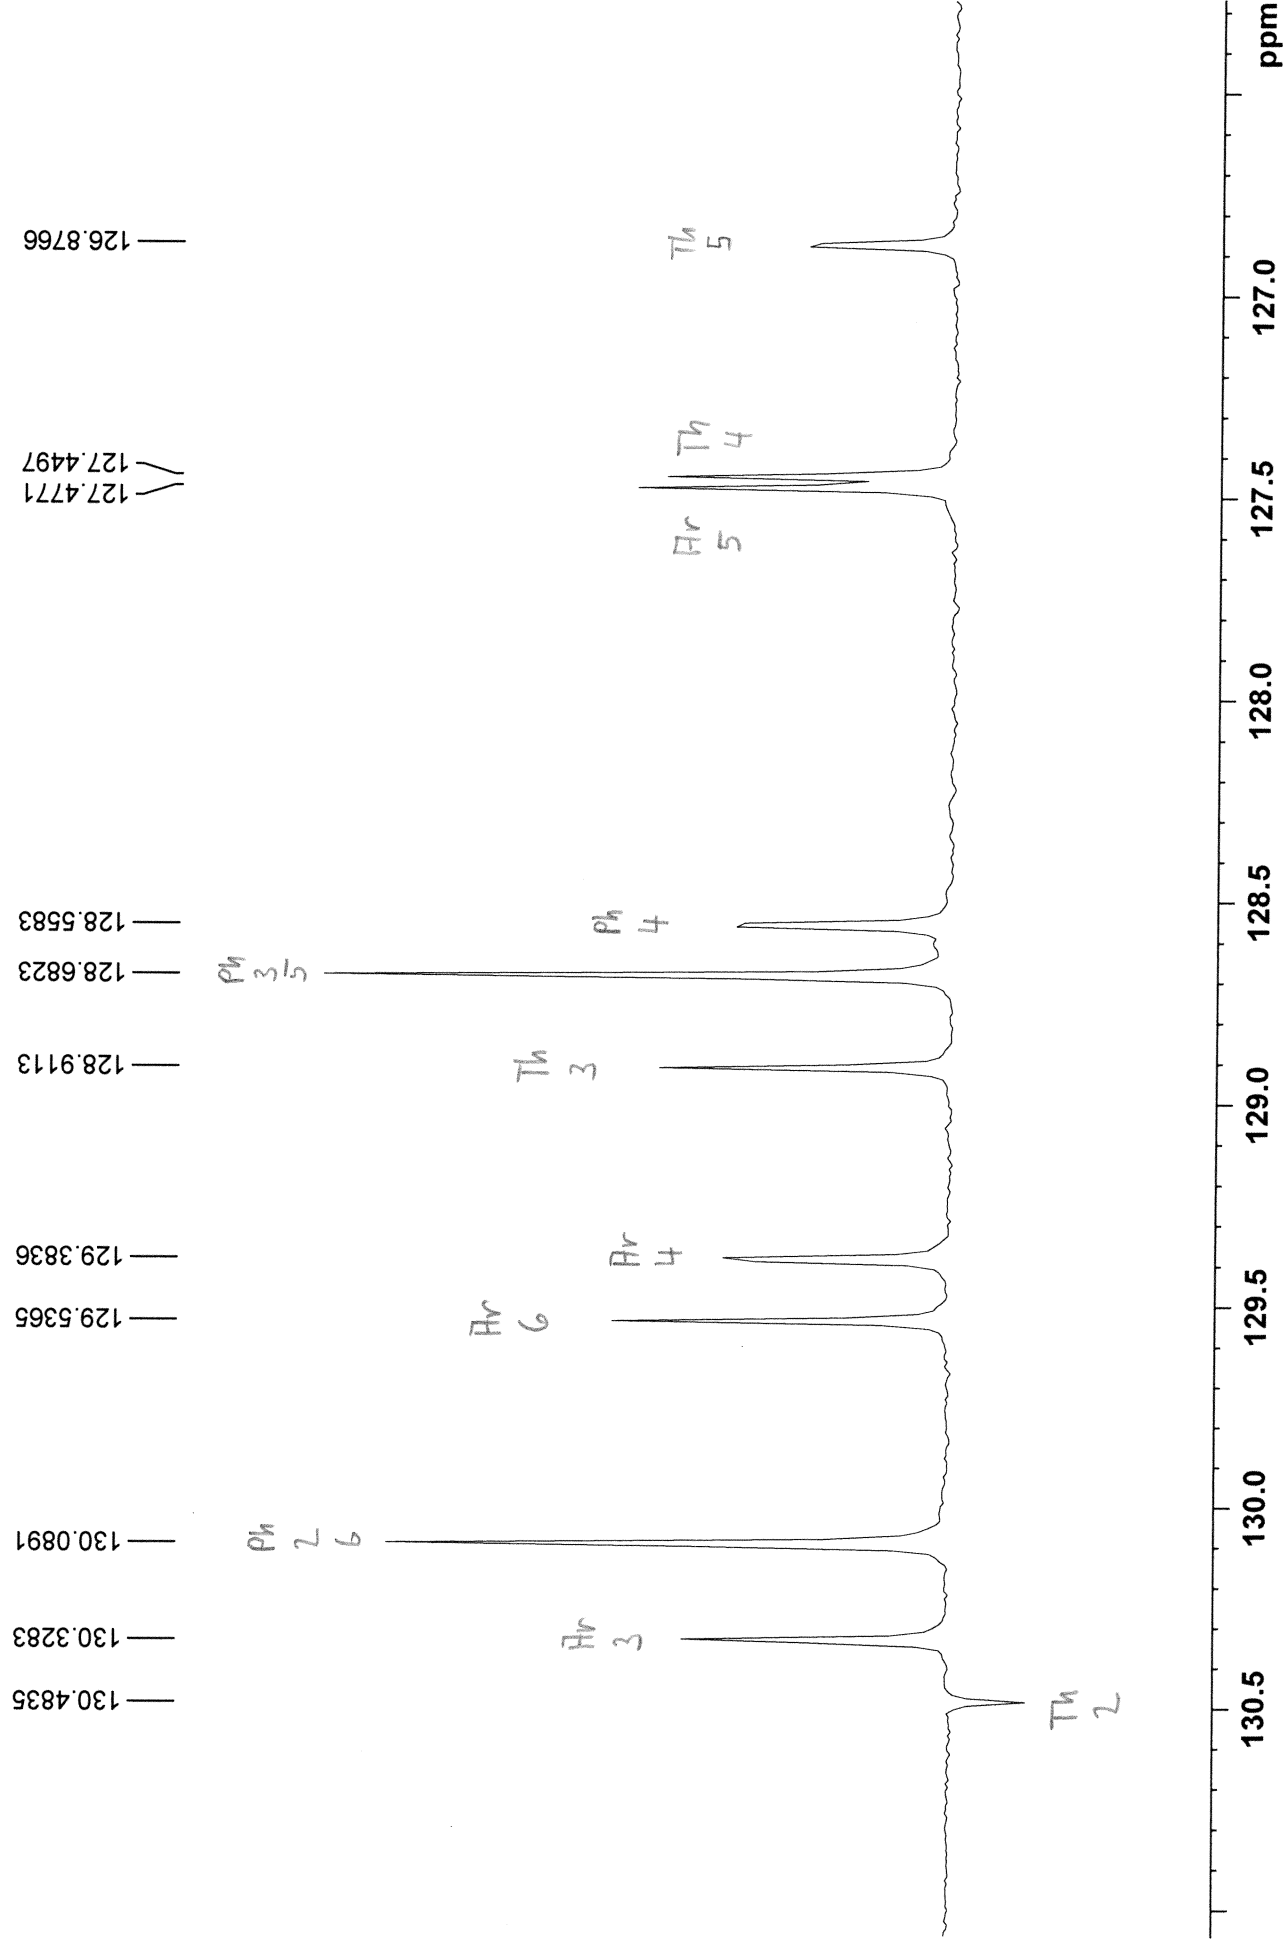

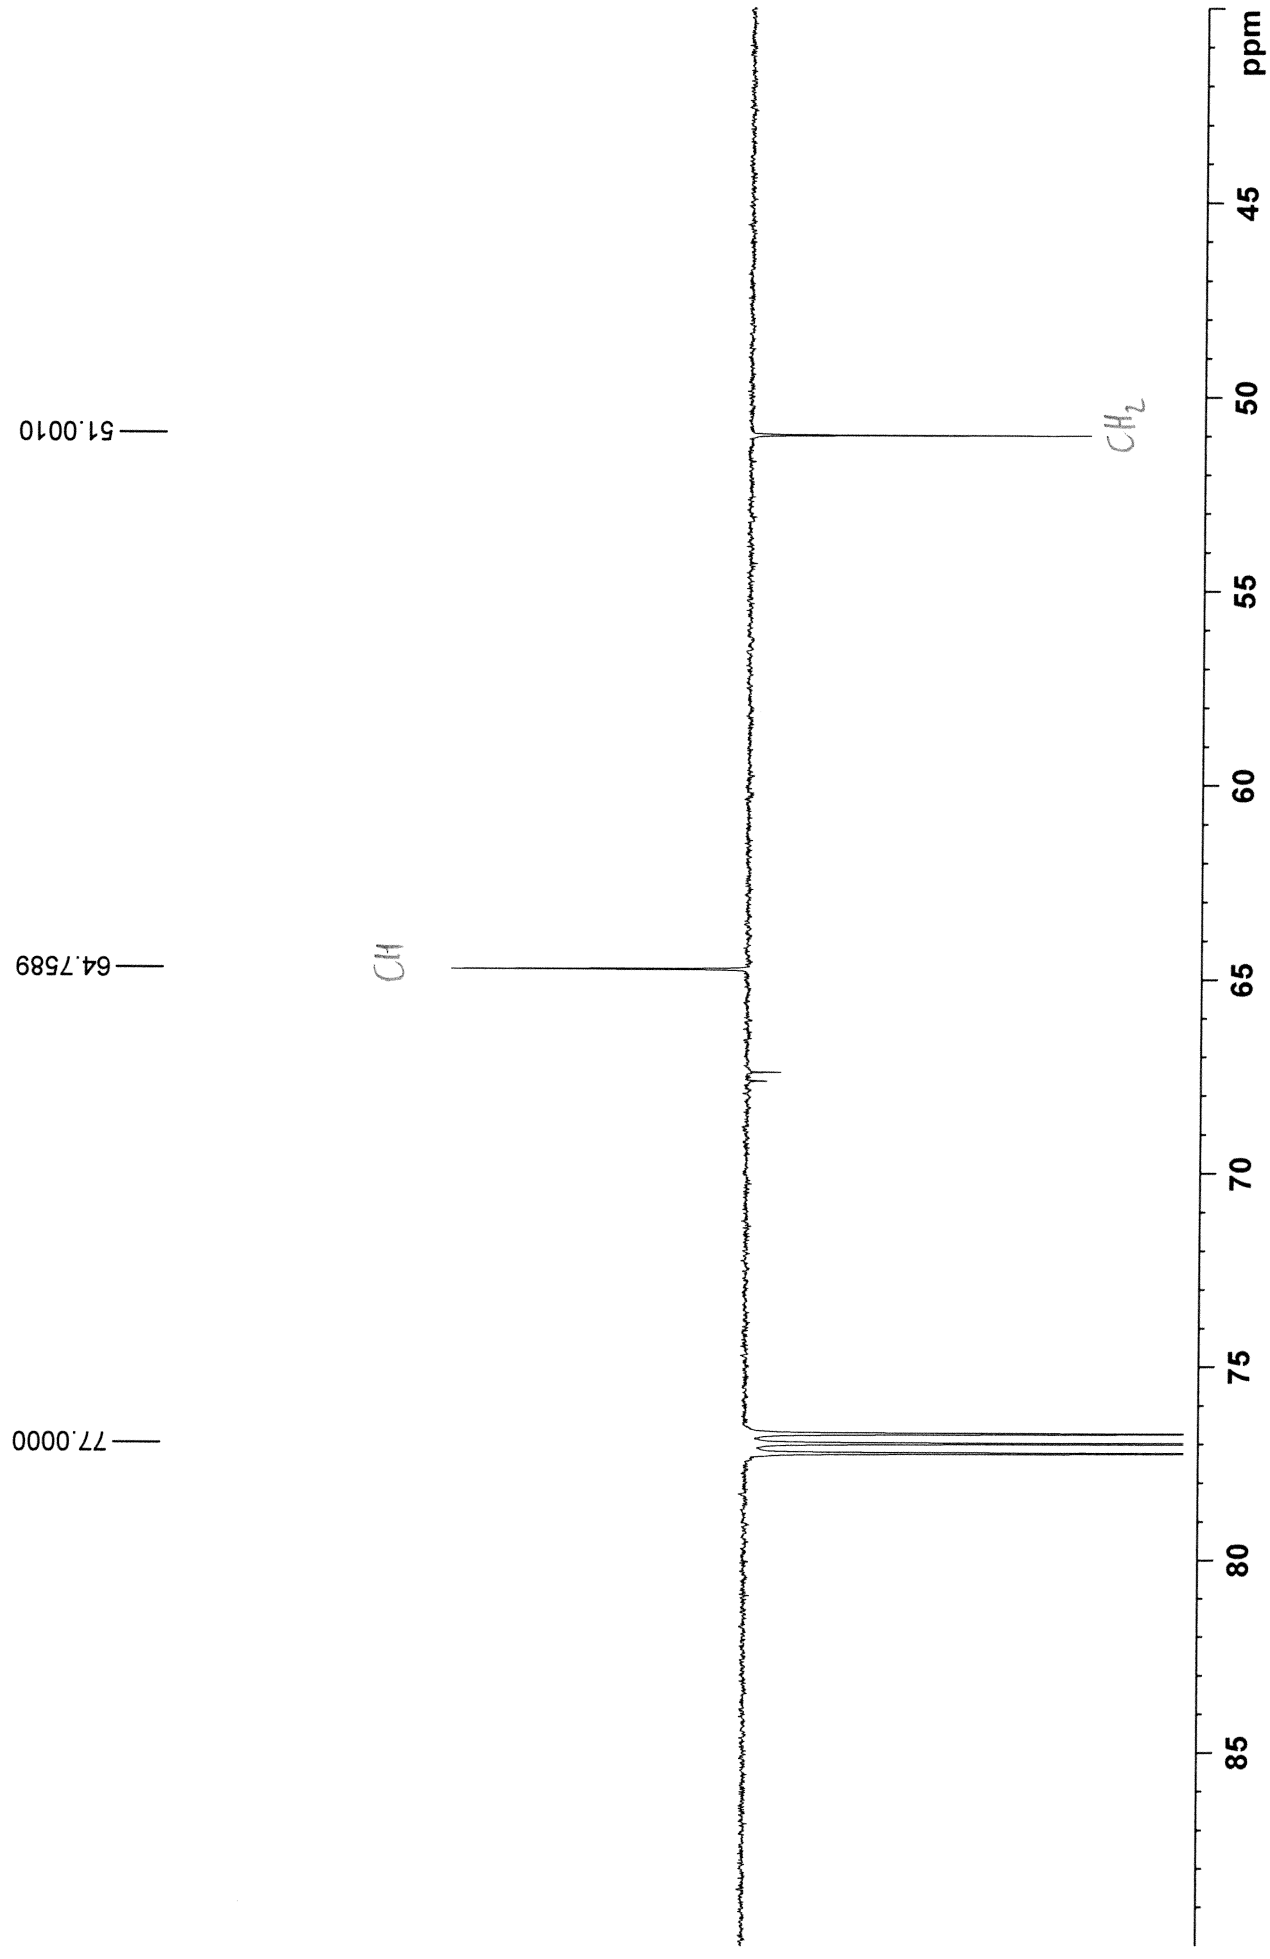

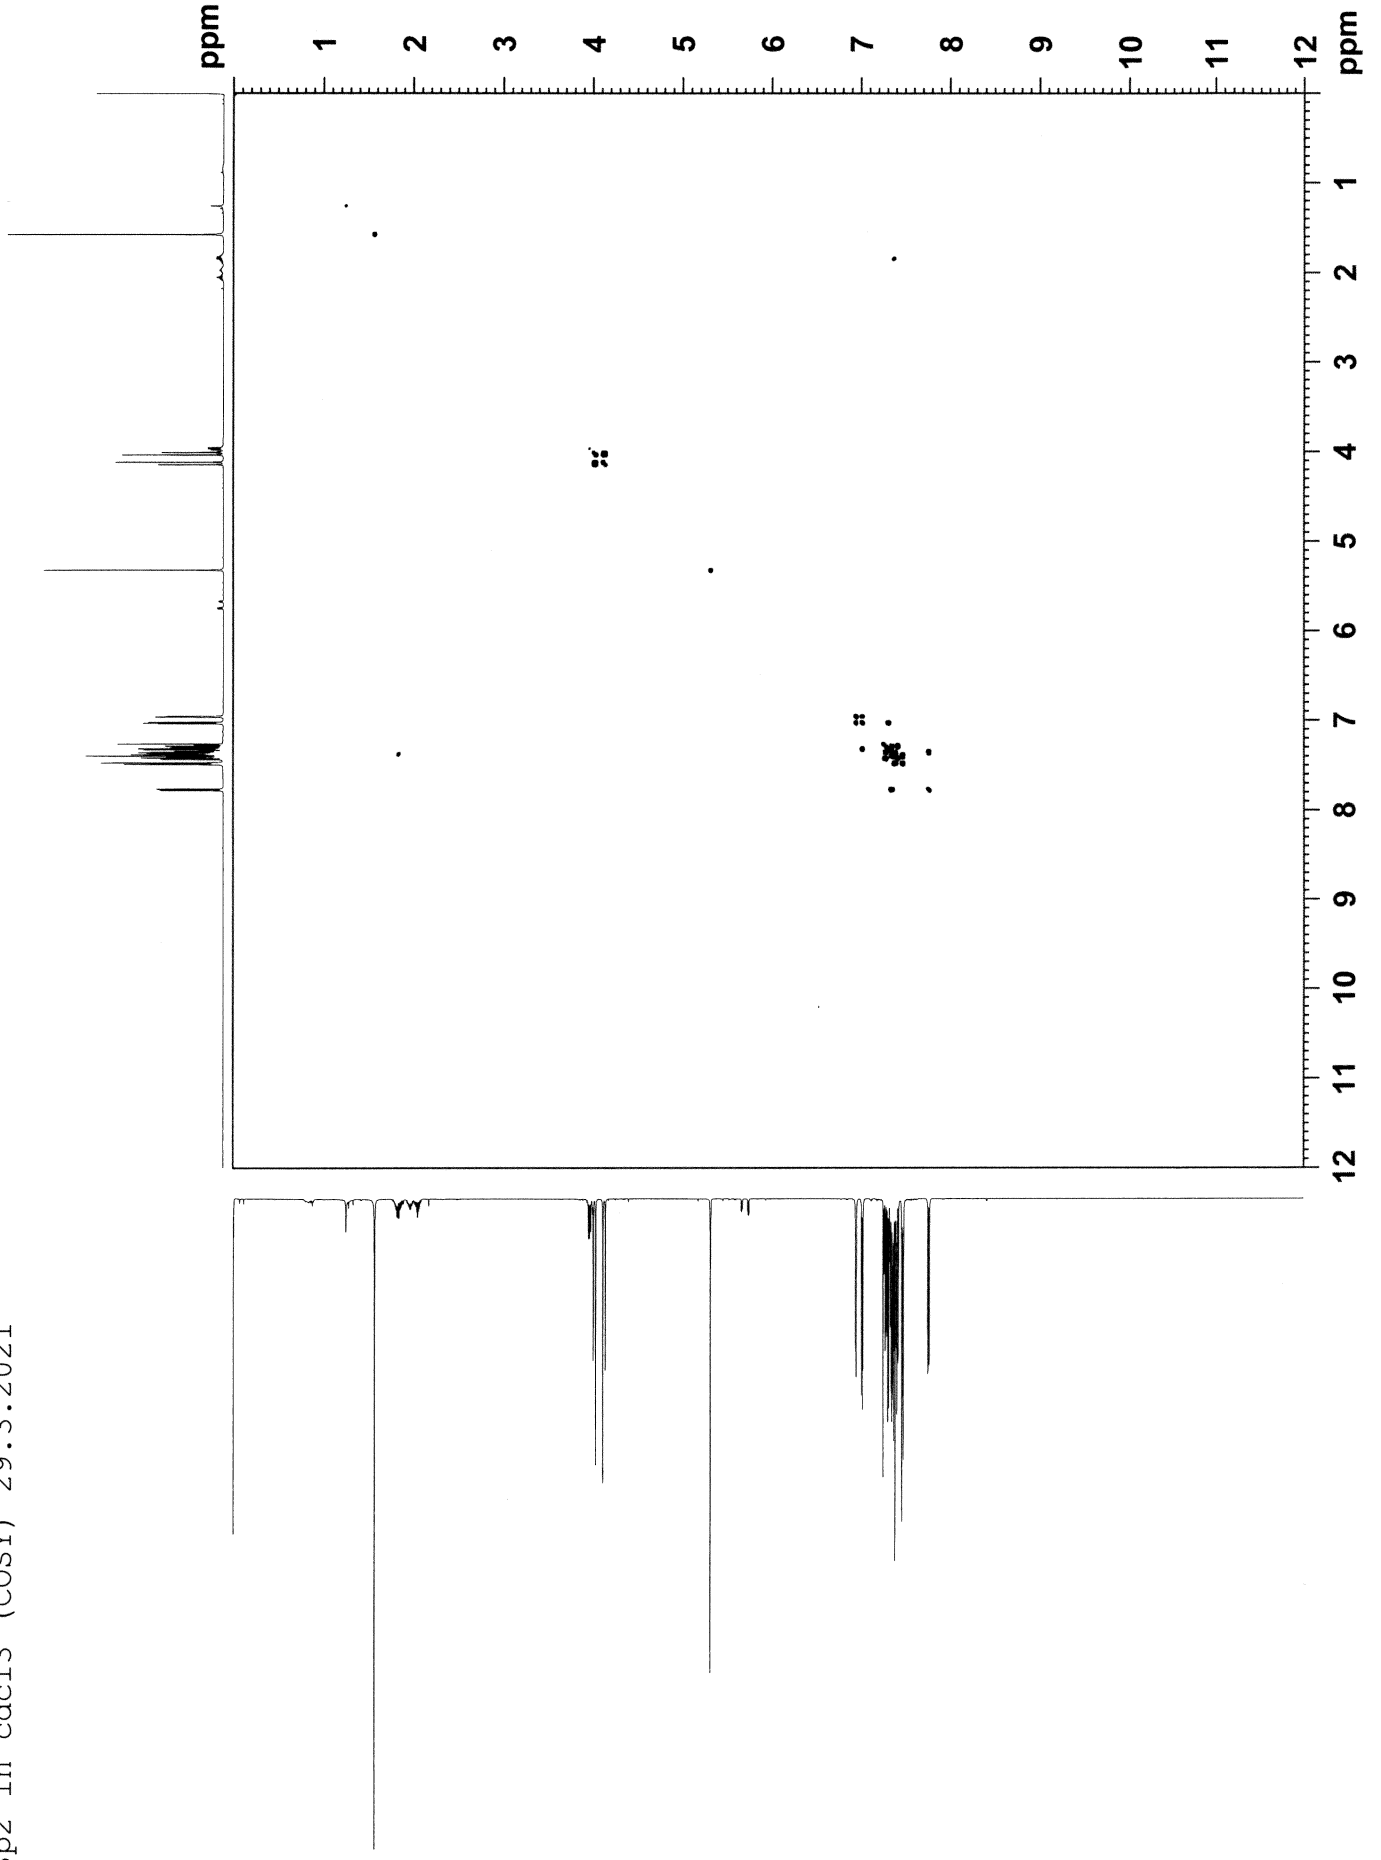

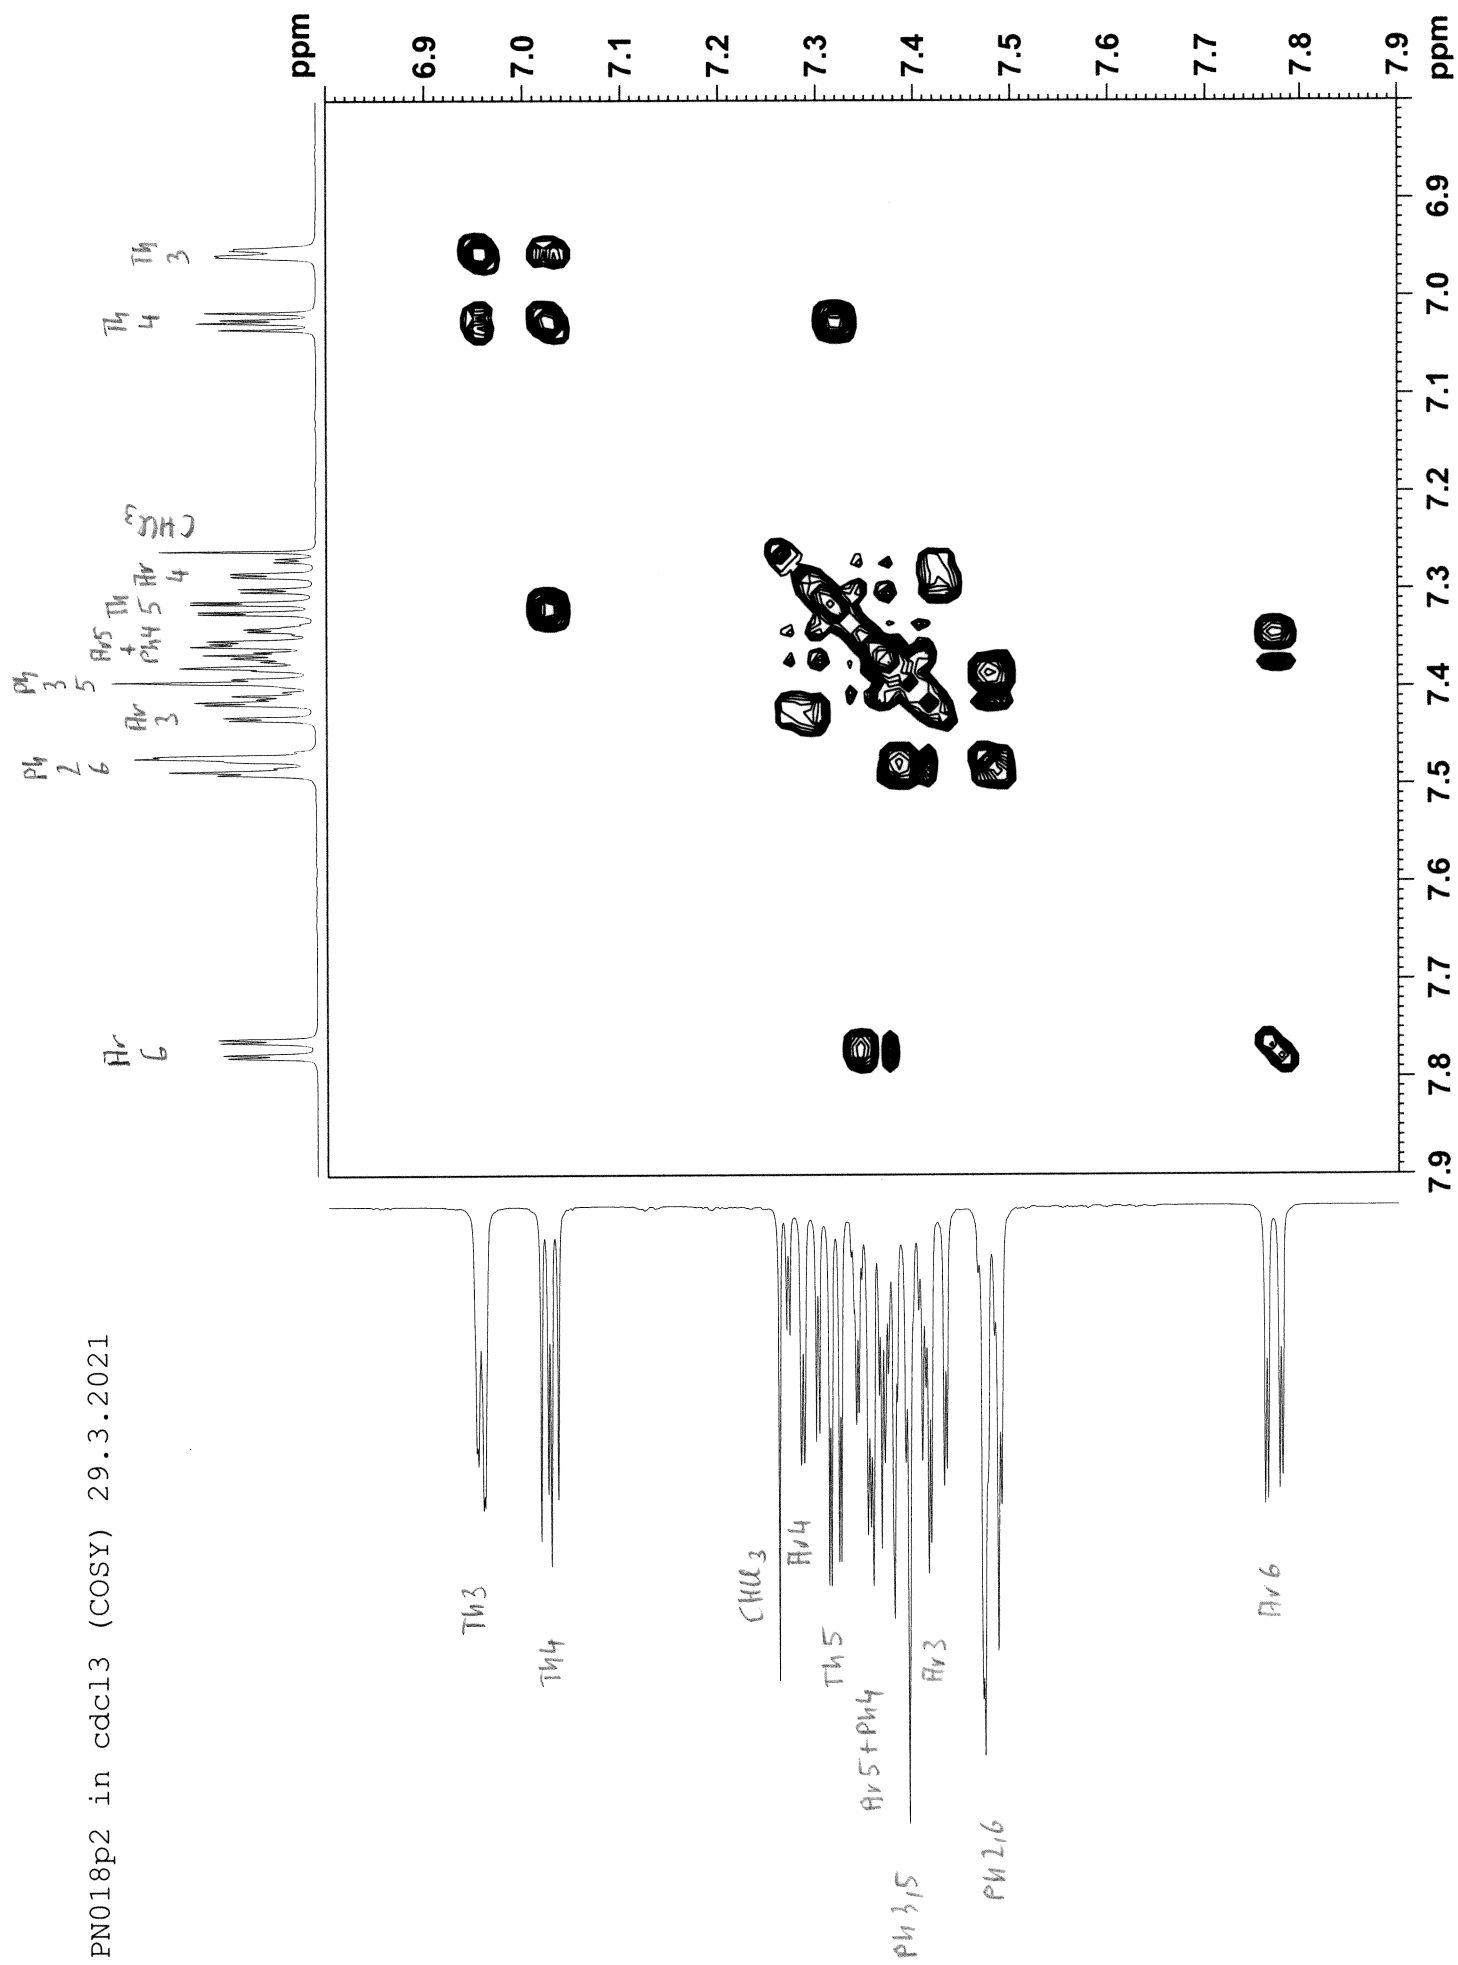

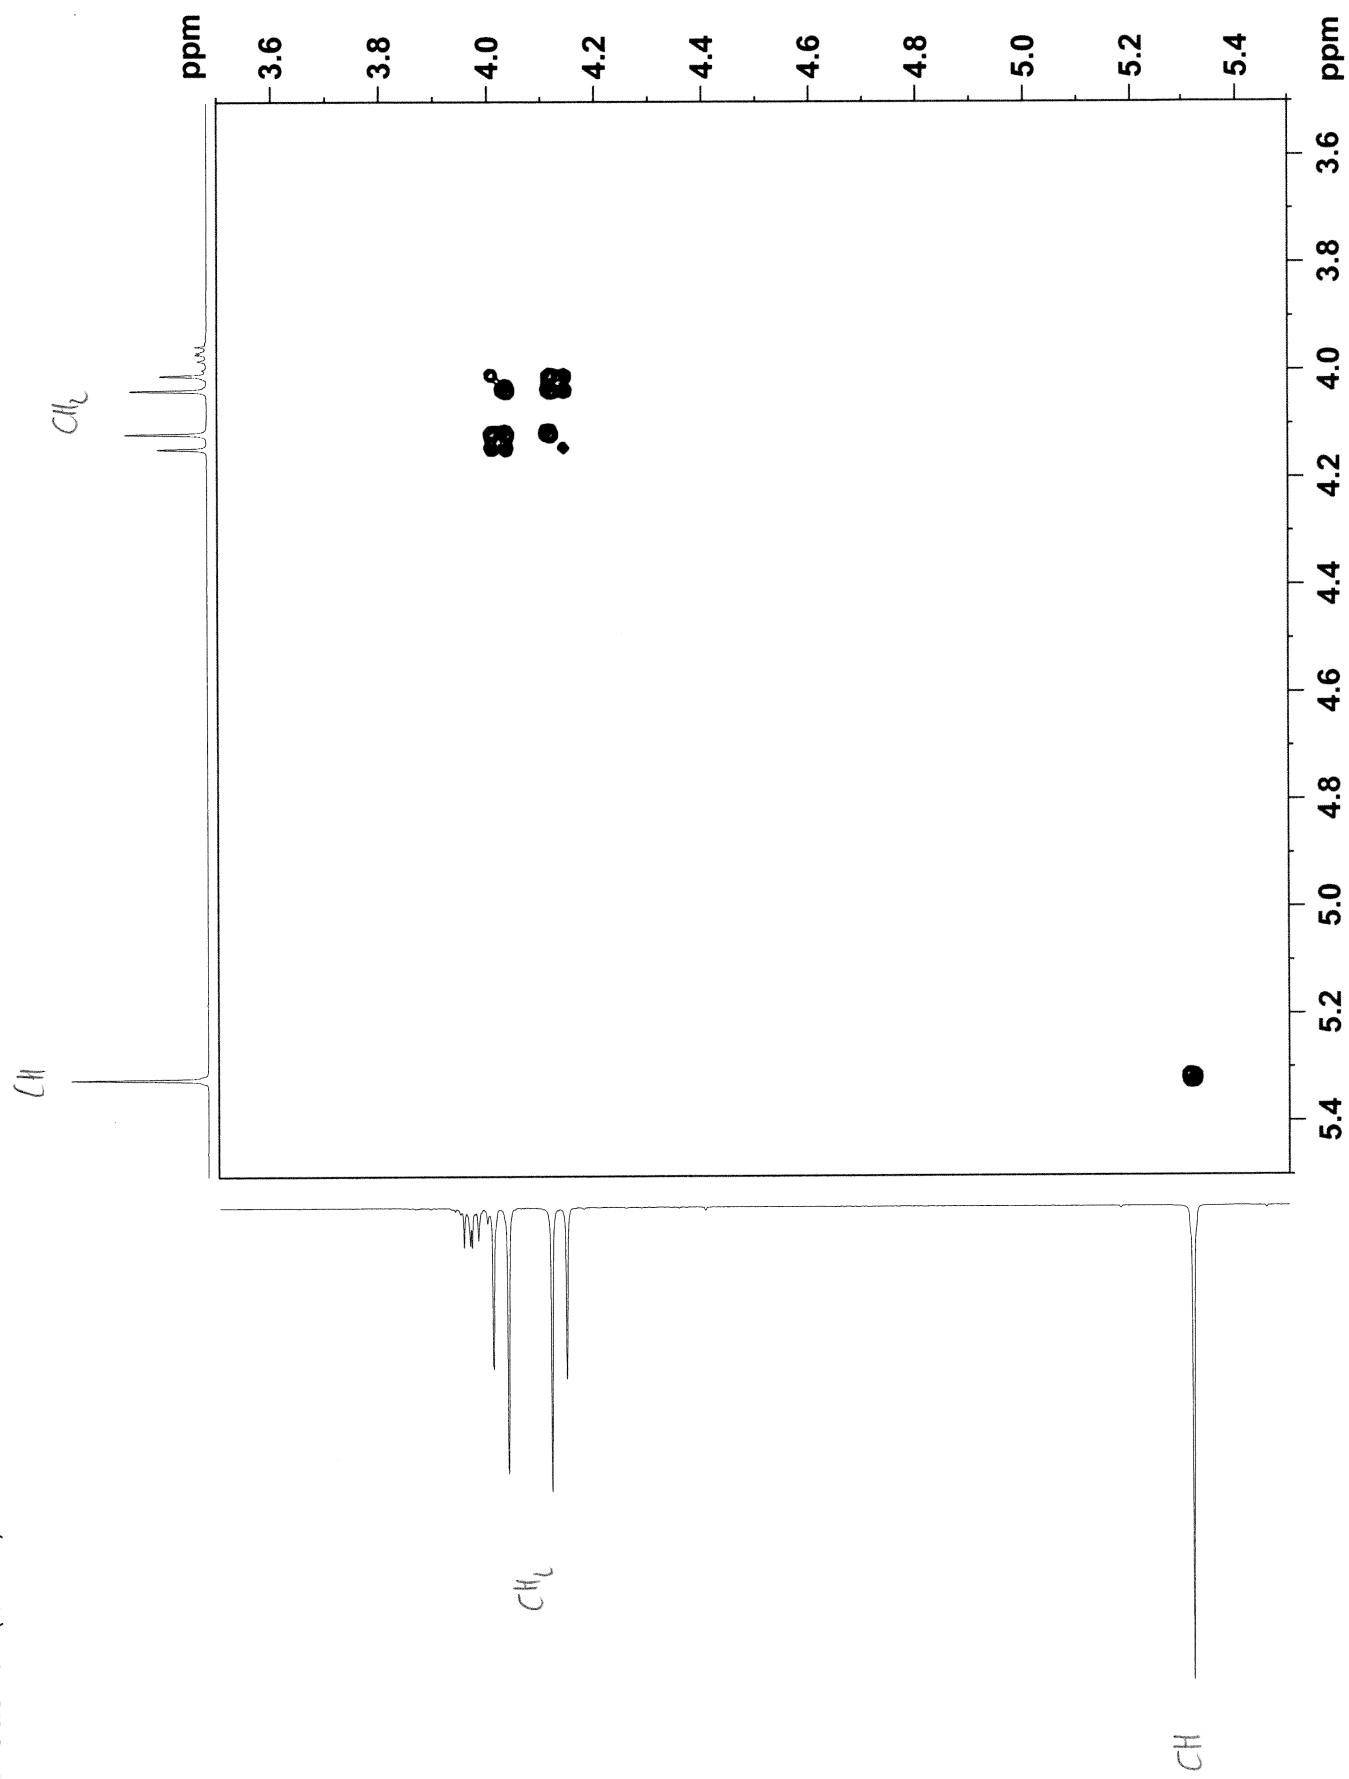

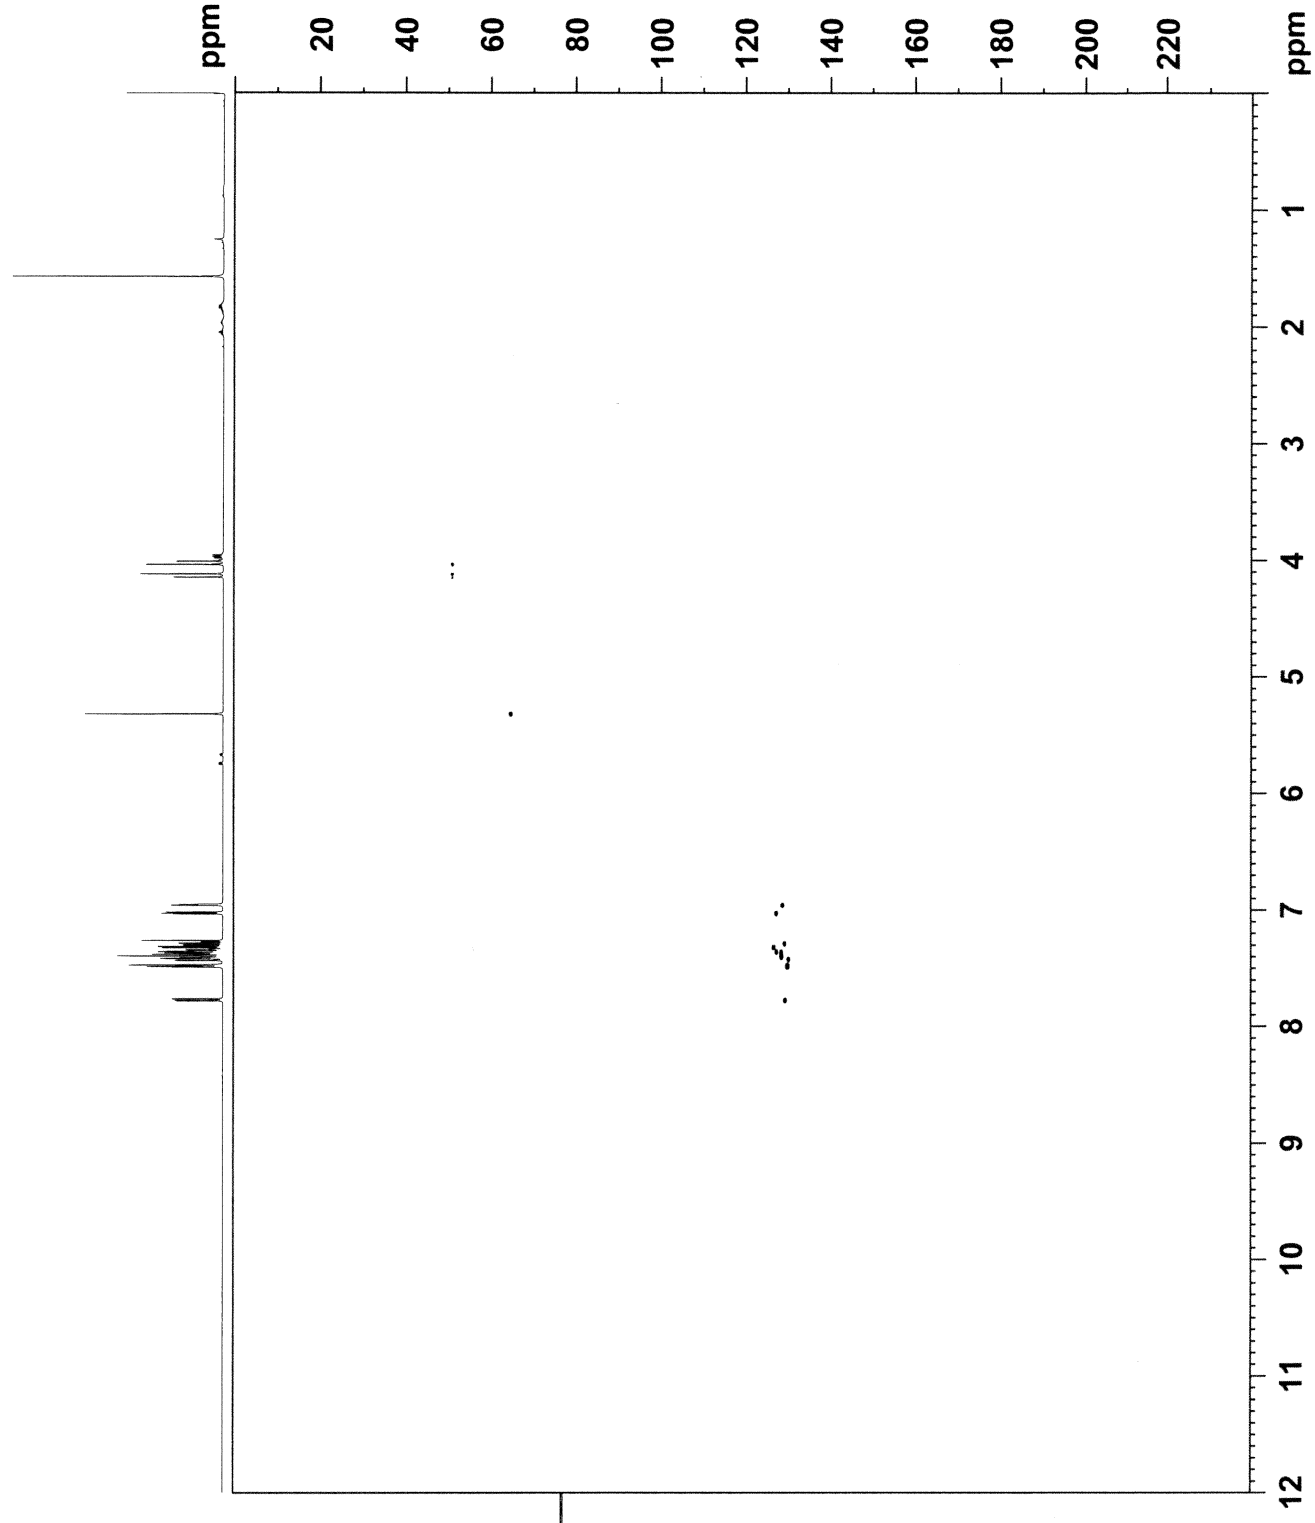

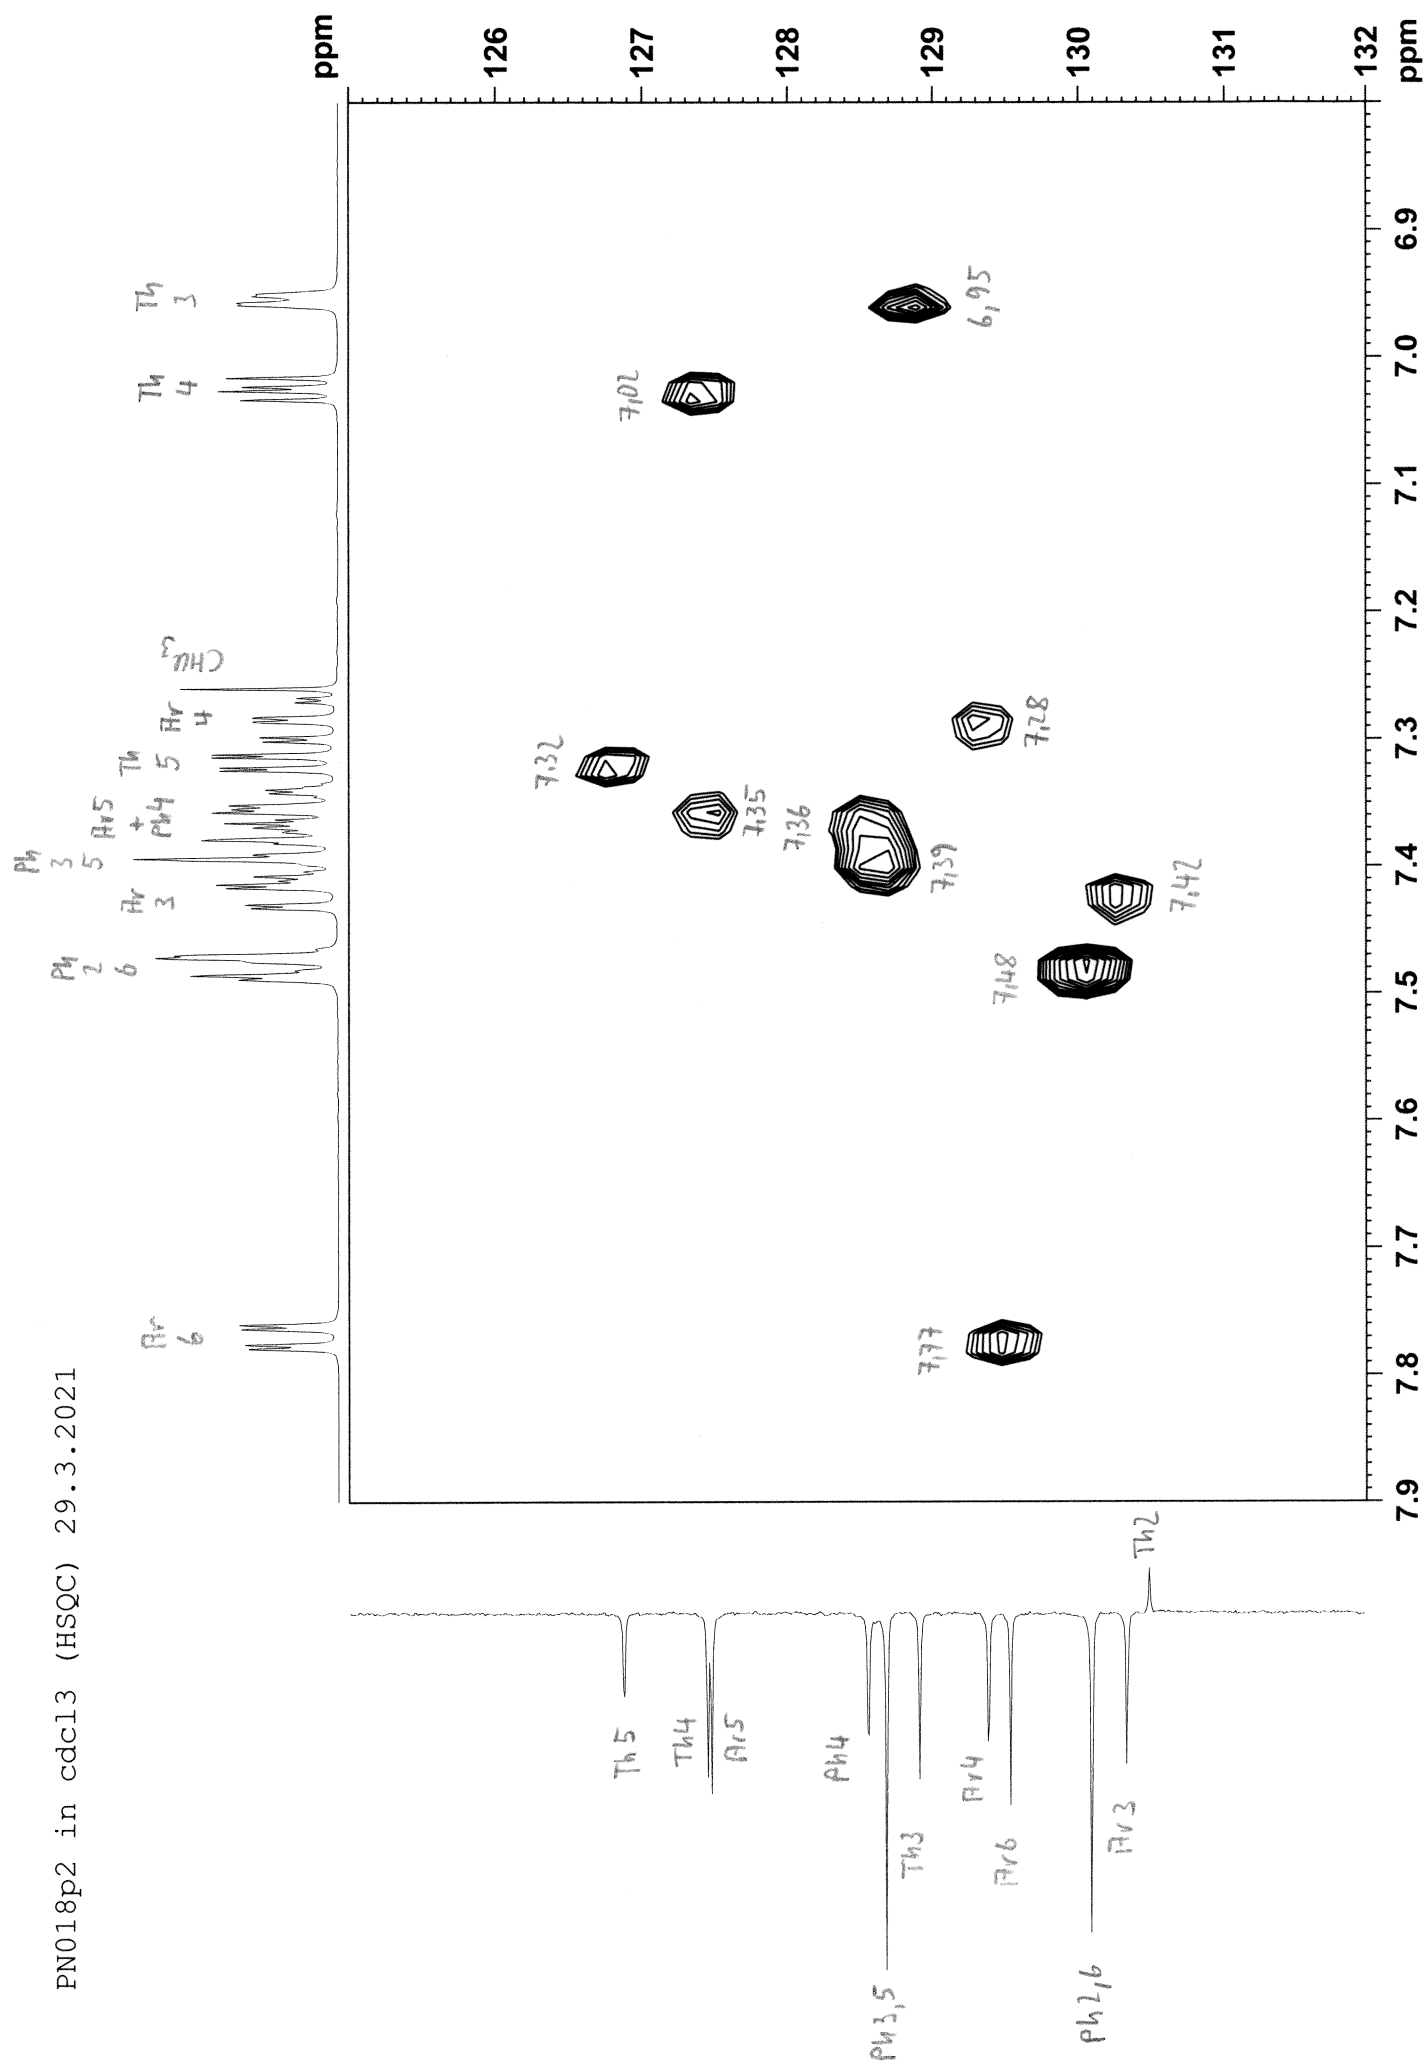

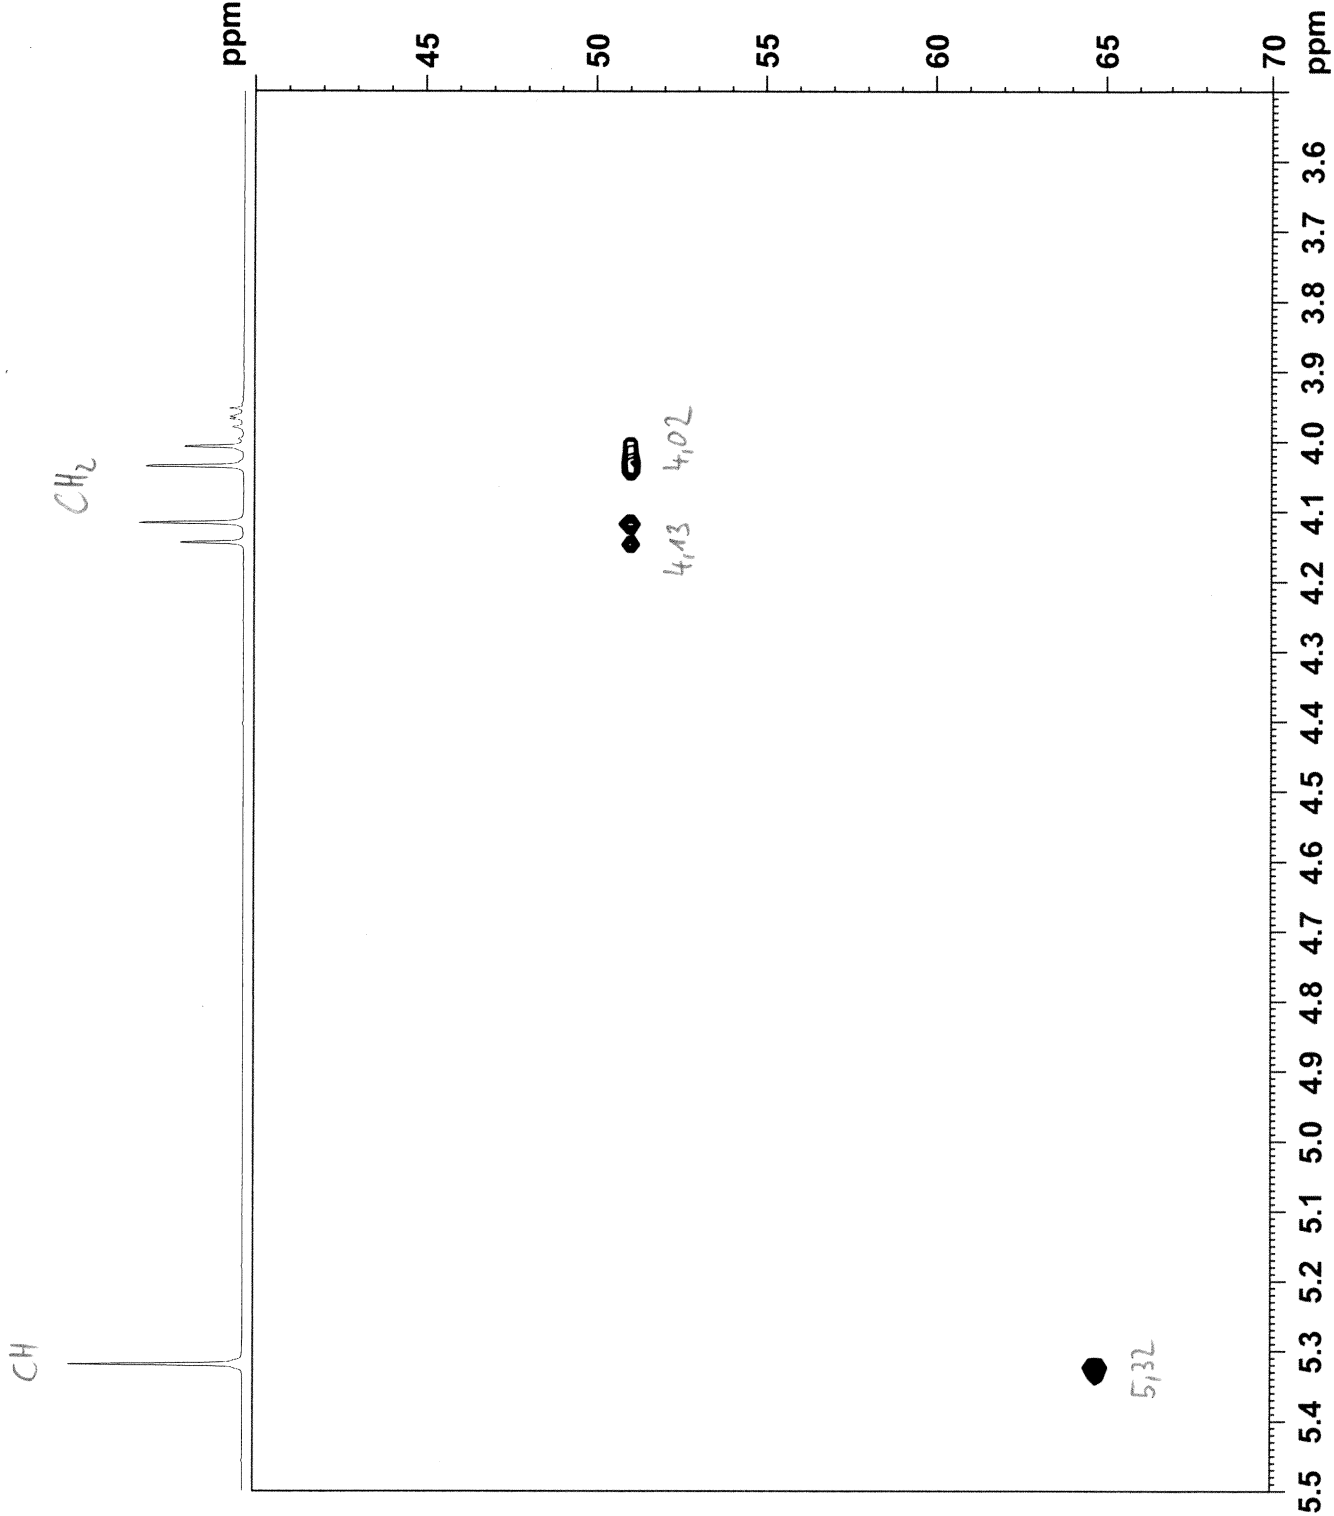



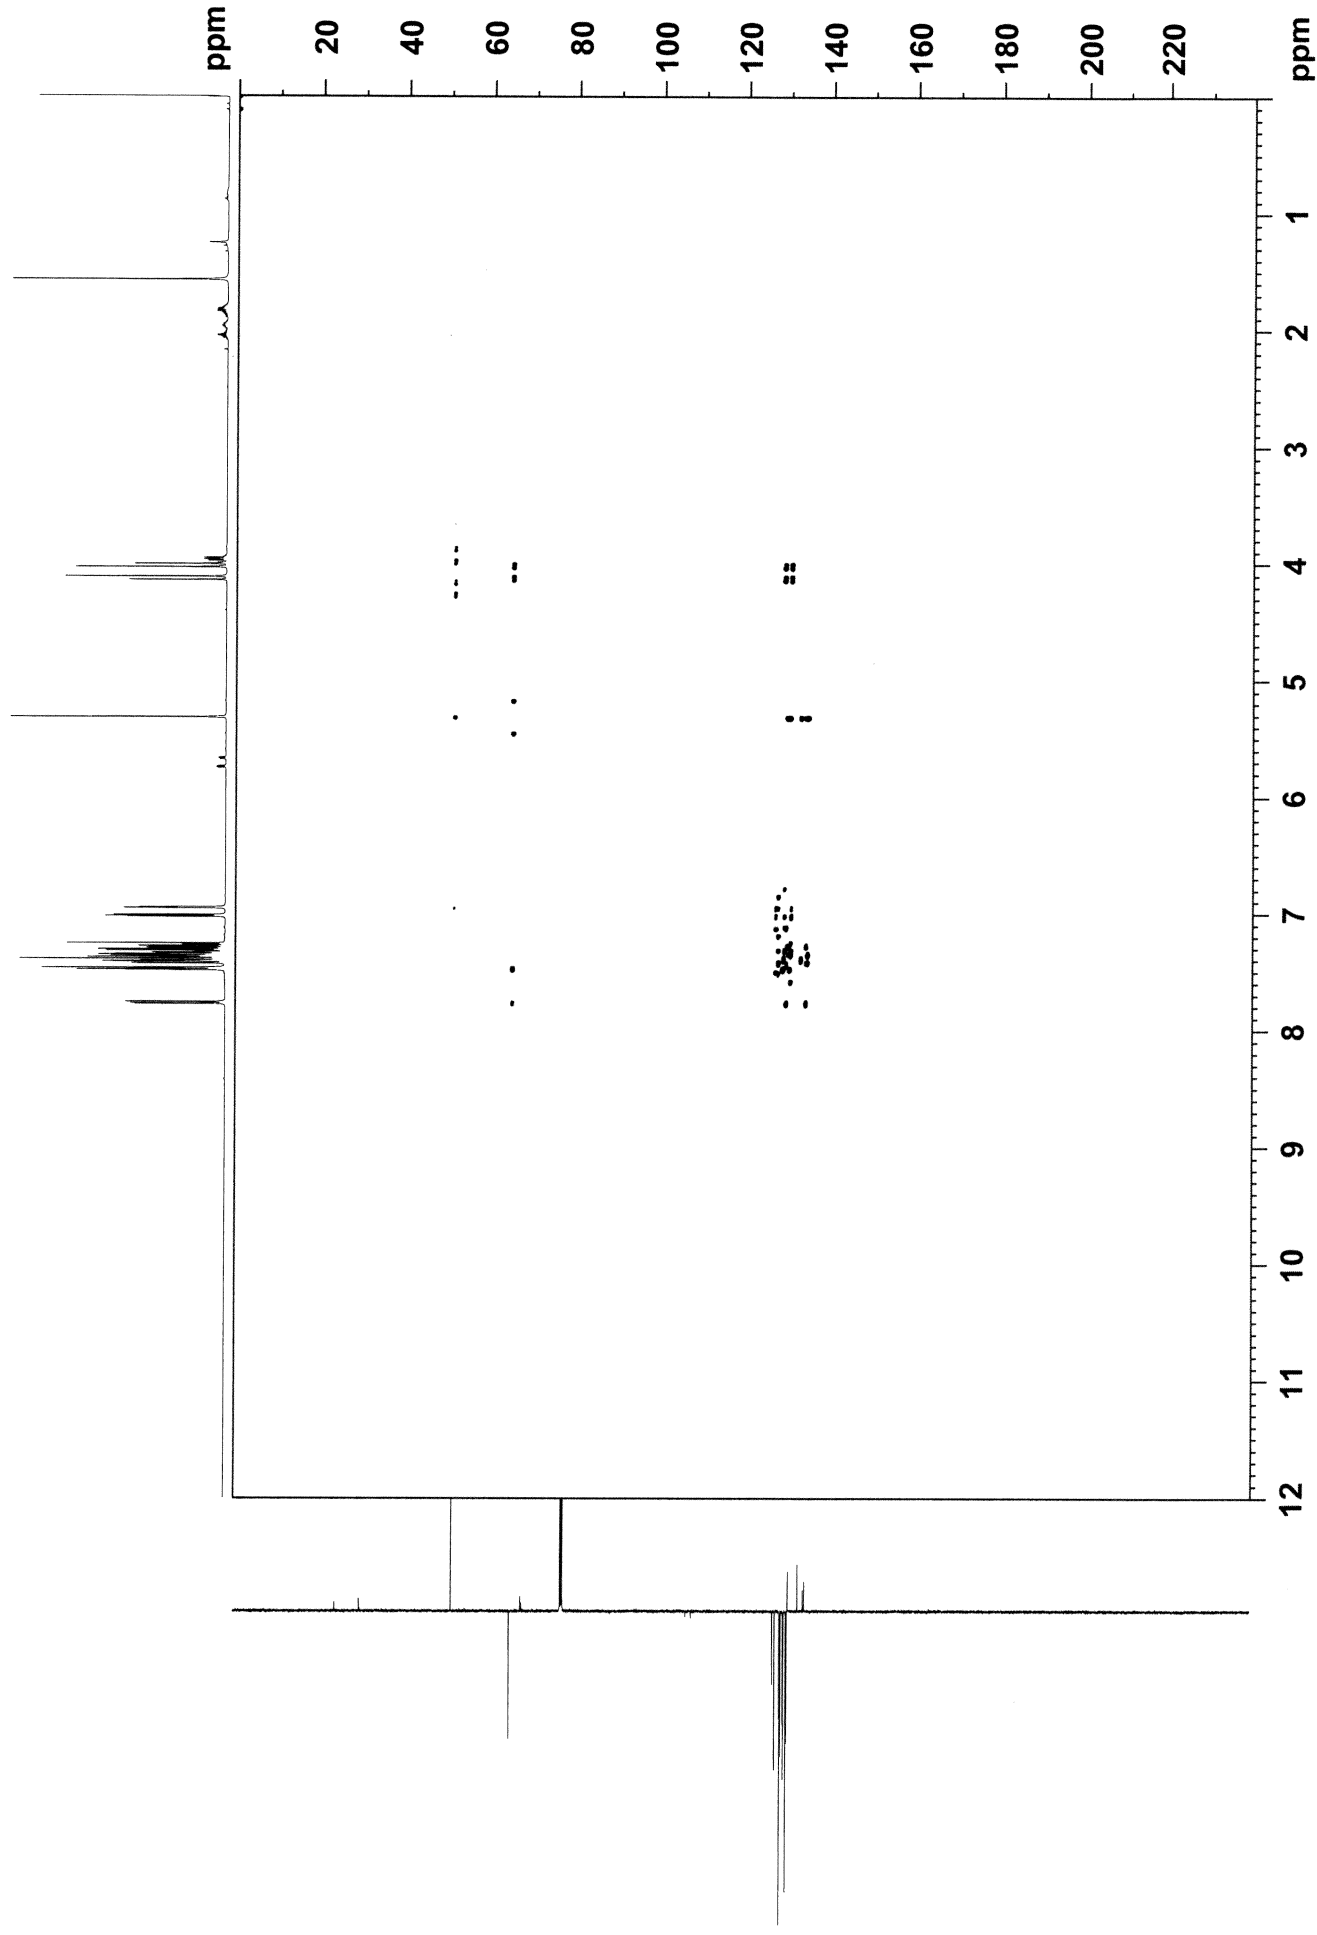

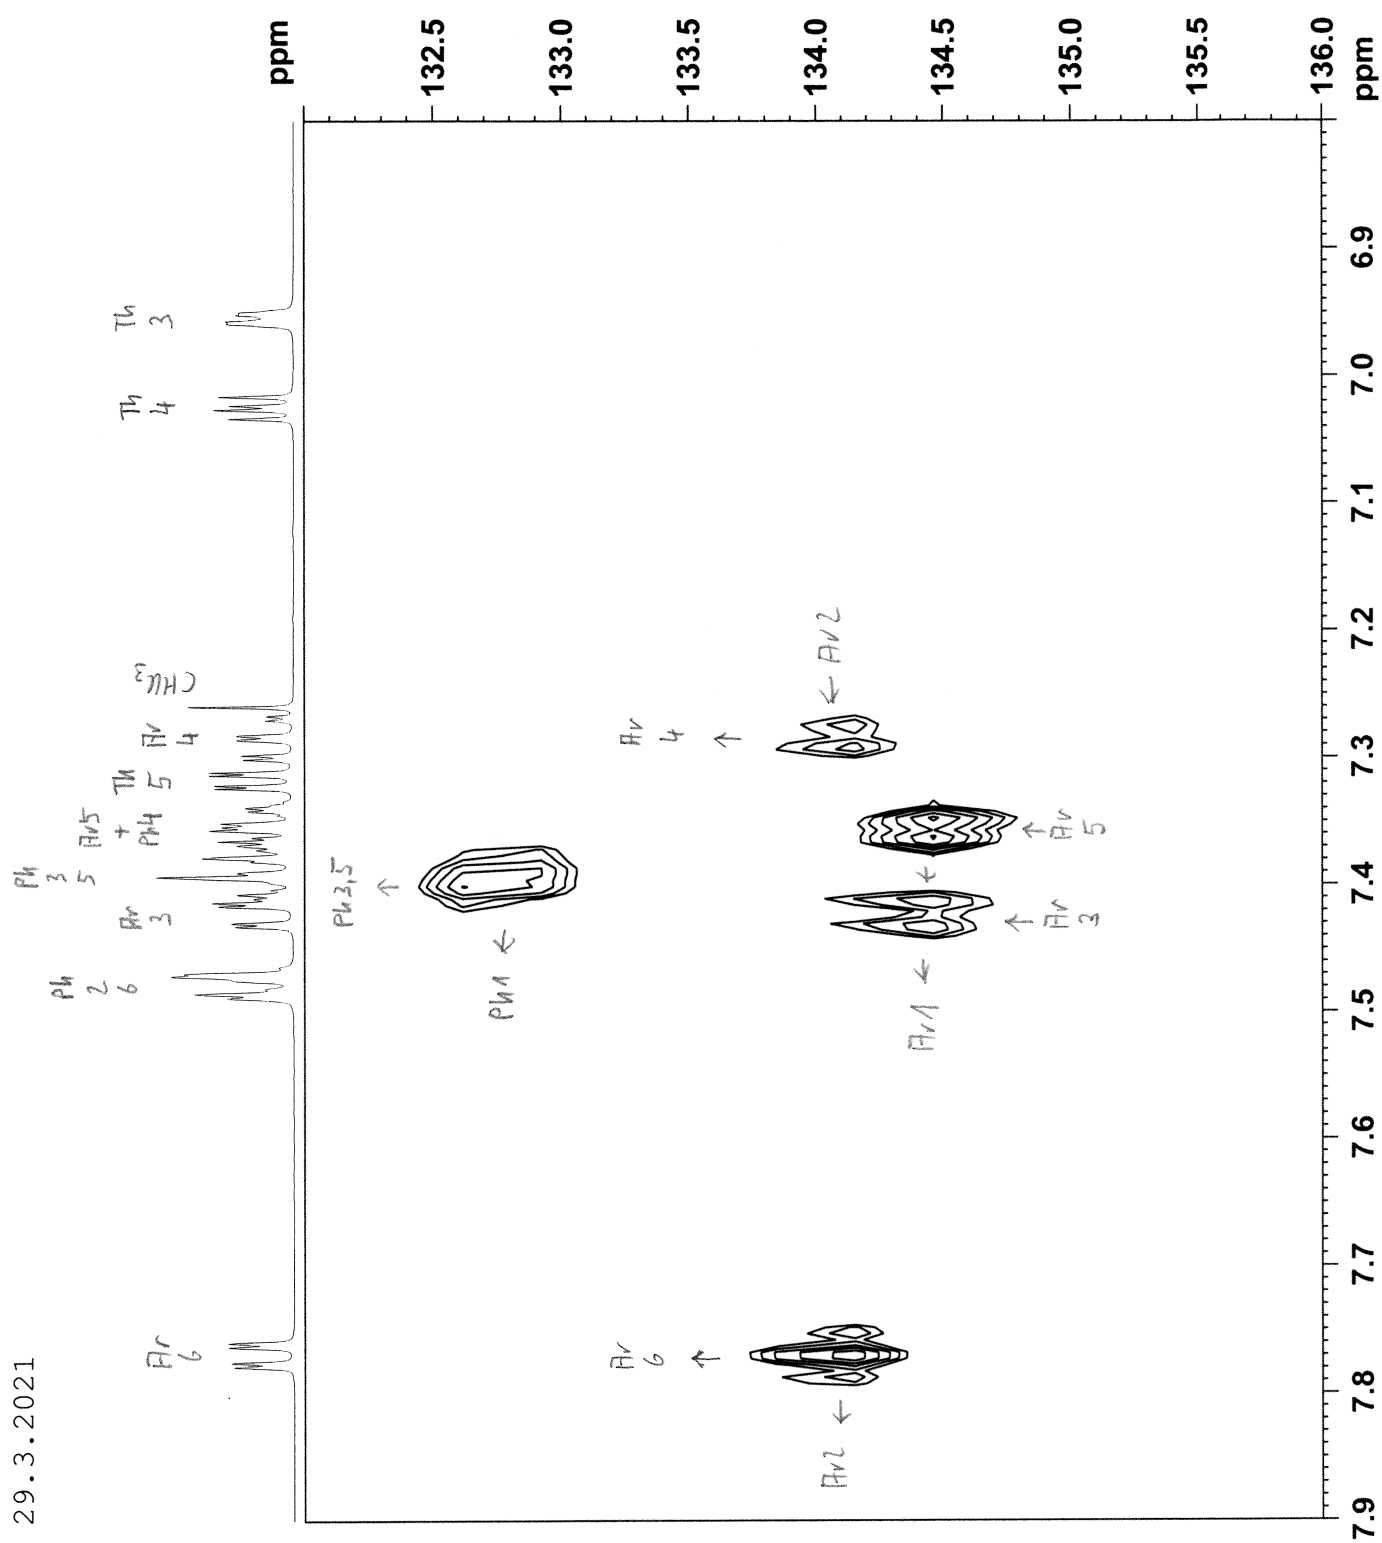



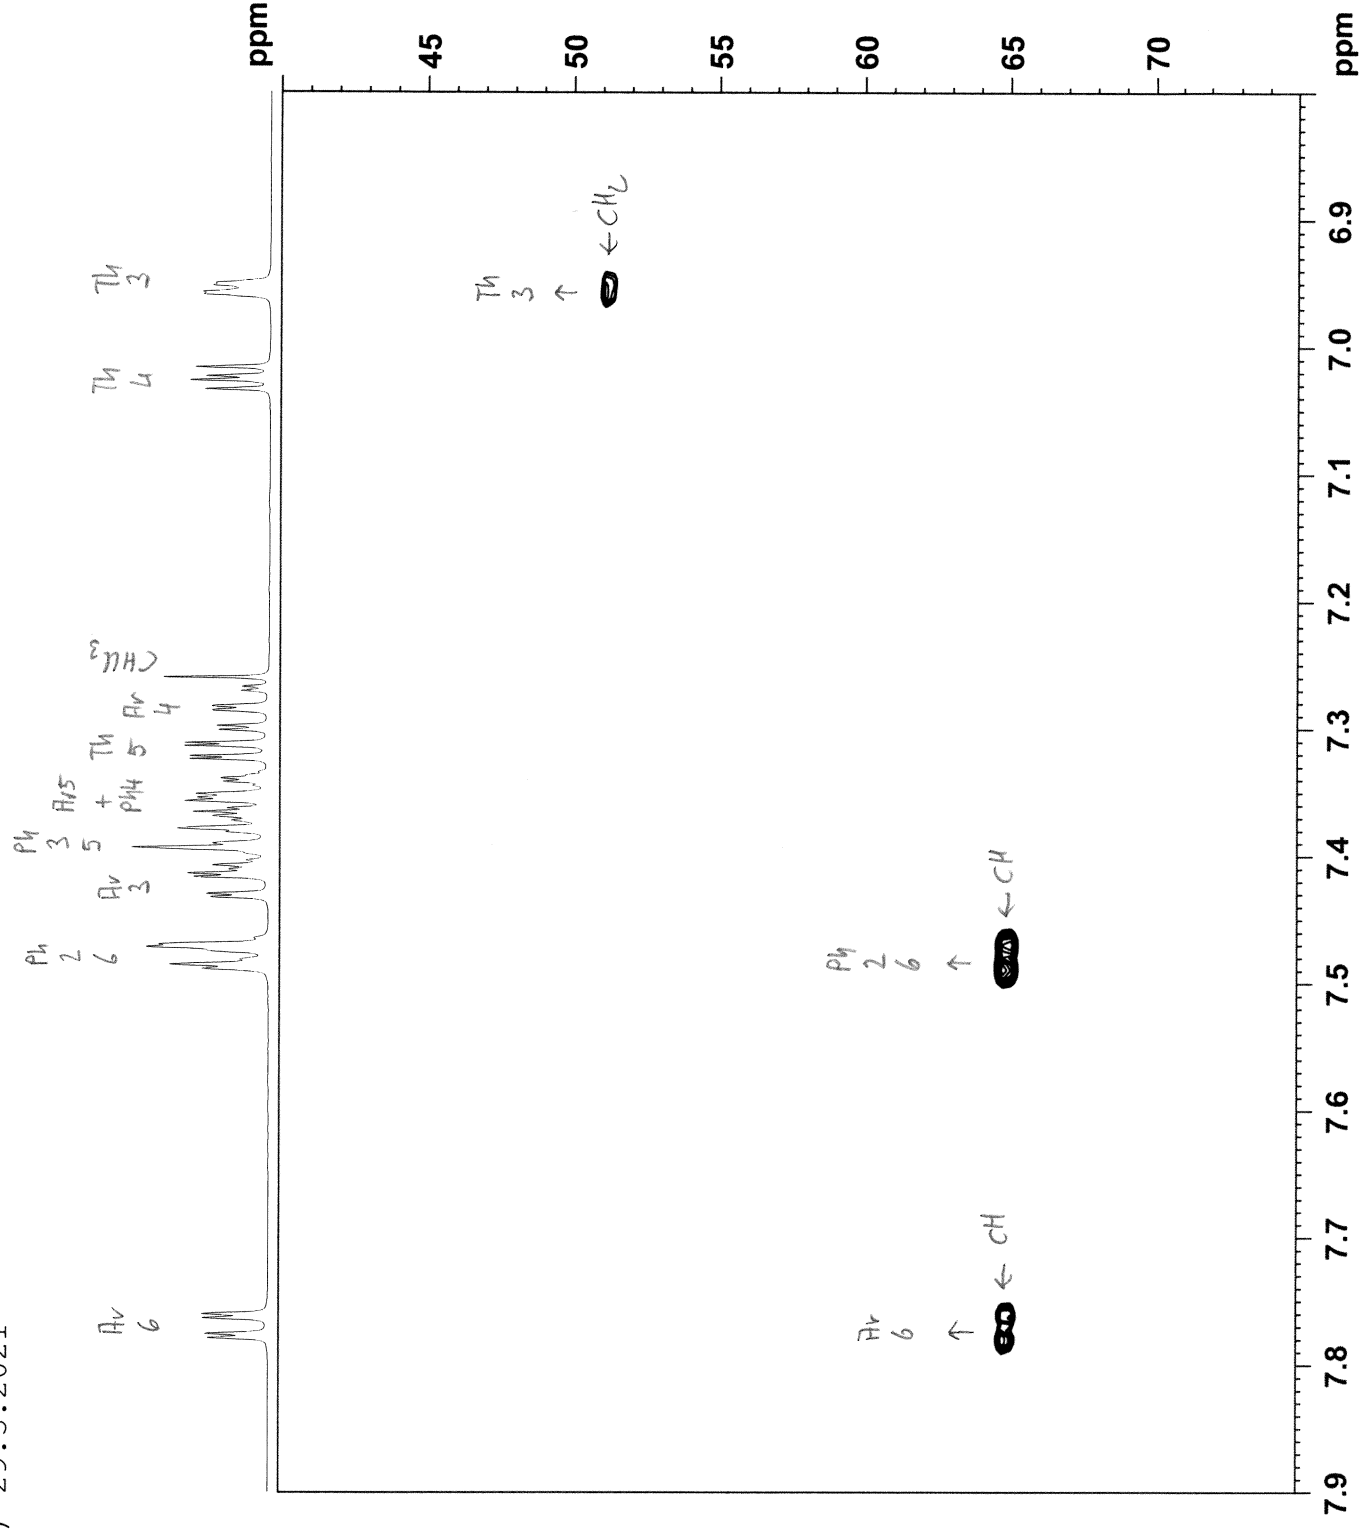

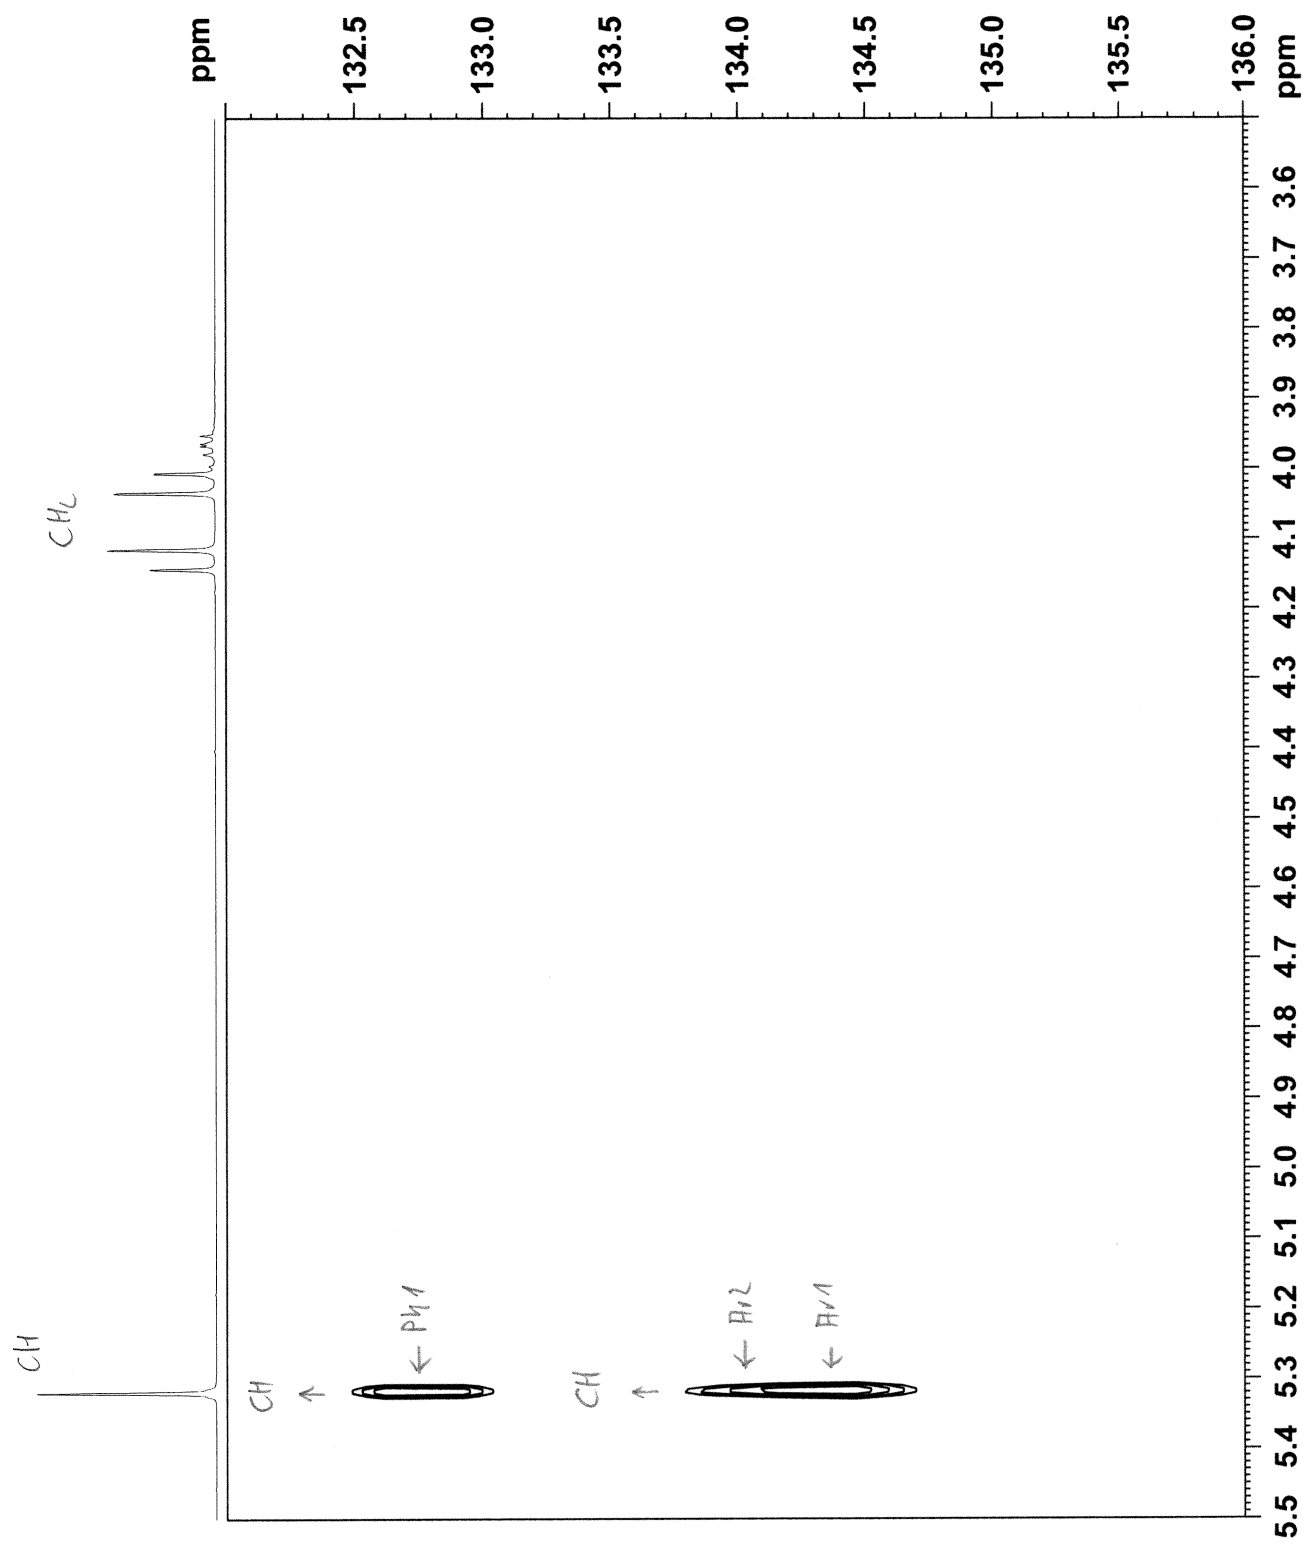

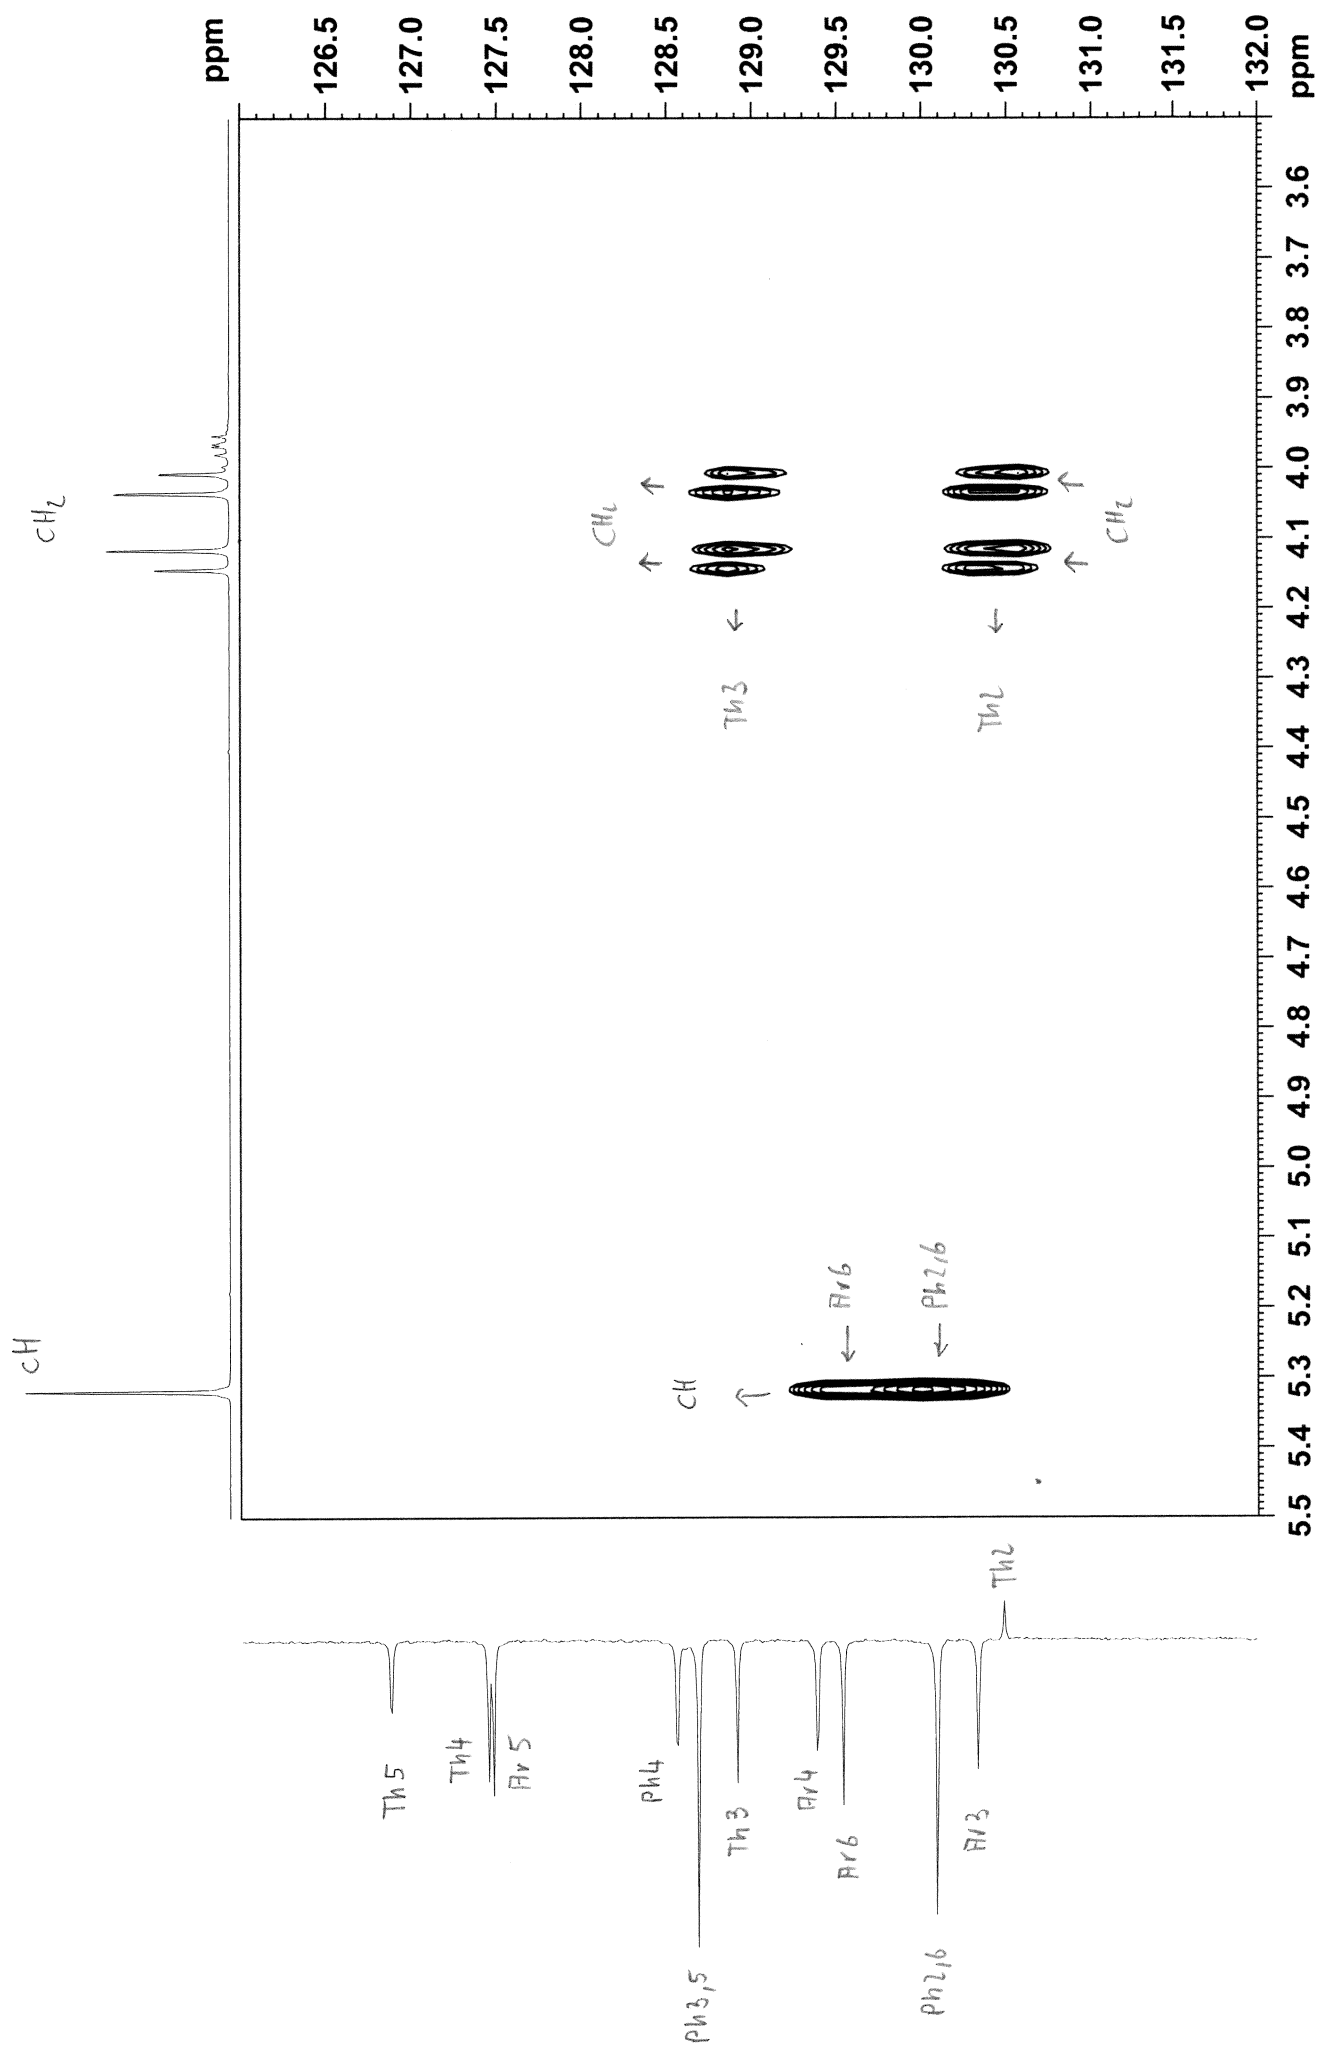

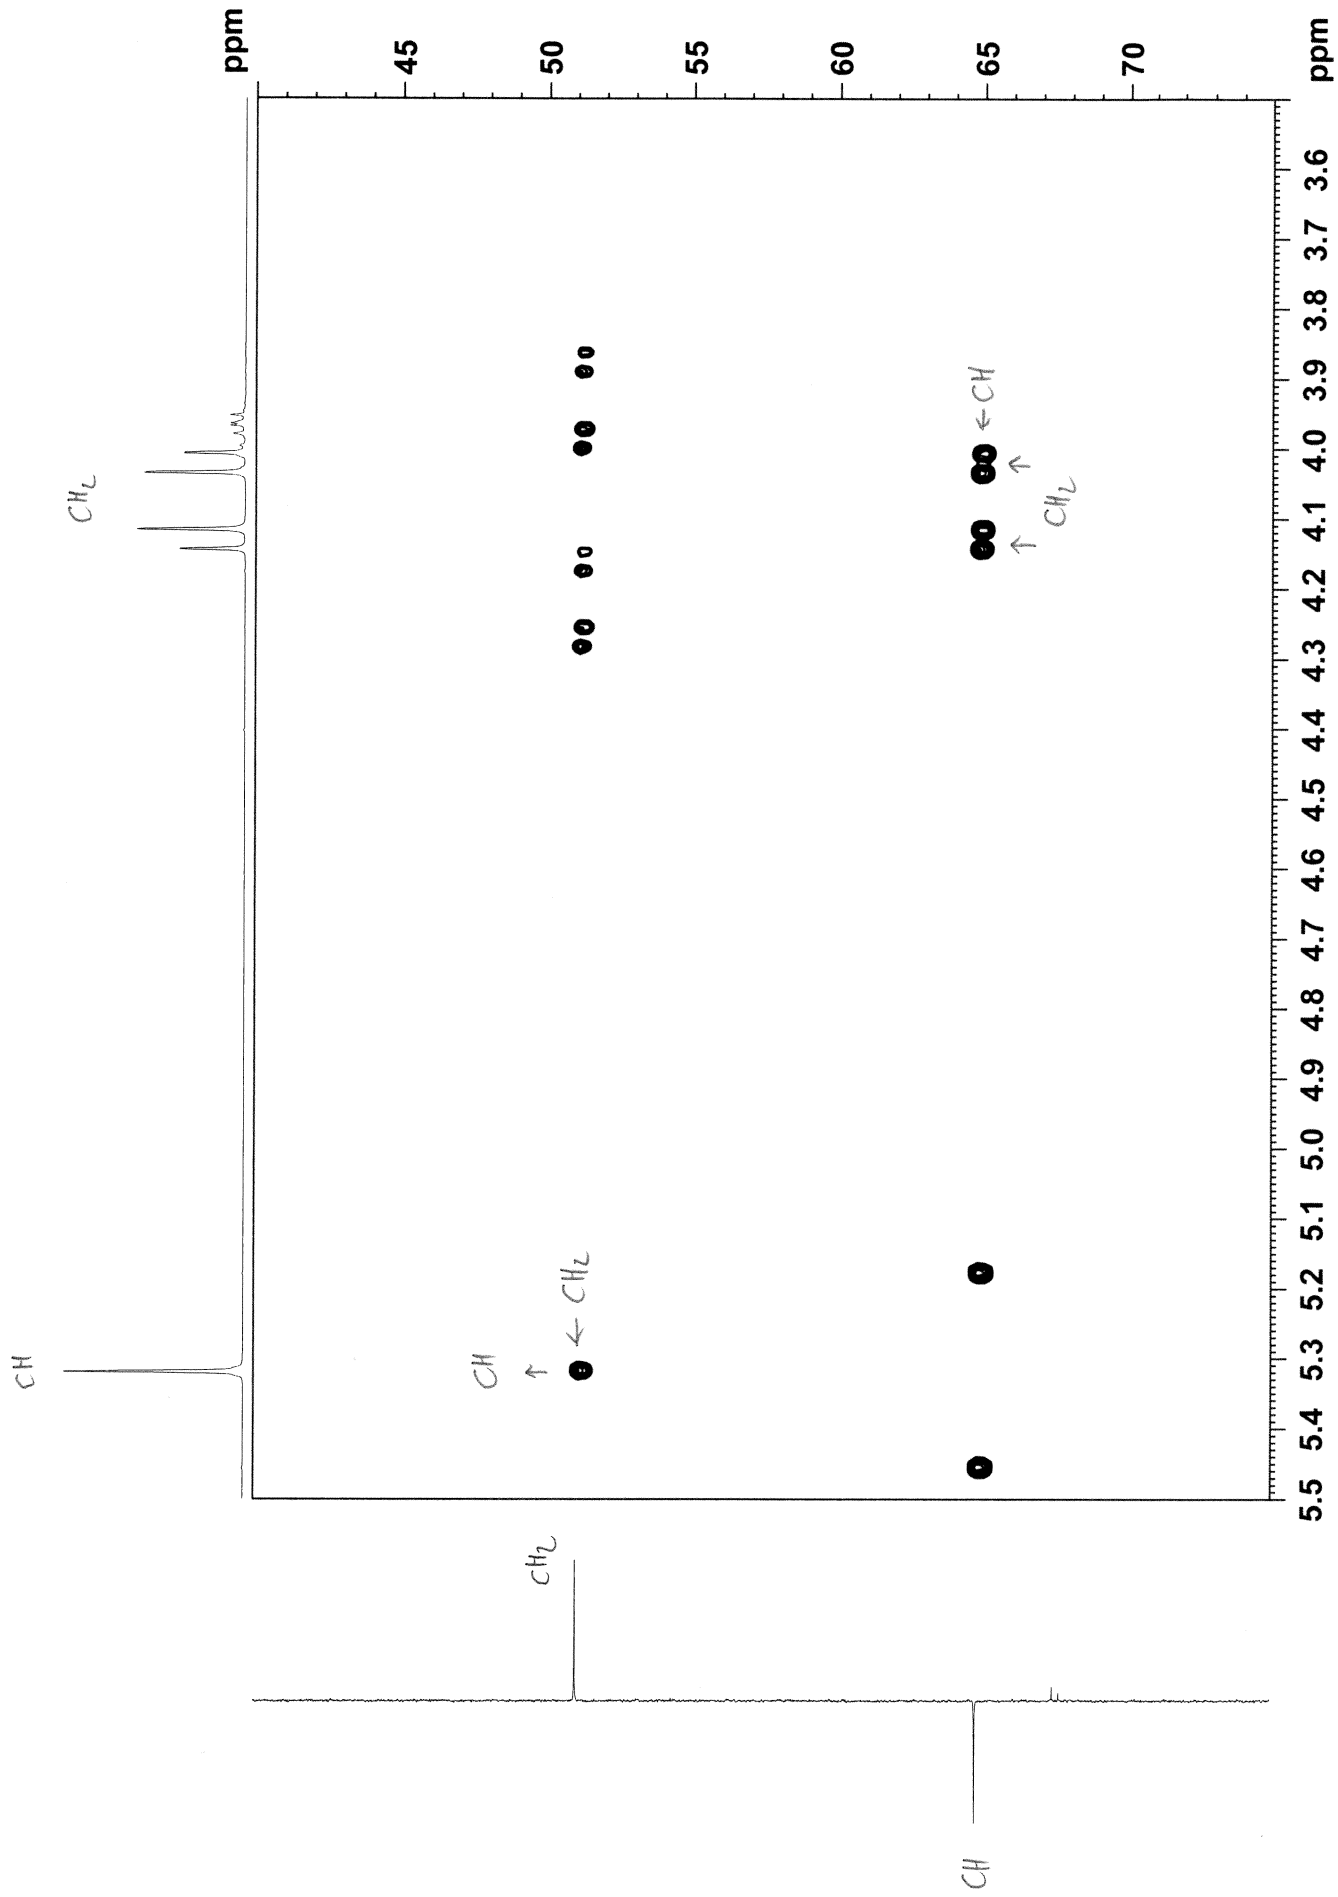

**Figure S15c.** NMR spectra of compound **7d**.

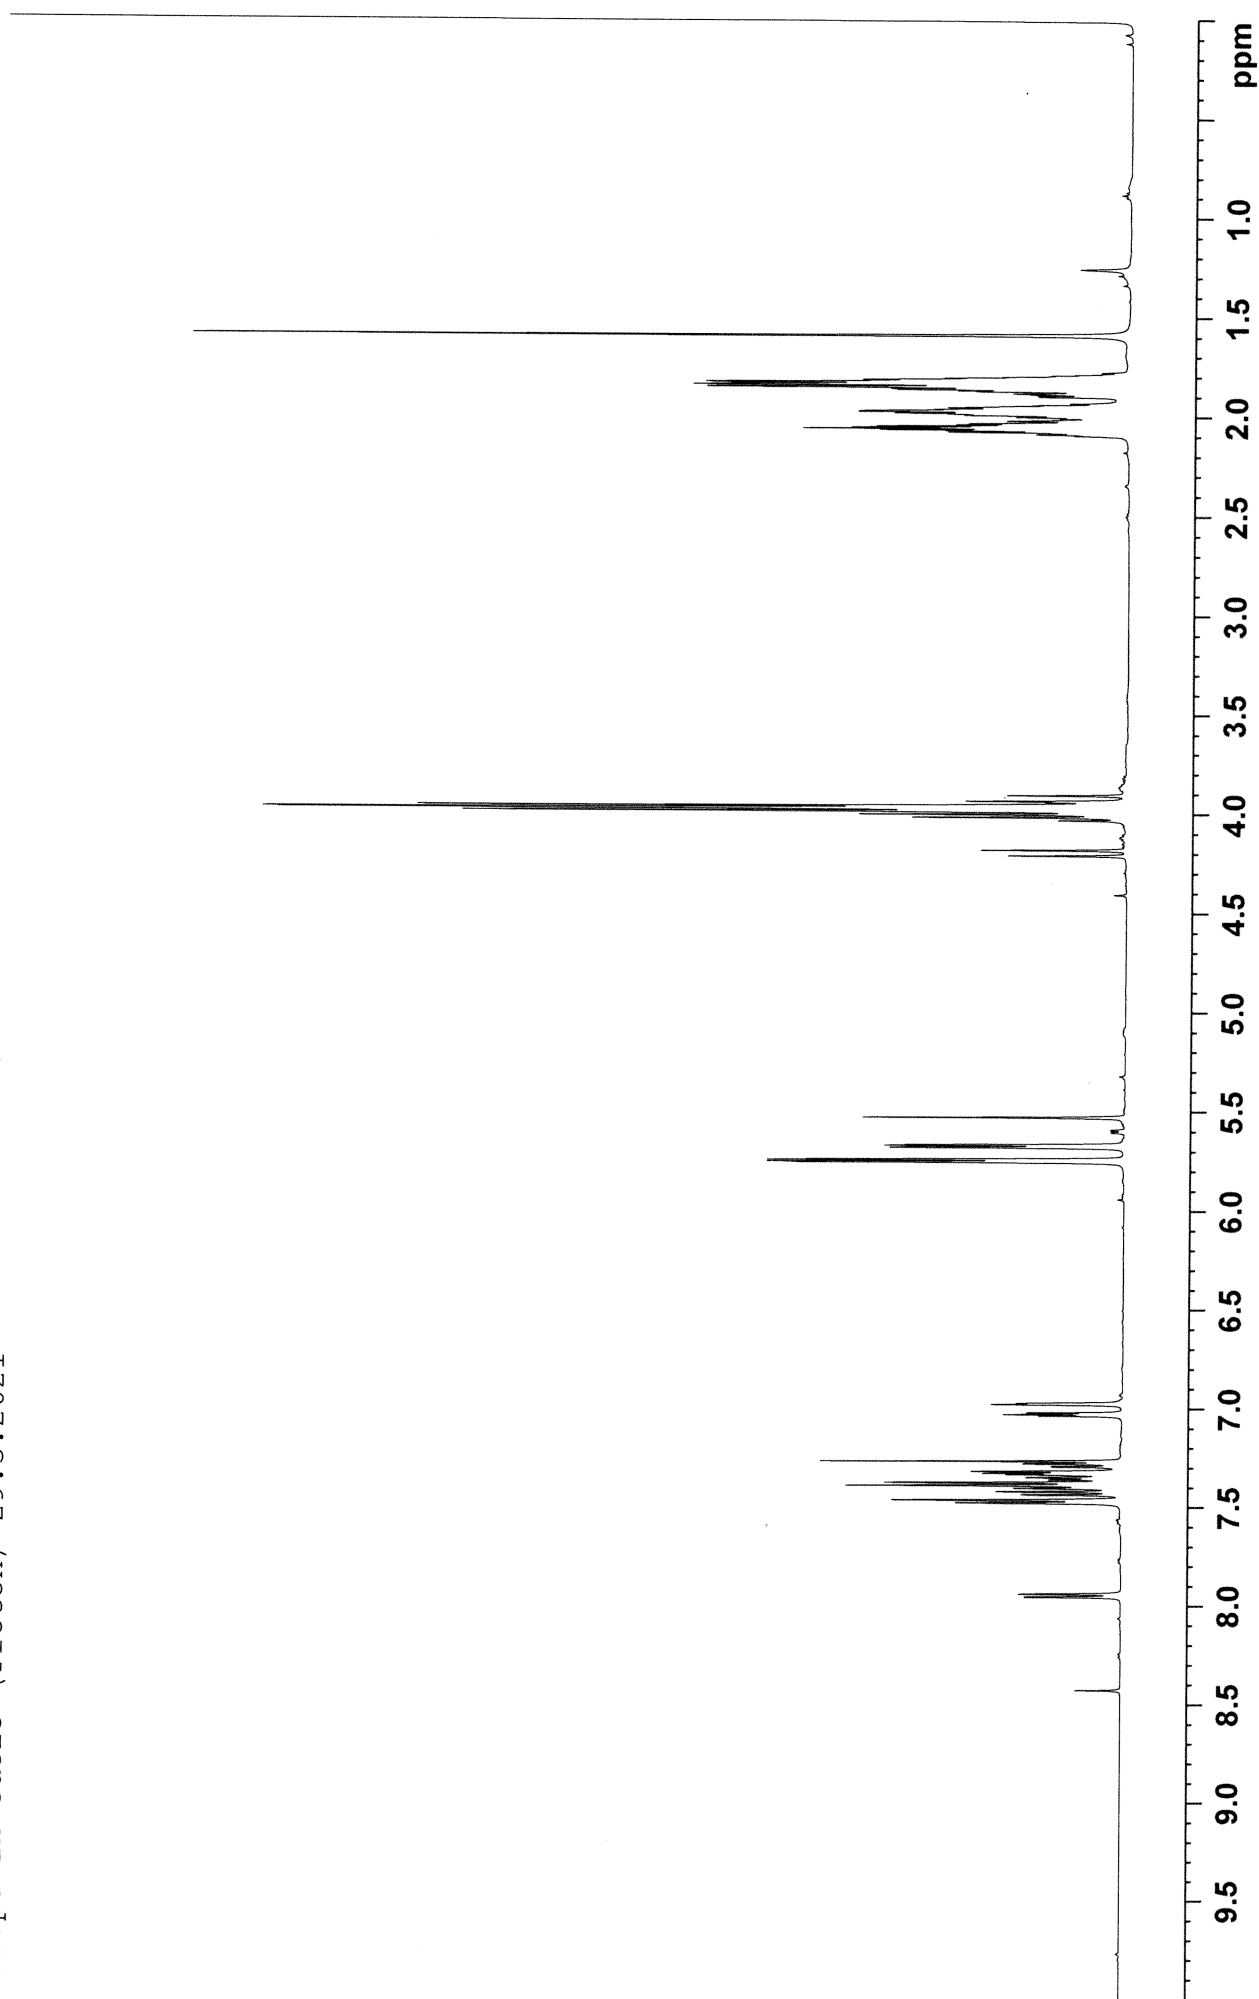



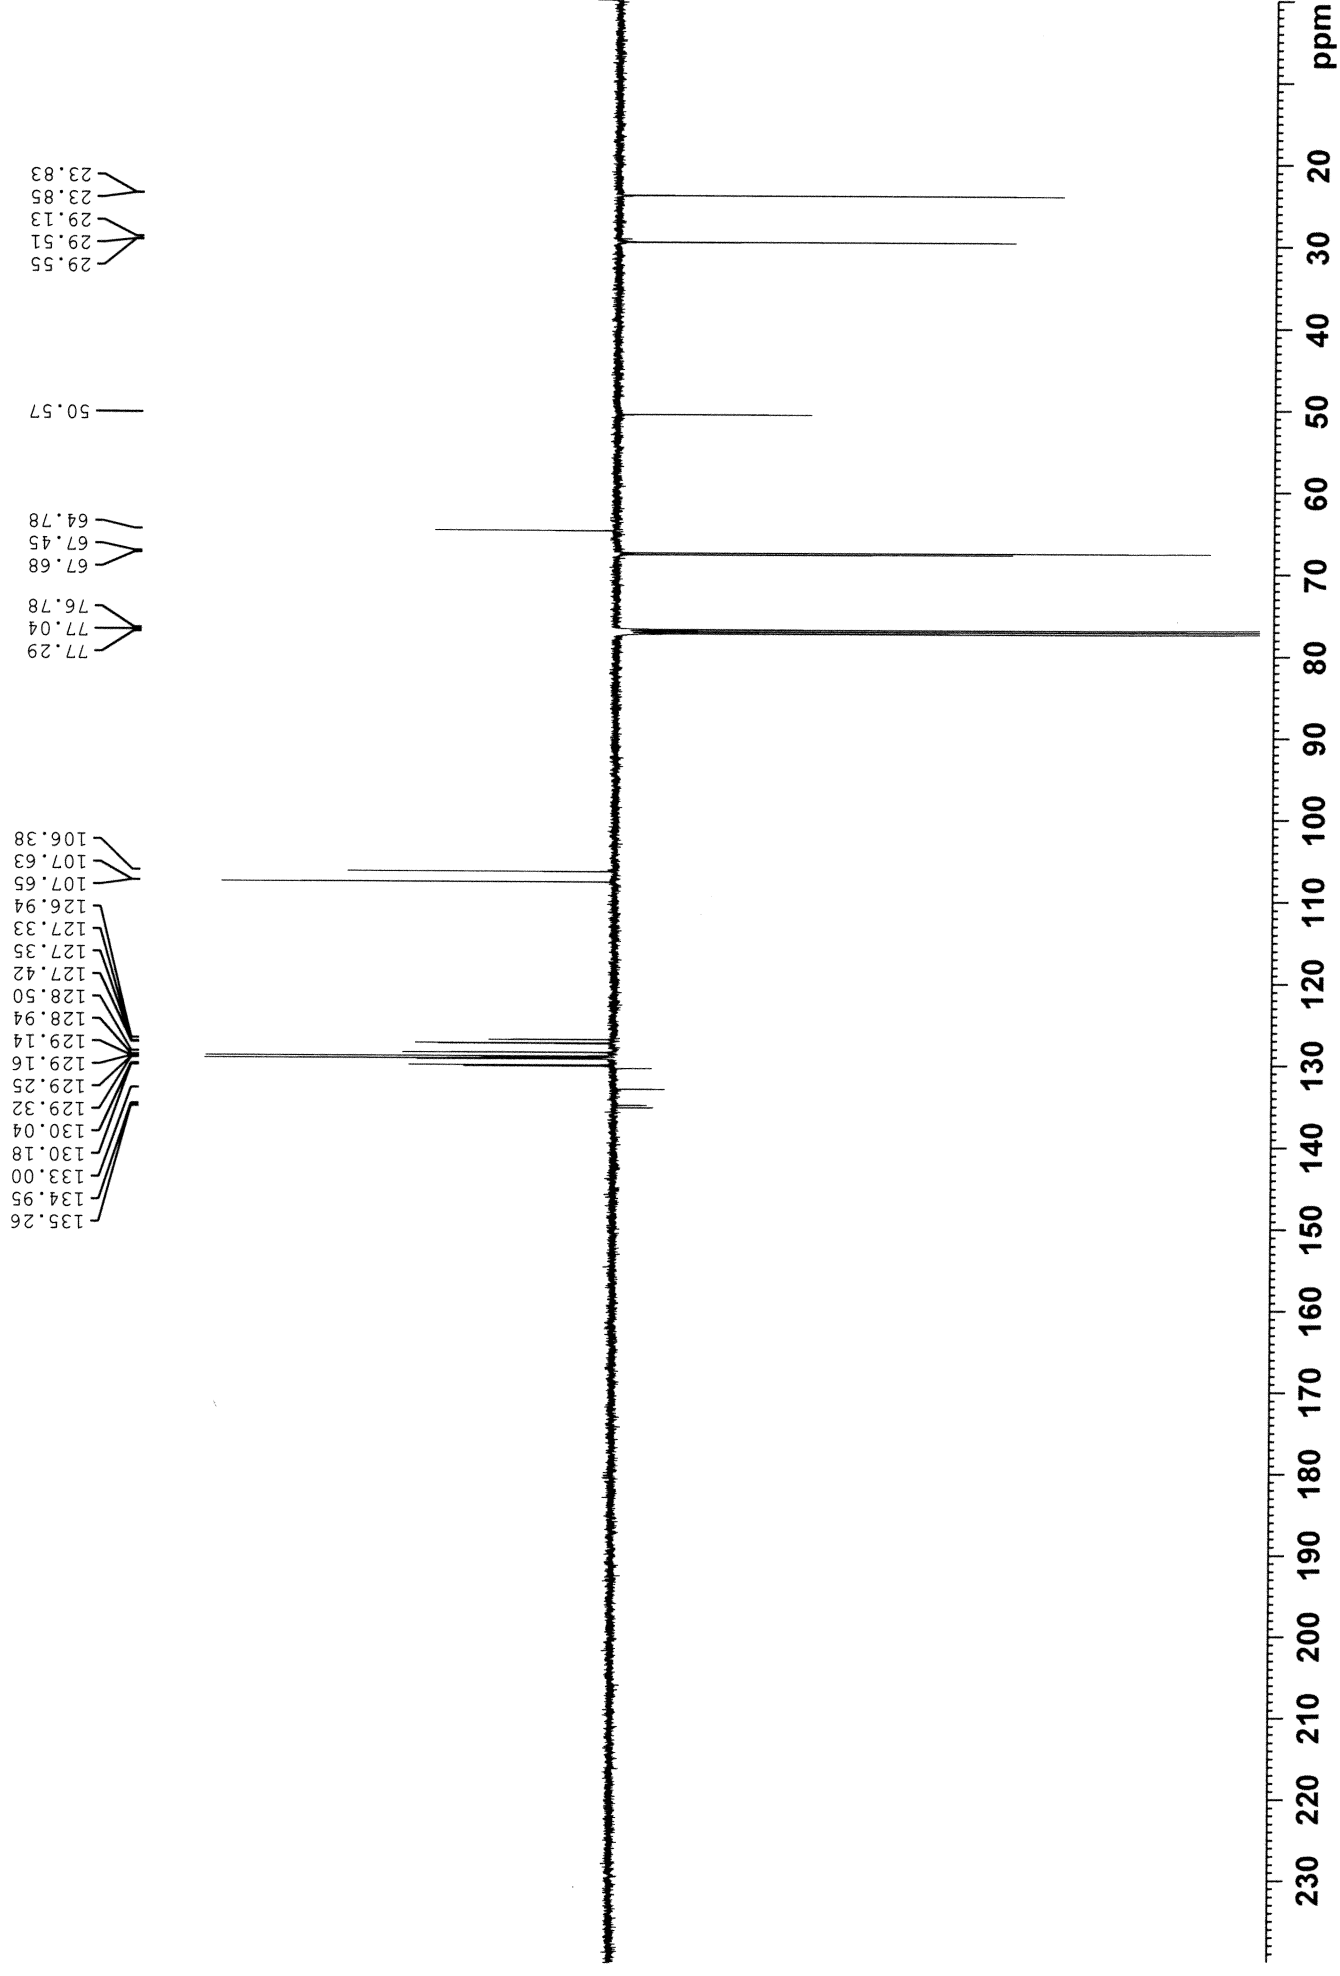

**Figure S16c.** NMR spectra of compound **8d**.

PN018-4 in cdcl3 (Proton) 29.7.2020

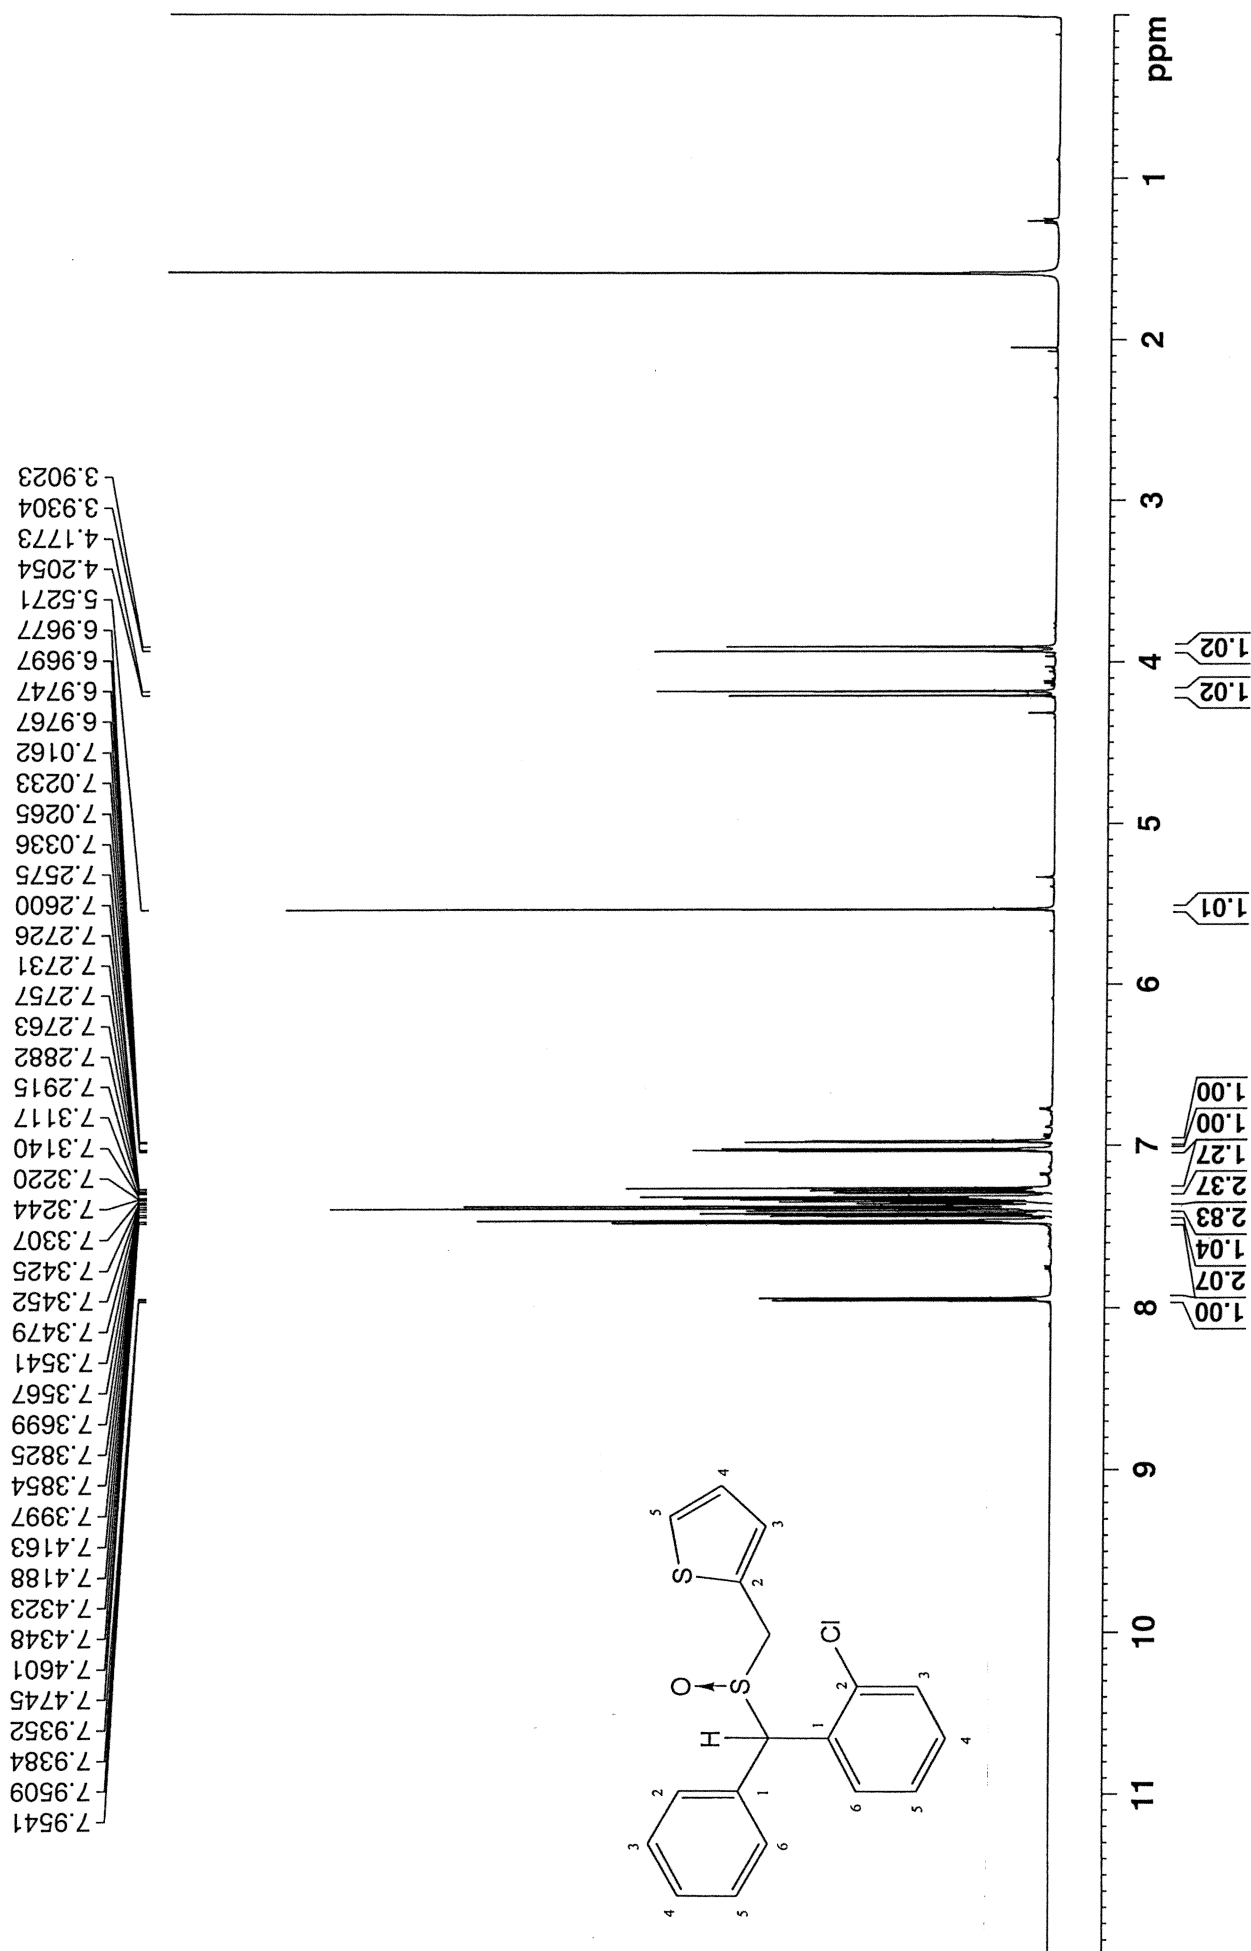

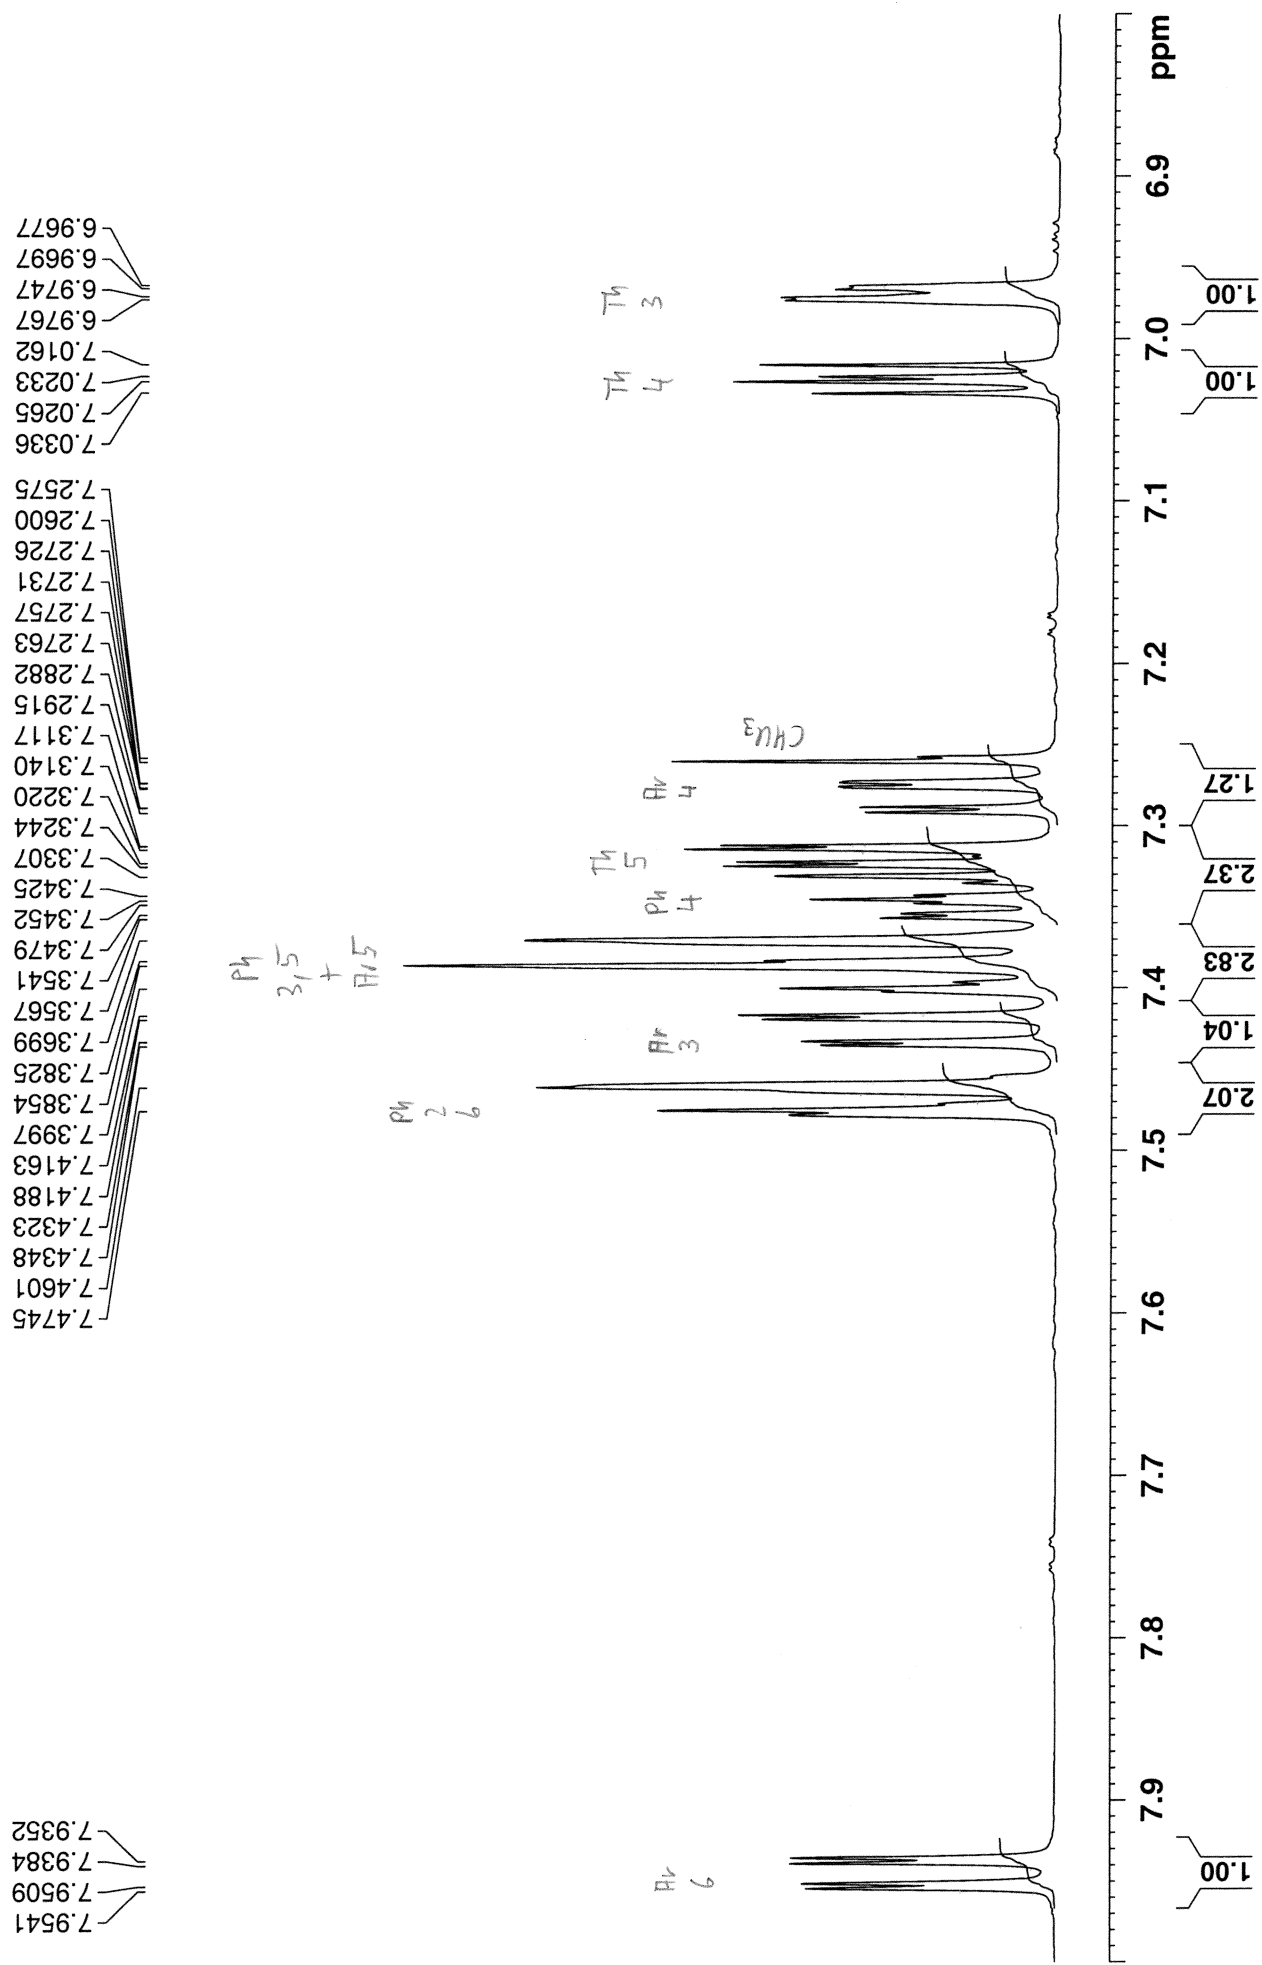

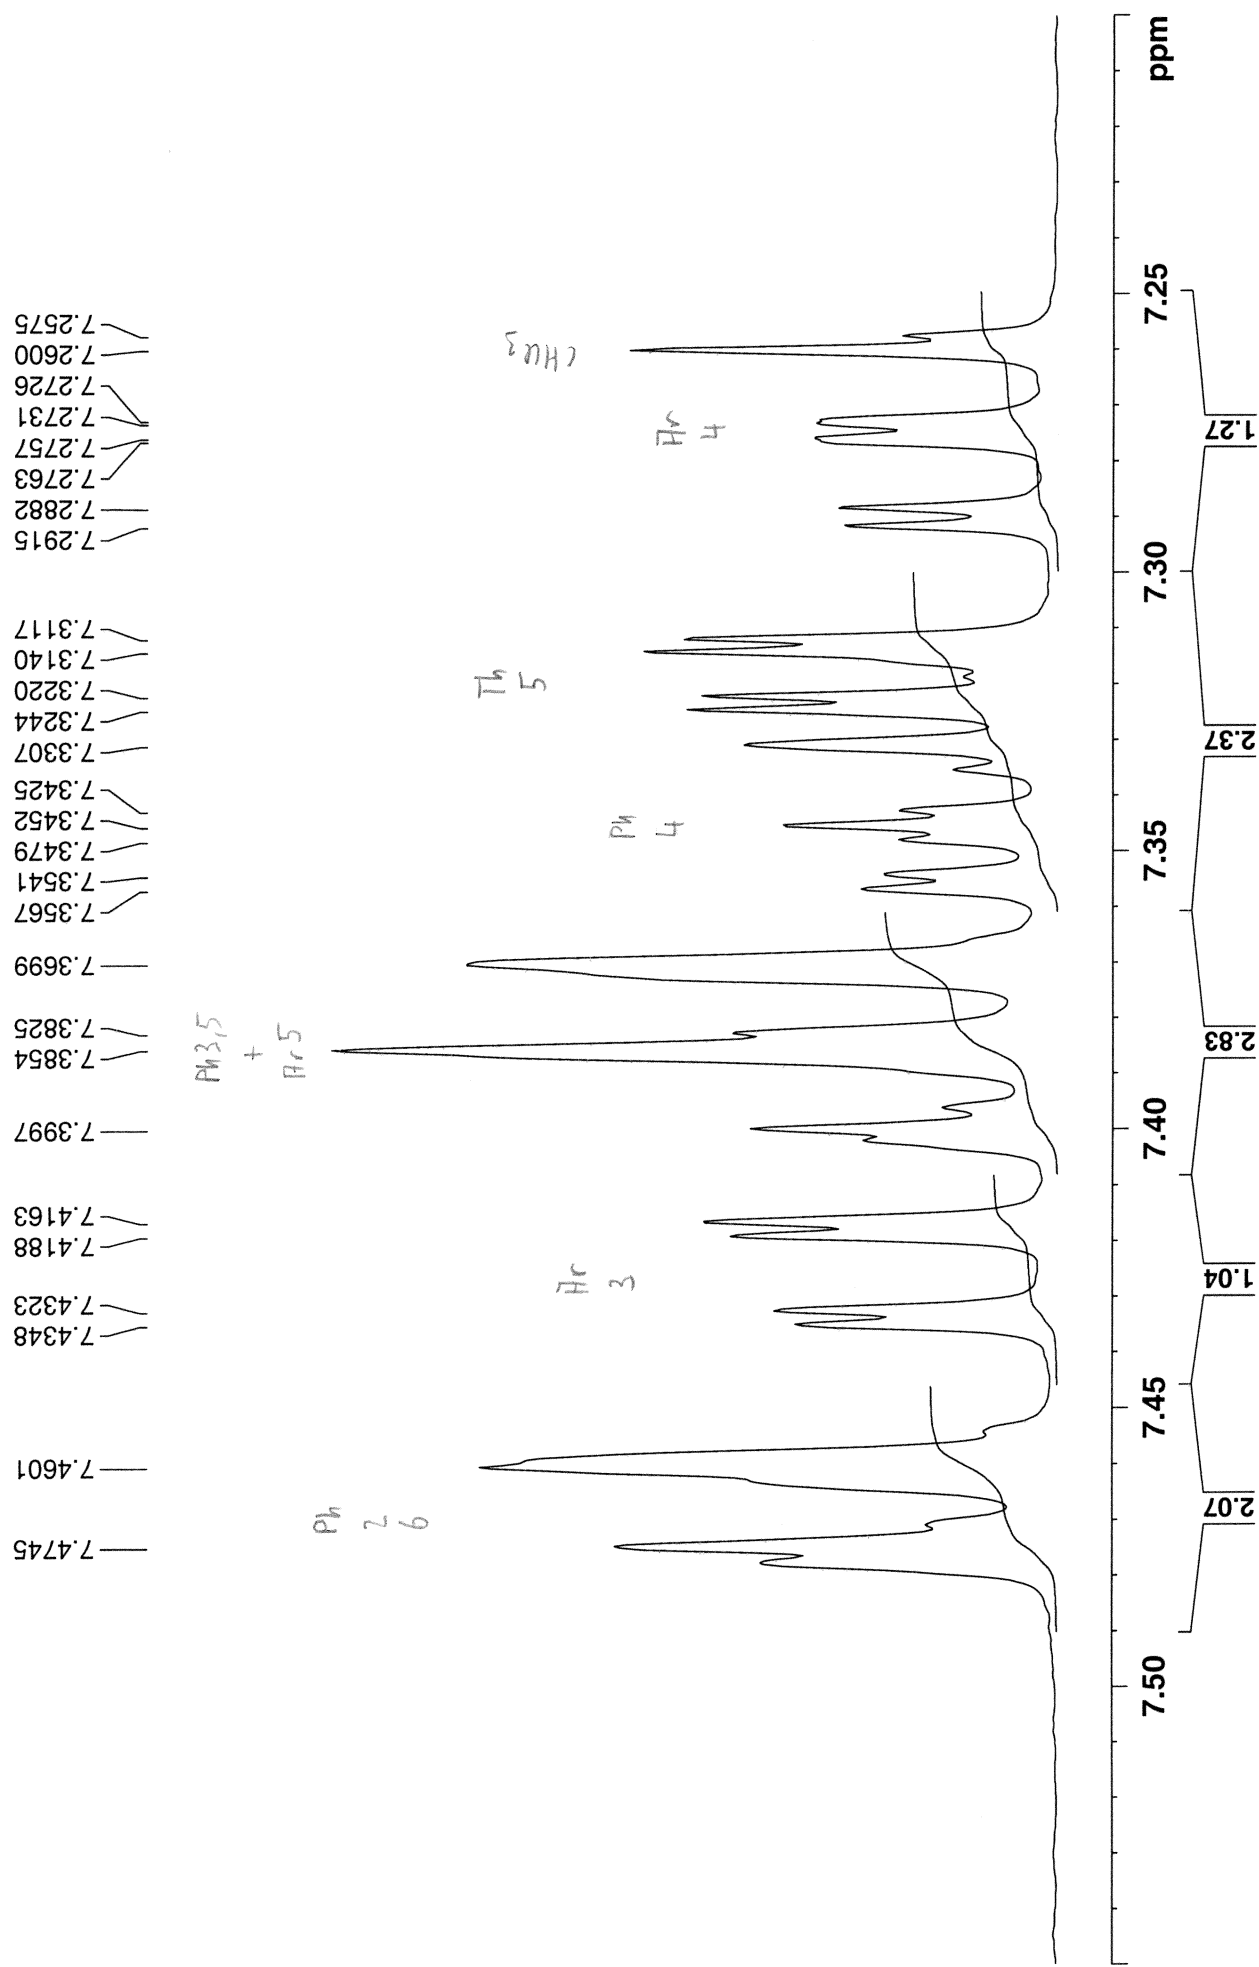

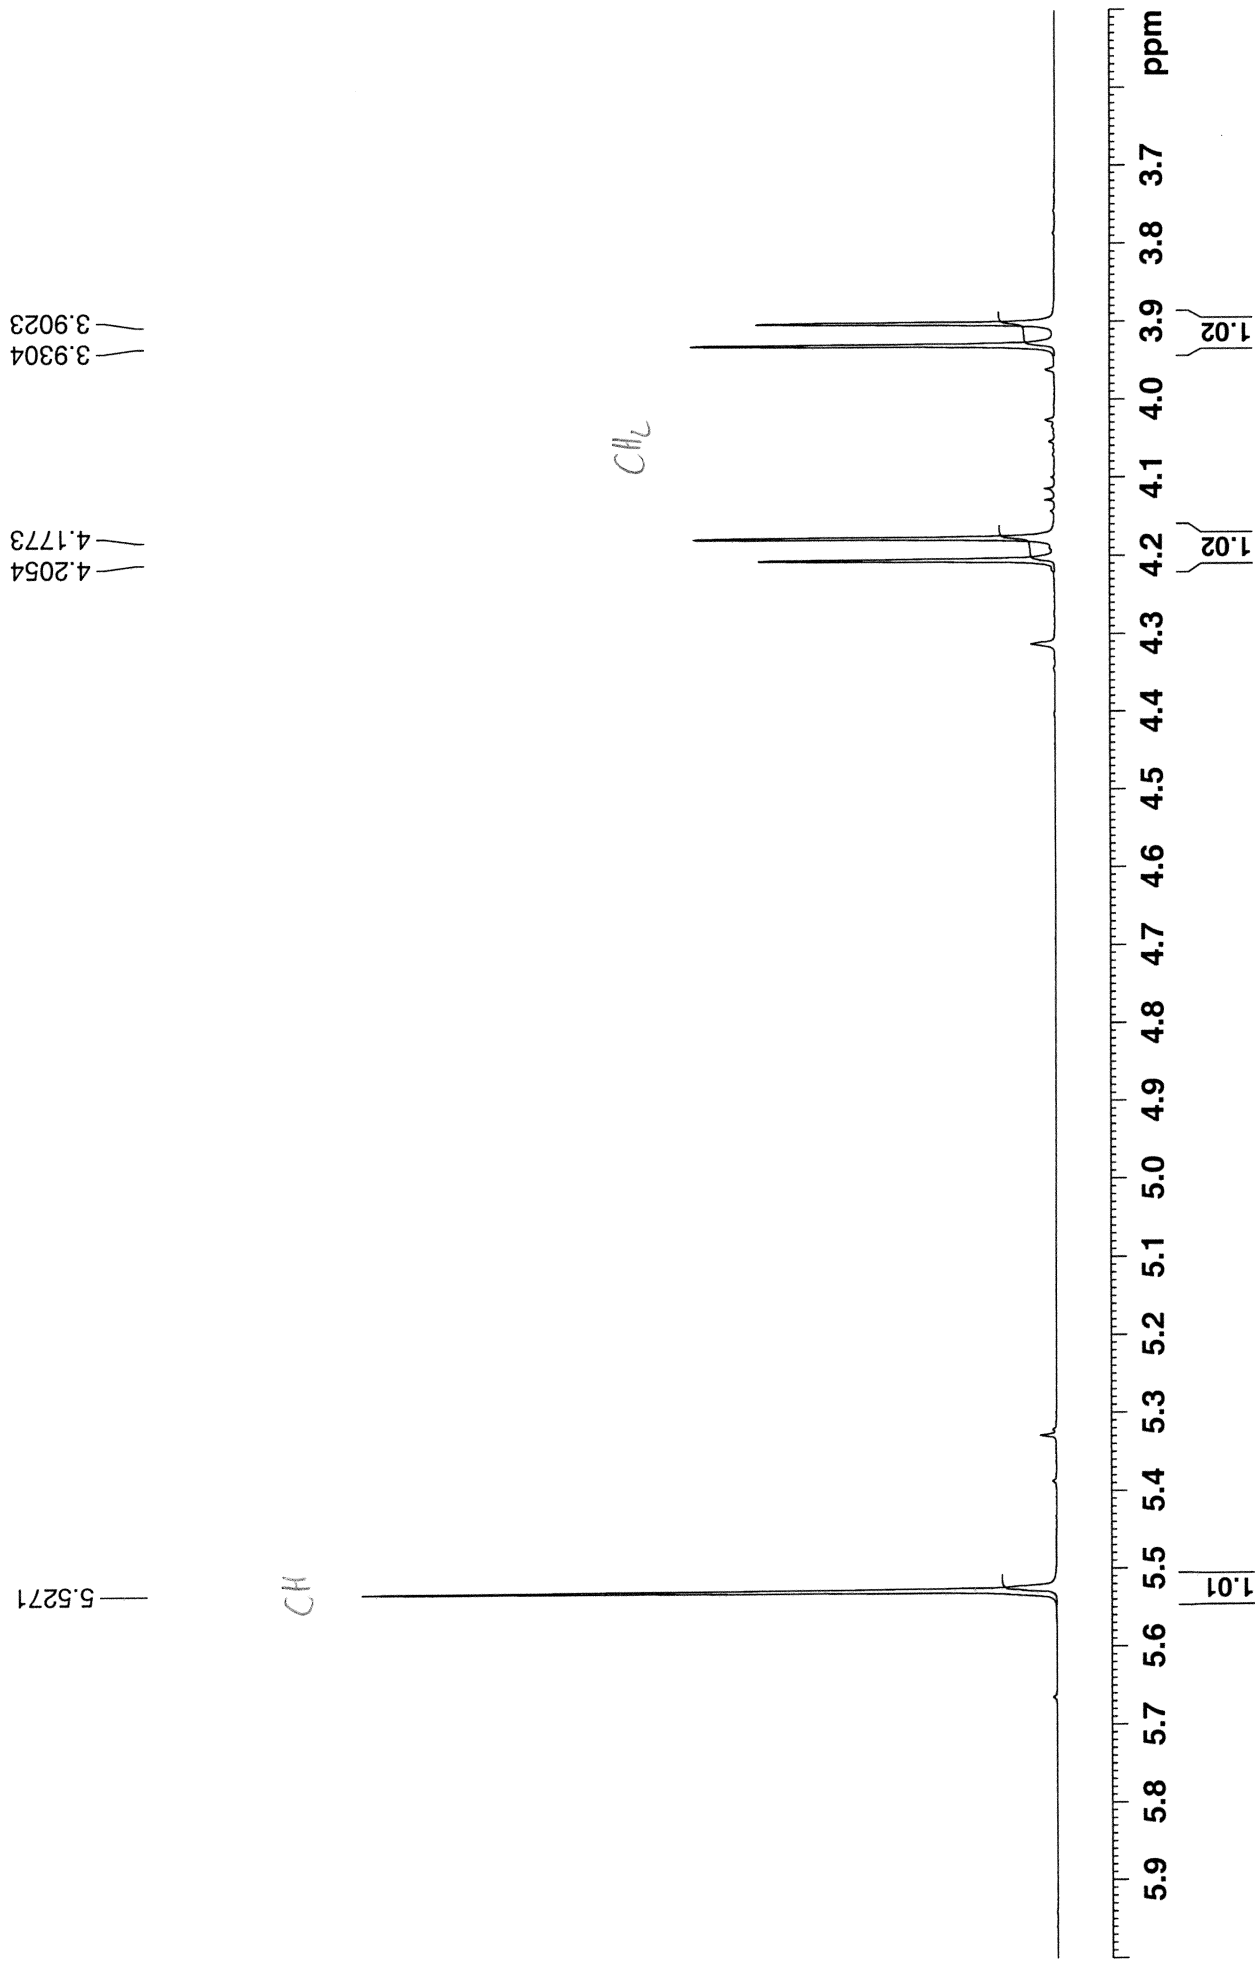

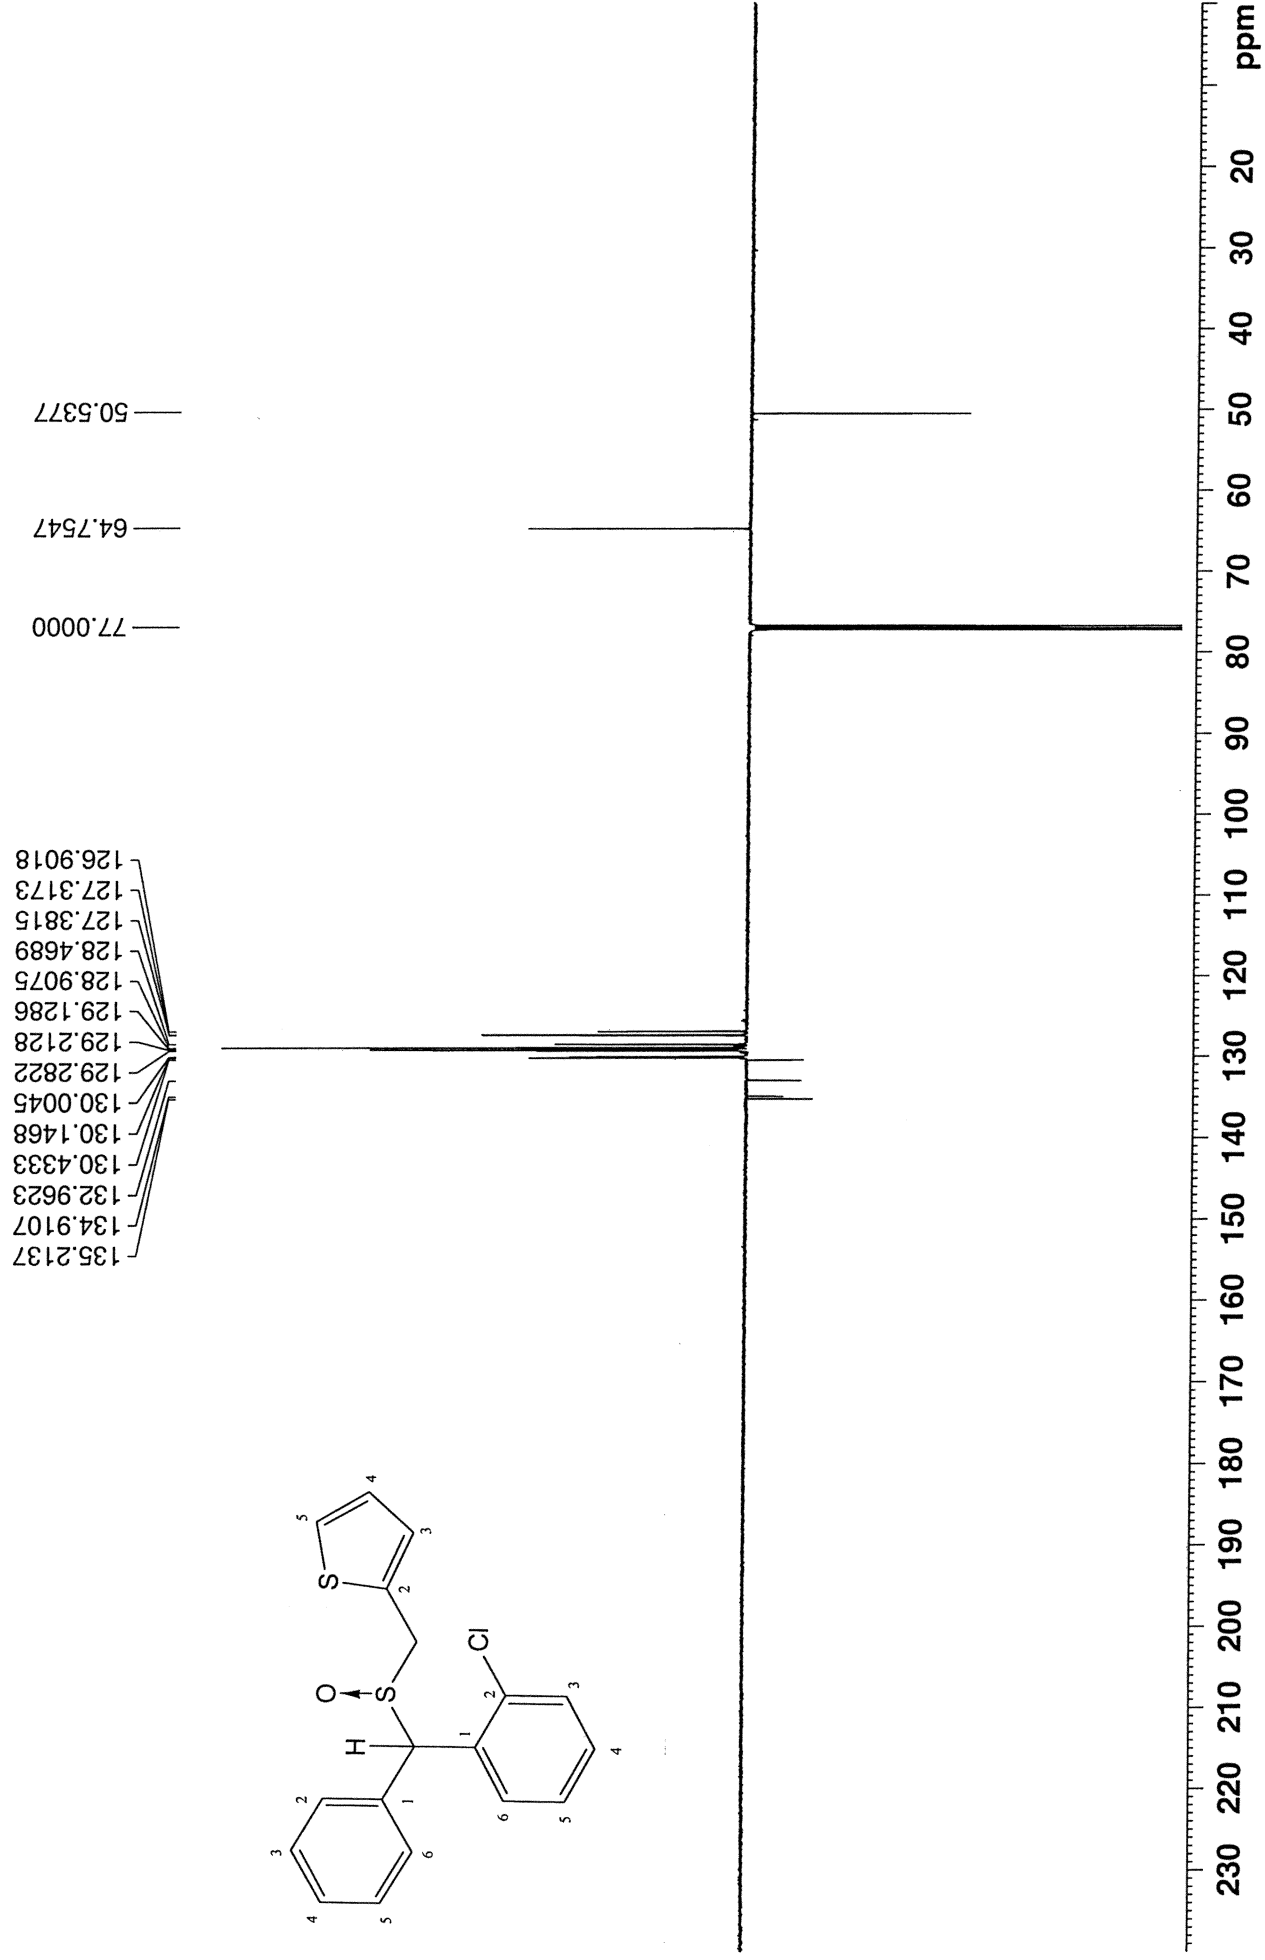

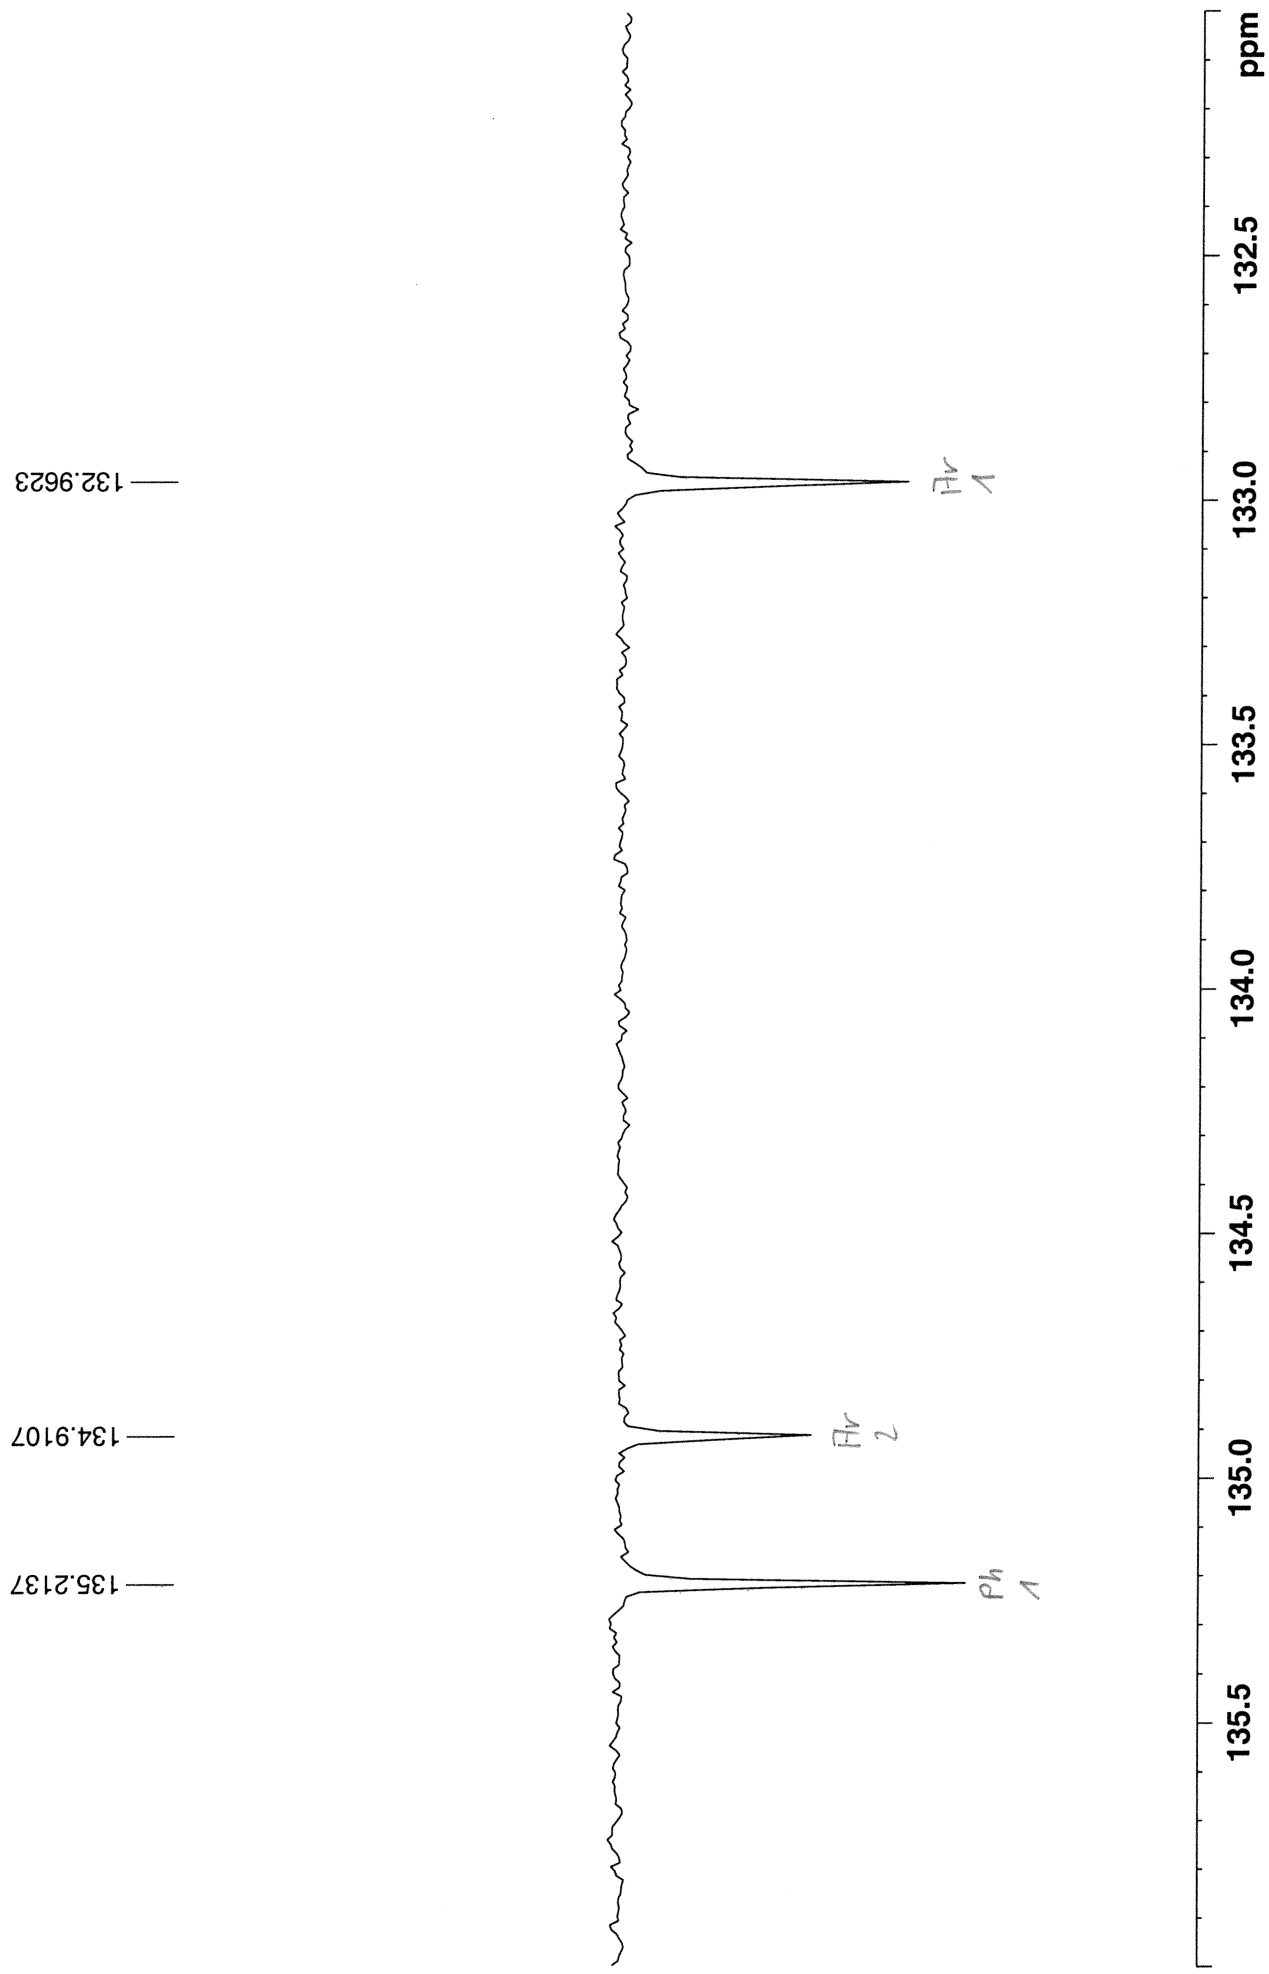

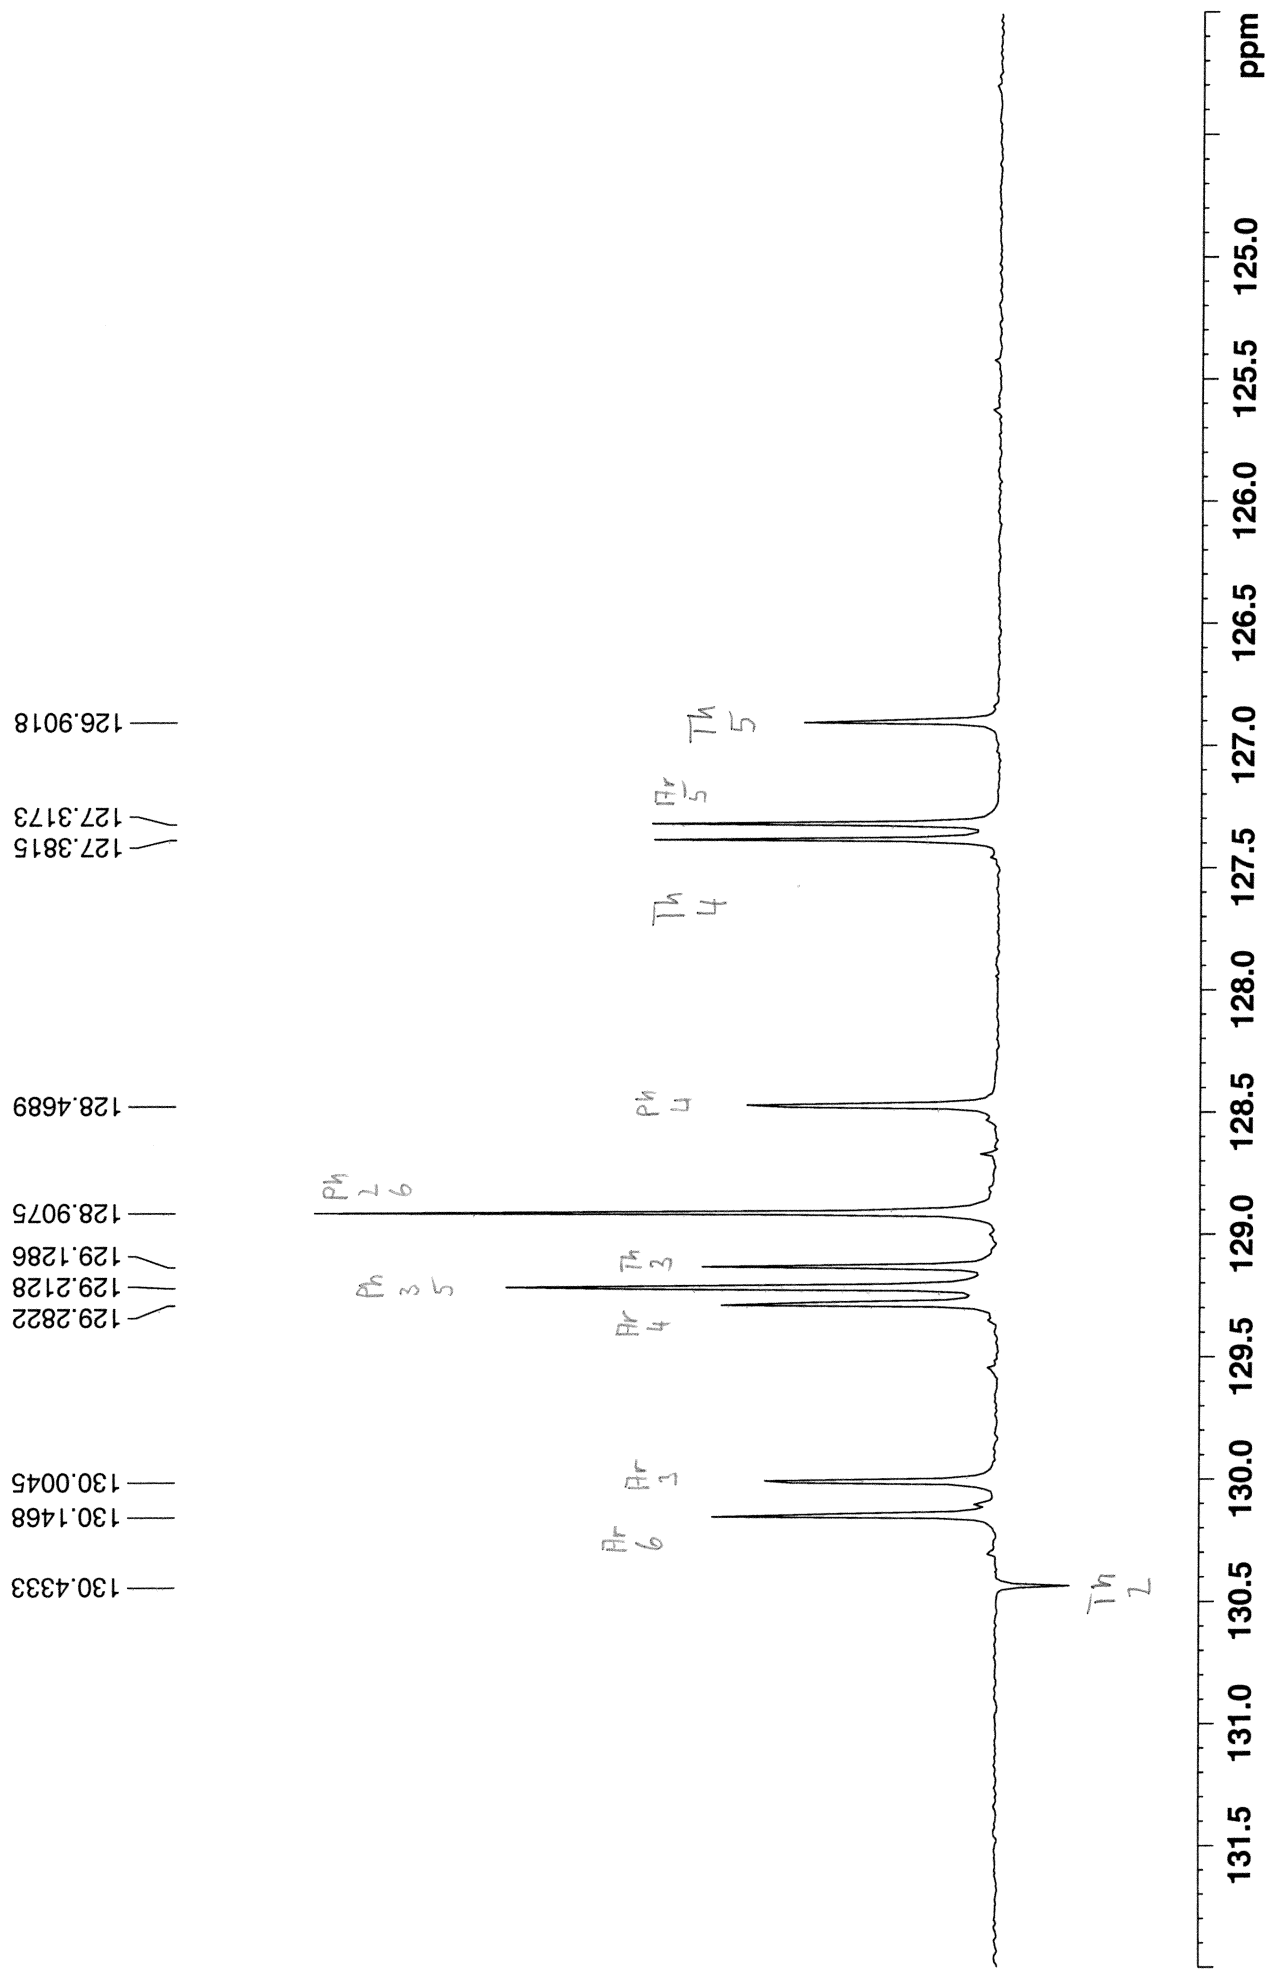



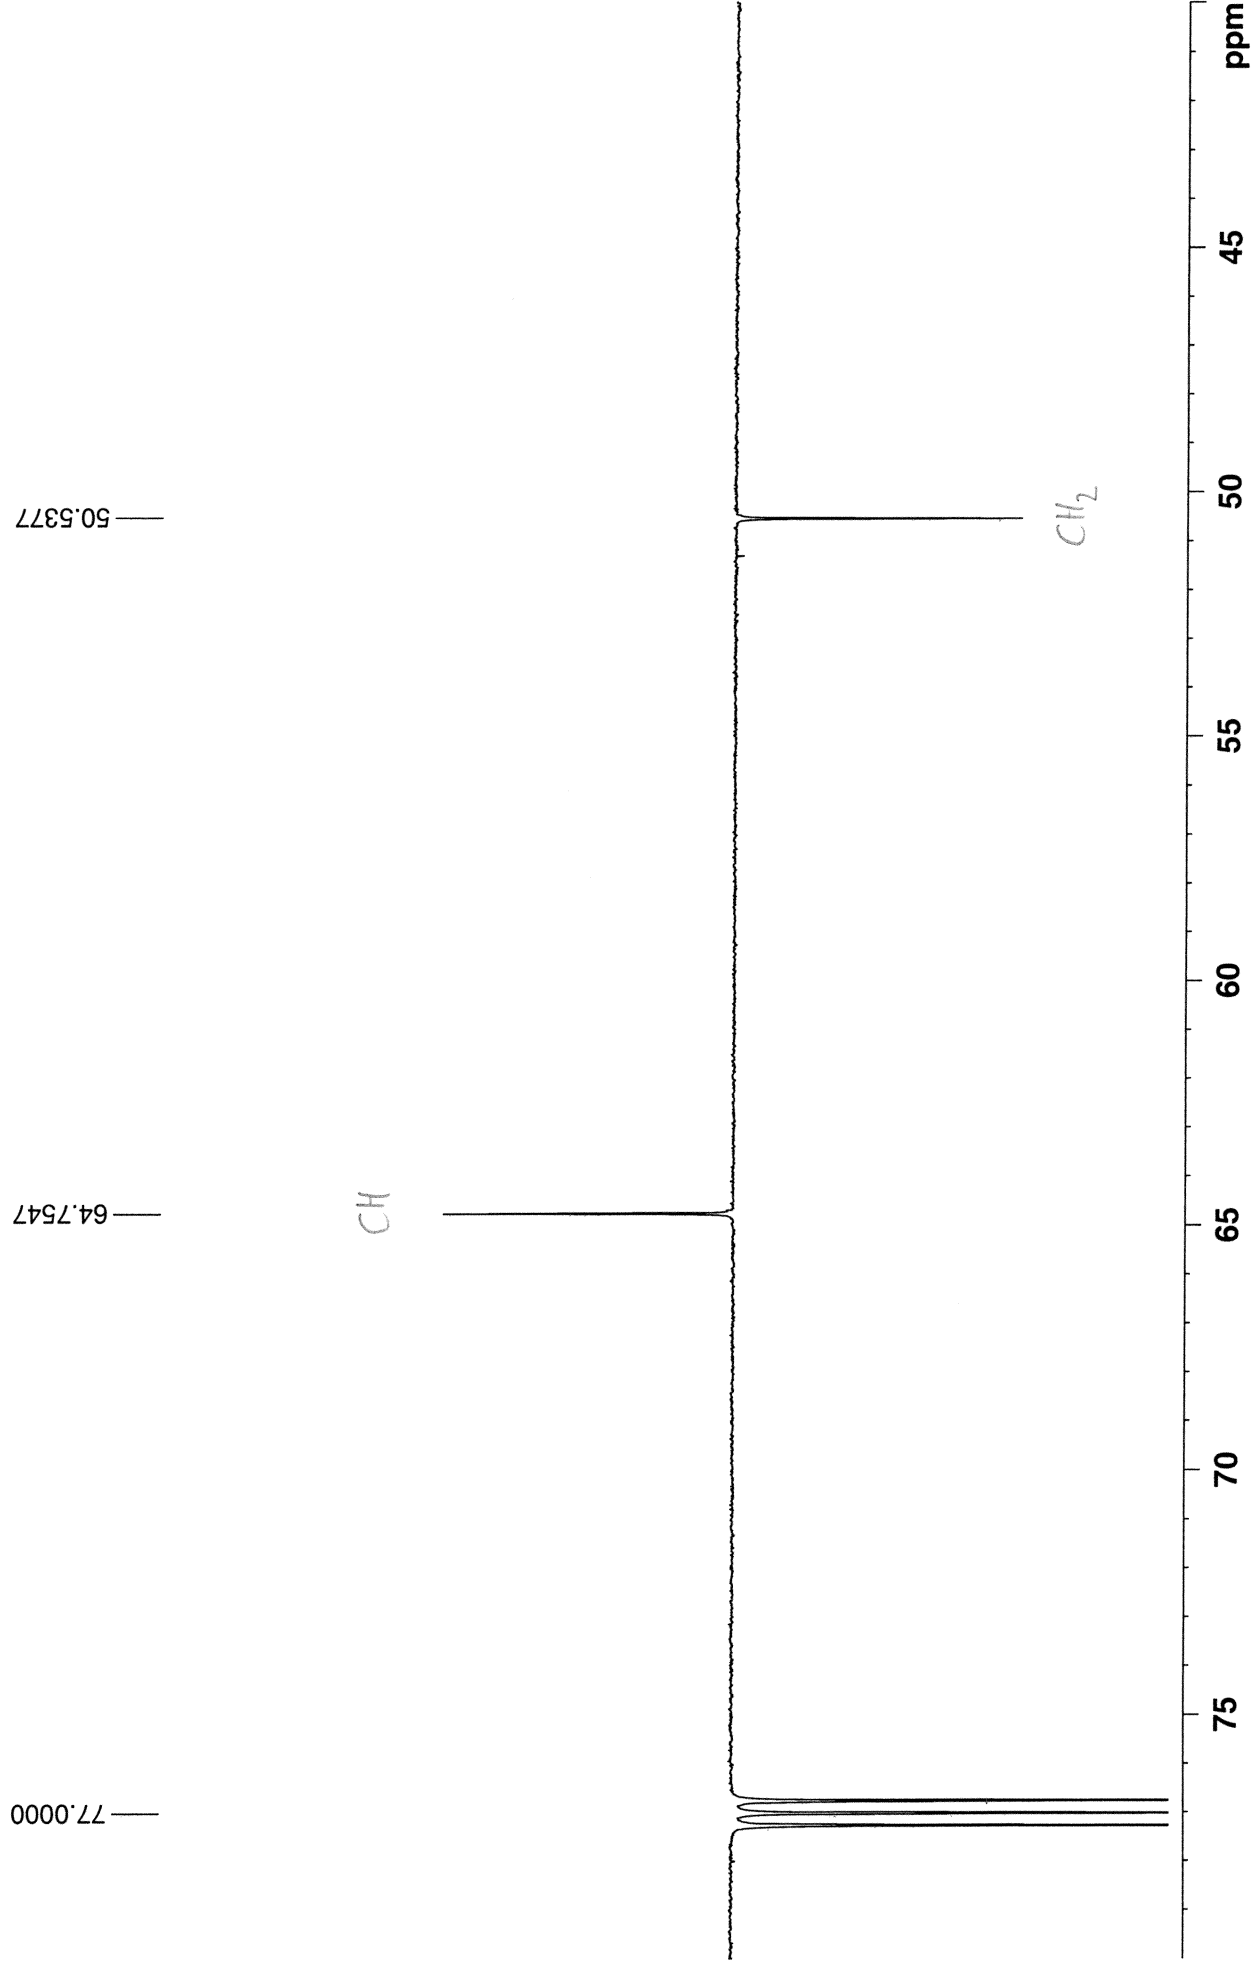

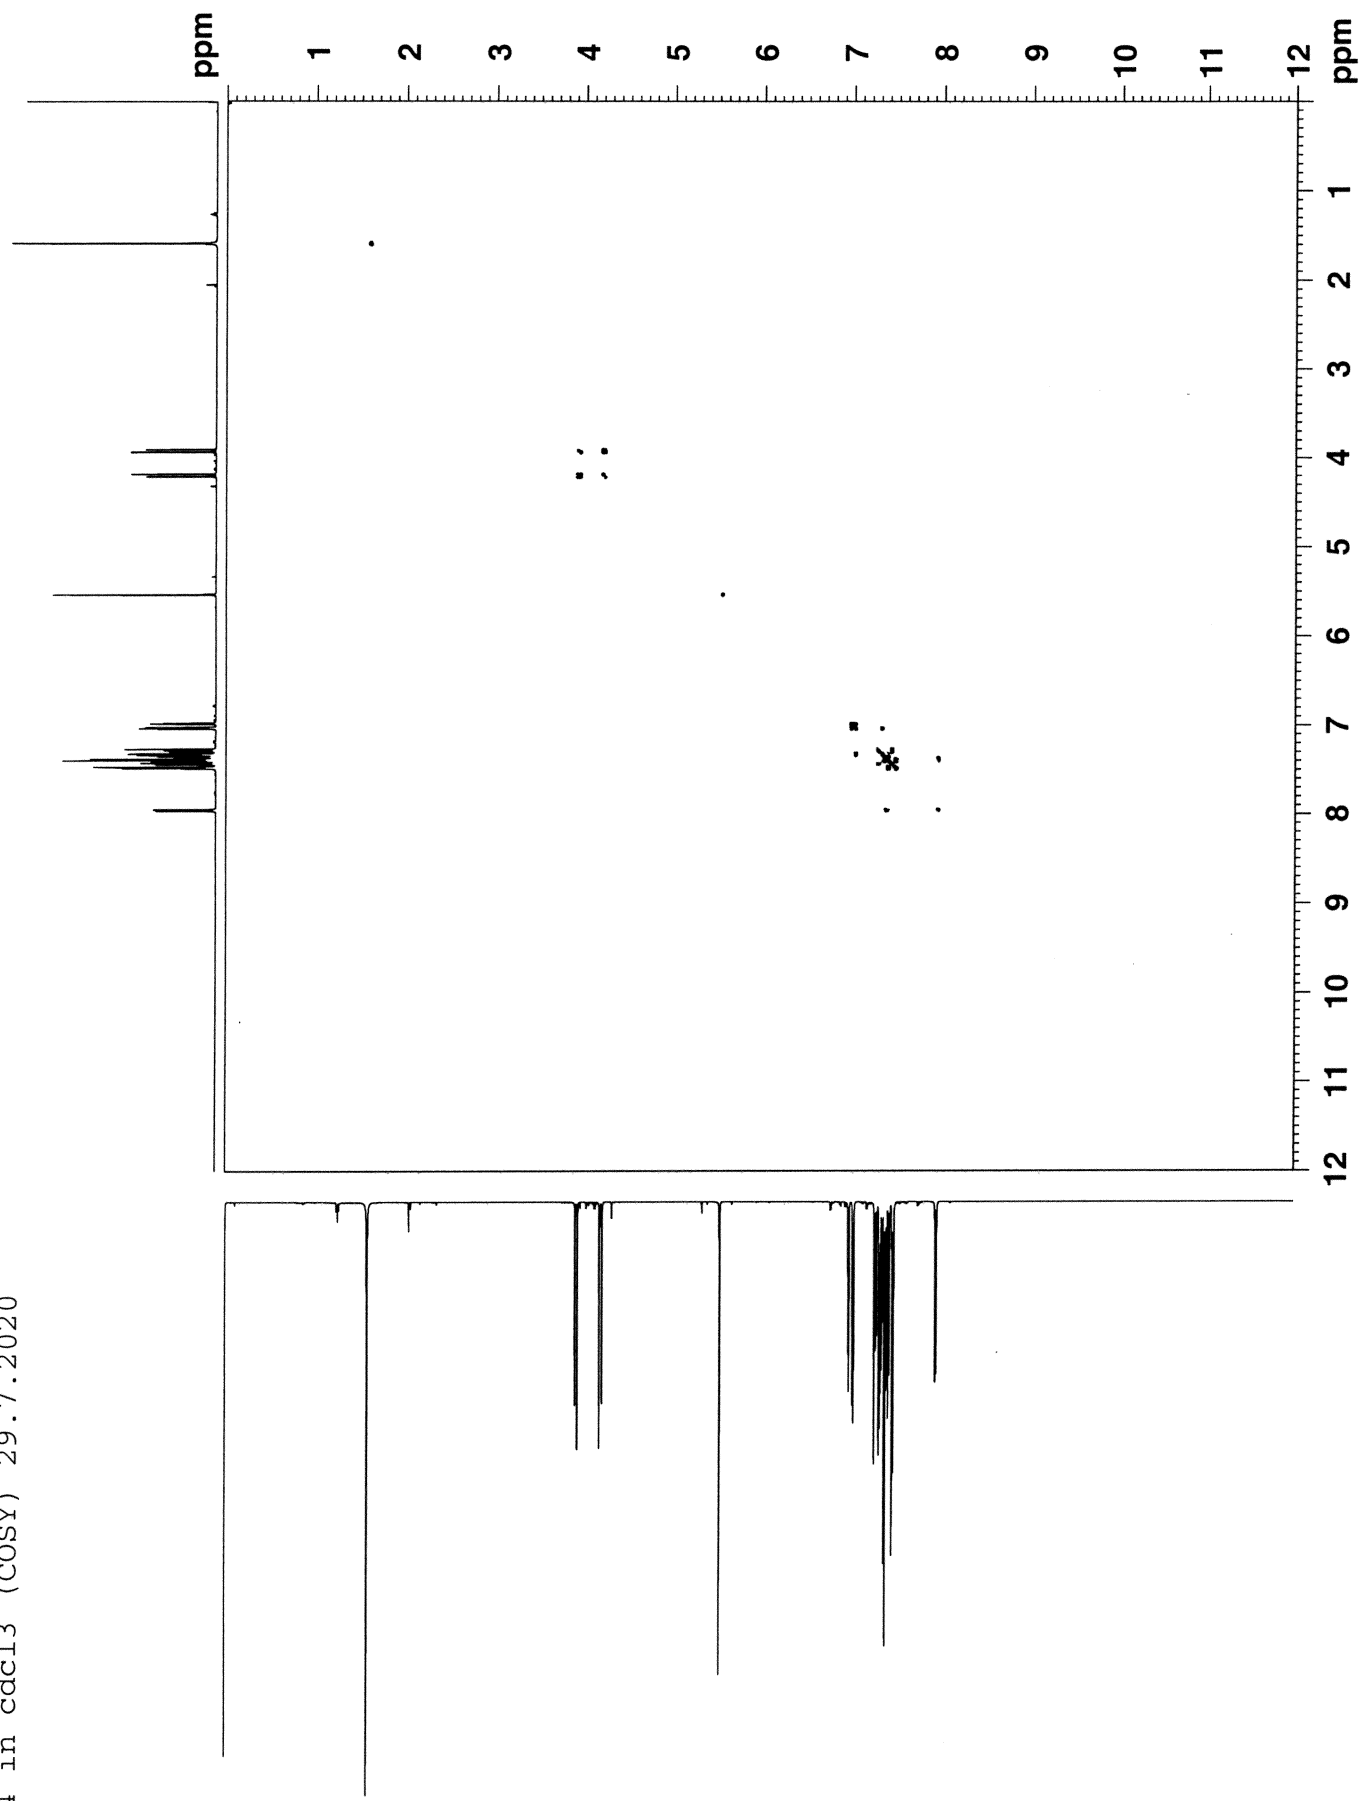

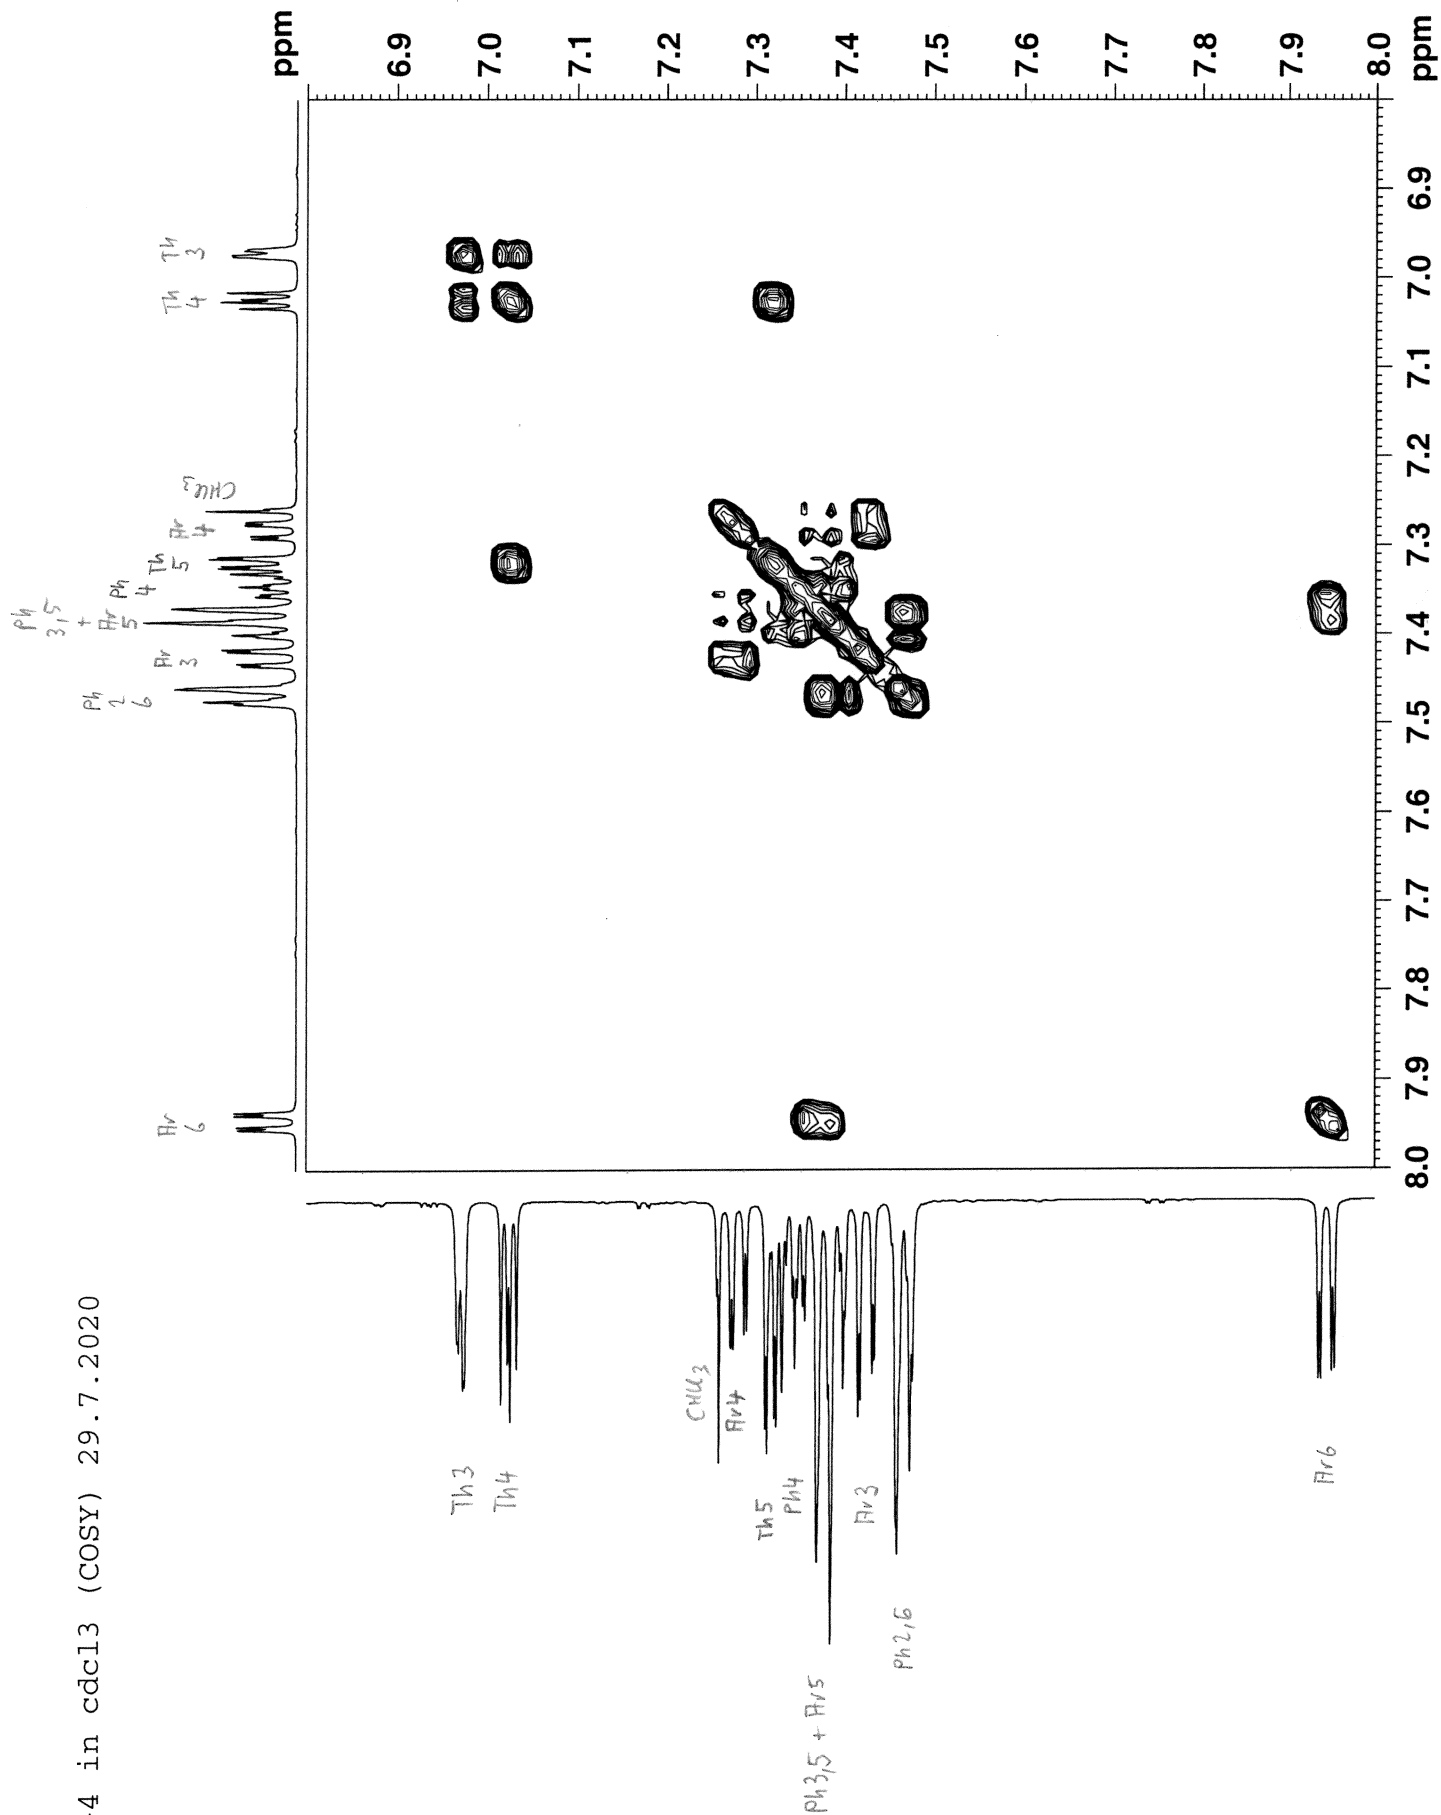

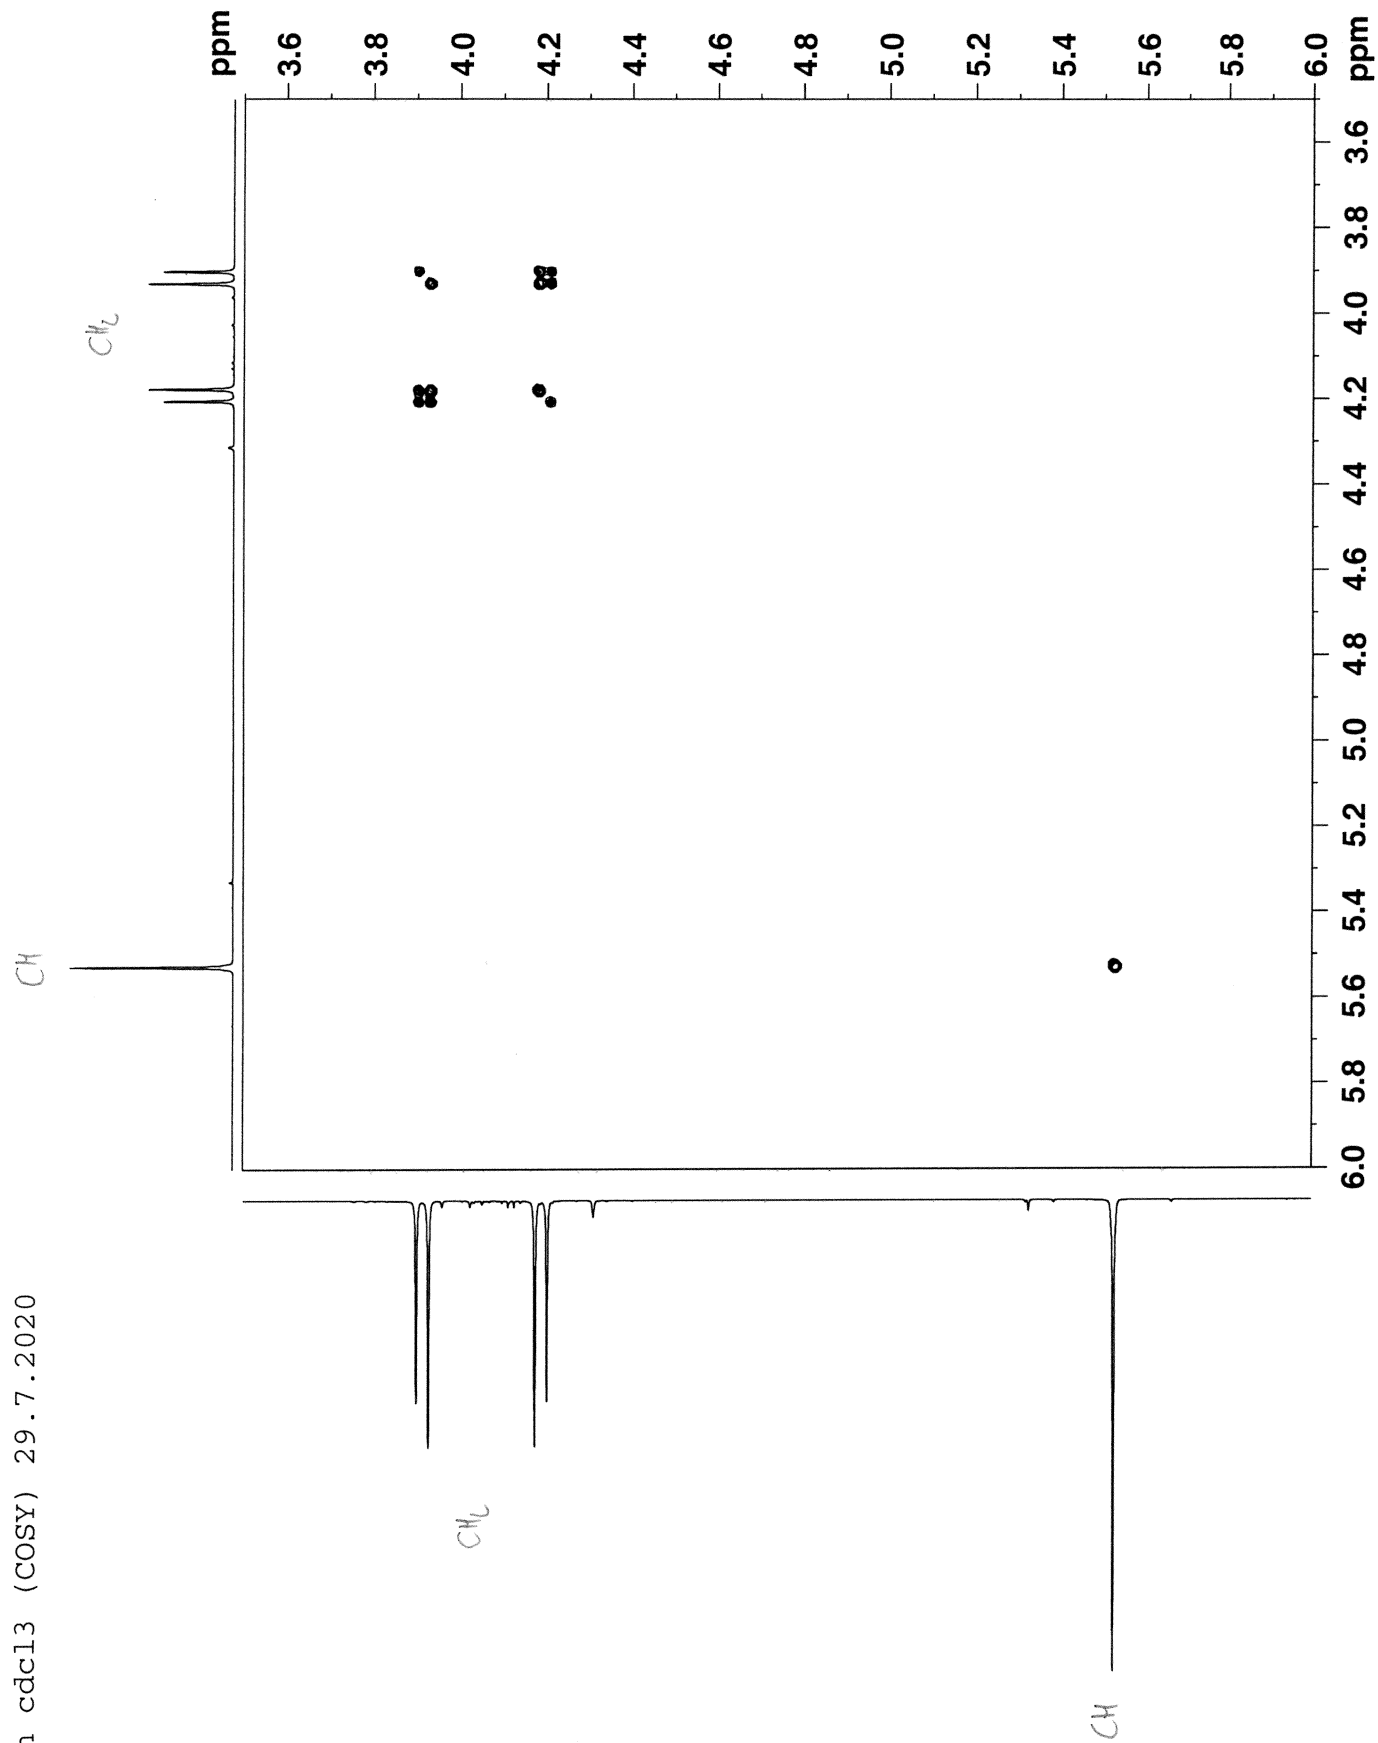

PN018-4 in cdcl3 (HSQC) 29.7.2020

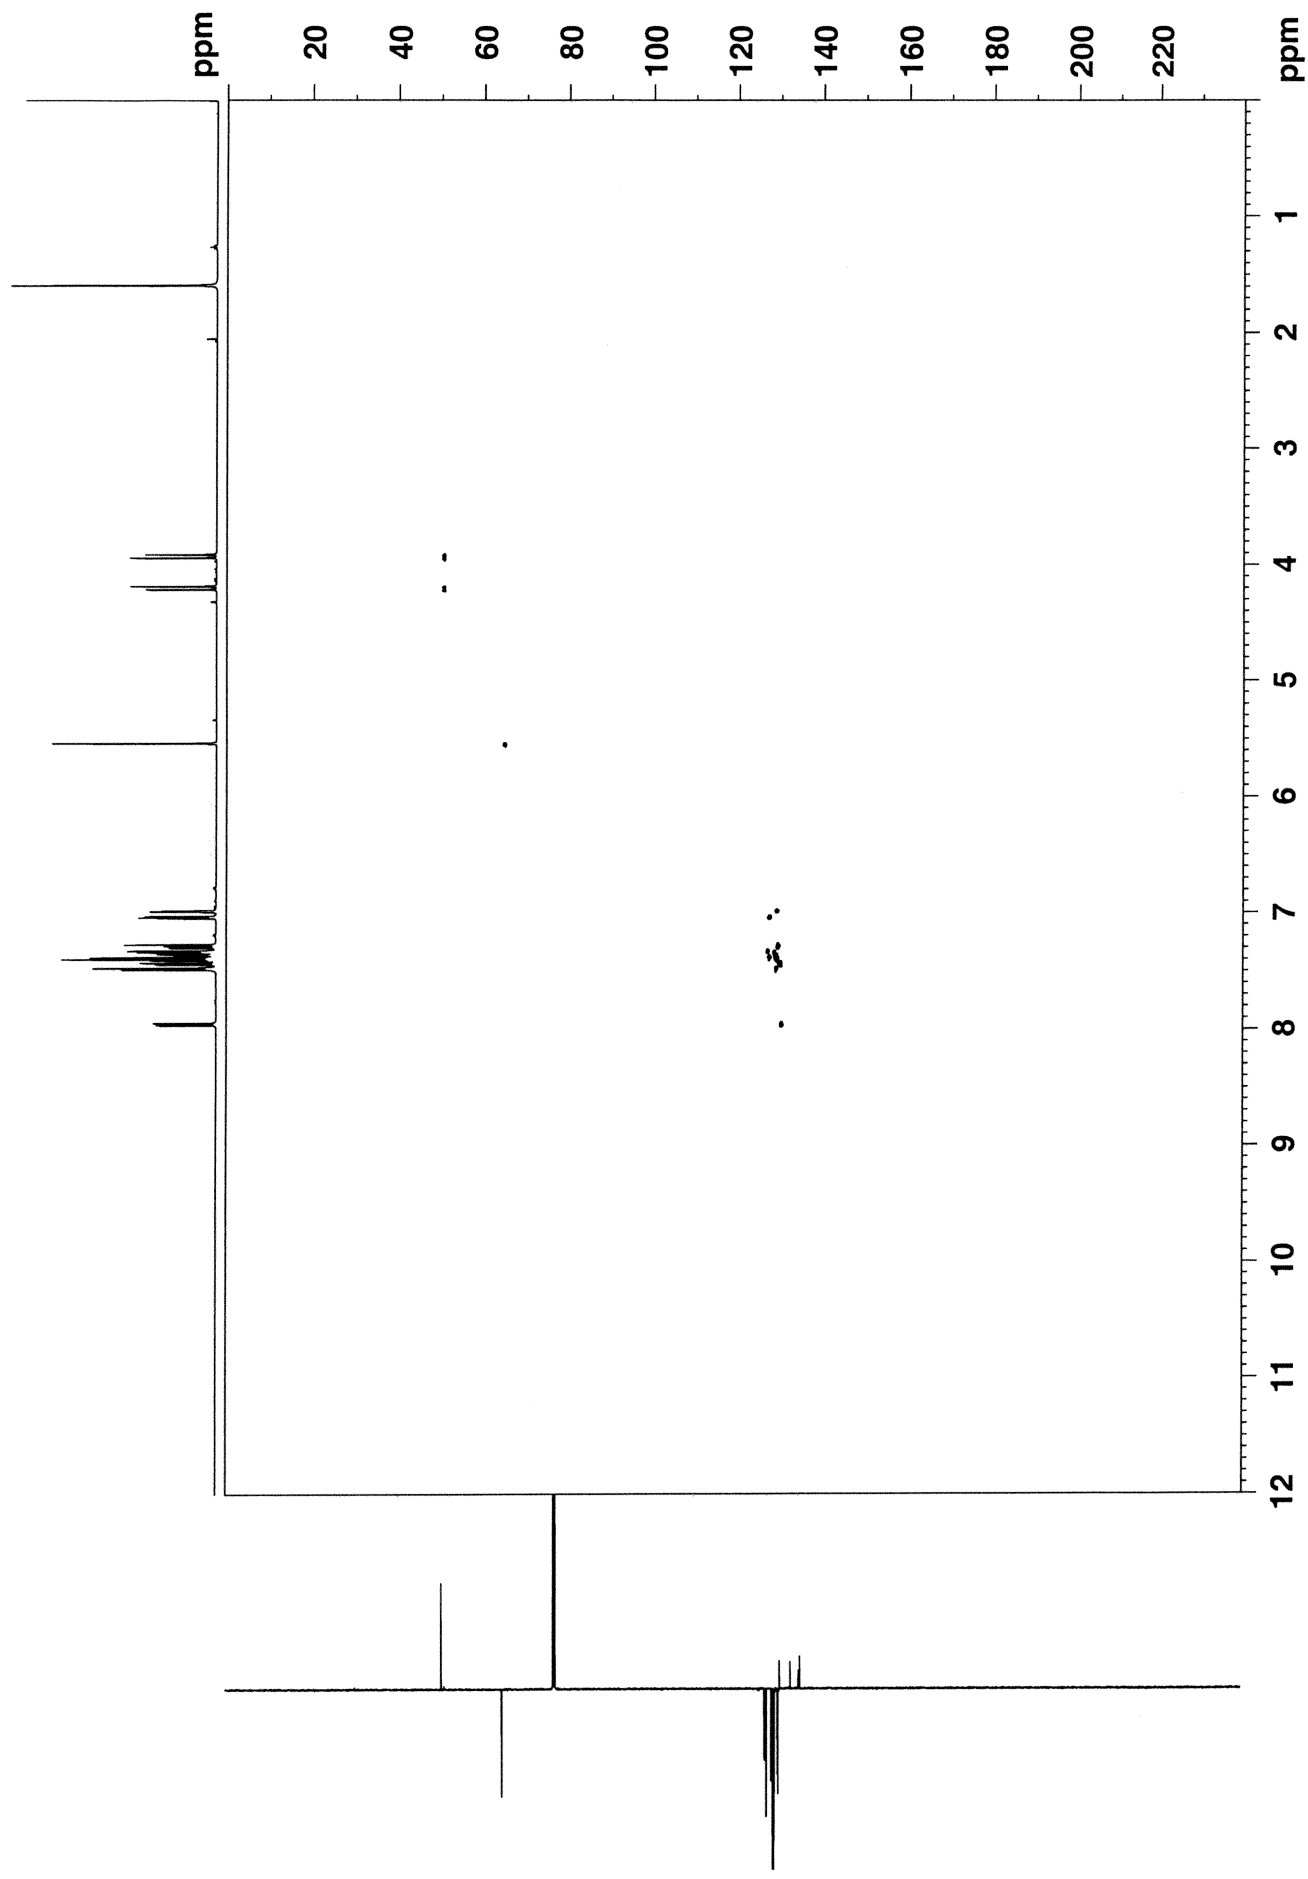

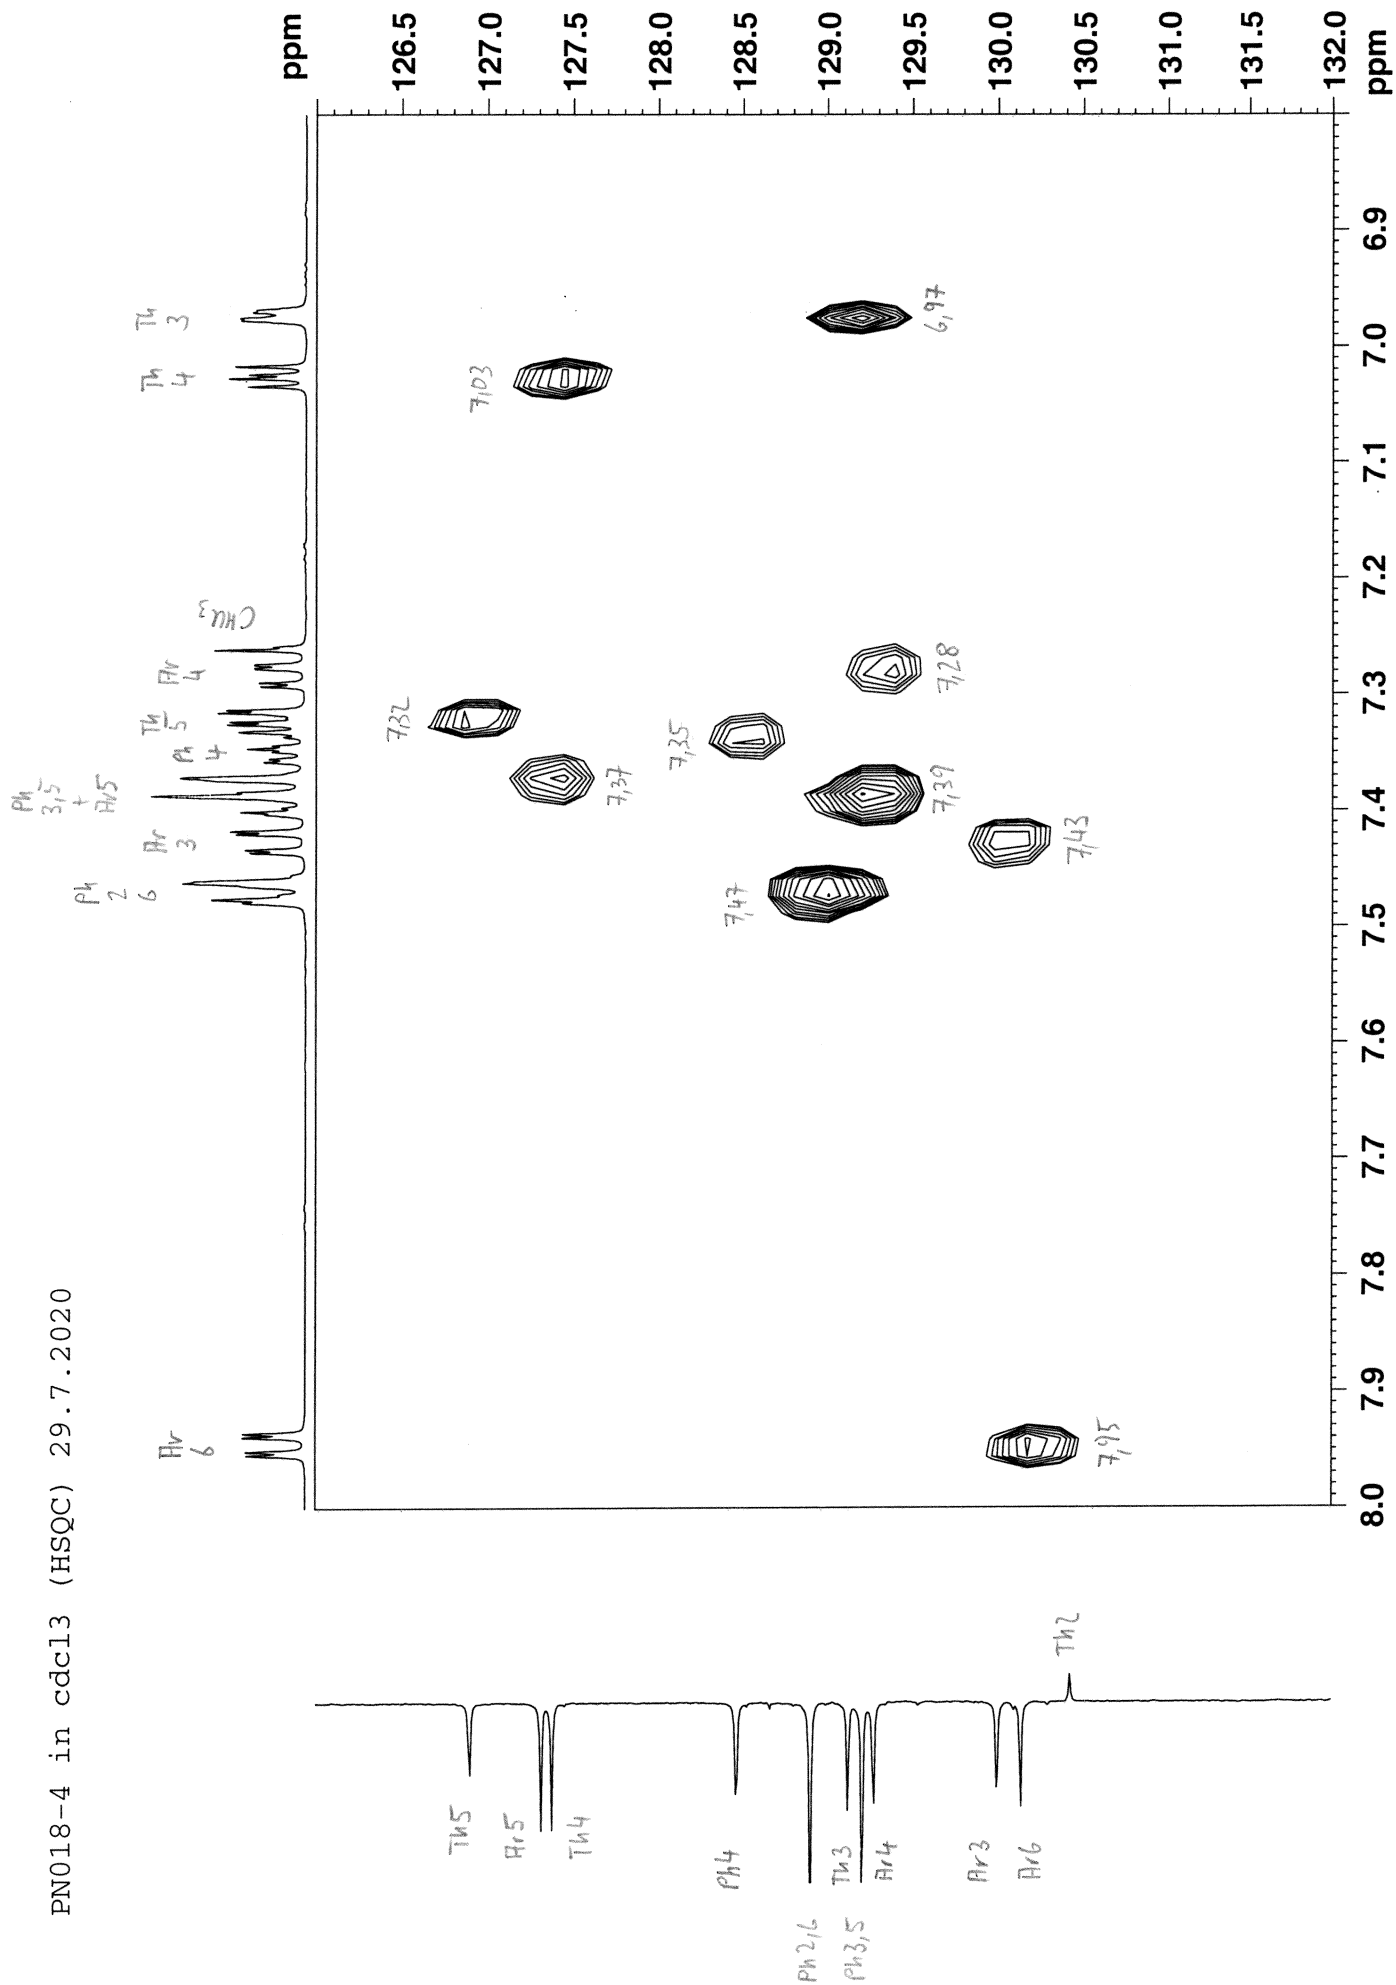

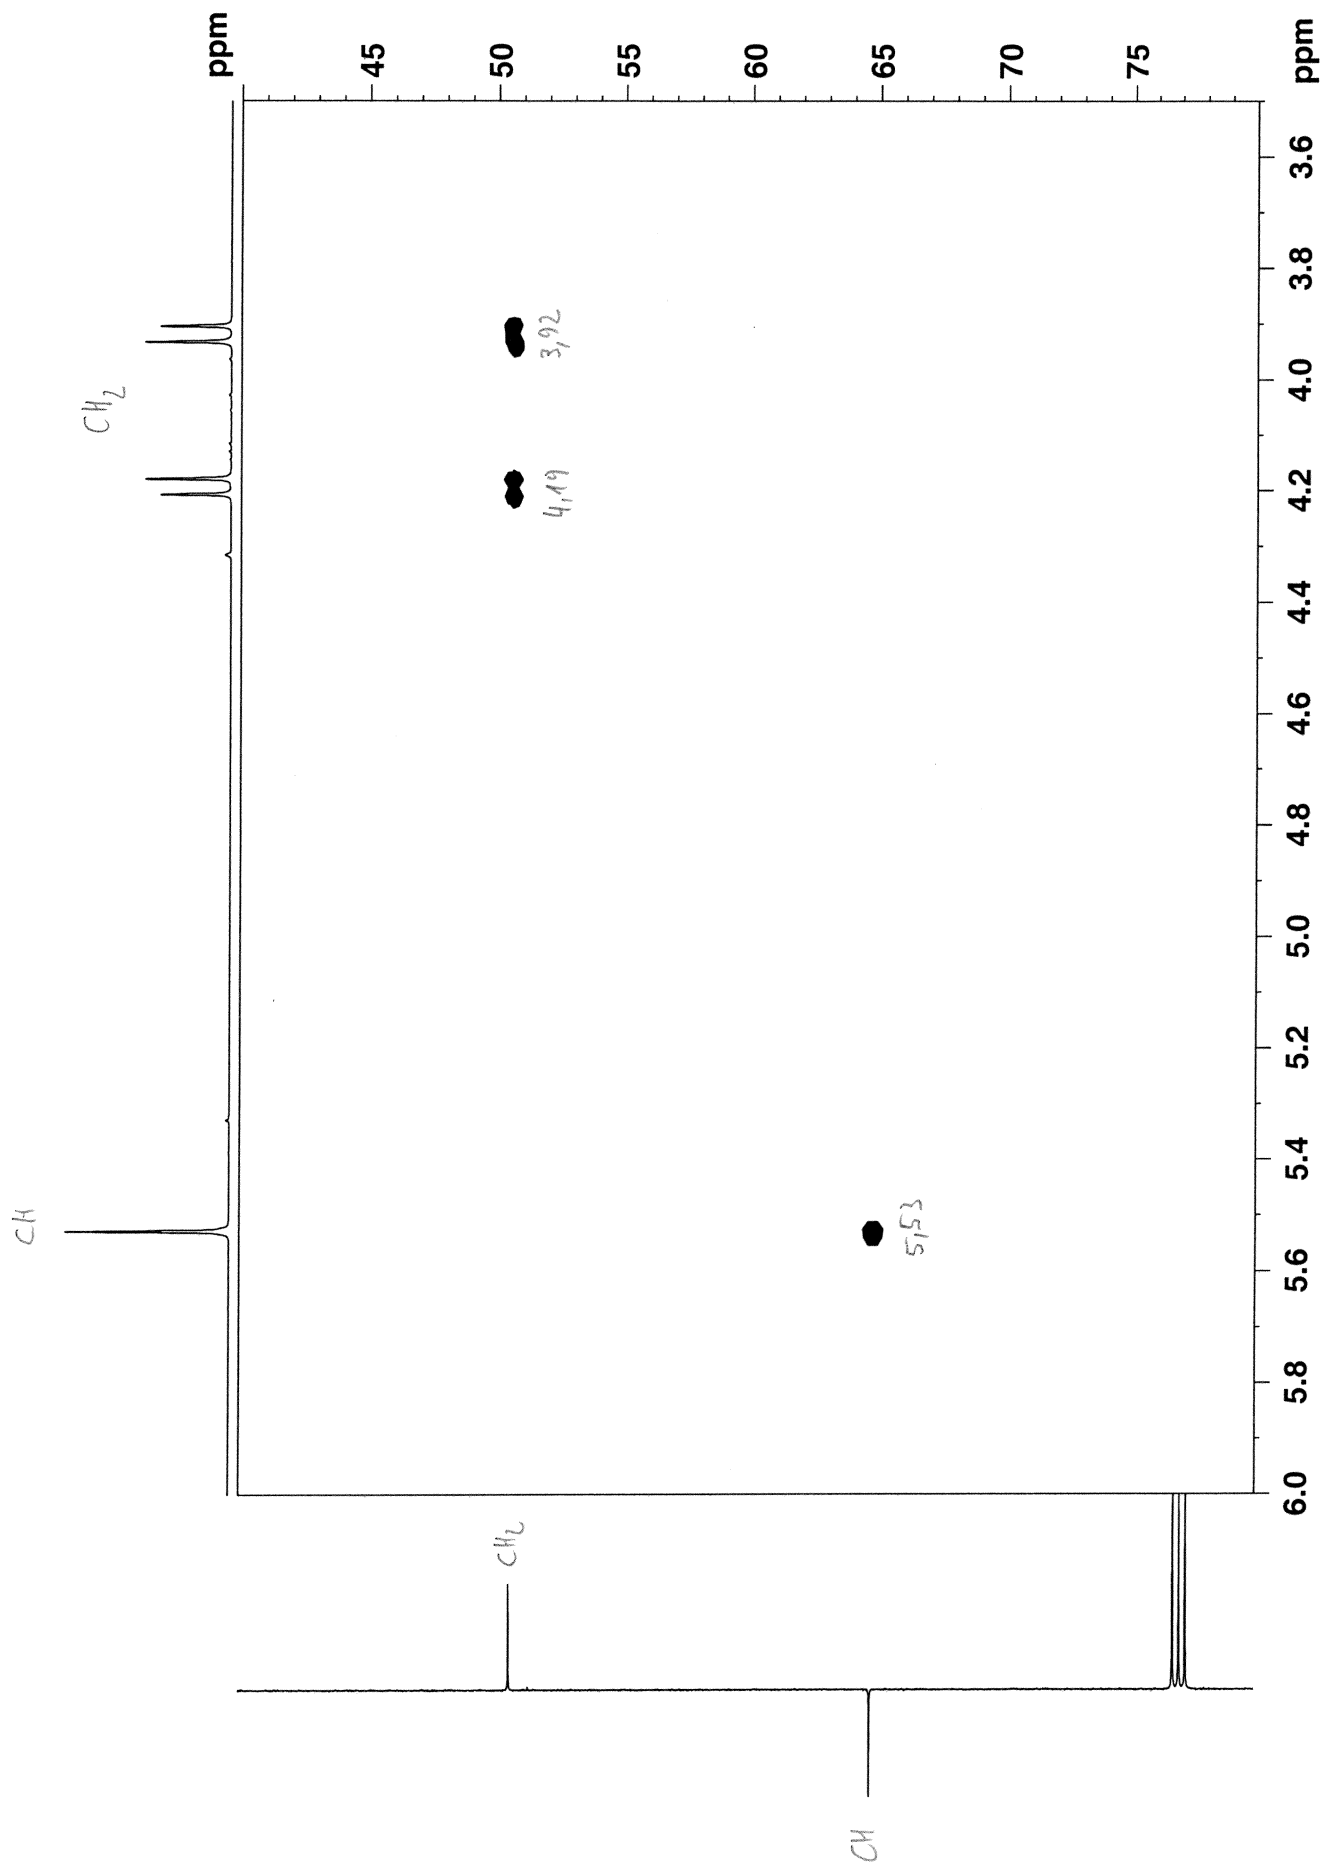

PN018-4 in cdcl3 (HMBC) 29.7.2020

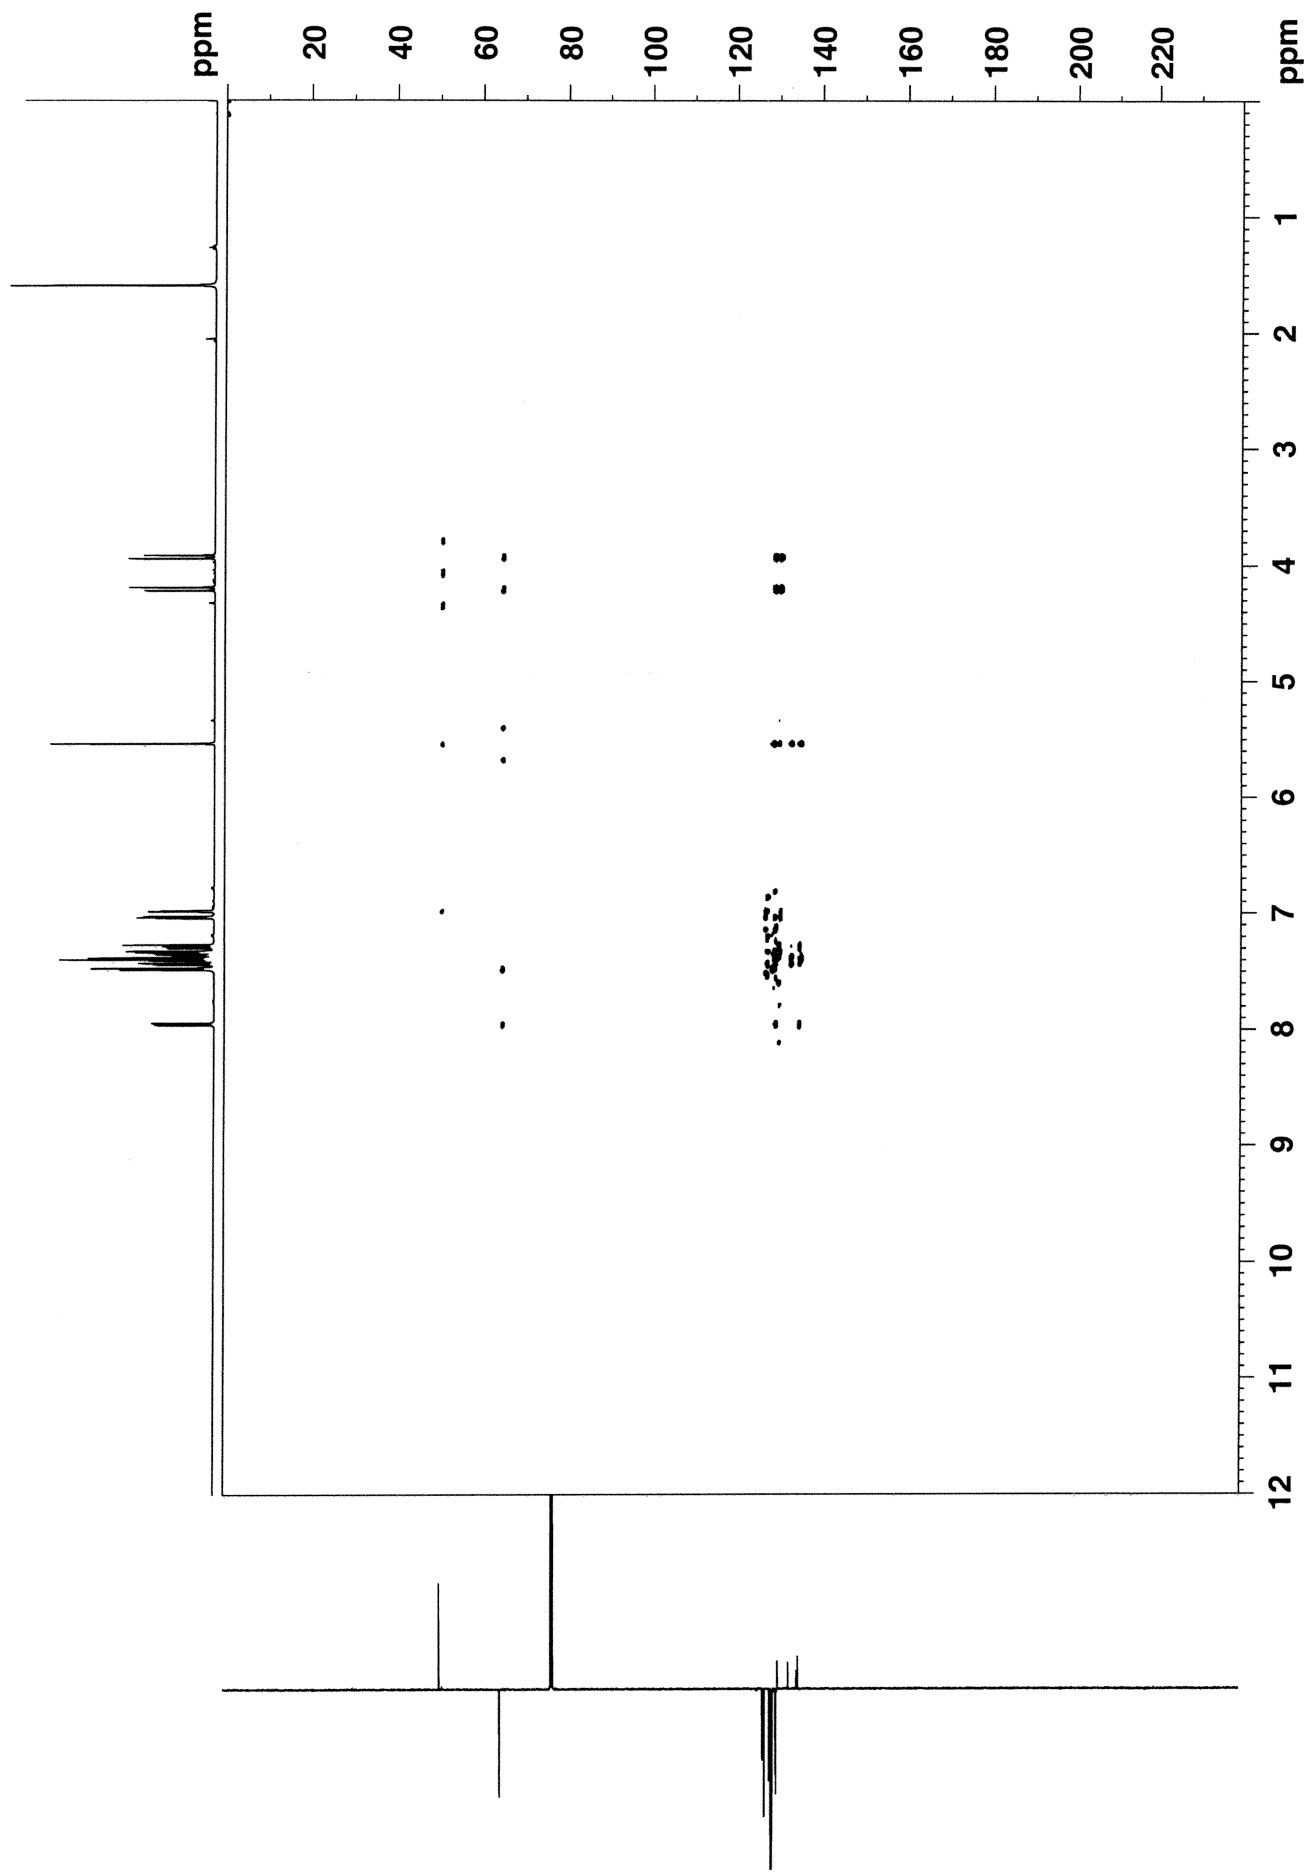



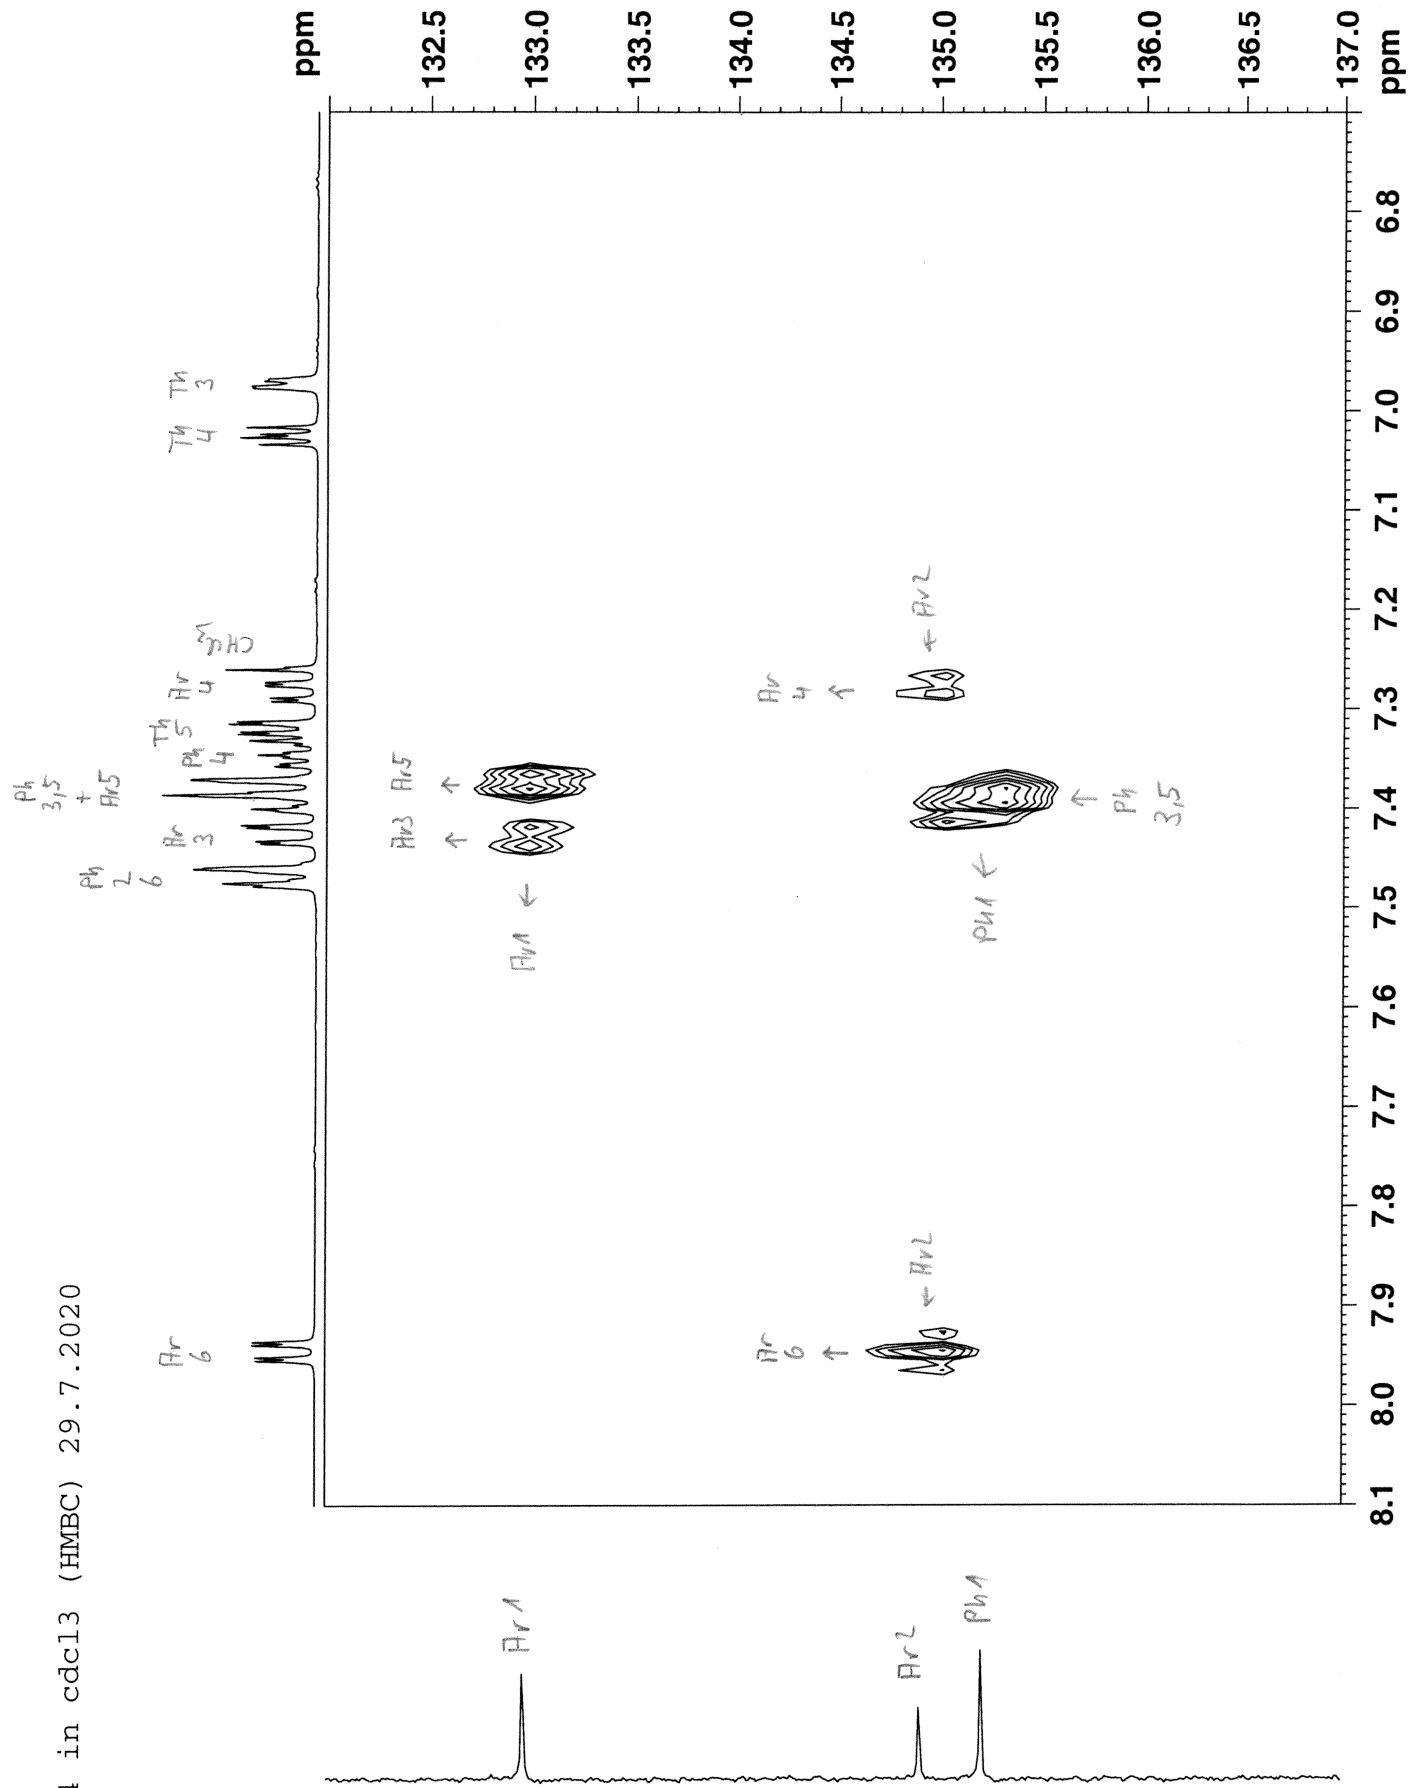

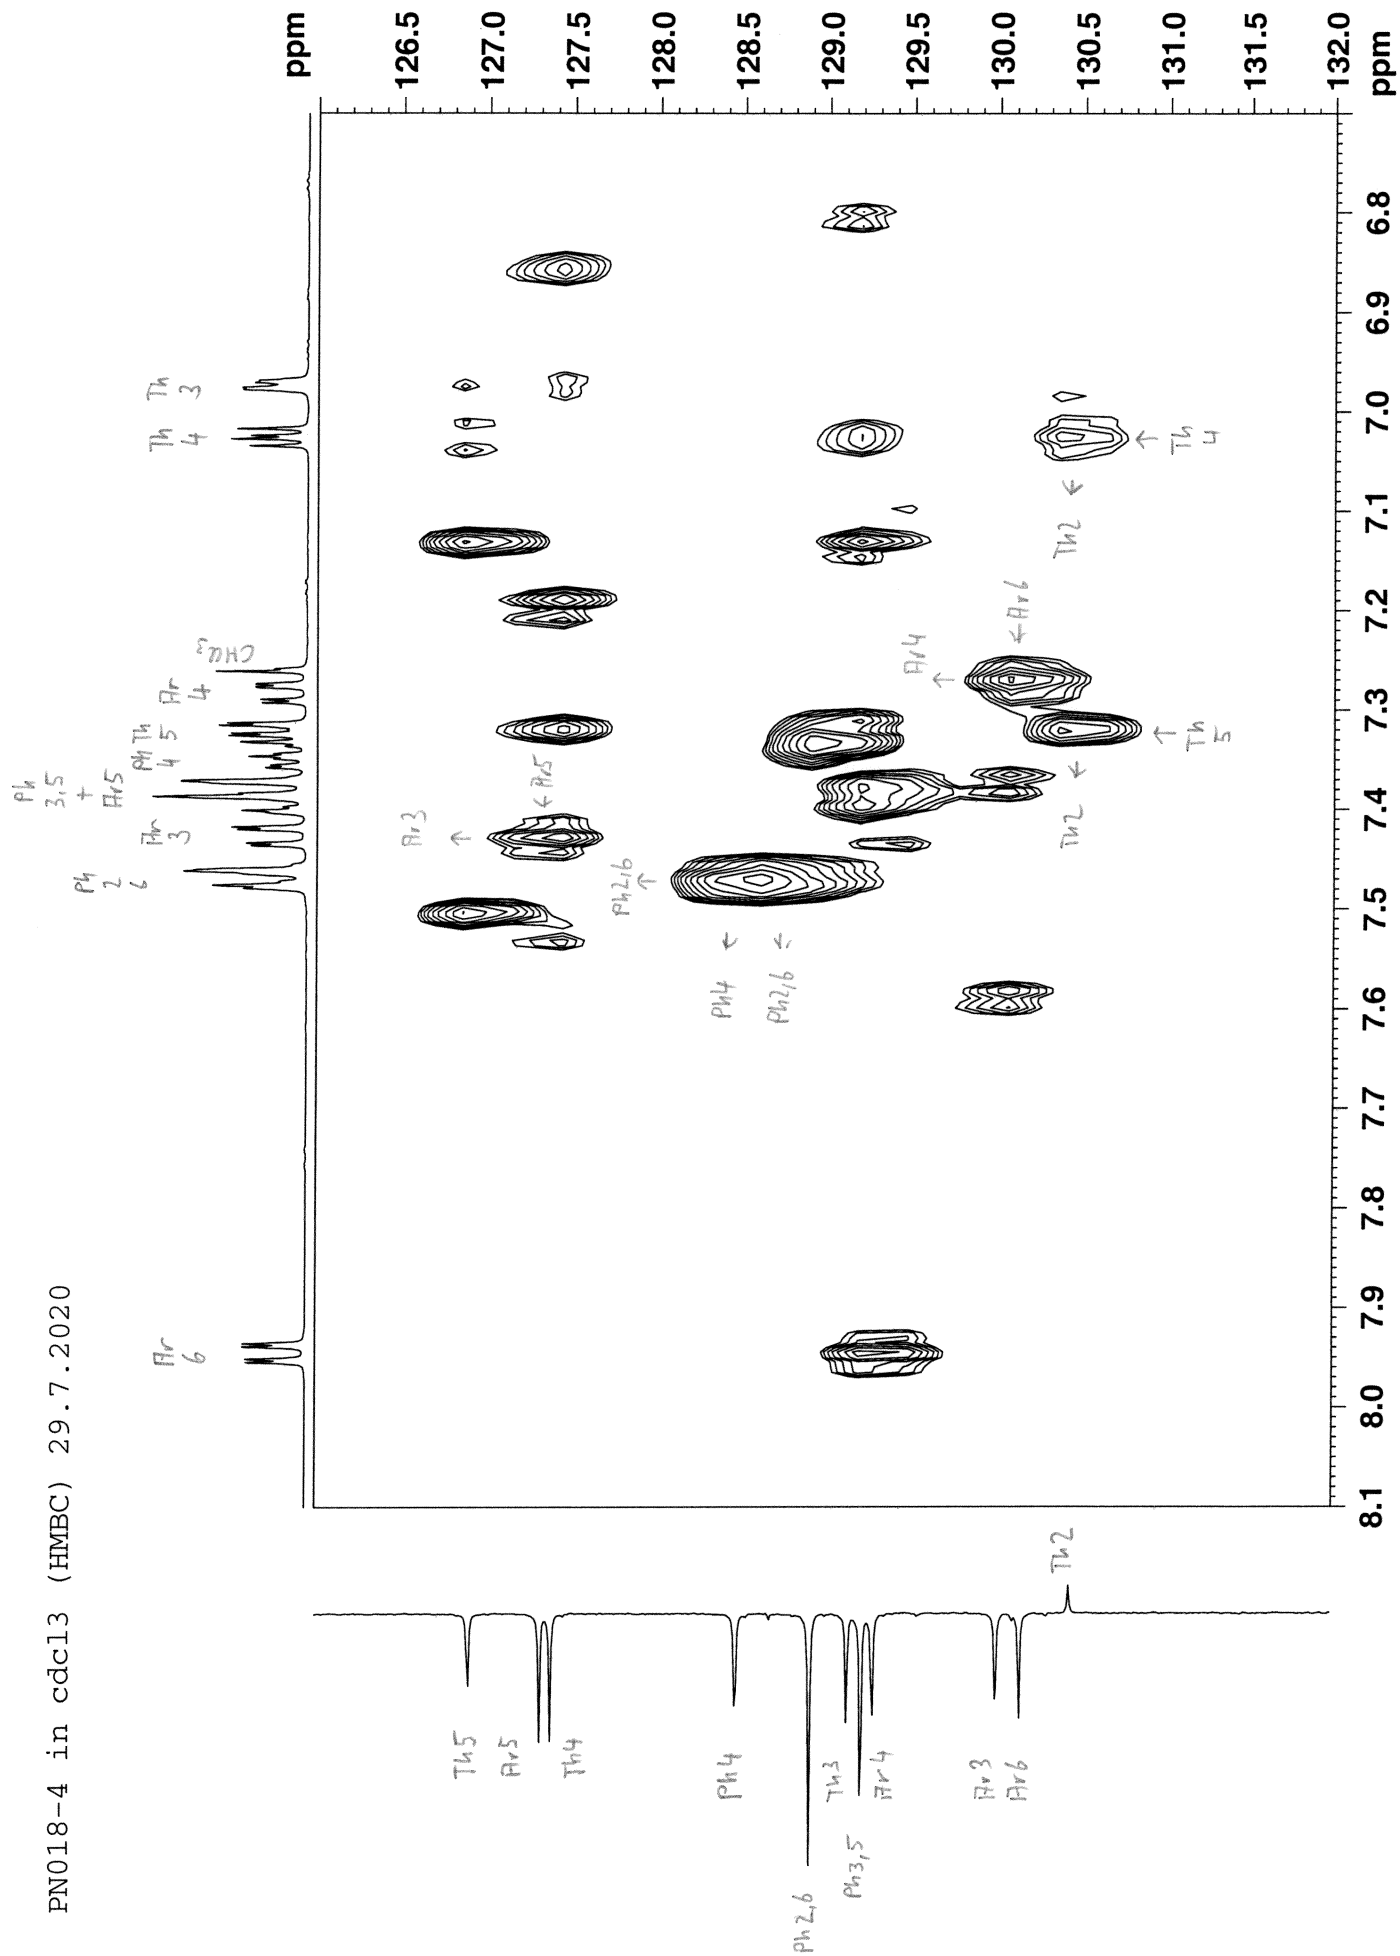

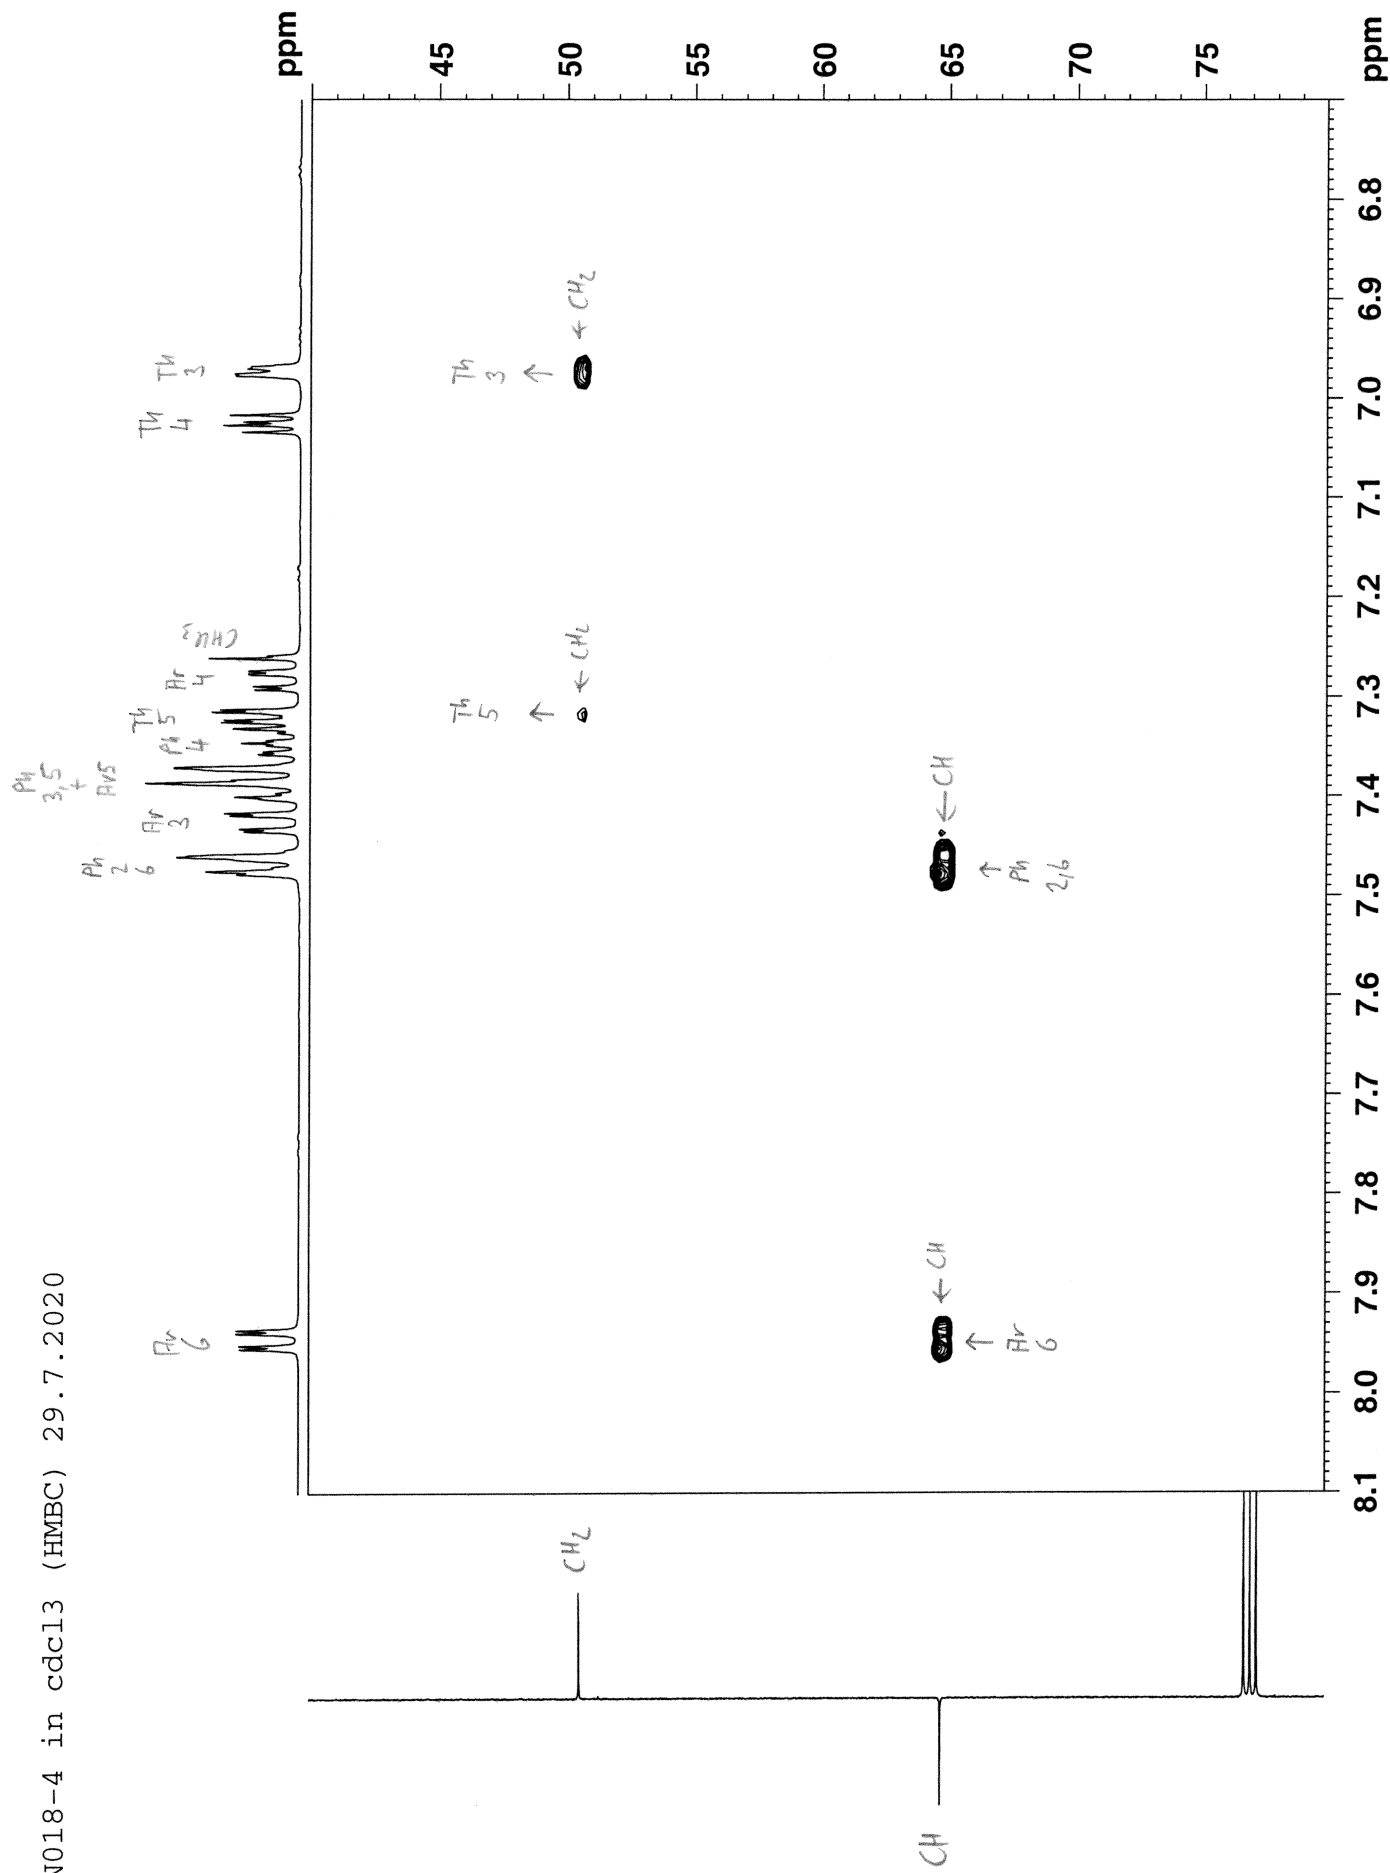

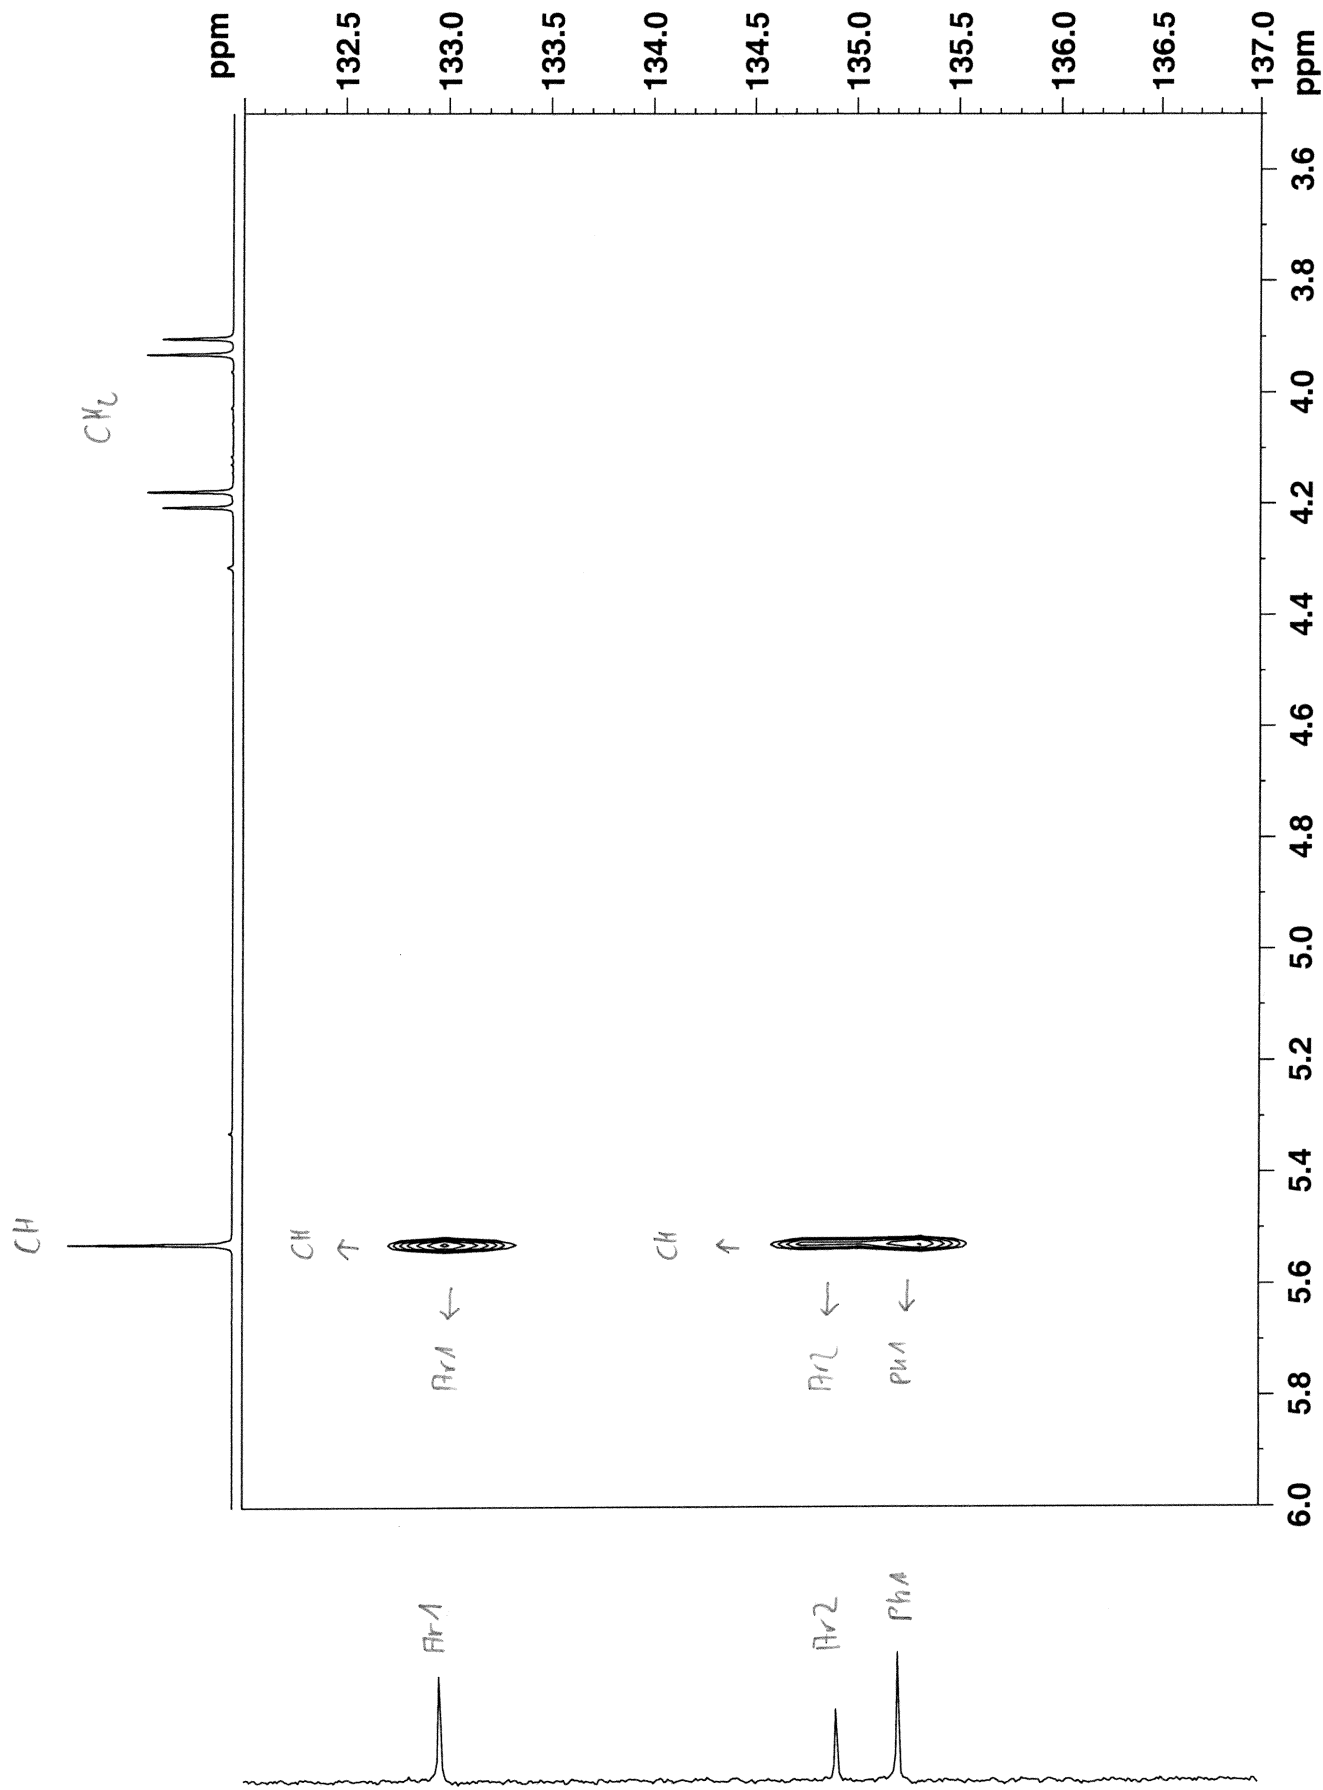

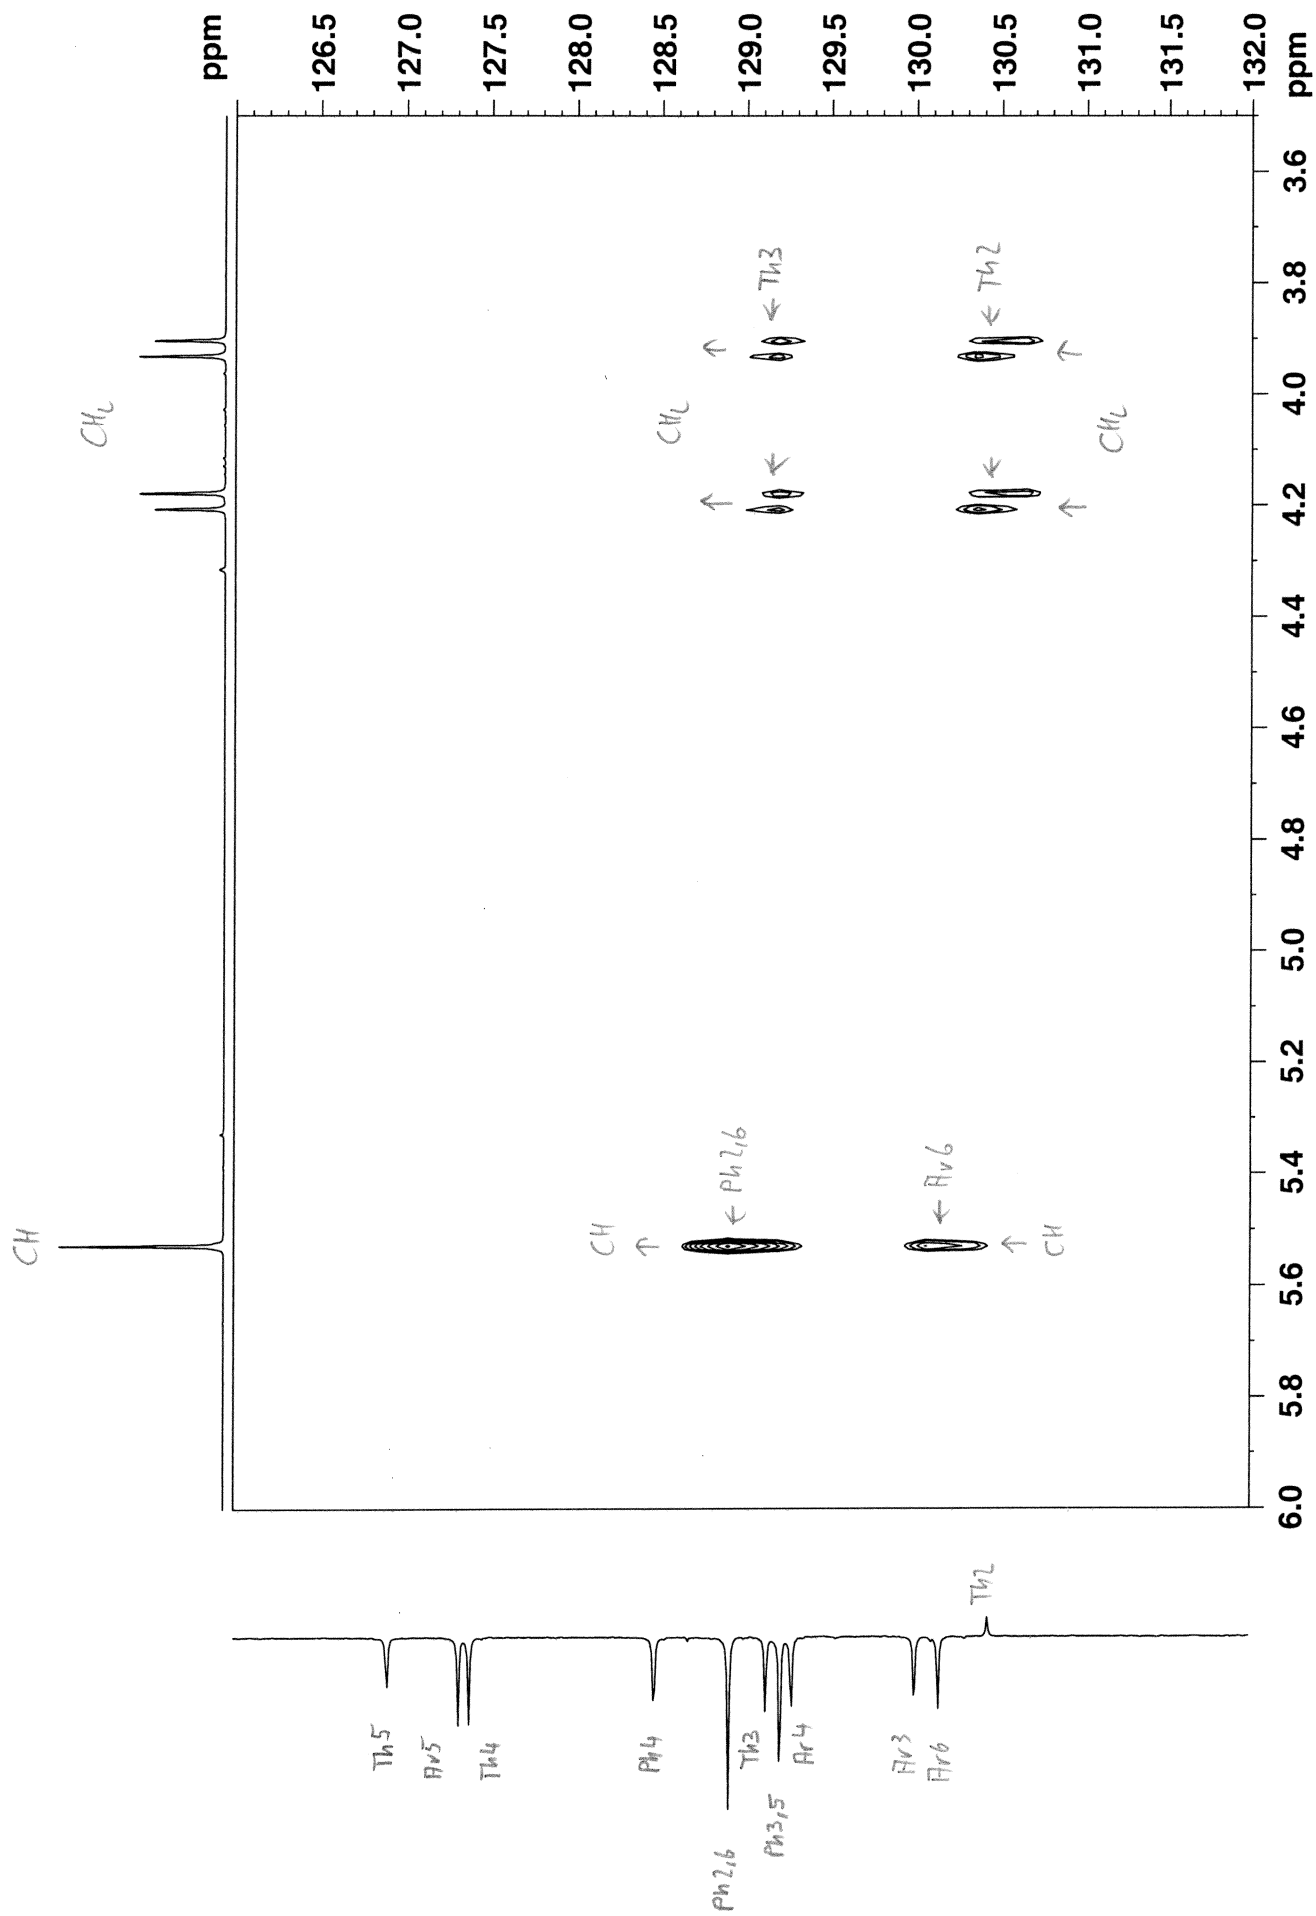

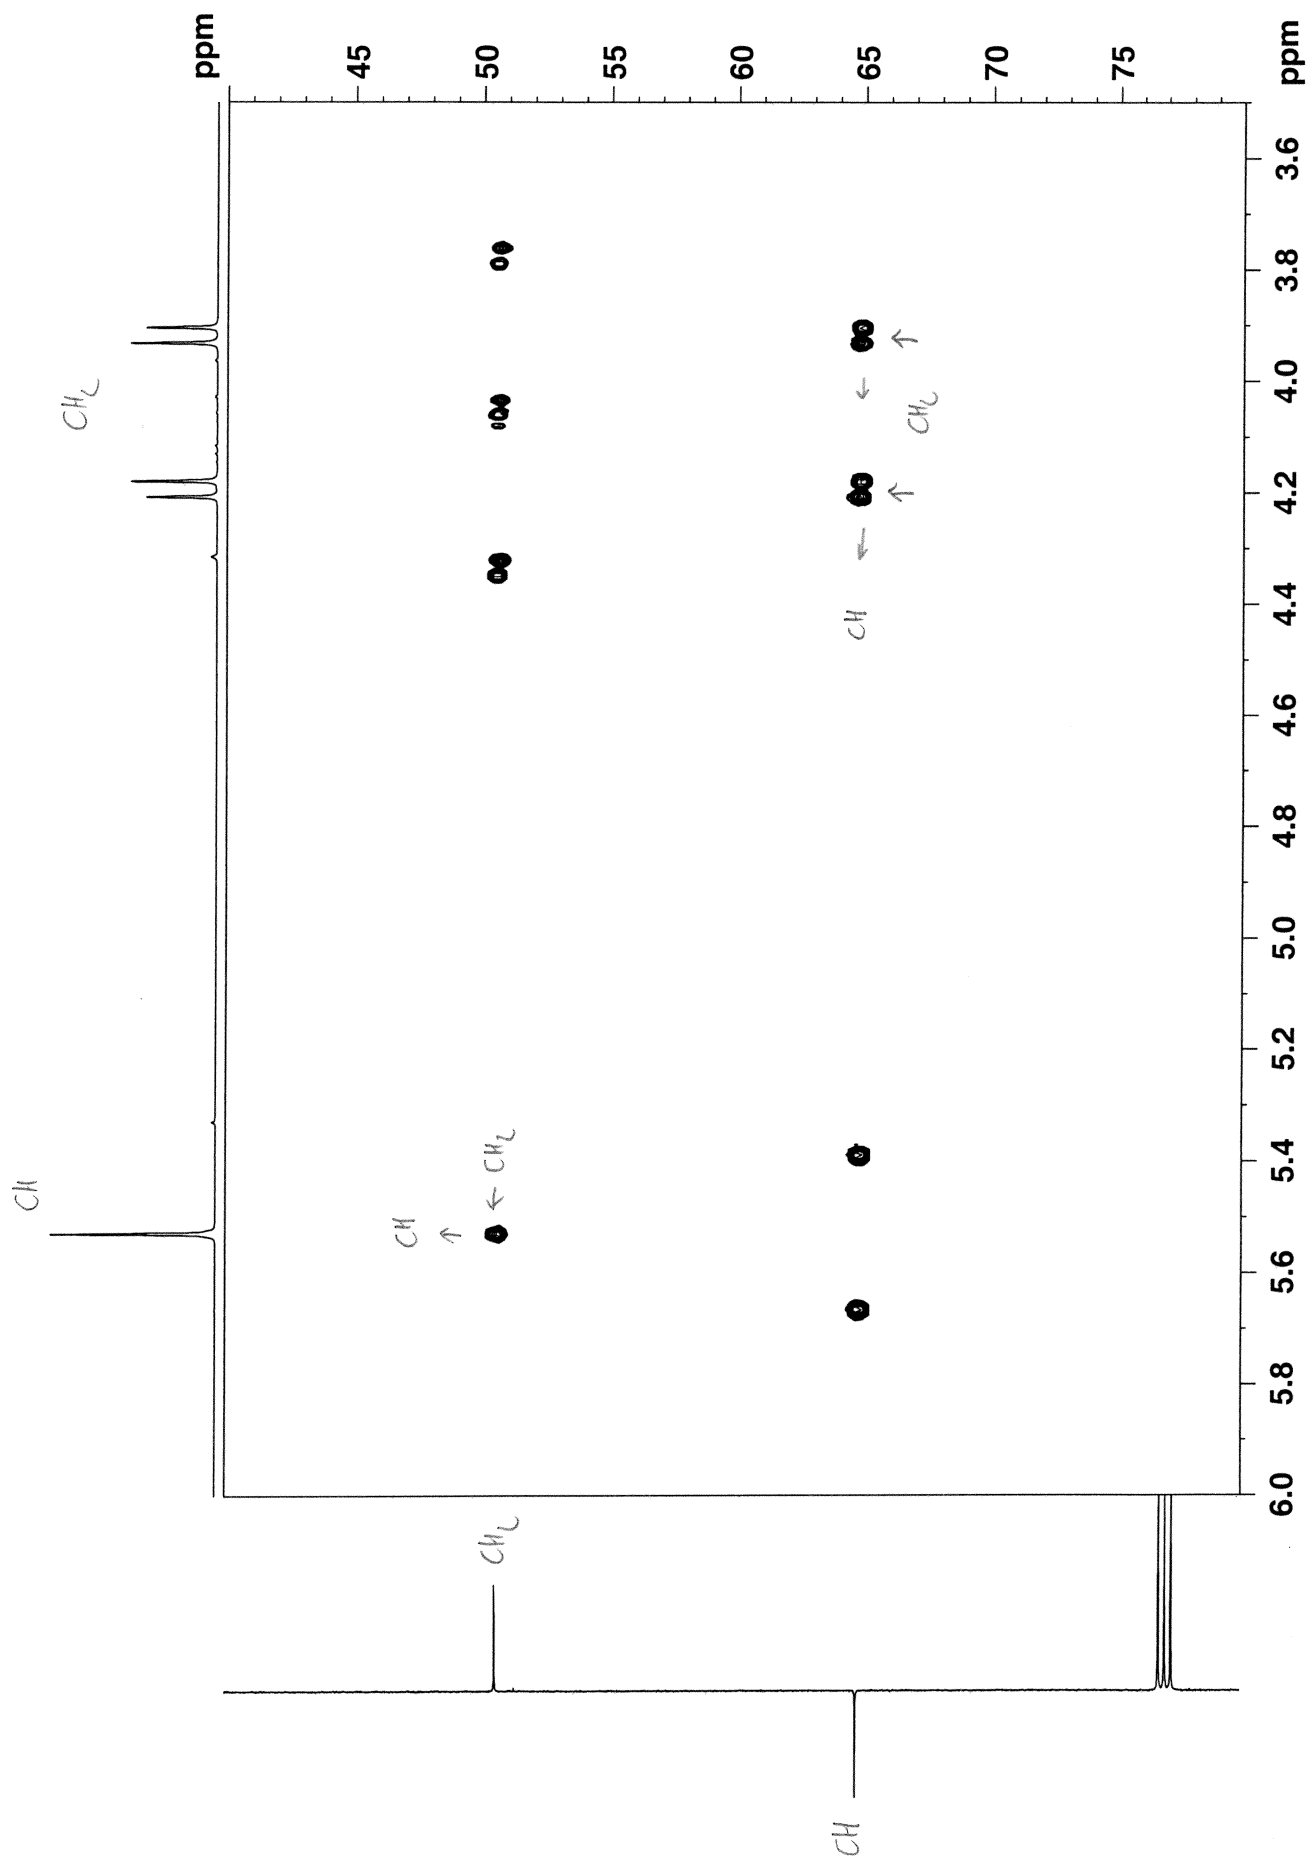

Figure S17c. NMR spectra of compound 5e.

CE167-S1P1 in cdcl3 (Proton) 6.9.2018

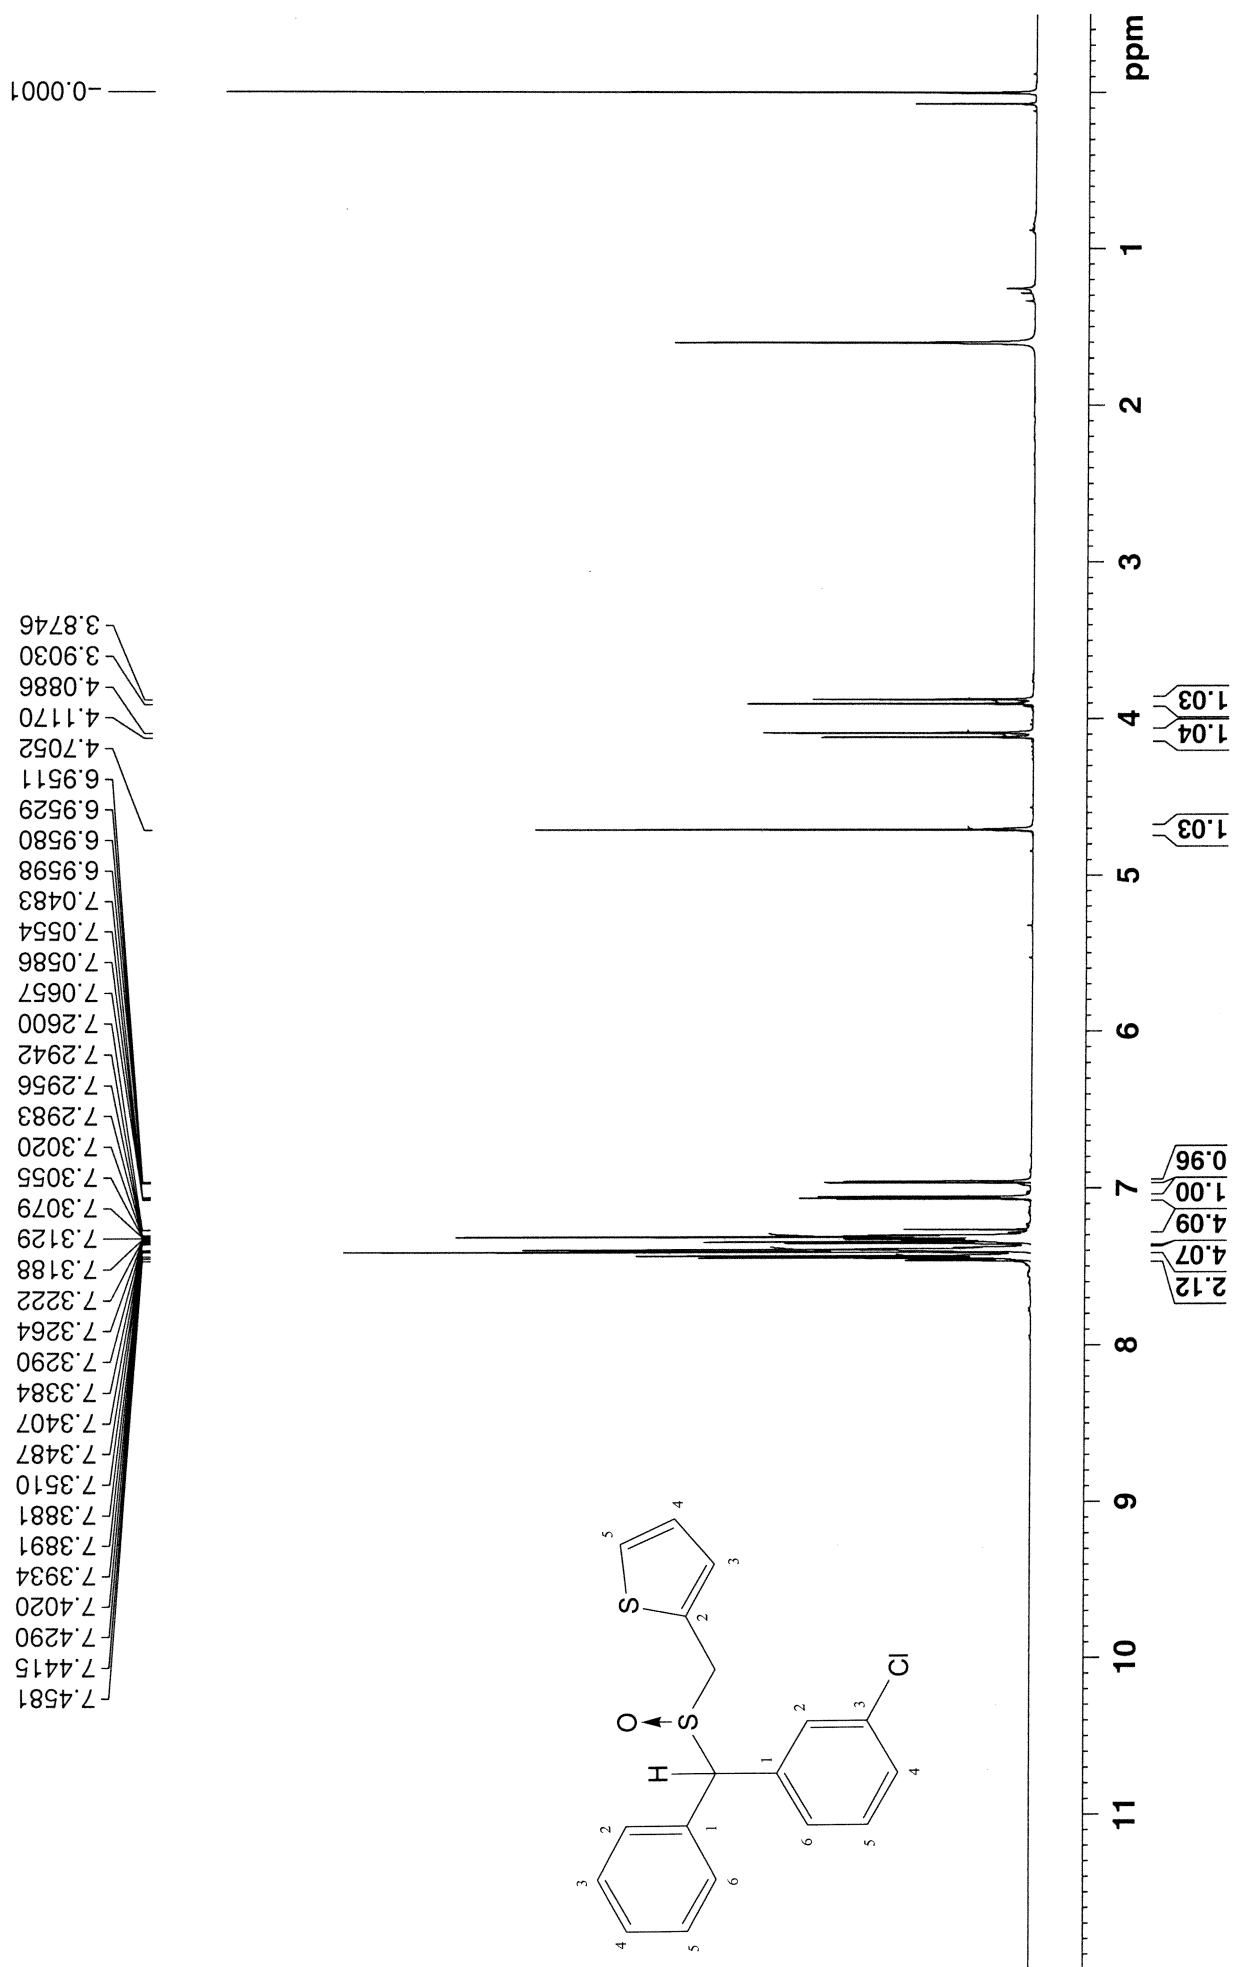

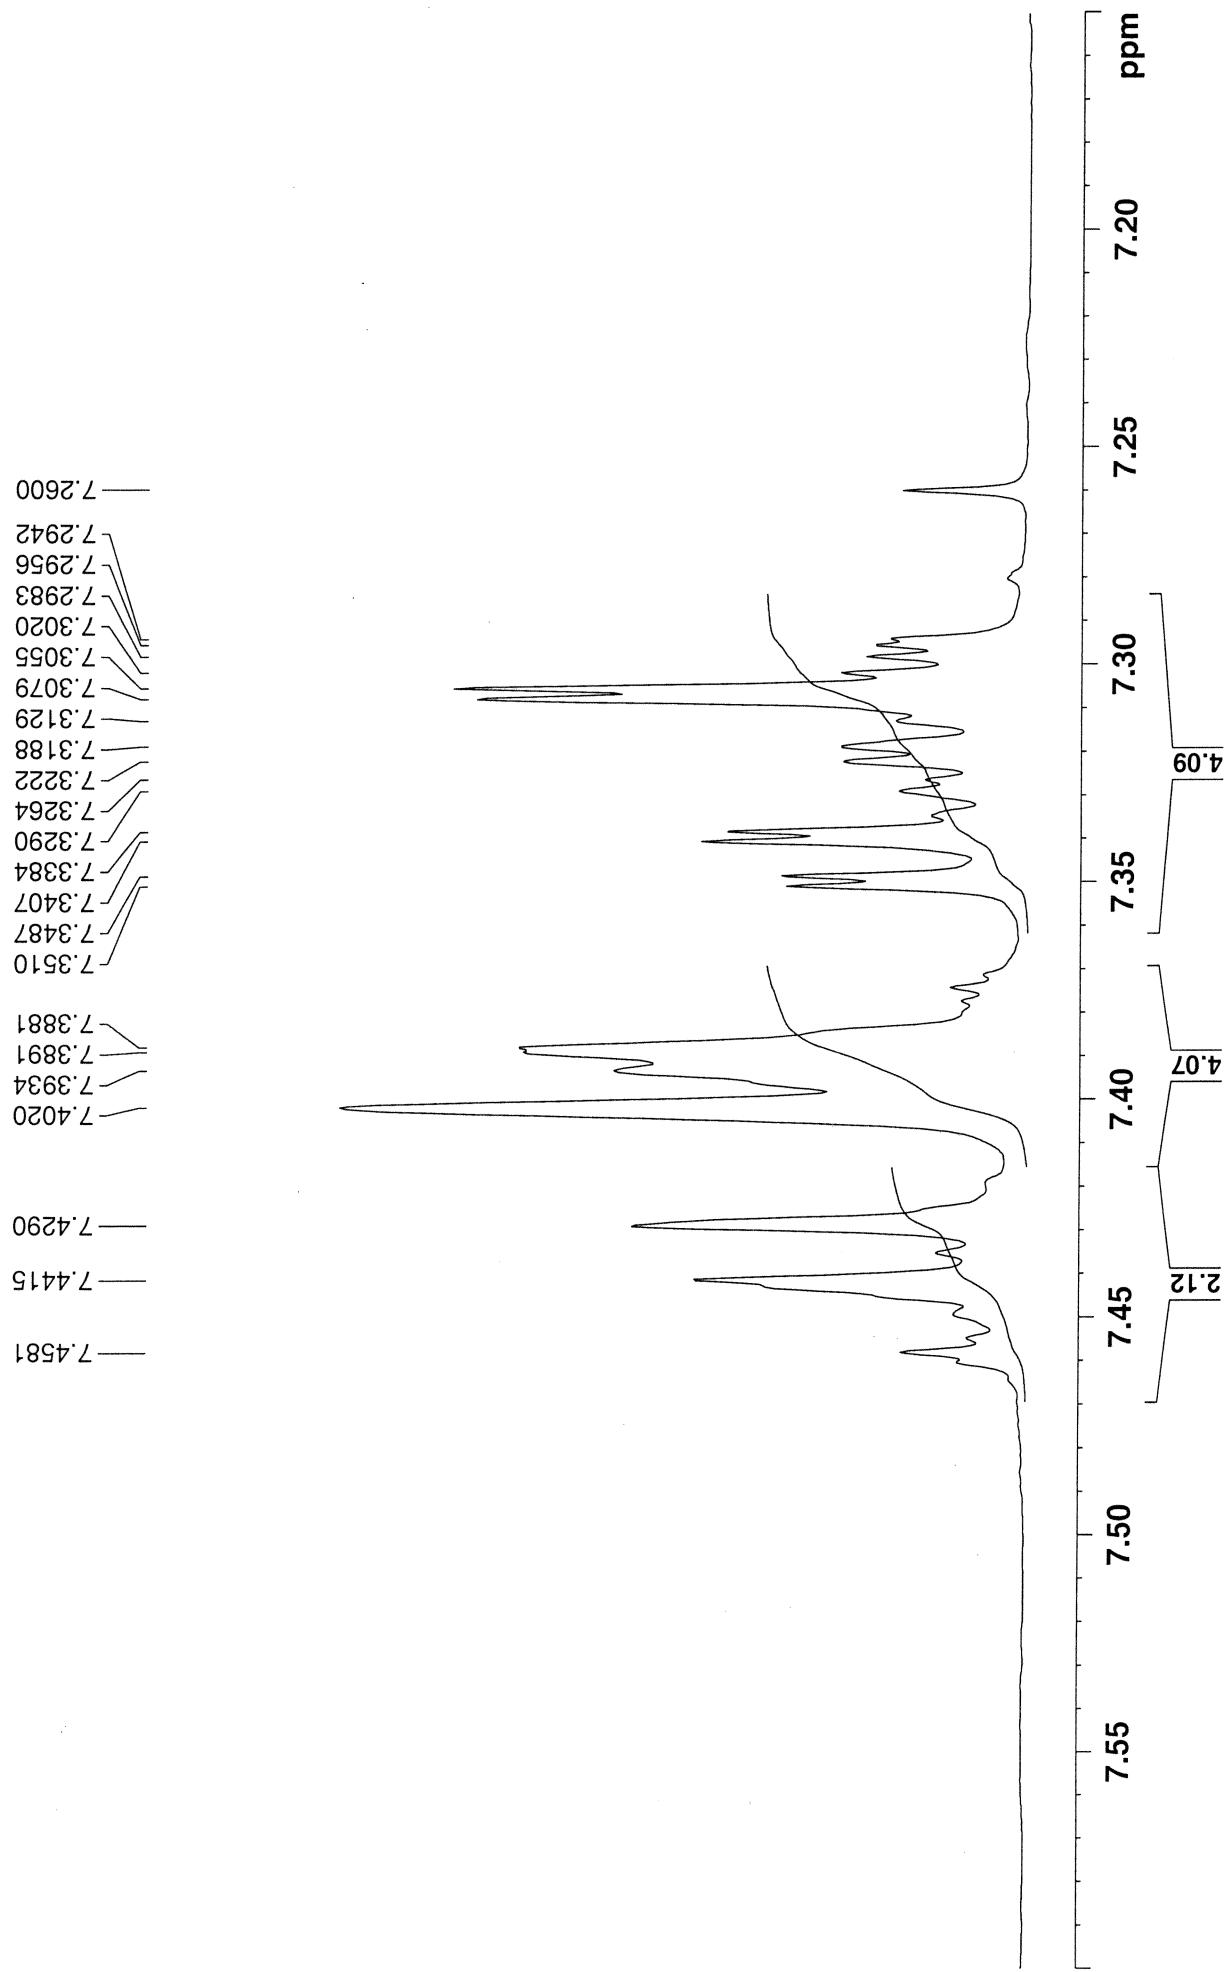



7.0657  
7.0586  
7.0554  
7.0483

6.9598  
6.9580  
6.9529  
6.9511

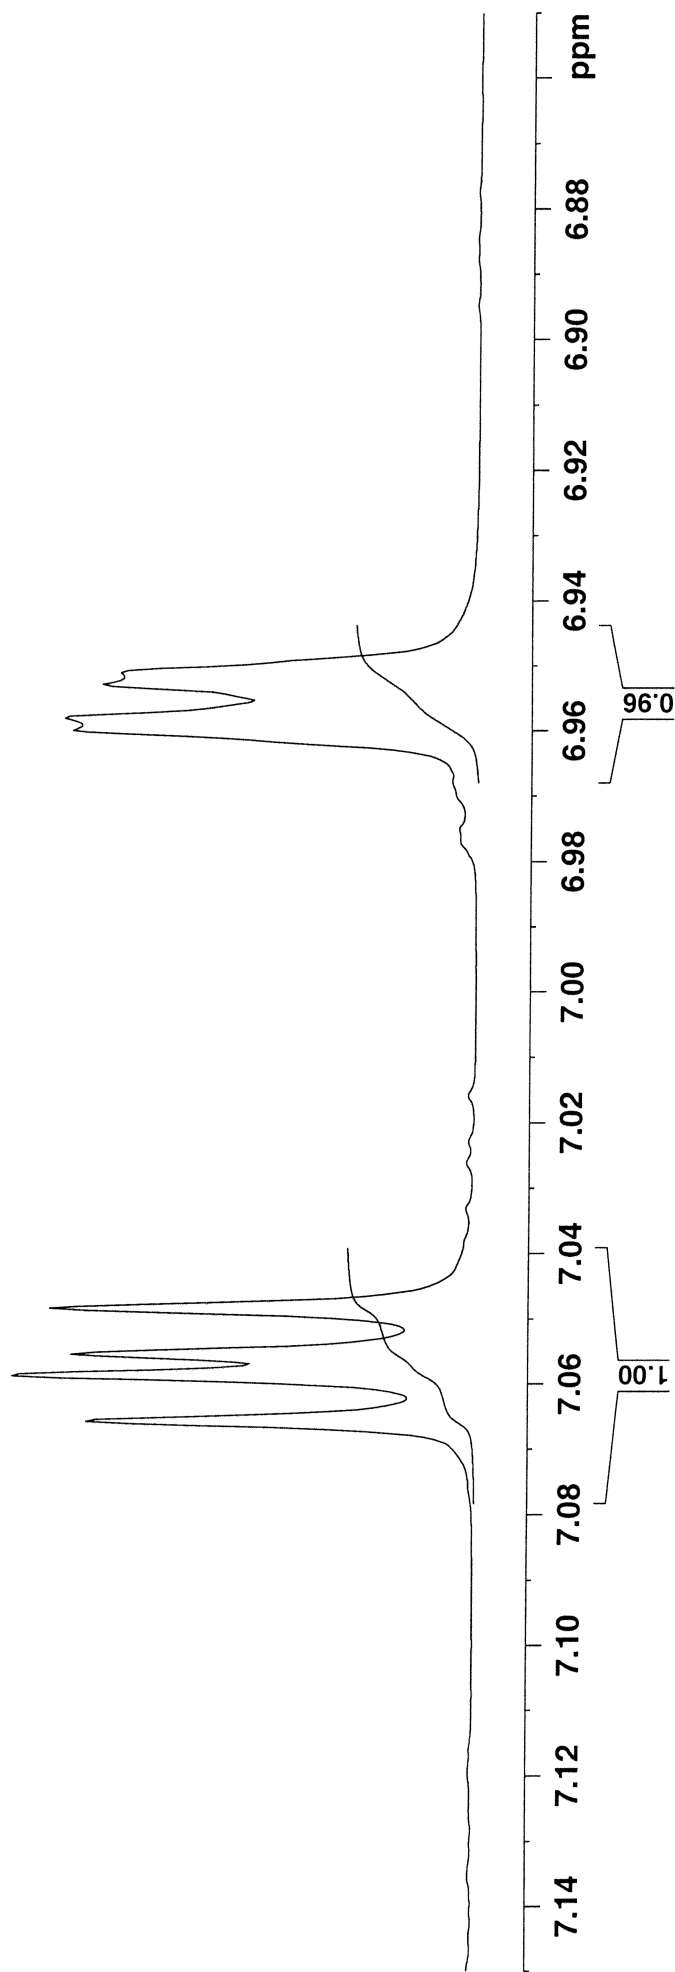

CE167-S1P1 in cdcl3 (Proton) 6.9.2018

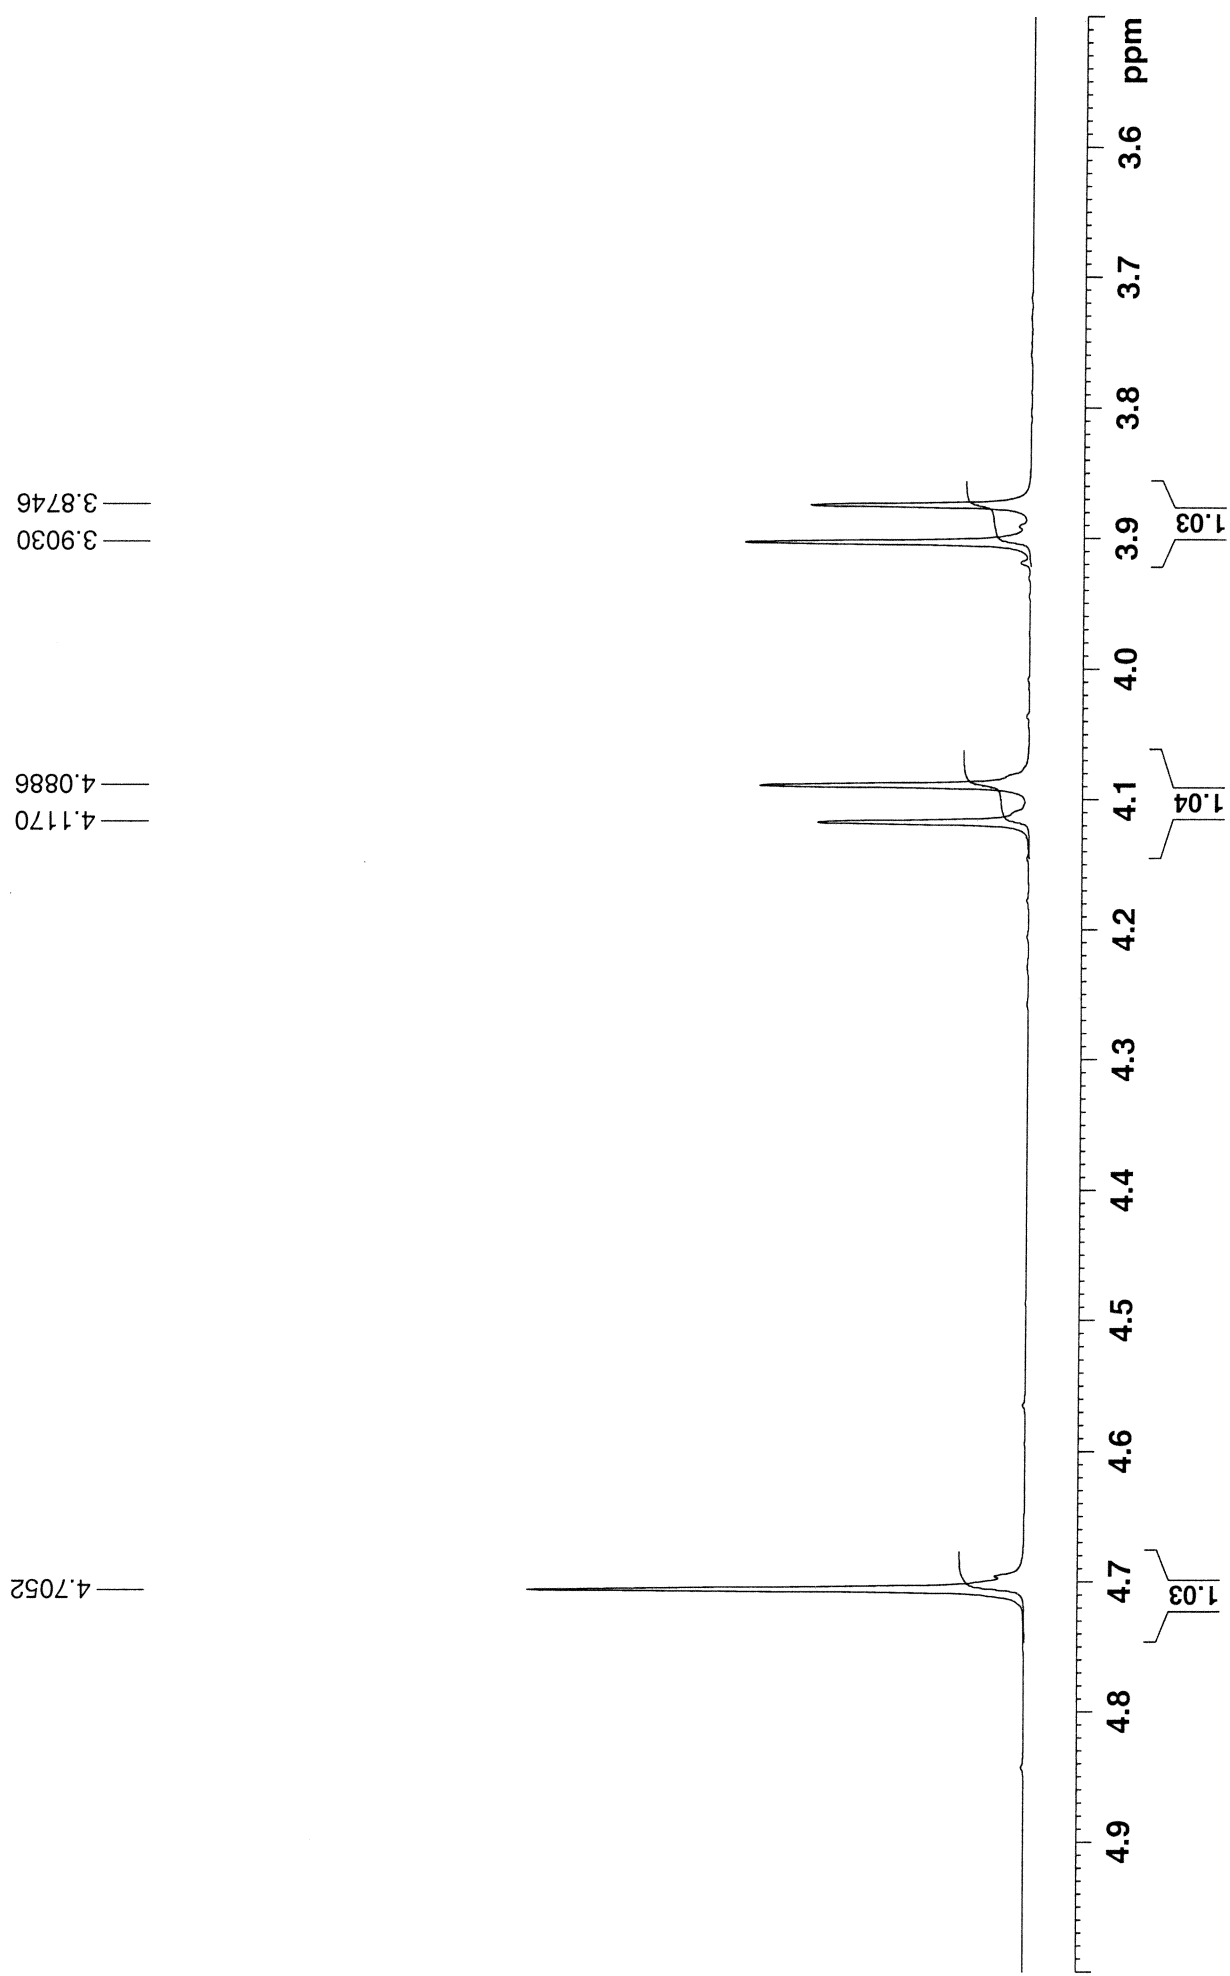

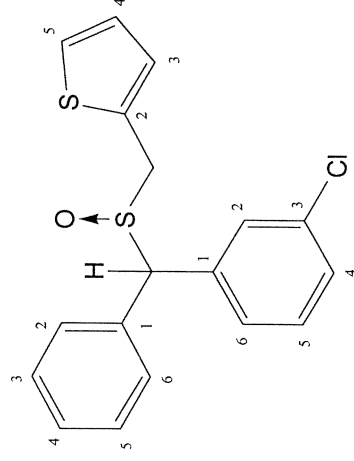

136.3328  
134.8024  
134.5163  
129.8347  
129.7911  
129.5411  
129.4677  
129.1743  
128.7507  
128.7234  
128.5759  
127.8861  
127.3260  
126.9681

77.0000  
68.7086  
50.0773

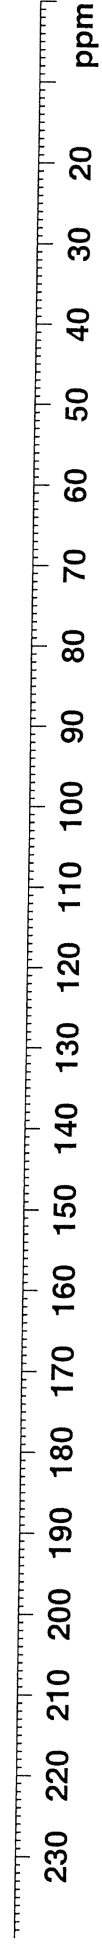

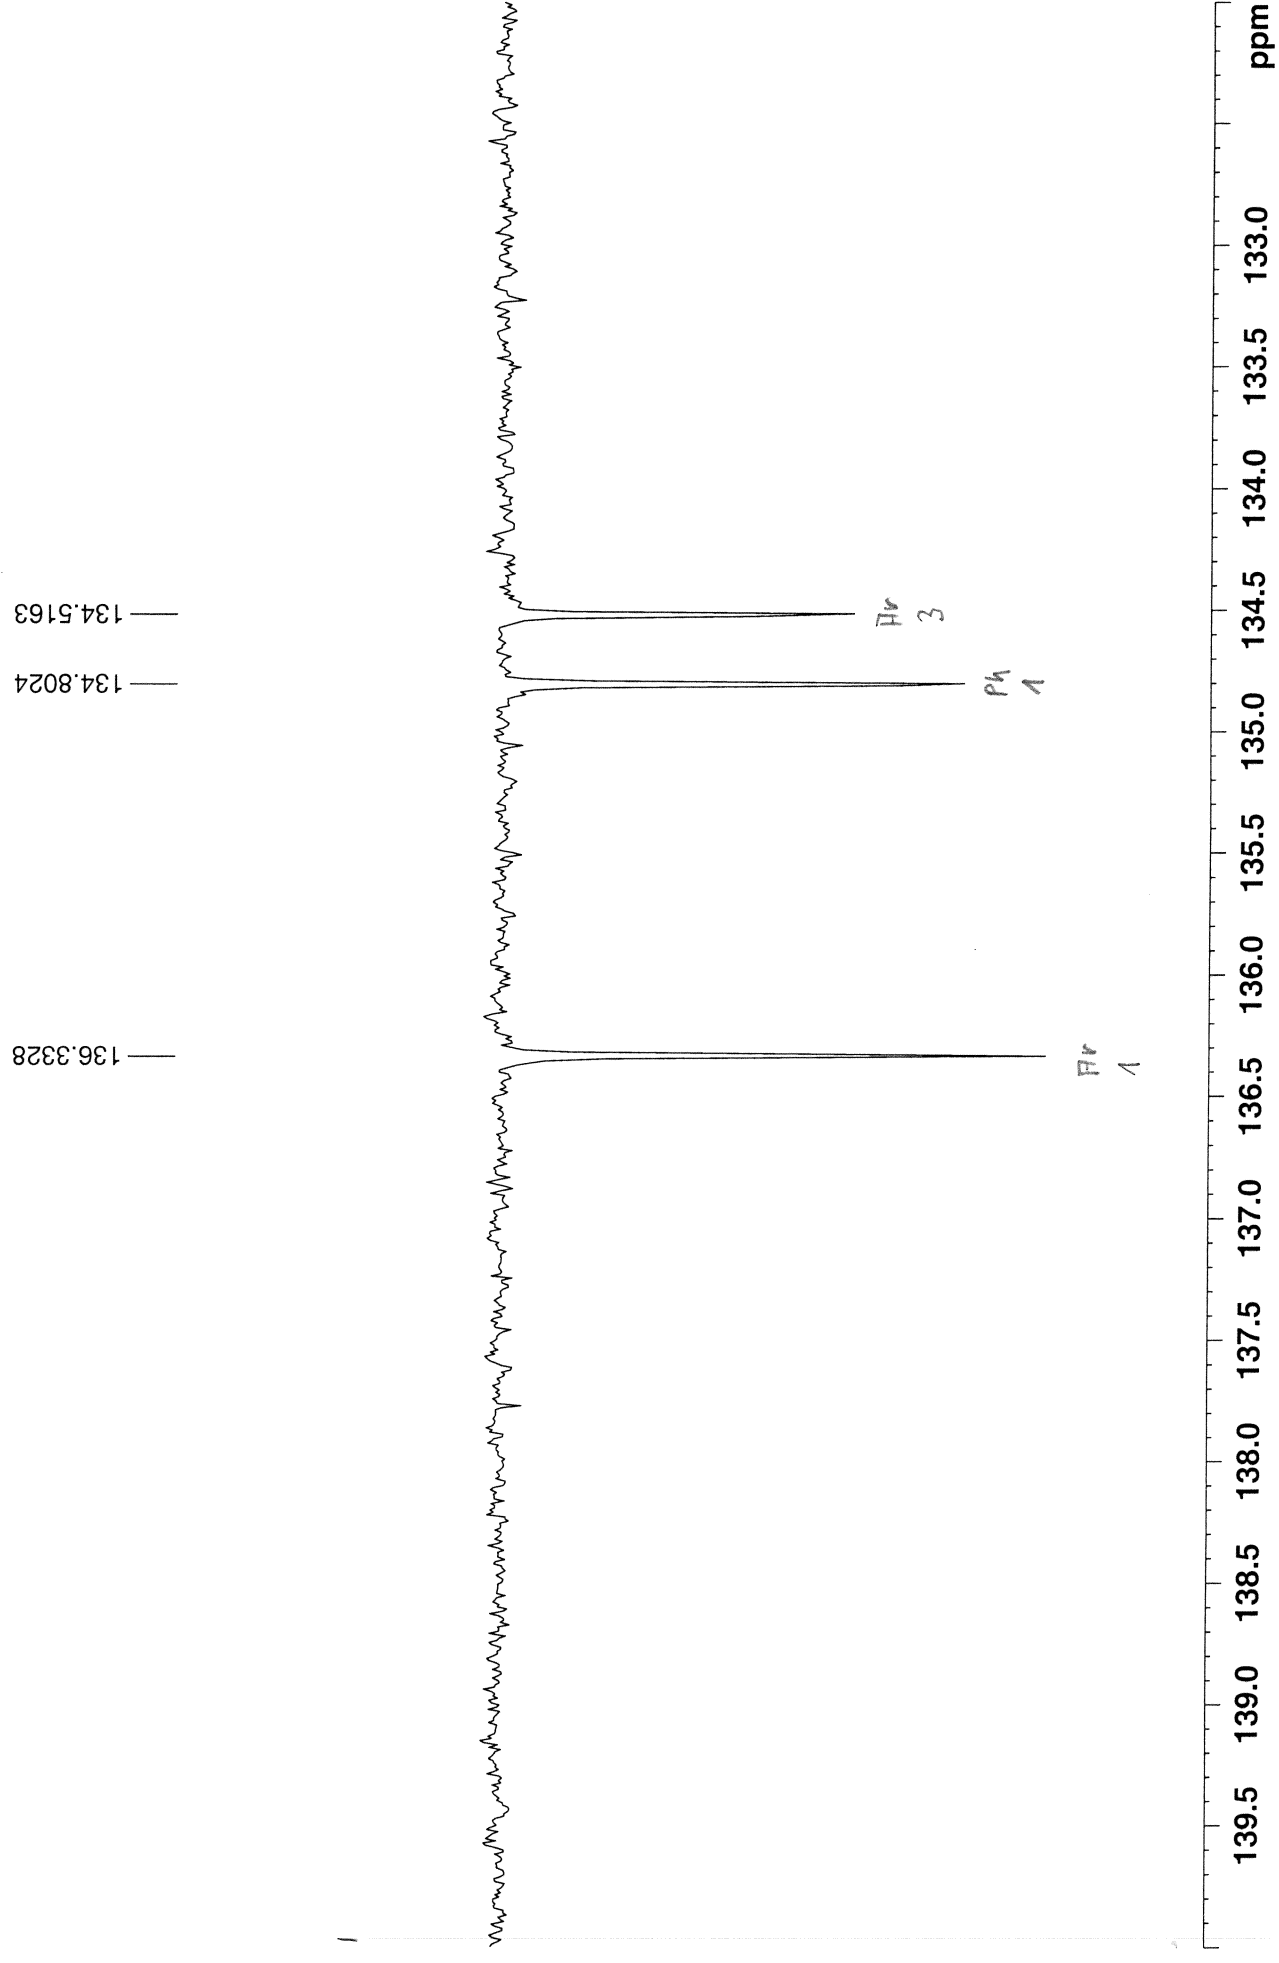

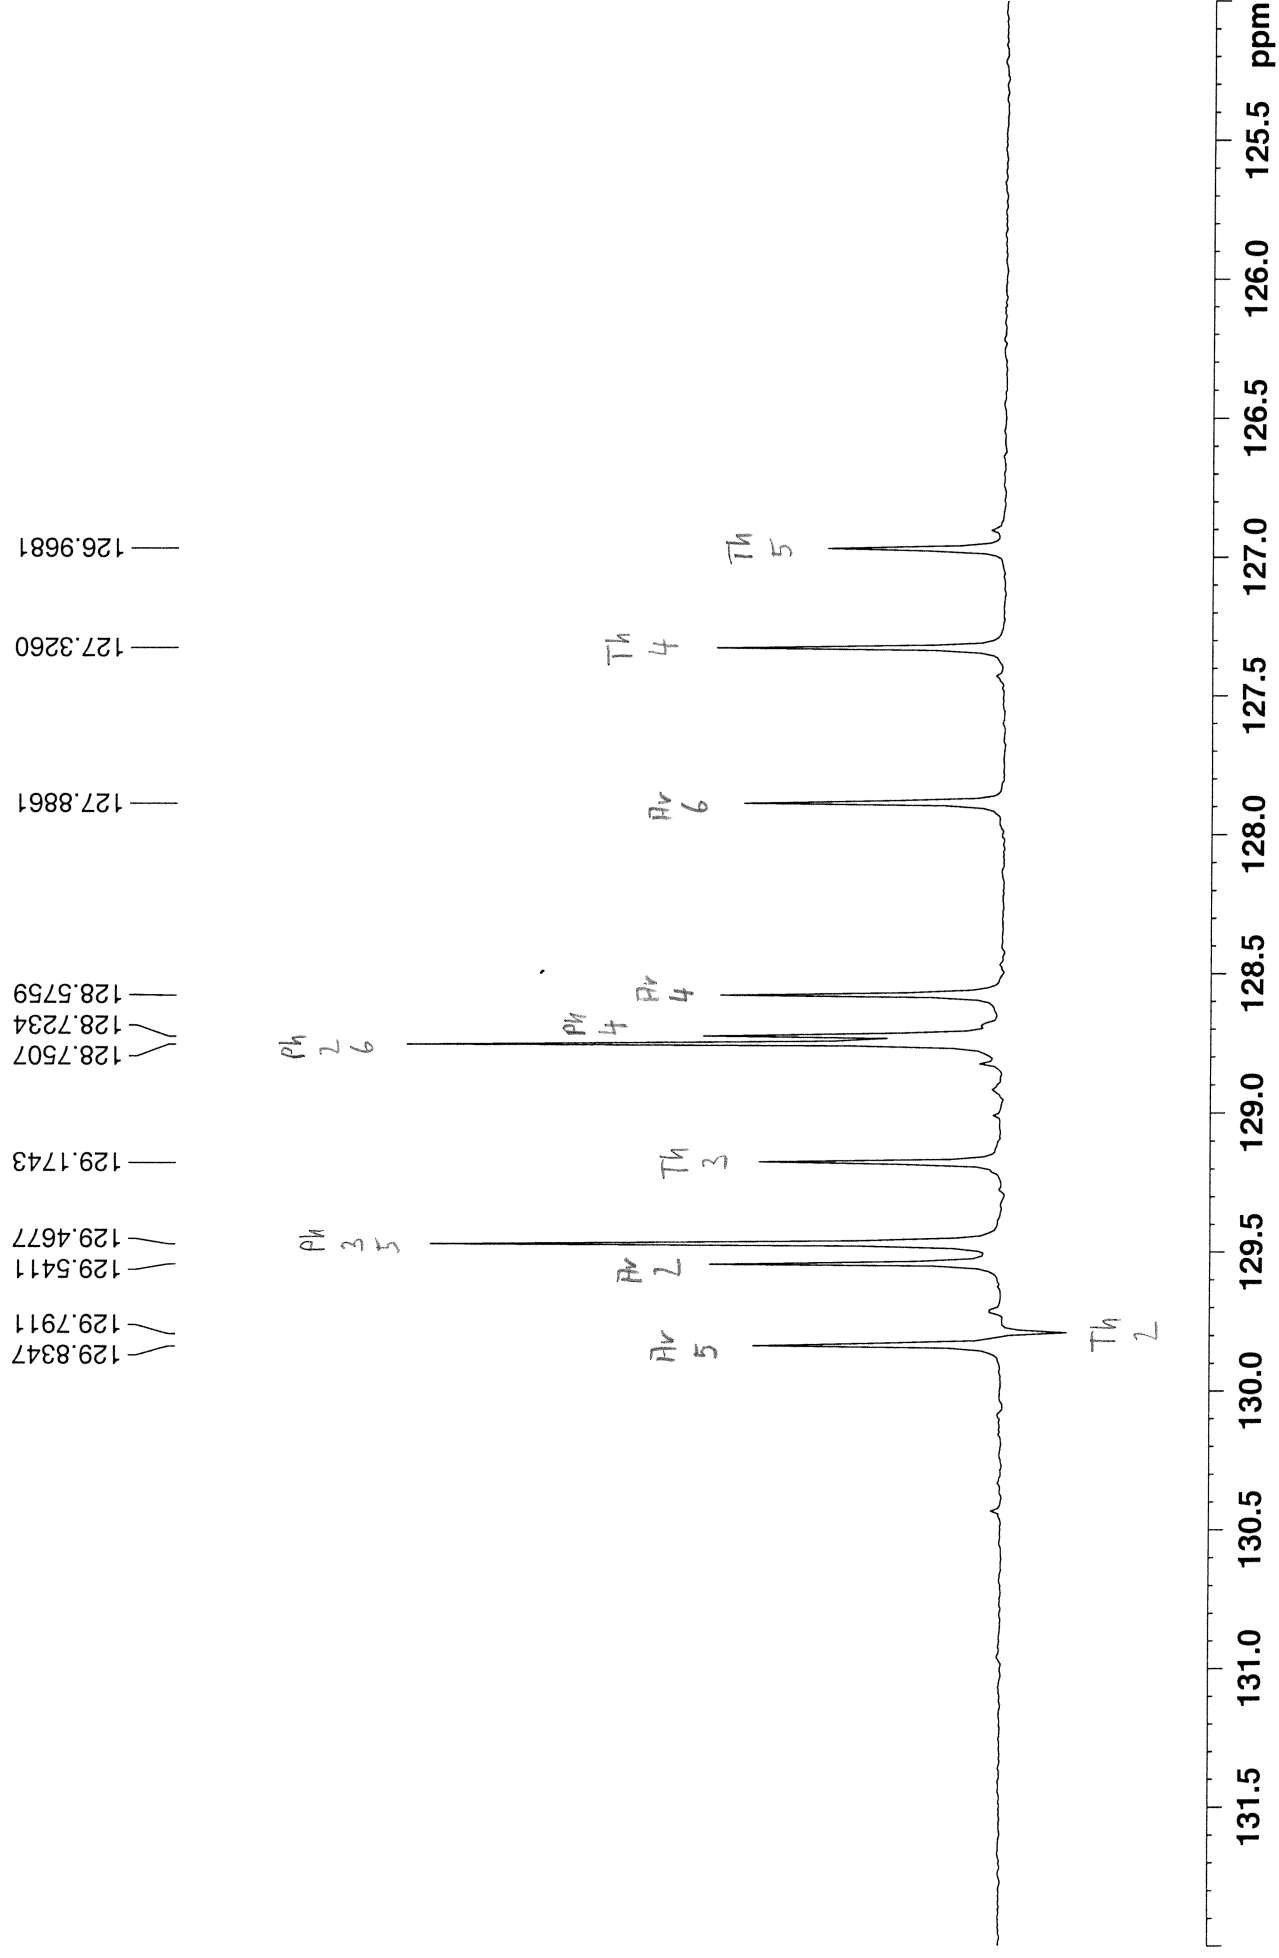

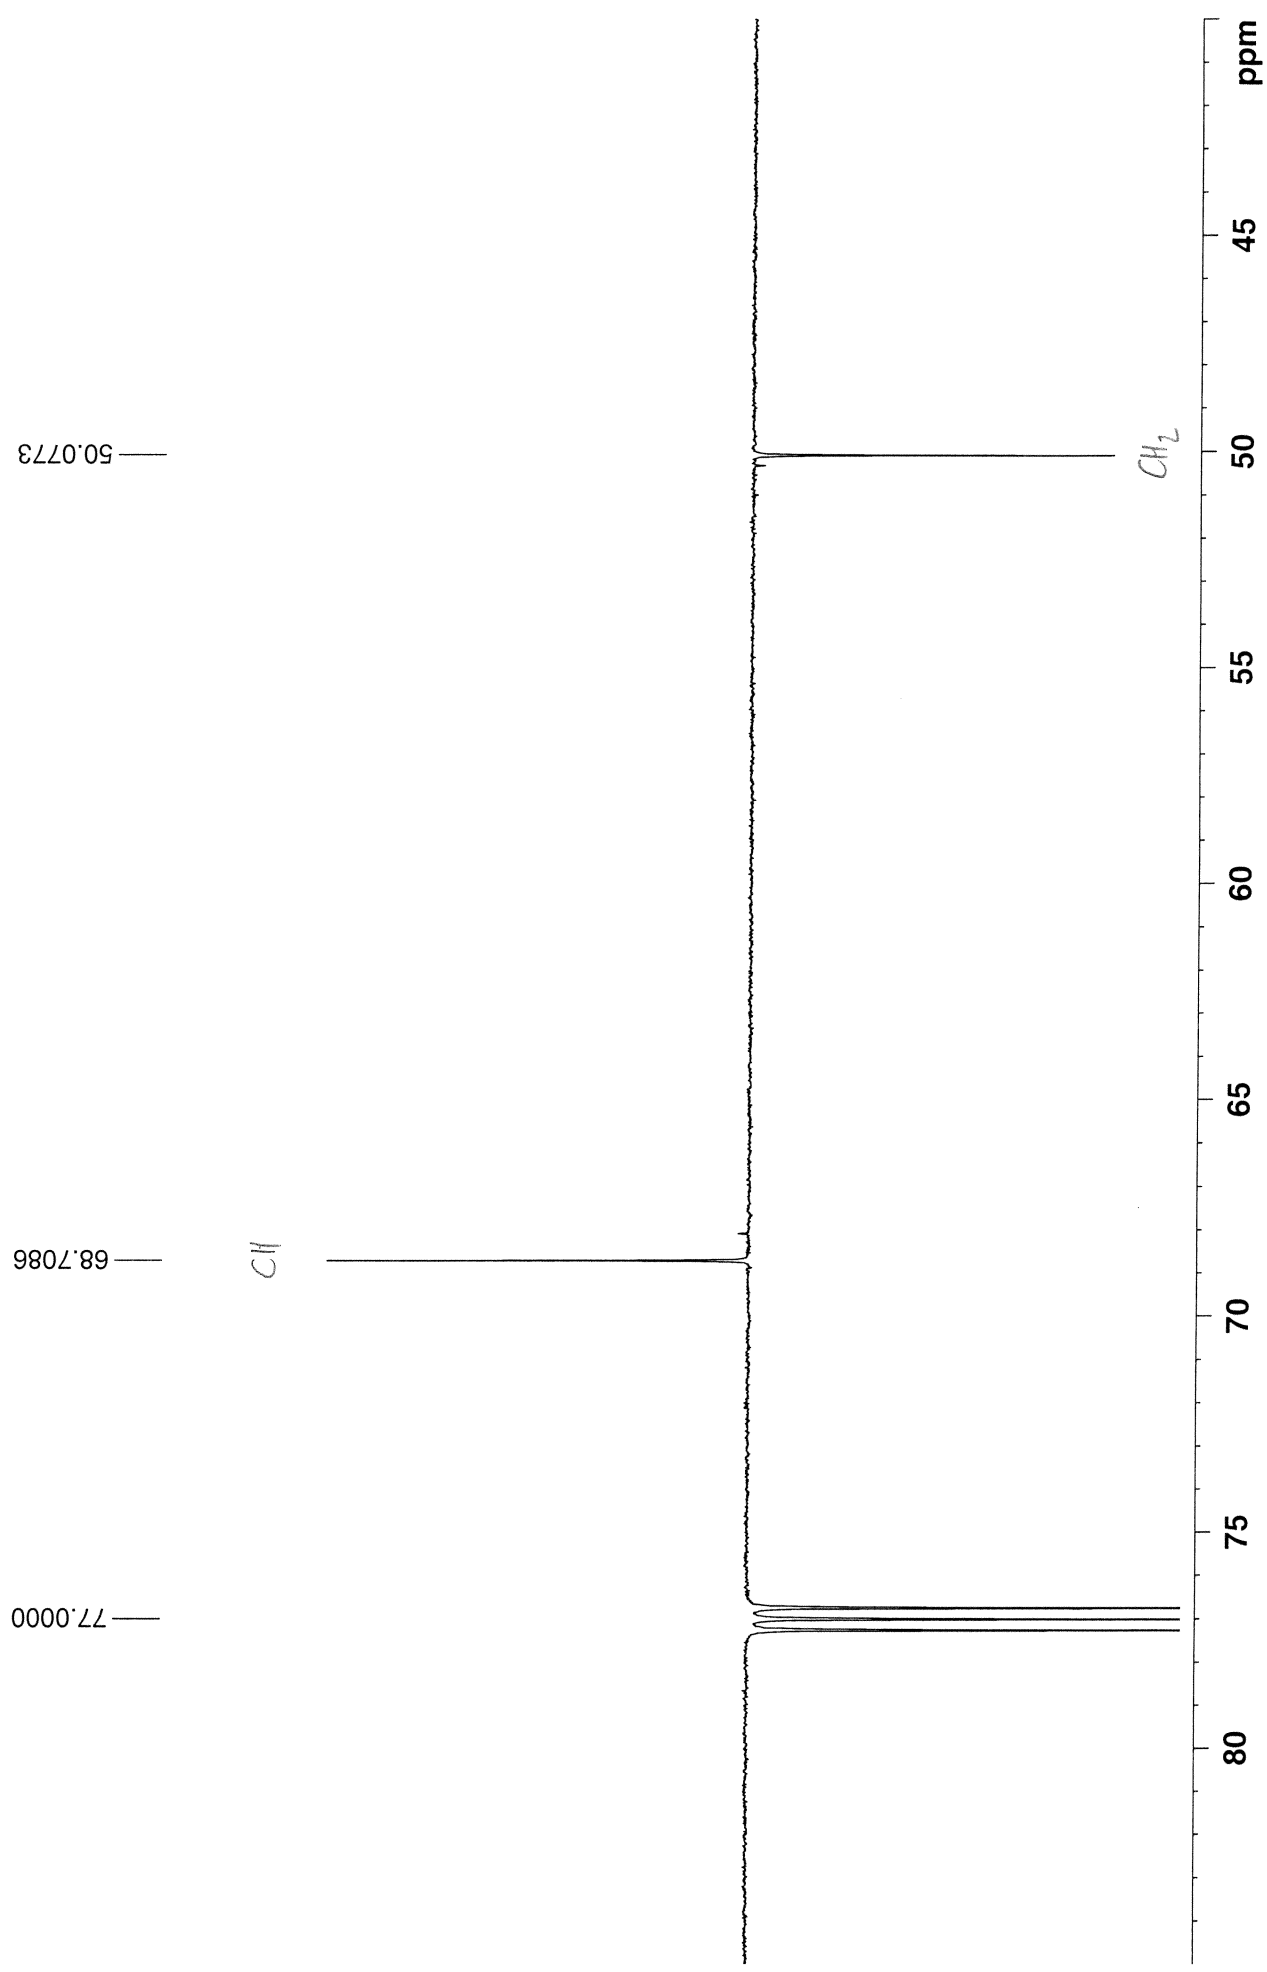

CE167-S1P1 in cdcl3 (HSQC) 6.9.2018

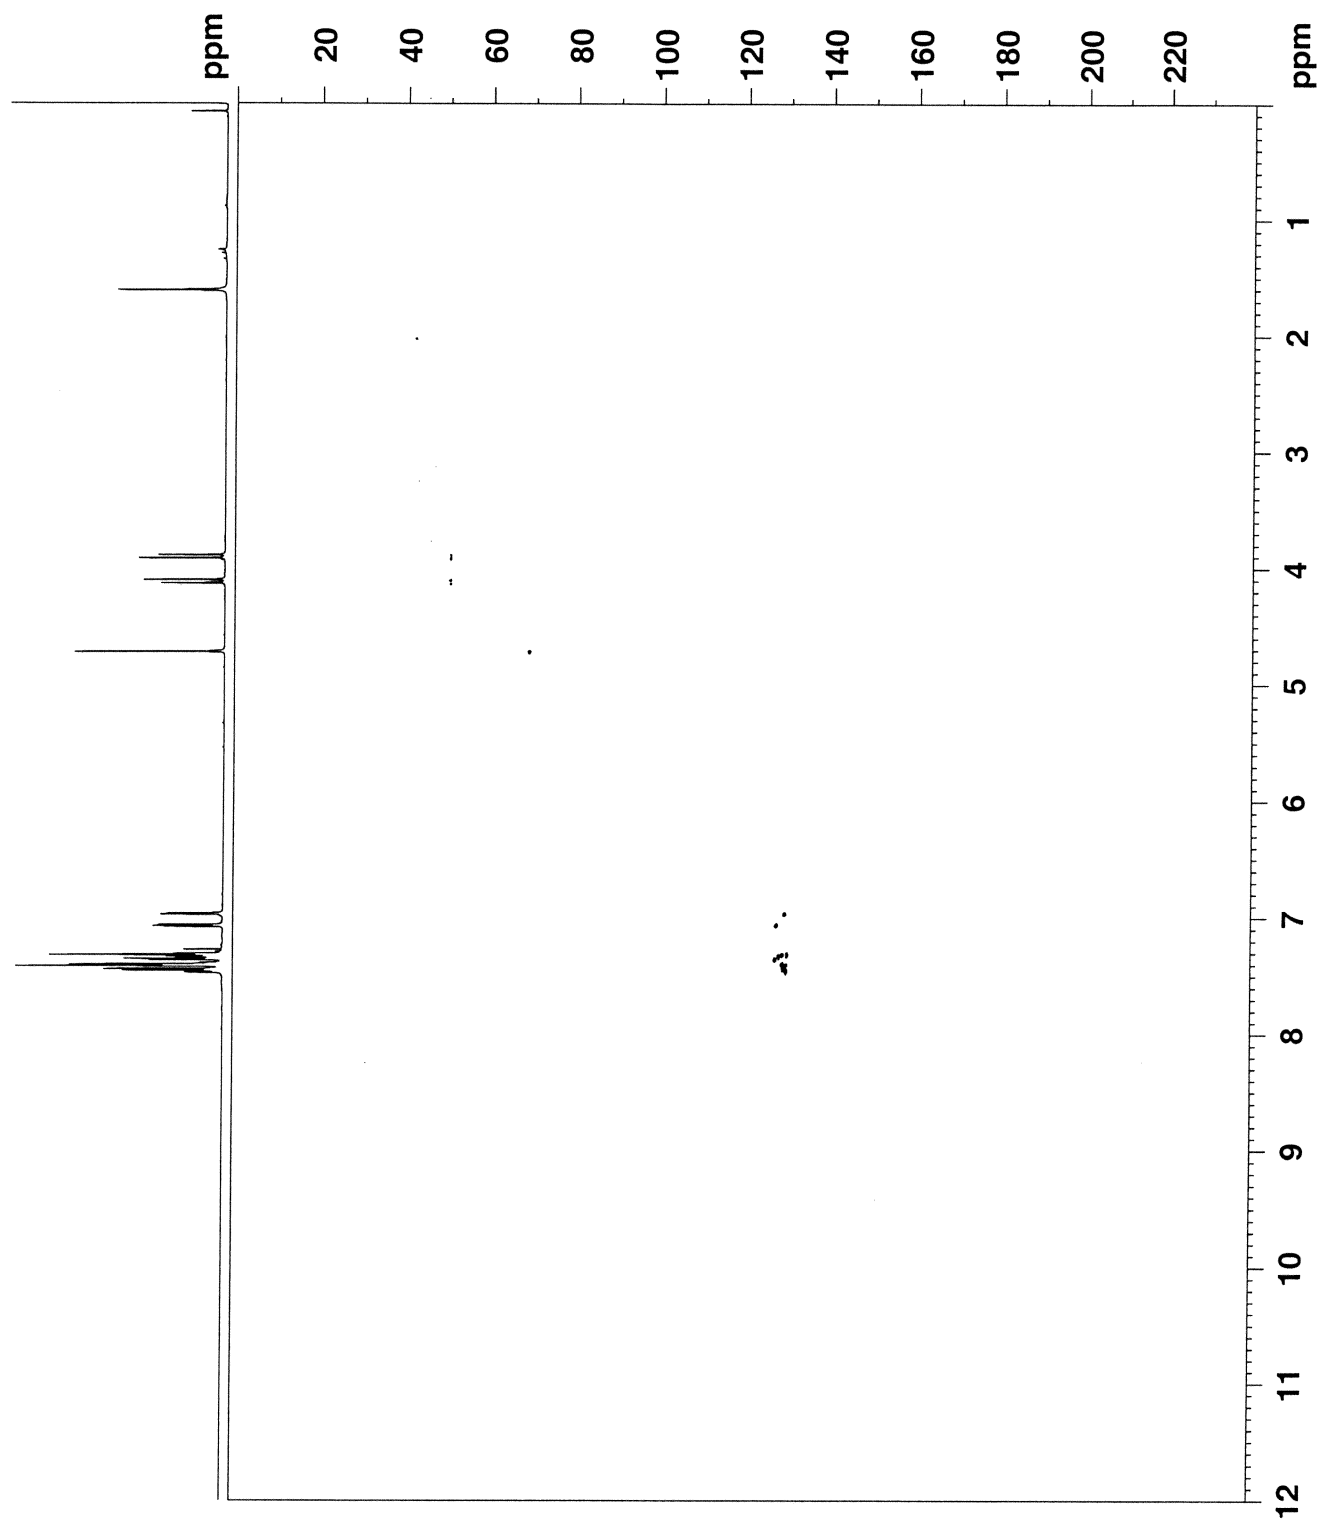

CE167-S1P1 in cdcl3 (HSQC) 6.9.2018

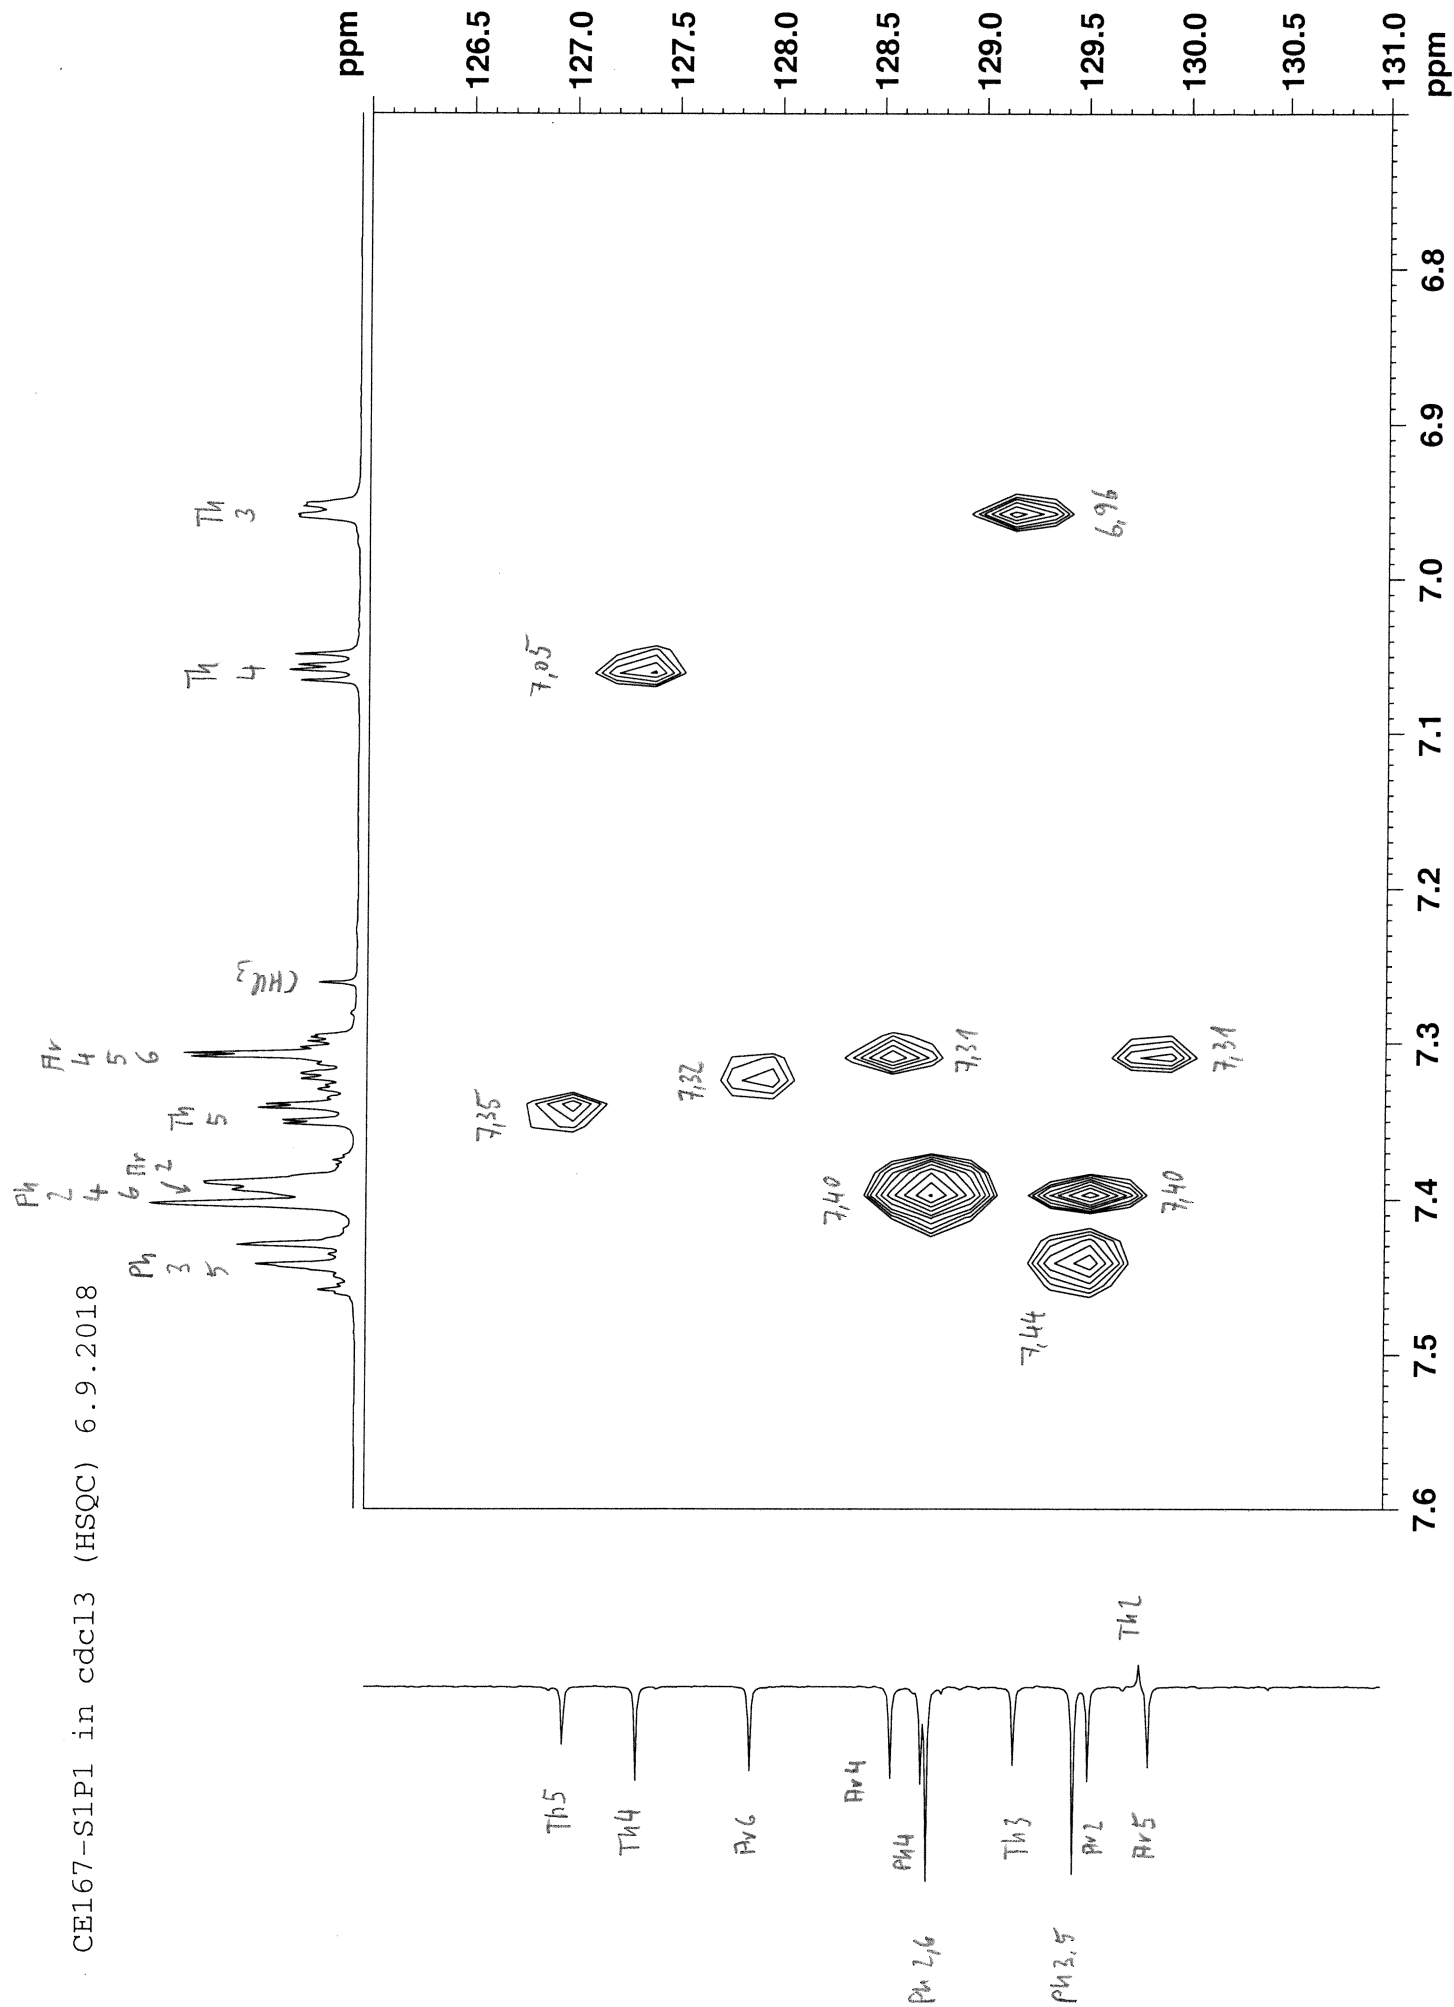



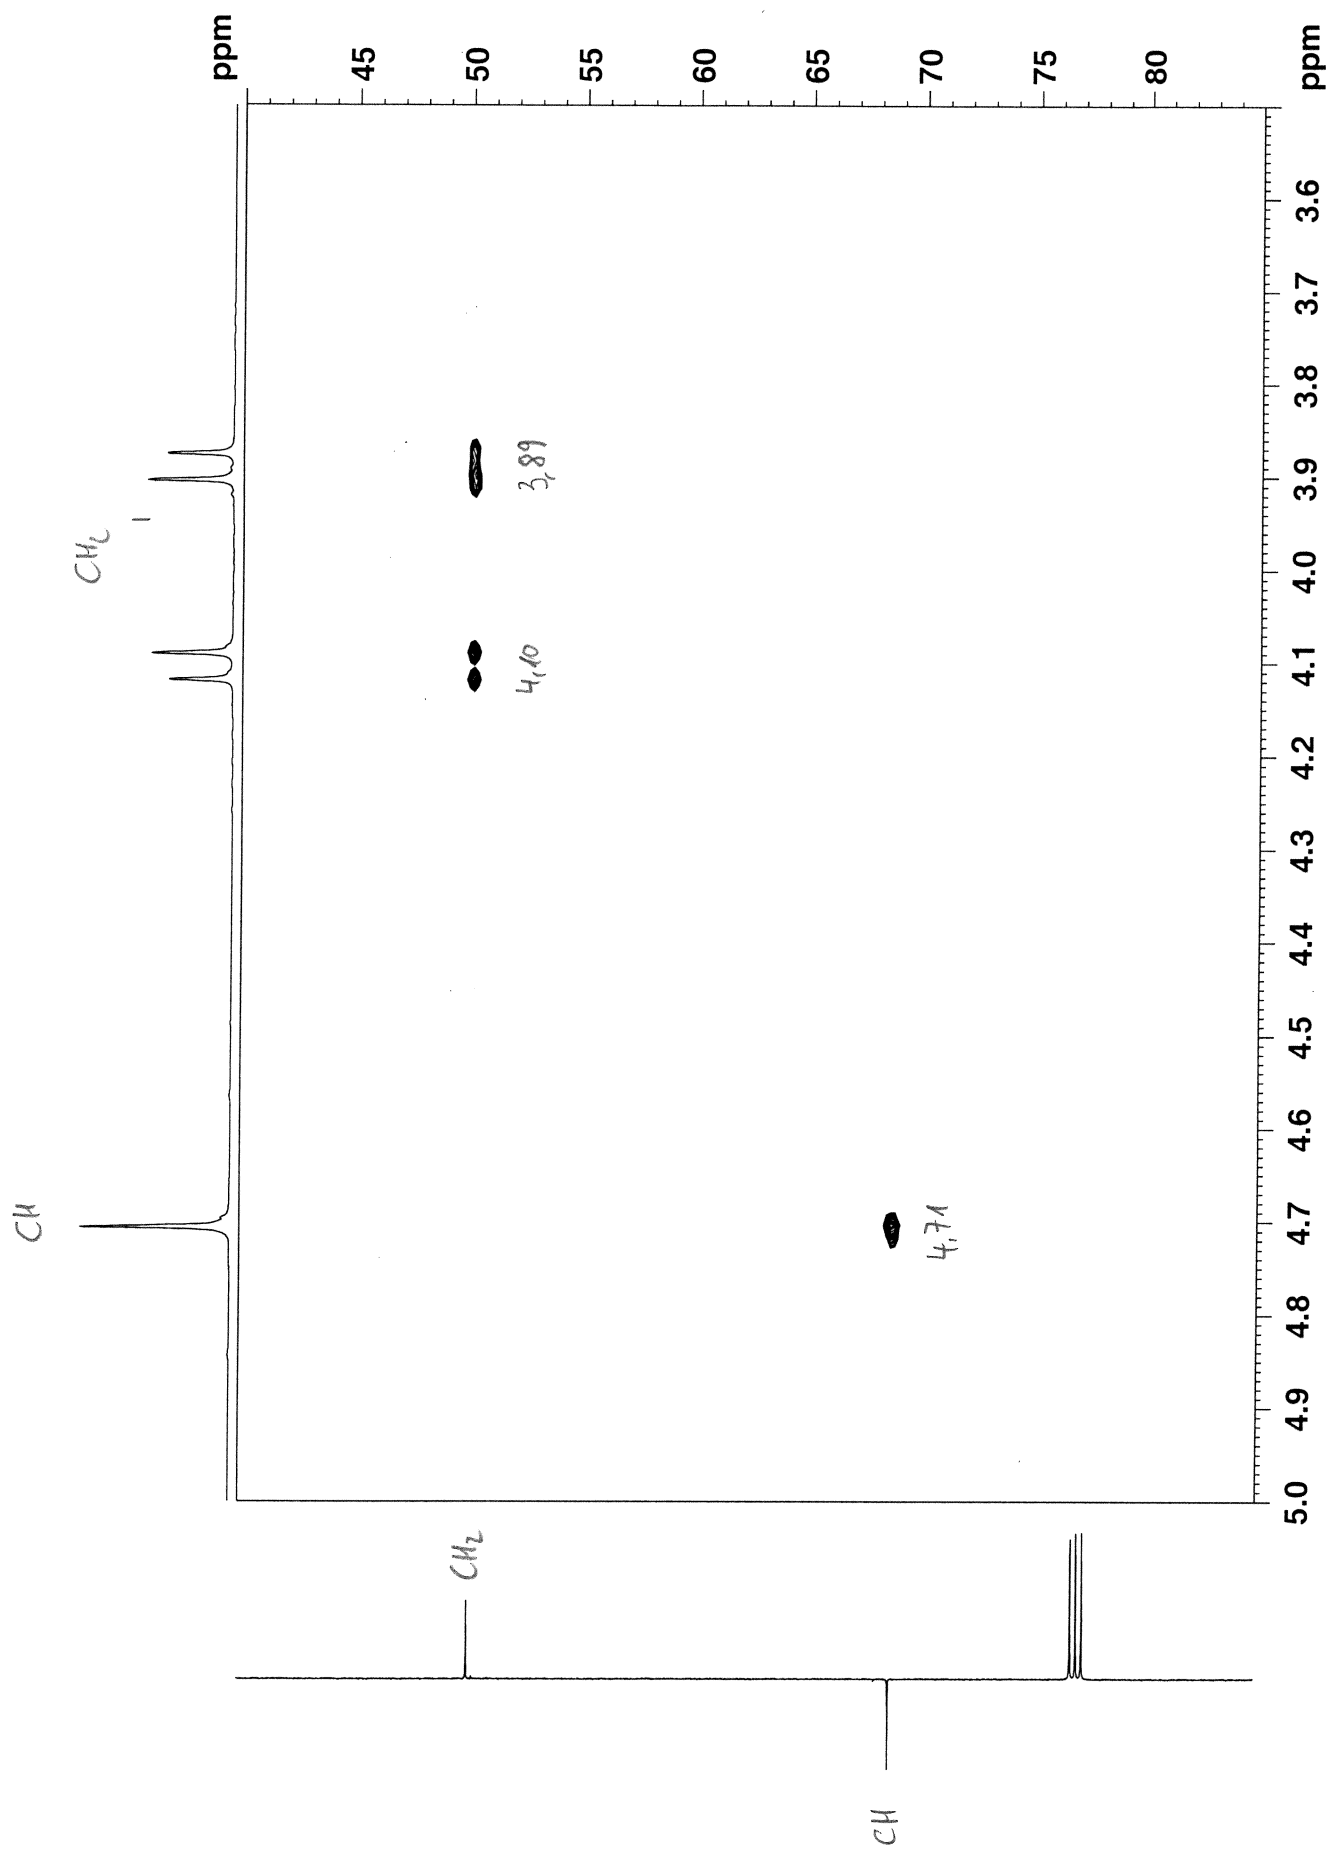

**Figure S18c.** NMR spectra of compound **6e**.

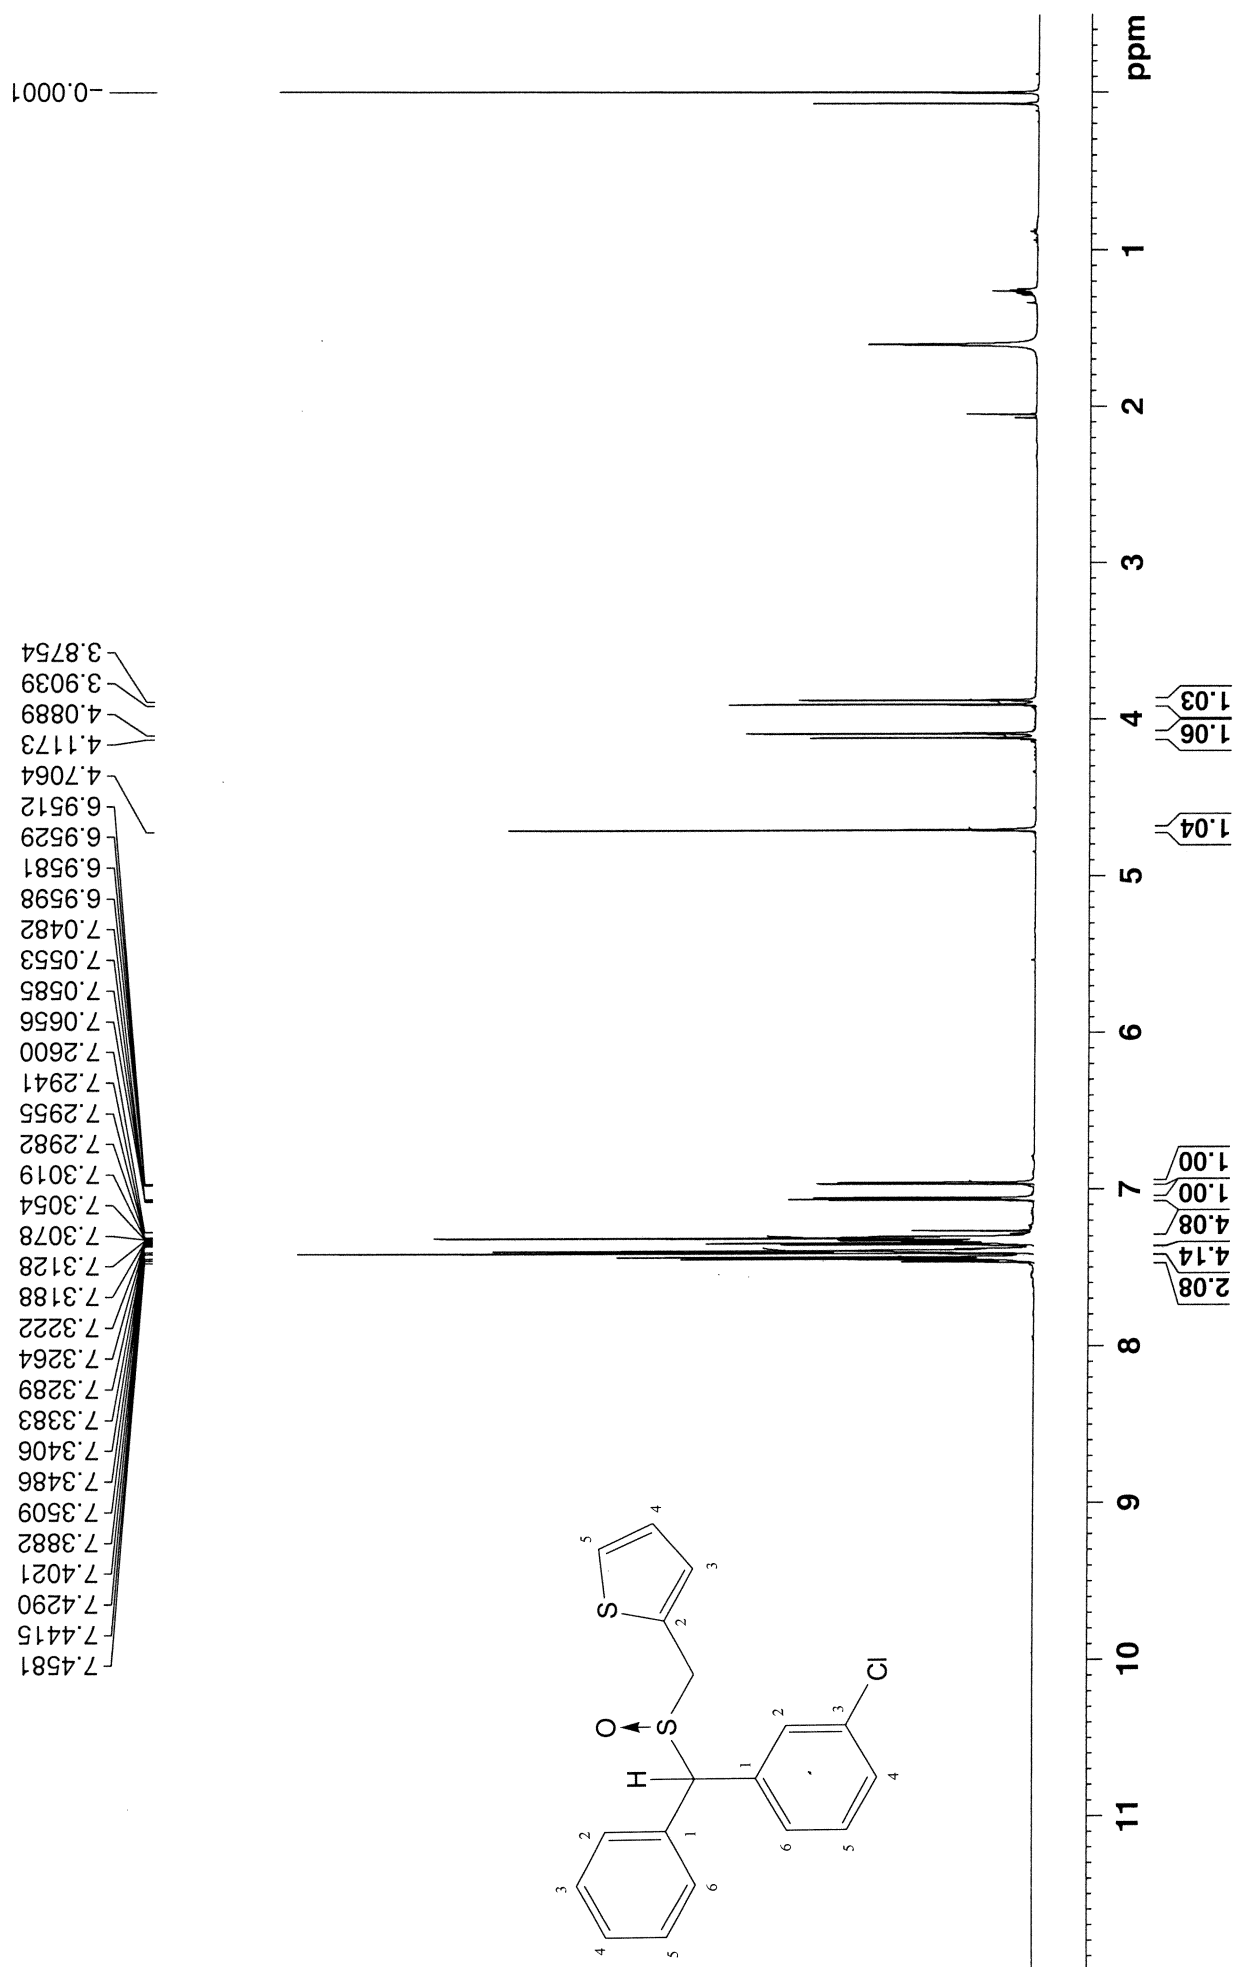

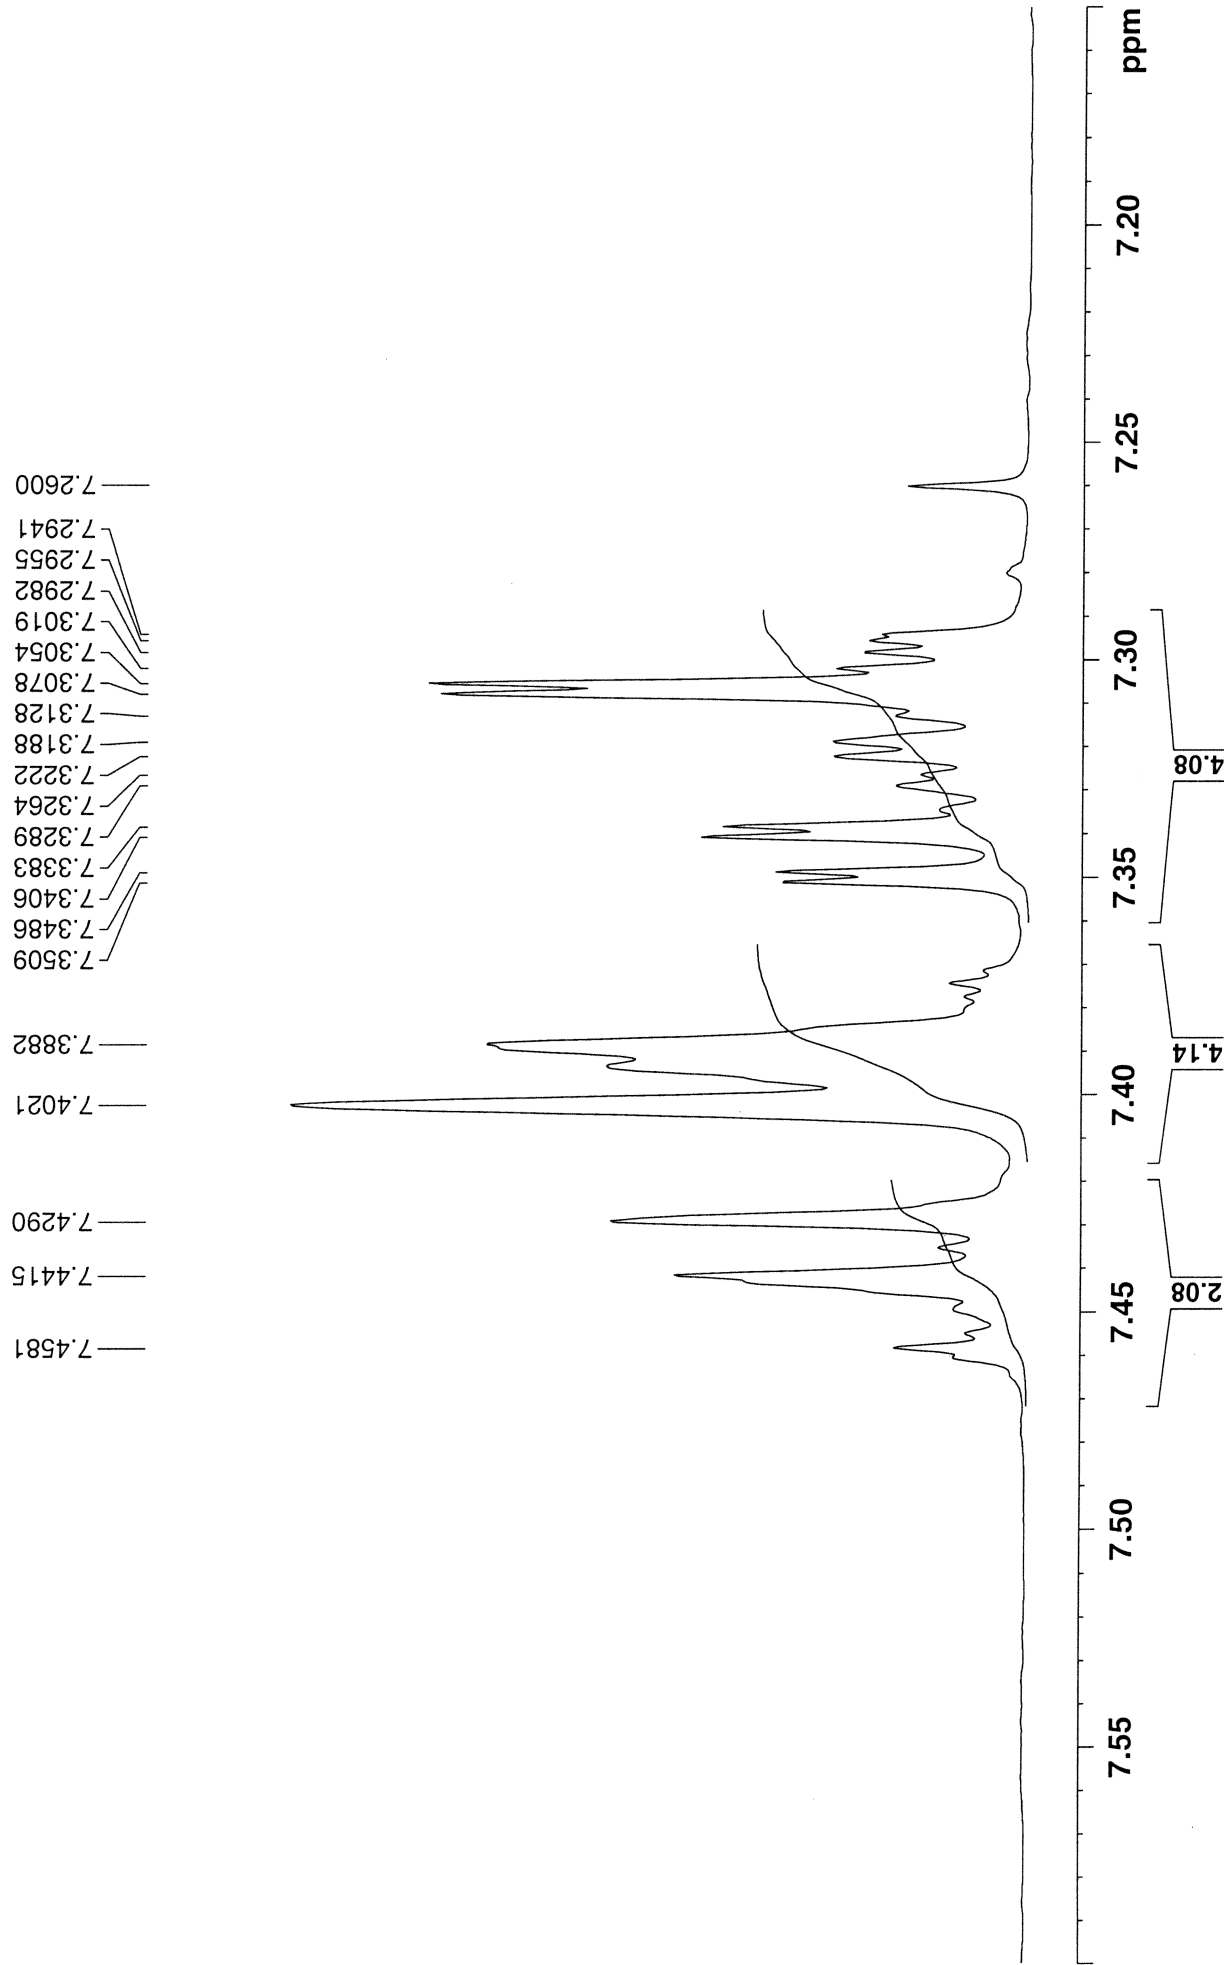

— 7.0656  
— 7.0585  
— 7.0553  
— 7.0482

— 6.9598  
— 6.9581  
— 6.9529  
— 6.9512

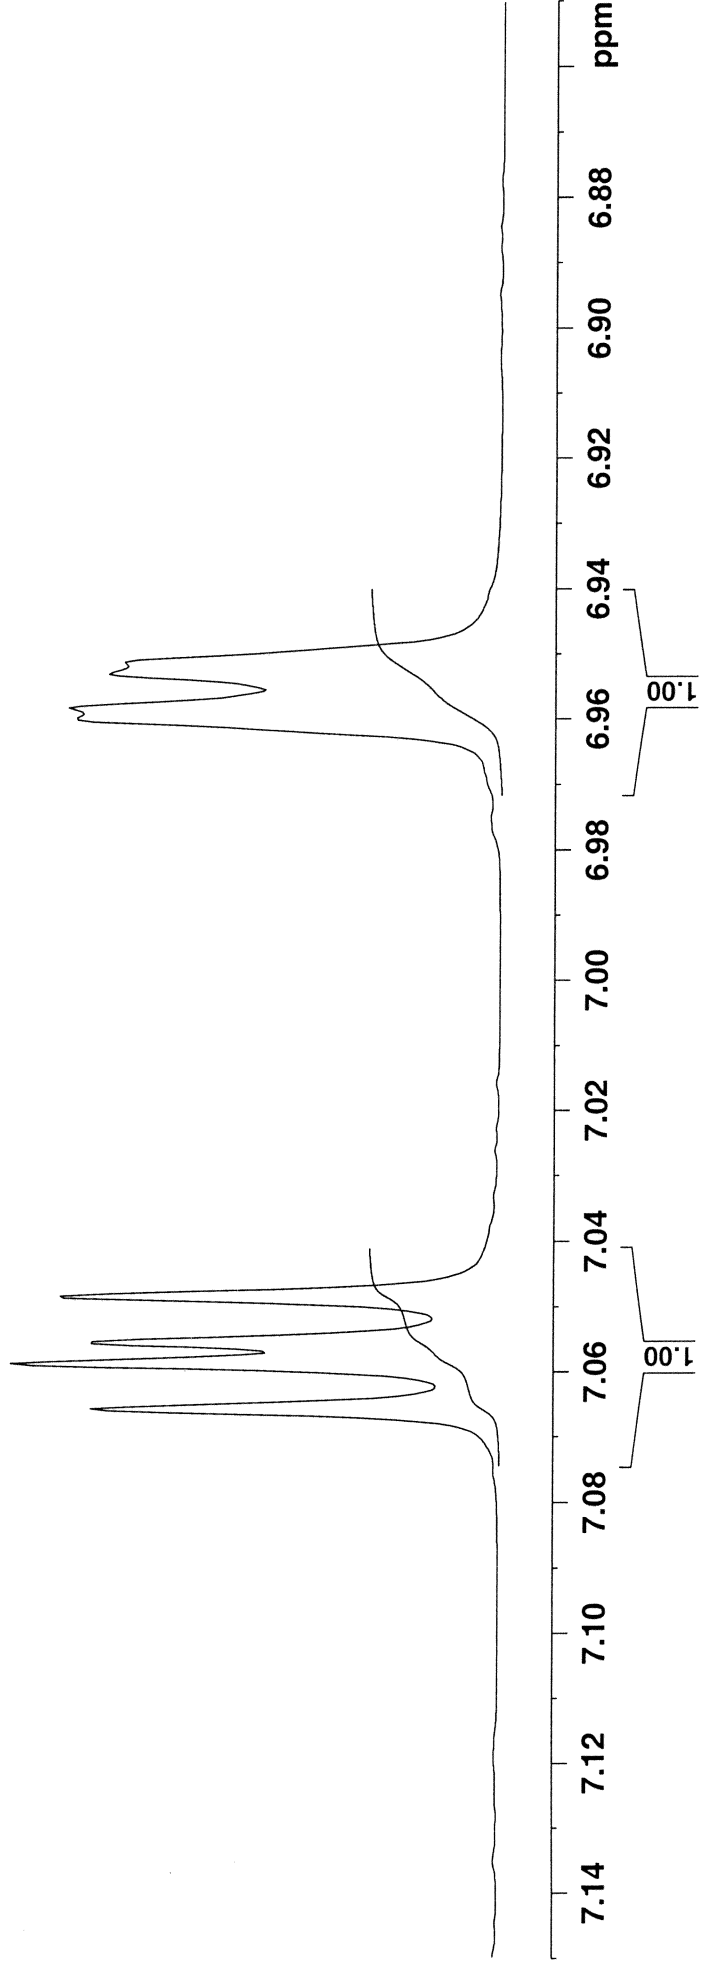

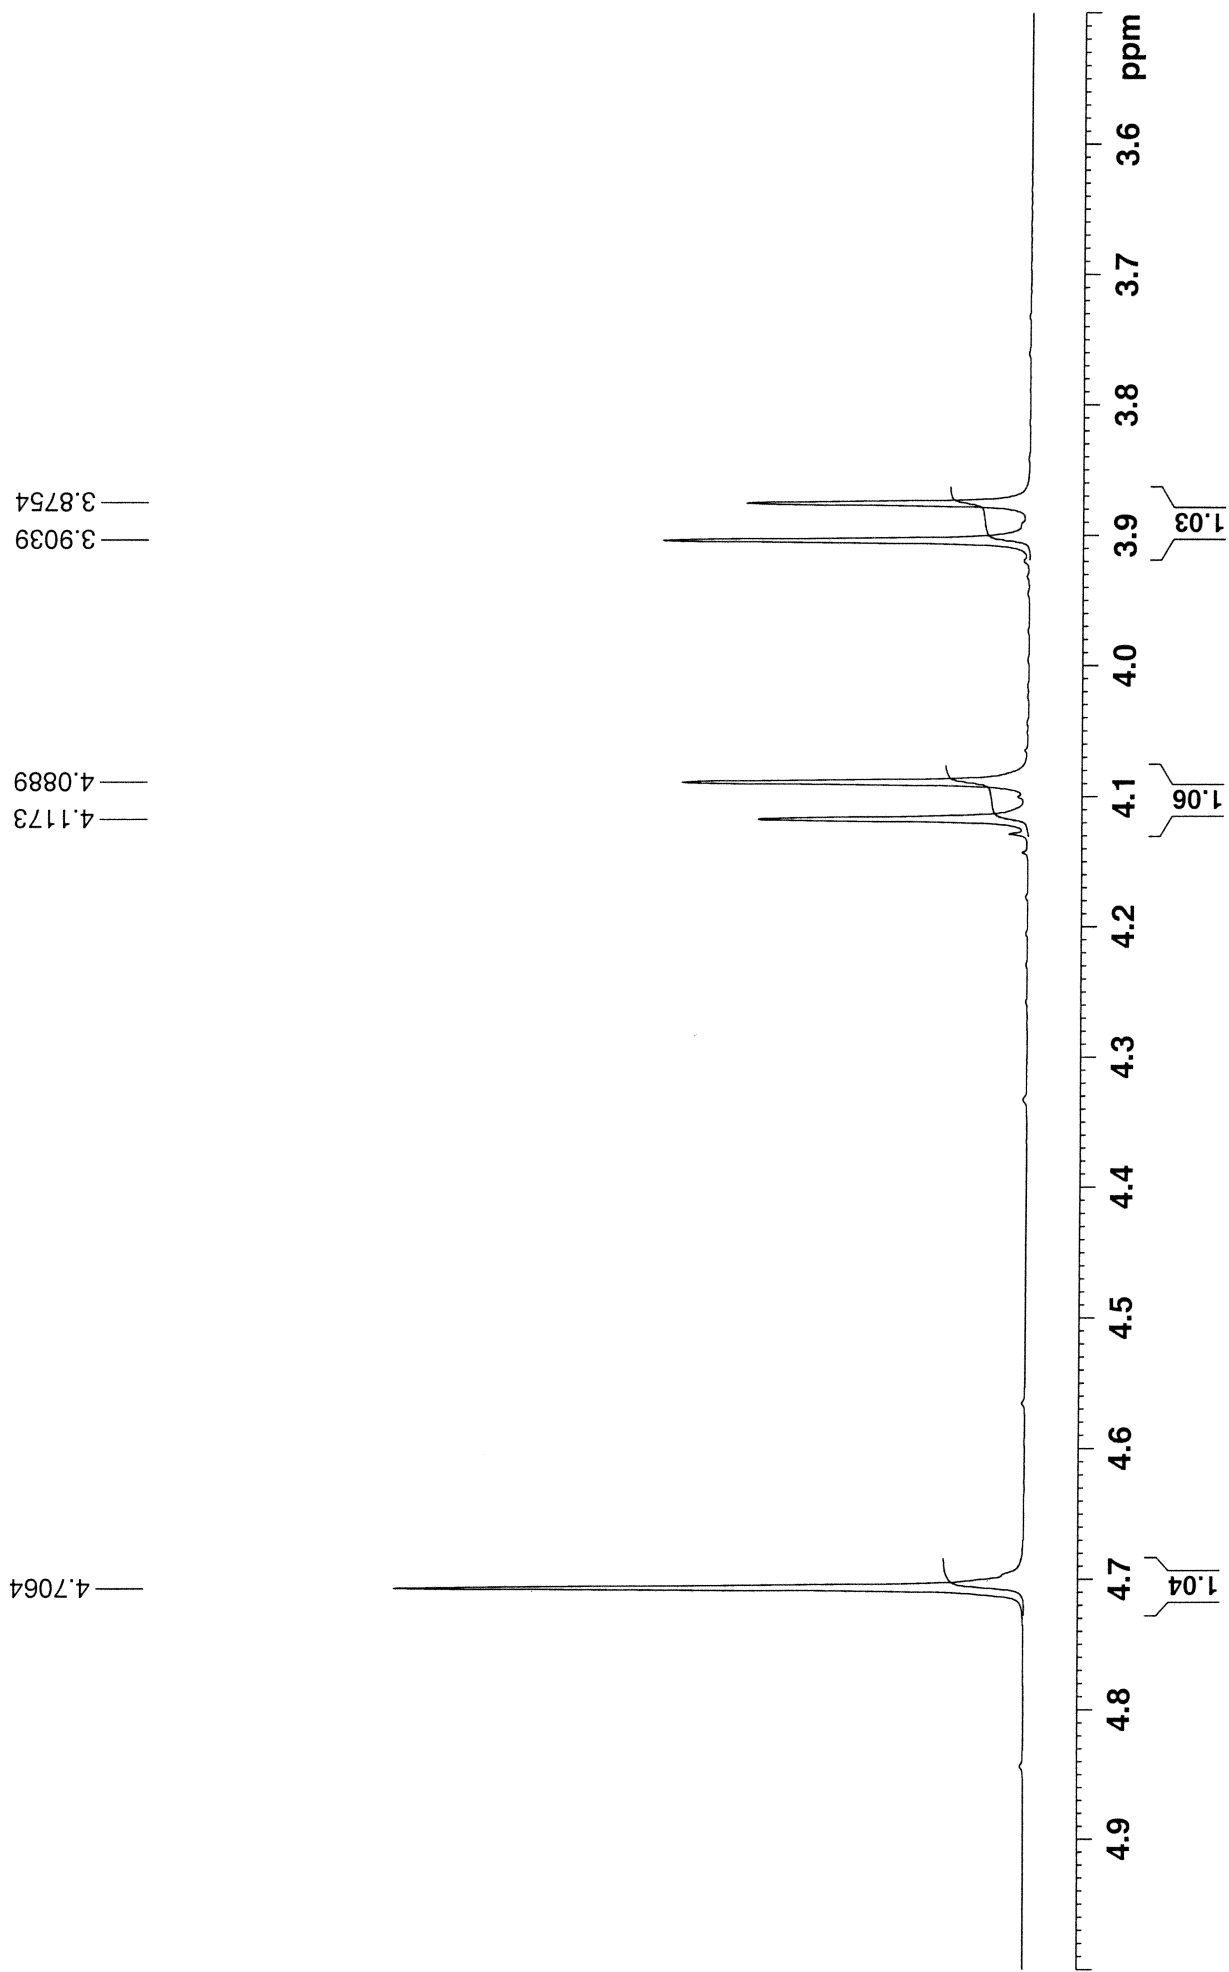

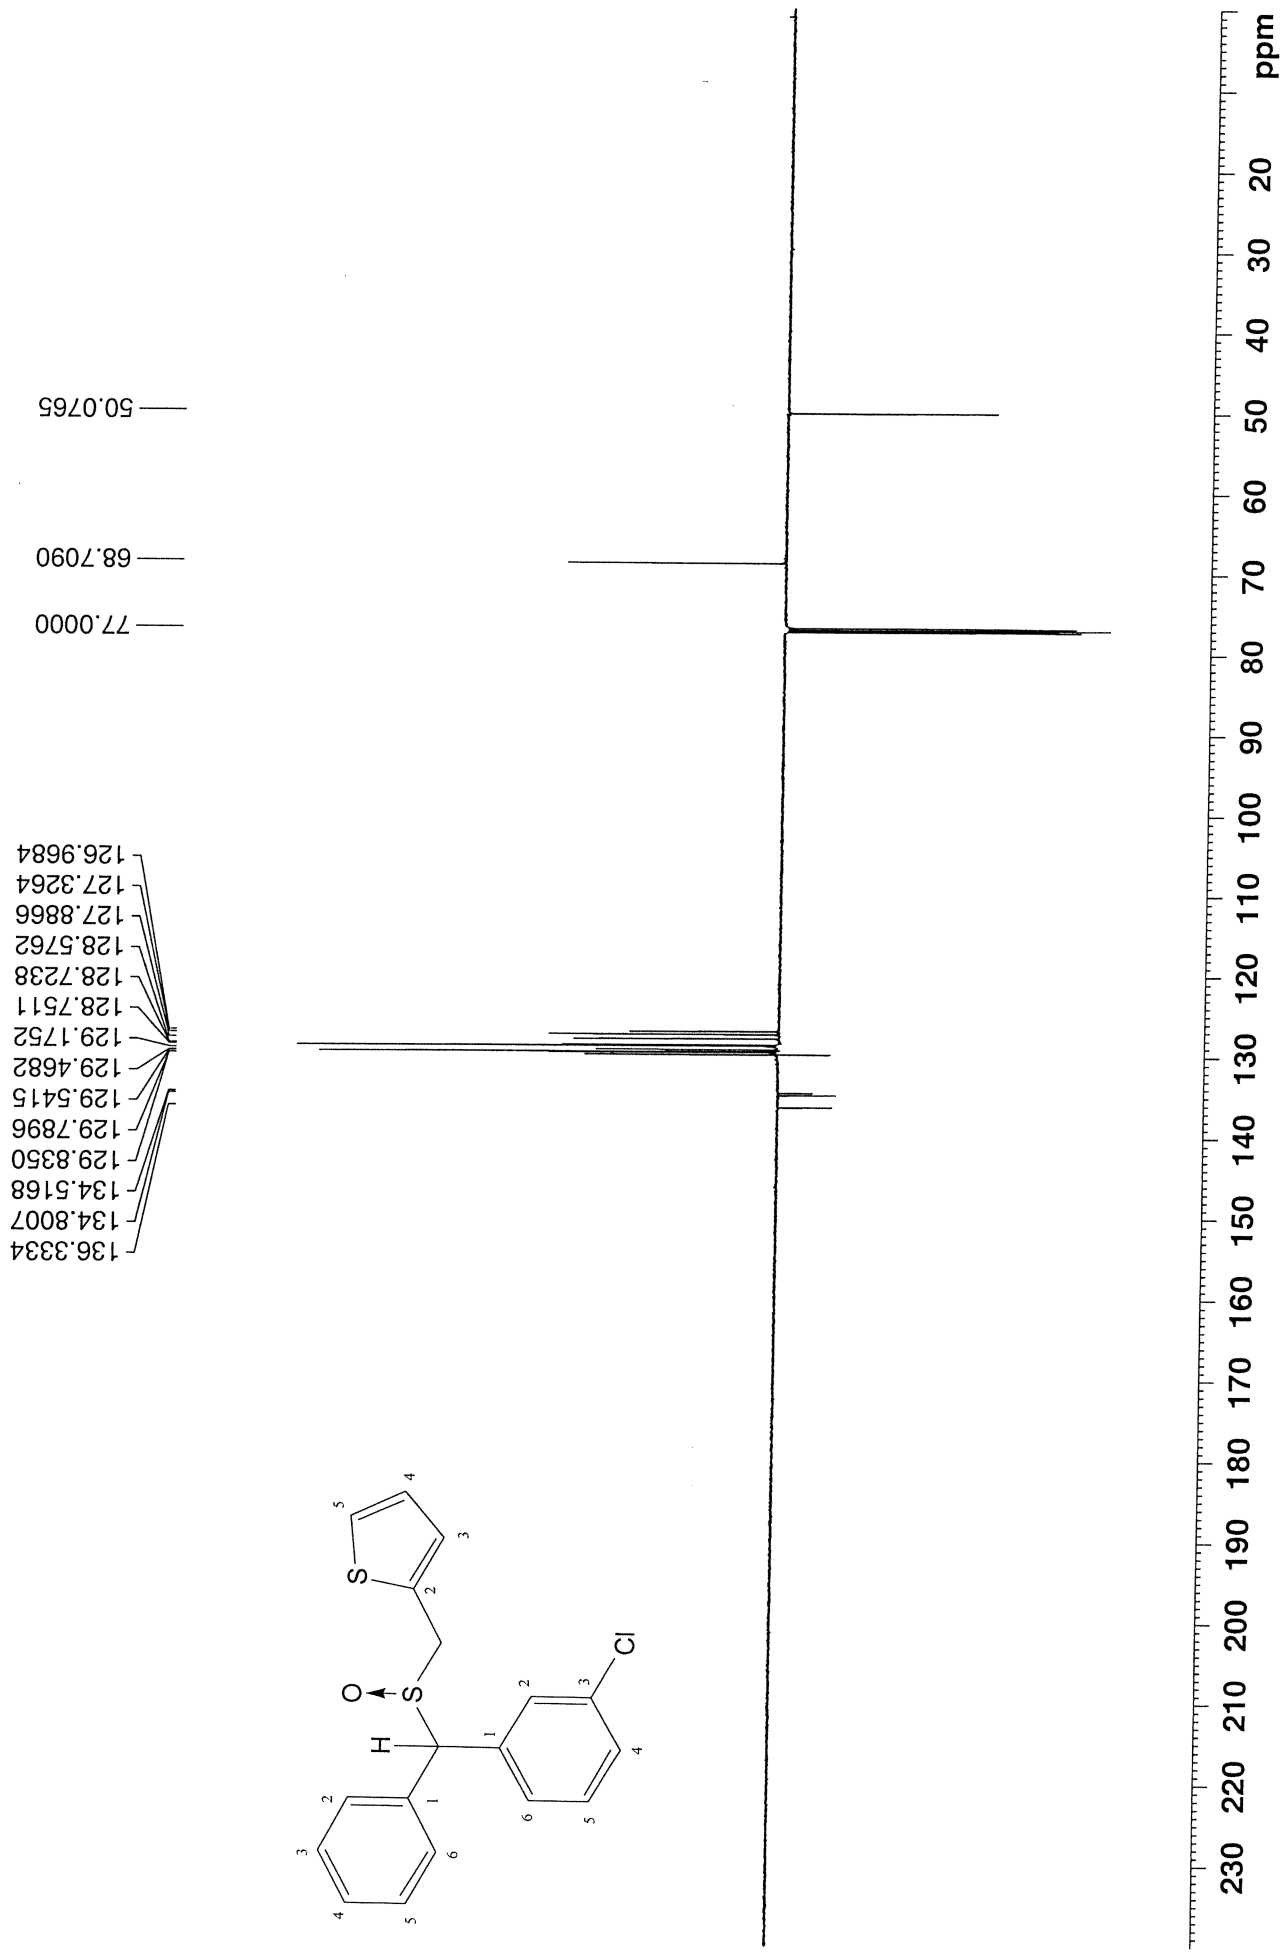

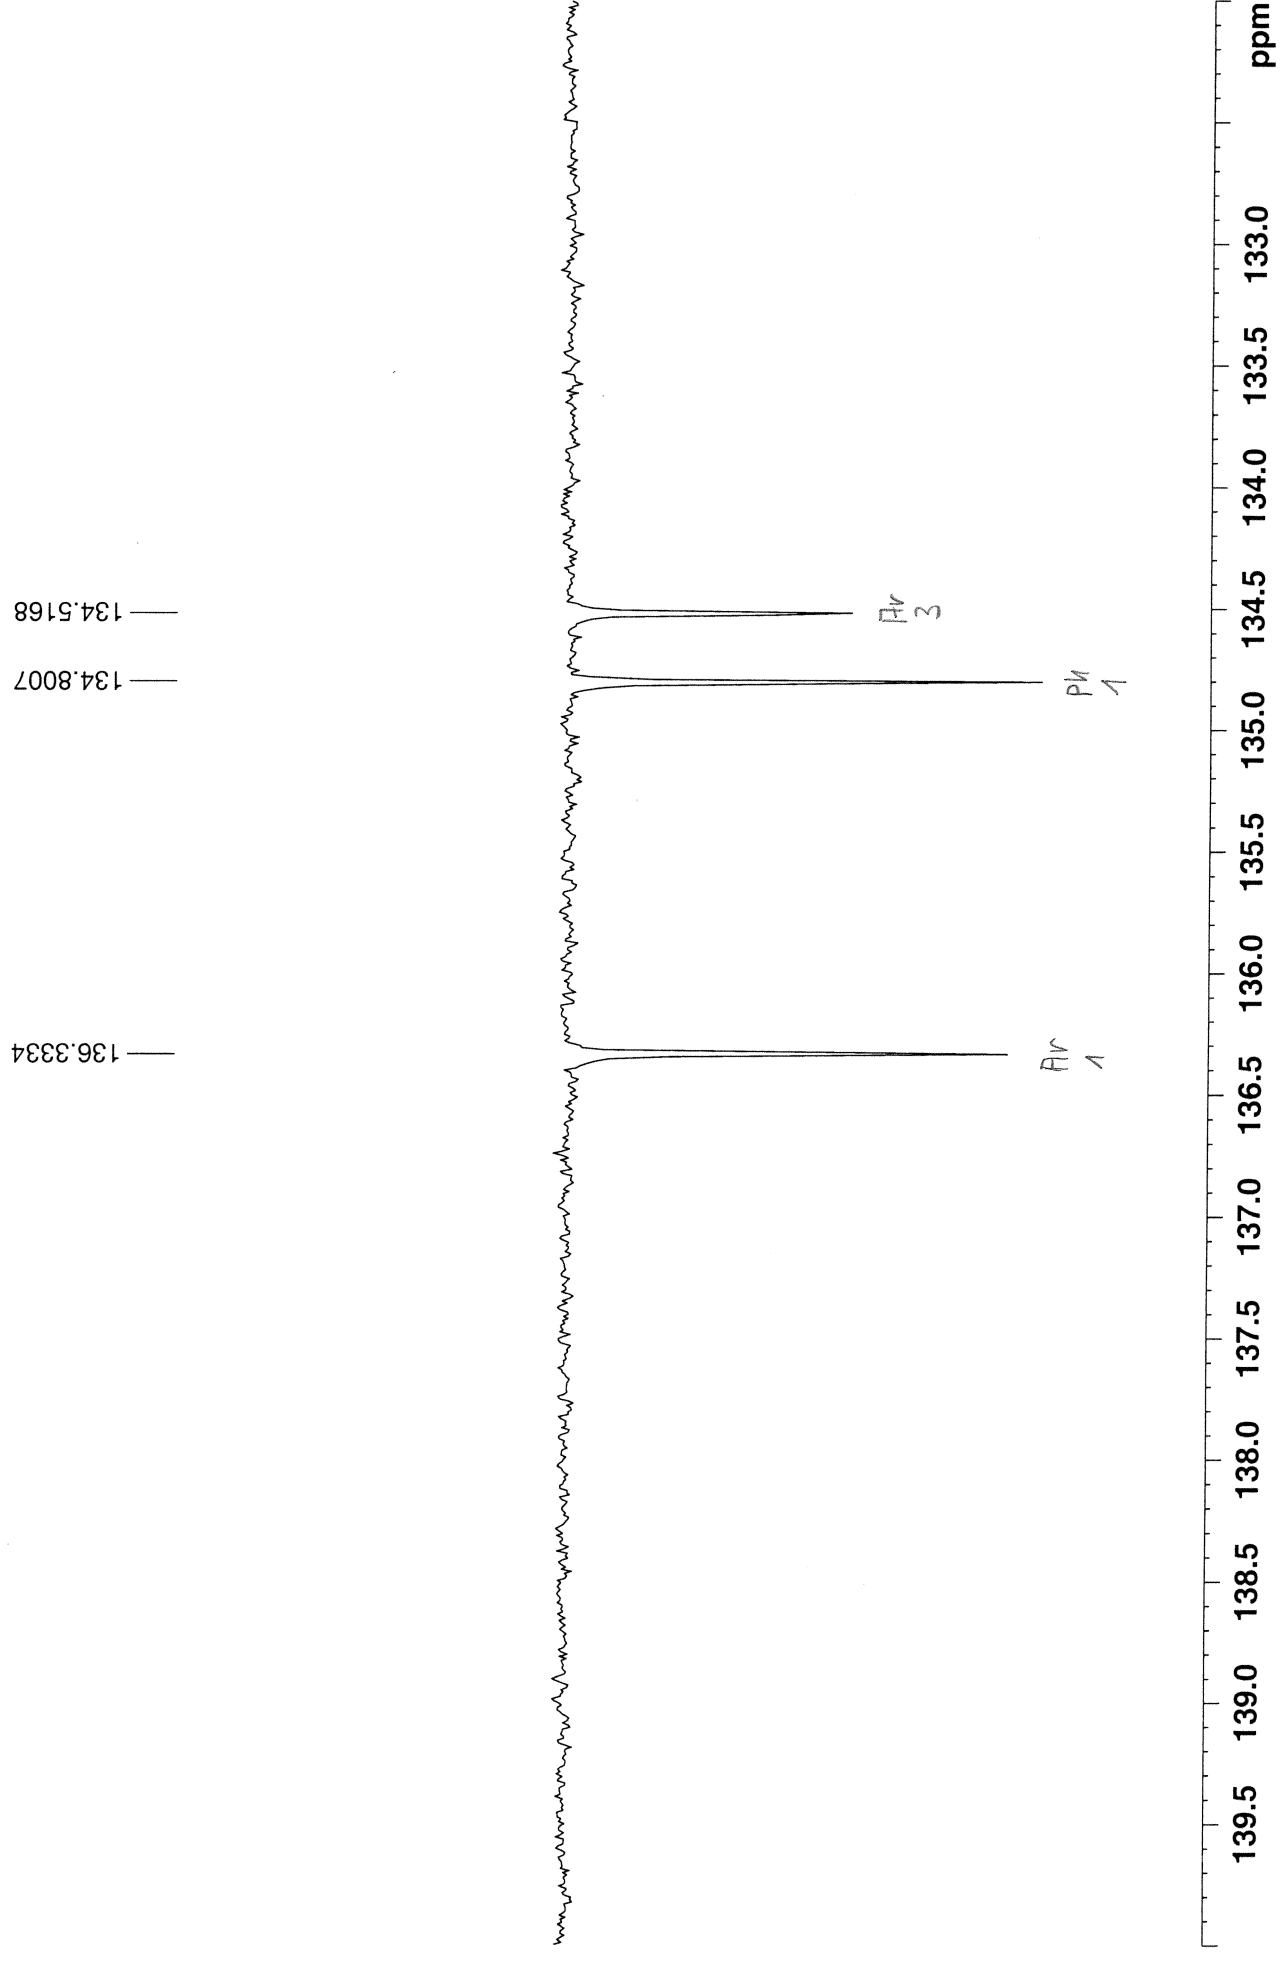

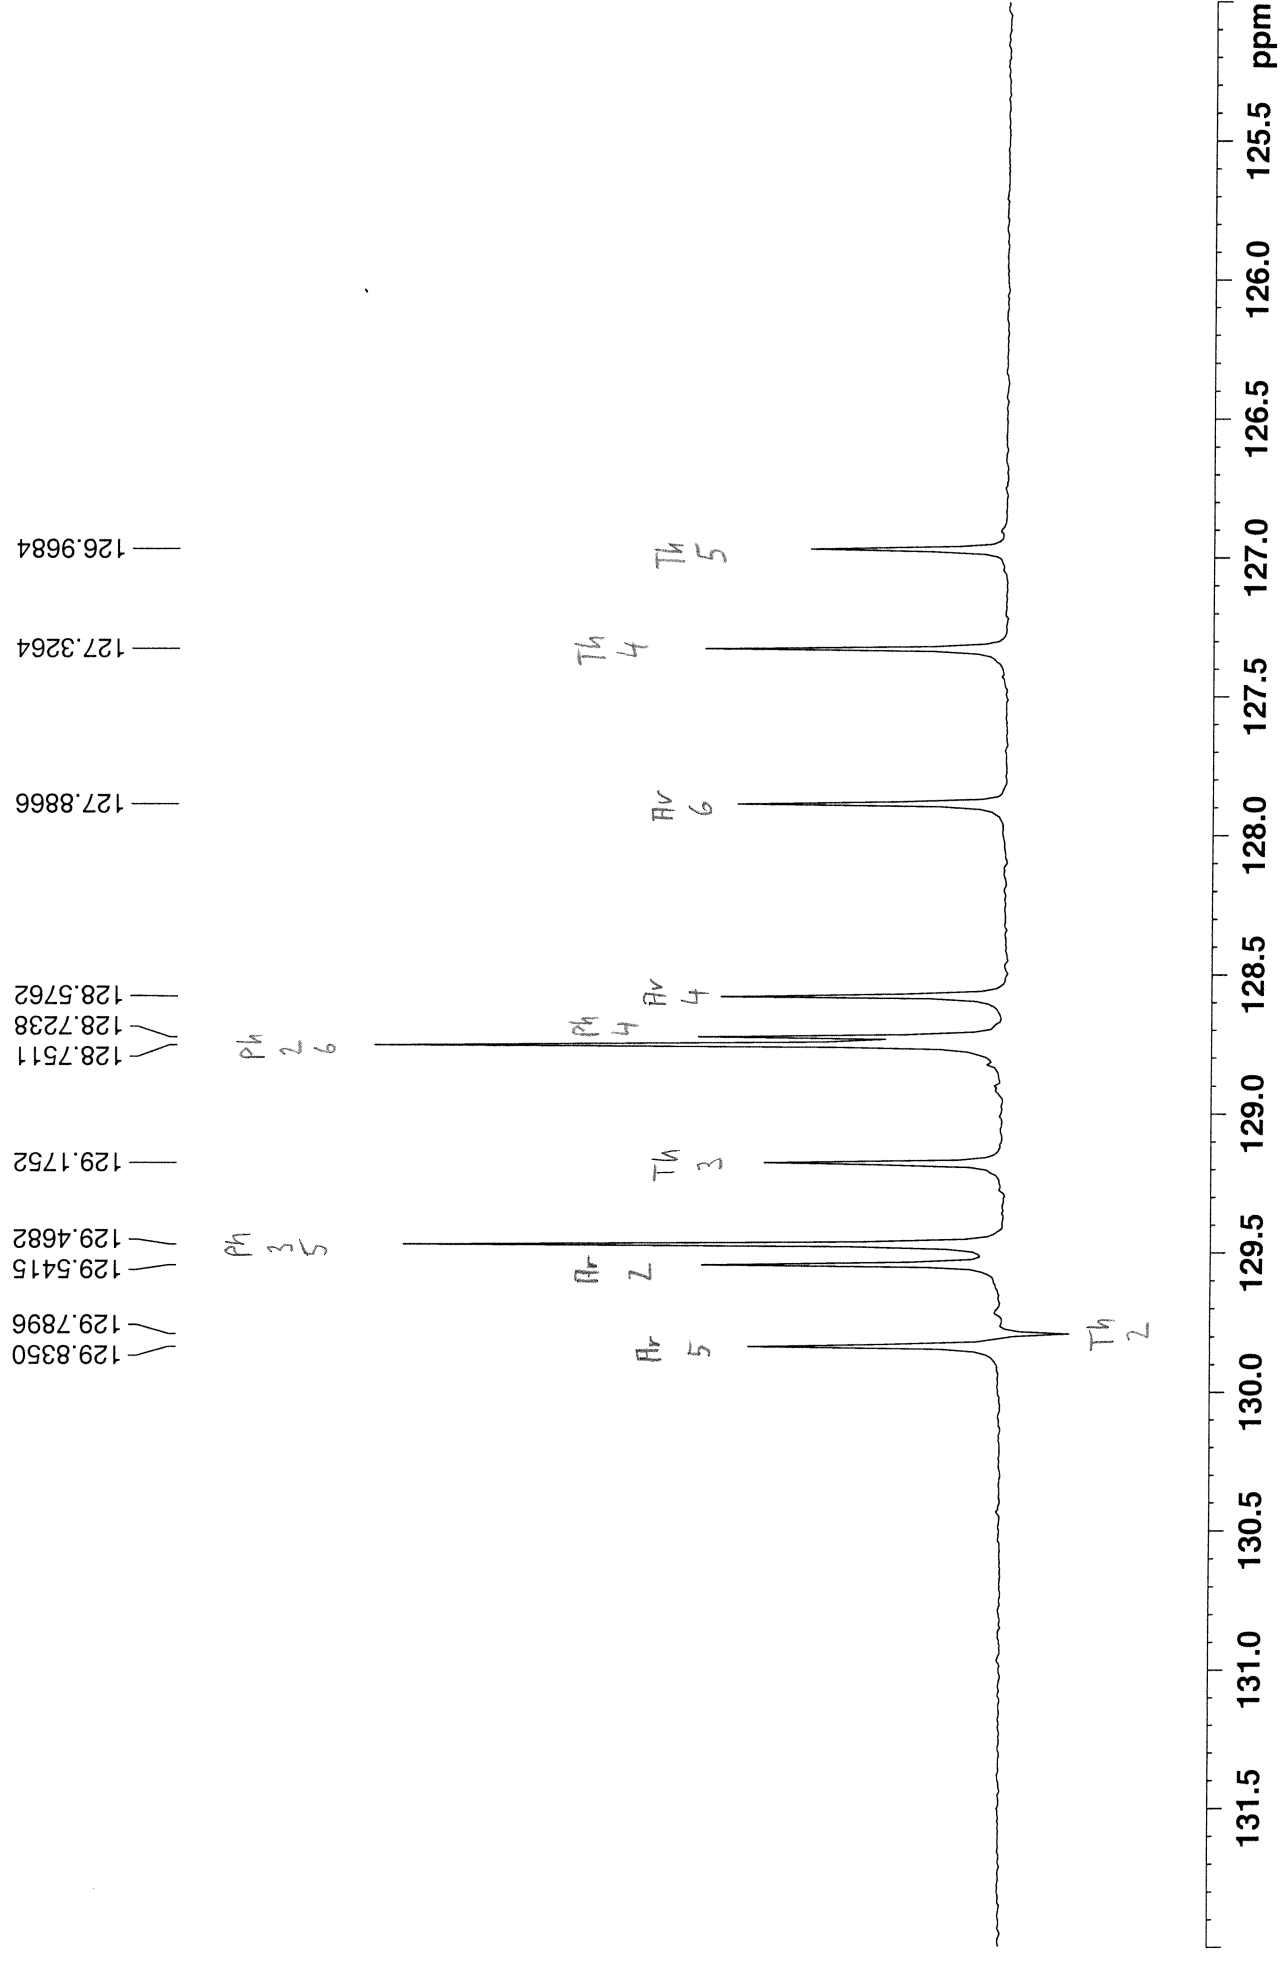



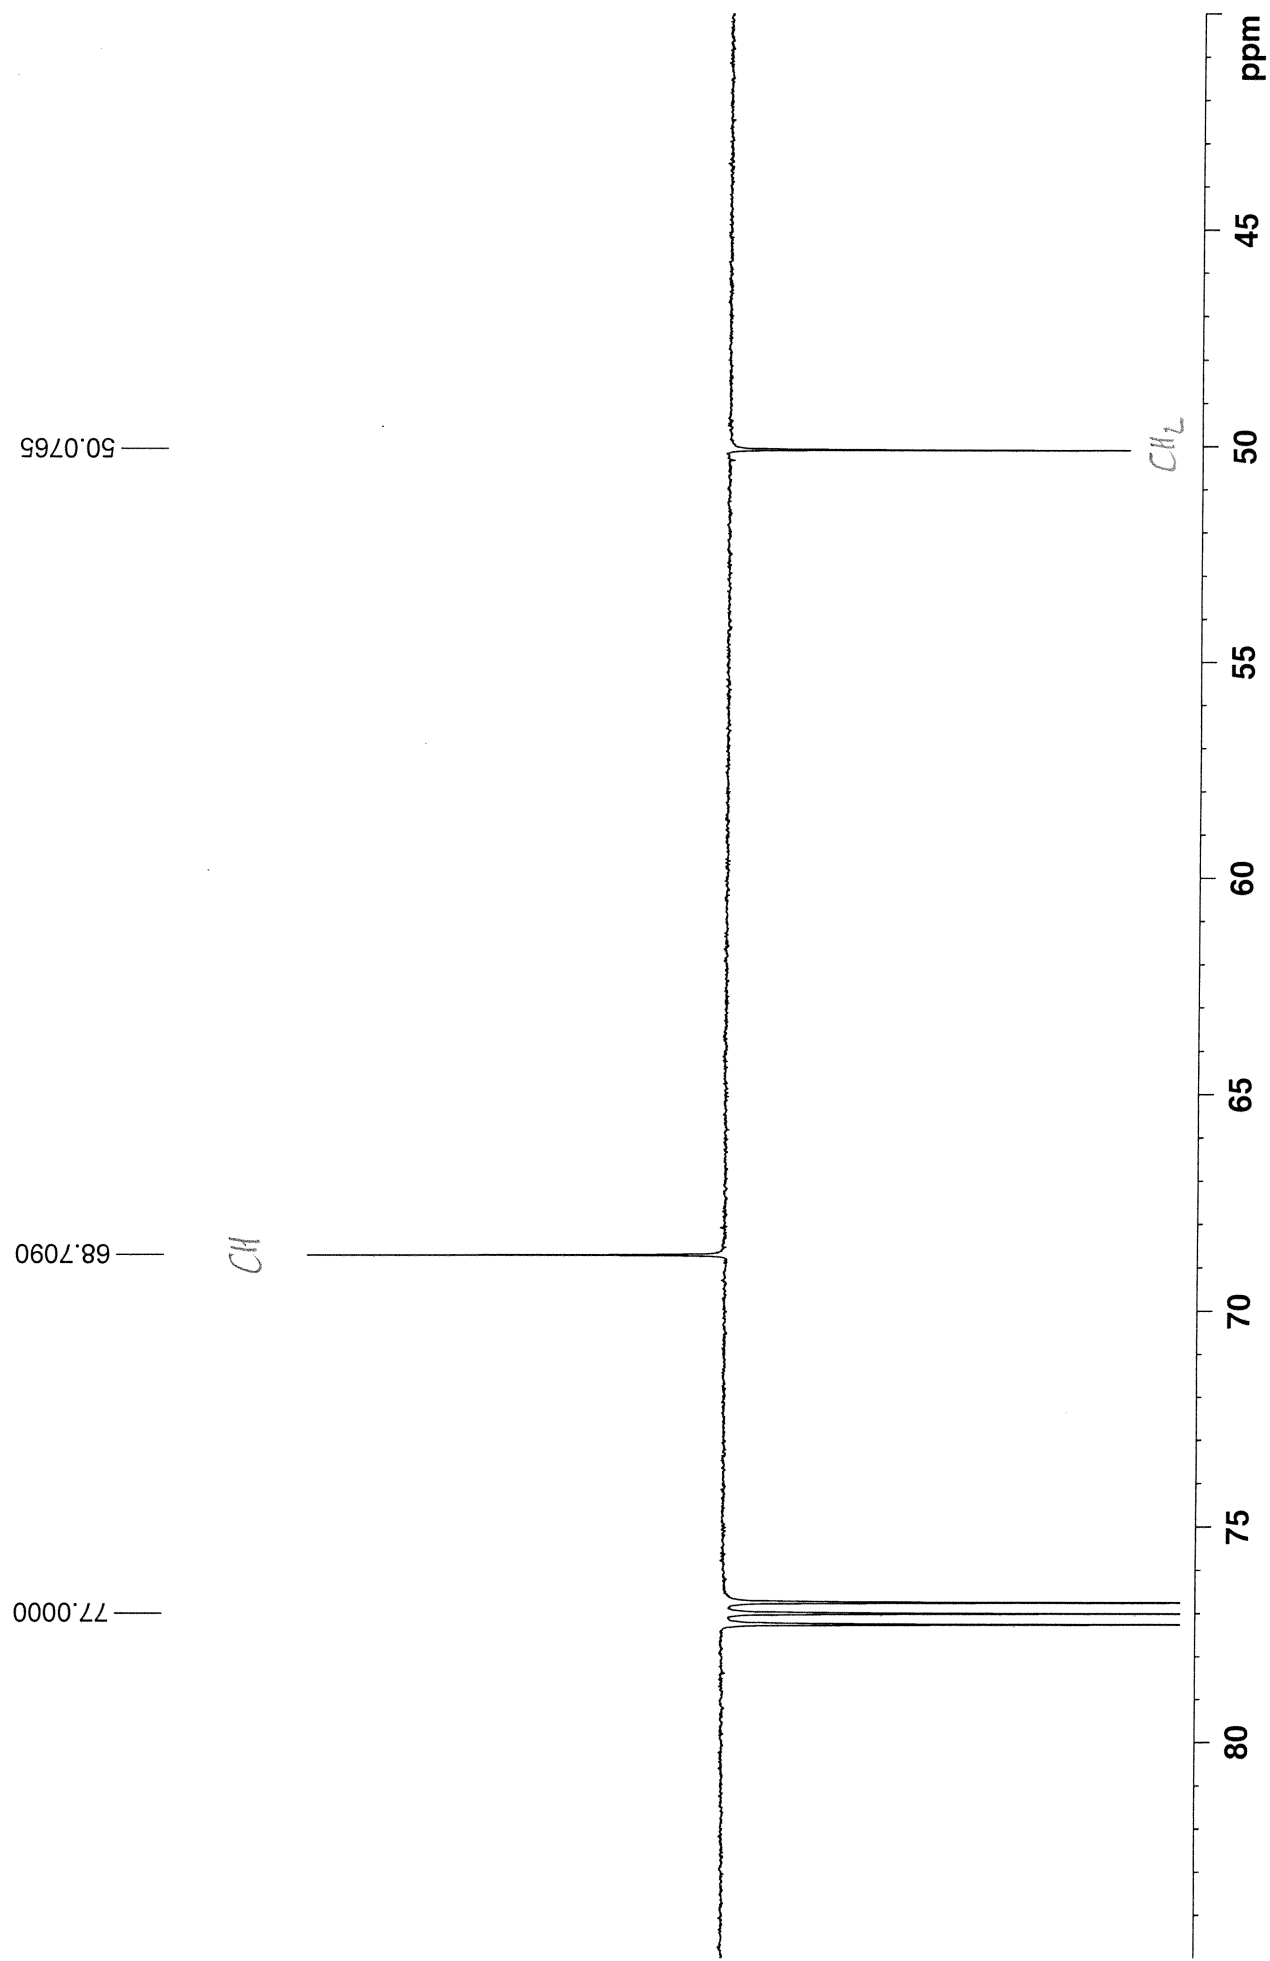

Figure S19c. NMR spectra of compound 7e.

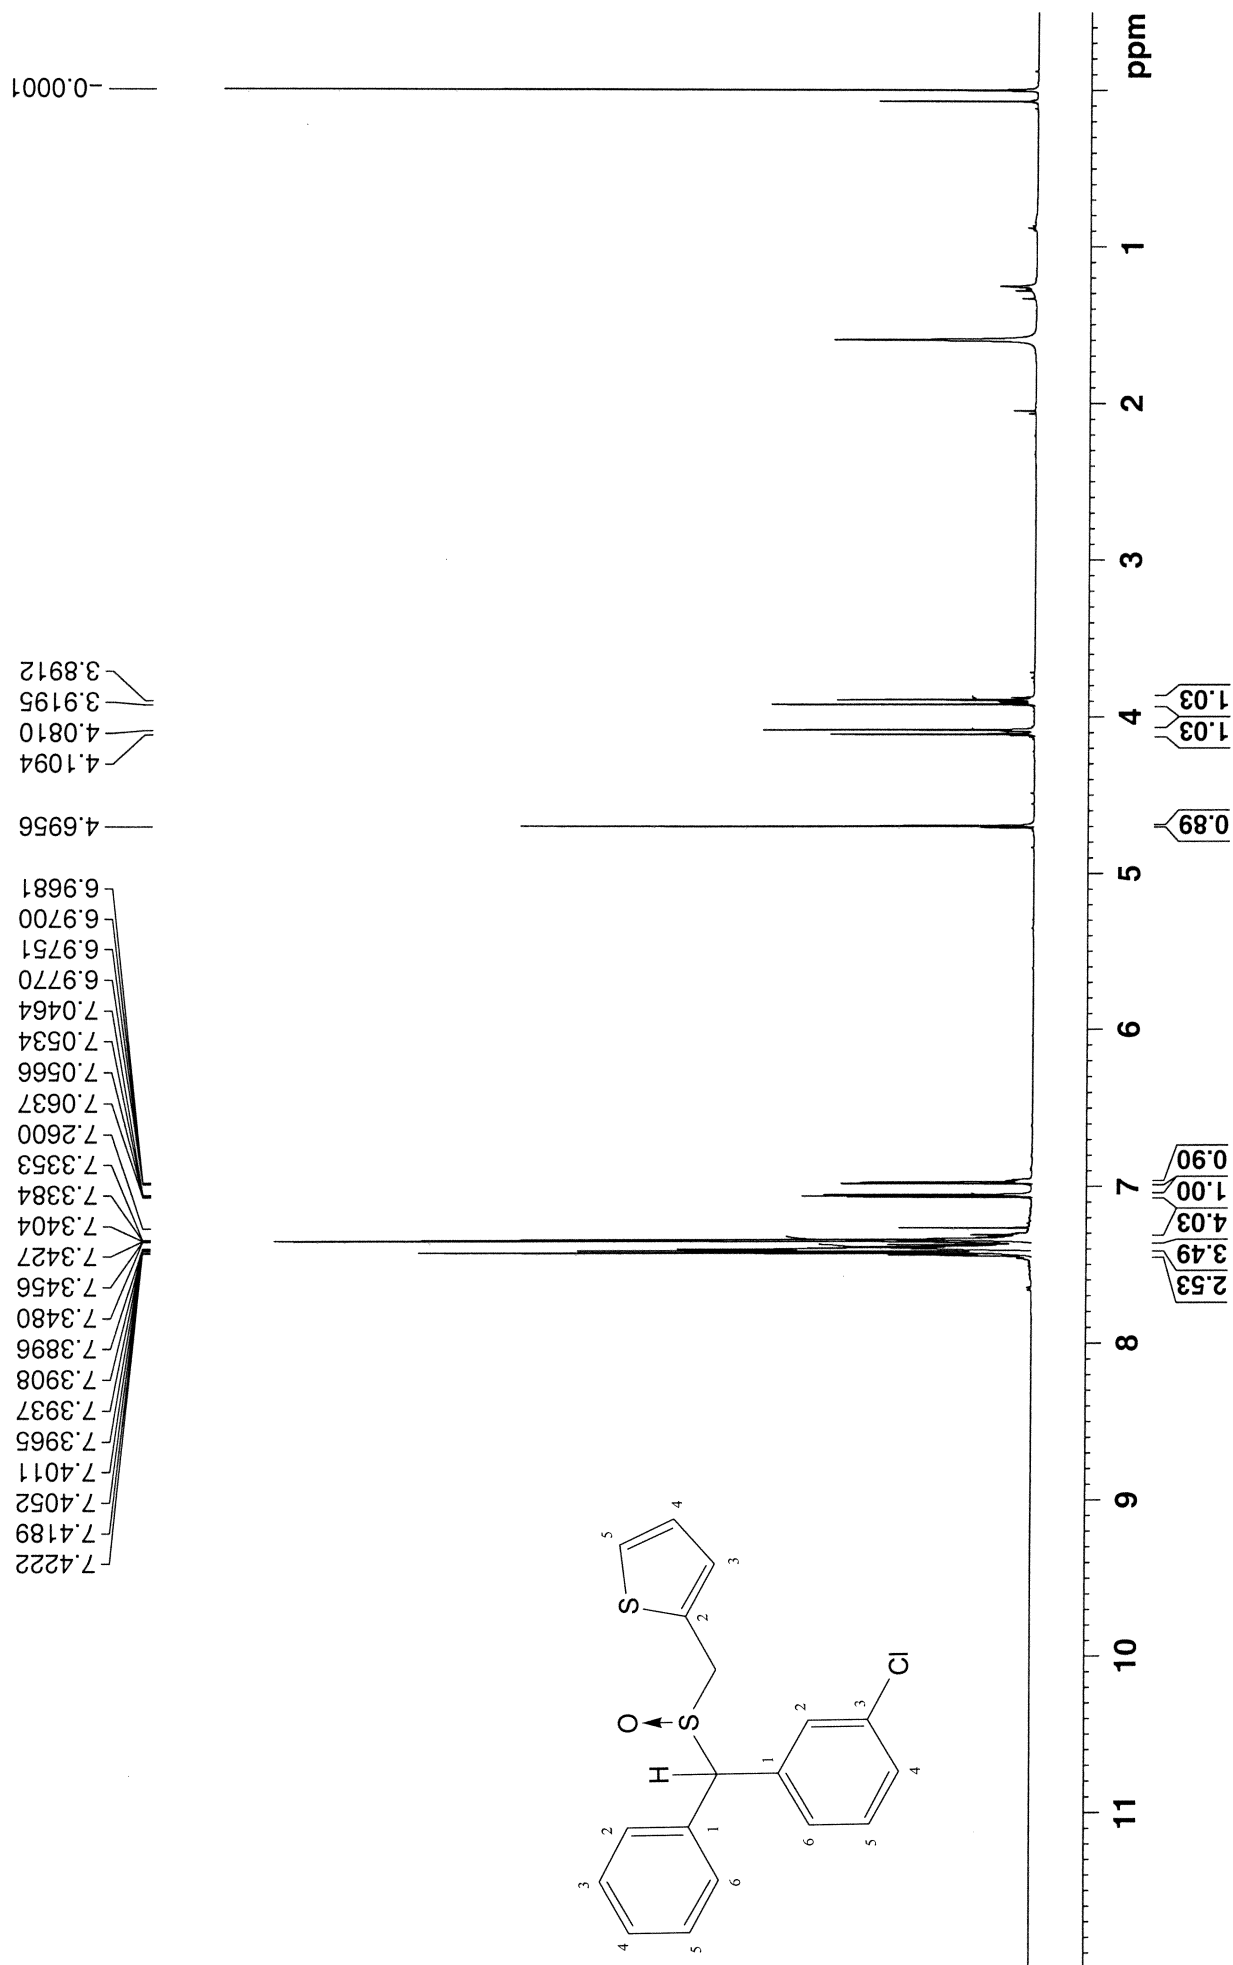

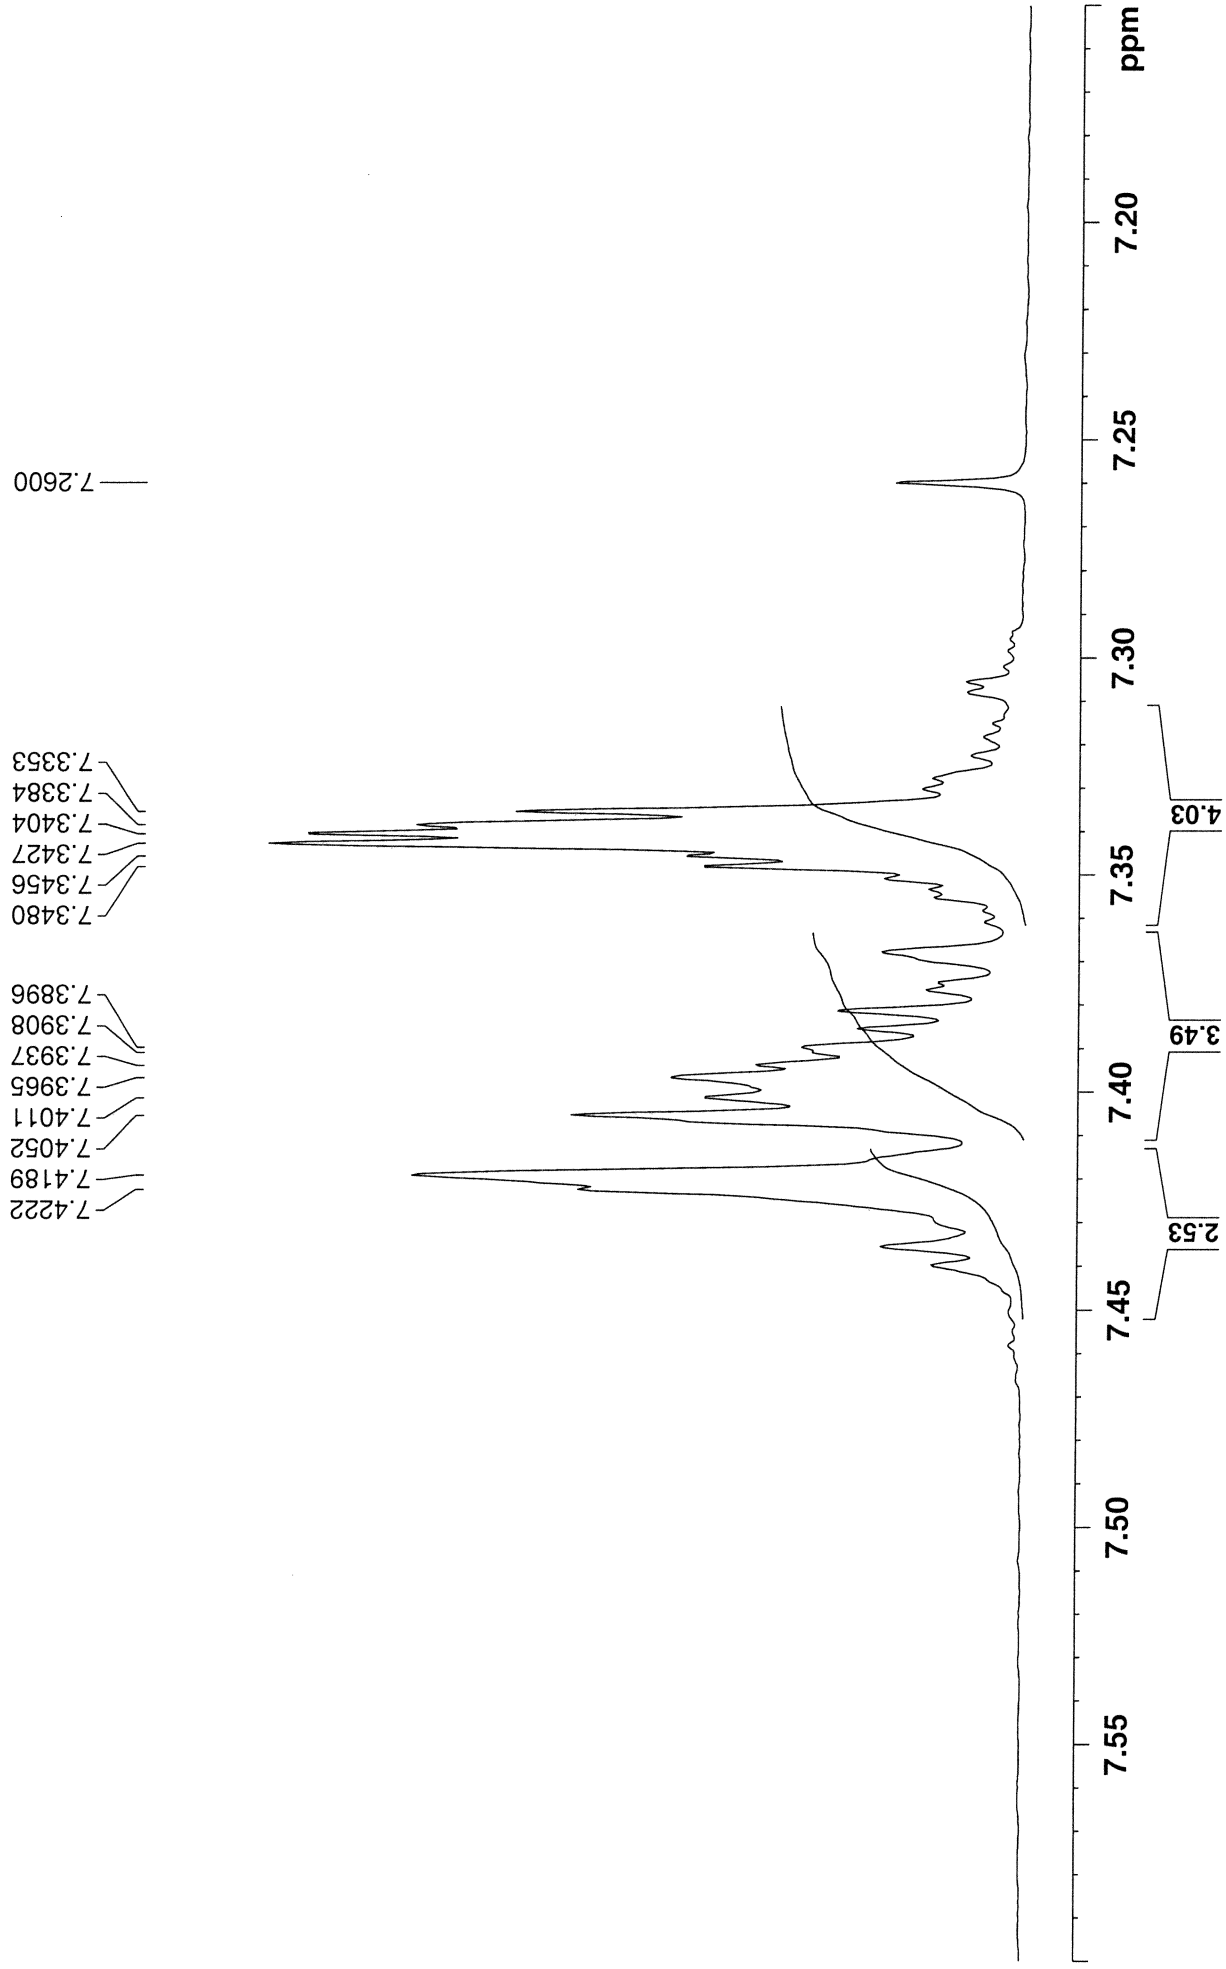

CE167-S2P1 in cdcl3 (Proton) 6.9.2018

7.0637  
7.0566  
7.0534  
7.0464

6.9770  
6.9751  
6.9700  
6.9681

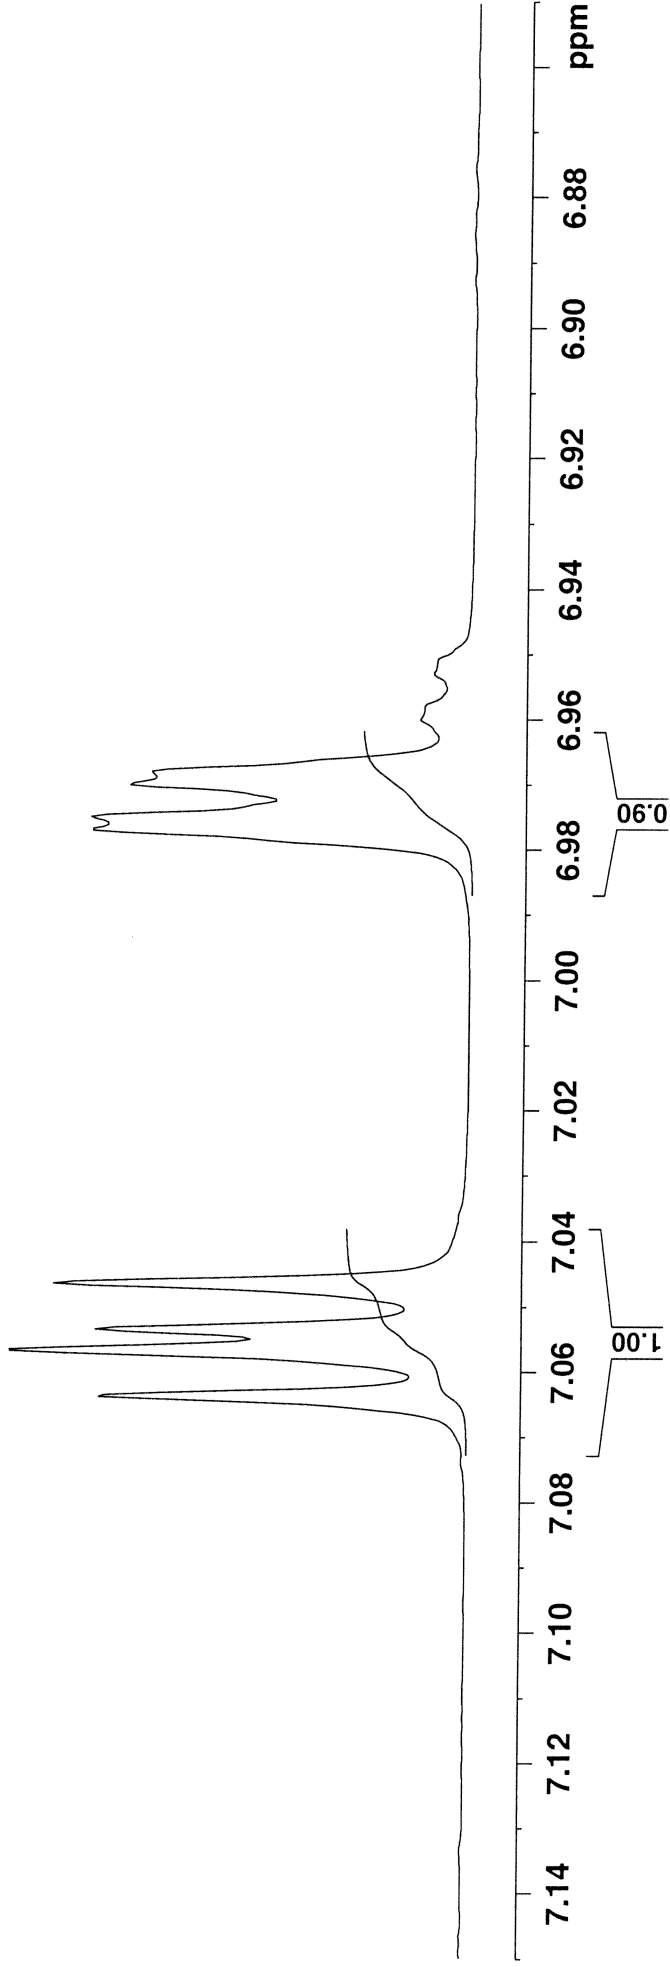

CE167-S2P1 in cdcl3 (Proton) 6.9.2018

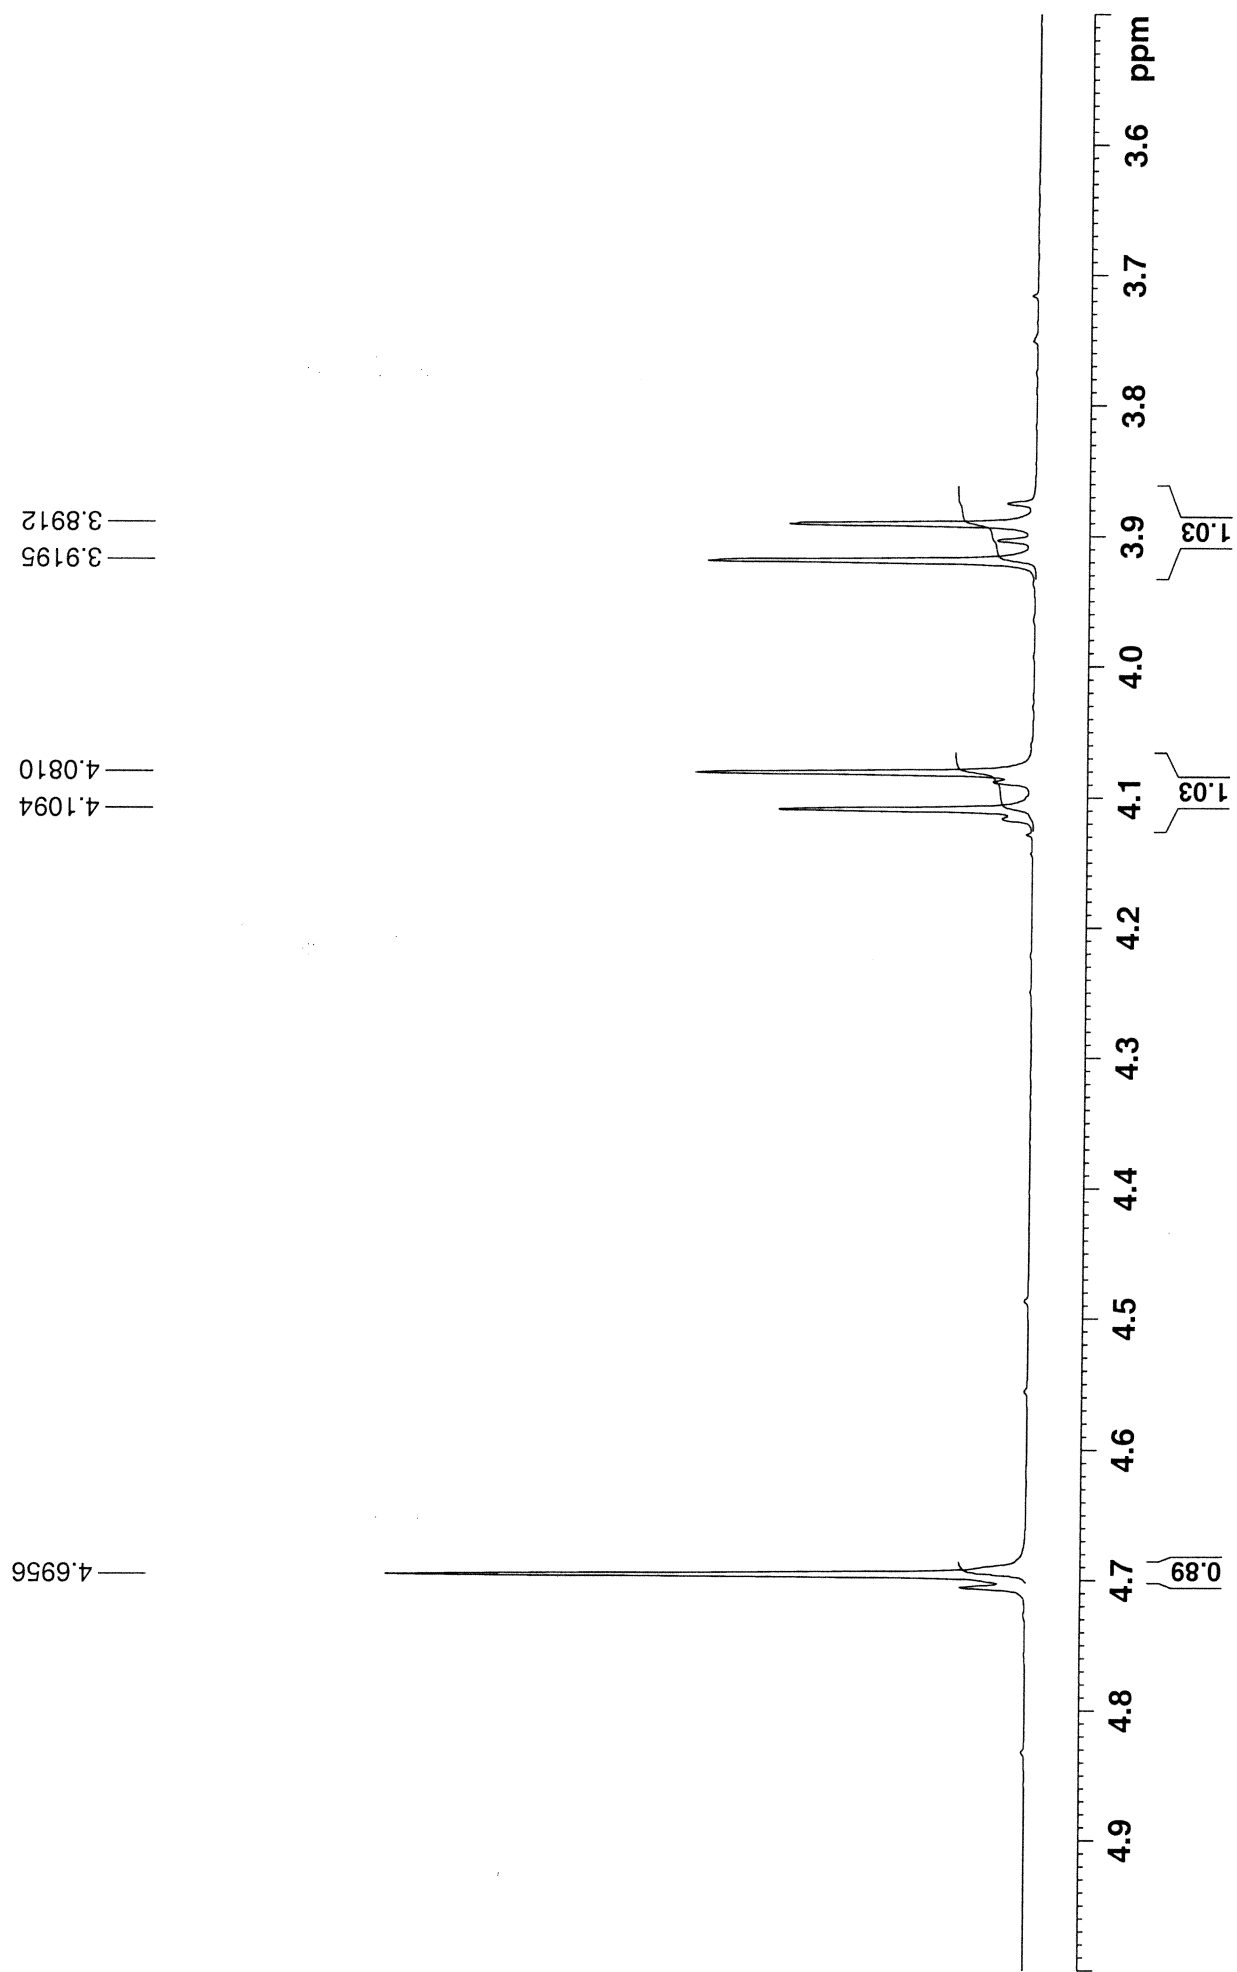

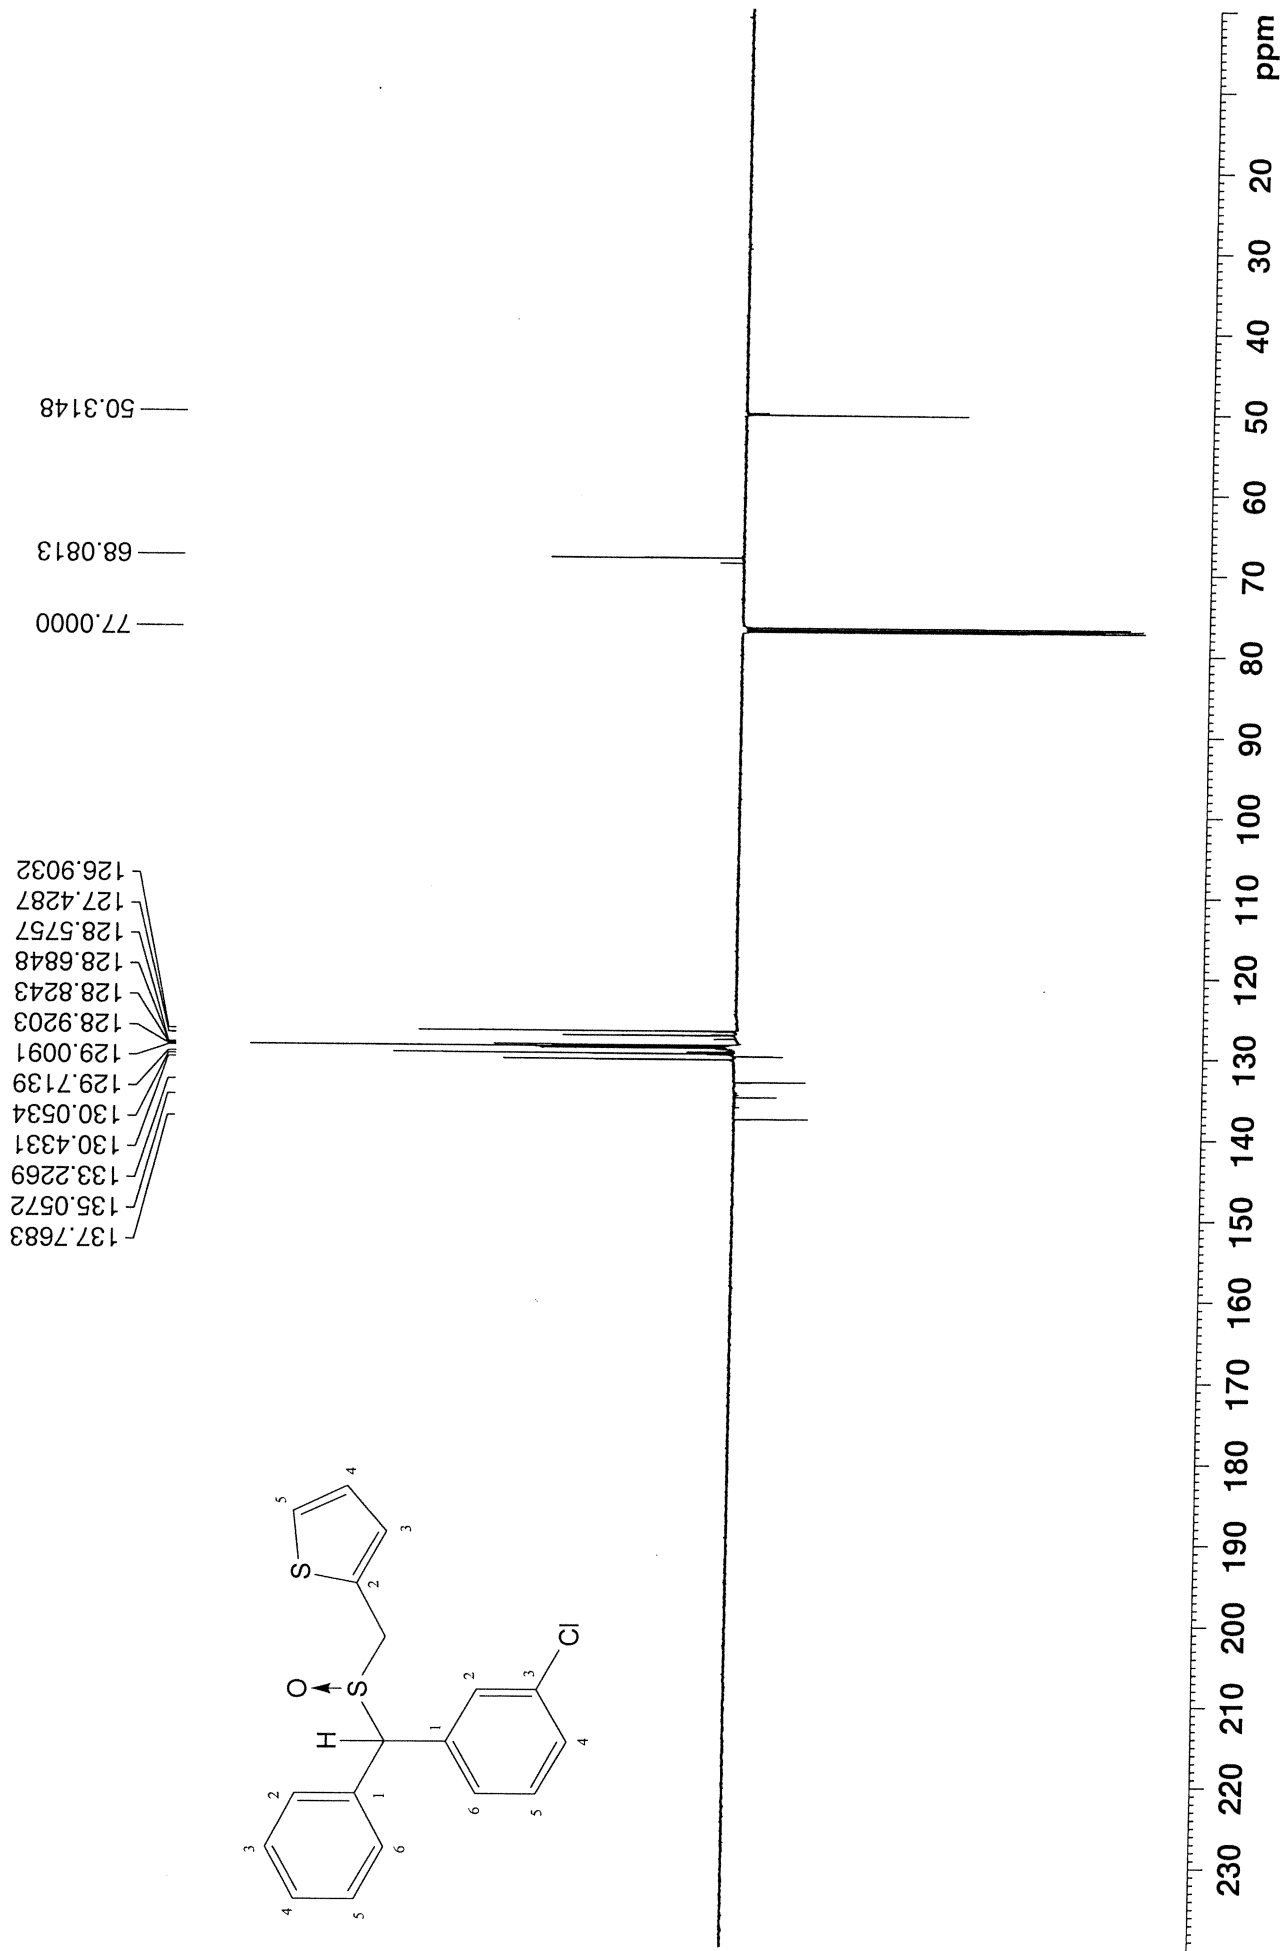

137.7683

135.0572

133.2269

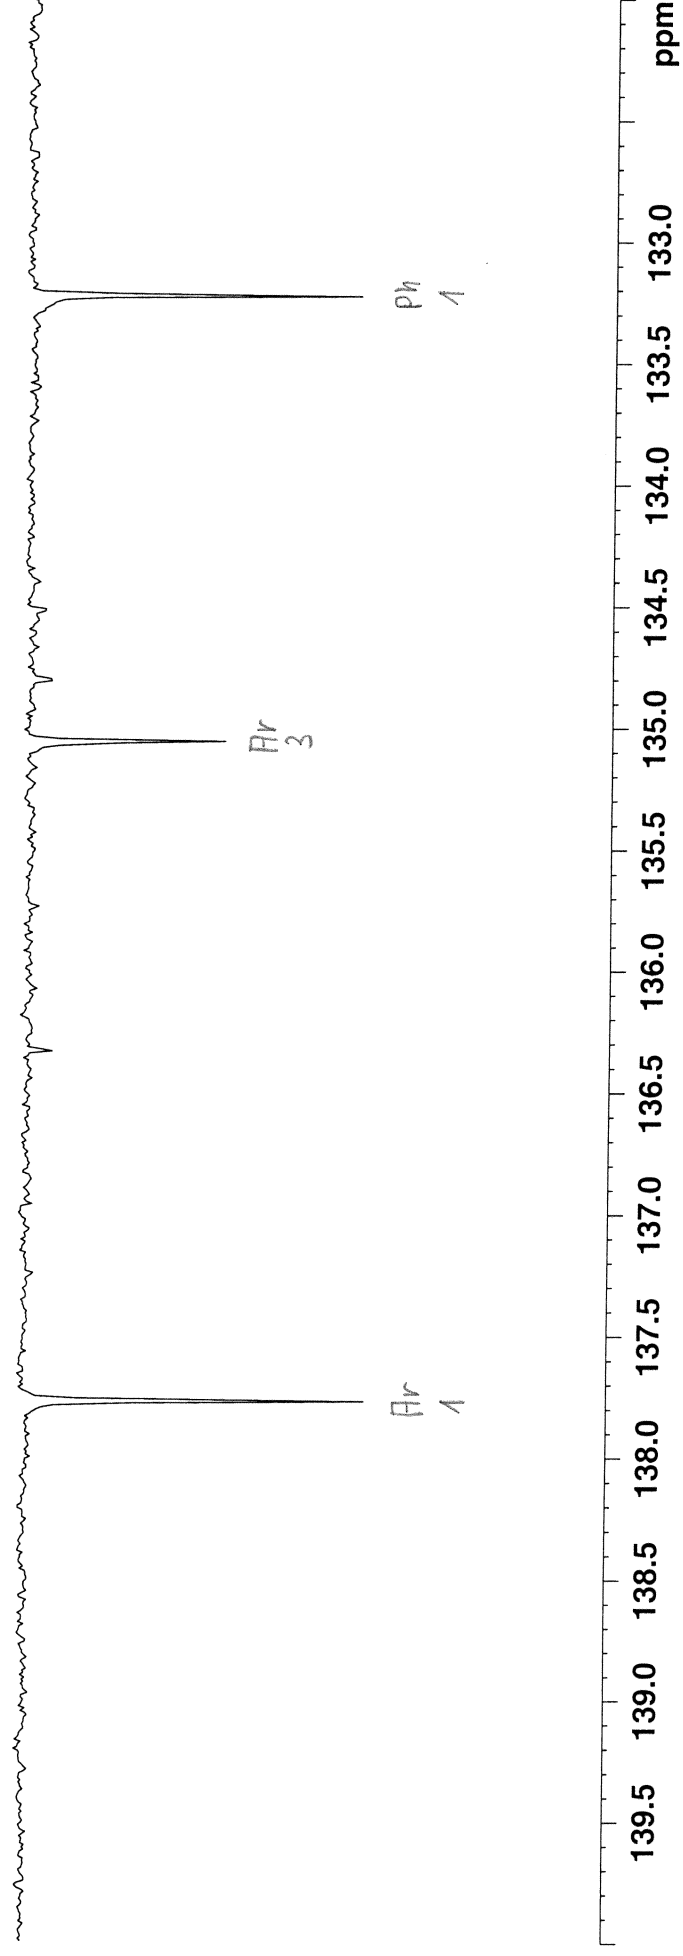

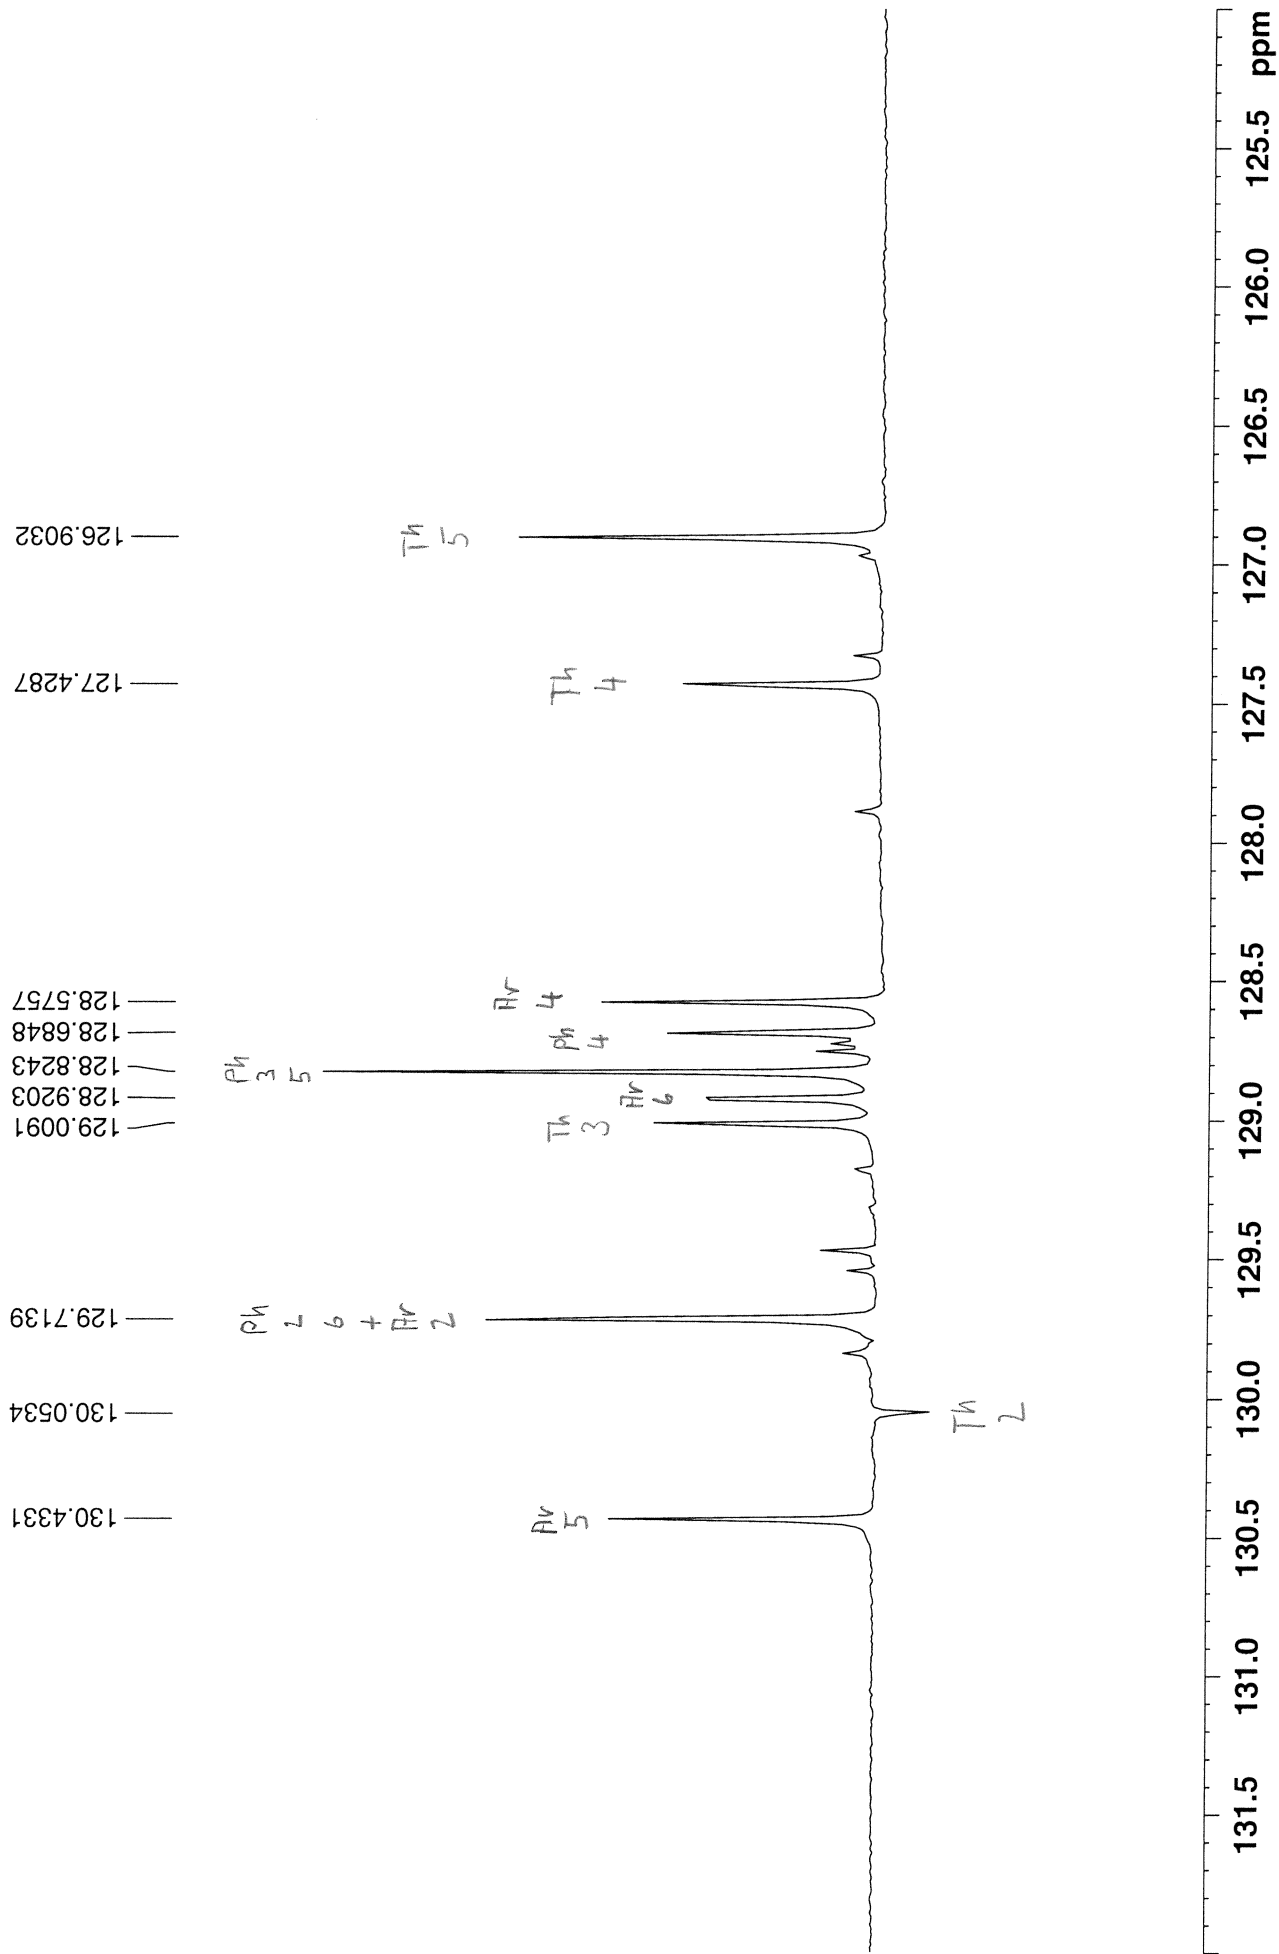



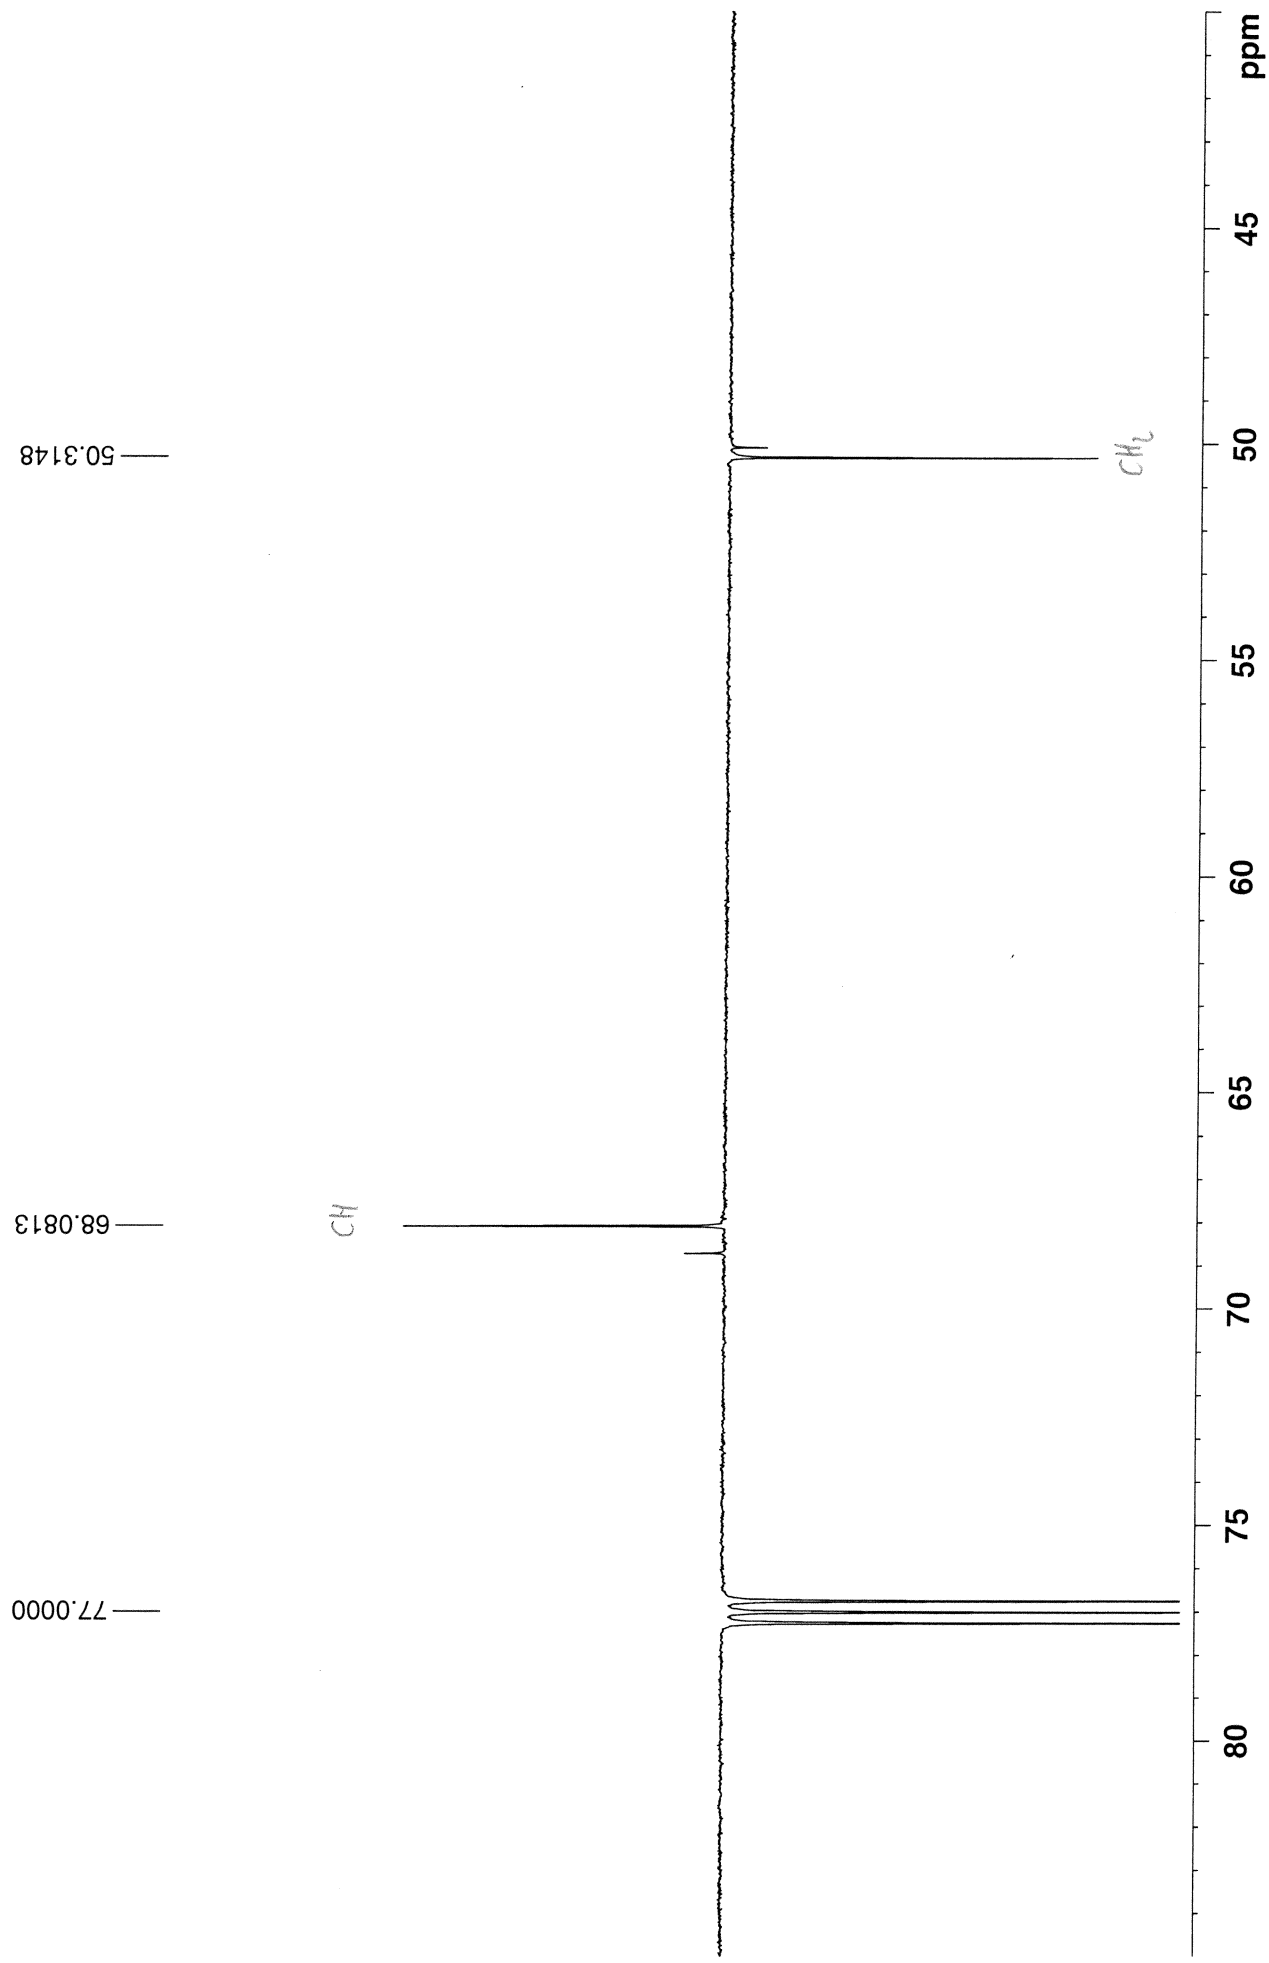

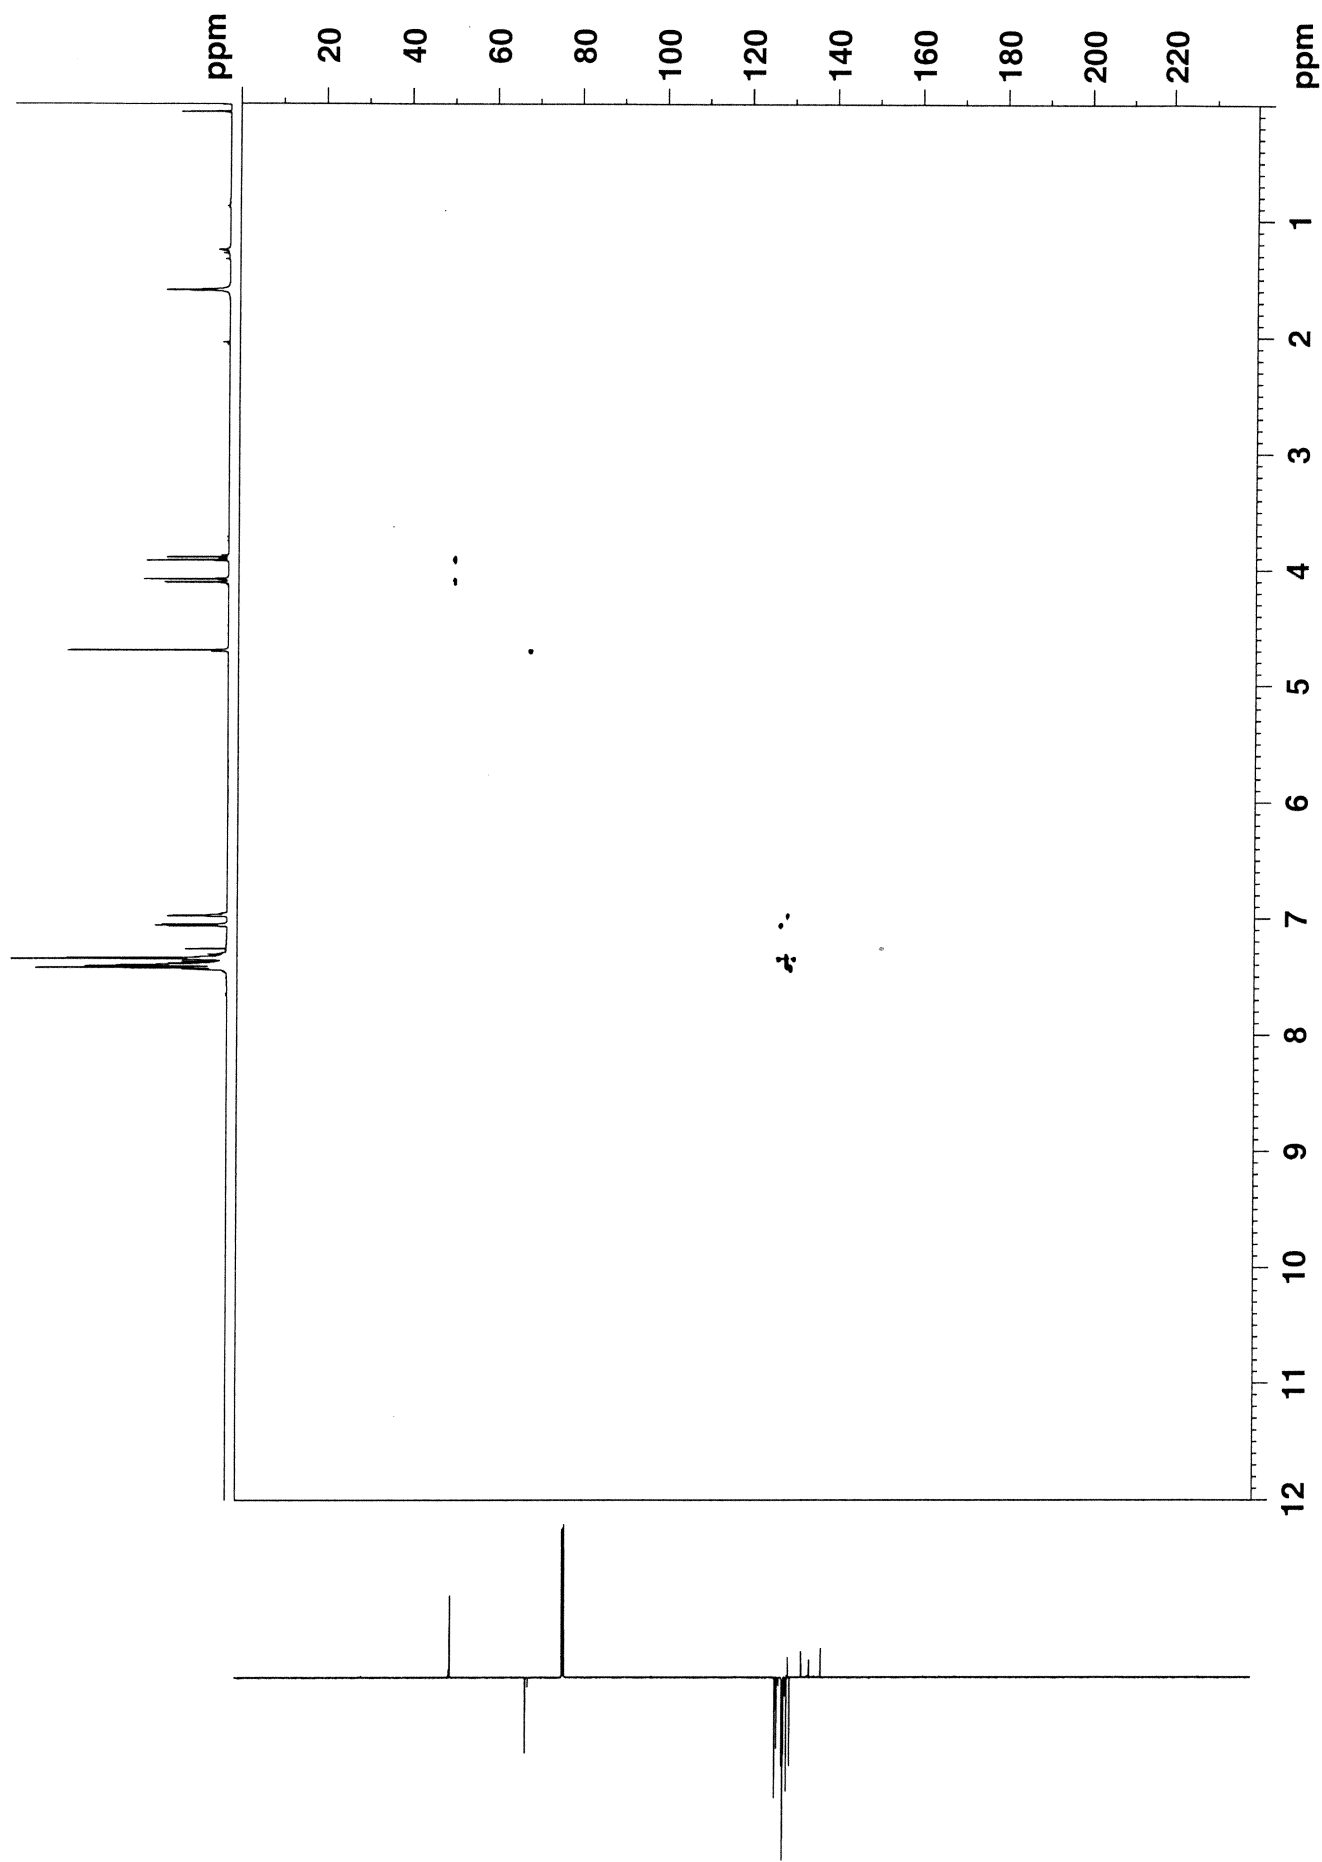

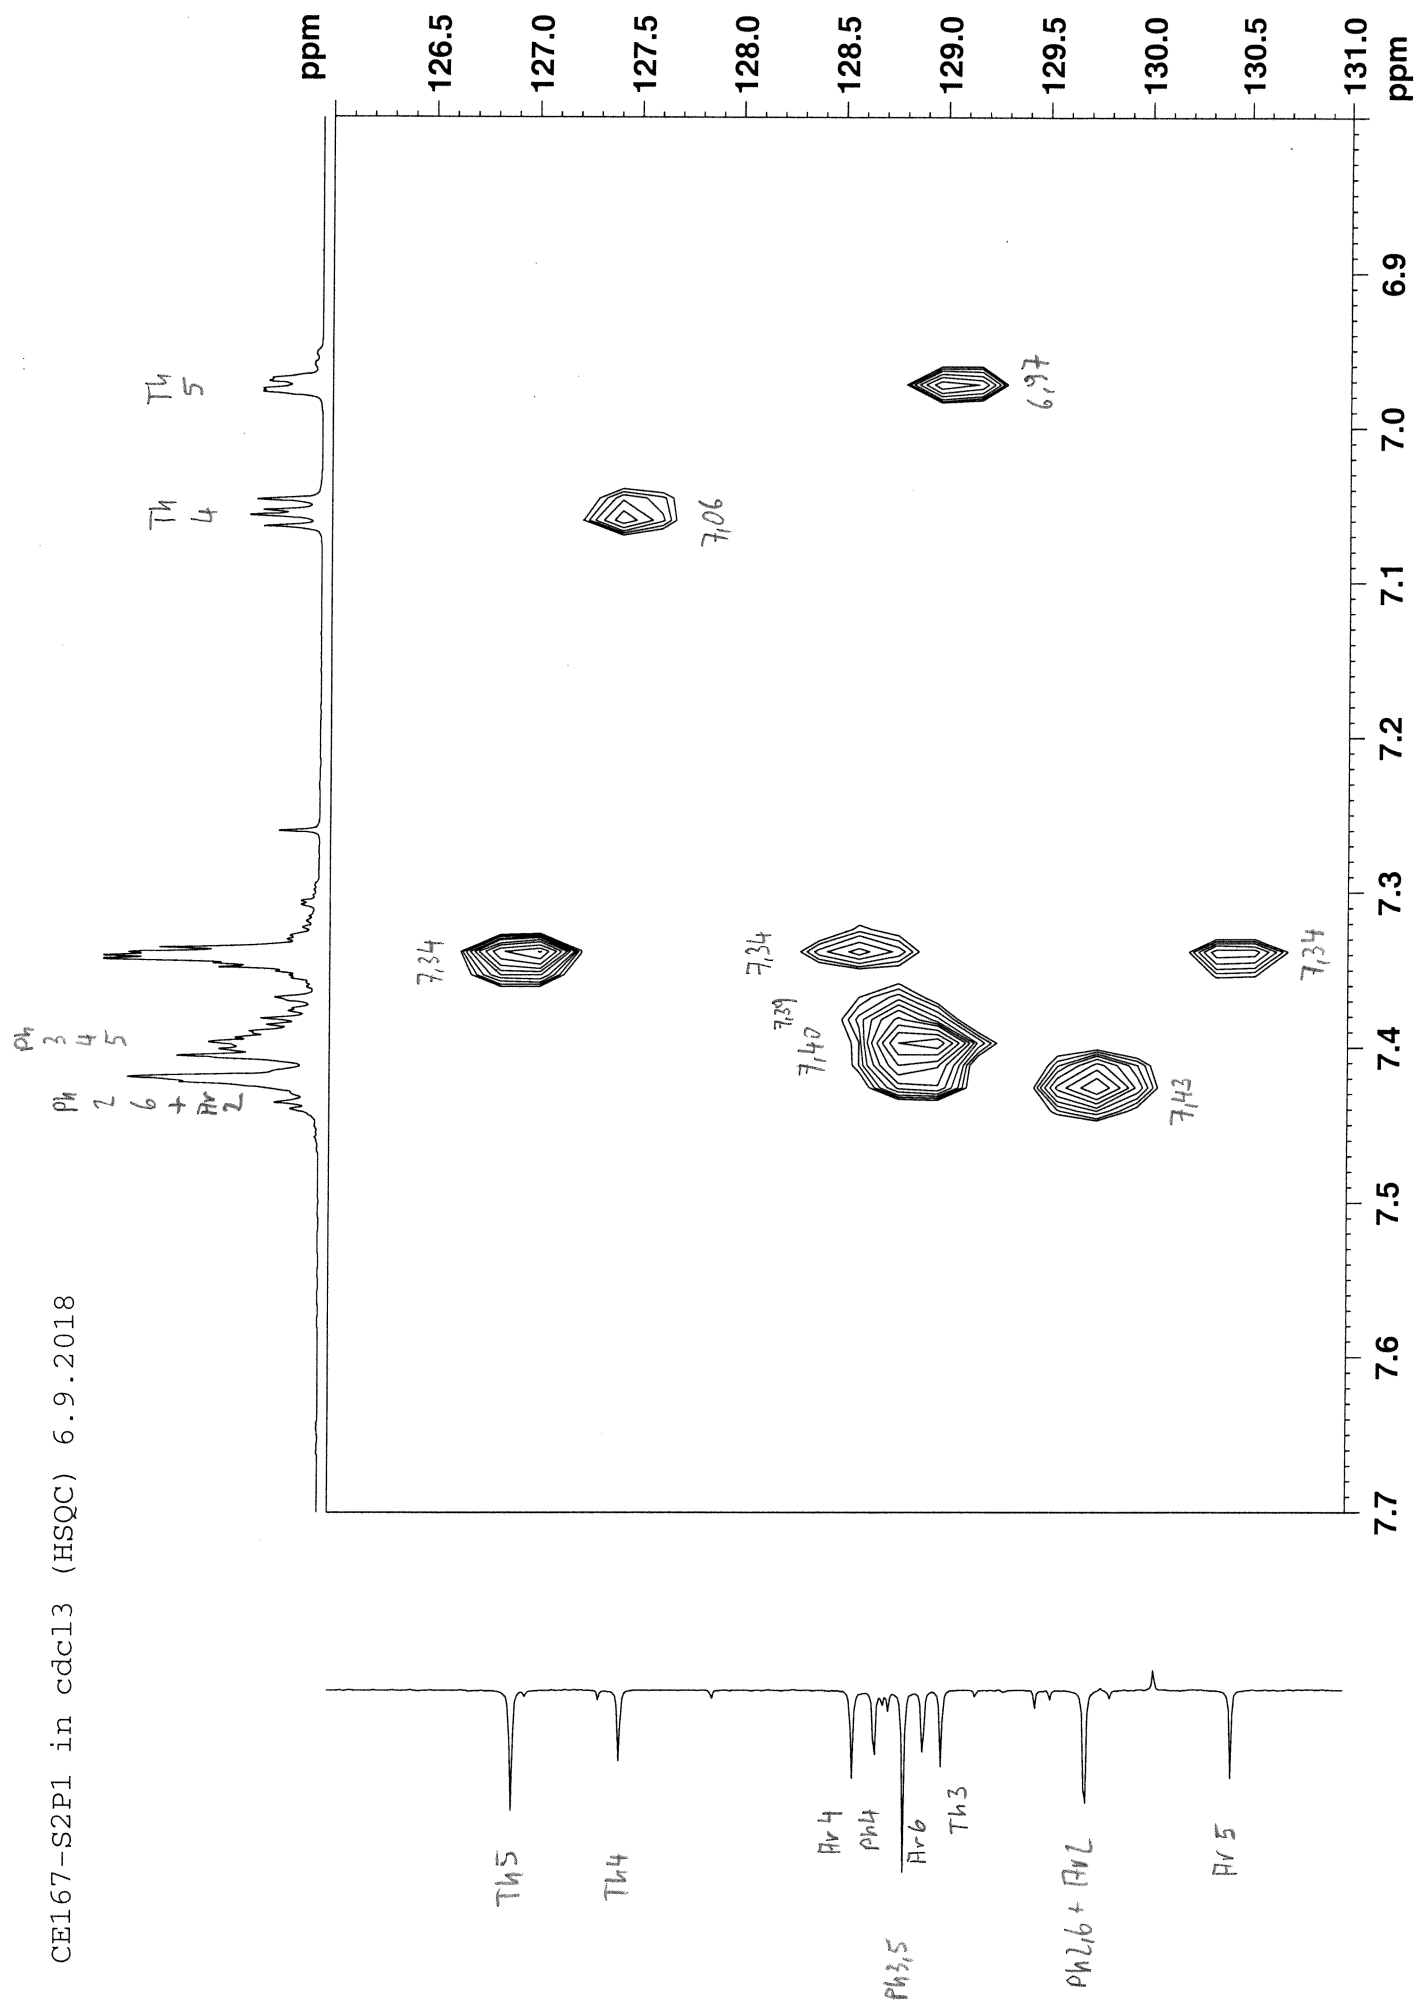

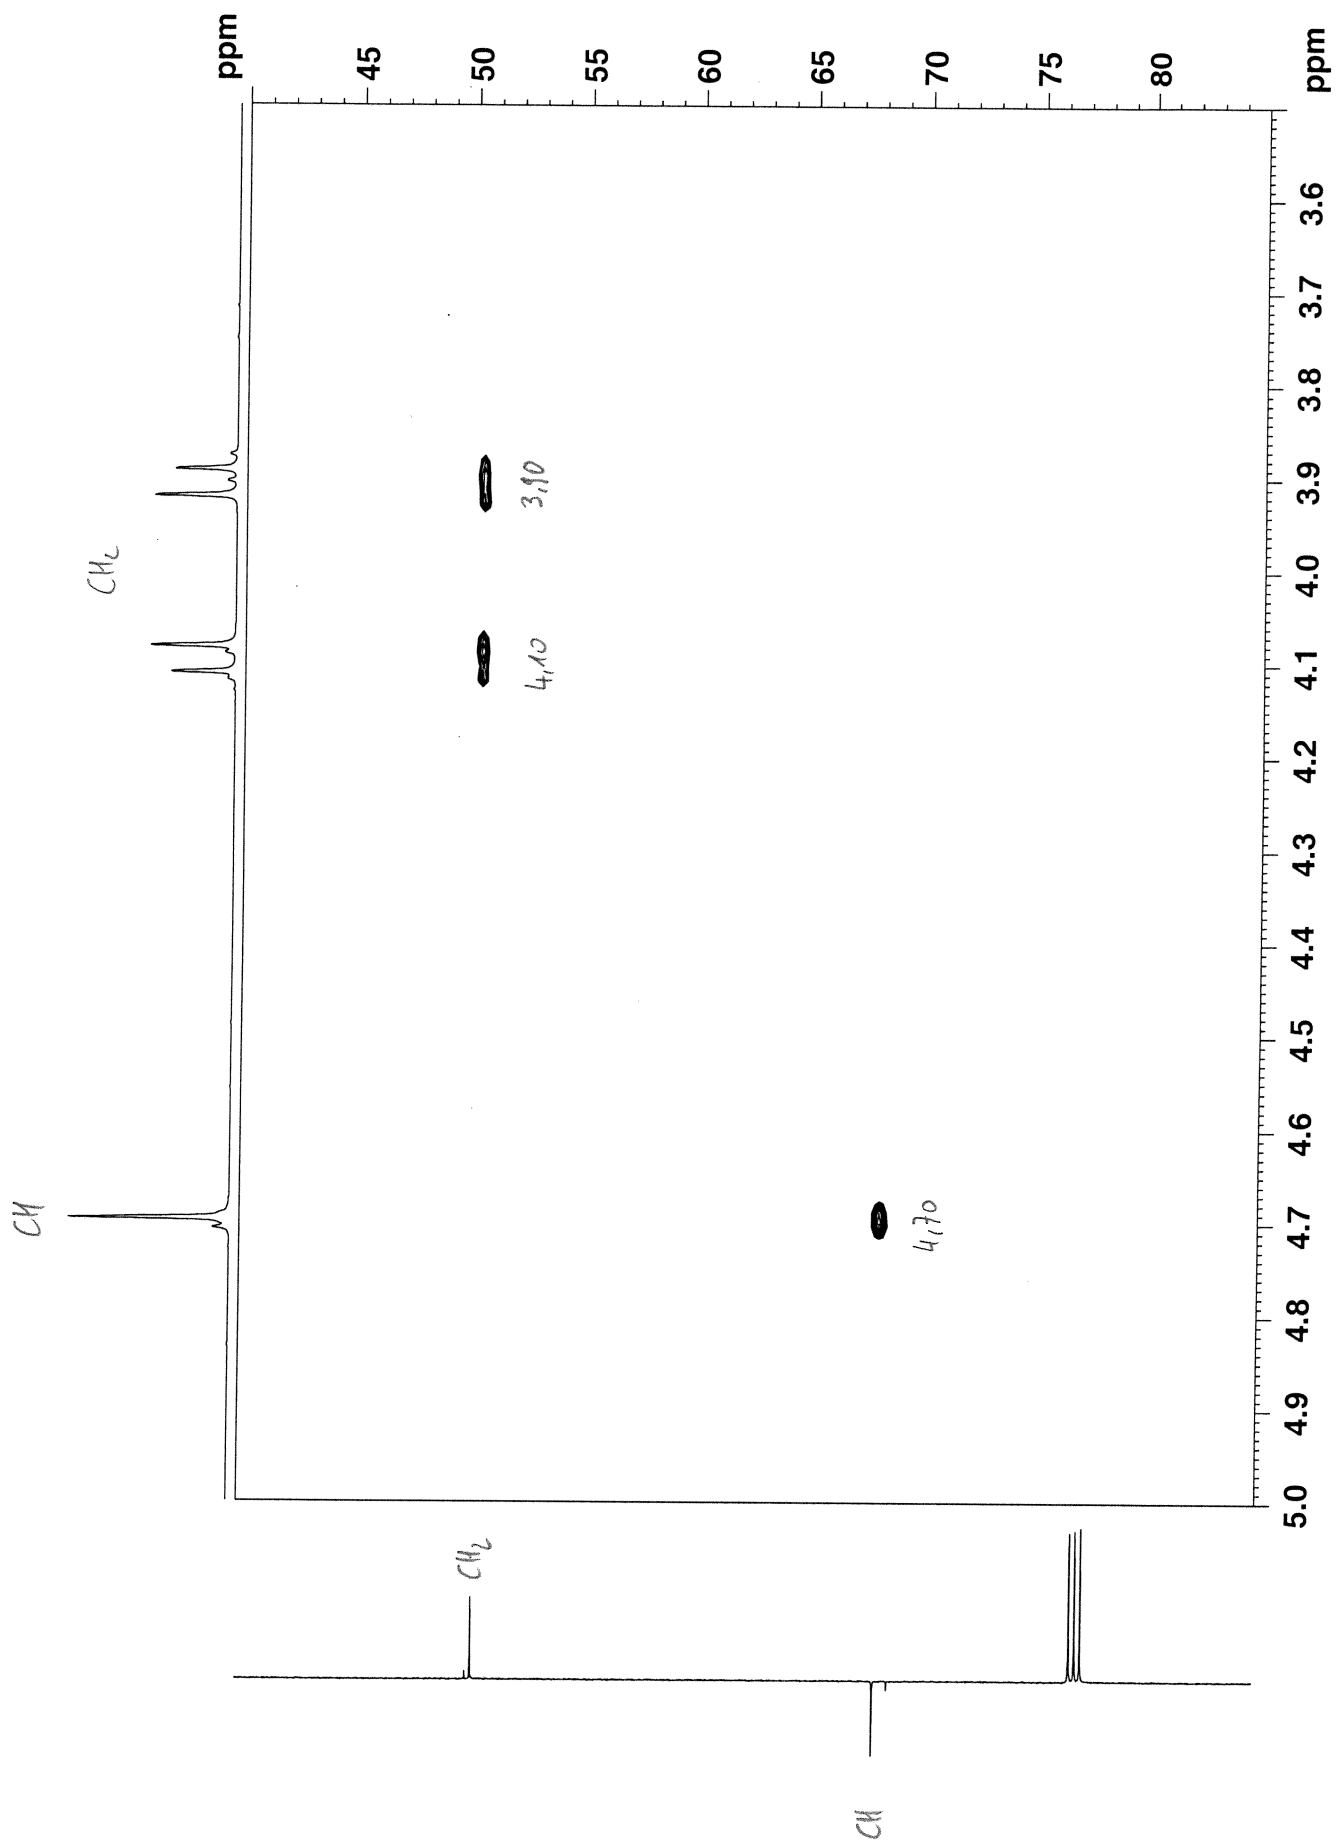

**Figure S20c.** NMR spectra of compound **8e**.

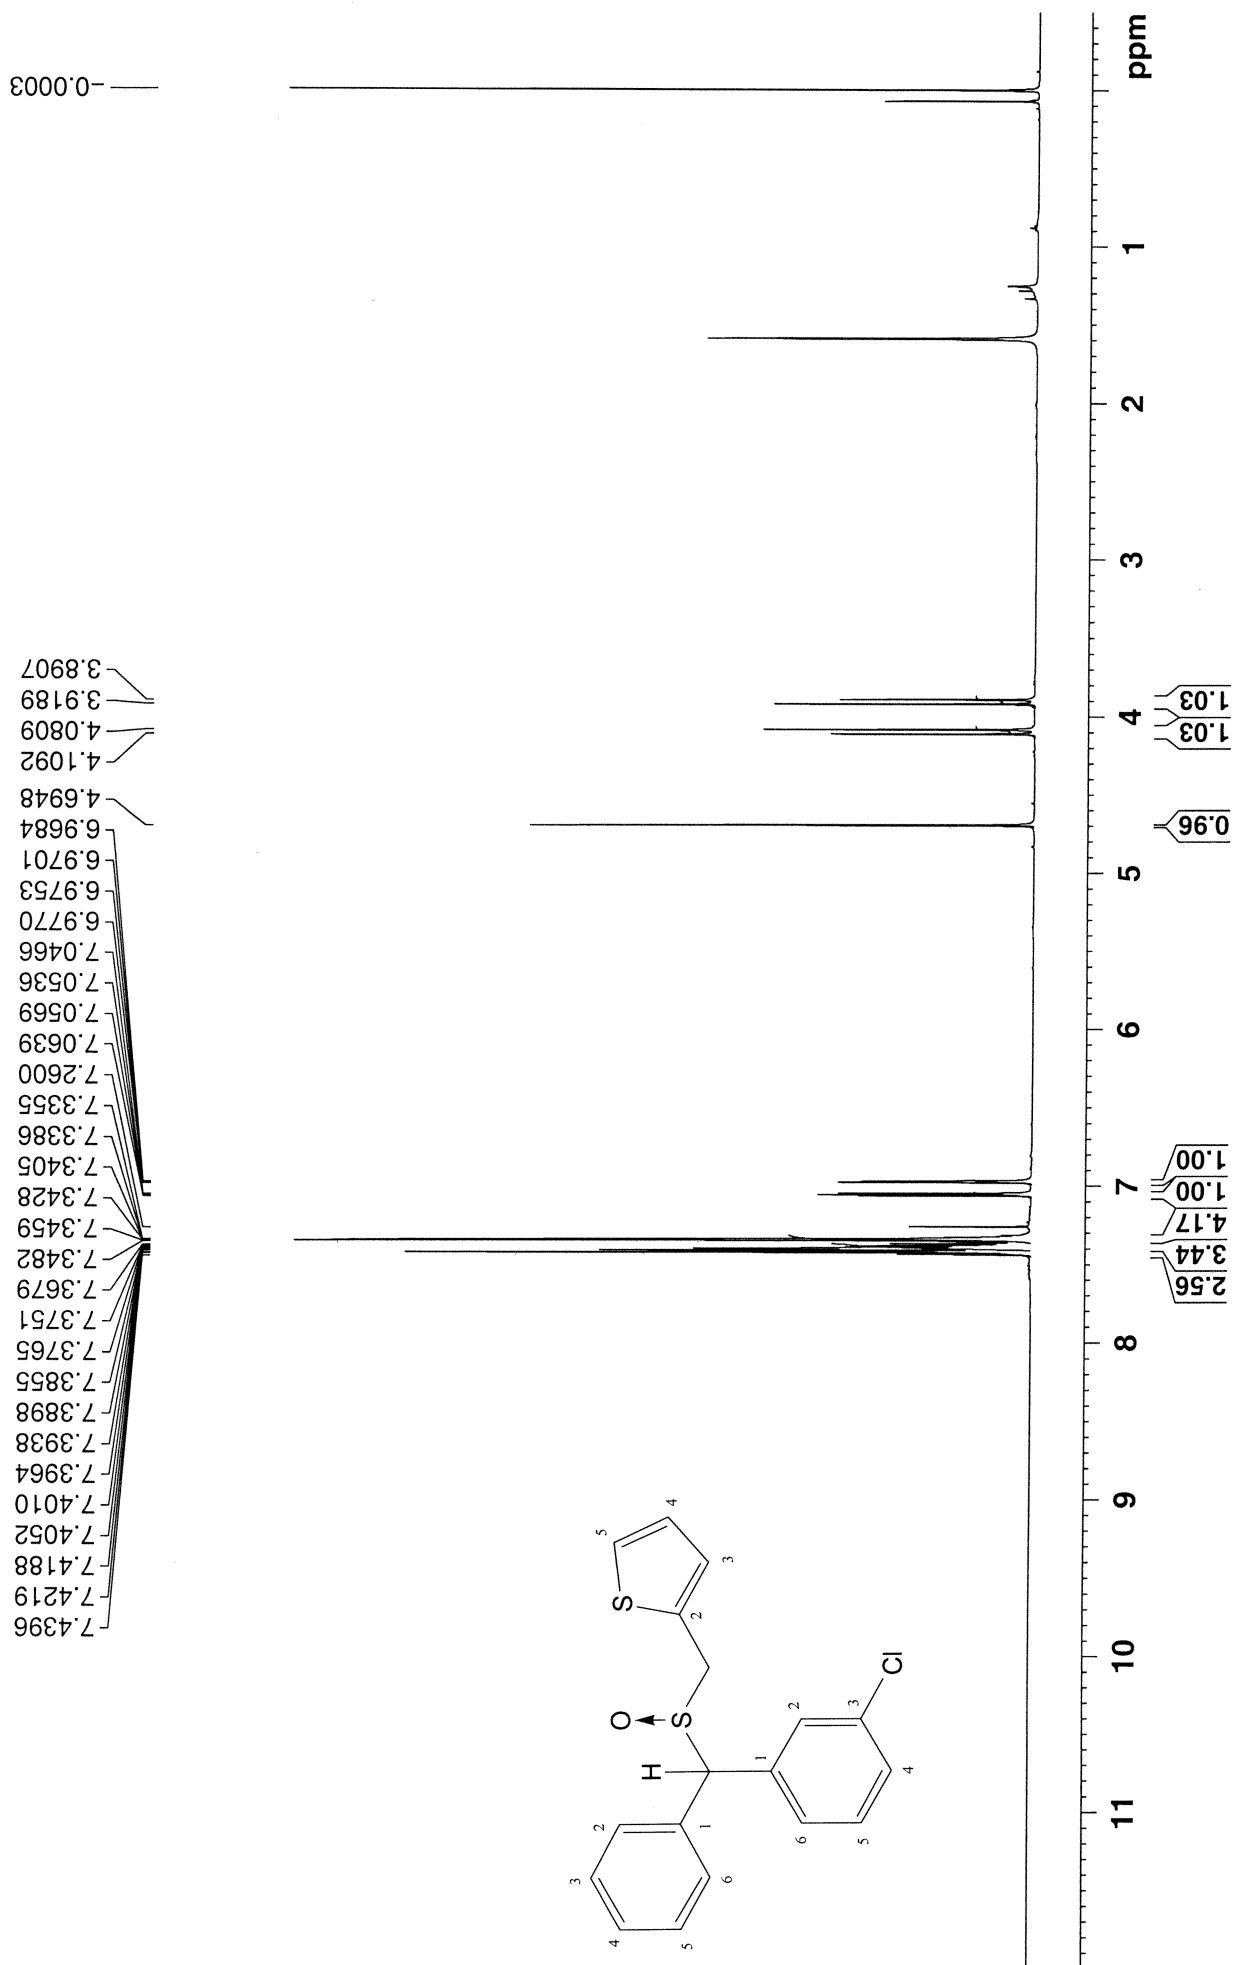

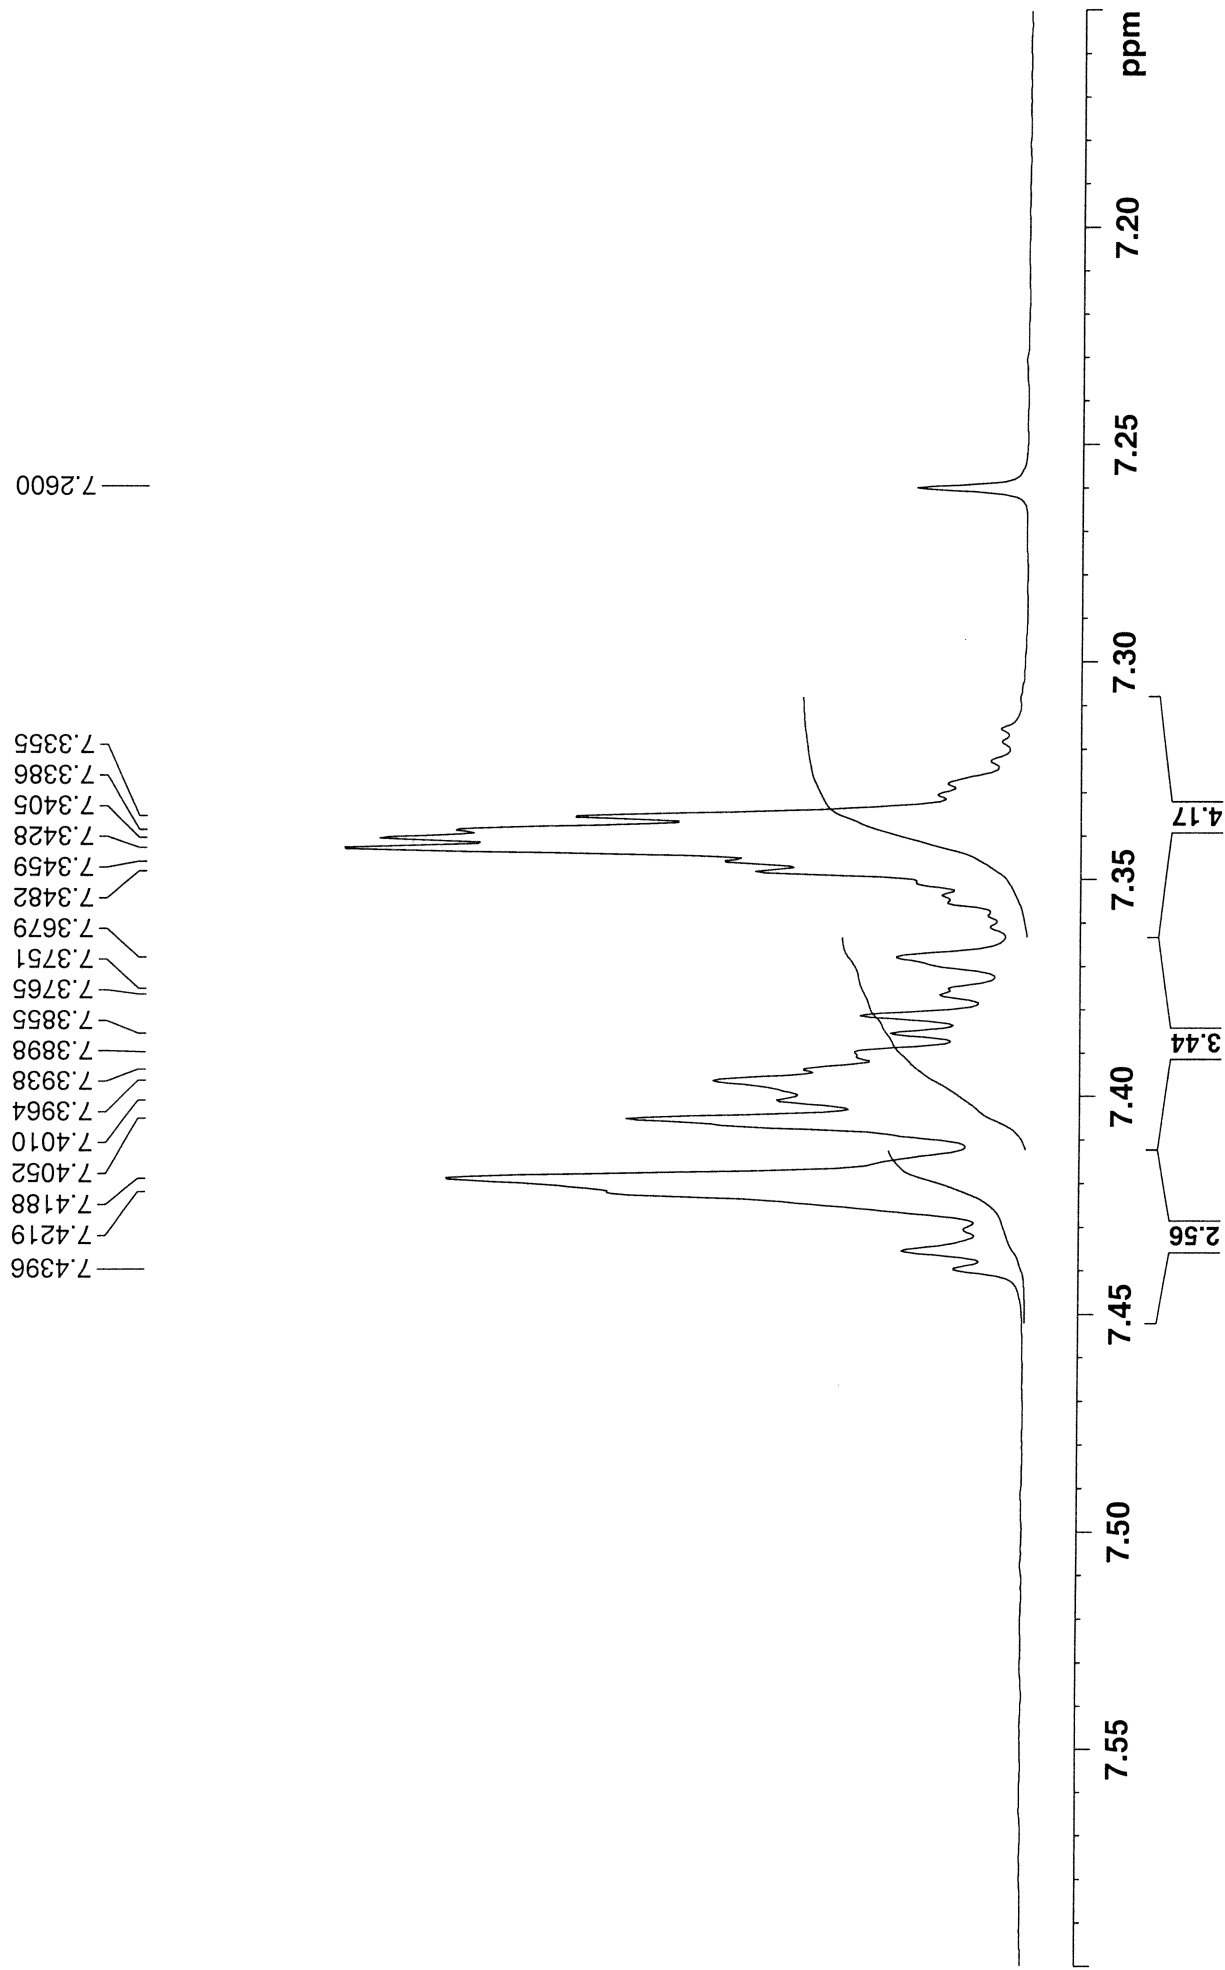

7.0639  
7.0569  
7.0536  
7.0466

6.9770  
6.9753  
6.9701  
6.9684

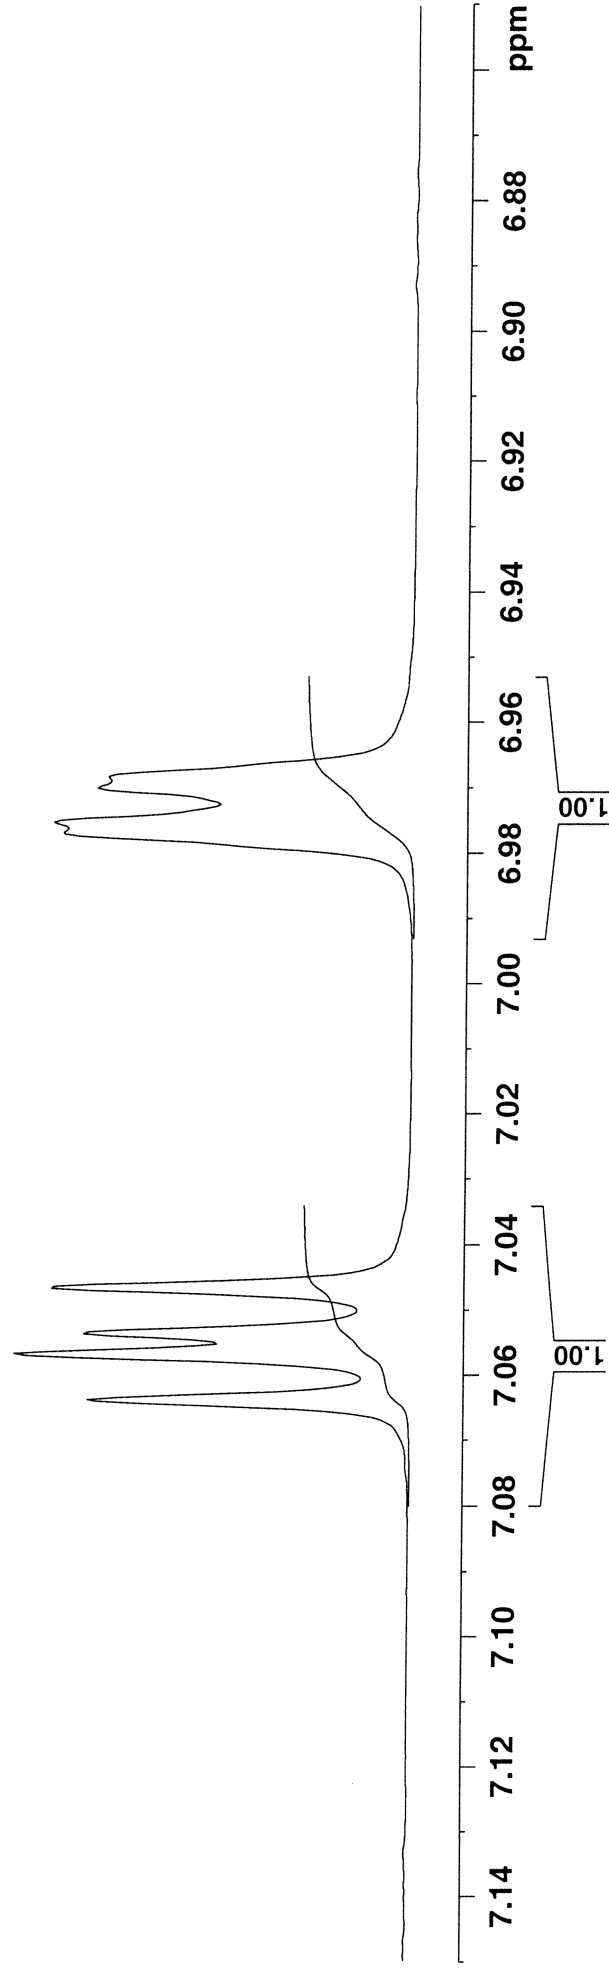

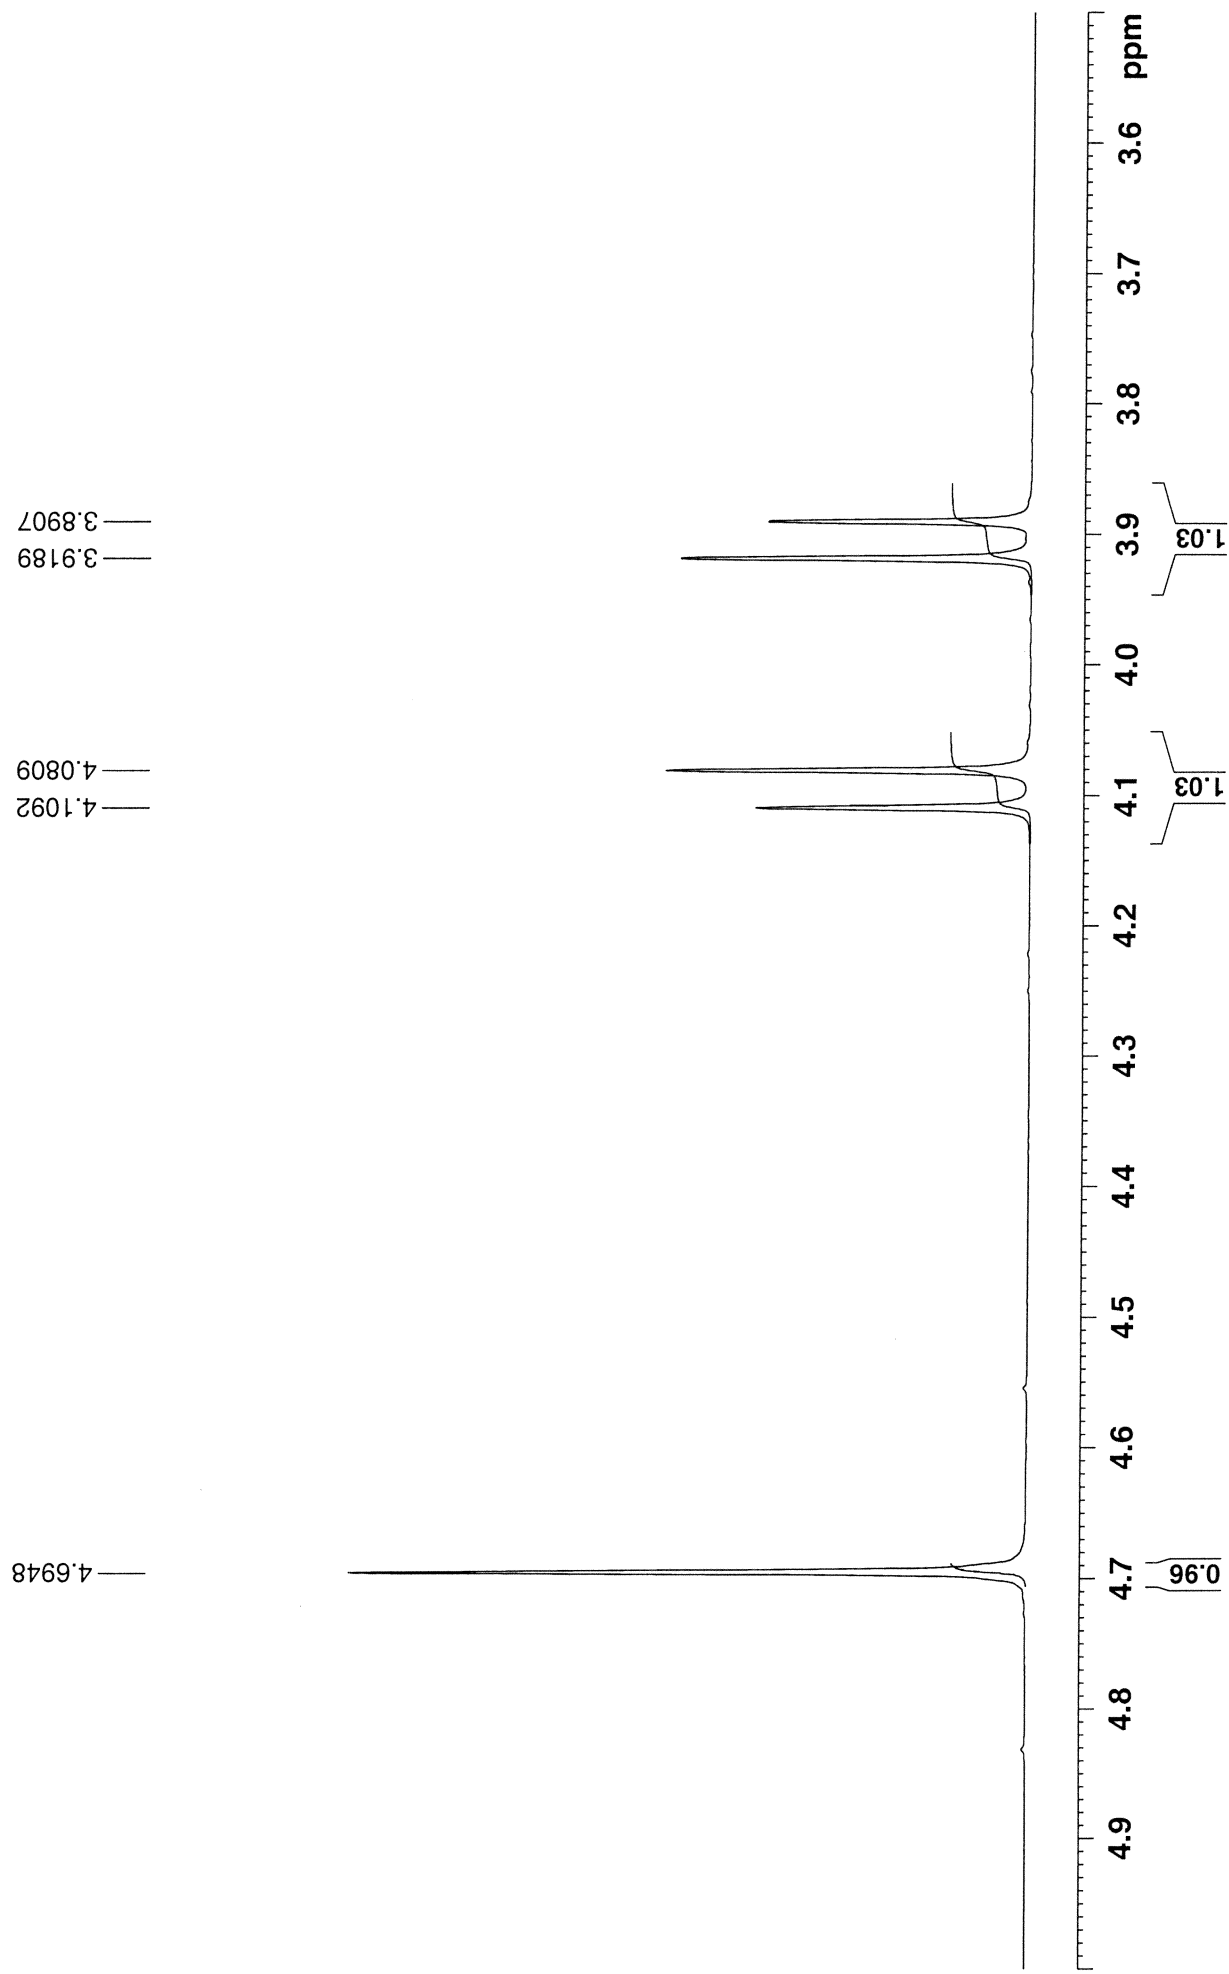



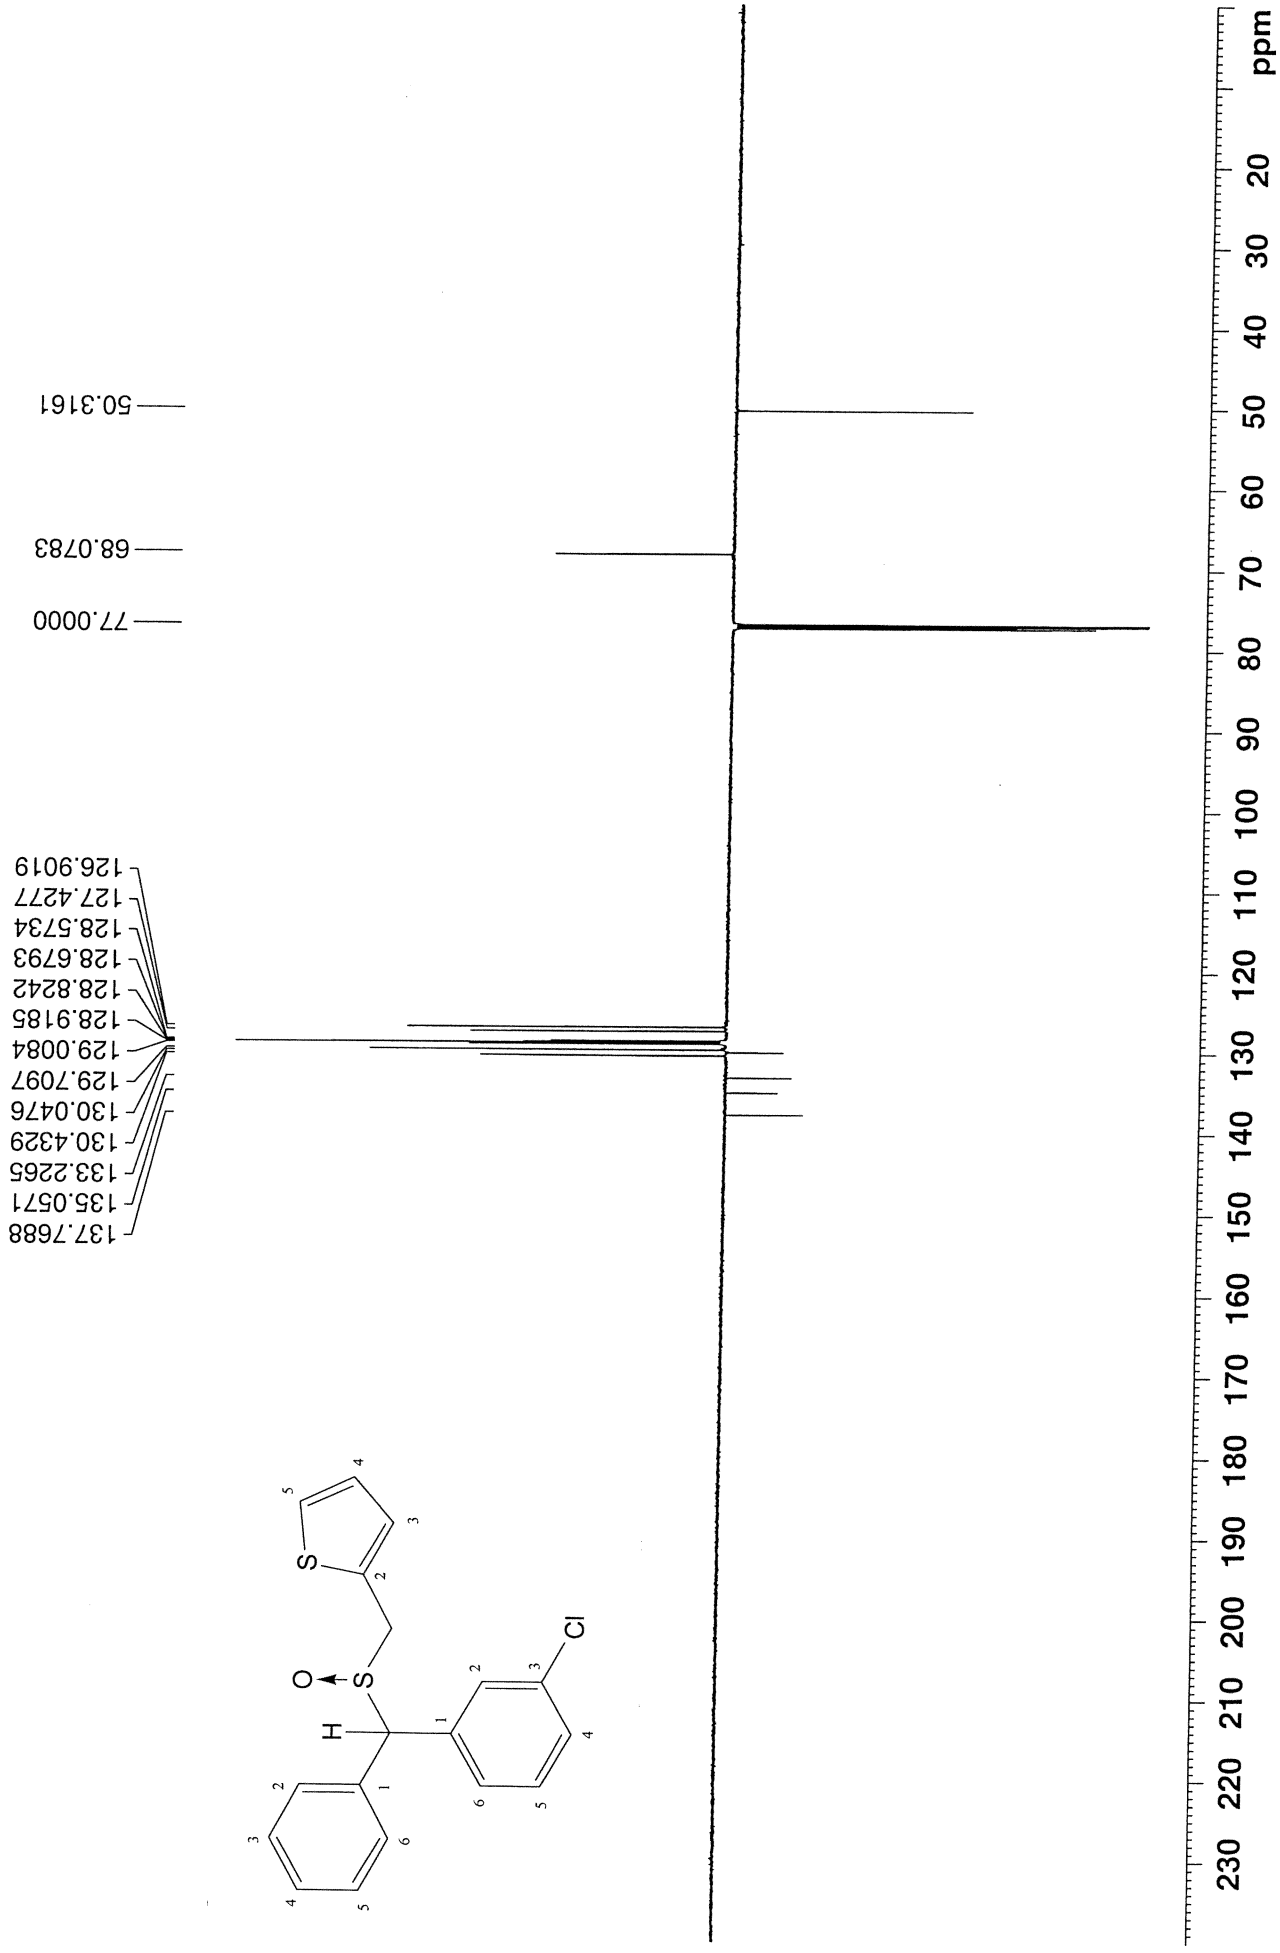

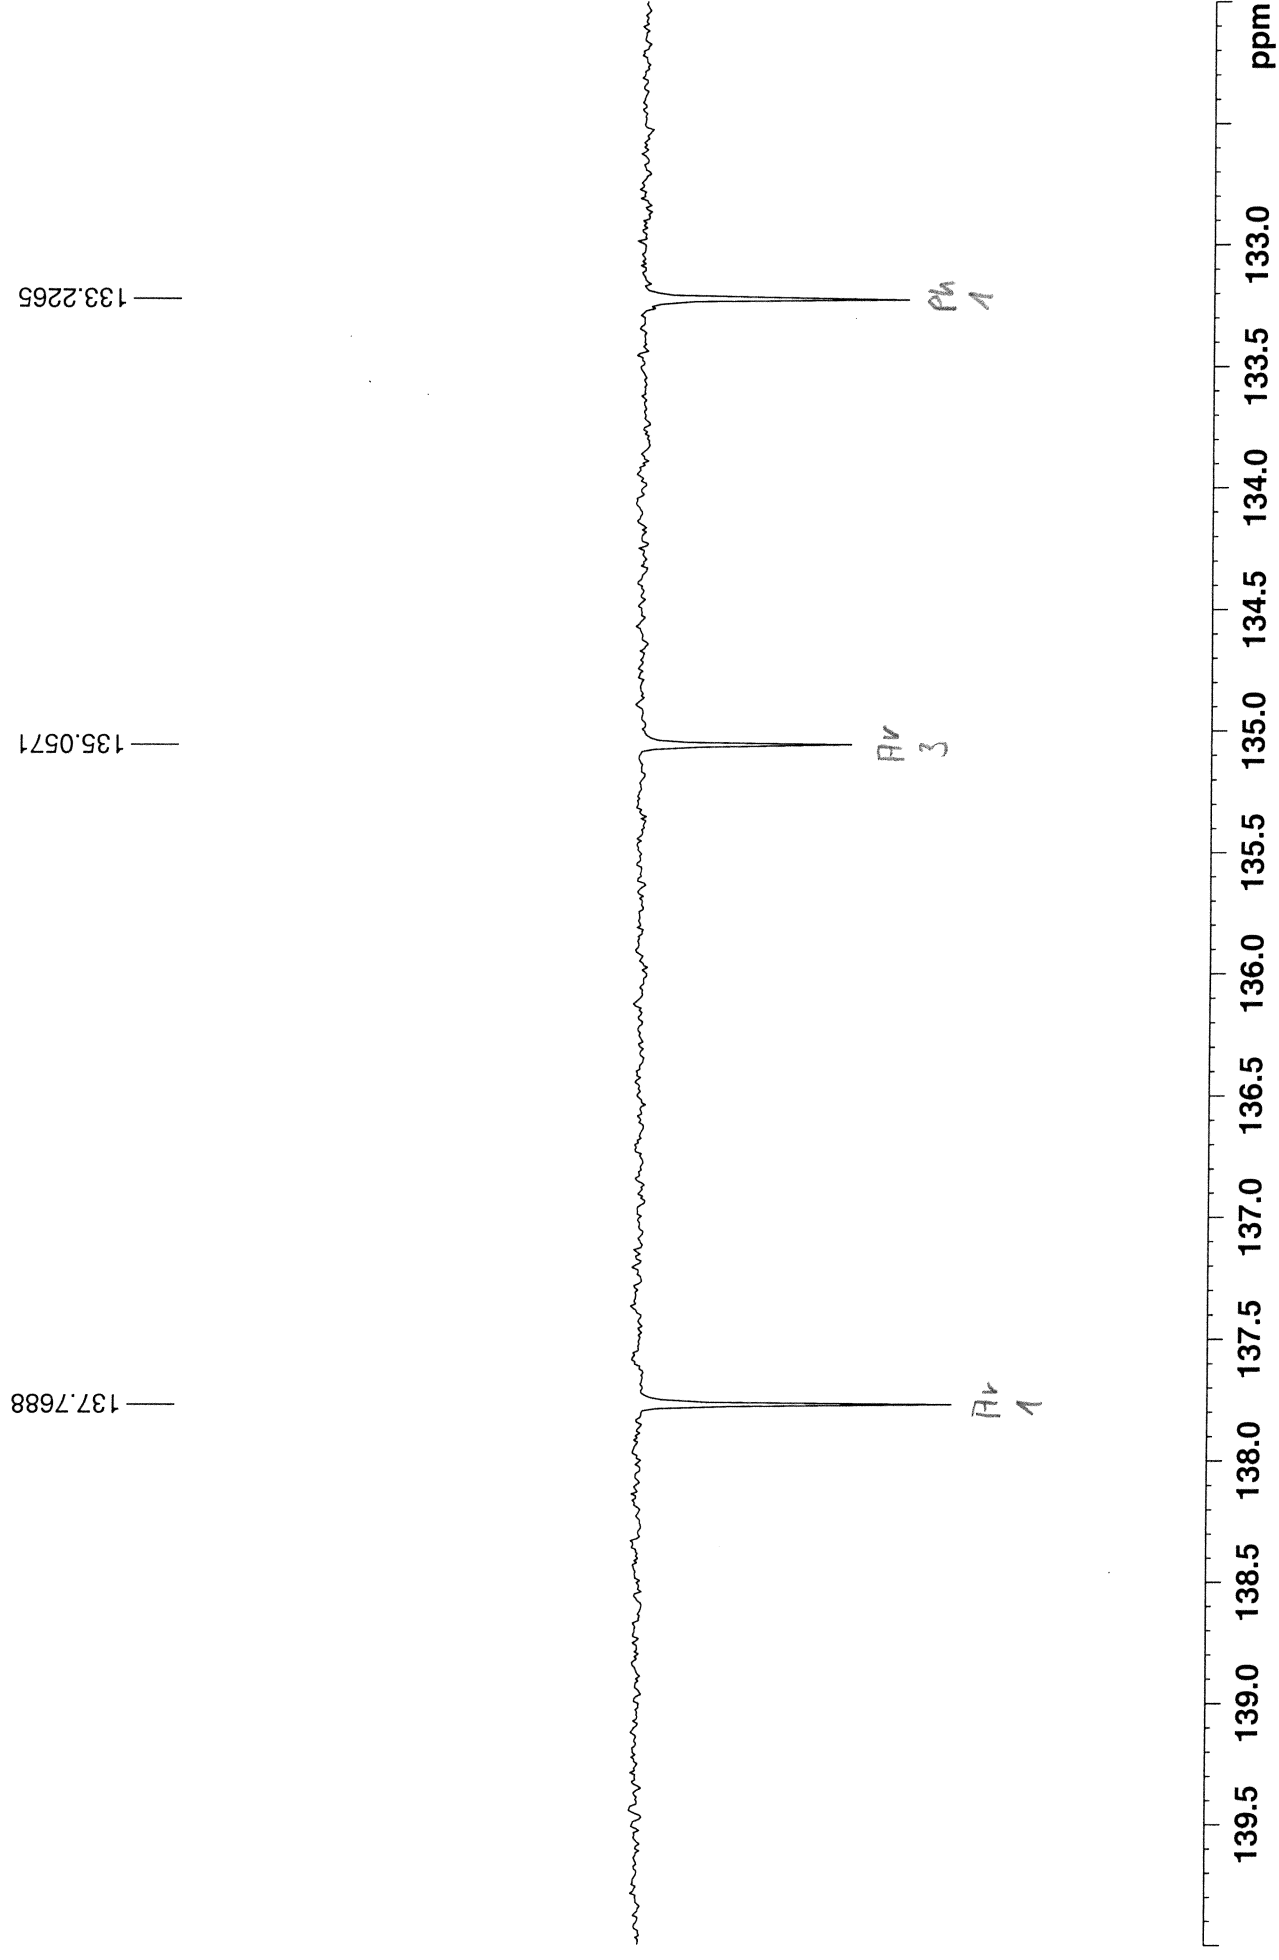

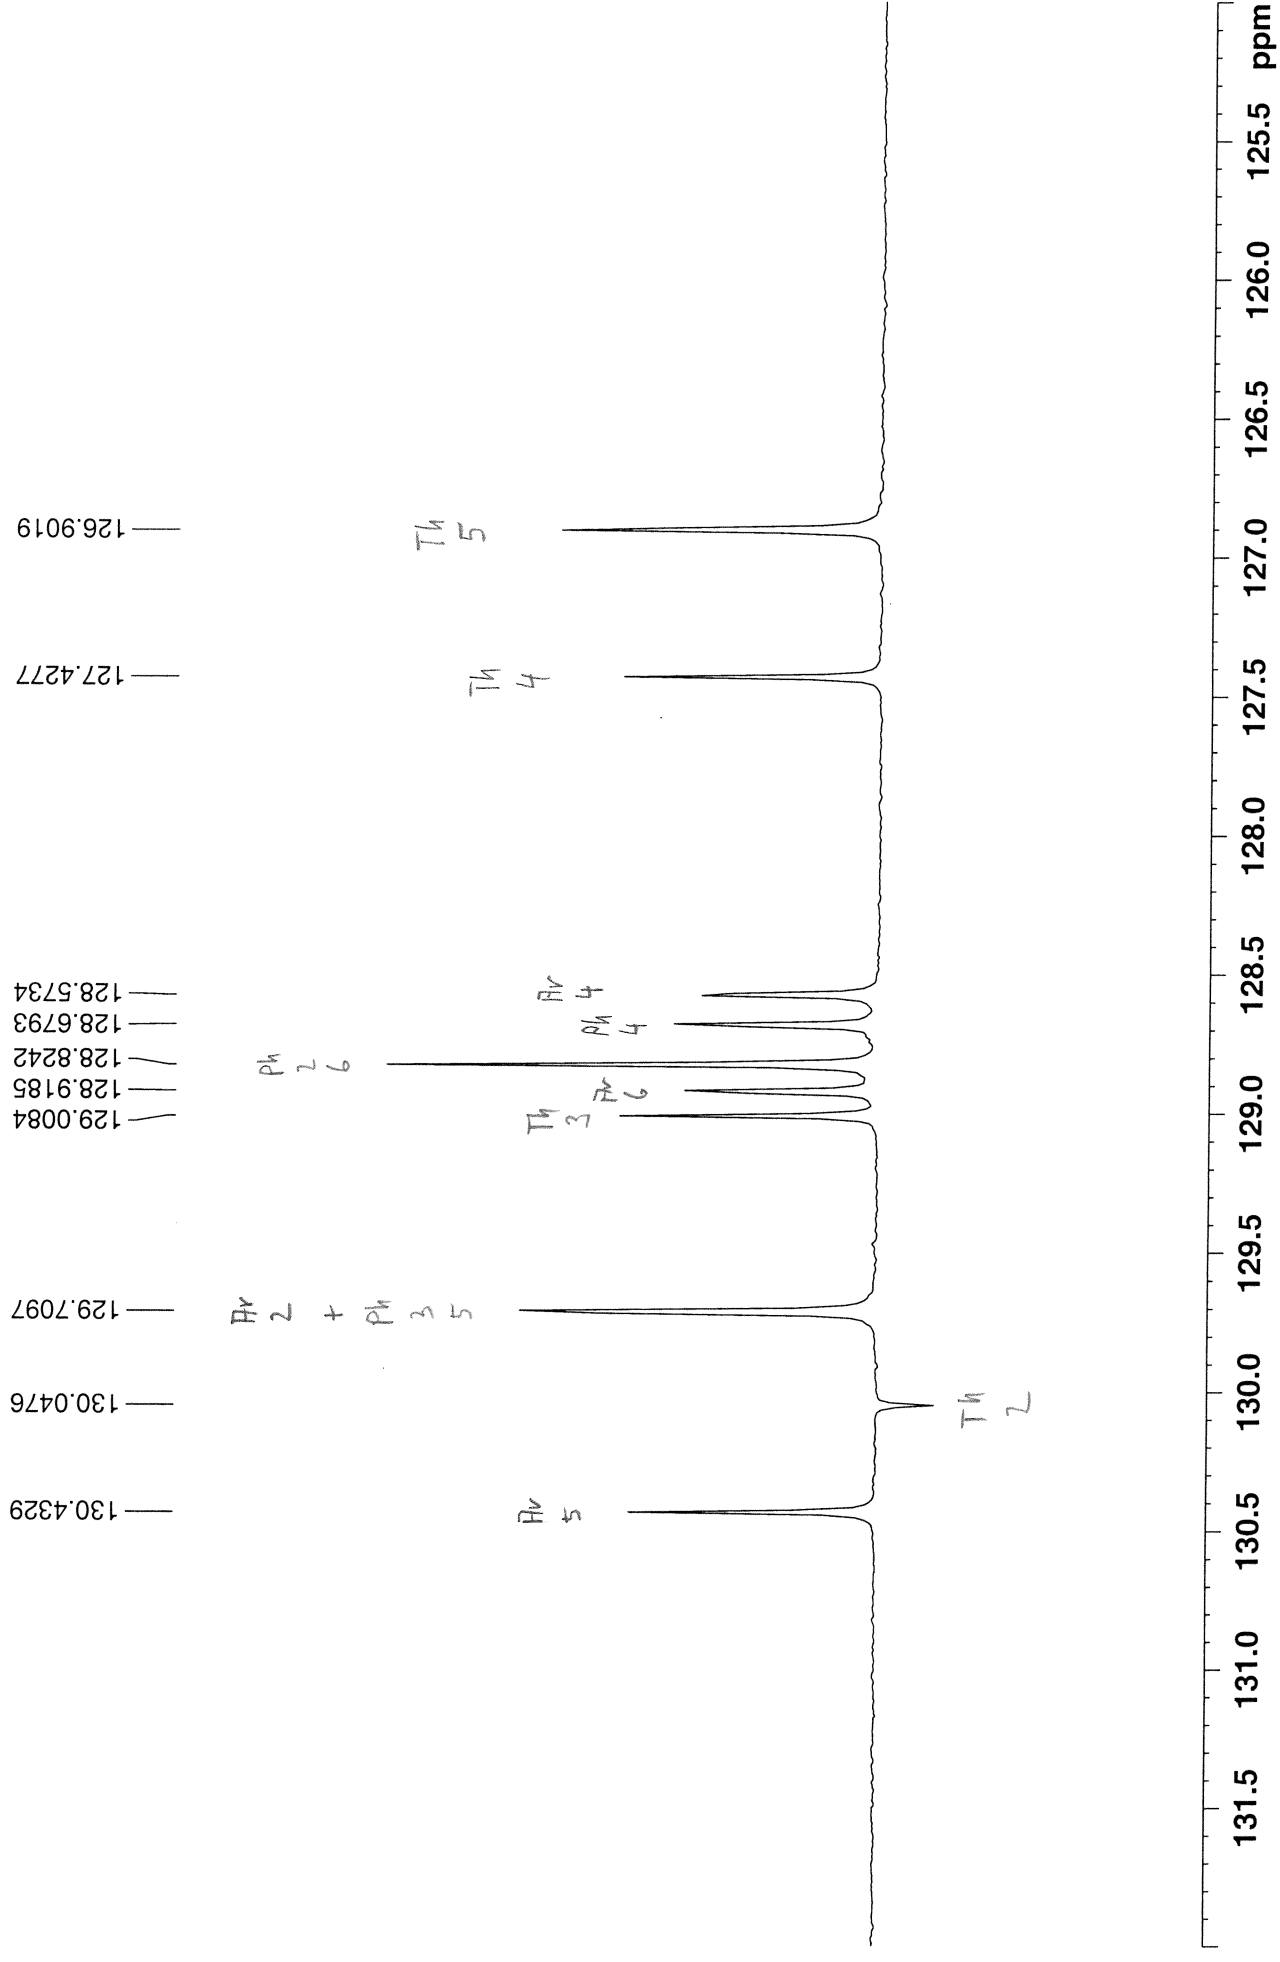

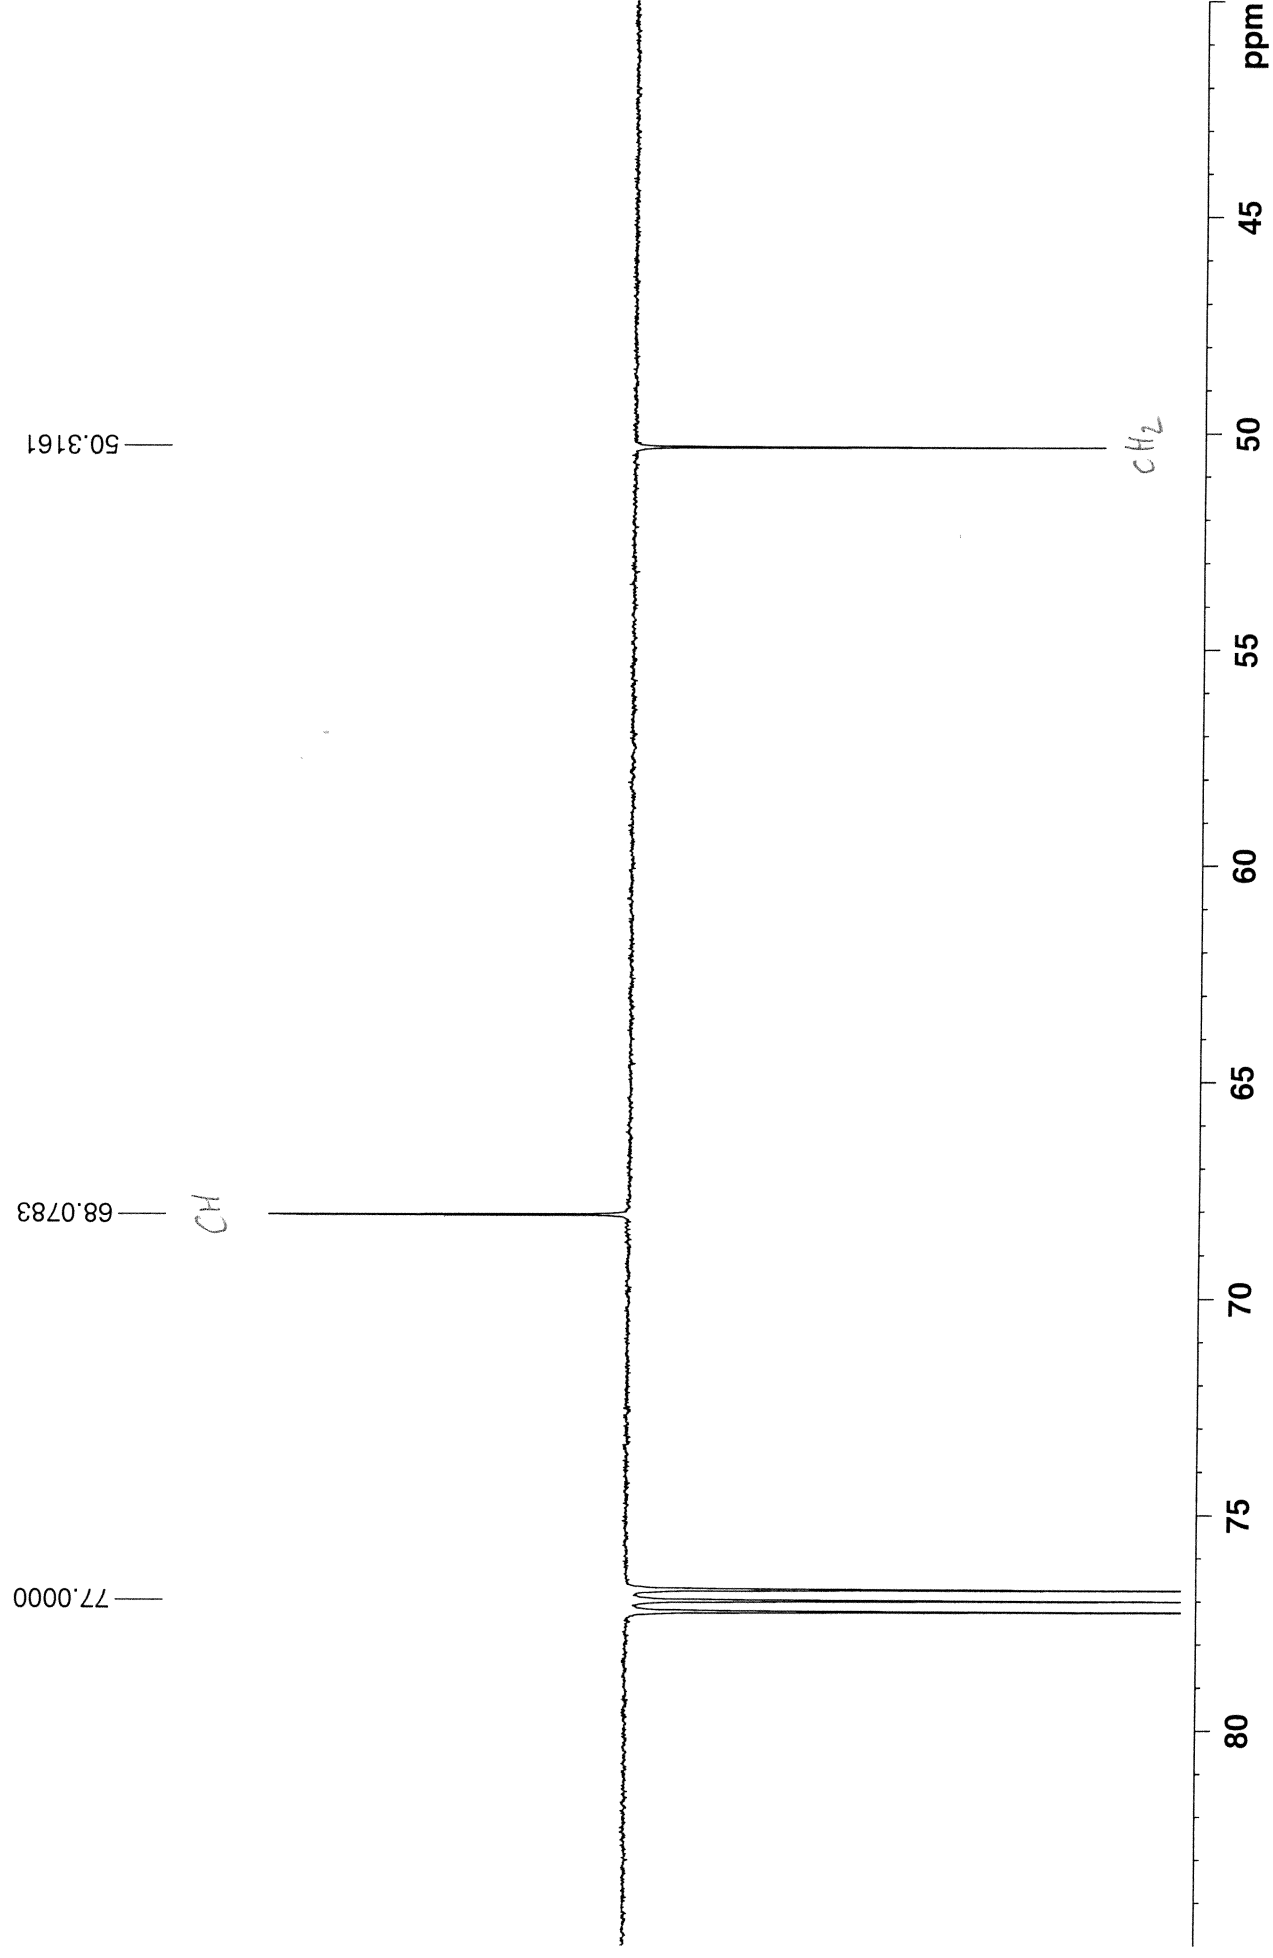

**Figure S21c.** NMR spectra of compound **5f**.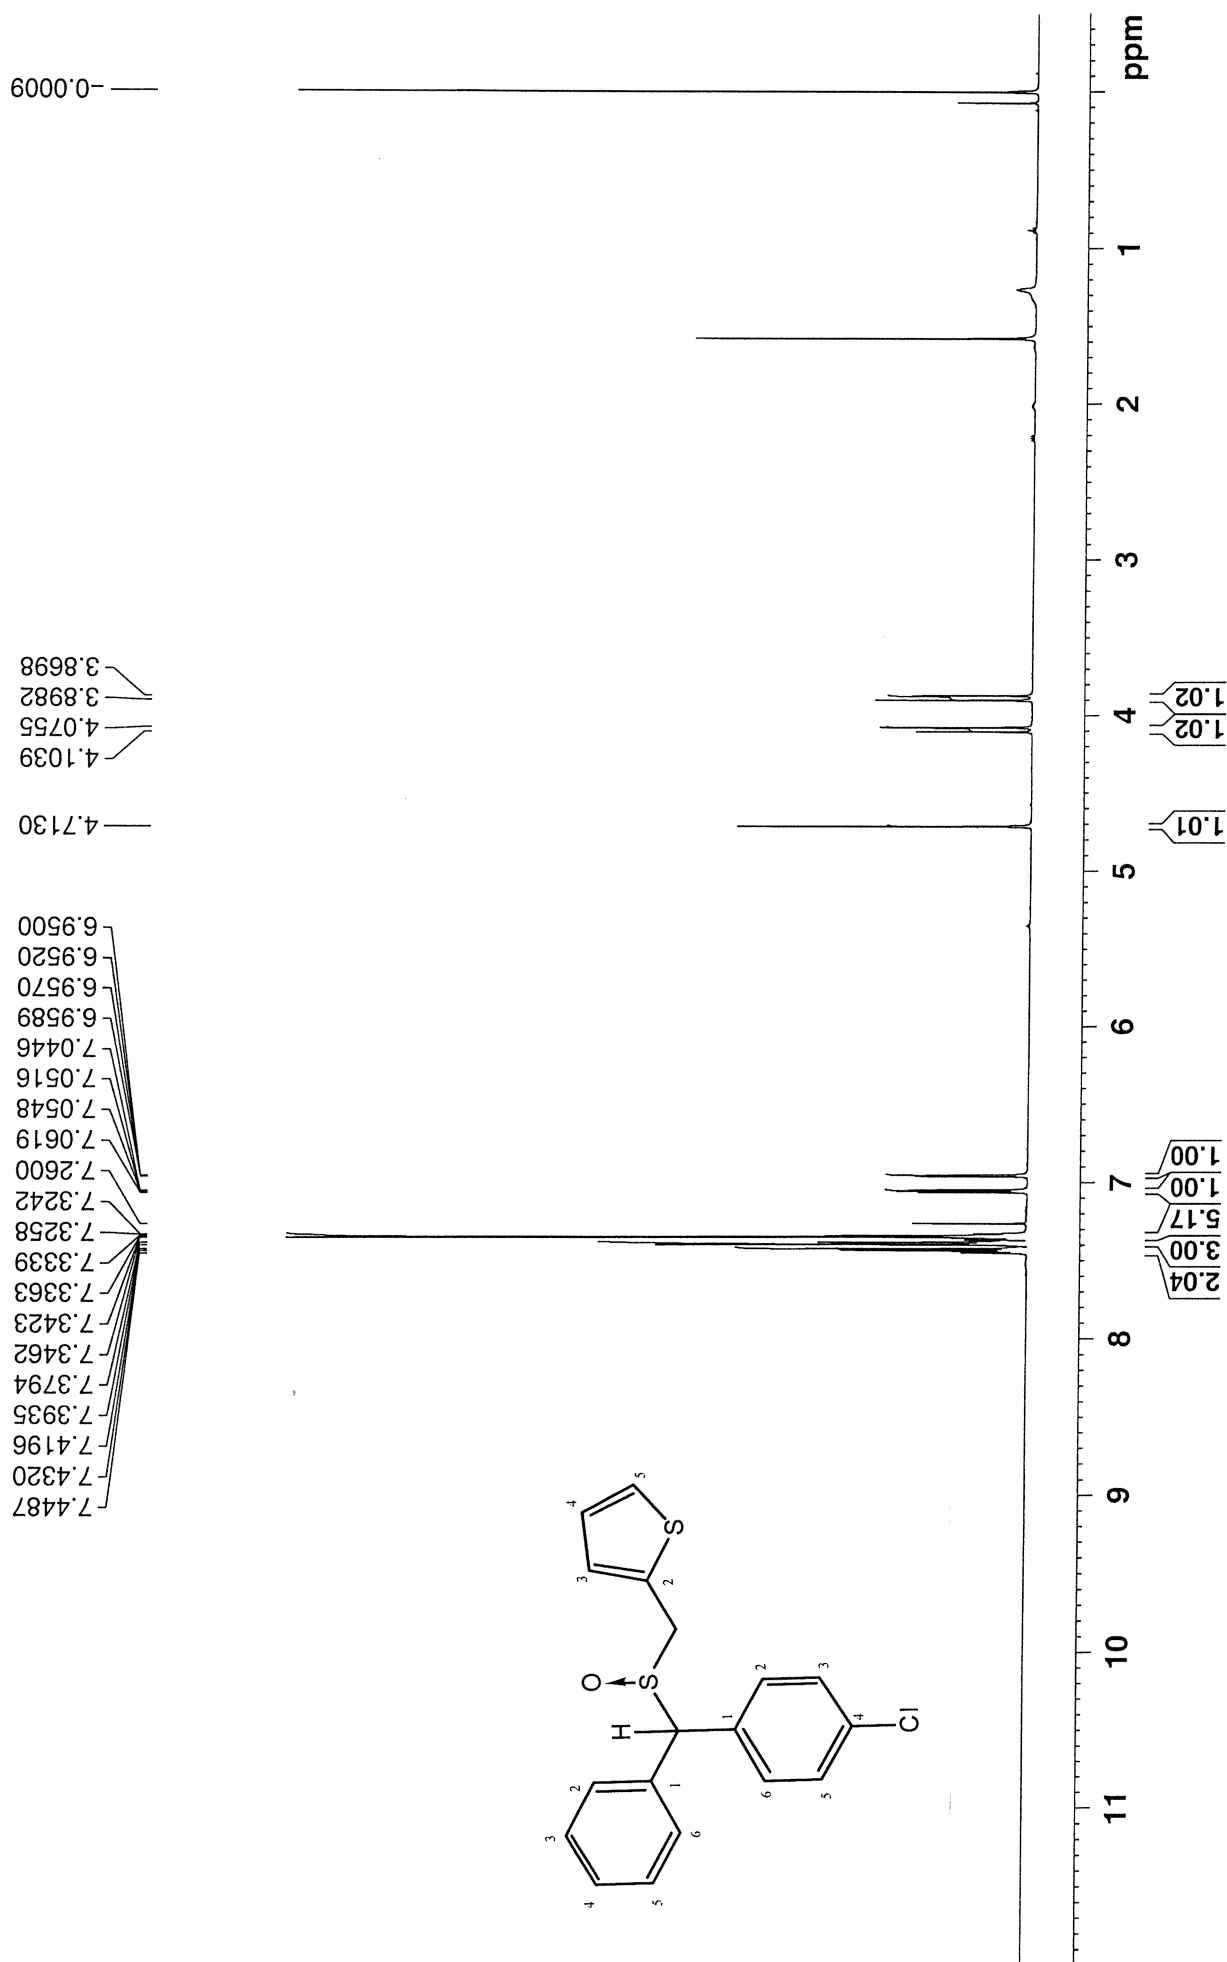

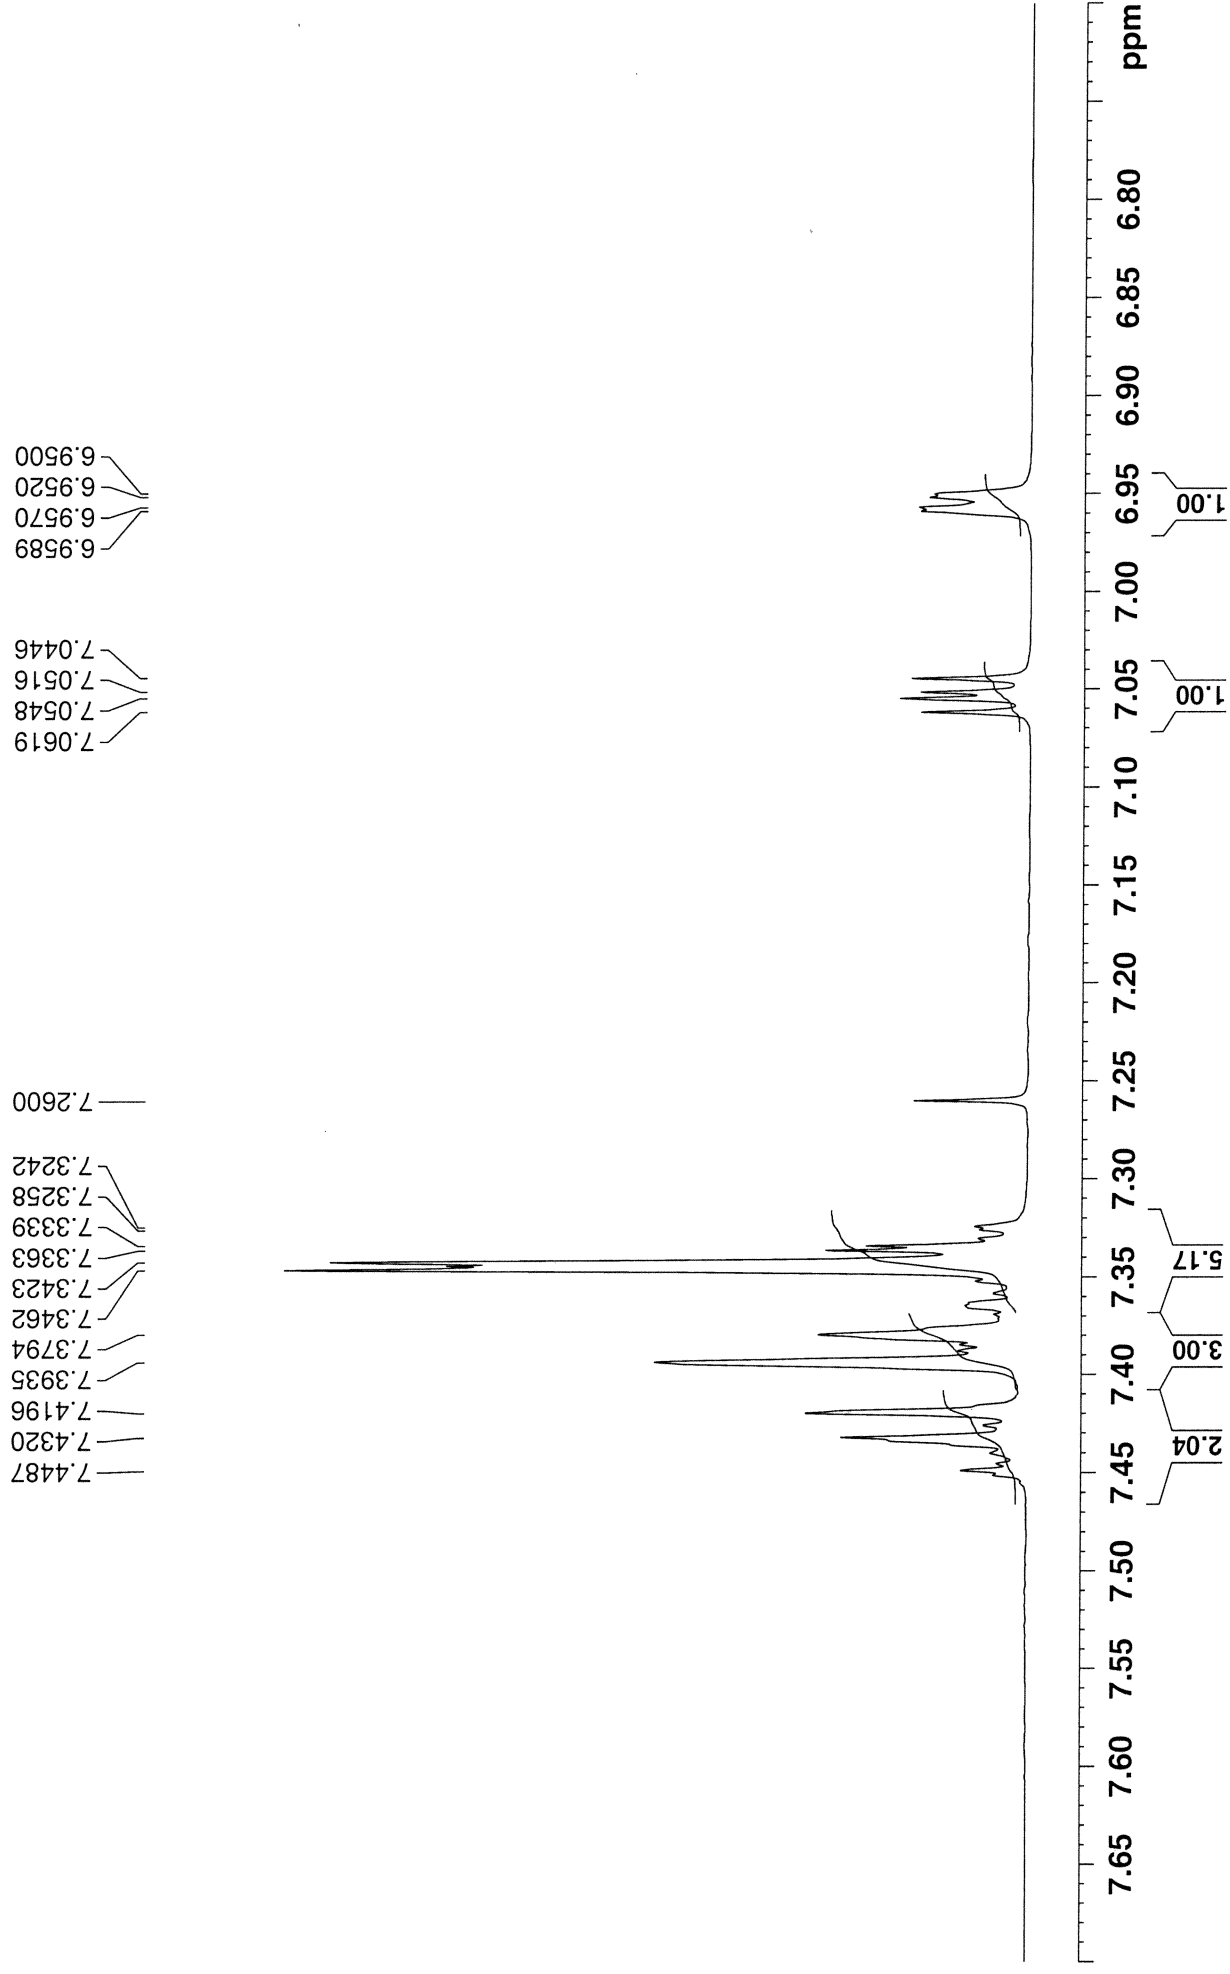

CE140-S1P1 in cdcl3 (Proton) 29.8.2018

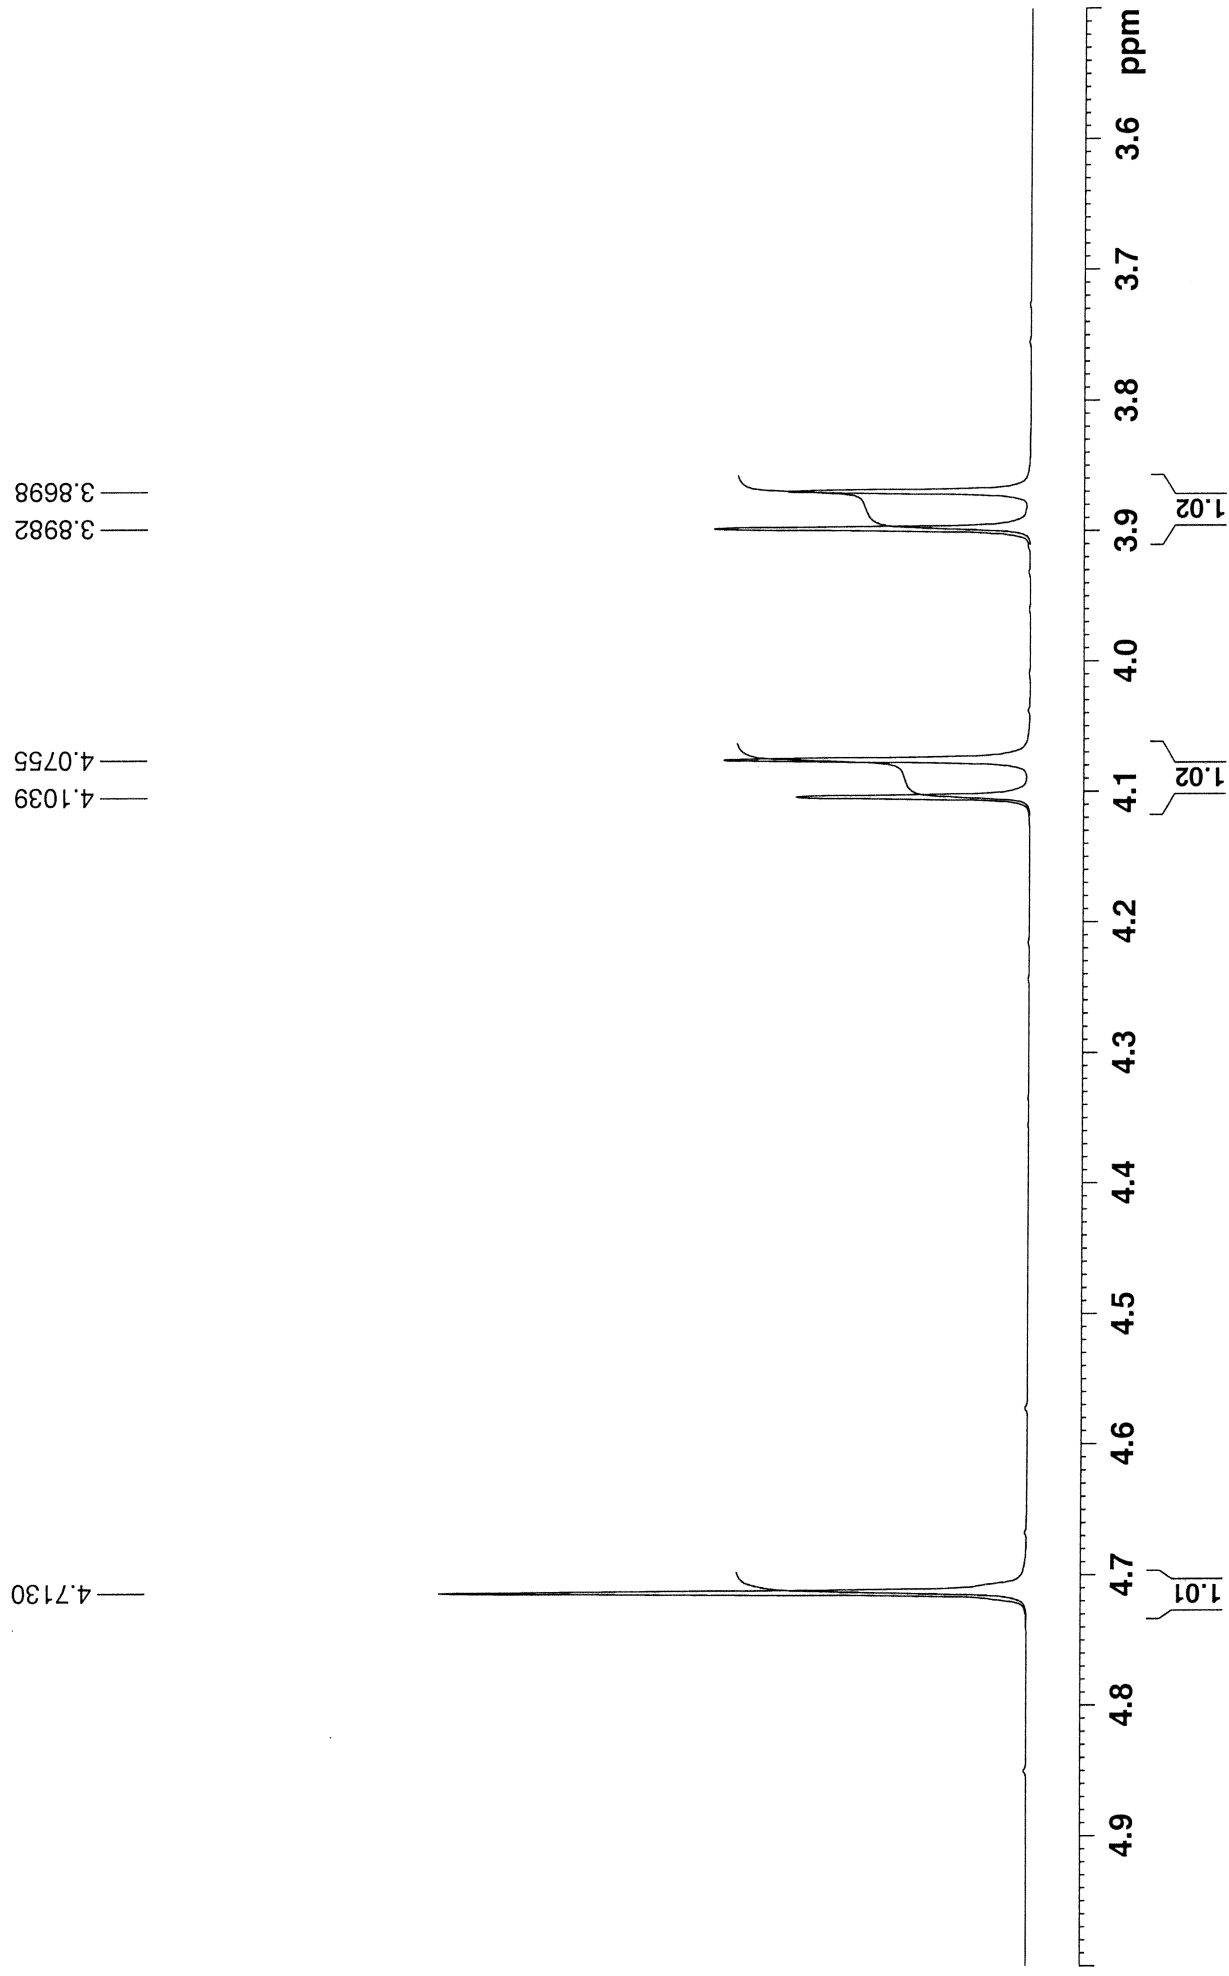

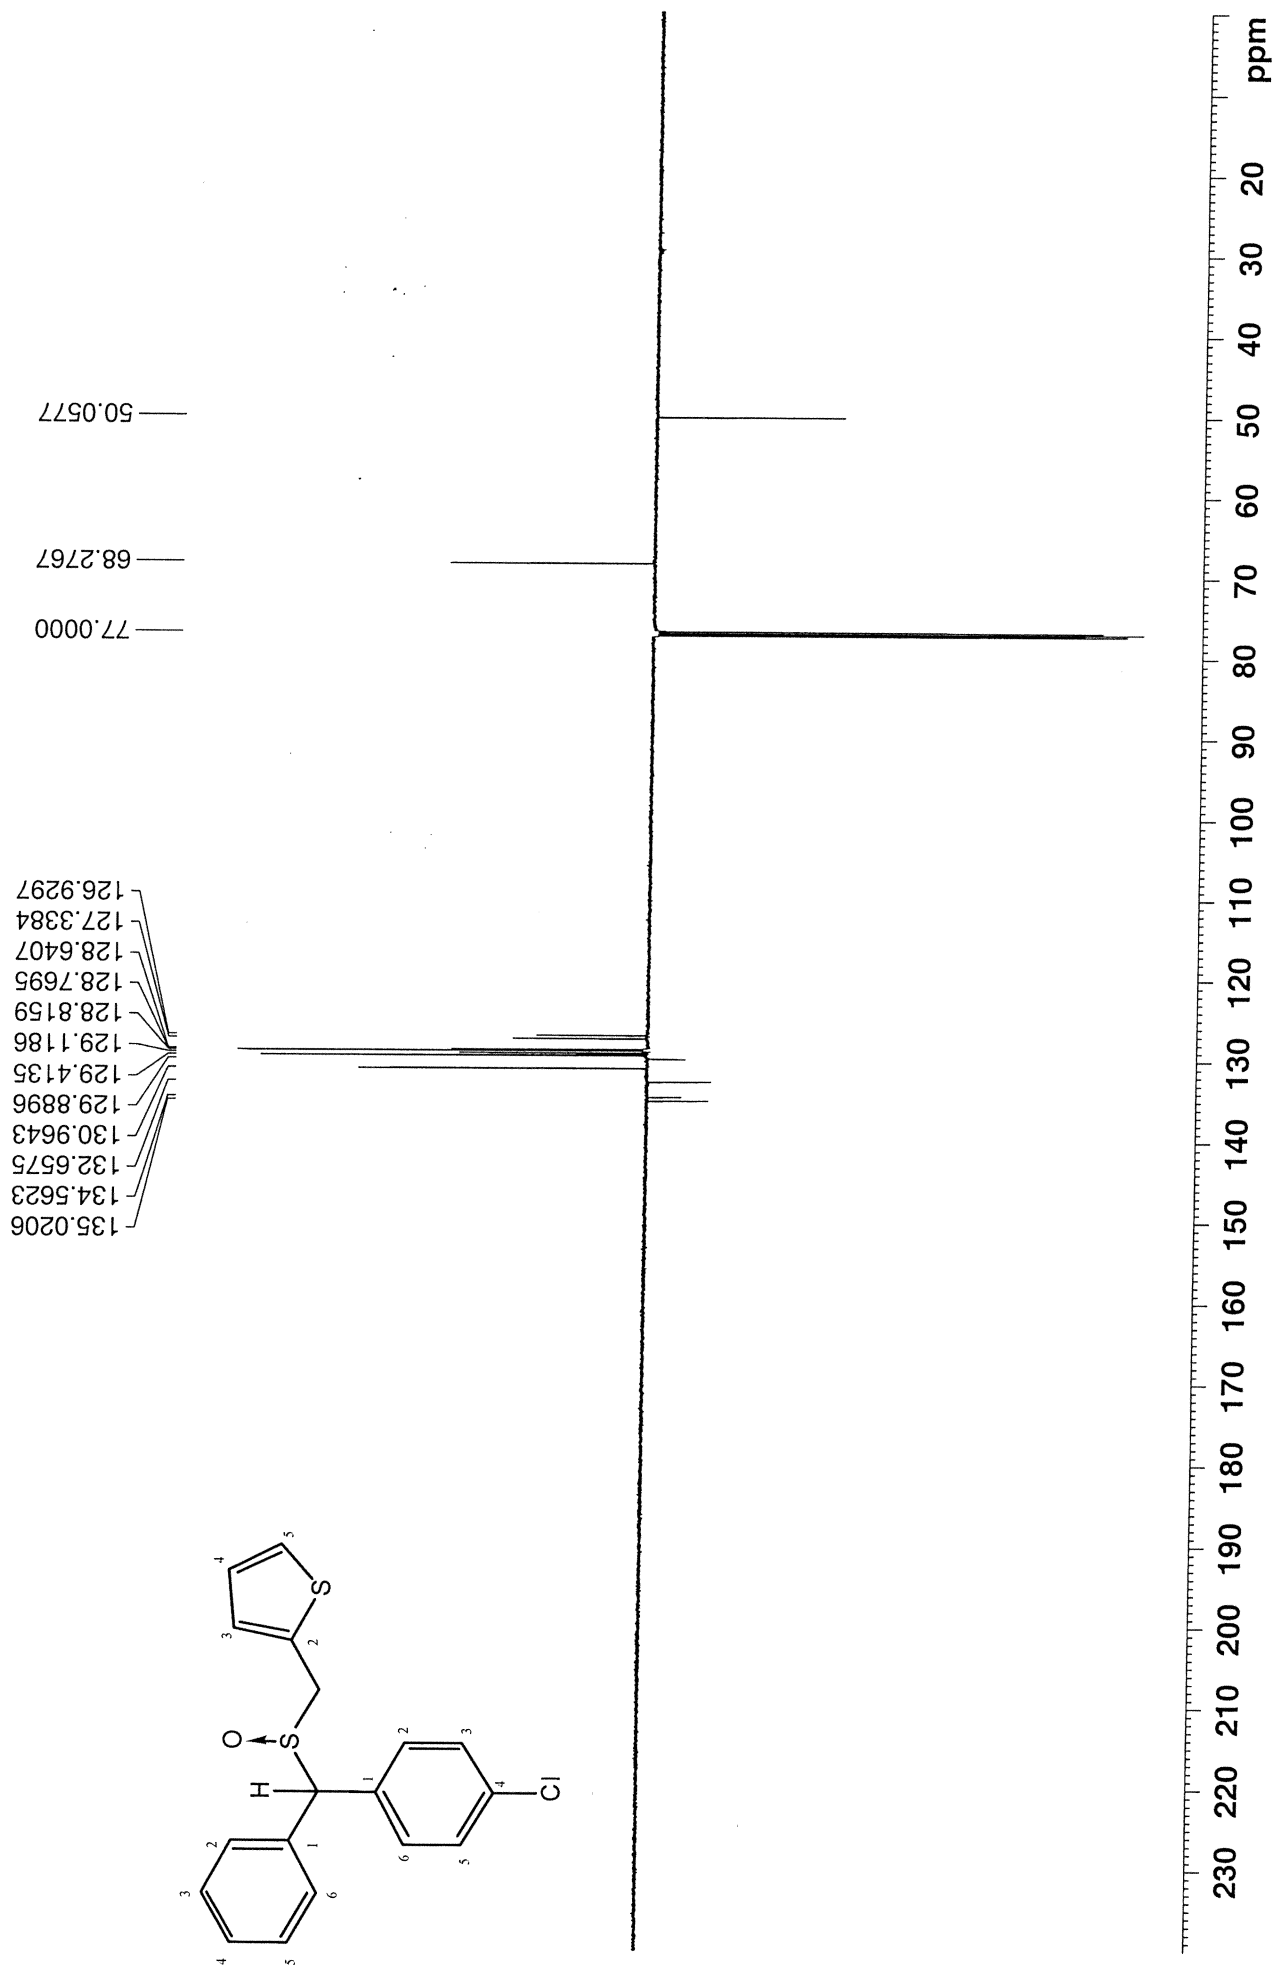



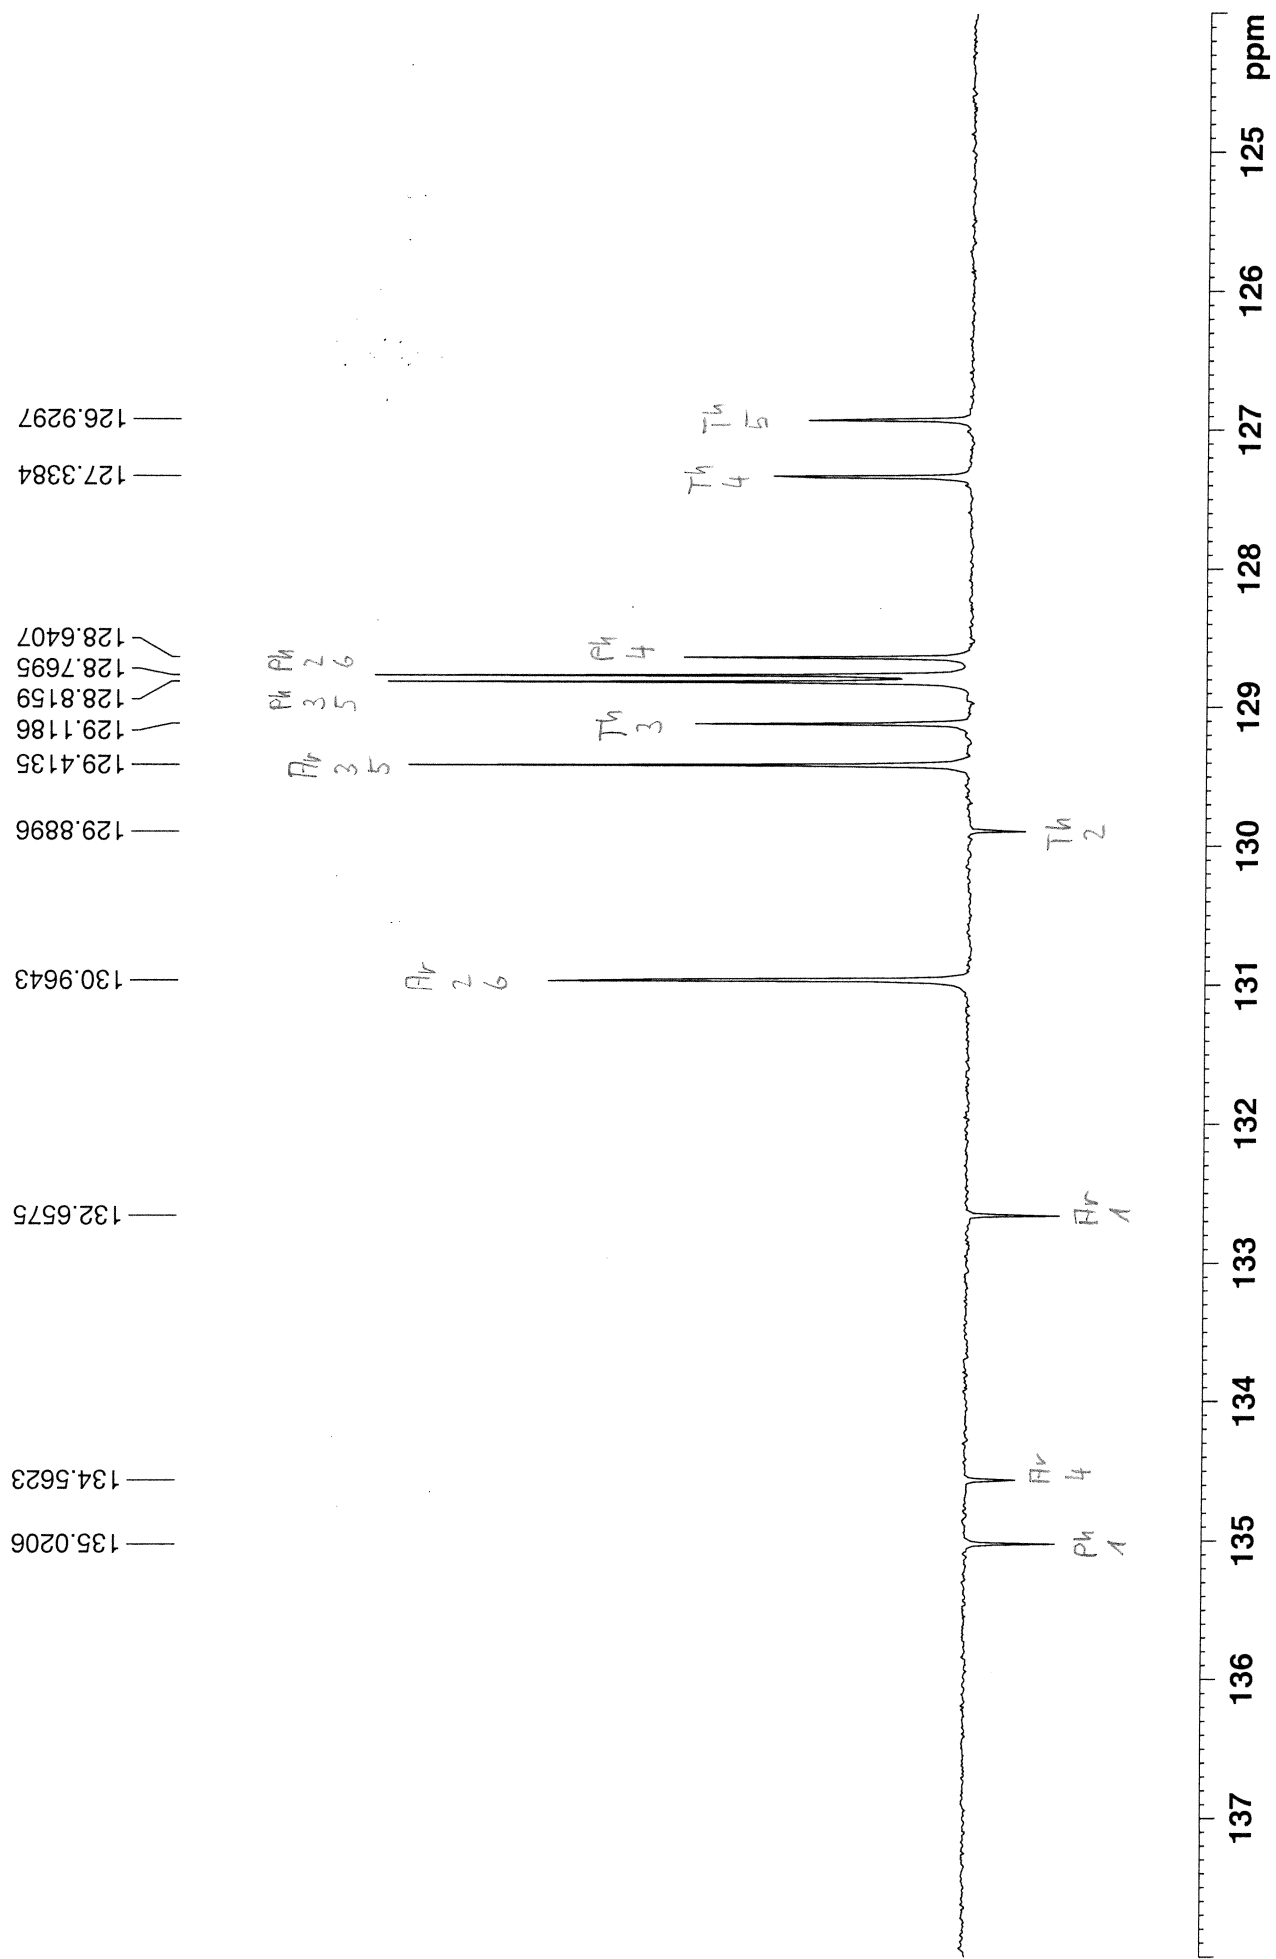

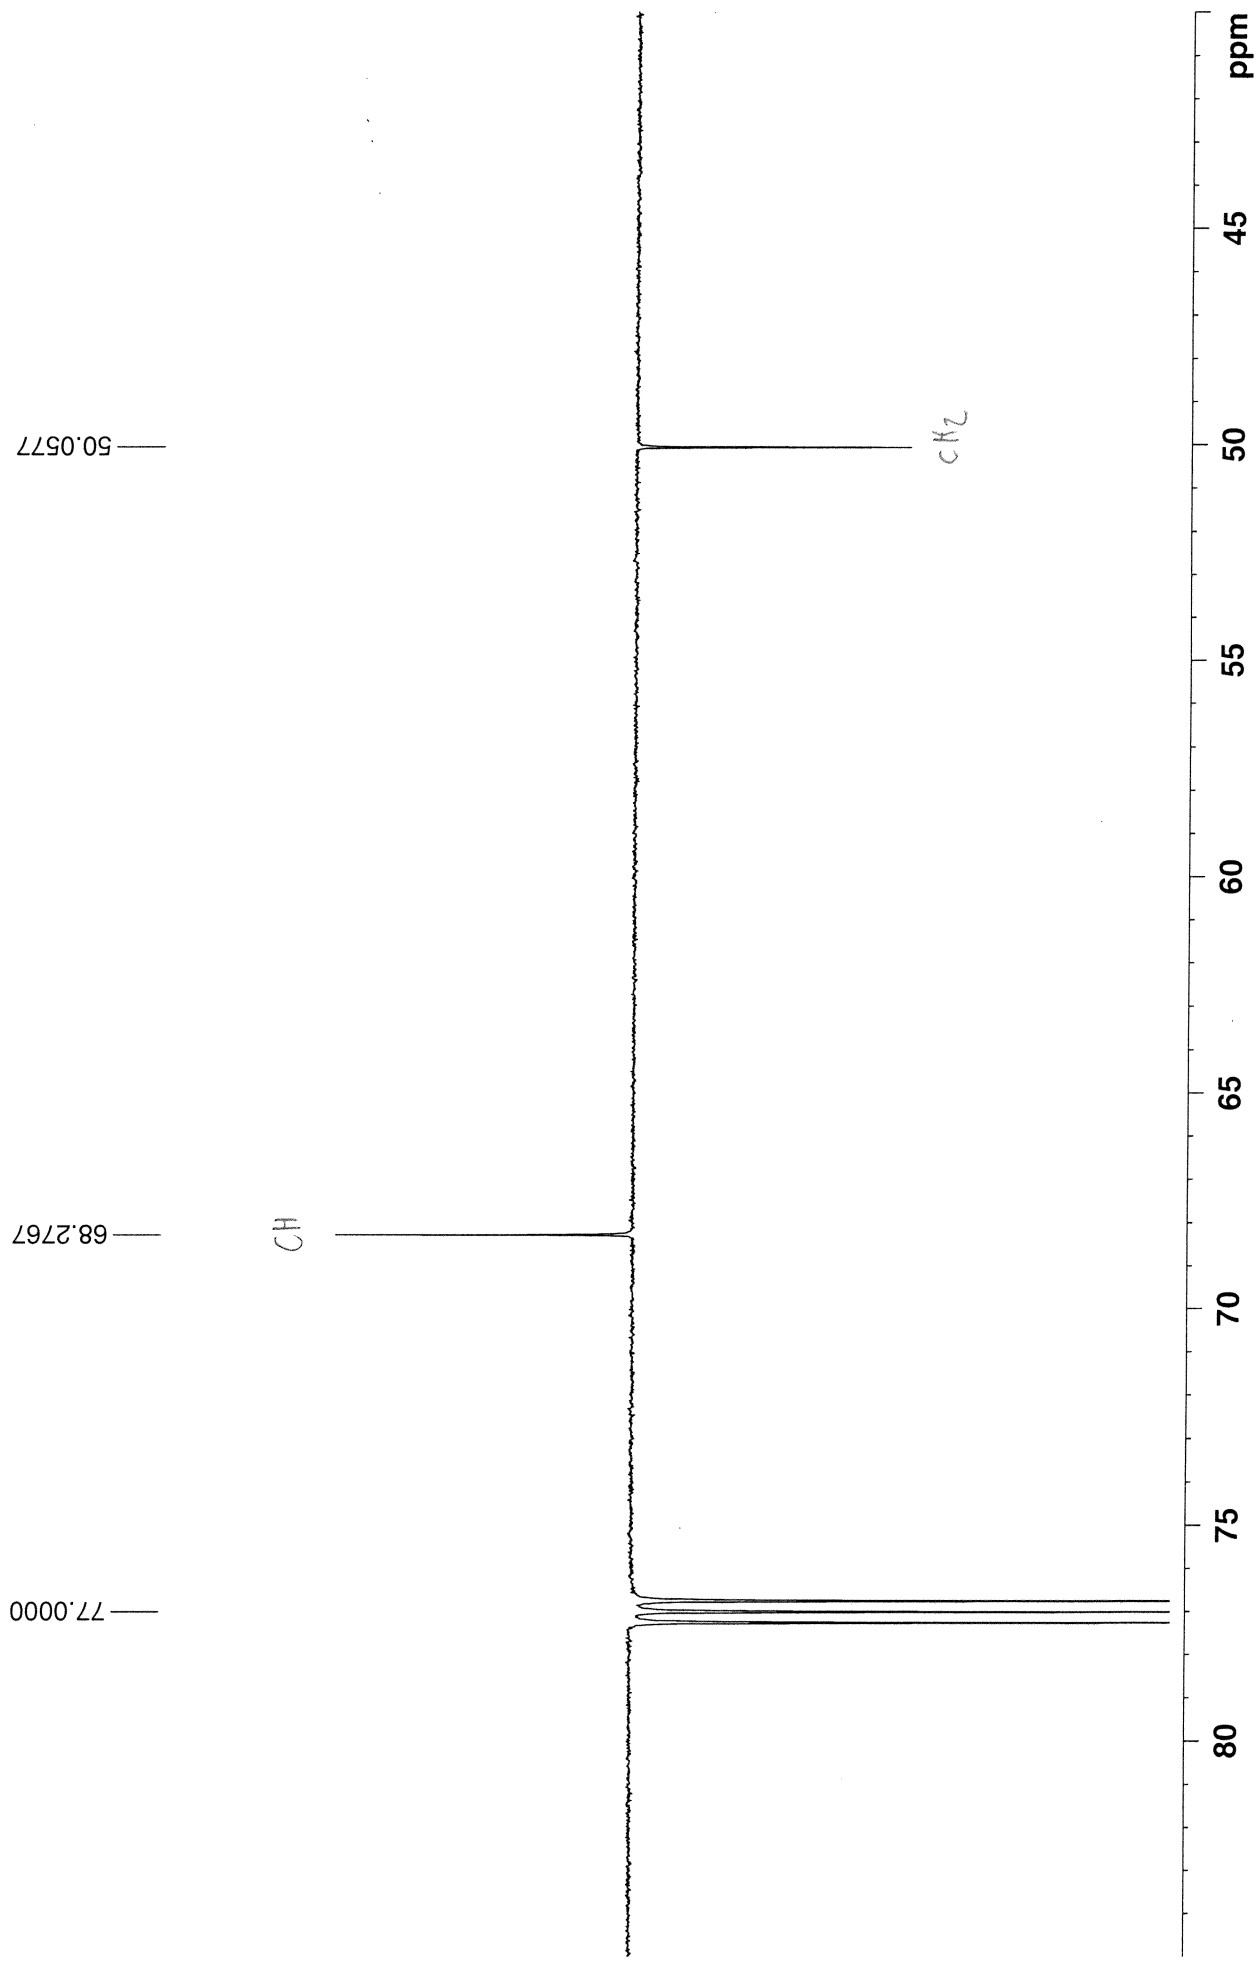

**Figure S22c.** NMR spectra of compound **6f**.

CE140-S1P2 in cdcl3 (Proton) 29.8.2018

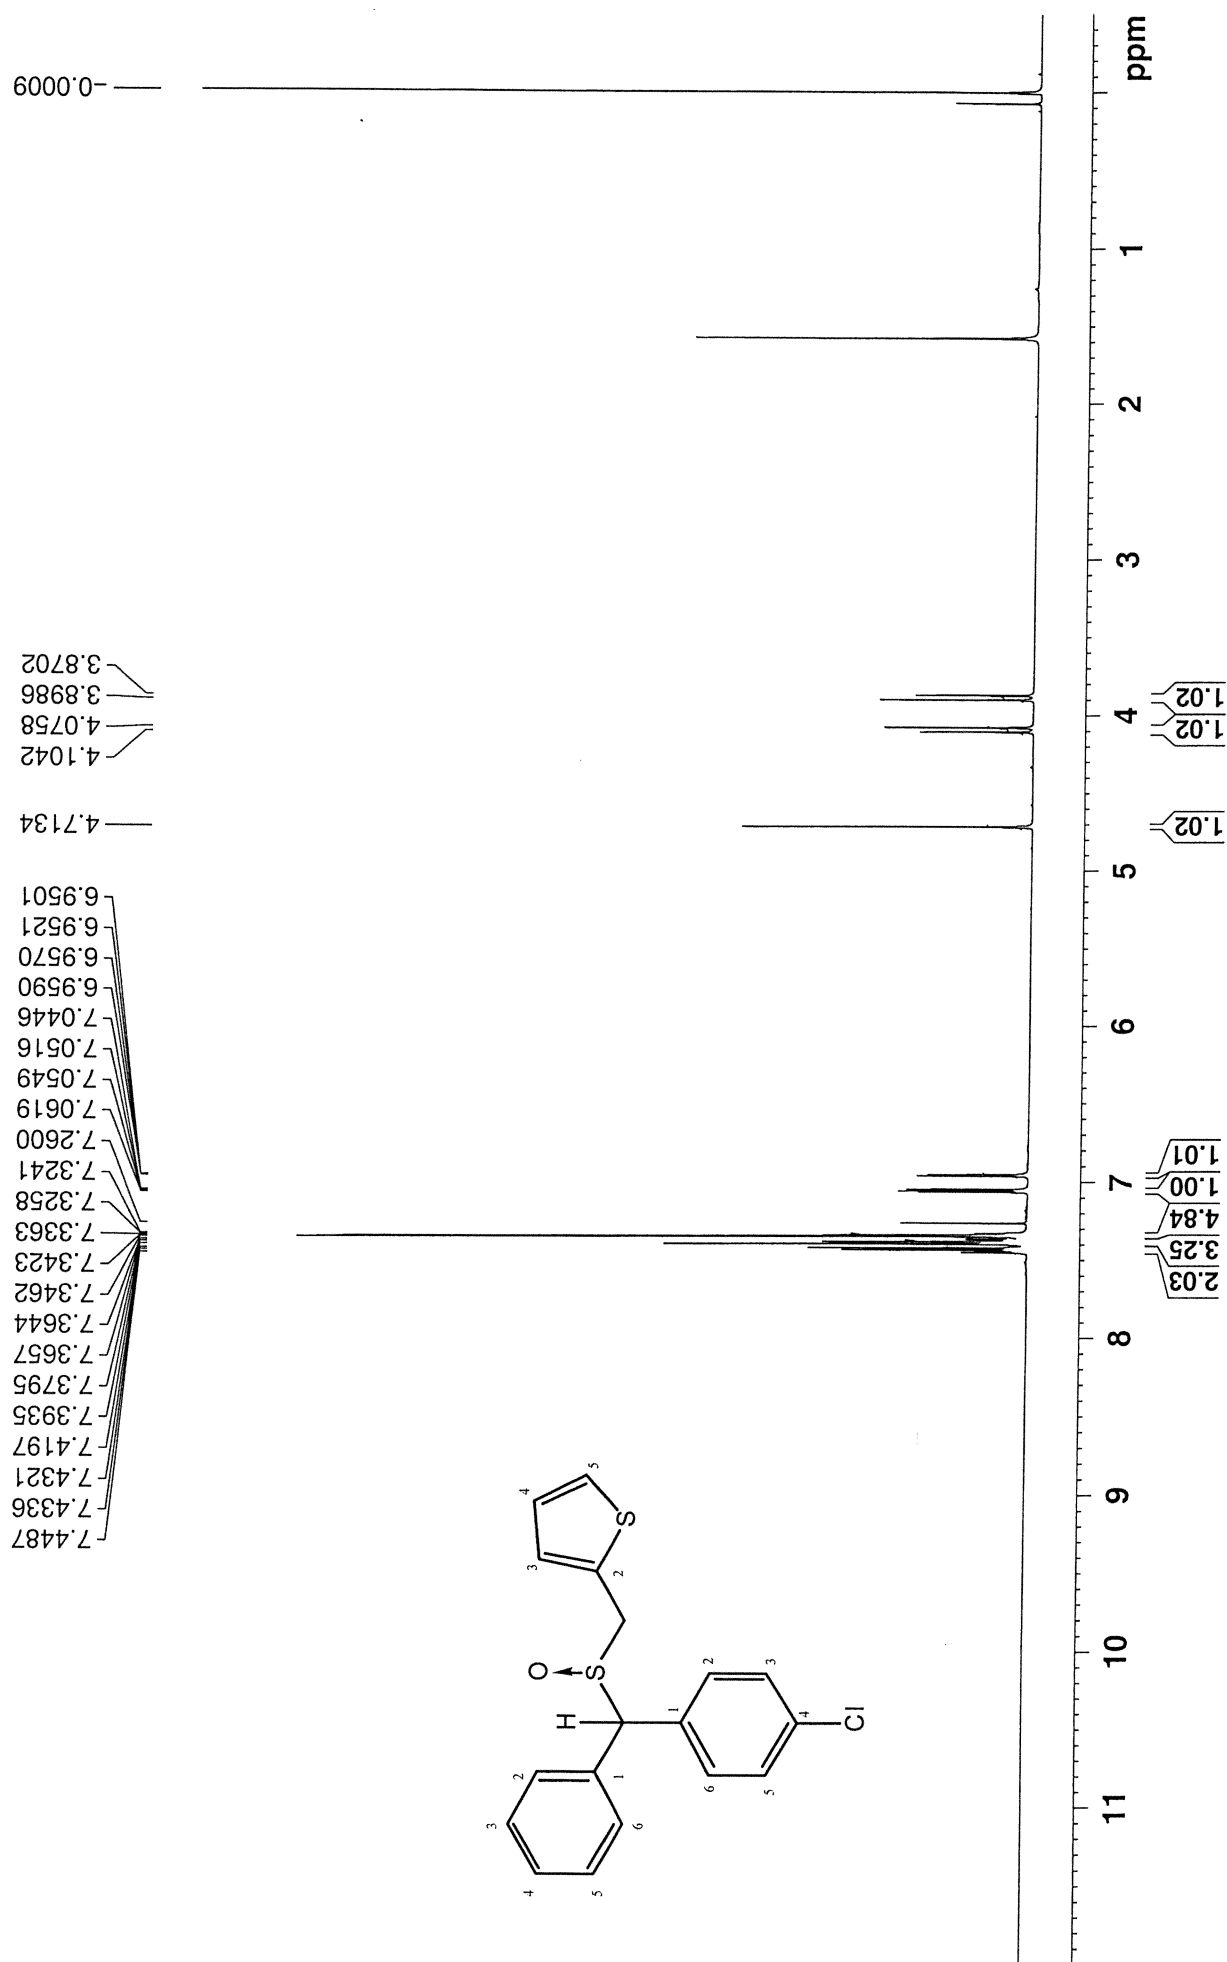

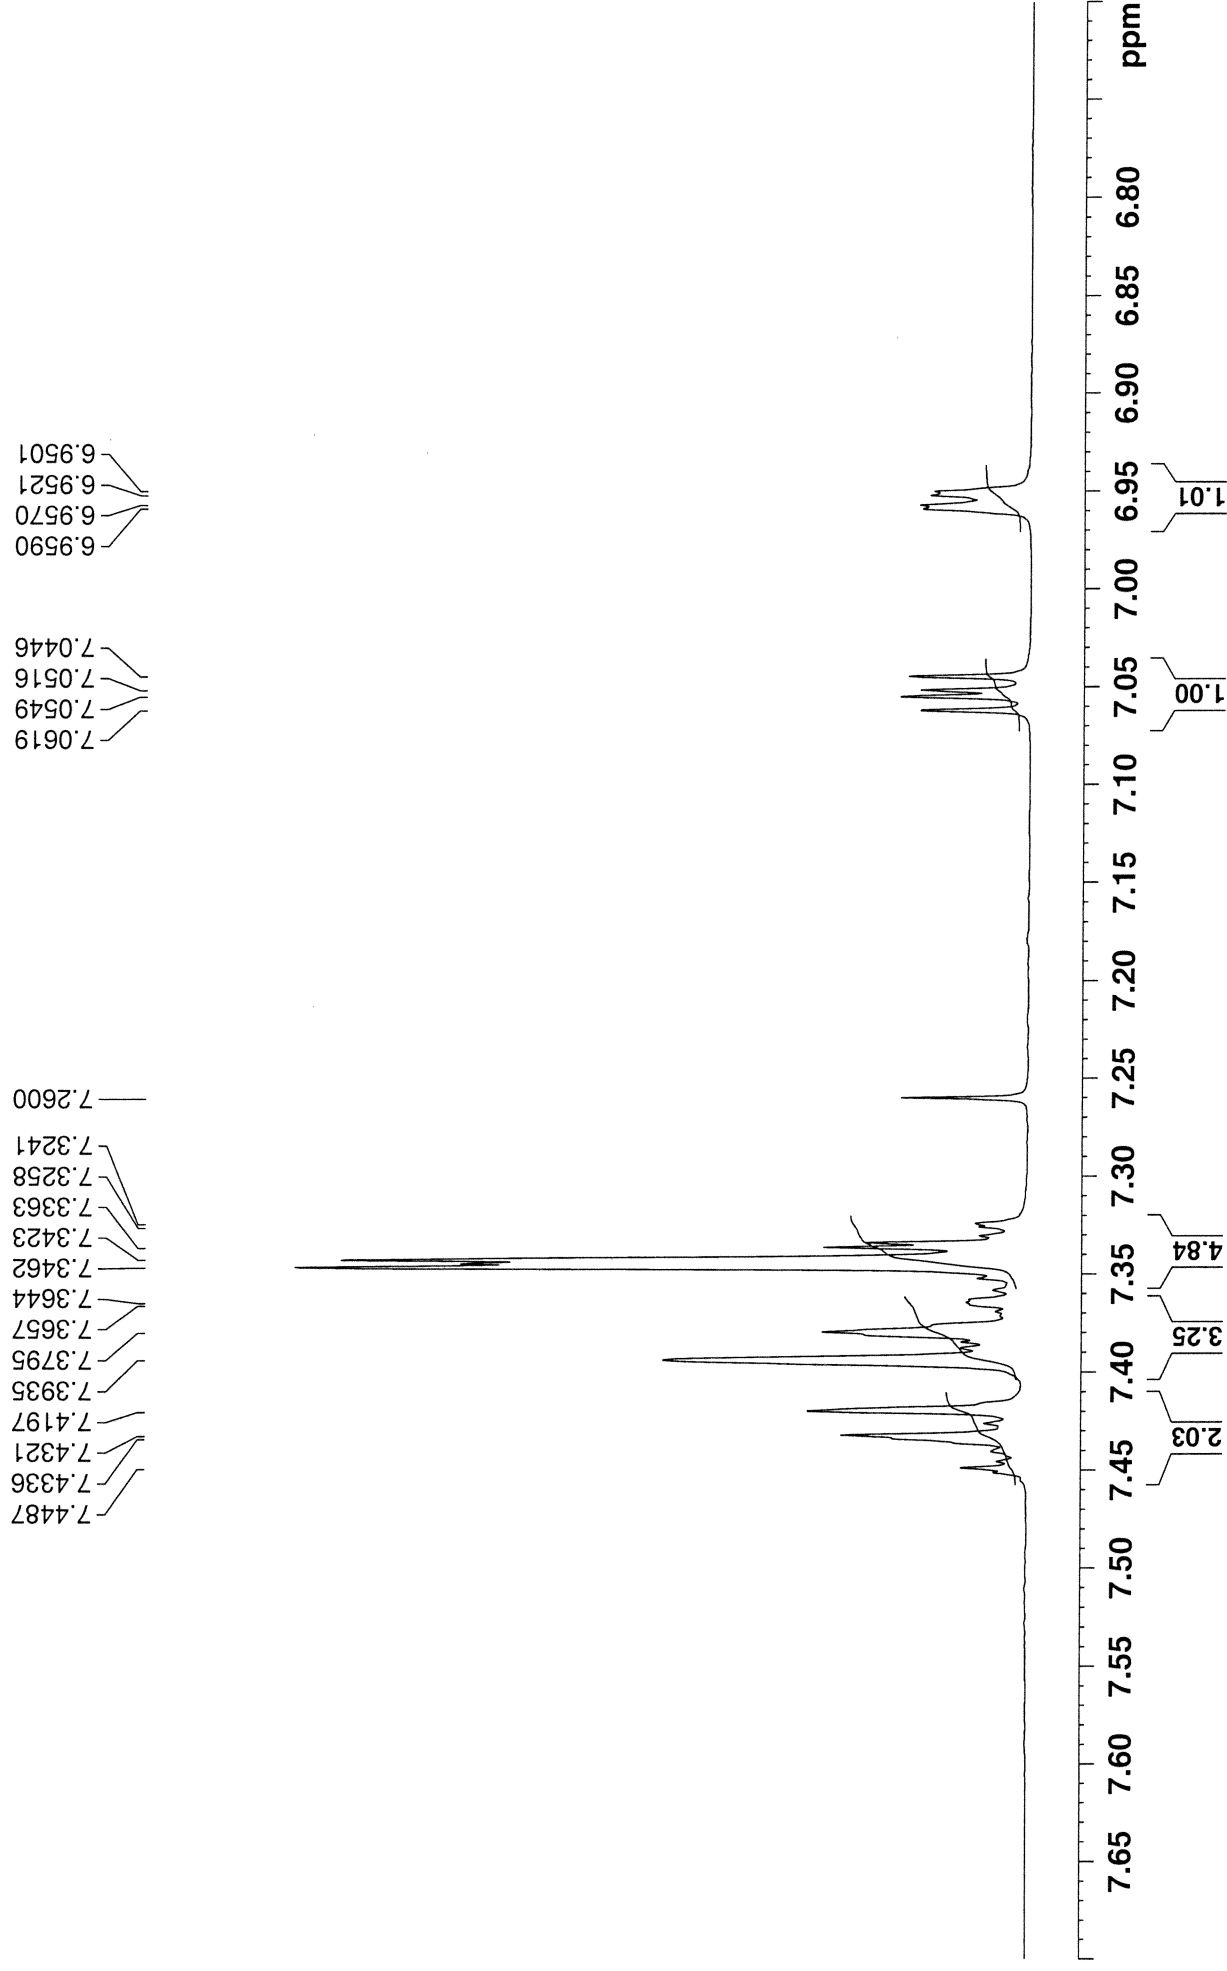

CE140-S1P2 in cdcl3 (Proton) 29.8.2018

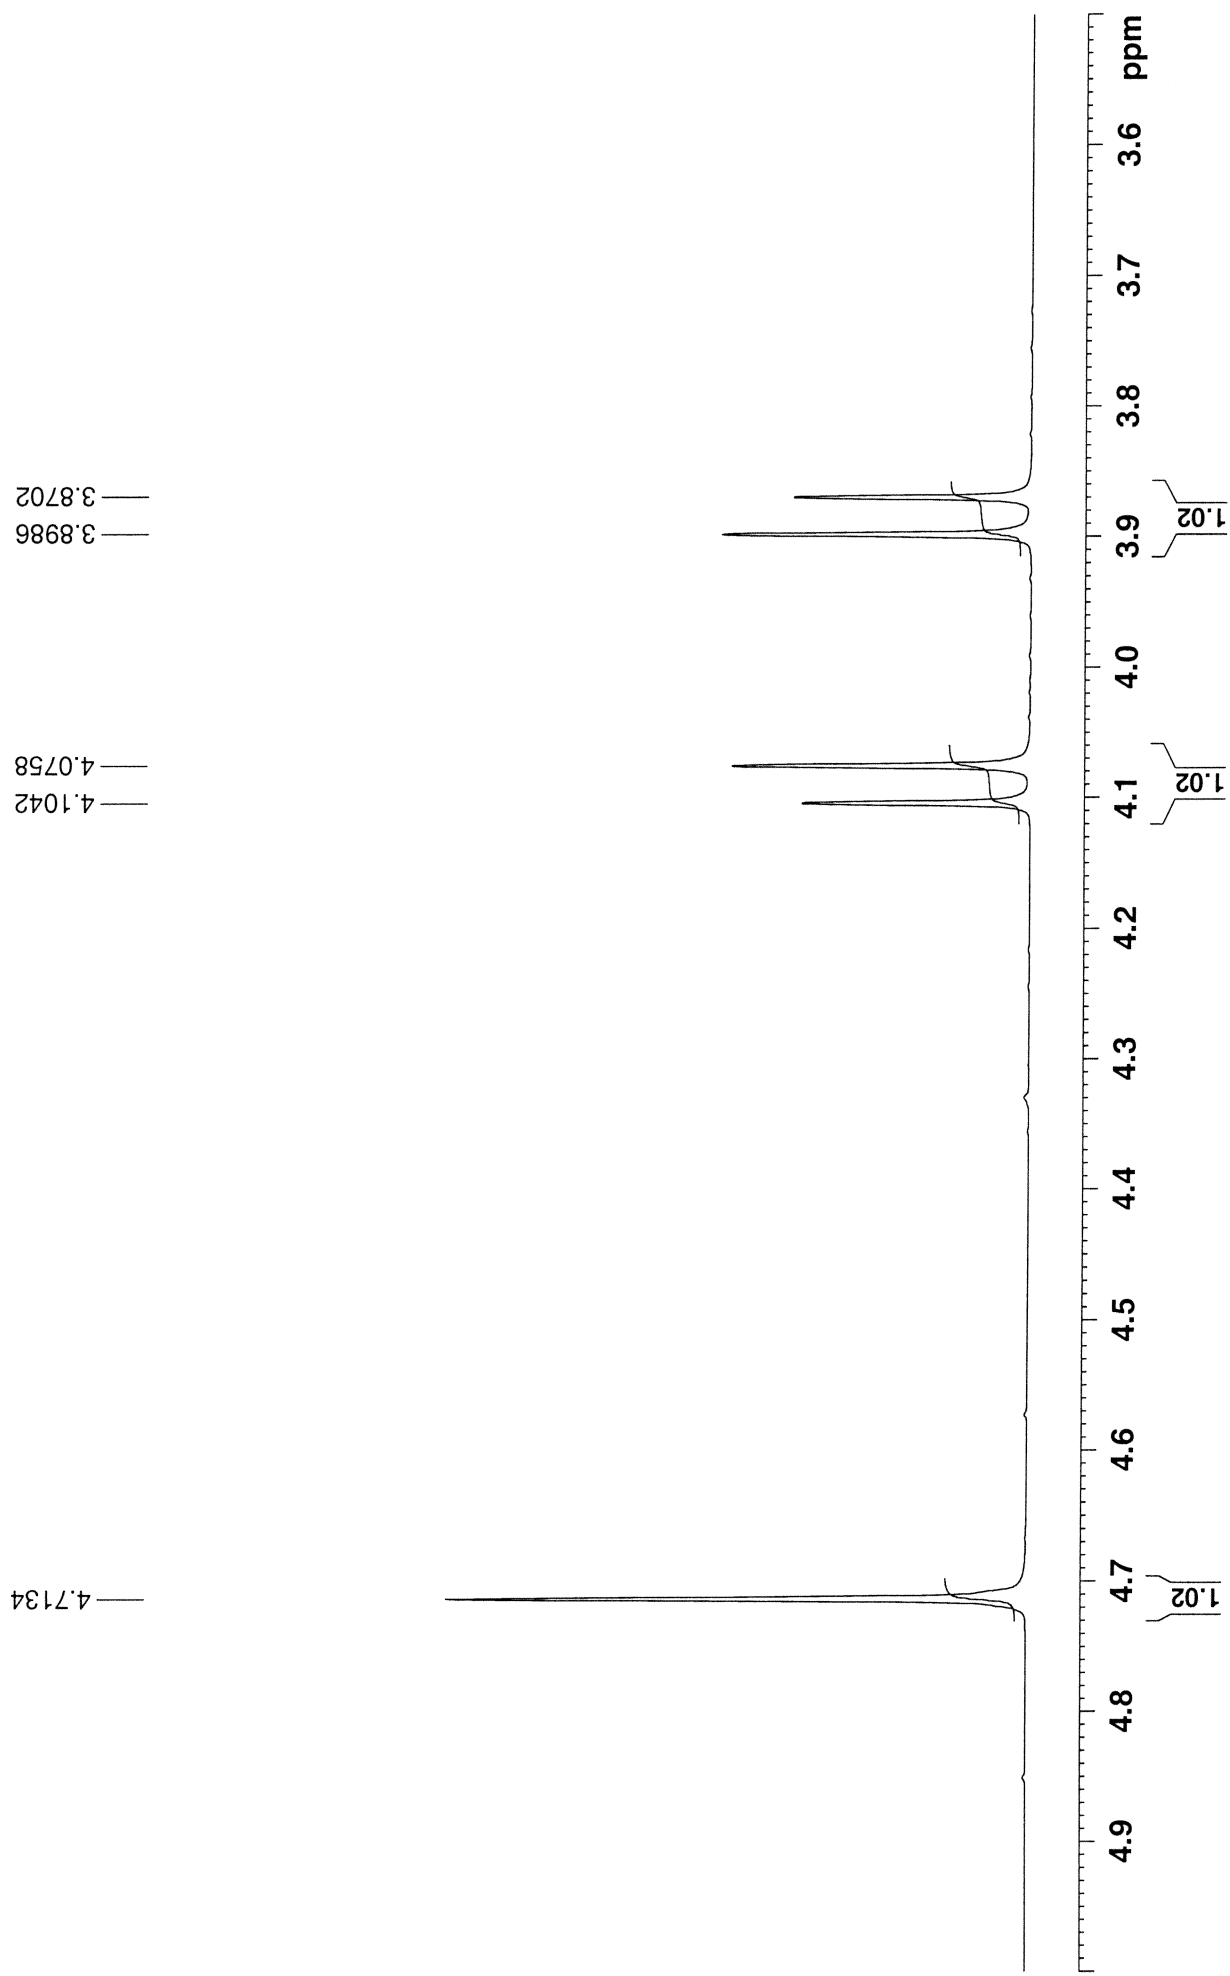

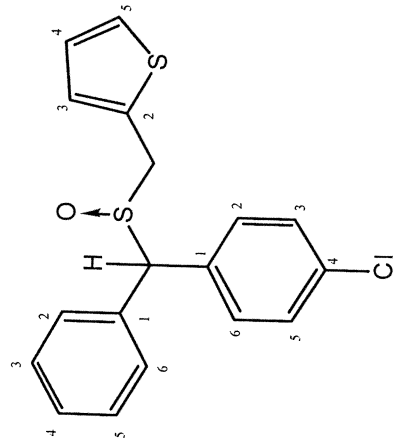

135.0194  
134.5614  
132.6566  
130.9613  
129.8880  
129.4126  
129.1178  
128.8150  
128.7685  
128.6398  
127.3375  
126.9289

77.0000  
68.2767  
50.0575

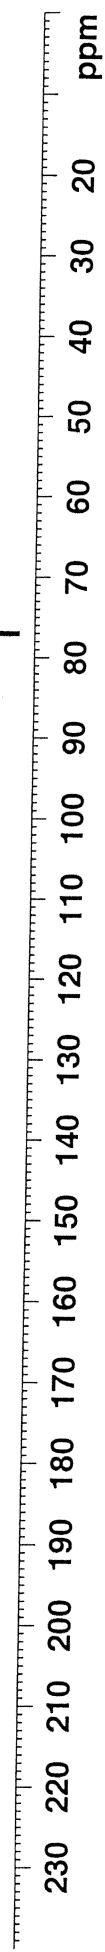

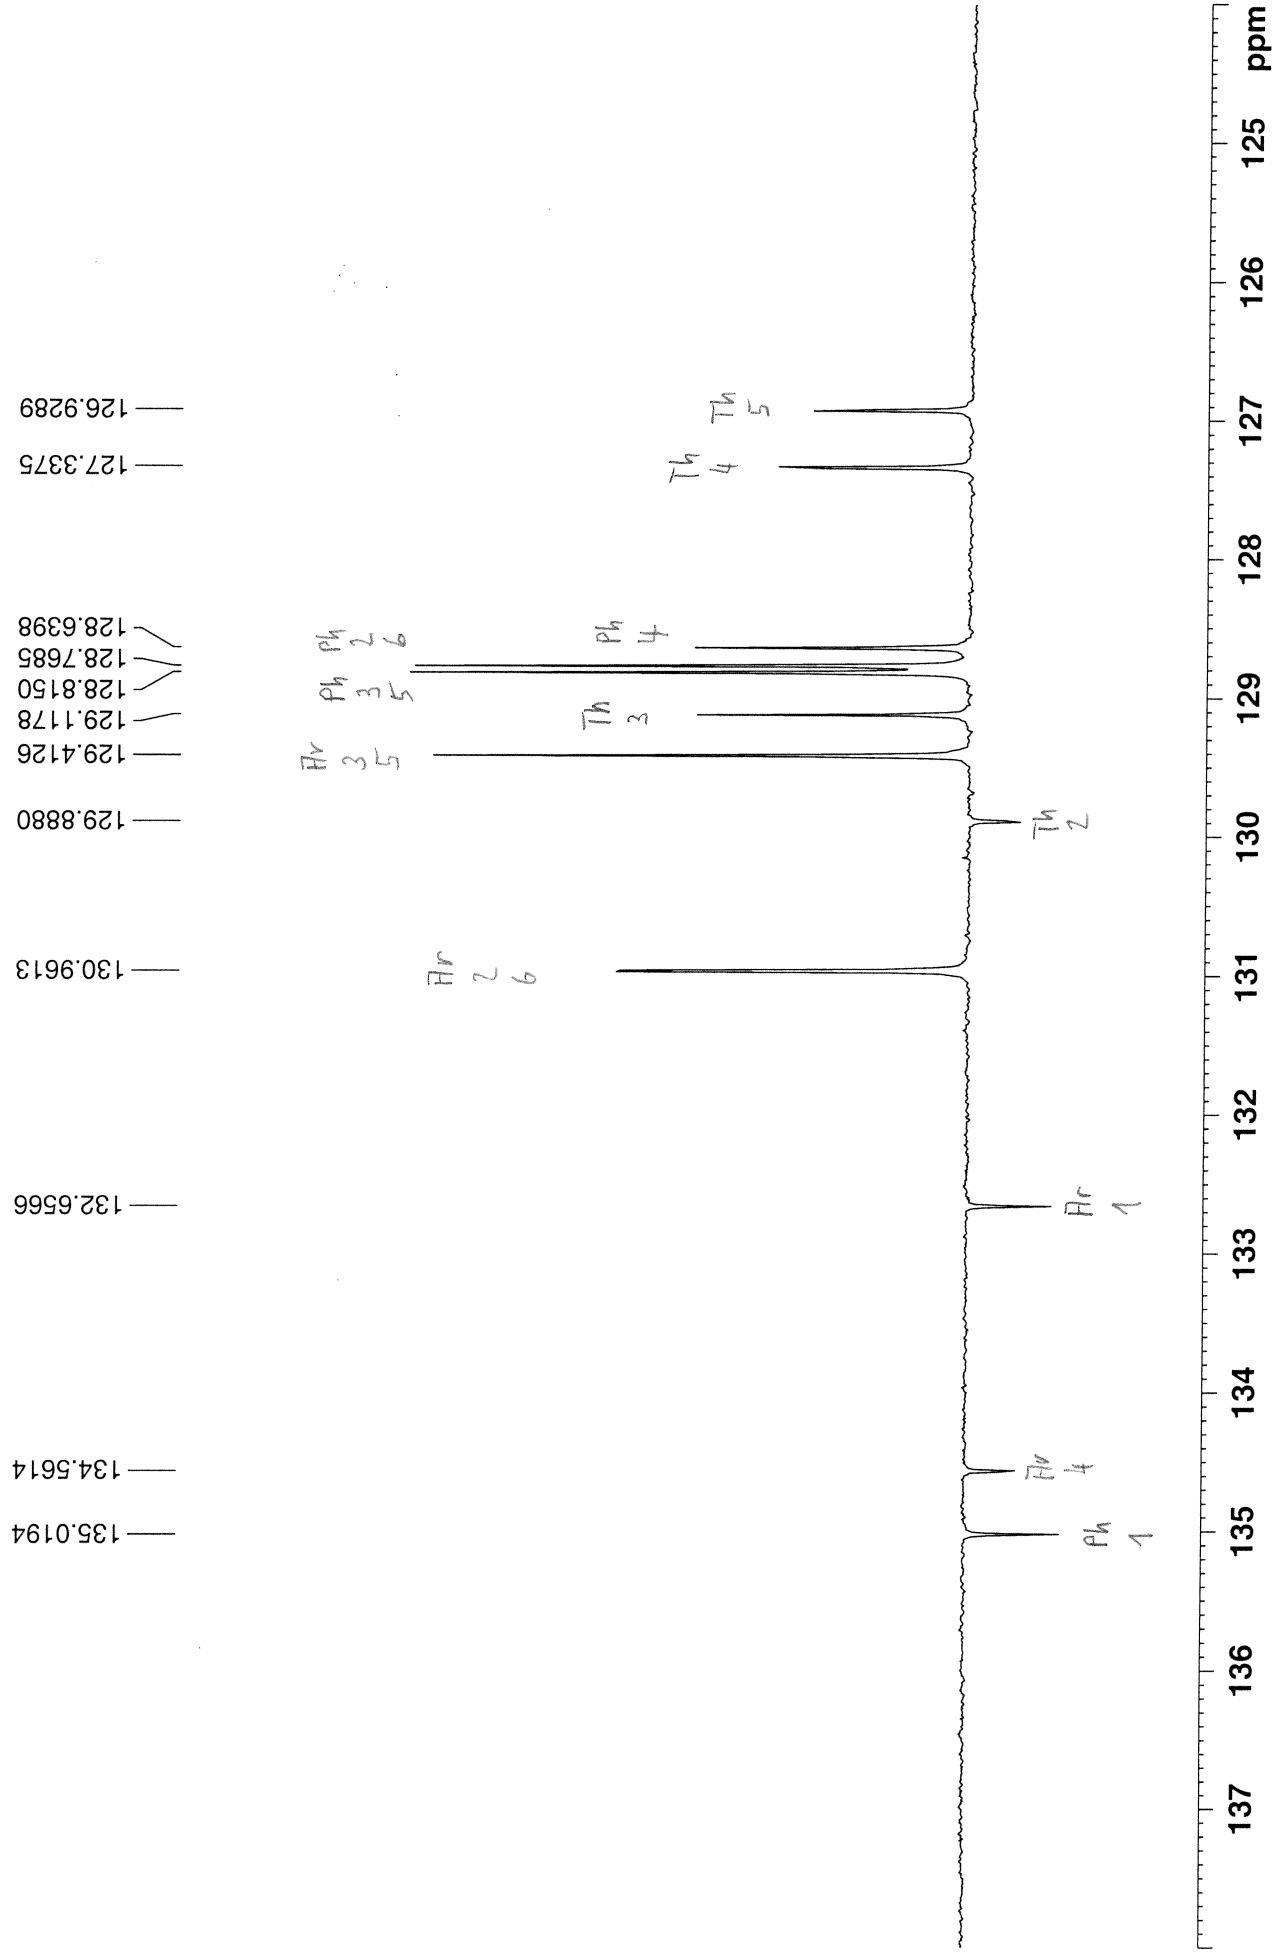

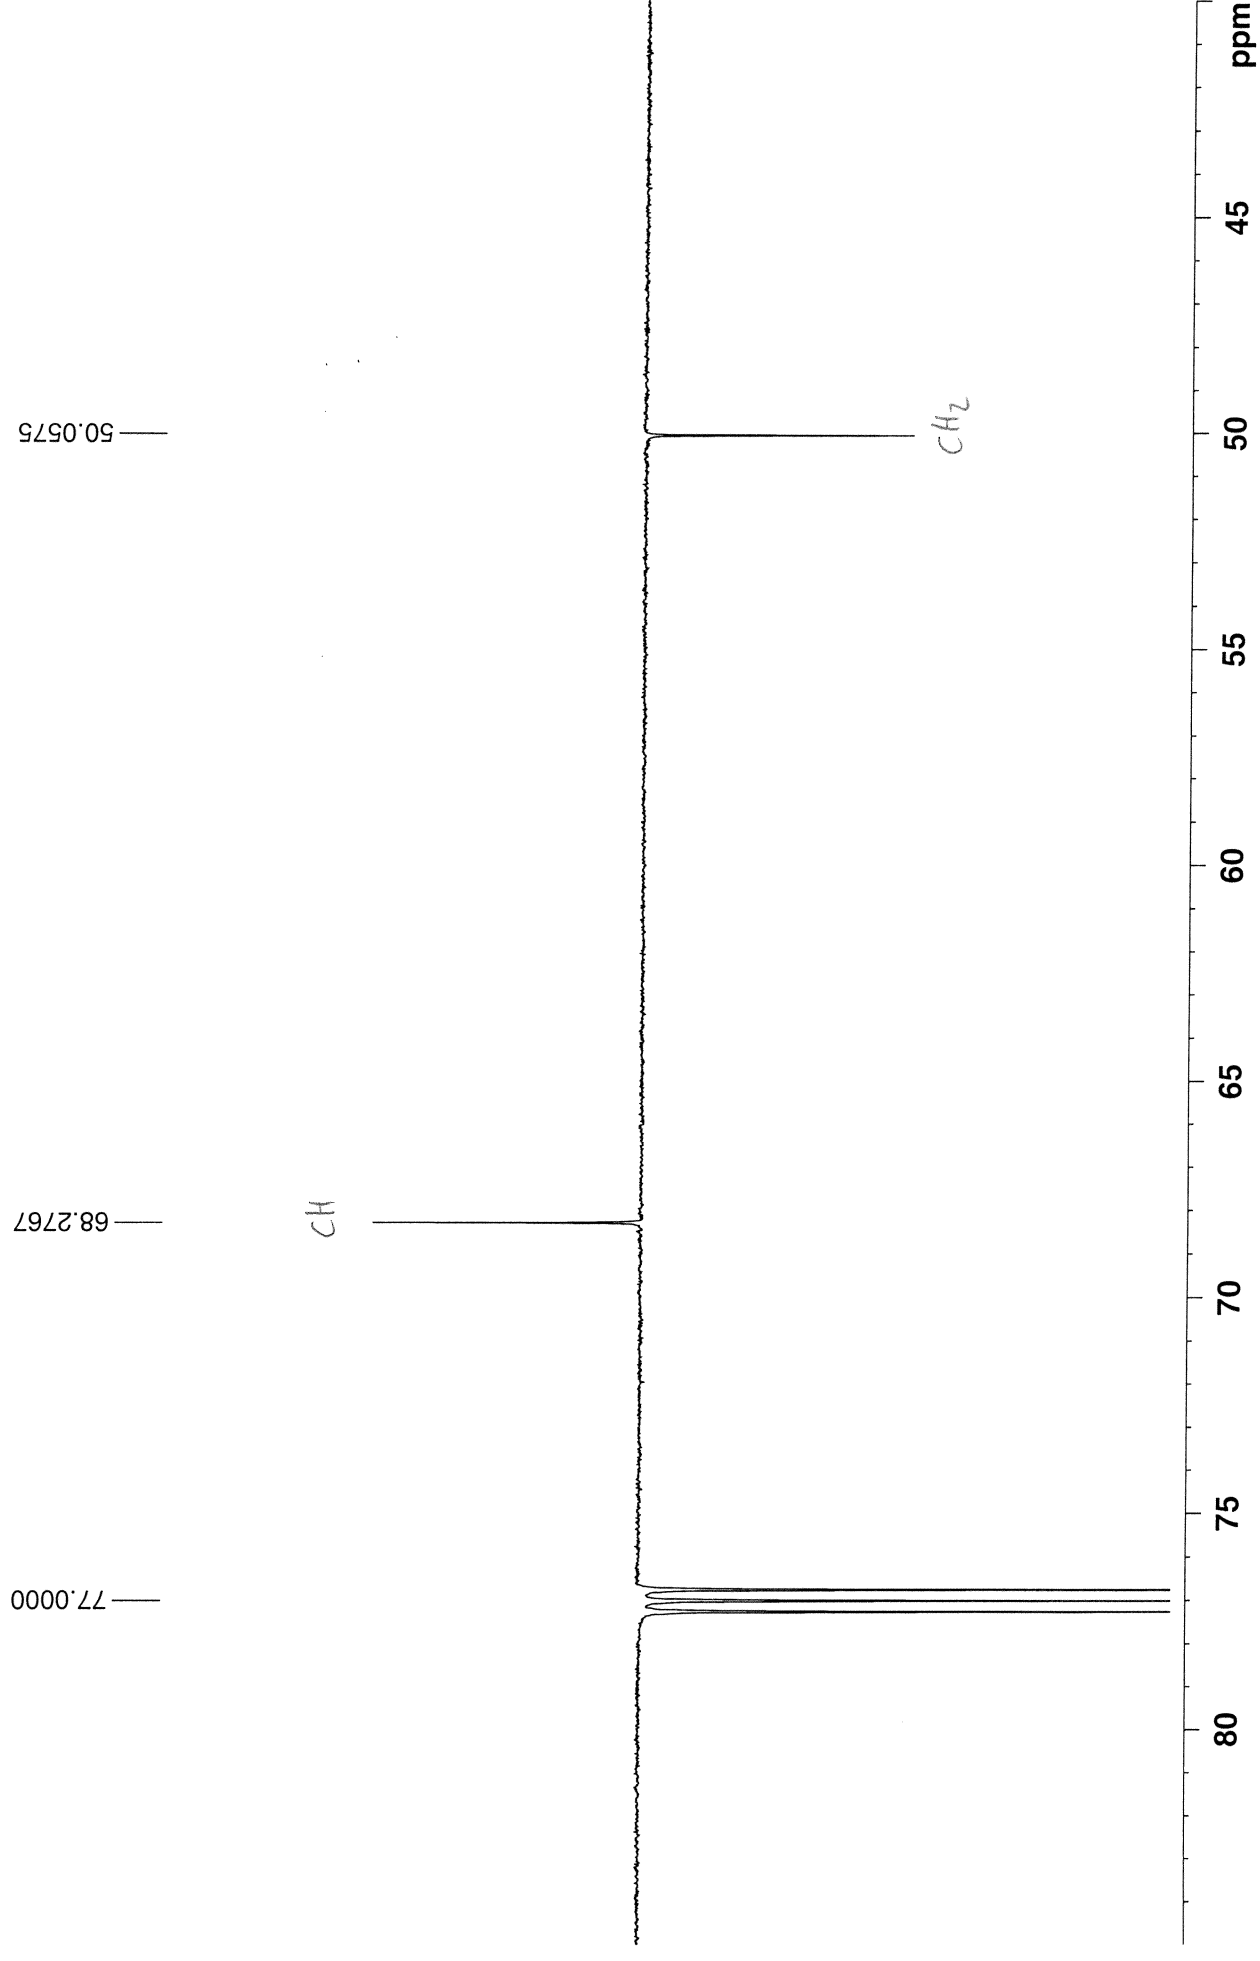



Figure S23c. NMR spectra of compound 7f.

CE140-S2P1 in cdcl3 (Proton) 29.8.2018

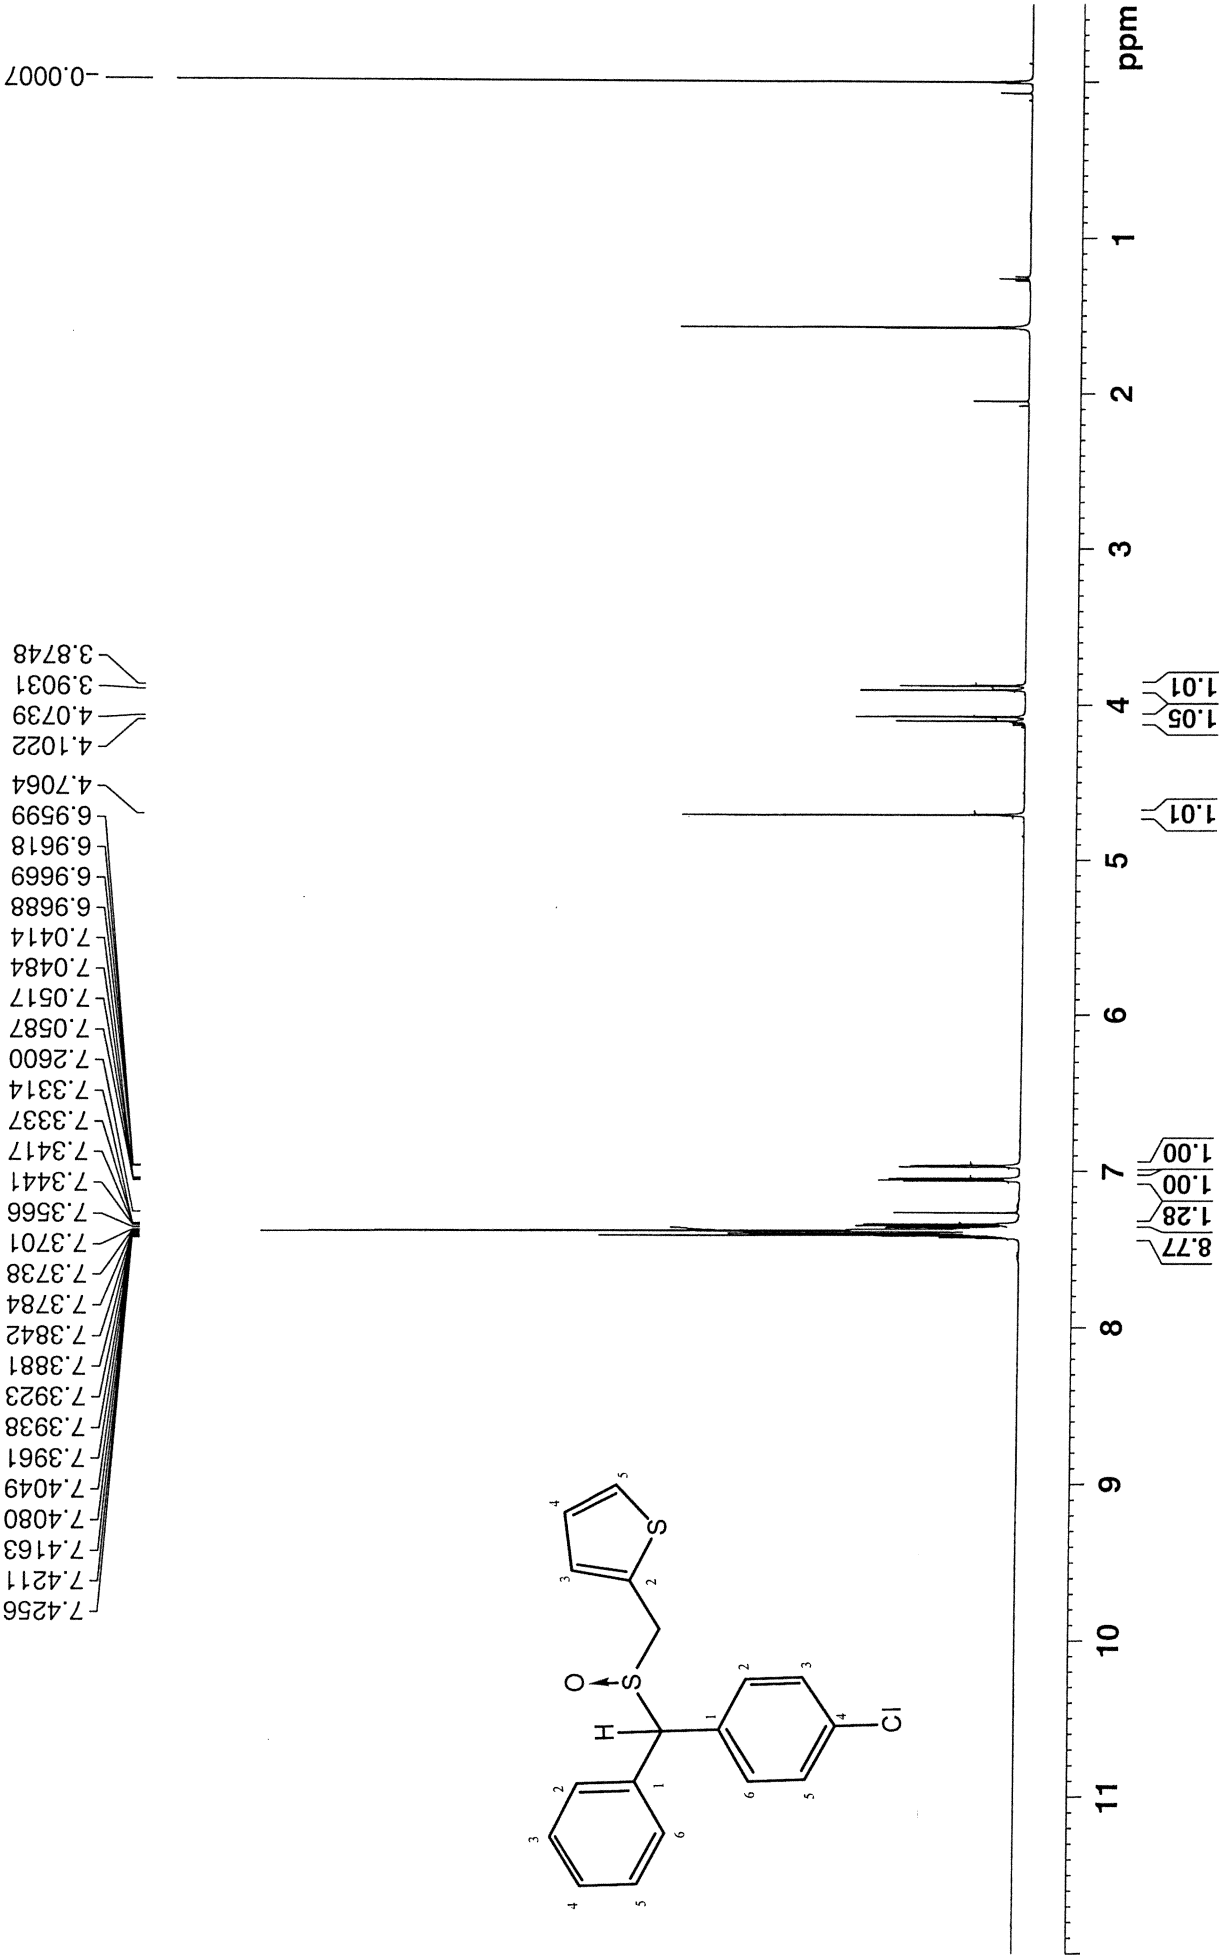

7.4256  
7.4211  
7.4163  
7.4080  
7.4049  
7.3961  
7.3938  
7.3923  
7.3881  
7.3842  
7.3784  
7.3738  
7.3701  
7.3566  
7.3441  
7.3417  
7.3337  
7.3314  
7.2600

7.0587  
7.0517  
7.0484  
7.0414  
6.9688  
6.9669  
6.9618  
6.9599

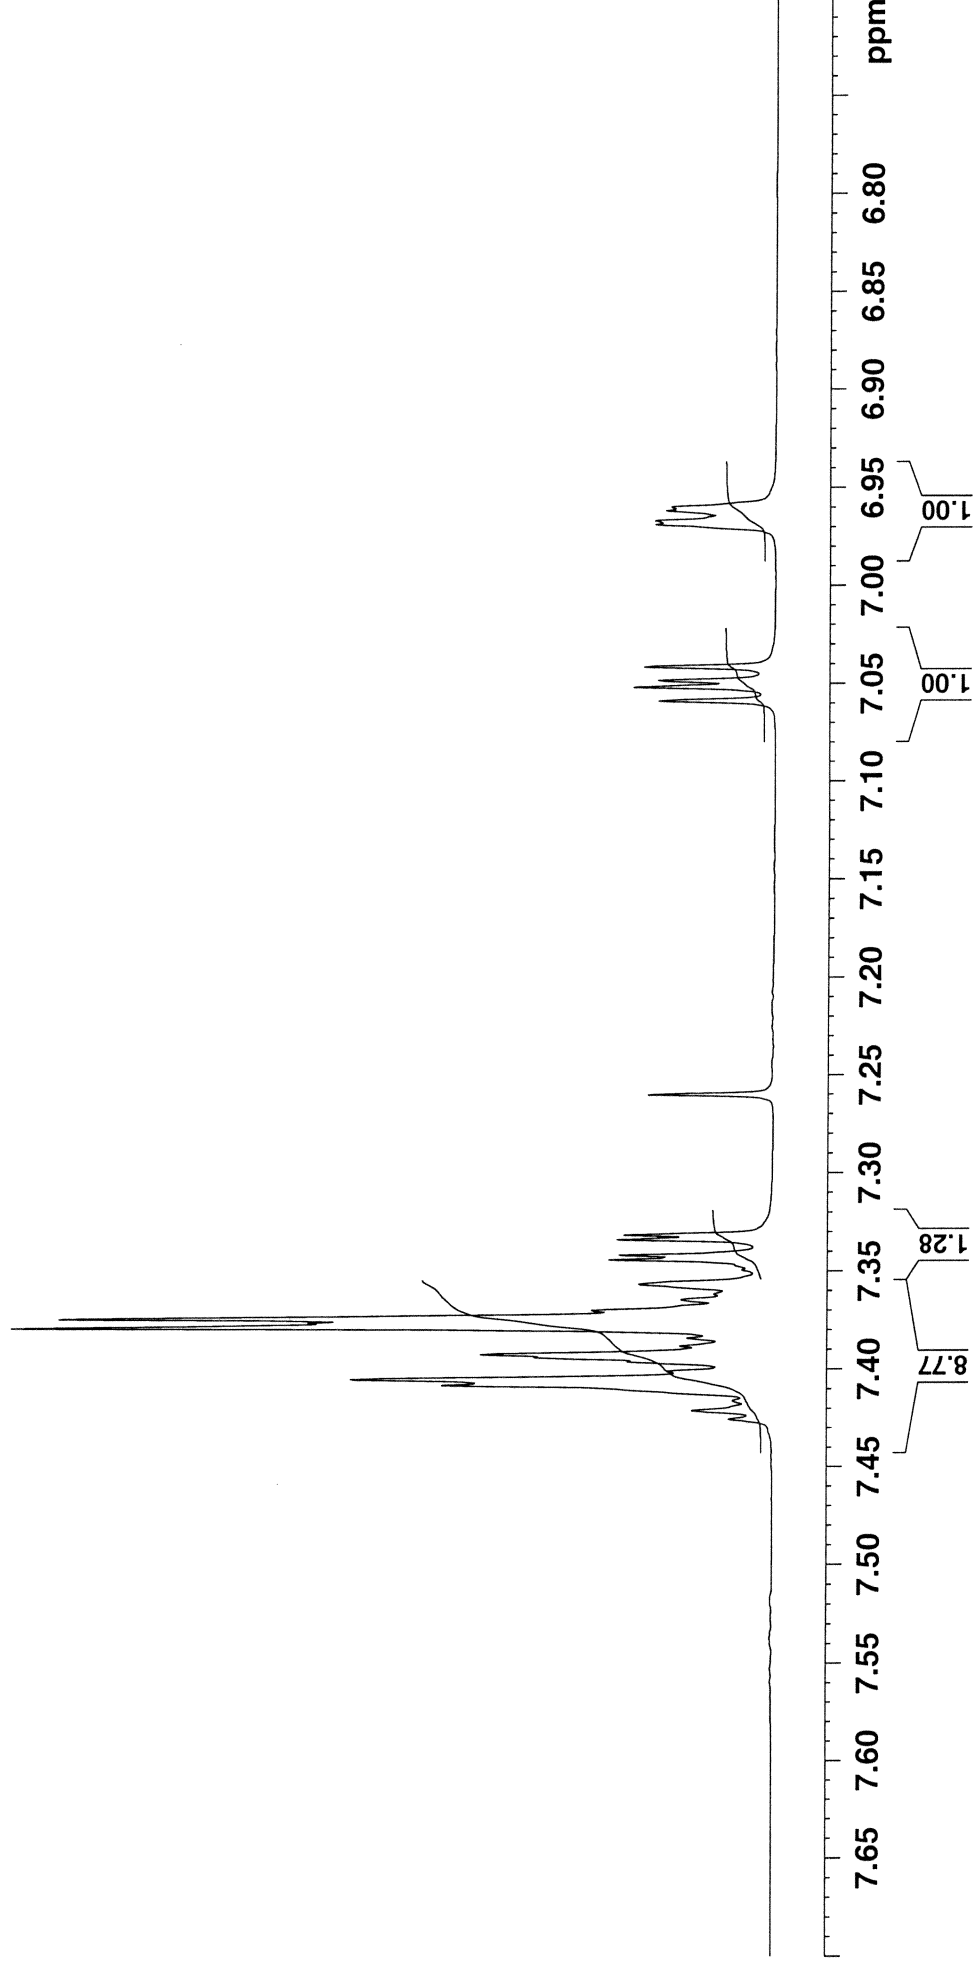

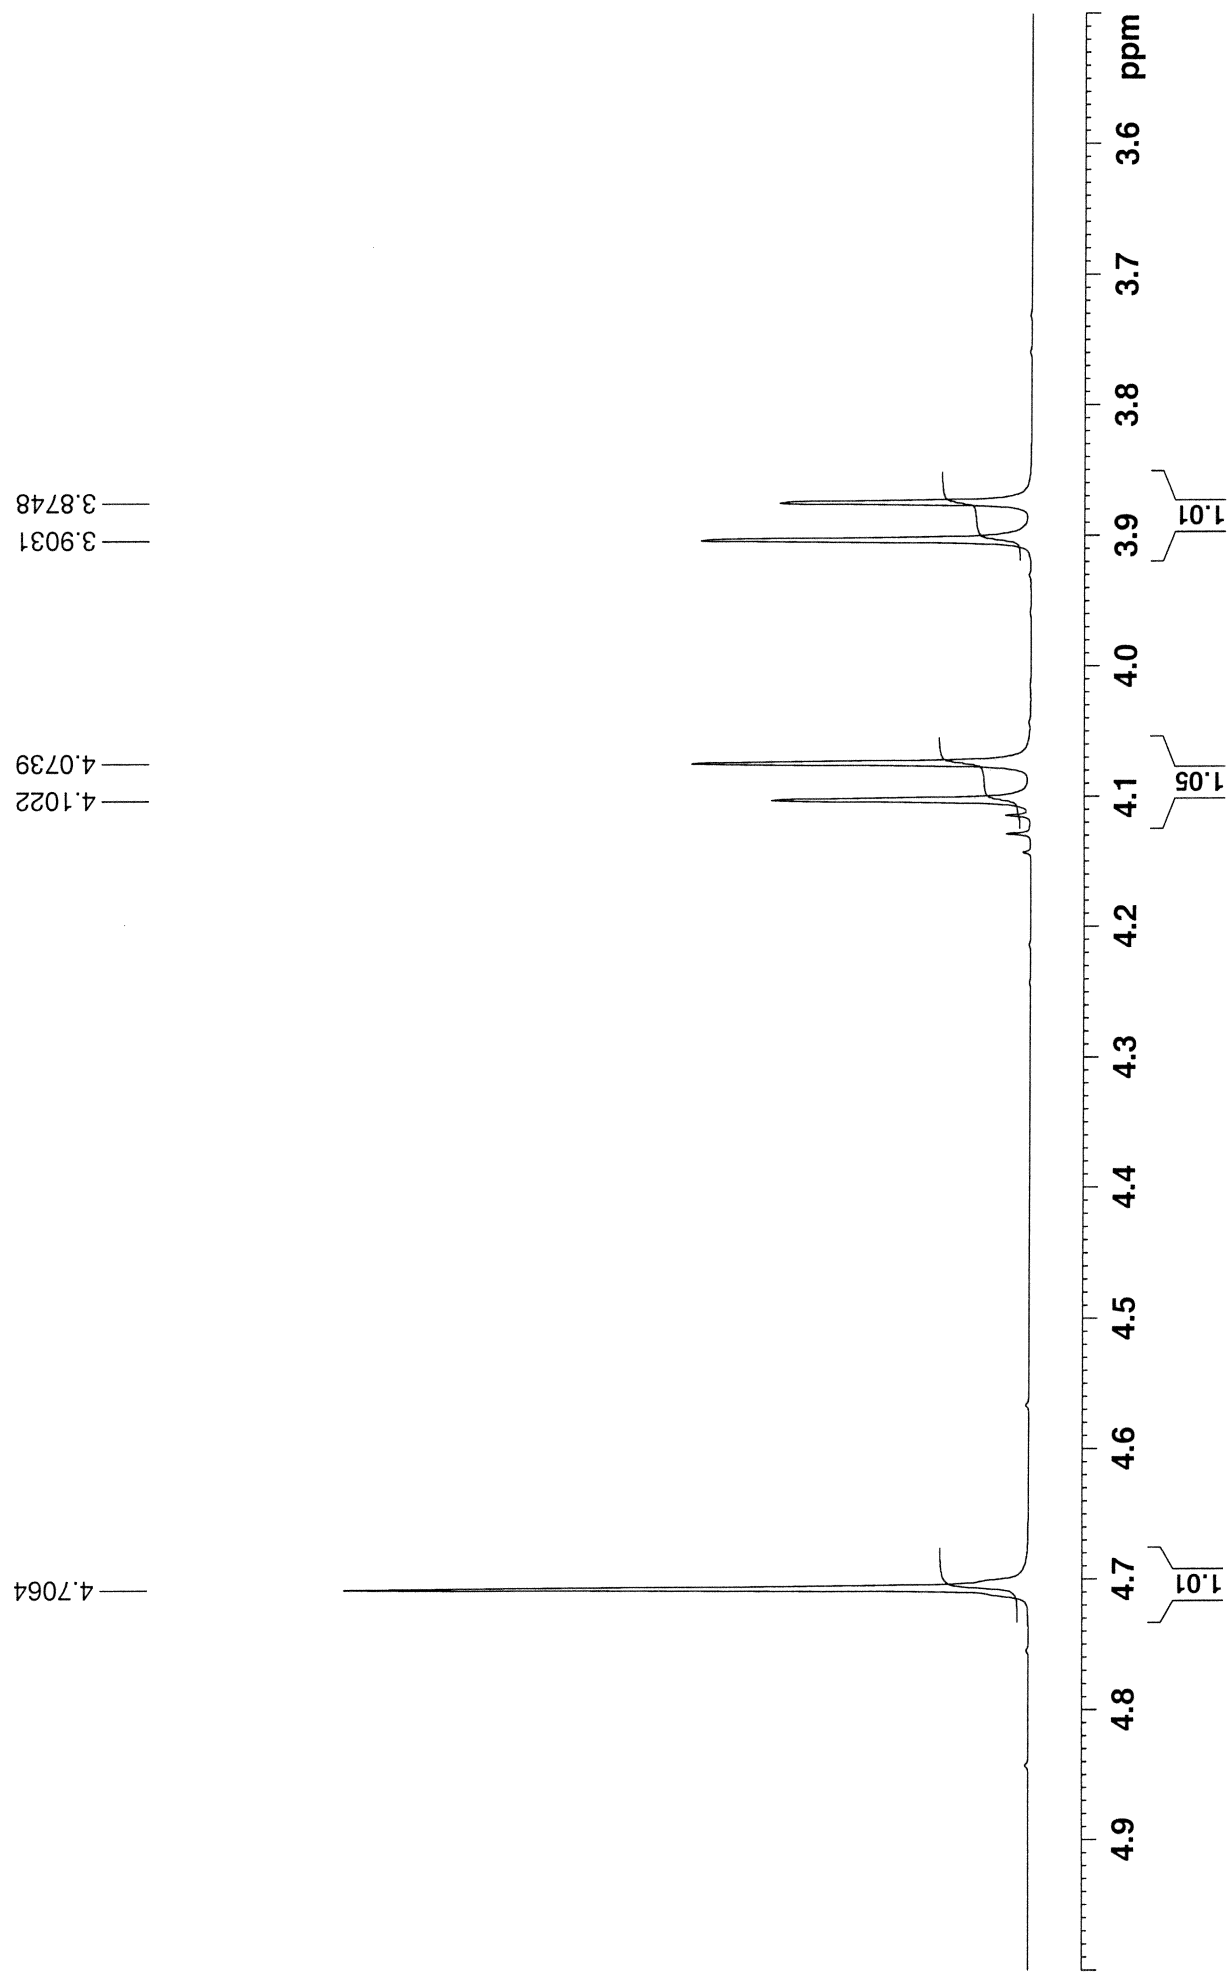

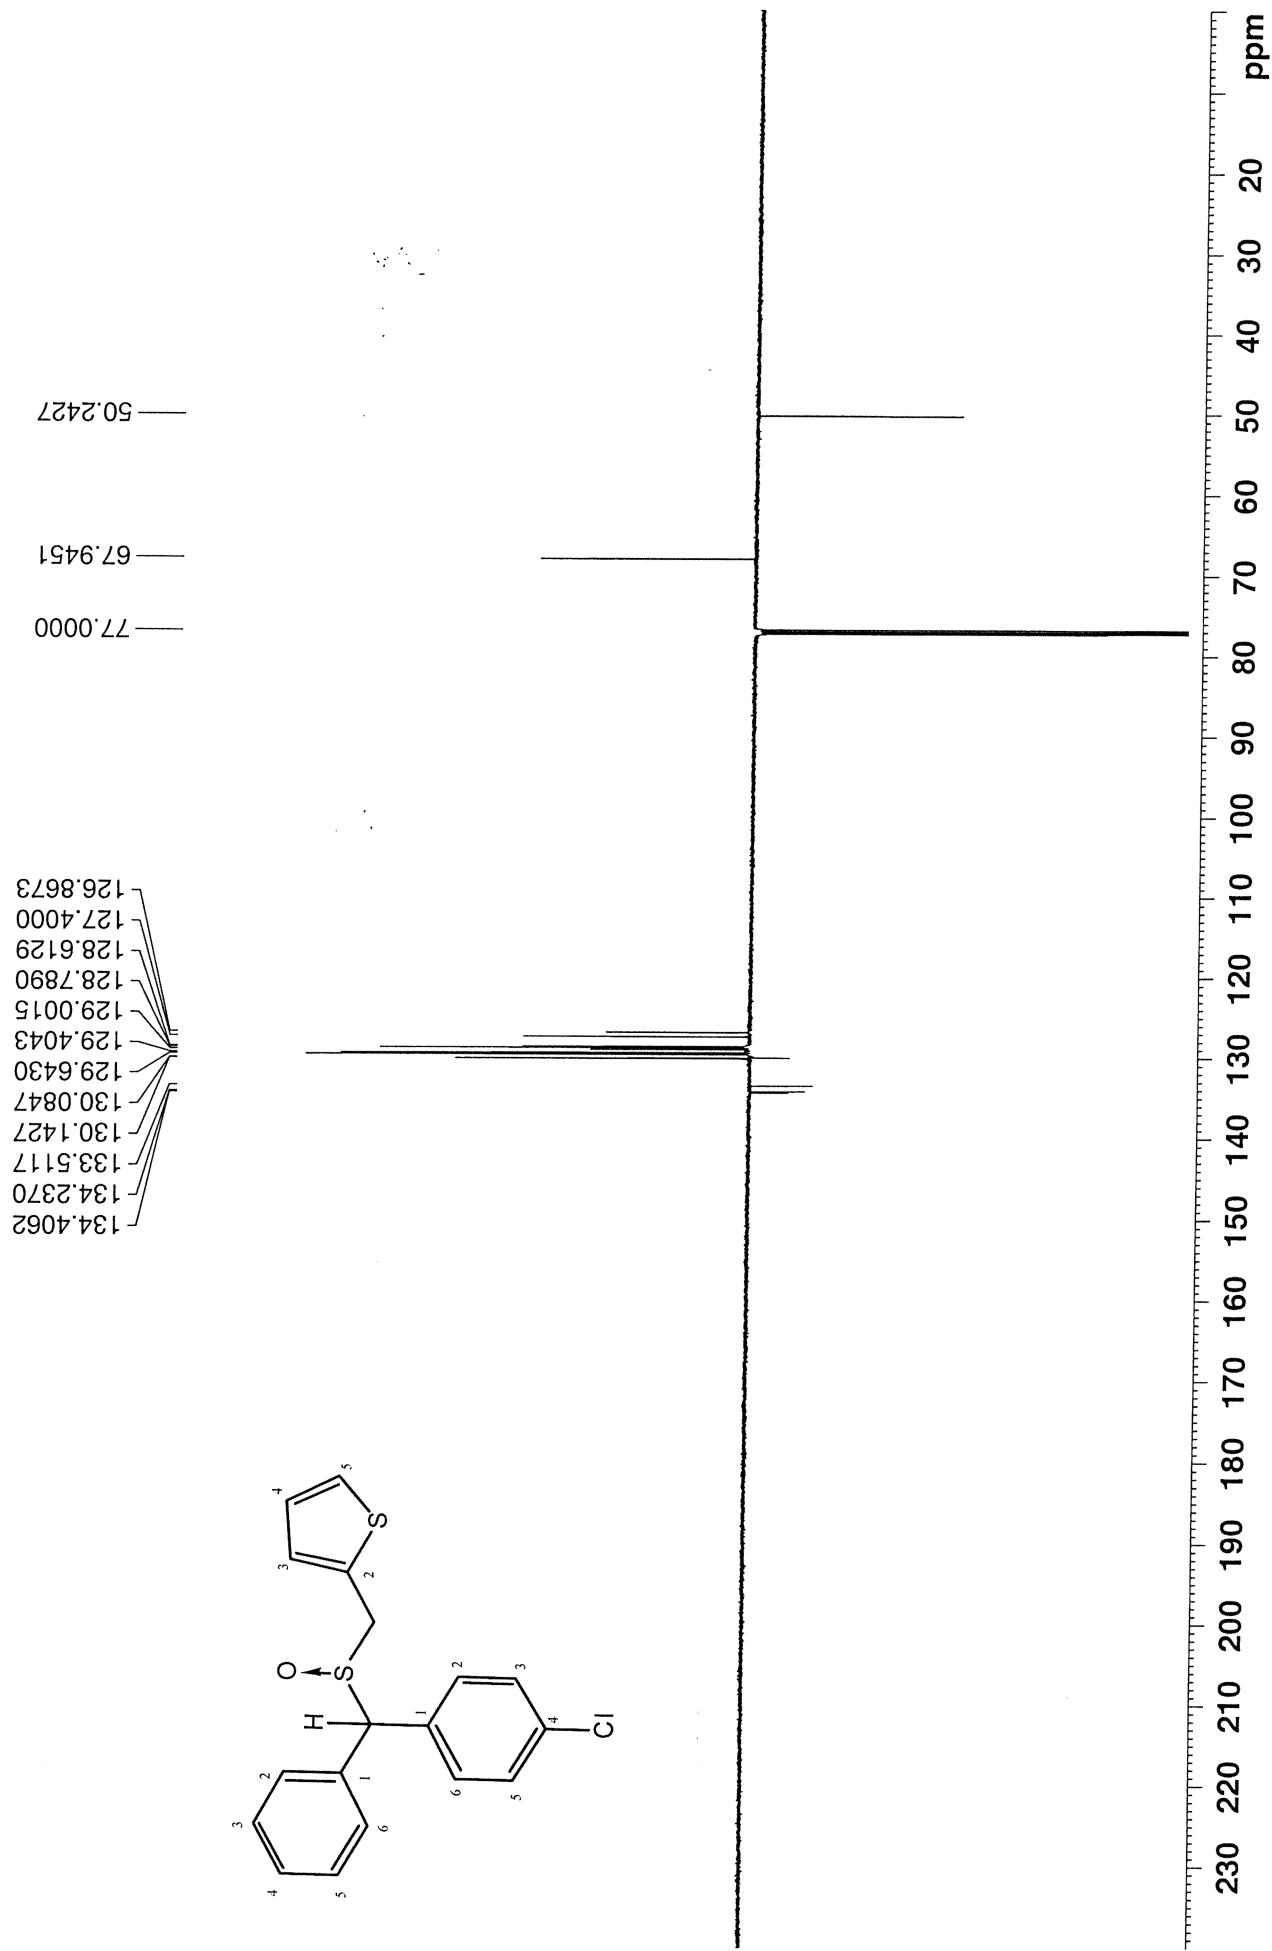

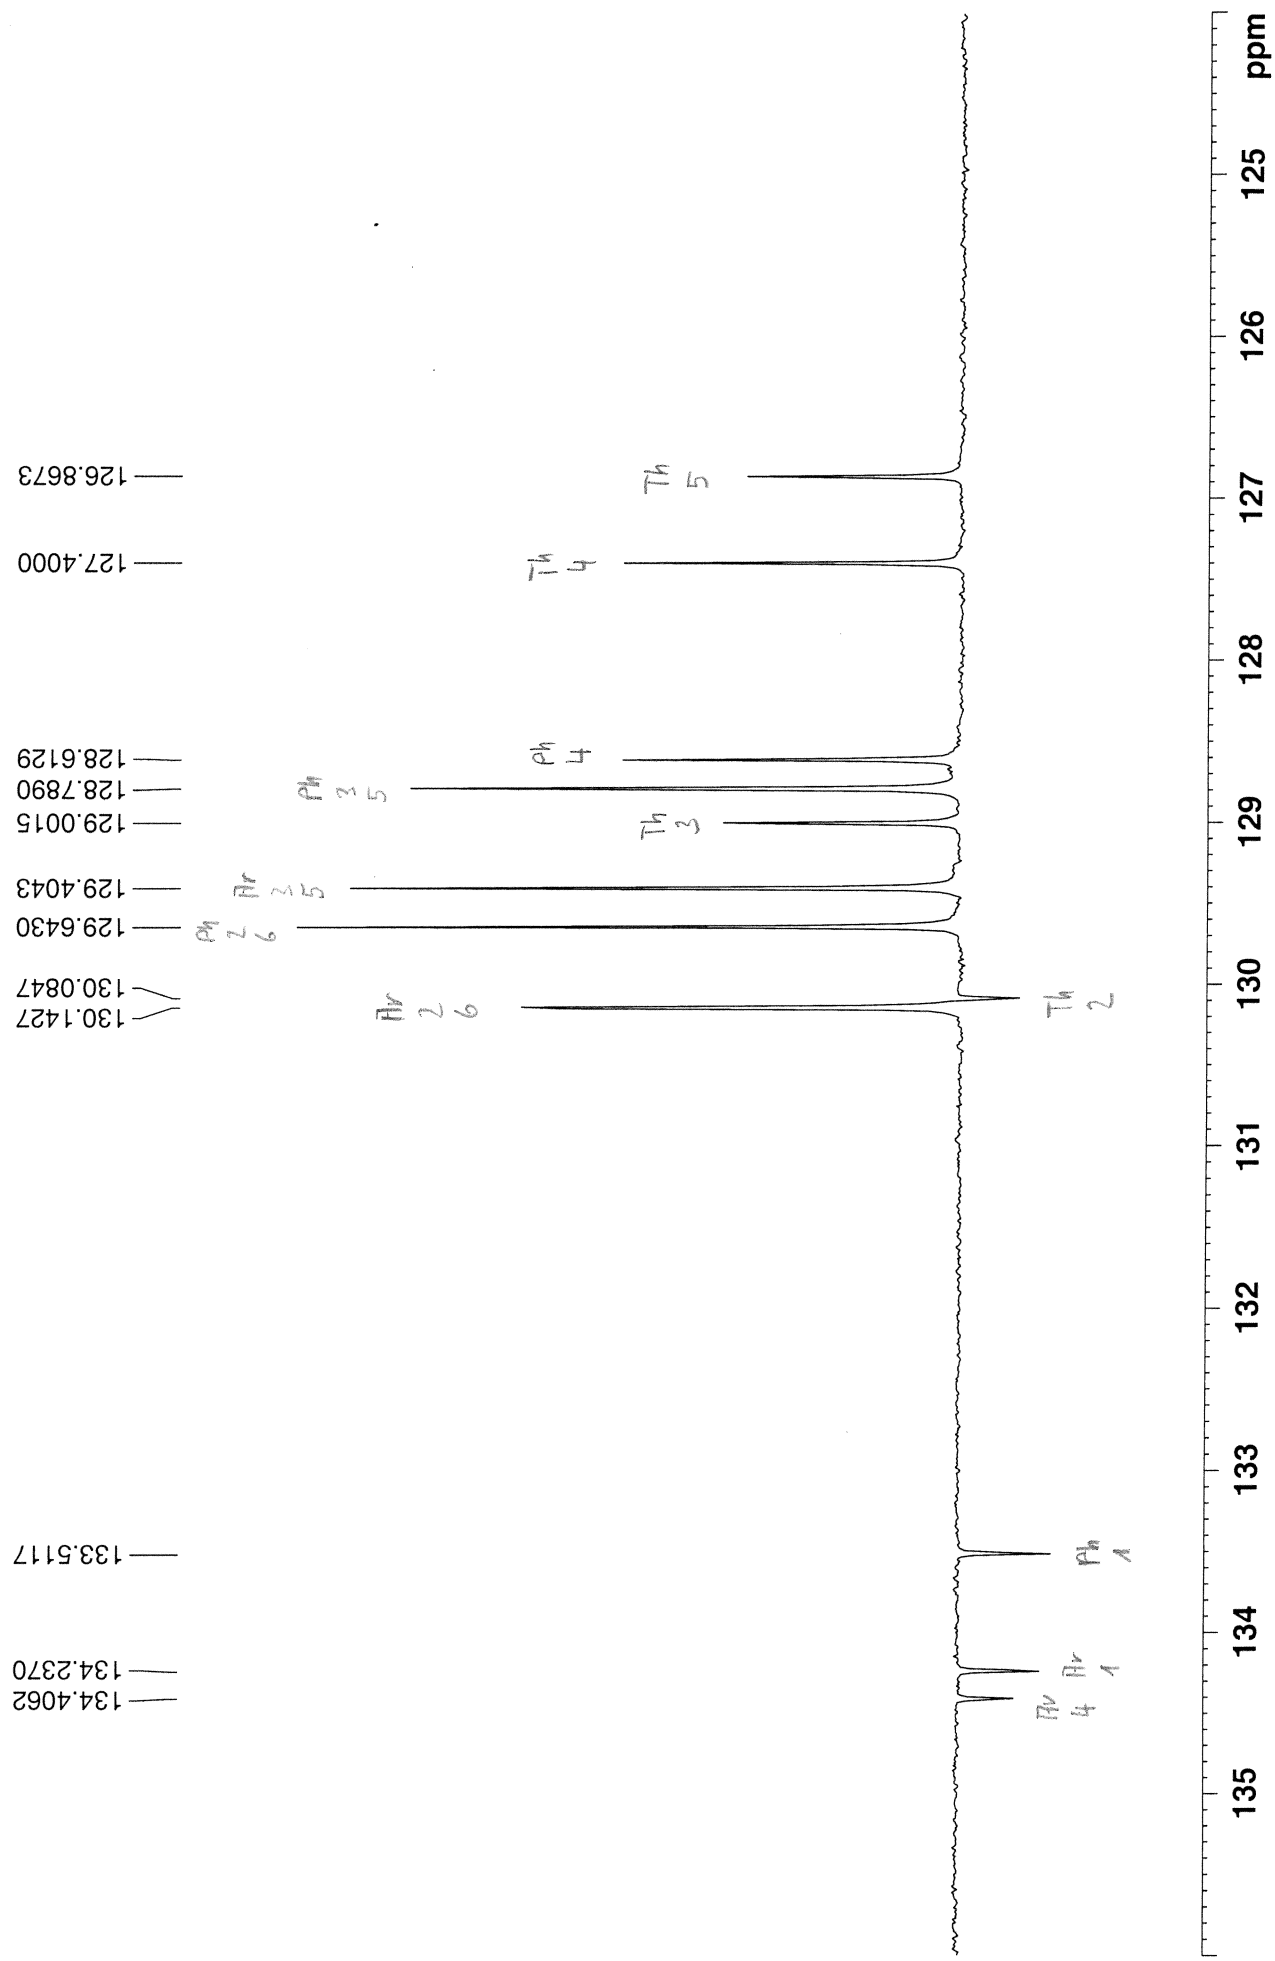

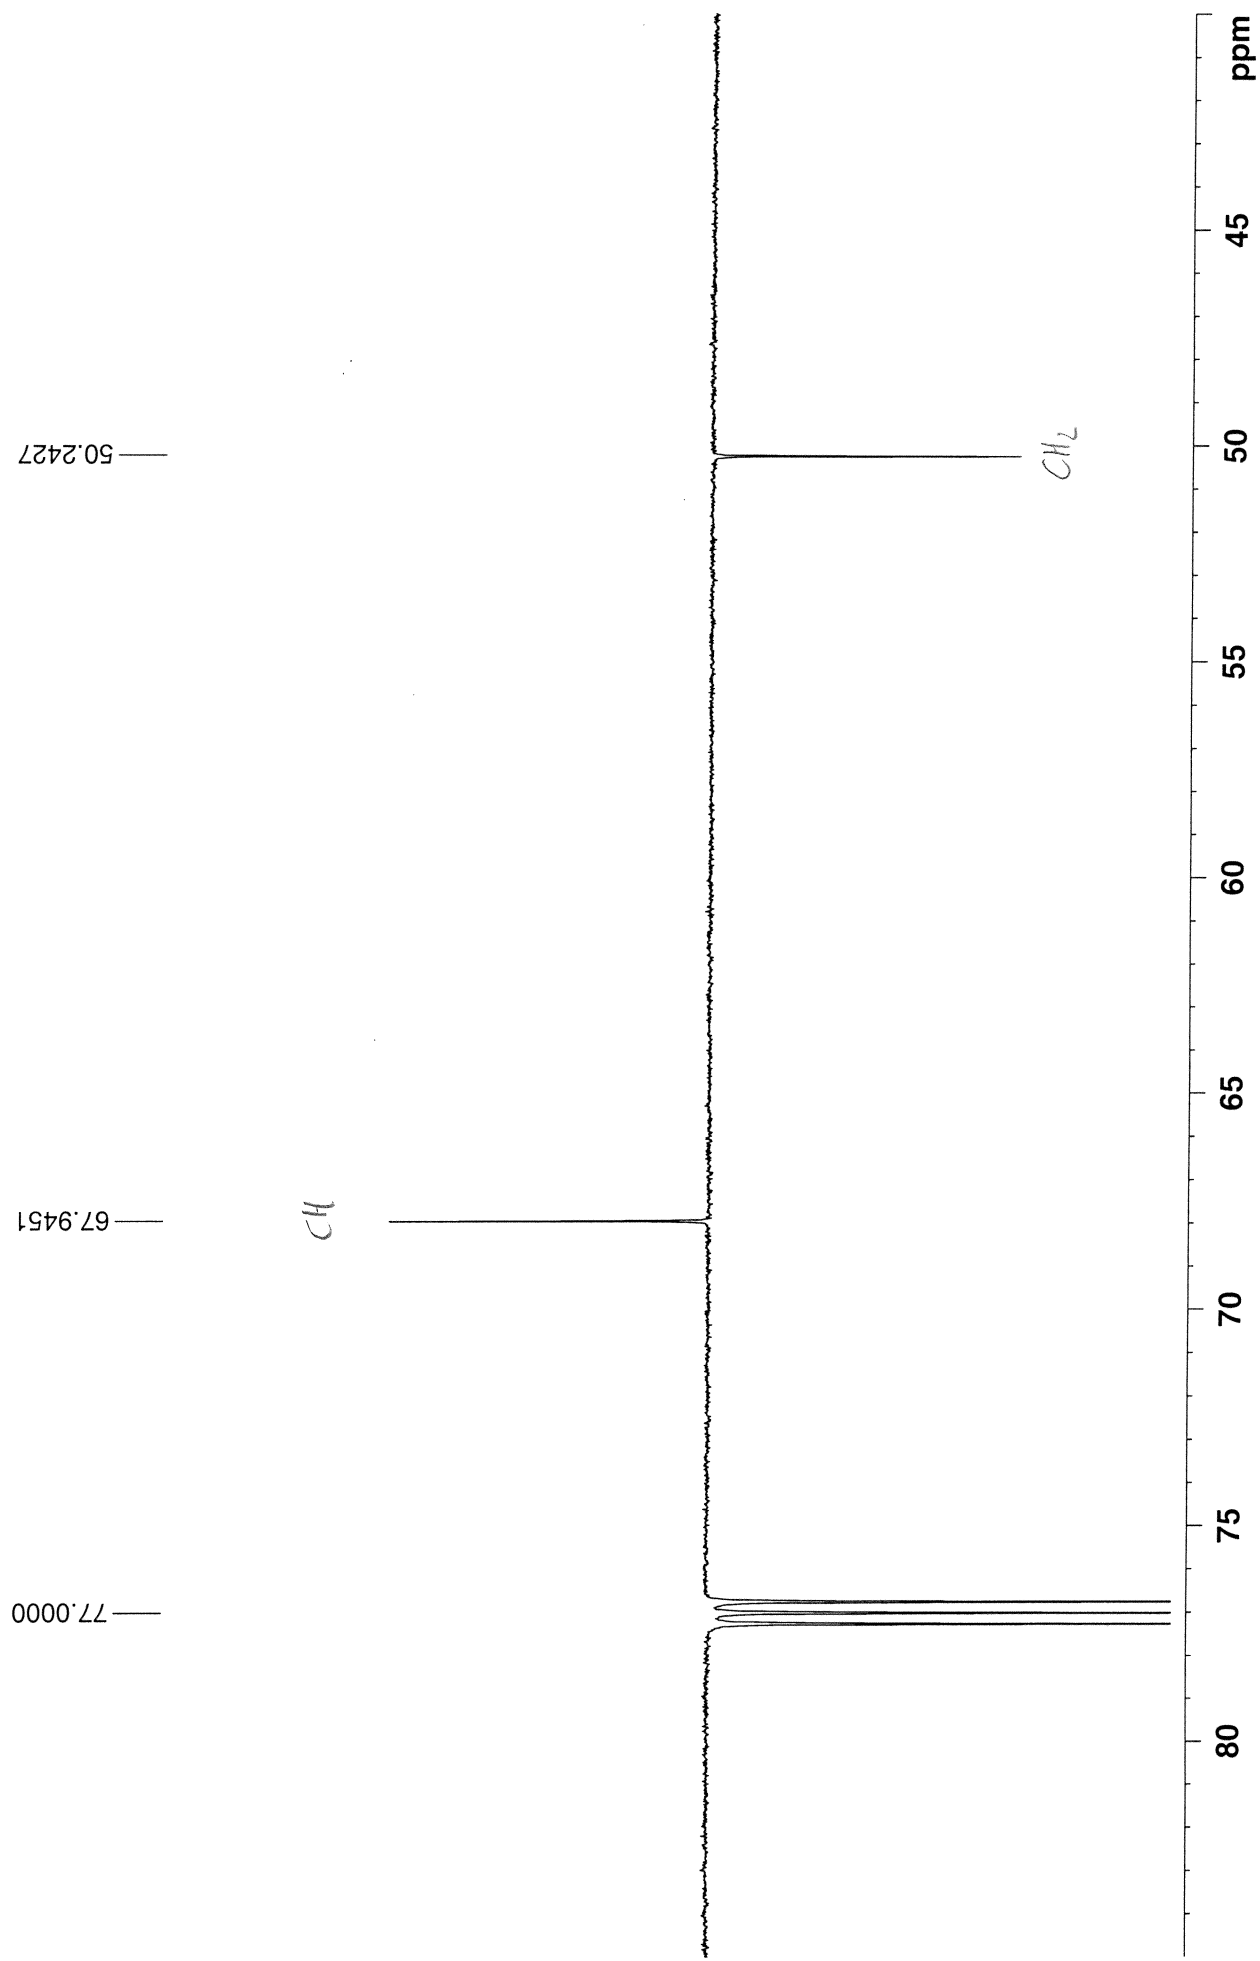

**Figure S24c.** NMR spectra of compound **8f**.

CE140-S2P2 in cdcl3 (Proton) 29.8.2018

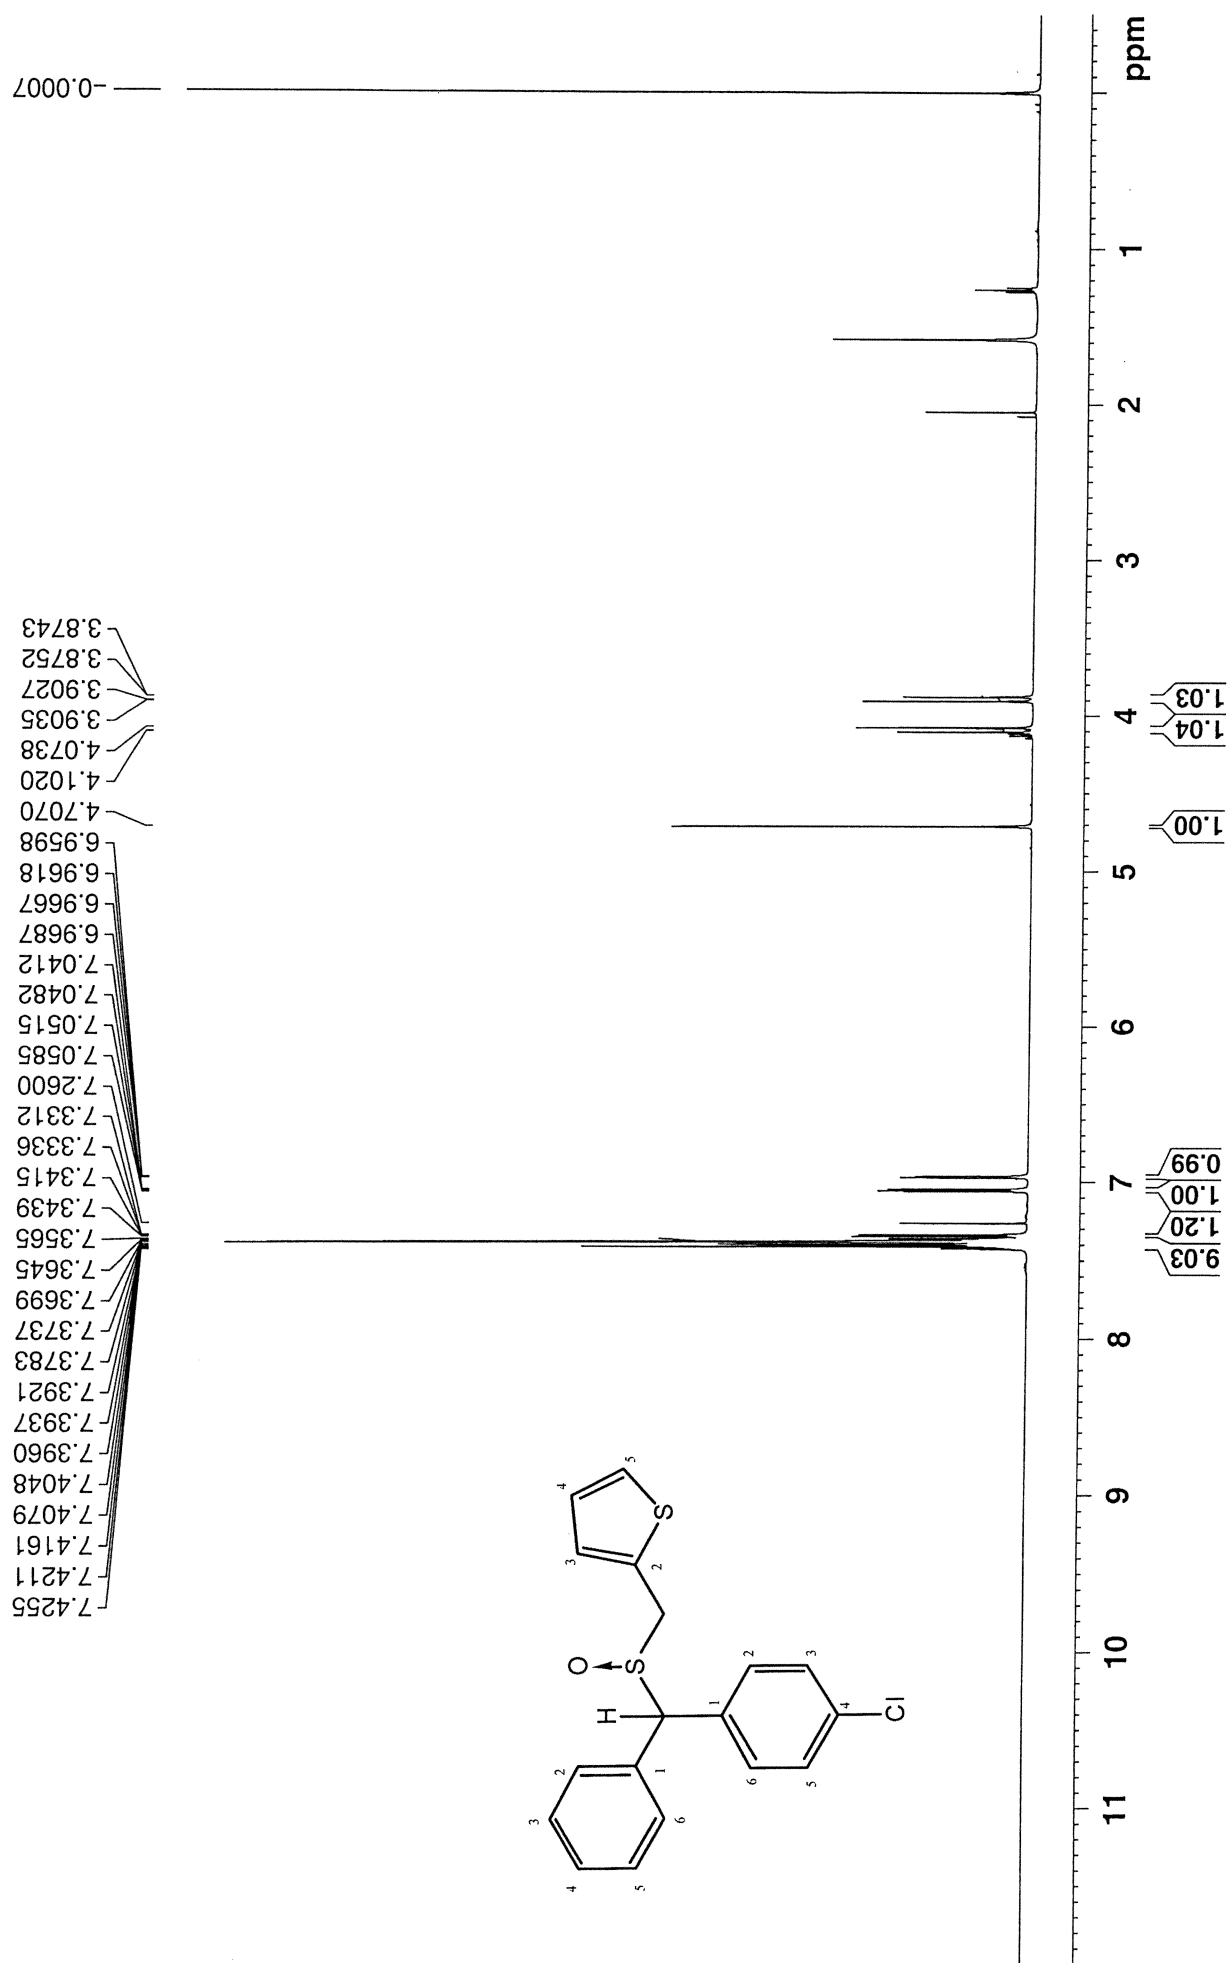

7.4255  
7.4211  
7.4161  
7.4079  
7.4048  
7.3960  
7.3937  
7.3921  
7.3783  
7.3737  
7.3699  
7.3645  
7.3565  
7.3439  
7.3415  
7.3336  
7.3312  
7.2600

7.0585  
7.0515  
7.0482  
7.0412

6.9687  
6.9667  
6.9618  
6.9598

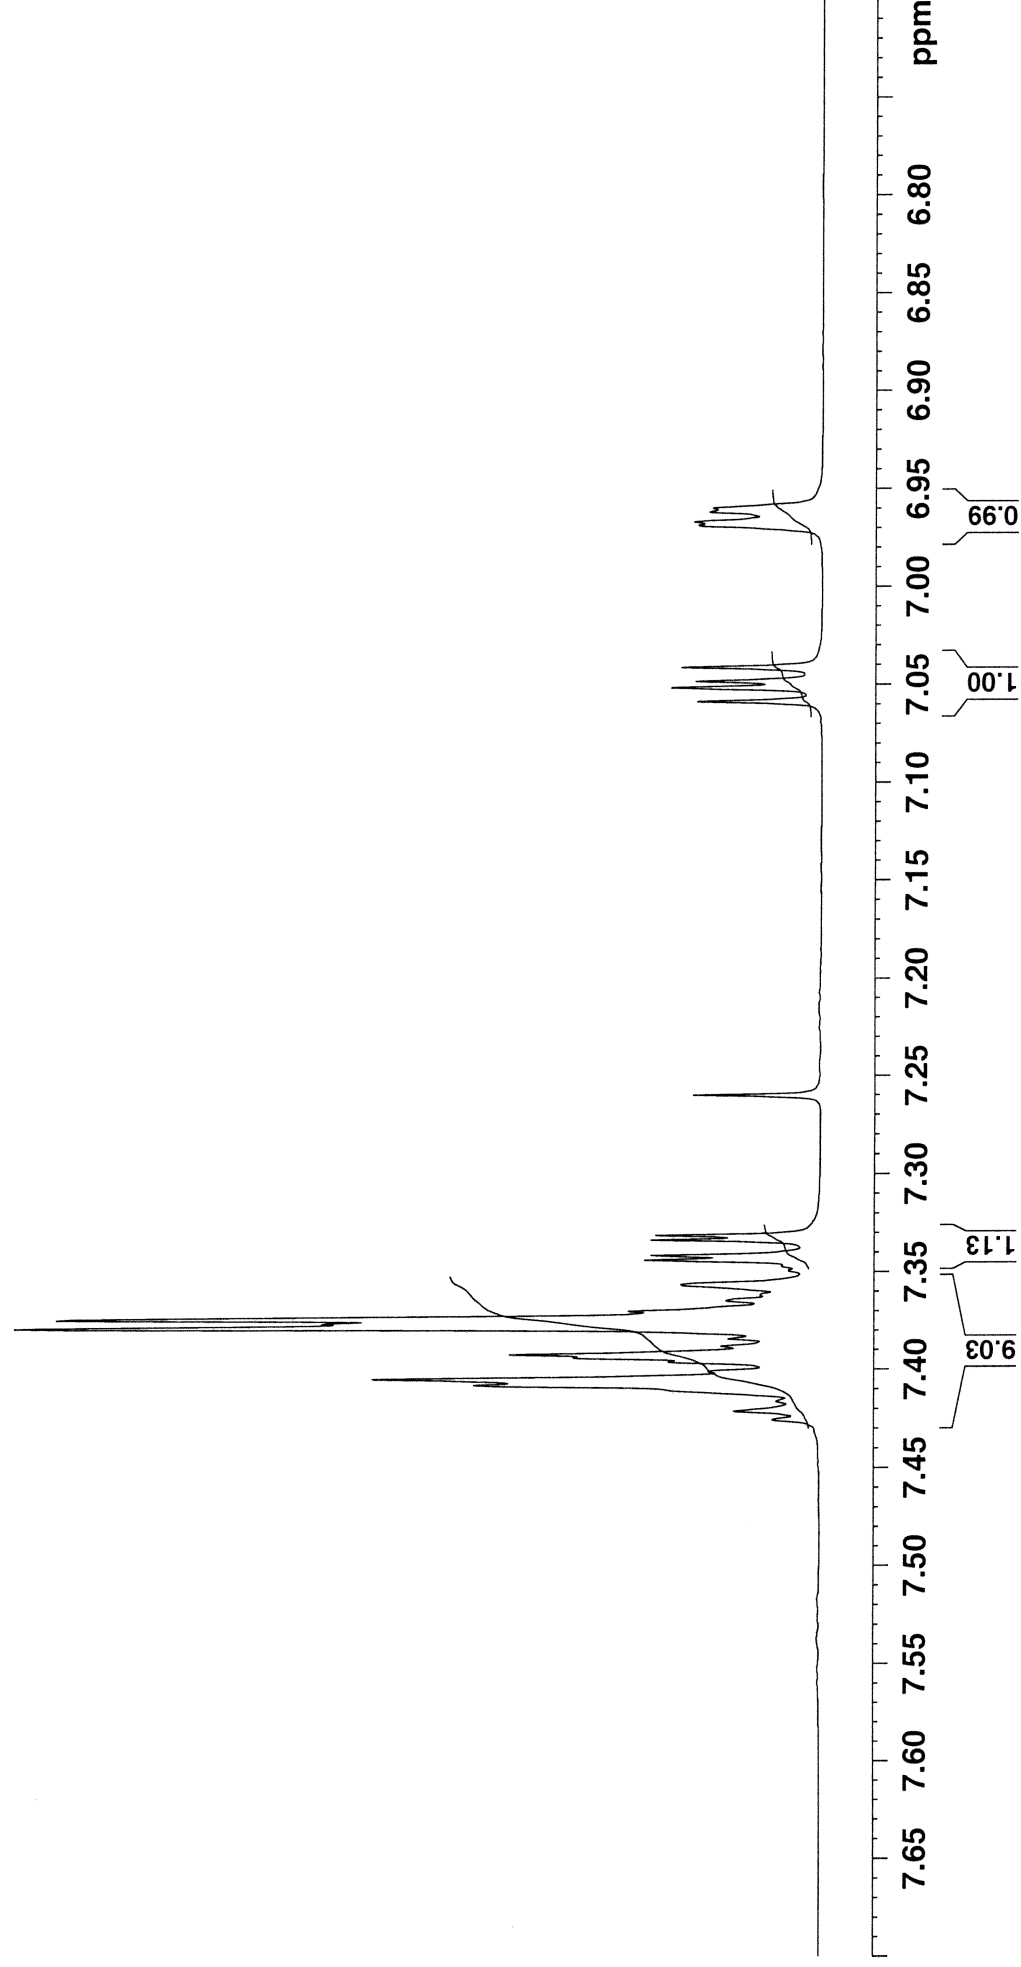



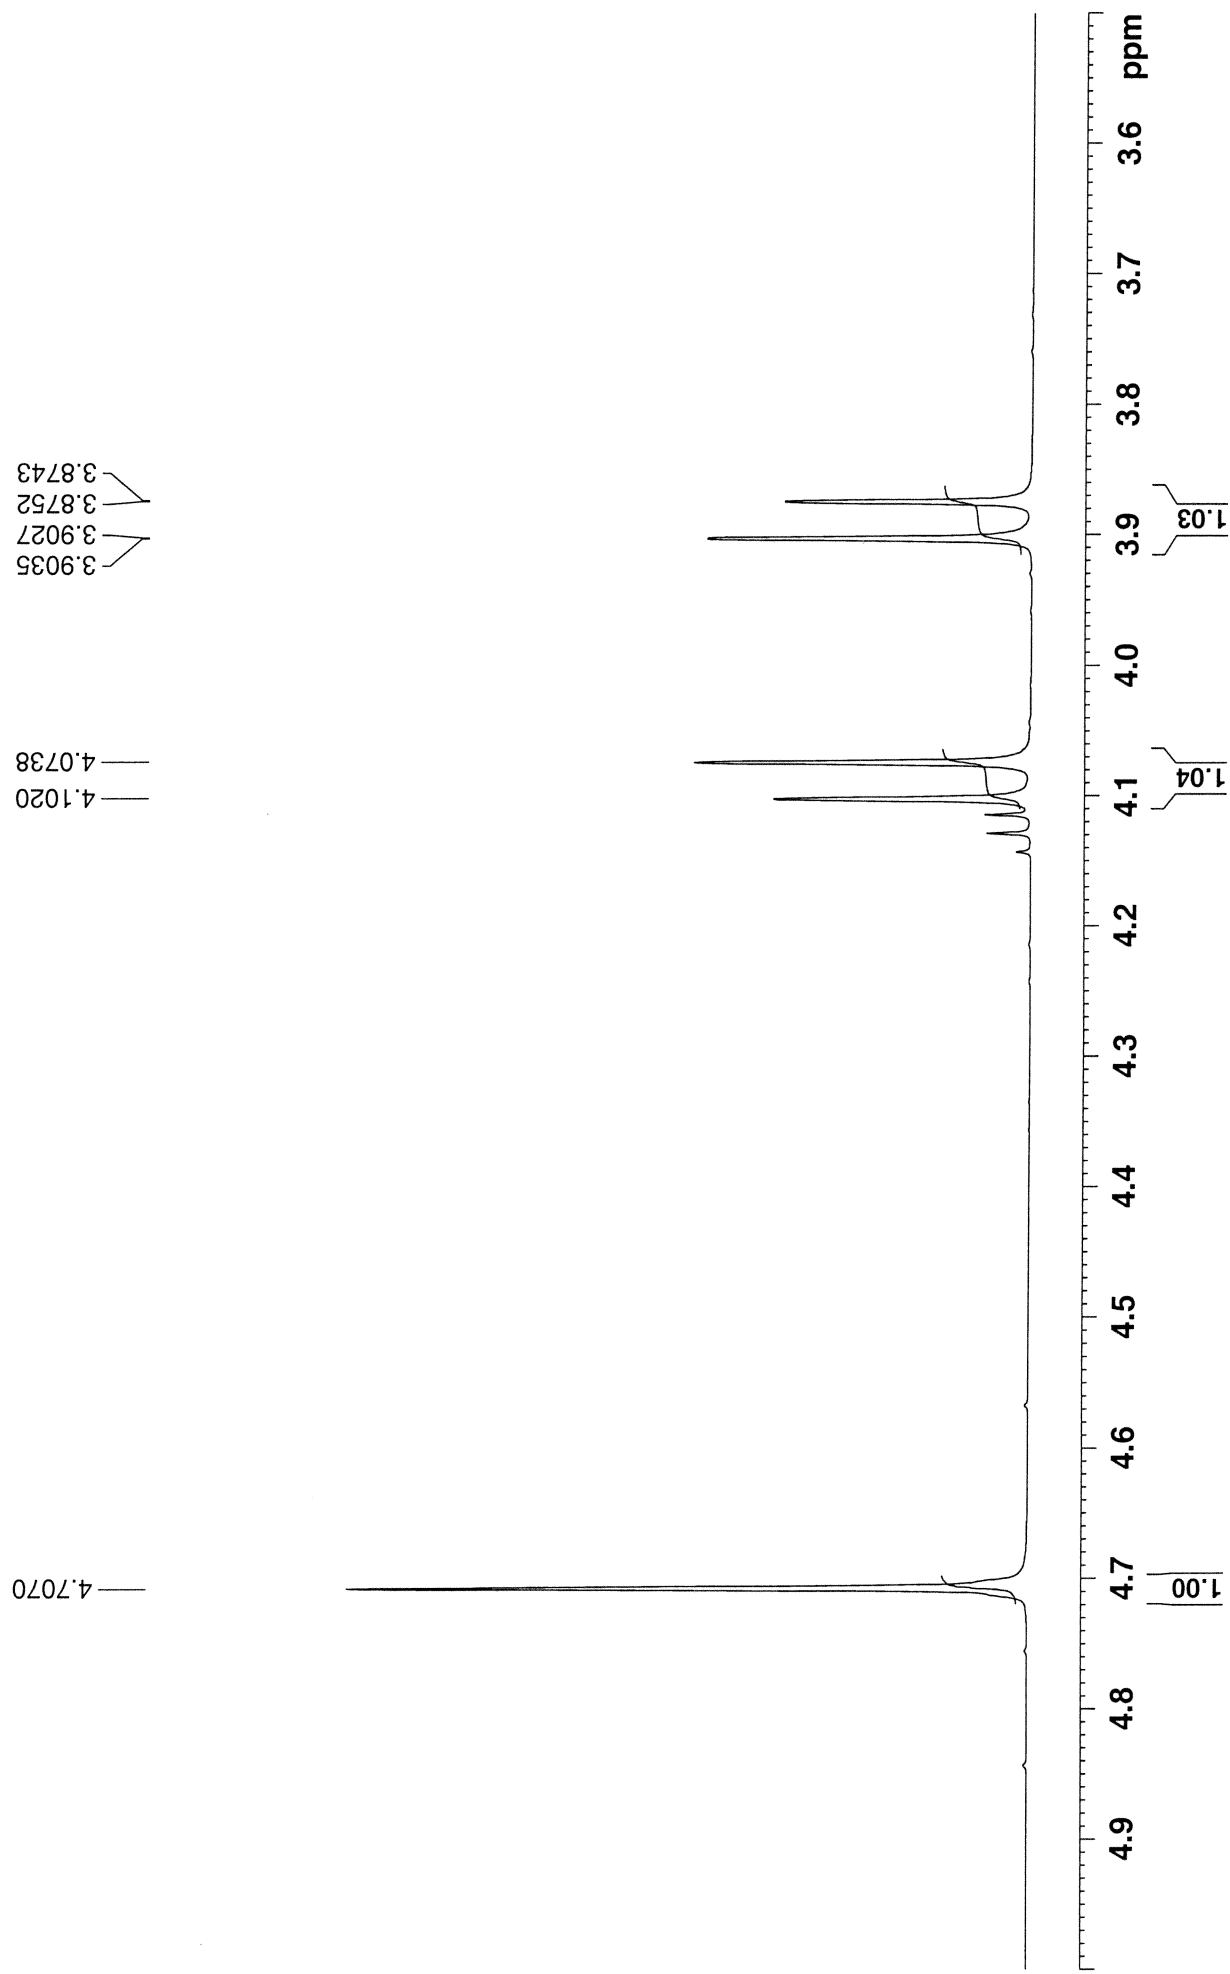

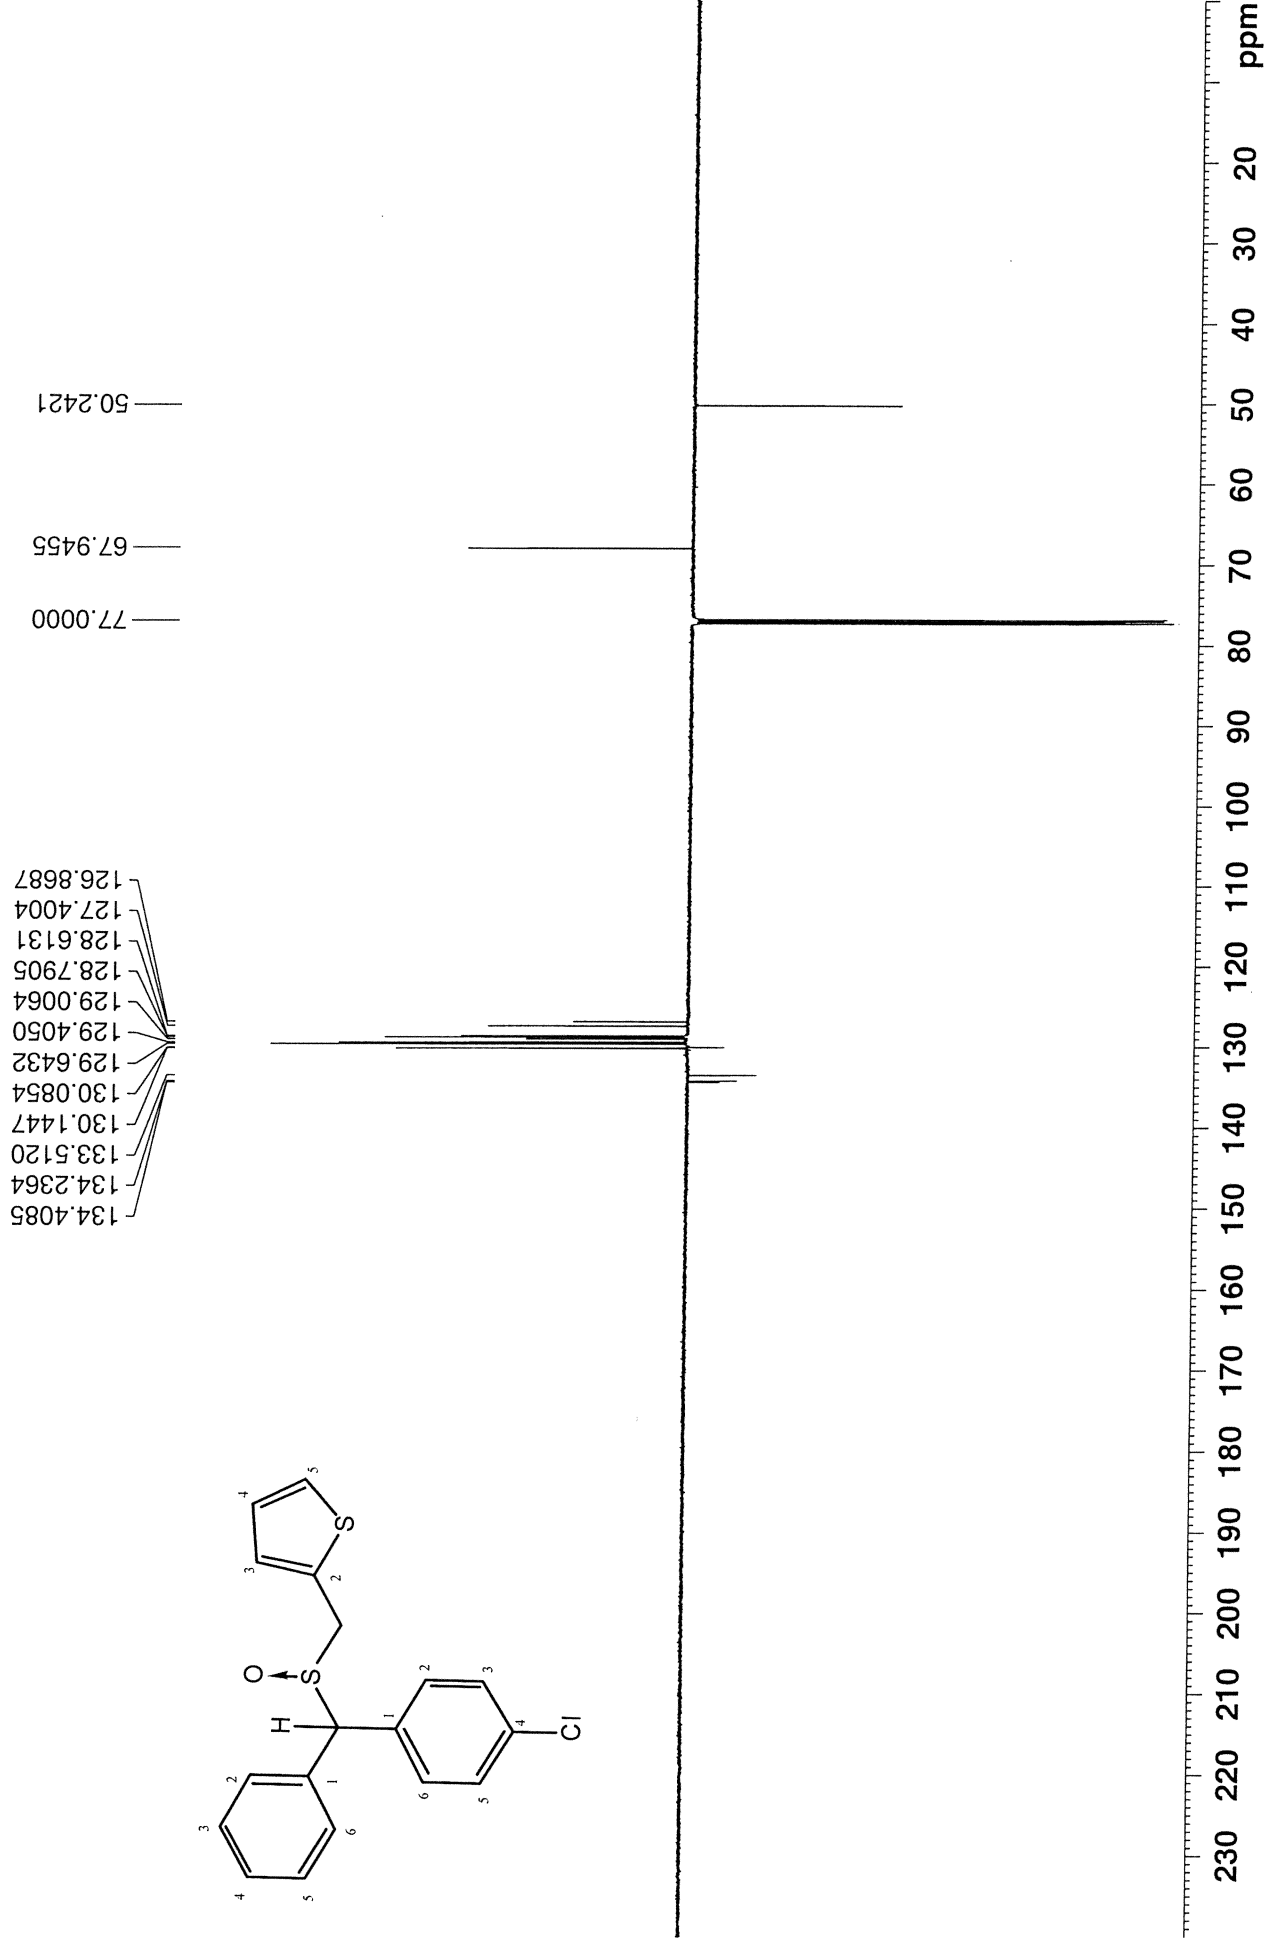

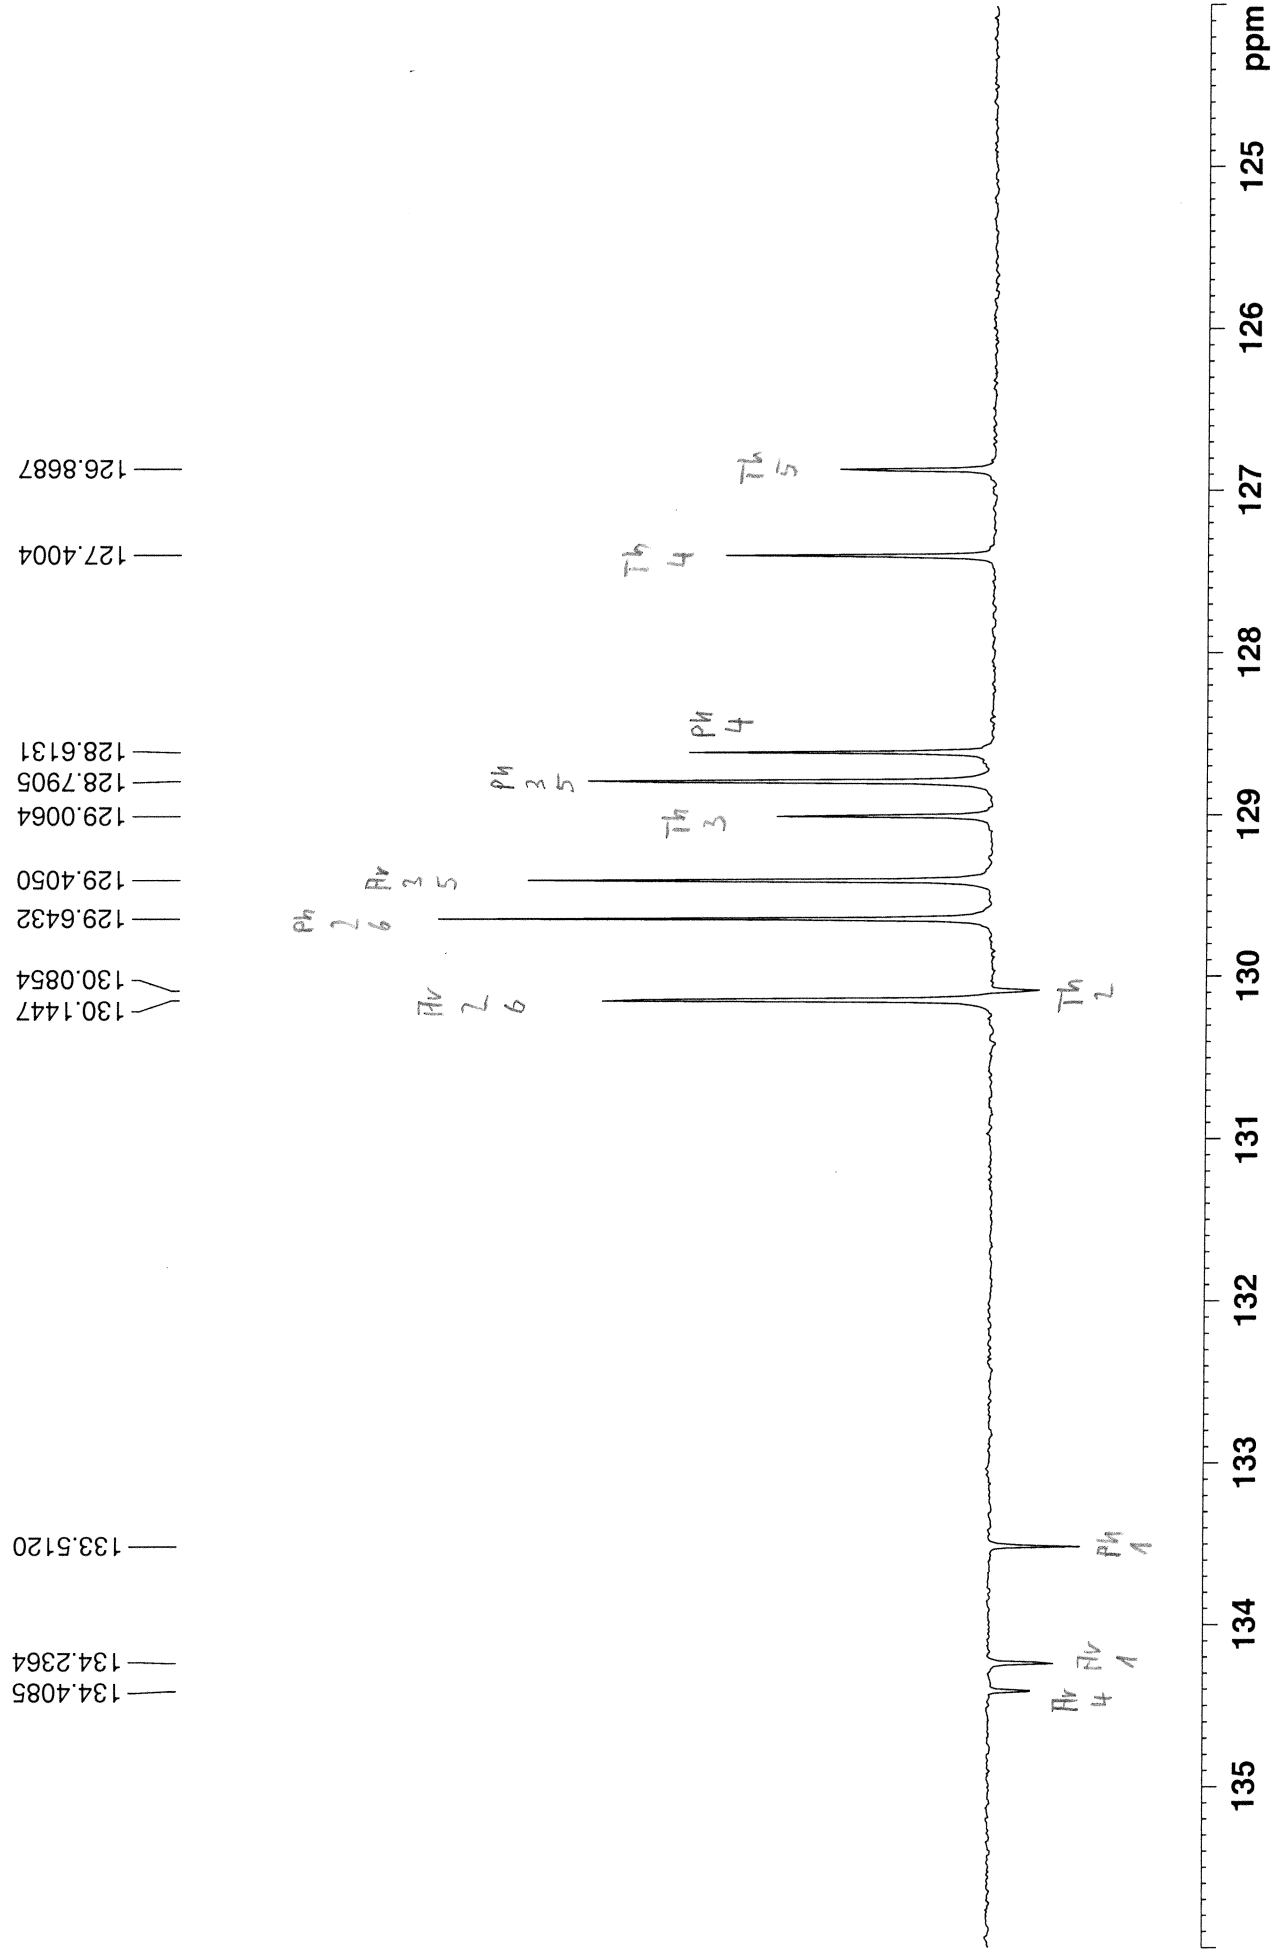

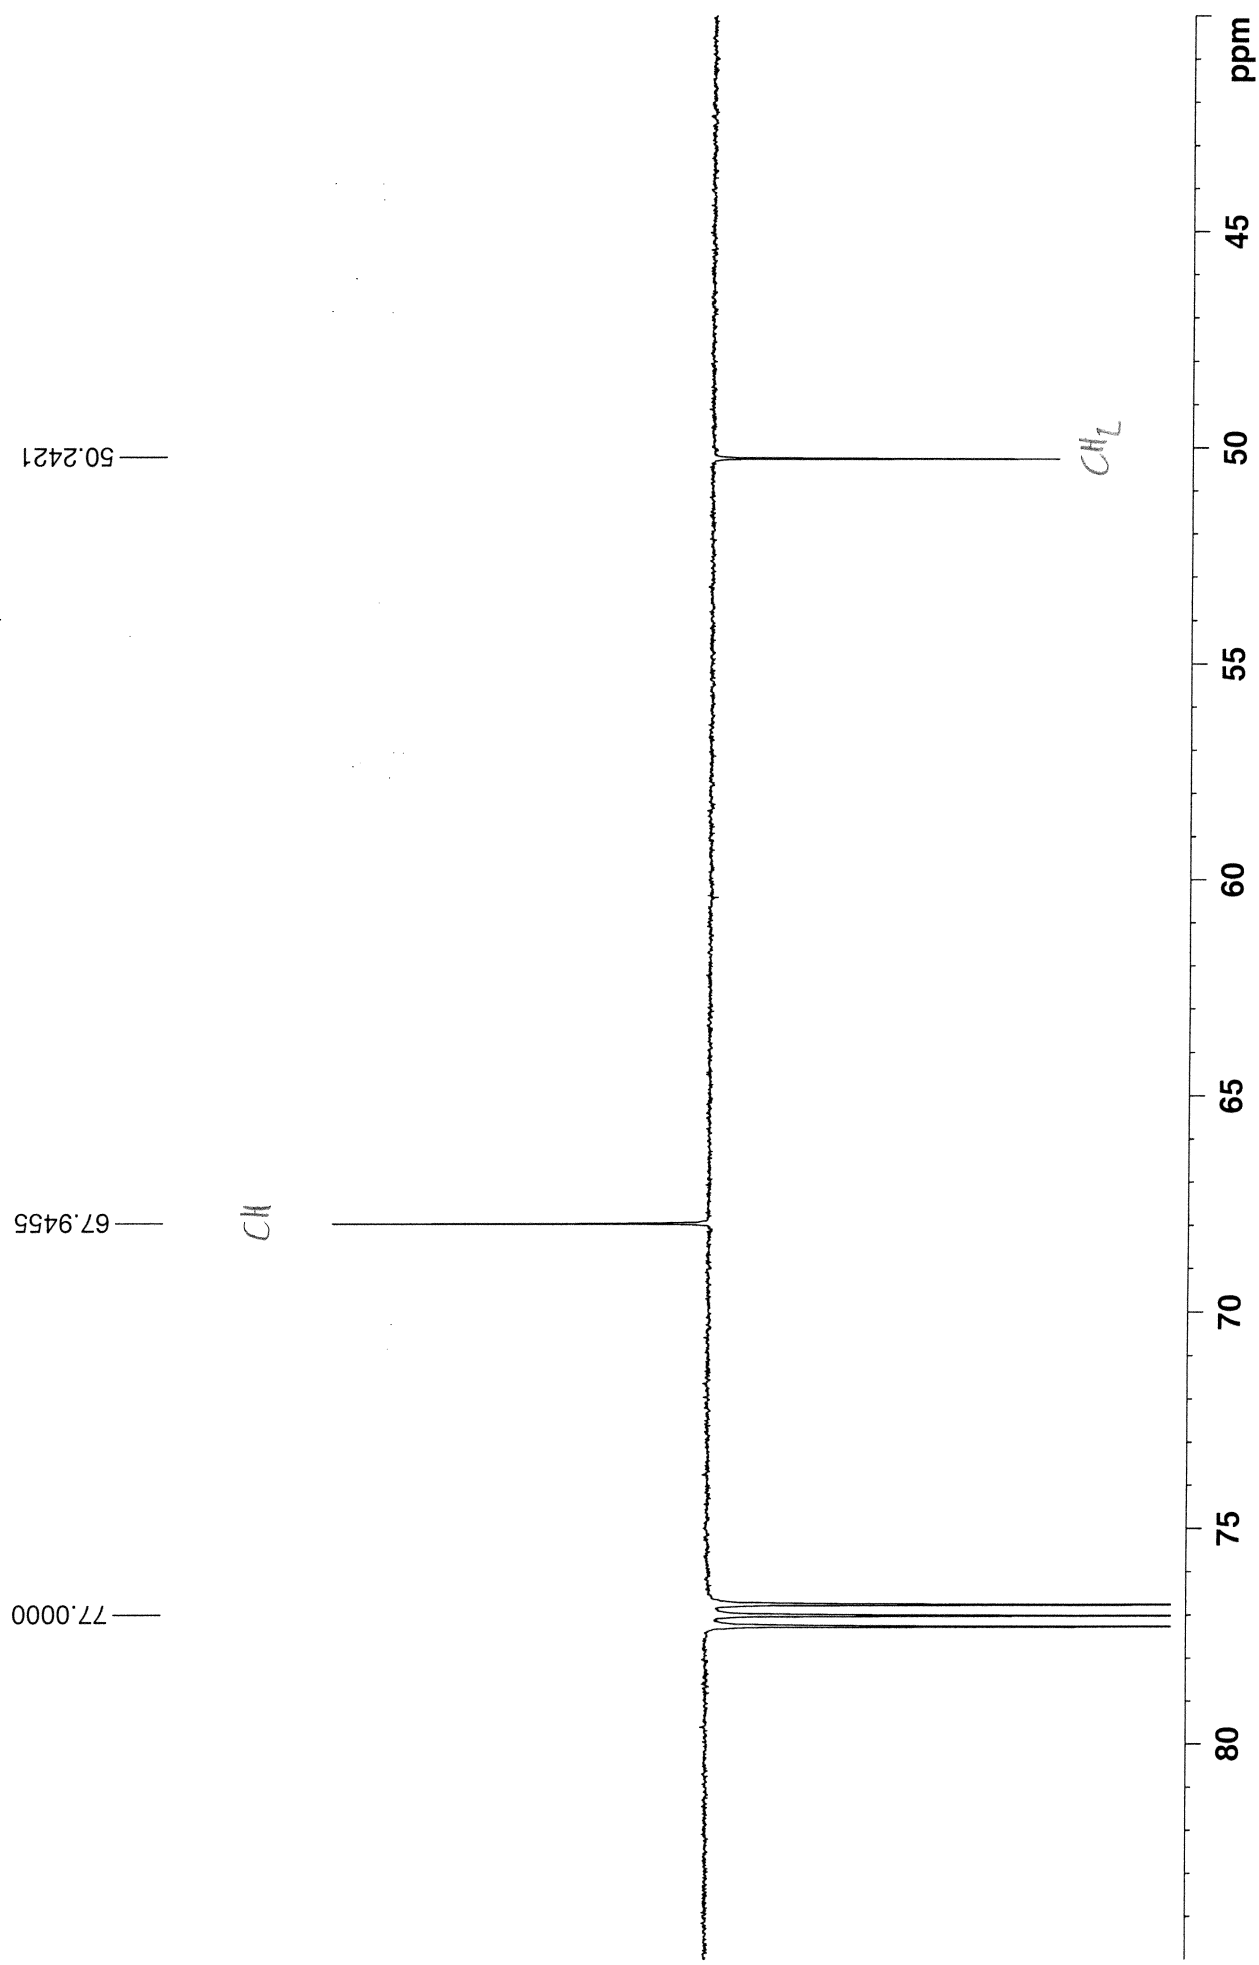

**Figure S25c.** NMR spectra of compound **5g**.

PN014-1 in cdcl3 (Proton) 29.7.2020

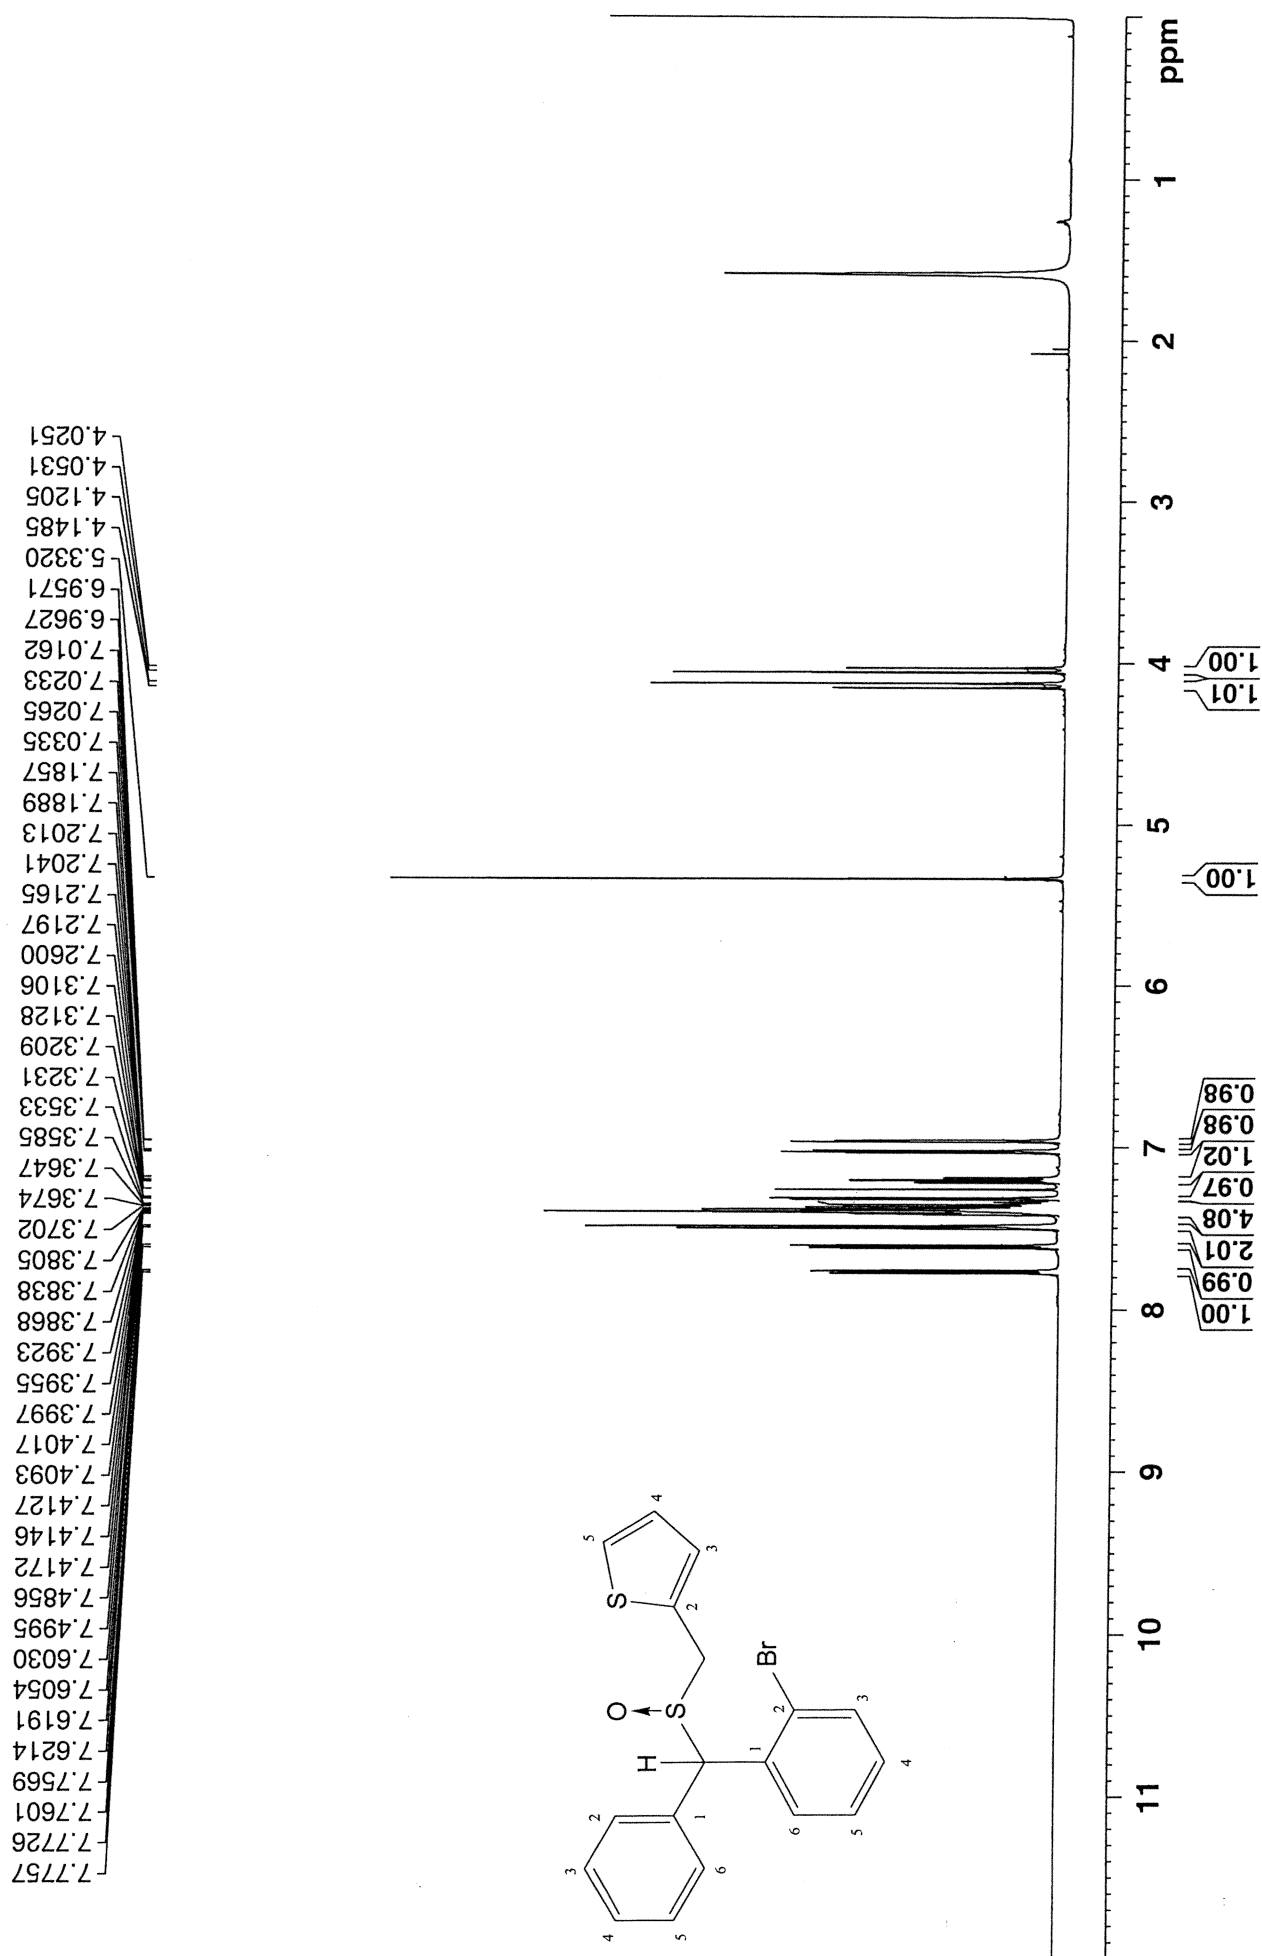

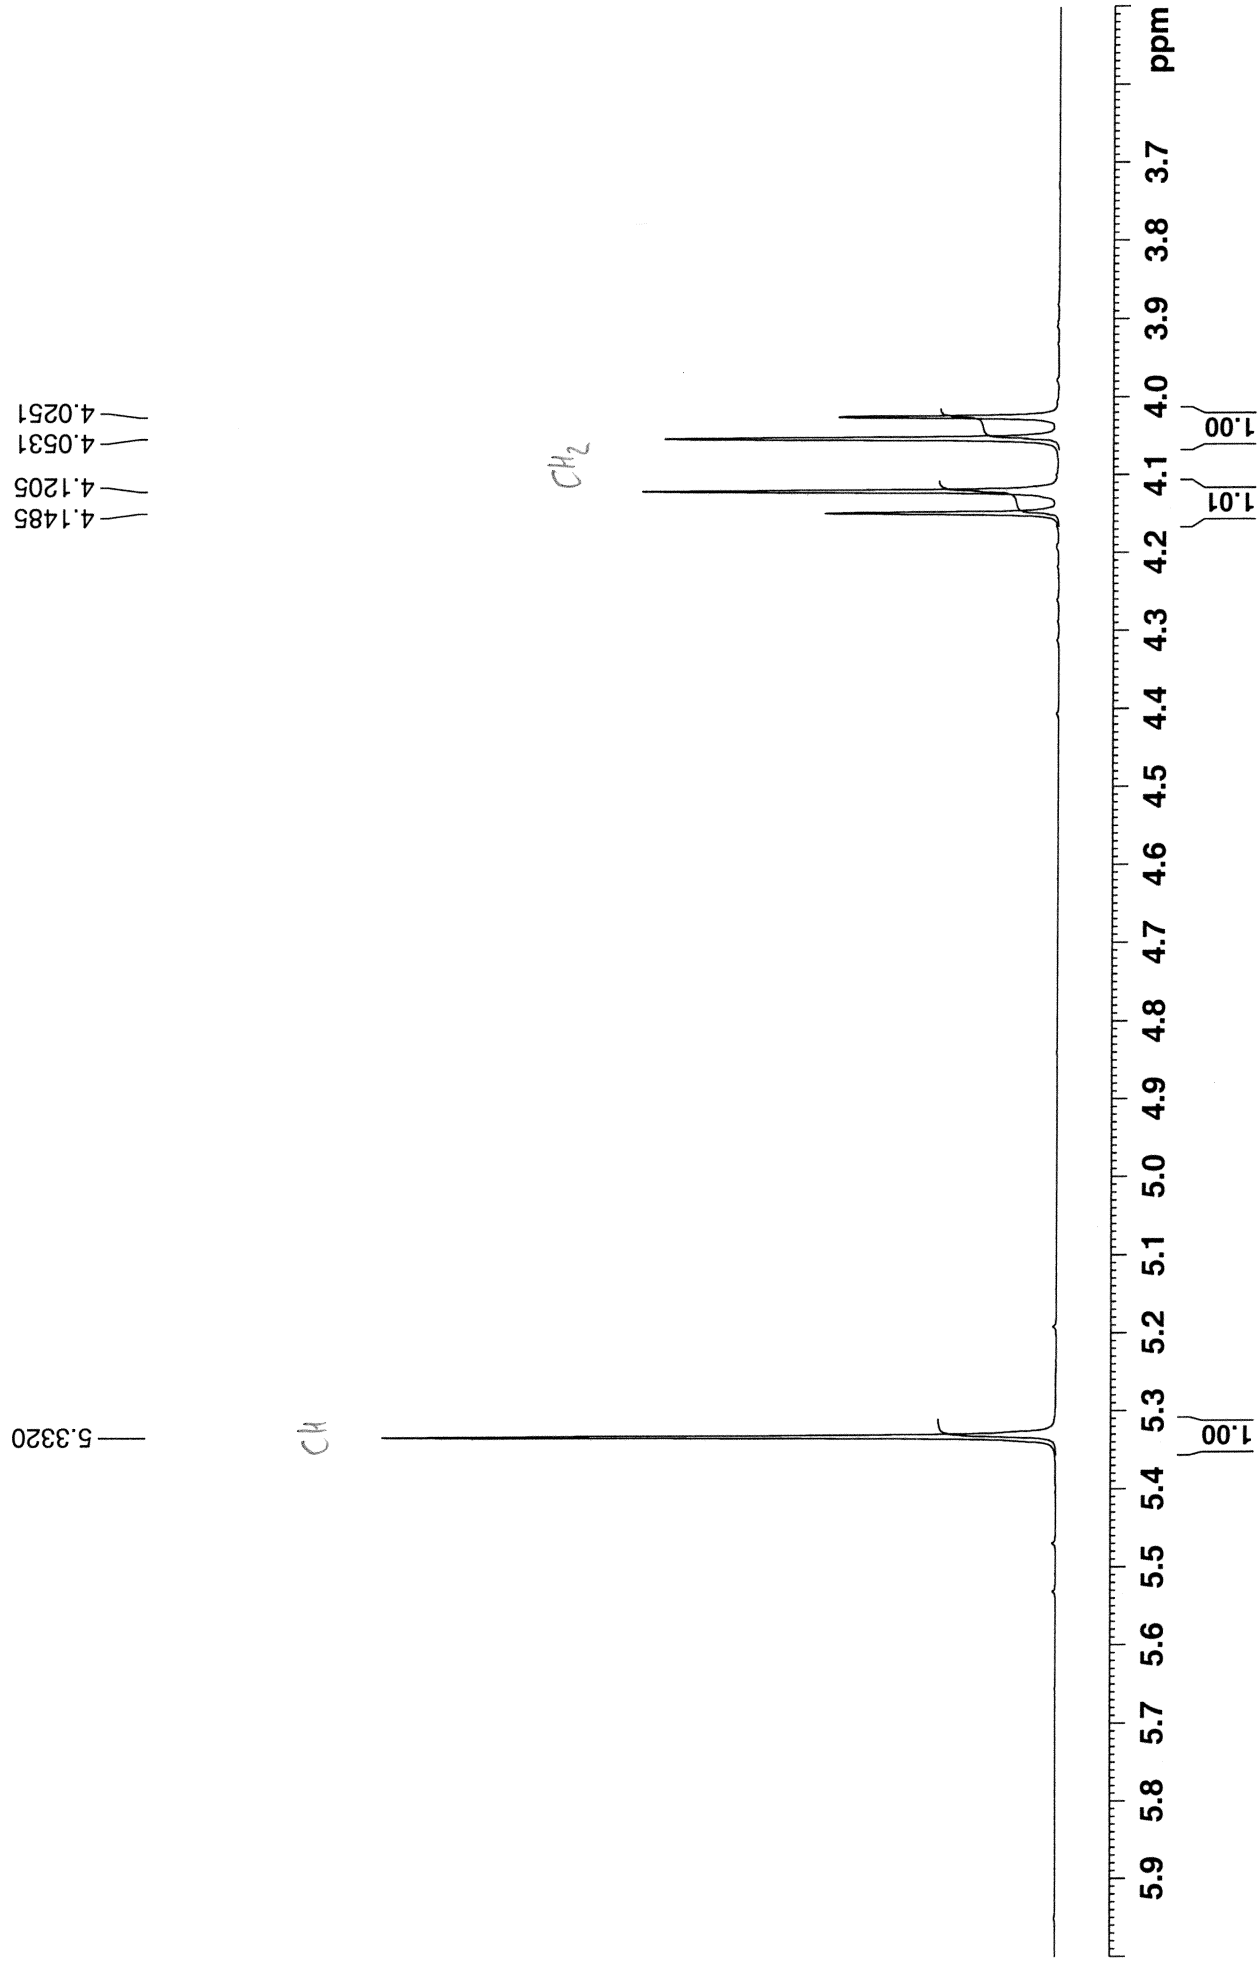

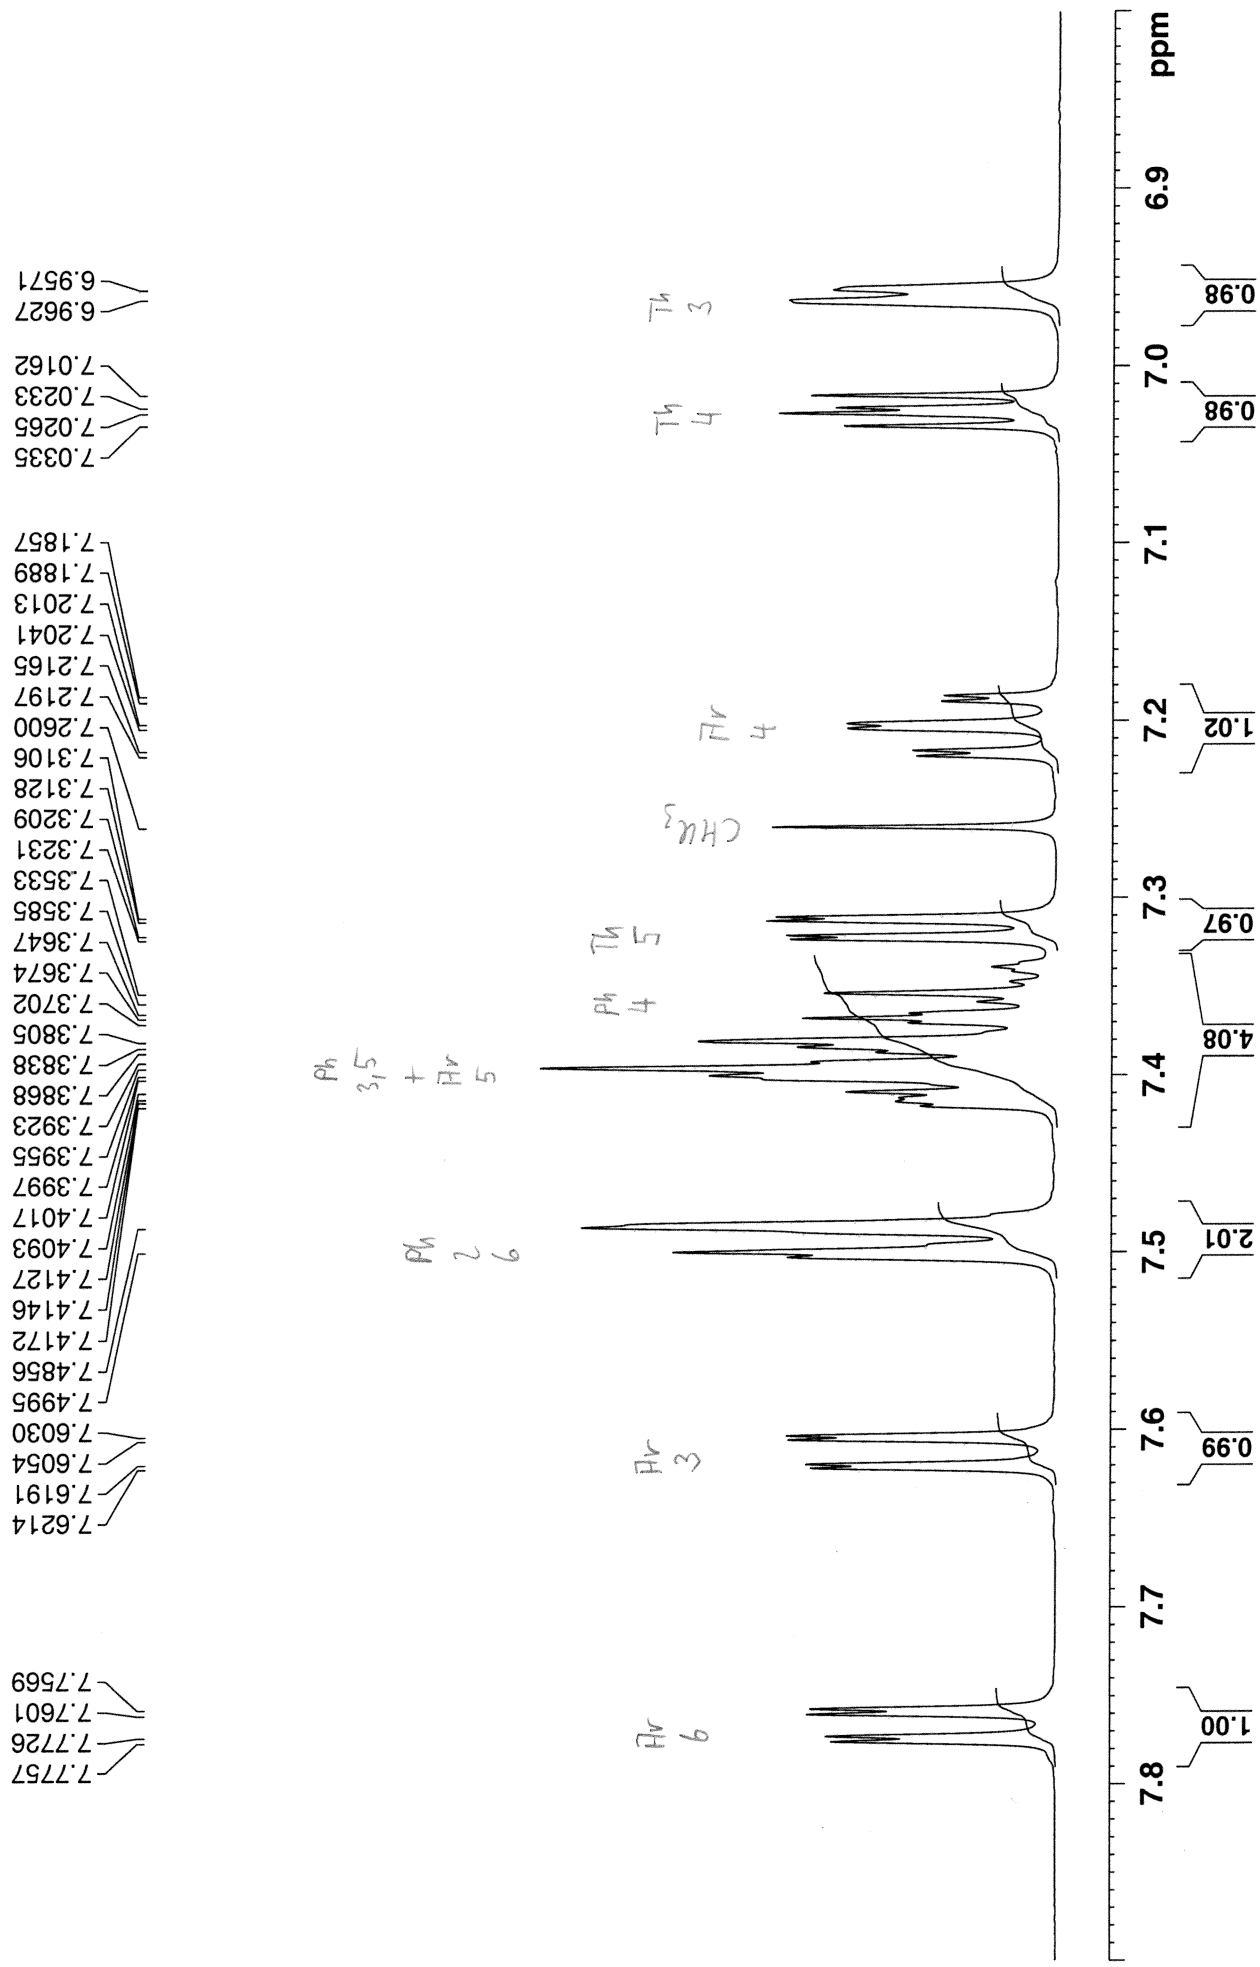

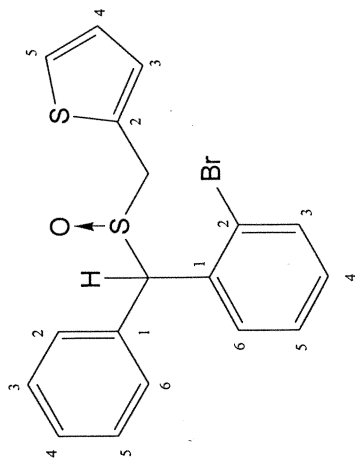

136.0217  
133.6877  
132.7604  
130.5339  
130.1315  
129.7070  
129.6519  
128.9444  
128.6796  
128.5674  
128.1083  
127.4832  
126.8850  
124.9023

77.0000  
67.2839  
51.0410

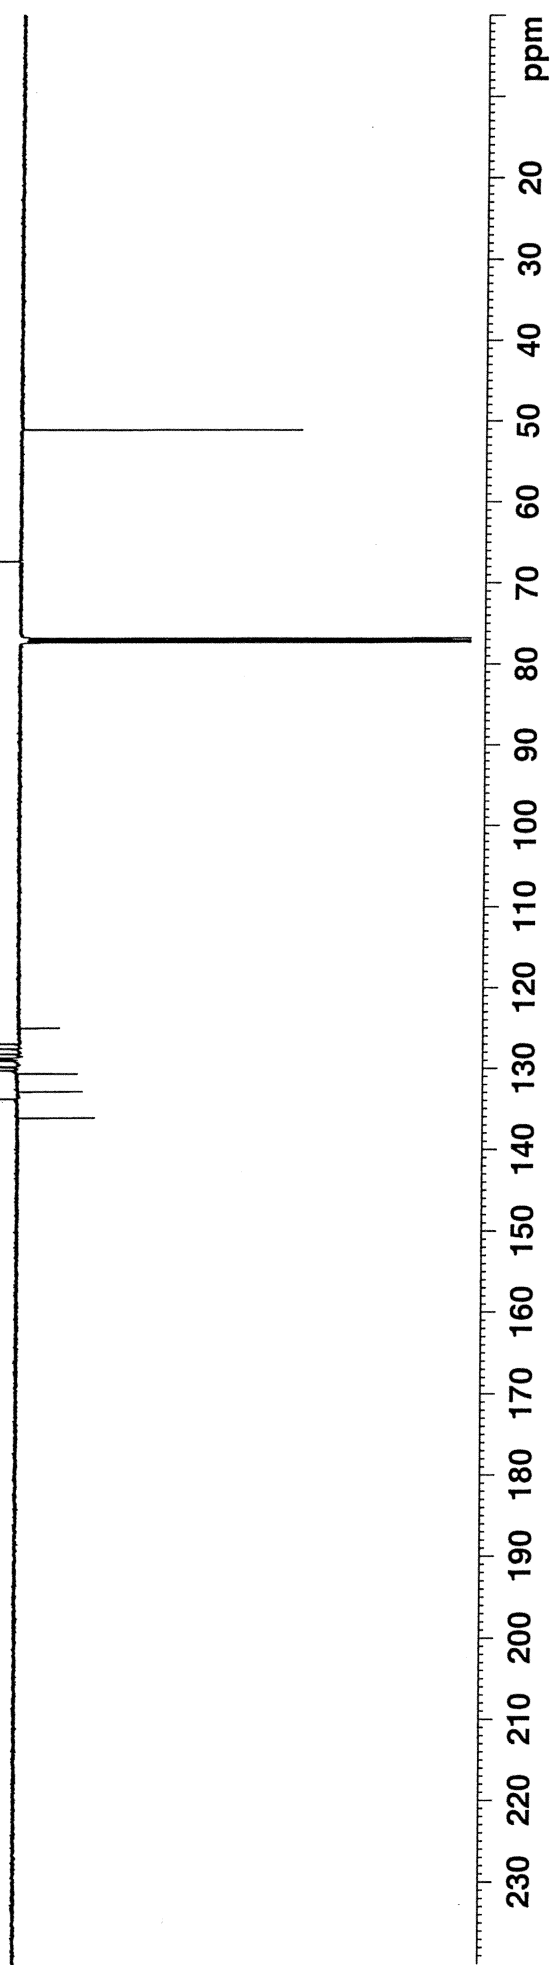



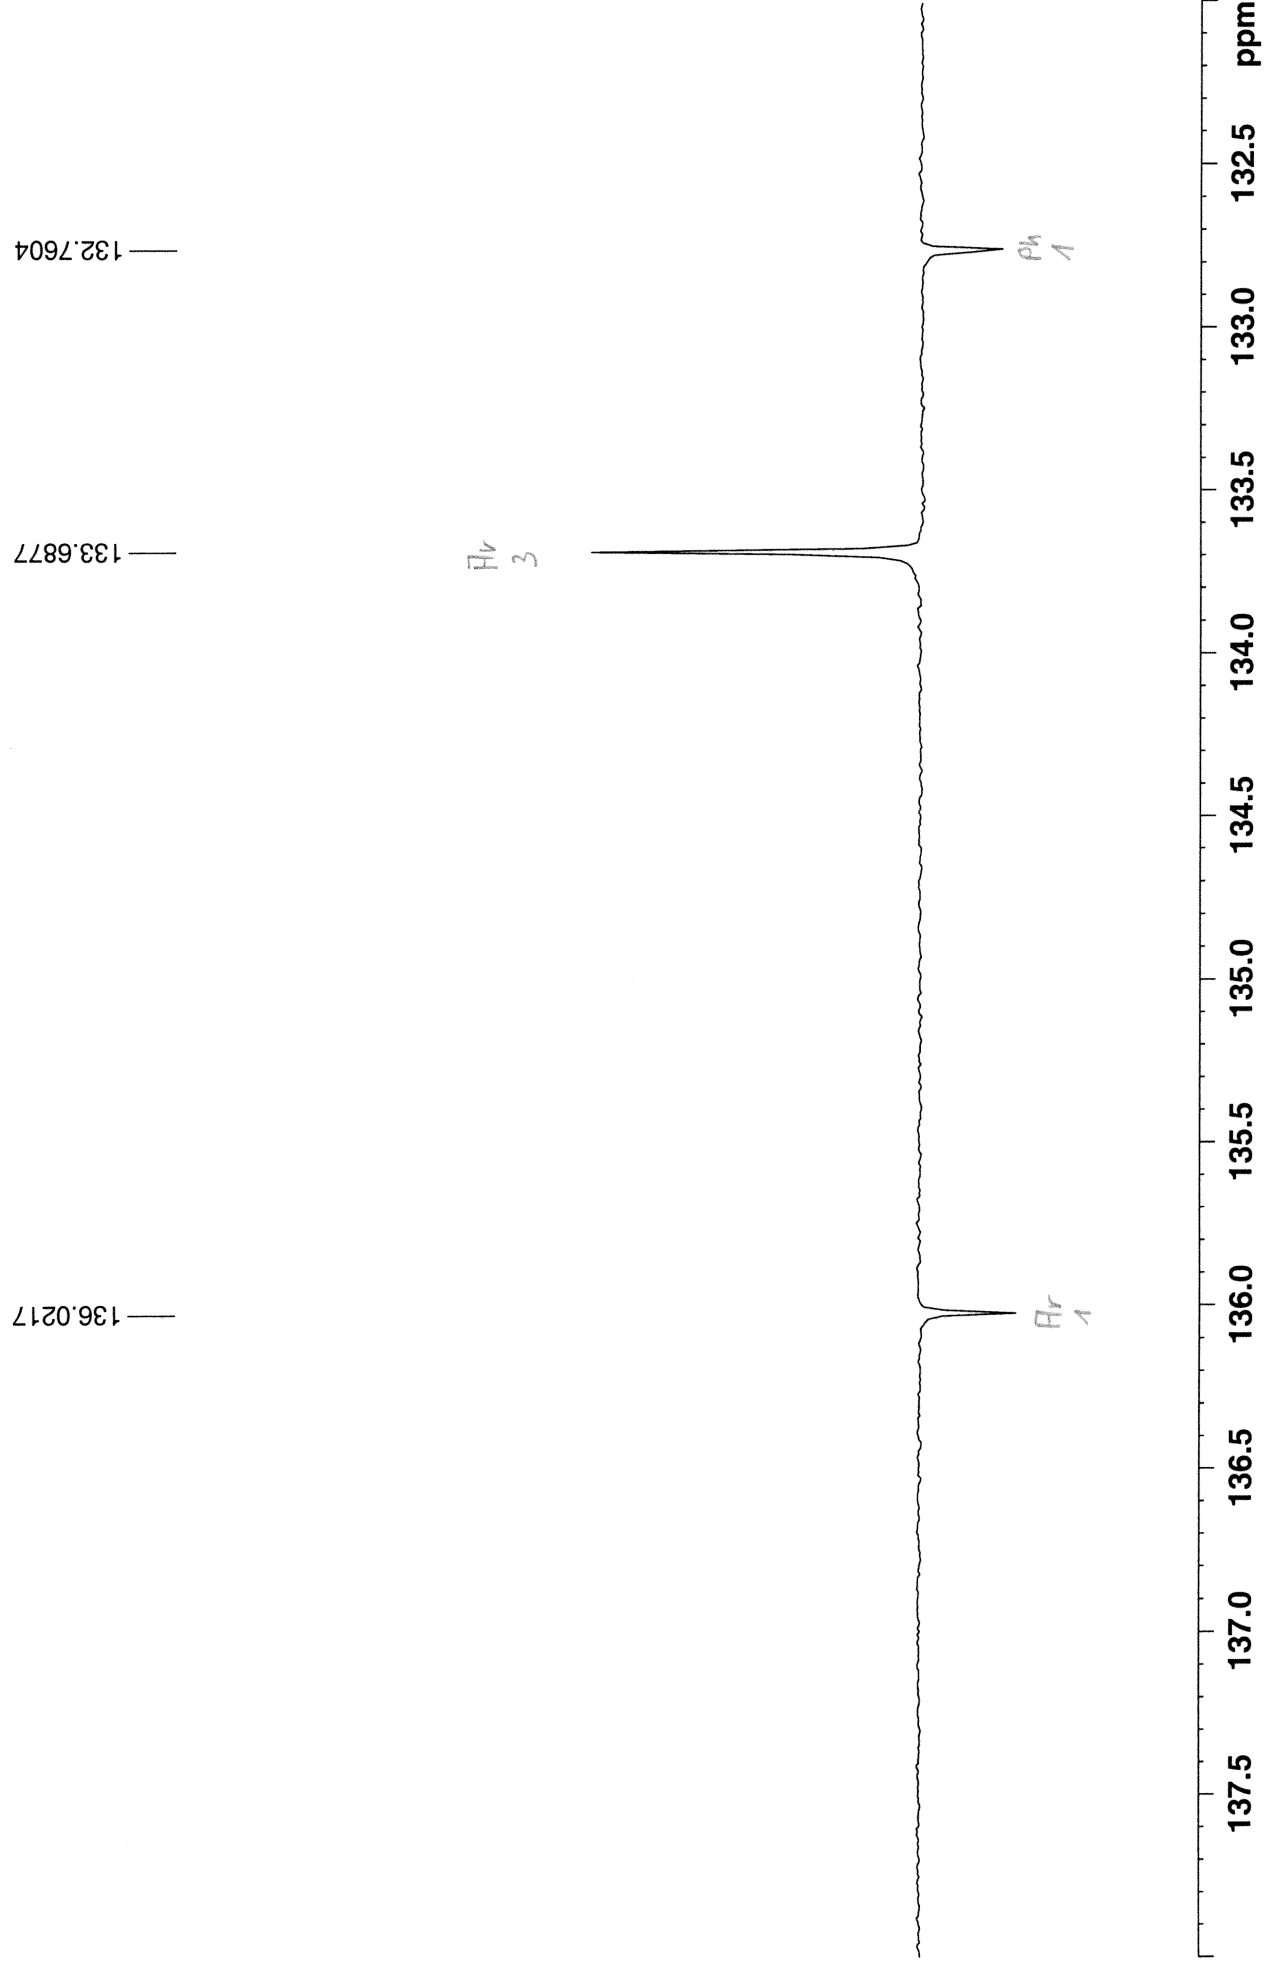

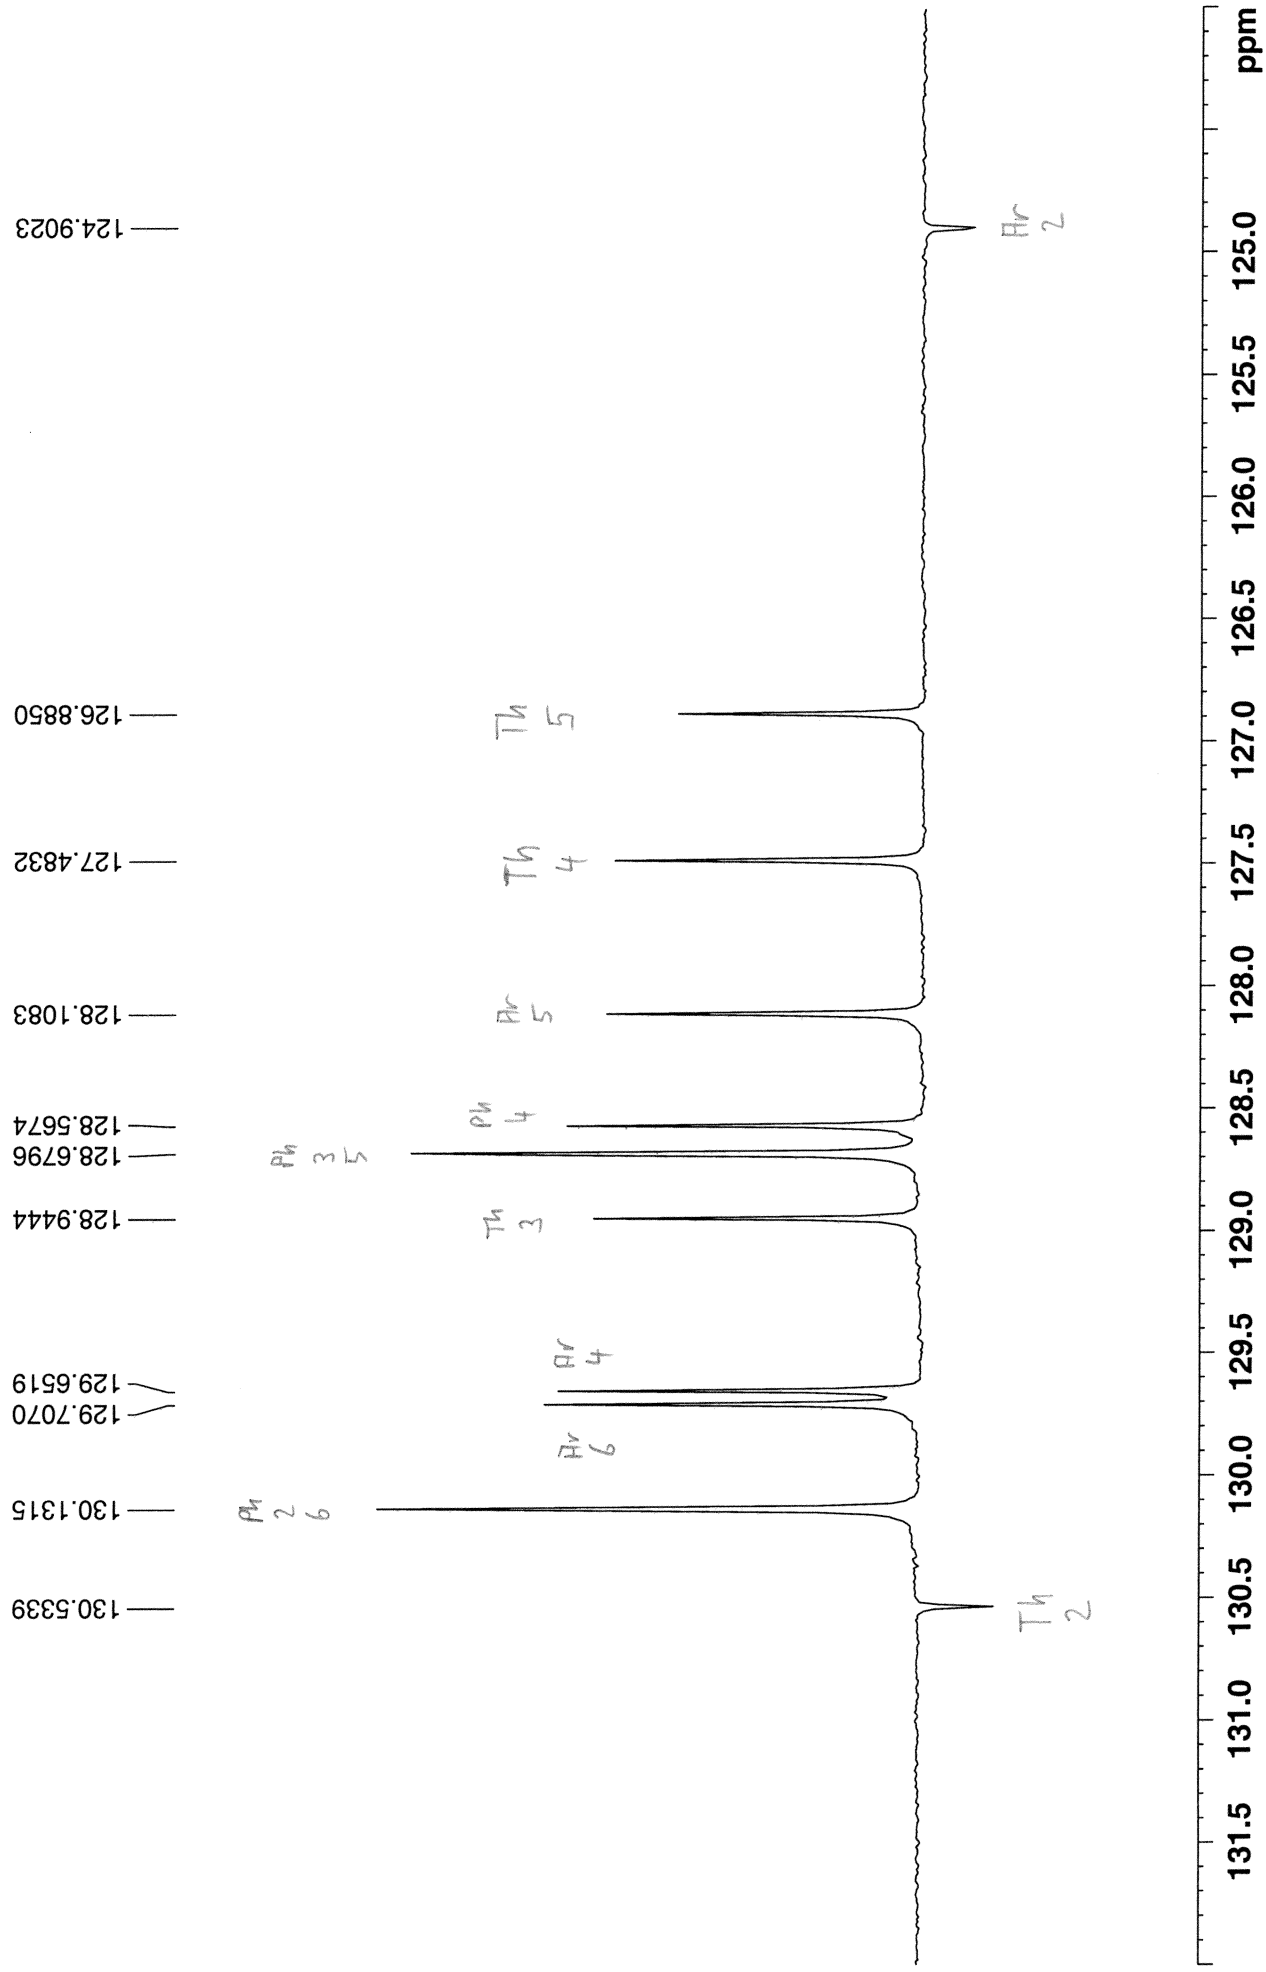

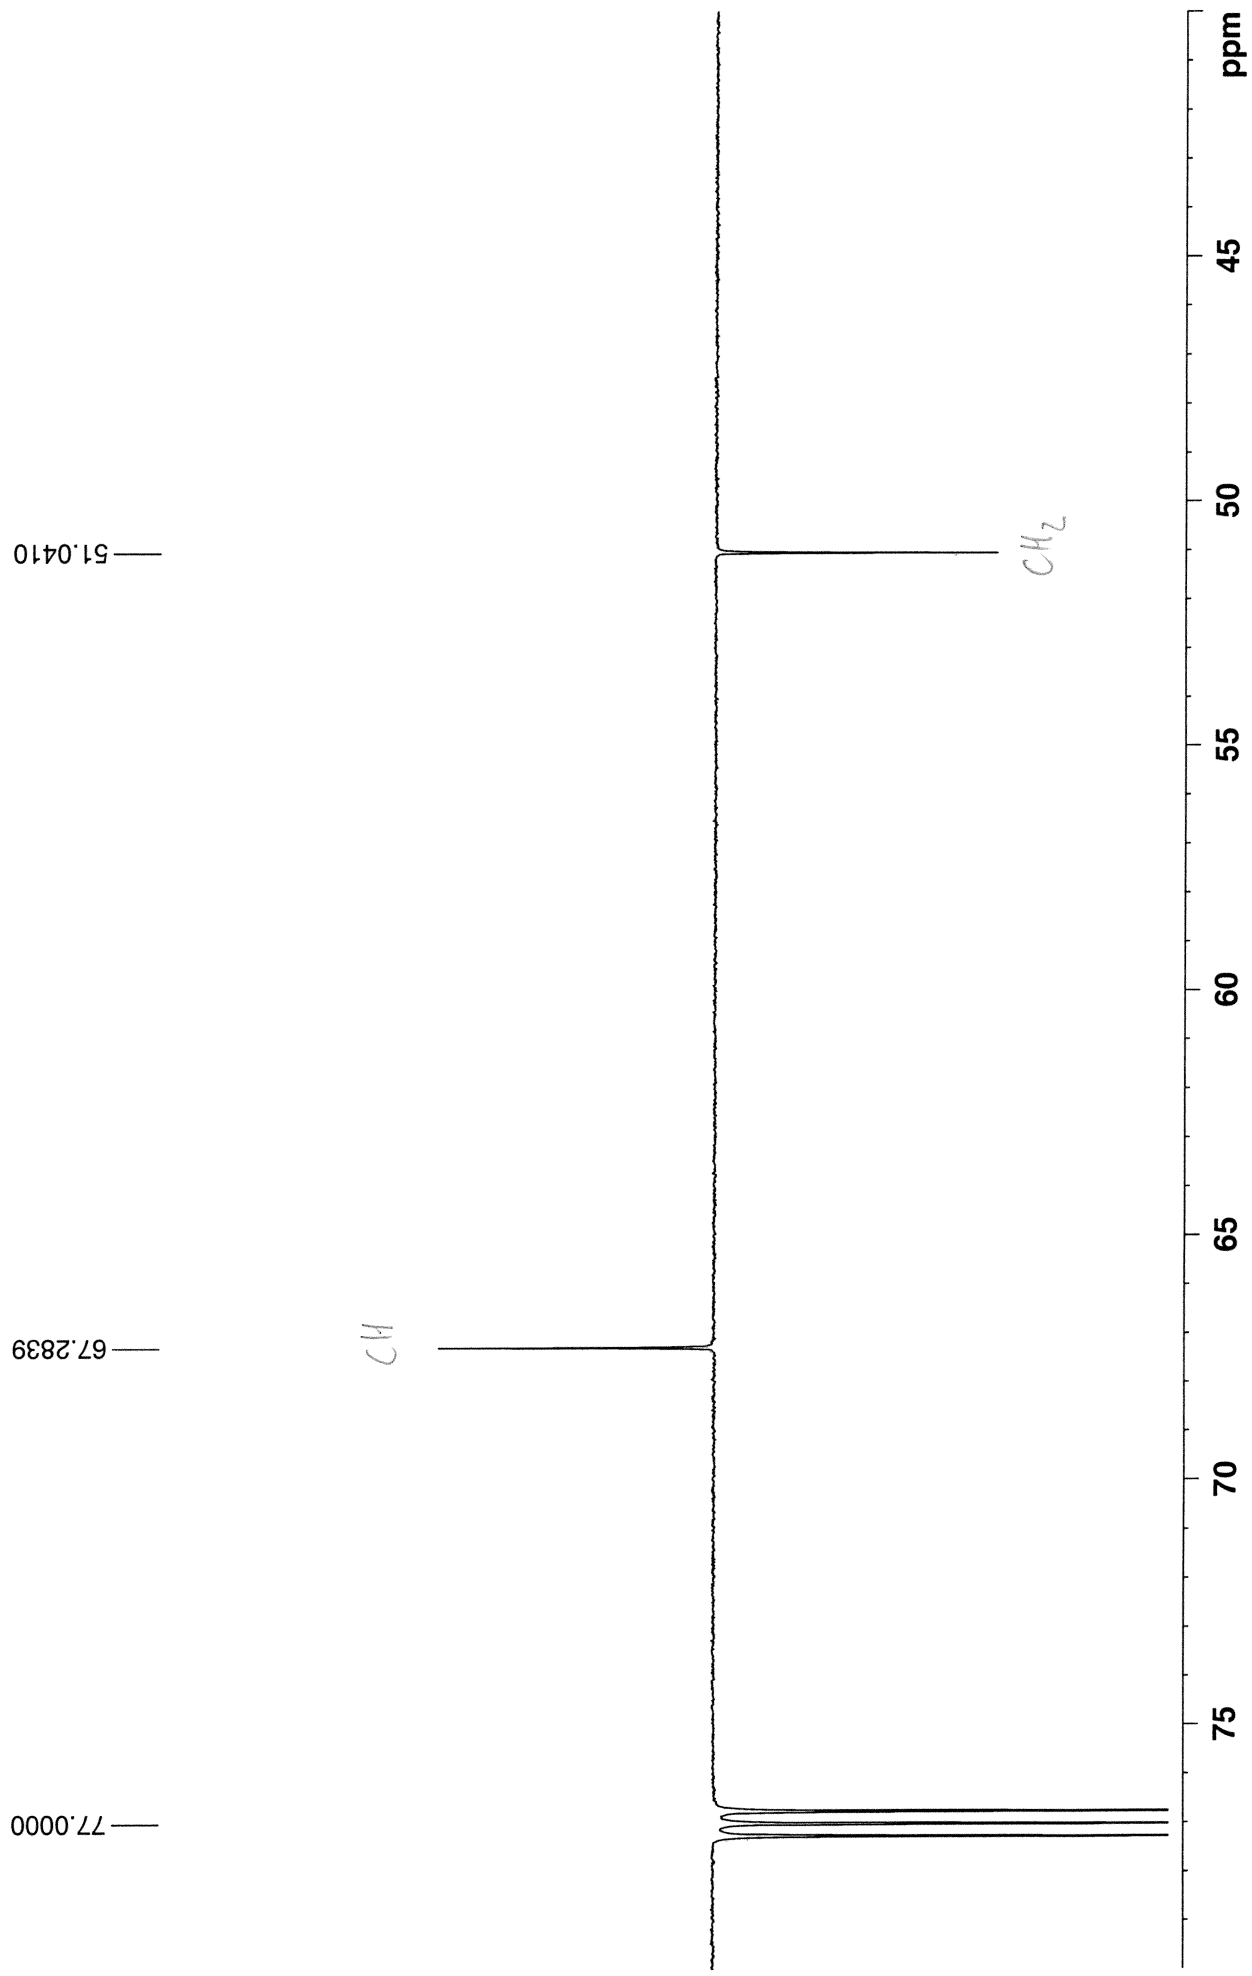

PN014-1 in cdcl3 (COSY) 29.7.2020

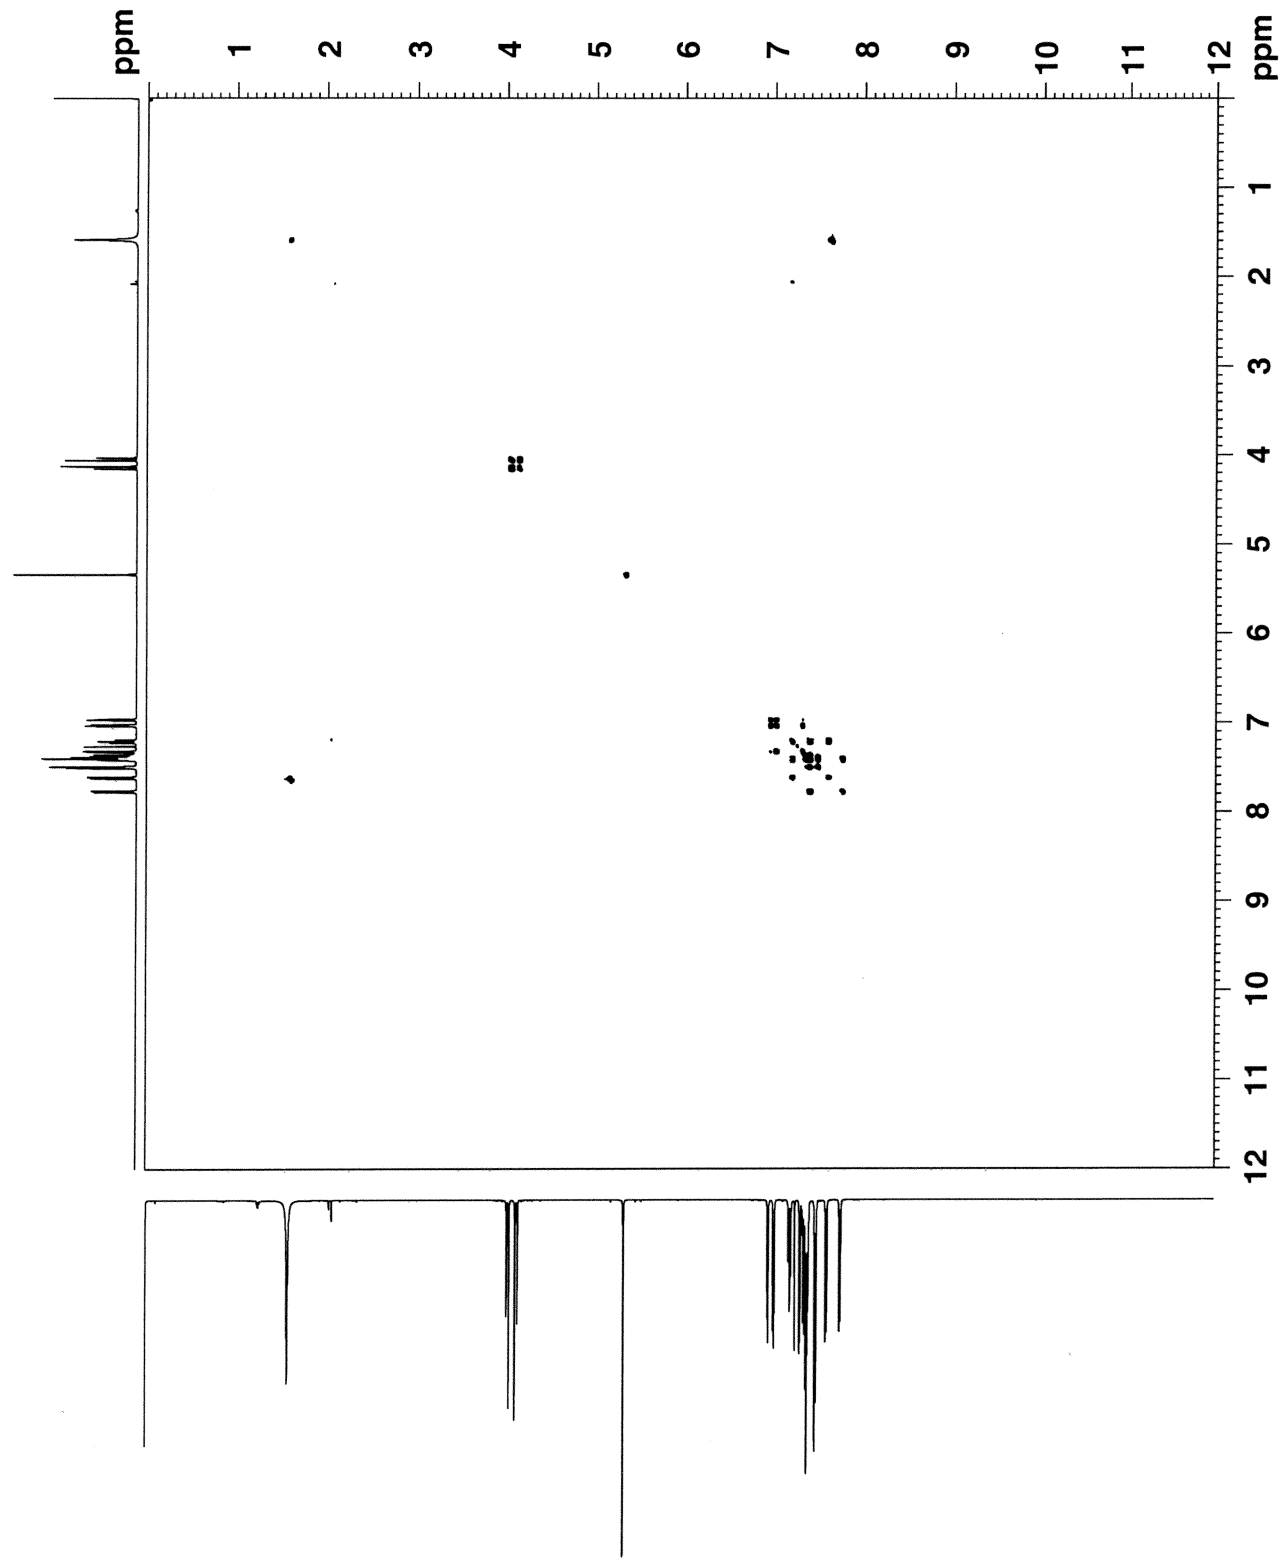

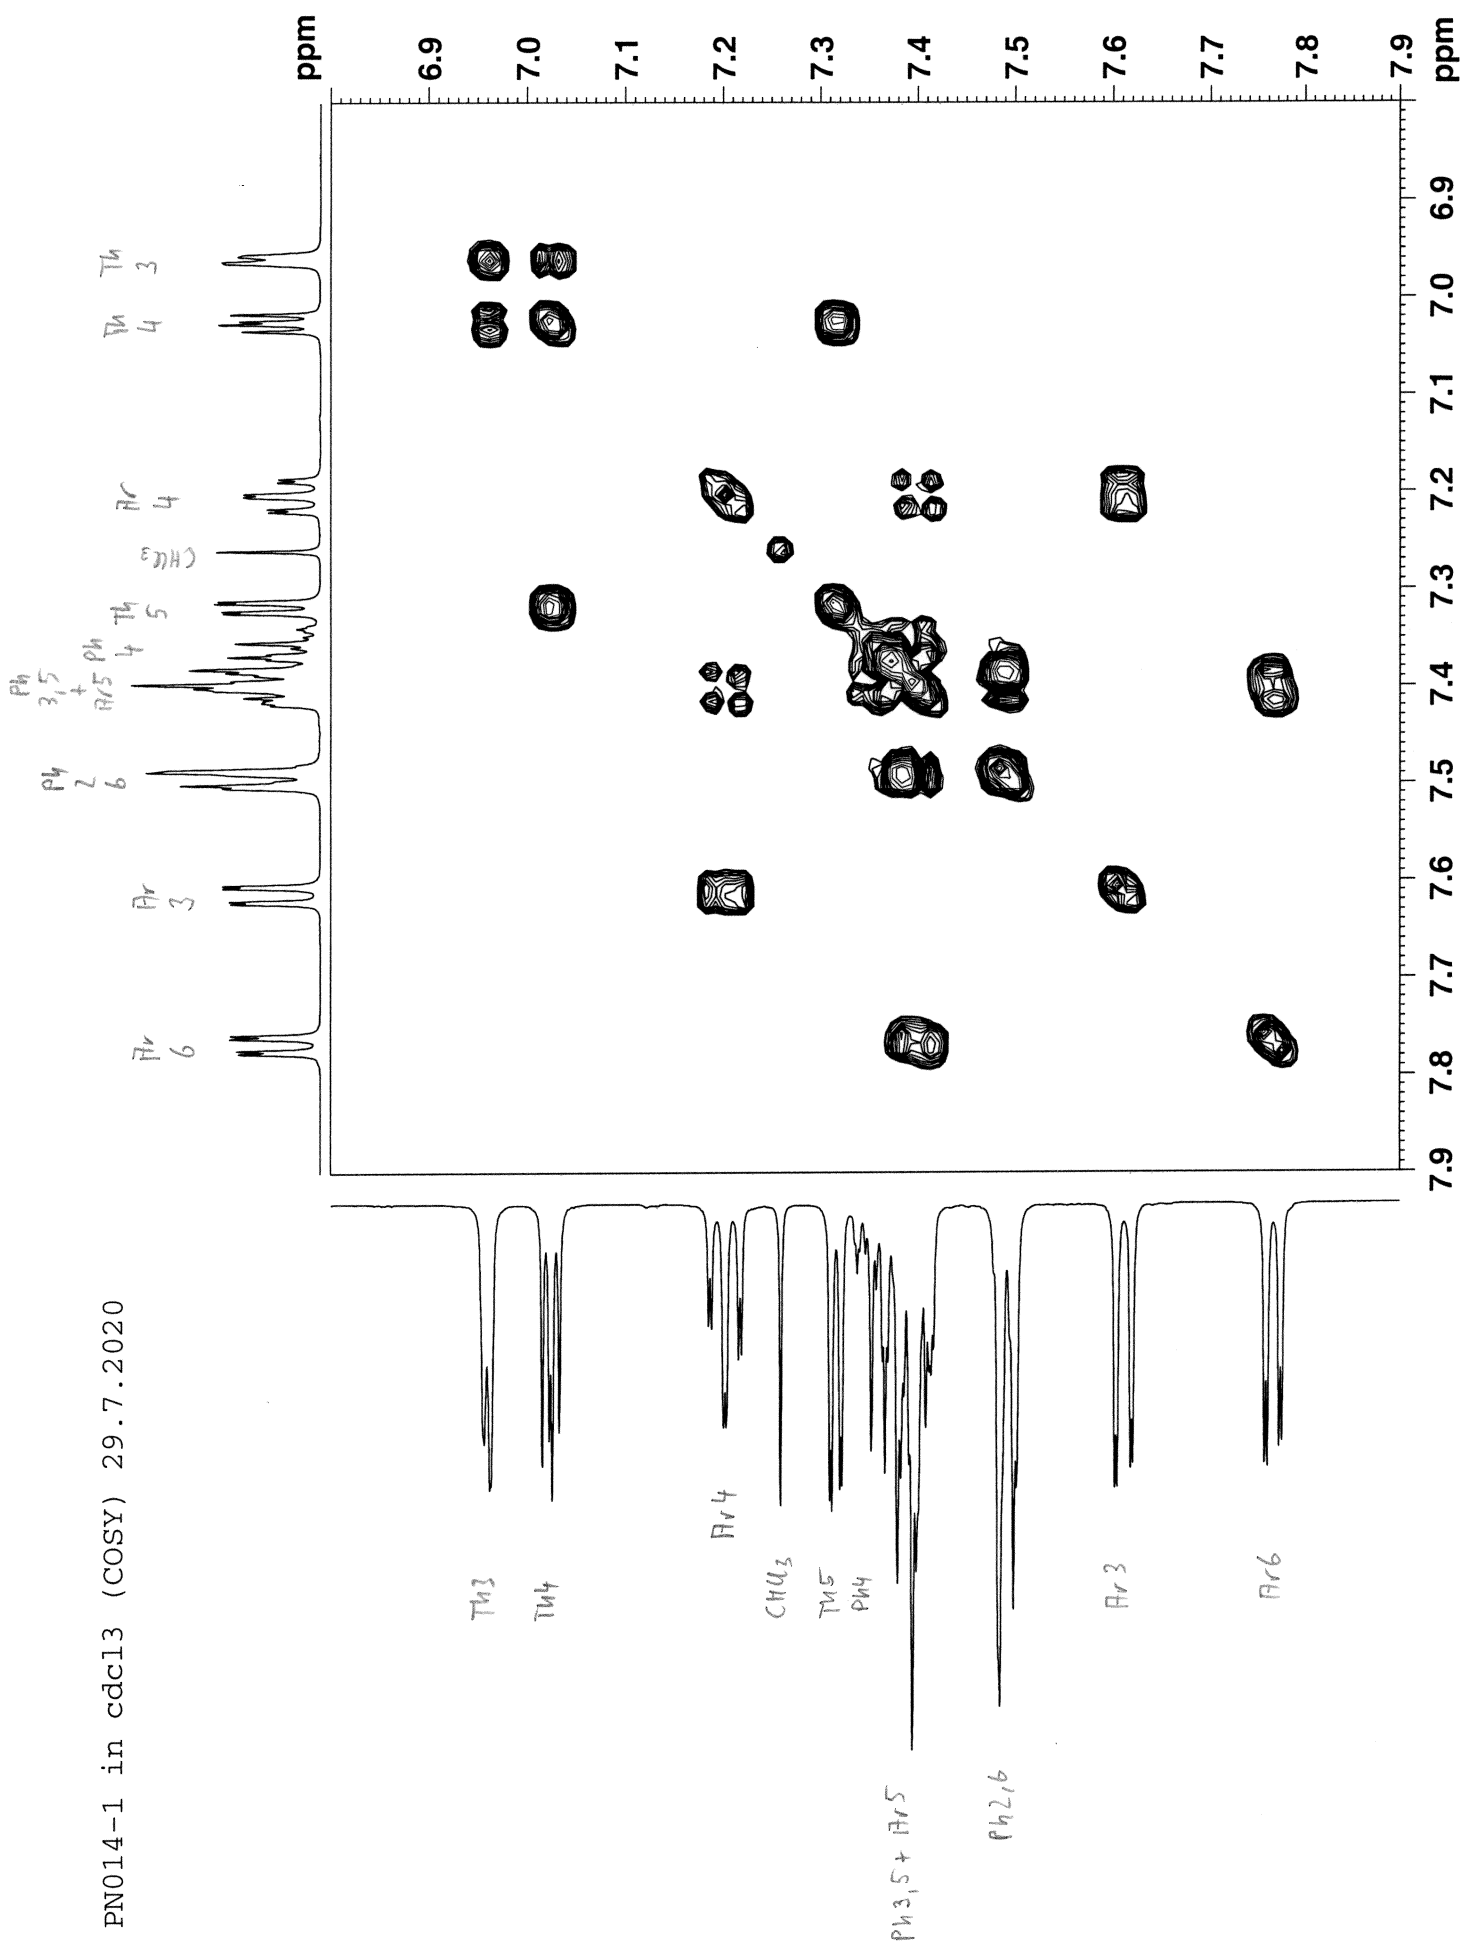

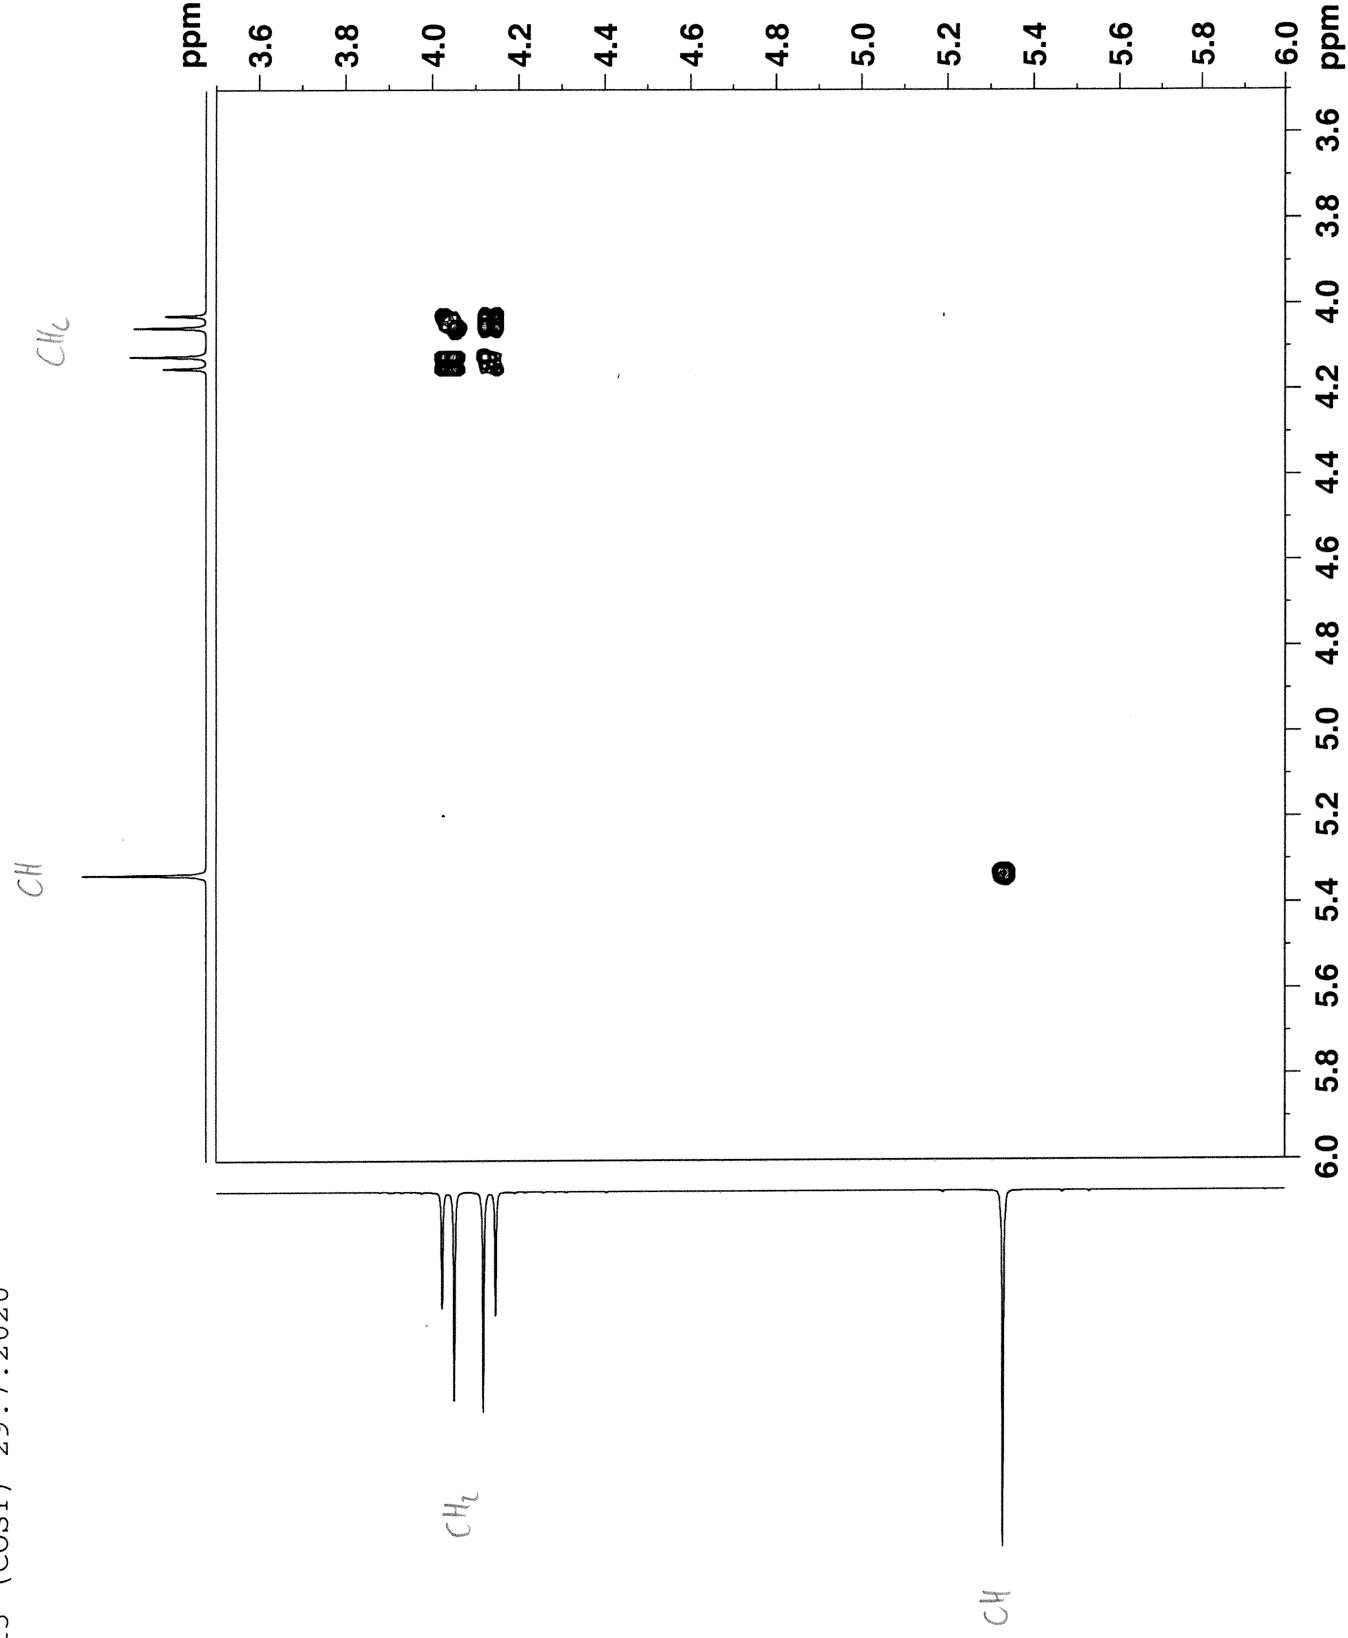

PN014-1 in cdcl3 (HSQC) 29.7.2020

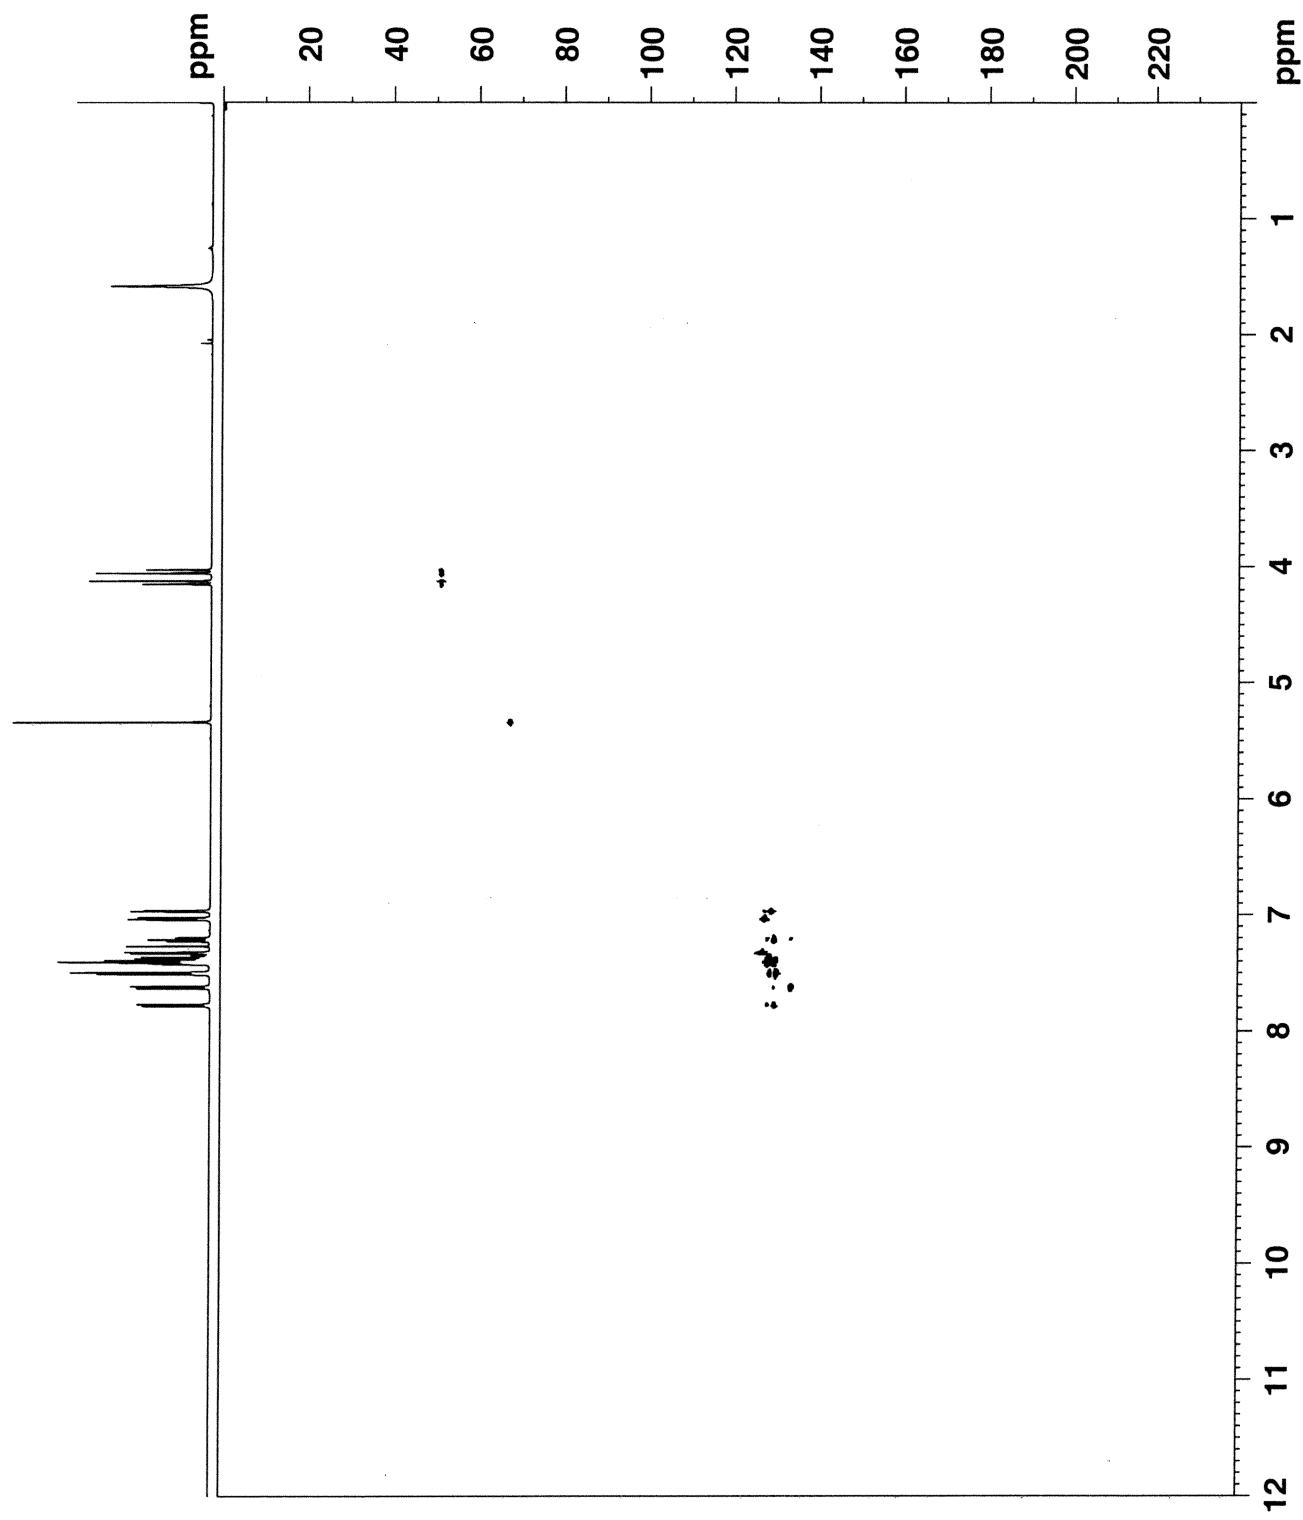

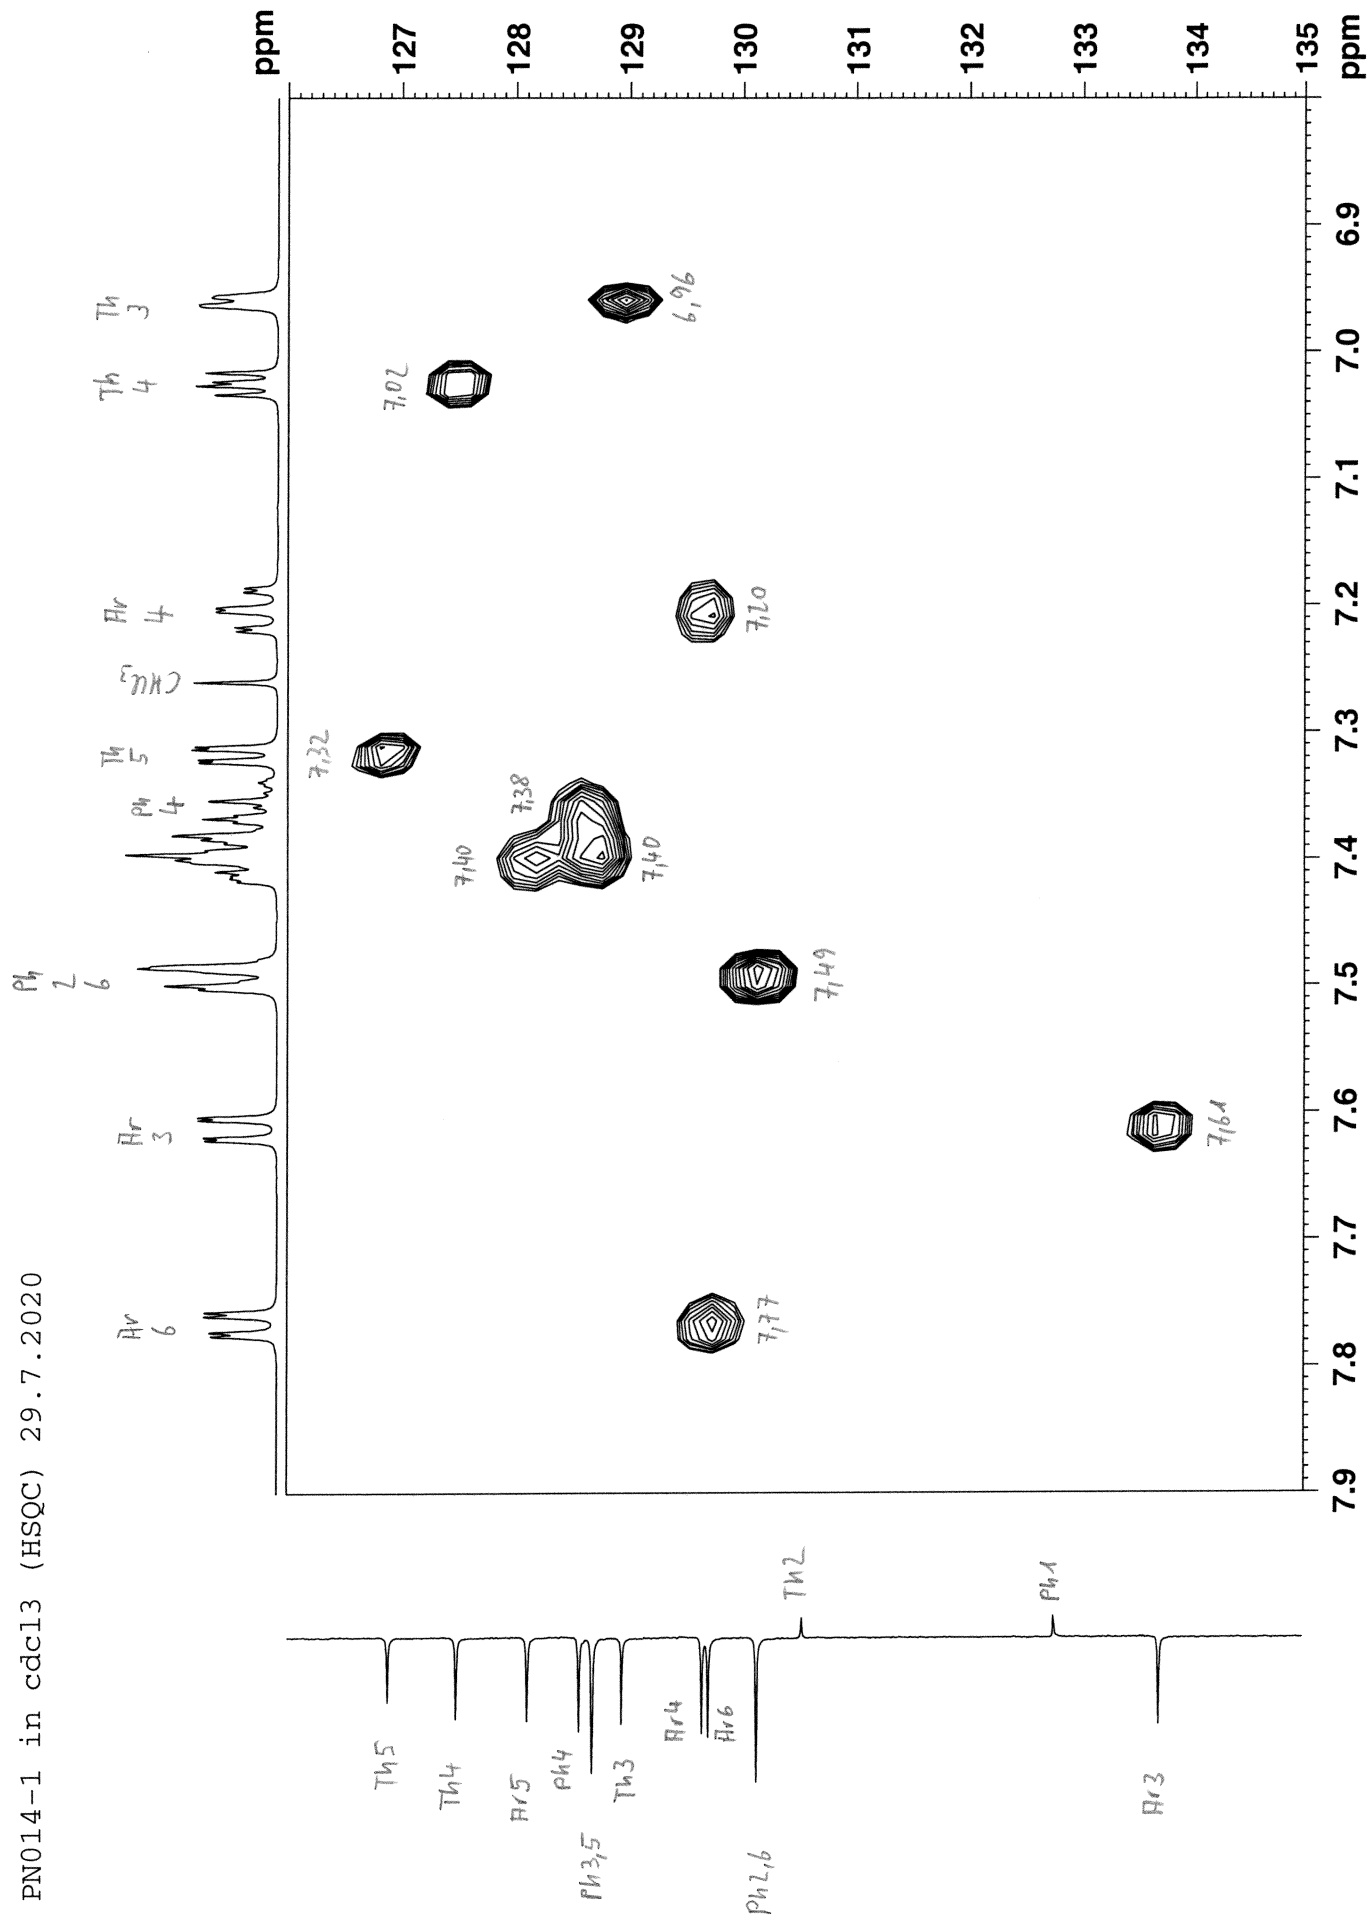



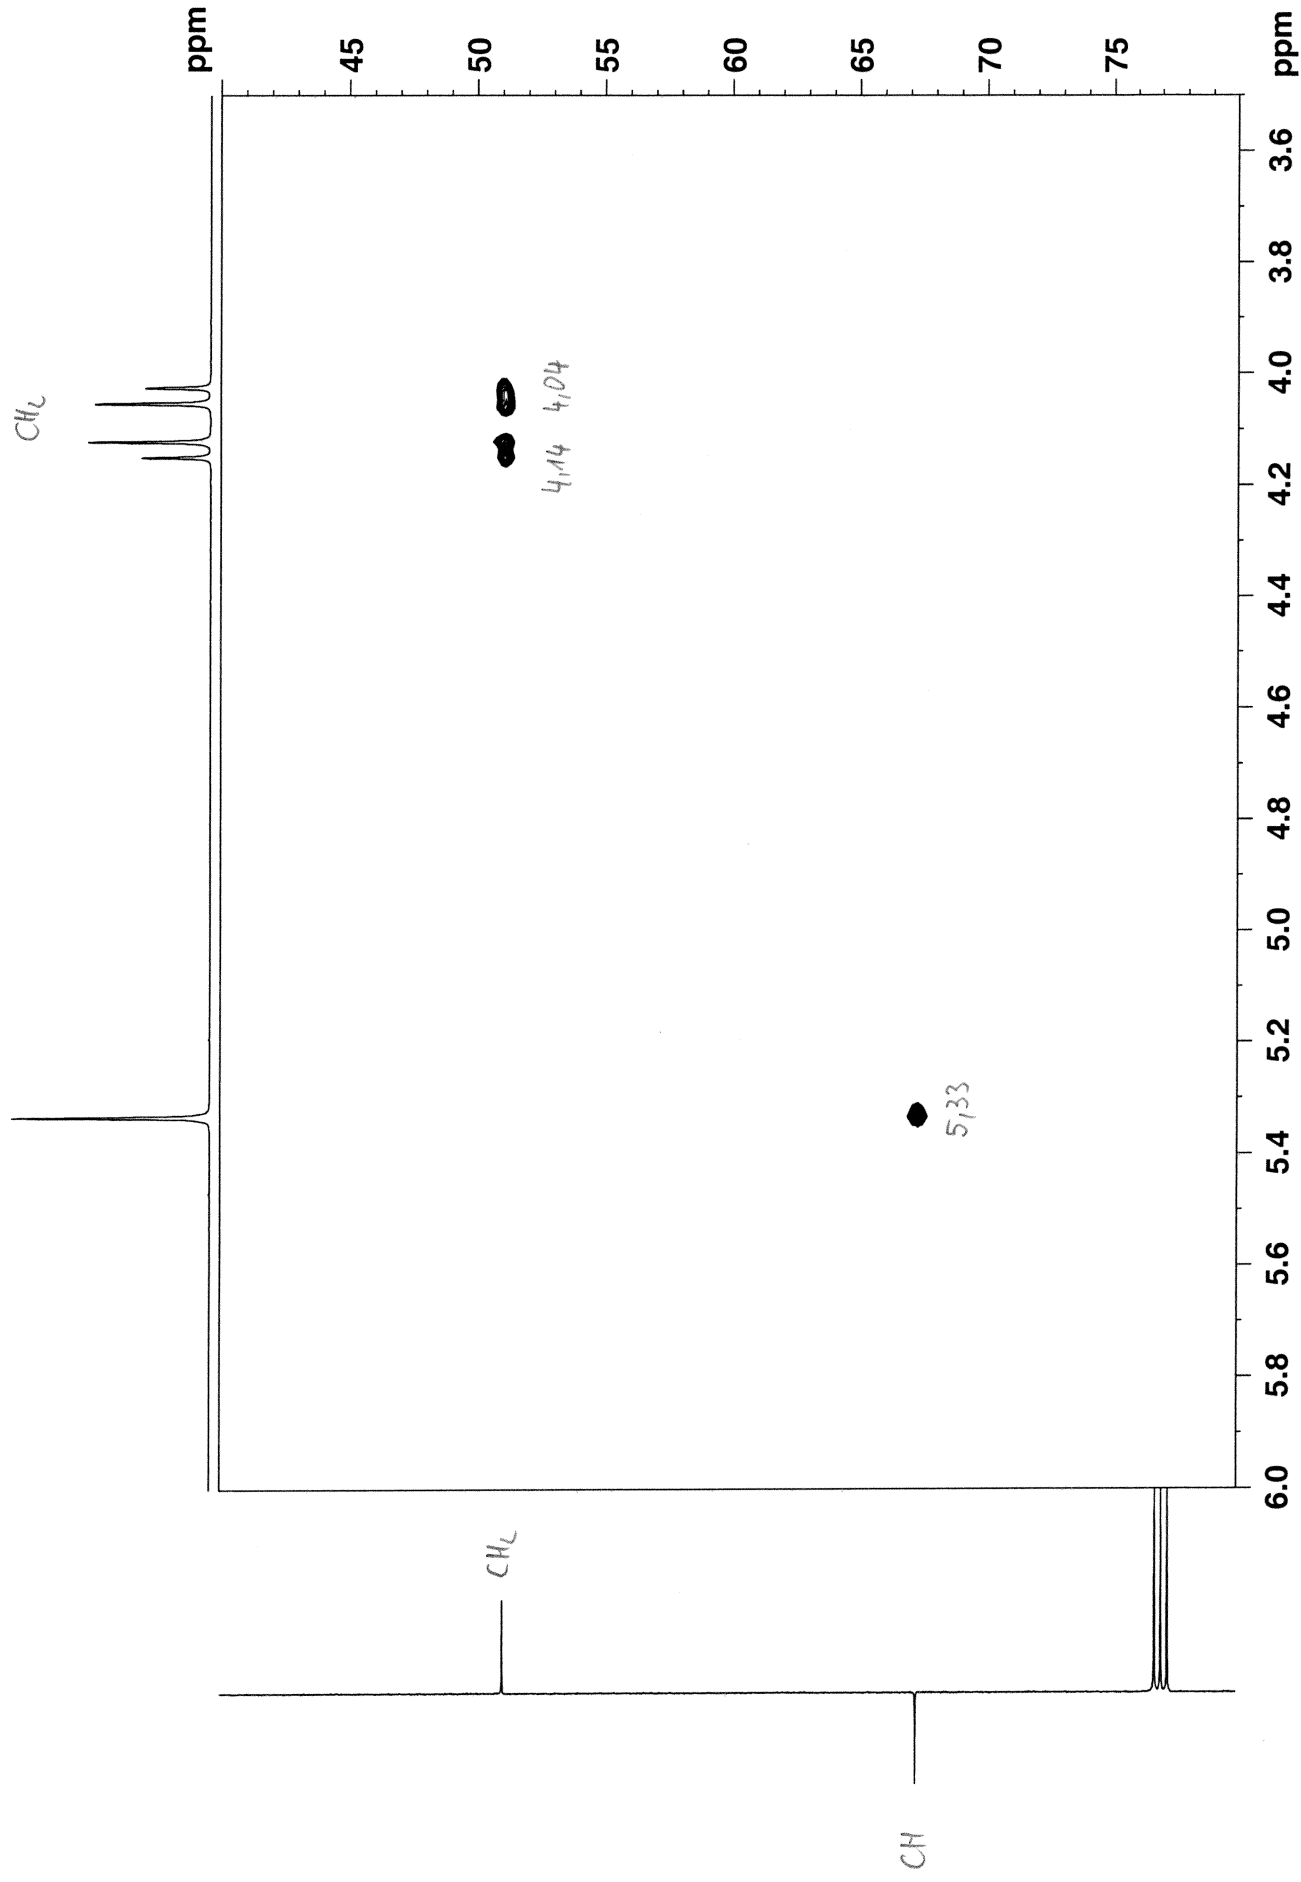

PN014-1 in cdcl3 (HMBC) 29.7.2020

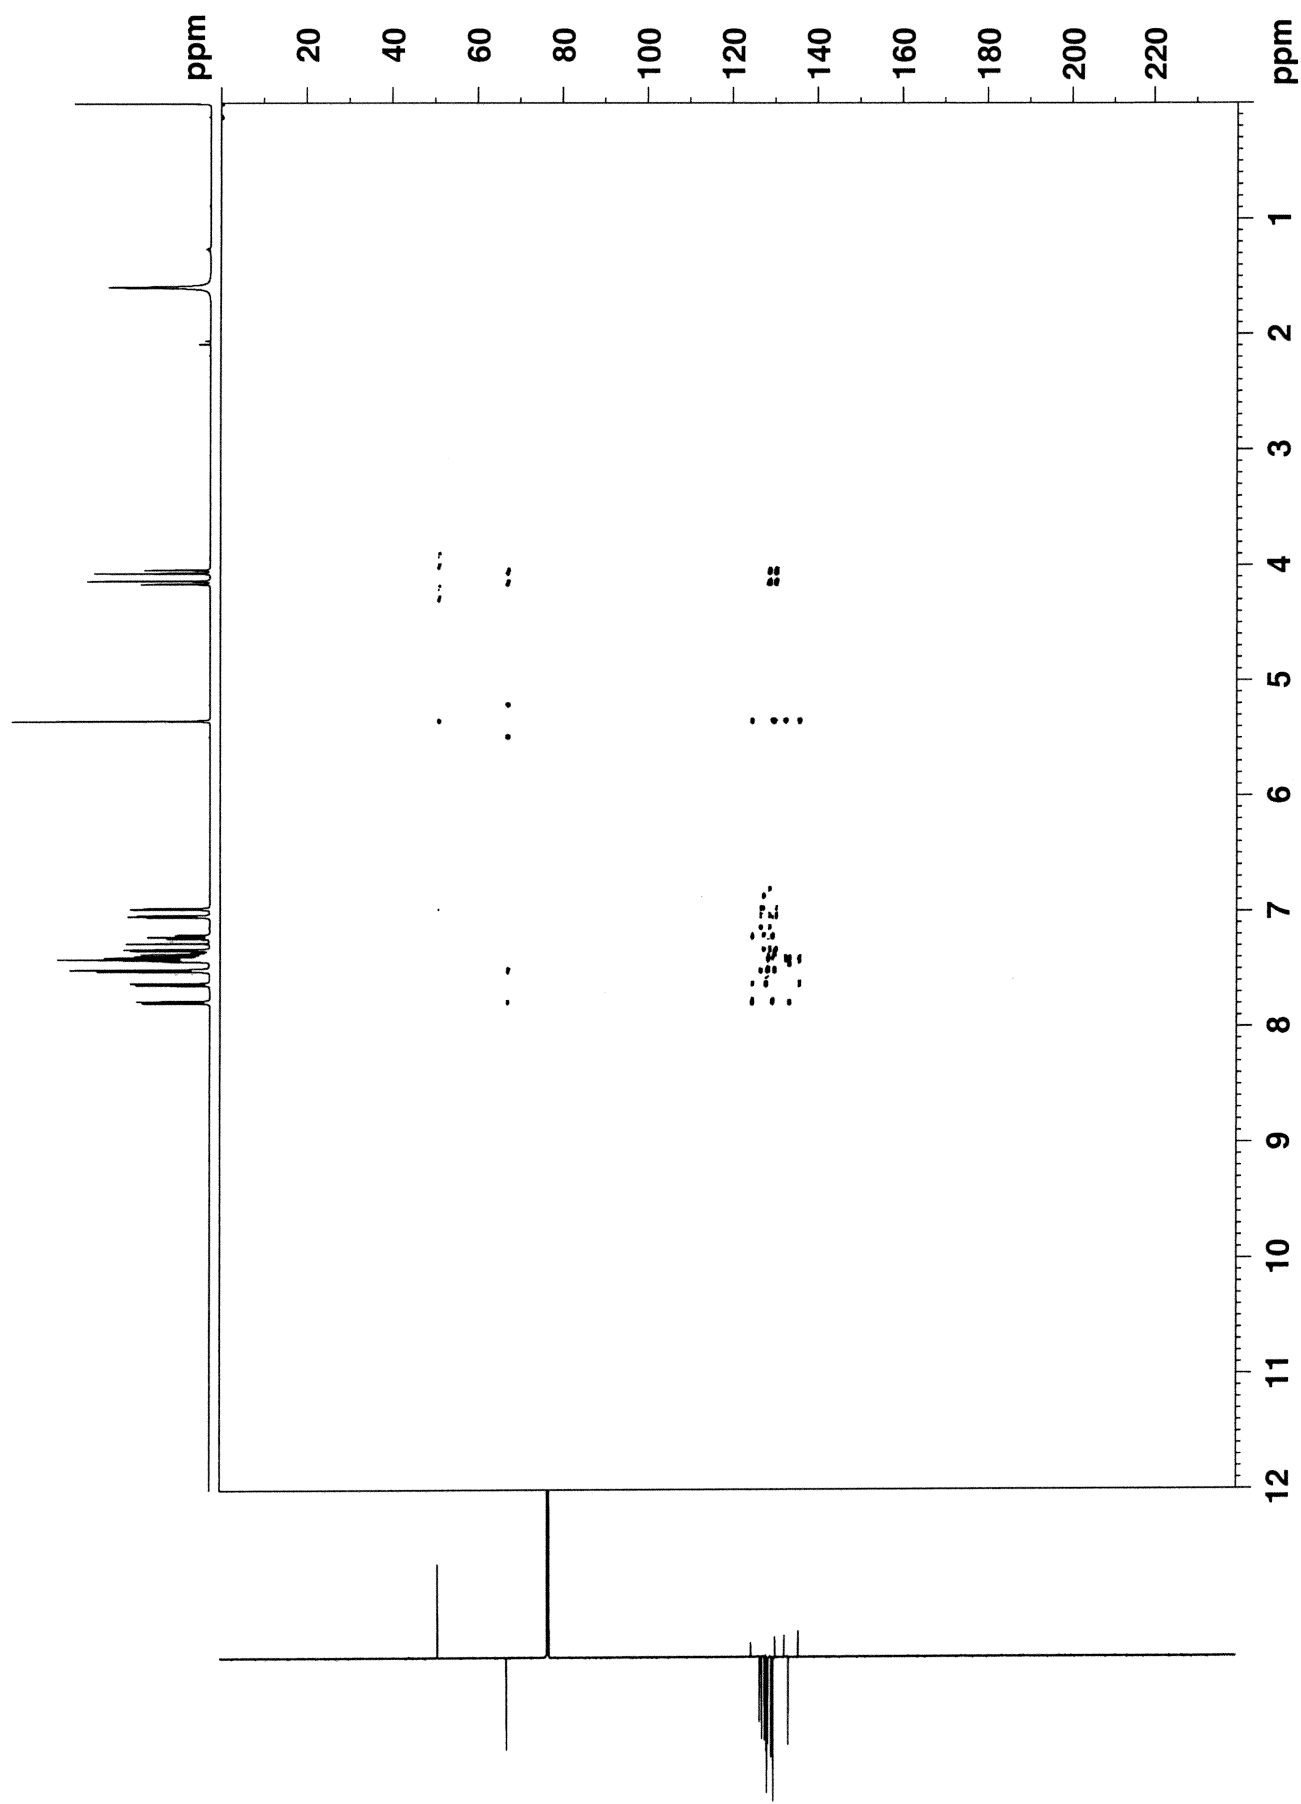

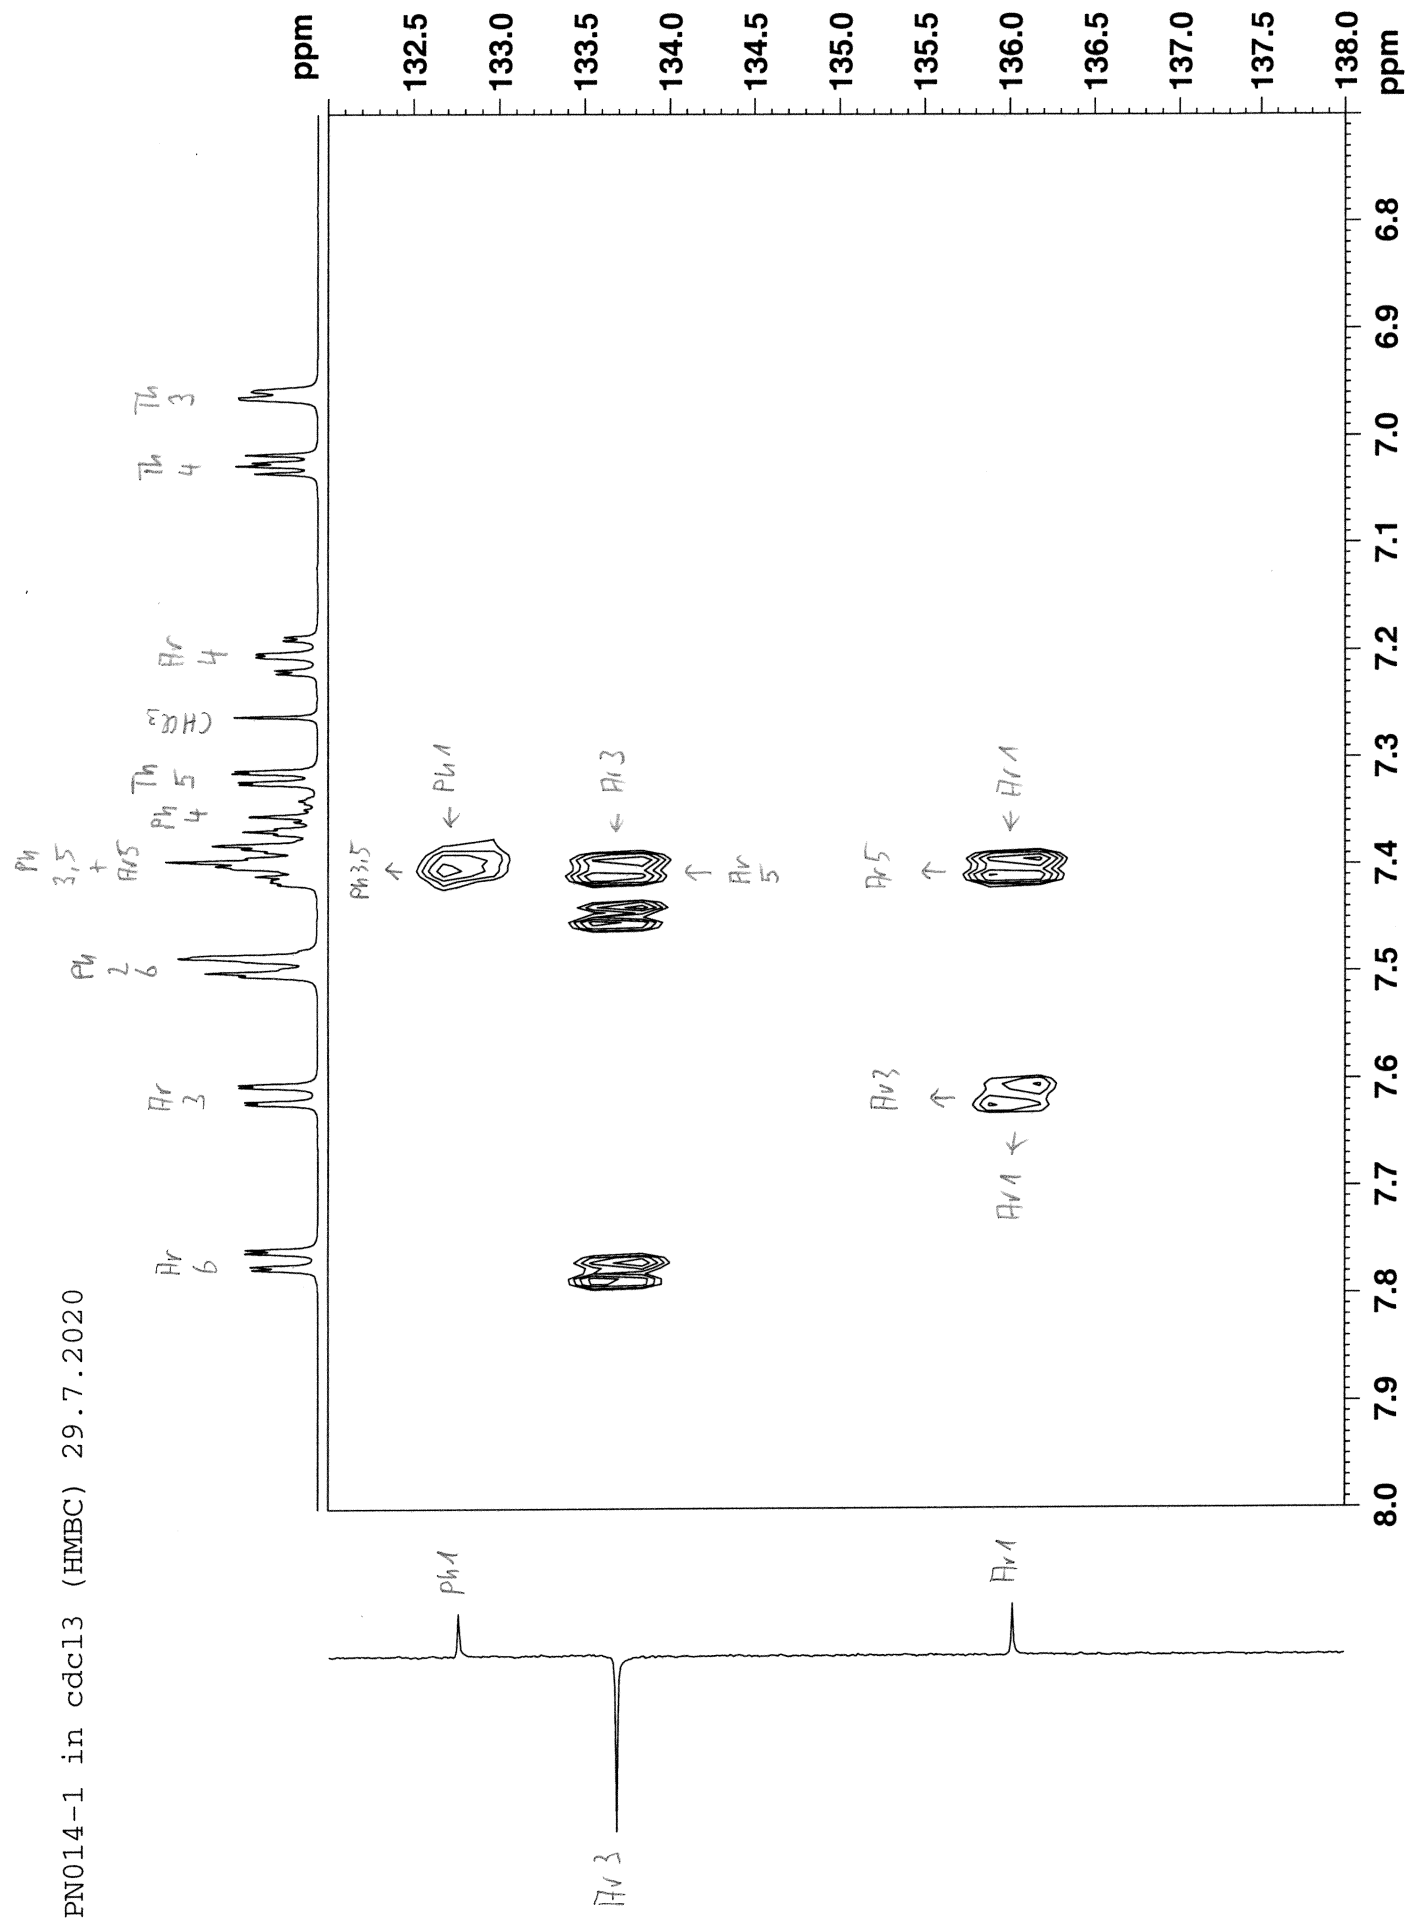



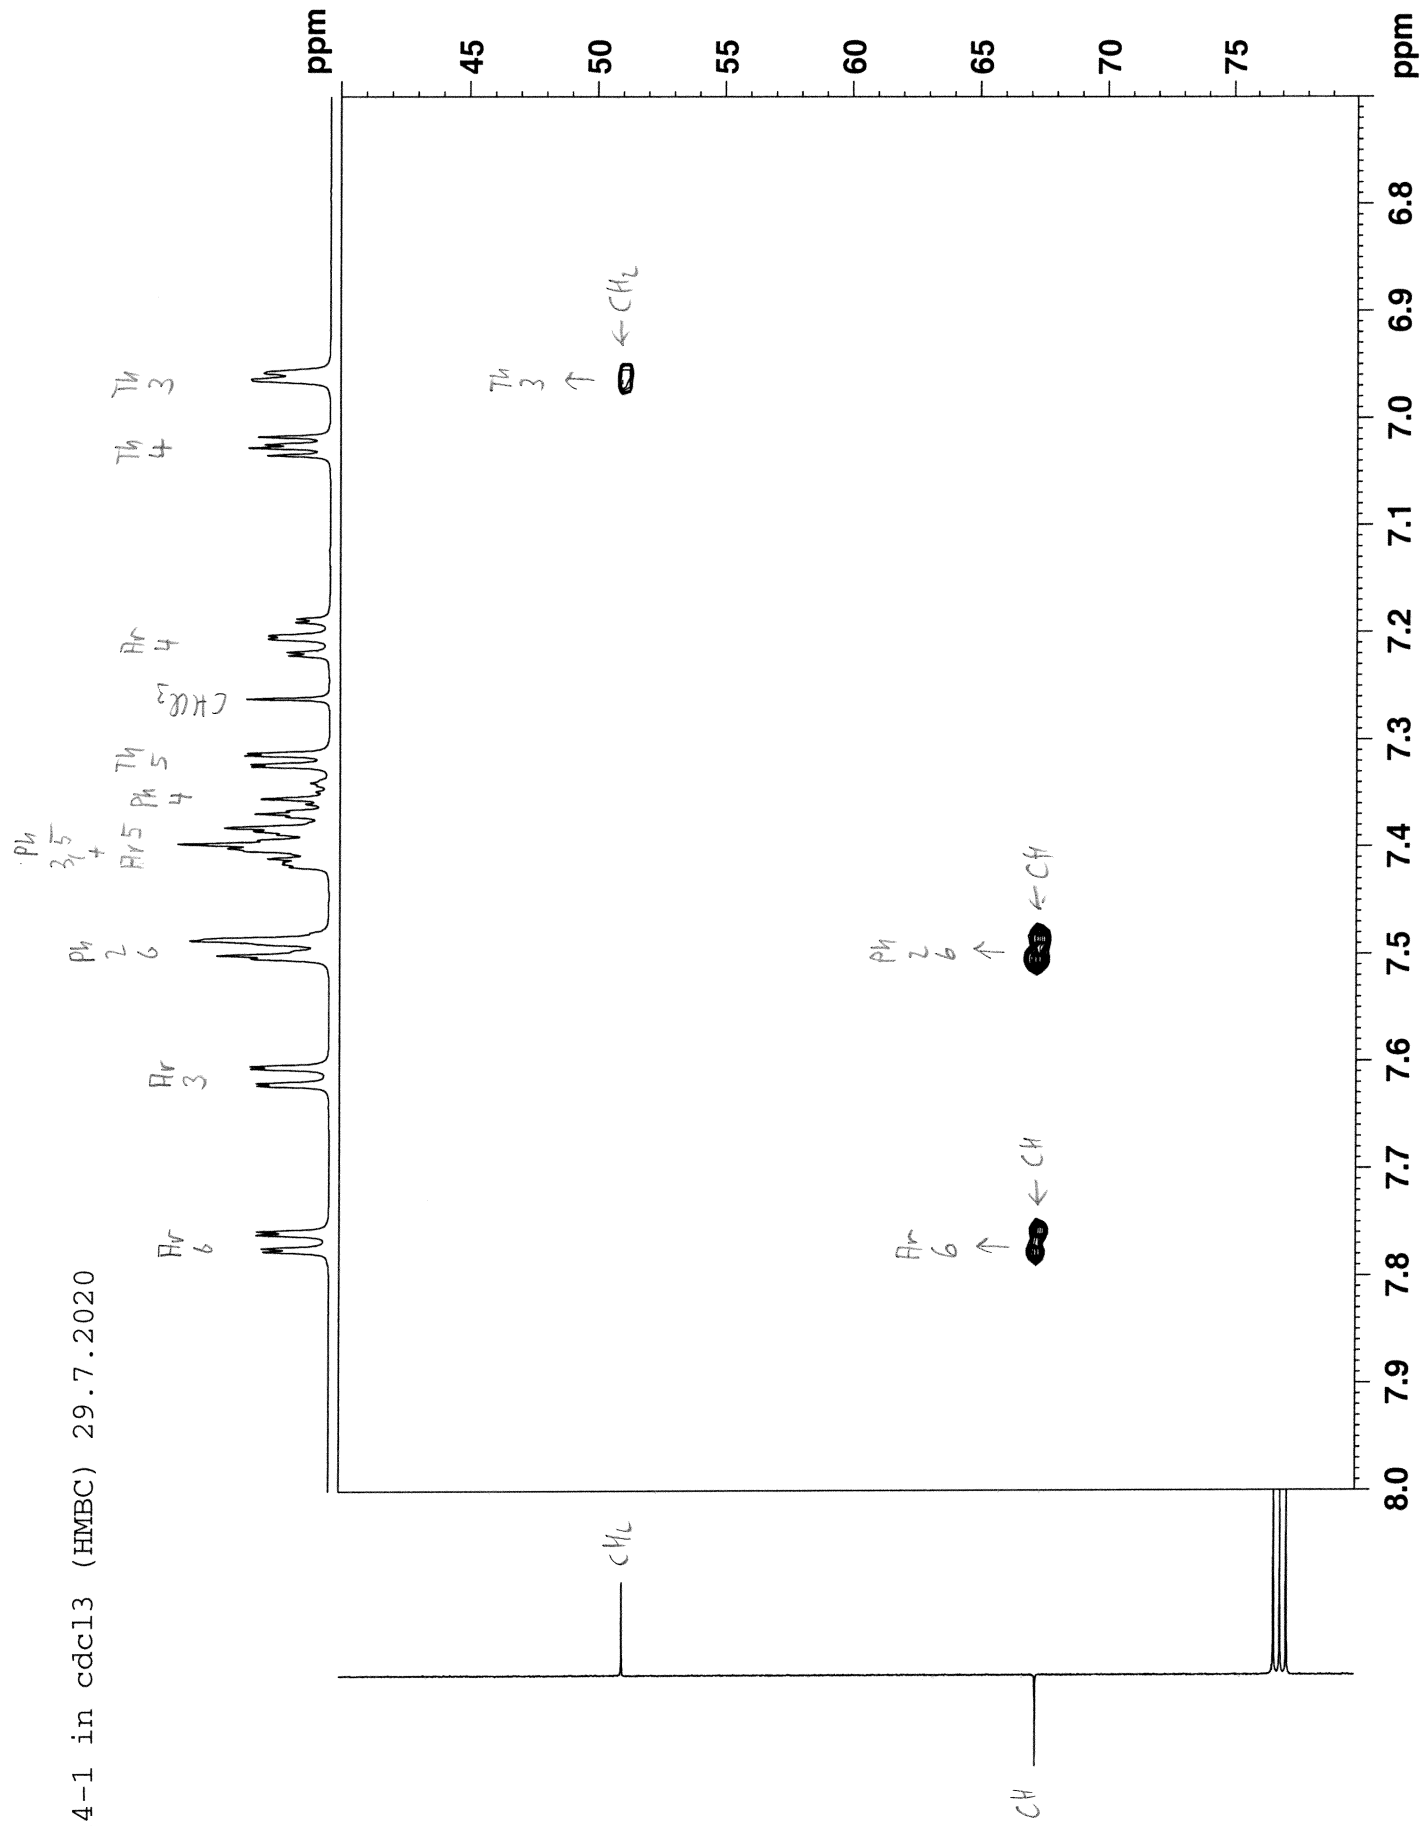

PN014-1 in cdcl3 (HMBC) 29.7.2020

CH

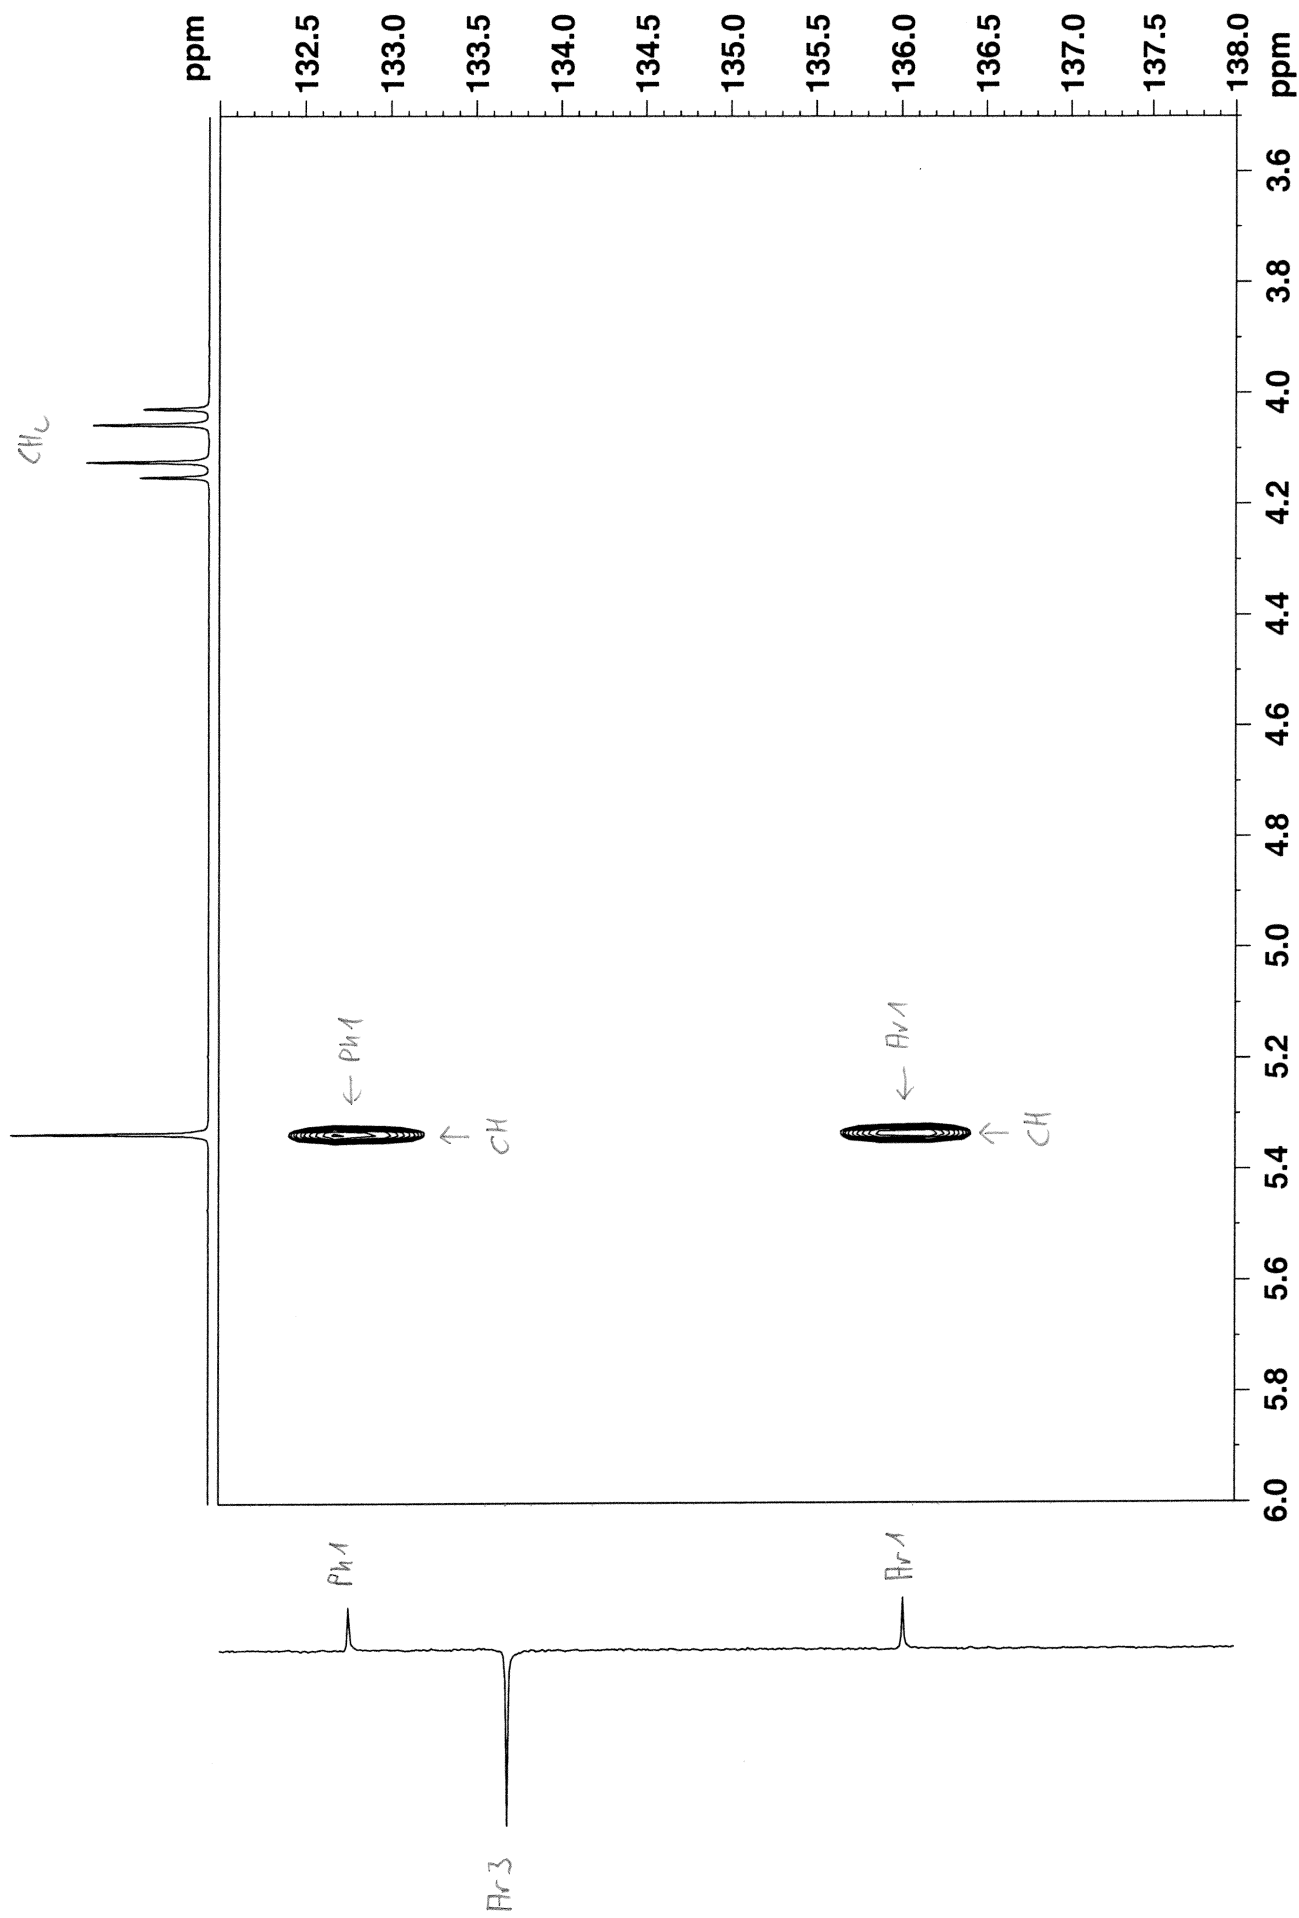

PN014-1 in cdcl3 (HMBC) 29.7.2020

CH

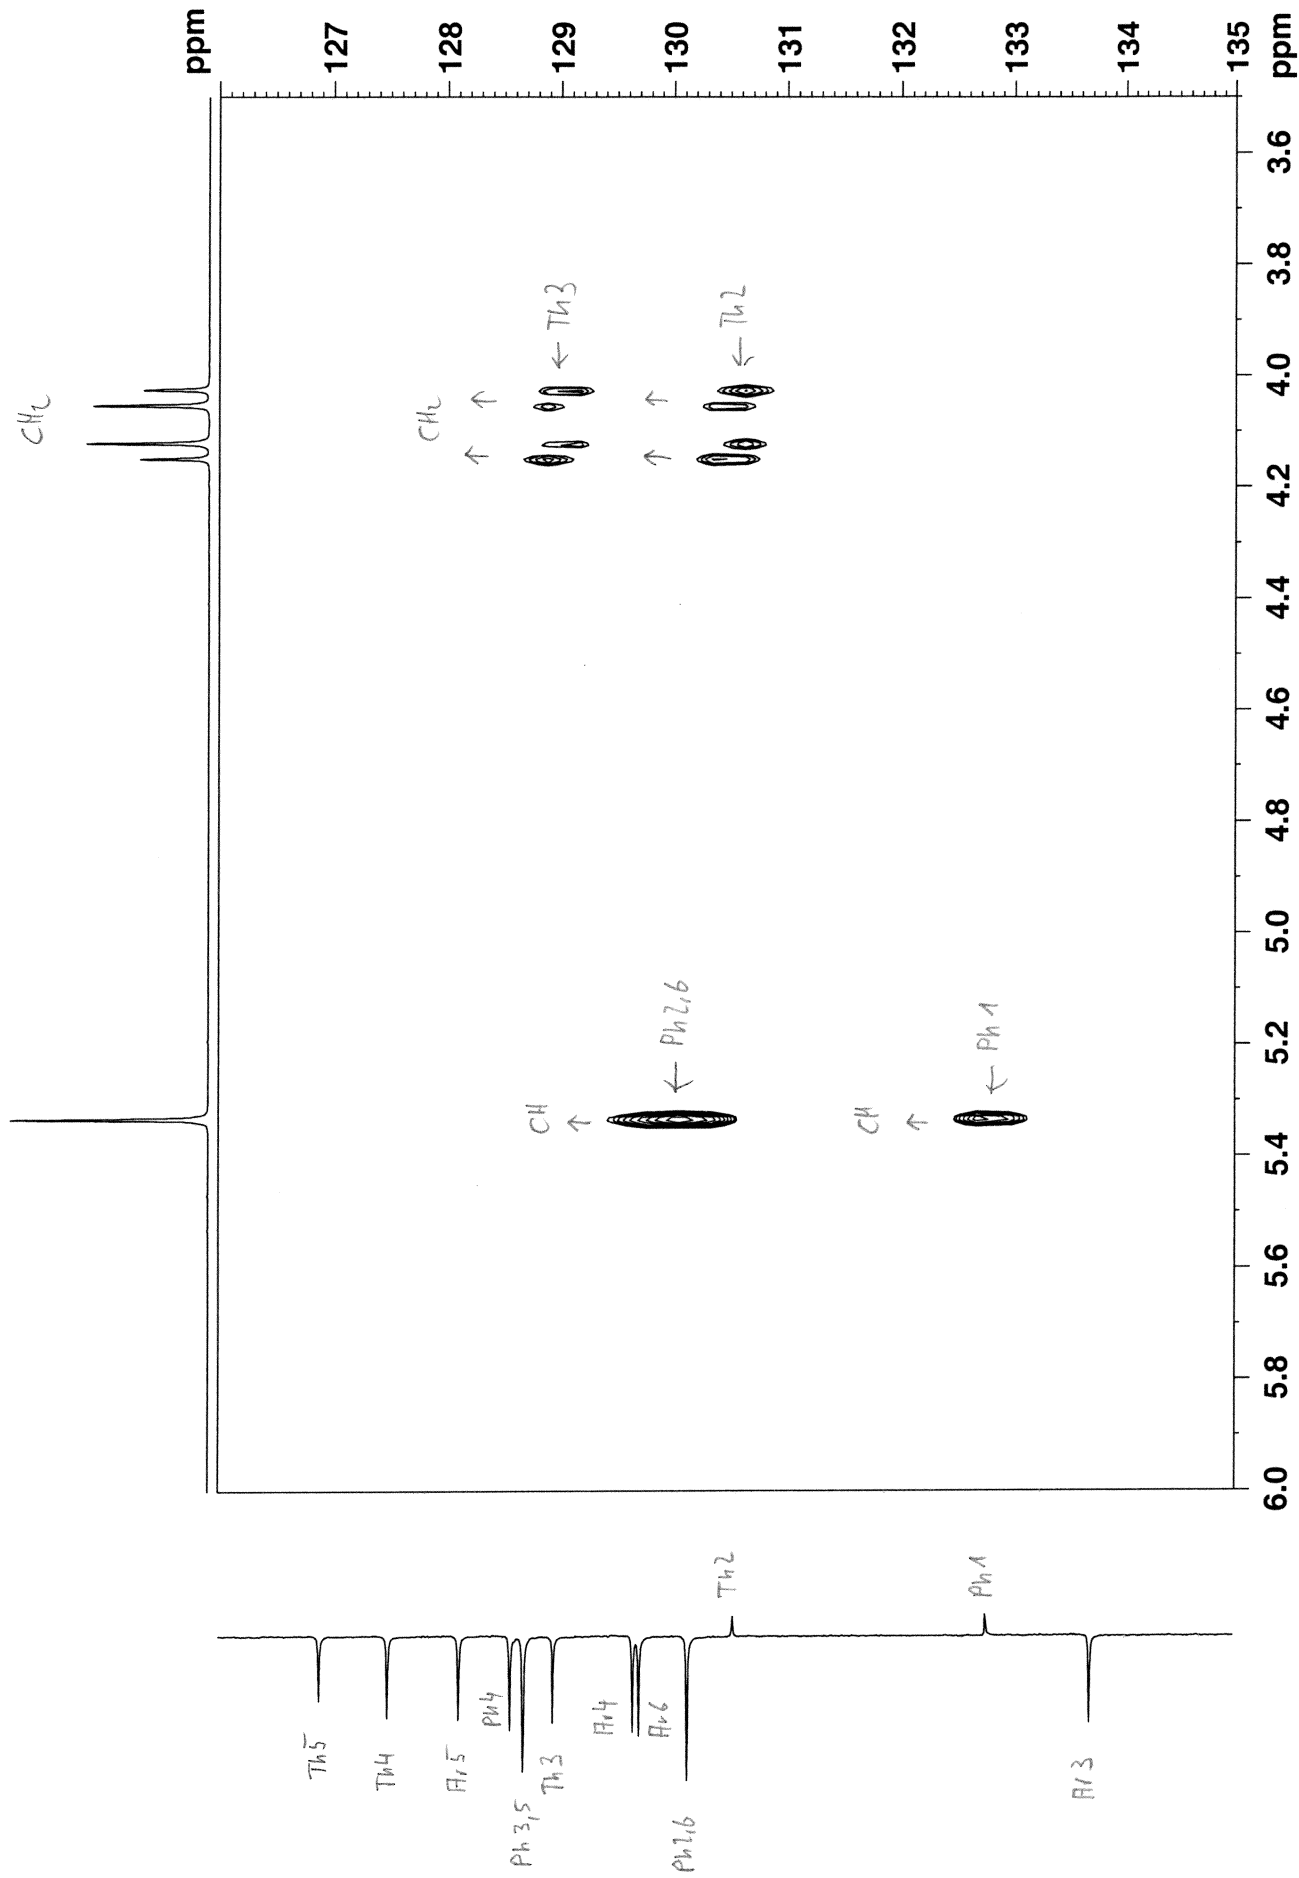

PN014-1 in cdcl3 (HMBC) 29.7.2020

CH

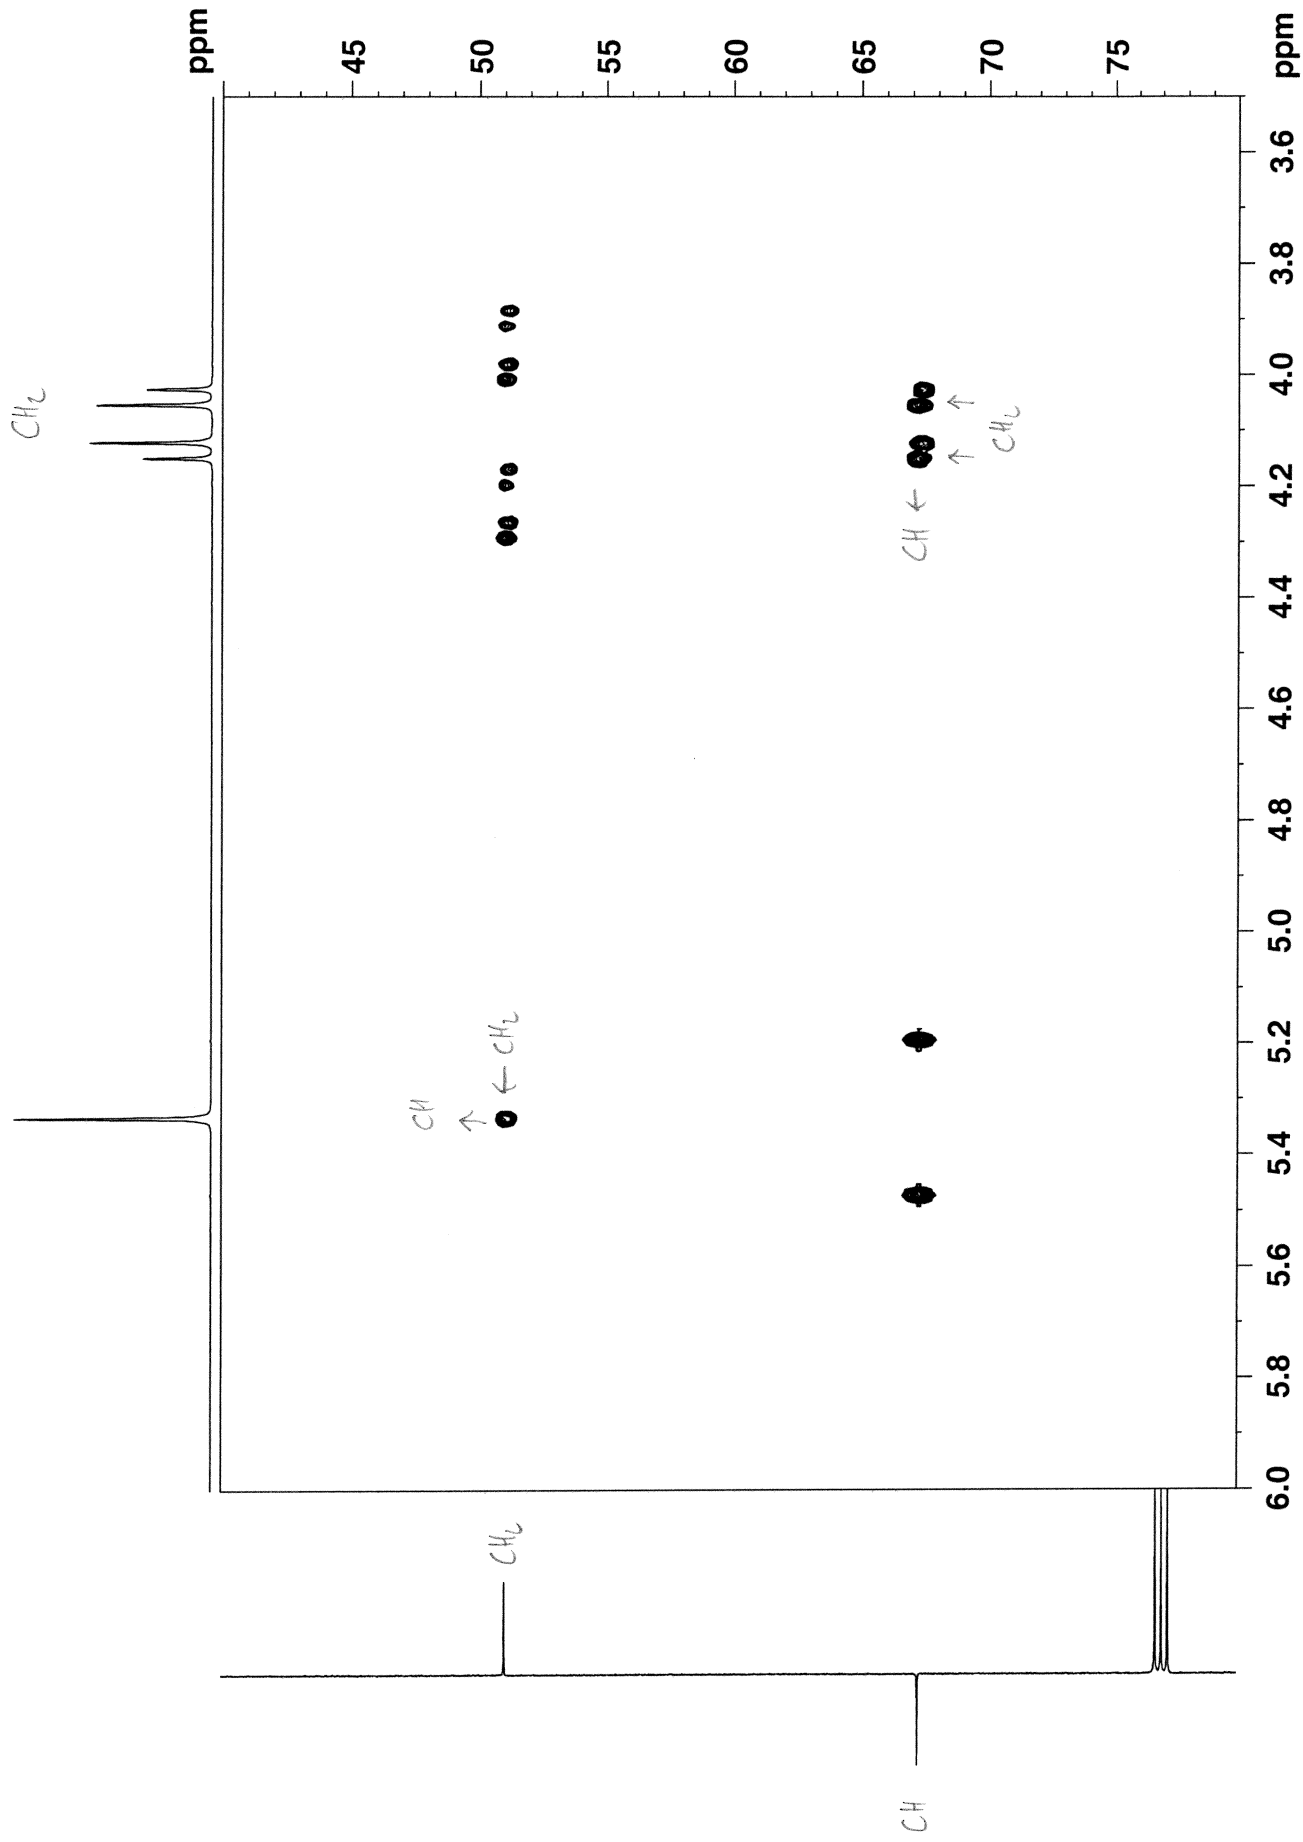



PN014p2 in cdcl3 (Proton) 11.3.2021

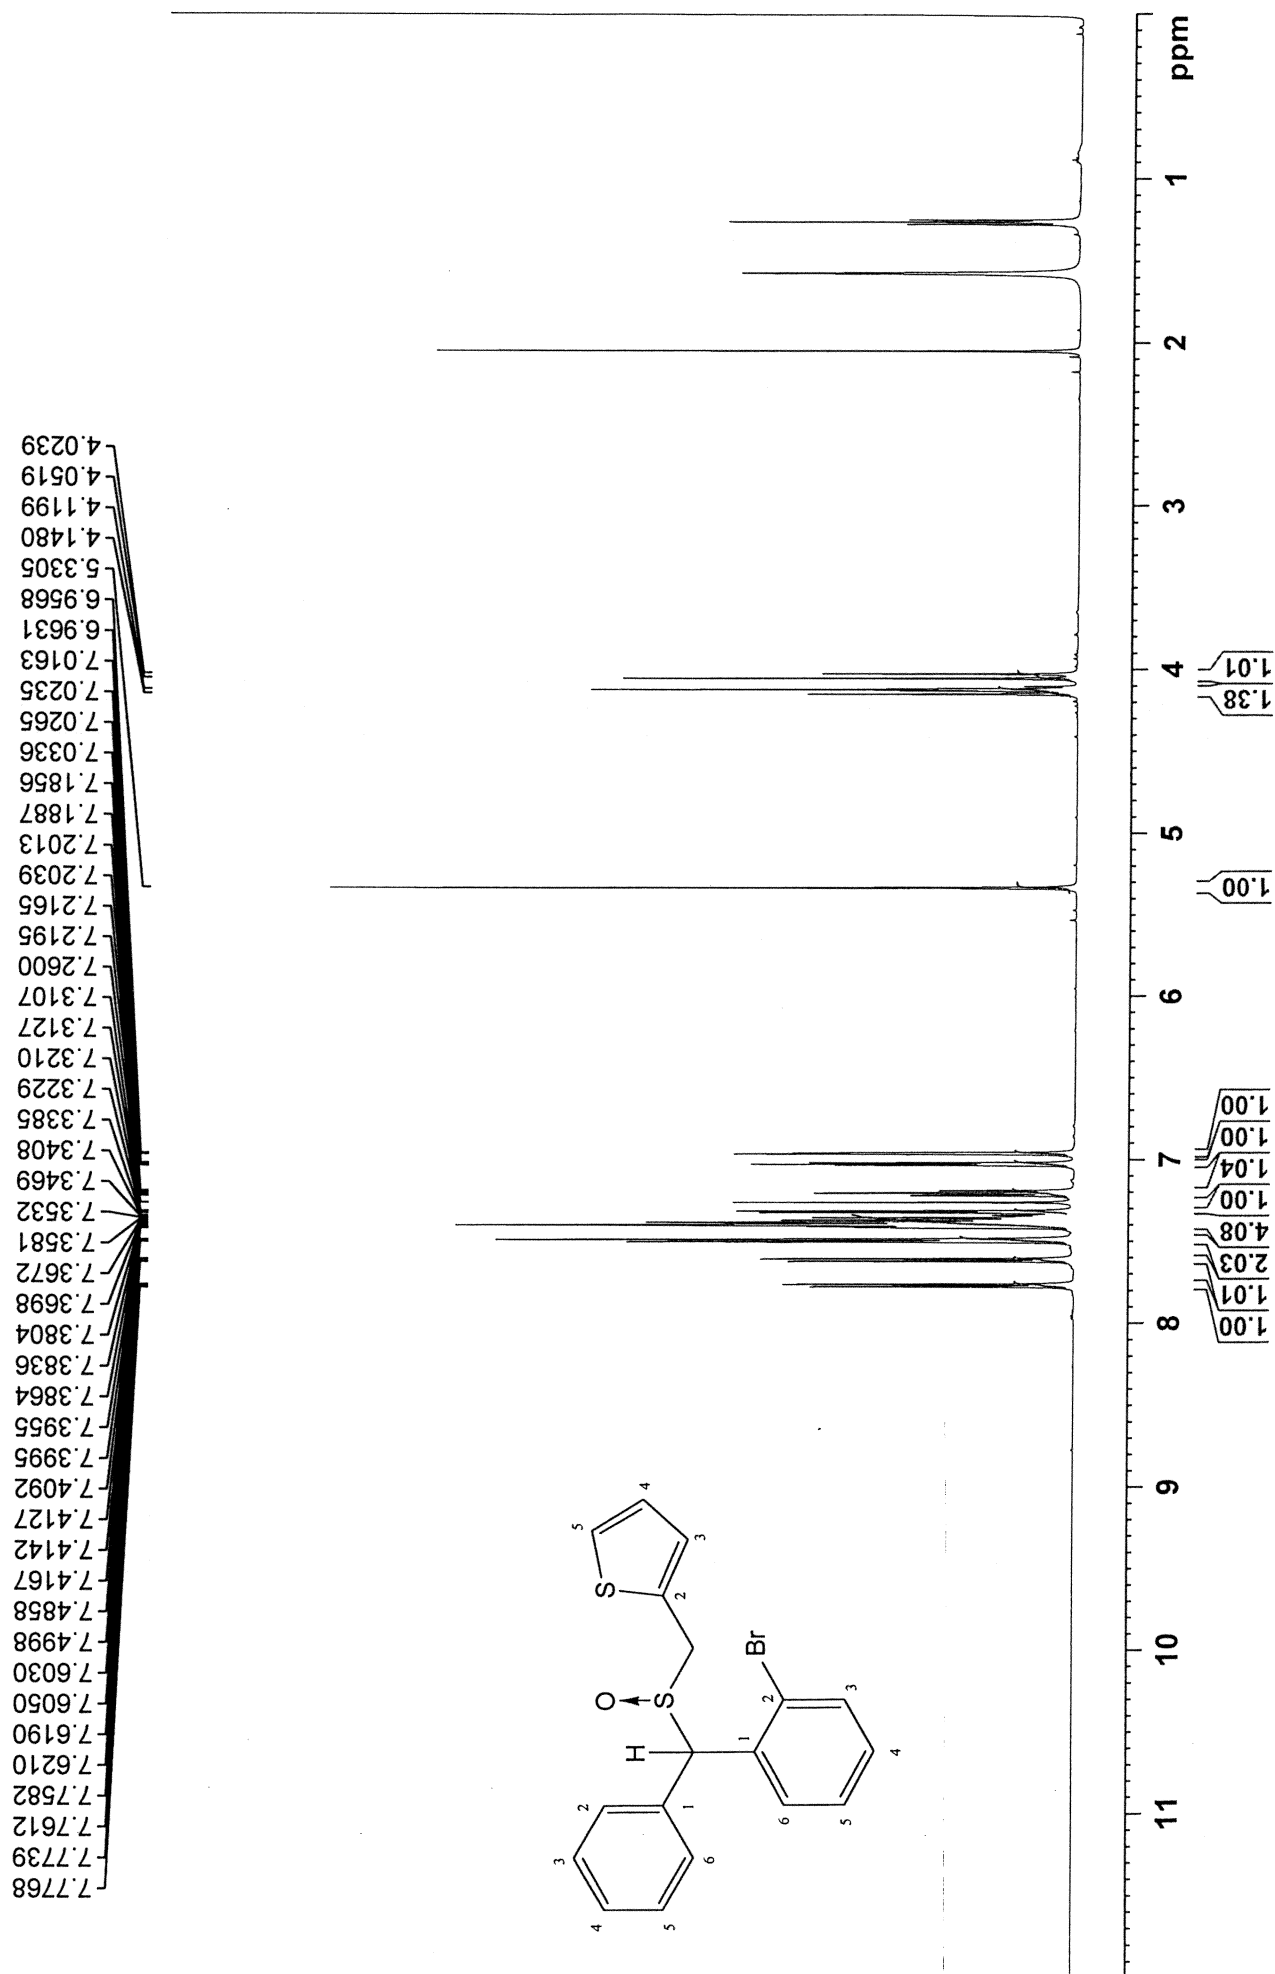

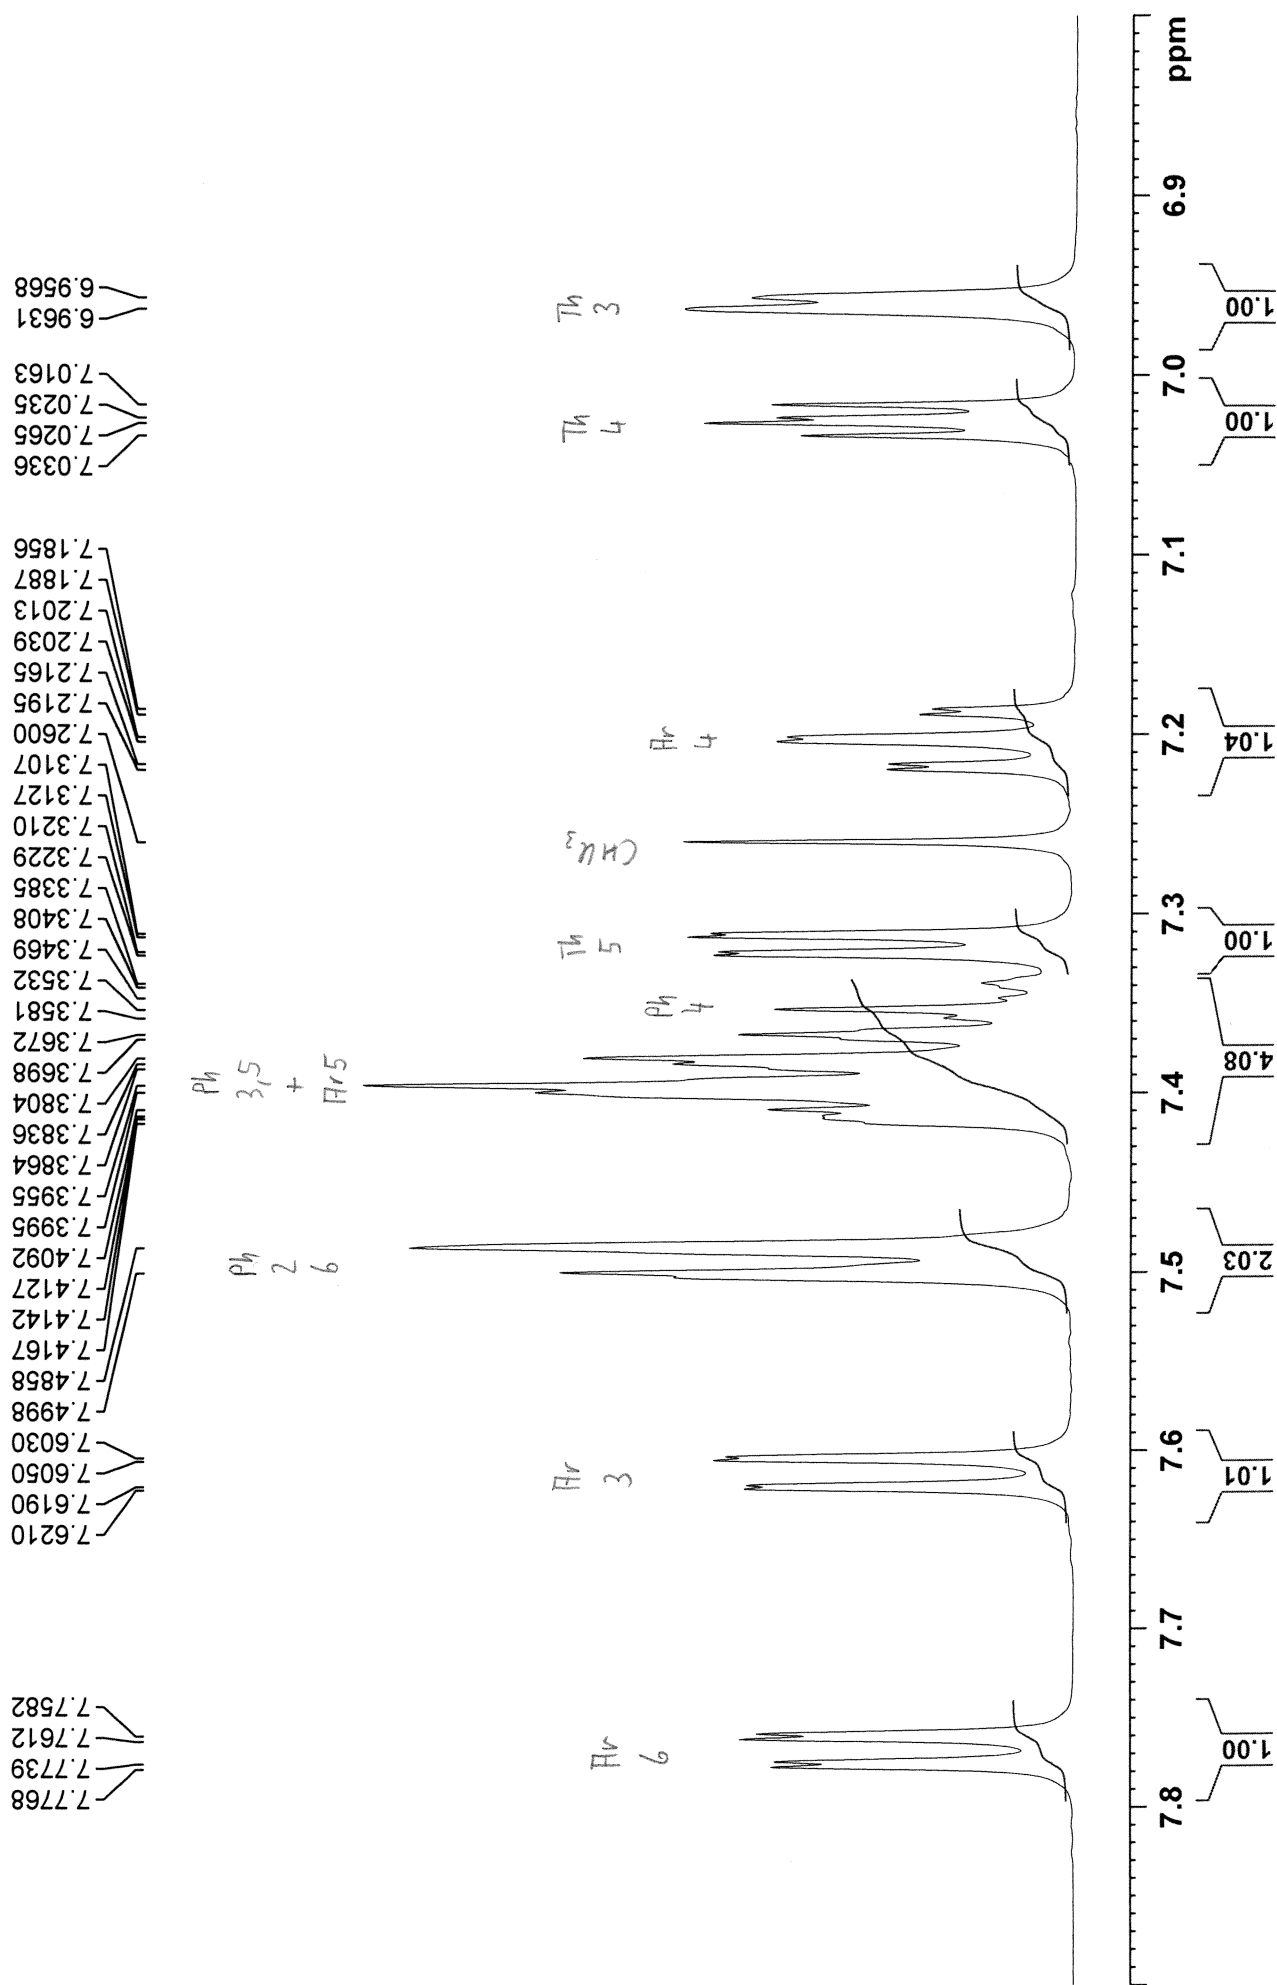

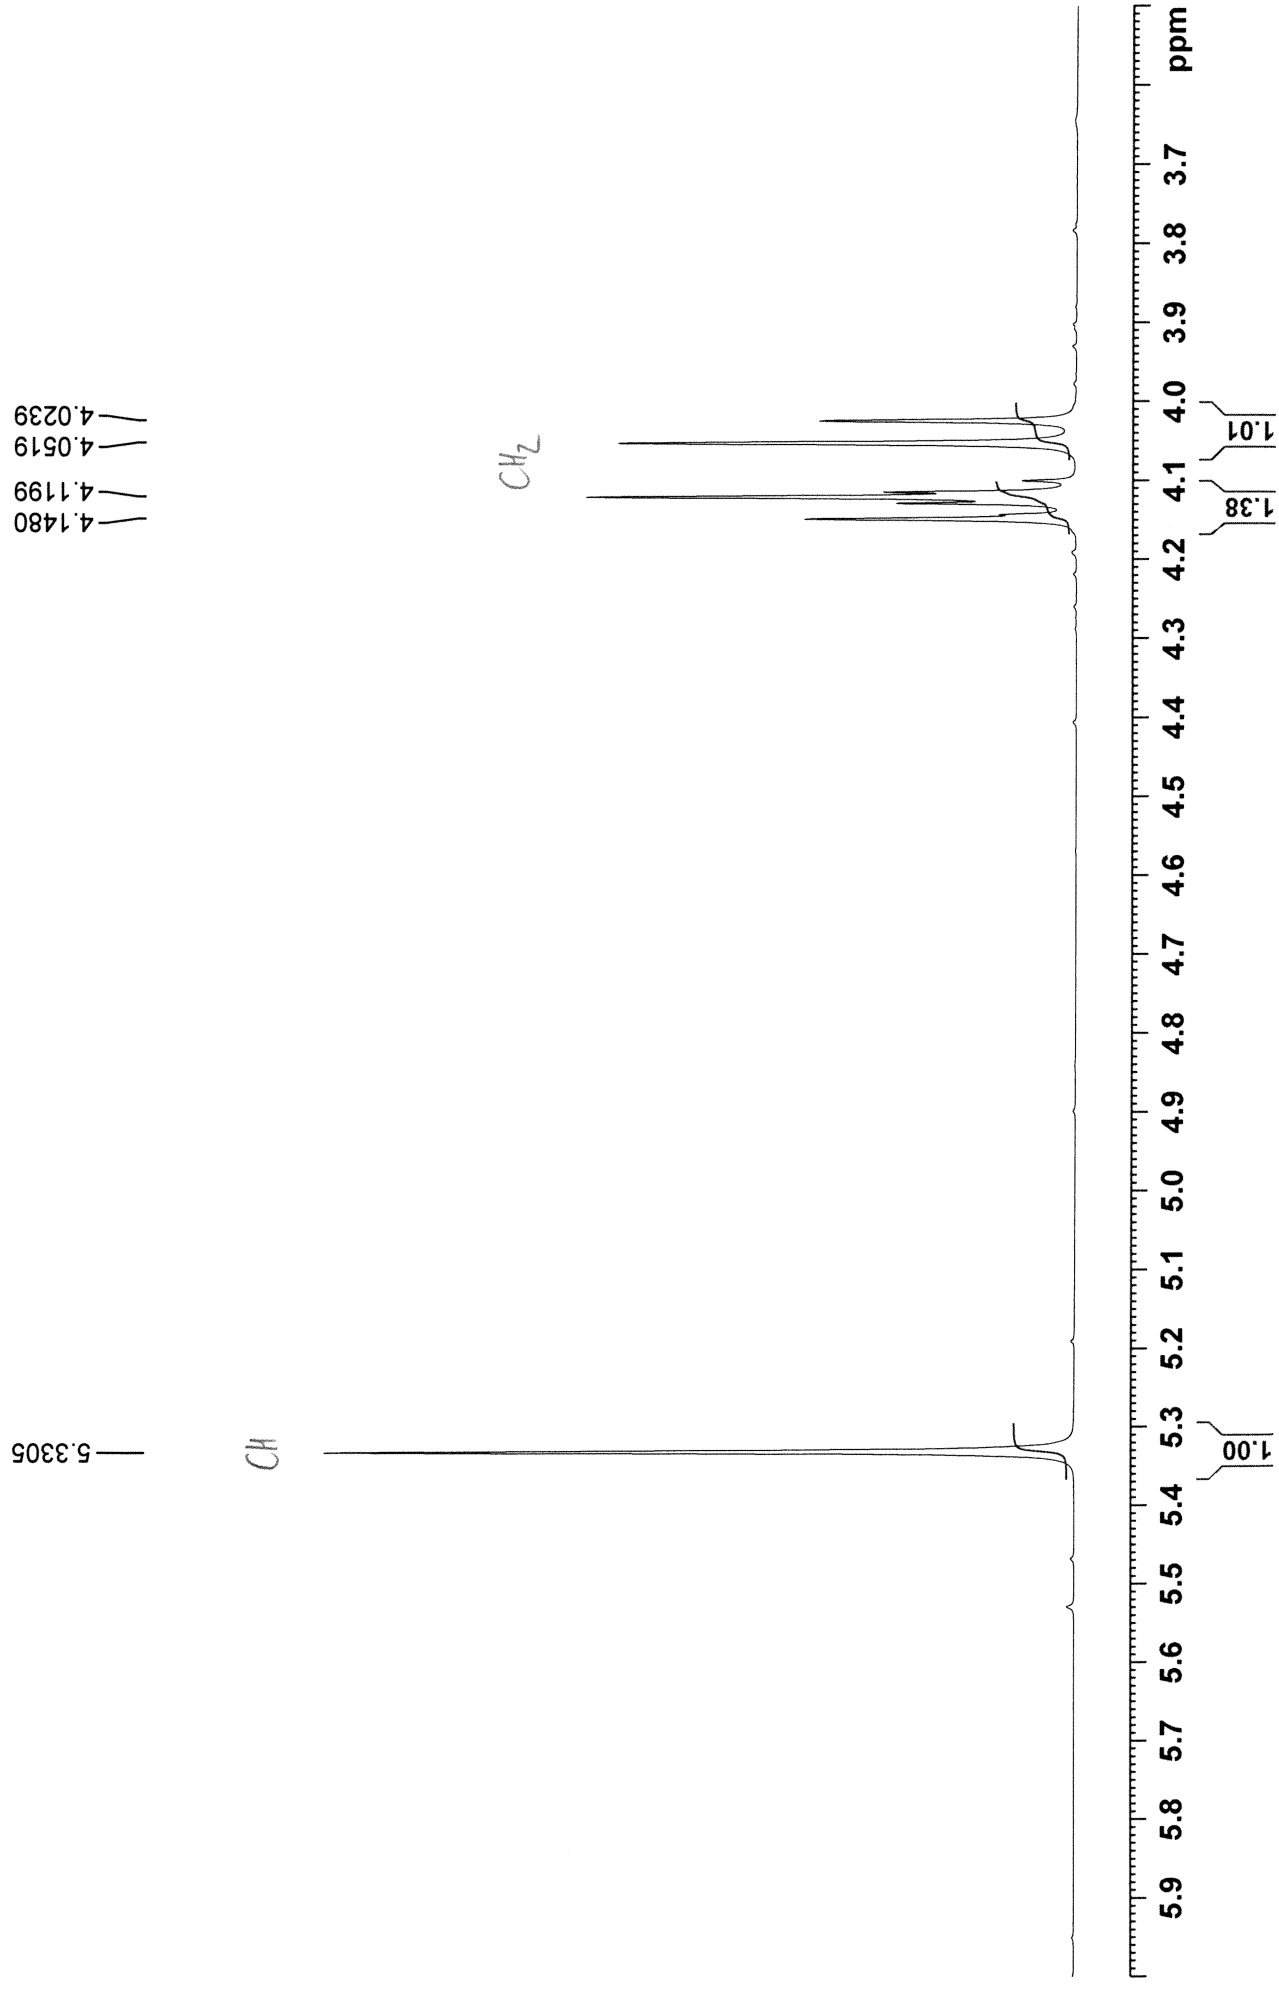

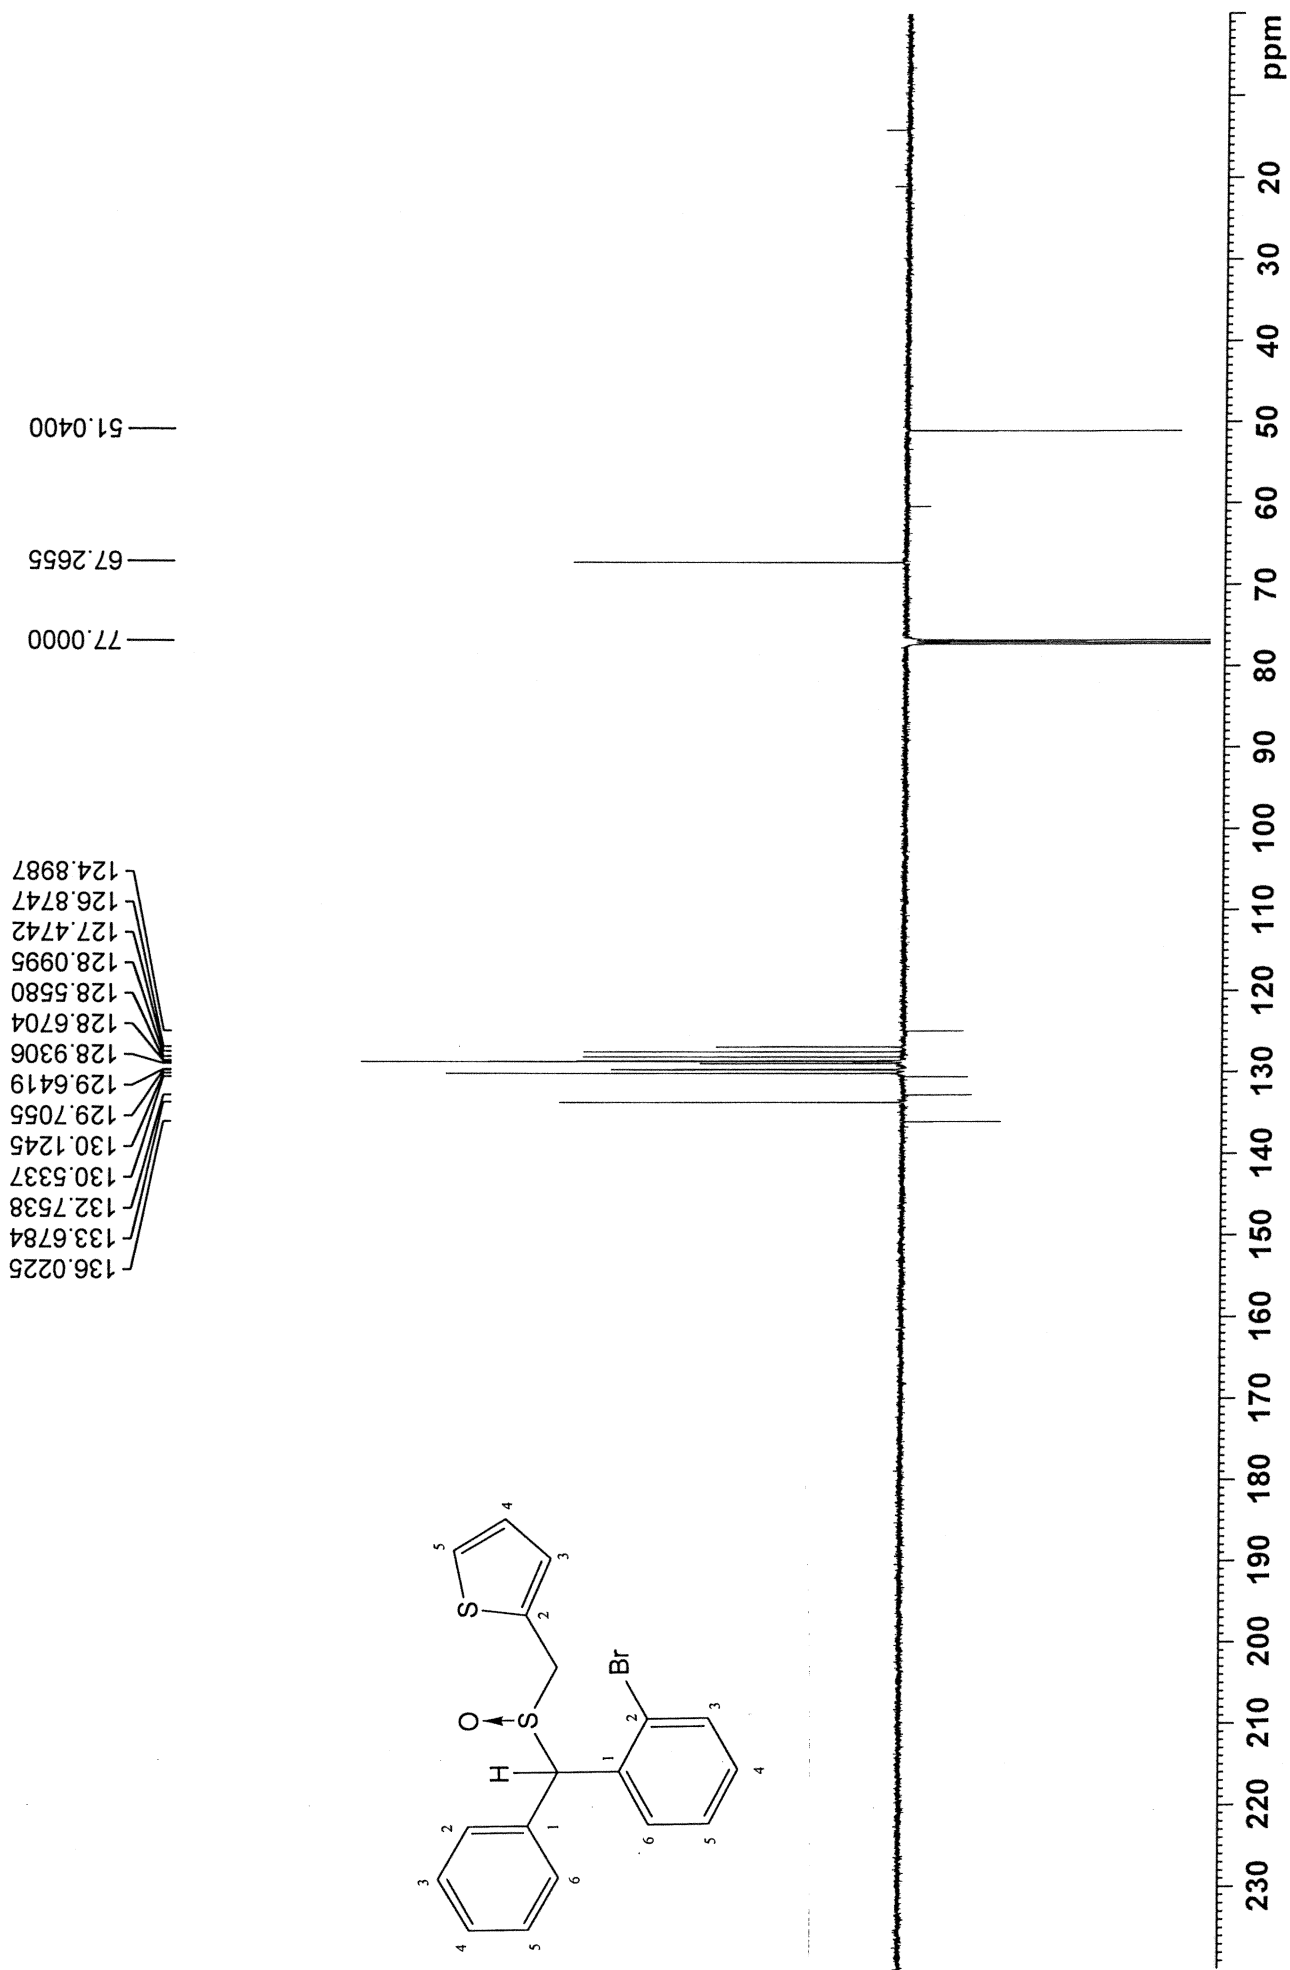

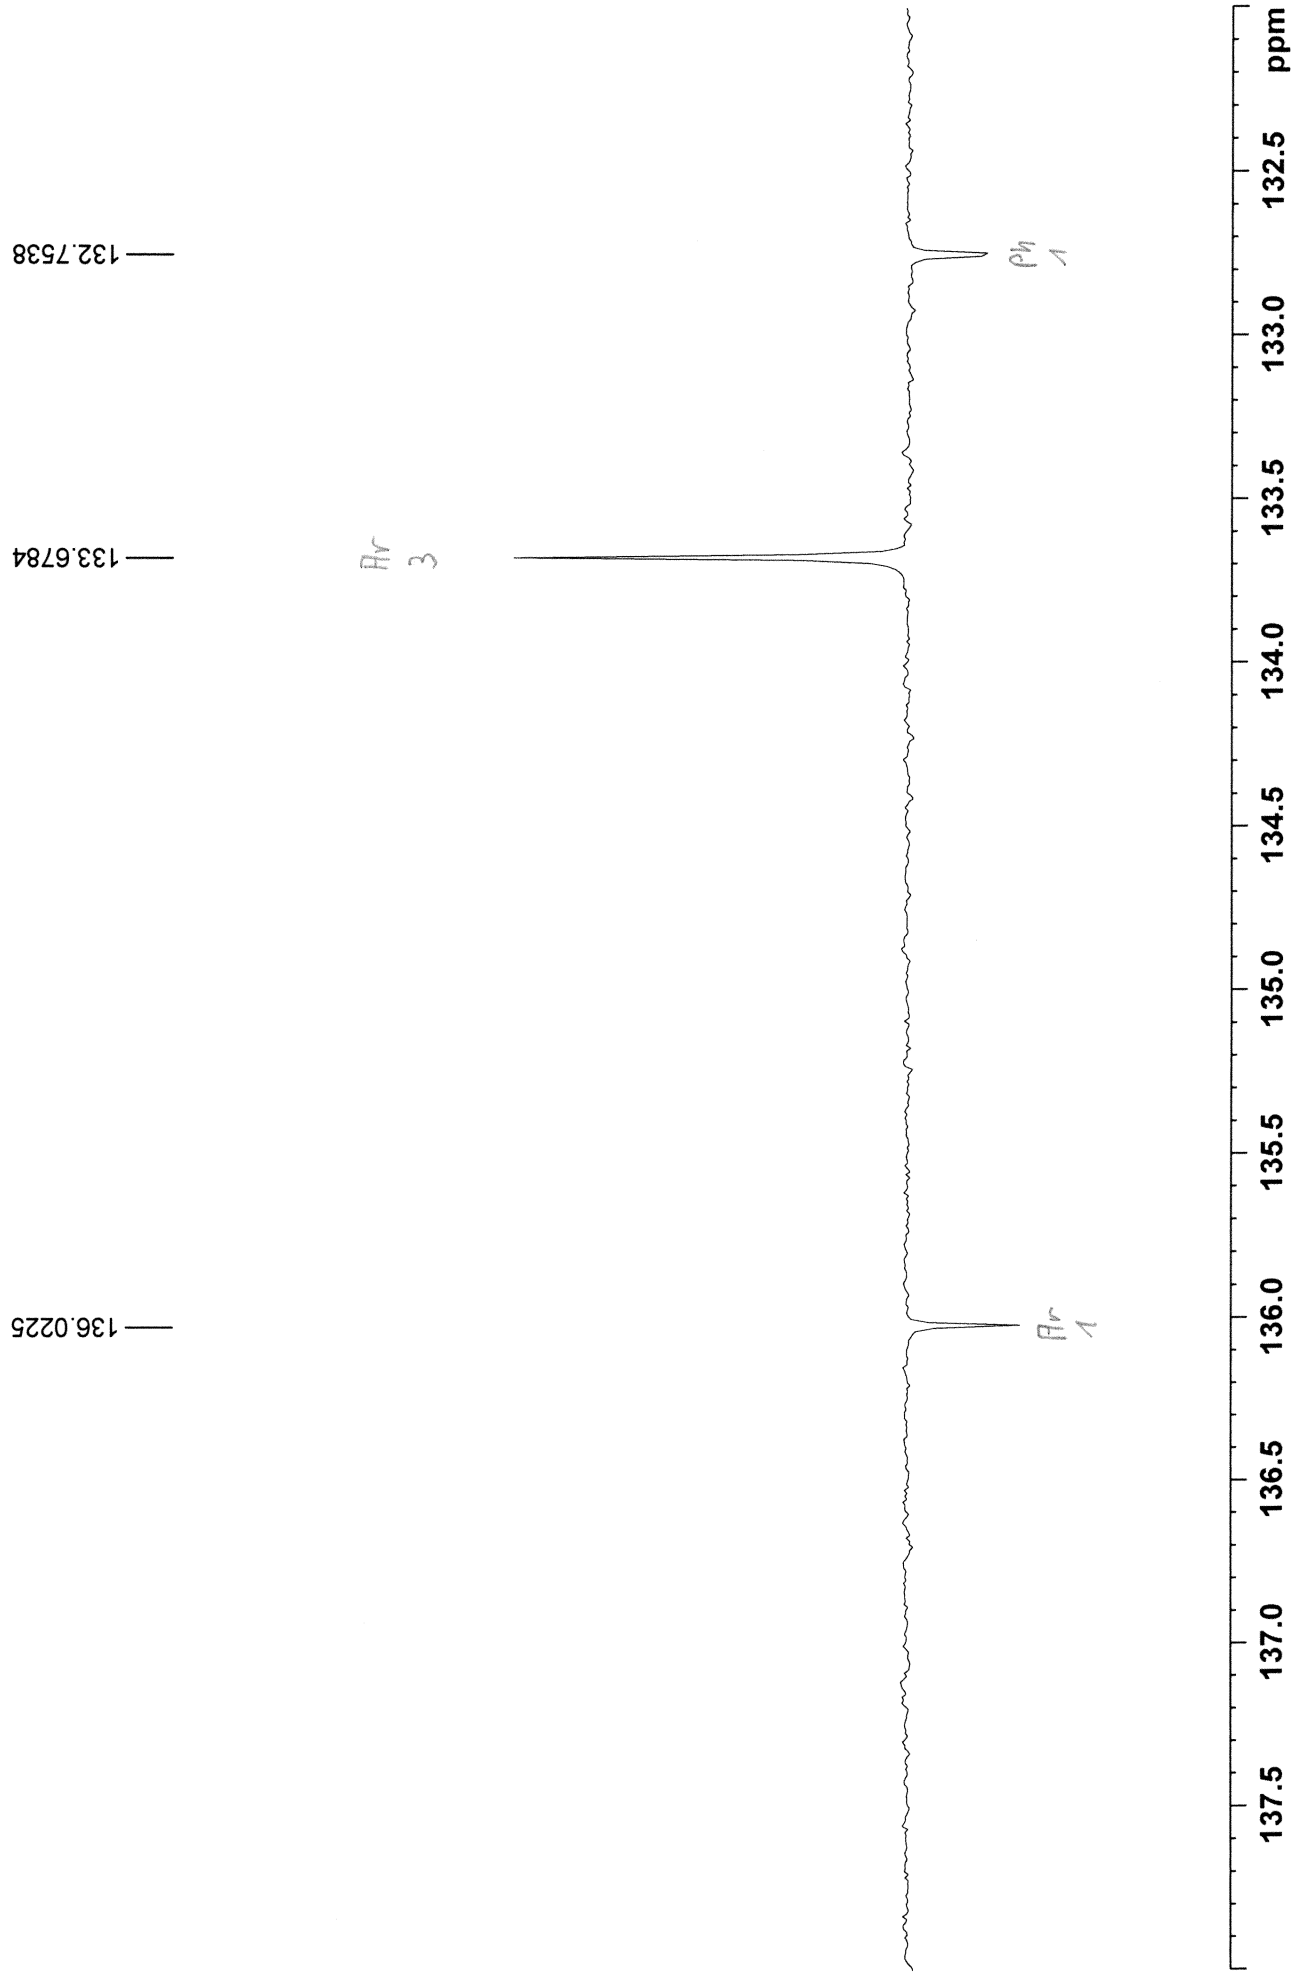

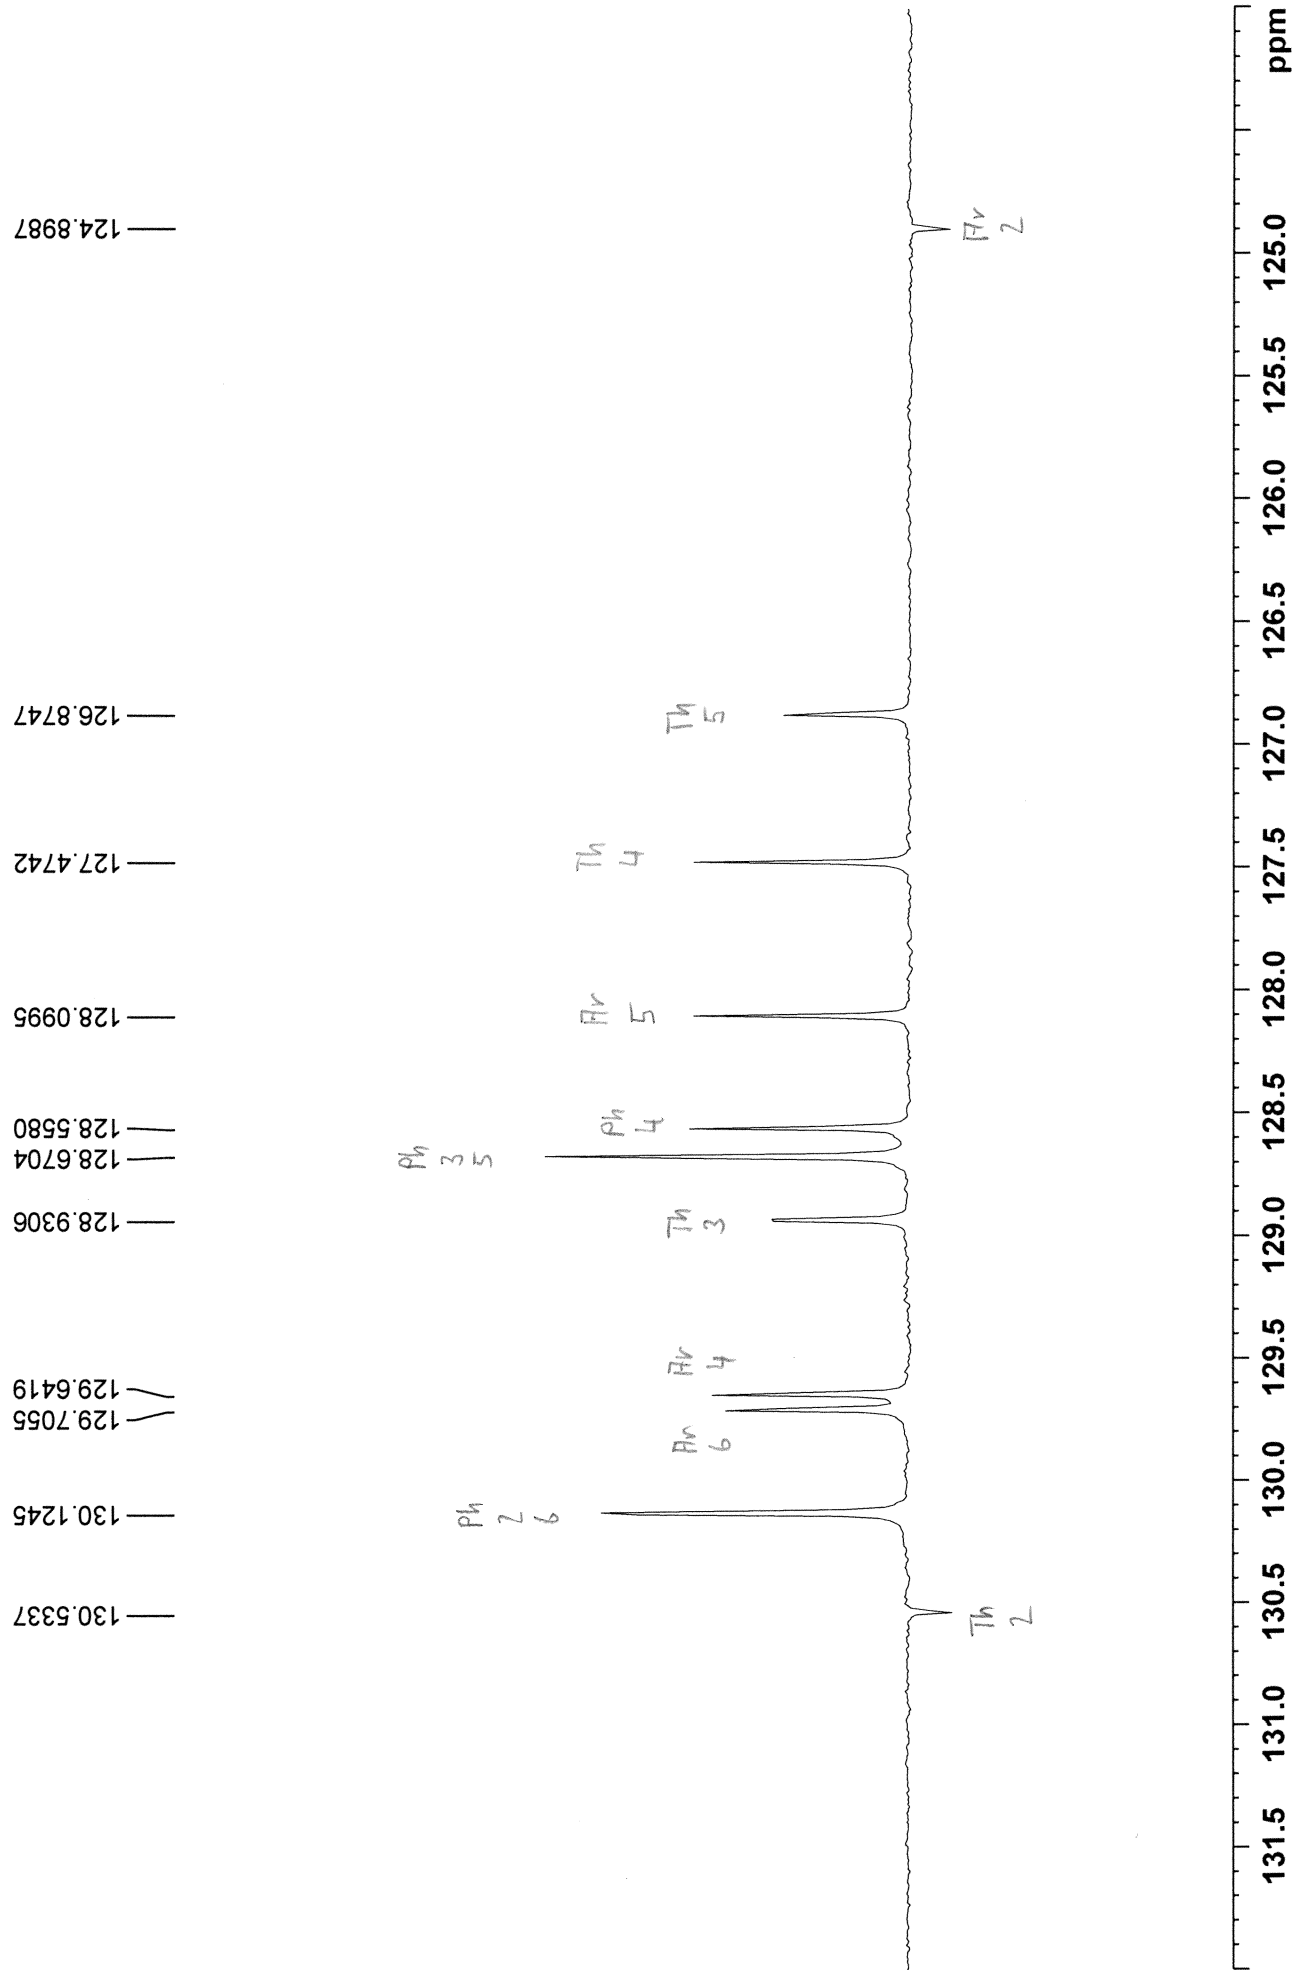

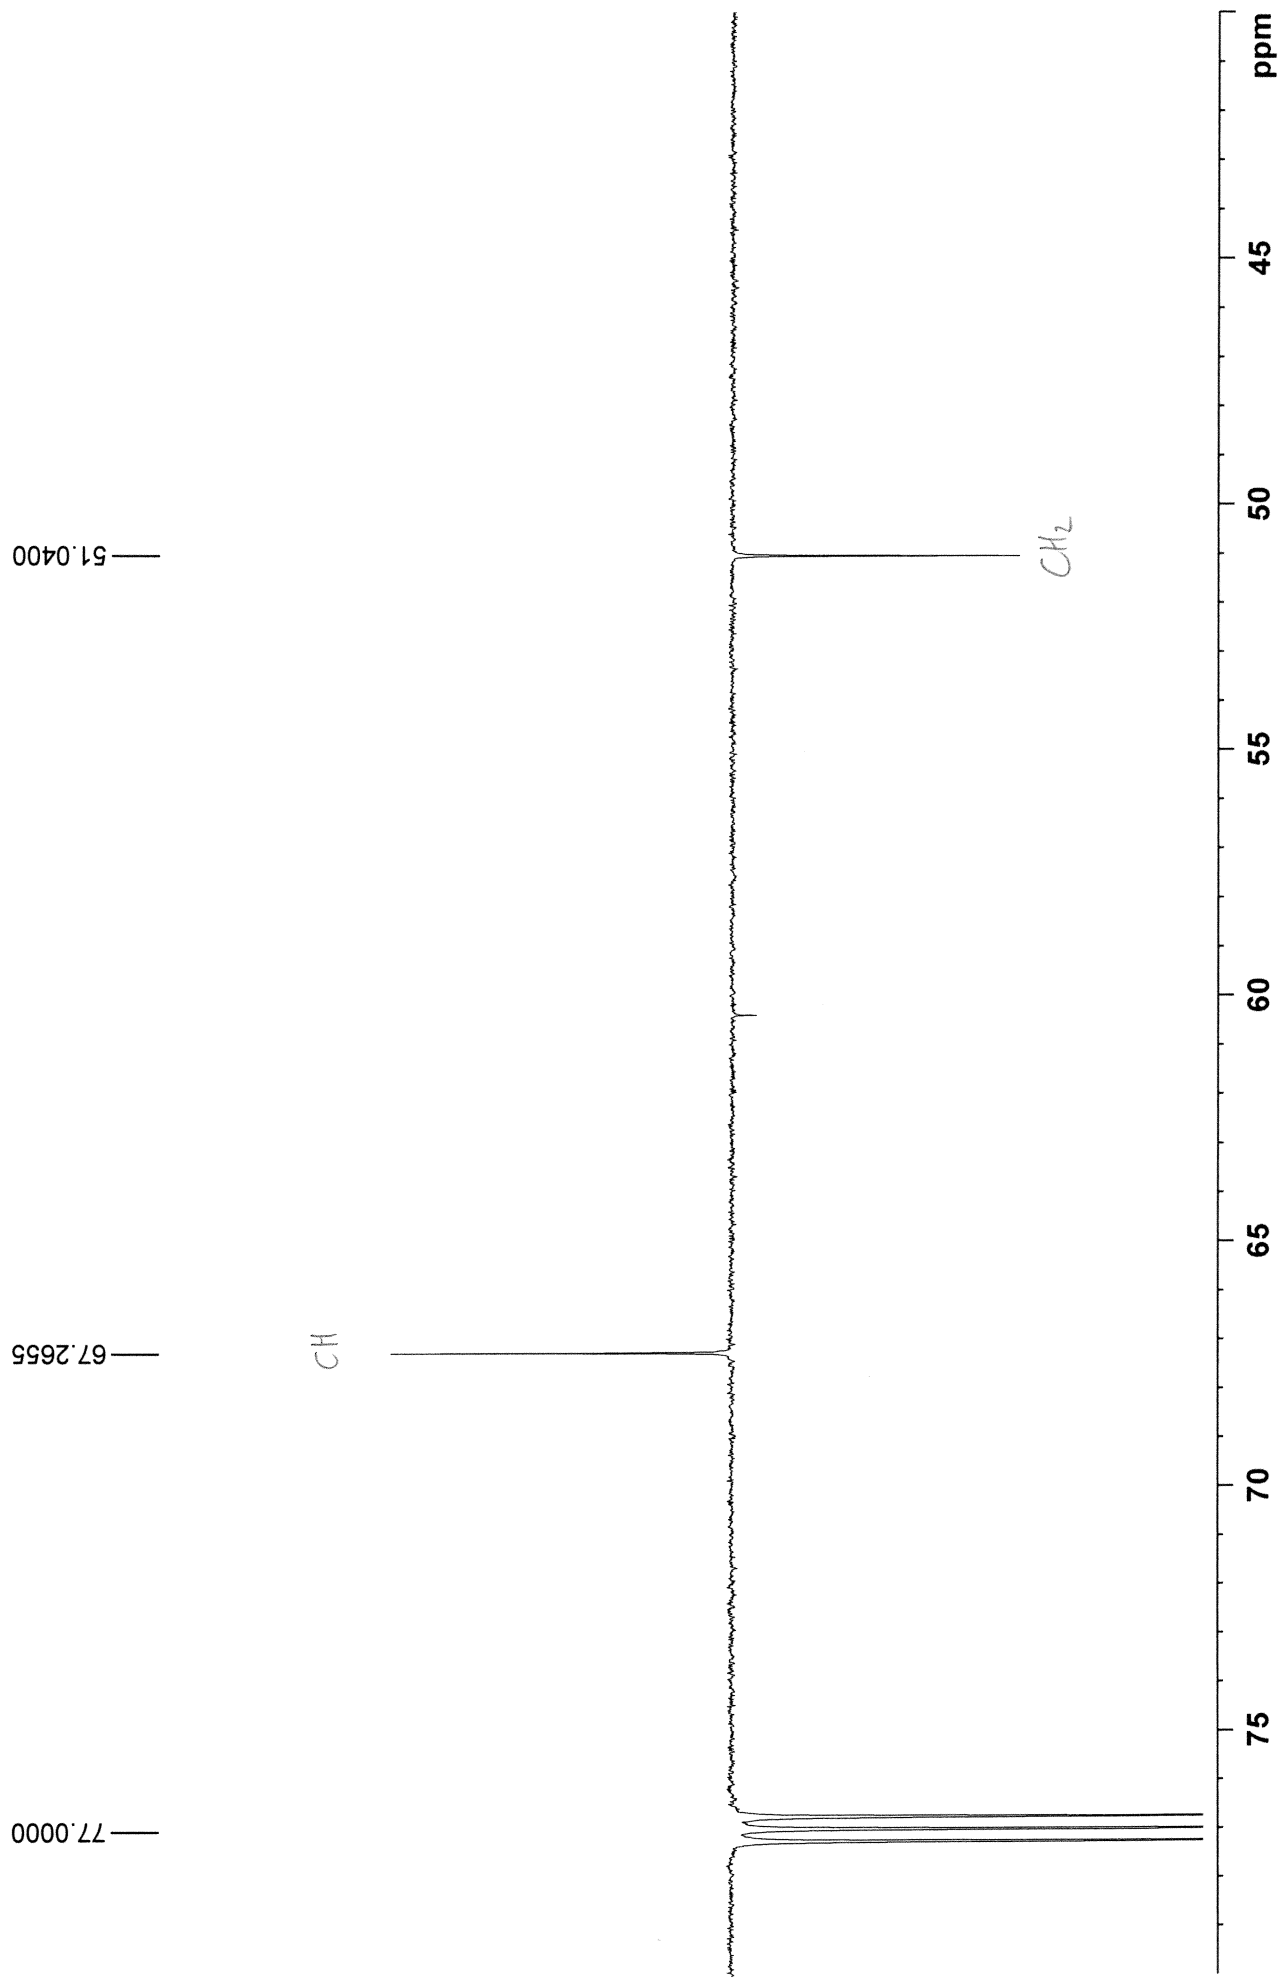

PN014p2 in cdcl3 (COSY) 11.3.2021

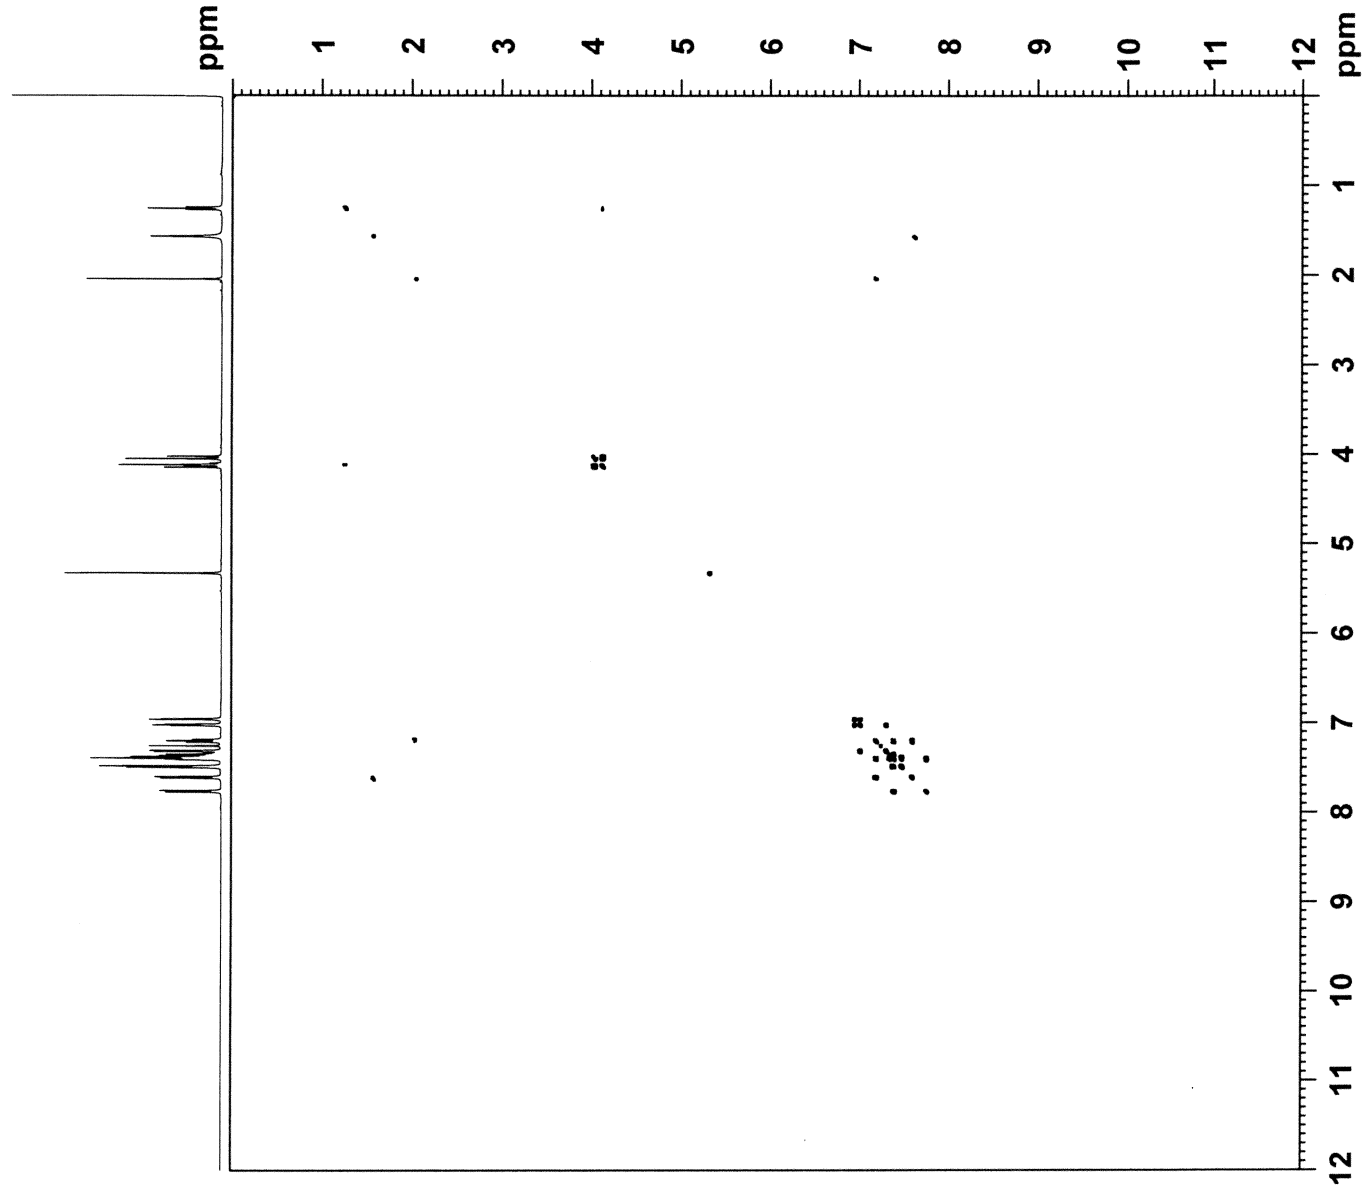



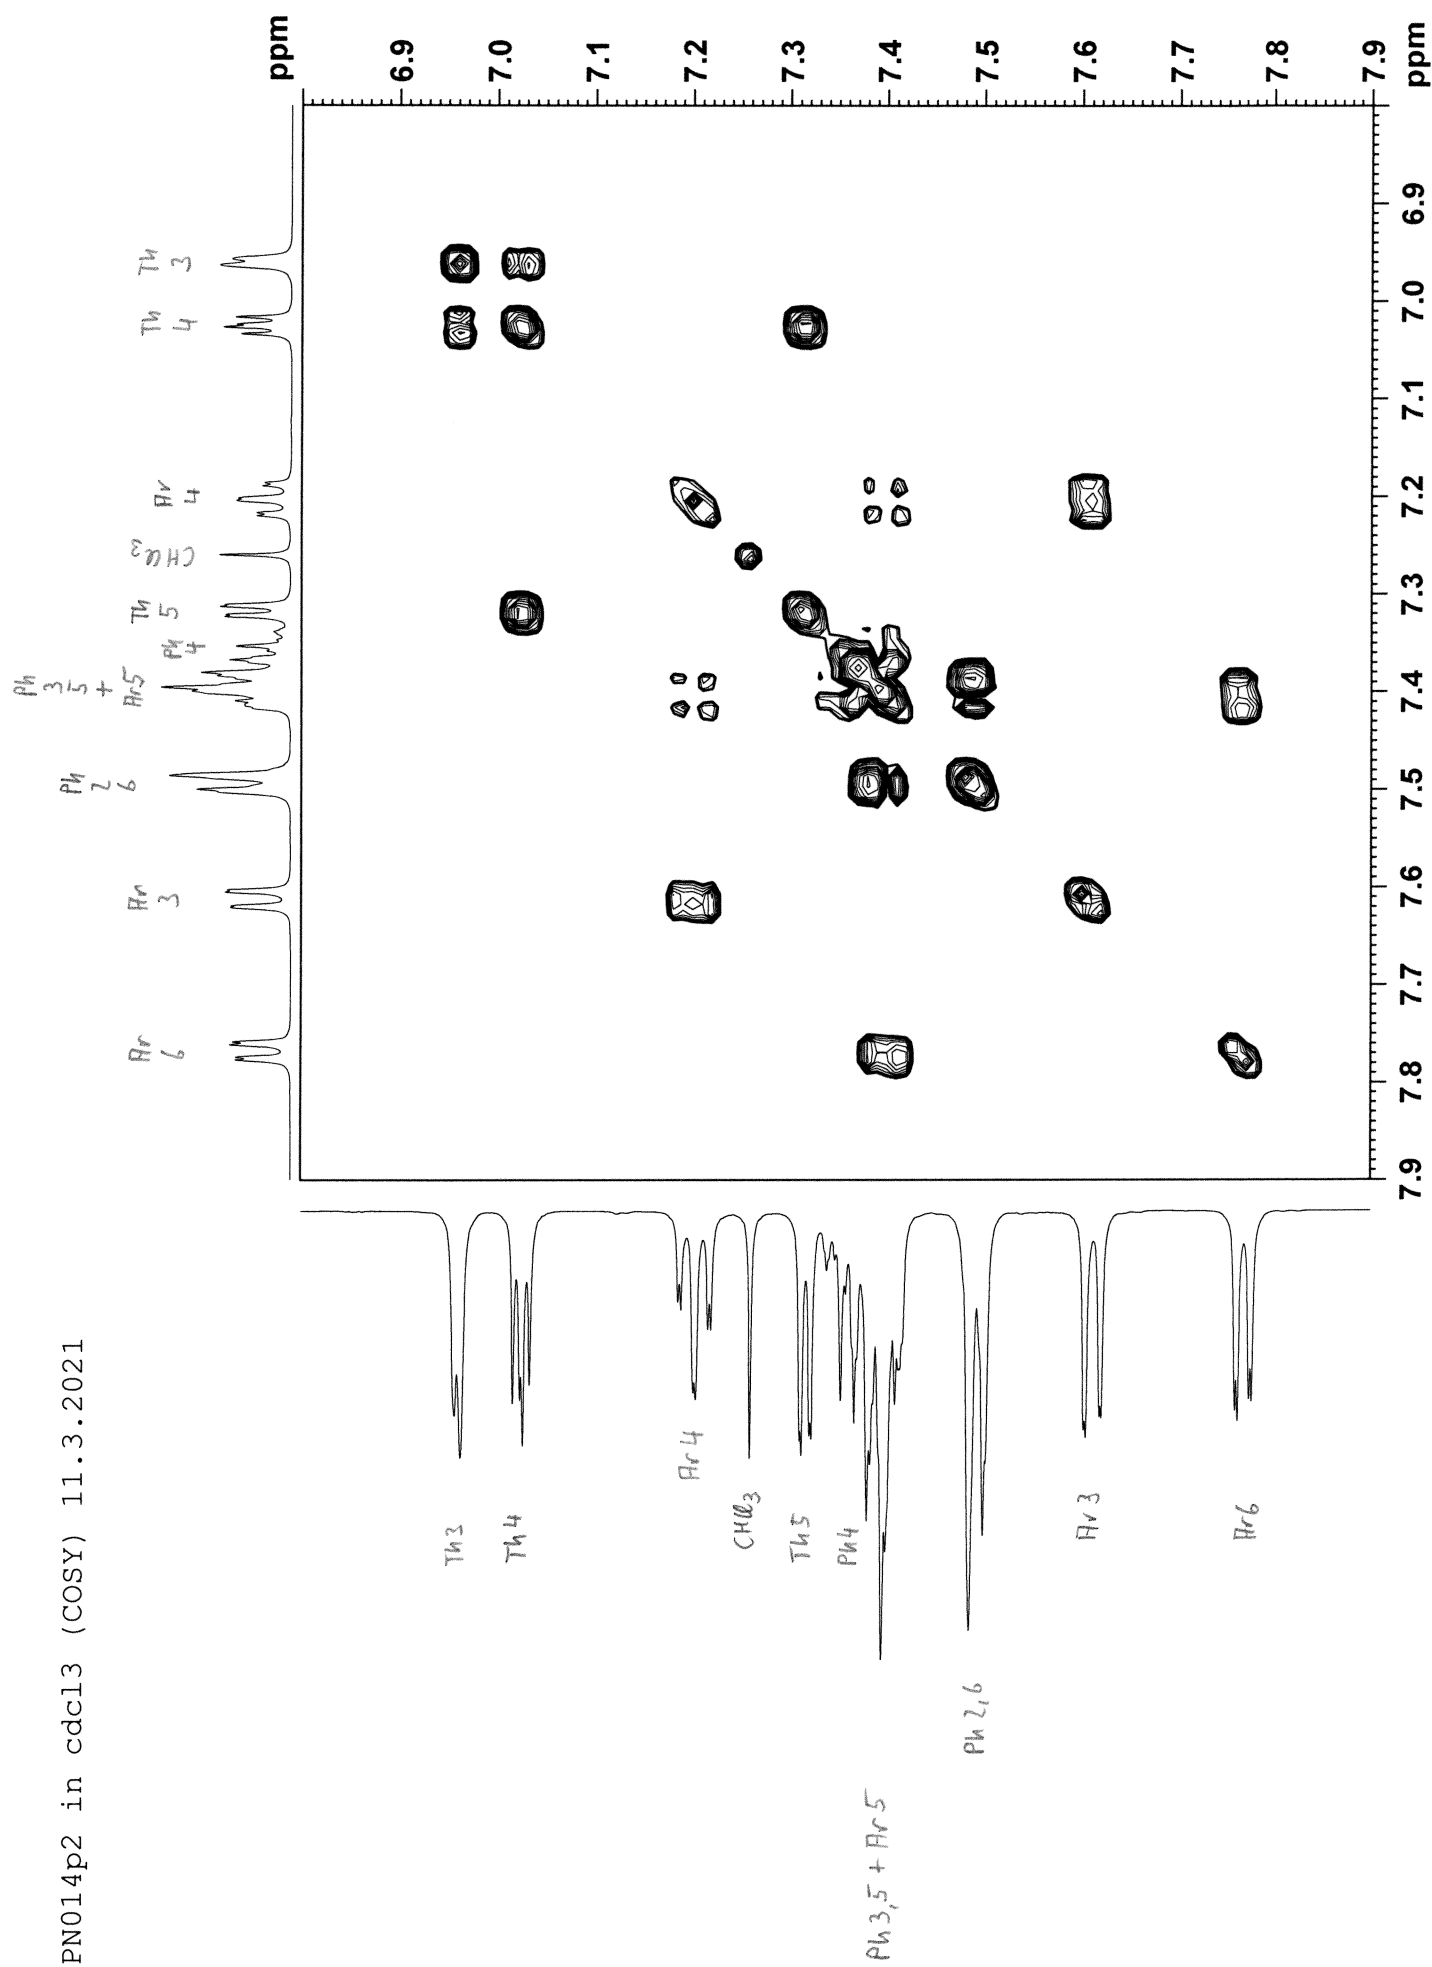

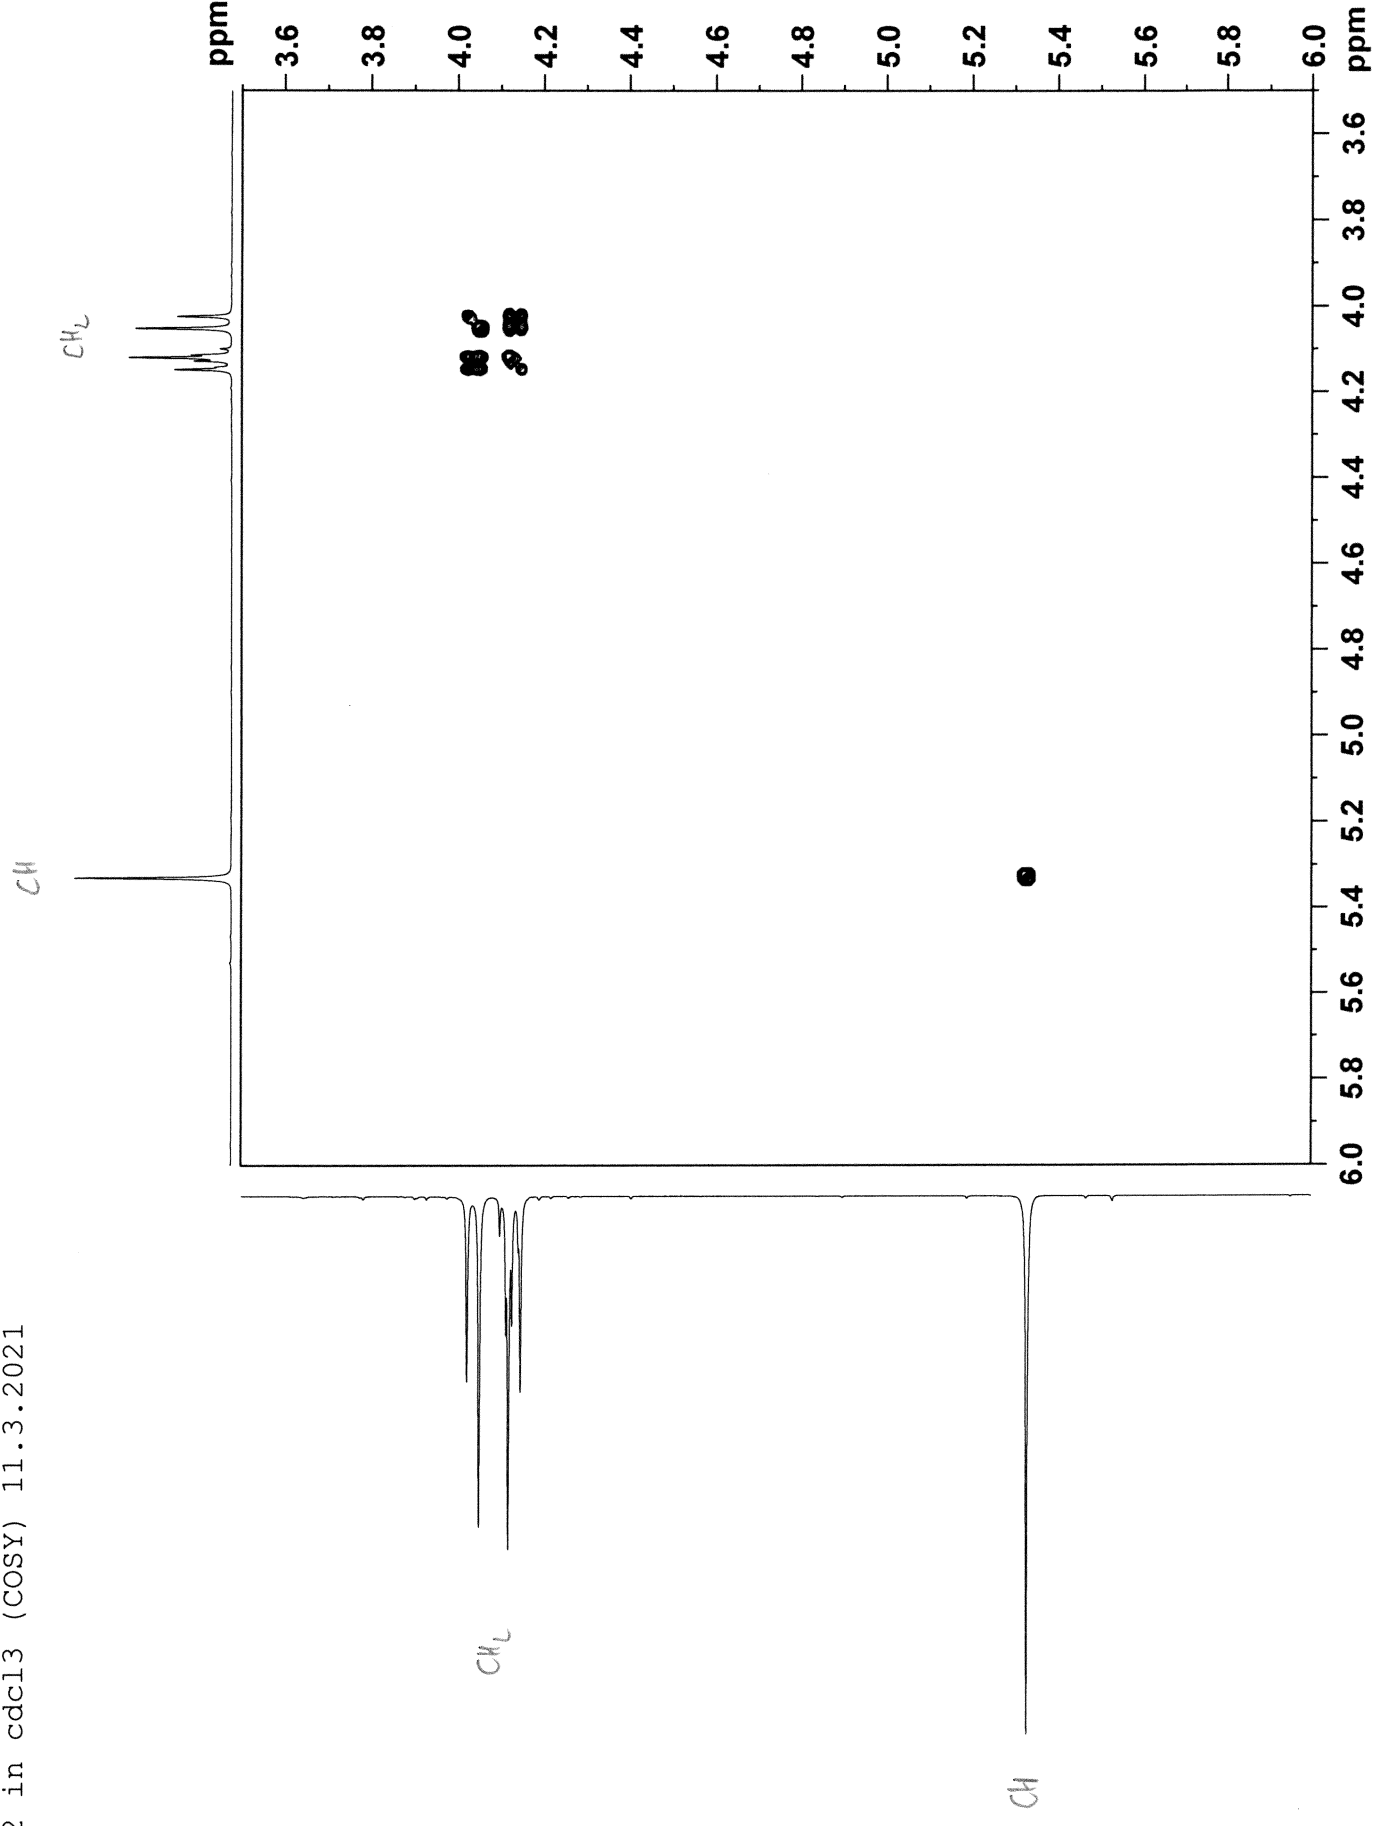

PN014p2 in cdcl3 (HSQC) 11.3.2021

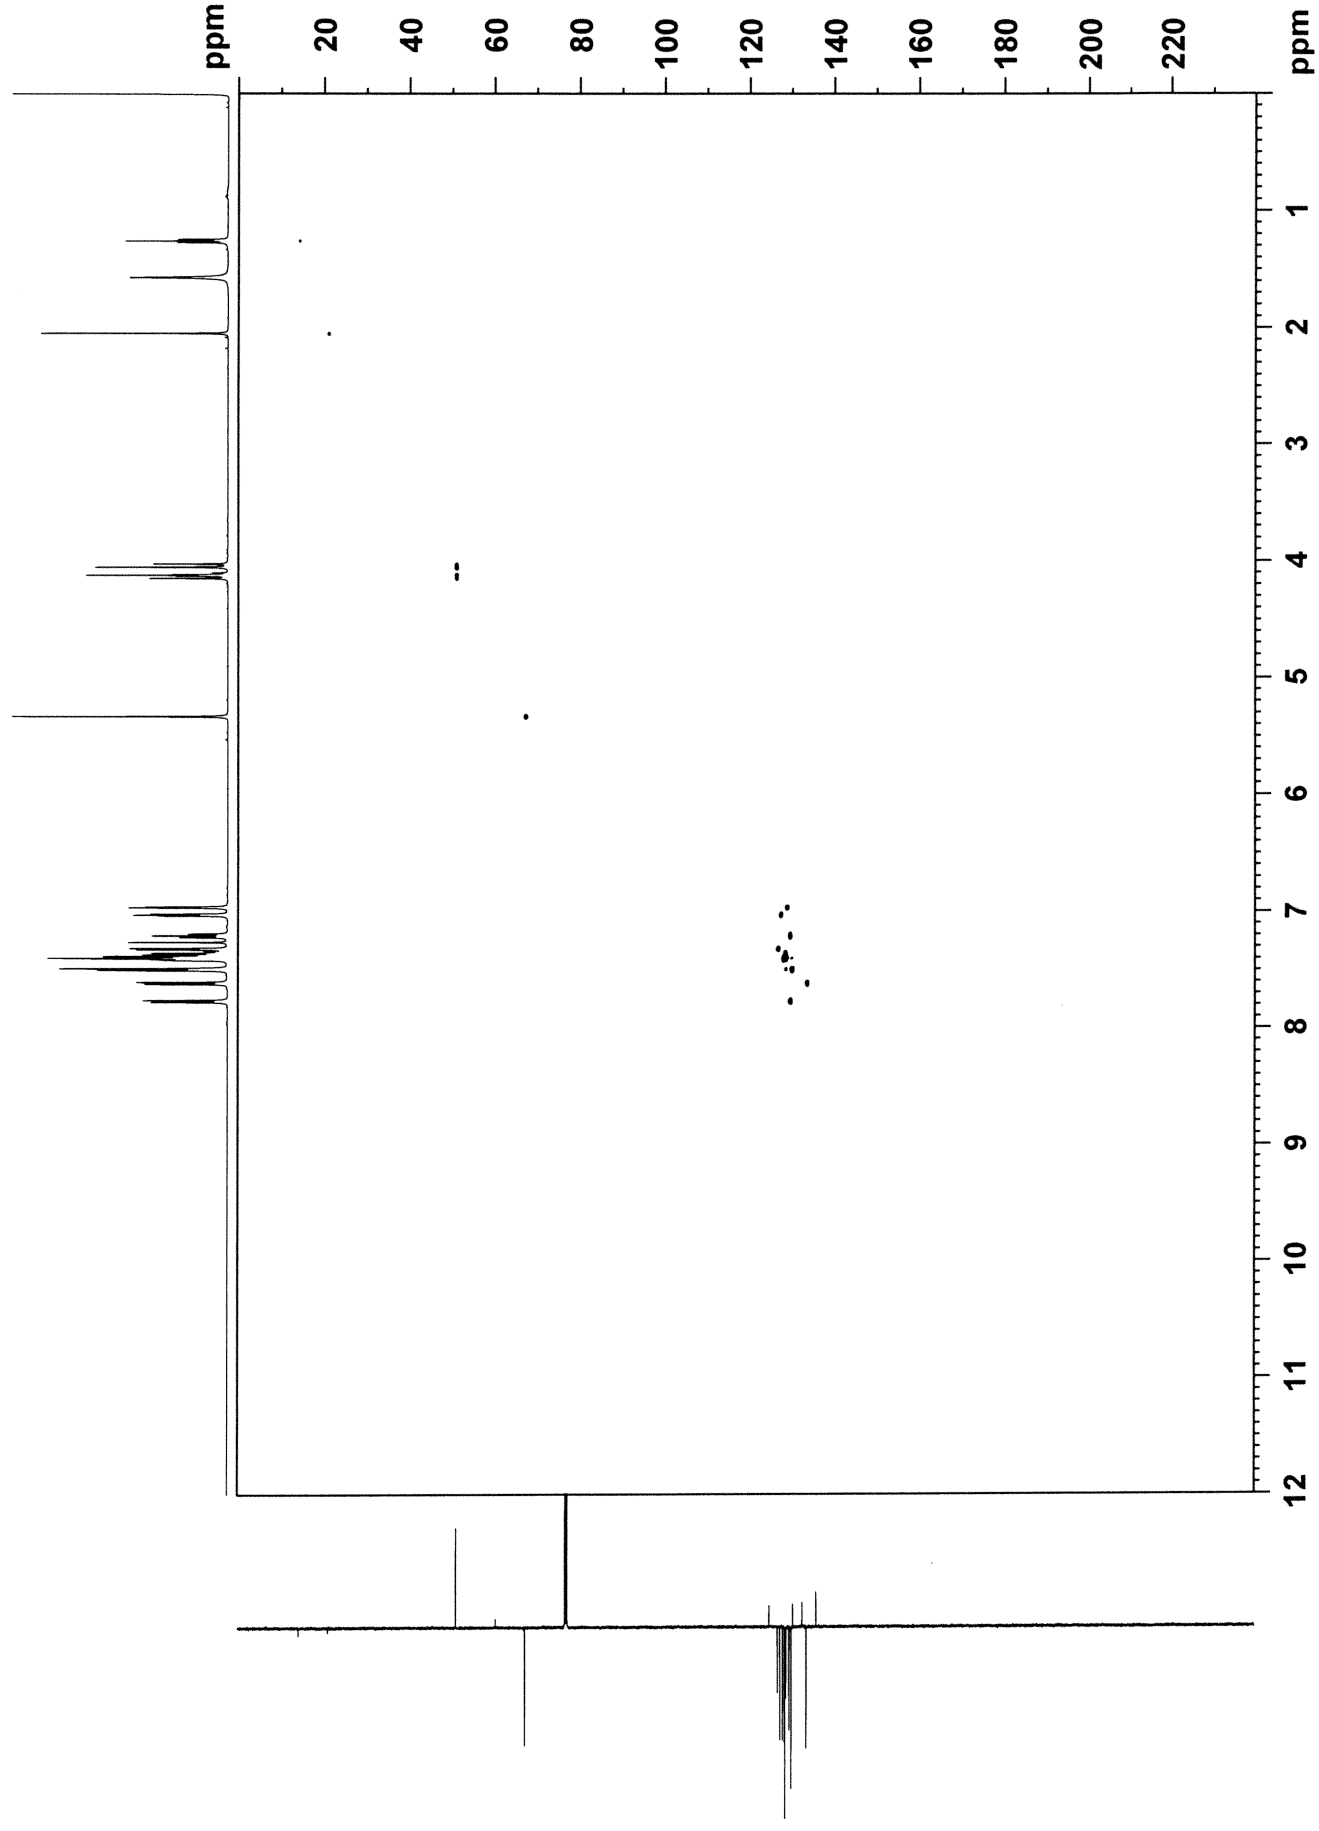

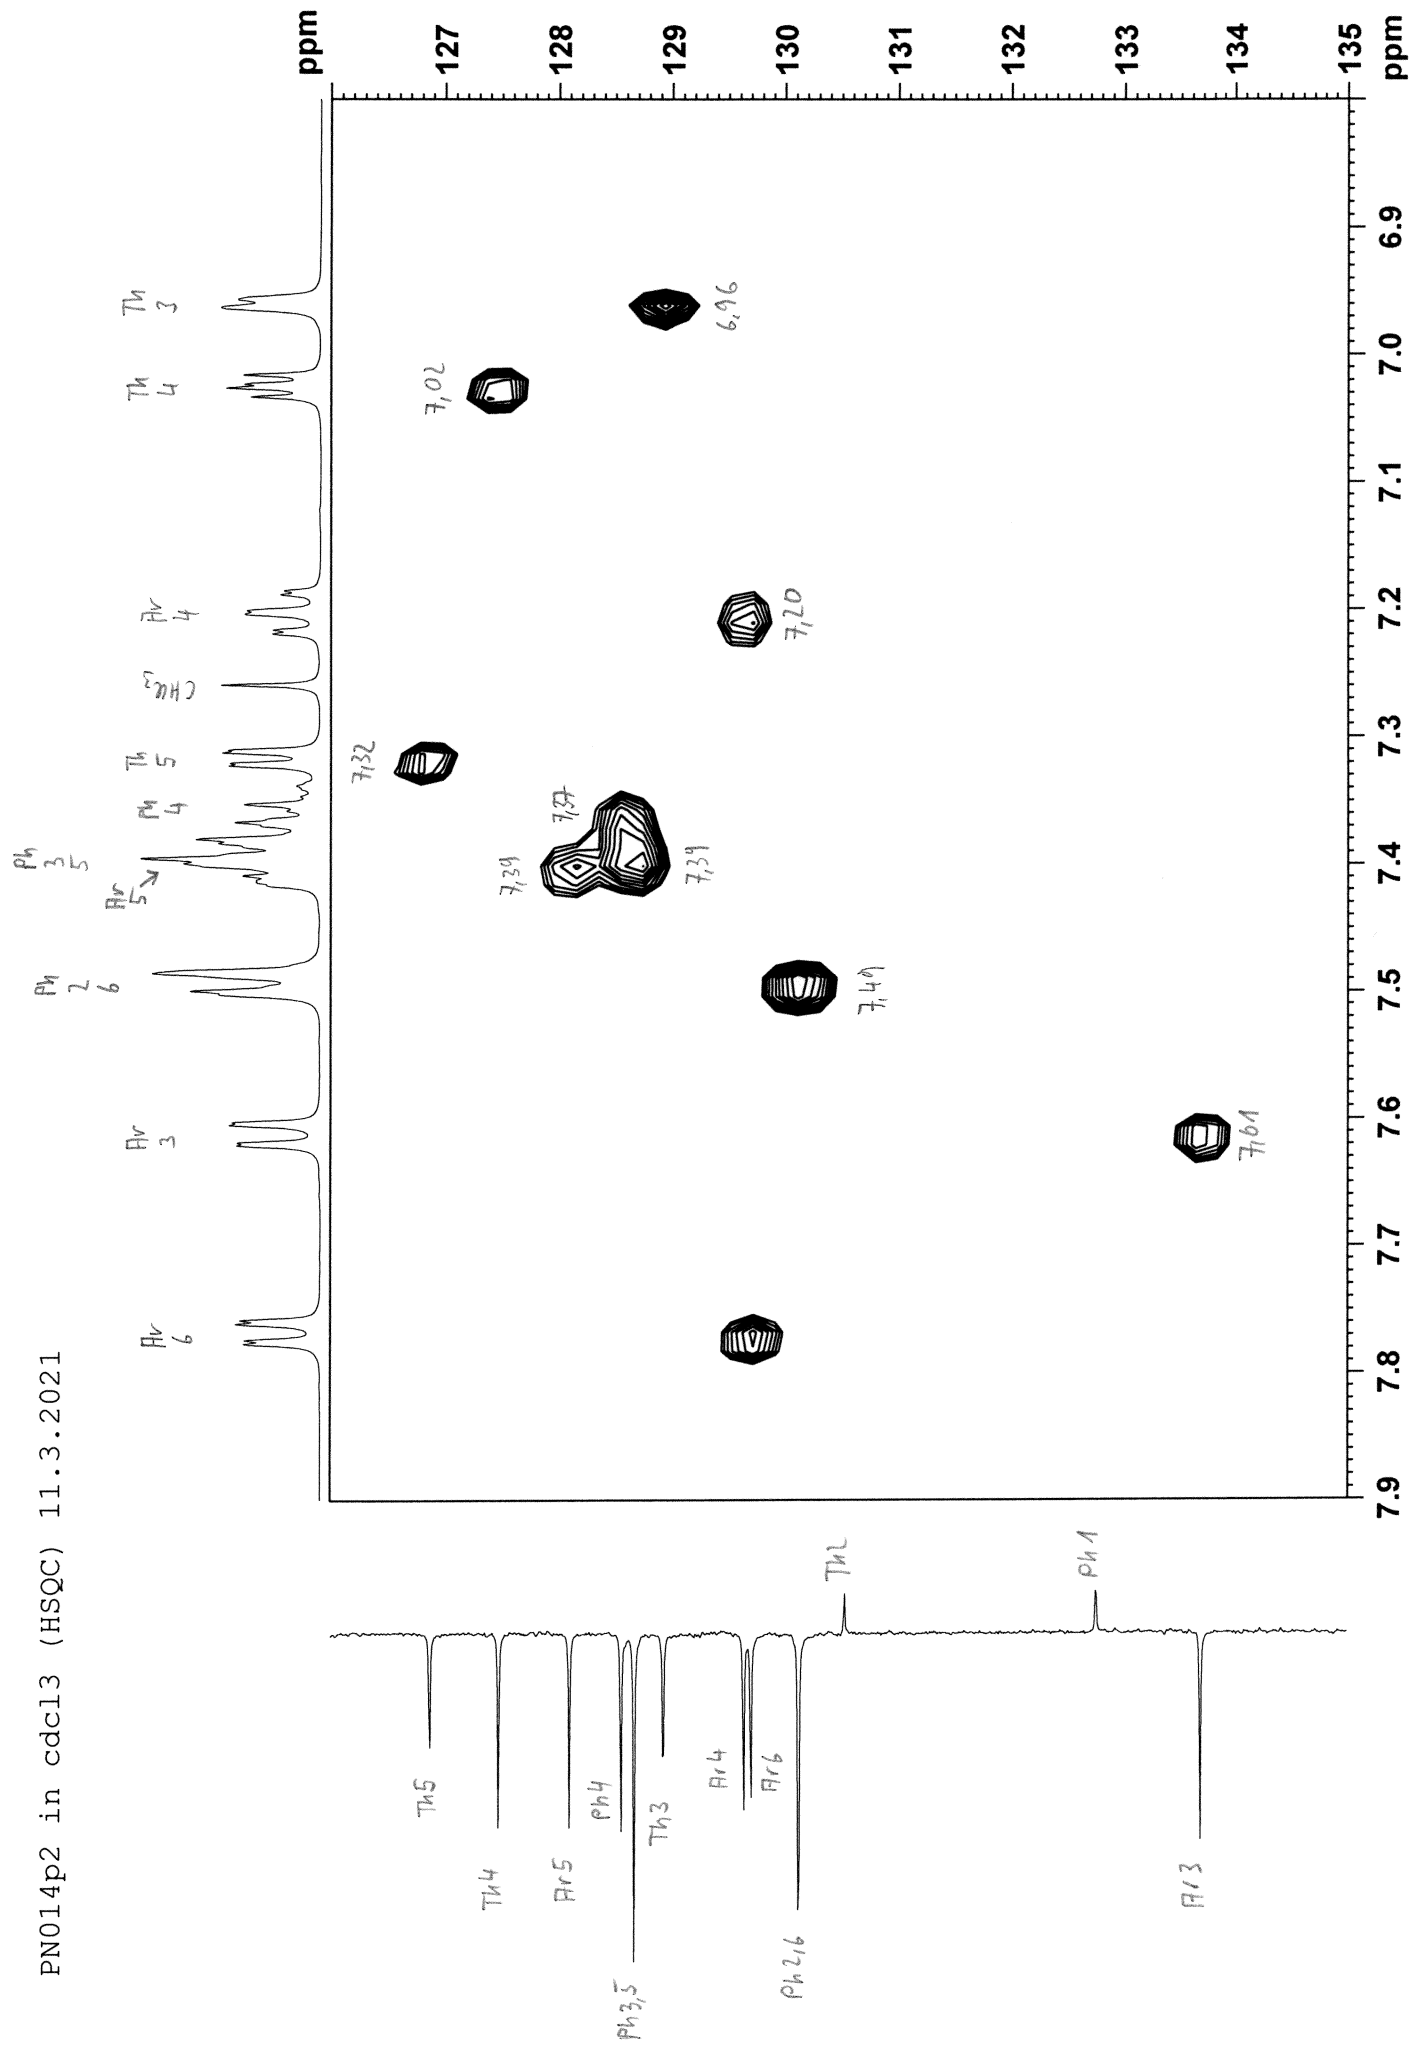

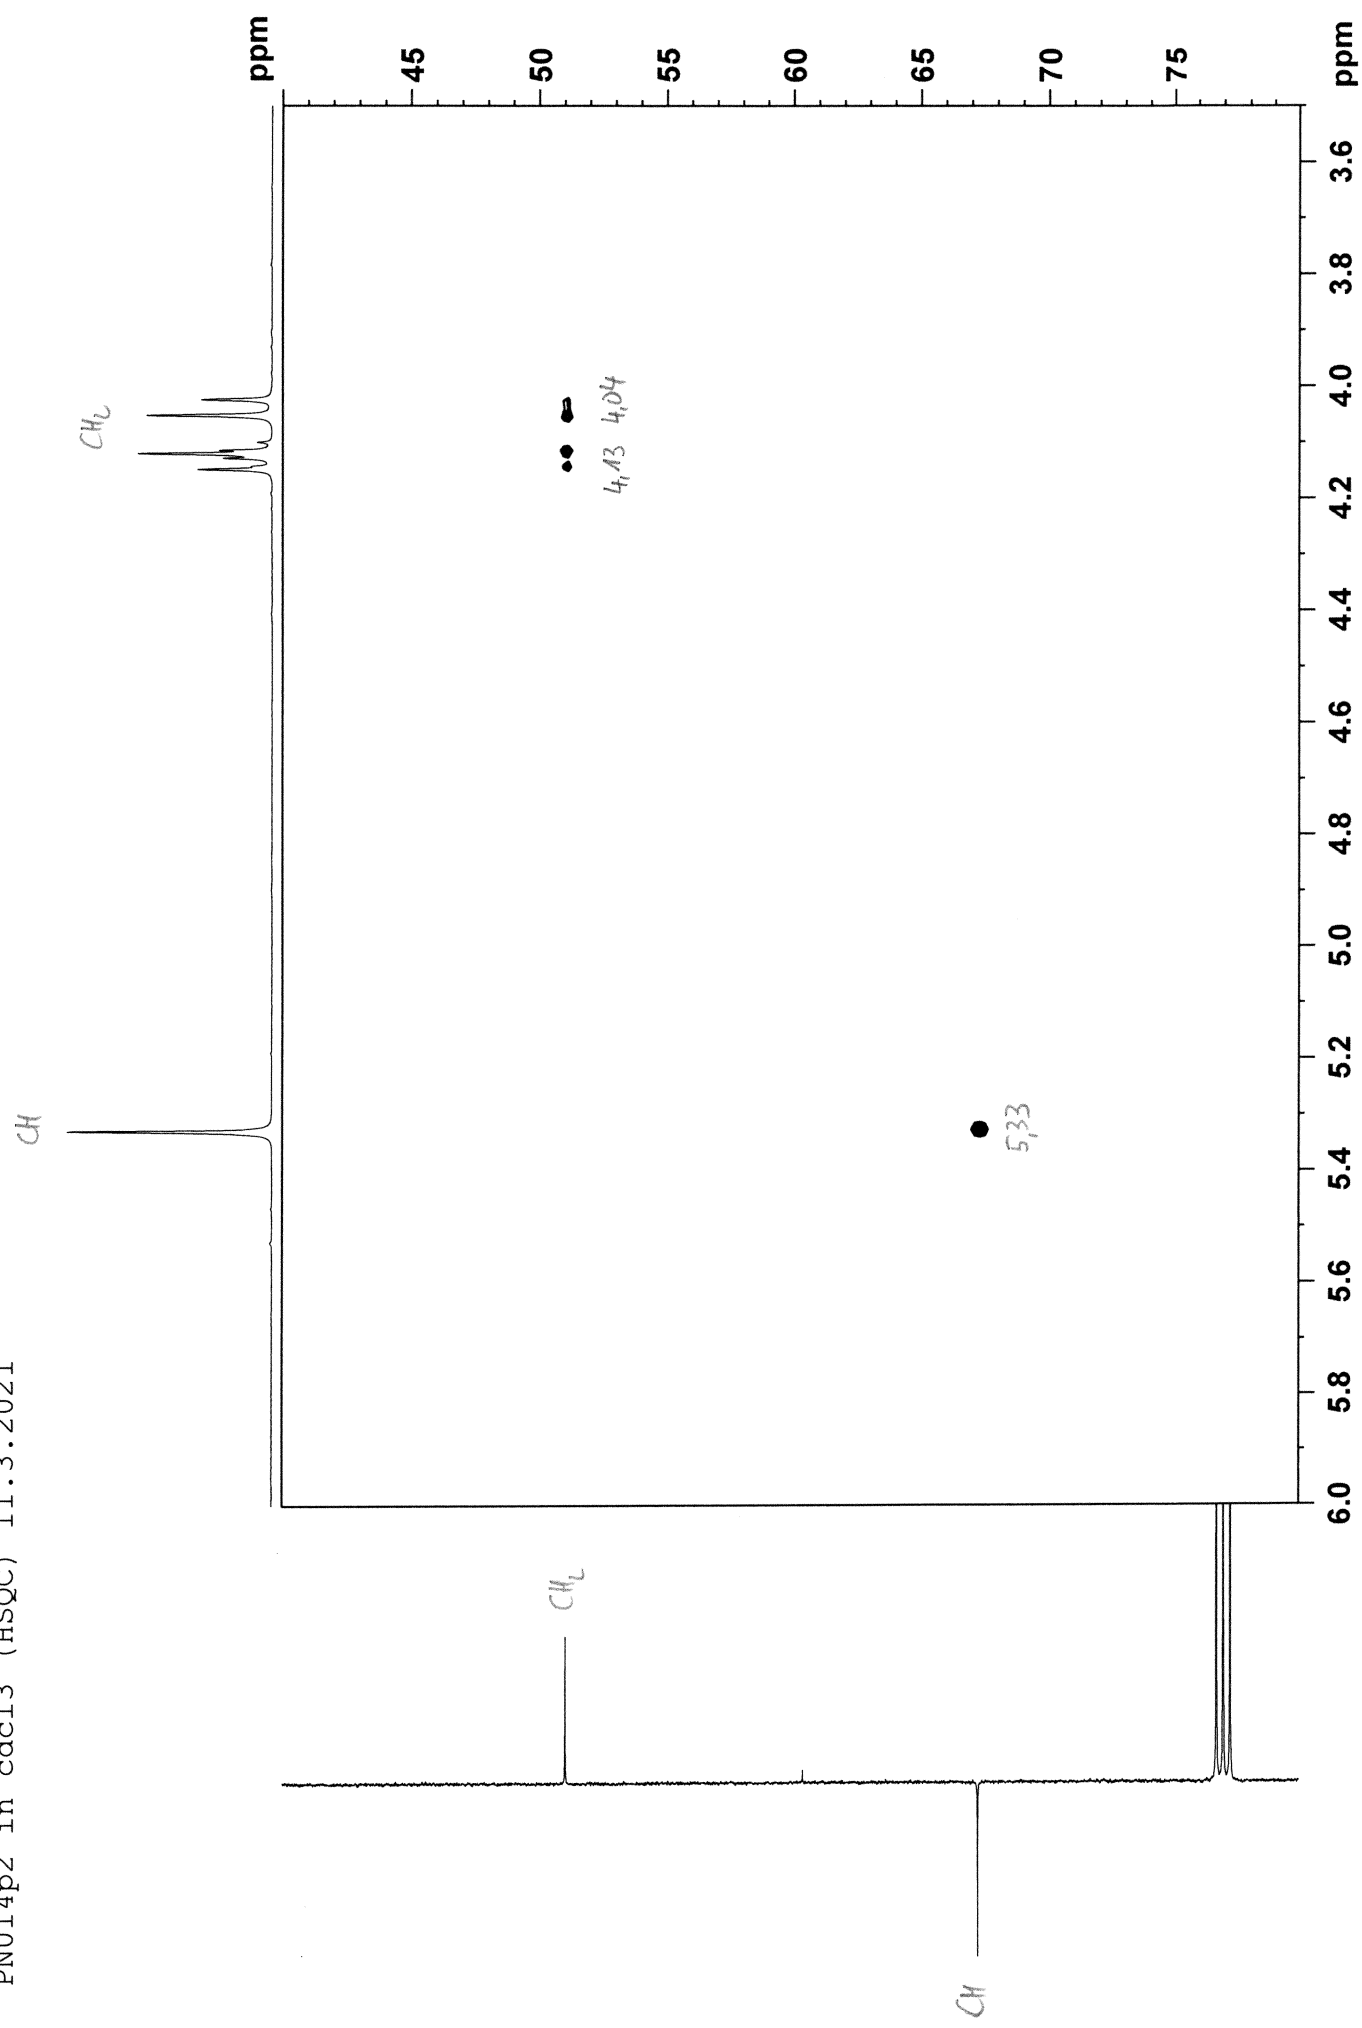

PN014p2 in cdcl3 (HMBC) 11.3.2021

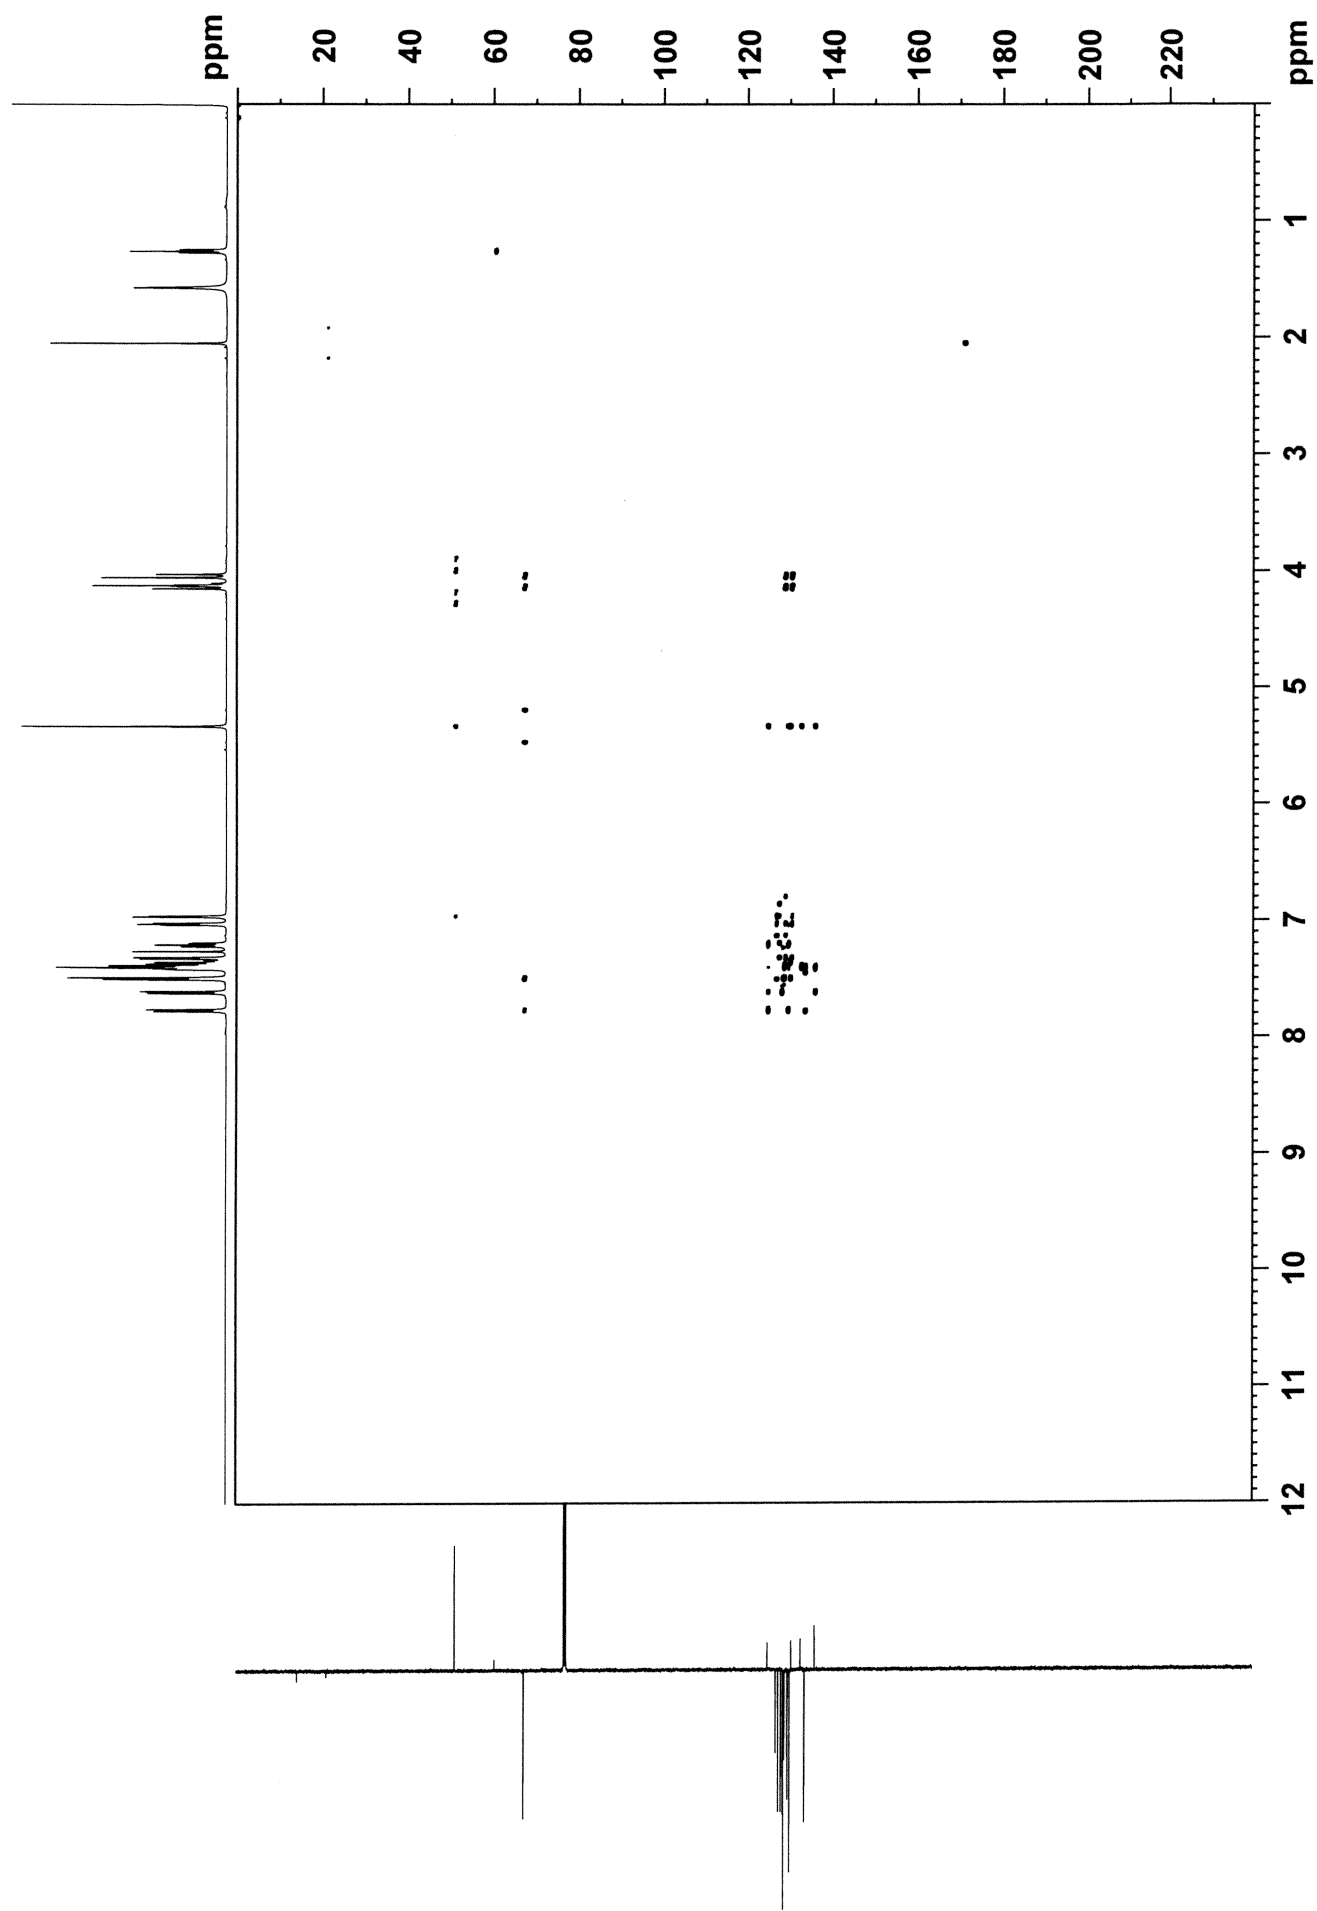

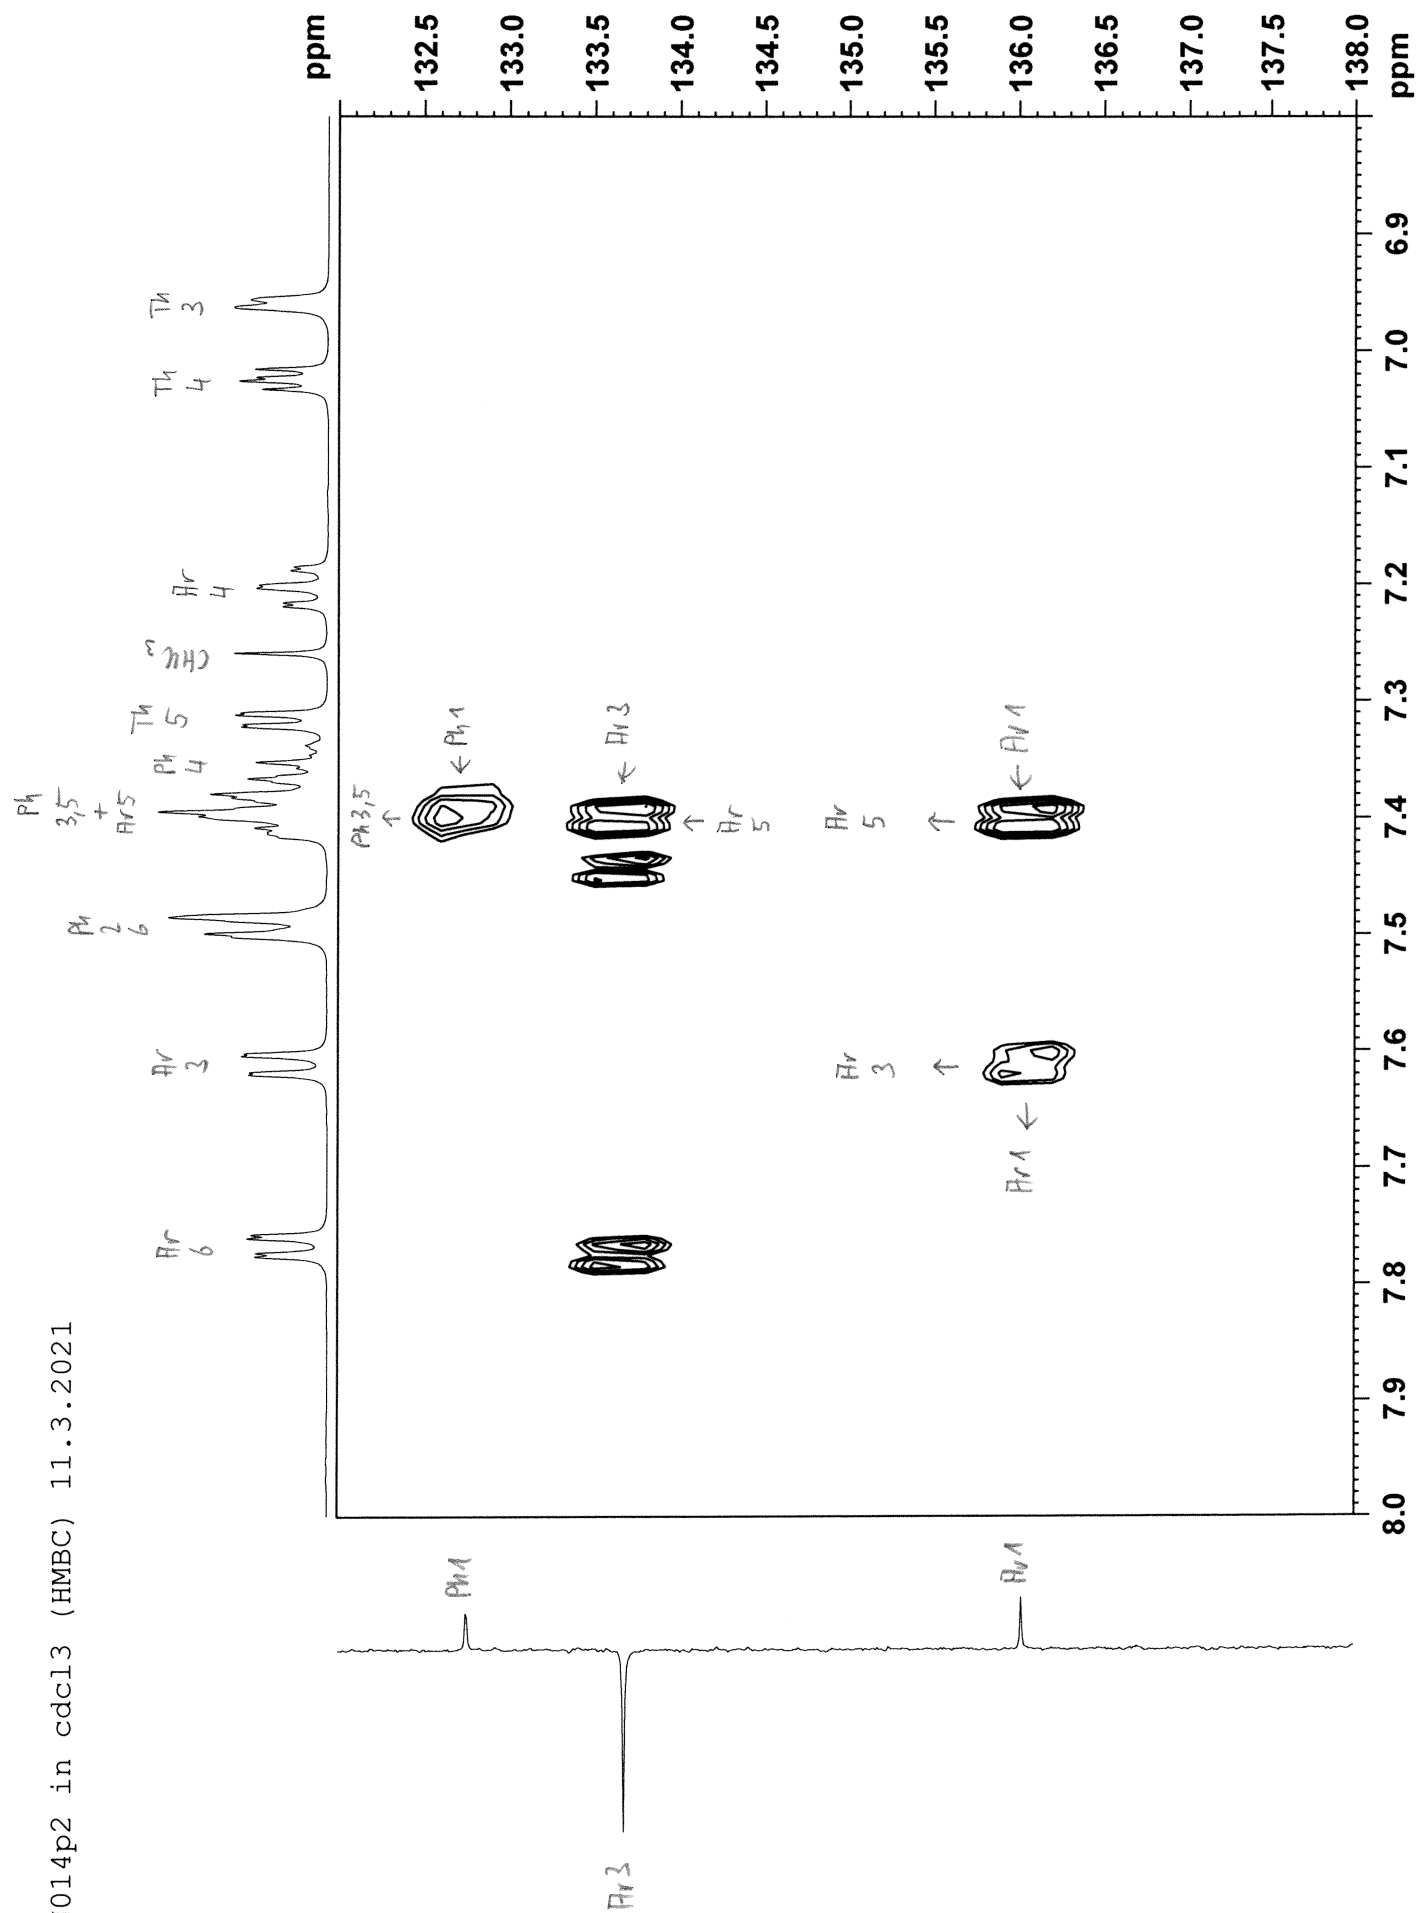





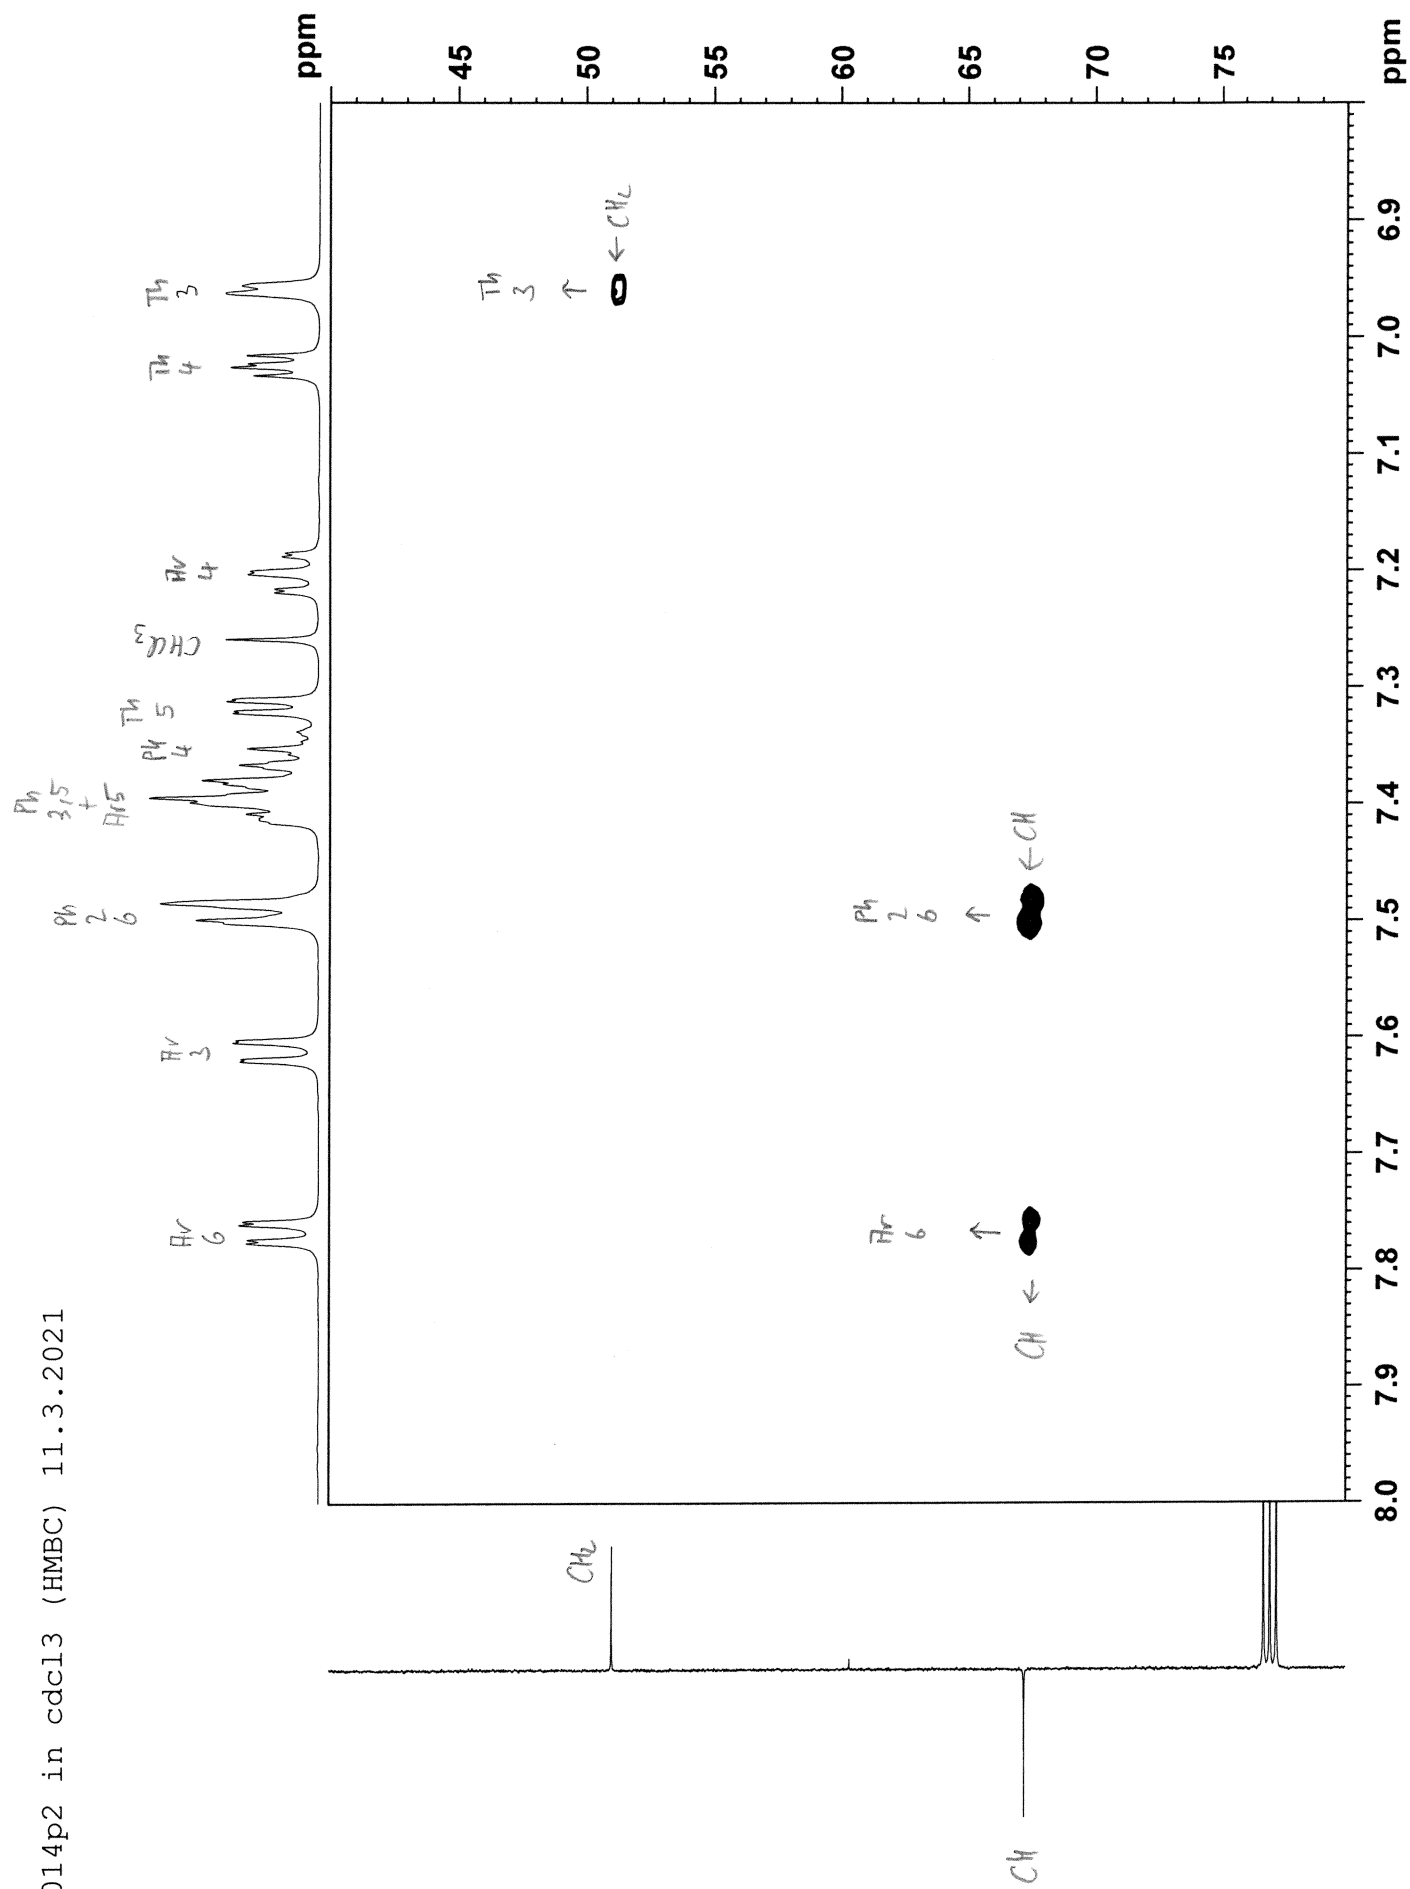

PN014p2 in cdcl3 (HMBC) 11.3.2021

CH

CH<sub>2</sub>

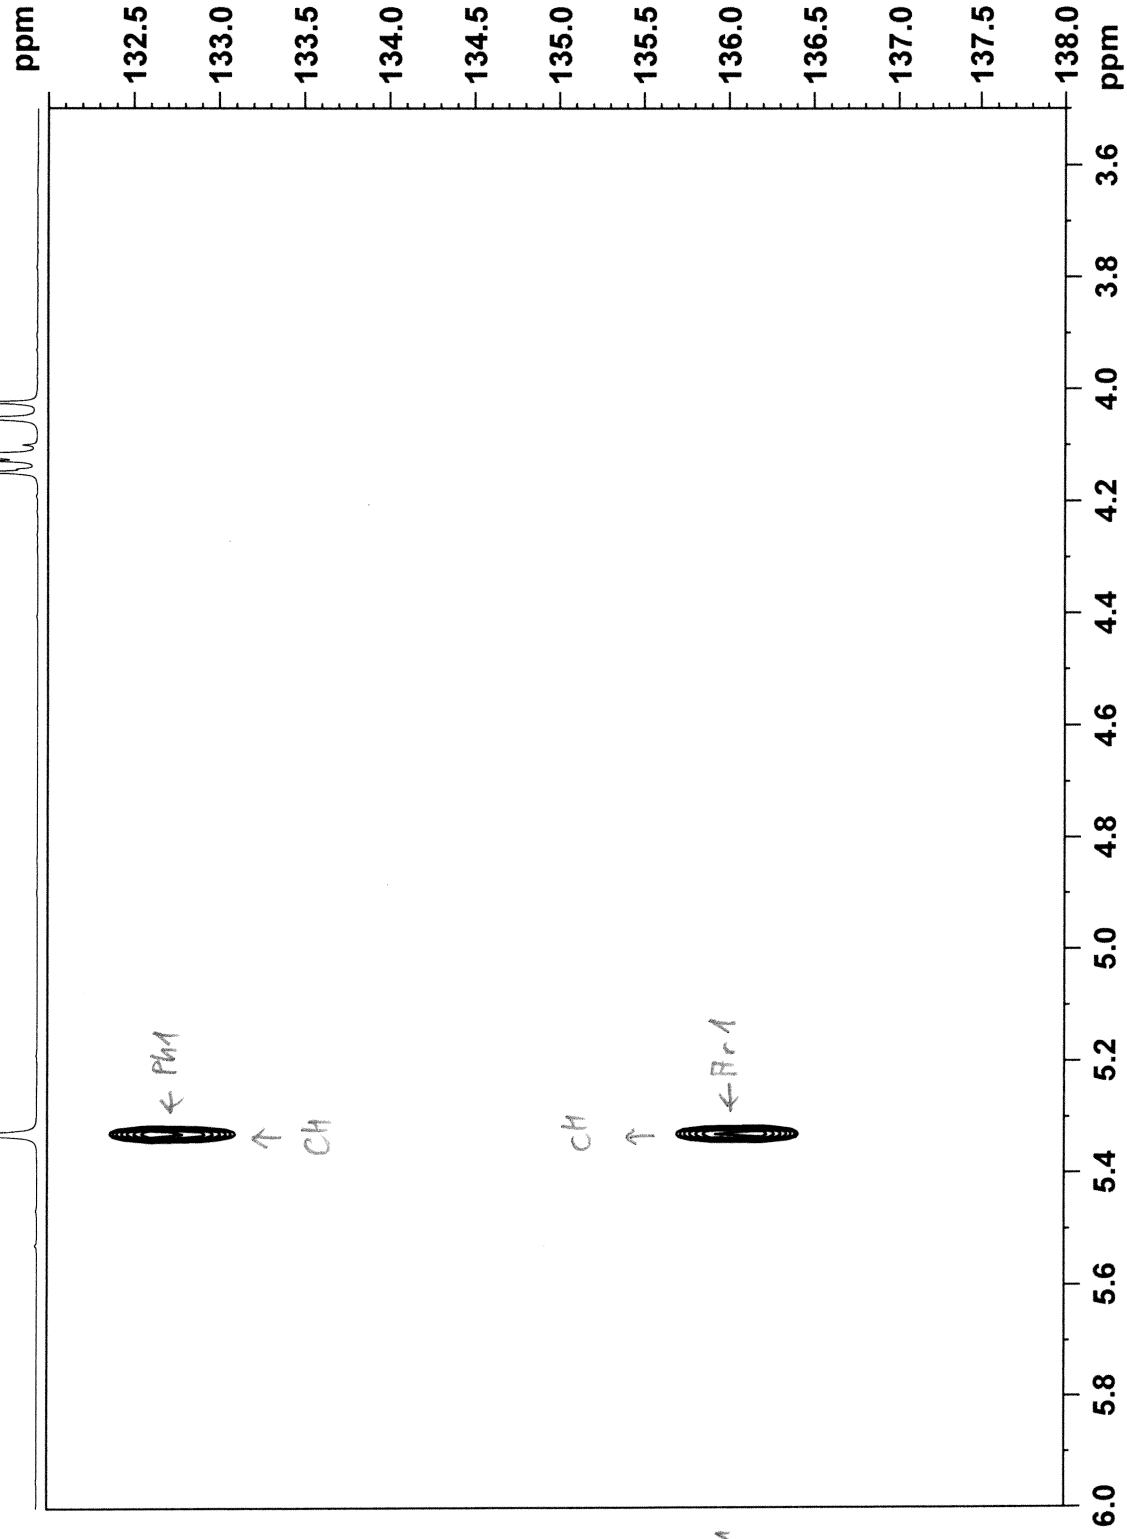

Ar3

PhA

ArA

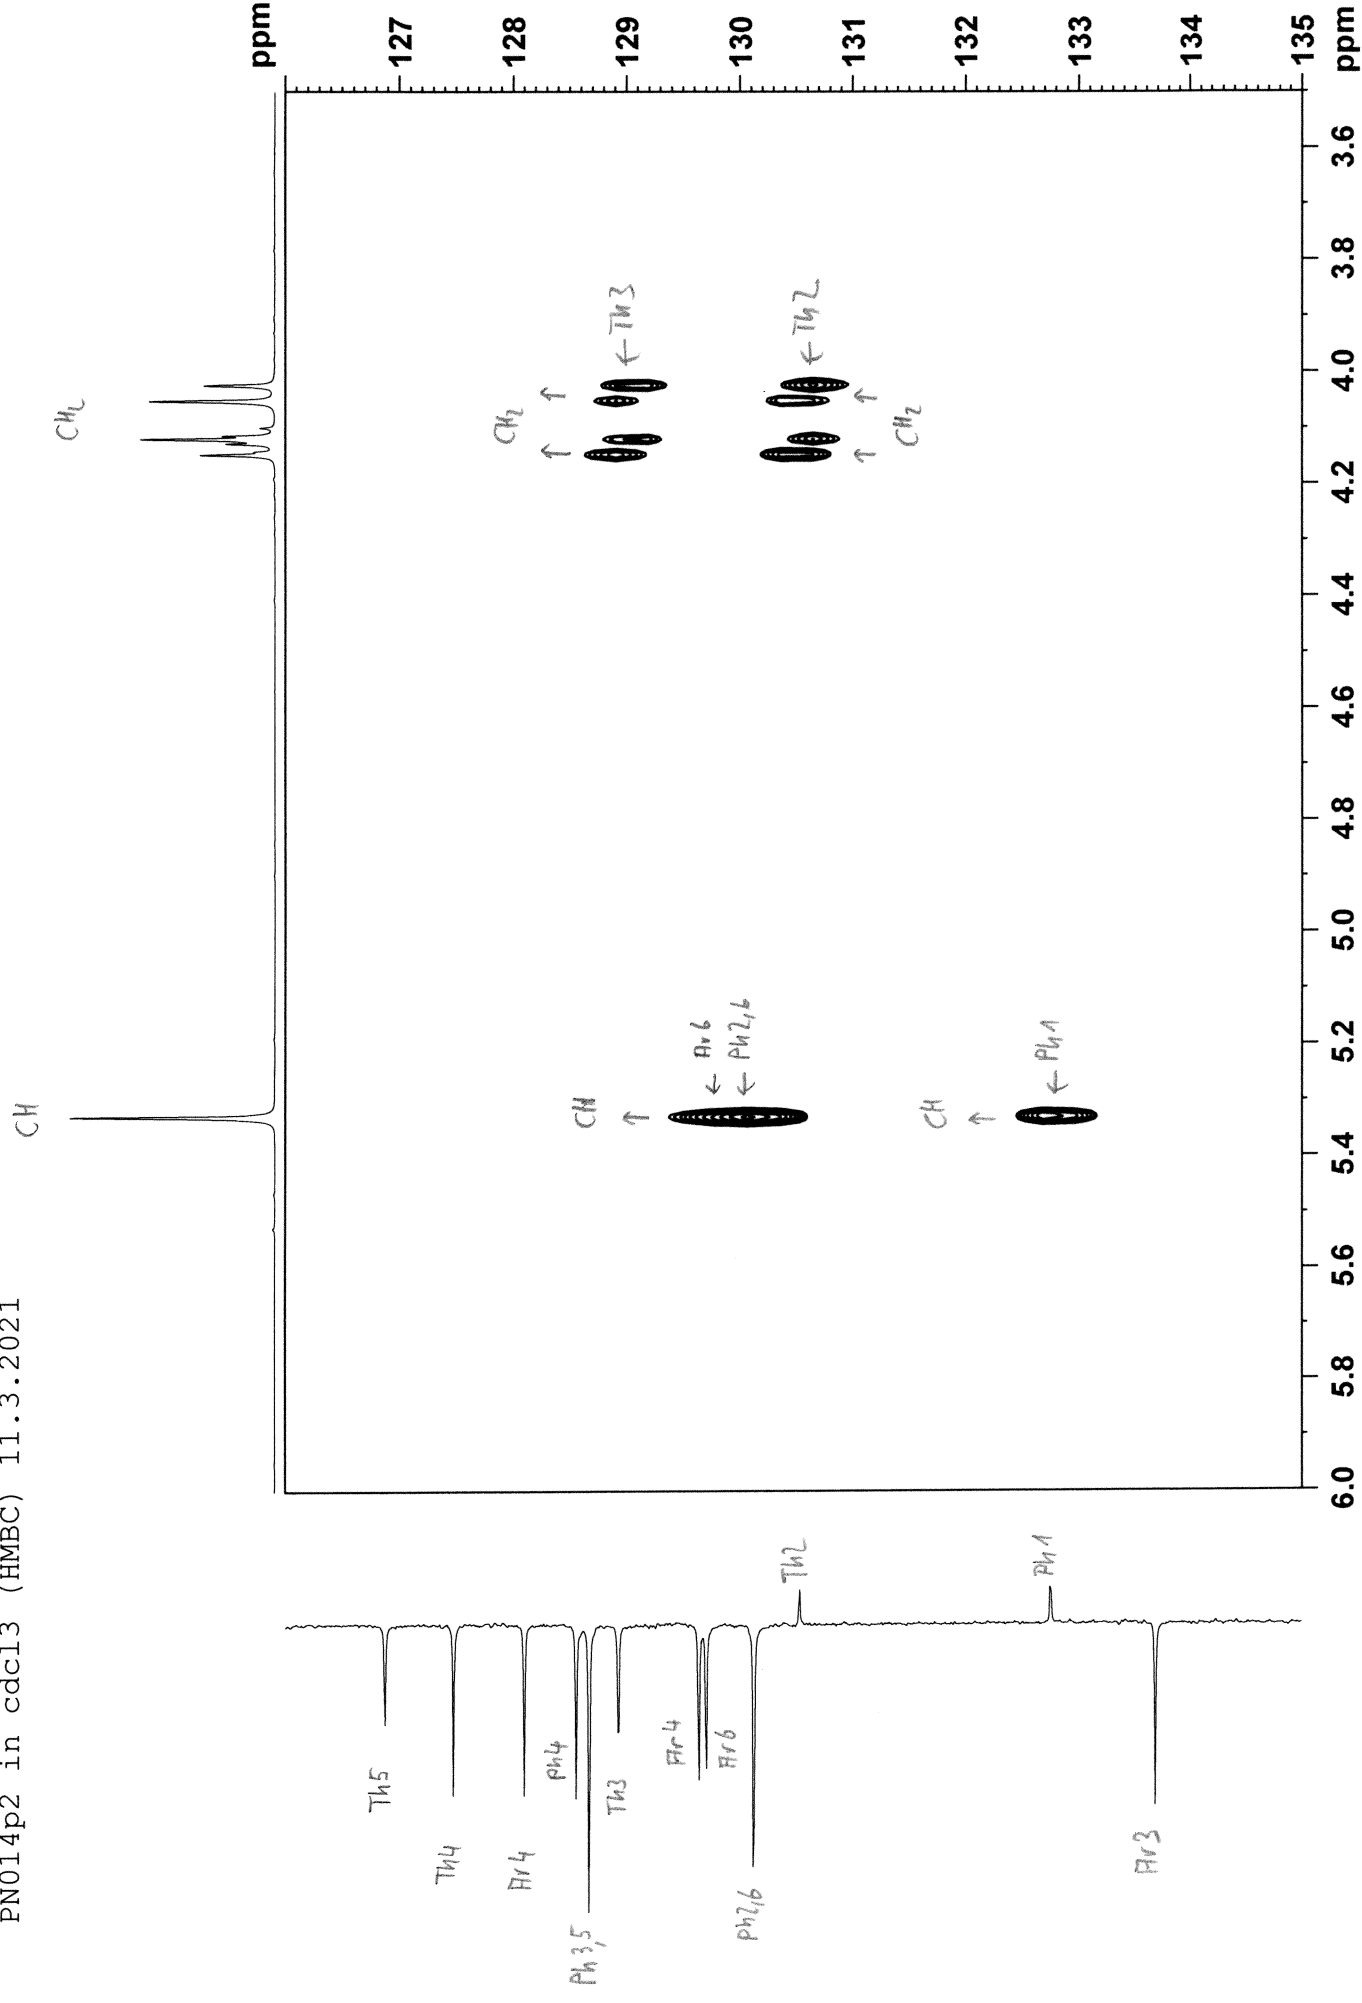

CH

CH<sub>2</sub>

ppm

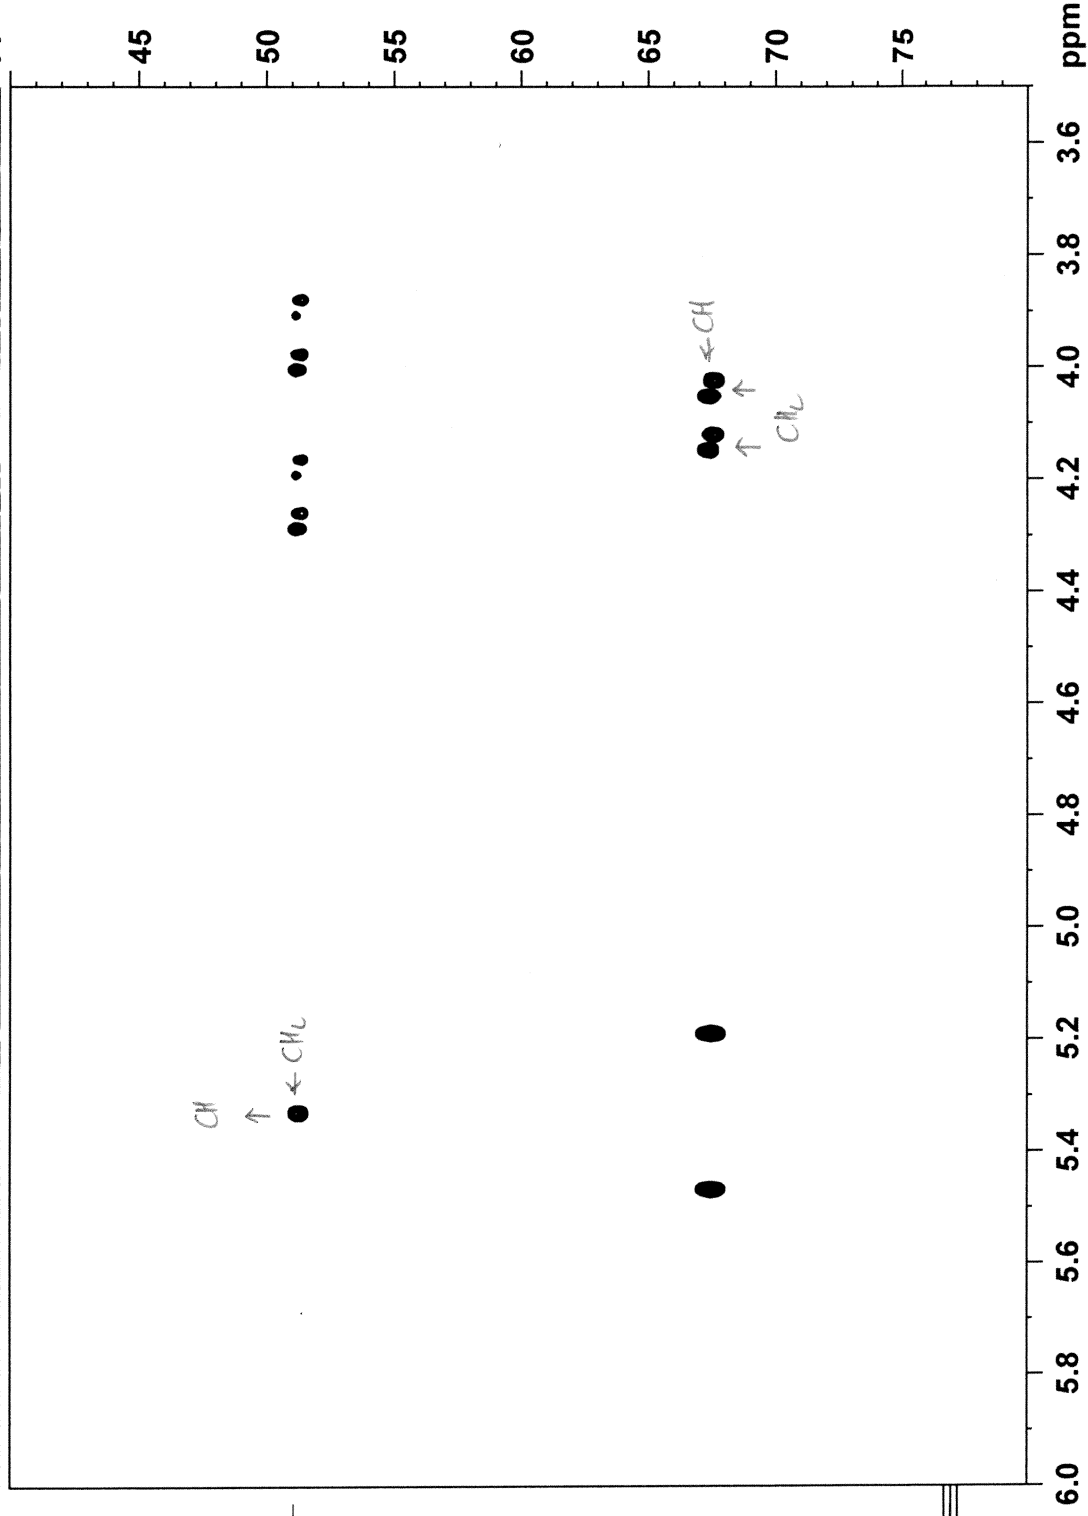

CH<sub>2</sub>

CH

**Figure S27c.** NMR spectra of compound 7g.

PN014p3 in cdcl3 (Proton) 11.3.2021

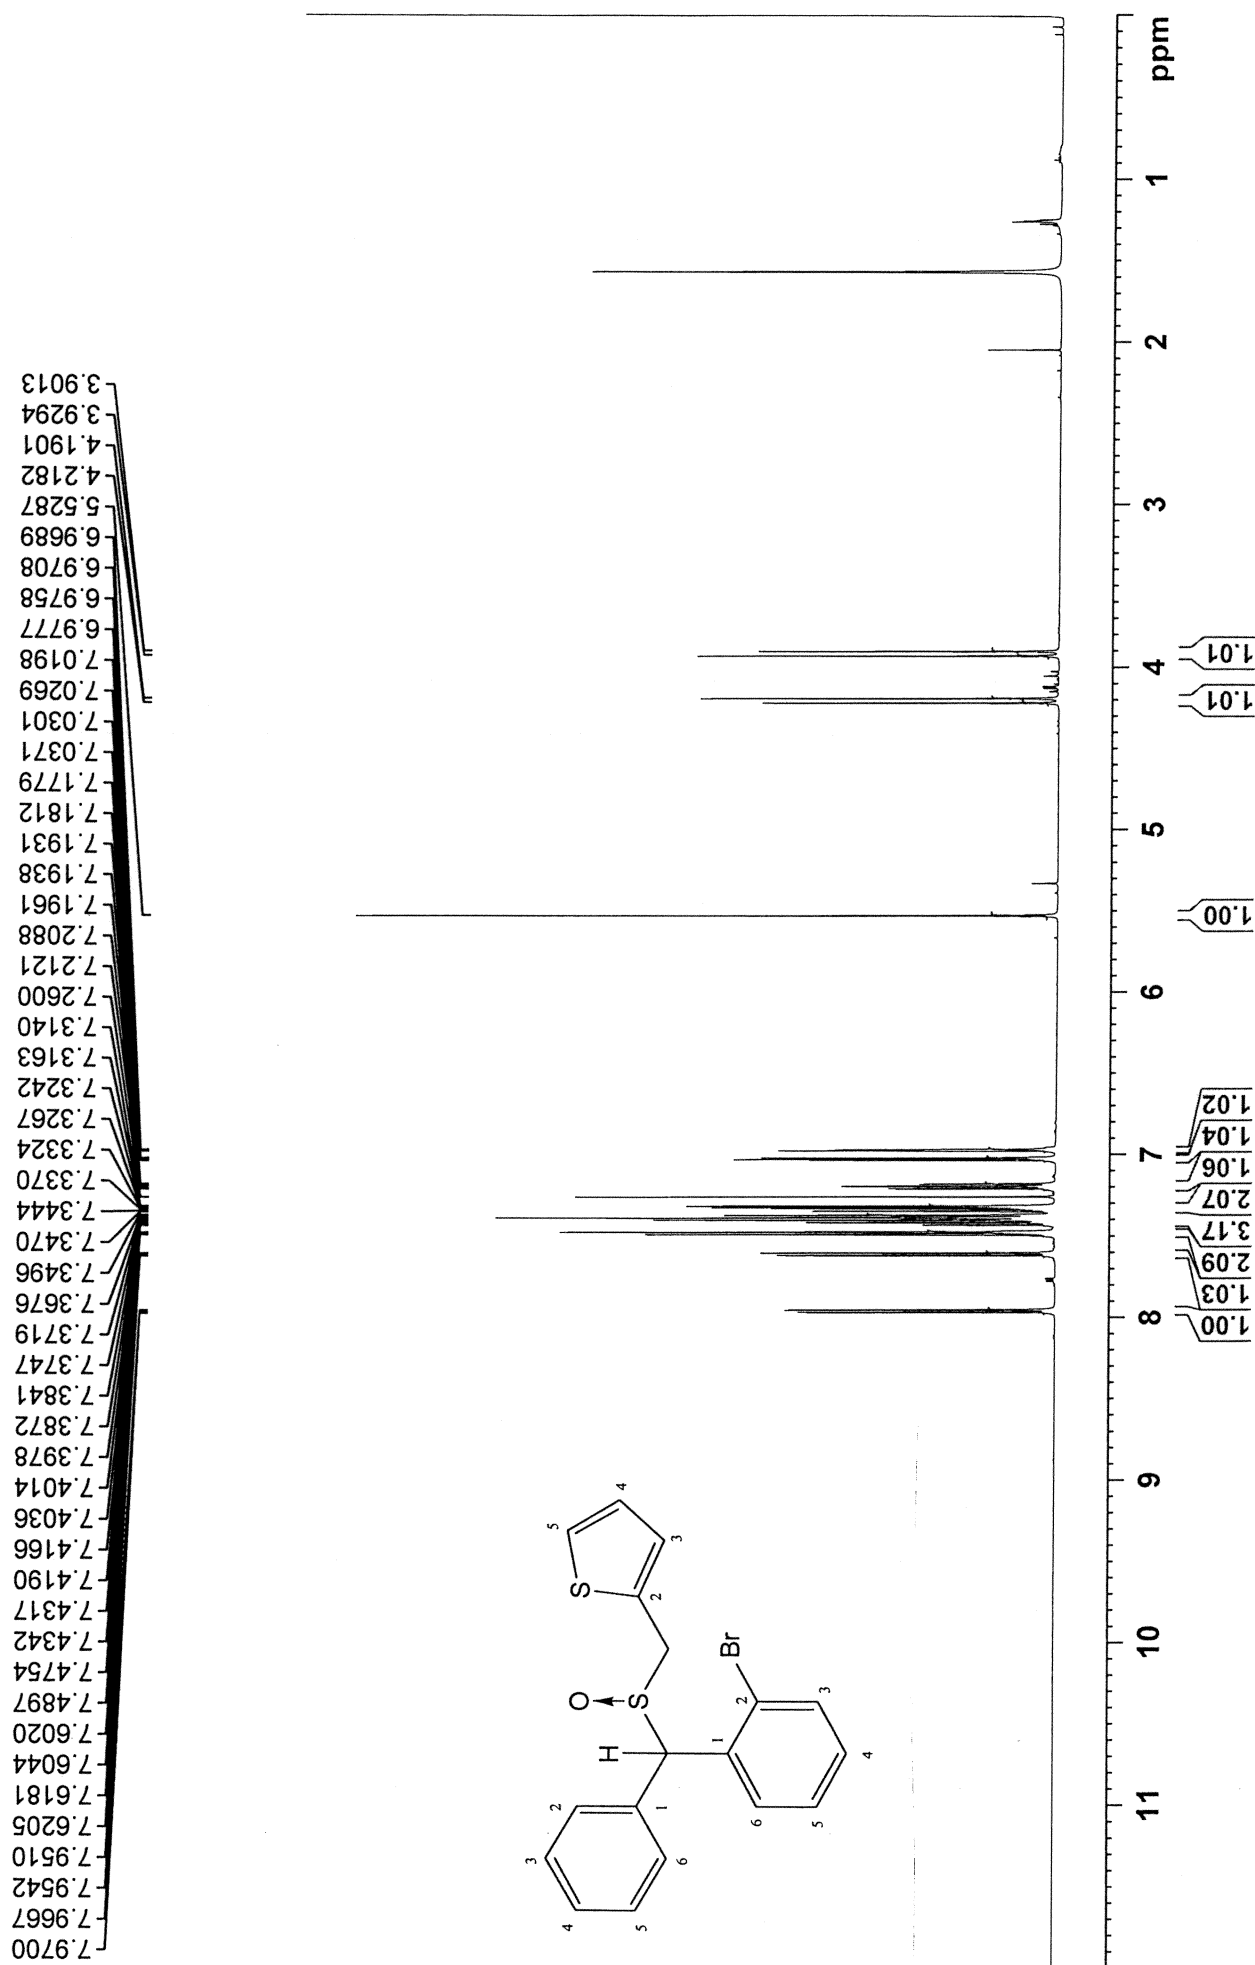

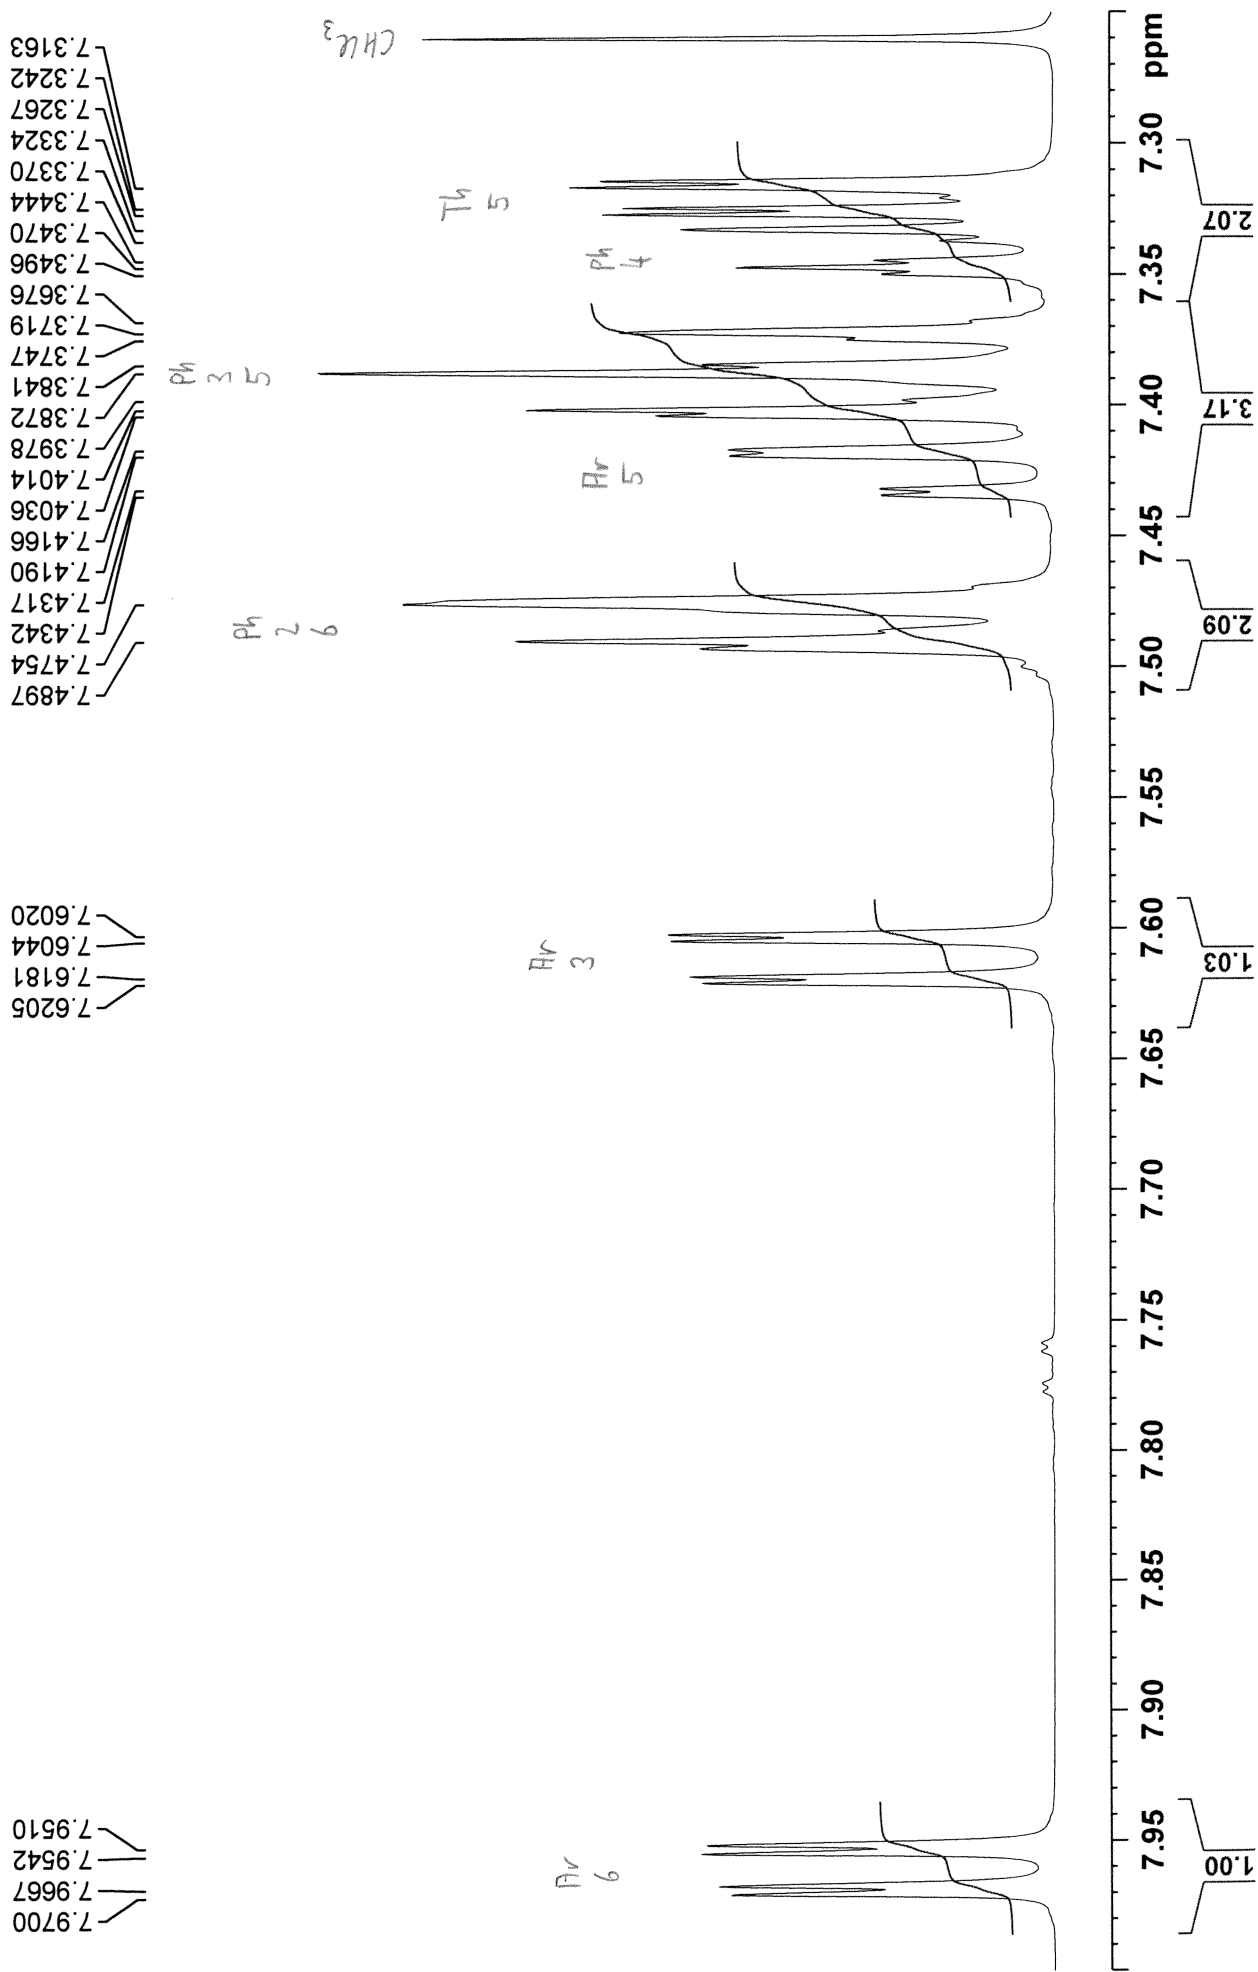

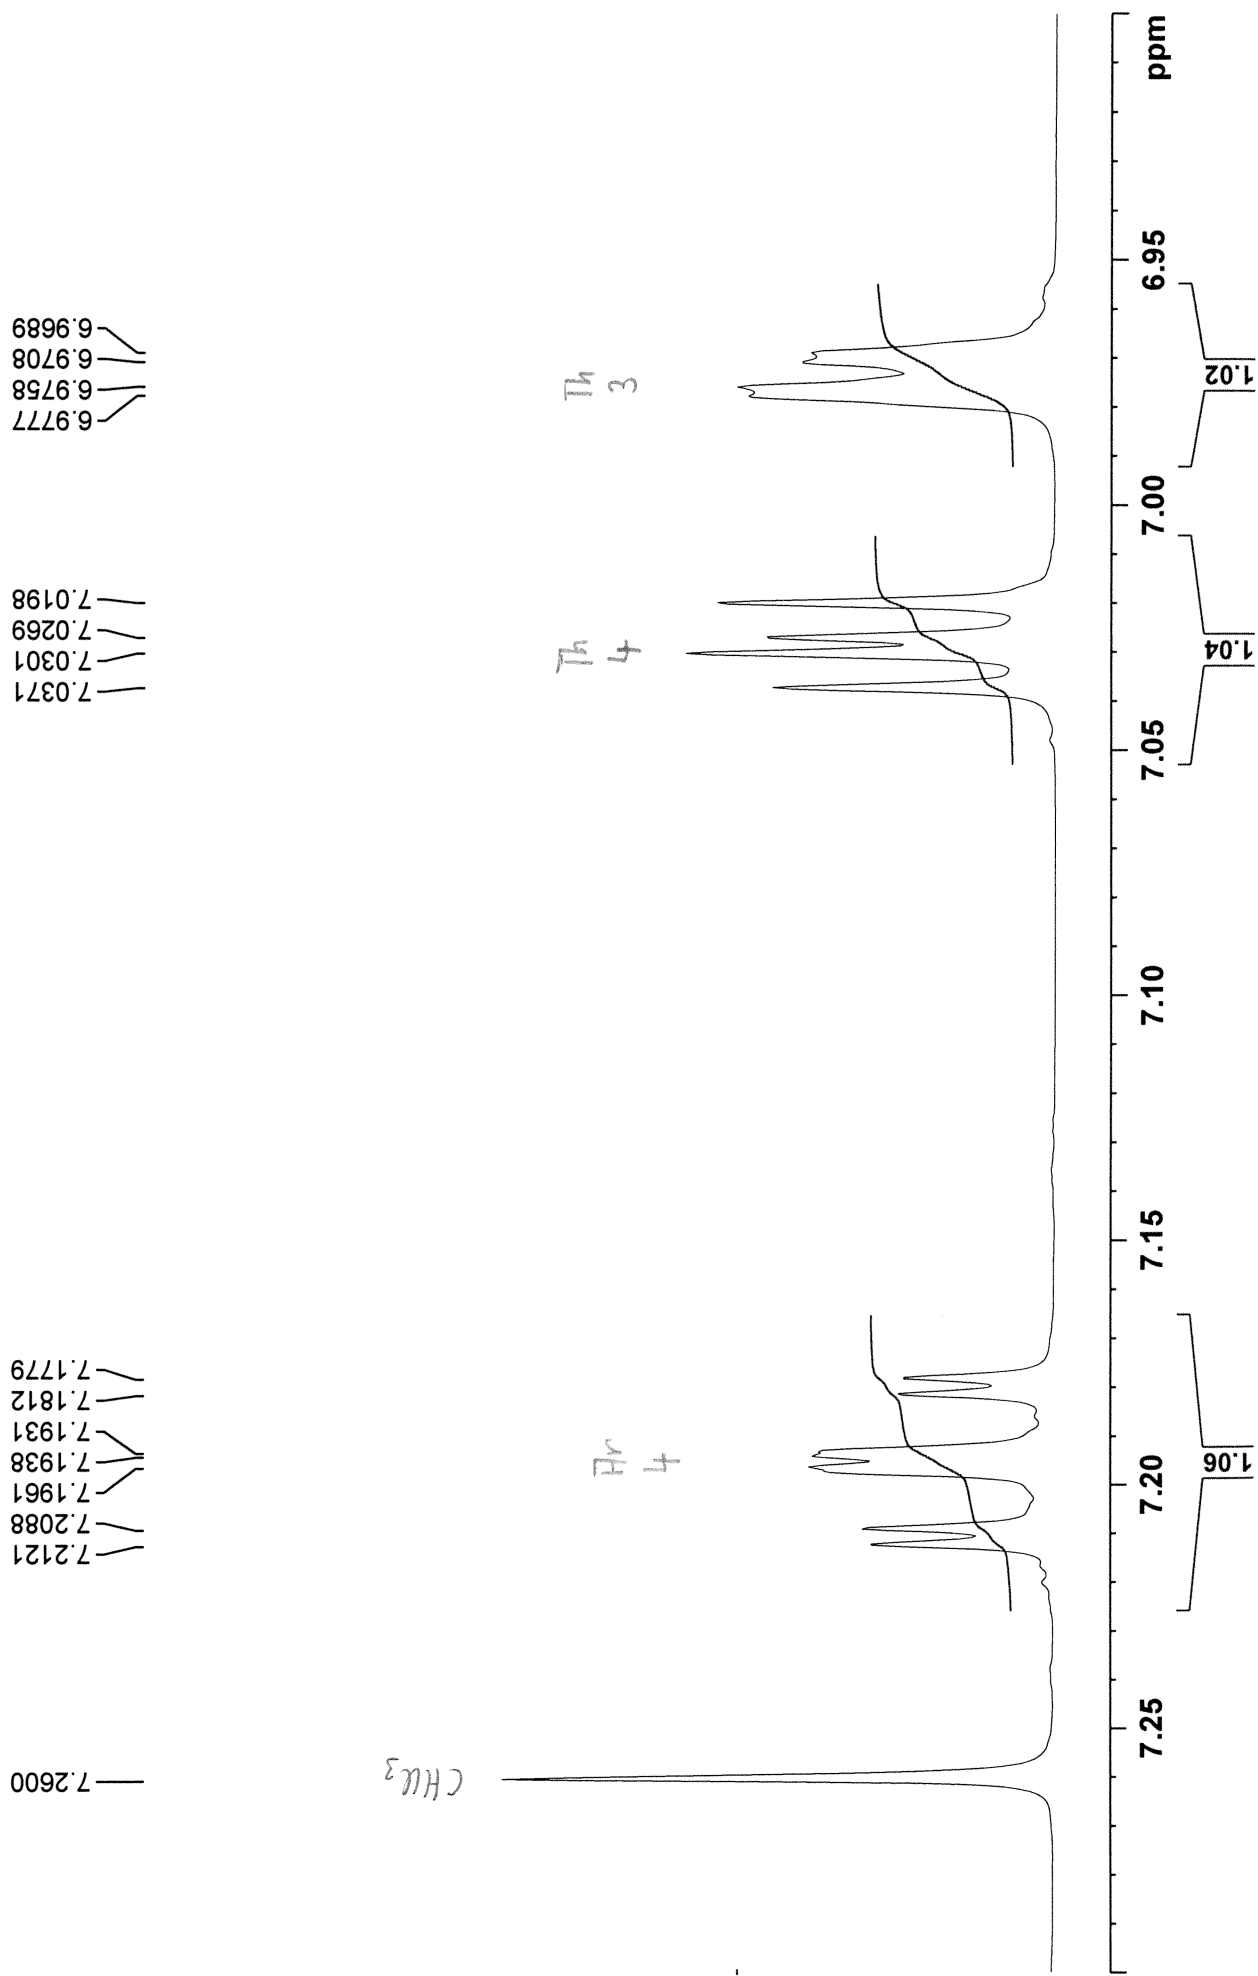

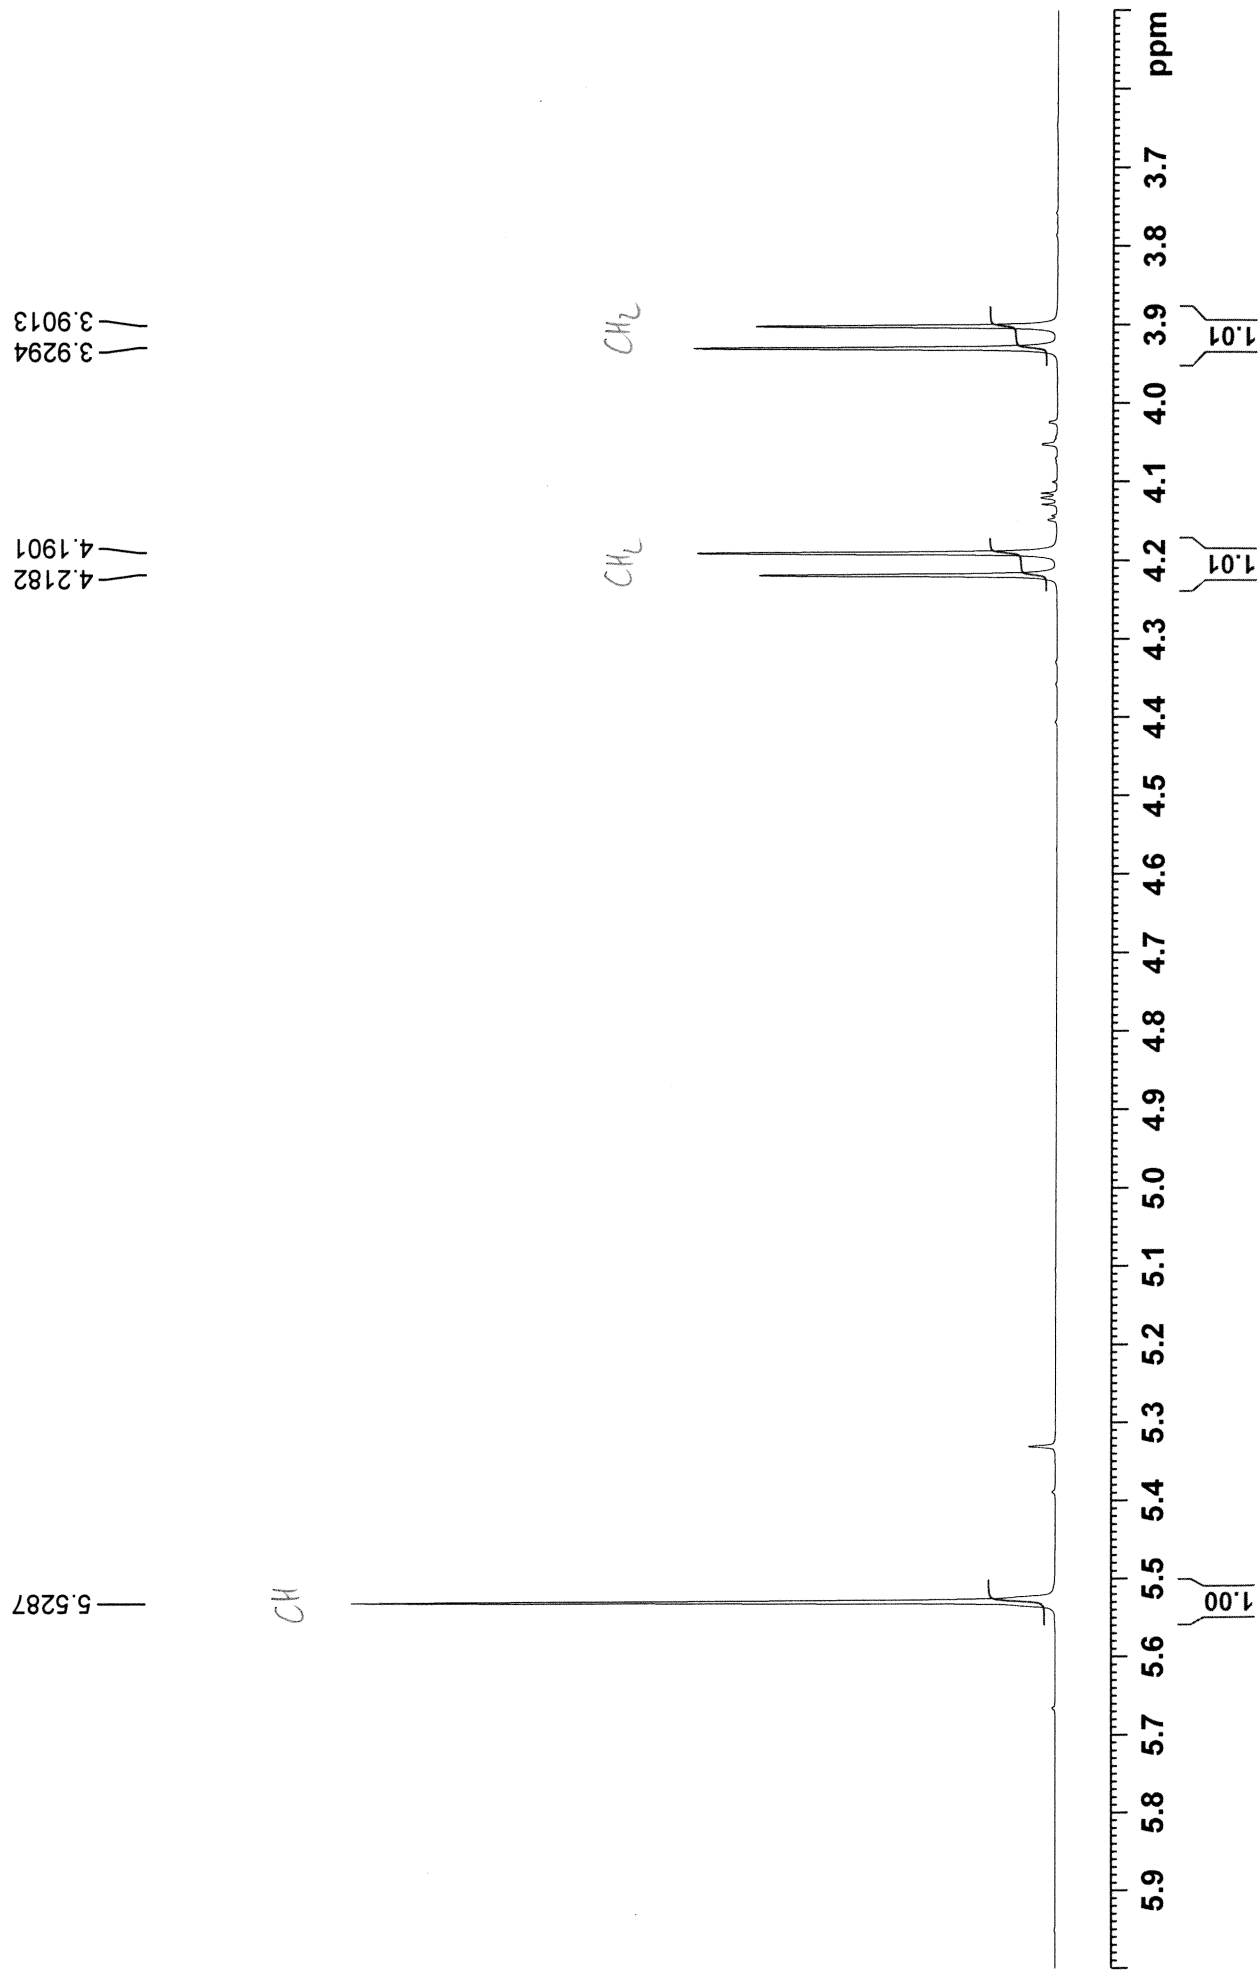



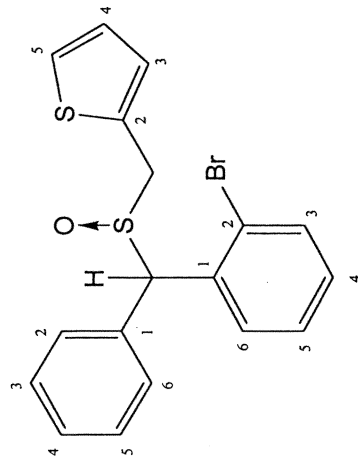

135.1808  
134.6739  
133.3604  
130.4008  
130.2707  
129.5553  
129.2033  
129.1595  
128.9126  
128.4734  
127.9560  
127.3891  
126.9078  
125.9159

77.0000  
67.2230  
50.4719

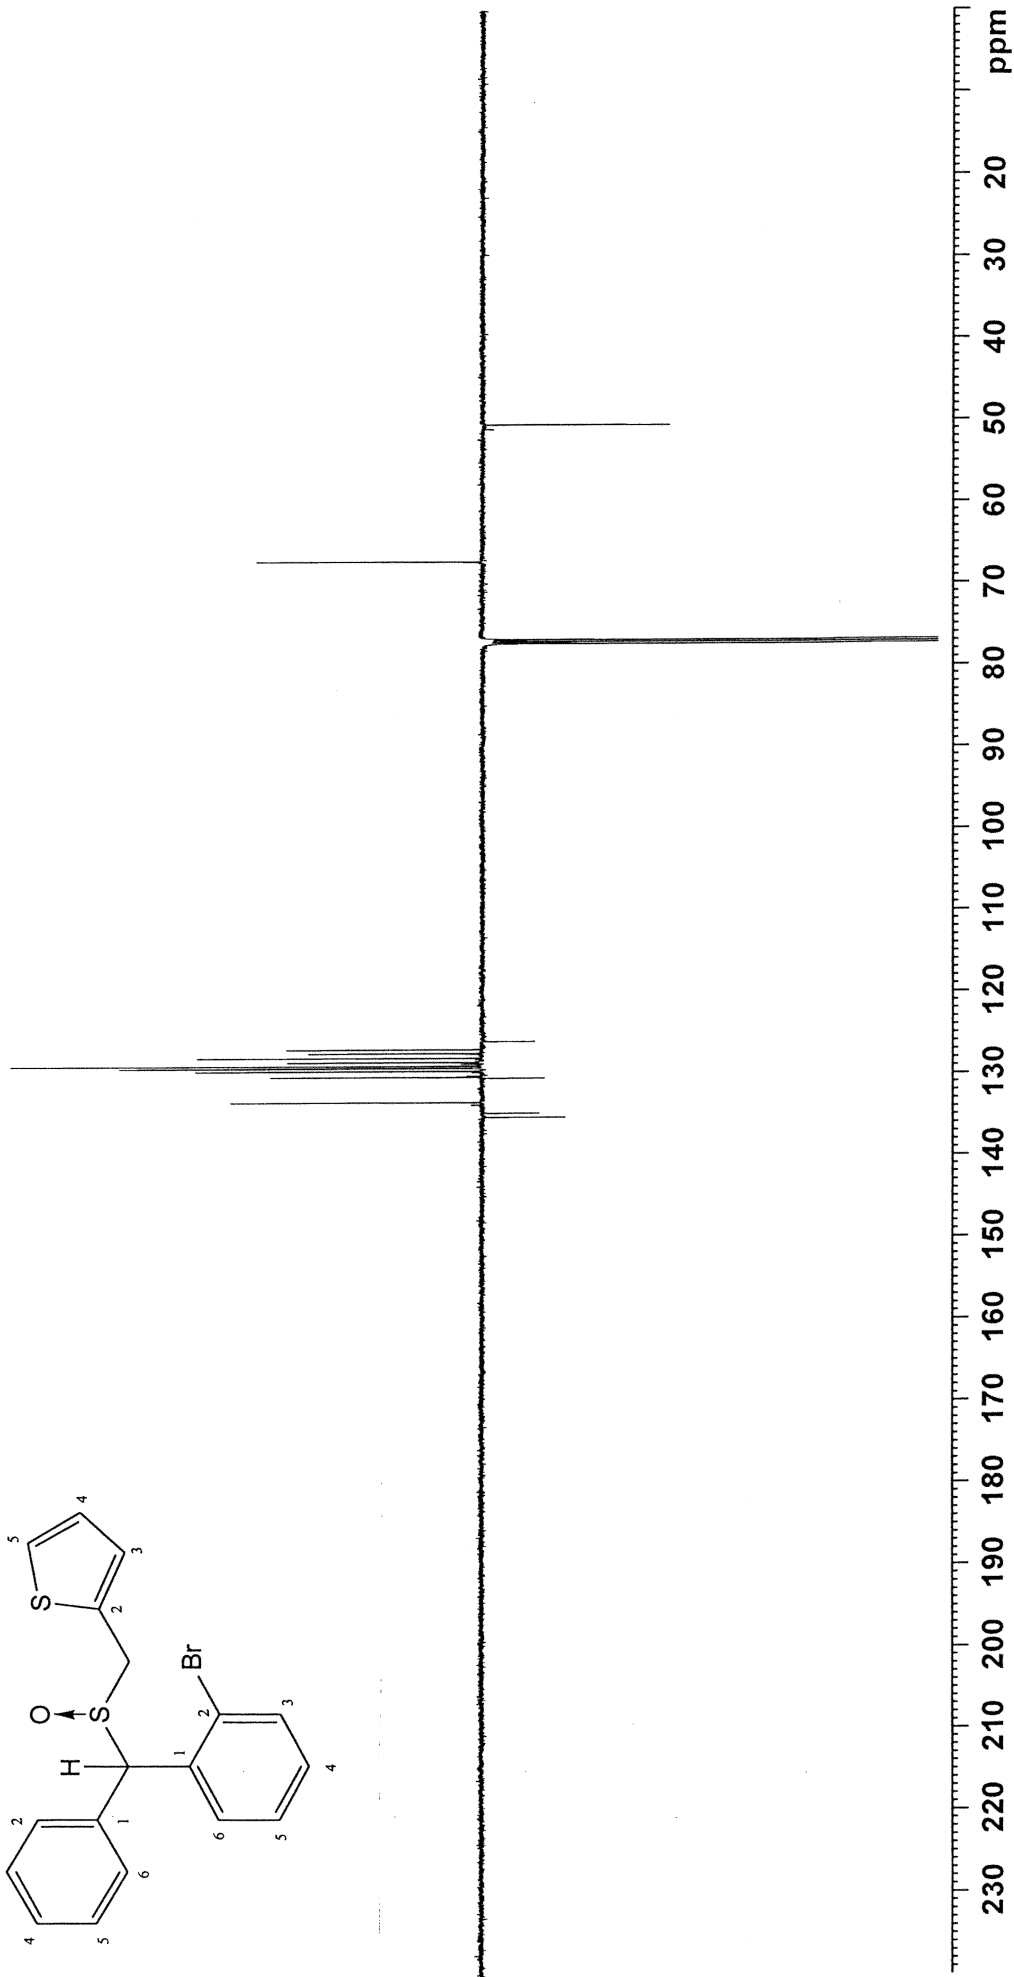

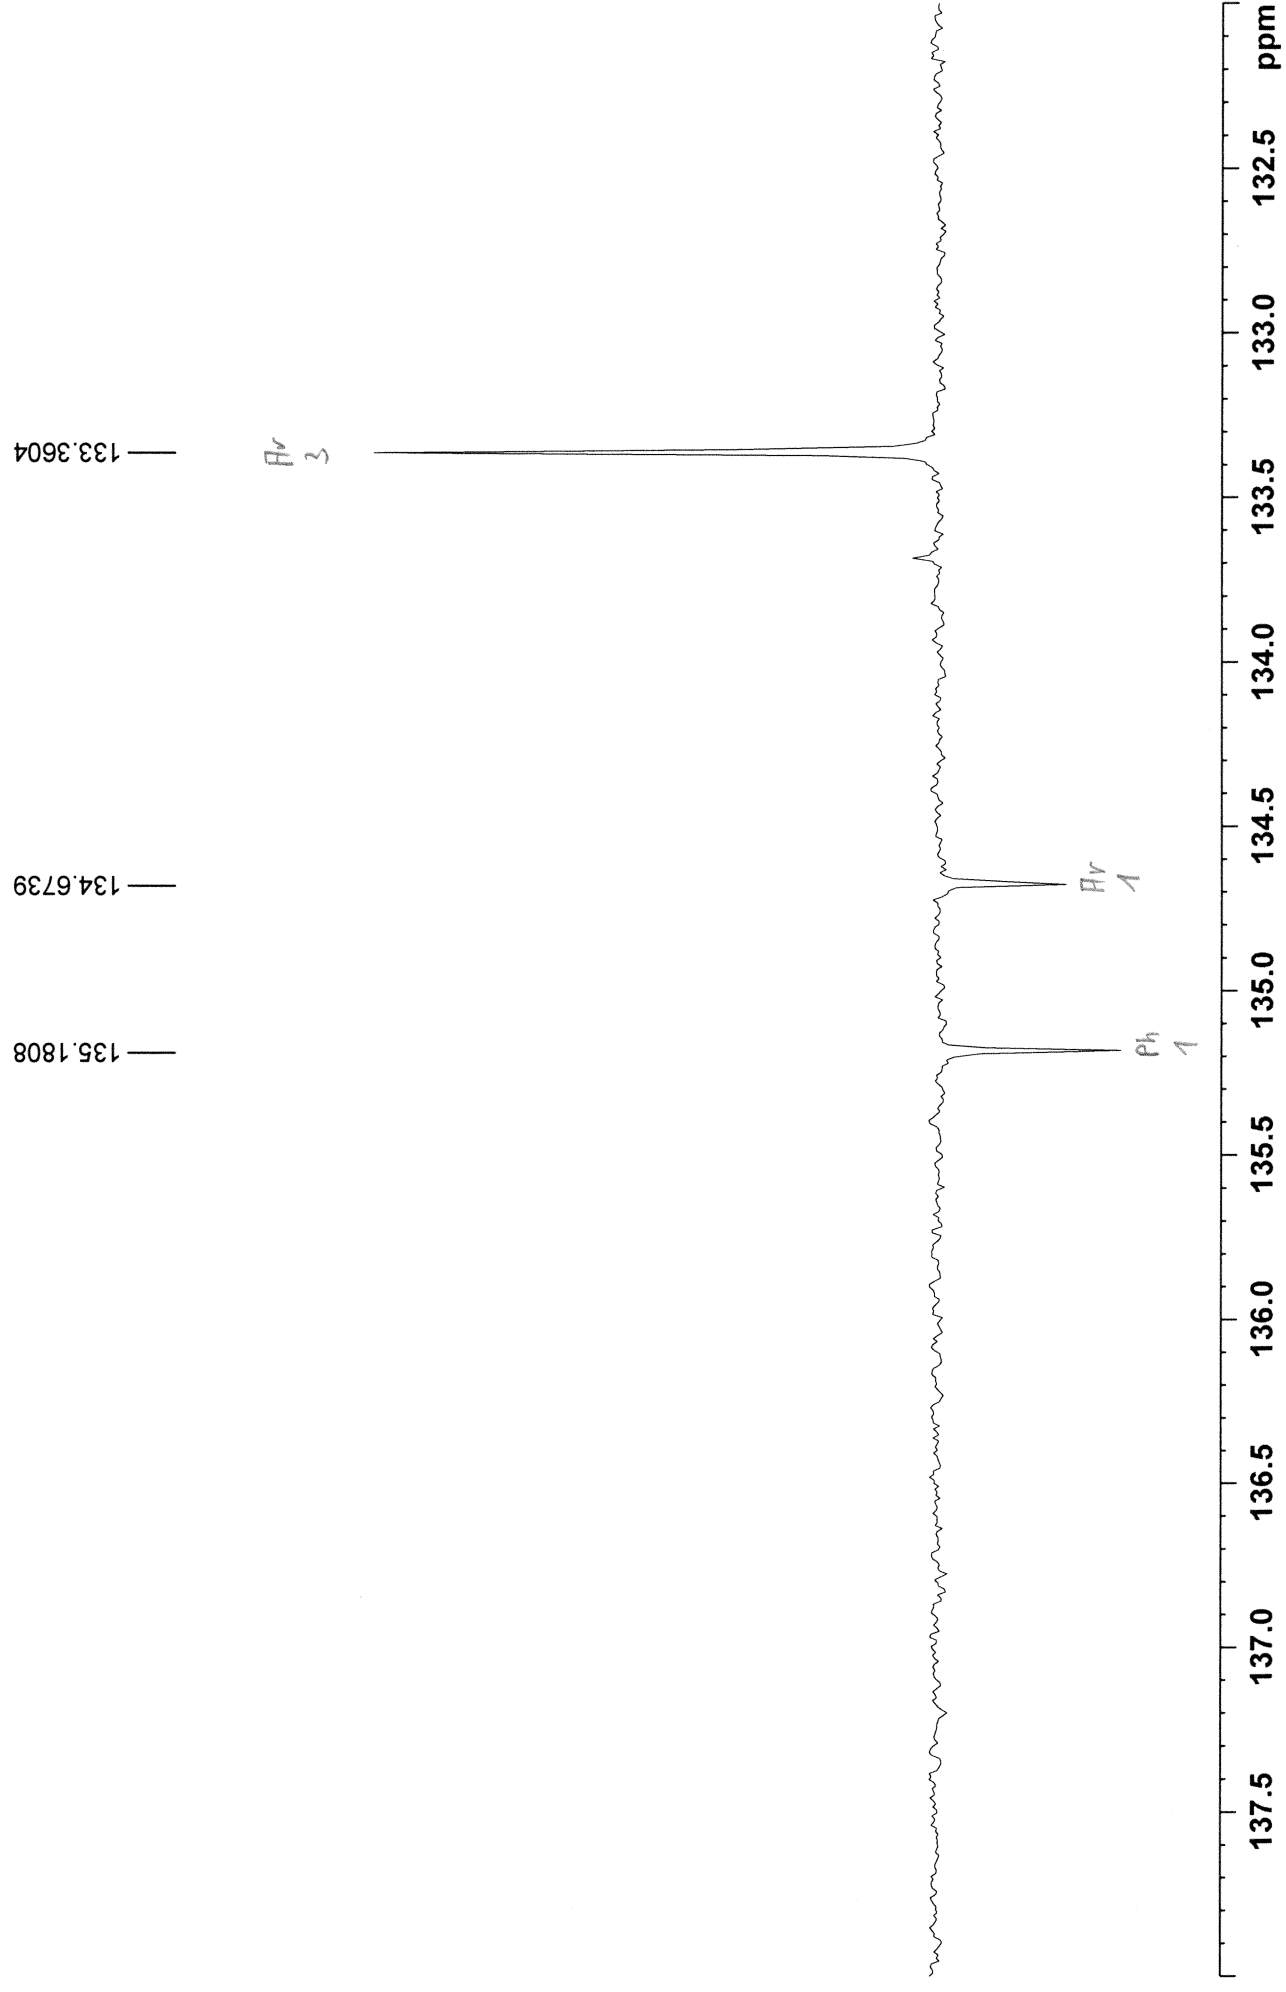

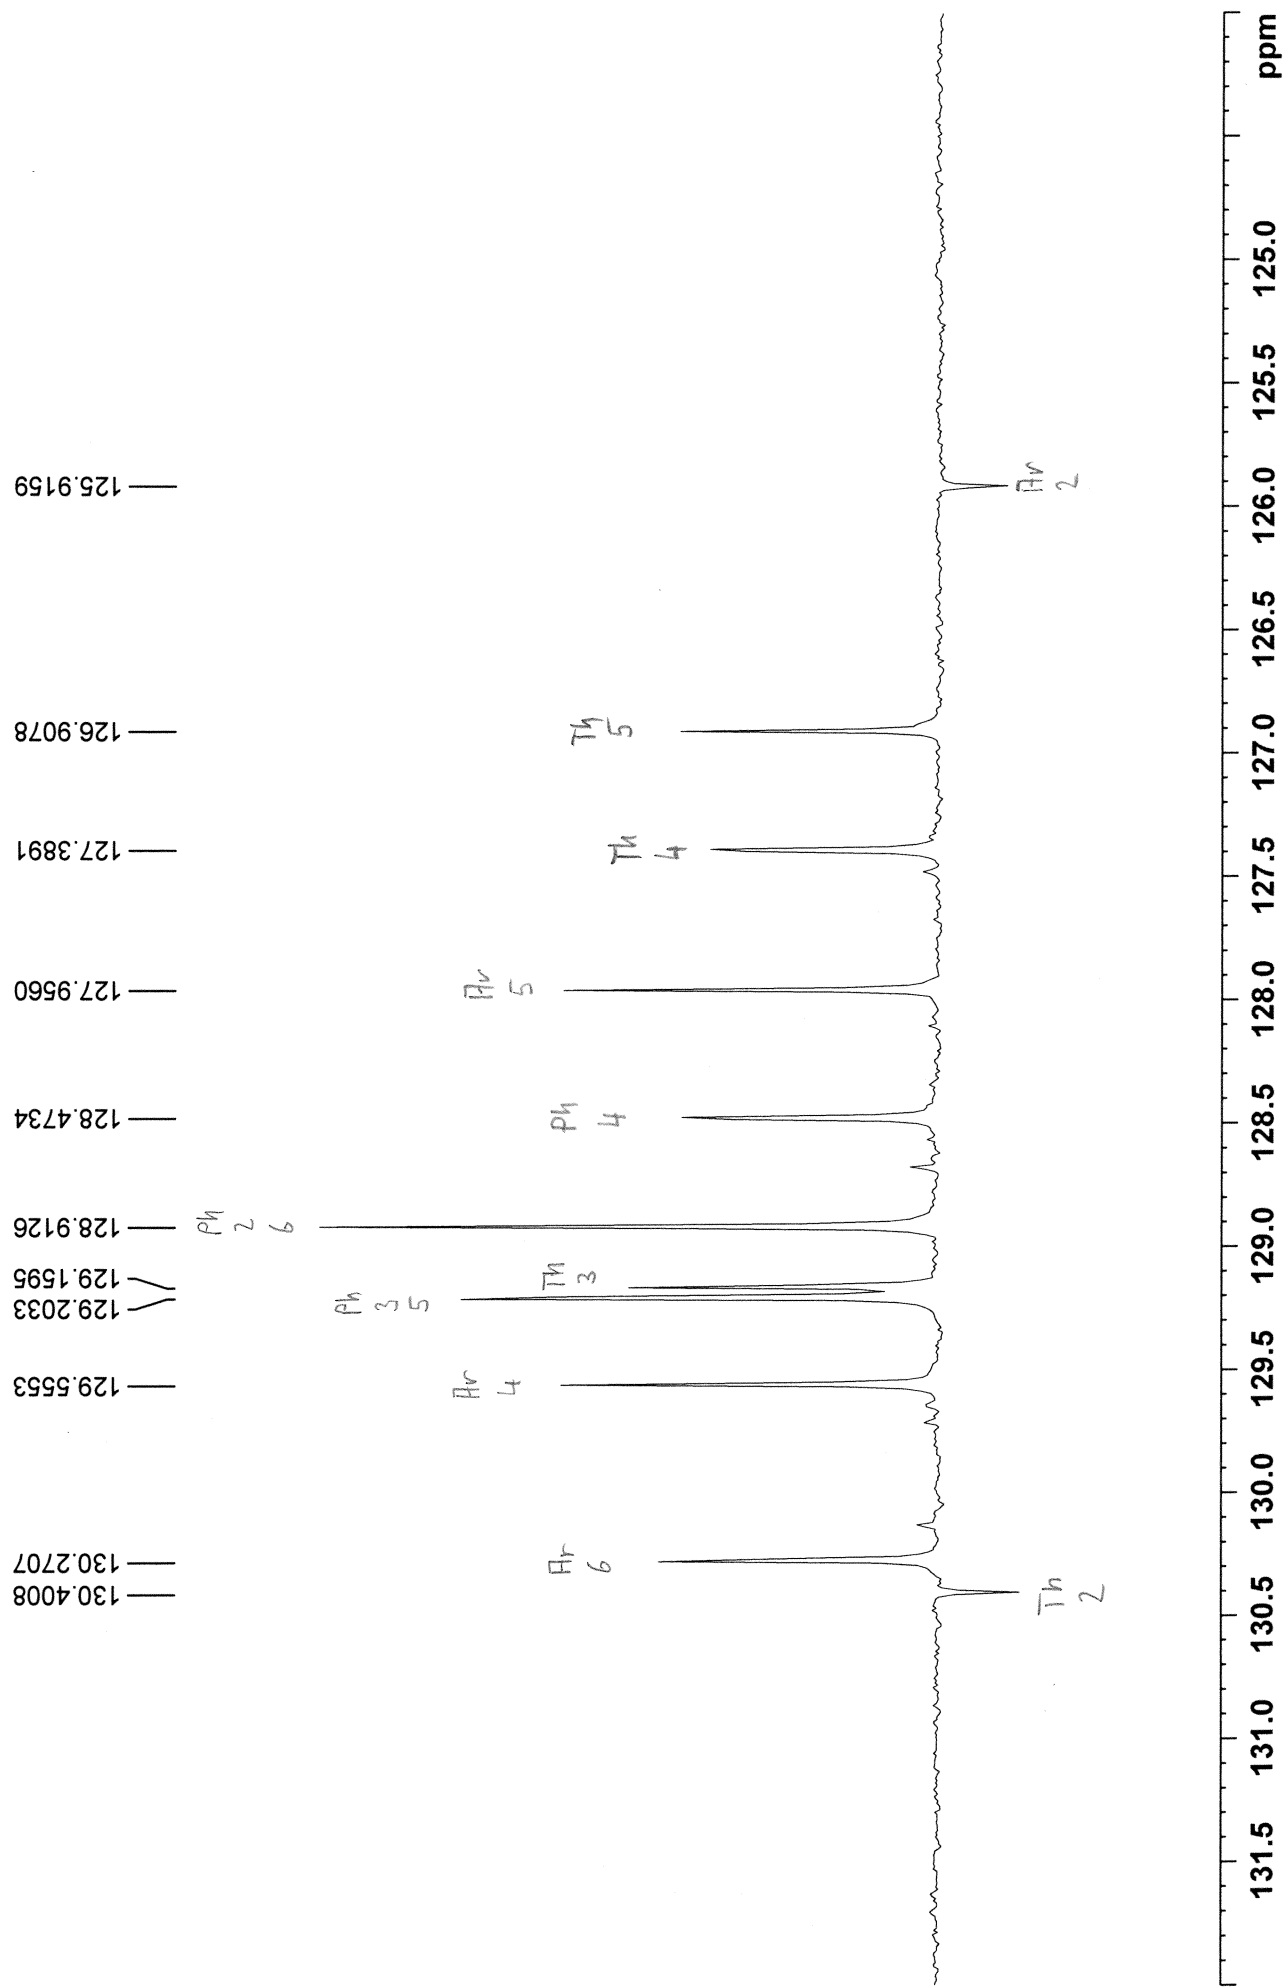

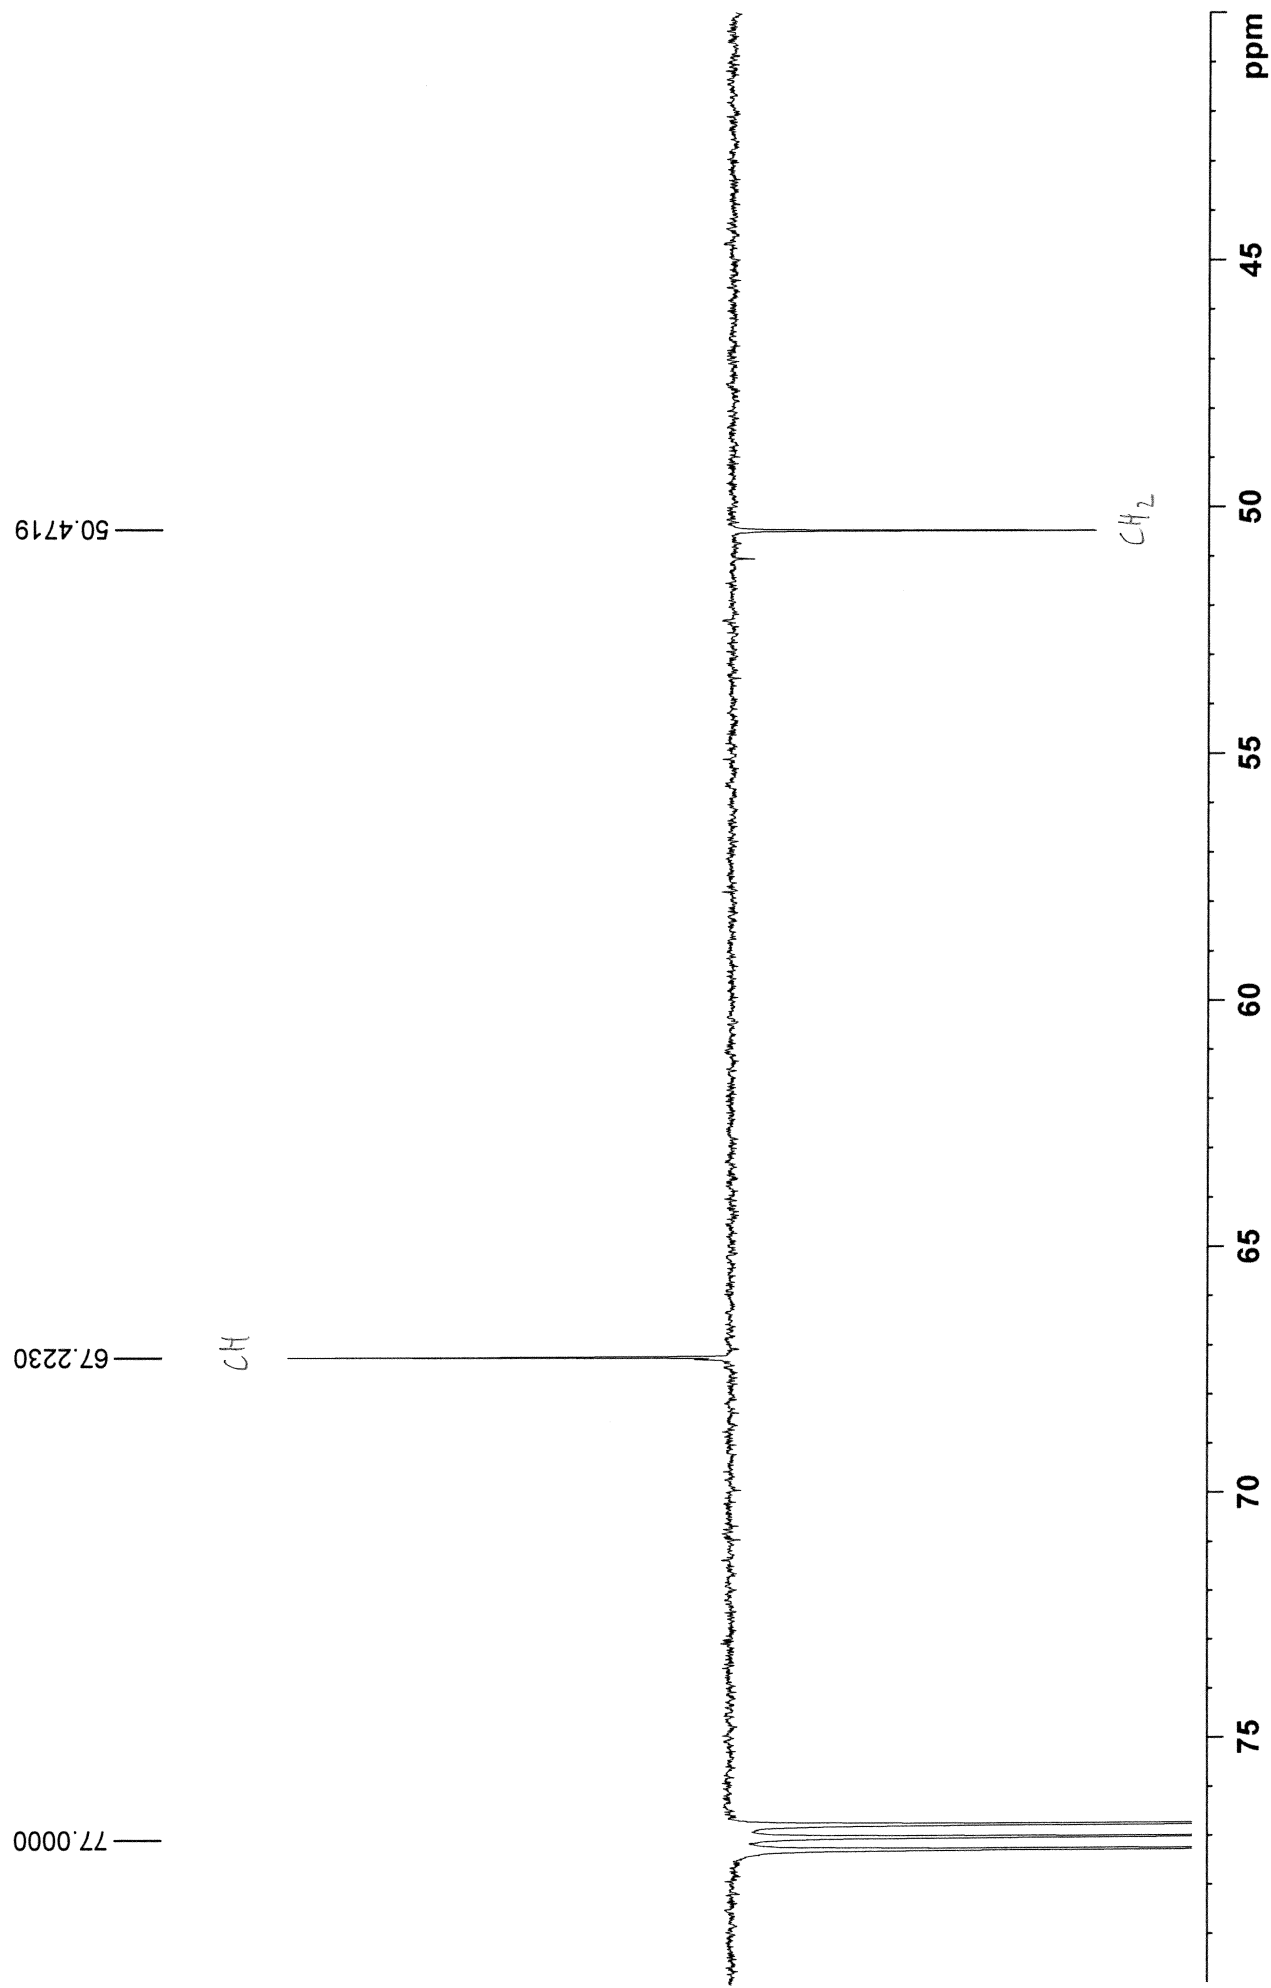

PN014p3 in cdcl3 (COSY) 11.3.2021

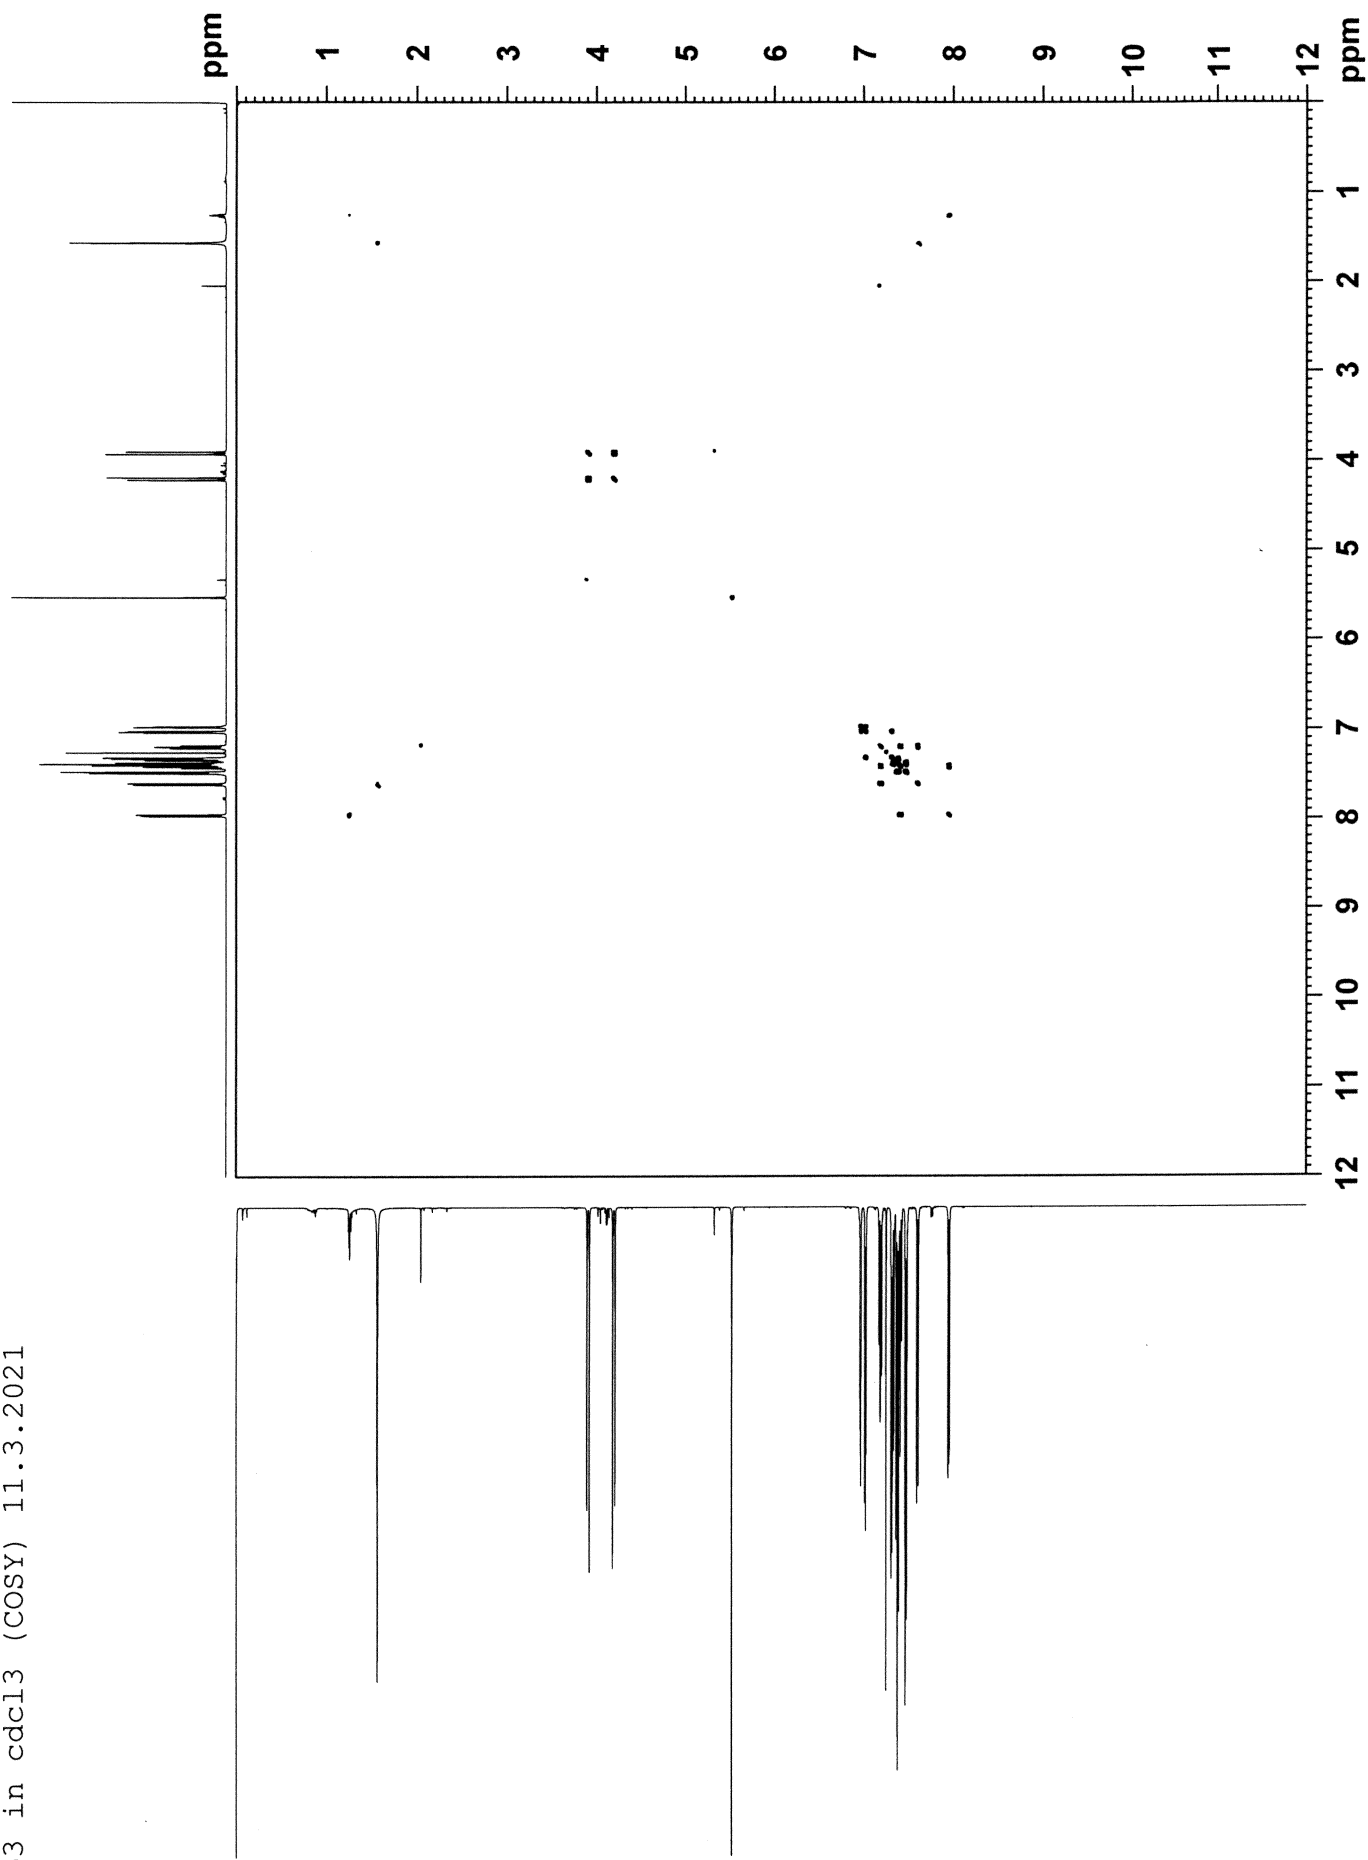

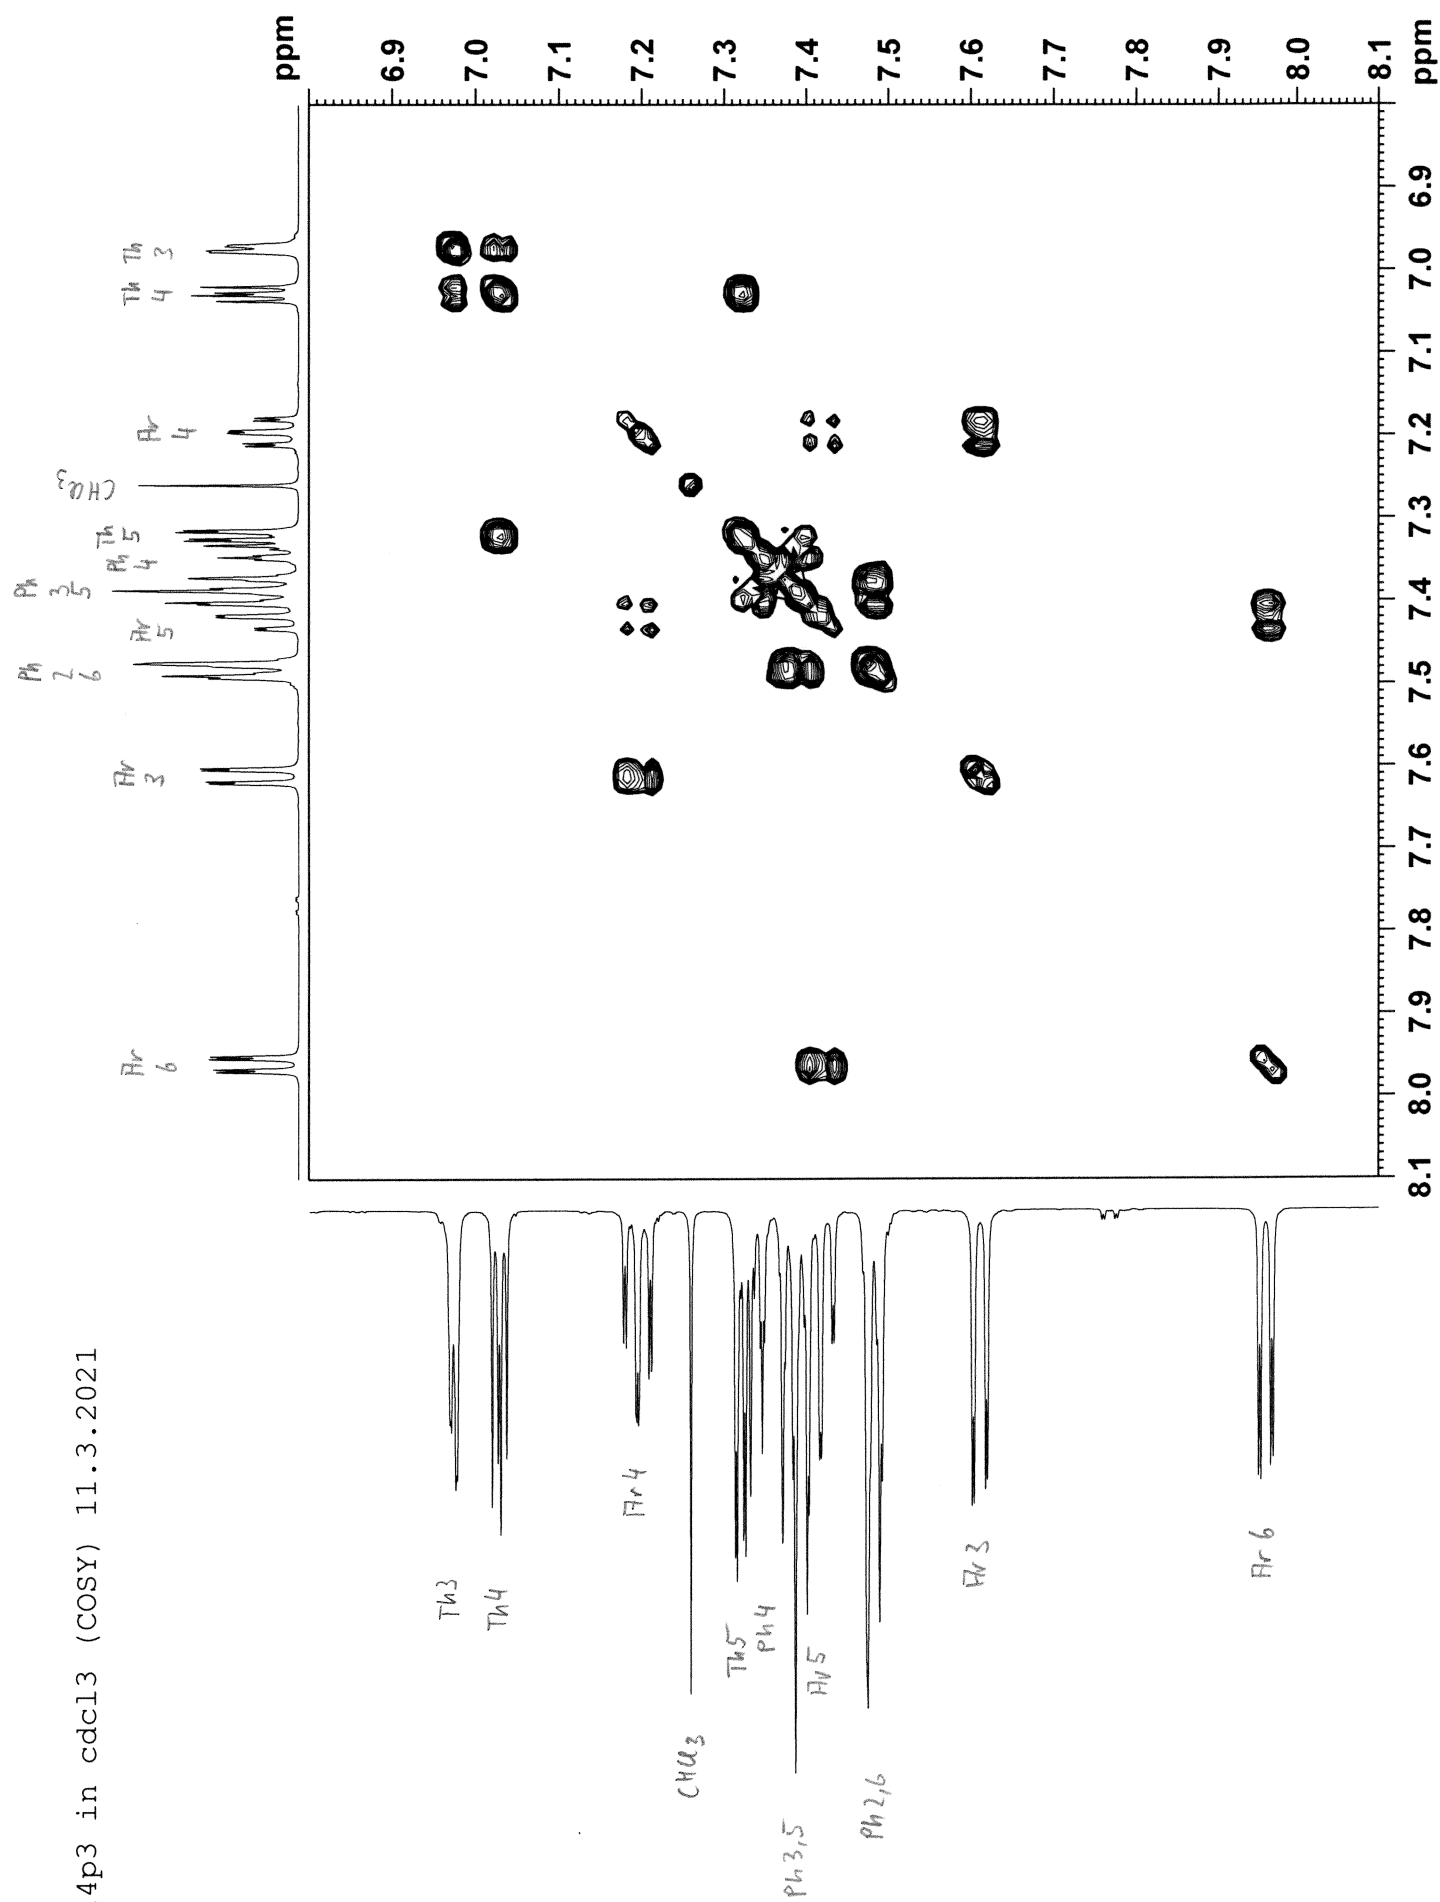

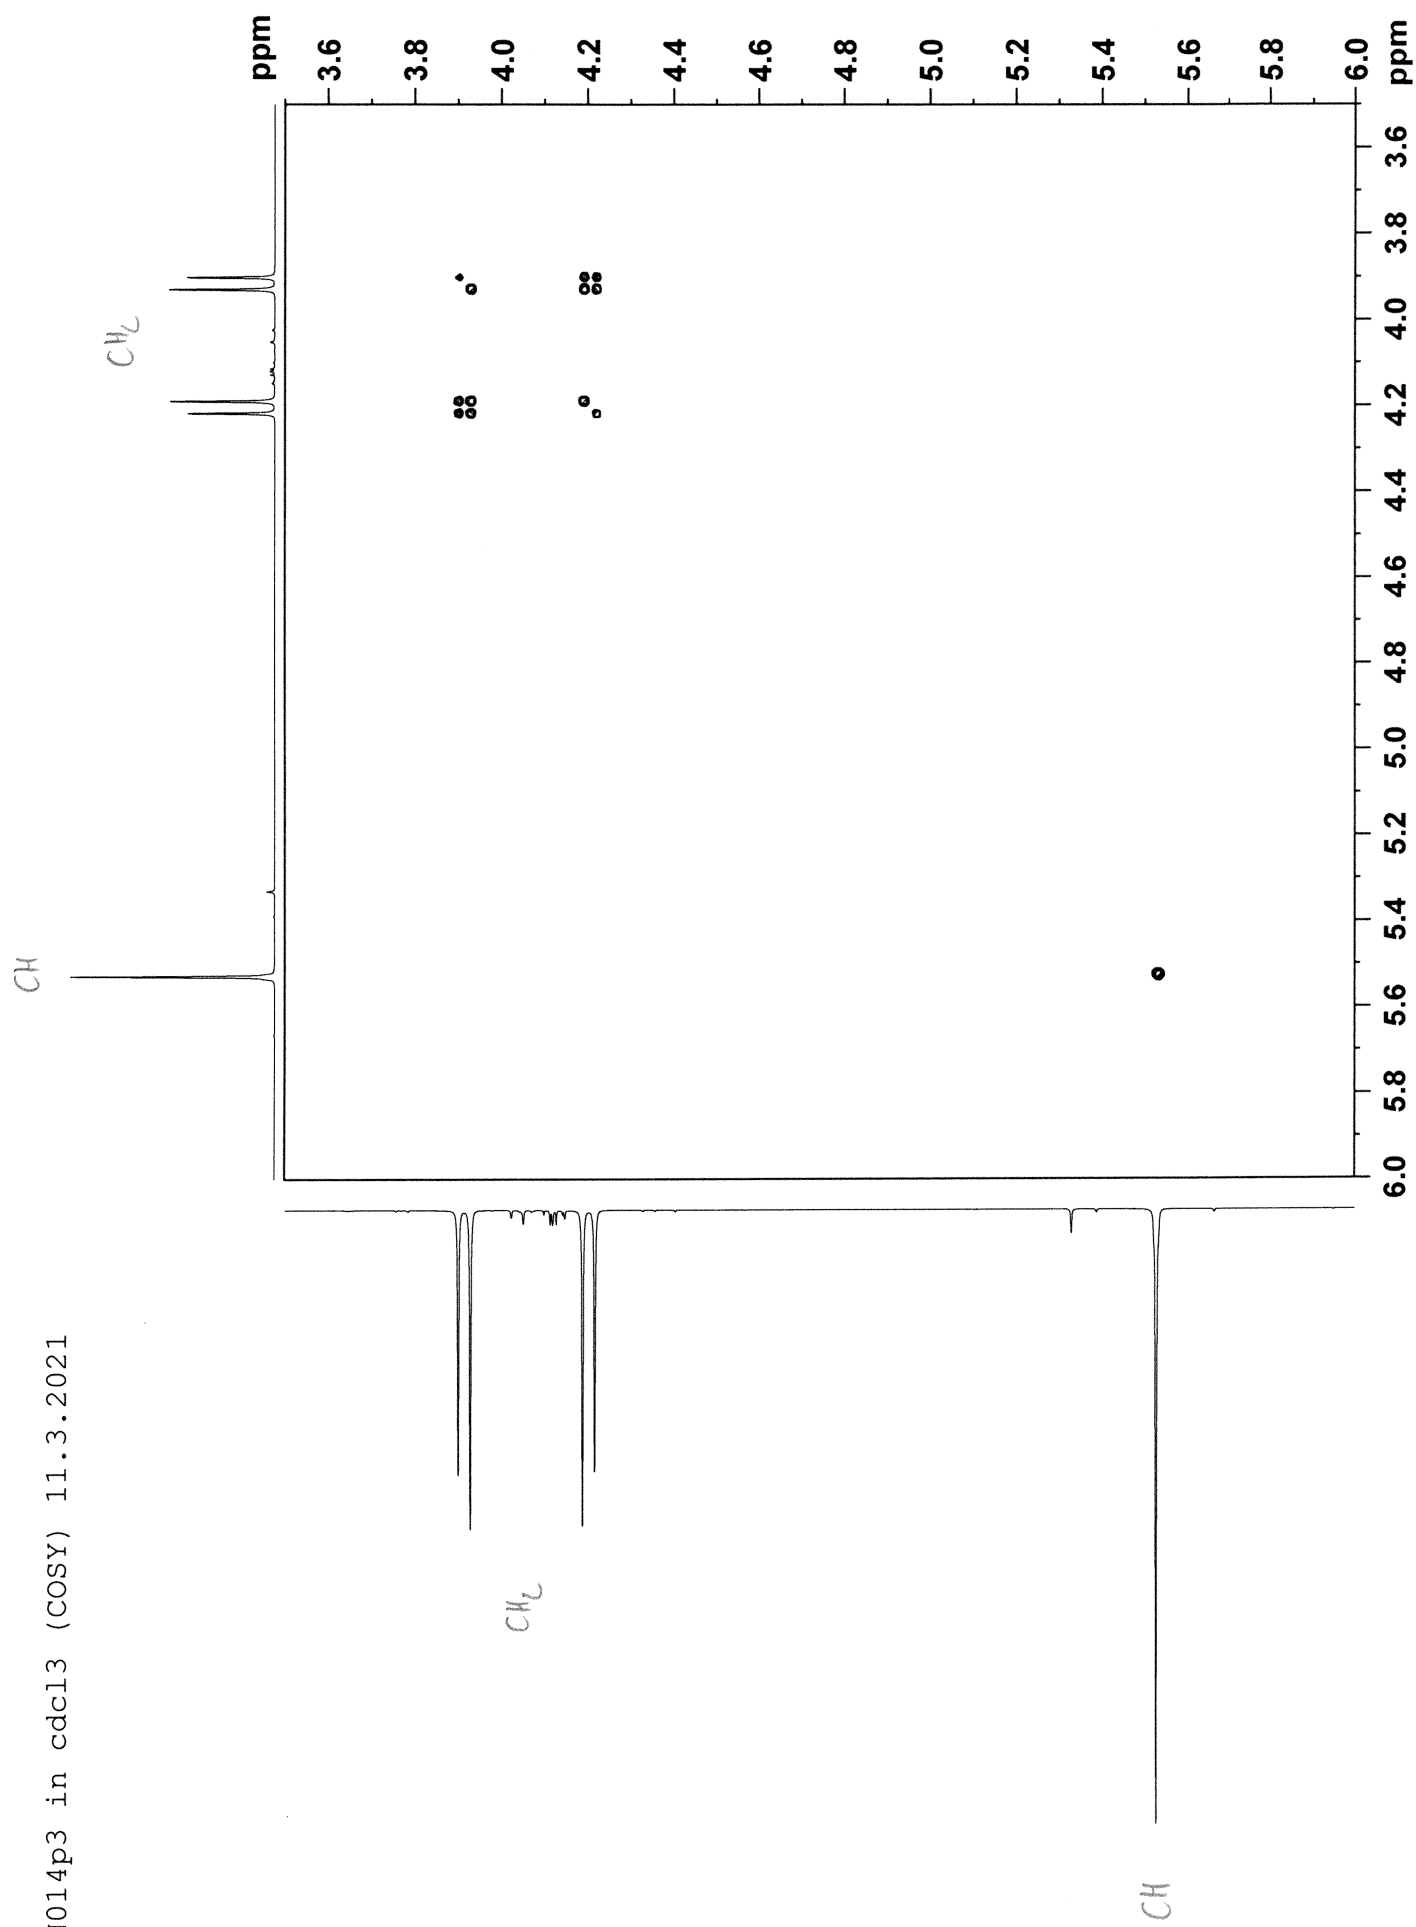

PN014p3 in cdcl3 (HSQC) 11.3.2021

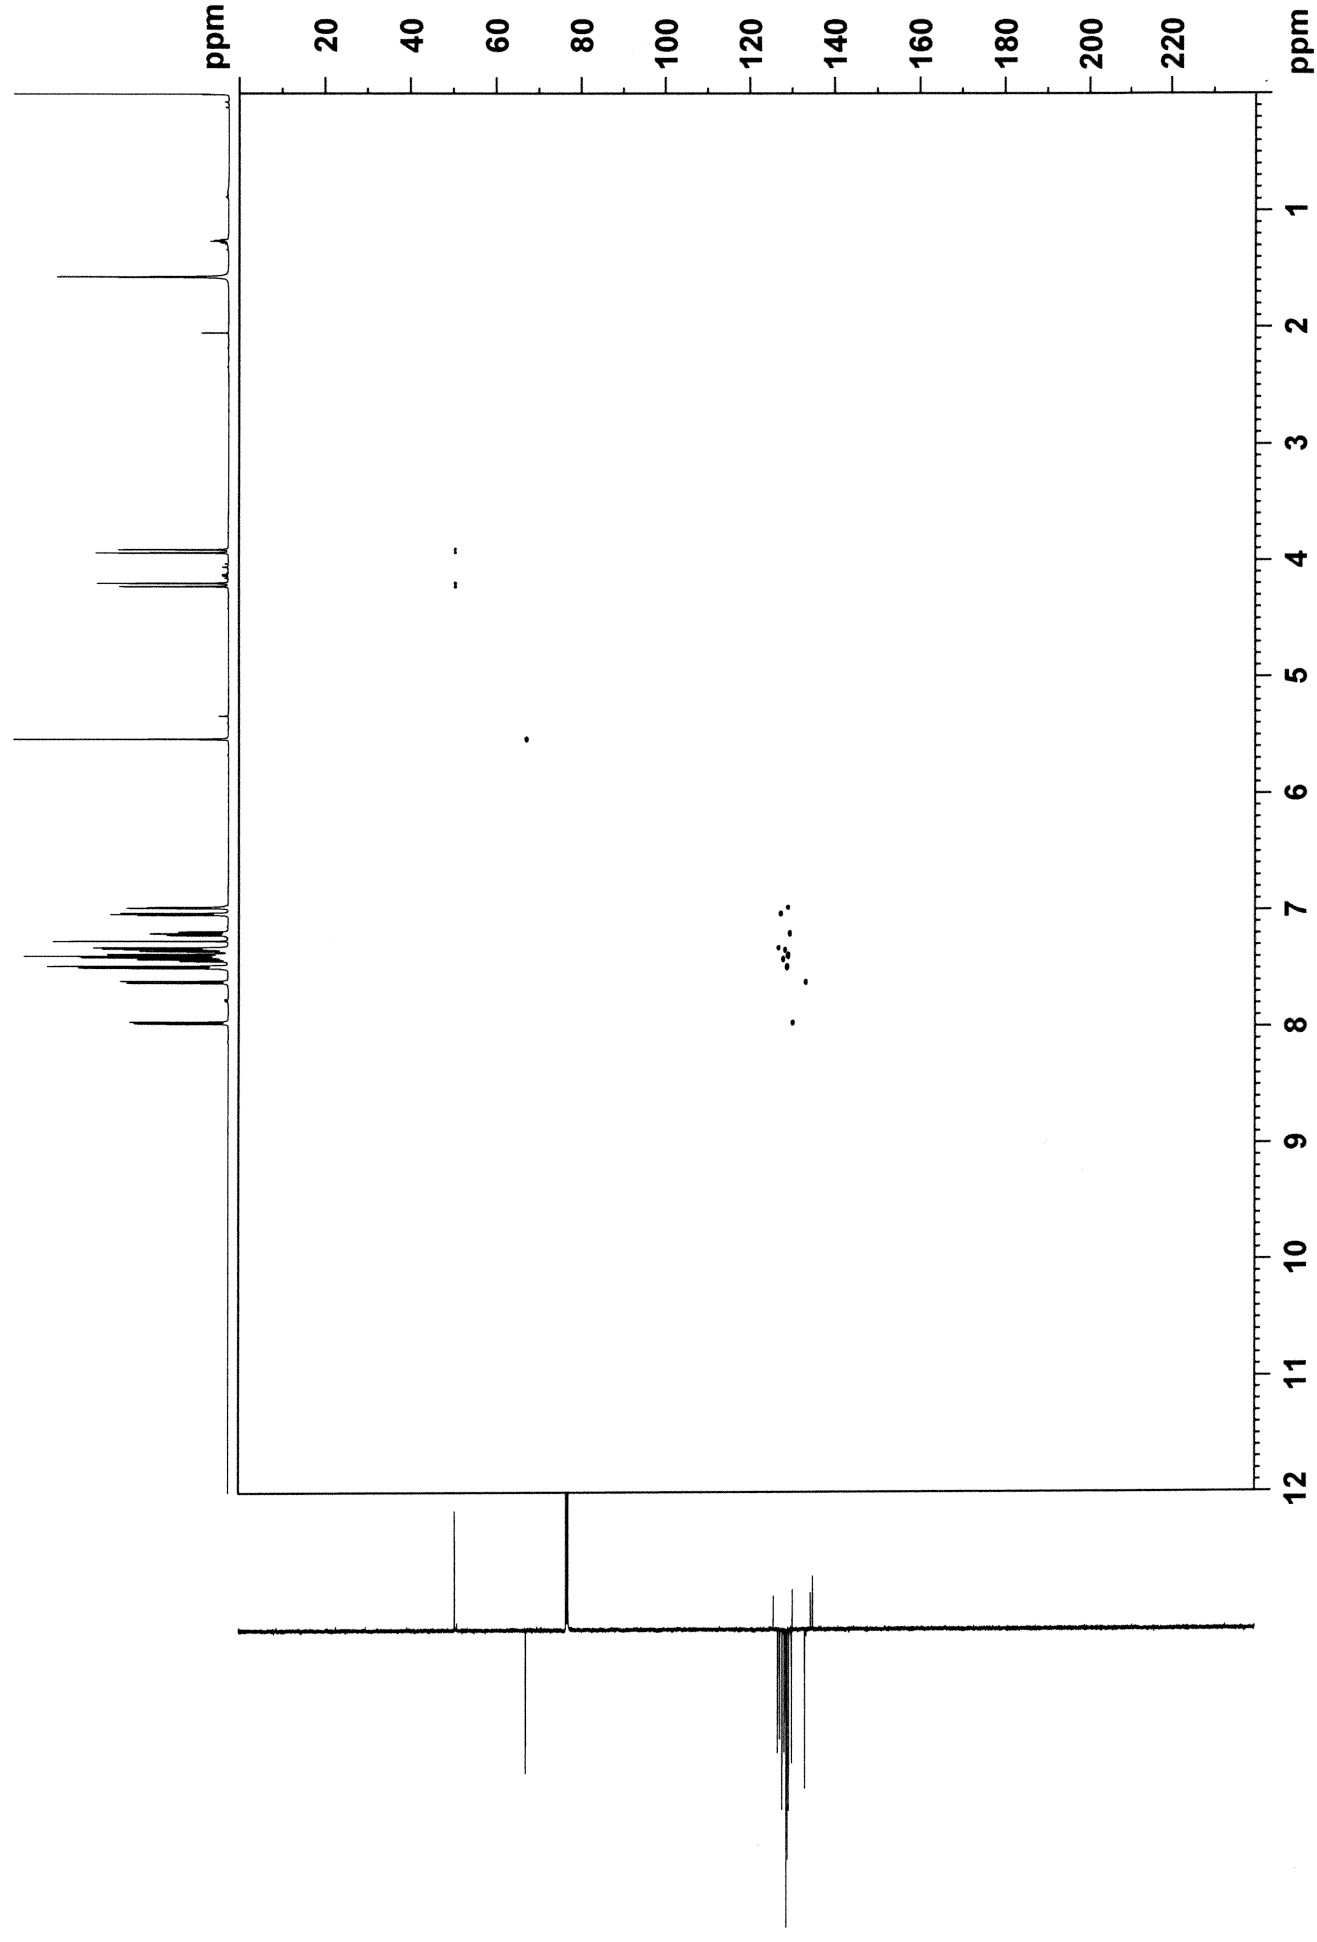



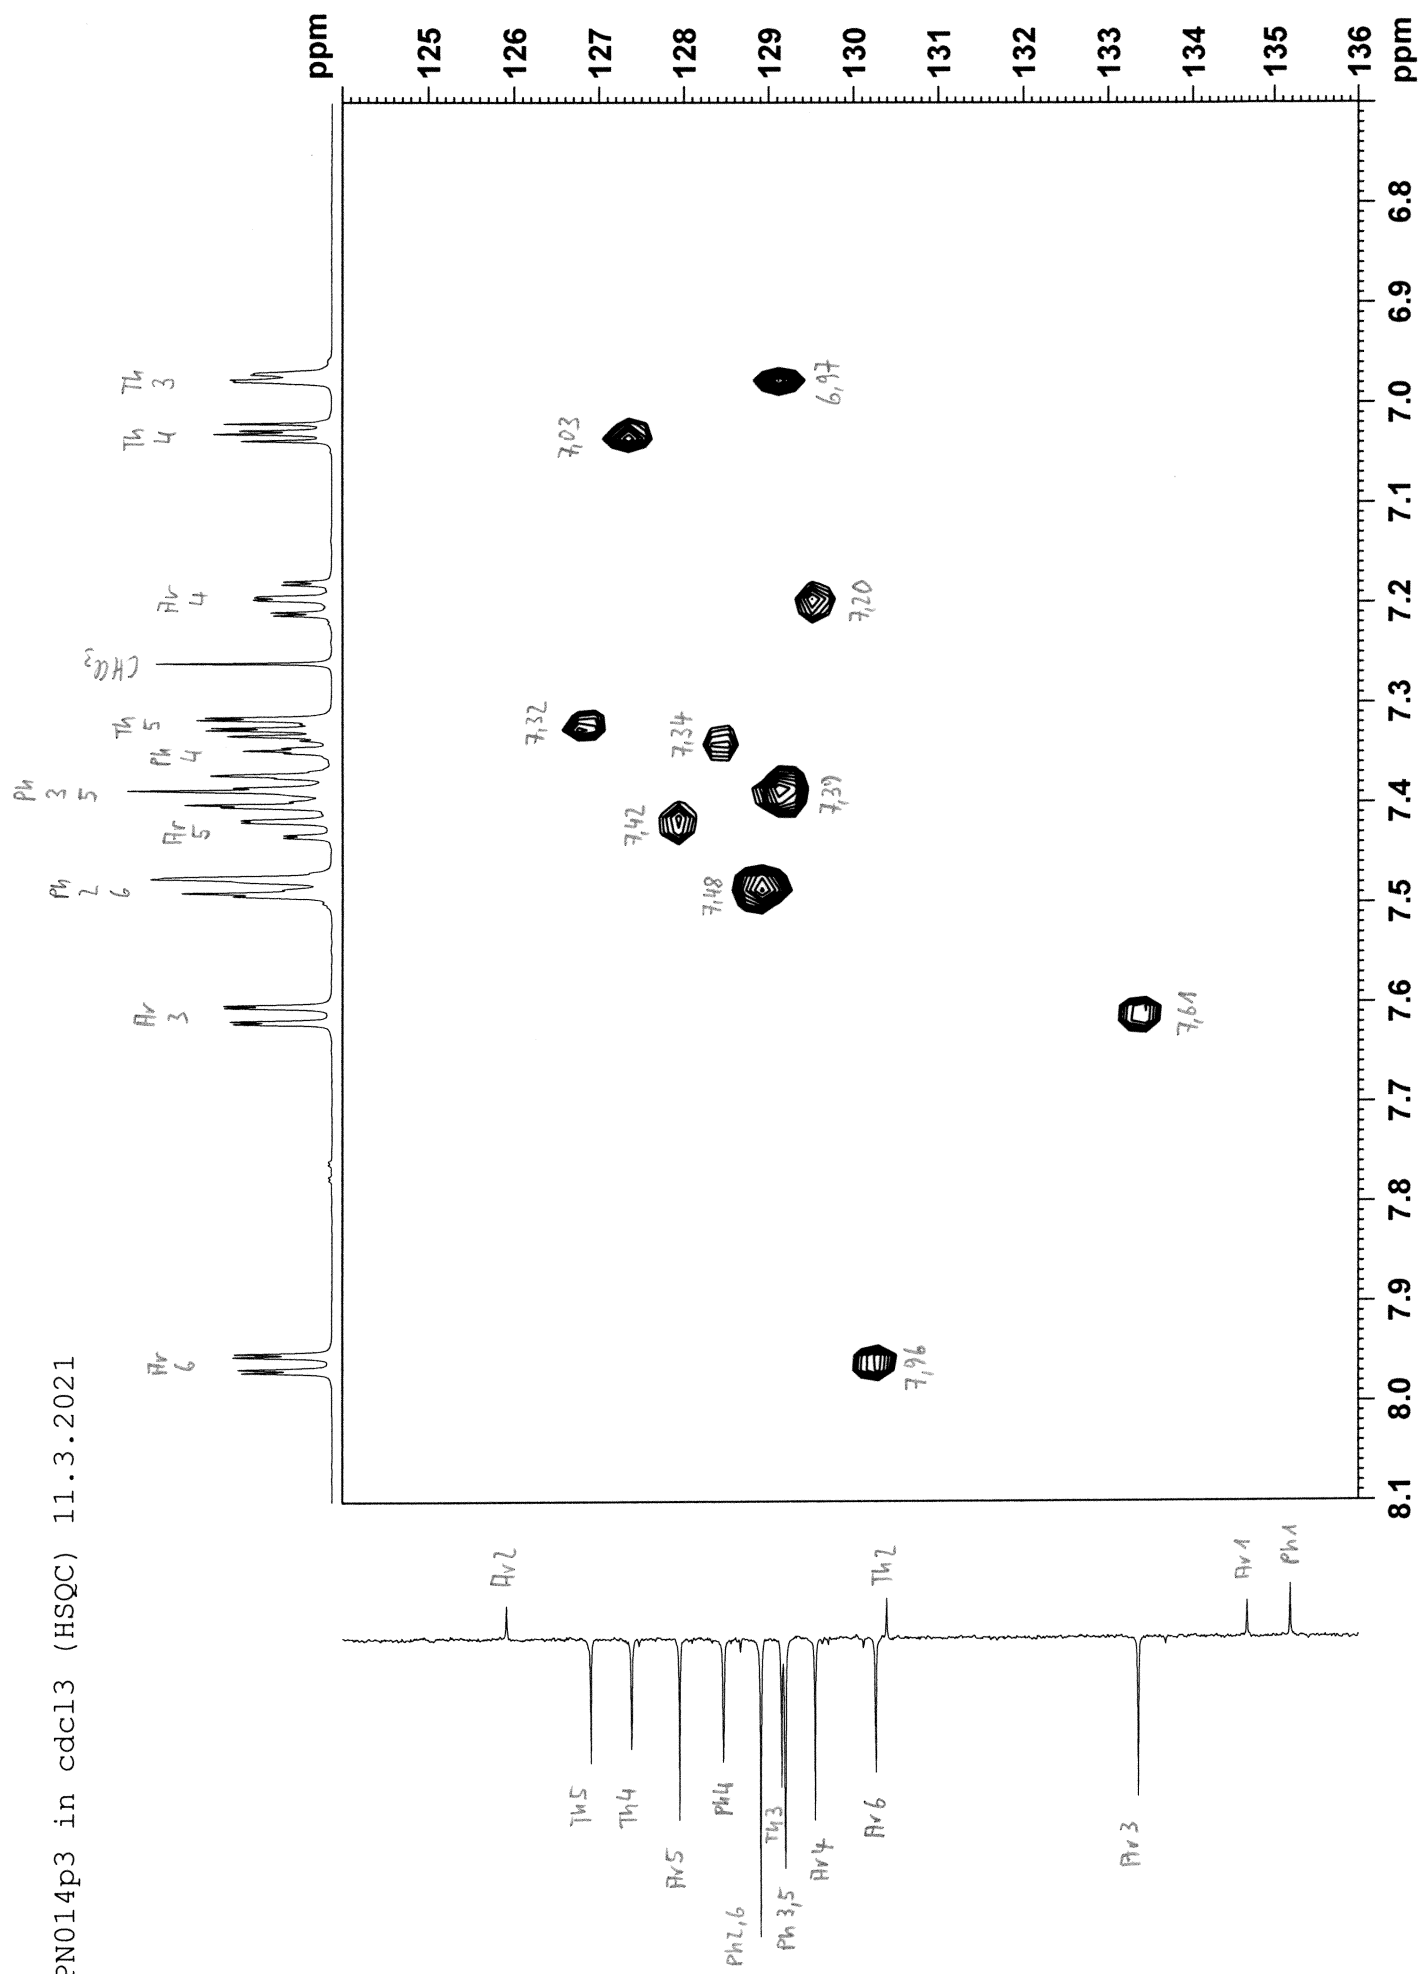

PN014p3 in cdcl3 (HSQC) 11.3.2021

CH

CH<sub>2</sub>

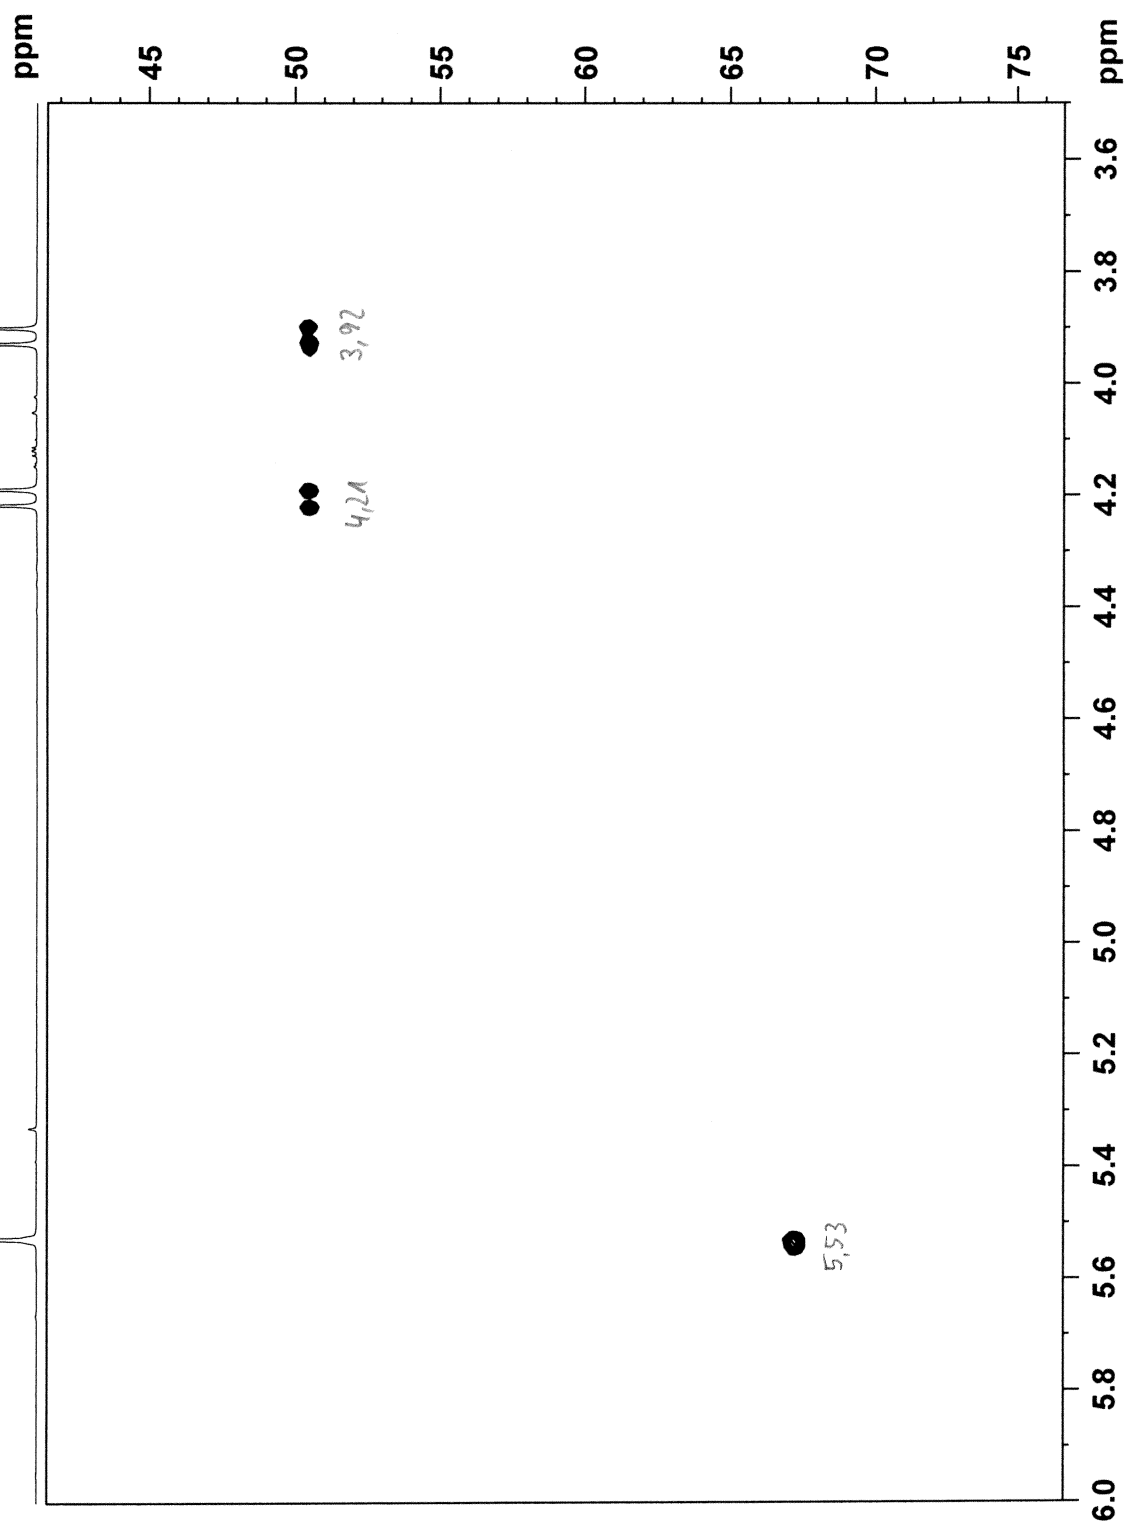

PN014p3 in cdcl3 (HMBC) 11.3.2021

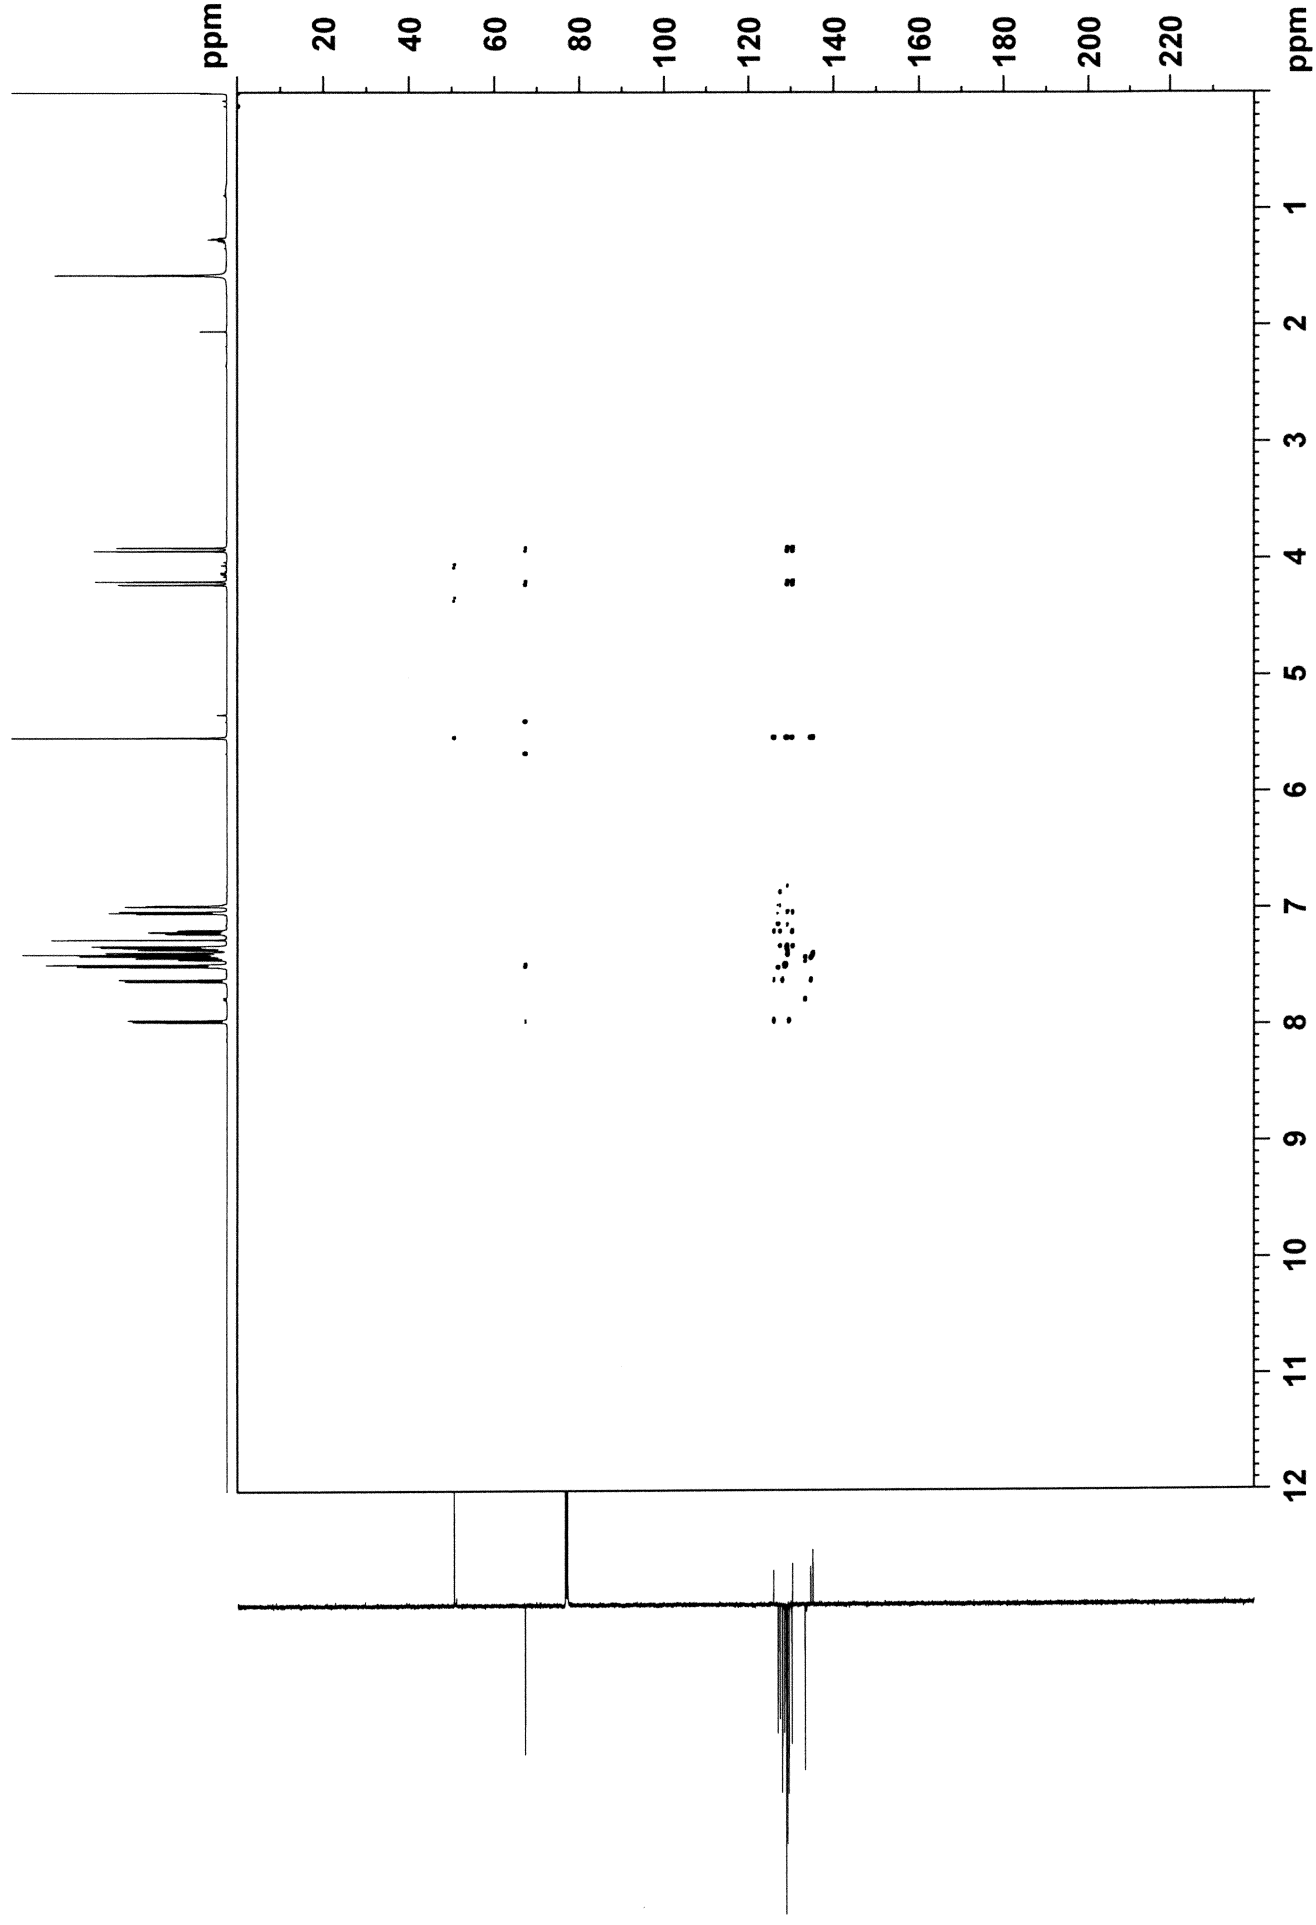

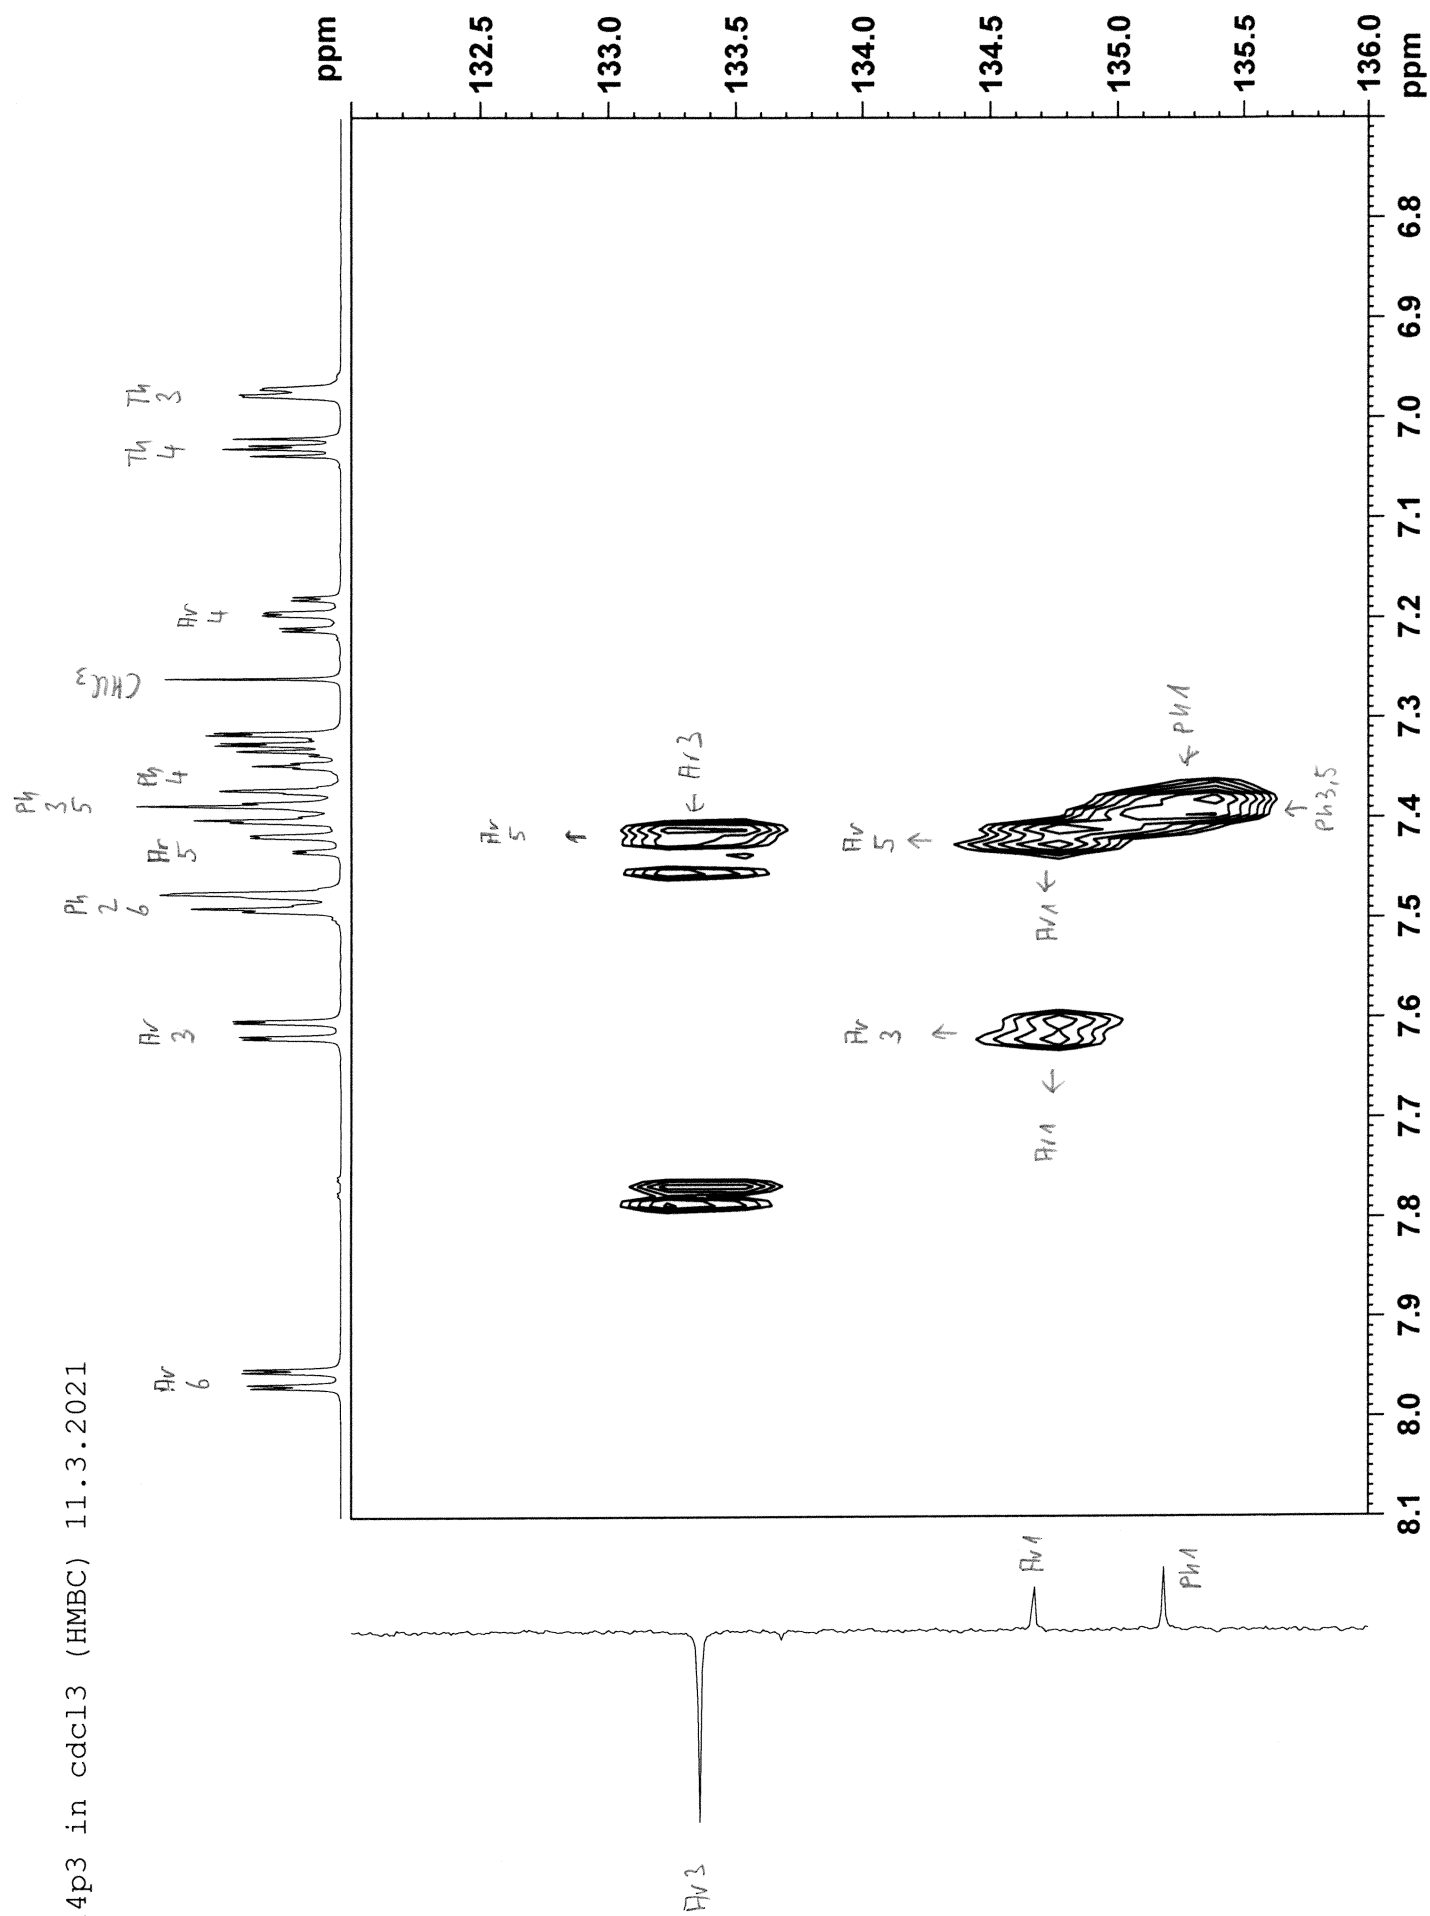

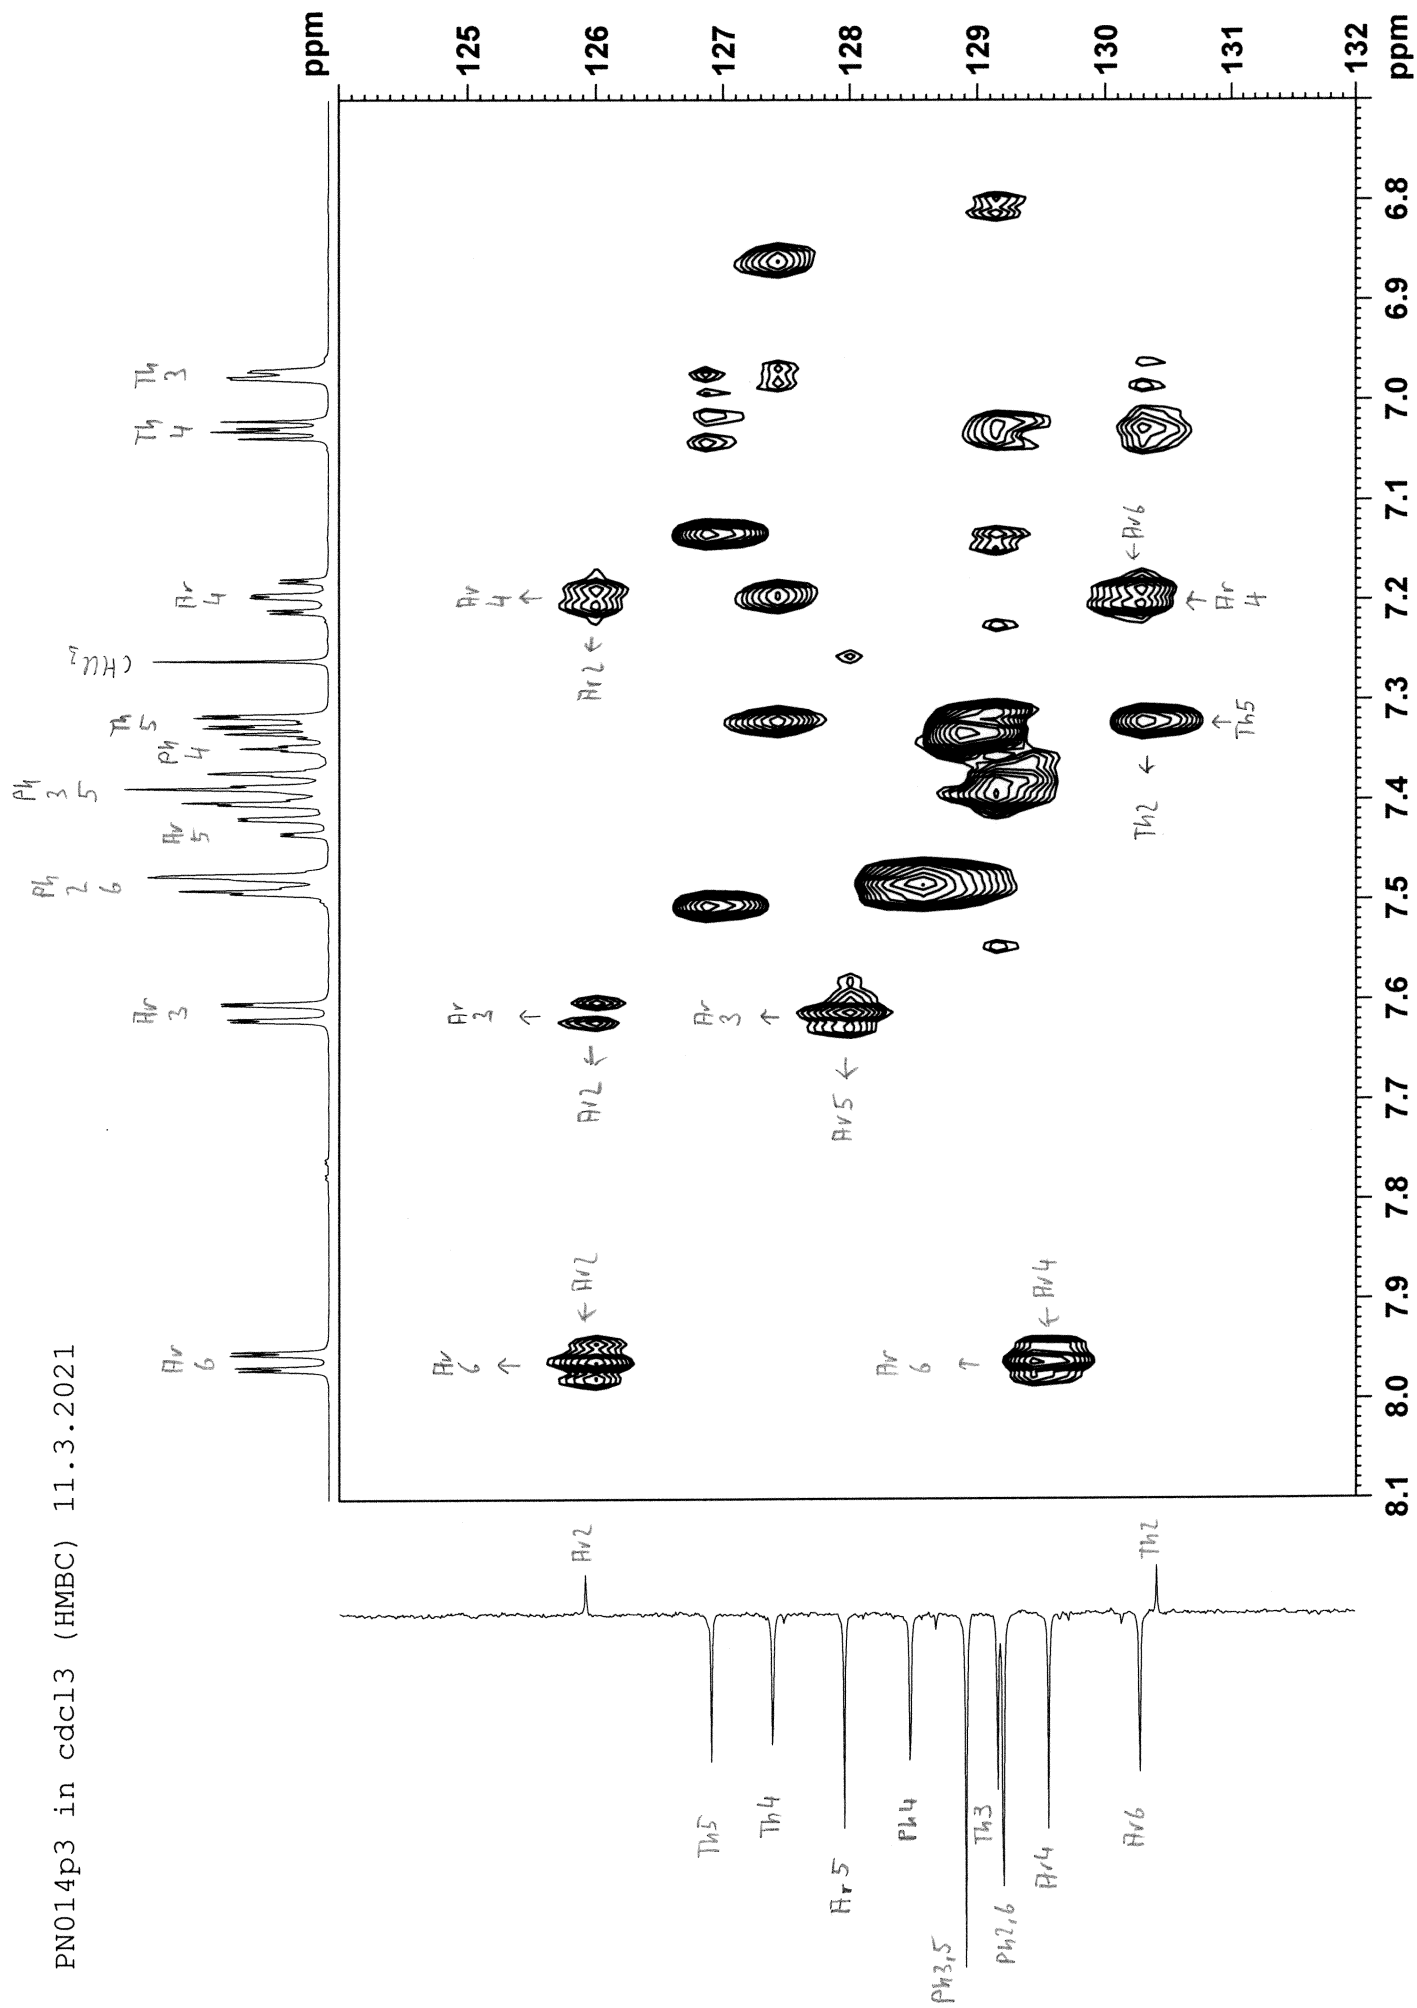

PN014p3 in cdcl3 (HMBC) 11.3.2021

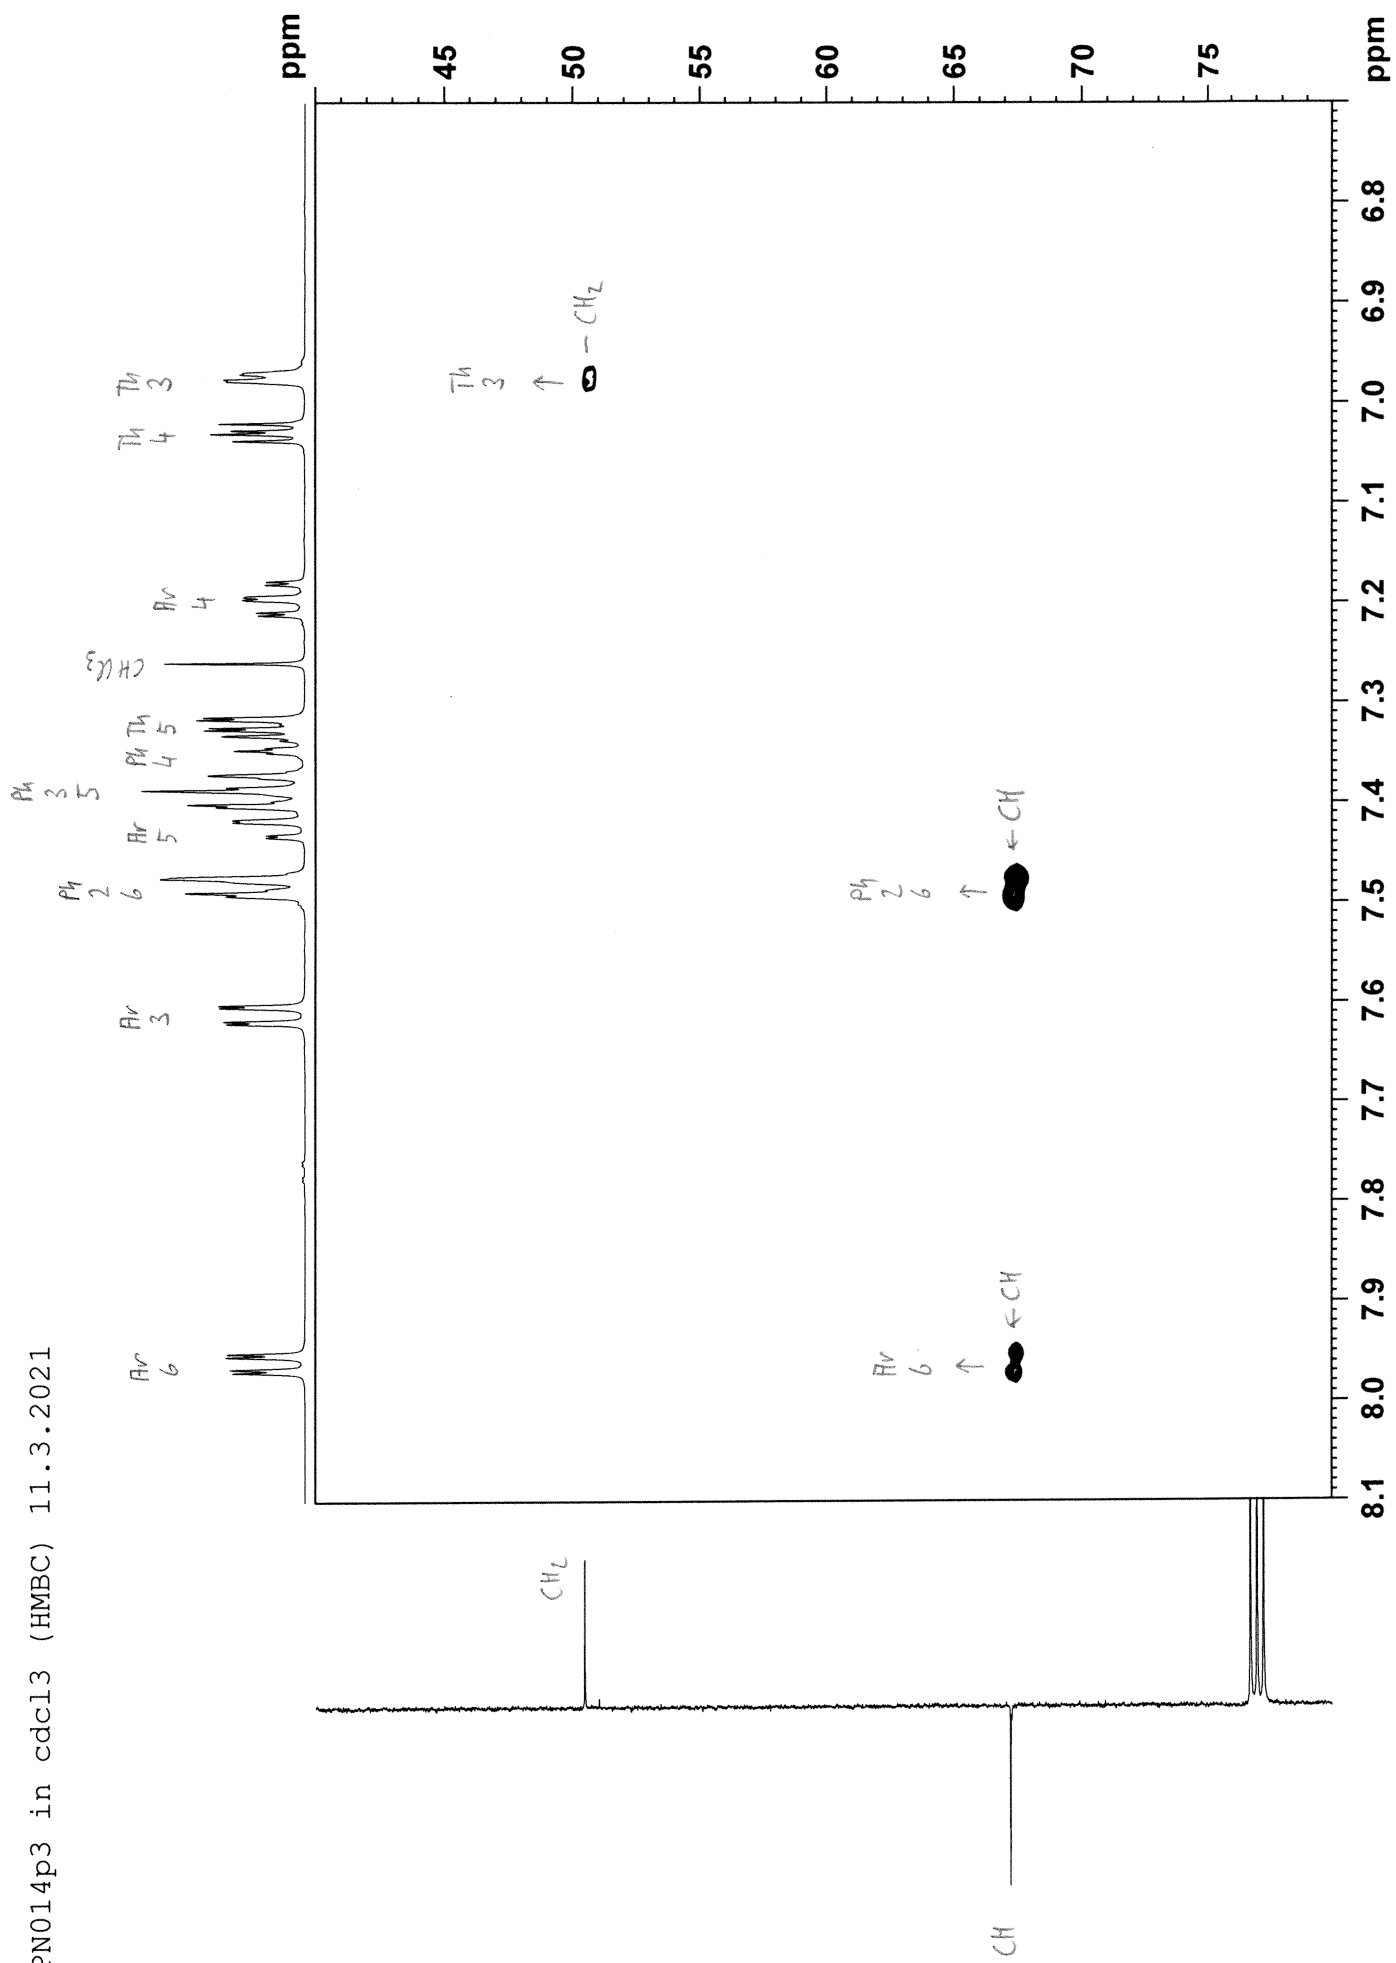

PN014p3 in cdcl3 (HMBC) 11.3.2021 CH

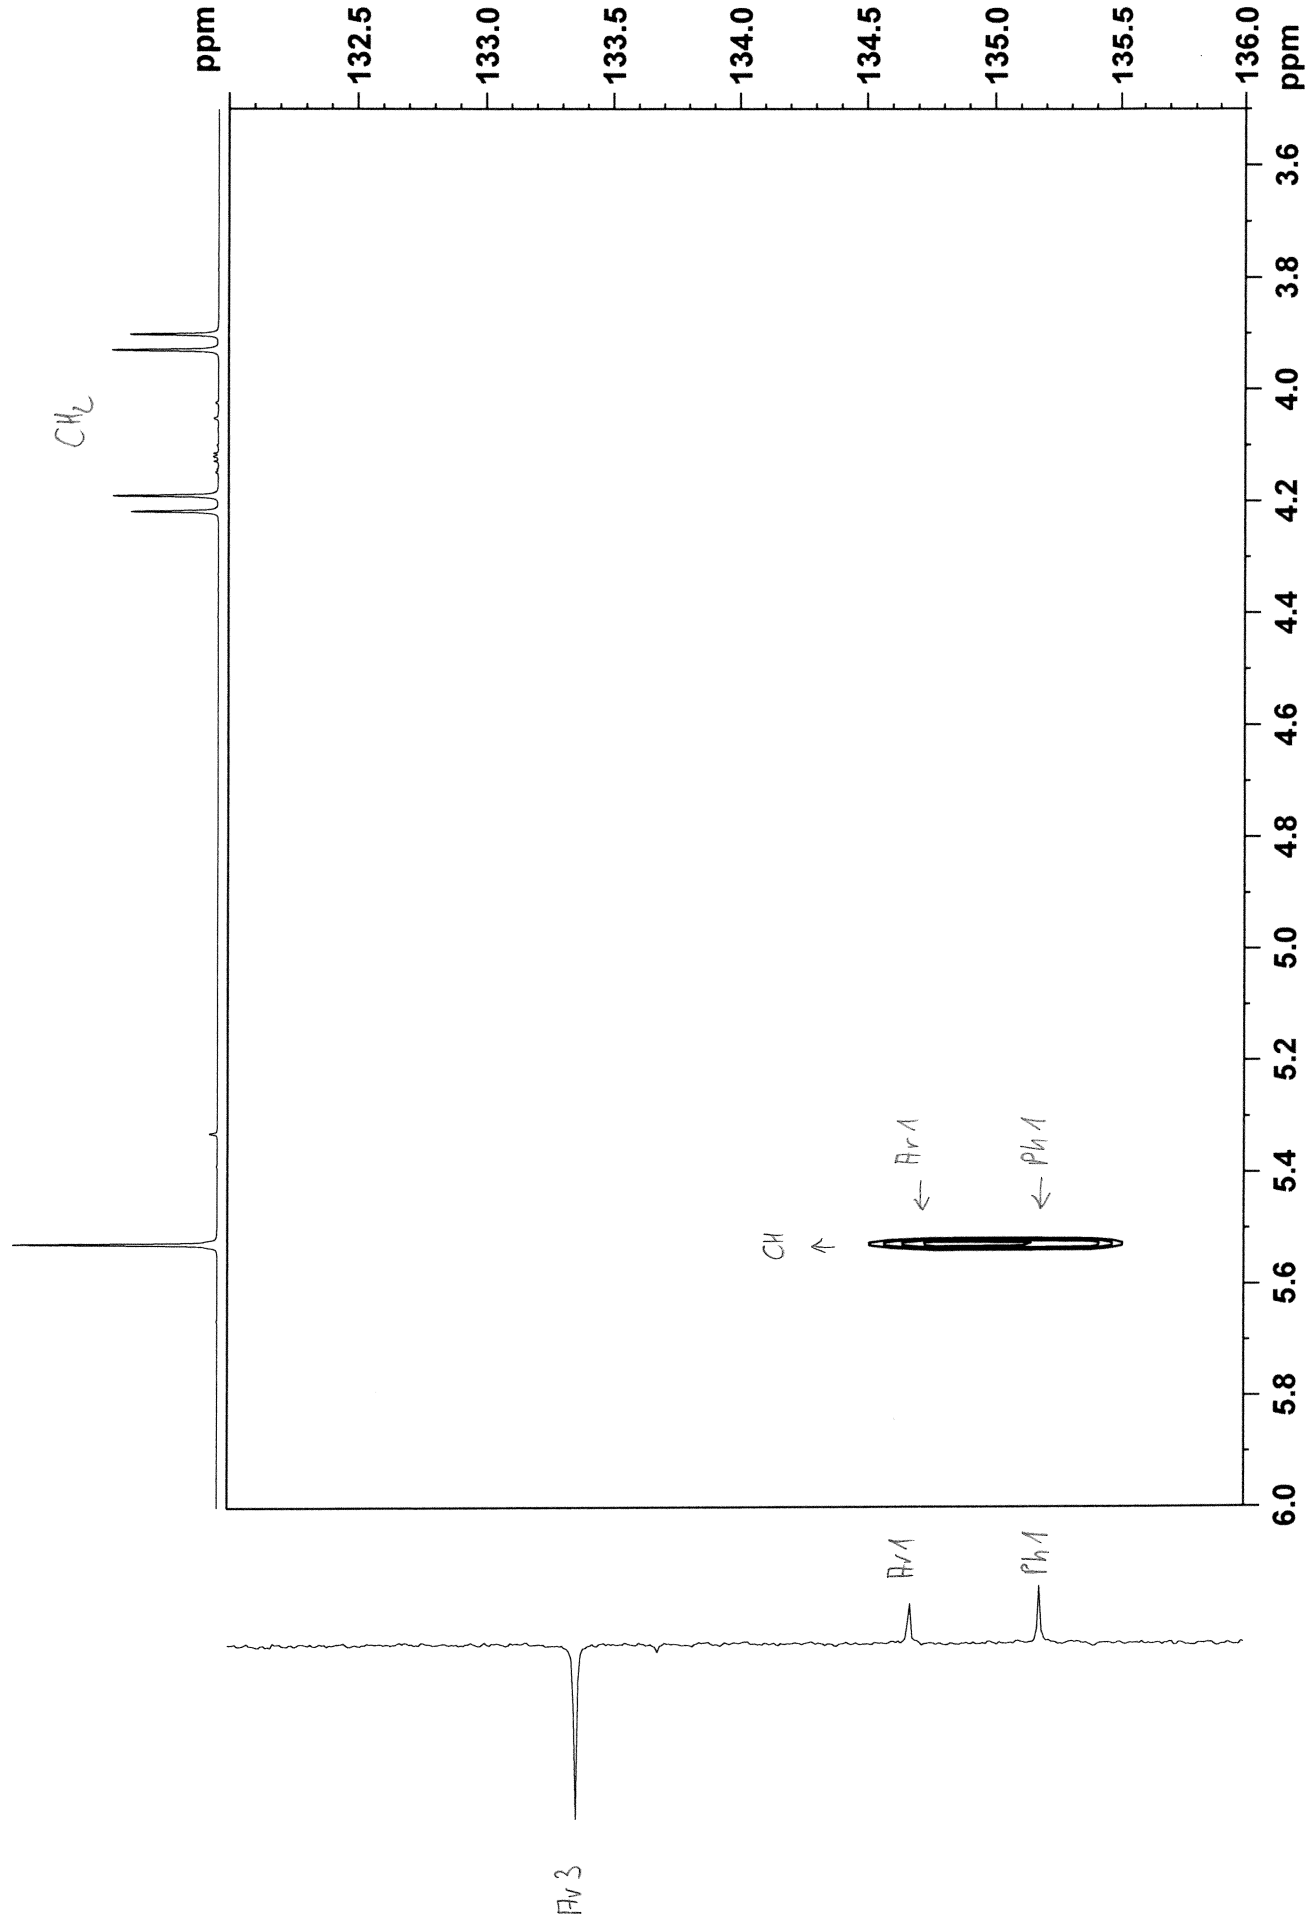

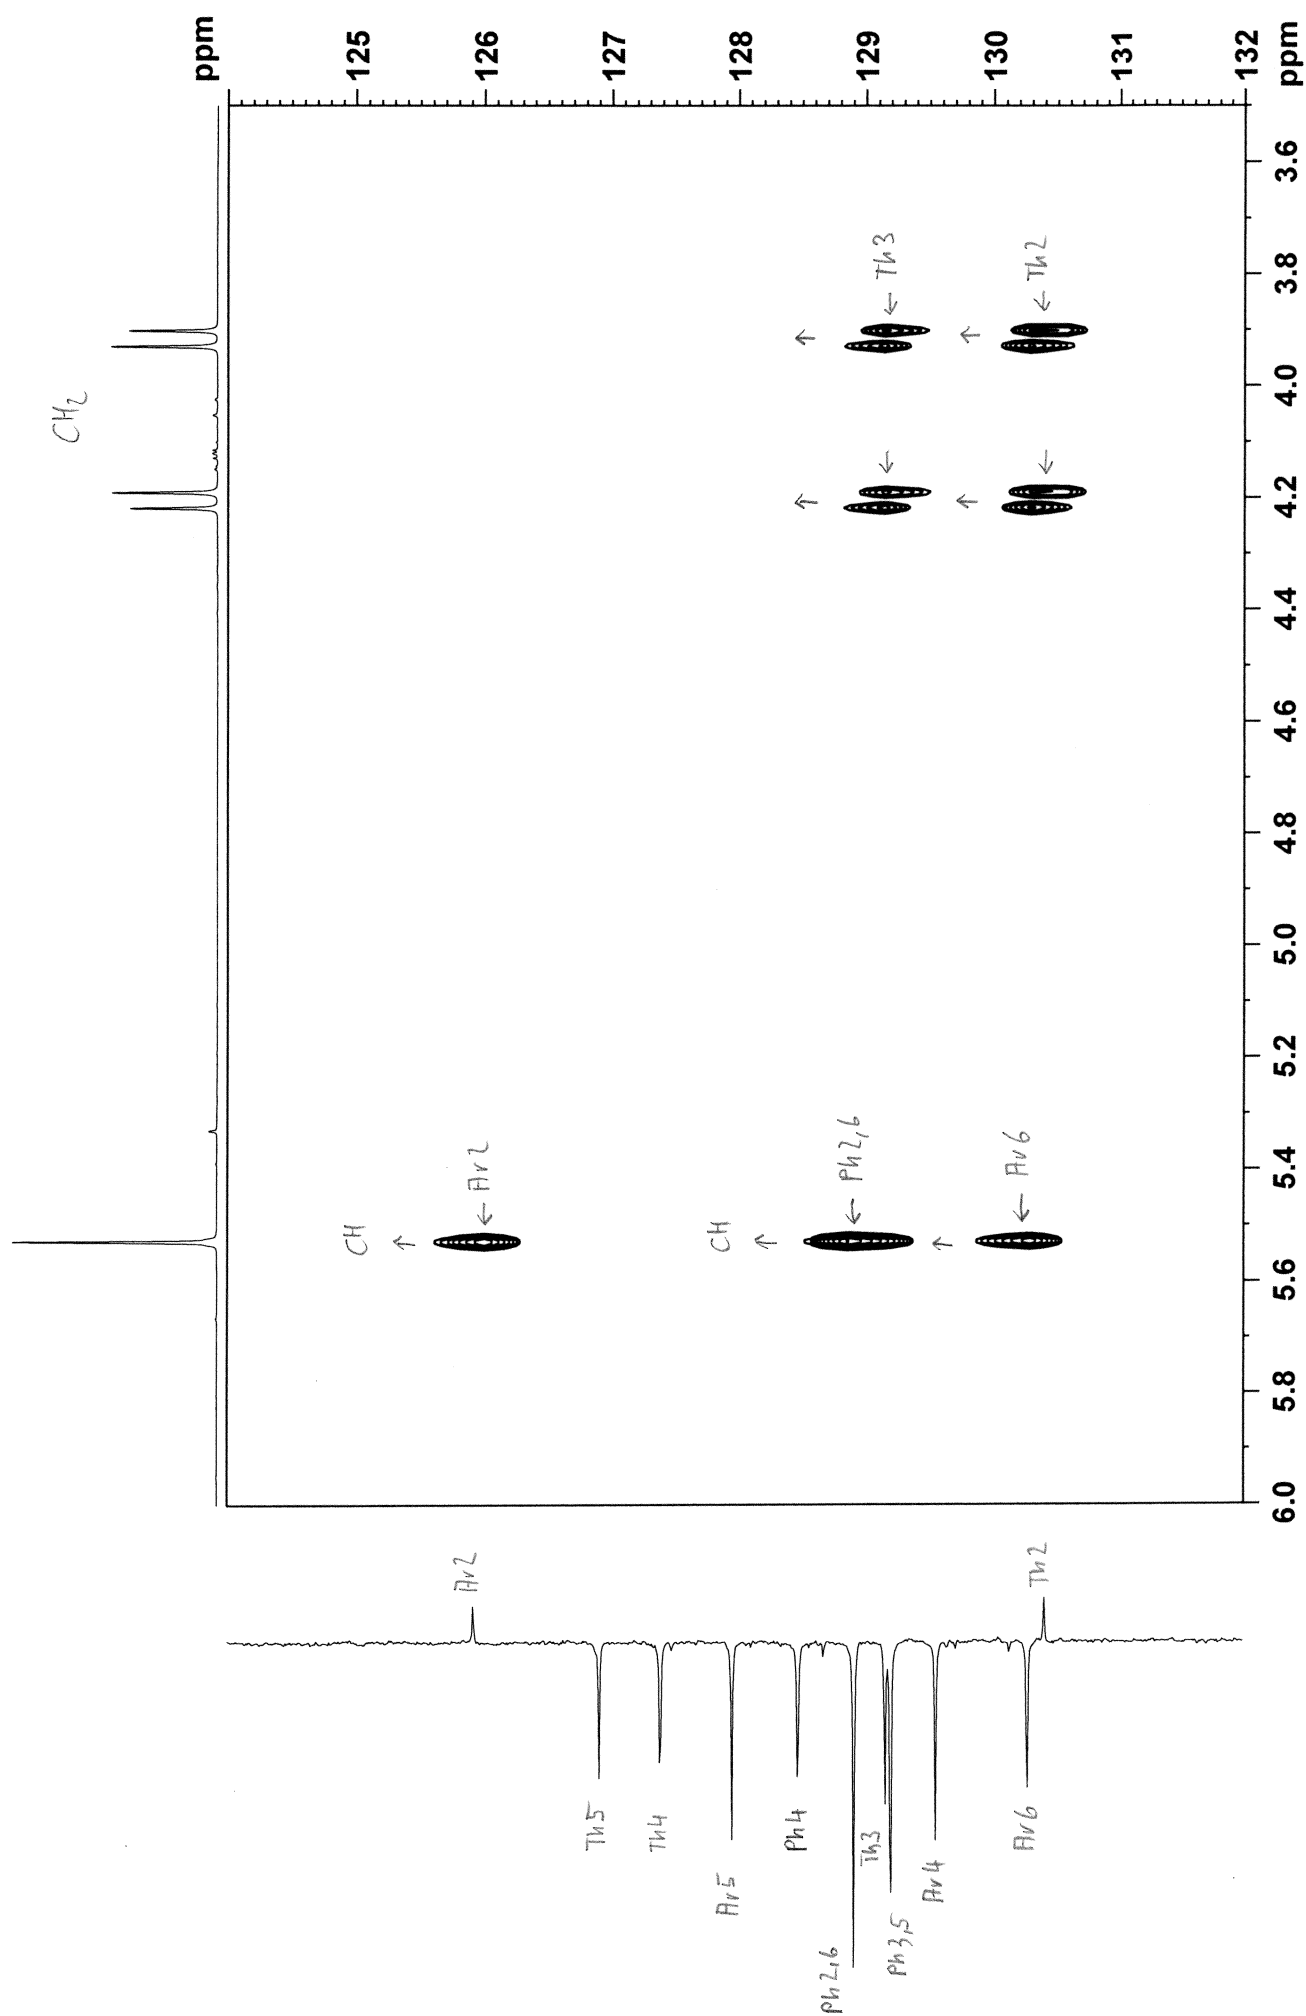



PN014p3 in cdcl3 (HMBC) 11.3.2021

CH

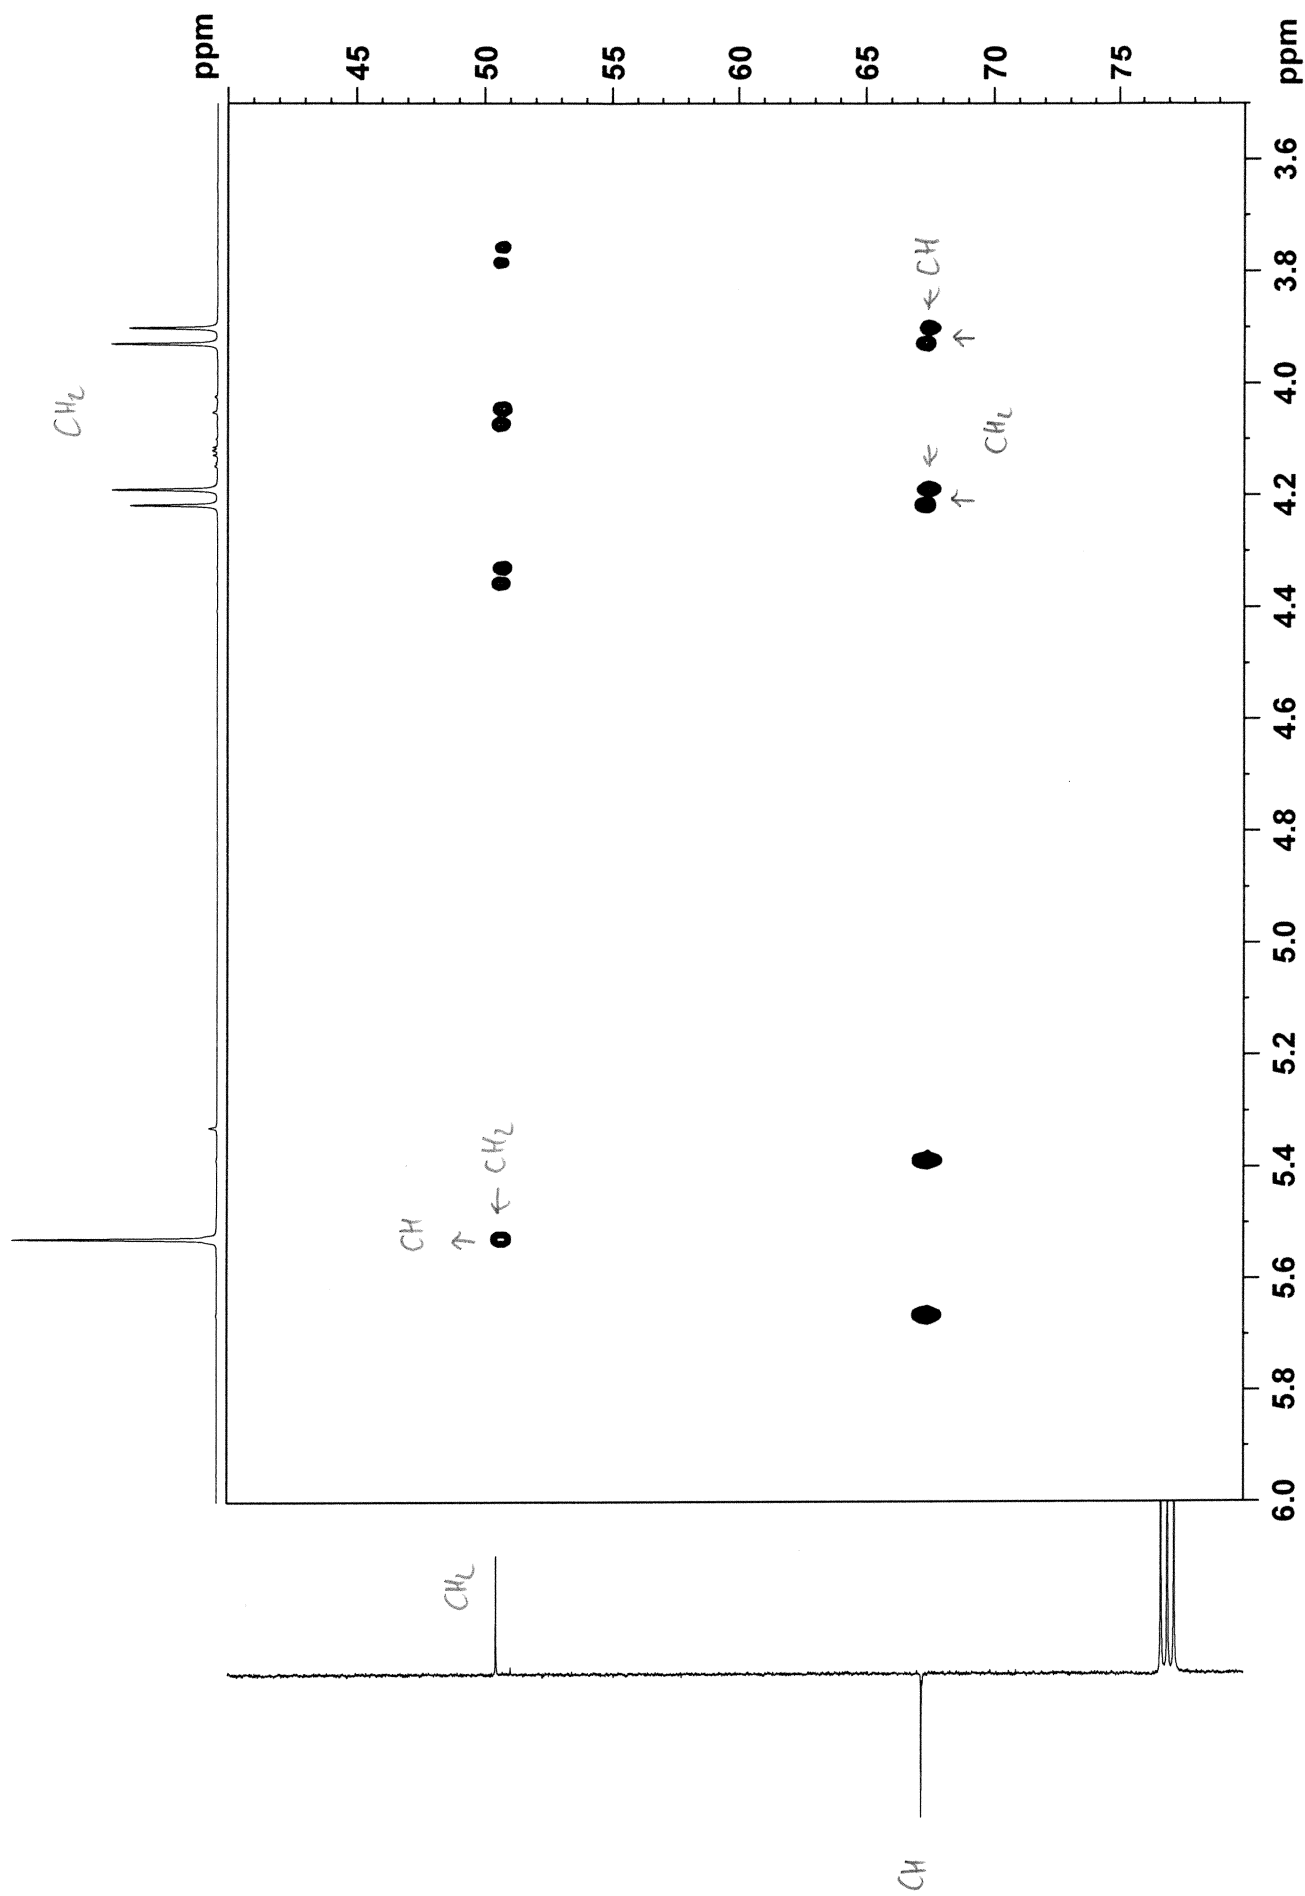

**Figure S28c.** NMR spectra of compound **8g**.

PN014-4 in cdcl3 (Proton) 29.7.2020

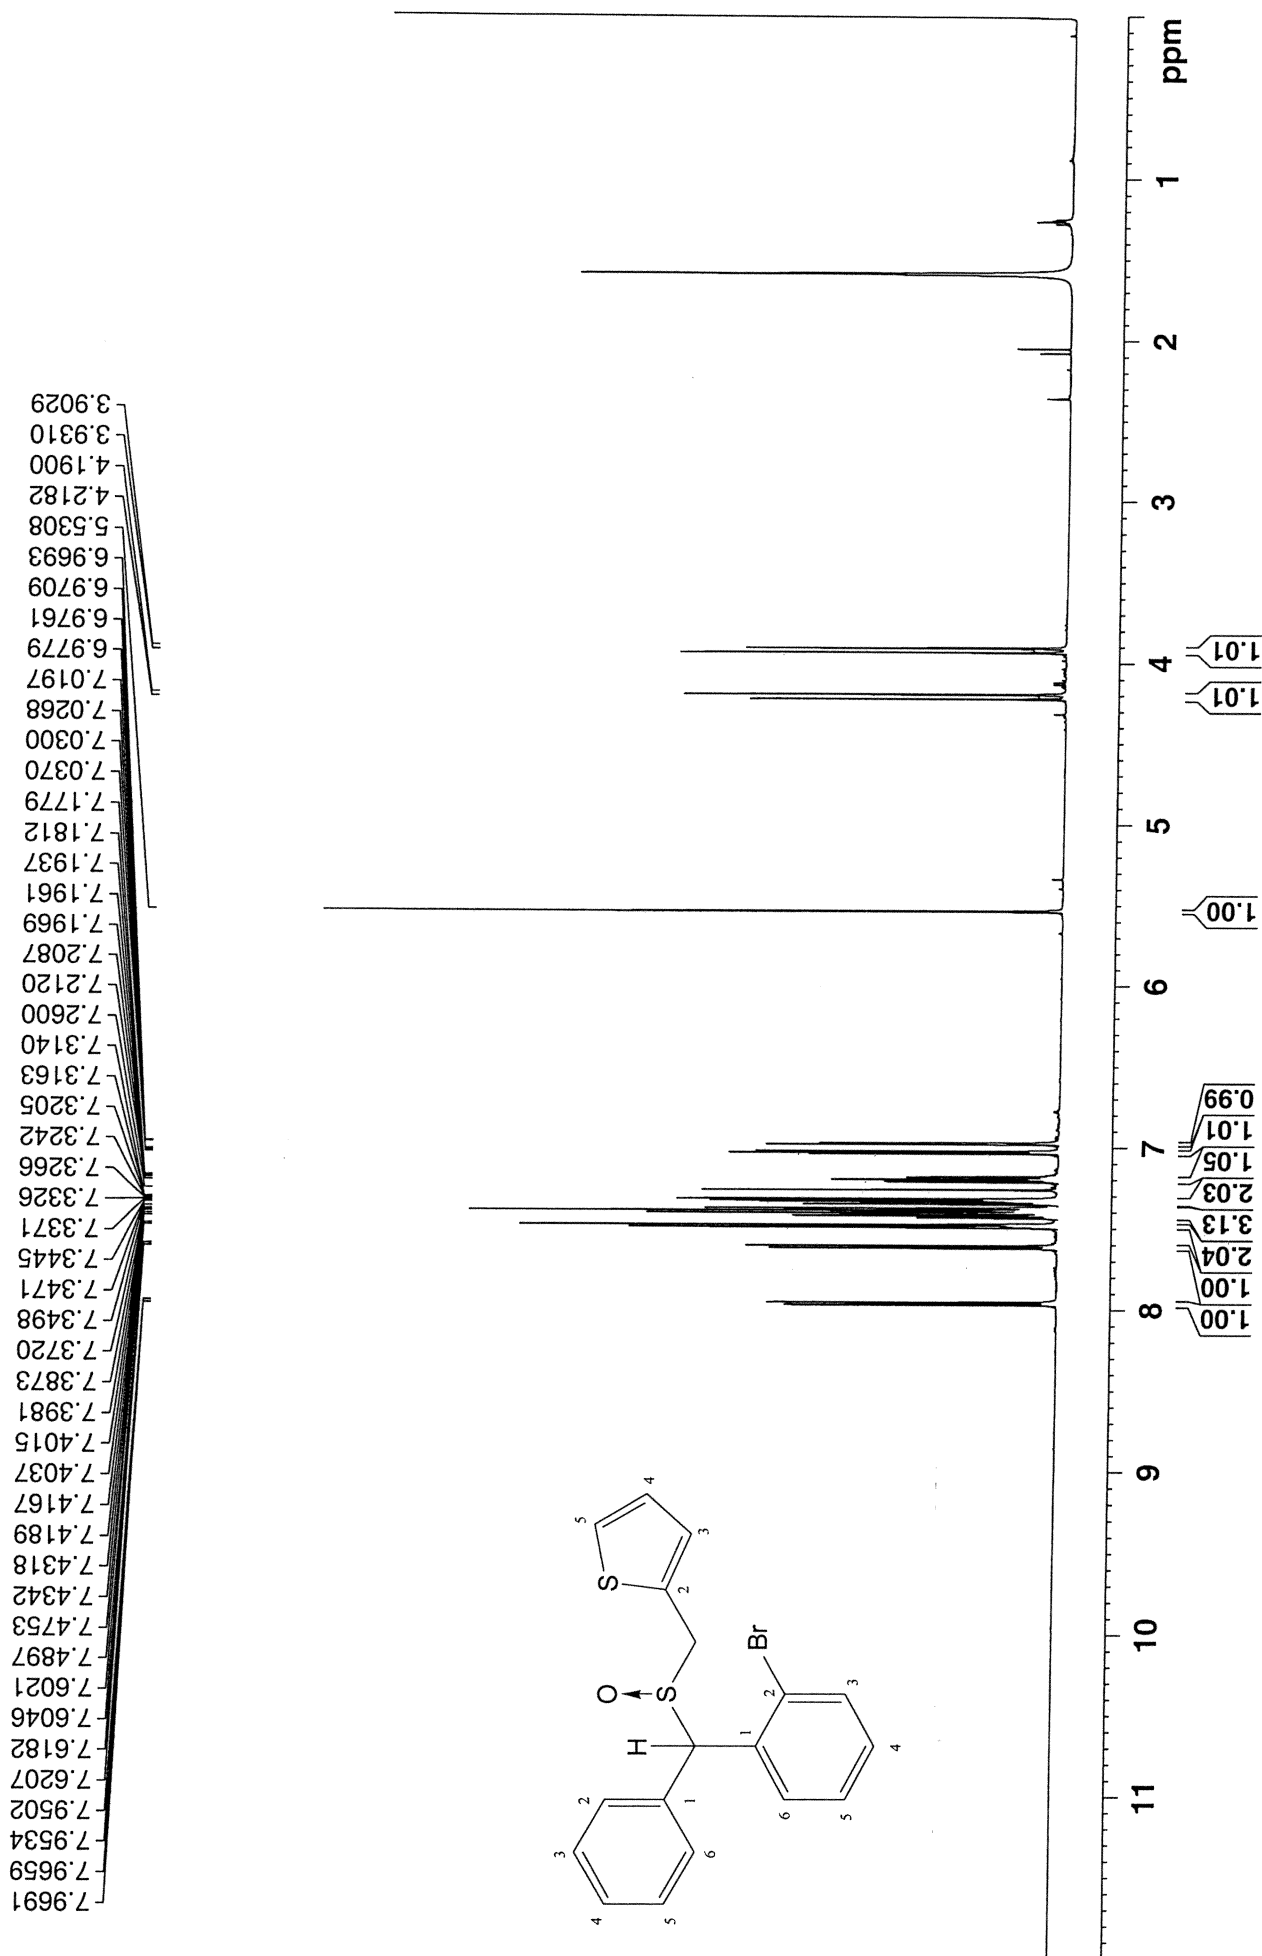

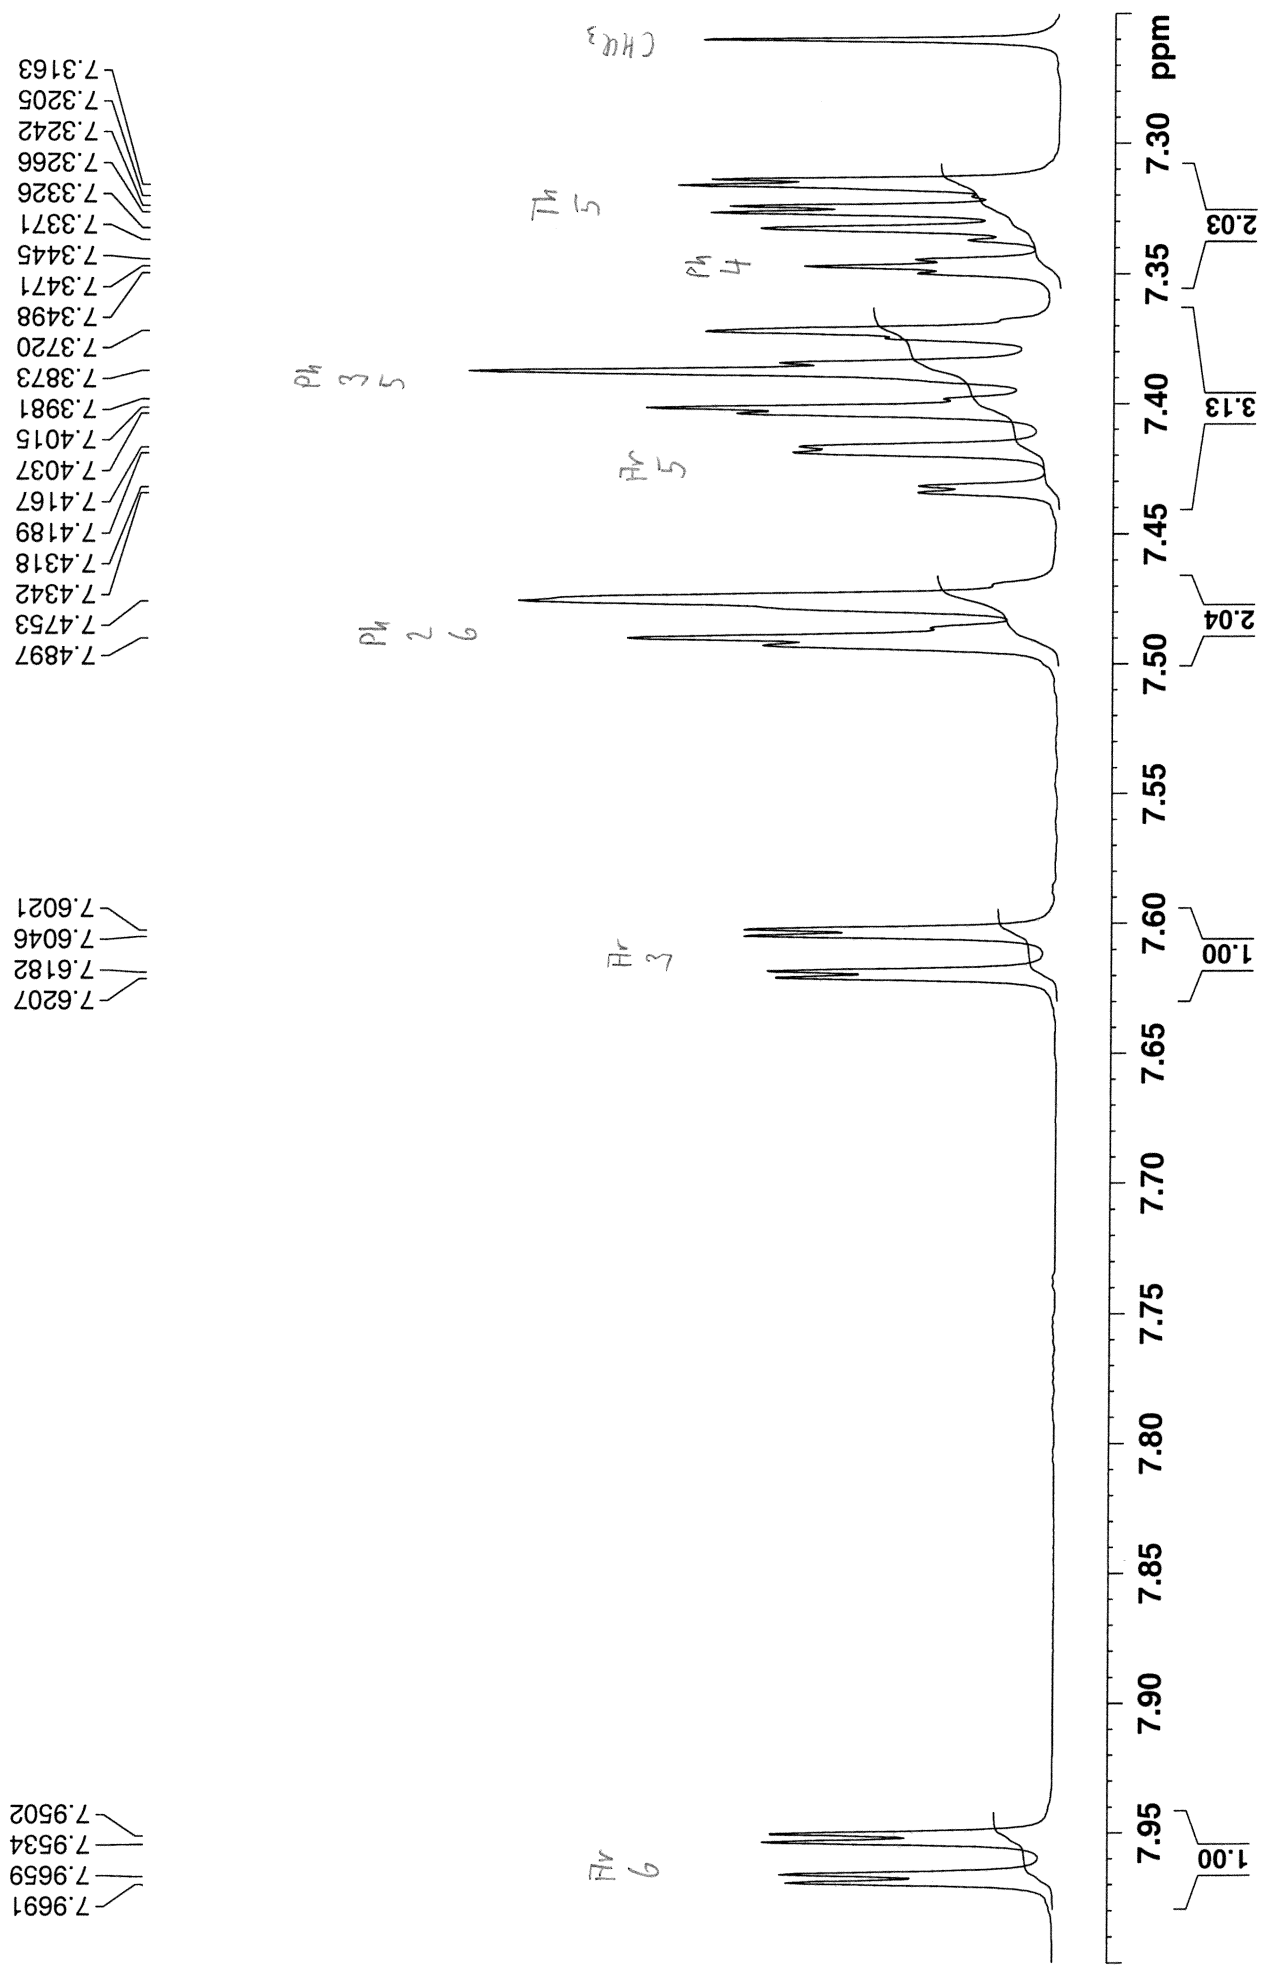

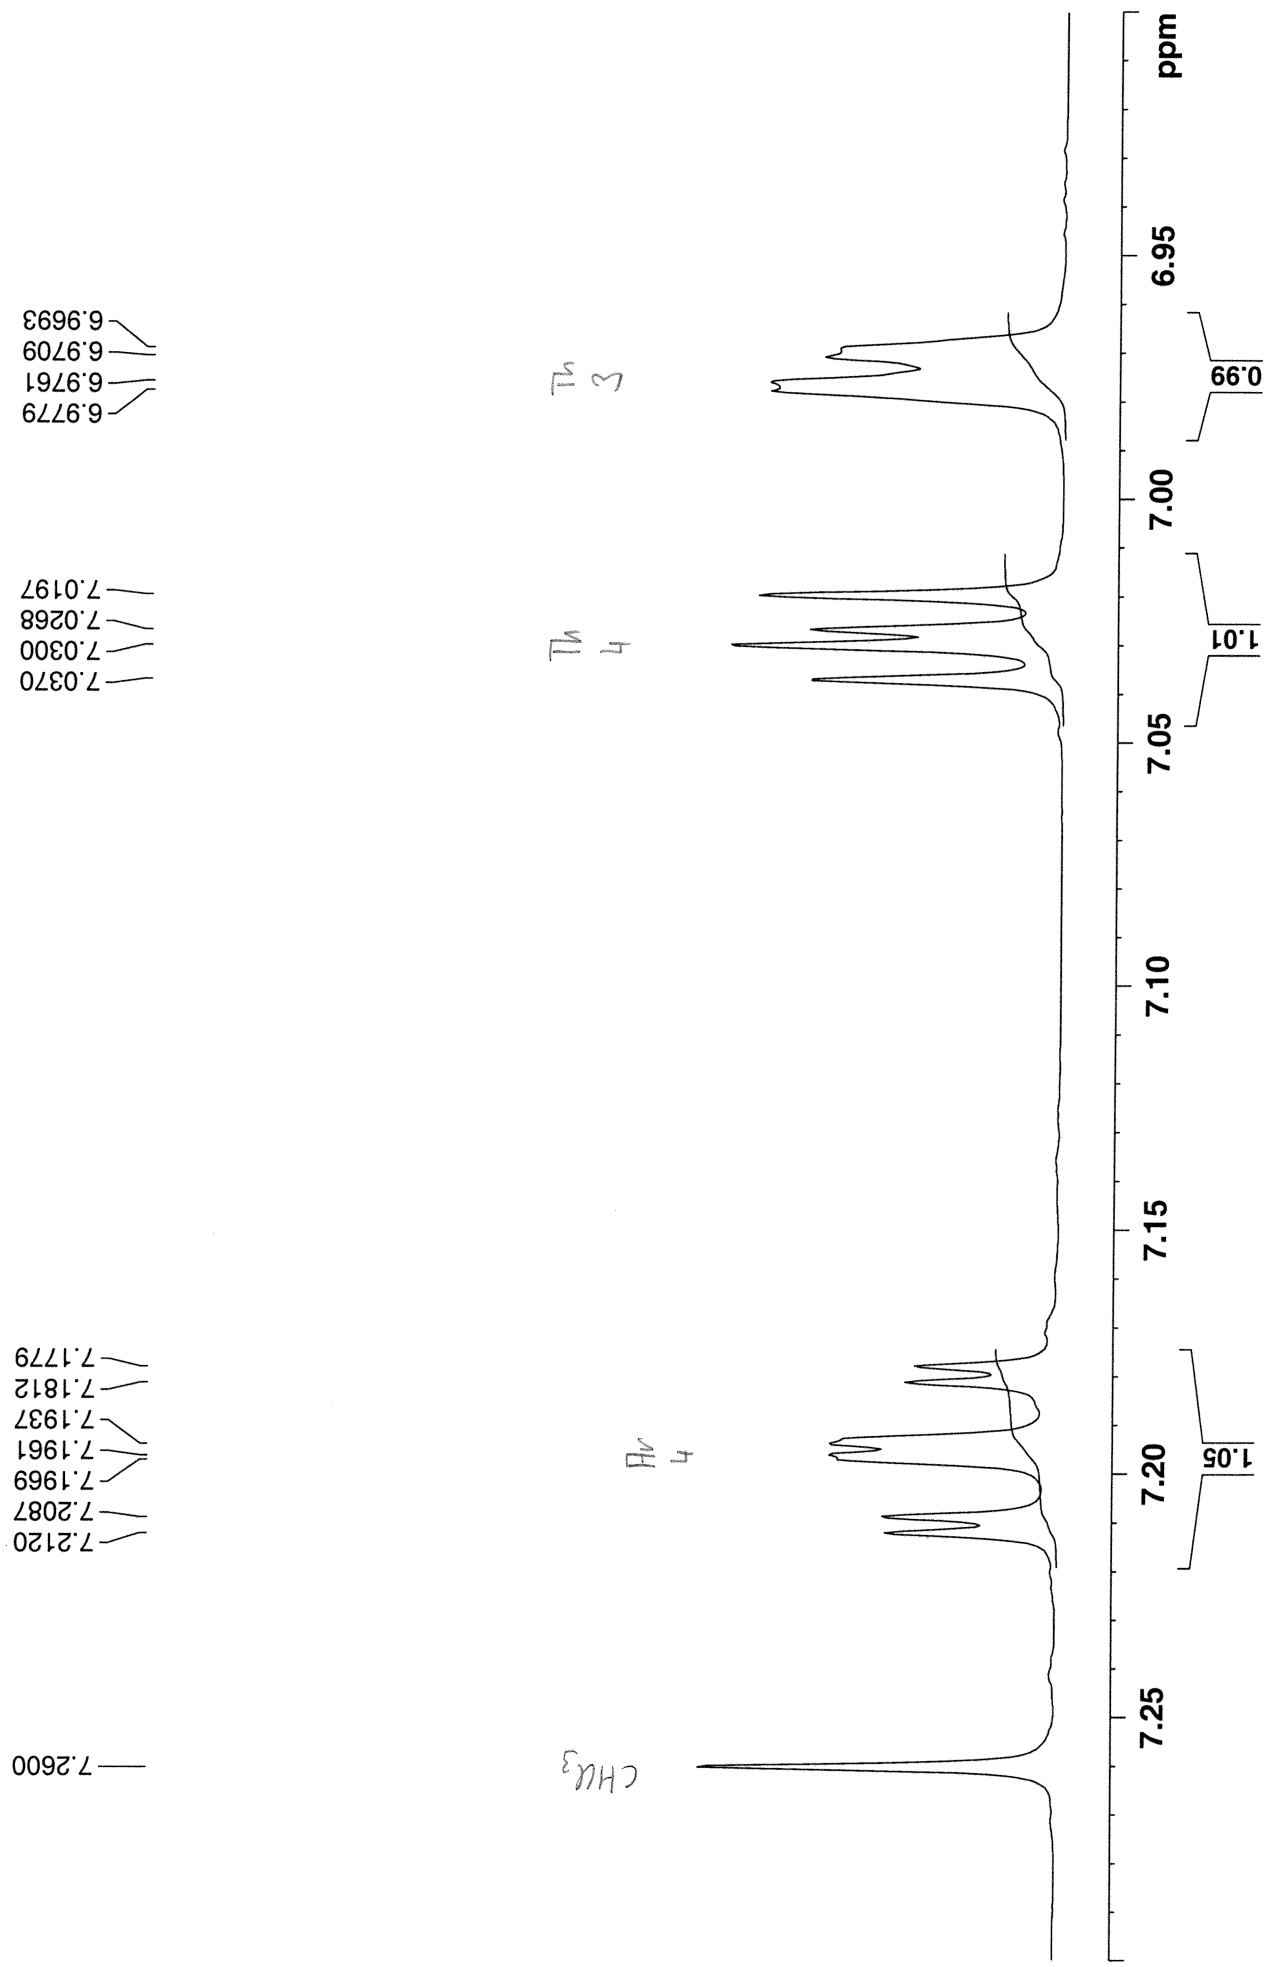

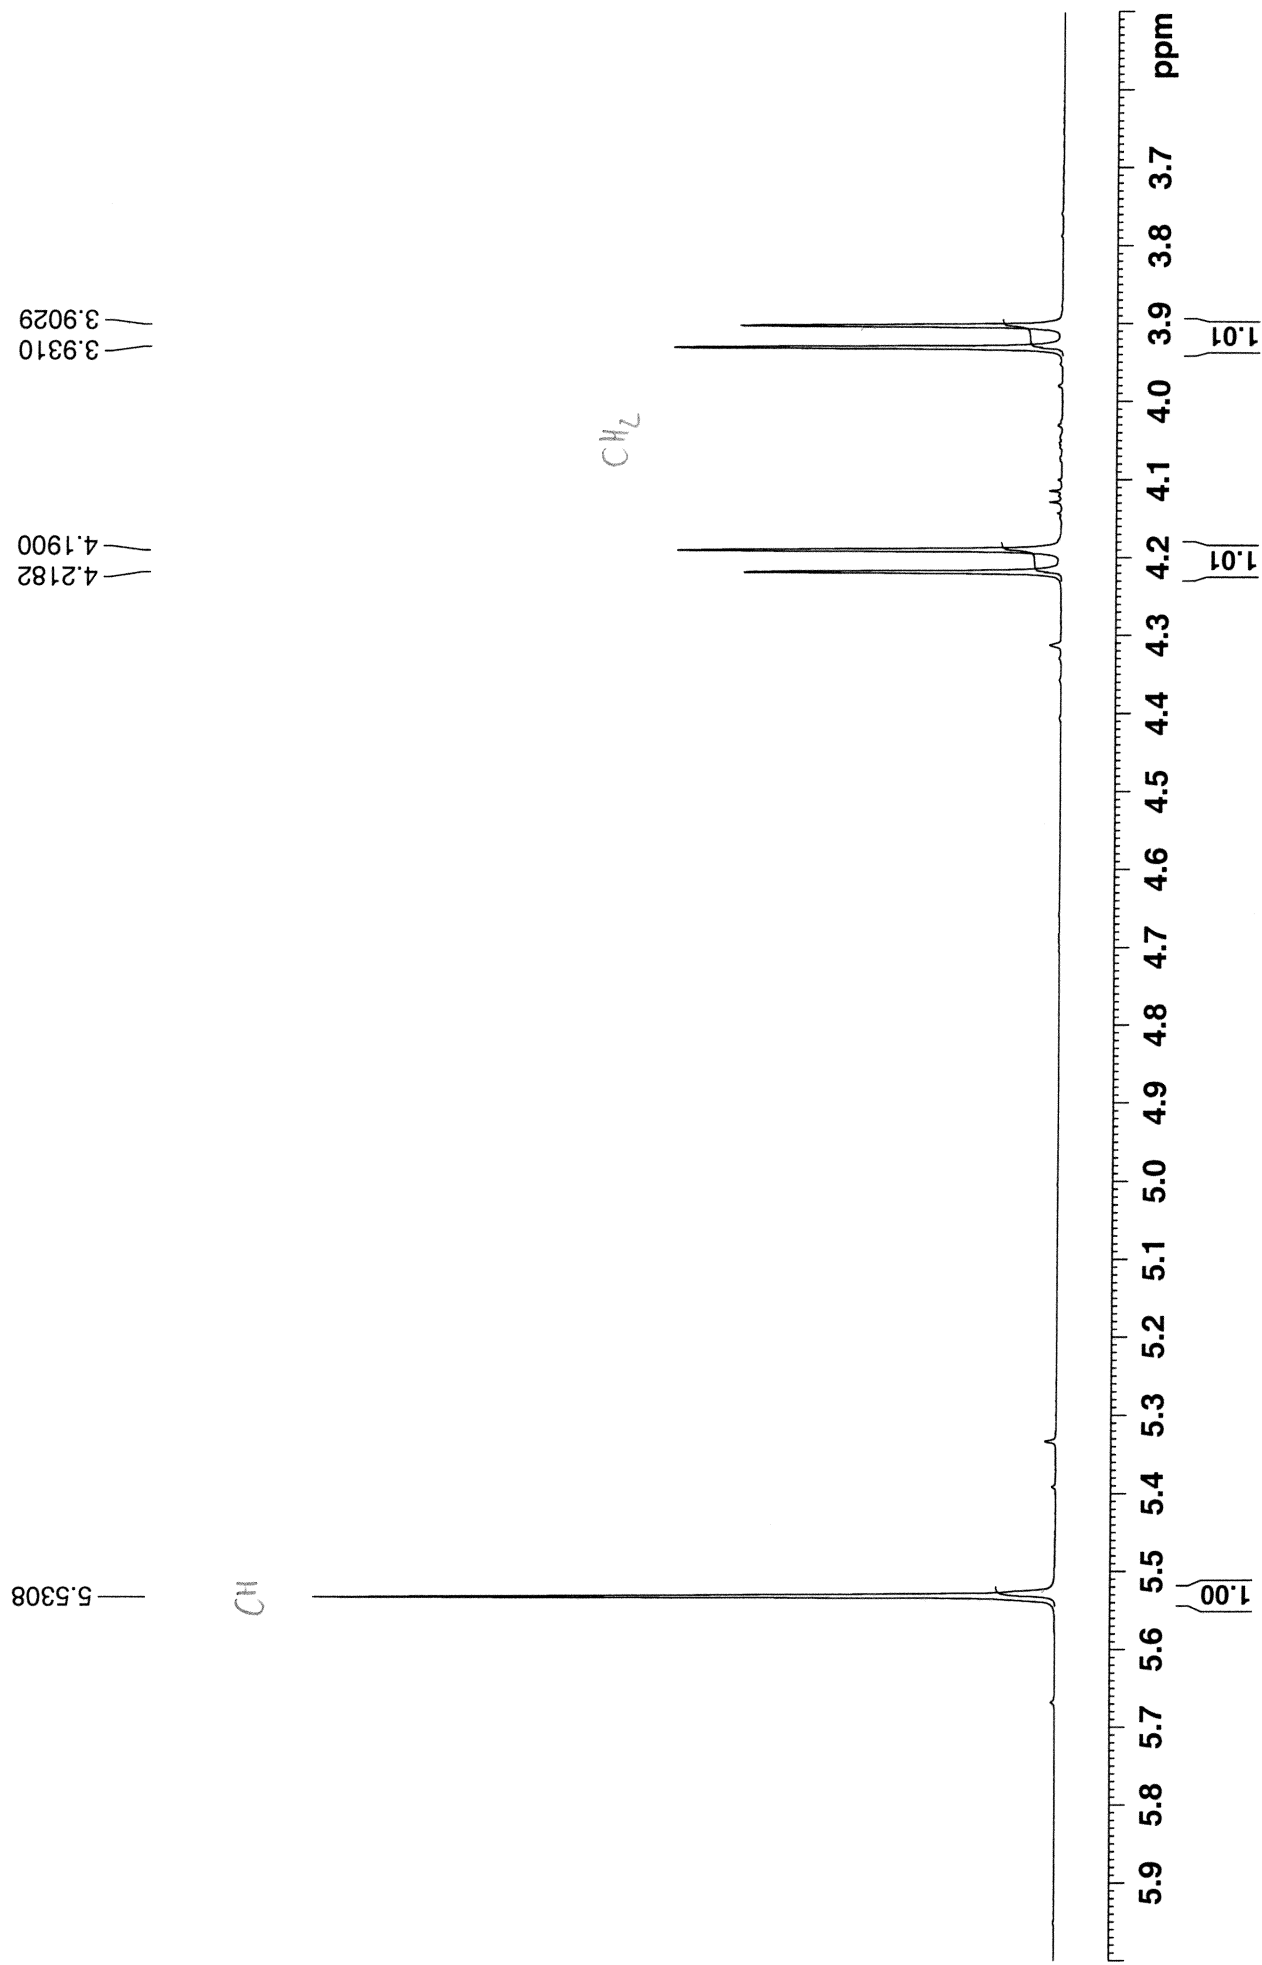

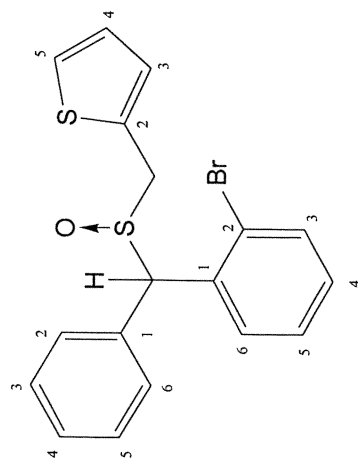

135.1761  
134.6715  
133.3653  
130.3974  
130.2683  
129.5604  
129.2095  
129.1657  
128.9167  
128.4837  
127.9605  
127.3950  
126.9131  
125.9204

77.0000  
67.2375  
50.4714

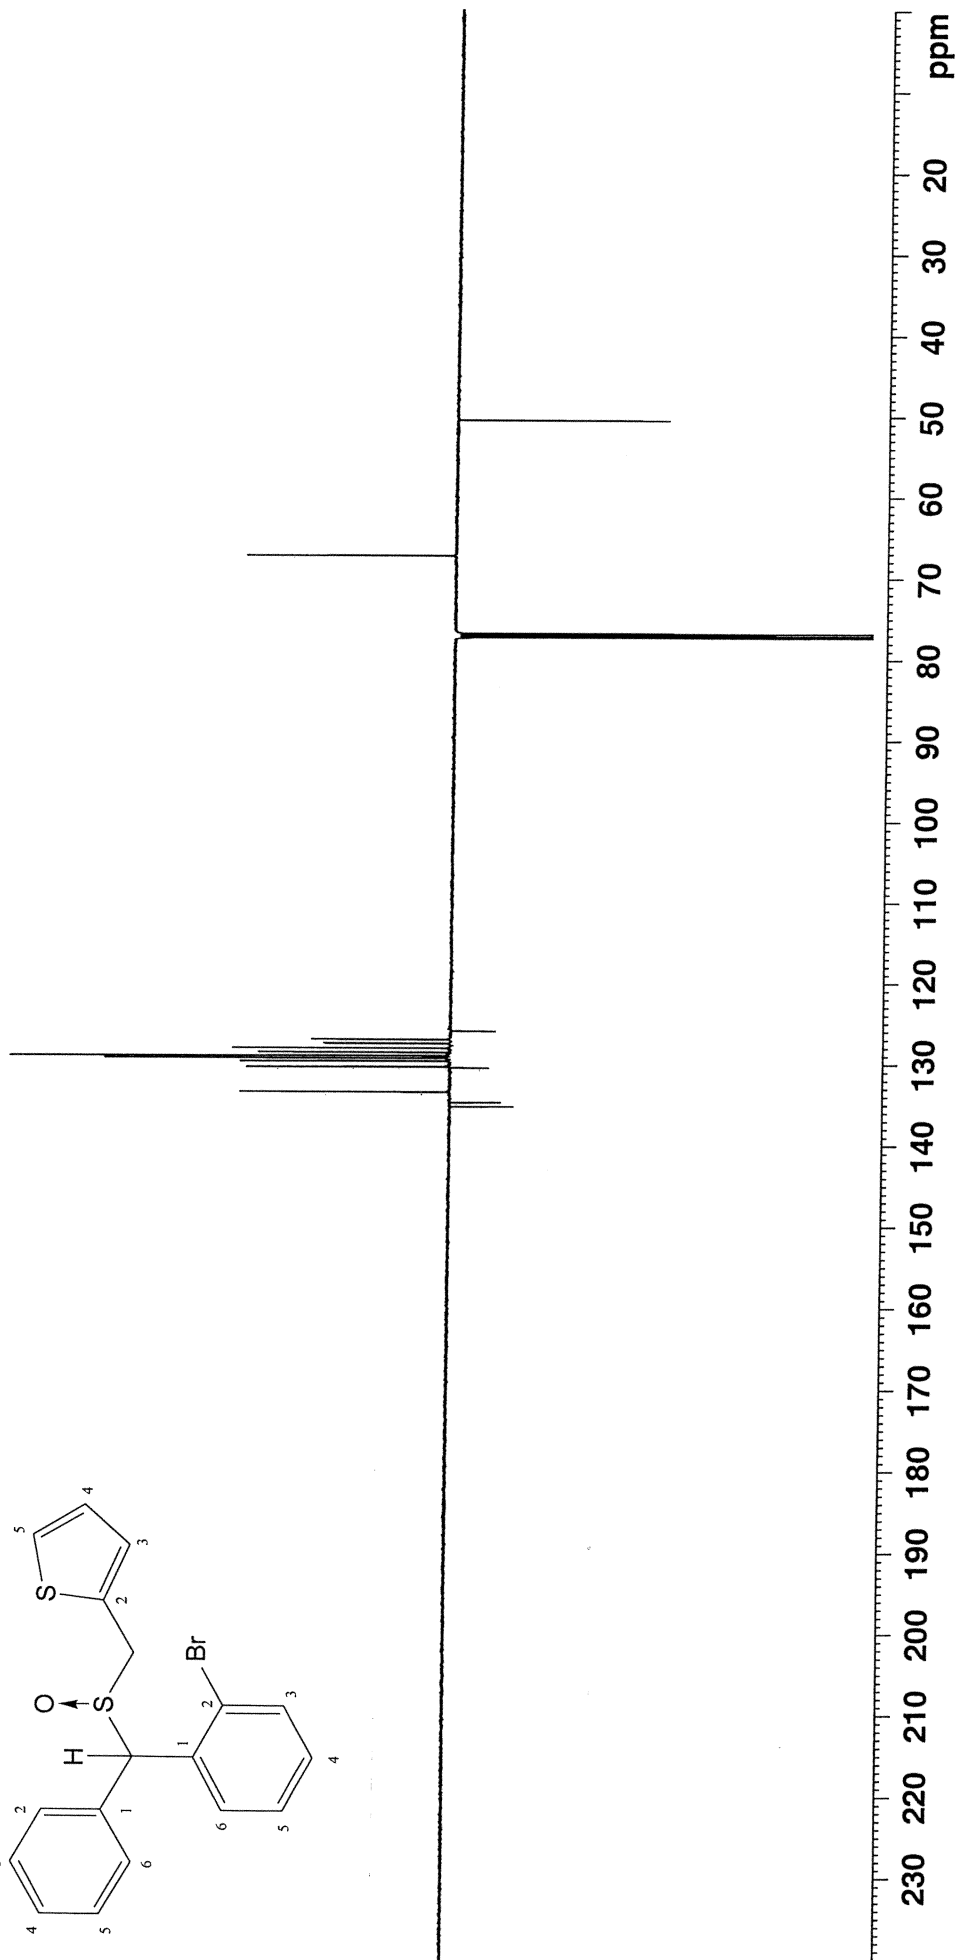

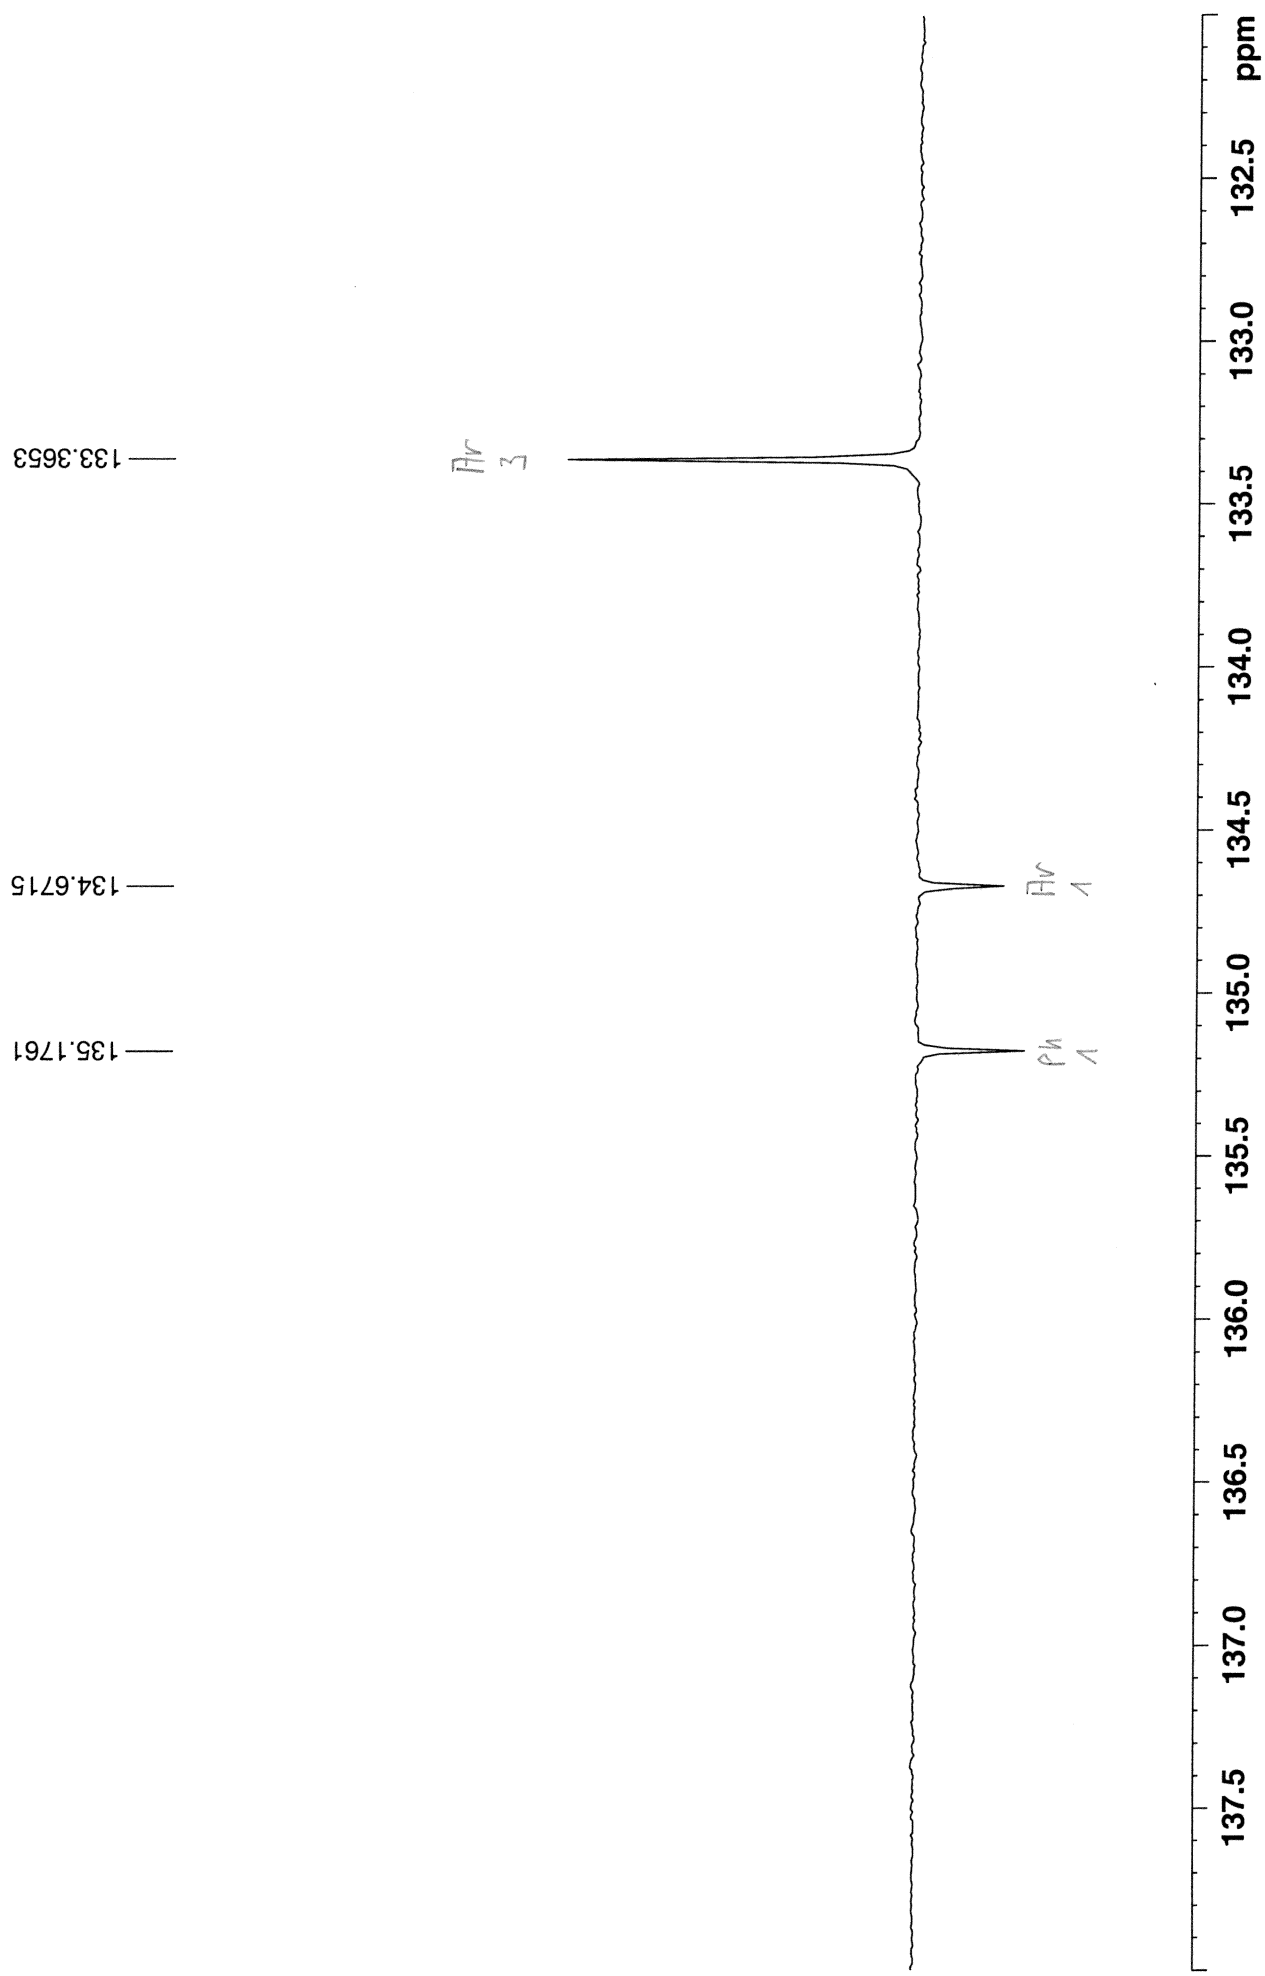

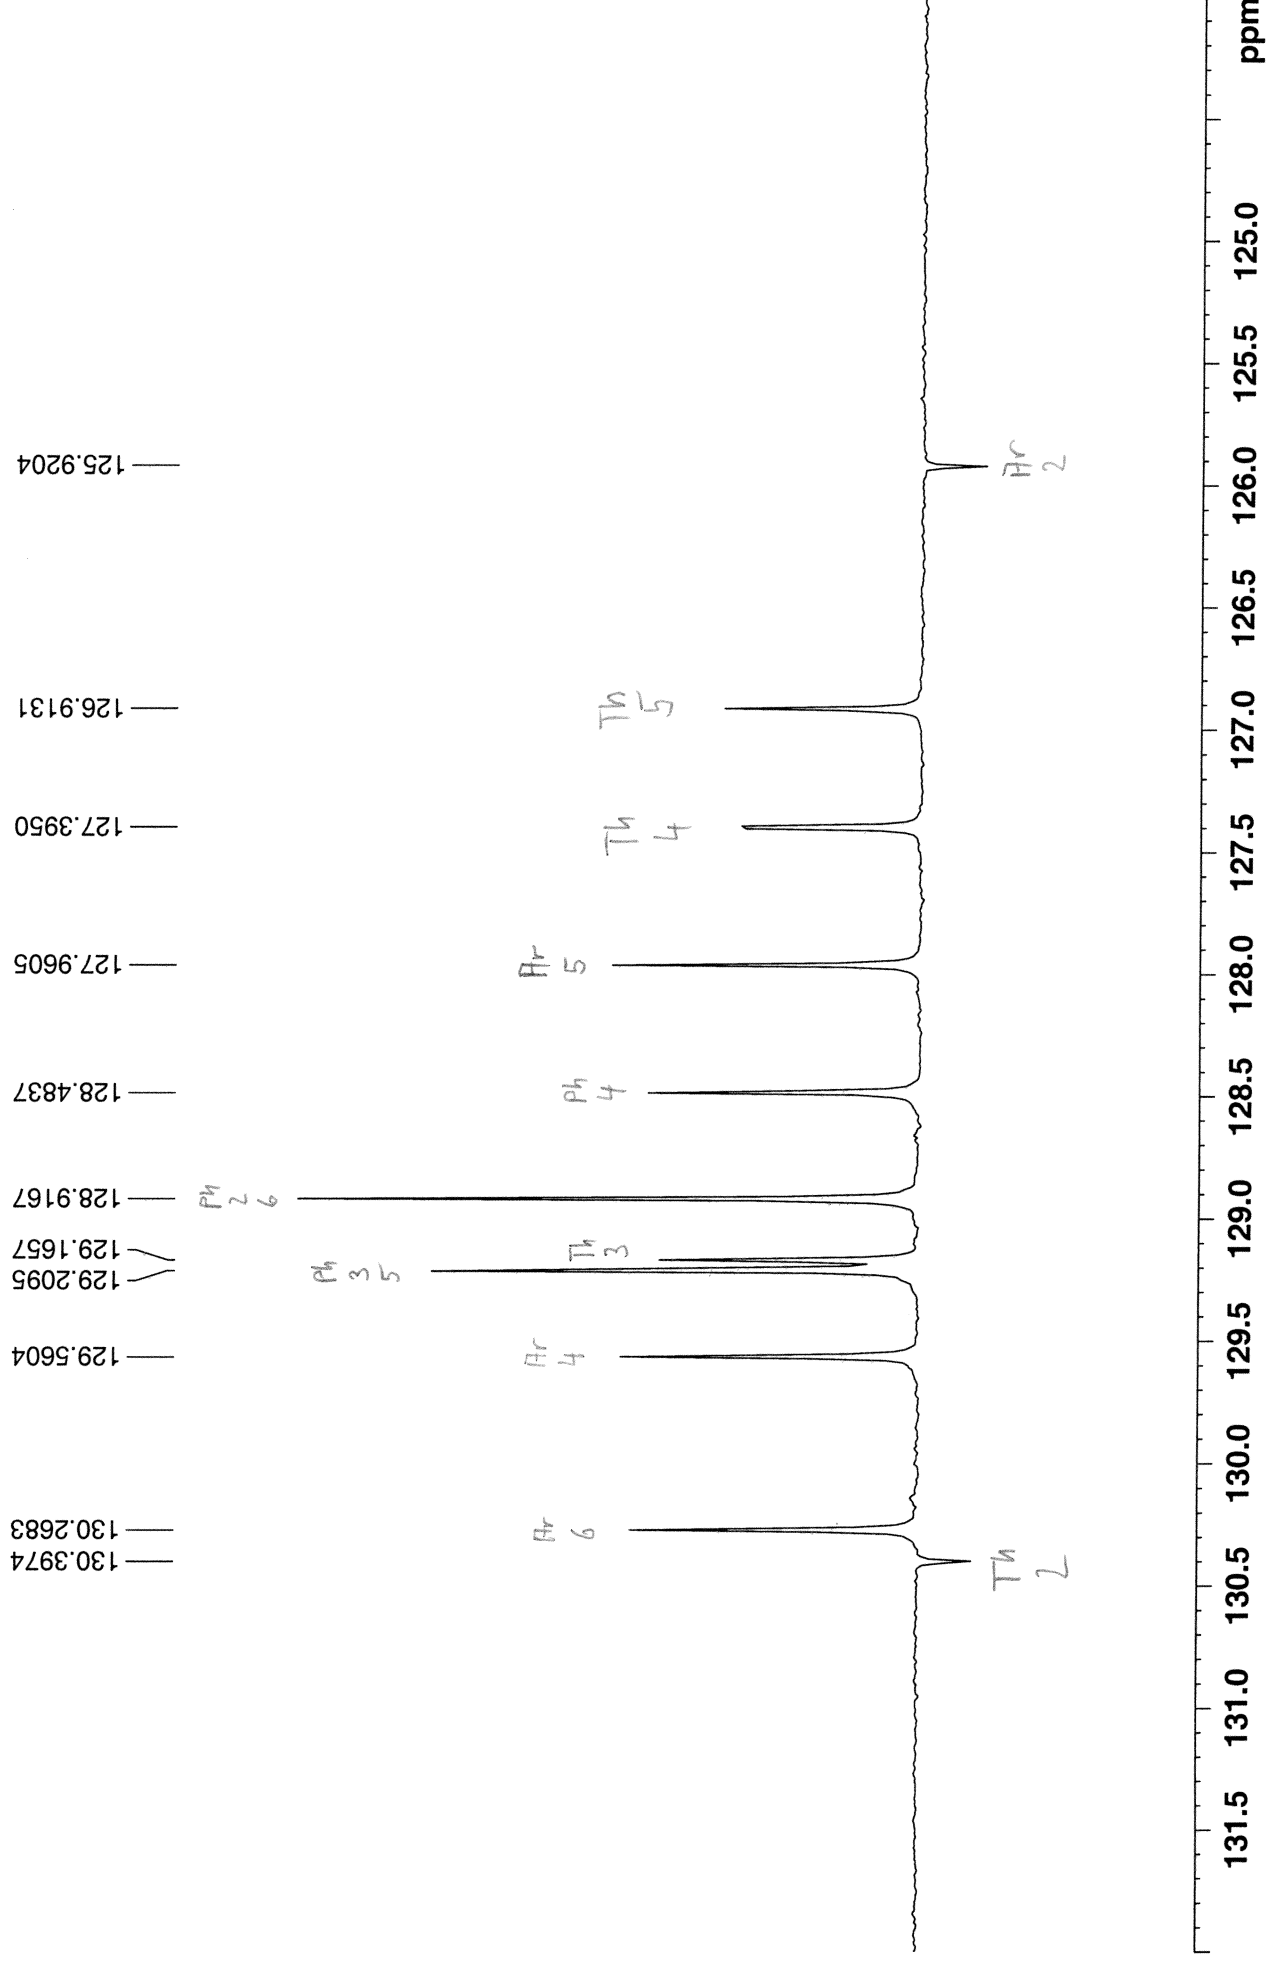



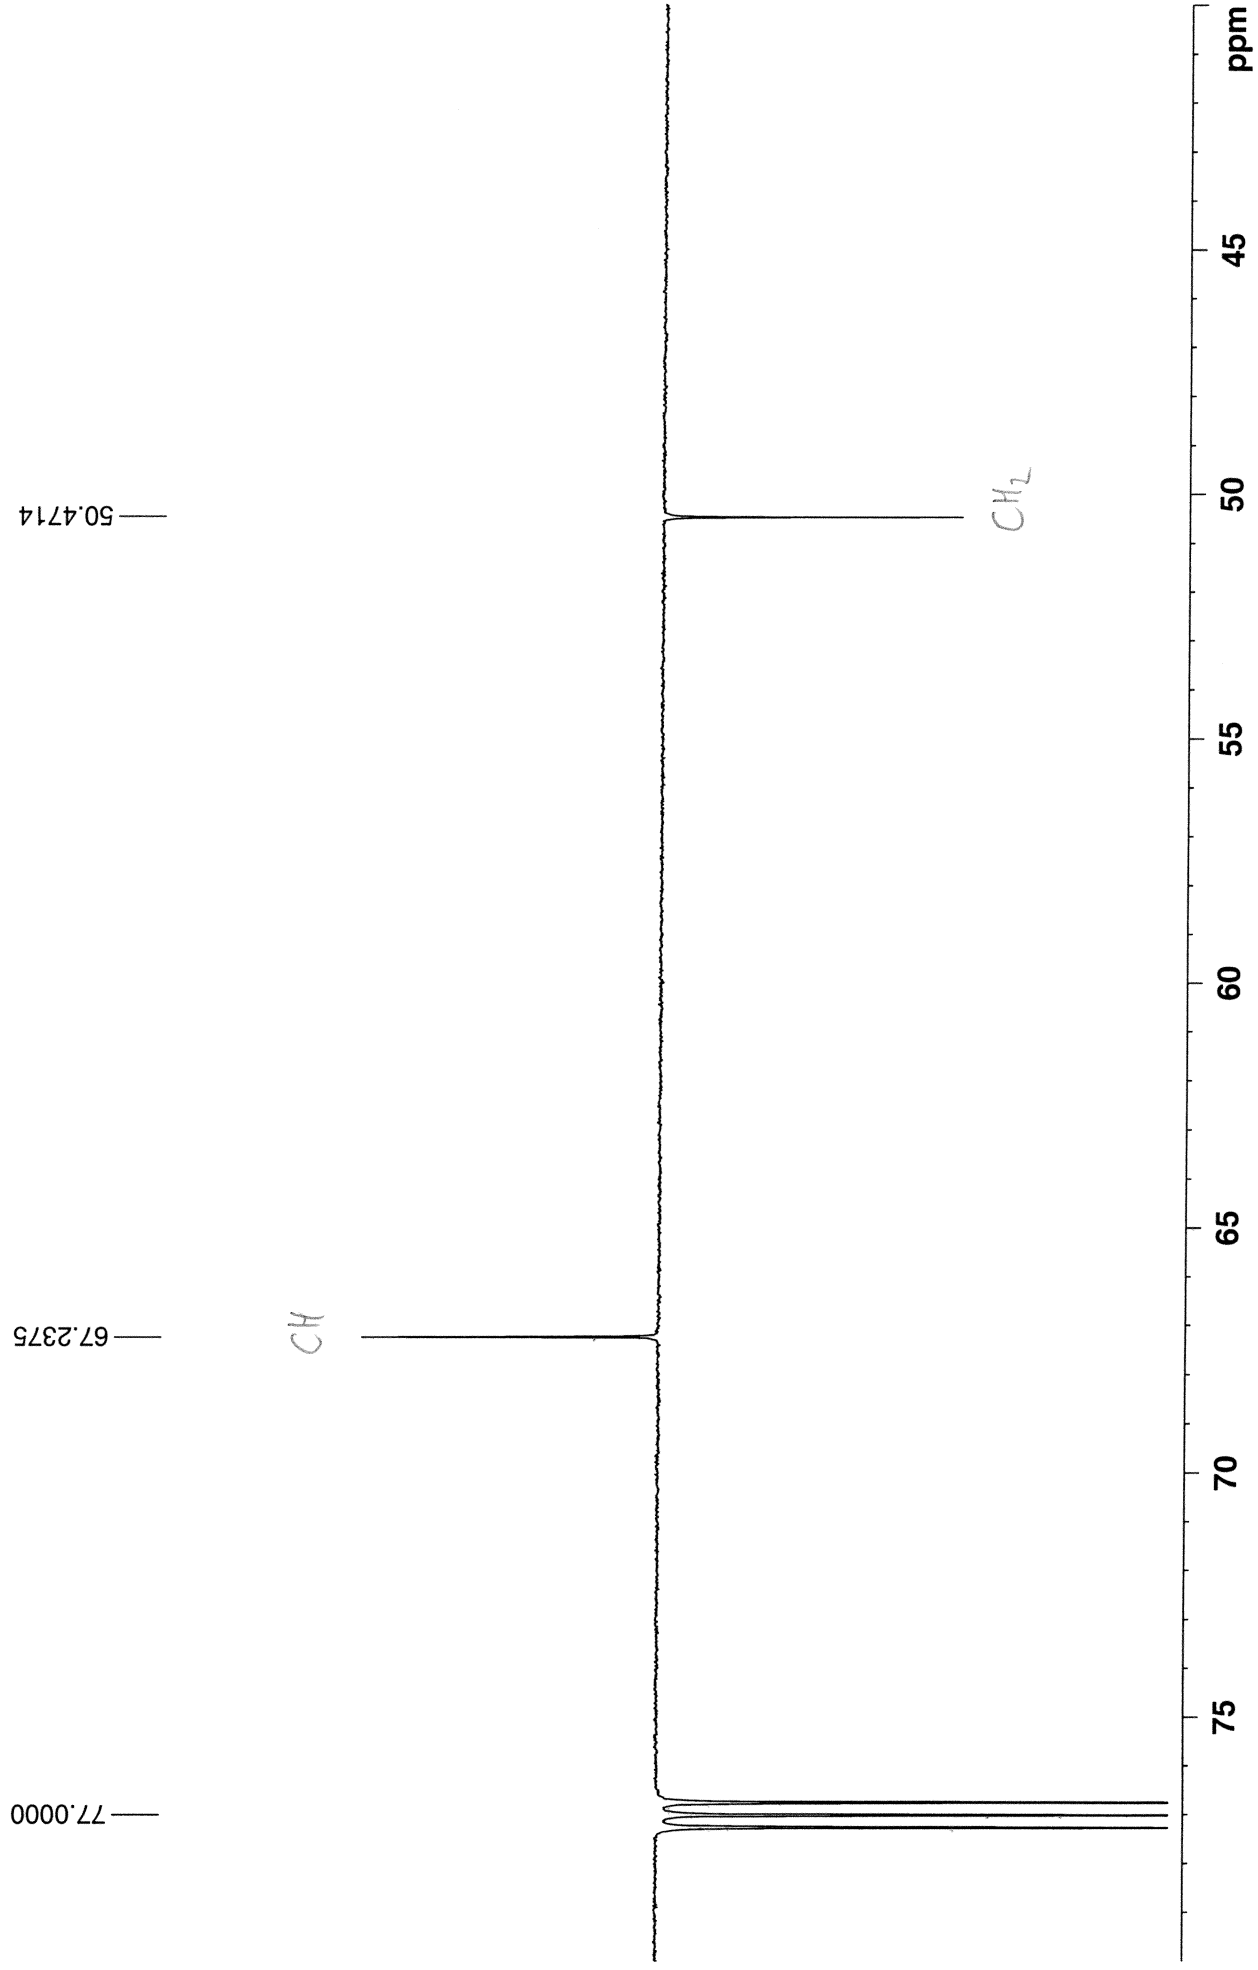

PN014-4 in cdcl3 (COSY) 29.7.2020

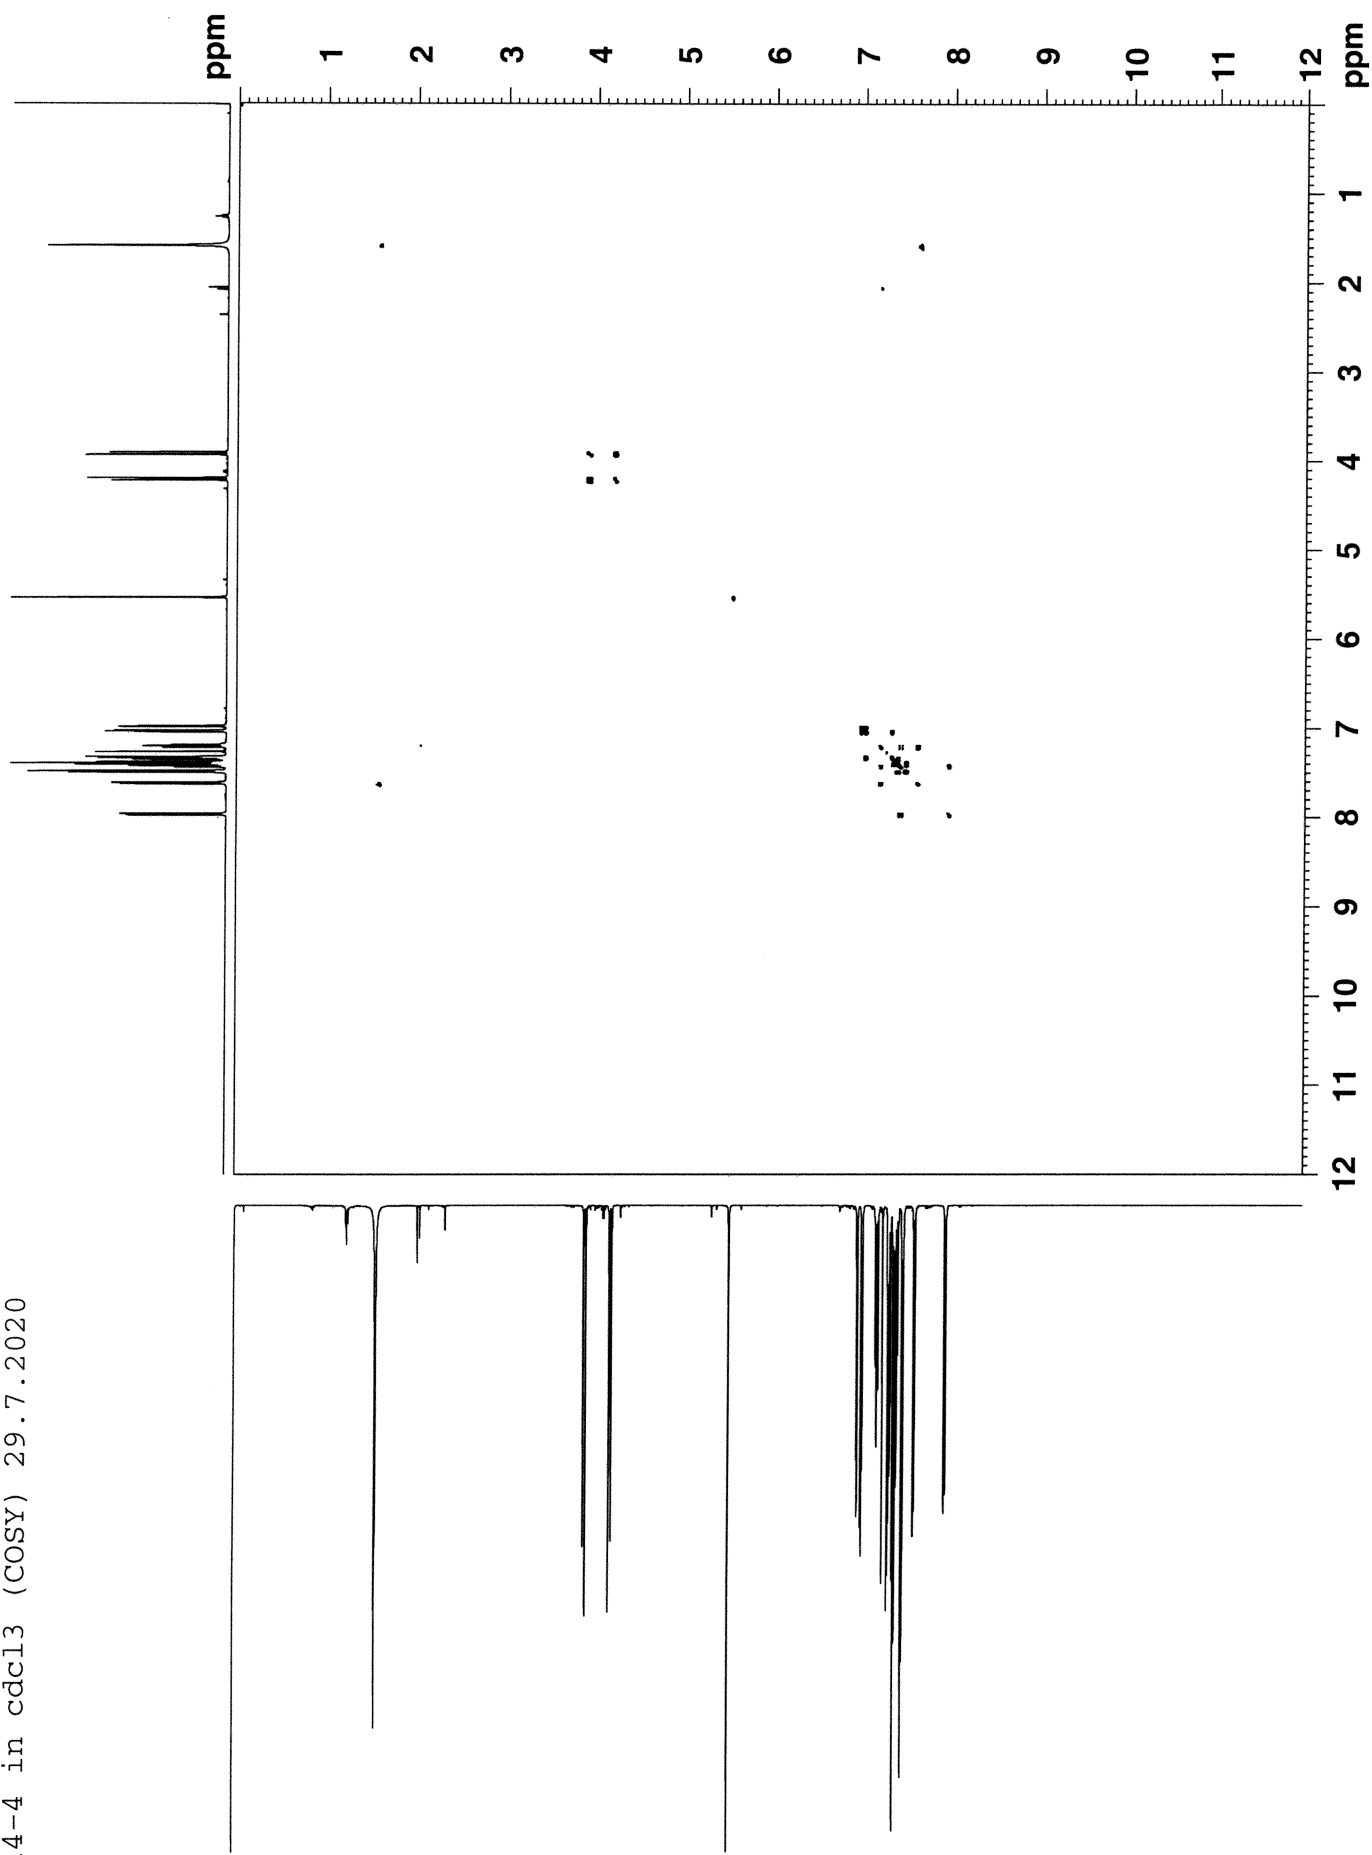

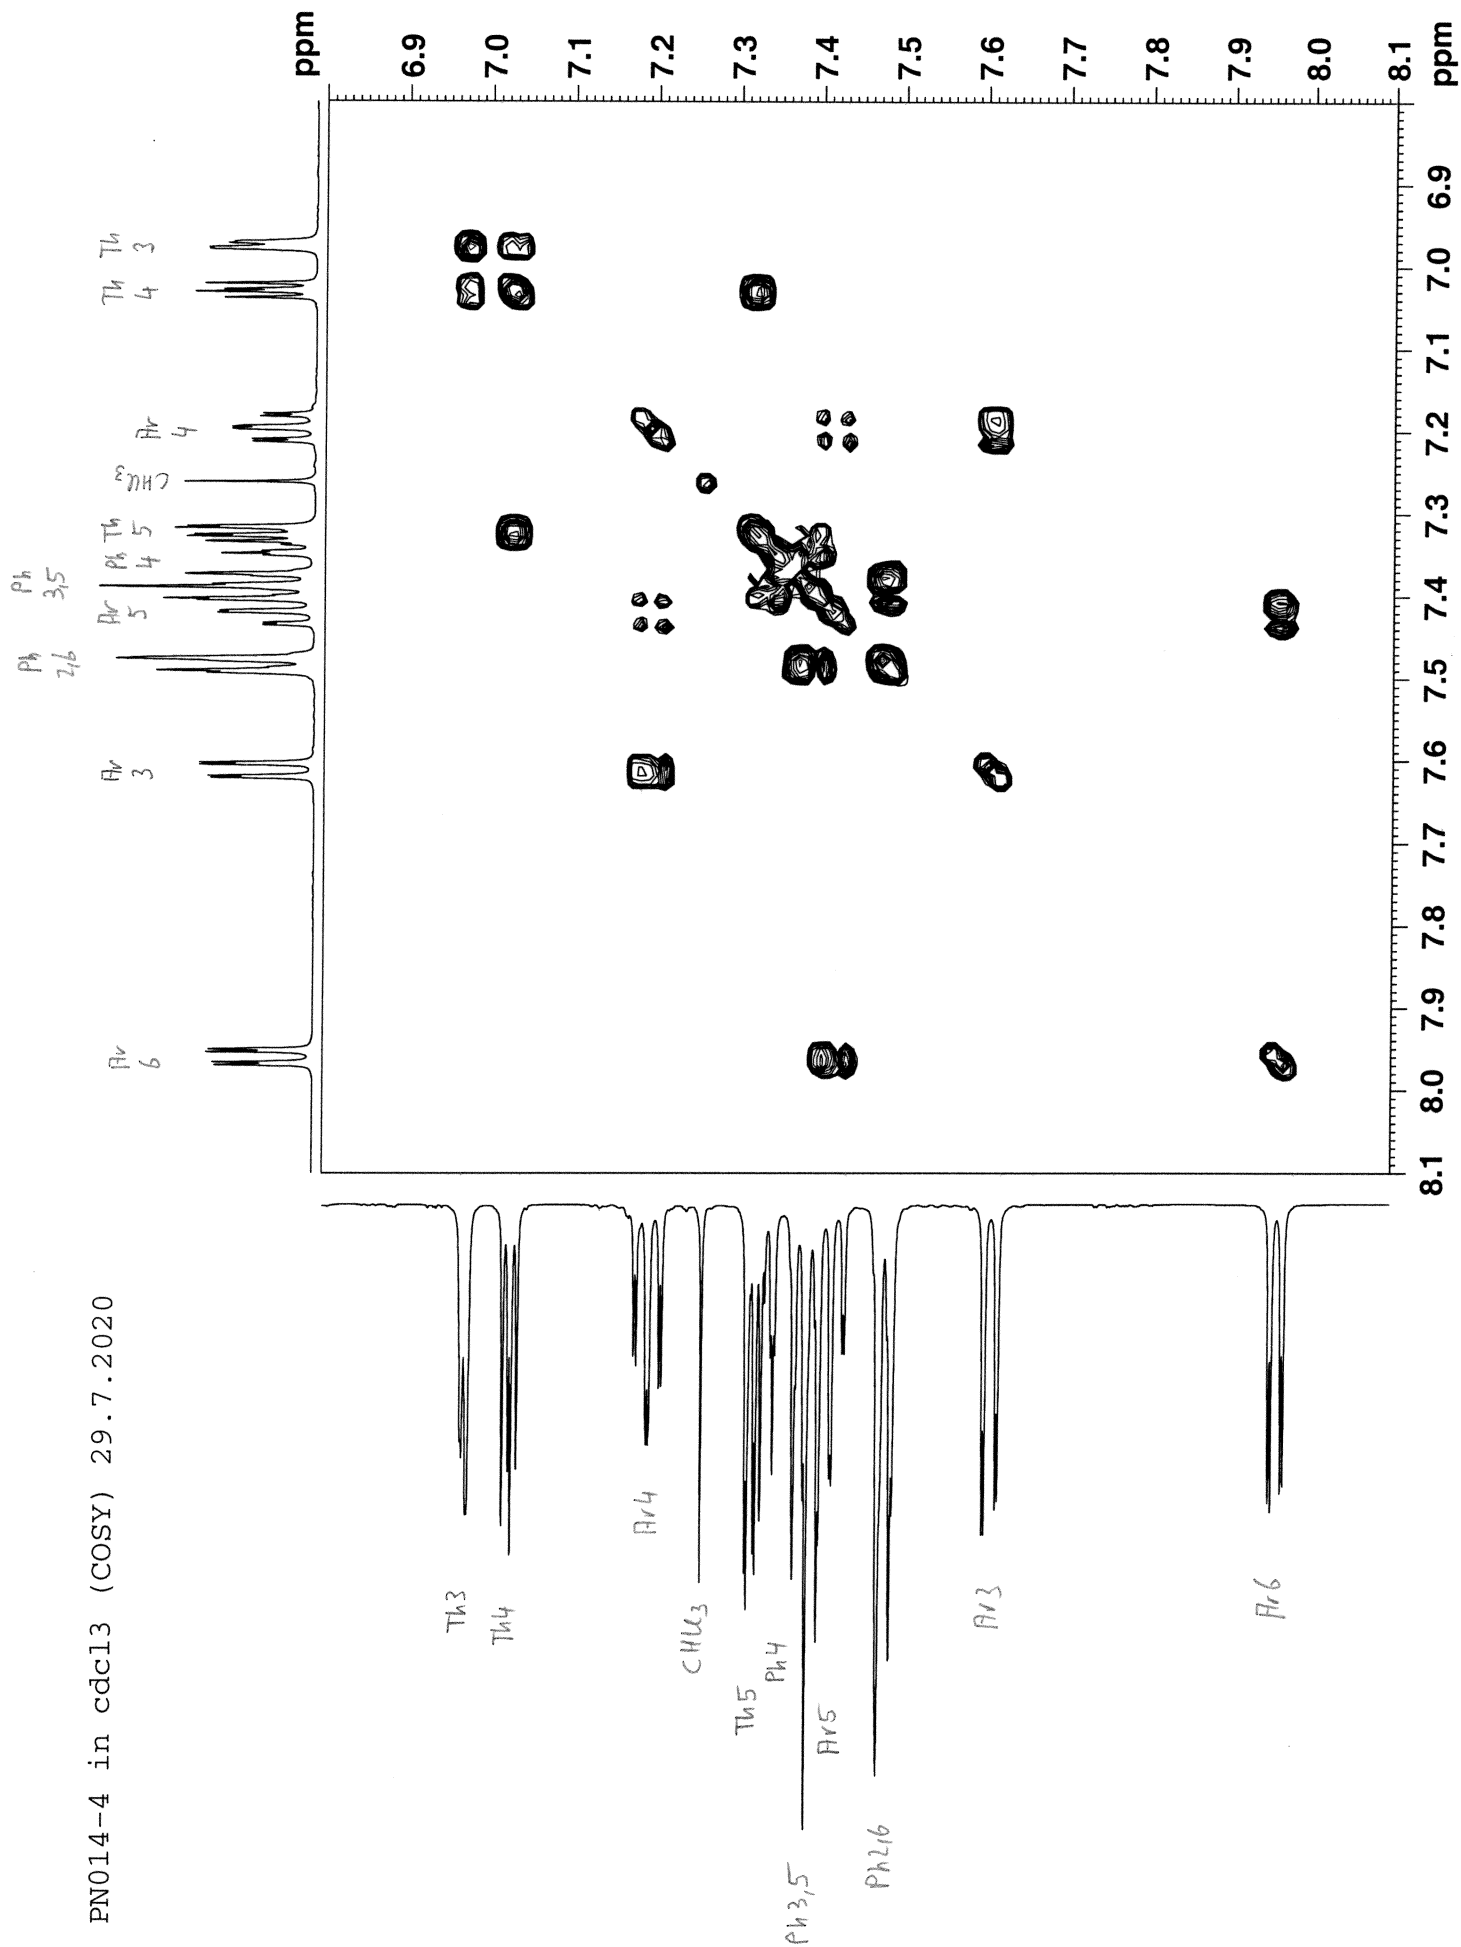

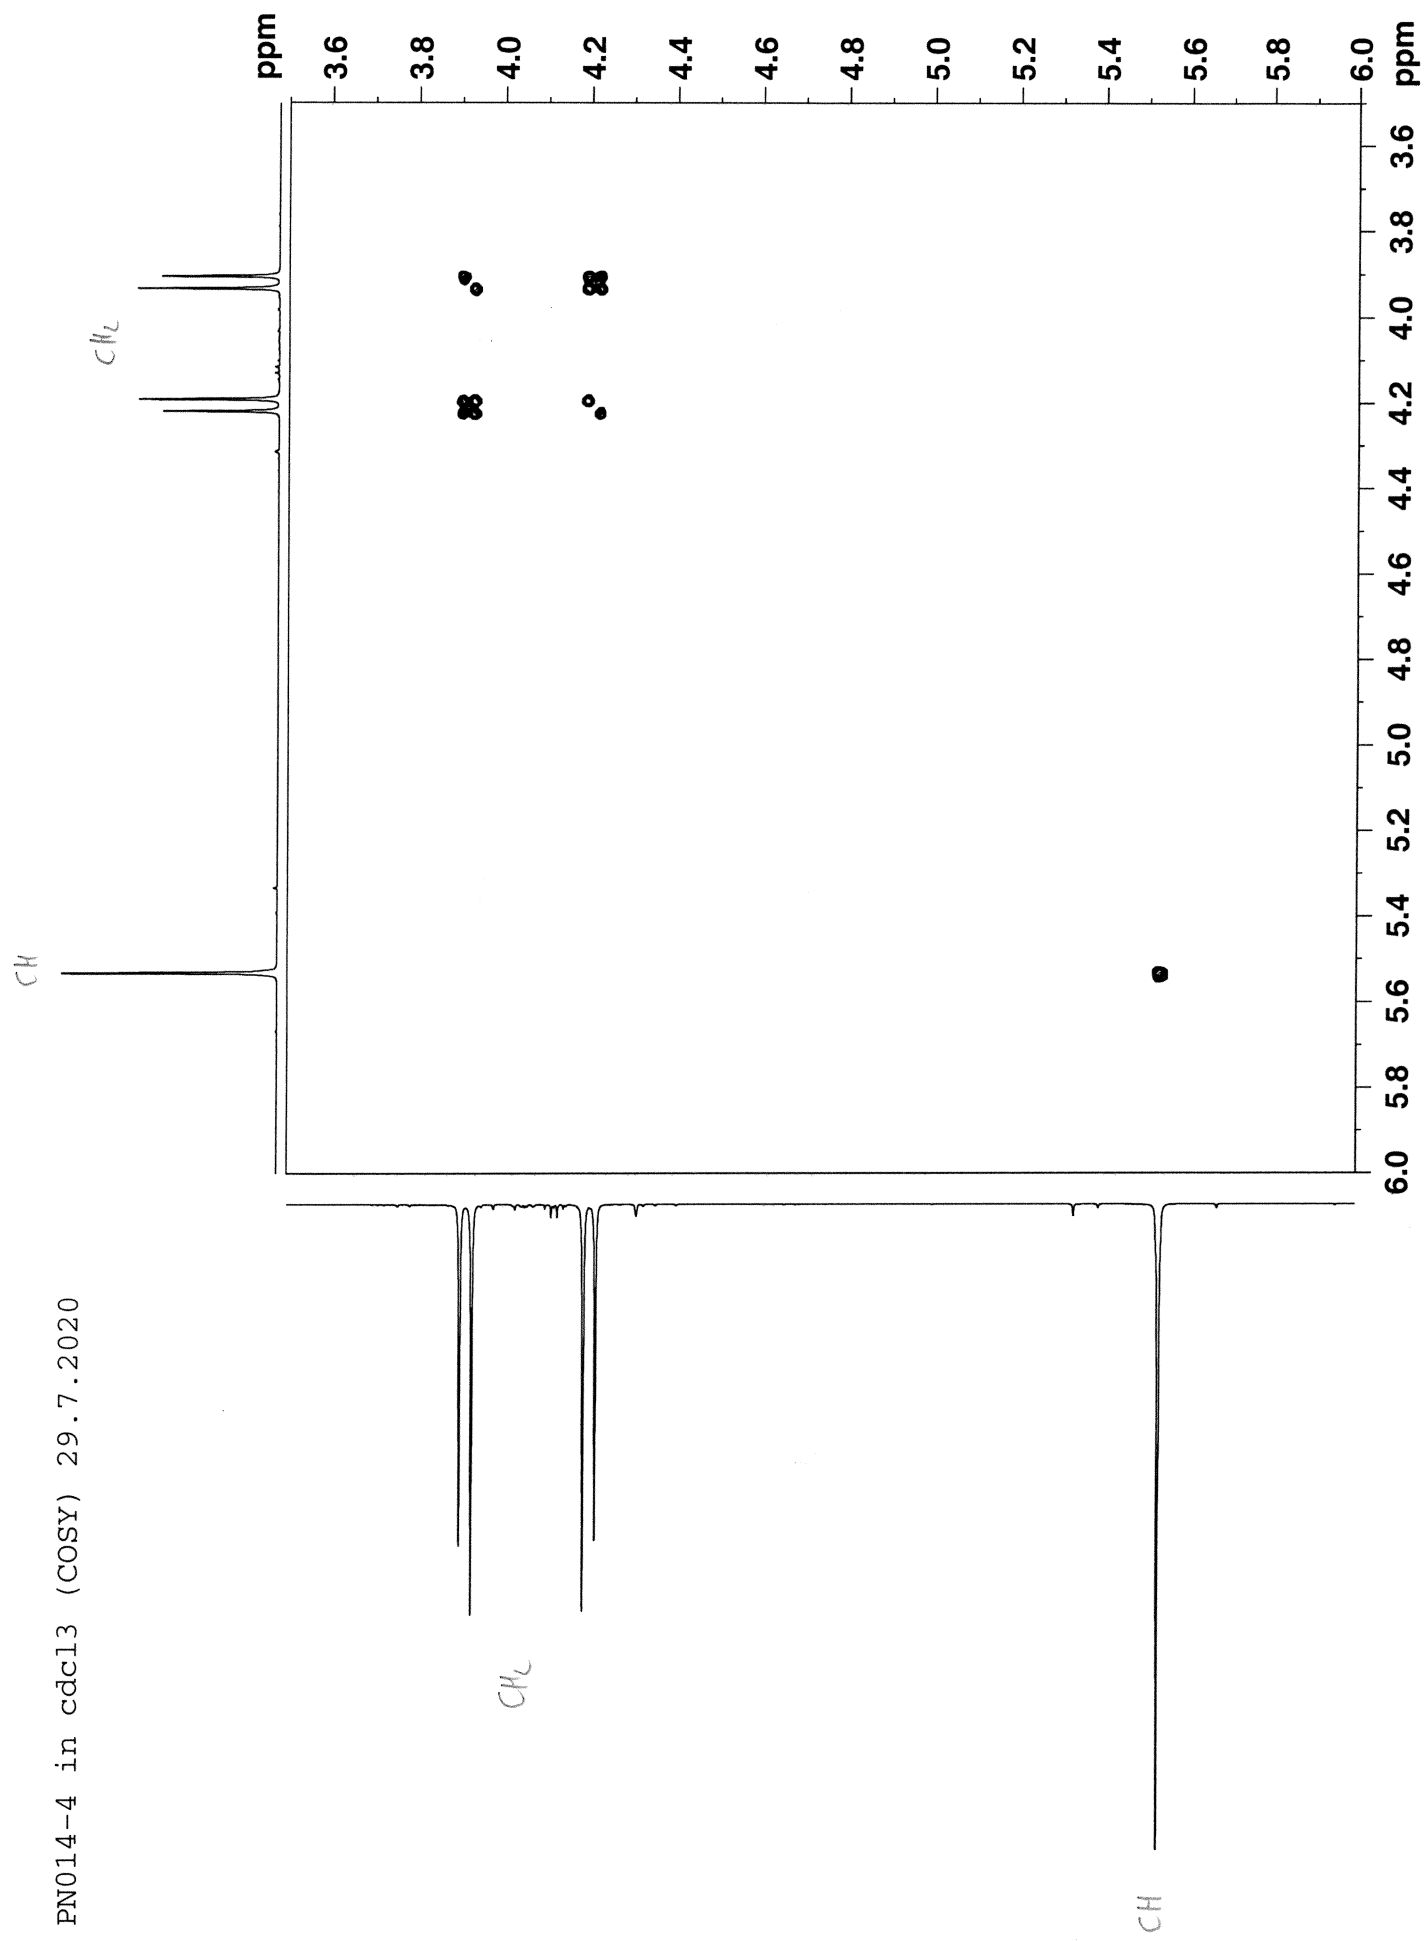

PN014-4 in cdcl3 (HSQC) 29.7.2020

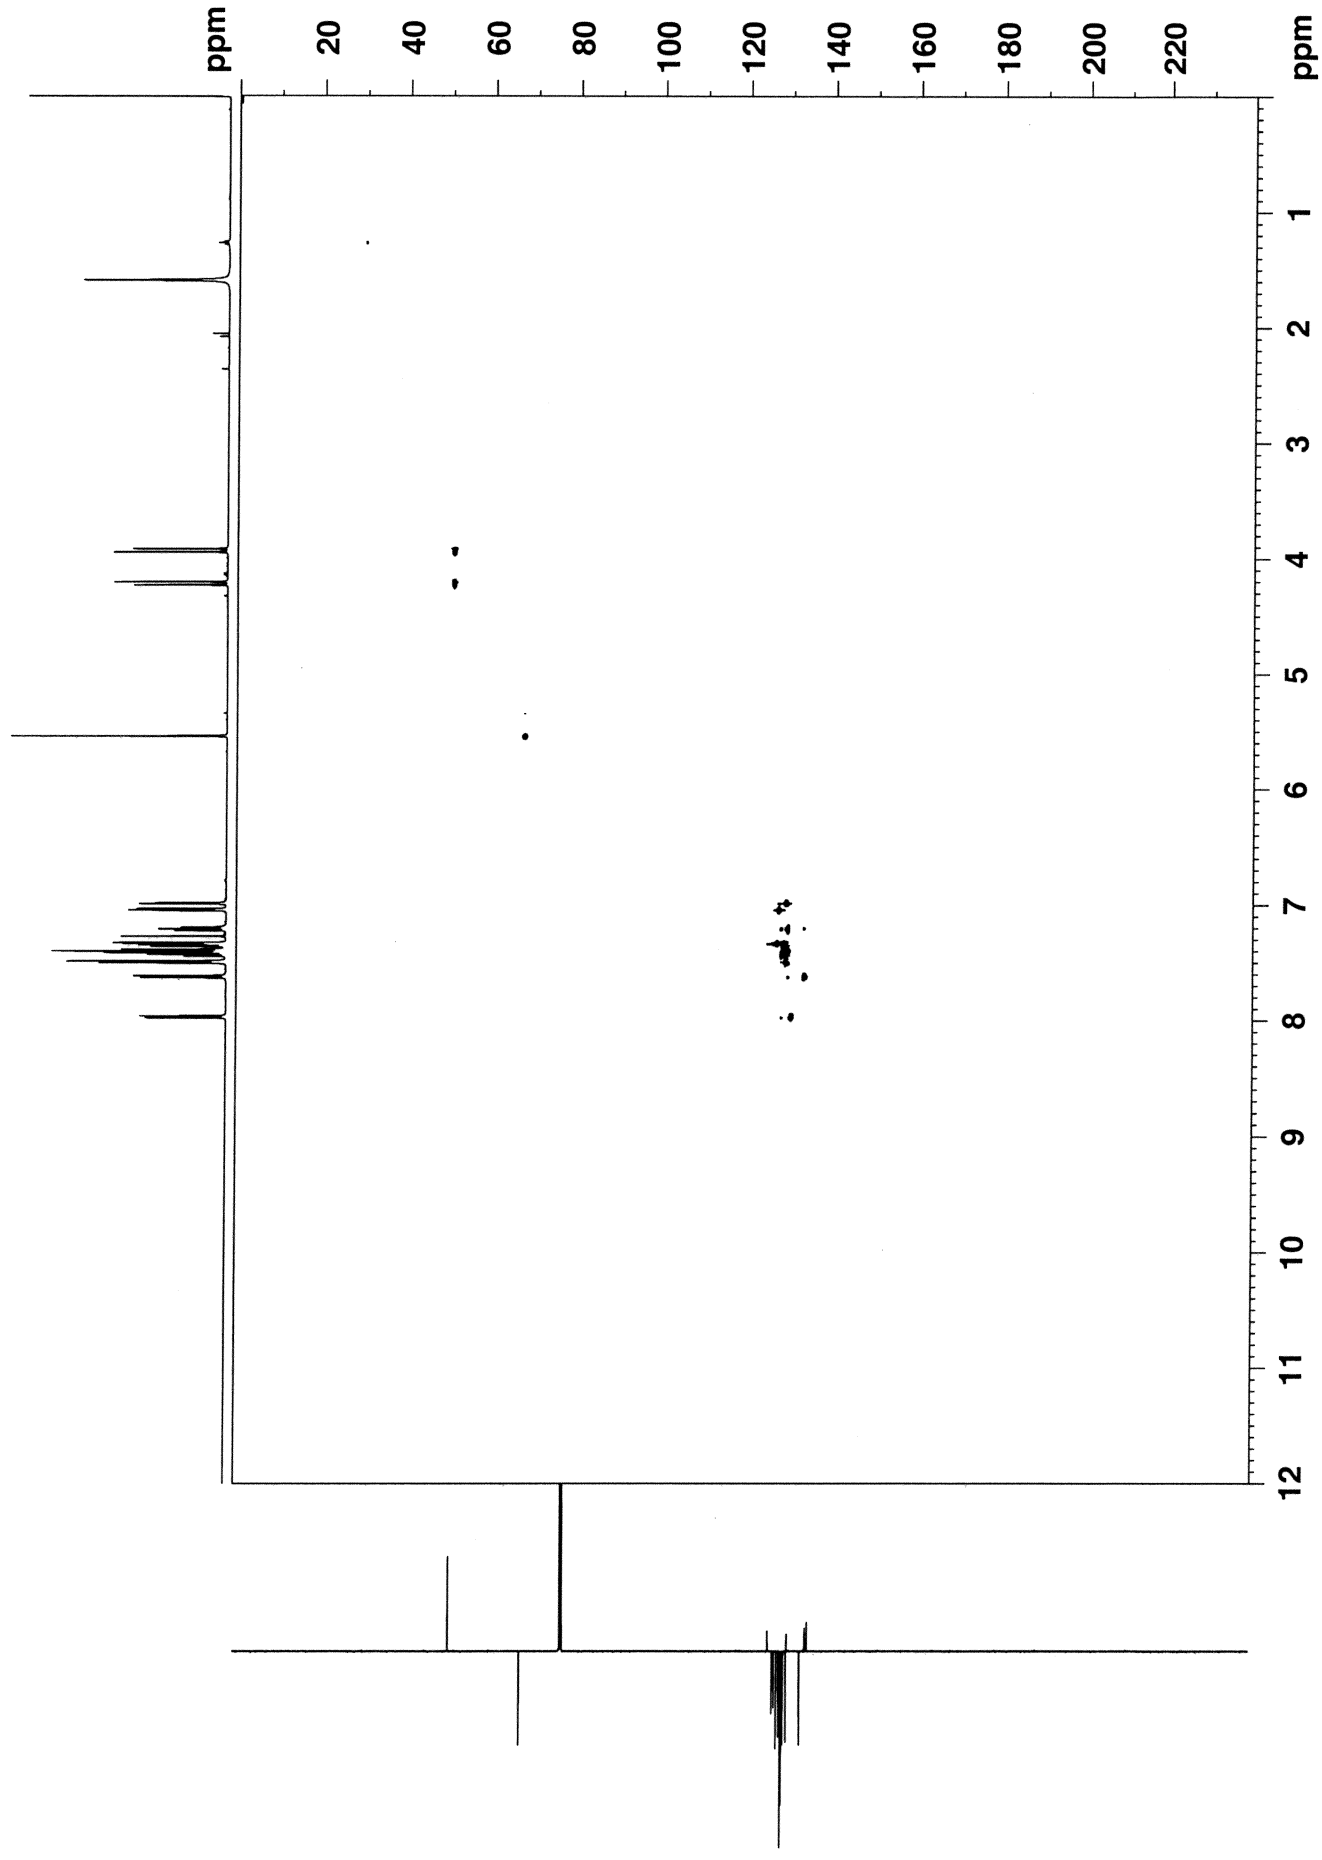

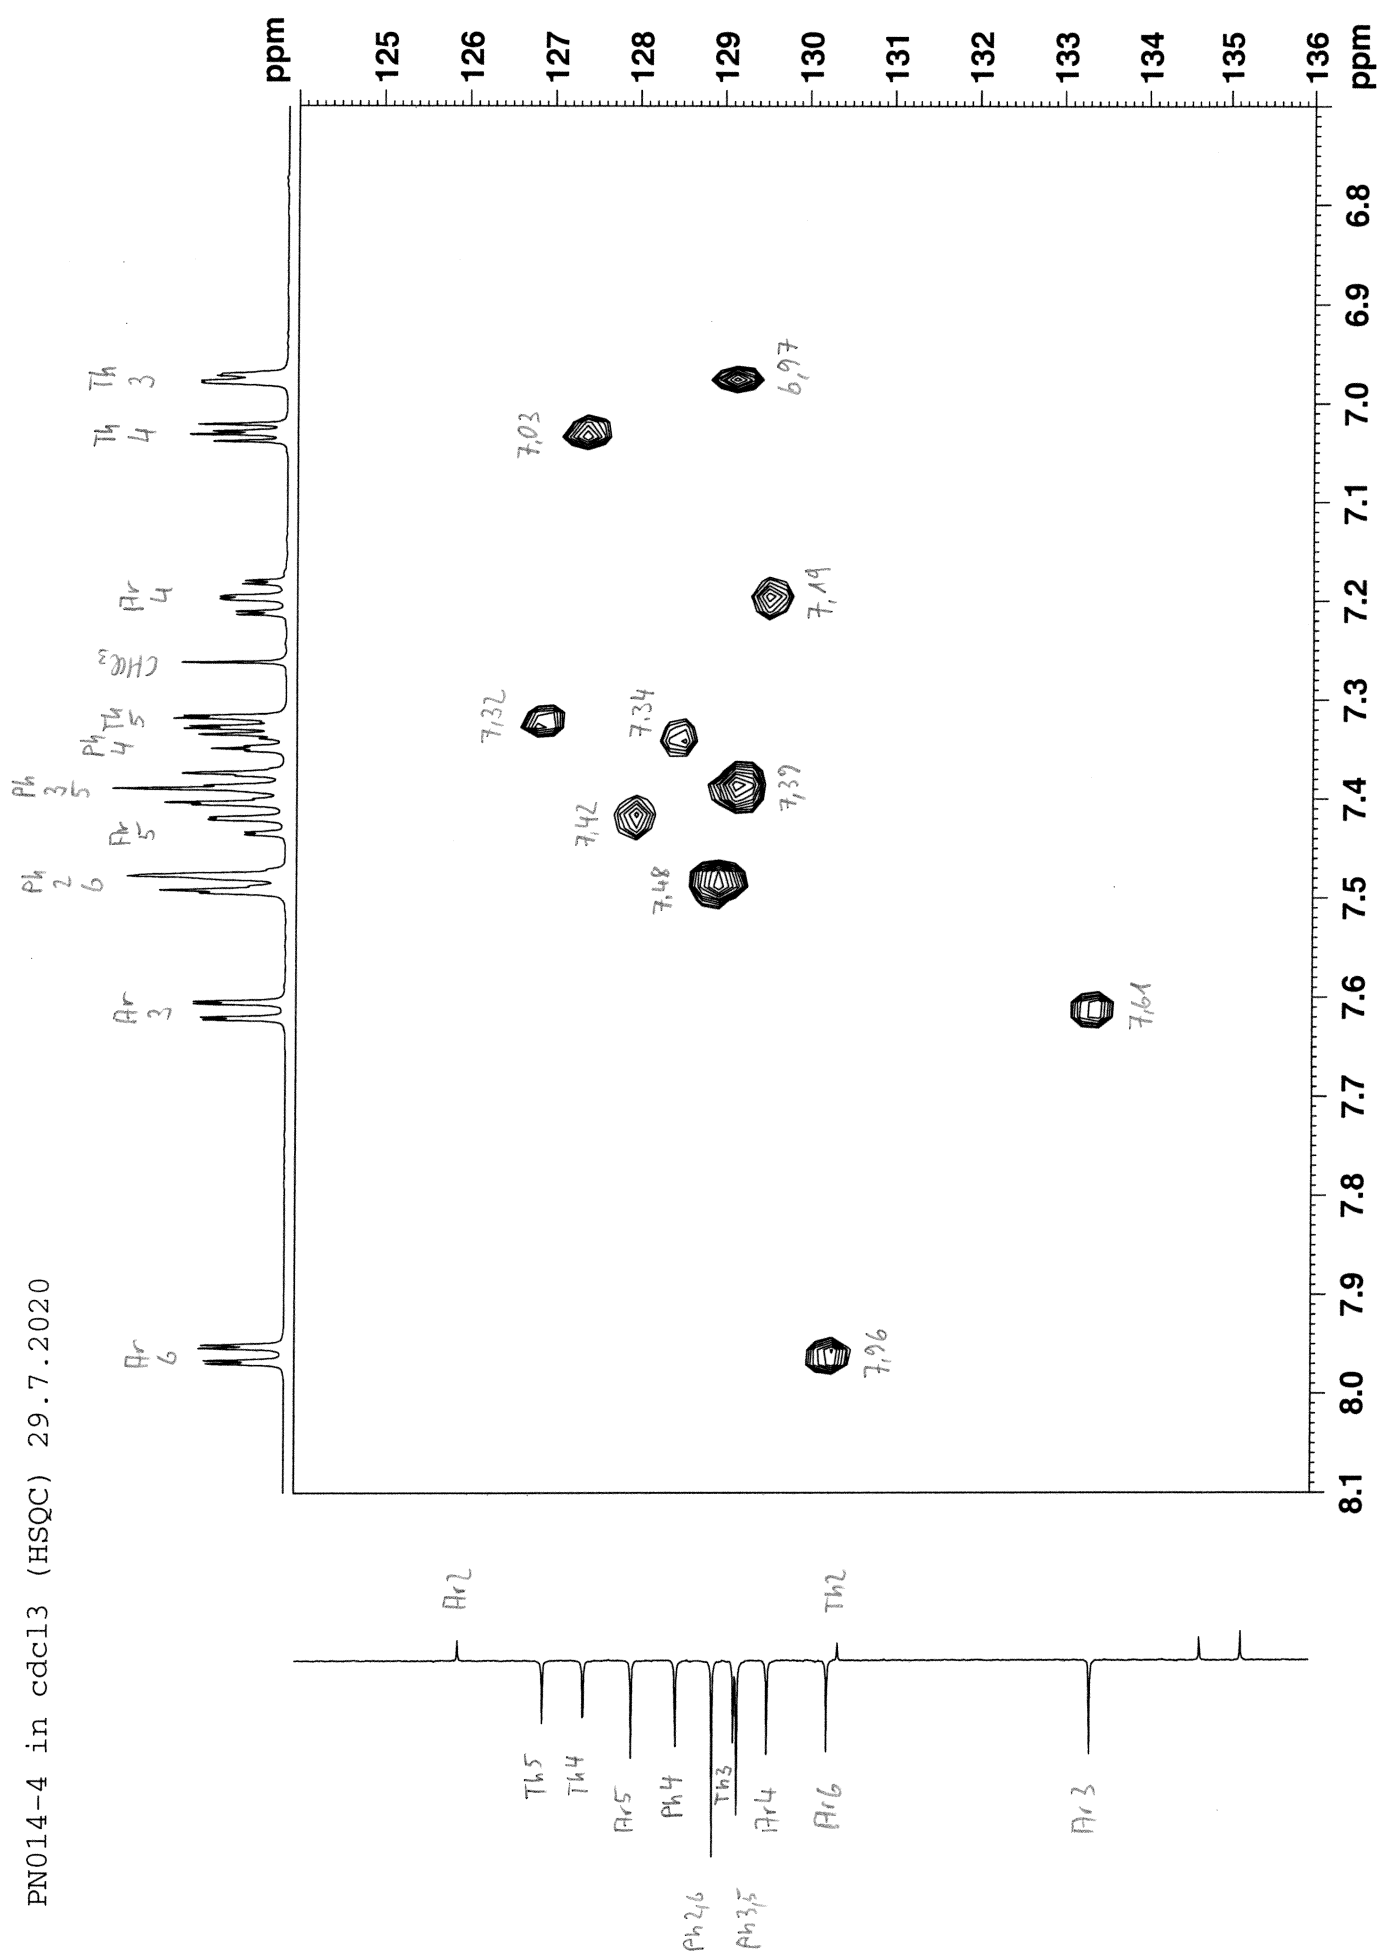

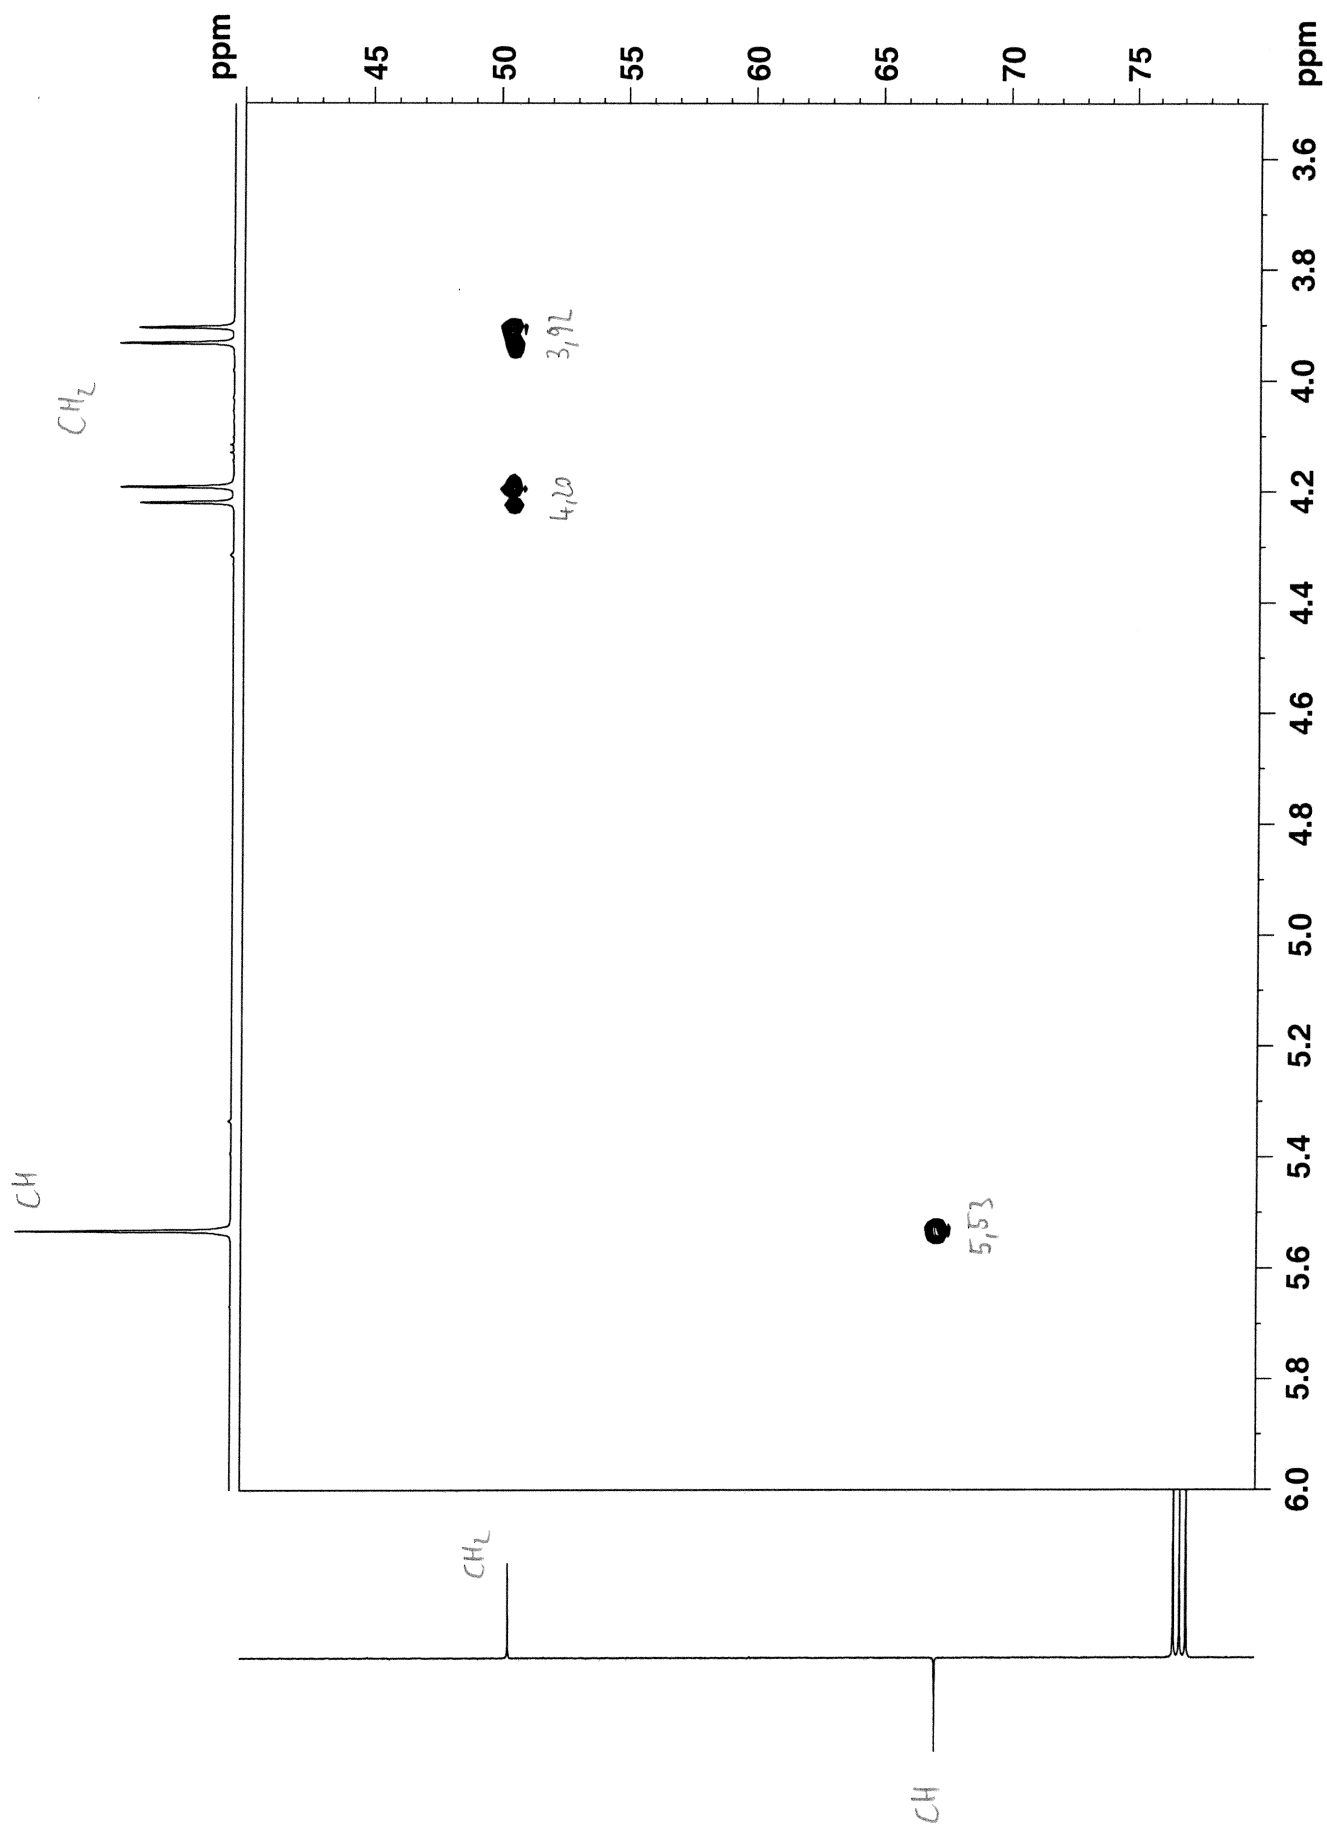

PN014-4 in cdcl3 (HMBC) 29.7.2020

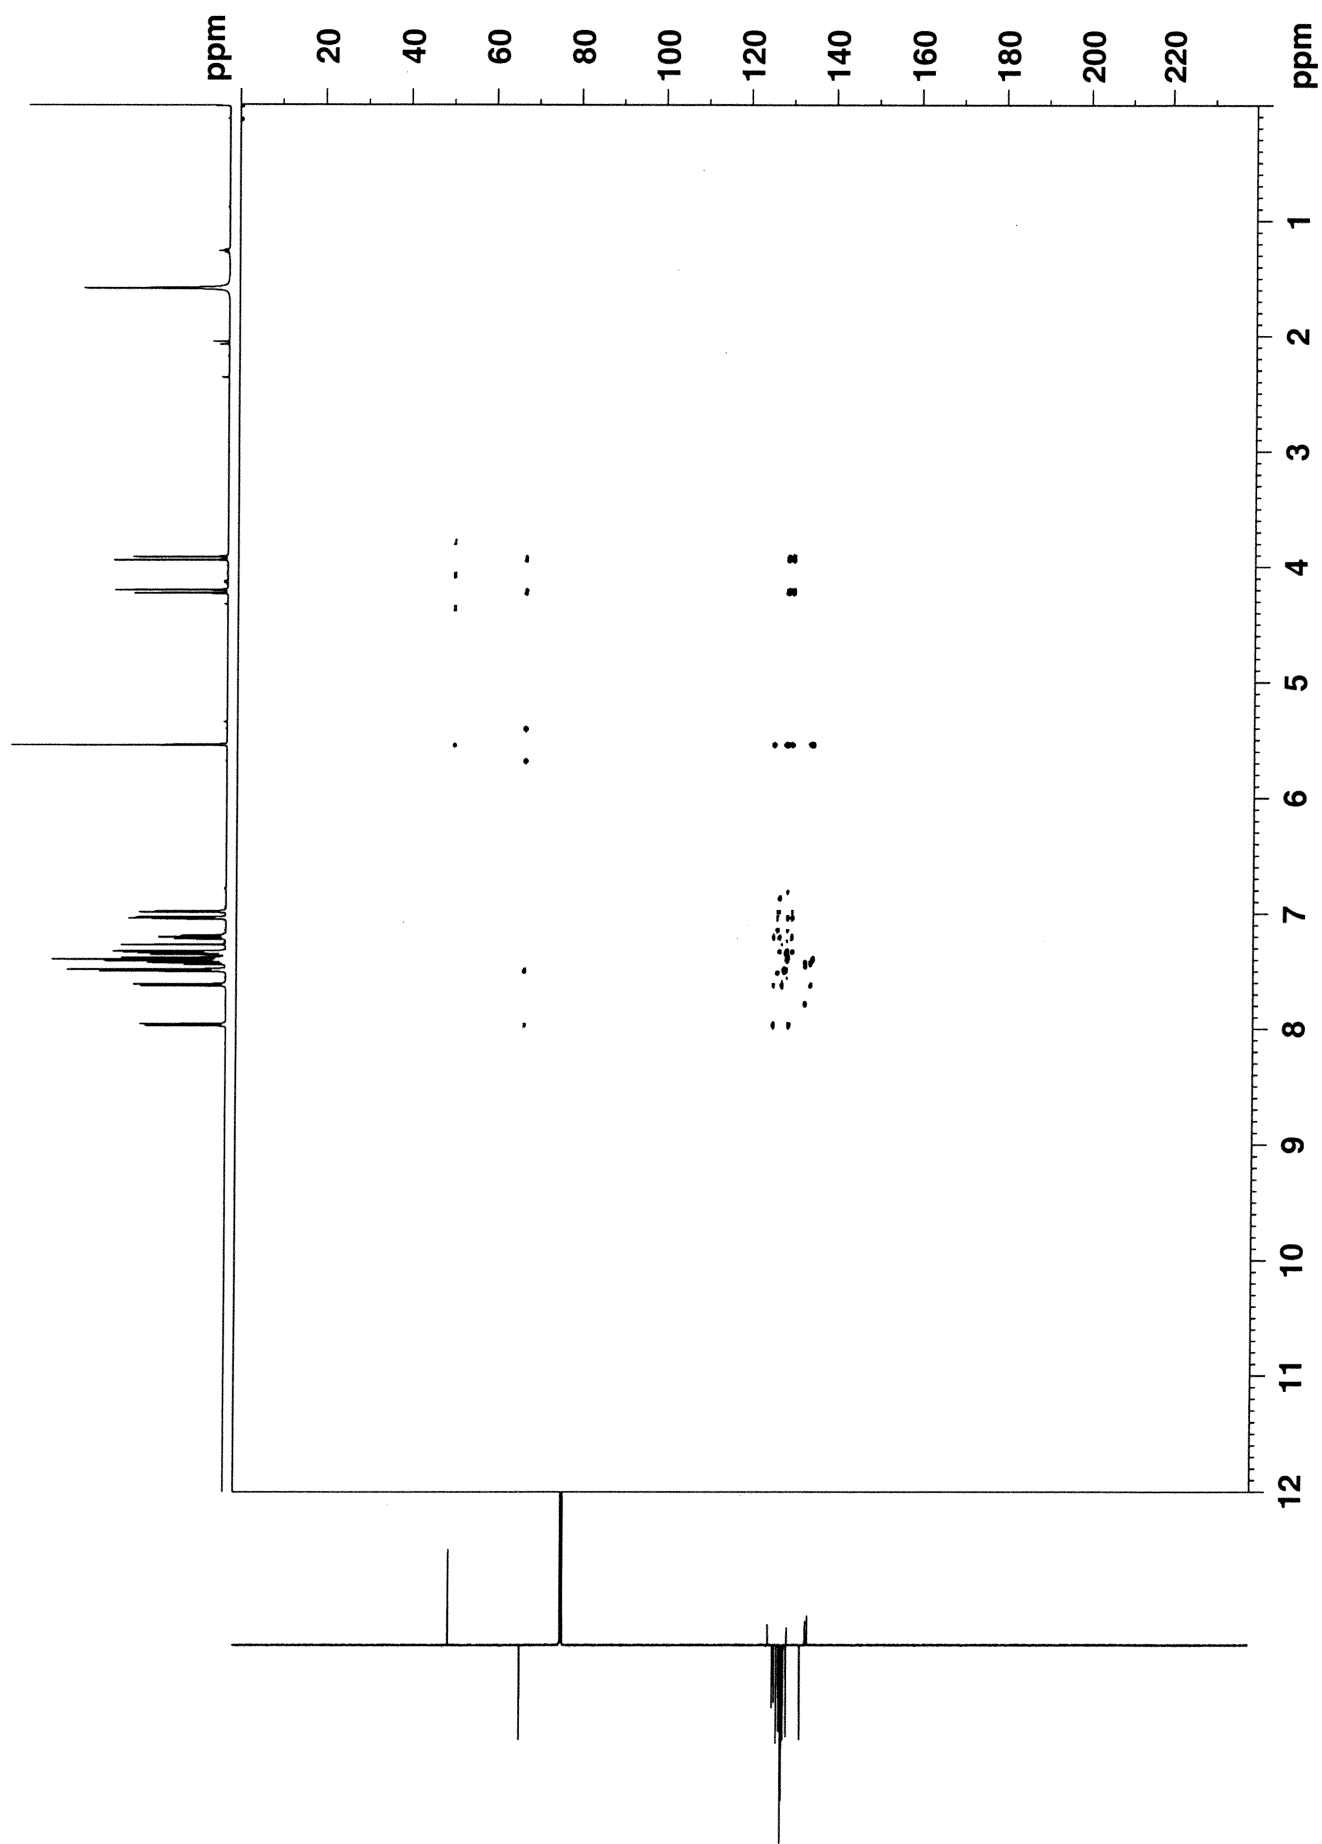



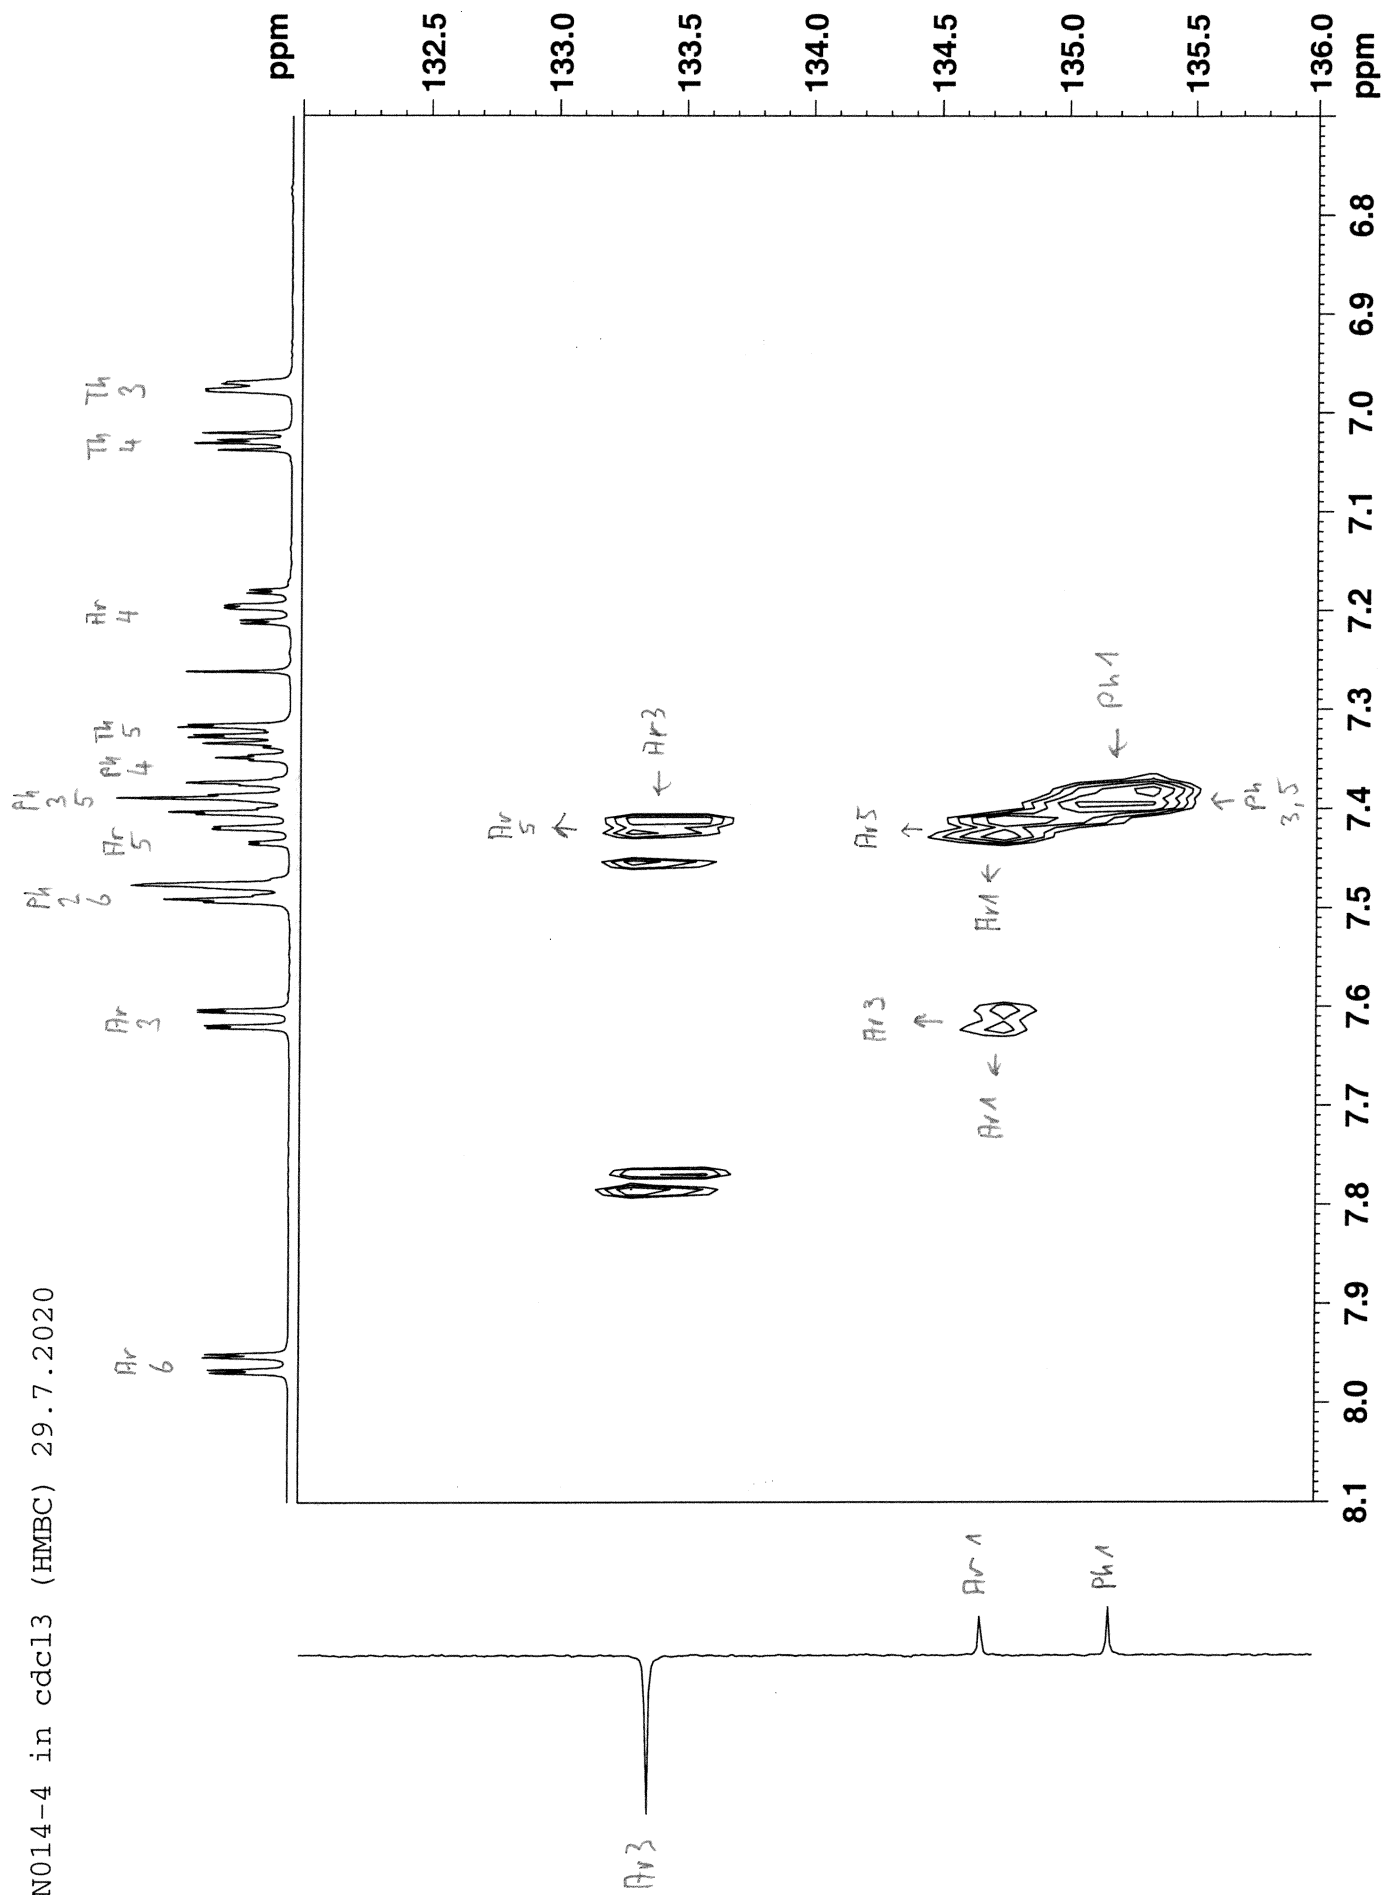

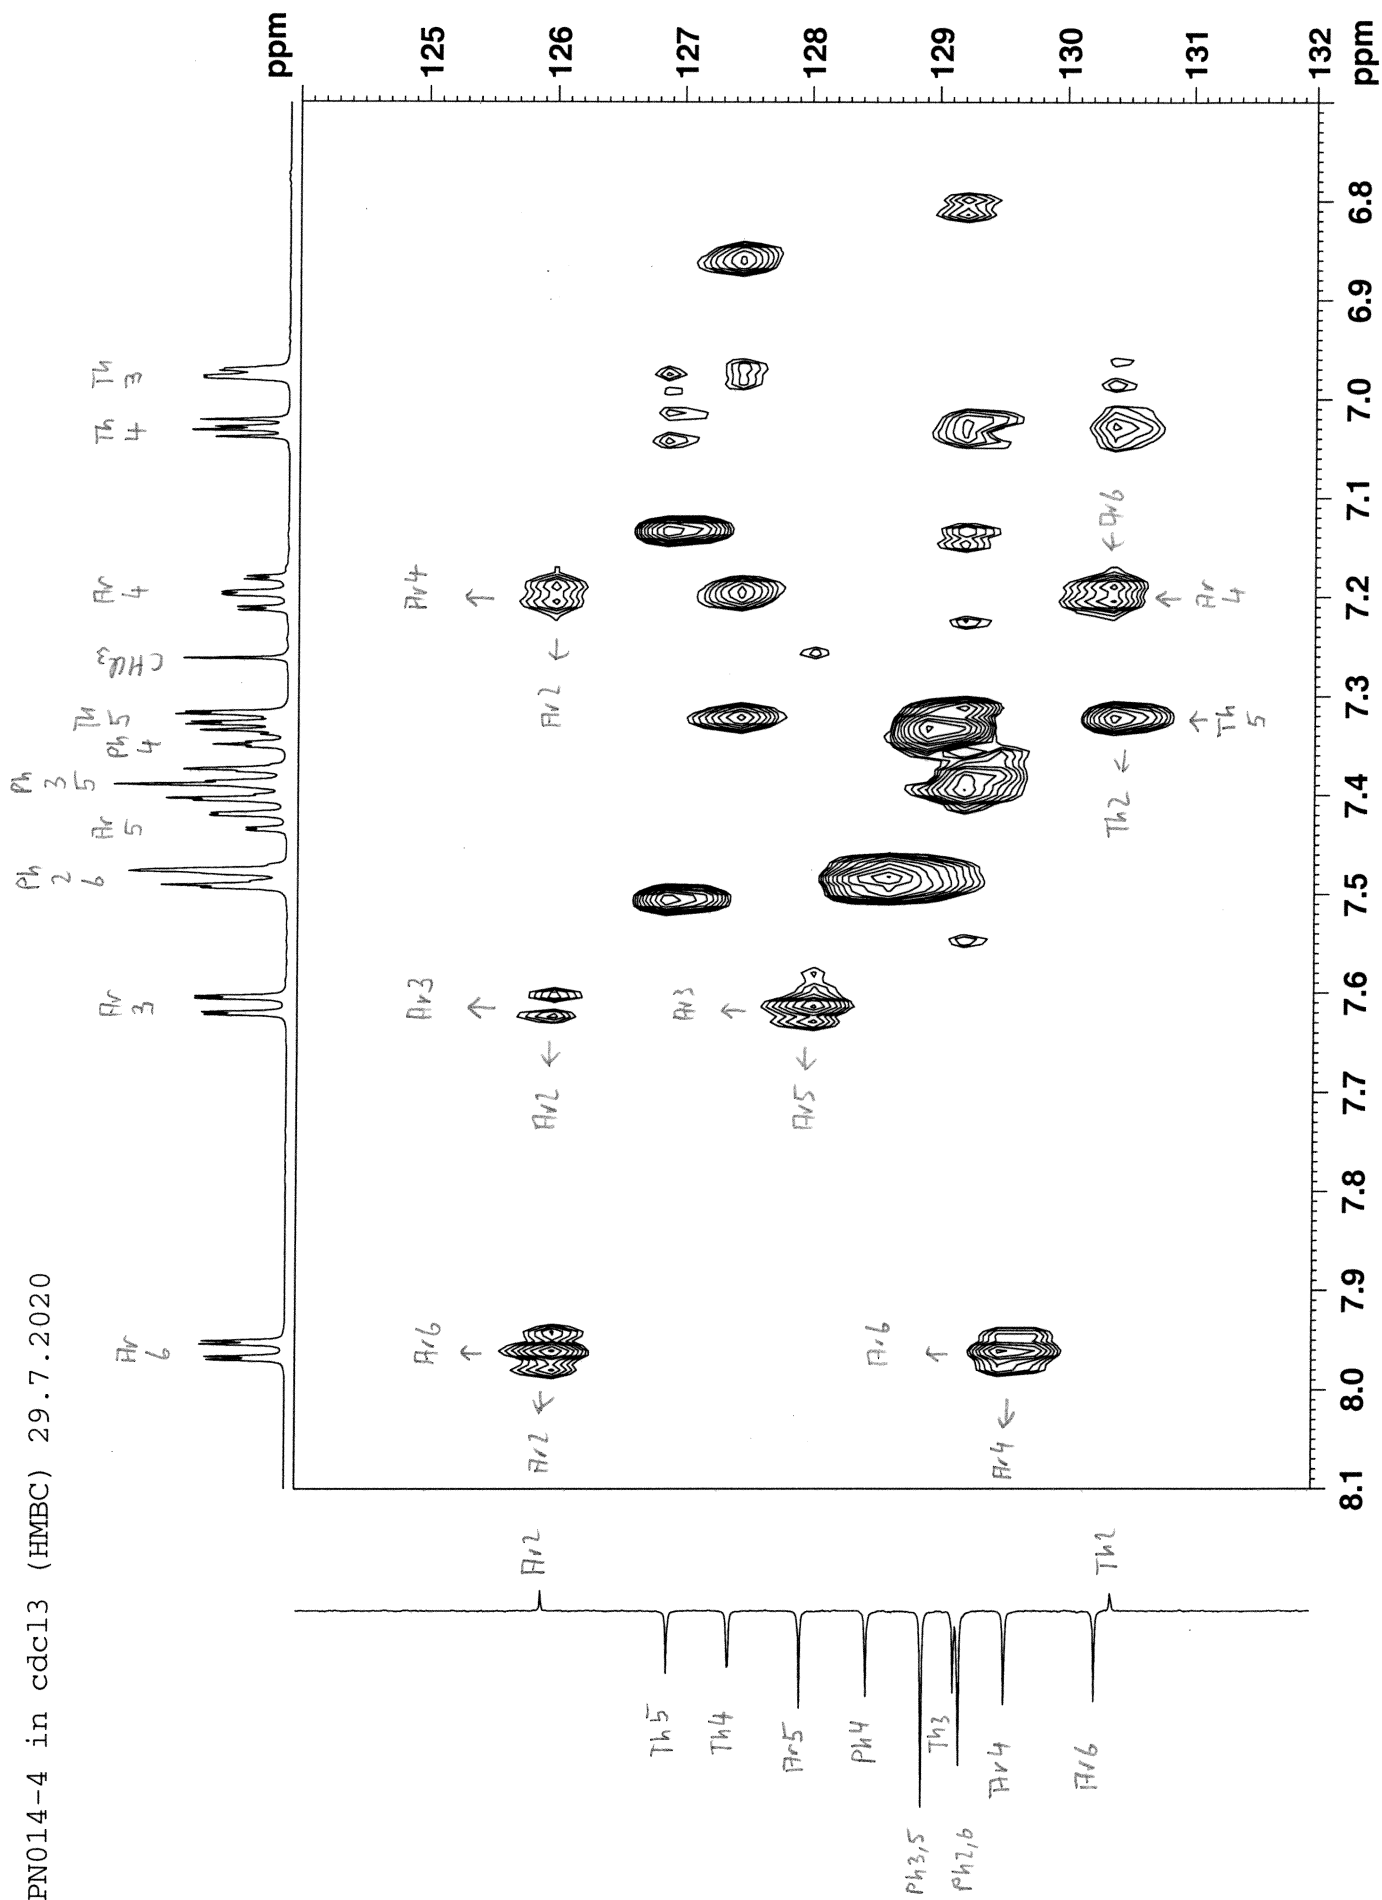

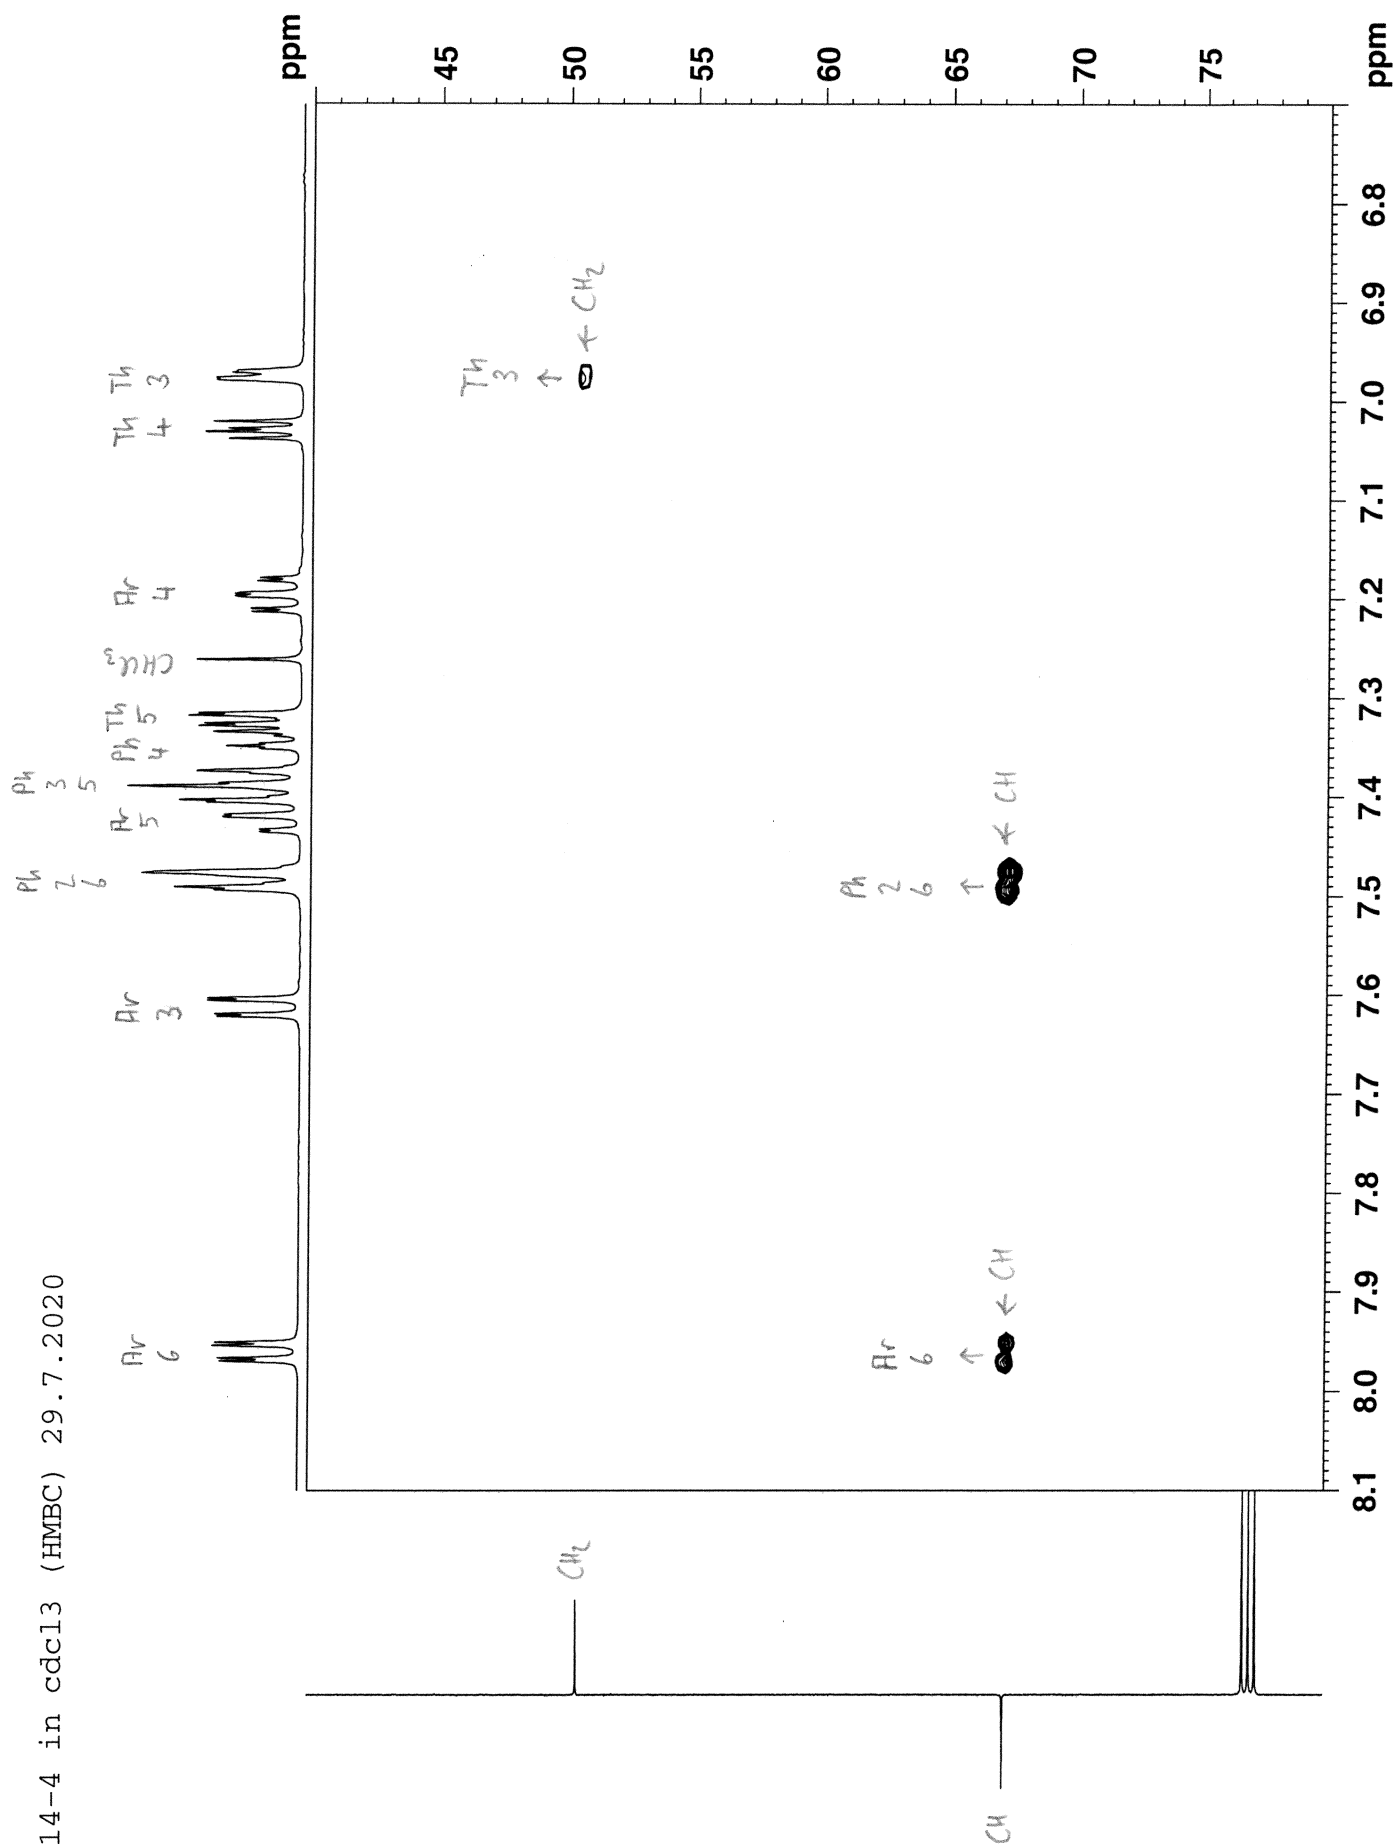

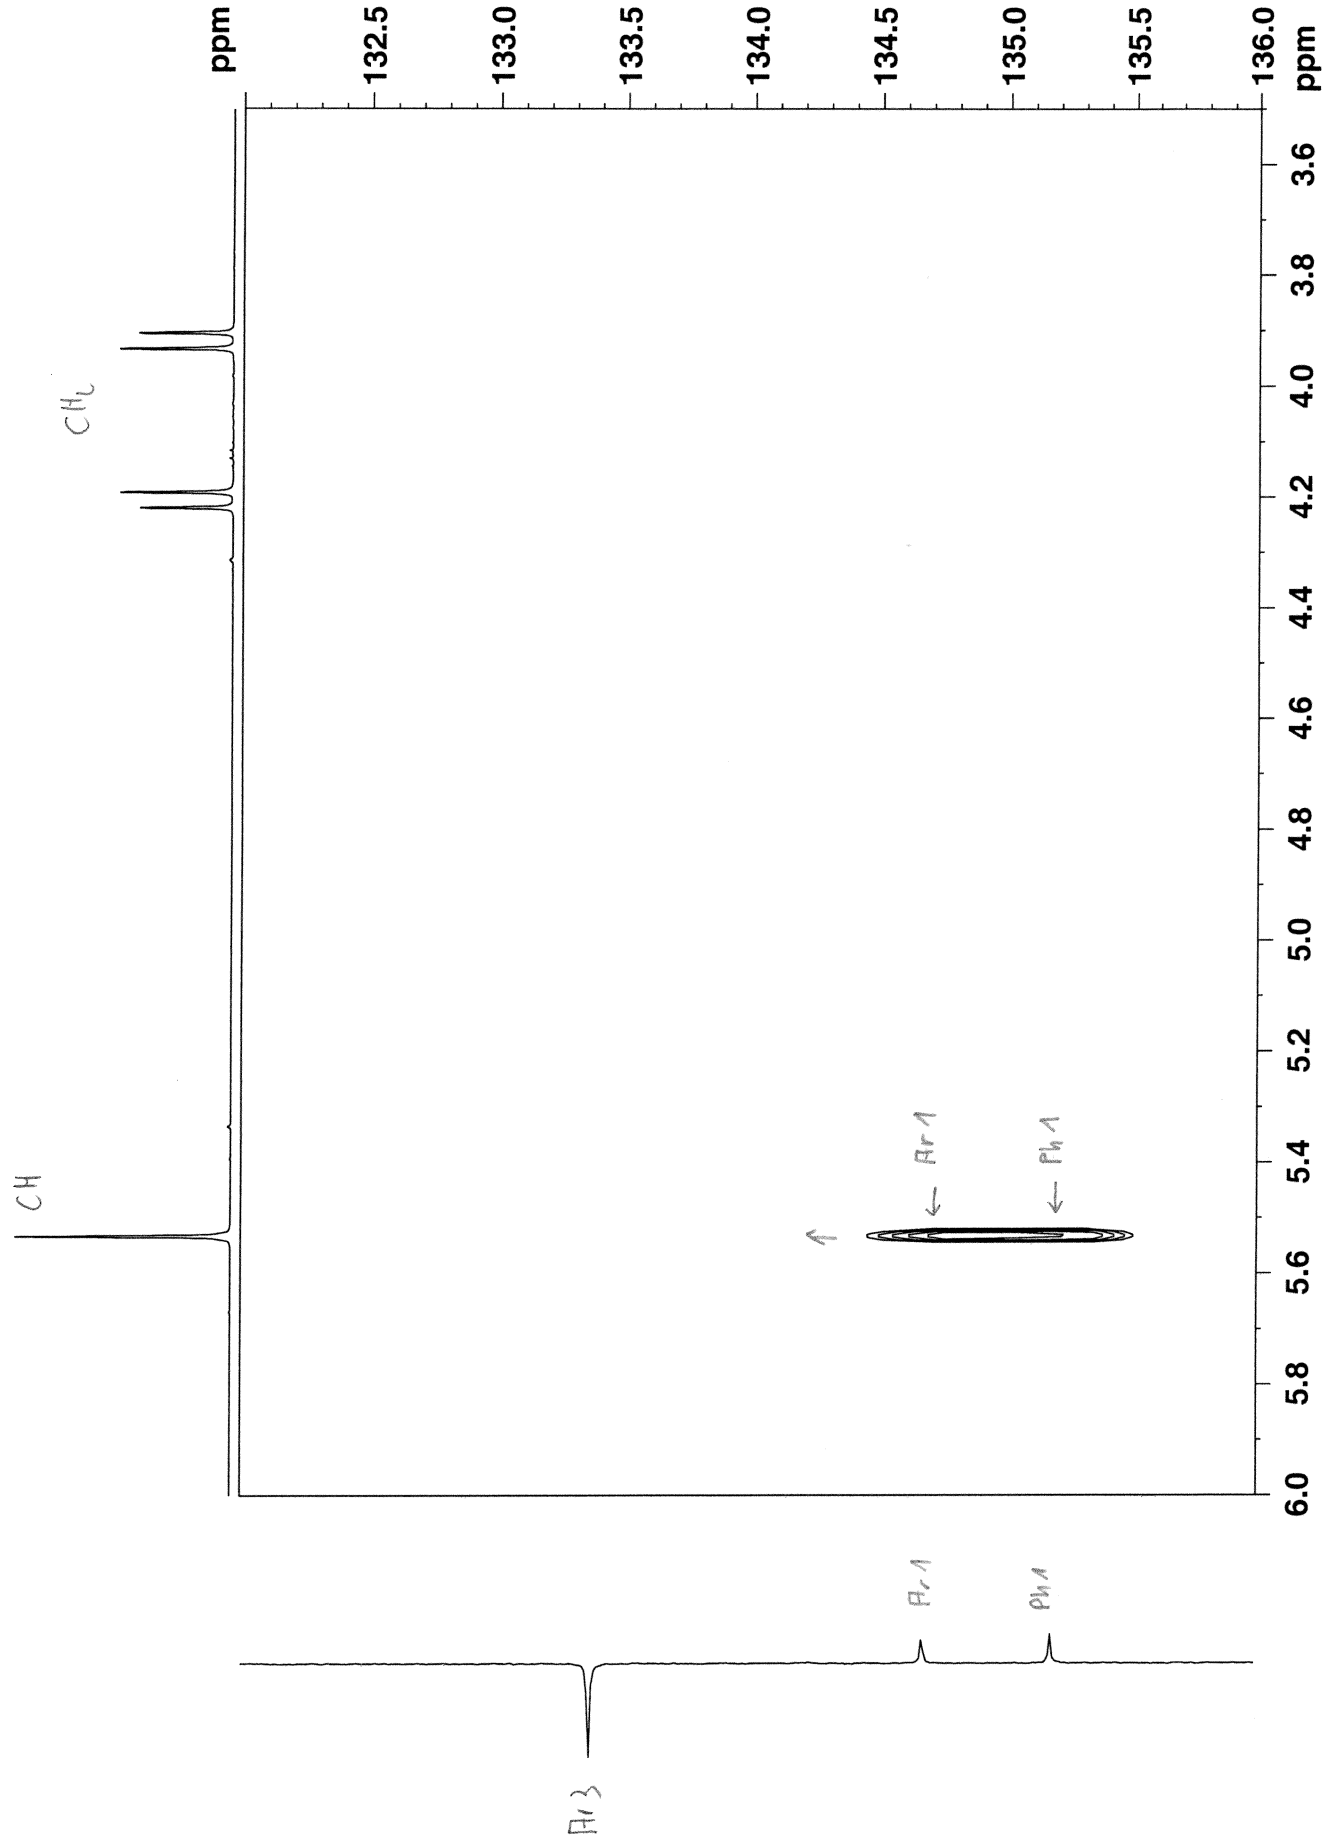

PN014-4 in cdcl3 (HMBC) 29.7.2020

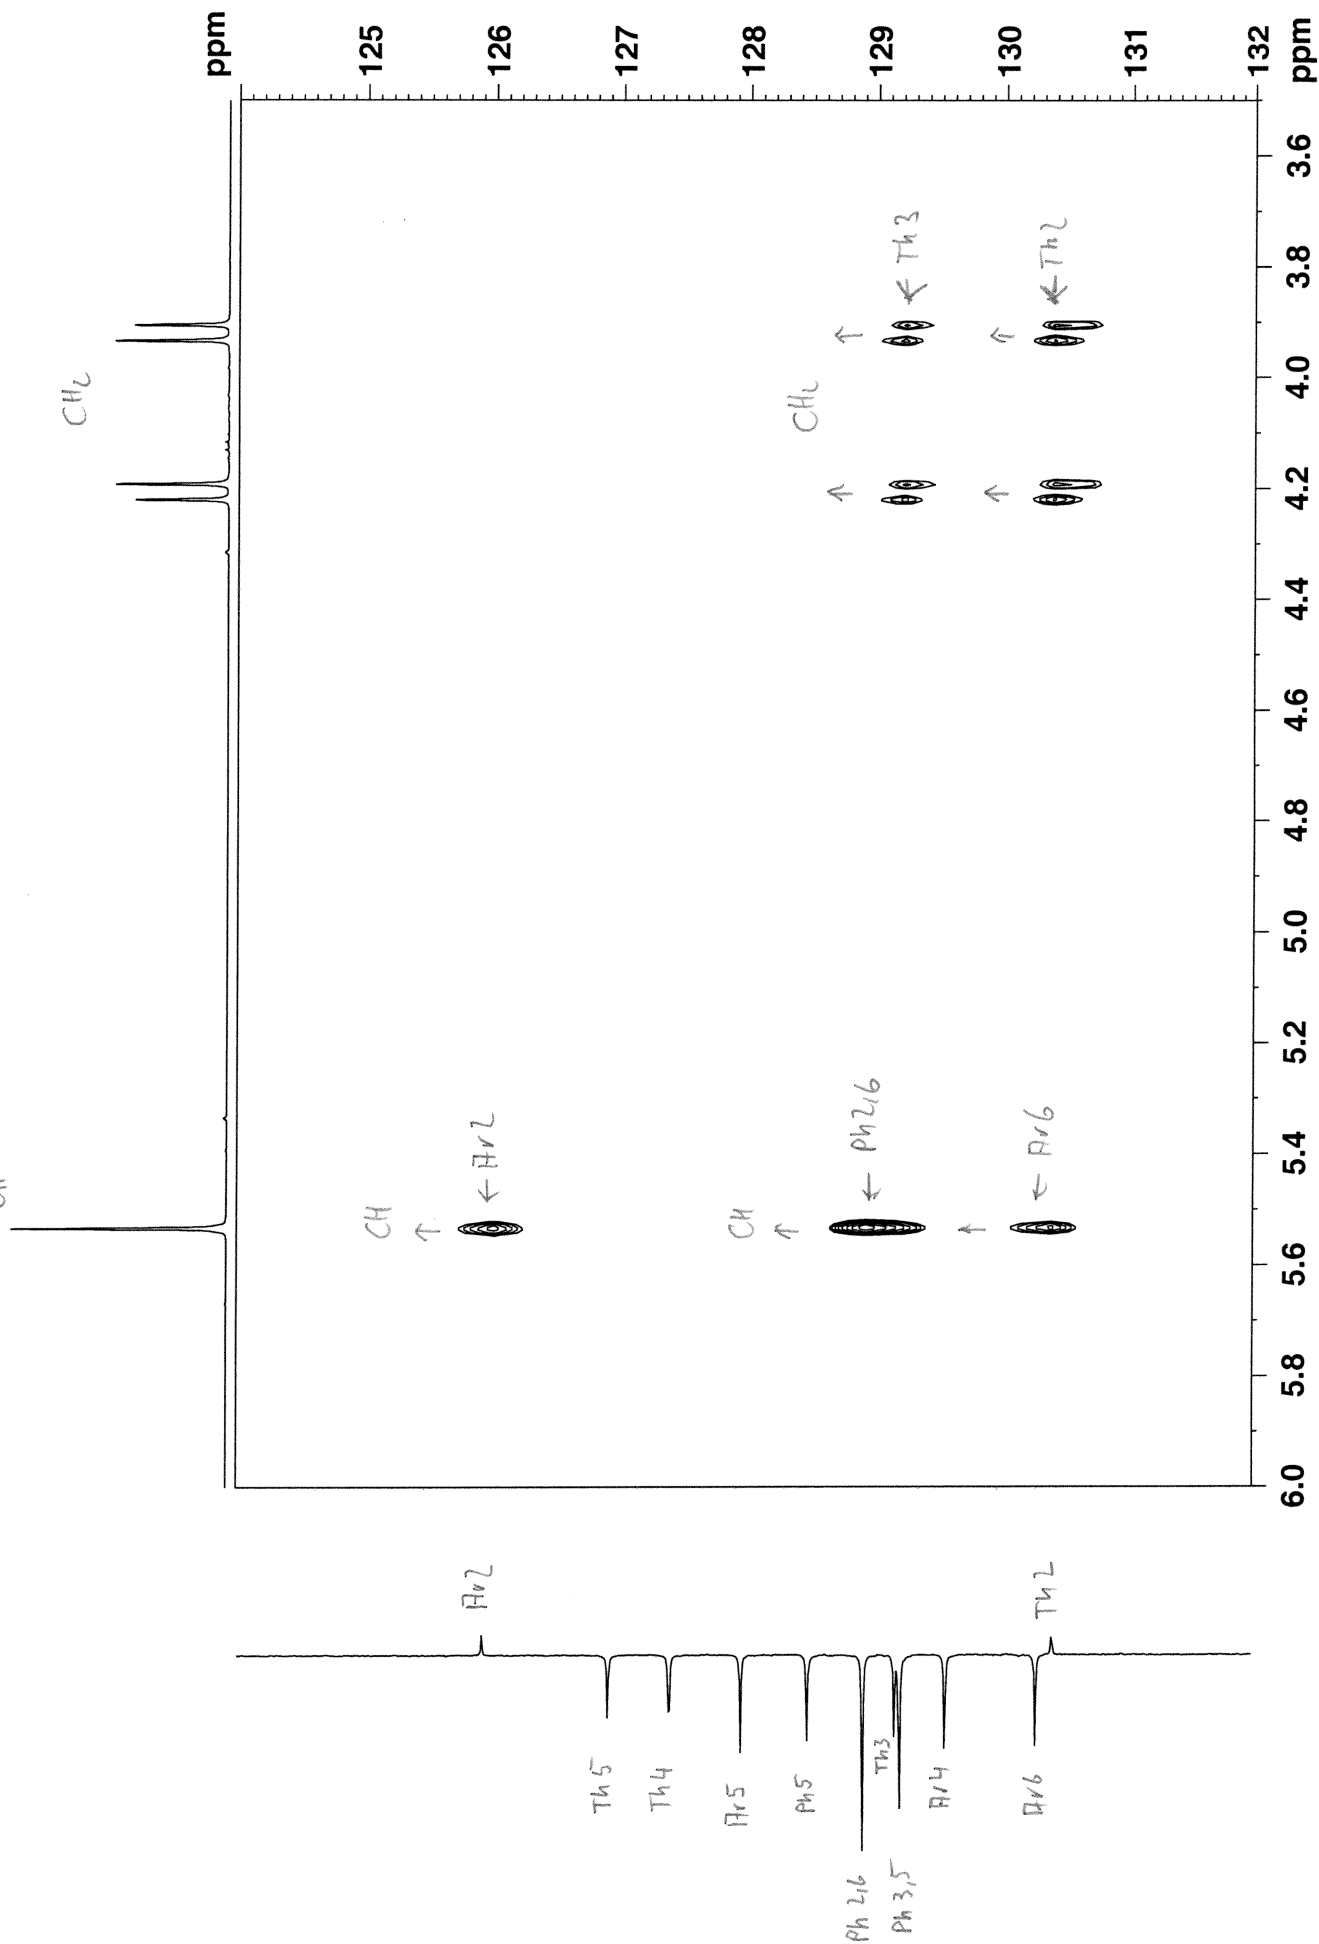

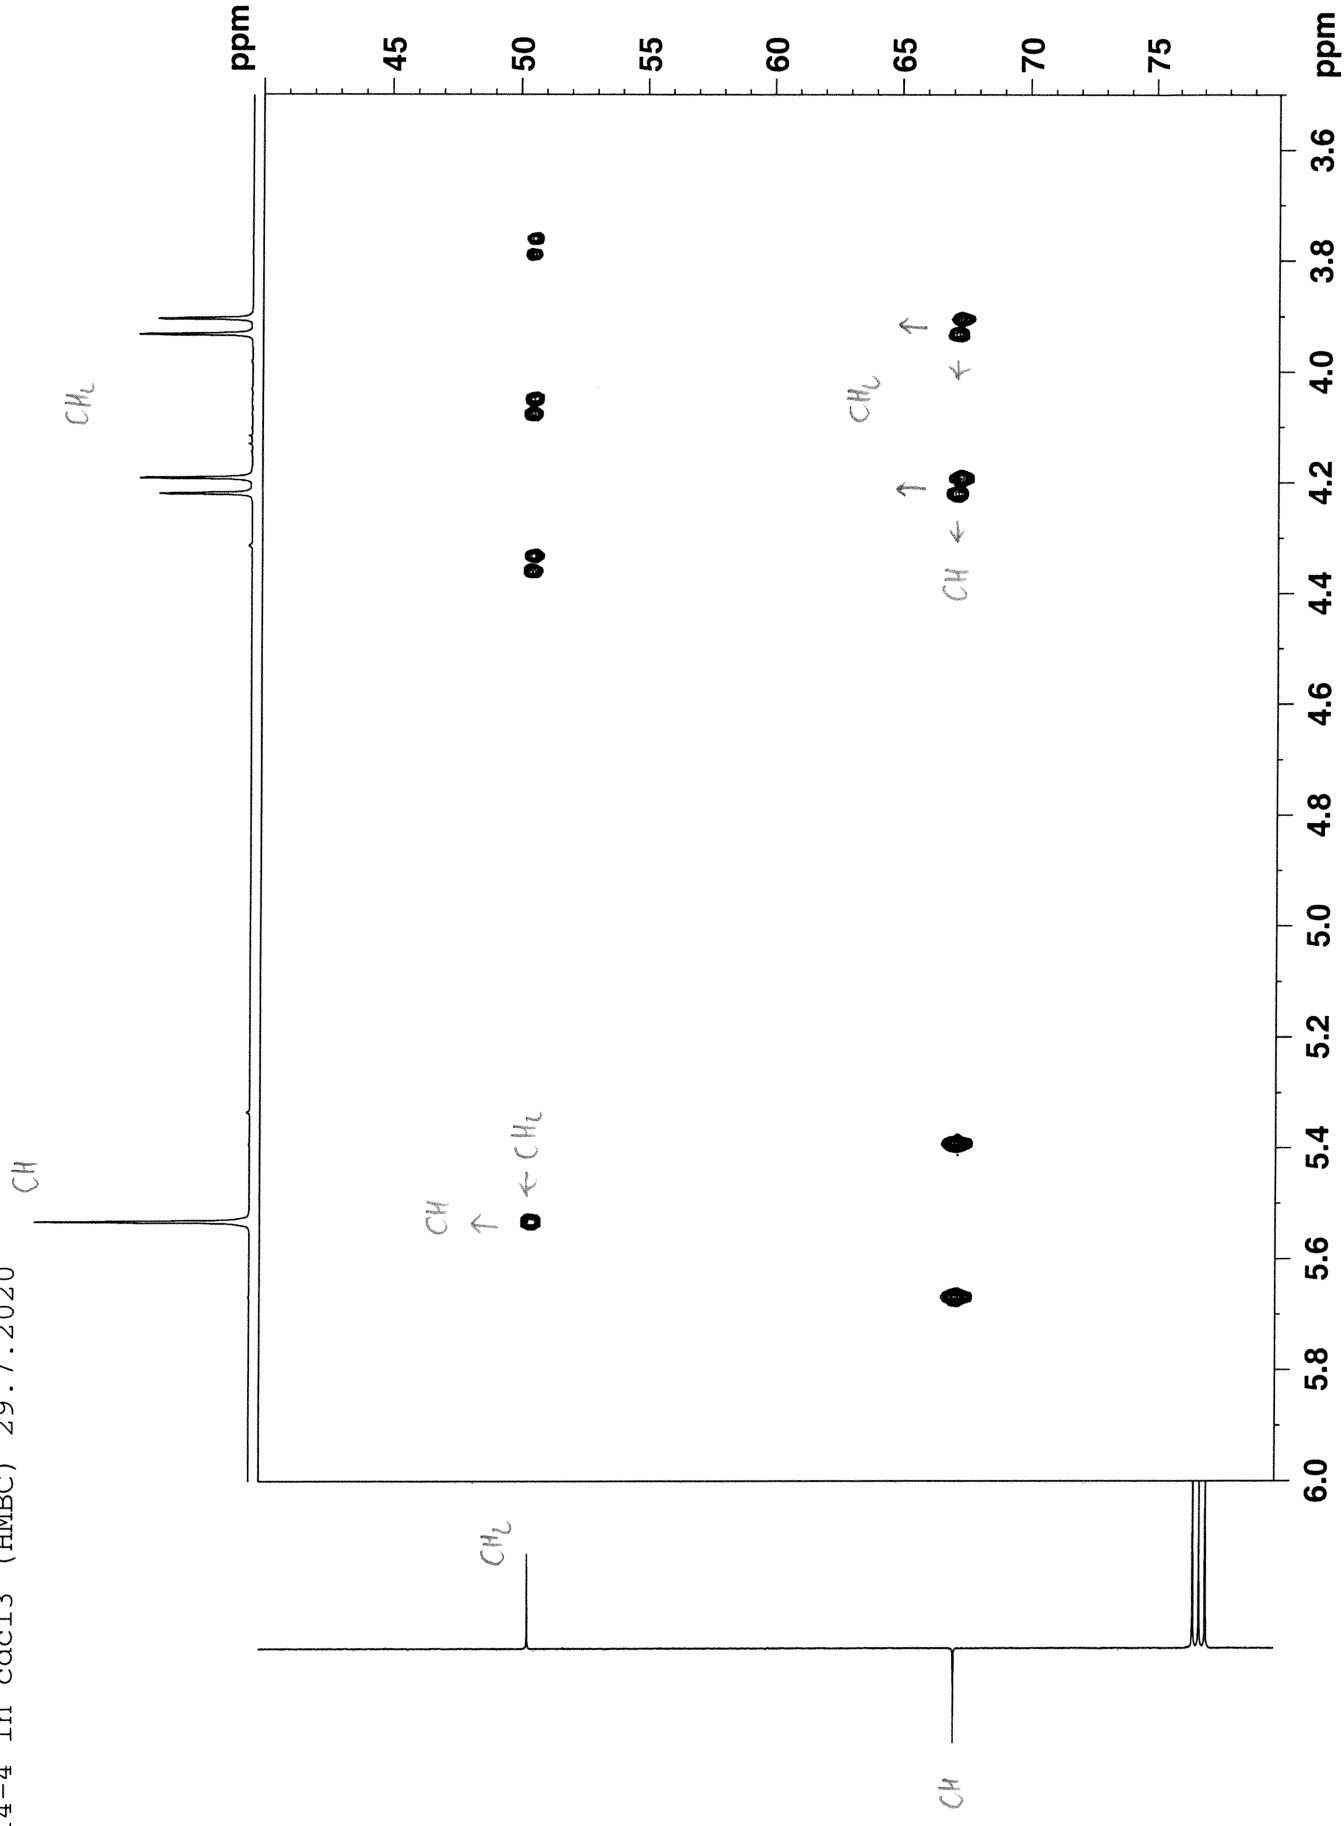

**Figure S29c.** NMR spectra of compound **5h**.

CE196S1P1 in cdcl3 (Proton) 17.5.2019

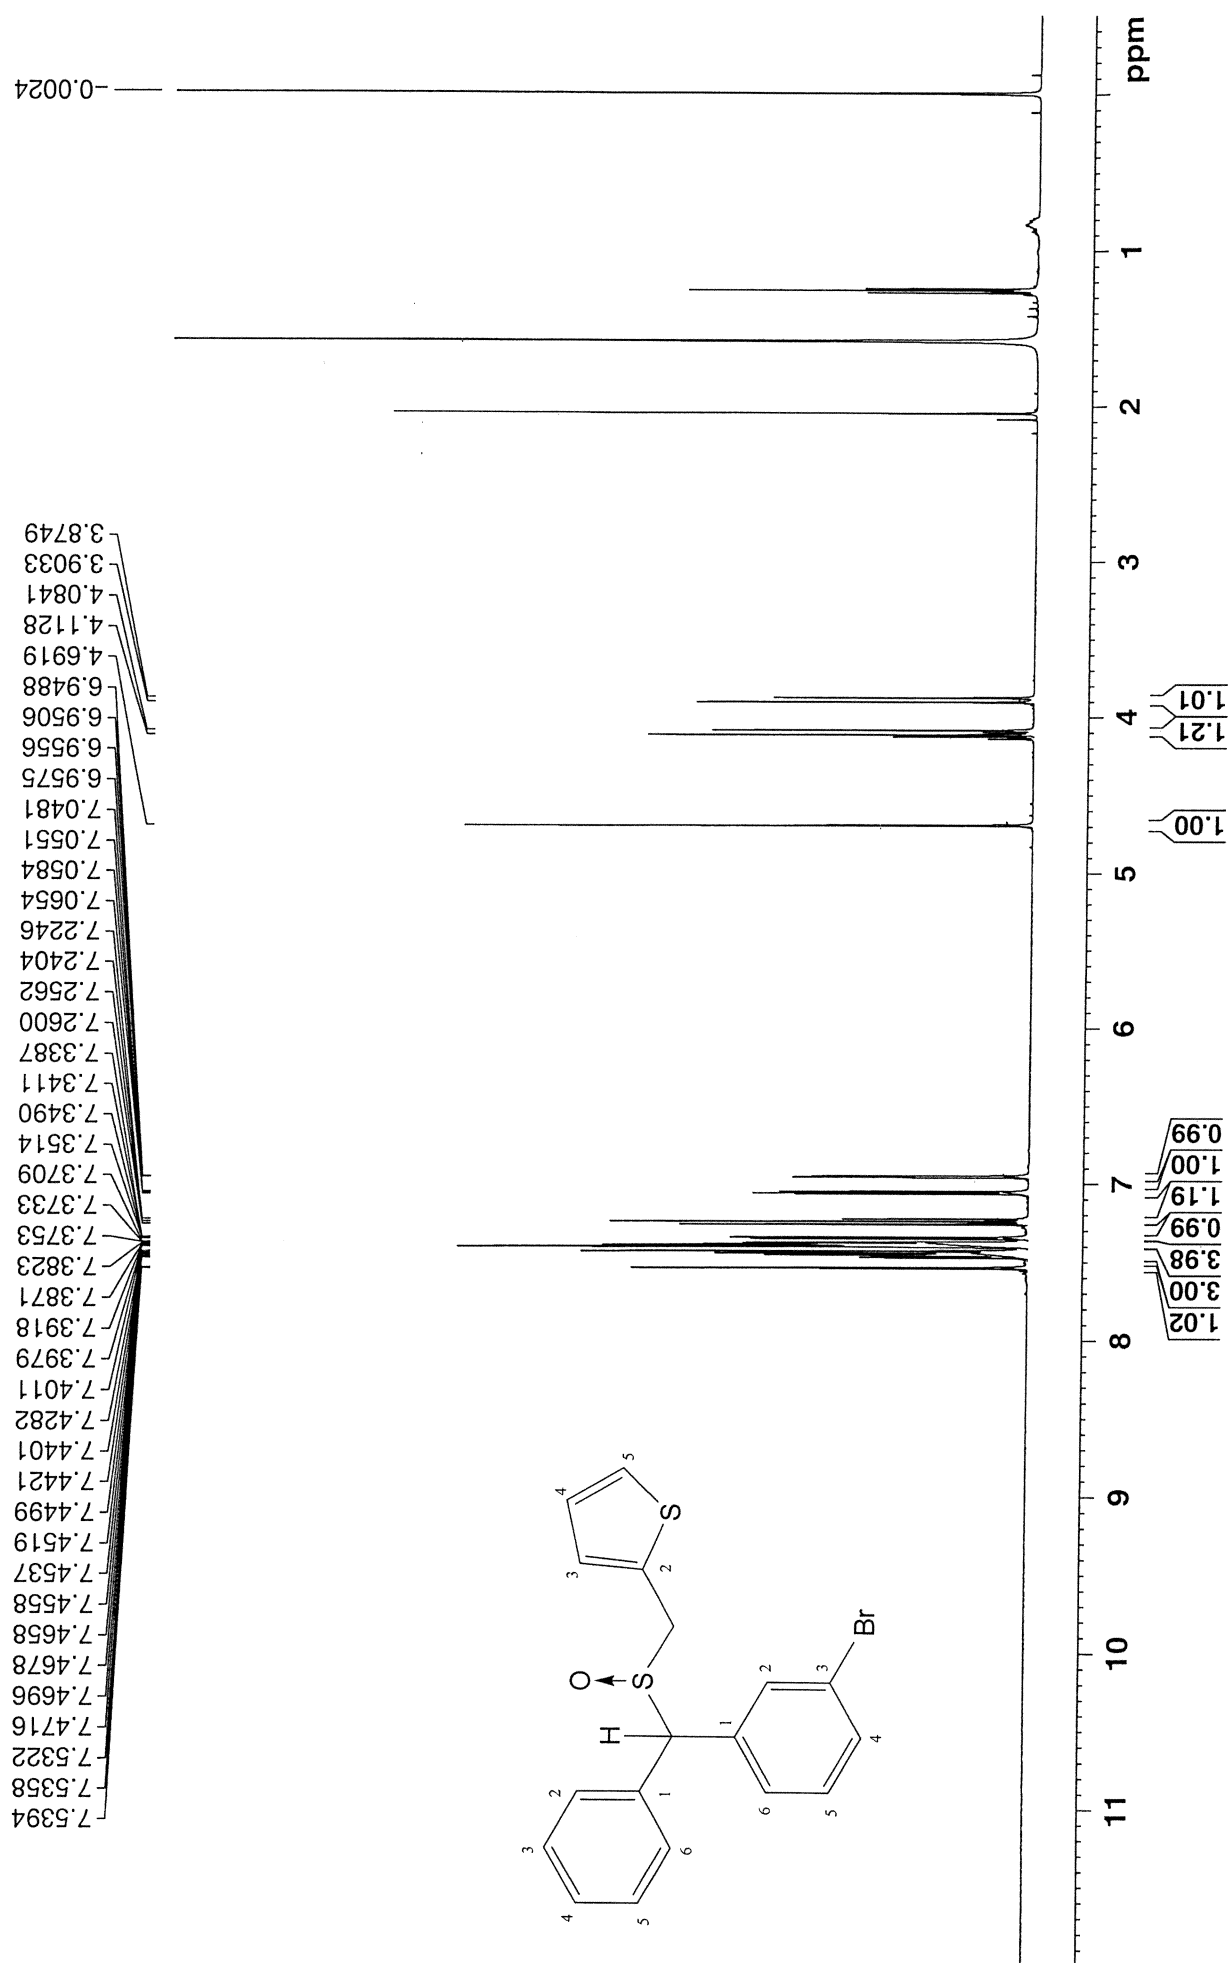

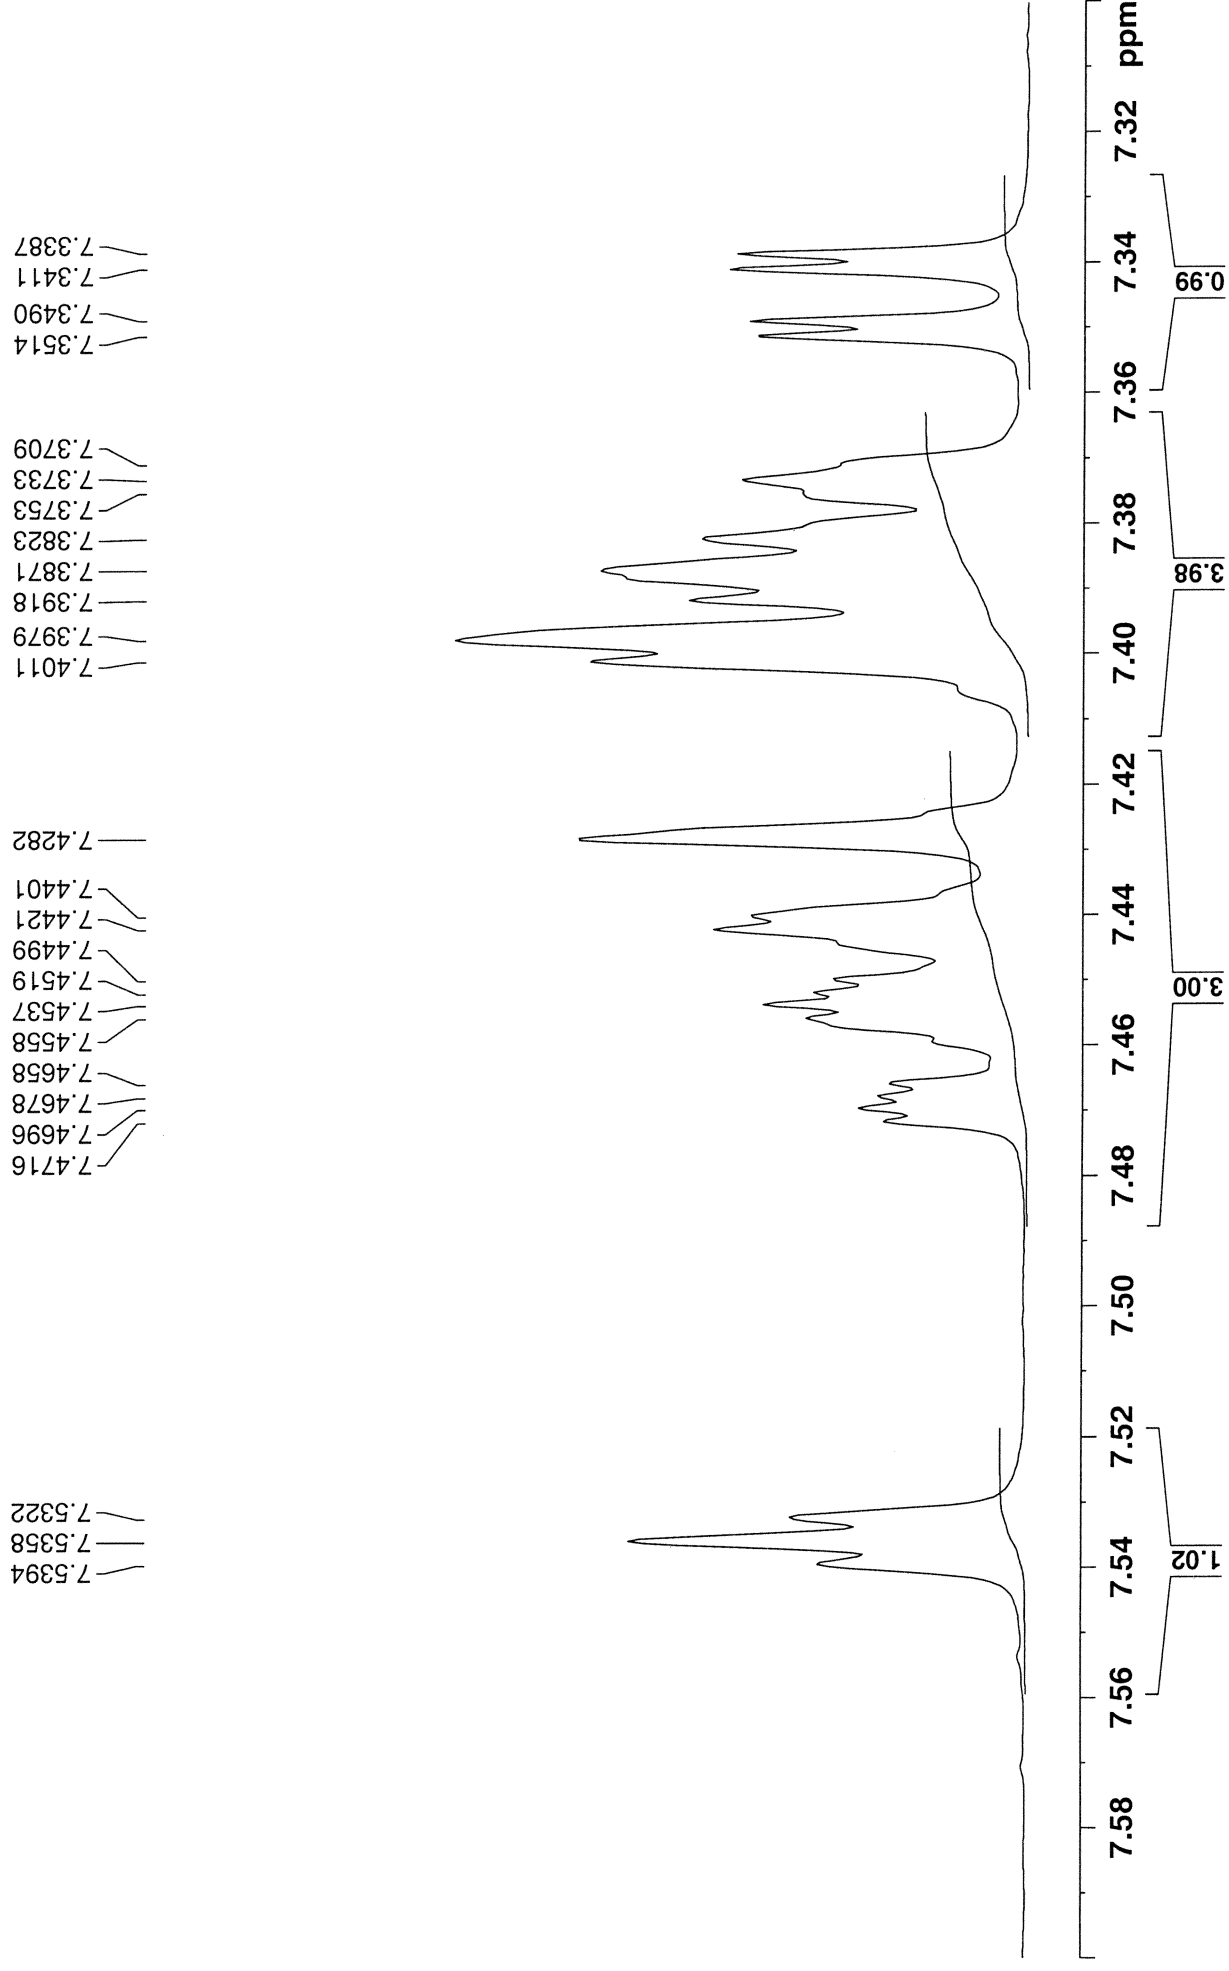



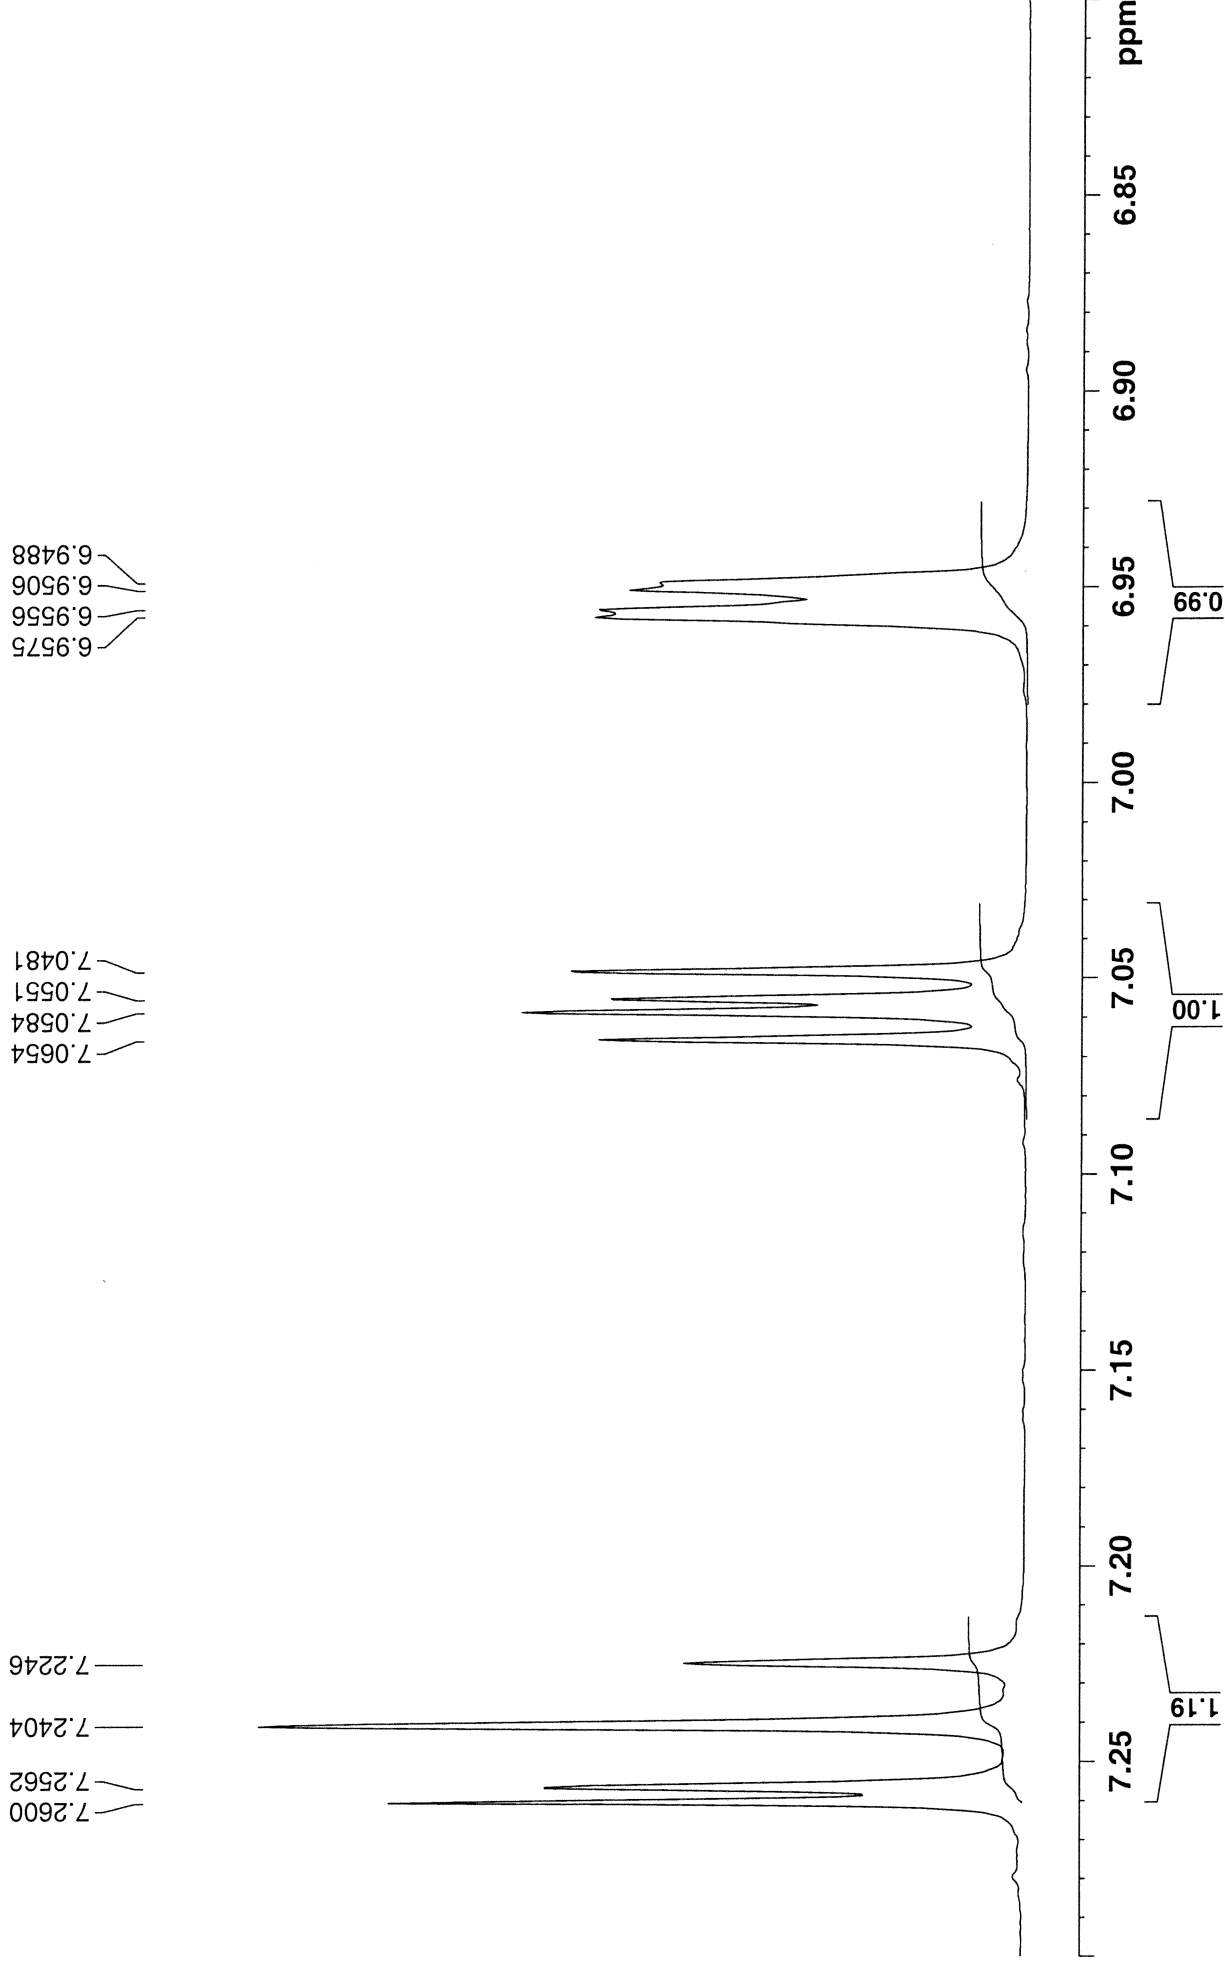

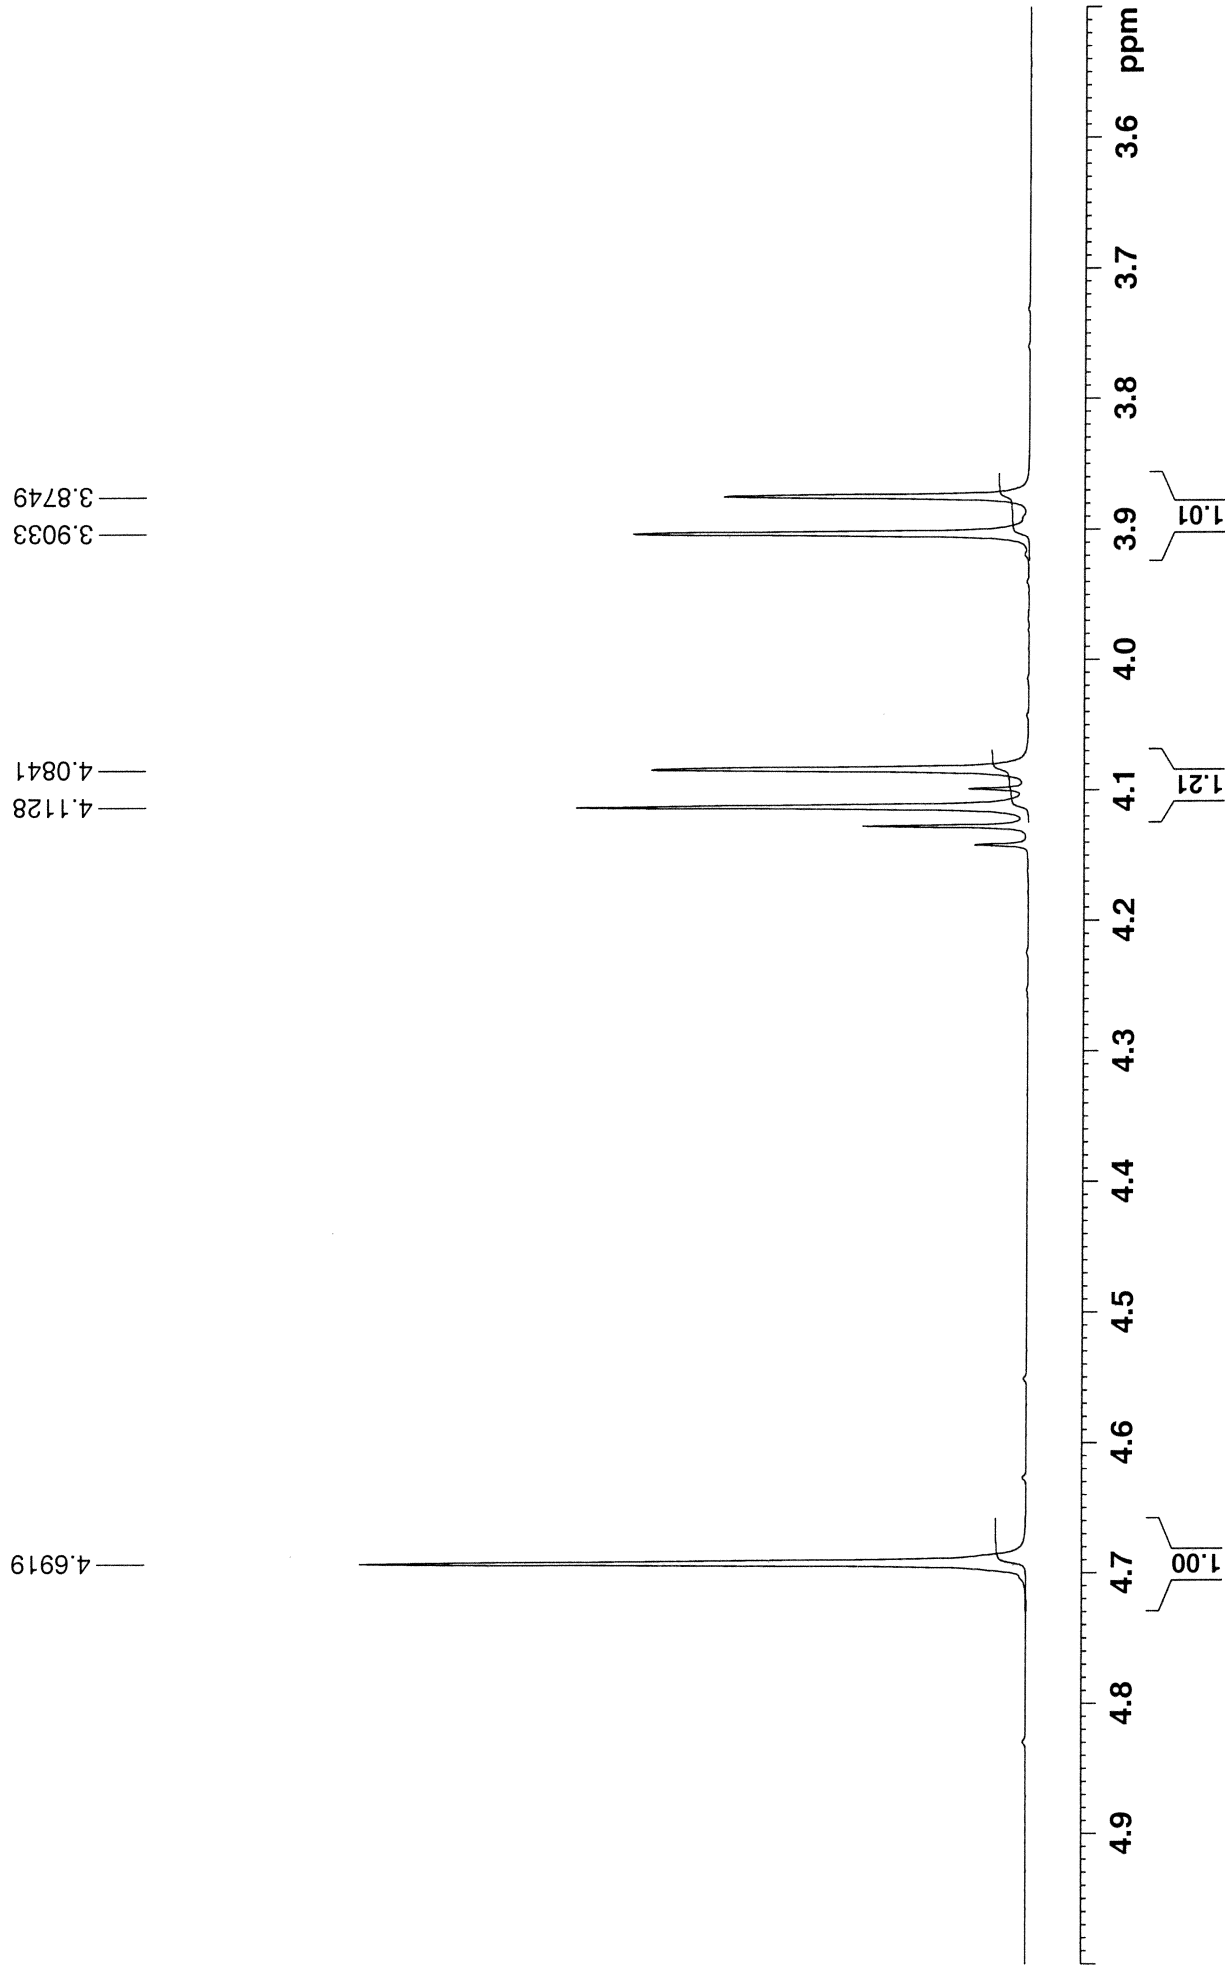

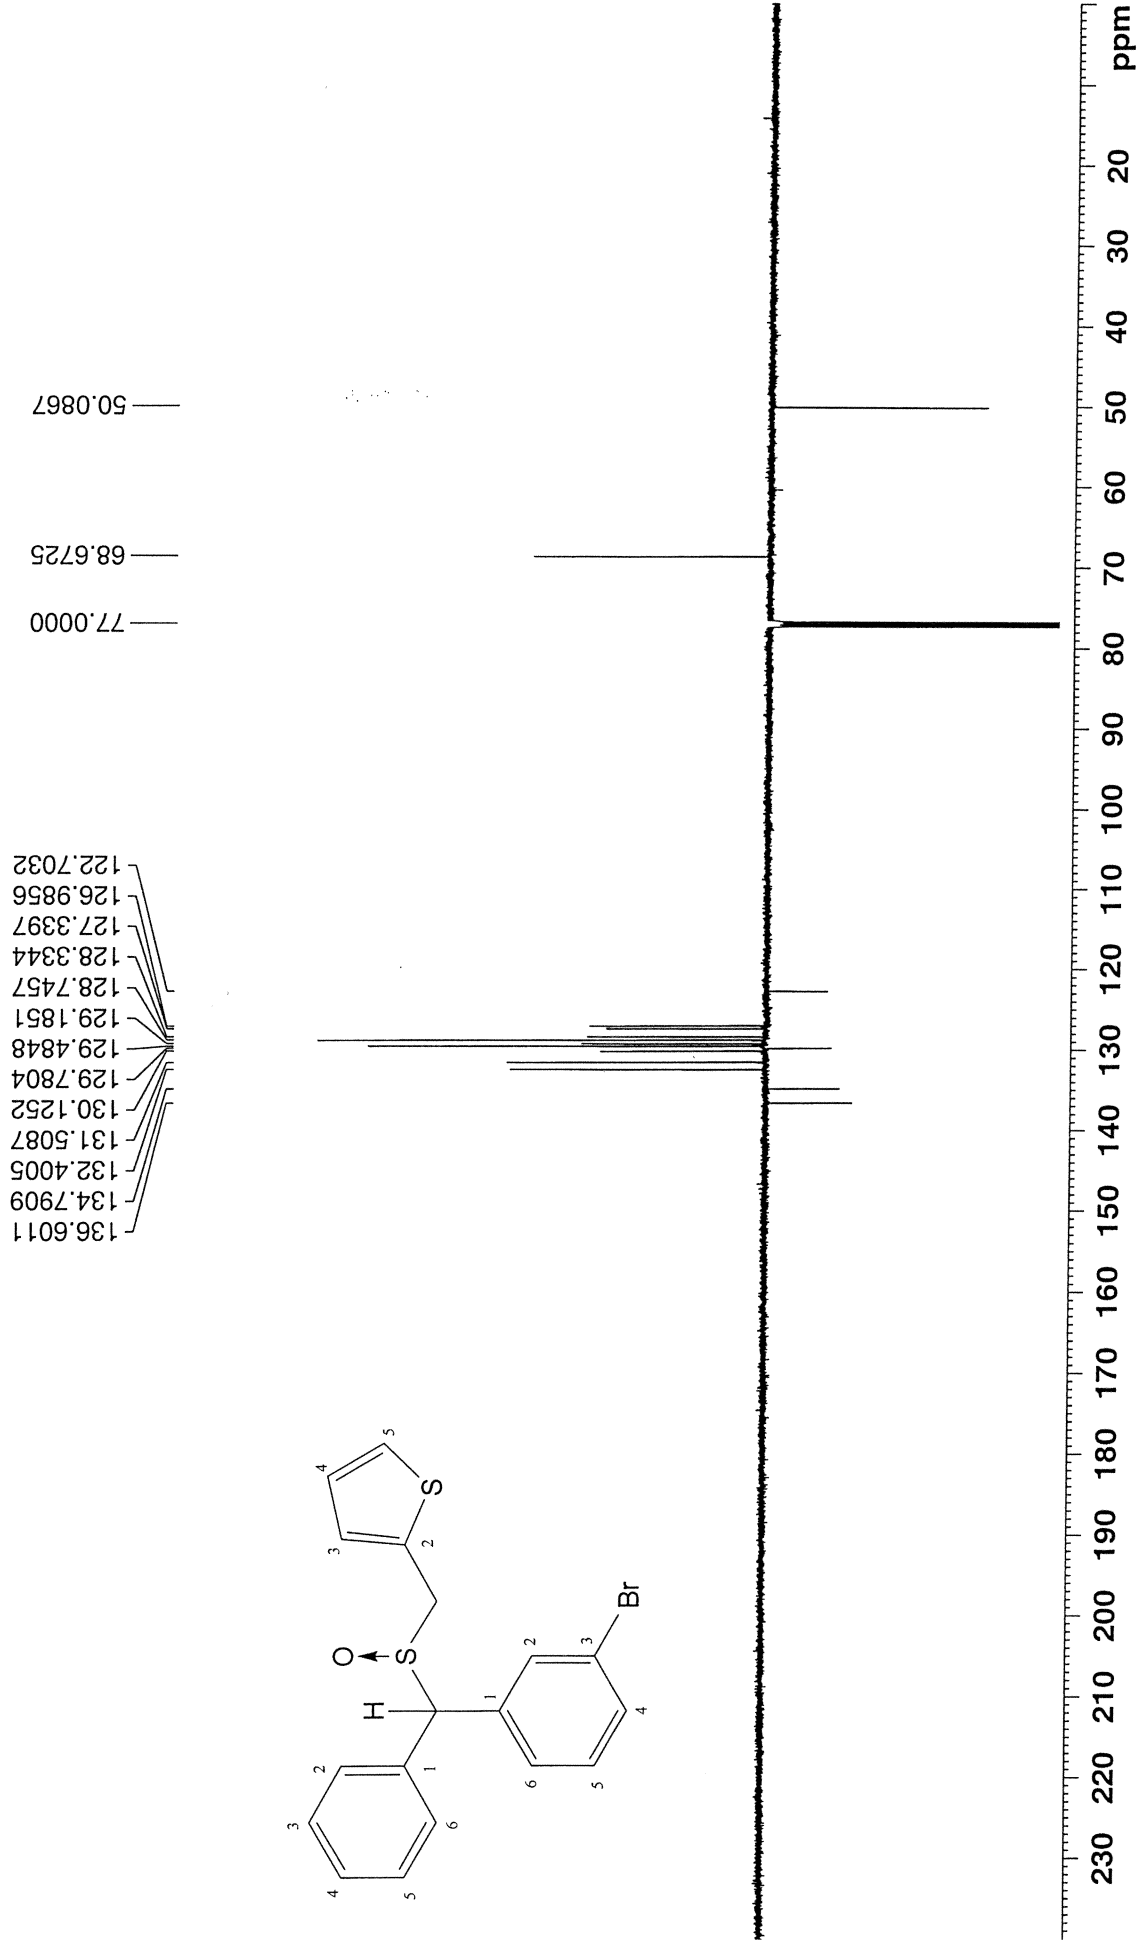

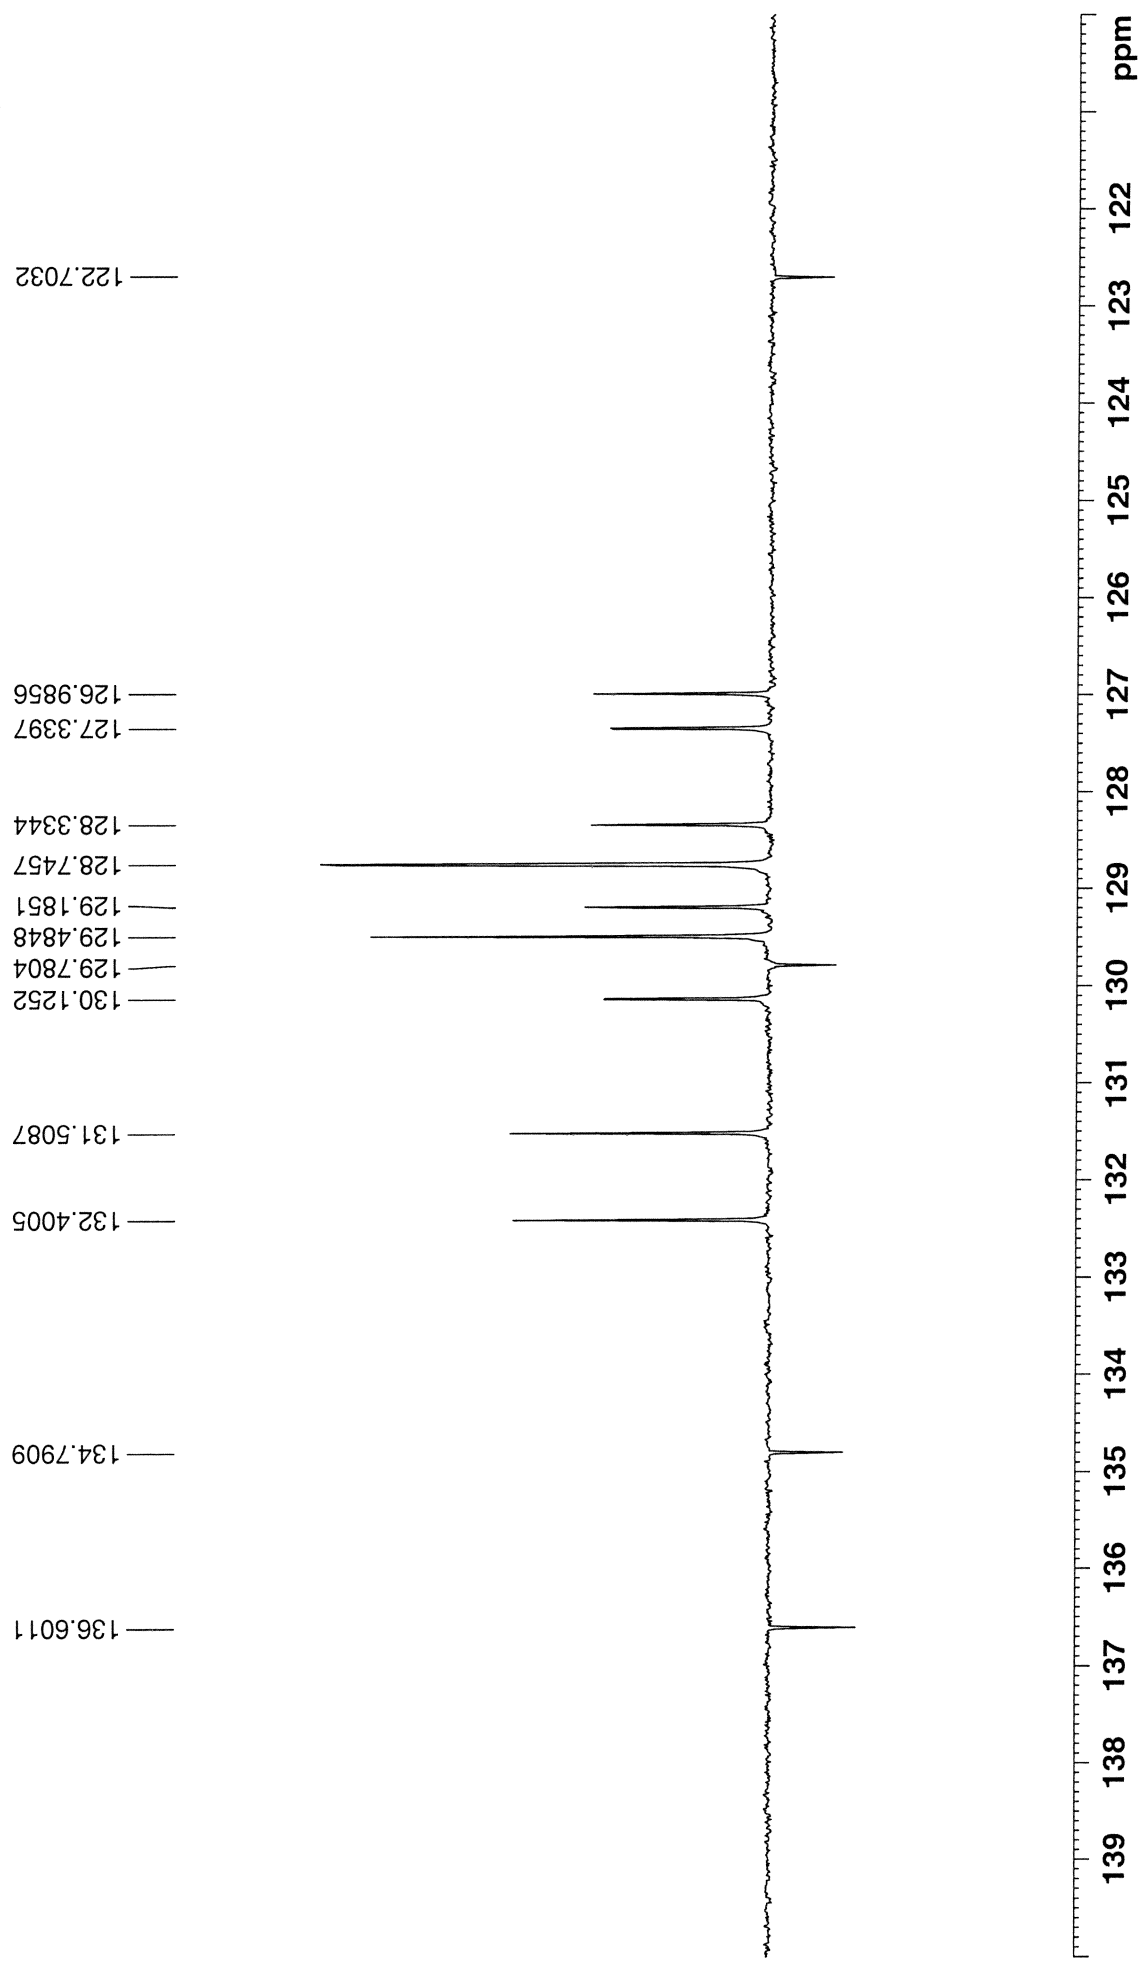

CE196S1P1 in cdcl3 (APT) 17.5.2019

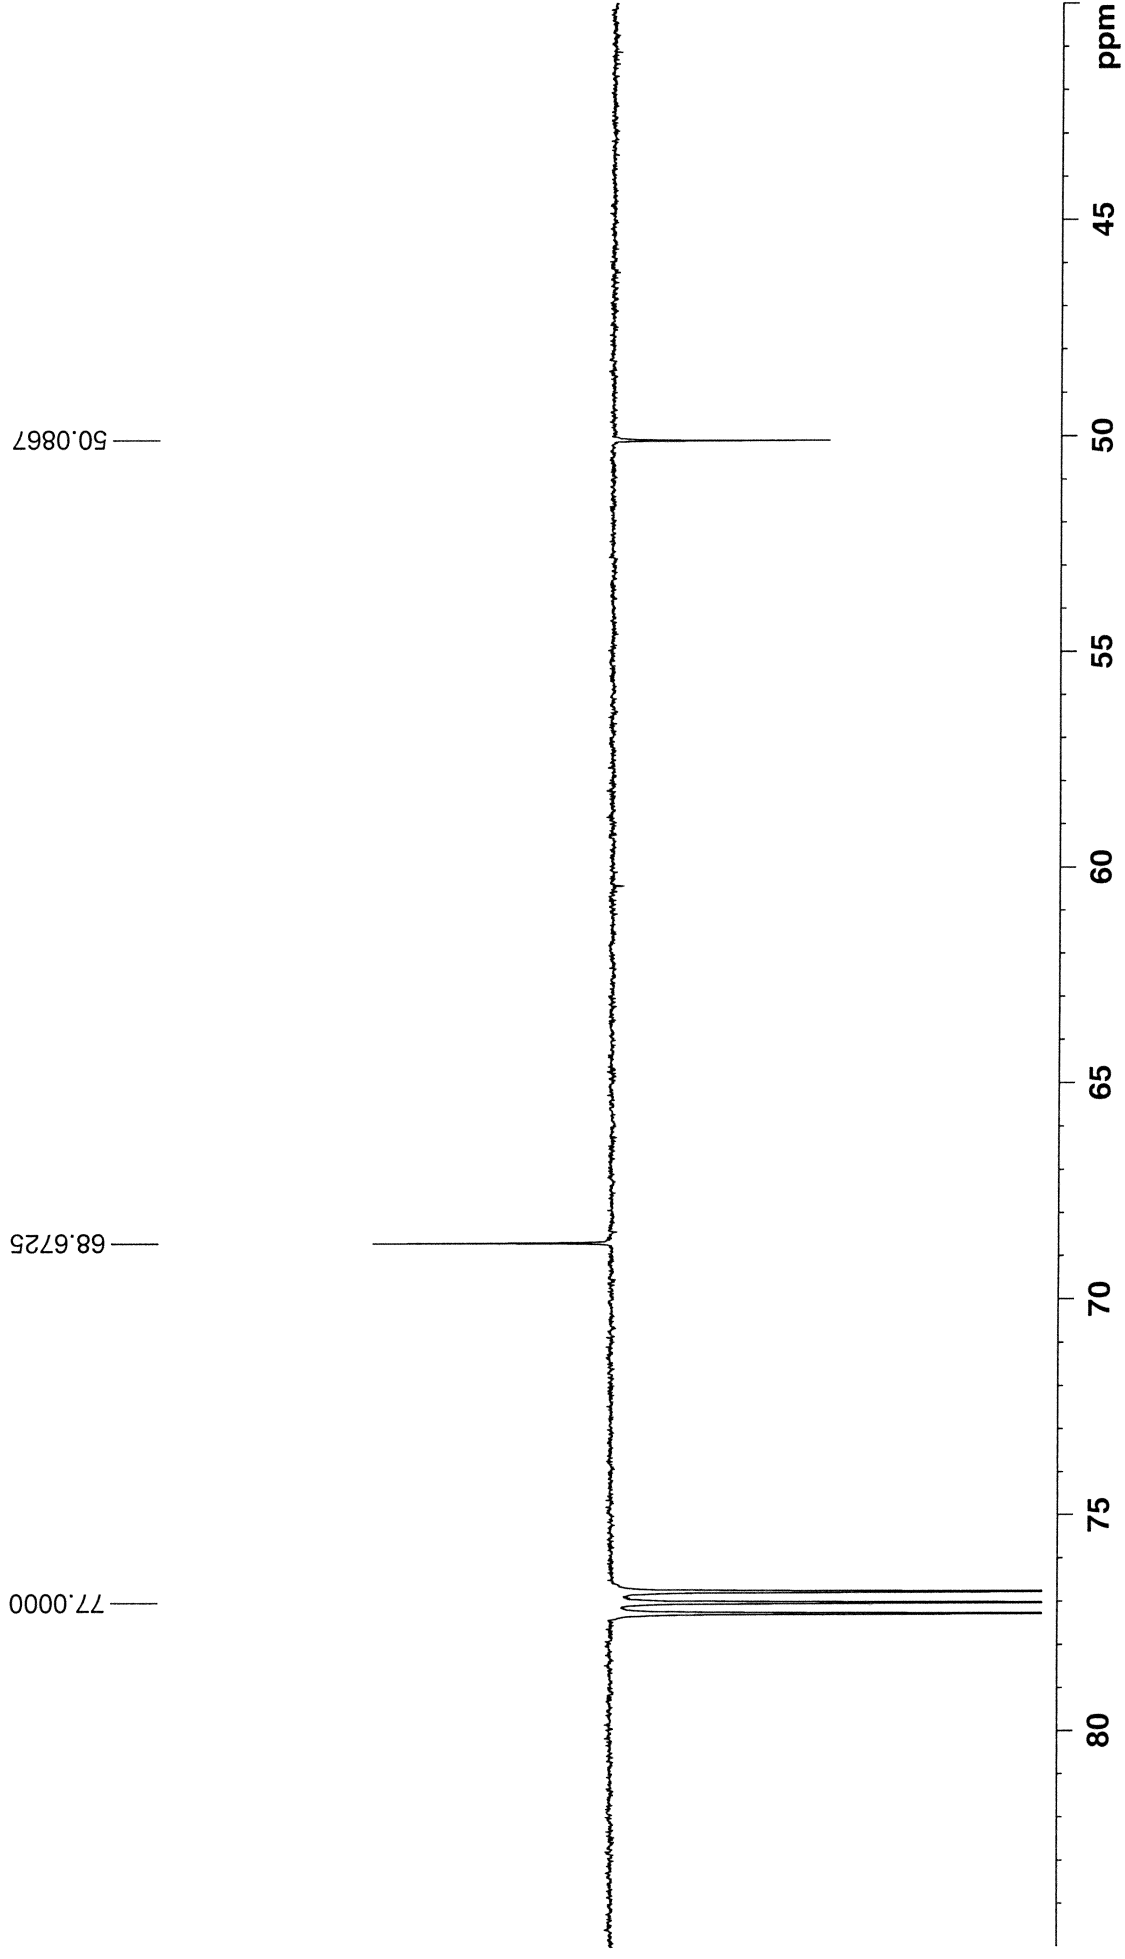

**Figure S30c.** NMR spectra of compound **6h**.

CE196S1P2 in cdcl3 (Proton) 17.5.2019

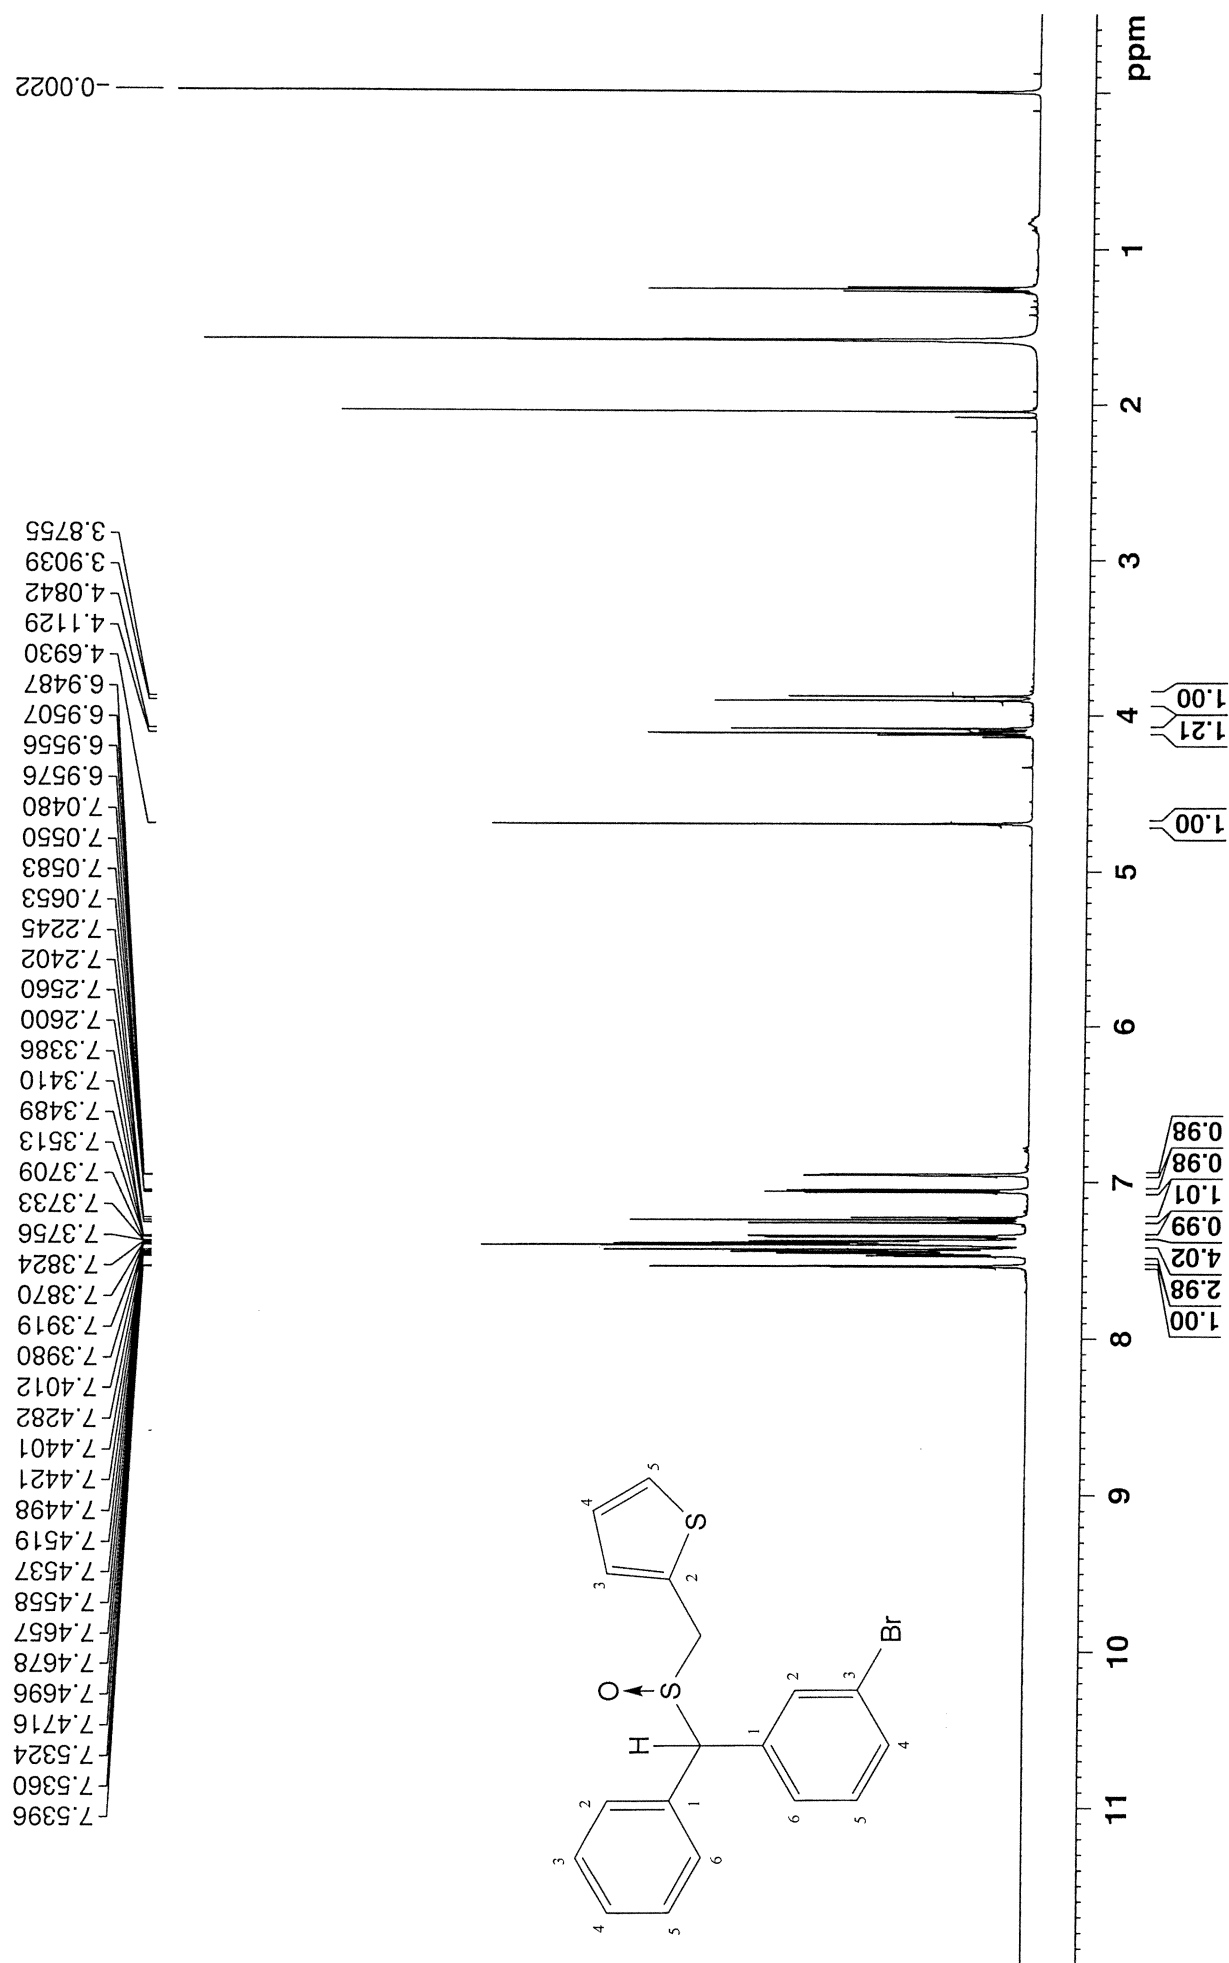

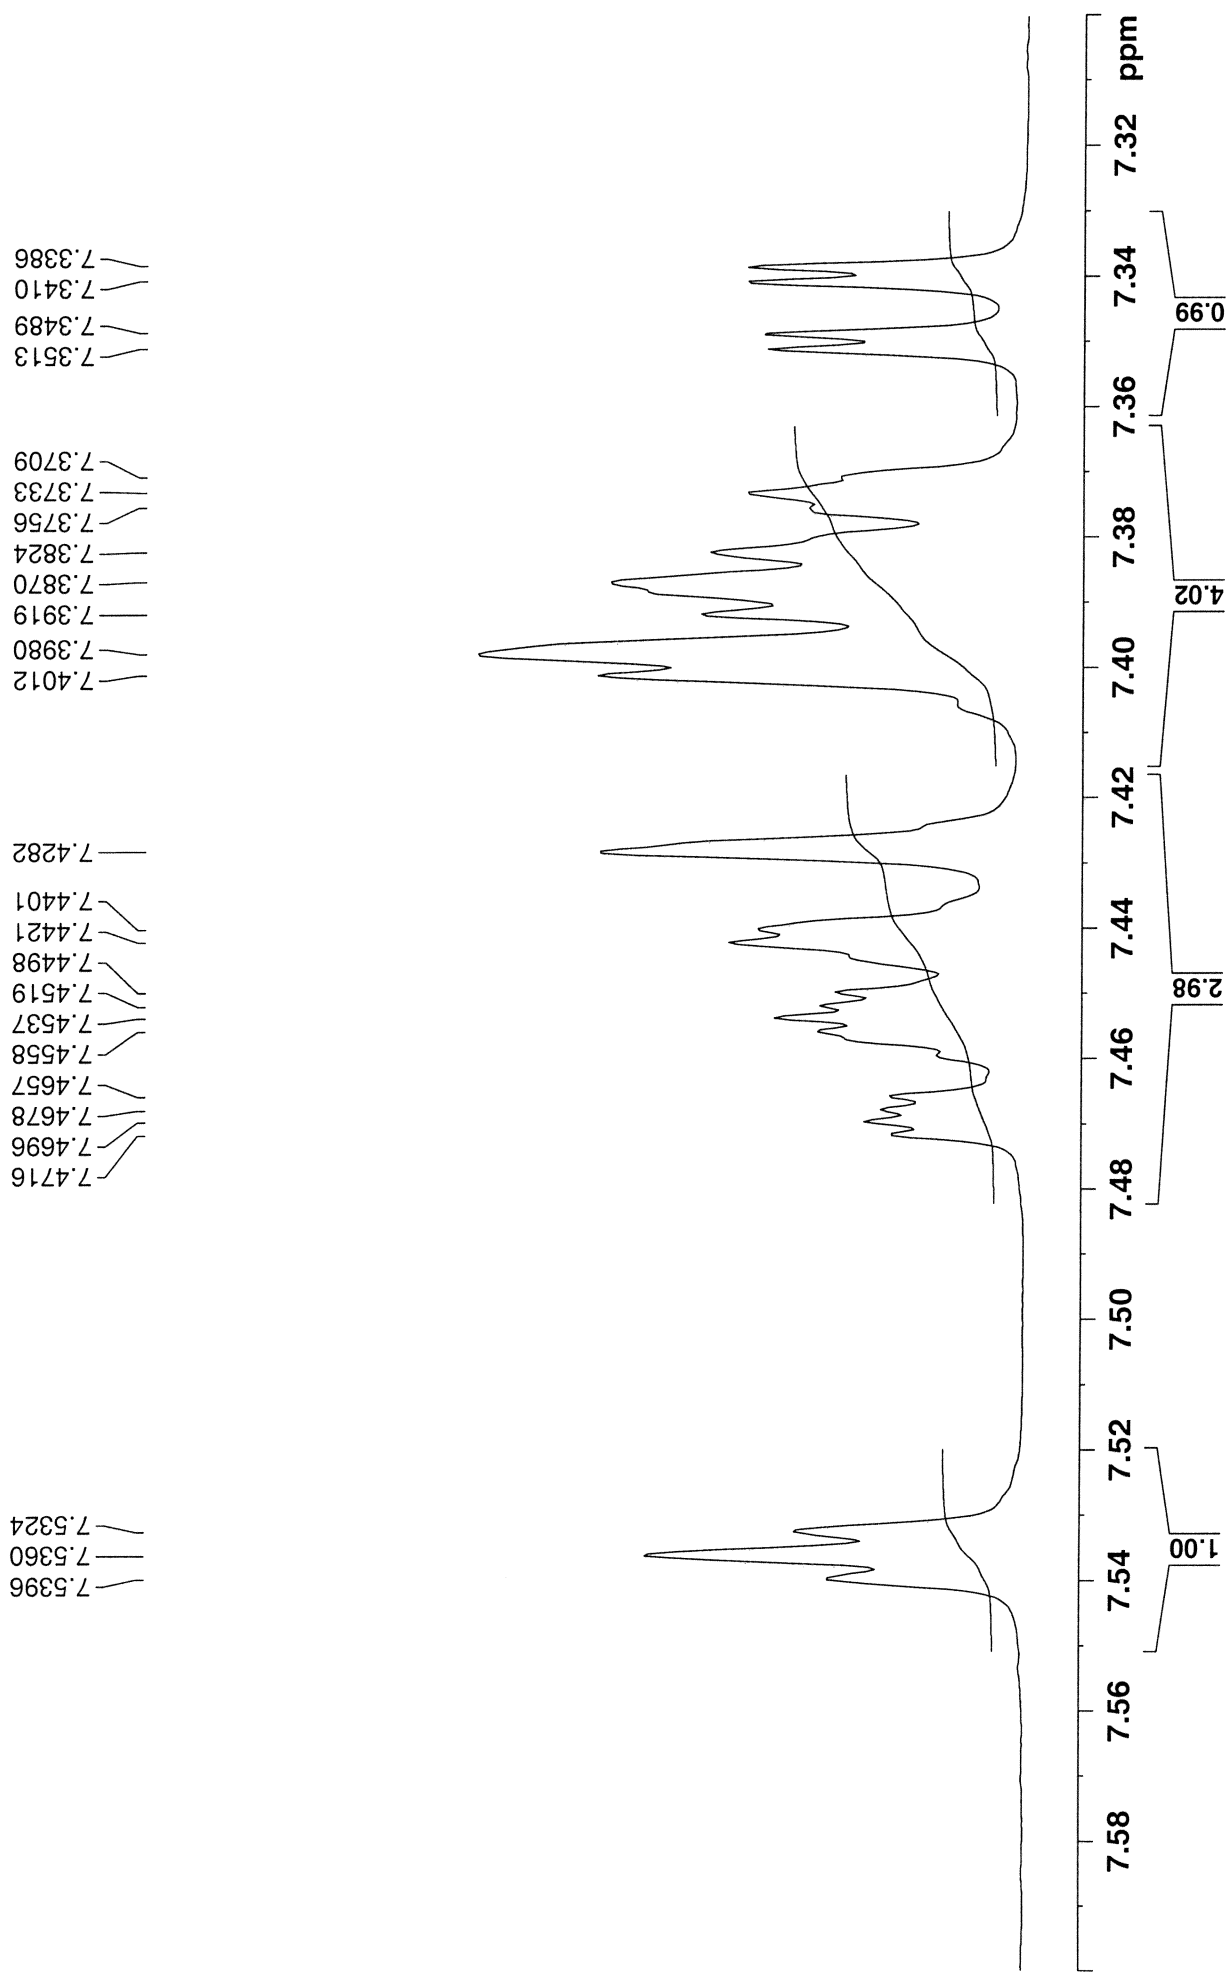

7.2600  
7.2560  
7.2402  
7.2245

7.0653  
7.0583  
7.0550  
7.0480

6.9576  
6.9556  
6.9507  
6.9487

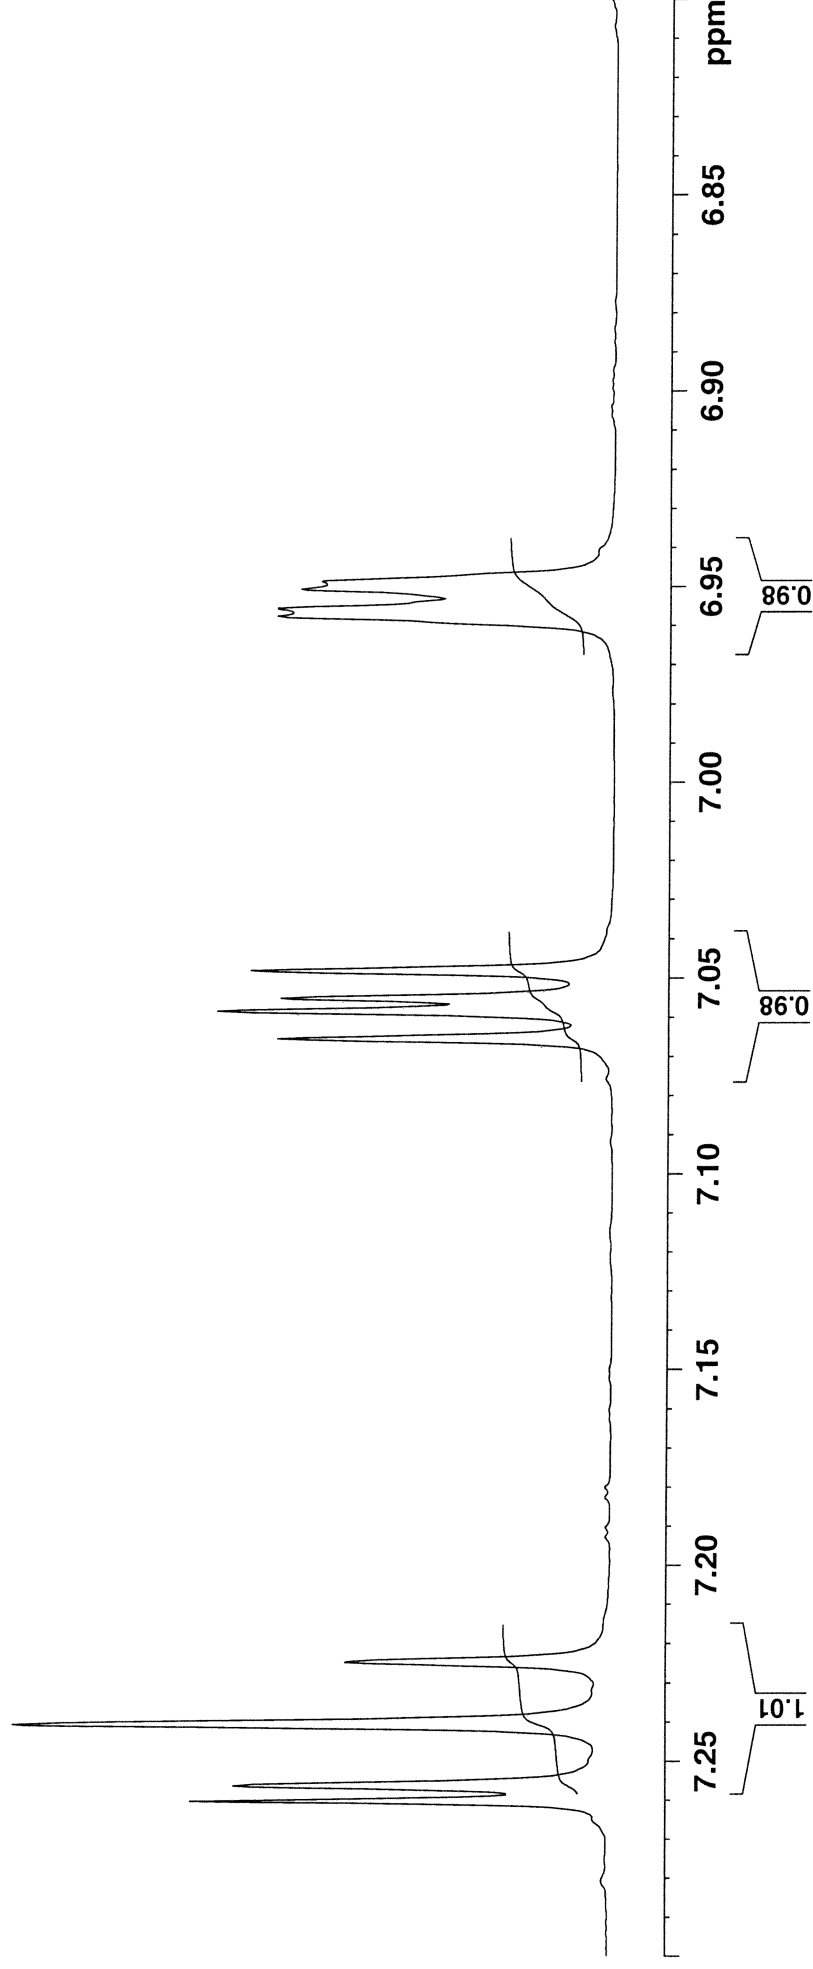



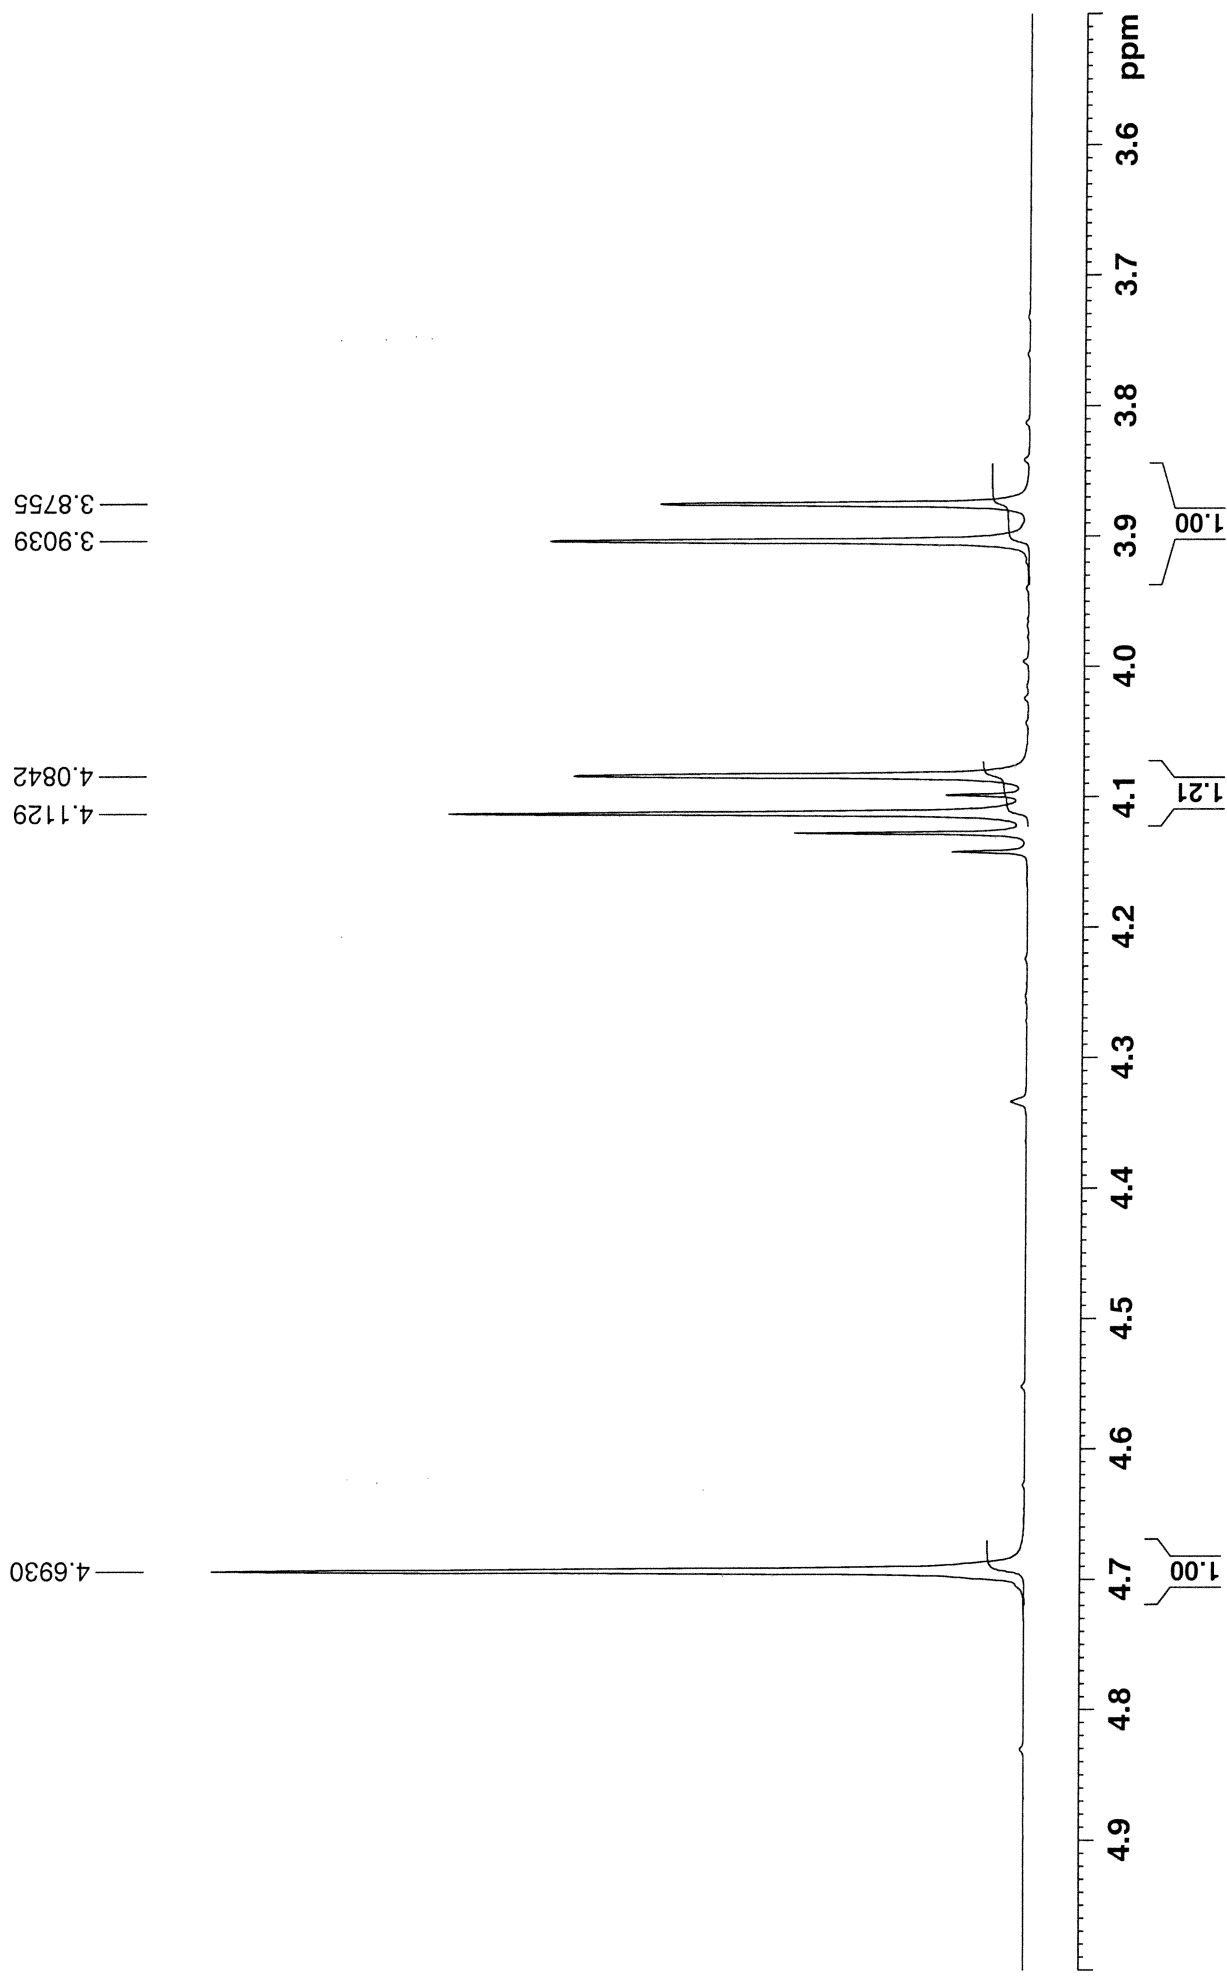

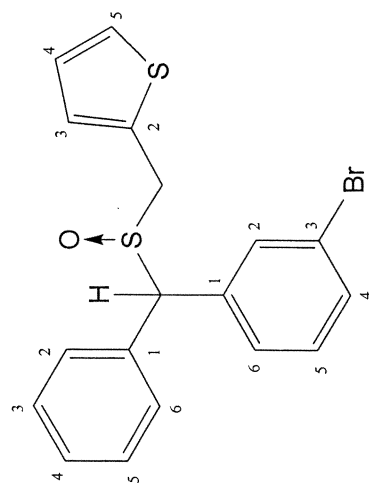

136.6008  
134.7901  
132.4001  
131.5083  
130.1241  
129.7796  
129.4841  
129.1856  
128.7441  
128.3335  
127.3382  
126.9852  
122.7031

77.0000  
68.6728  
50.0861

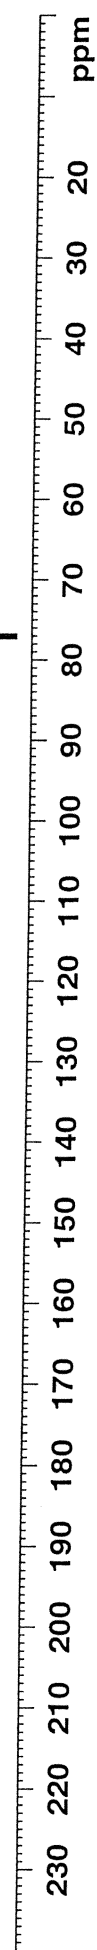

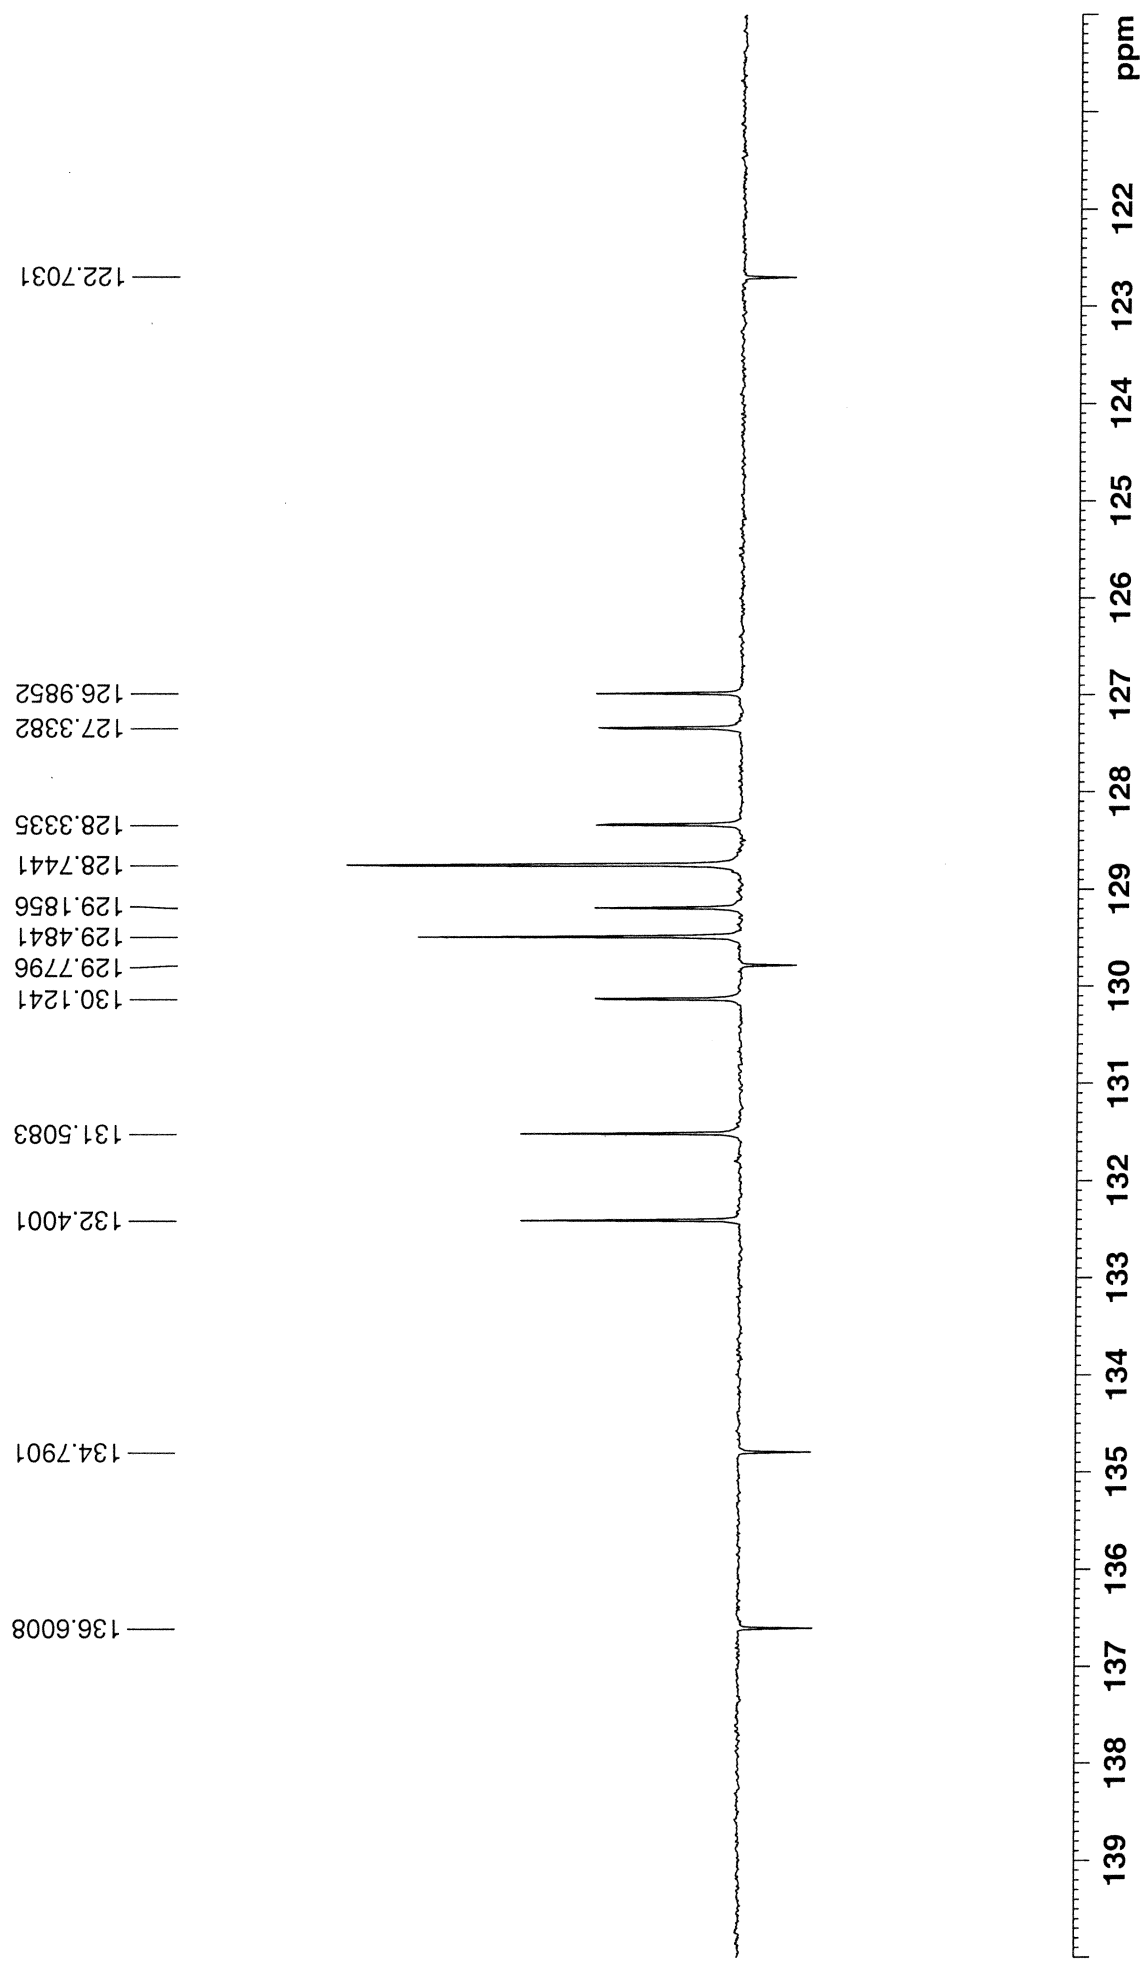

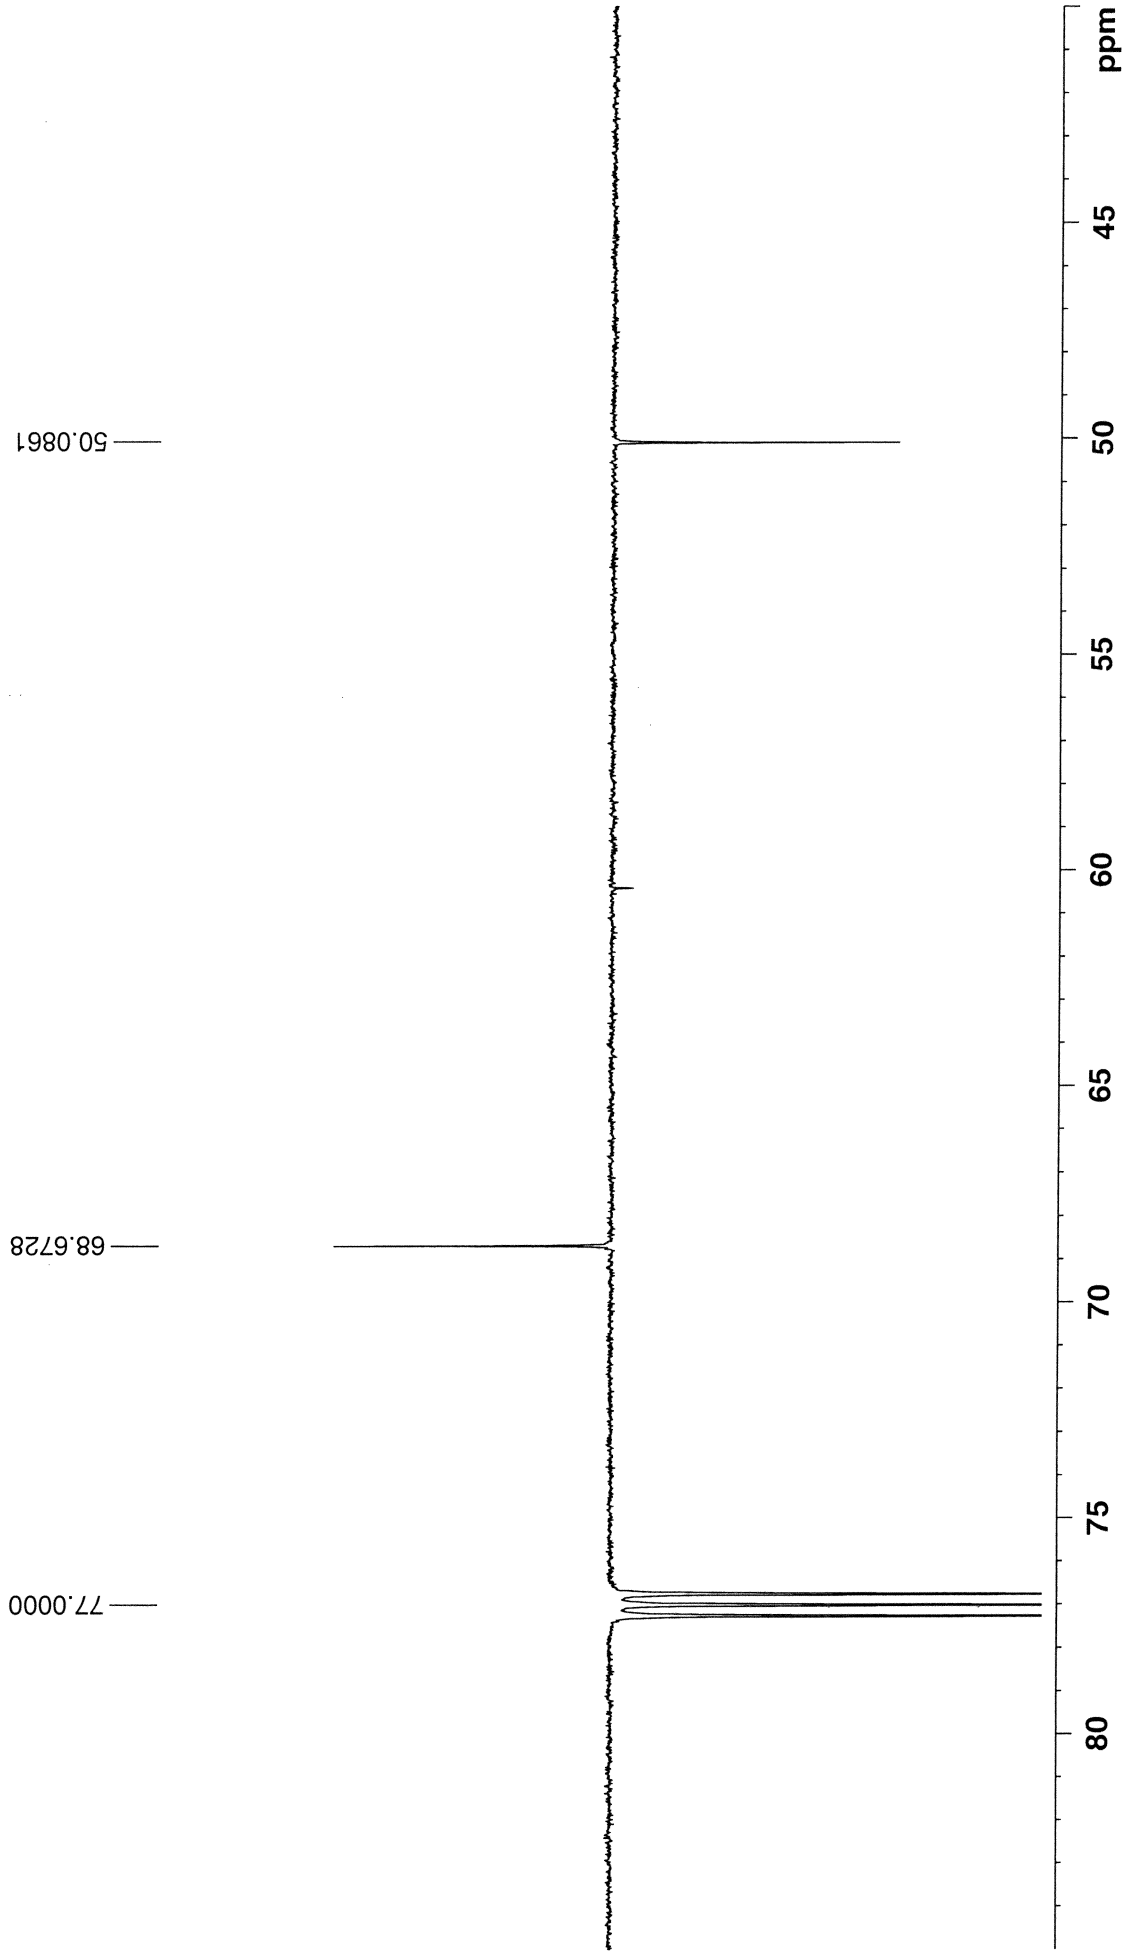

**Figure S31c.** NMR spectra of compound **7h**.

CE196S2P1 in cdcl3 (Proton) 17.5.2019

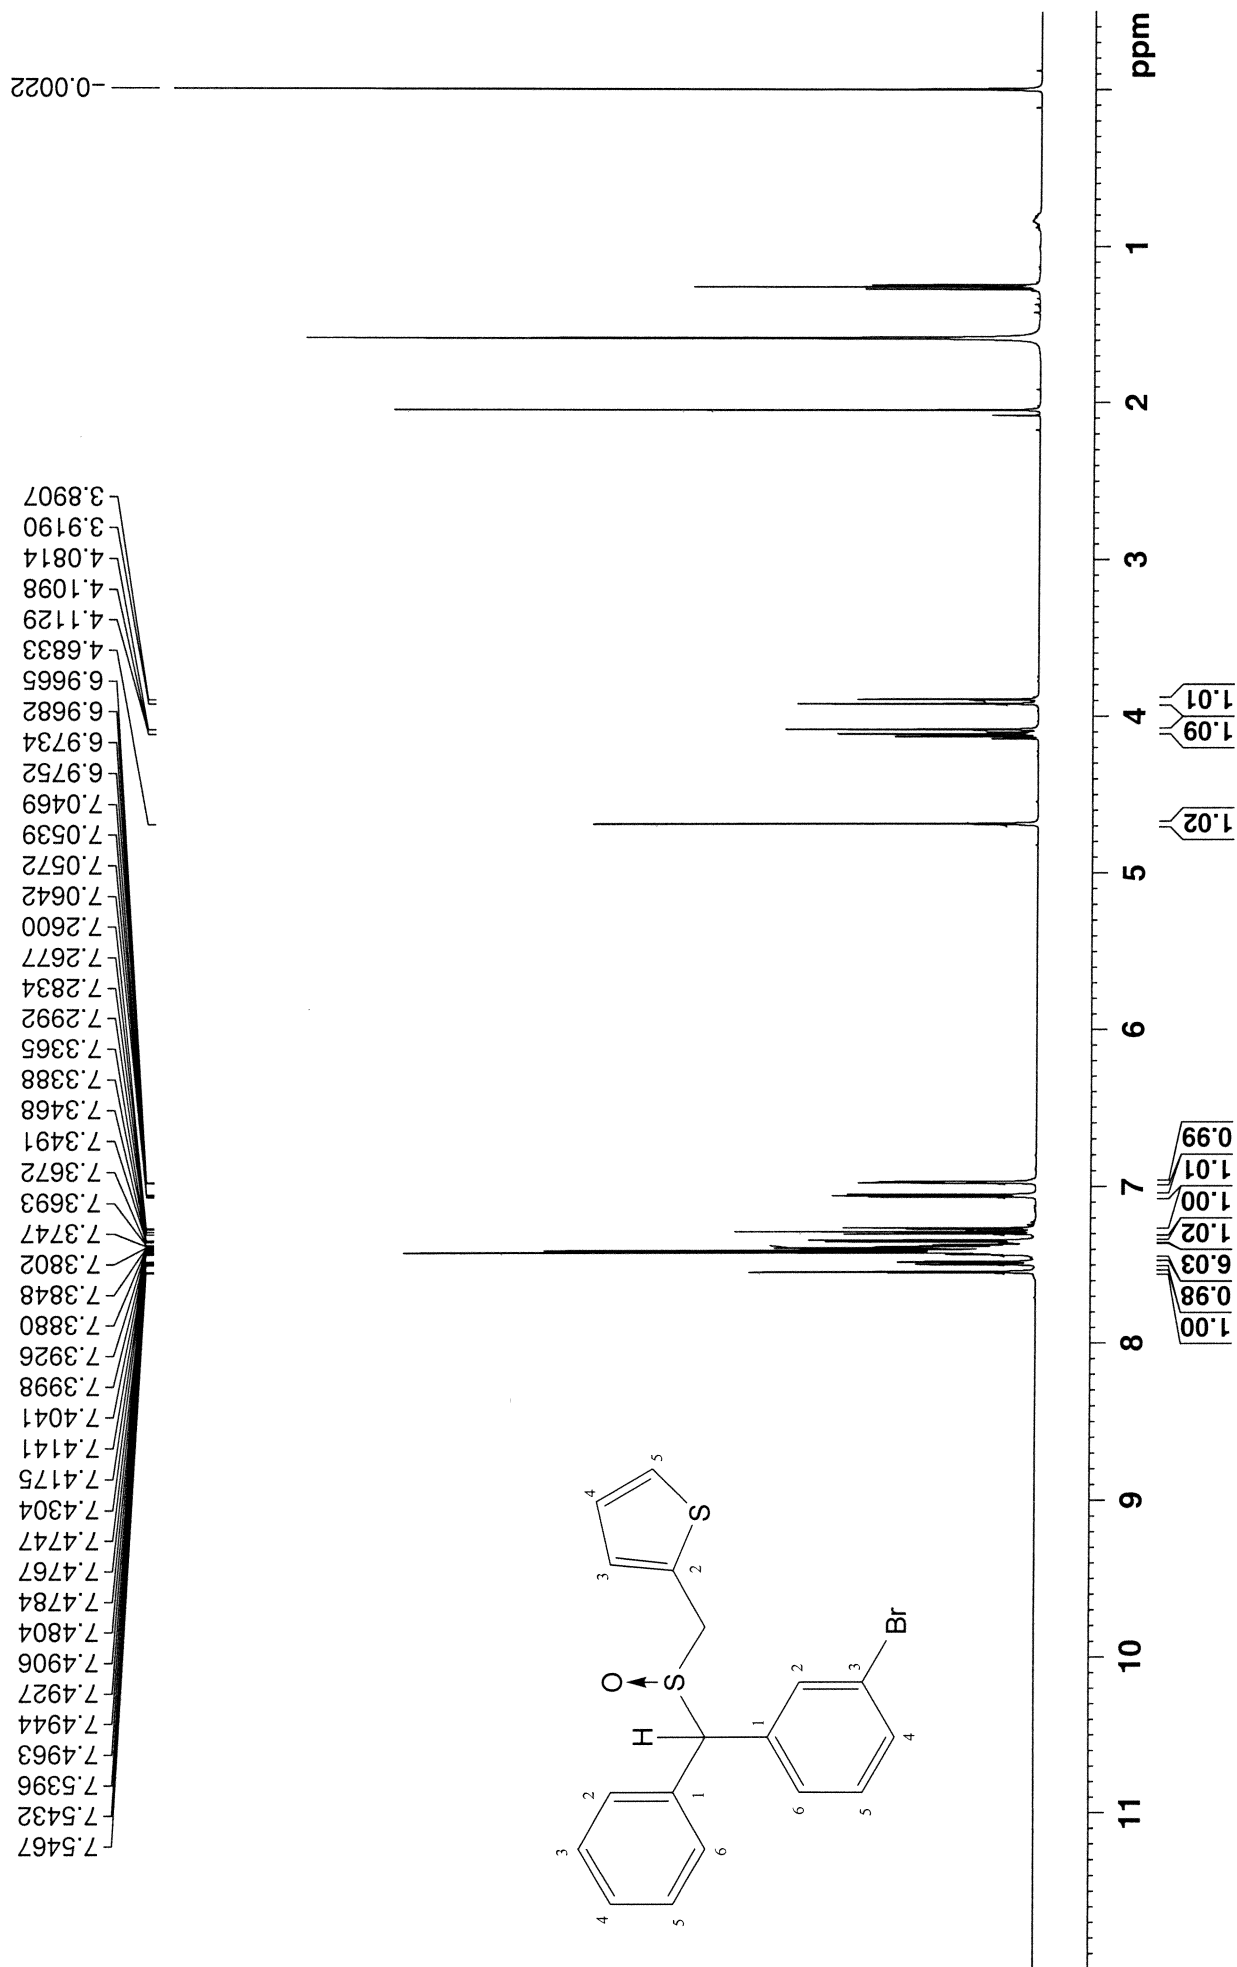

7.5467  
7.5432  
7.5396  
7.4963  
7.4944  
7.4927  
7.4906  
7.4804  
7.4784  
7.4767  
7.4747  
7.4304  
7.4175  
7.4141  
7.4041  
7.3998  
7.3926  
7.3880  
7.3848  
7.3802  
7.3747  
7.3693  
7.3672  
7.3491  
7.3468  
7.3388  
7.3365  
7.2992  
7.2834  
7.2677  
7.2600

7.0642  
7.0572  
7.0539  
7.0469

6.9752  
6.9734  
6.9682  
6.9665

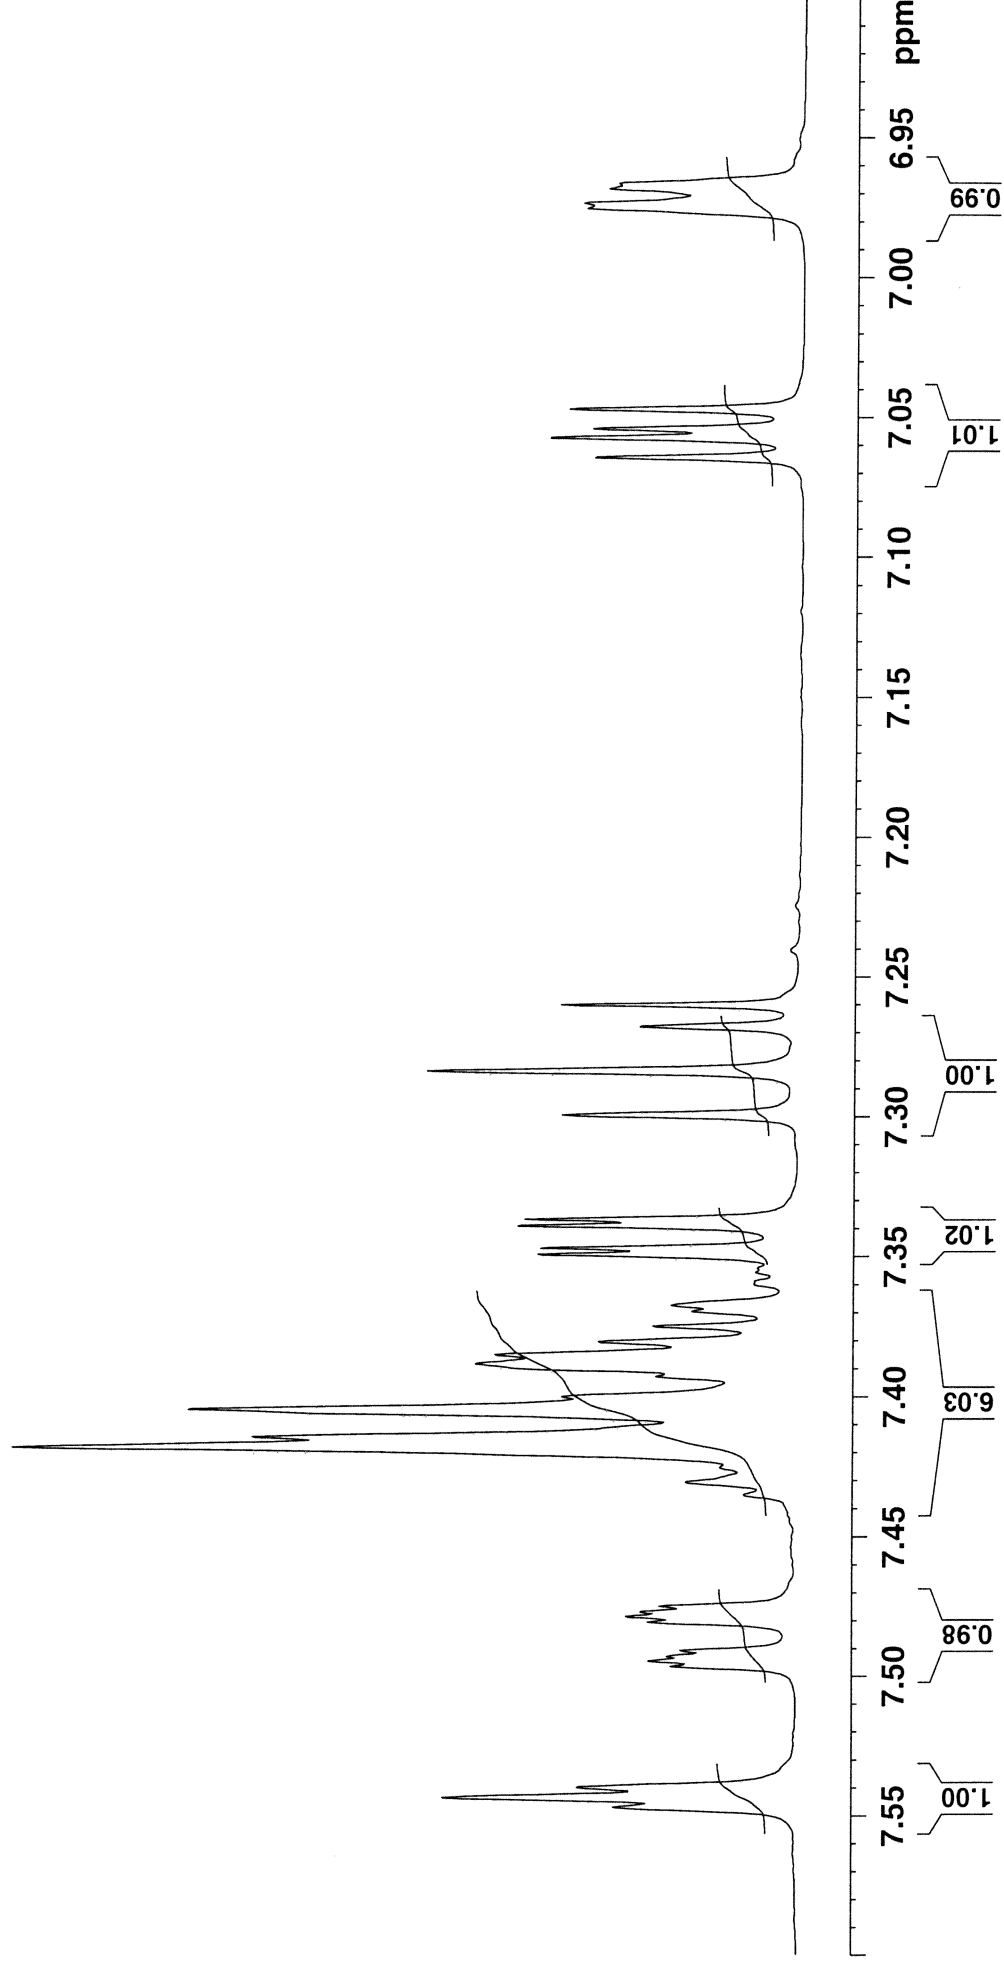

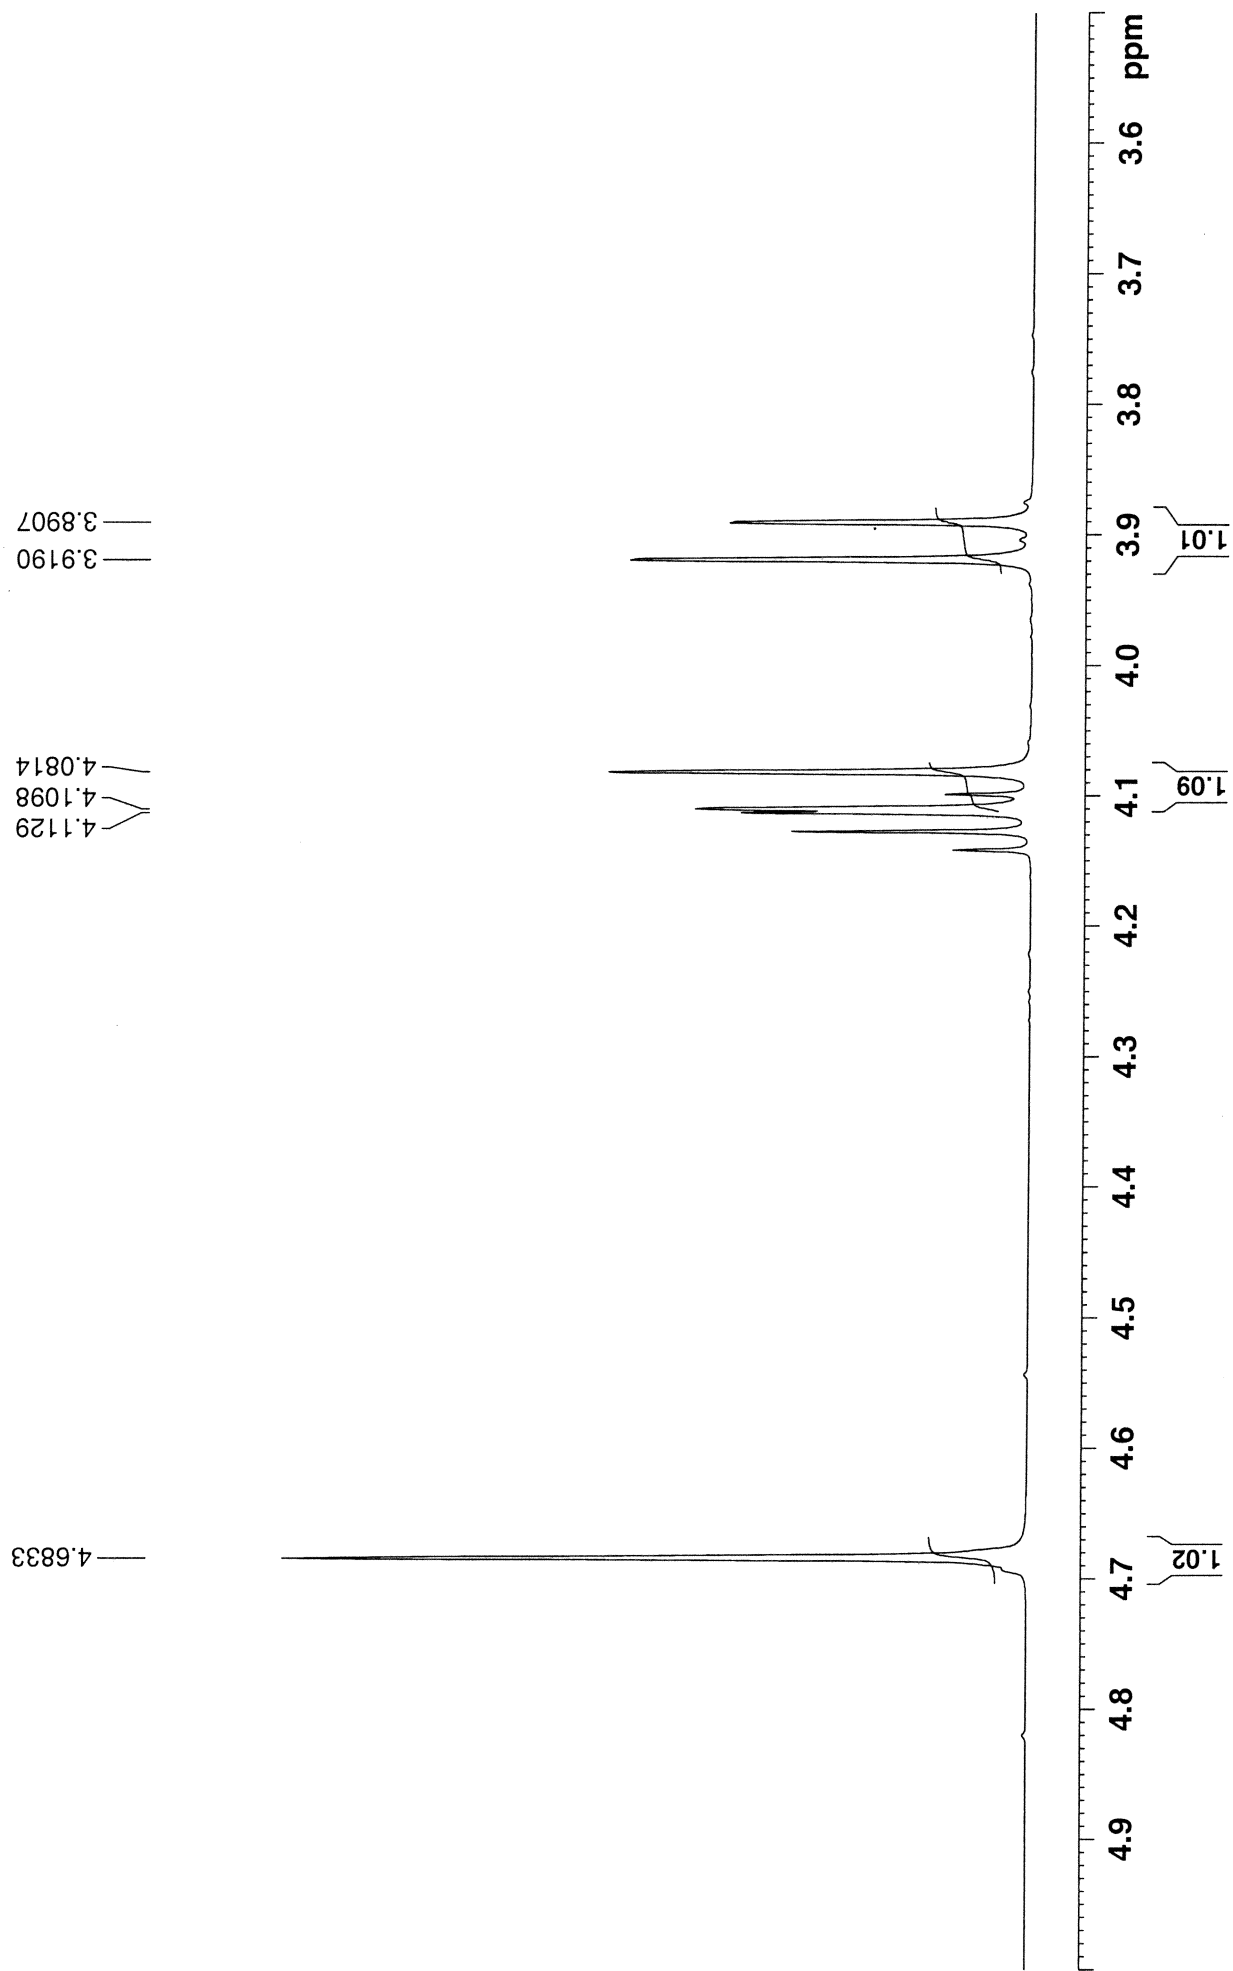

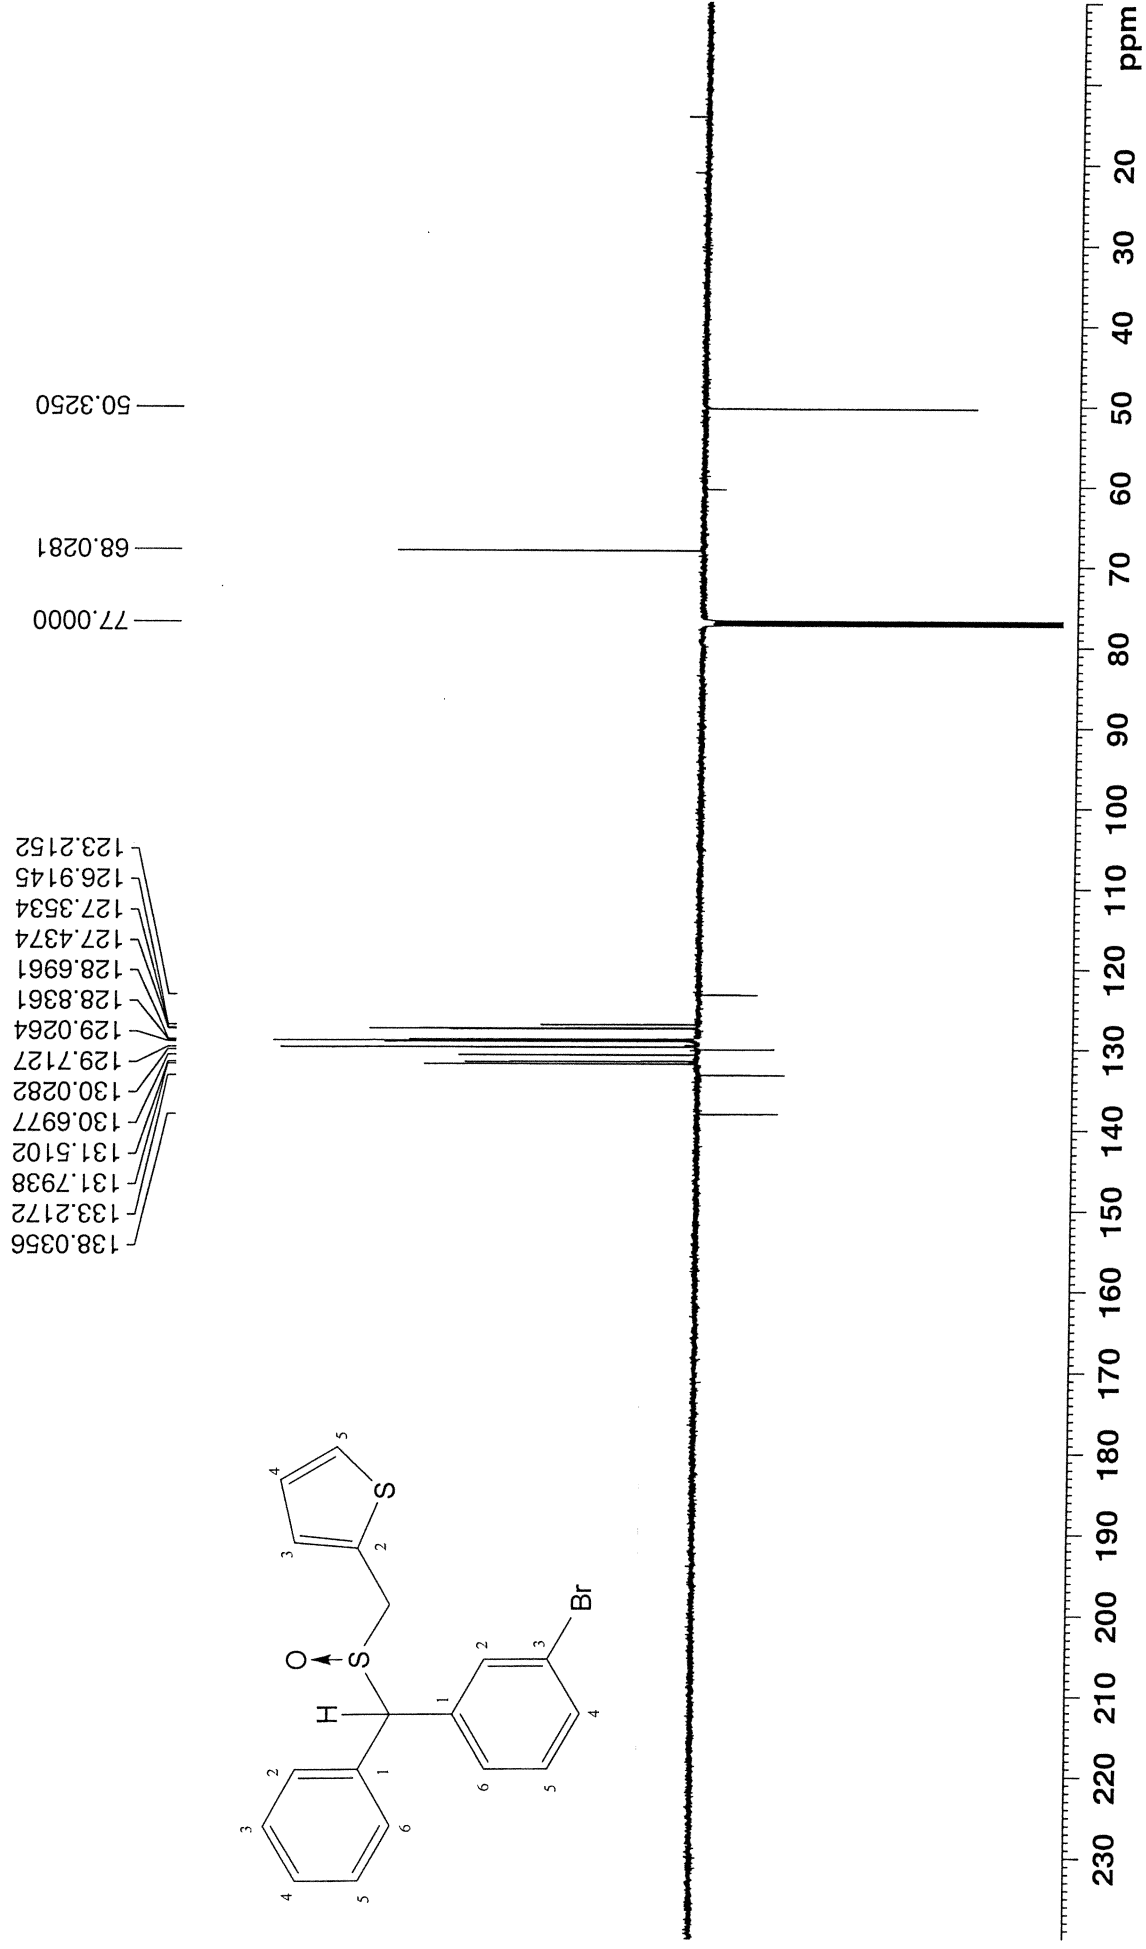



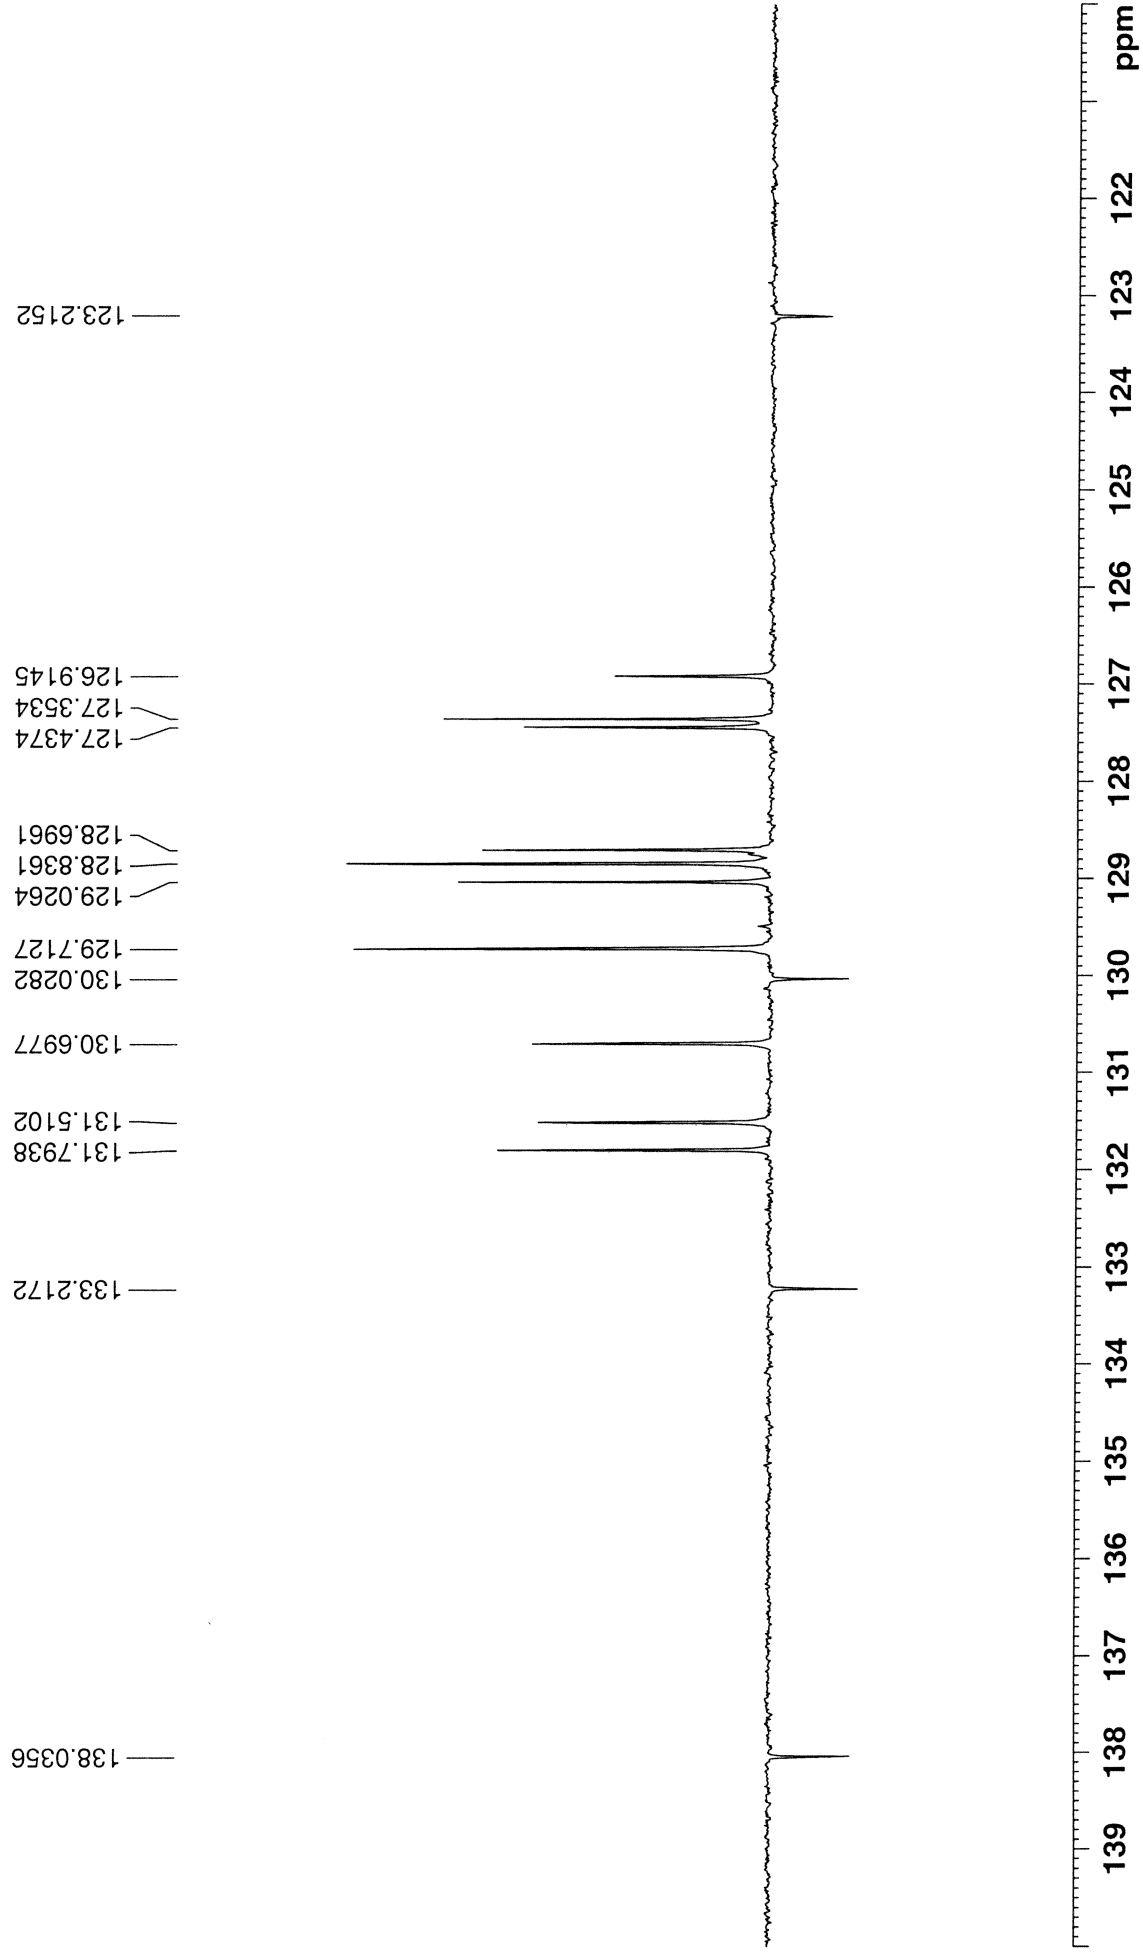

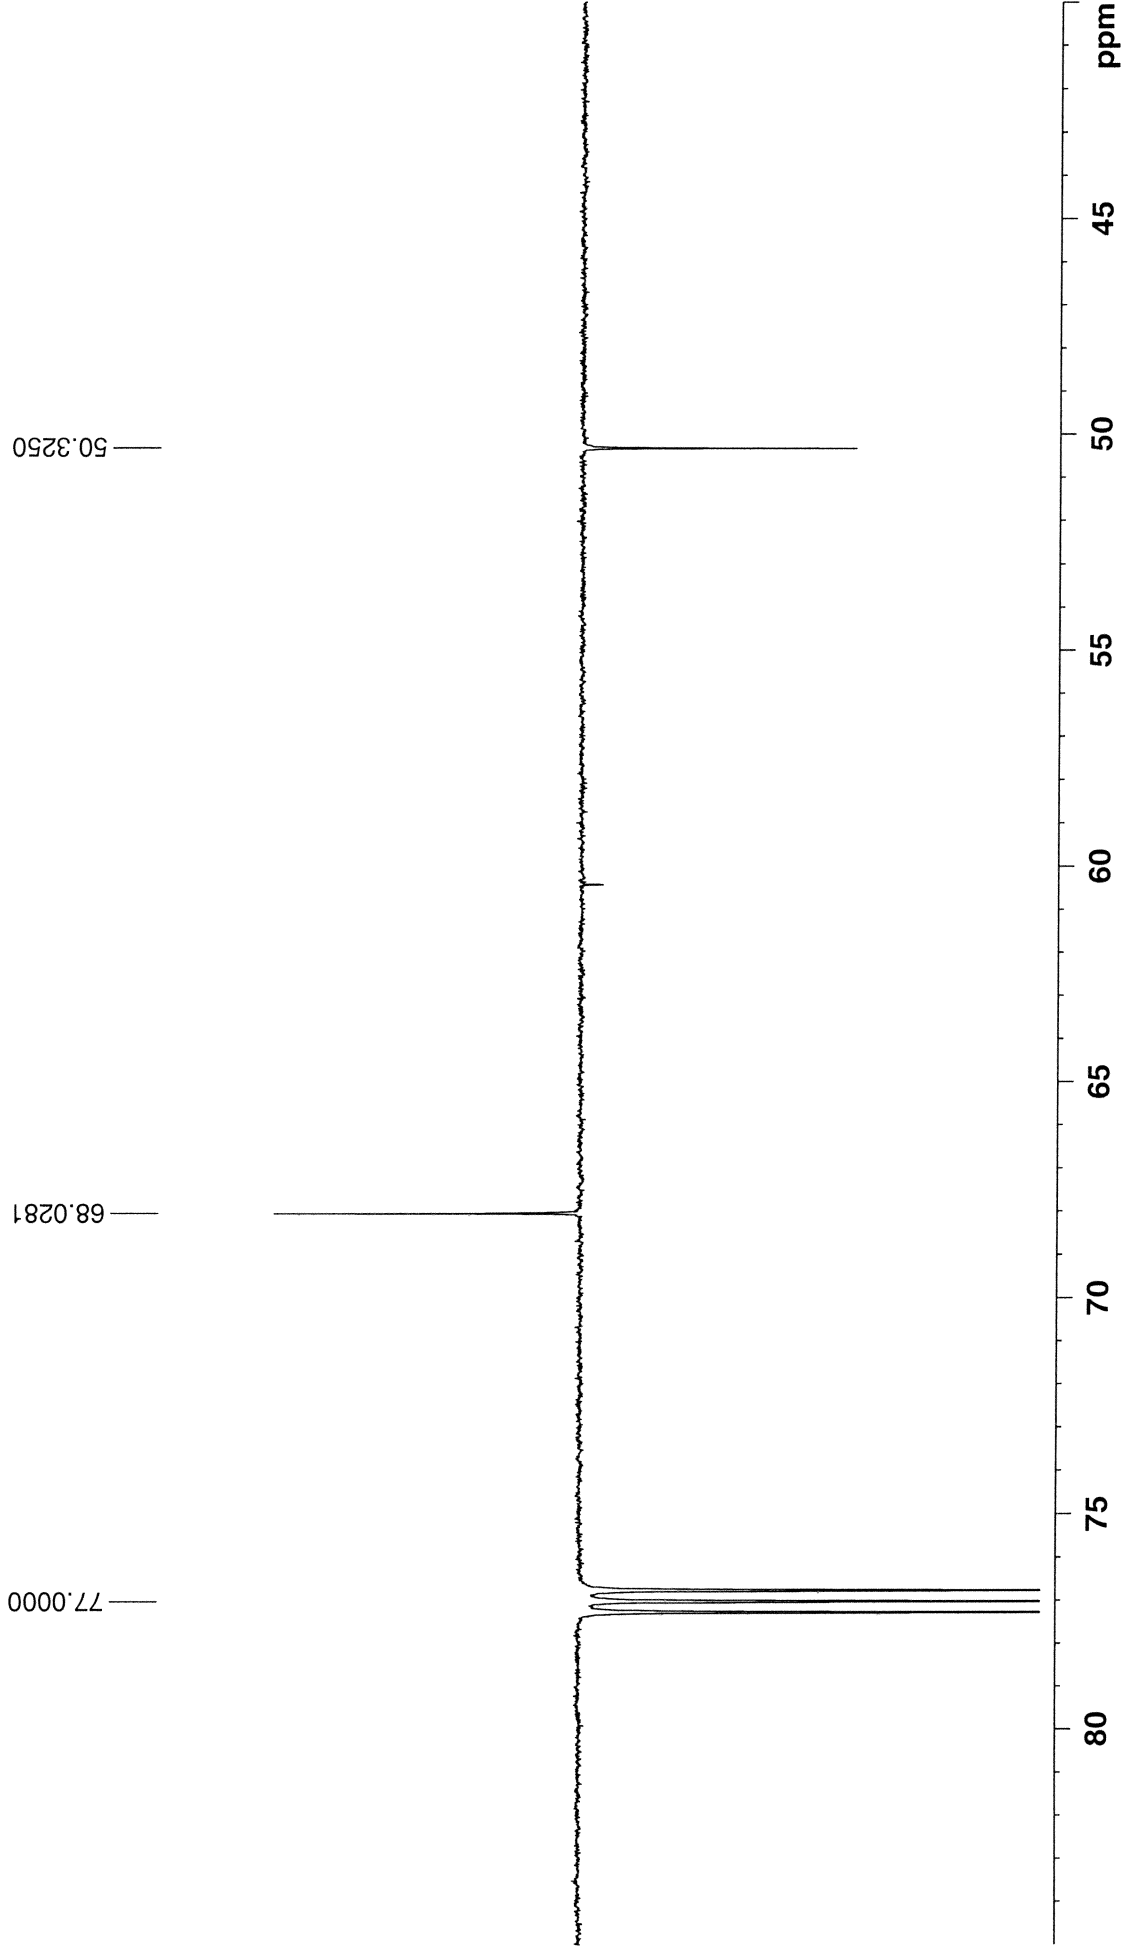

**Figure S32c.** NMR spectra of compound **8h**.

CE196S2P2 in cdcl3 (Proton) 17.5.2019

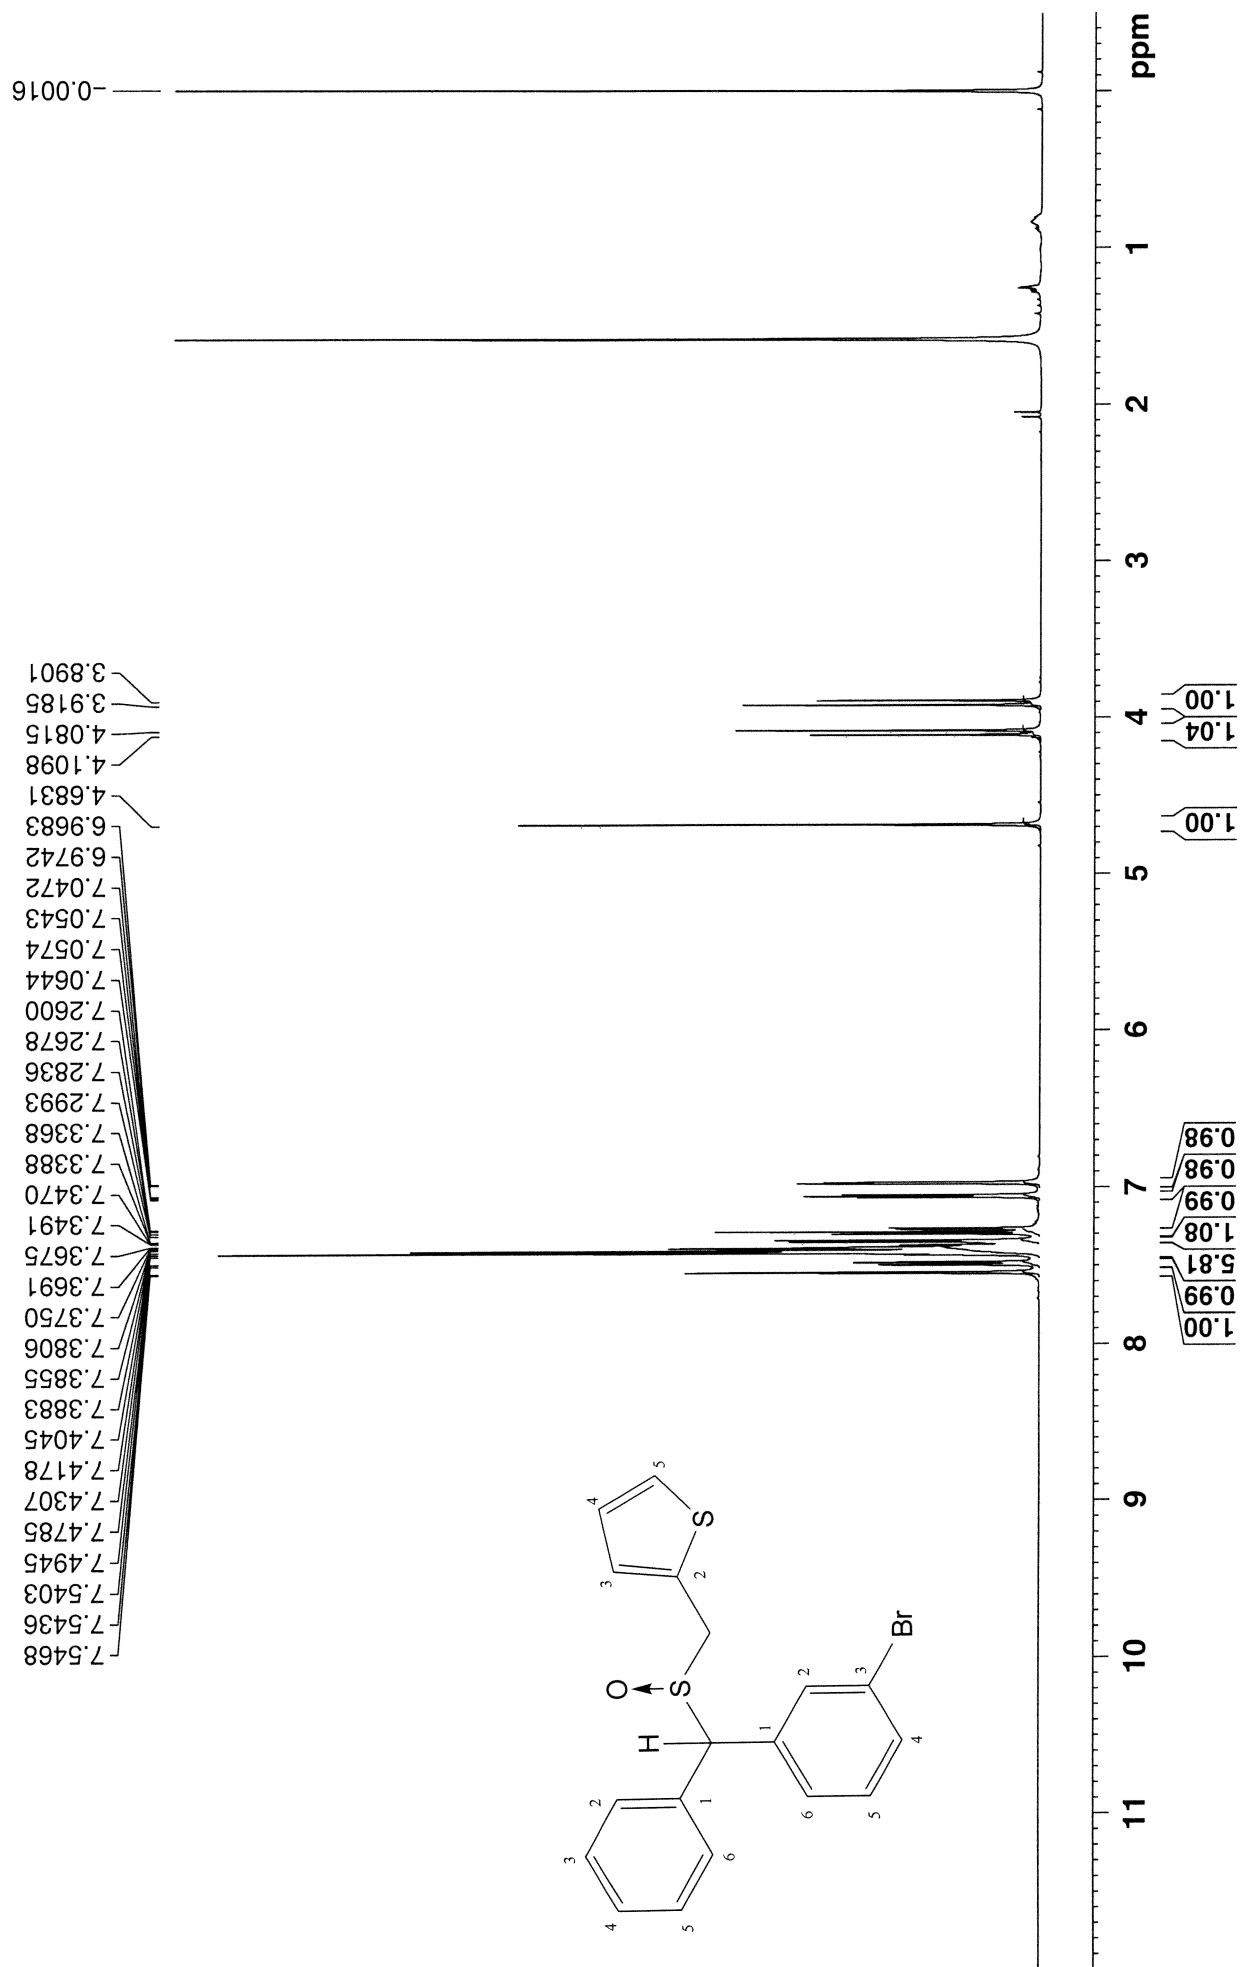

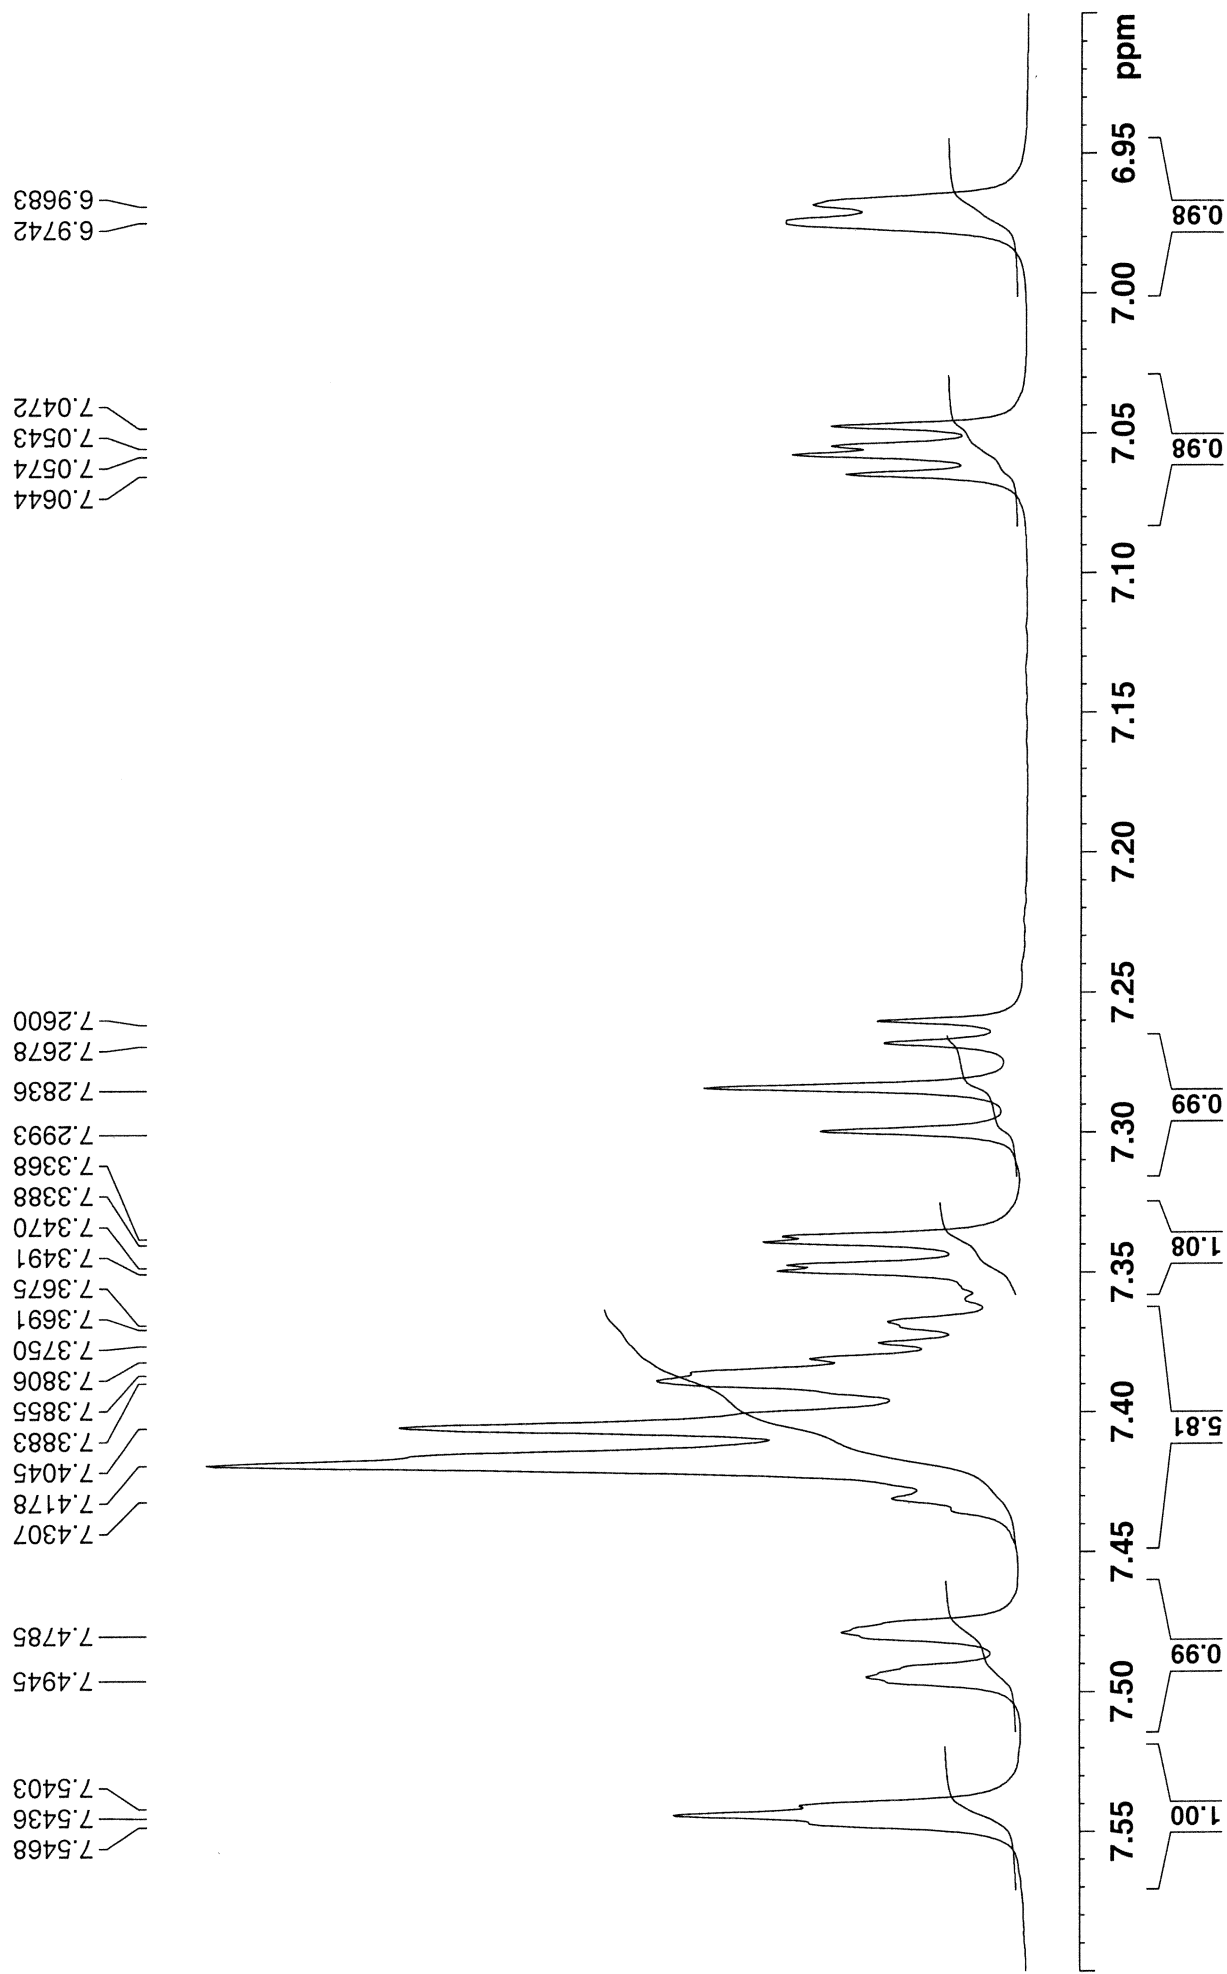

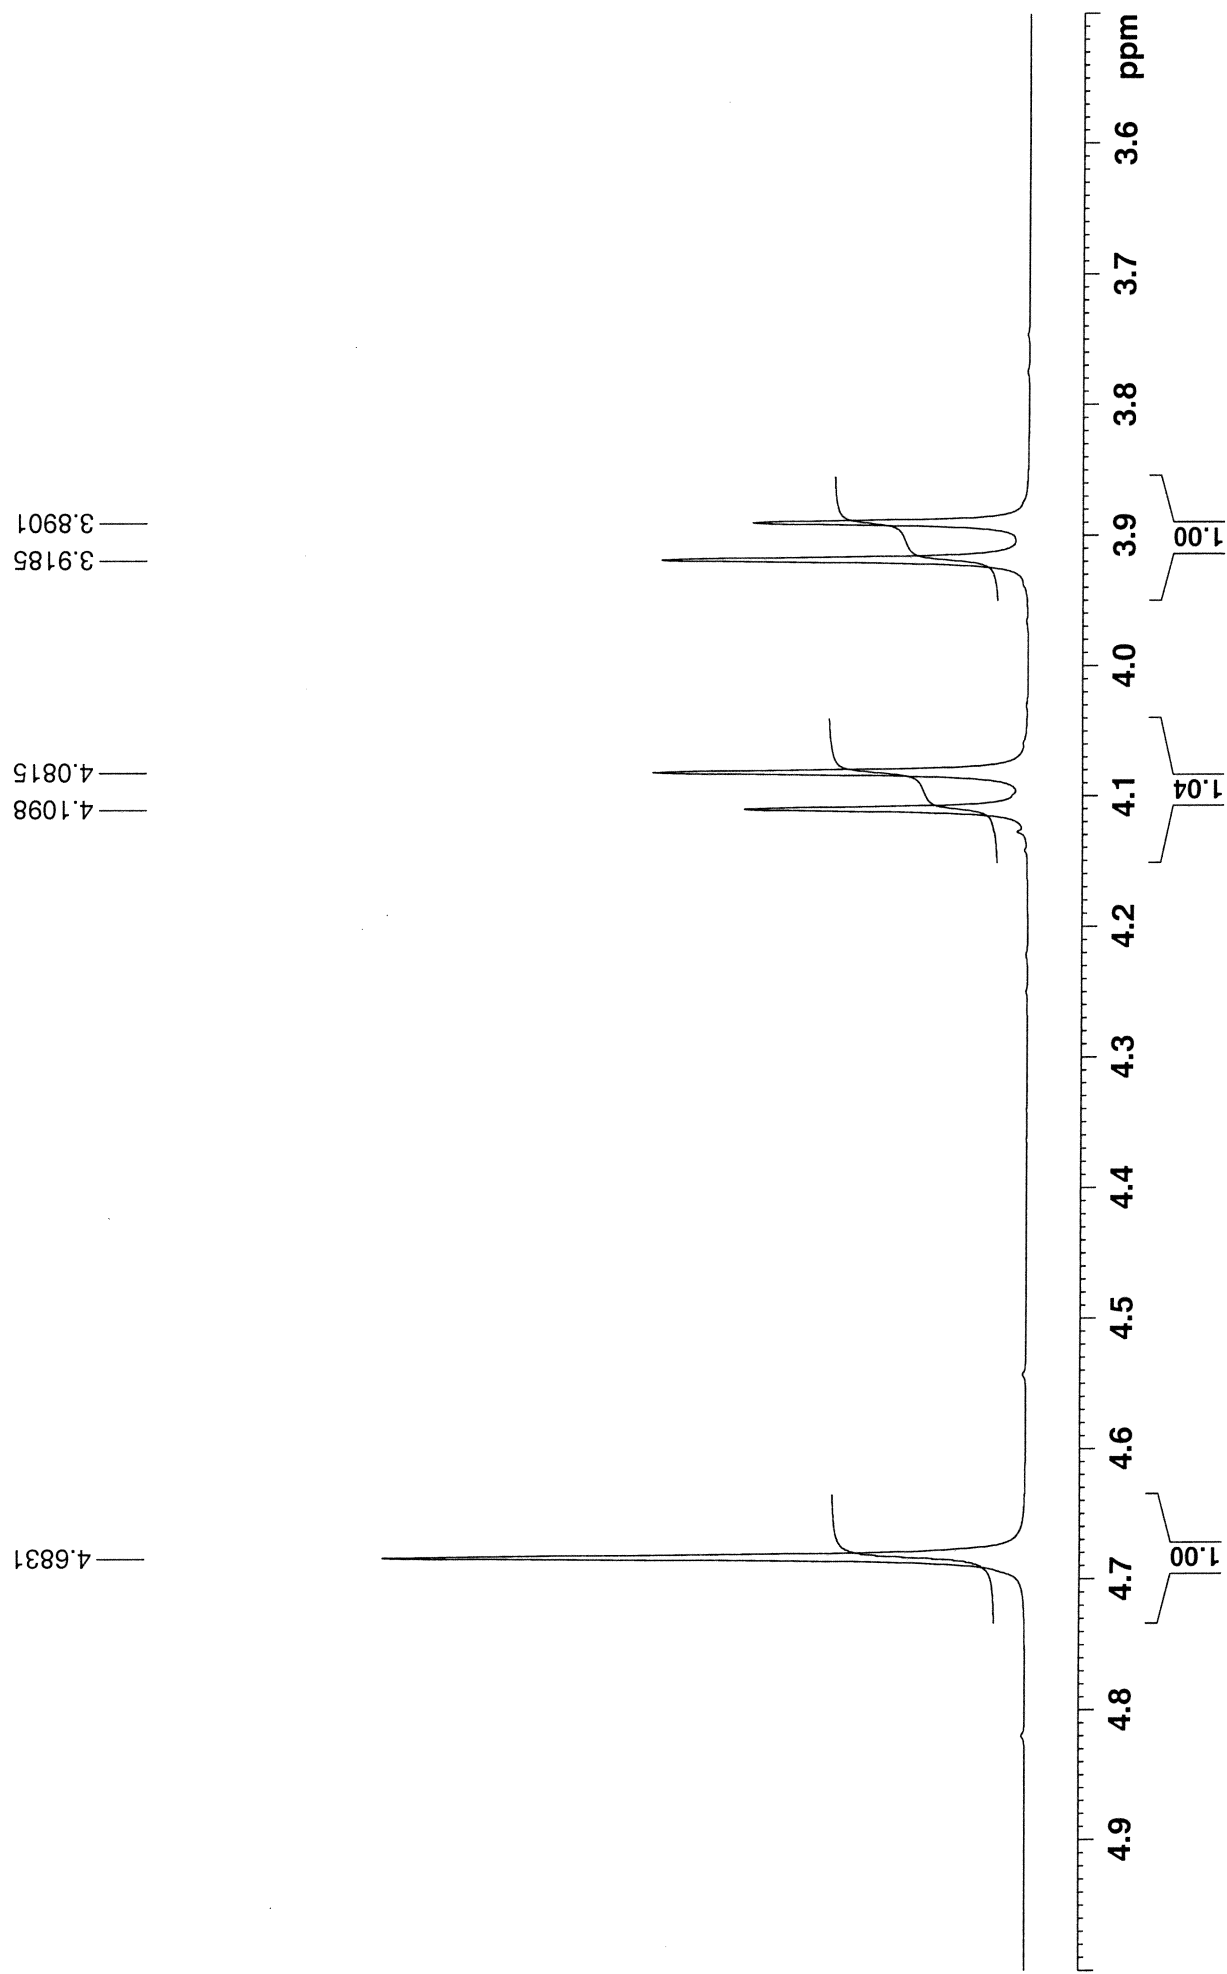

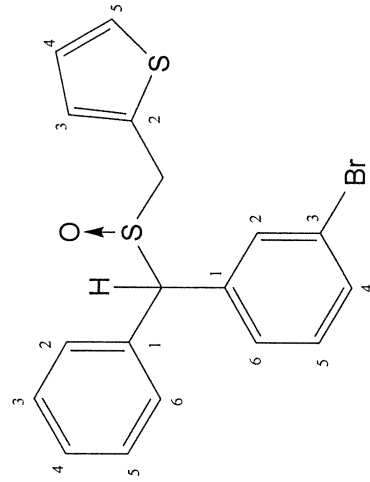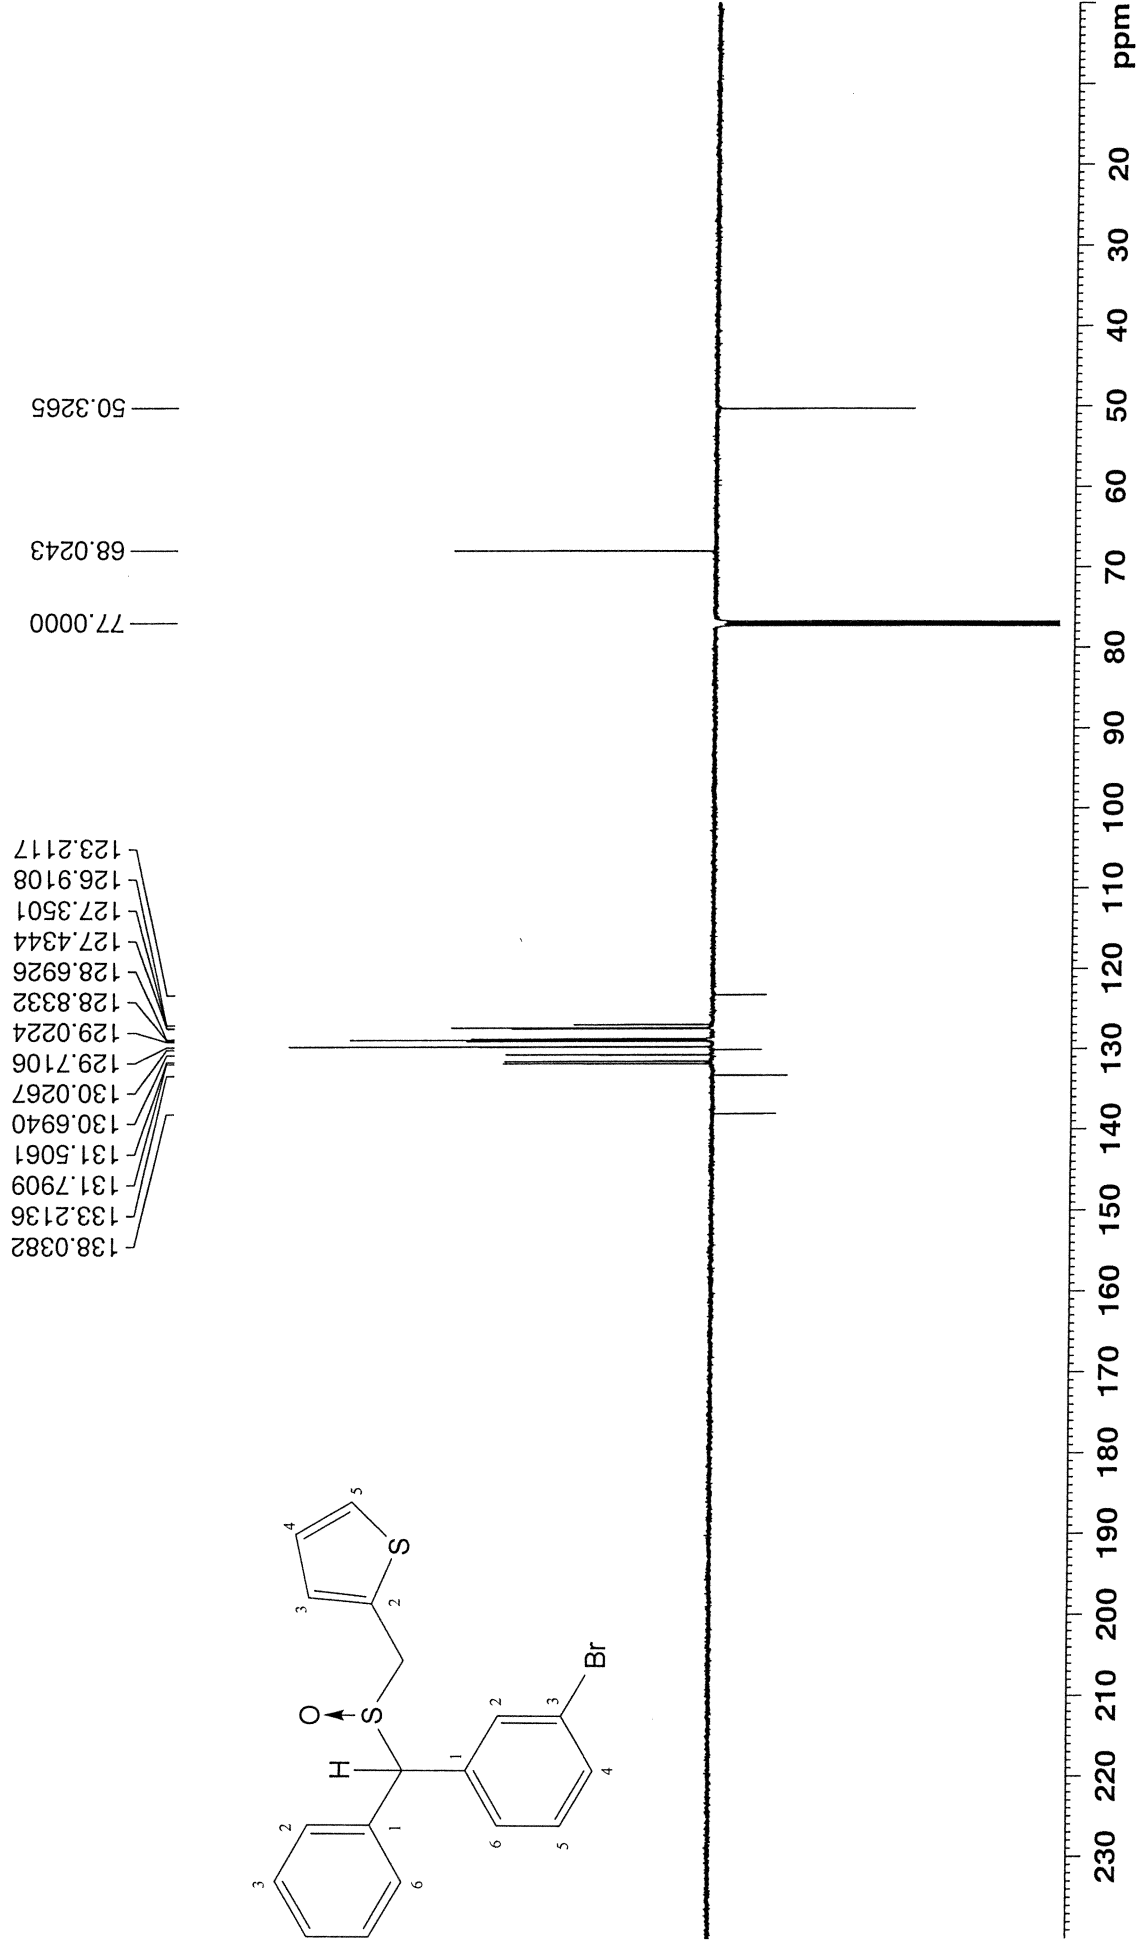

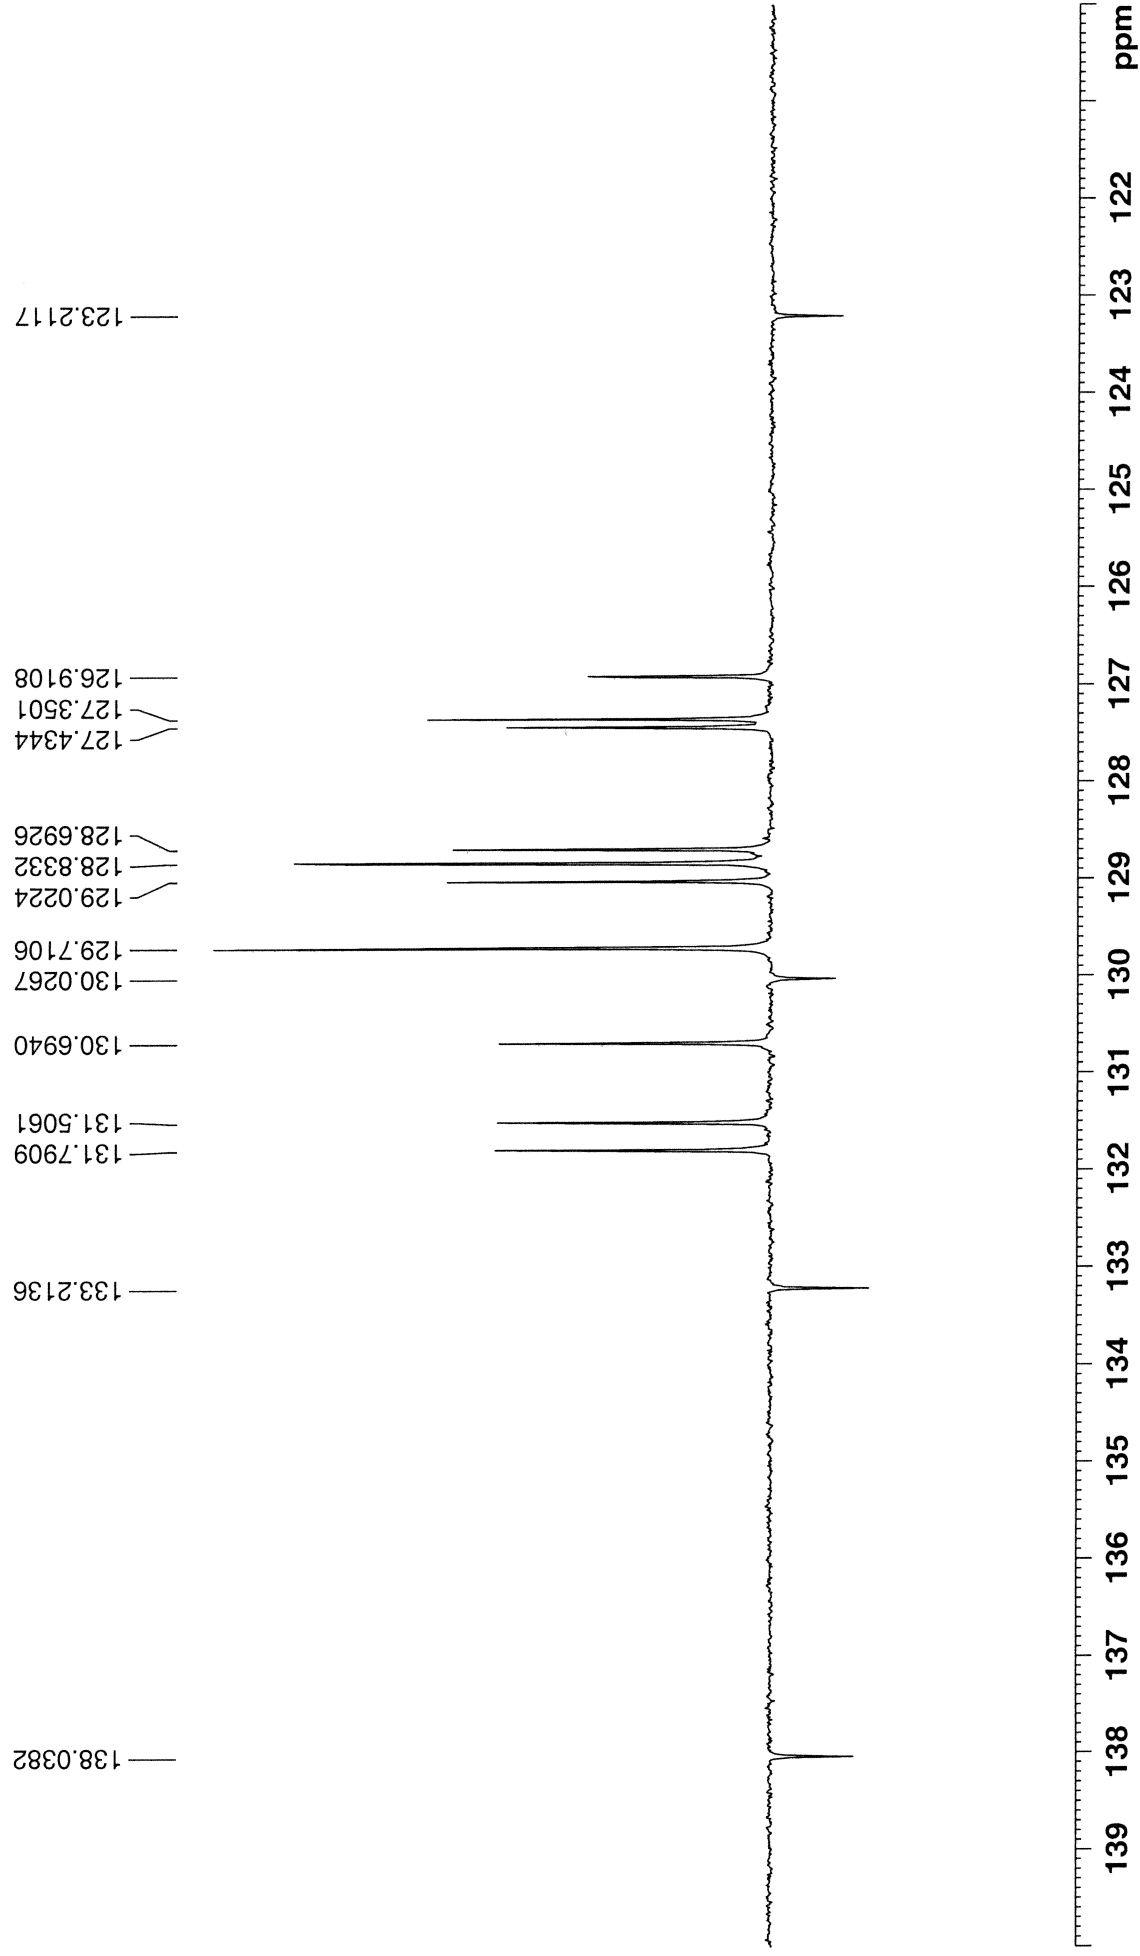

CE196S2P2 in cdcl3 (APT) 17.5.2019

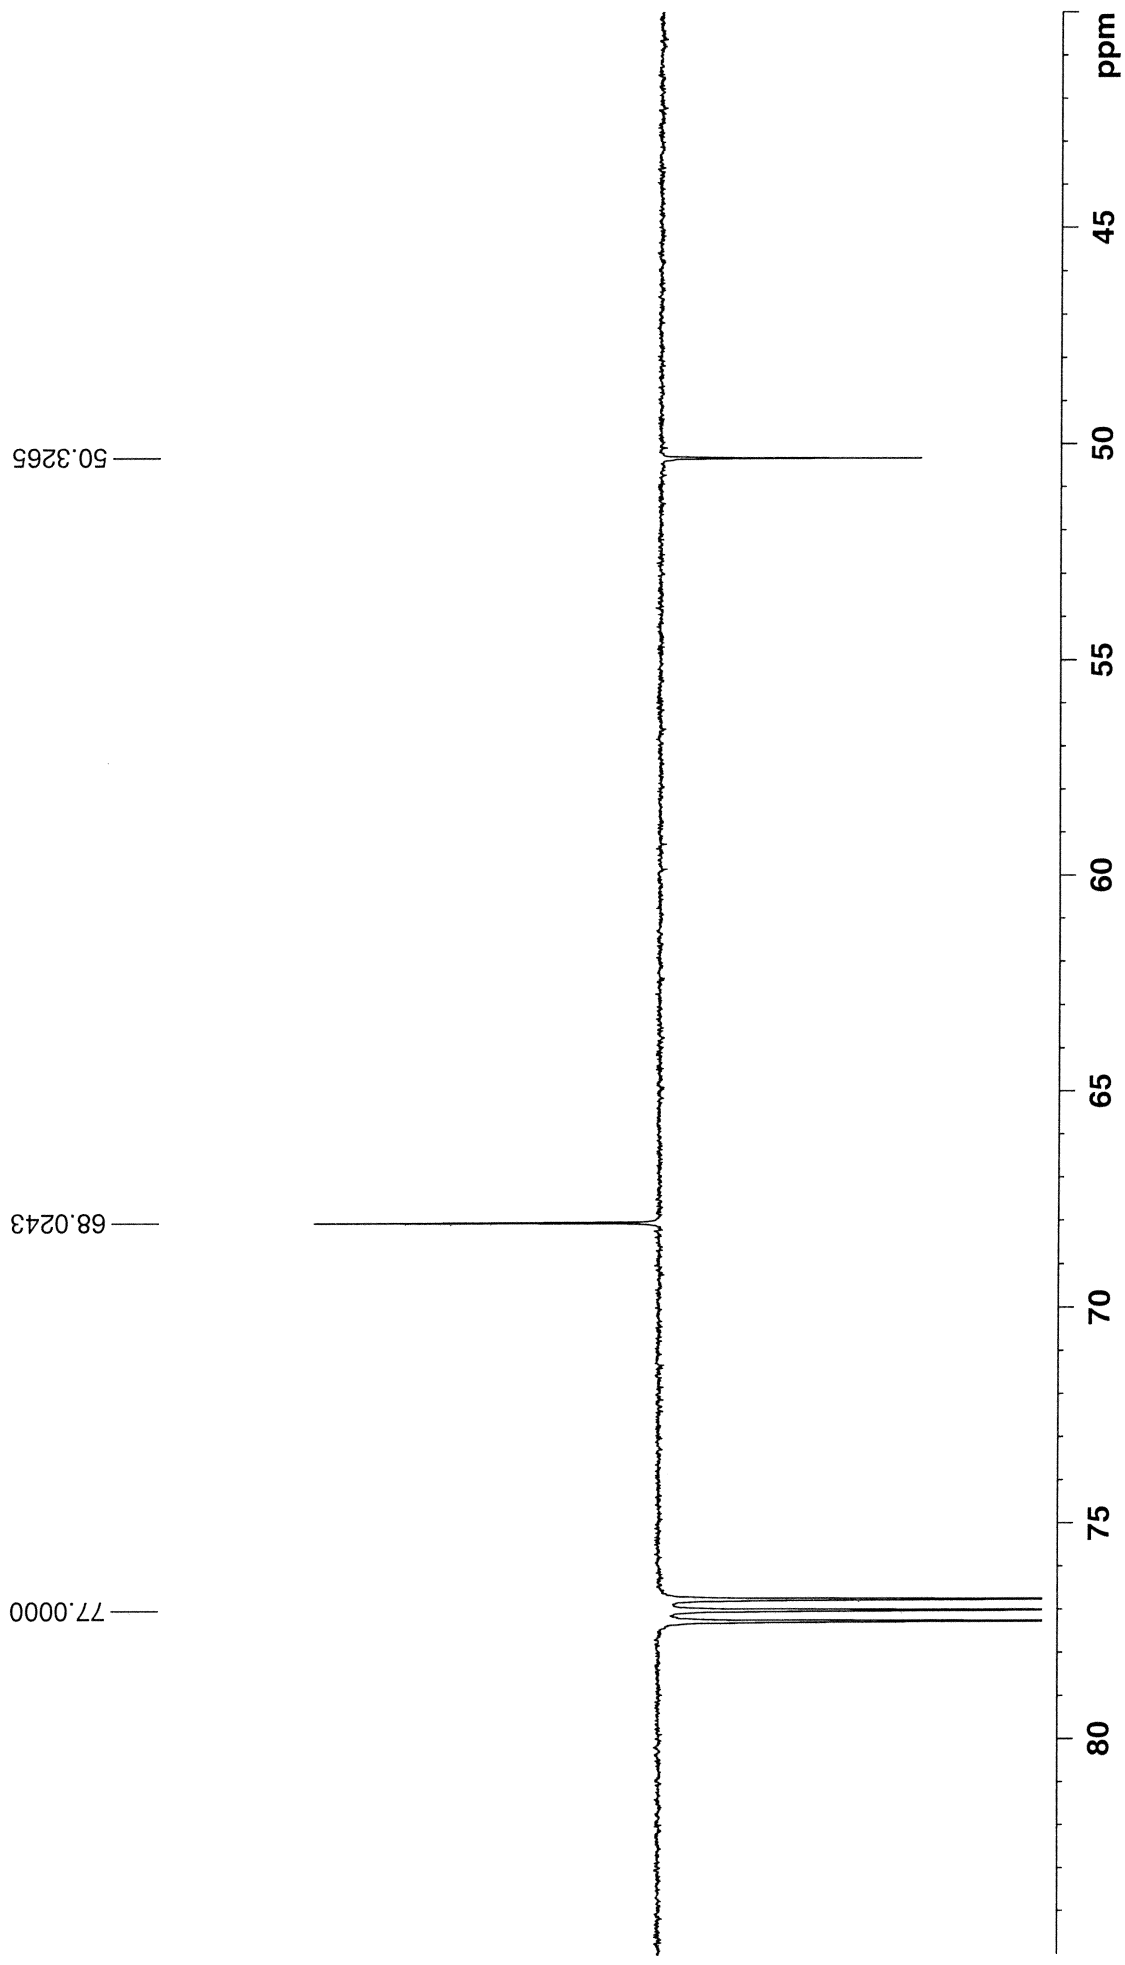



**Figure S33c.** NMR spectra of compound **5i**.

MK-31p1 in cdcl3 (Proton) 4.9.2020

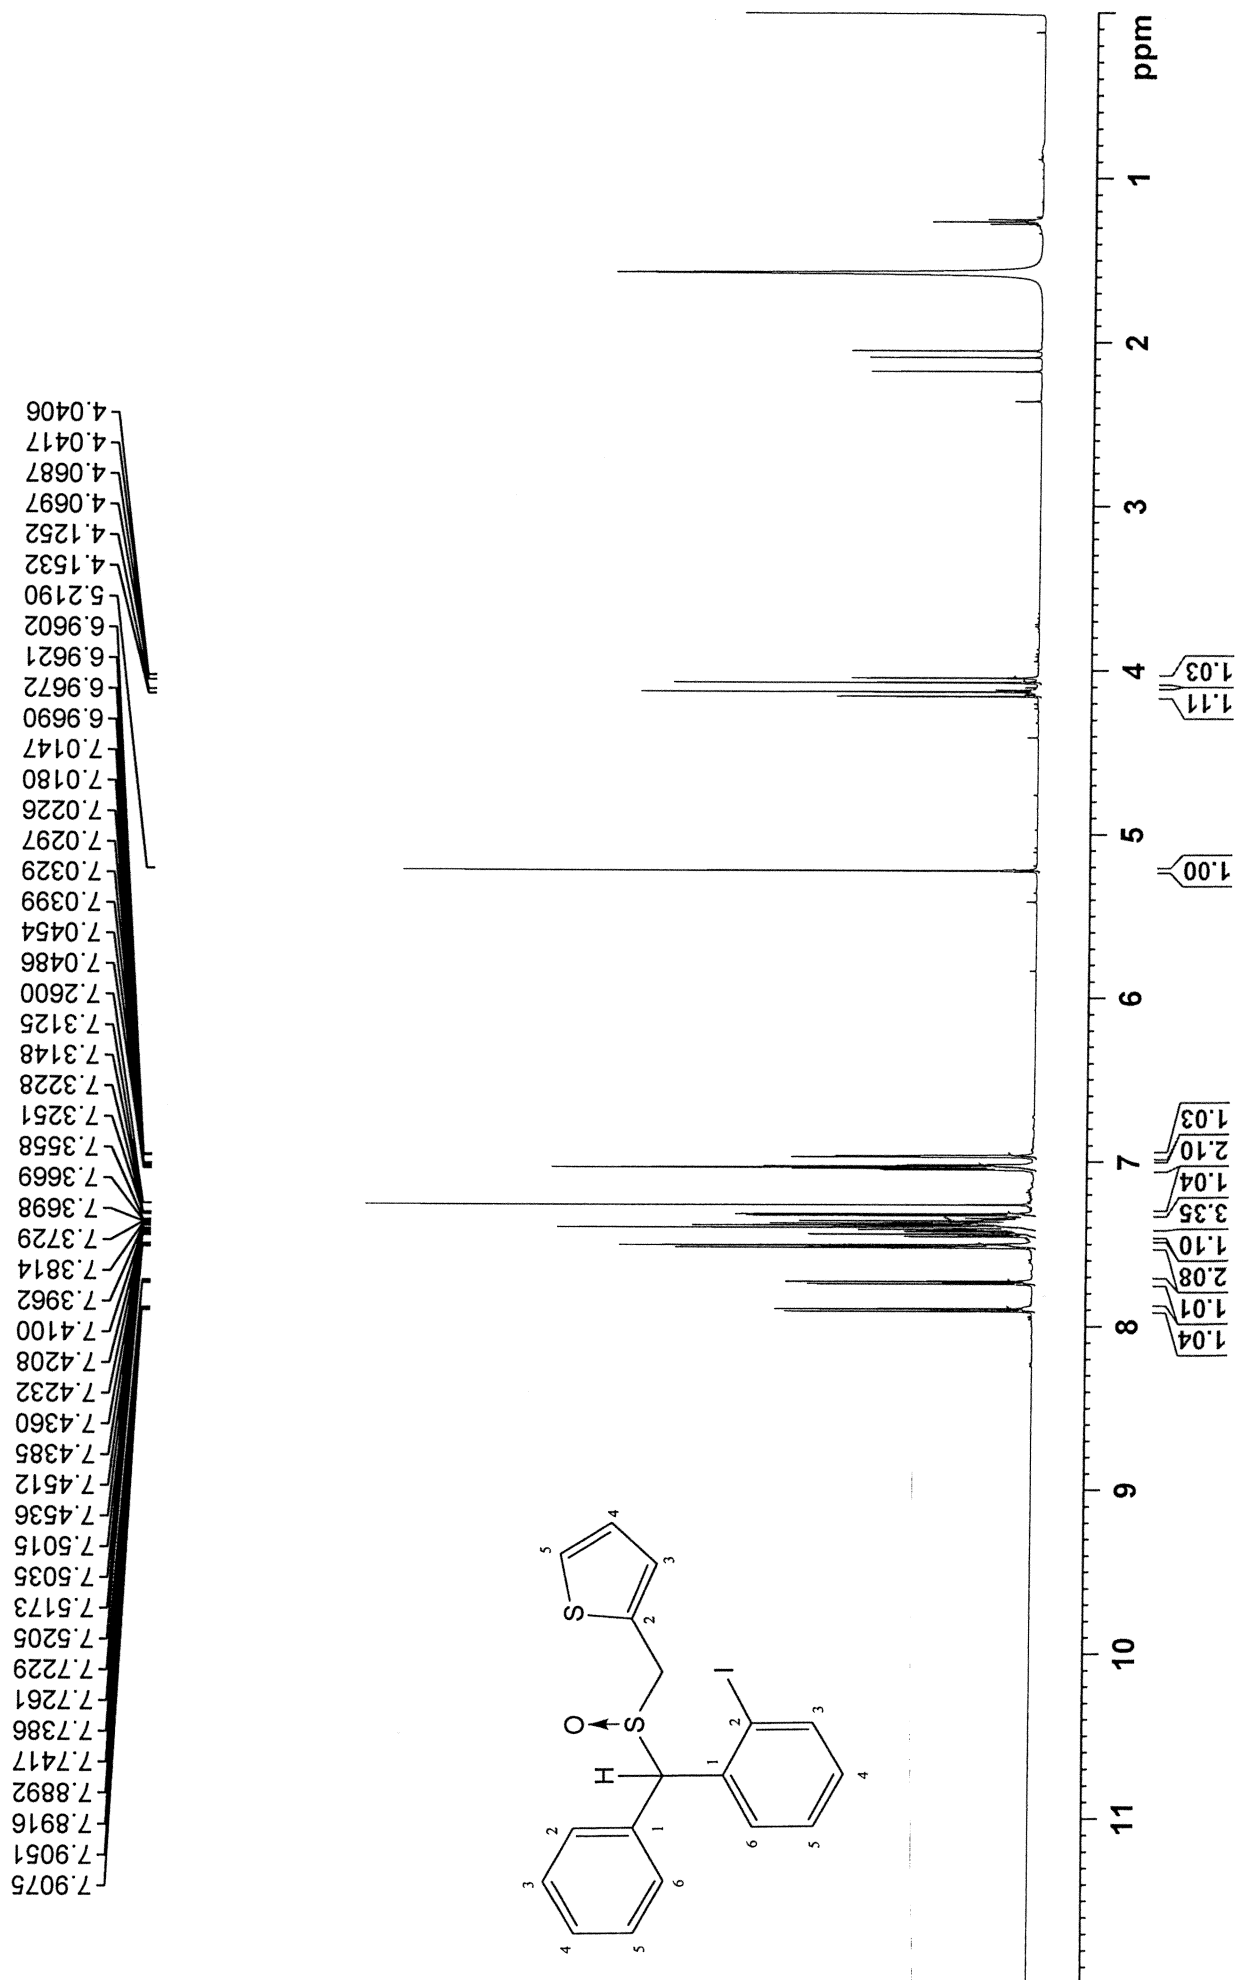

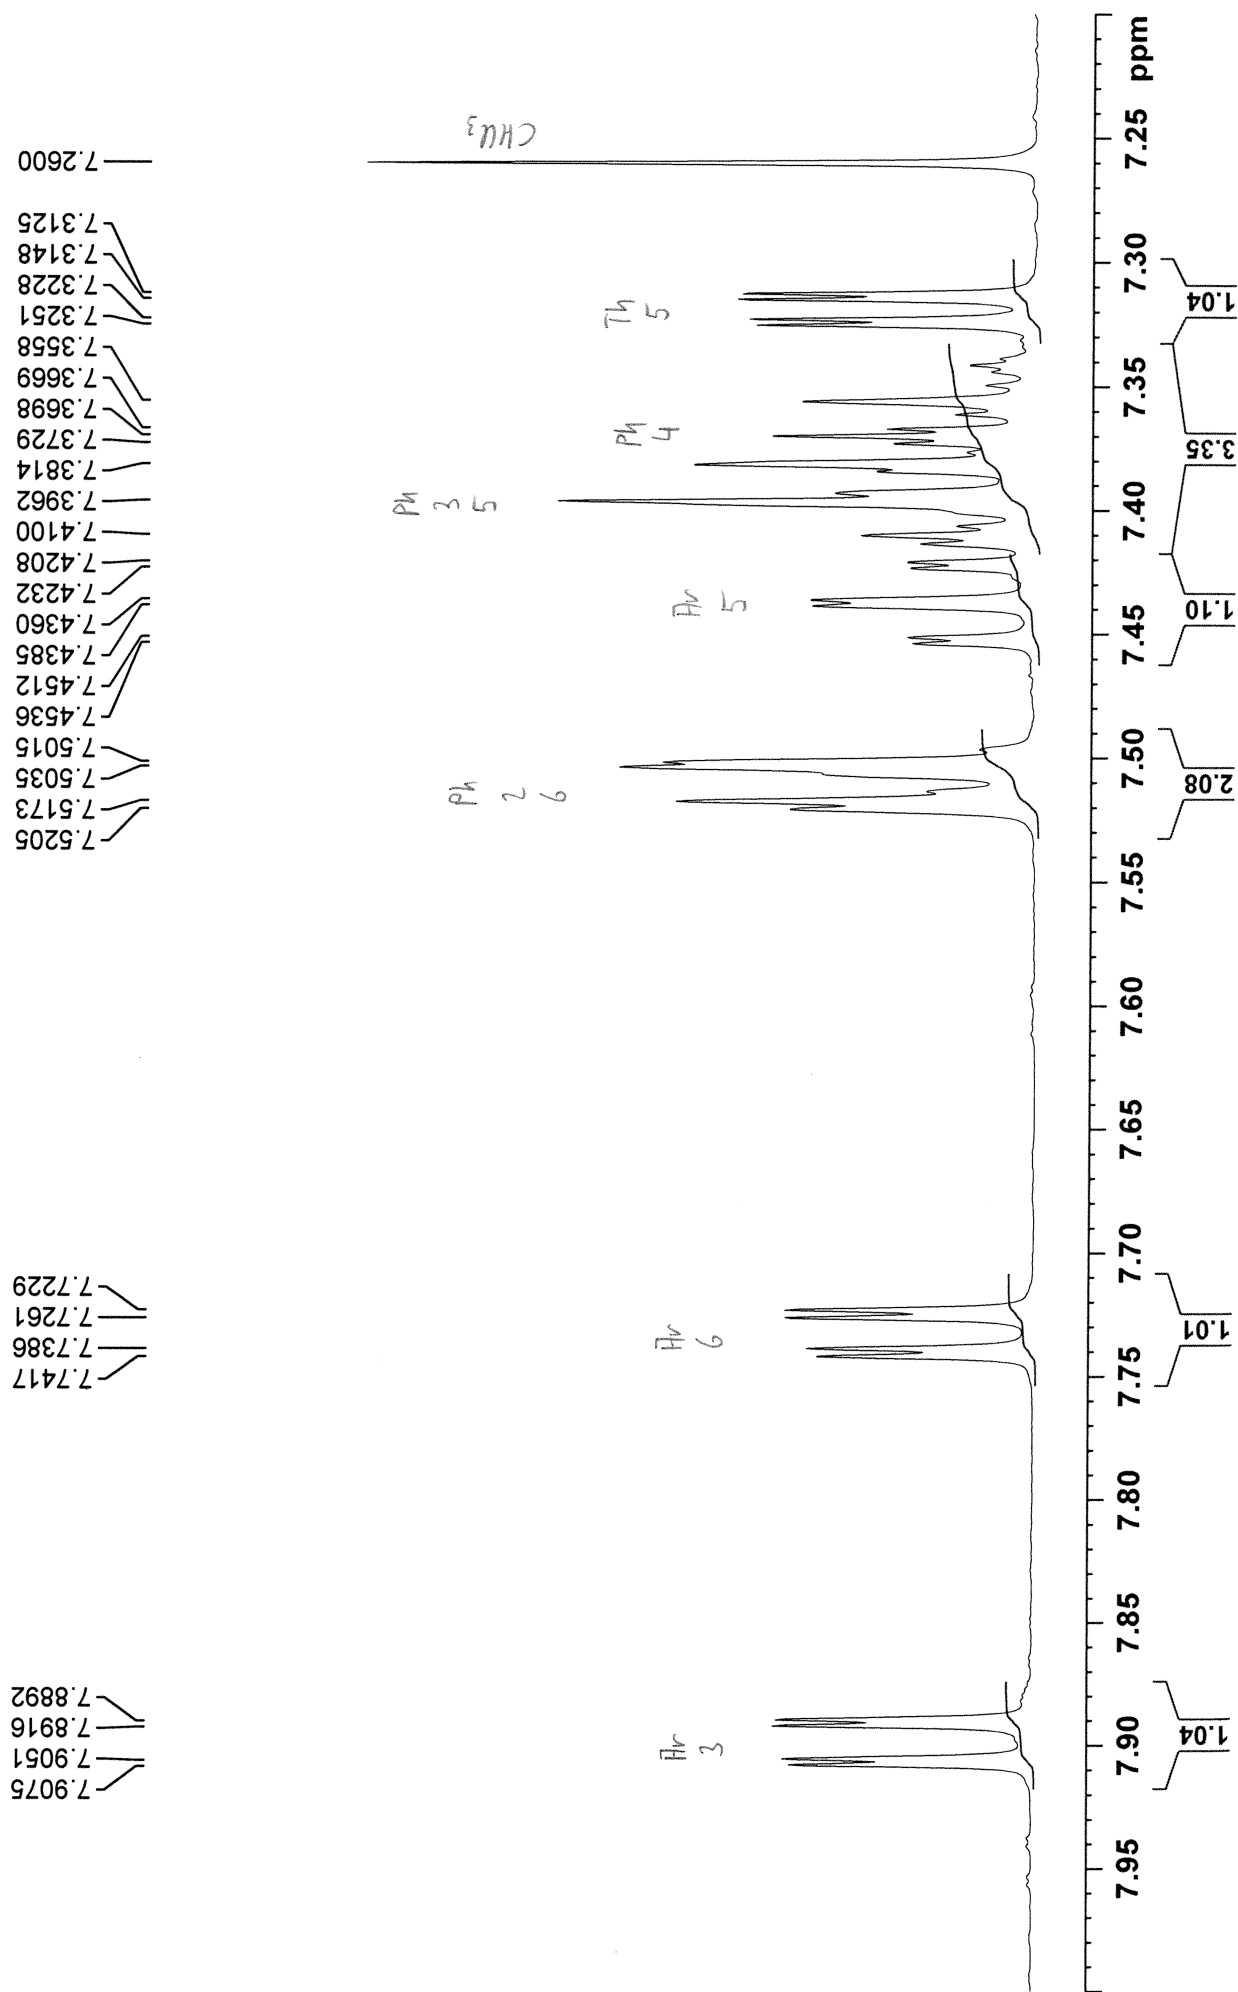

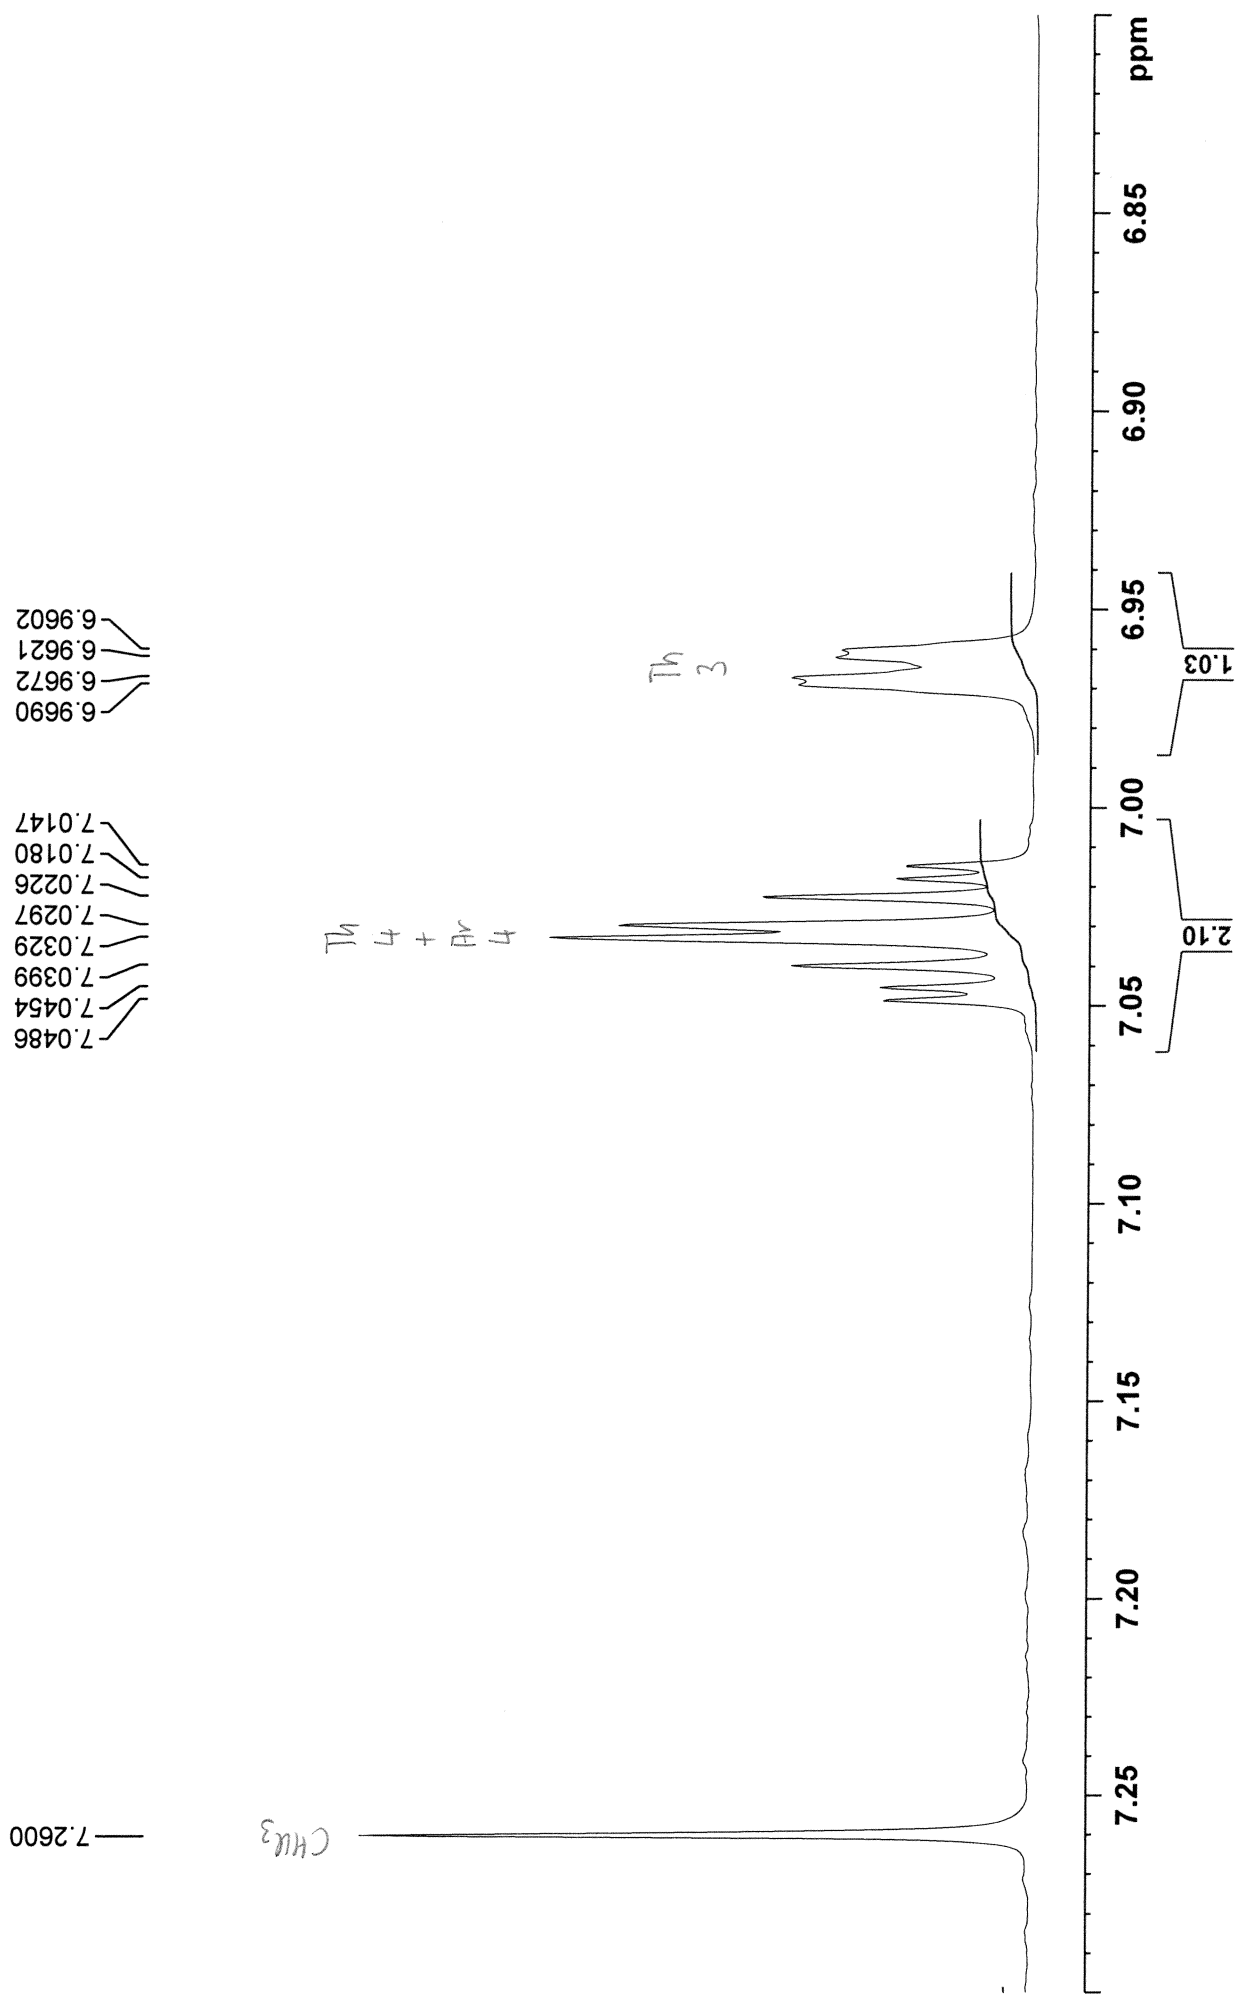

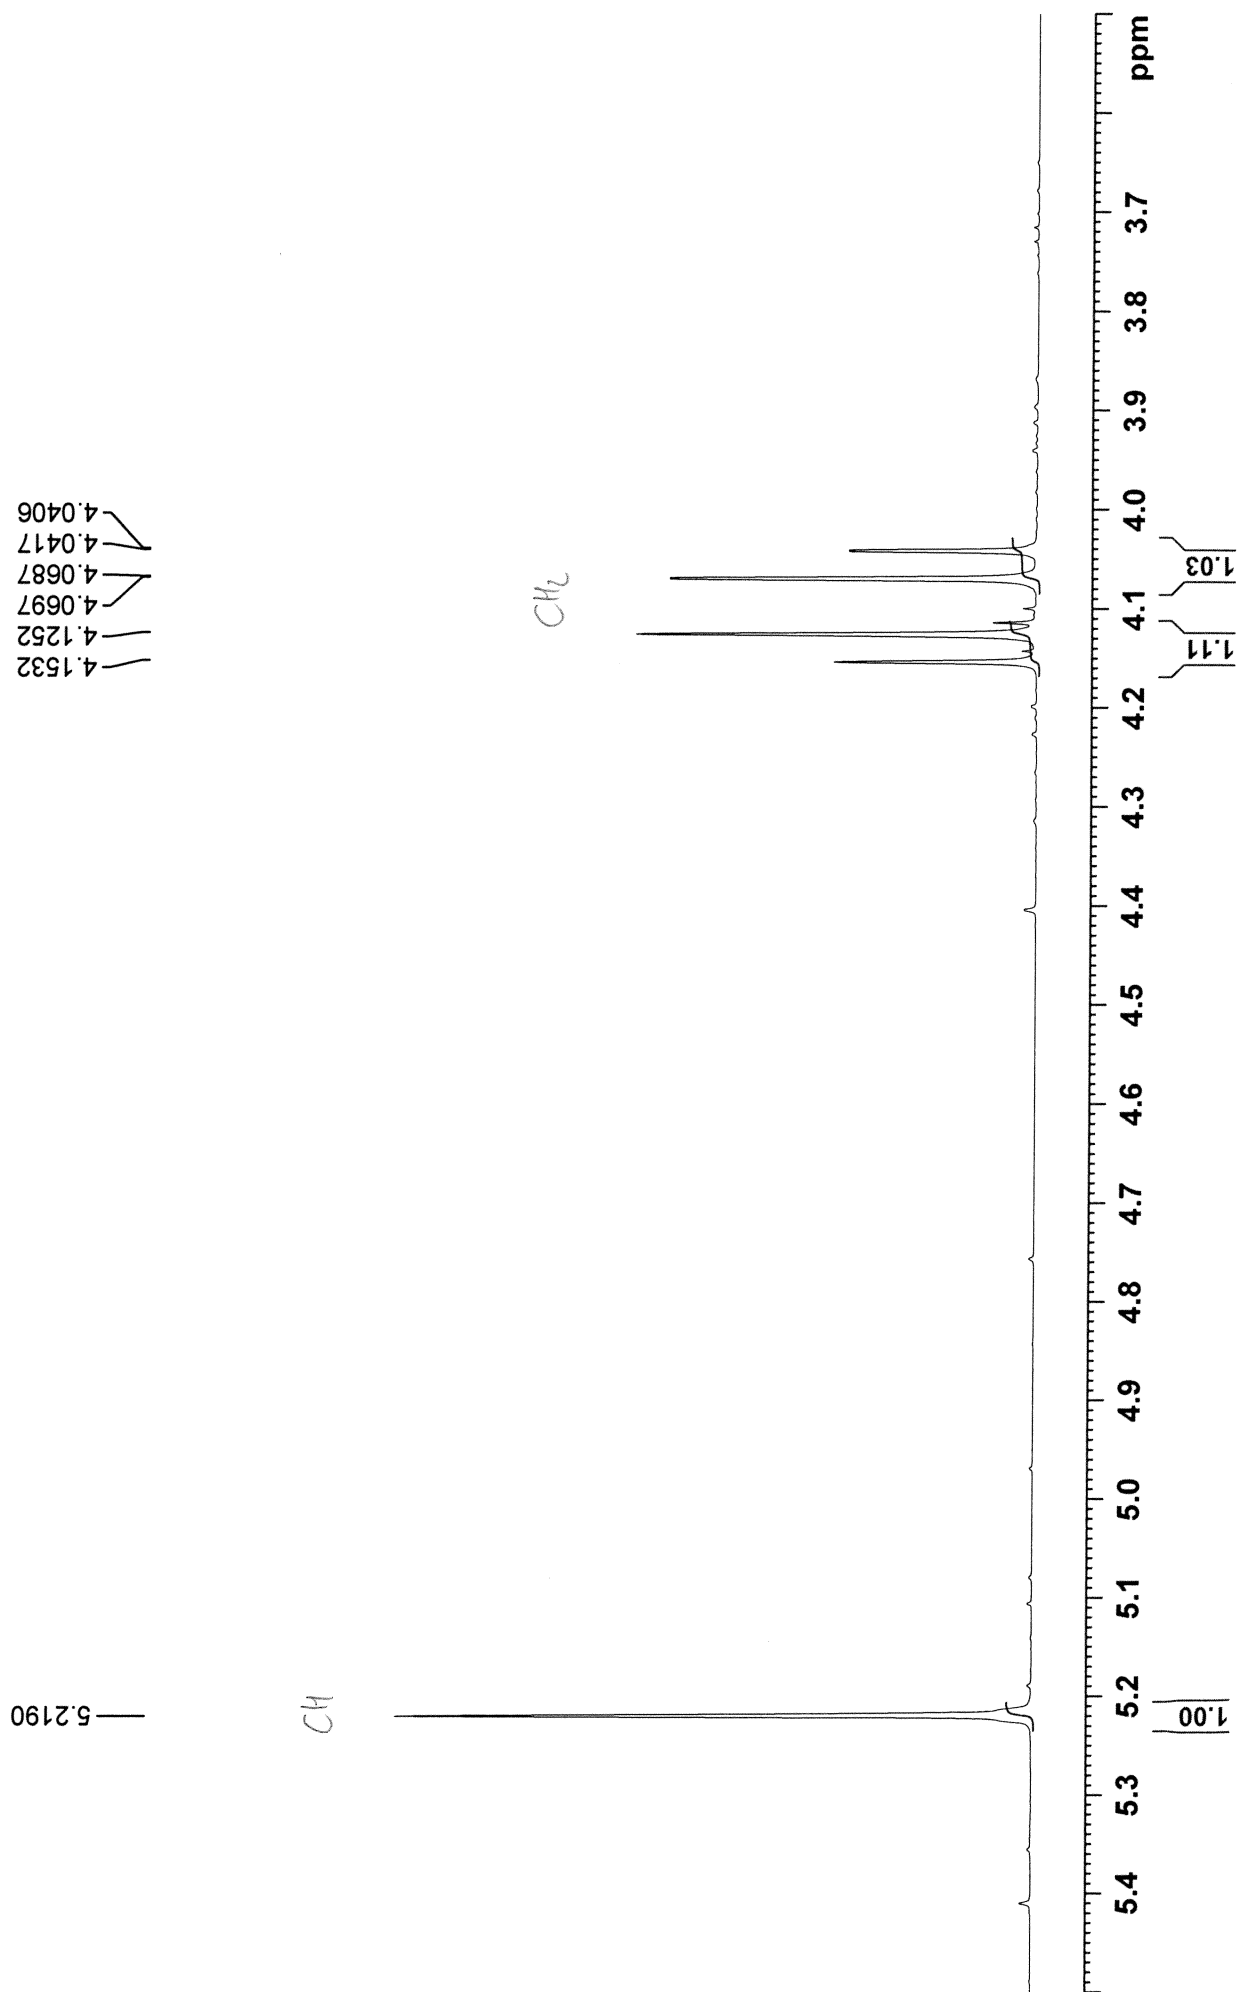

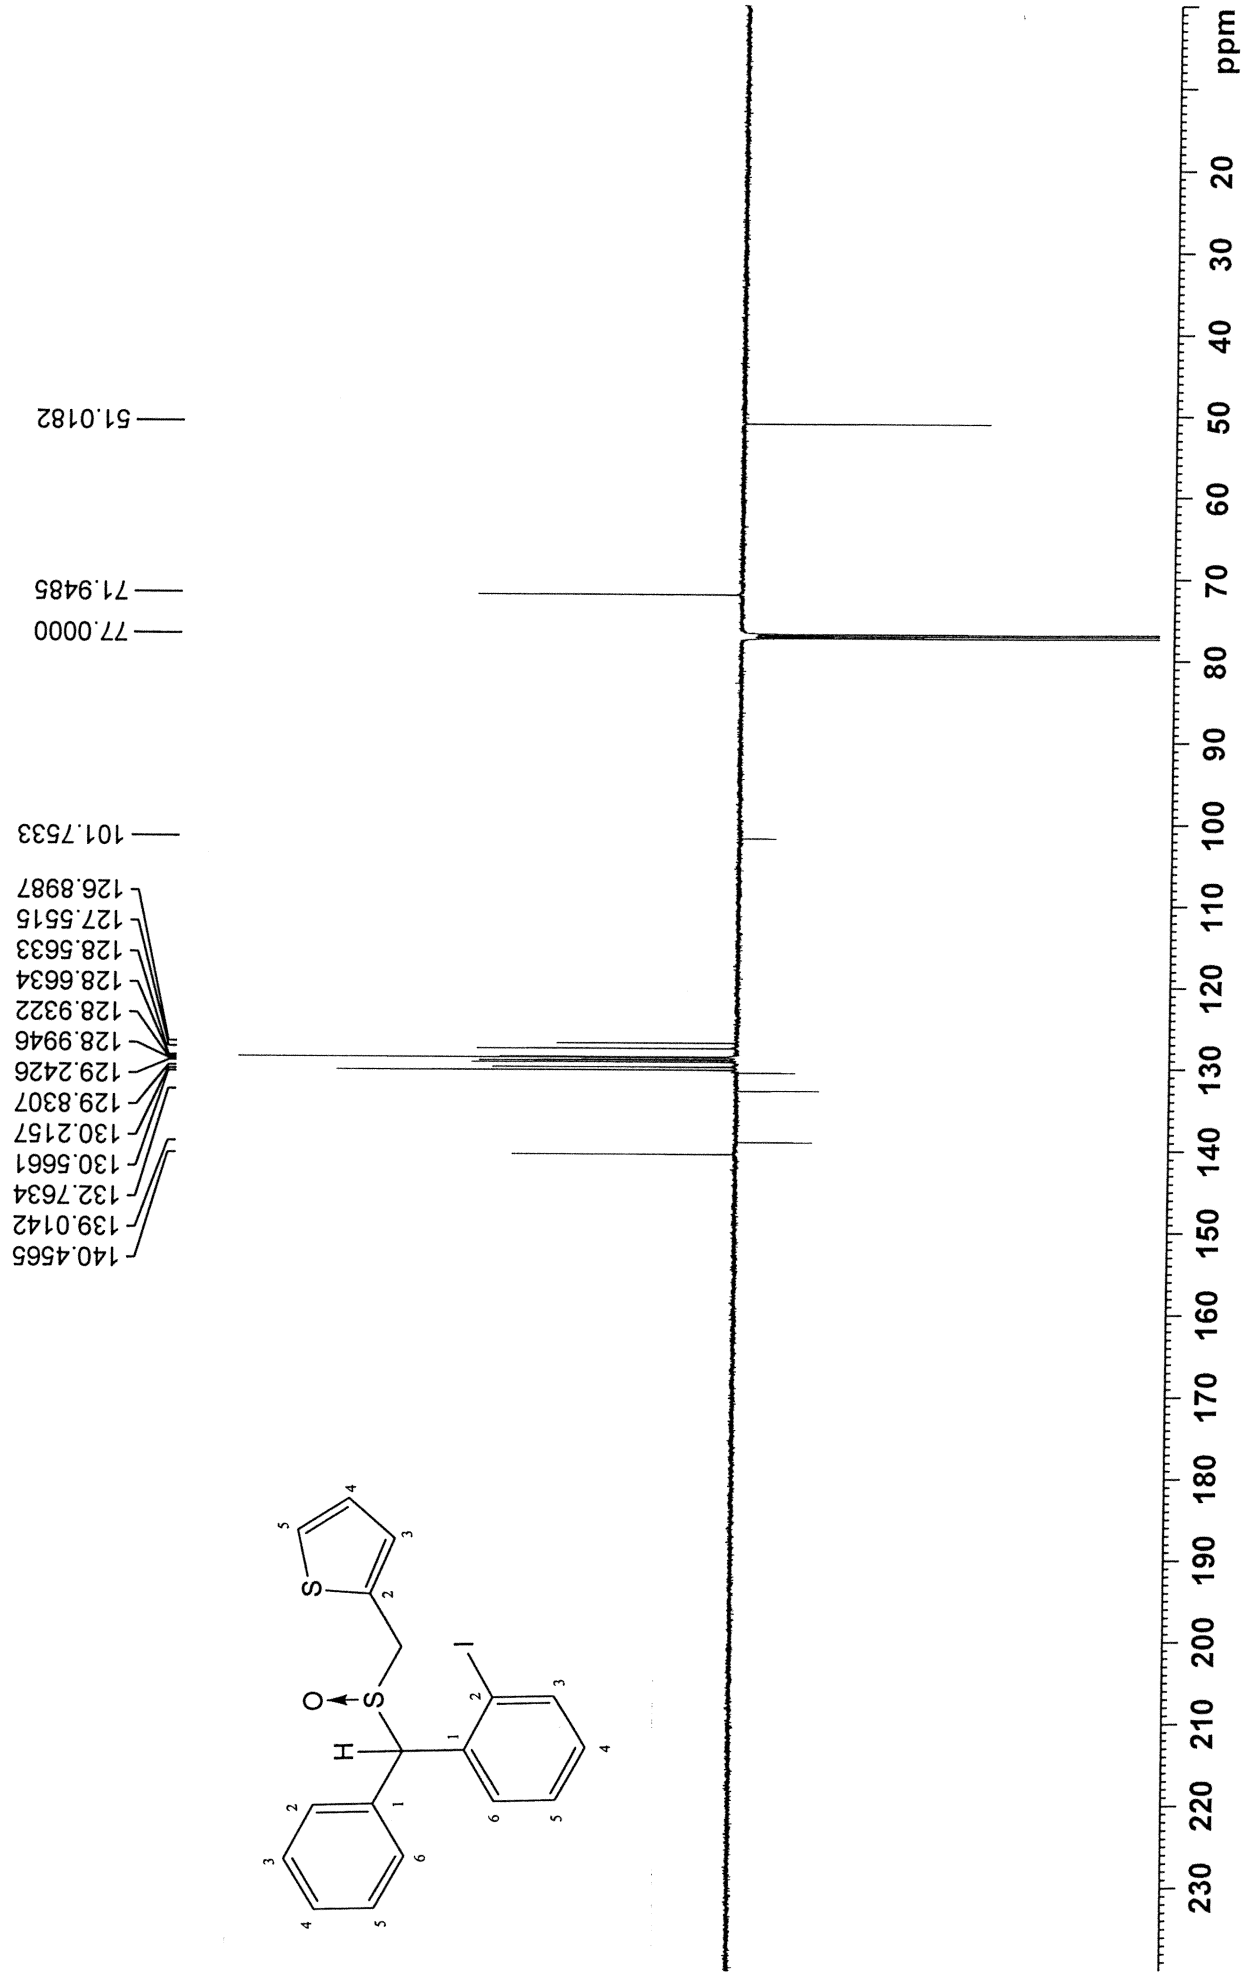

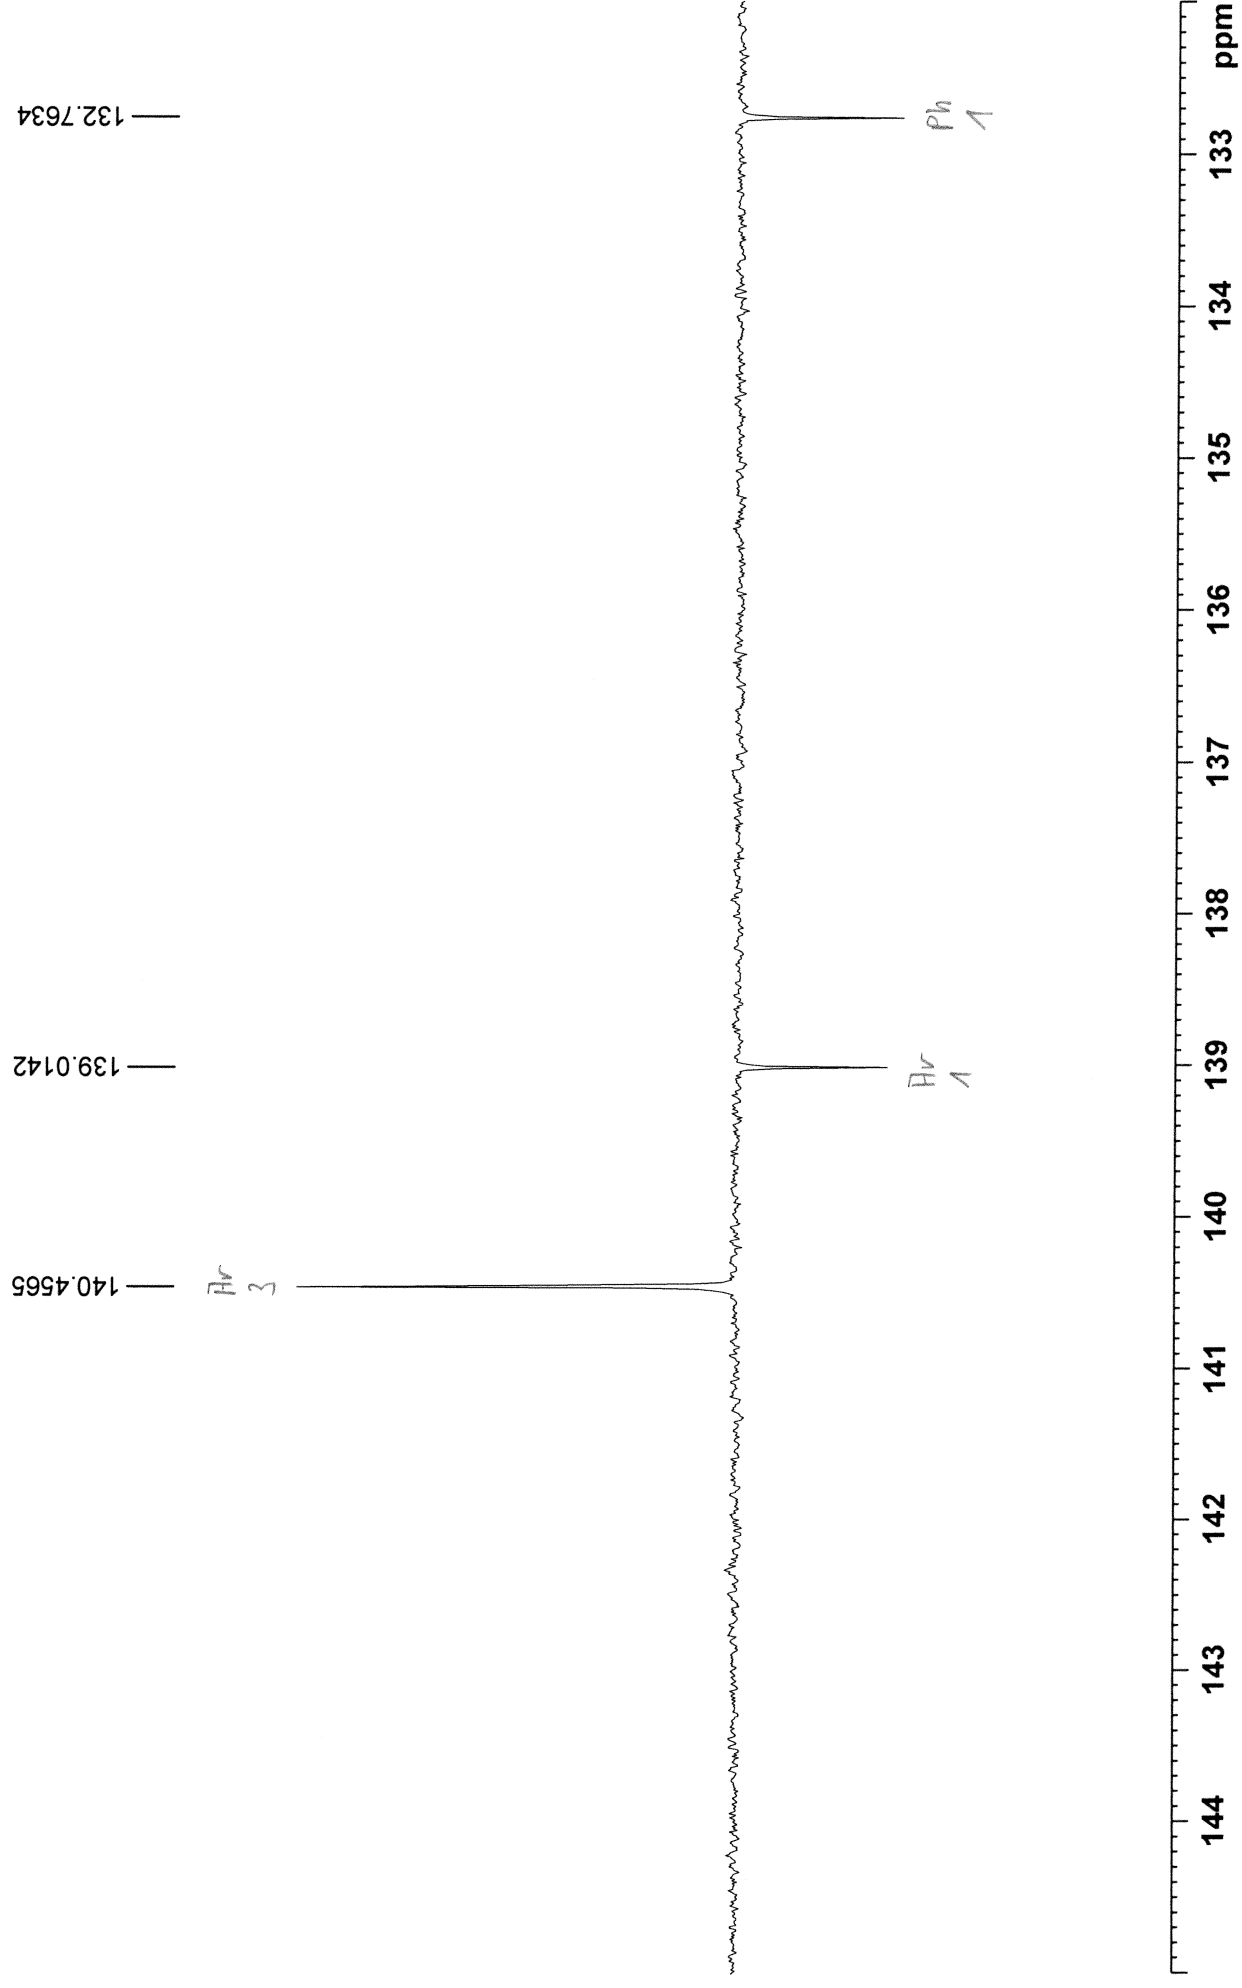

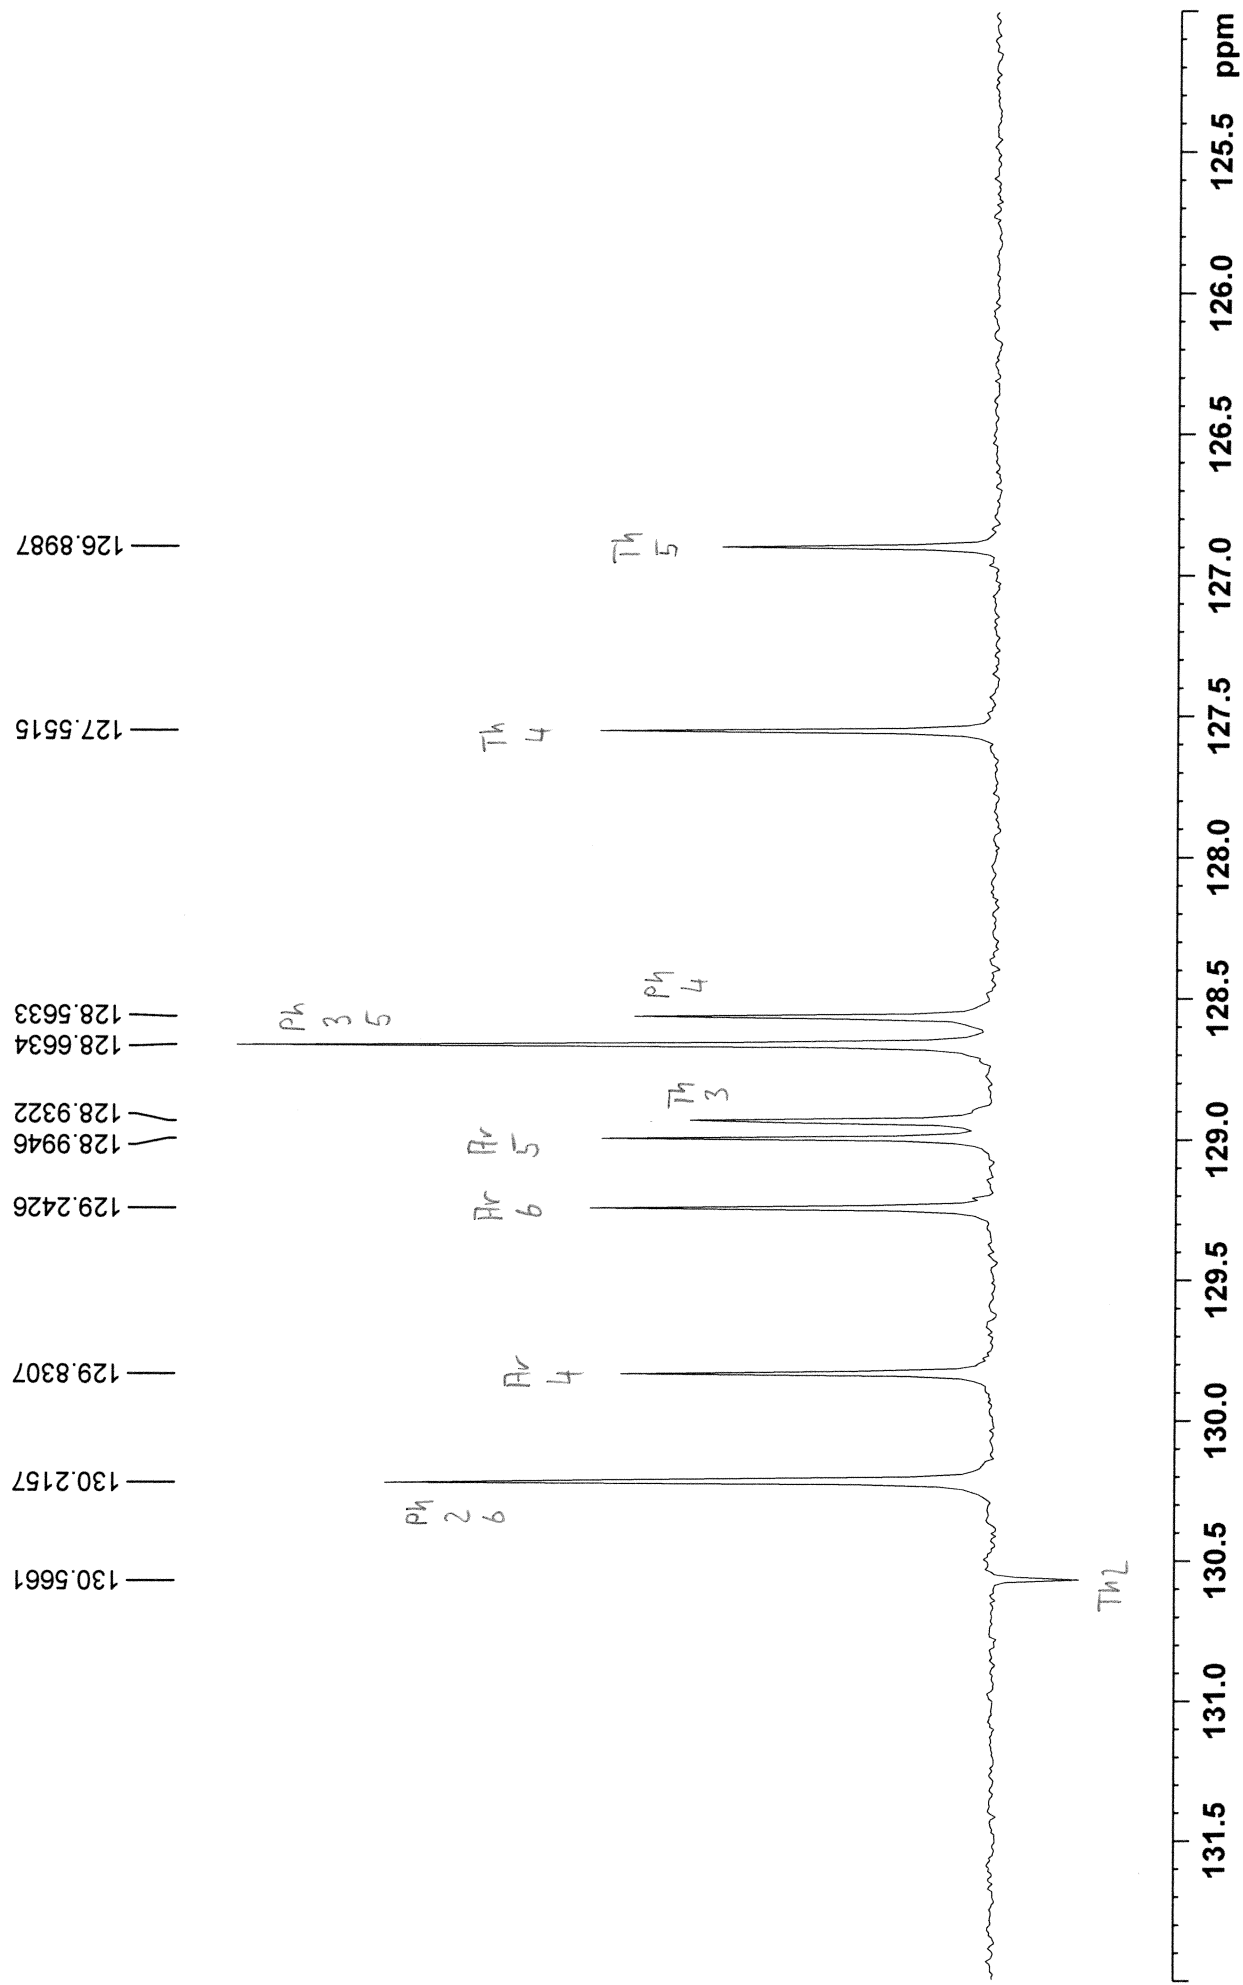

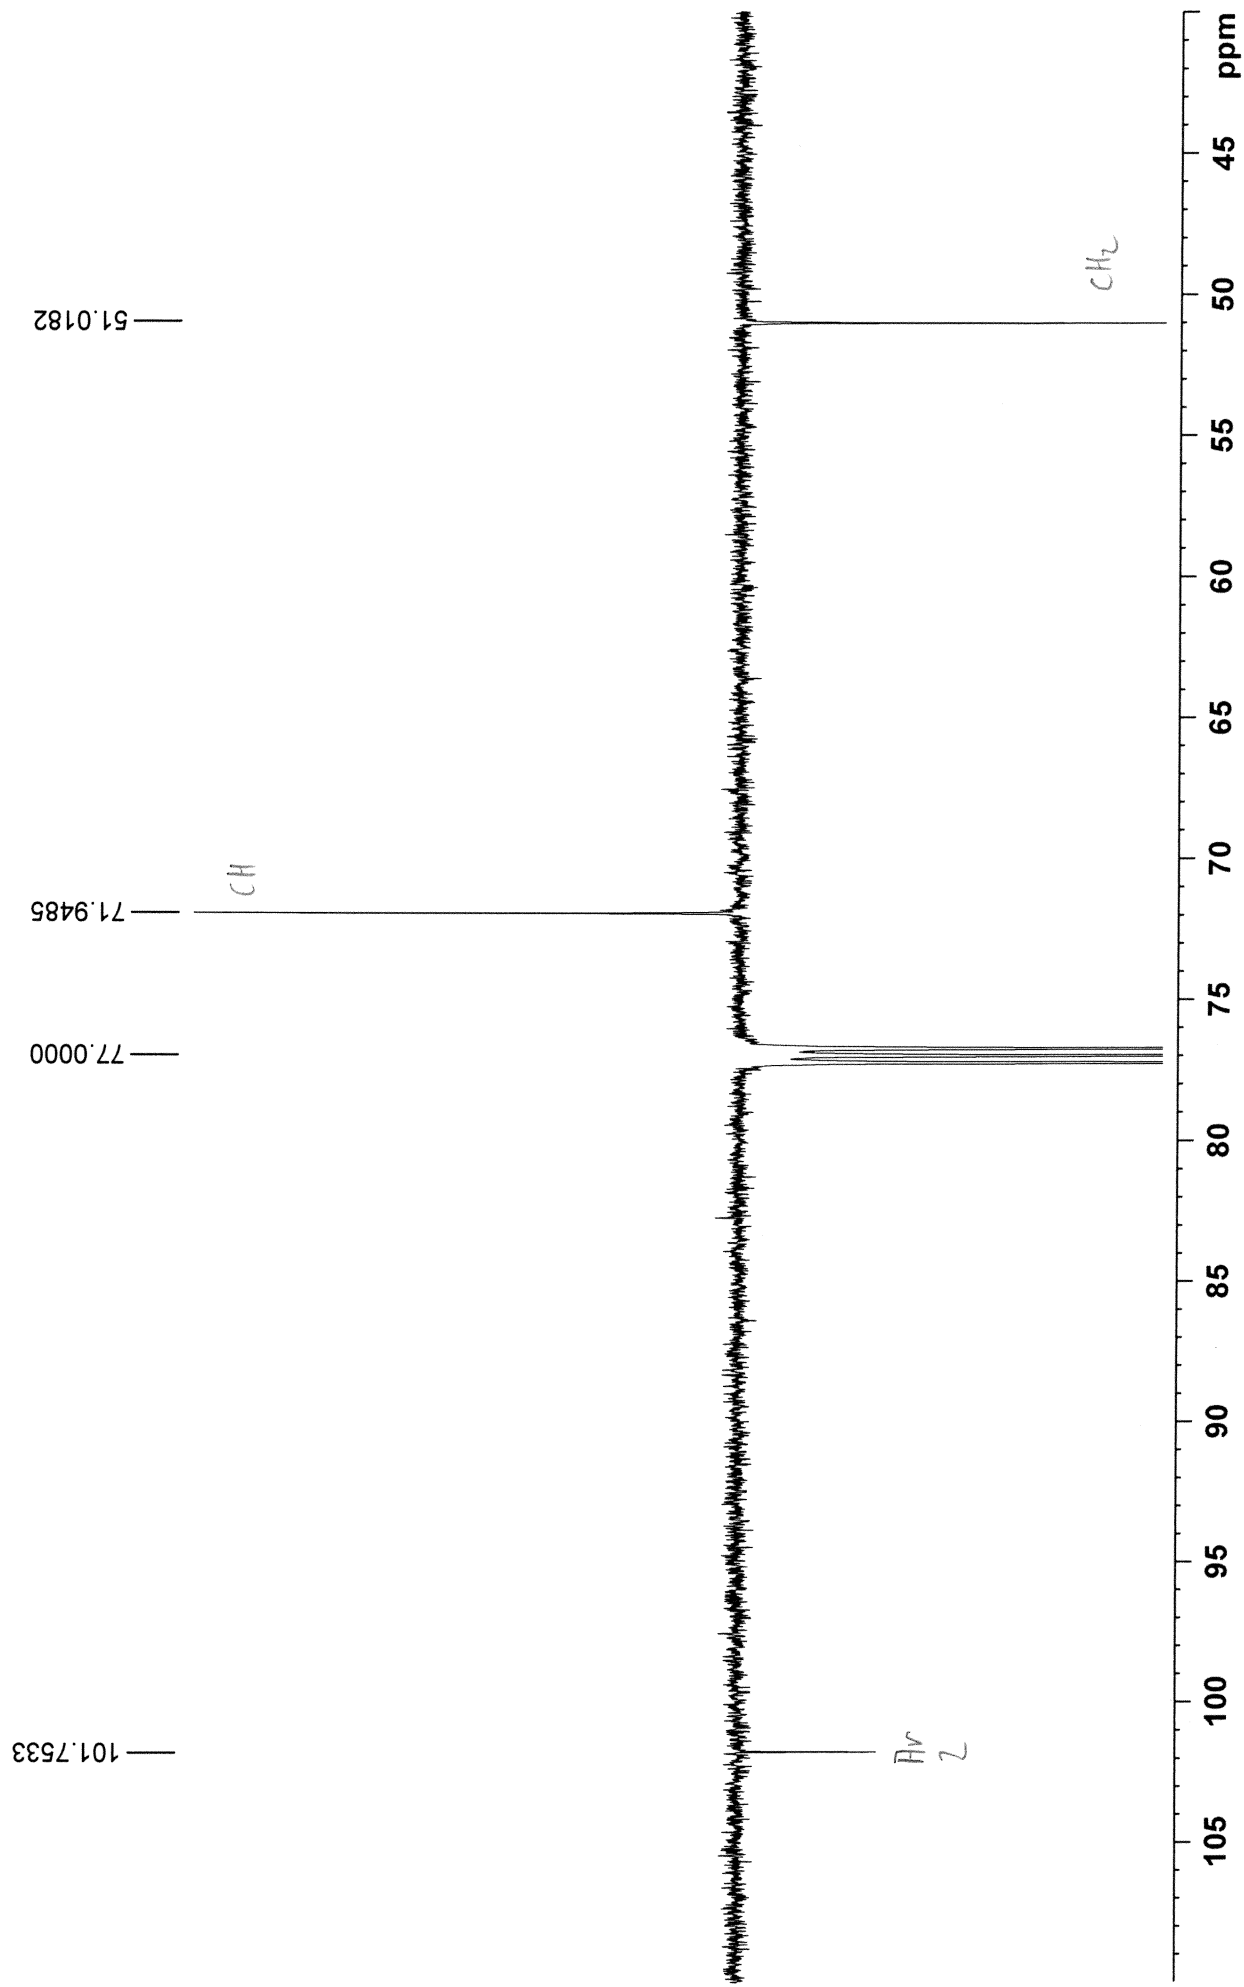



**Figure S34c.** NMR spectra of compound **6i**.

MK-31p2 in cdcl3 (Proton) 4.9.2020

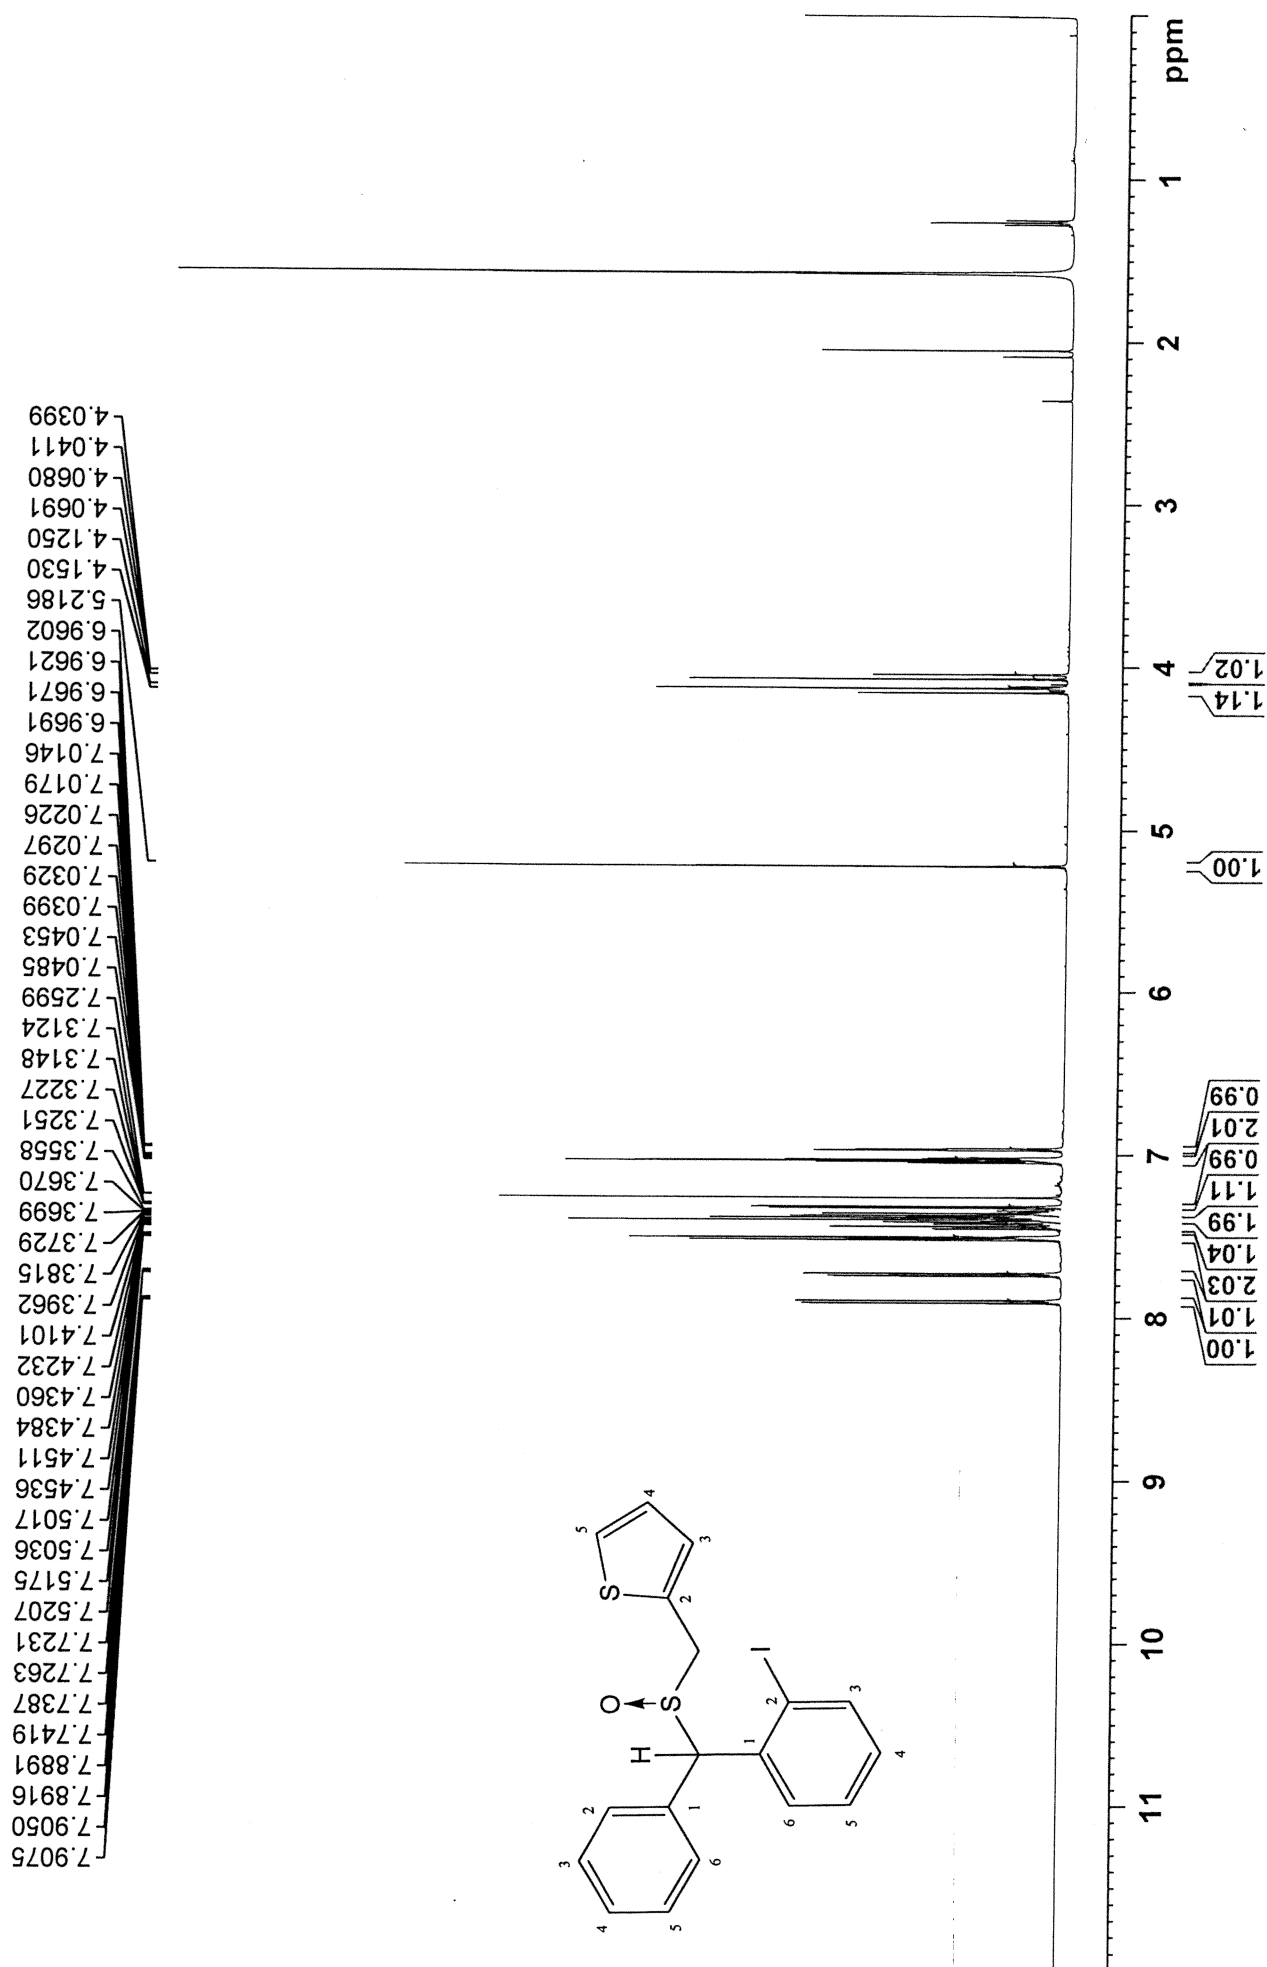

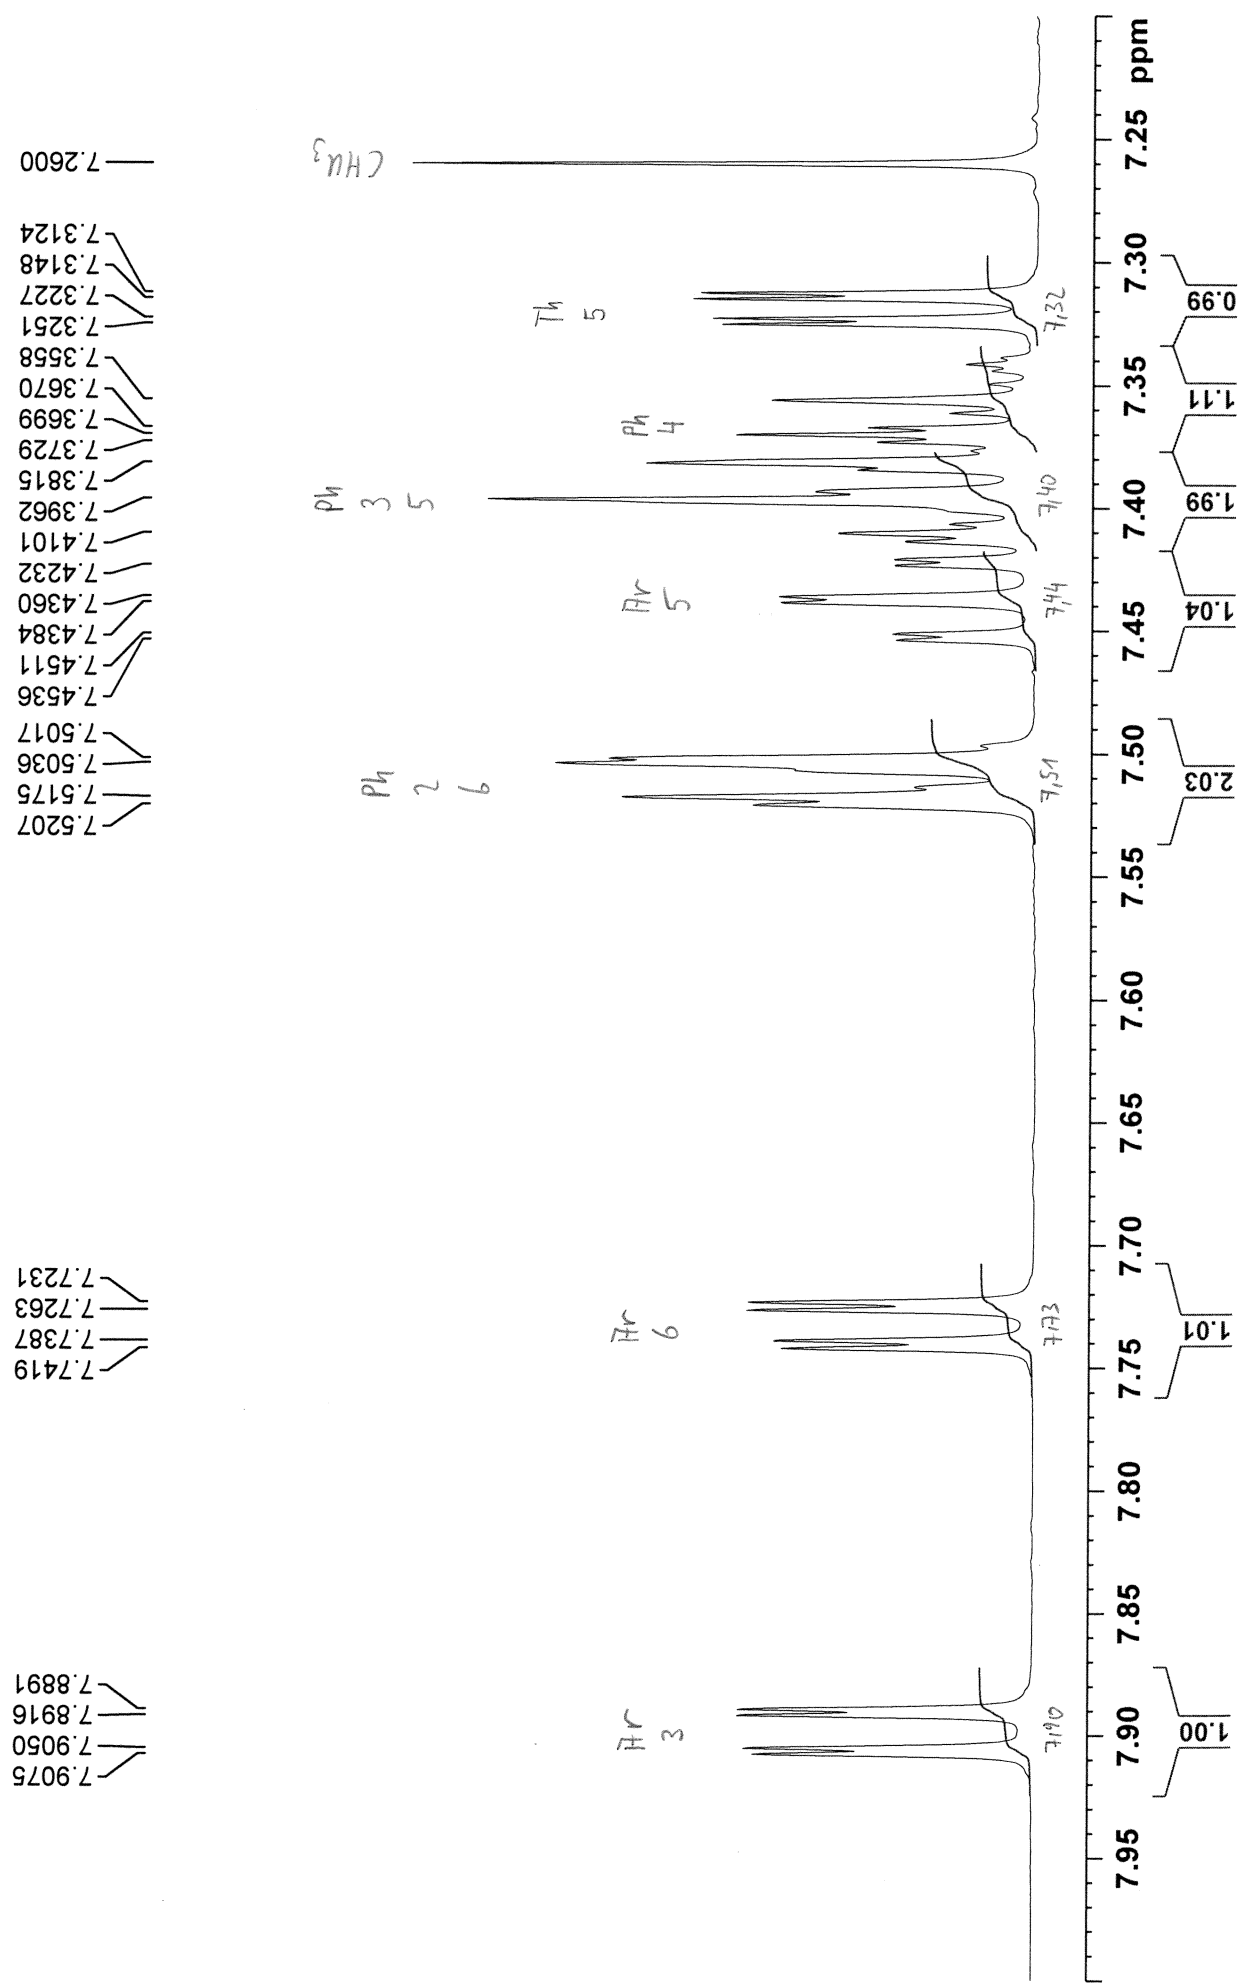

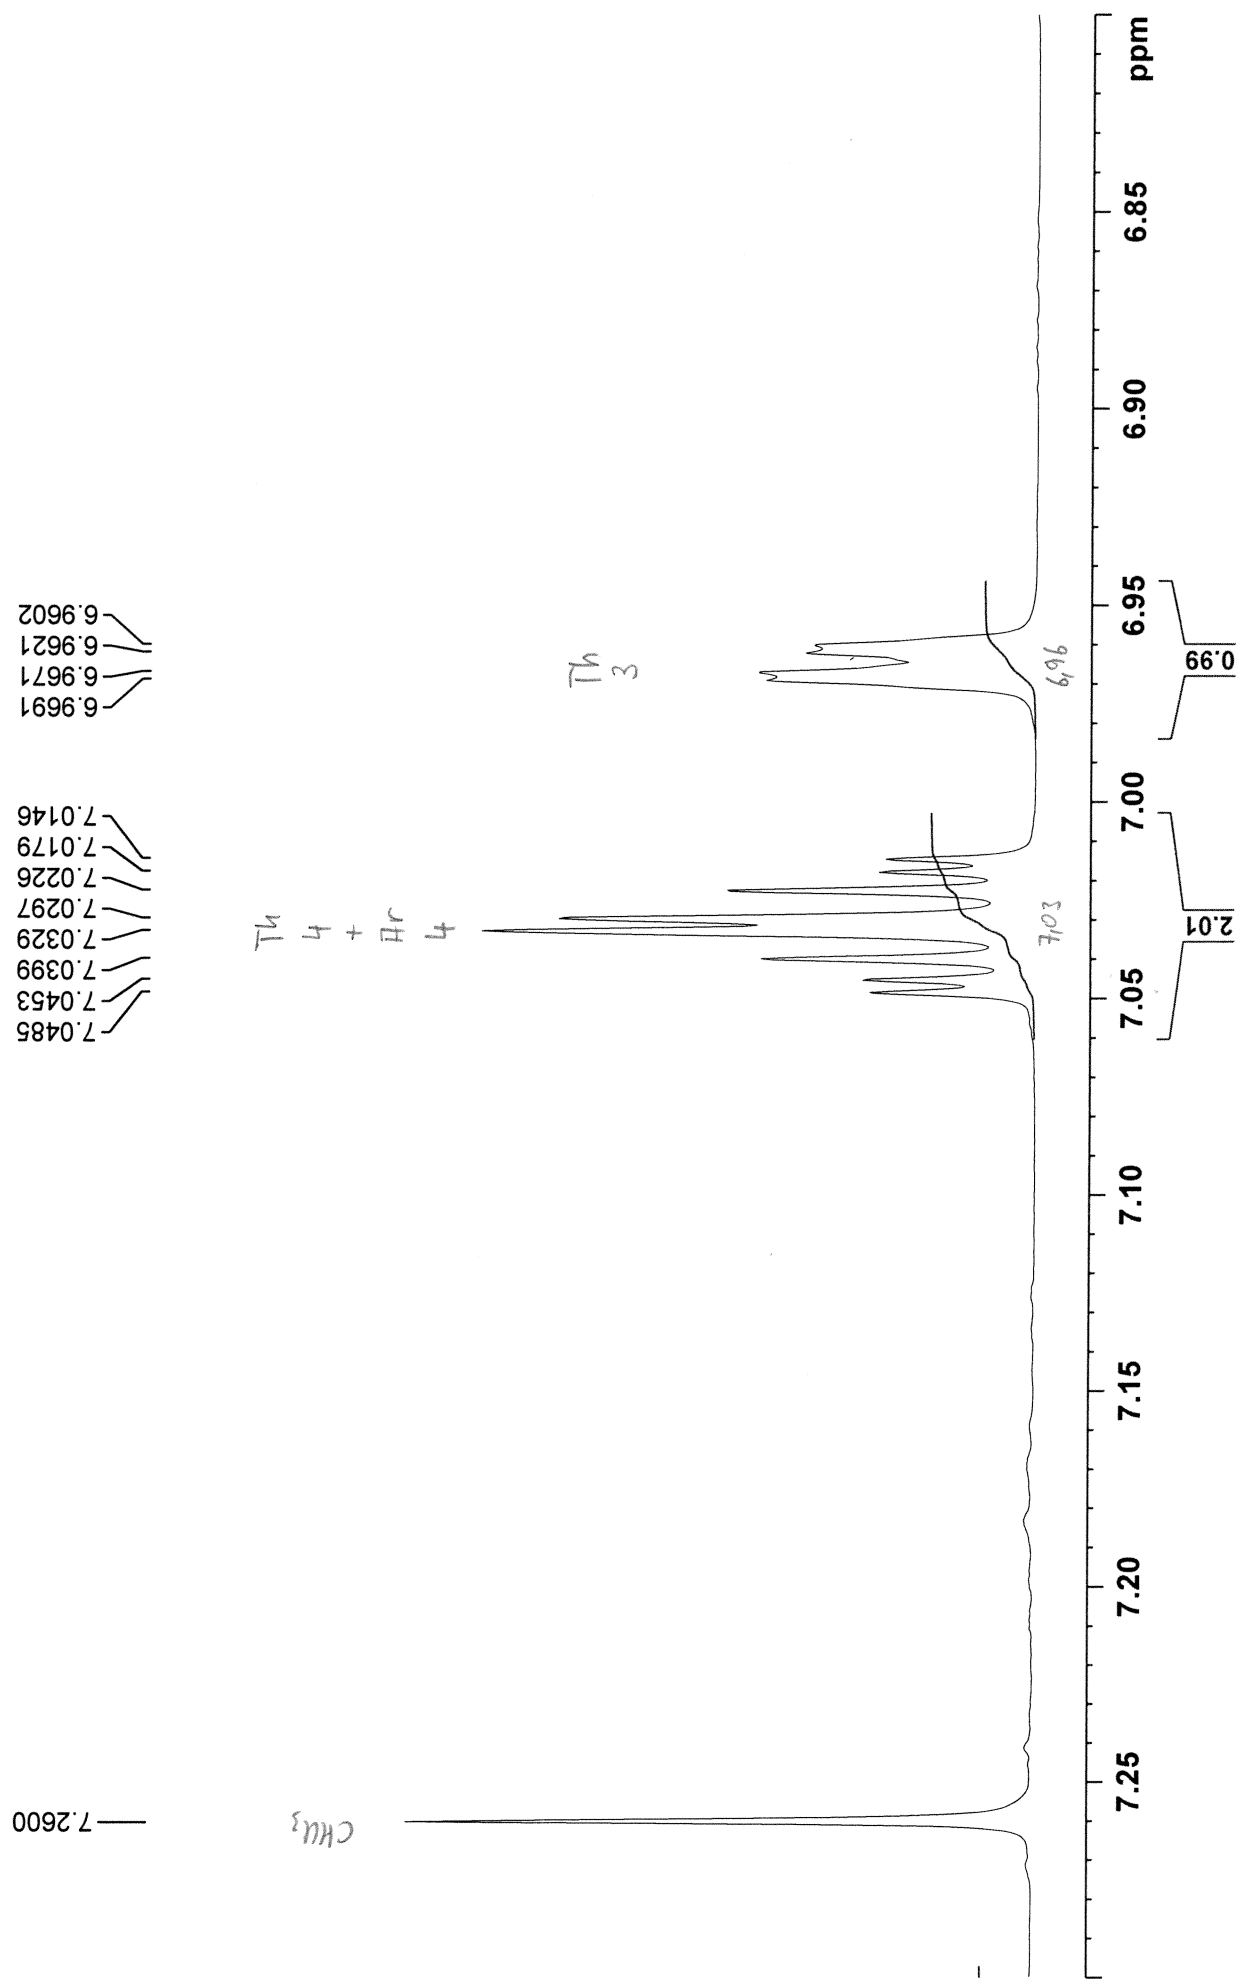

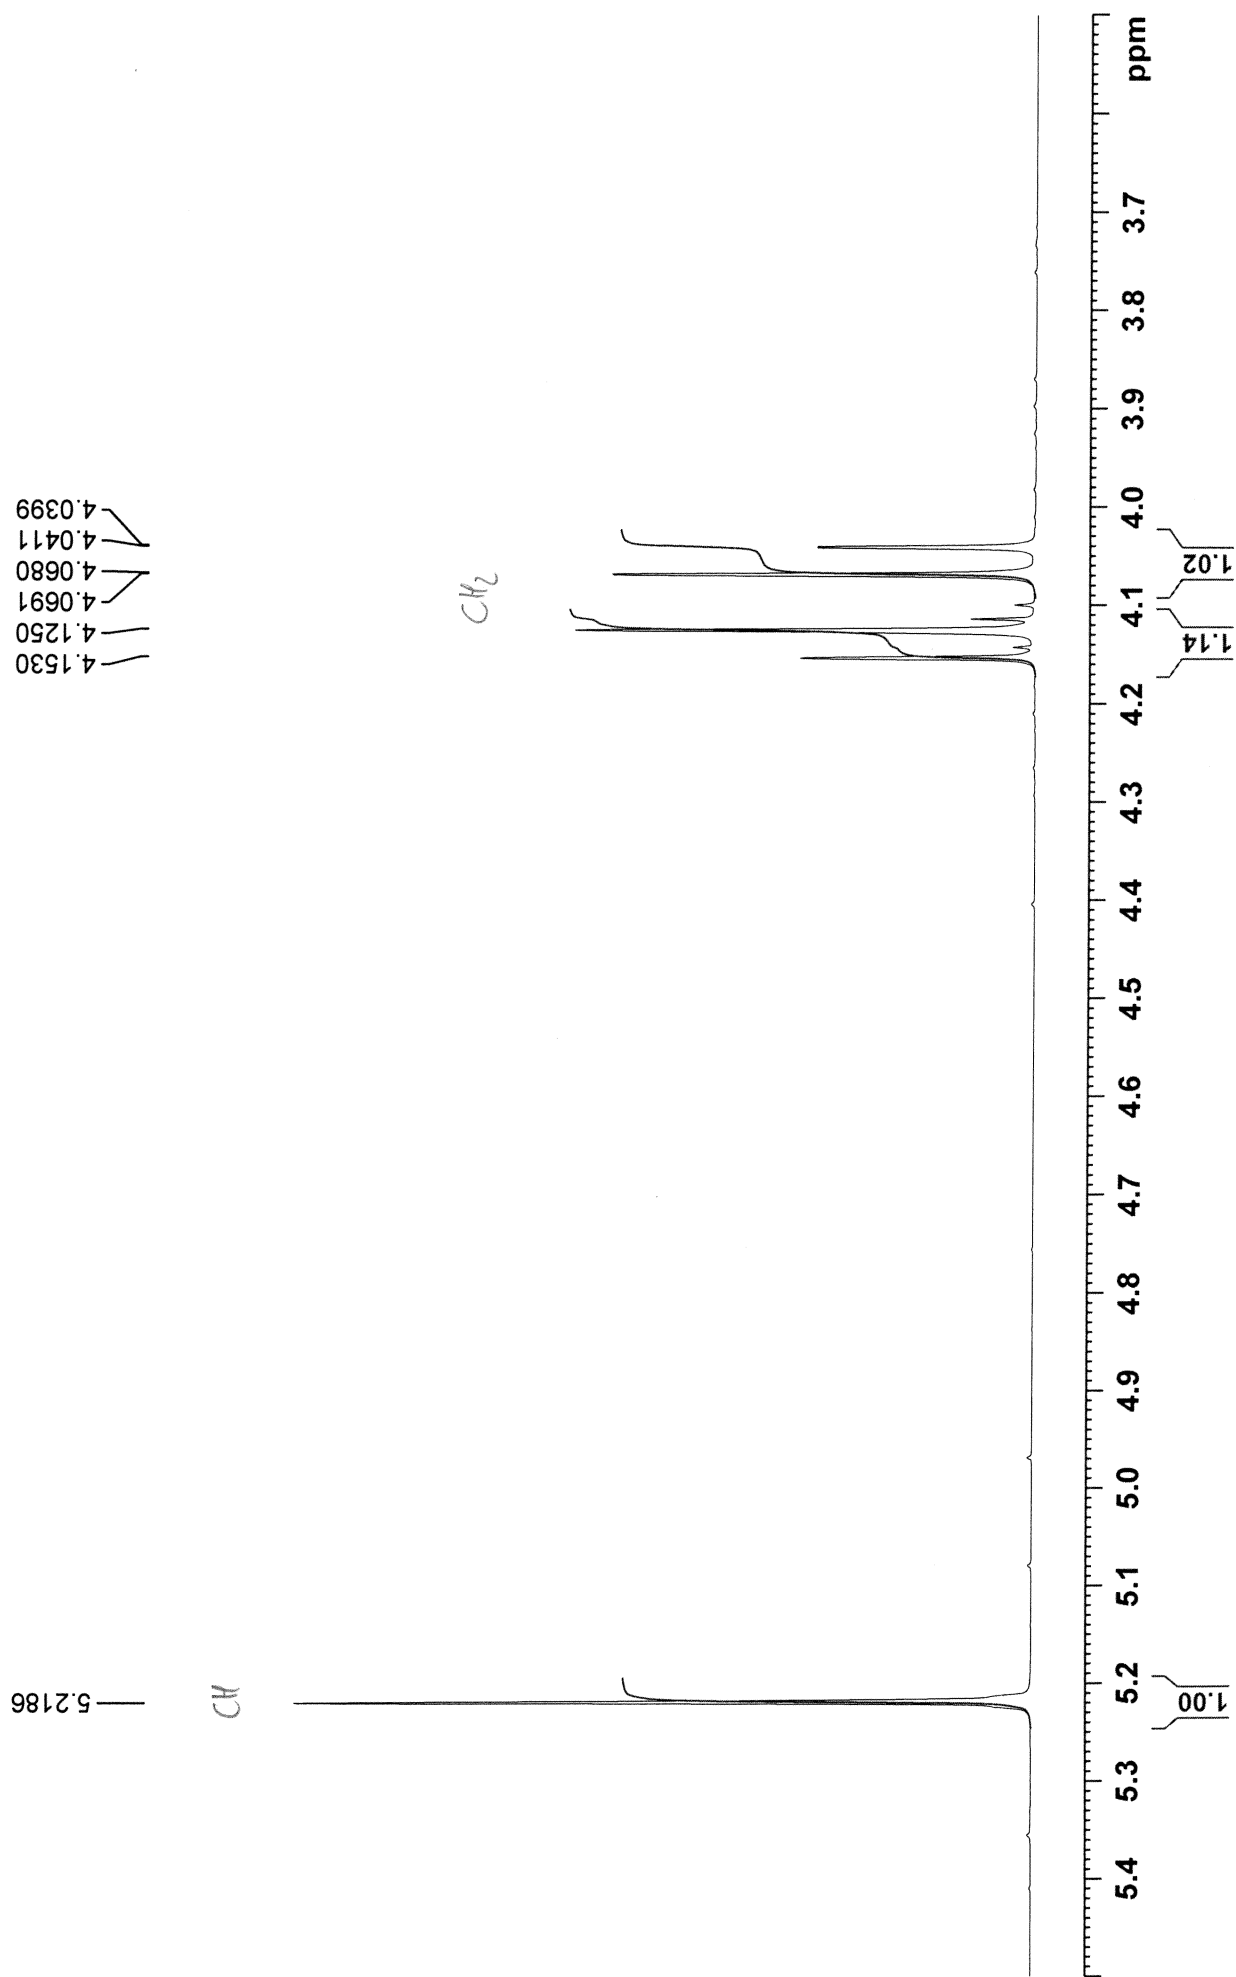

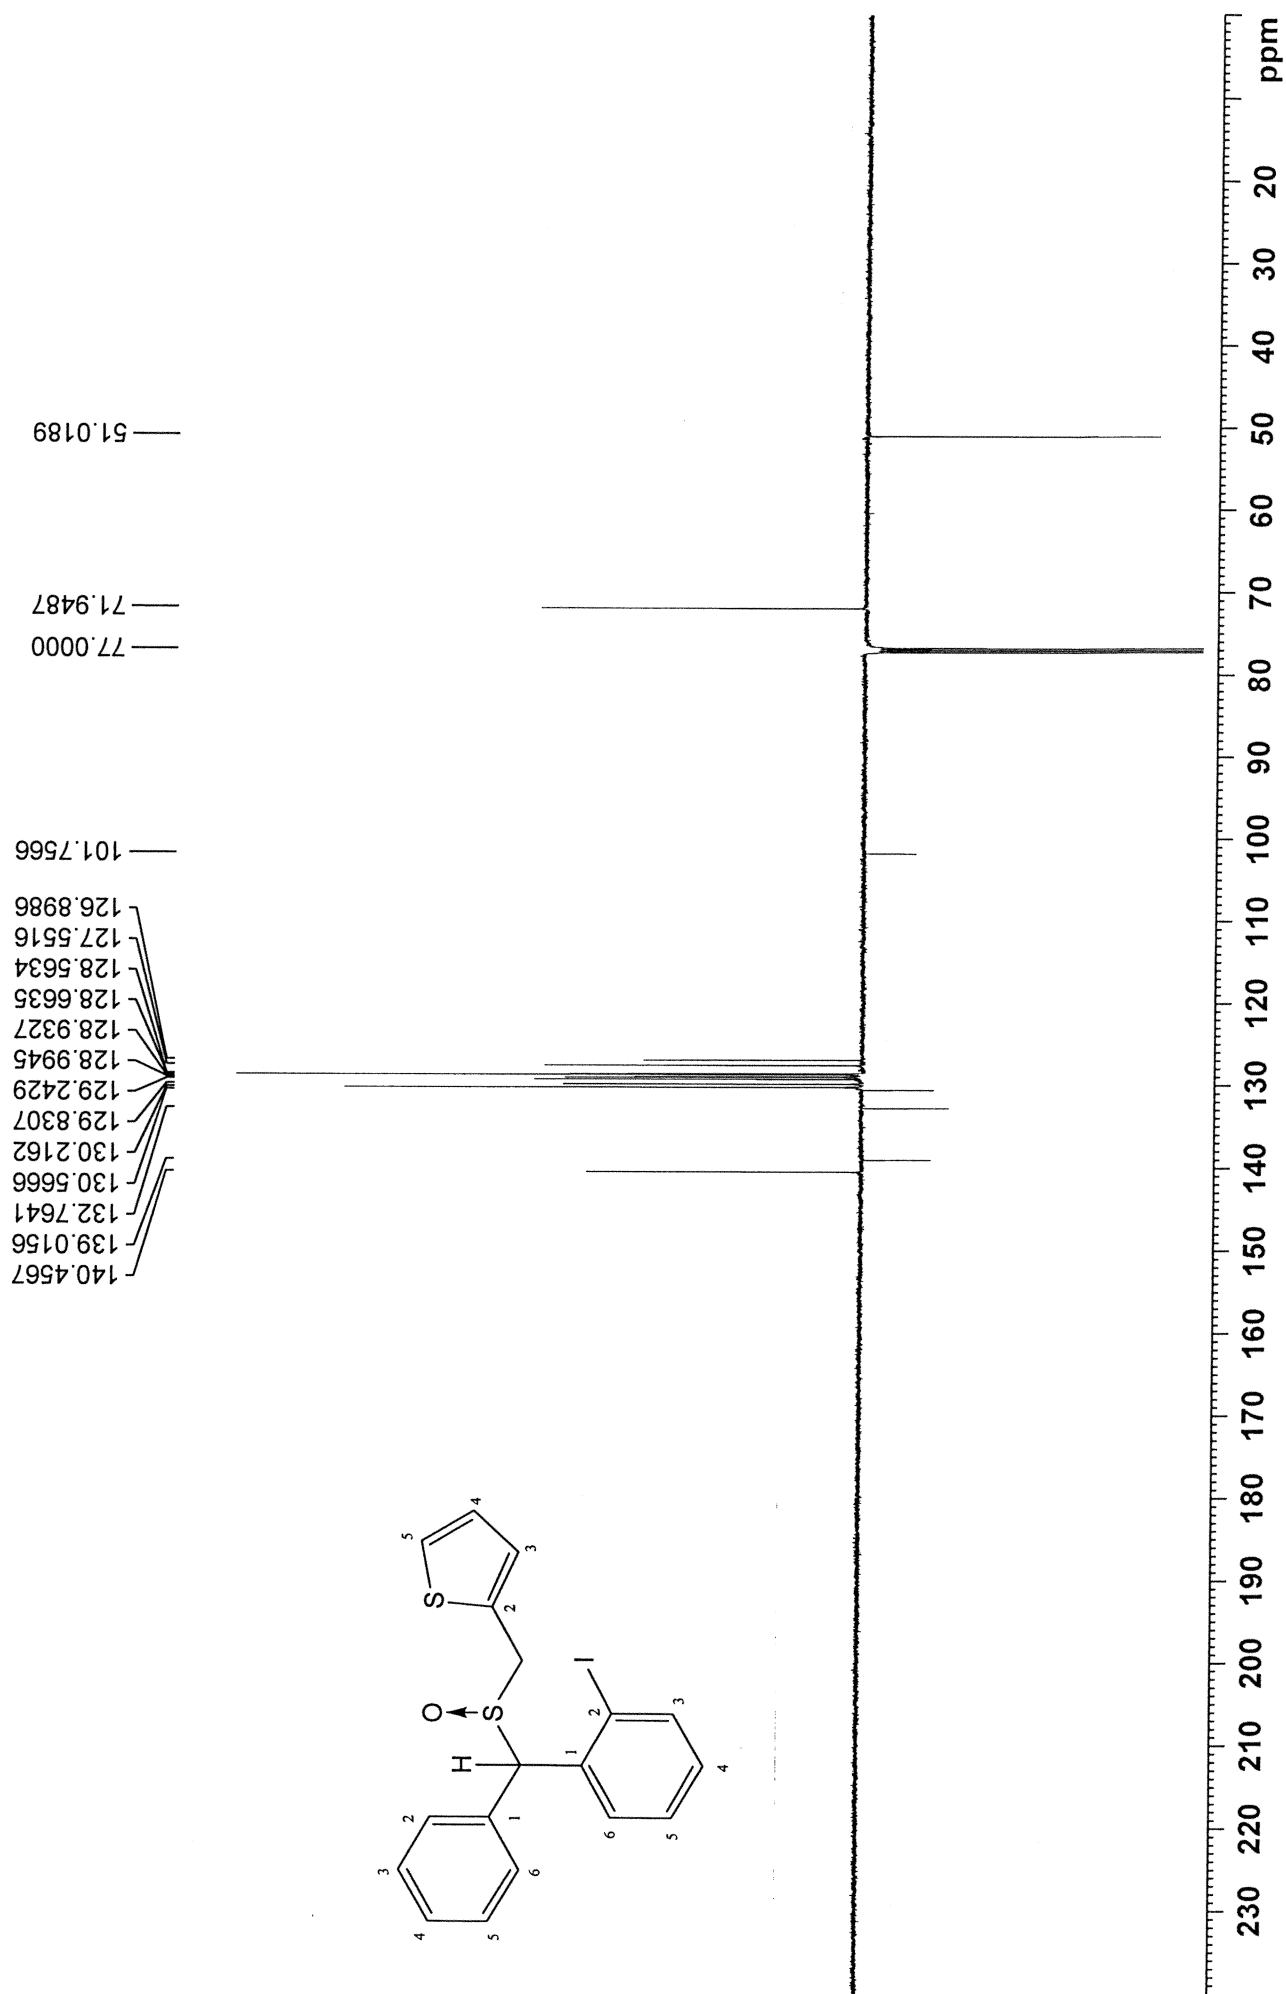

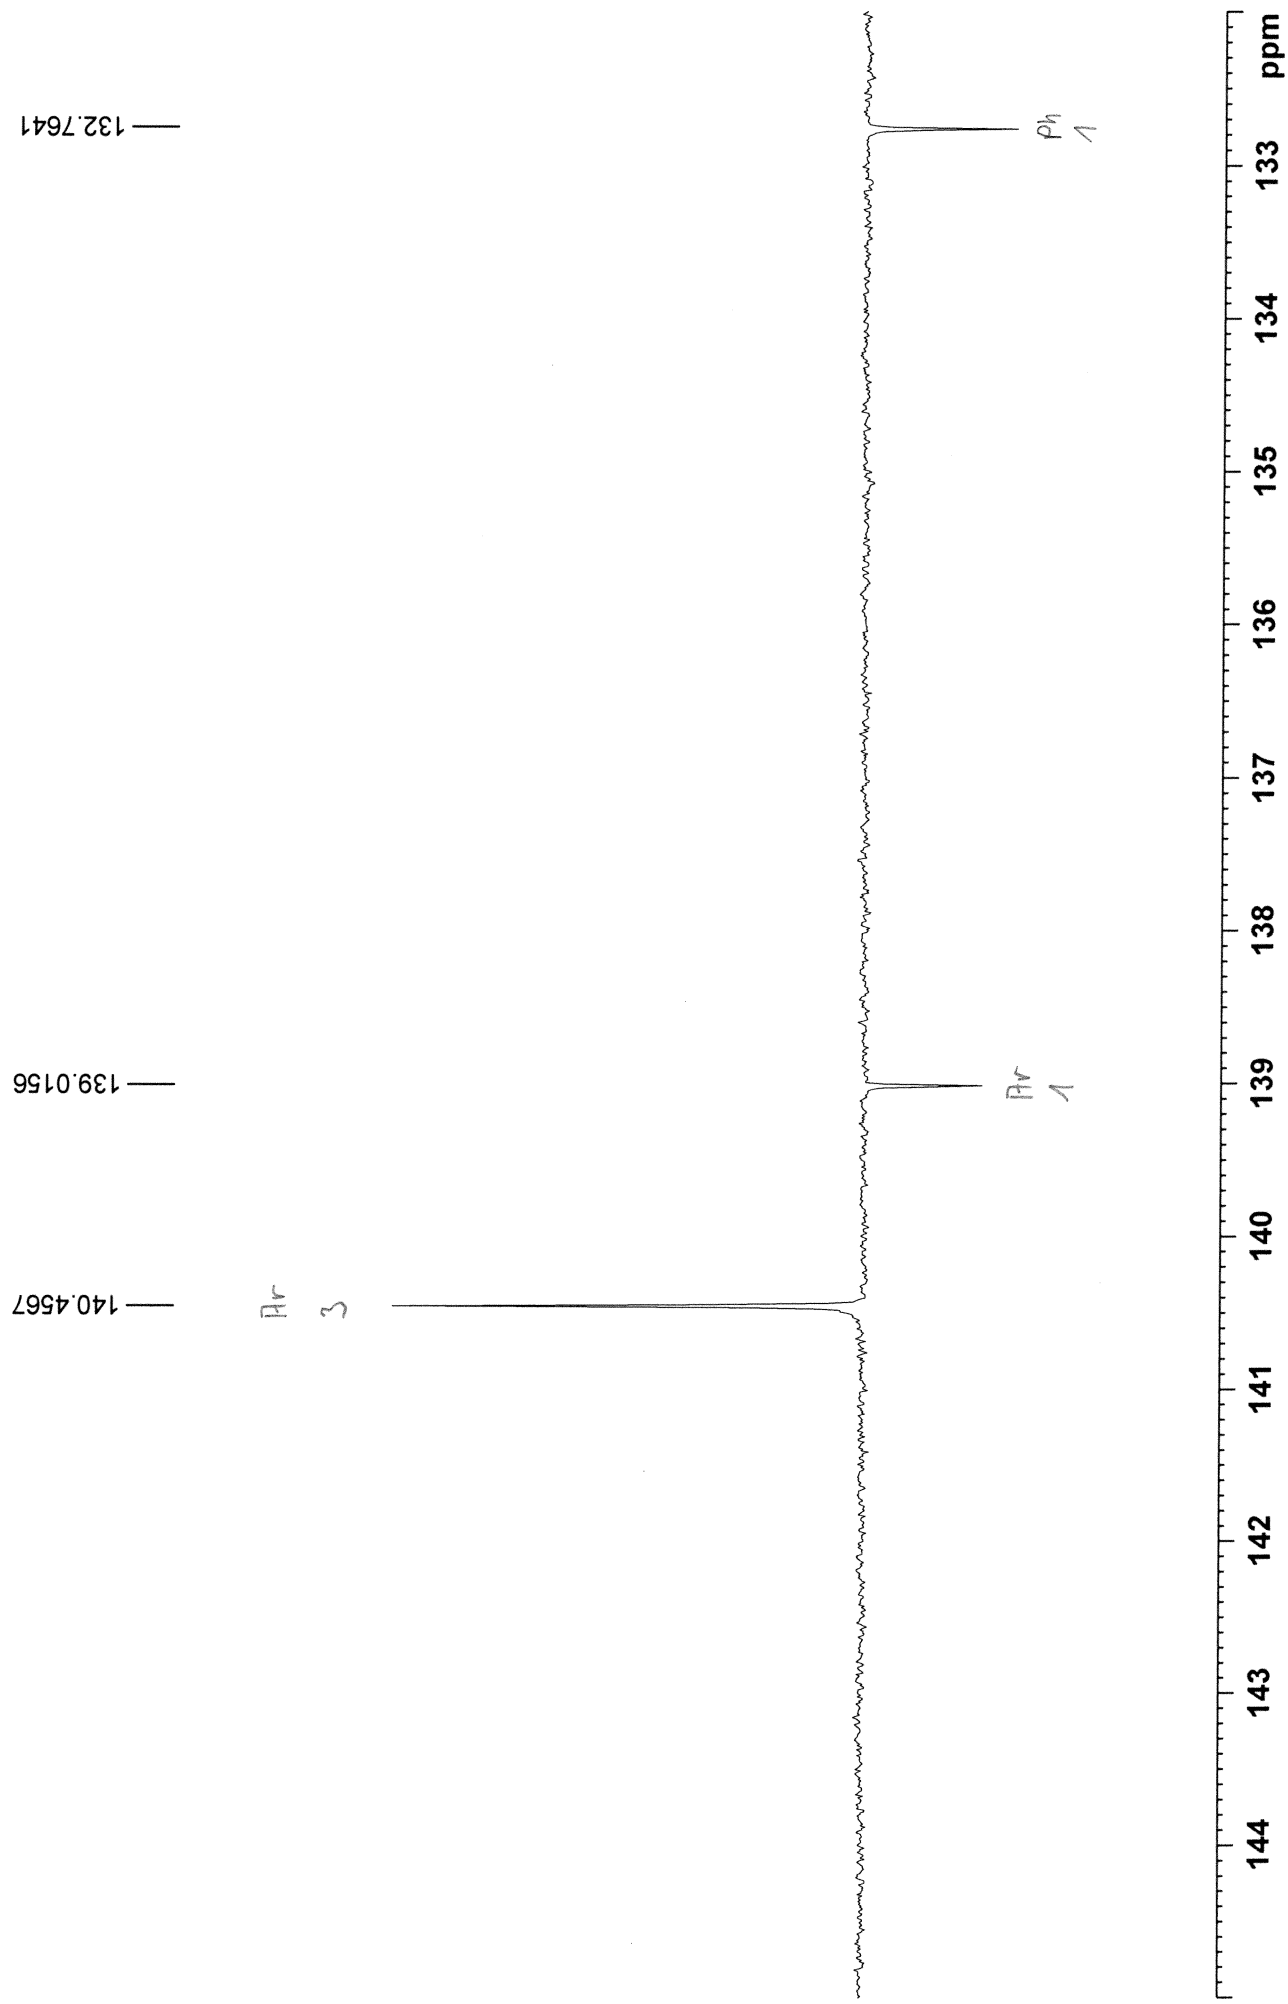

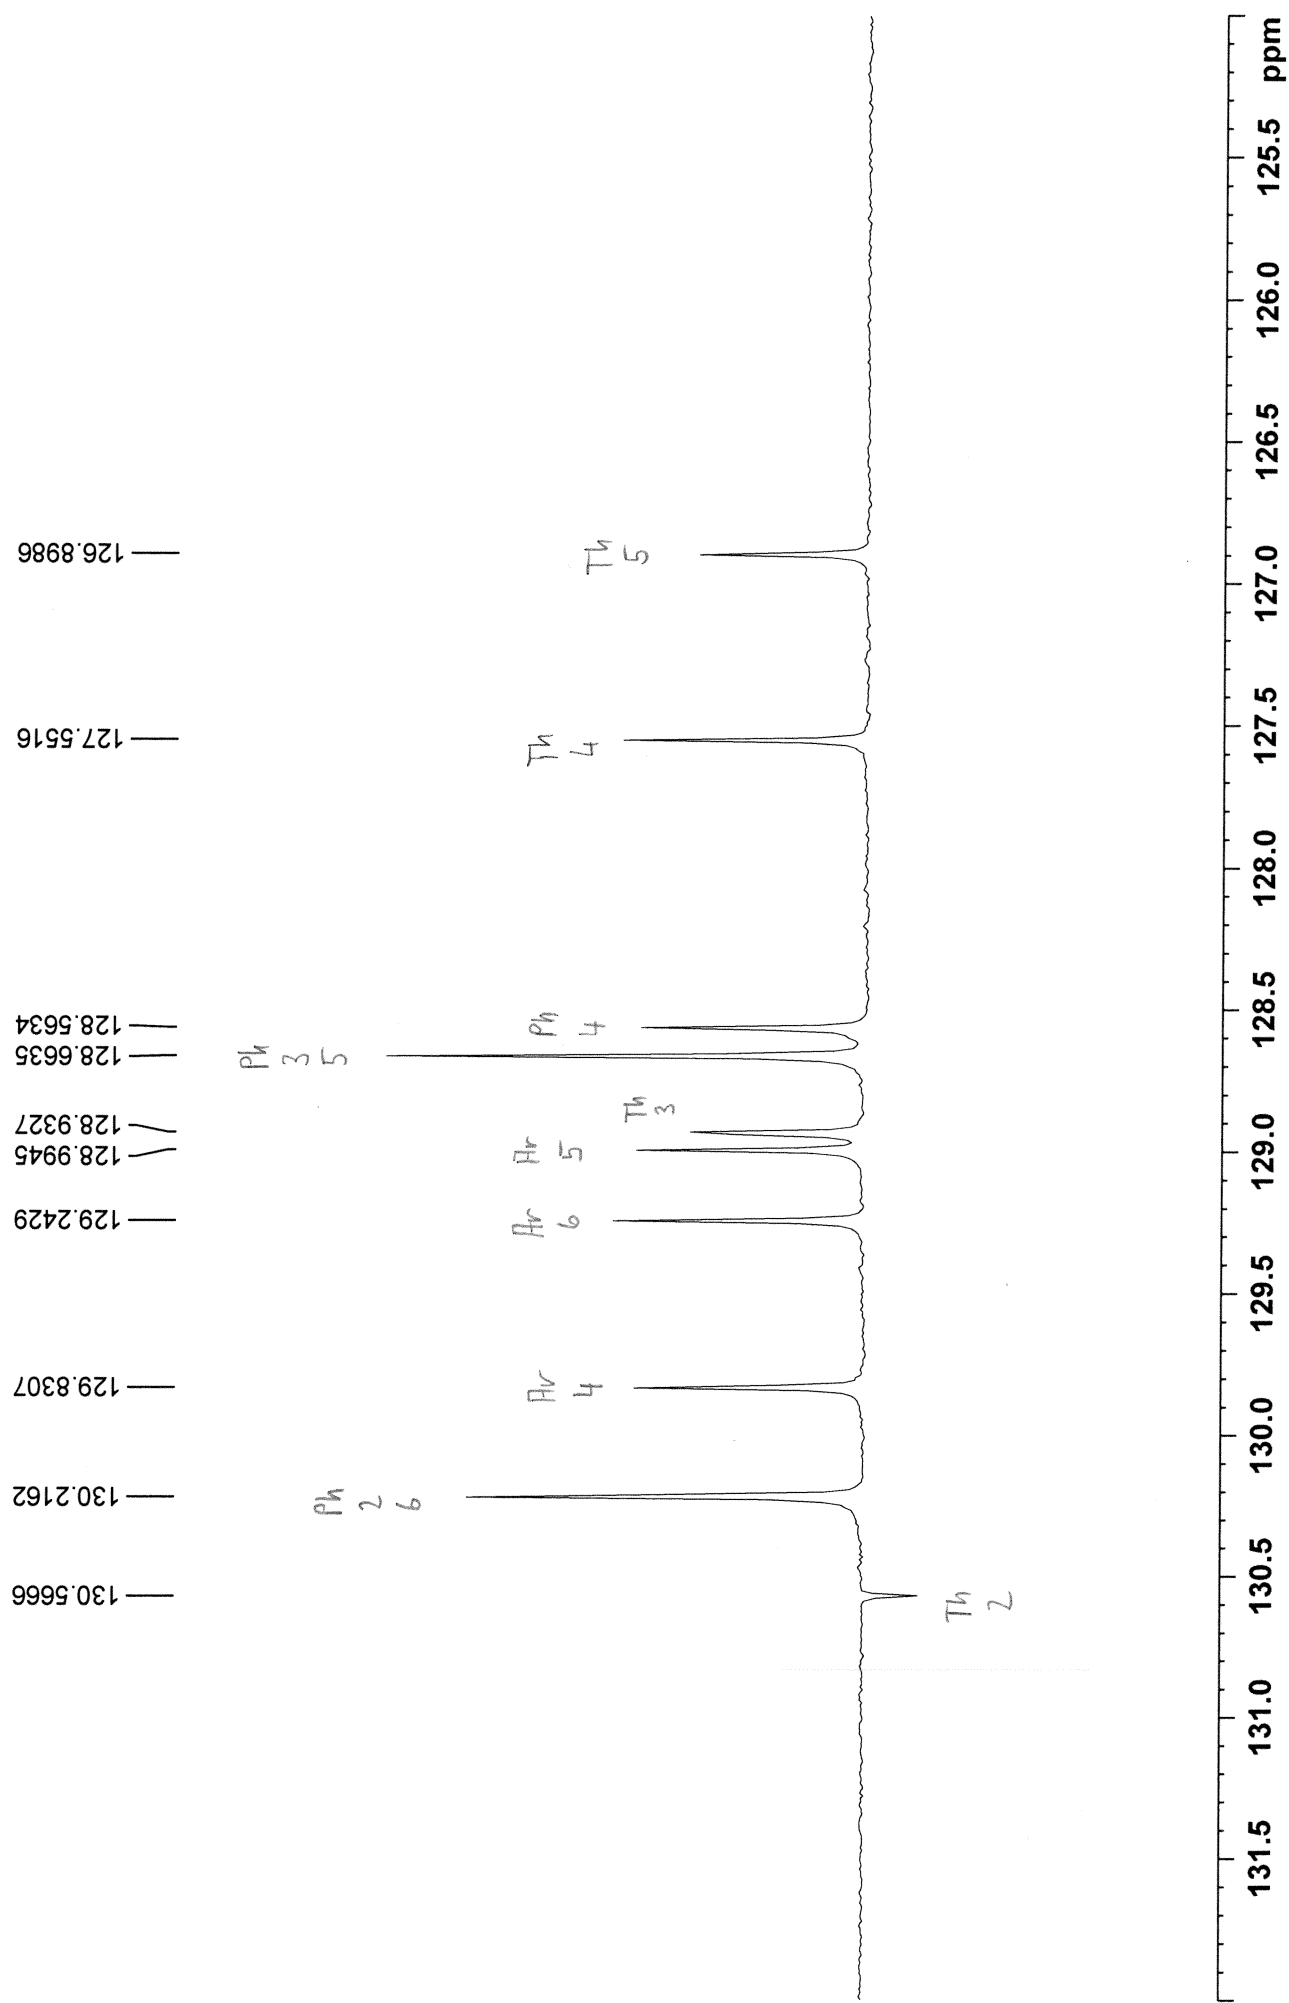

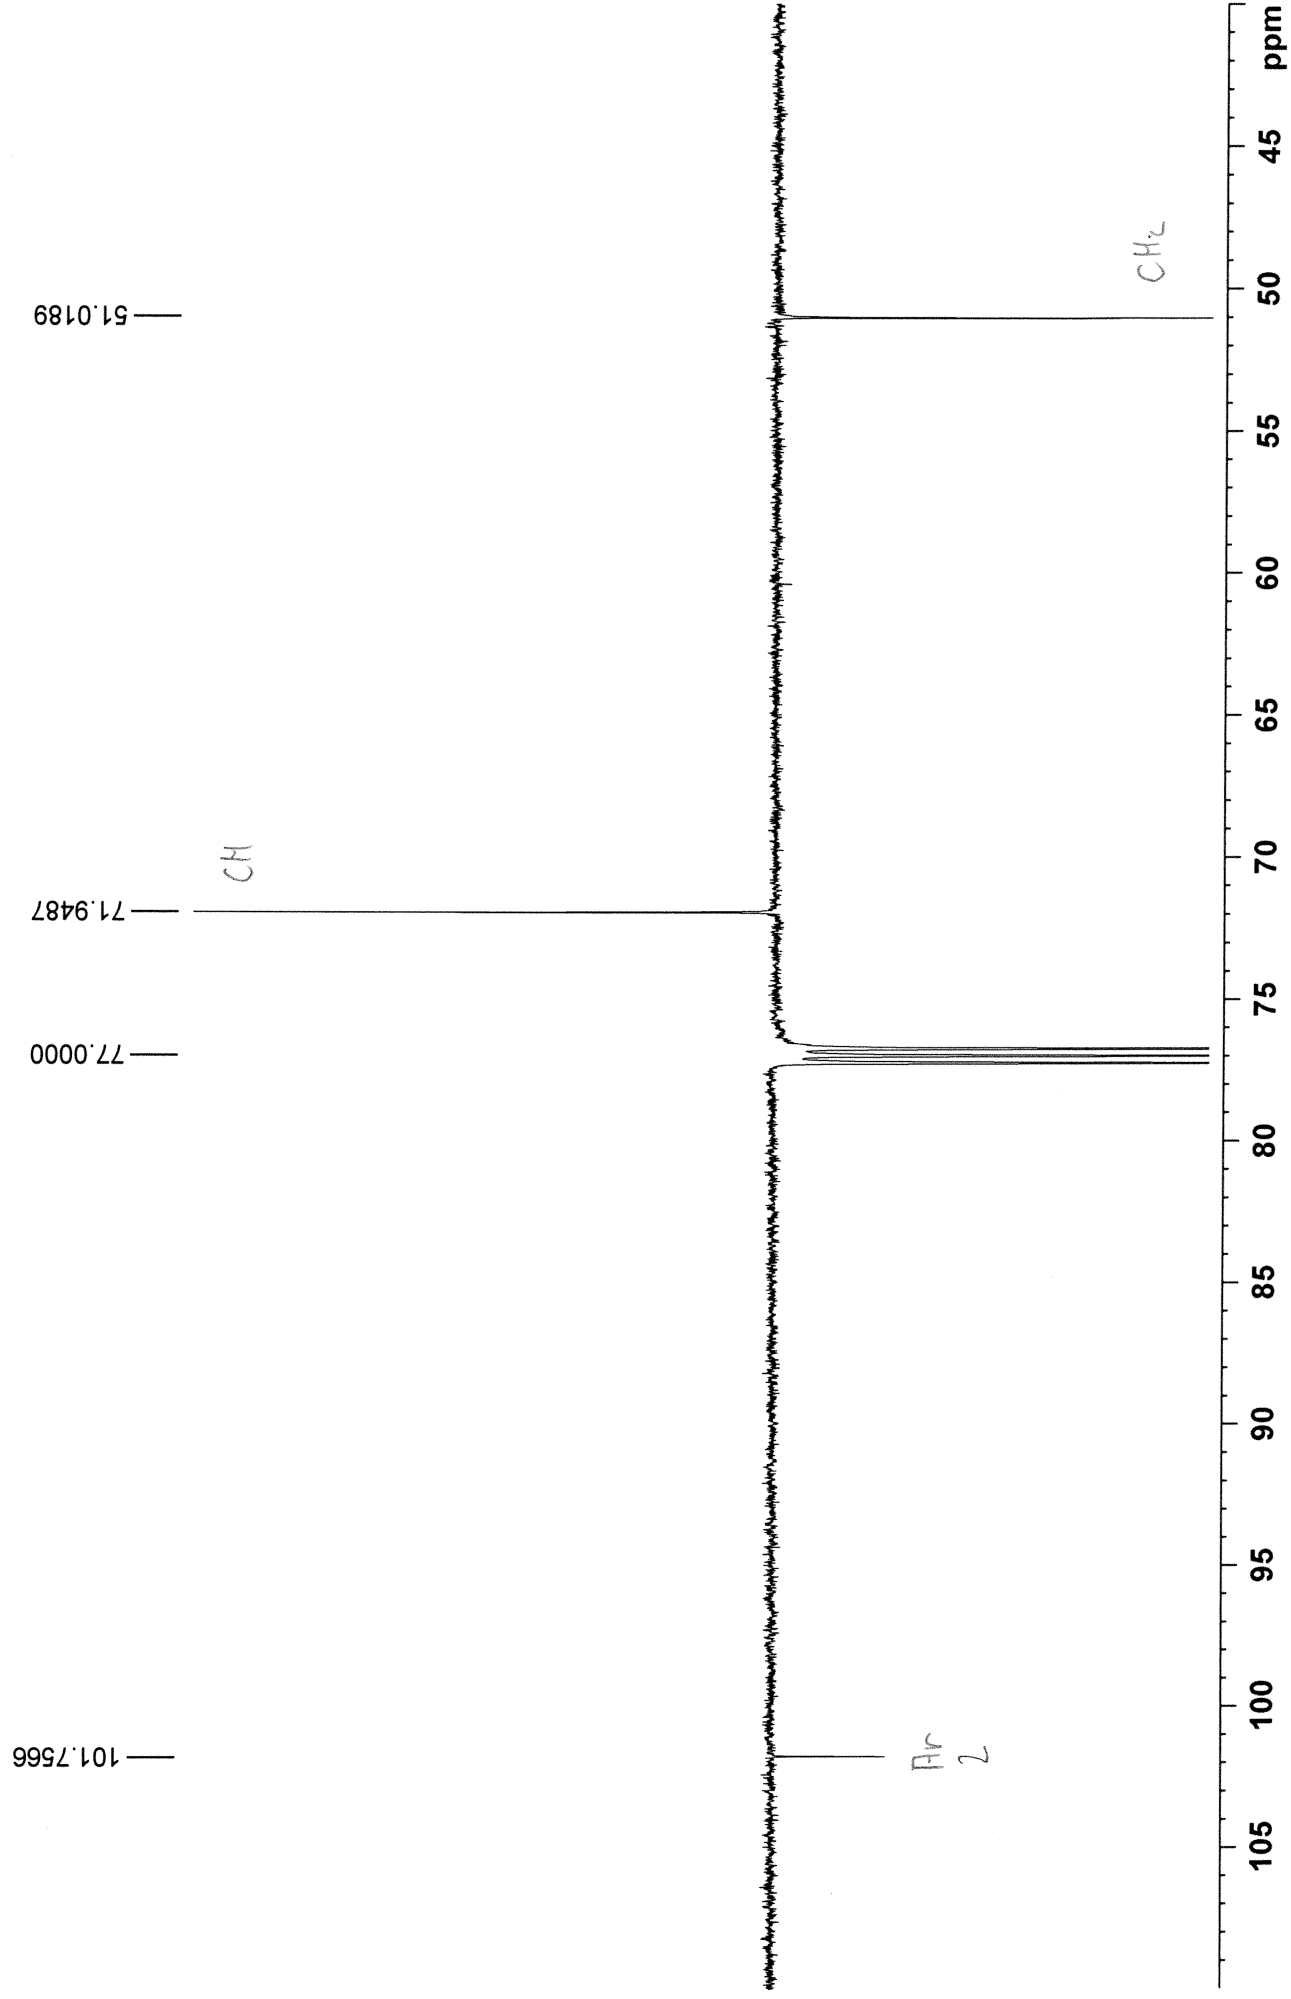



MK-31p2 in cdcl3 (COSY) 4.9.2020

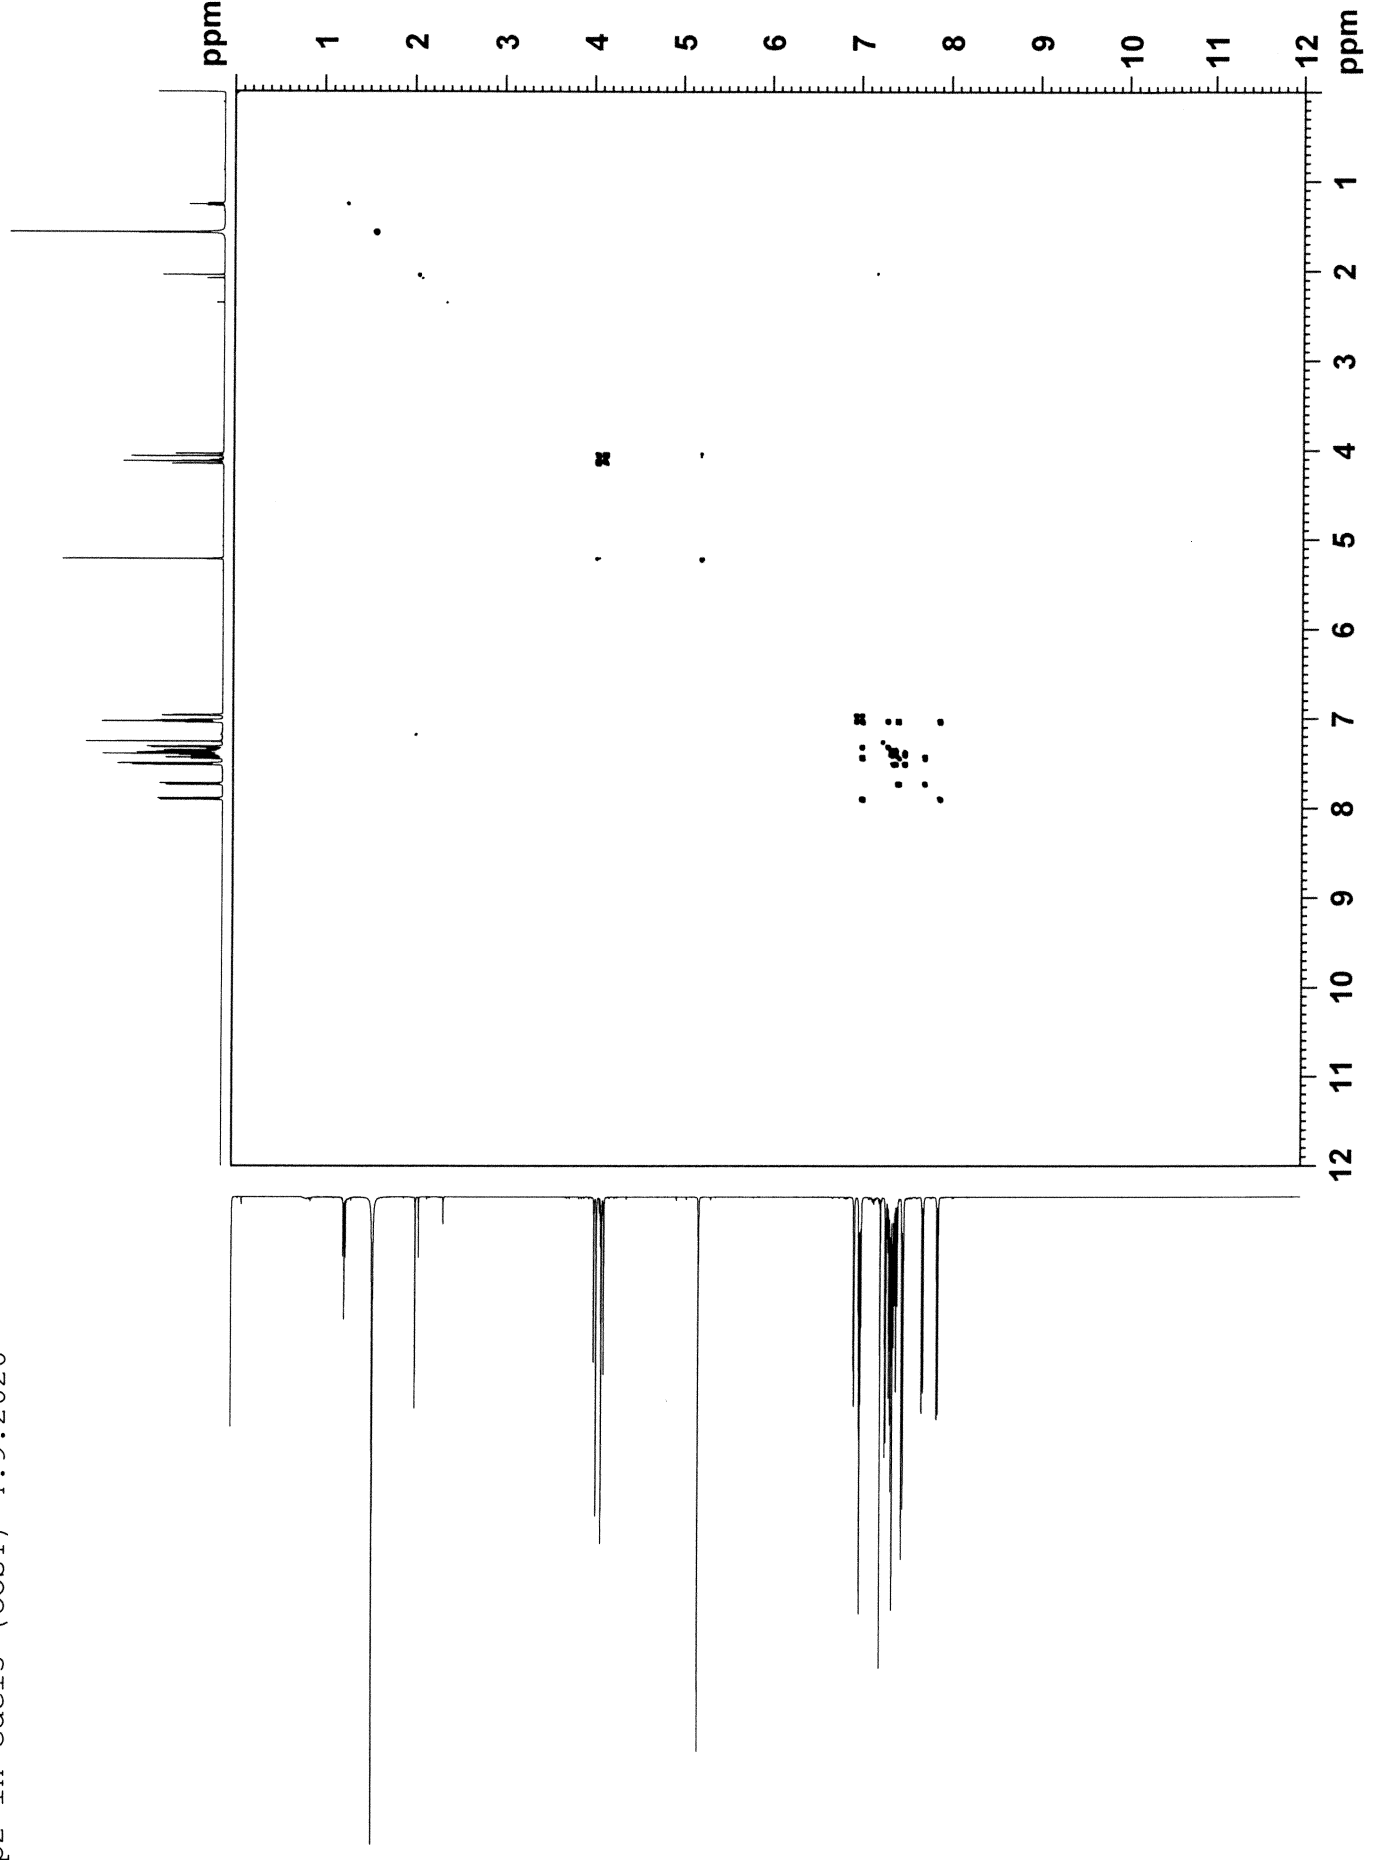

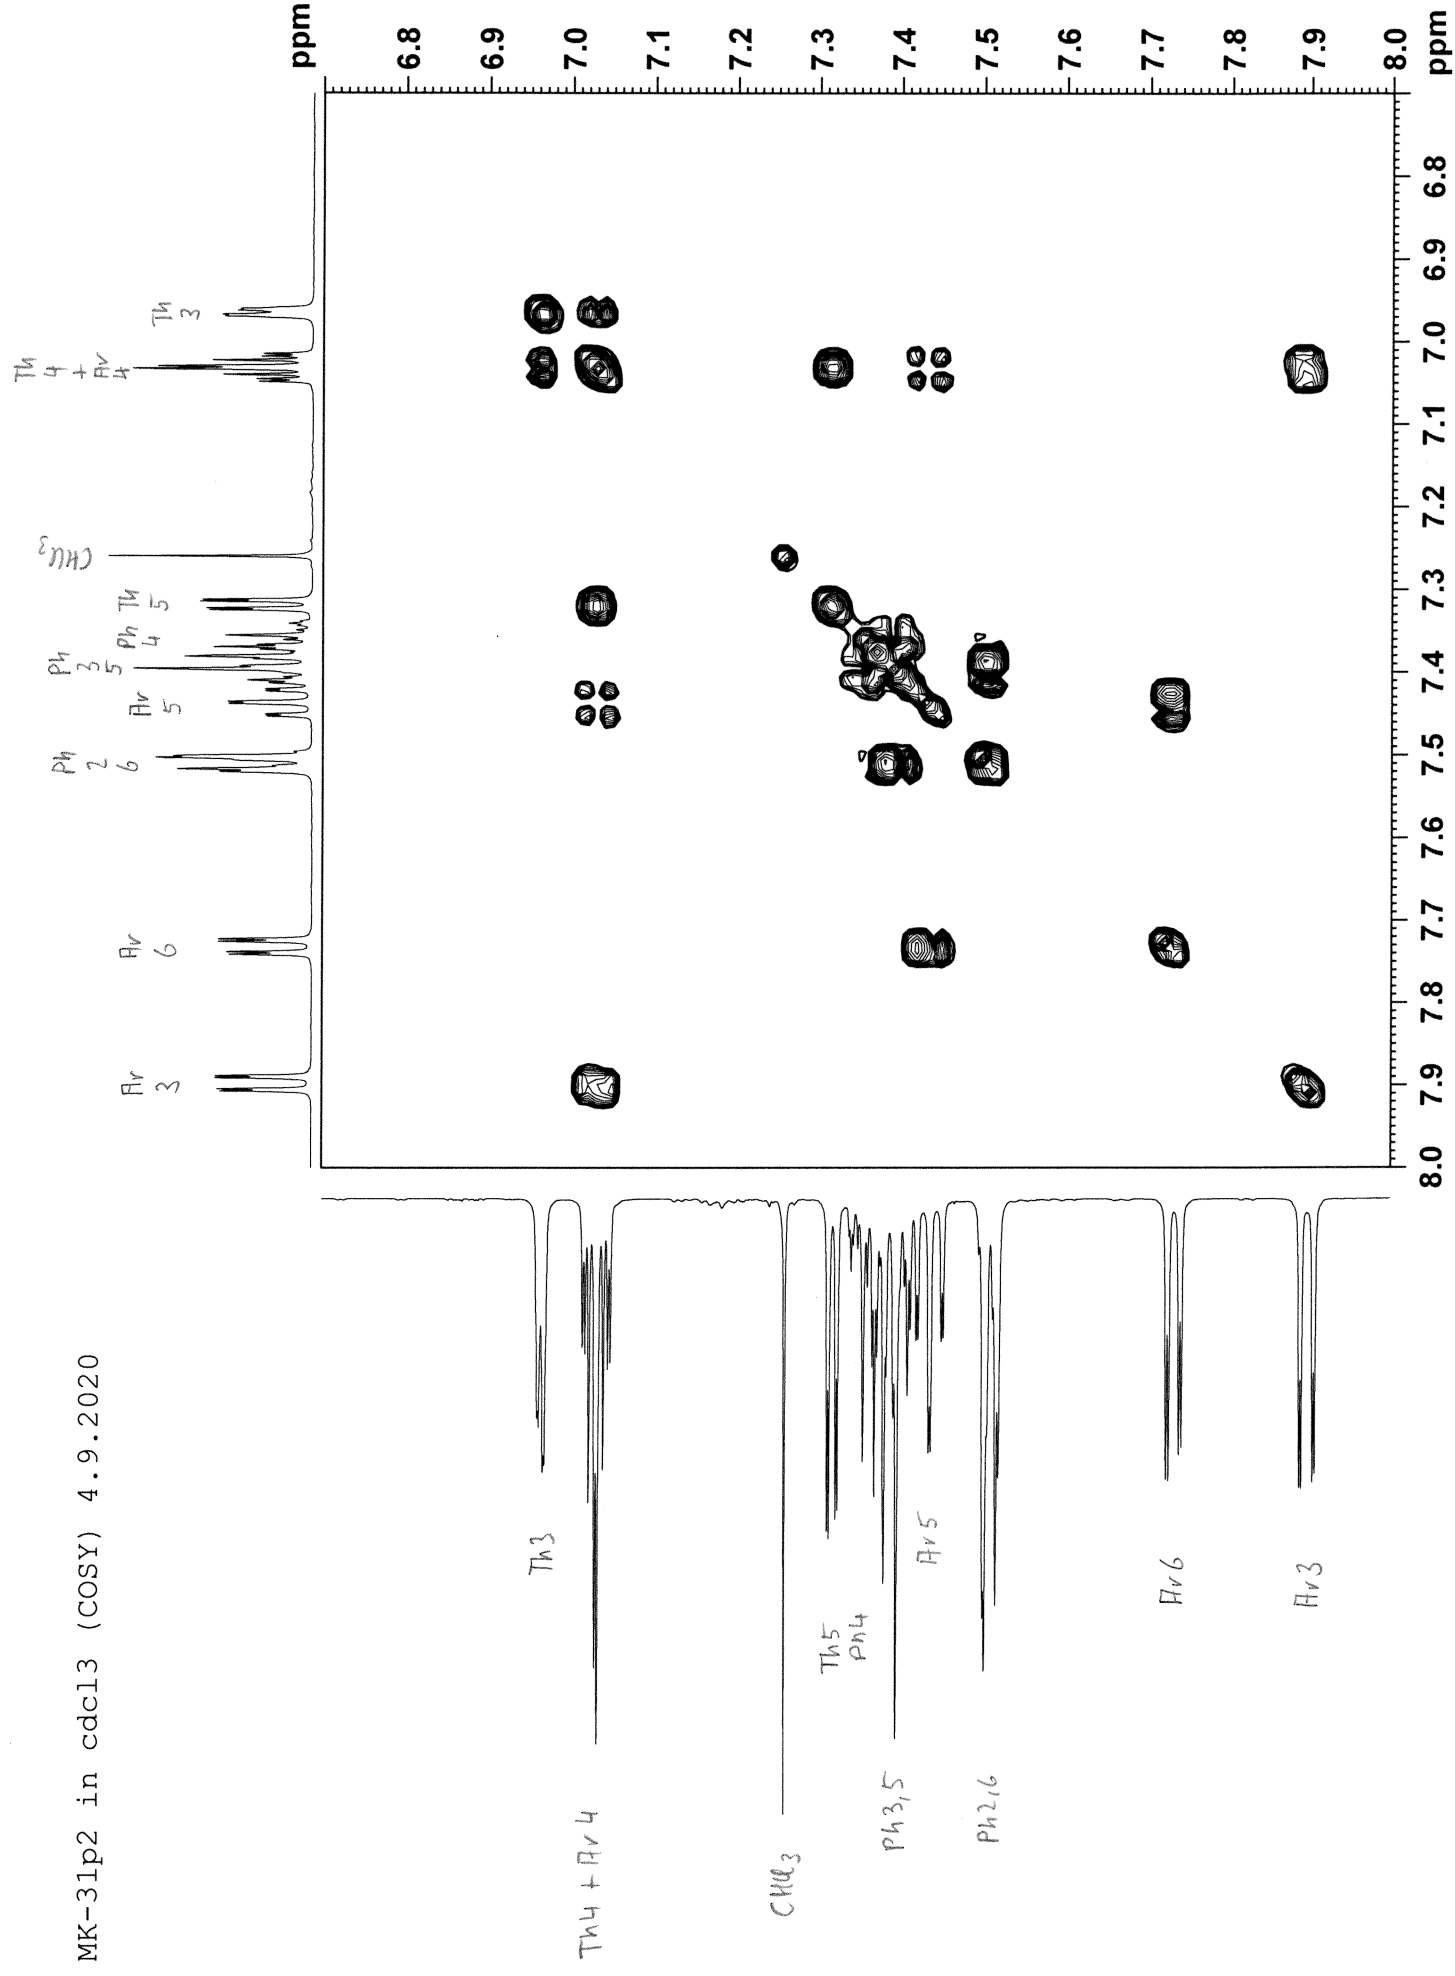

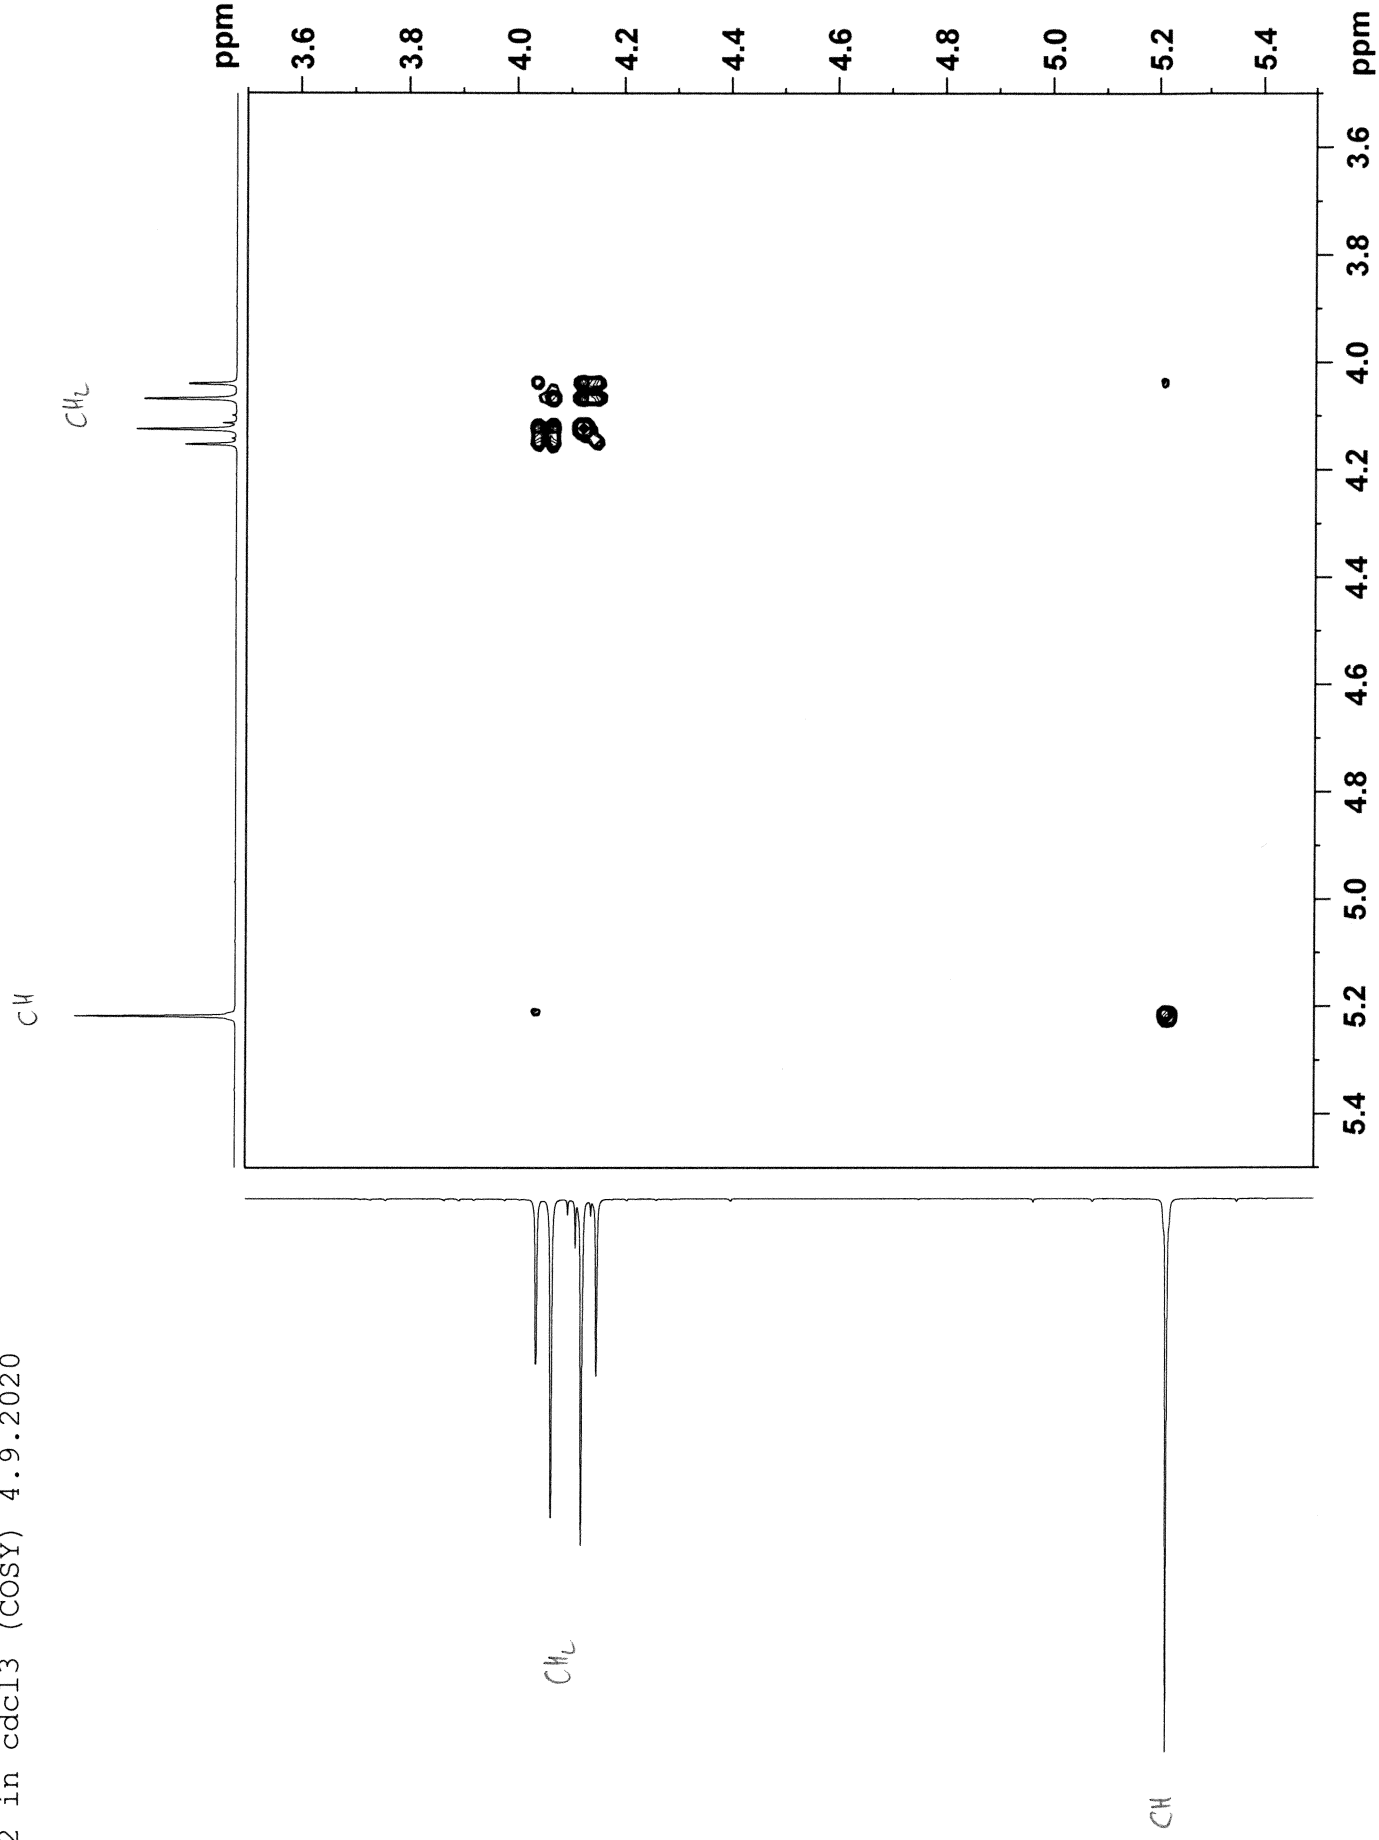

MK-31p2 in cdcl3 (HSQC) 4.9.2020

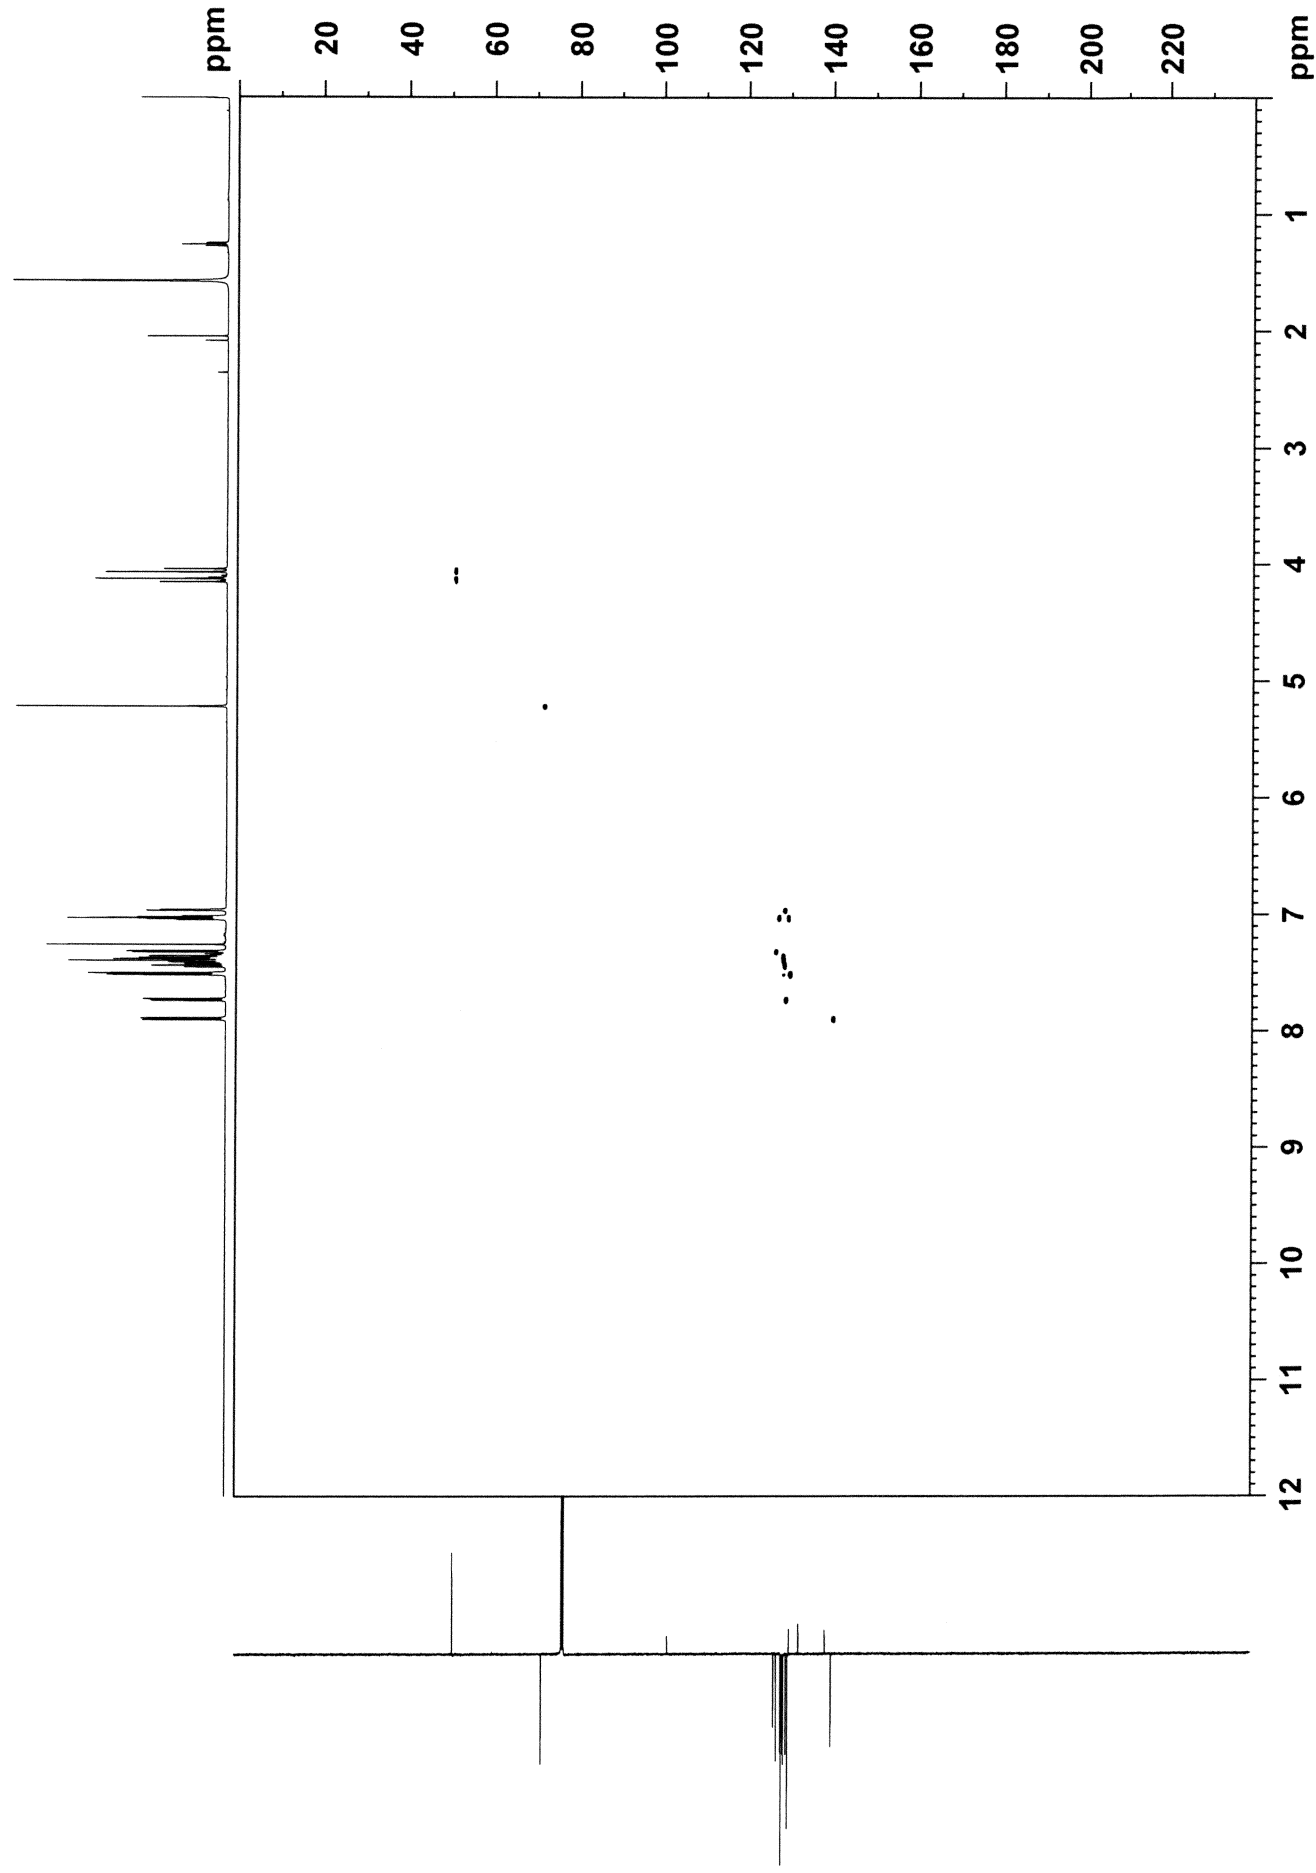

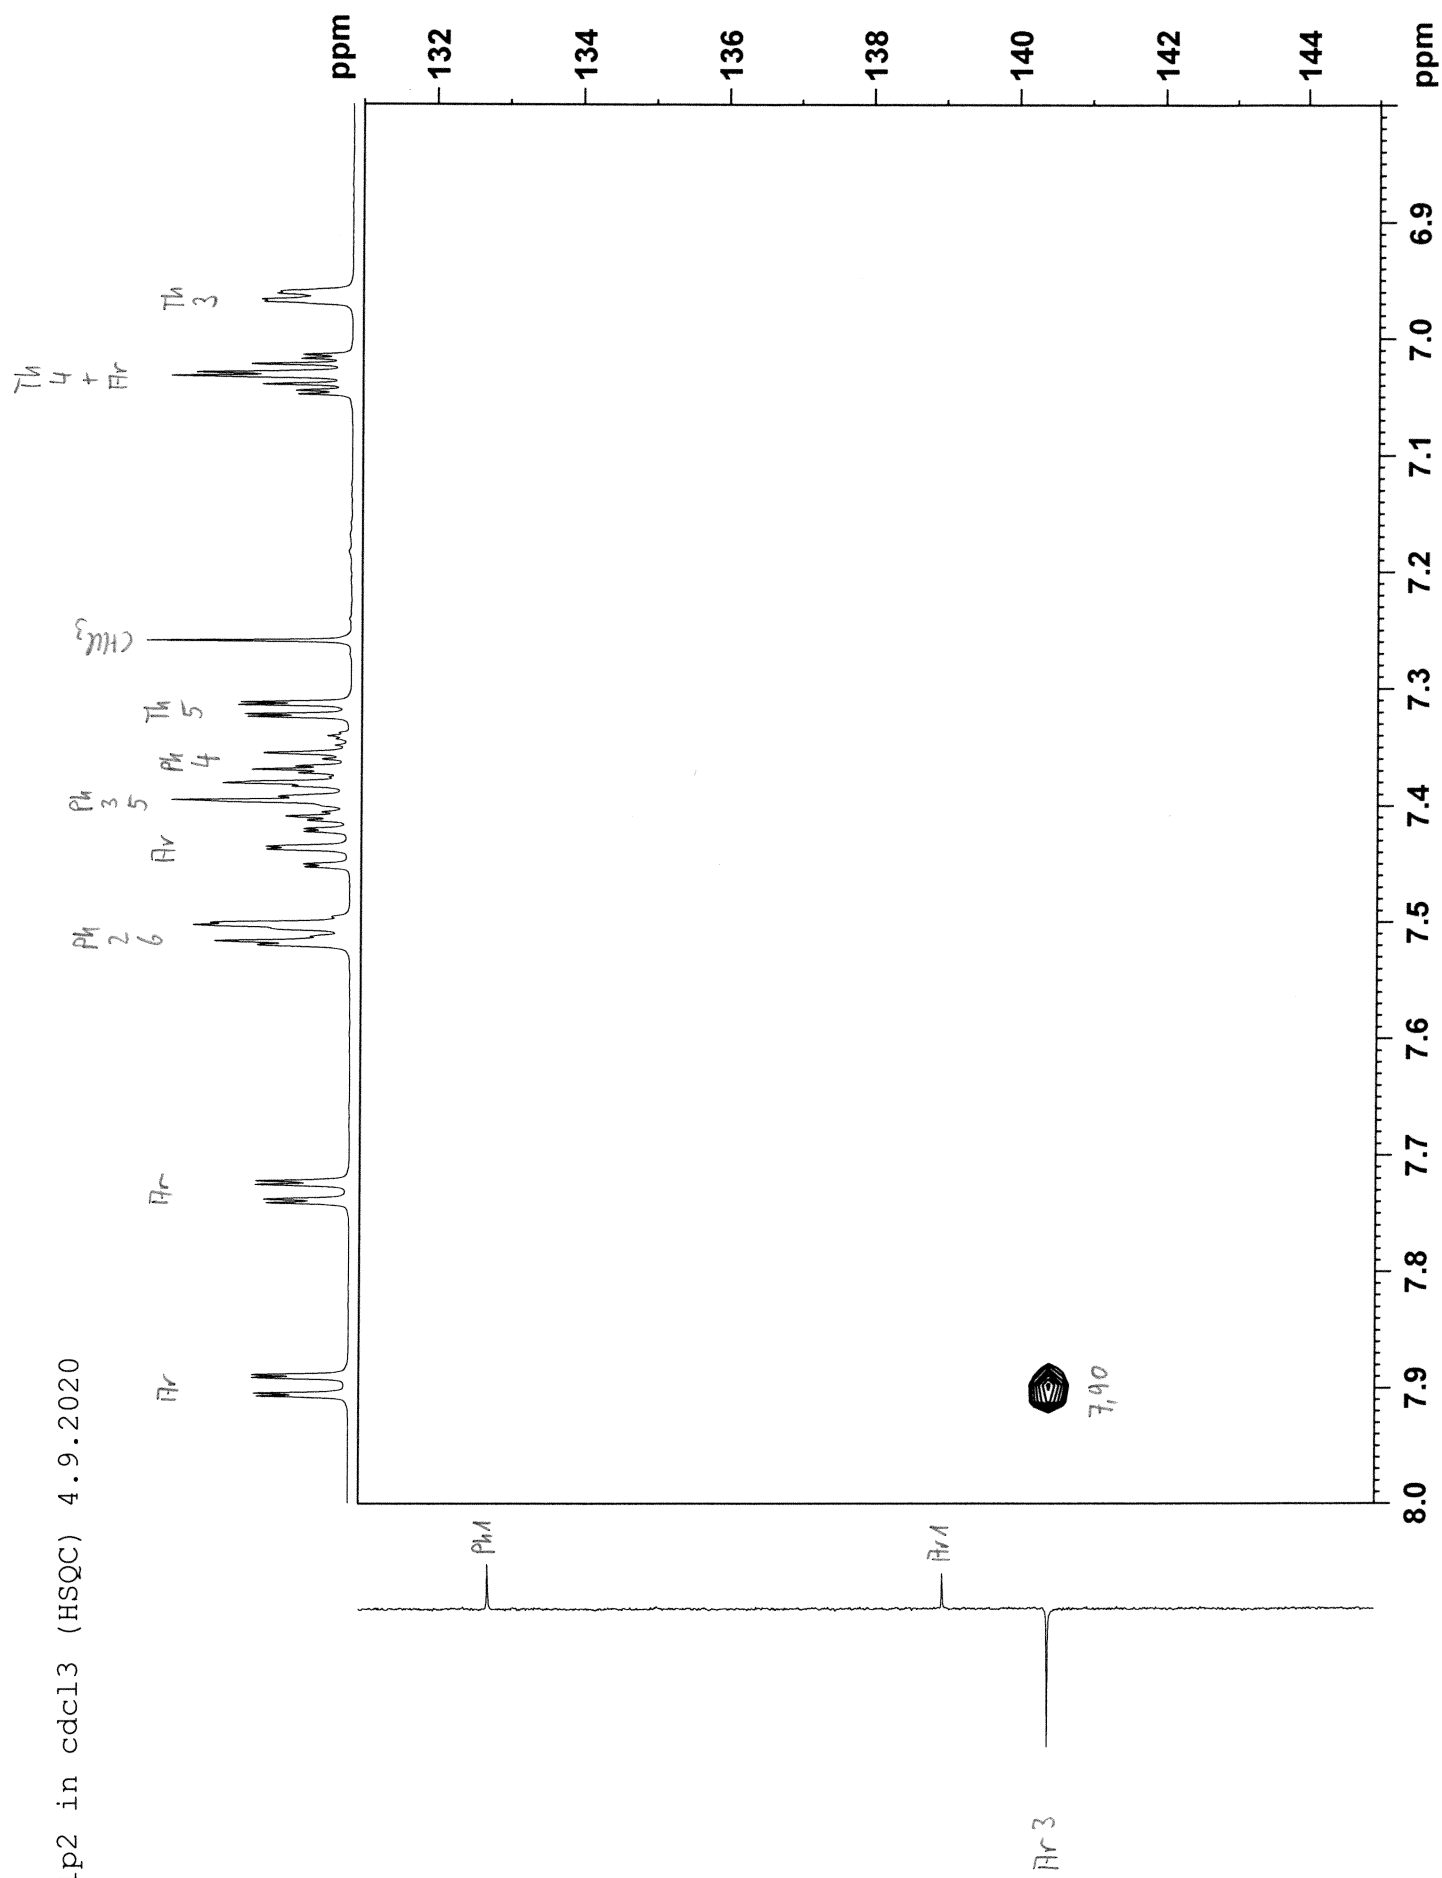

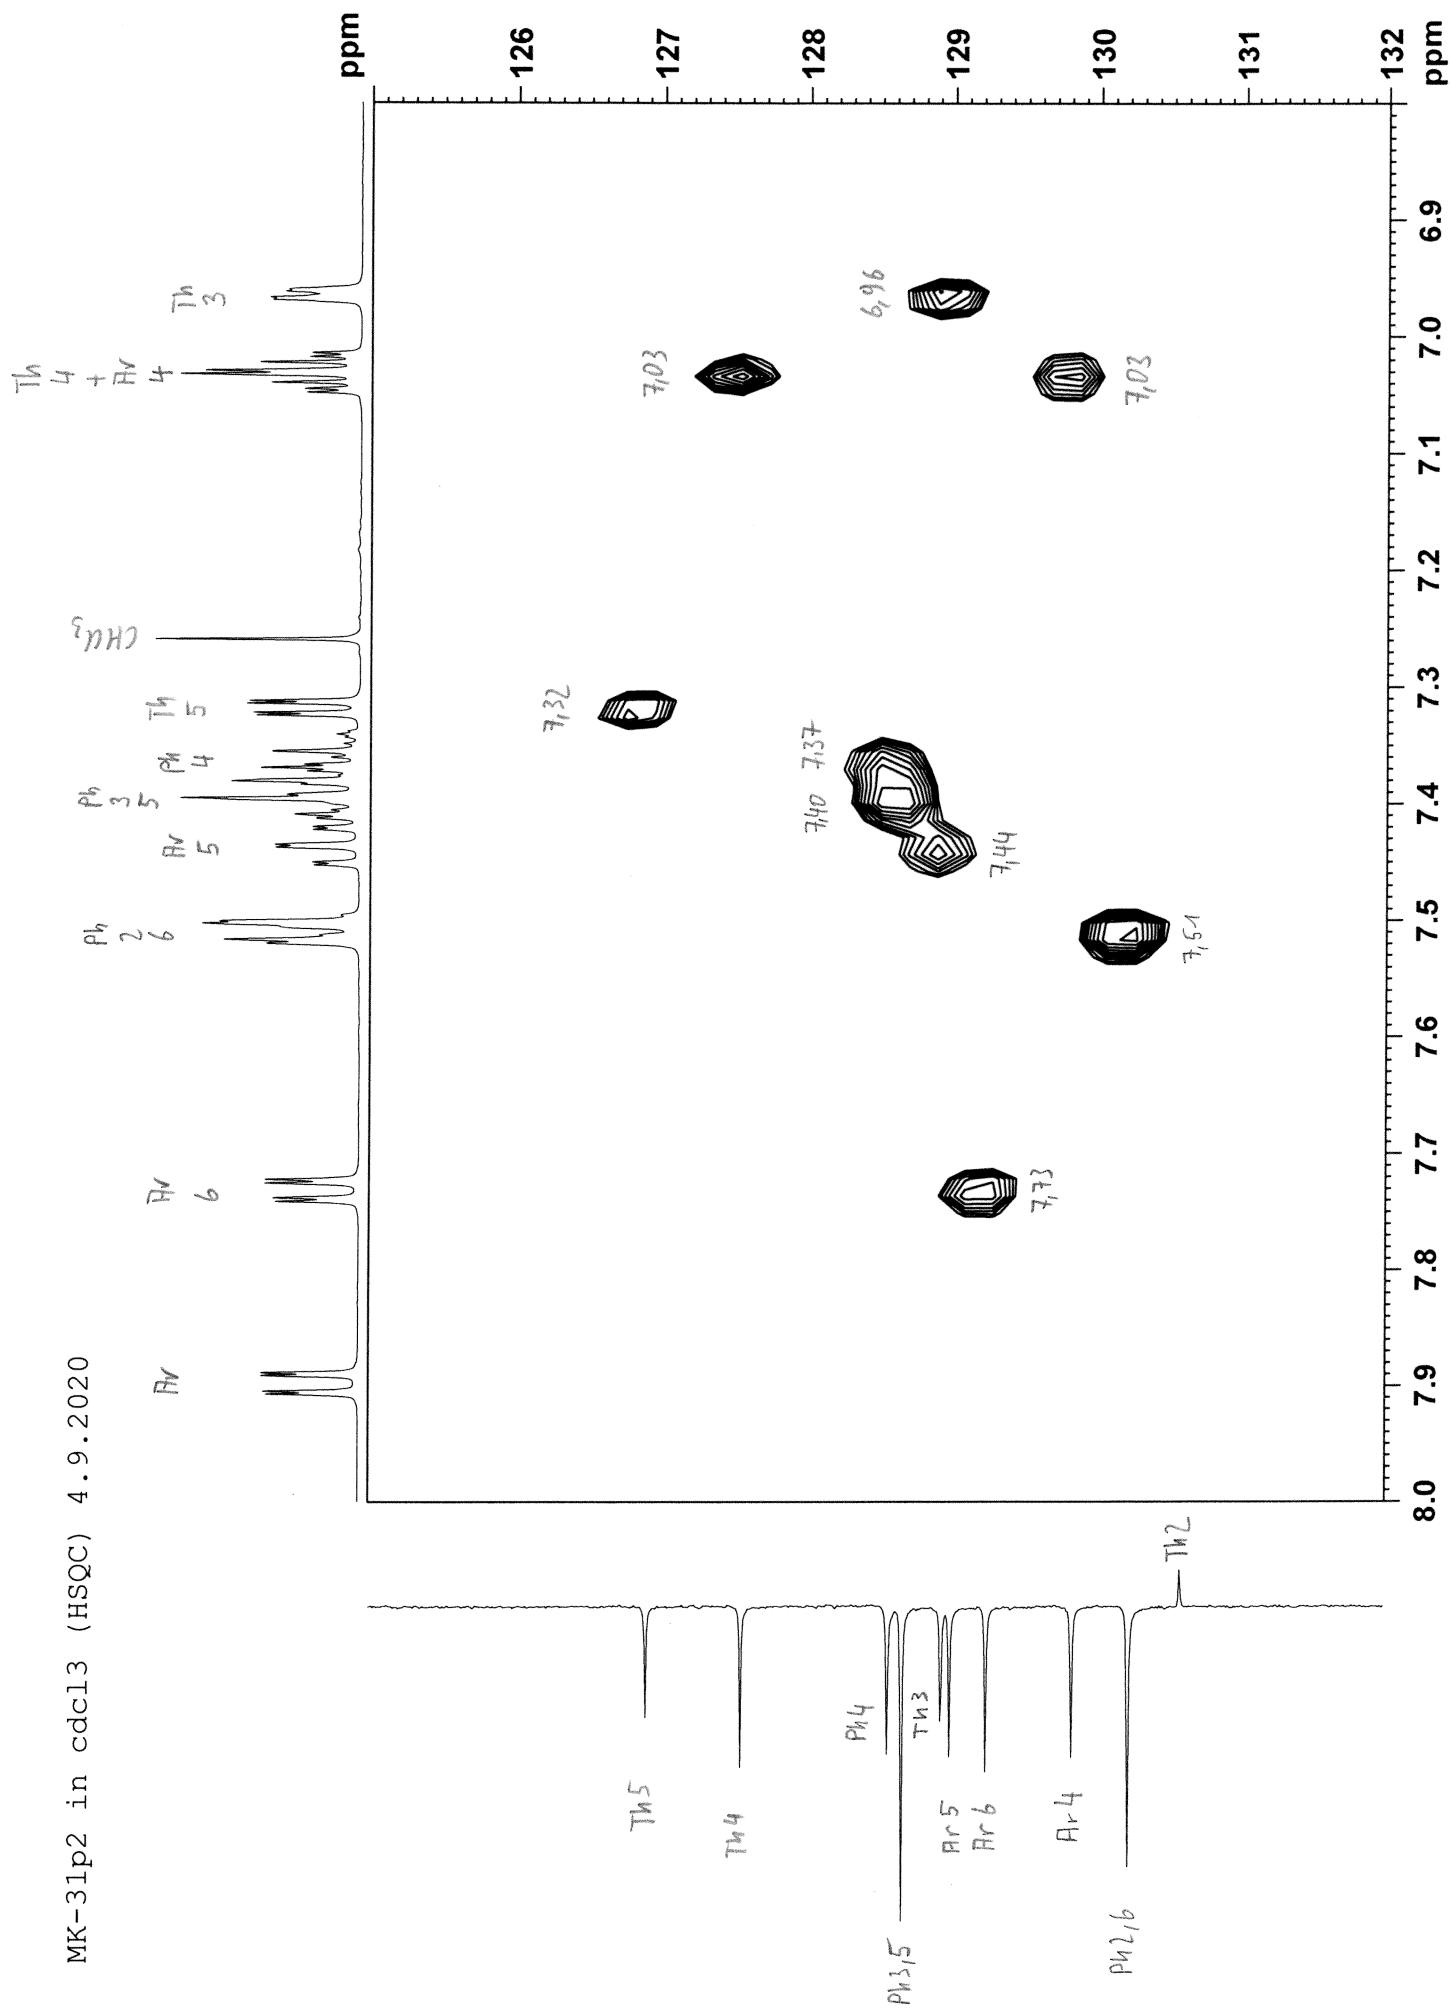

MK-31p2 in cdc13 (HSQC) 4.9.2020

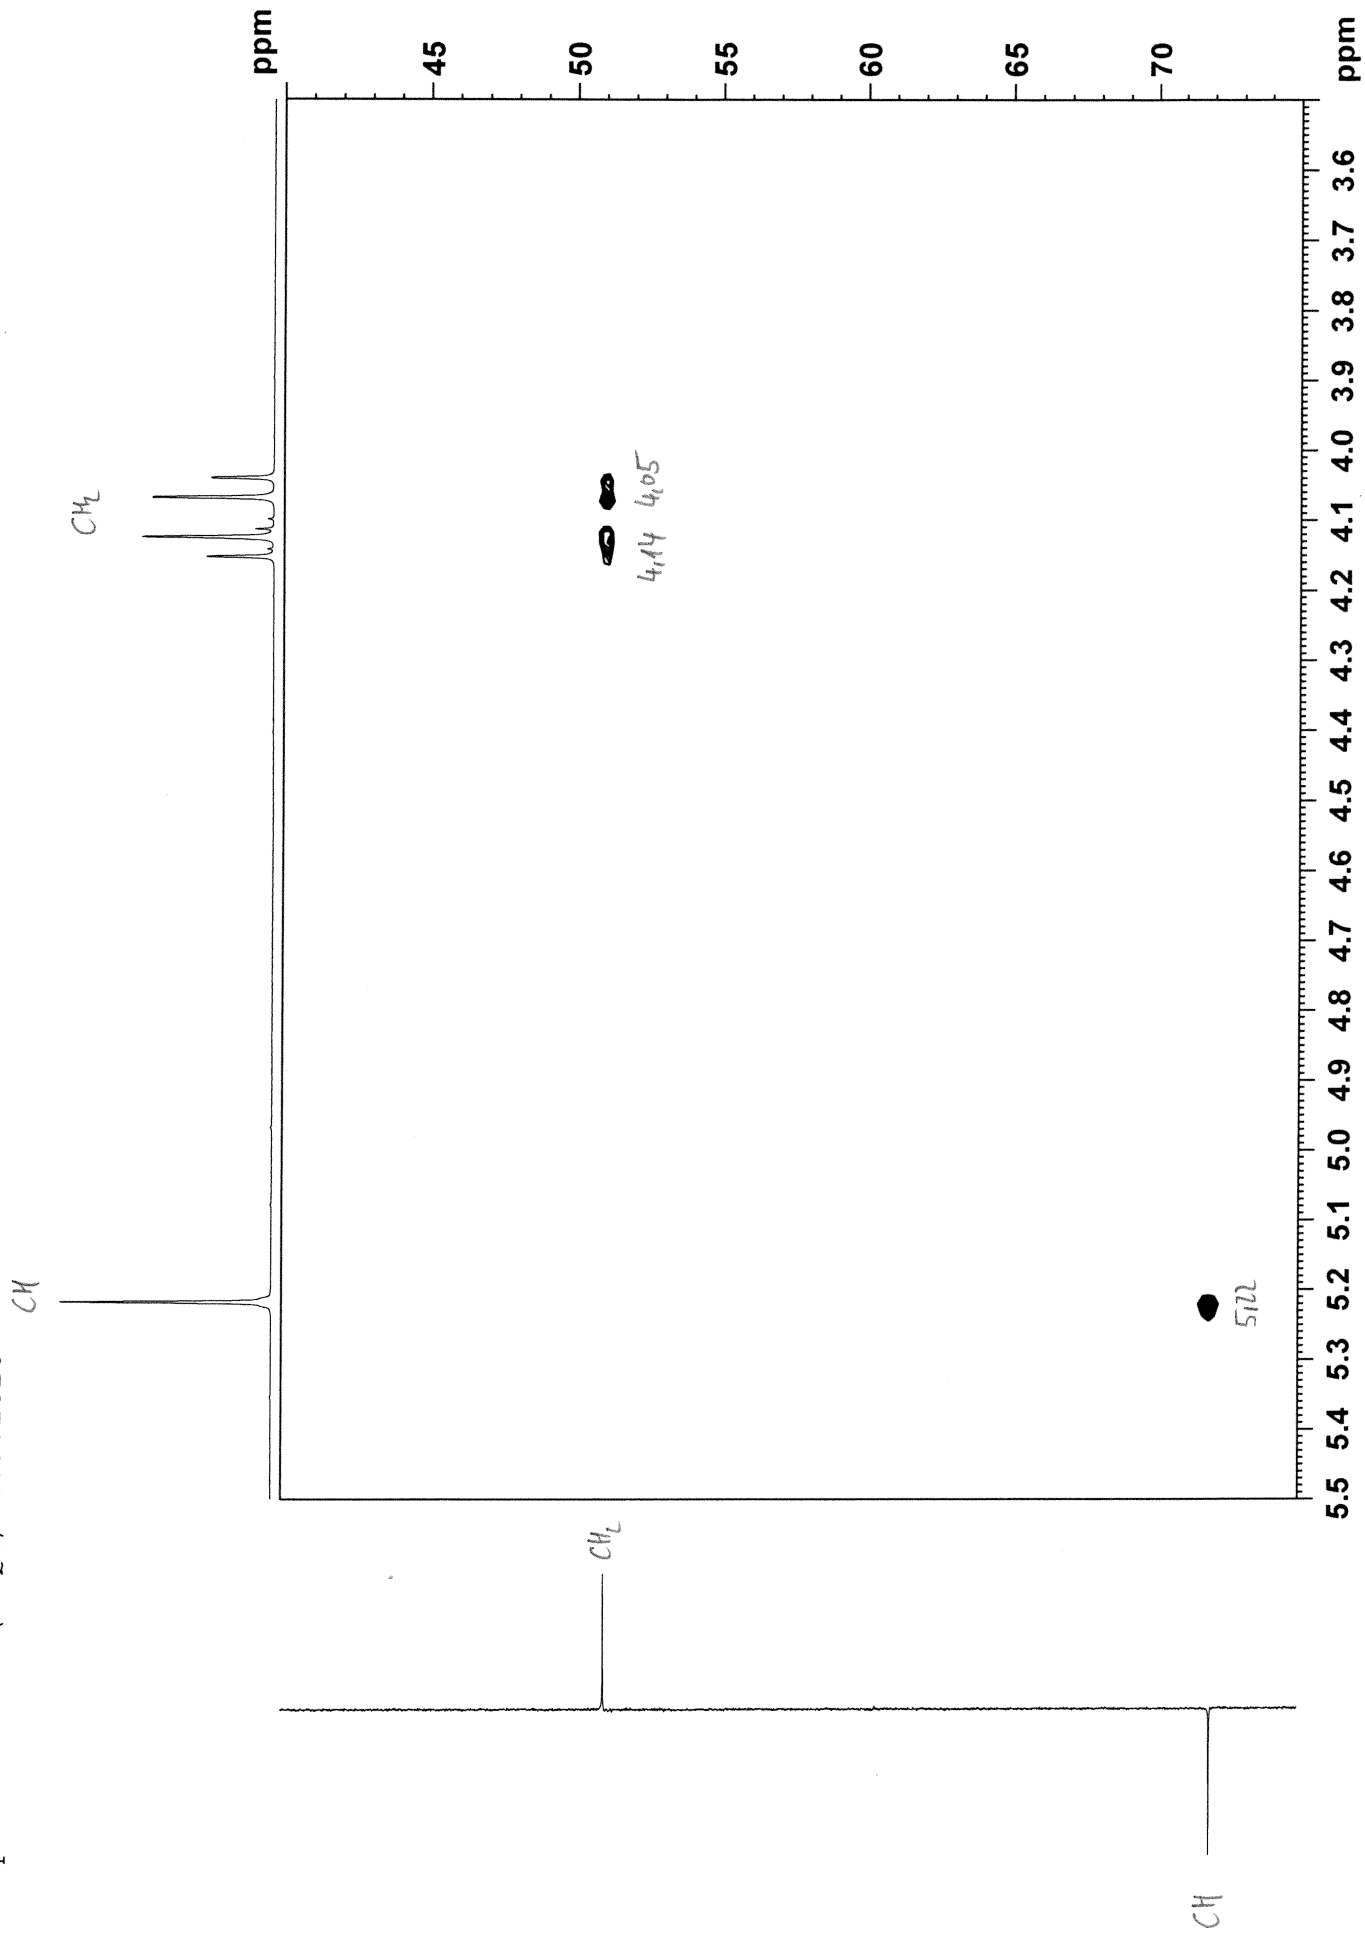

MK-31p2 in cdcl3 (HMBC) 4.9.2020

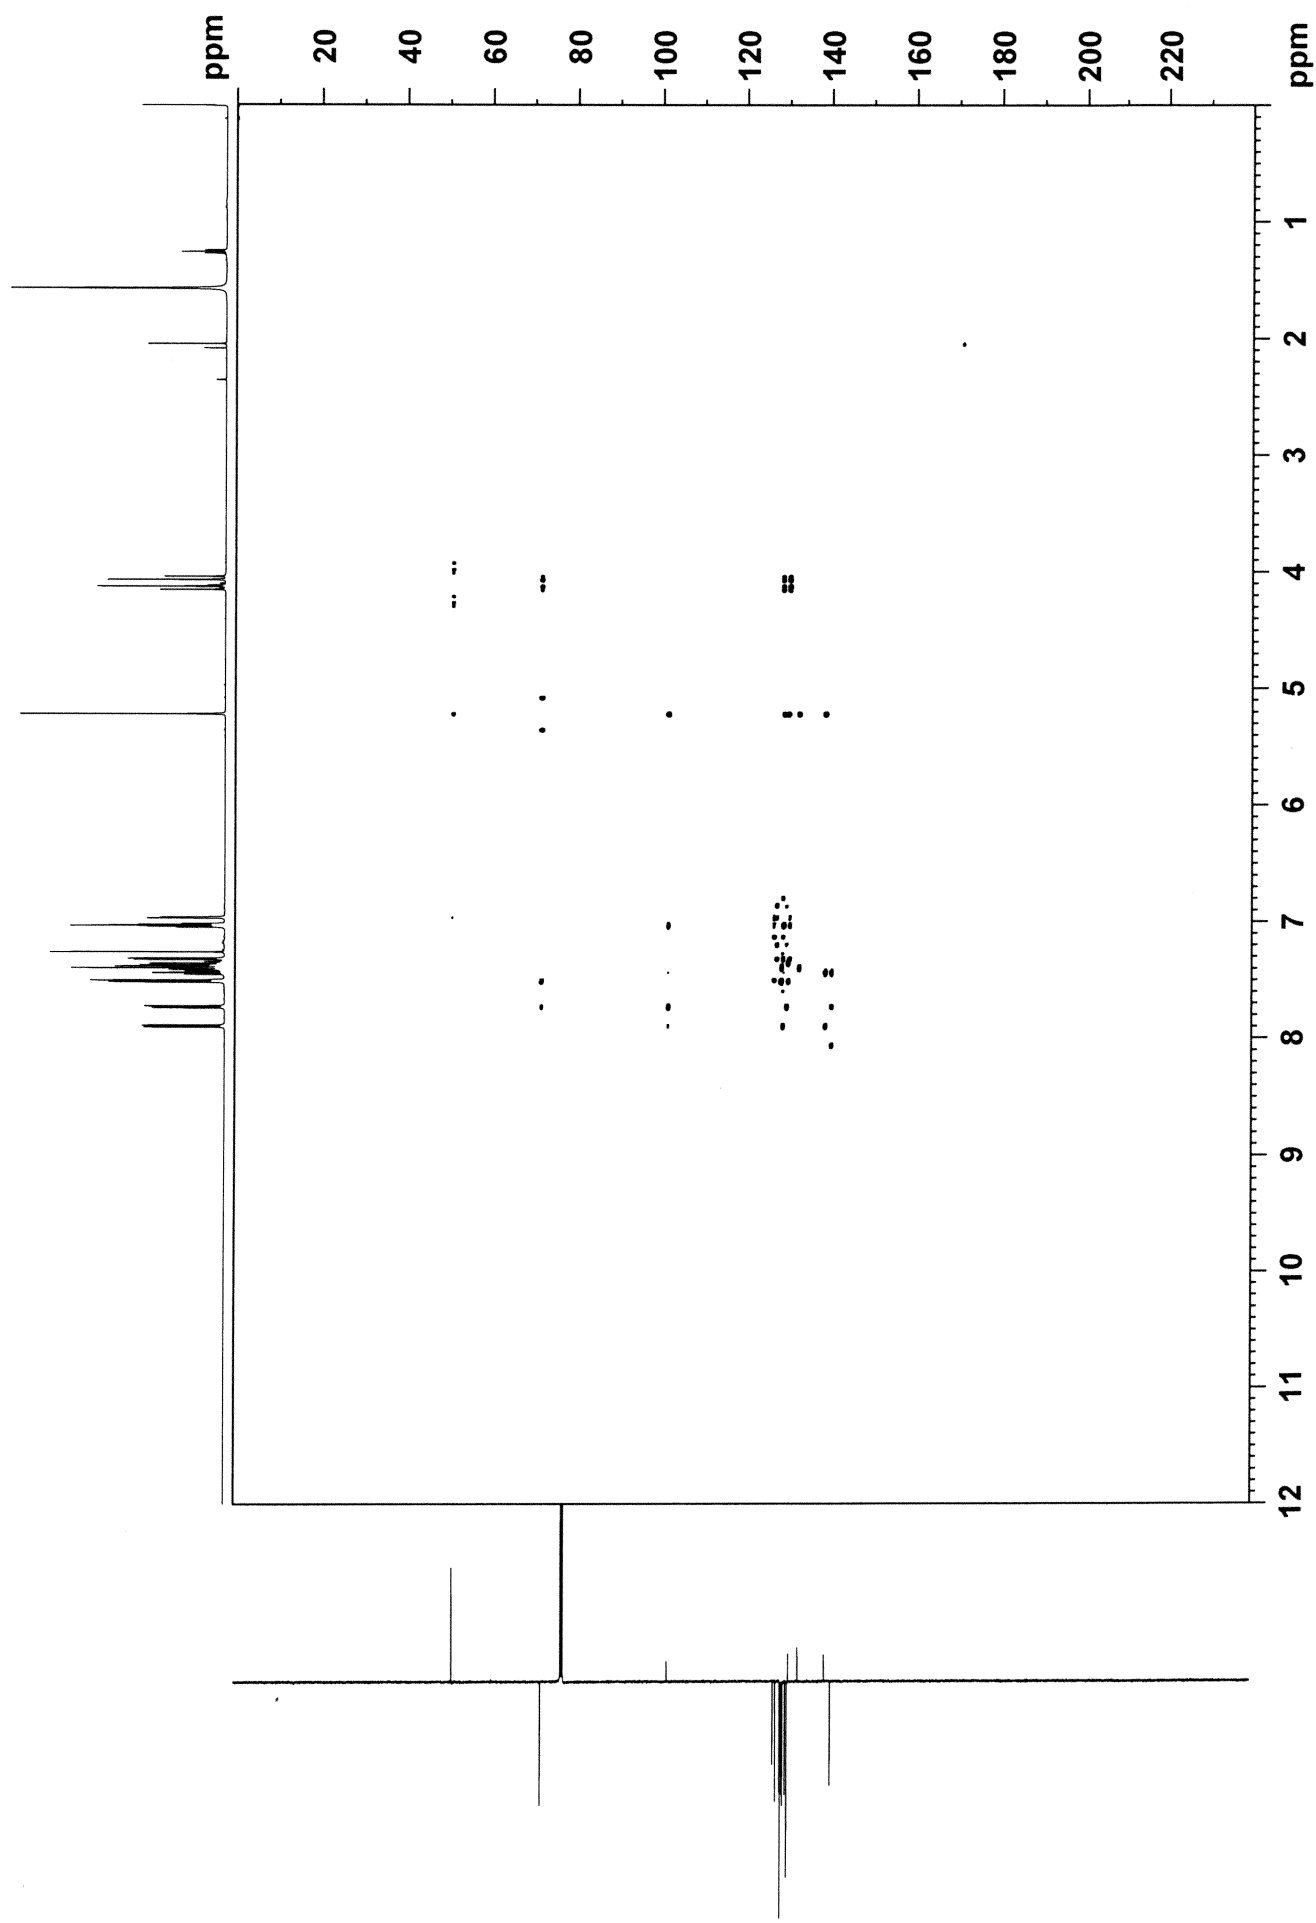



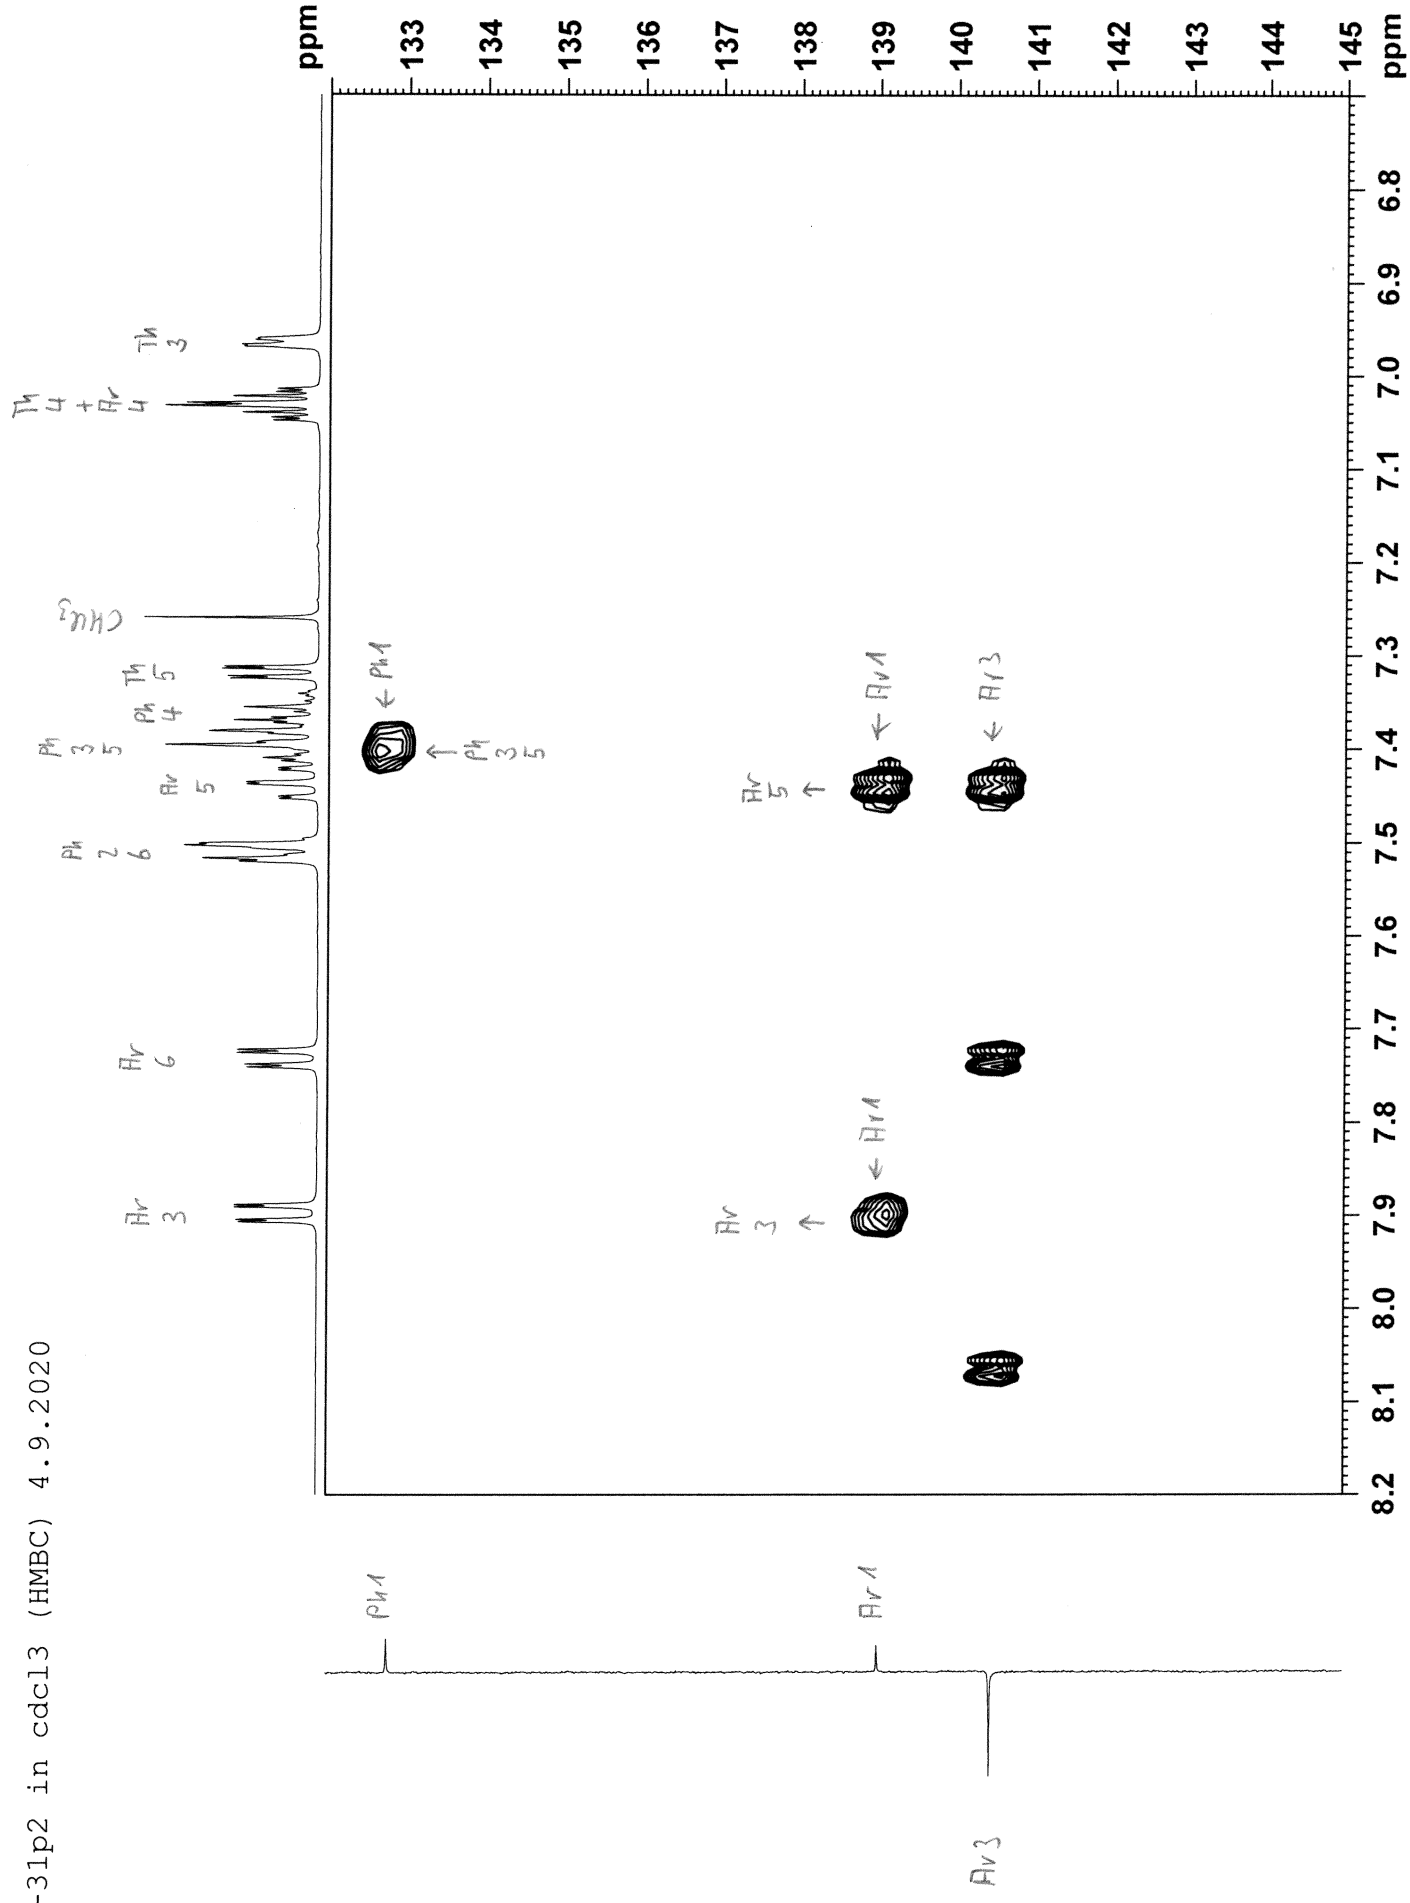

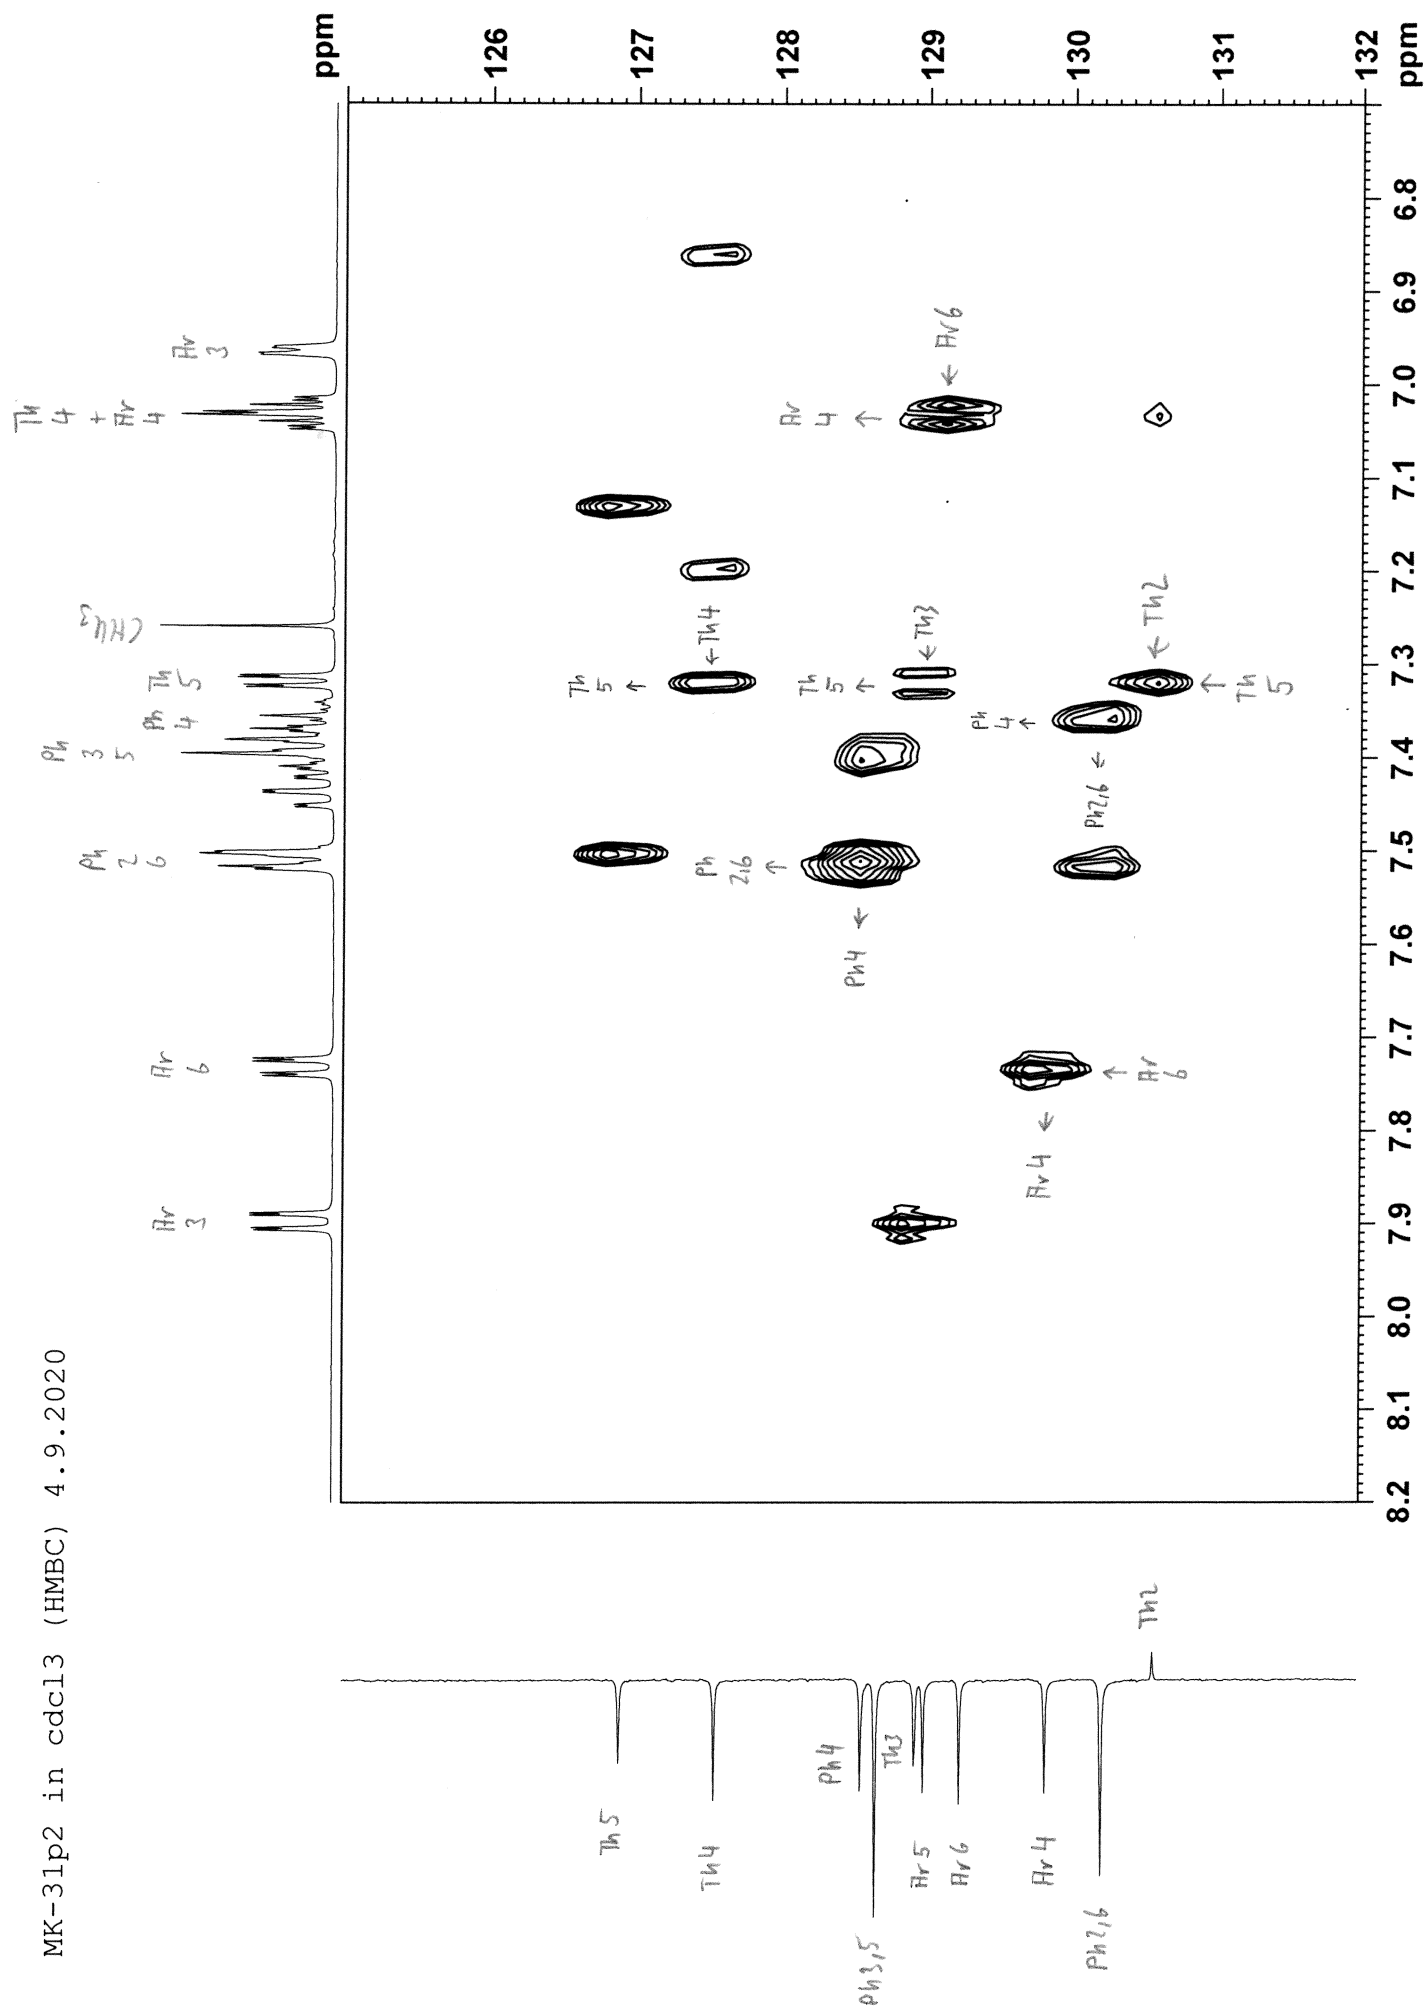

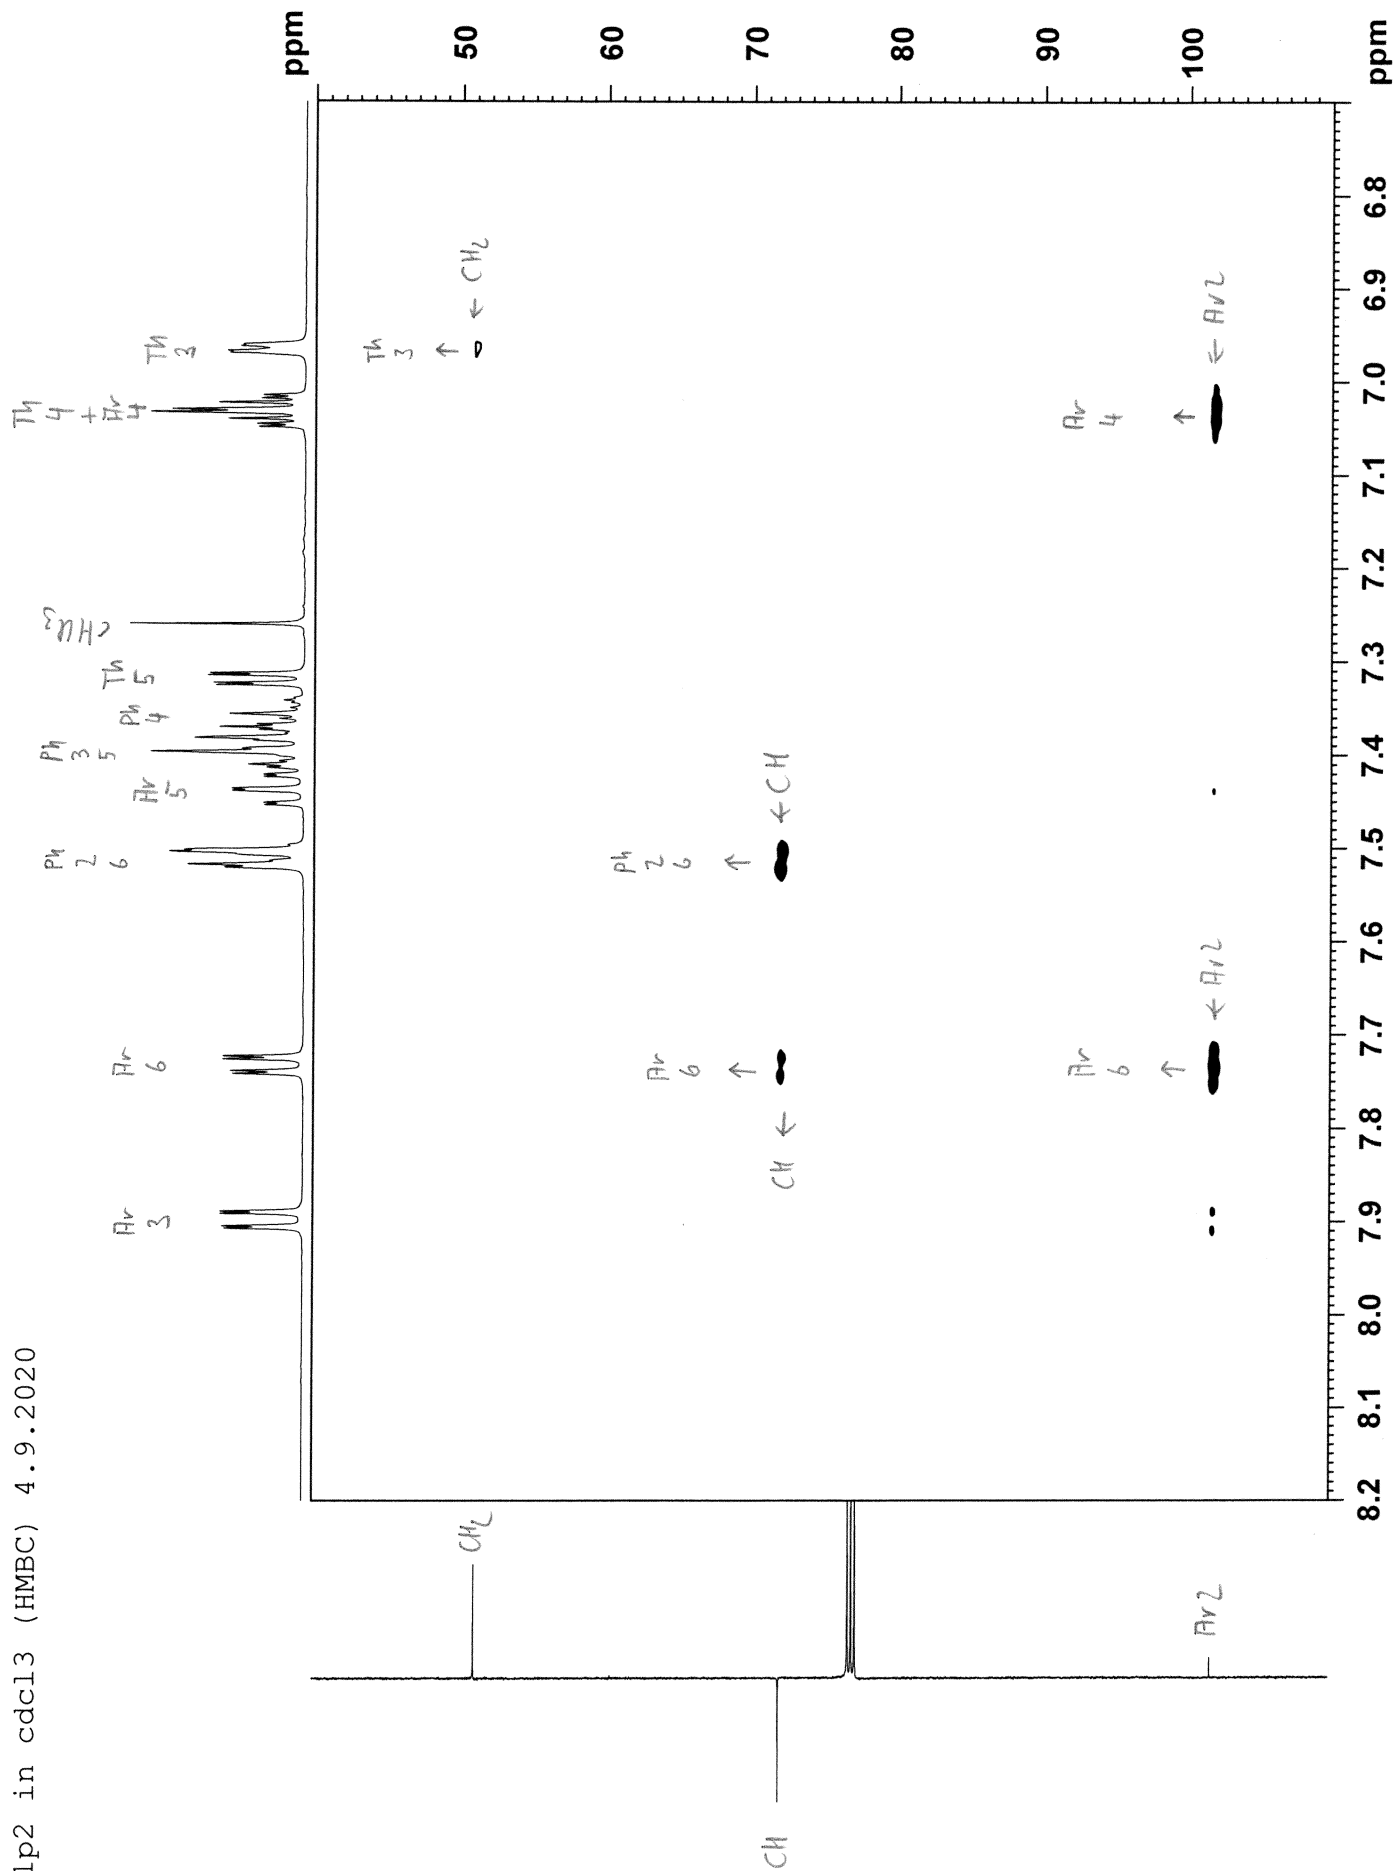

MK-31p2 in cdcl3 (HMBC) 4.9.2020

CH

CH<sub>2</sub>

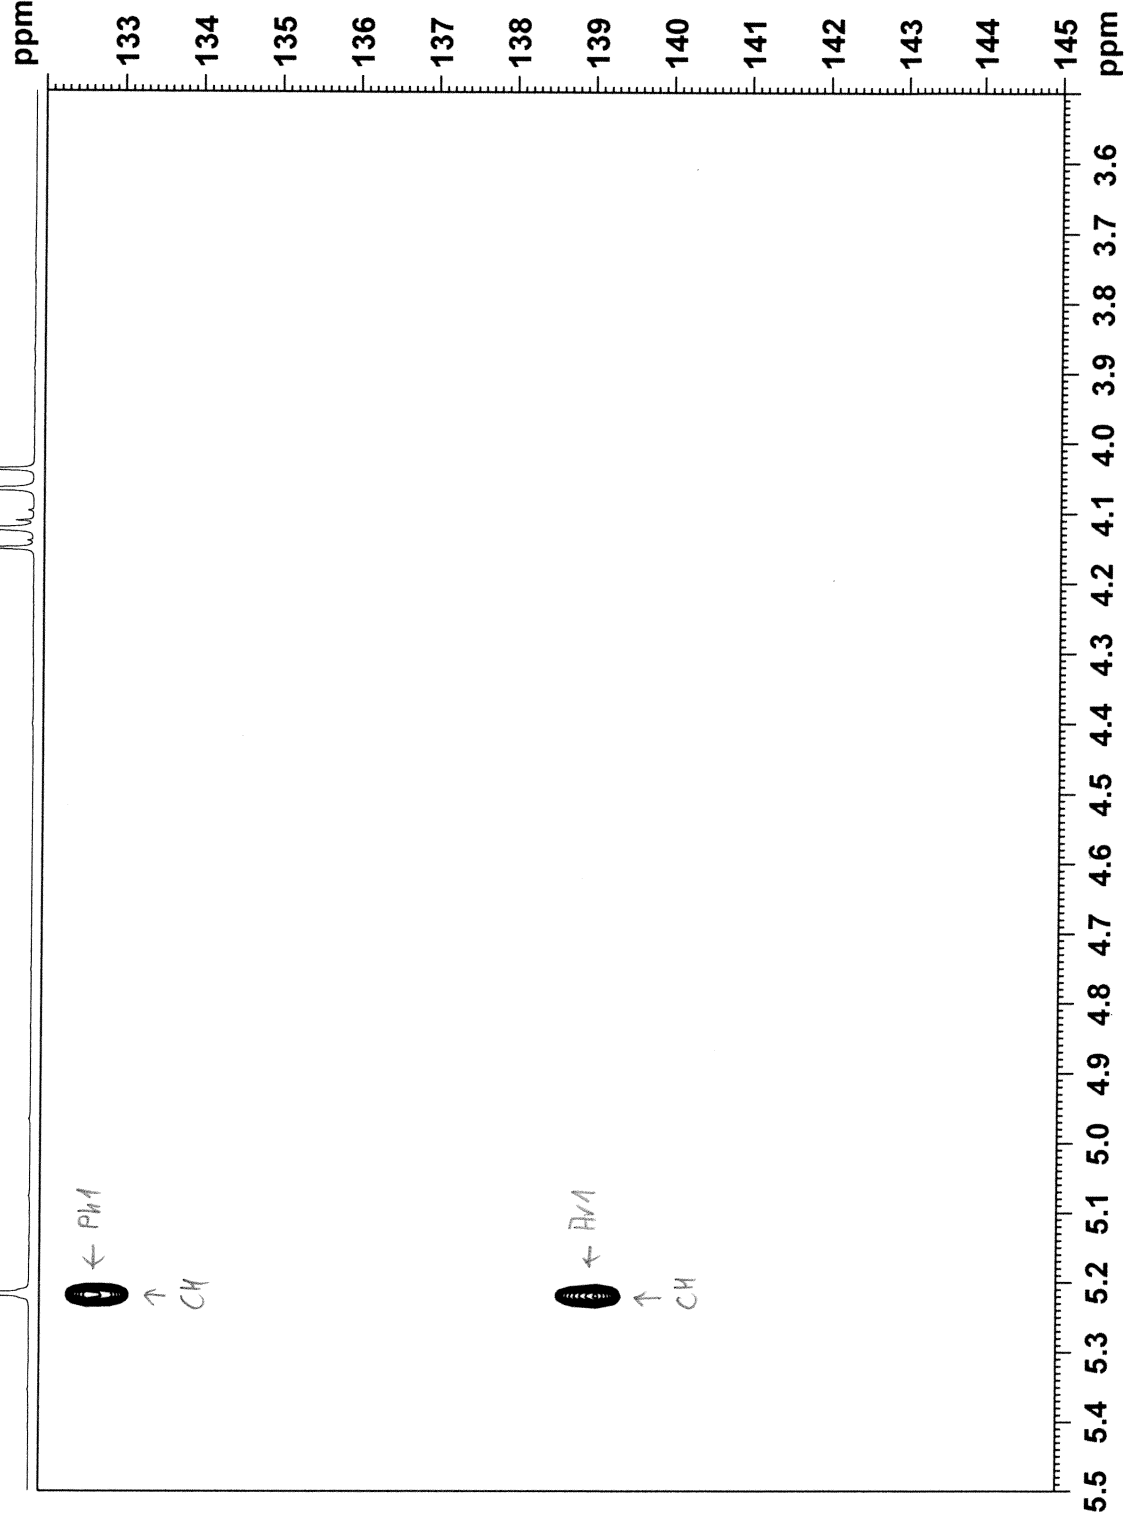

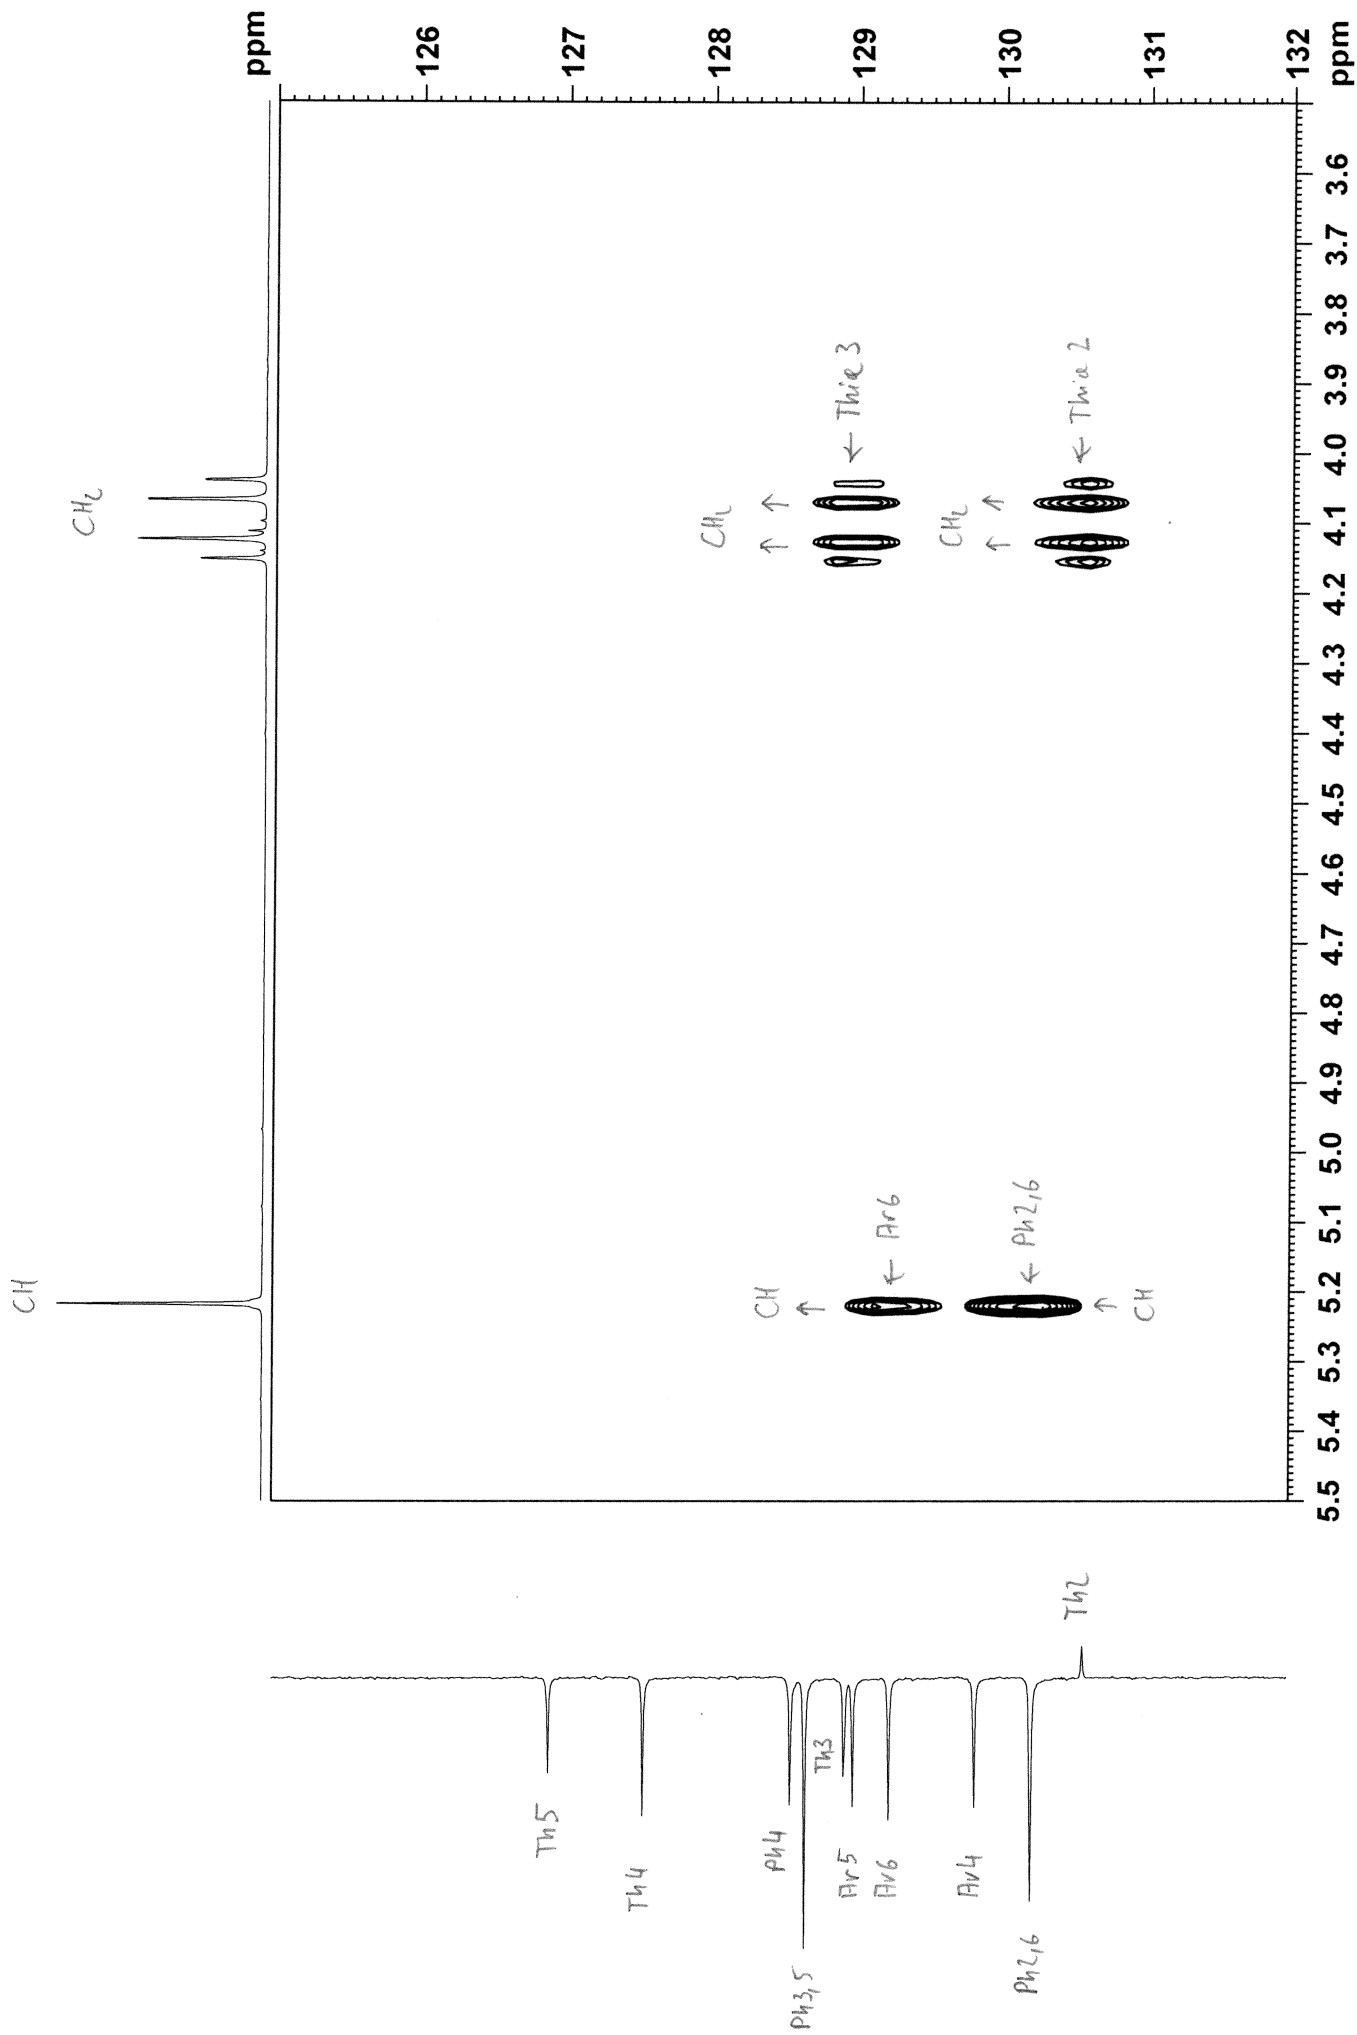

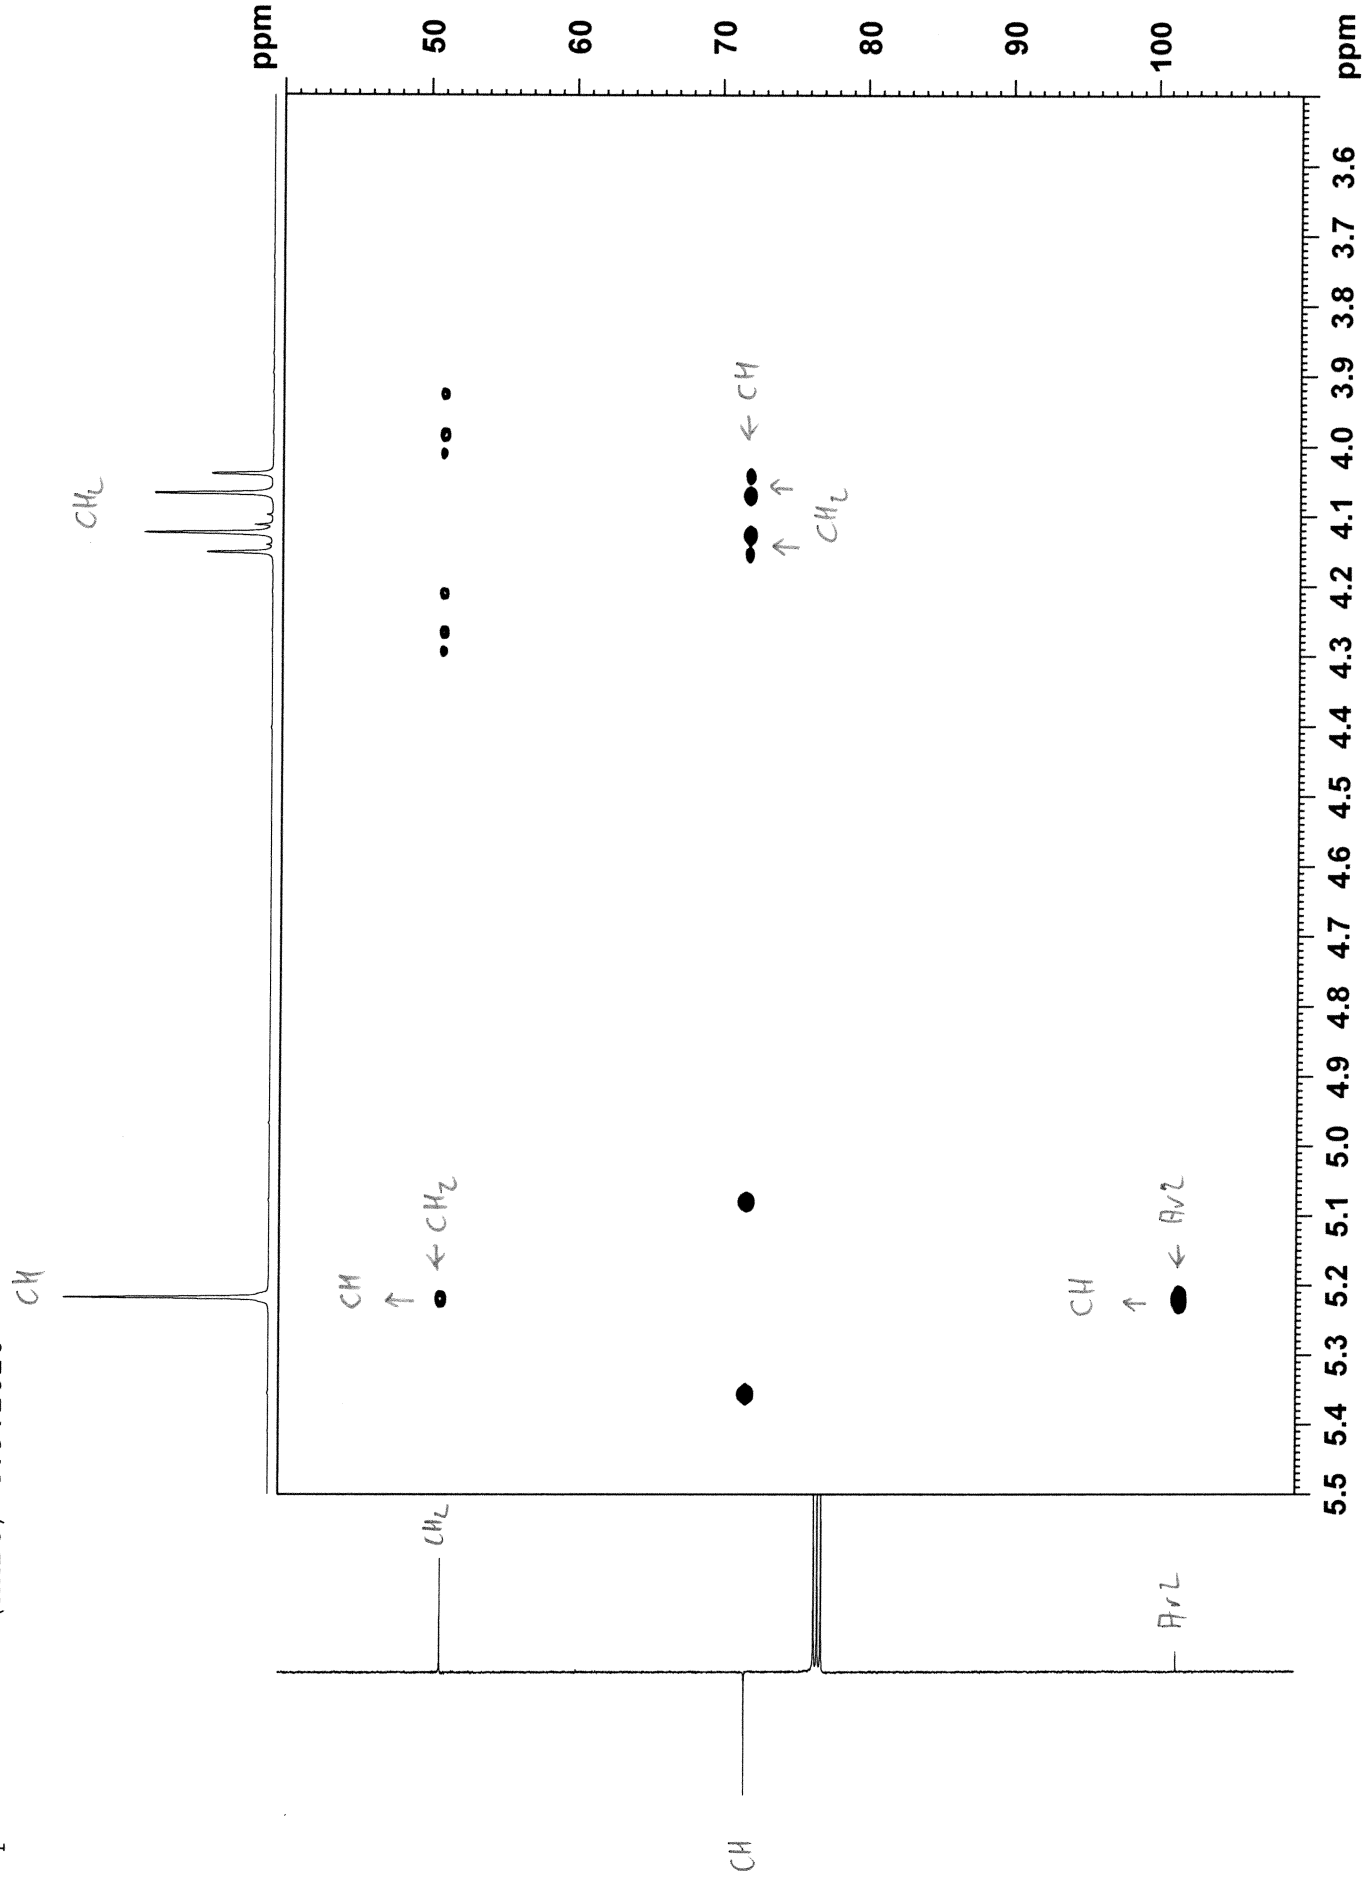

**Figure S35c.** NMR spectra of compound 7i.

MK031B\_P3 in cdcl3 (Proton) 20.5.2021

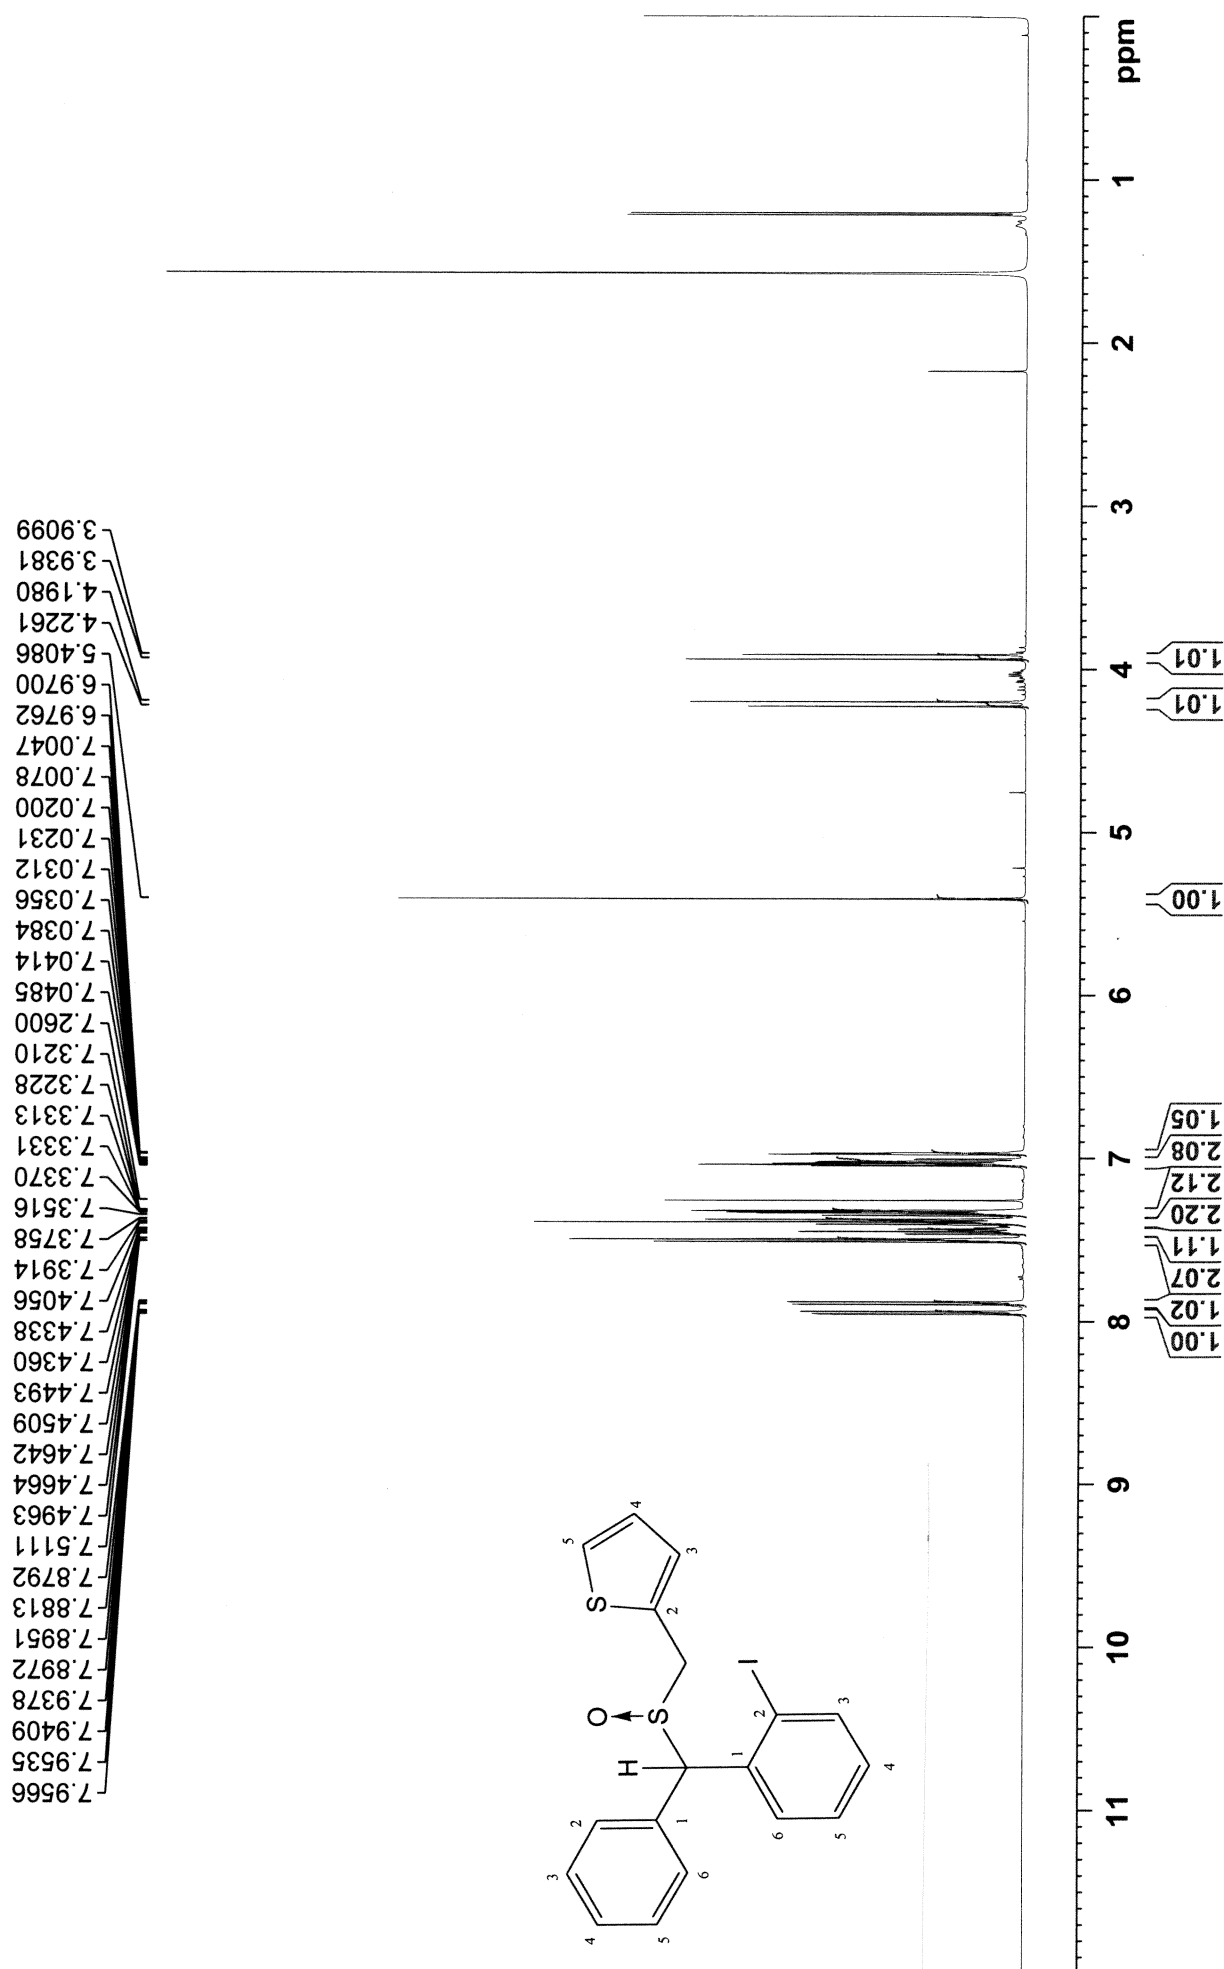

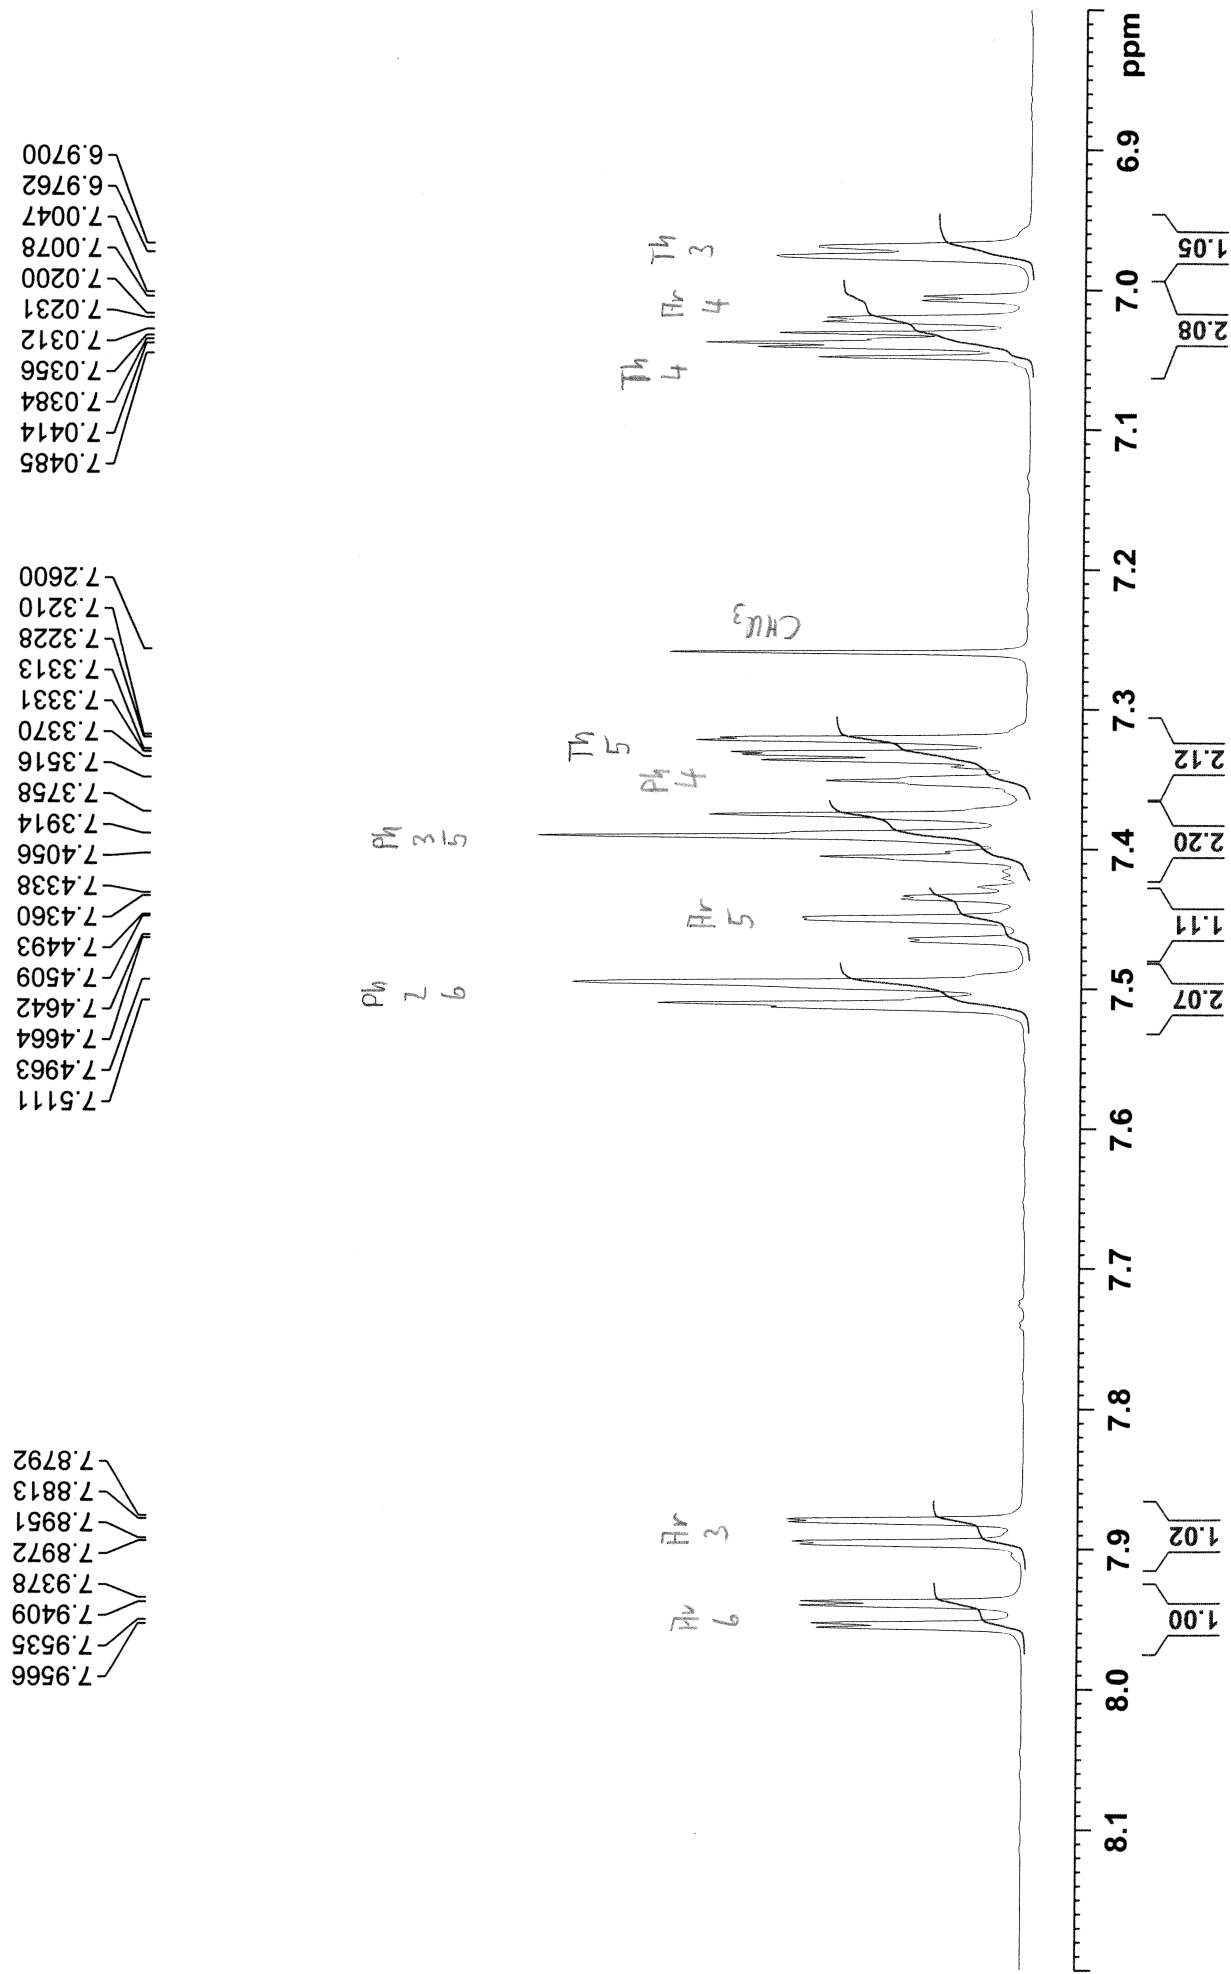



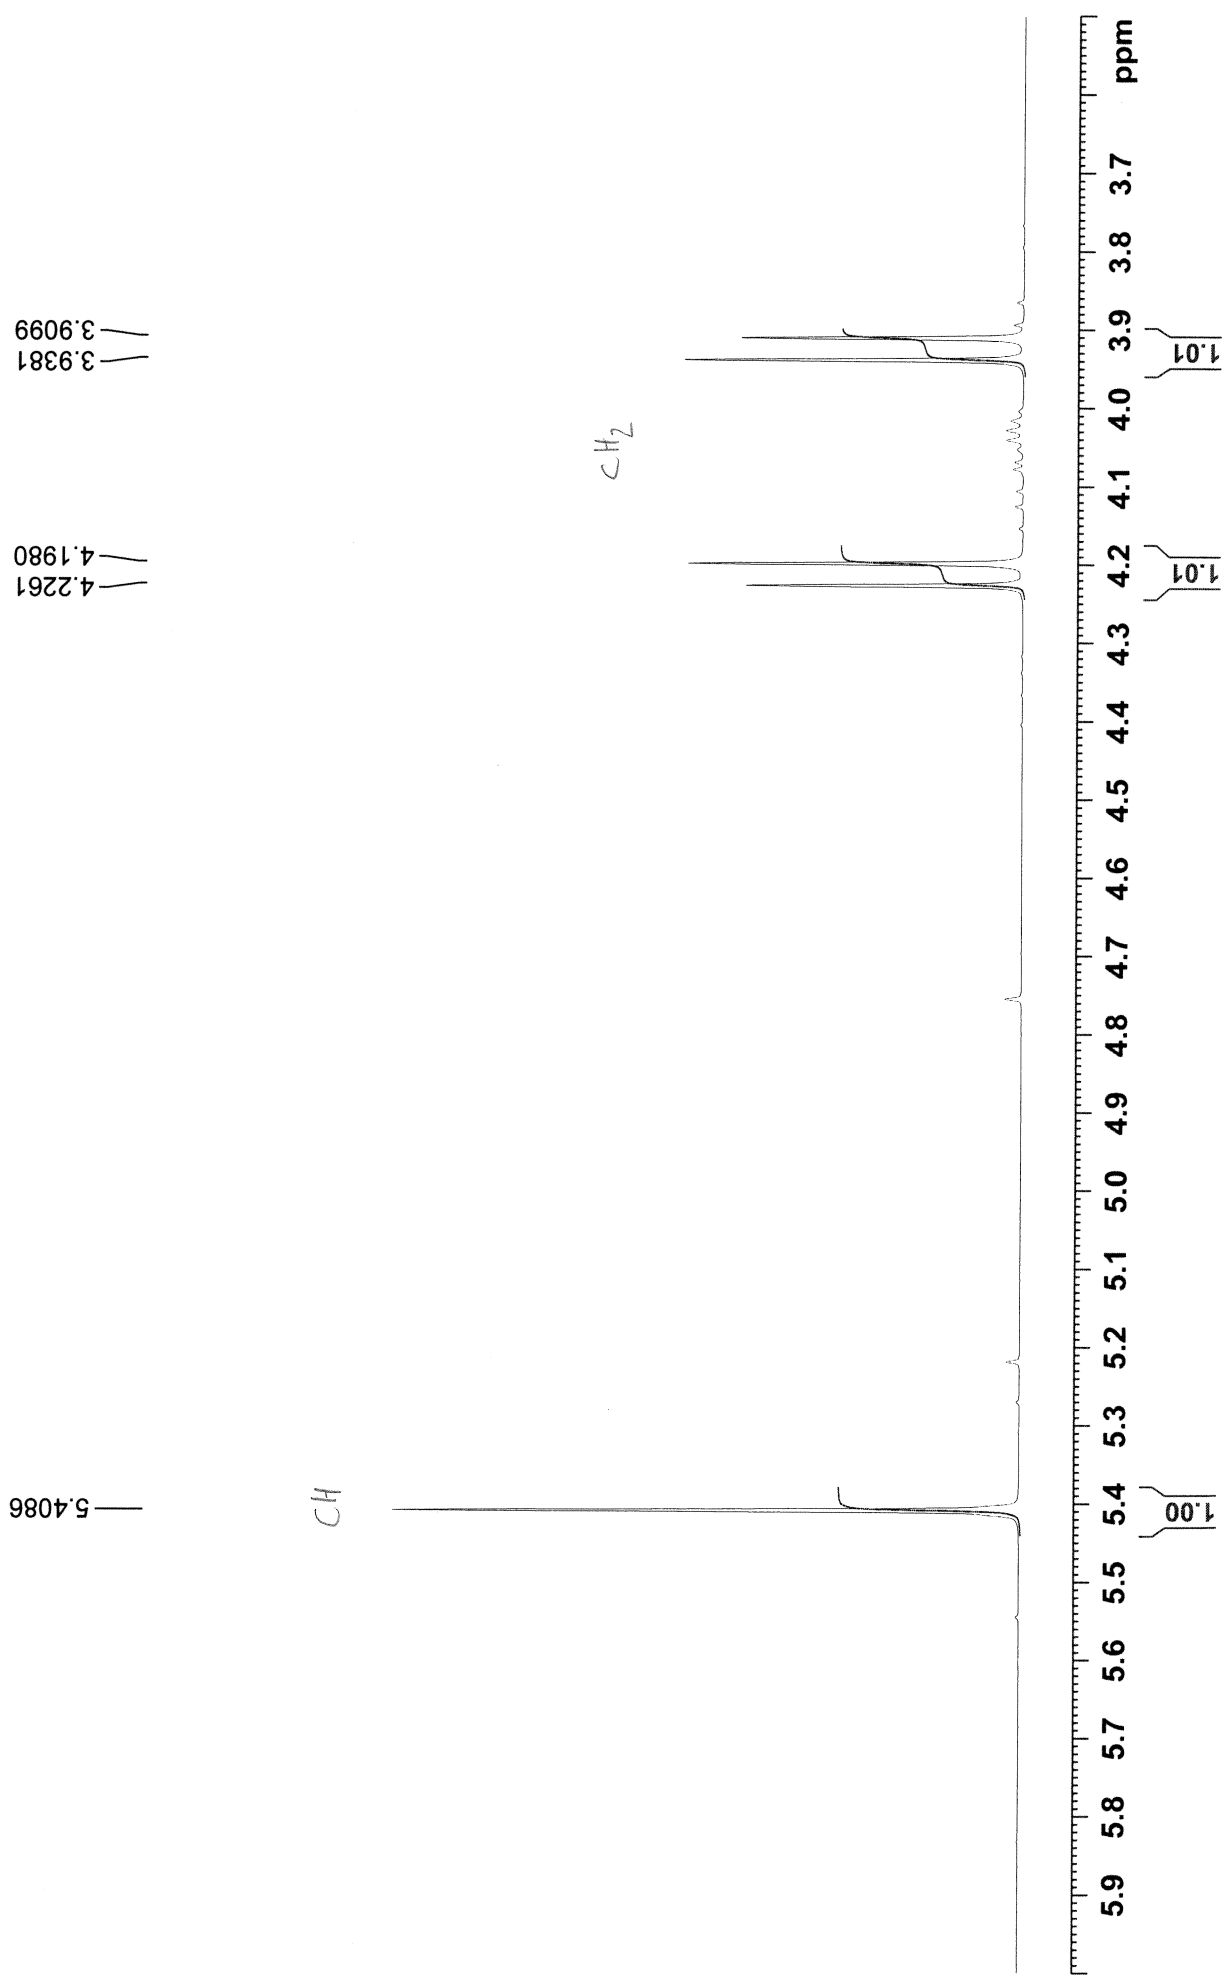

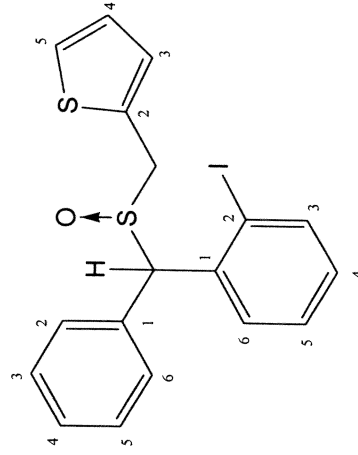

140.1566  
137.8941  
135.1239  
130.2616  
129.7723  
129.6694  
129.2302  
129.2024  
128.9364  
128.8216  
128.4997  
127.4343  
126.9601  
103.0140

77.0000  
71.8314

50.2689

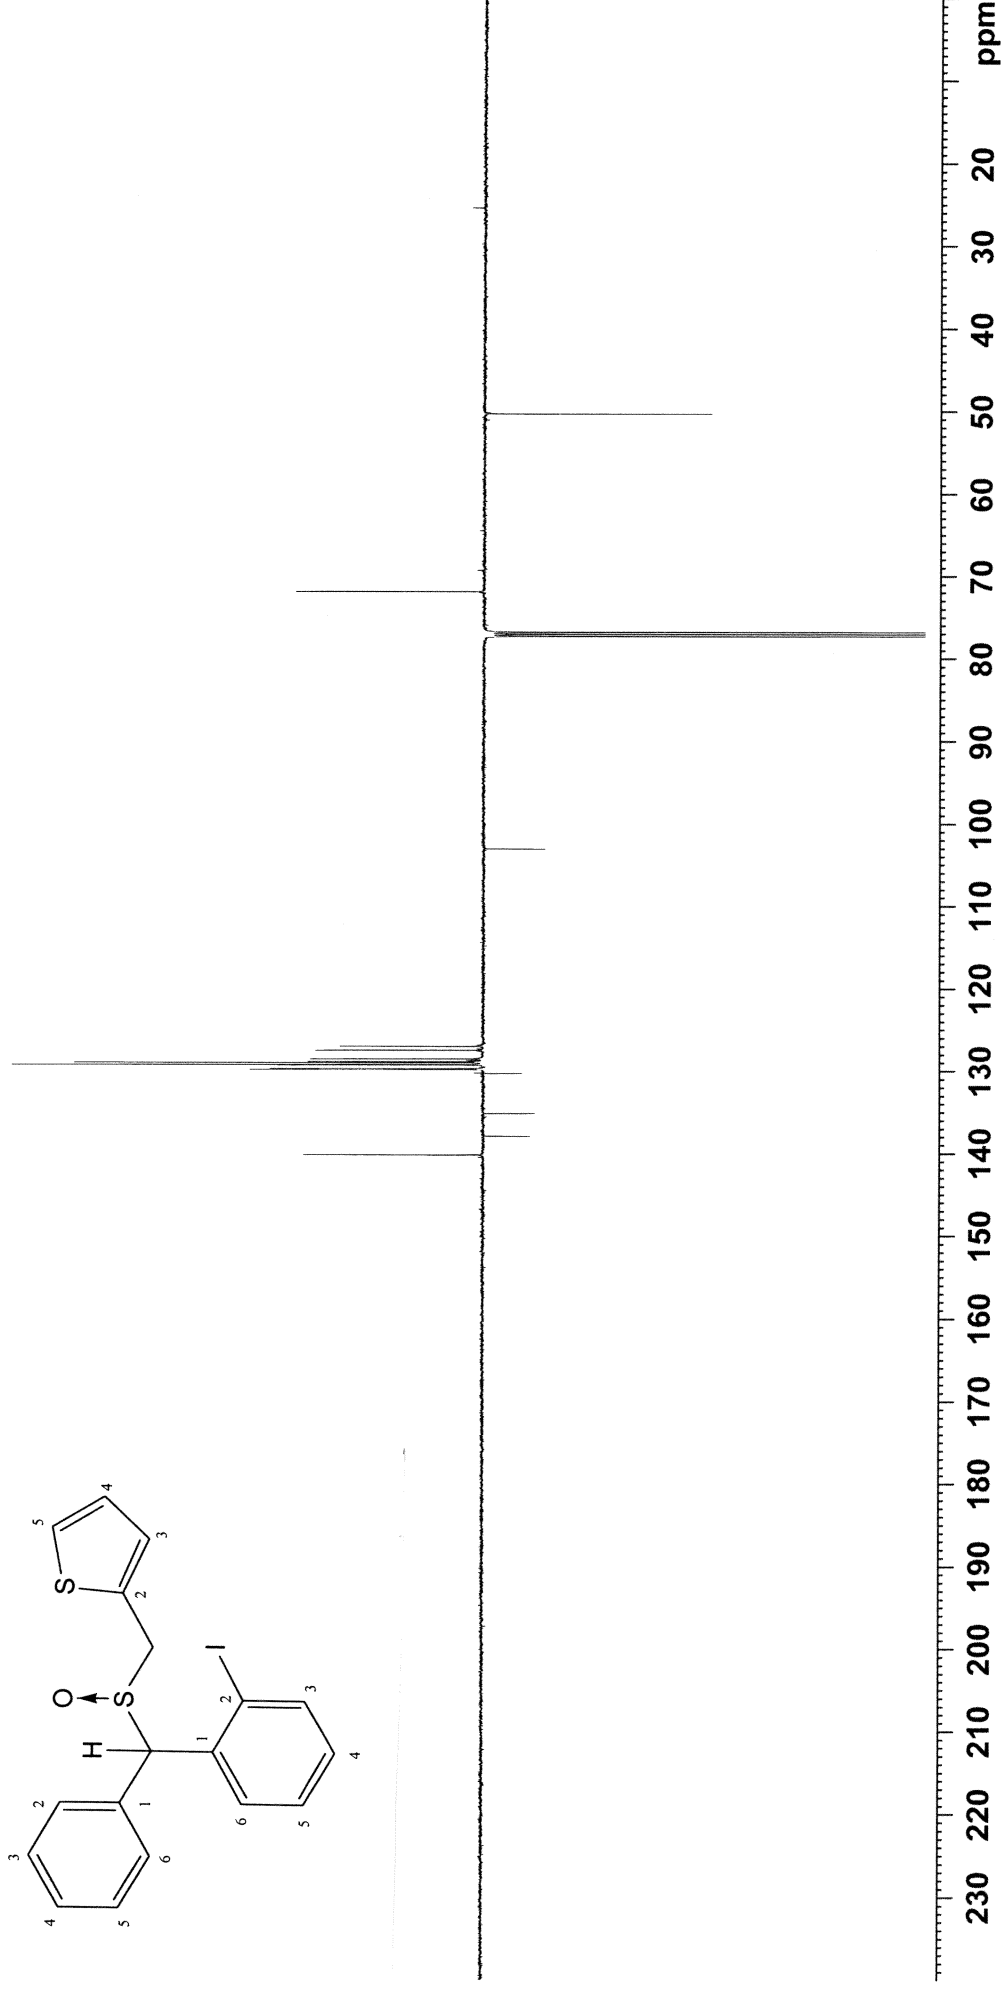

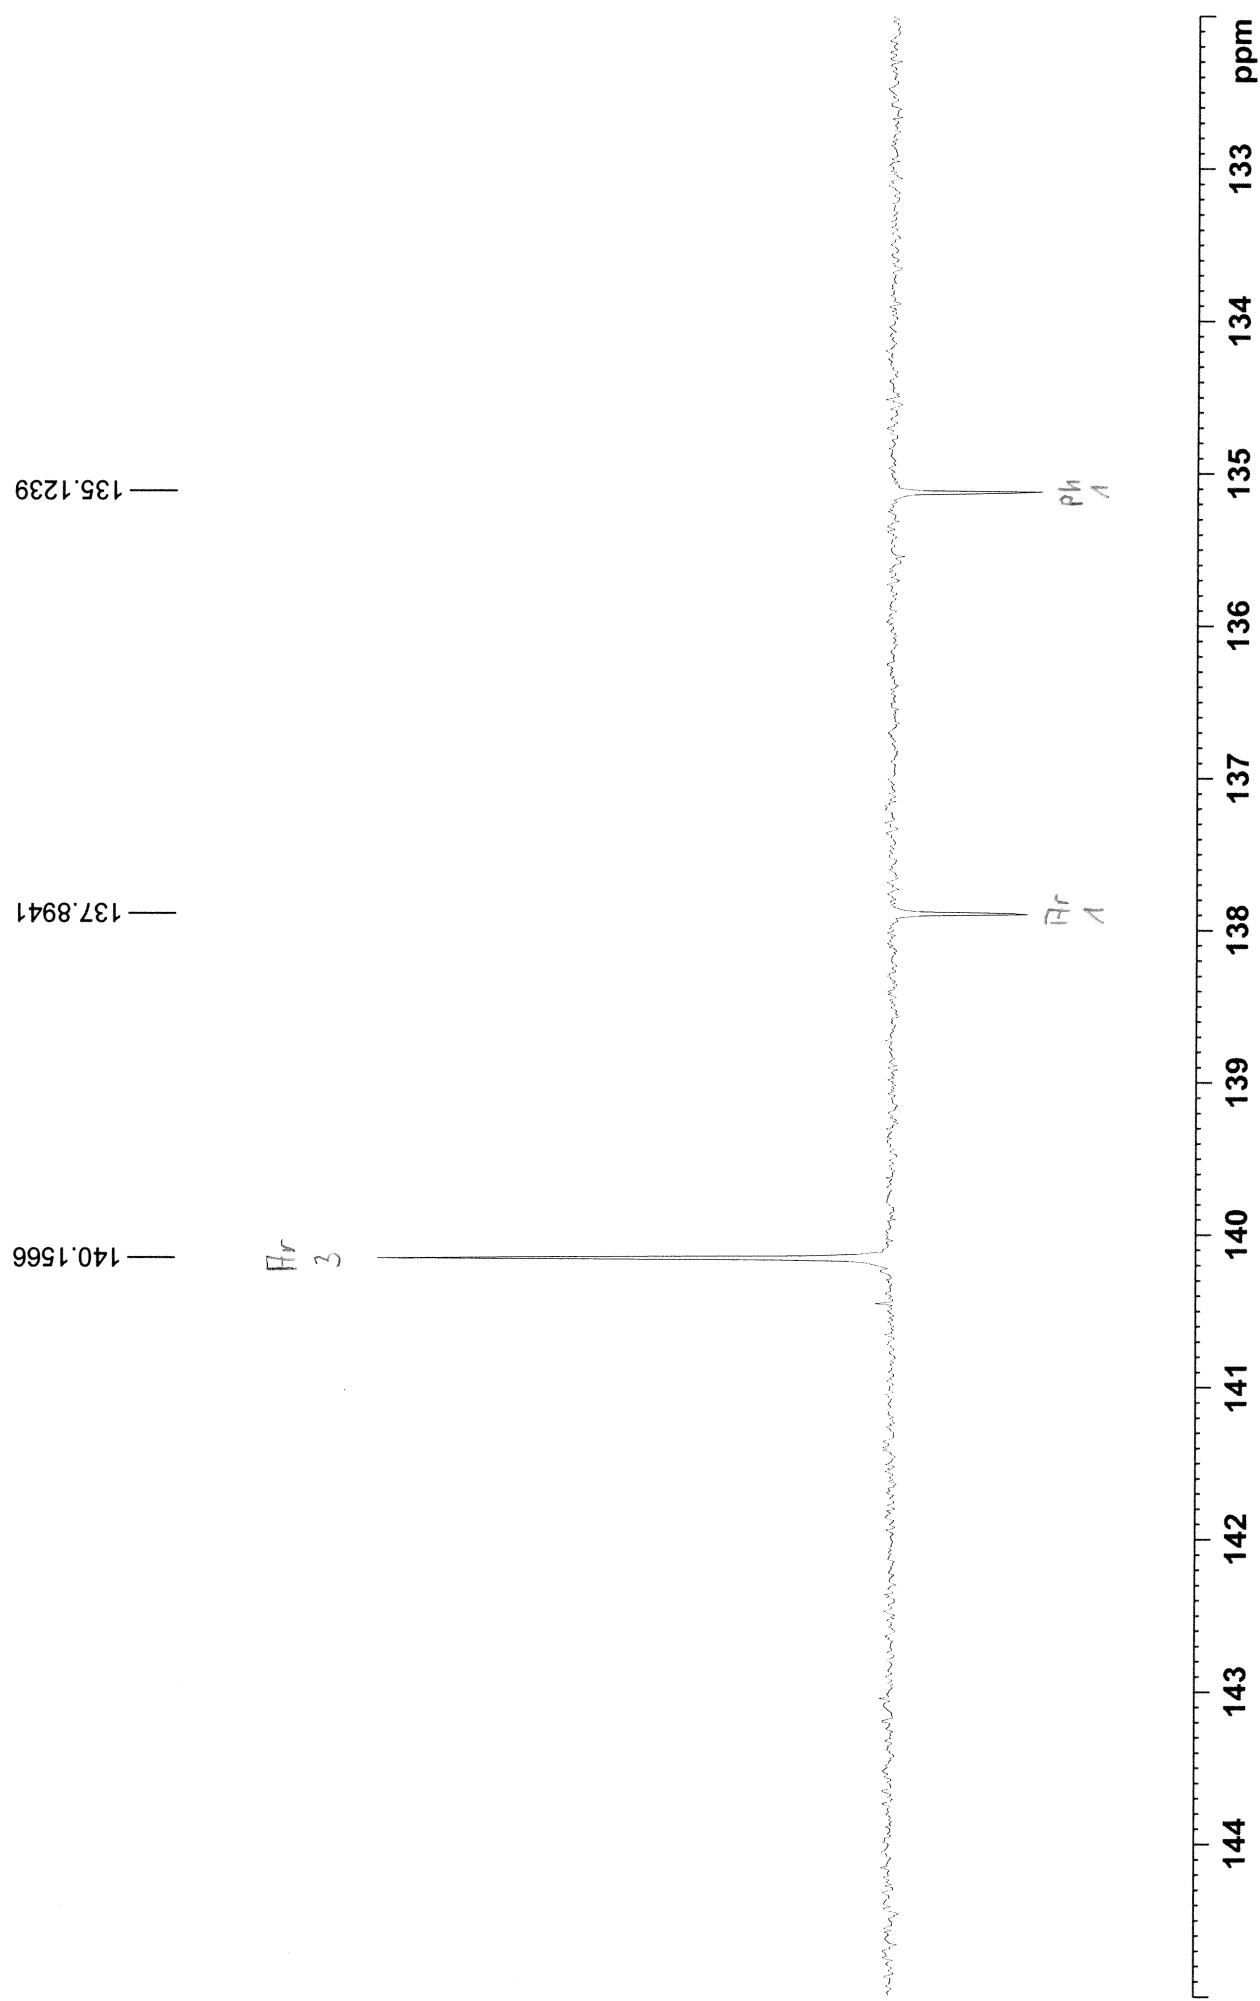

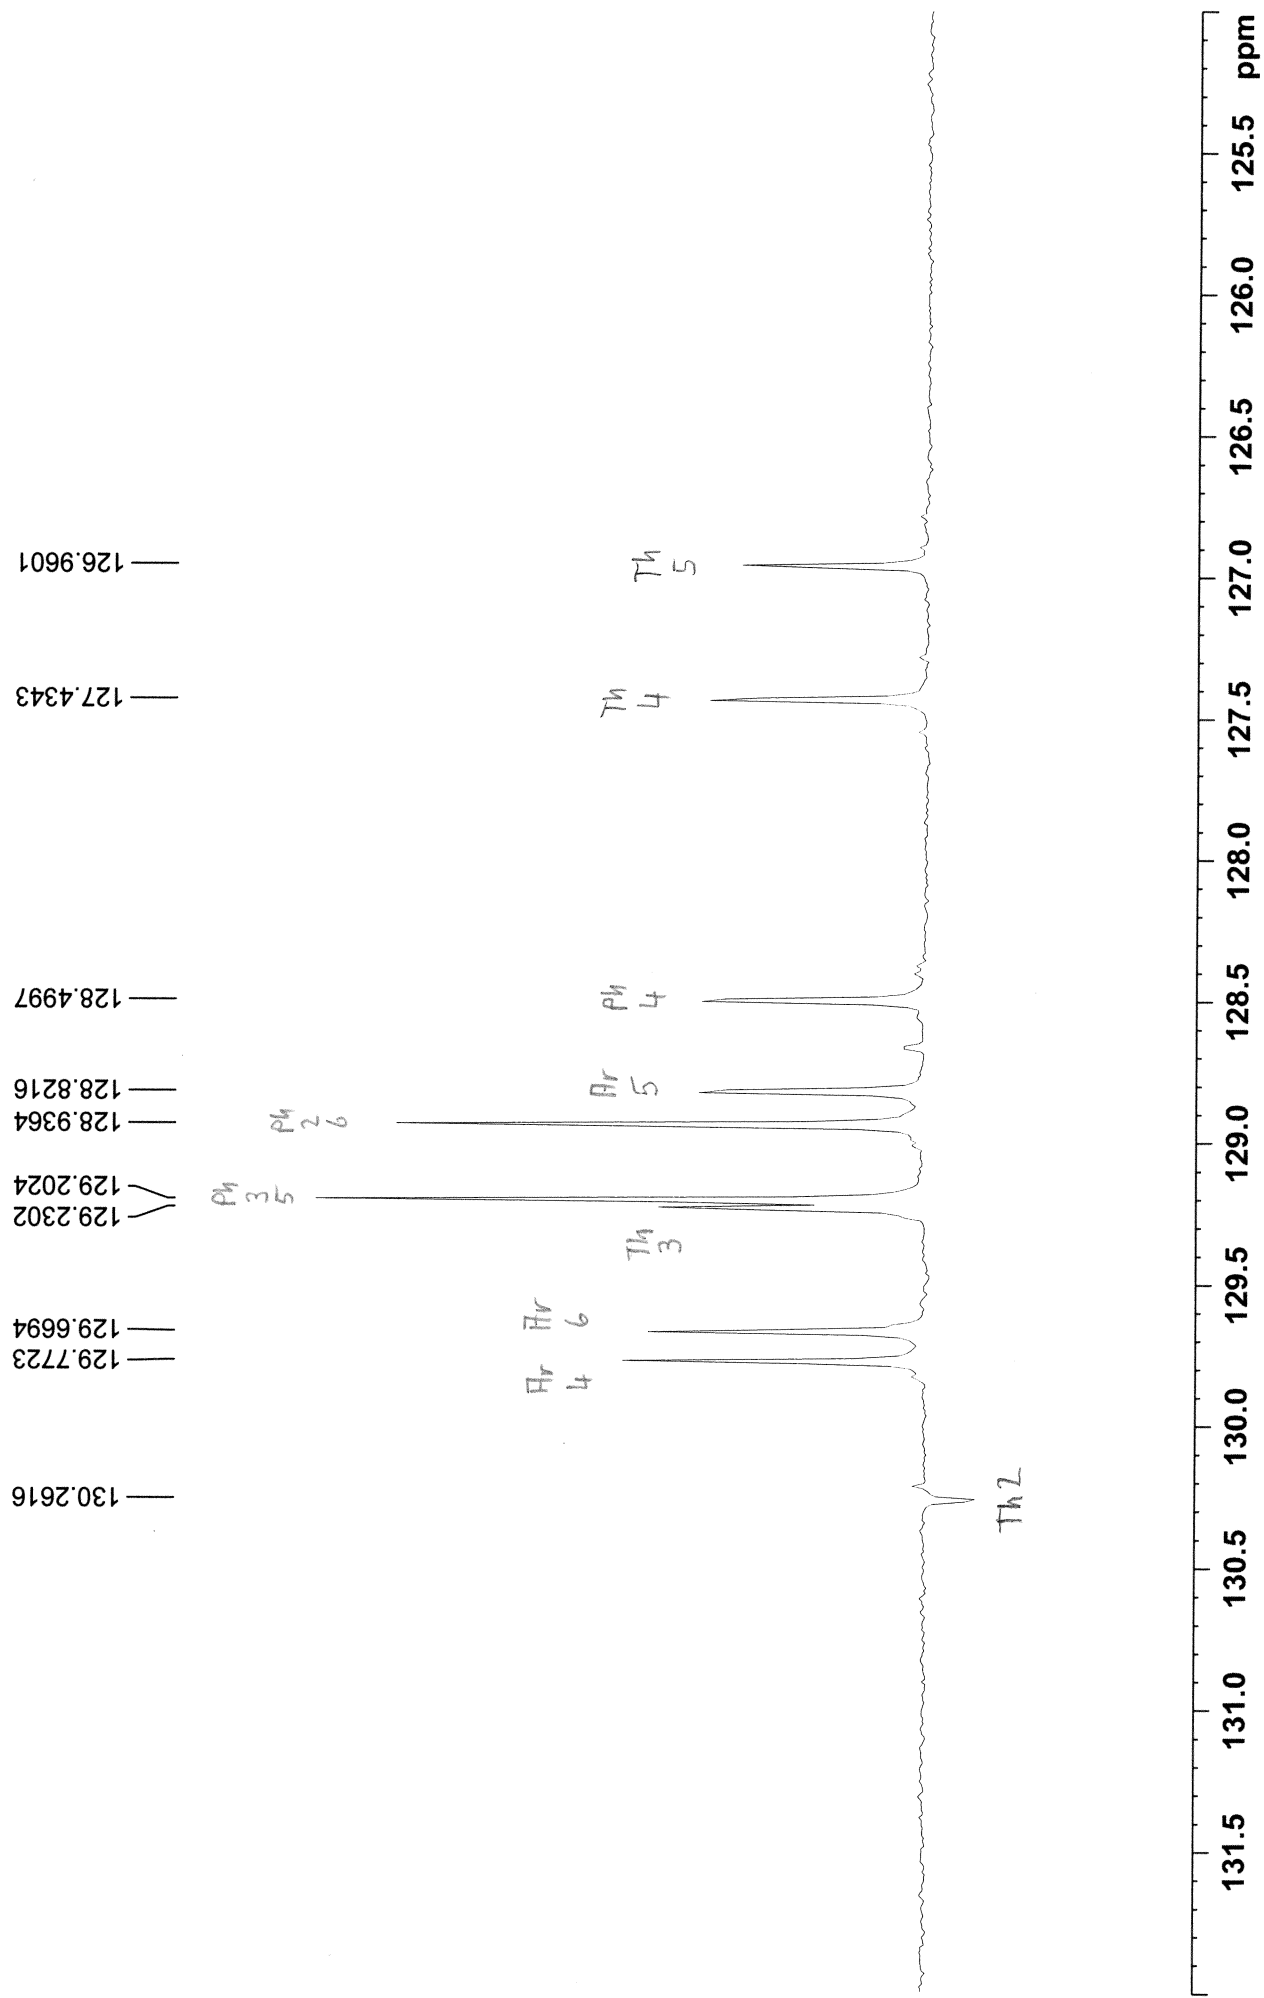

MK031B\_P3 in cdcl3 (APT) 20.5.2021

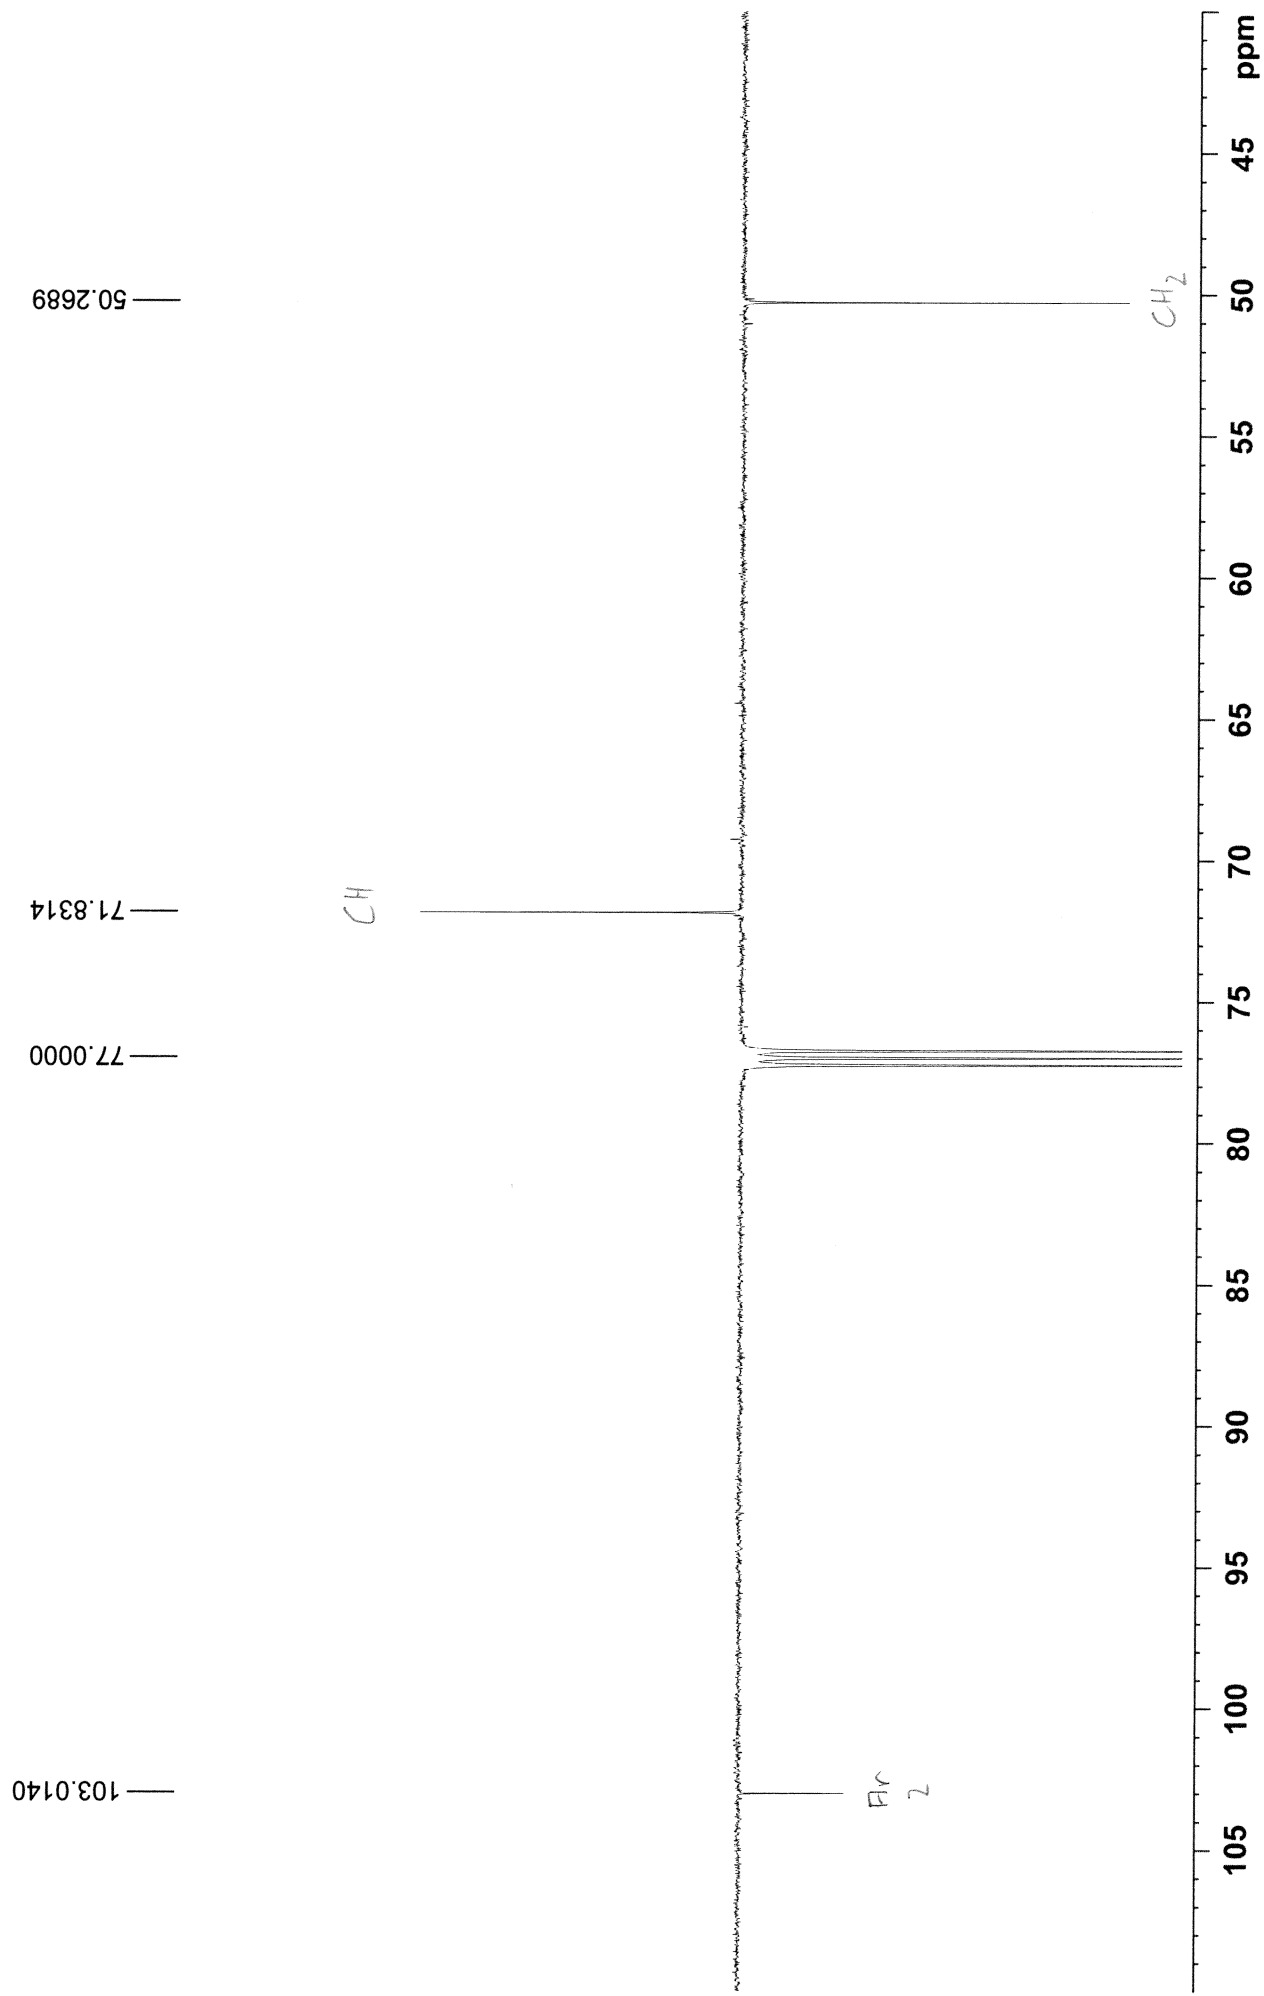

MK031B\_P3 in cdcl3 (COSY) 20.5.2021

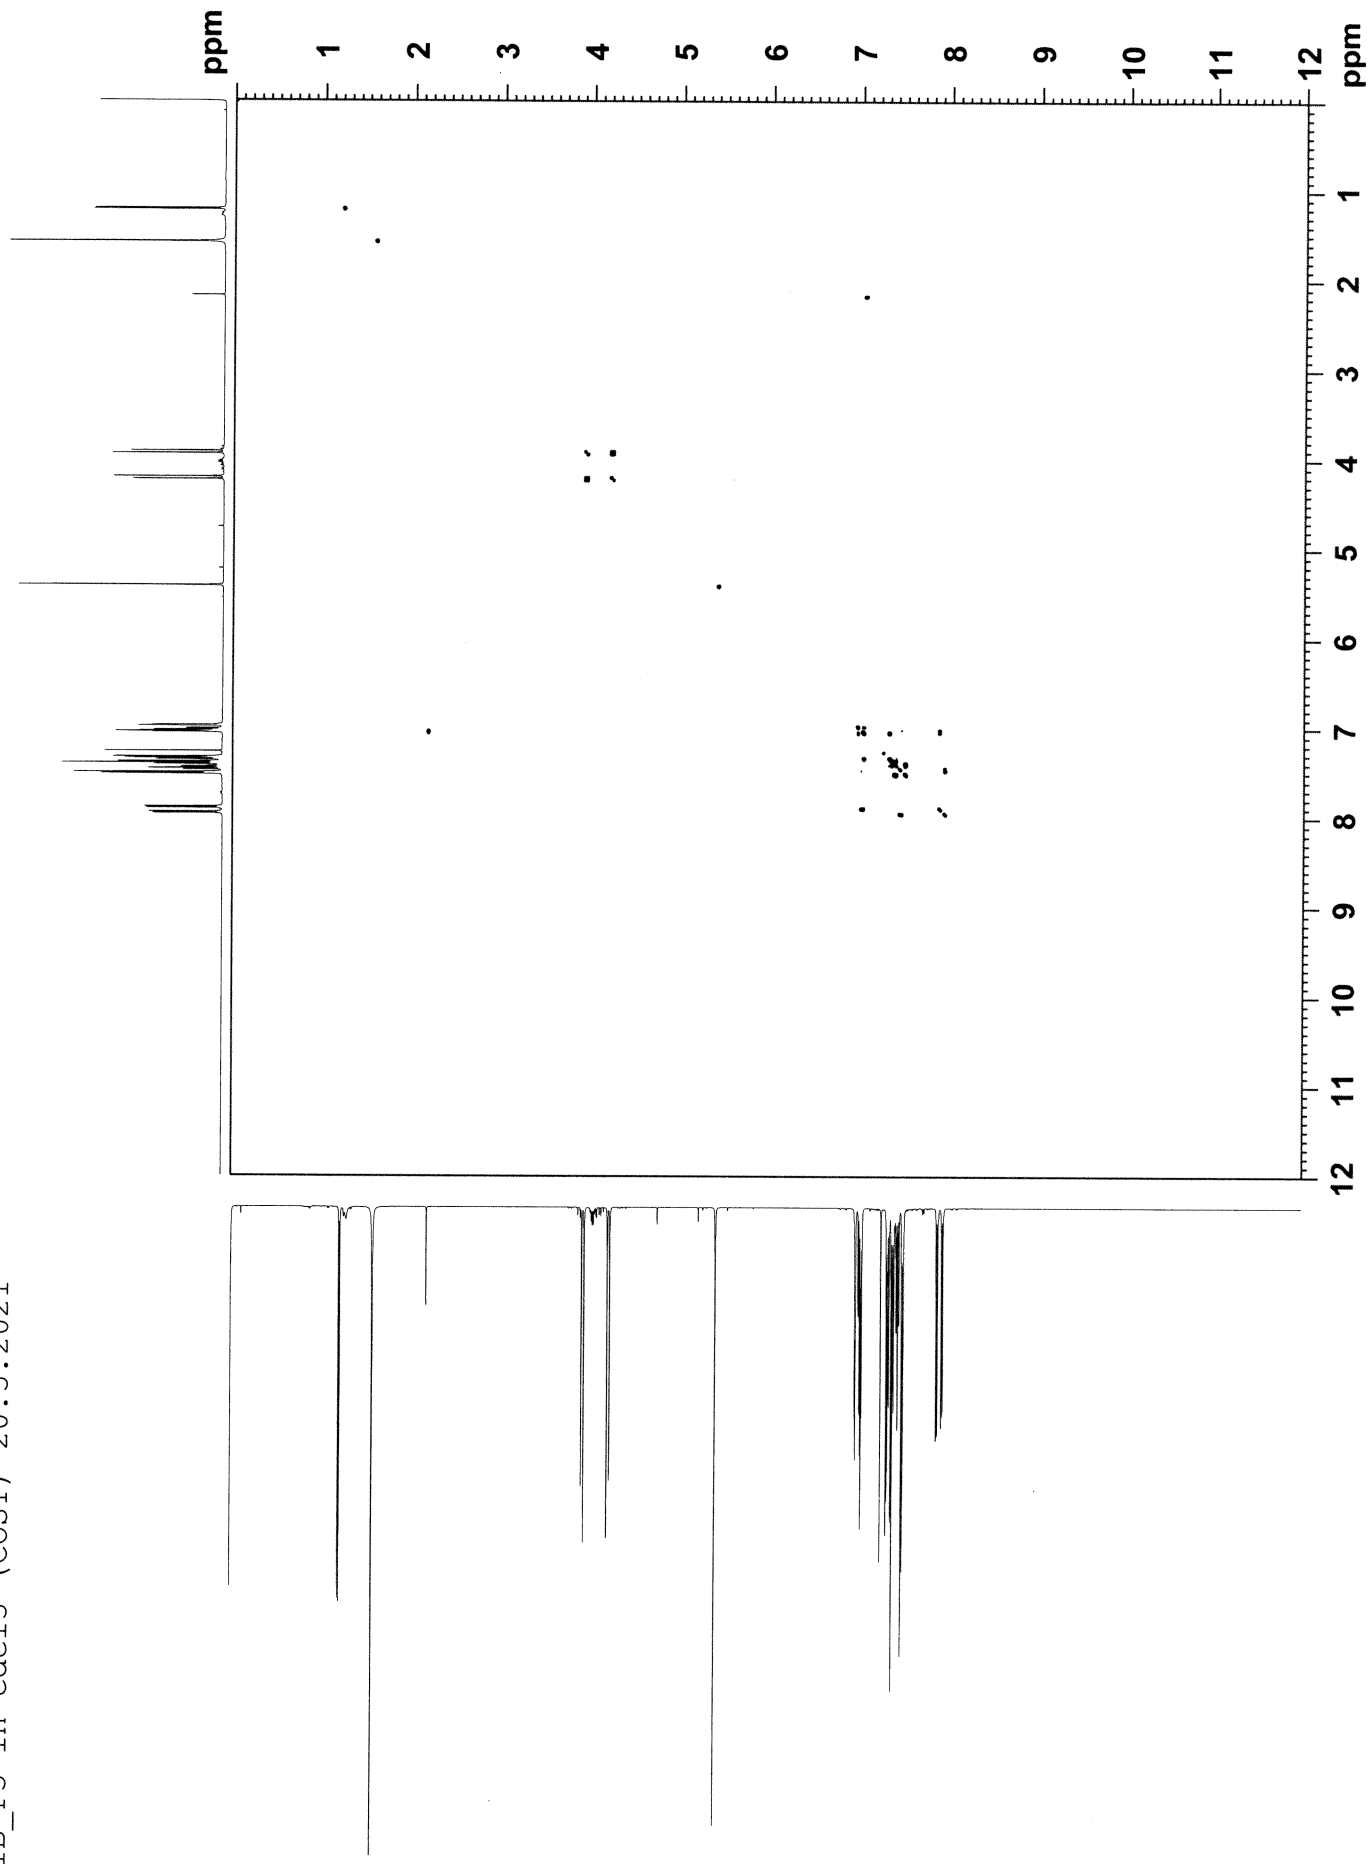

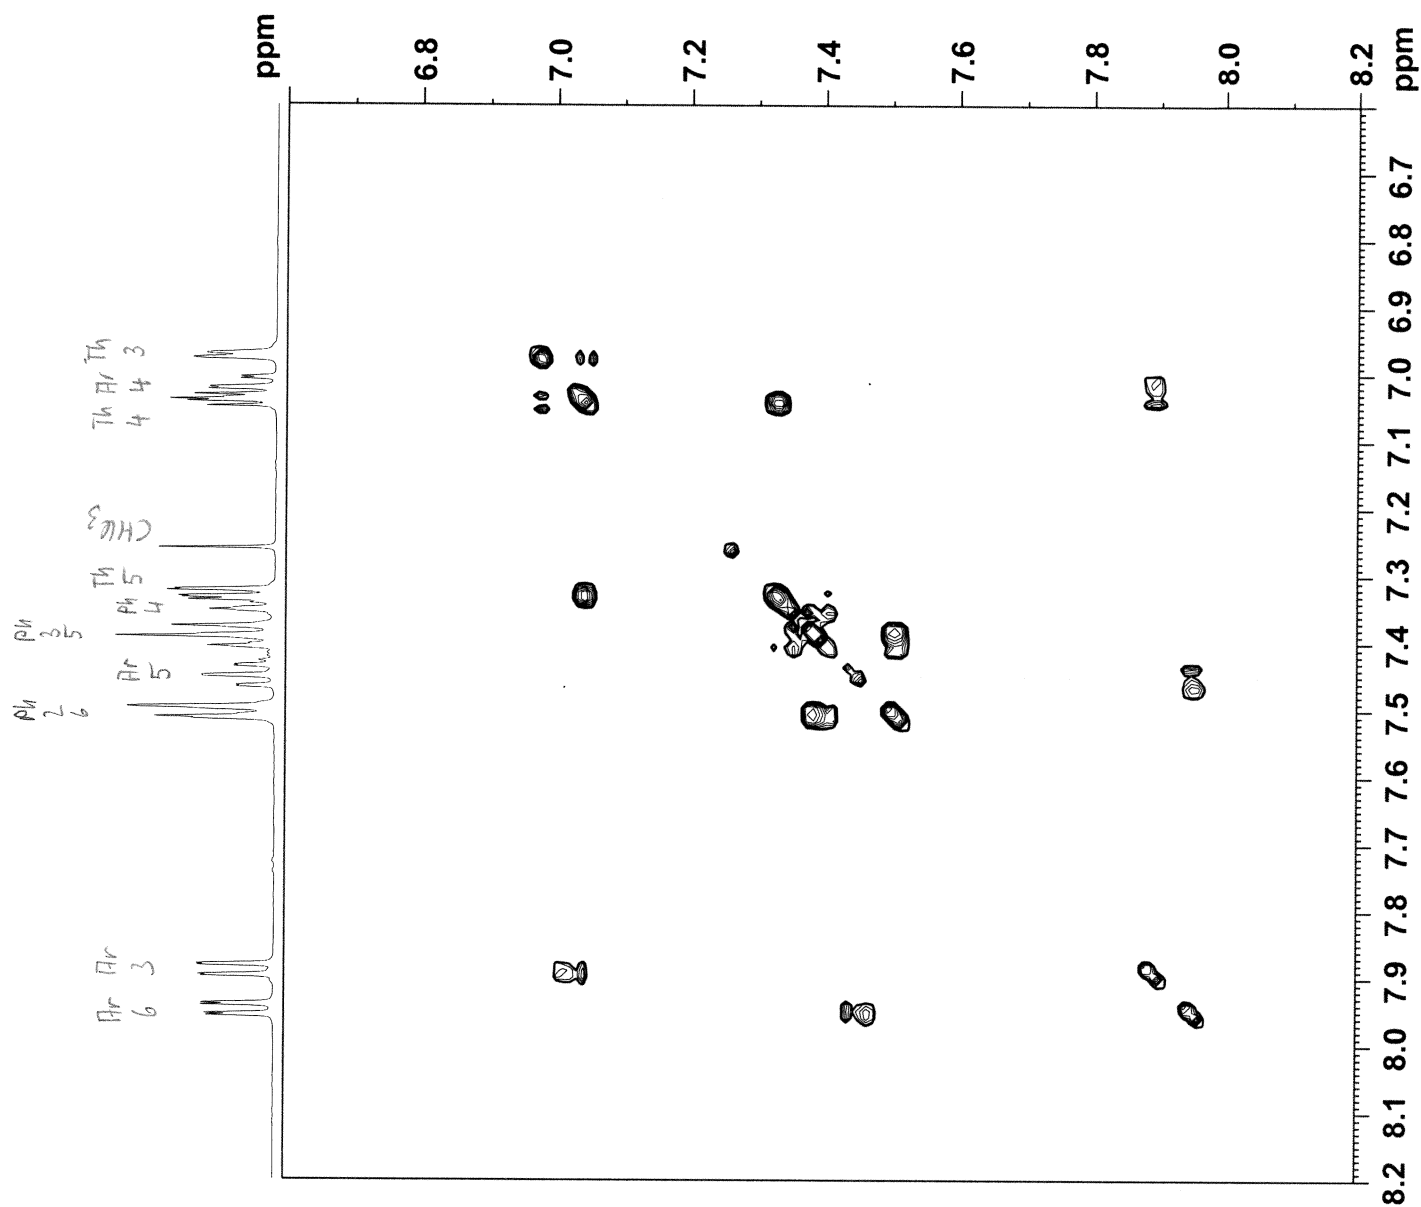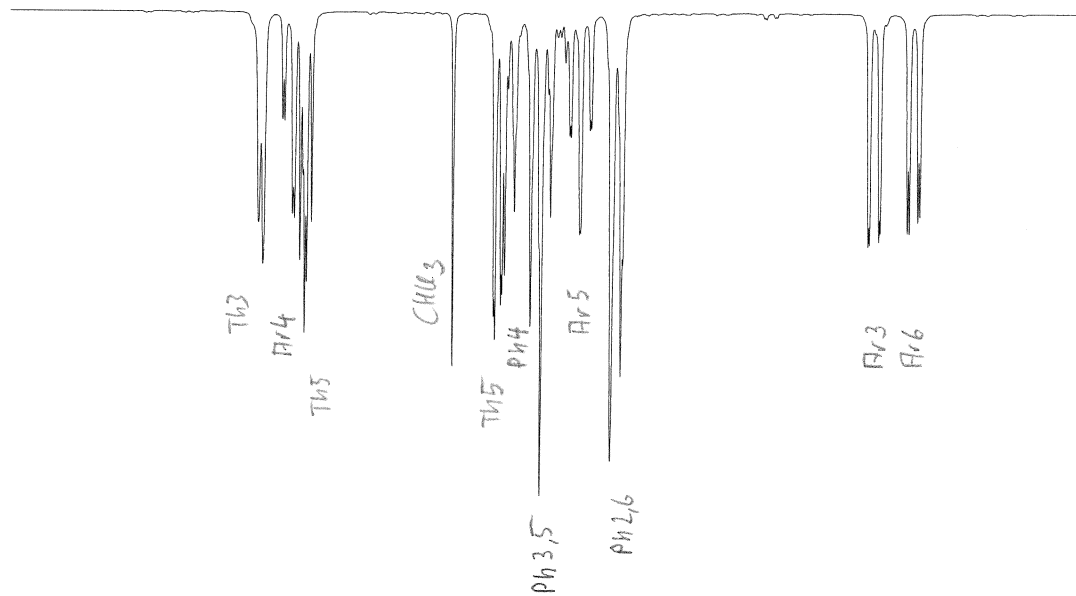

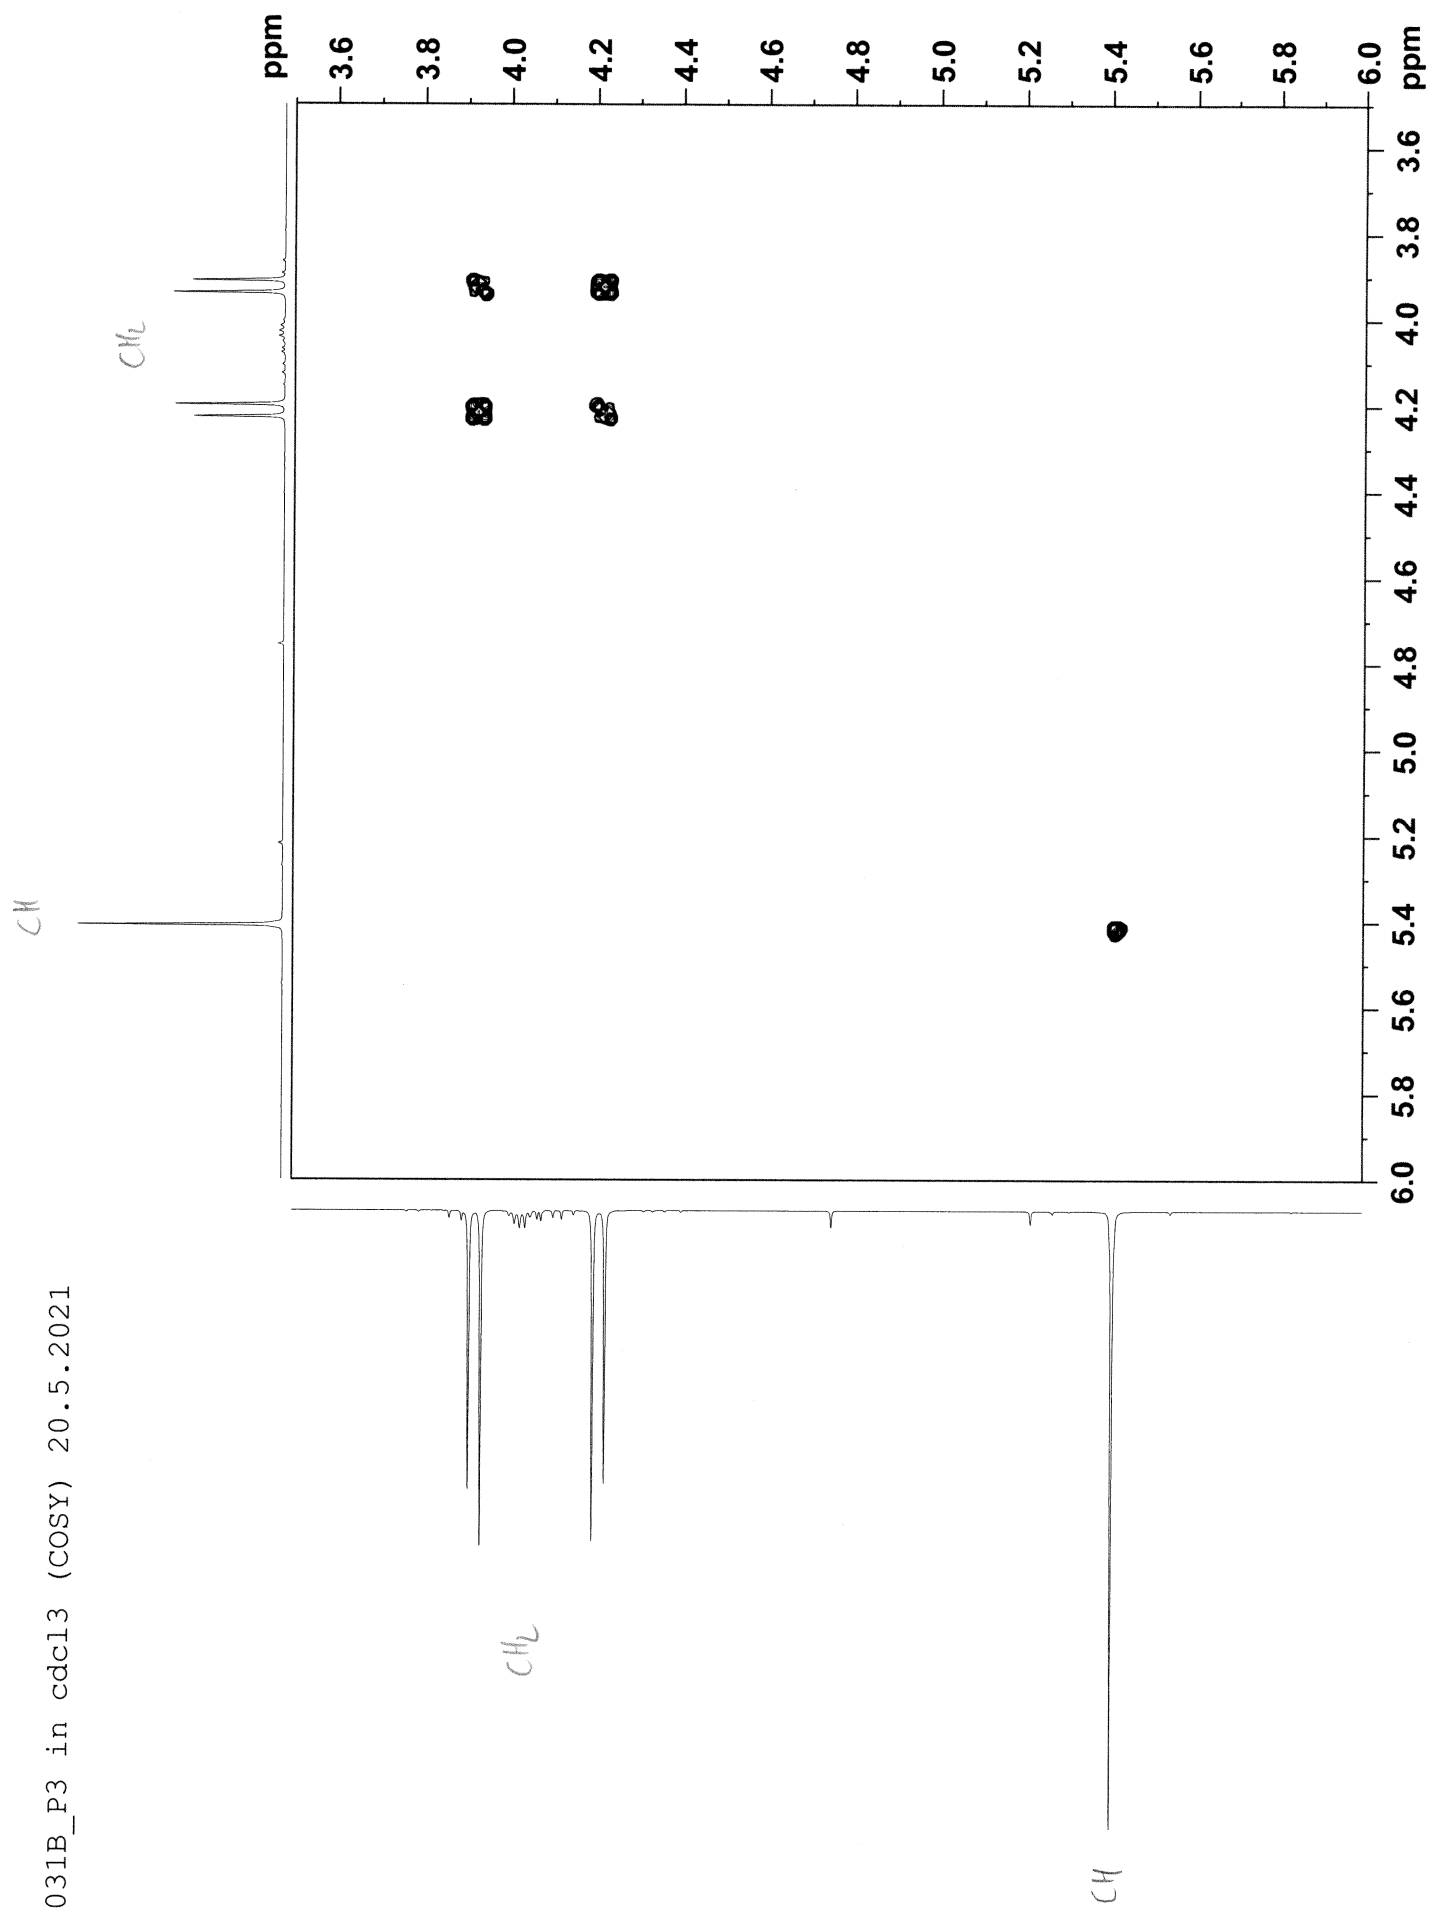



MK031B\_P3 in cdcl3 (HSQC) 20.5.2021

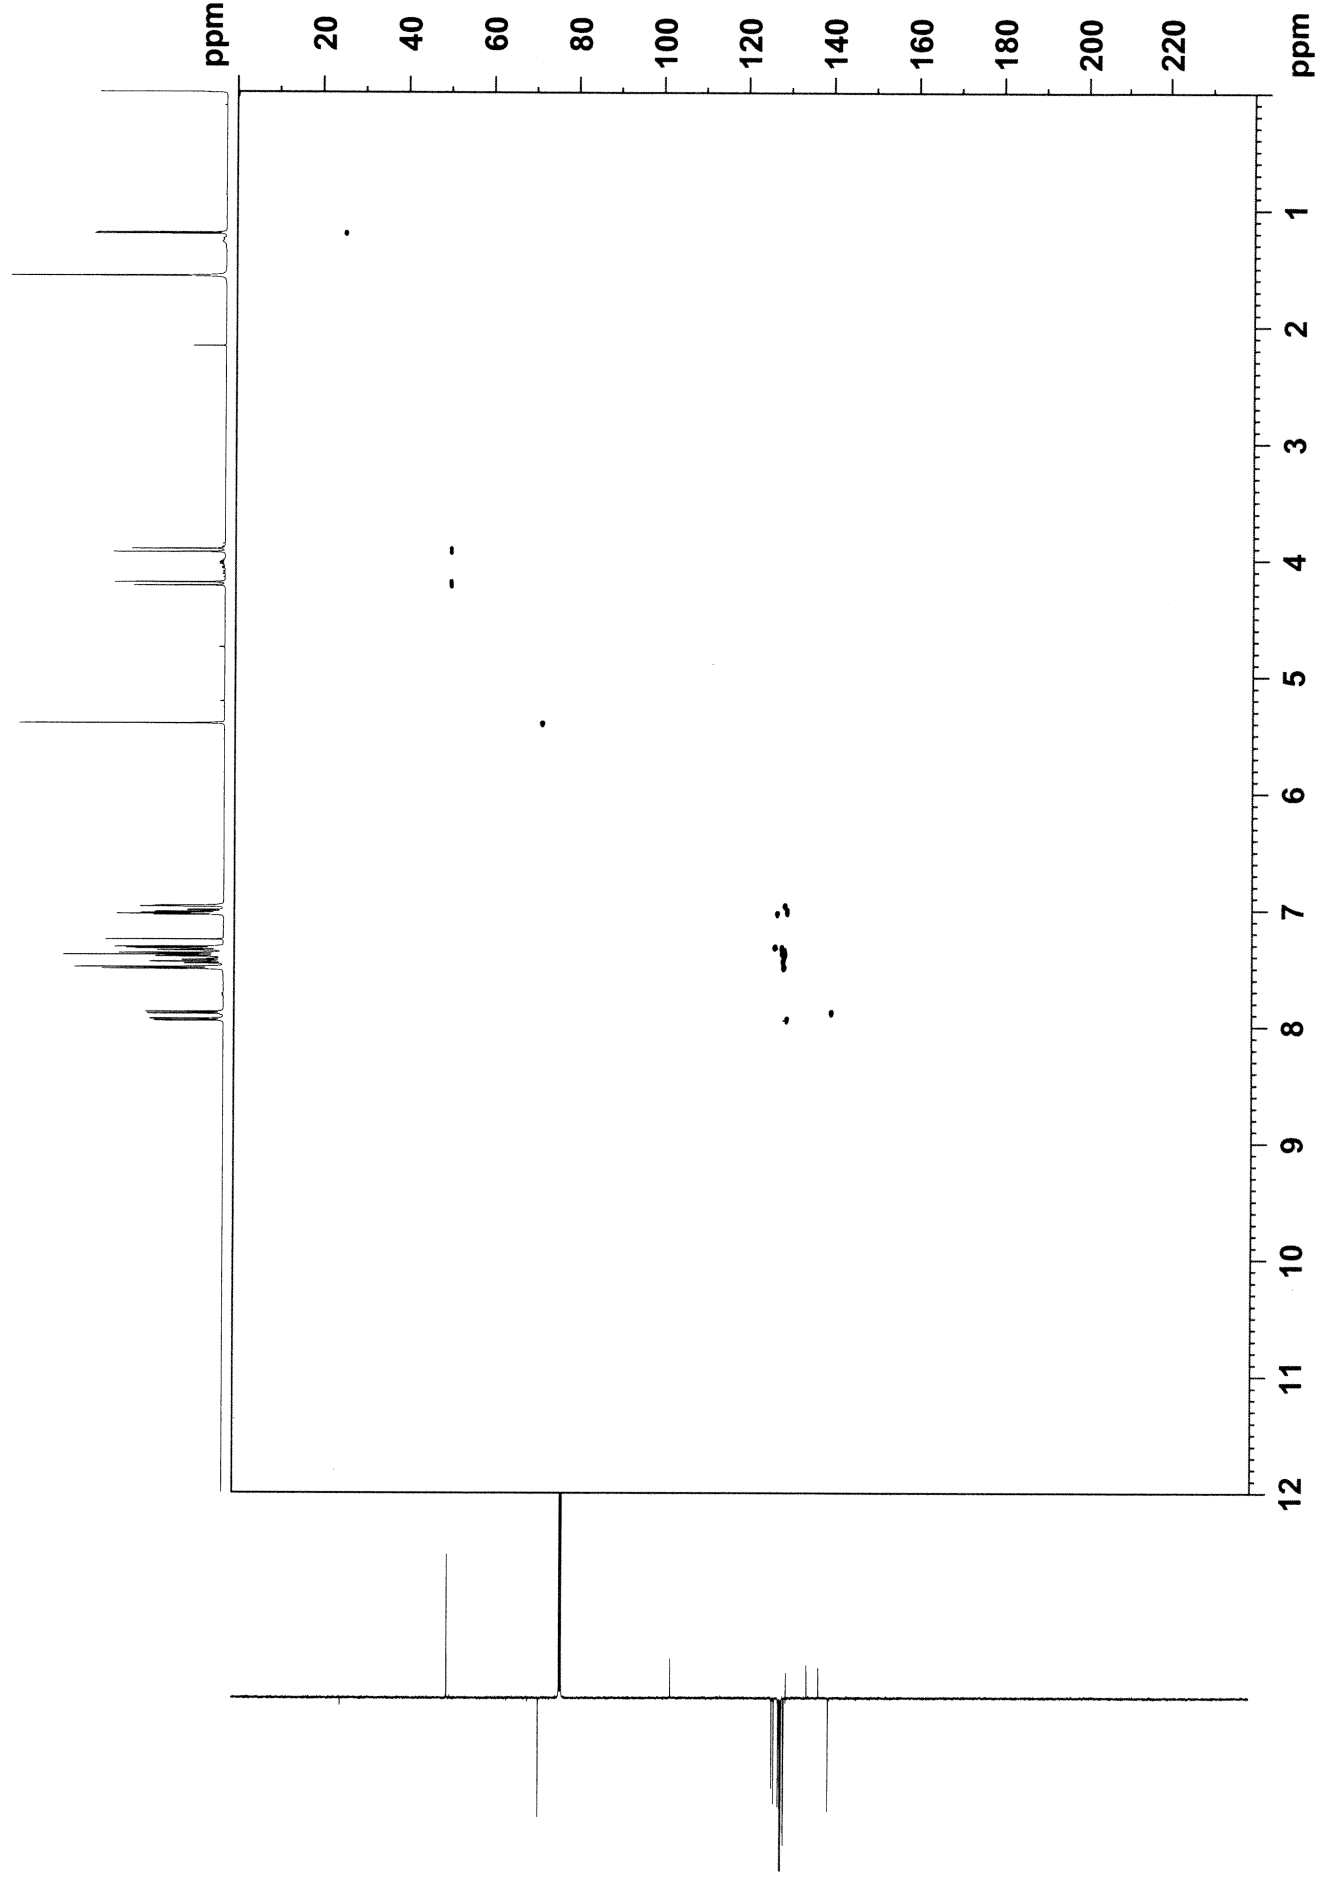

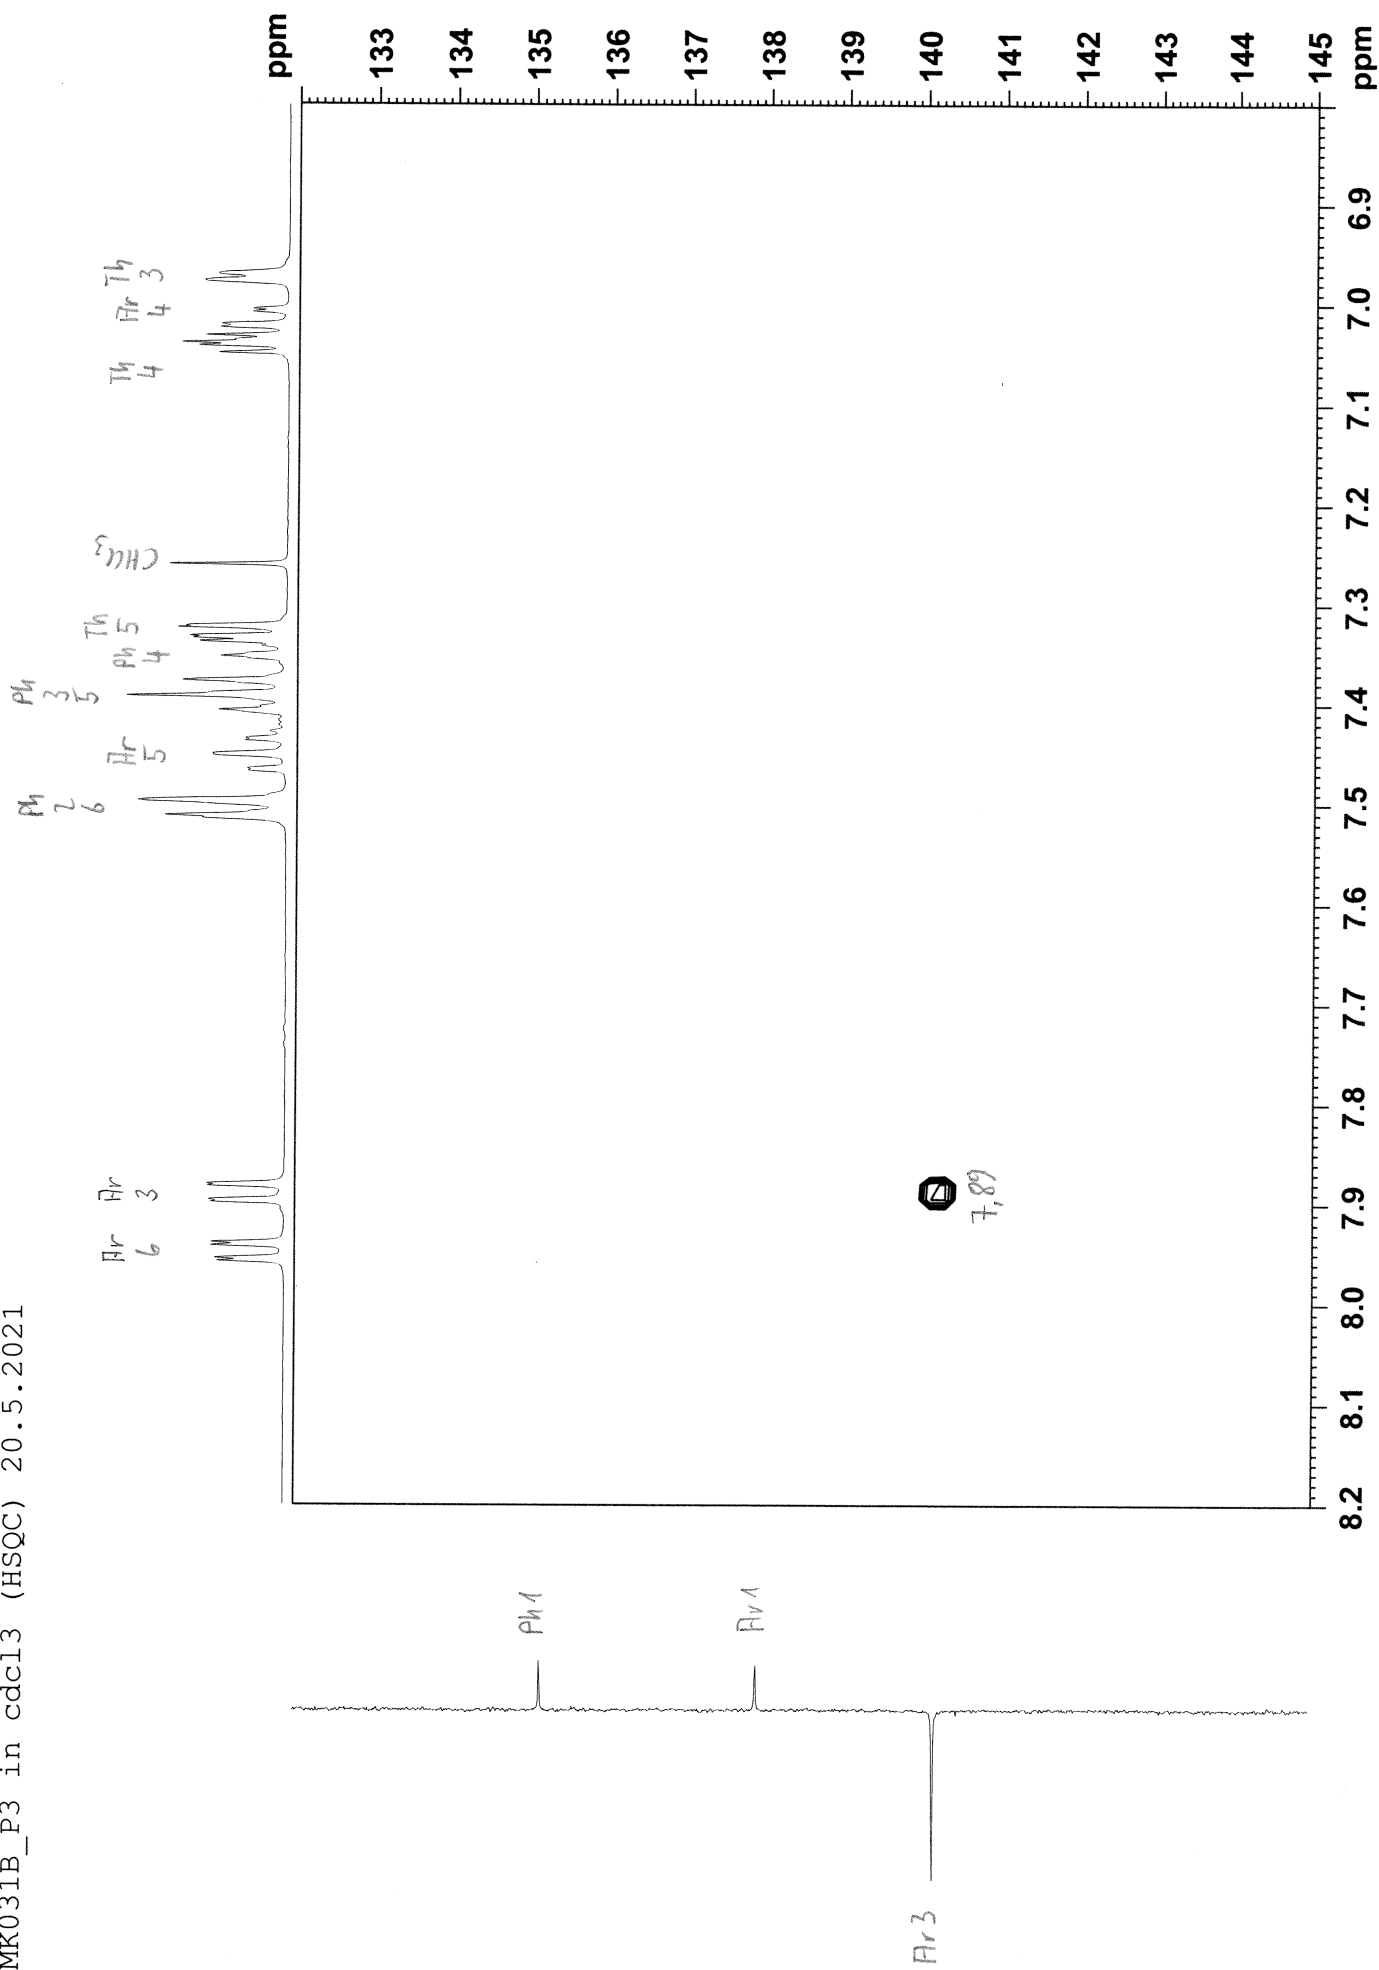

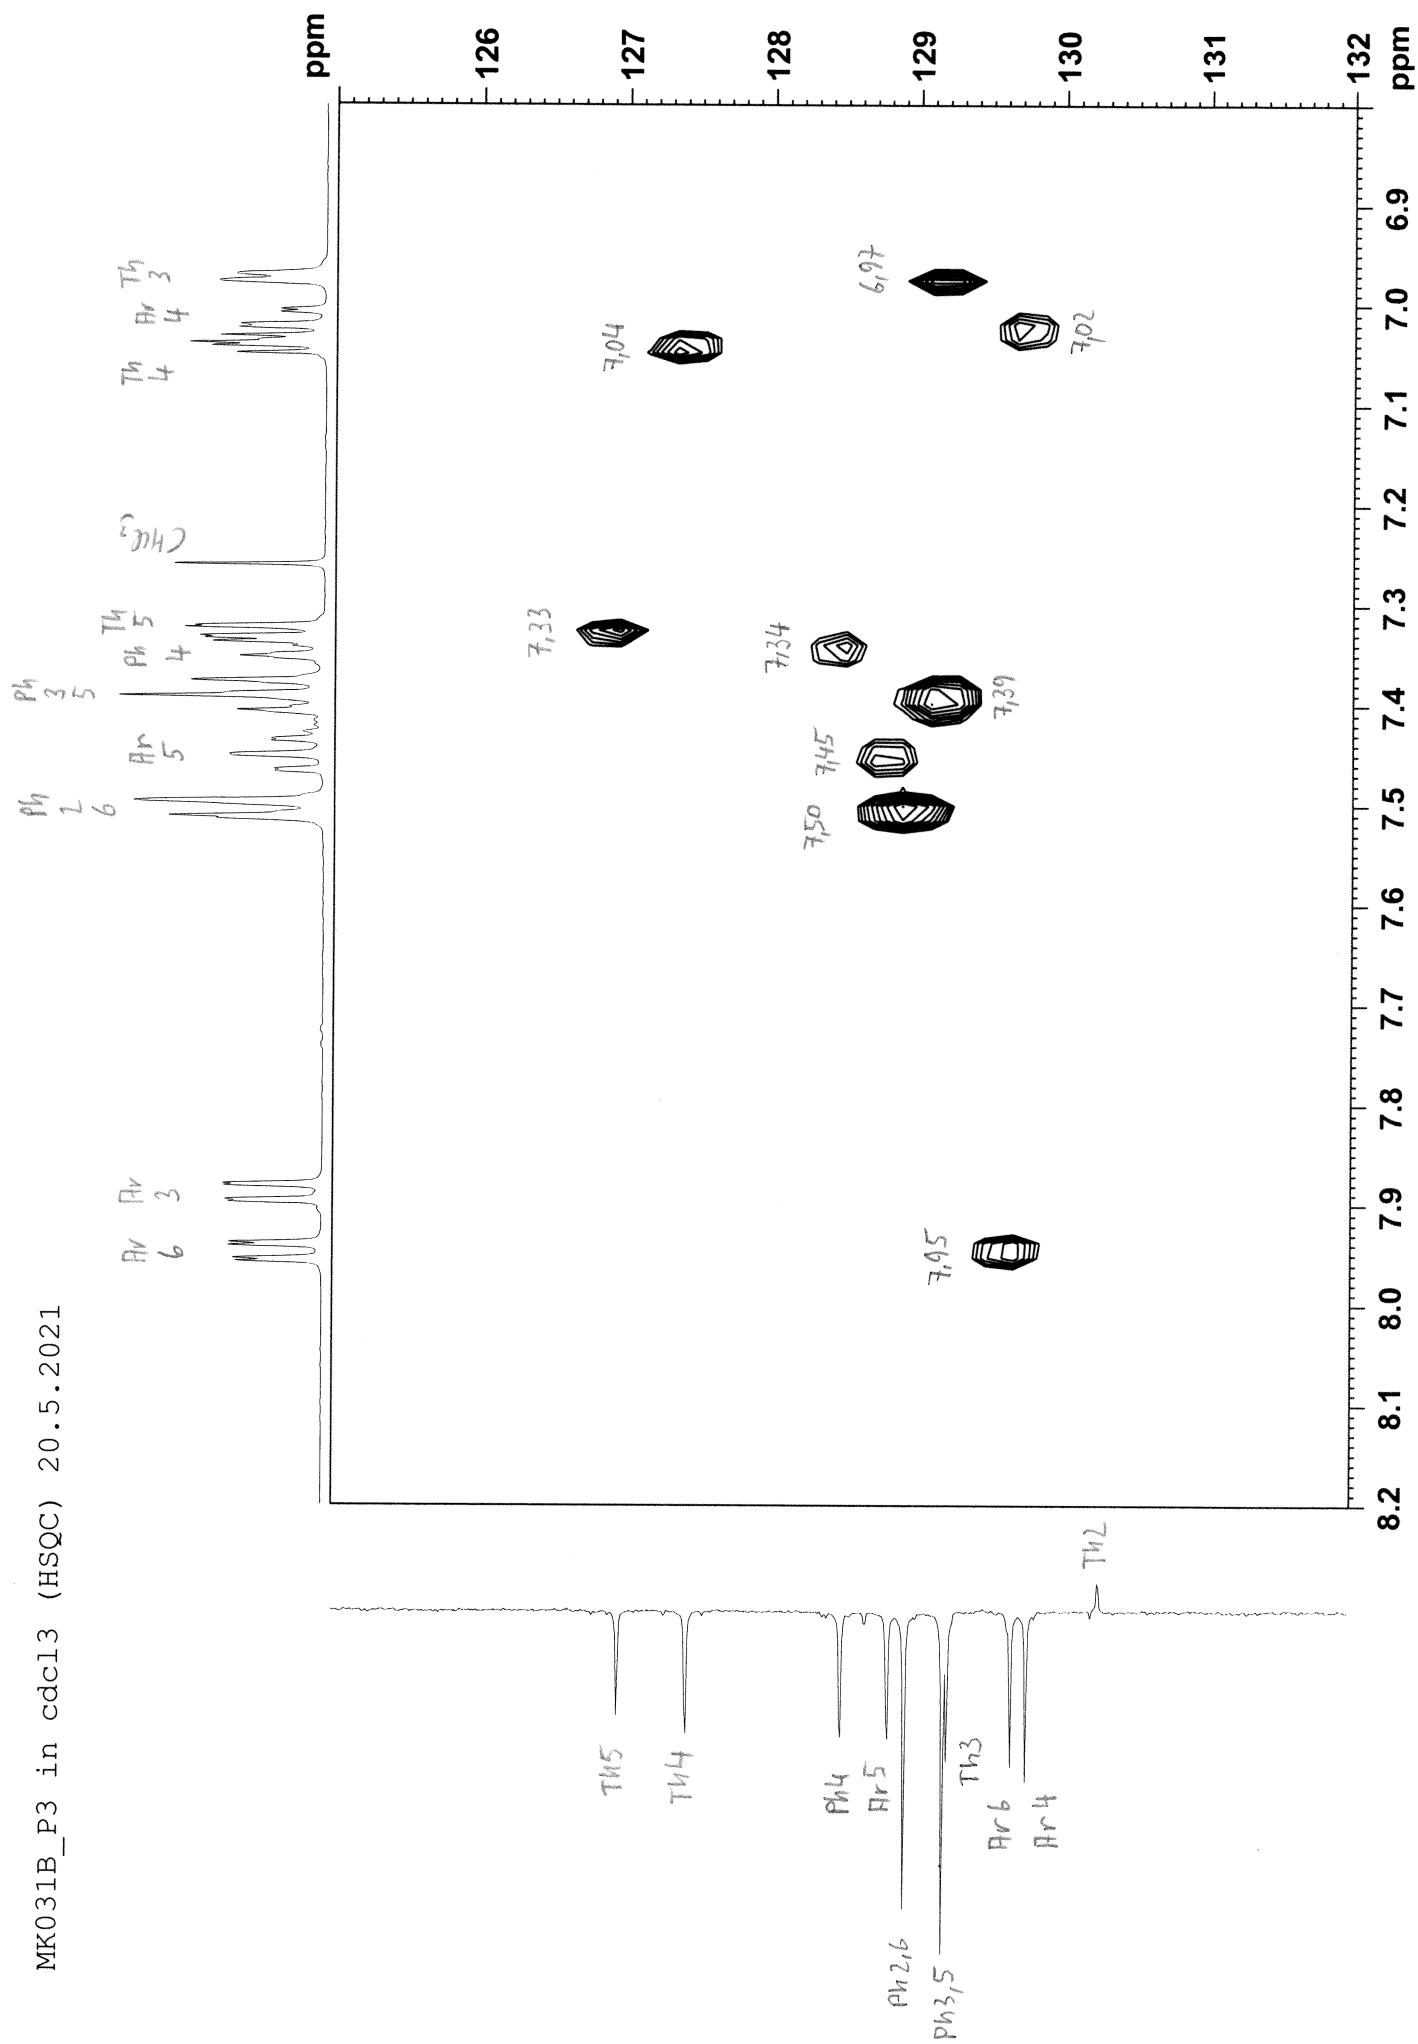

CH

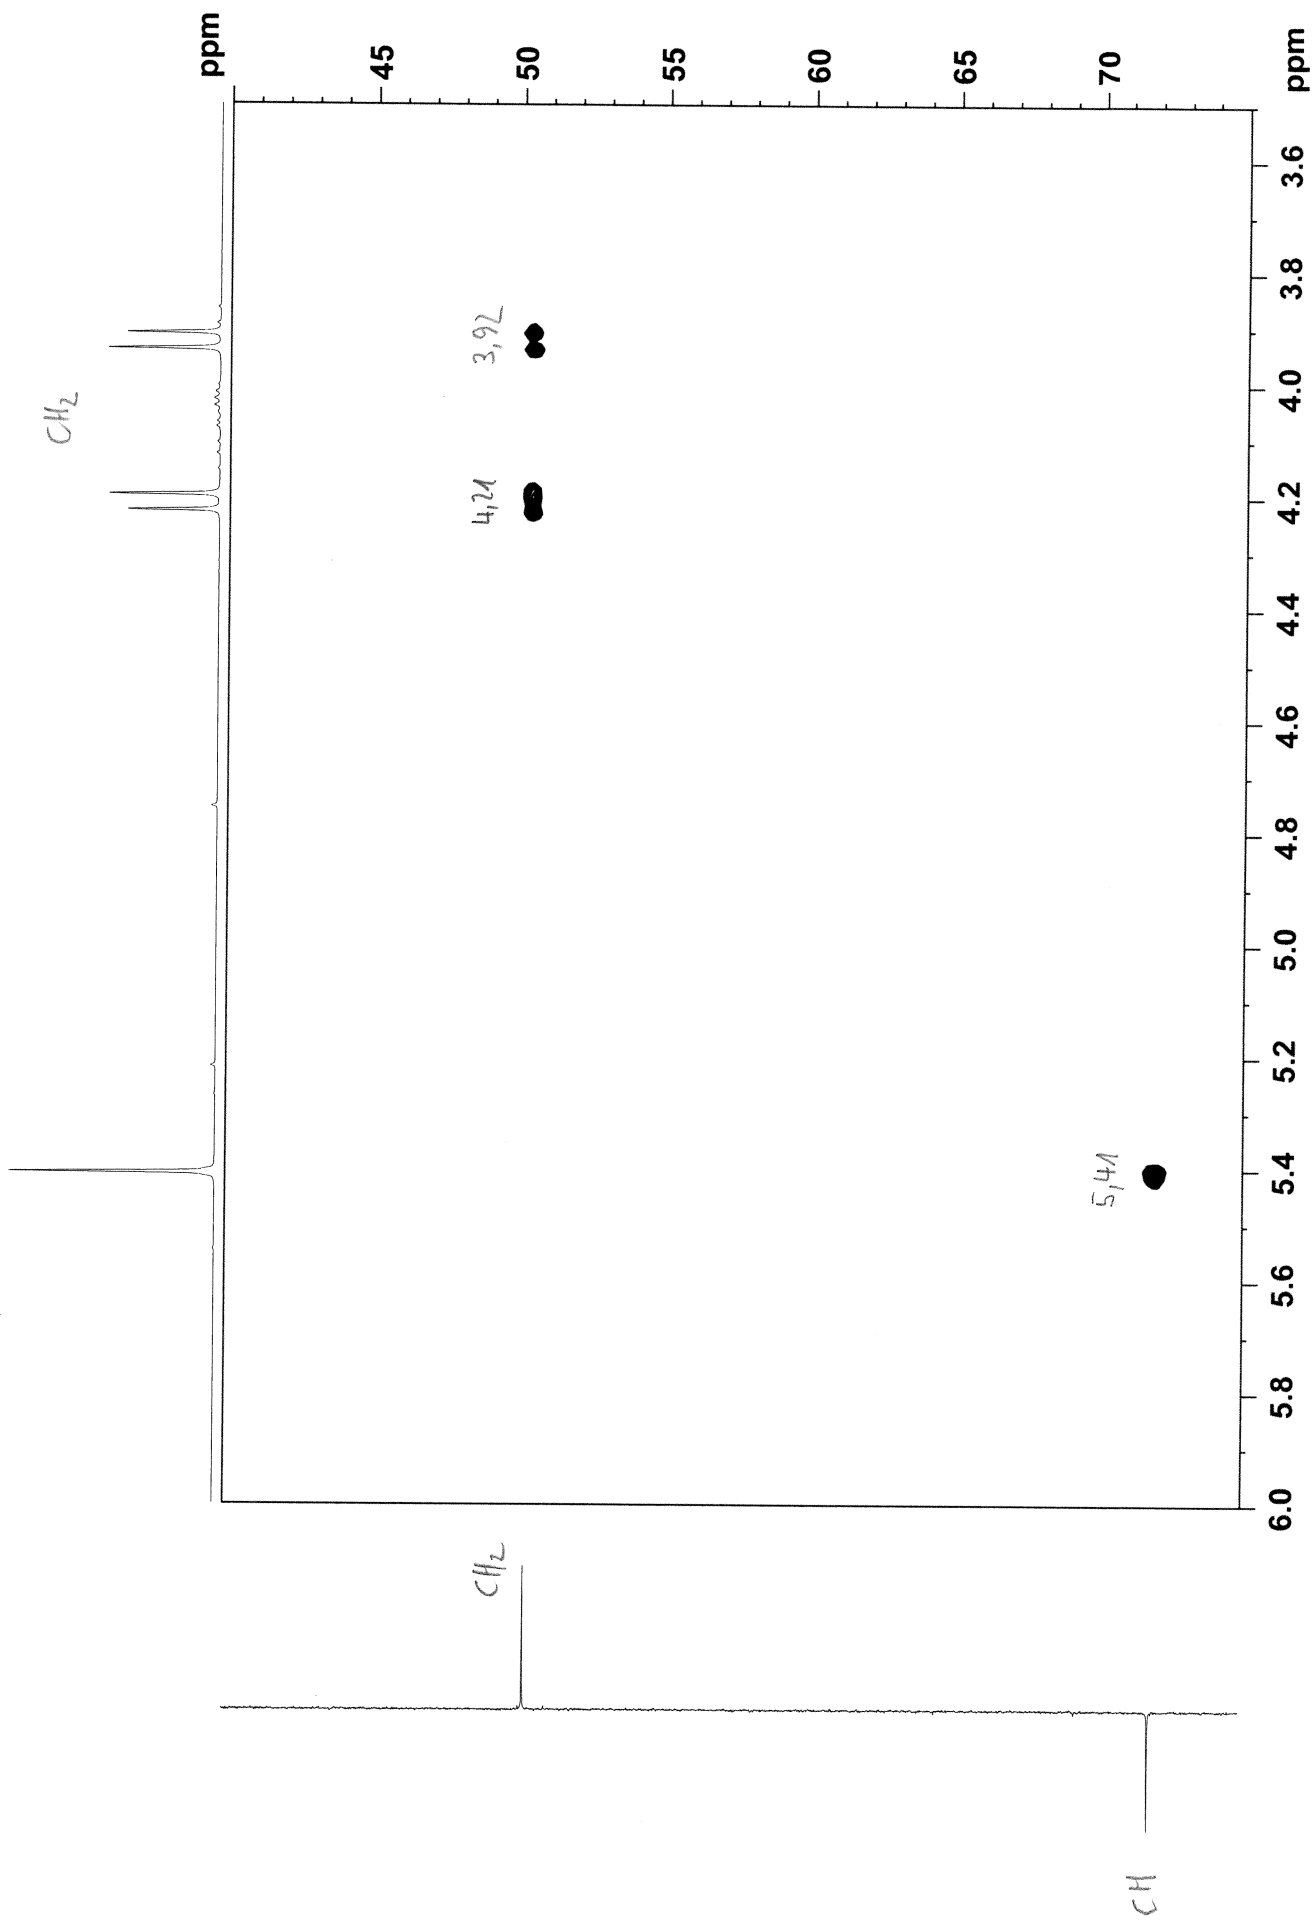

MK031B\_P3 in cdcl3 (HMBC) 20.5.2021

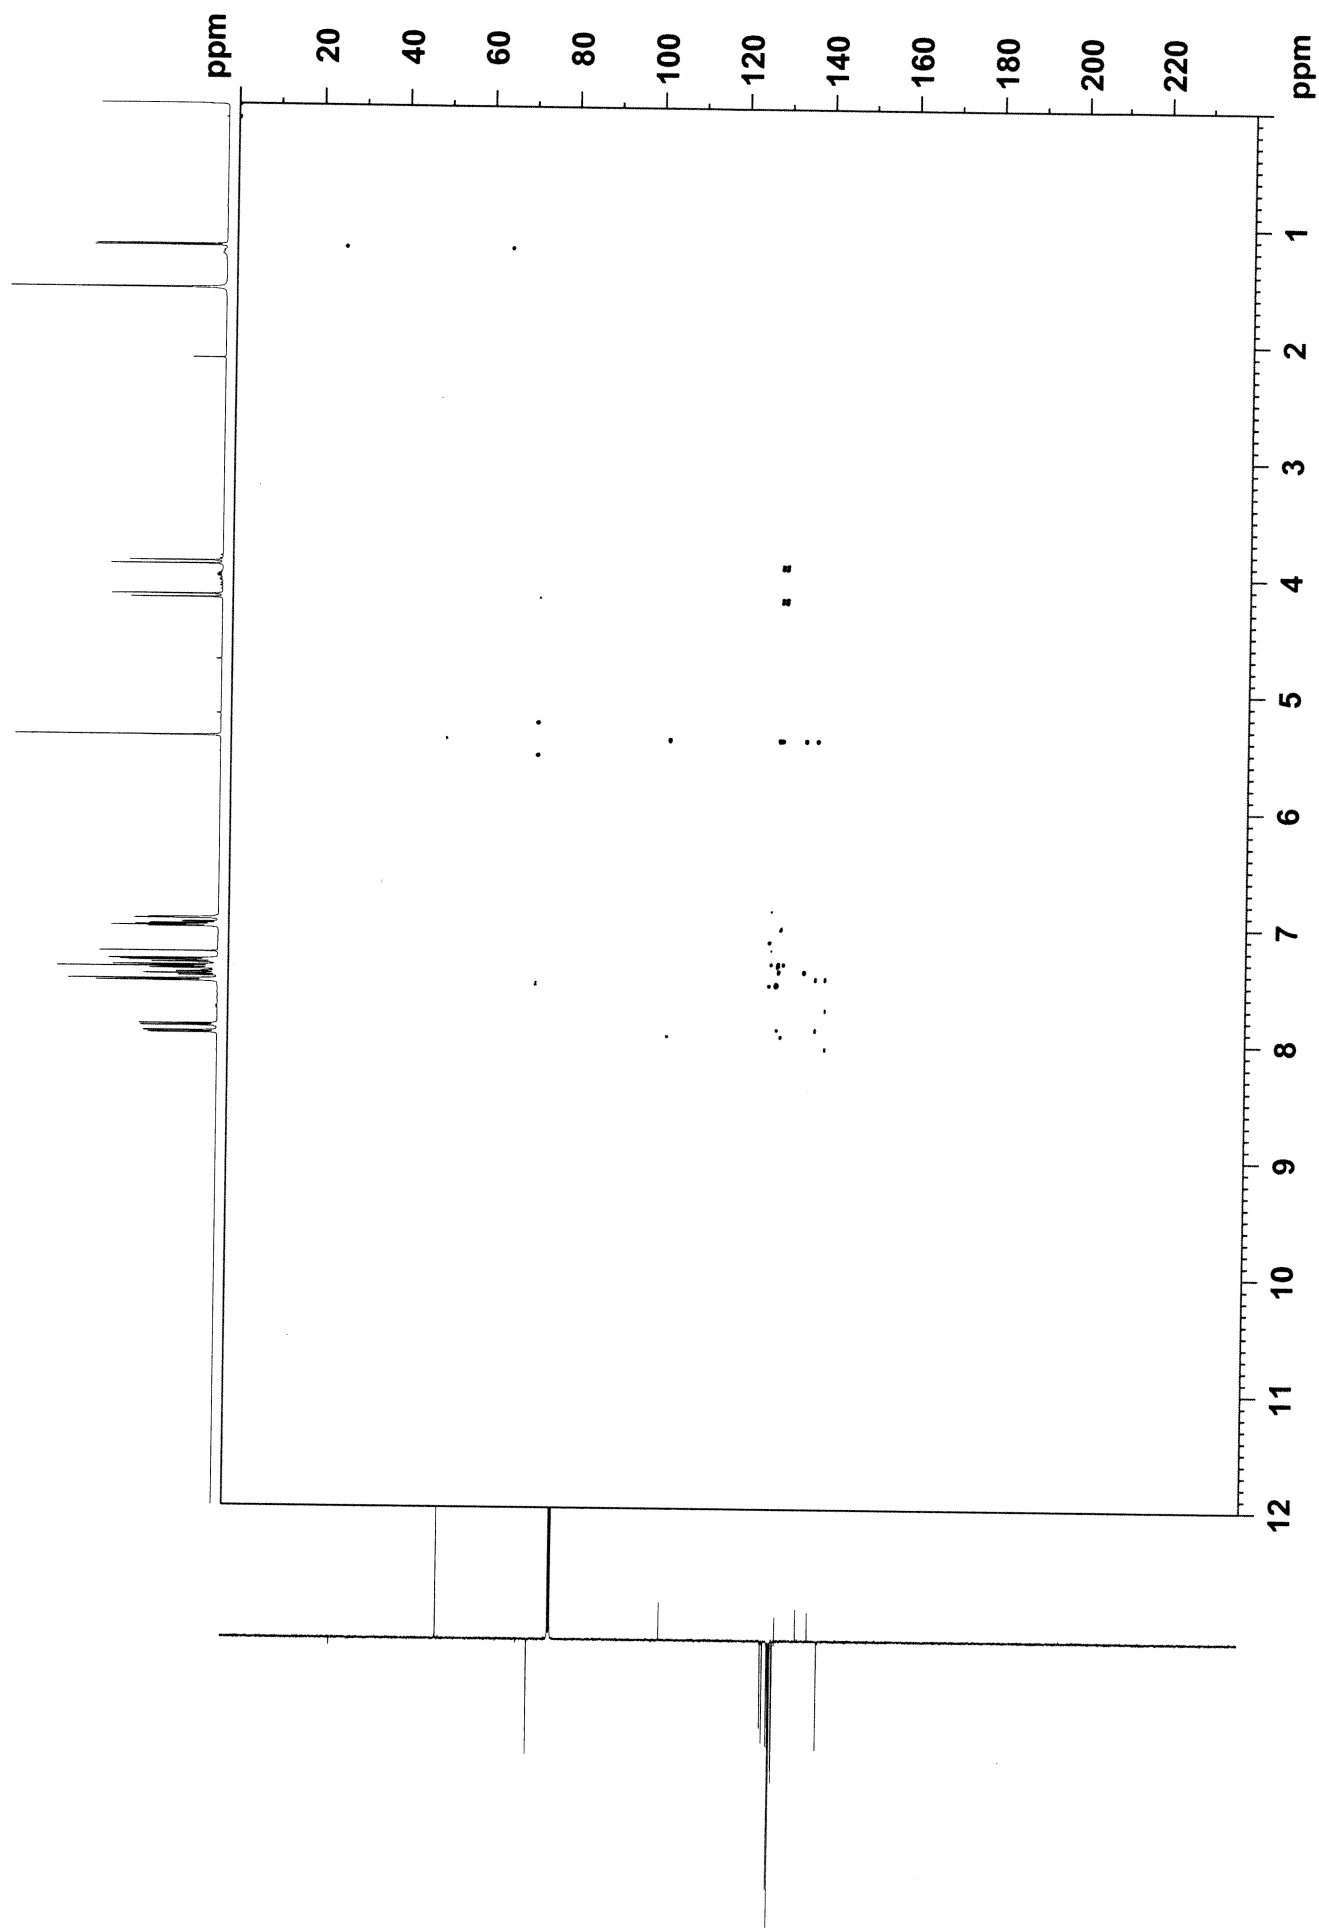



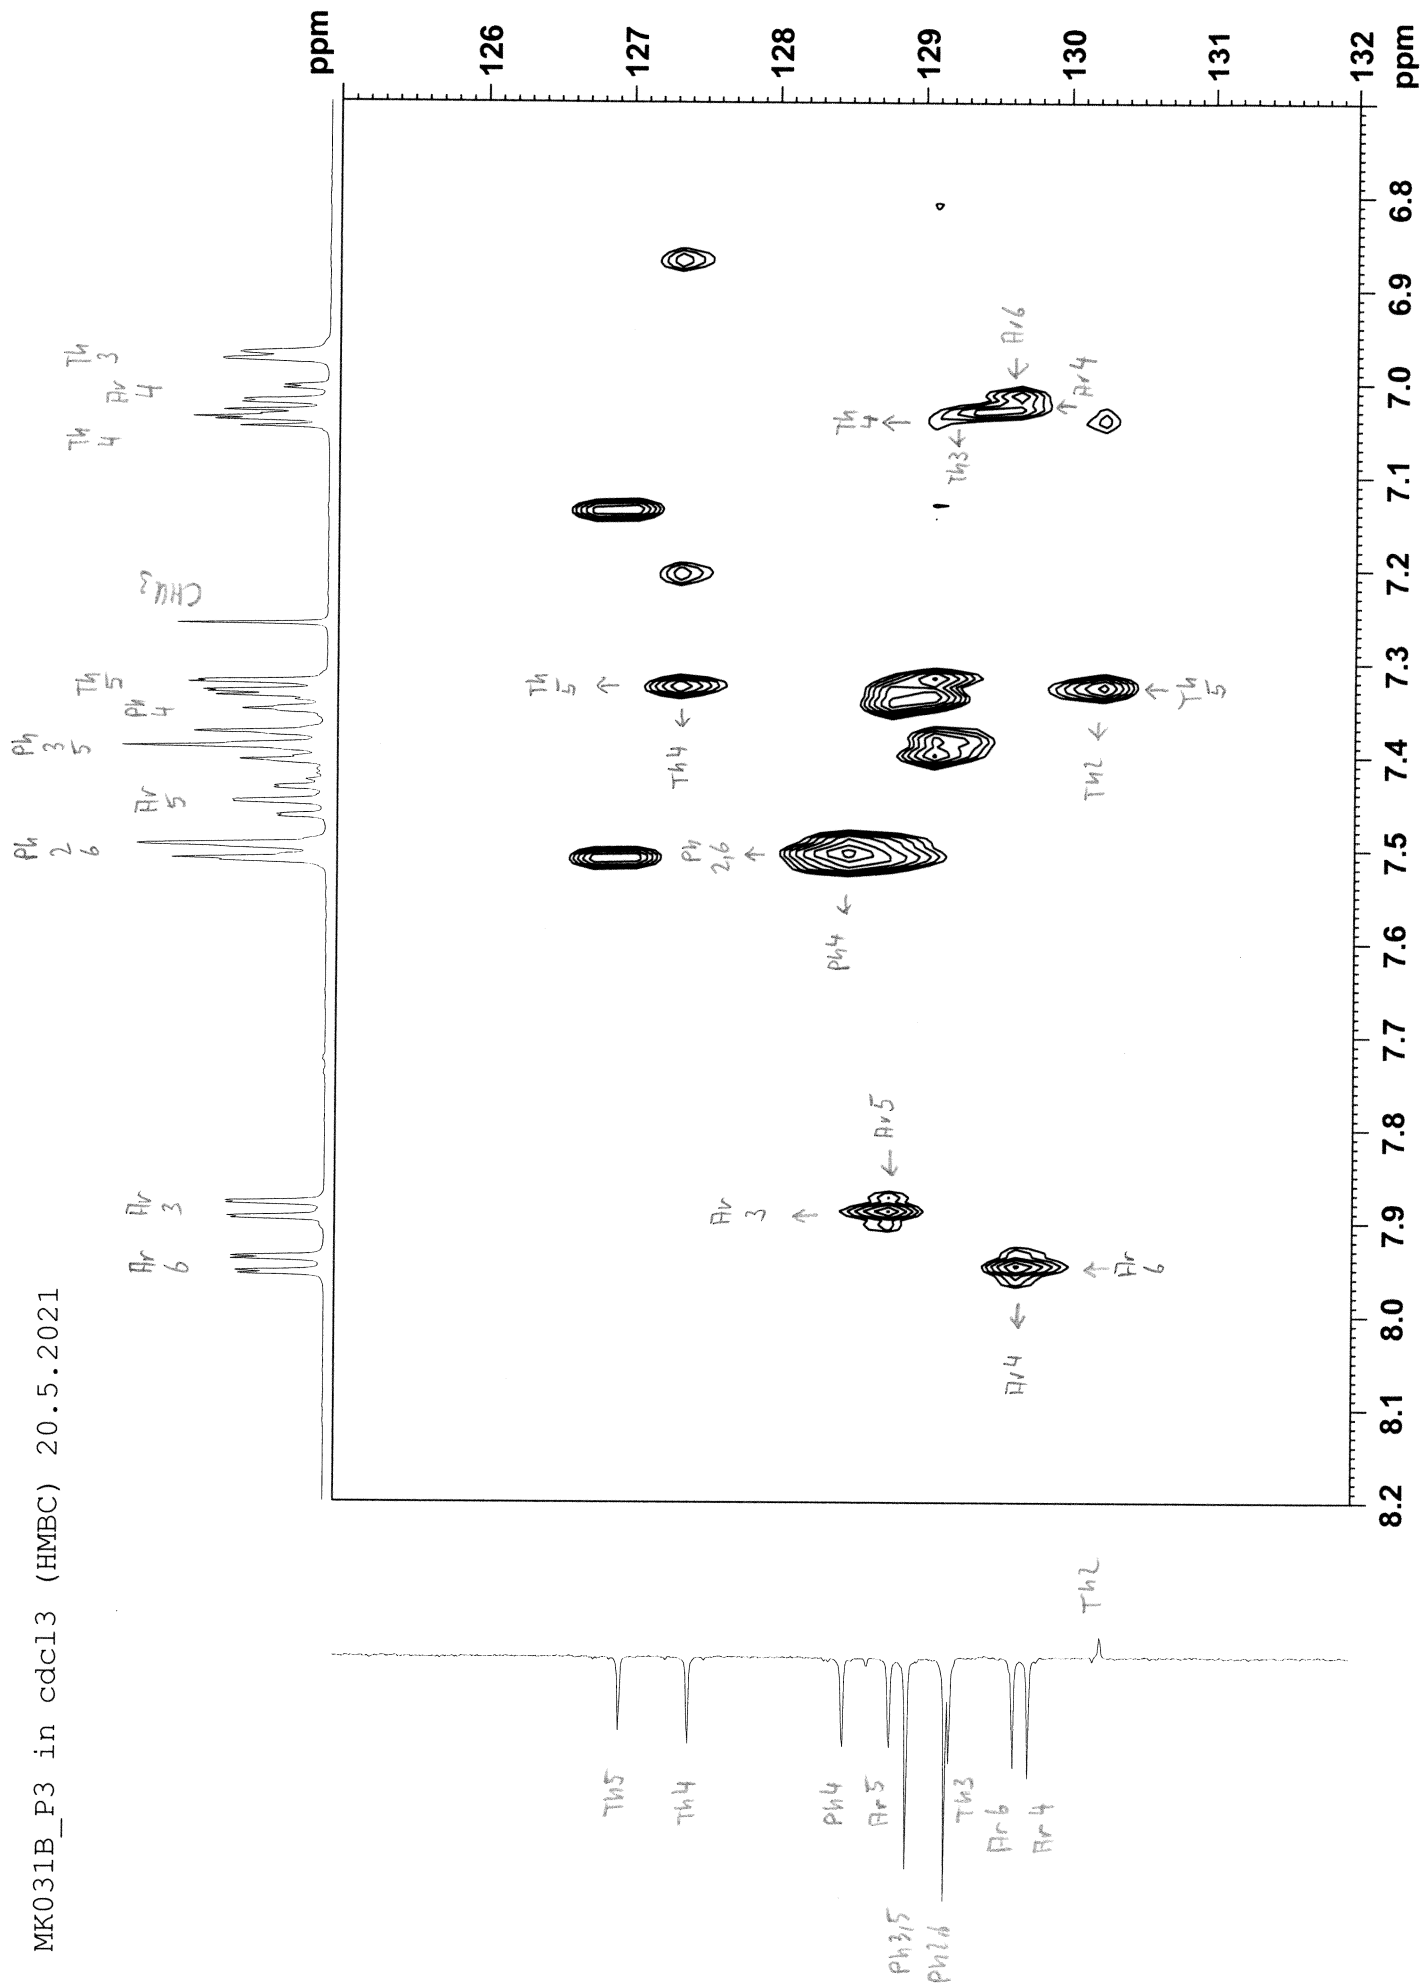

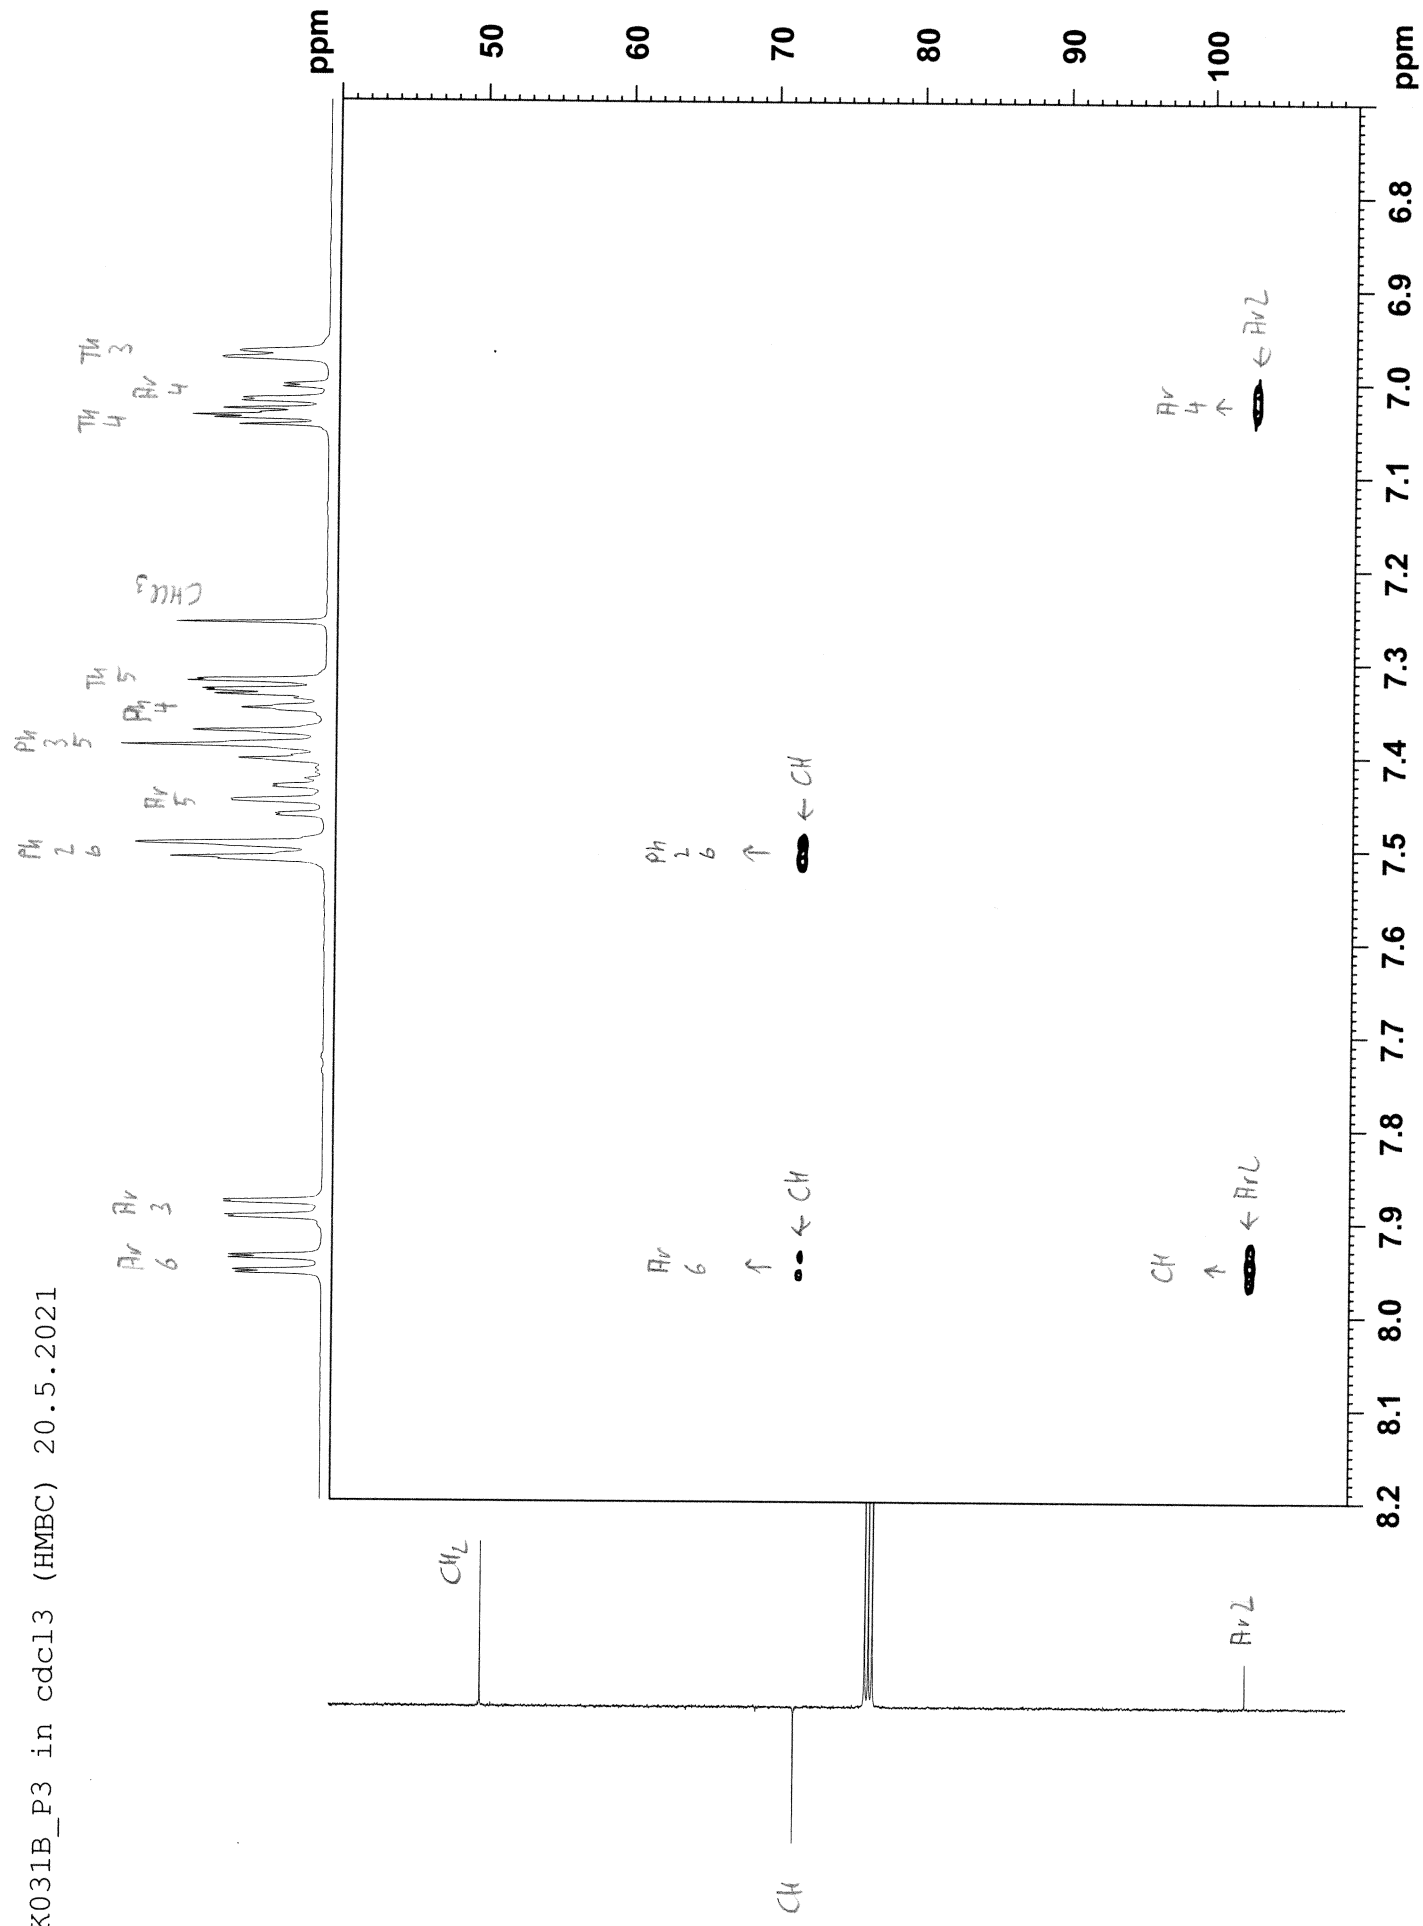



MK031B\_P3 in cdcl3 (HMBC) 20.5.2021

CH

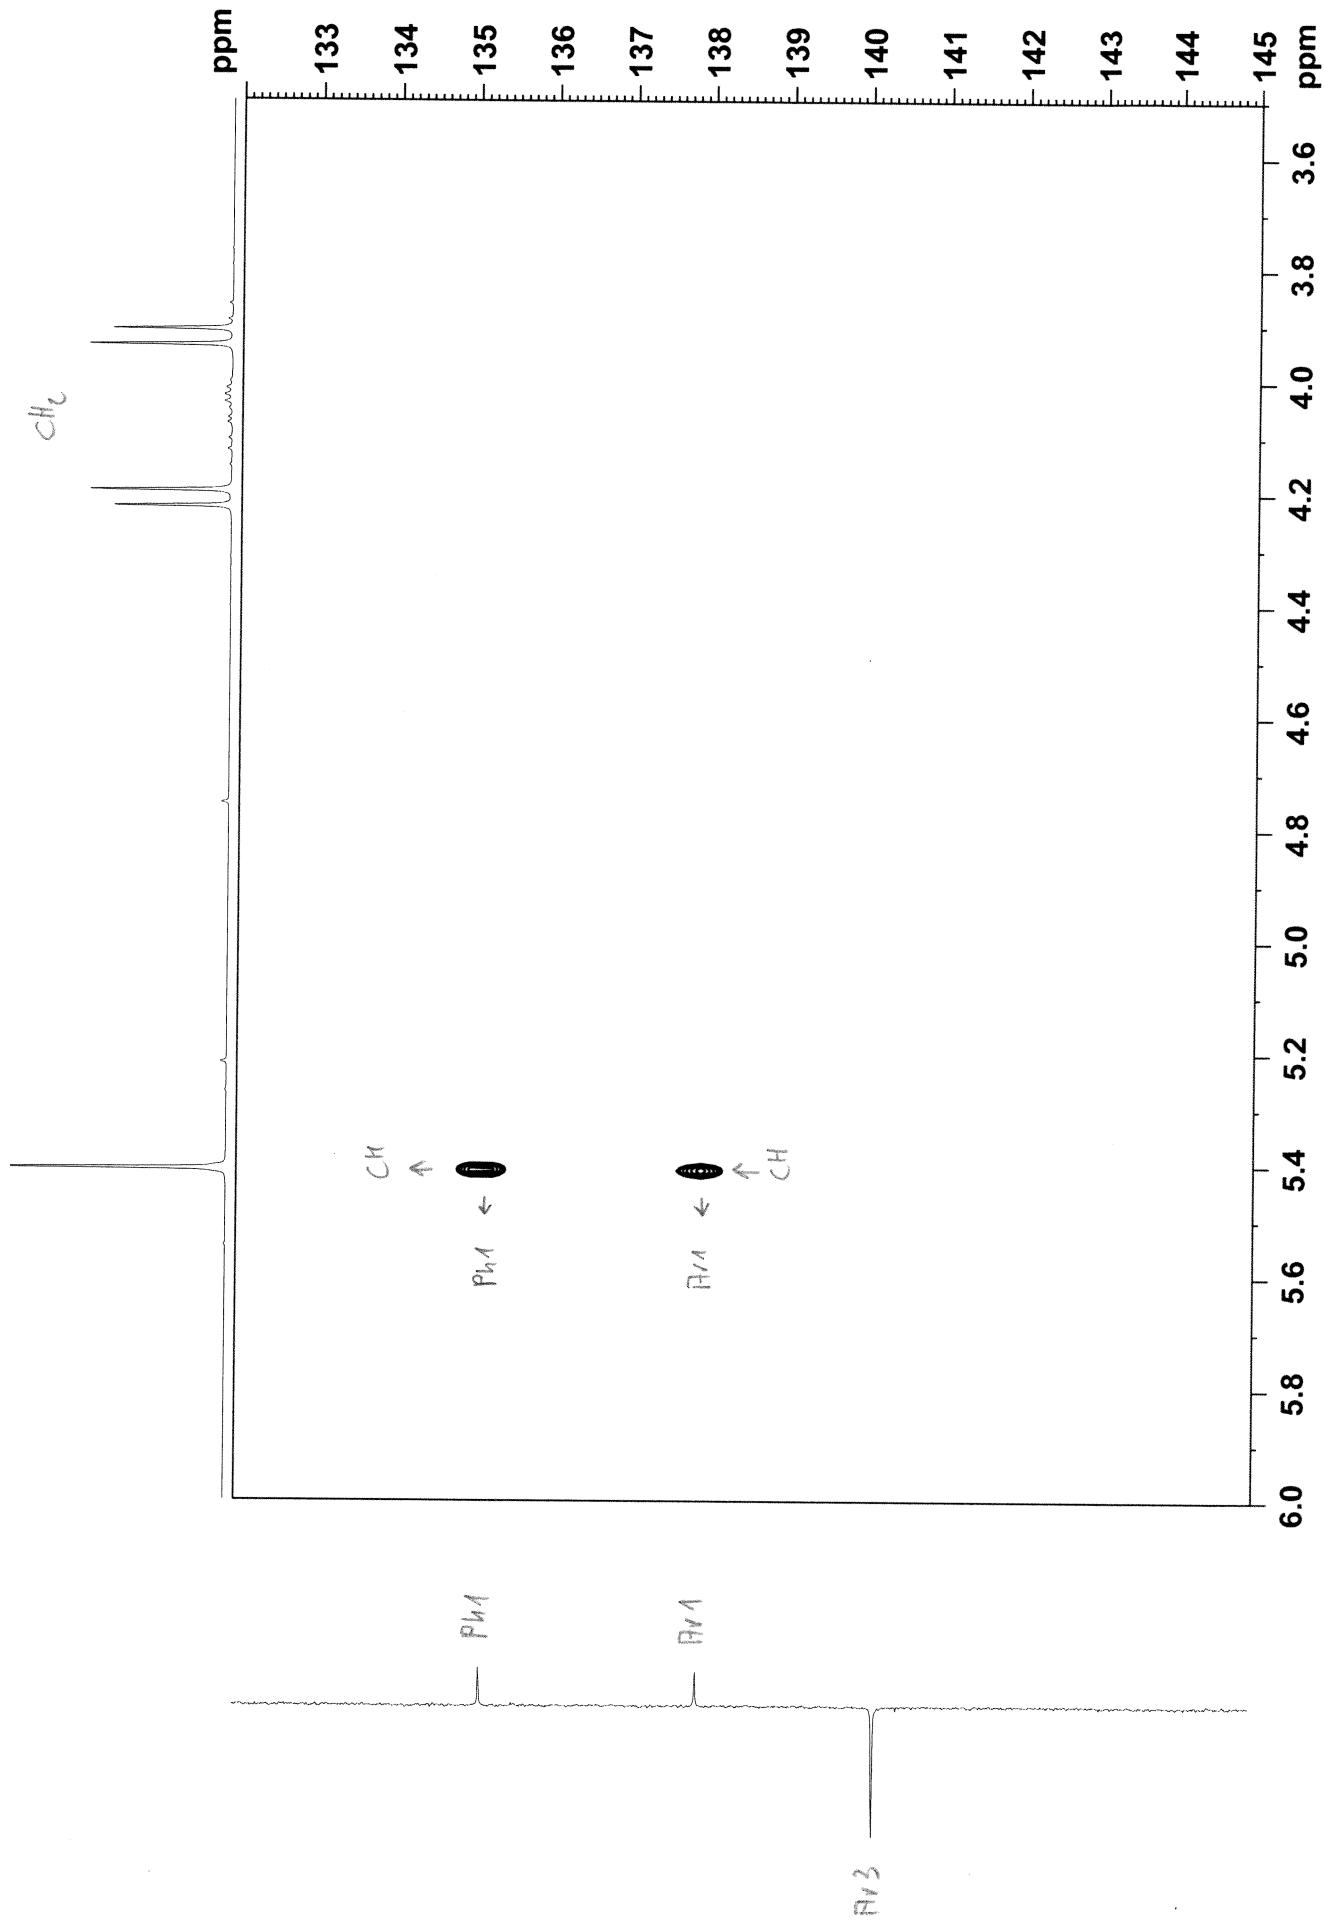

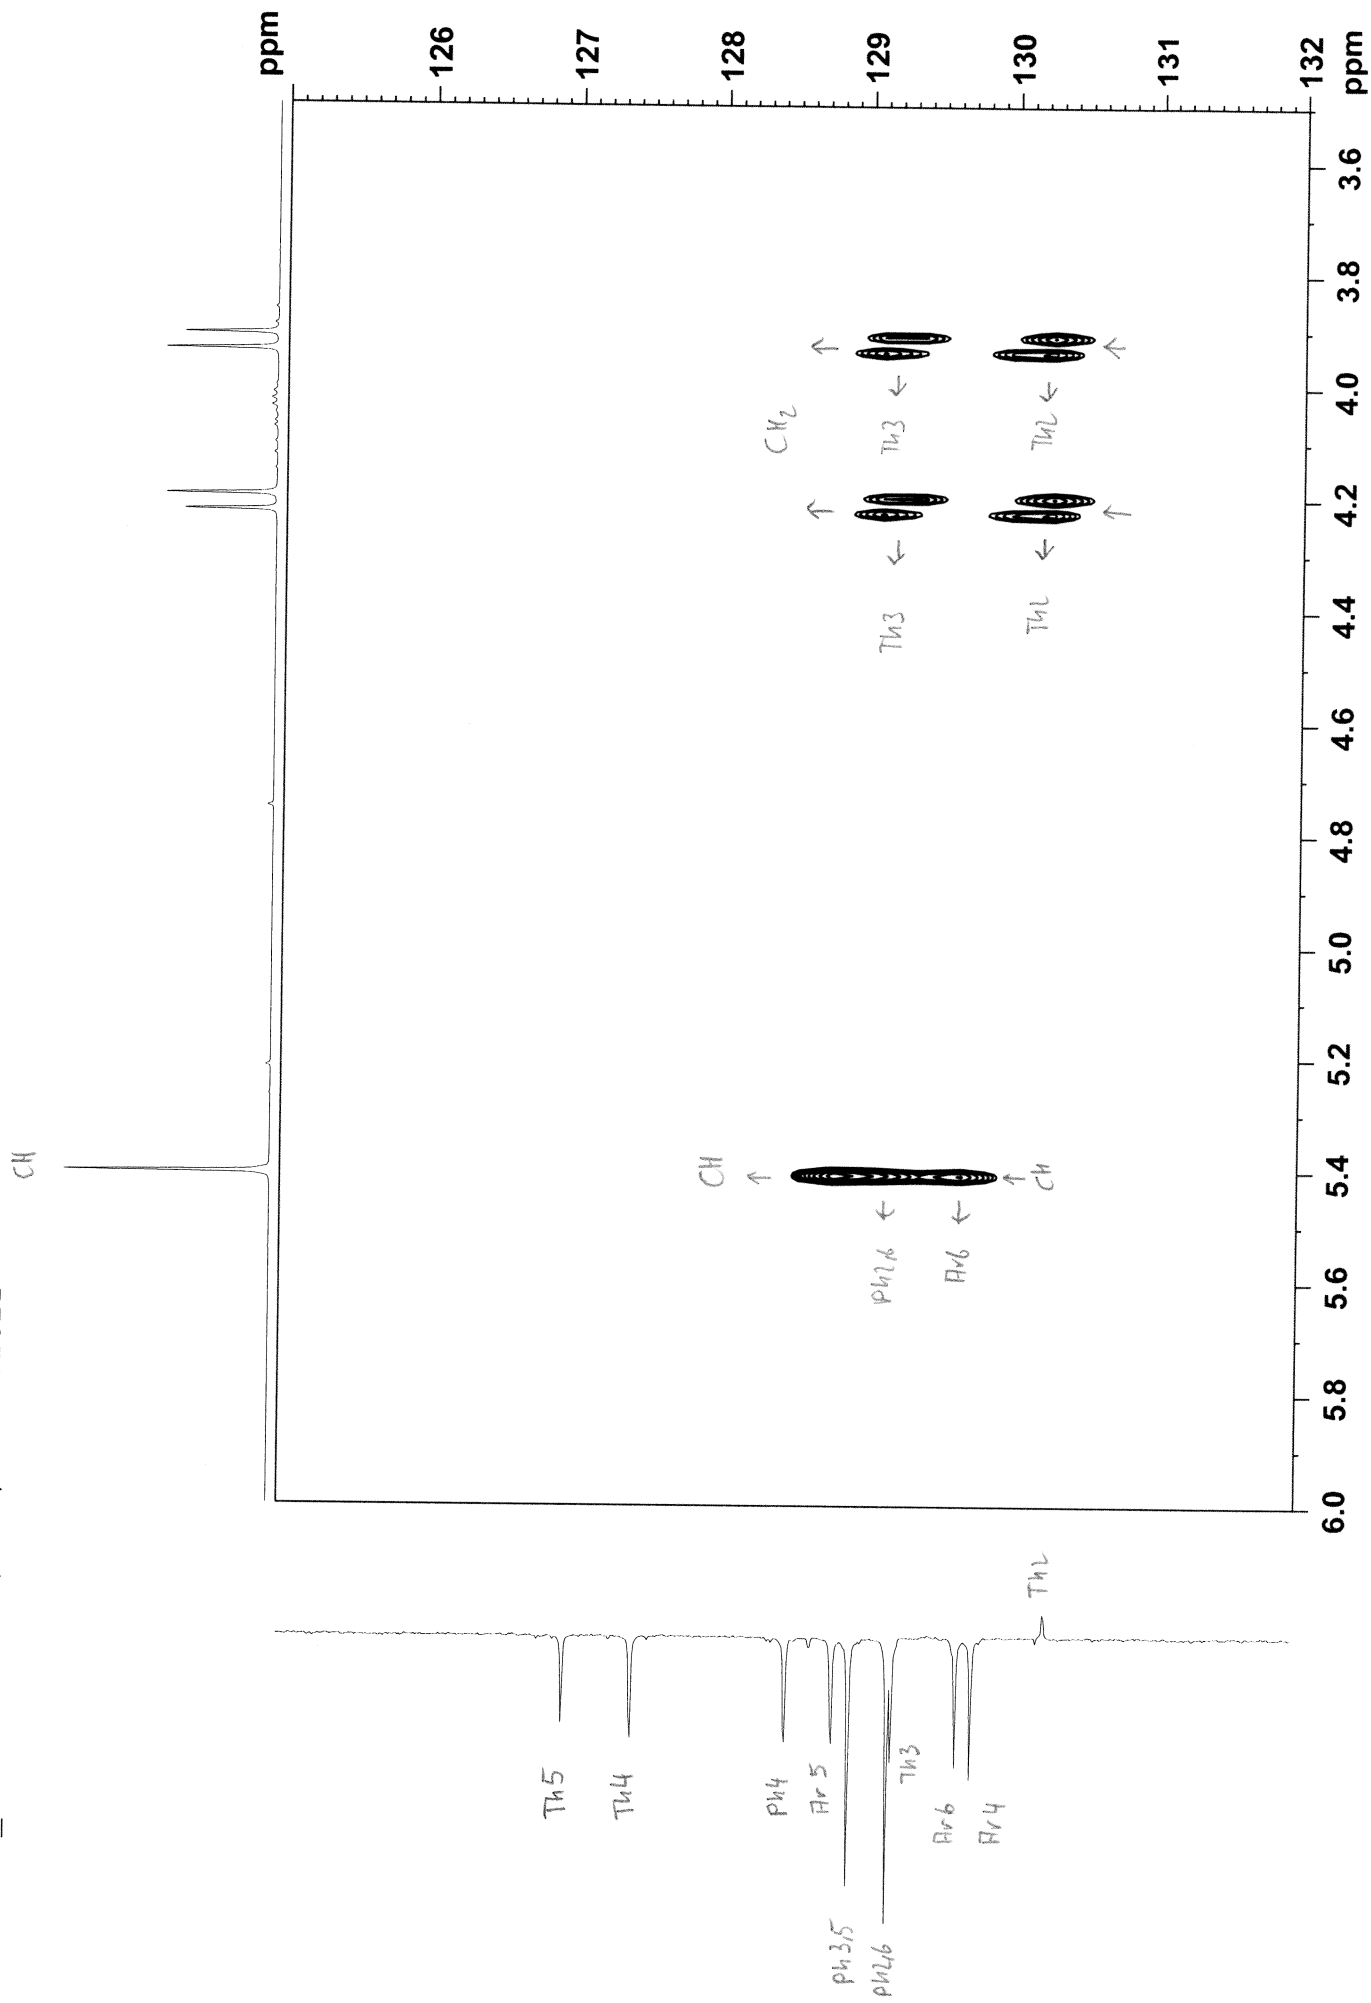

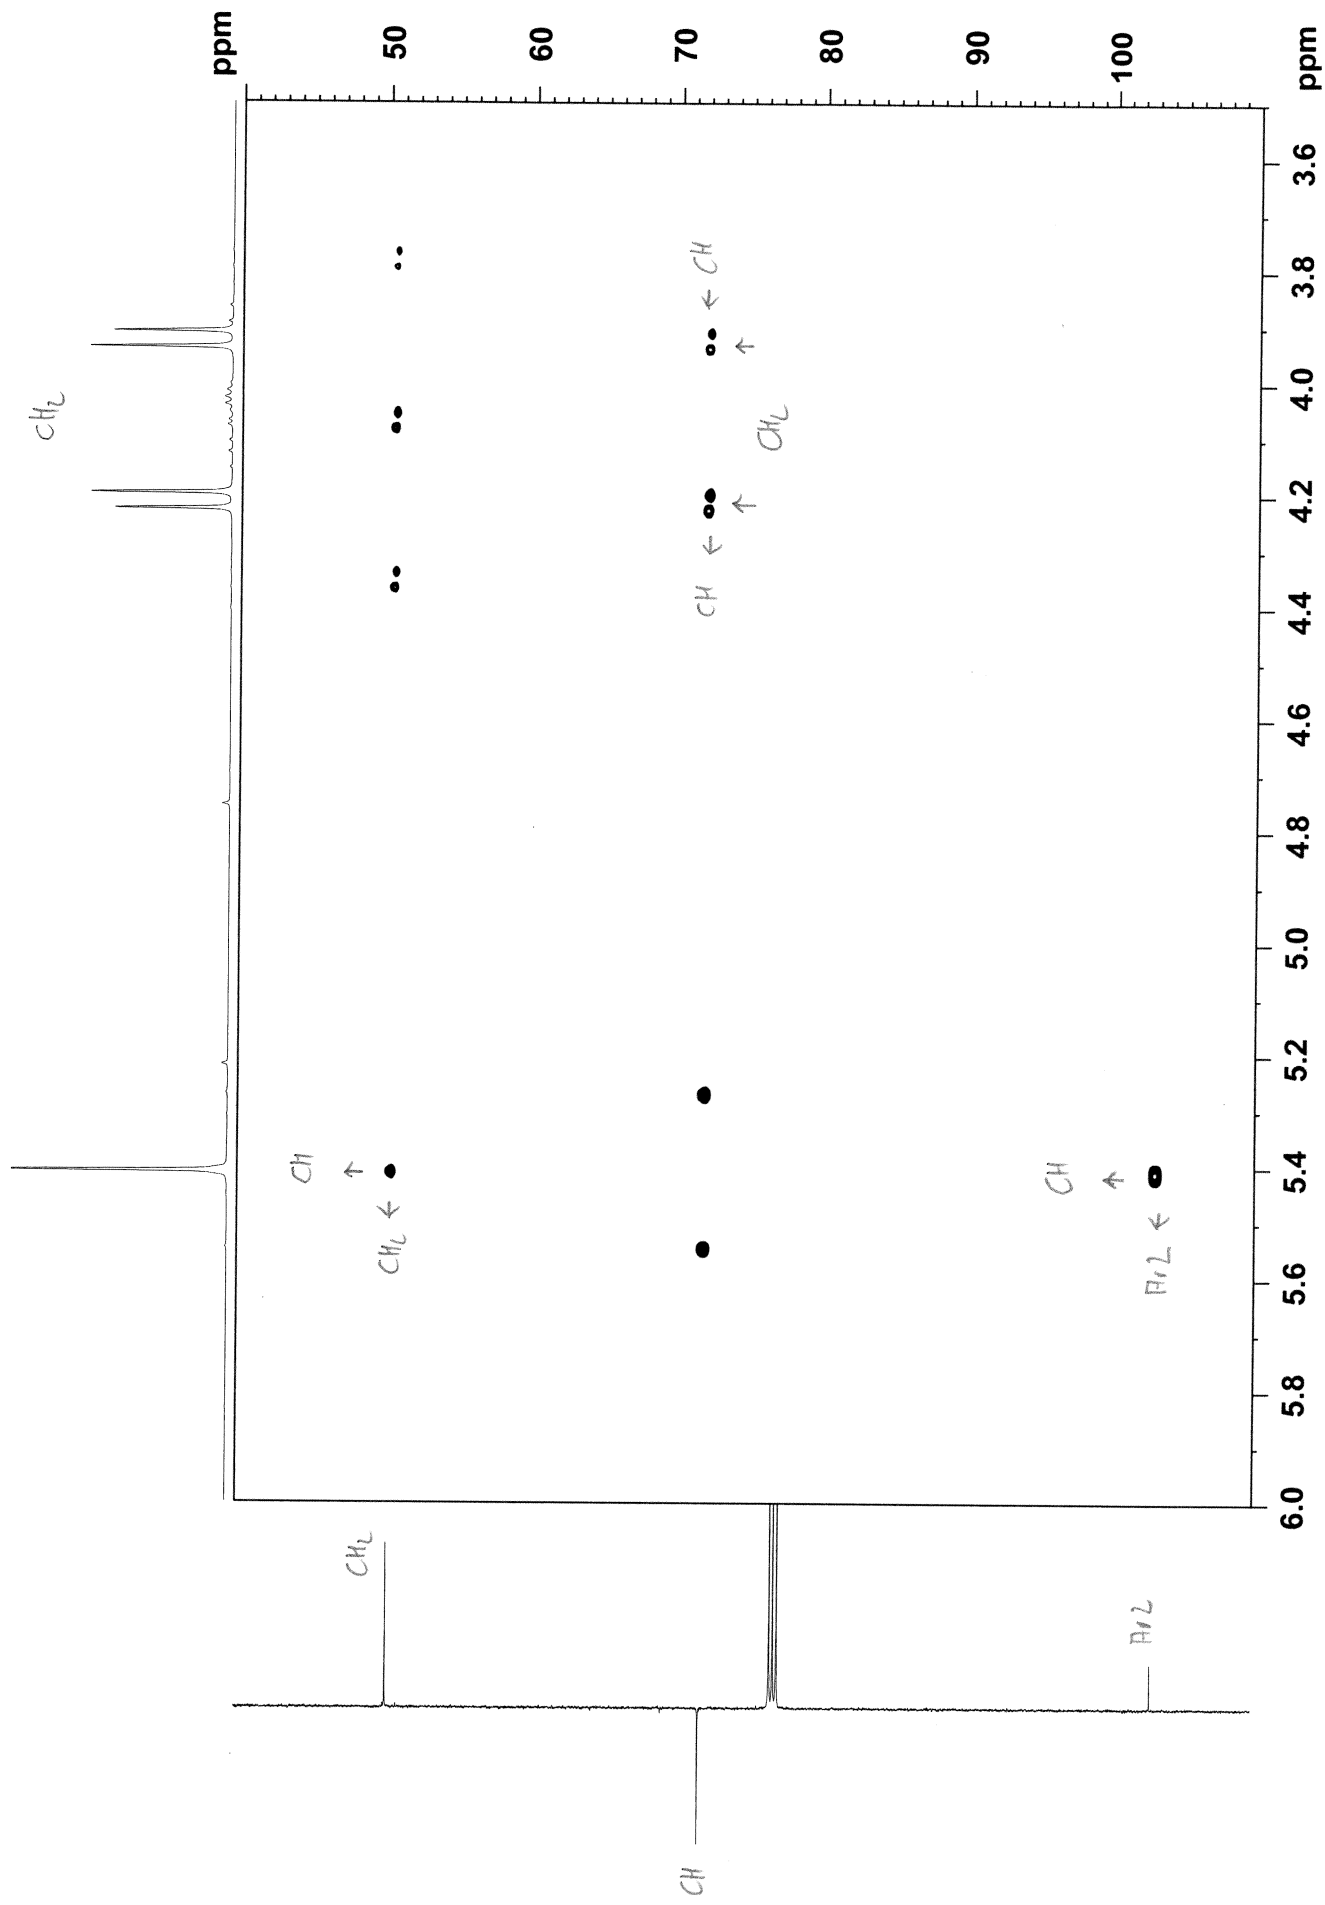

Figure S36c. NMR spectra of compound 8i.

MK-031p4 in cdcl3 (Proton, 400 MHz) 29.4.2022

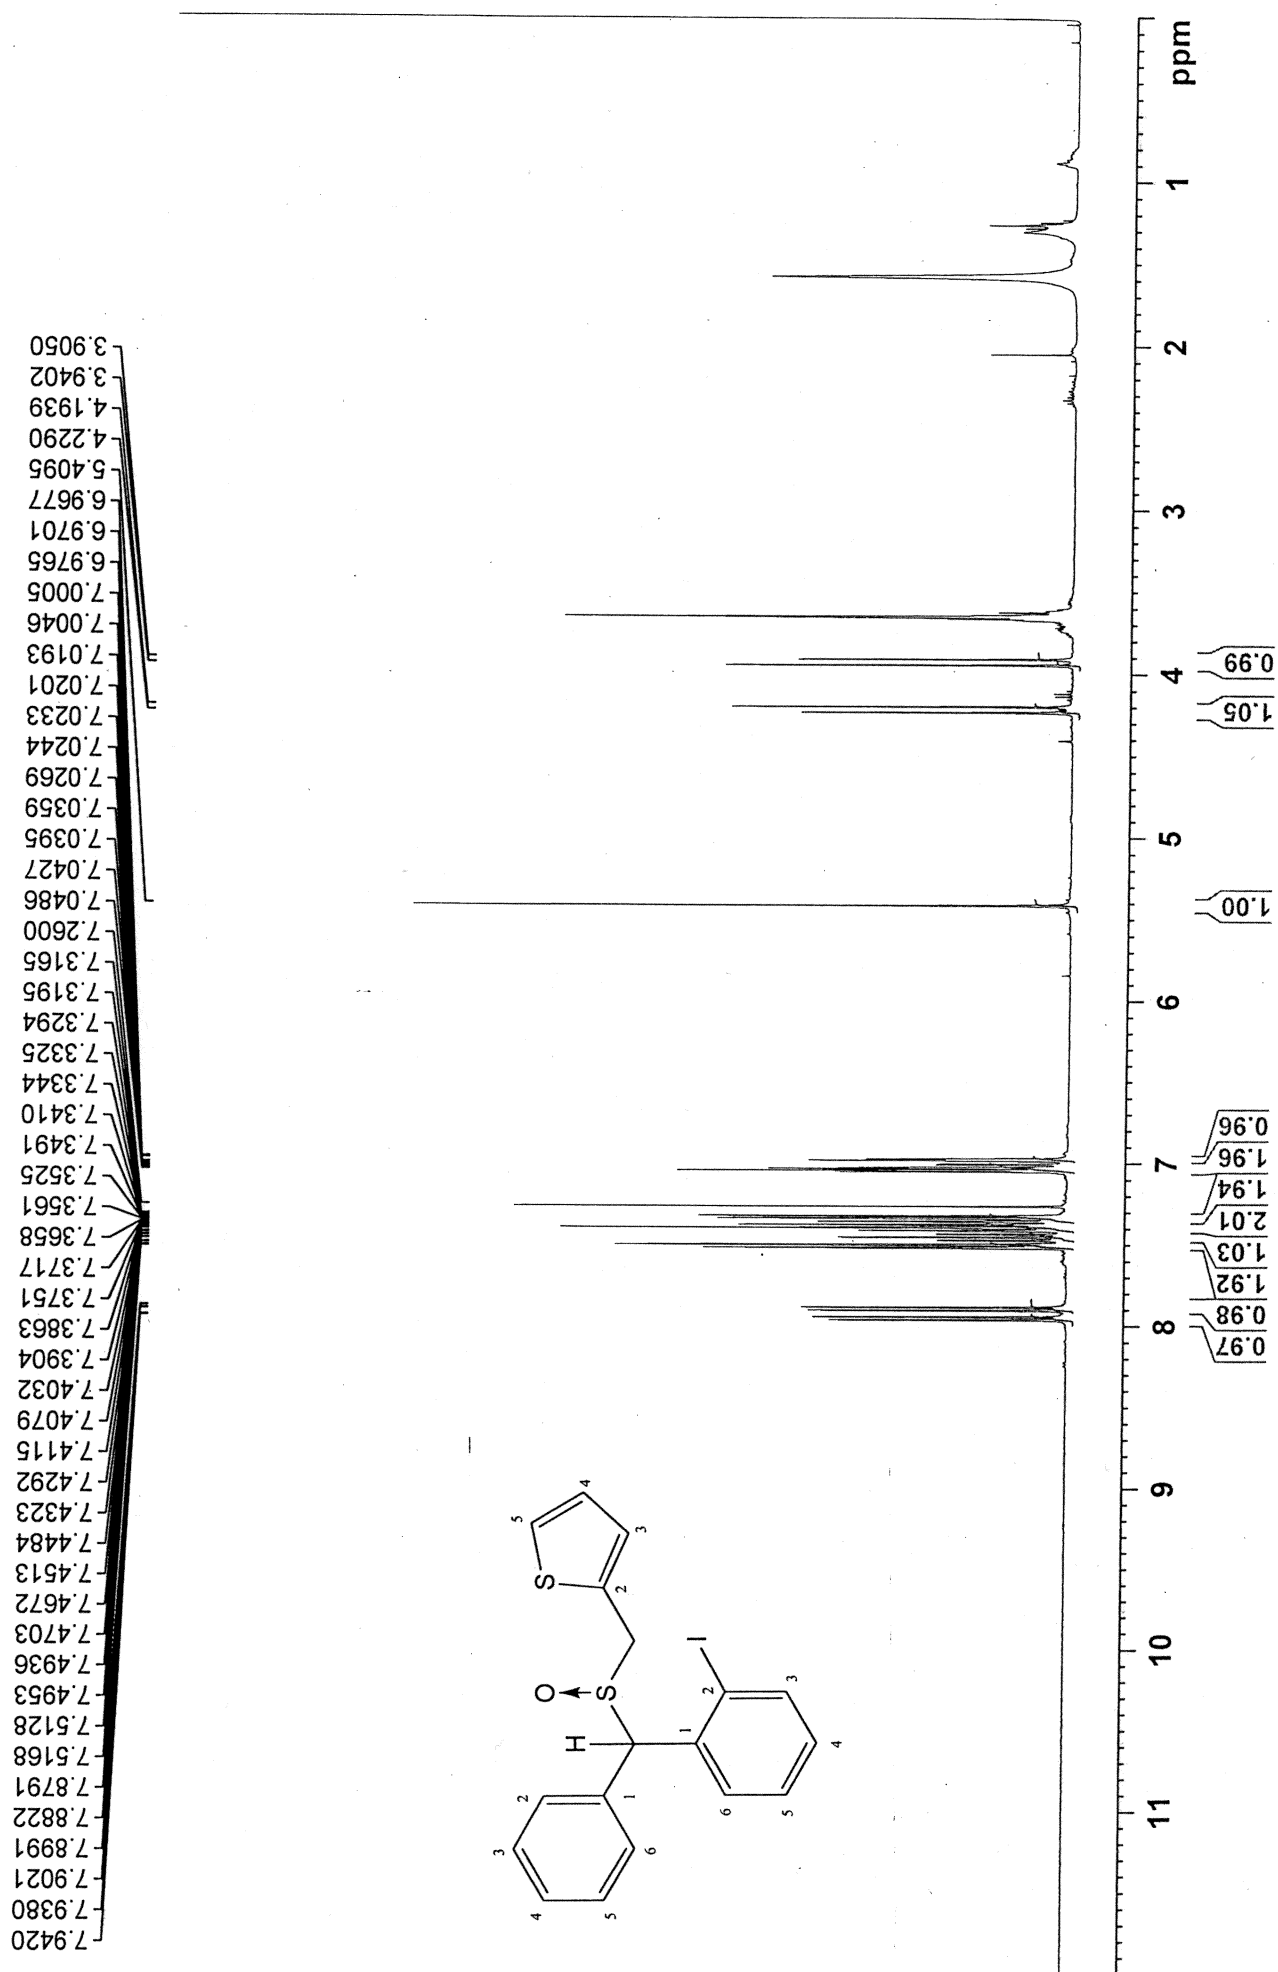

MK-031p4 in cdcl3 (Proton, 400 MHz) 29.4.2022

7.9616  
7.9576  
7.9420  
7.9380  
7.9021  
7.8991  
7.8822  
7.8791

Ar  
3

Ar  
6

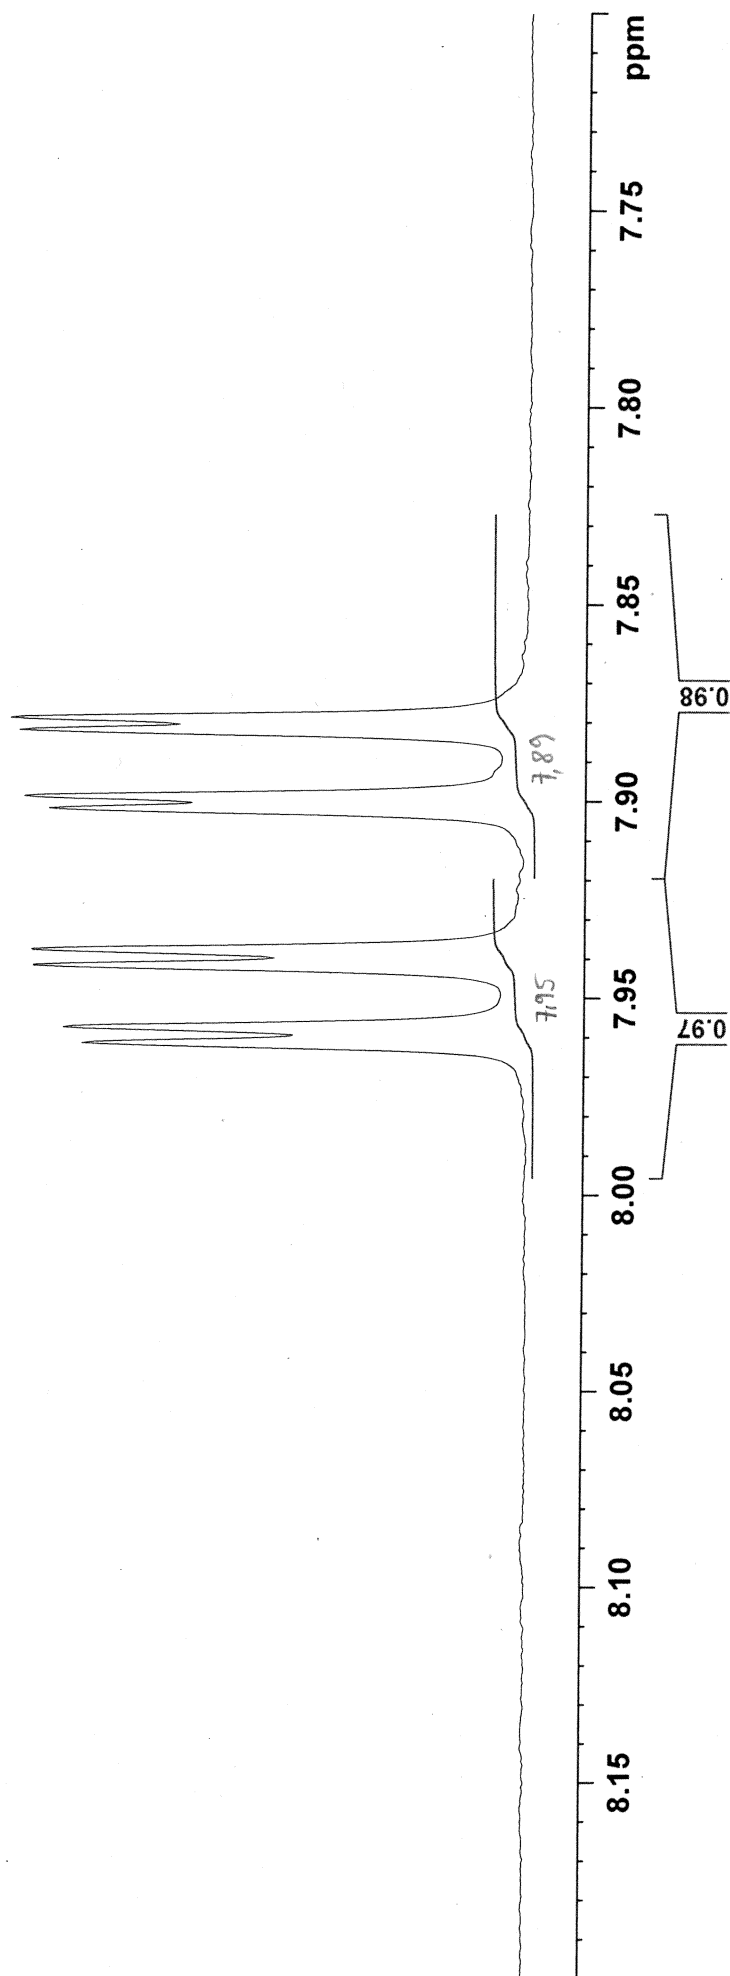

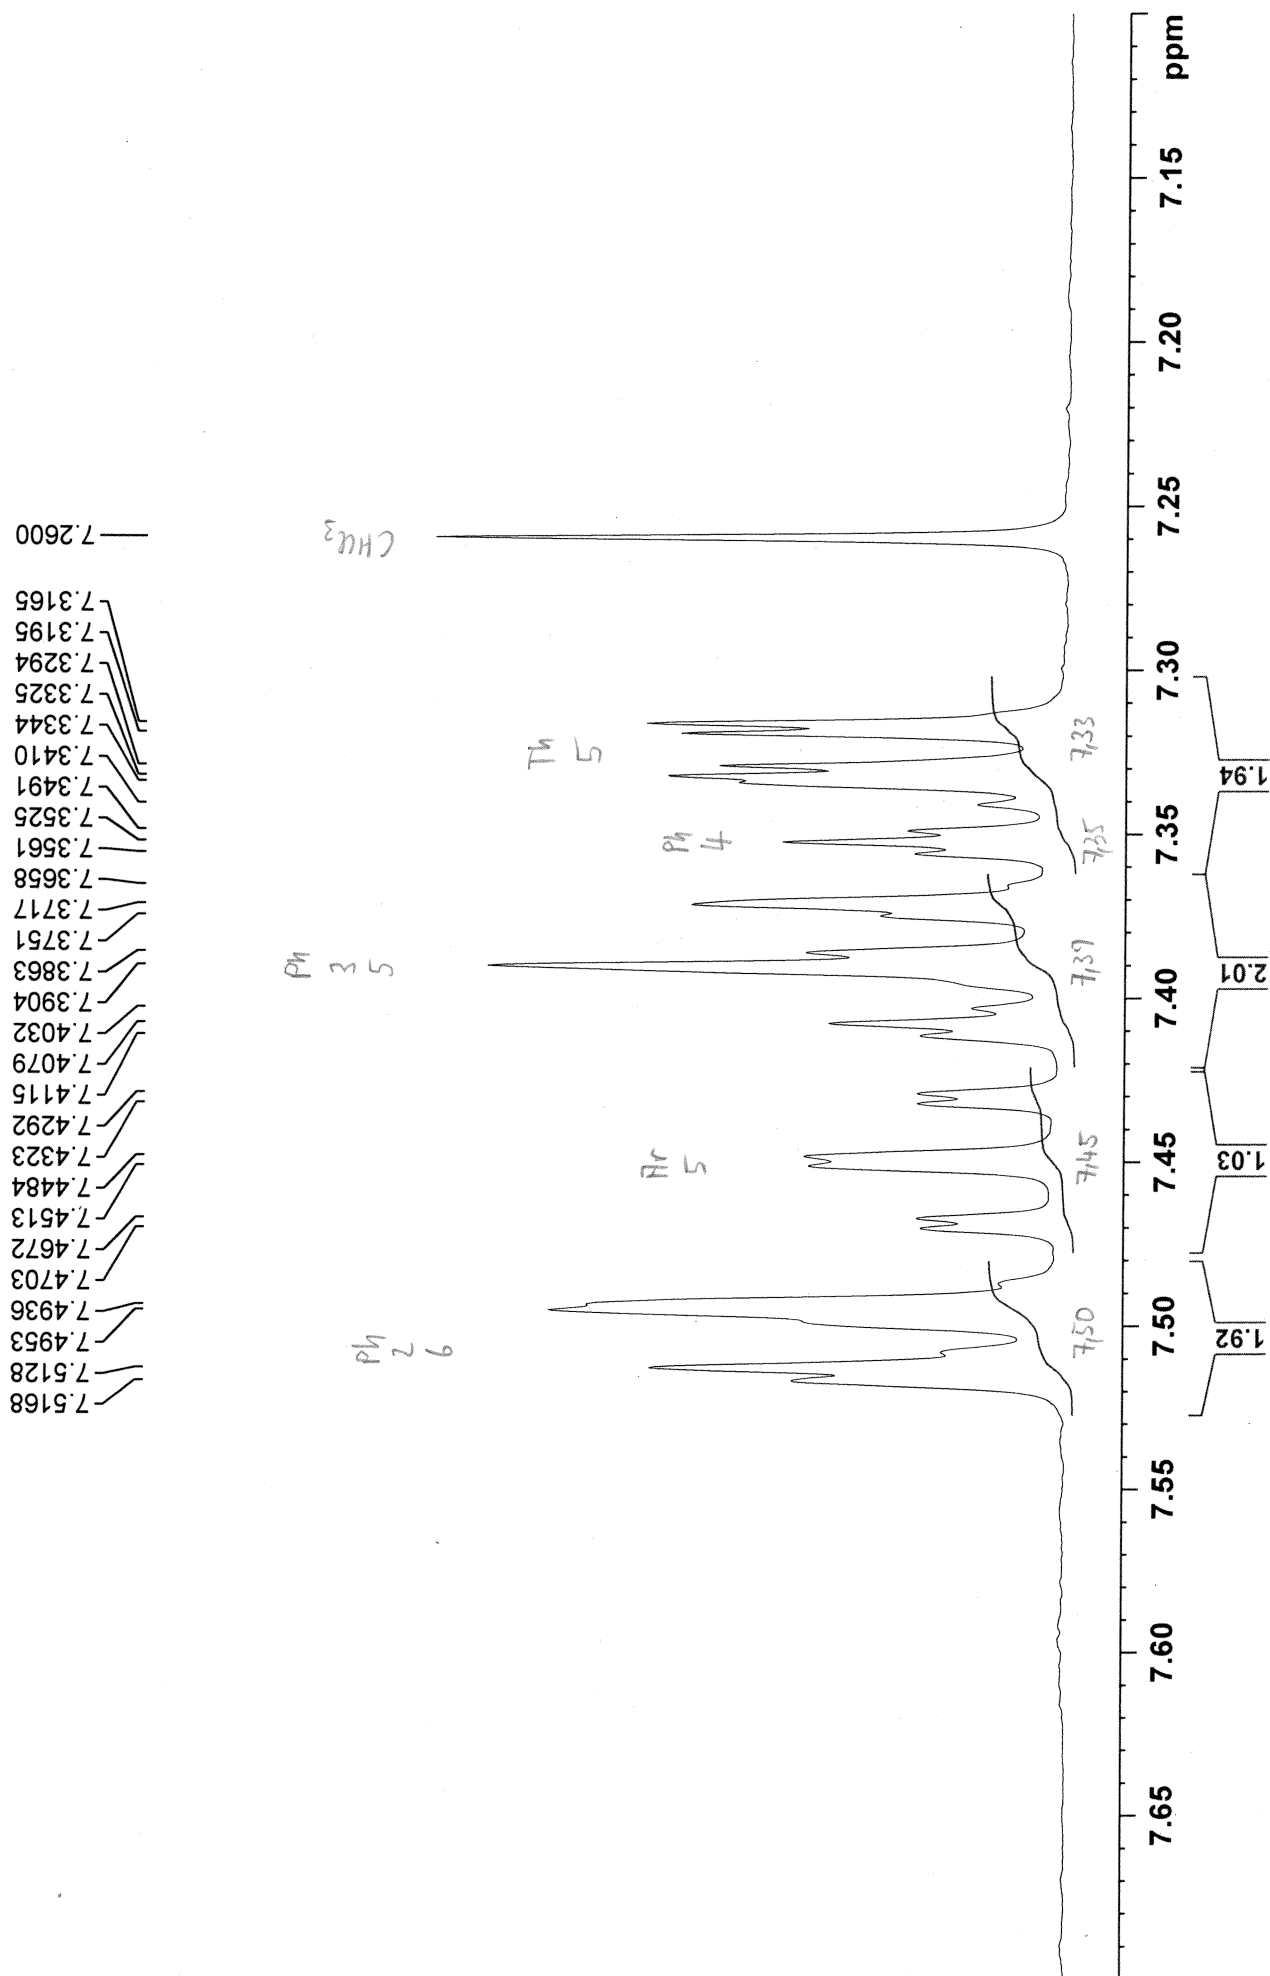

MK-031p4 in cdcl3 (Proton, 400 MHz) 29.4.2022

7.0486  
7.0427  
7.0395  
7.0359  
7.0269  
7.0244  
7.0233  
7.0201  
7.0193  
7.0046  
7.0005  
6.9765  
6.9701  
6.9677

TH  
4

Ar  
4

TH  
3

6.97

7.02

7.04

7.20 7.15 7.10 7.05 7.00 6.95 6.90 6.85 6.80 6.75 ppm

0.96

1.96

MK-031p4 in cdcl3 (Proton, 400 MHz) 29.4.2022

— 5.4095

CH

— 4.2290  
— 4.1939

— 3.9402  
— 3.9050

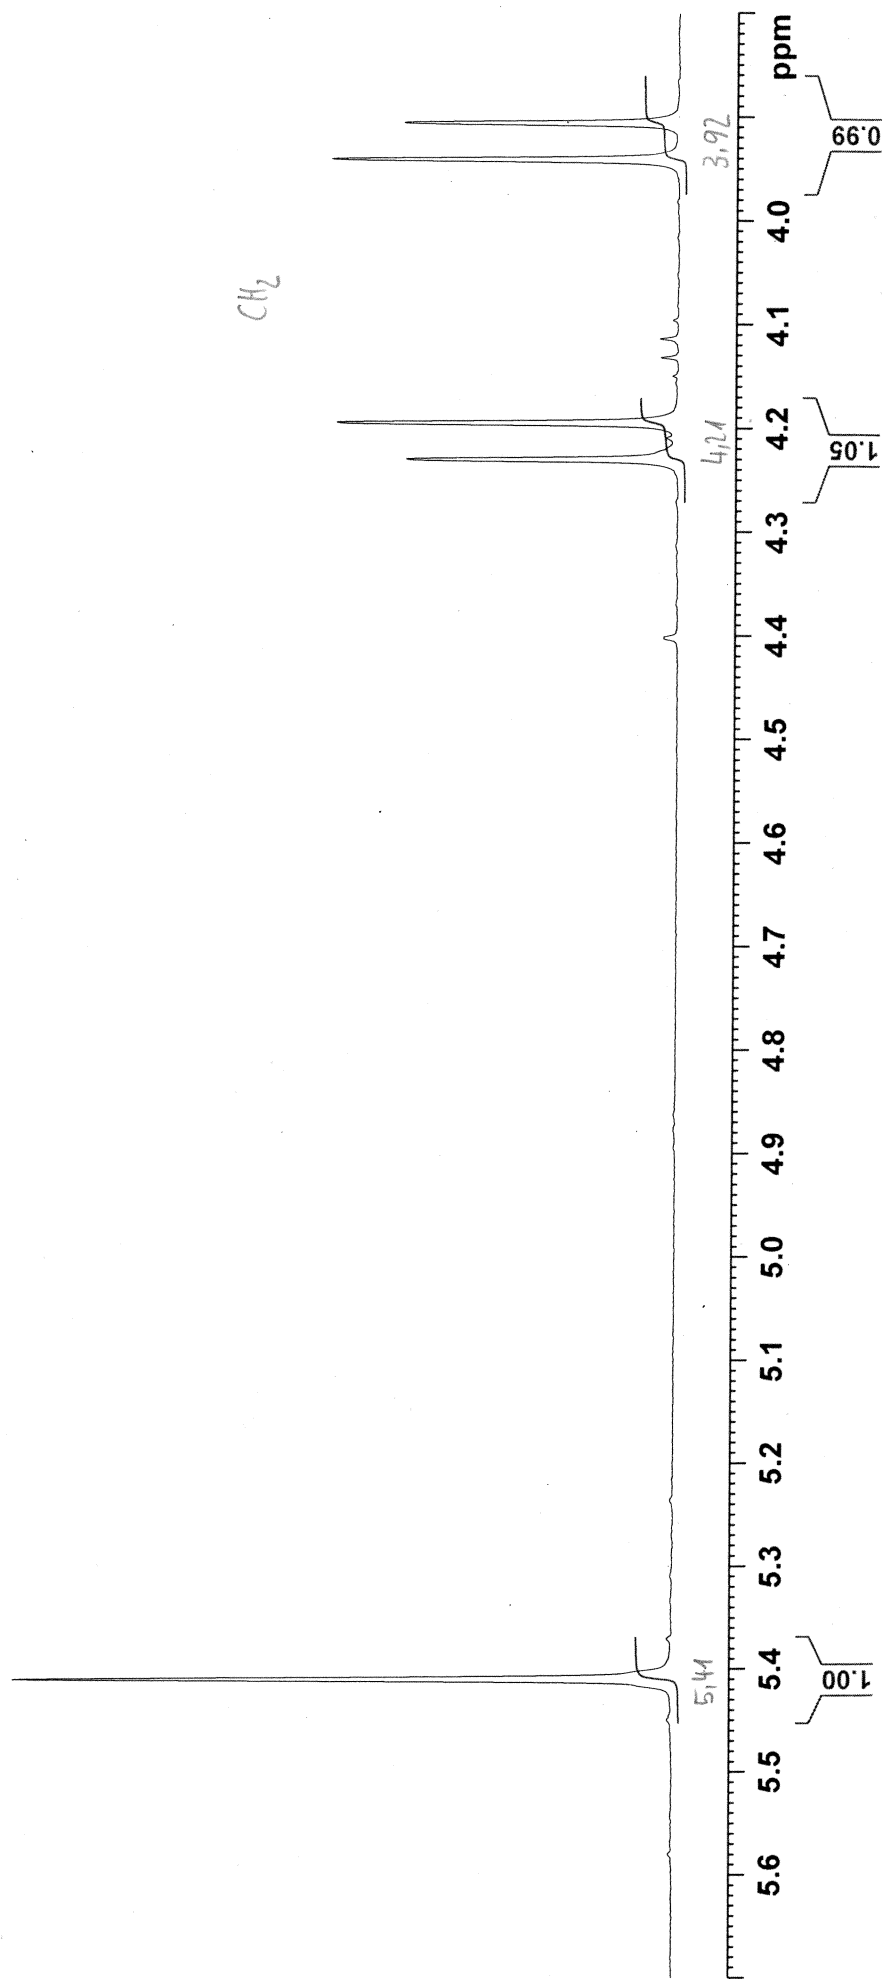



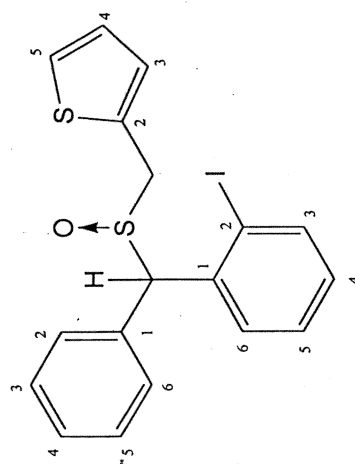

140.1705  
137.9360  
135.1870  
130.3499  
129.7744  
129.7095  
129.2068  
128.9575  
128.8177  
128.4937  
127.4370  
126.9406  
103.0150

77.0000  
71.8863  
70.5571

50.3608

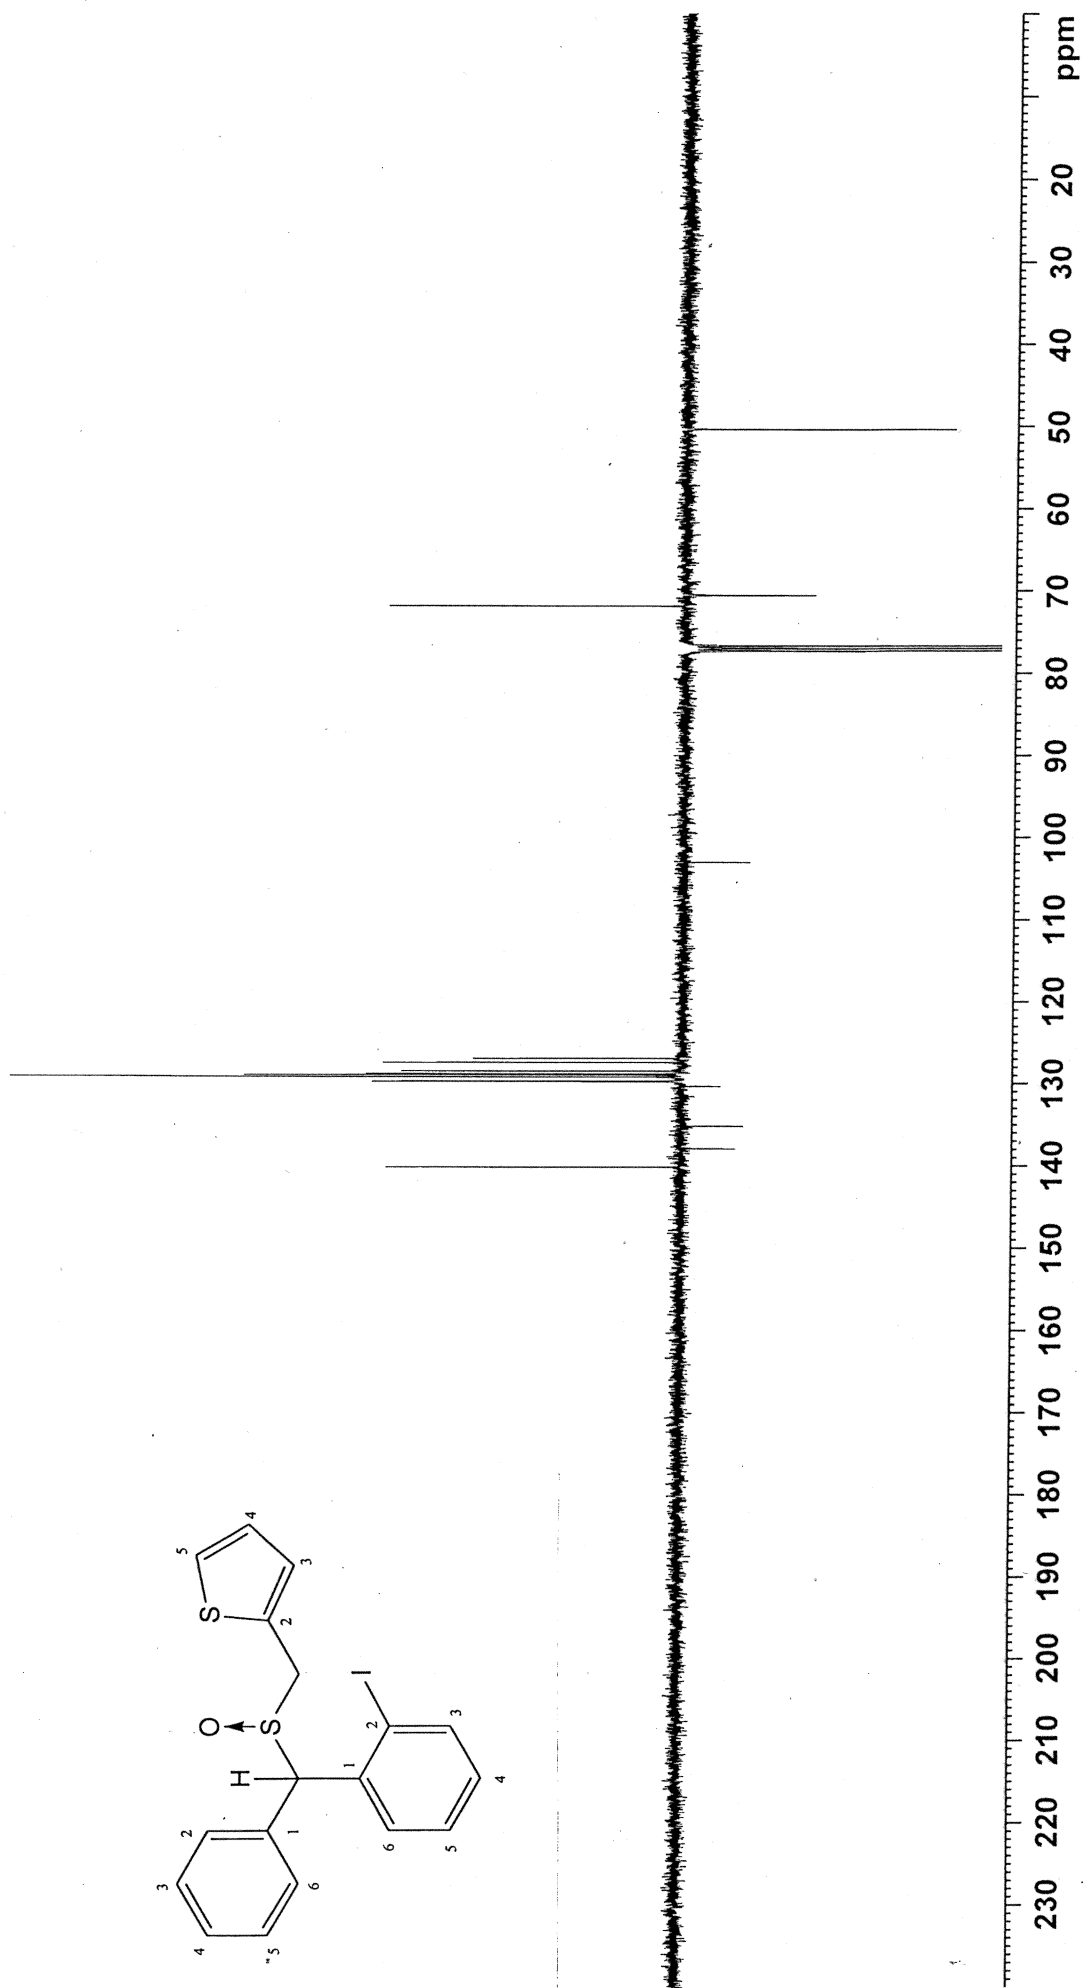

MK-031p4 in cdcl3 (APT, 100 MHz) 29.4.2022

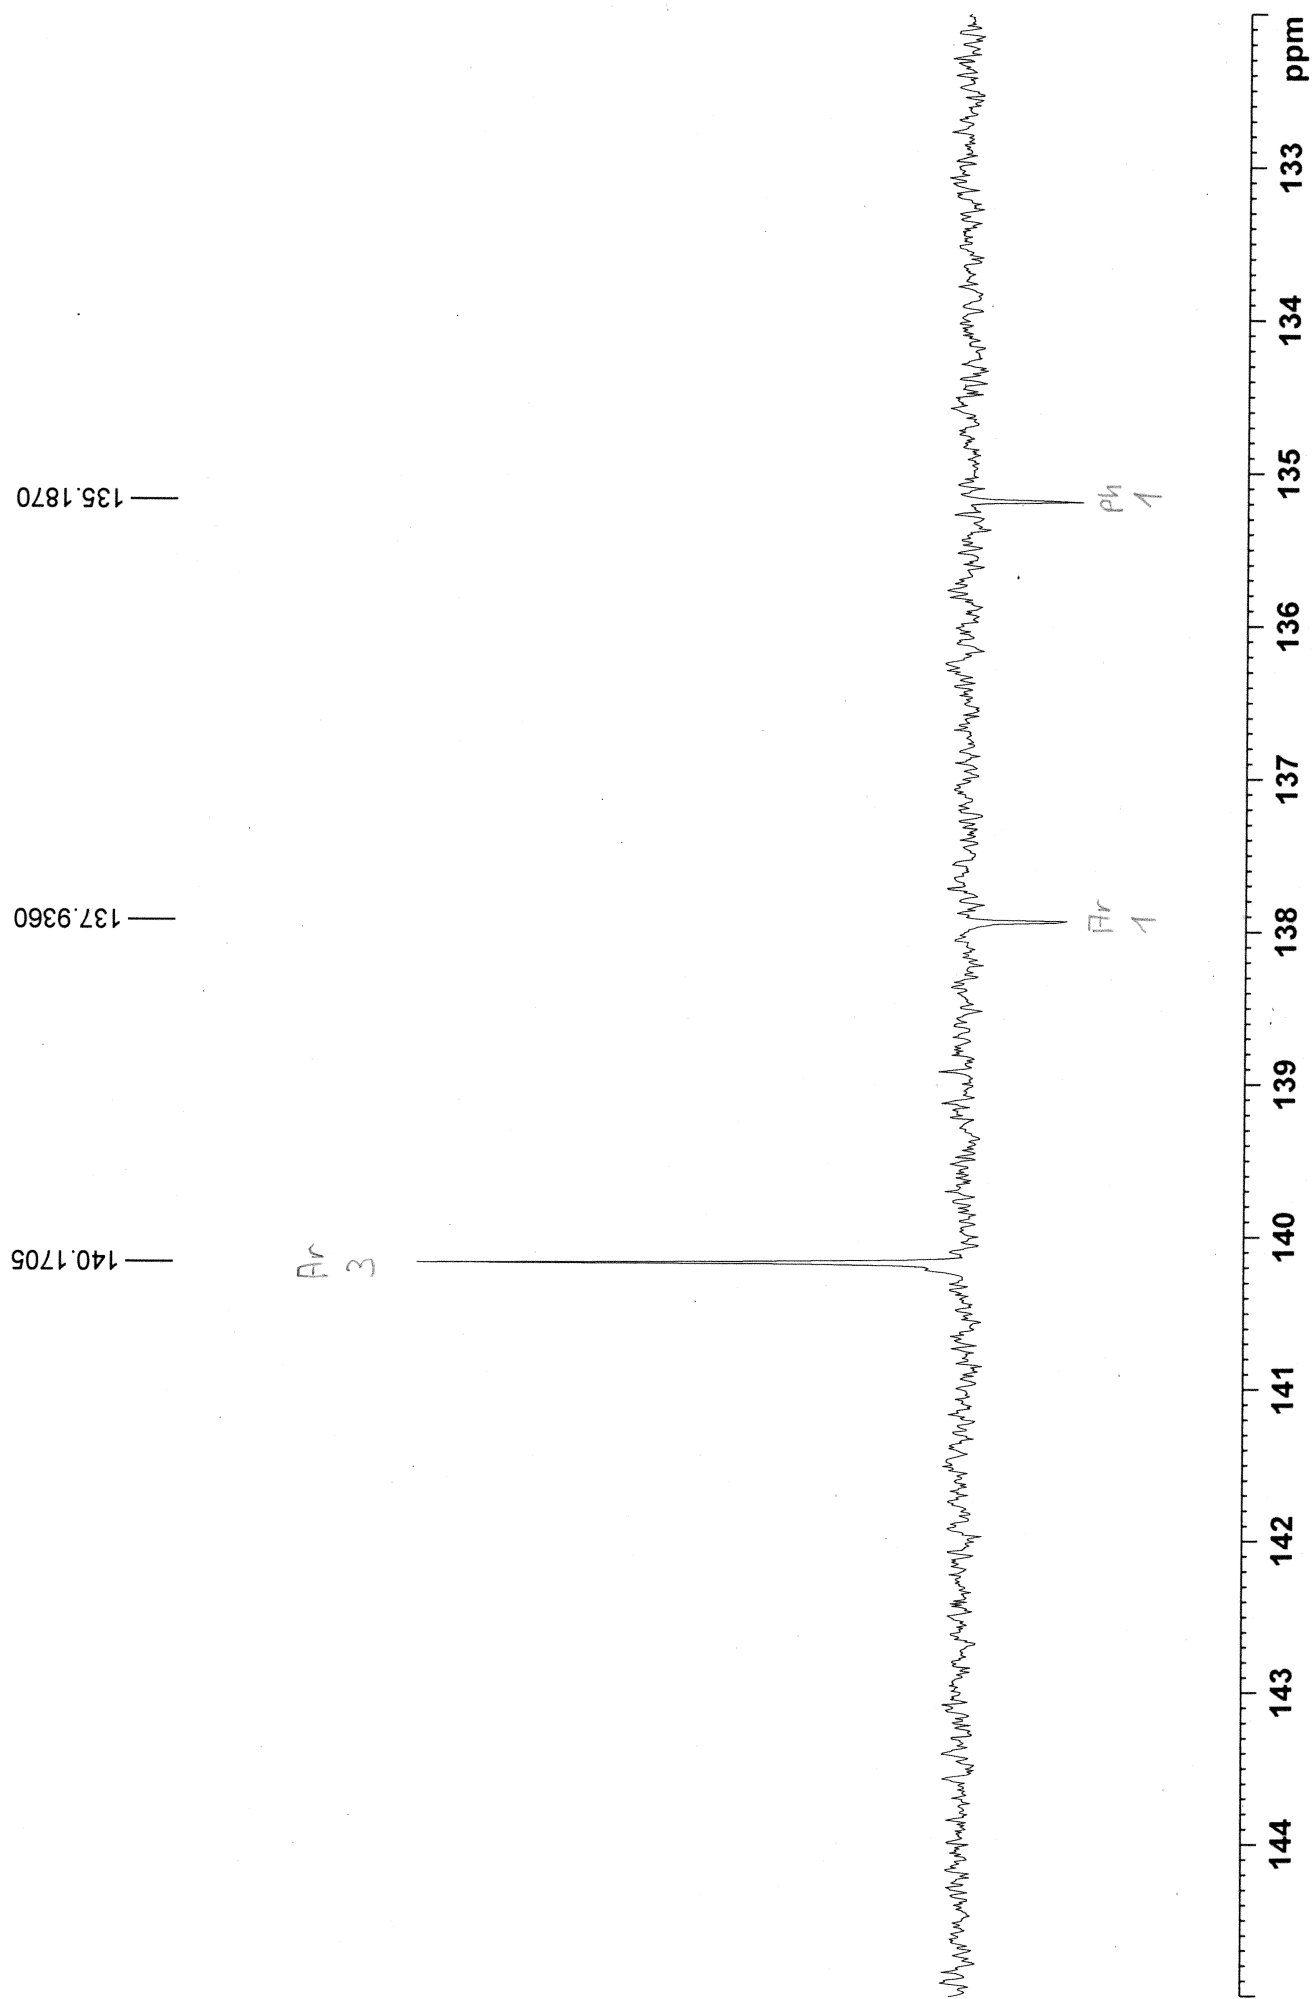

MK-031p4 in cdcl3 (APT, 100 MHz) 29.4.2022

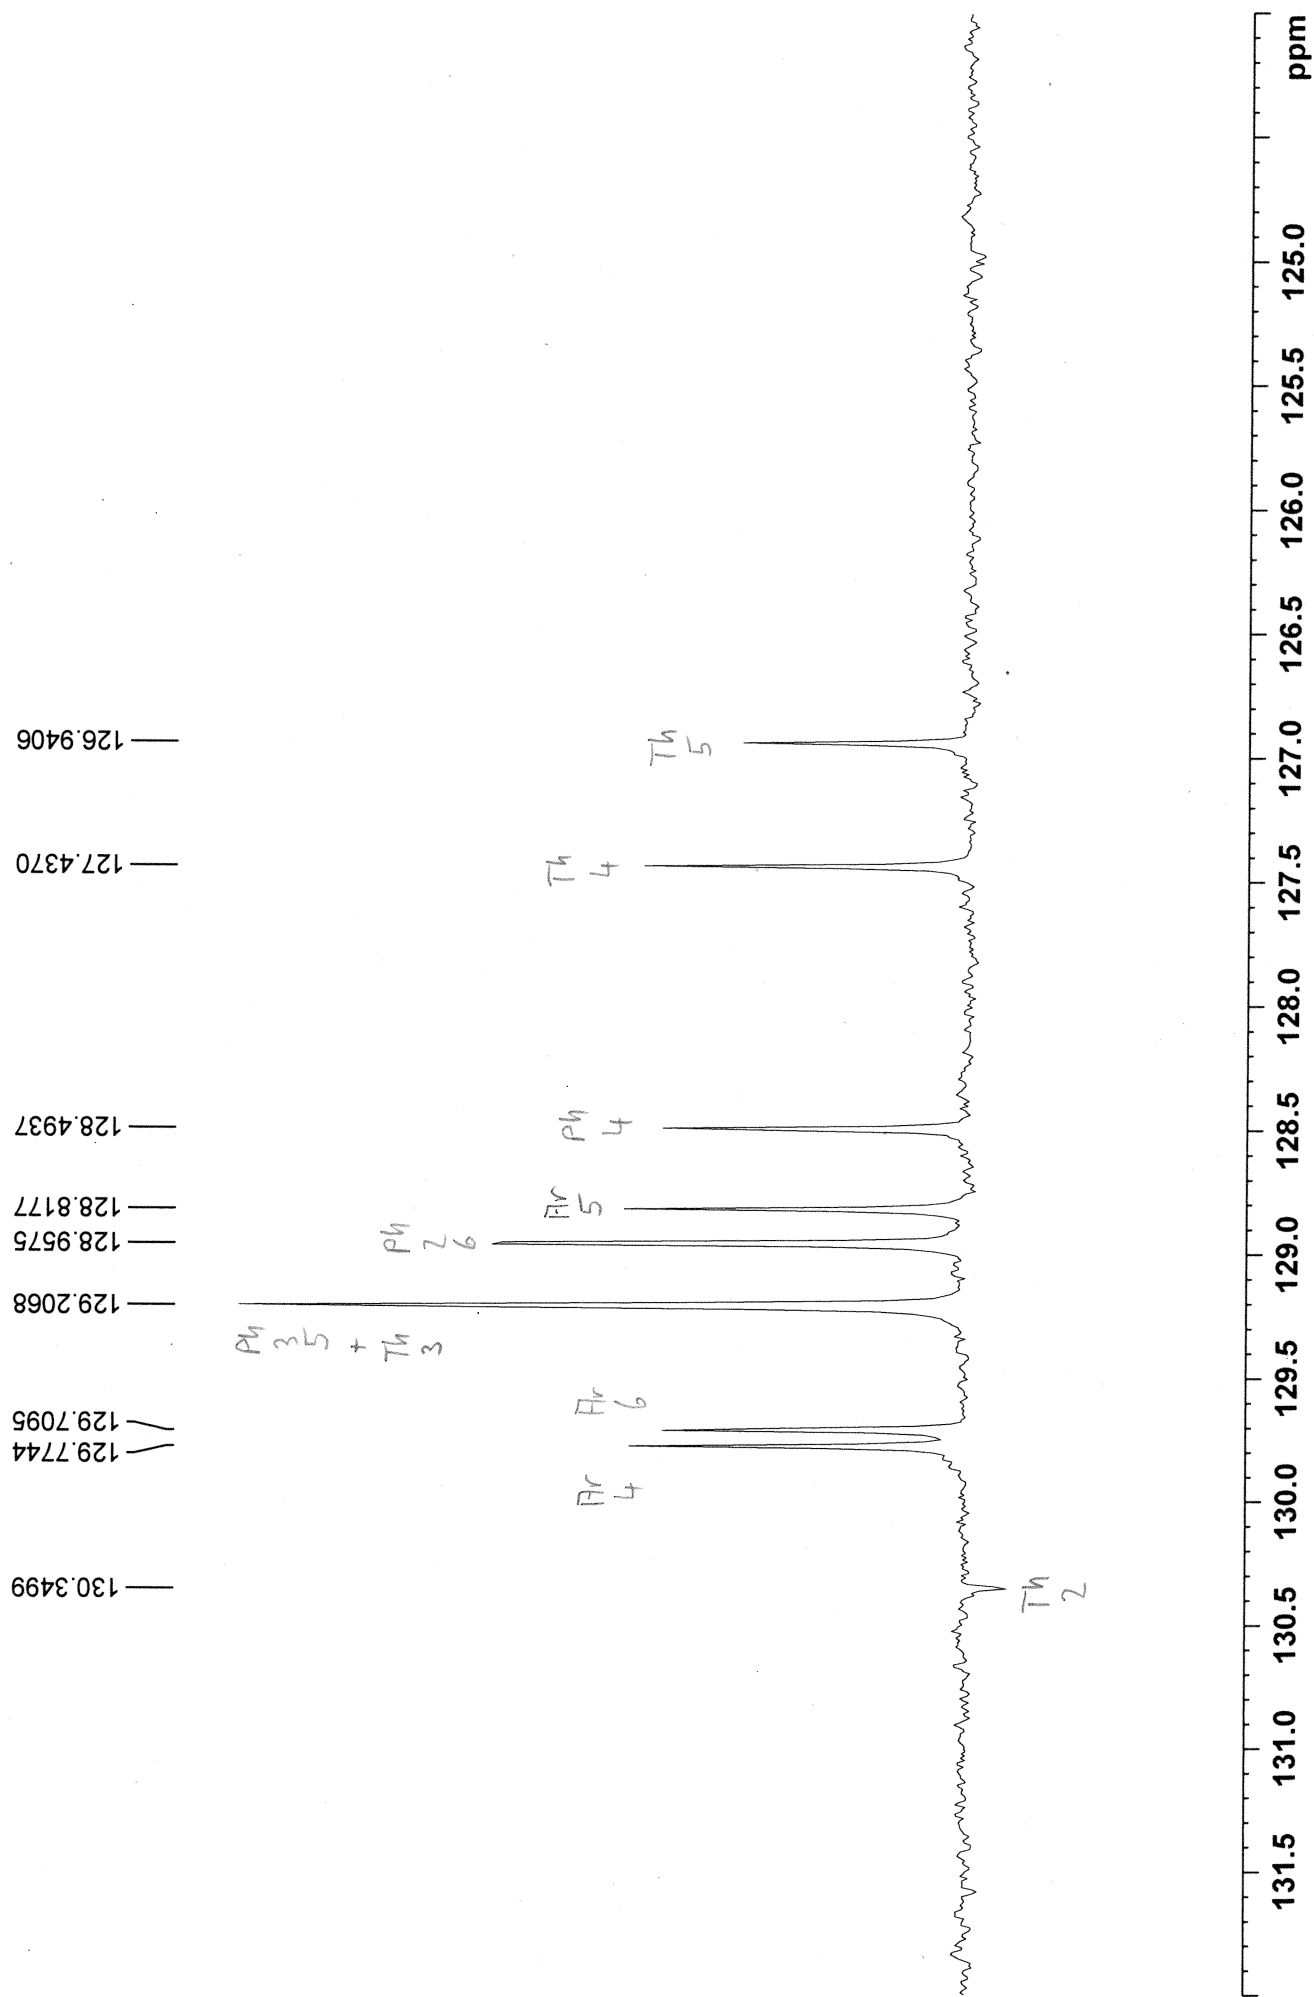

MK-031p4 in cdcl3 (APT, 100 MHz) 29.4.2022

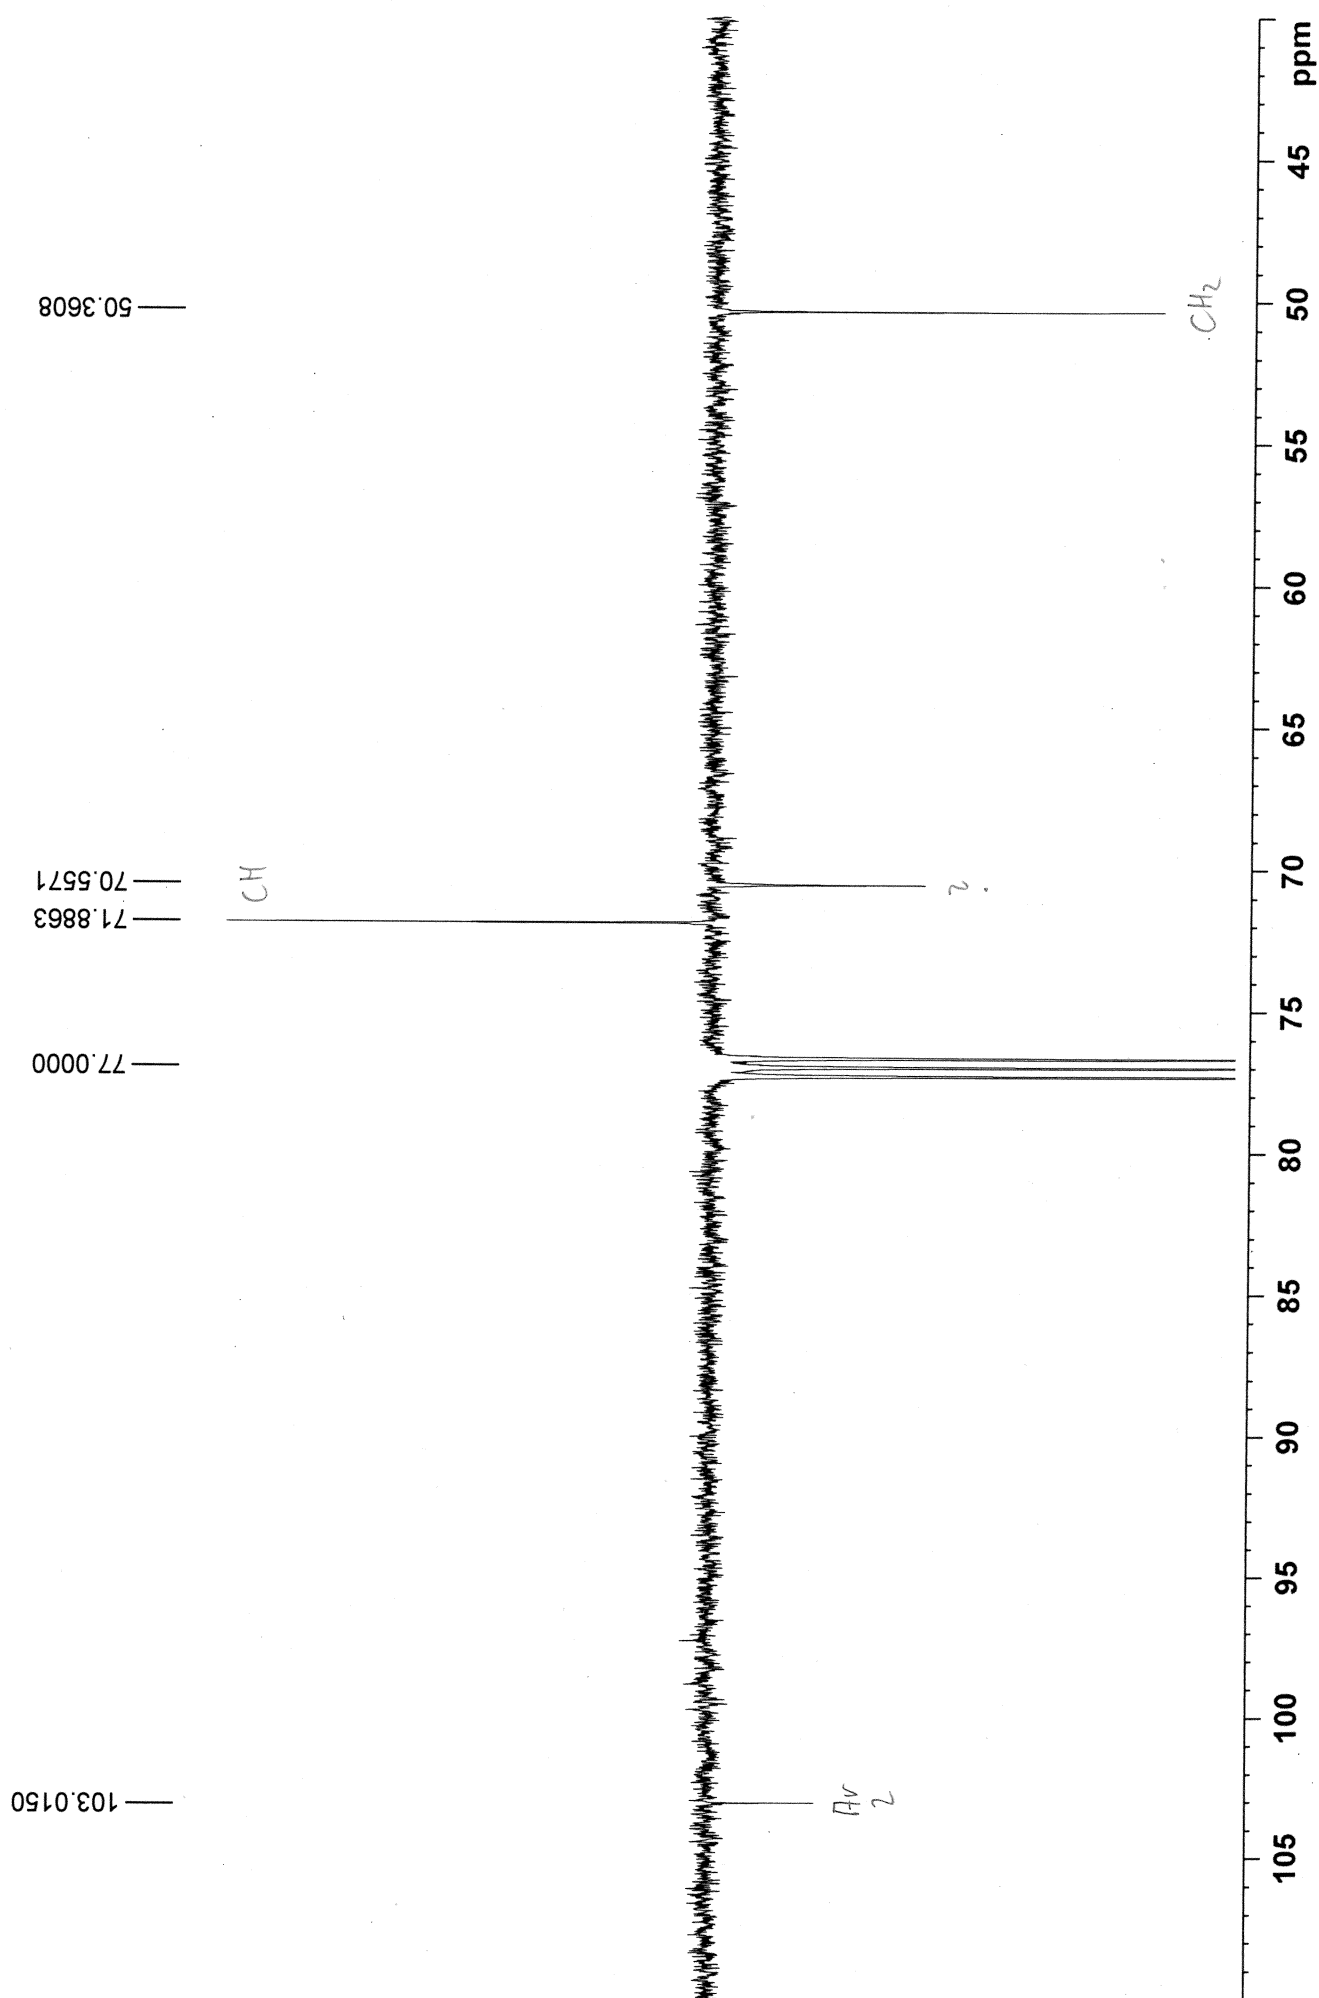

MK-031p4 in cdcl3 (COSY, 400 MHz) 29.4.2022

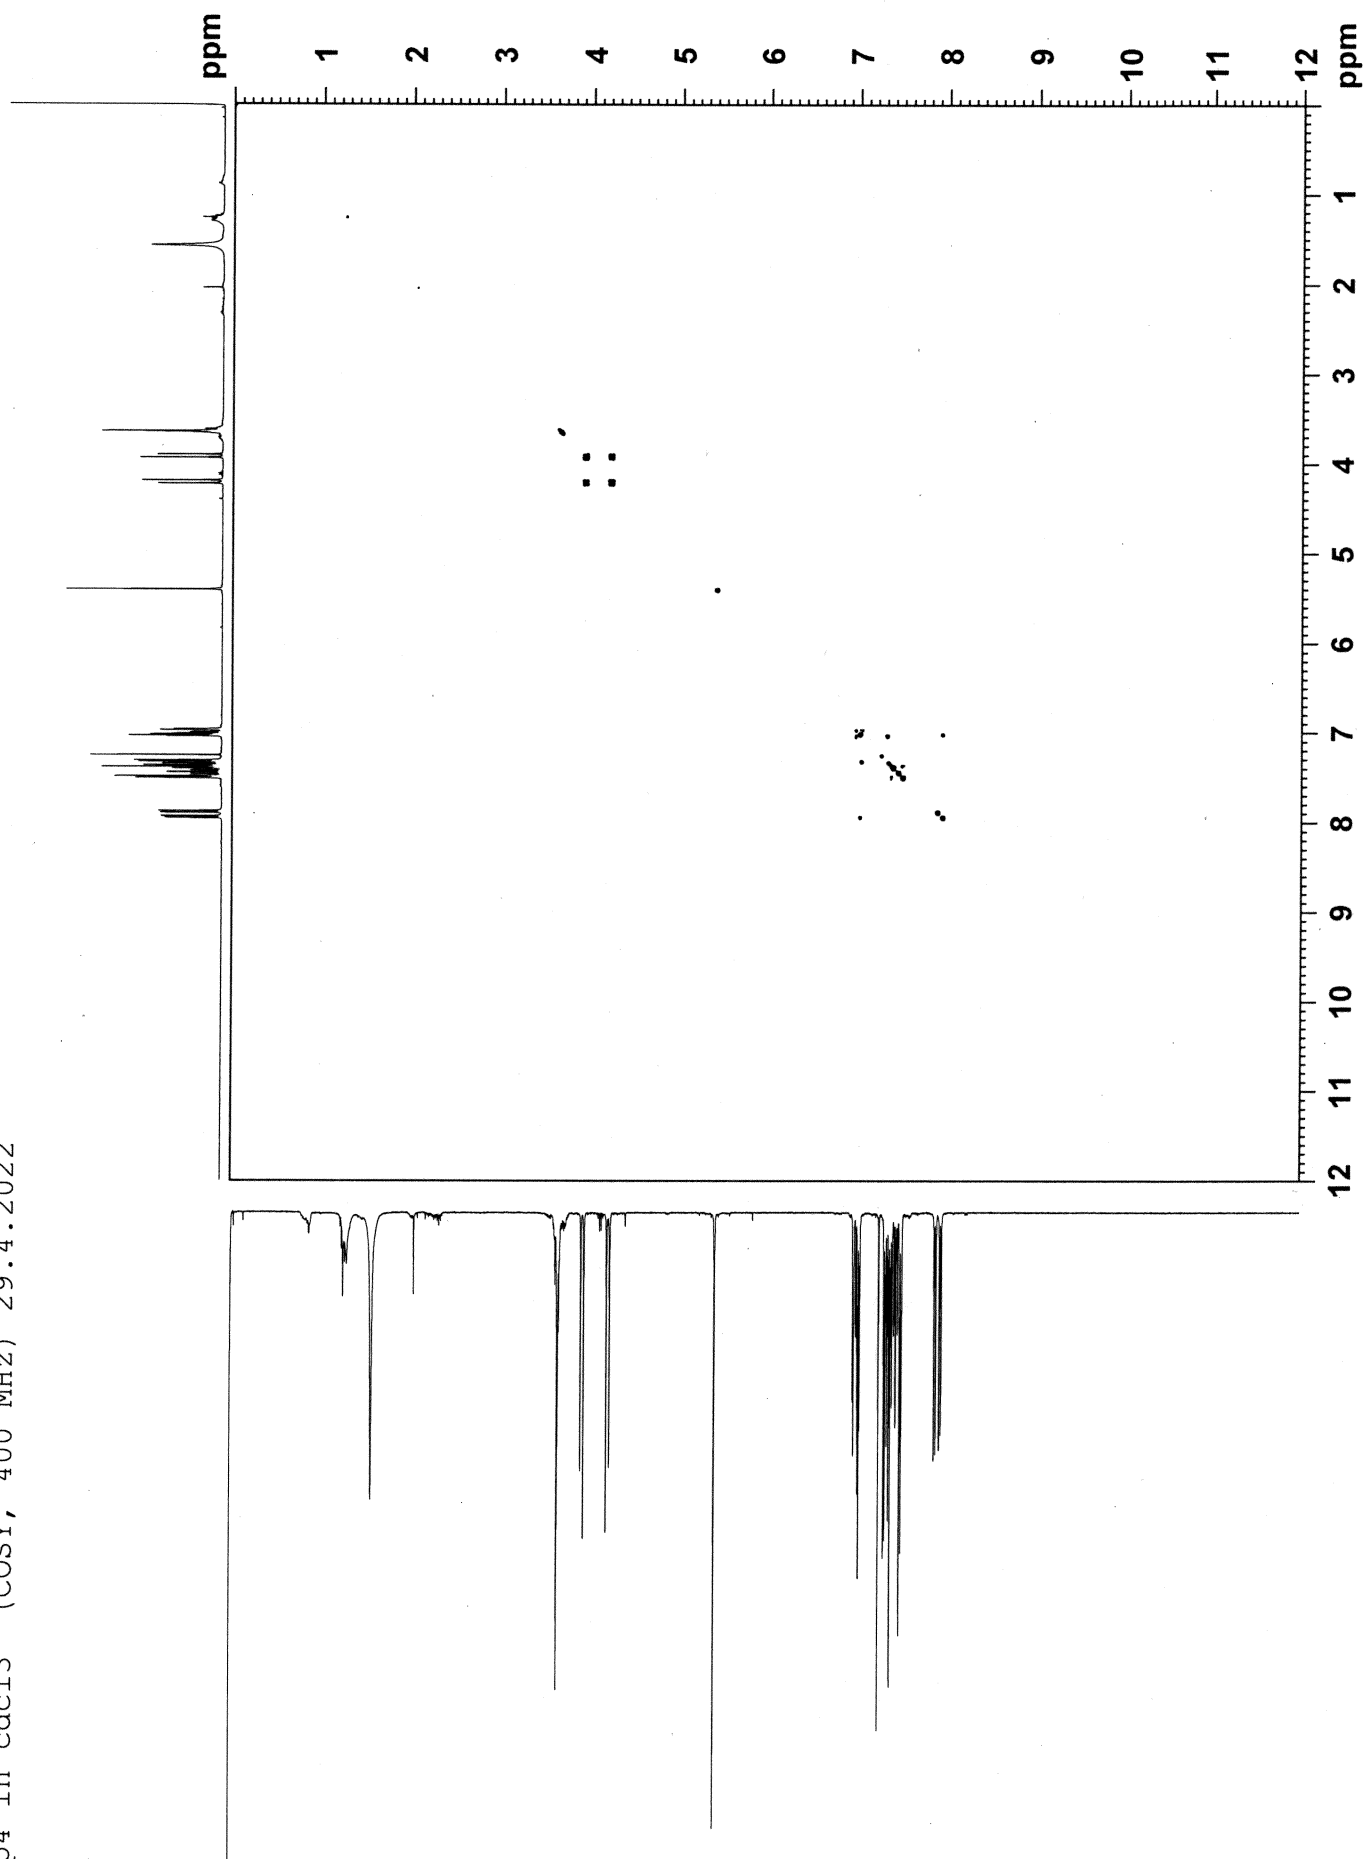

MK-031p4 in cdcl3 (COSY, 400 MHz) 29.4.2022

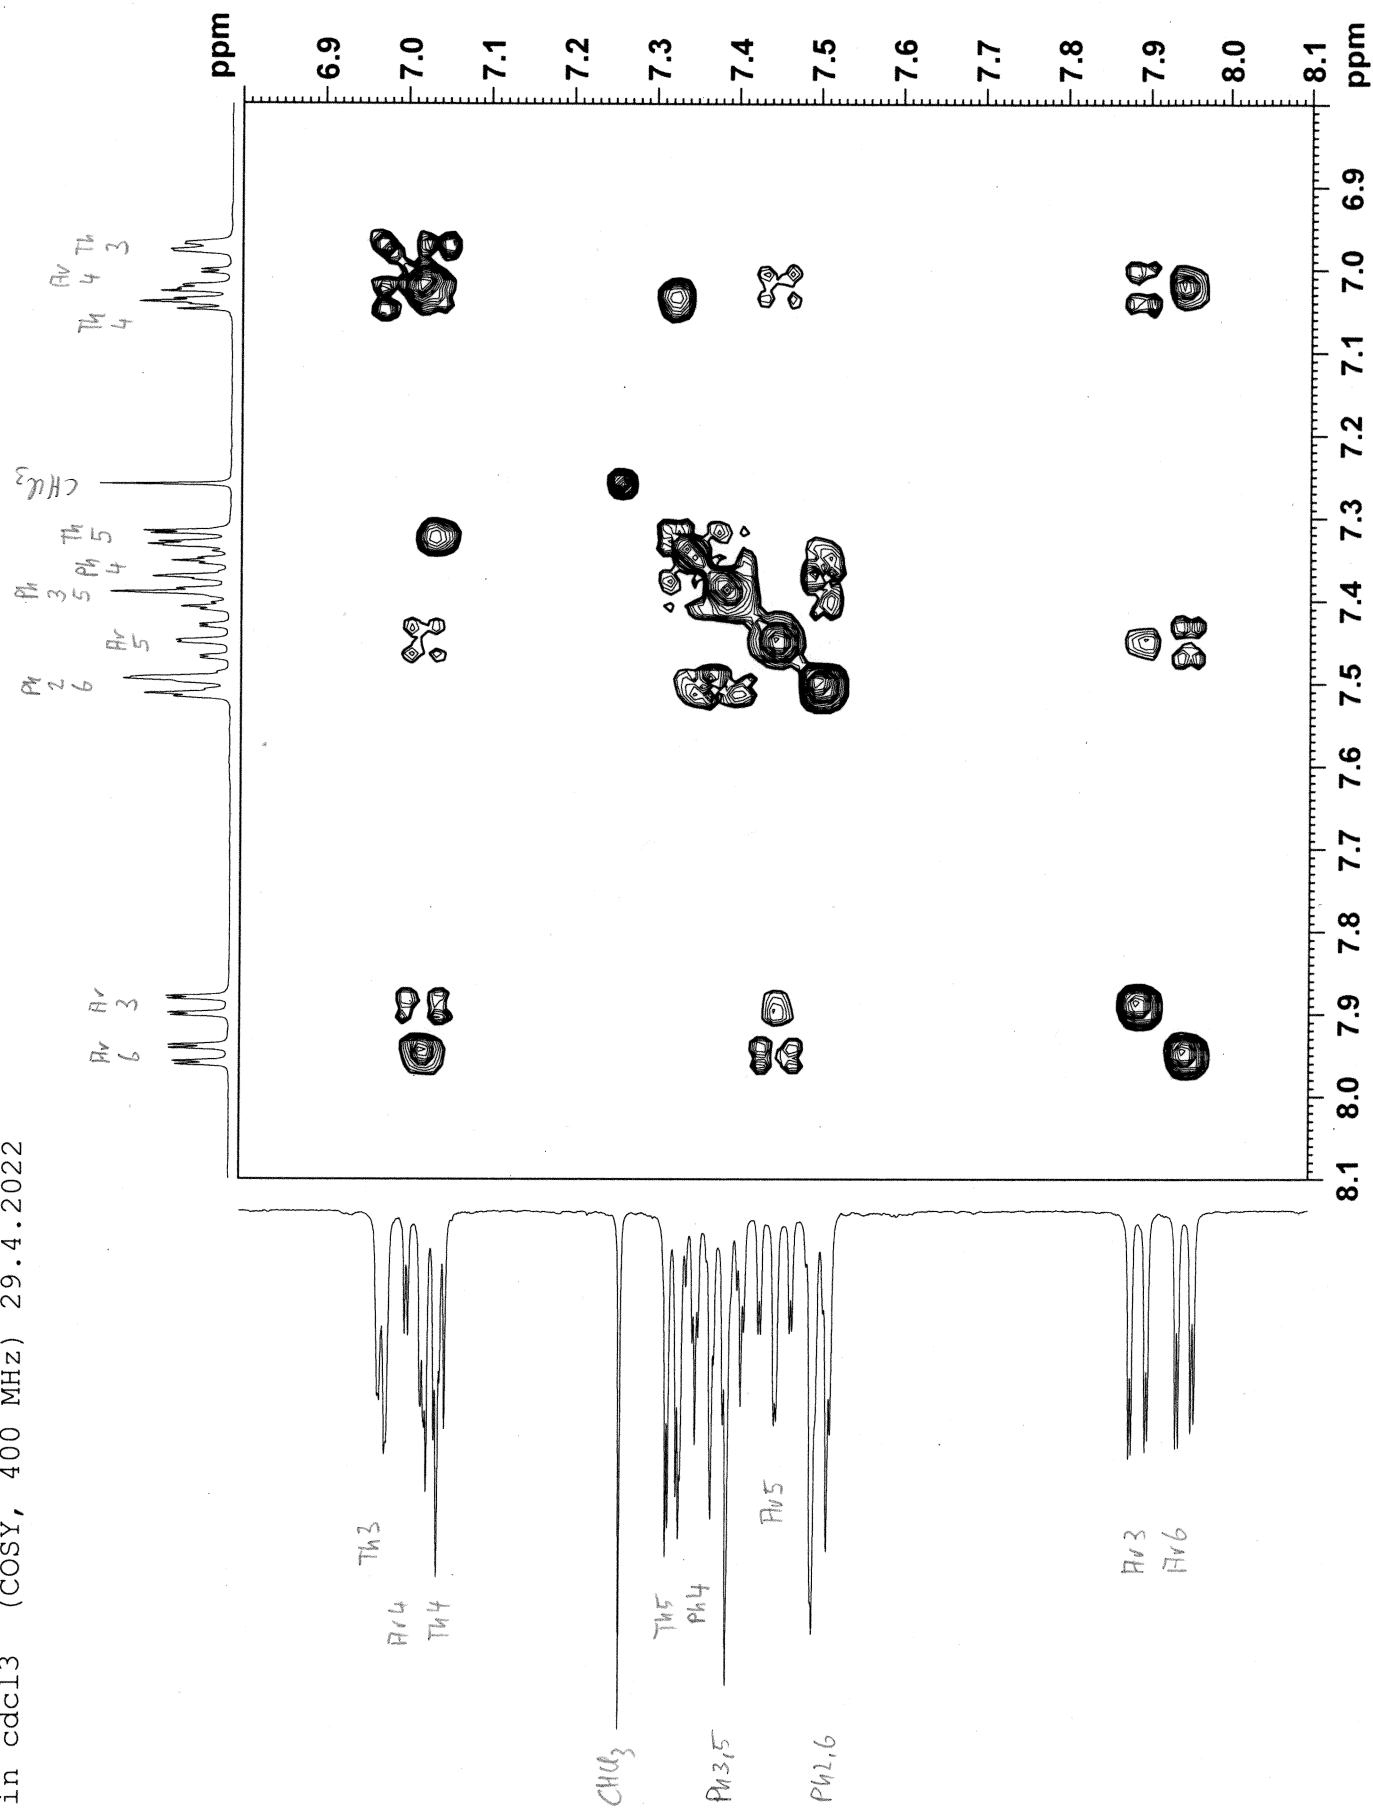

MK-031p4 in cdcl3 (COSY, 400 MHz) 29.4.2022

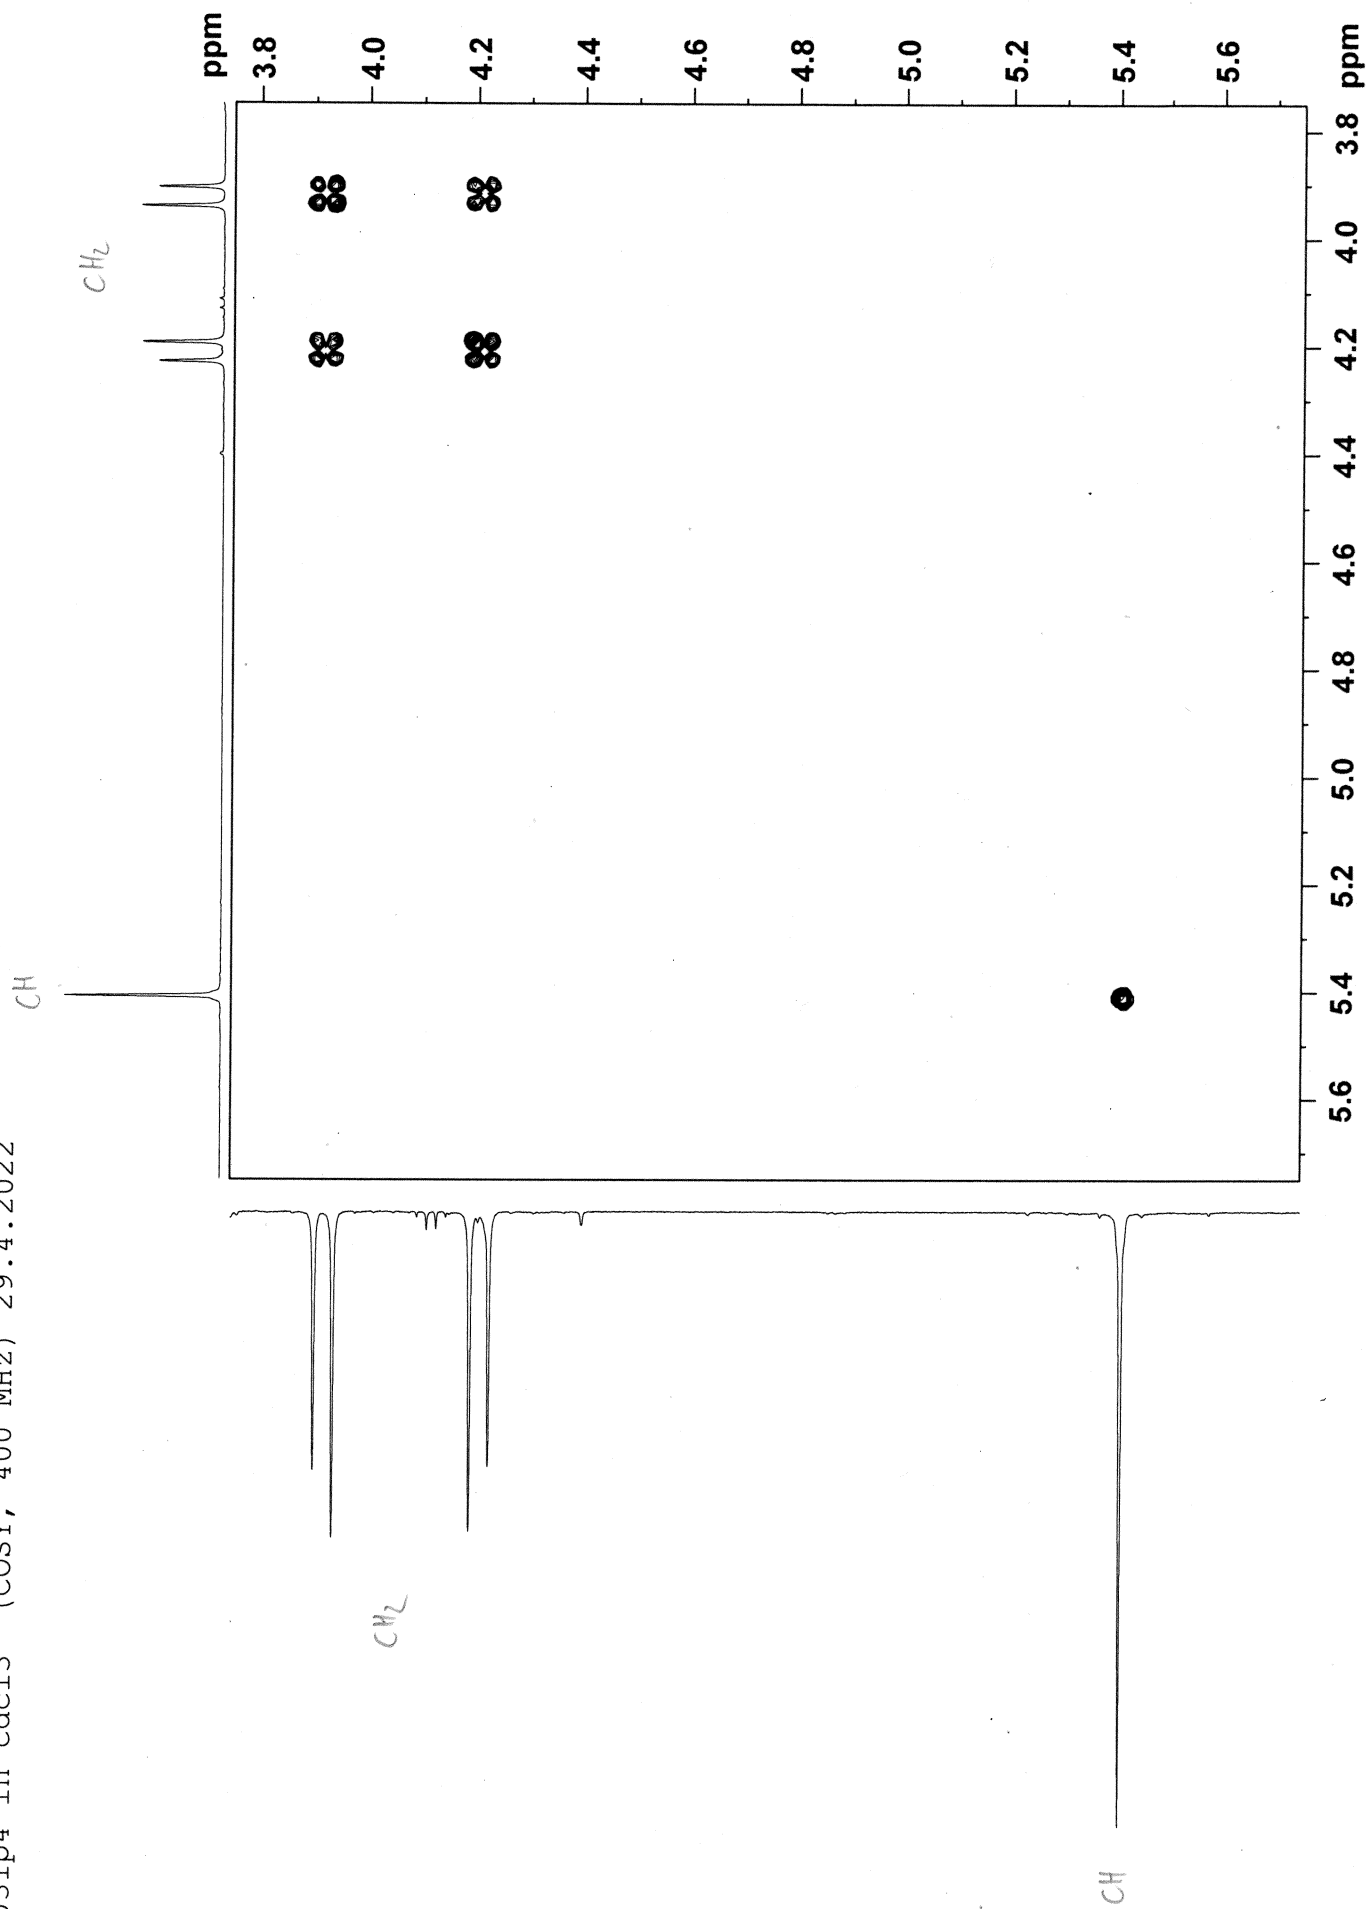

MK-031p4 in cdcl3 (HSQC, 400 MHz) 29.4.2022

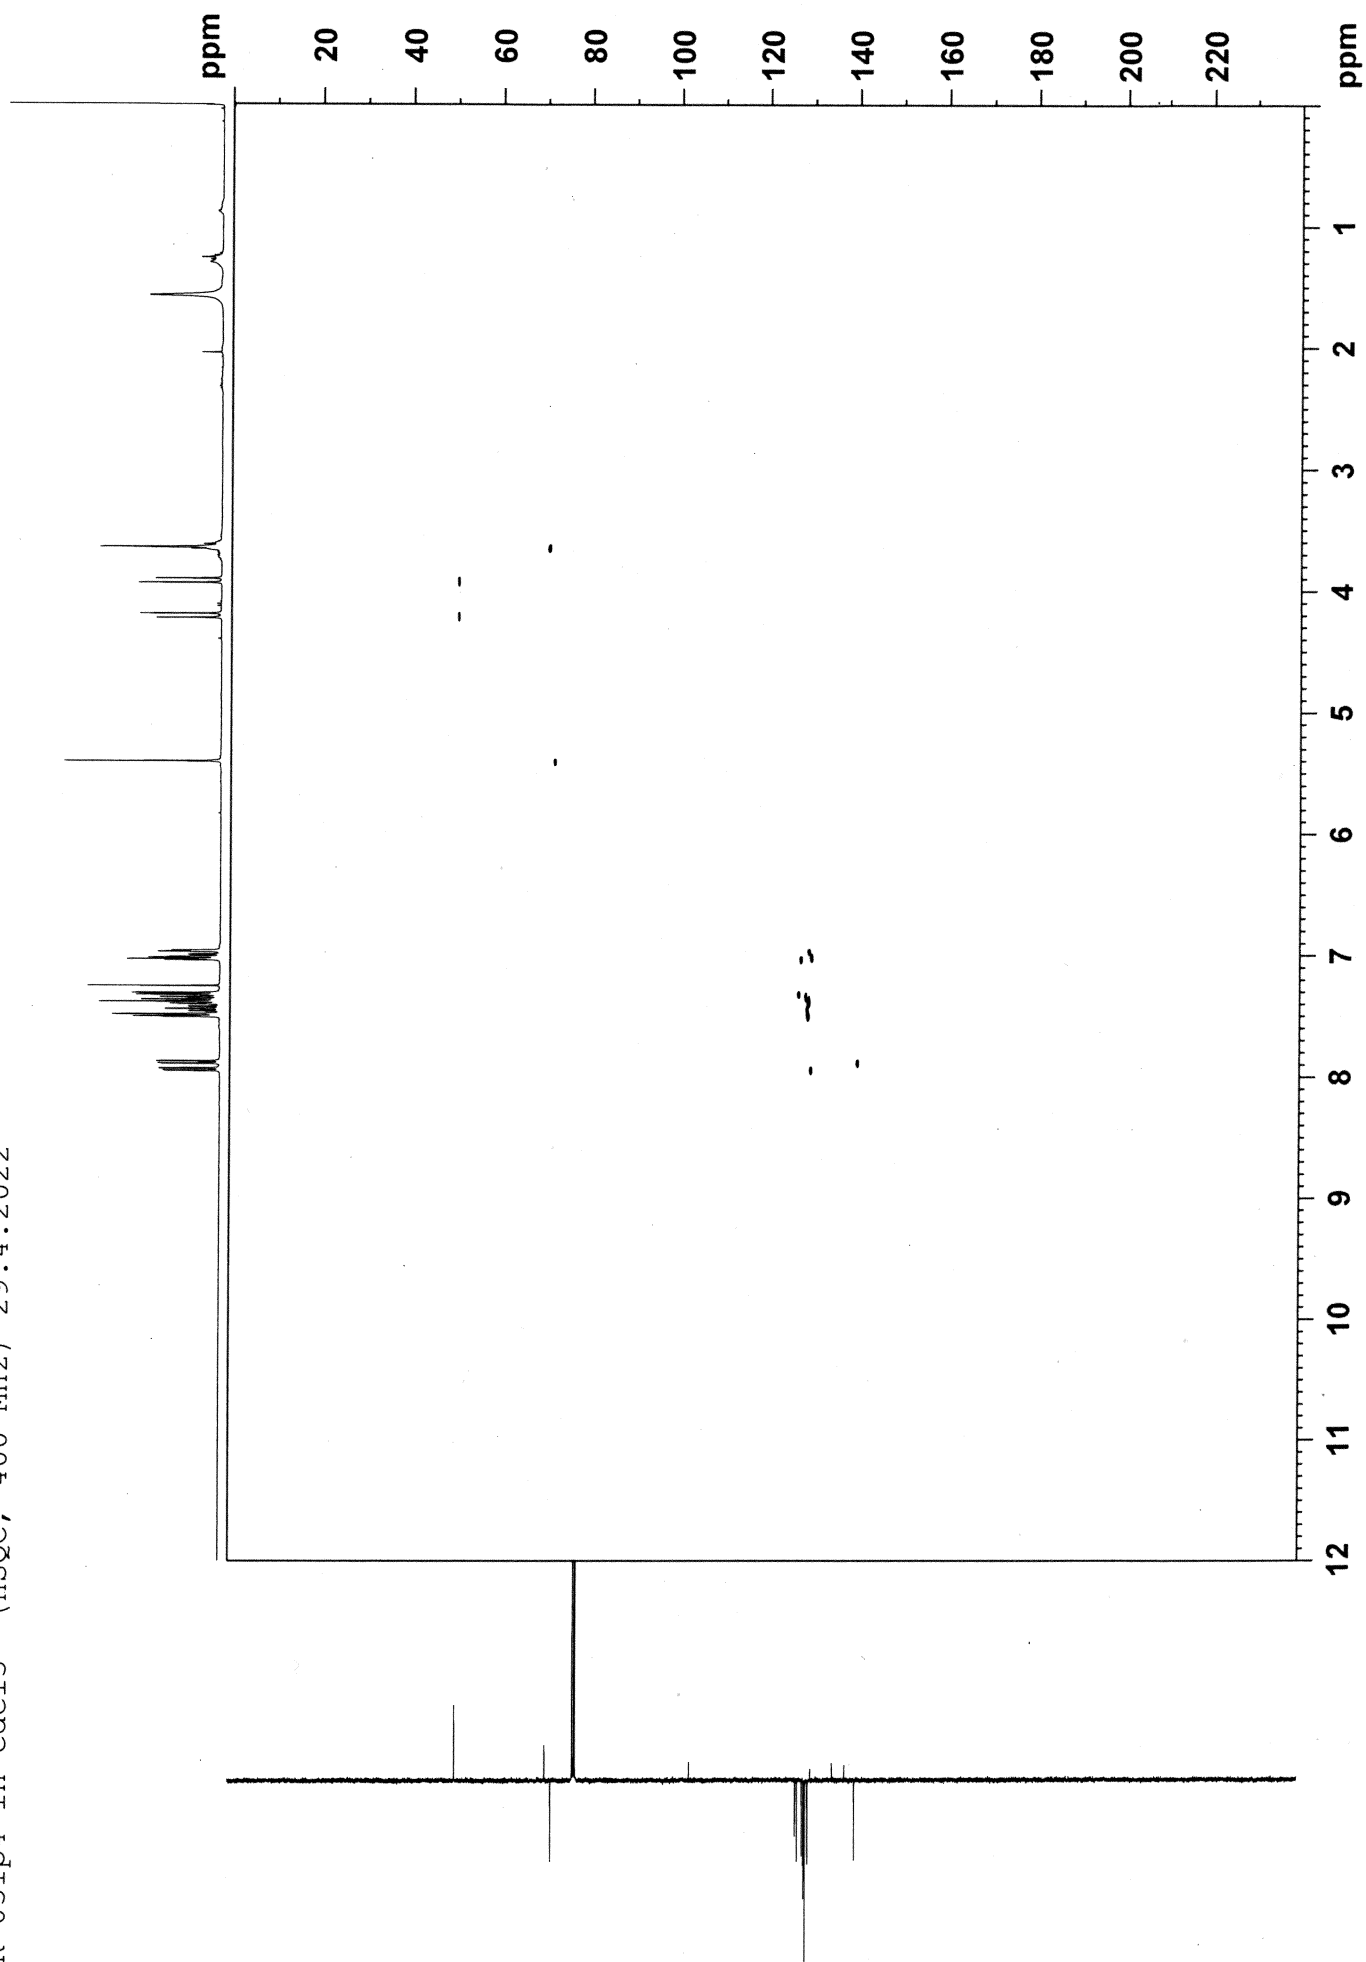



MK-031p4 in cdcl3 (HSQC, 400 MHz) 29.4.2022

Fv3

Fv6

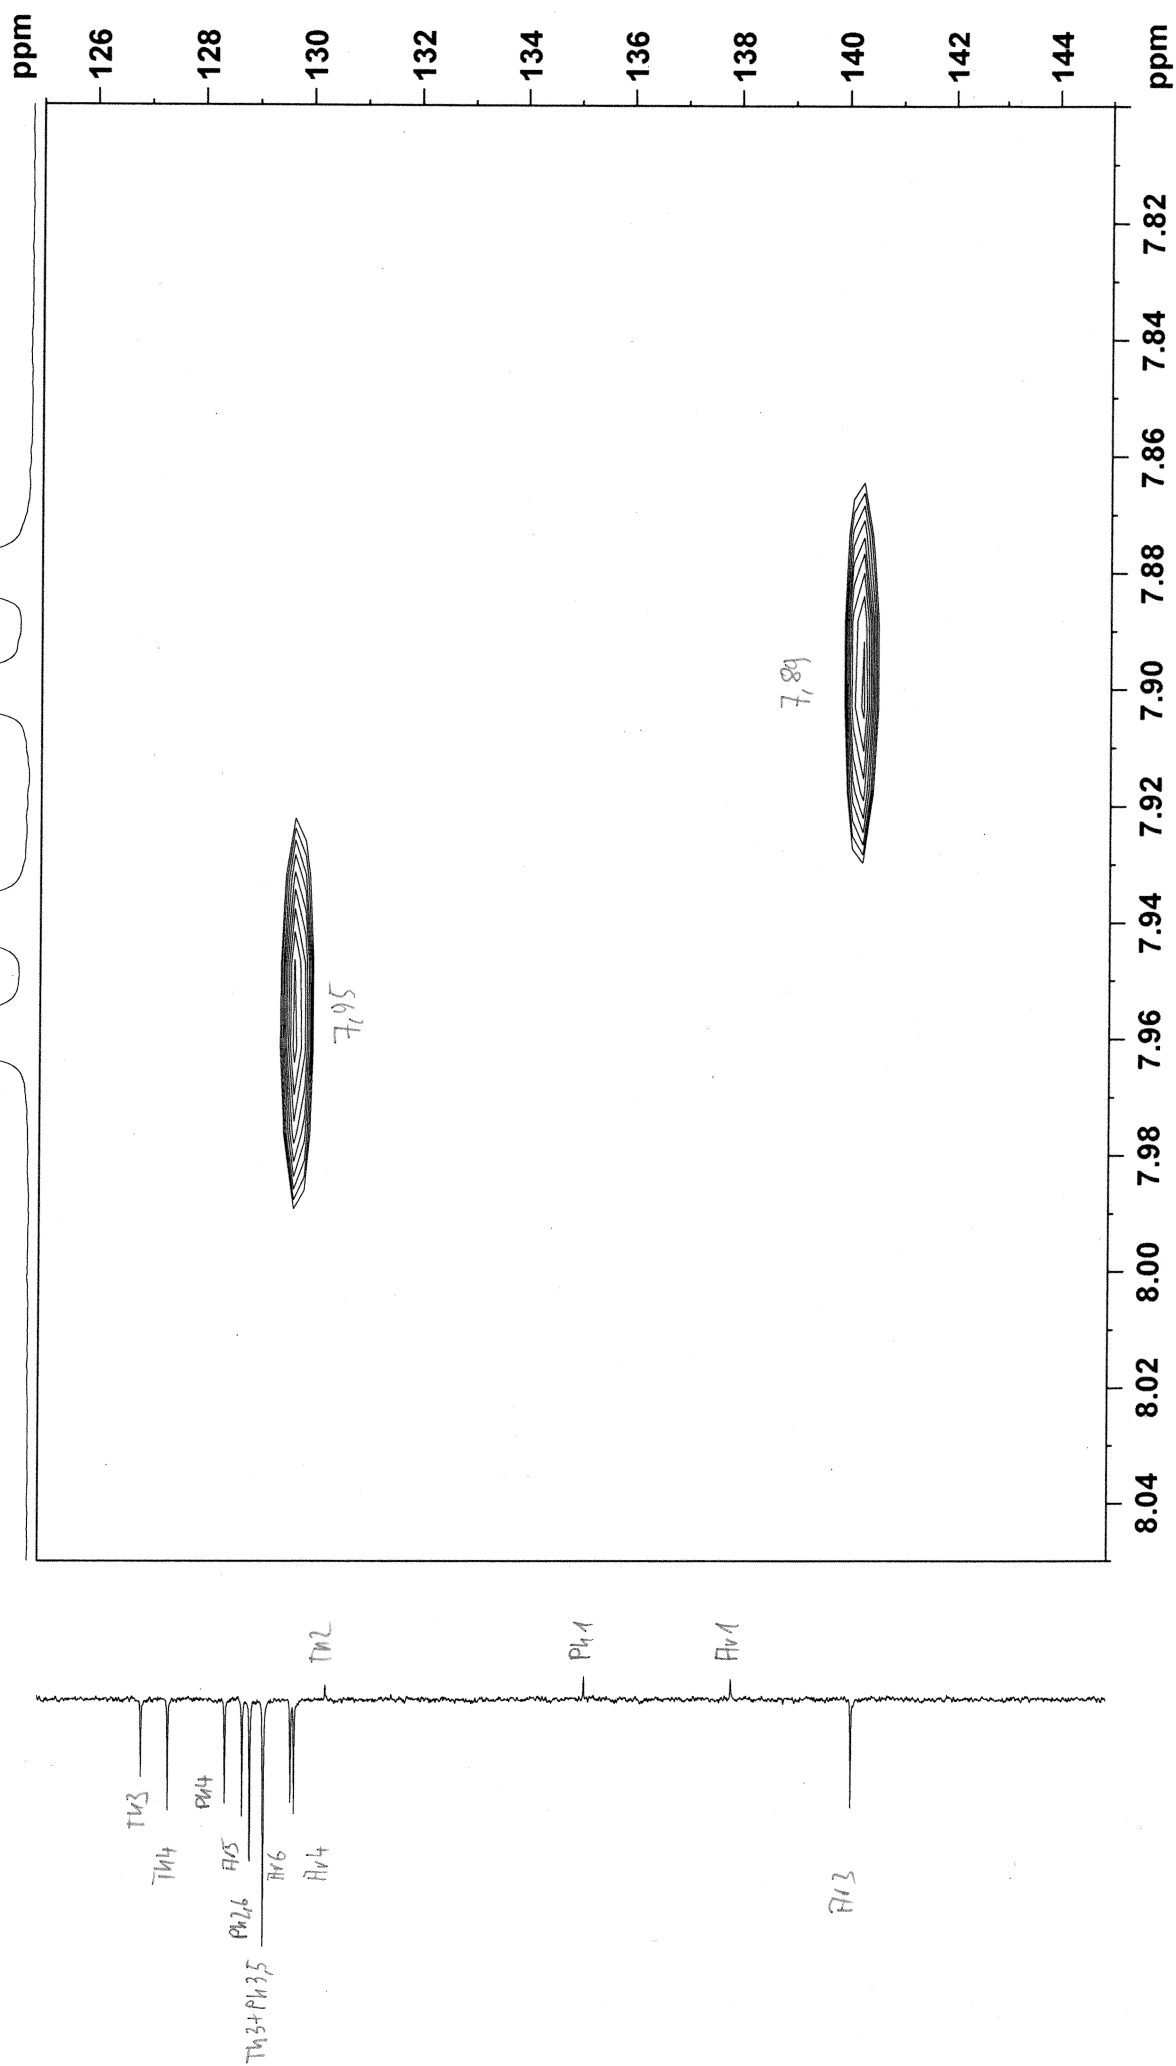

MK-031p4 in cdcl3 (HSQC, 400 MHz) 29.4.2022

Th5

Ph

Ar

Ph

Th

(H<sub>2</sub>O)

Th

Ar

Th

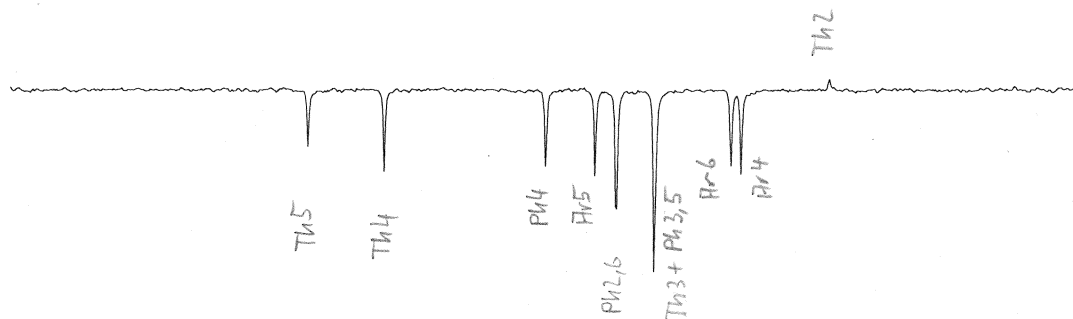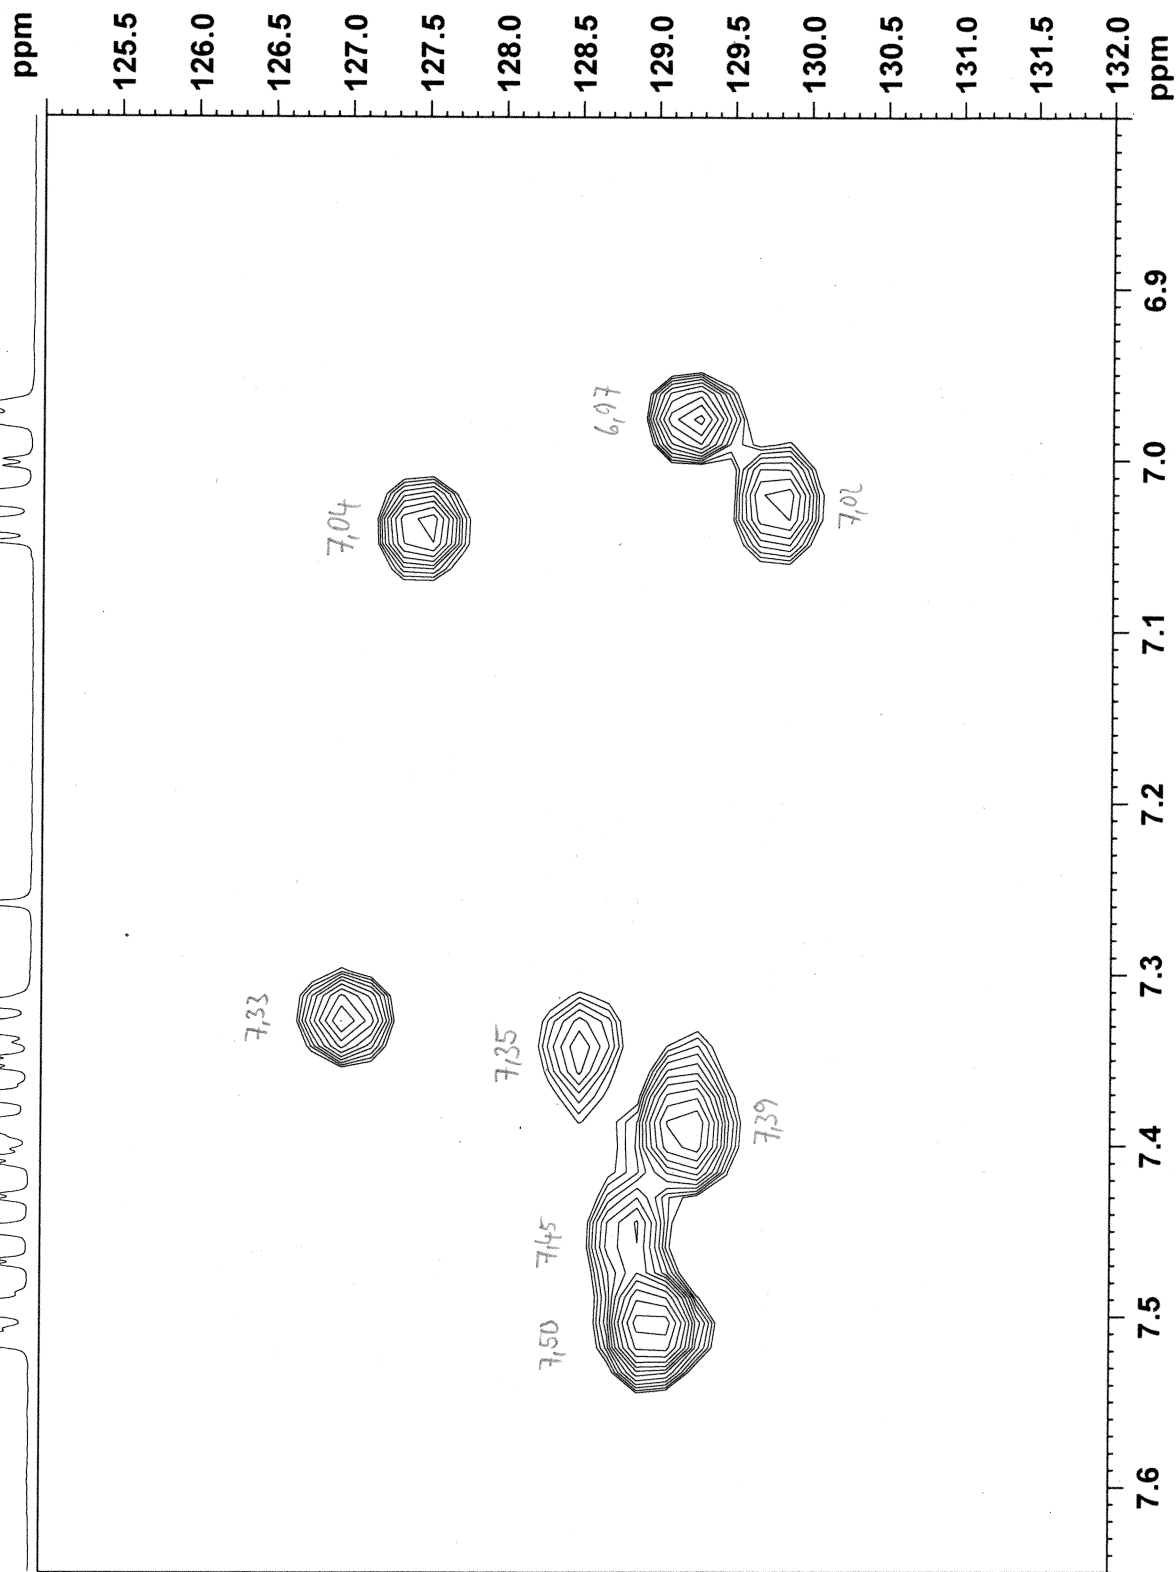

MK-031p4 in cdcl3 (HSQC, 400 MHz) 29.4.2022

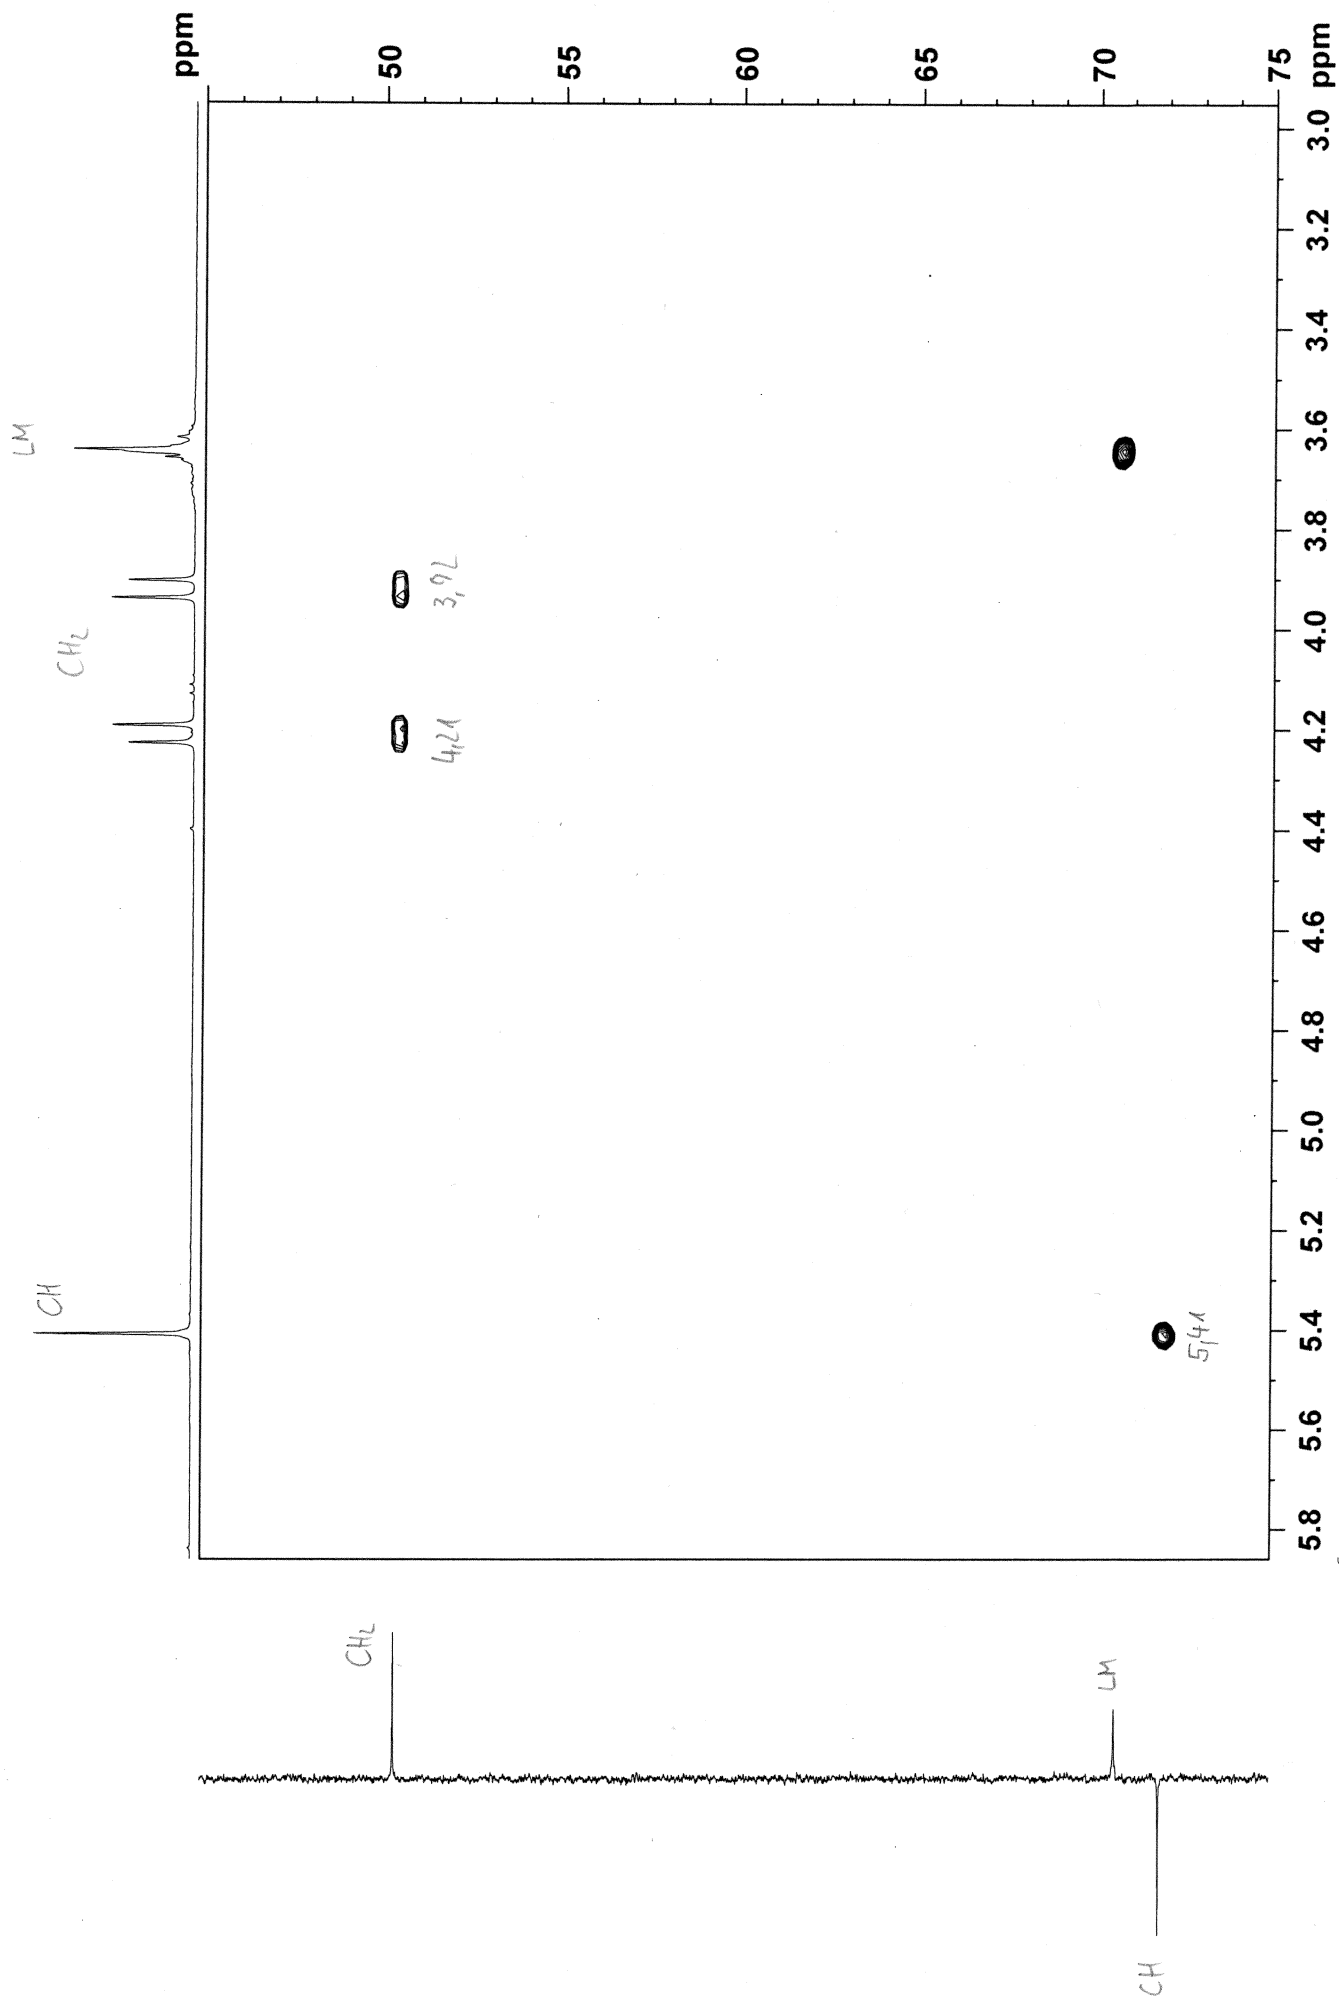

MK-031p4 in cdcl3 (HMBC, 400 MHz) 29.4.2022

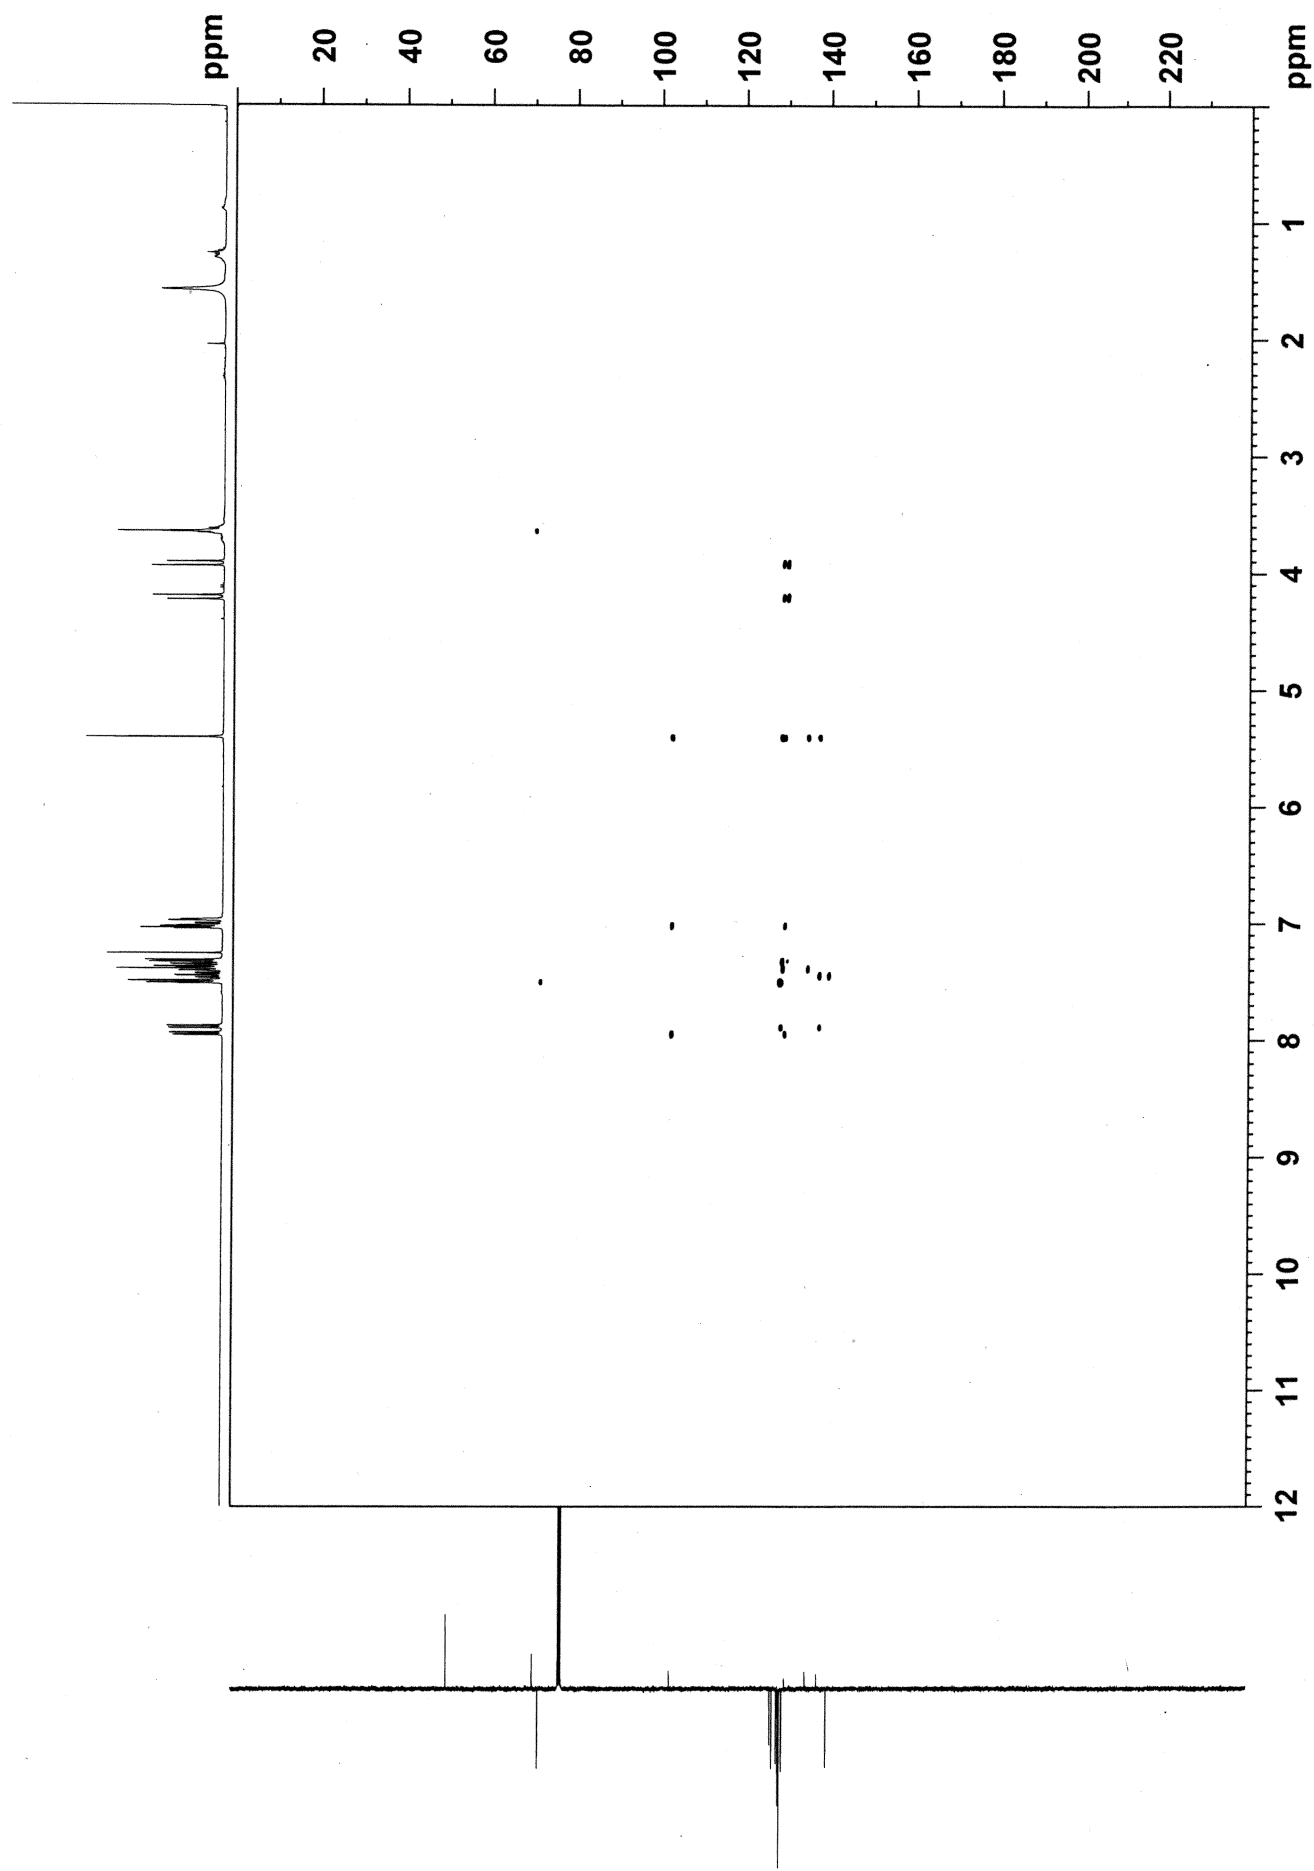

MK-031p4 in cdcl3 (HMBC, 400 MHz) 29.4.2022

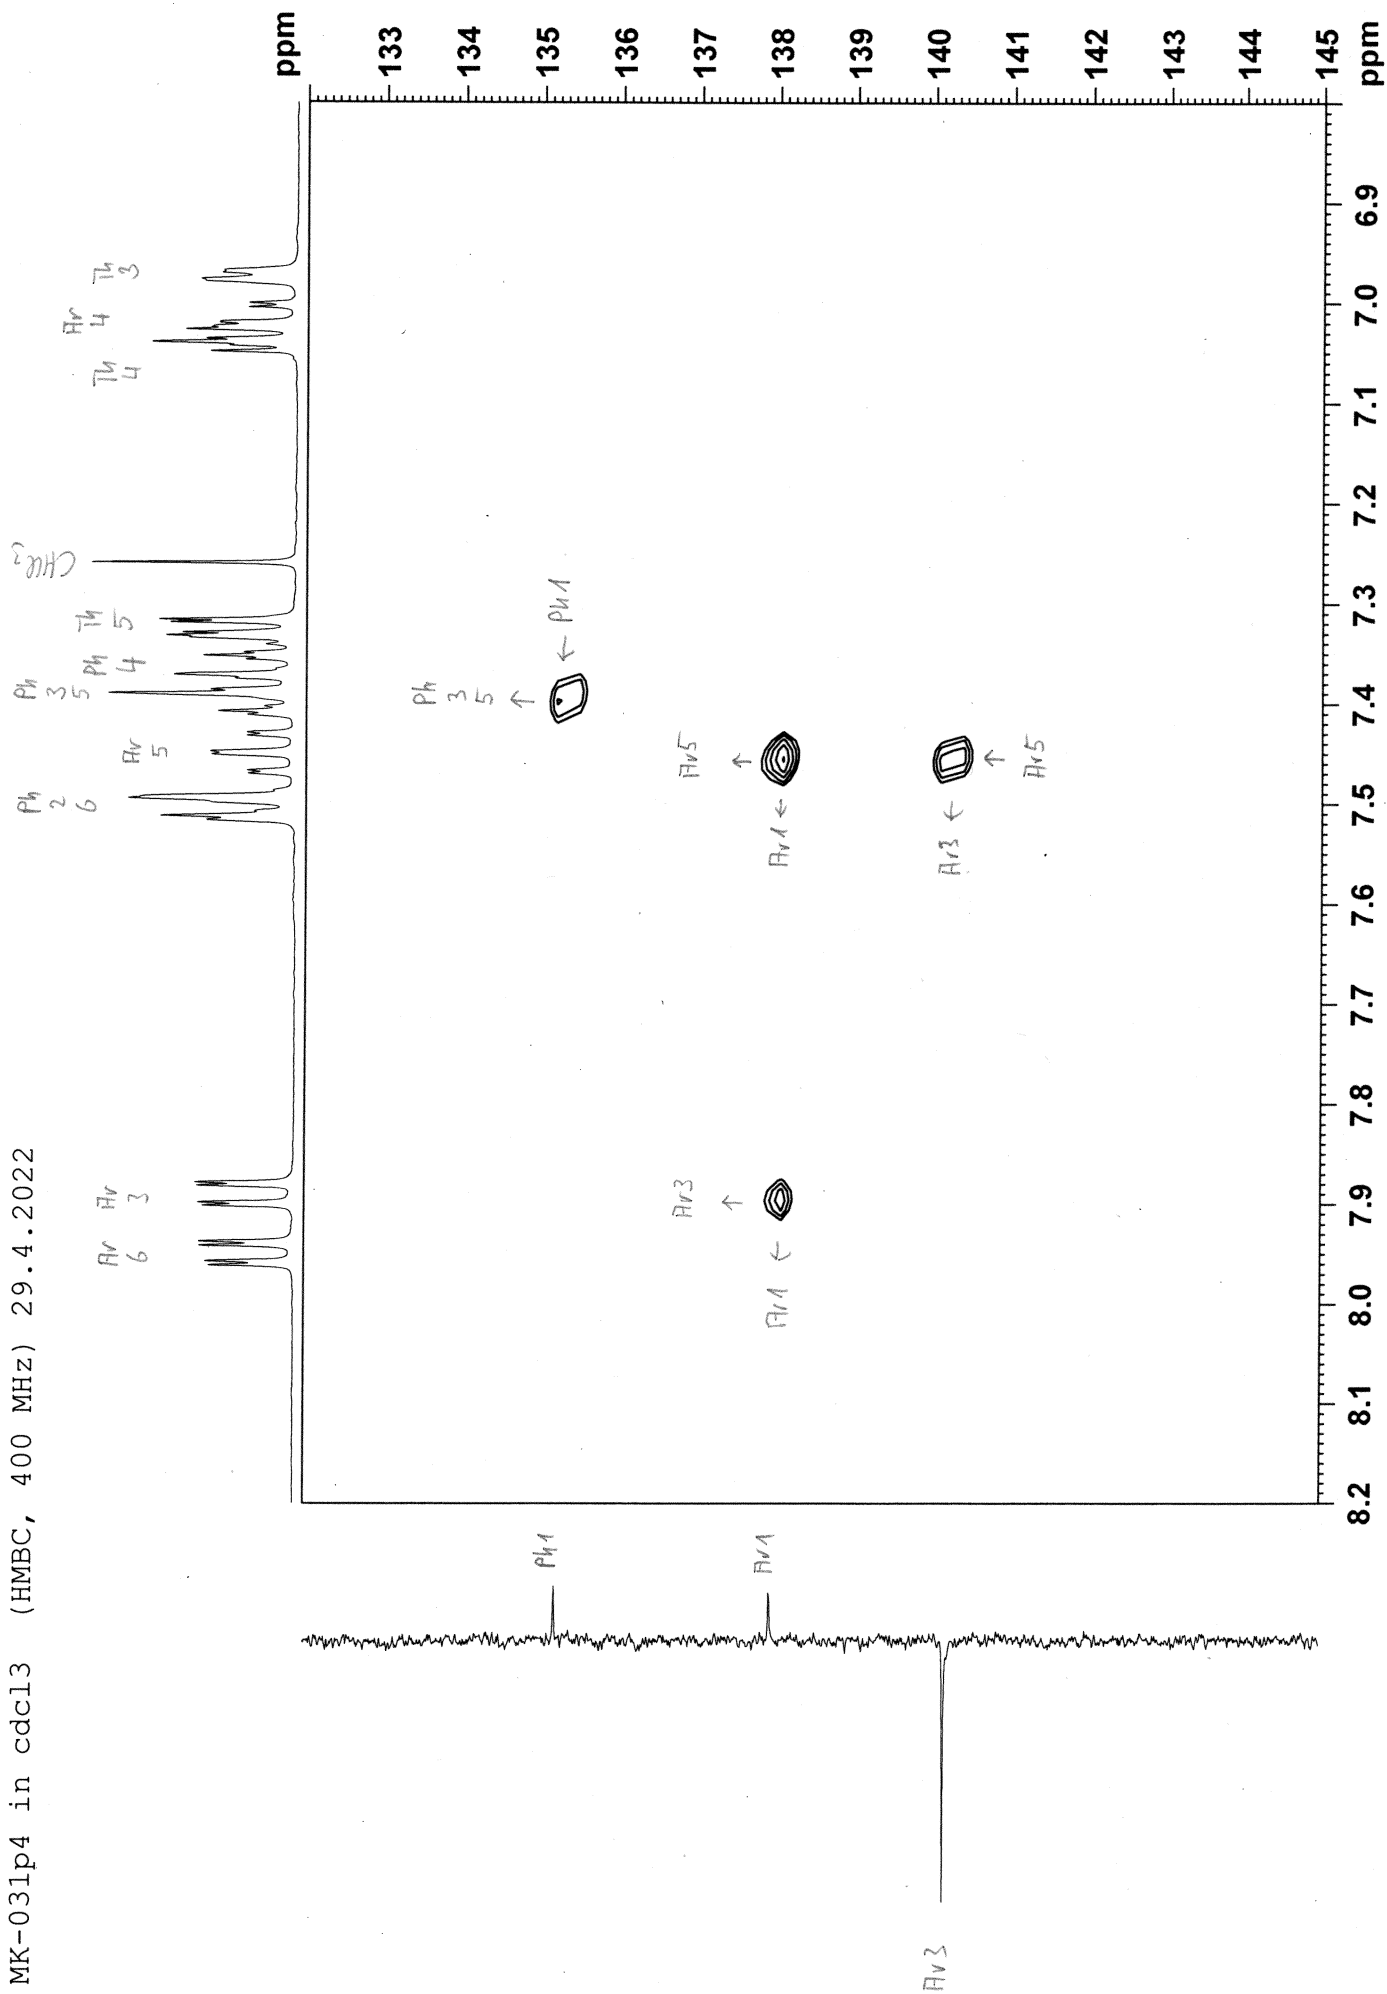

MK-031p4 in cdcl3 (HMBC, 400 MHz) 29.4.2022

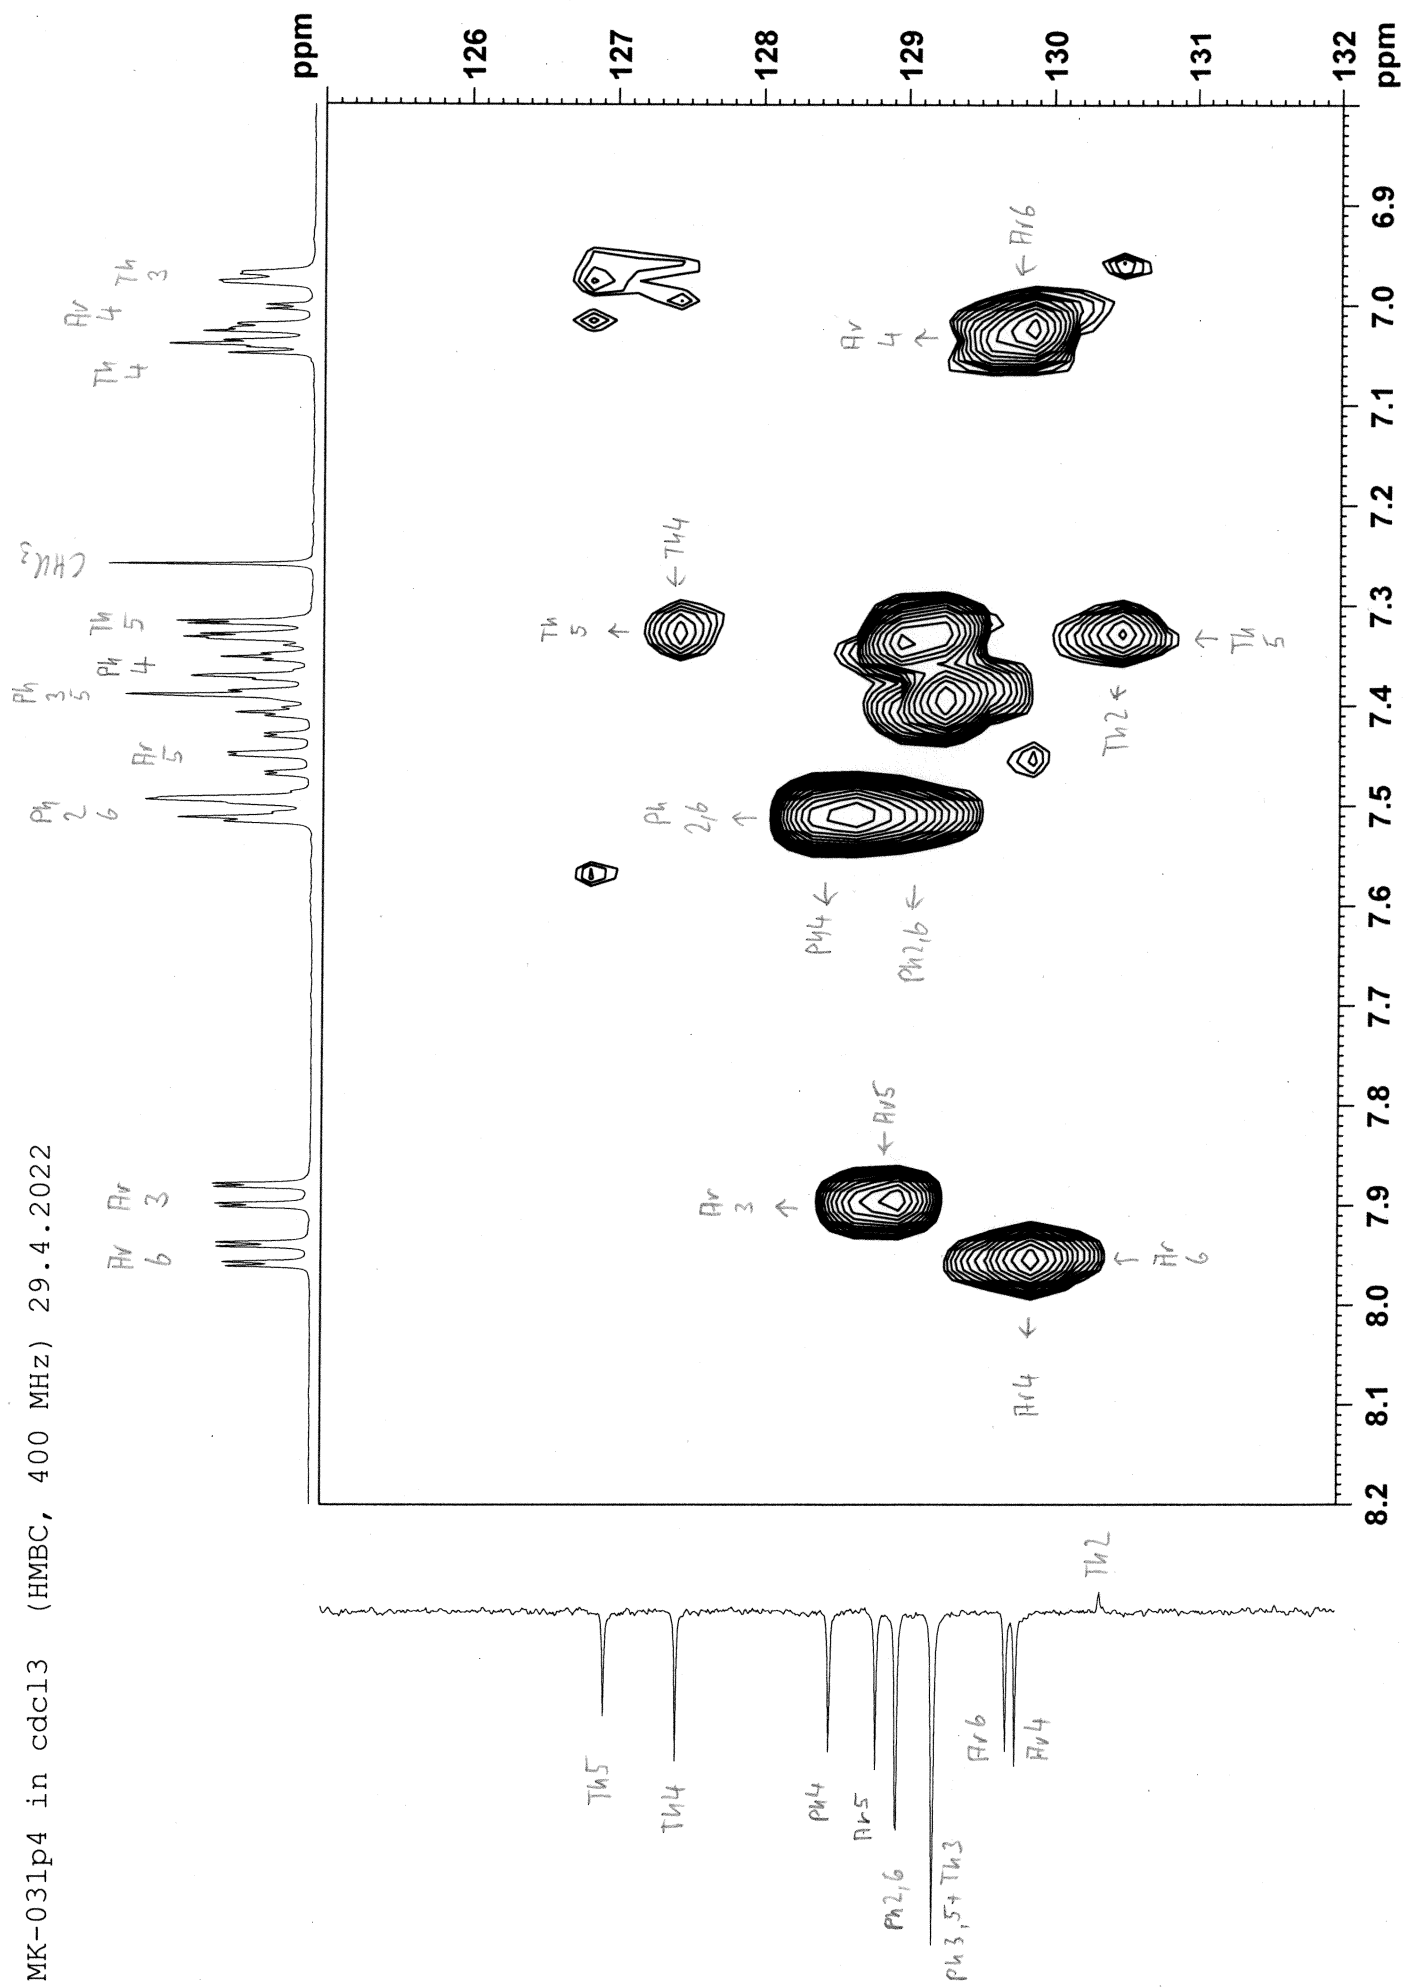

MK-031p4 in cdcl3 (HMBC, 400 MHz) 29.4.2022

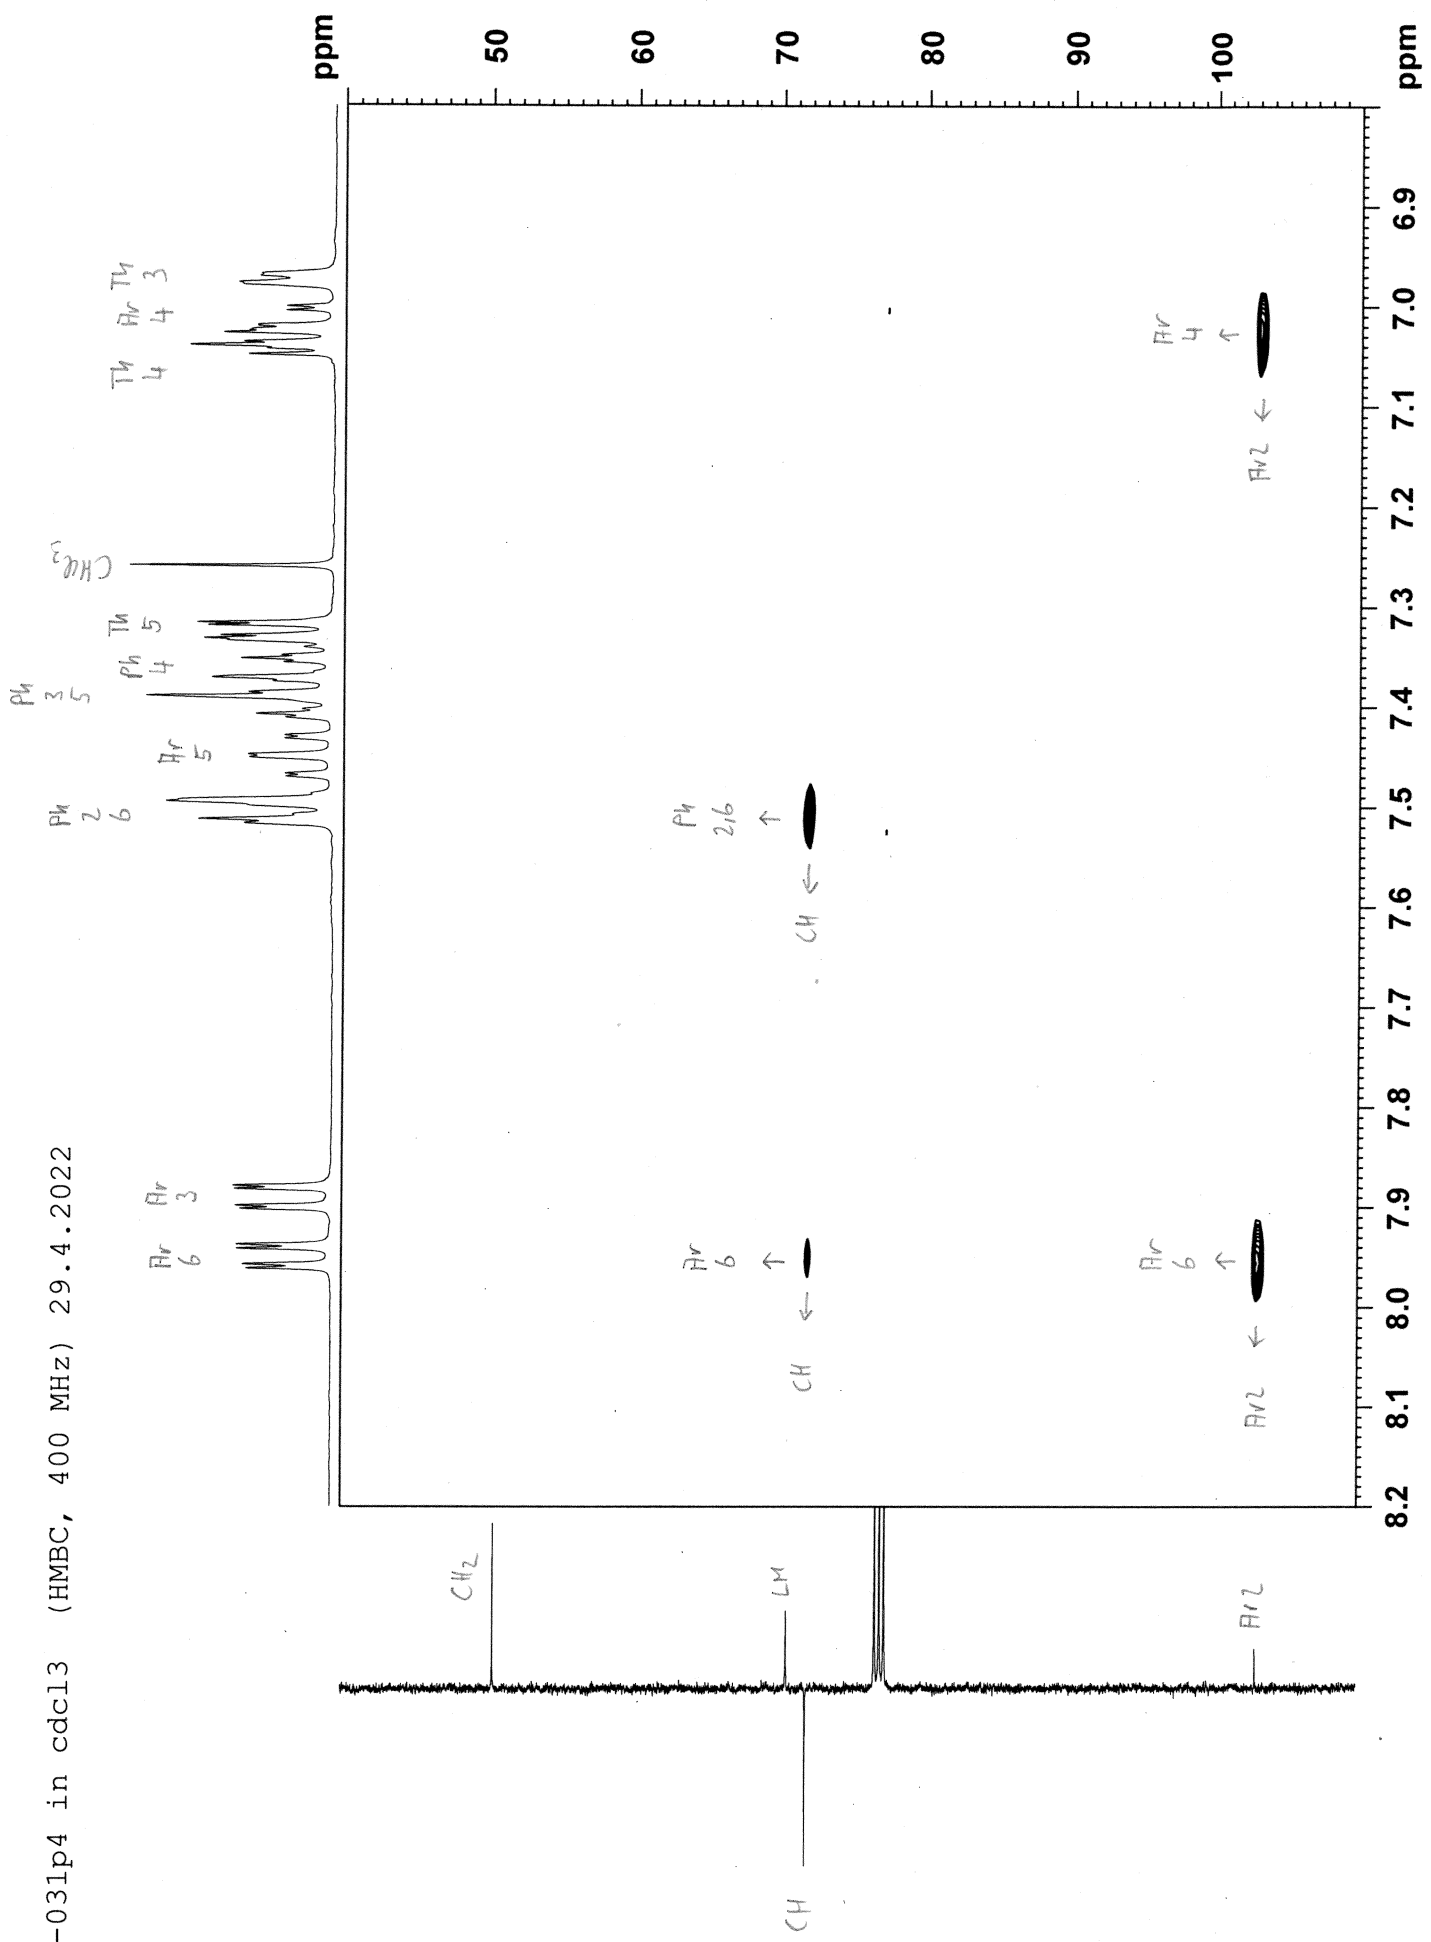

MK-031p4 in cdcl3 (HMBC, 400 MHz) 29.4.2022

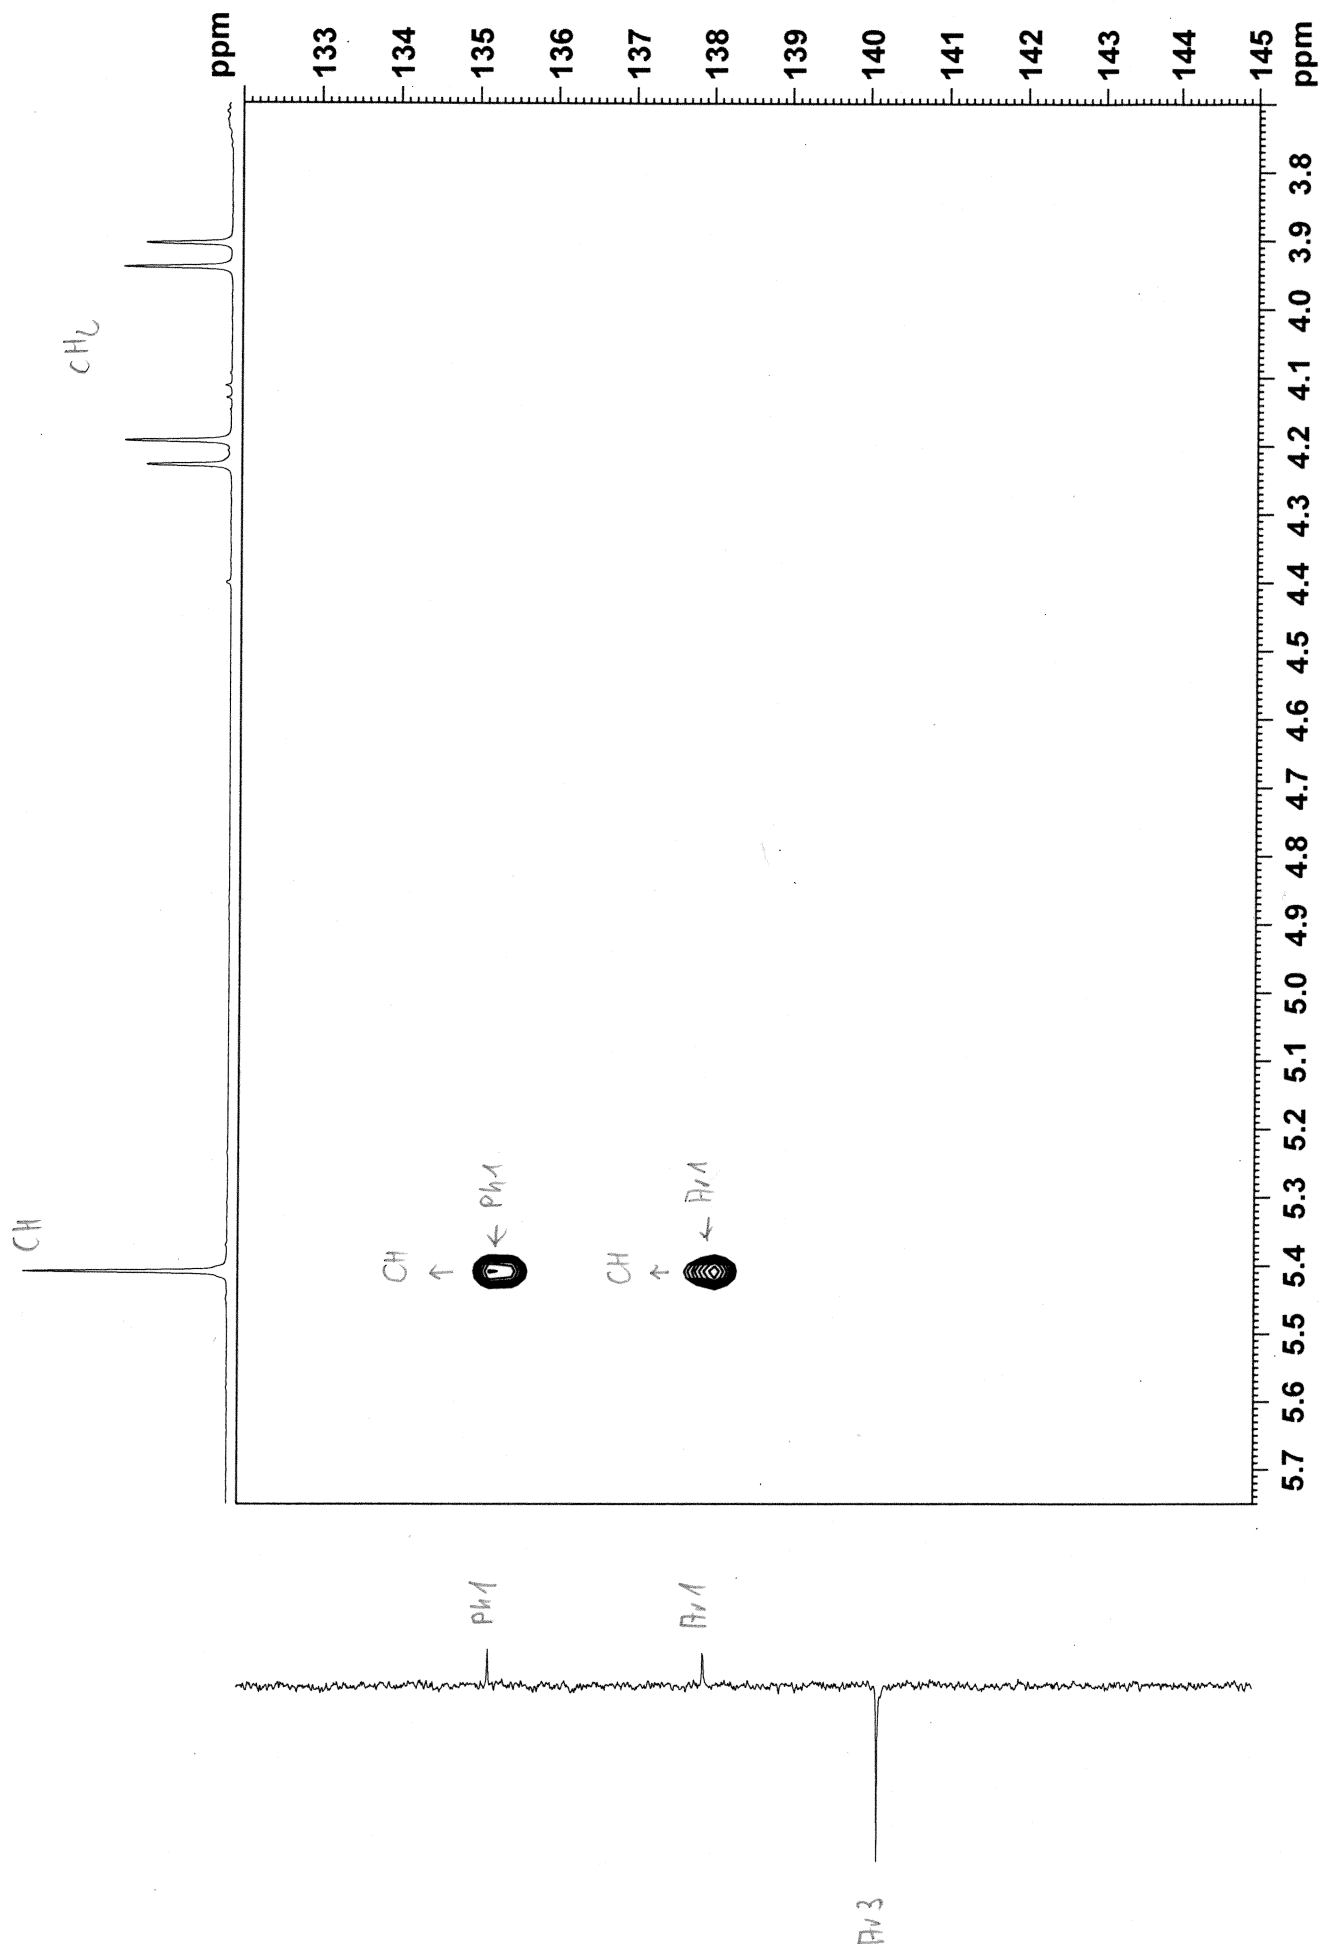



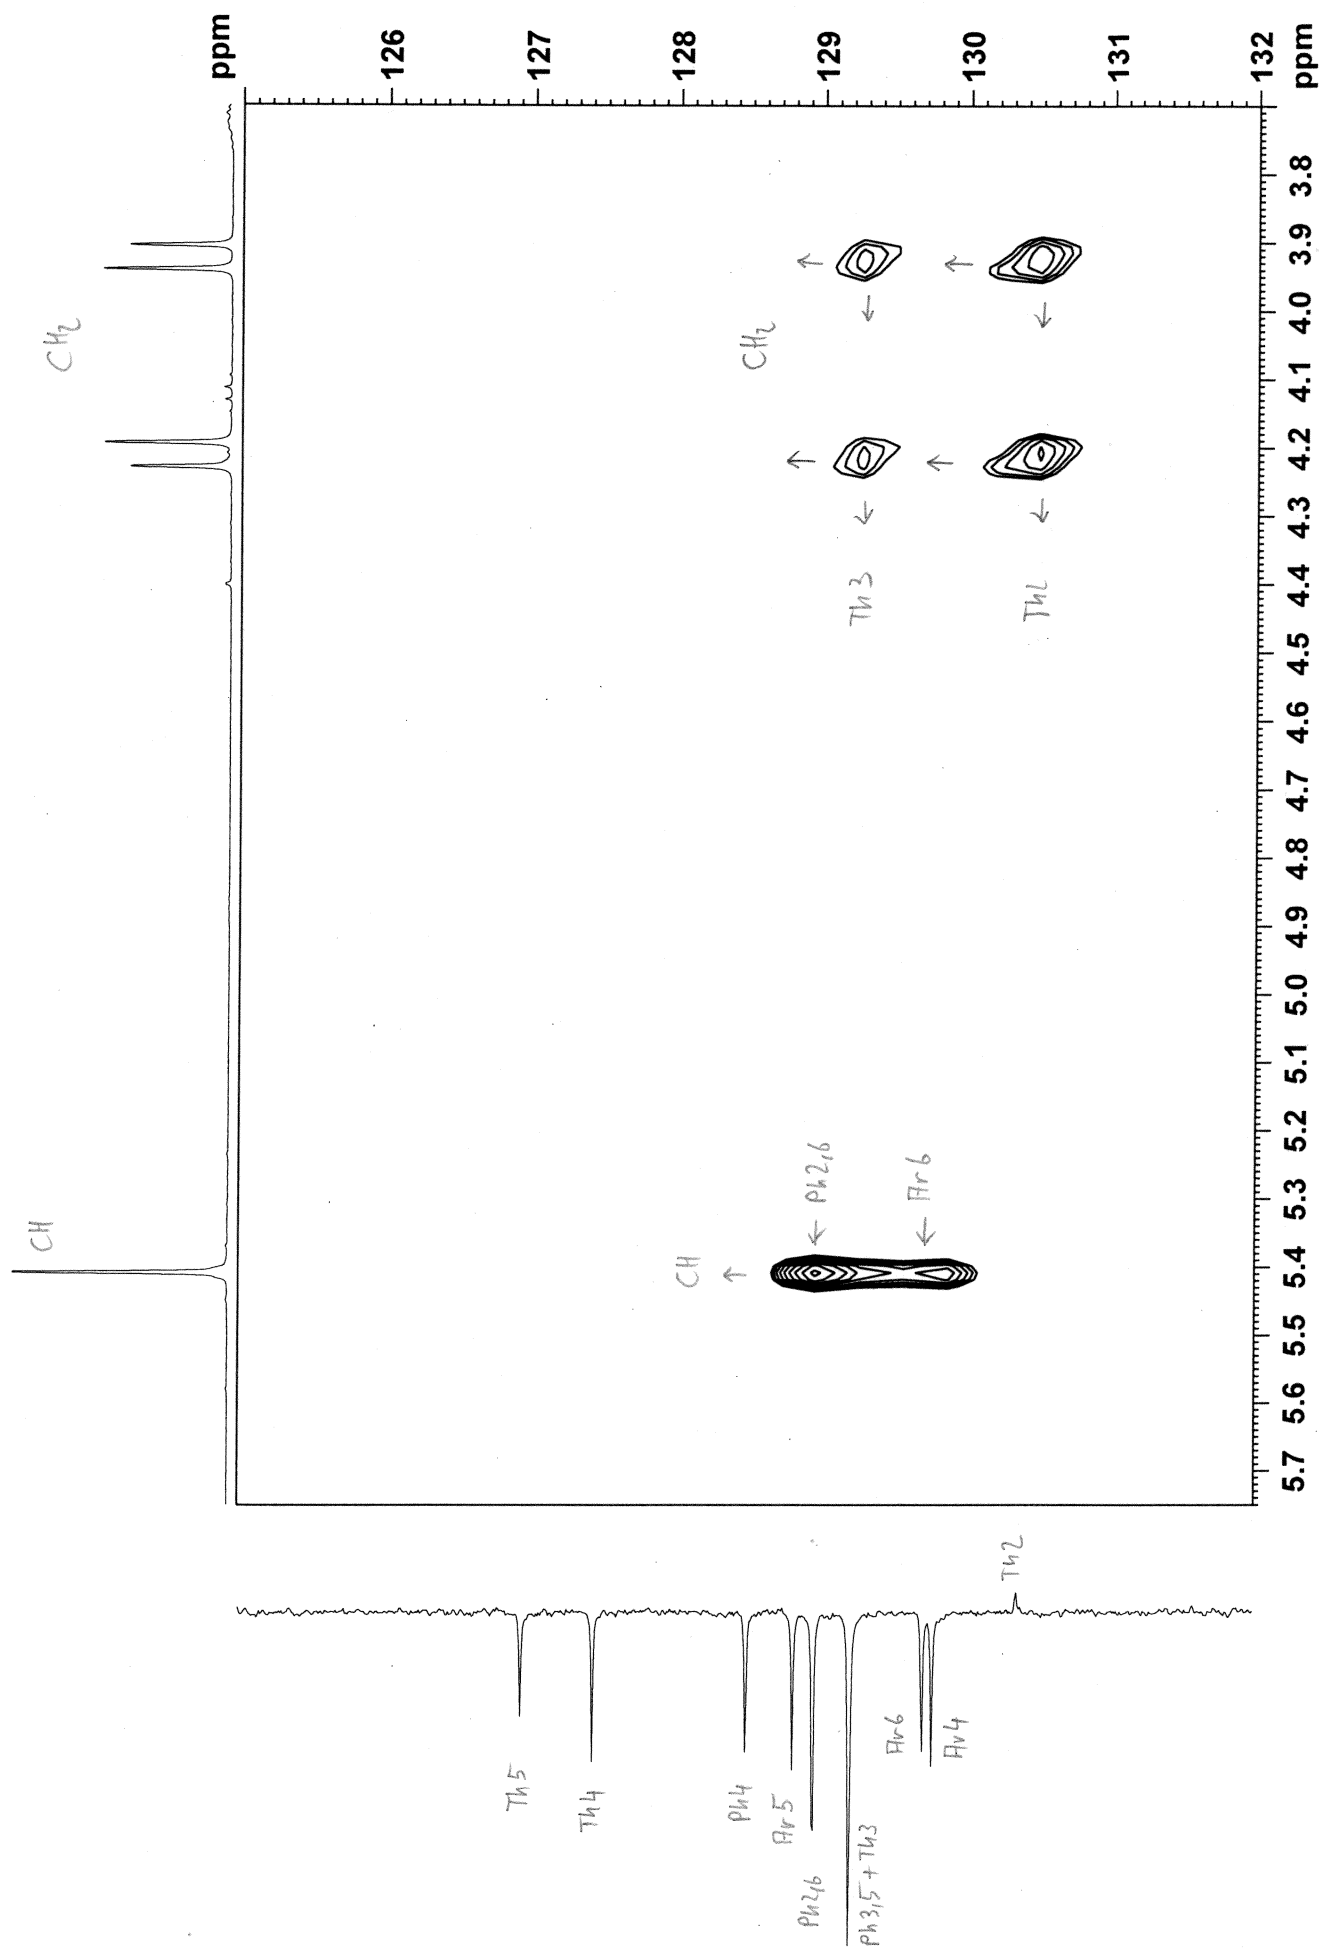

MK-031p4 in cdcl3 (HMBC, 400 MHz) 29.4.2022

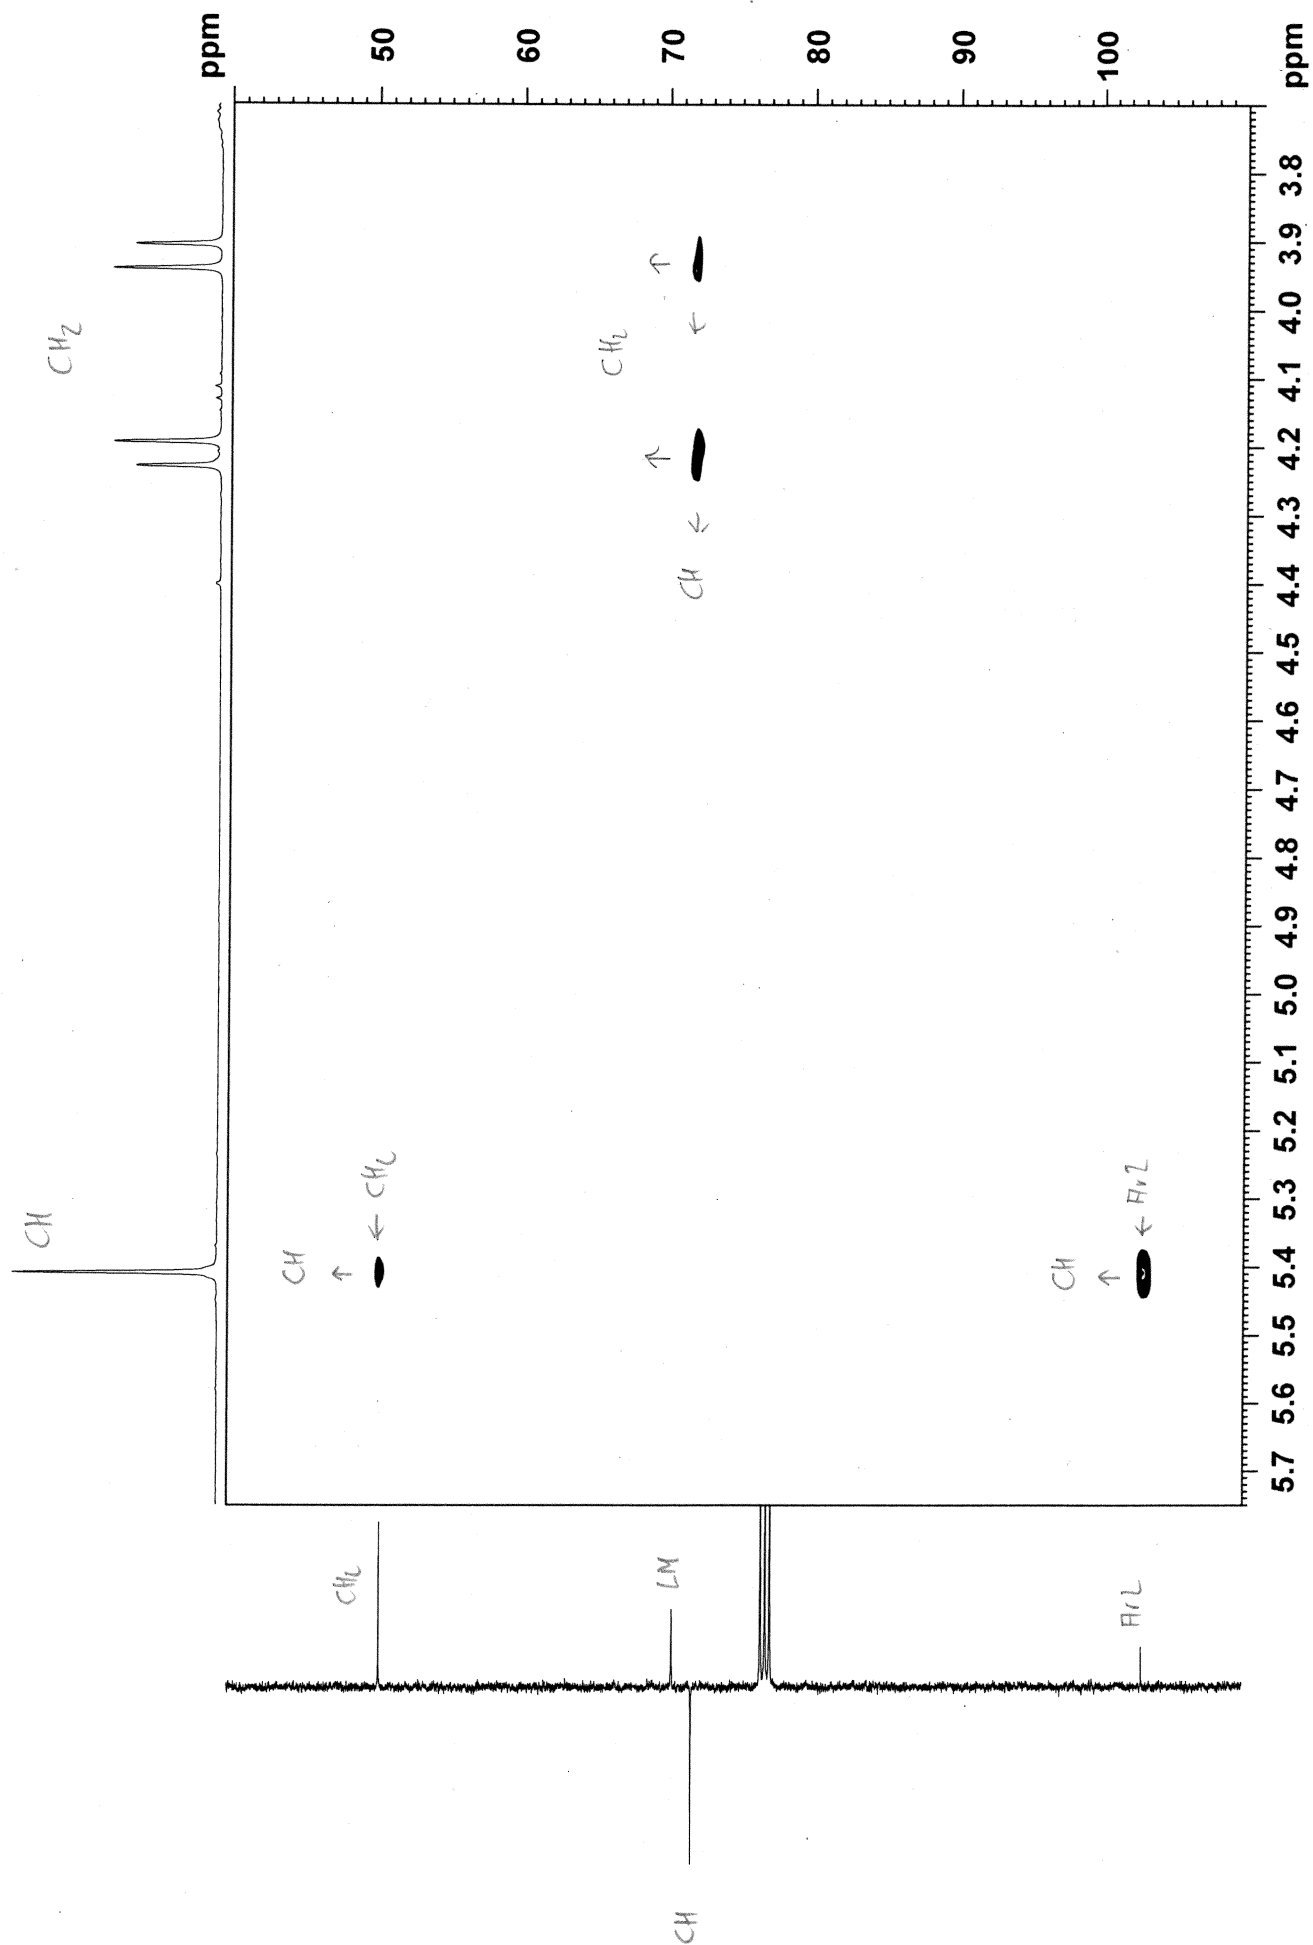

MK-30-1-1 in cdcl3 (Proton) 29.7.2020

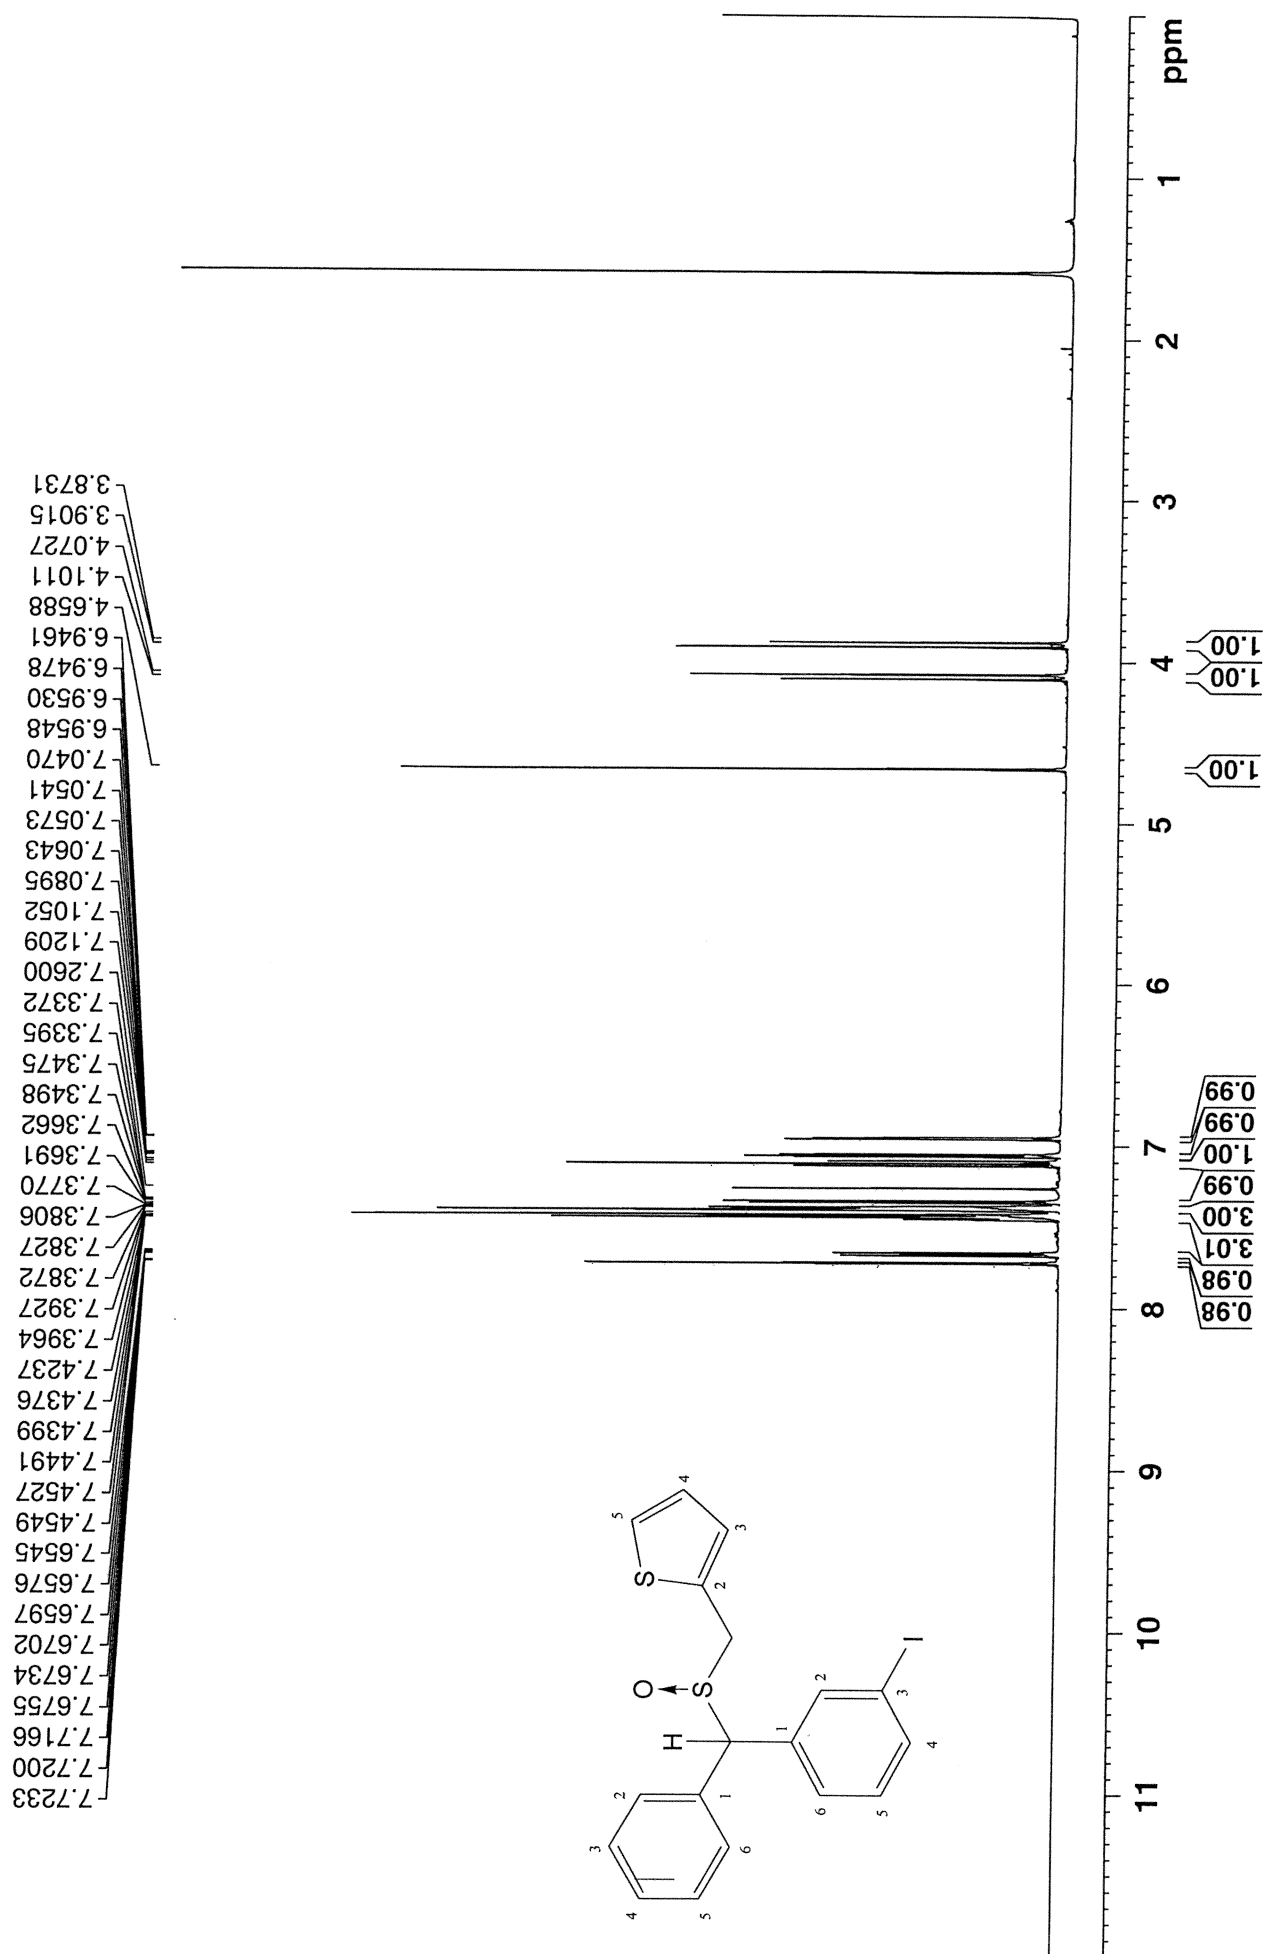

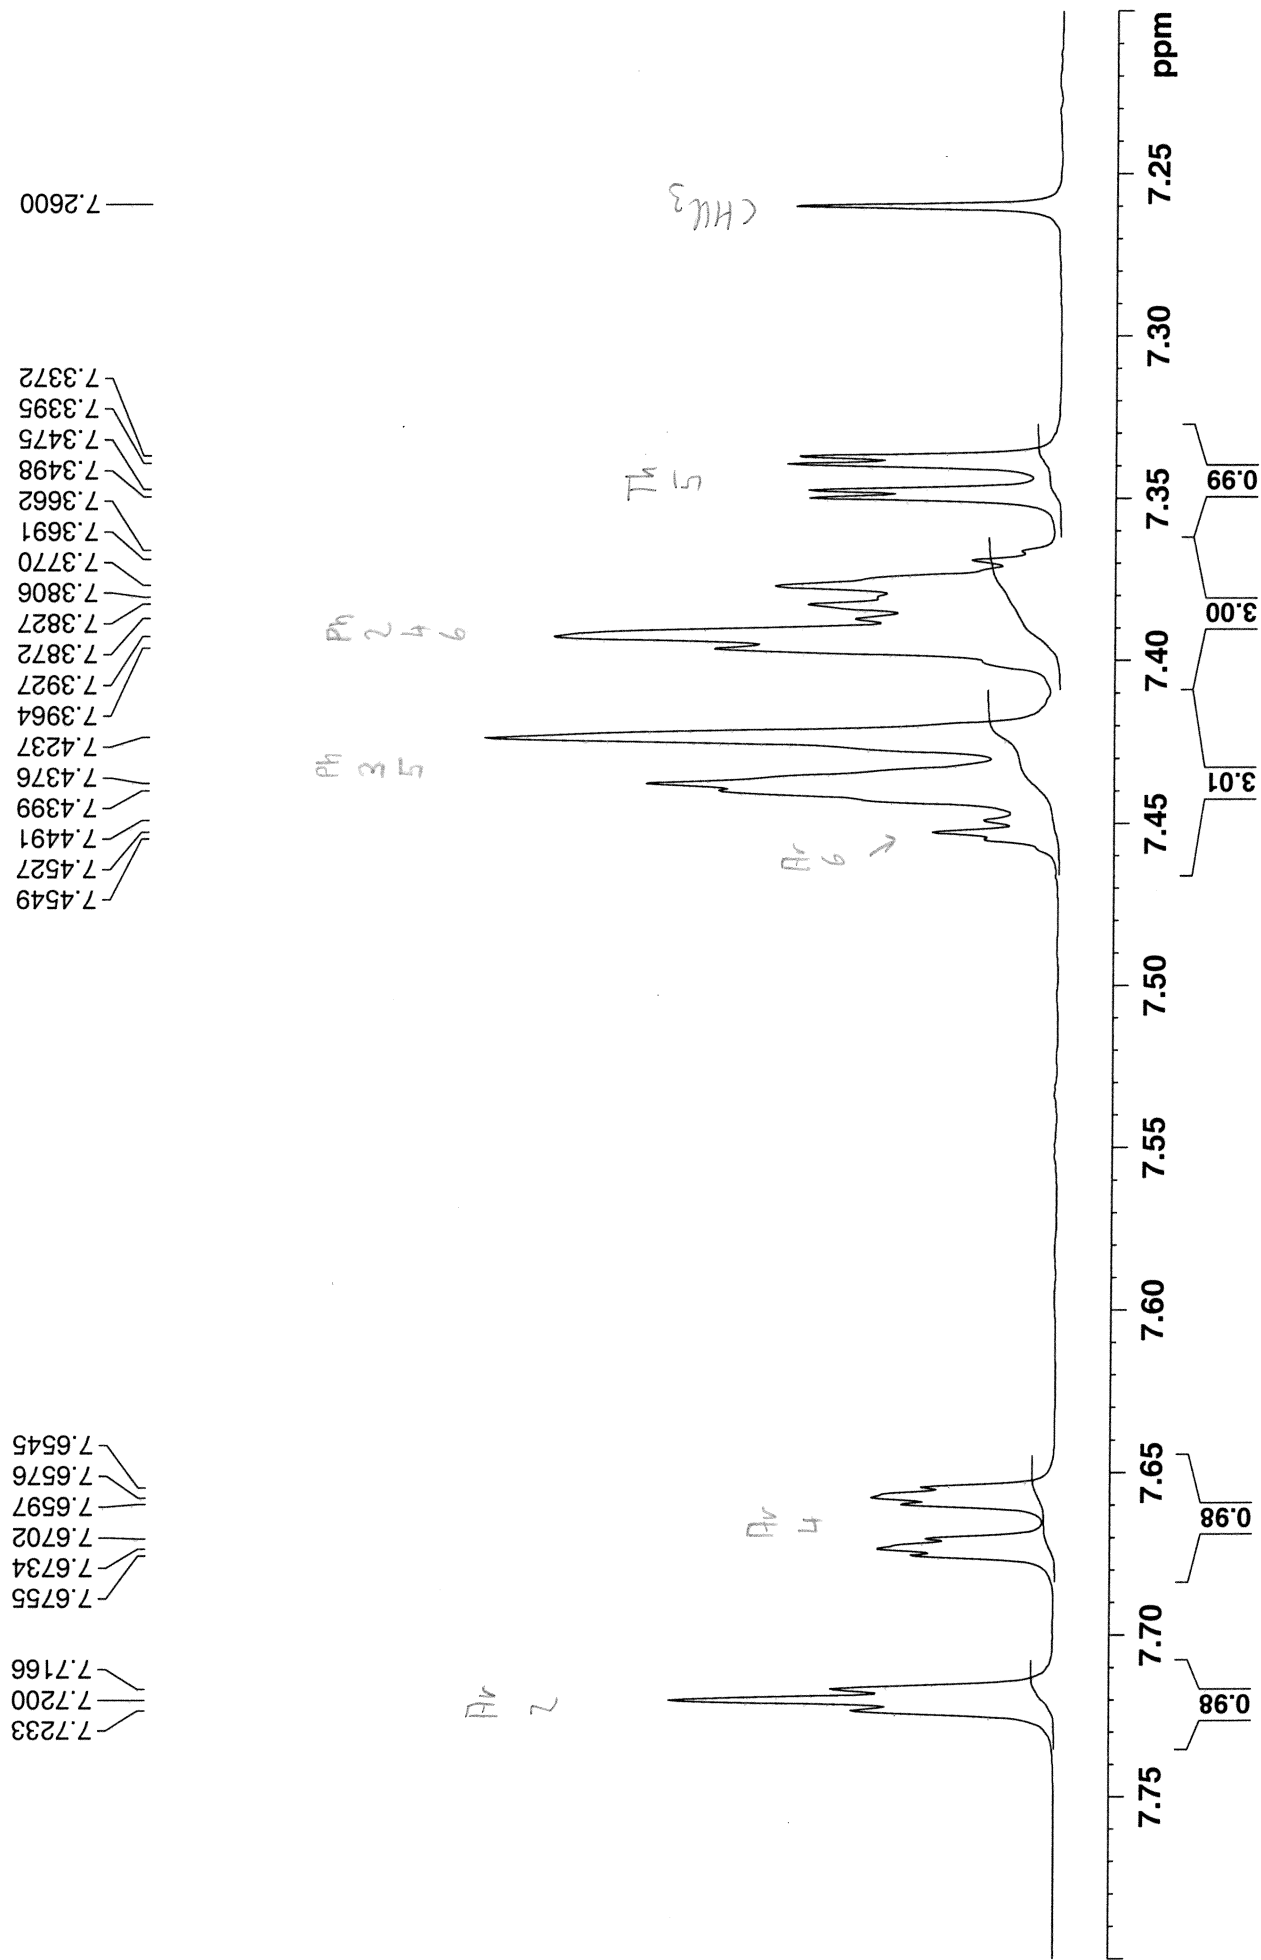

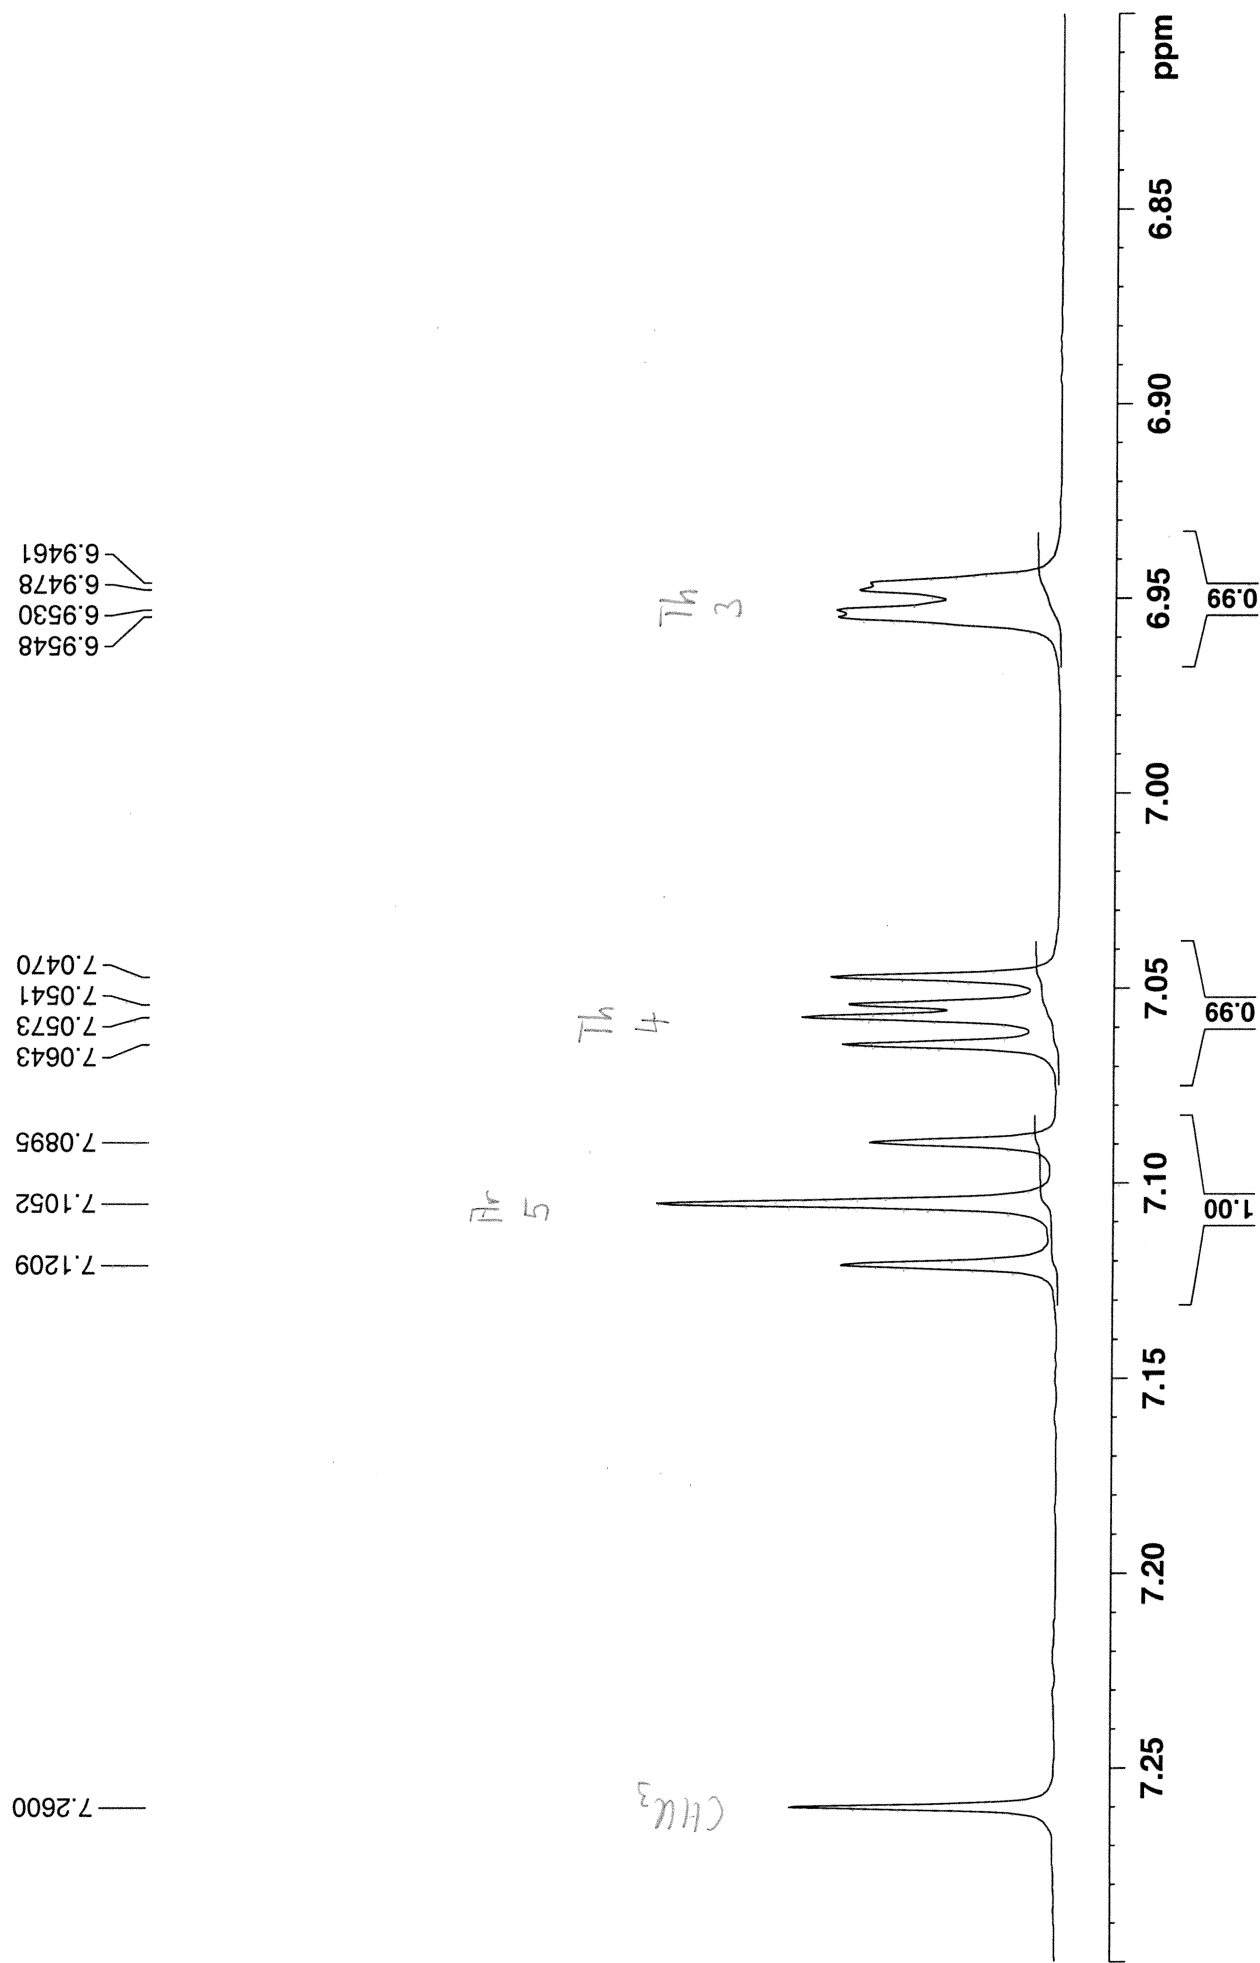

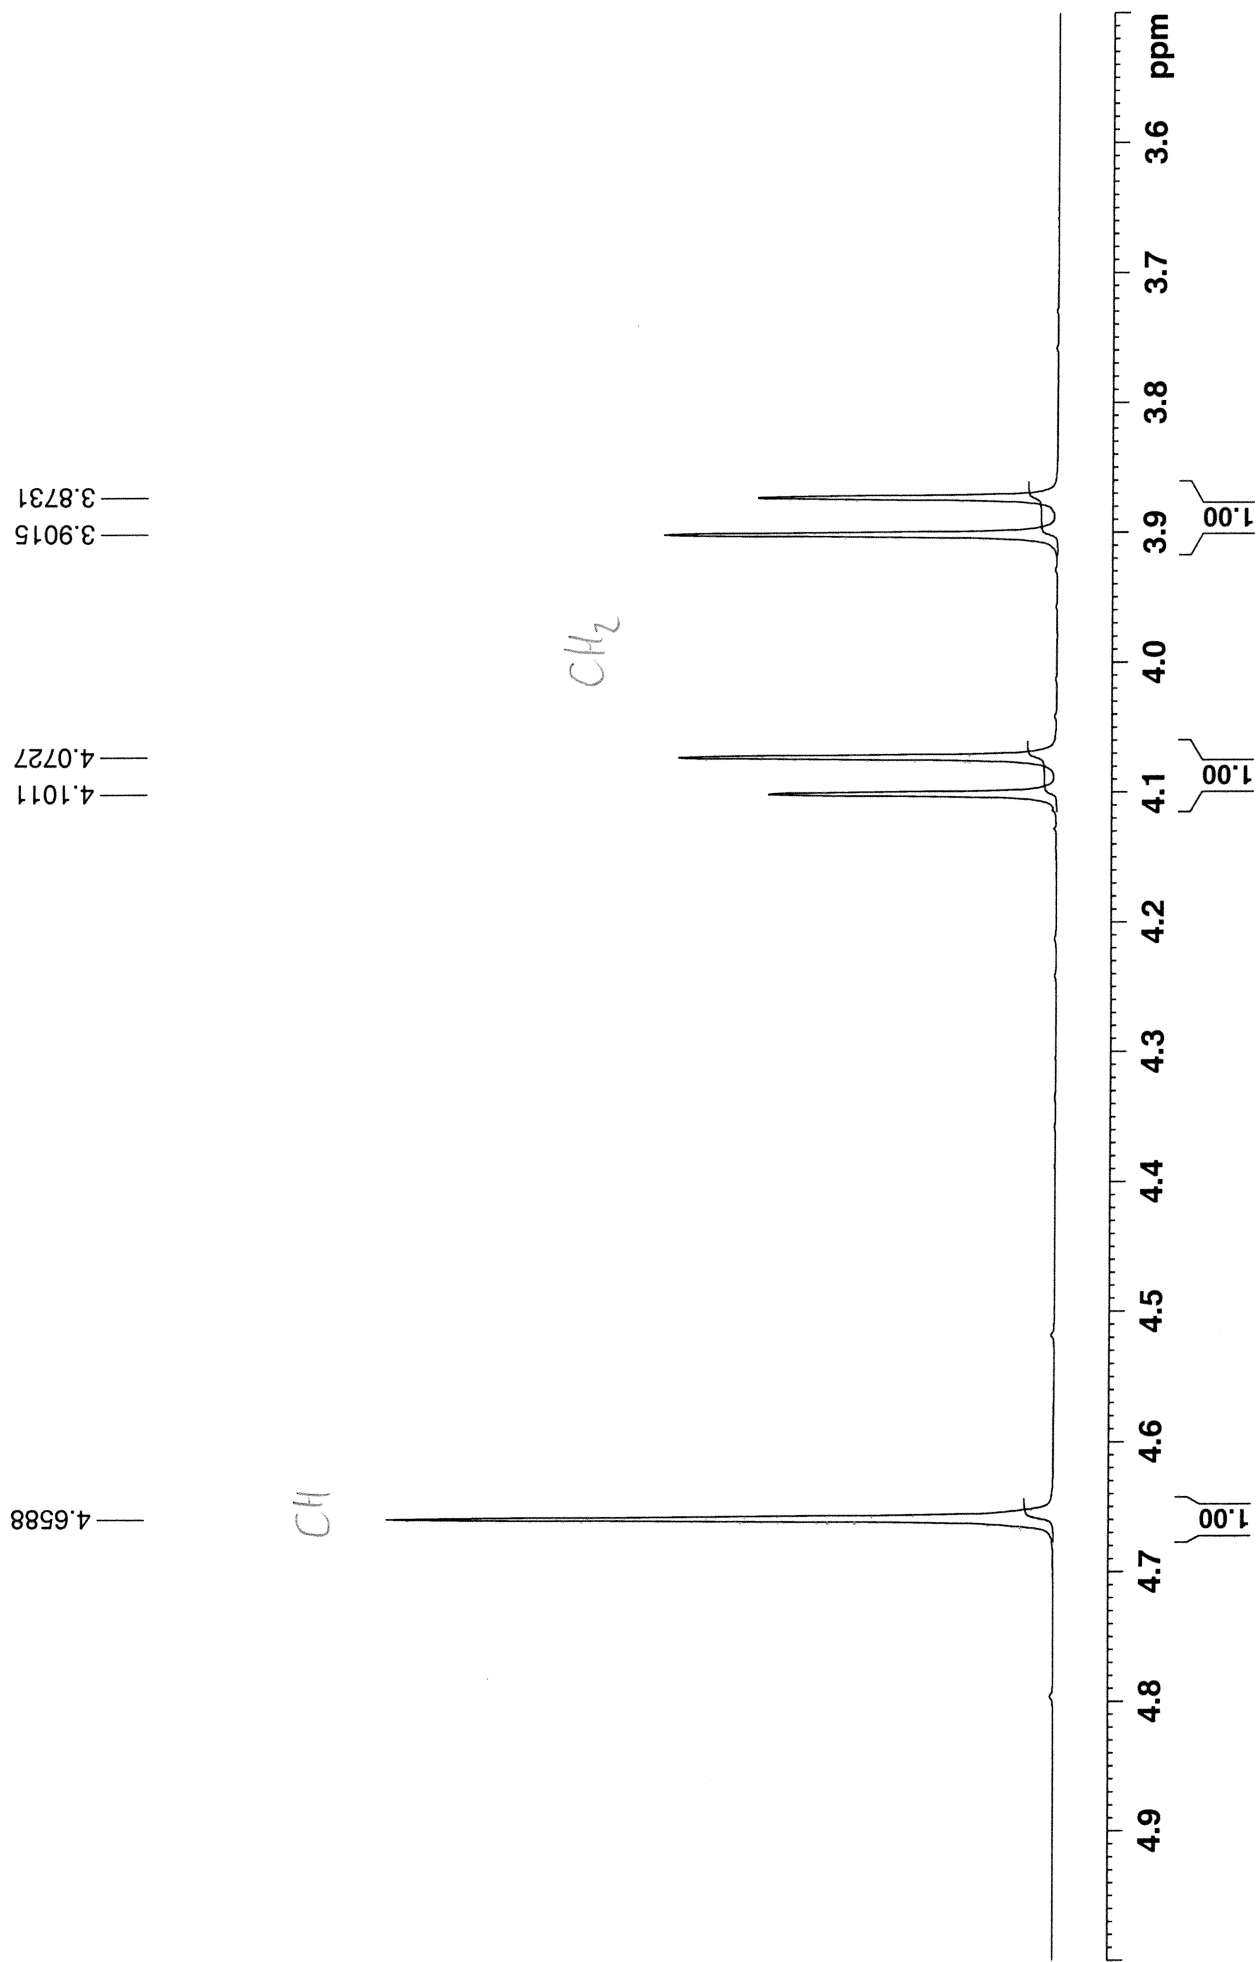

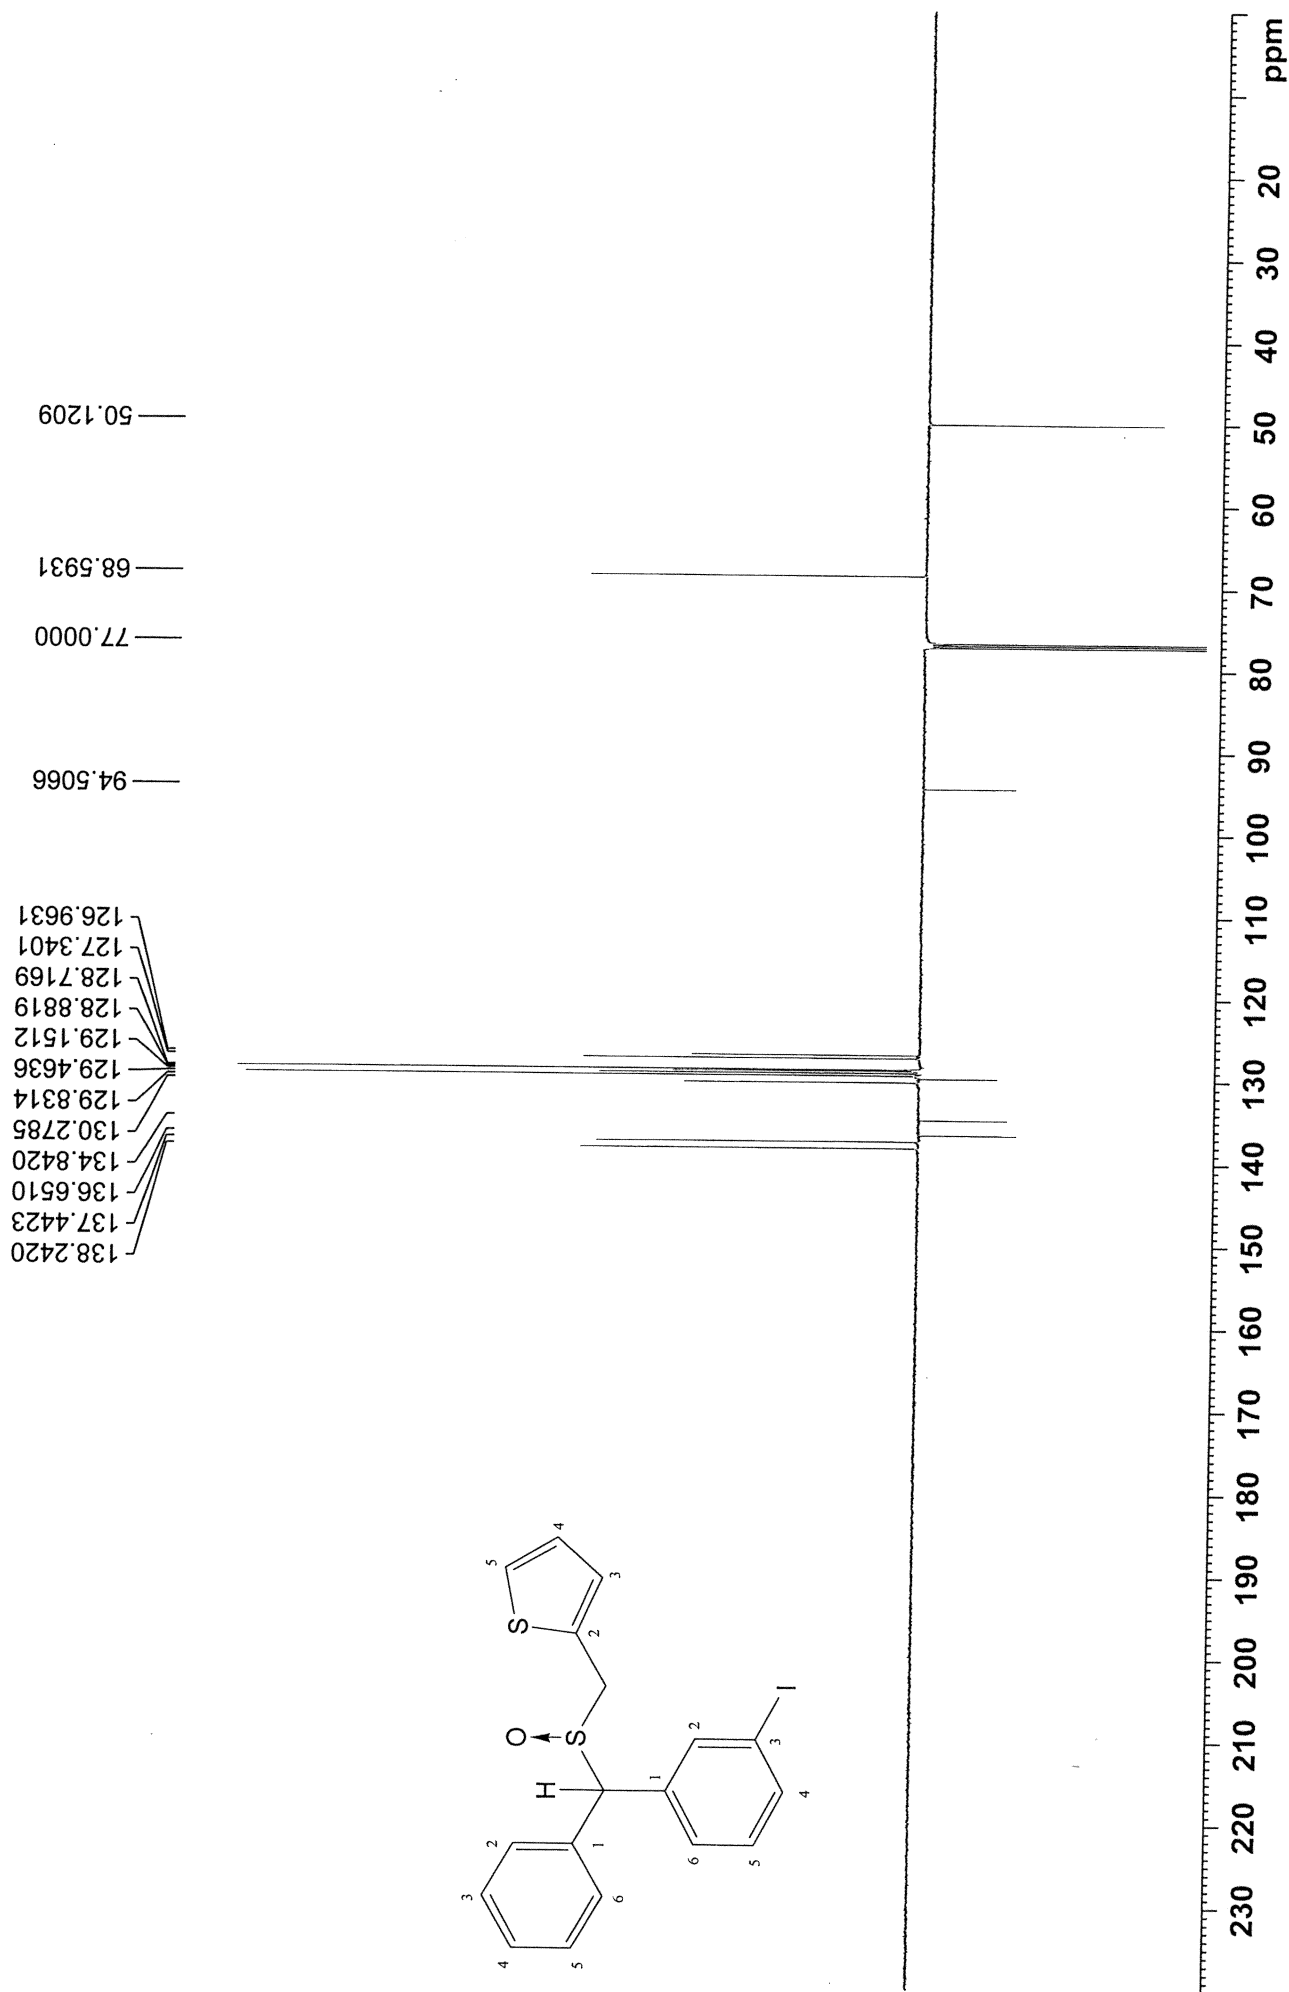

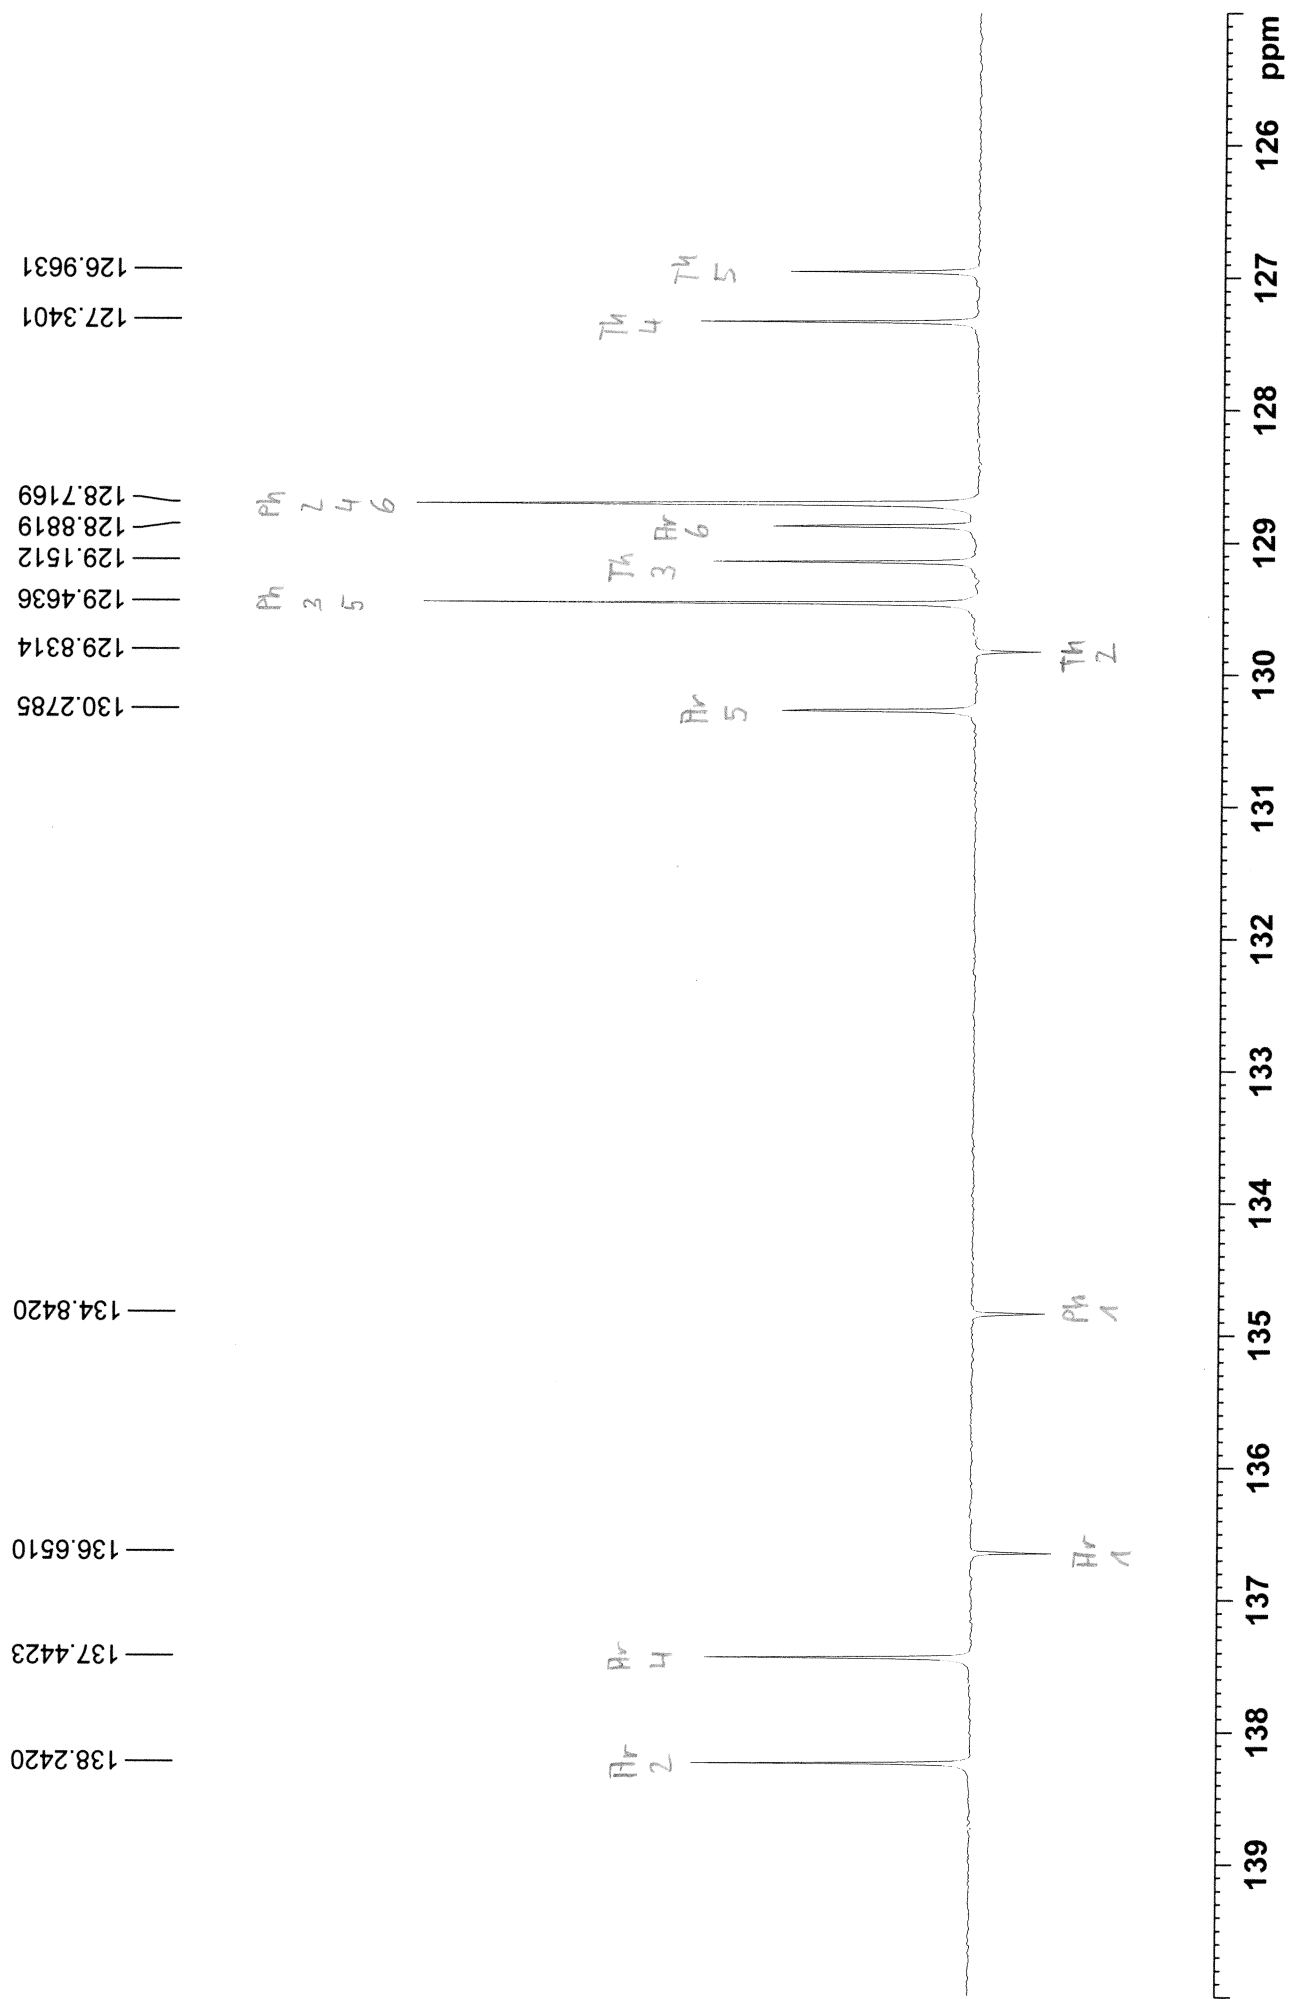



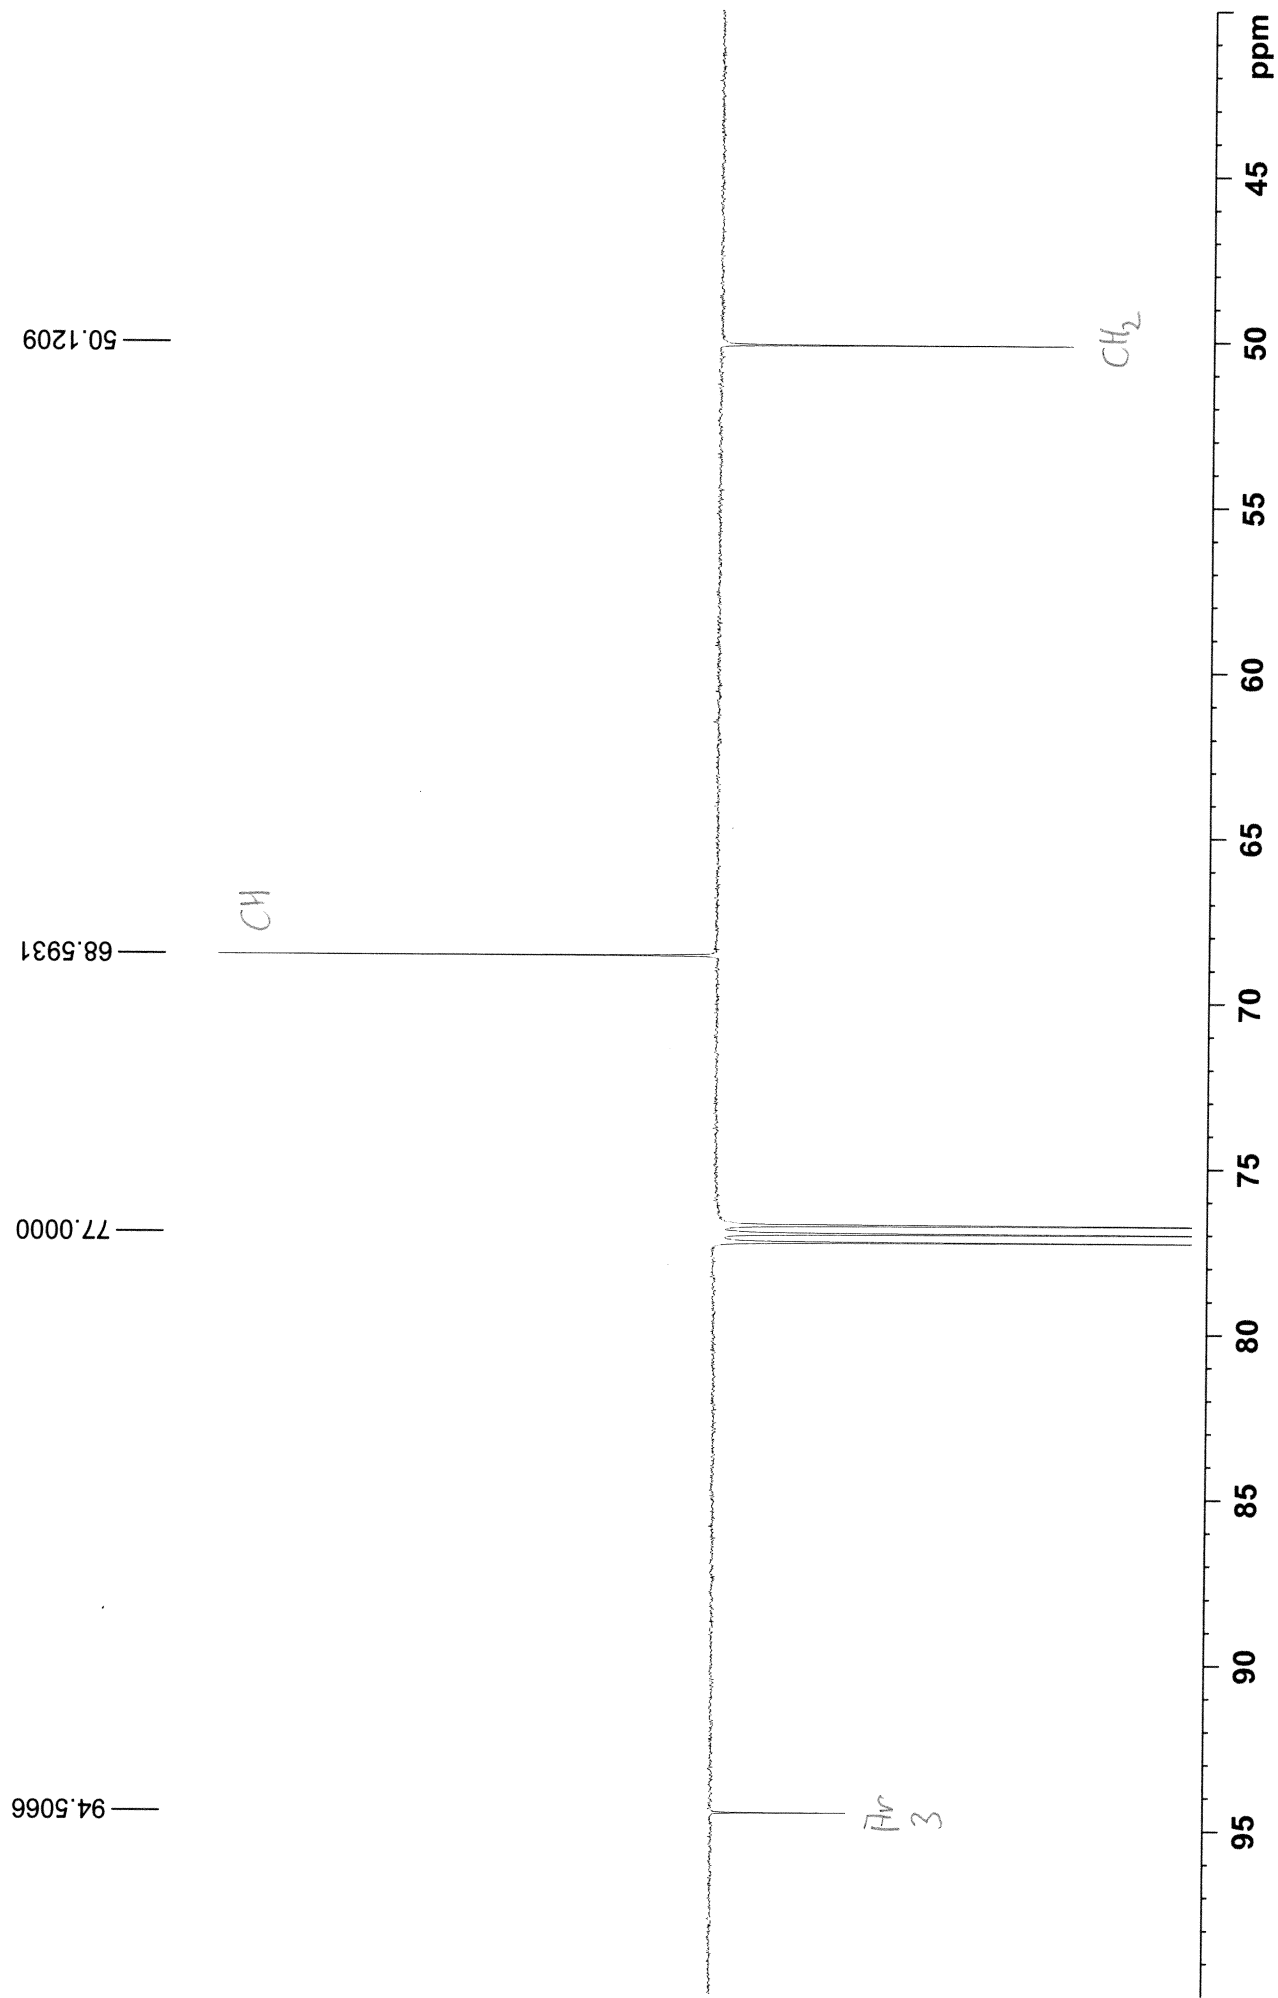

MK-30-1-1 in cdcl3 (COSY) 29.7.2020

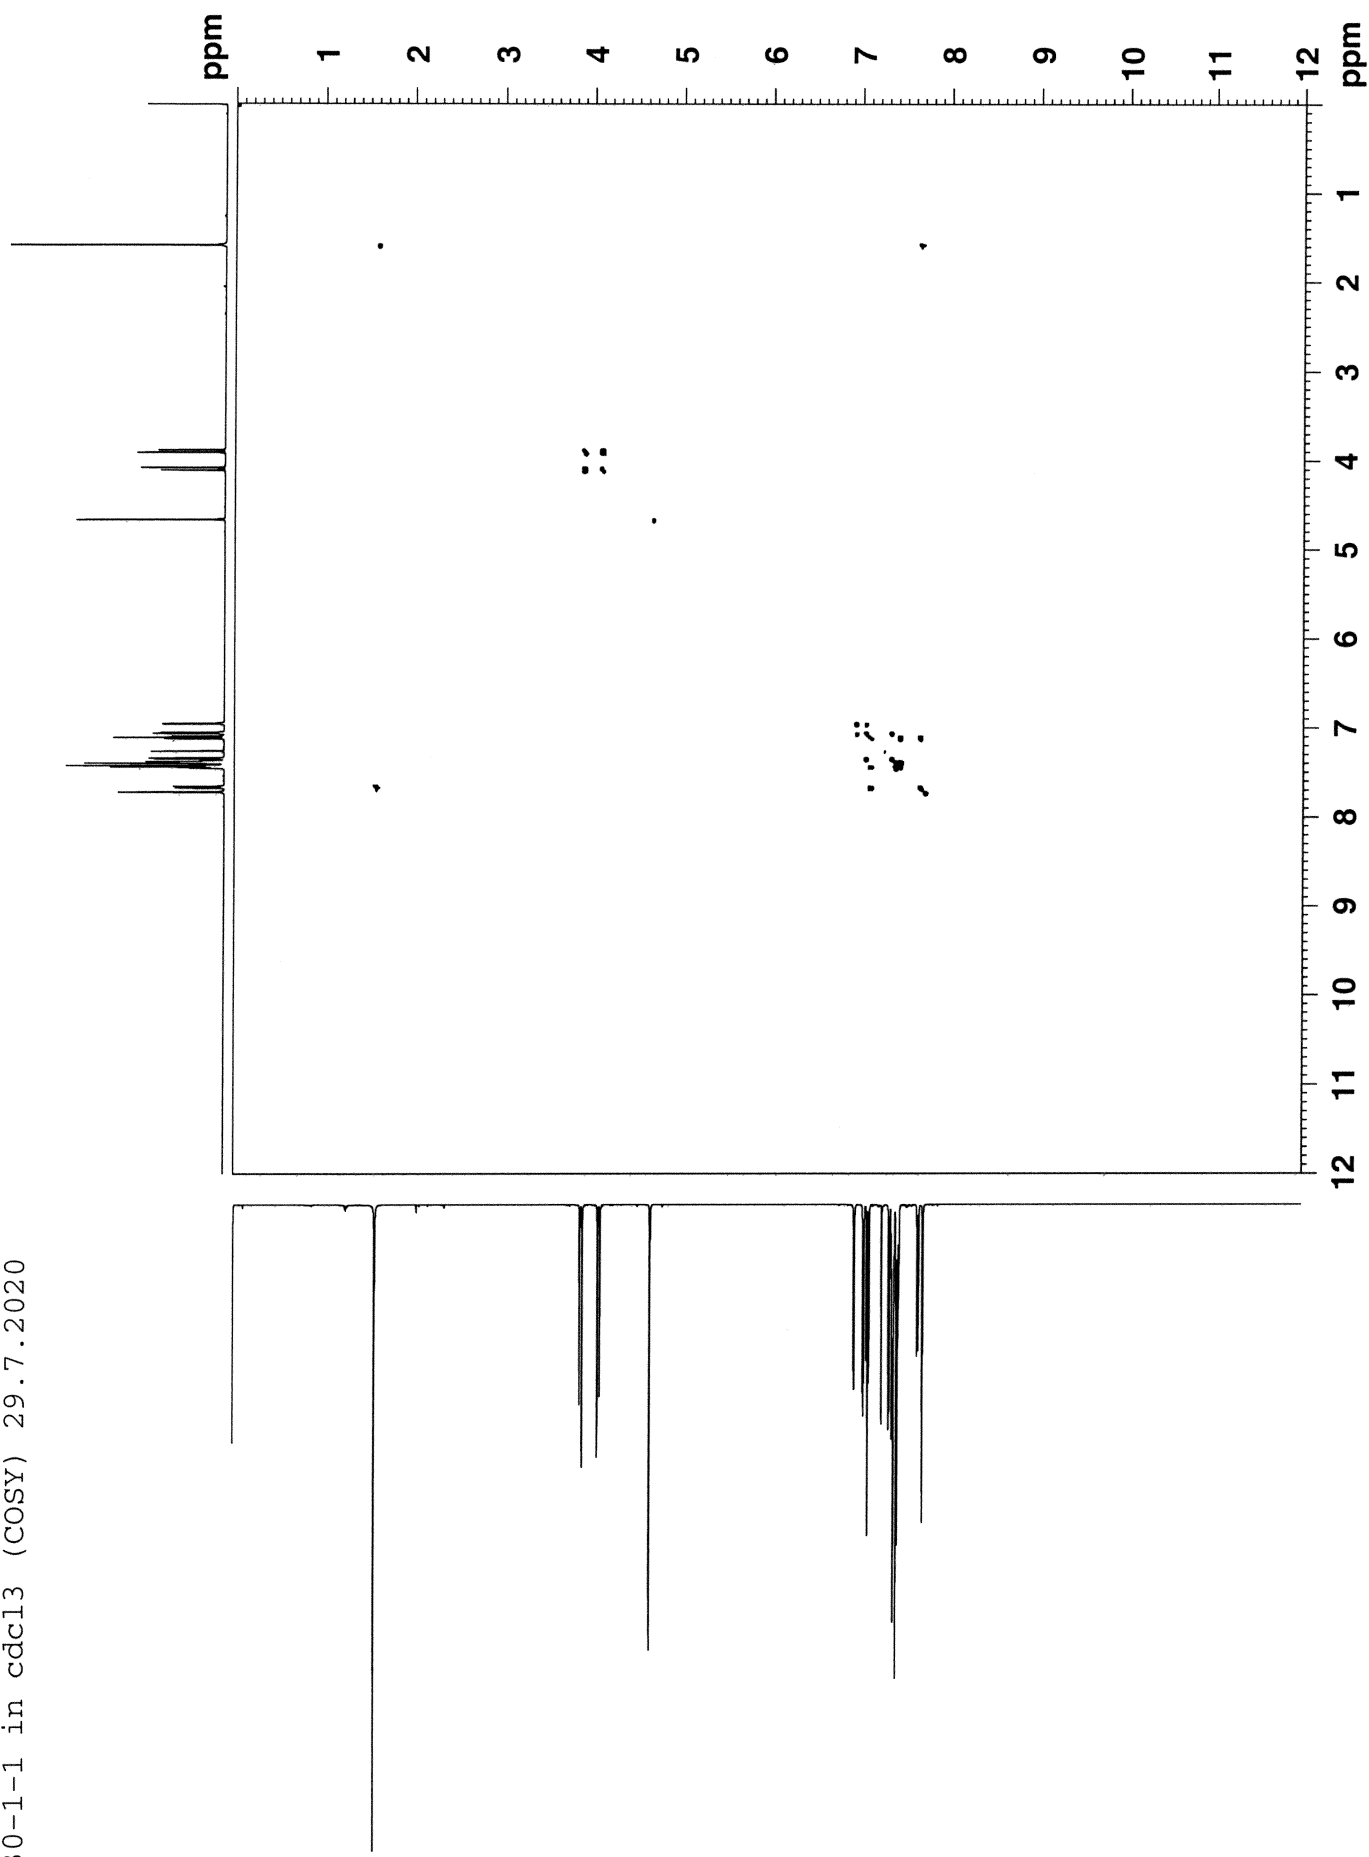

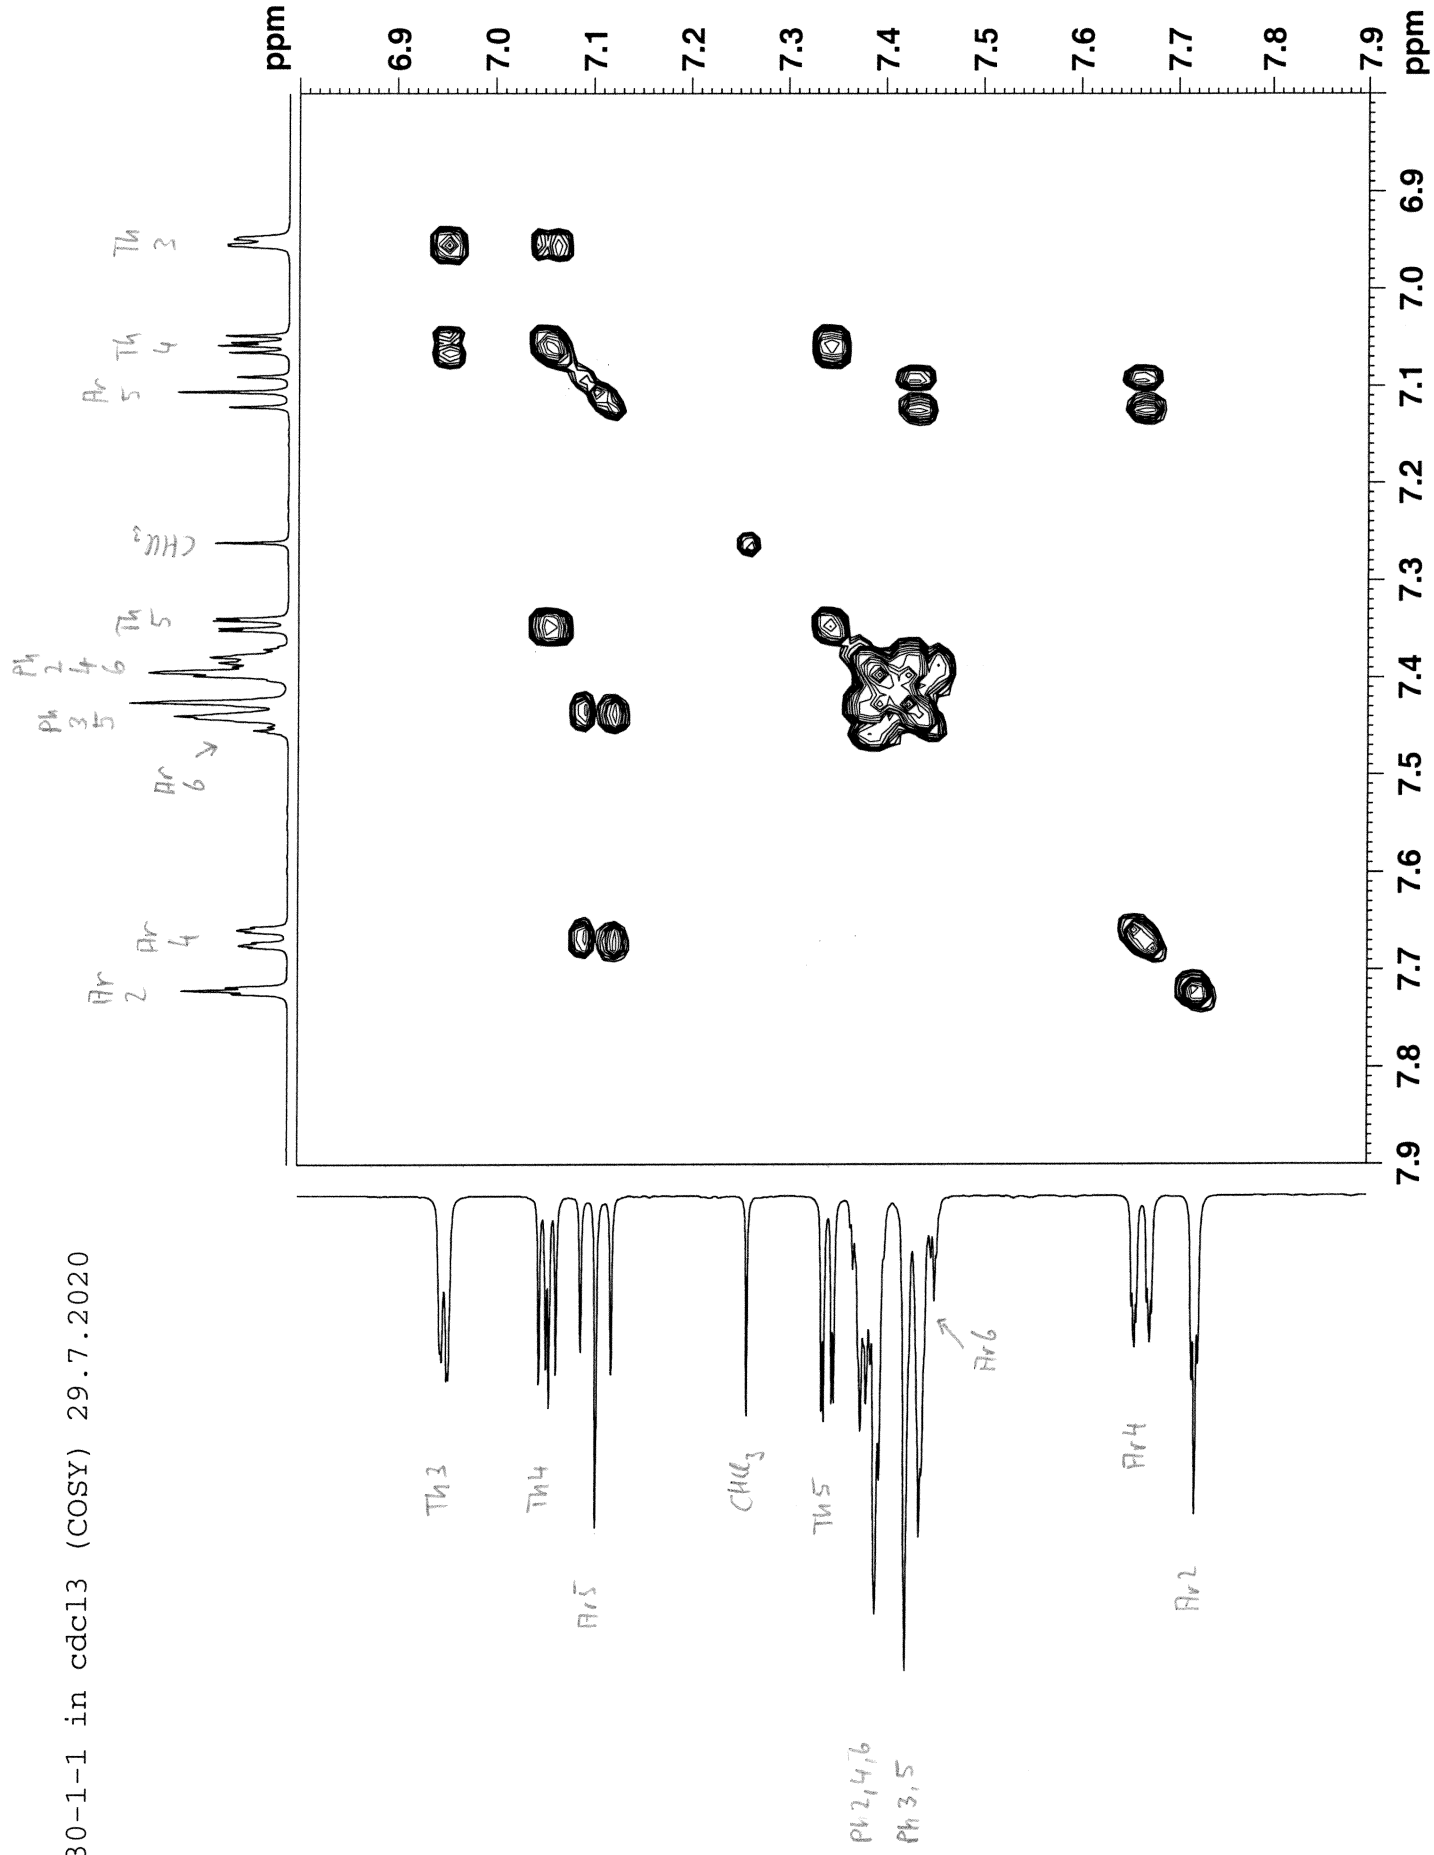

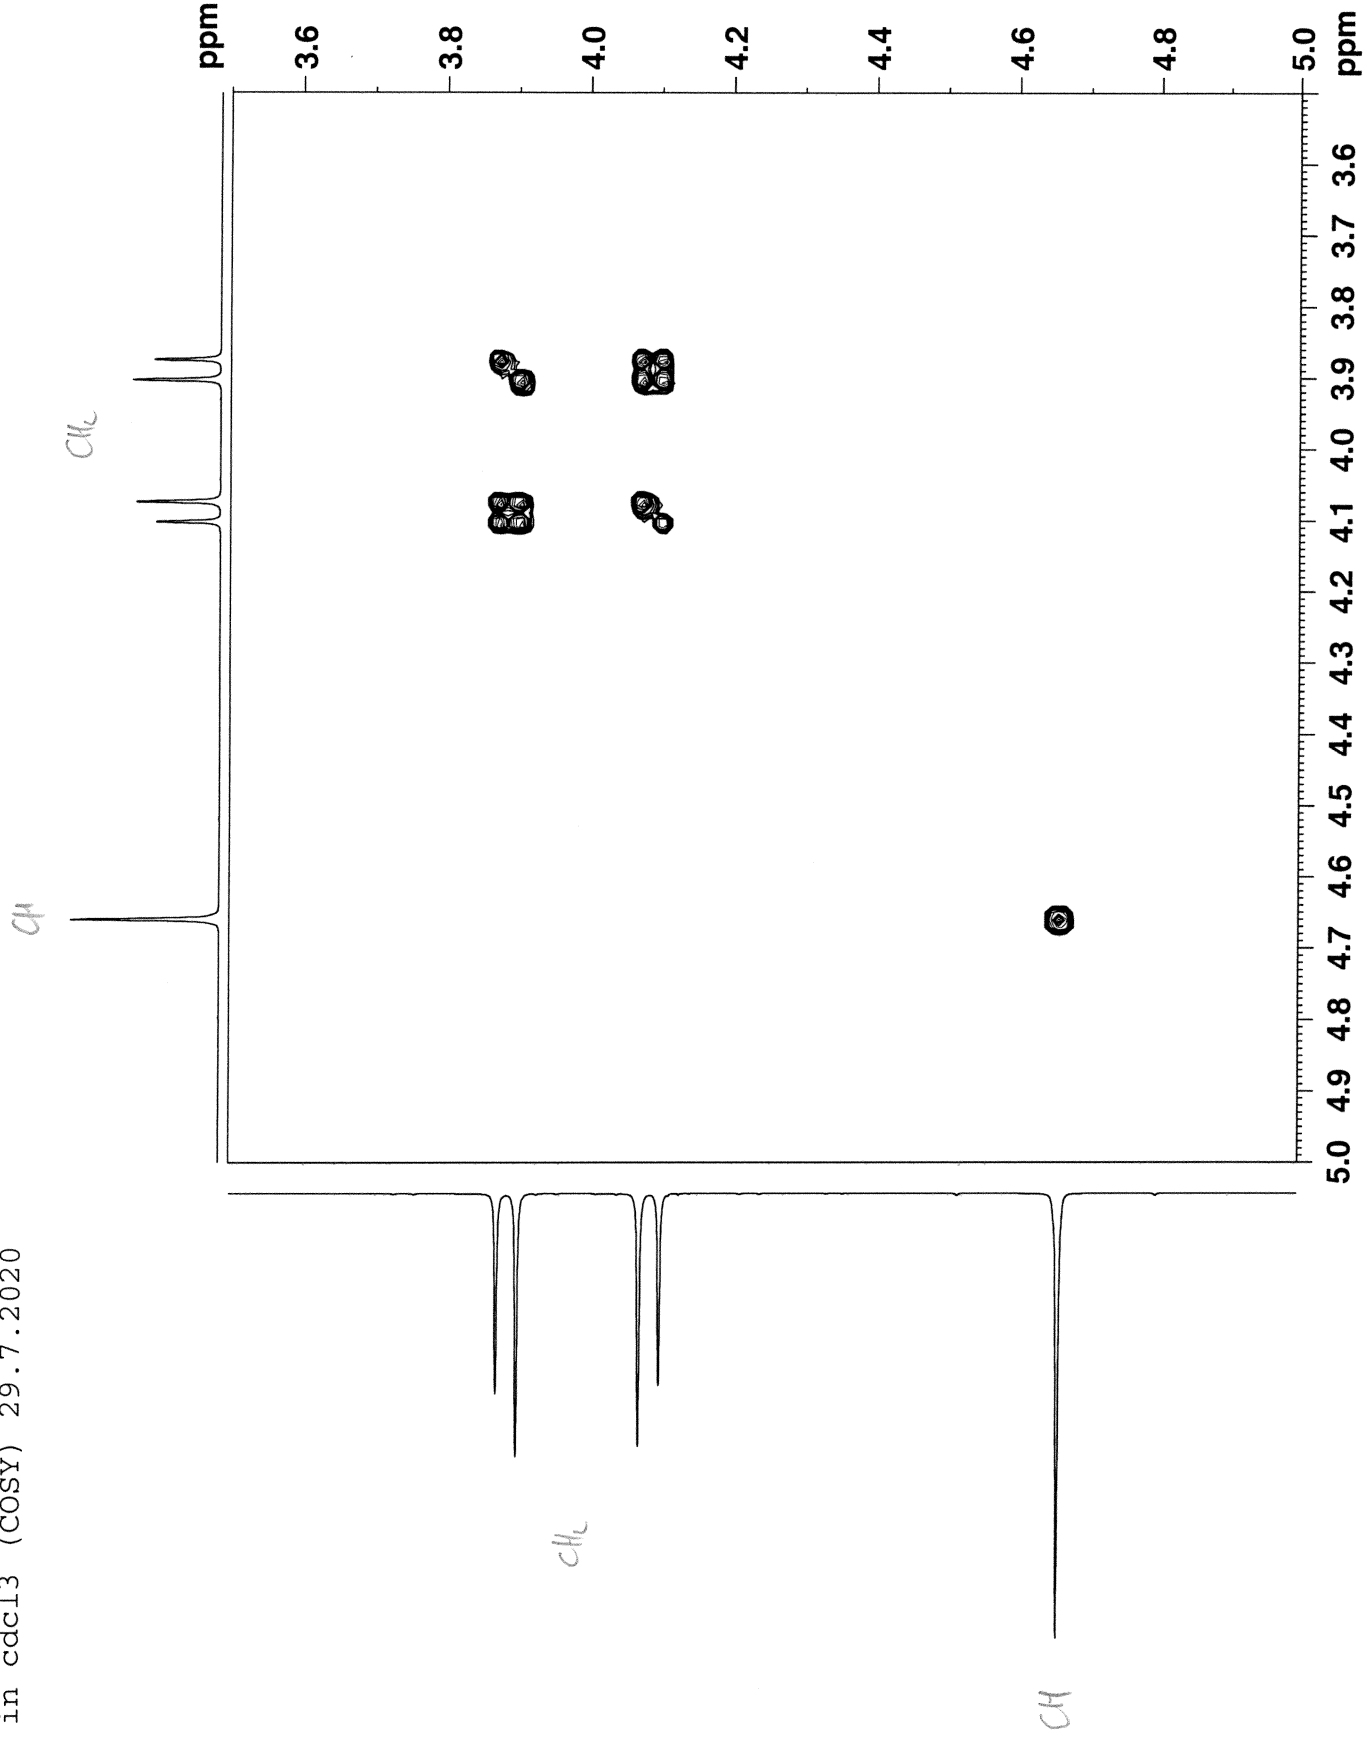

MK-30-1-1 in cdcl3 (HSQC) 29.7.2020

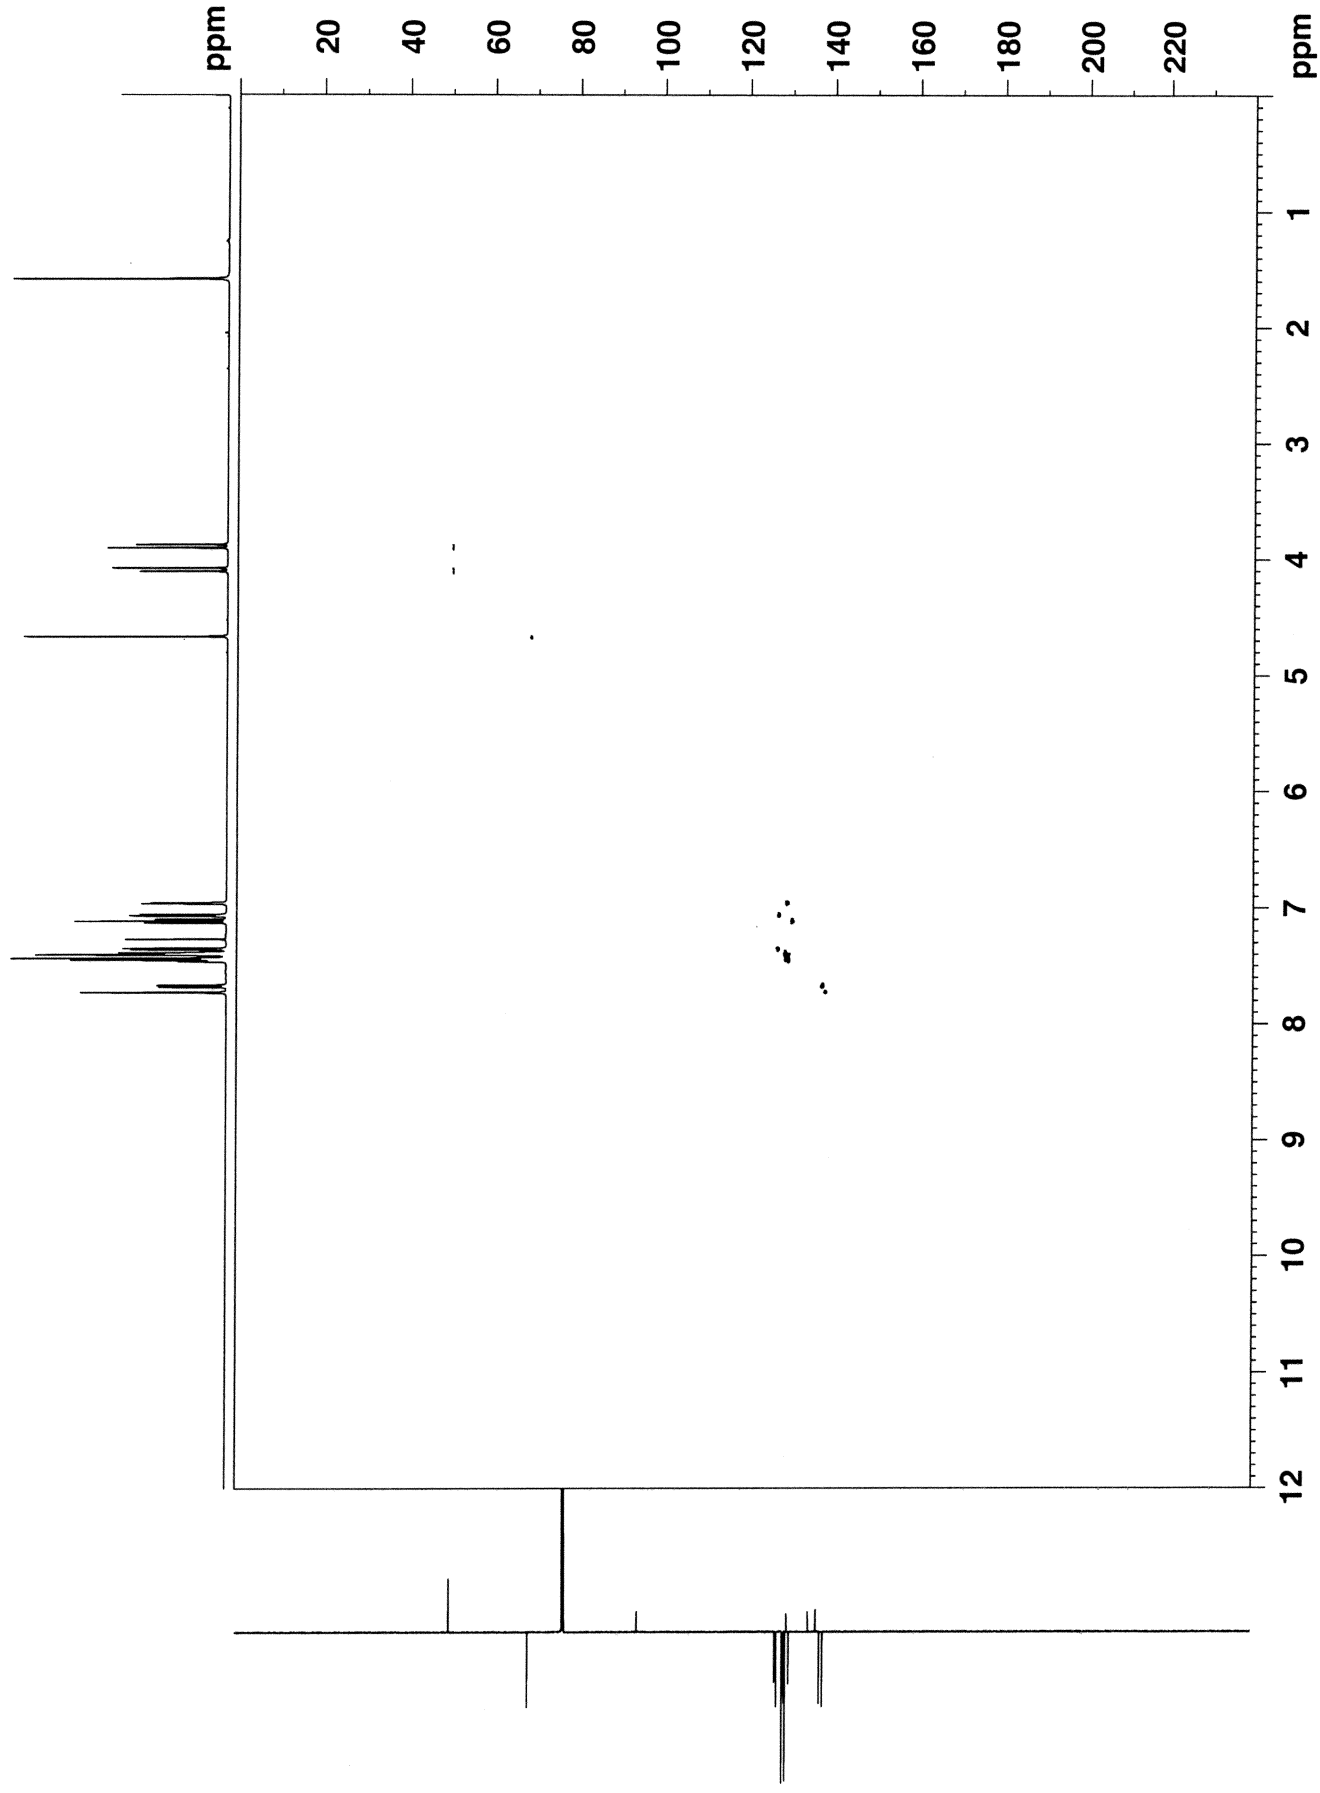

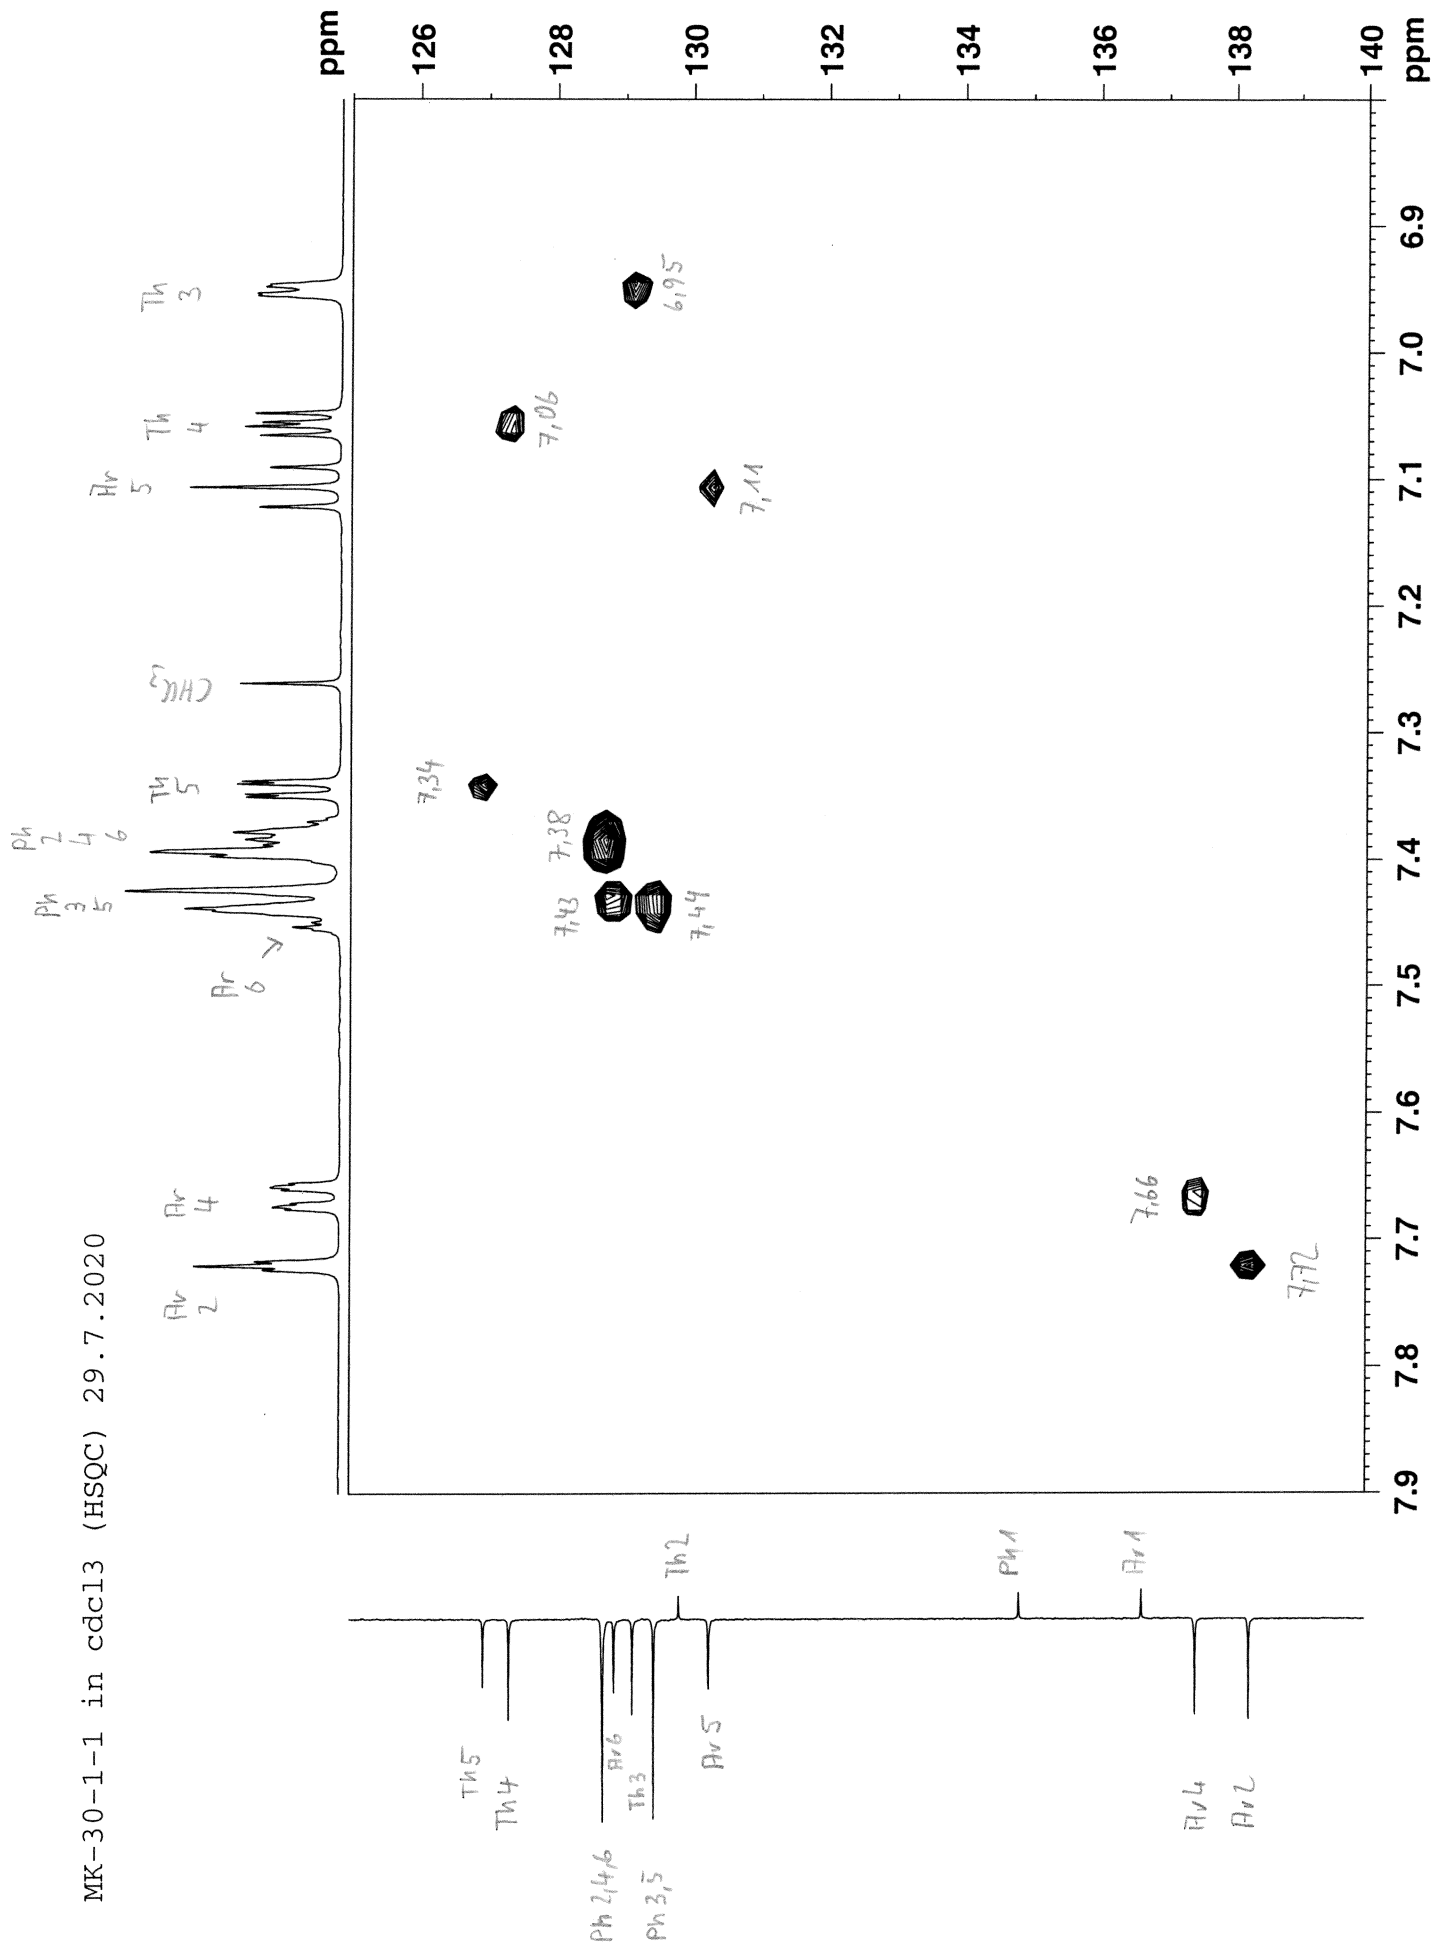

MK-30-1-1 in cdcl3 (HSQC) 29.7.2020

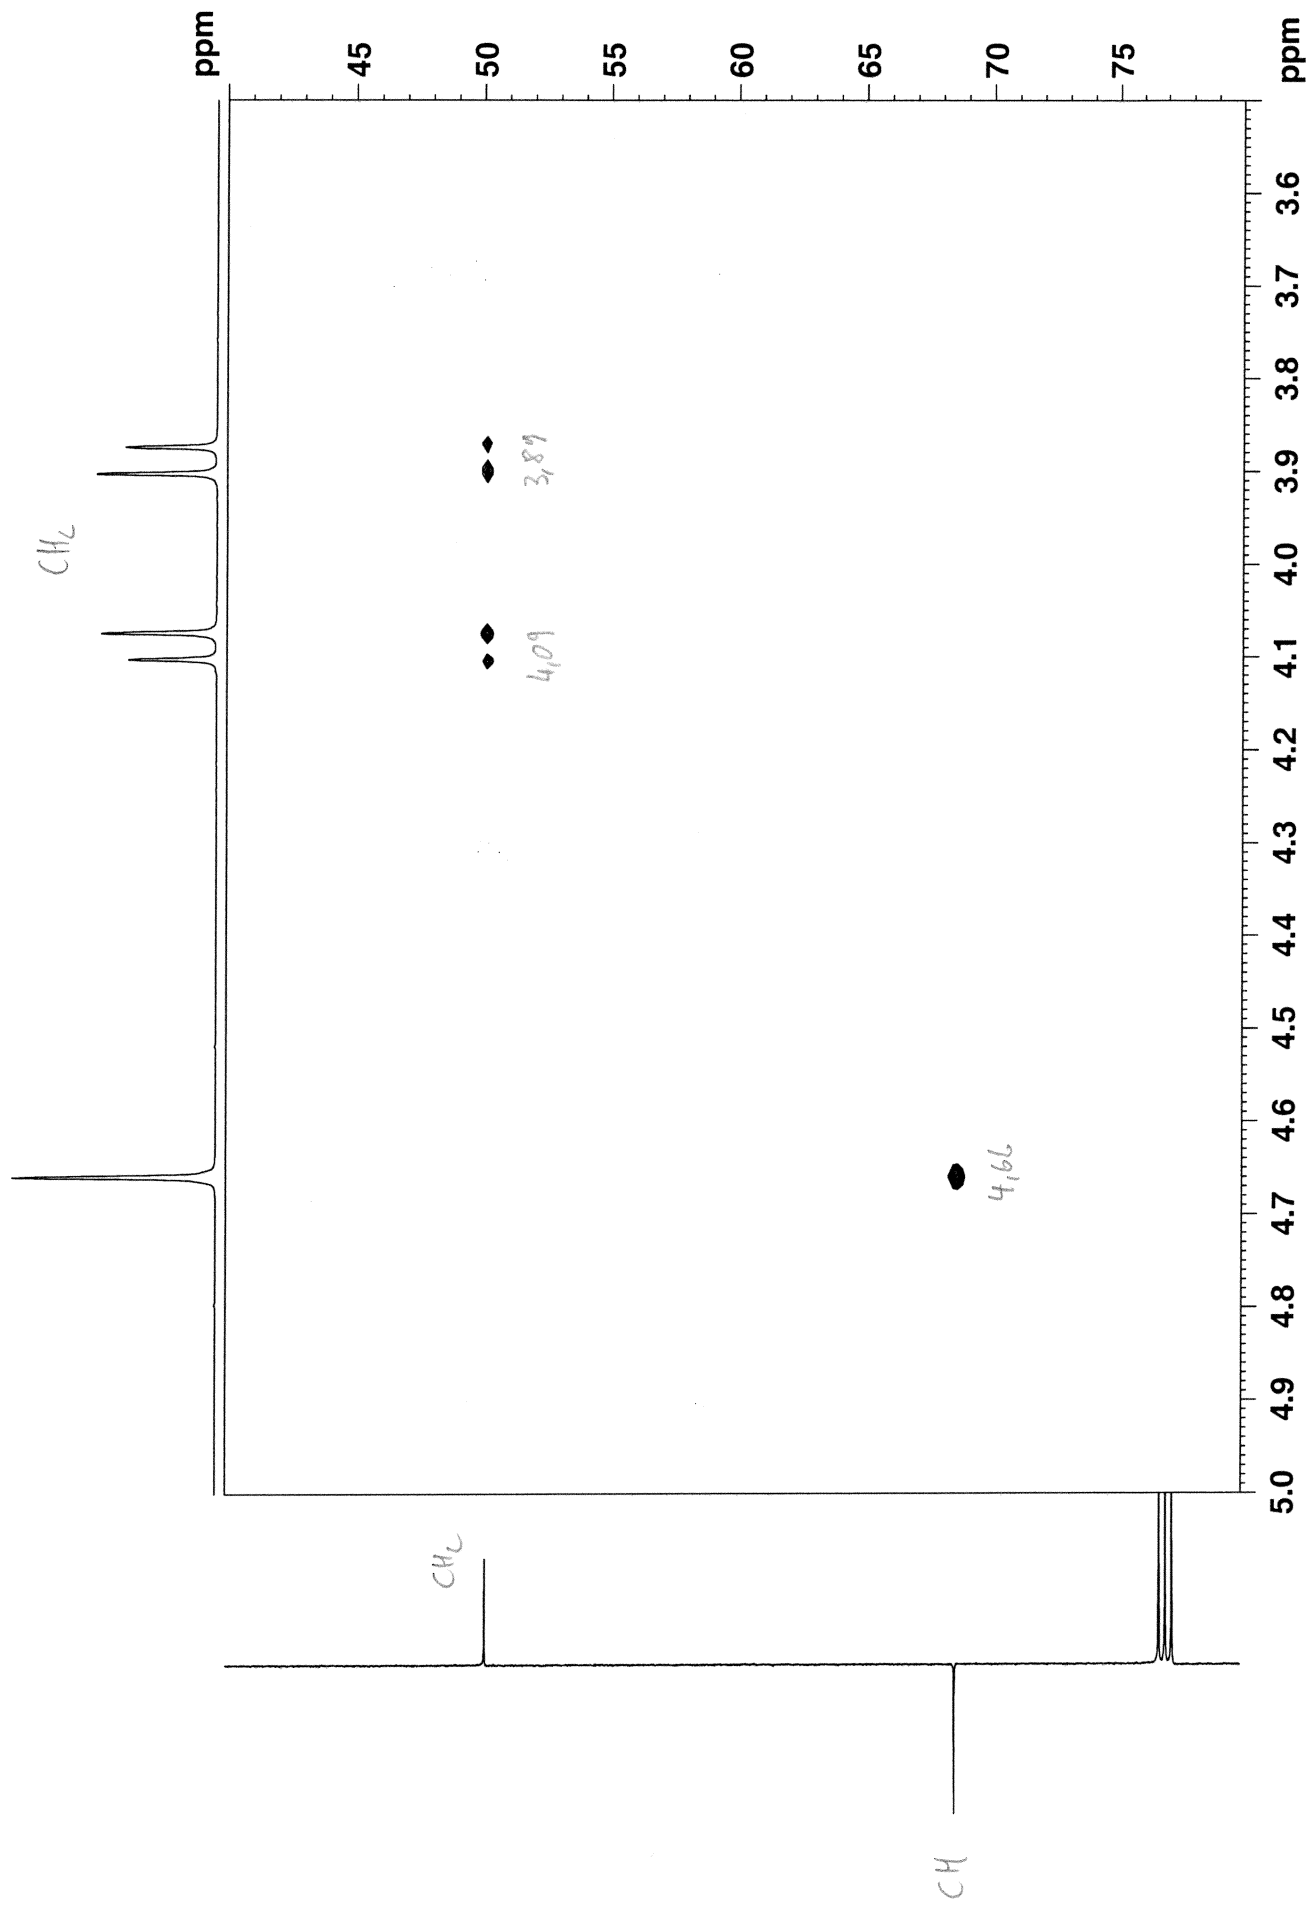

MK-30-1-1 in cdcl3 (HMBC) 29.7.2020

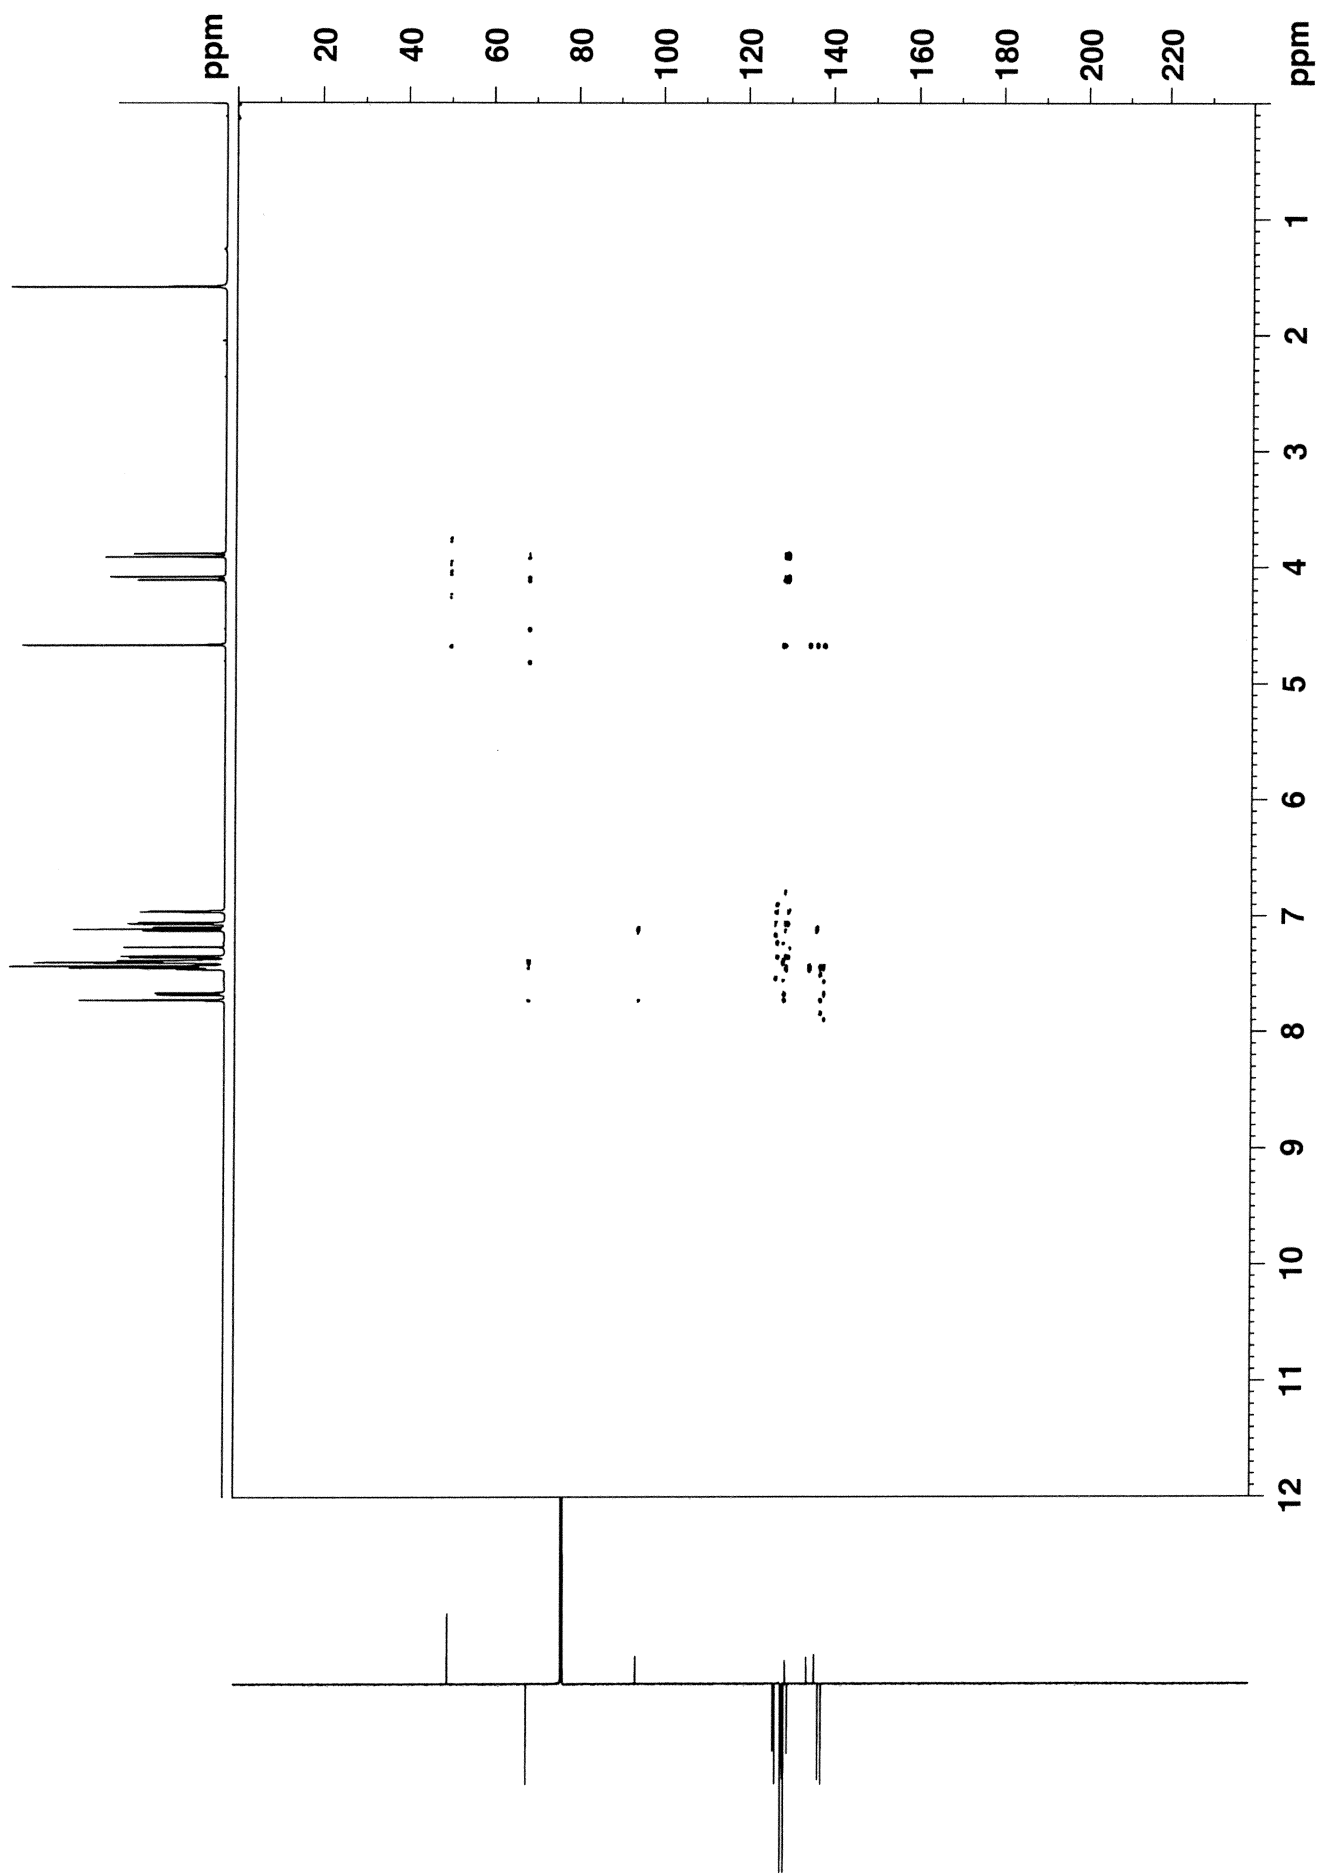



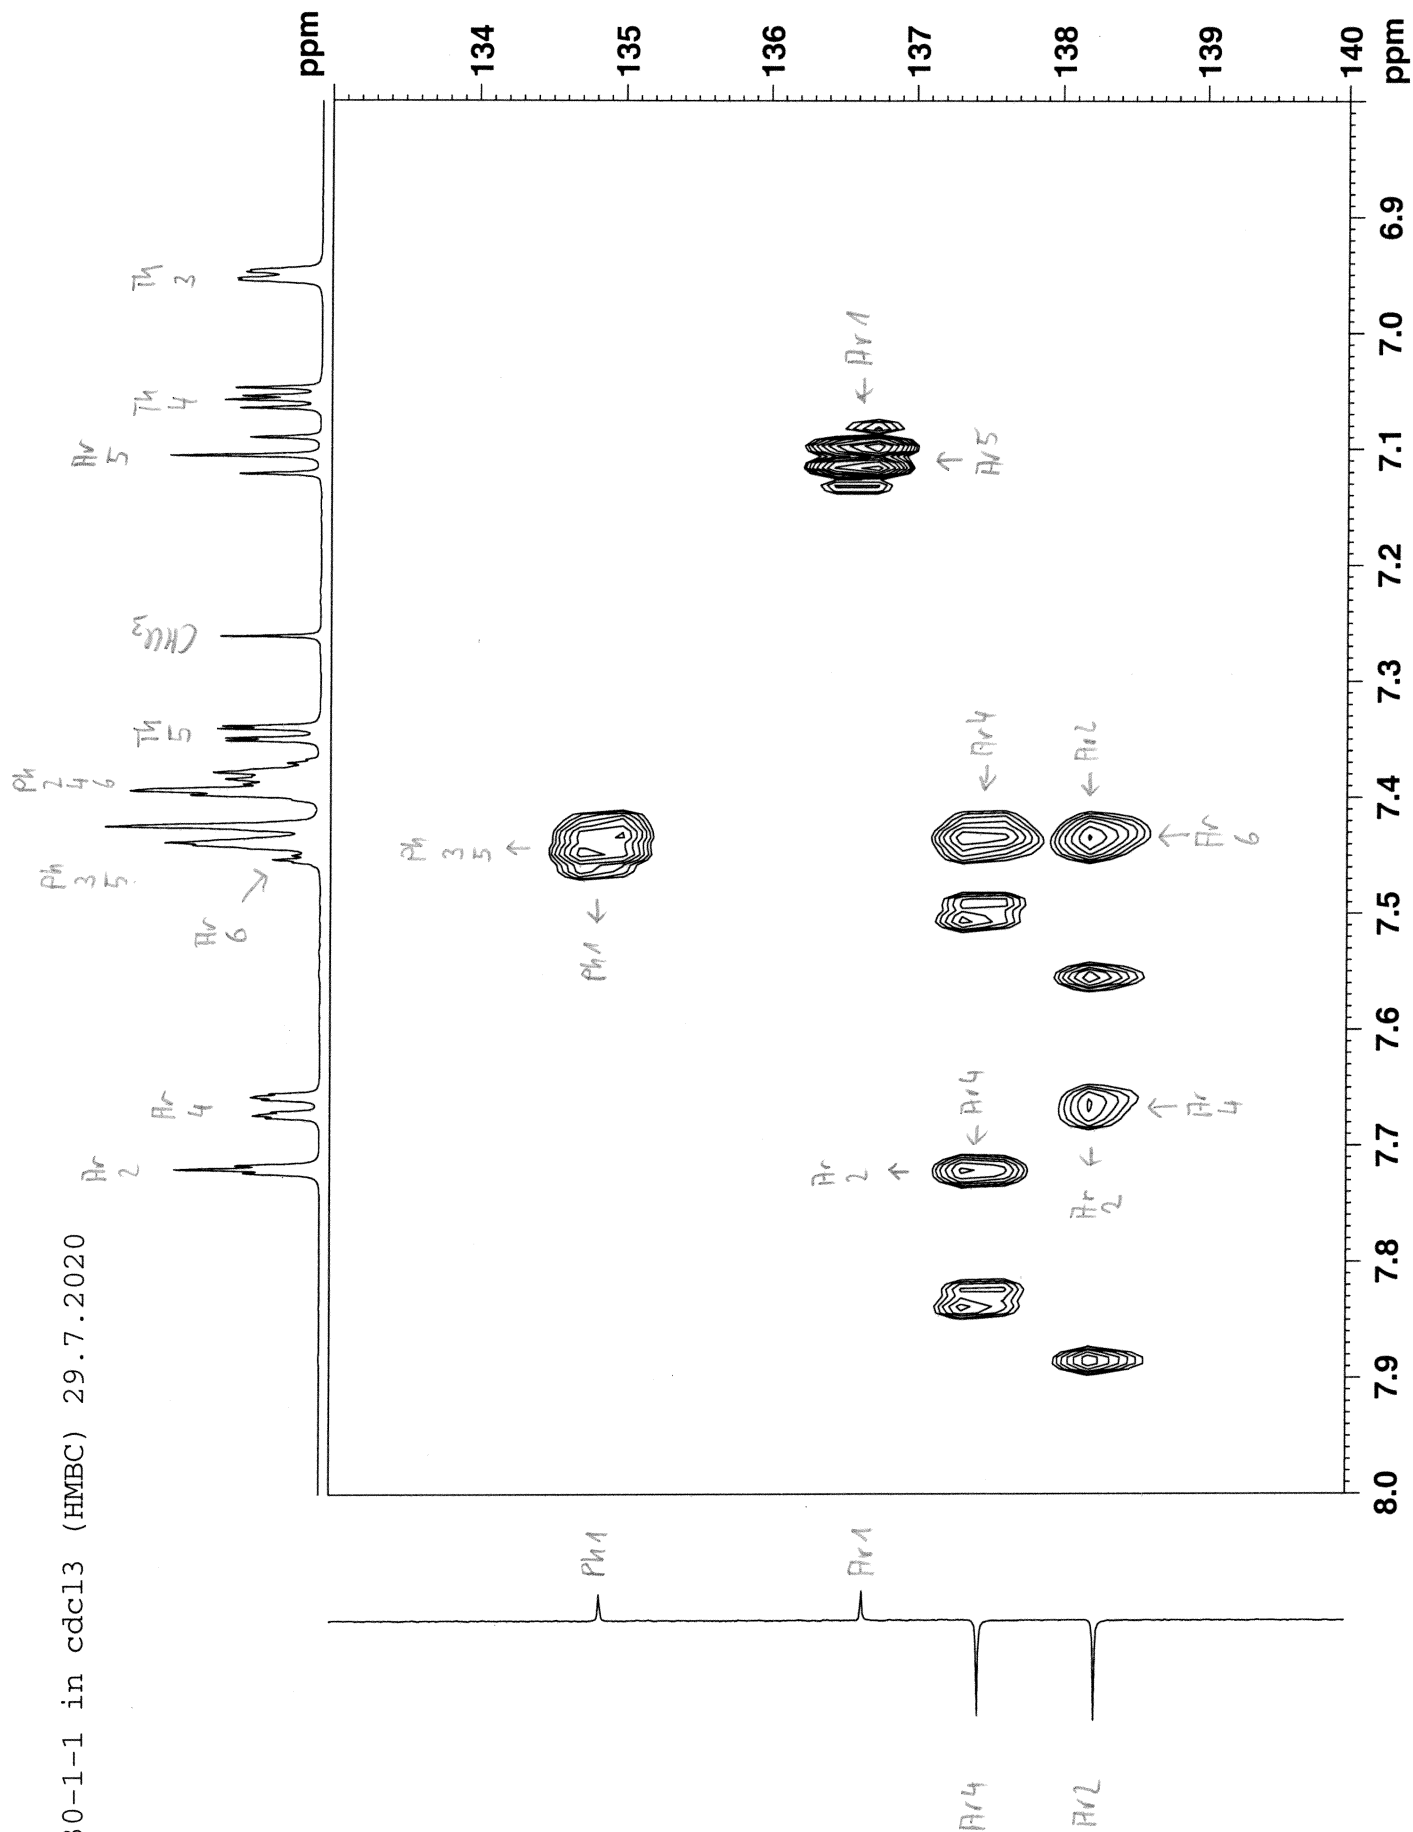

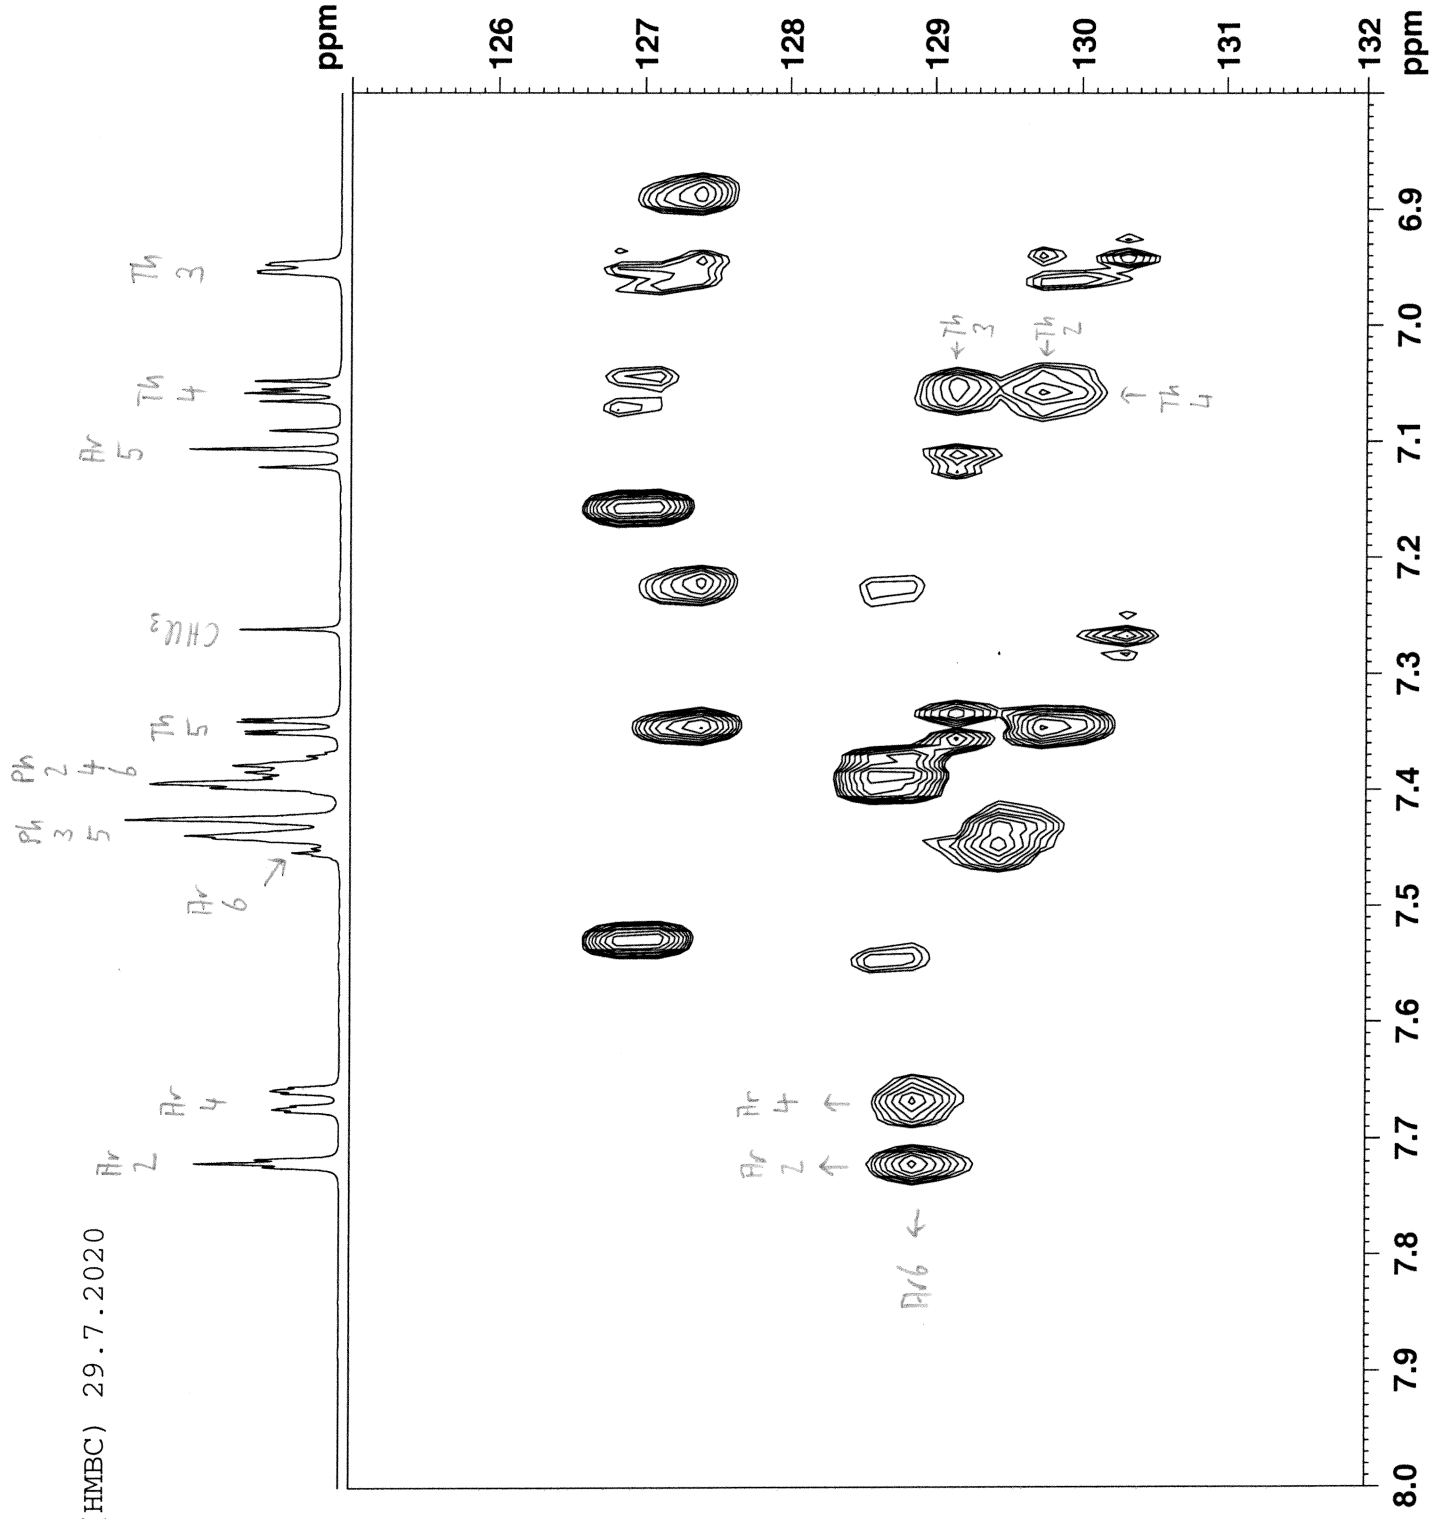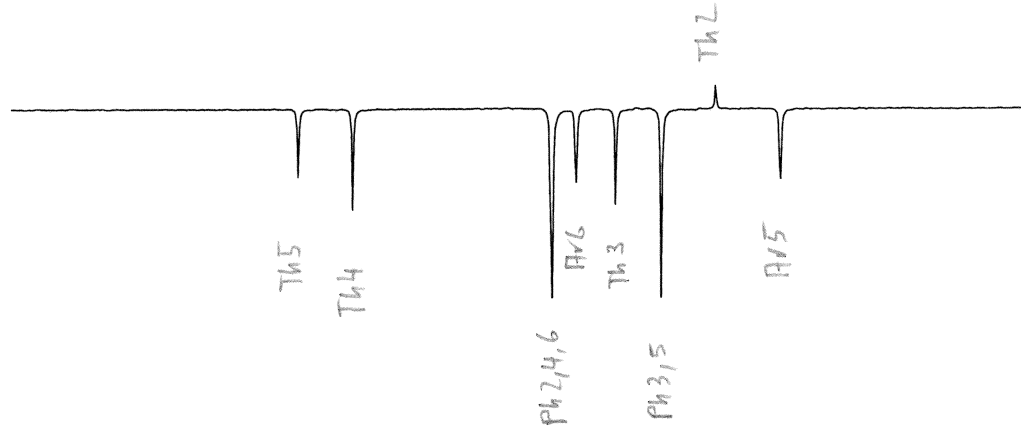

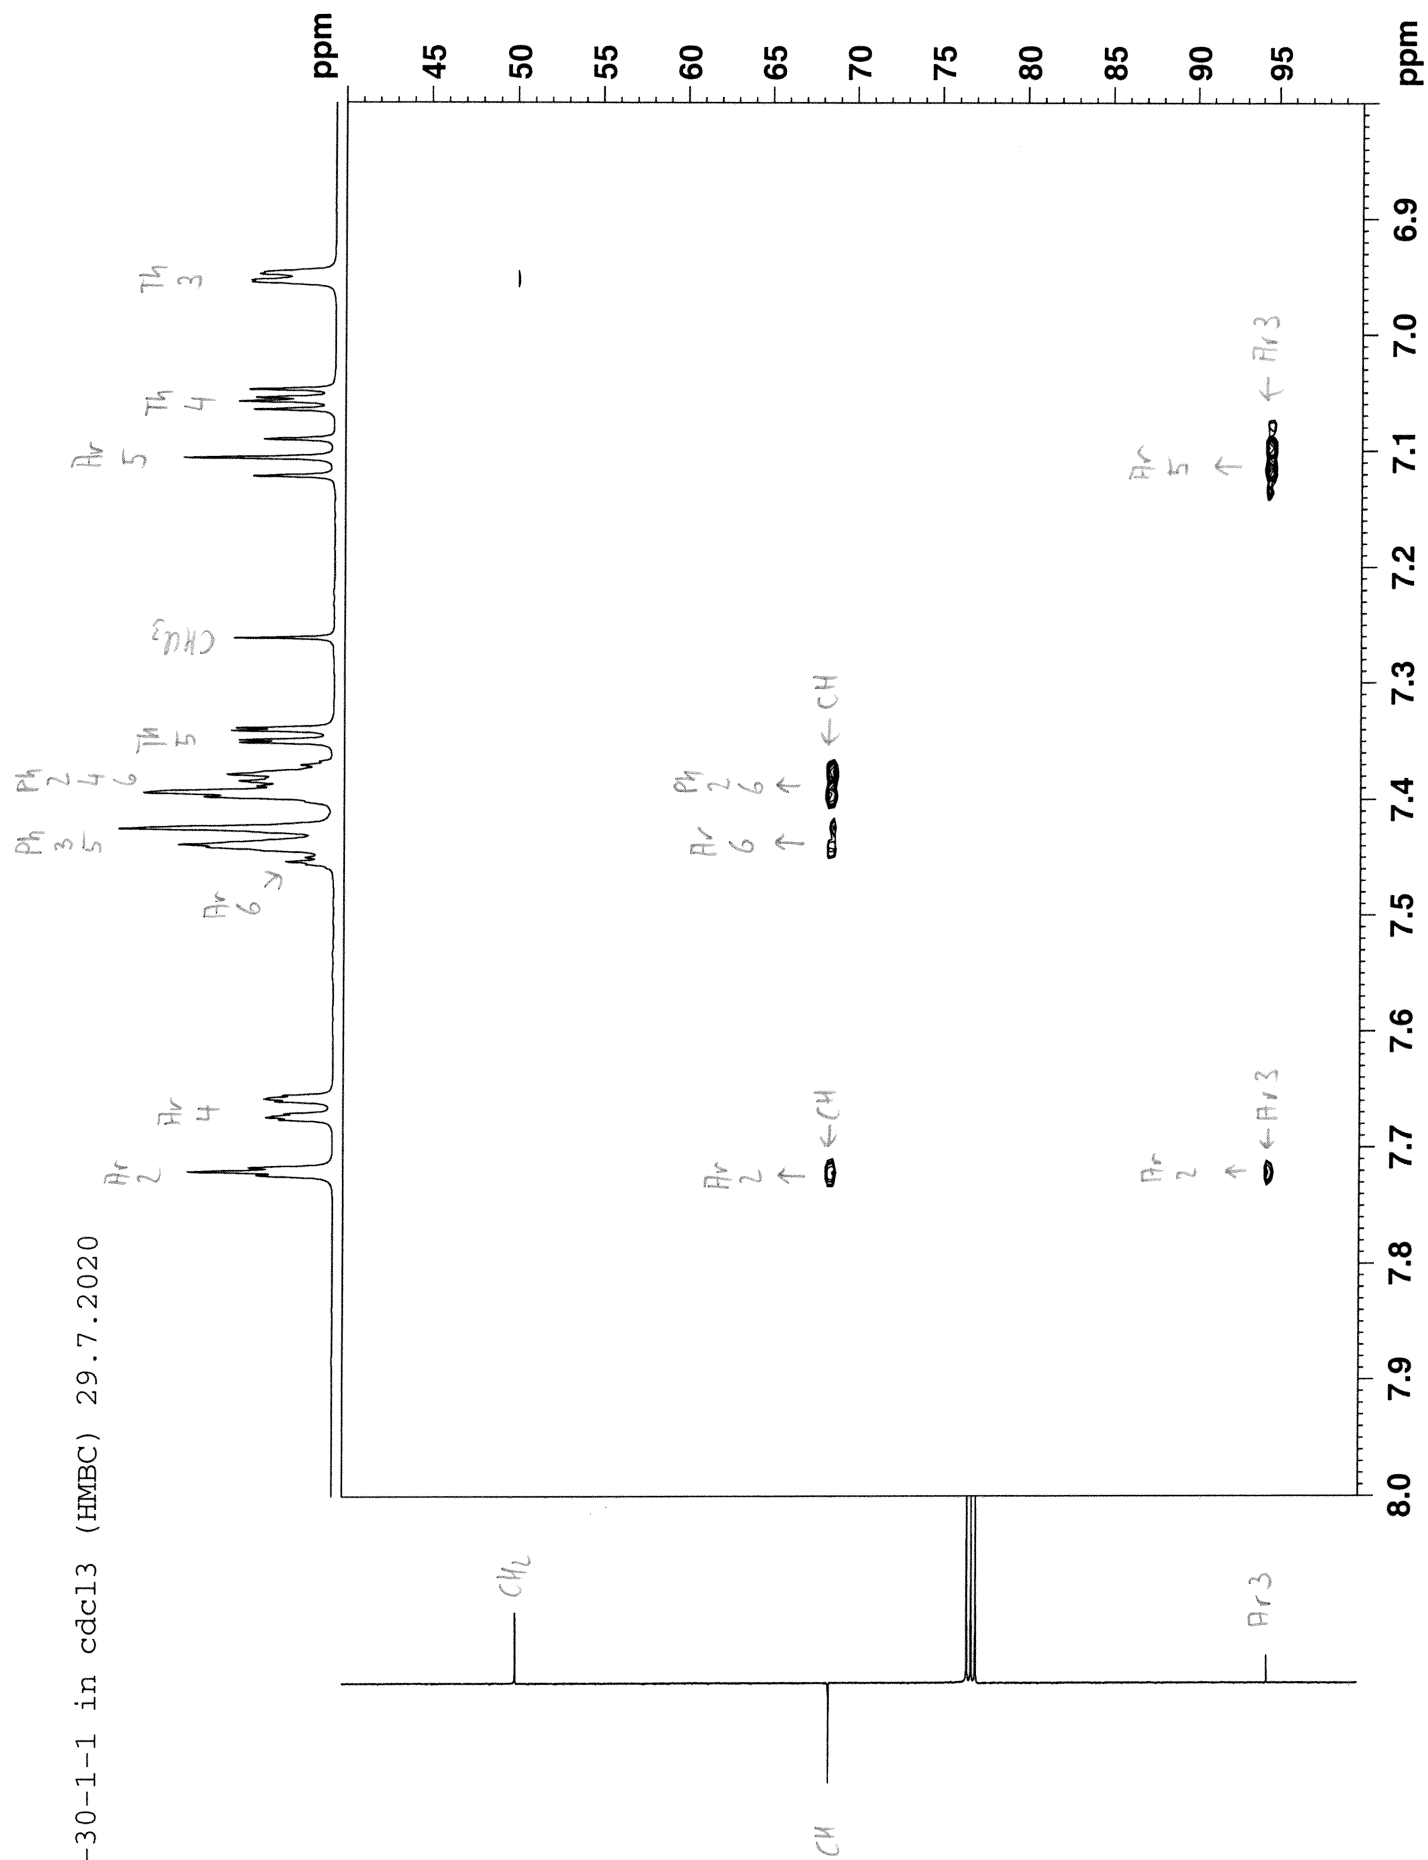

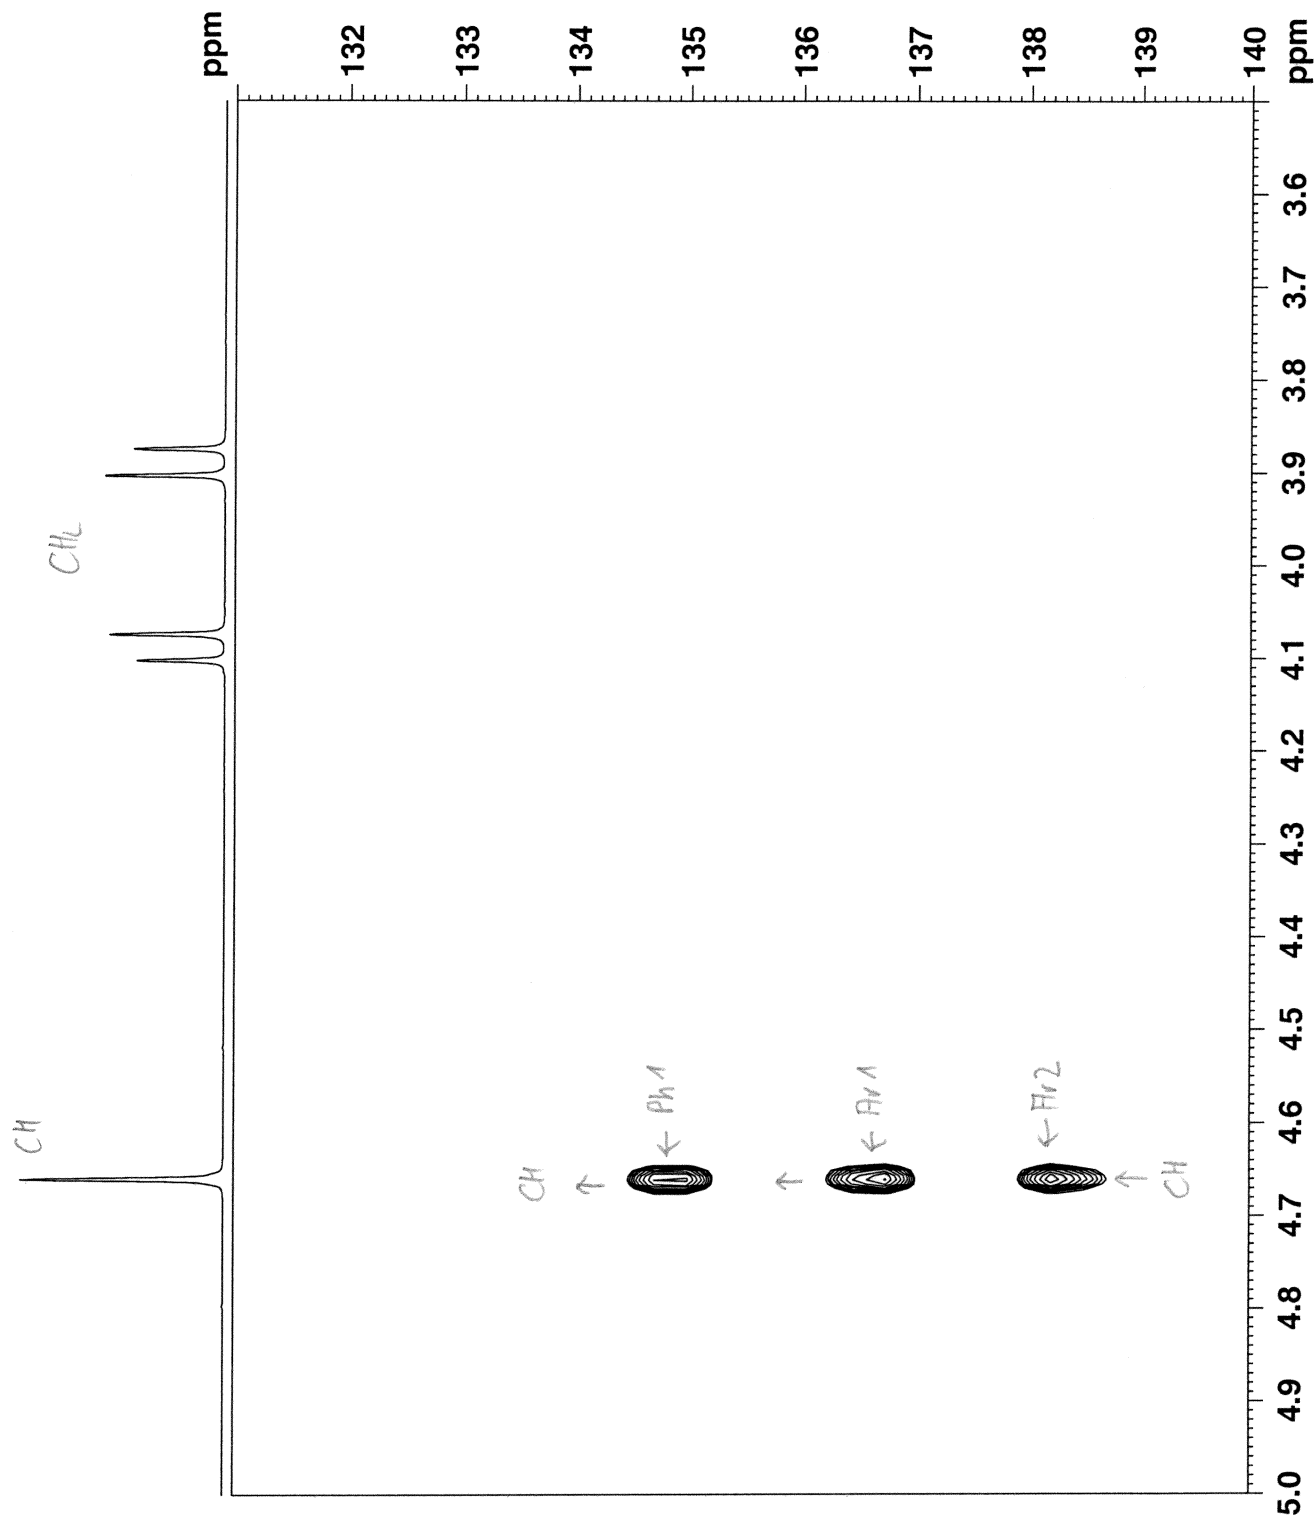

Ph 1

Ar 1

Ar 4

Ar 2

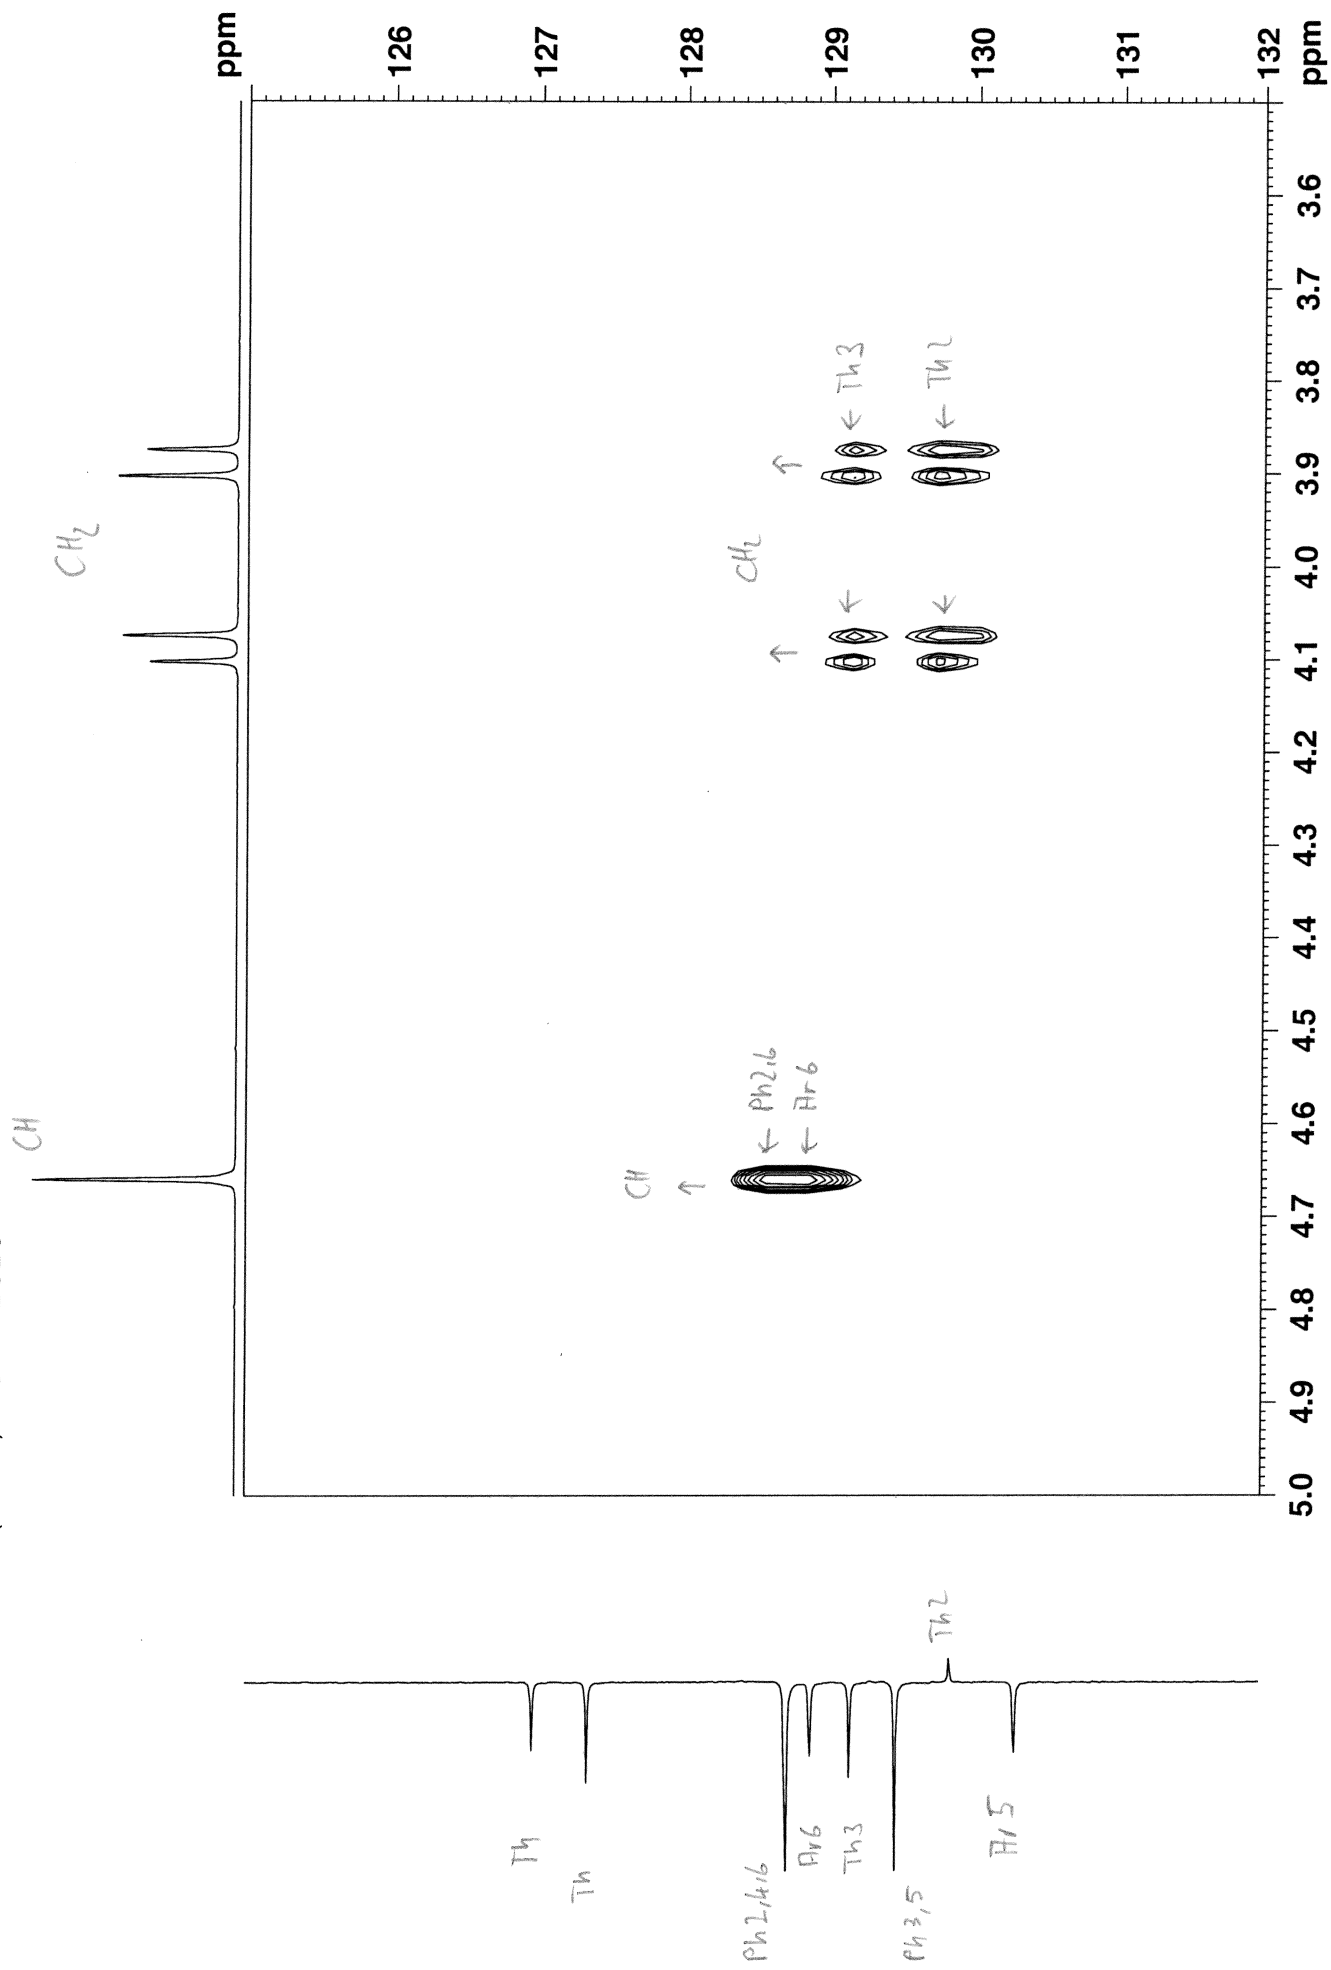

MK-30-1-1 in cdcl3 (HMBC) 29.7.2020

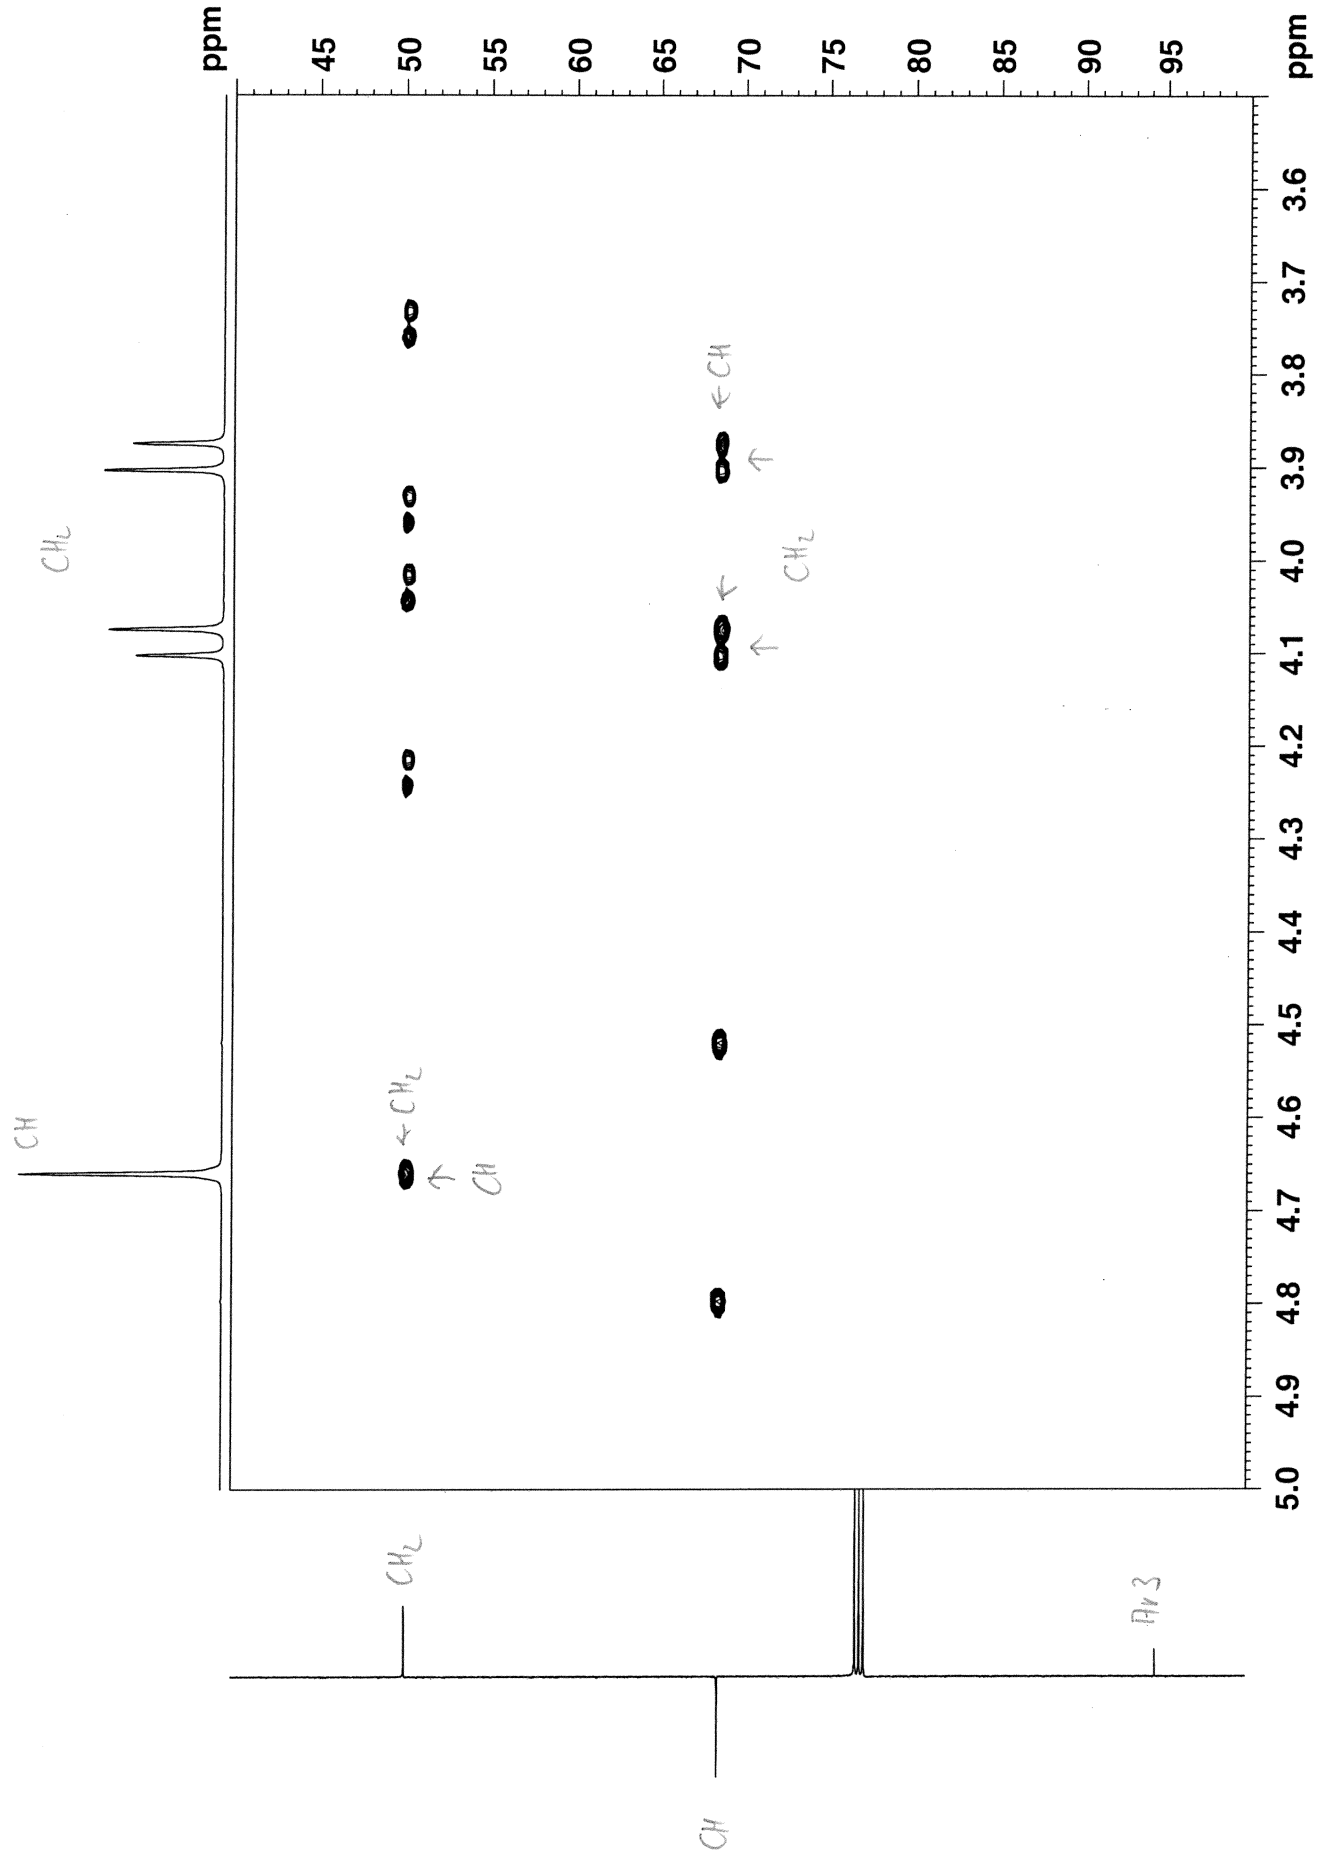

**Figure S38c.** NMR spectra of compound **6j**.

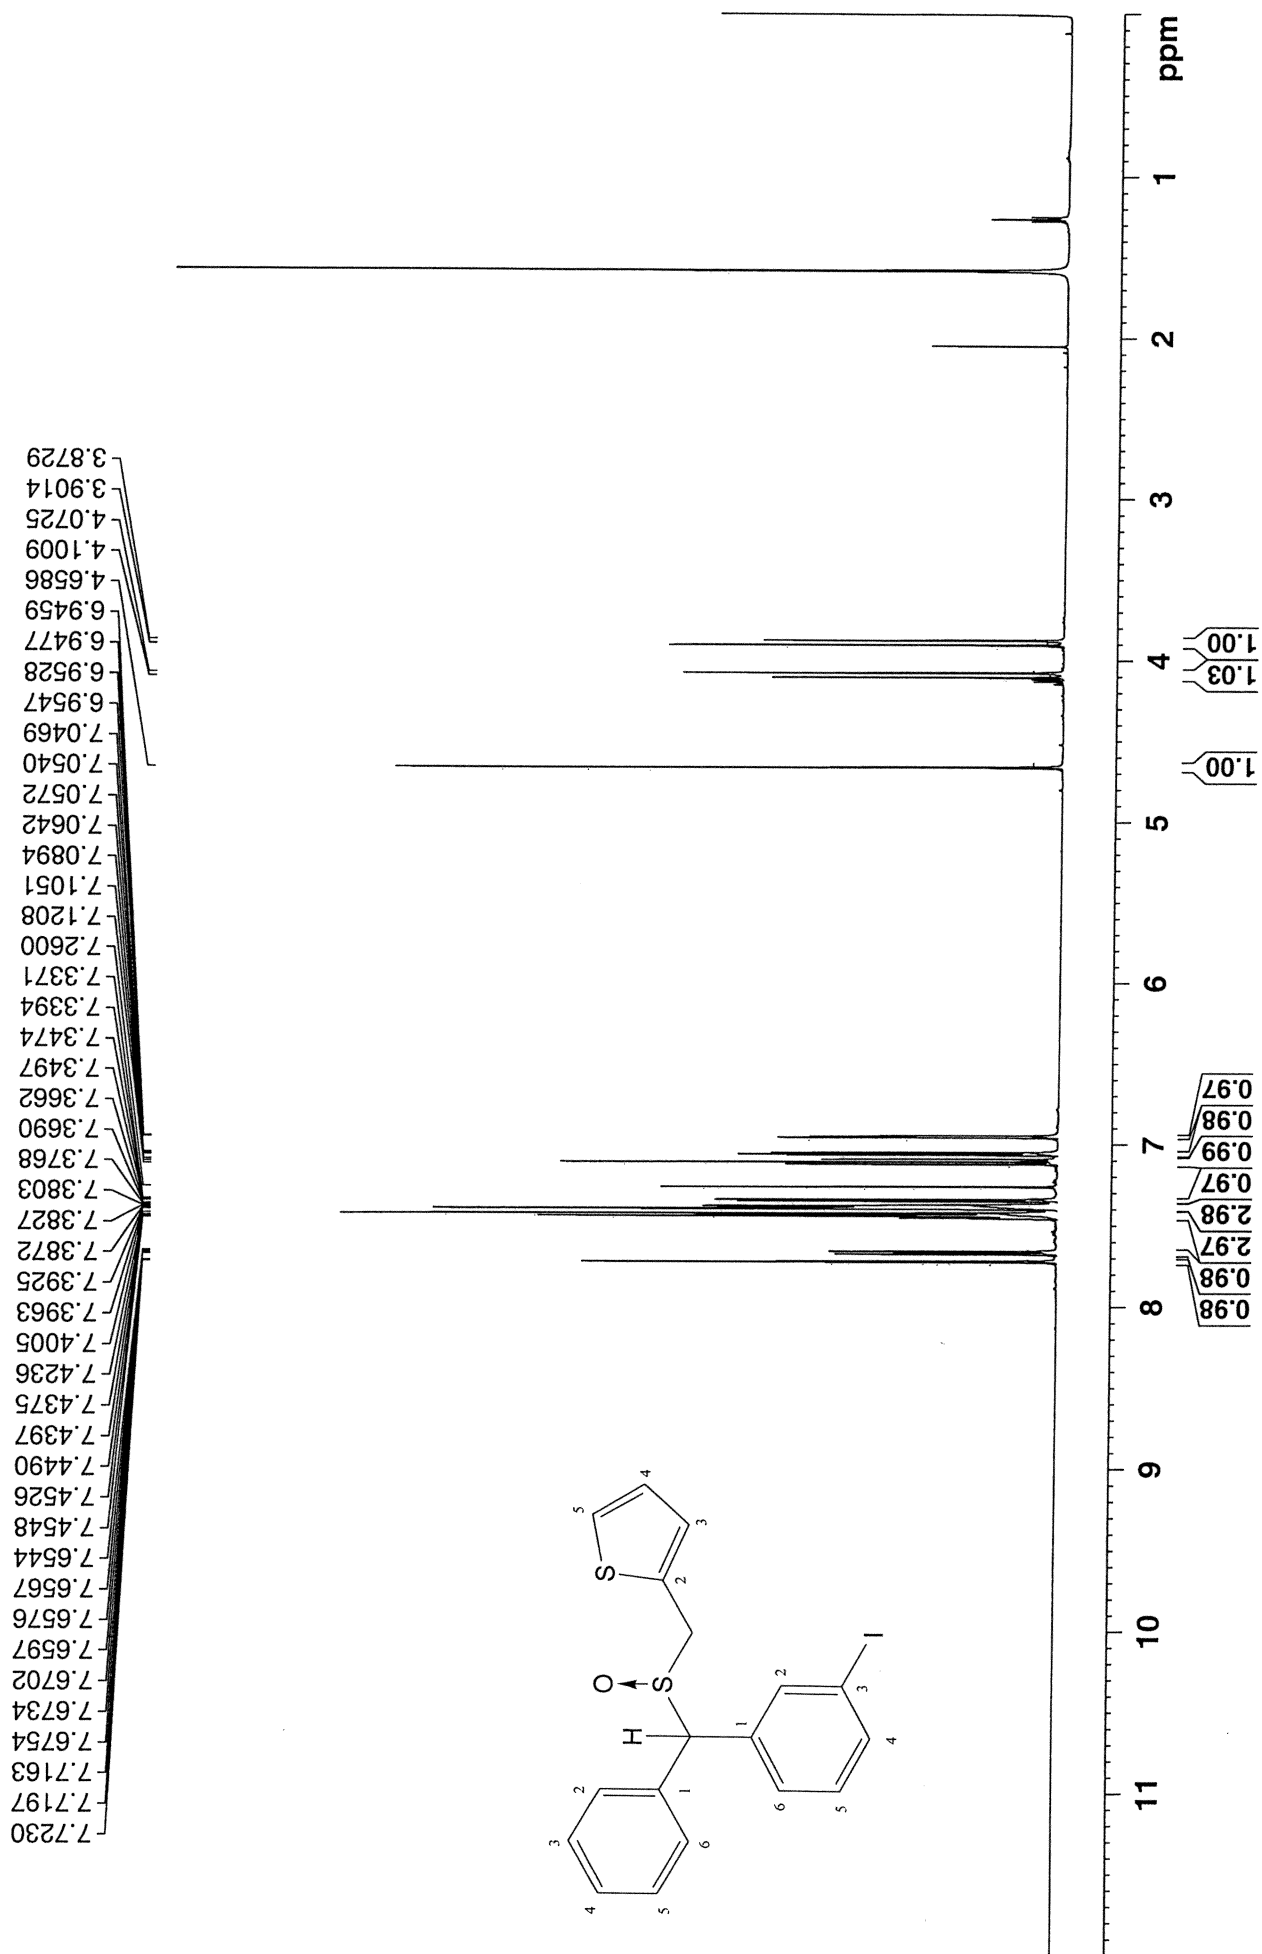

MK-30-1-2 in cdcl3 (Proton) 29.7.2020

7.7230  
7.7197  
7.7163  
7.6754  
7.6734  
7.6702  
7.6597  
7.6576  
7.6567  
7.6544

7.4548  
7.4526  
7.4490  
7.4397  
7.4375  
7.4236  
7.4005  
7.3963  
7.3925  
7.3872  
7.3827  
7.3803  
7.3768  
7.3690  
7.3662  
7.3497  
7.3474  
7.3394  
7.3371

7.2600

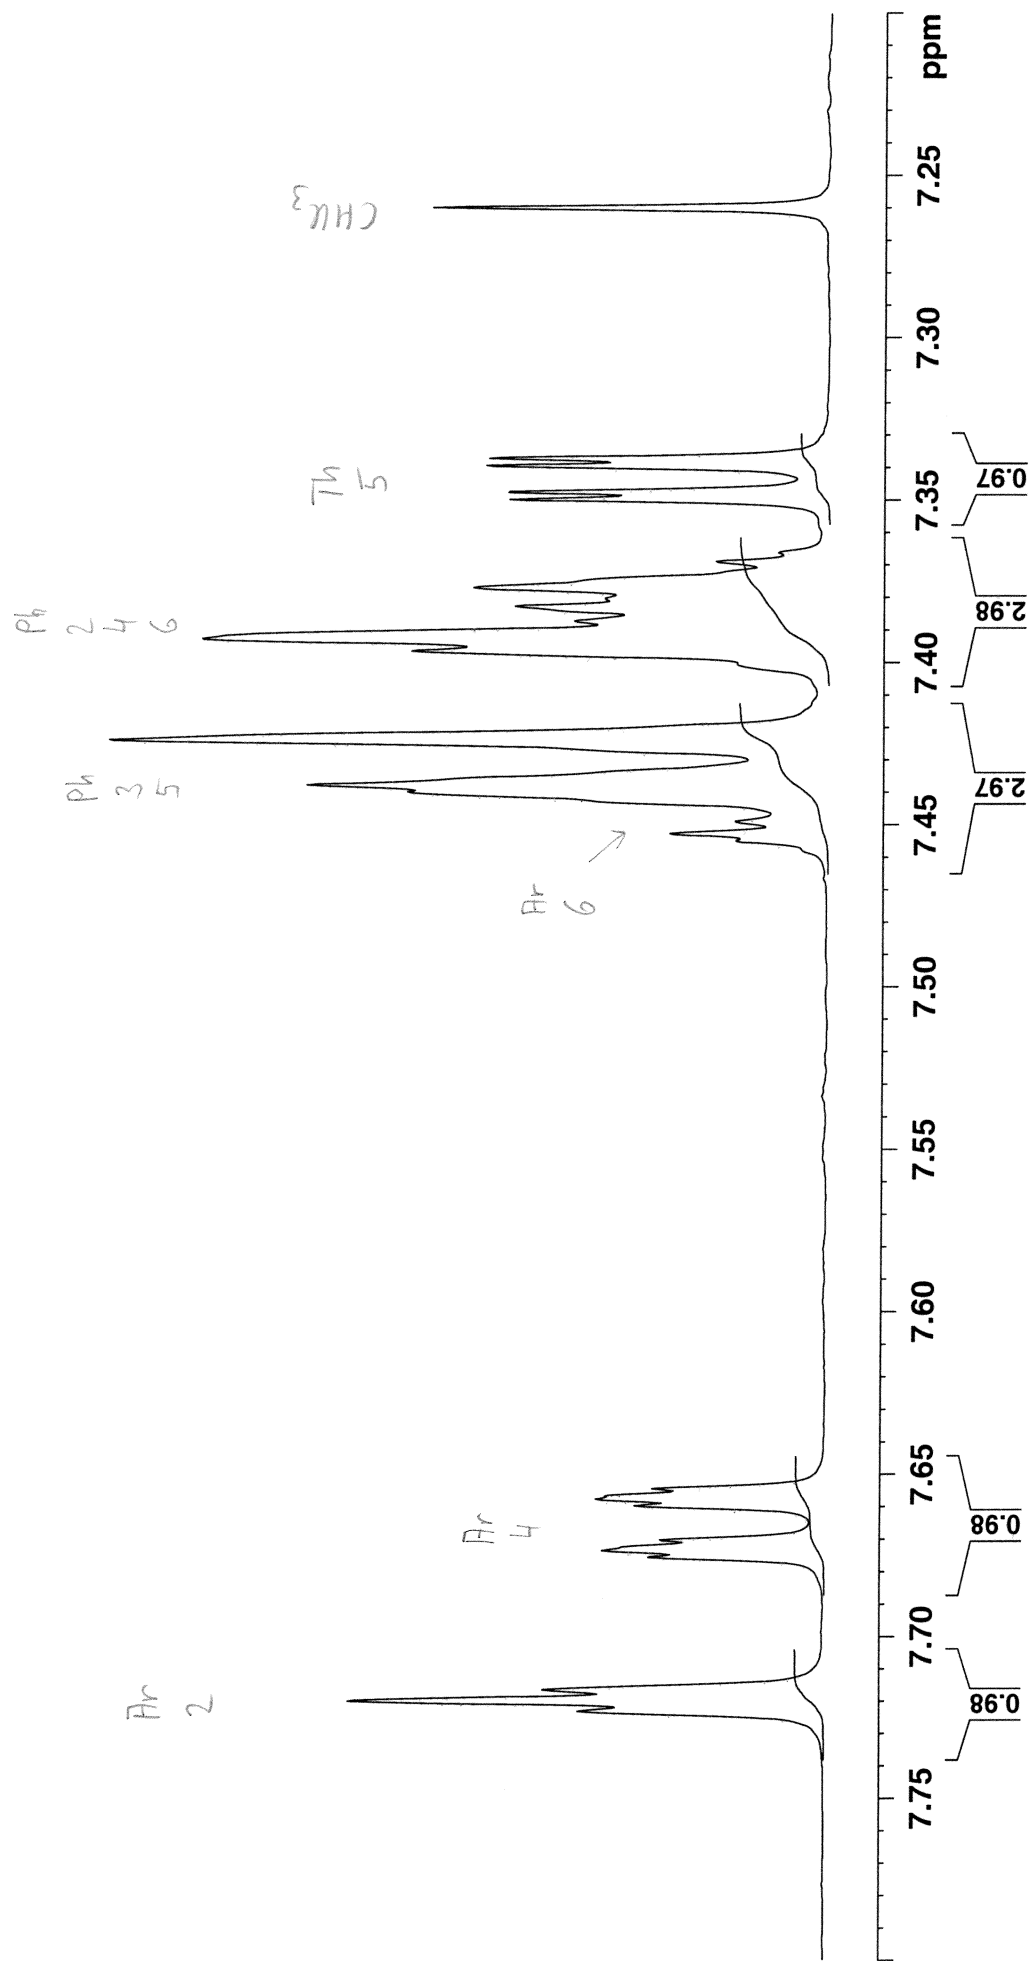



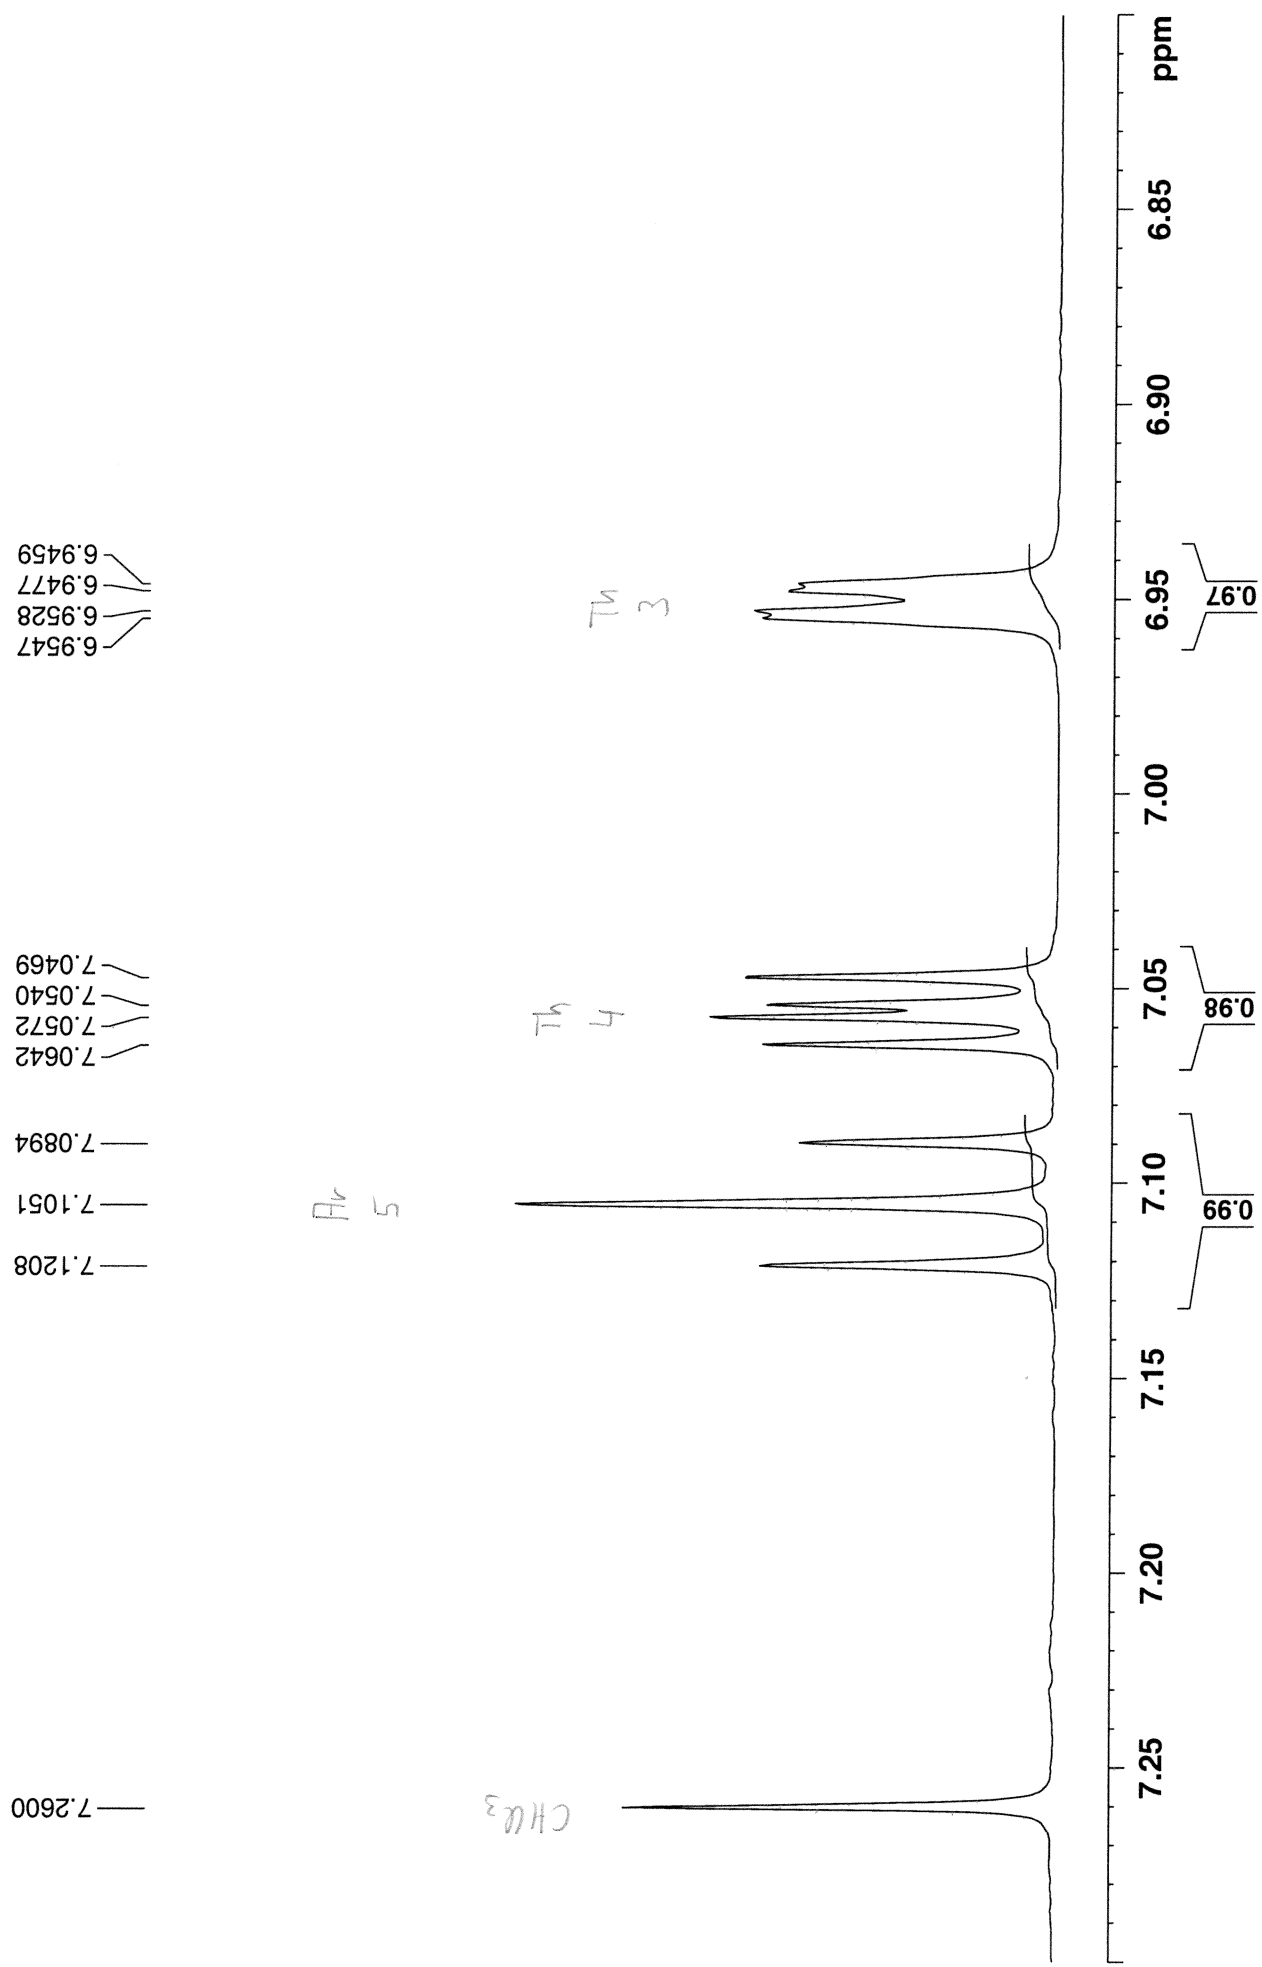

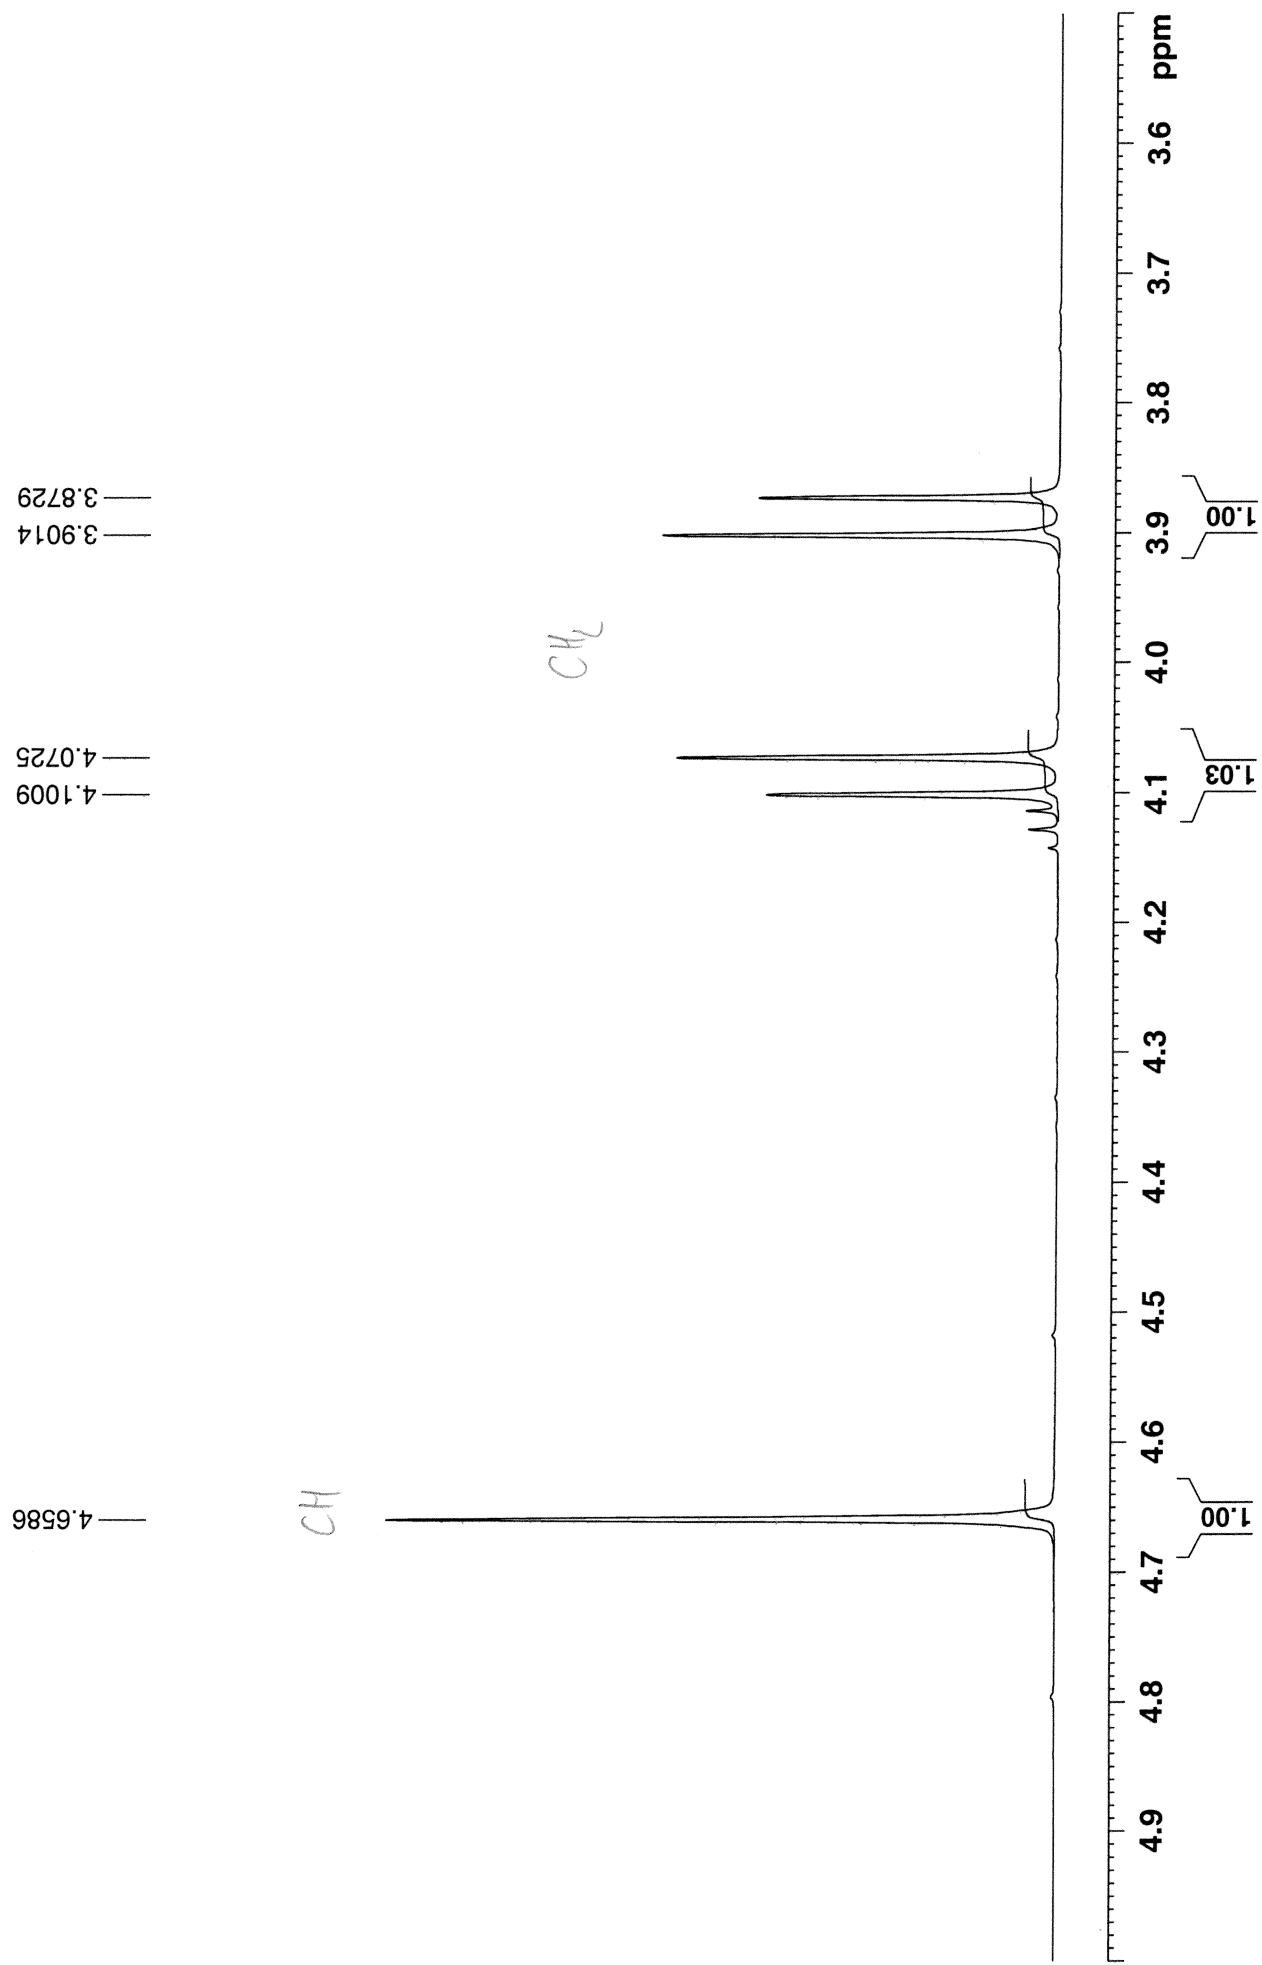

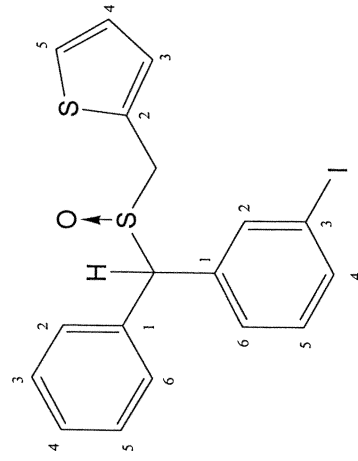

138.2418  
137.4422  
136.6501  
134.8414  
130.2771  
129.8312  
129.4635  
129.1510  
128.8804  
128.7167  
127.3400  
126.9630

94.5064

77.0000

68.5934

50.1209

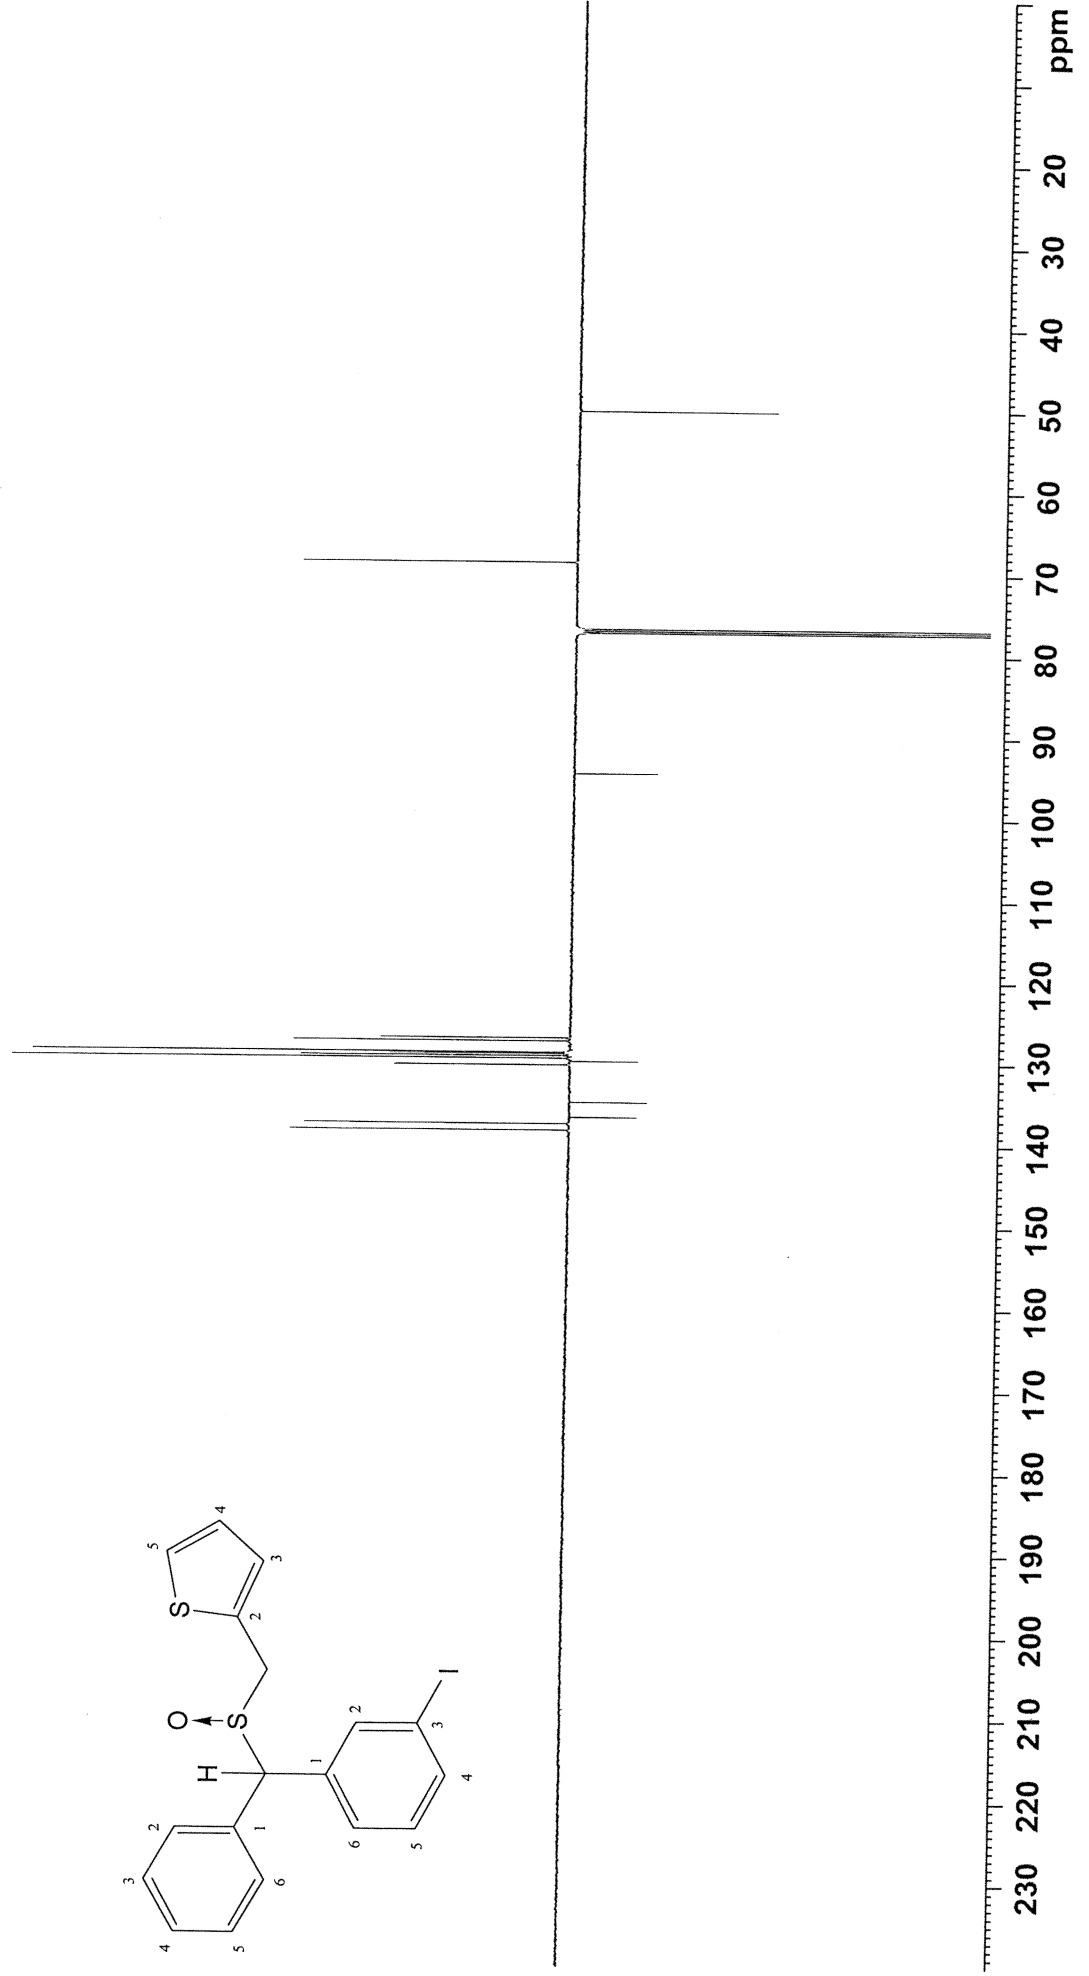

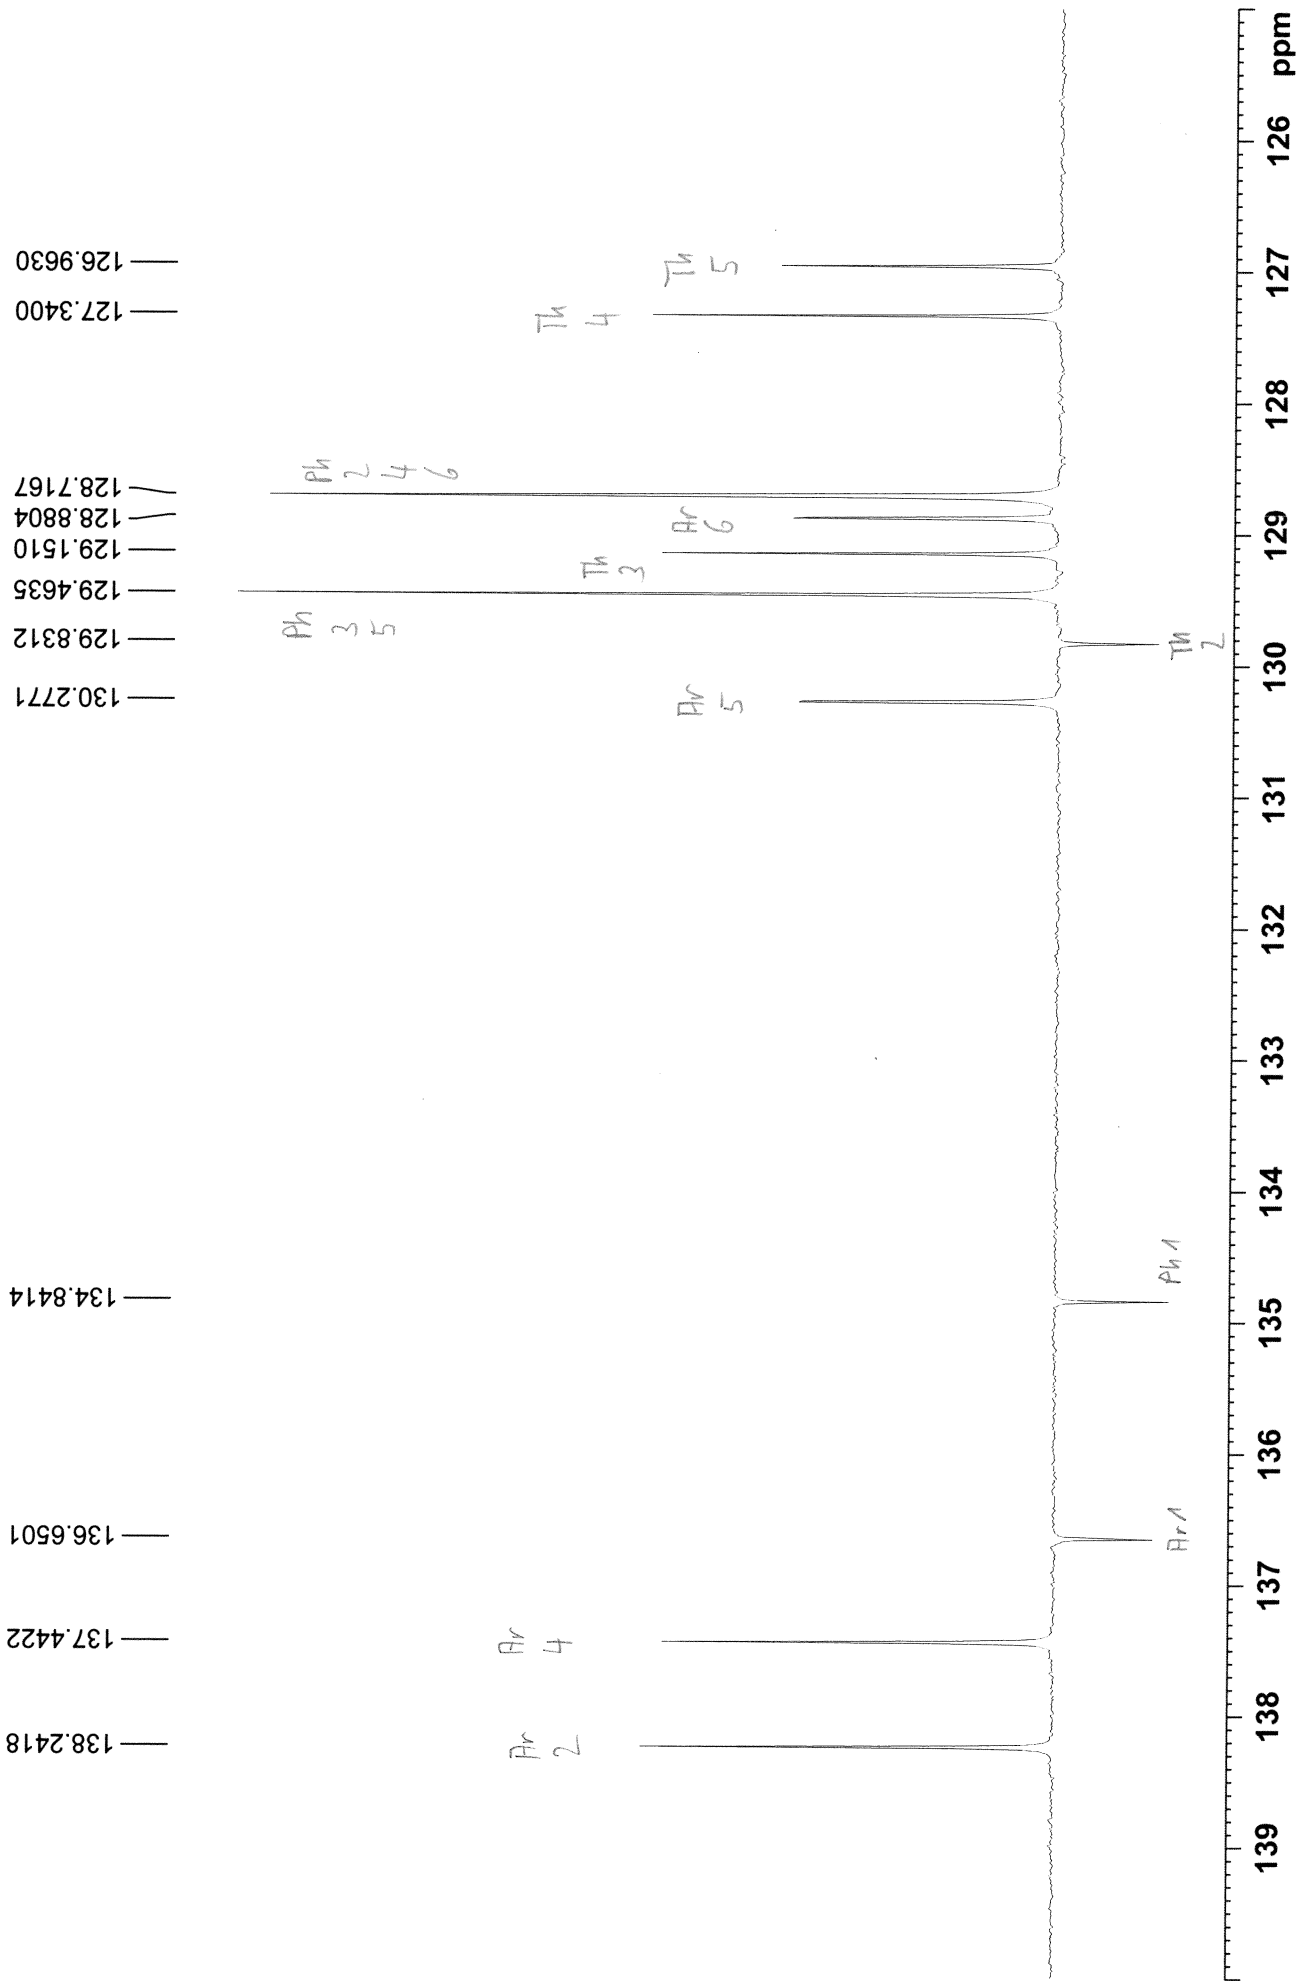

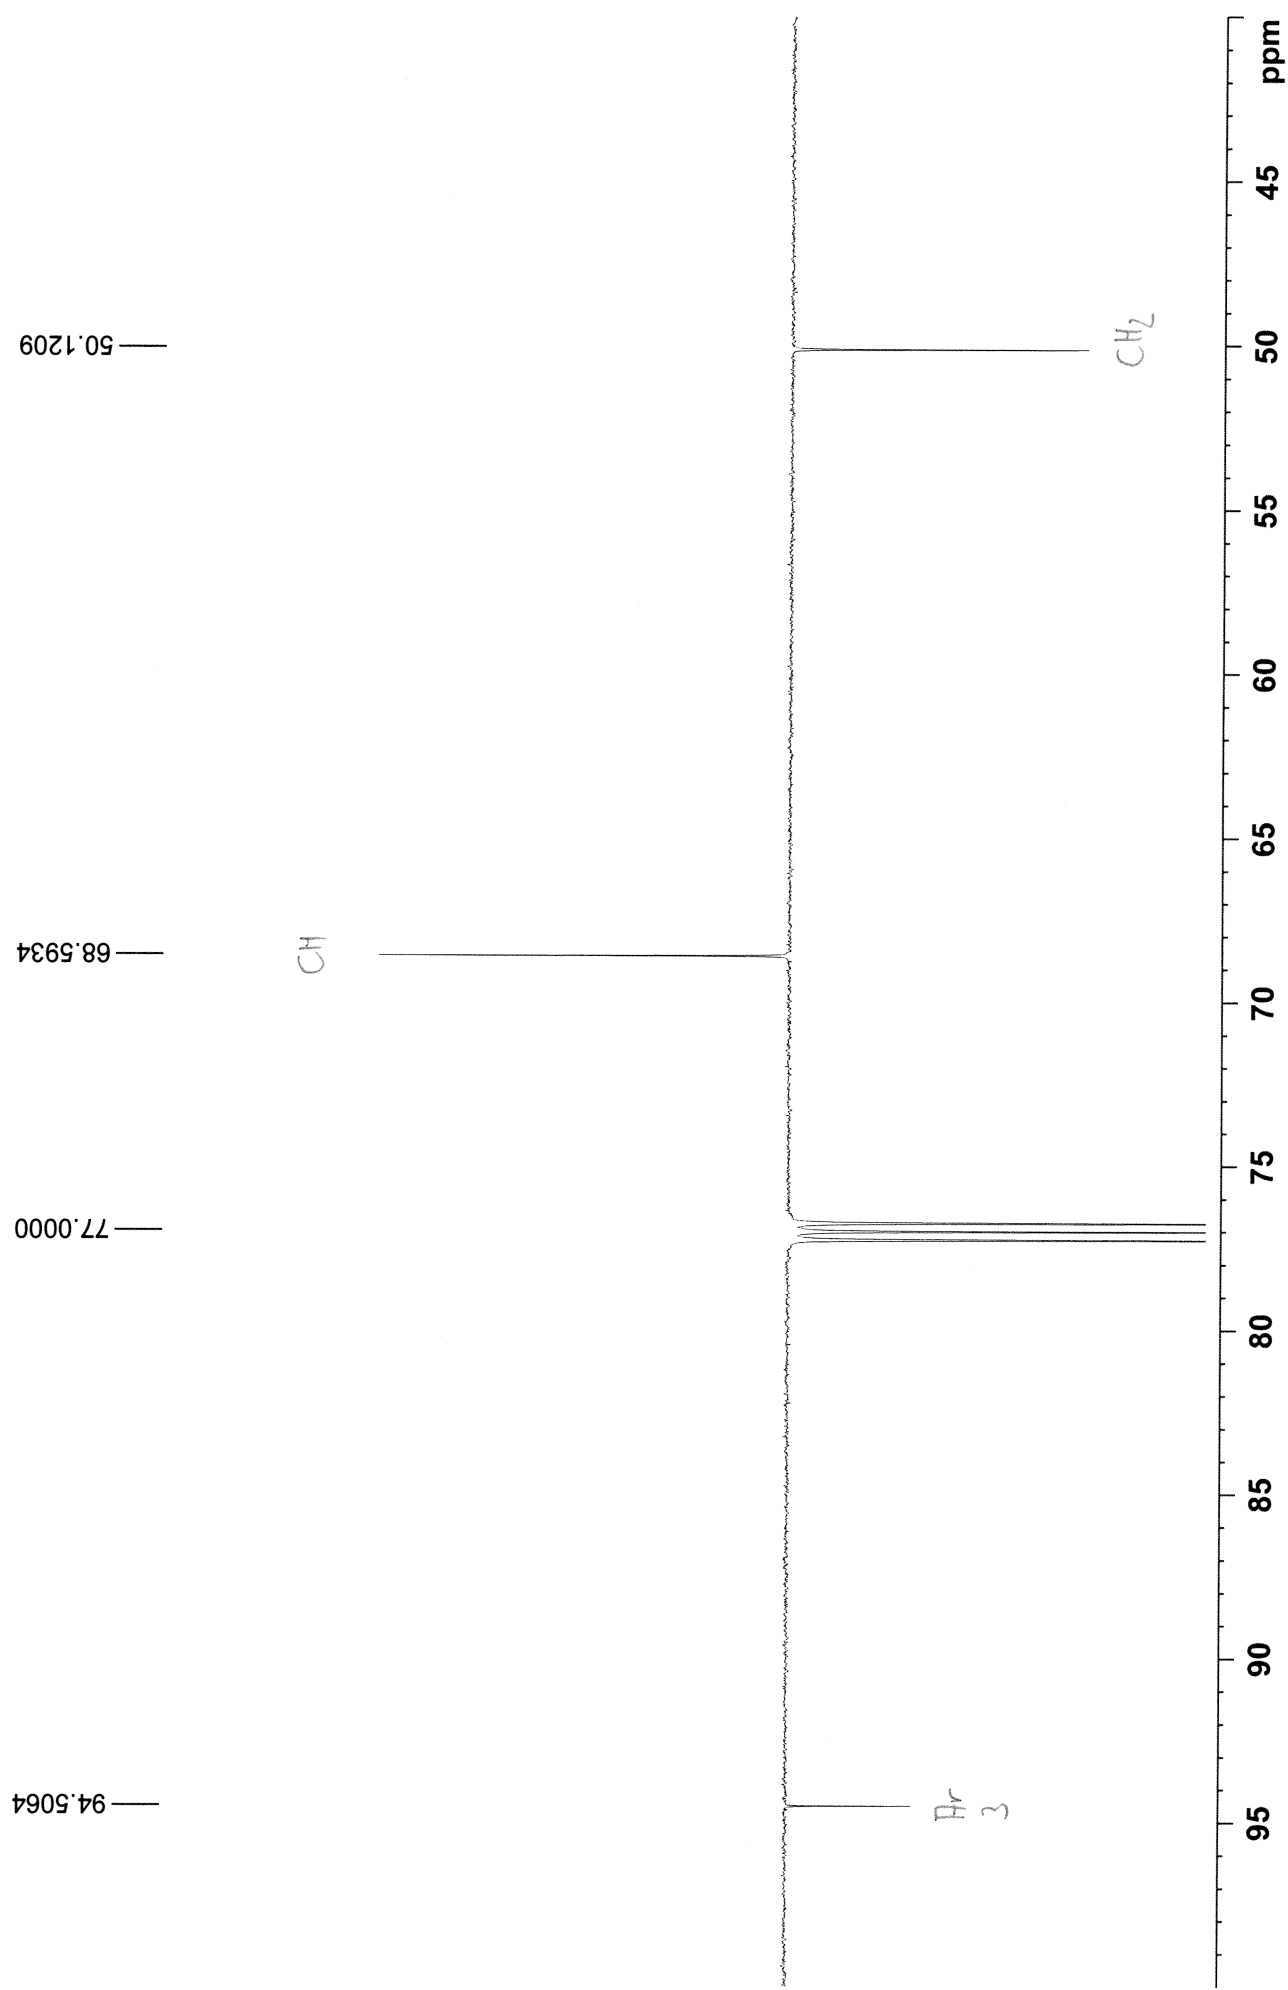

**Figure S39c.** NMR spectra of compound 7j.

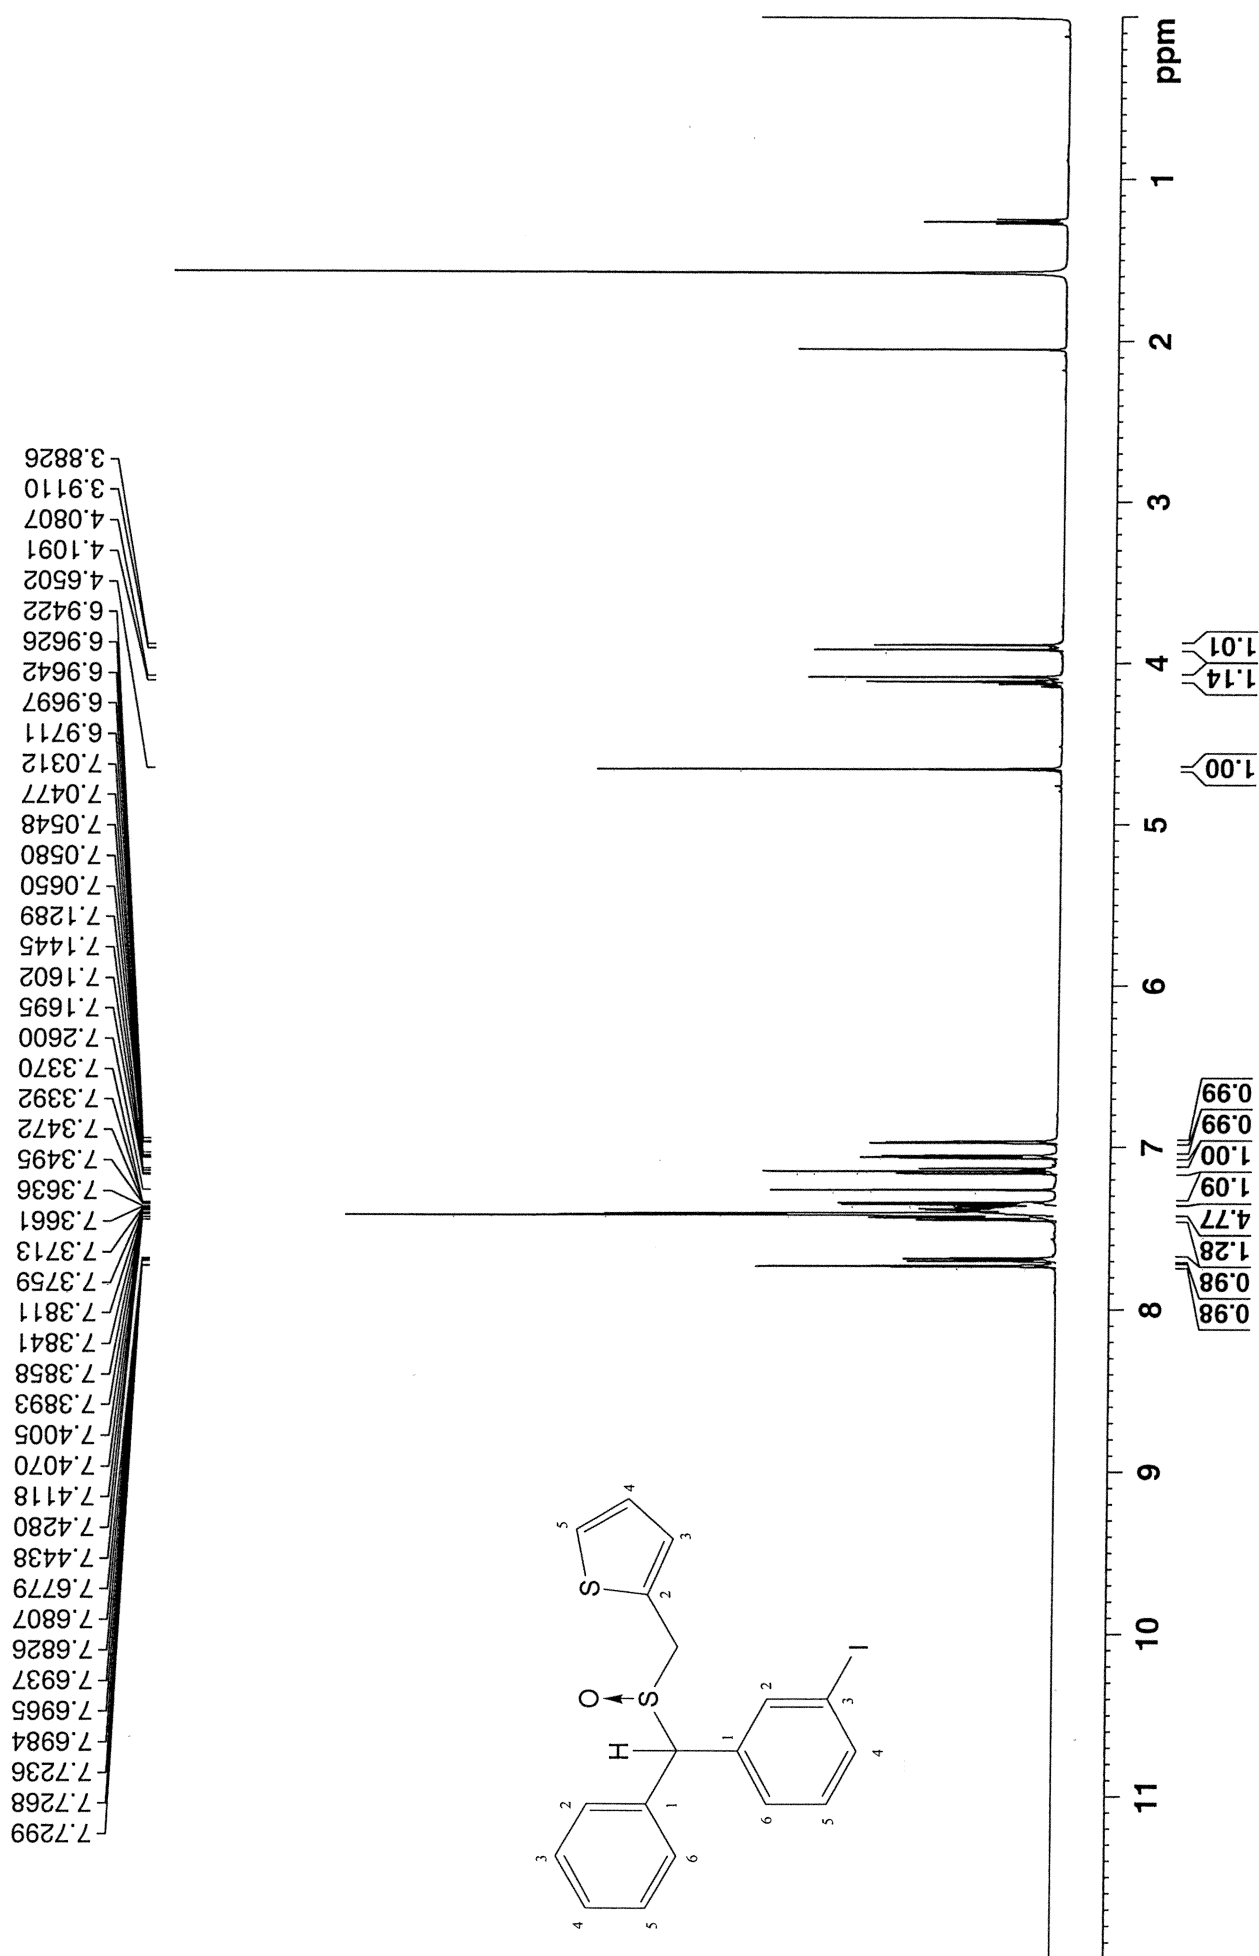

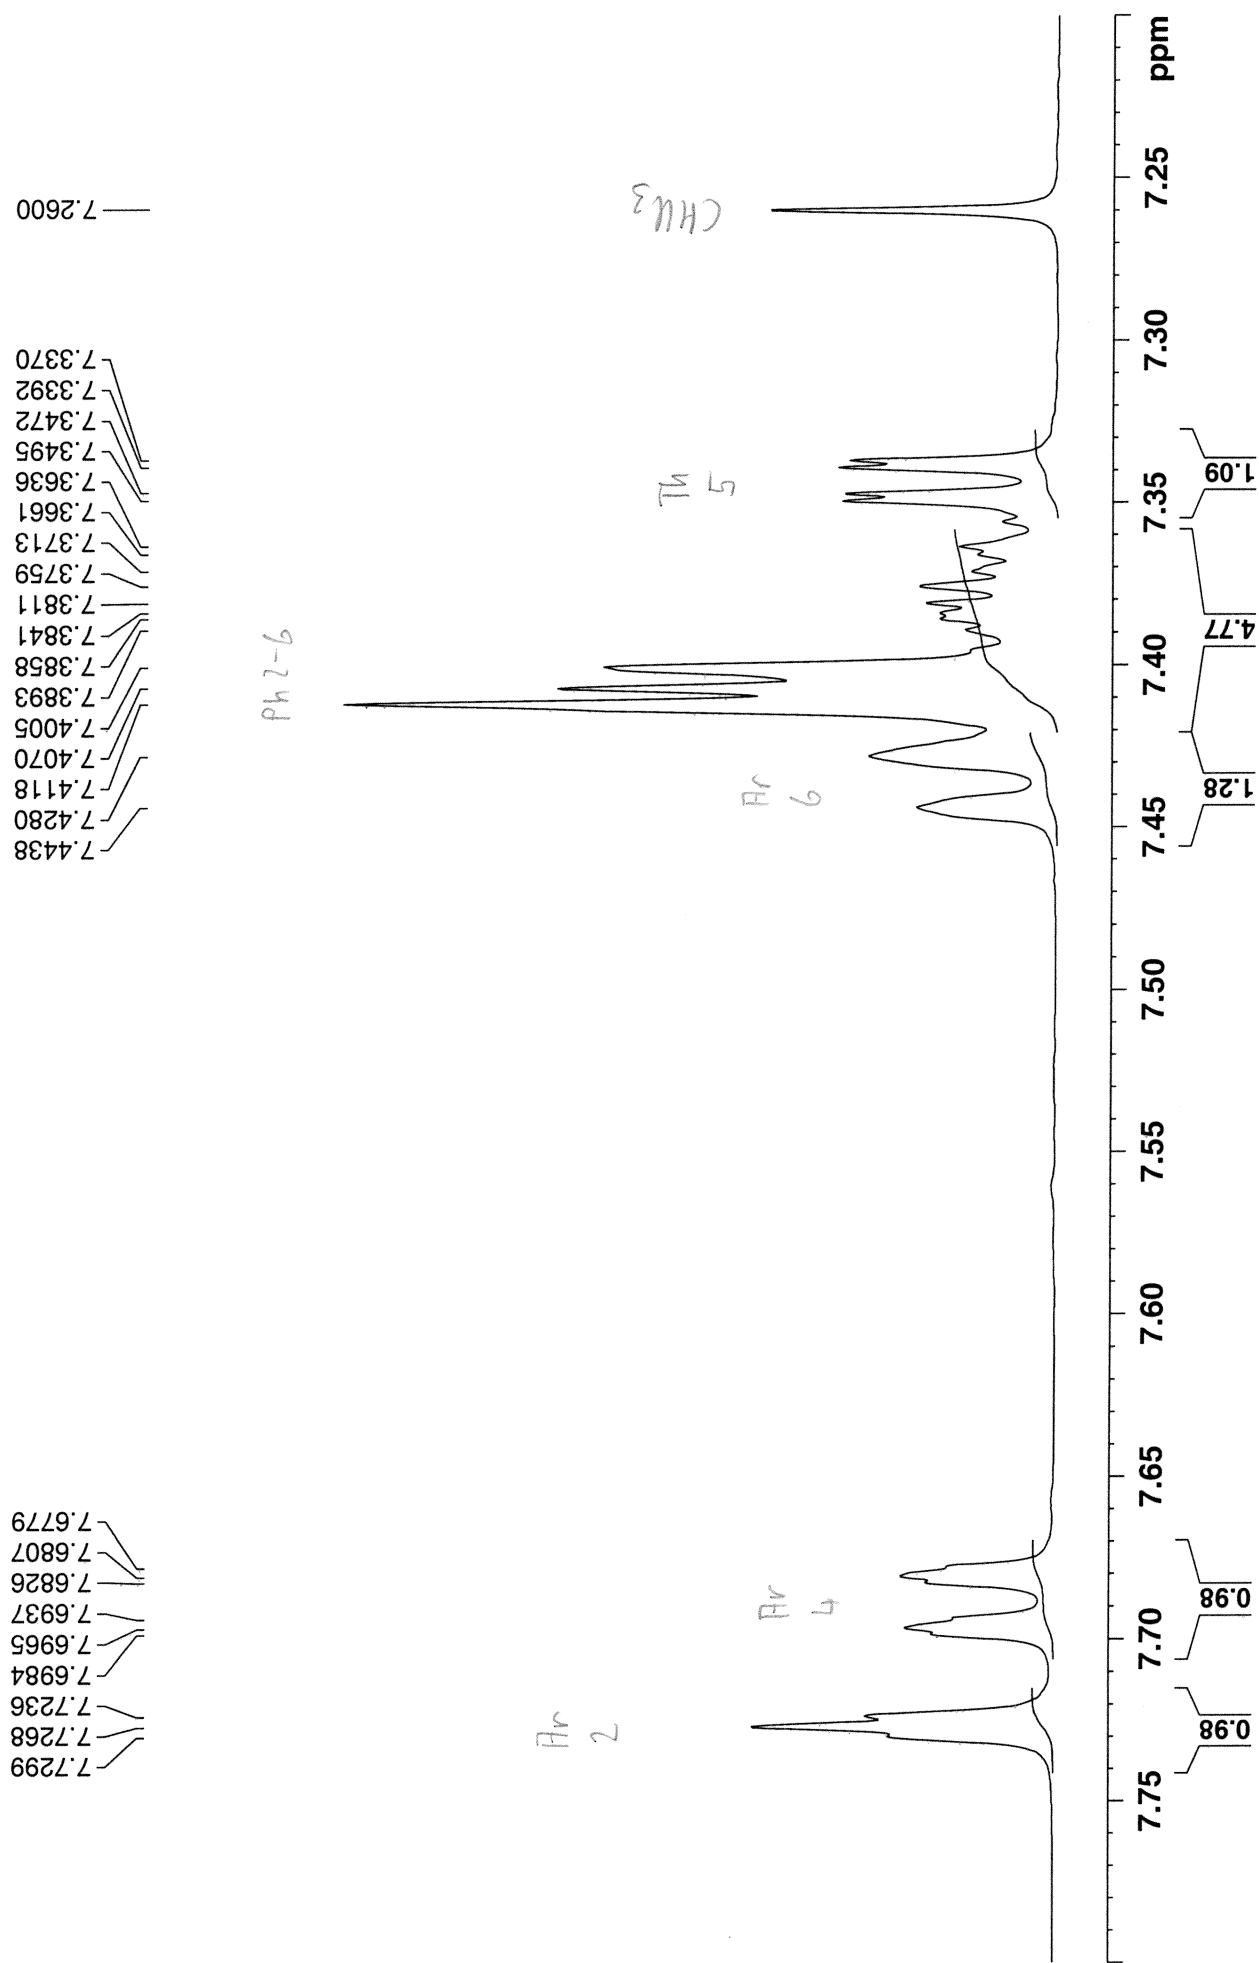

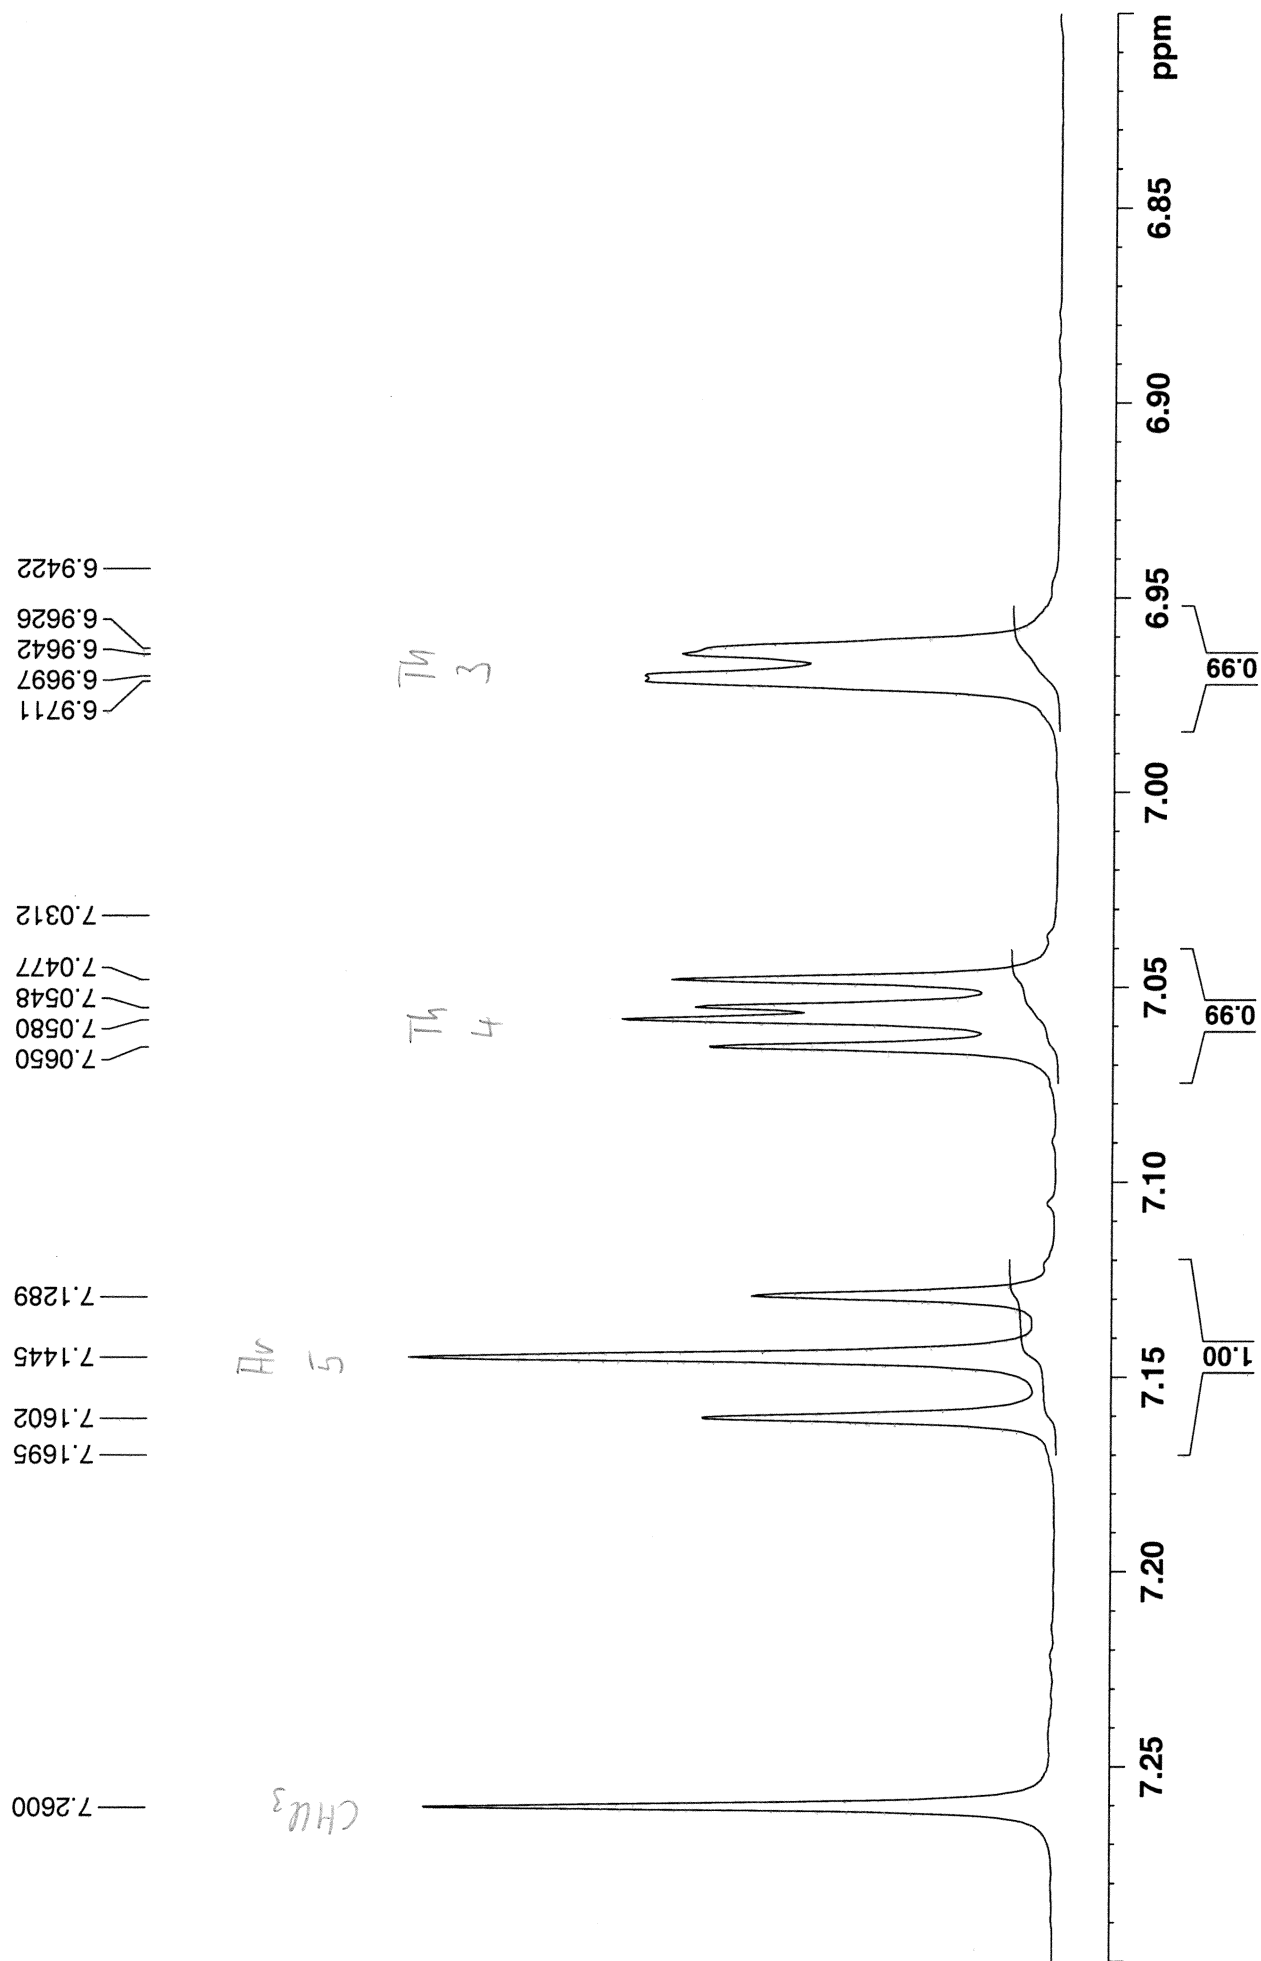



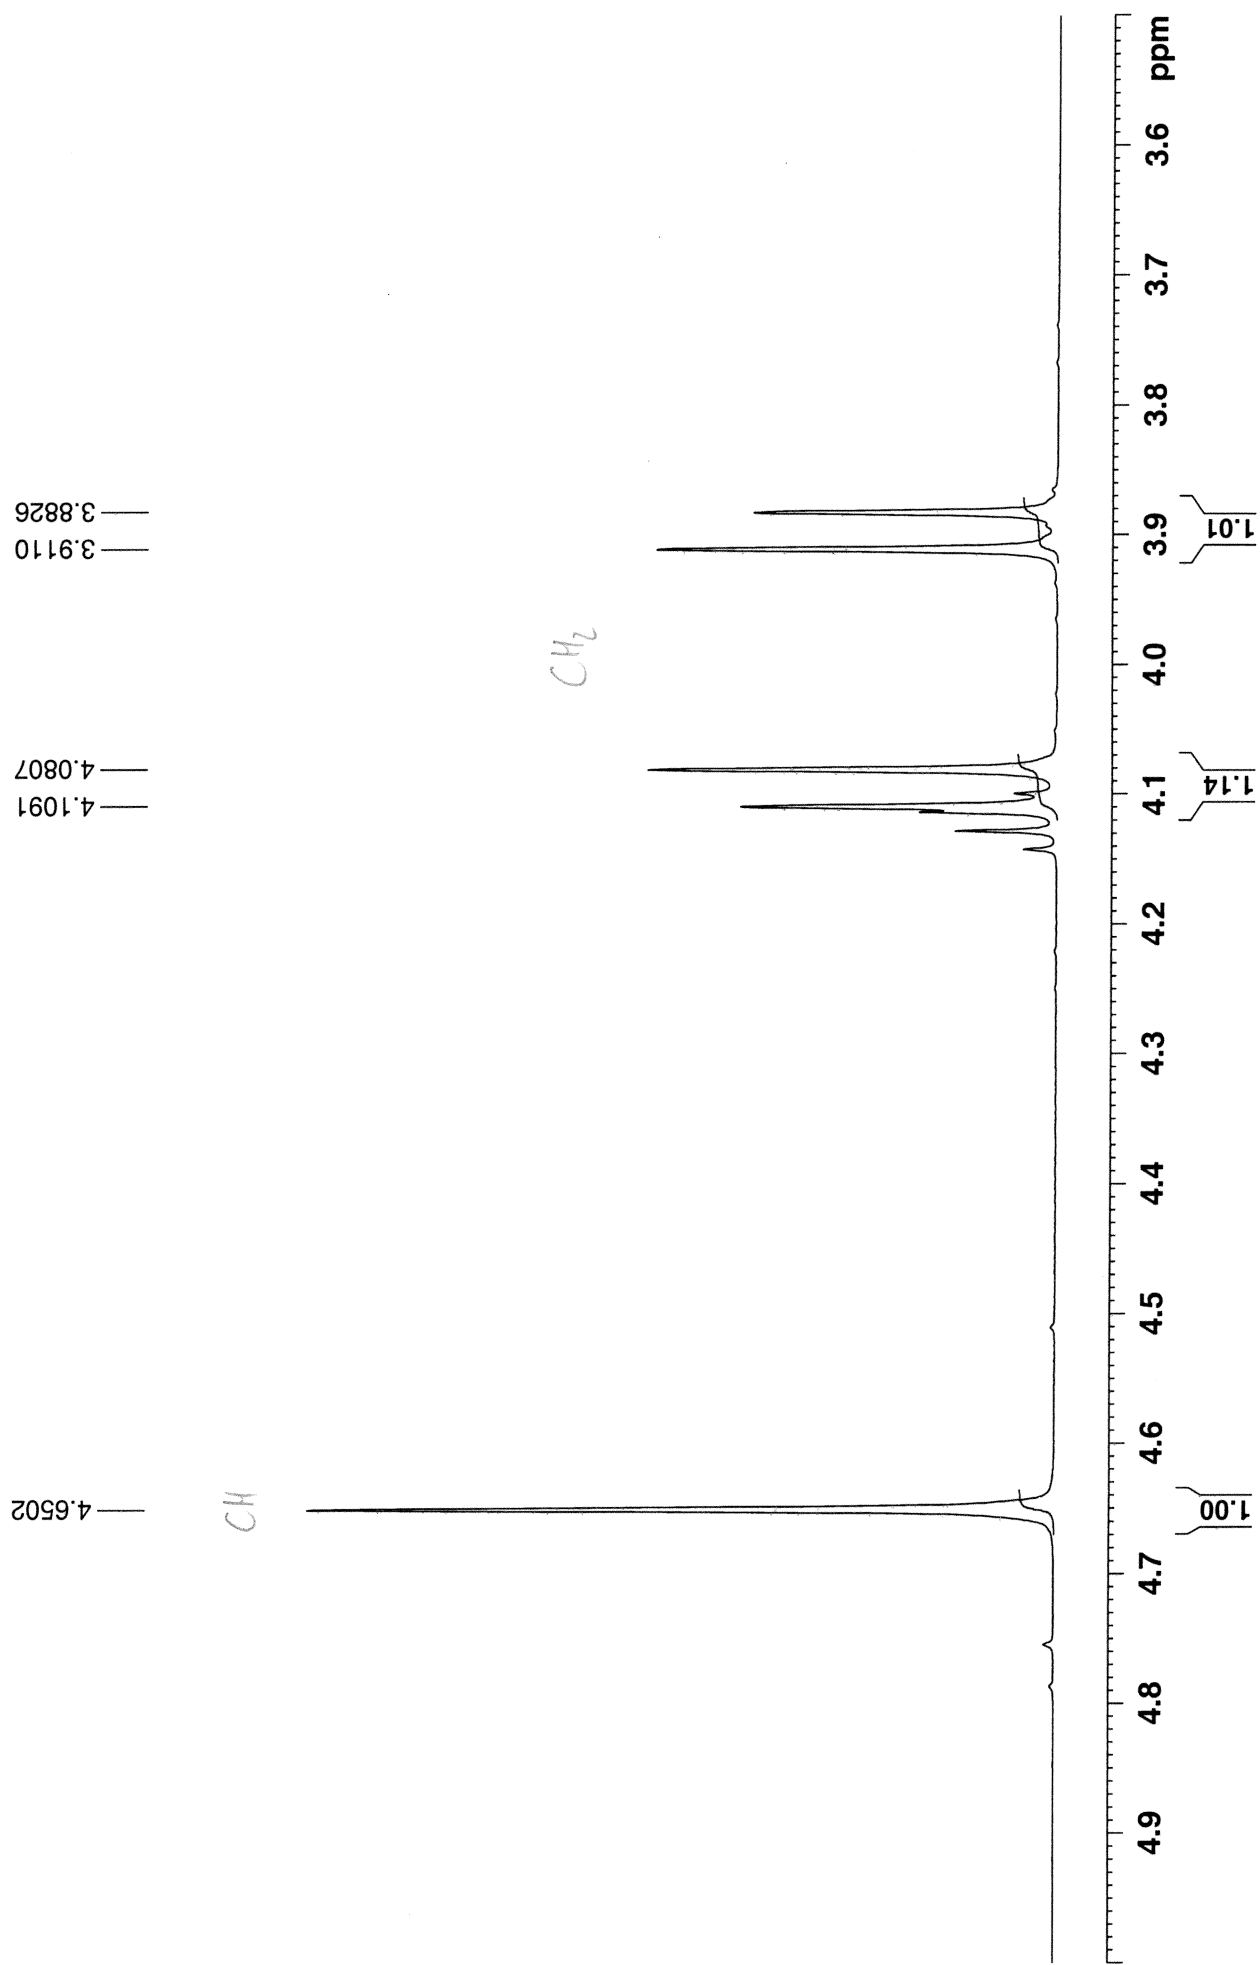

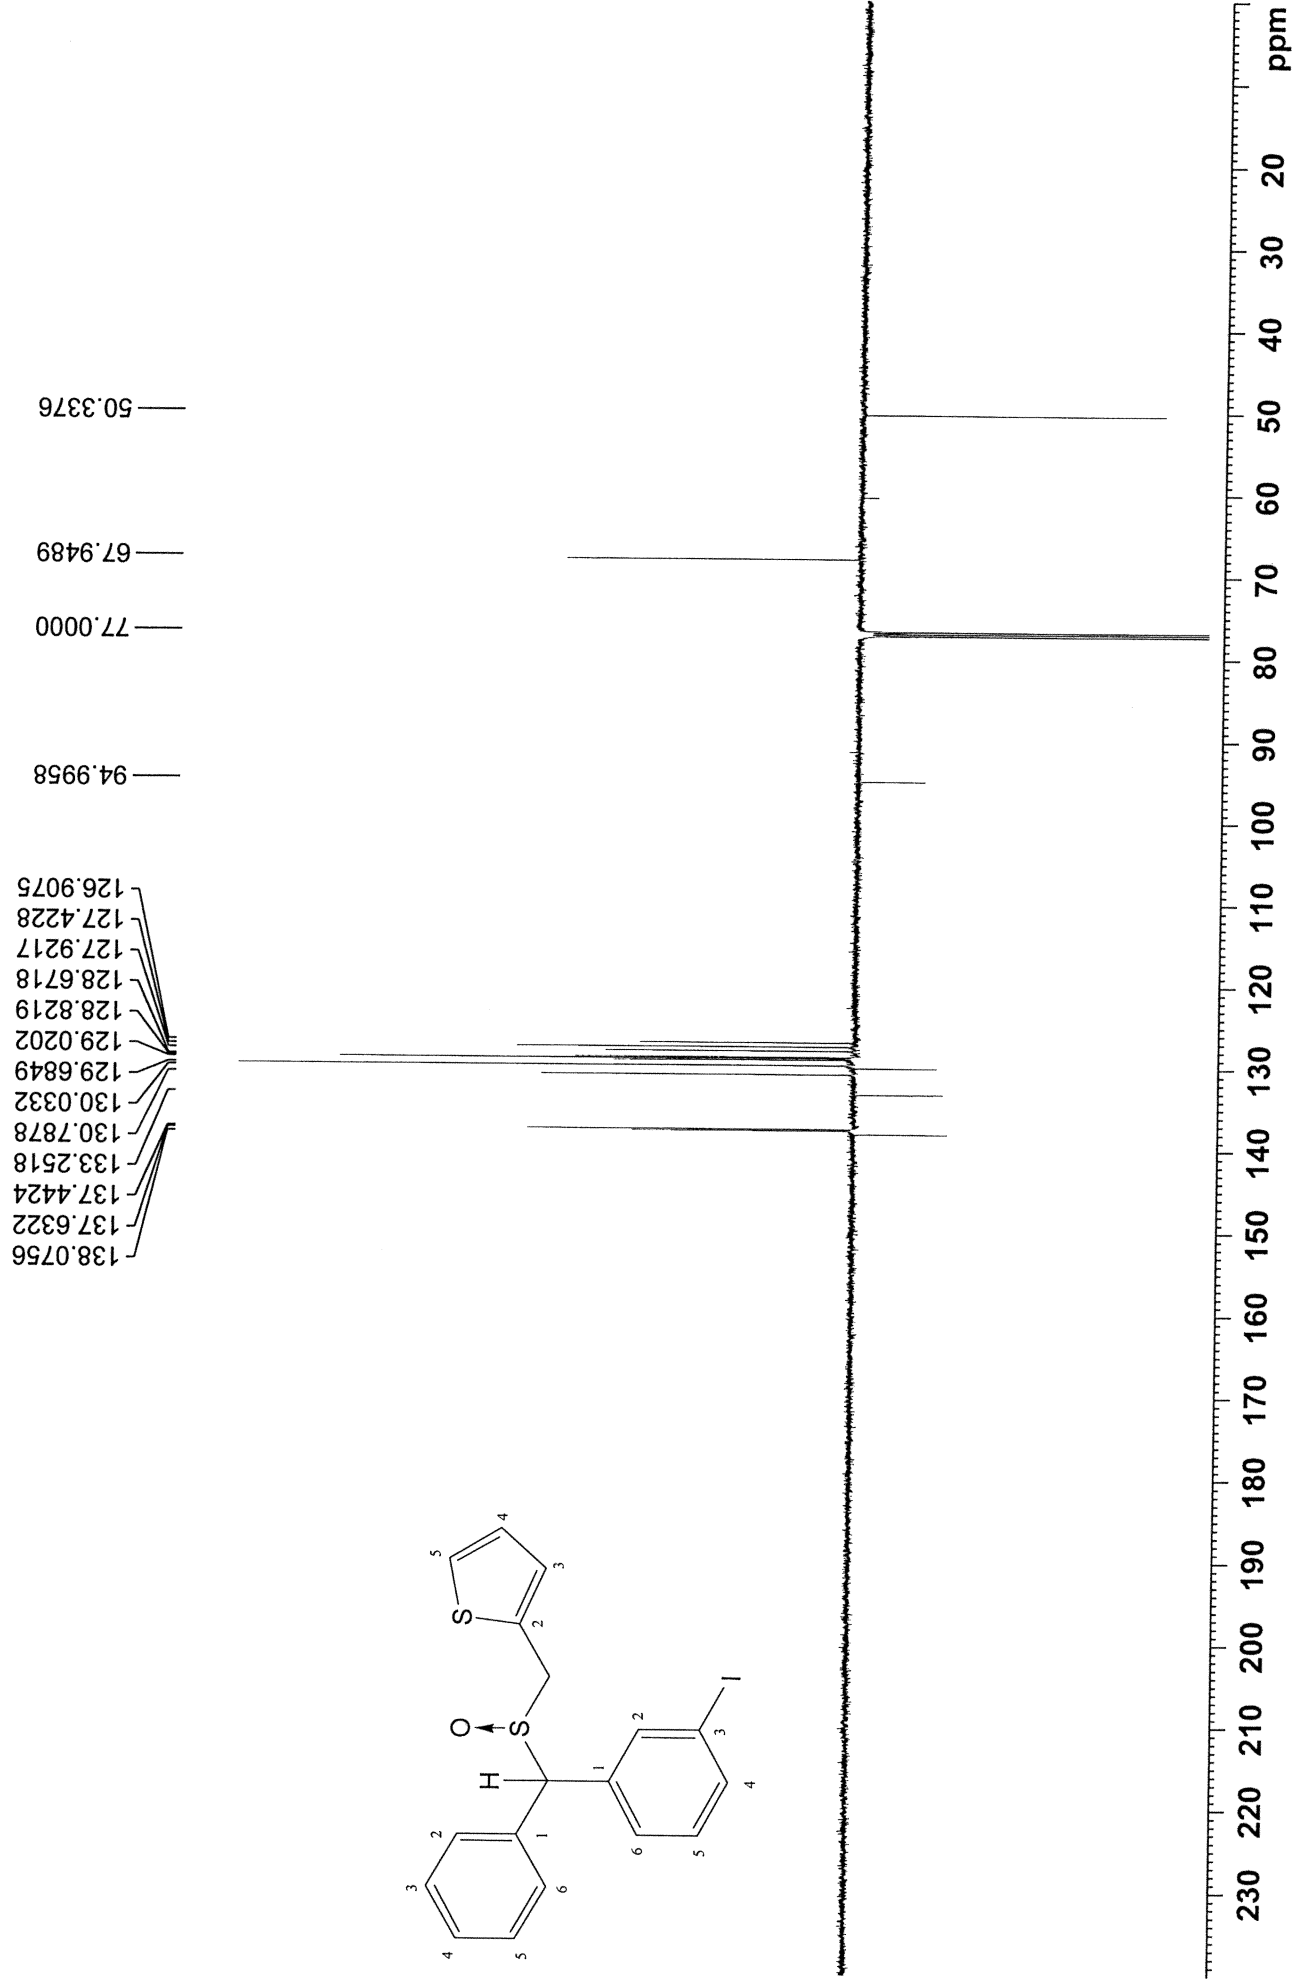

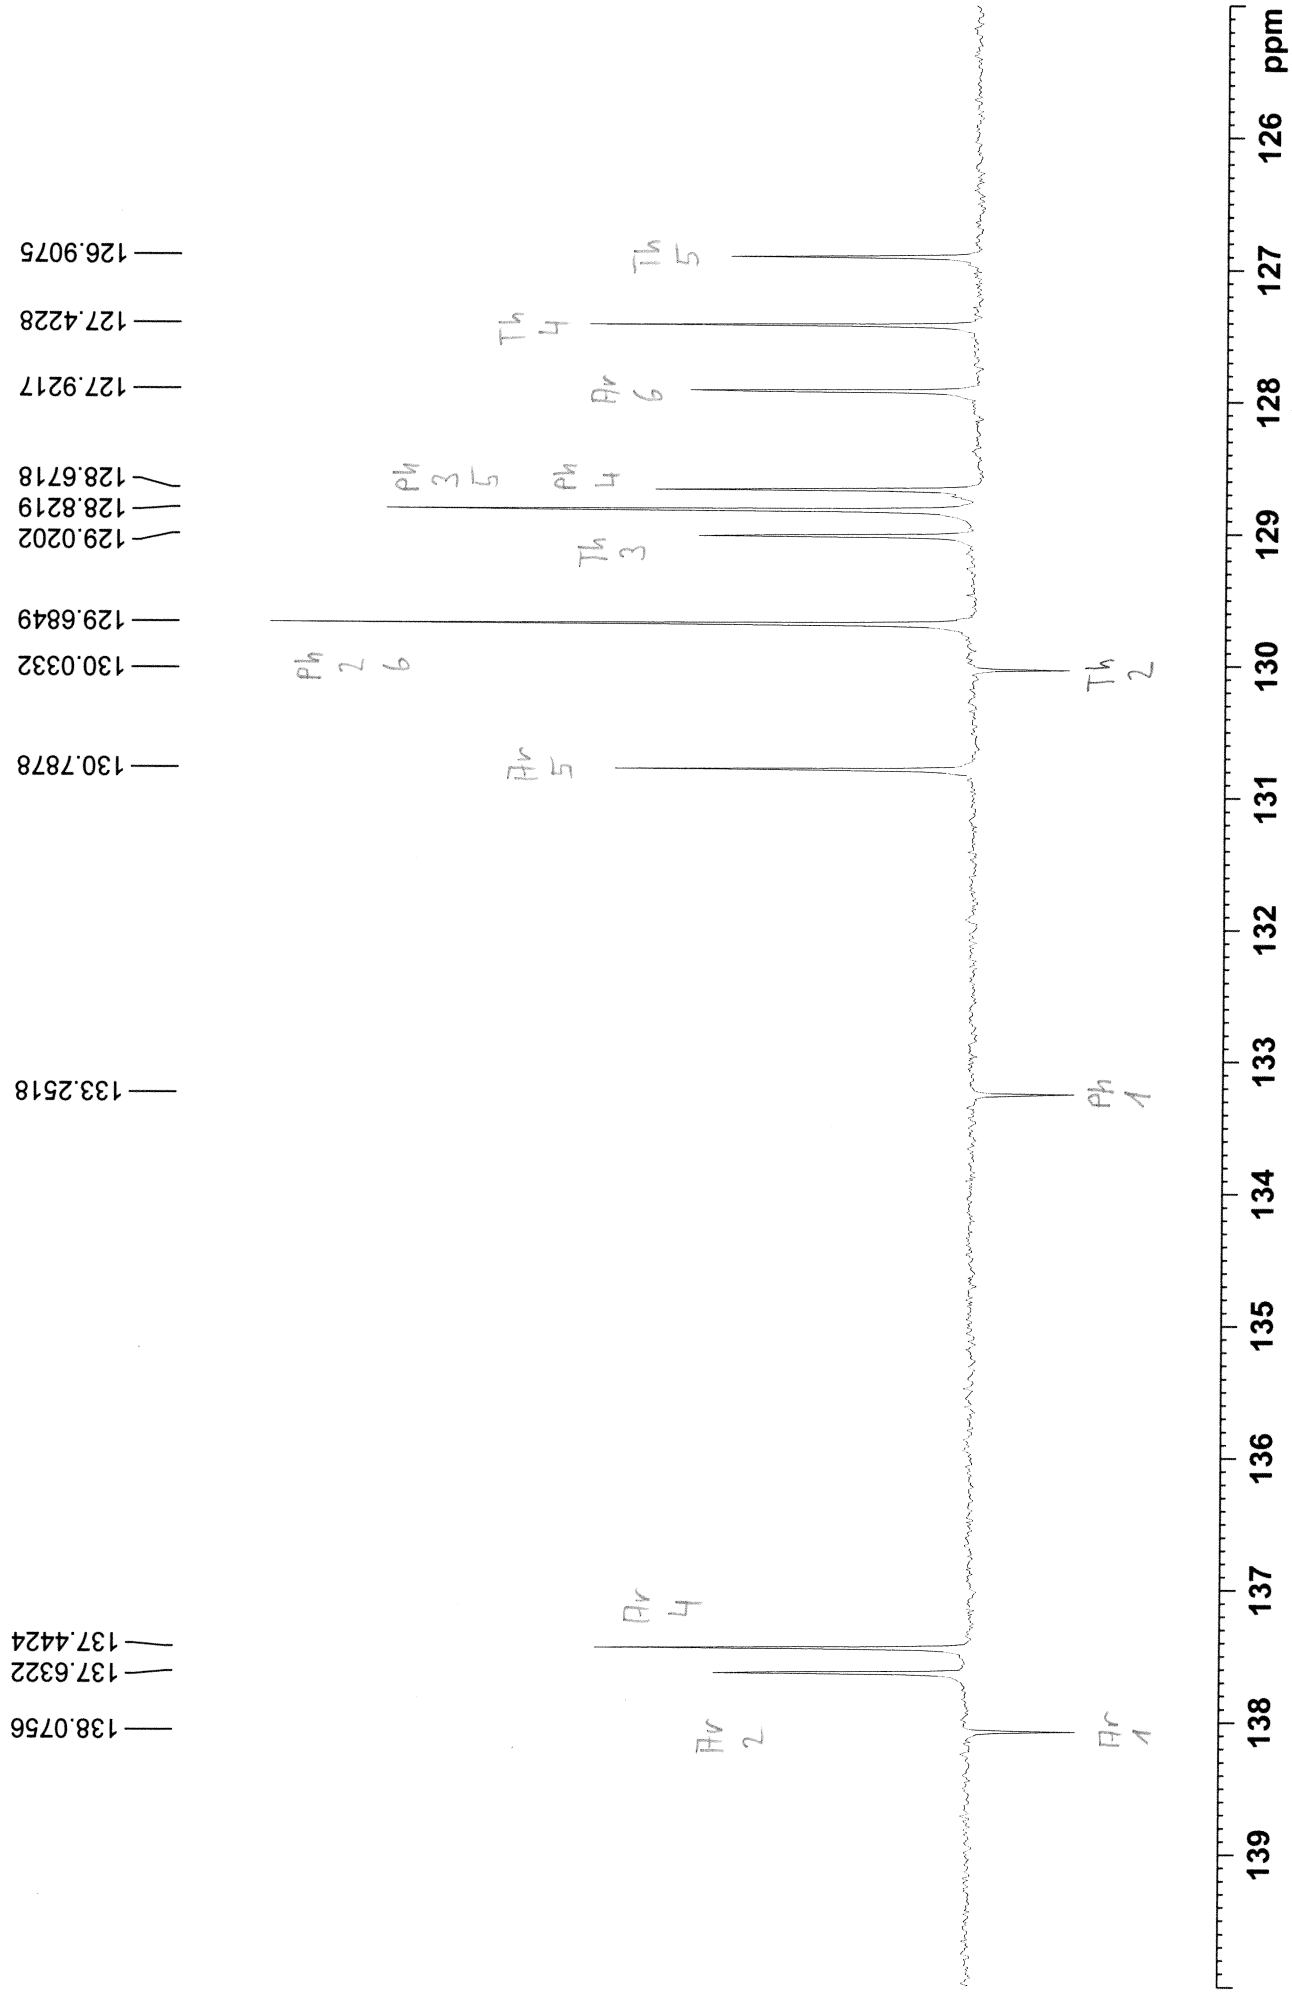

MK-30-2-1 in cdcl3 (APT) 29.7.2020

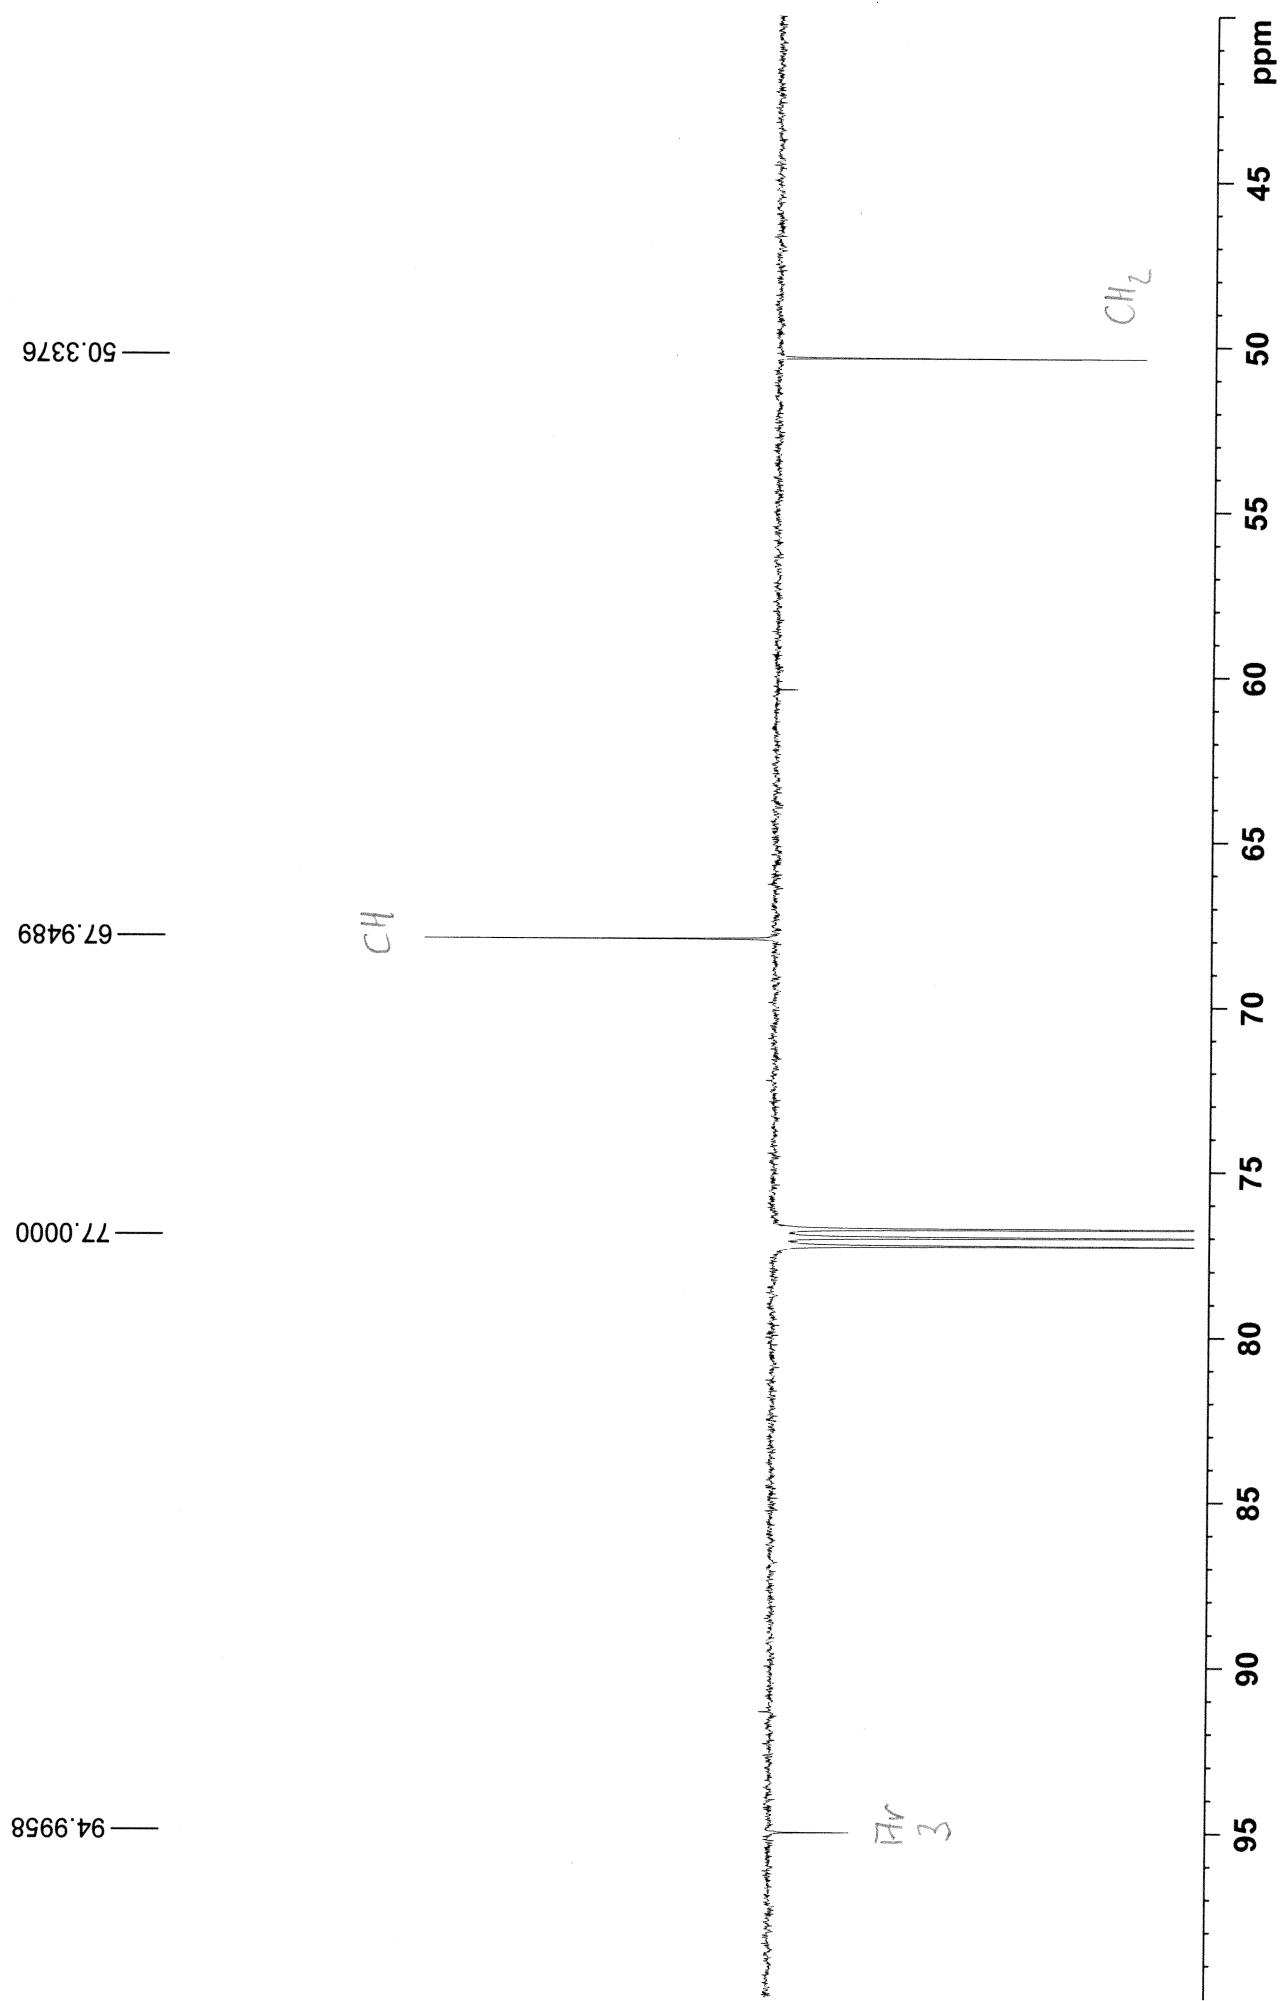

MK-30-2-1 in cdcl3 (COSY) 29.7.2020

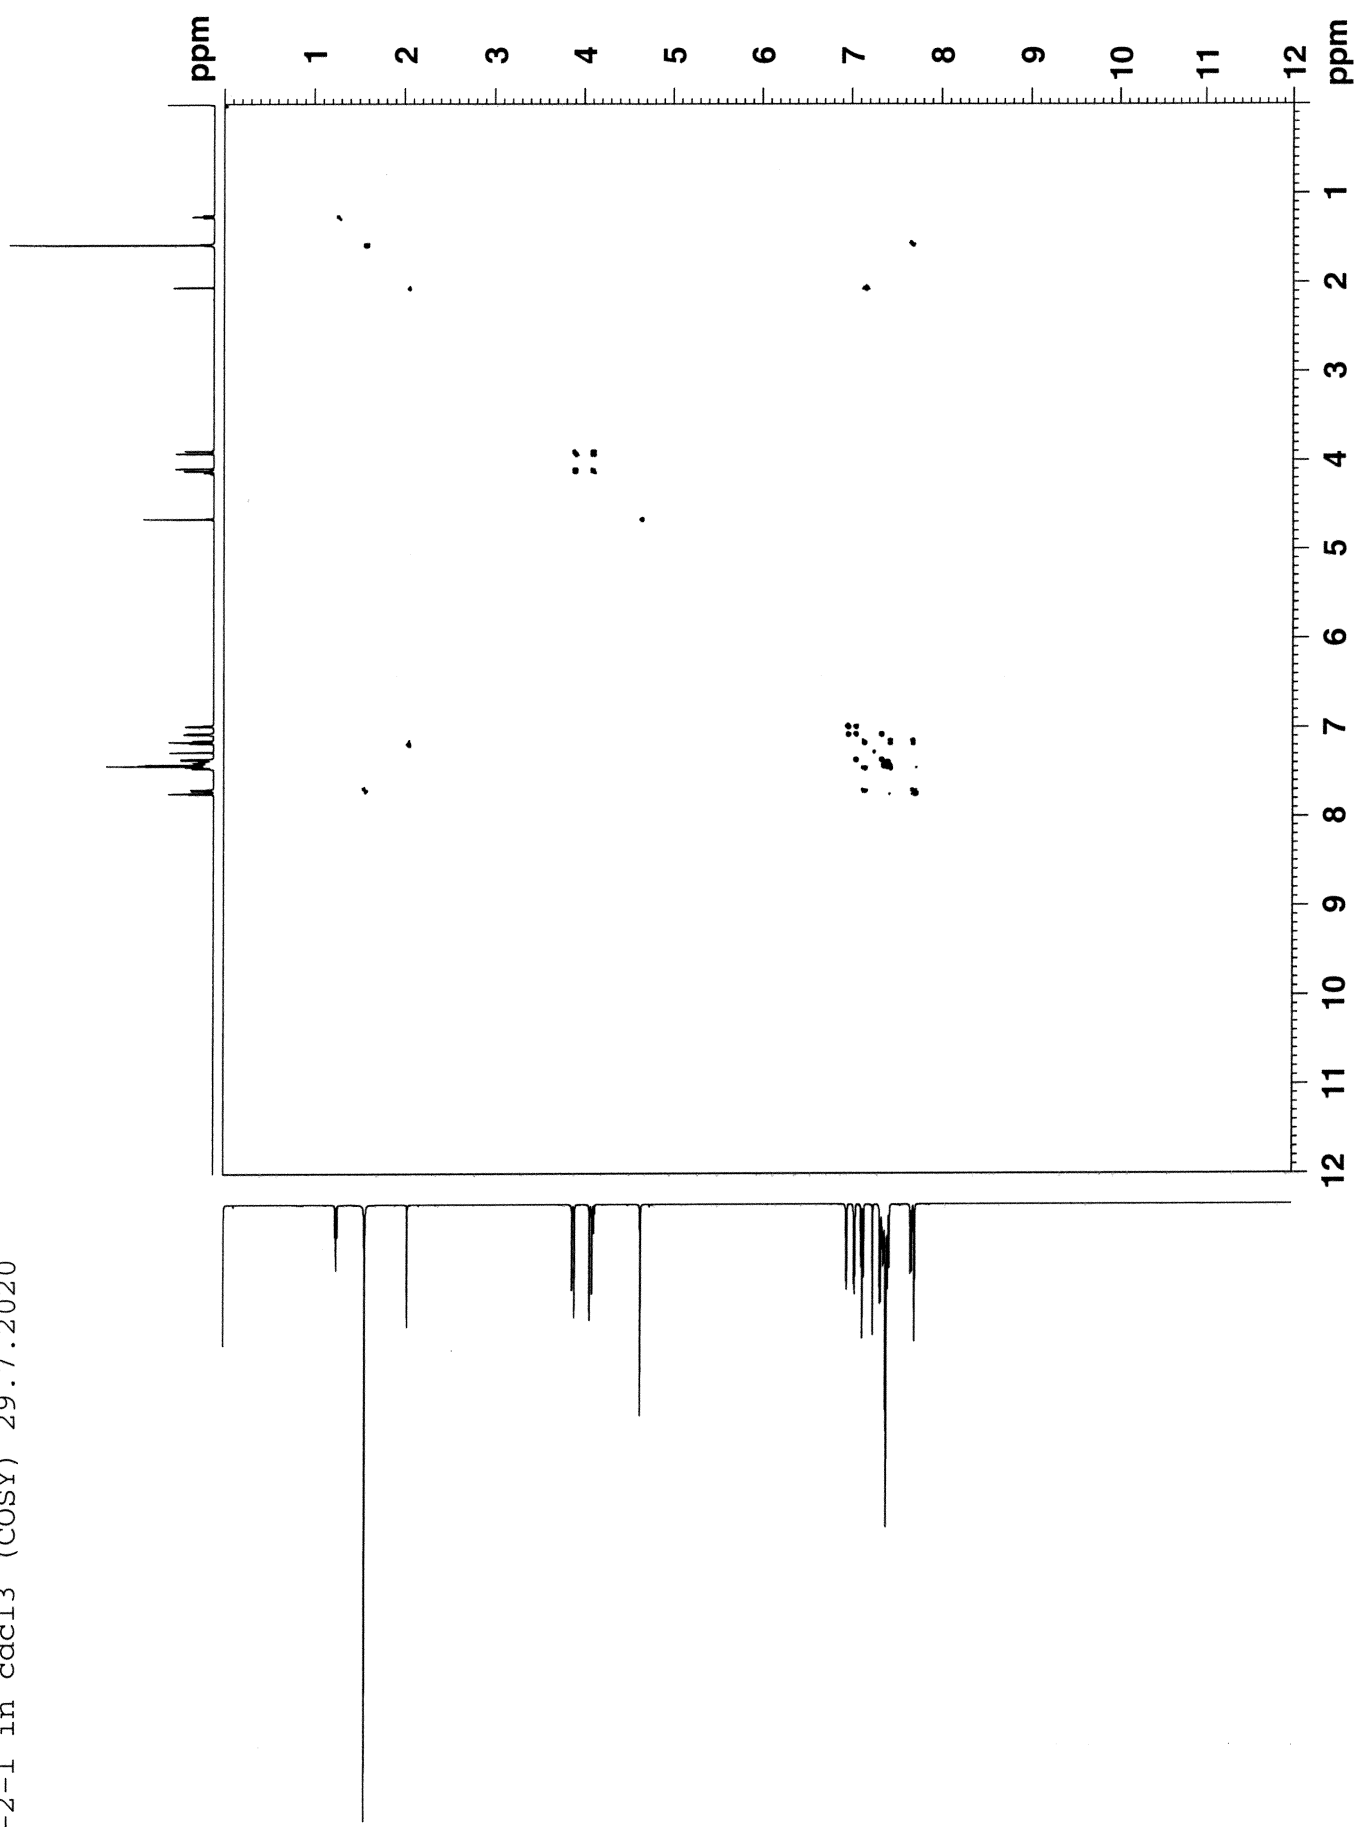

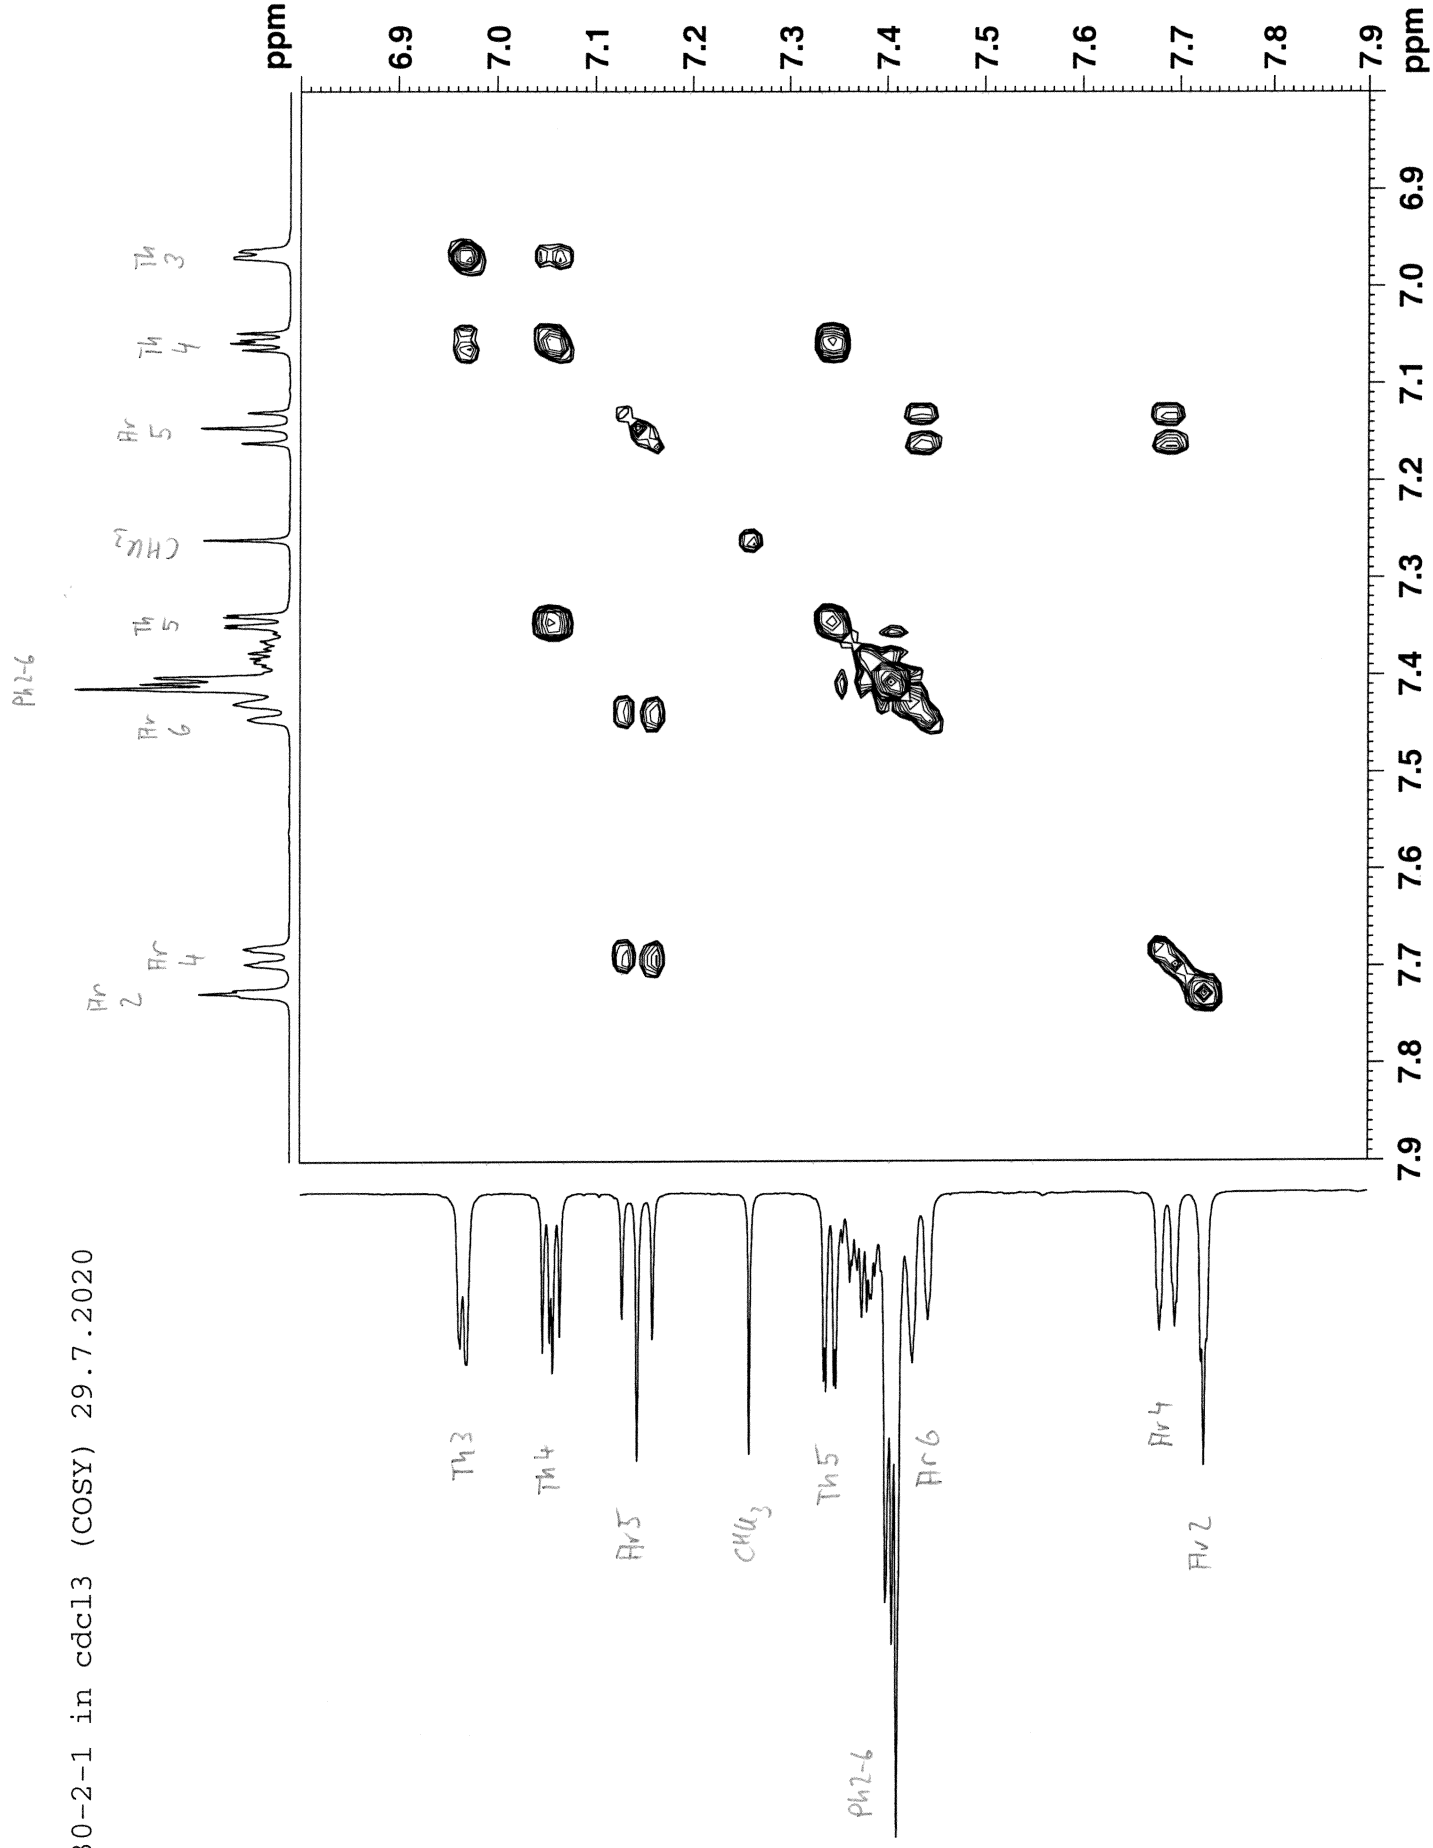

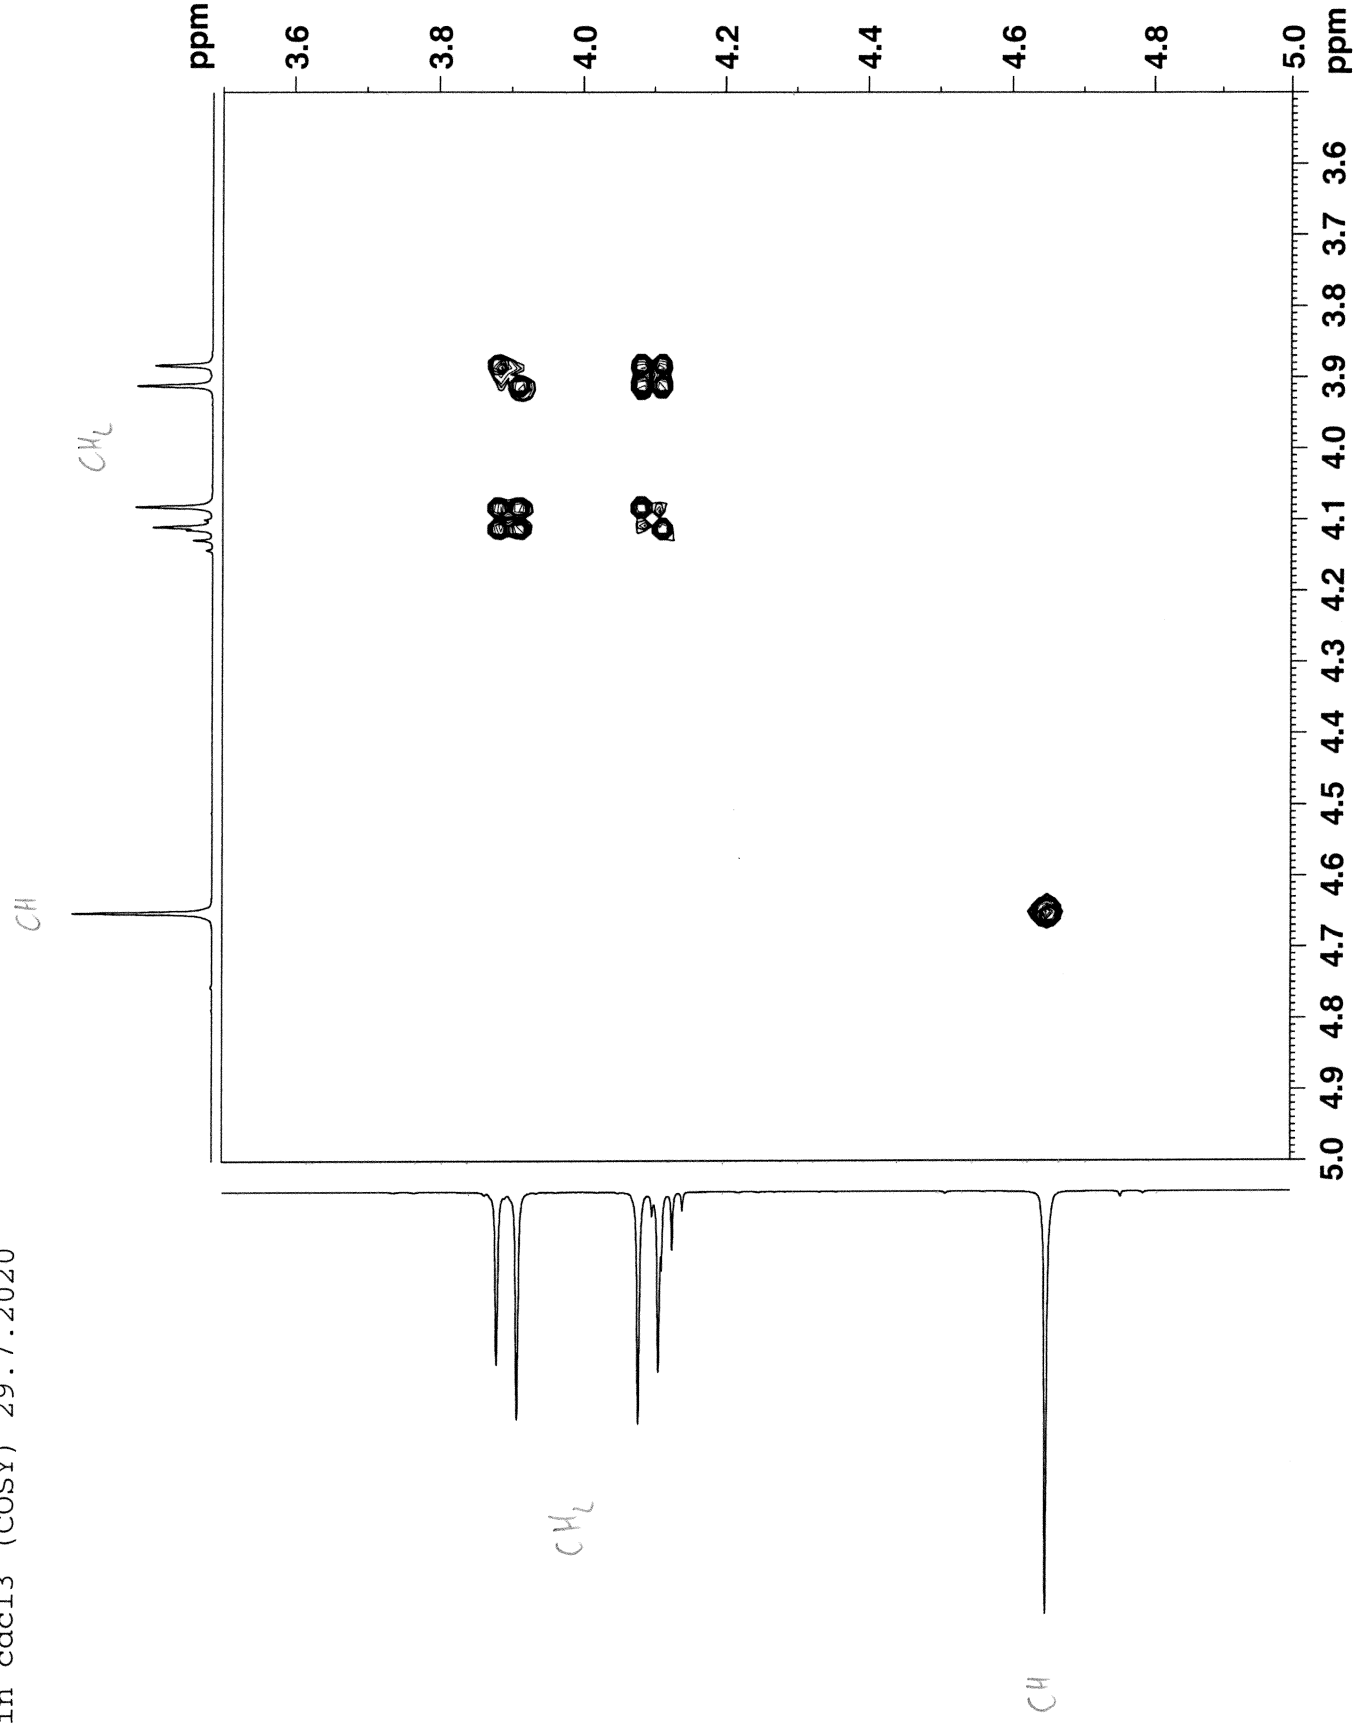

MK-30-2-1 in cdcl3 (HSQC) 29.7.2020

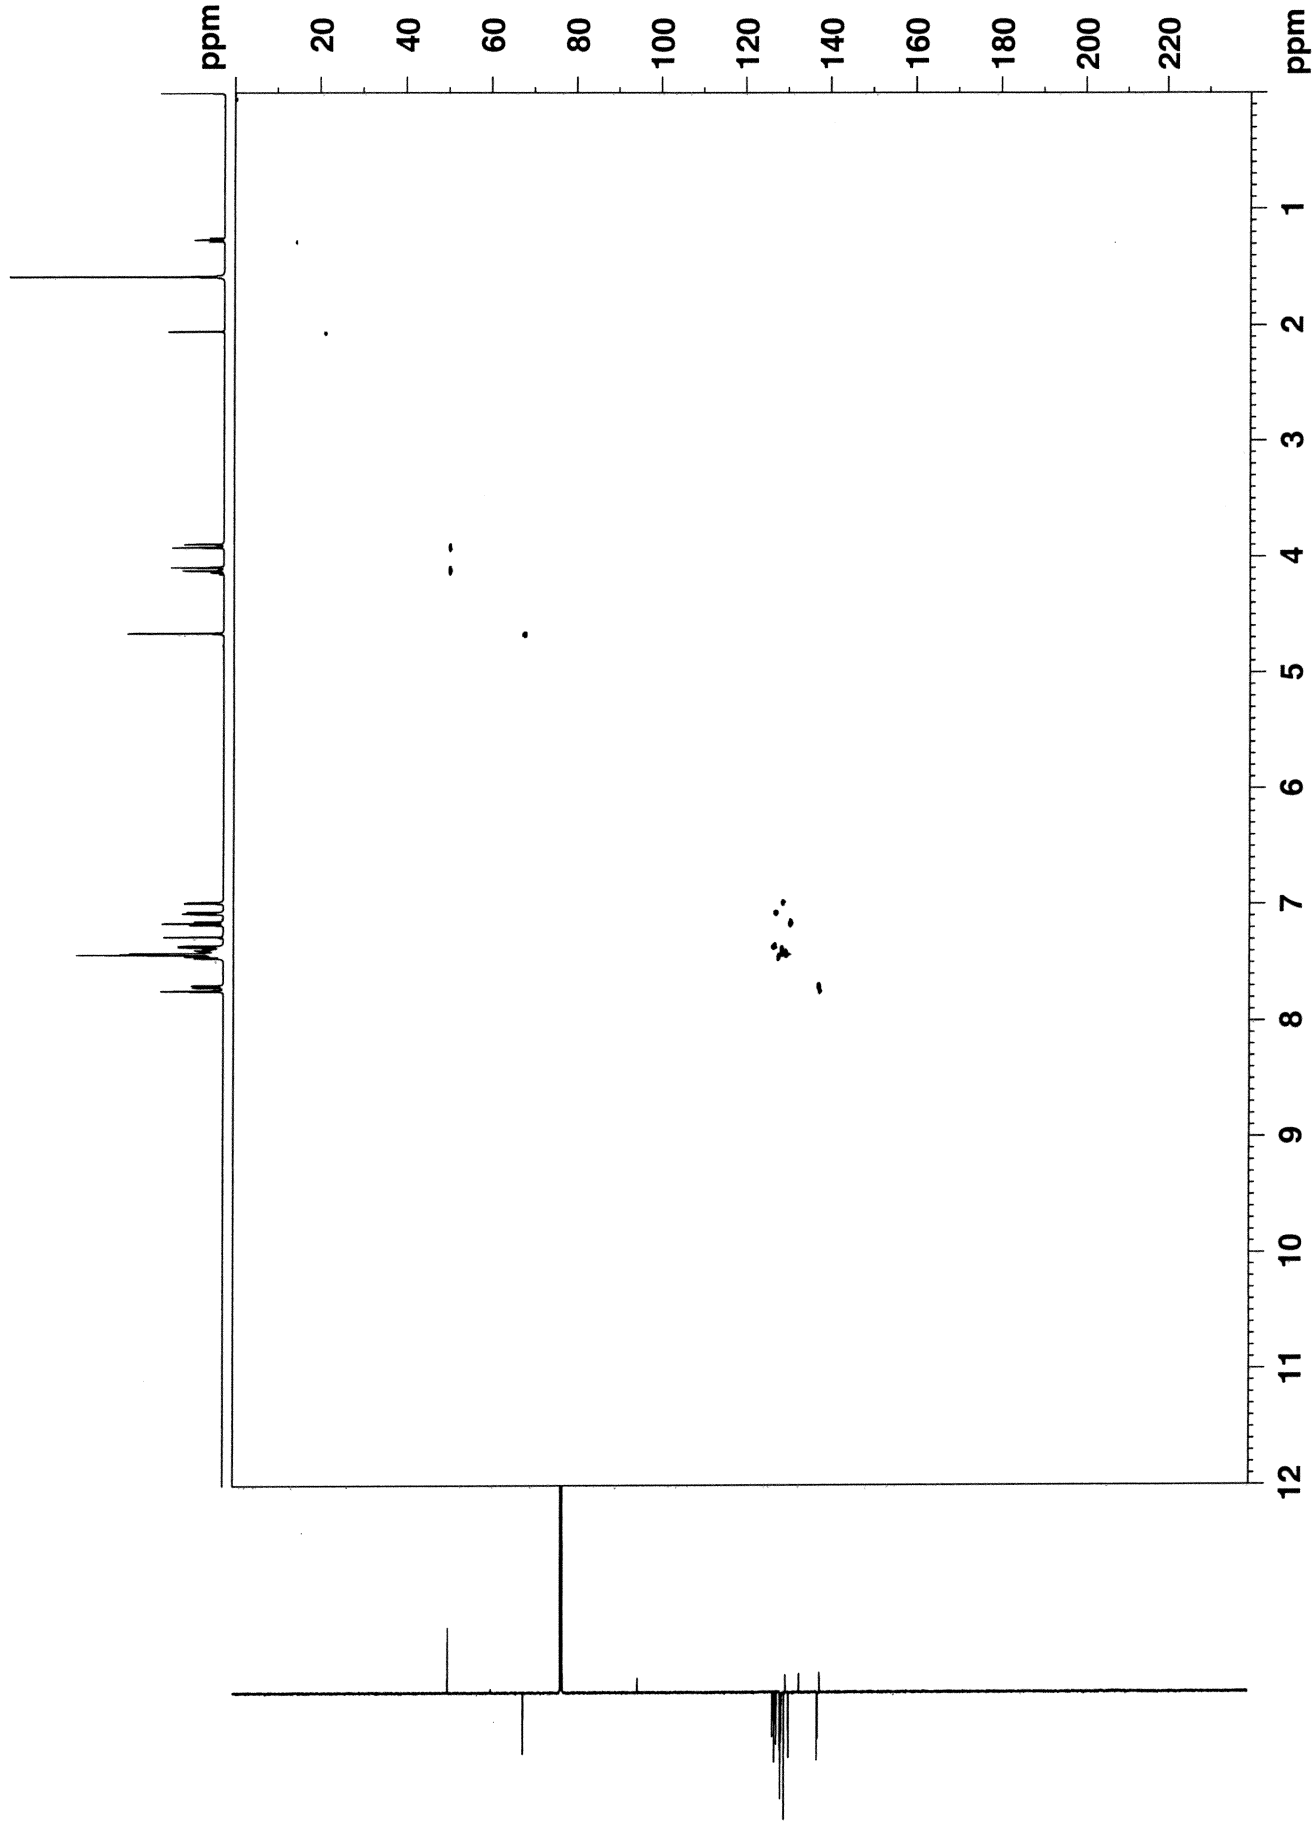



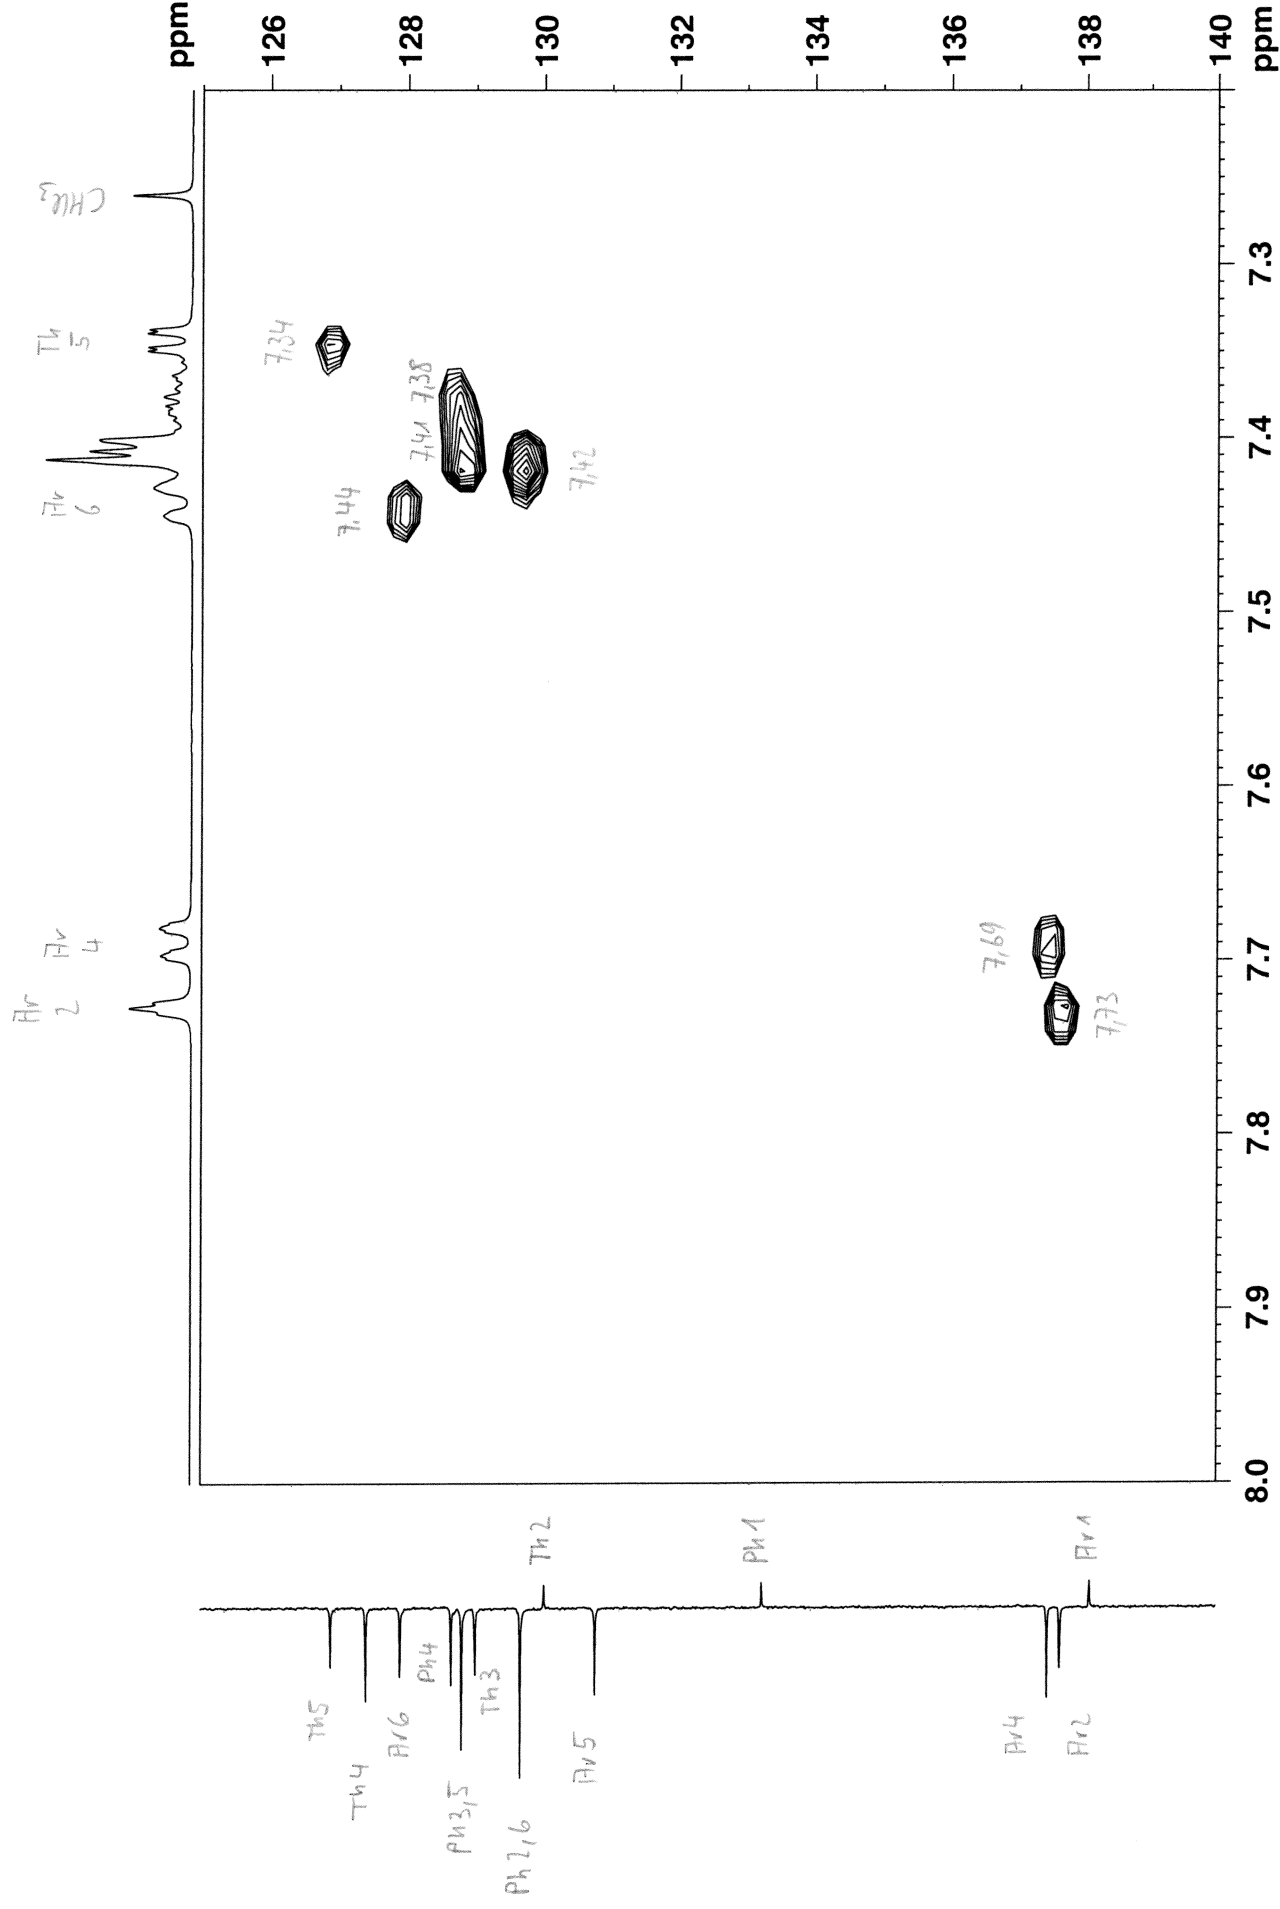

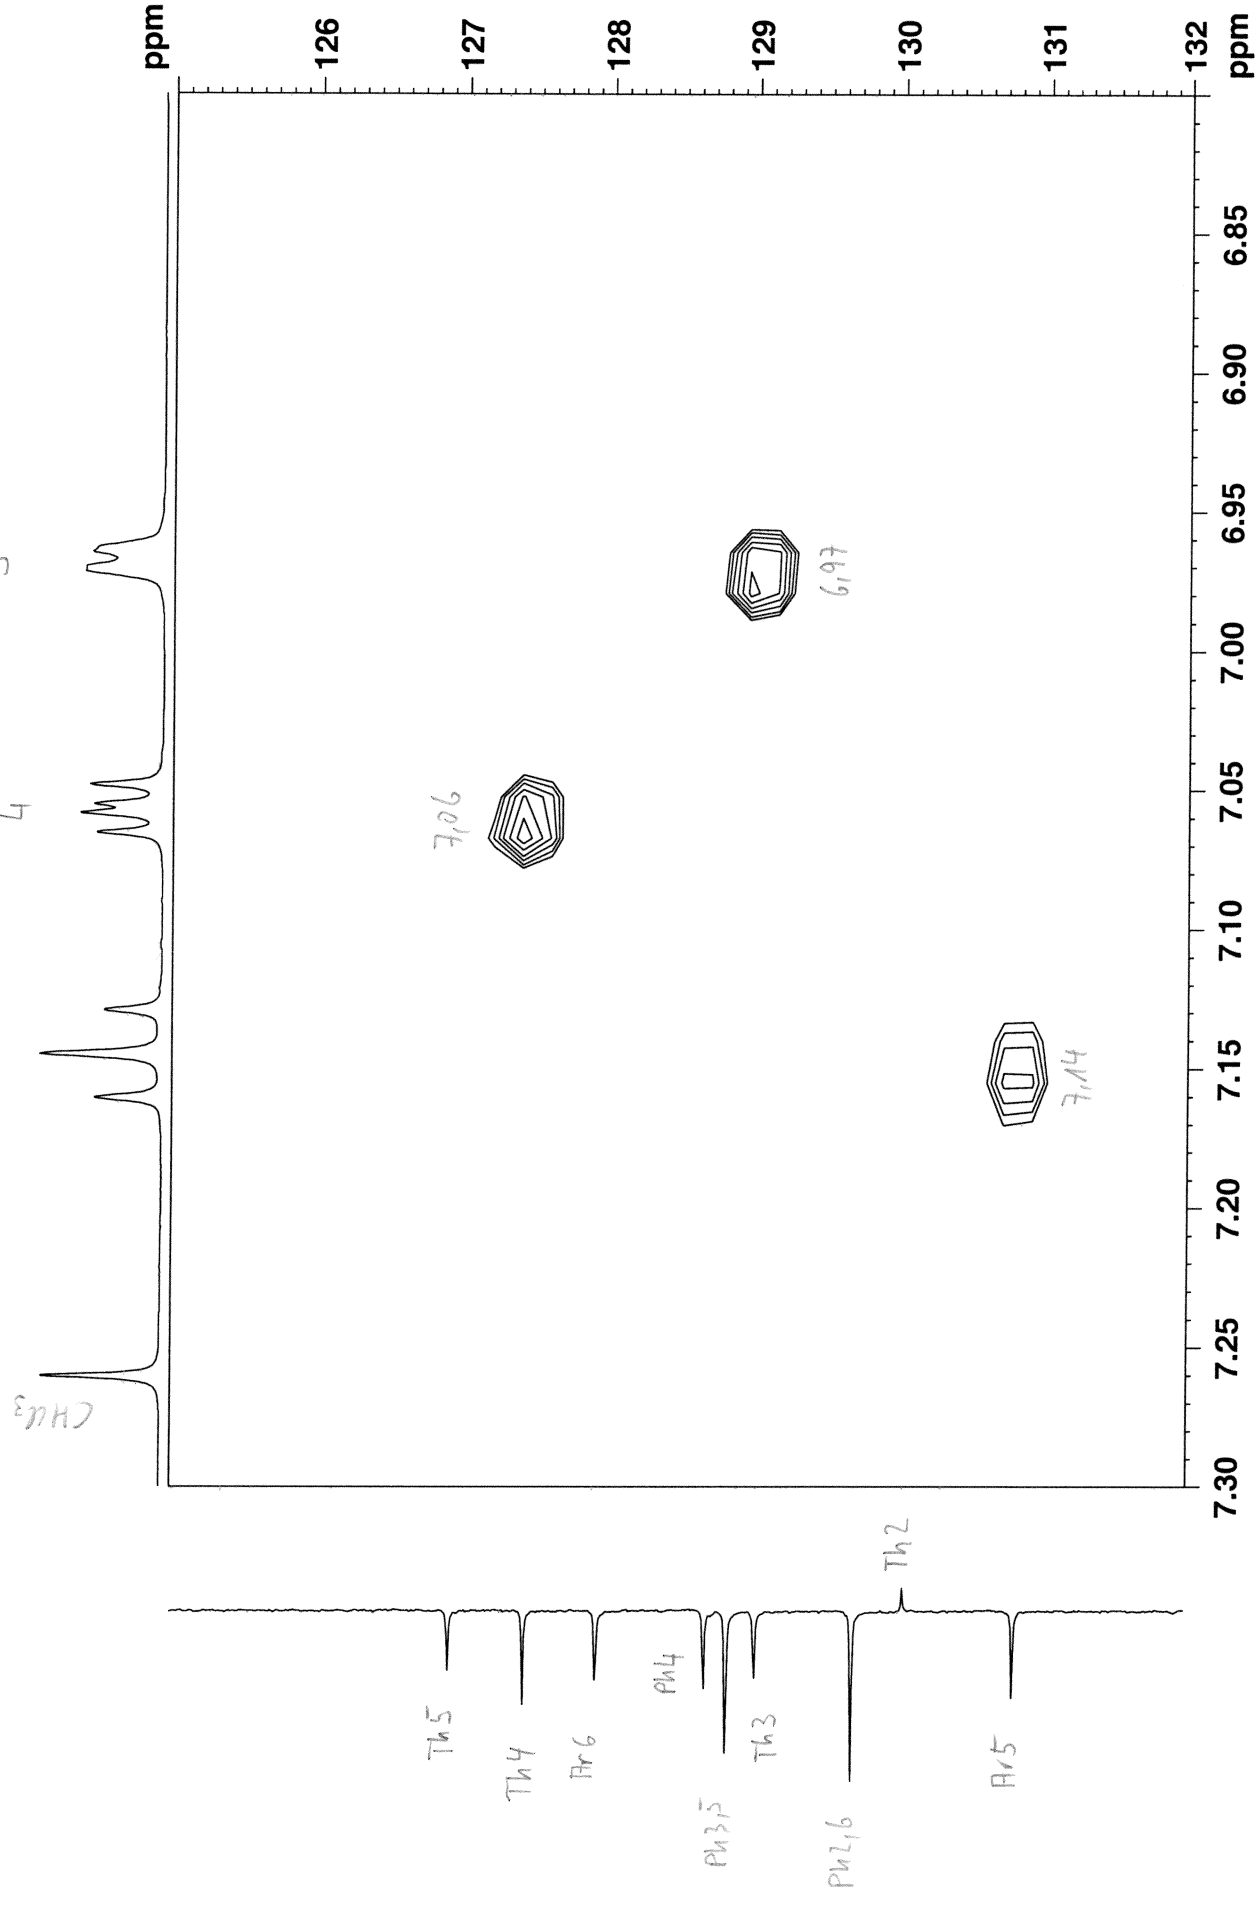

MK-30-2-1 in cdcl3 (HSQC) 29.7.2020

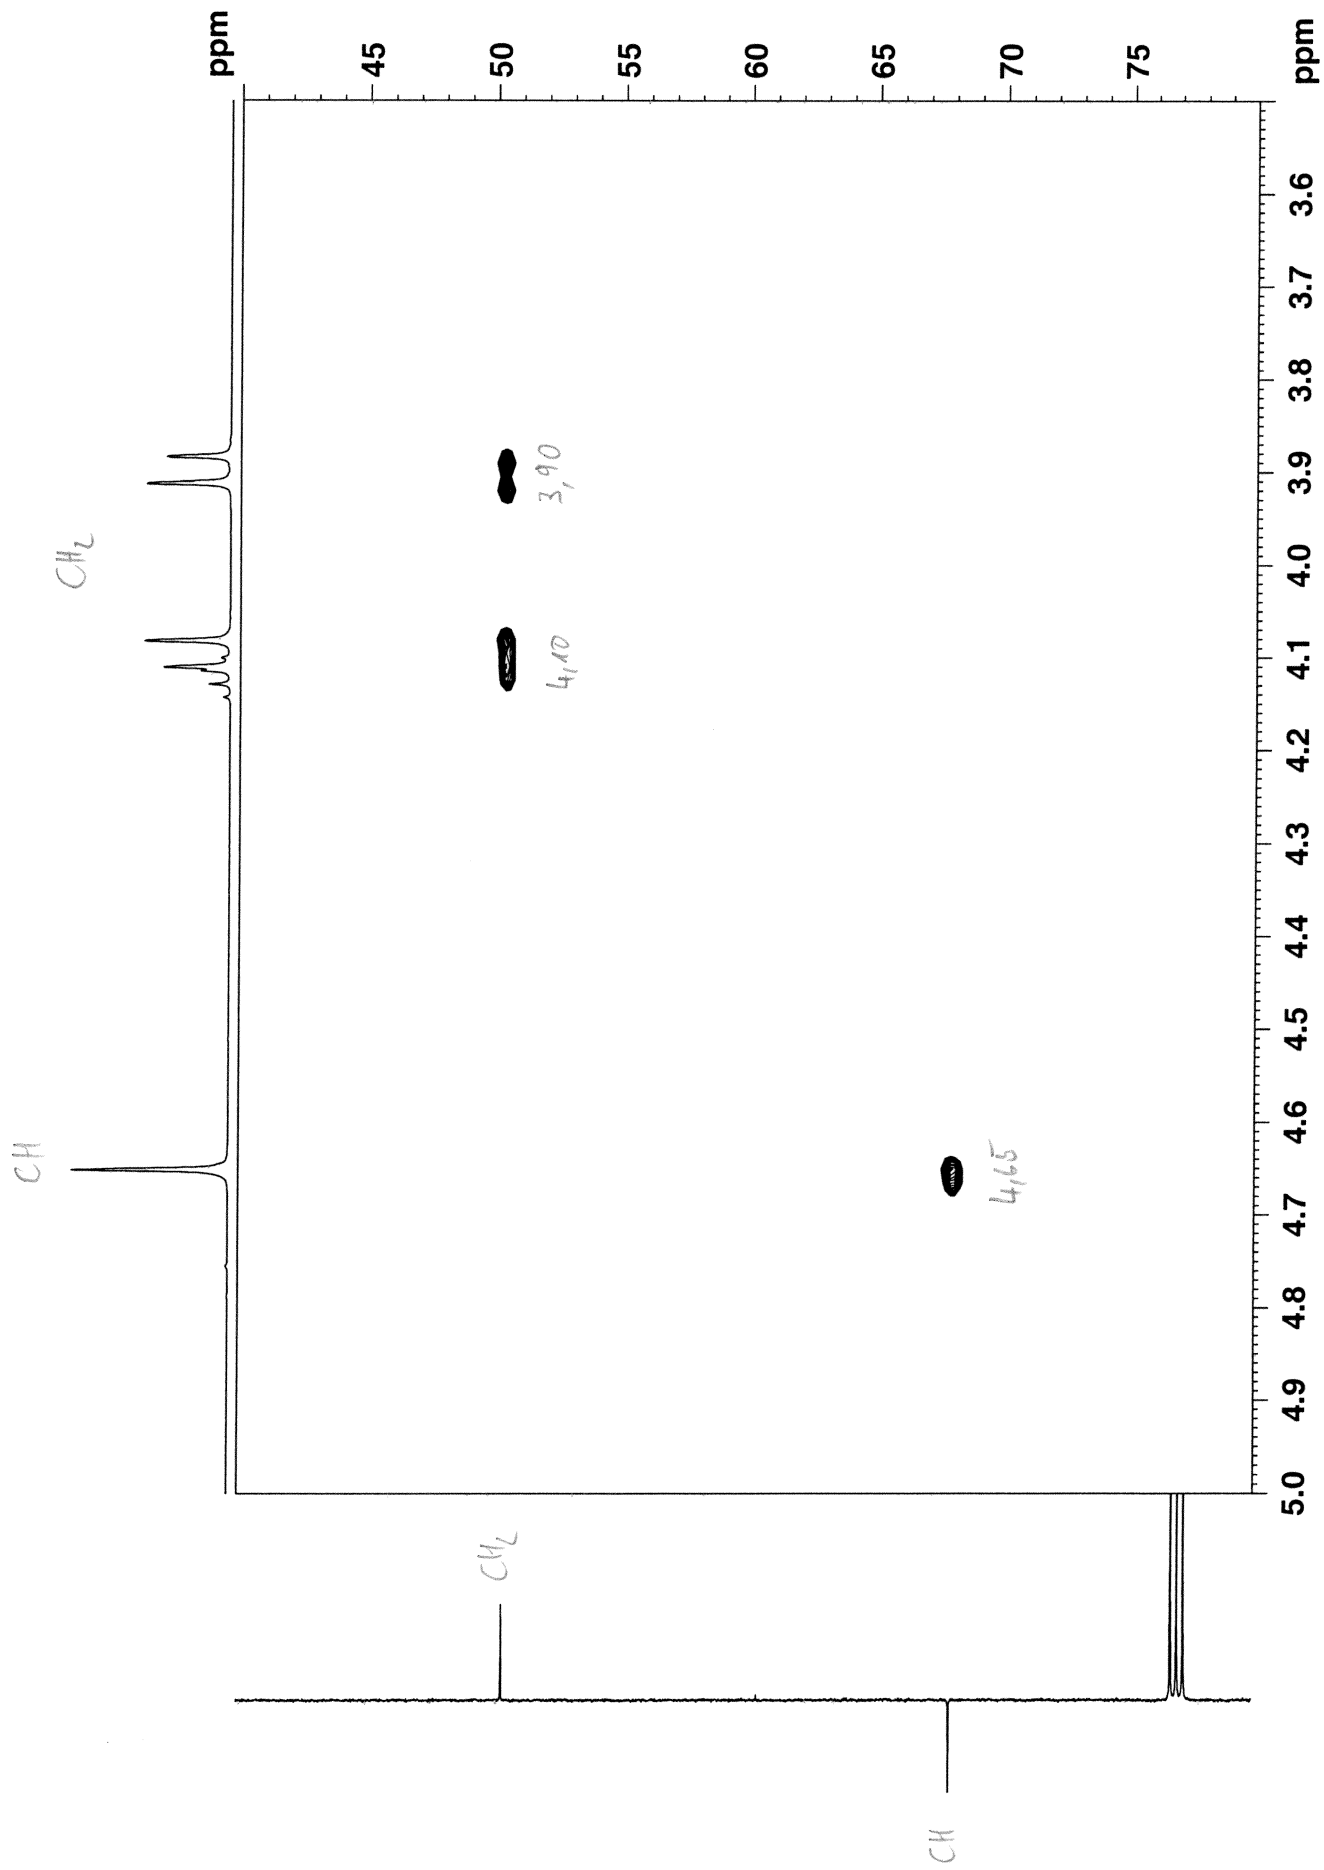

MK-30-2-1 in cdcl3 (HMBC) 29.7.2020

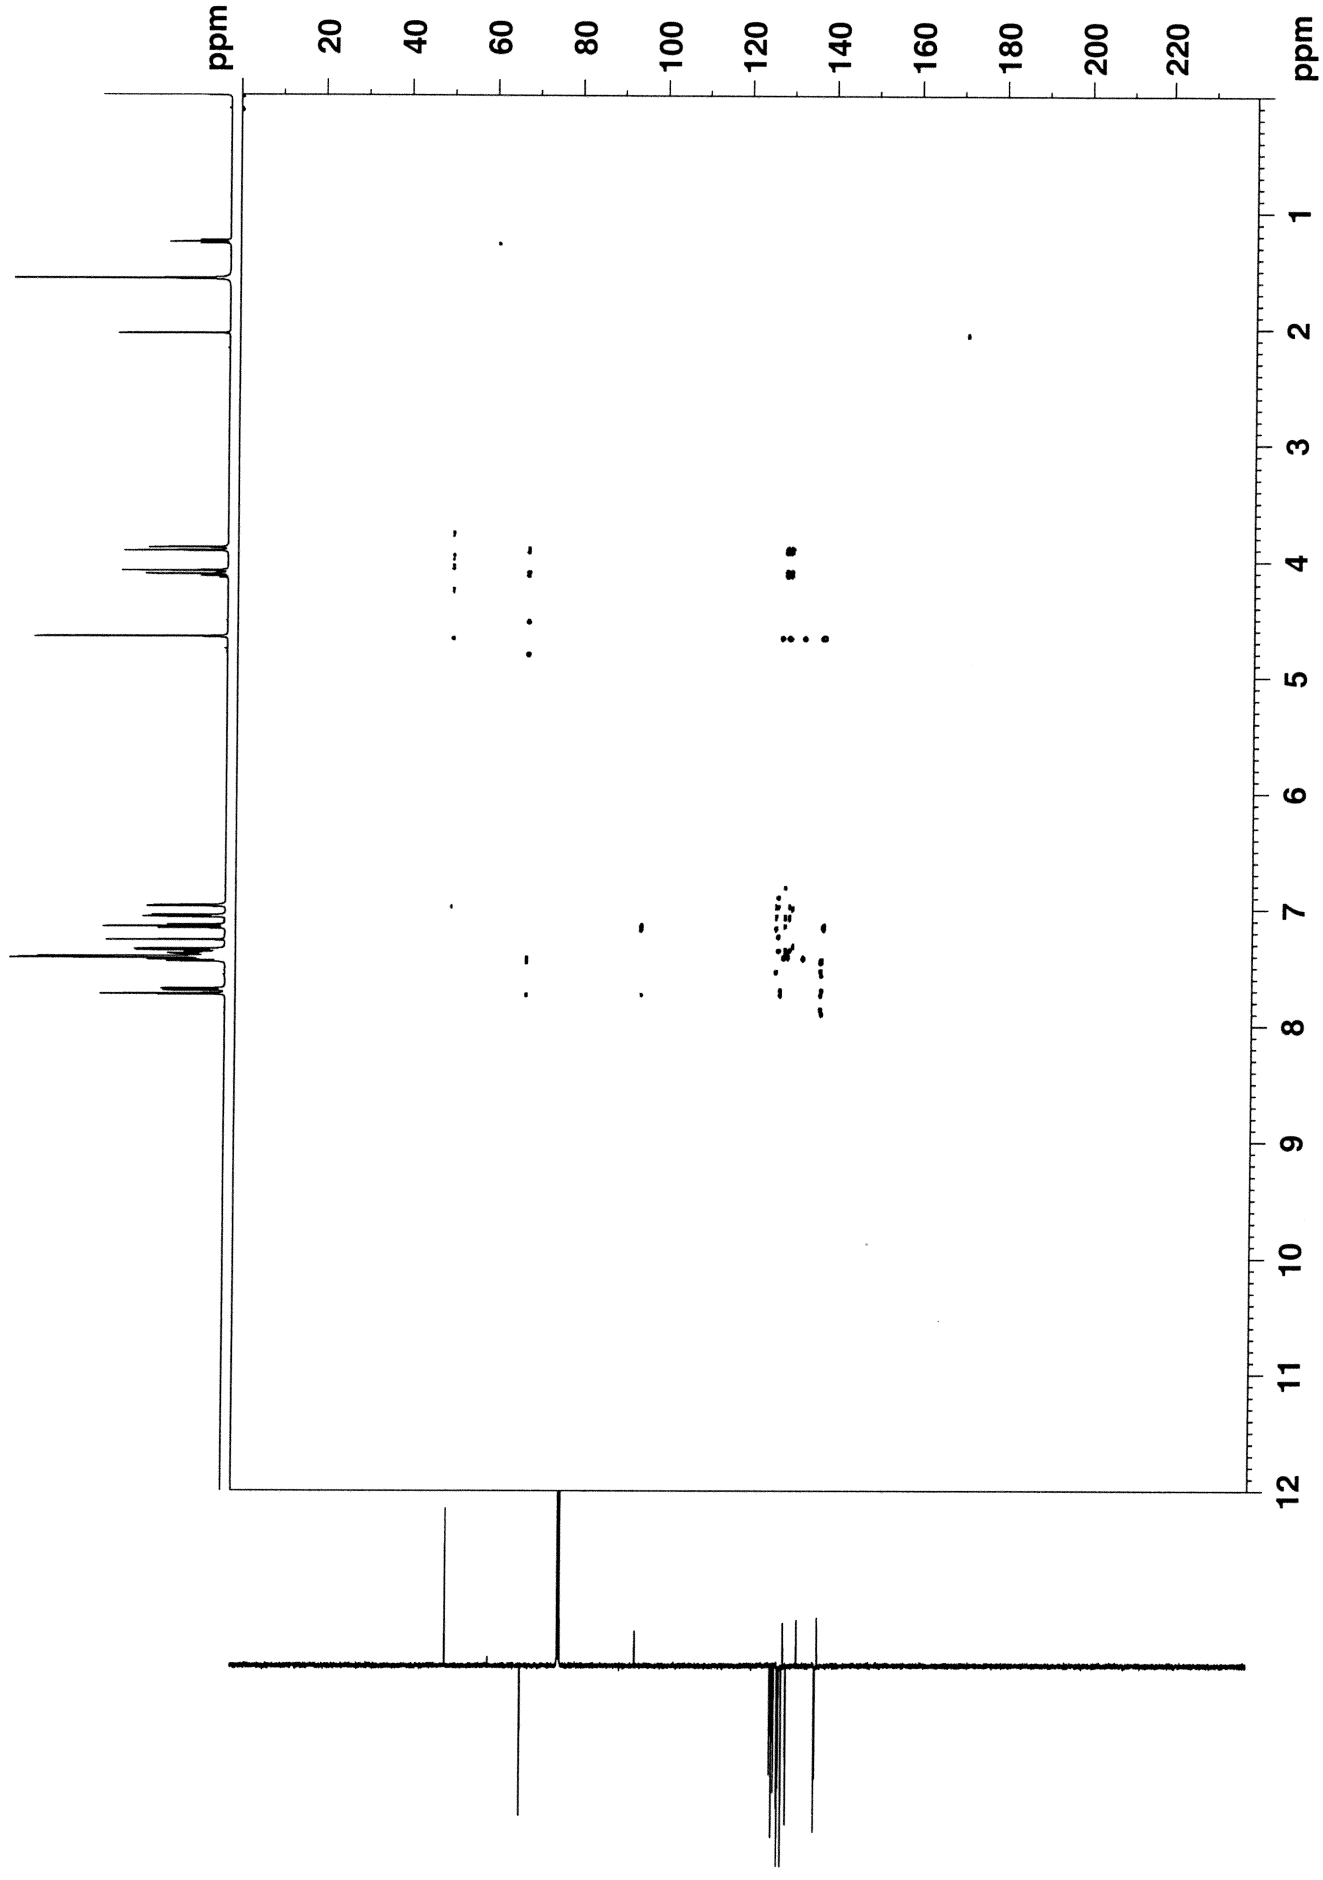

MK-30-2-1 in cdcl3 (HMBC) 29.7.2020

Ph2-6

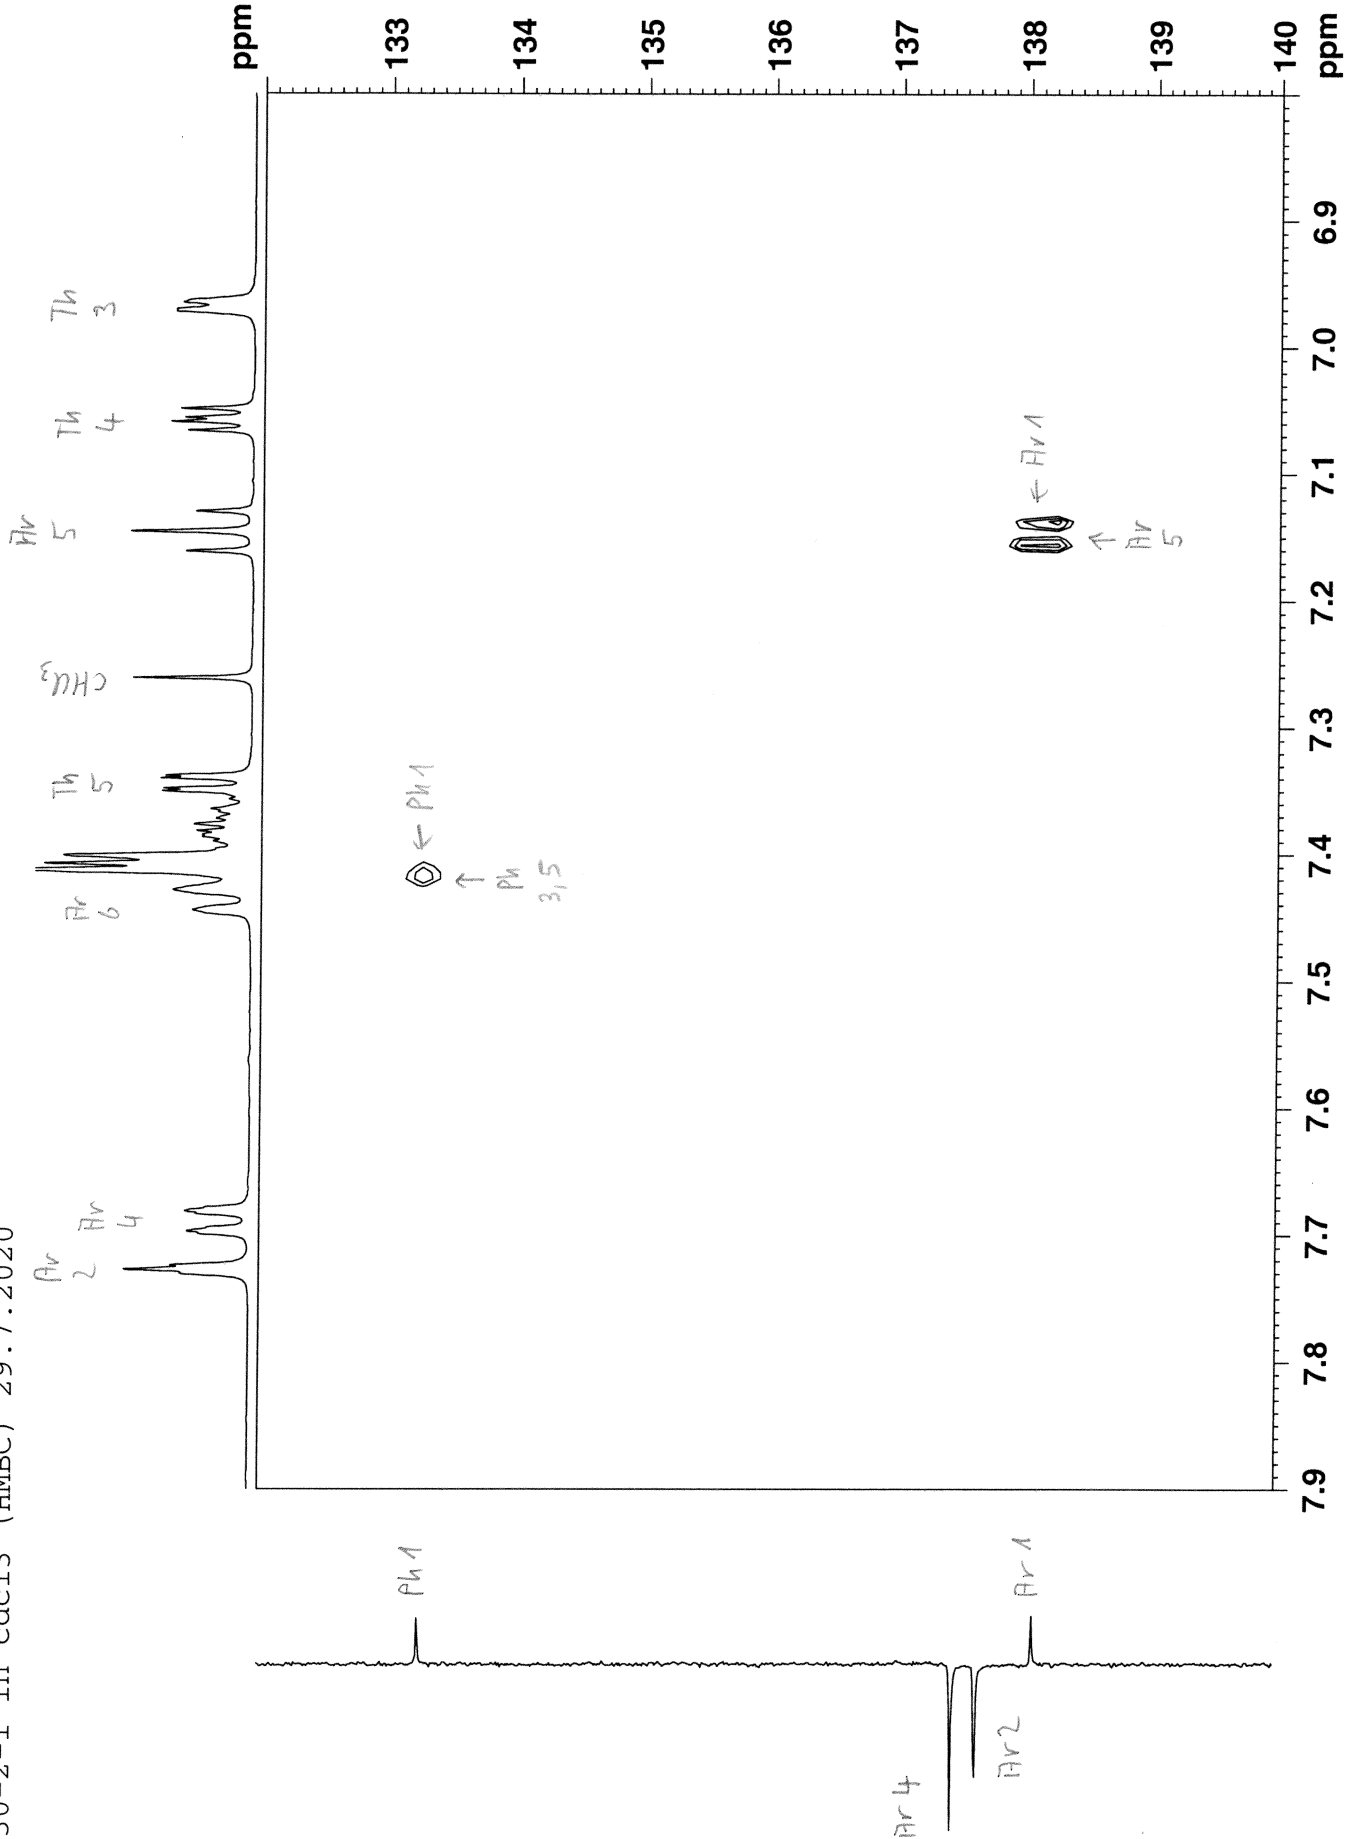

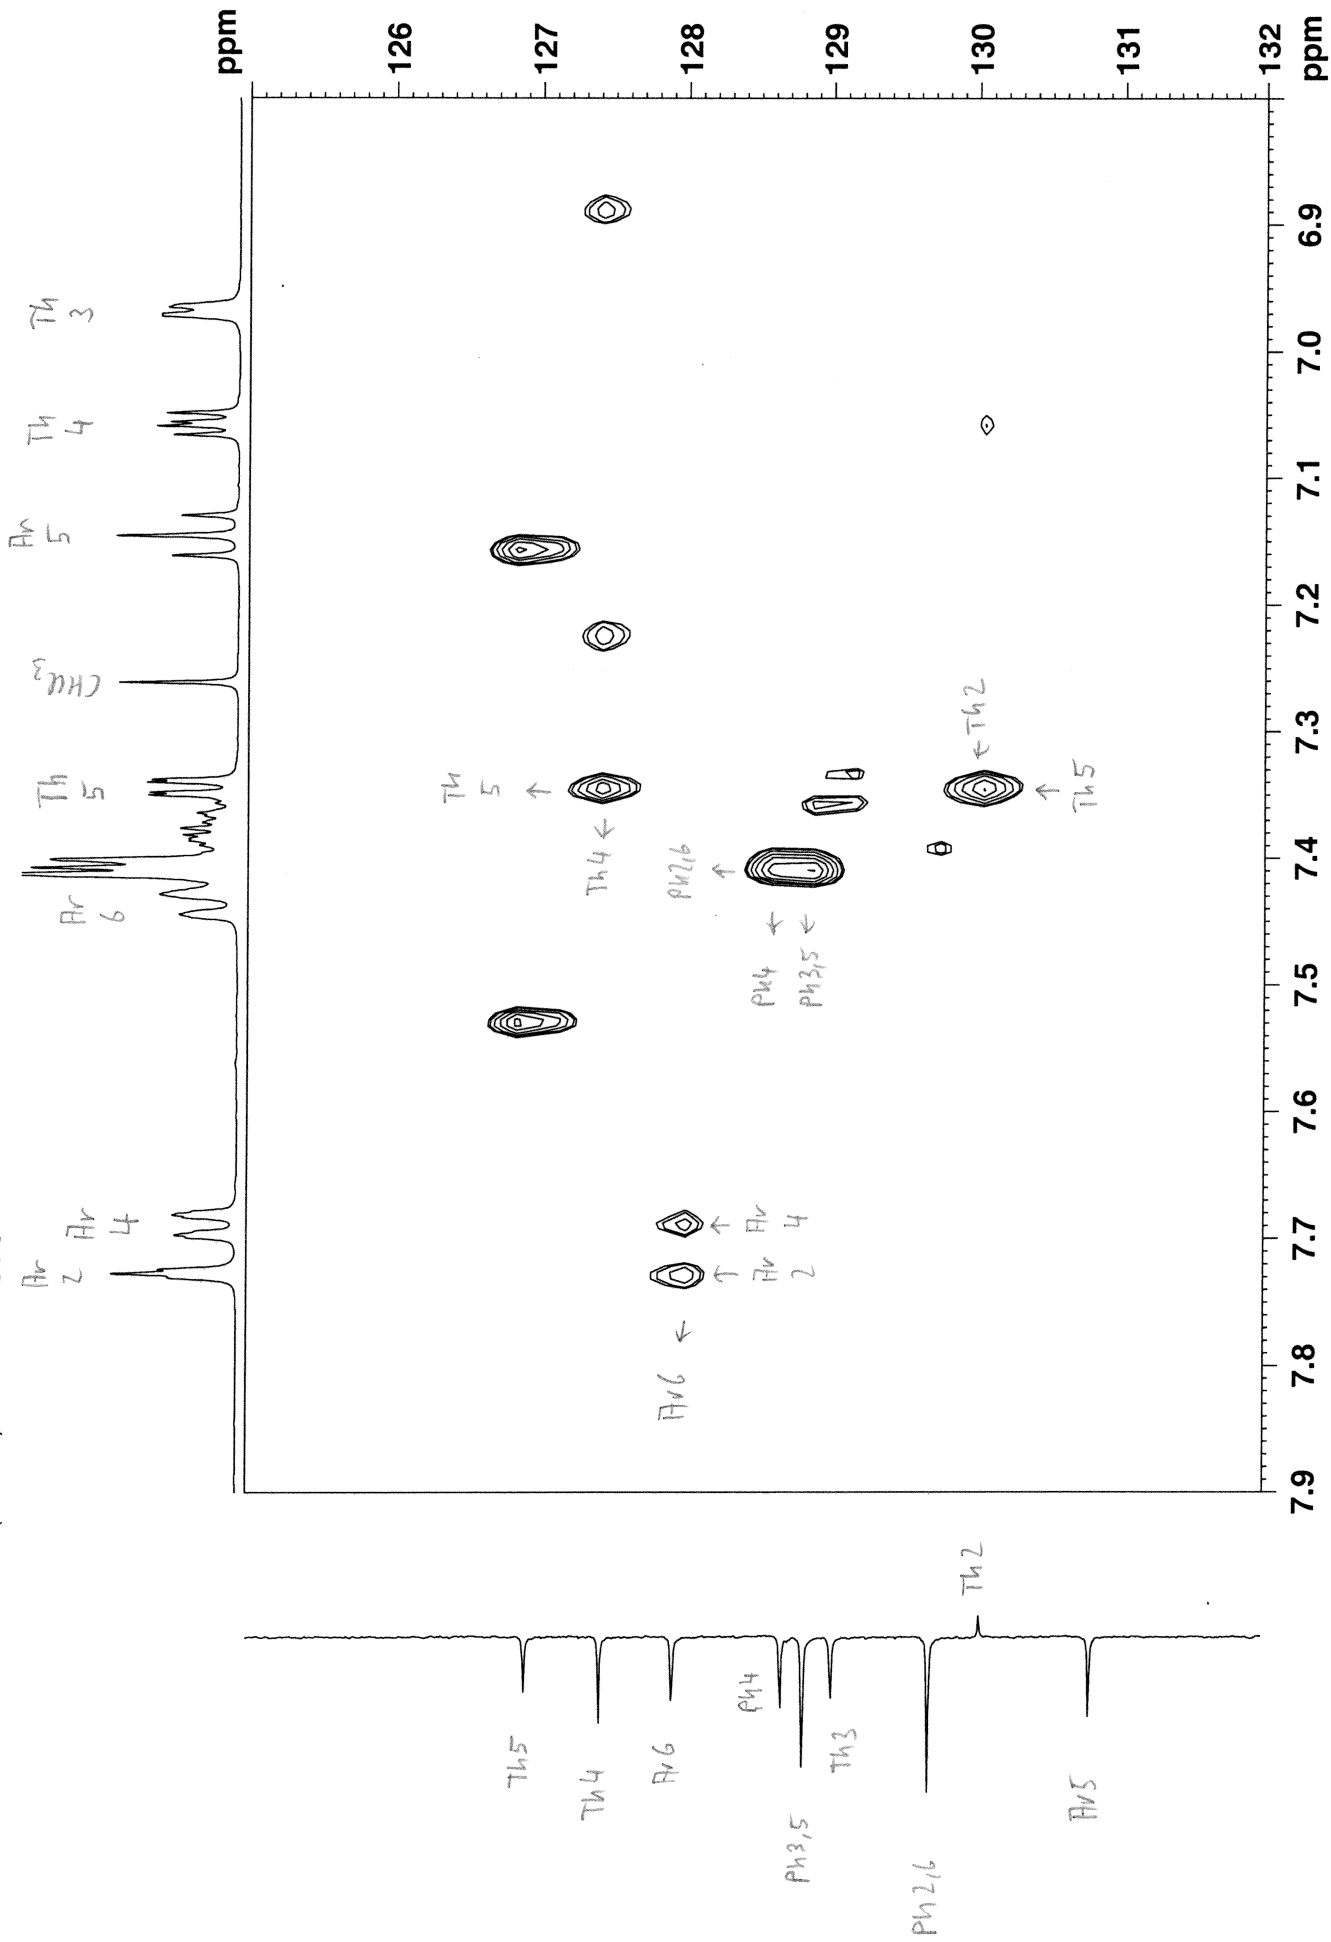

Ph2-6

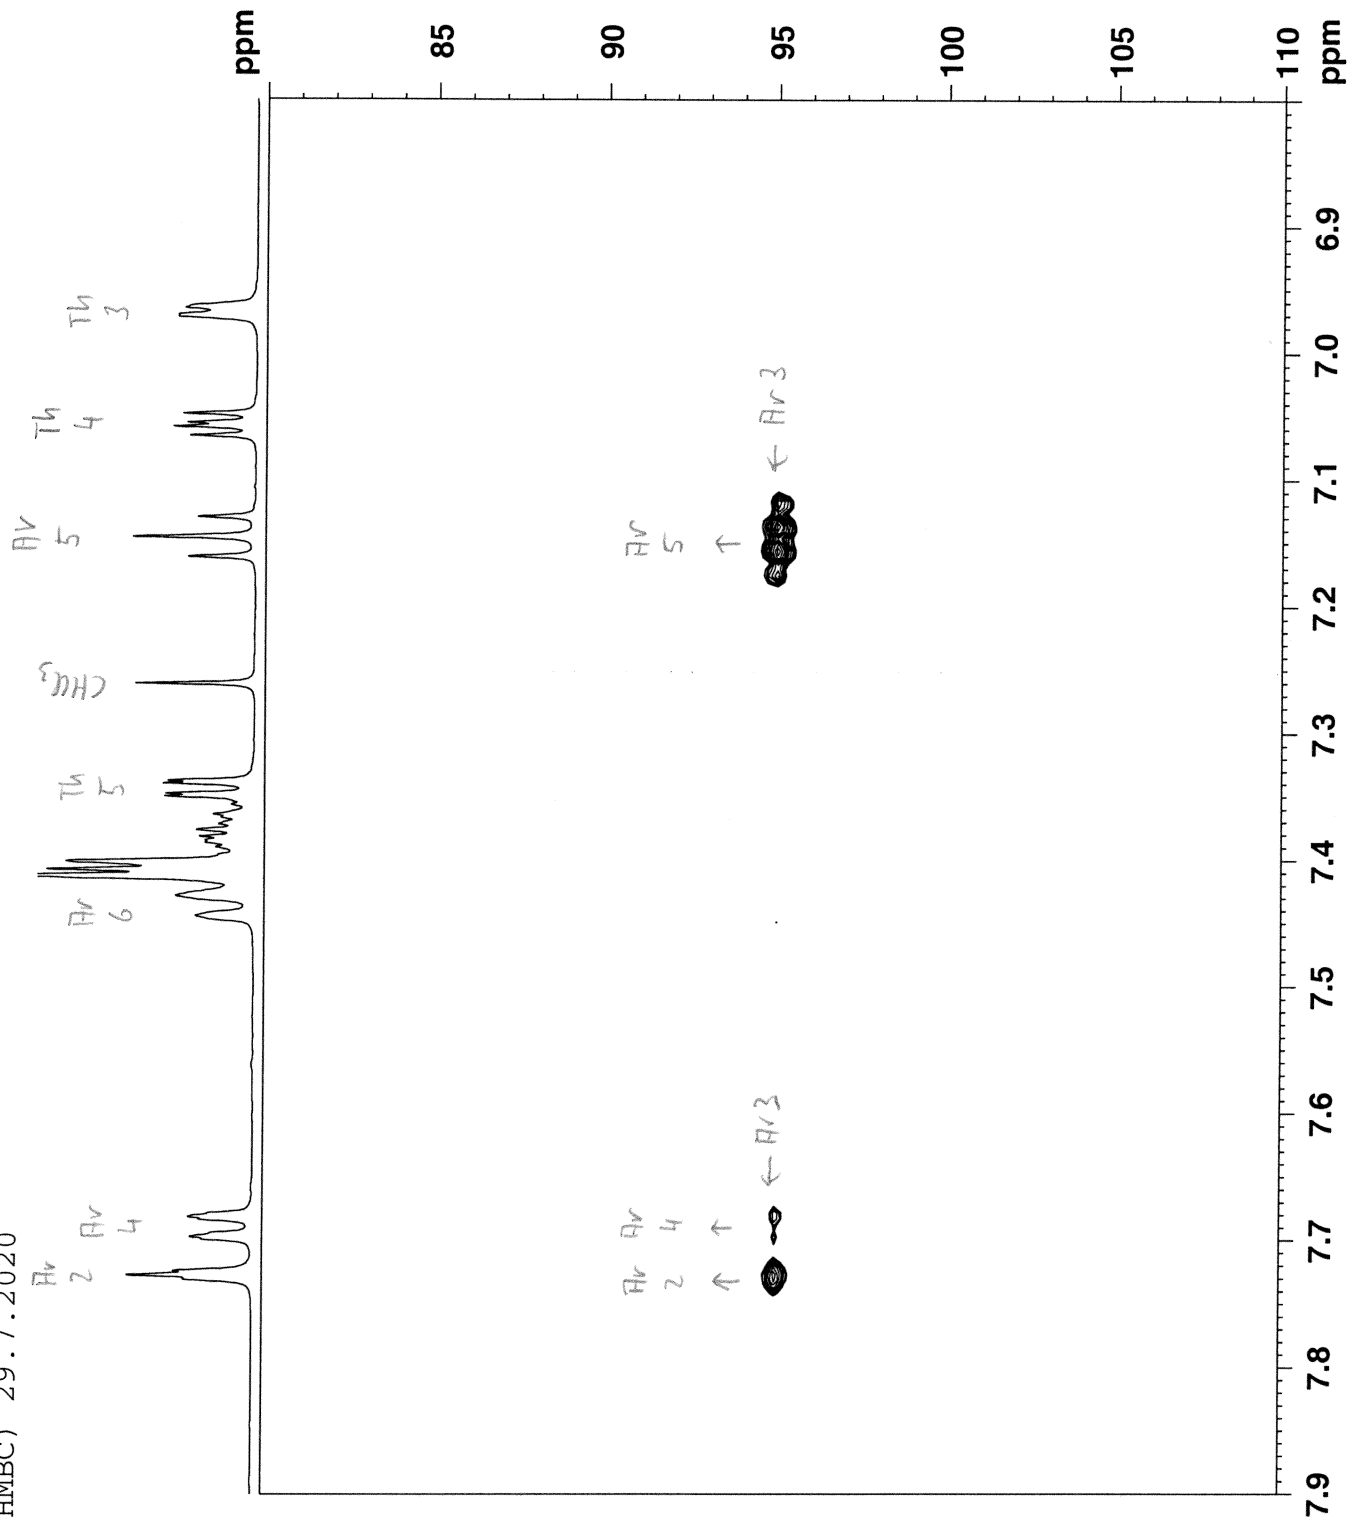

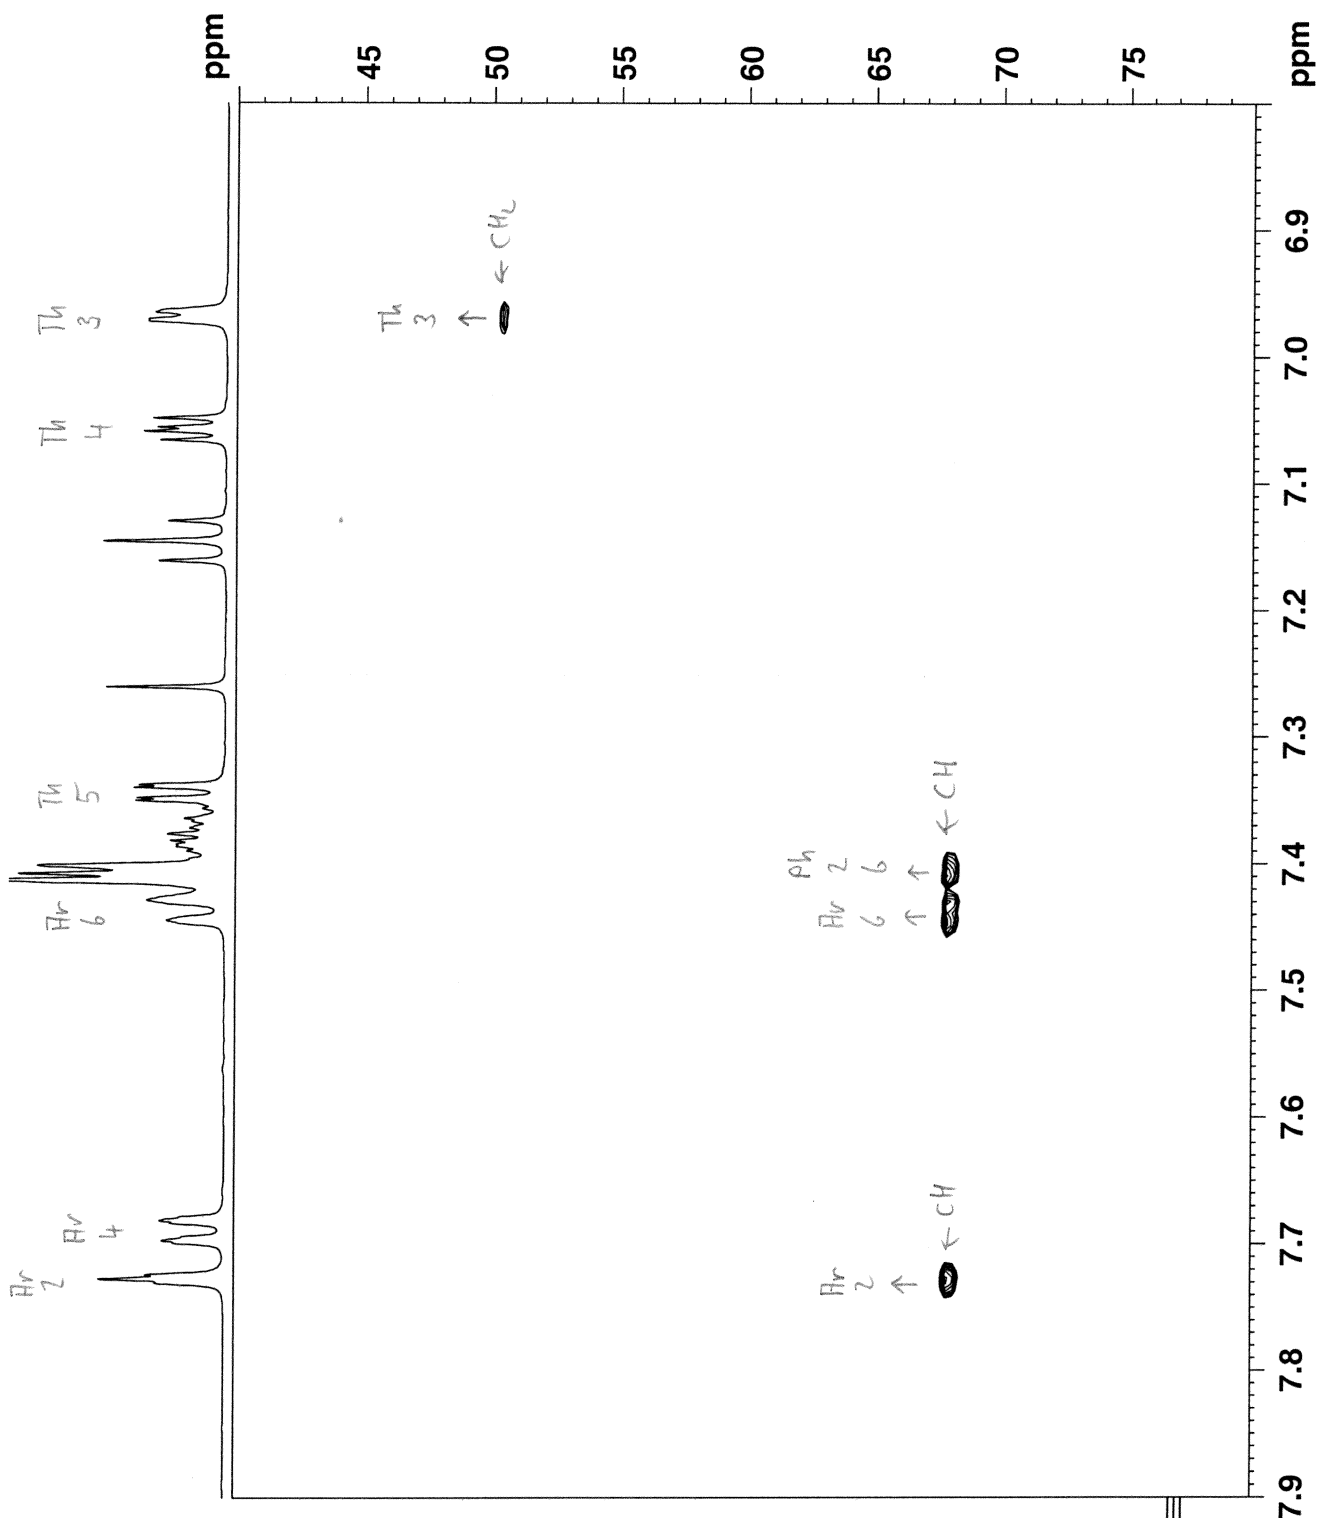



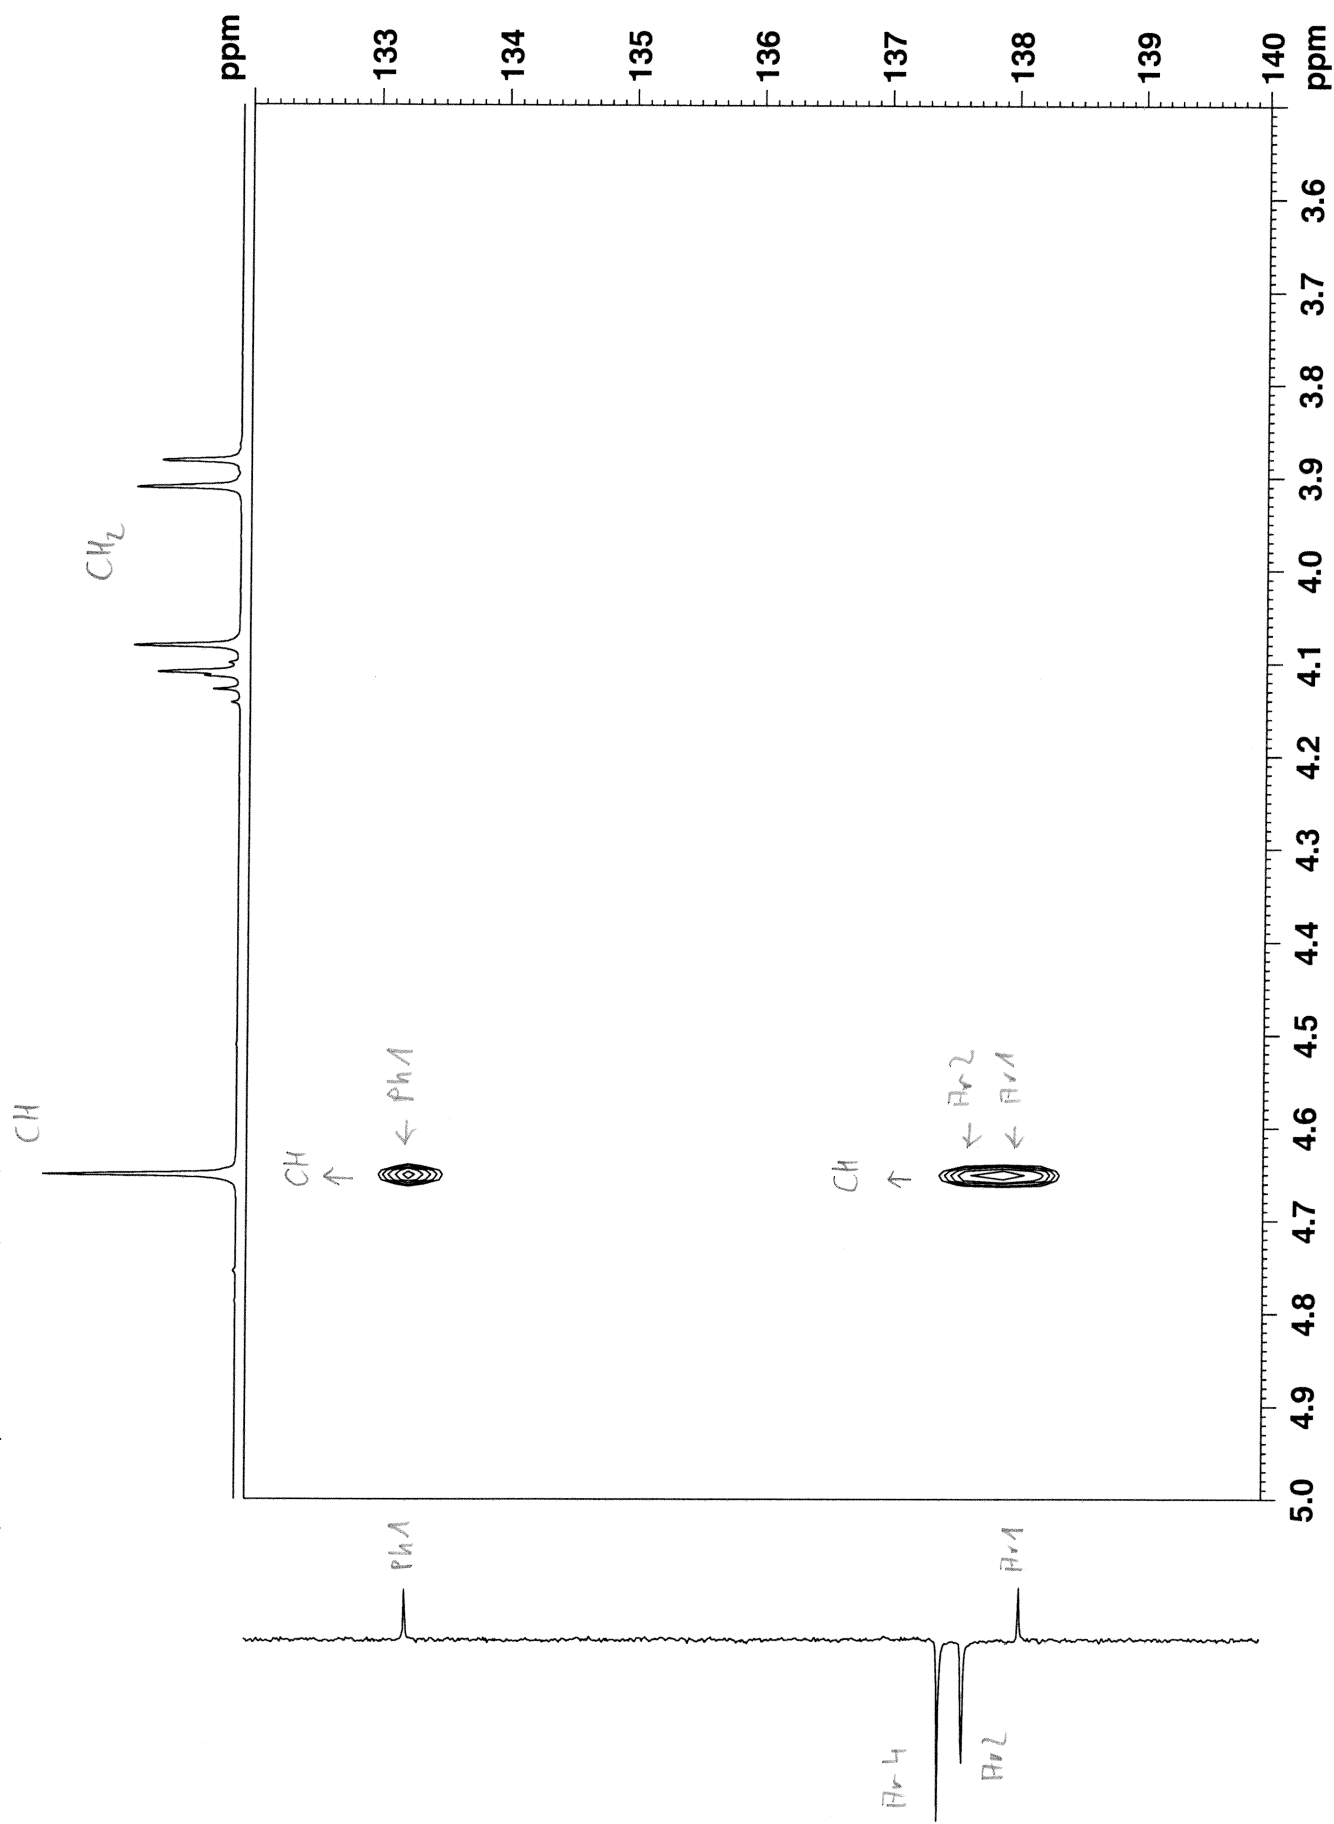

MK-30-2-1 in cdcl3 (HMBC) 29.7.2020 CH

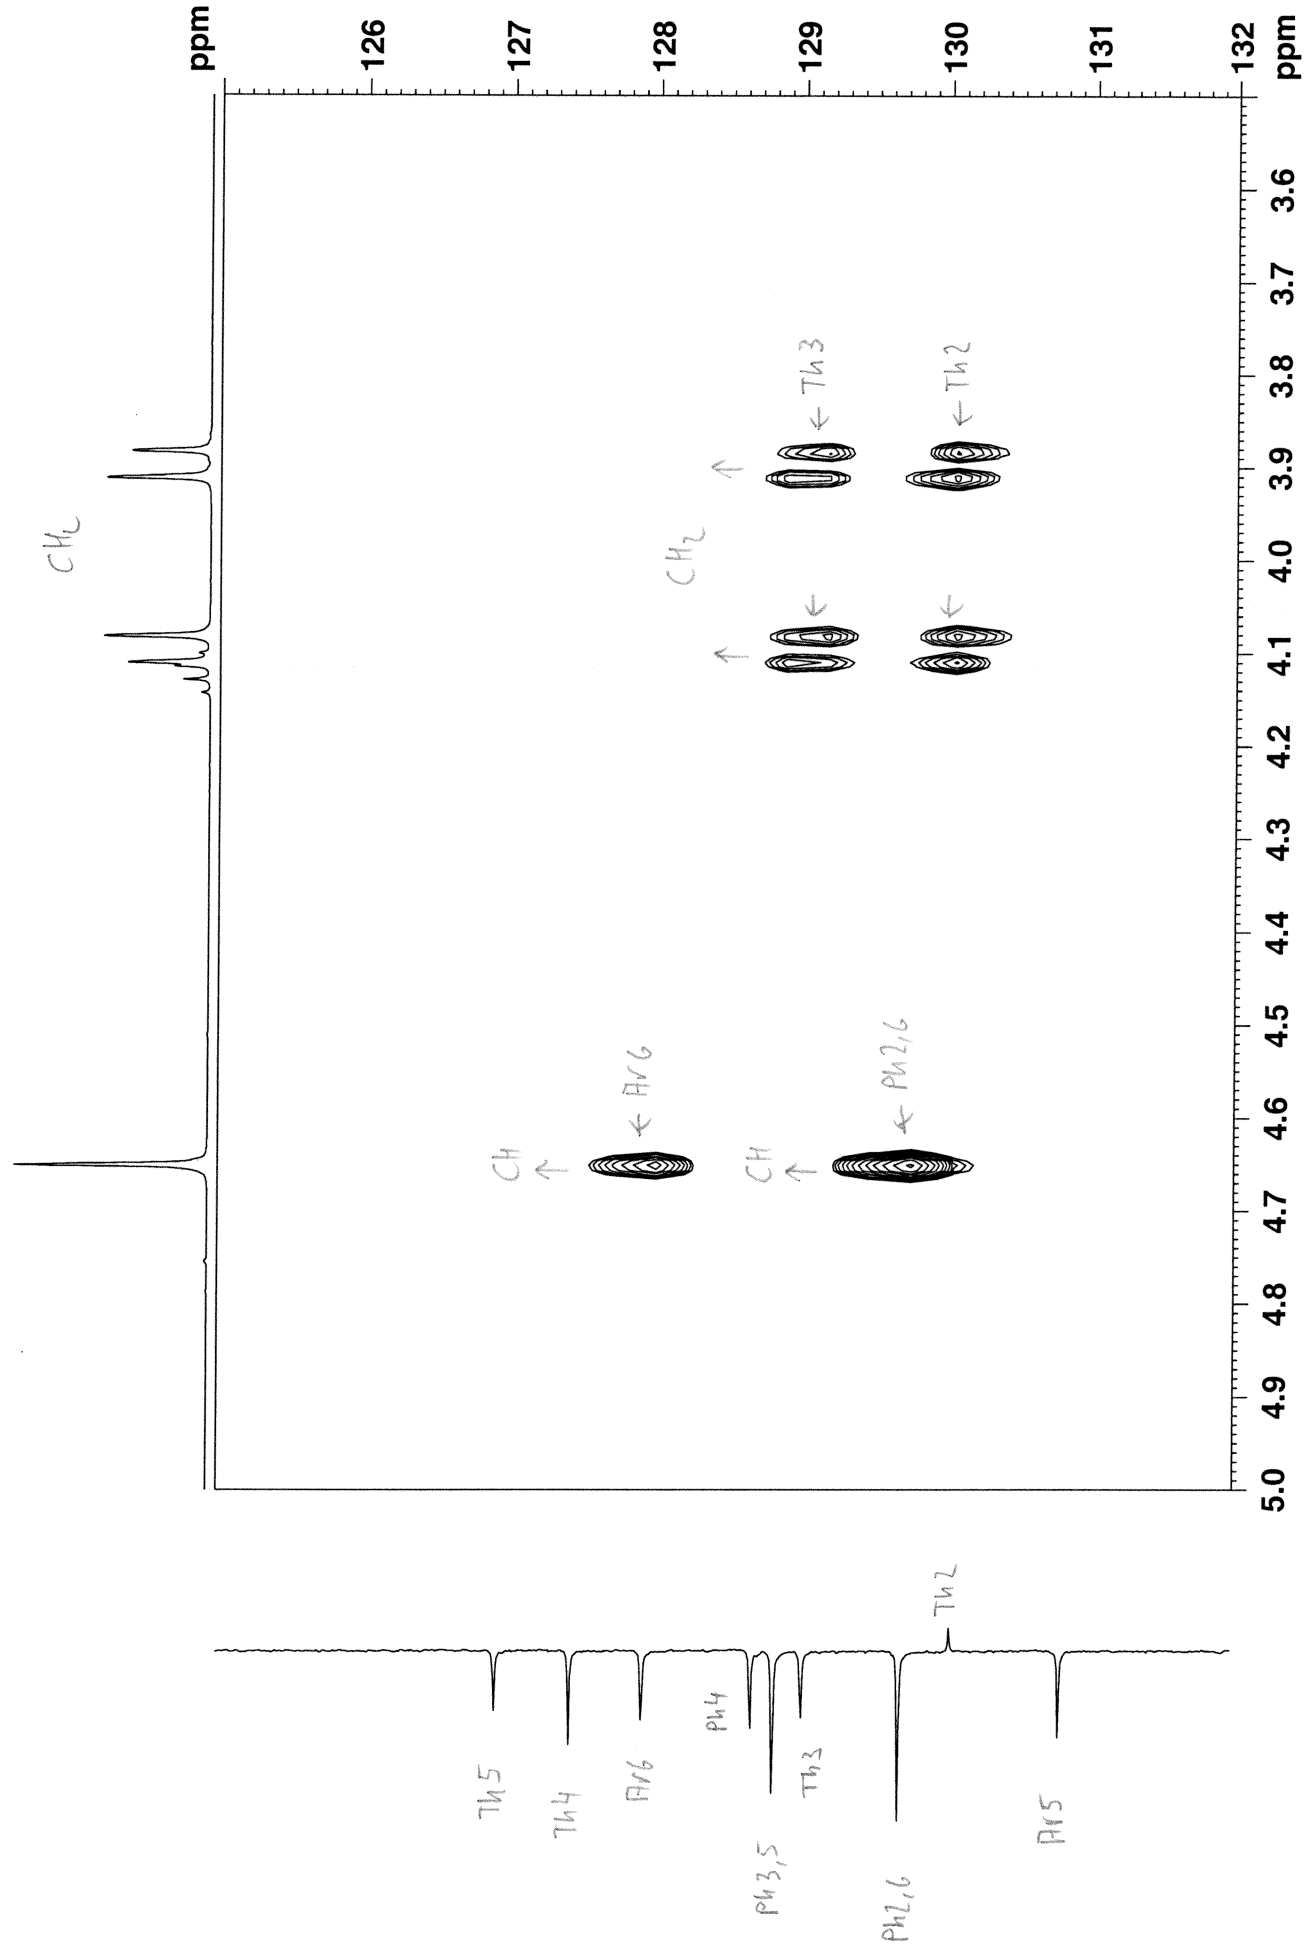

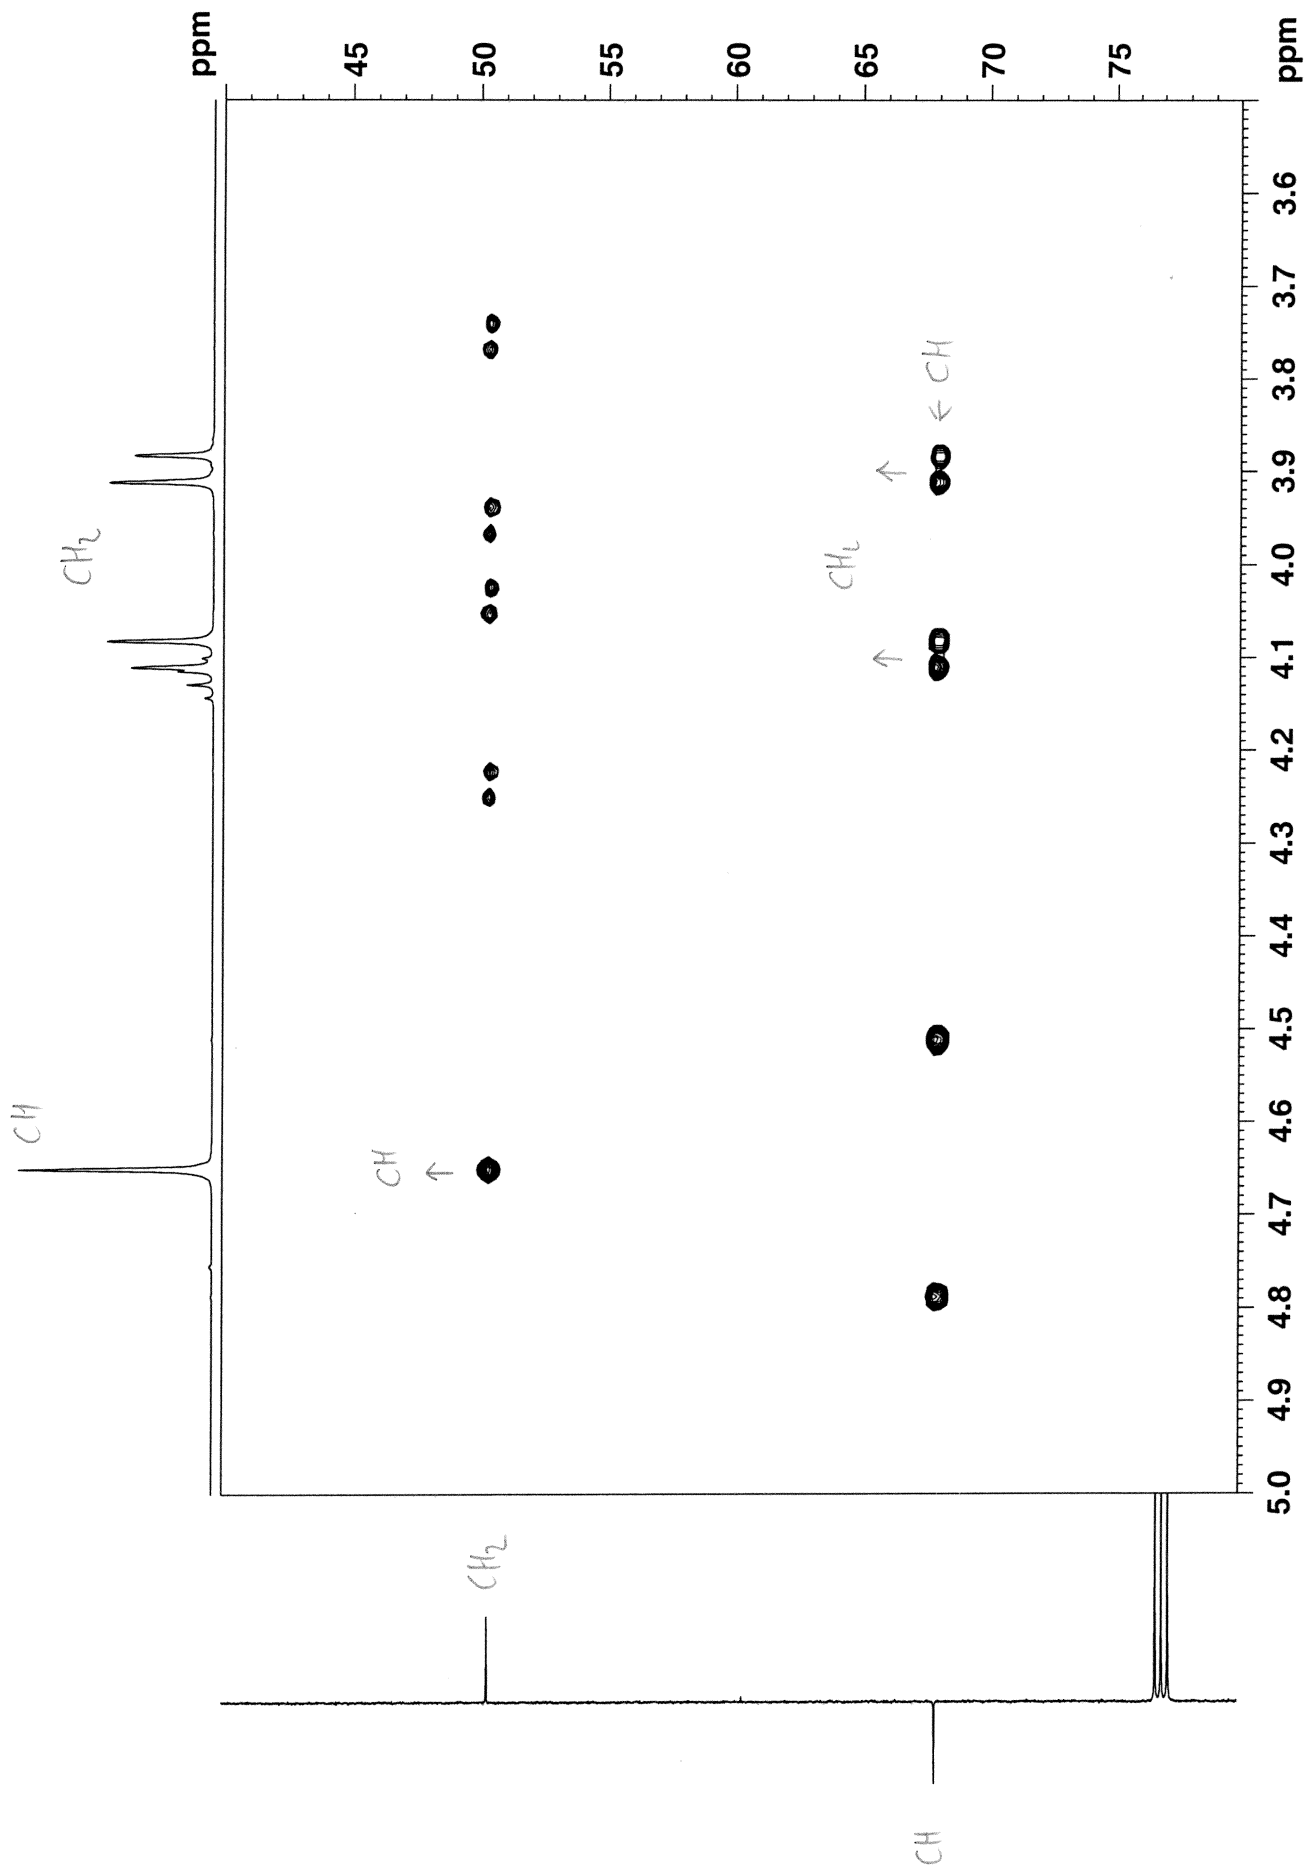

Figure S40c. NMR spectra of compound 8j.

MK-30-2-2 in cdcl3 (Proton) 29.7.2020

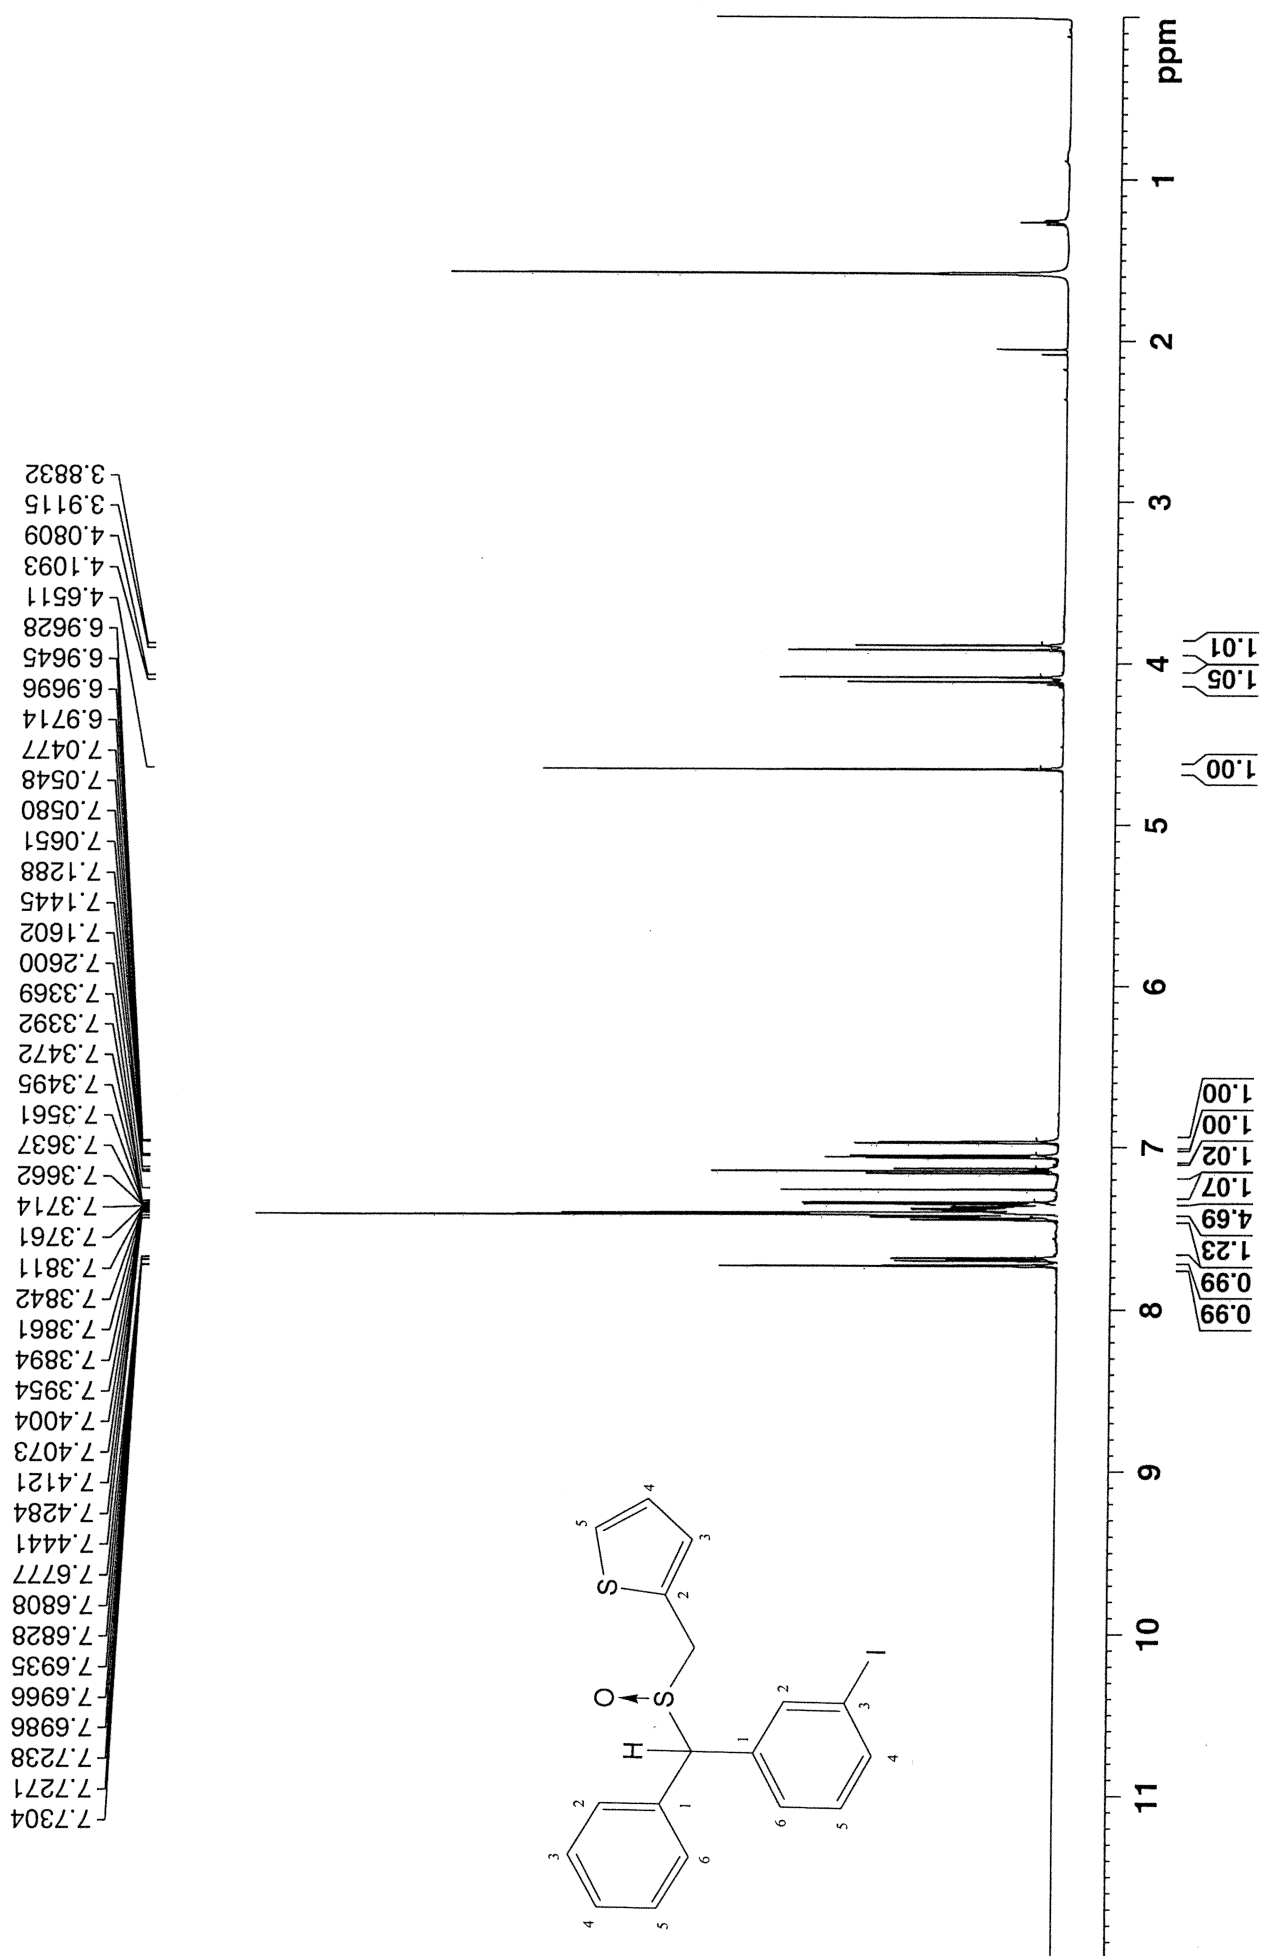

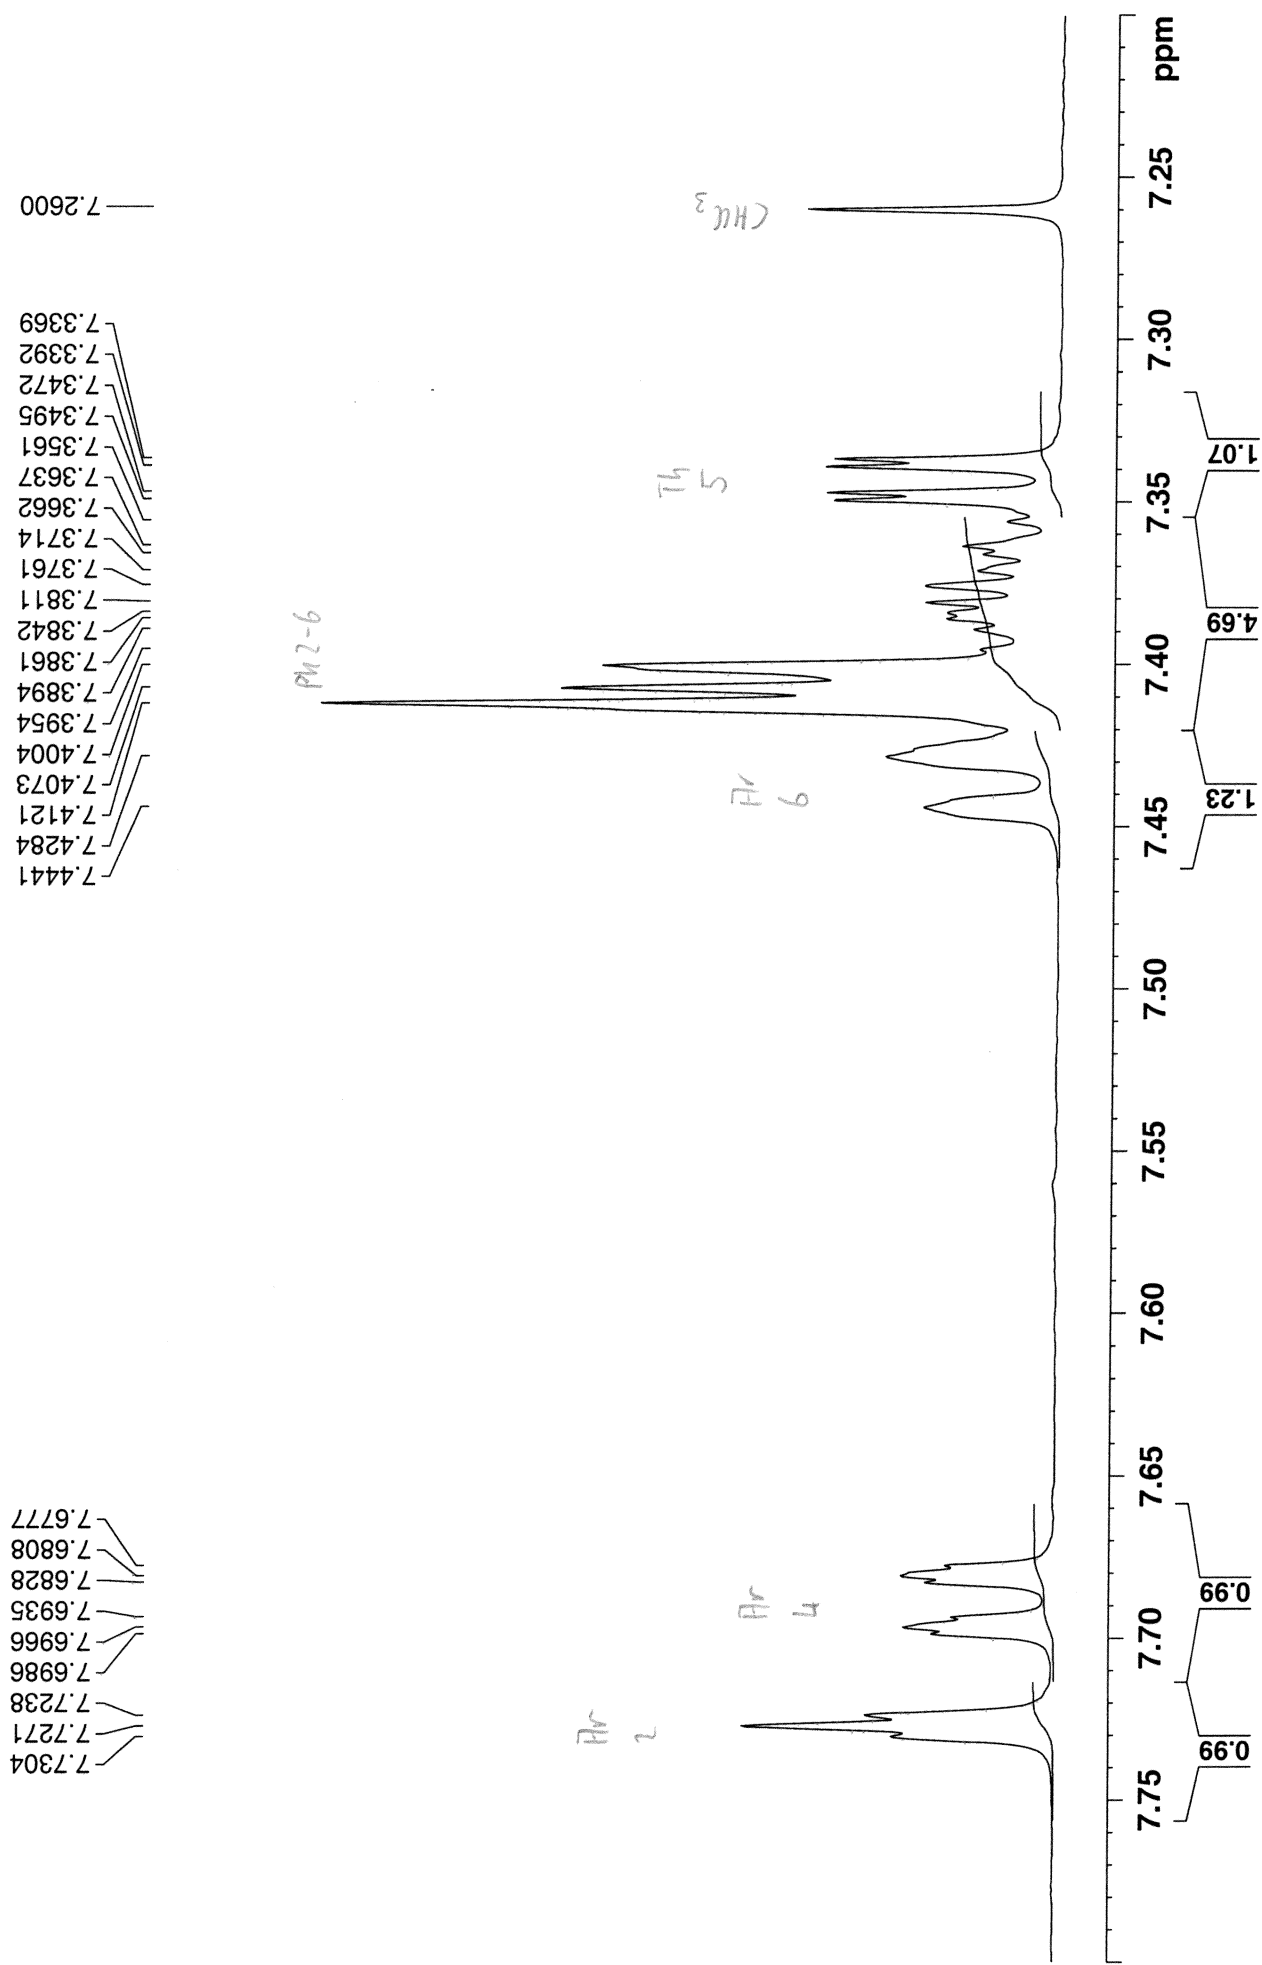

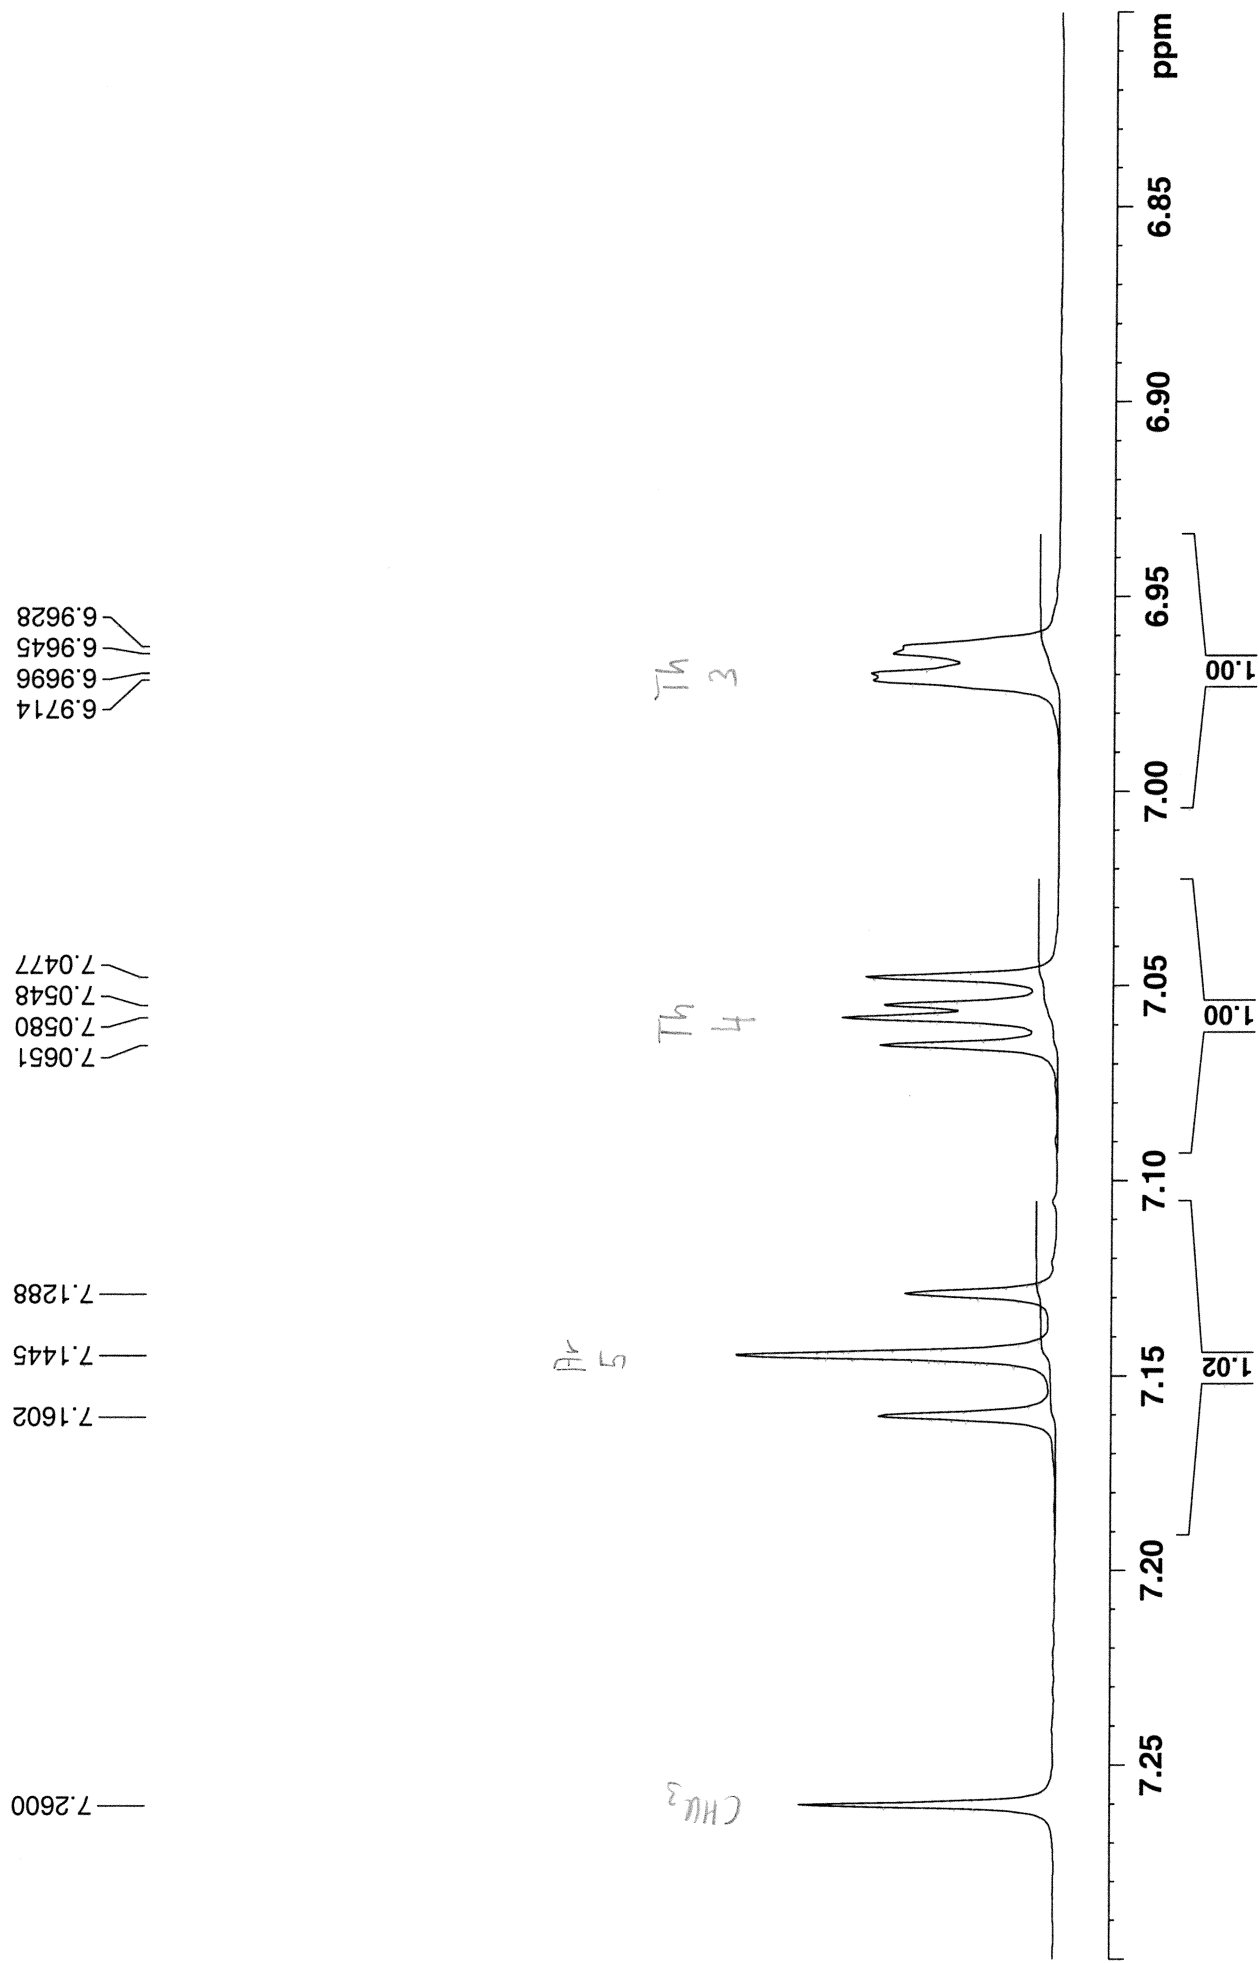

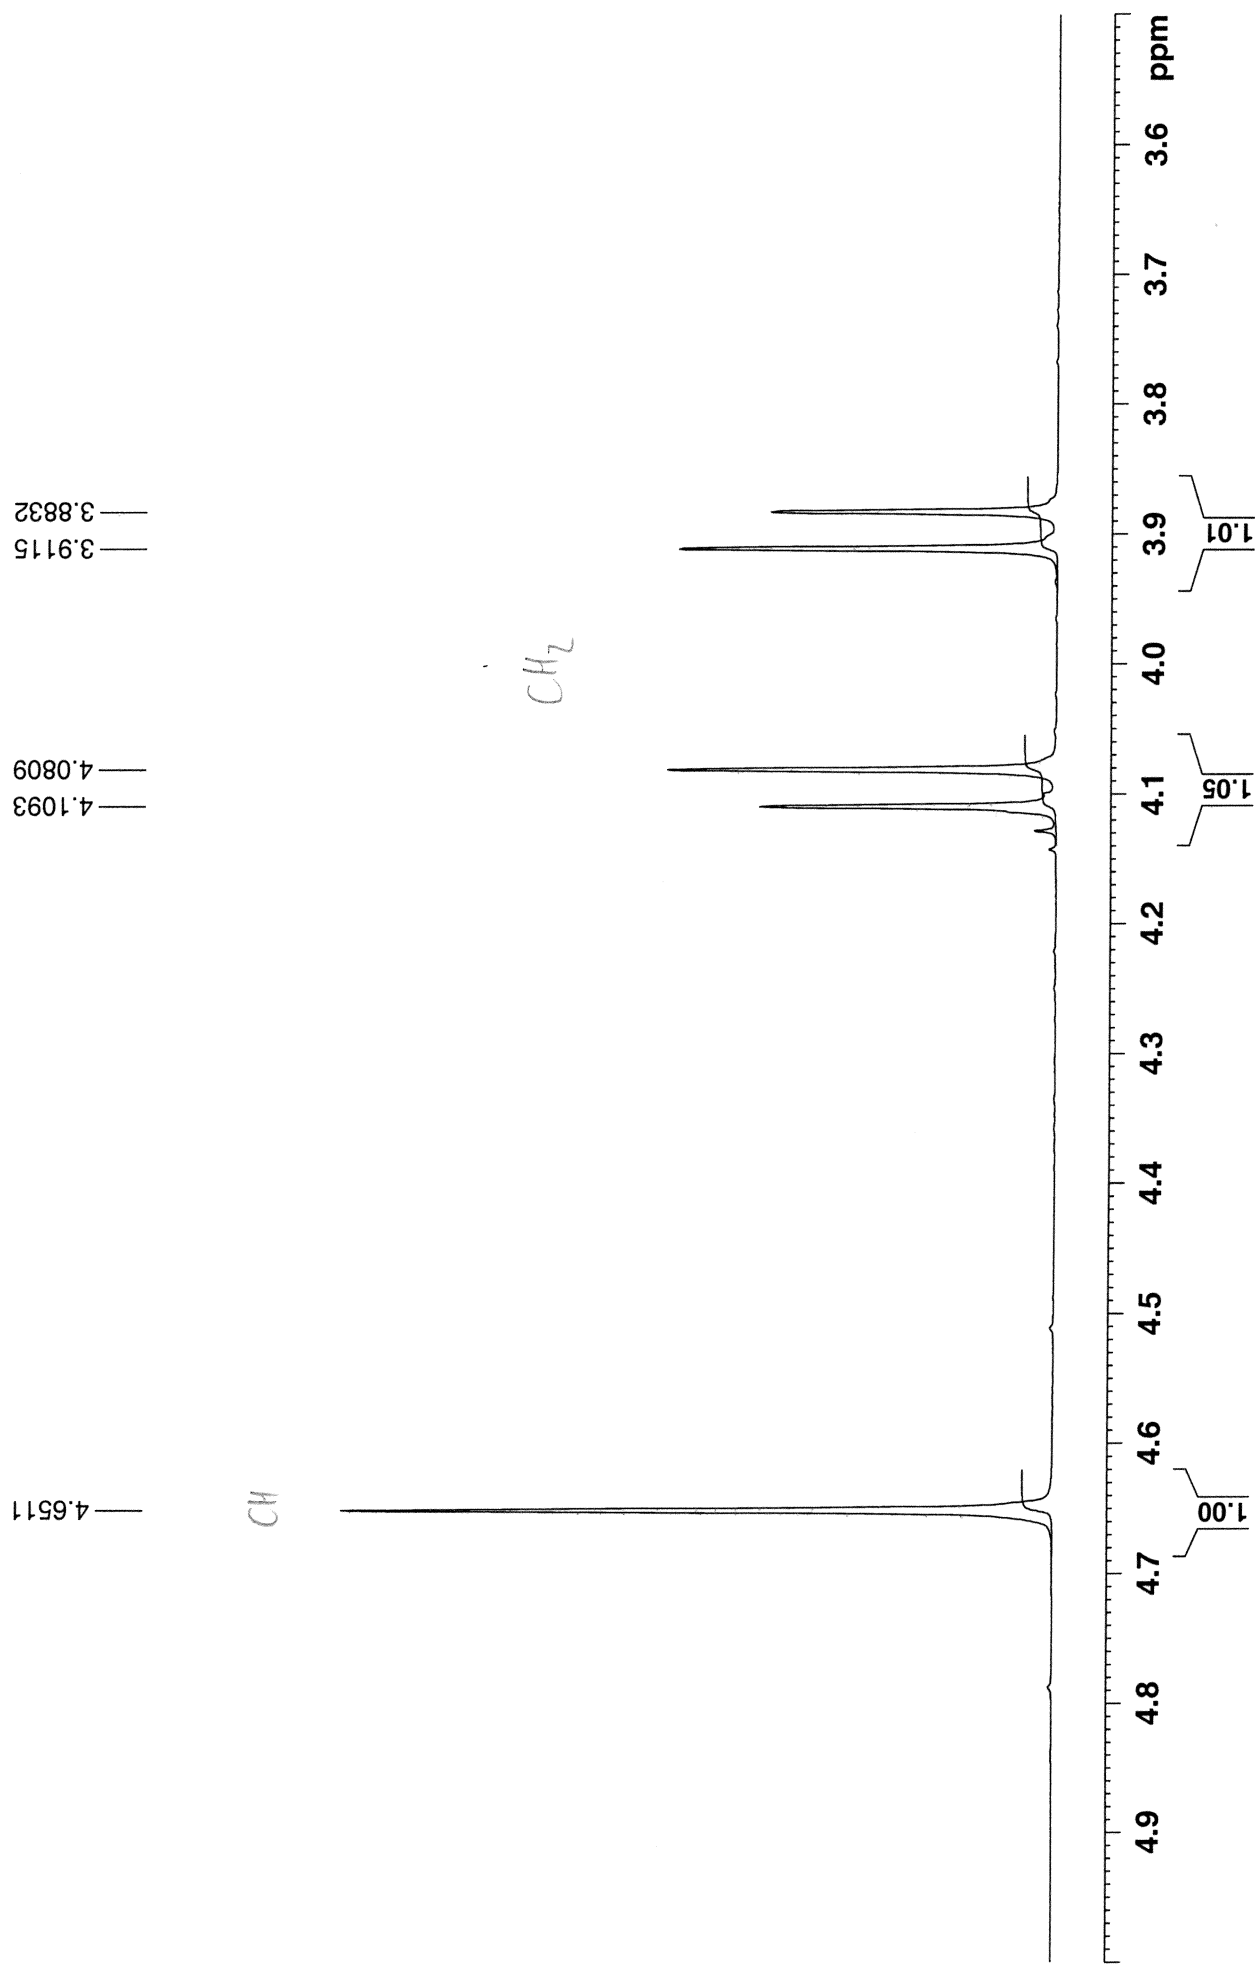

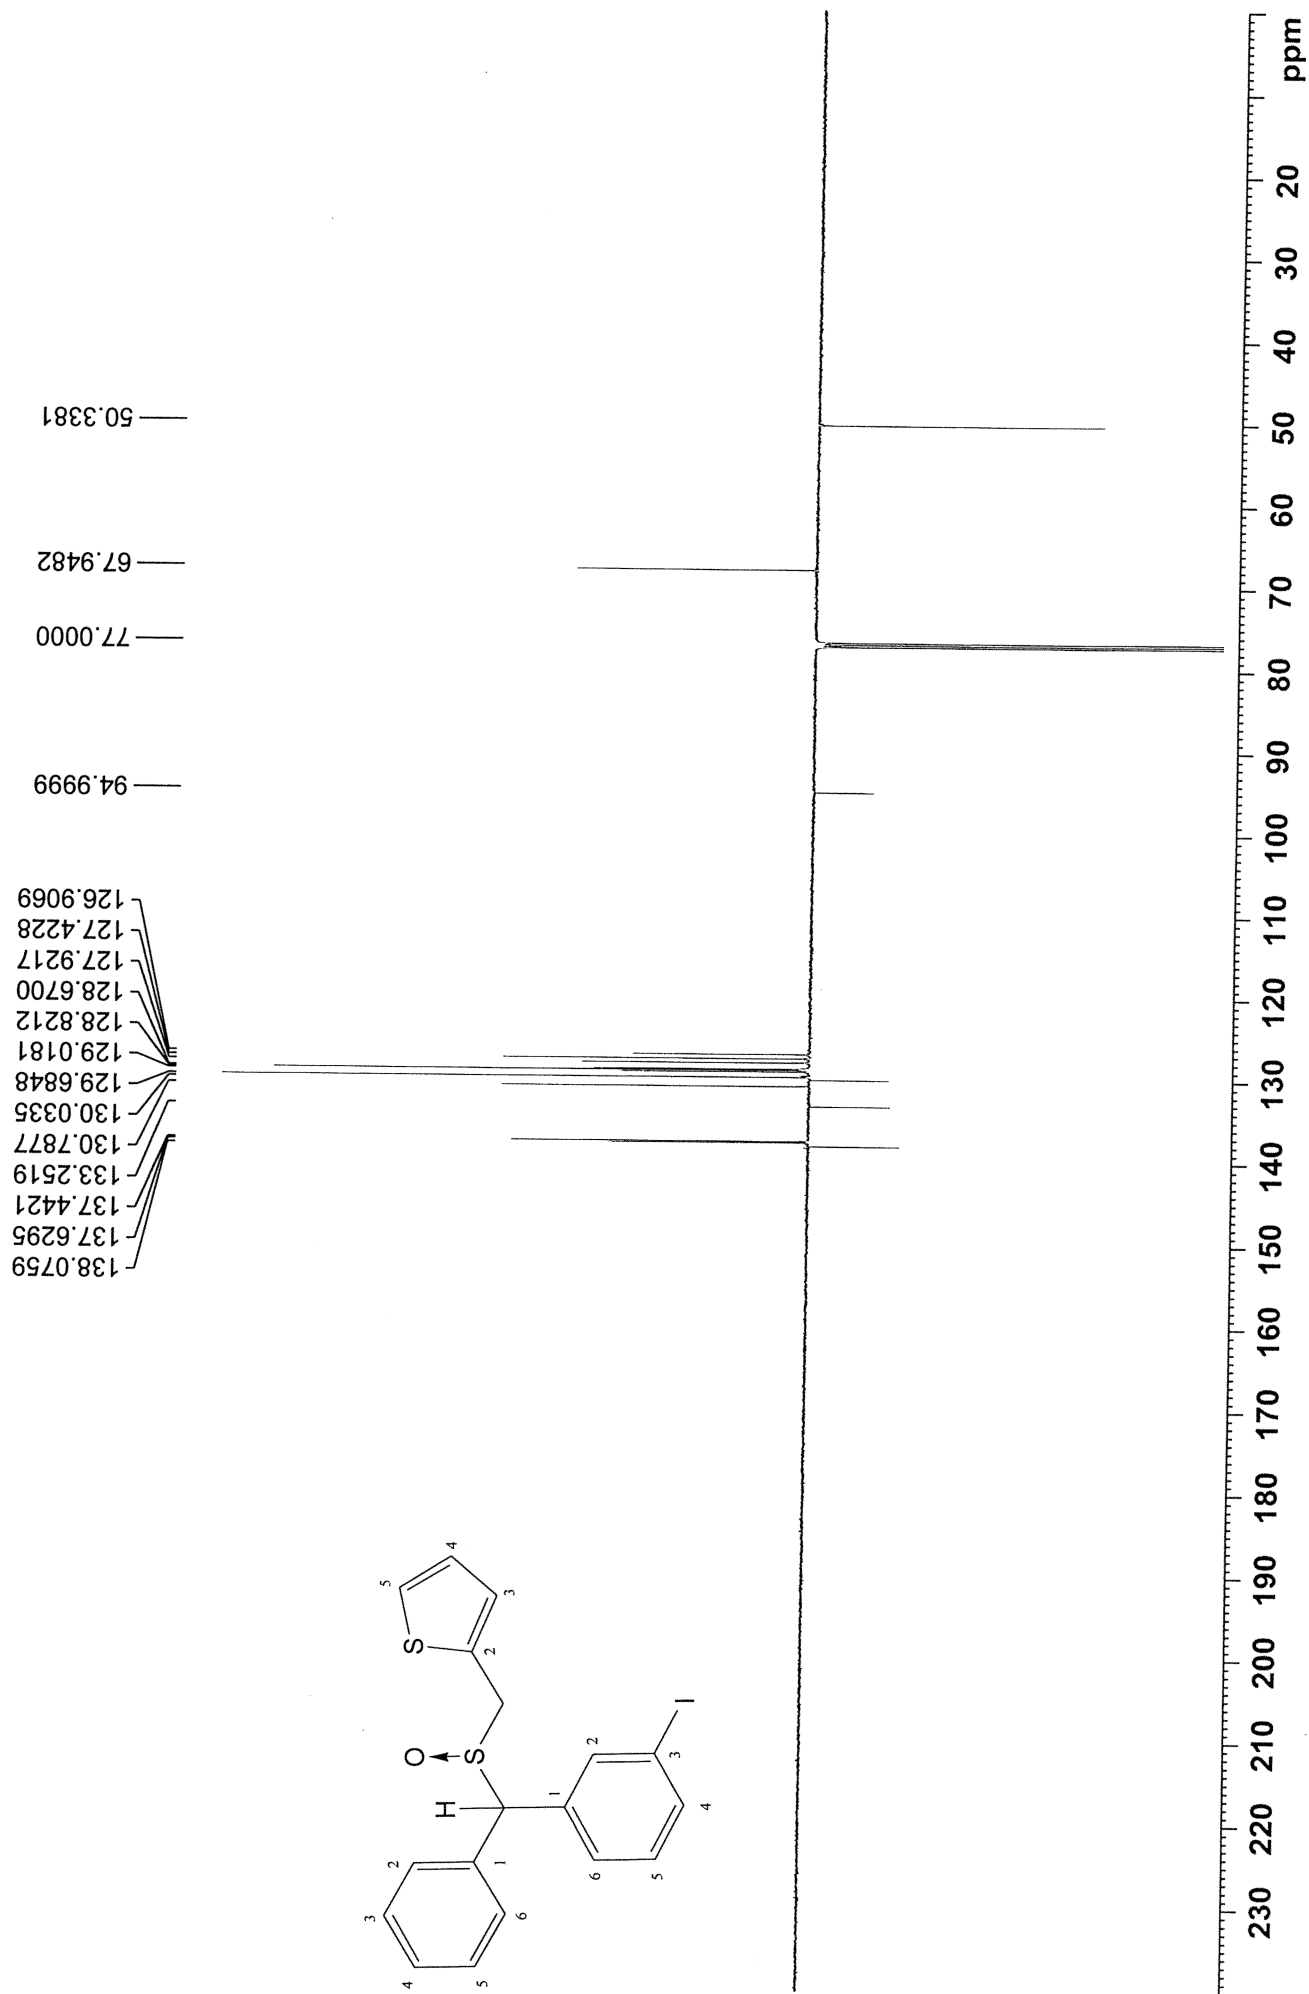



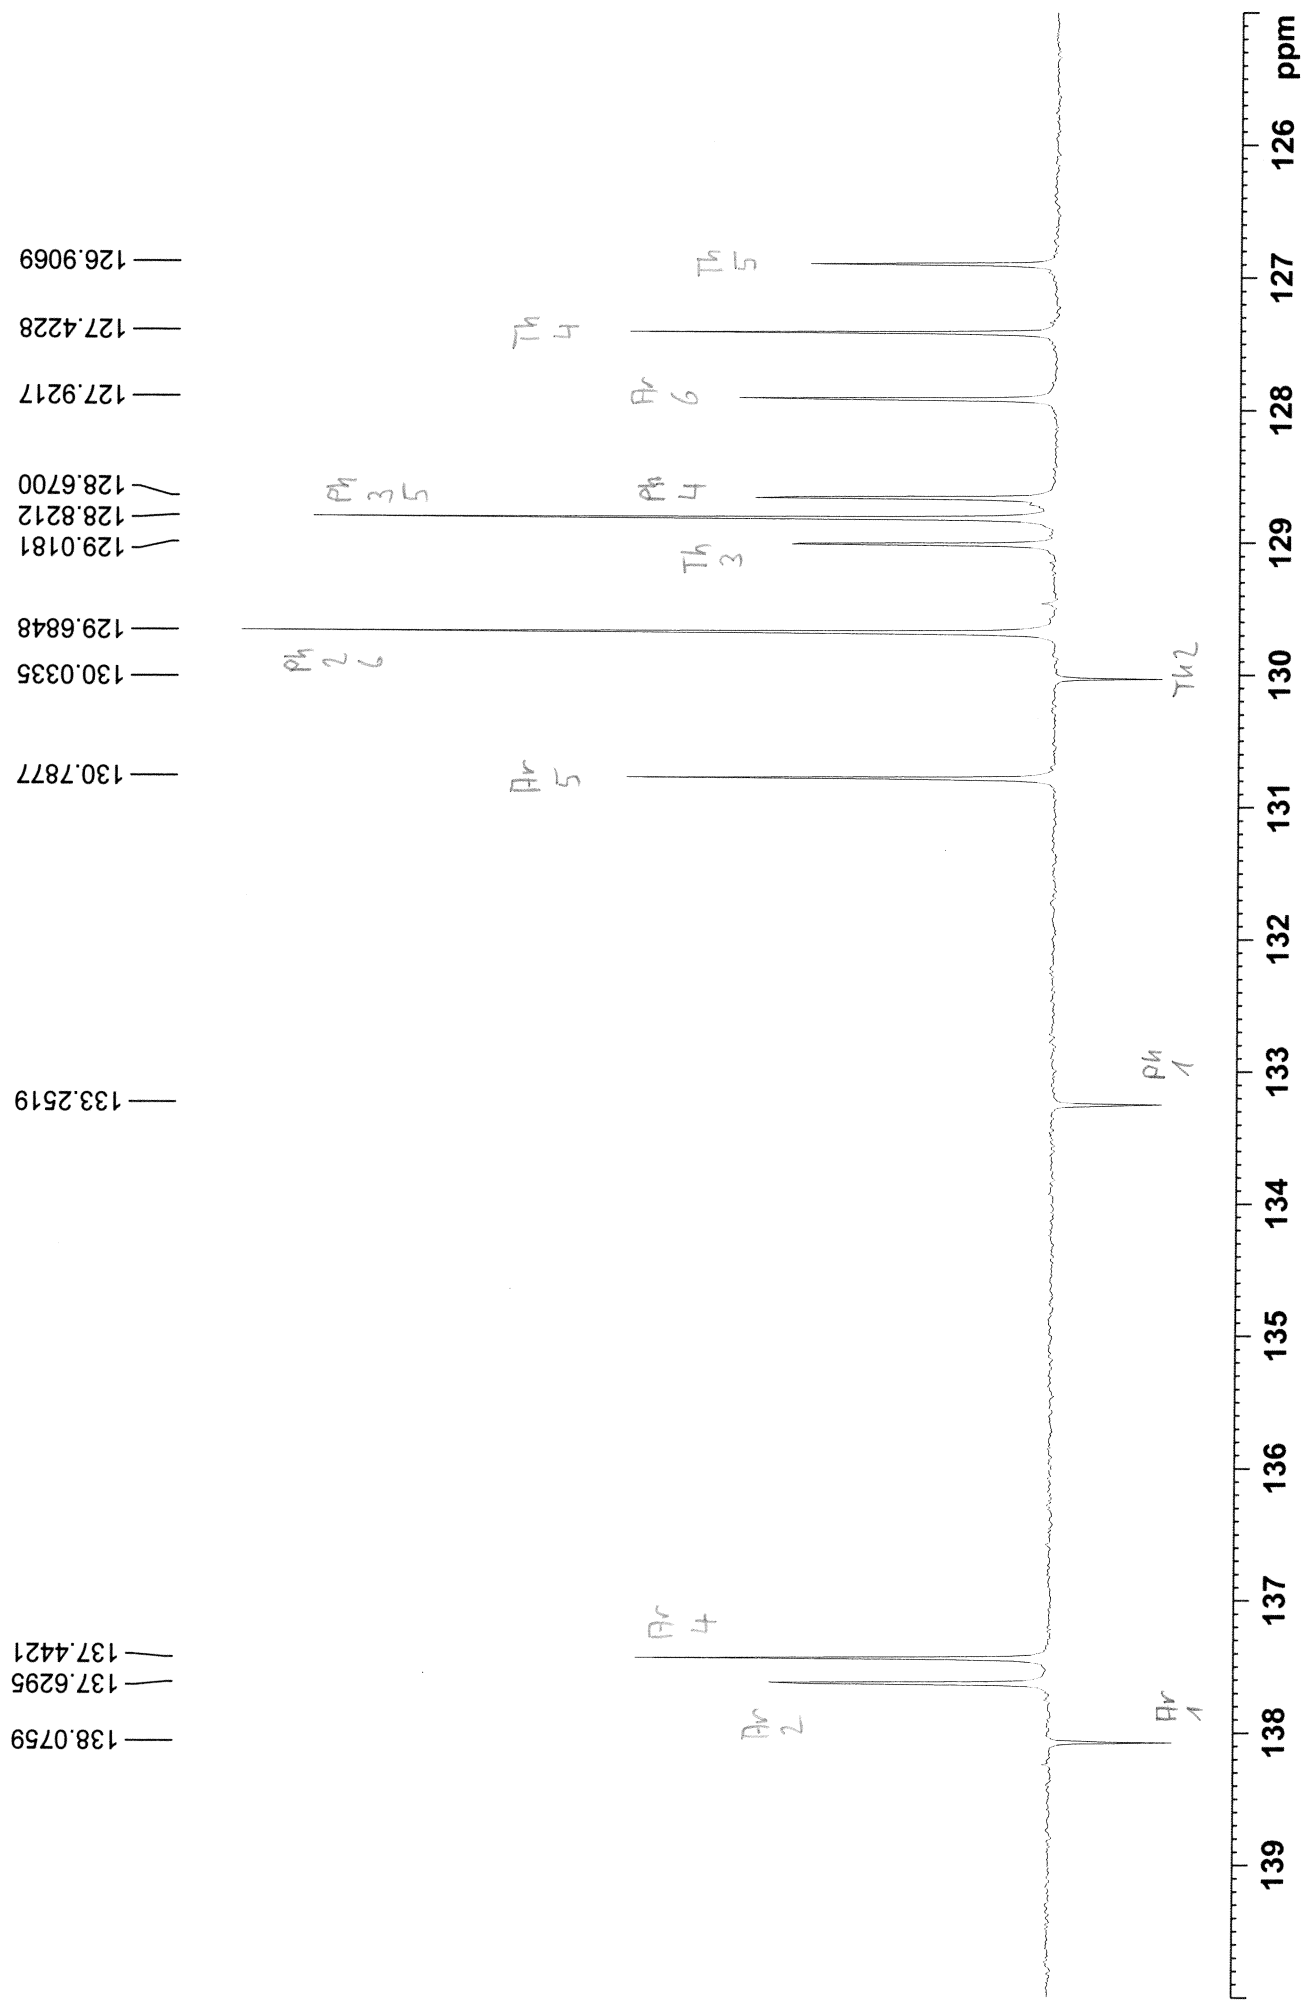

MK-30-2-2 in cdcl3 (APT) 29.7.2020

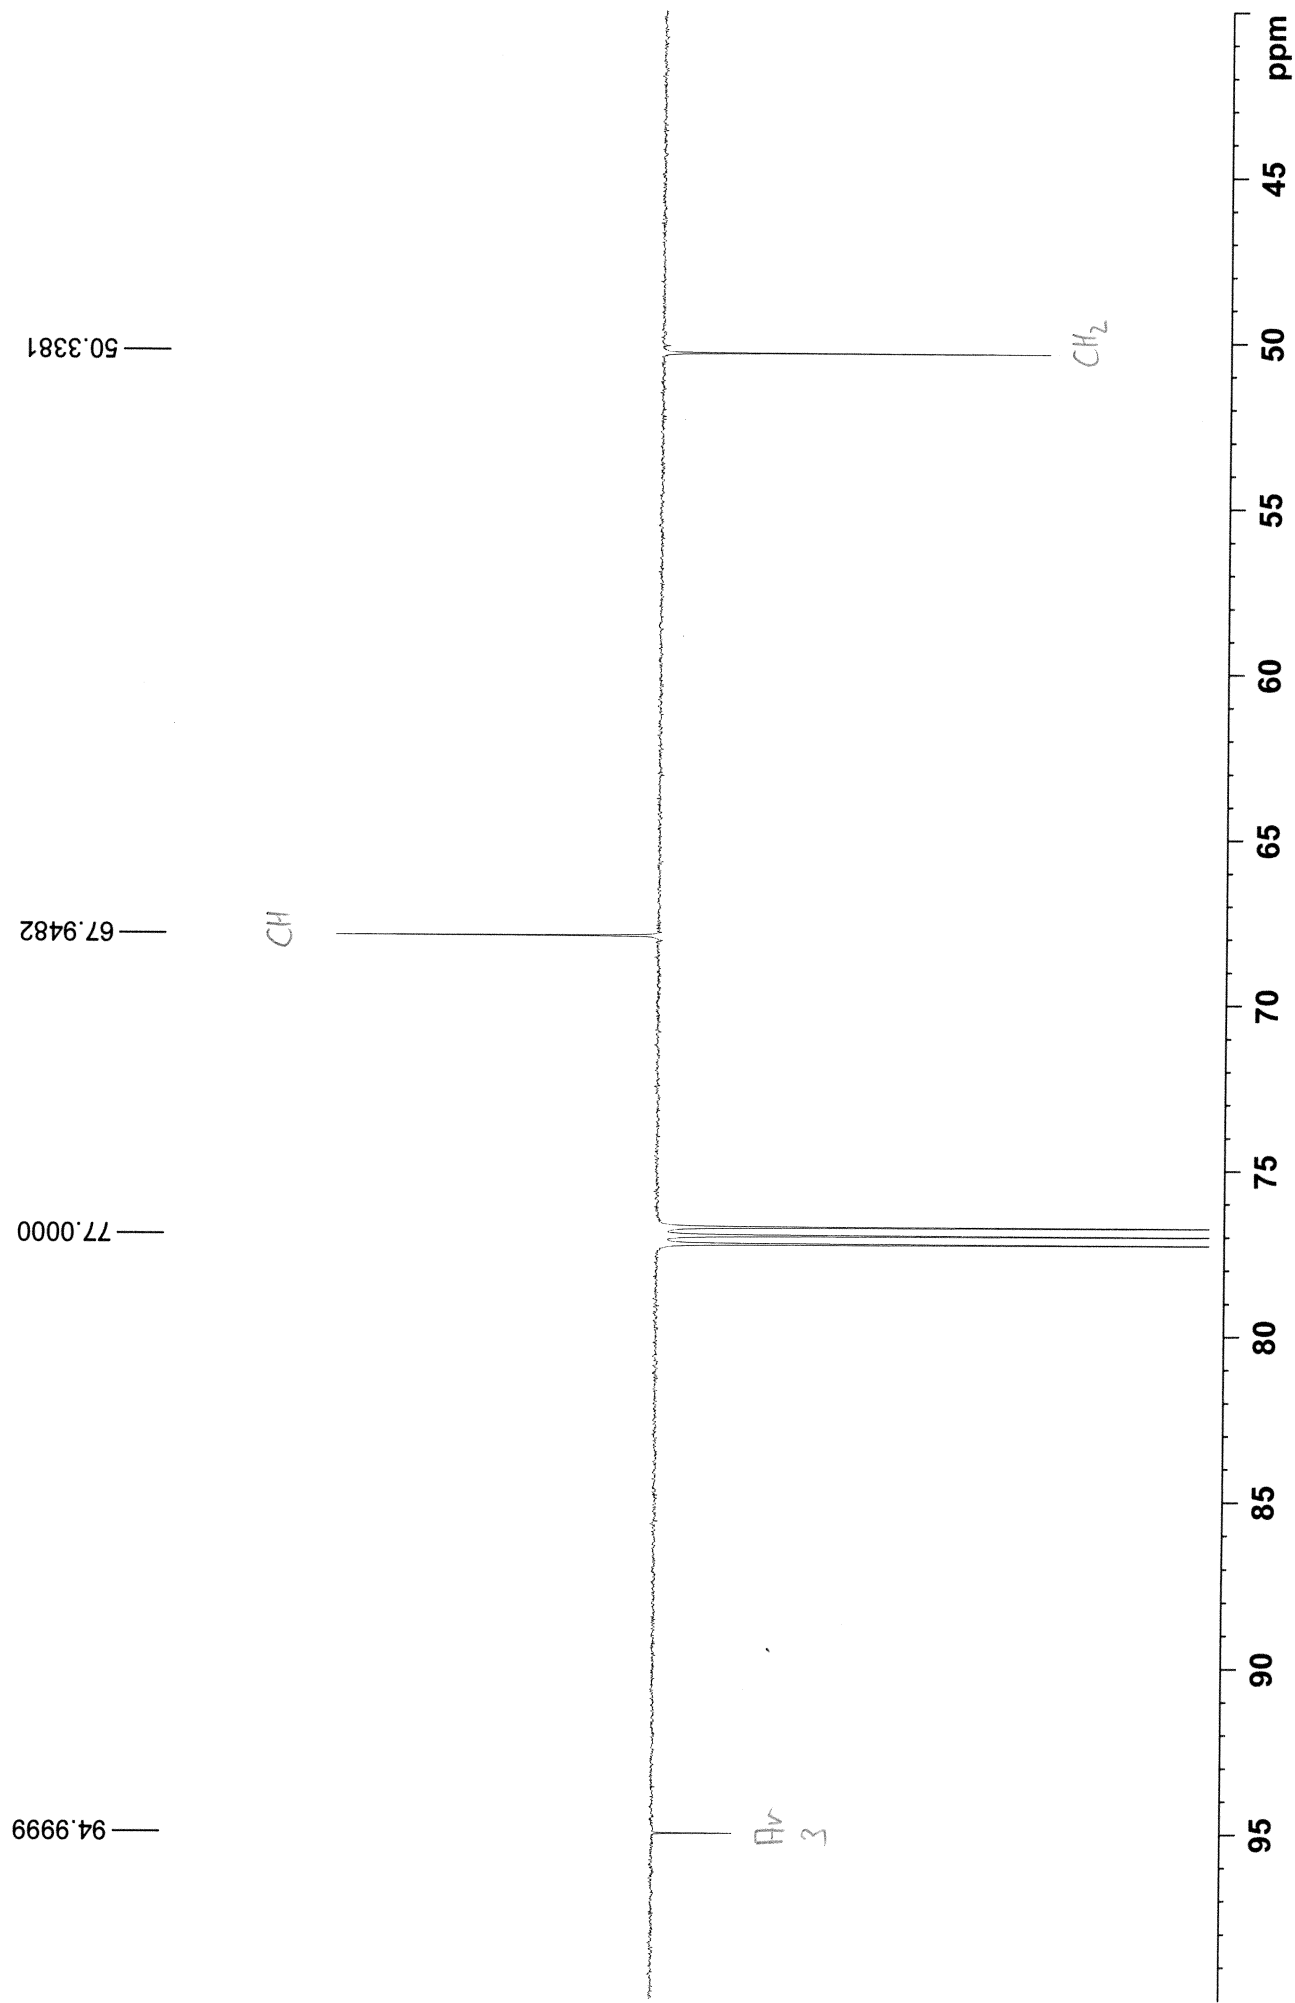

Figure S41c. NMR spectra of compound 5k.

SB001-1 in cdcl3 (Proton) 20.1.2021

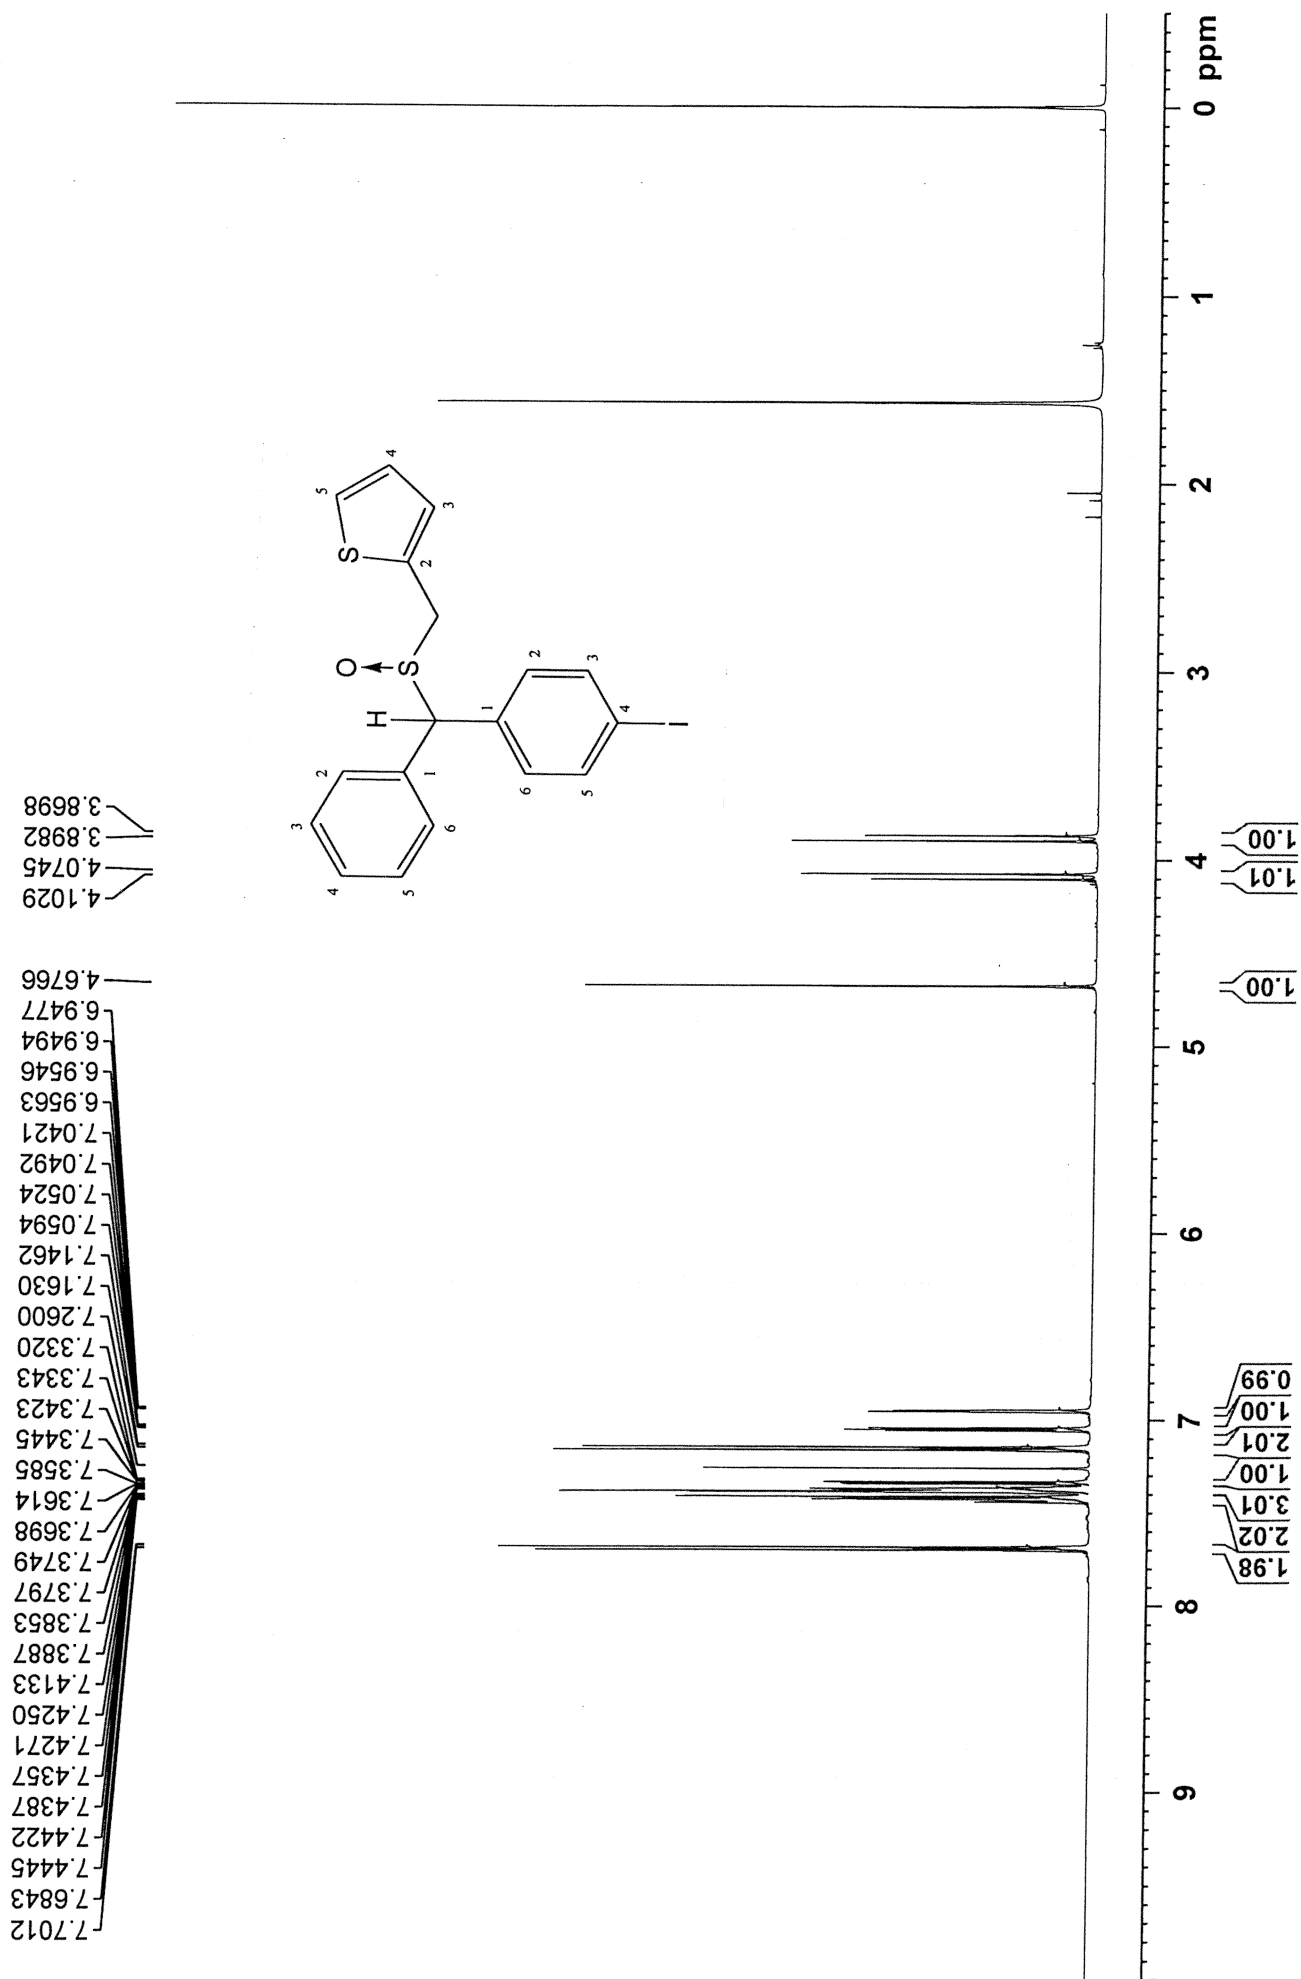

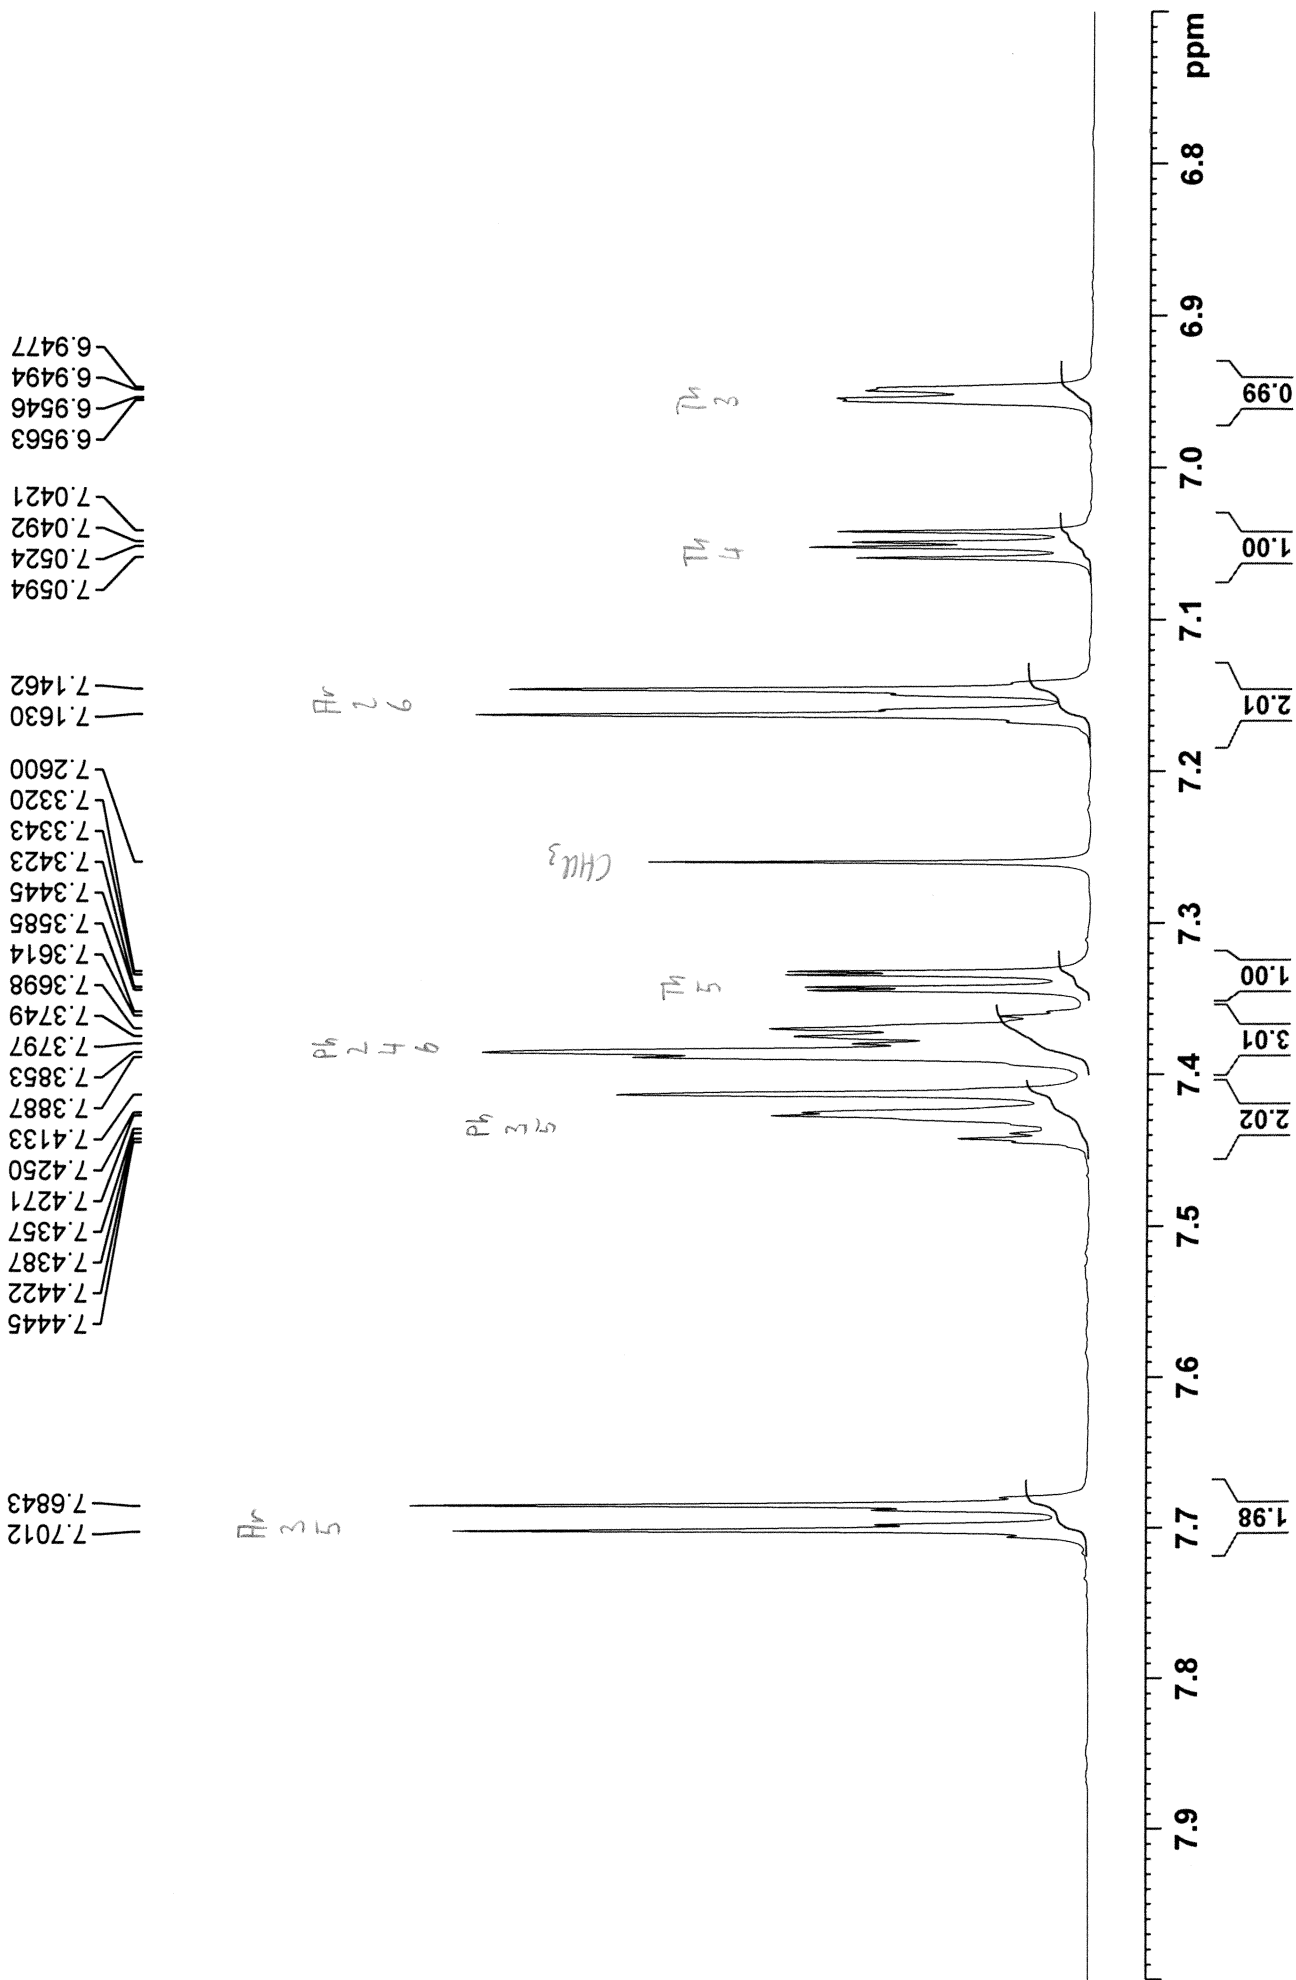

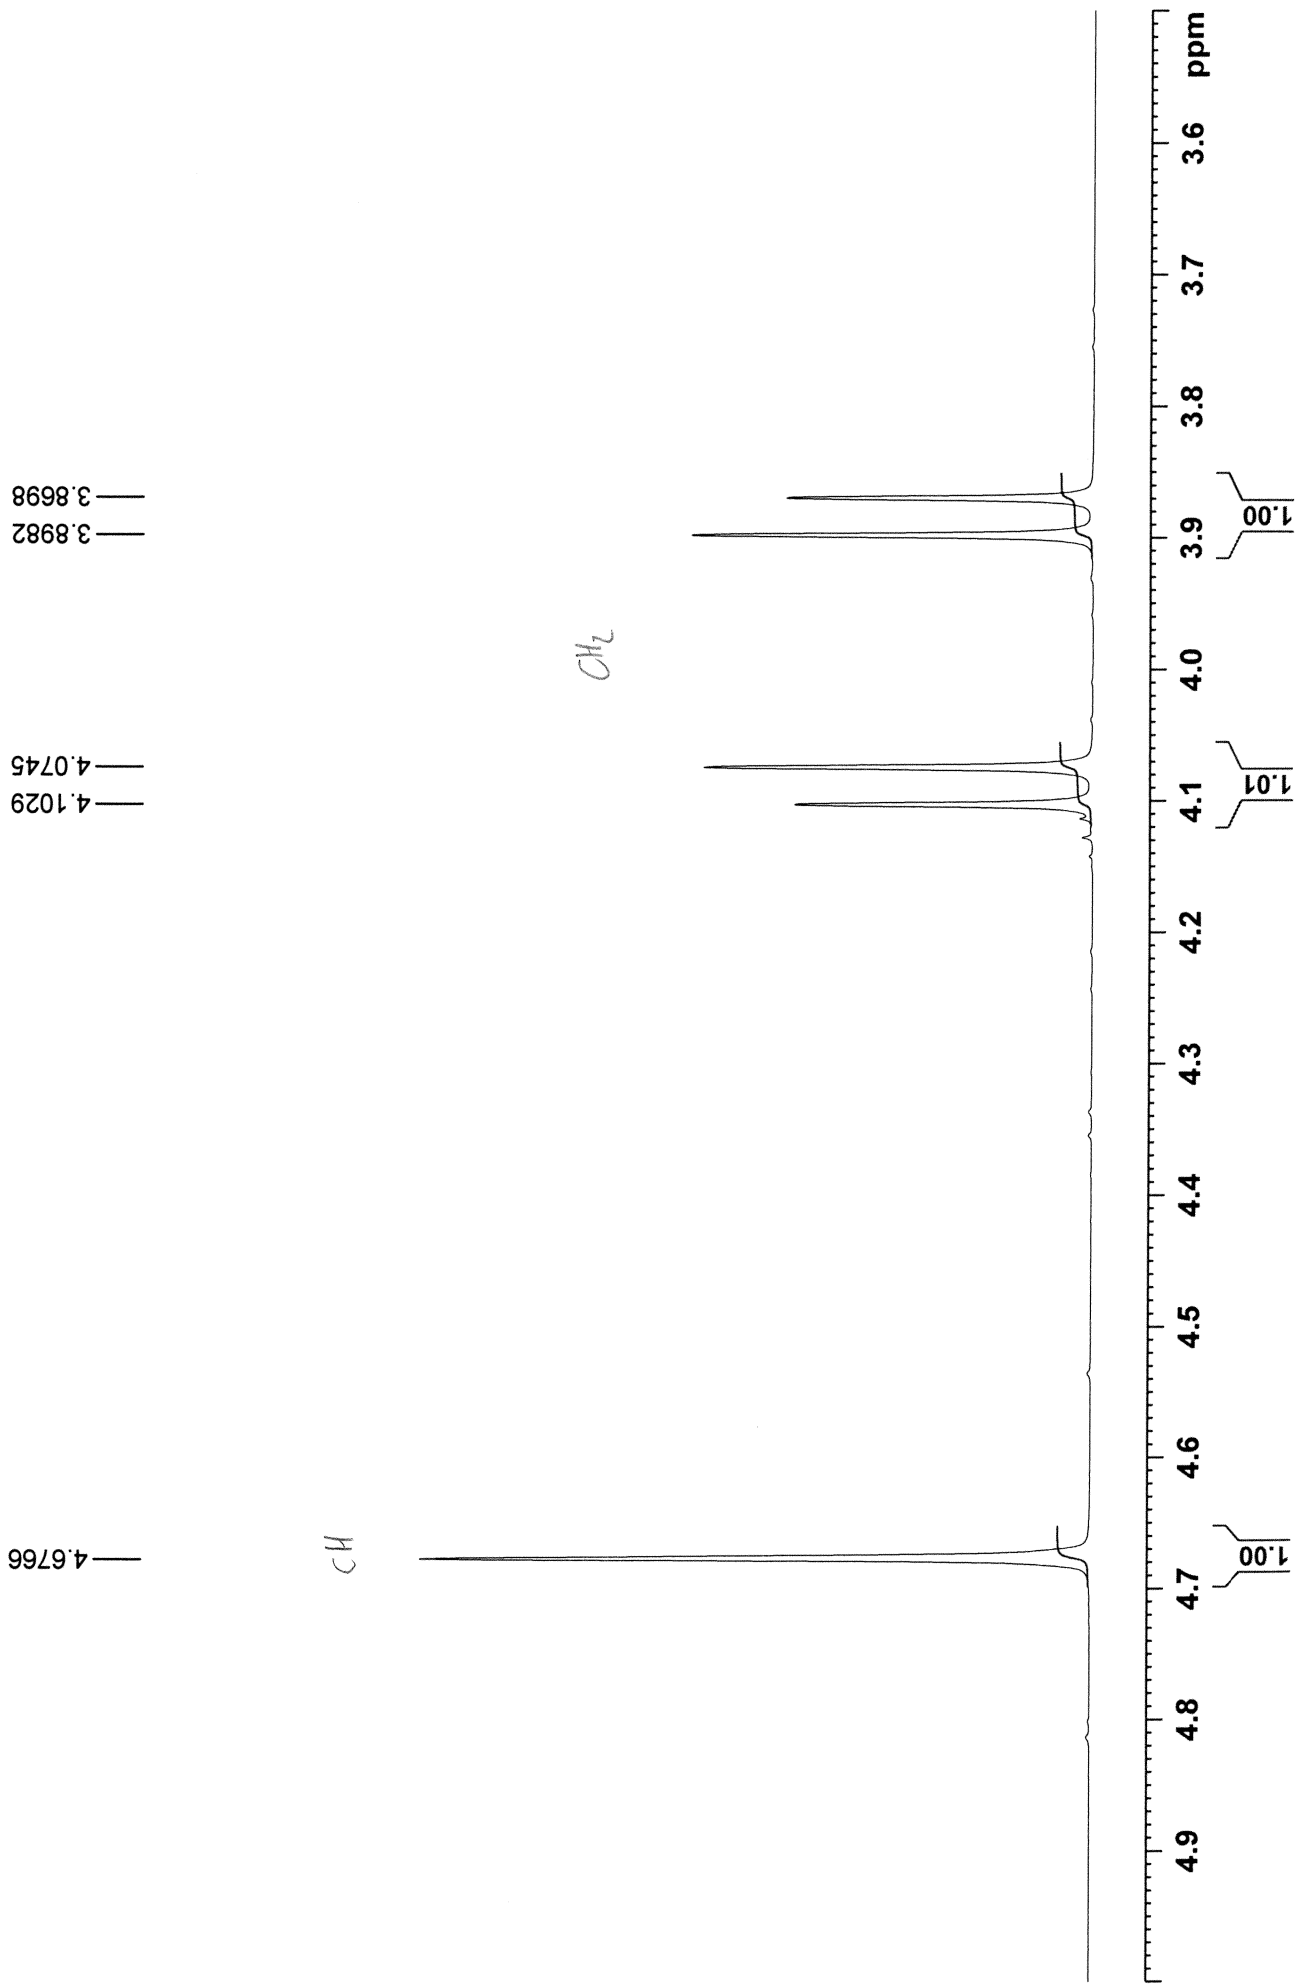

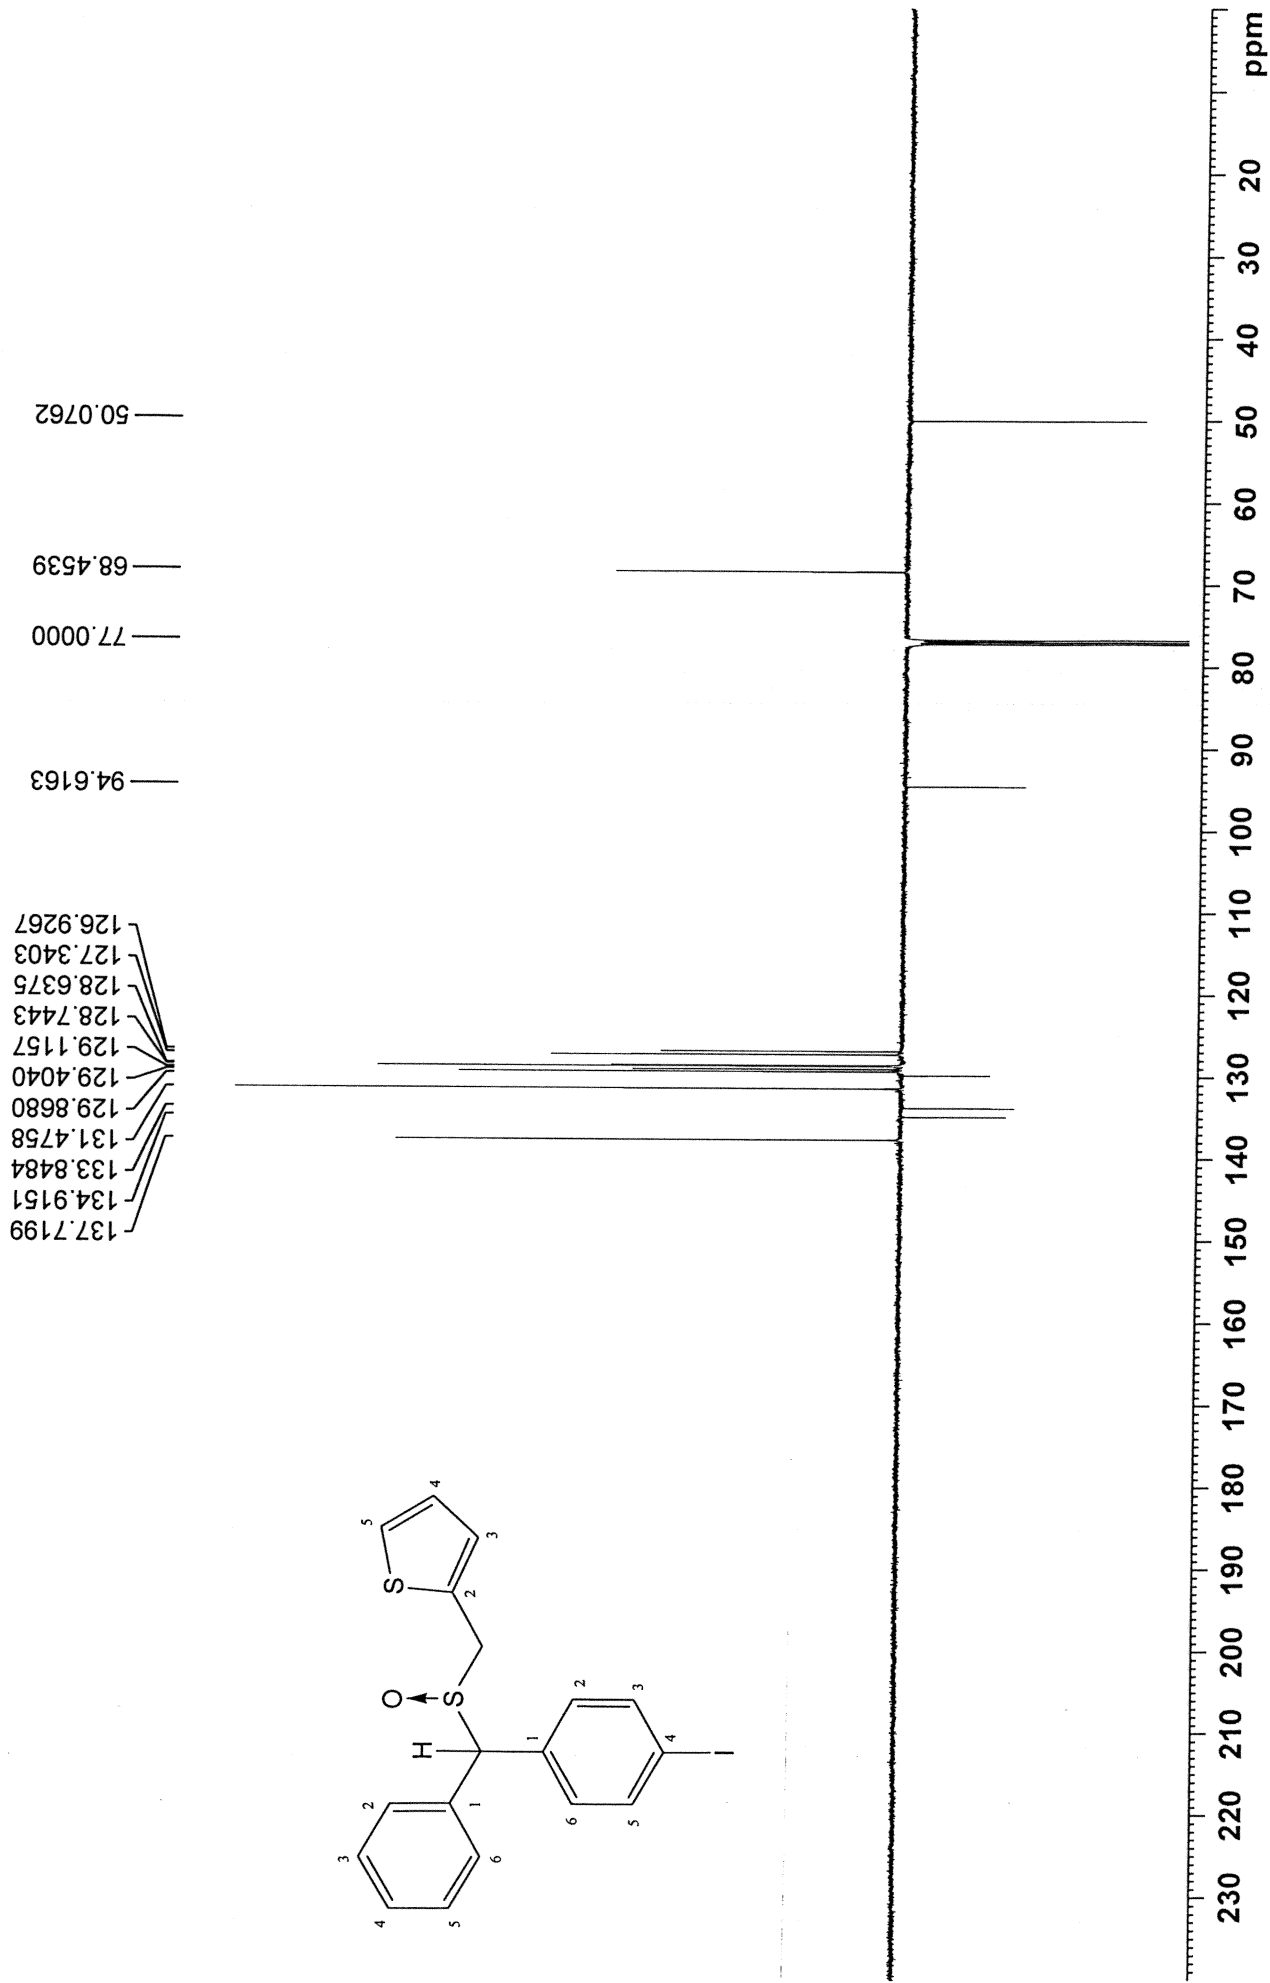

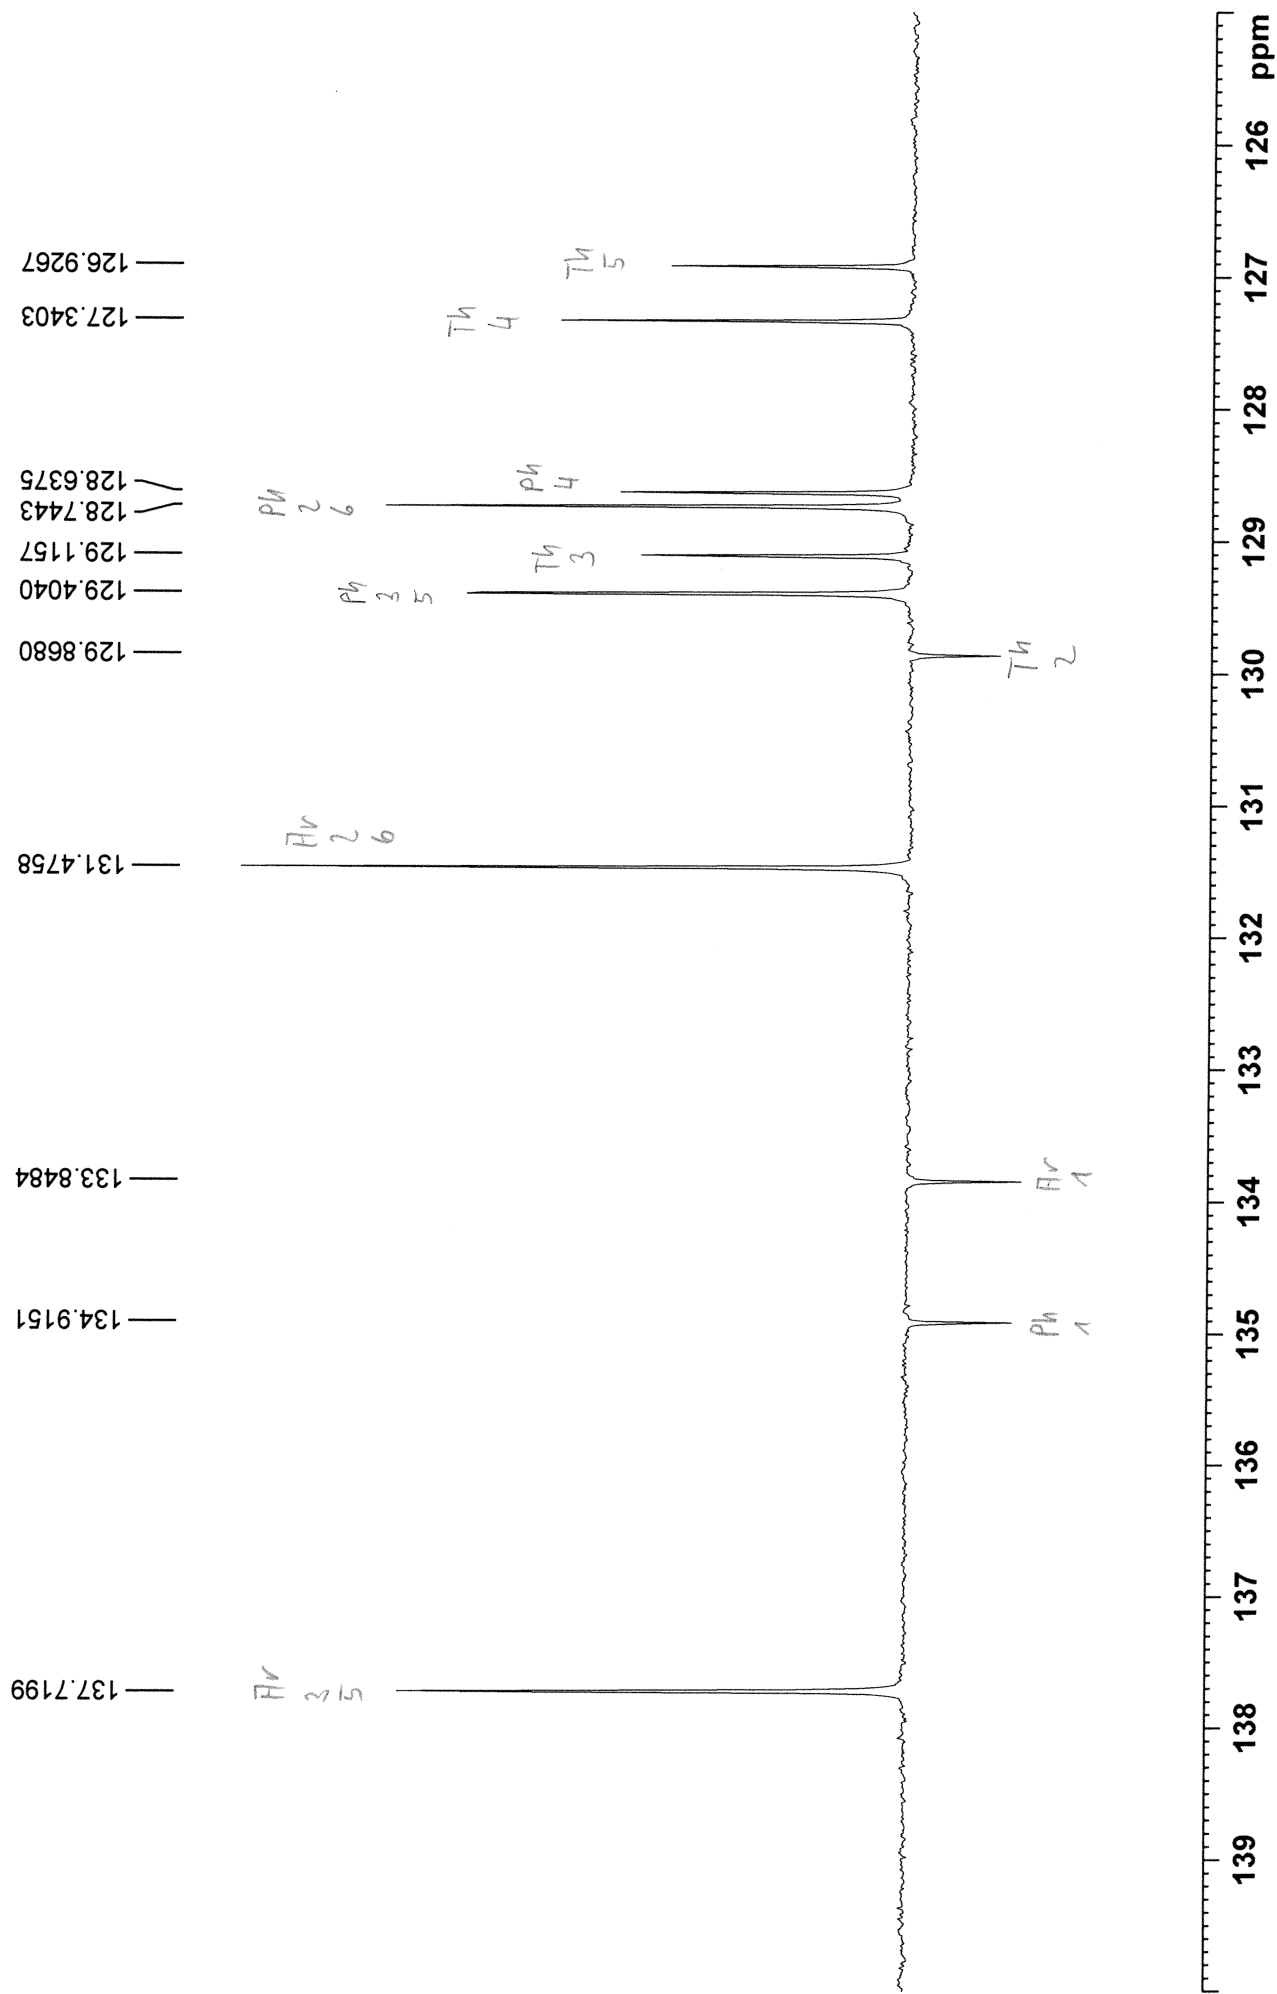

SB001-1 in cdcl3 (APT) 20.1.2021

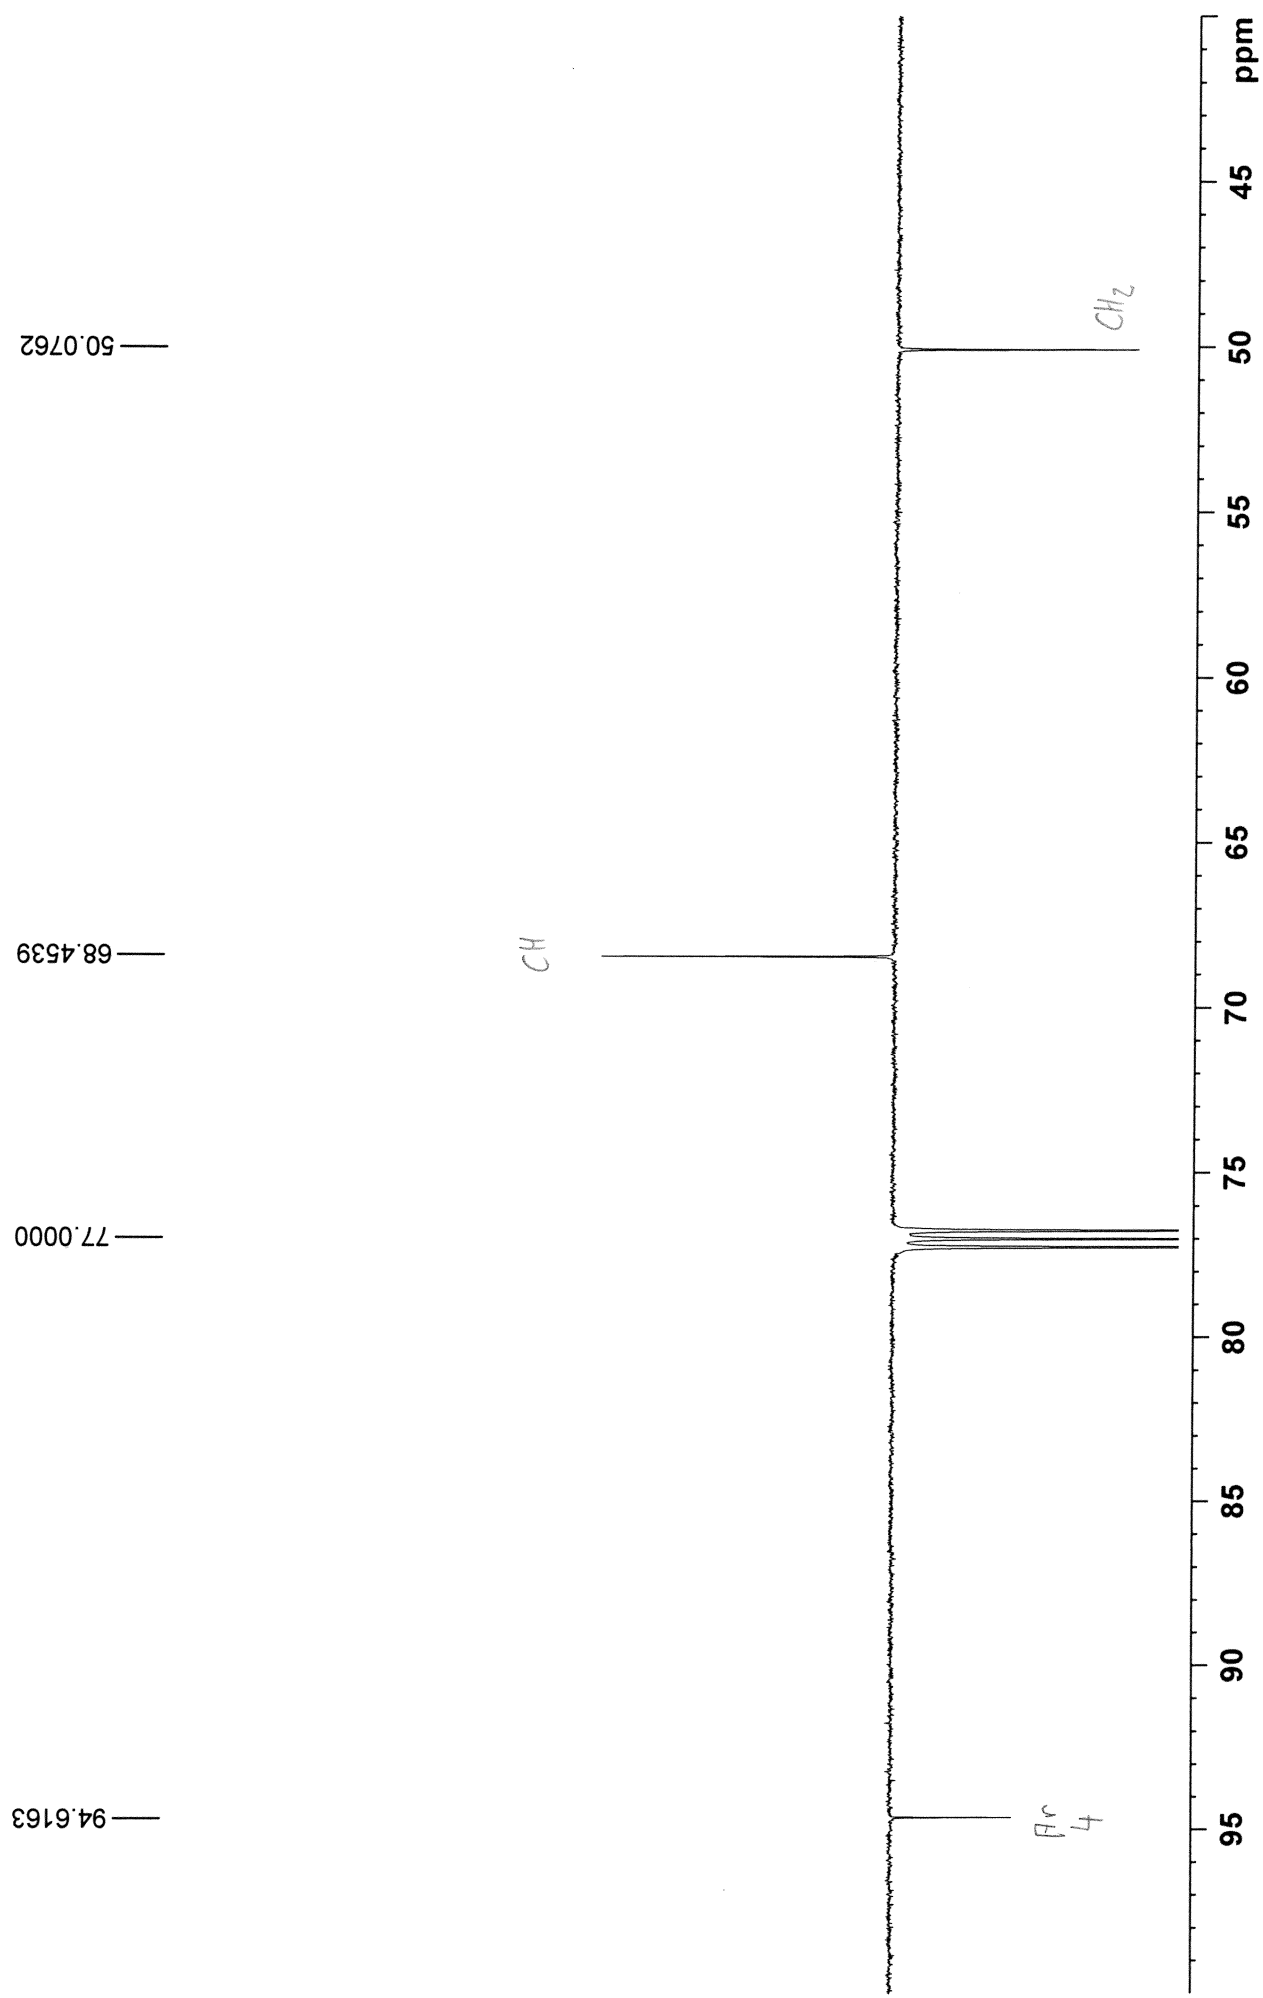



SB001-1 in cdcl3 (COSY) 20.1.2021

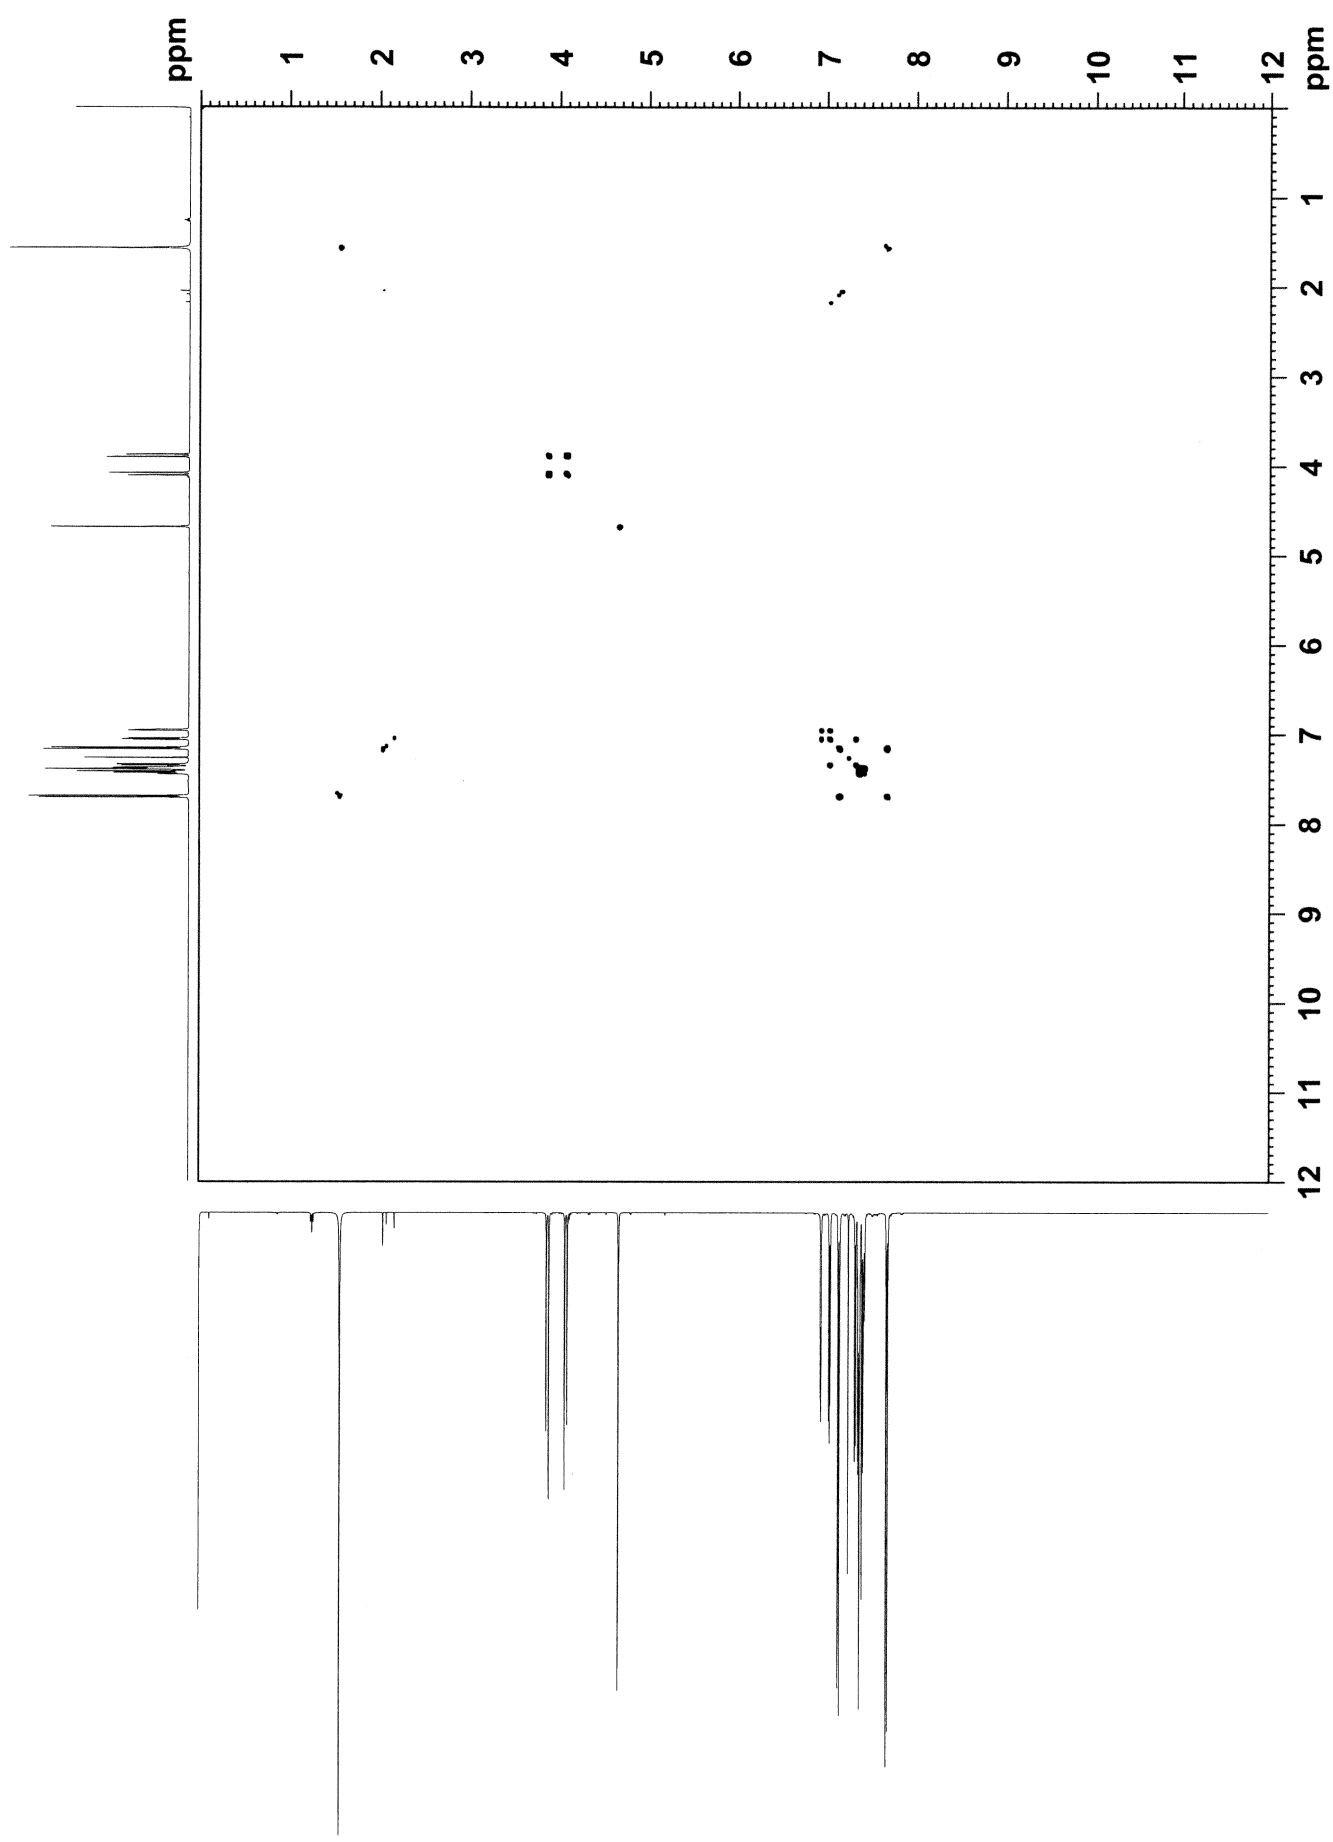

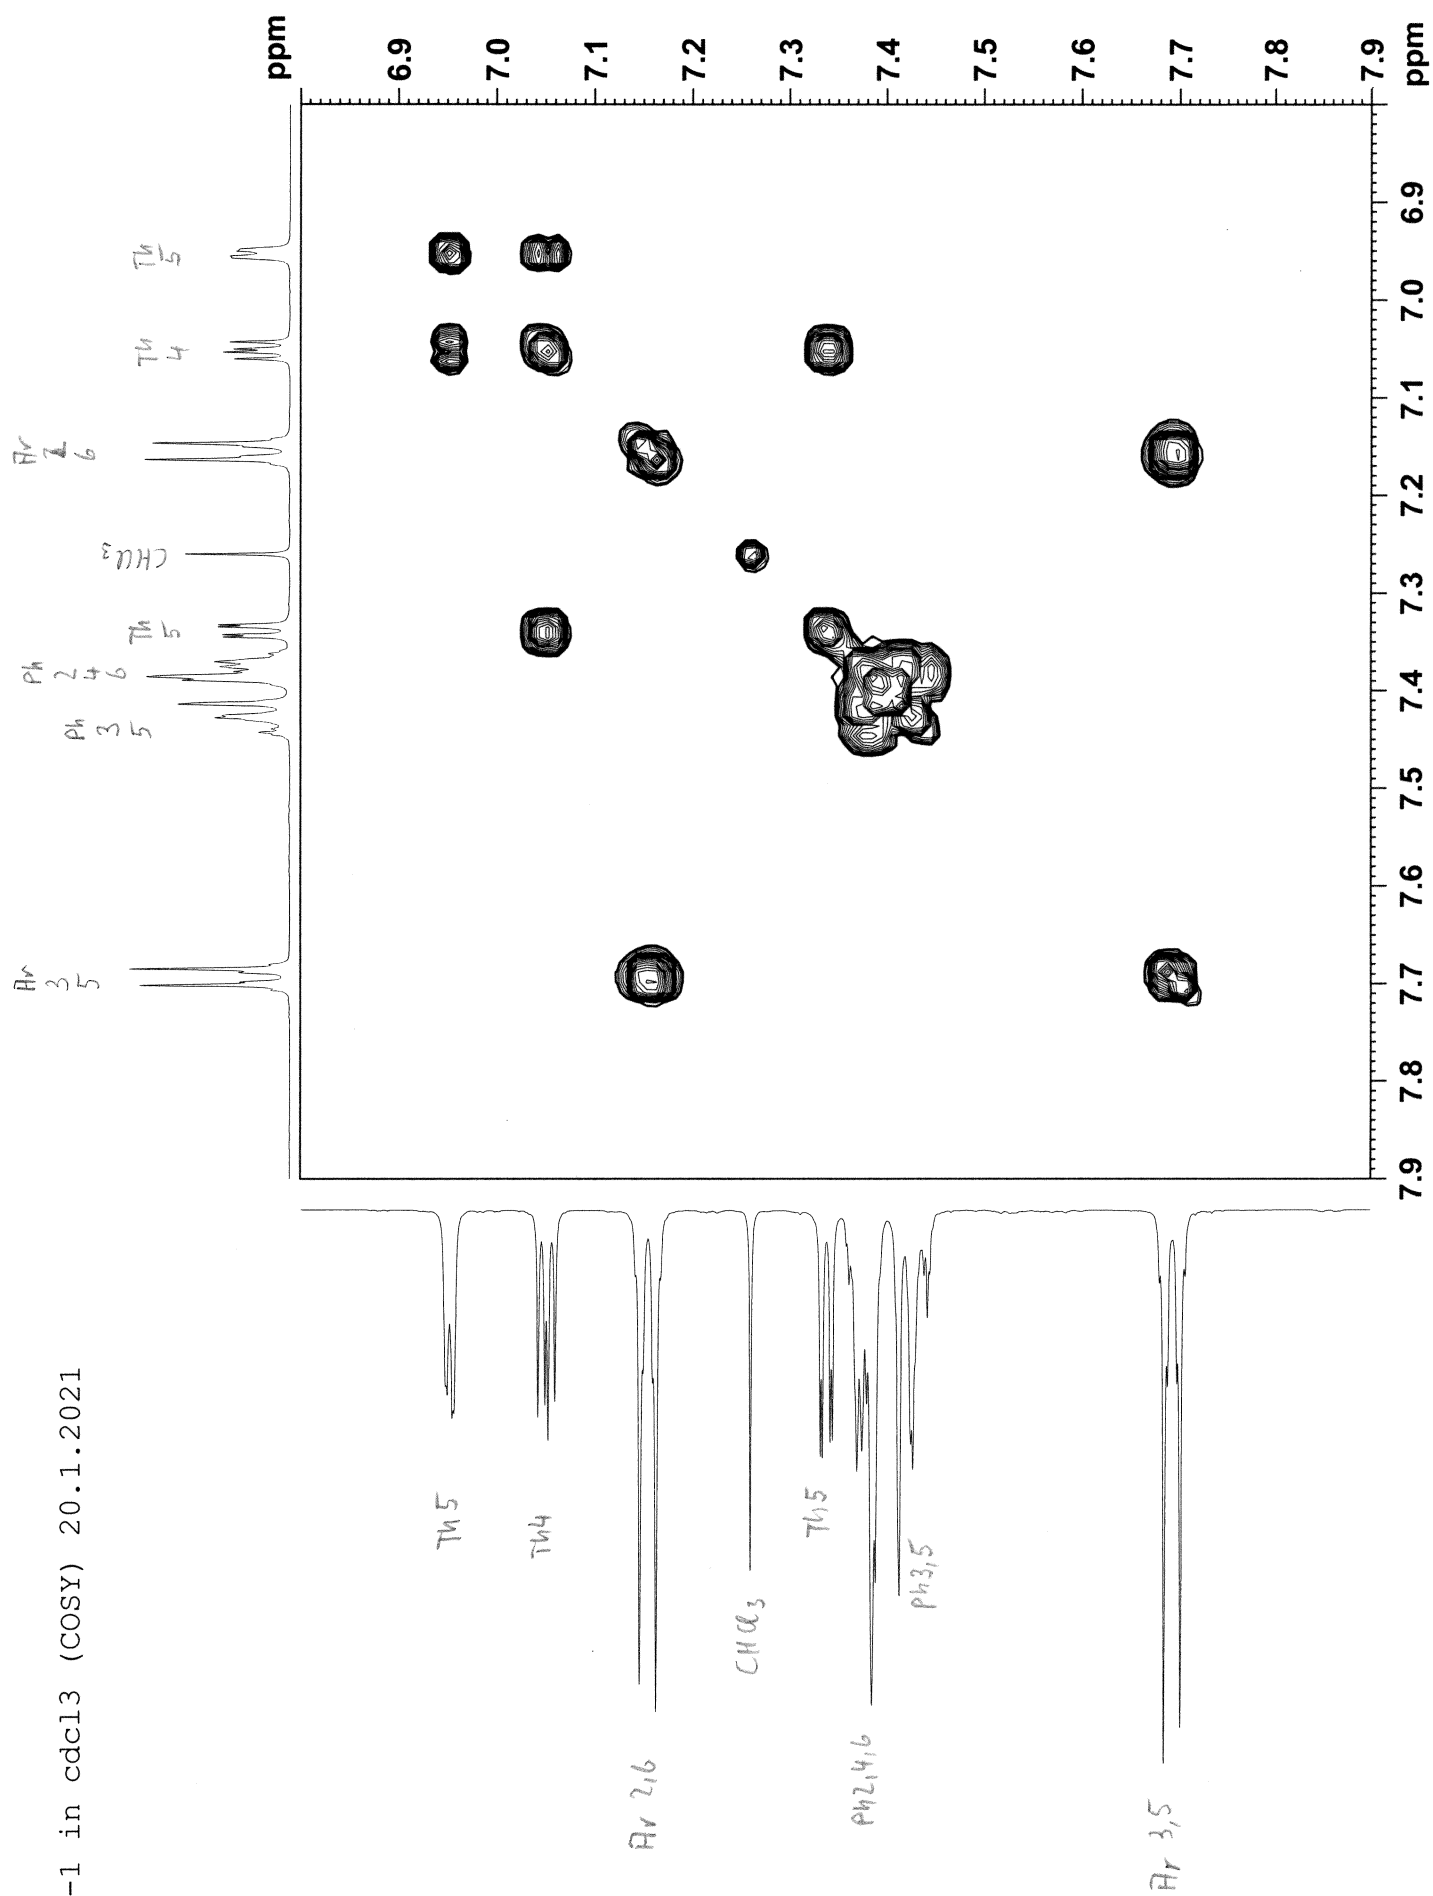

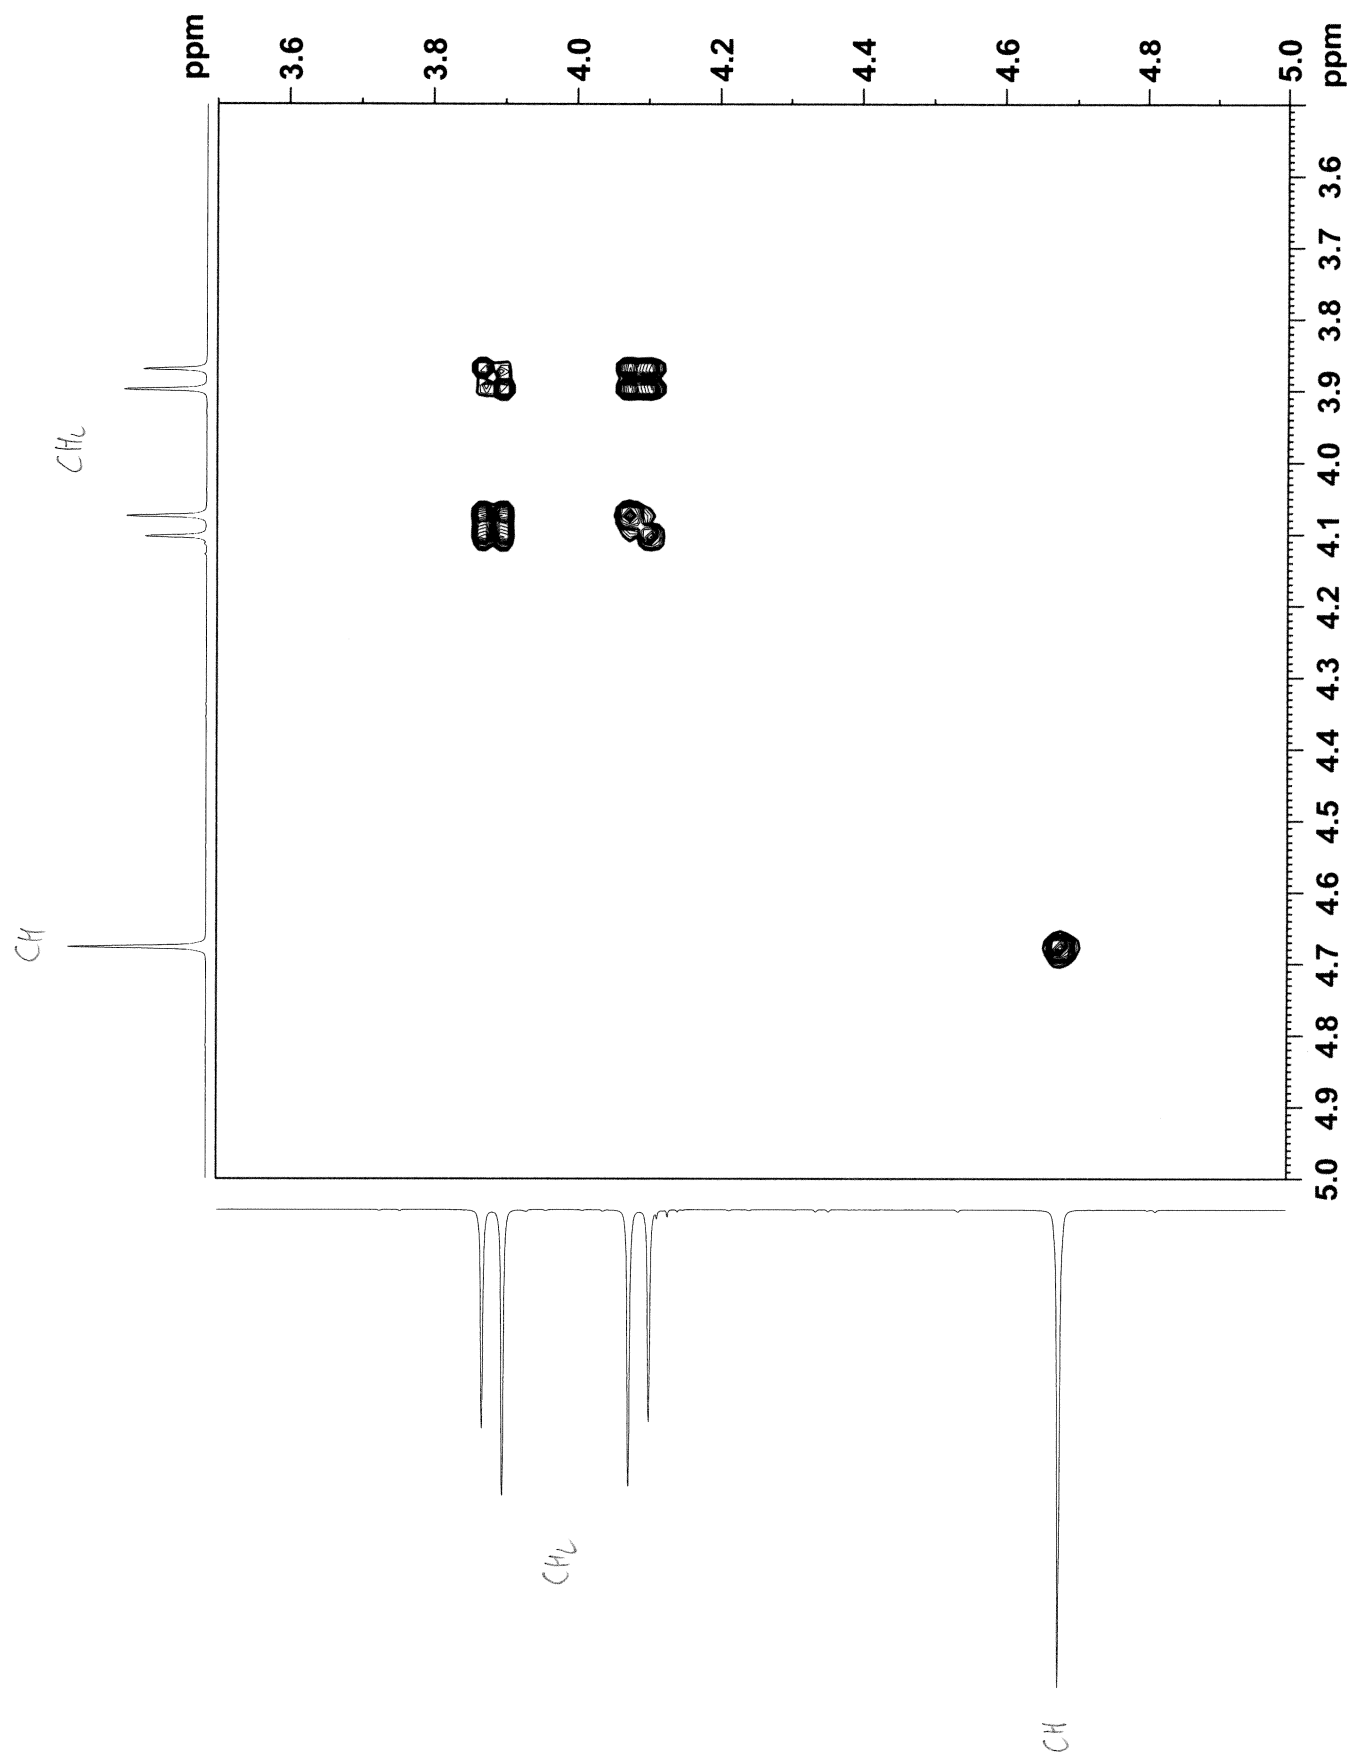

SB001-1 in cdcl3 (HSQC) 20.1.2021

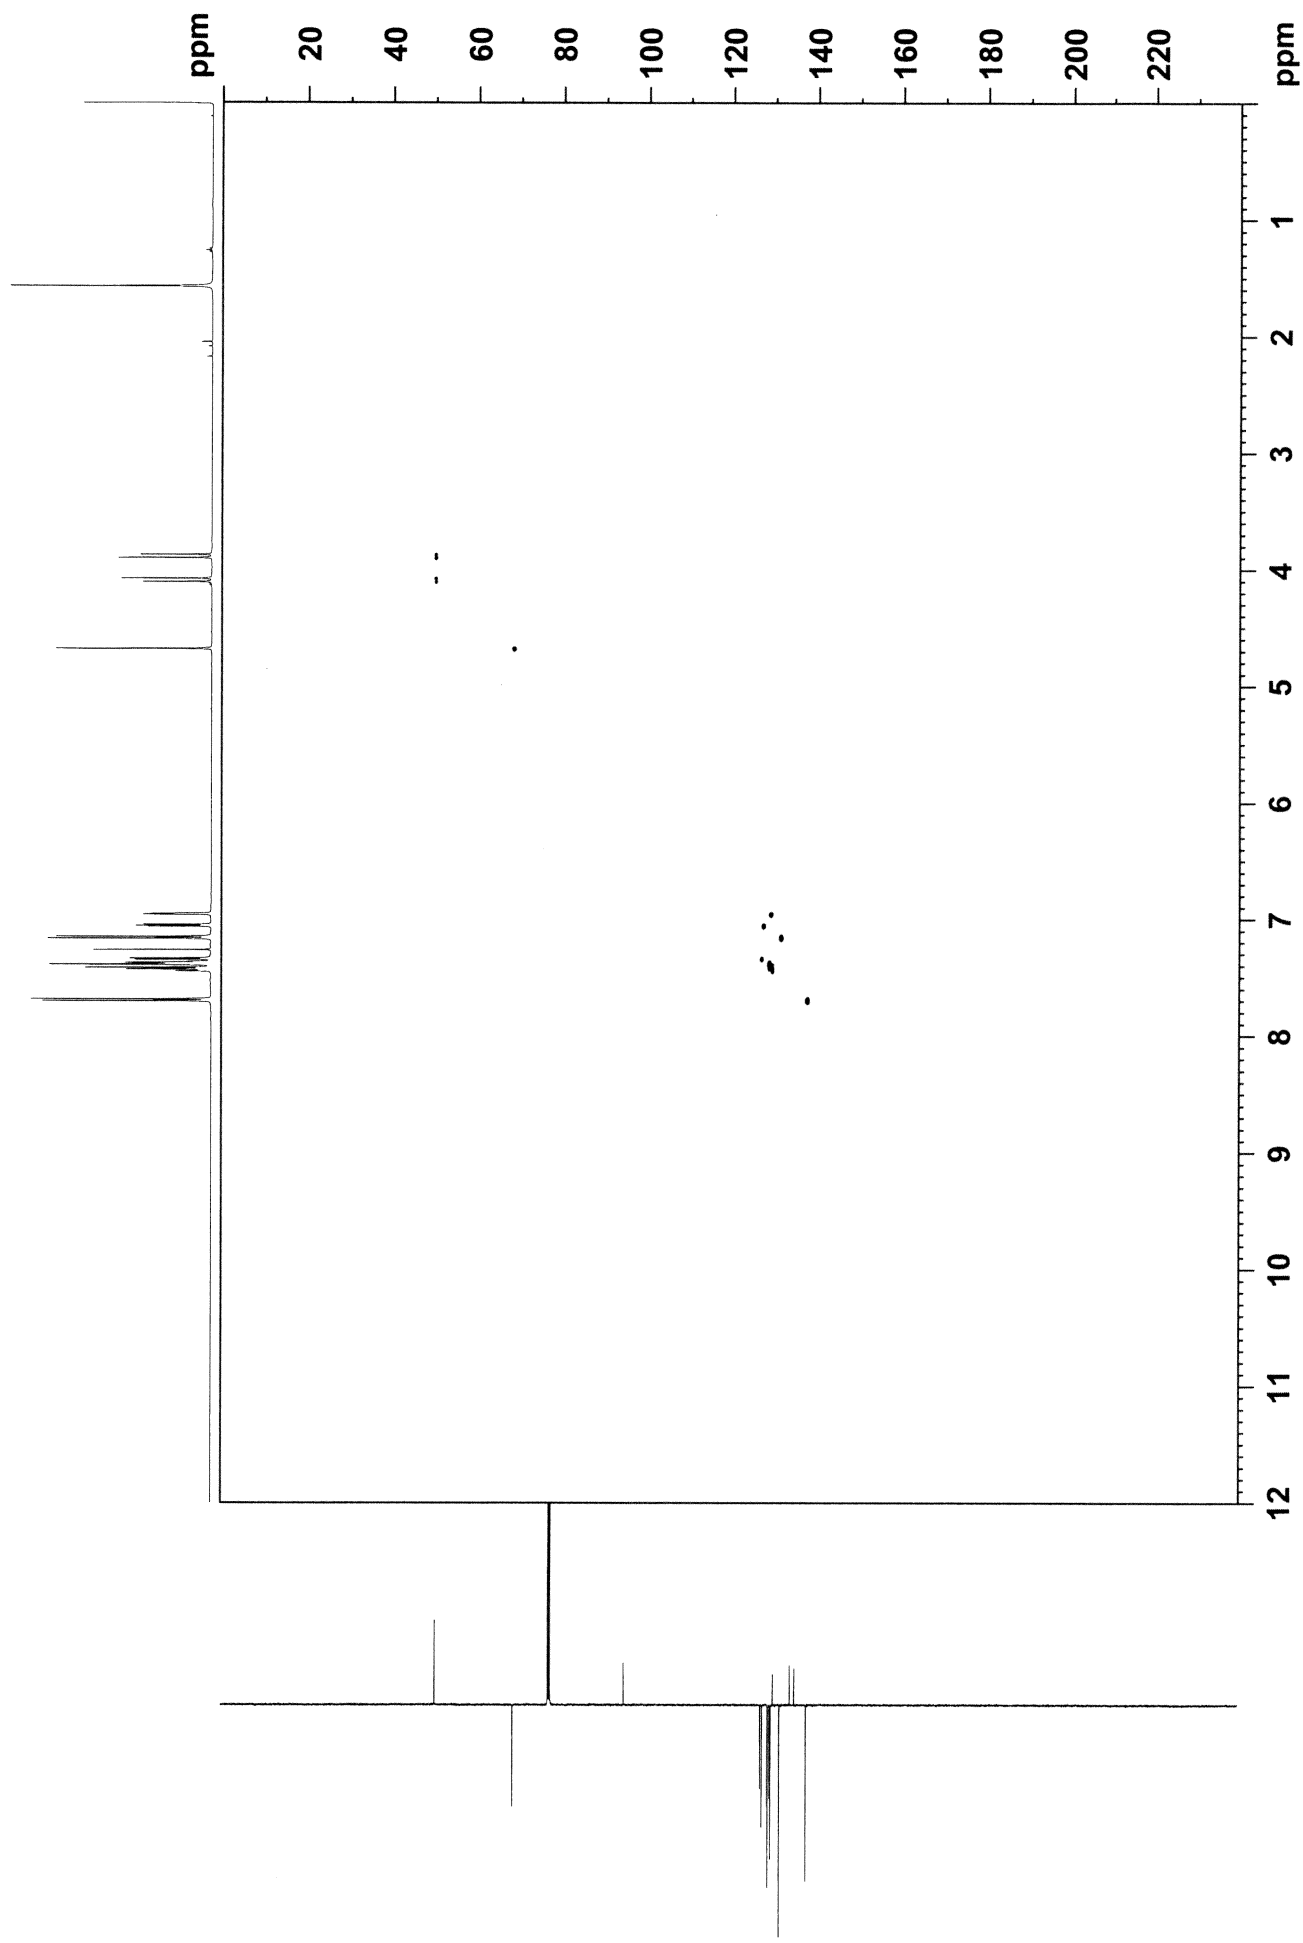

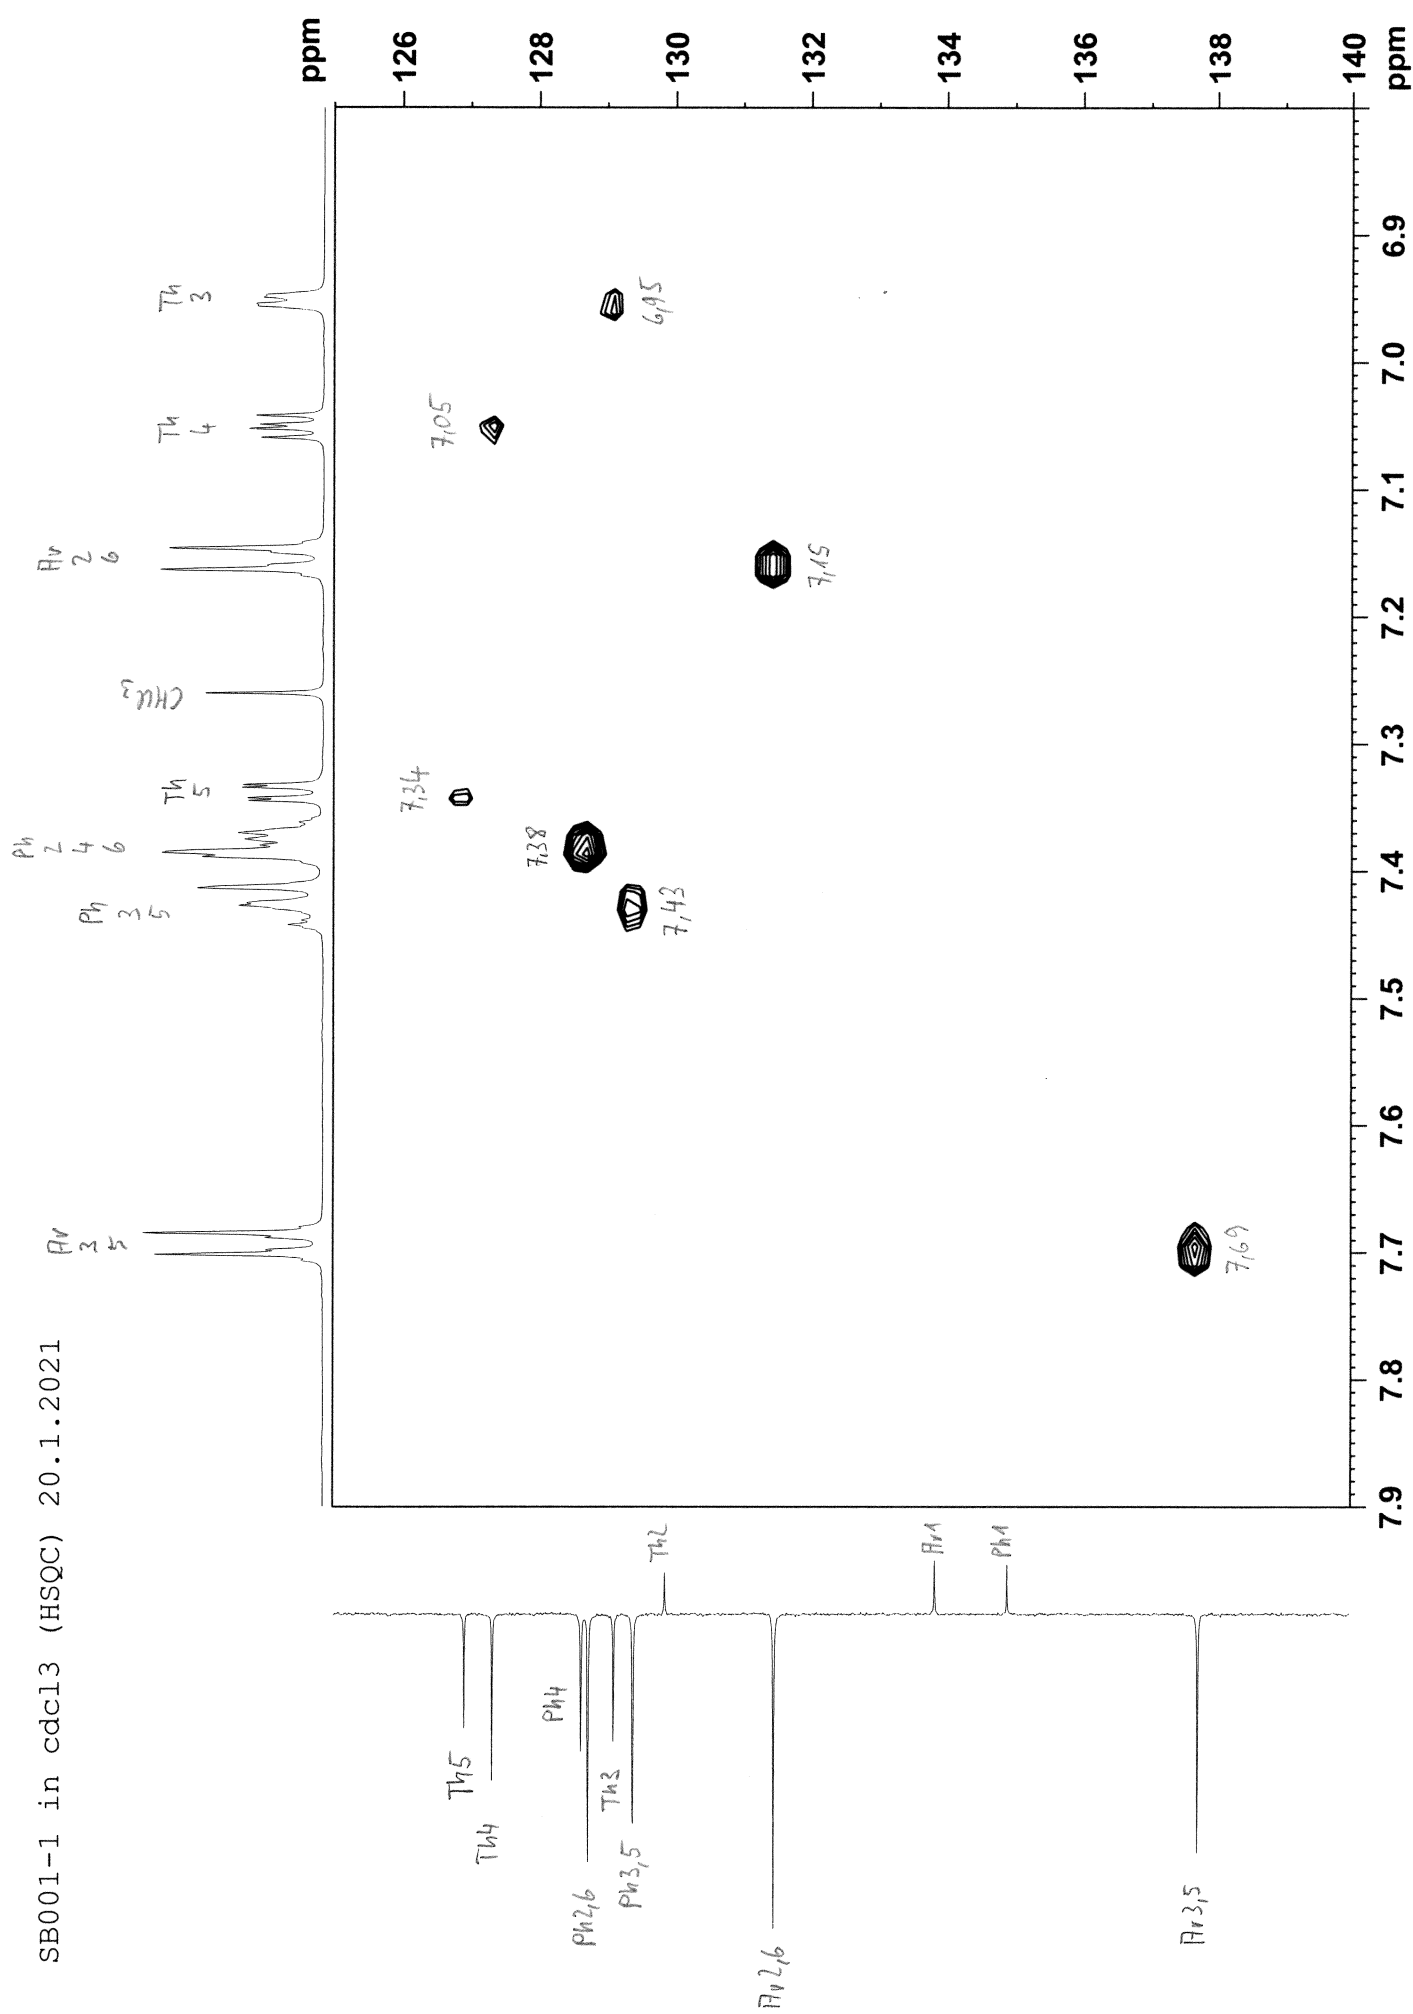

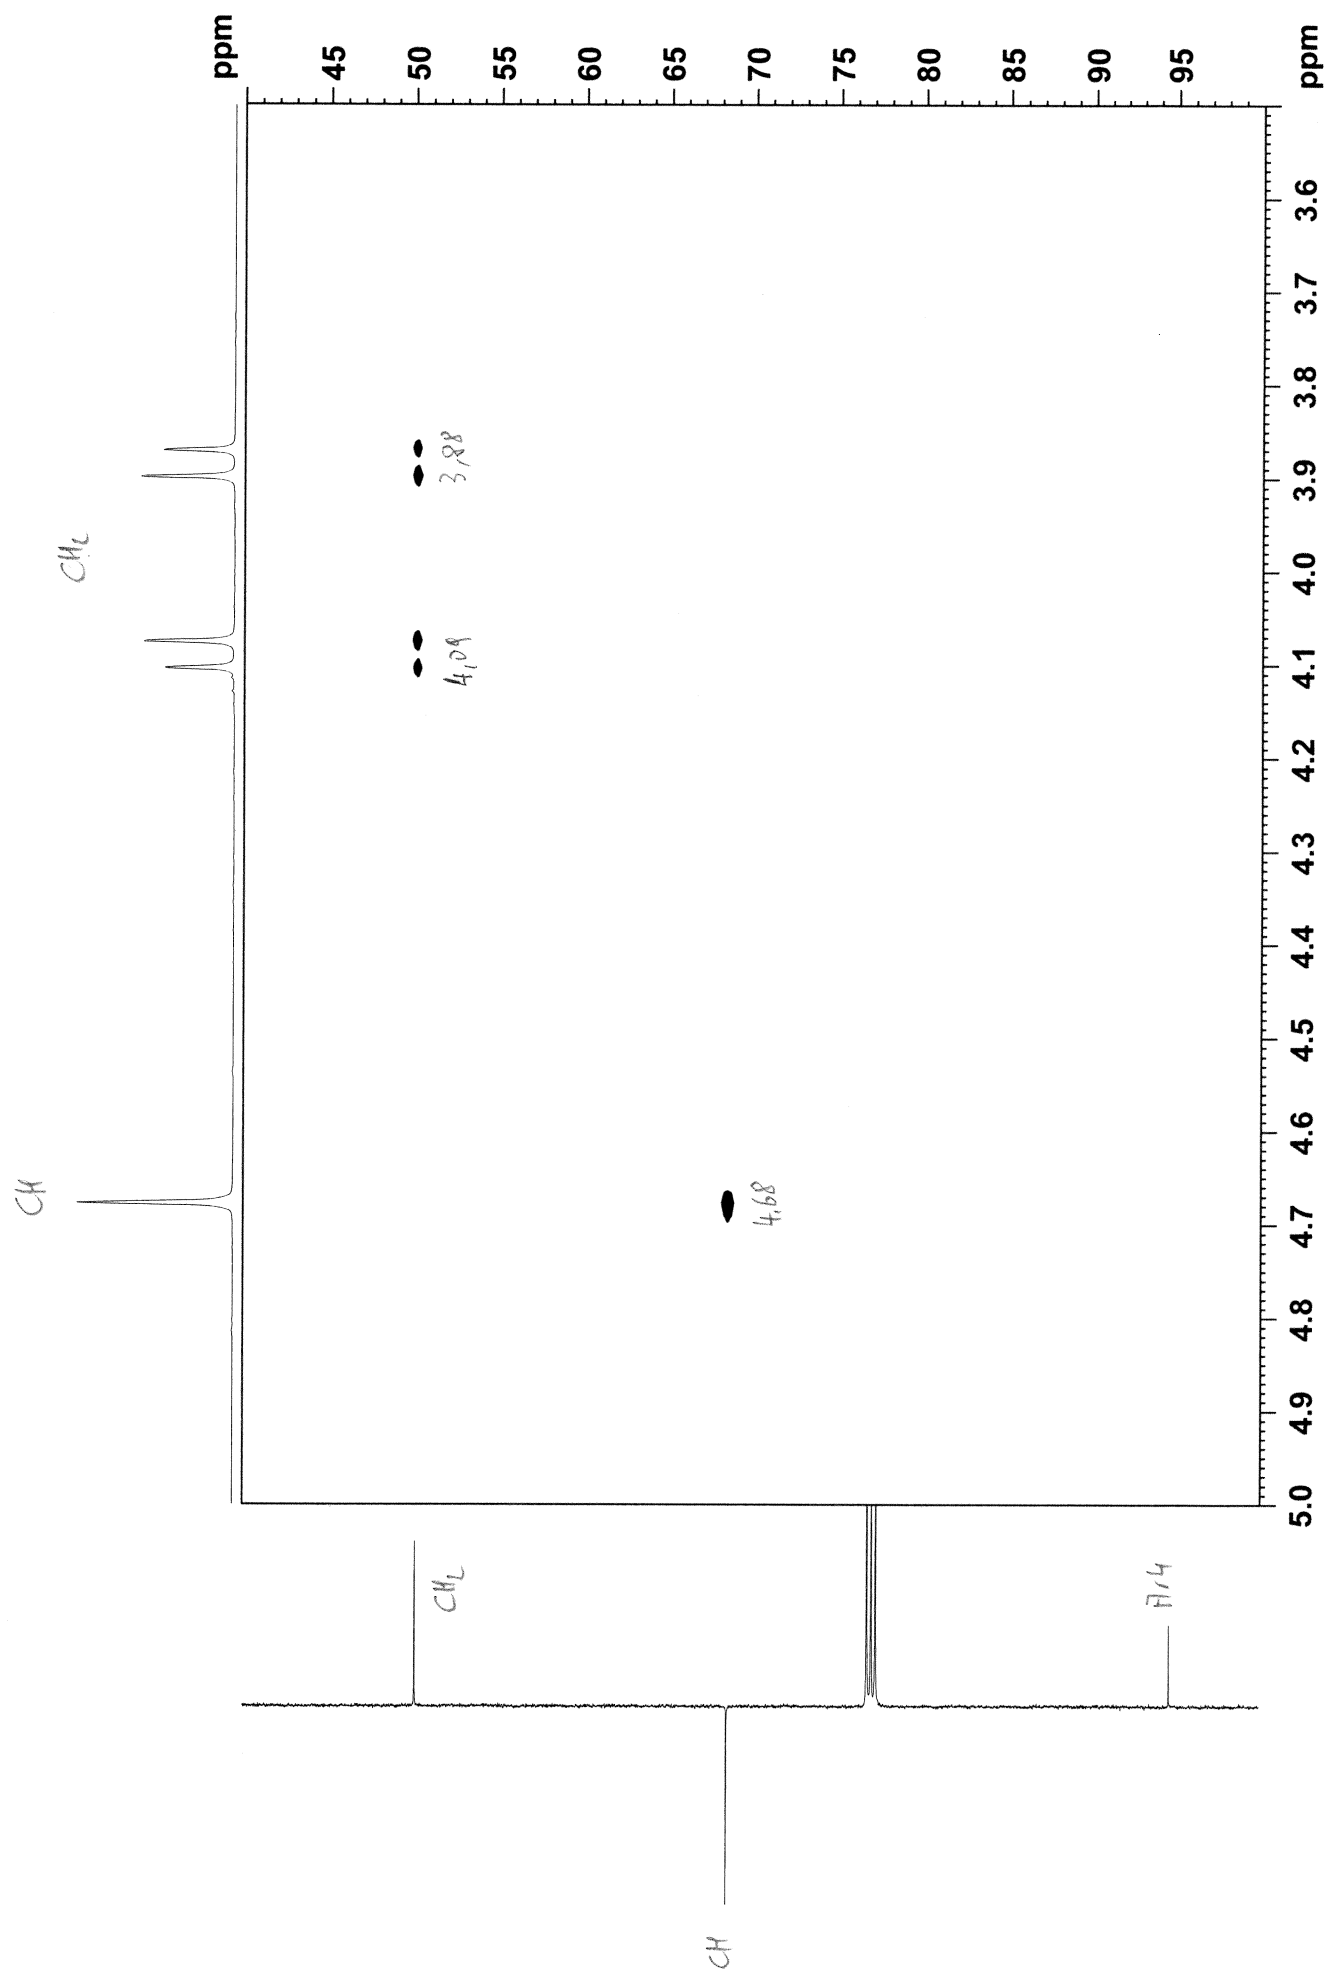

SB001-1 in cdcl3 (HMBC) 20.1.2021

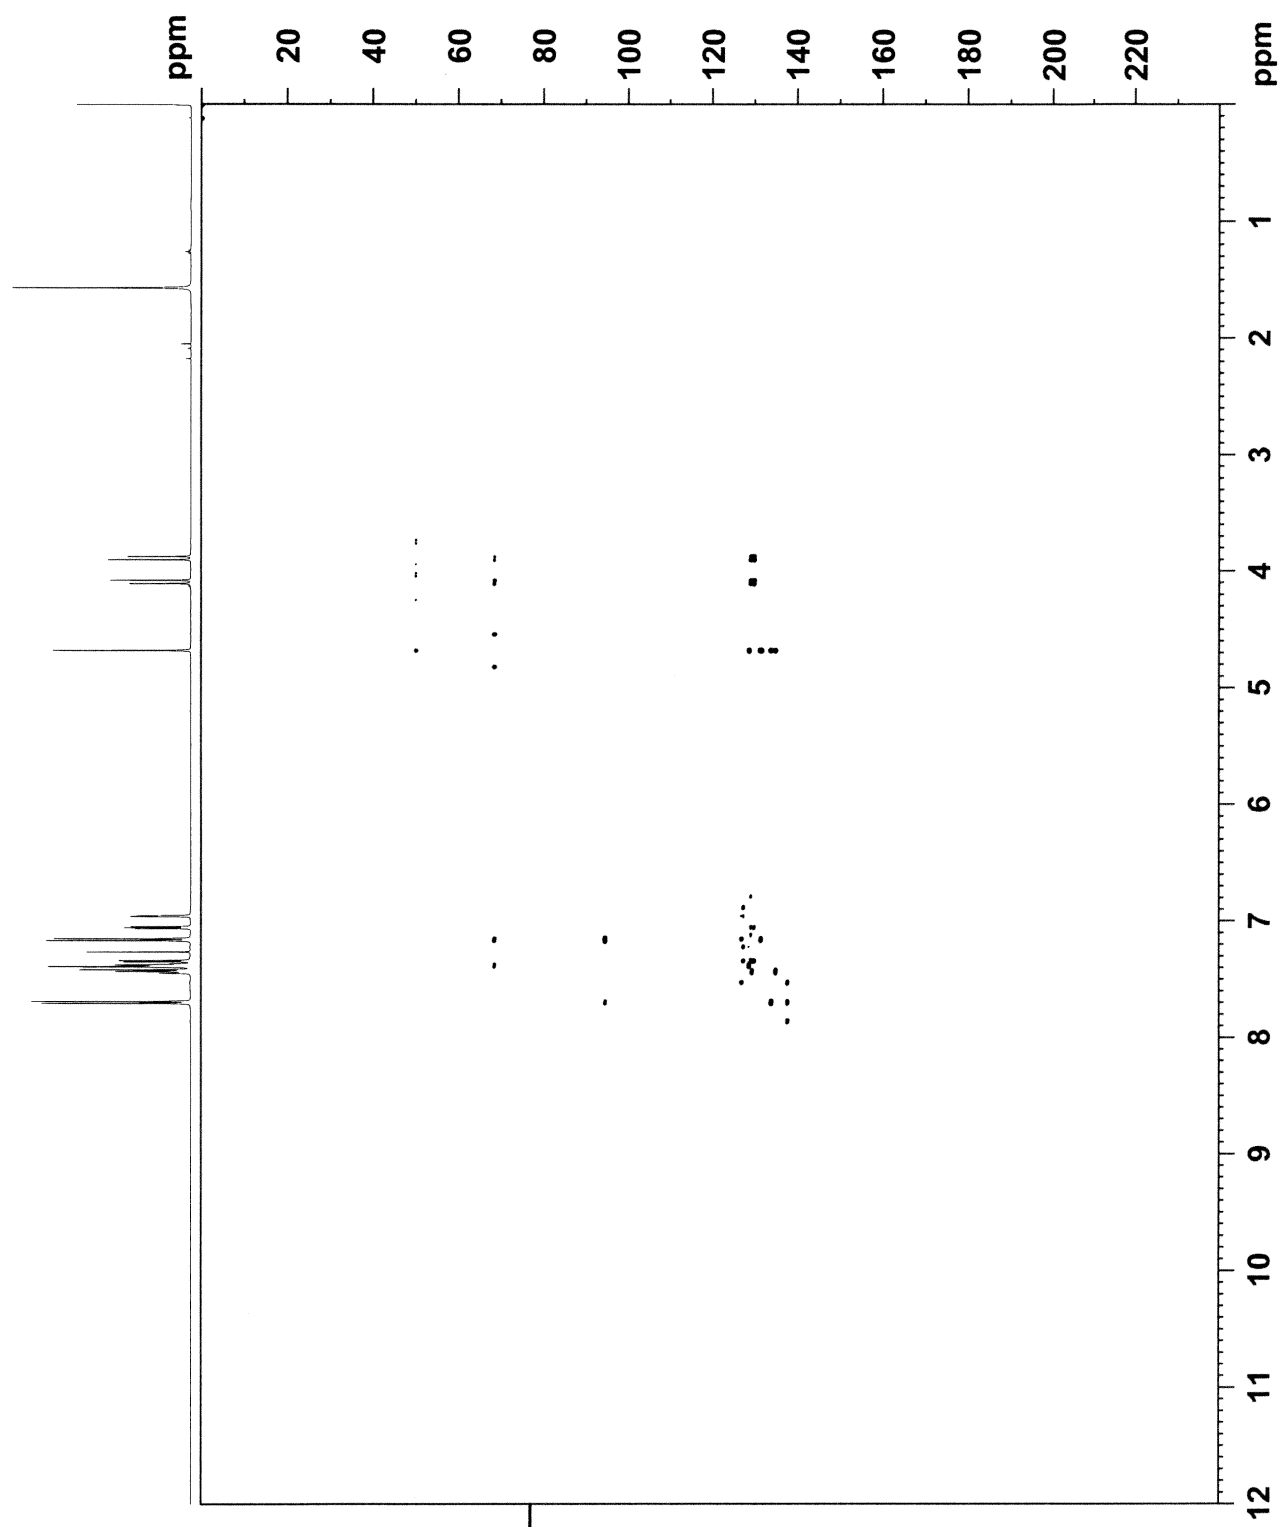

SB001-1 in cdcl3 (HMBC) 20.1.2021

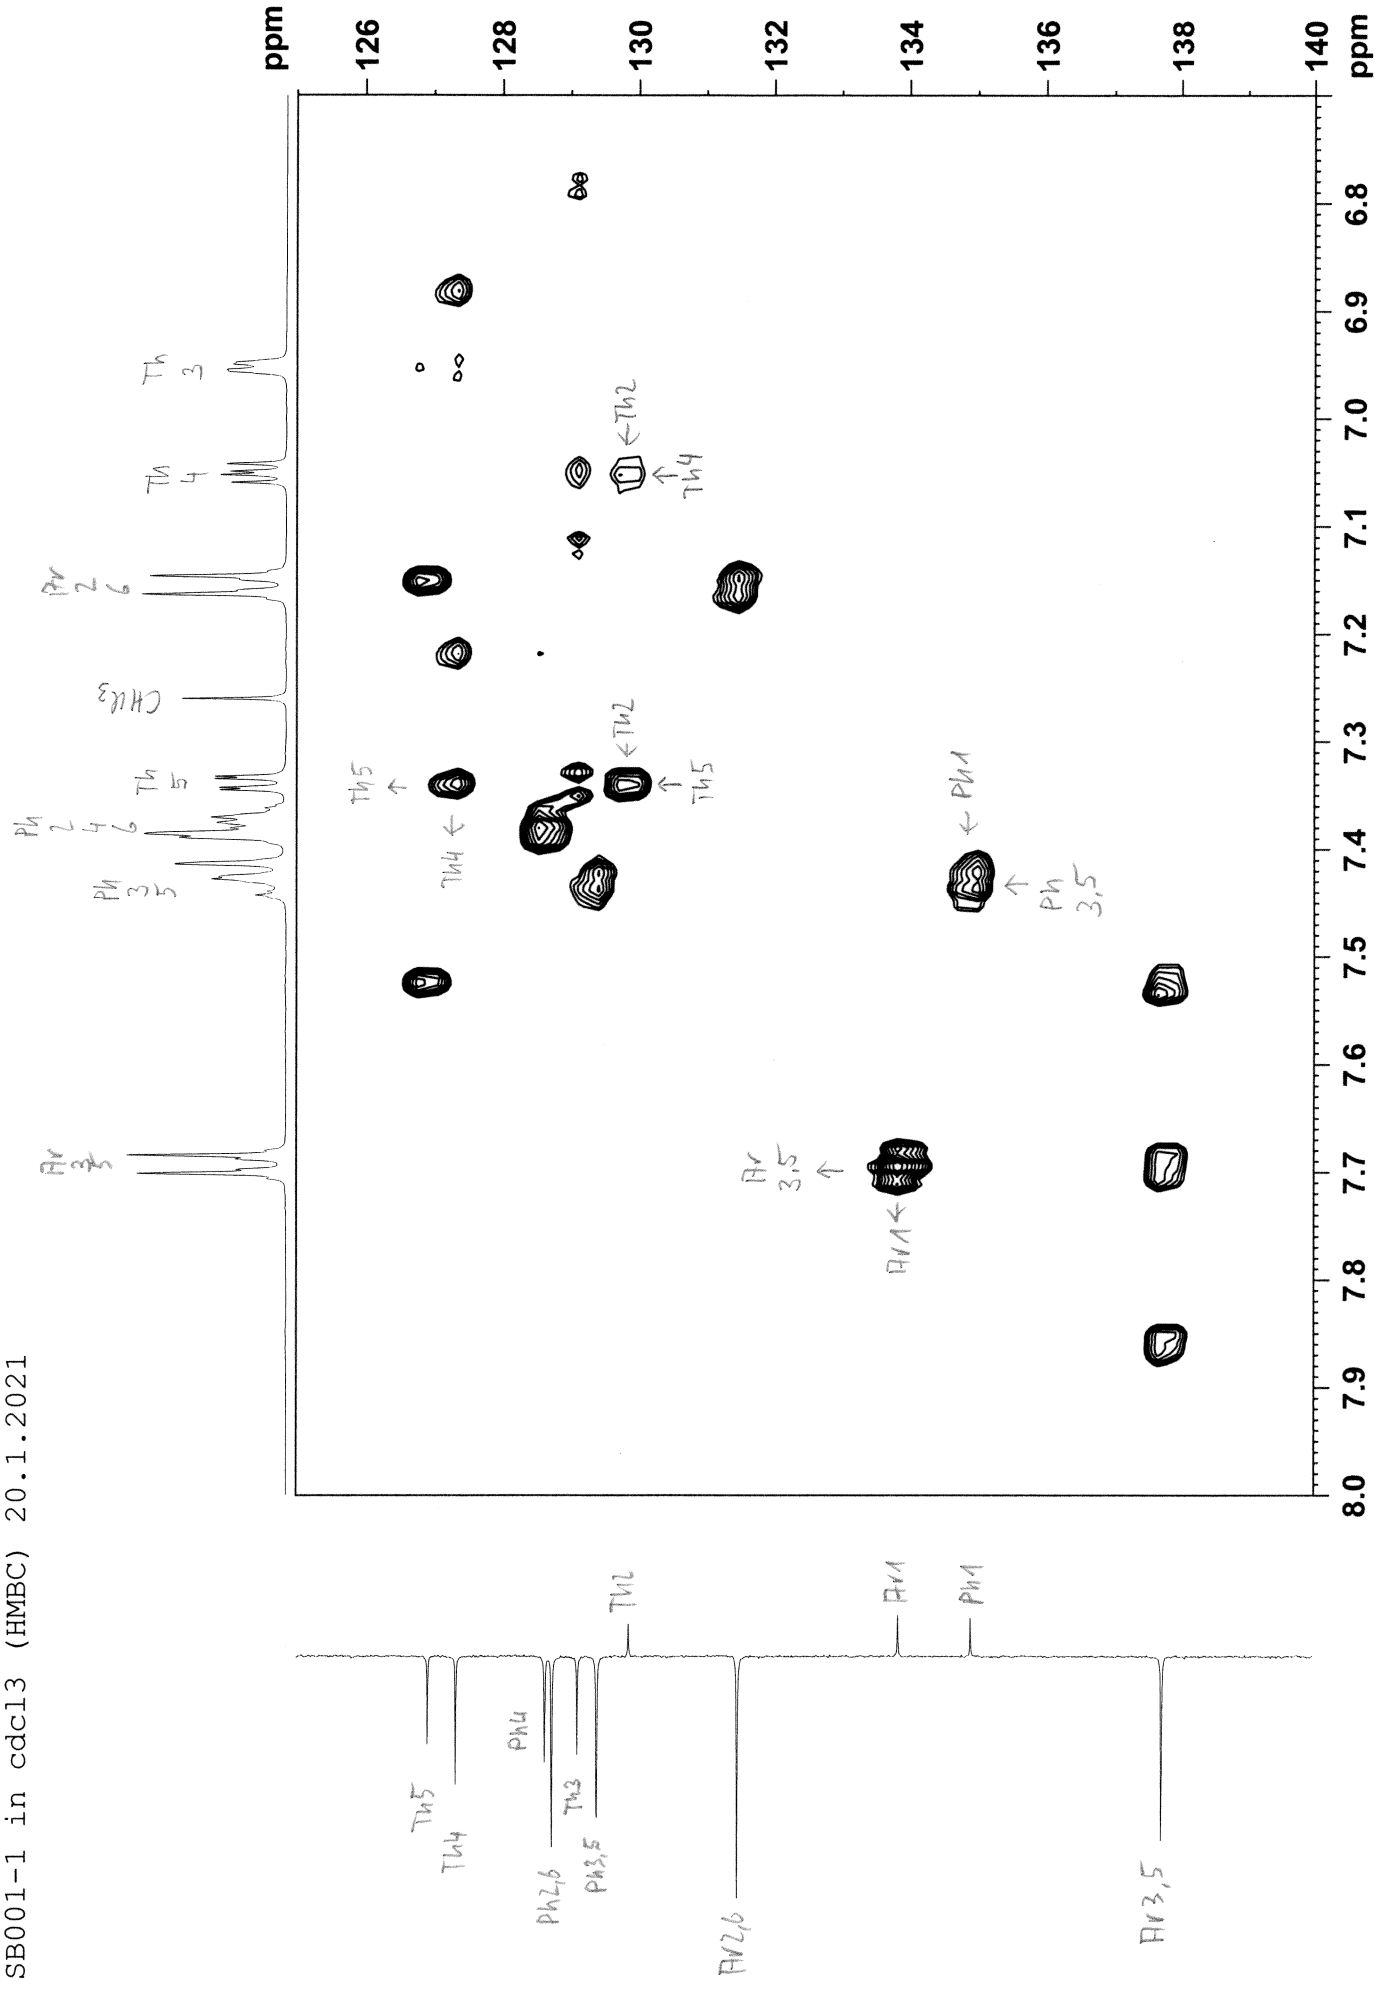



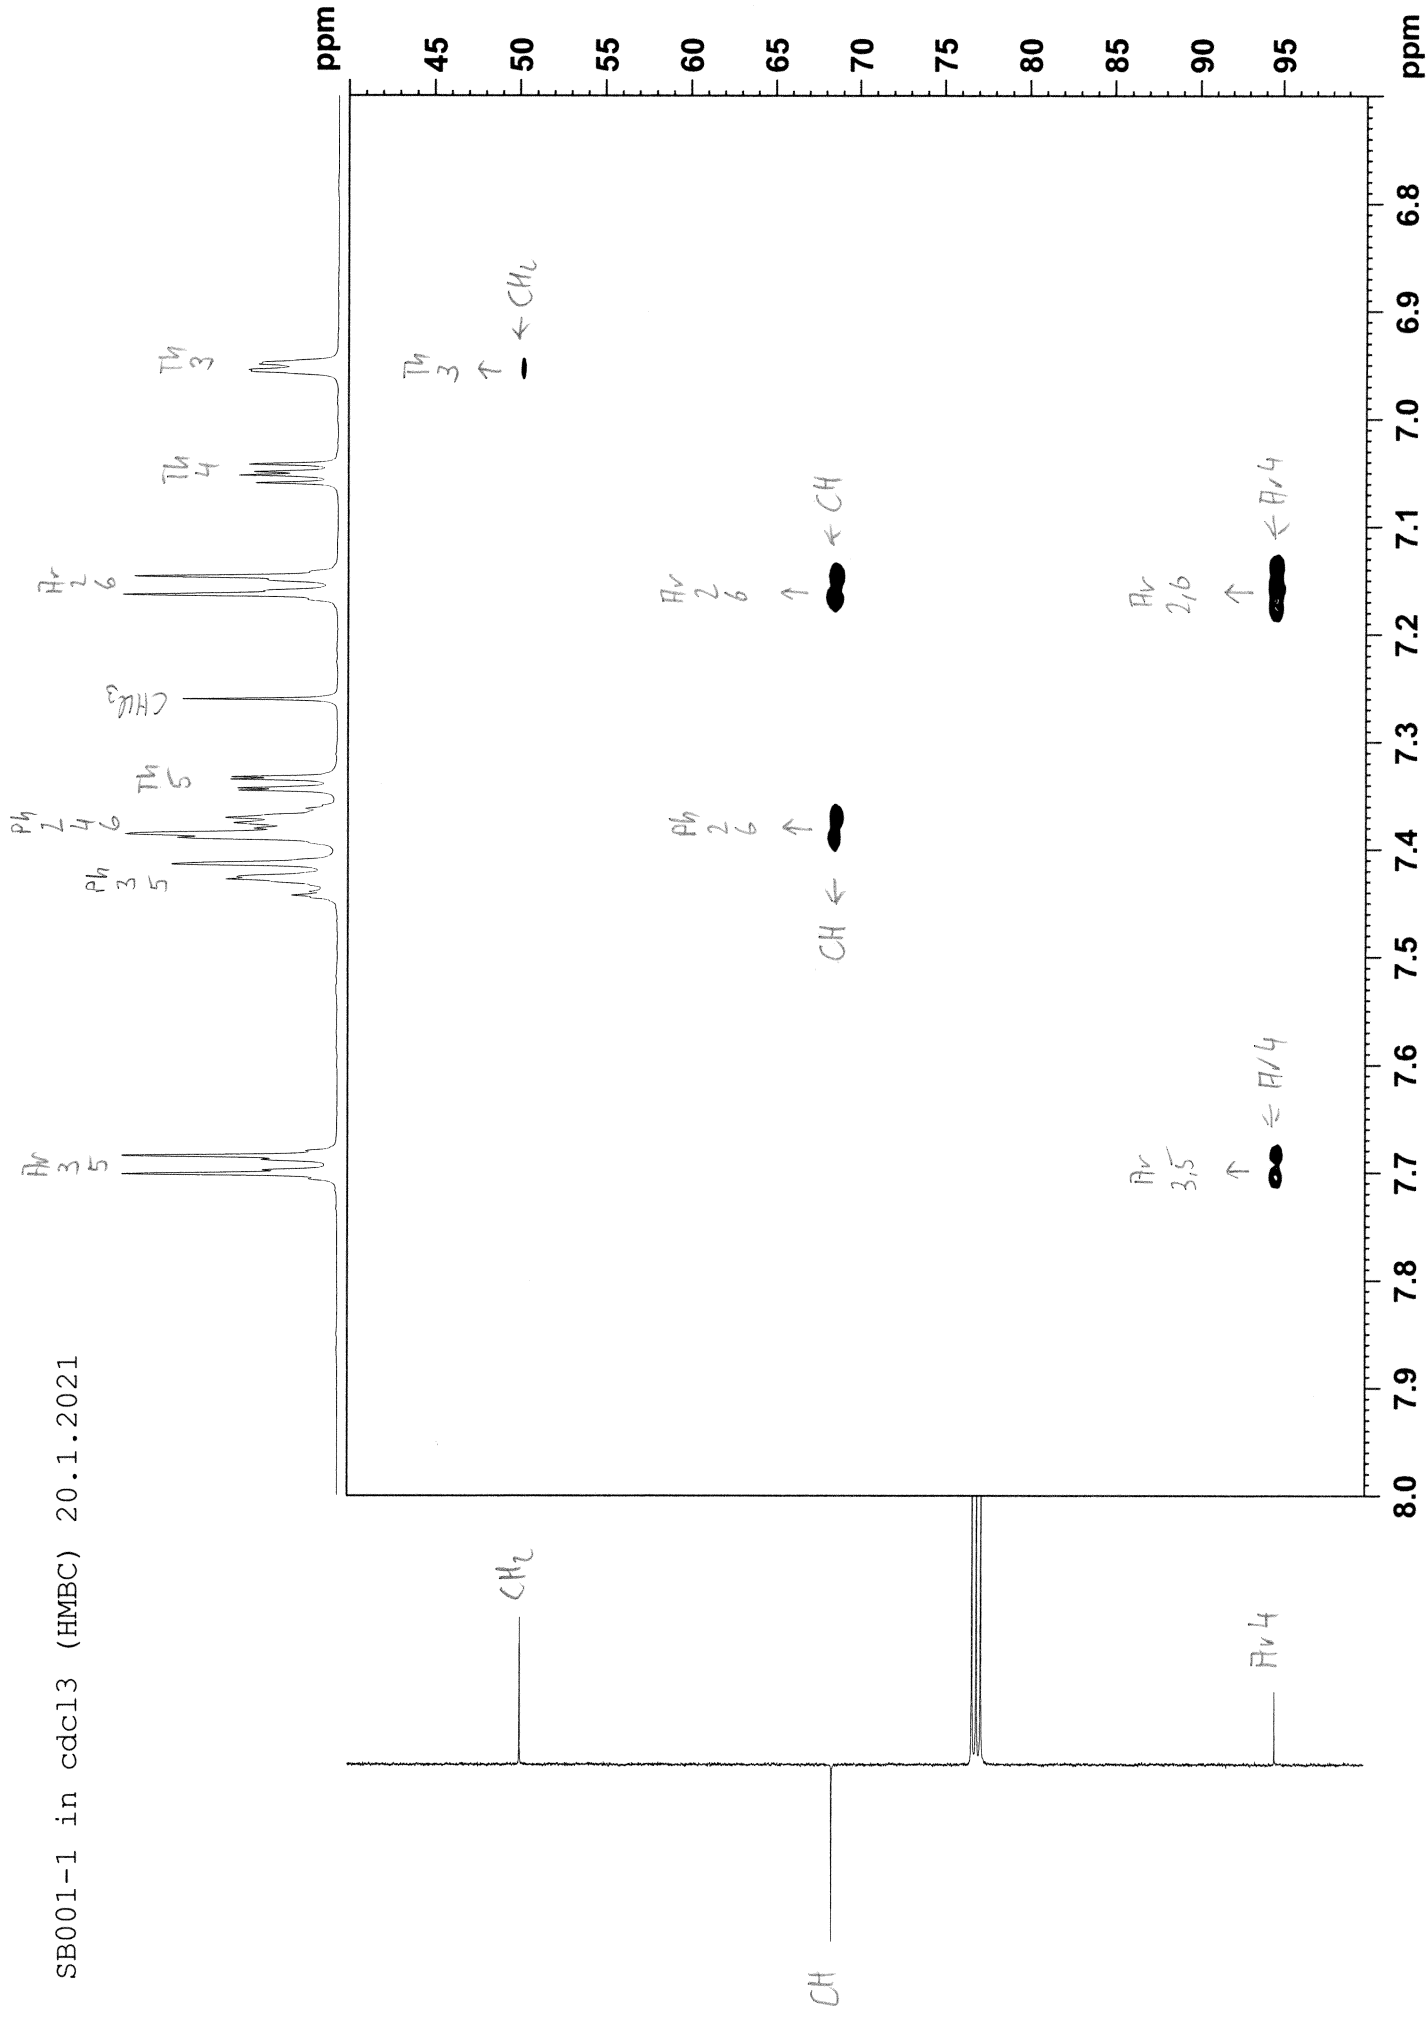

CH

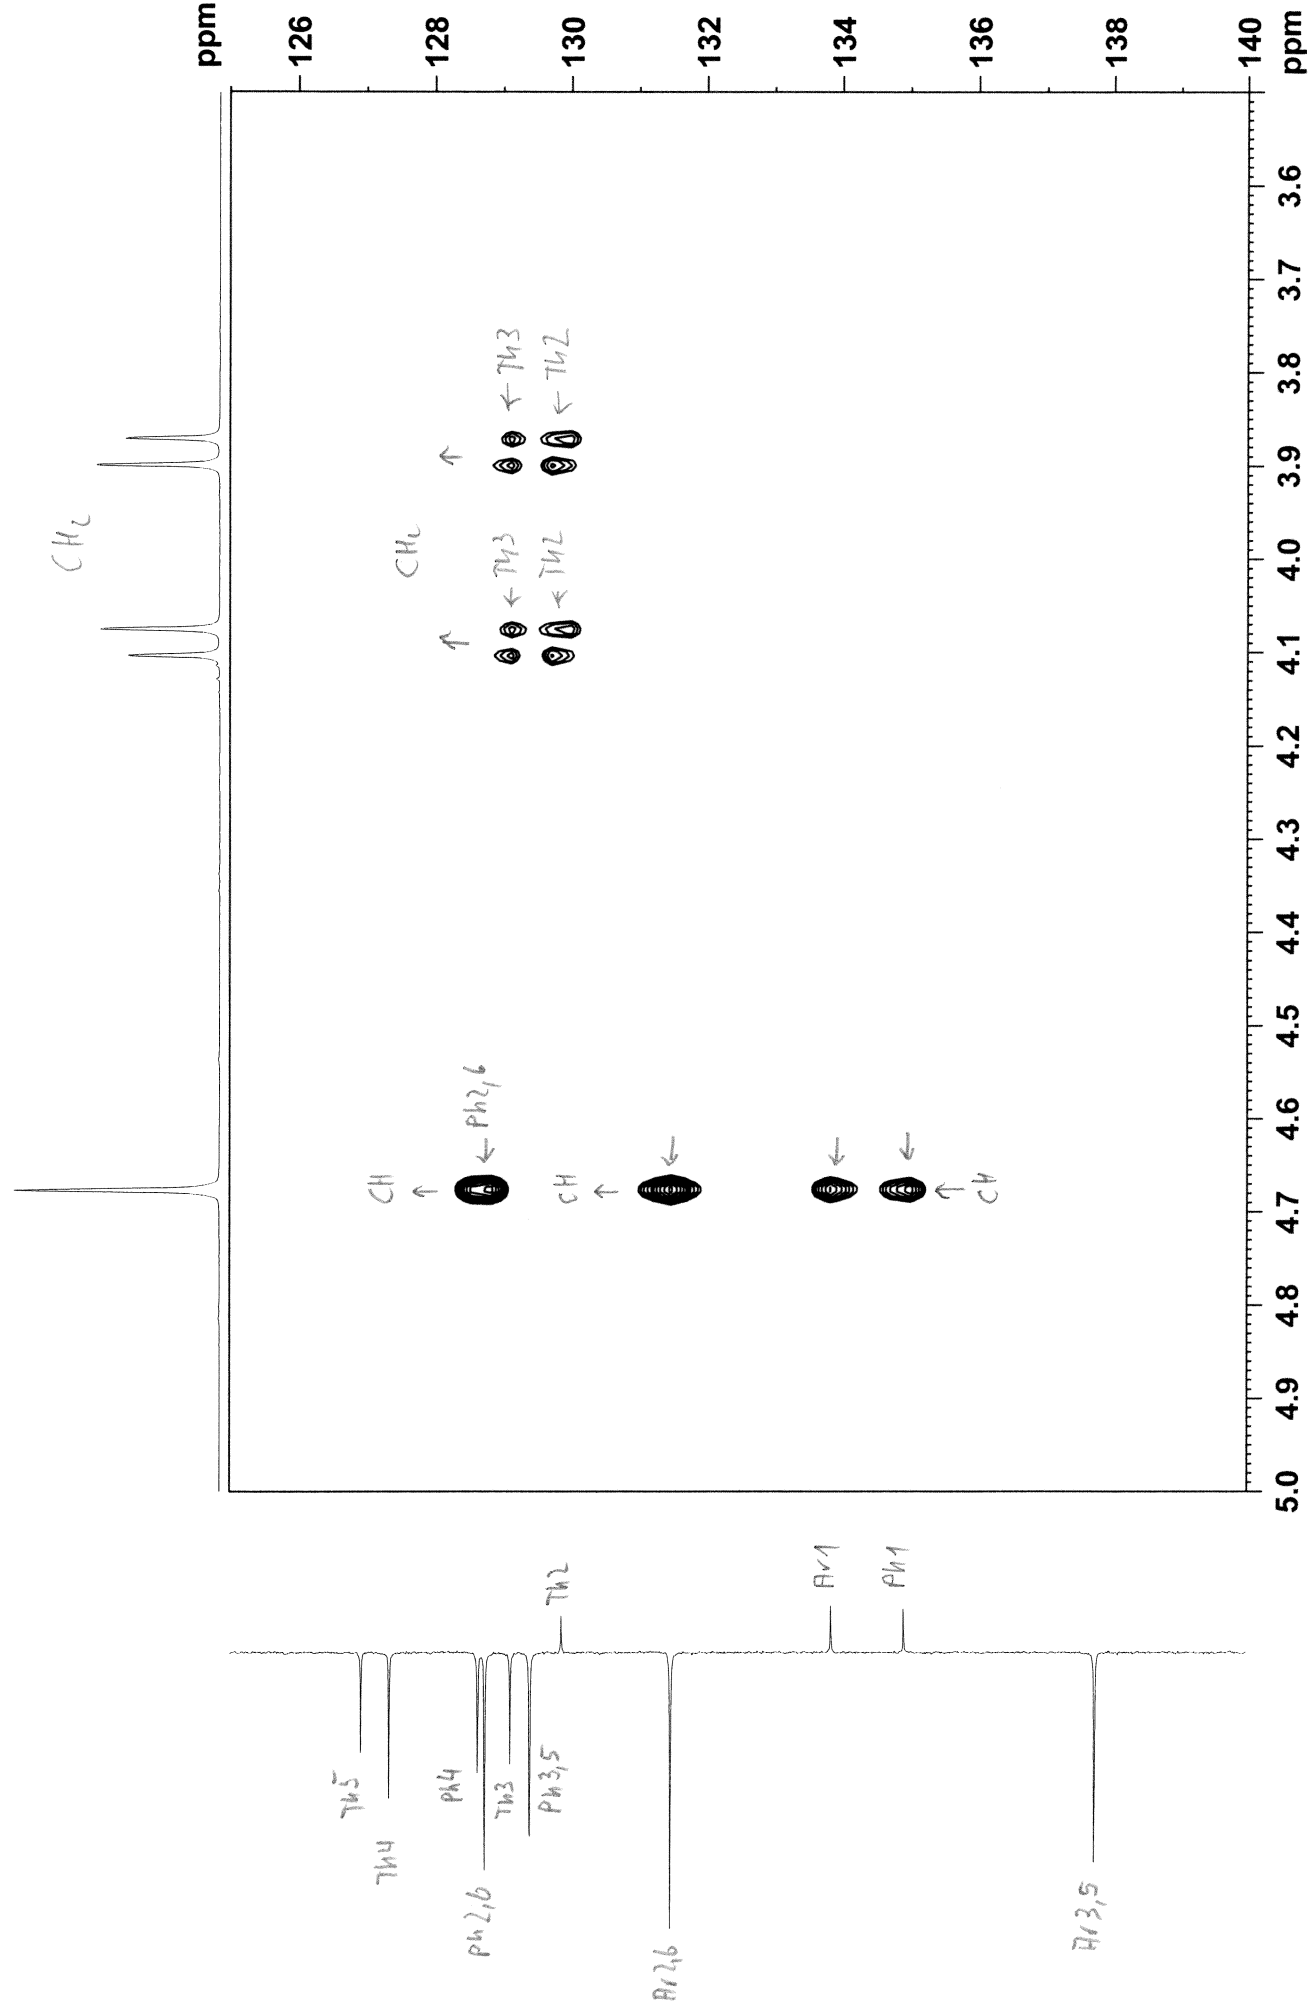

SB001-1 in cdcl3 (HMBC) 20.1.2021

CH

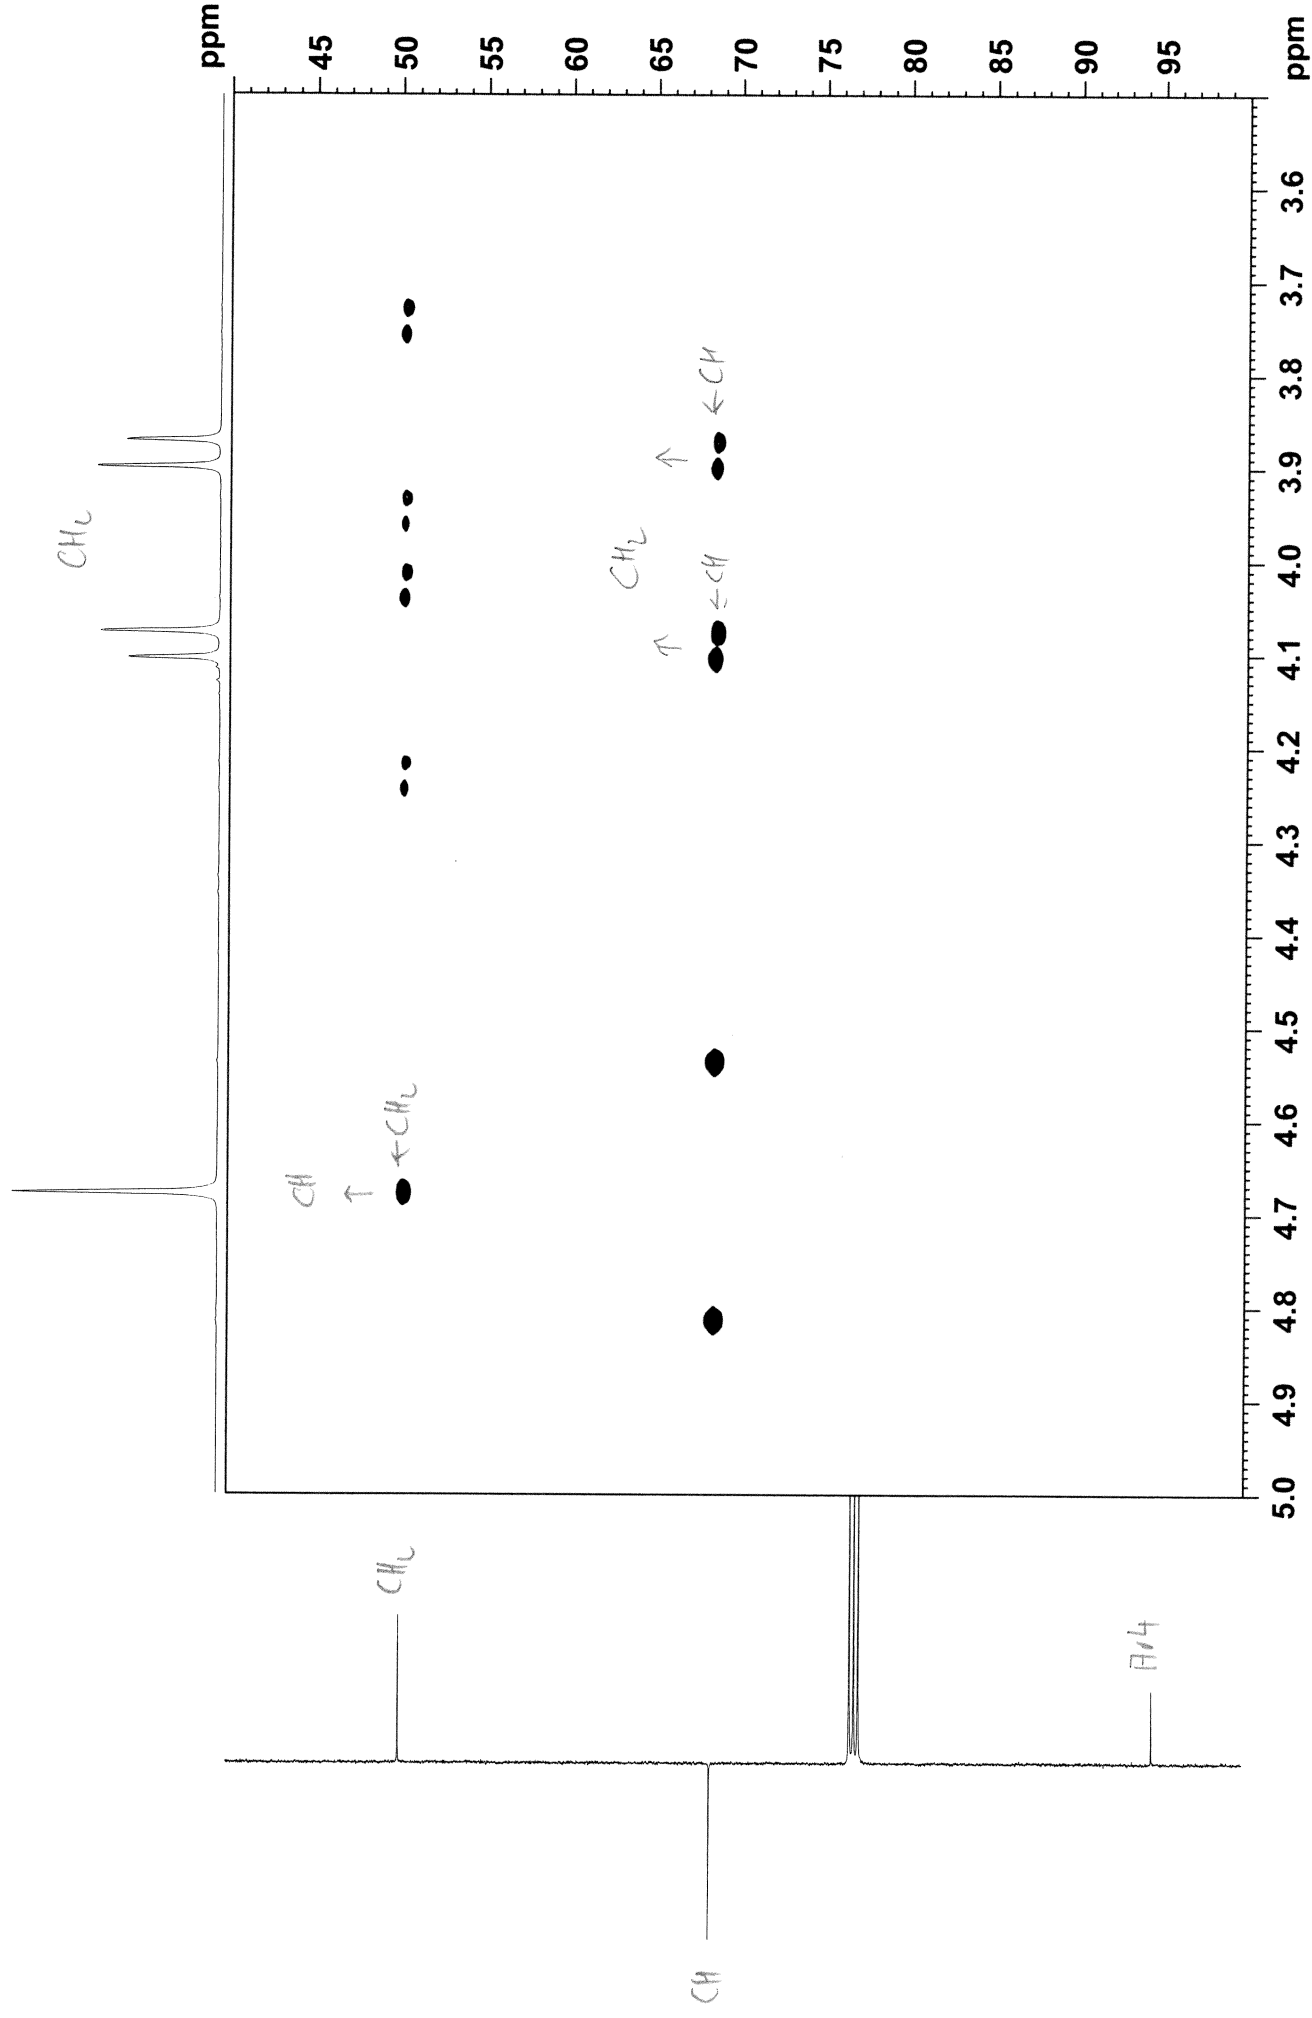

**Figure S42c.** NMR spectra of compound **6k**.

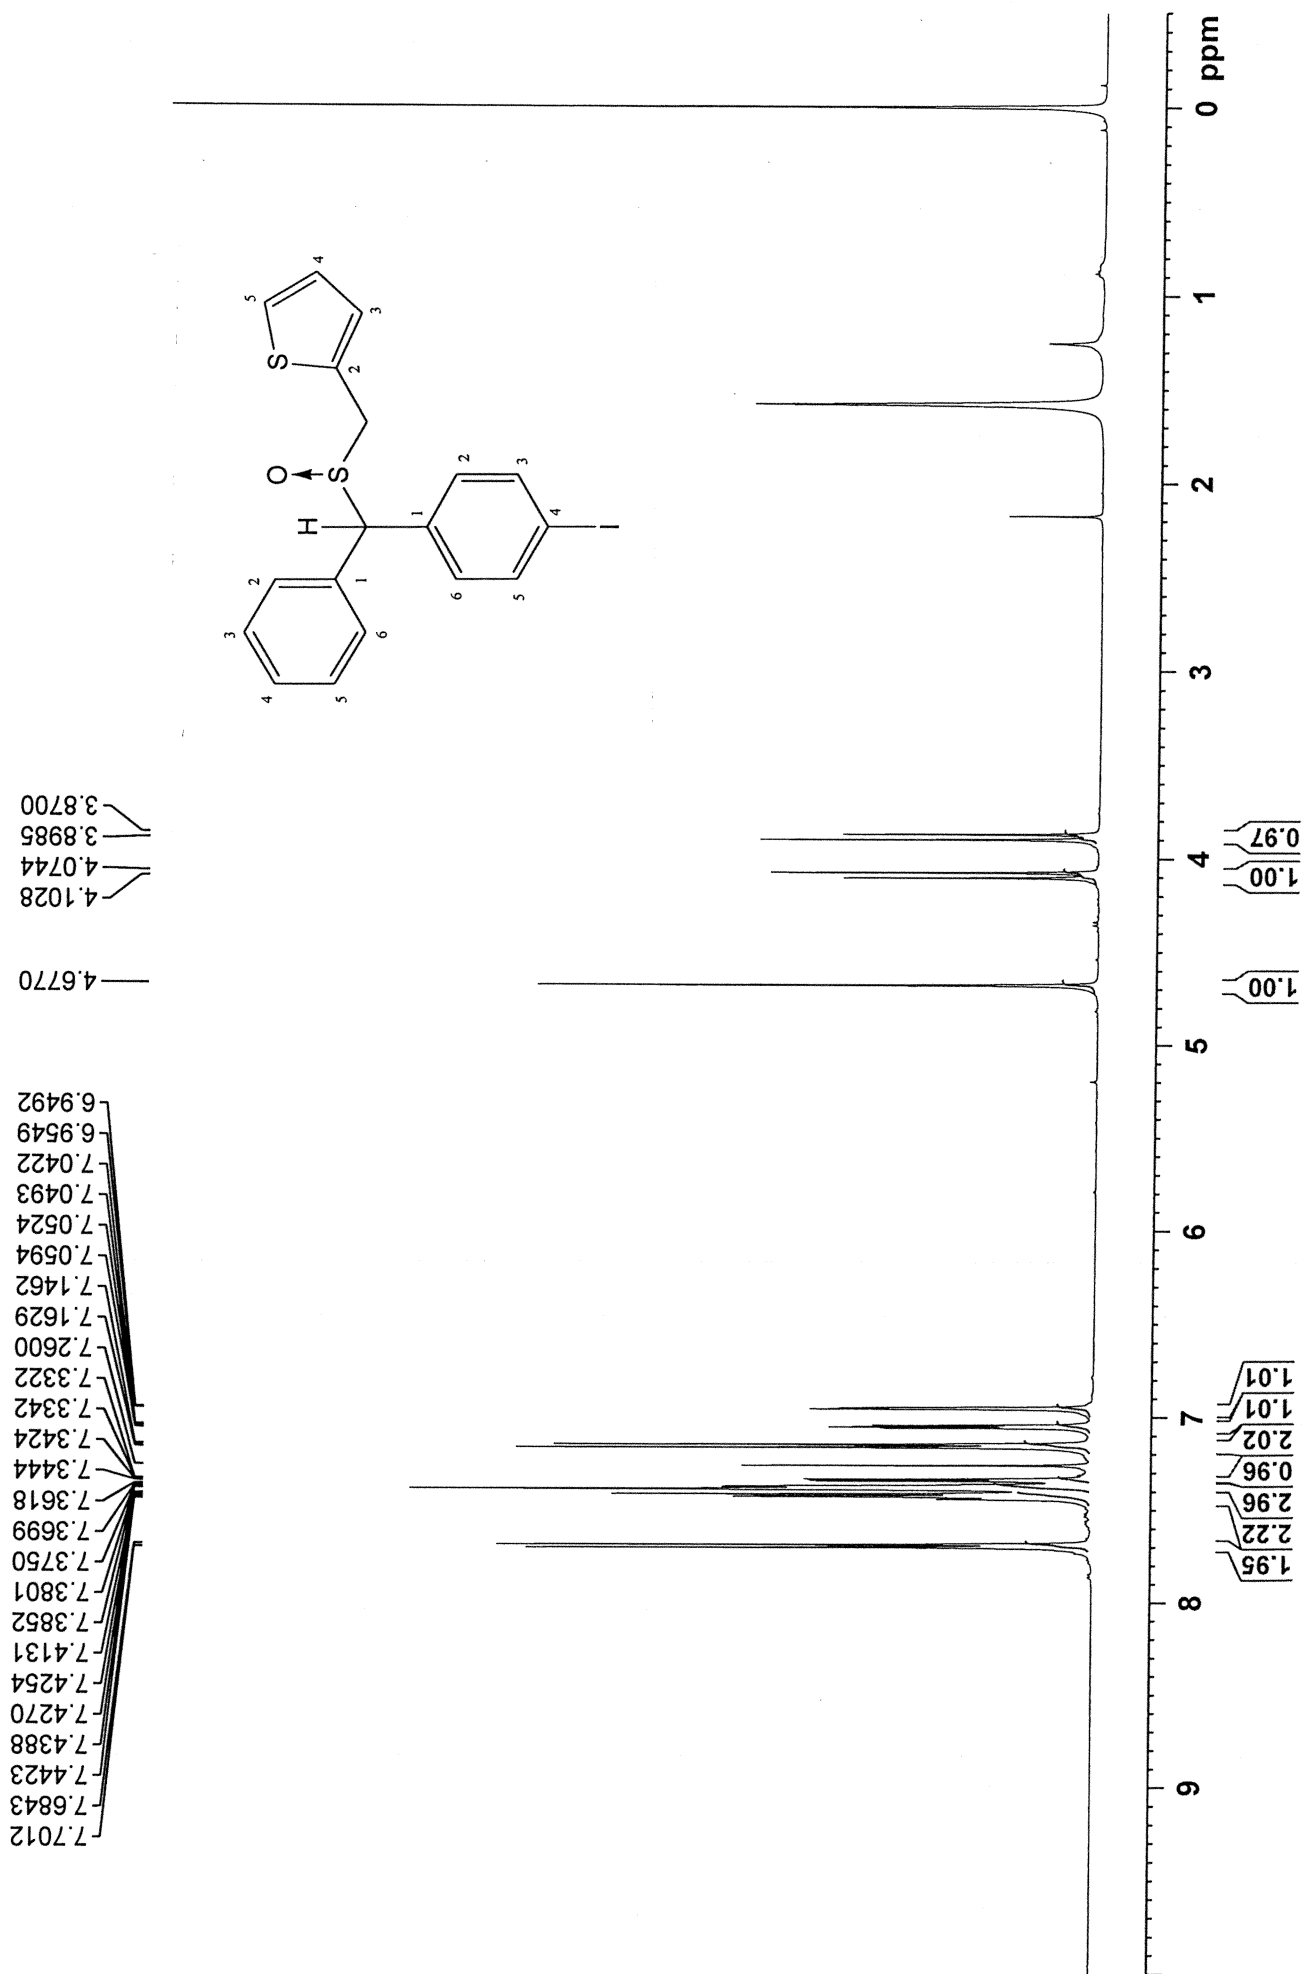

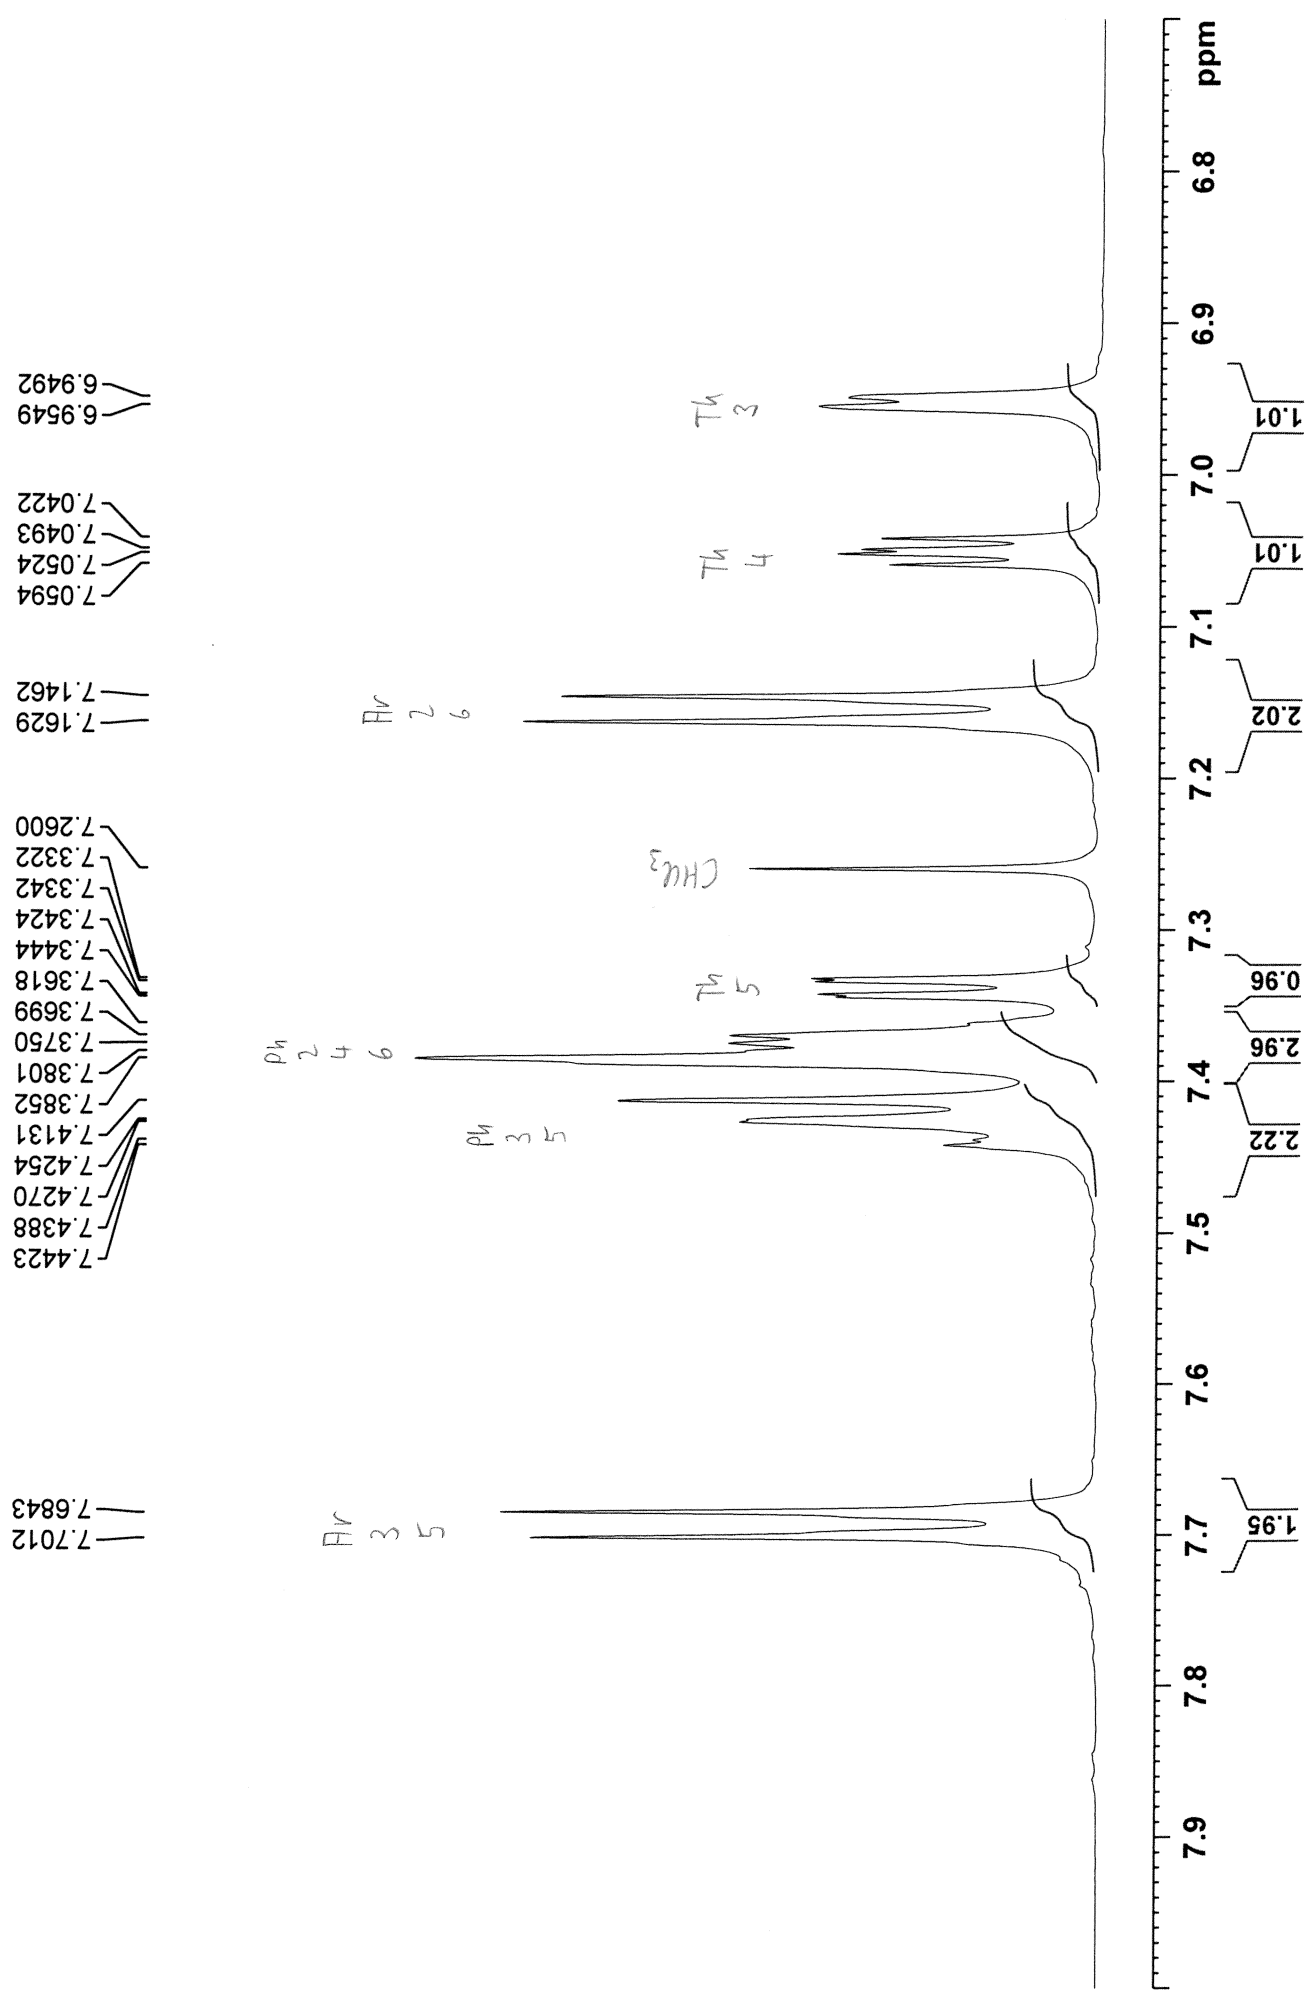

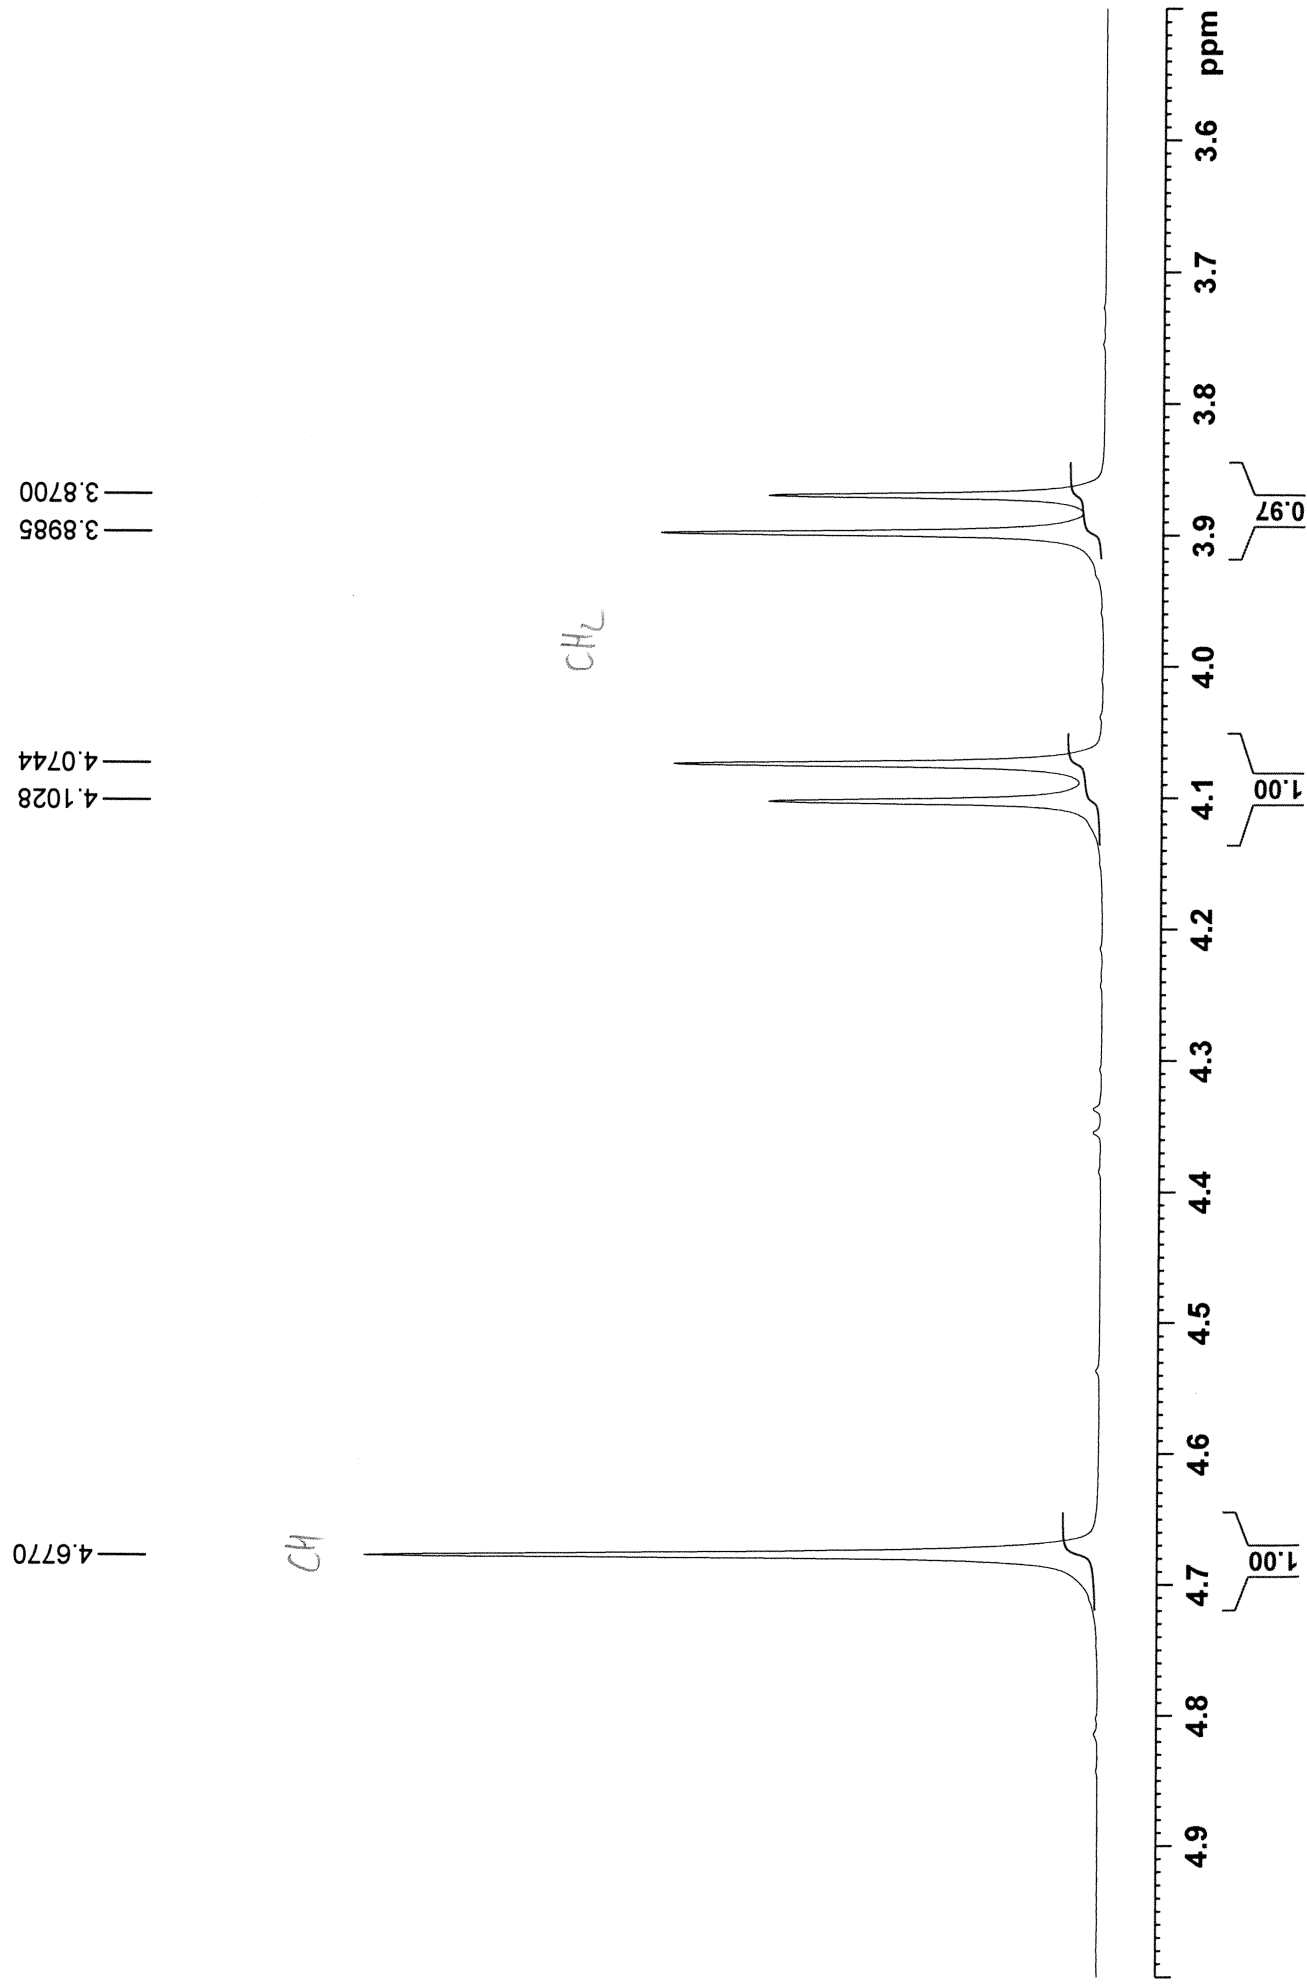

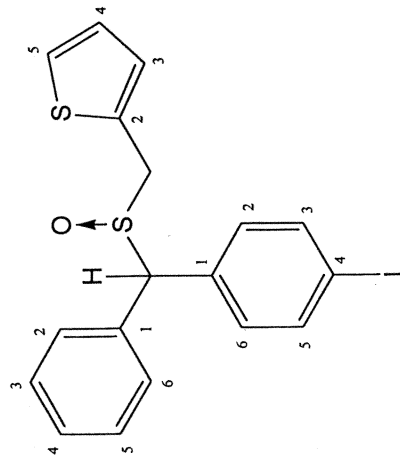

137.7208  
134.9148  
133.8485  
131.4756  
129.8680  
129.4043  
129.1182  
128.7439  
128.6382  
127.3405  
126.9270

94.6164

77.0000

68.4540

50.0736

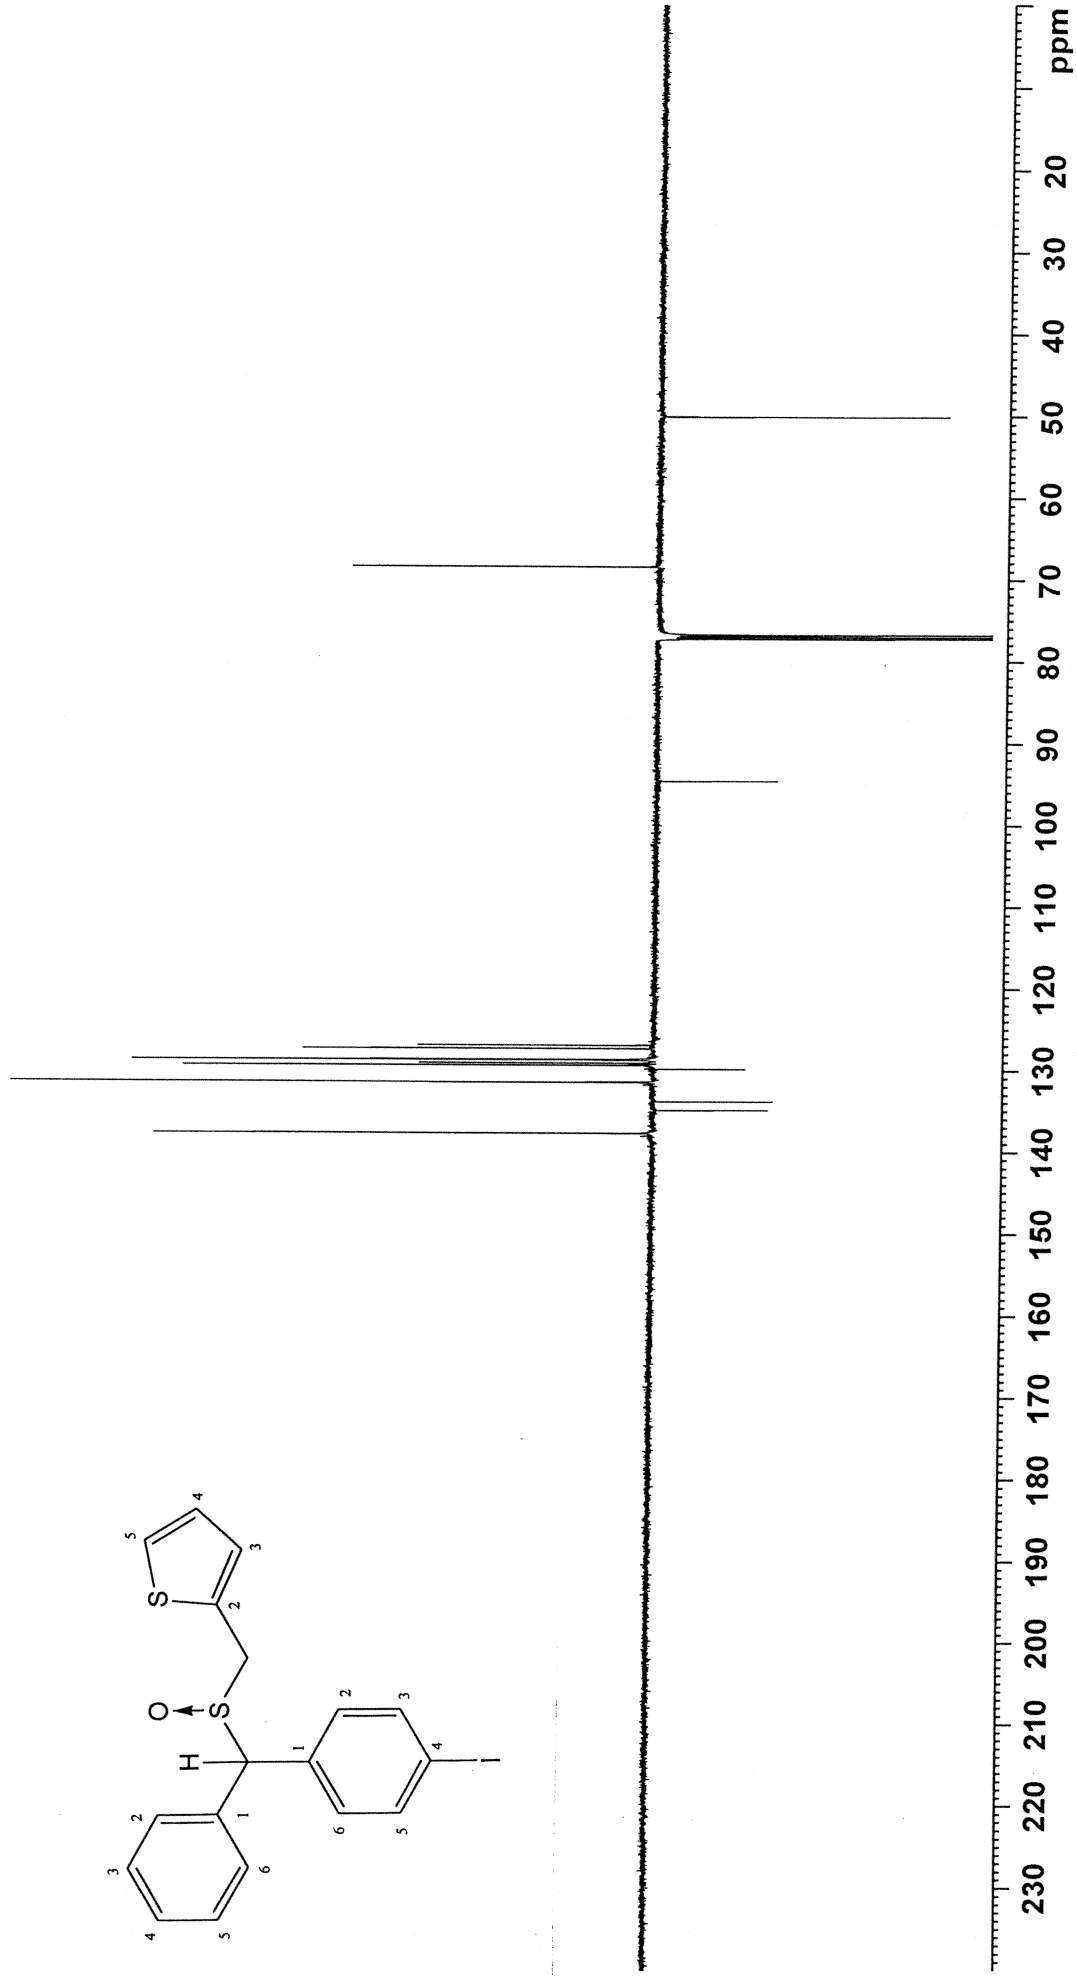

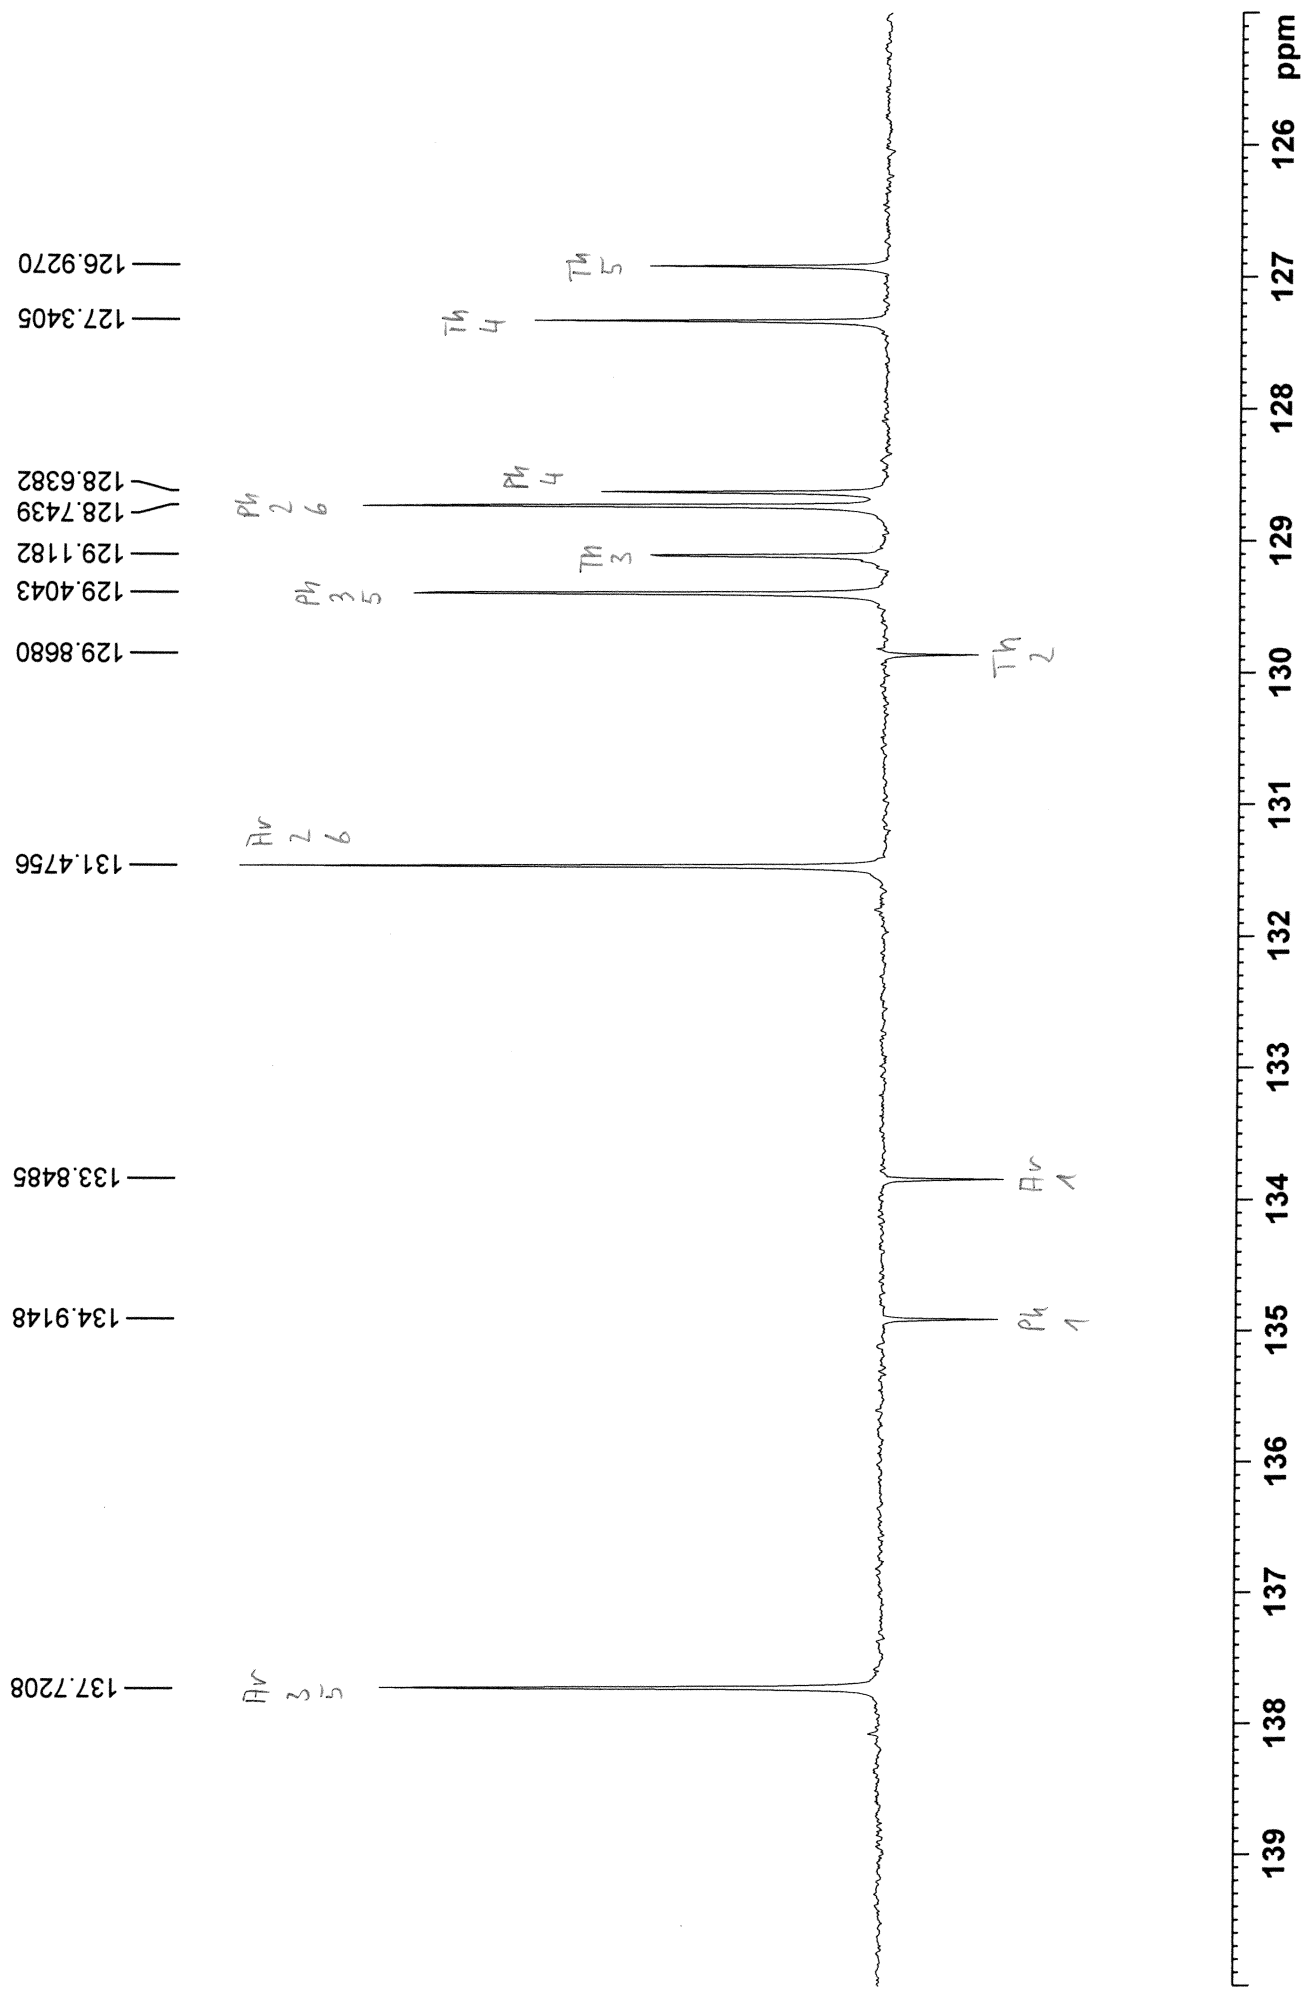



SB001-2 in cdcl3 (APT) 20.1.2021

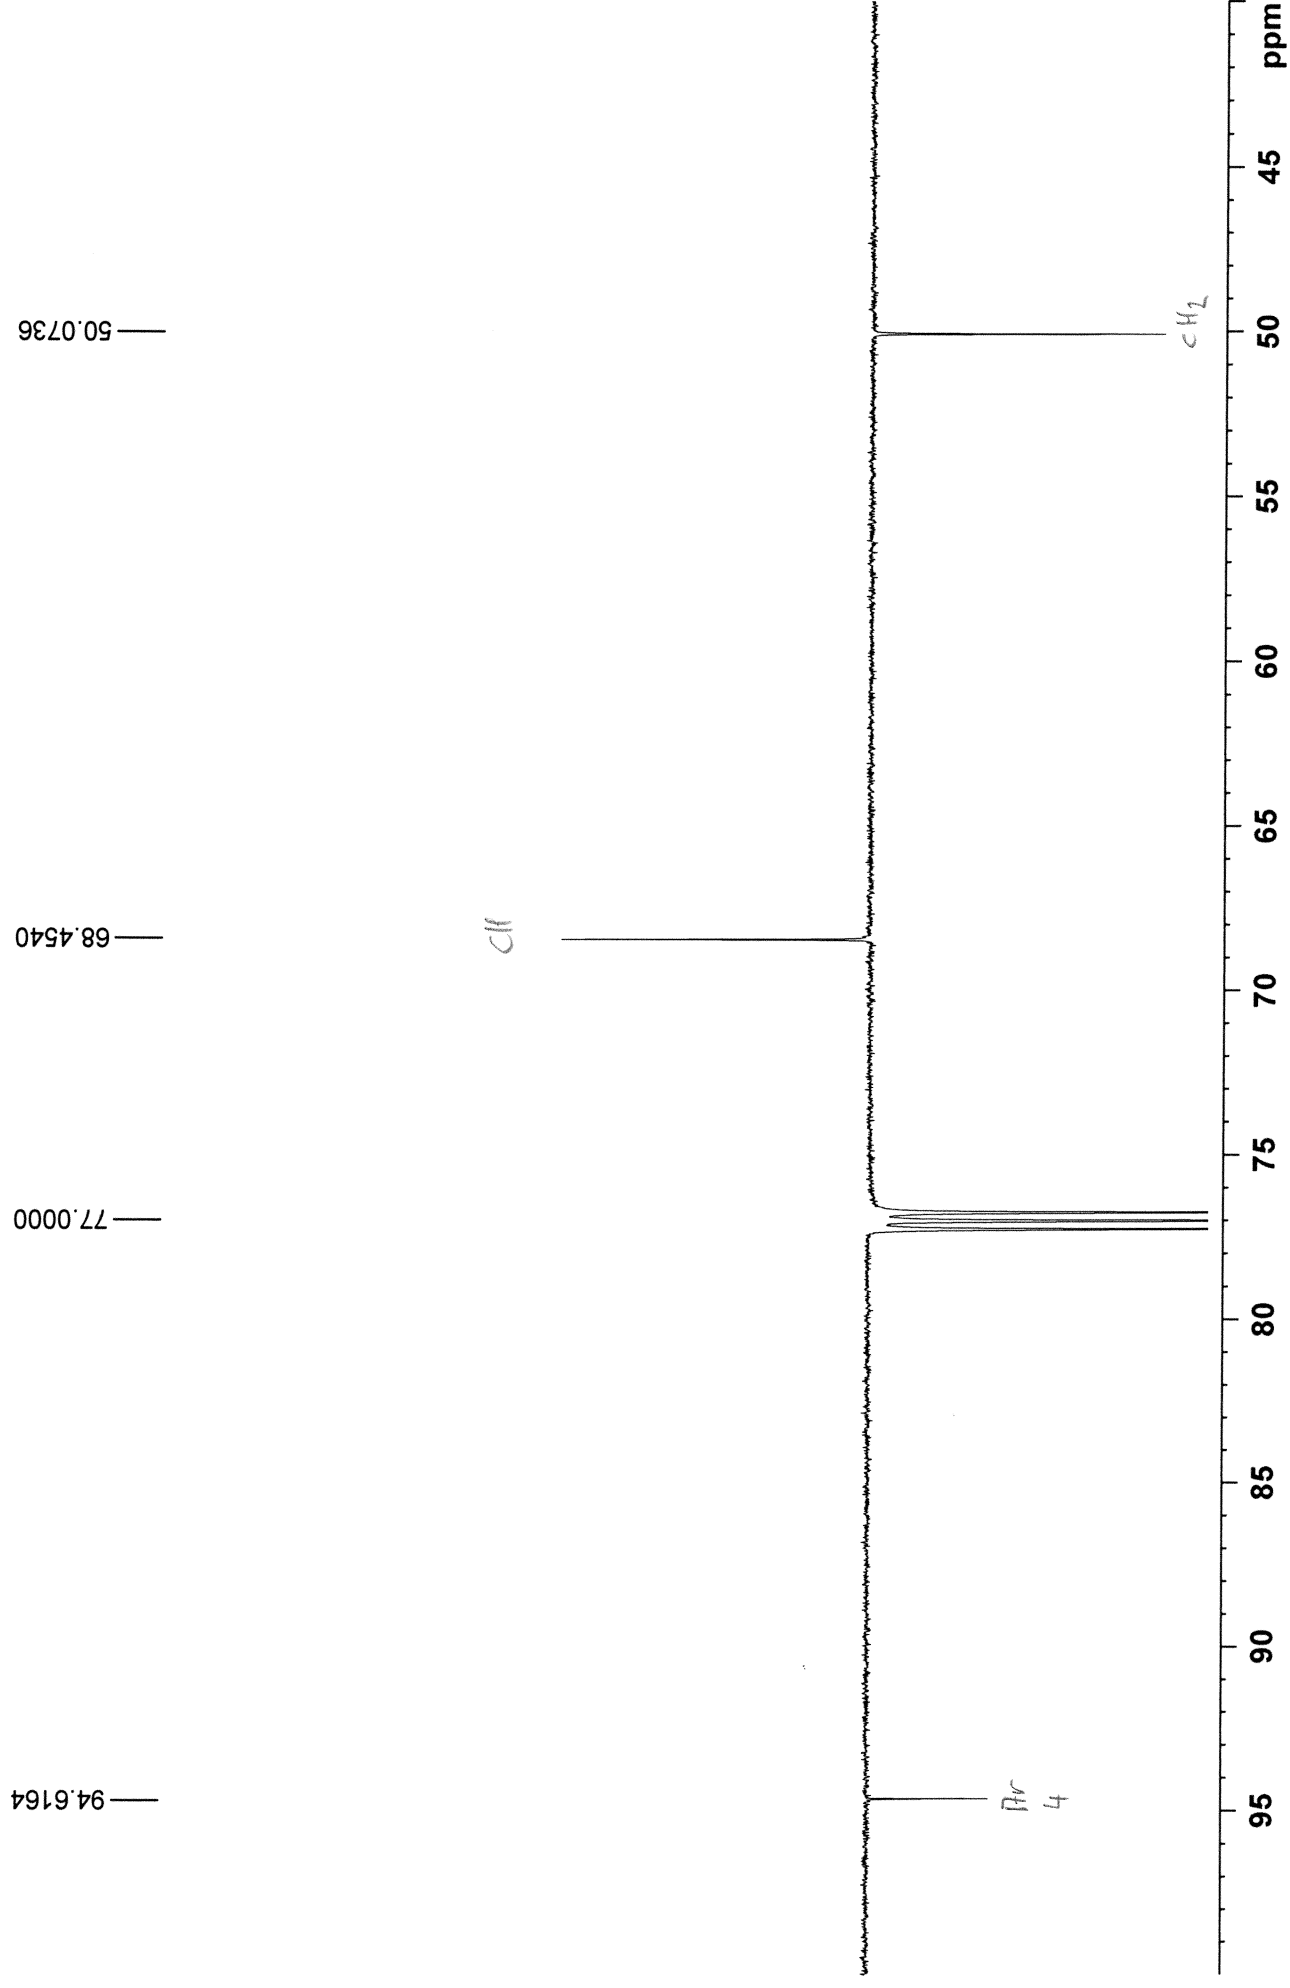

**Figure S43c.** NMR spectra of compound 7k.

SB002-1 in cdcl3 (Proton) 20.1.2021

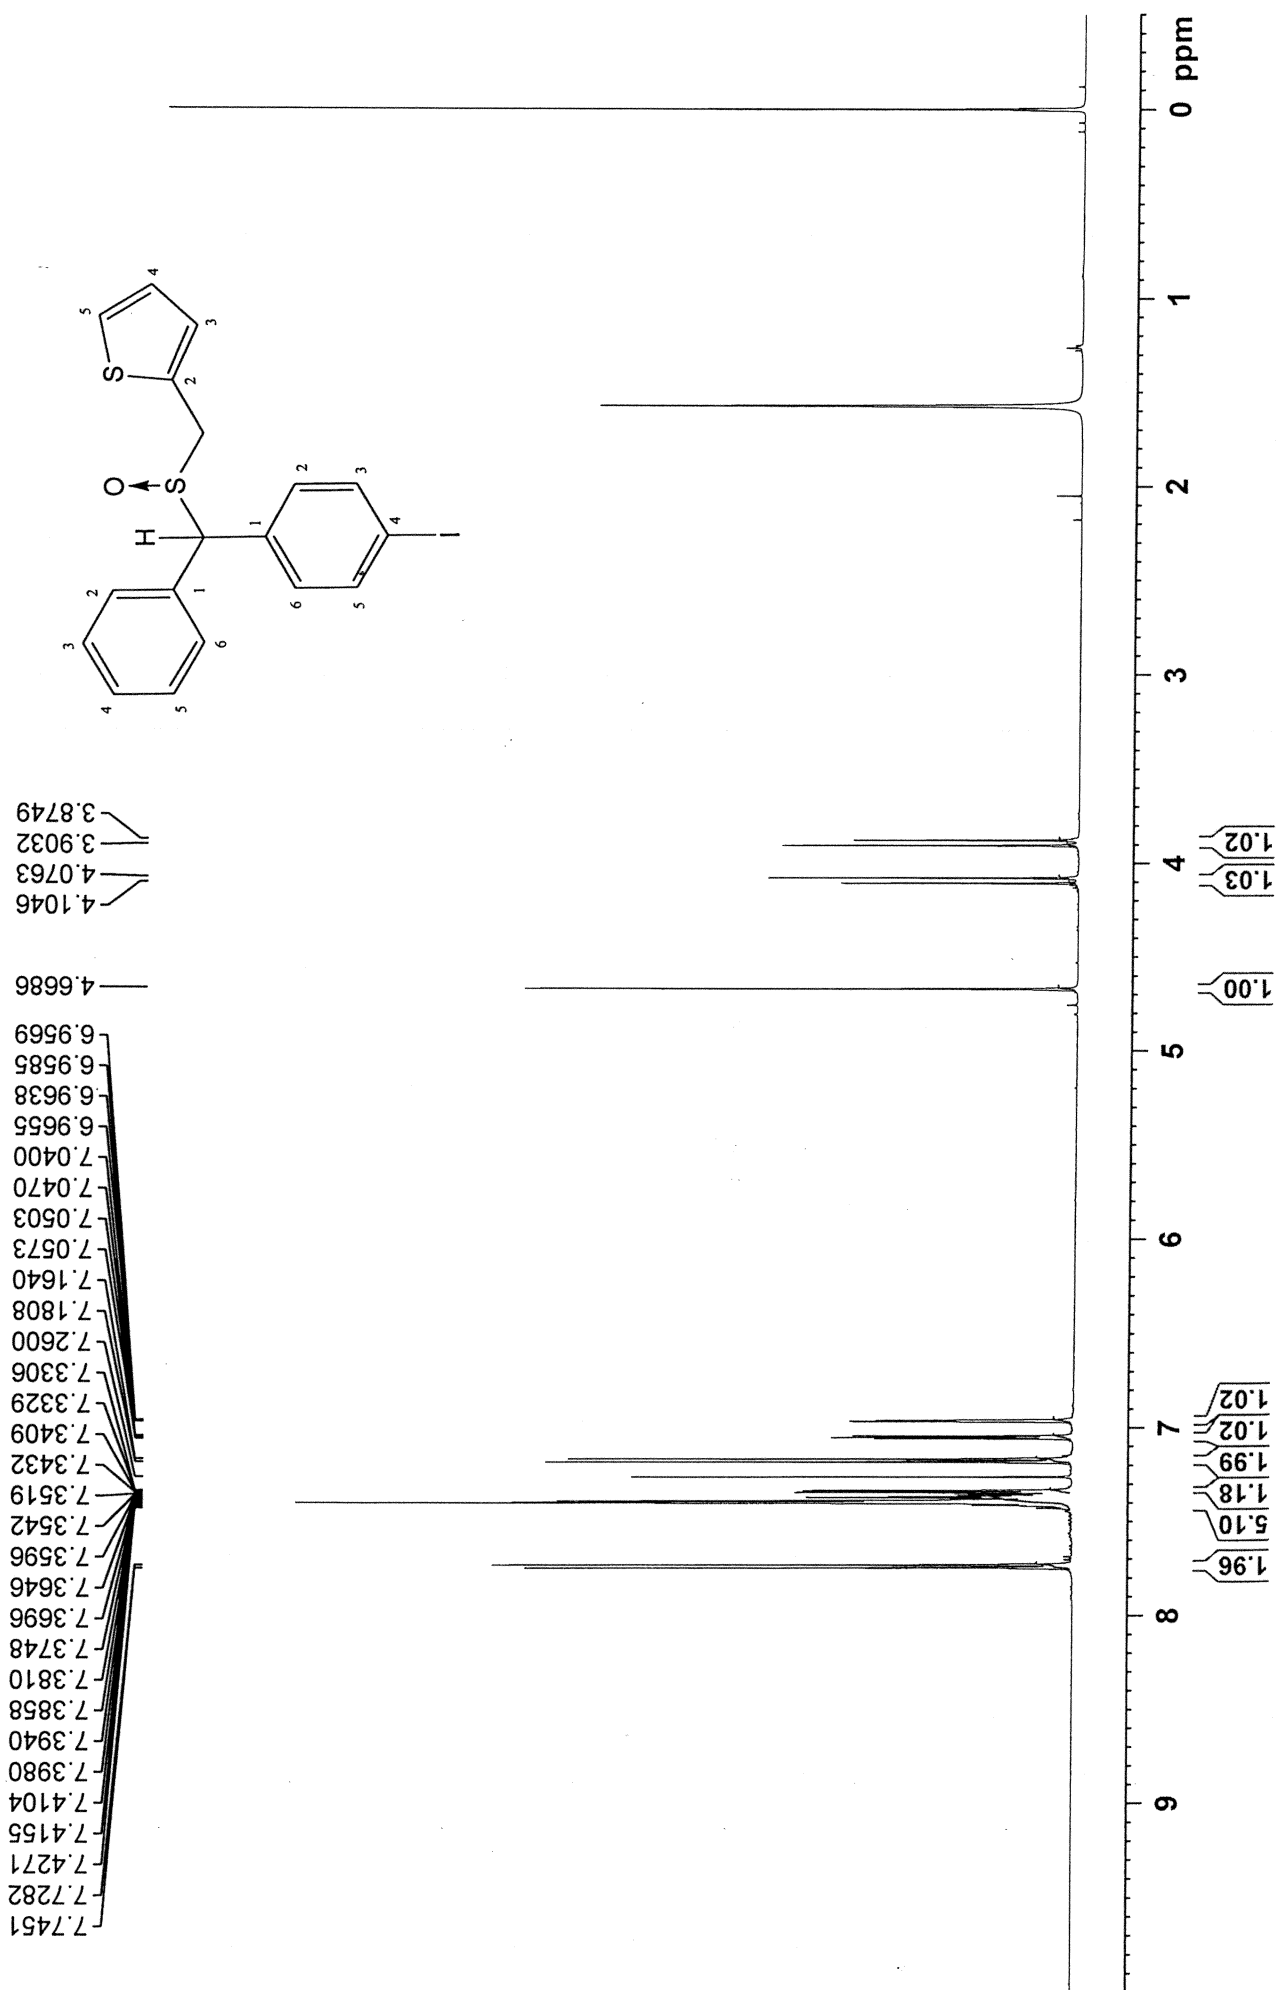

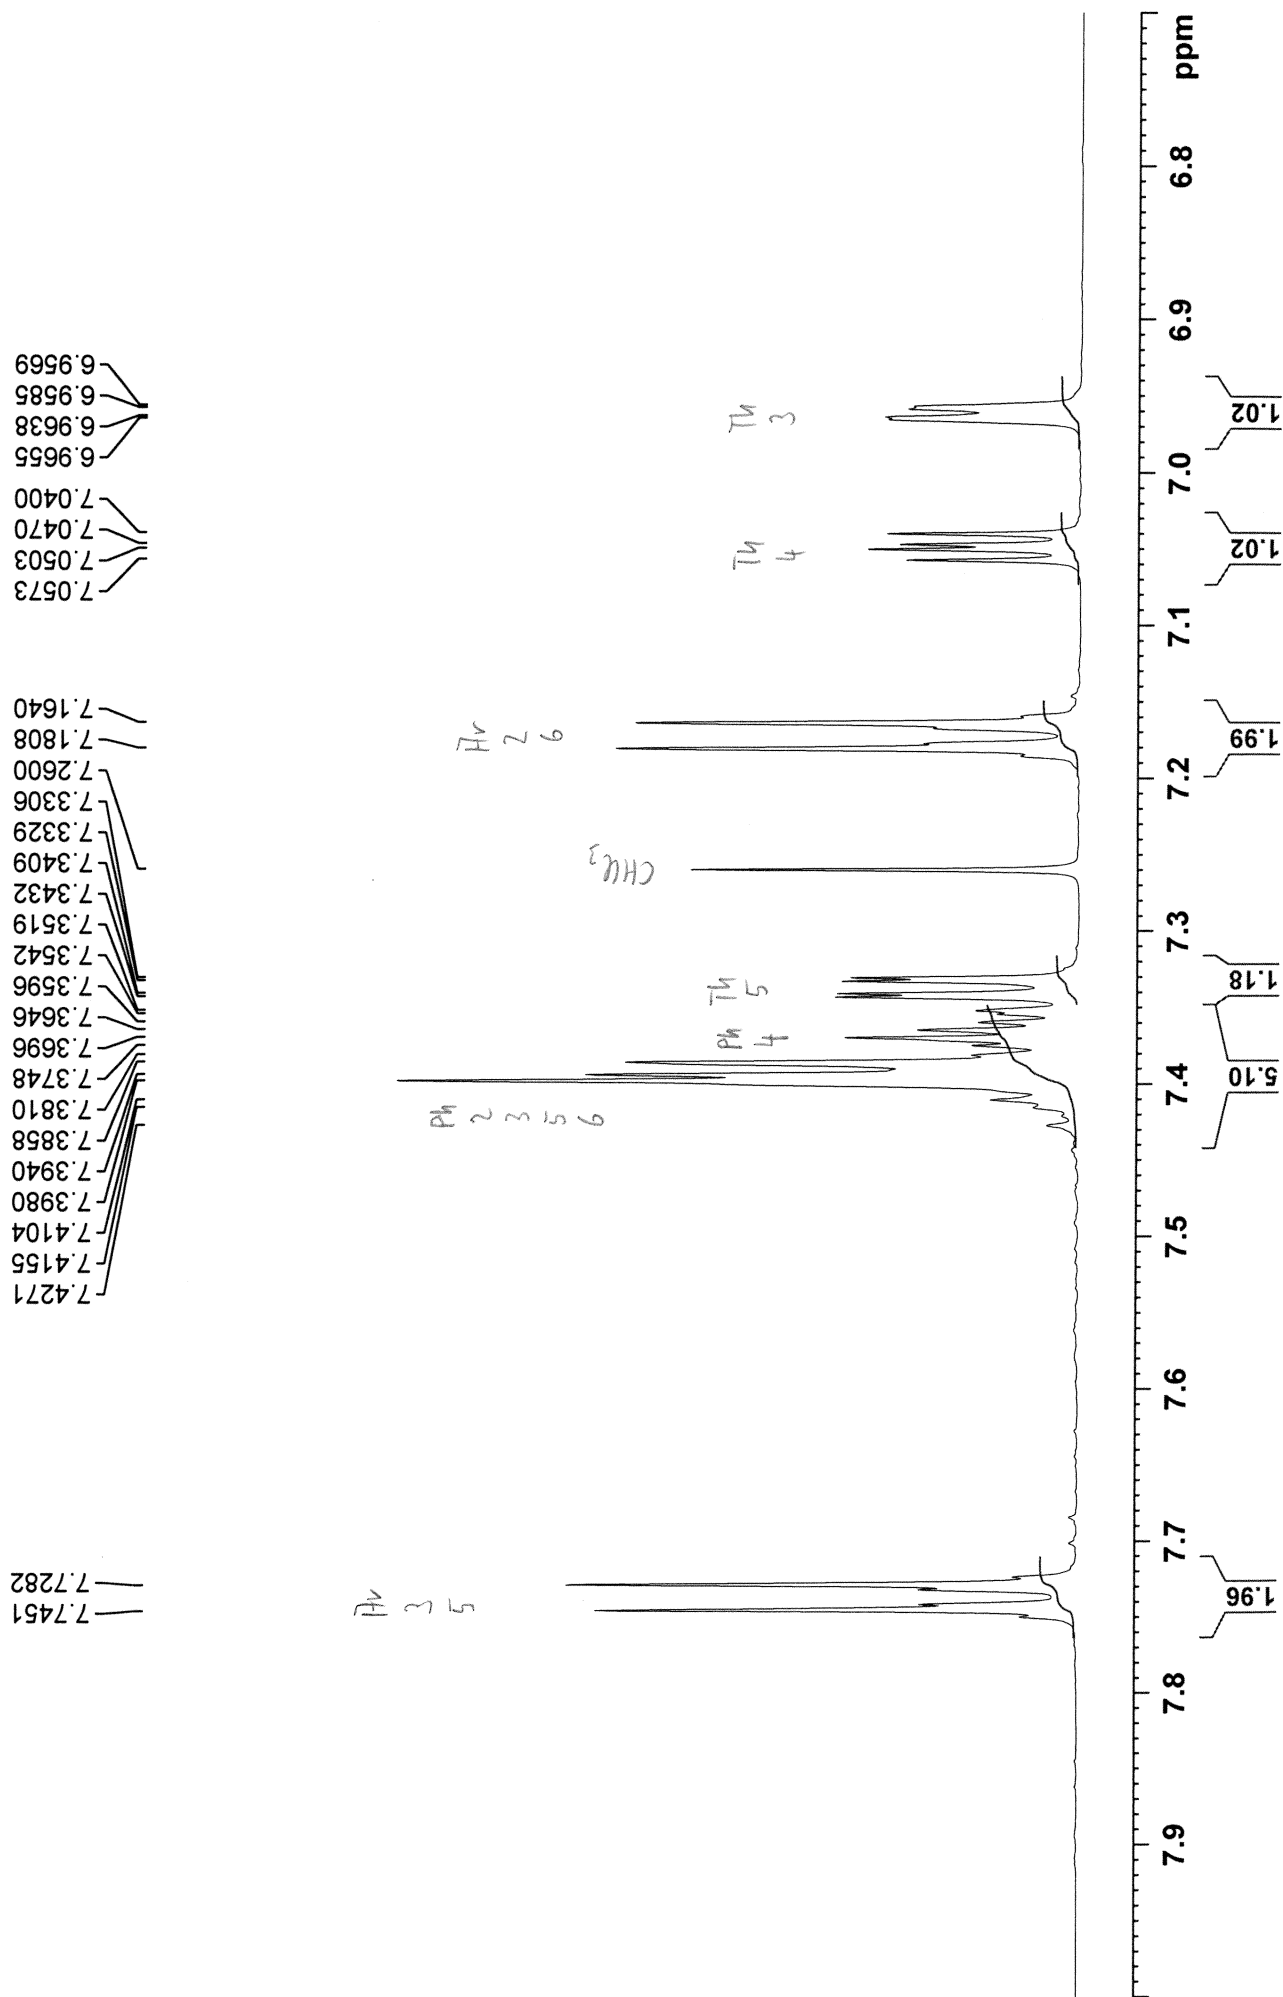

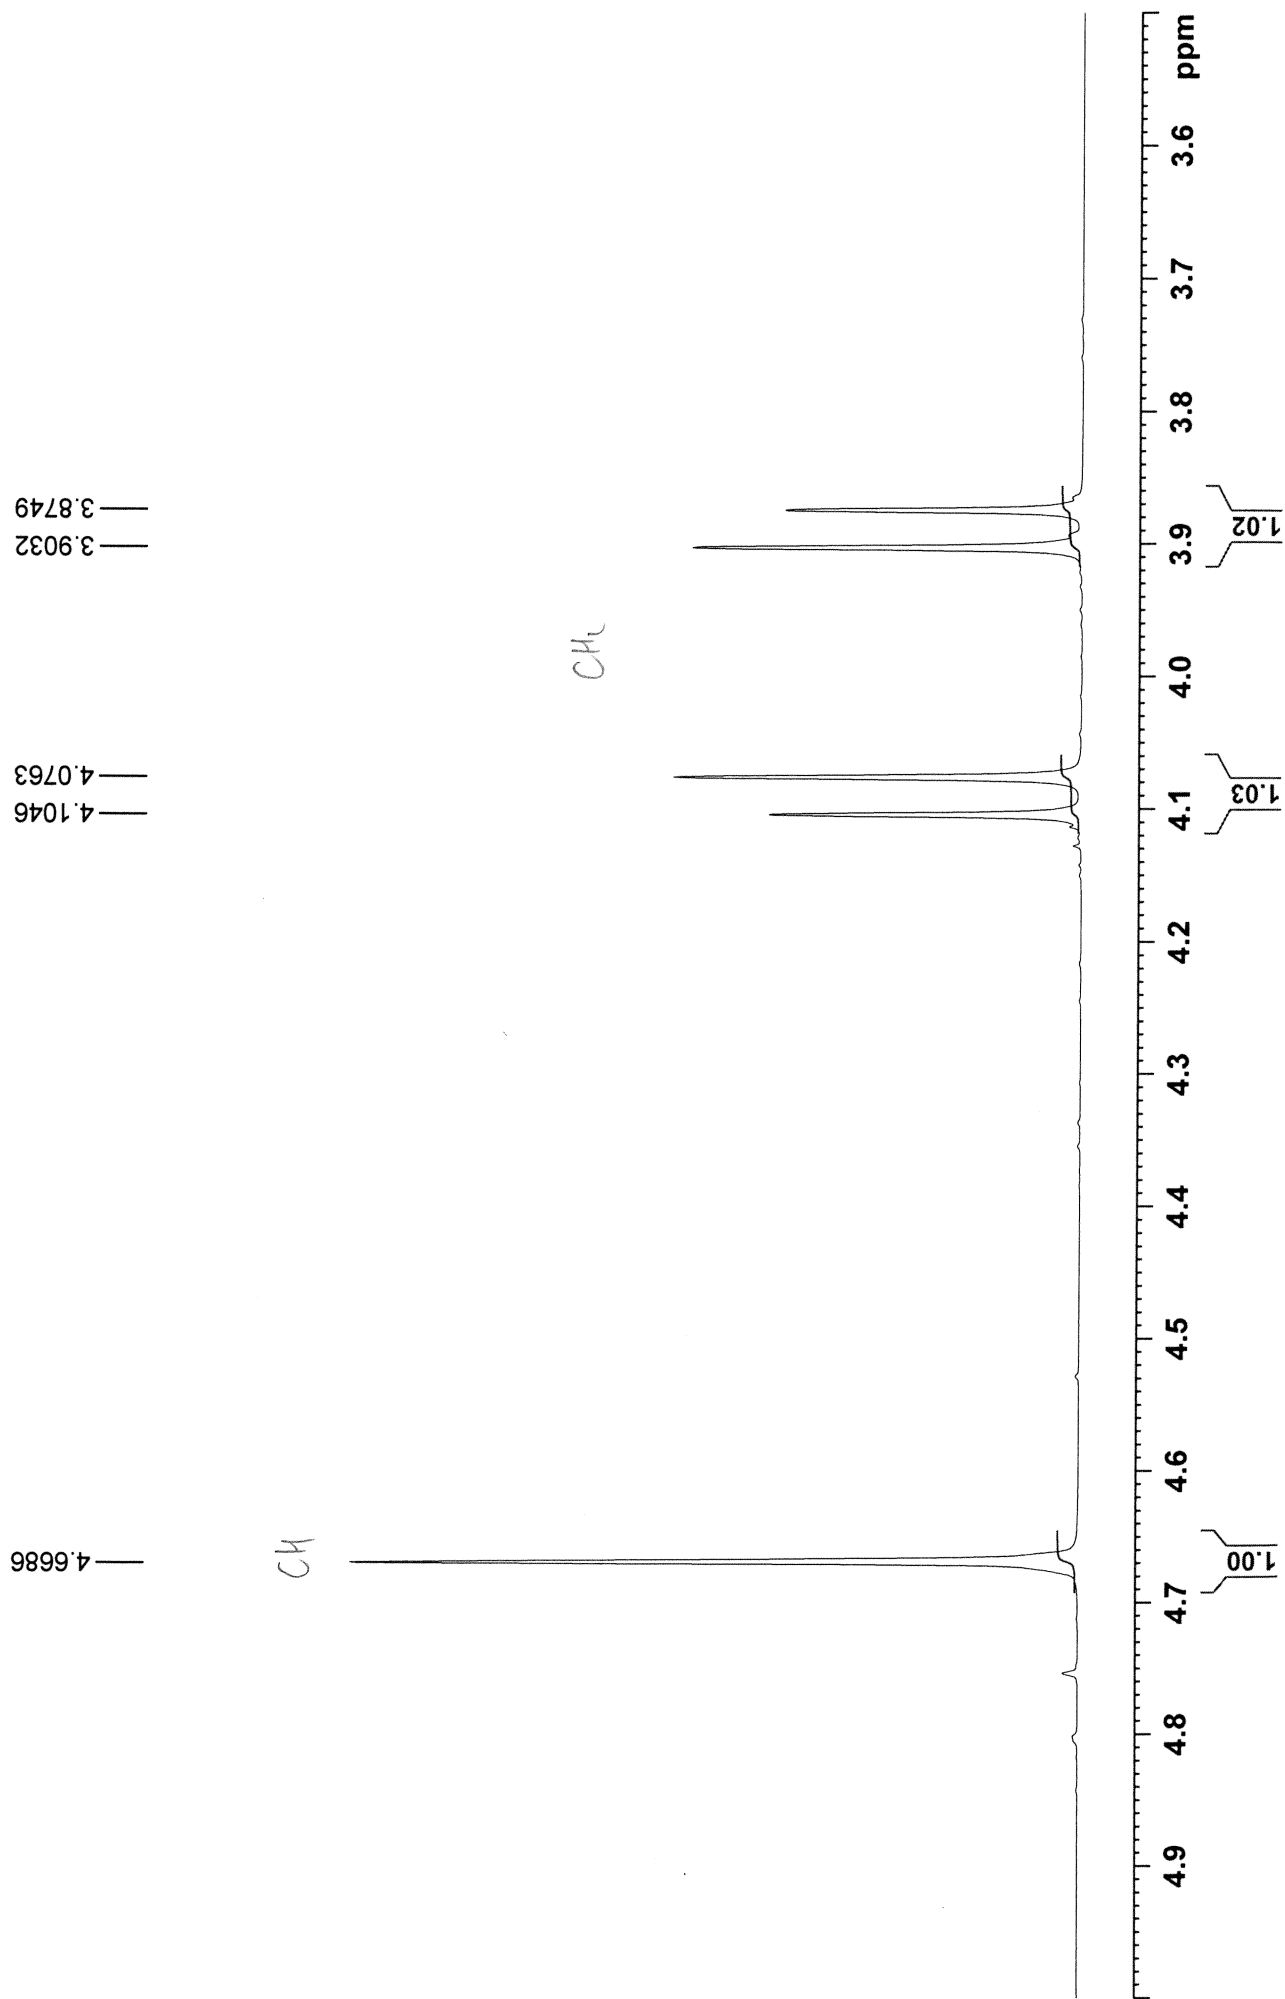

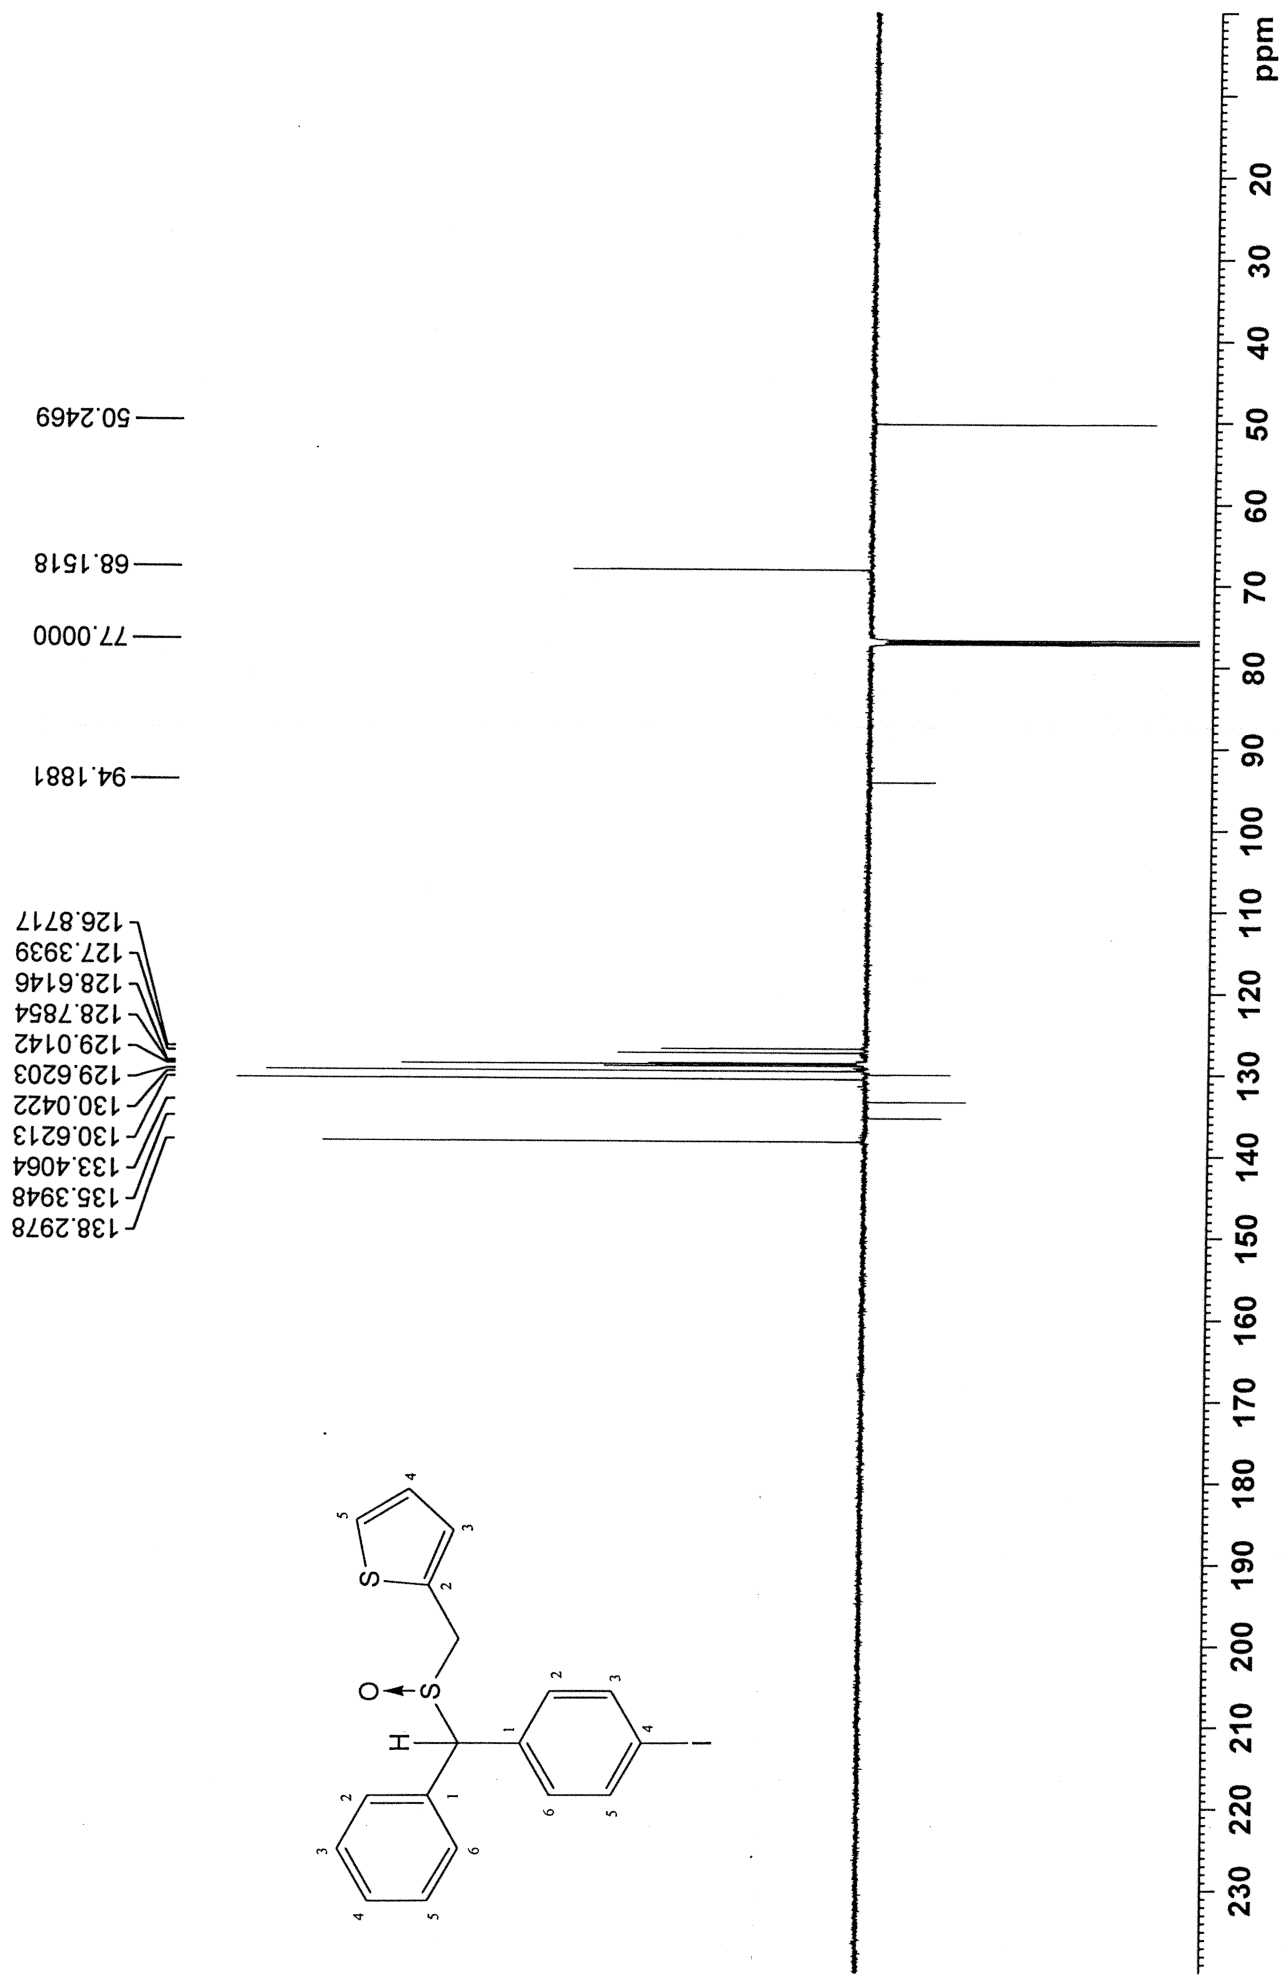

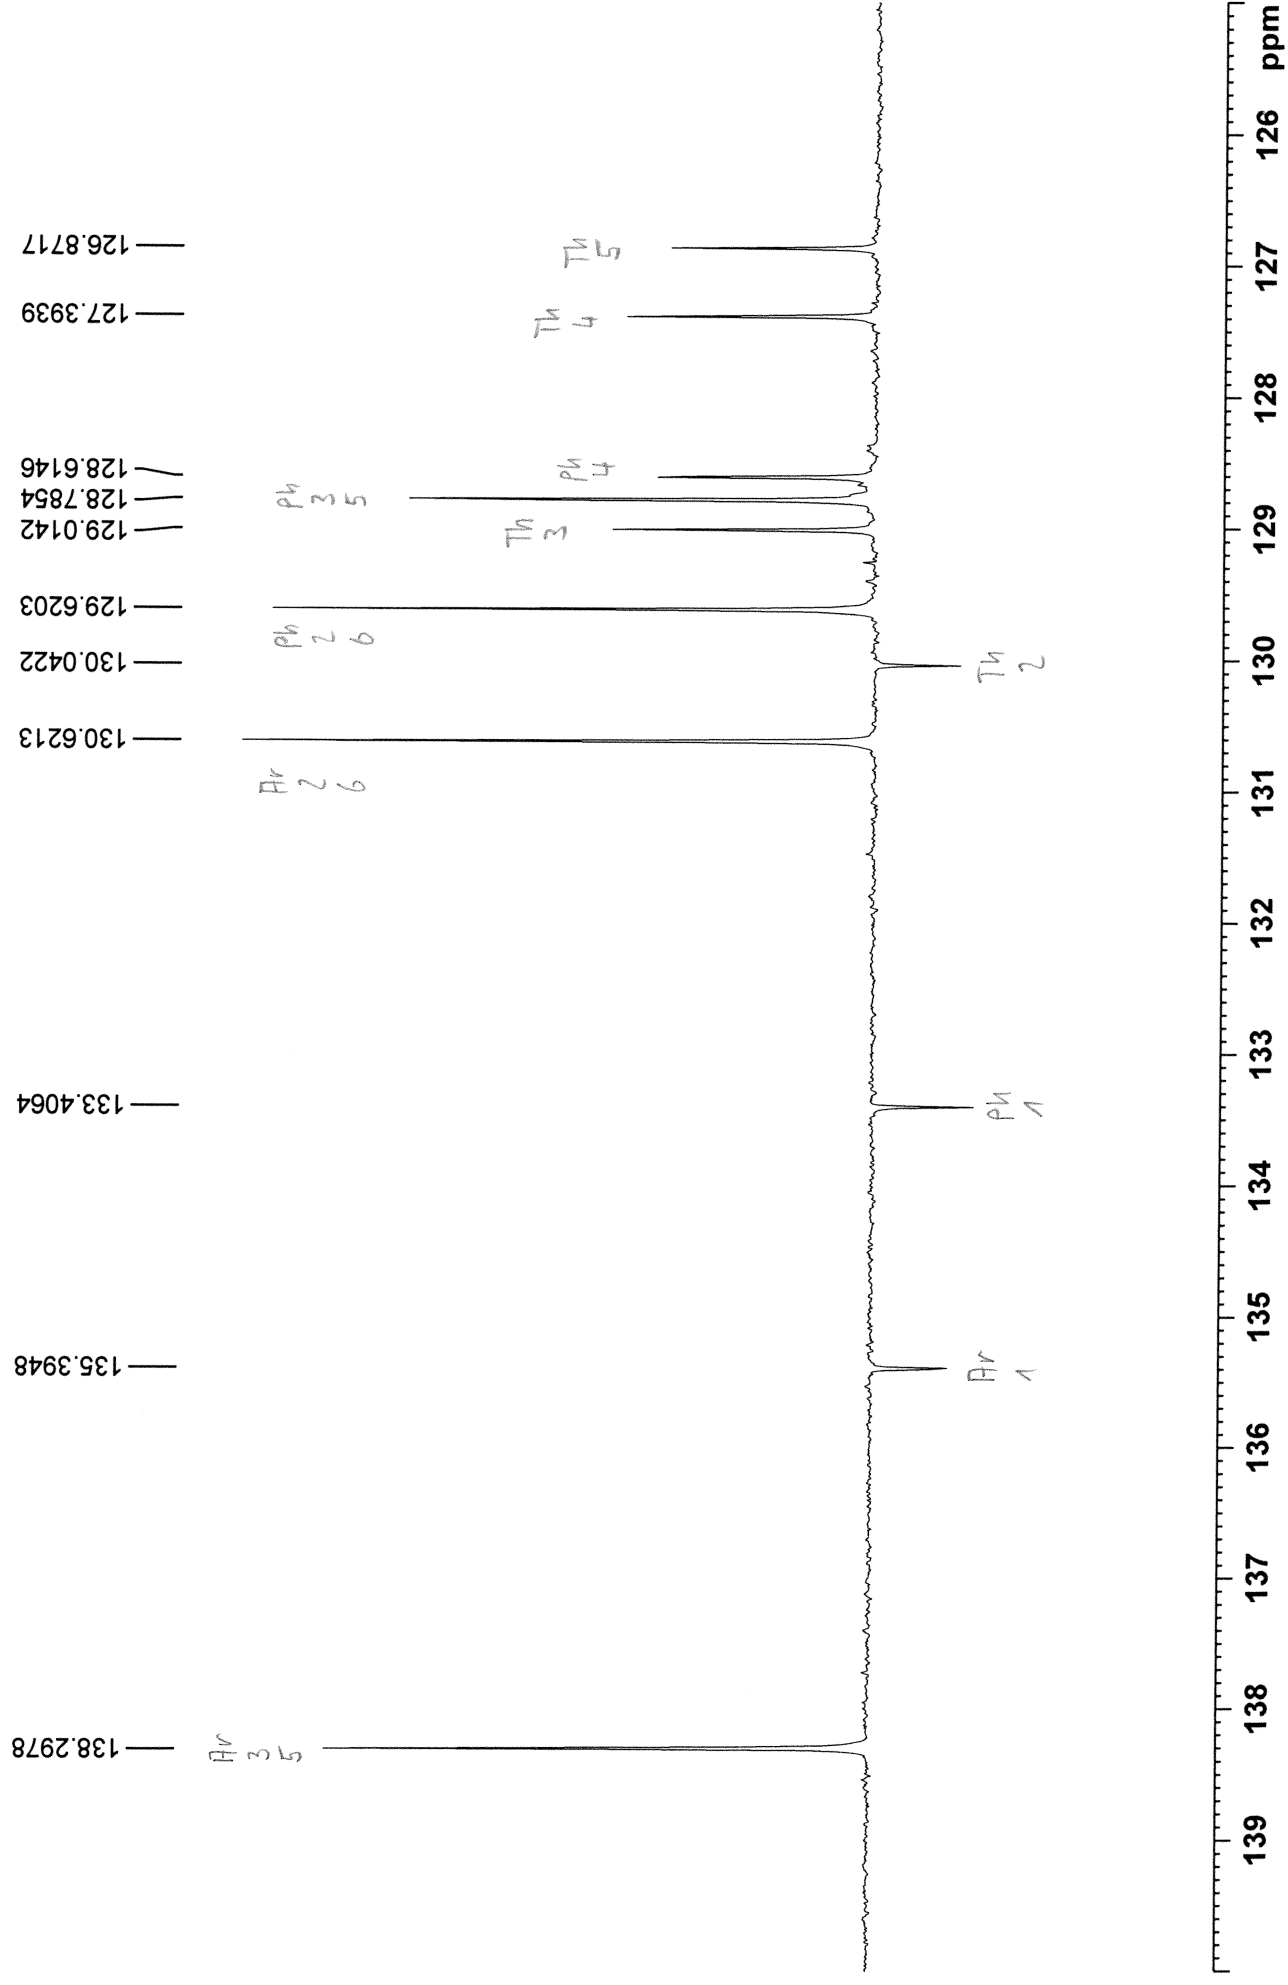

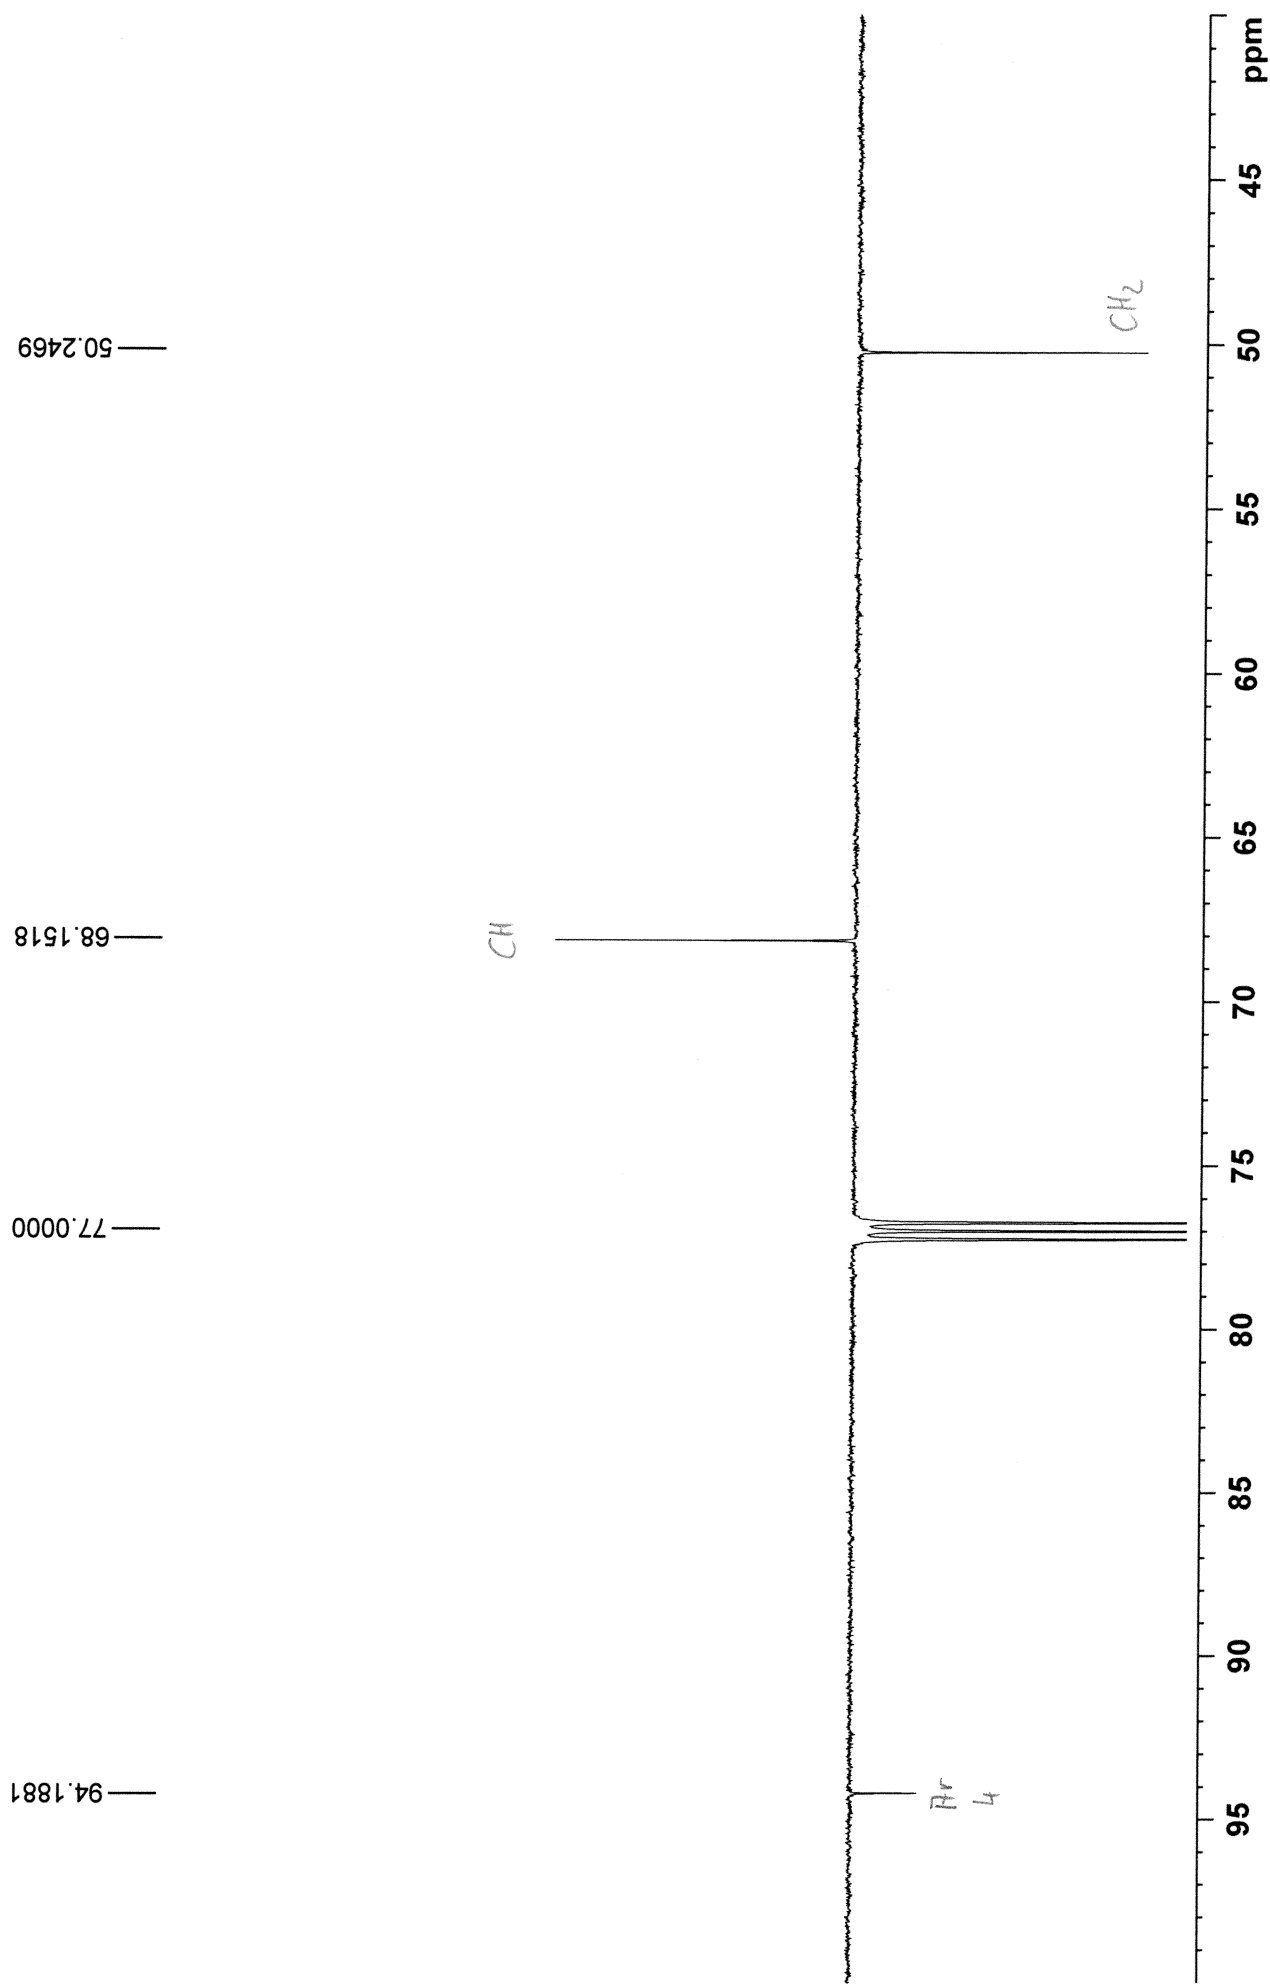

SB002-1 in cdcl3 (COSY) 20.1.2021

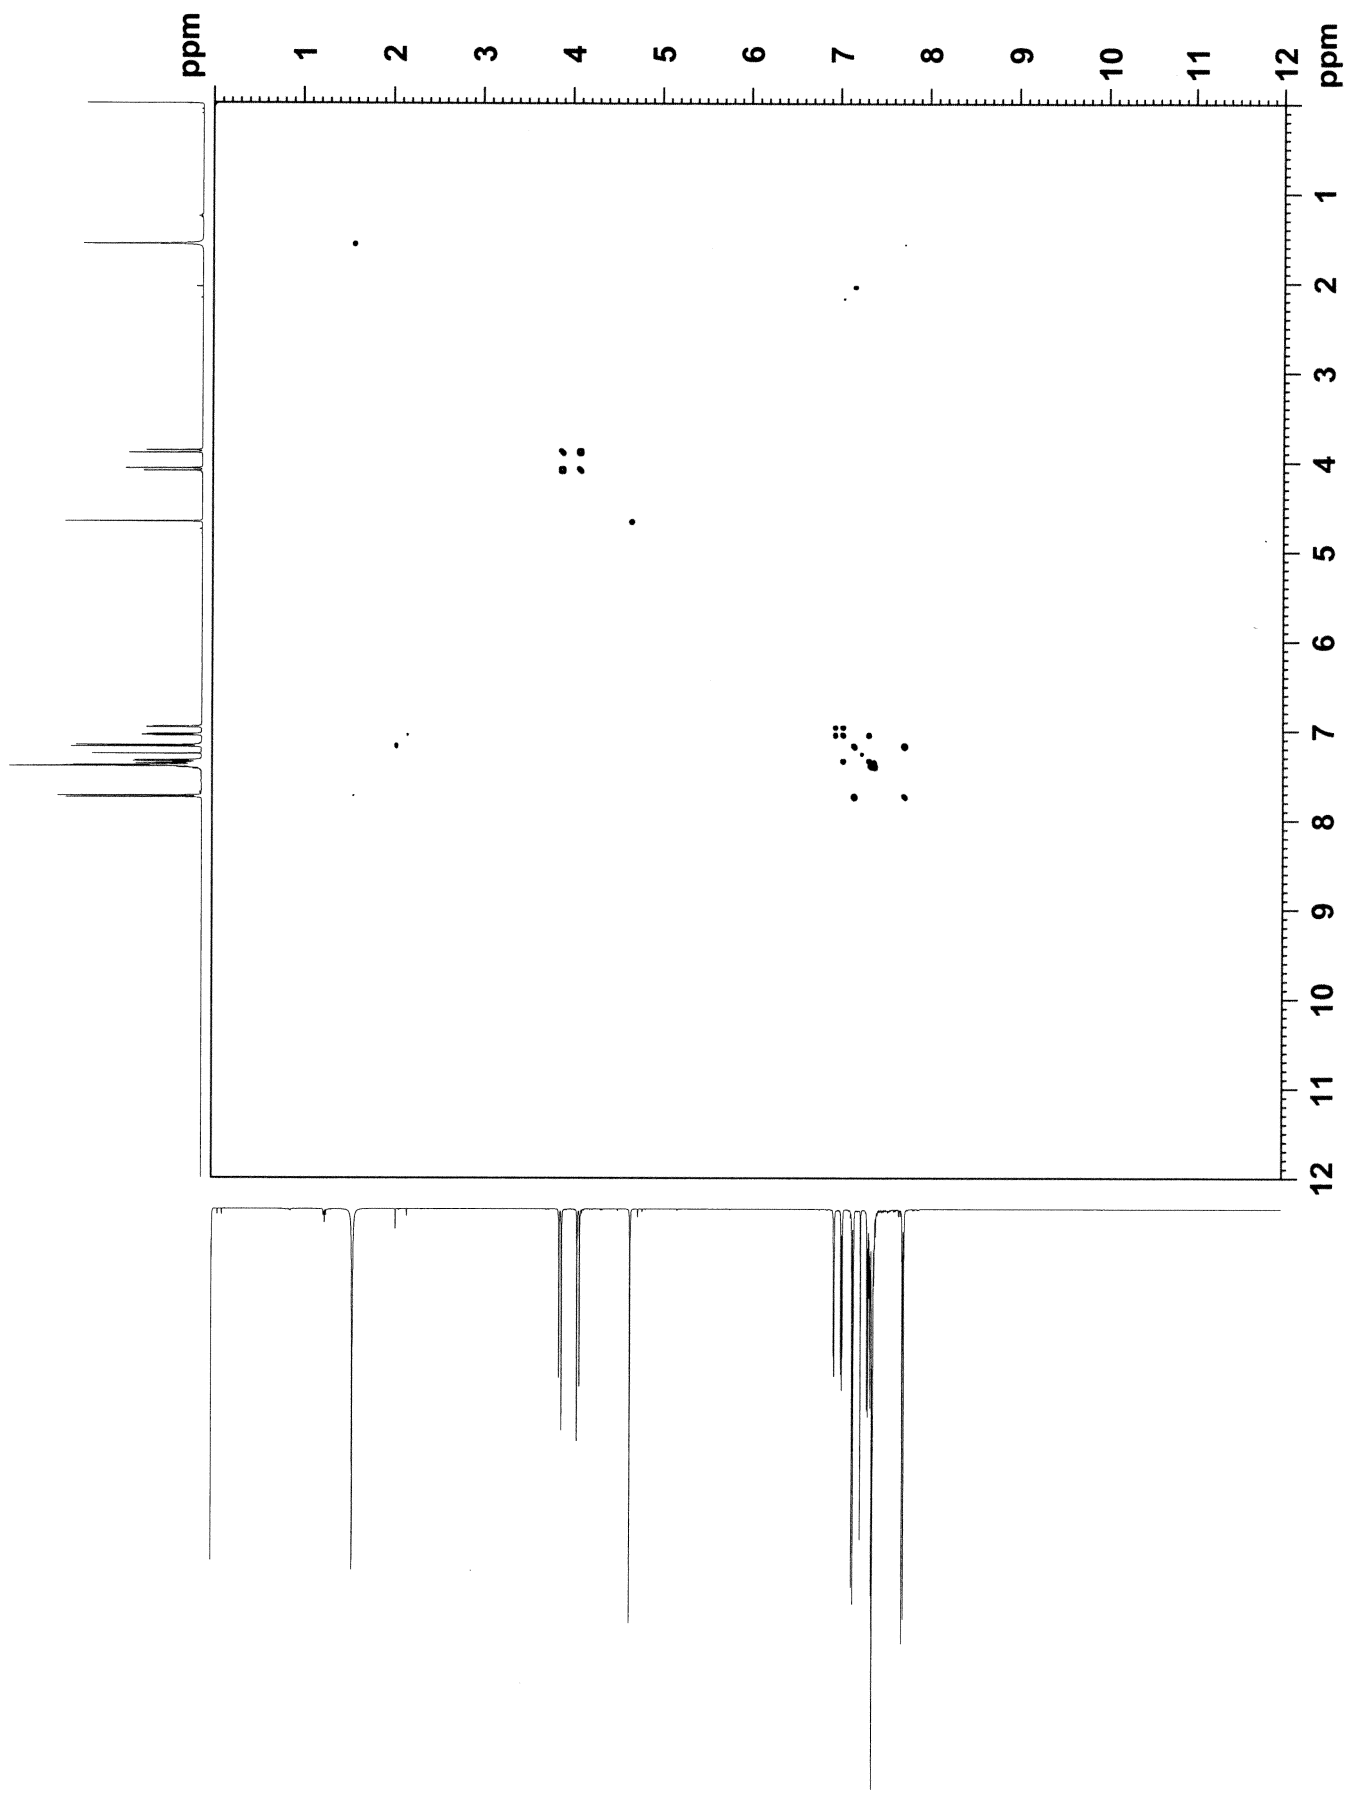



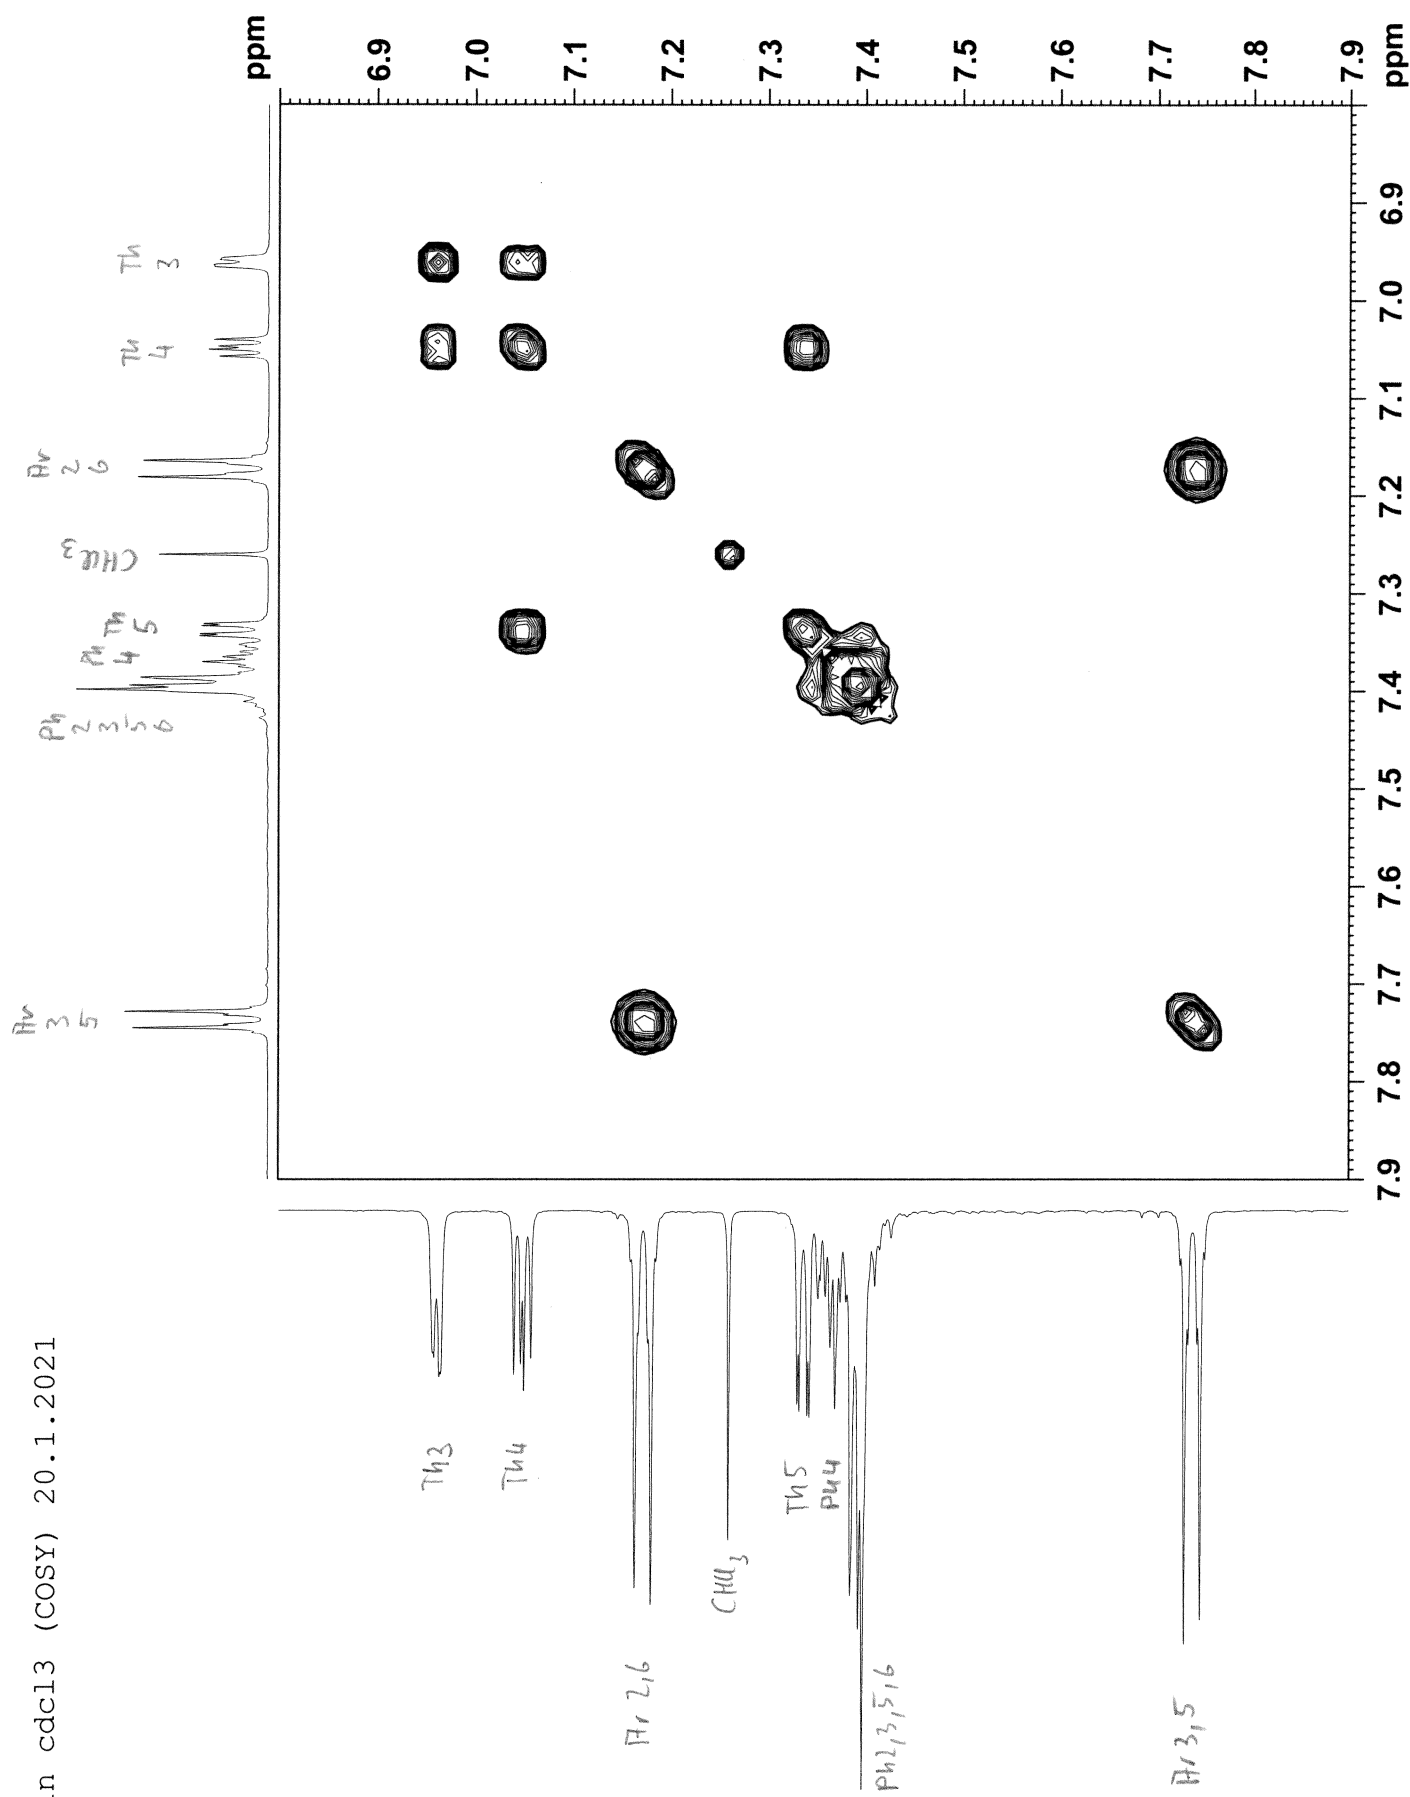

SB002-1 in cdcl3 (COSY) 20.1.2021

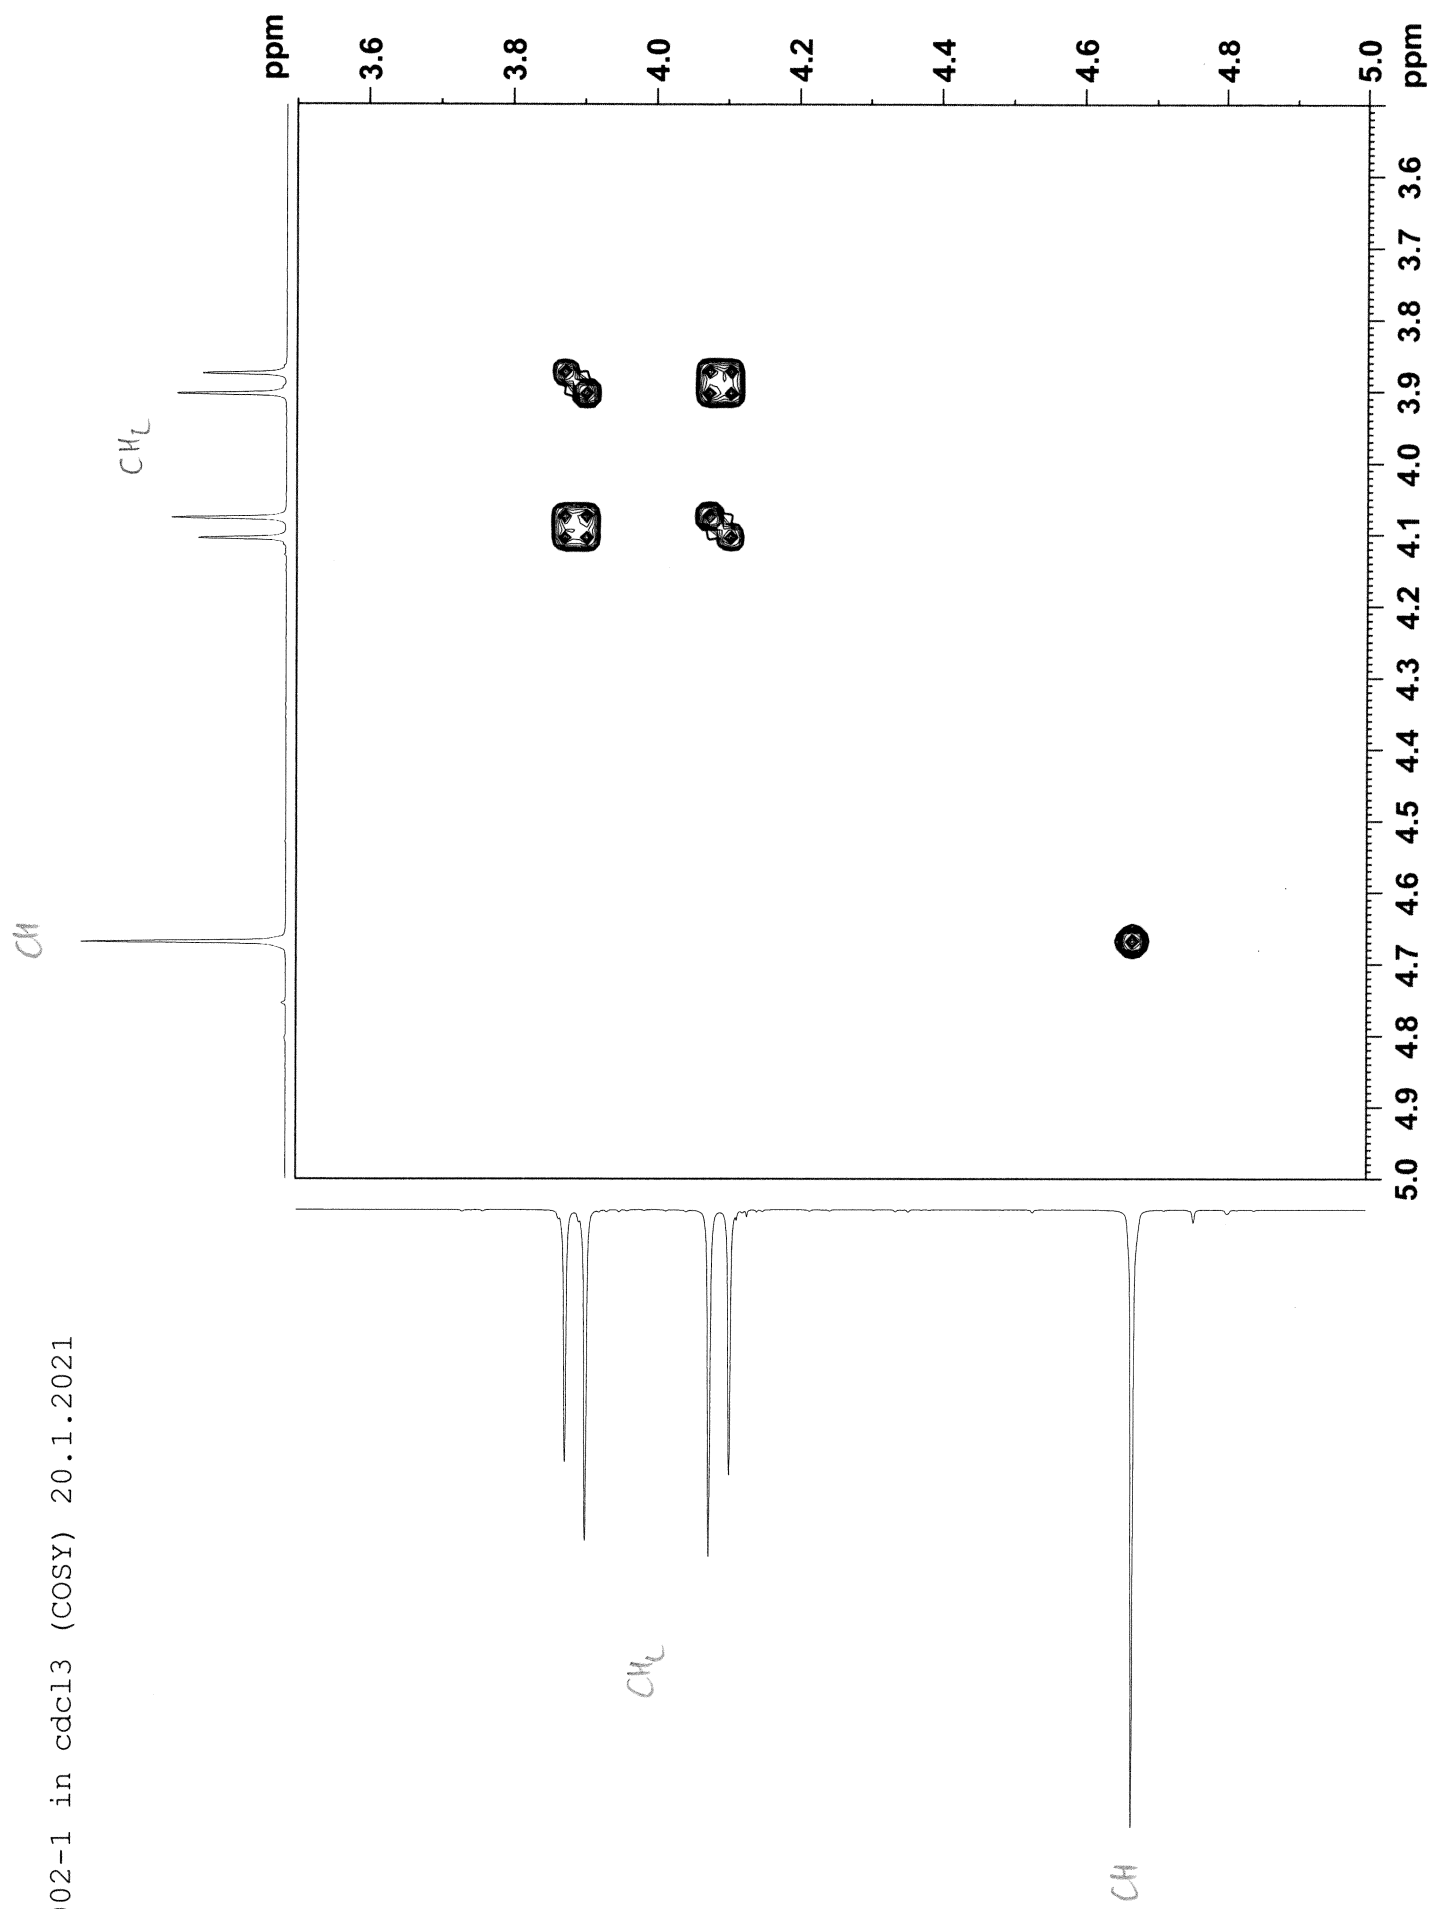

SB002-1 in cdcl3 (HSQC) 20.1.2021

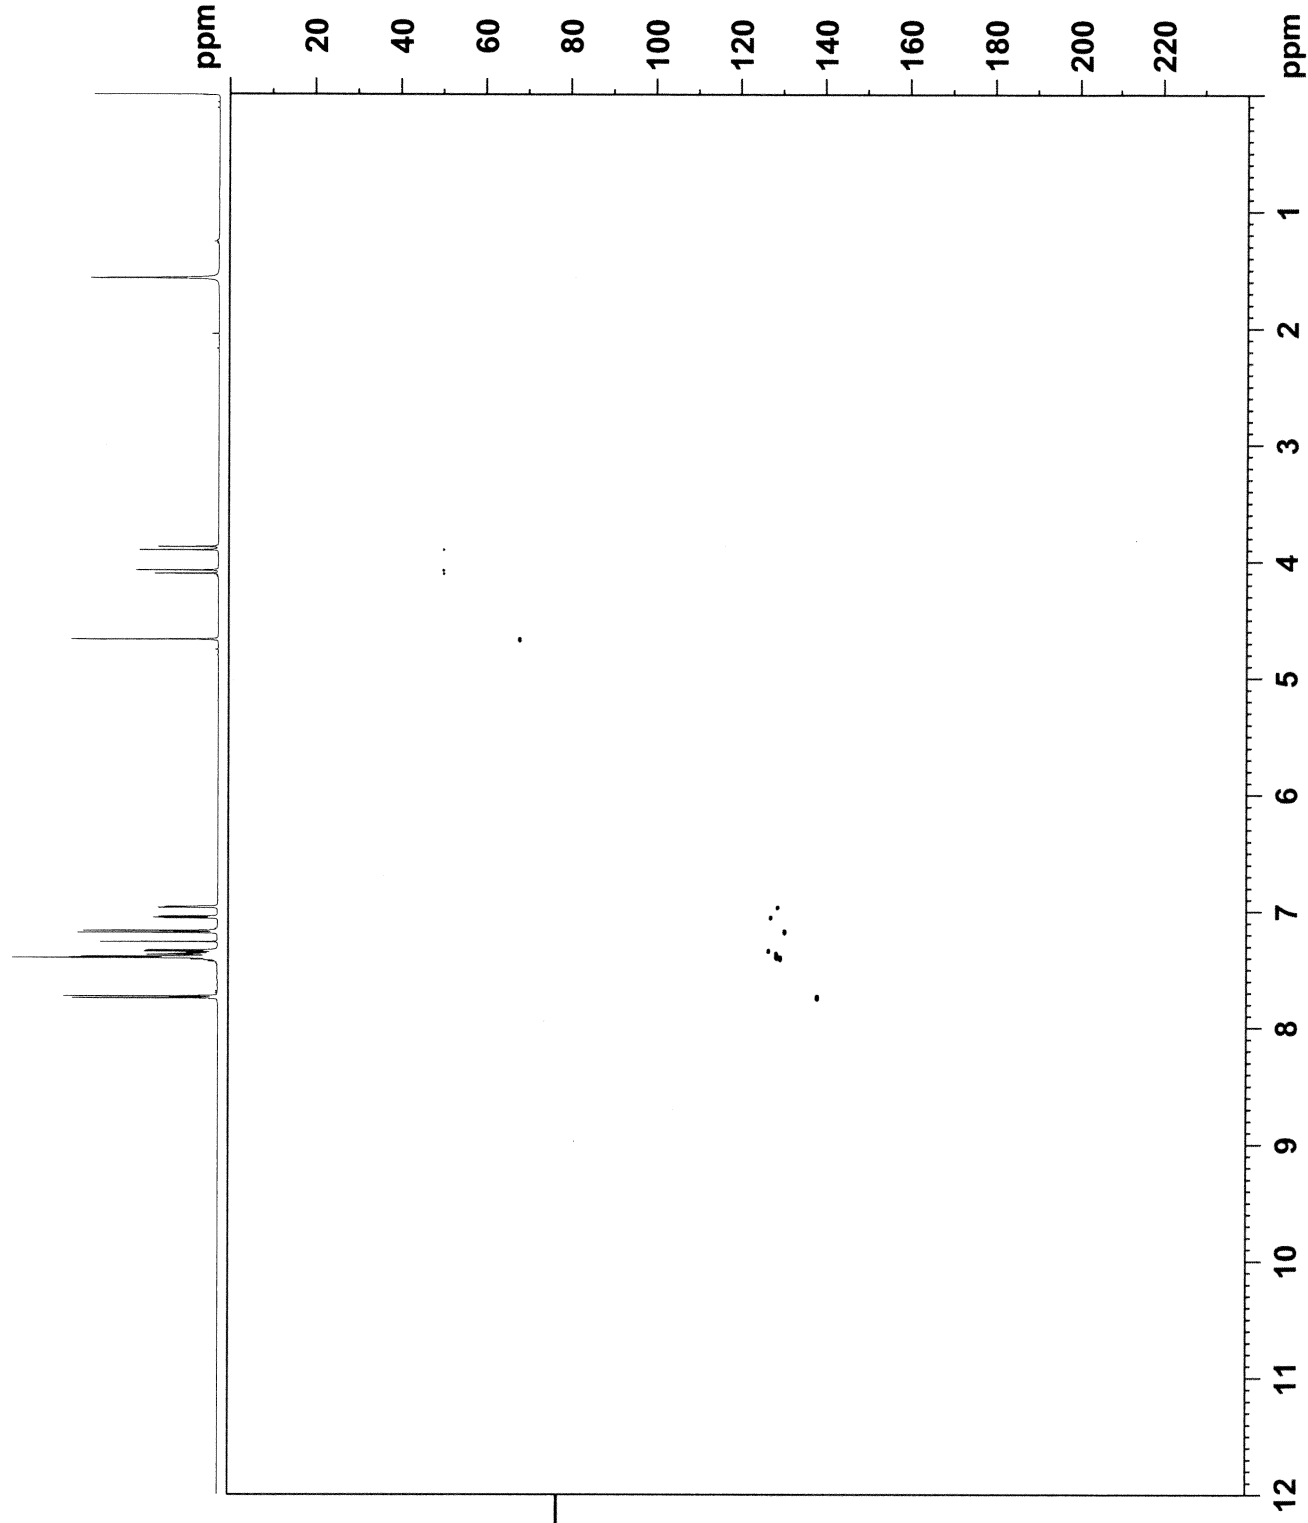

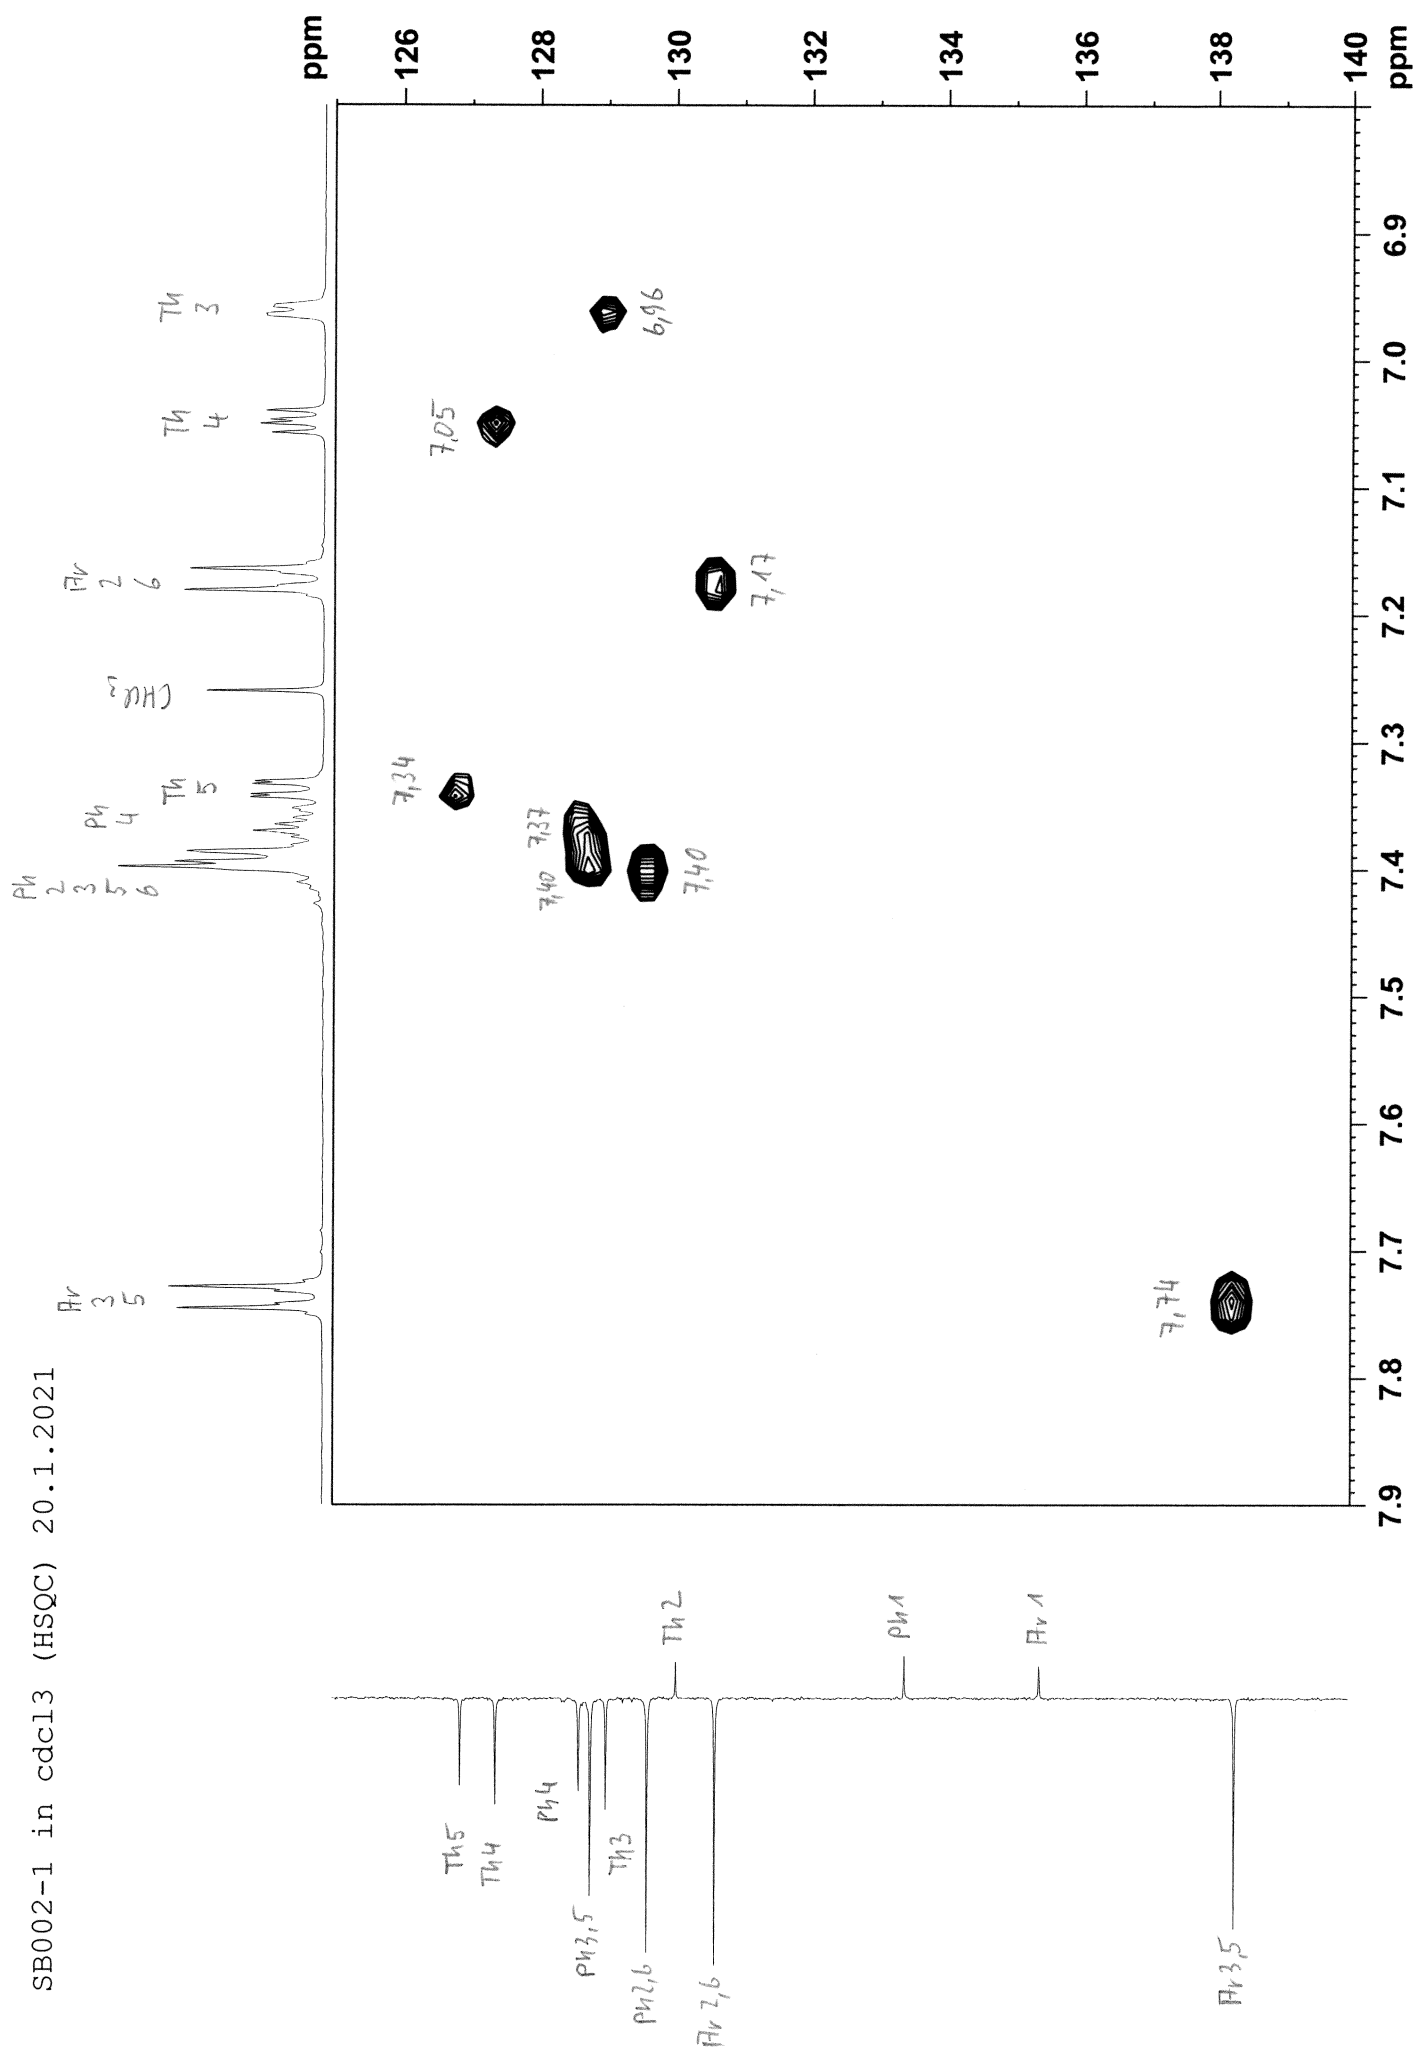

SB002-1 in cdcl3 (HSQC) 20.1.2021

CH

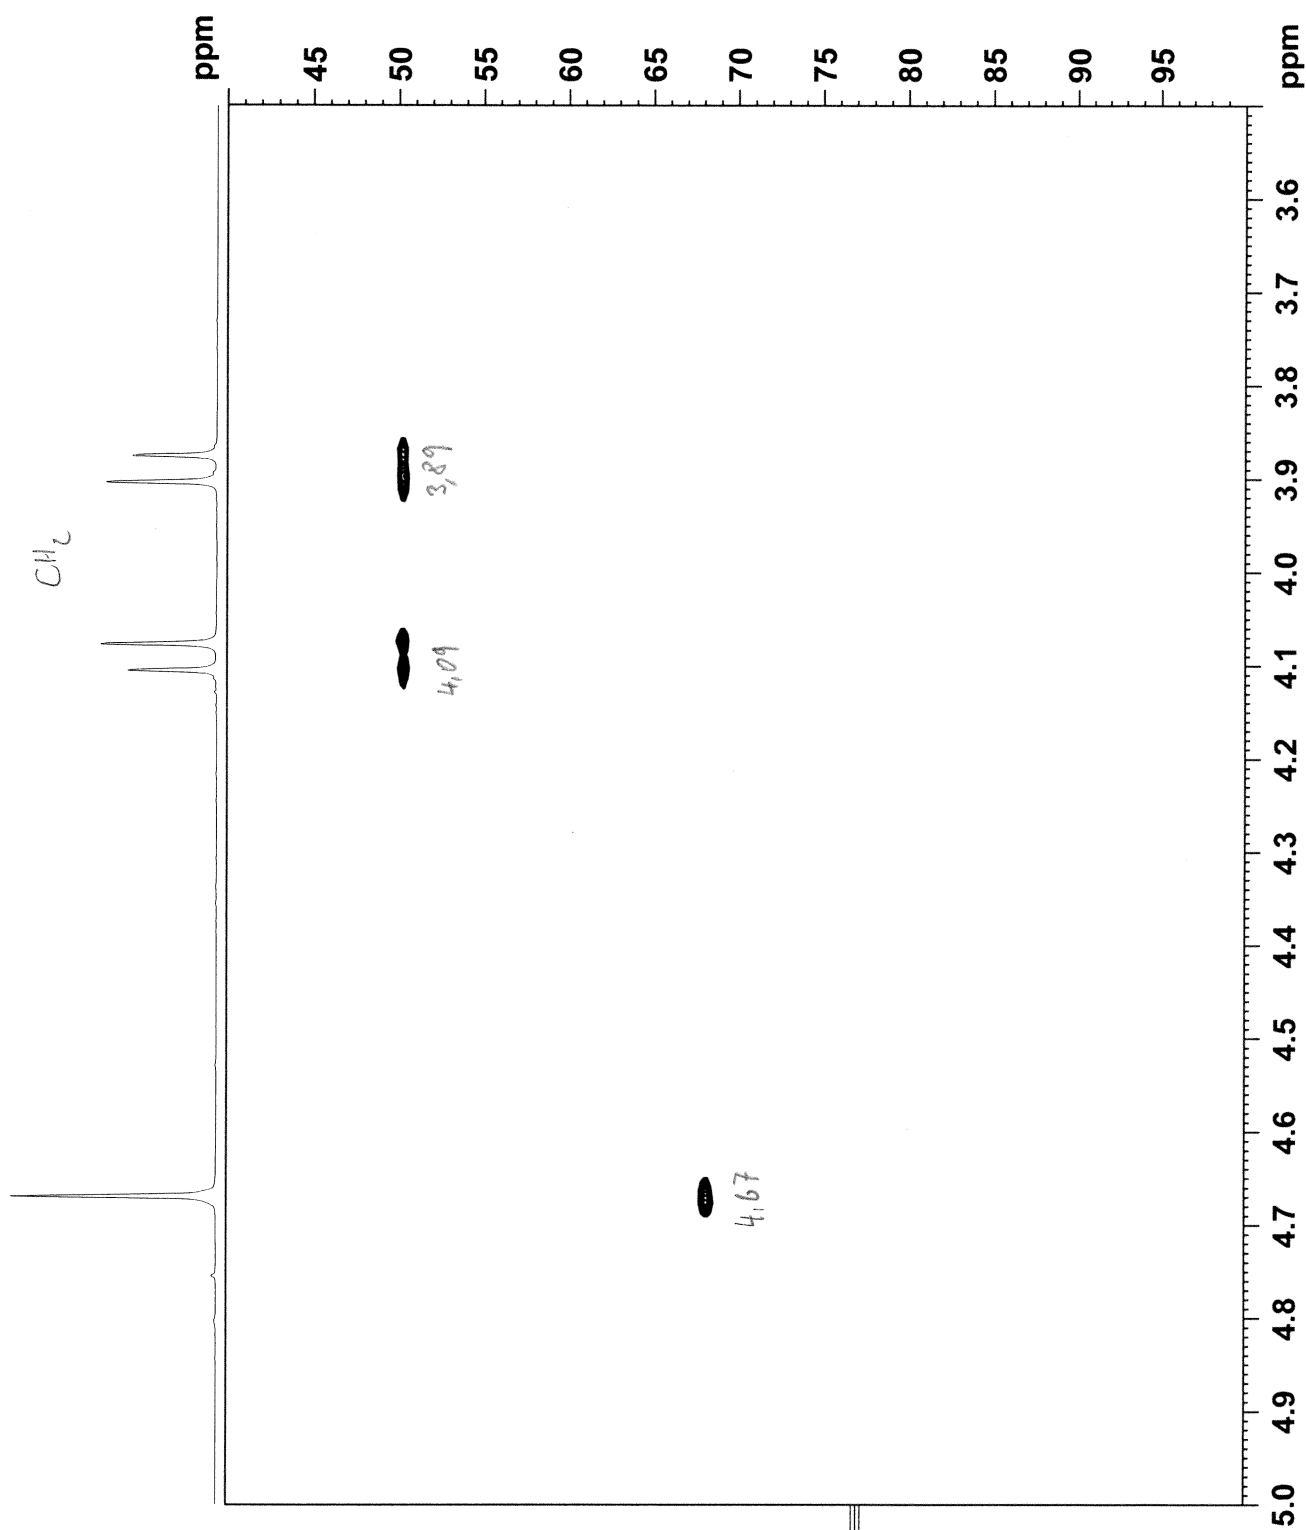

$\text{CH}_2$

CH

$\text{H}_2\text{O}$

SB002-1 in cdcl3 (HMBC) 20.1.2021

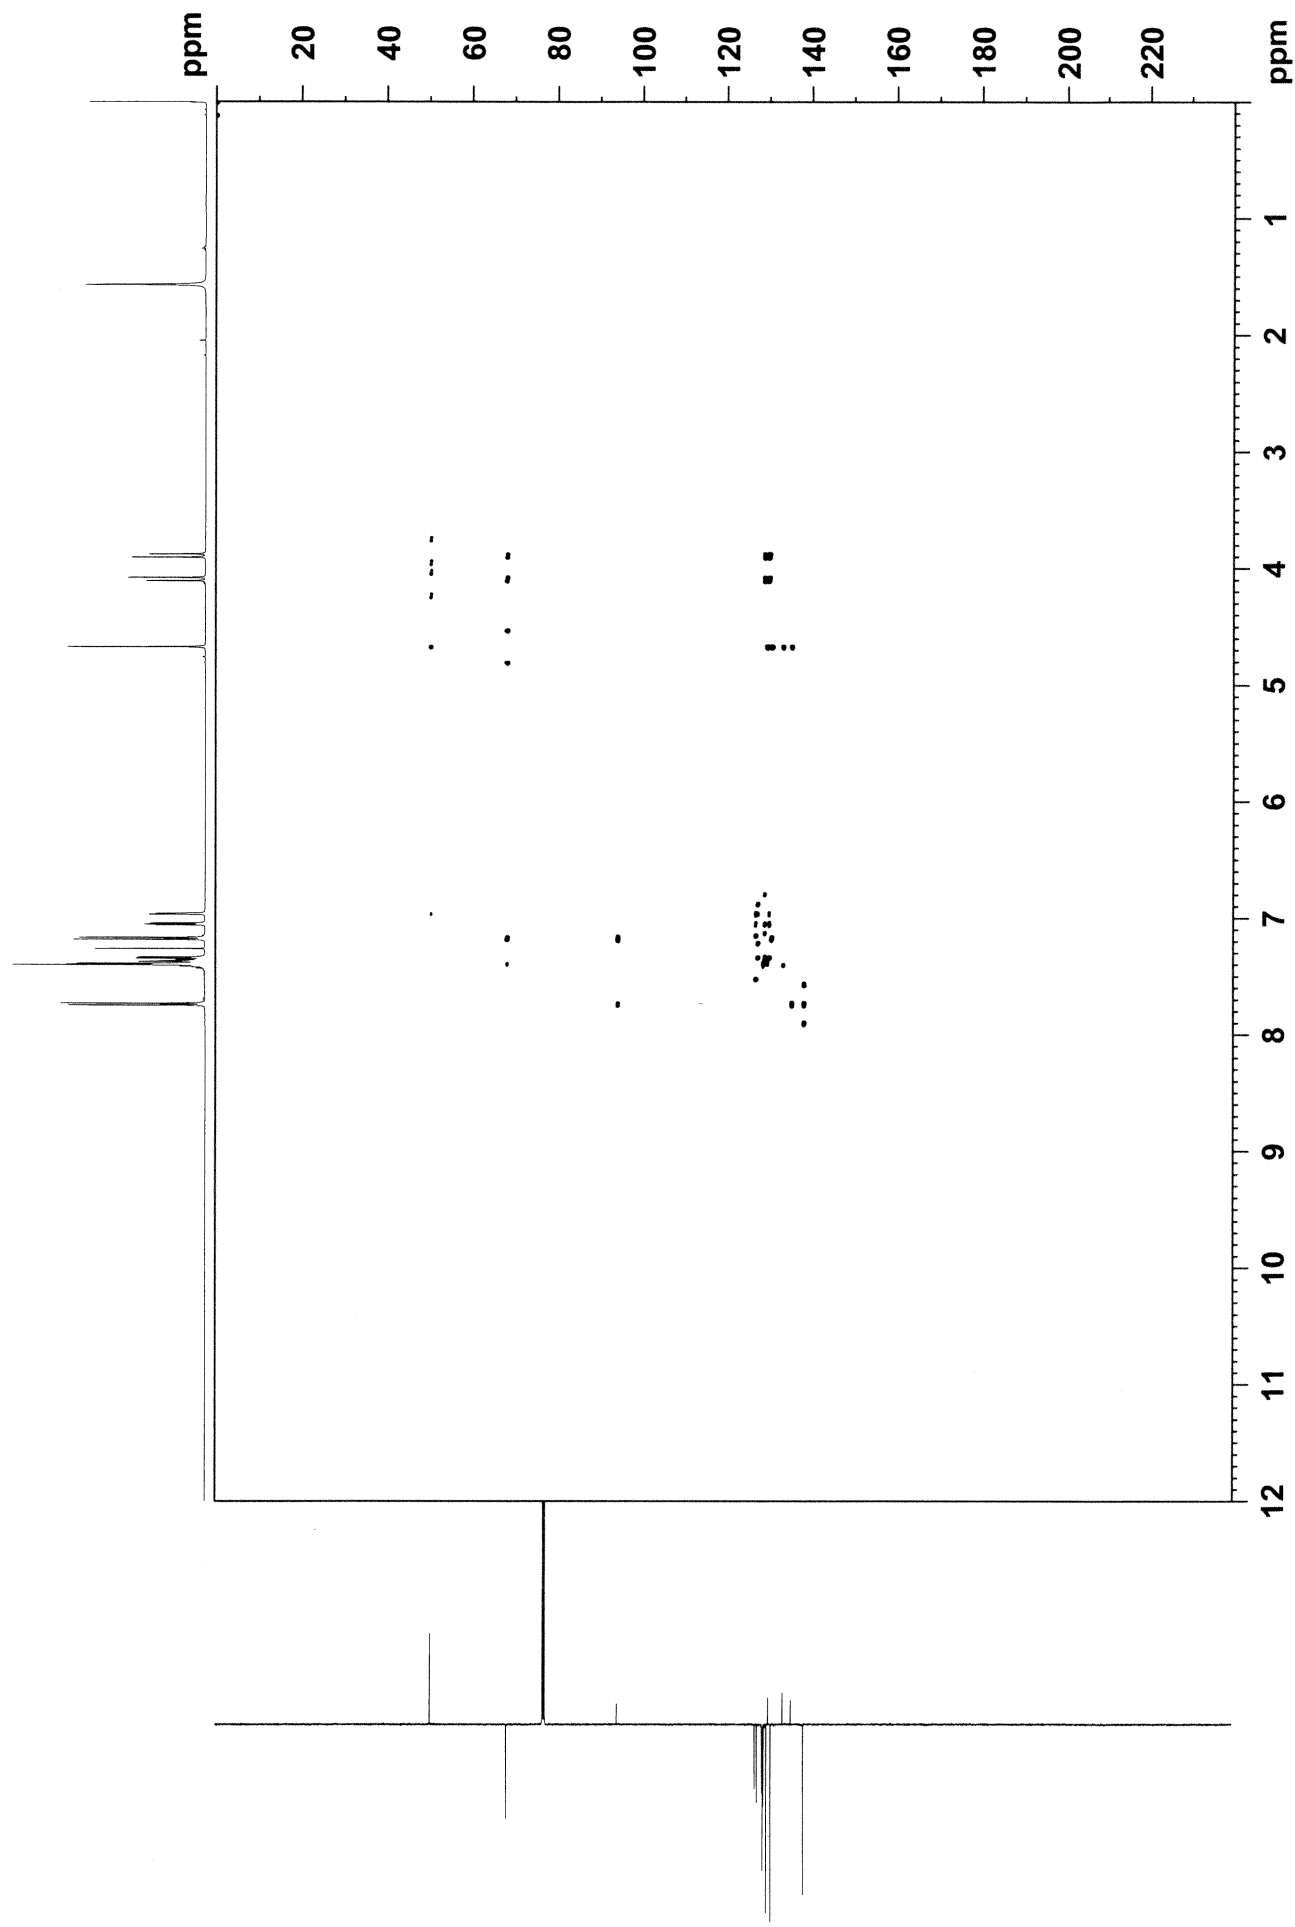

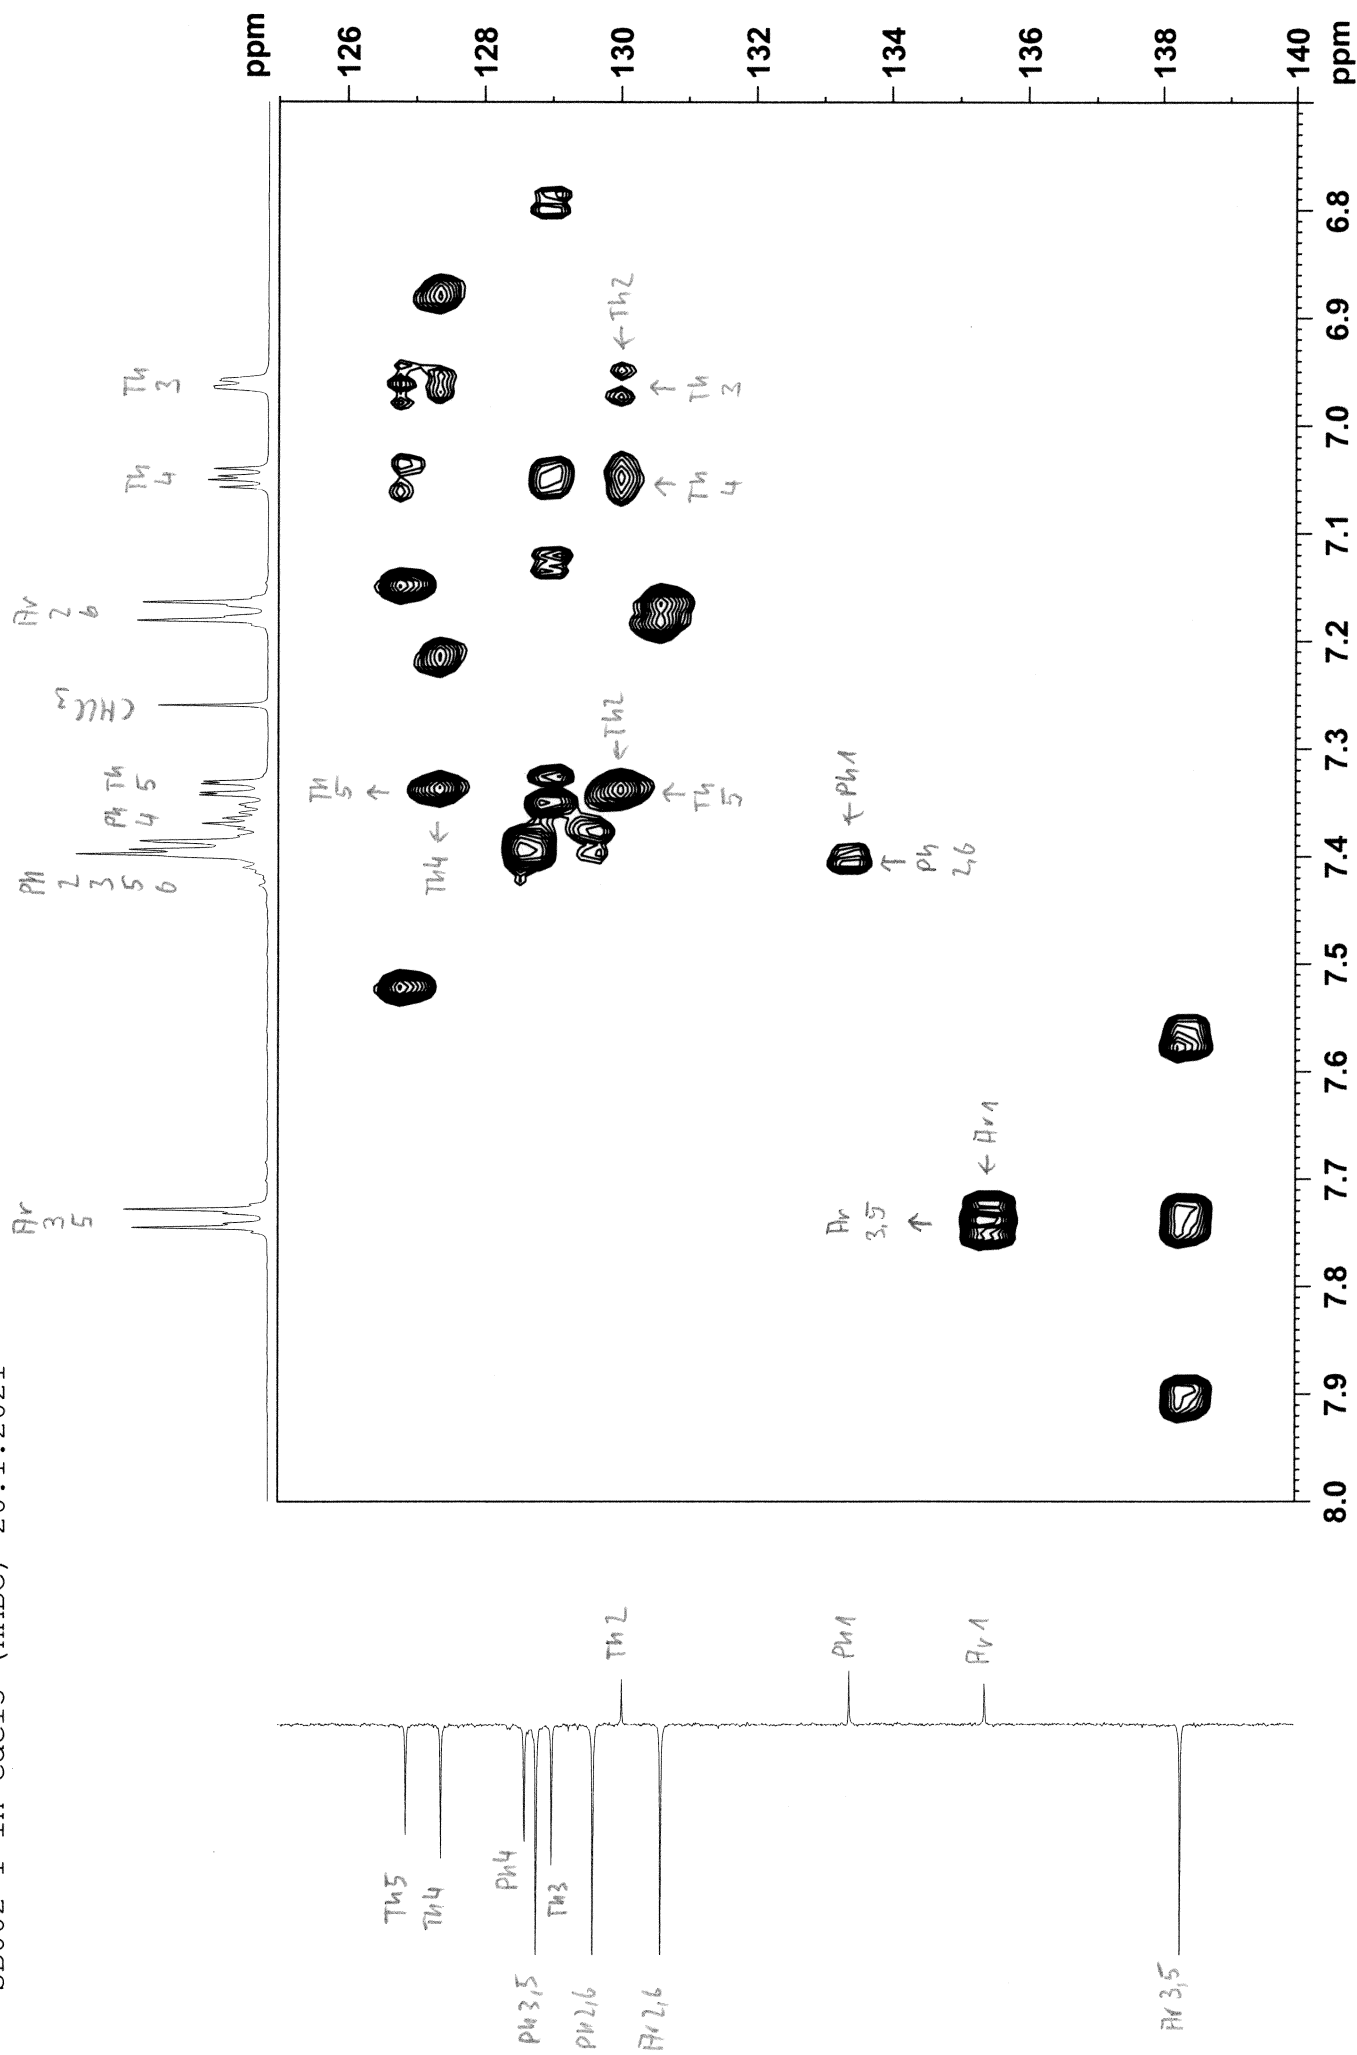

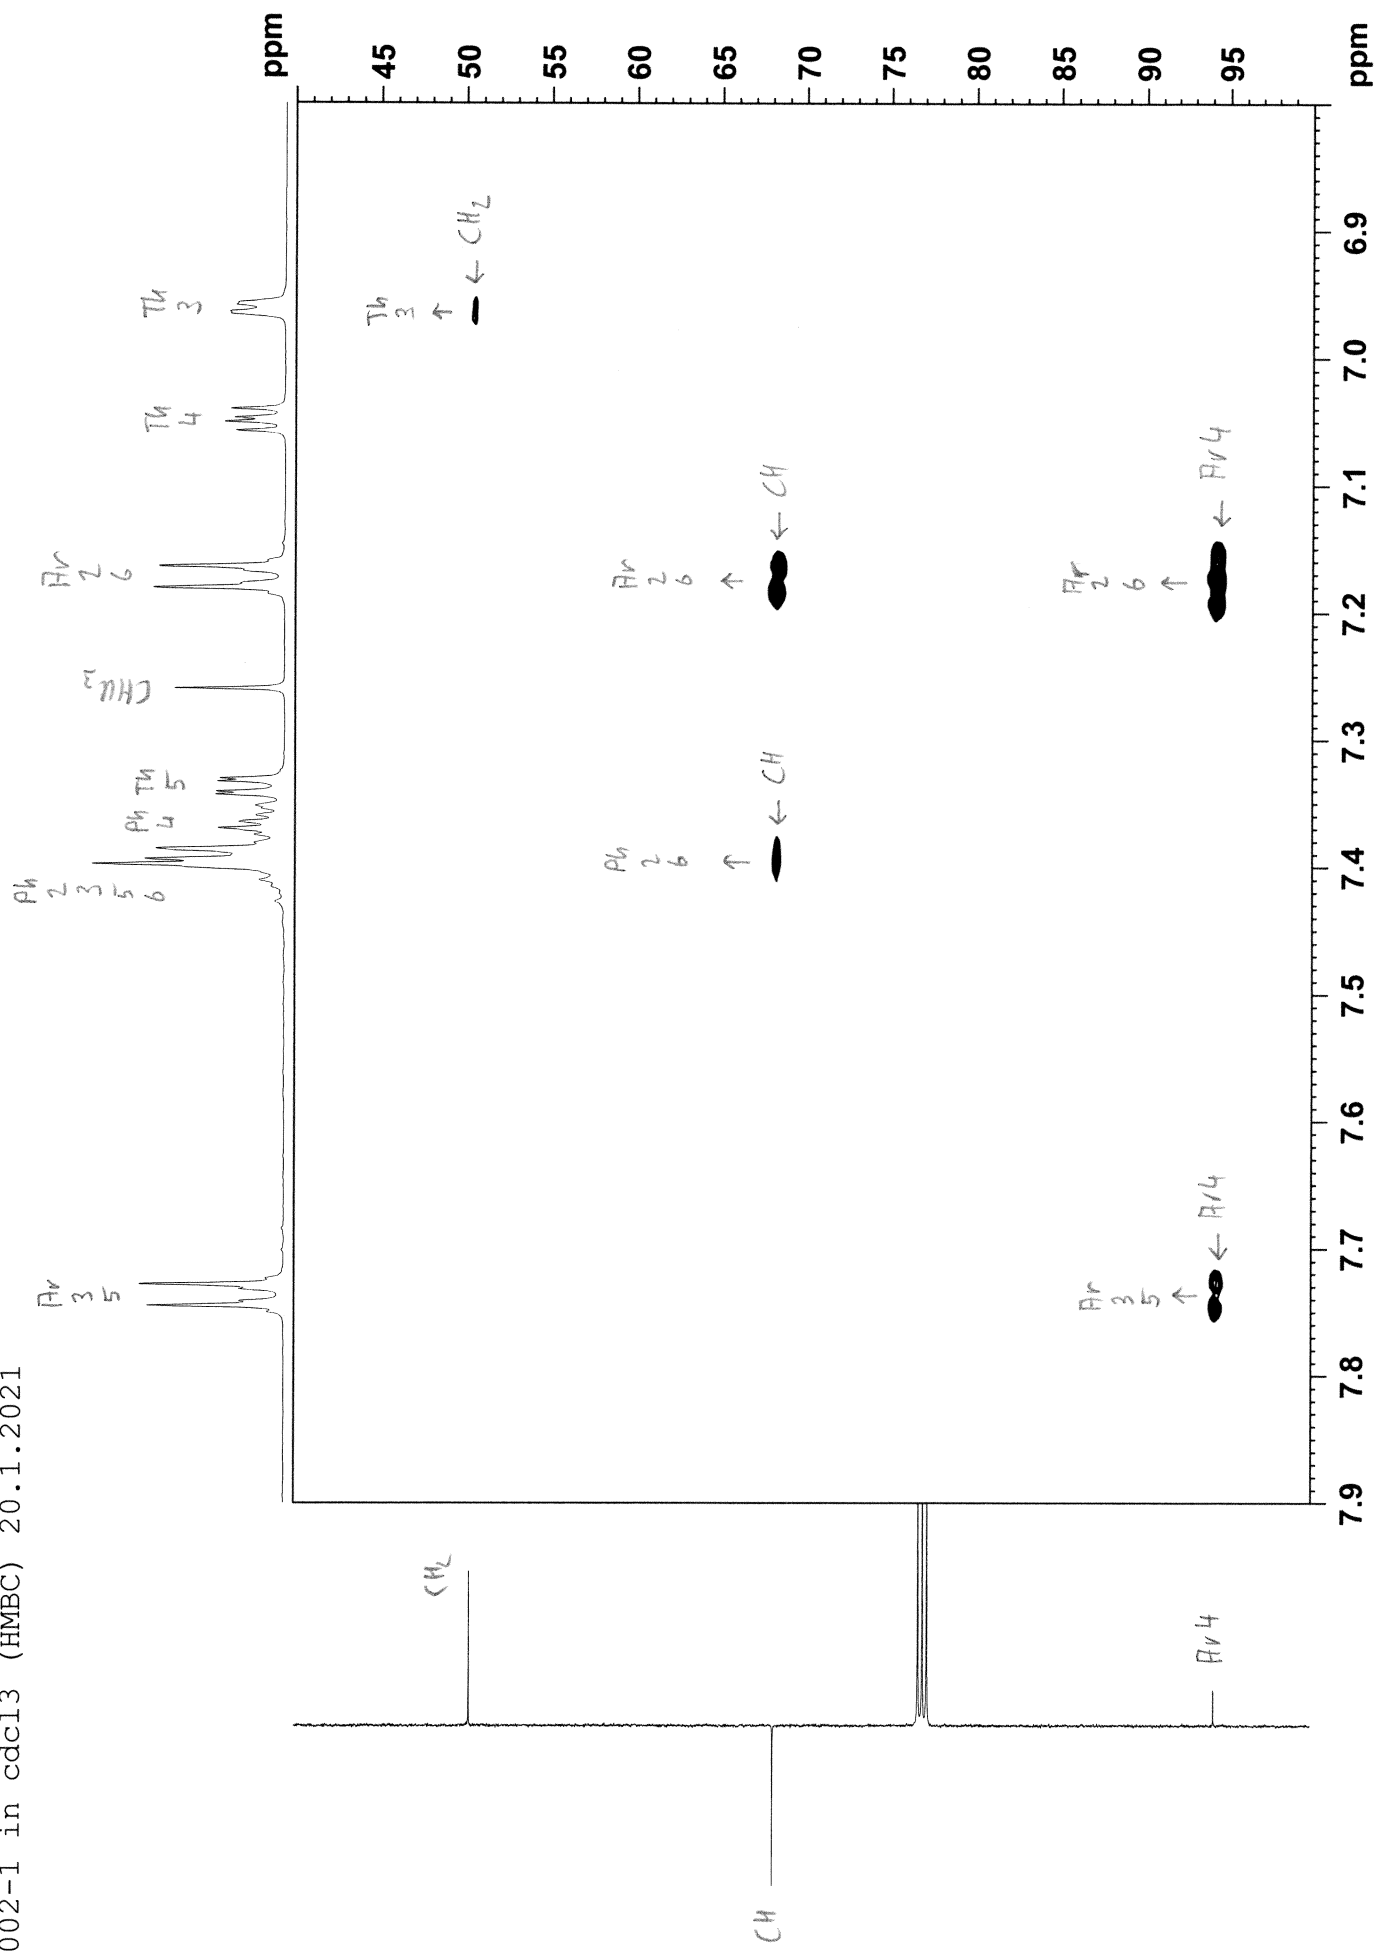



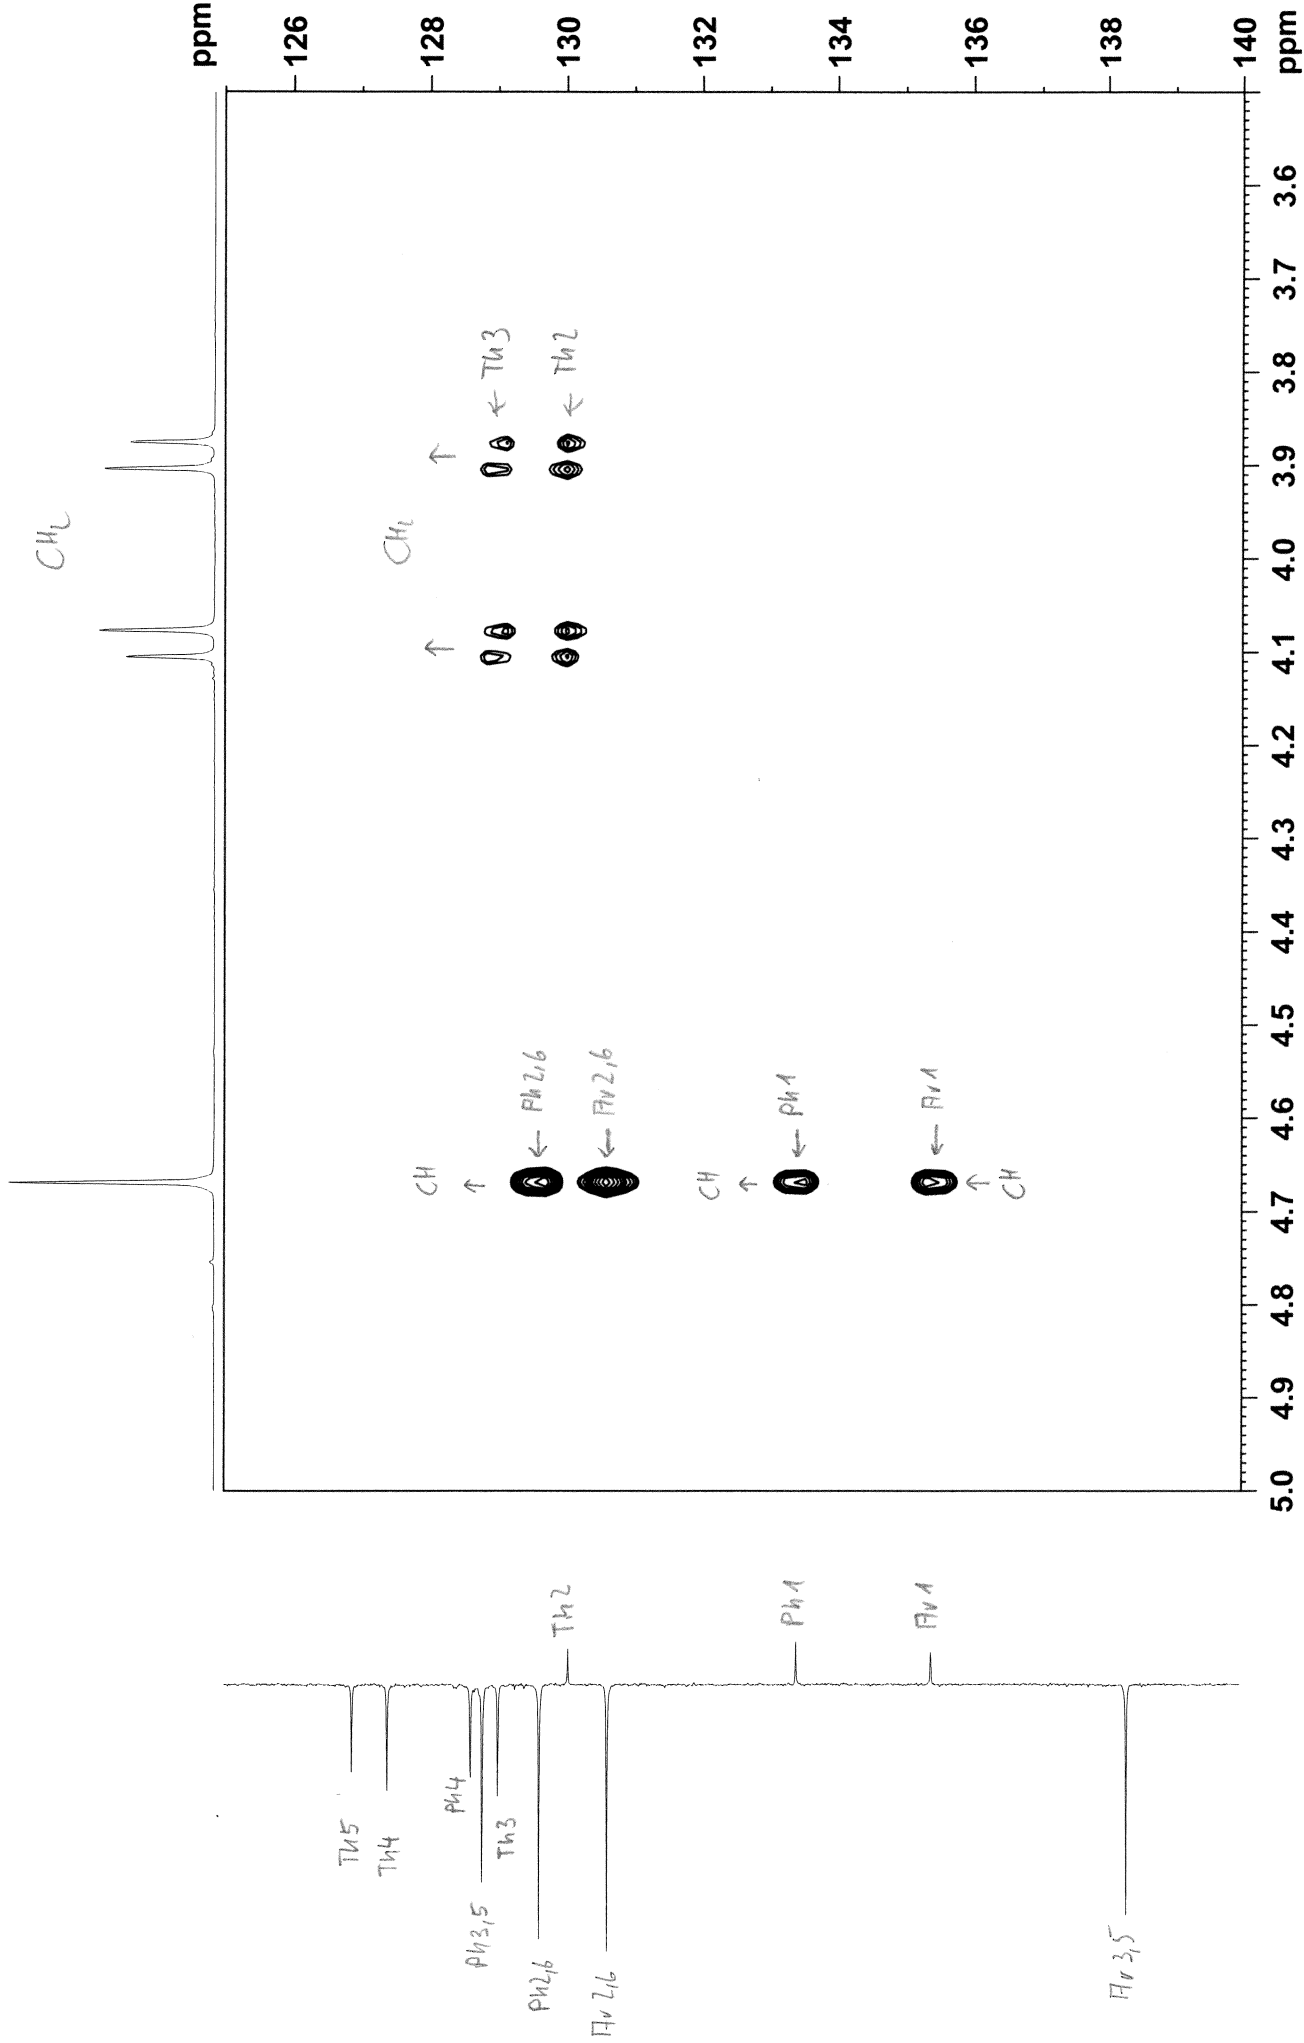

CH

CH<sub>2</sub>

ppm

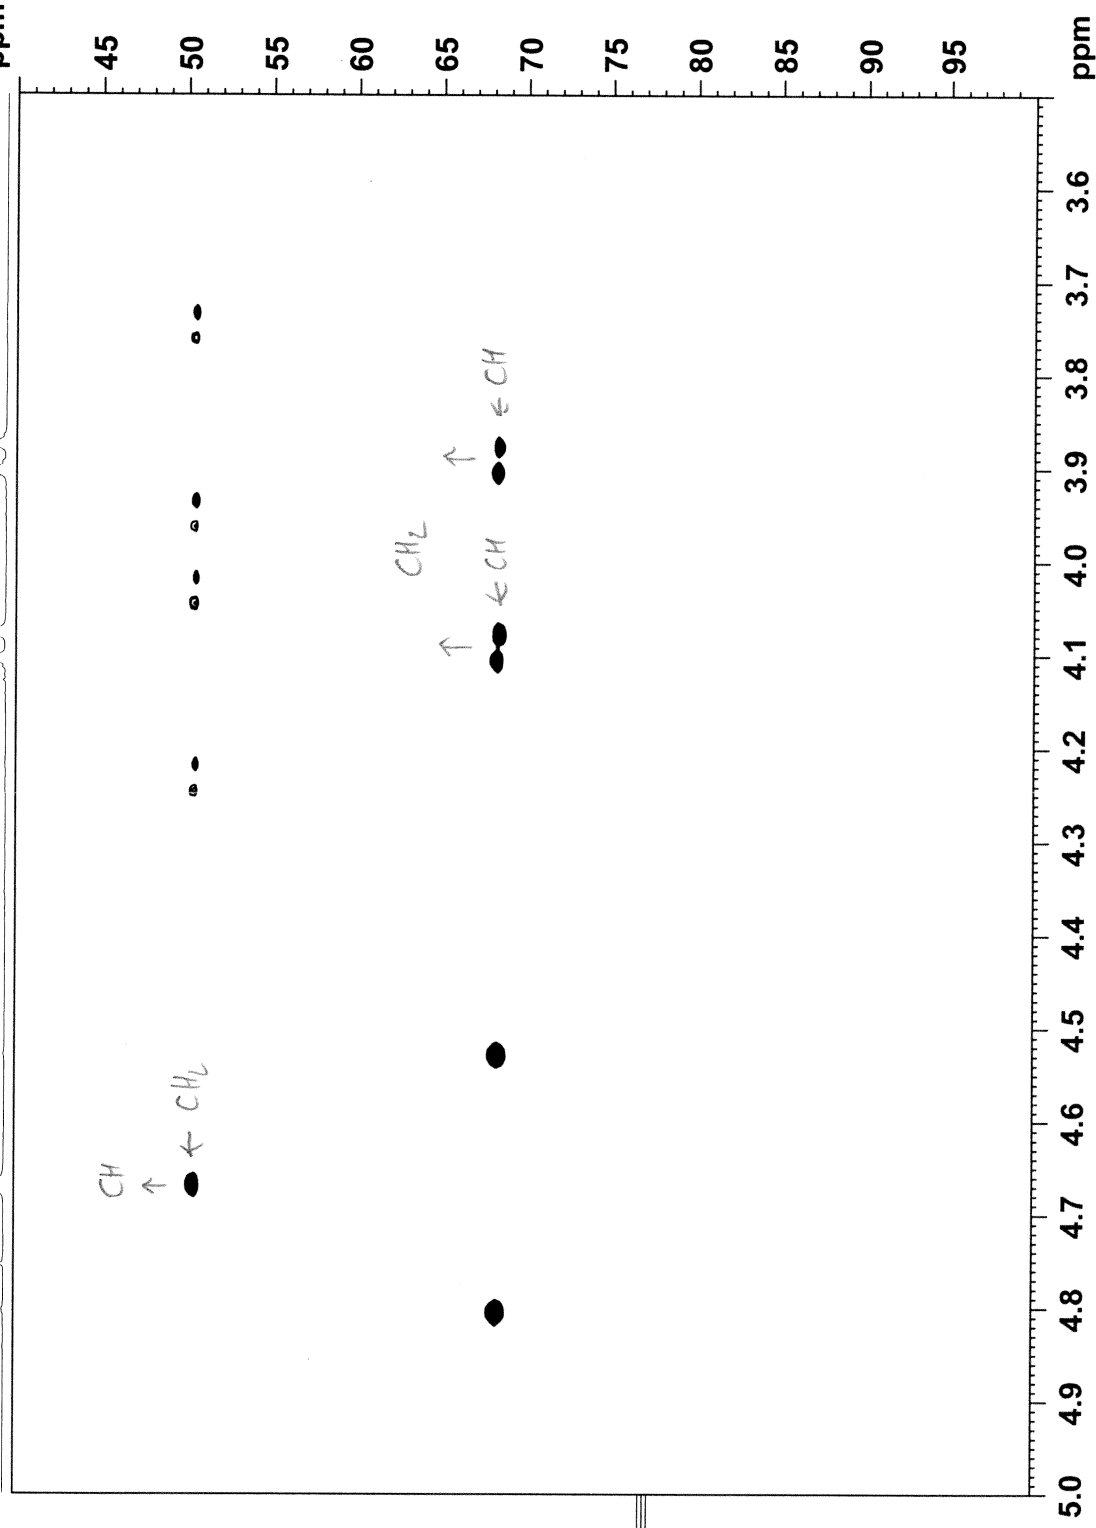

CH<sub>2</sub>

CH

CH<sub>2</sub>

**Figure S44c.** NMR spectra of compound **8k**.

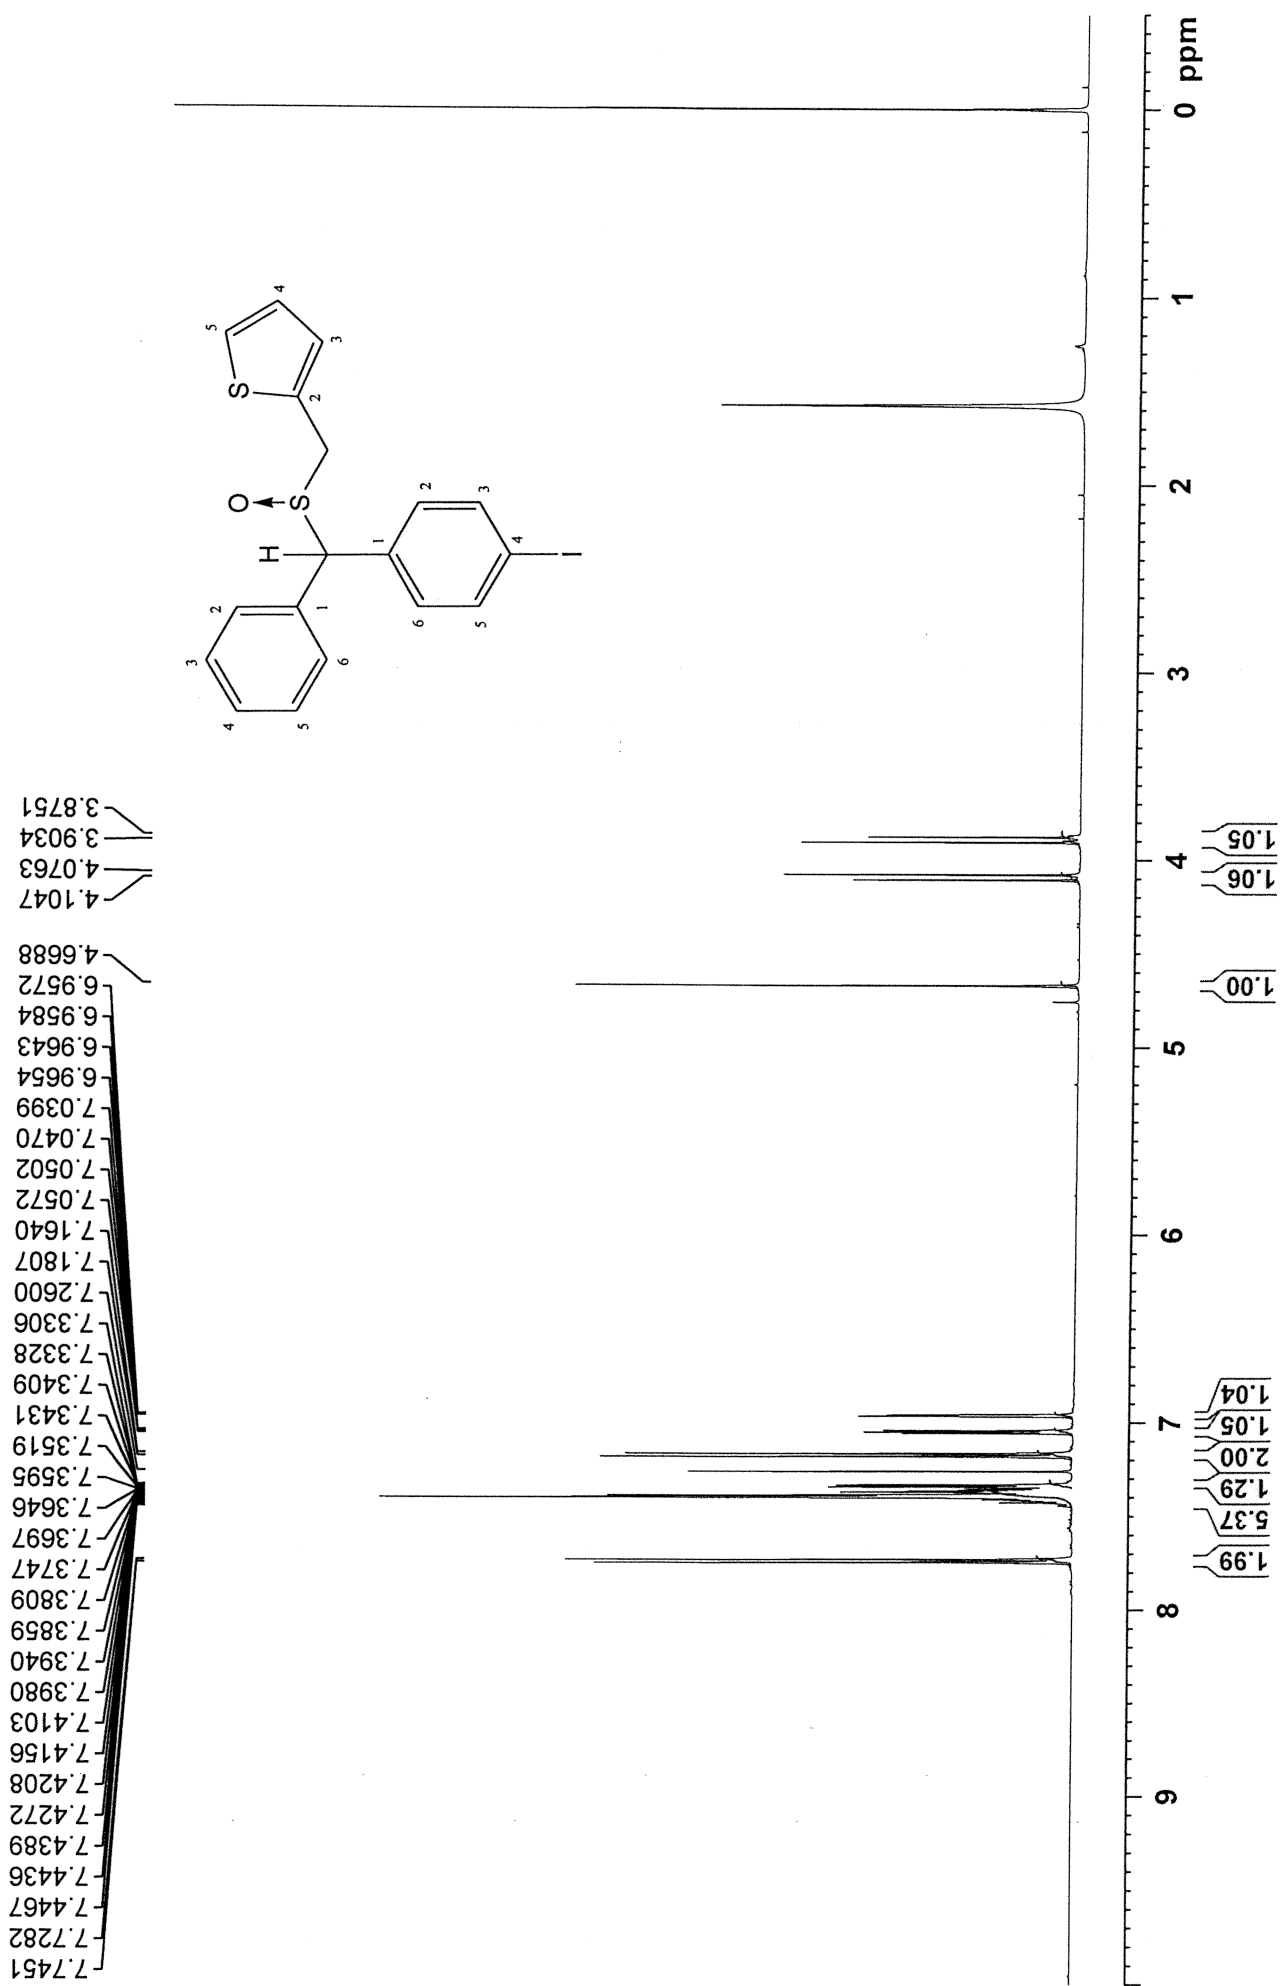

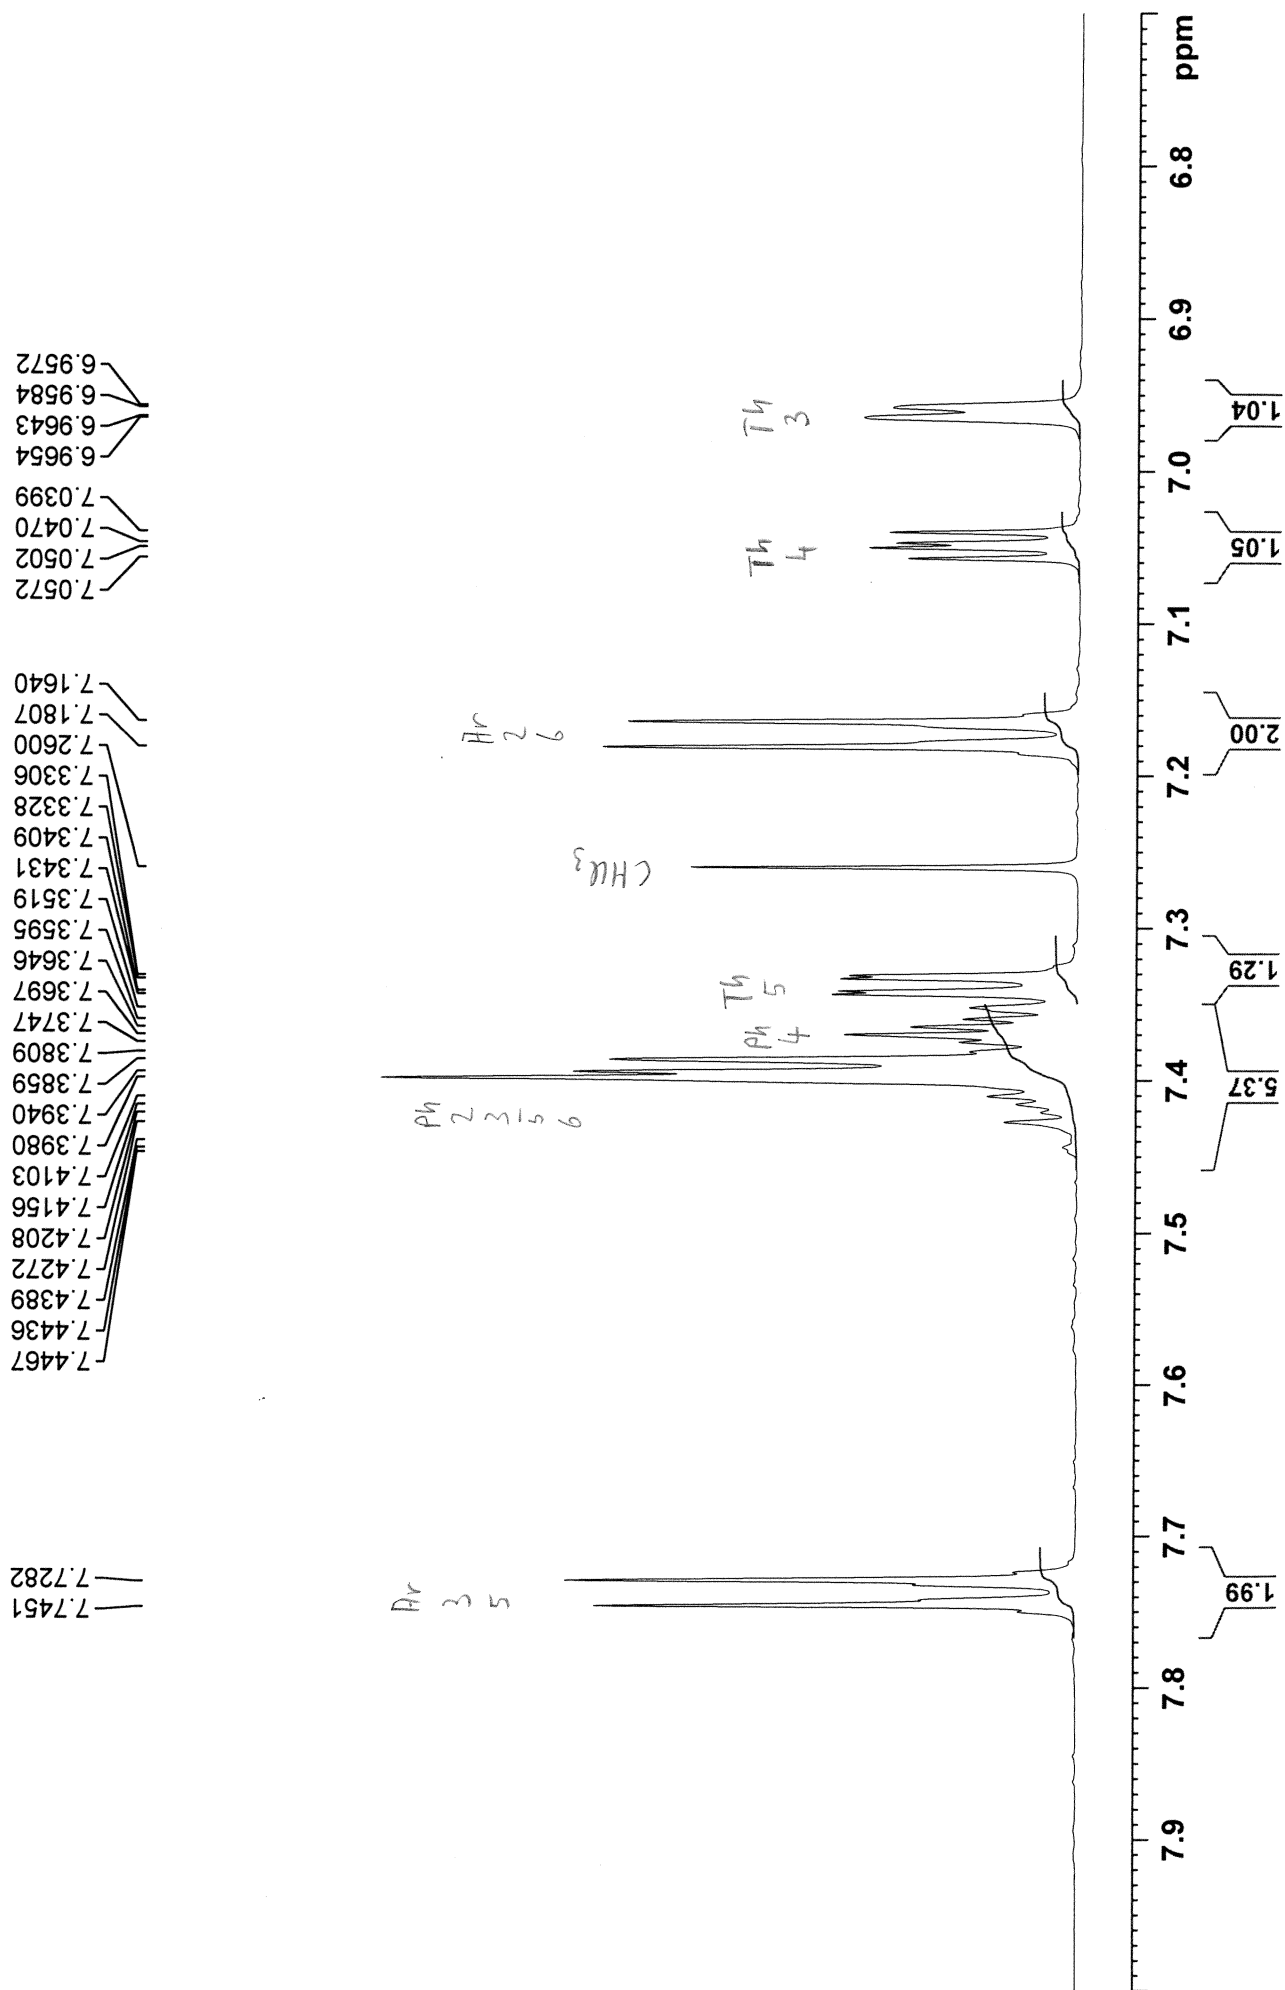

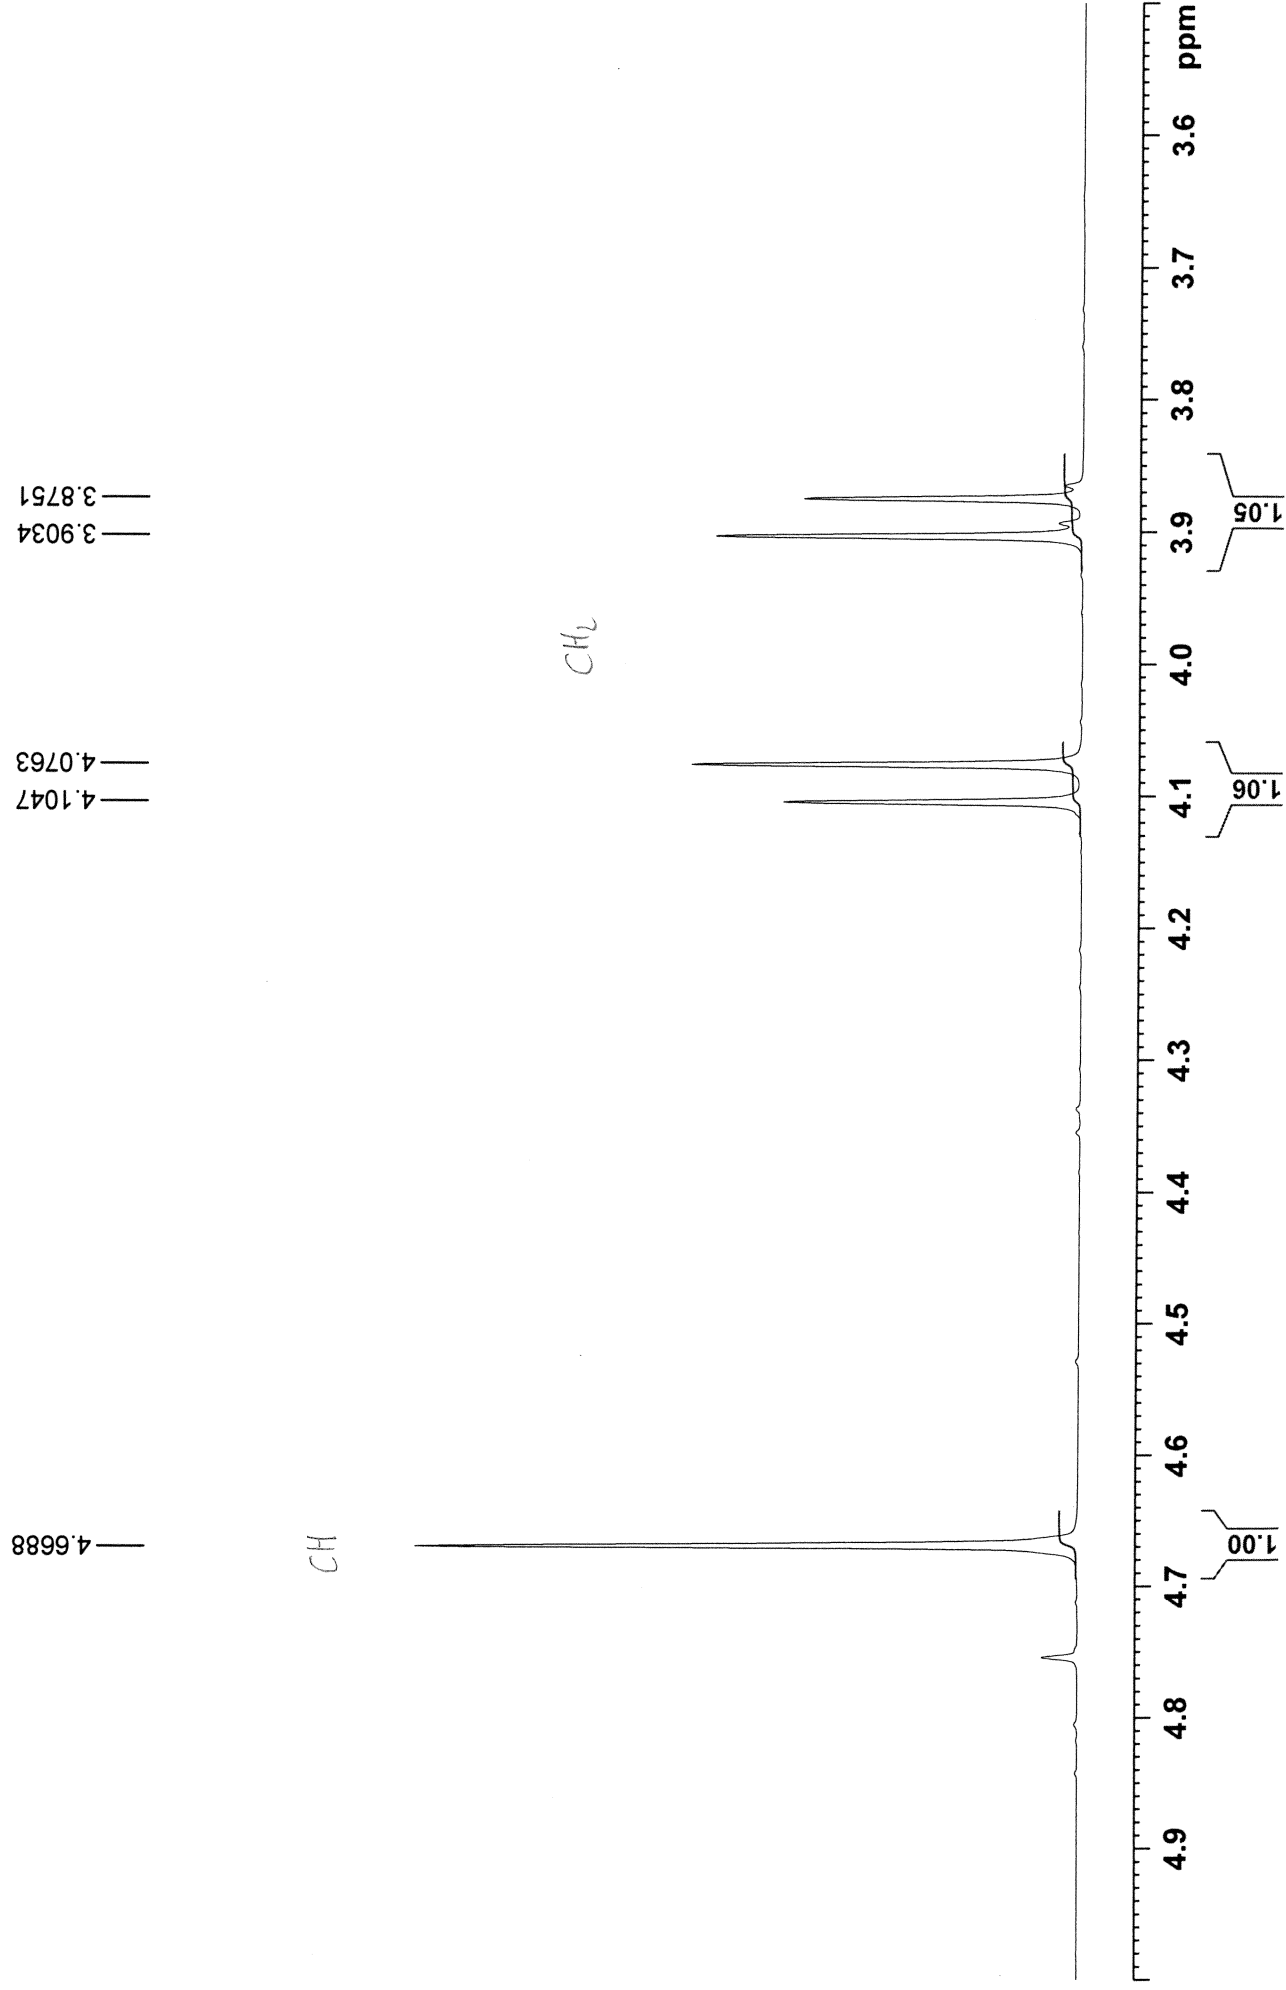

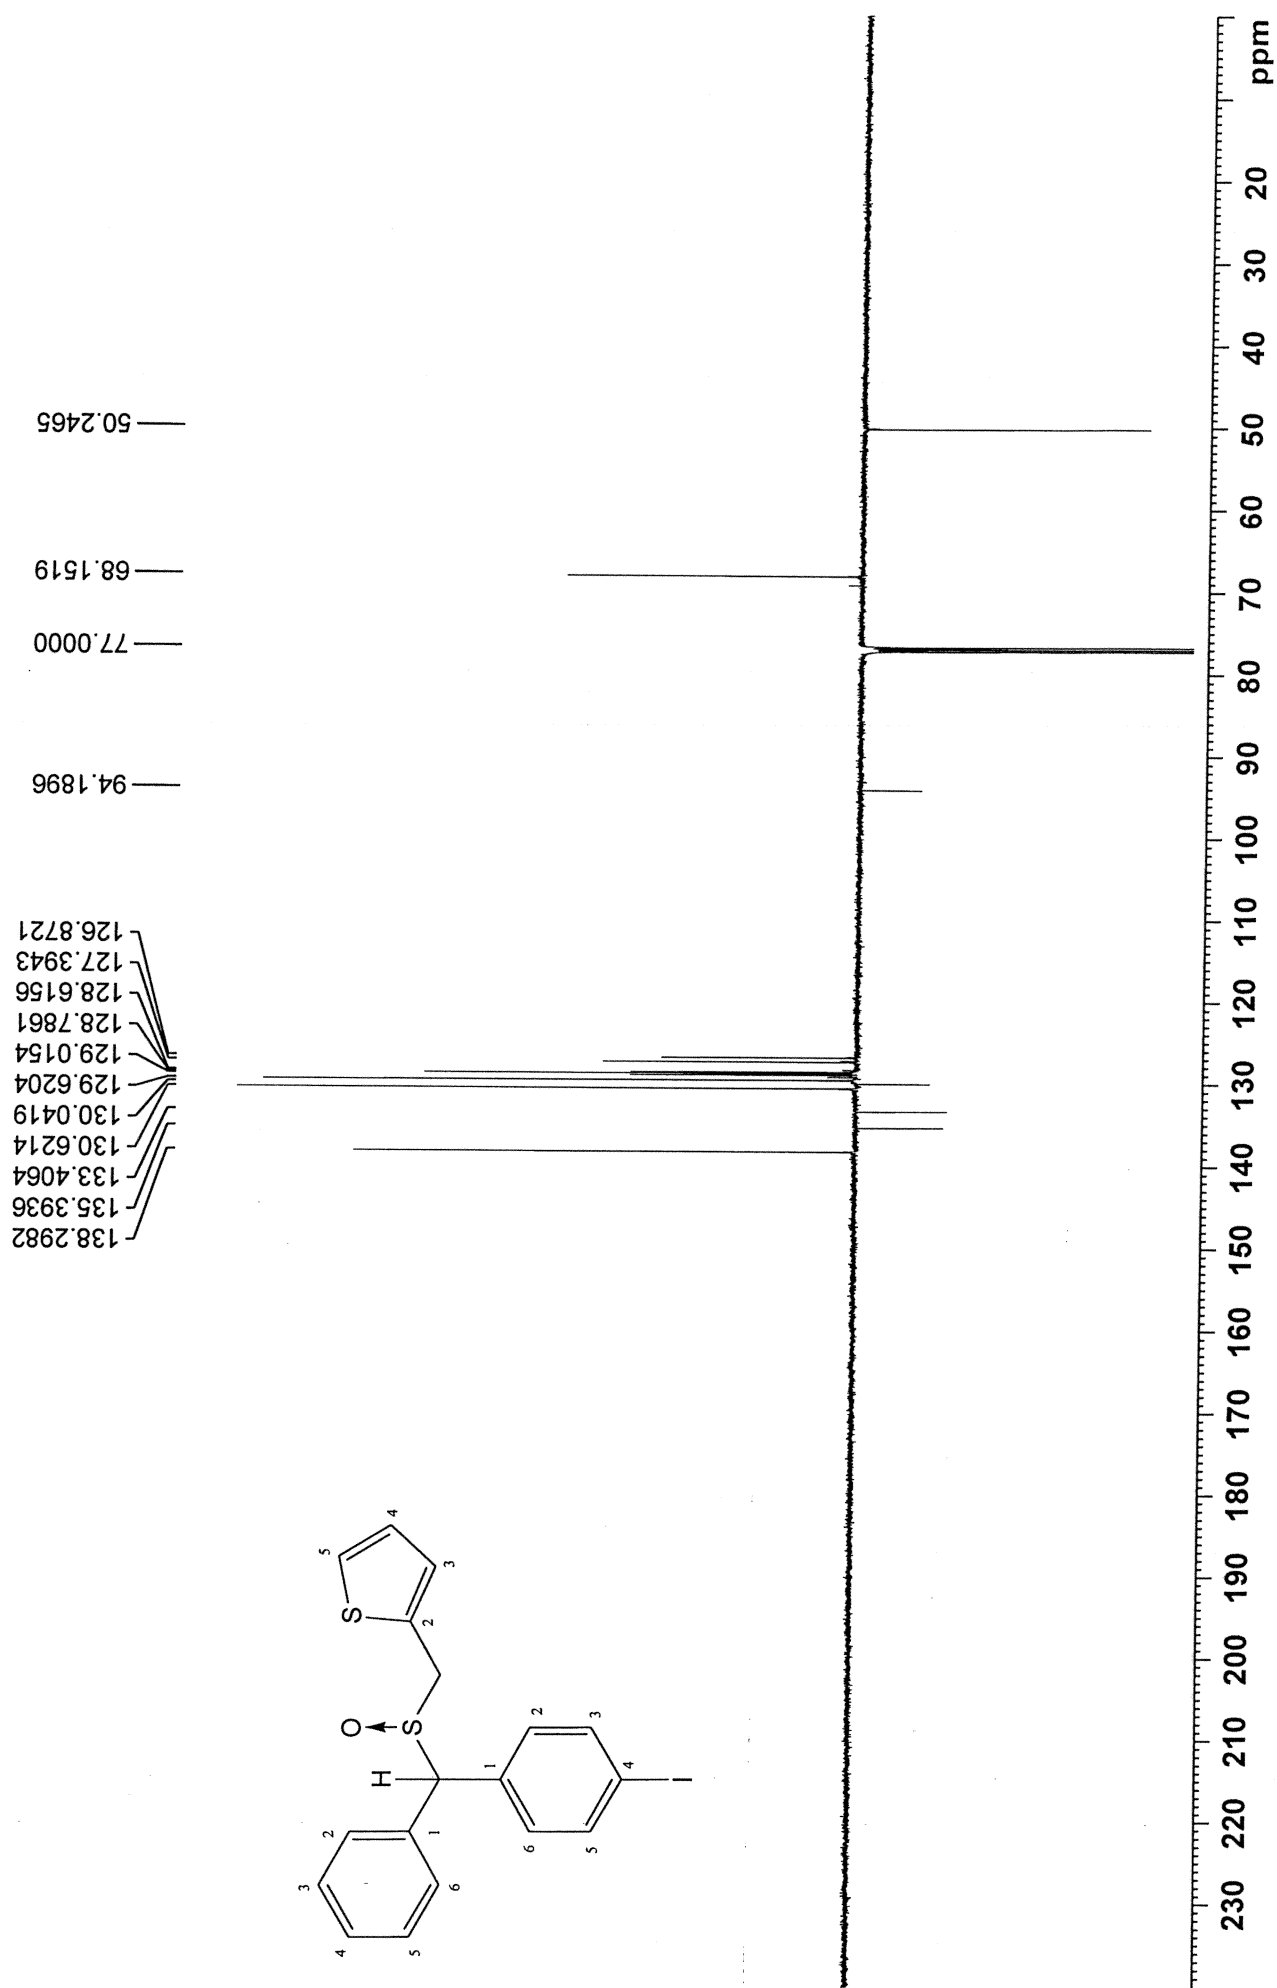

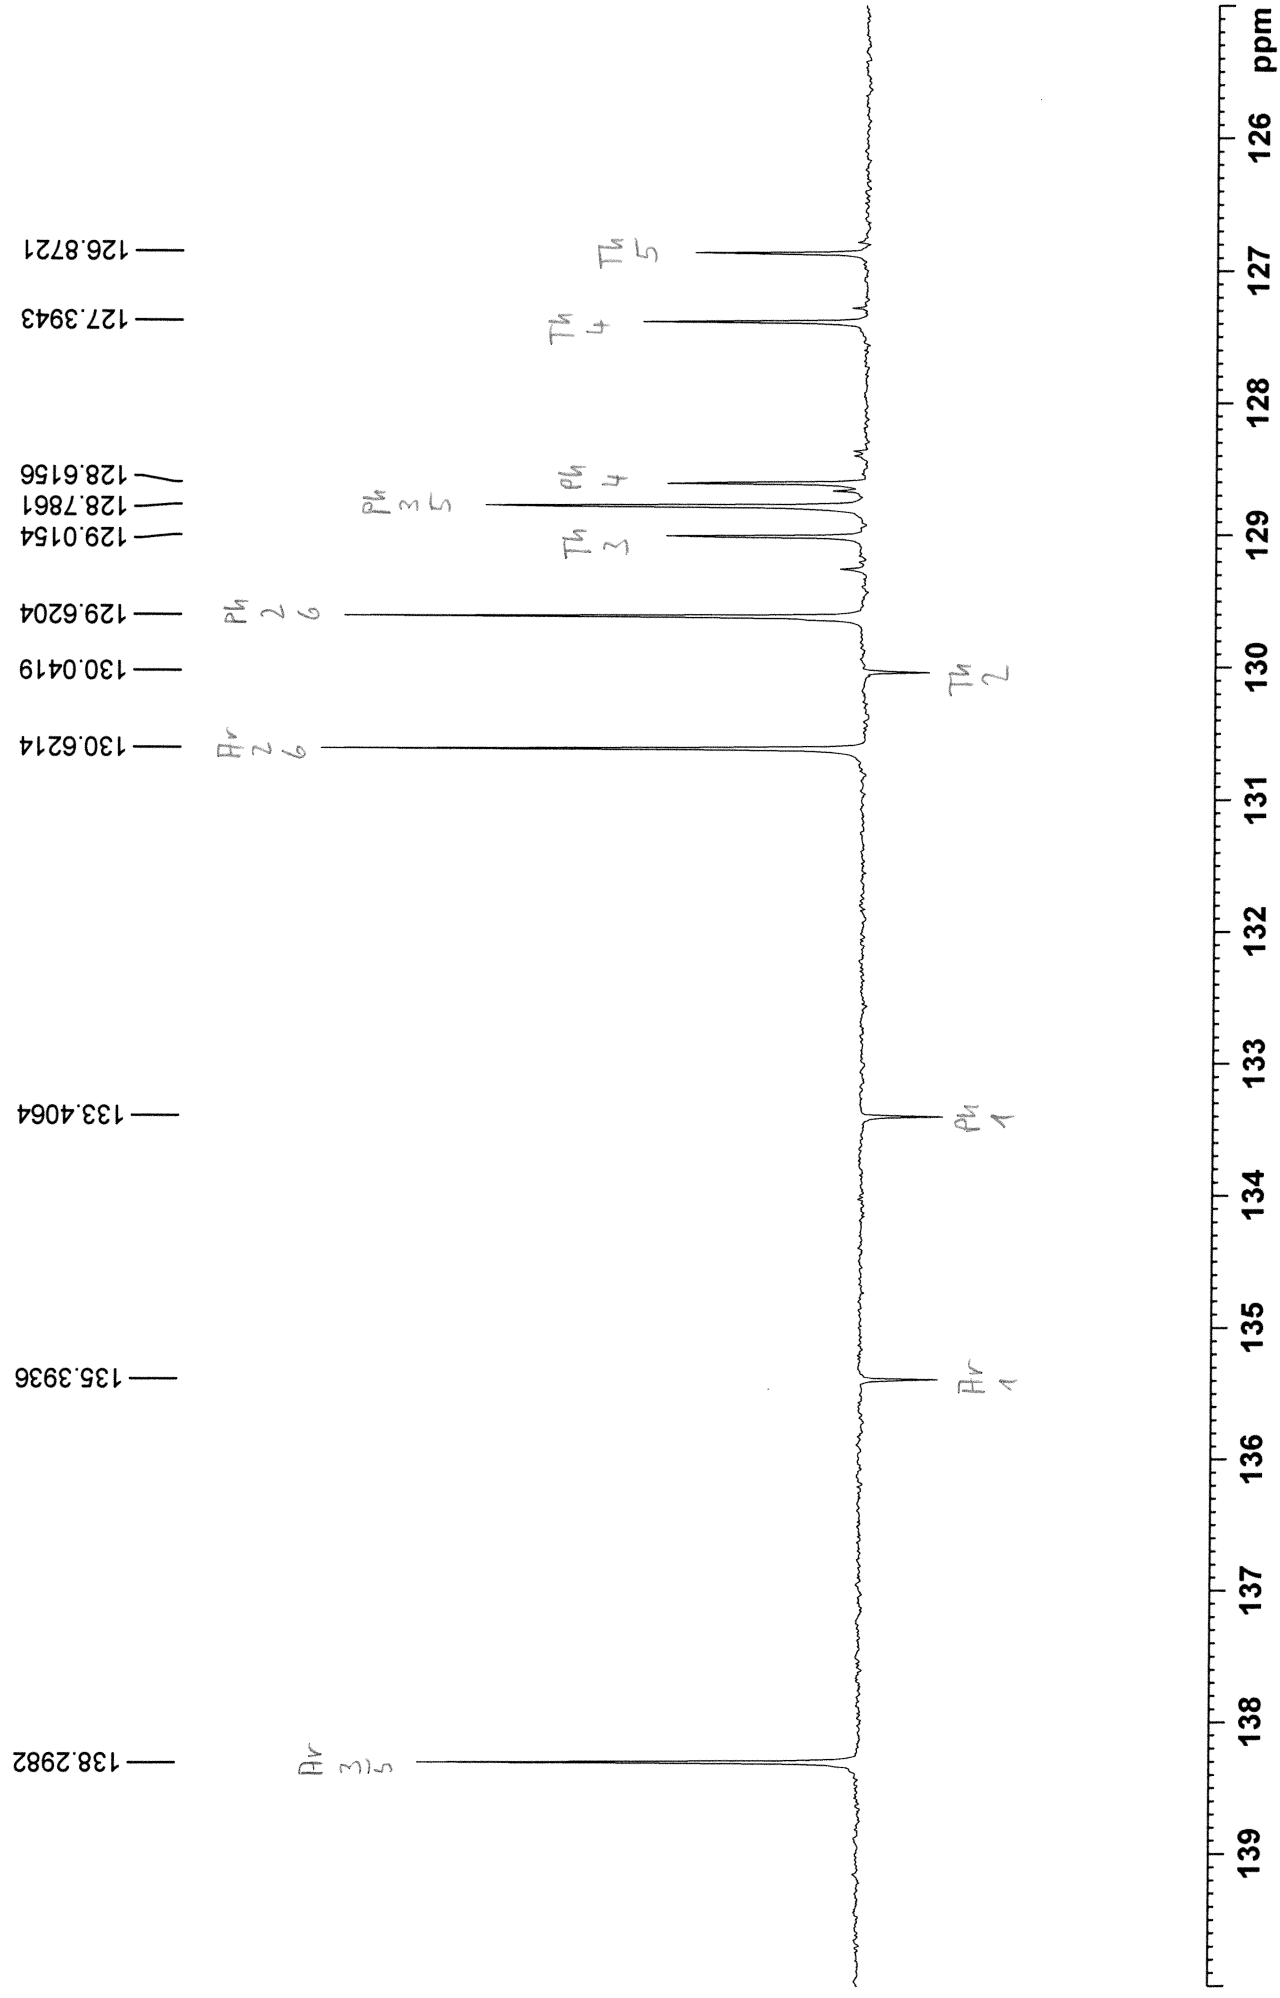

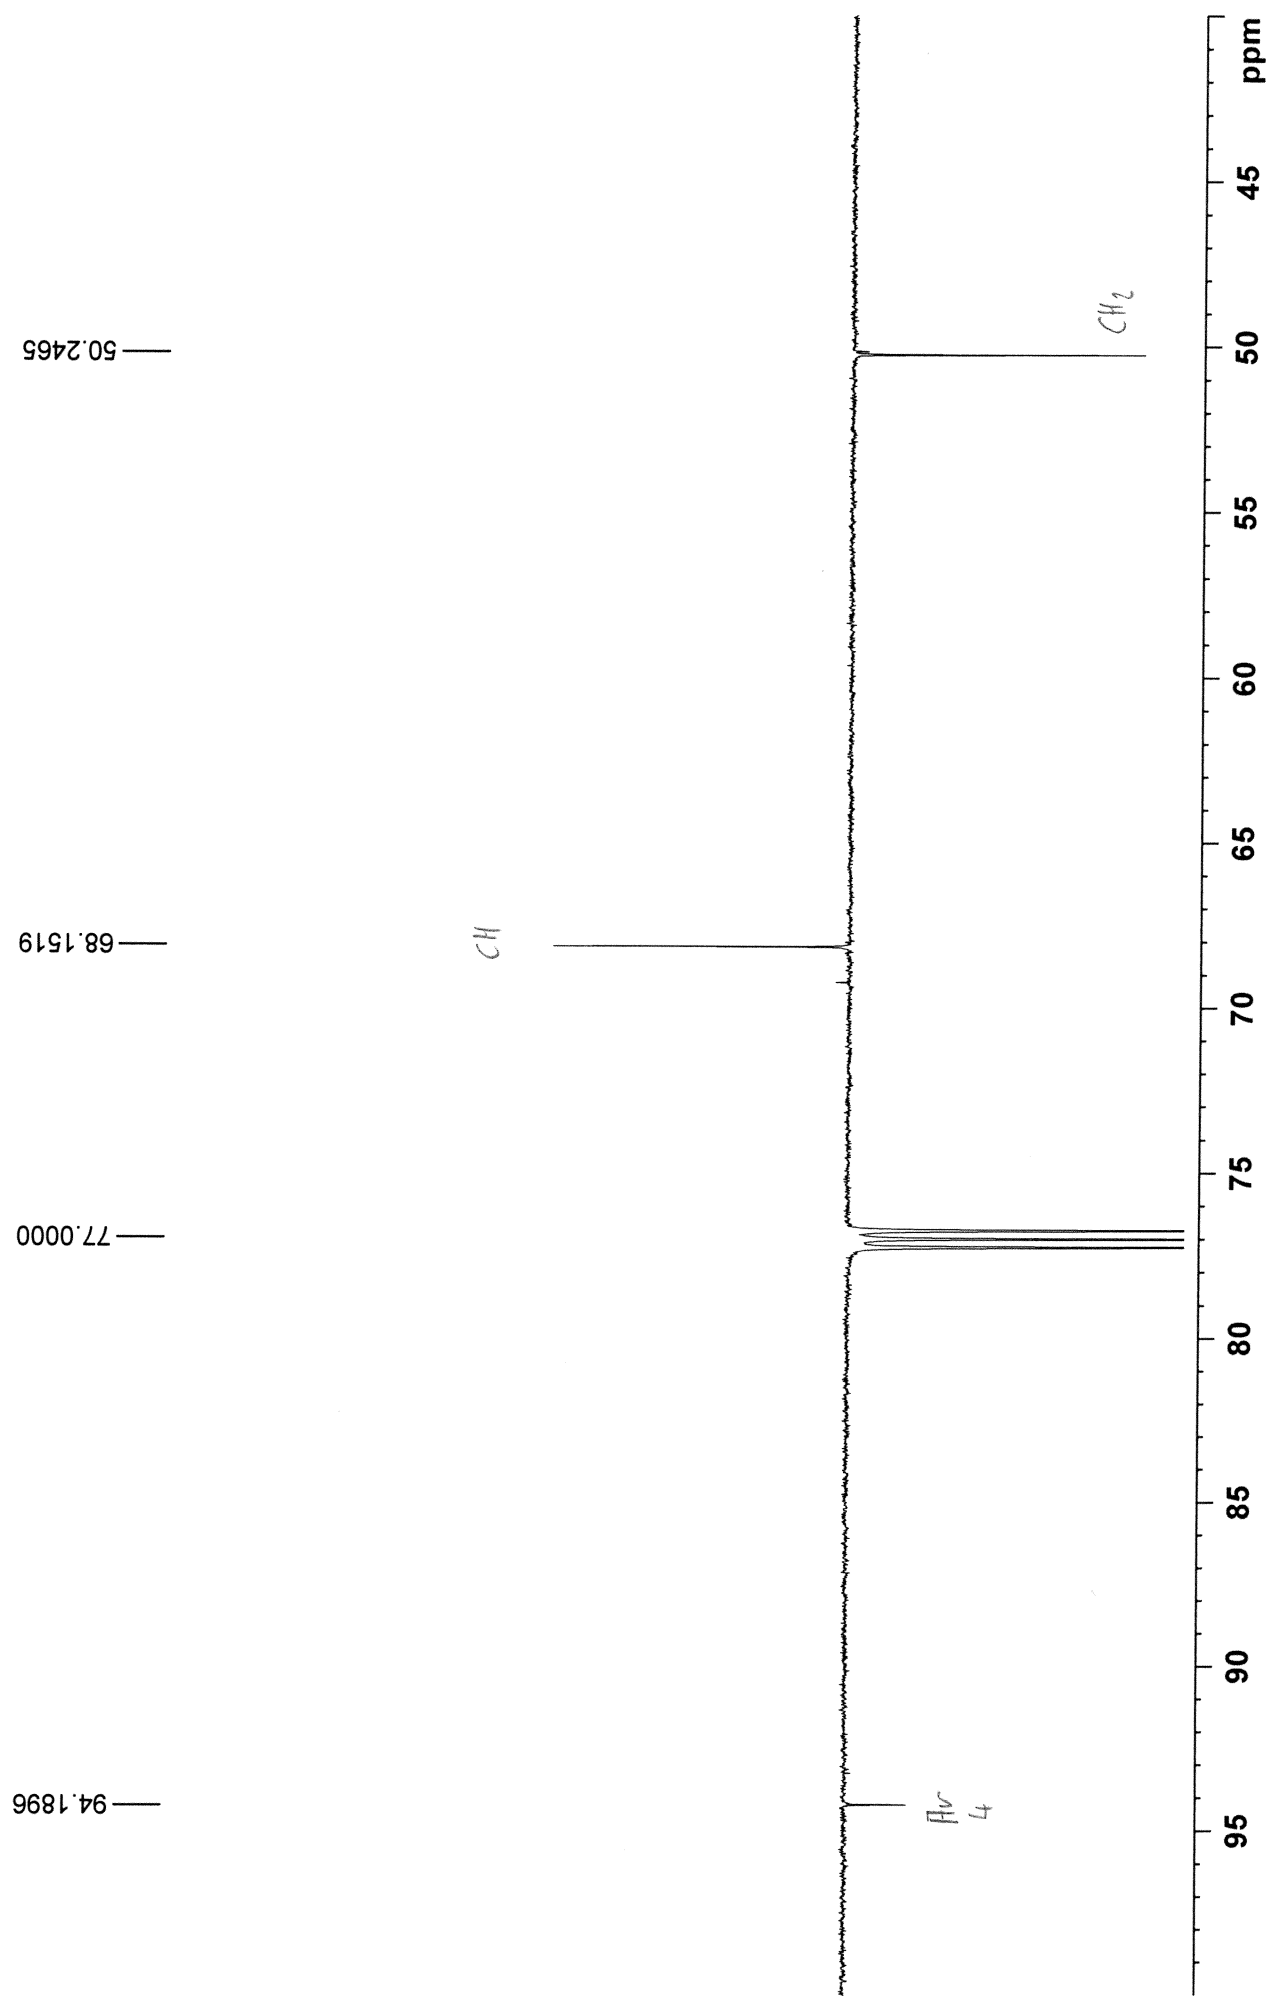



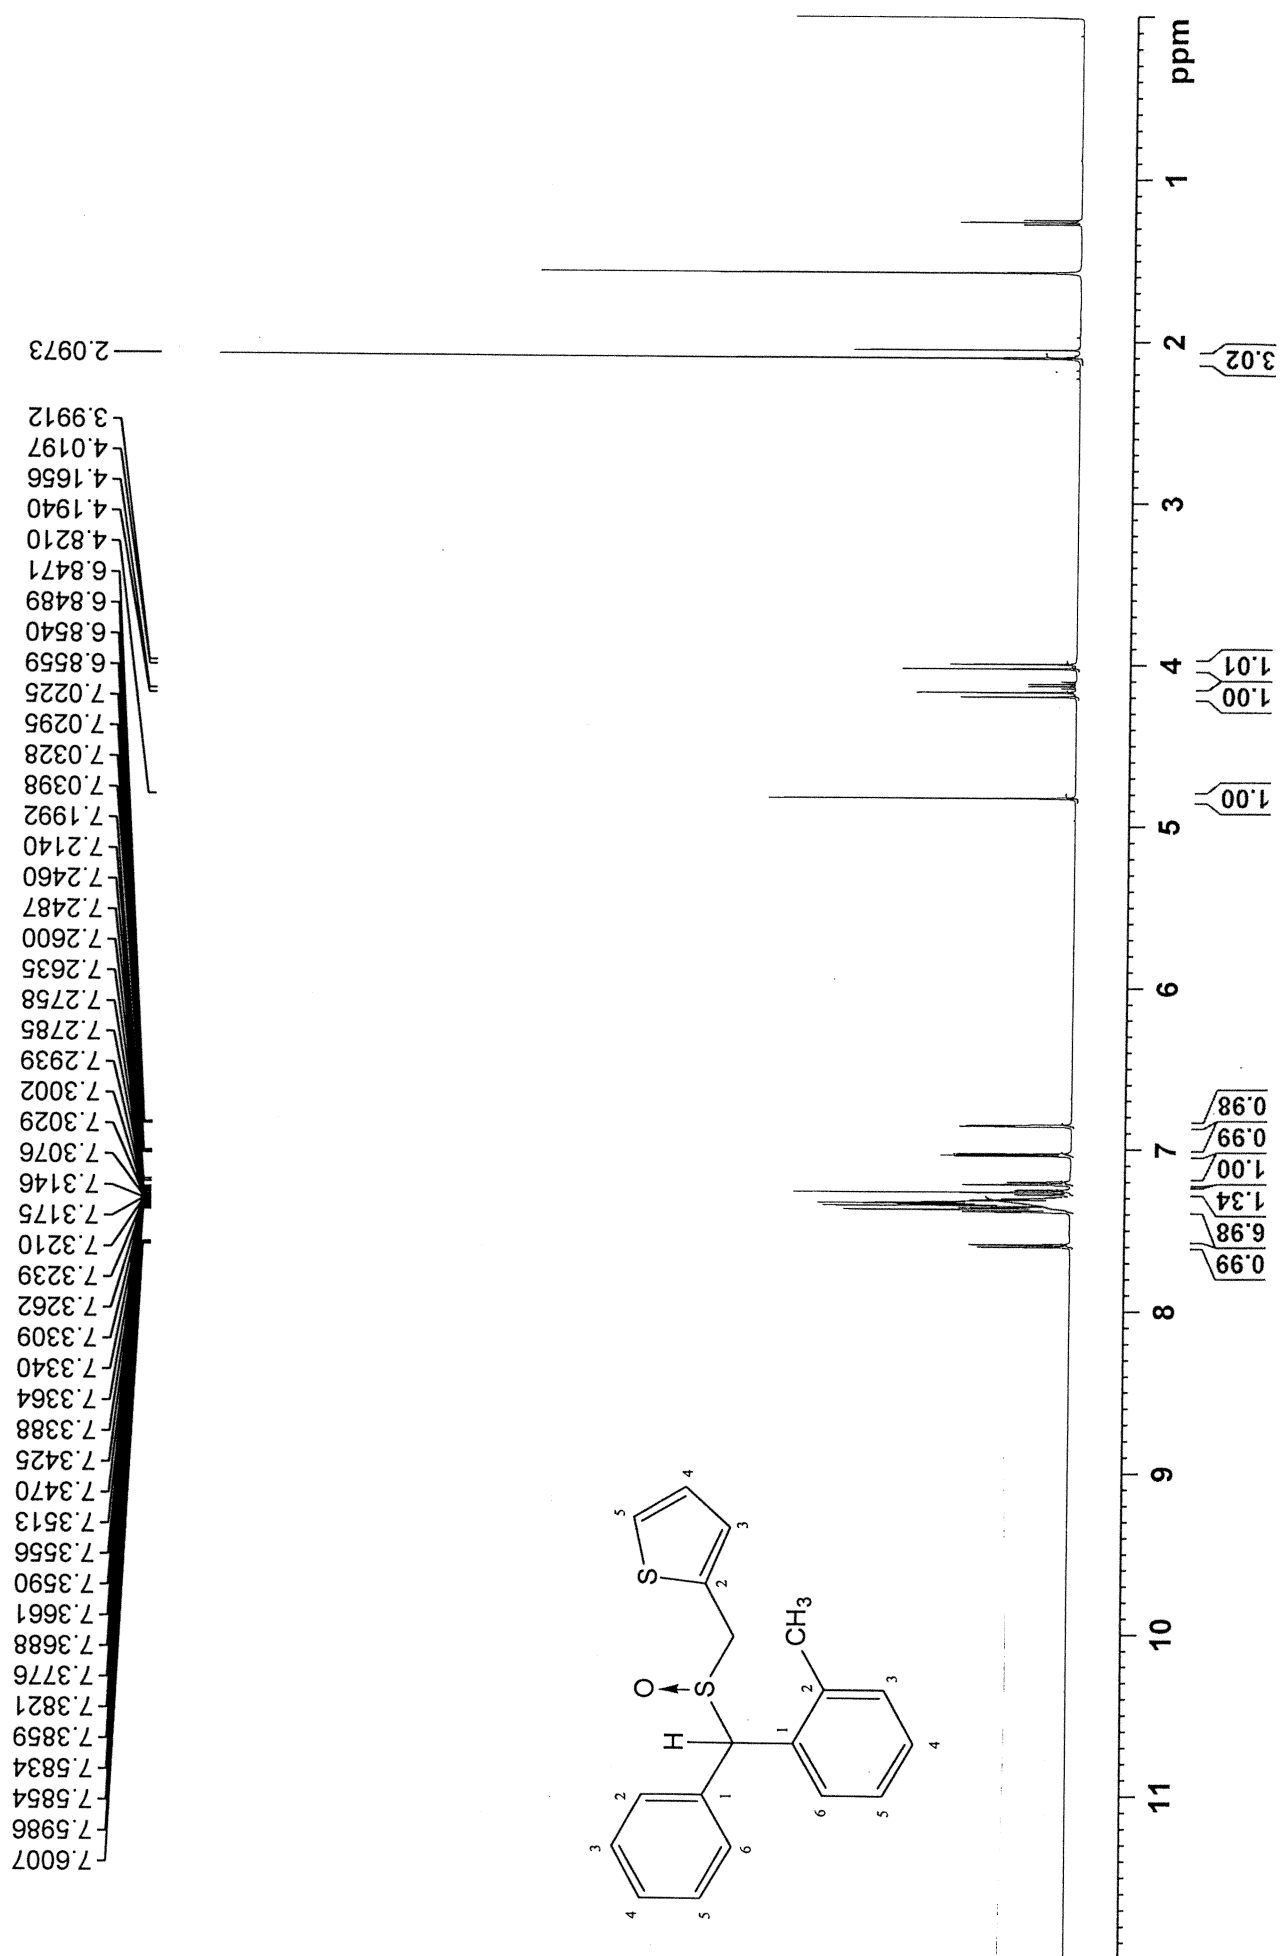

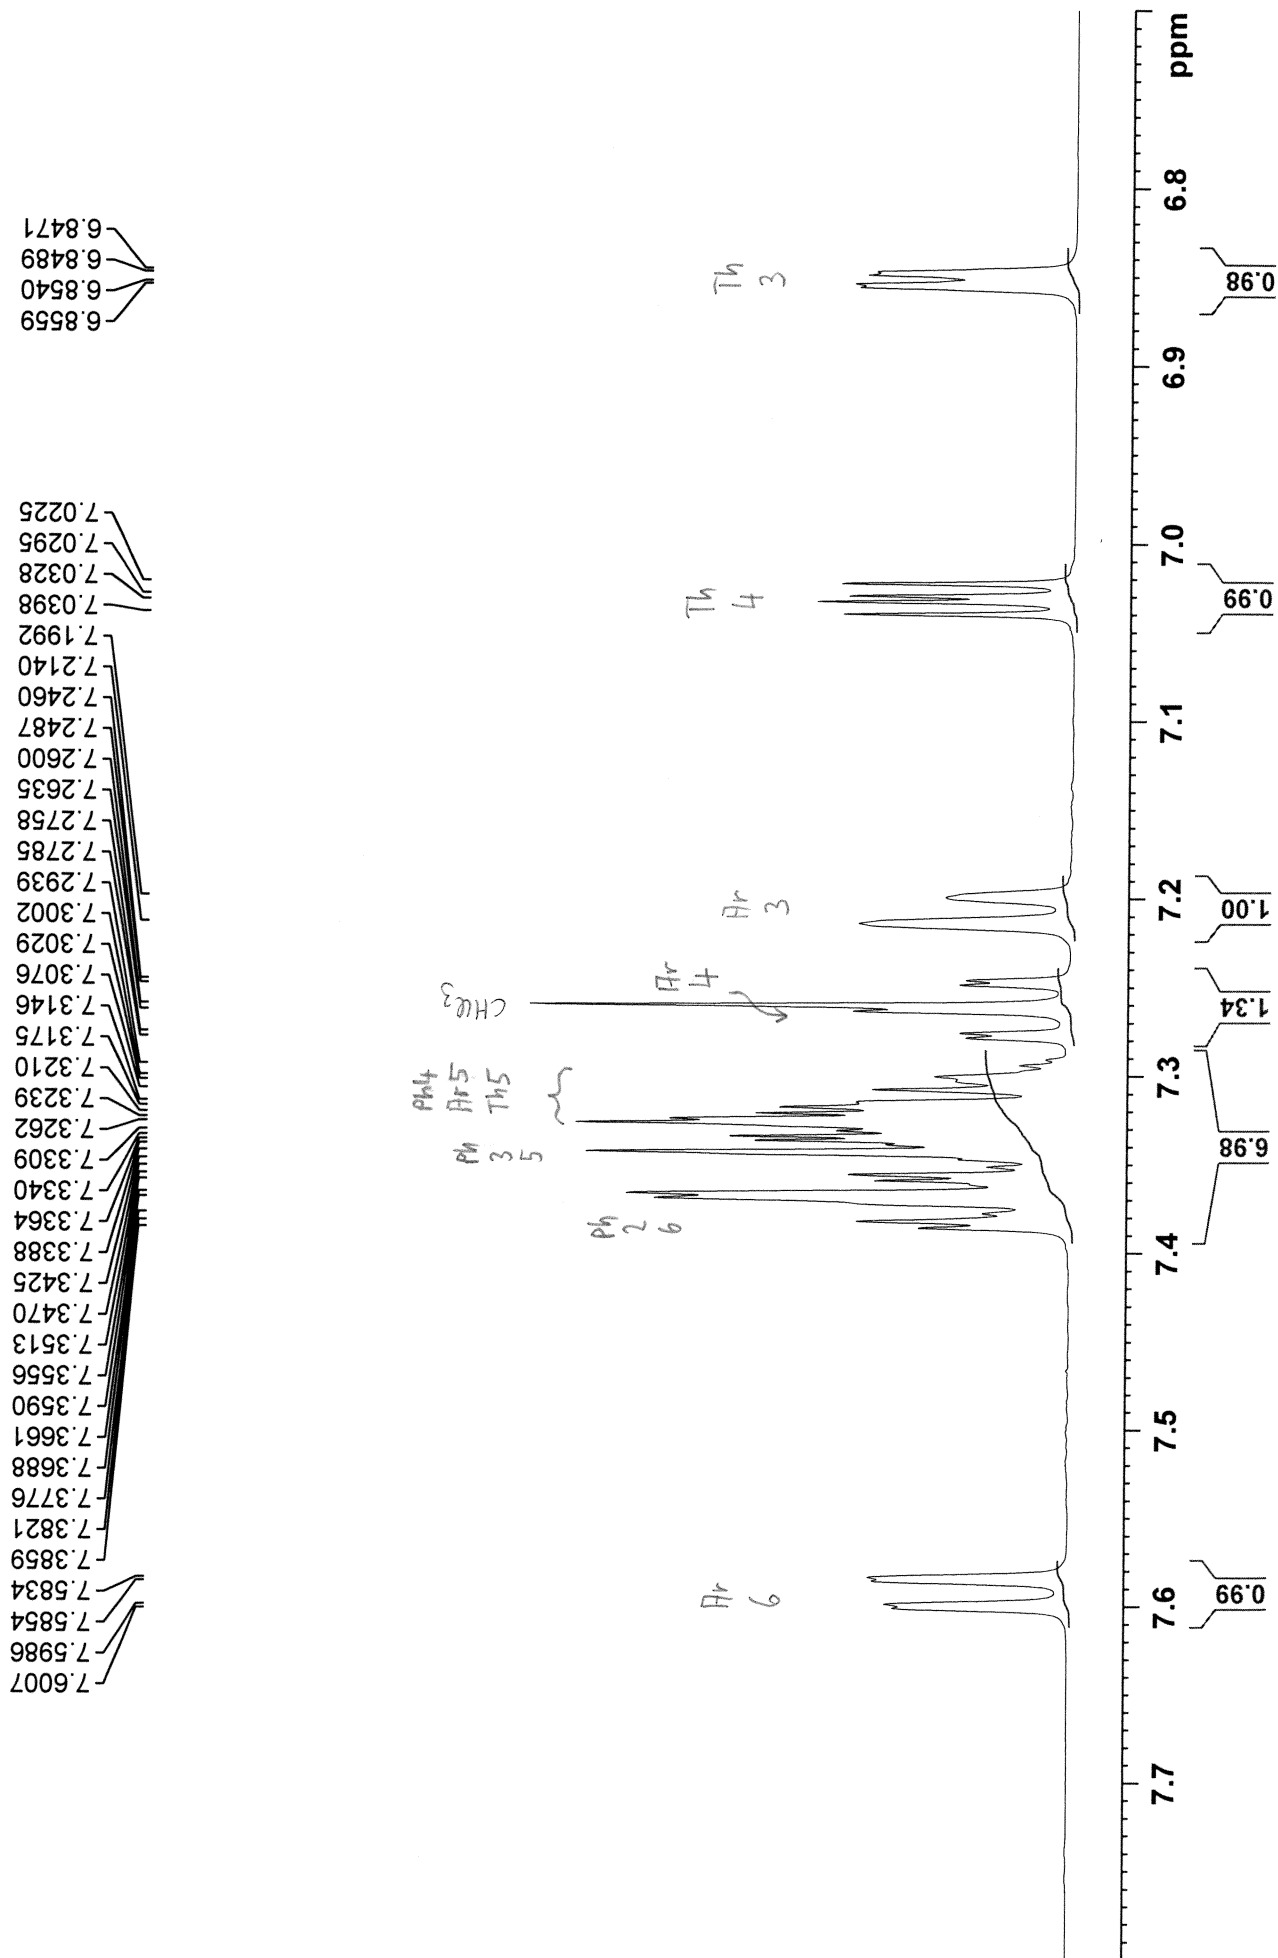

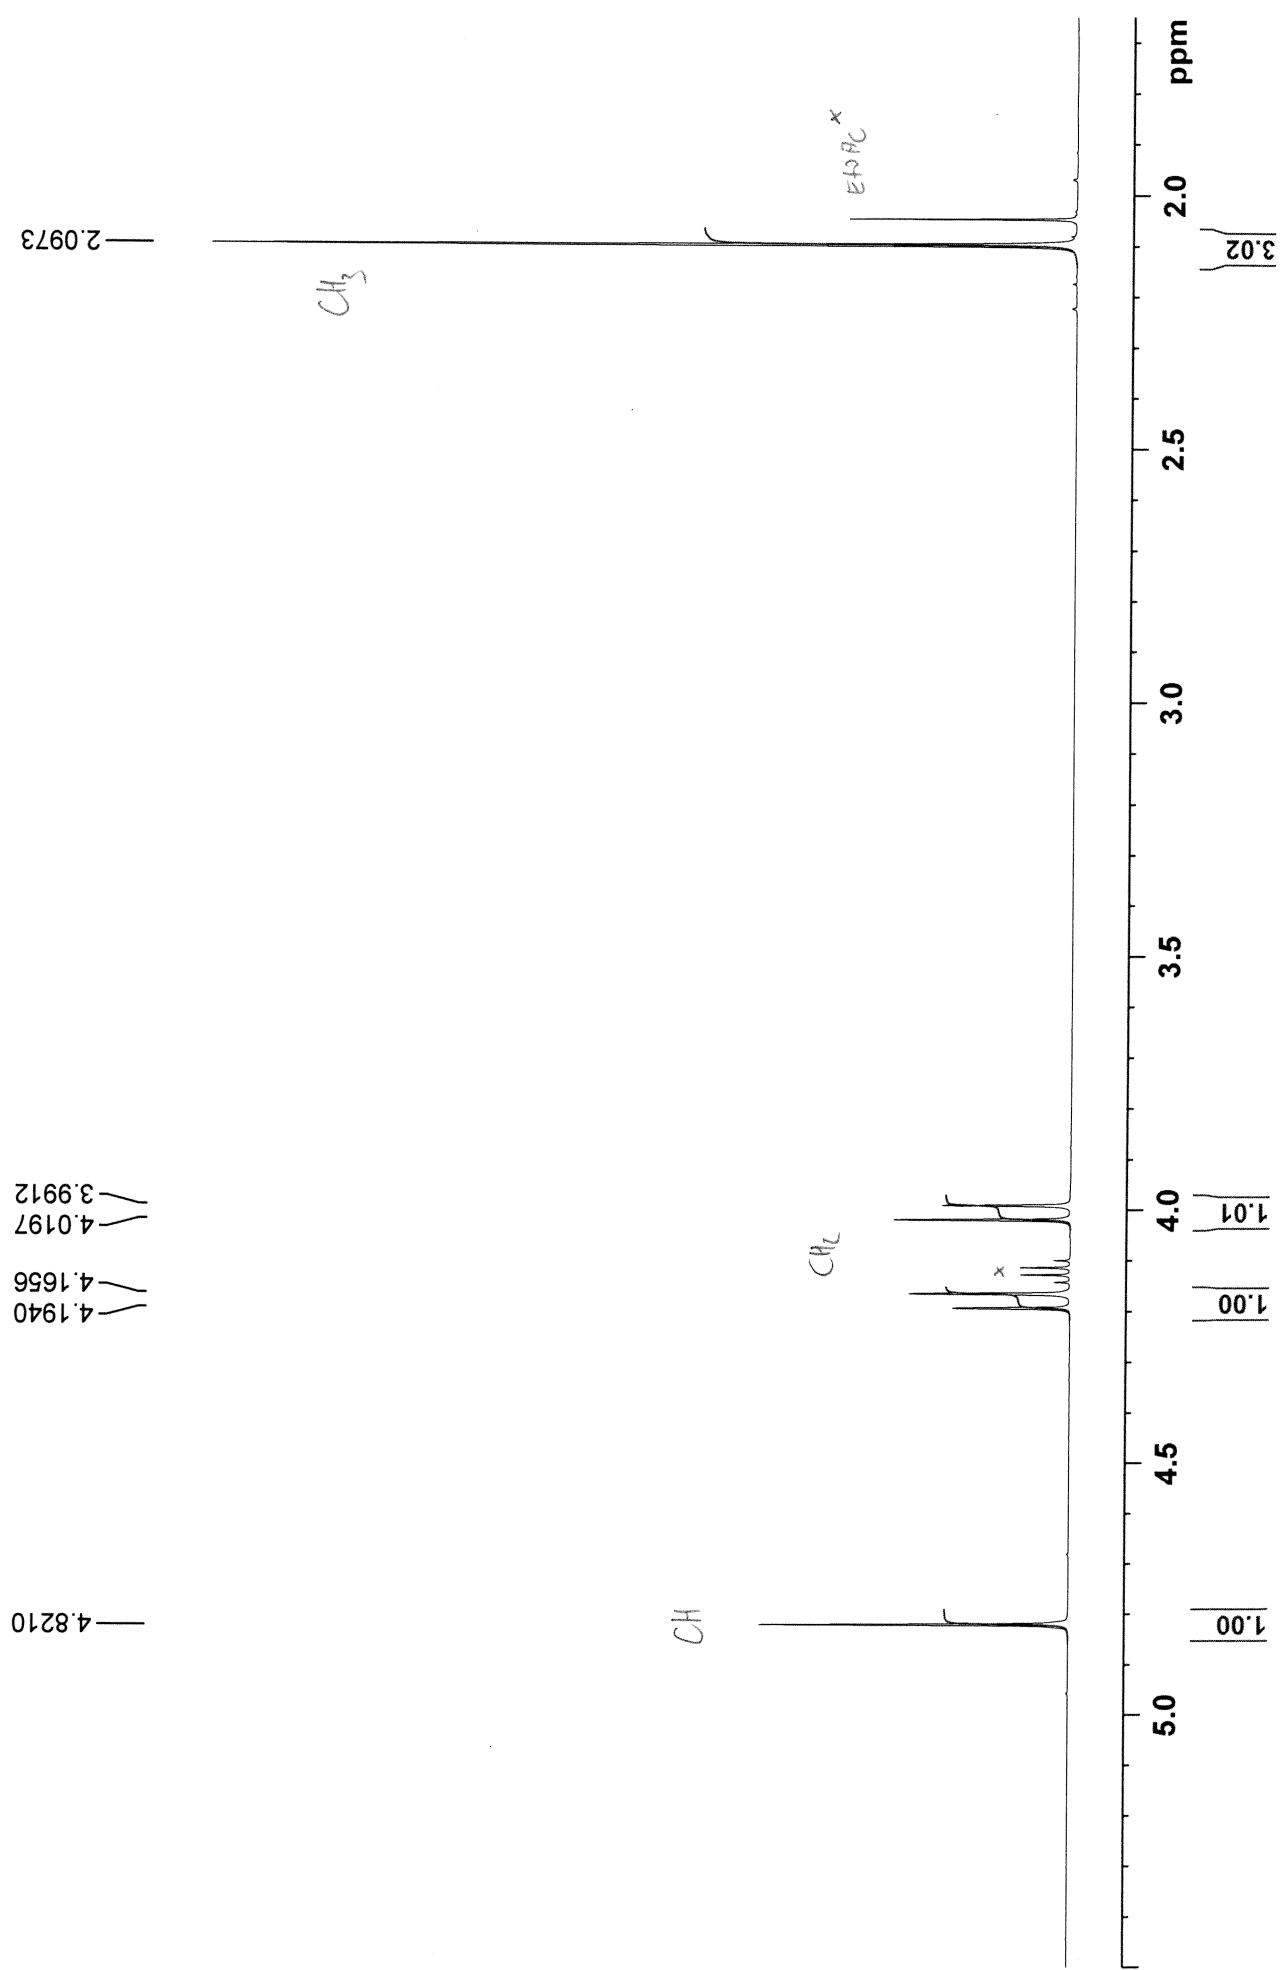

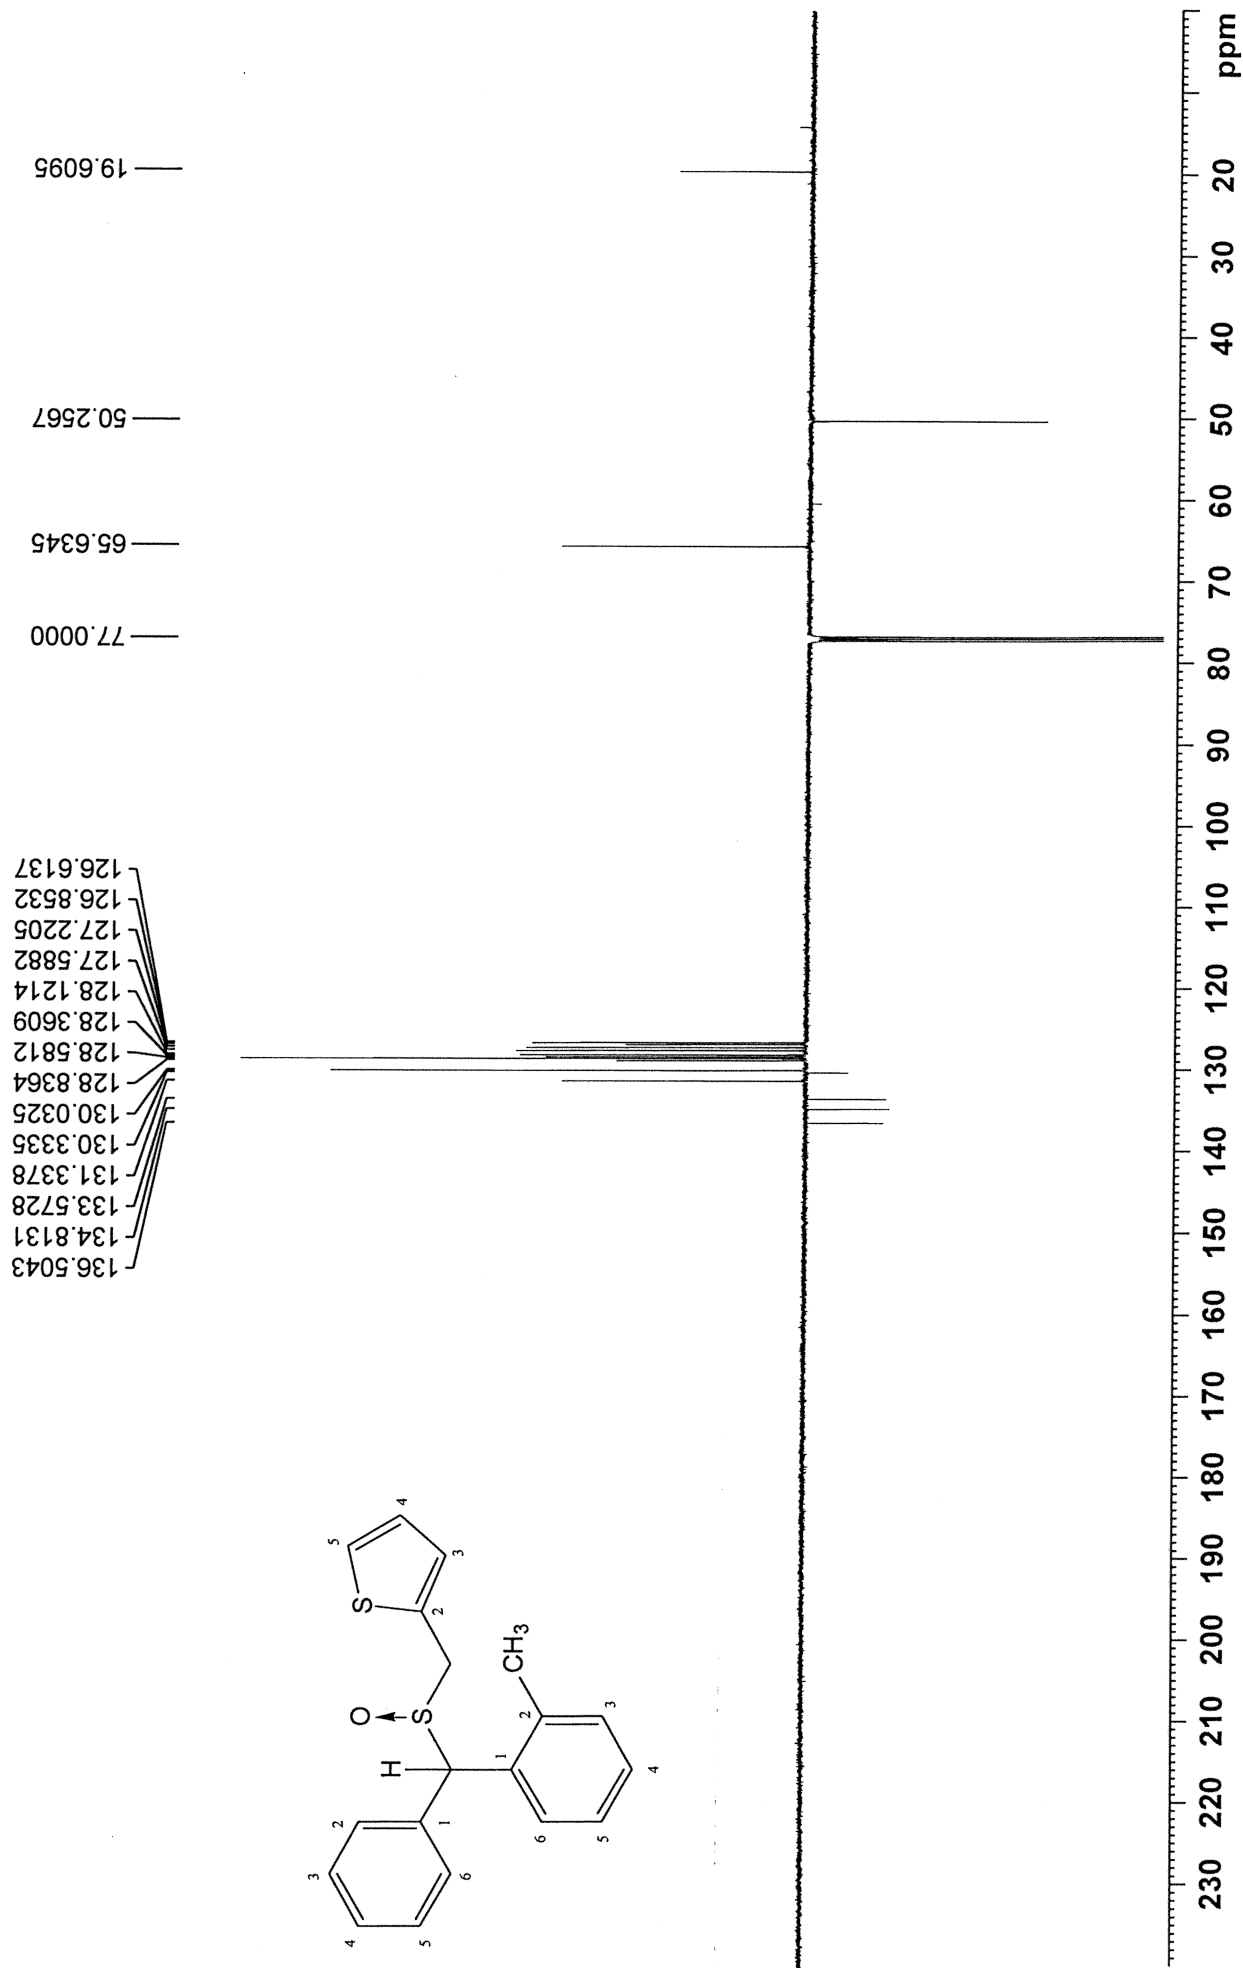

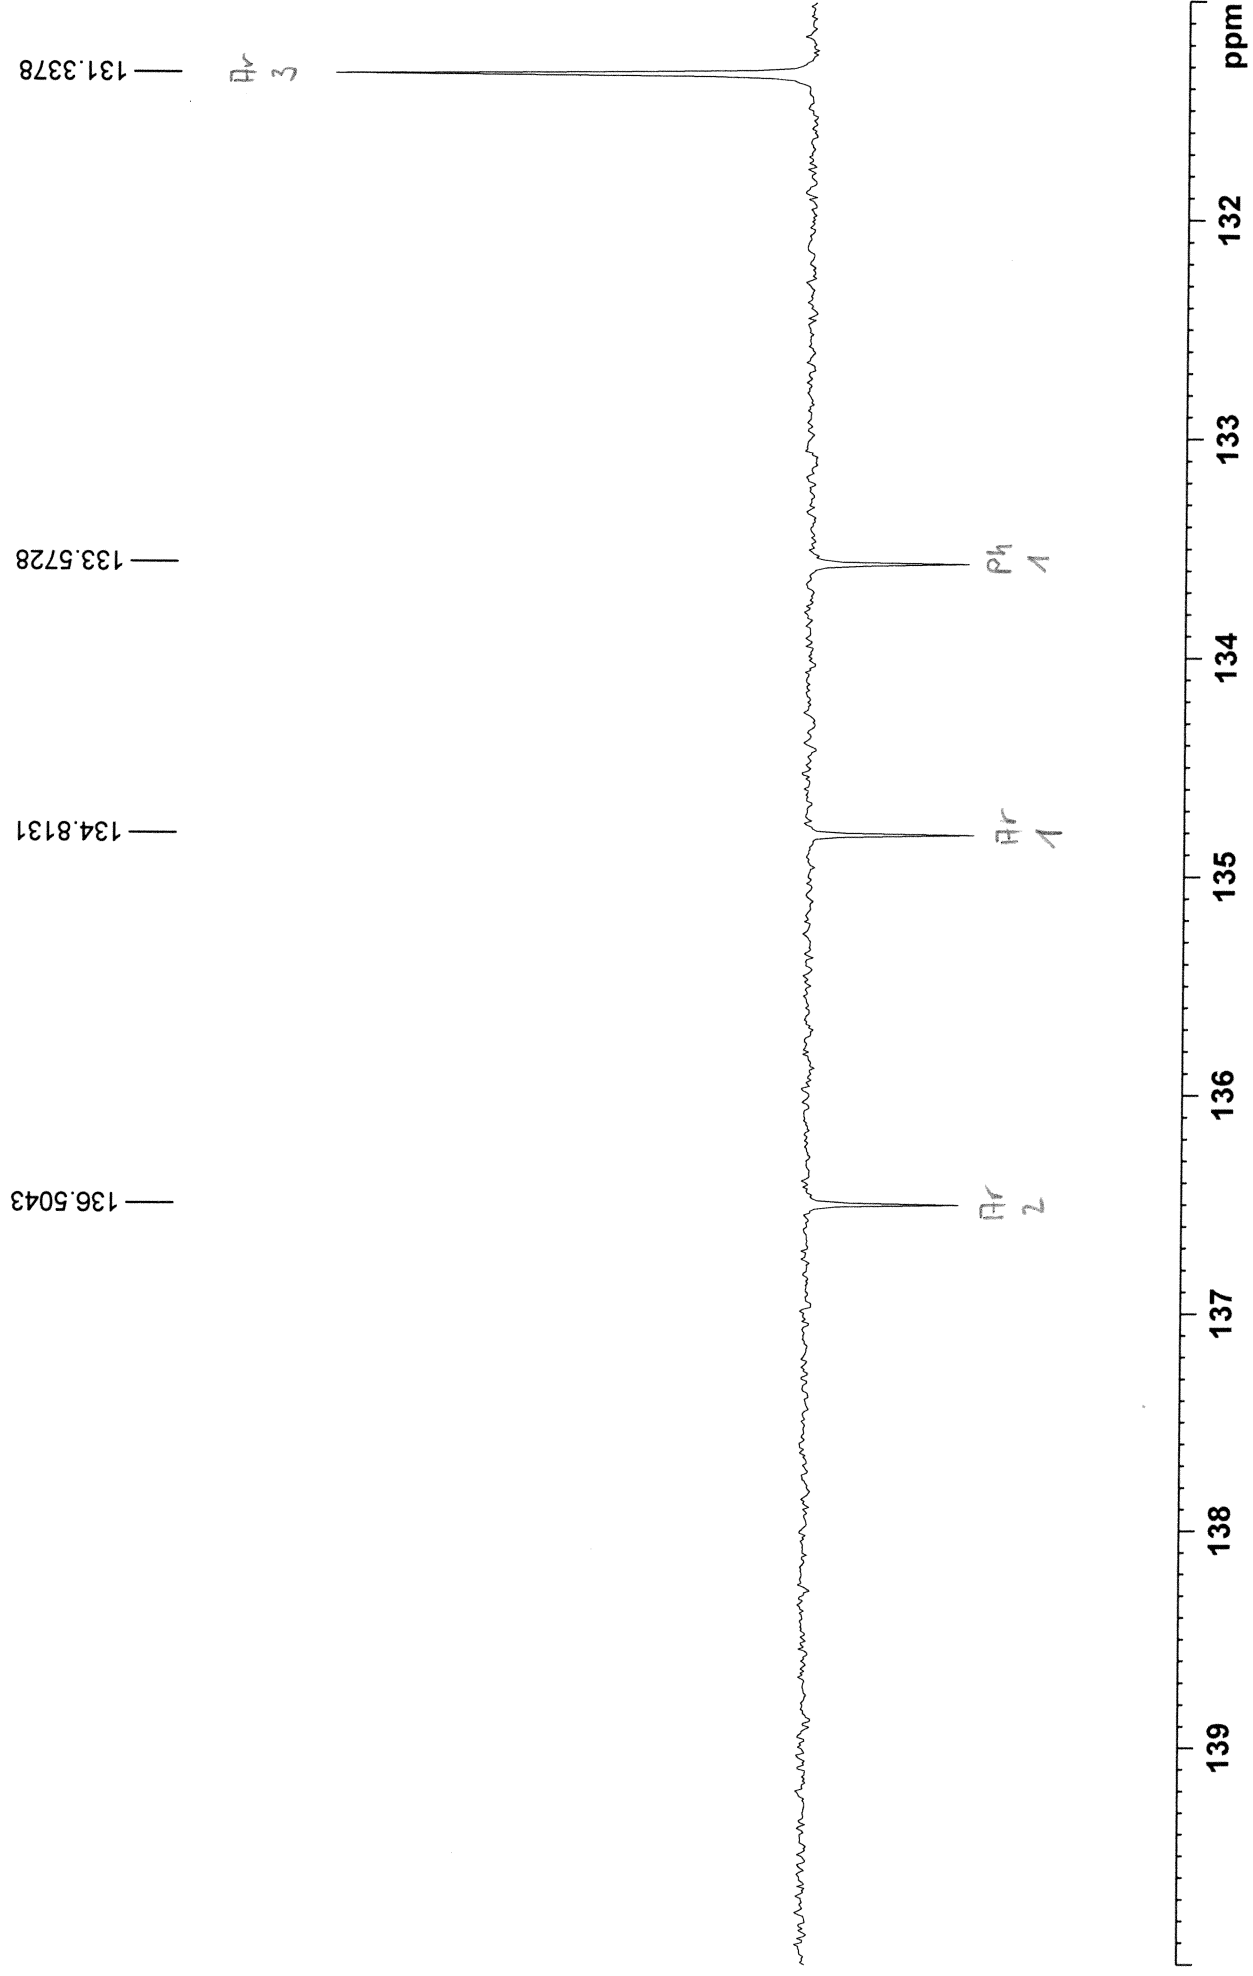

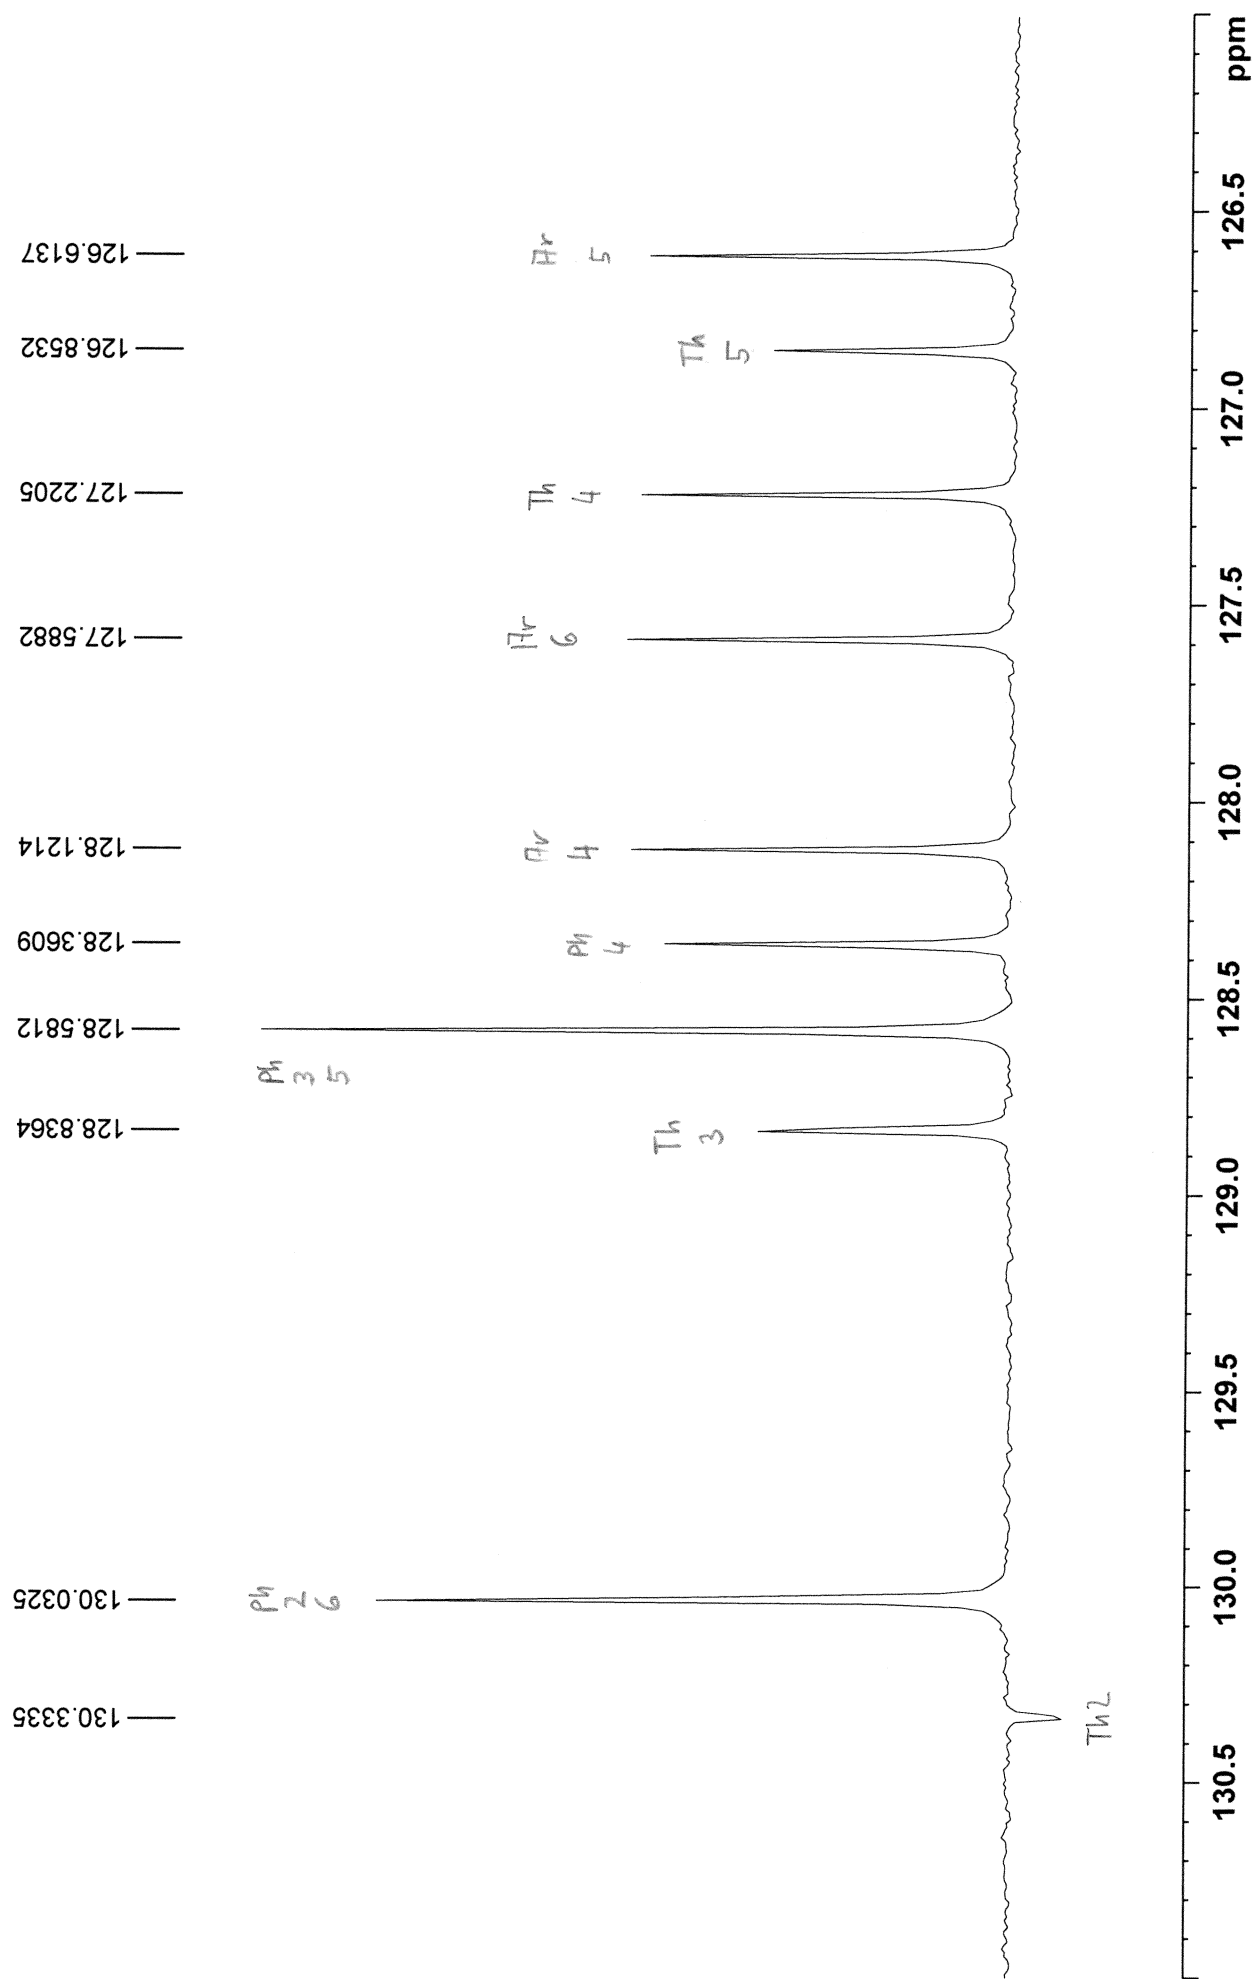

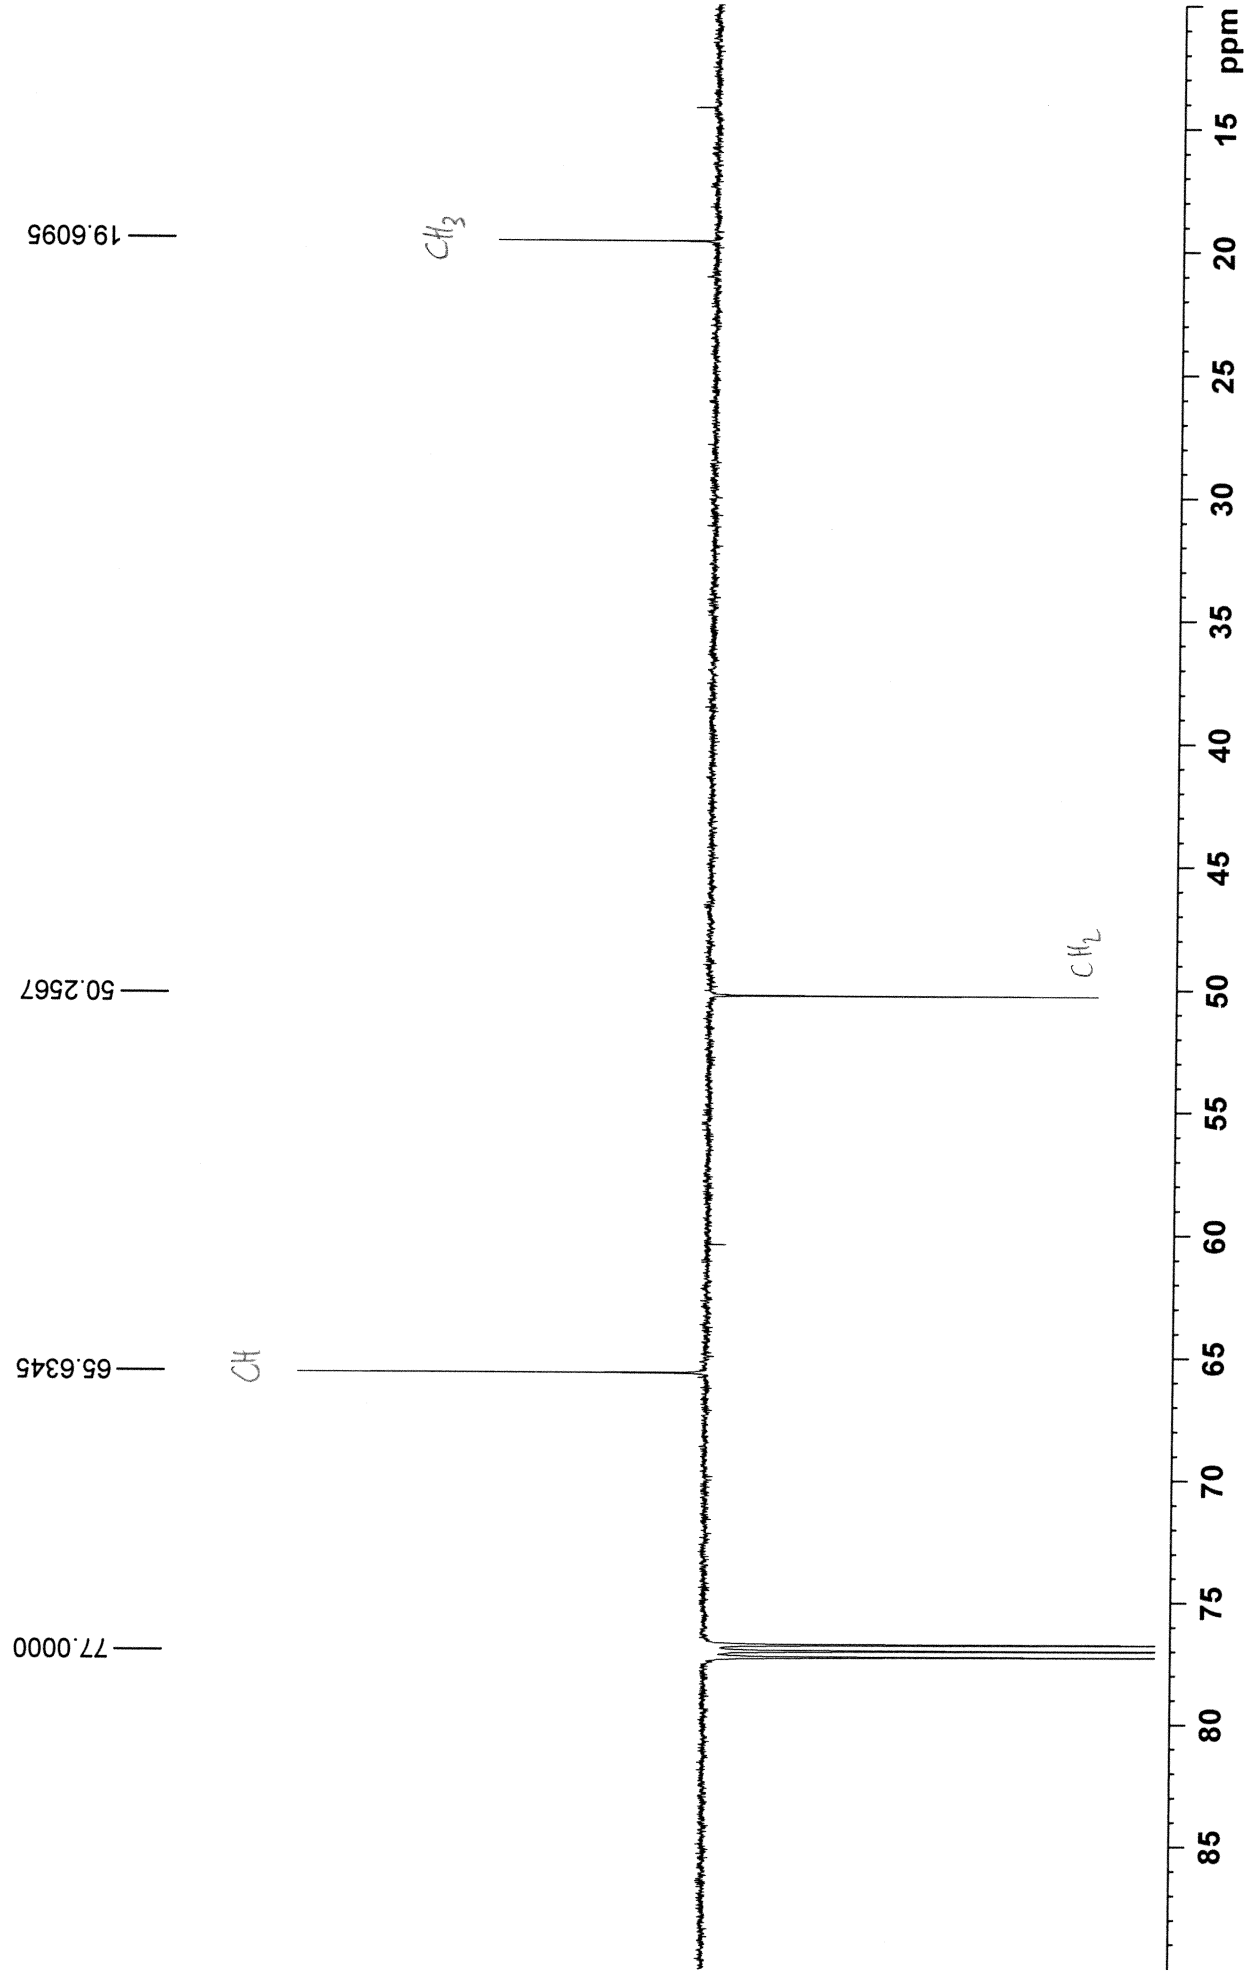

PN006p1 in cdcl3 (COSY) 29.3.2021

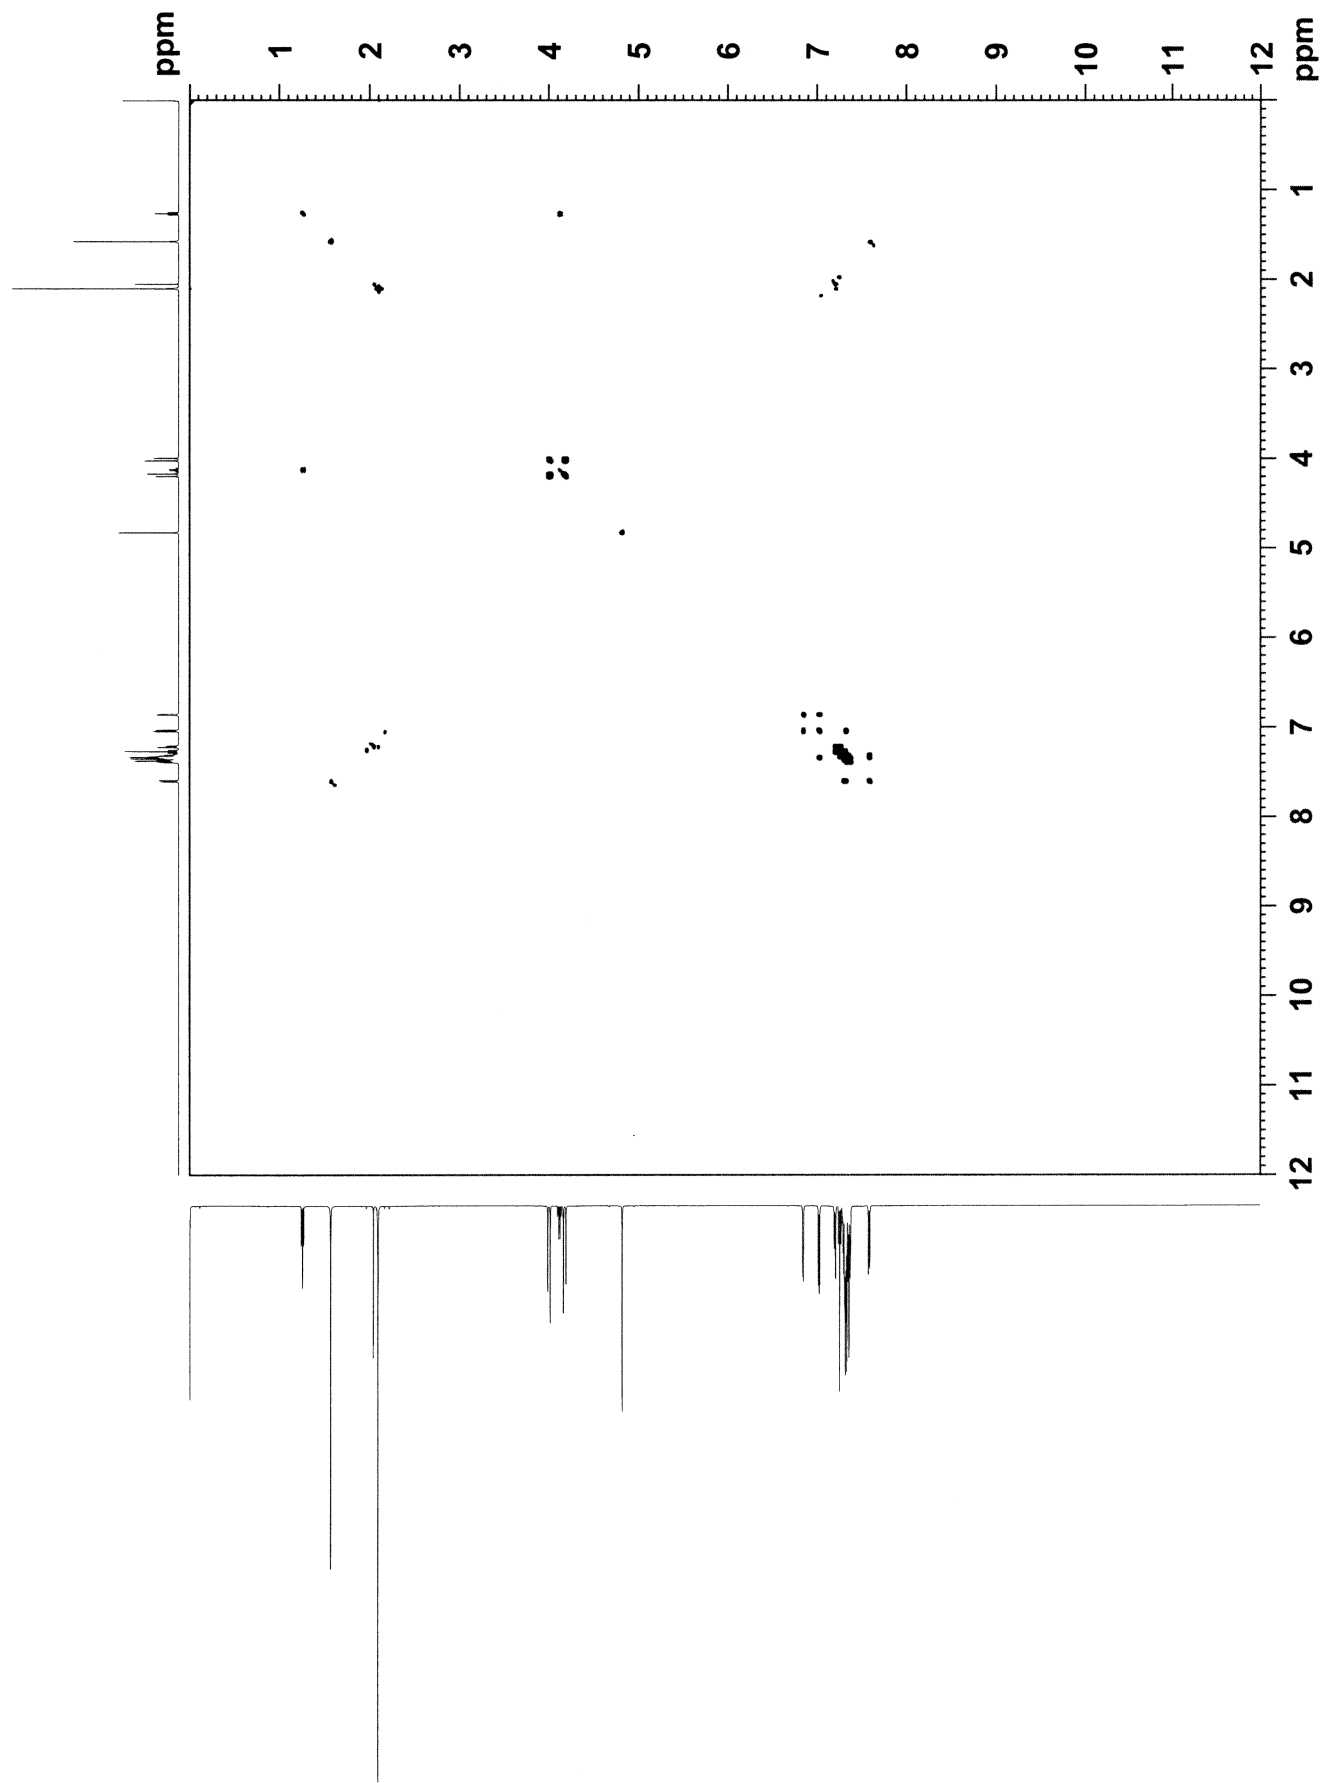



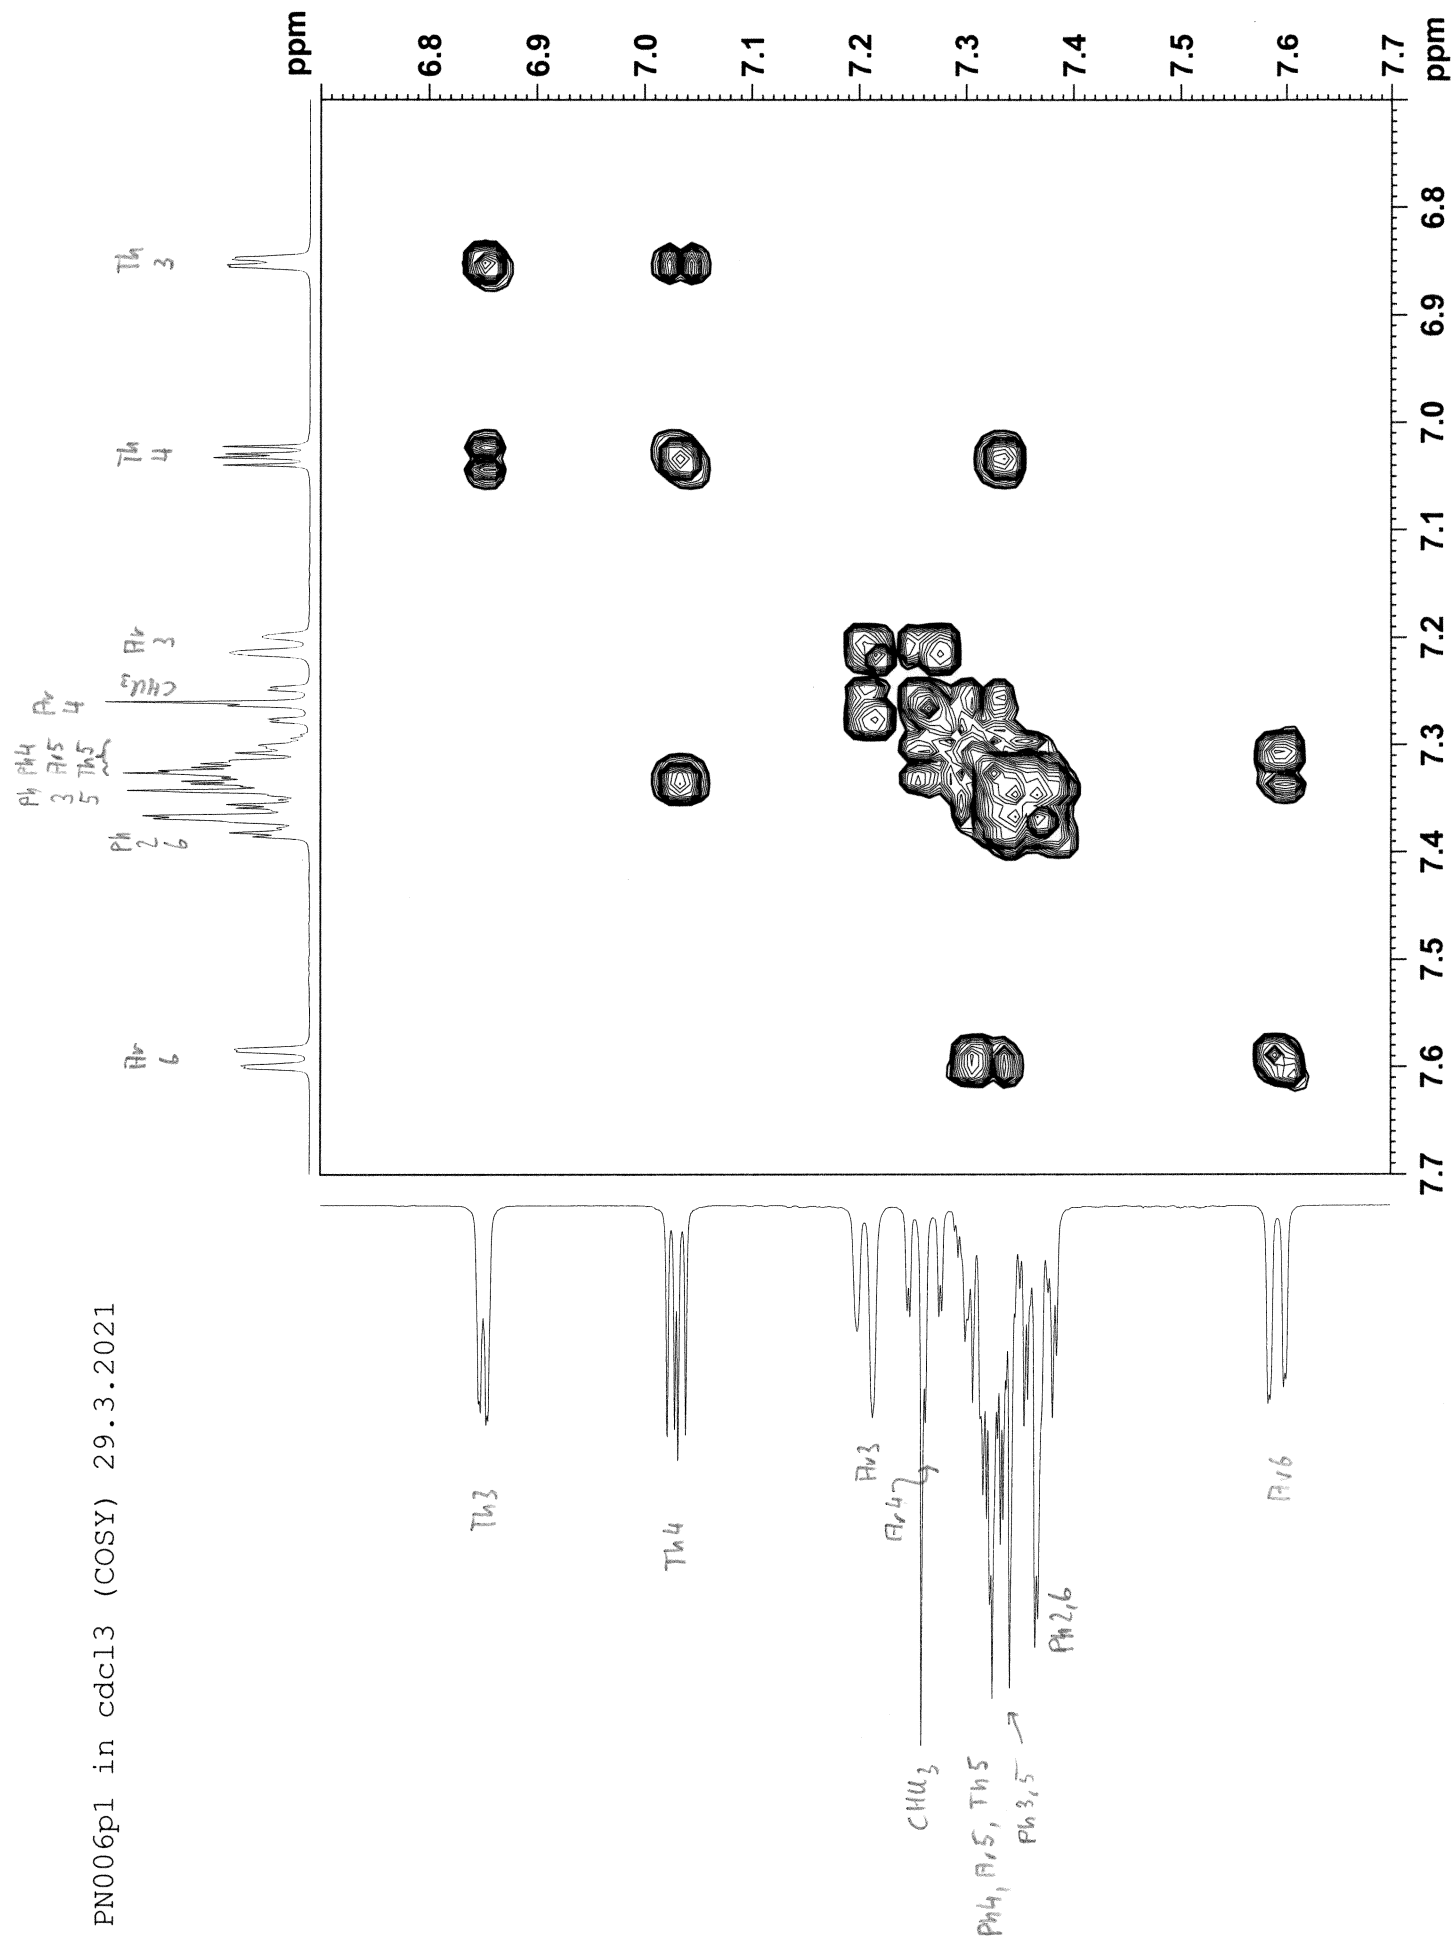

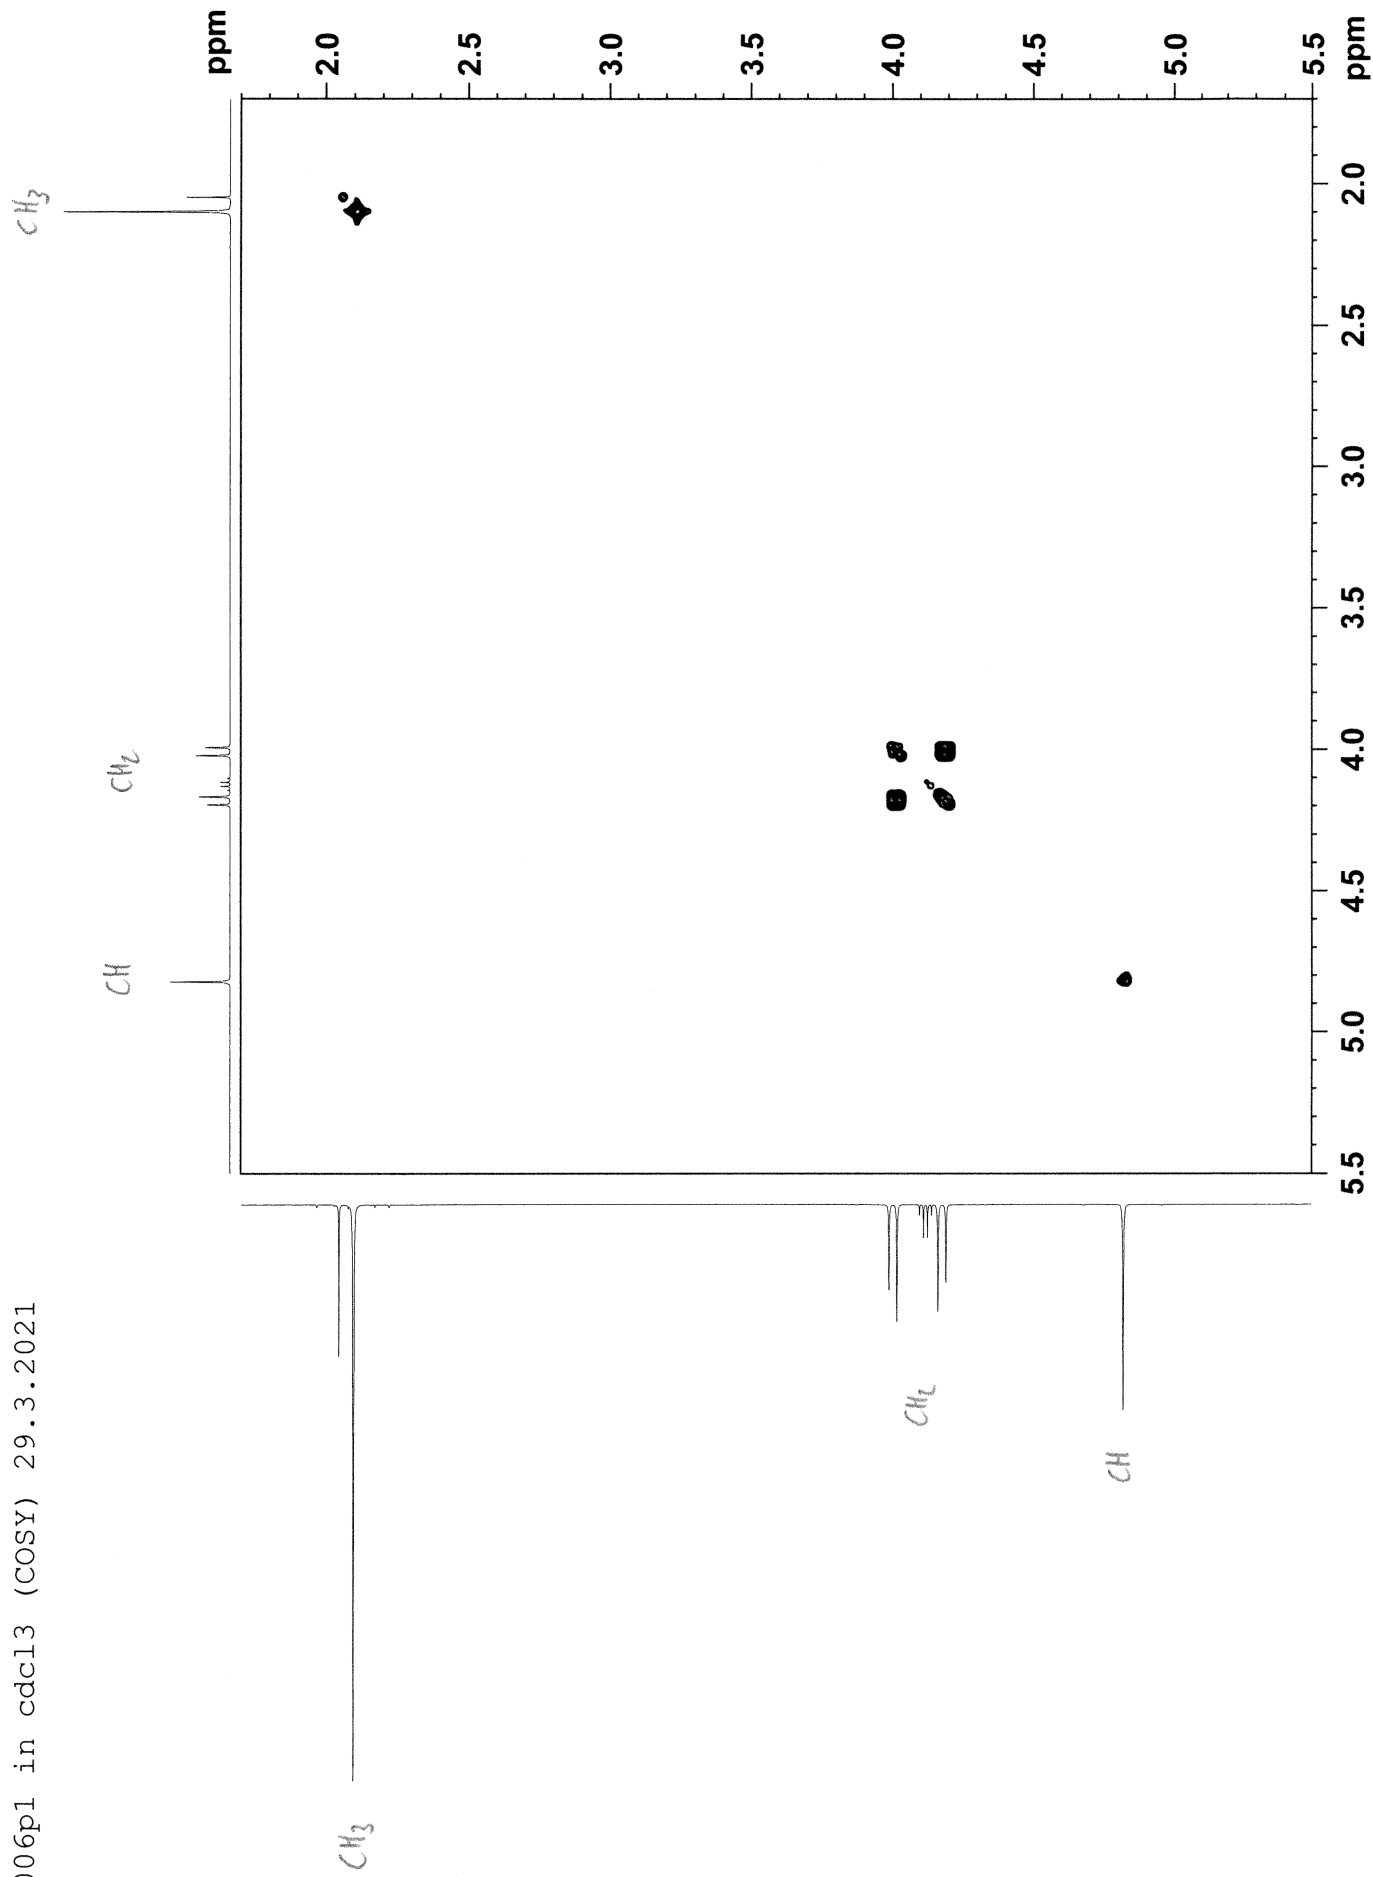

PN006p1 in cdcl3 (HSQC) 29.3.2021

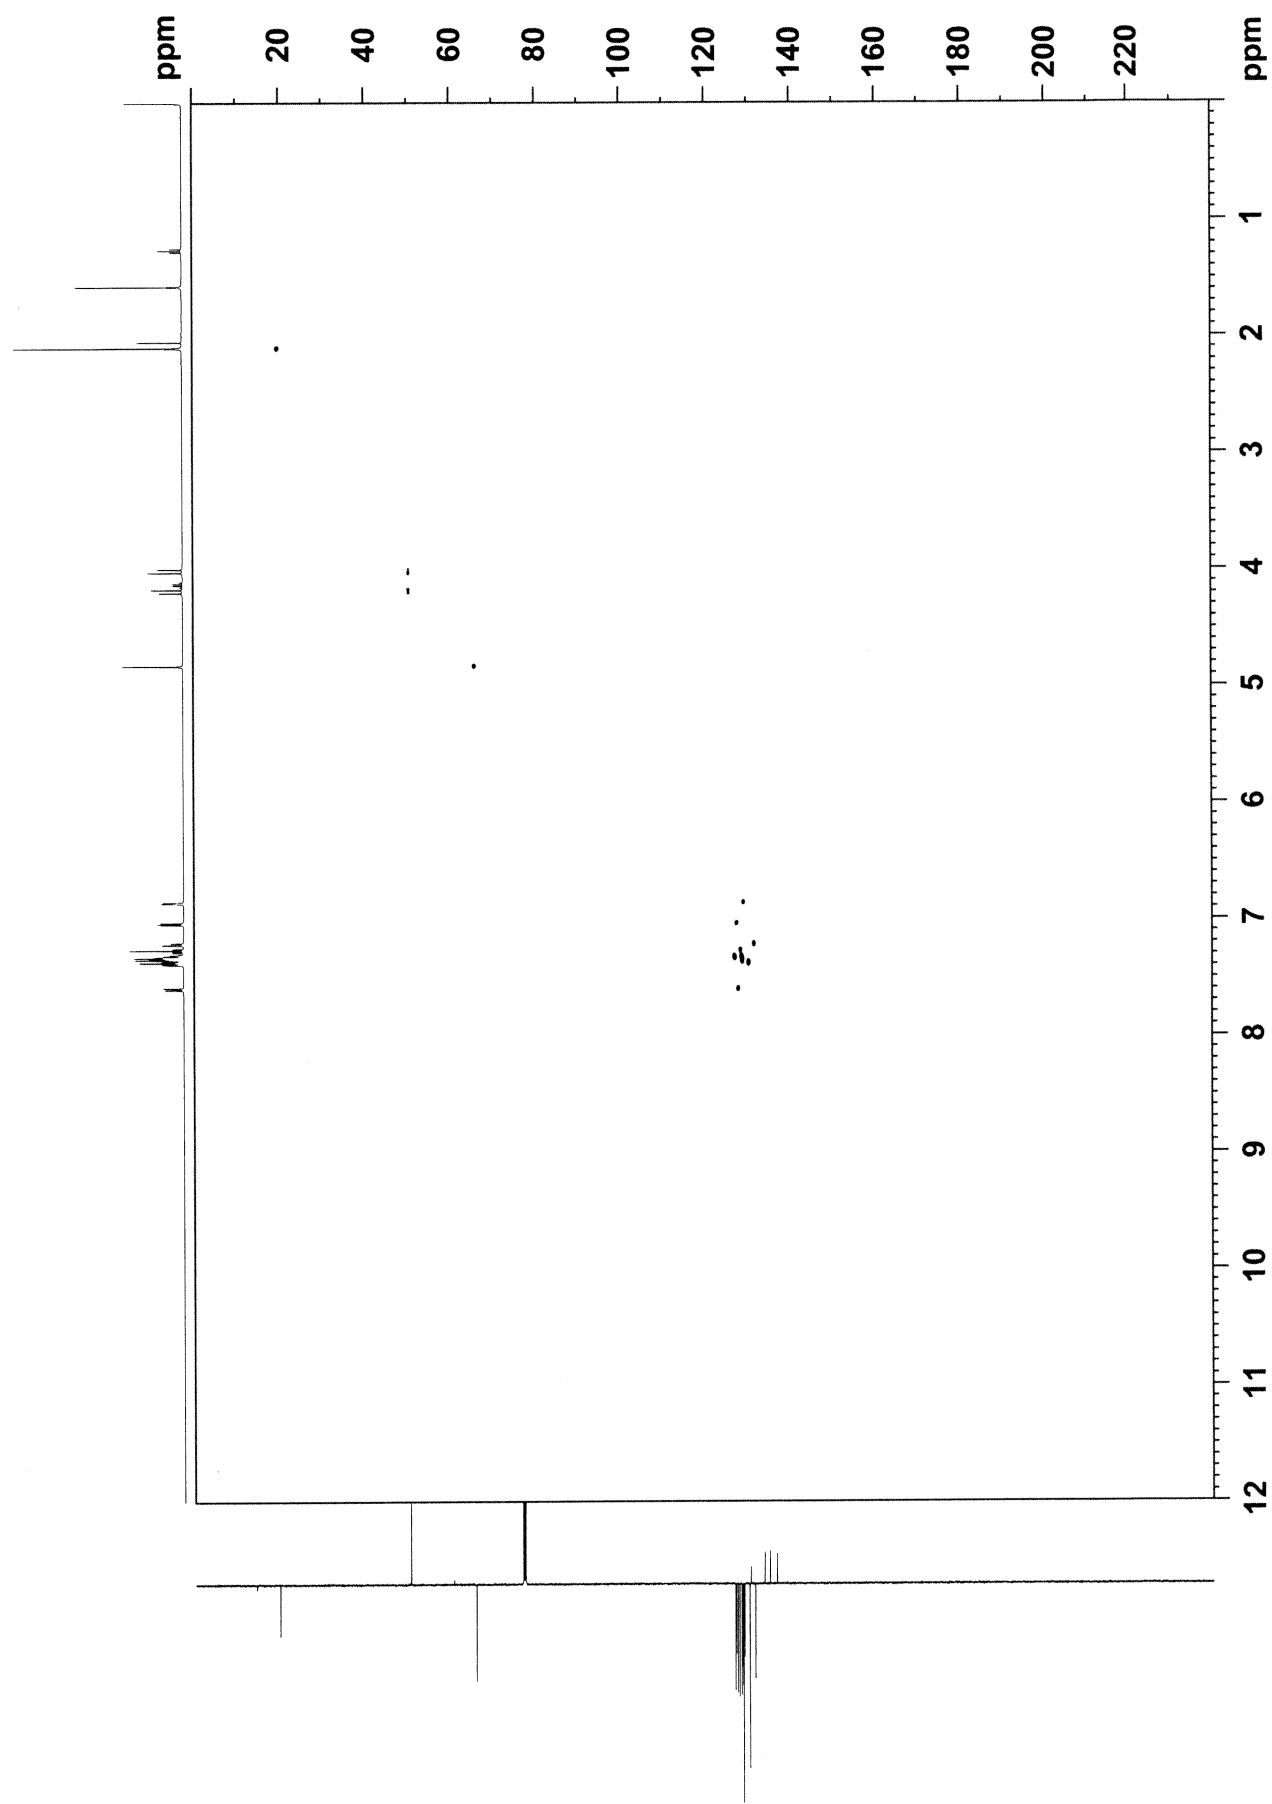

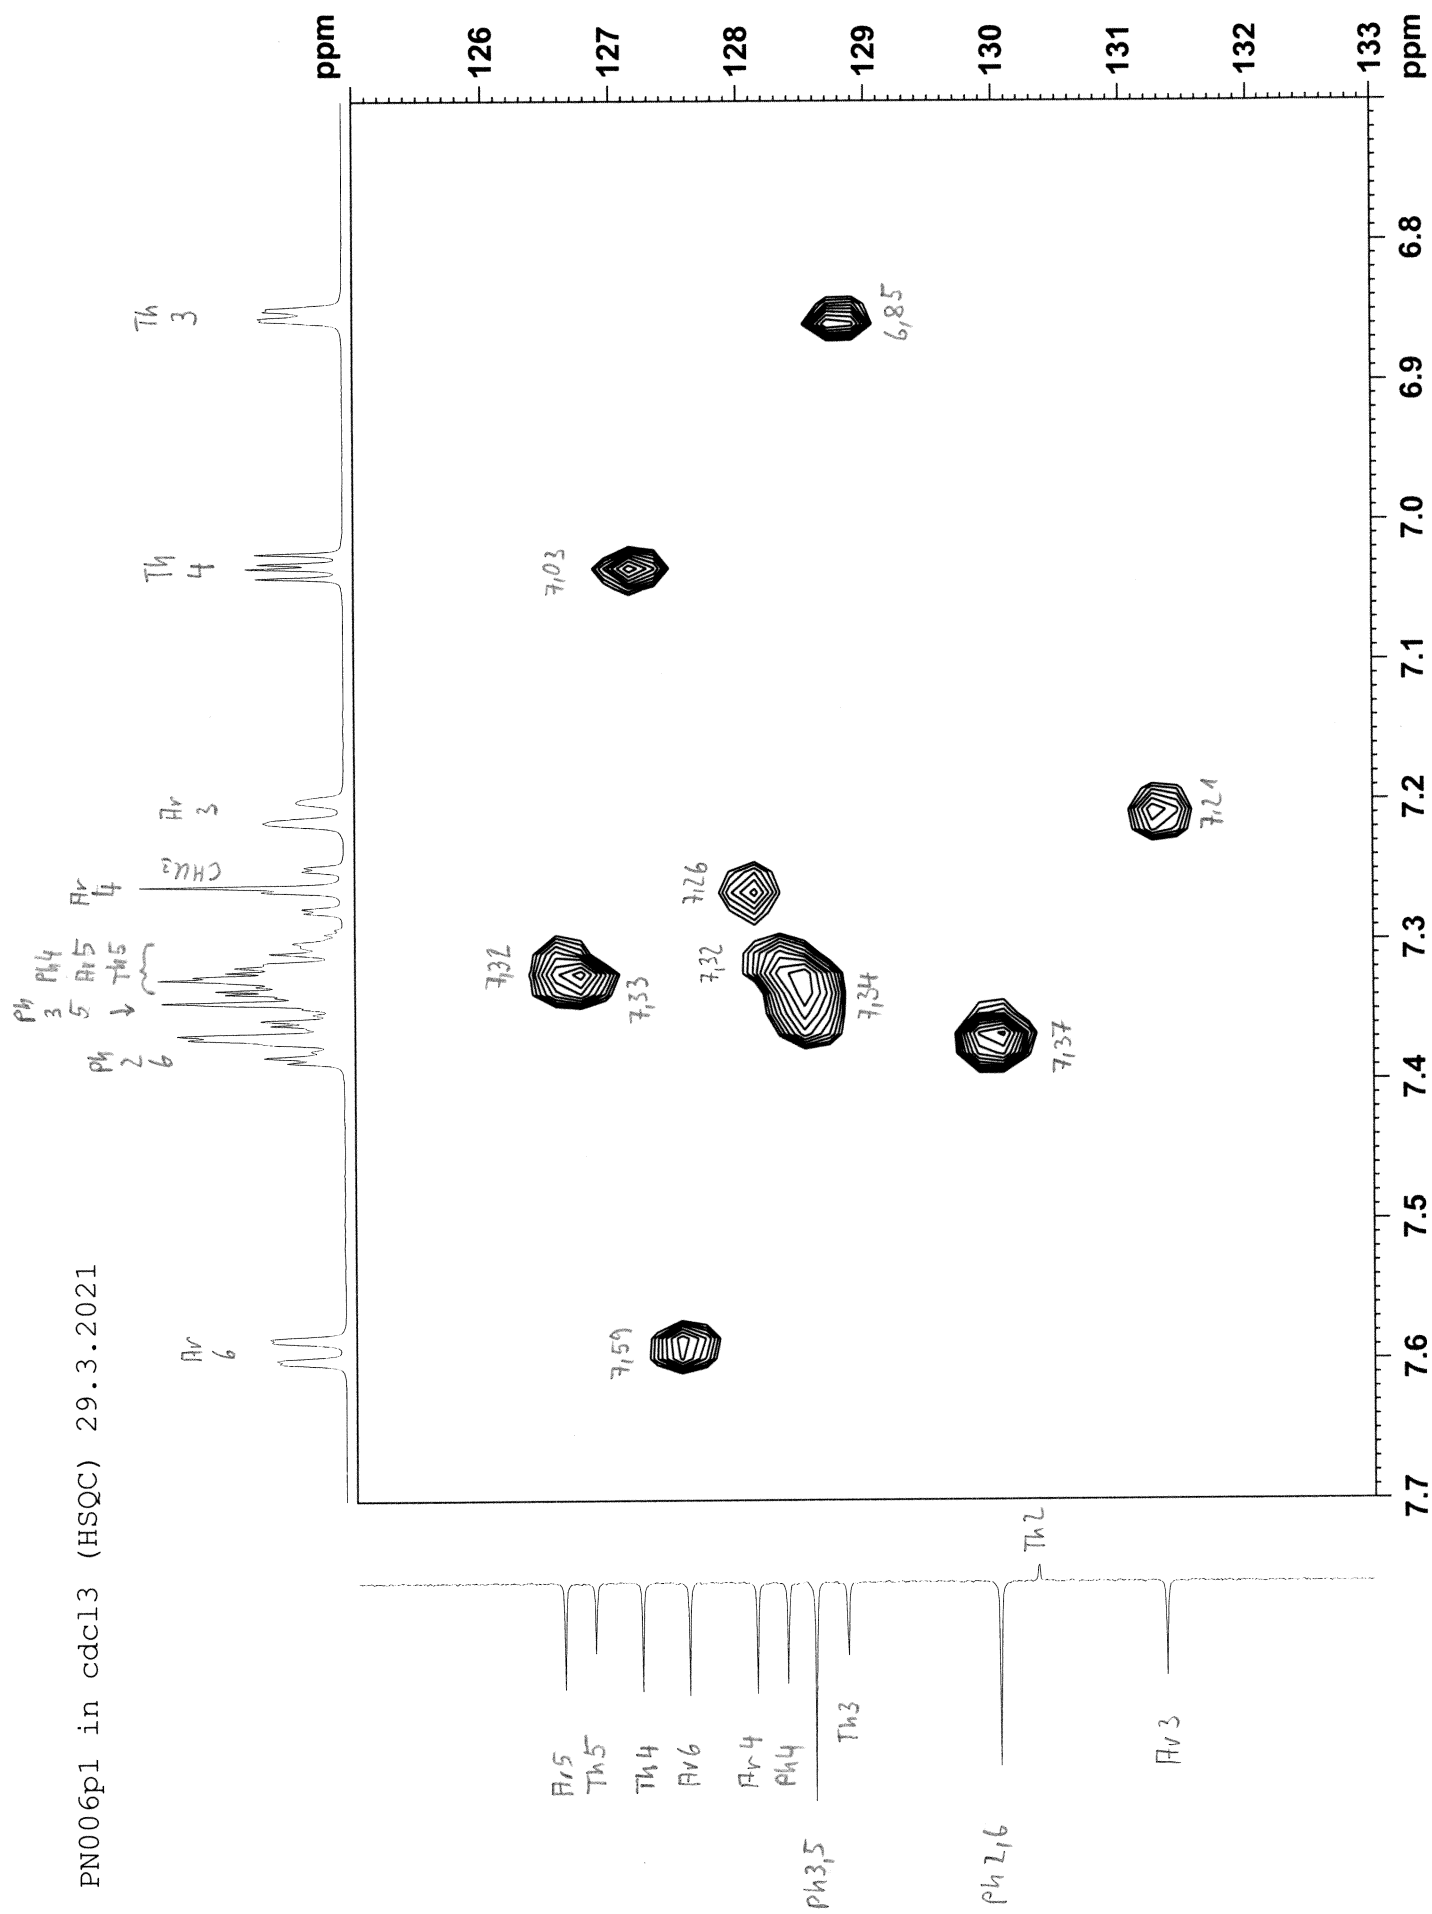

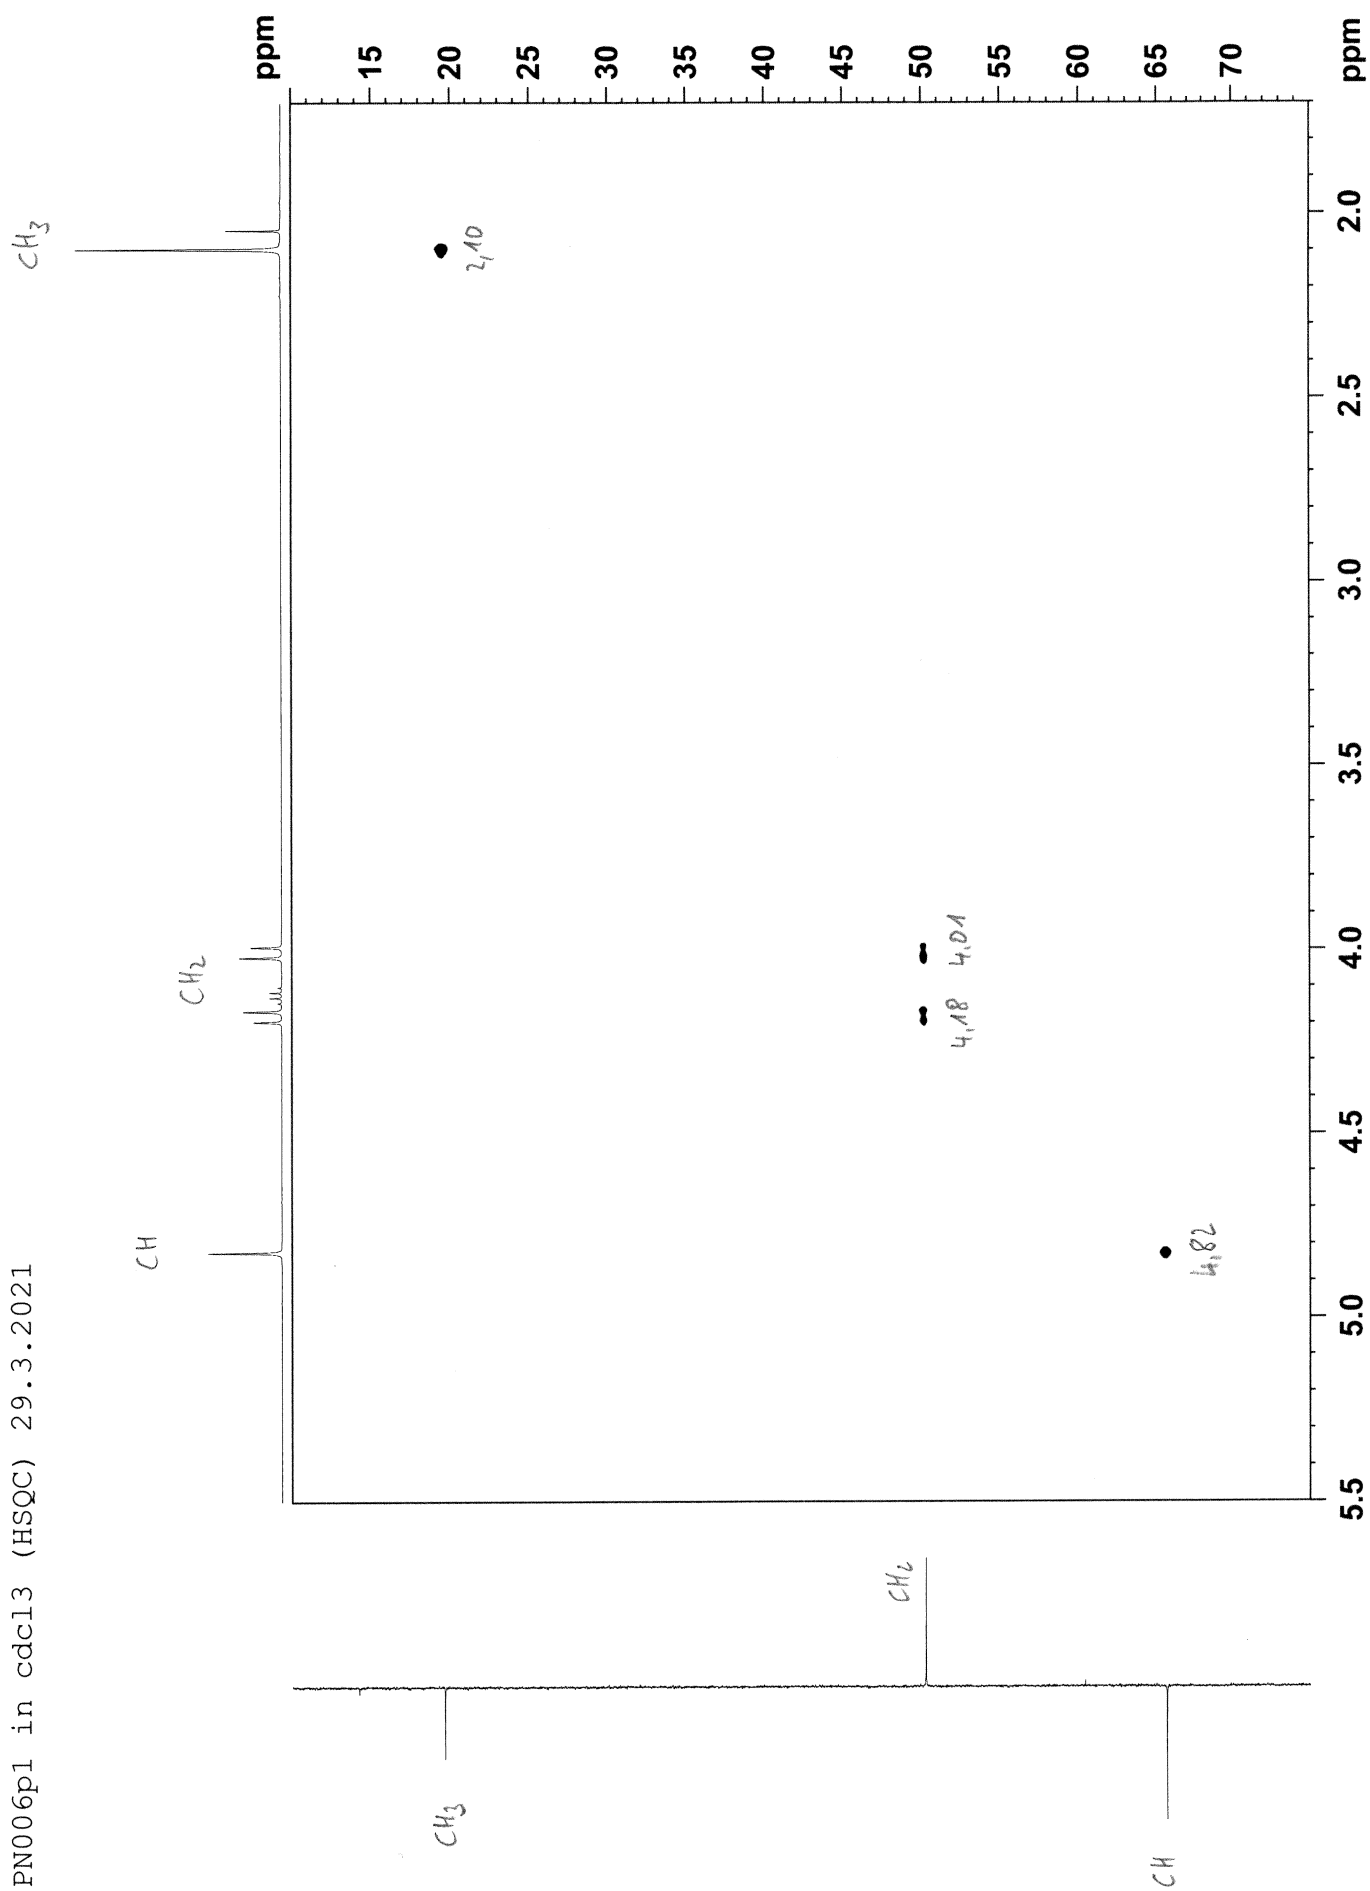

PN006p1 in cdcl3 (HMBC) 29.3.2021

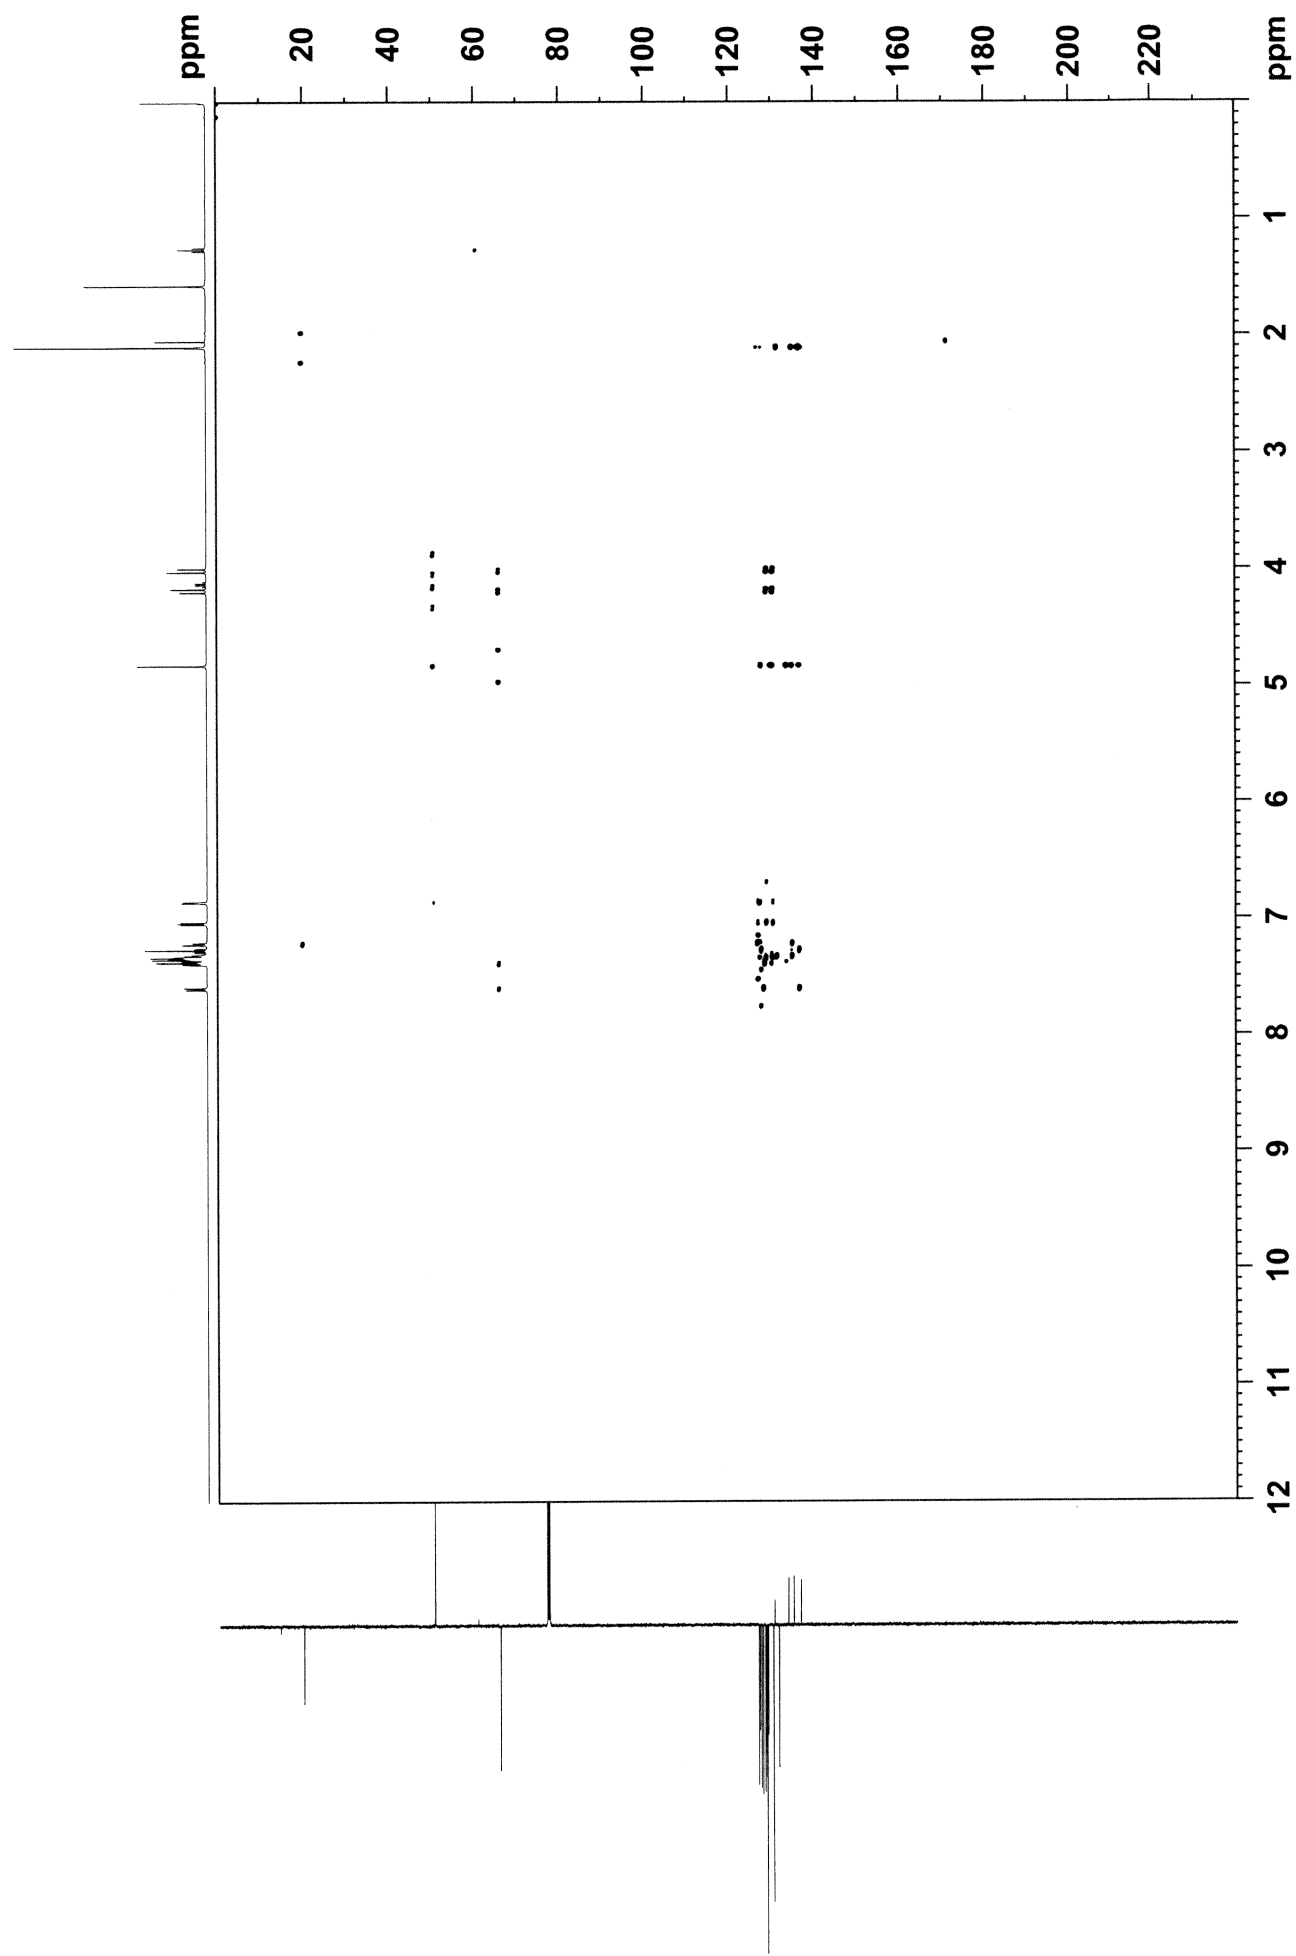

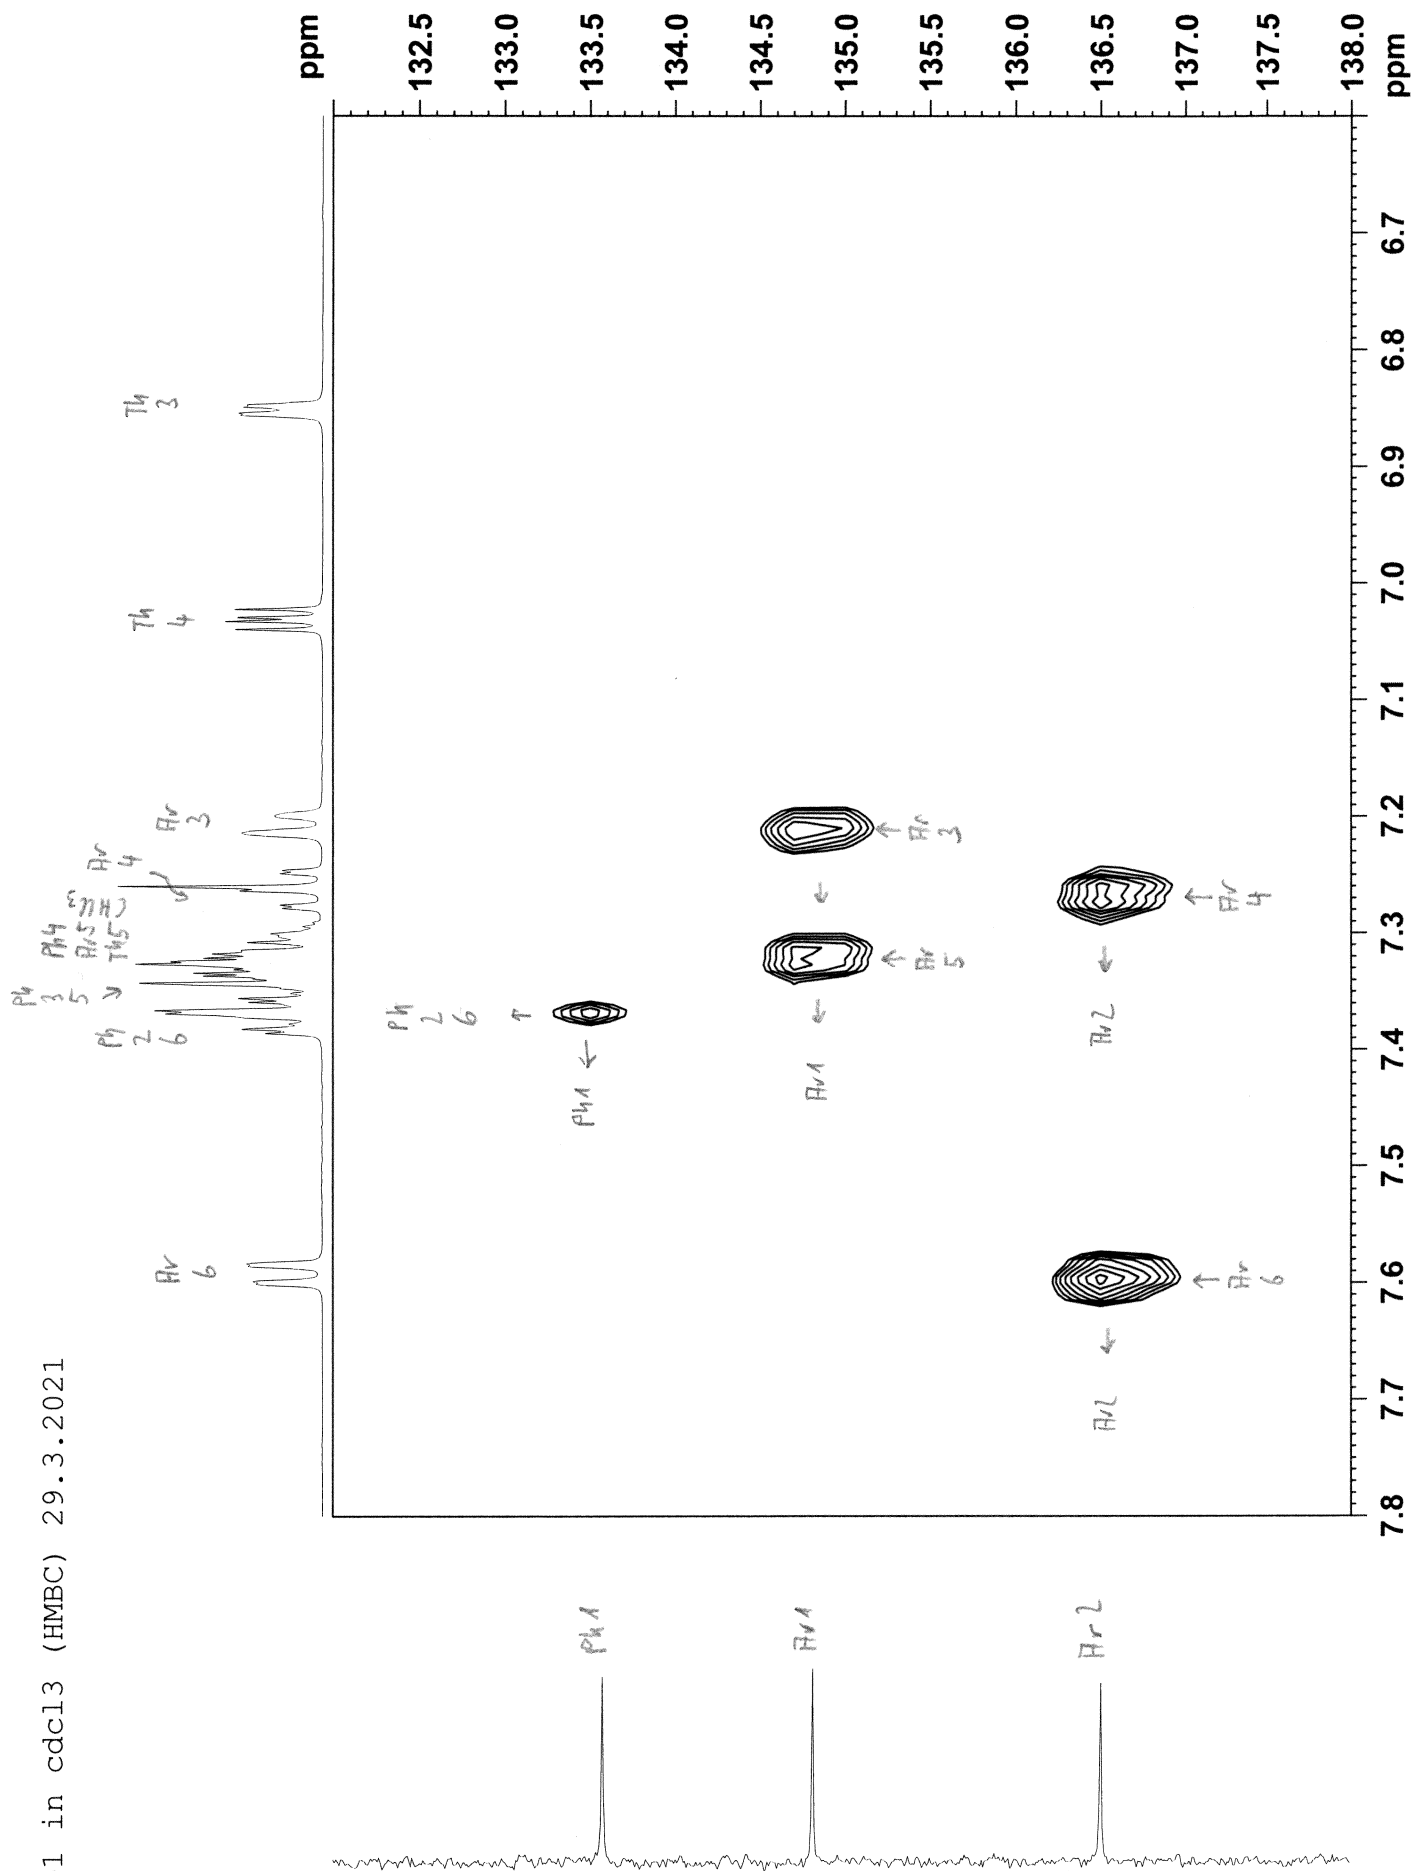

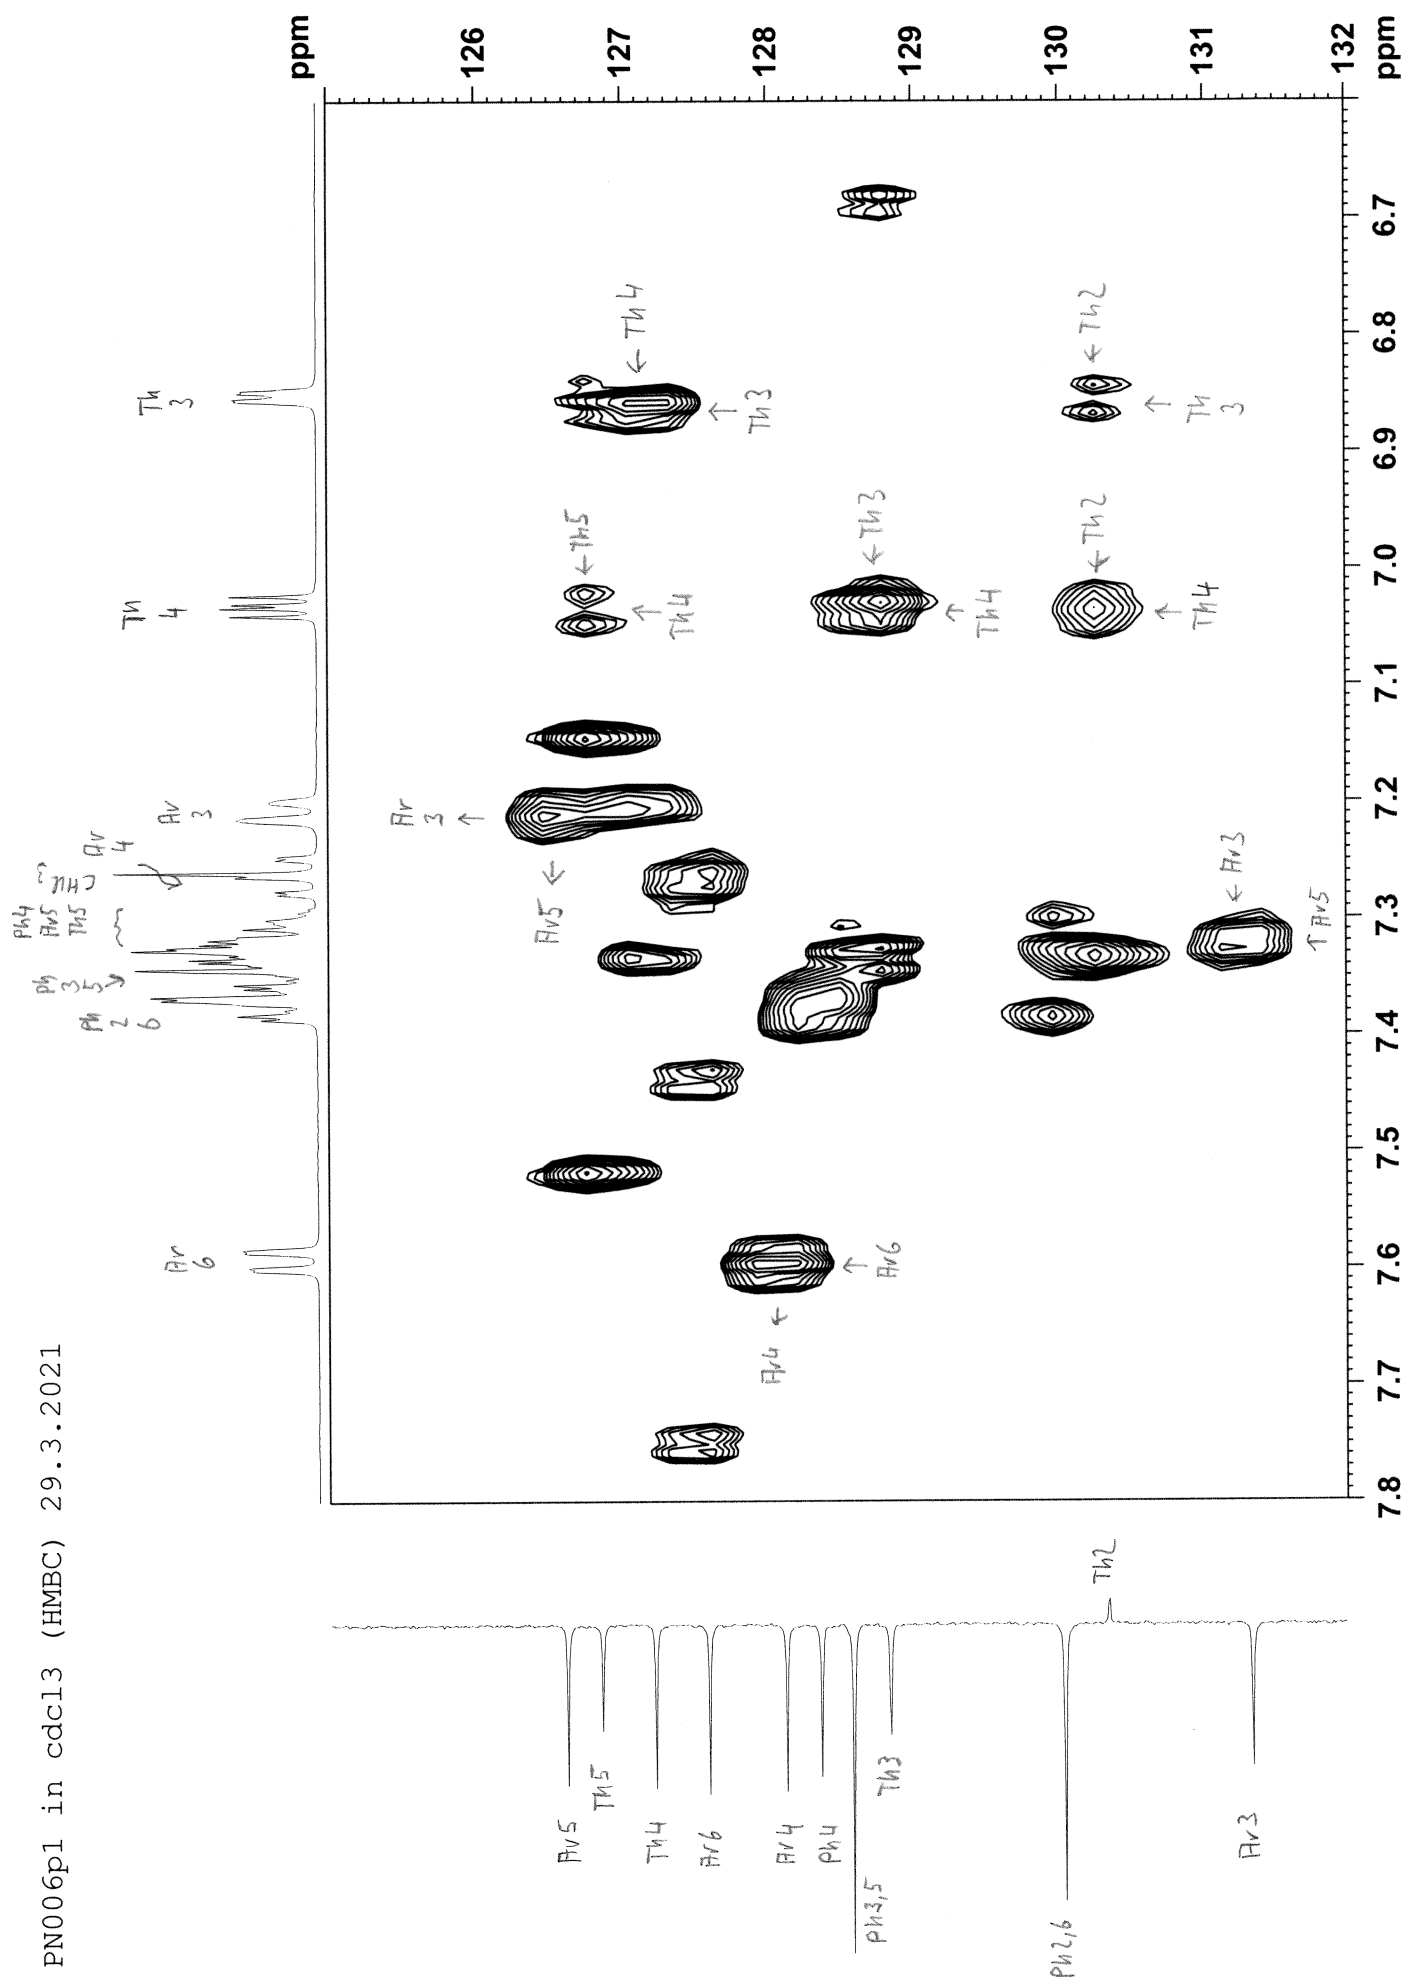



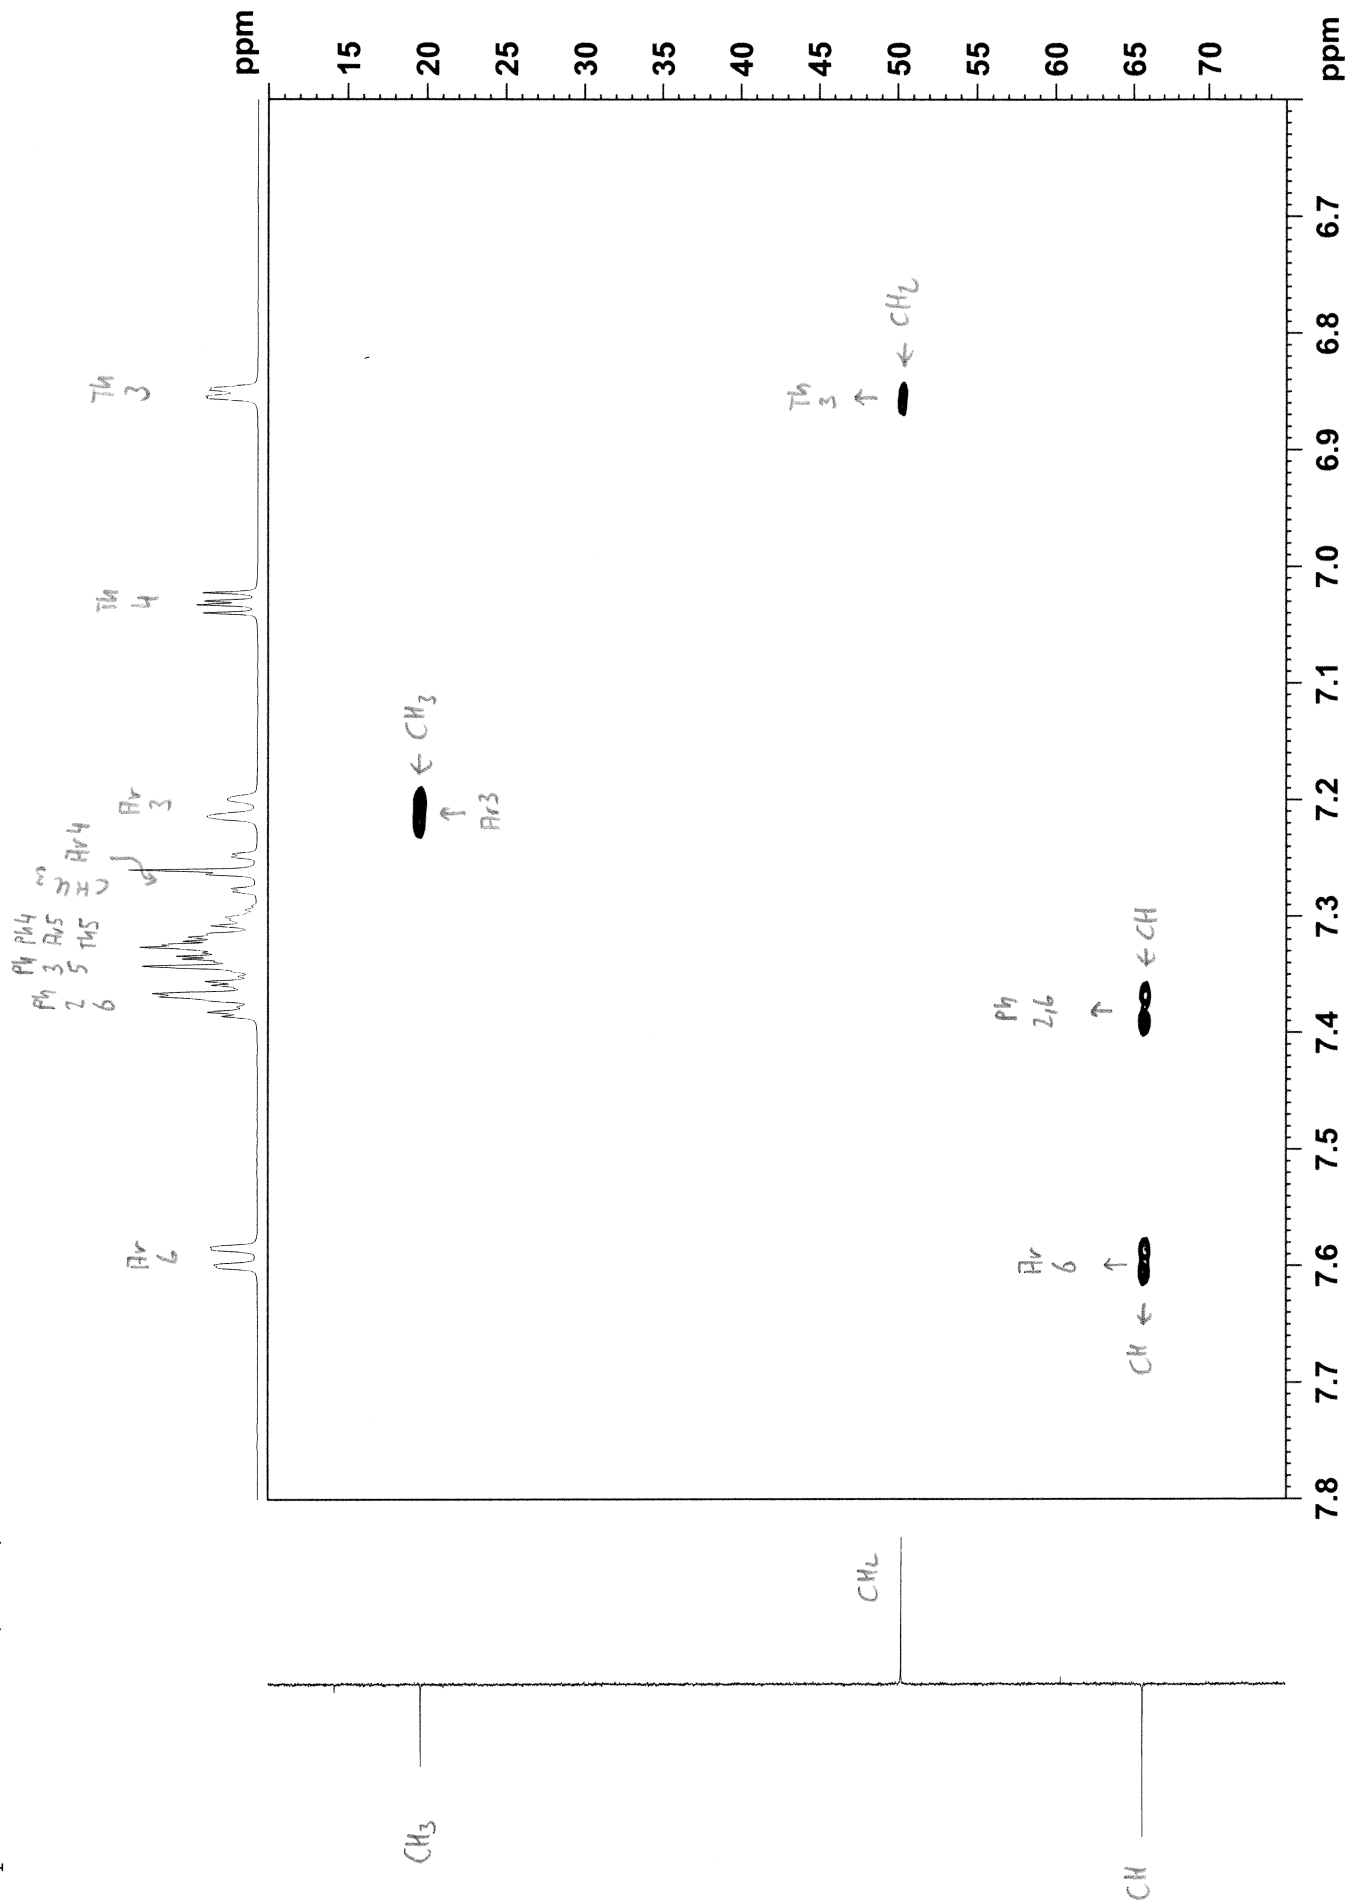

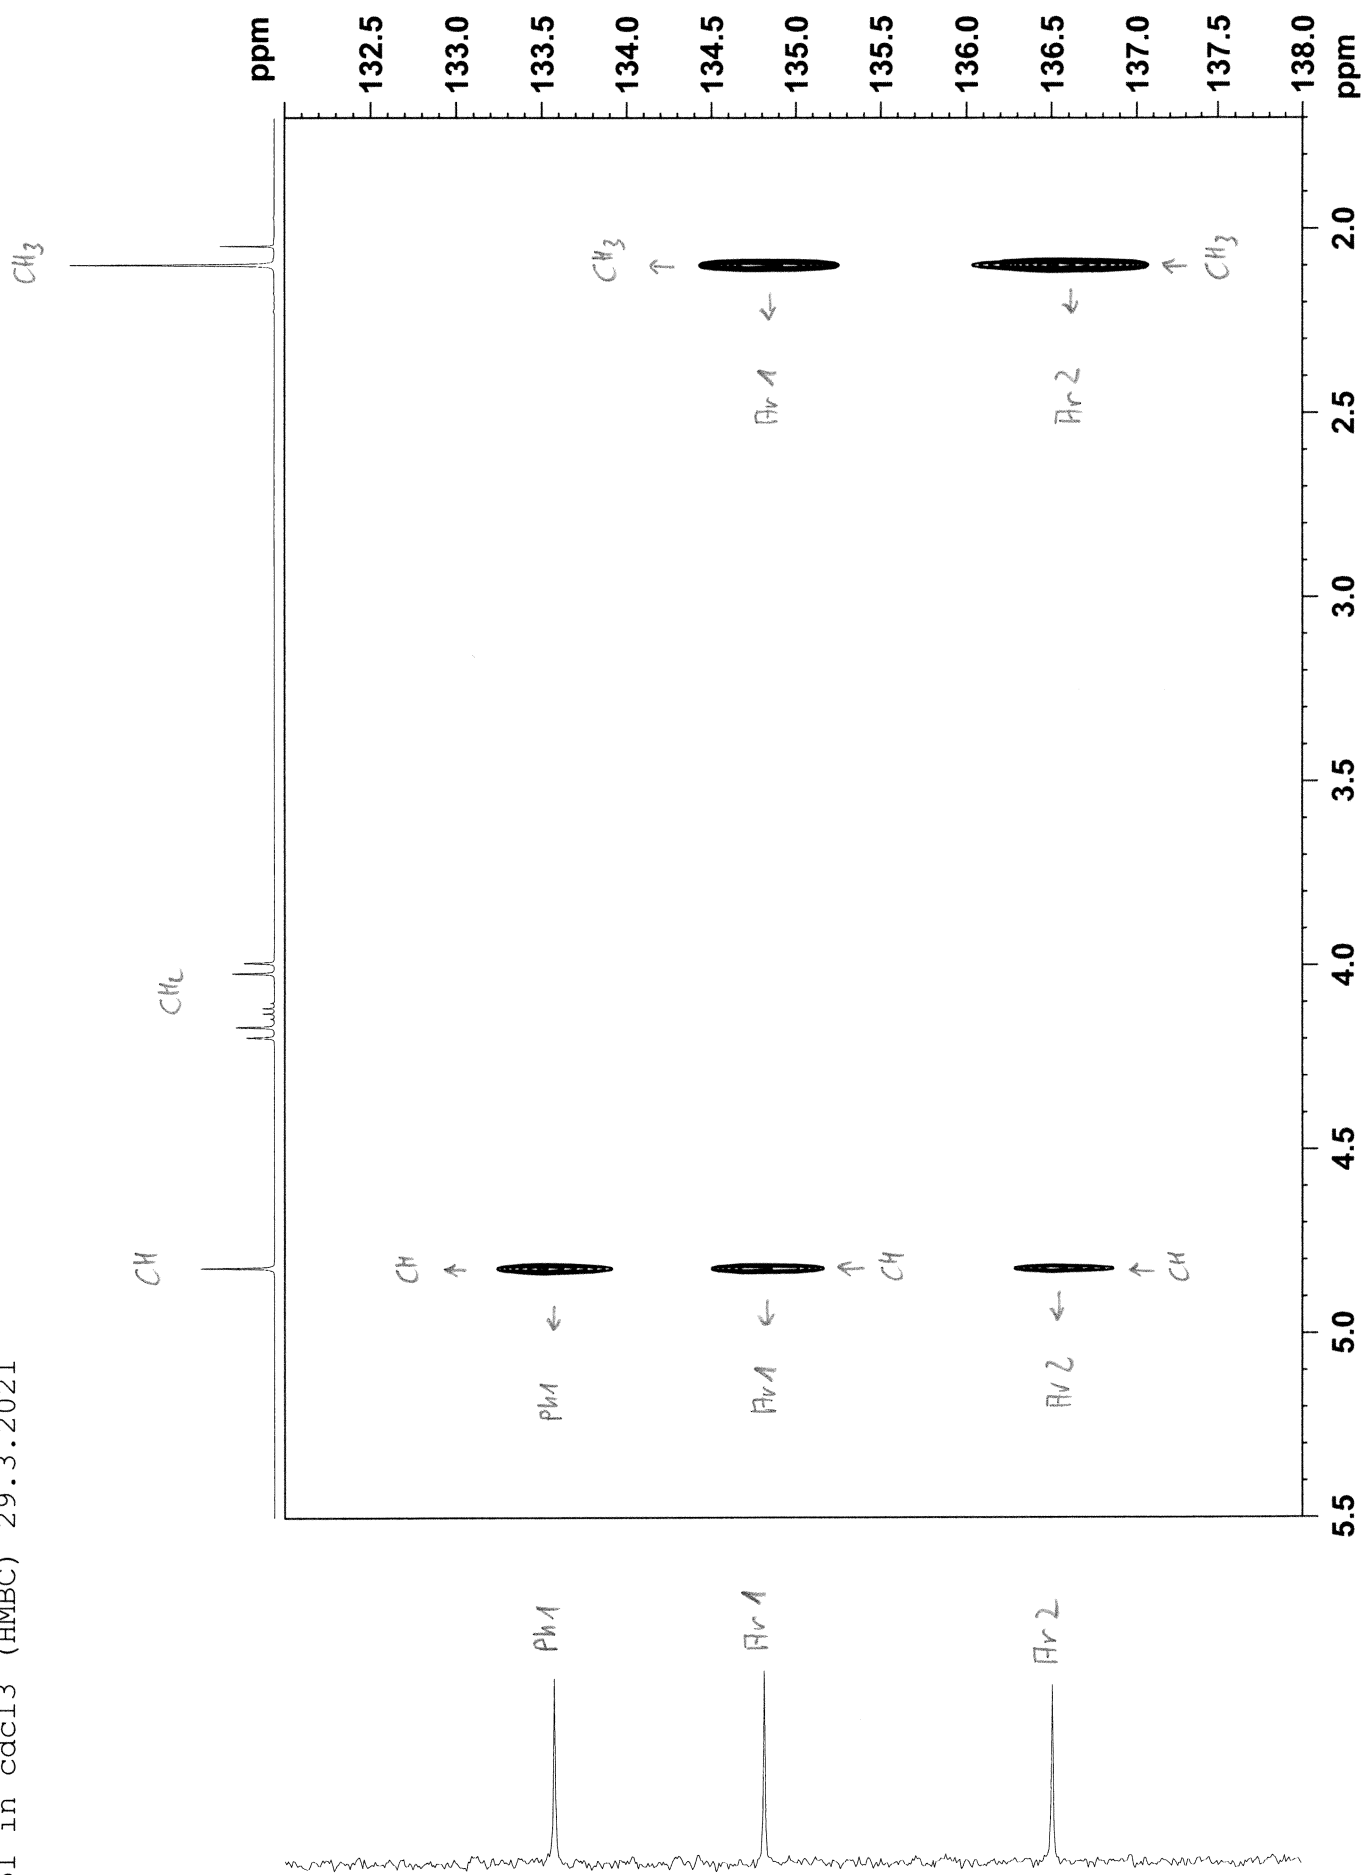



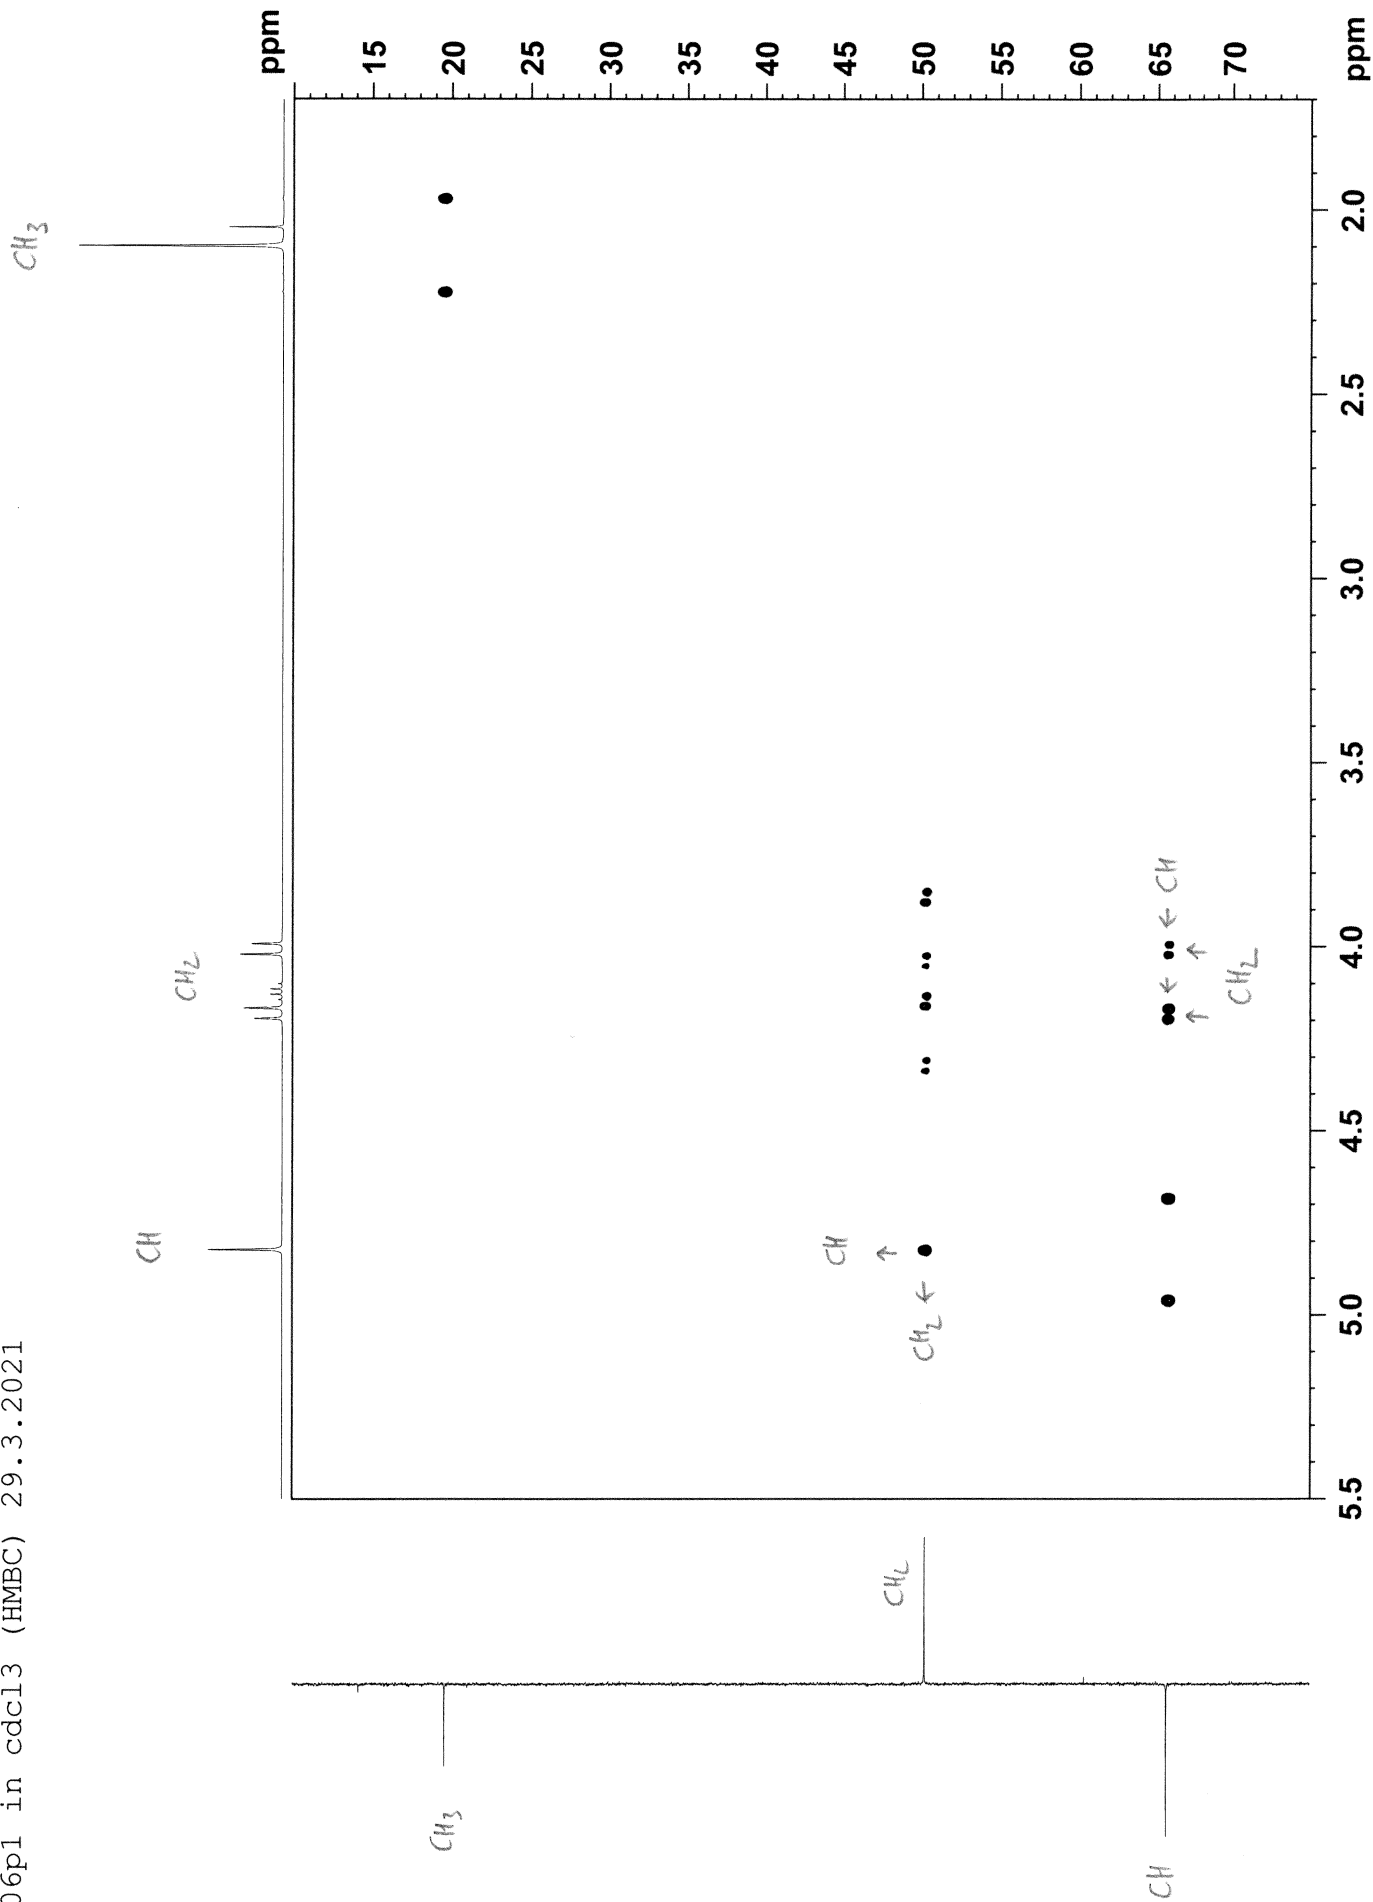

**Figure S46c.** NMR spectra of compound **6l**.

PN006p2 in cdcl3 (Proton) 29.3.2021

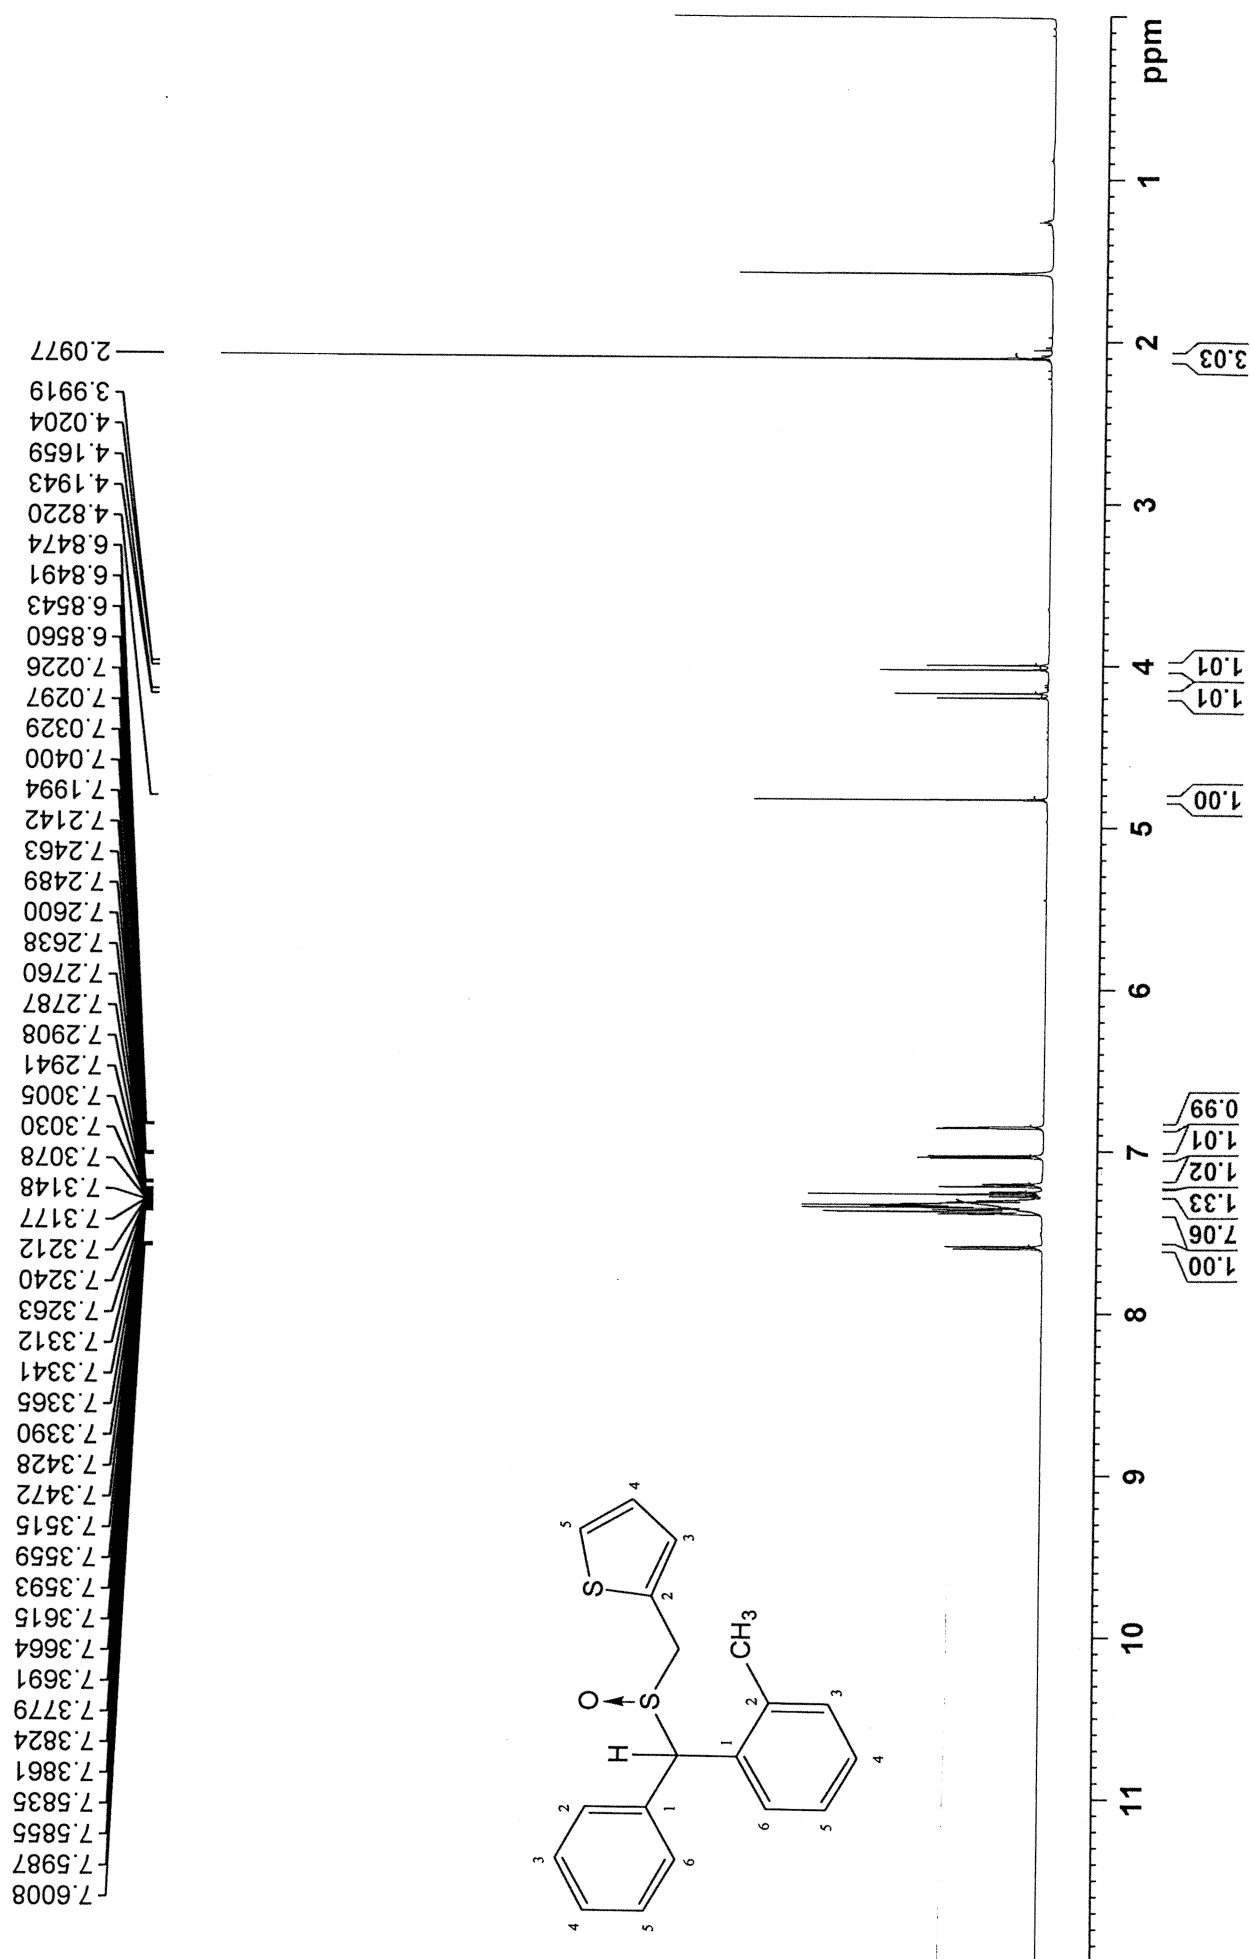

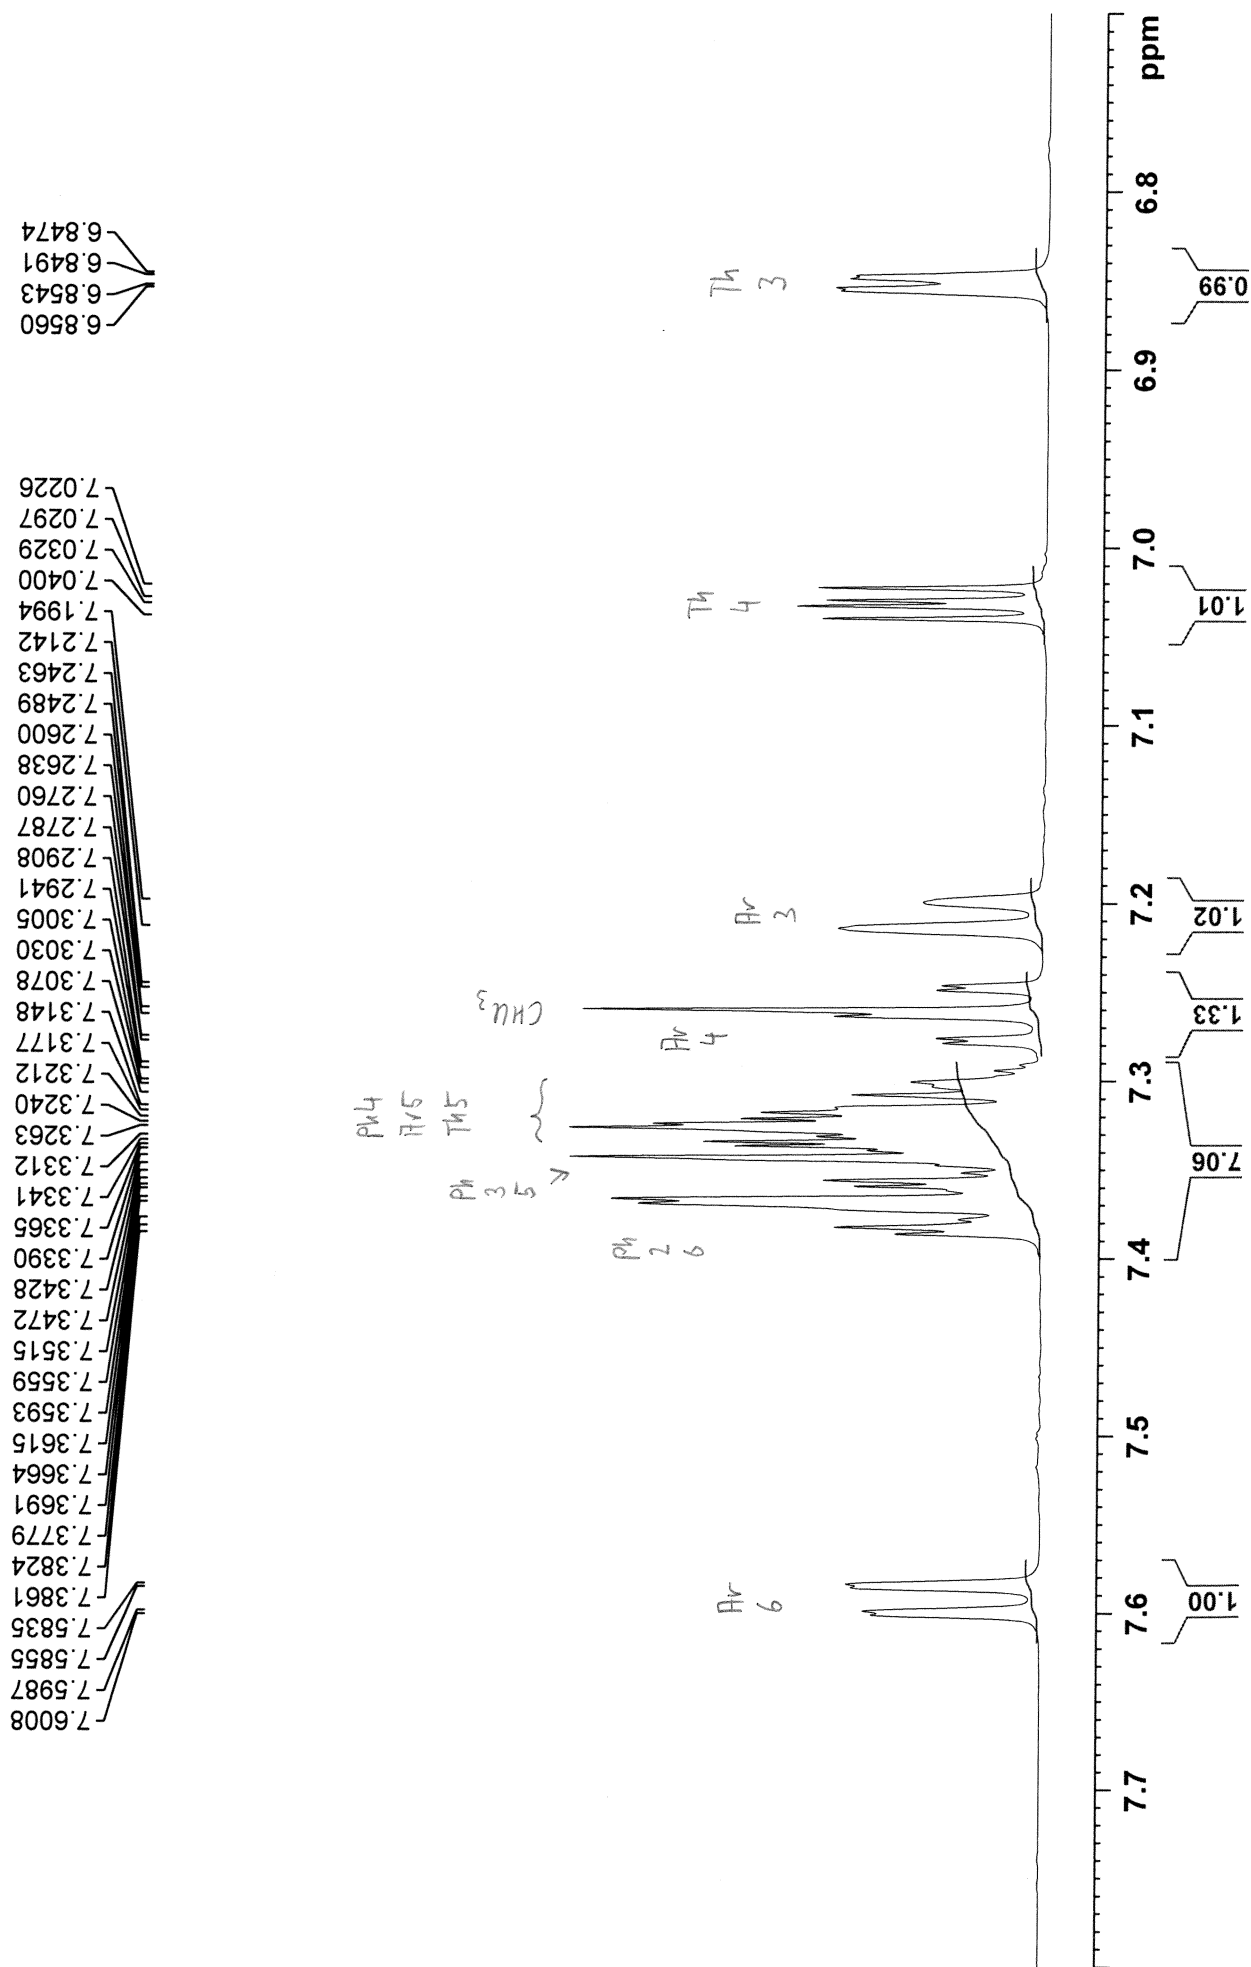

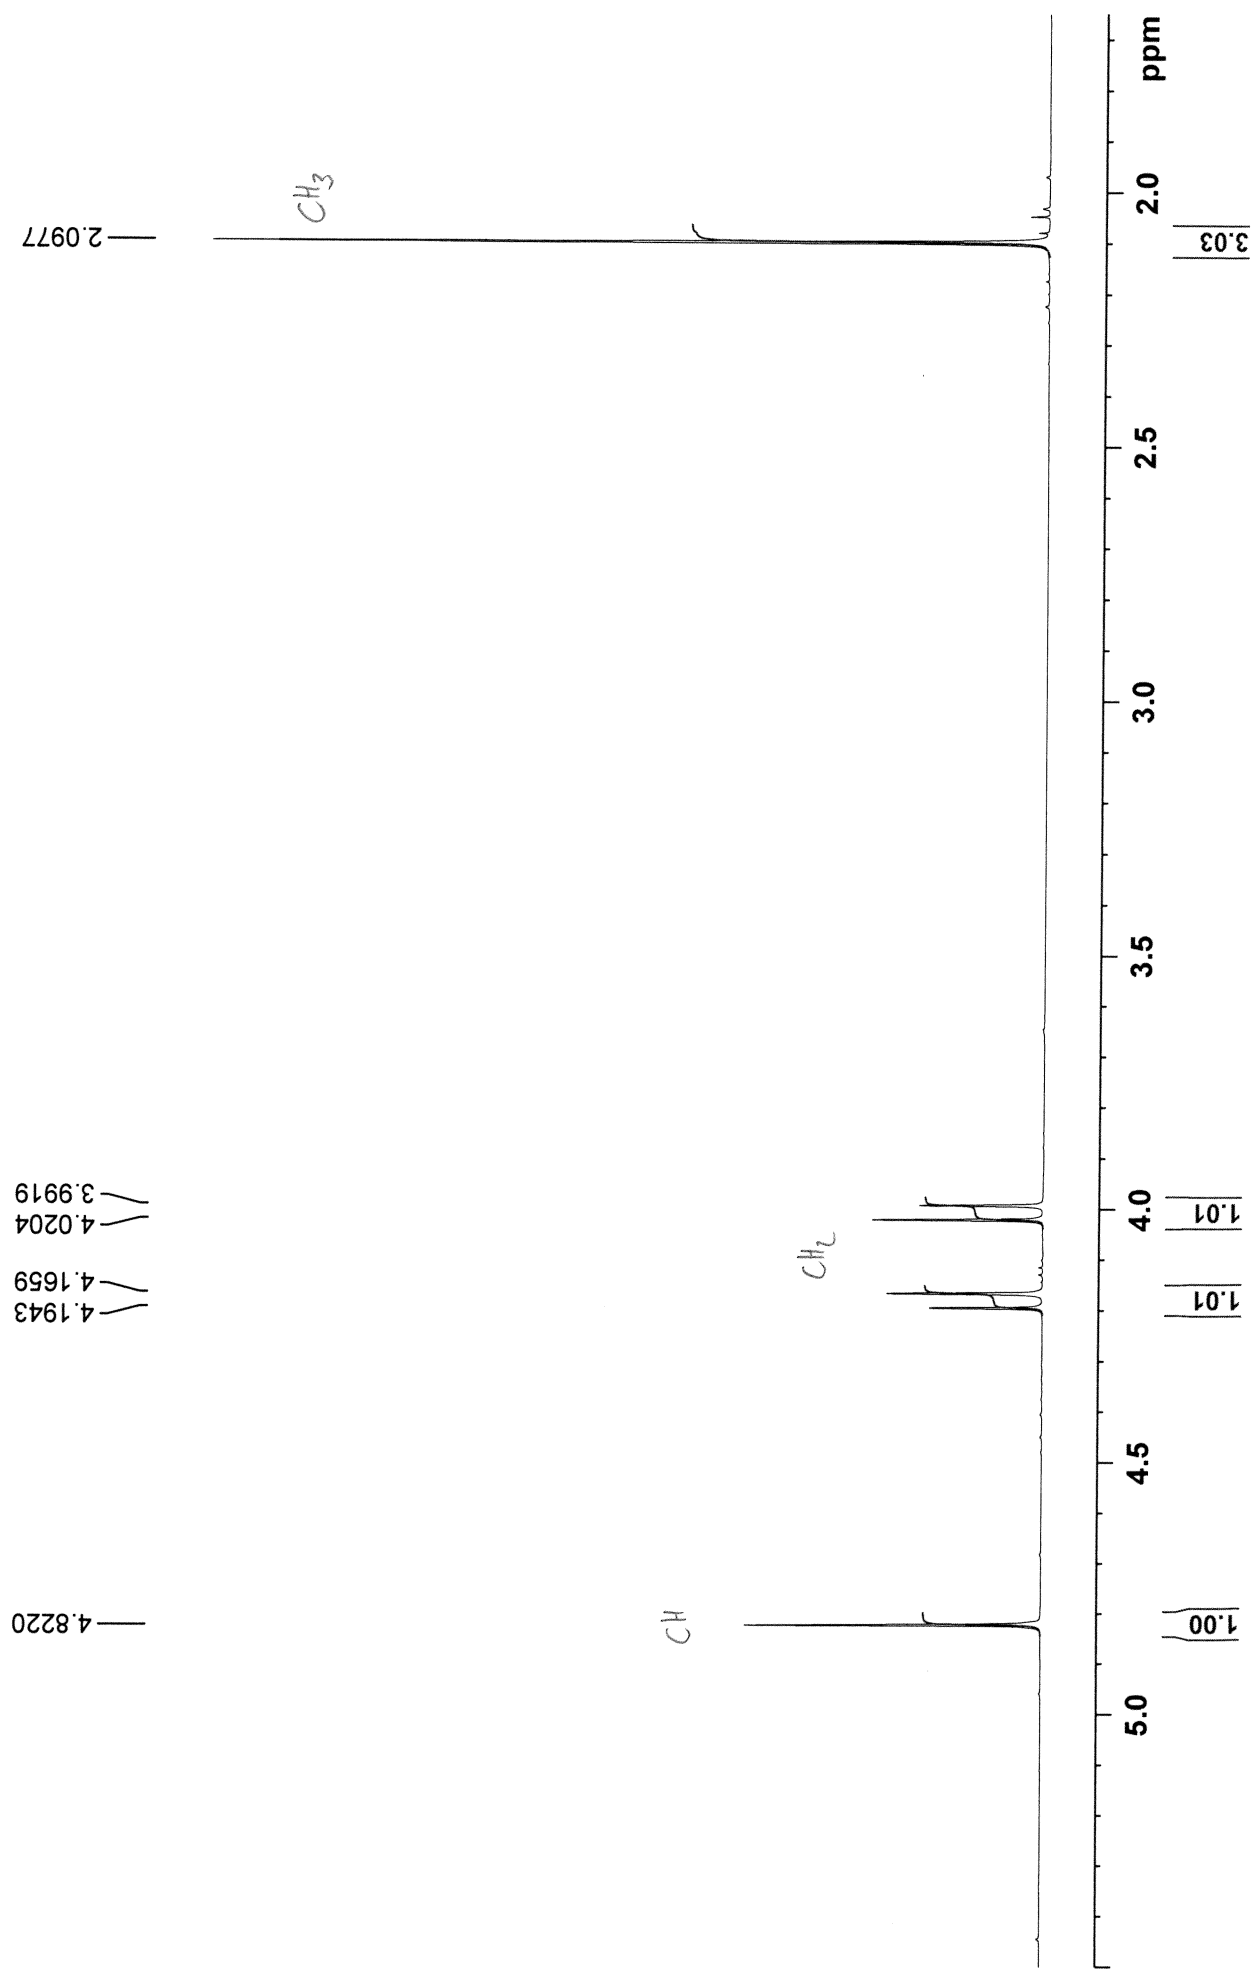

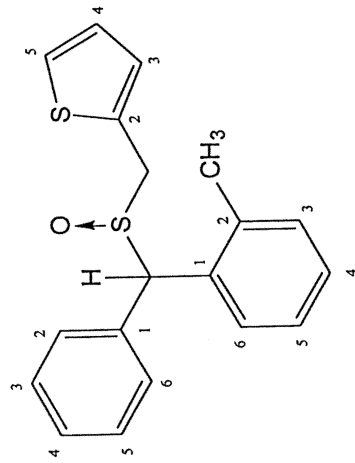

136.5043  
134.8129  
133.5727  
131.3383  
130.3316  
130.0327  
128.8379  
128.5814  
128.3616  
128.1217  
127.5882  
127.2206  
126.8541  
126.6138

77.0000

65.6352

50.2560

19.6093

230 220 210 200 190 180 170 160 150 140 130 120 110 100 90 80 70 60 50 40 30 20 ppm



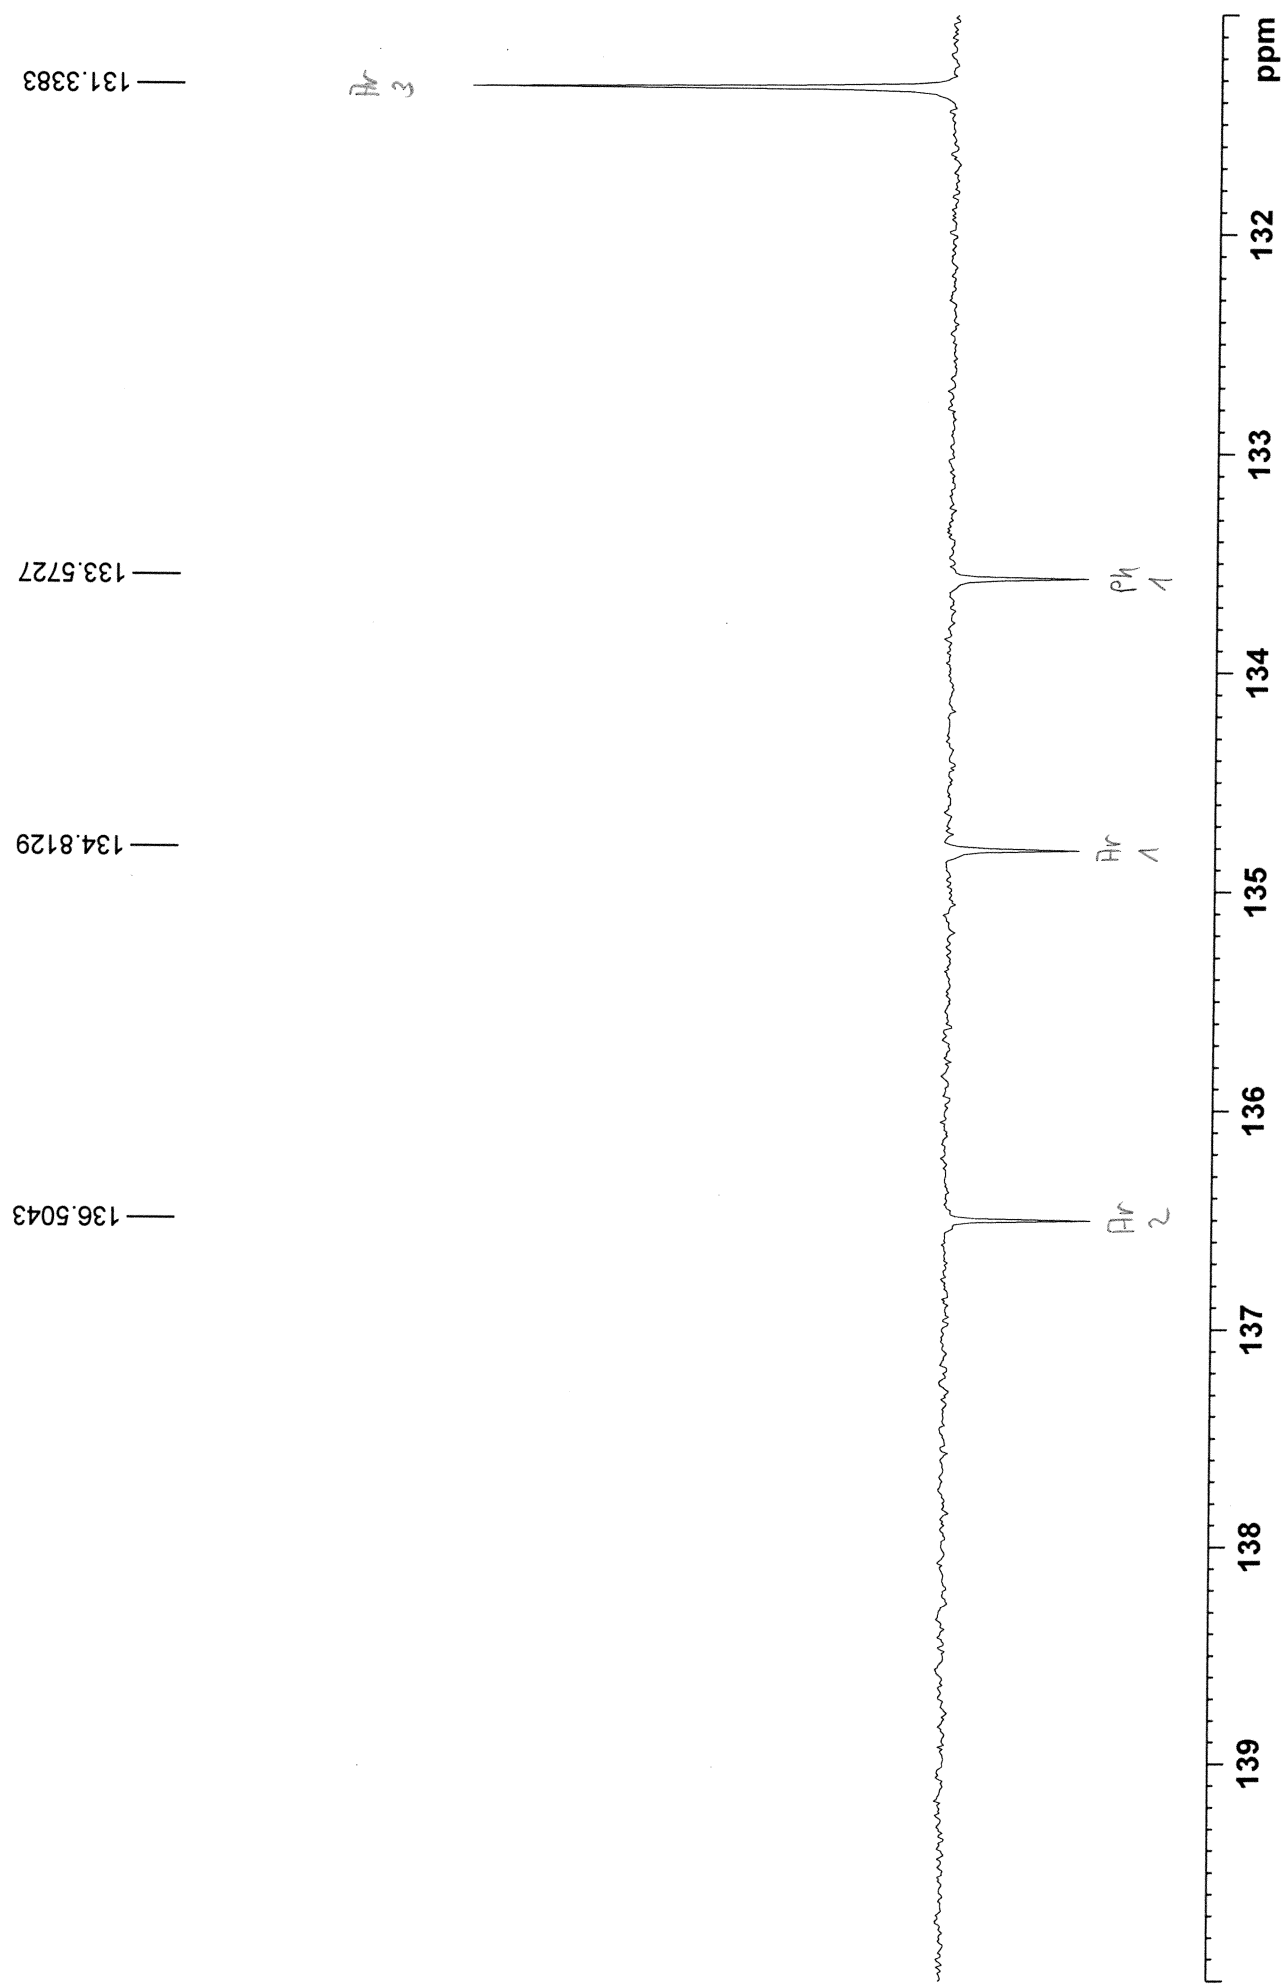

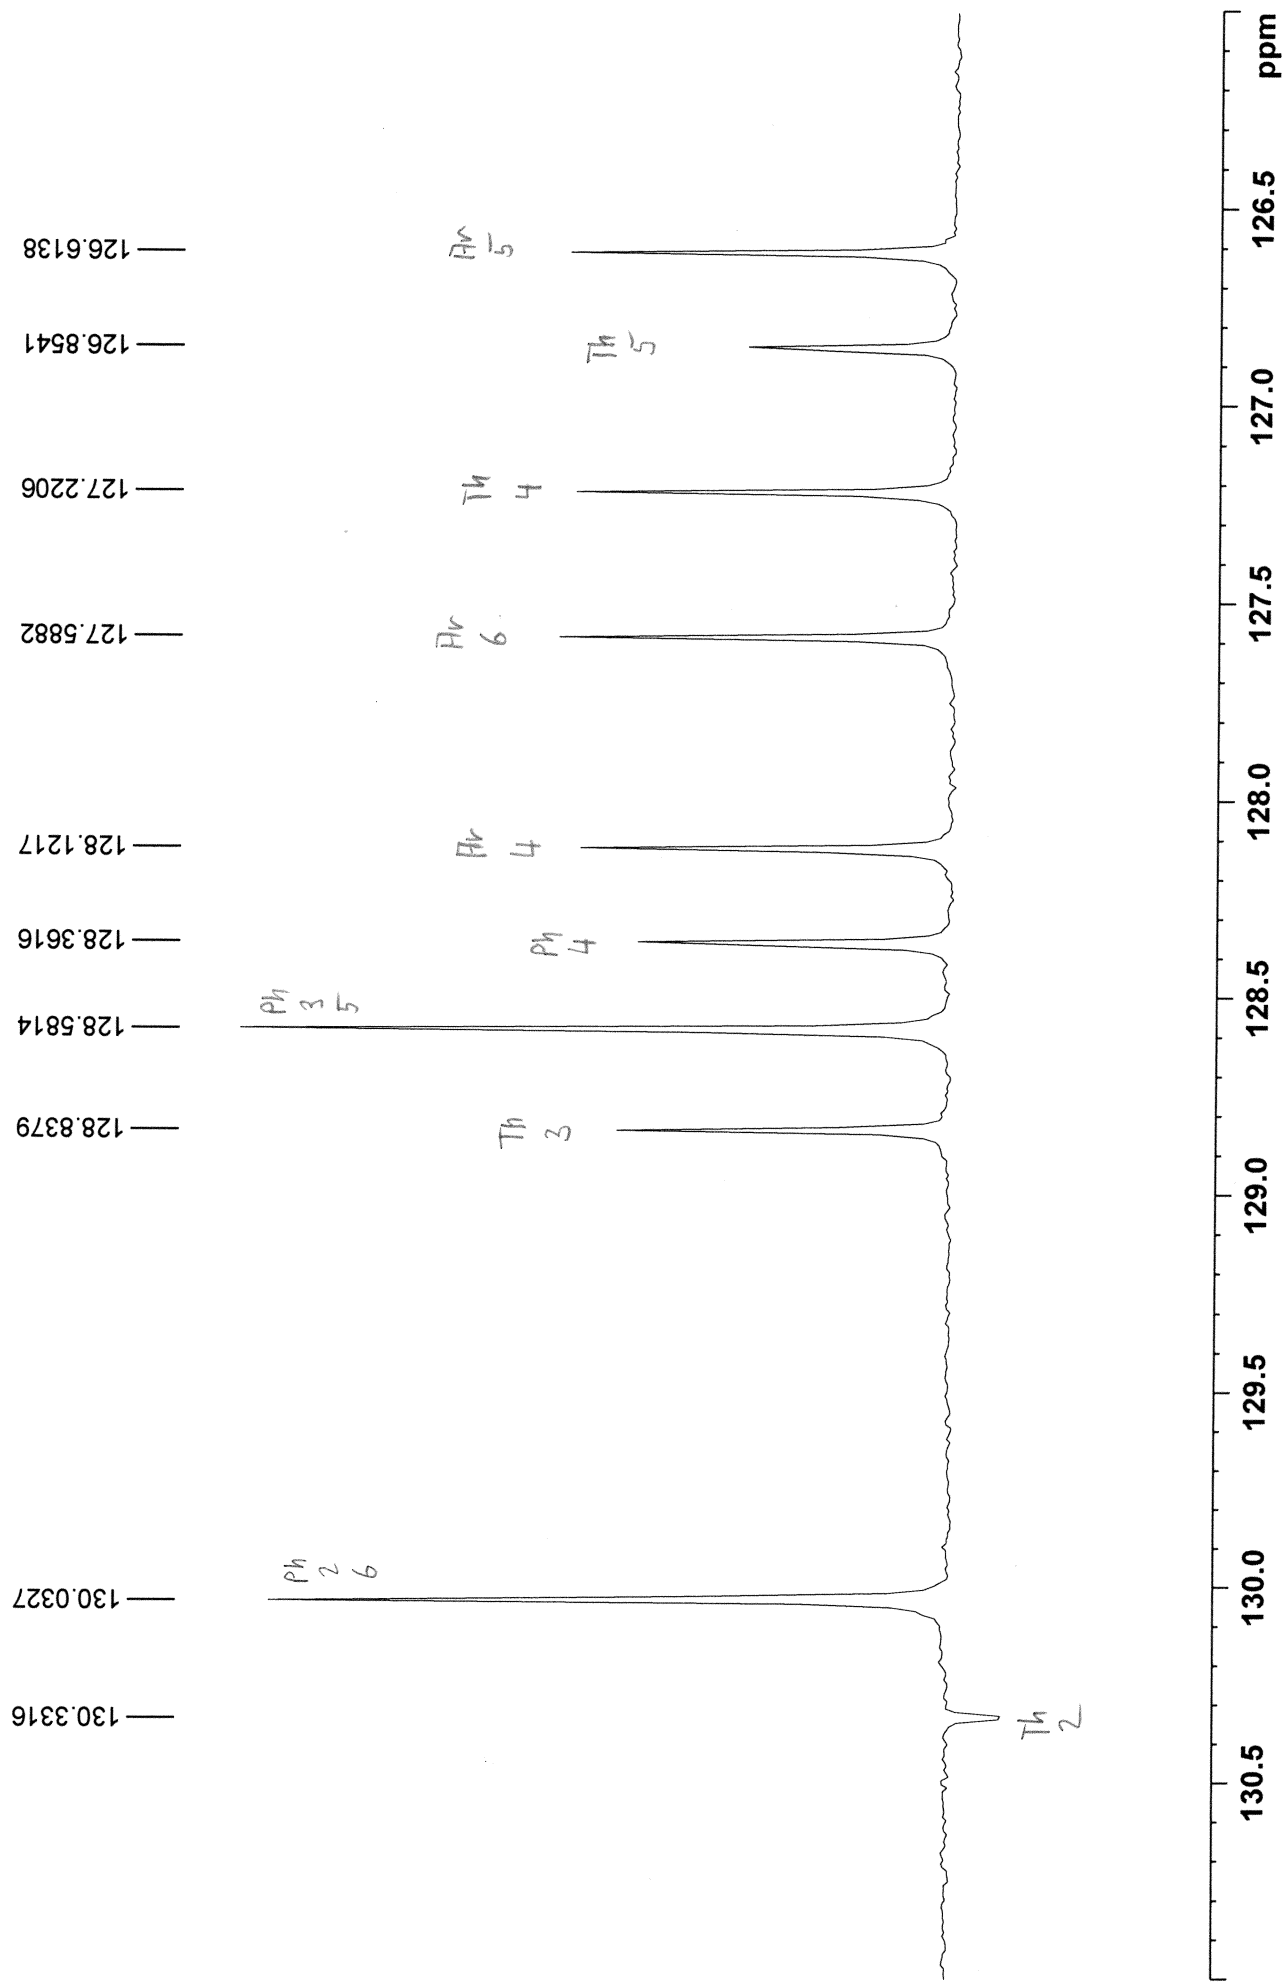

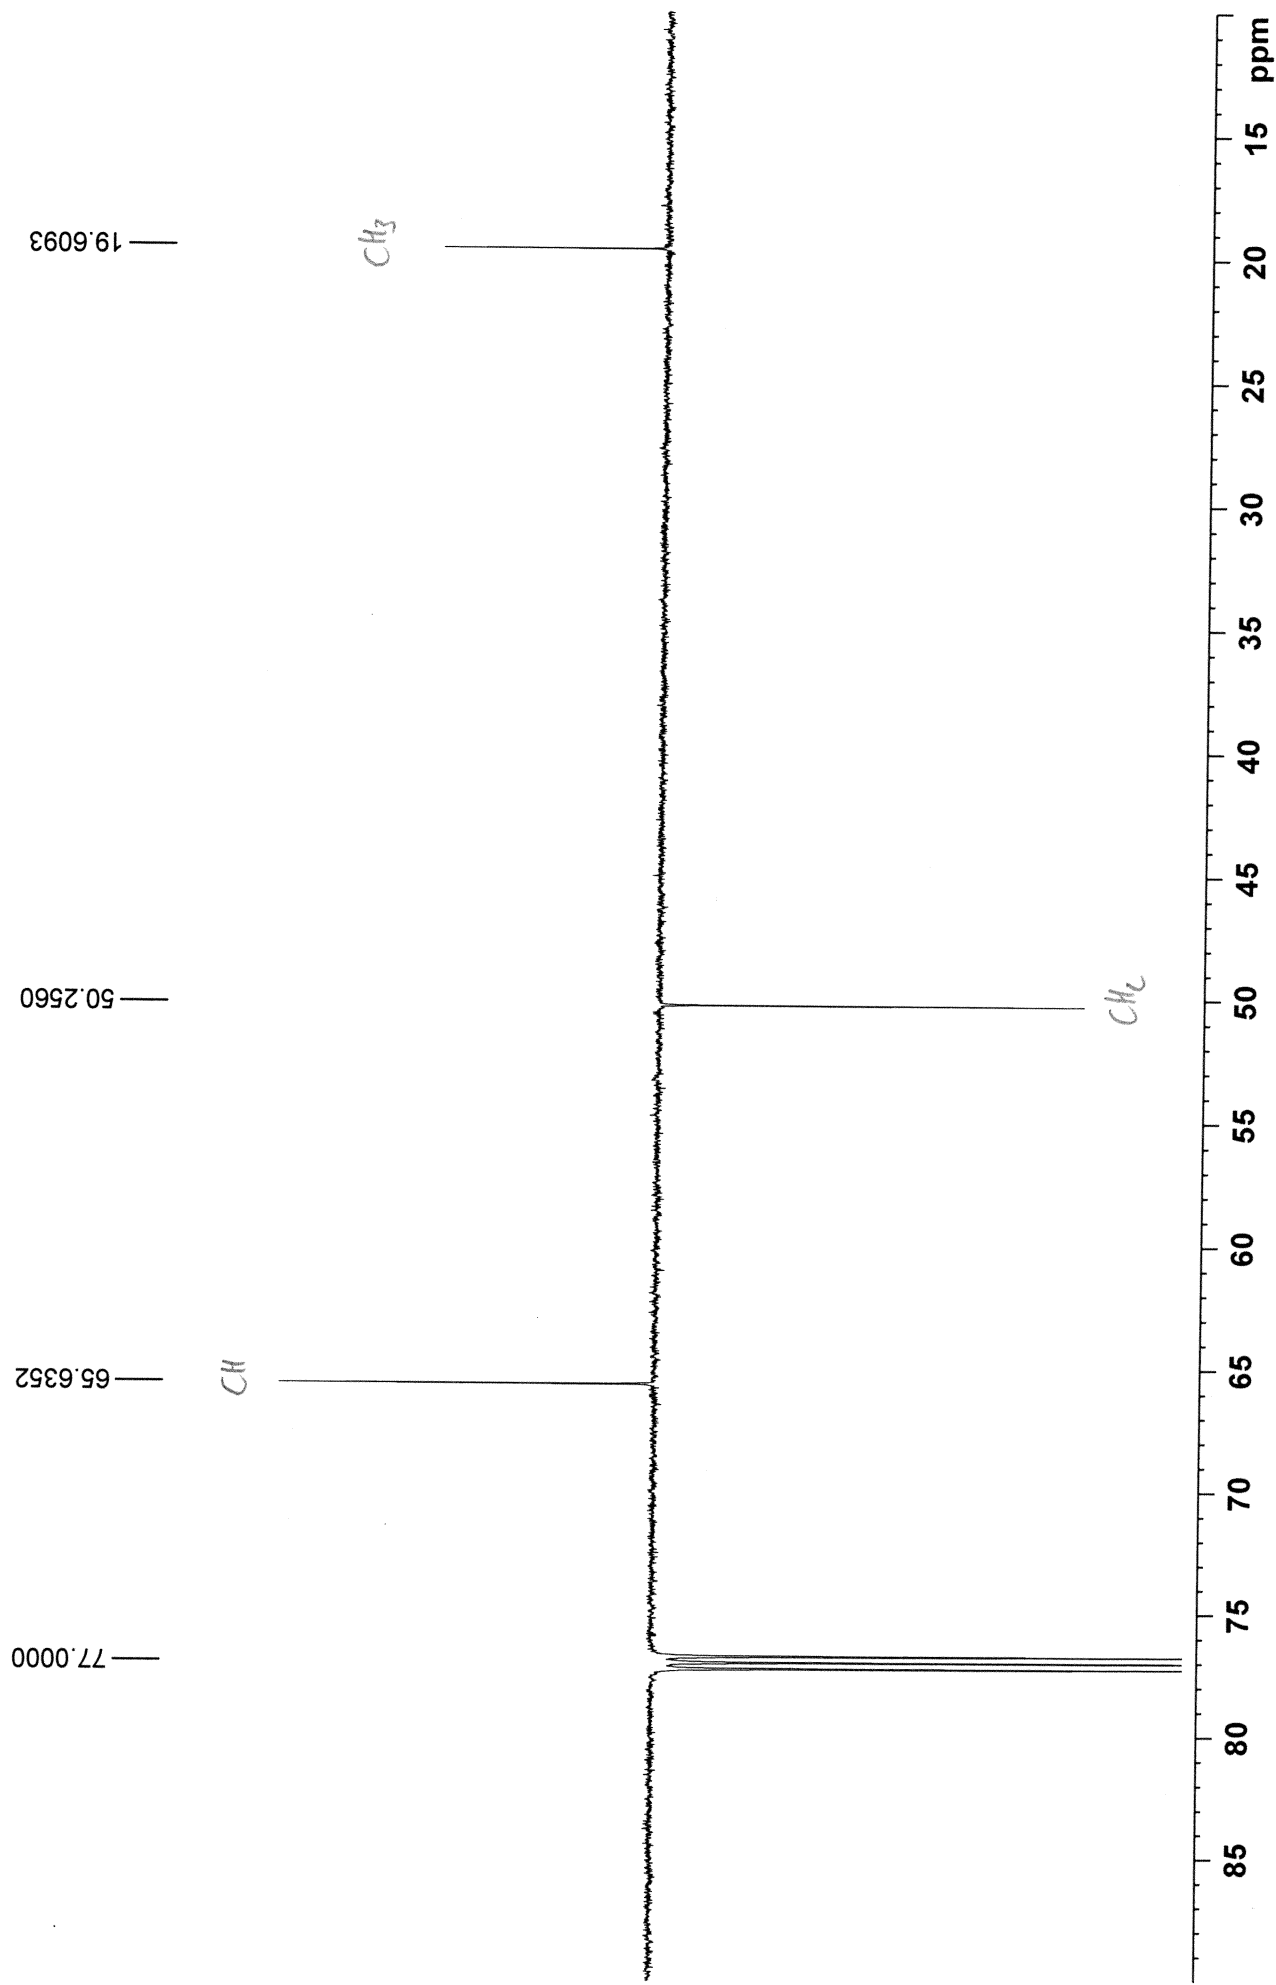

PN006p2 in cdcl3 (COSY) 29.3.2021

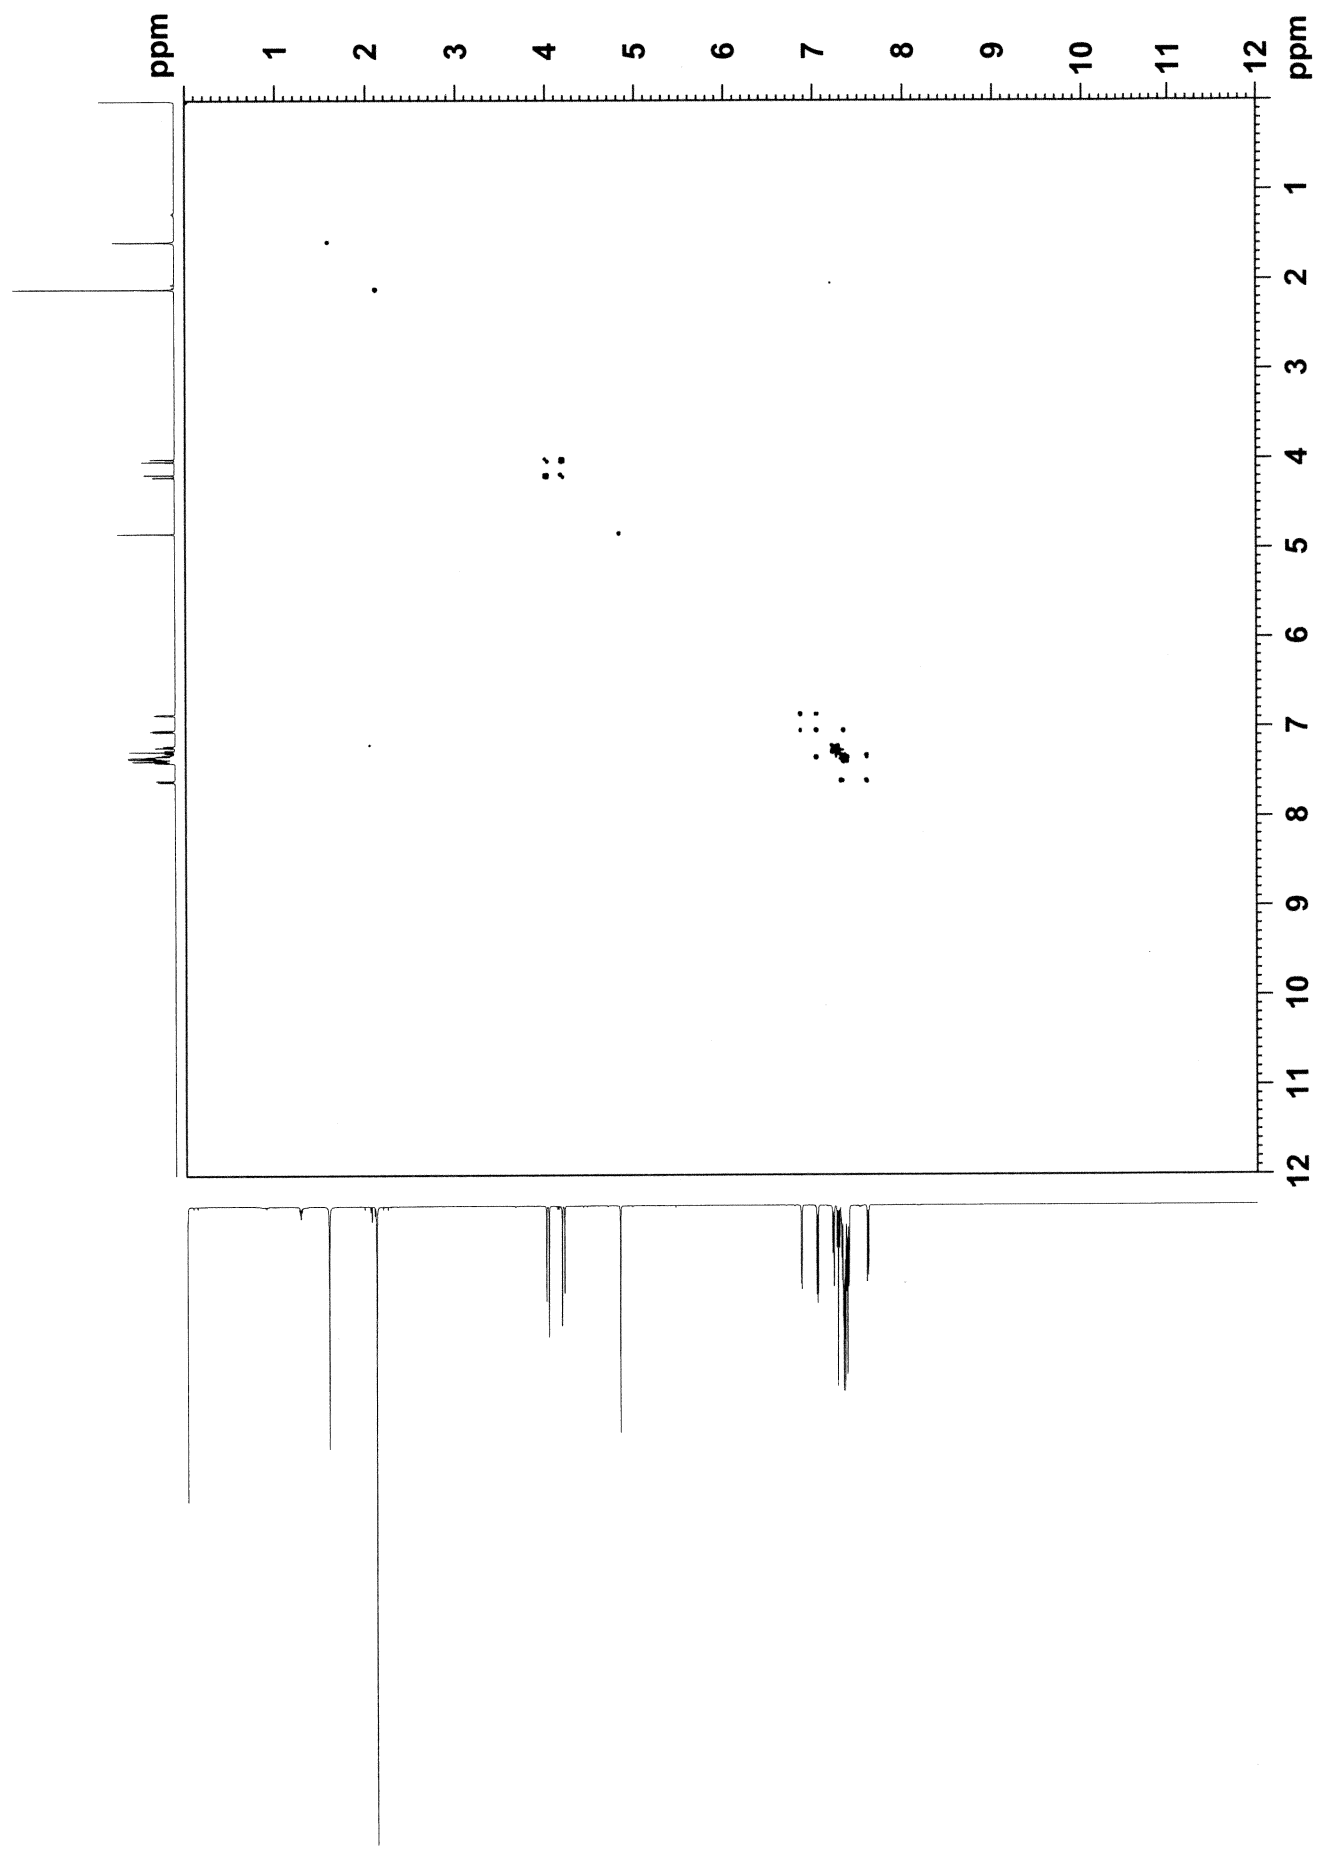

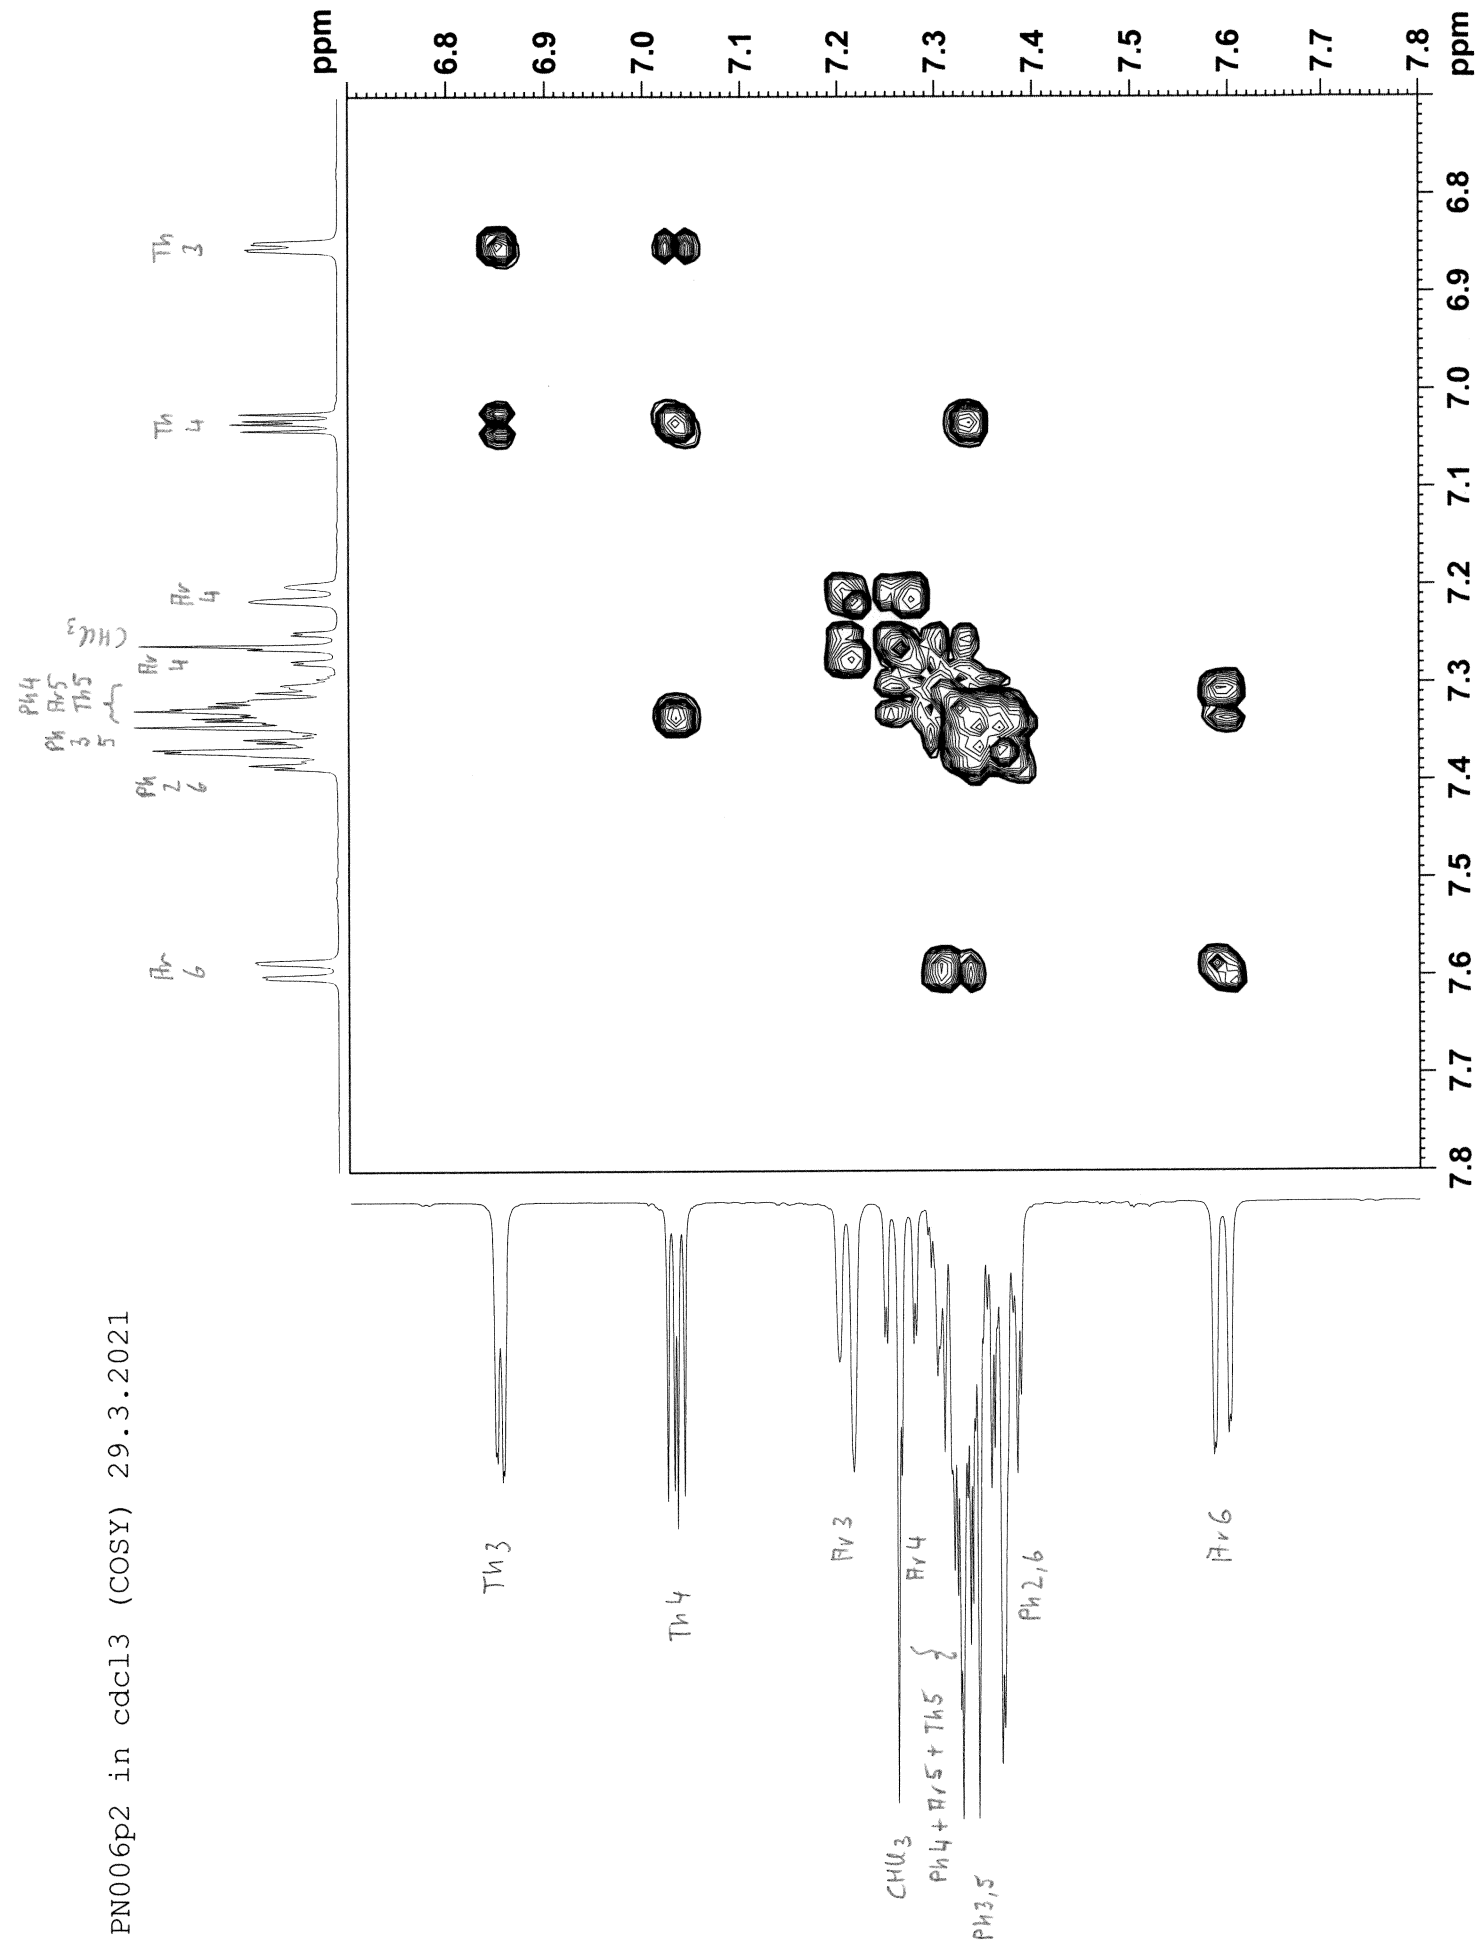

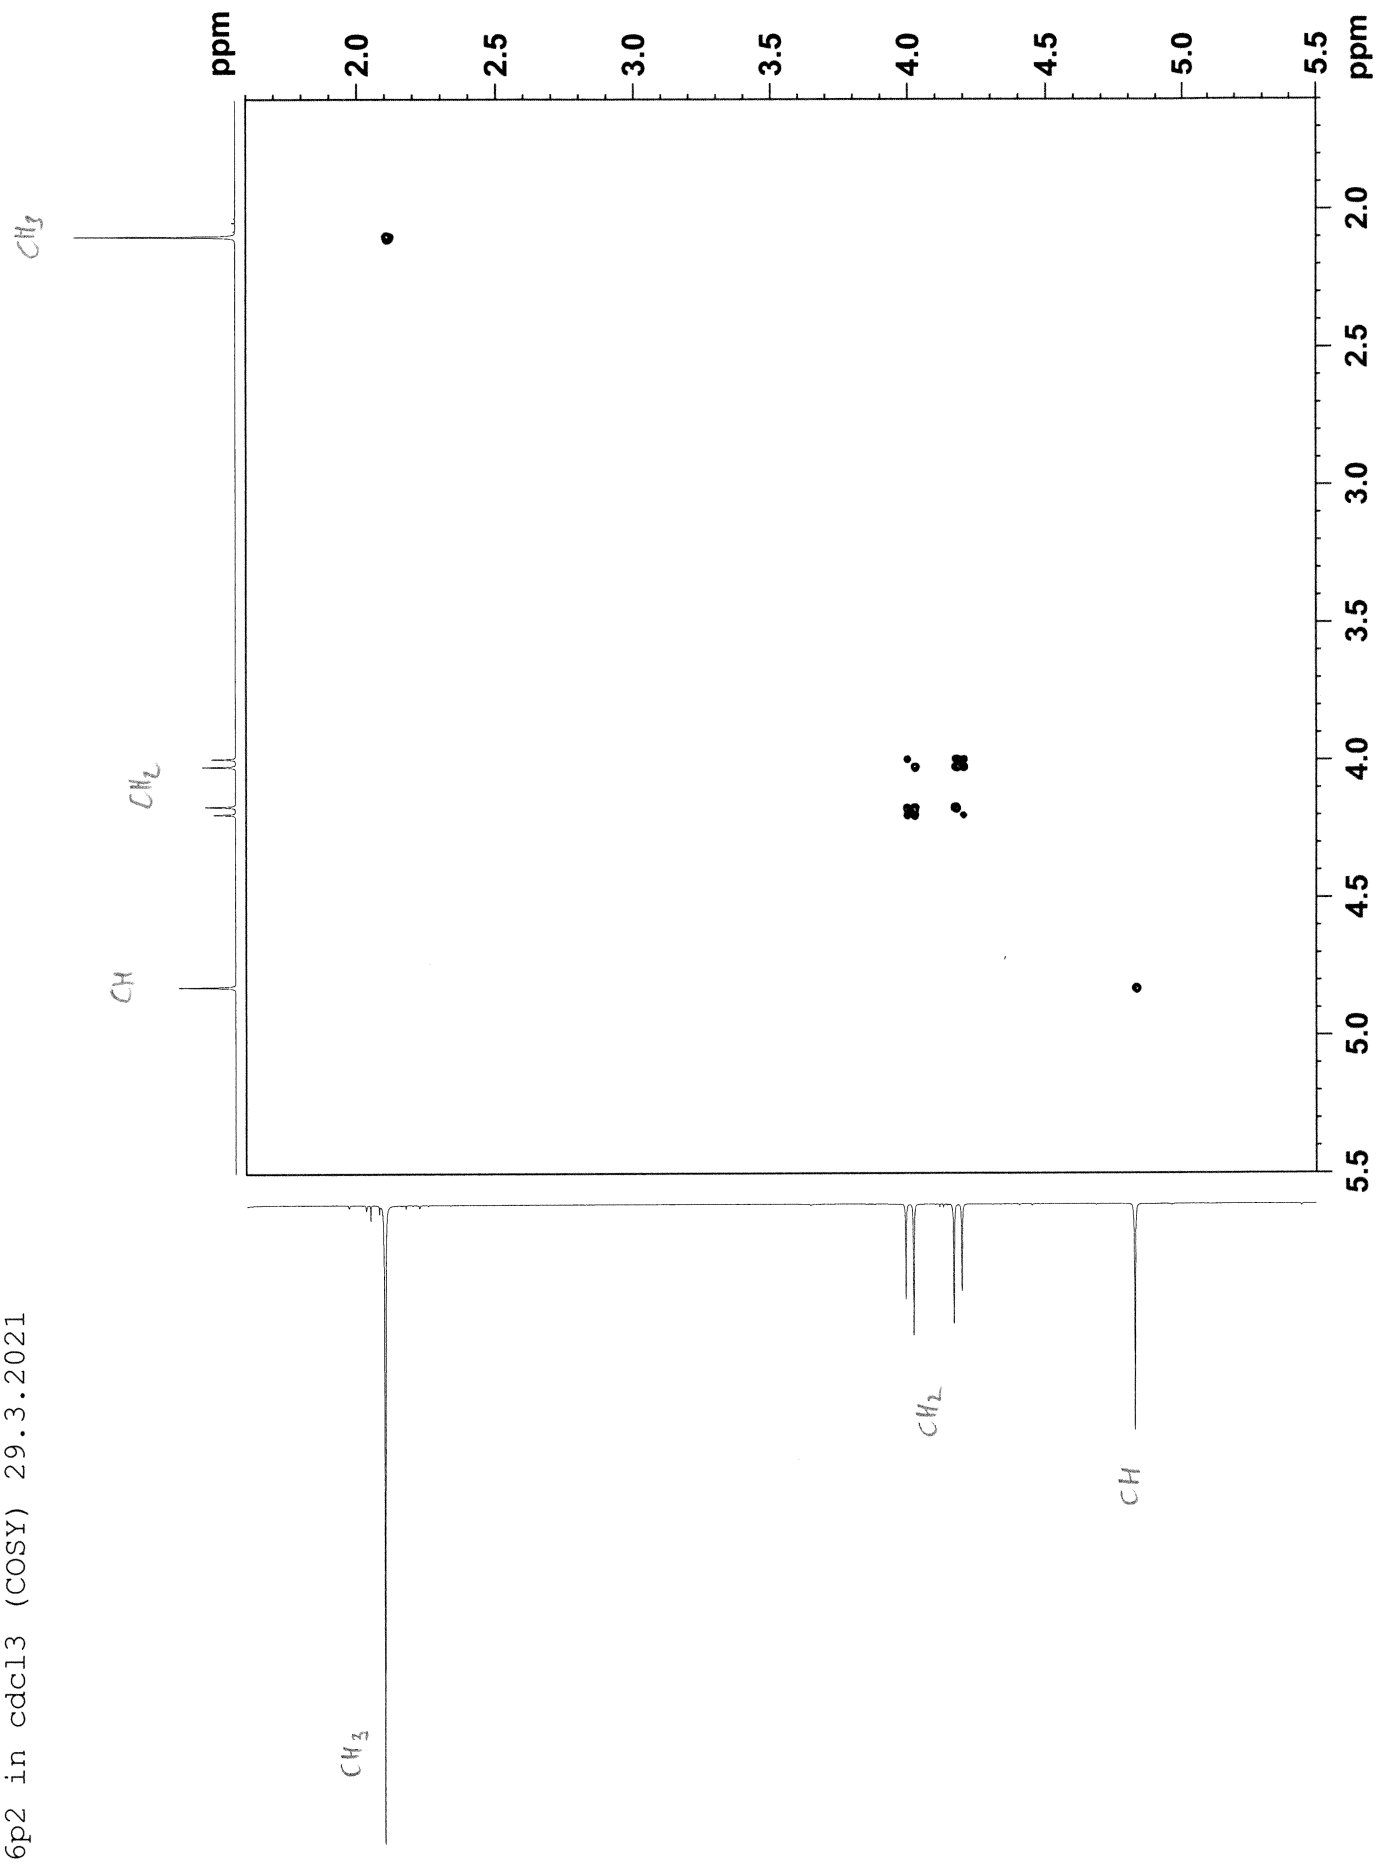

PN006p1 in cdcl3 (HSQC) 29.3.2021

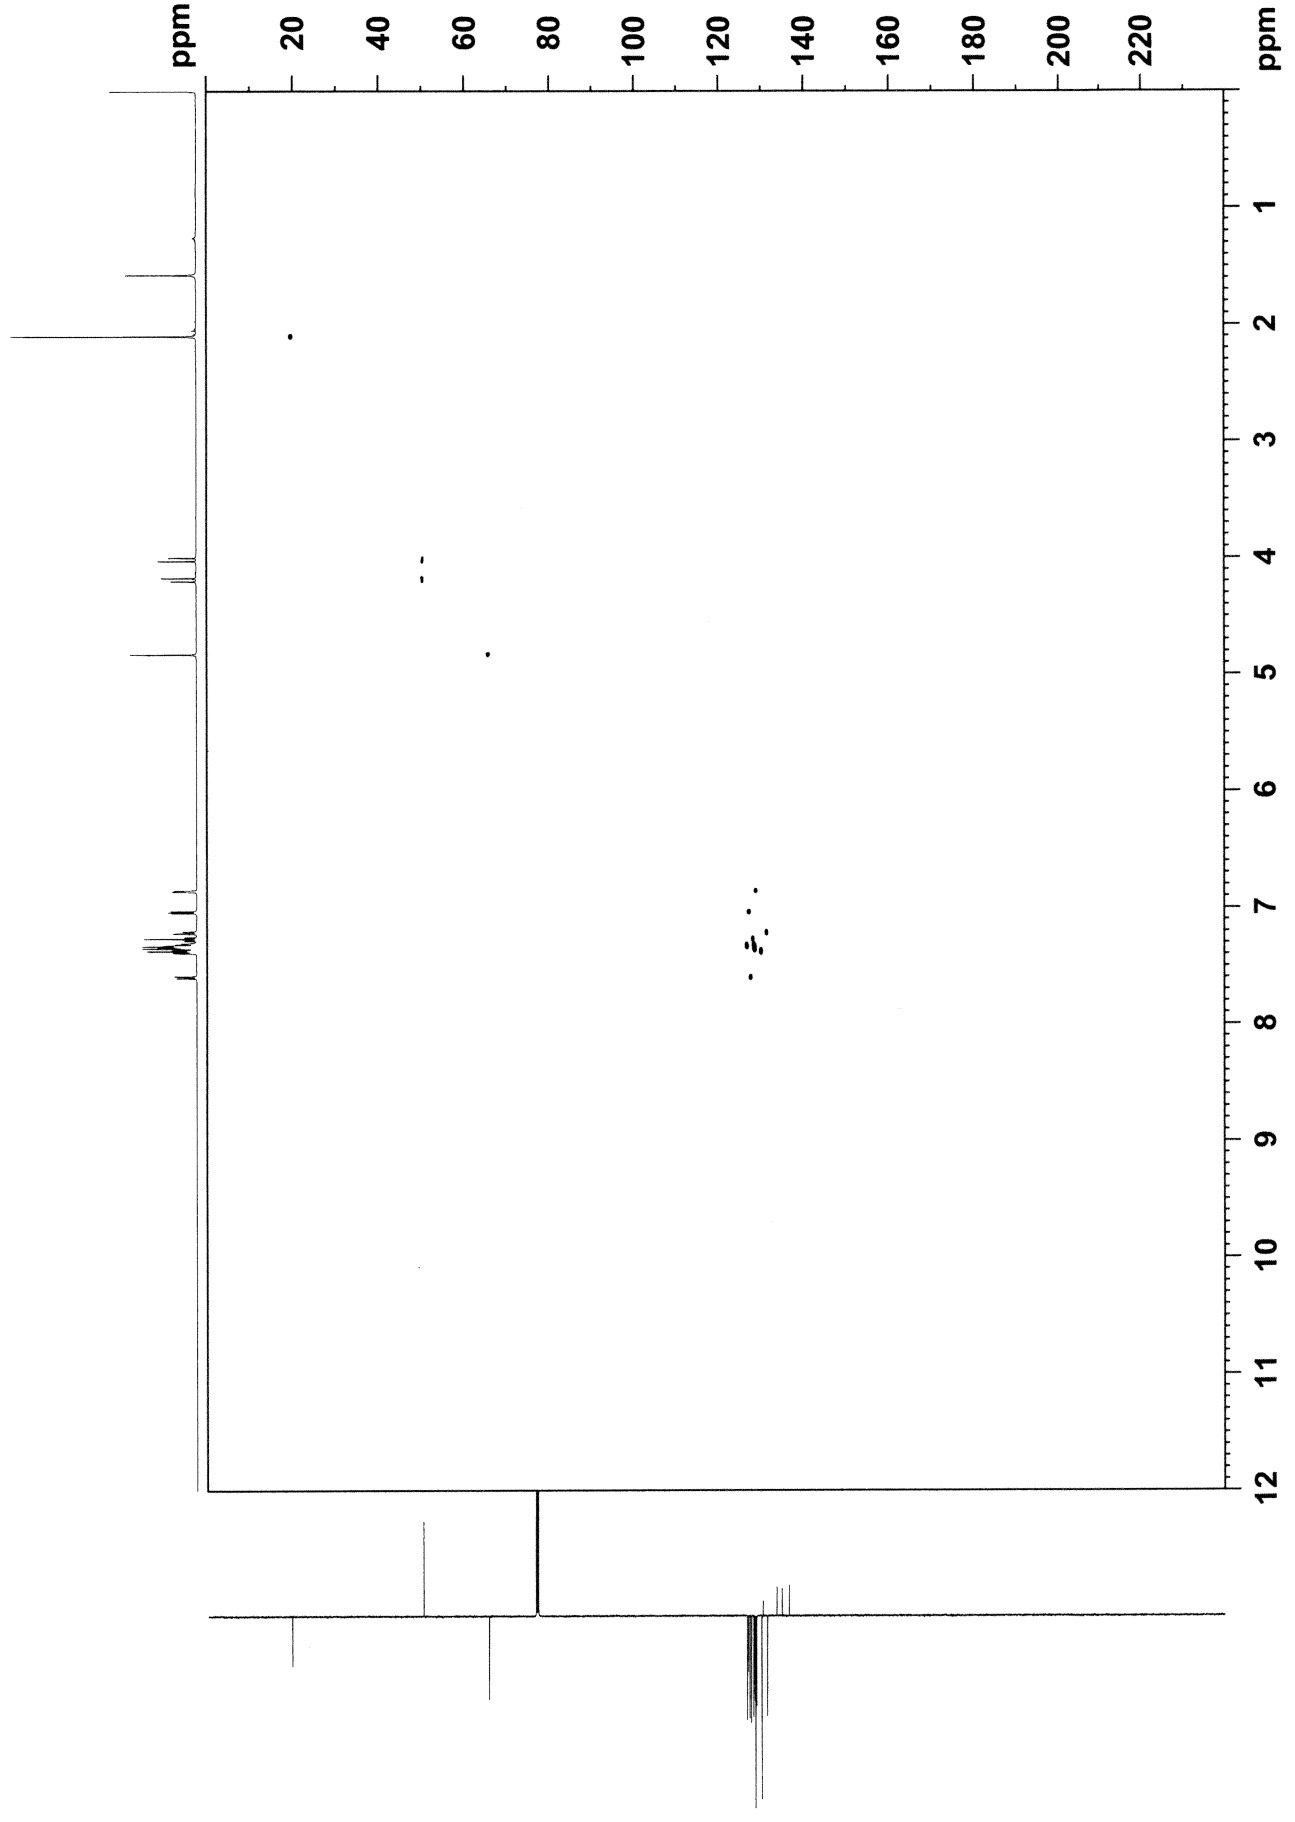

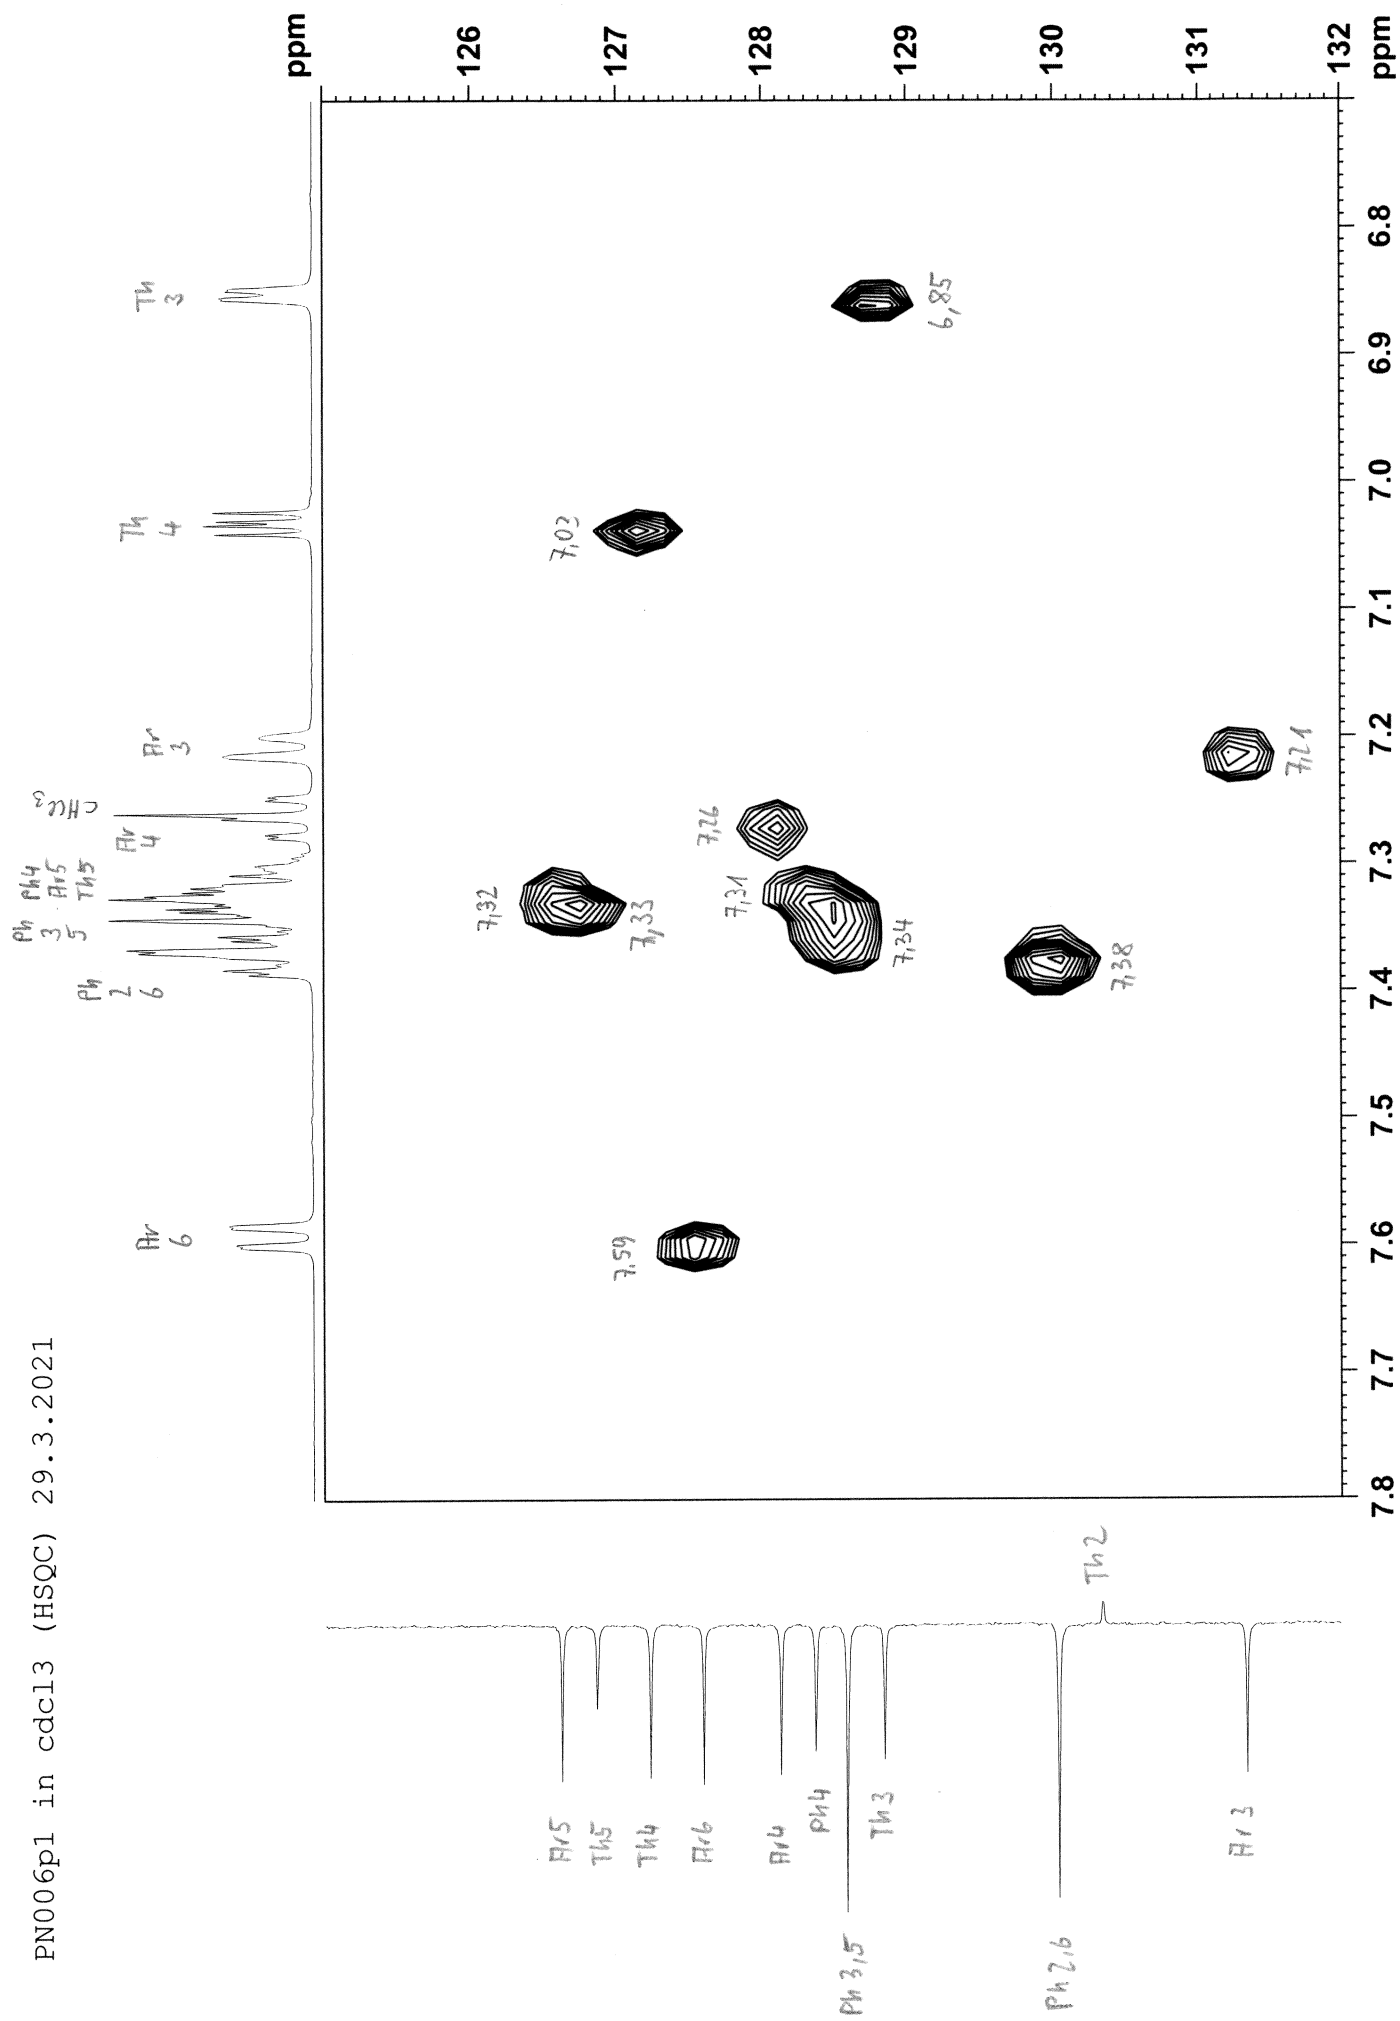



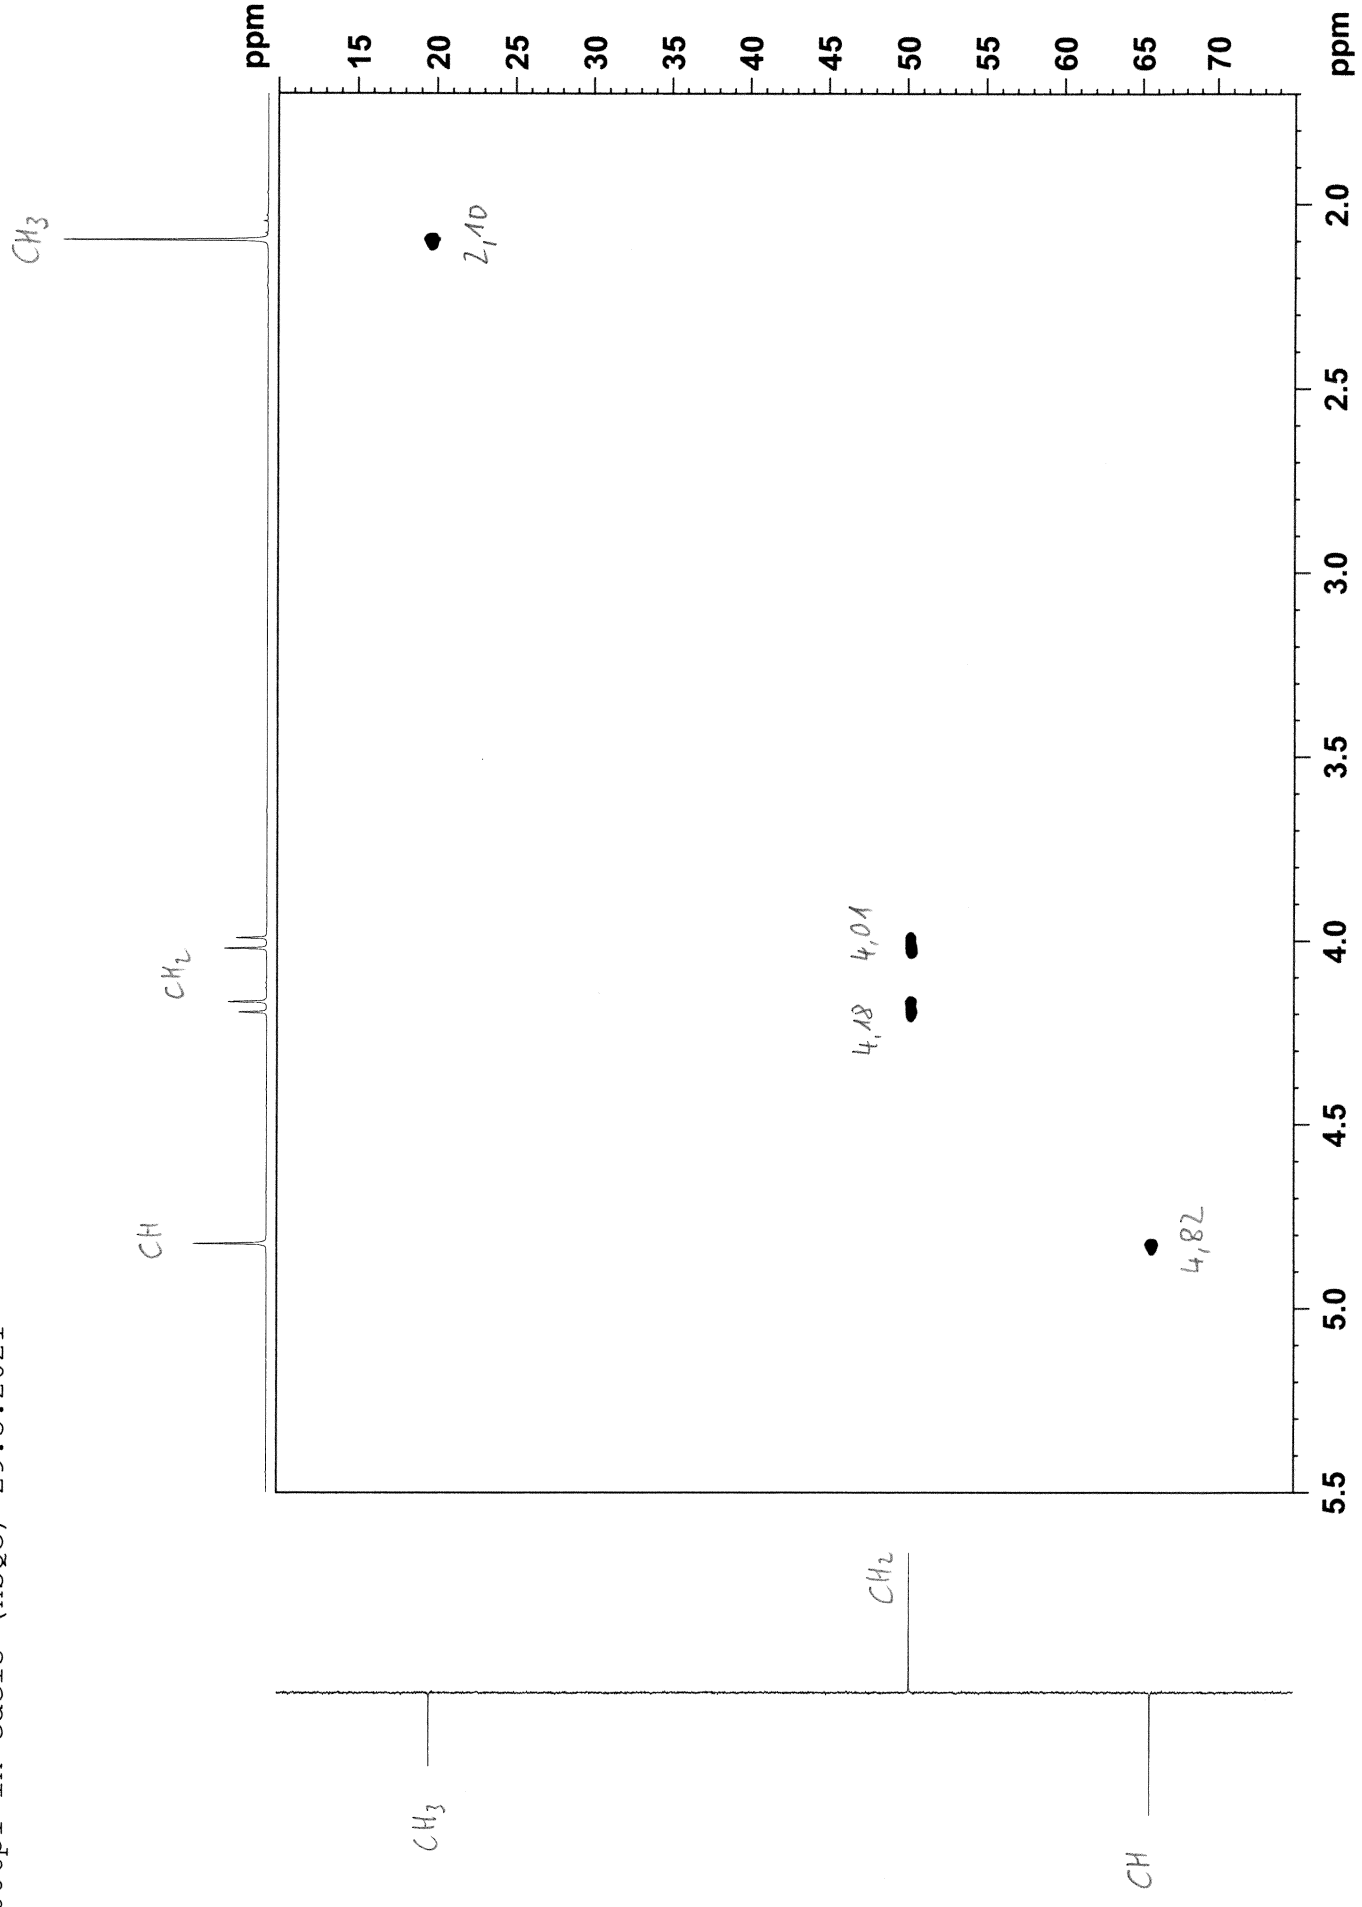

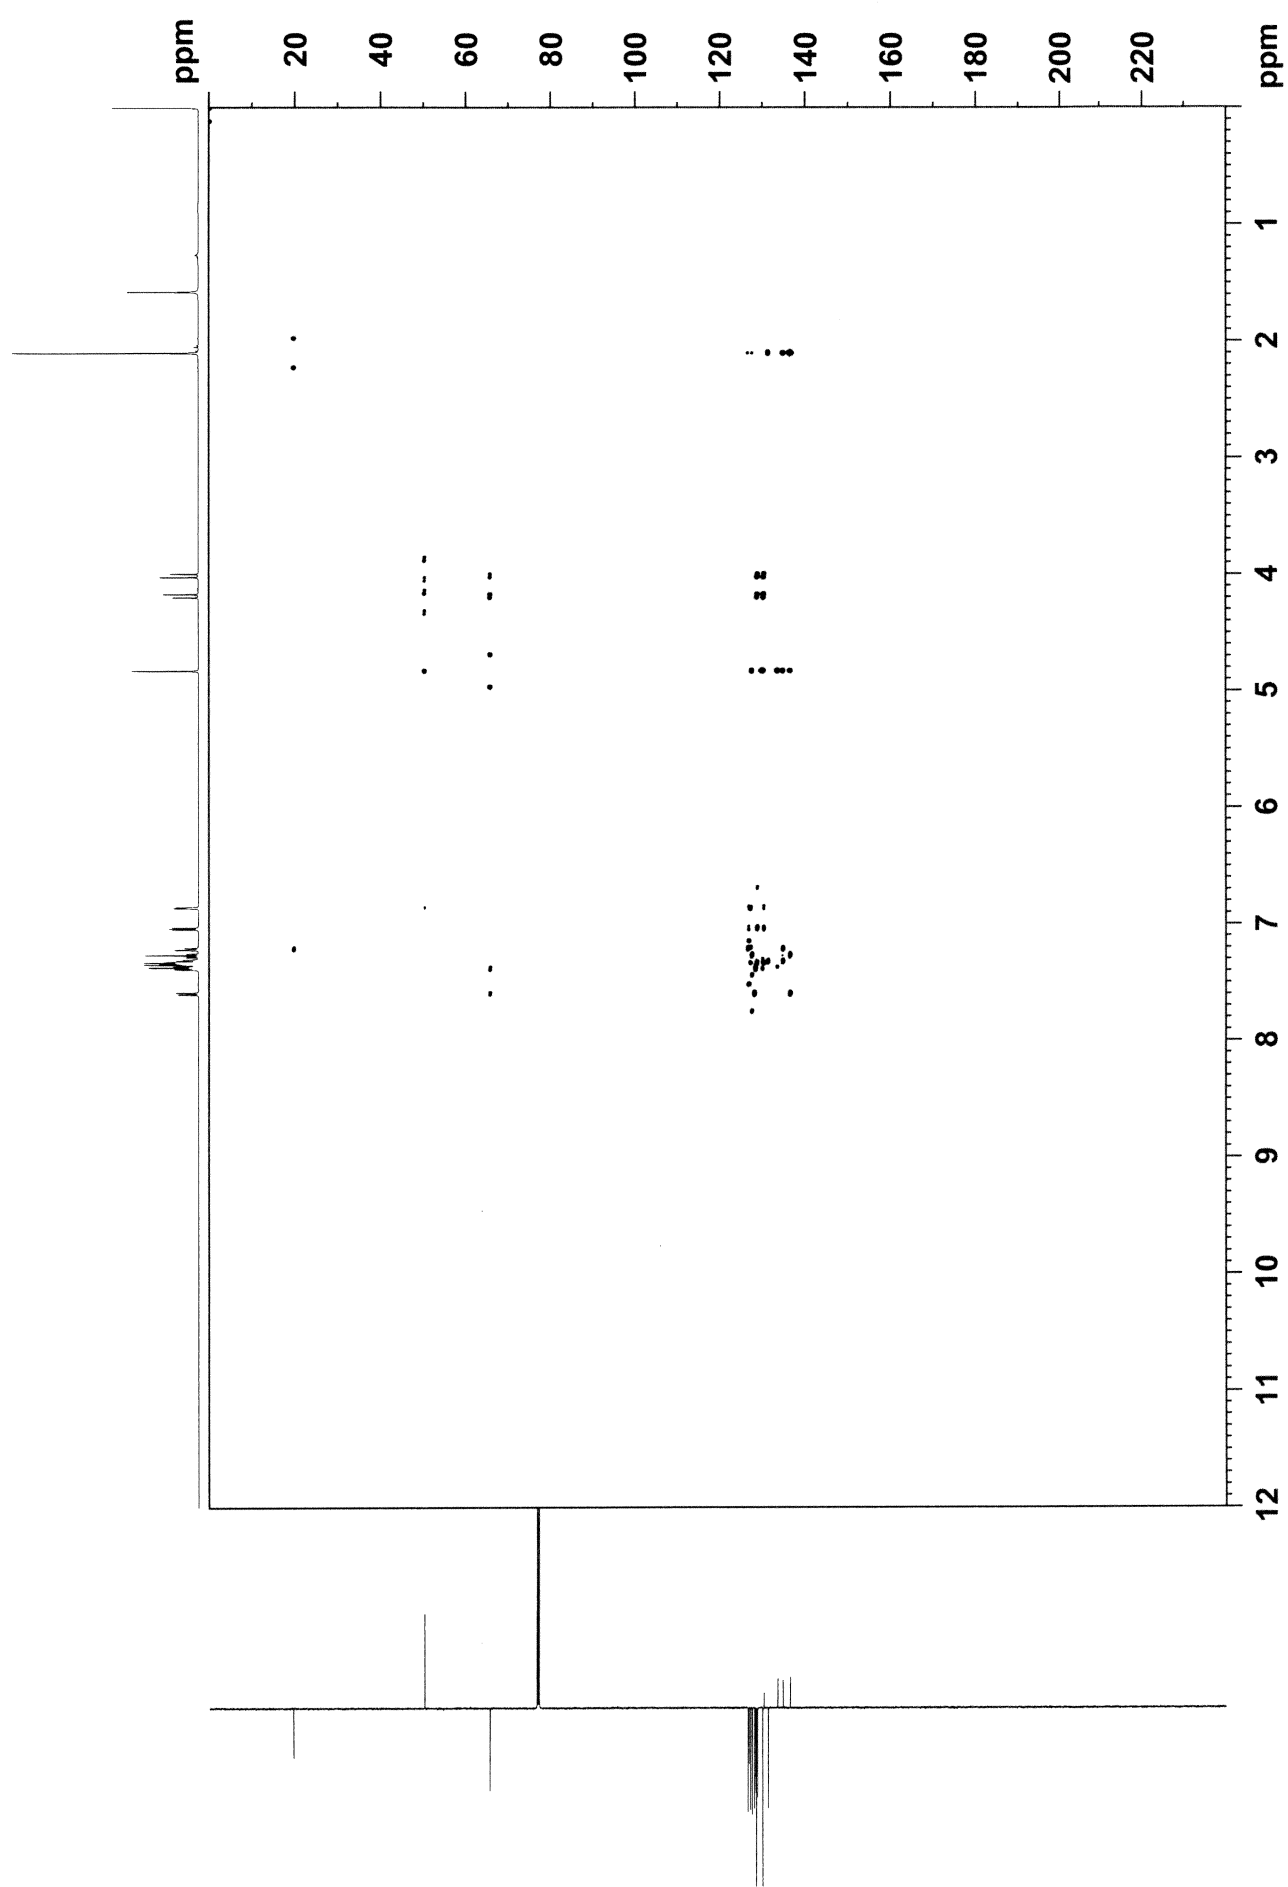

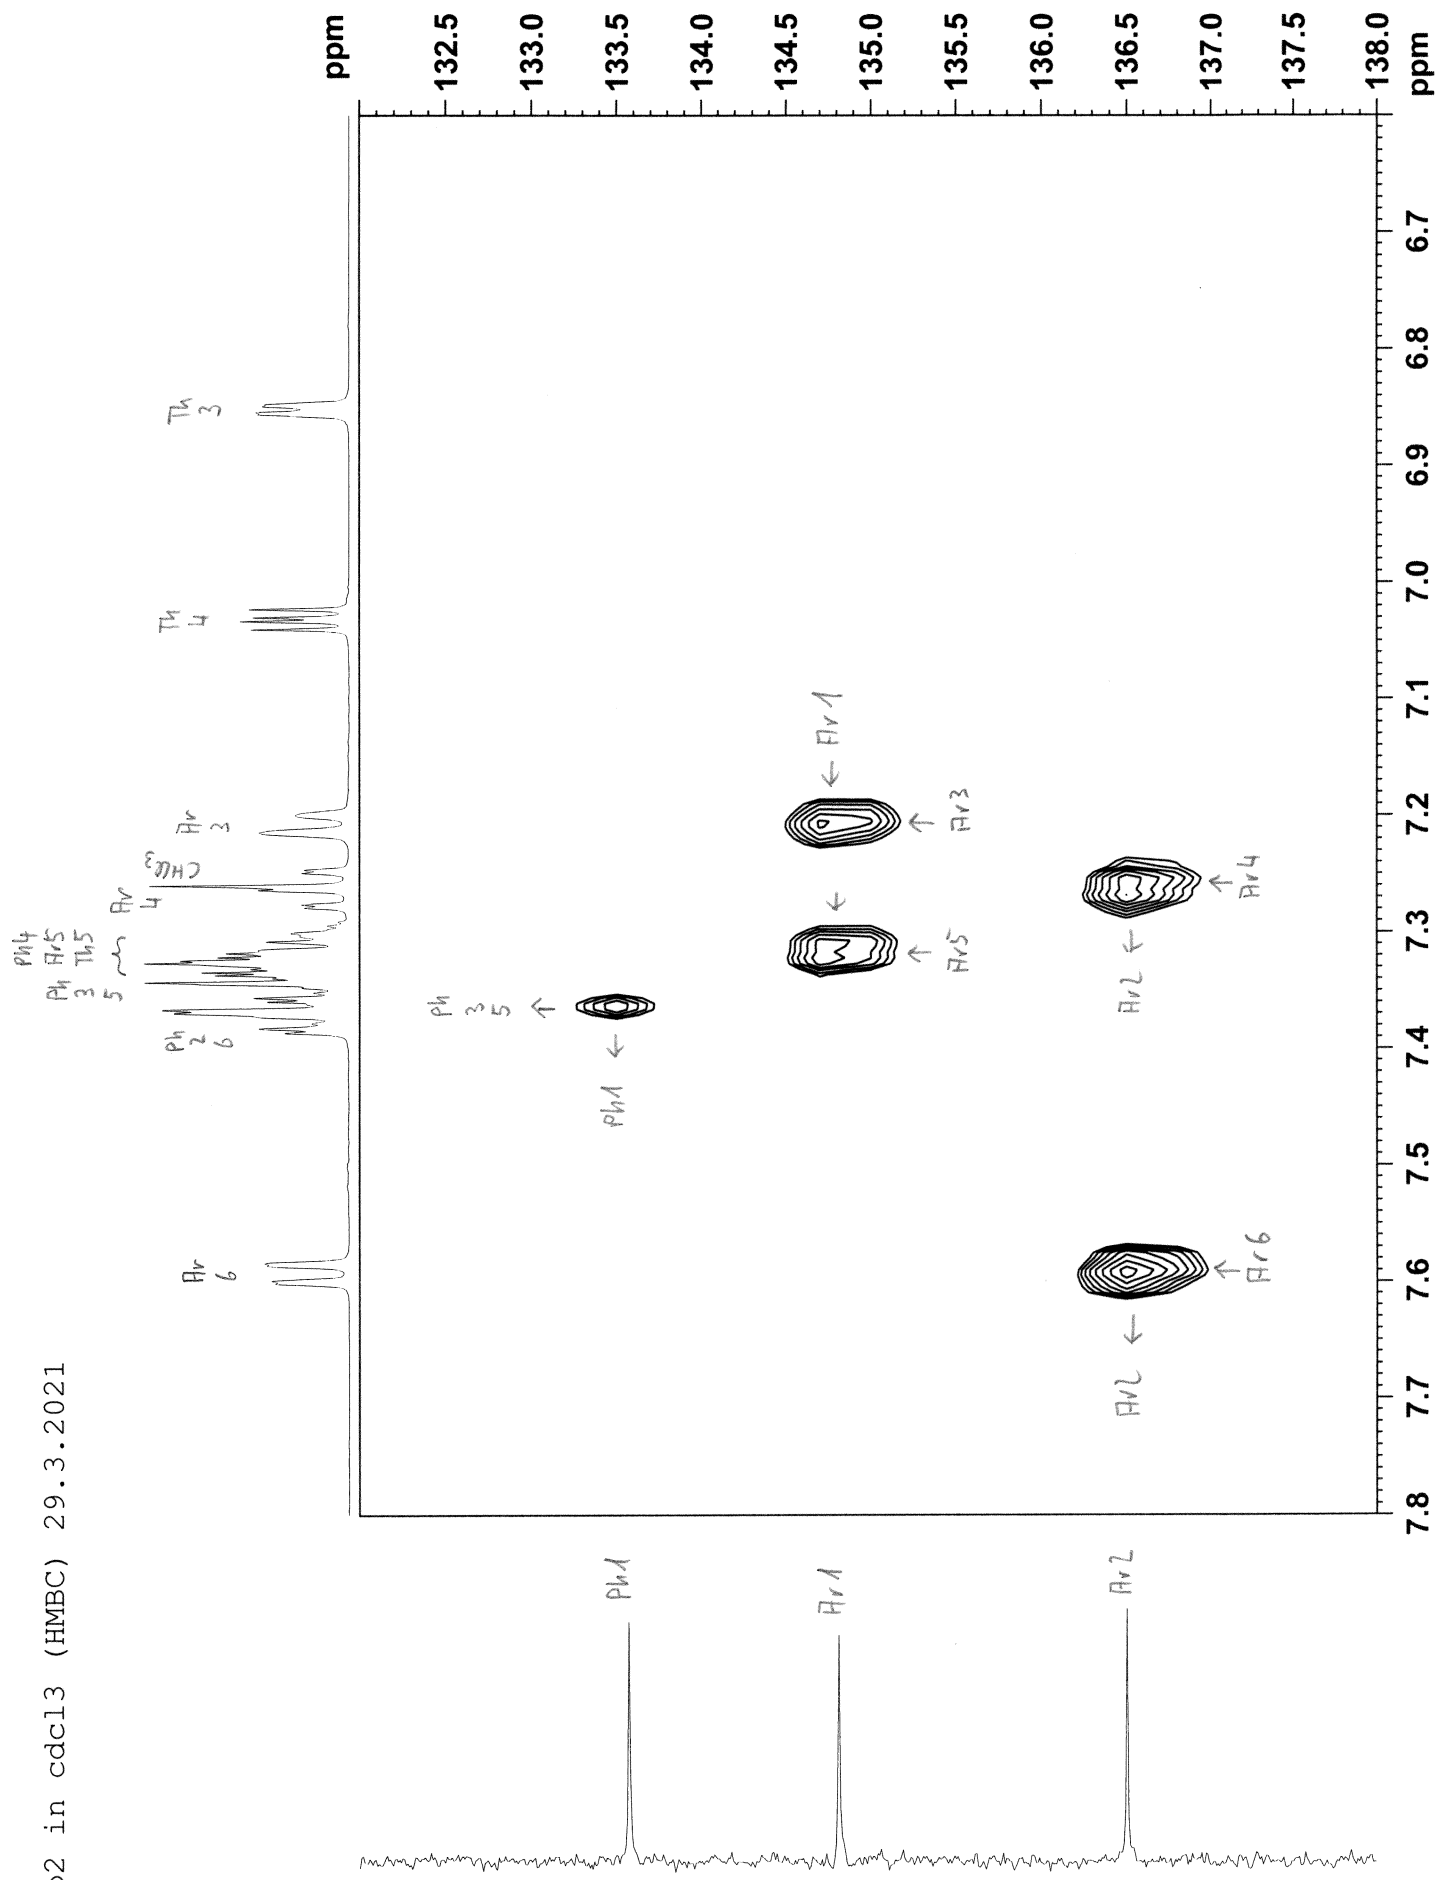

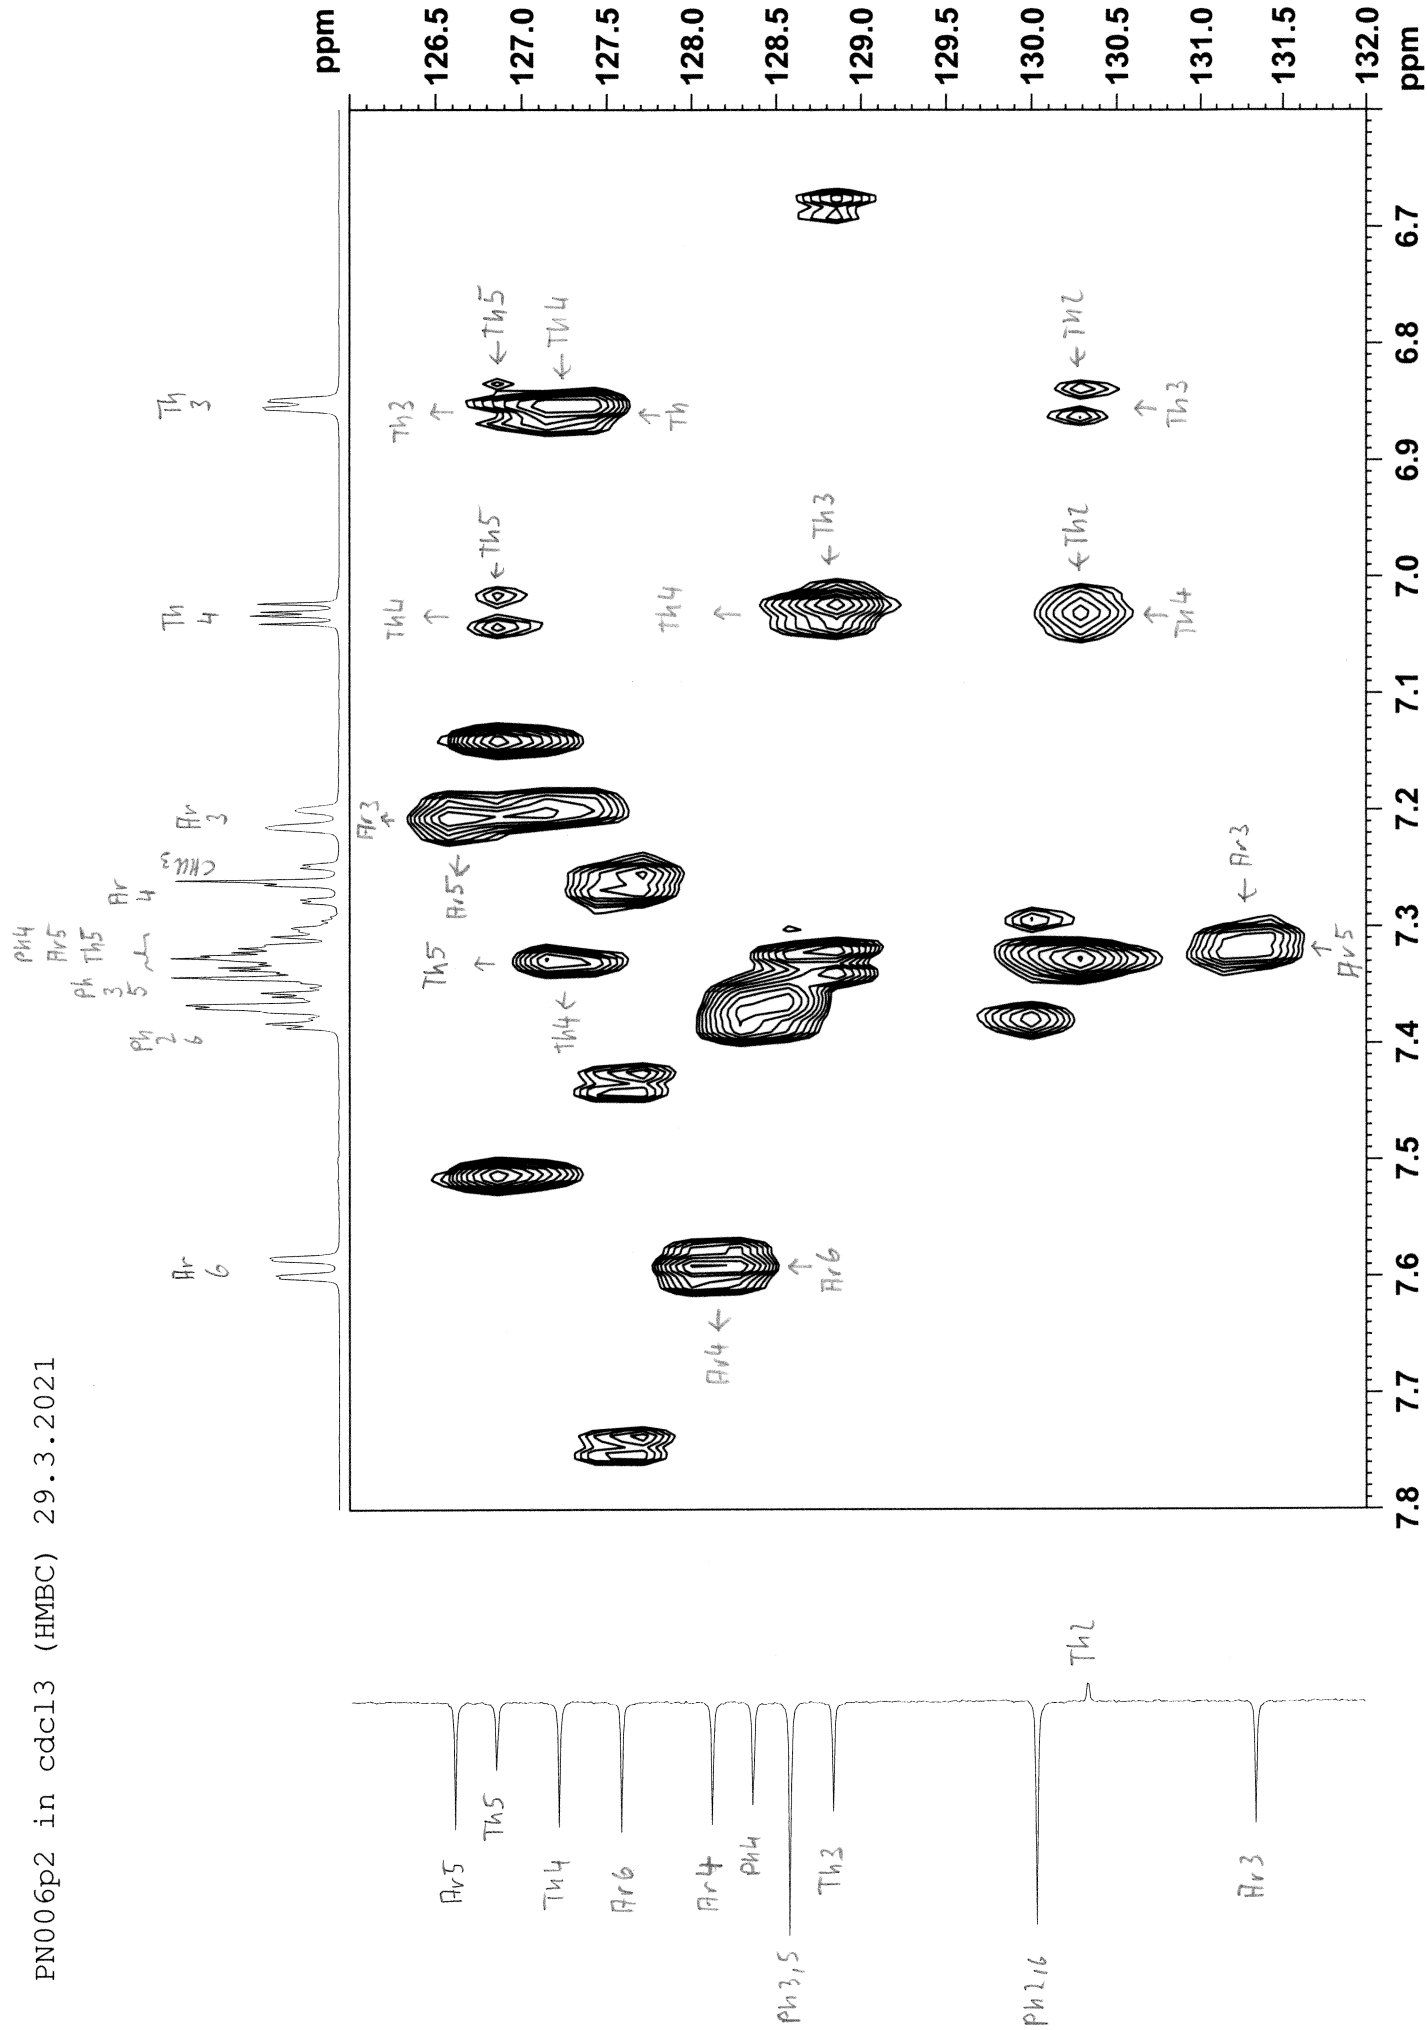

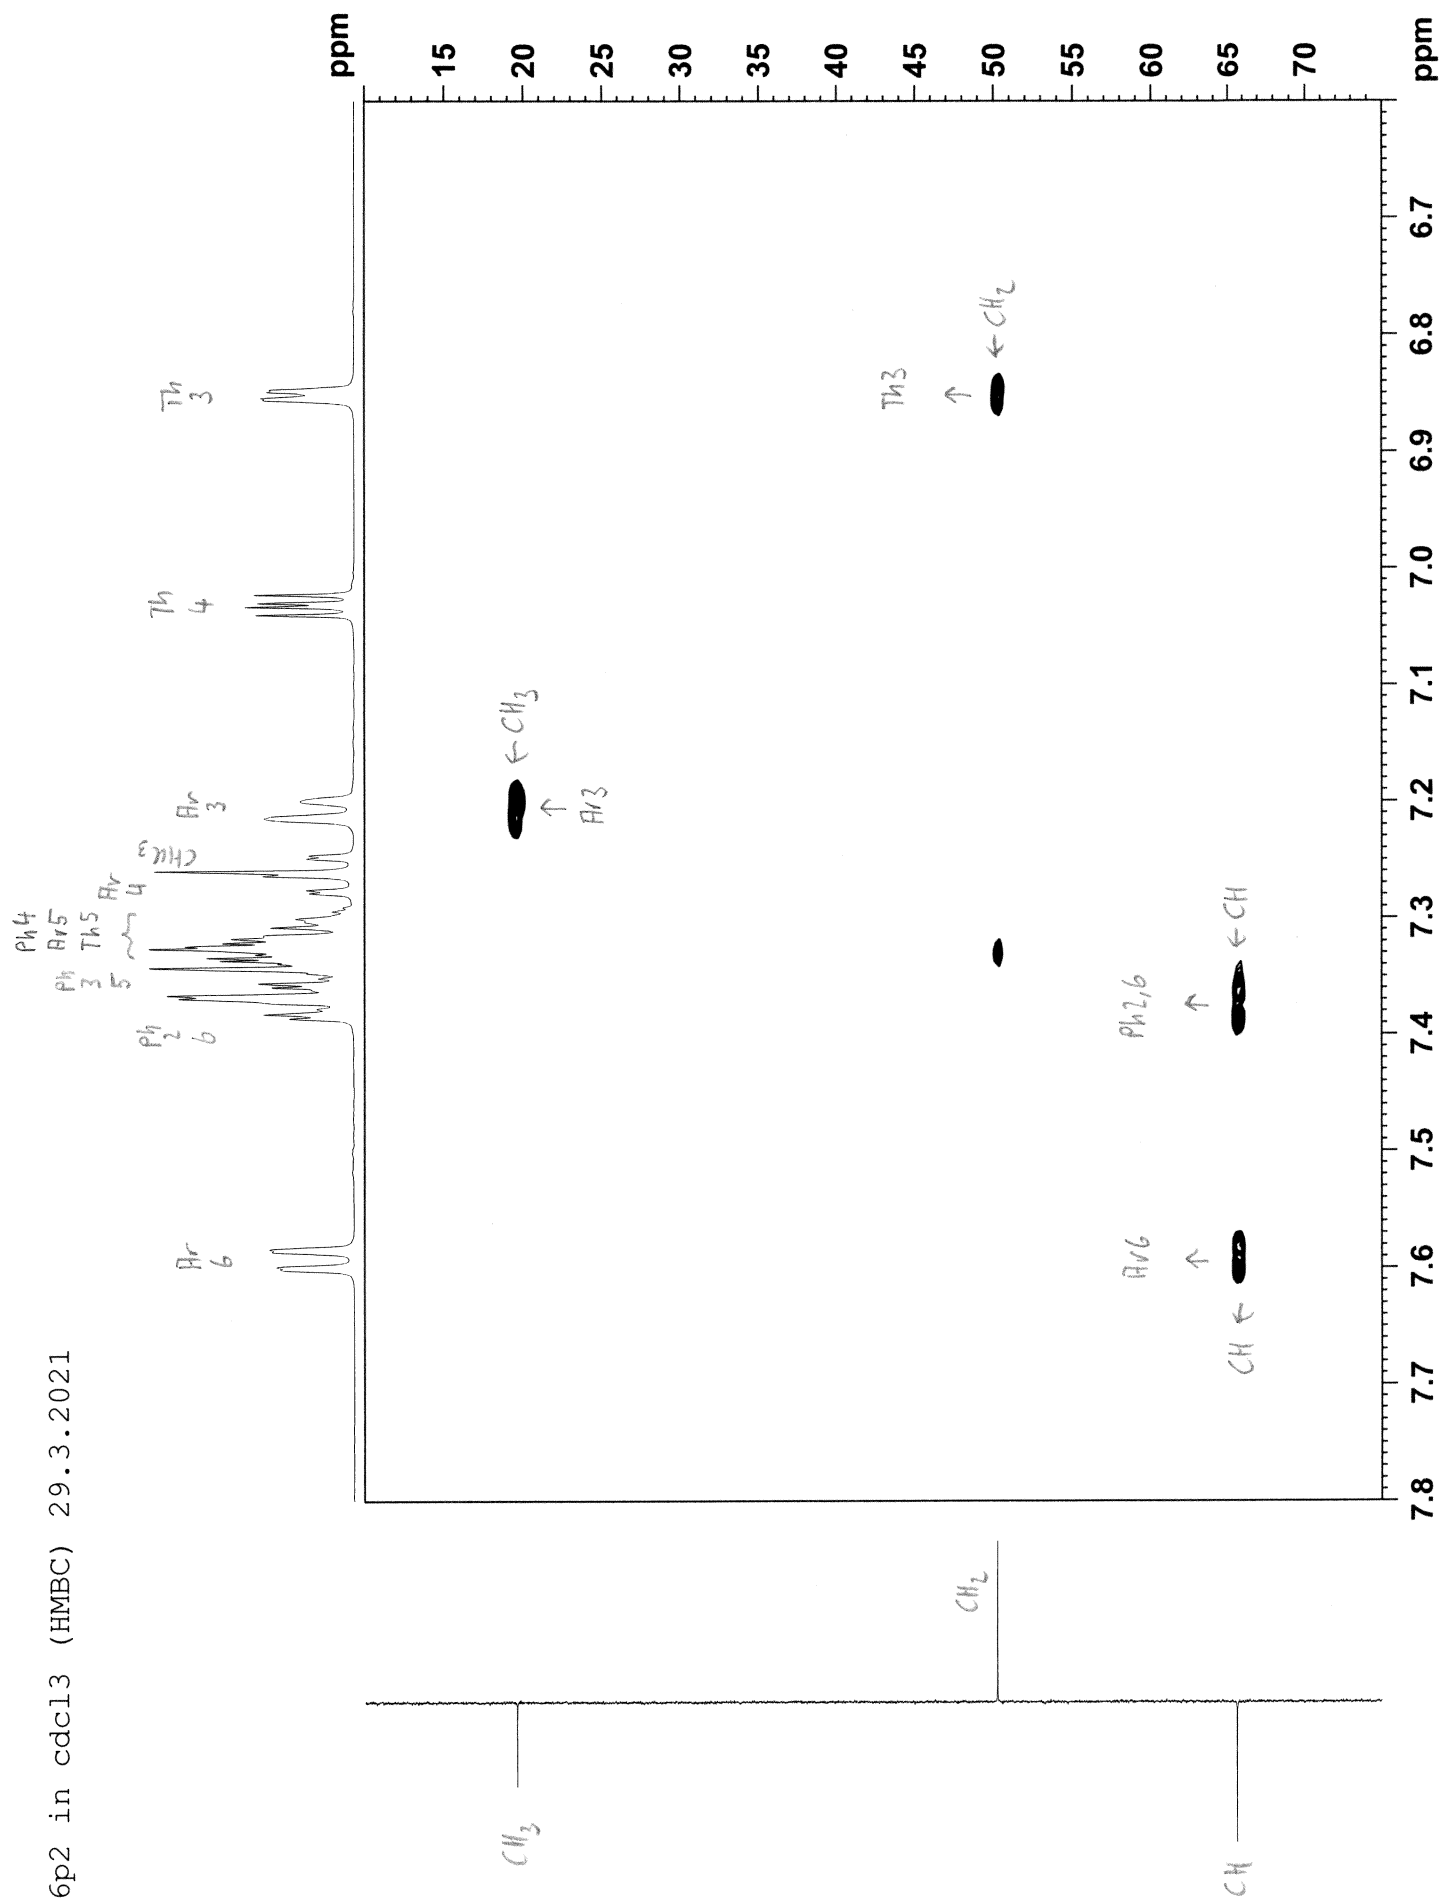

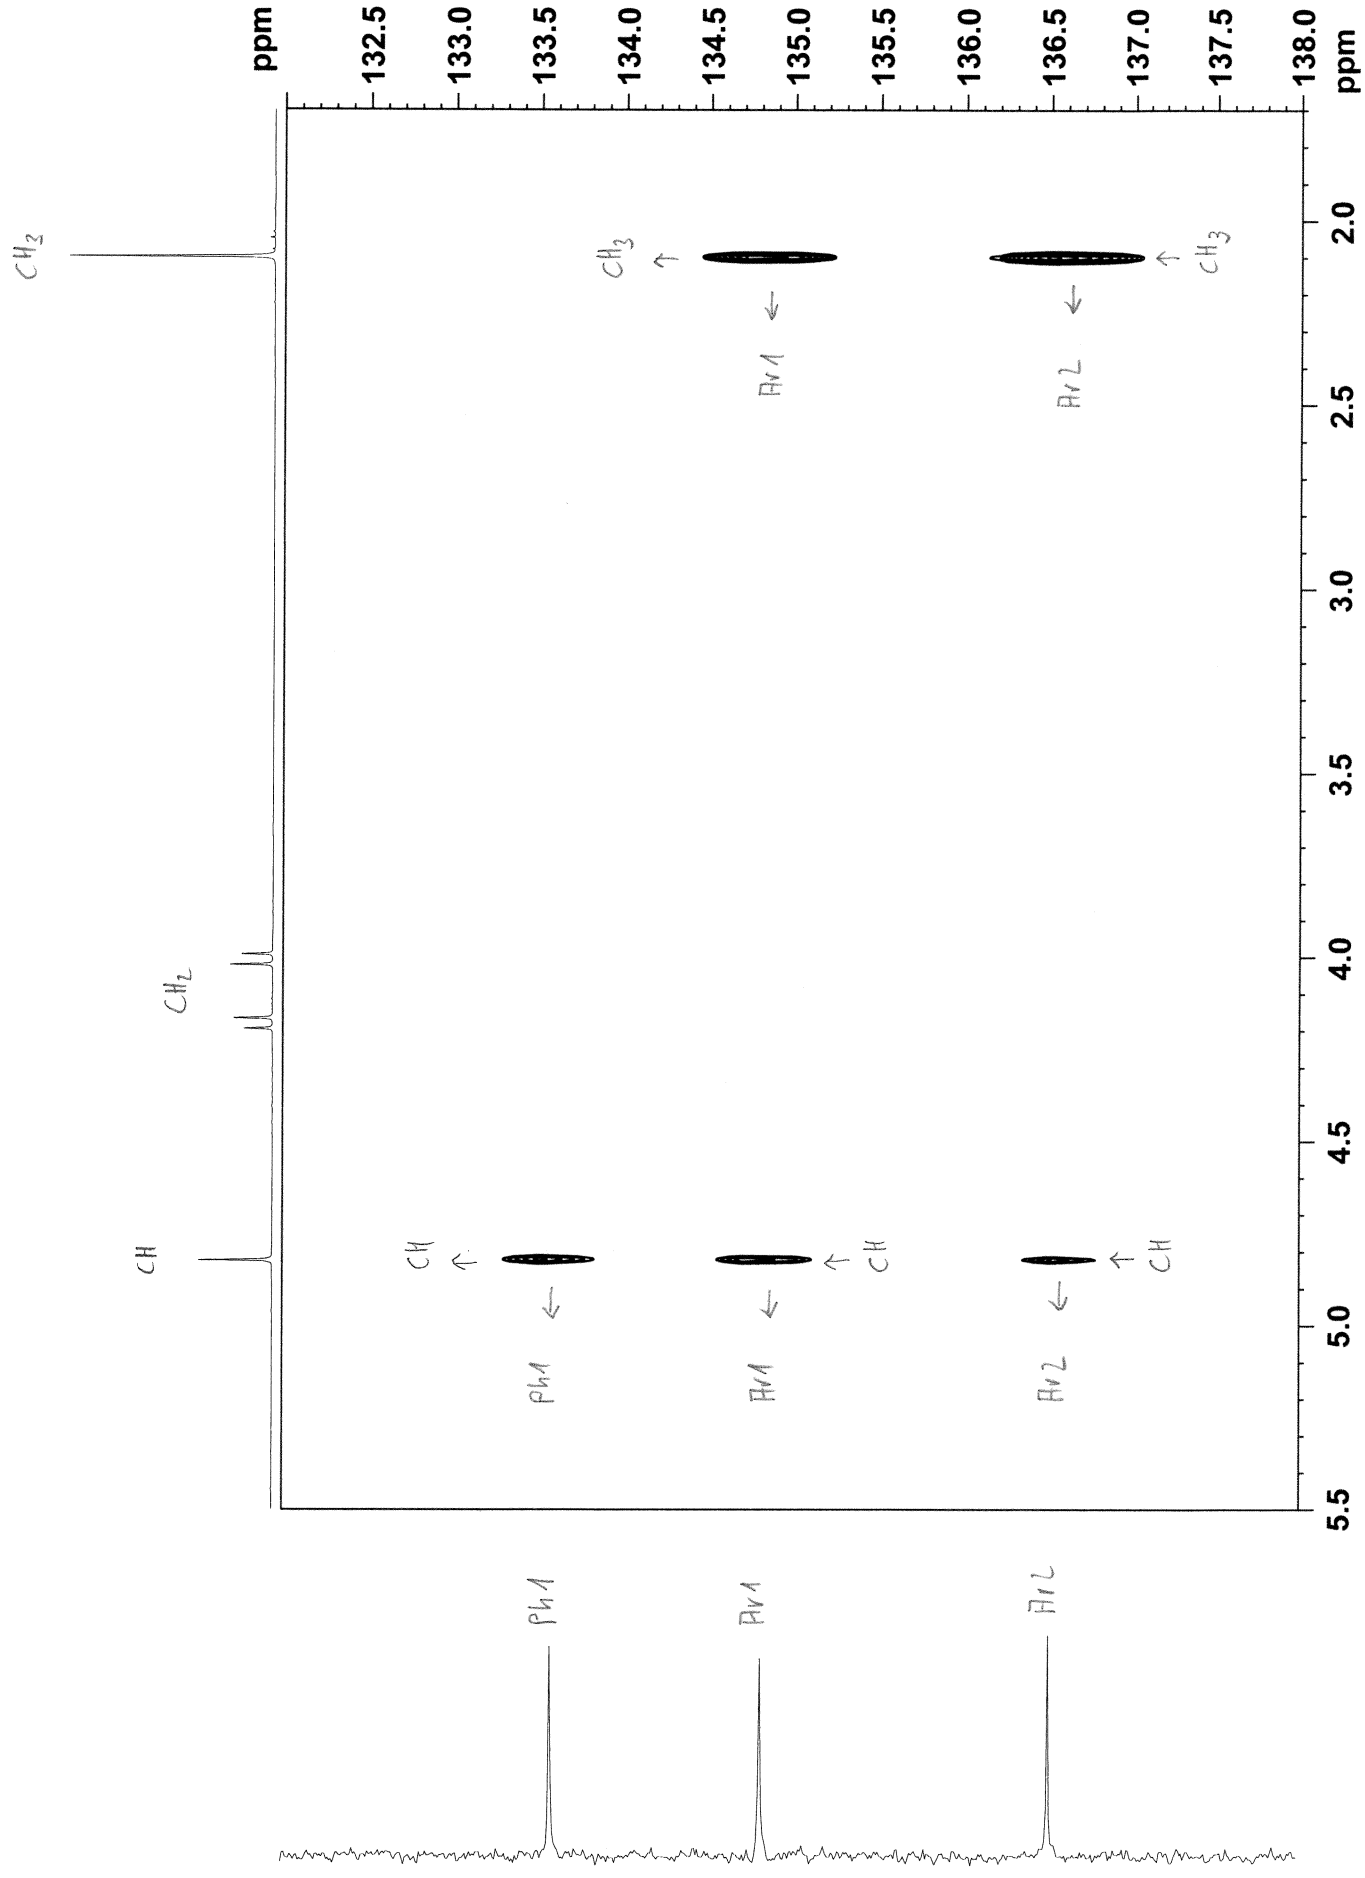

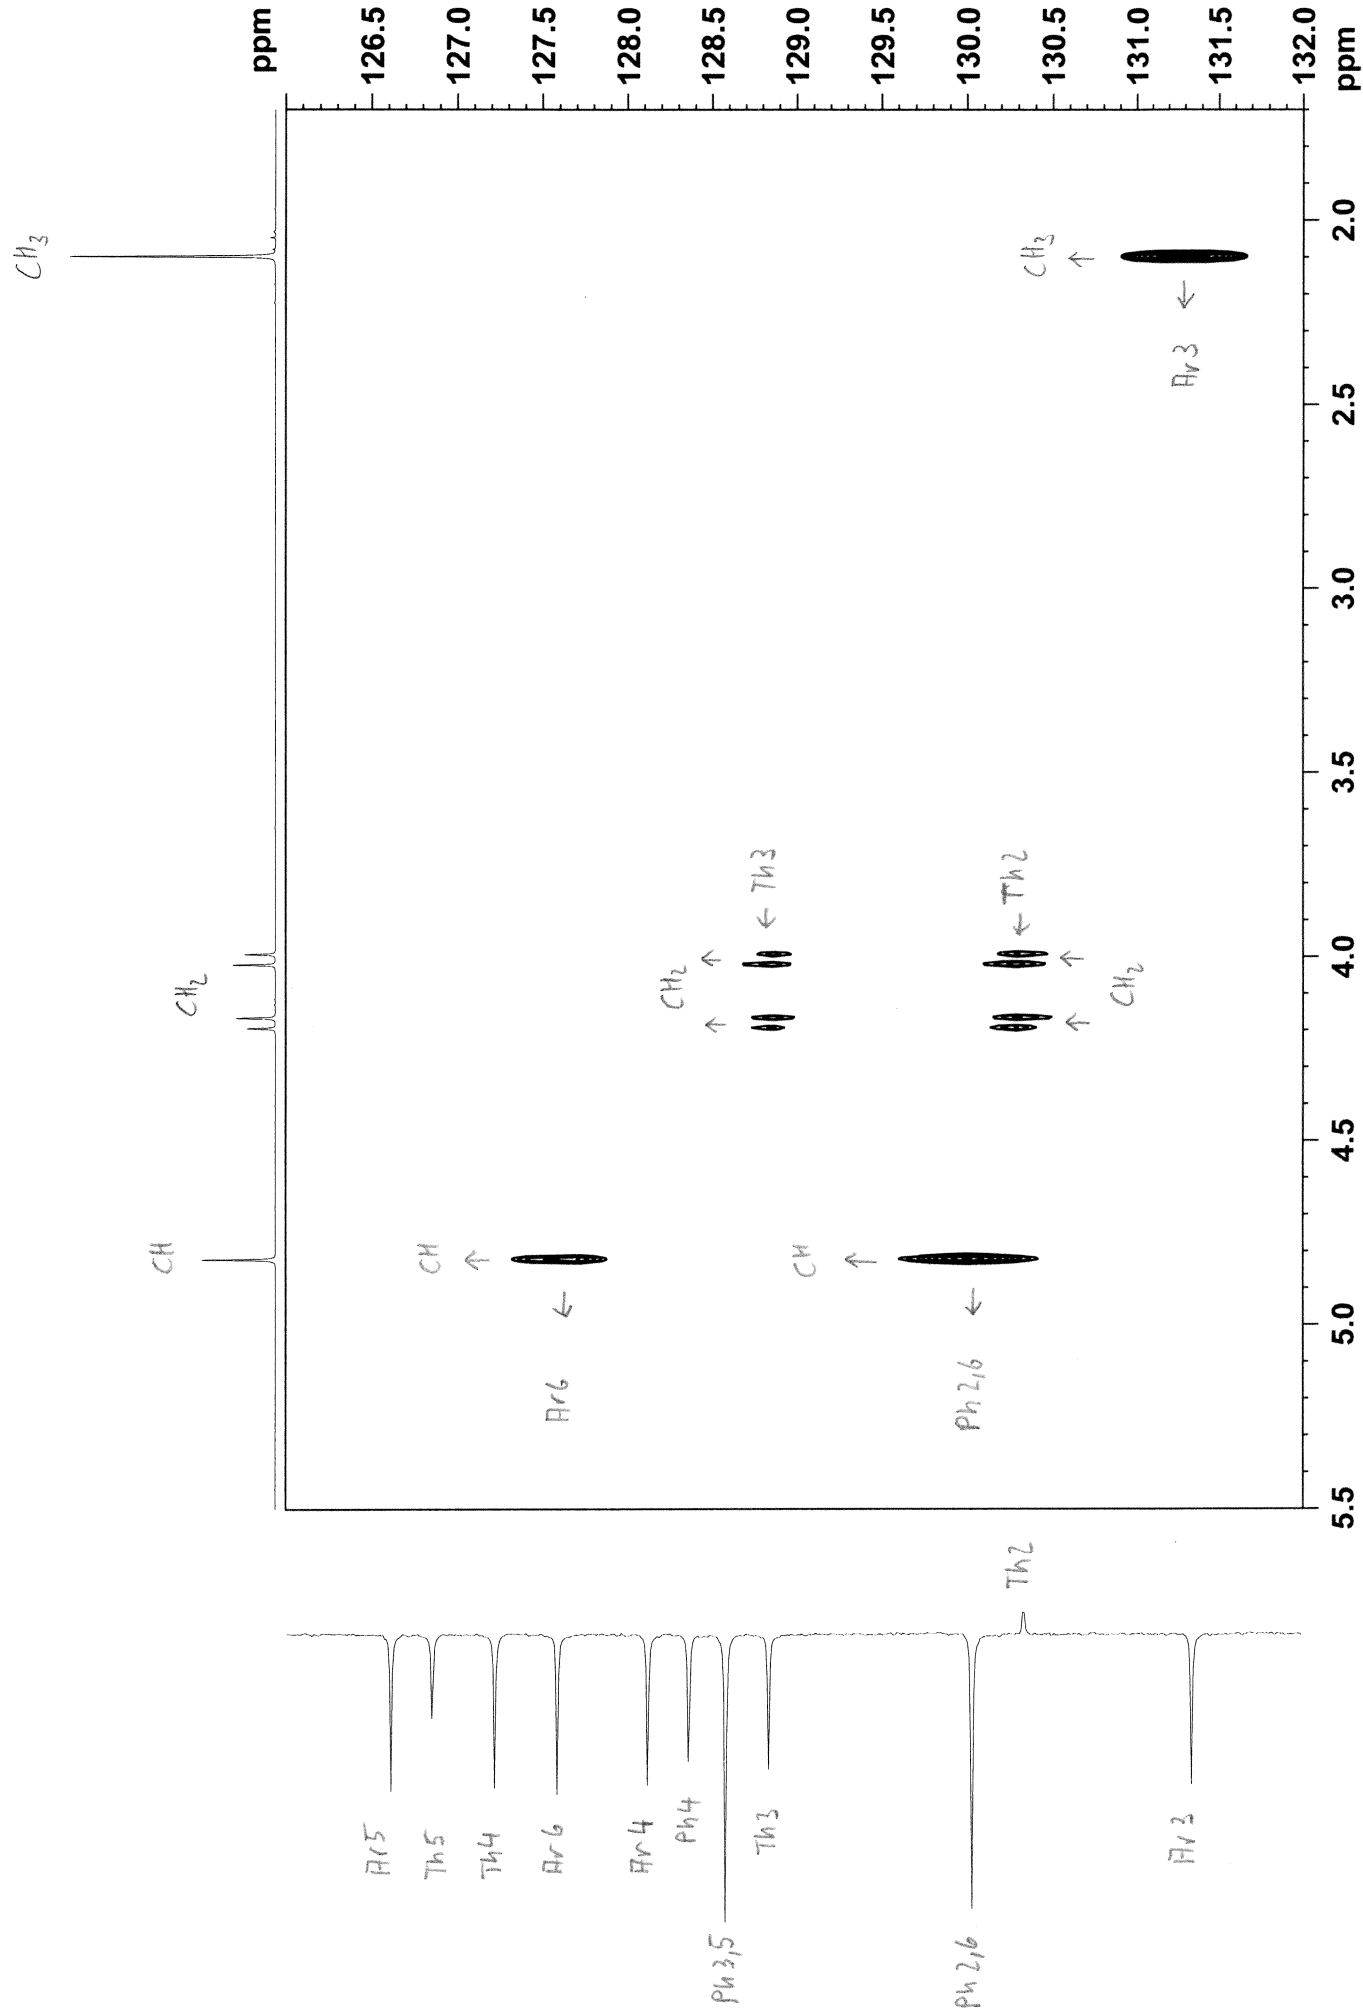

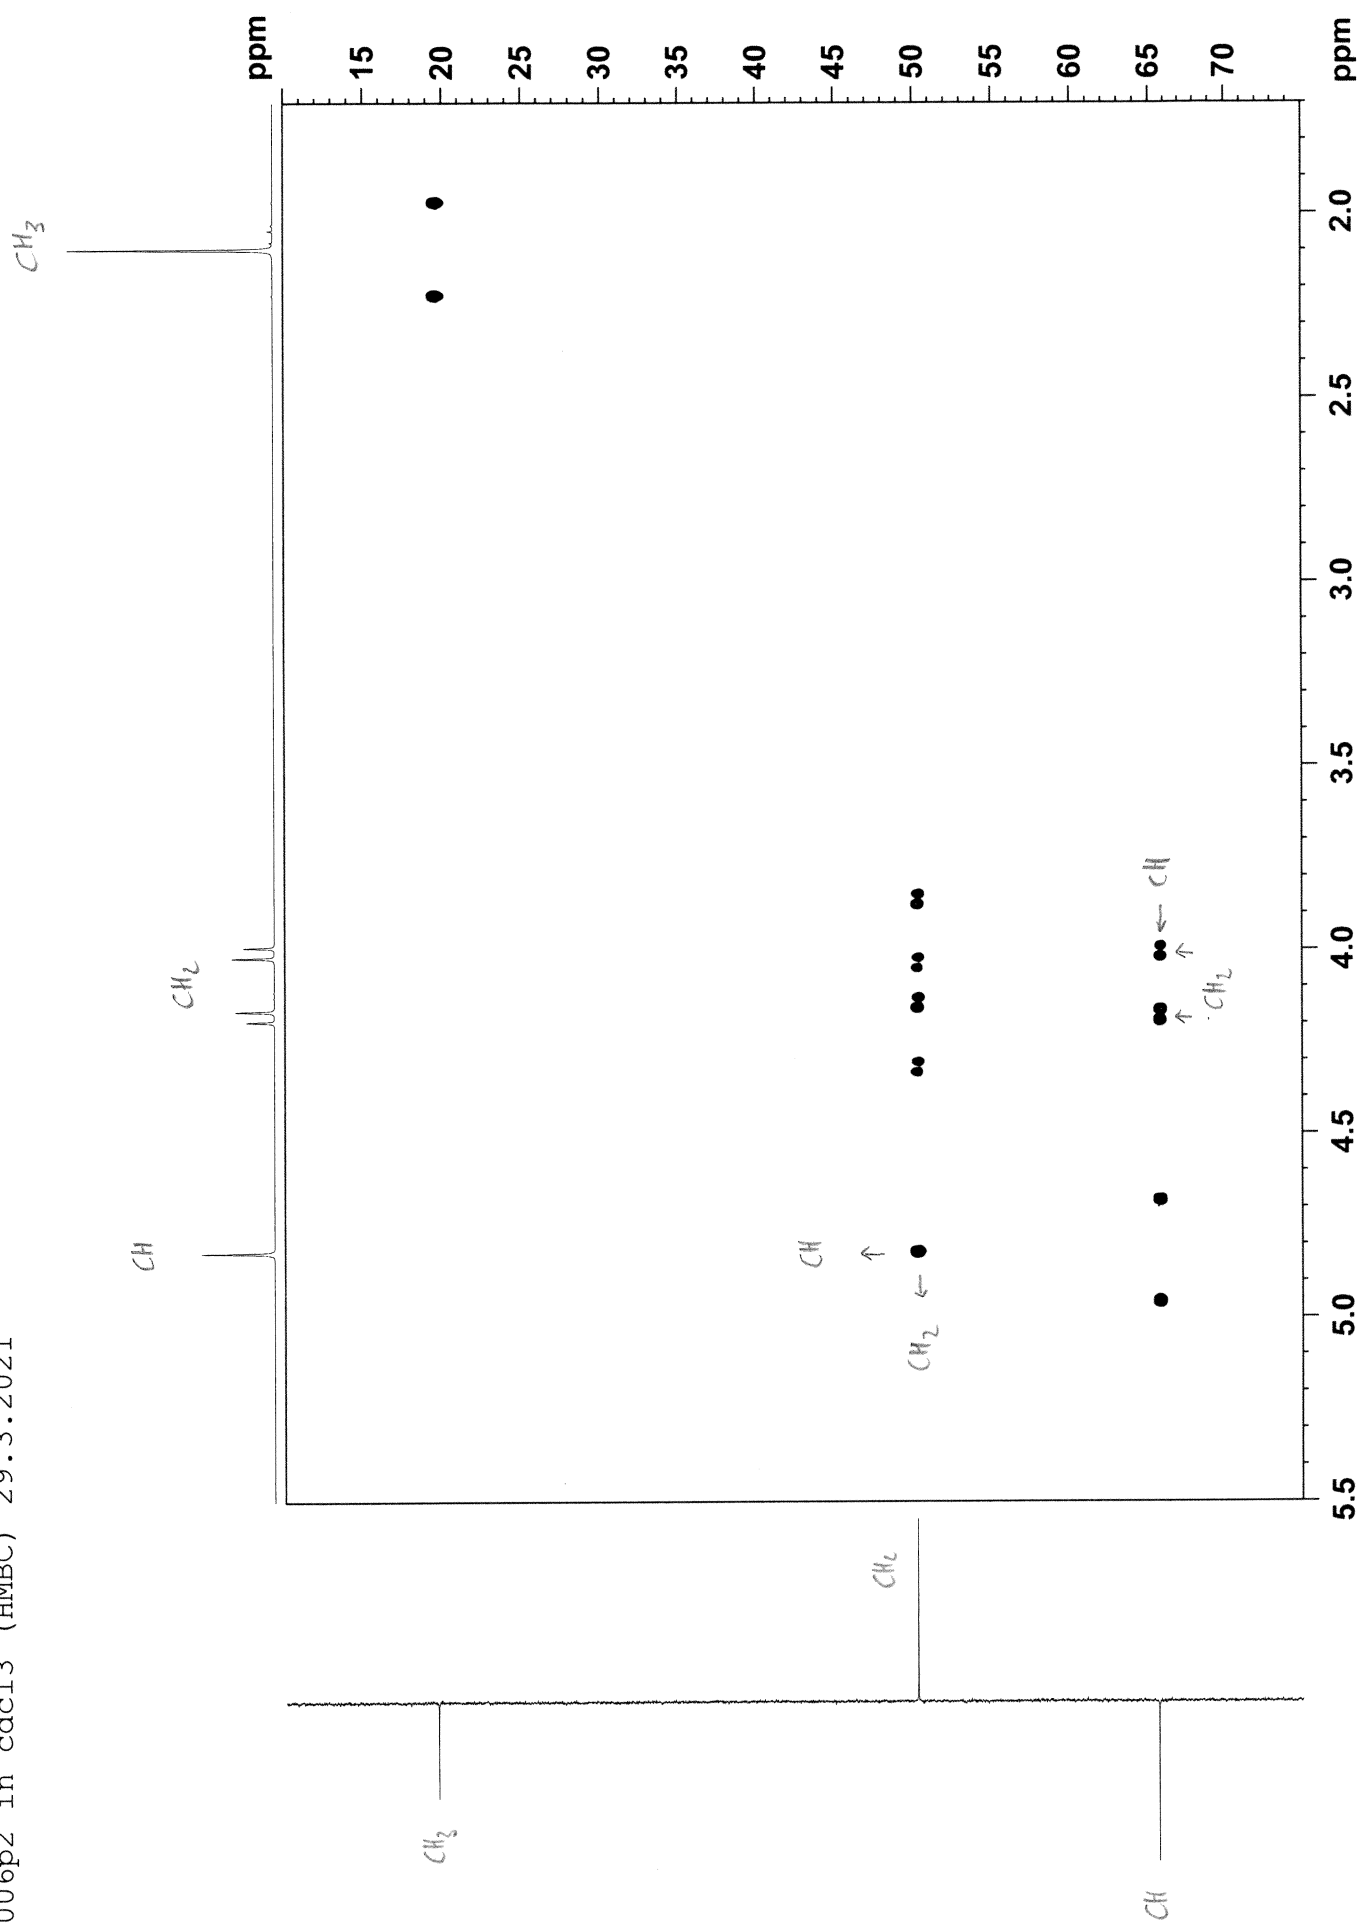



**Figure S47c.** NMR spectra of compound **7l**.

PN006-3 in cdcl3 (Proton) 29.7.2020

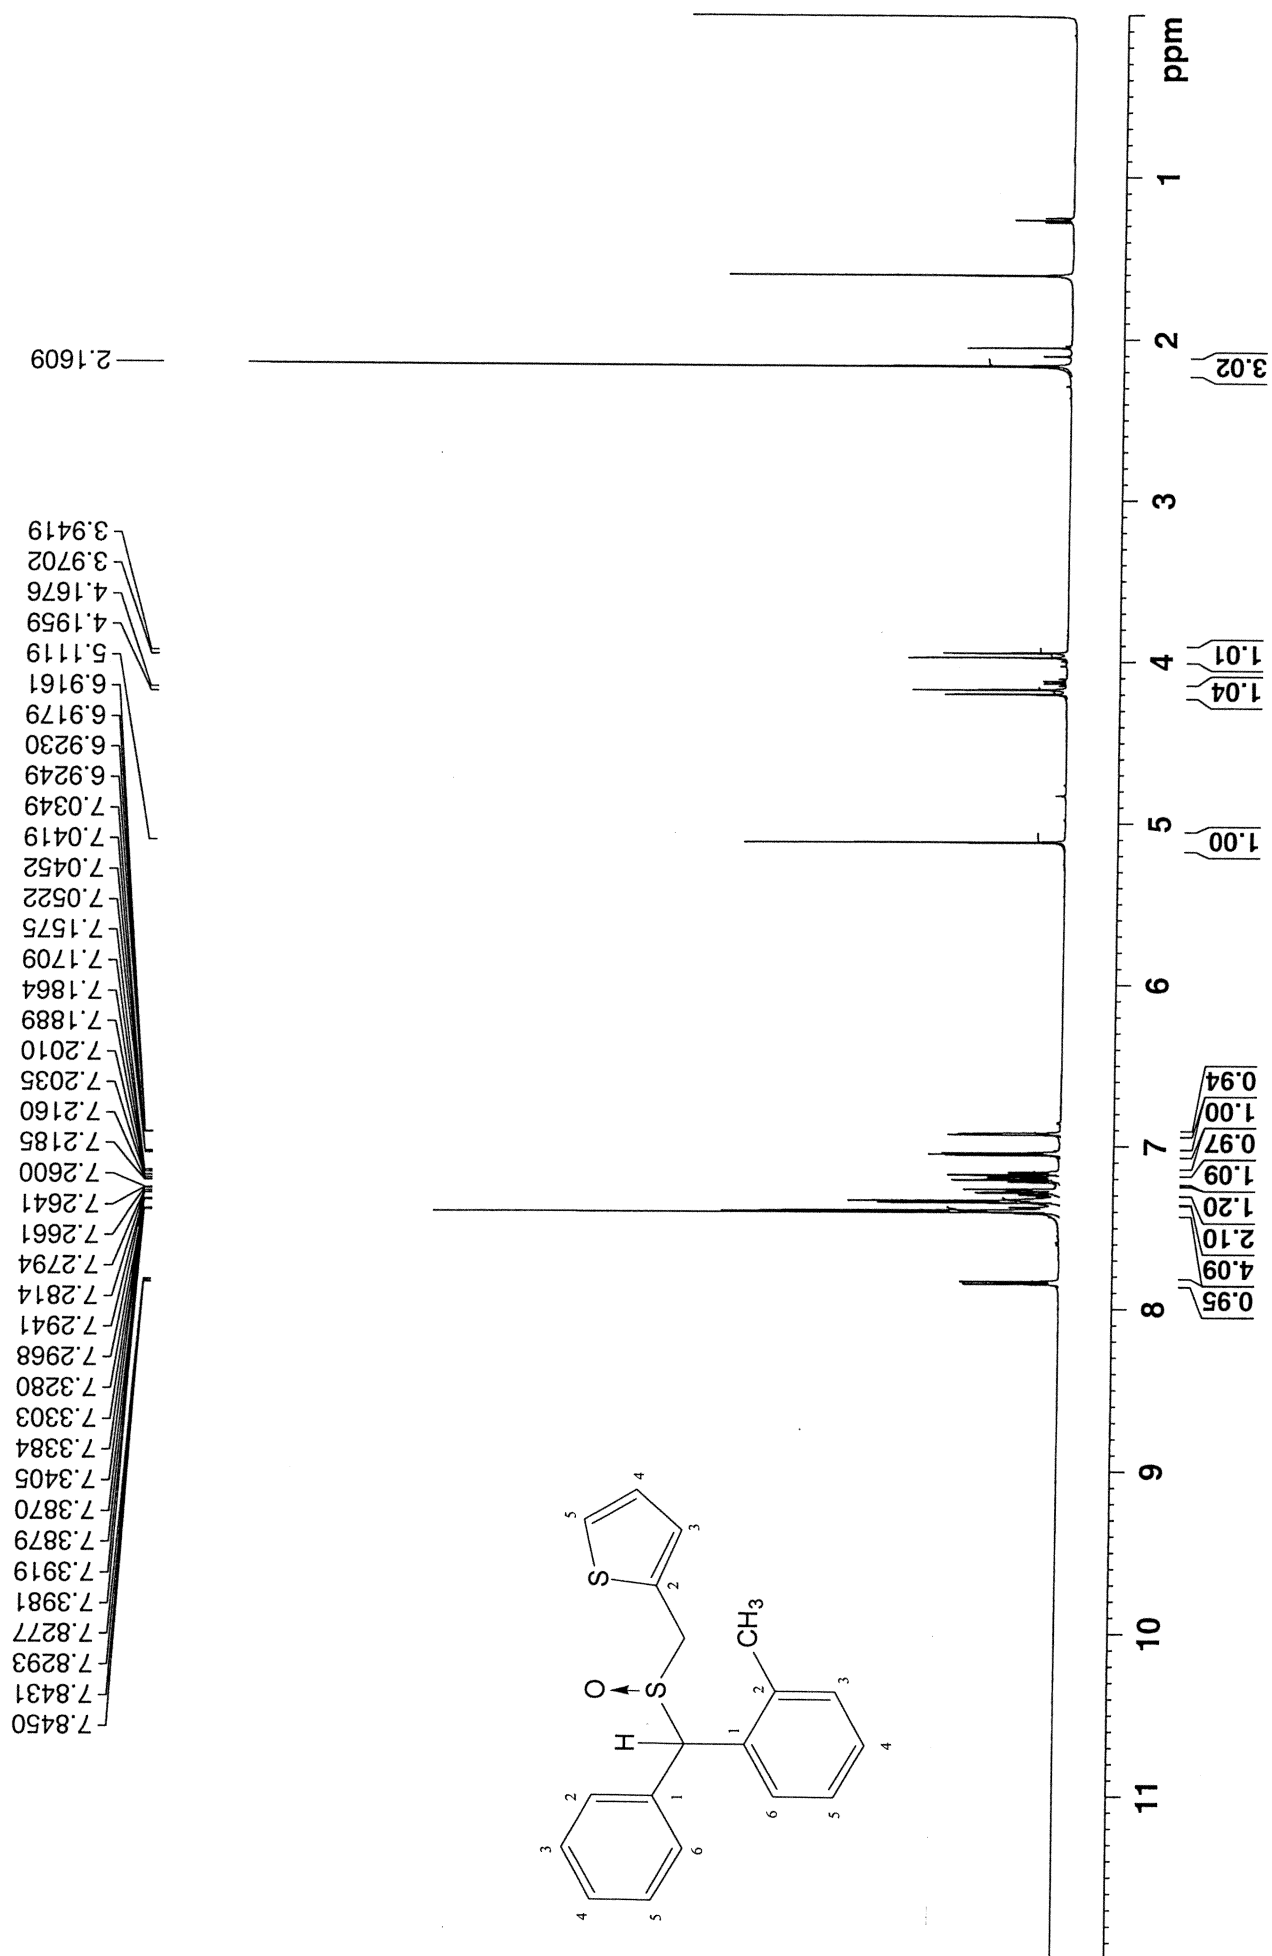

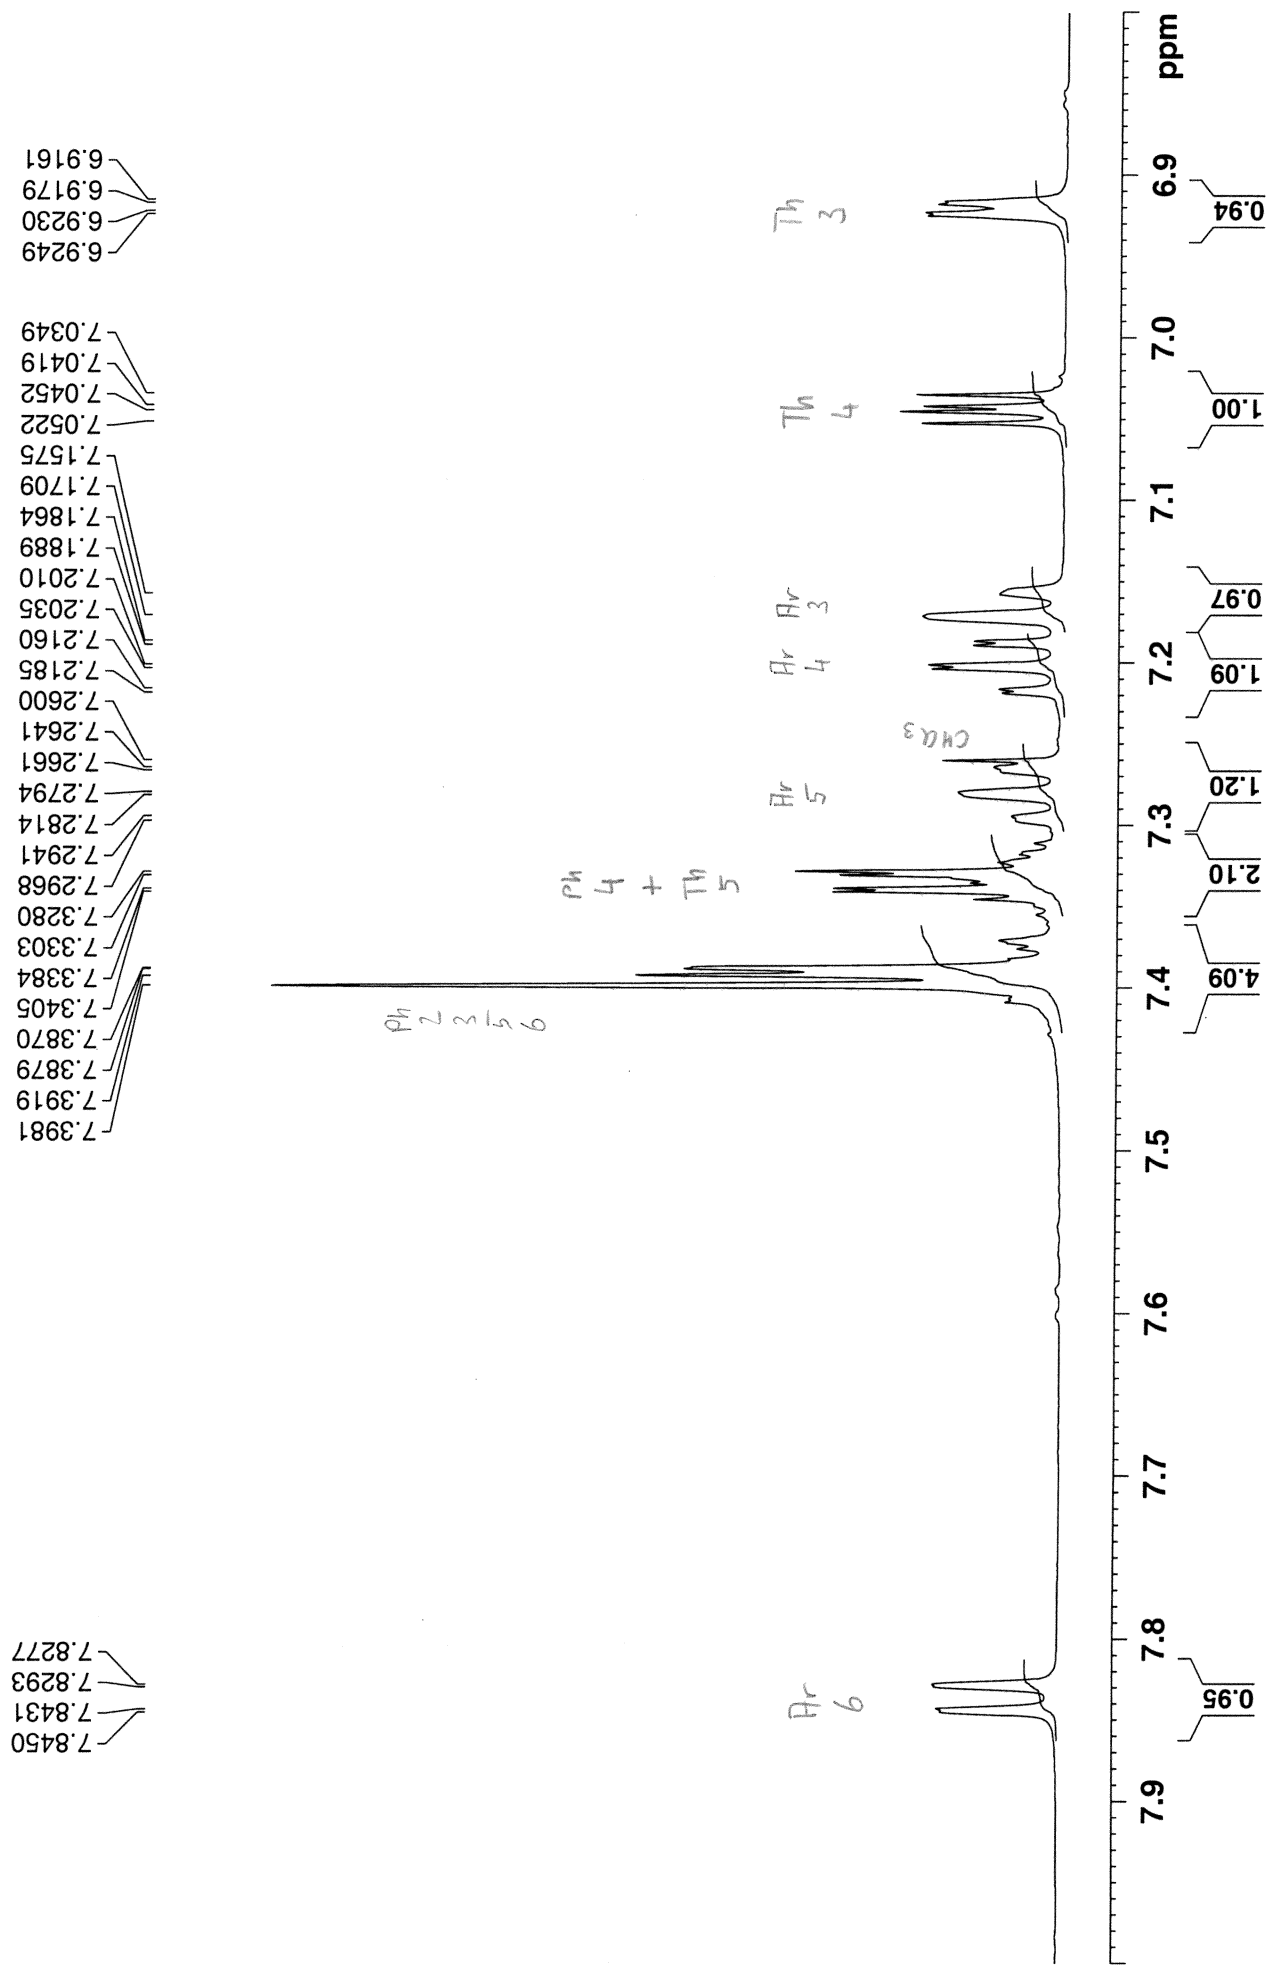

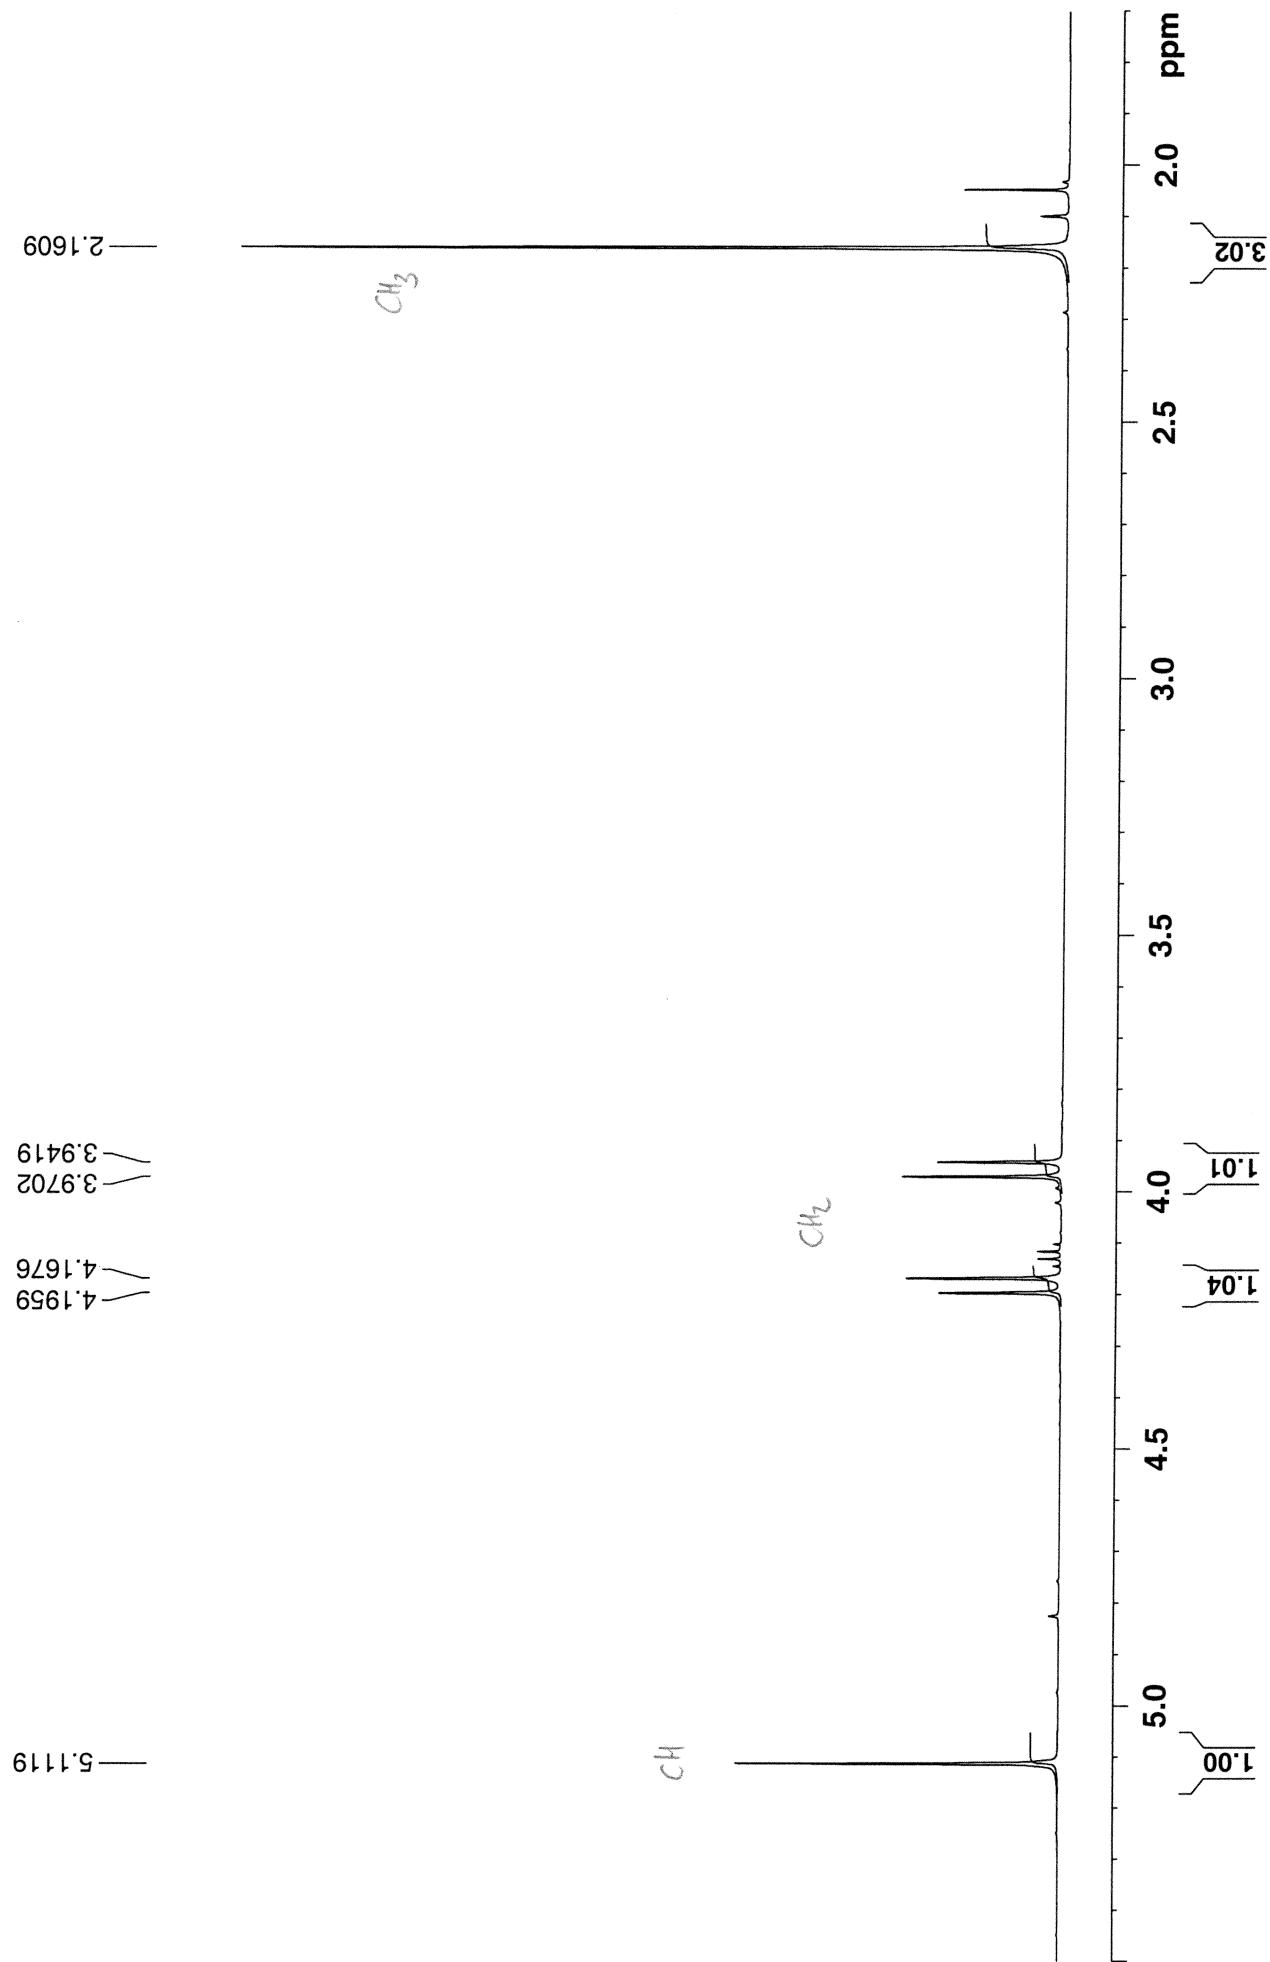

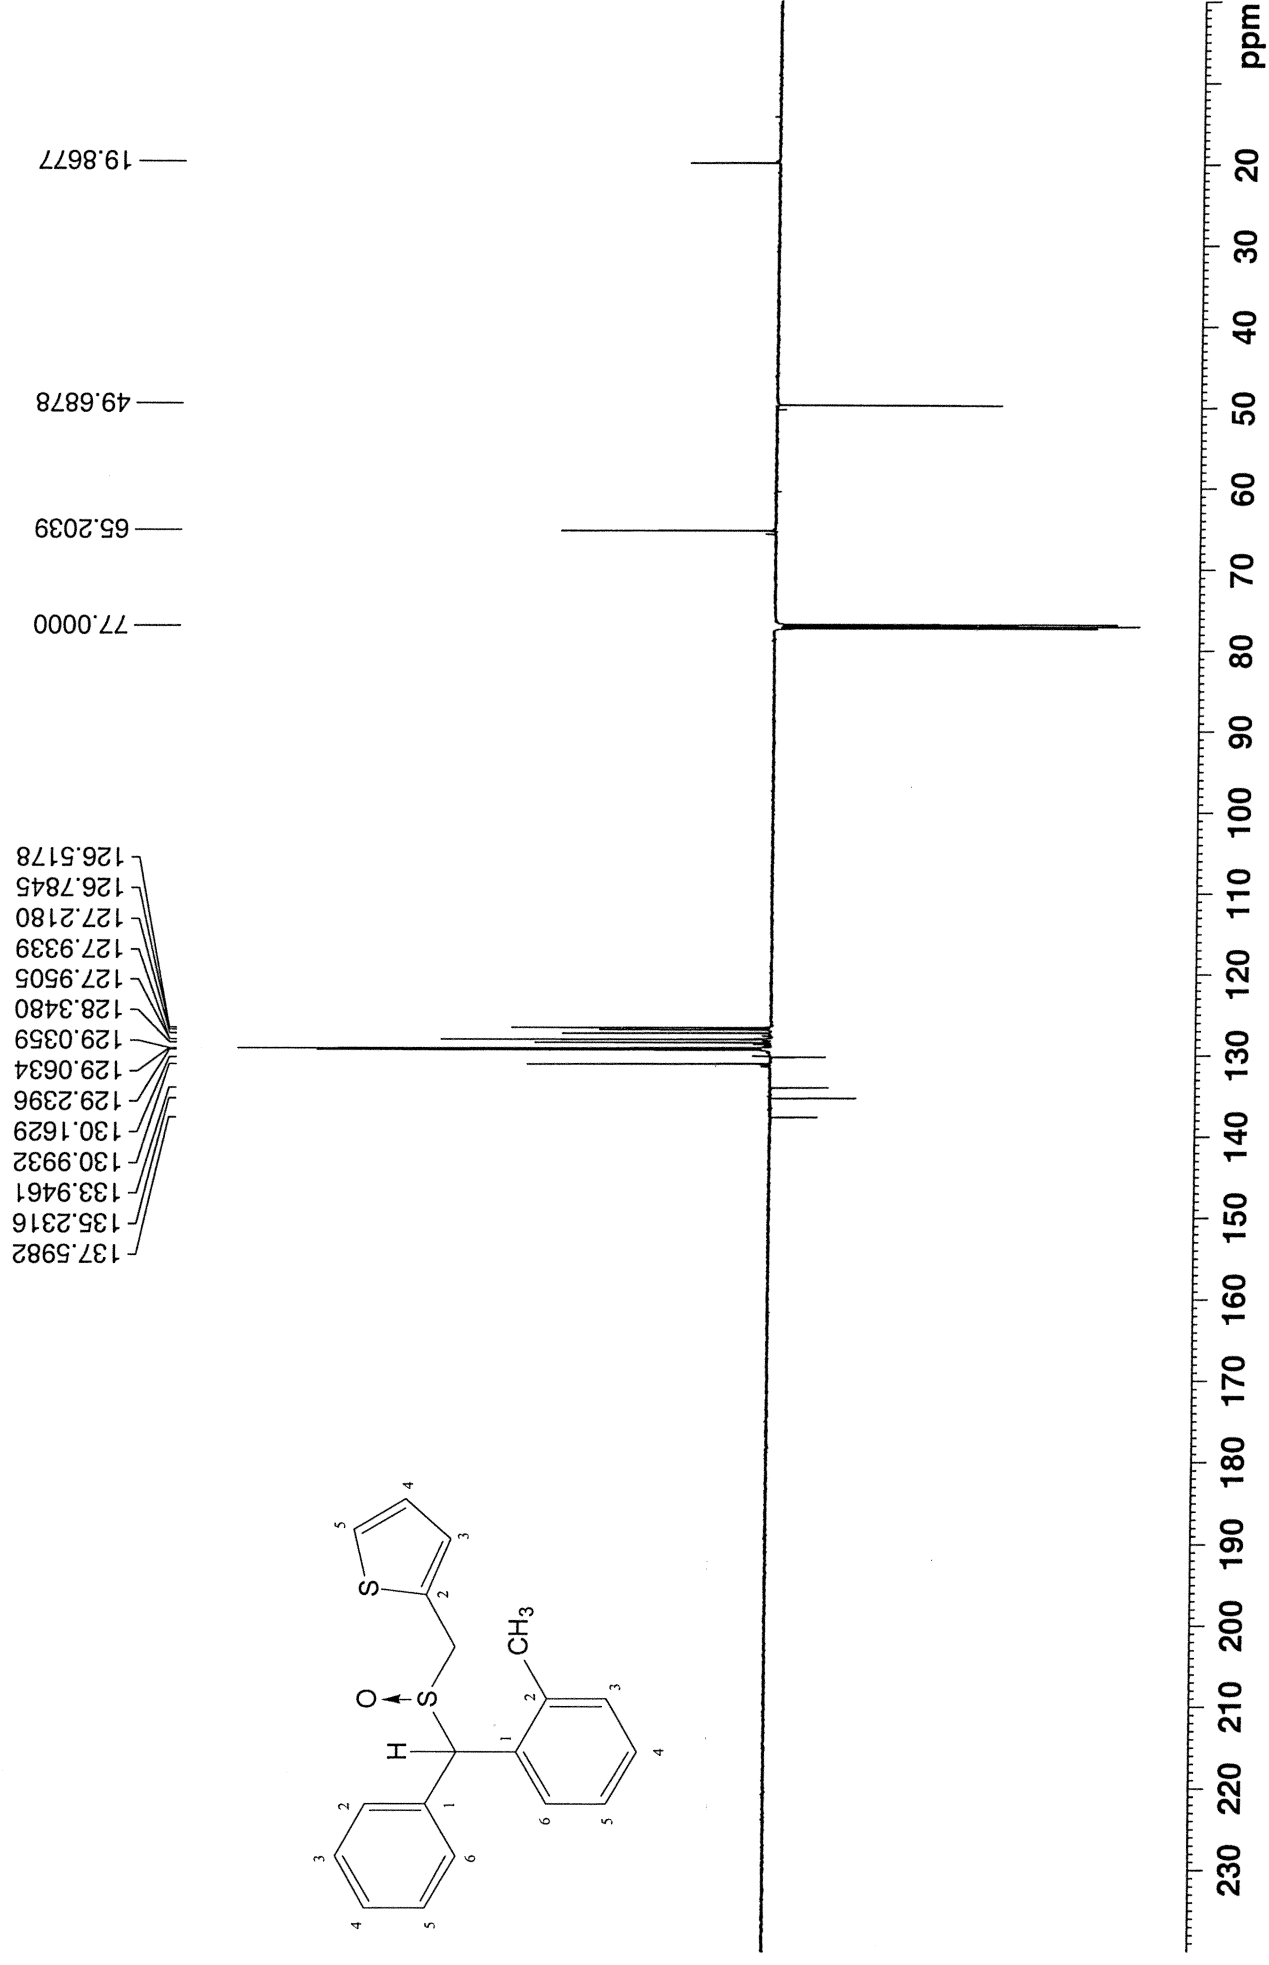

PN006-3 in cdcl3 (APT) 29.7.2020

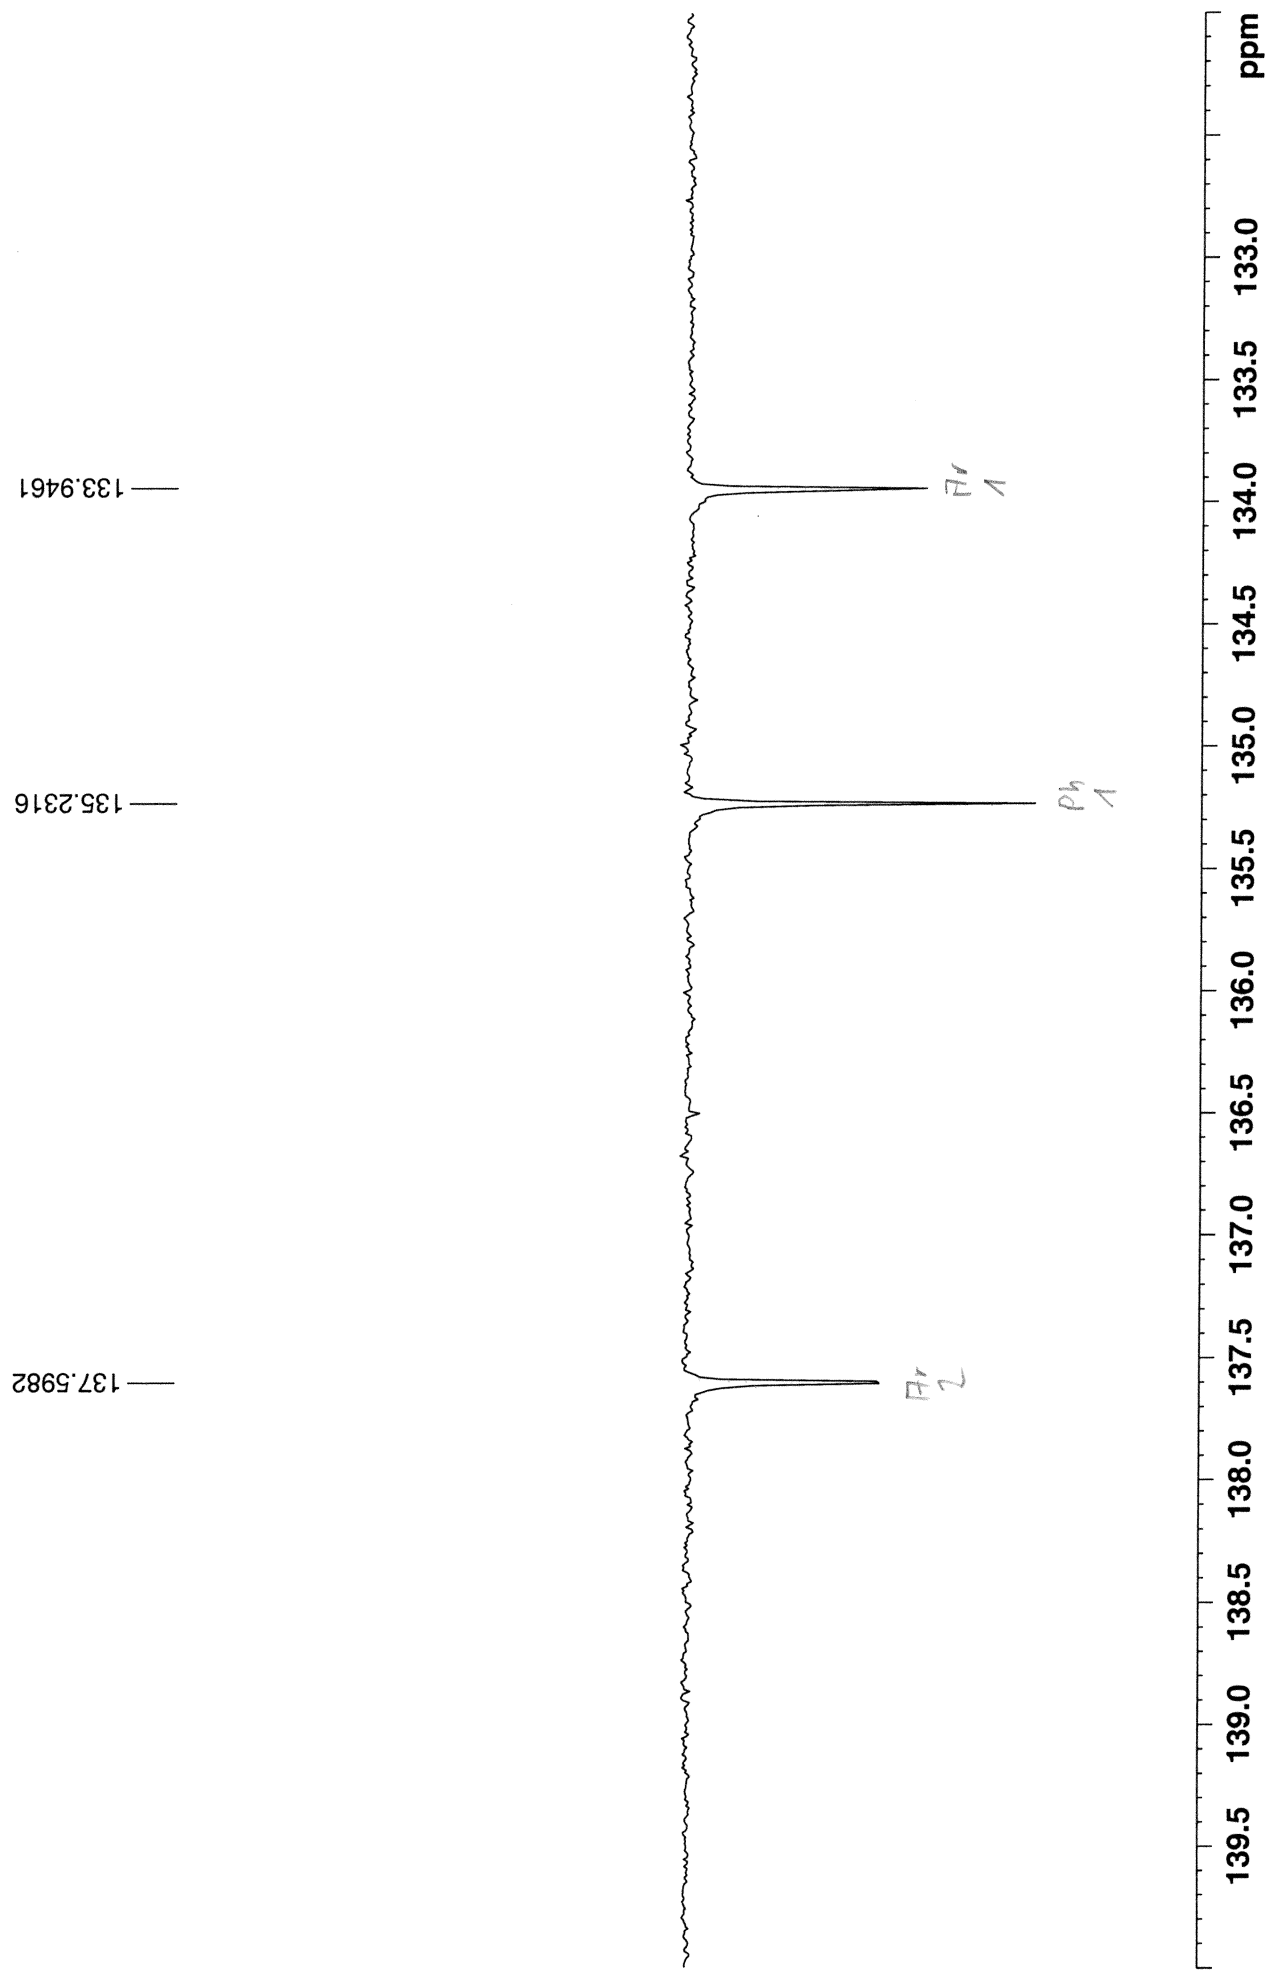

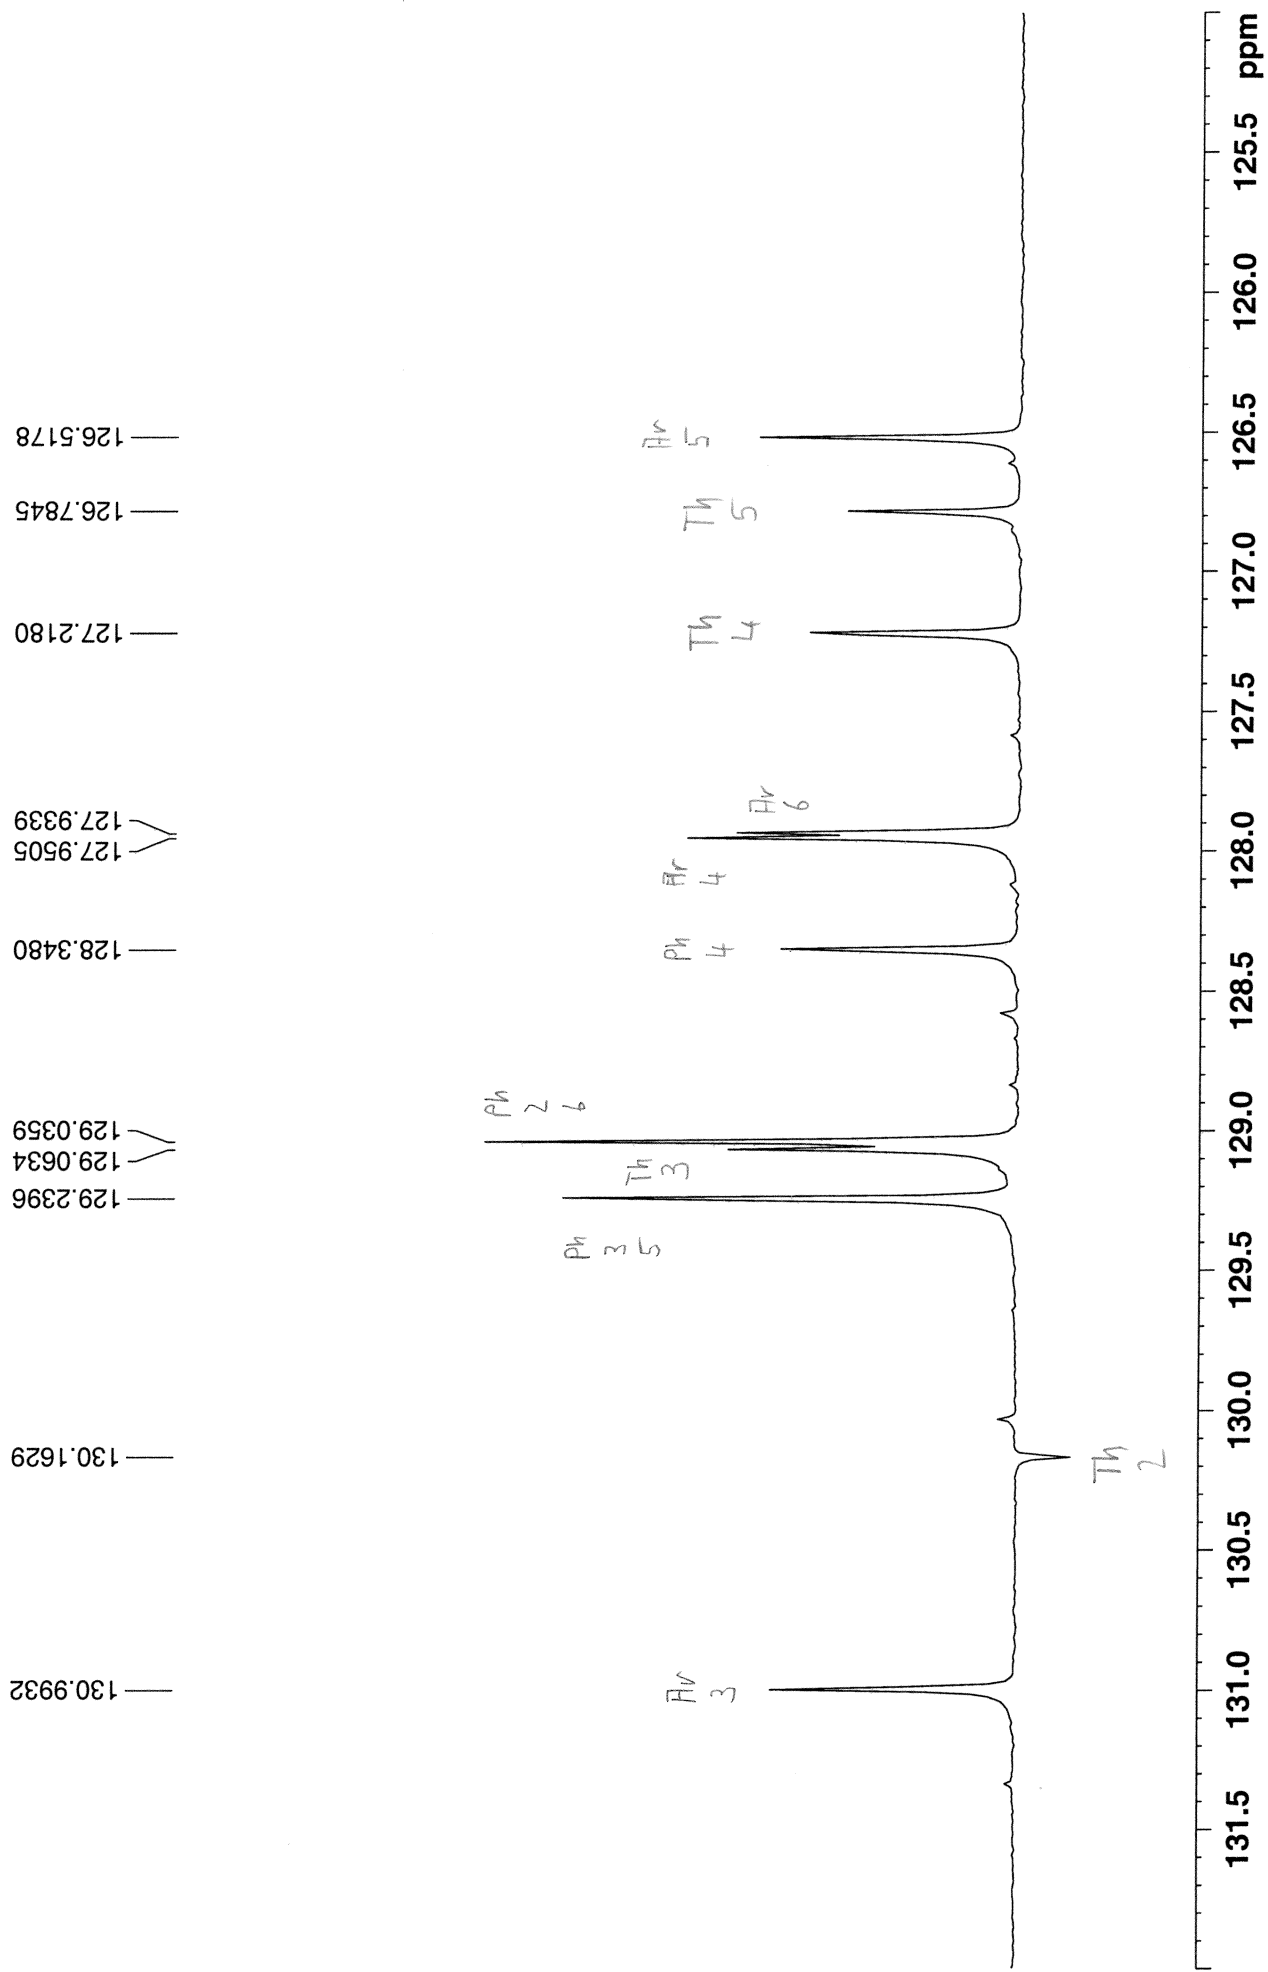

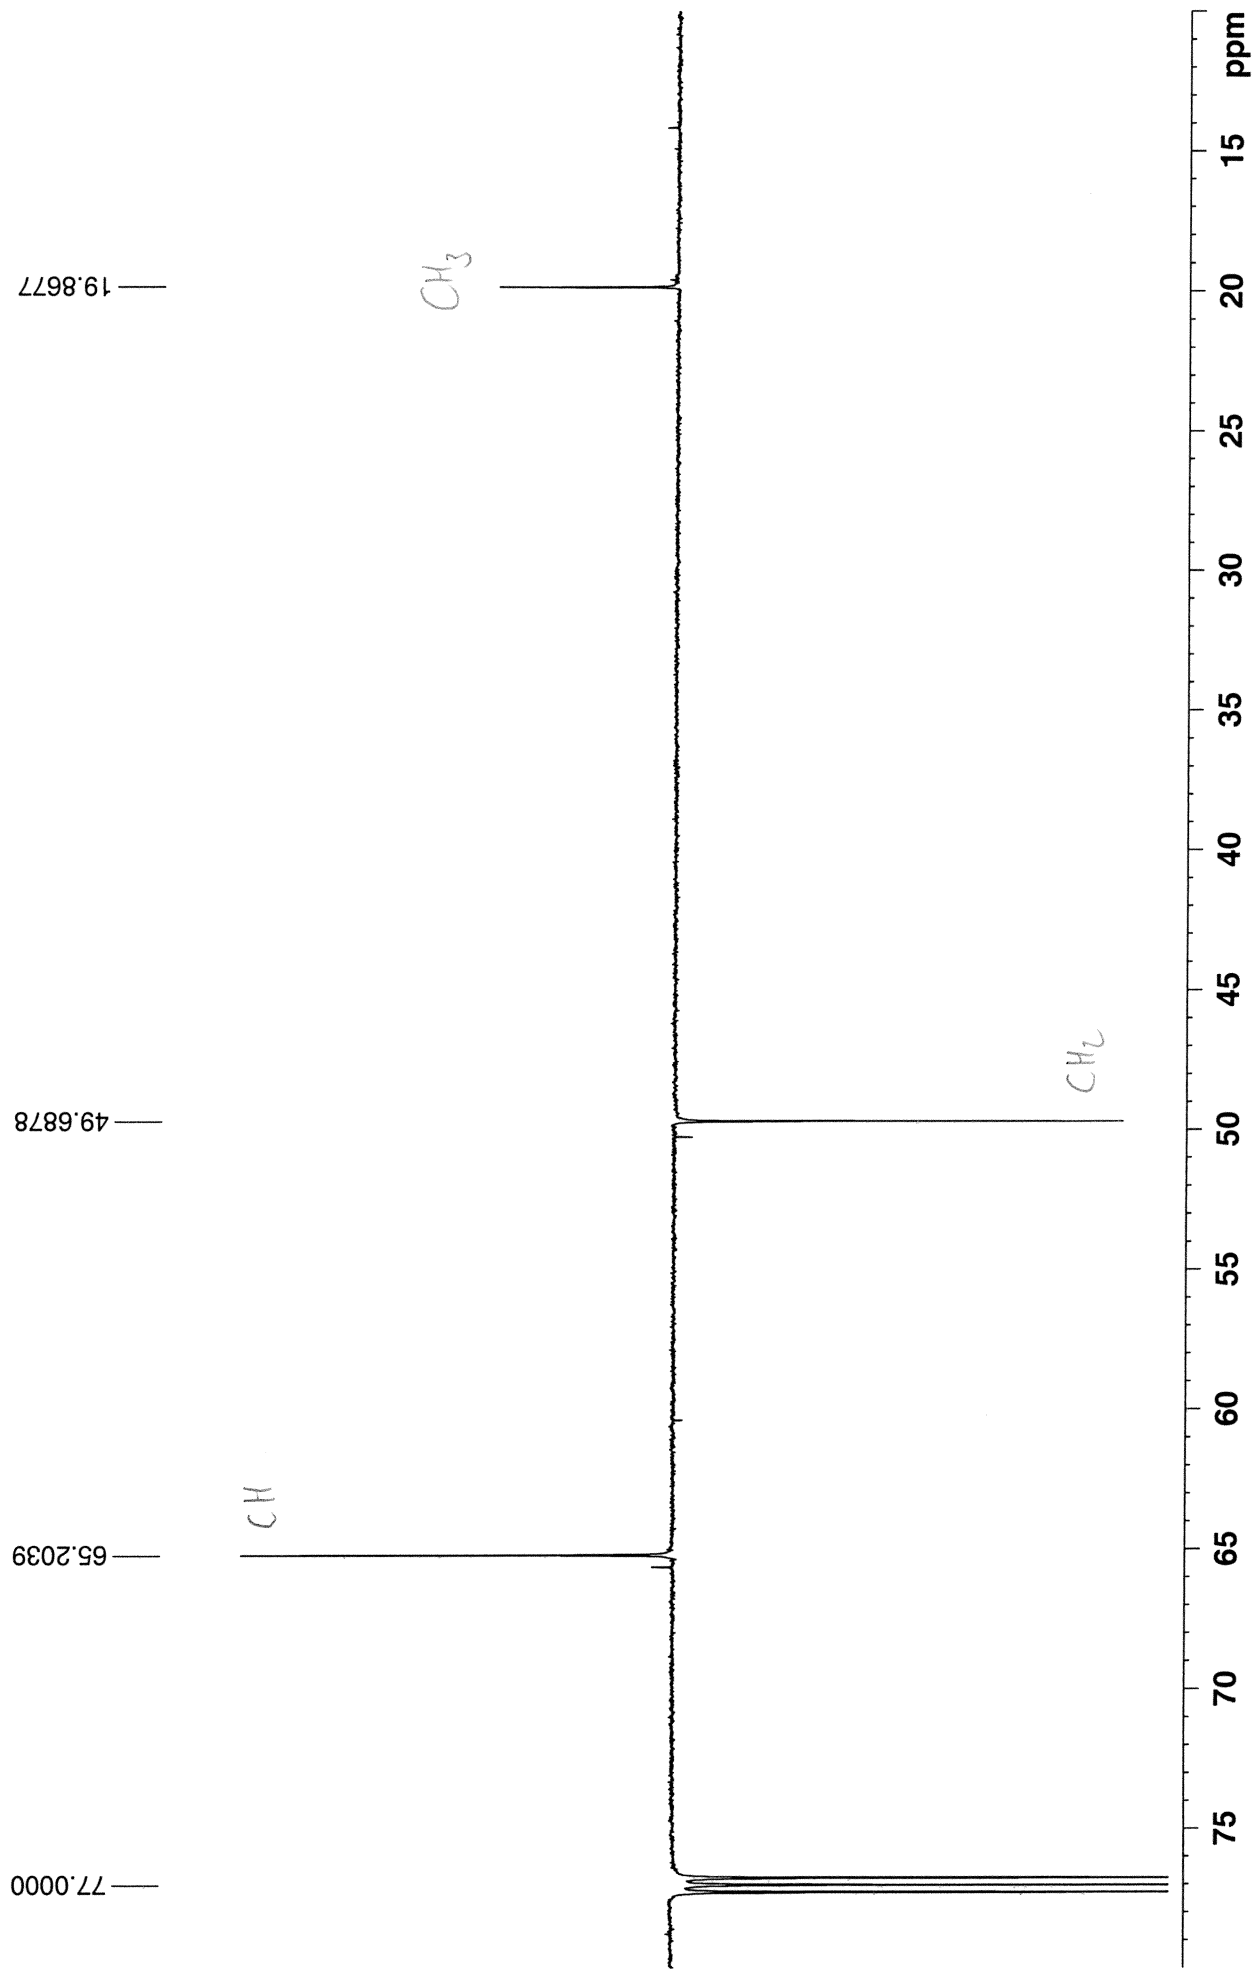

PN006-3 in cdcl3 (COSY) 29.7.2020

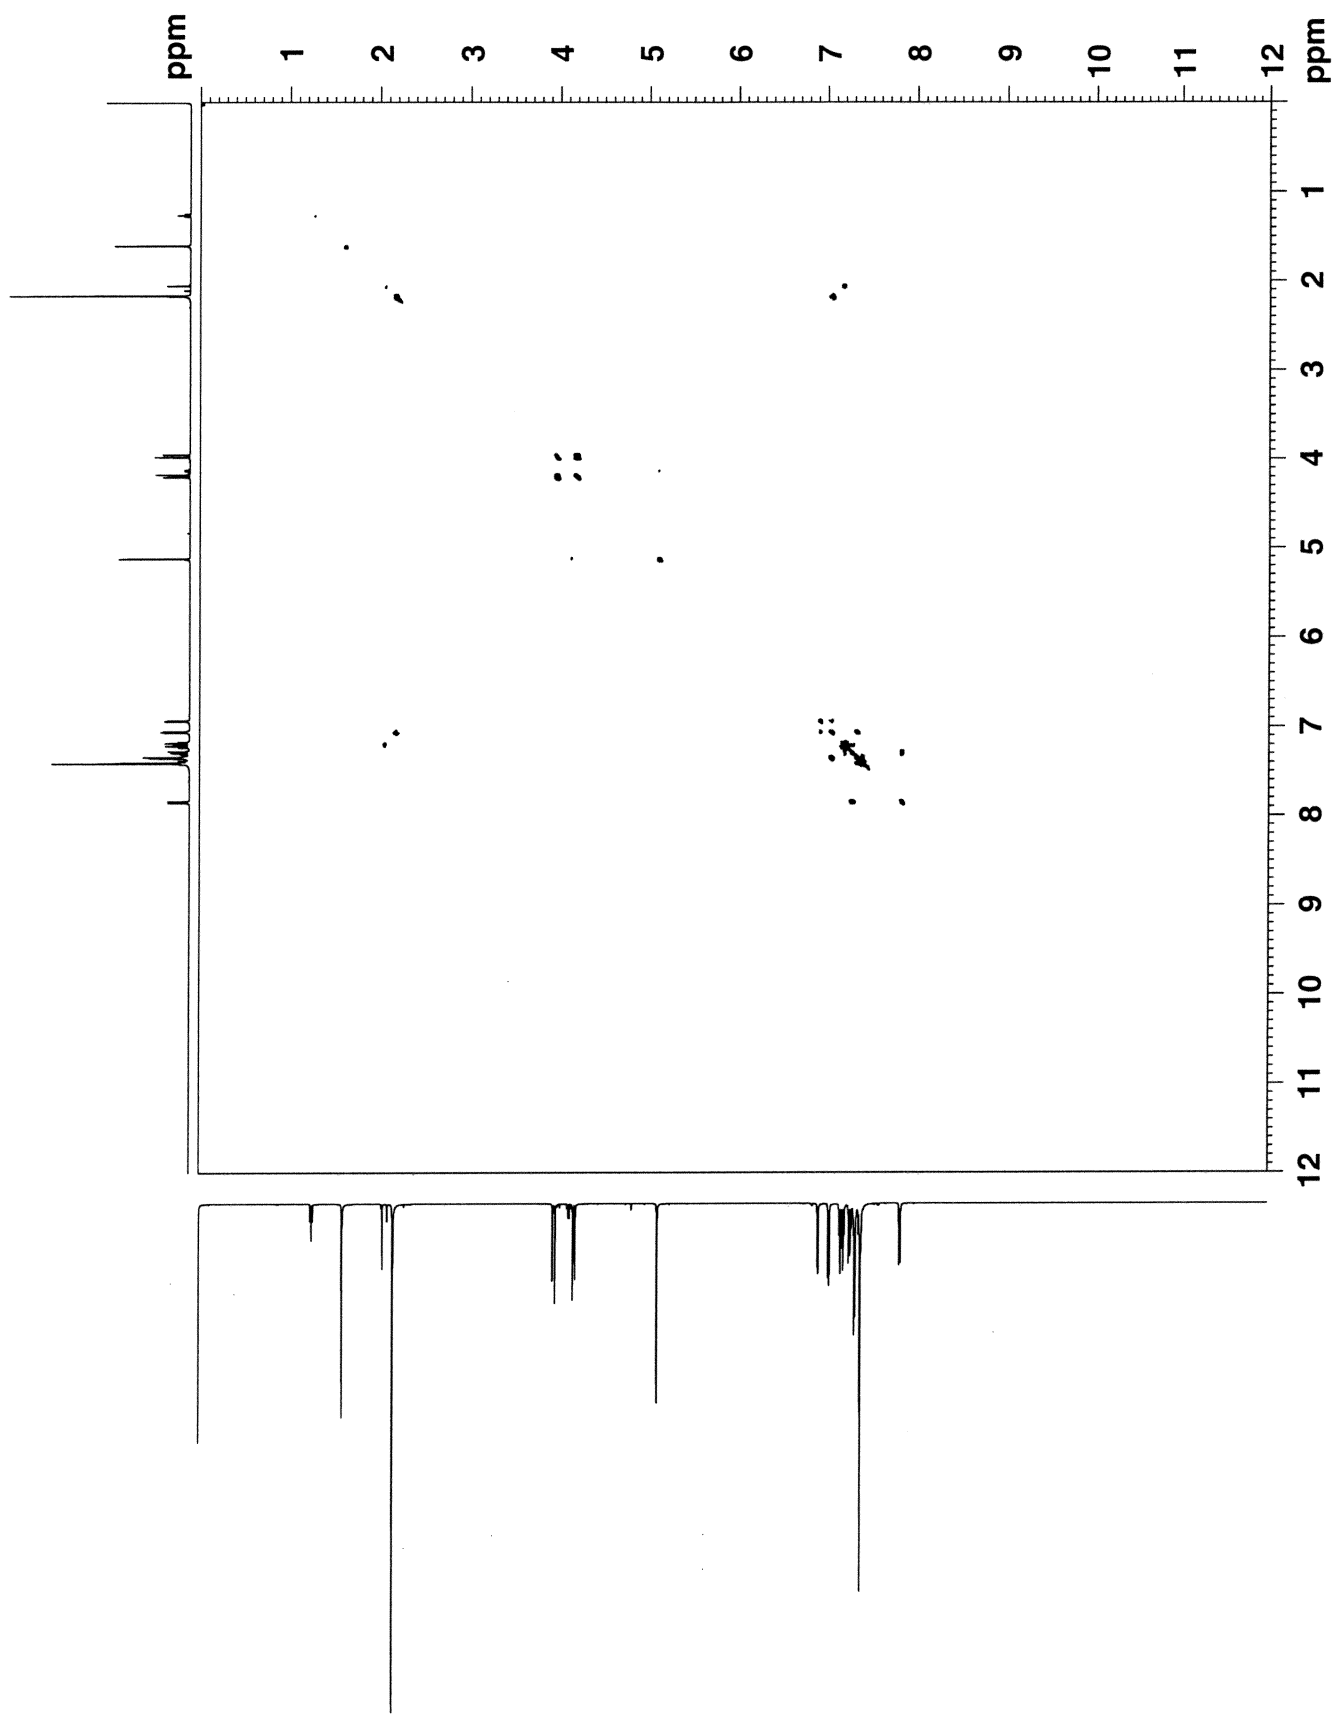



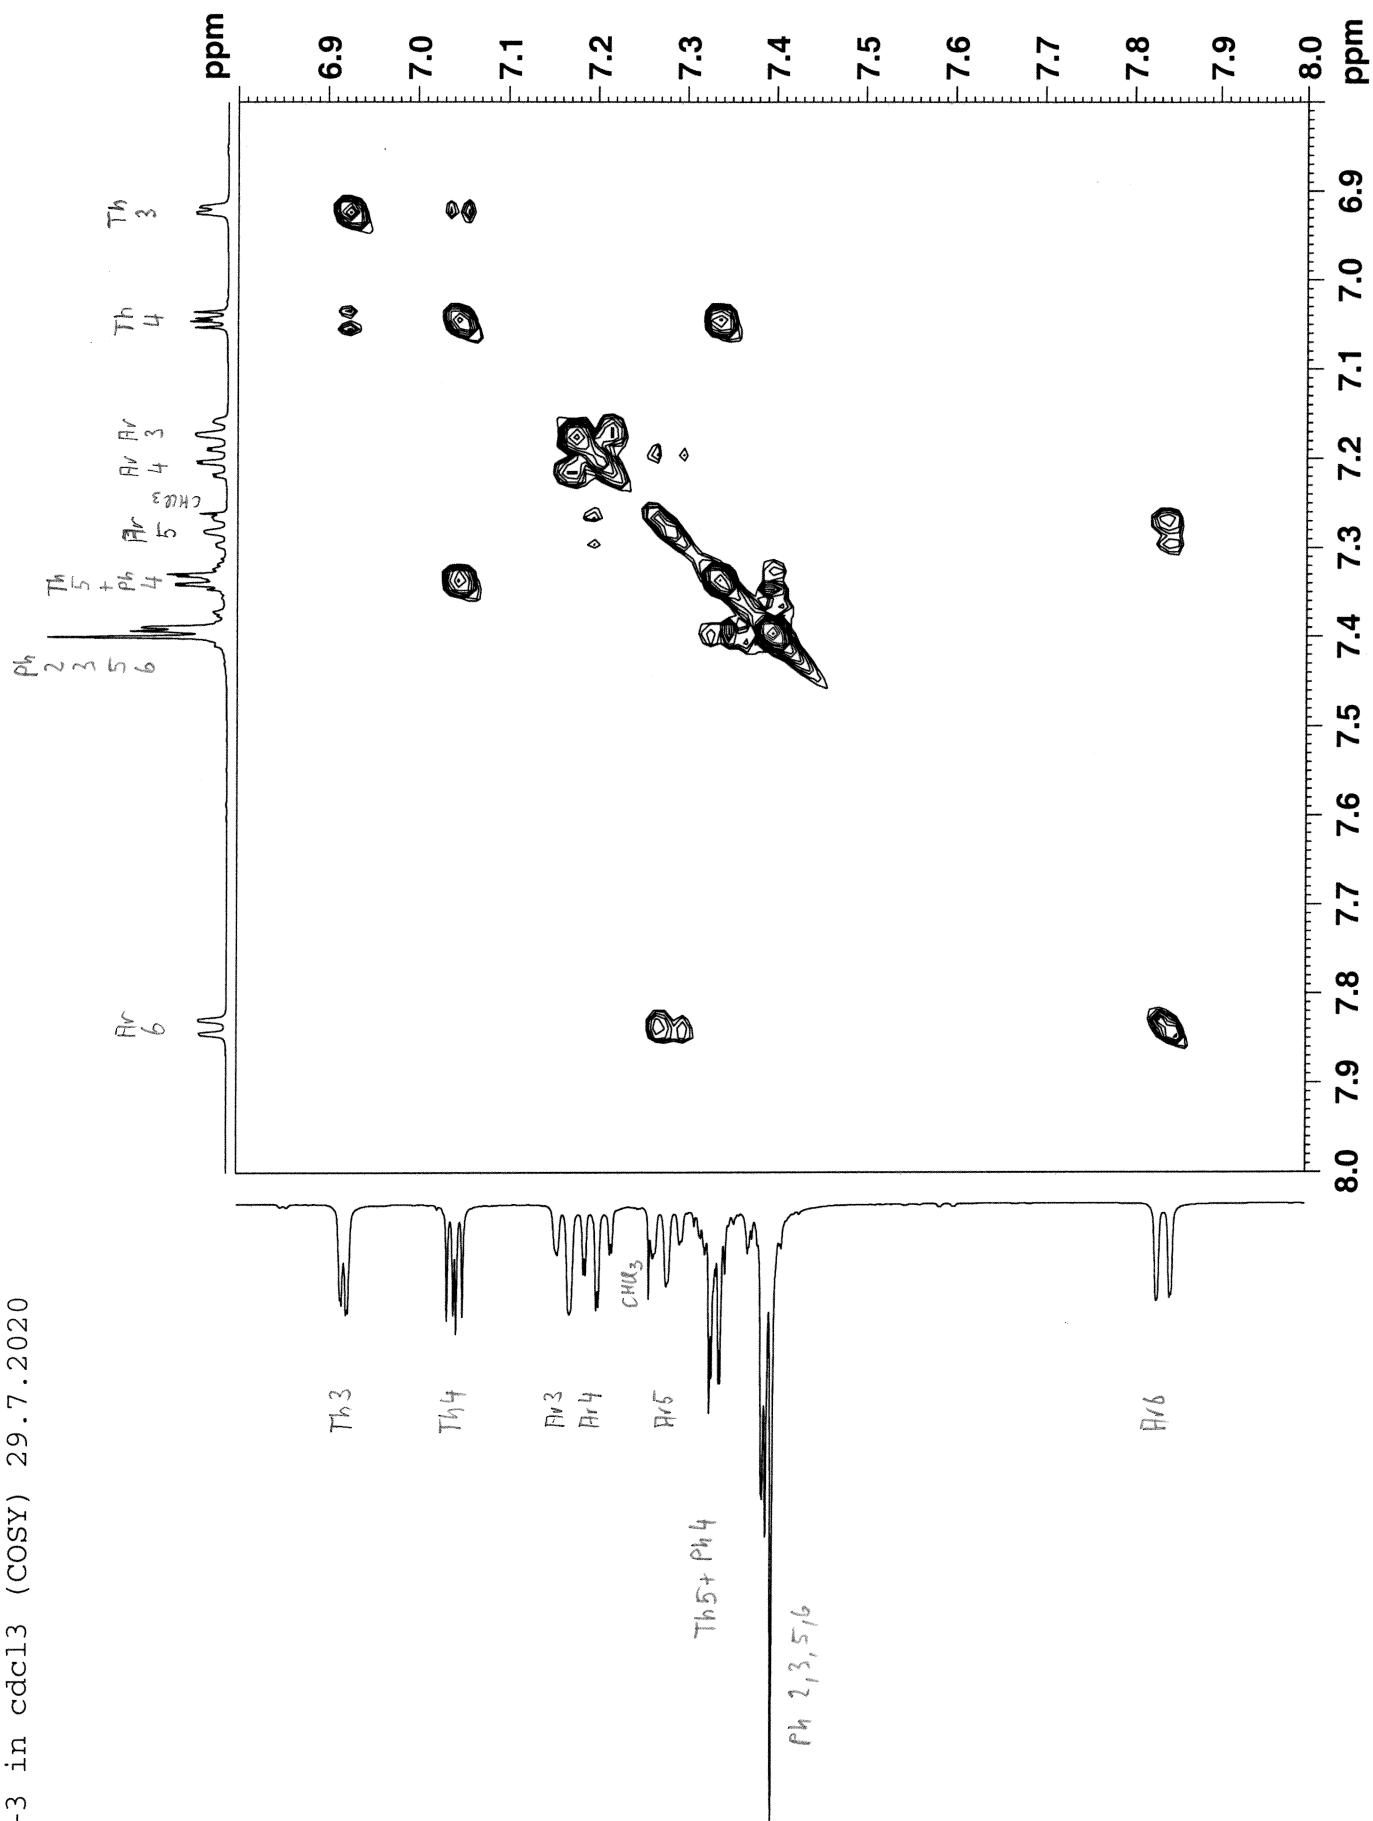

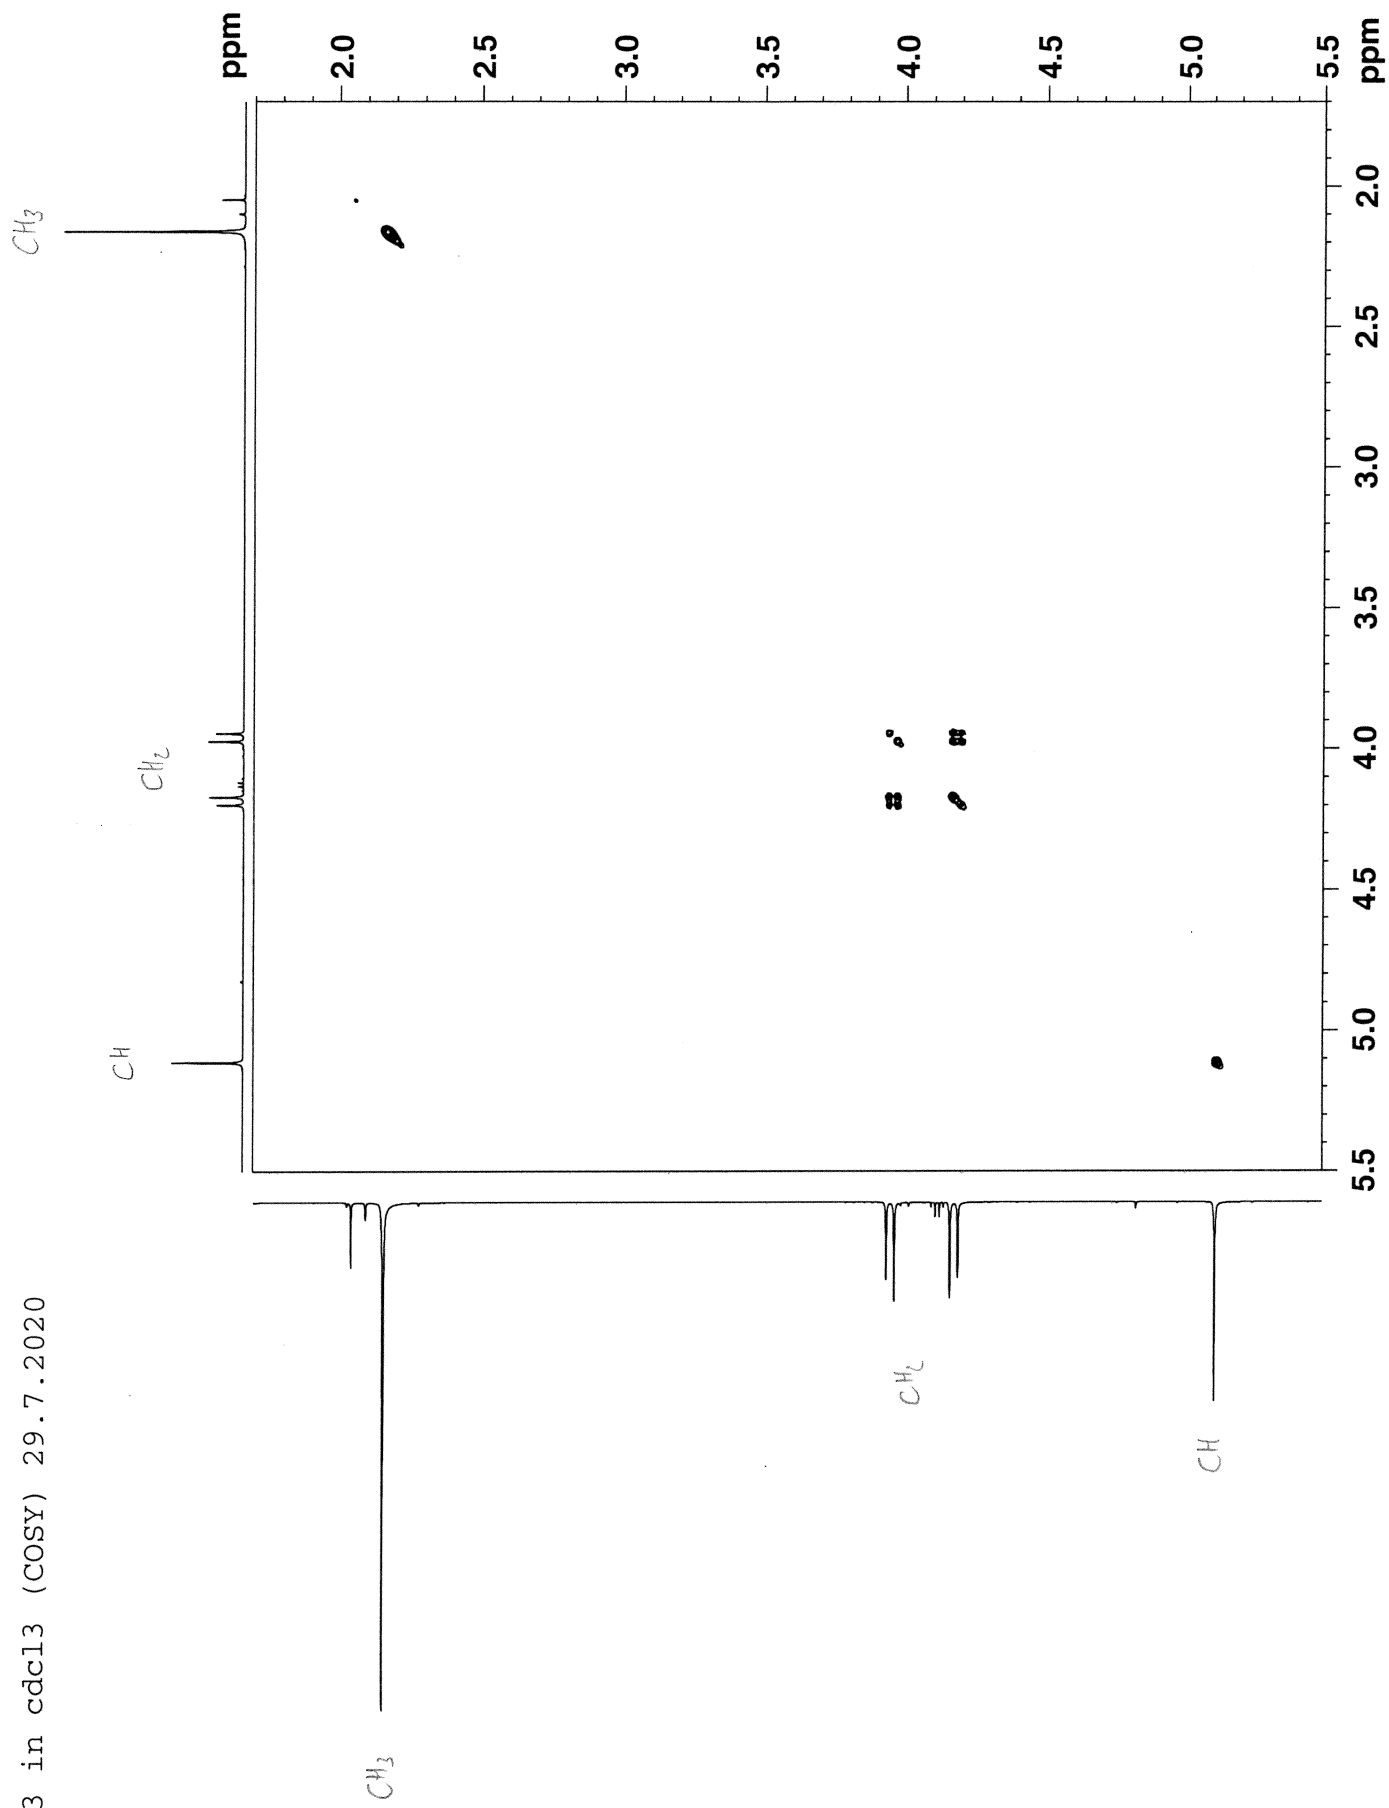

PN006-3 in cdcl3 (HSQC) 29.7.2020

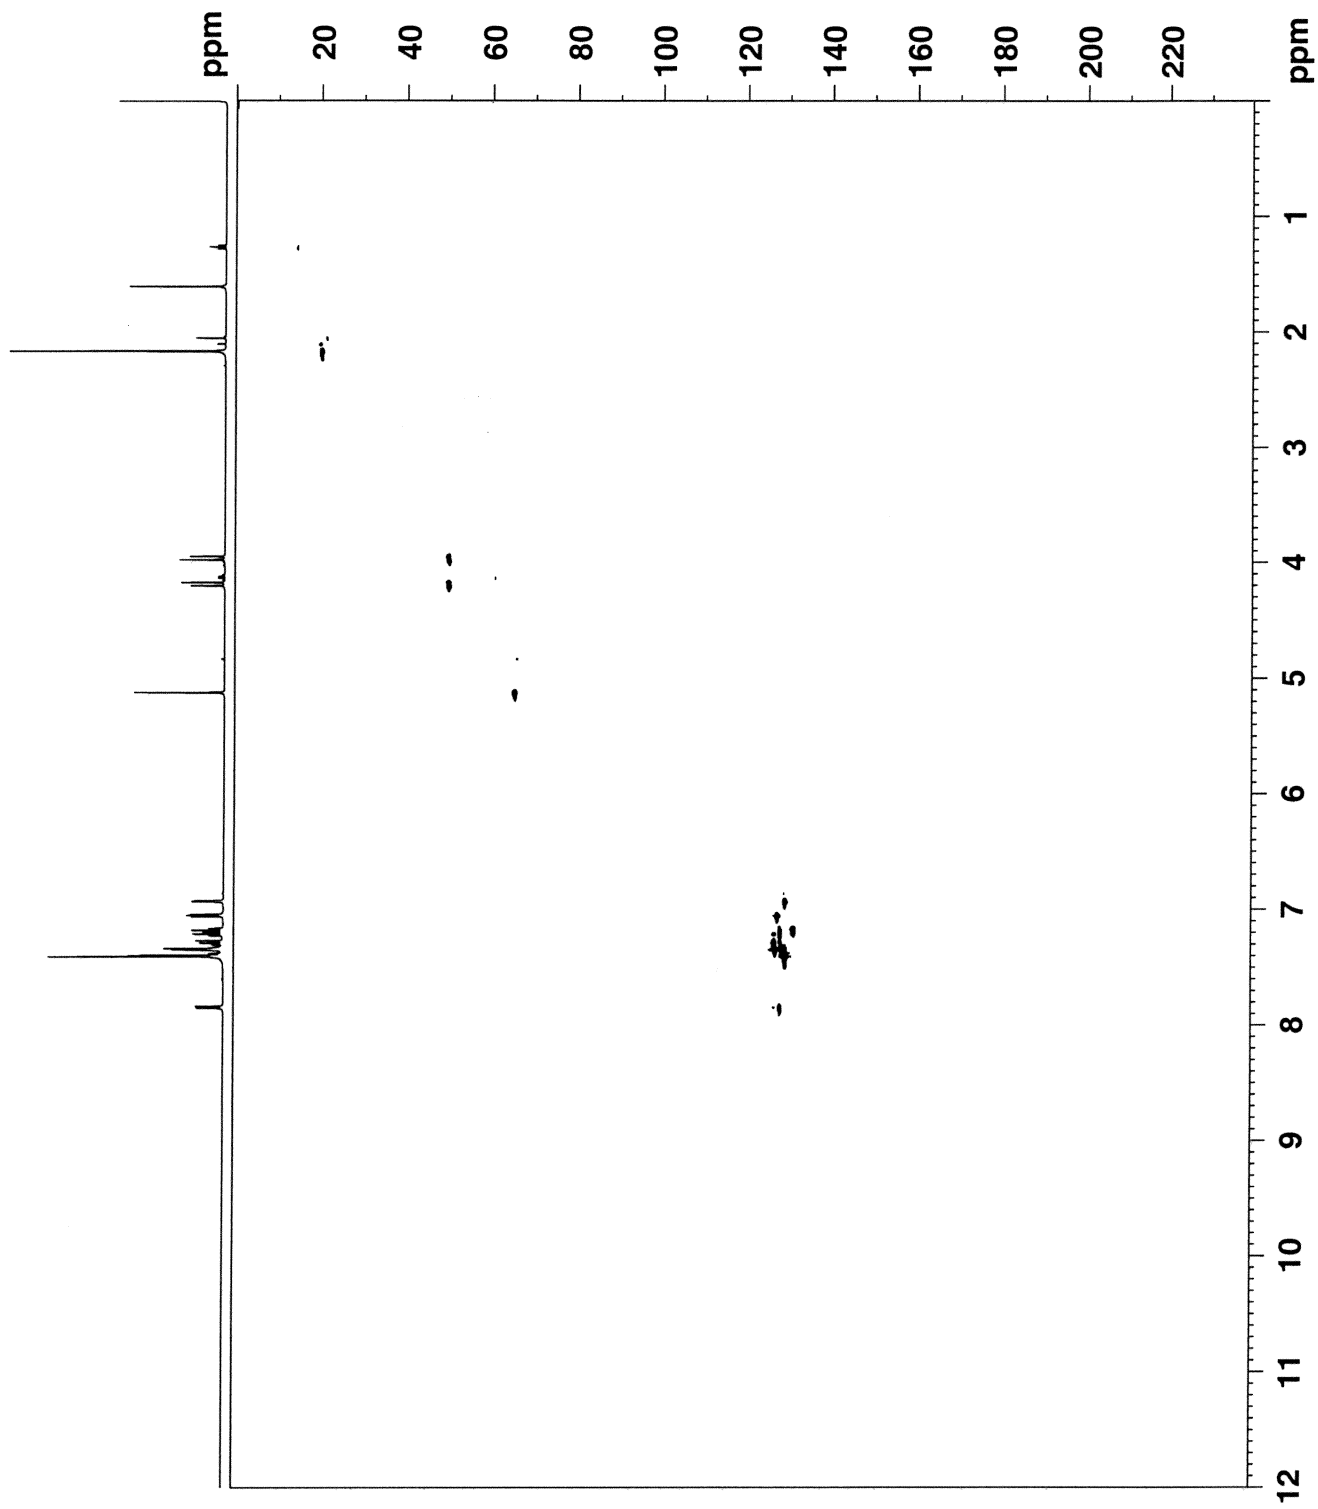

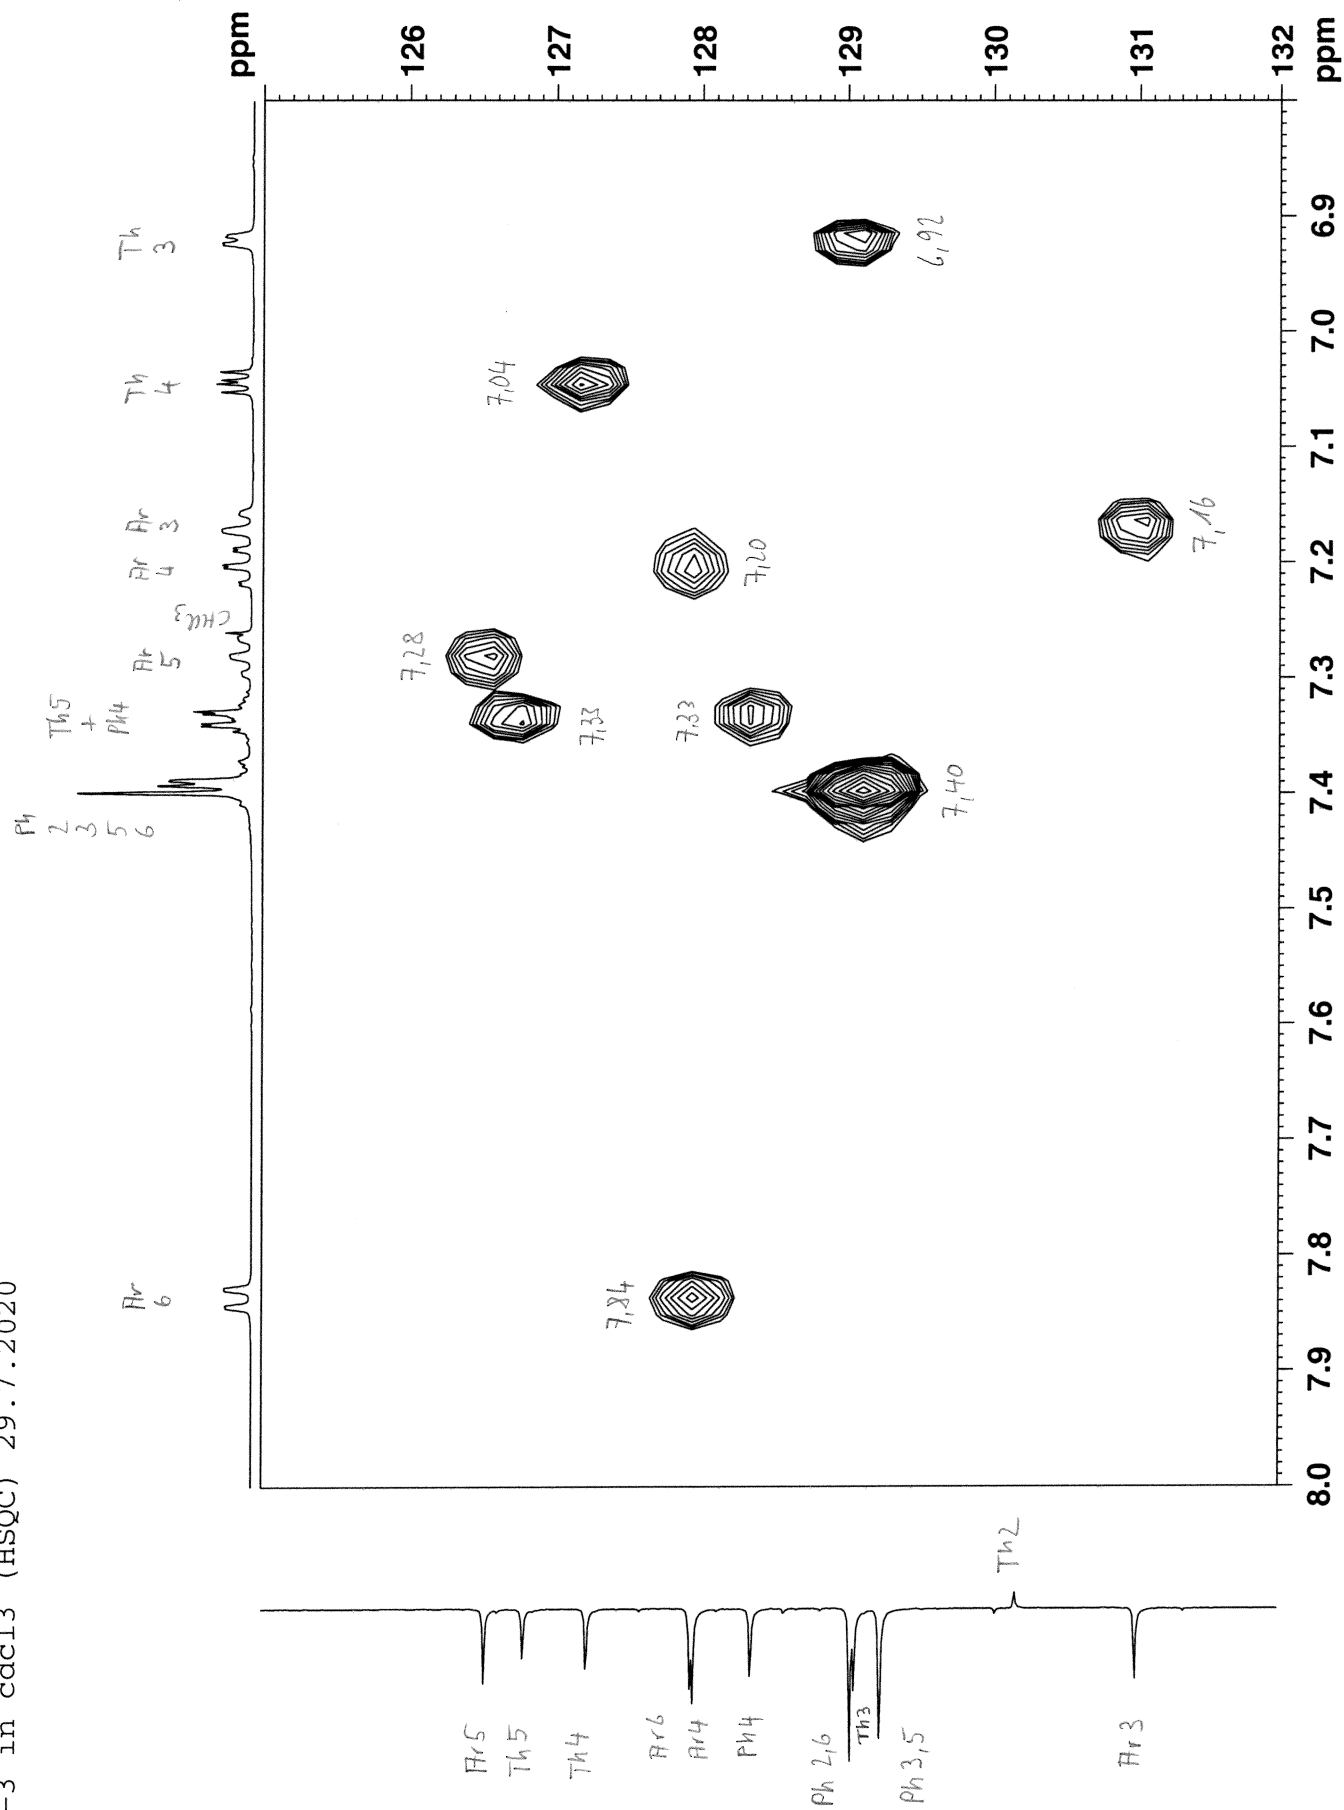

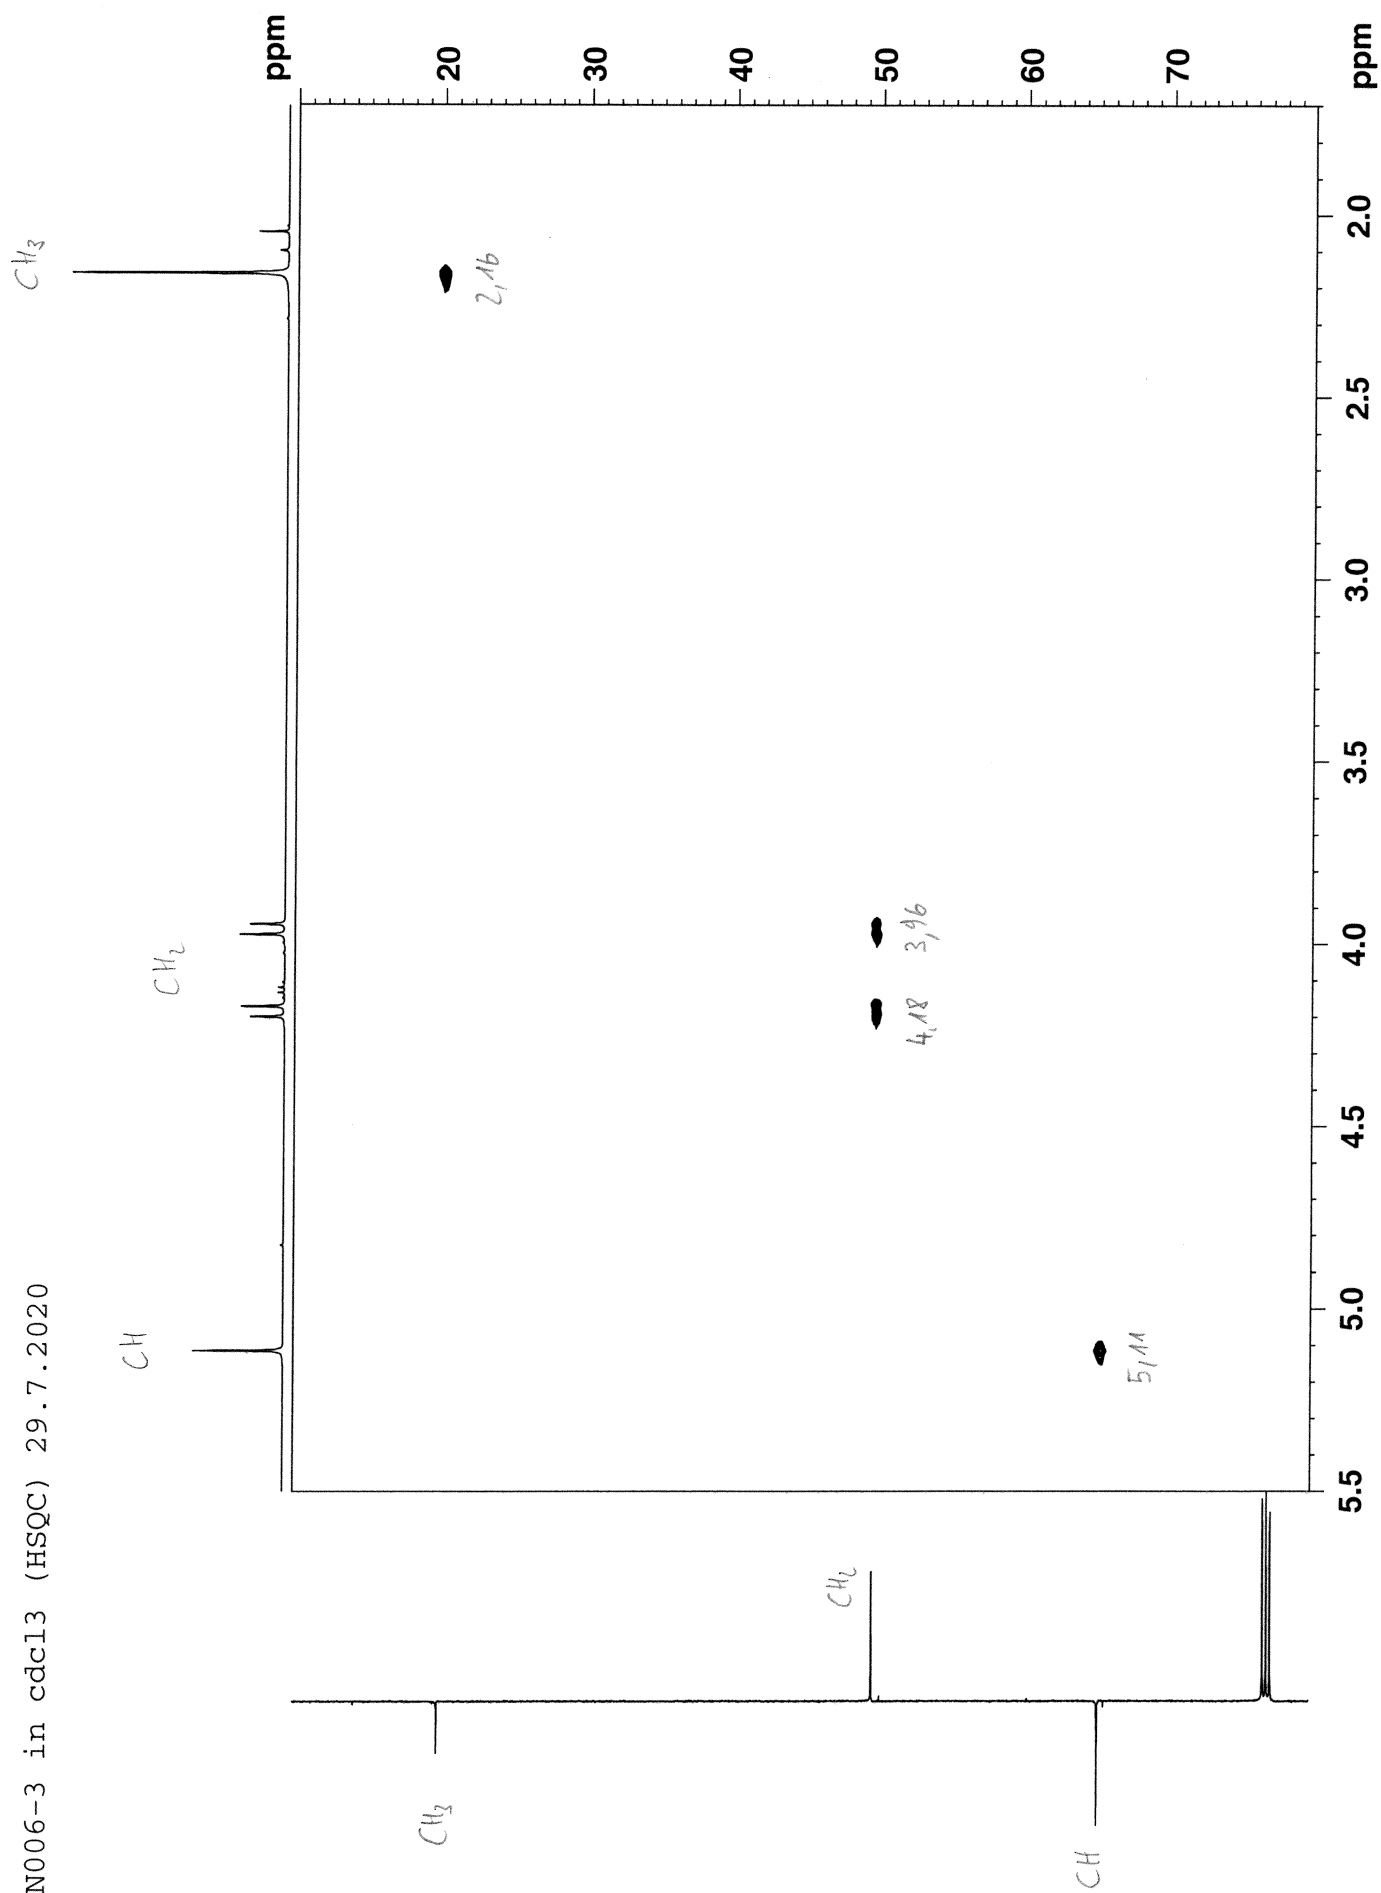

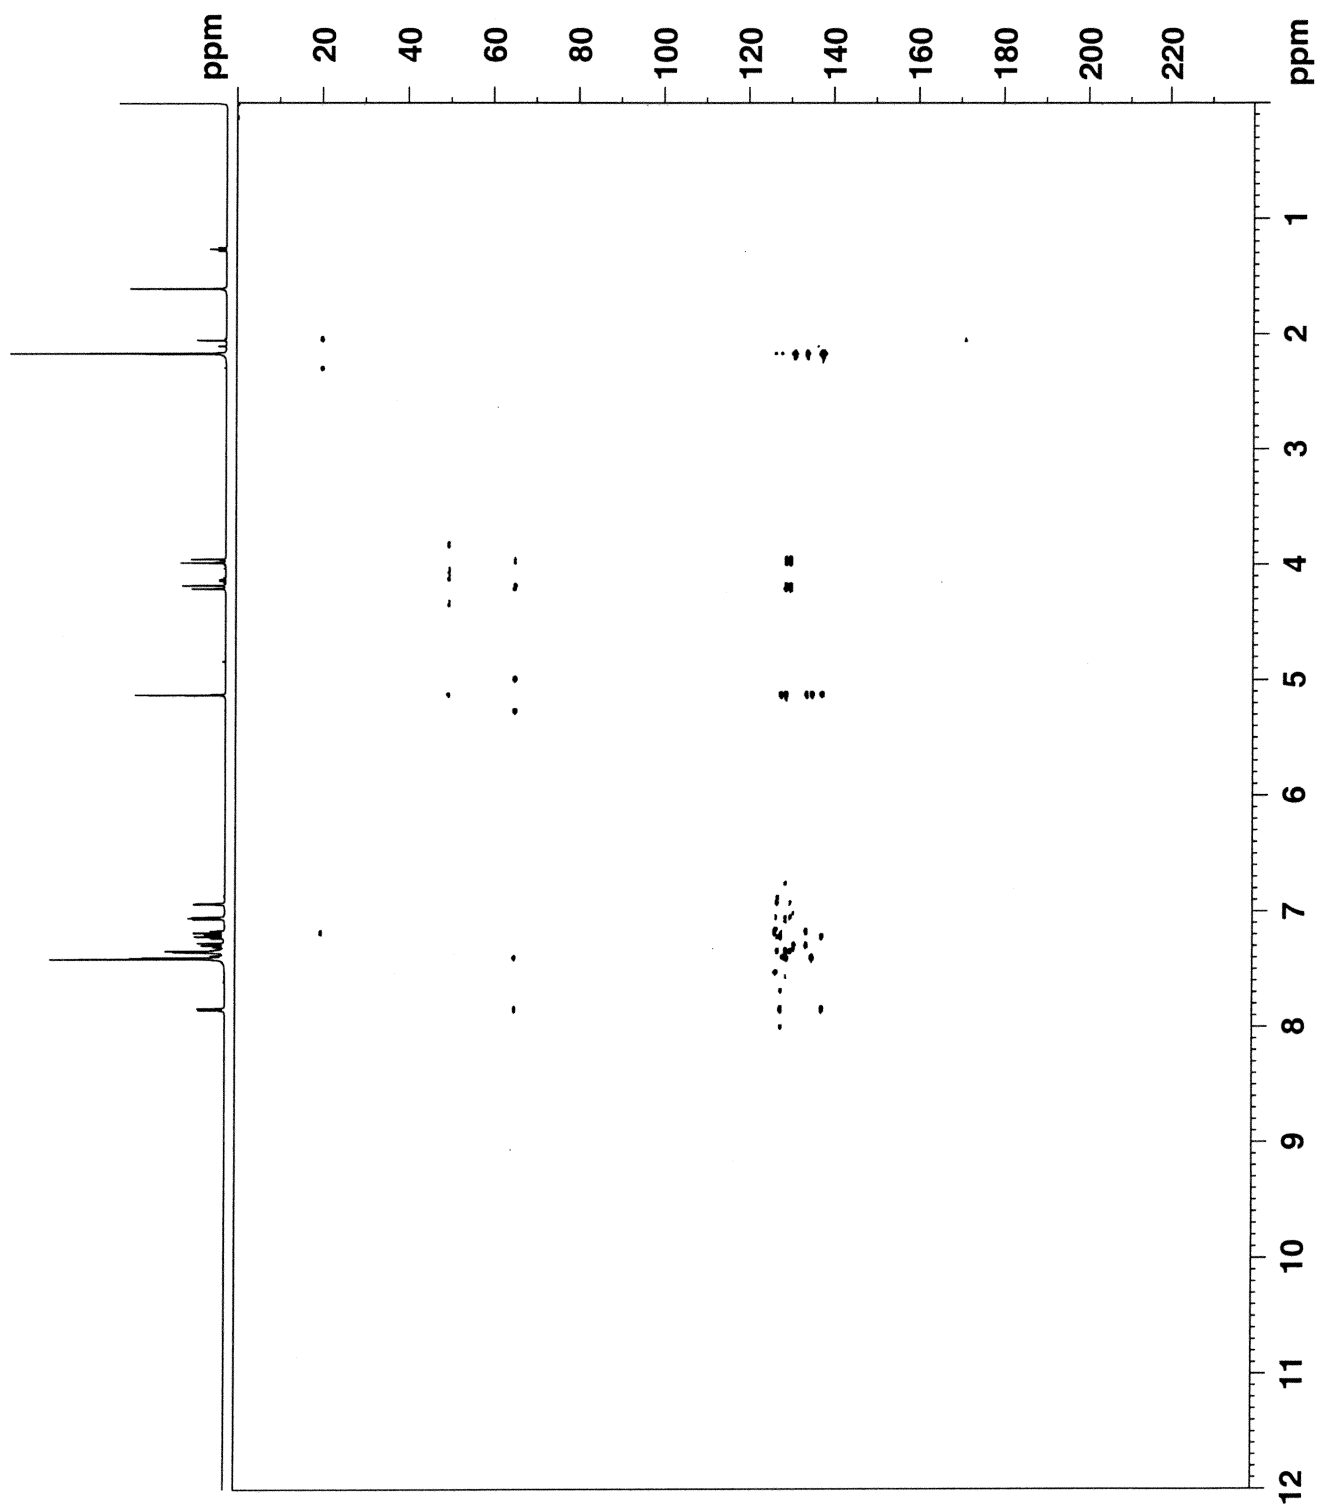

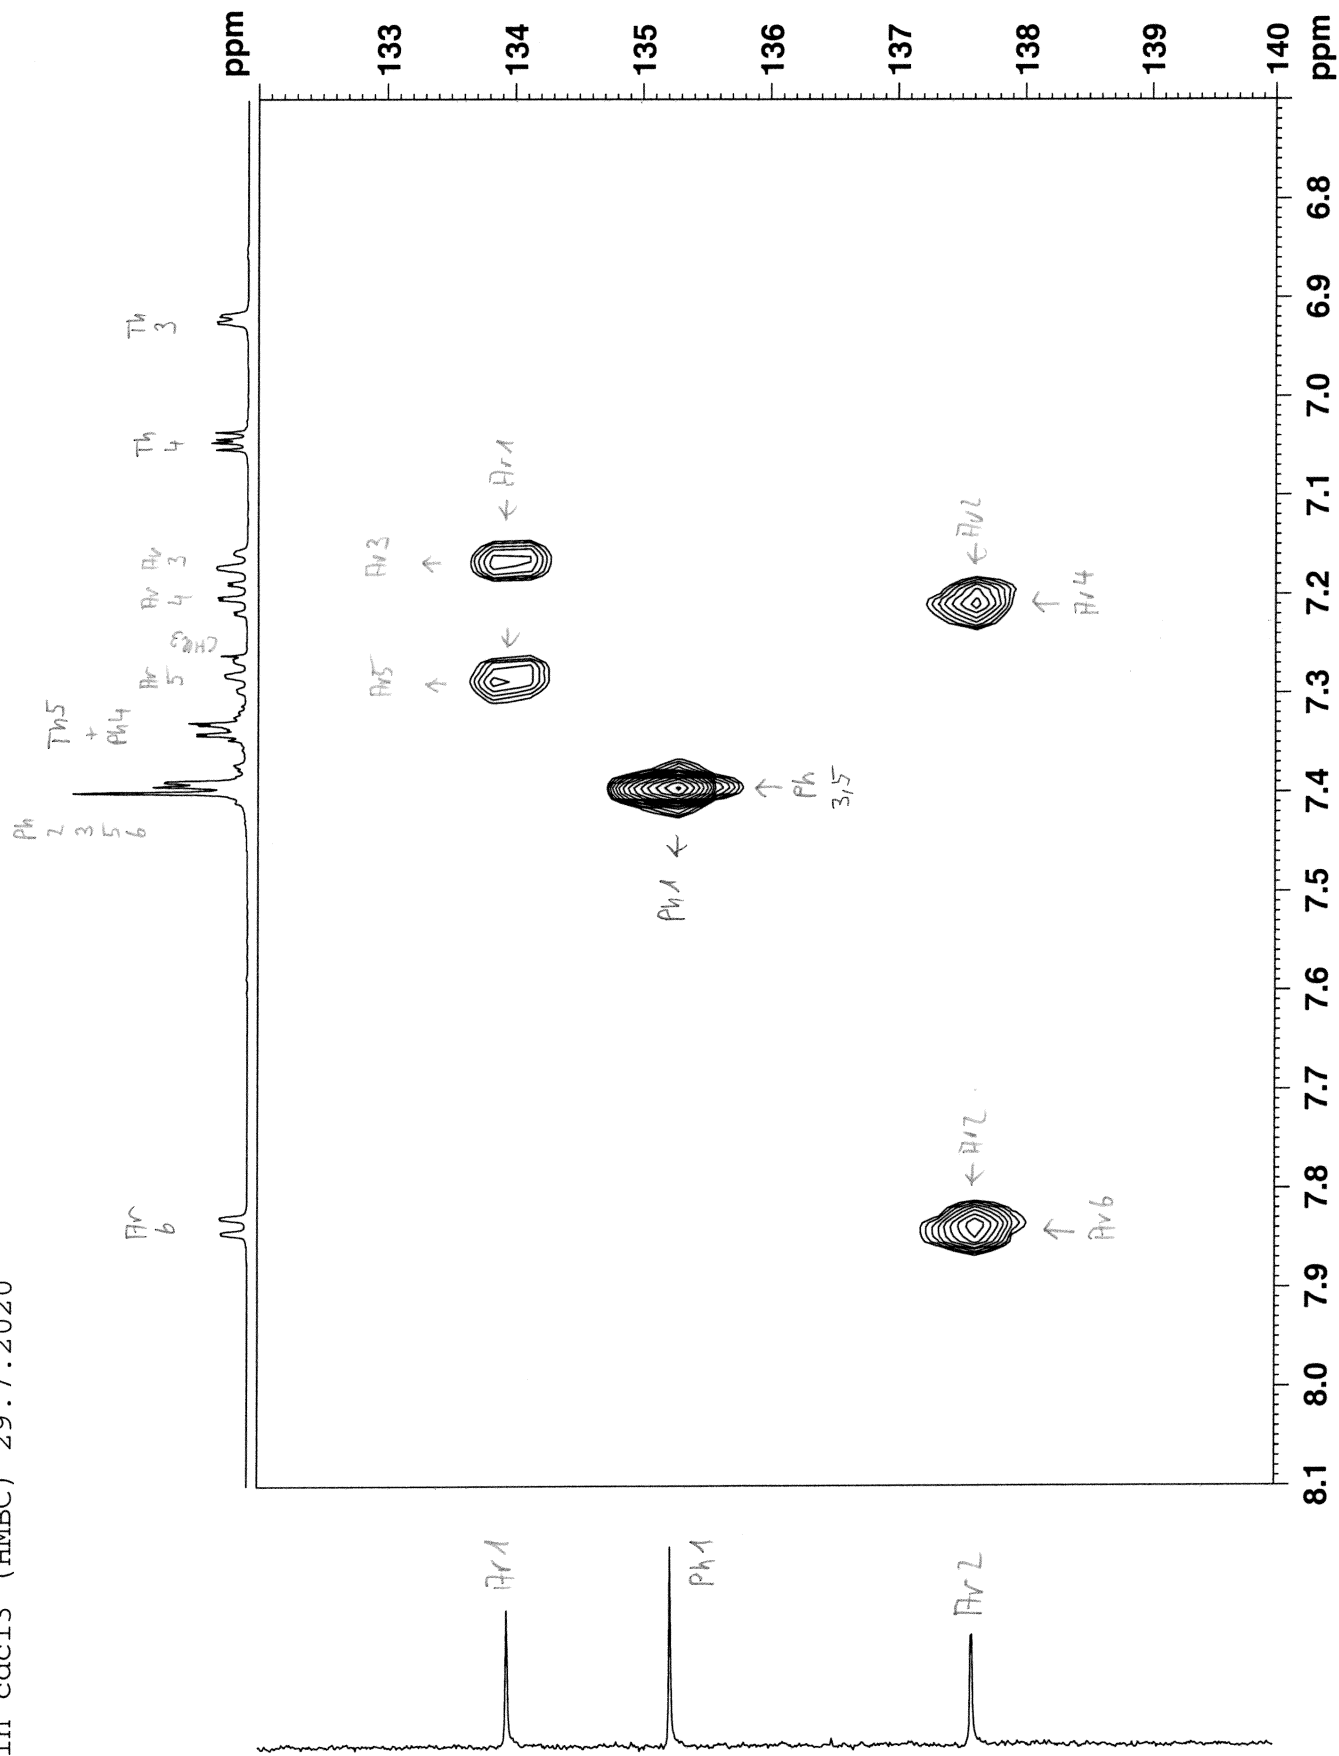

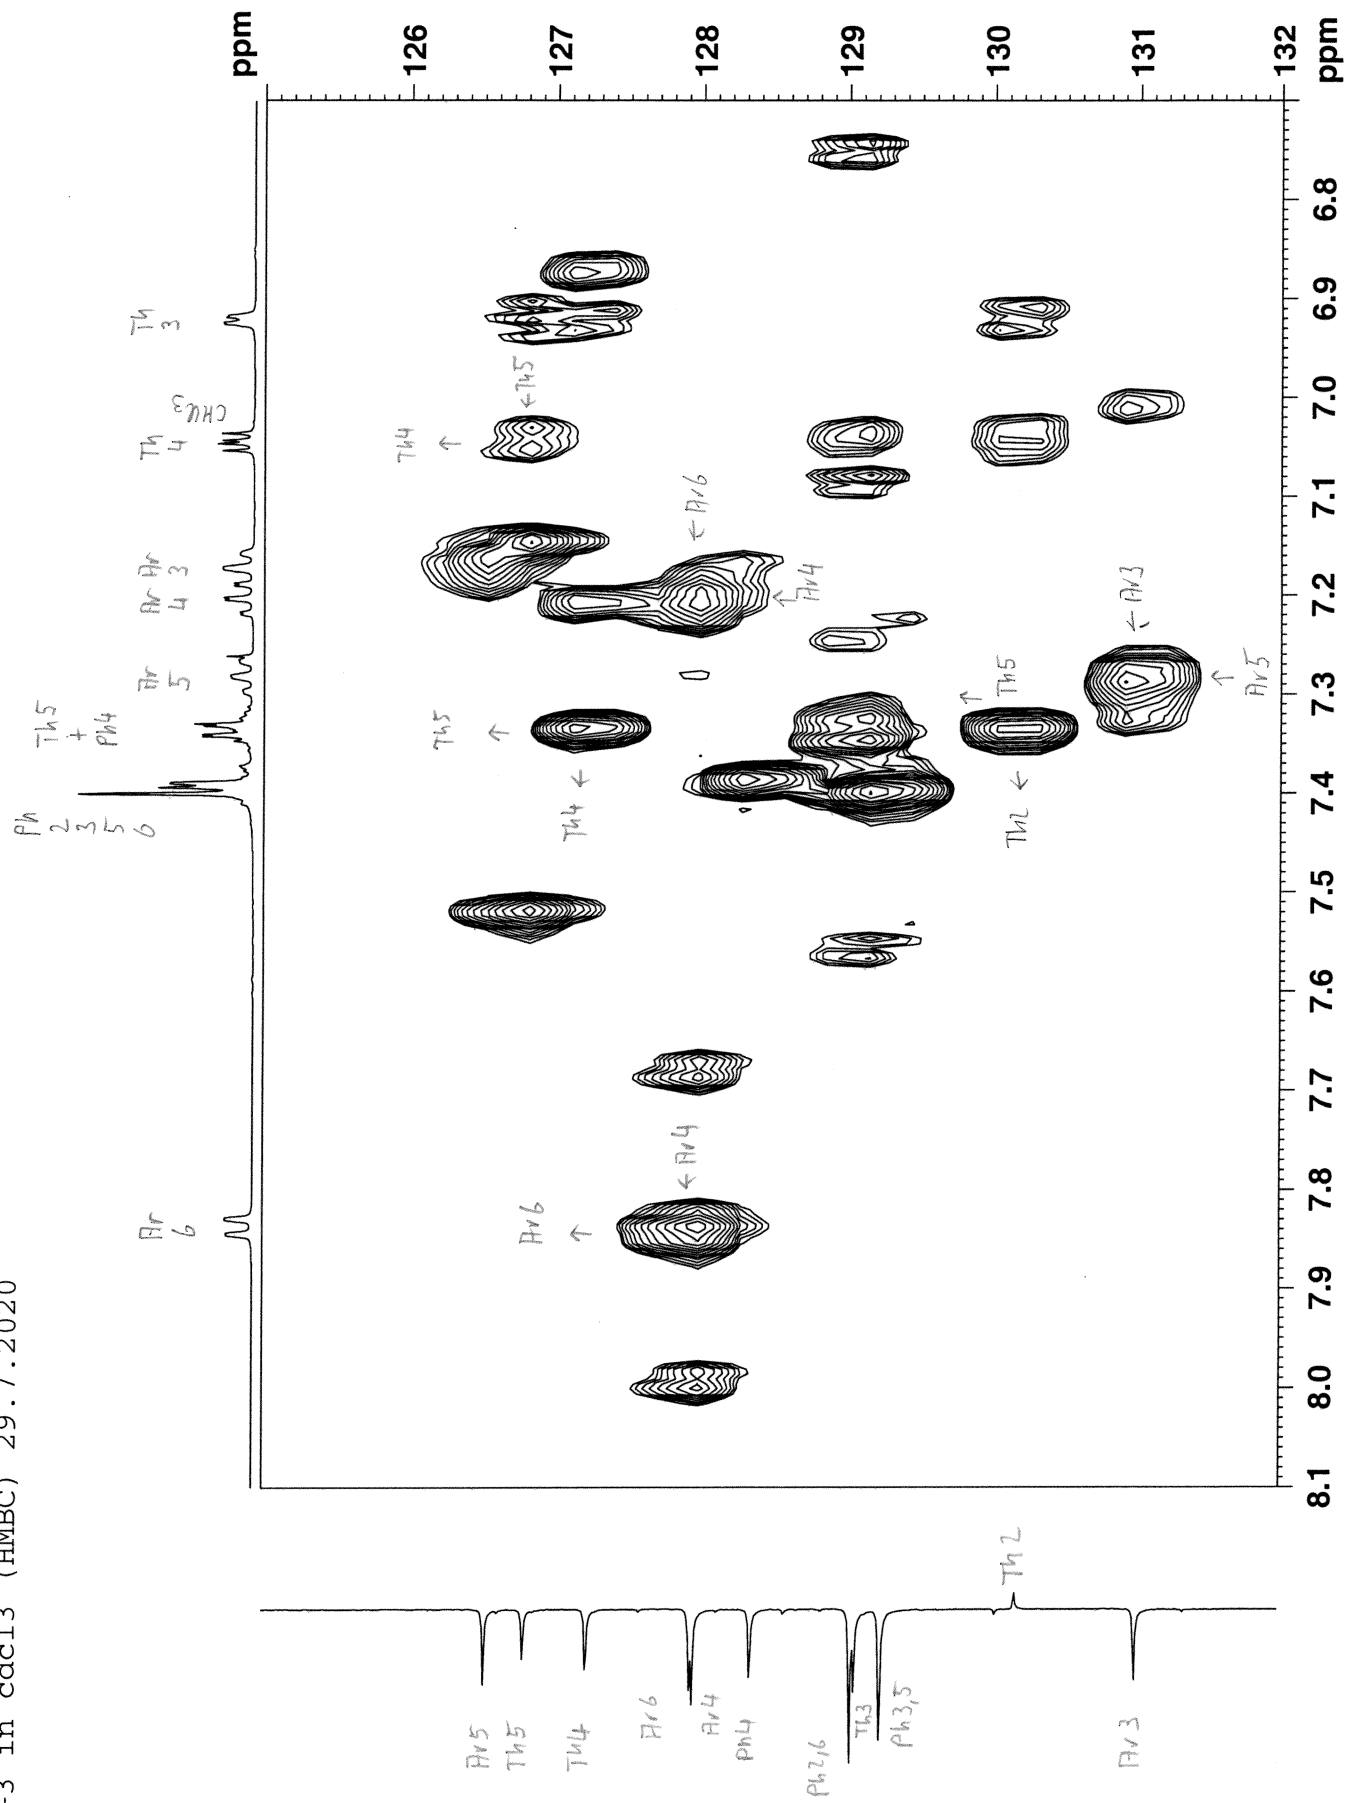



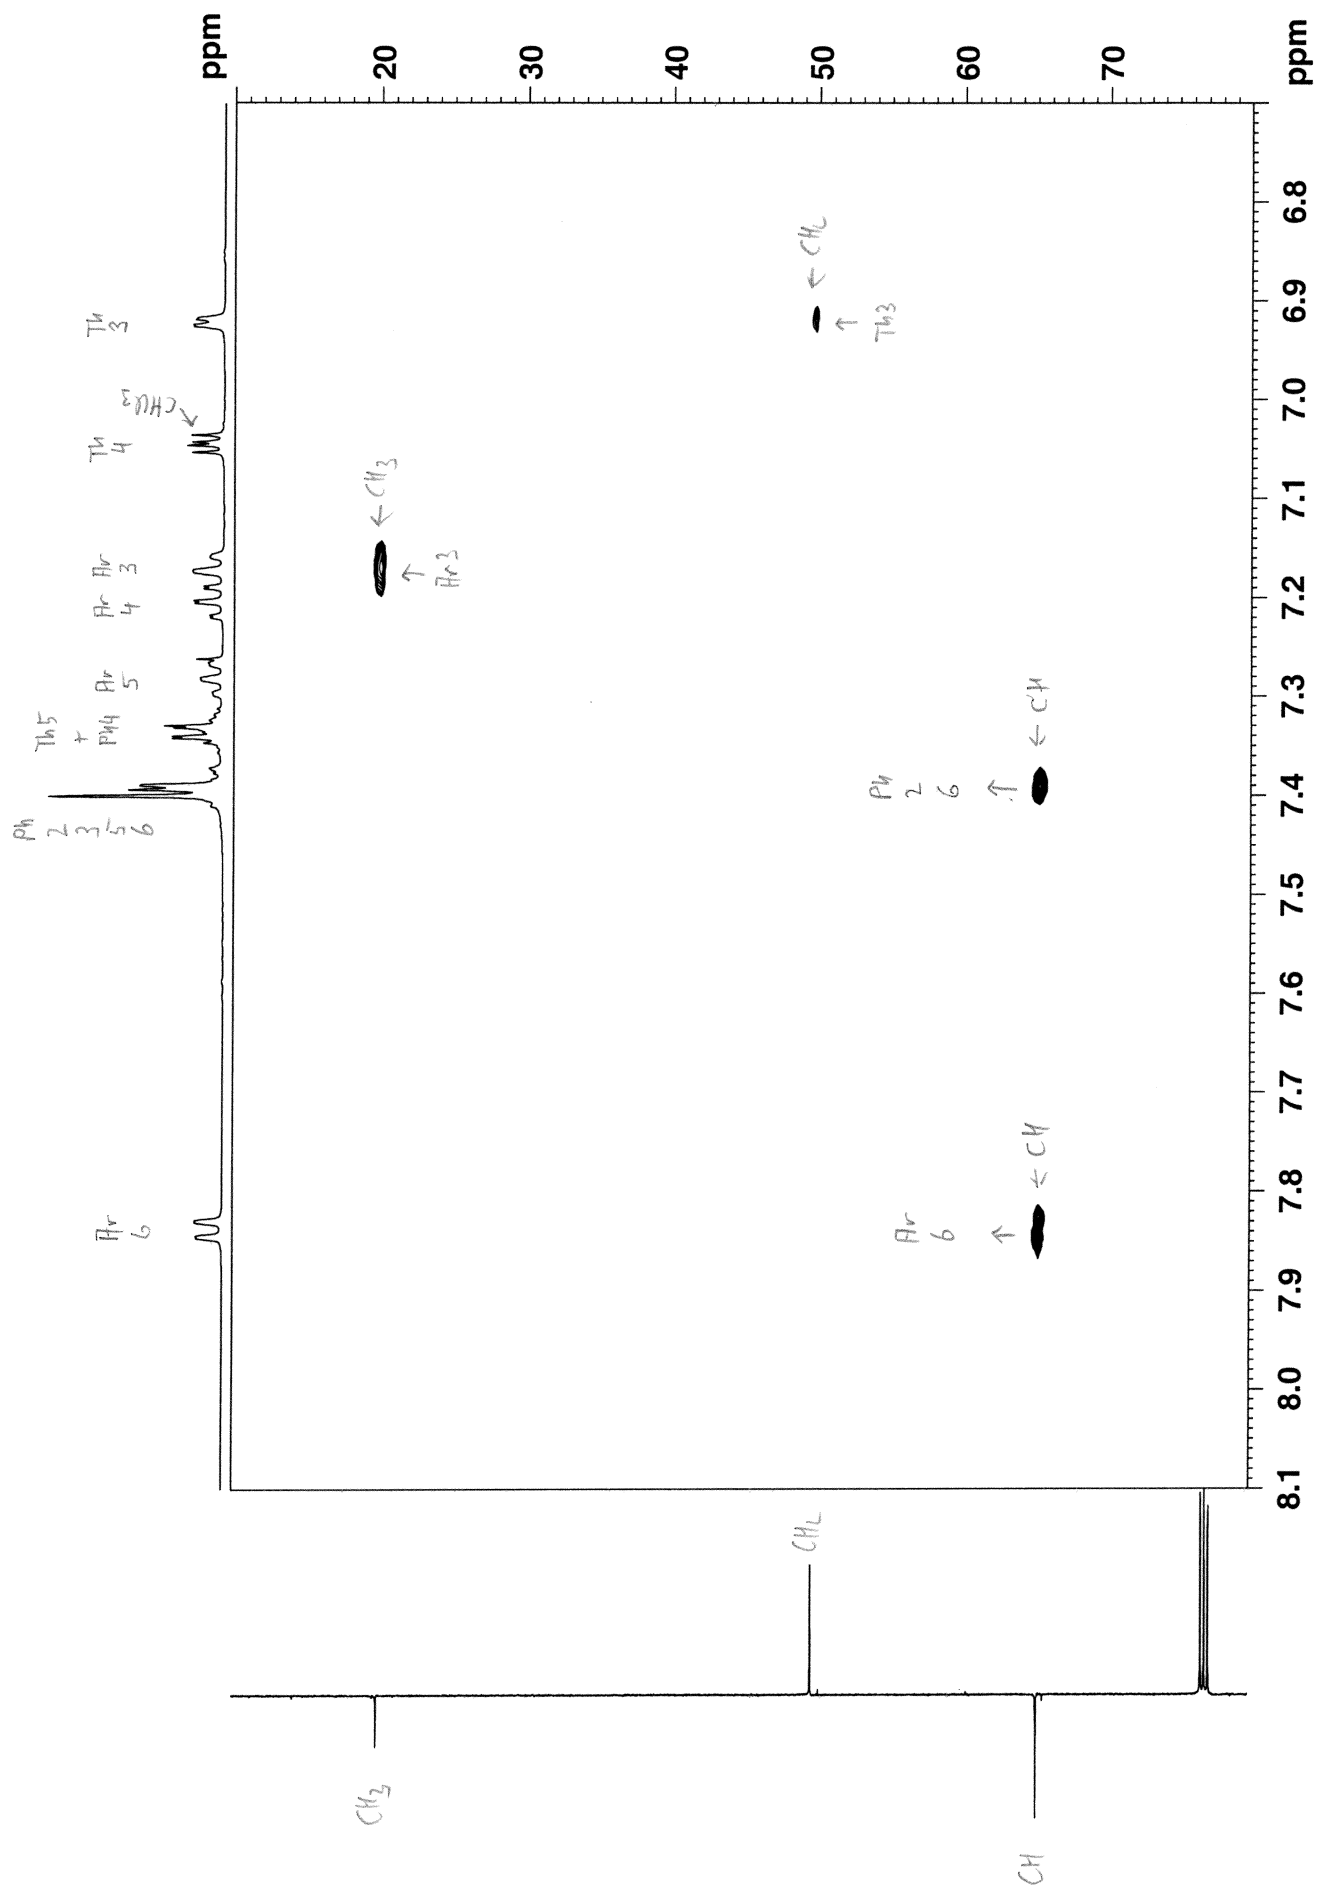

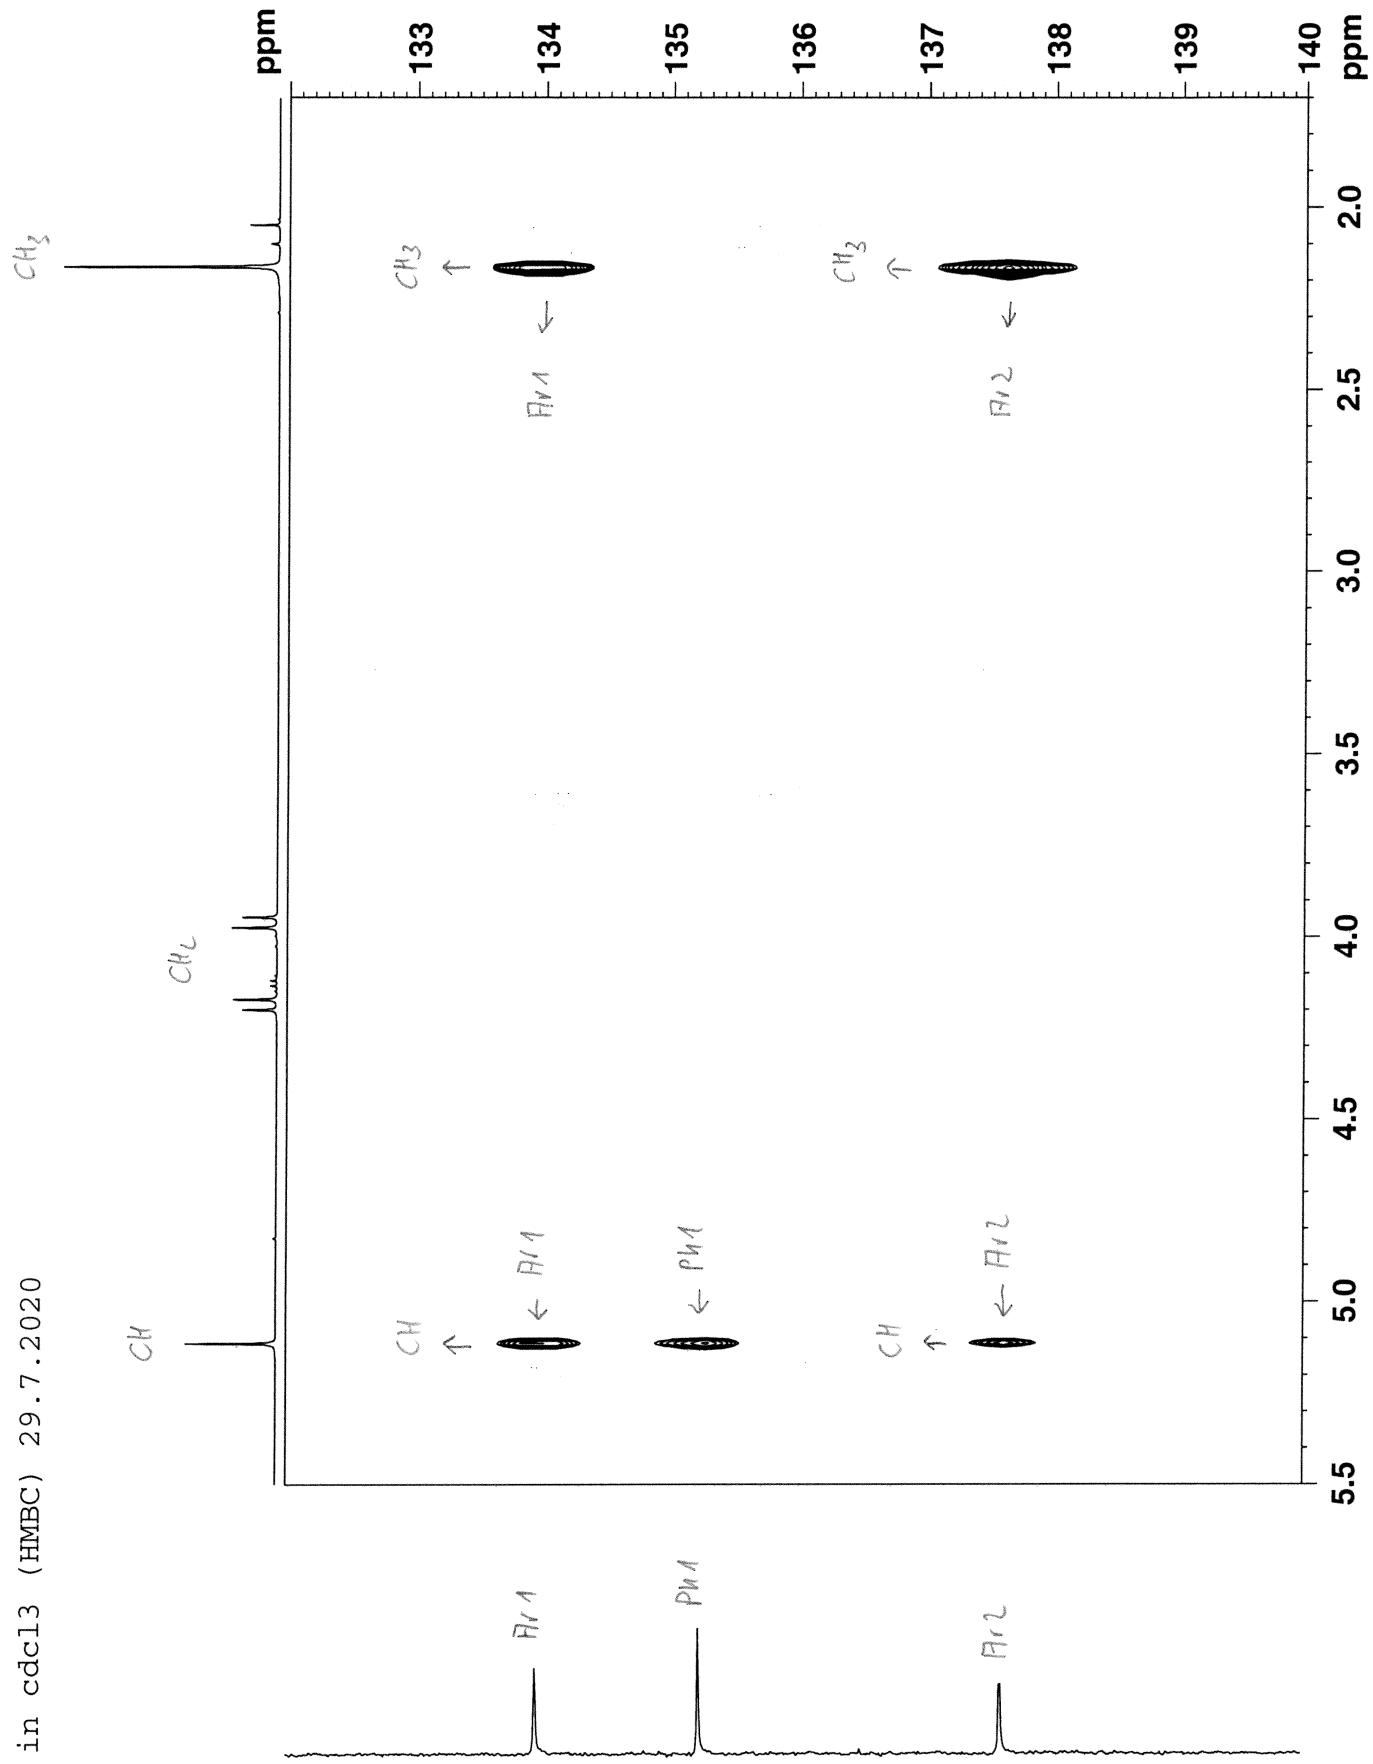

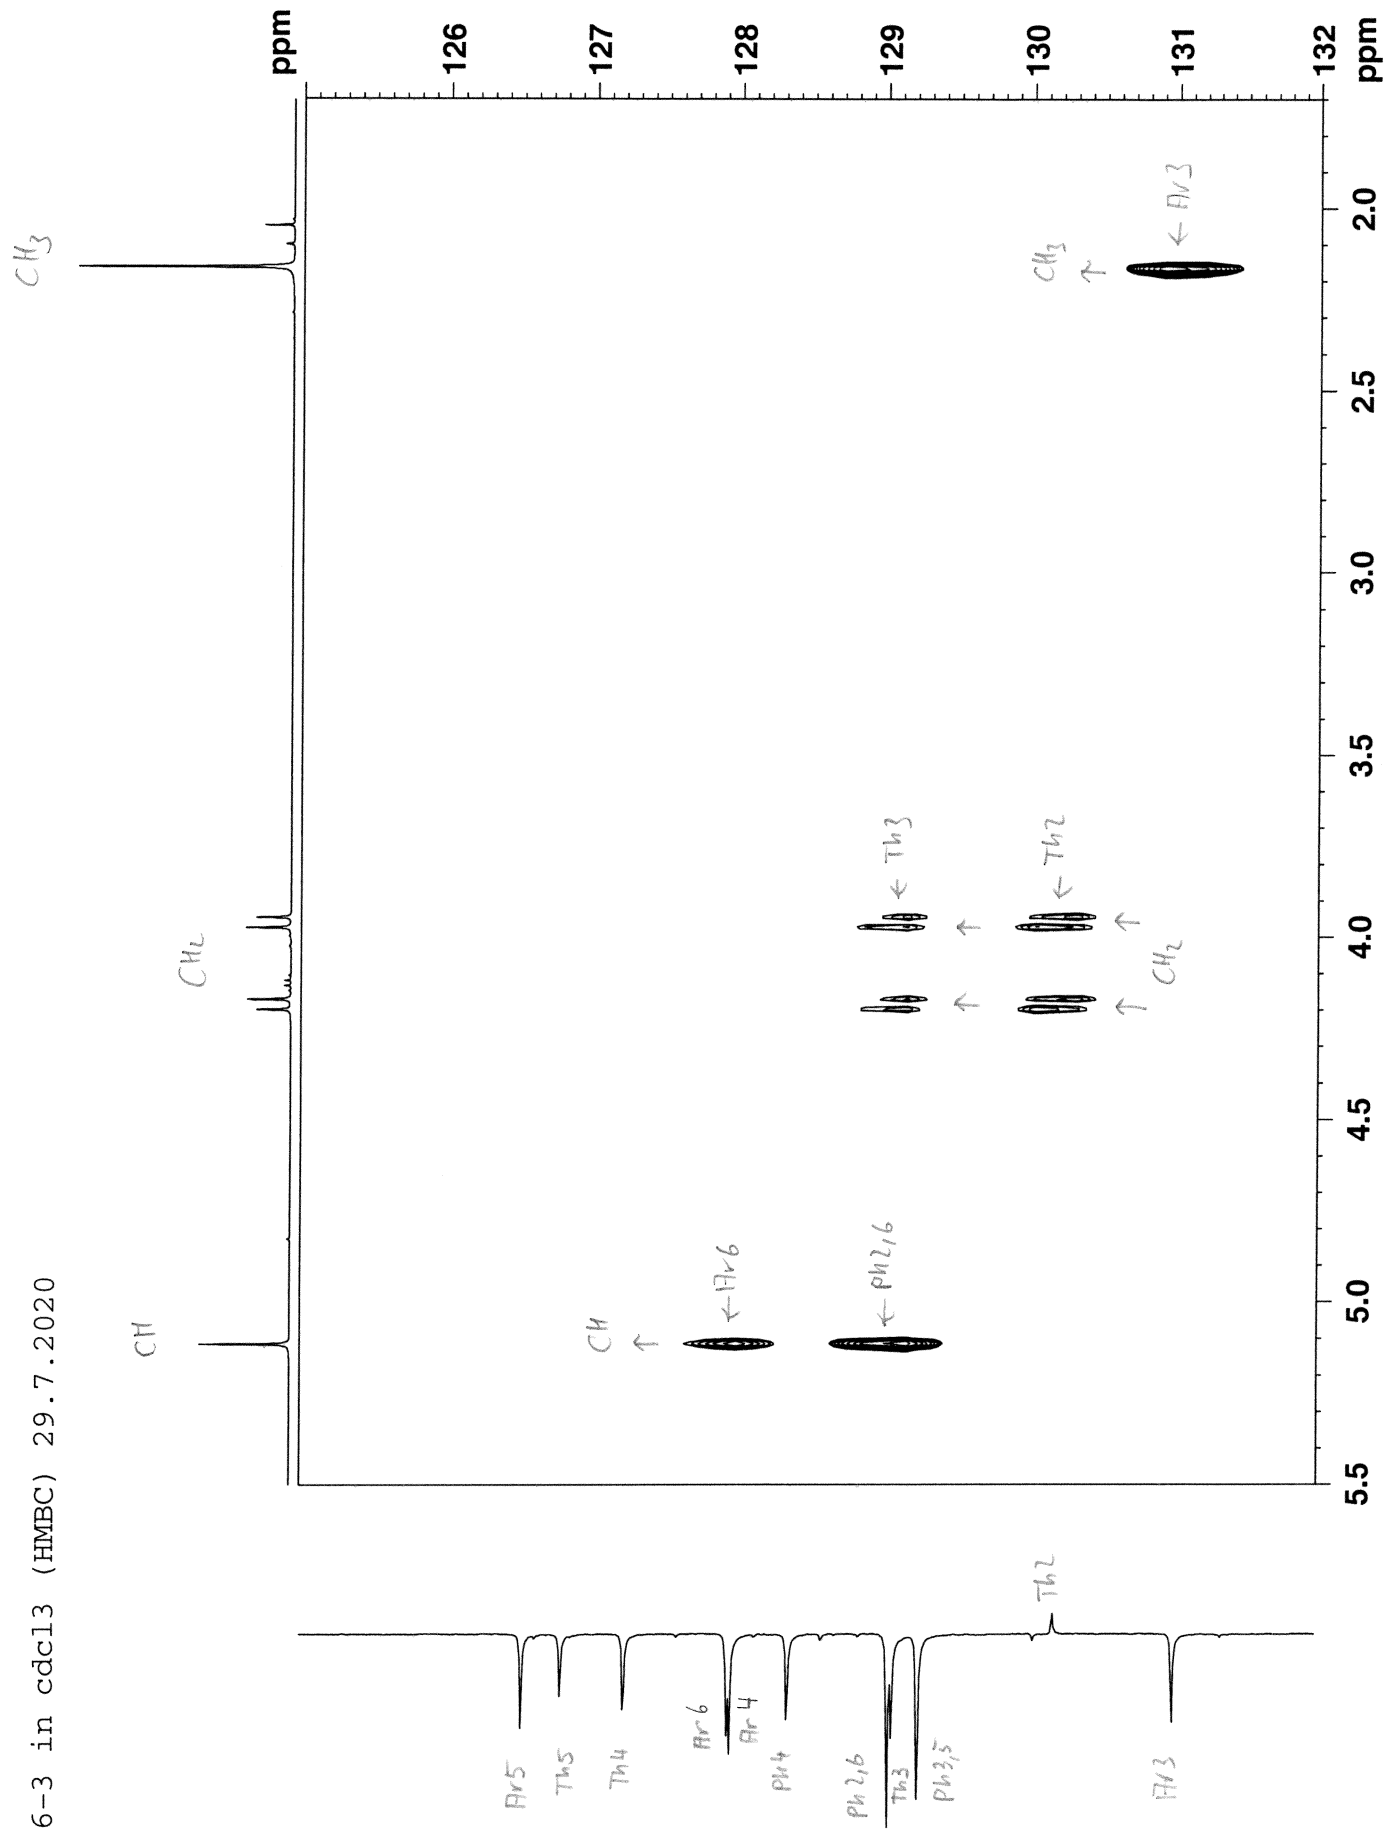

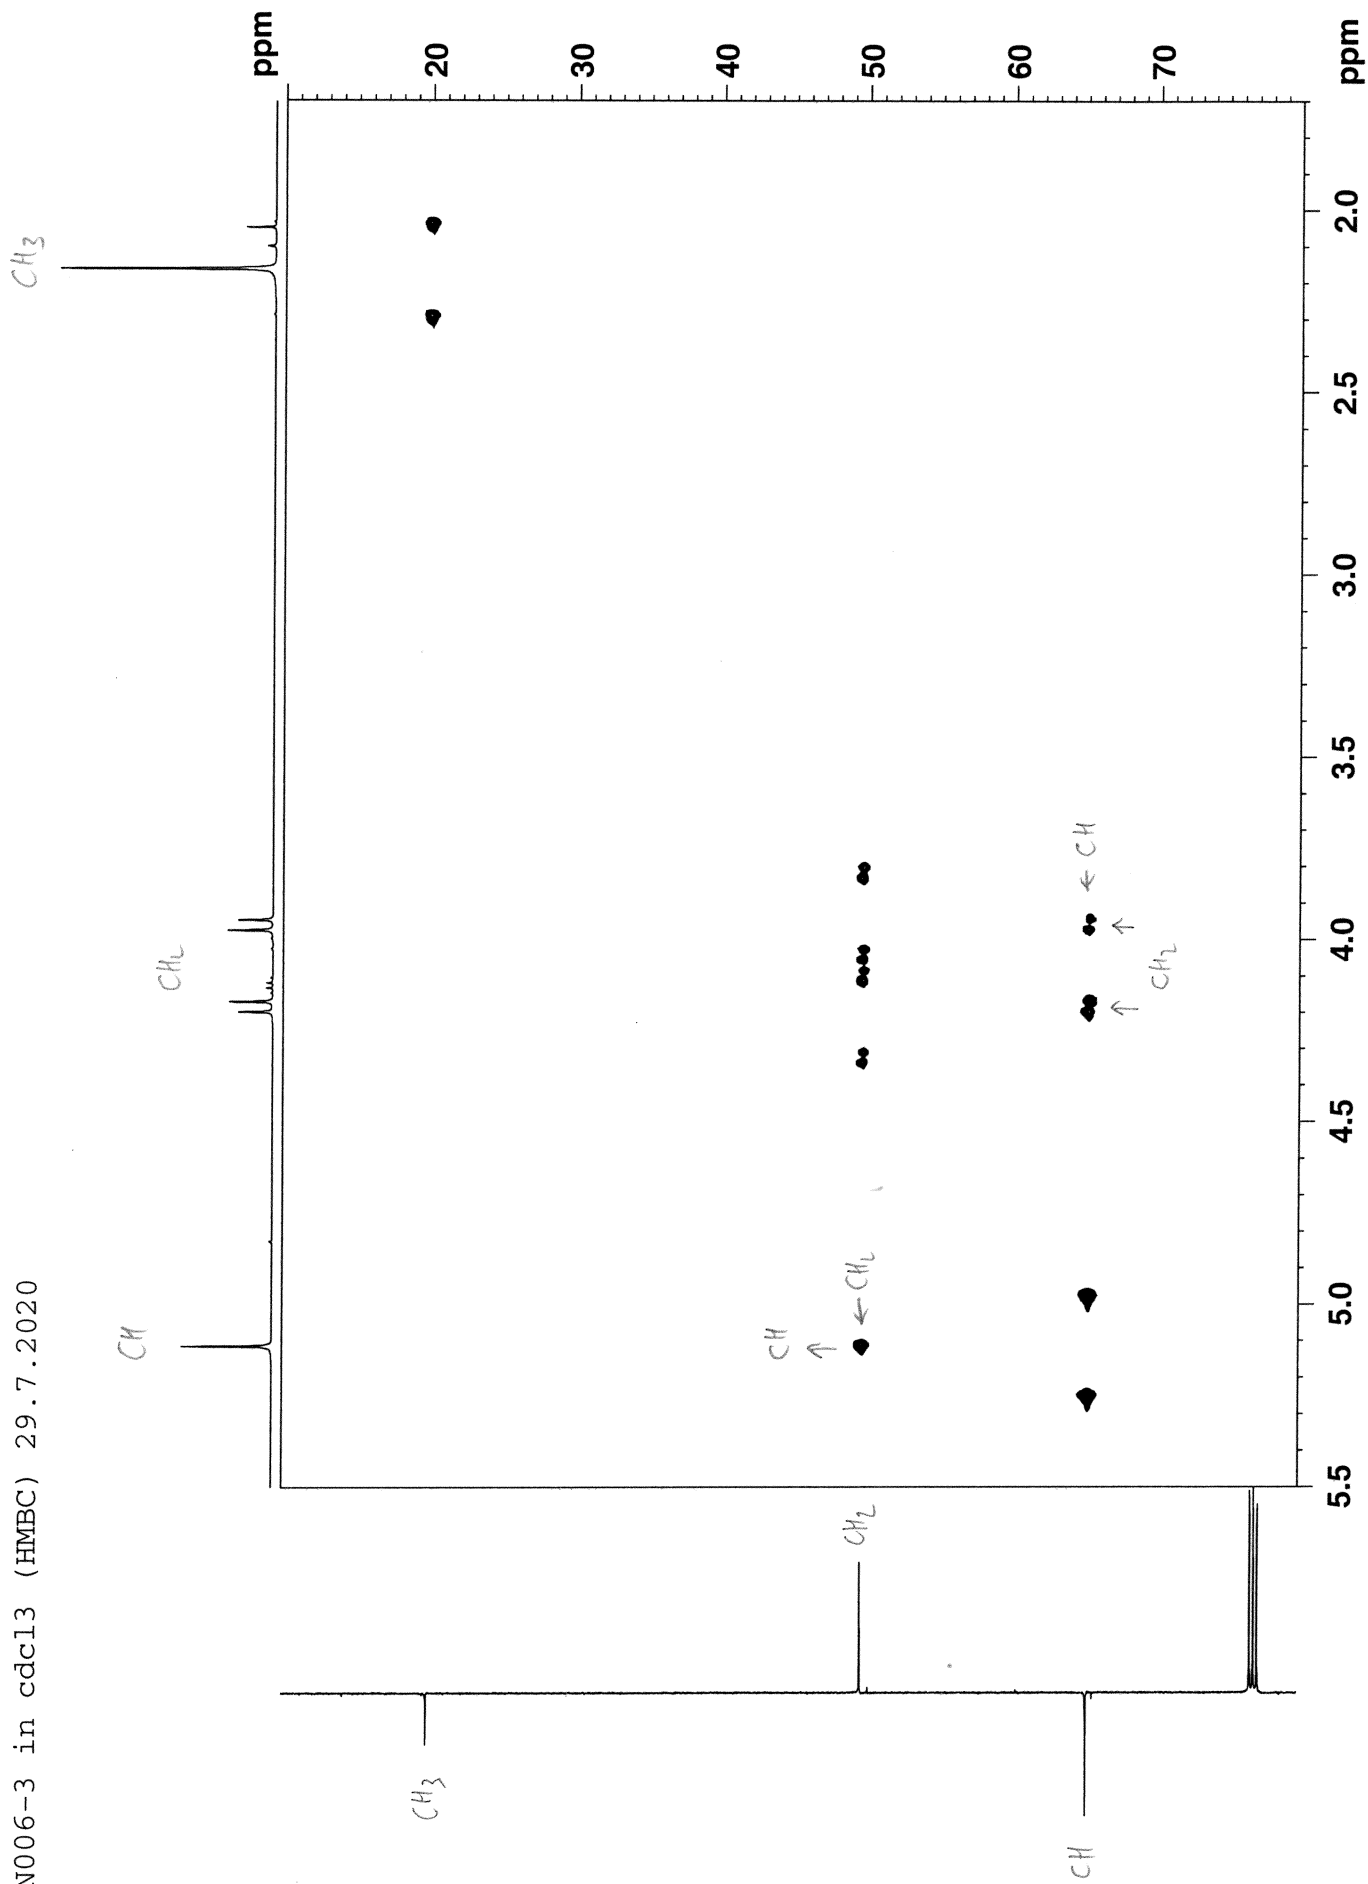

**Figure S48c.** NMR spectra of compound **8l**.

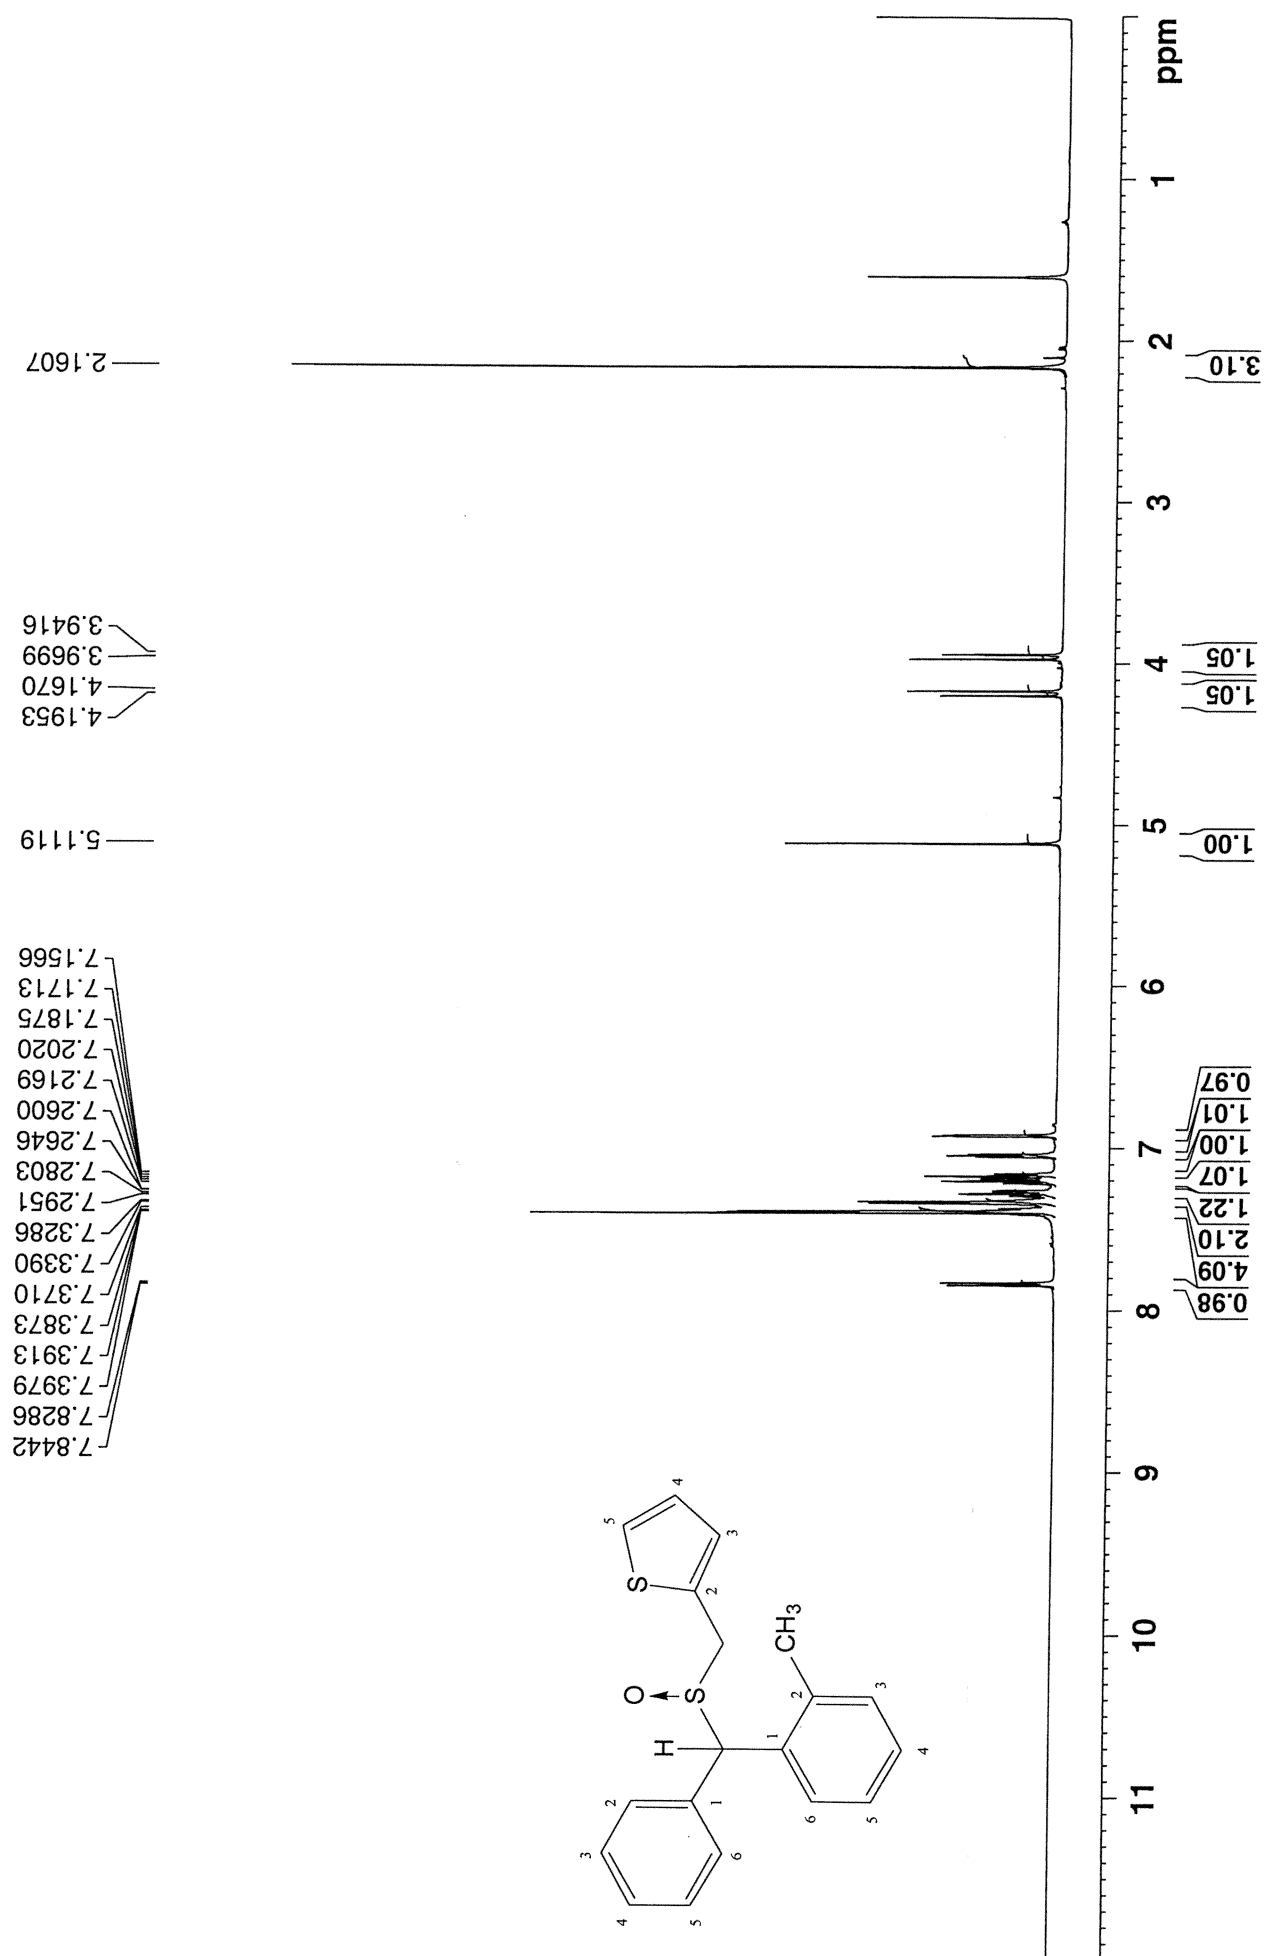

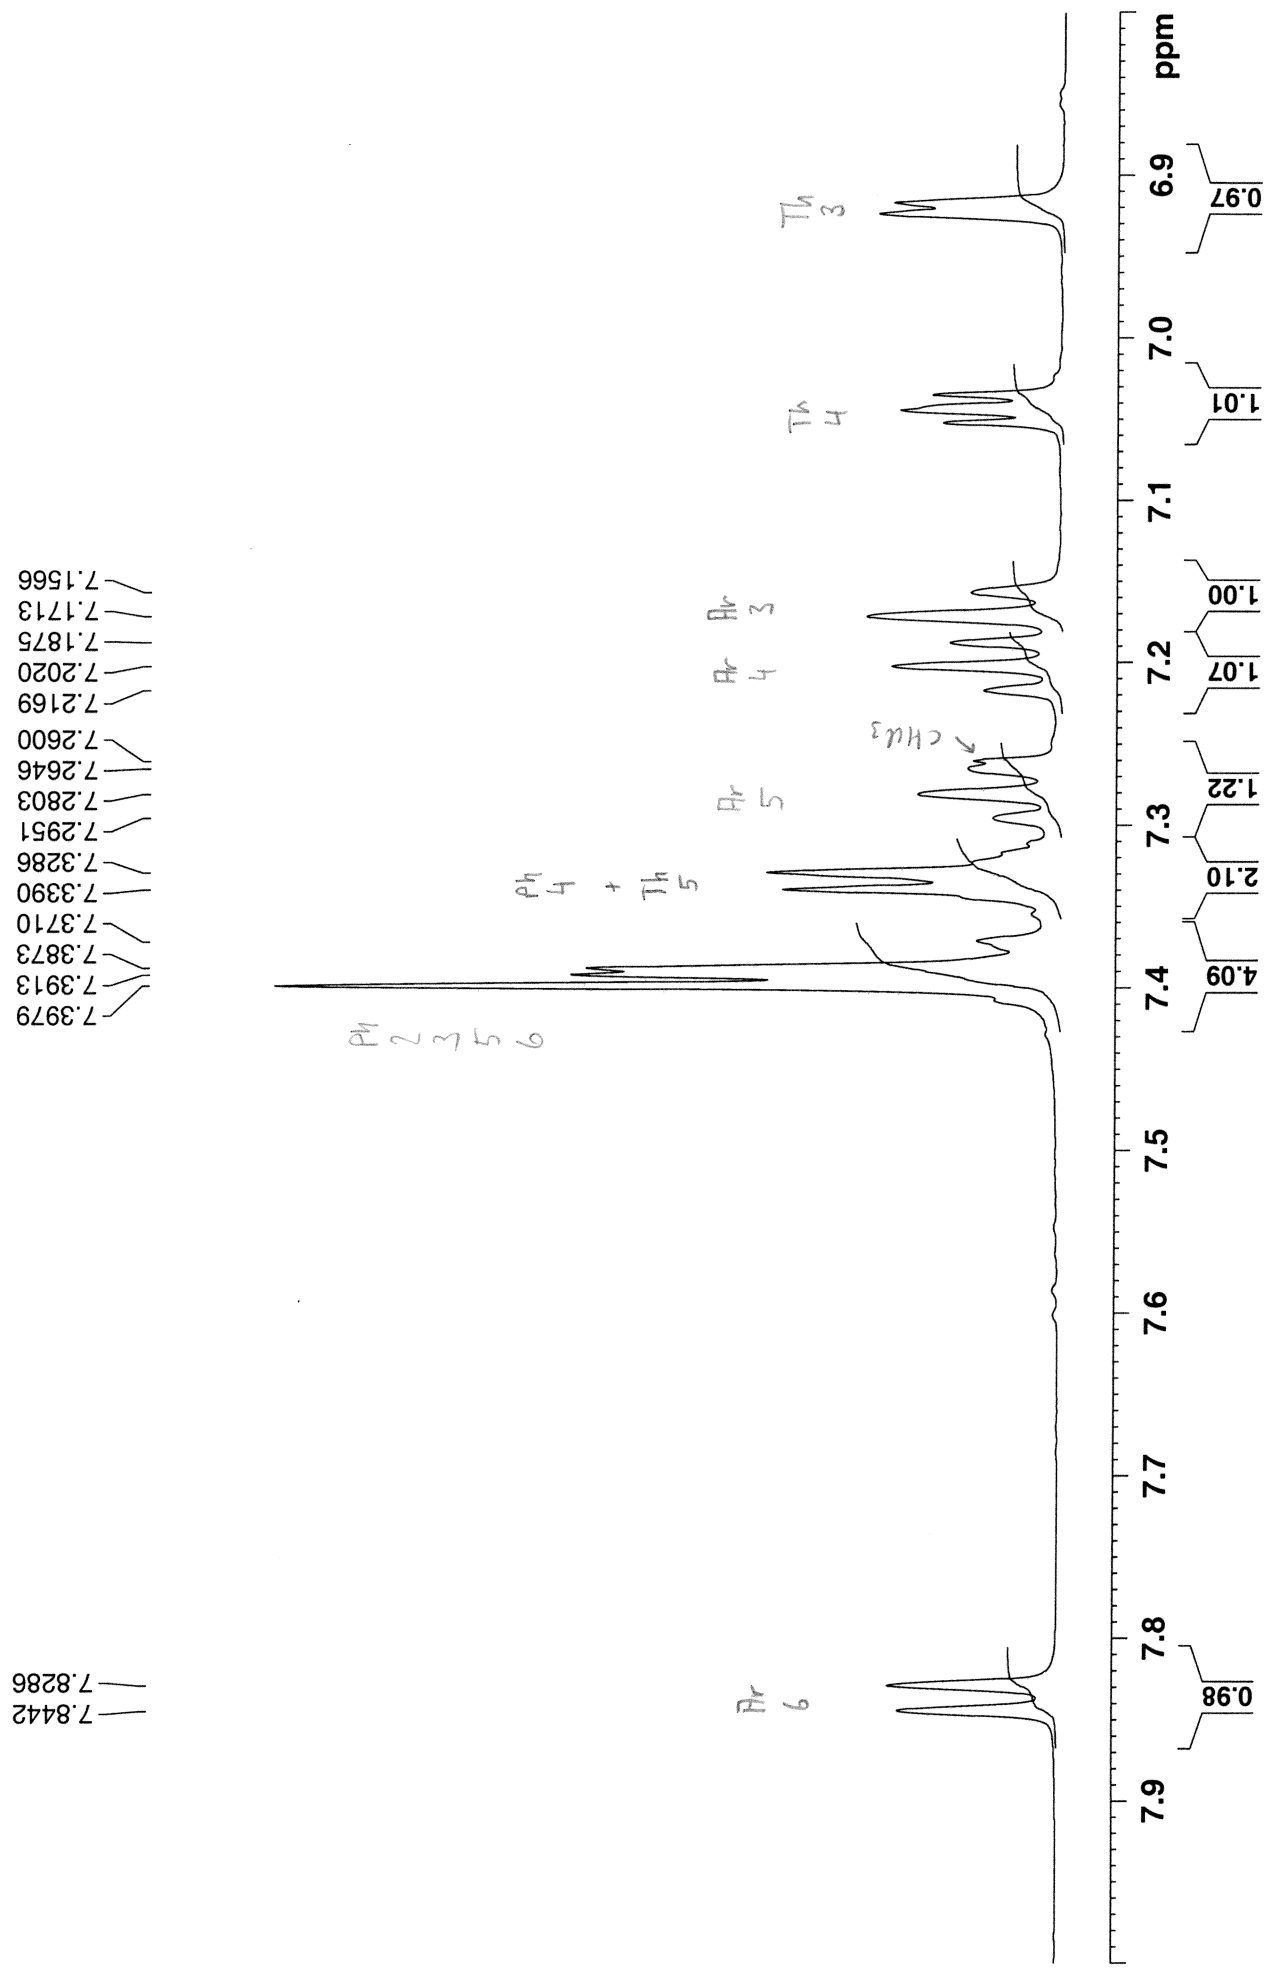

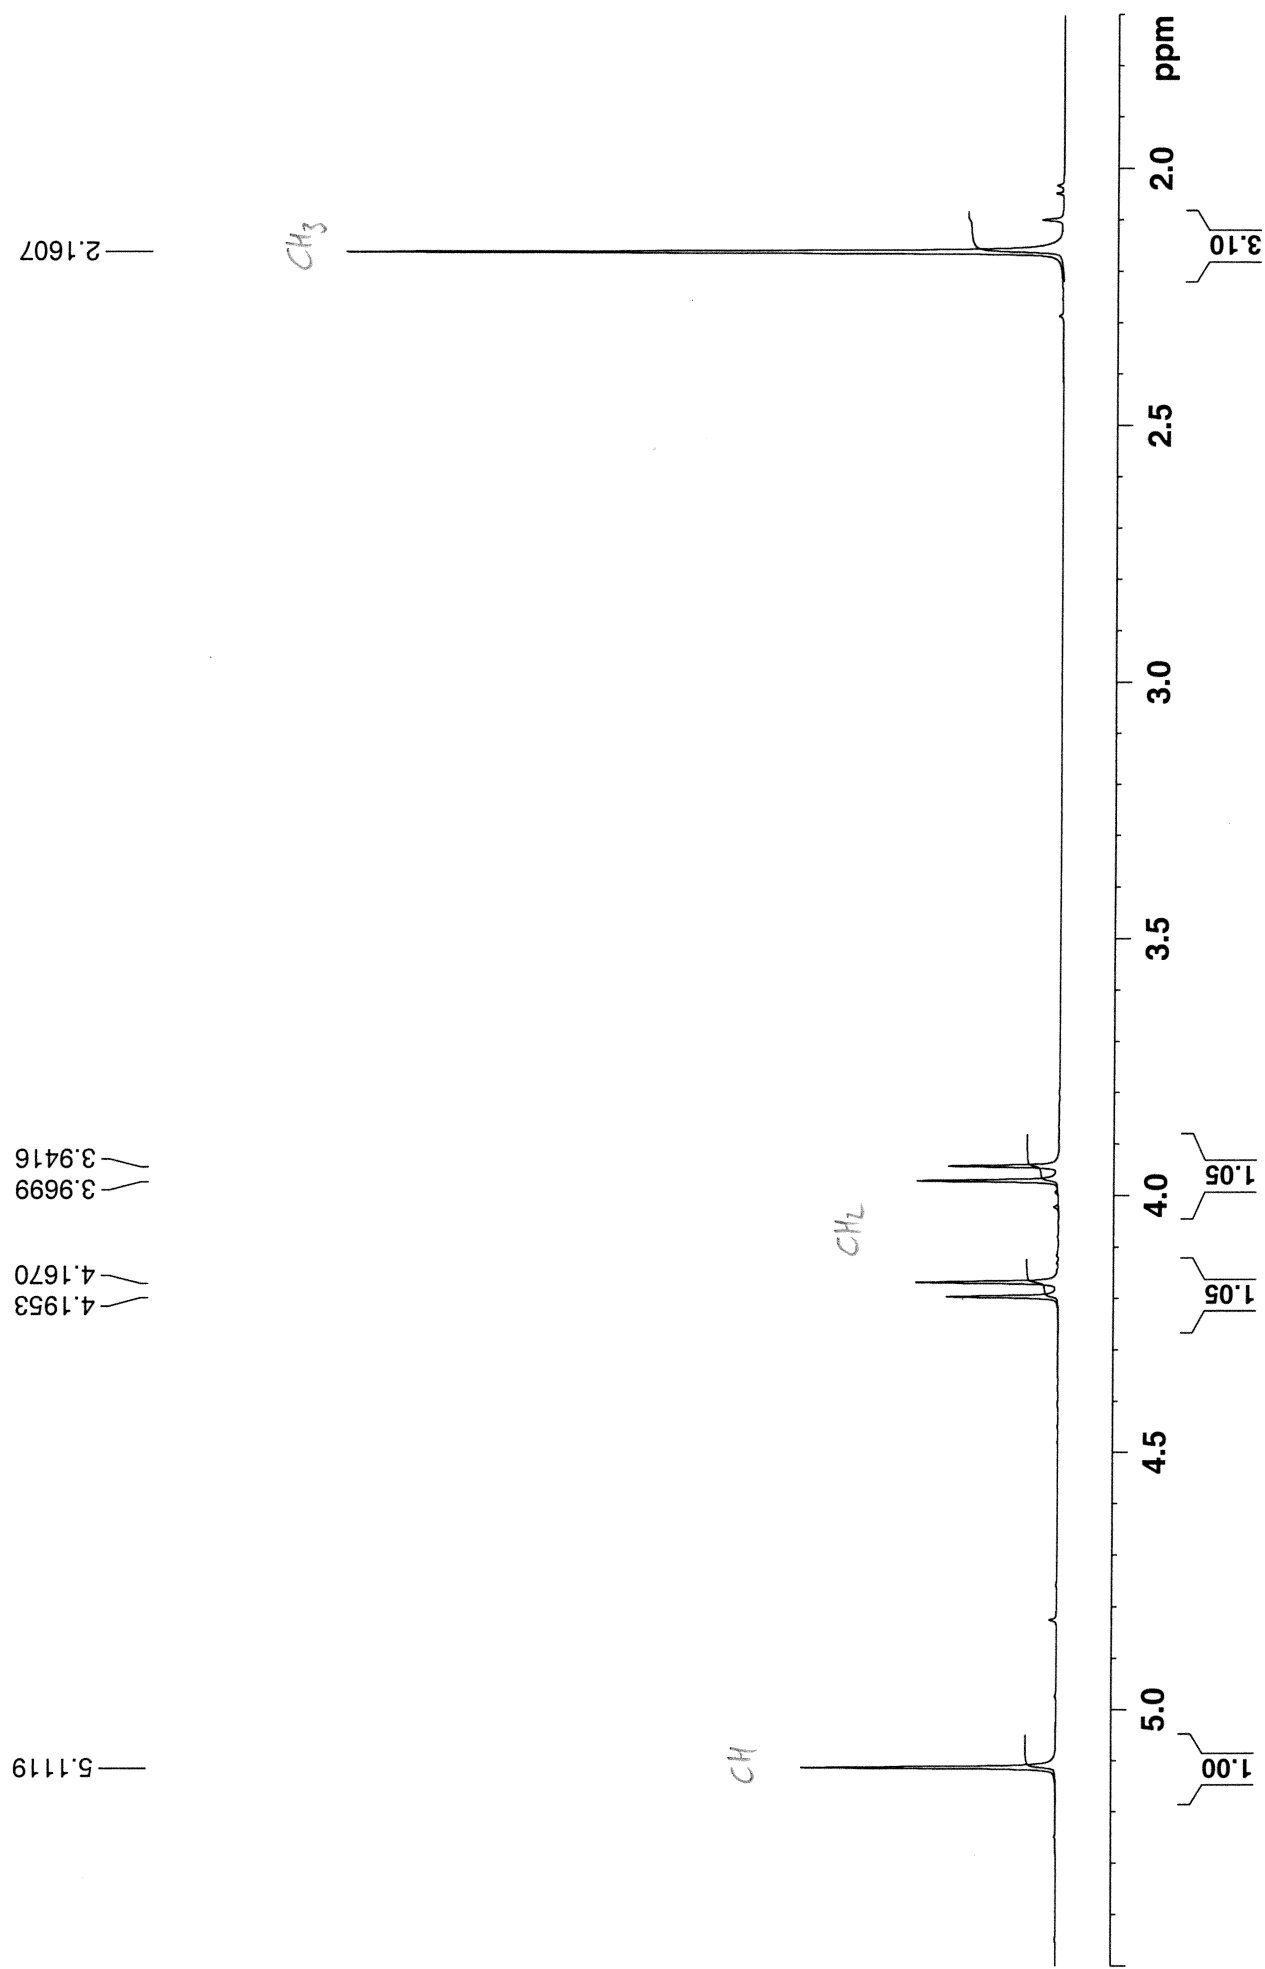

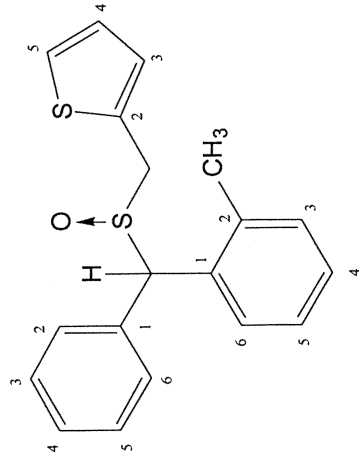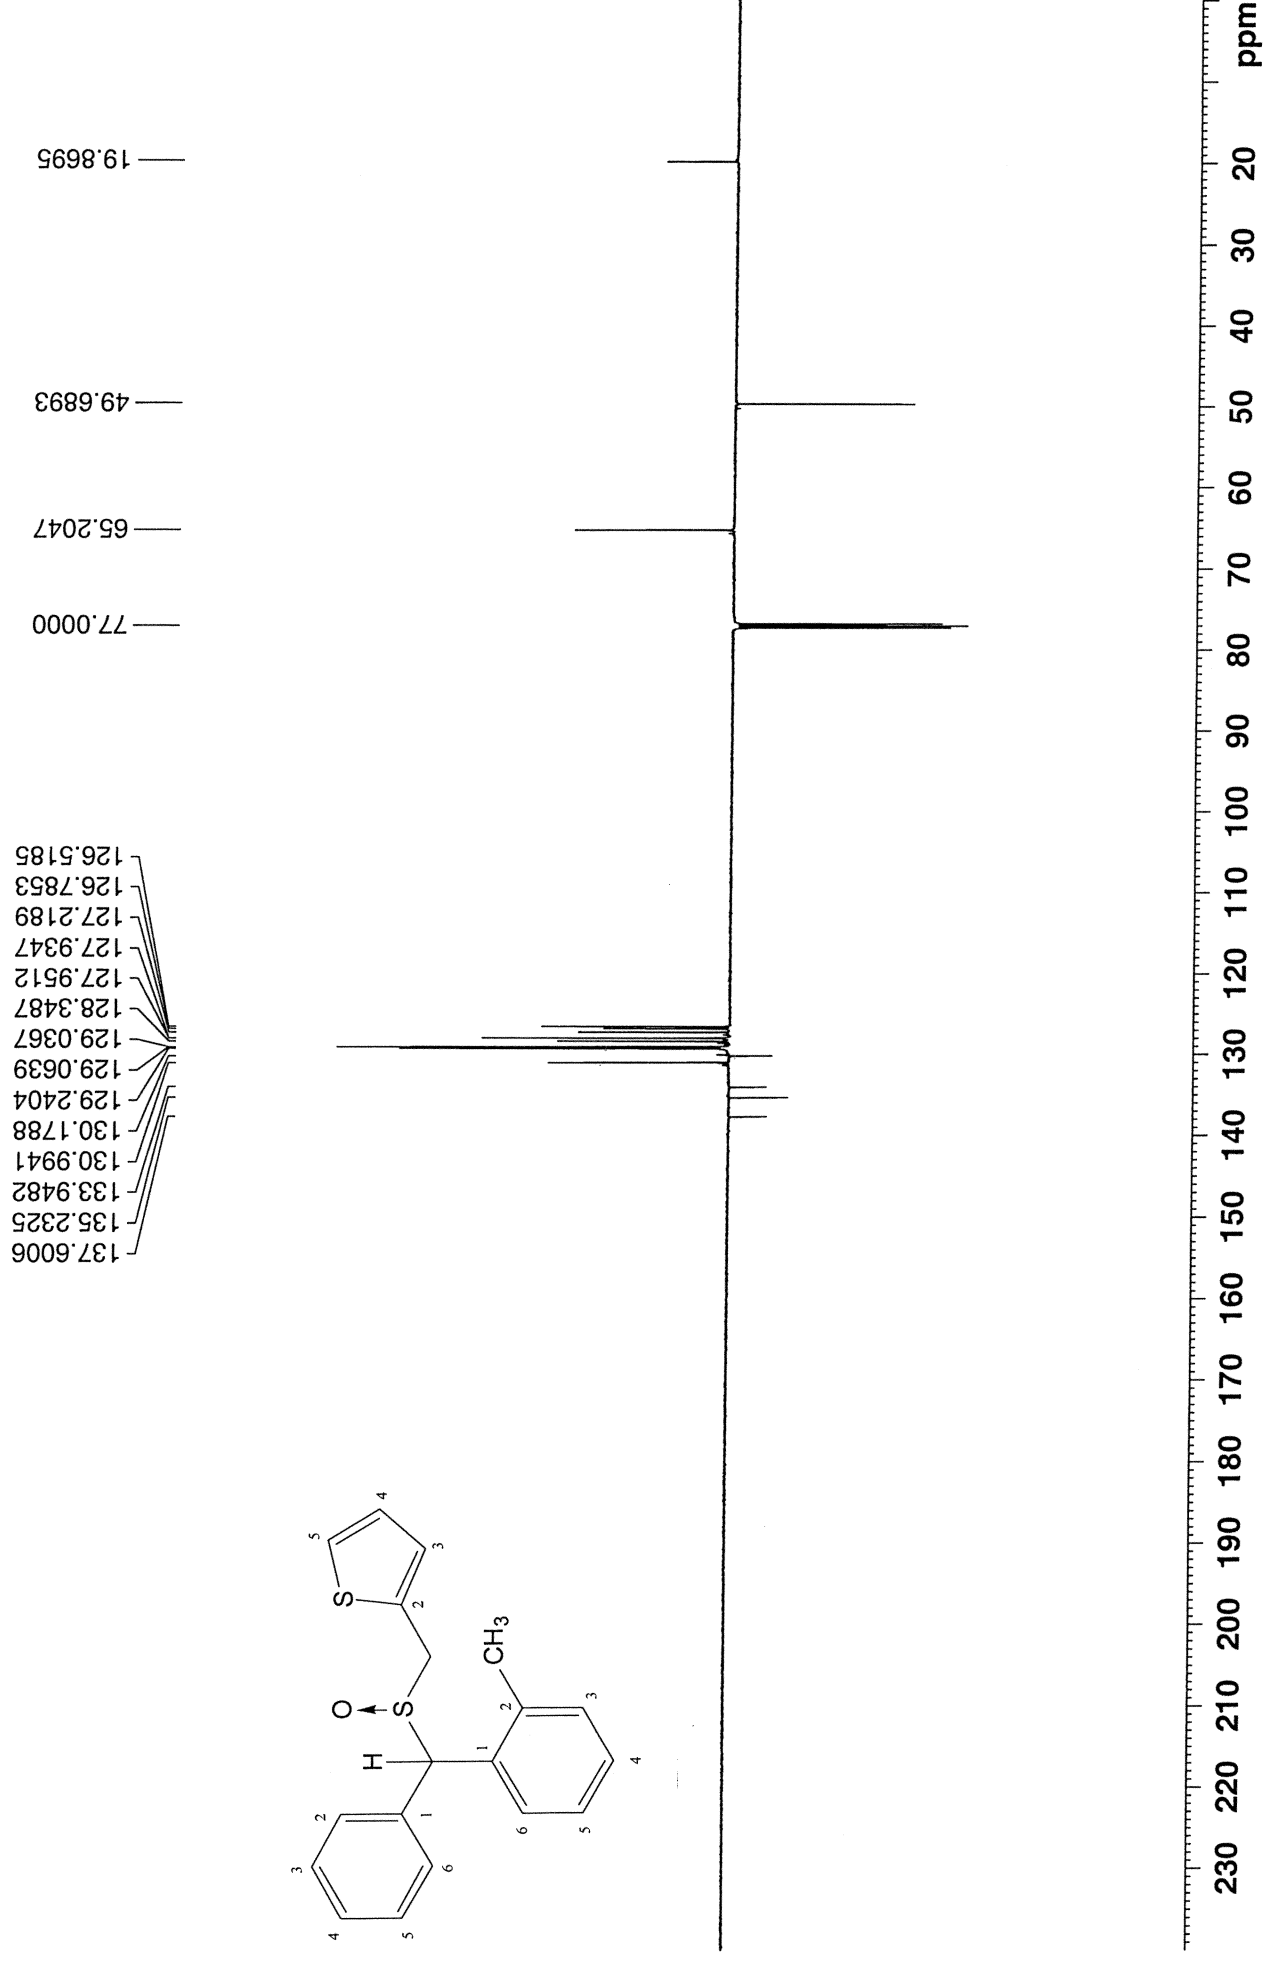



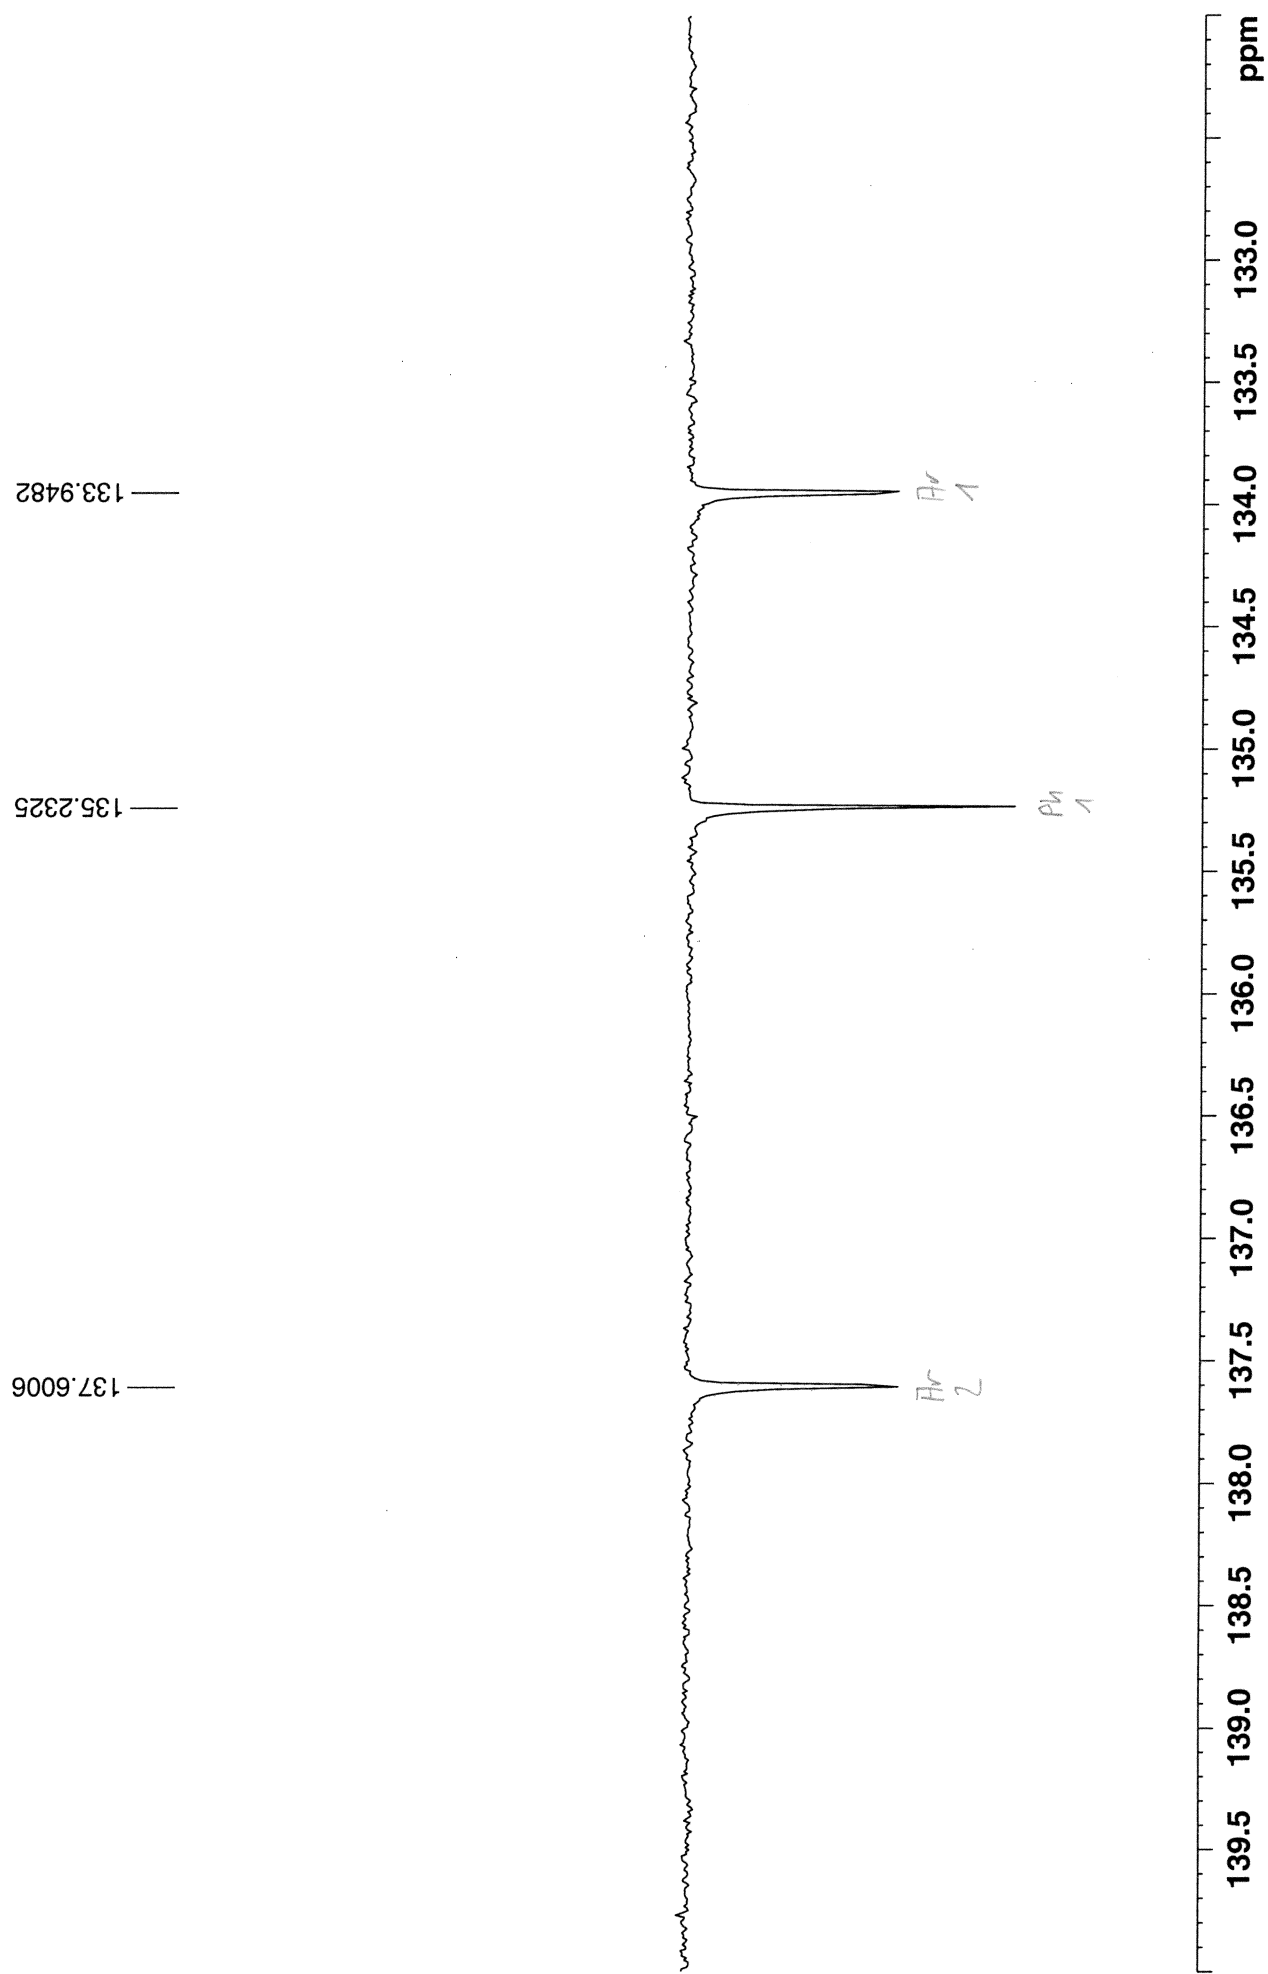

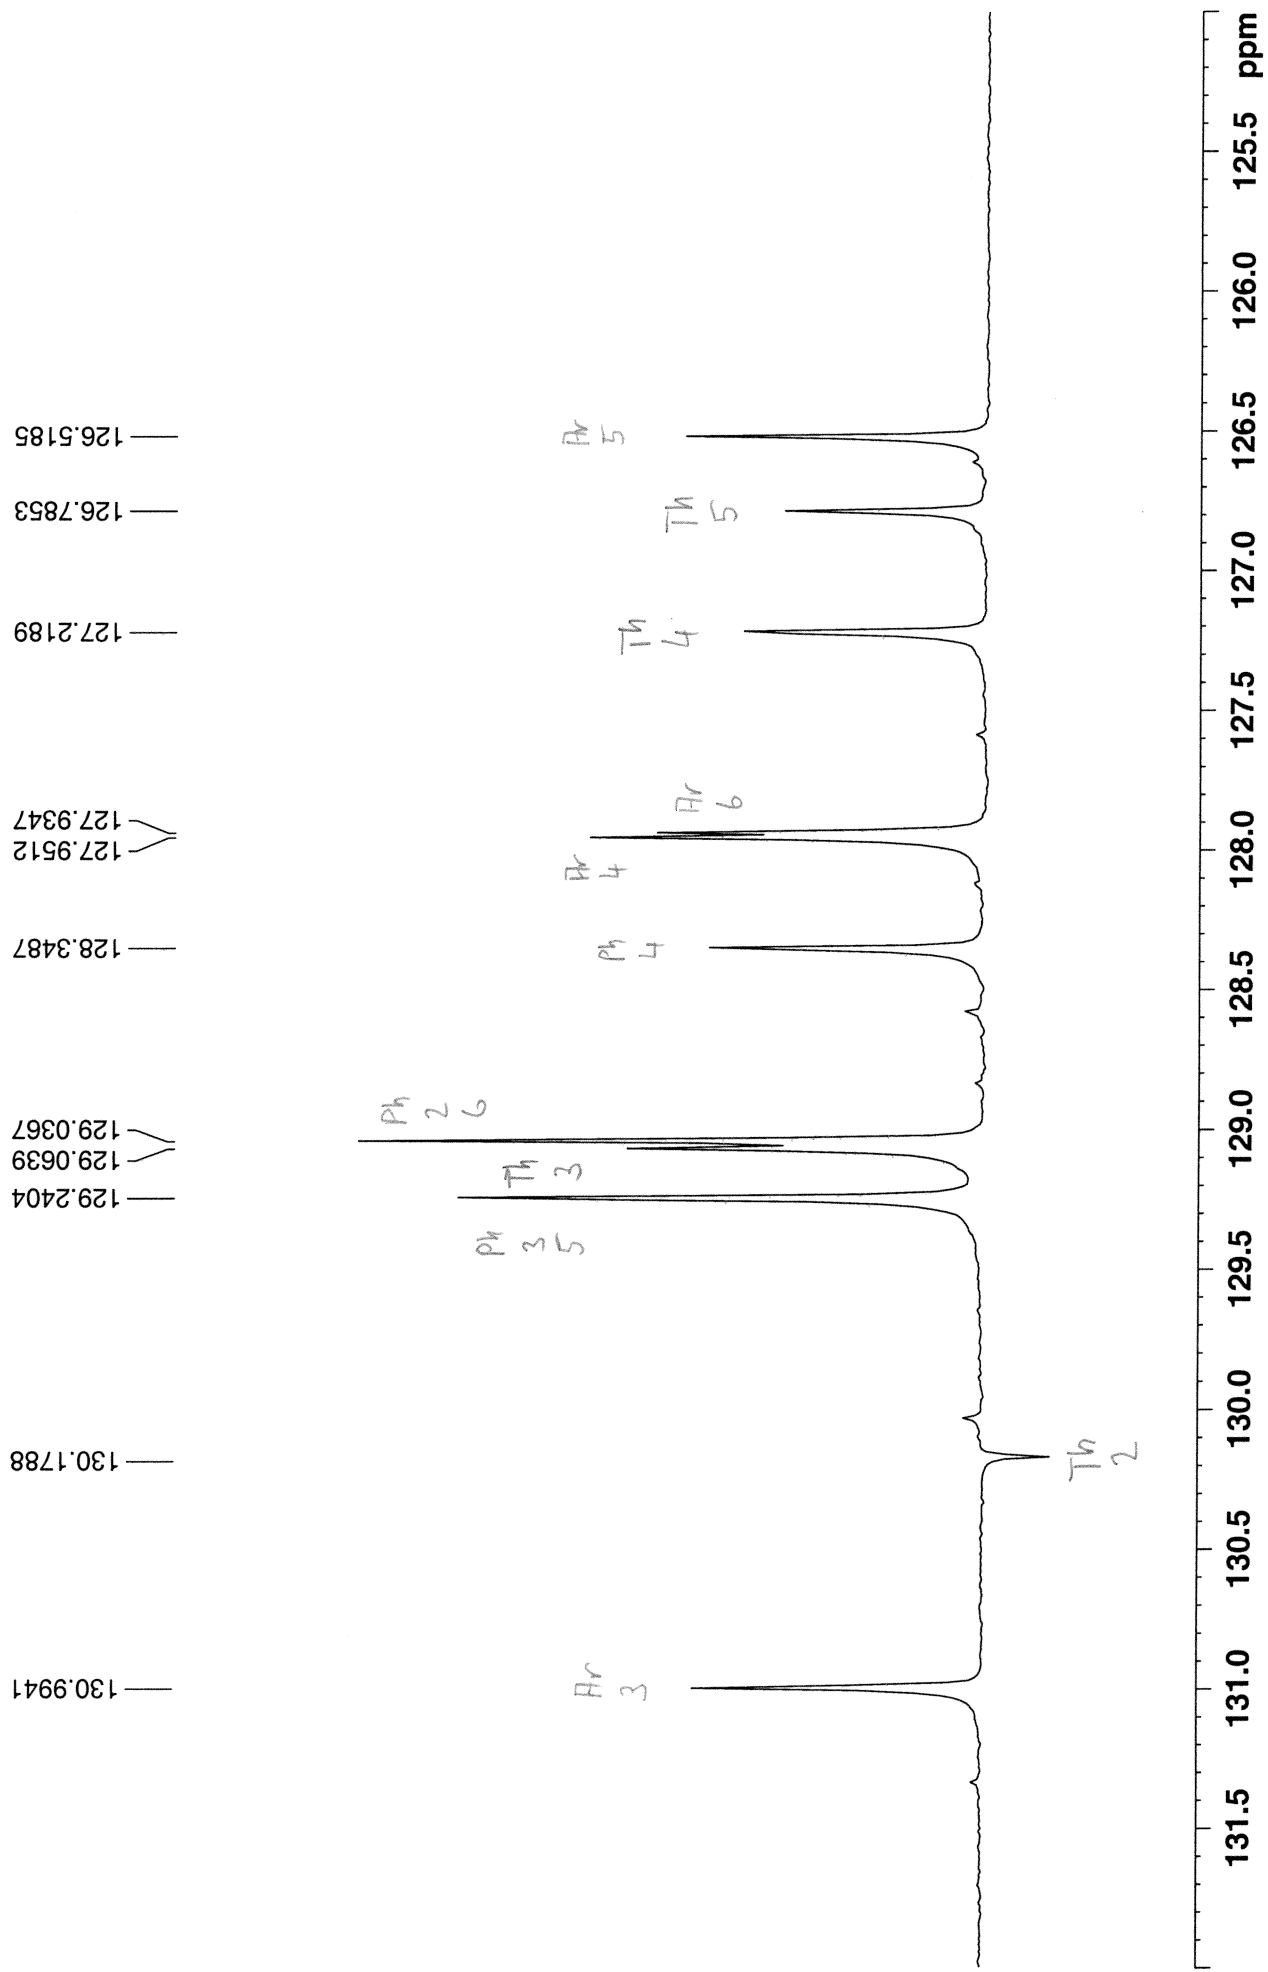

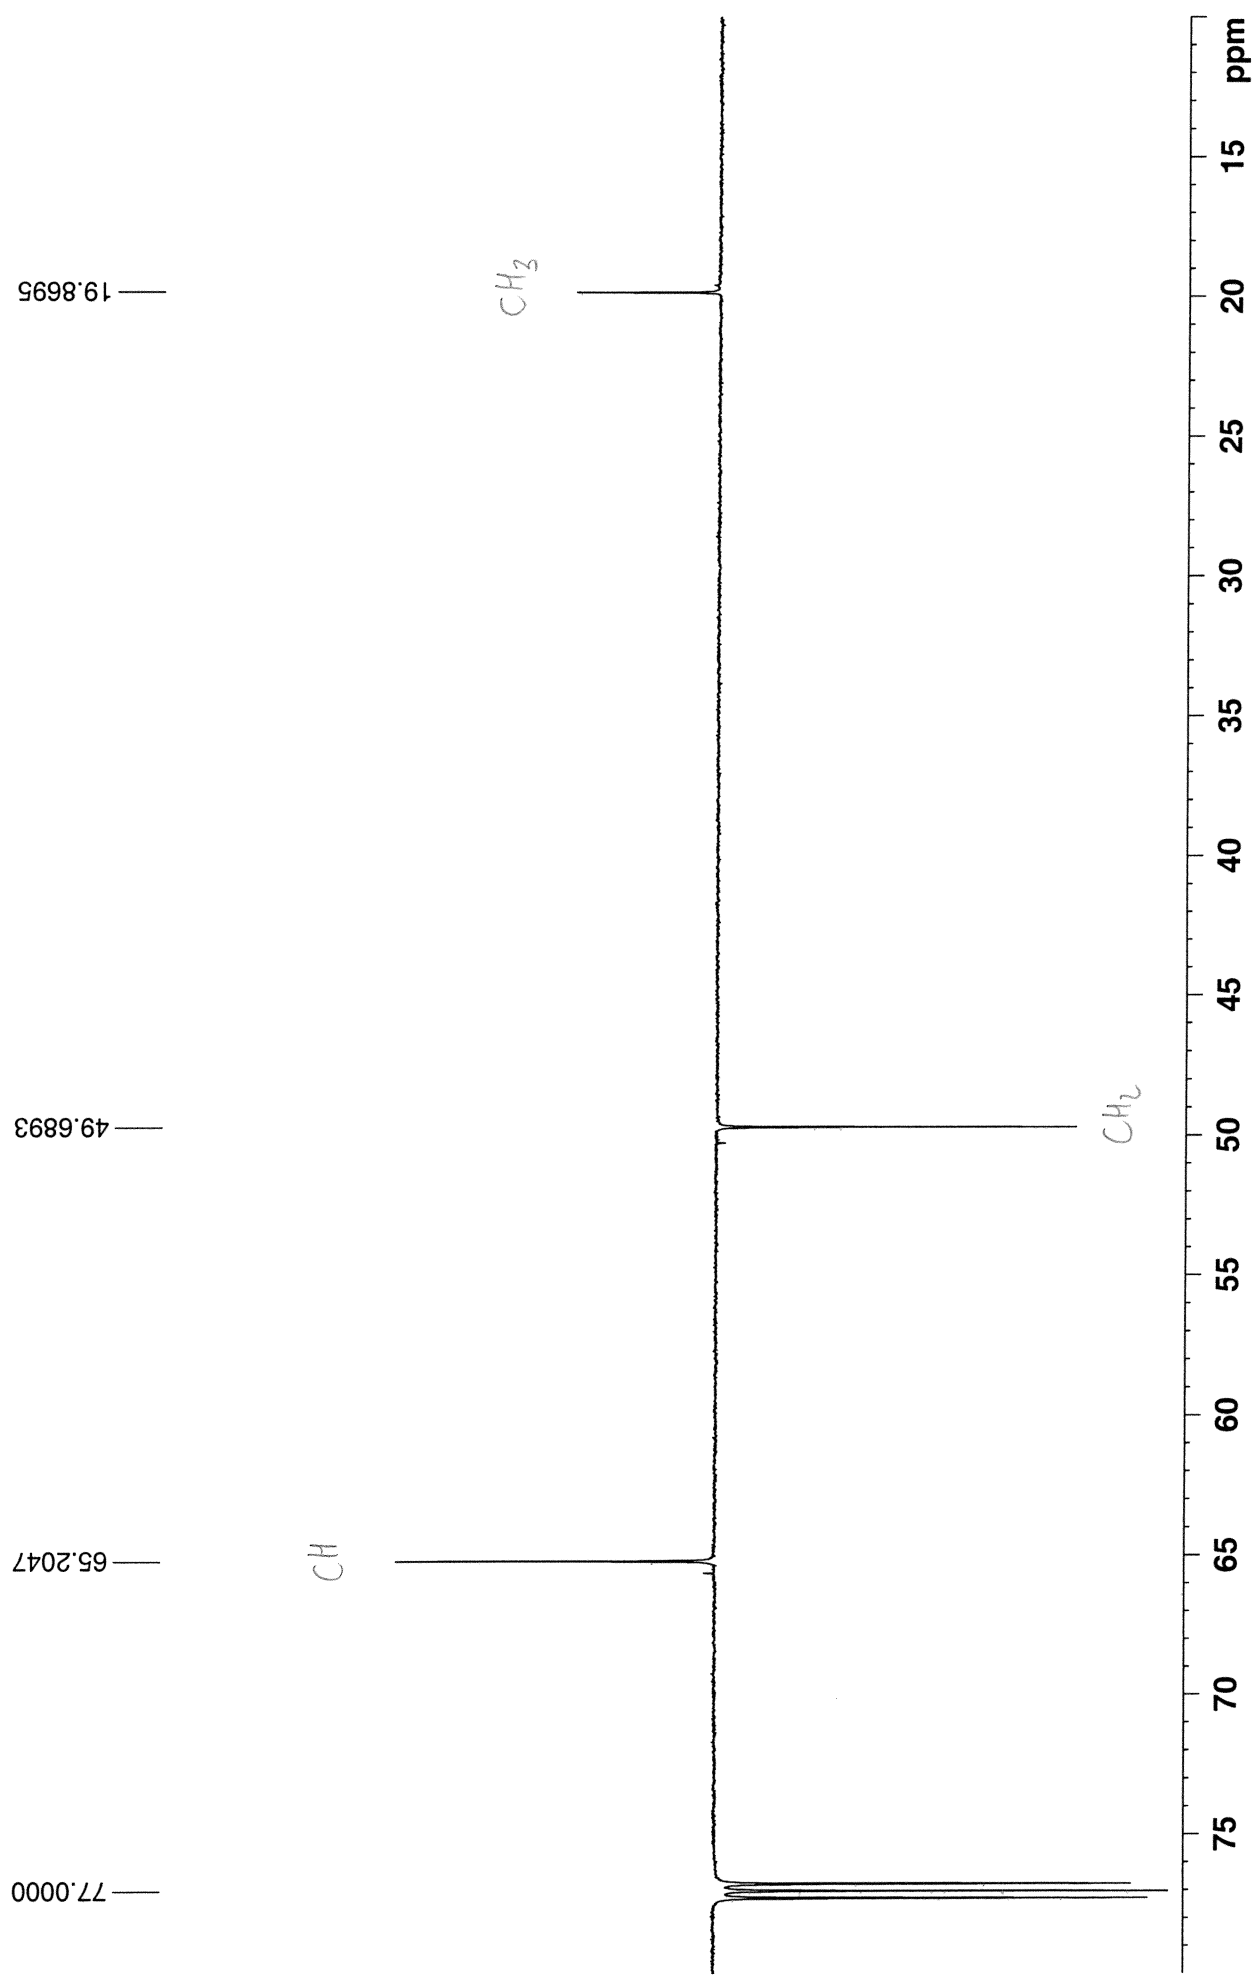

**Figure S49c.** NMR spectra of compound **5m**.

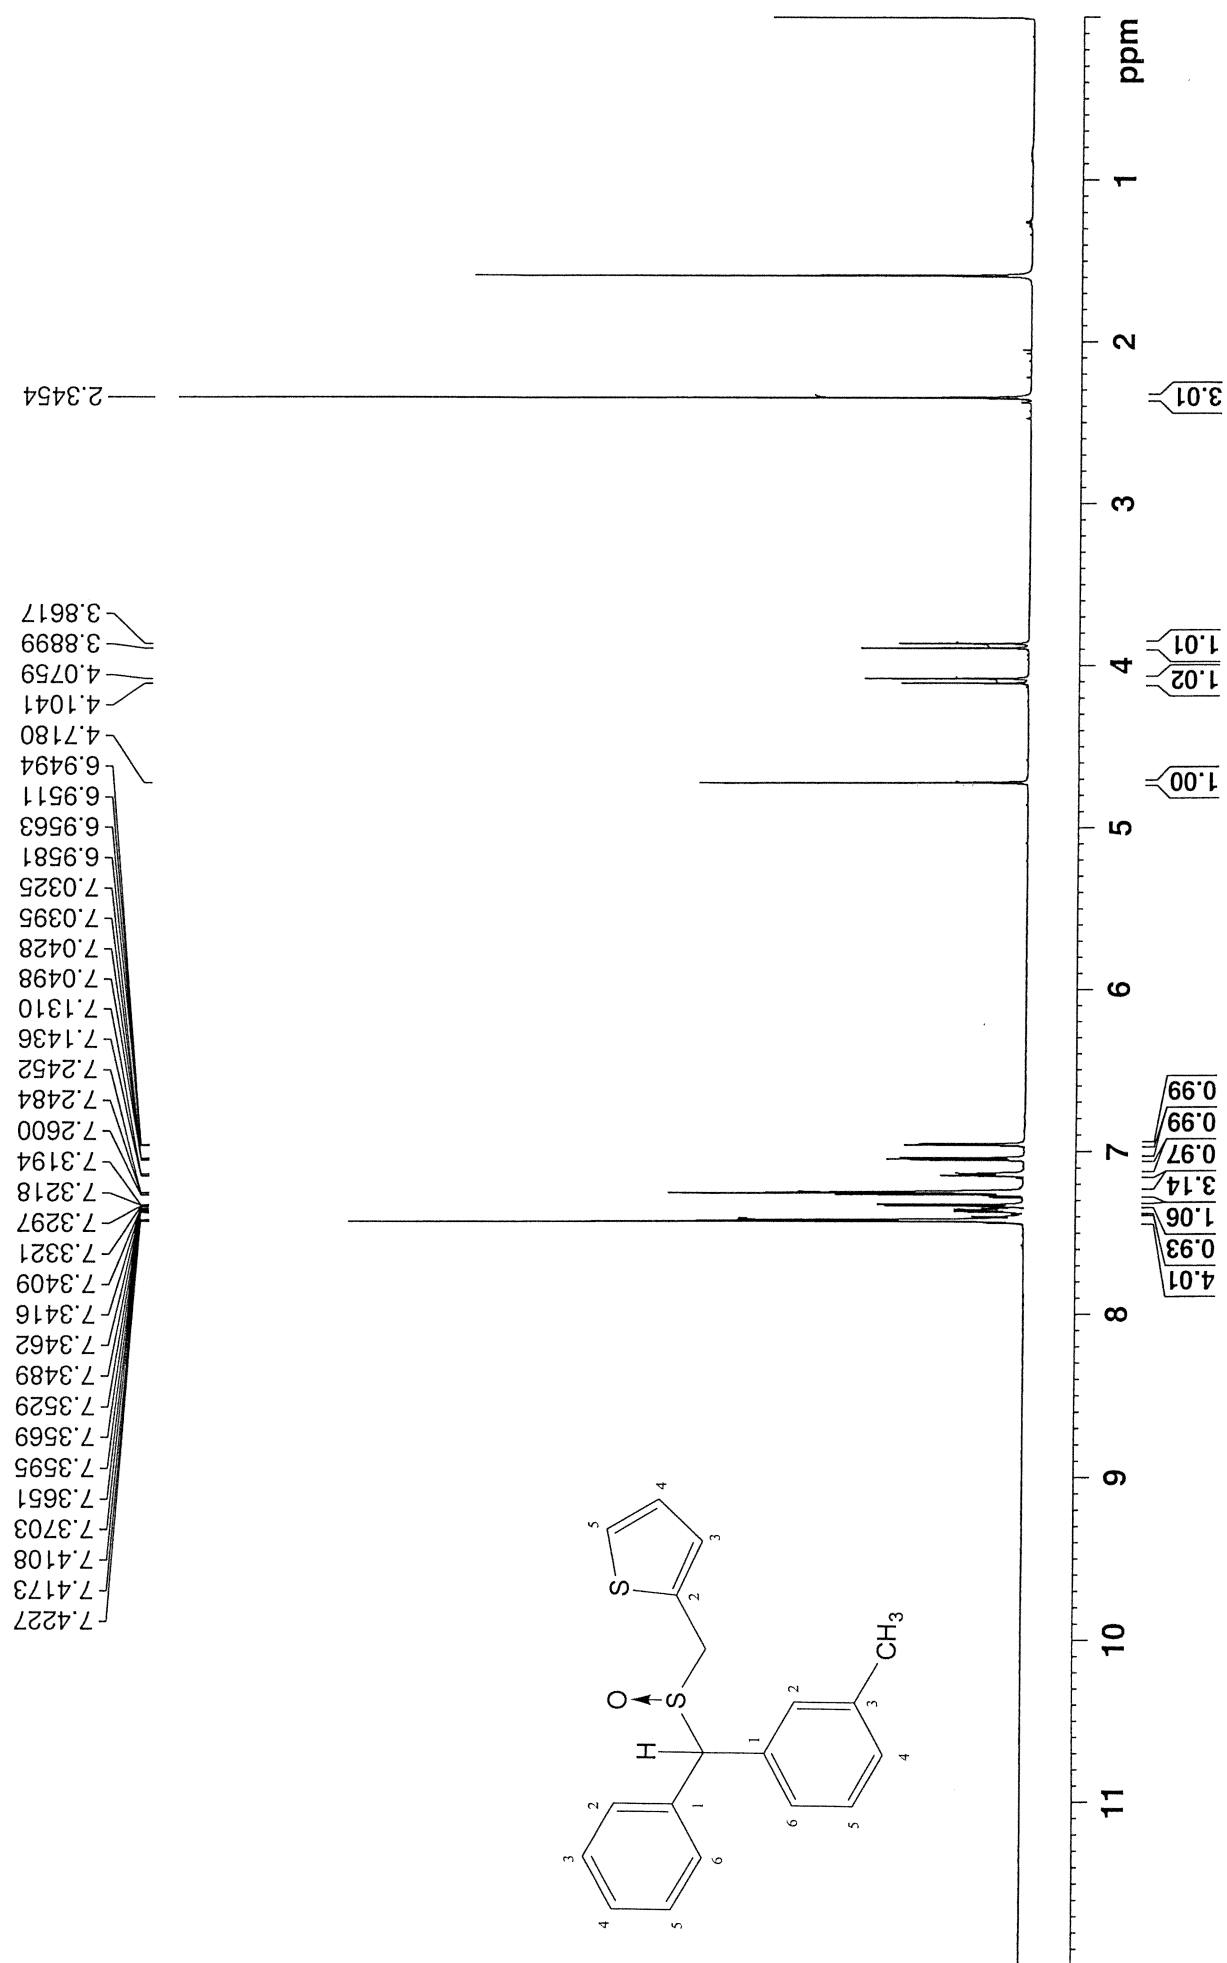

7.4227  
7.4173  
7.4108  
7.3703  
7.3651  
7.3595  
7.3569  
7.3529  
7.3489  
7.3462  
7.3416  
7.3409  
7.3321  
7.3321  
7.3297  
7.3218  
7.3194  
7.2600  
7.2484  
7.2452

7.1436  
7.1310

7.0498  
7.0428  
7.0395  
7.0325

6.9581  
6.9563  
6.9511  
6.9494

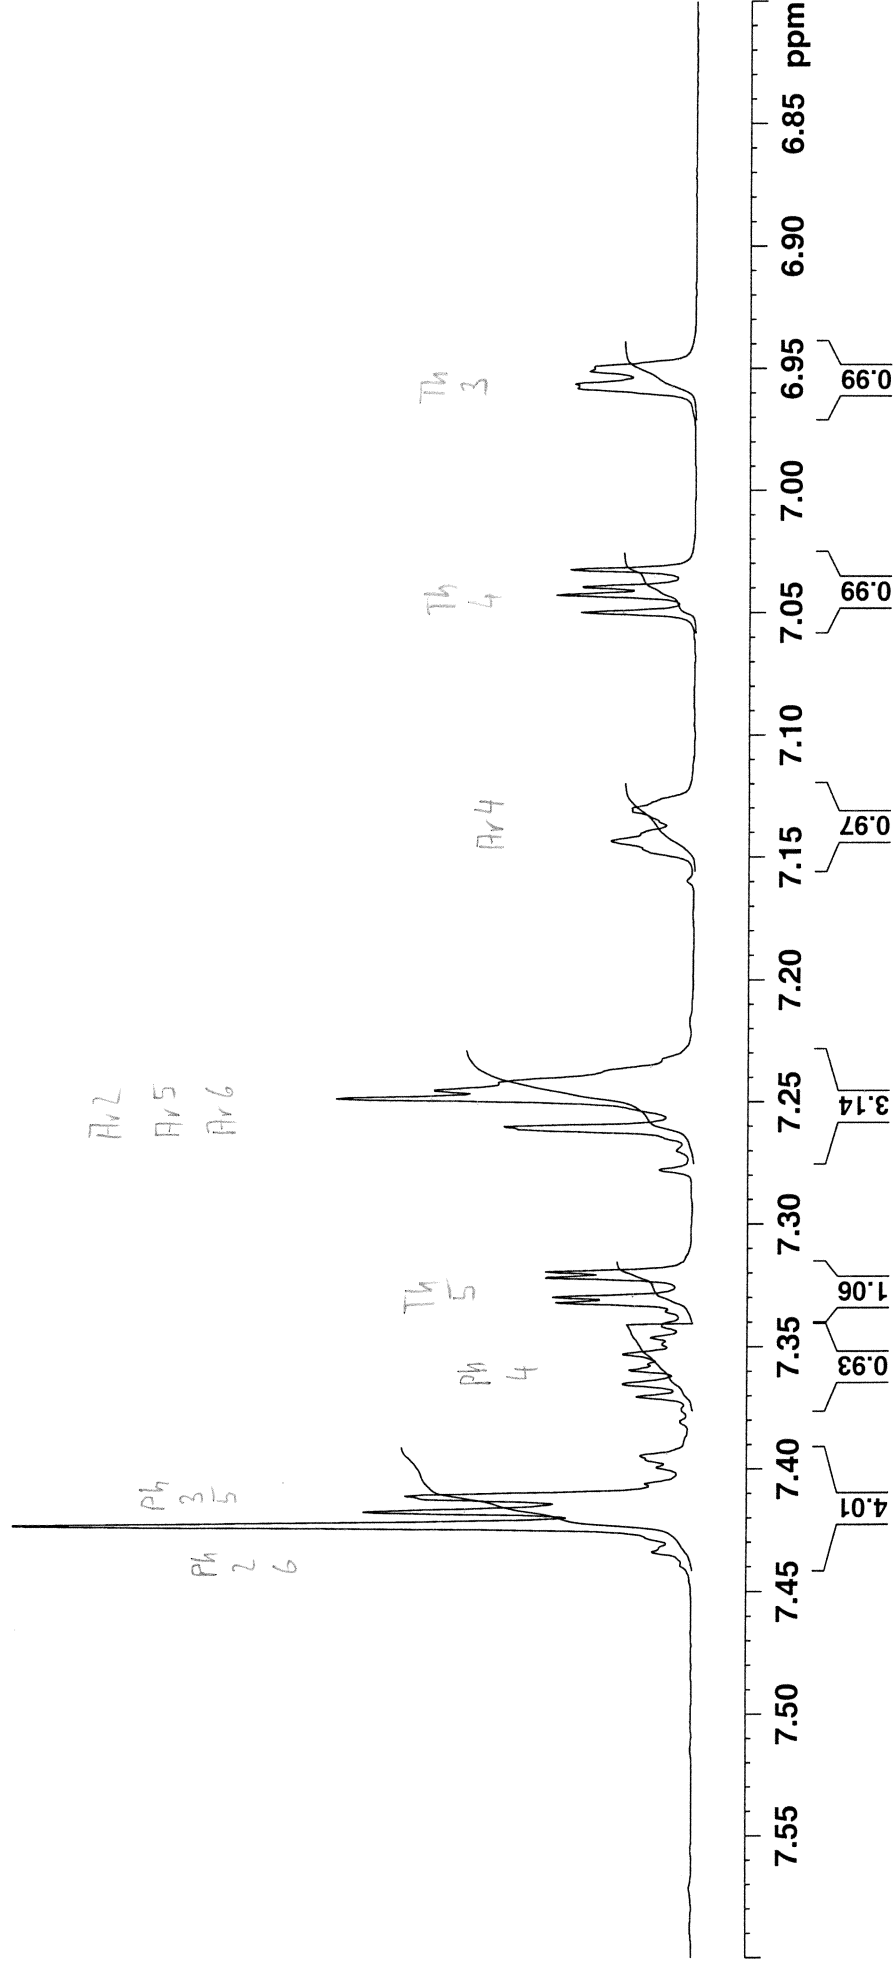

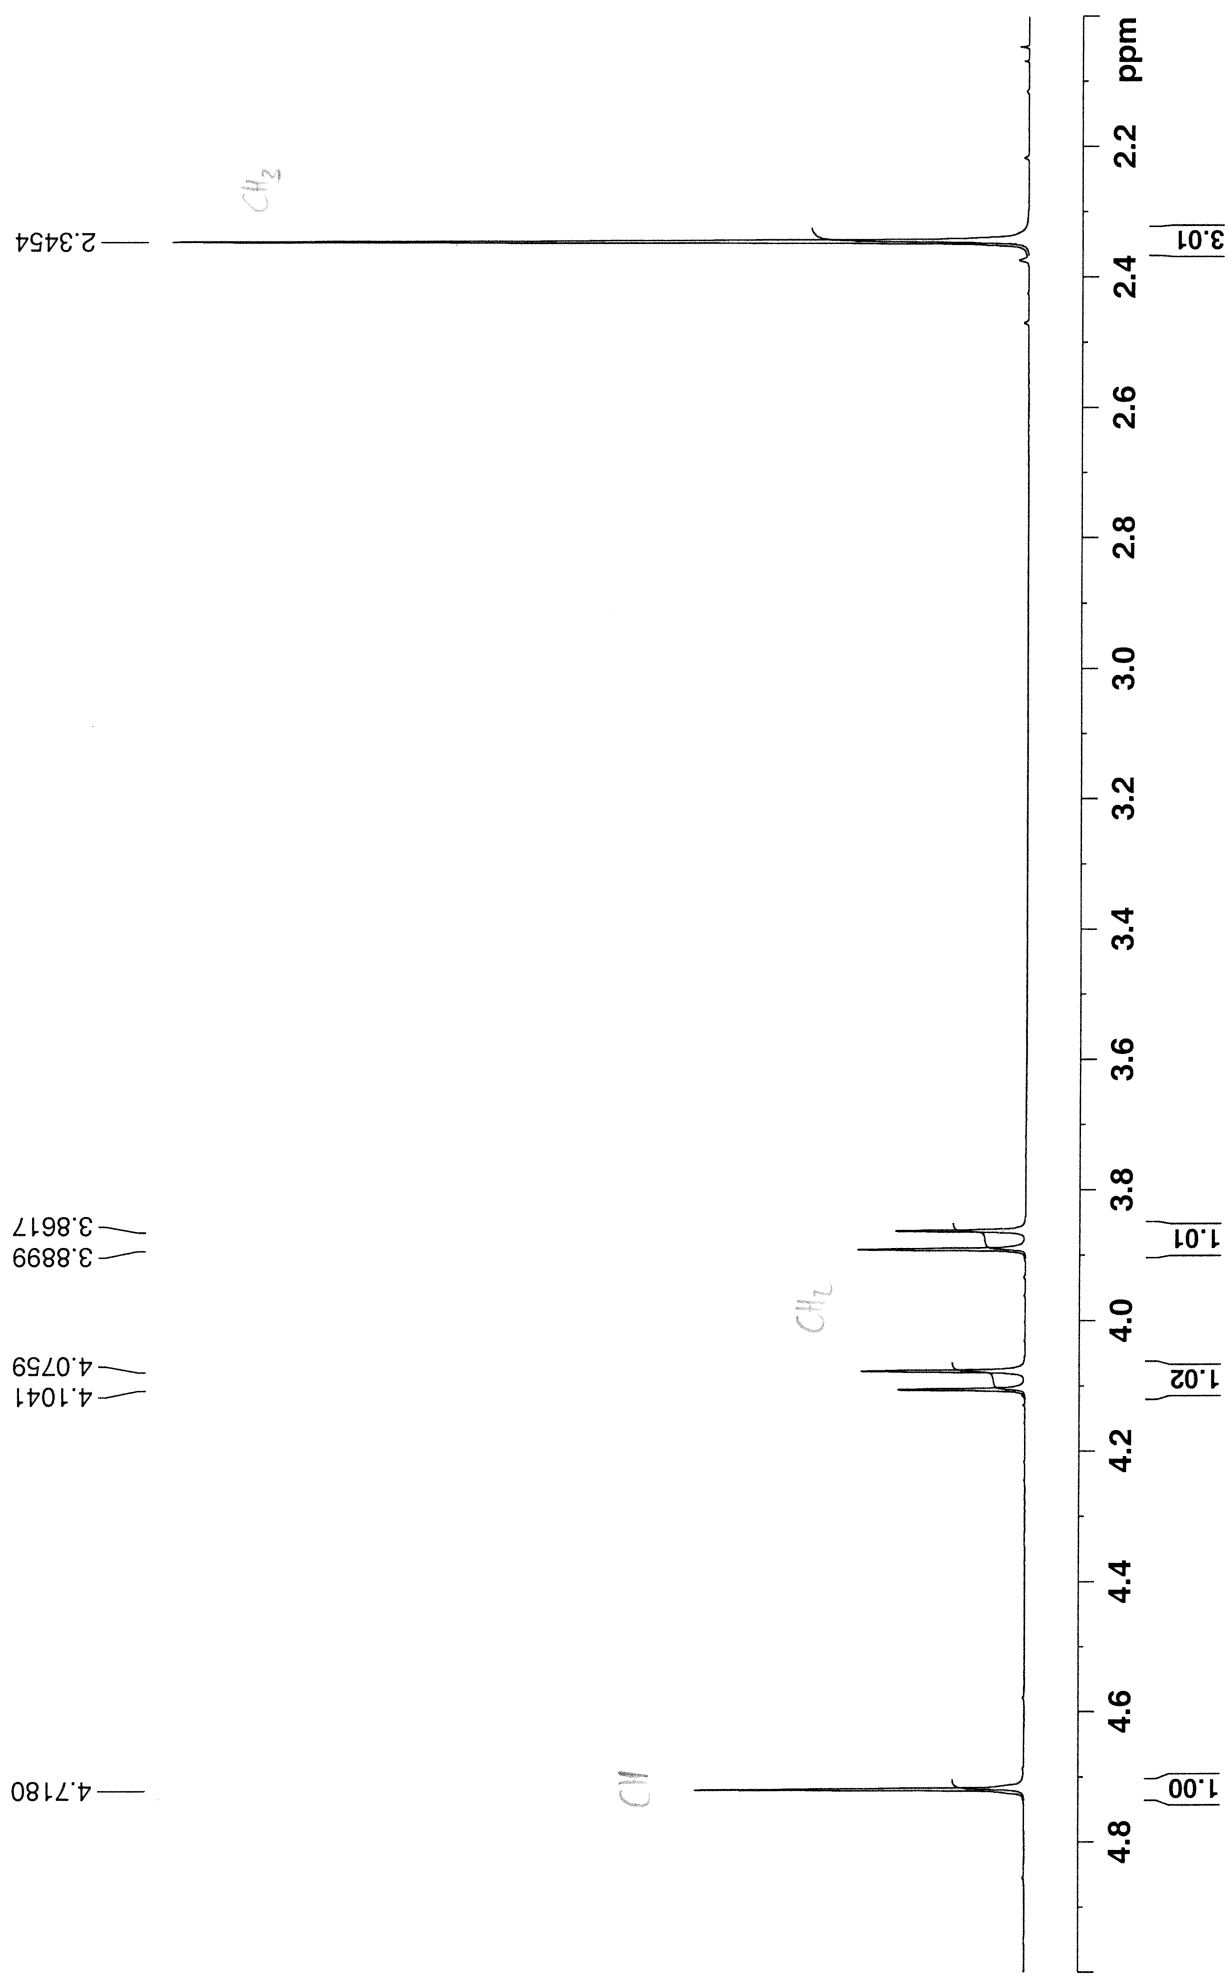

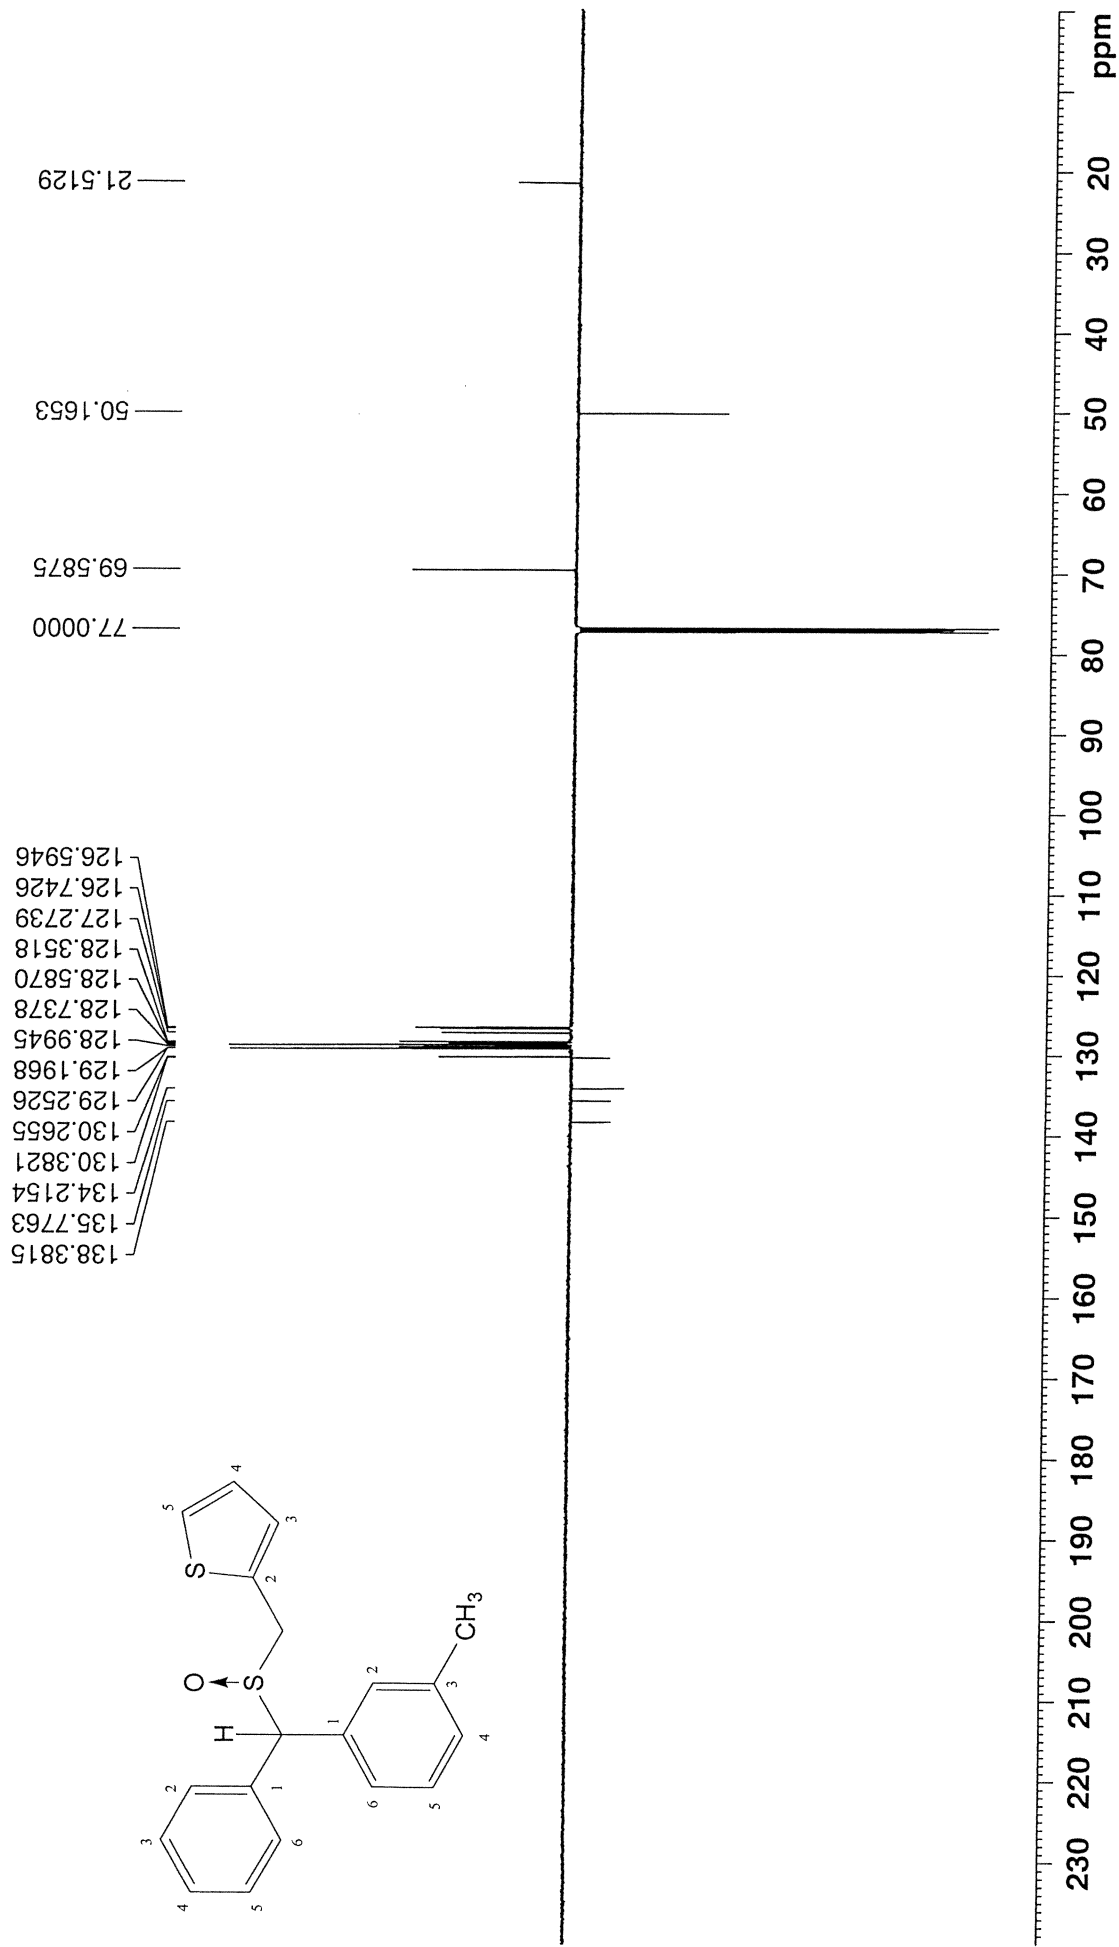

PN016\_1\_1 in cdcl3 (APT) 29.8.2019

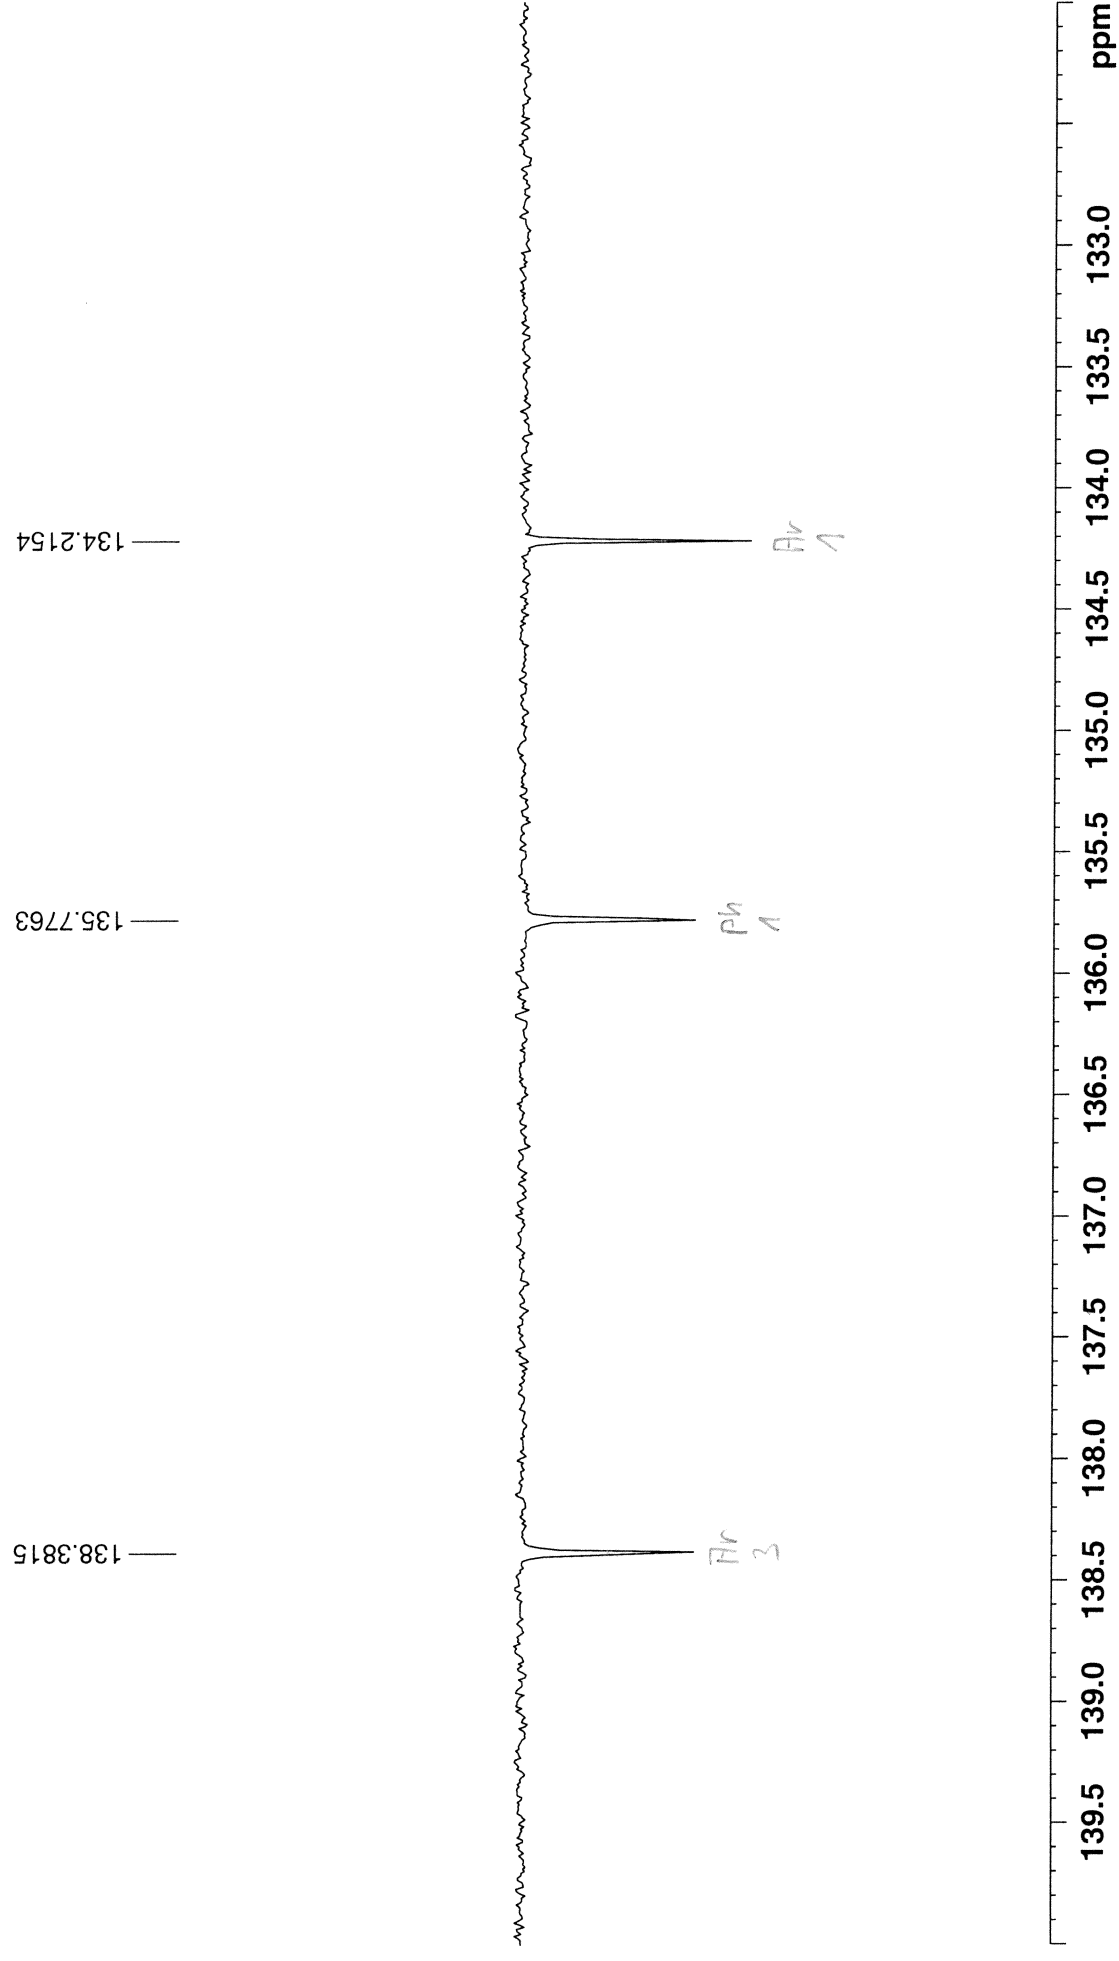



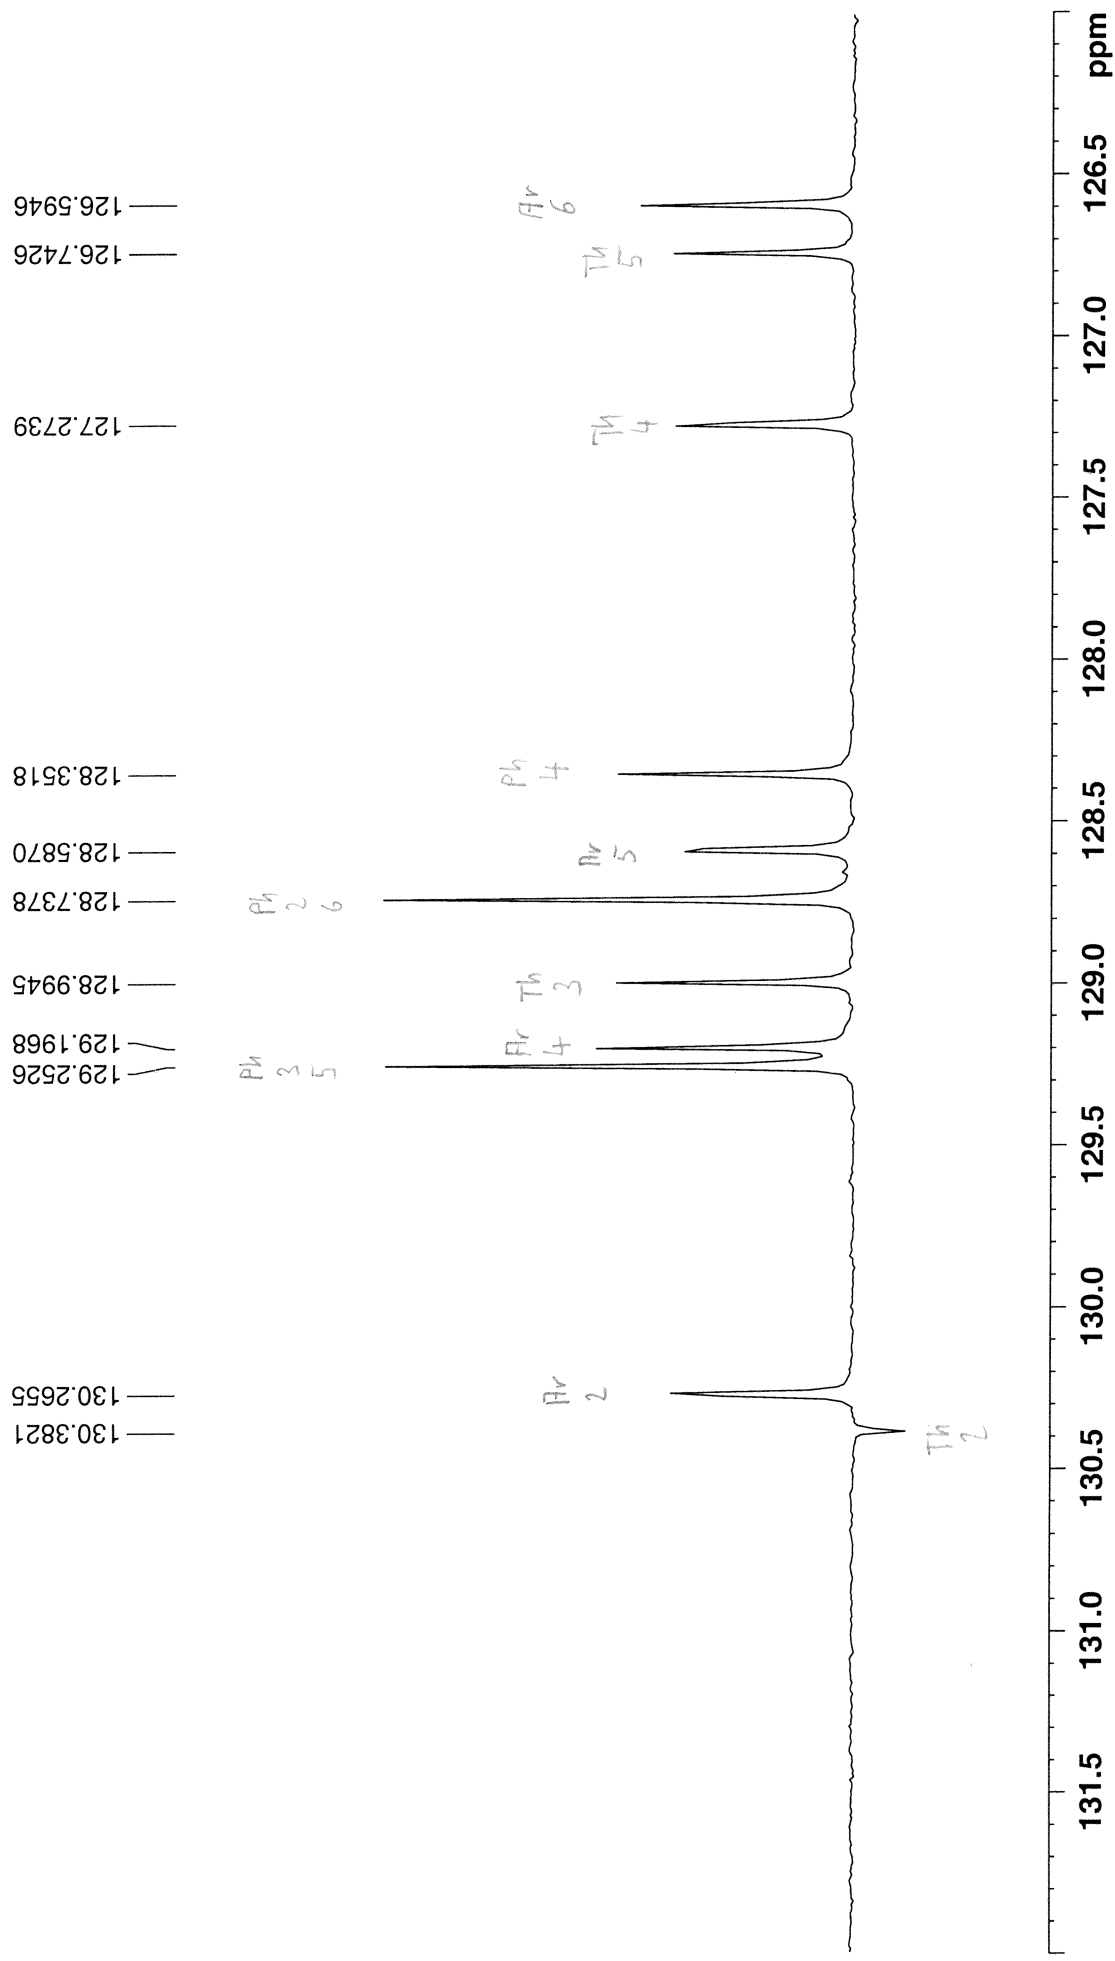

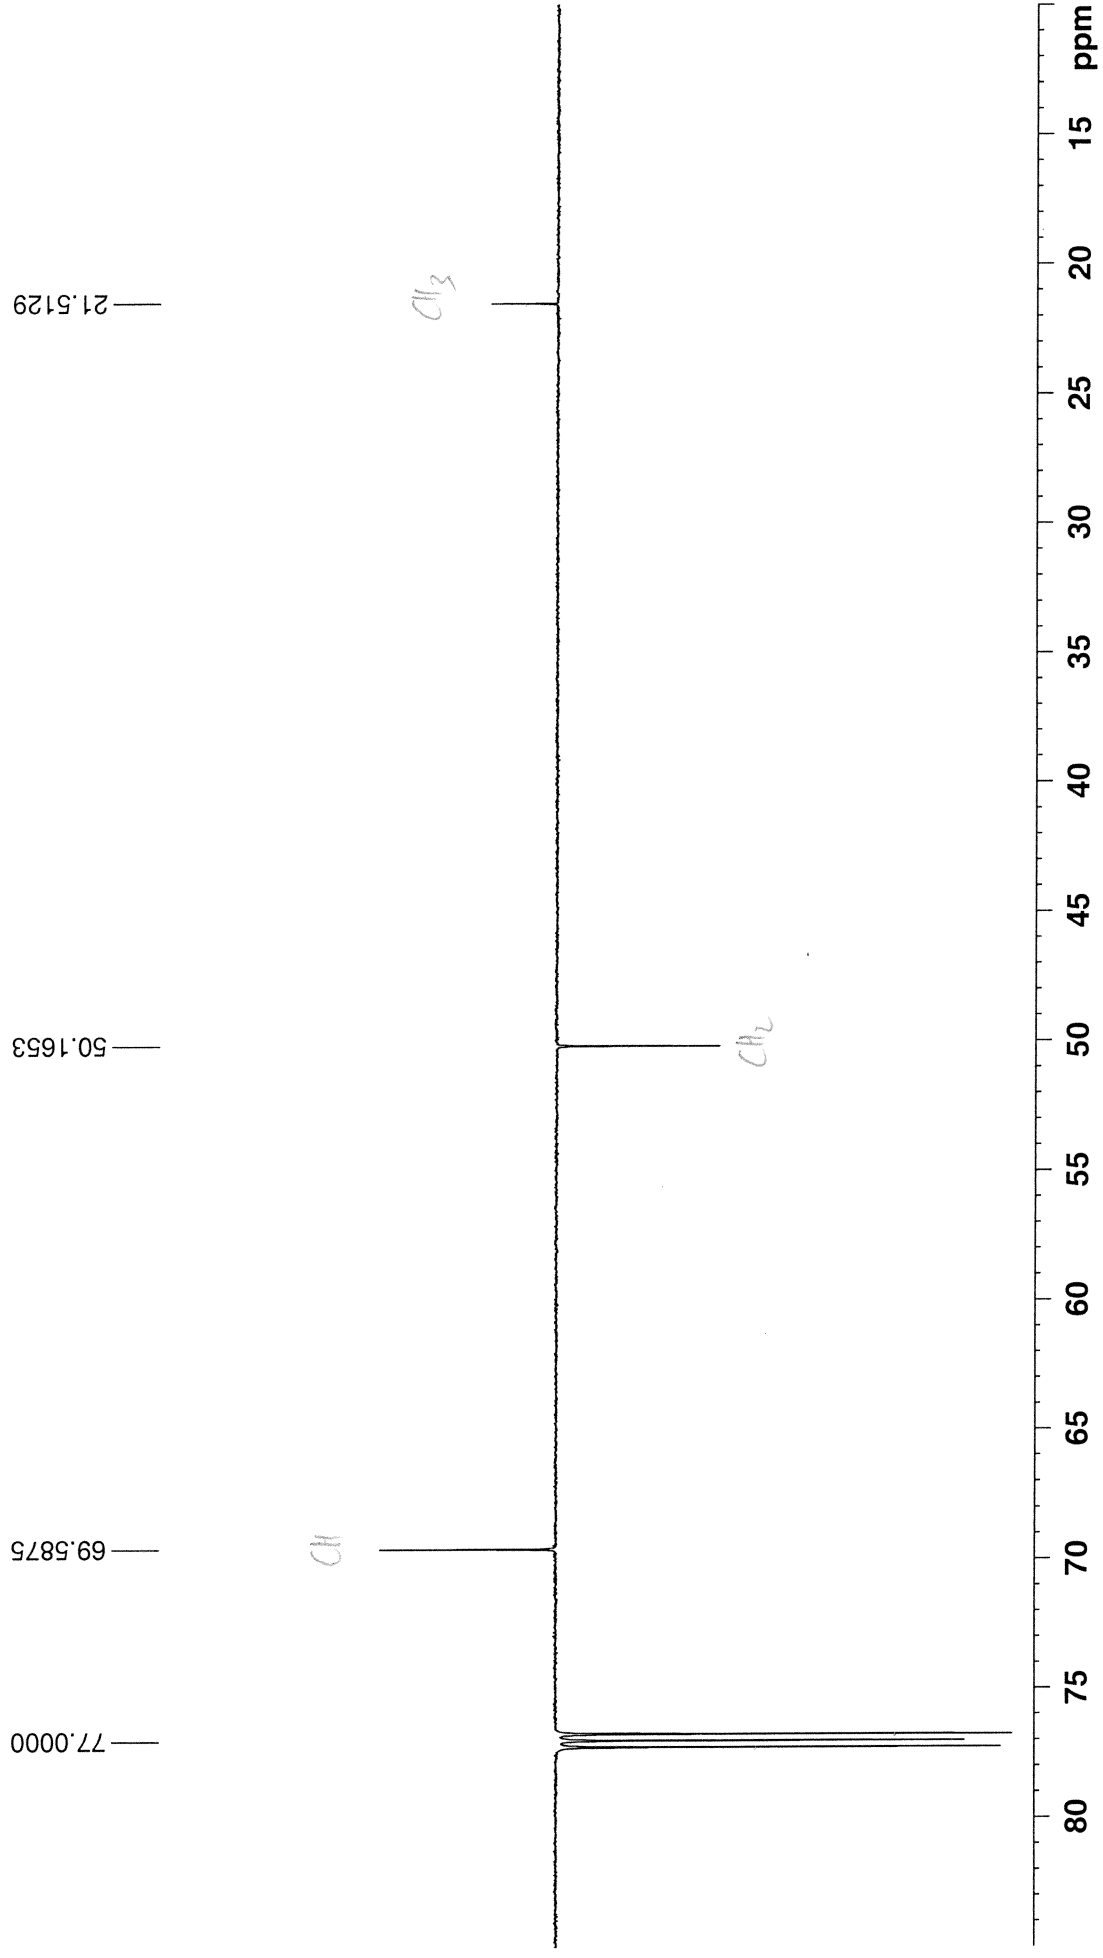

PN016\_1\_1 in cdcl3 (COSY) 29.8.2019

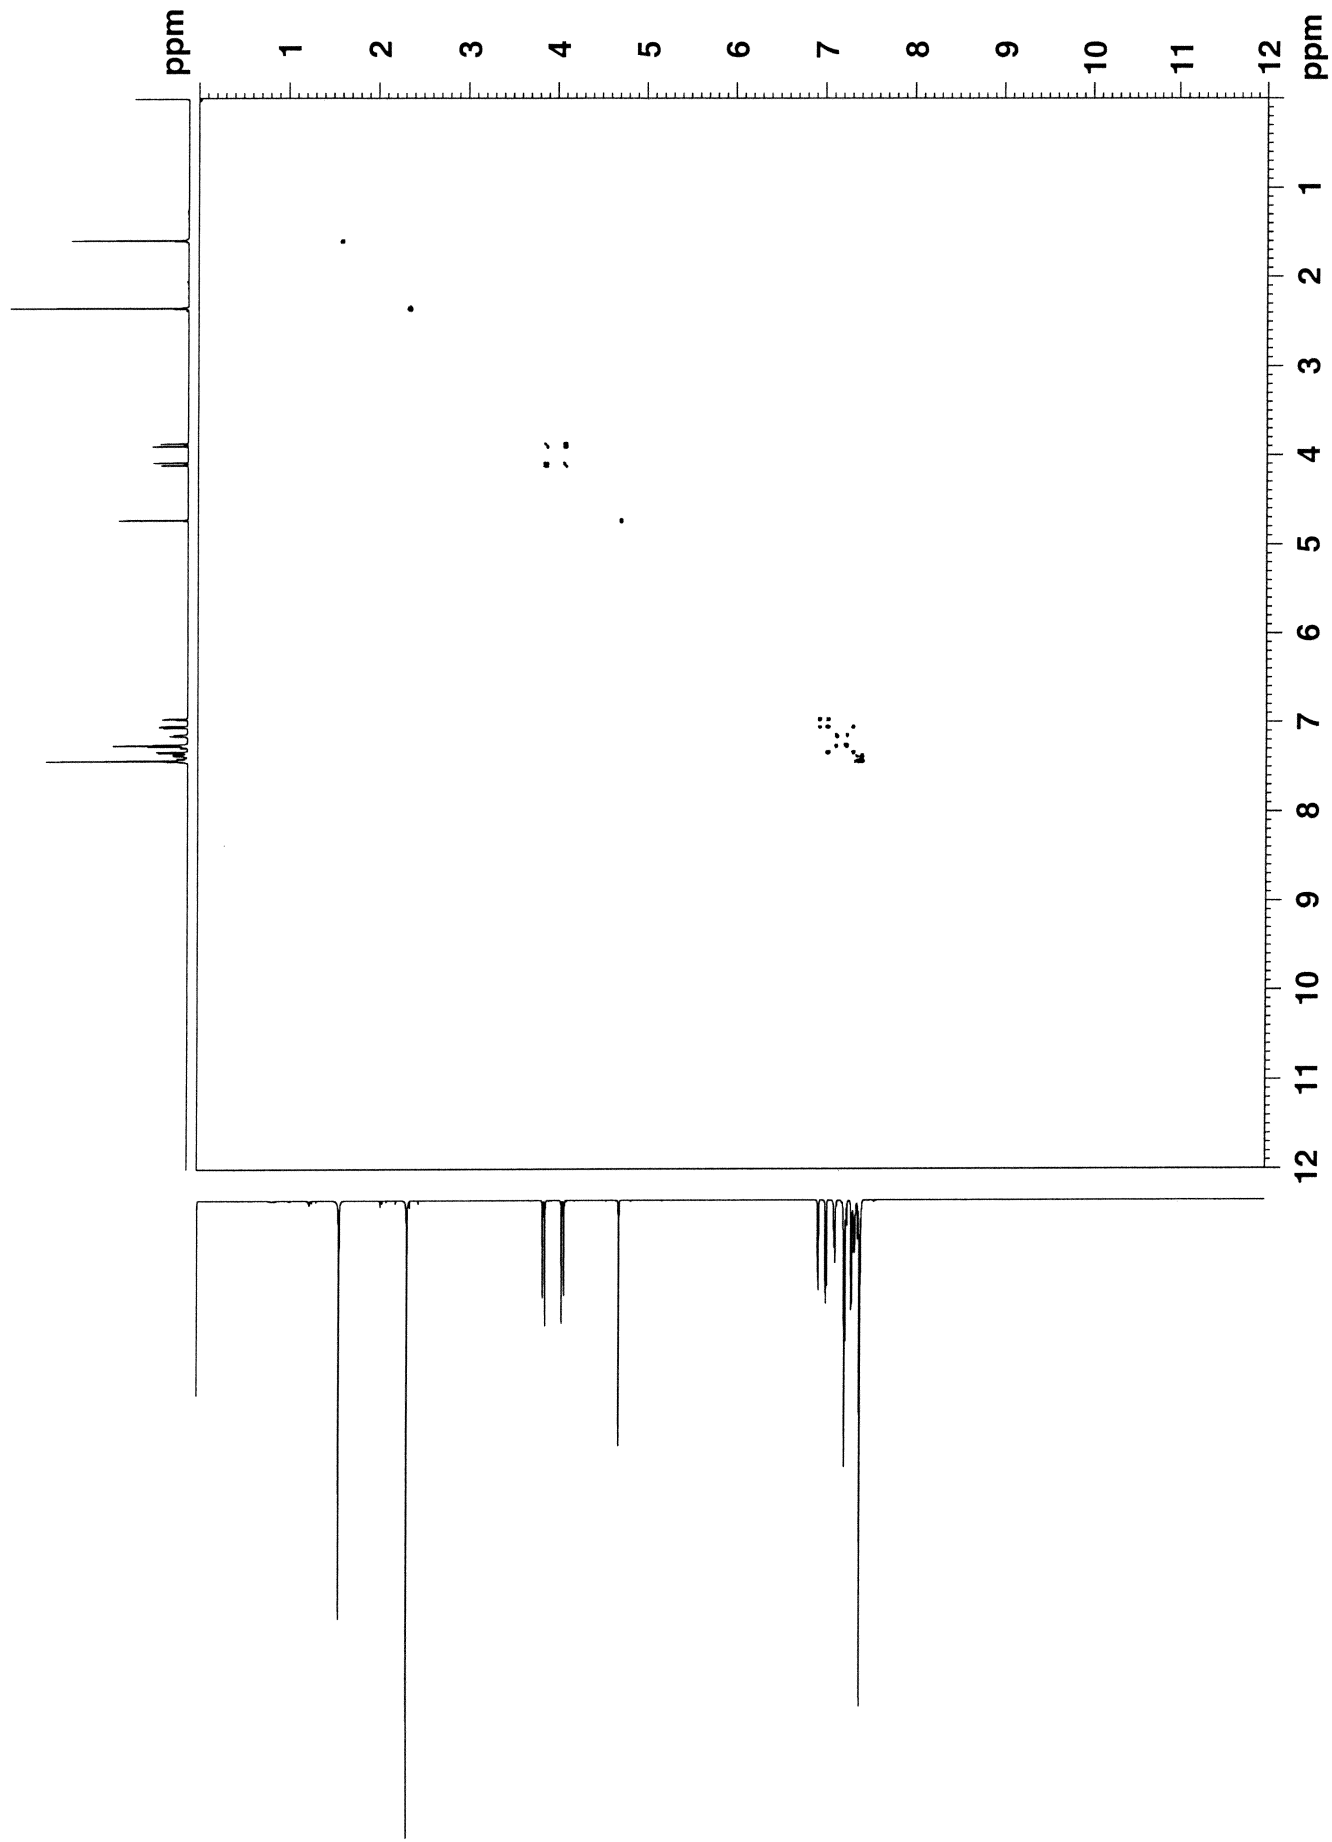

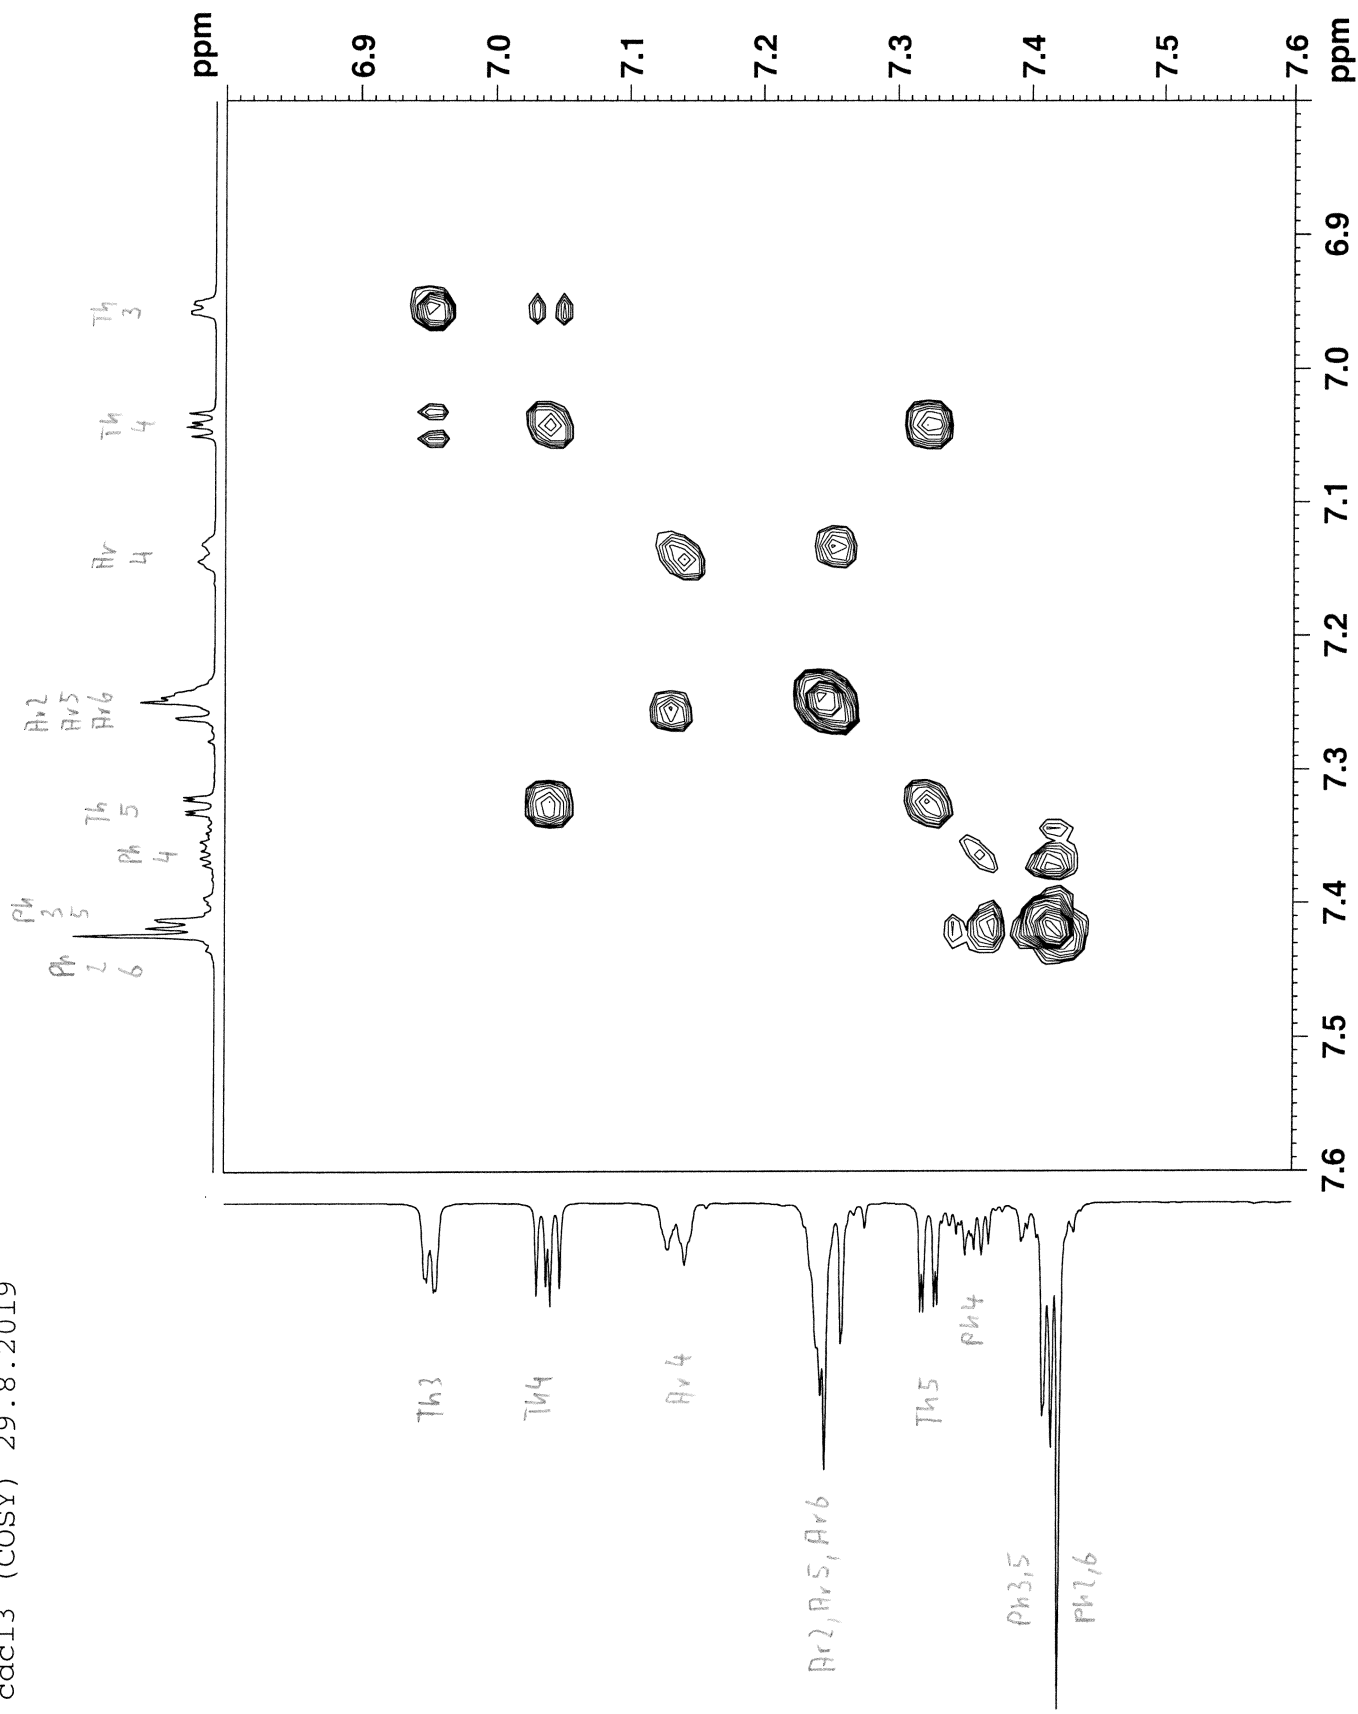

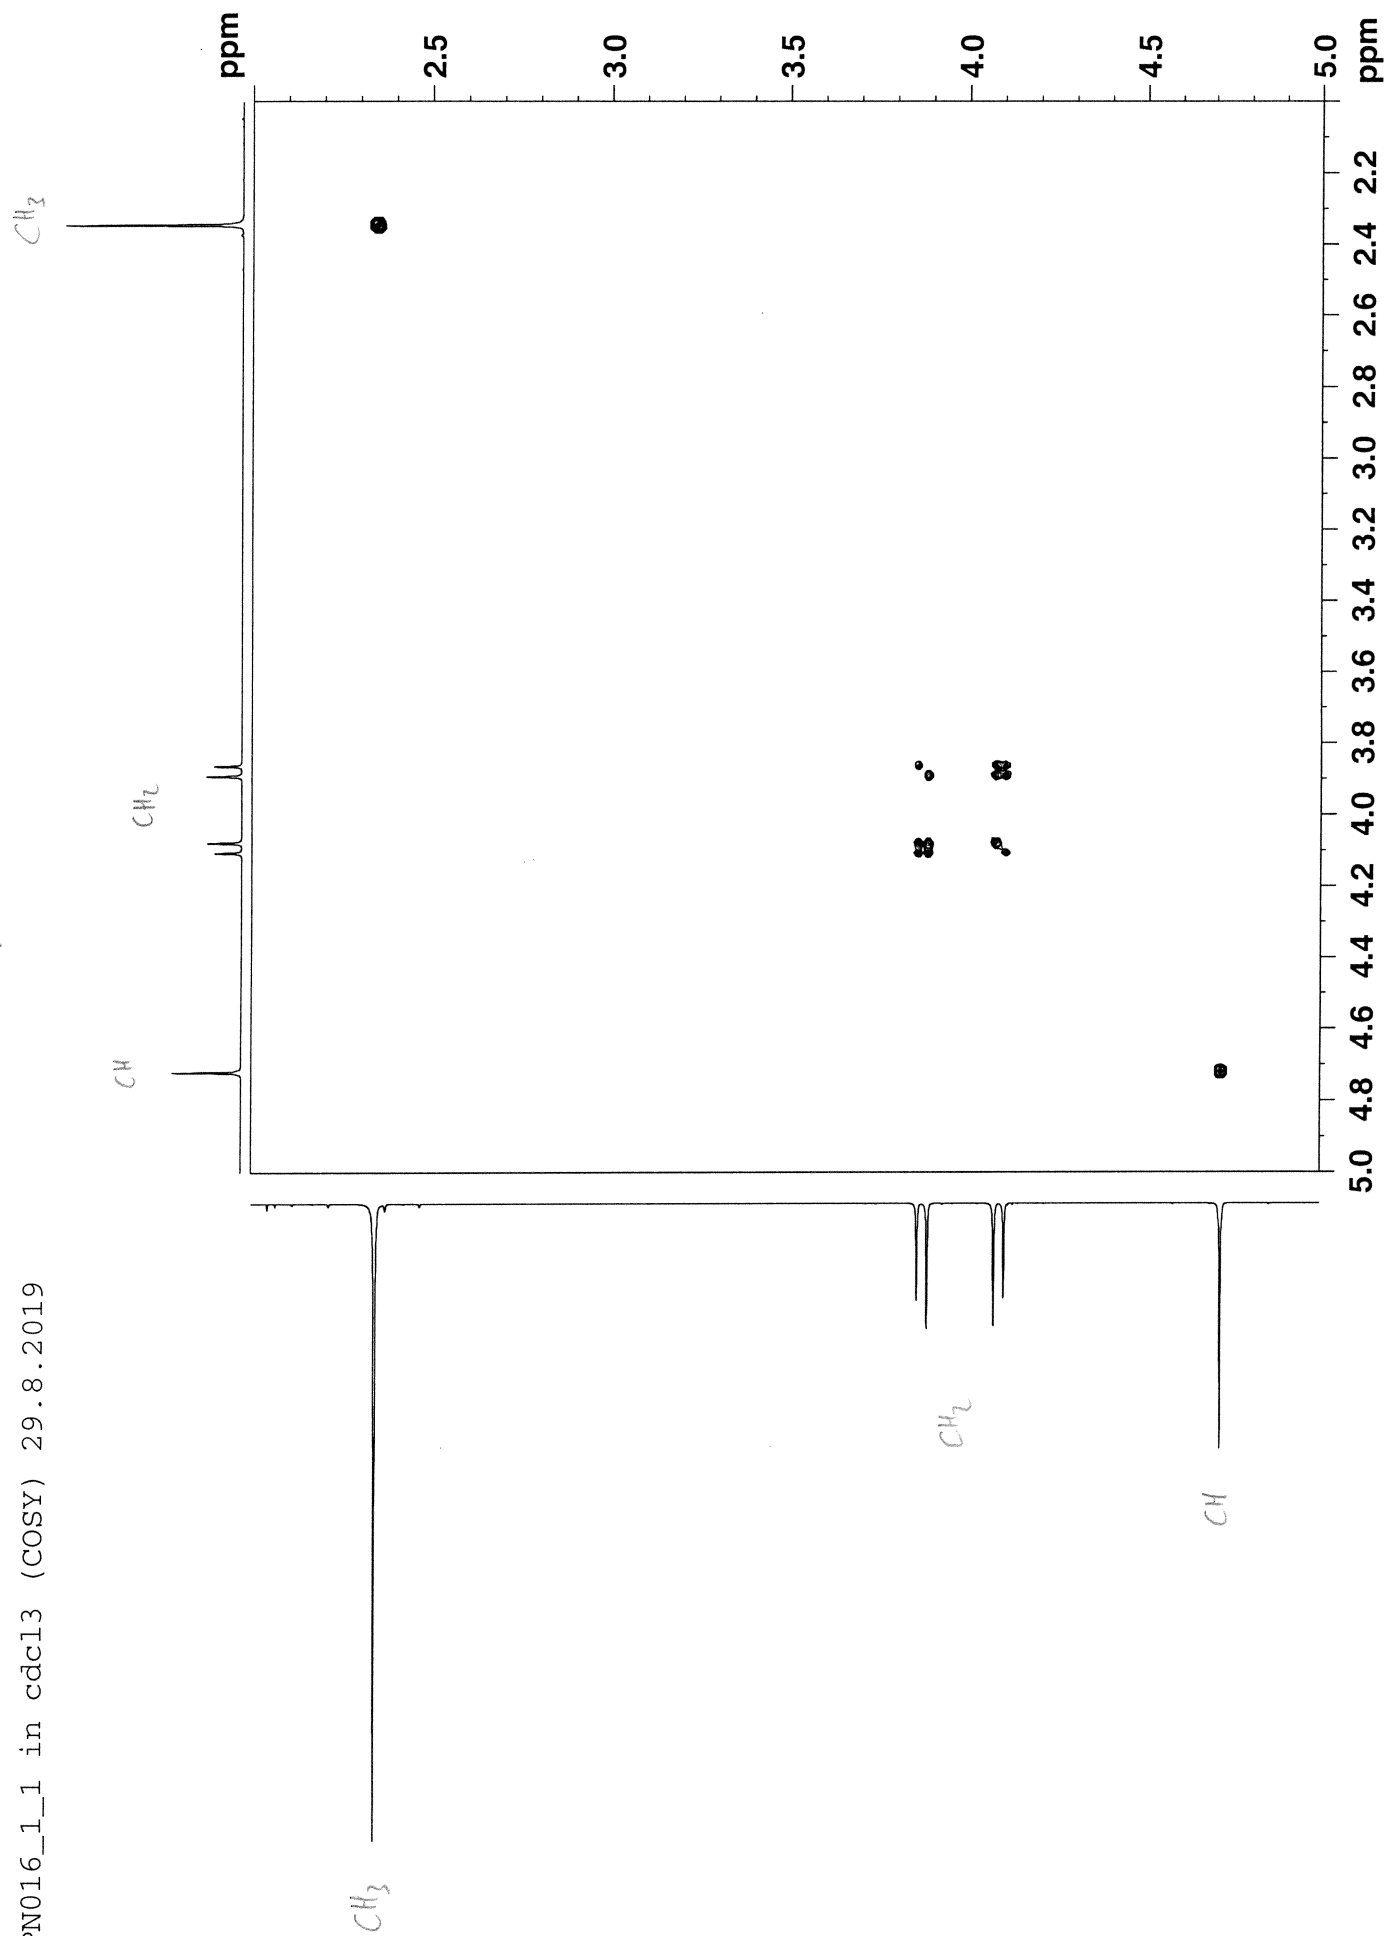

PN016\_1\_1 in cdcl3 (HSQC) 29.8.2019

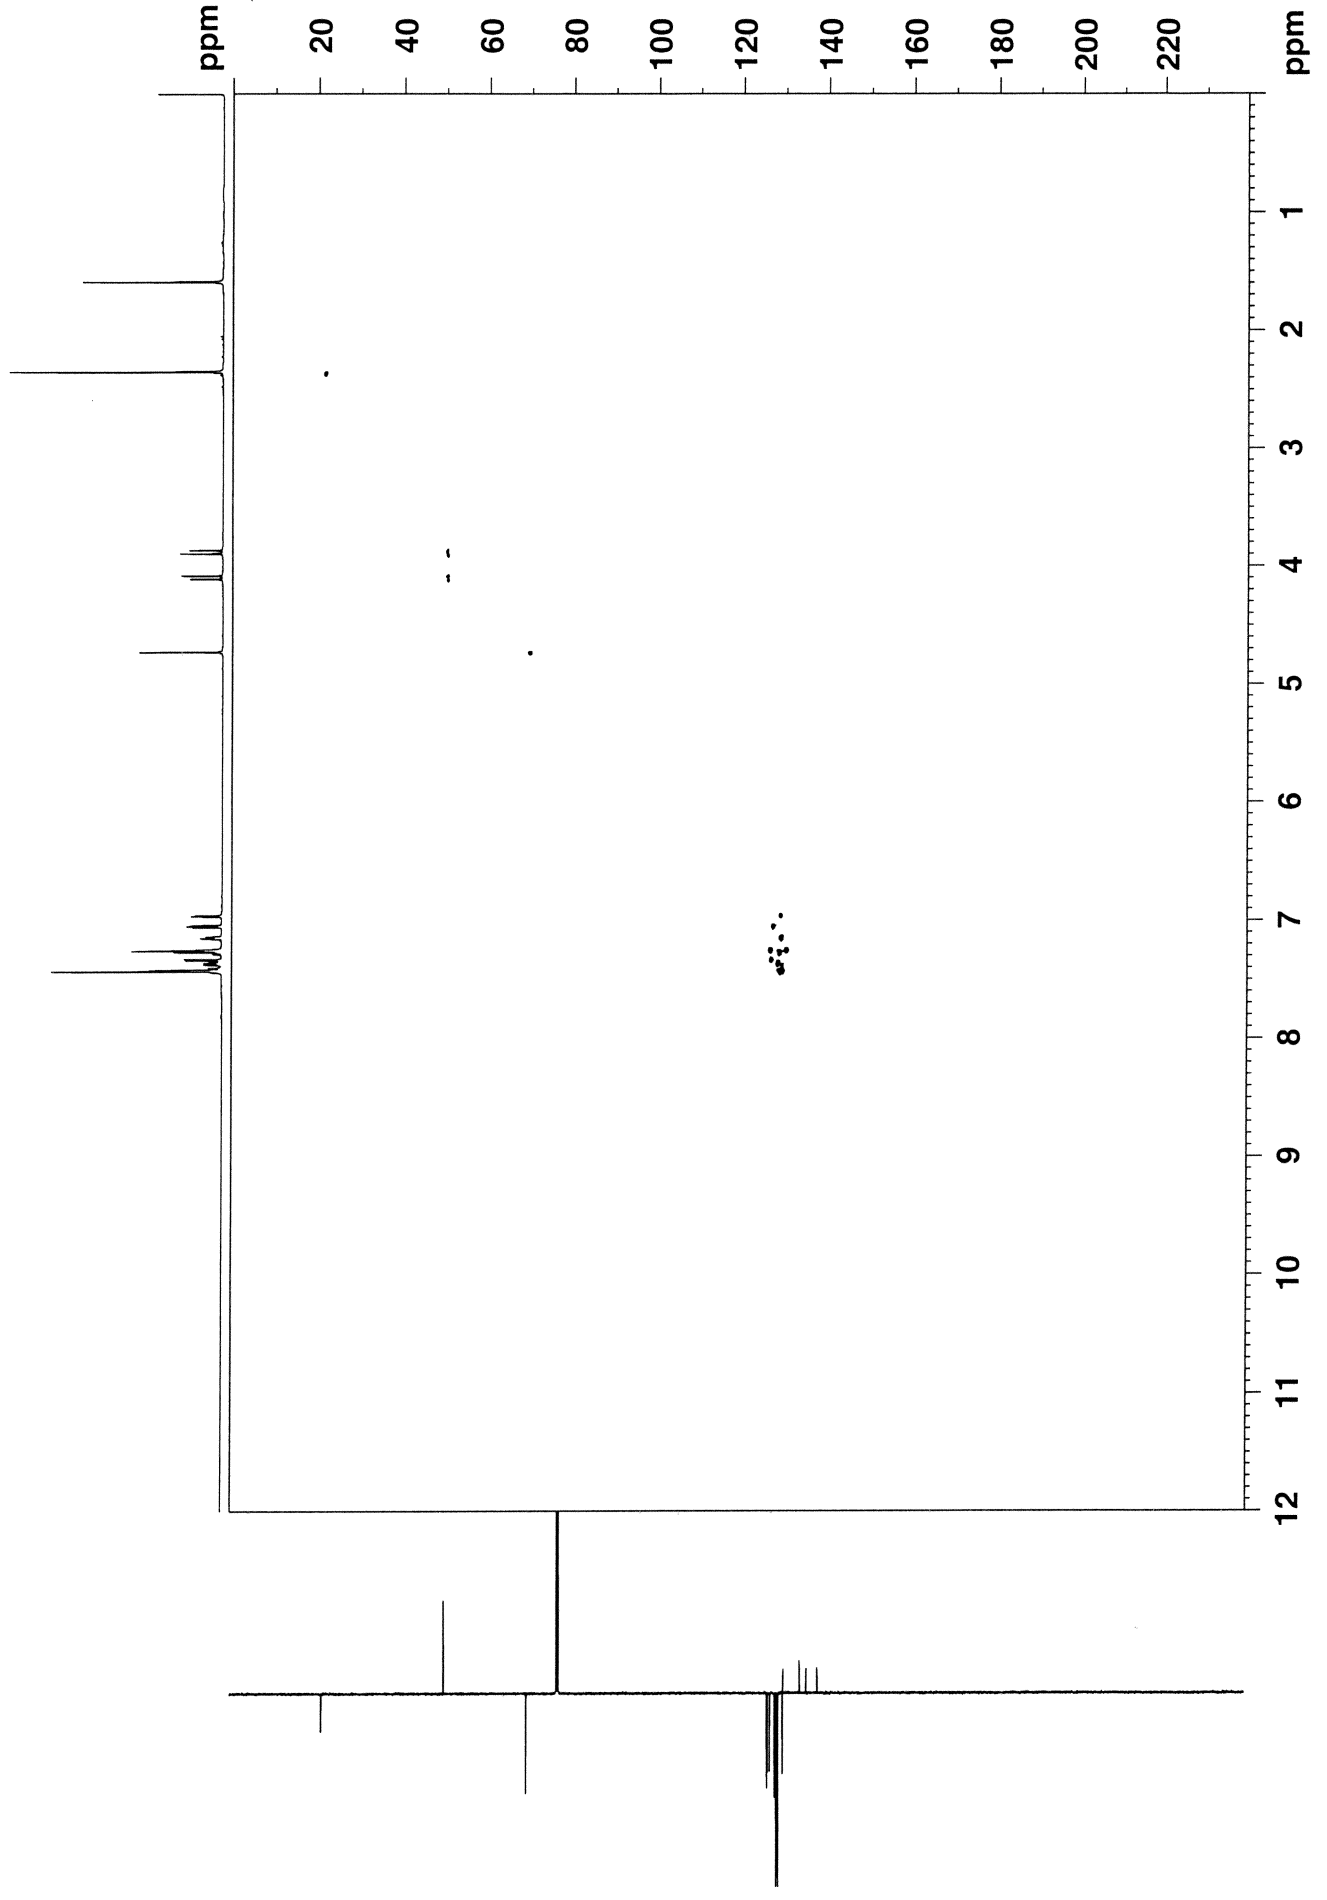

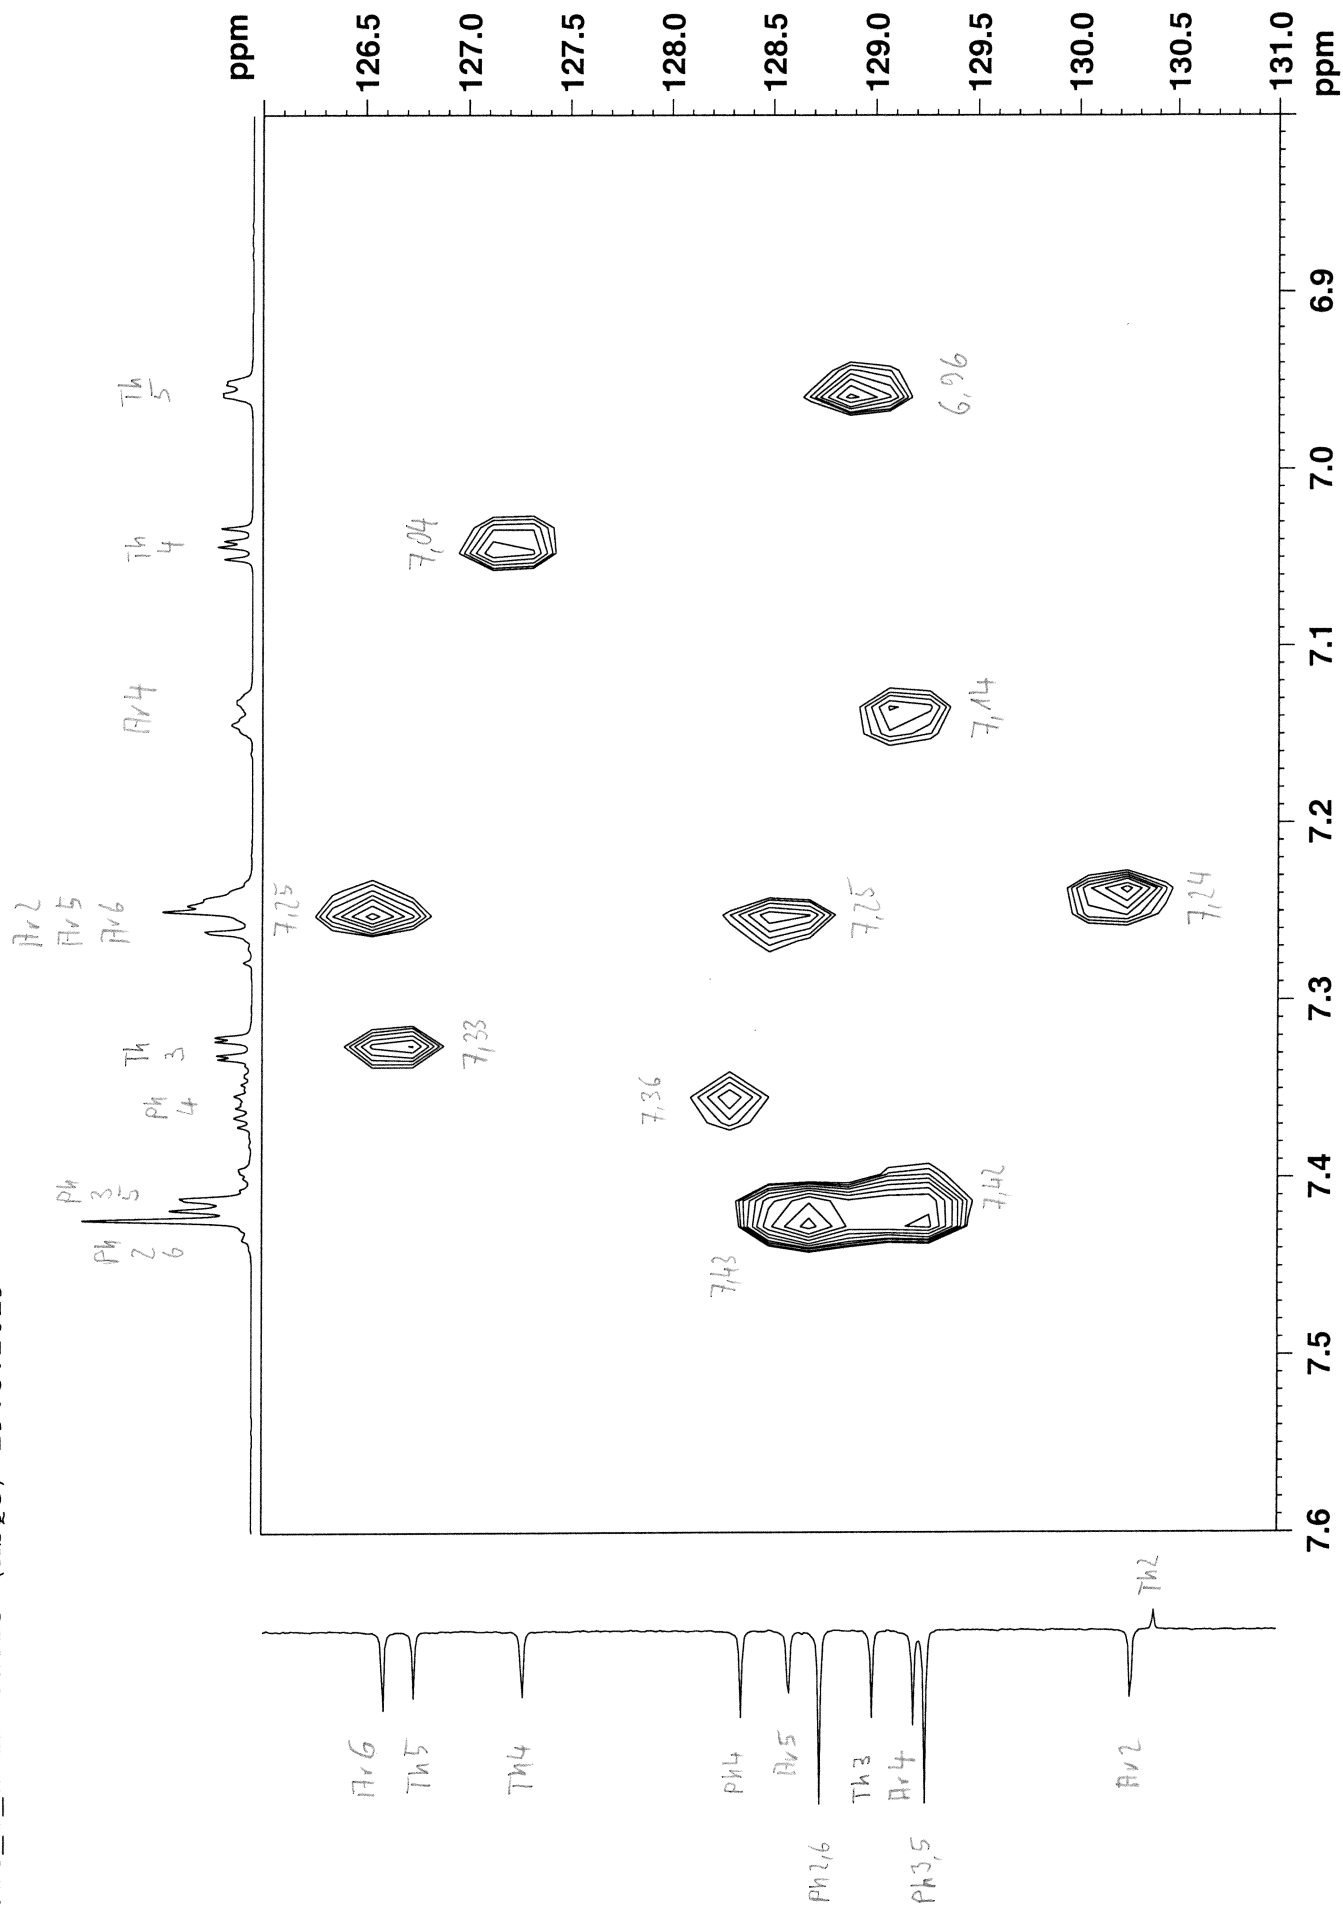

CH3

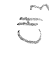 $CH_2$



PN016\_1\_1 in cdcl3 (HMBC) 29.8.2019

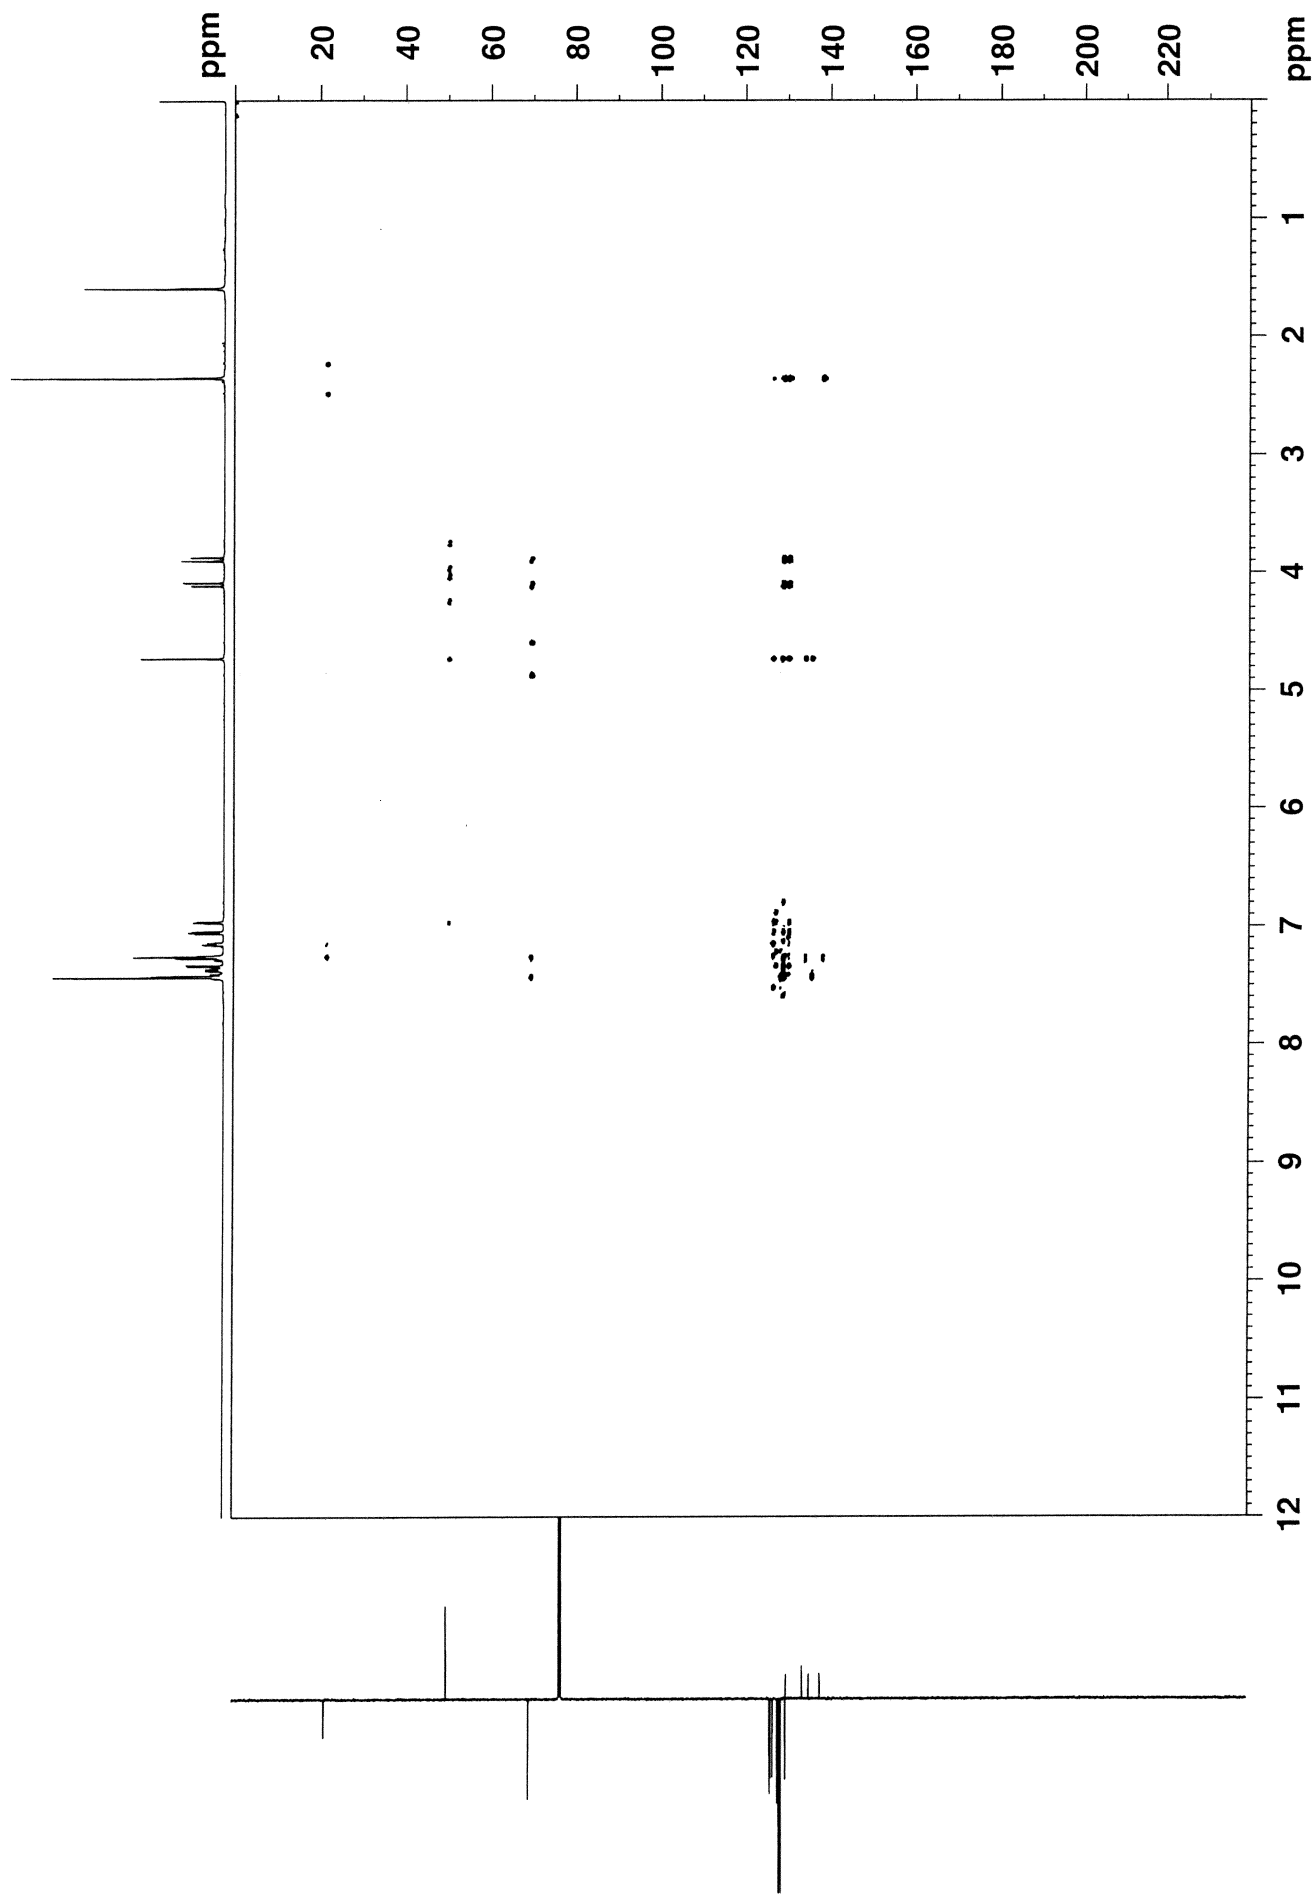

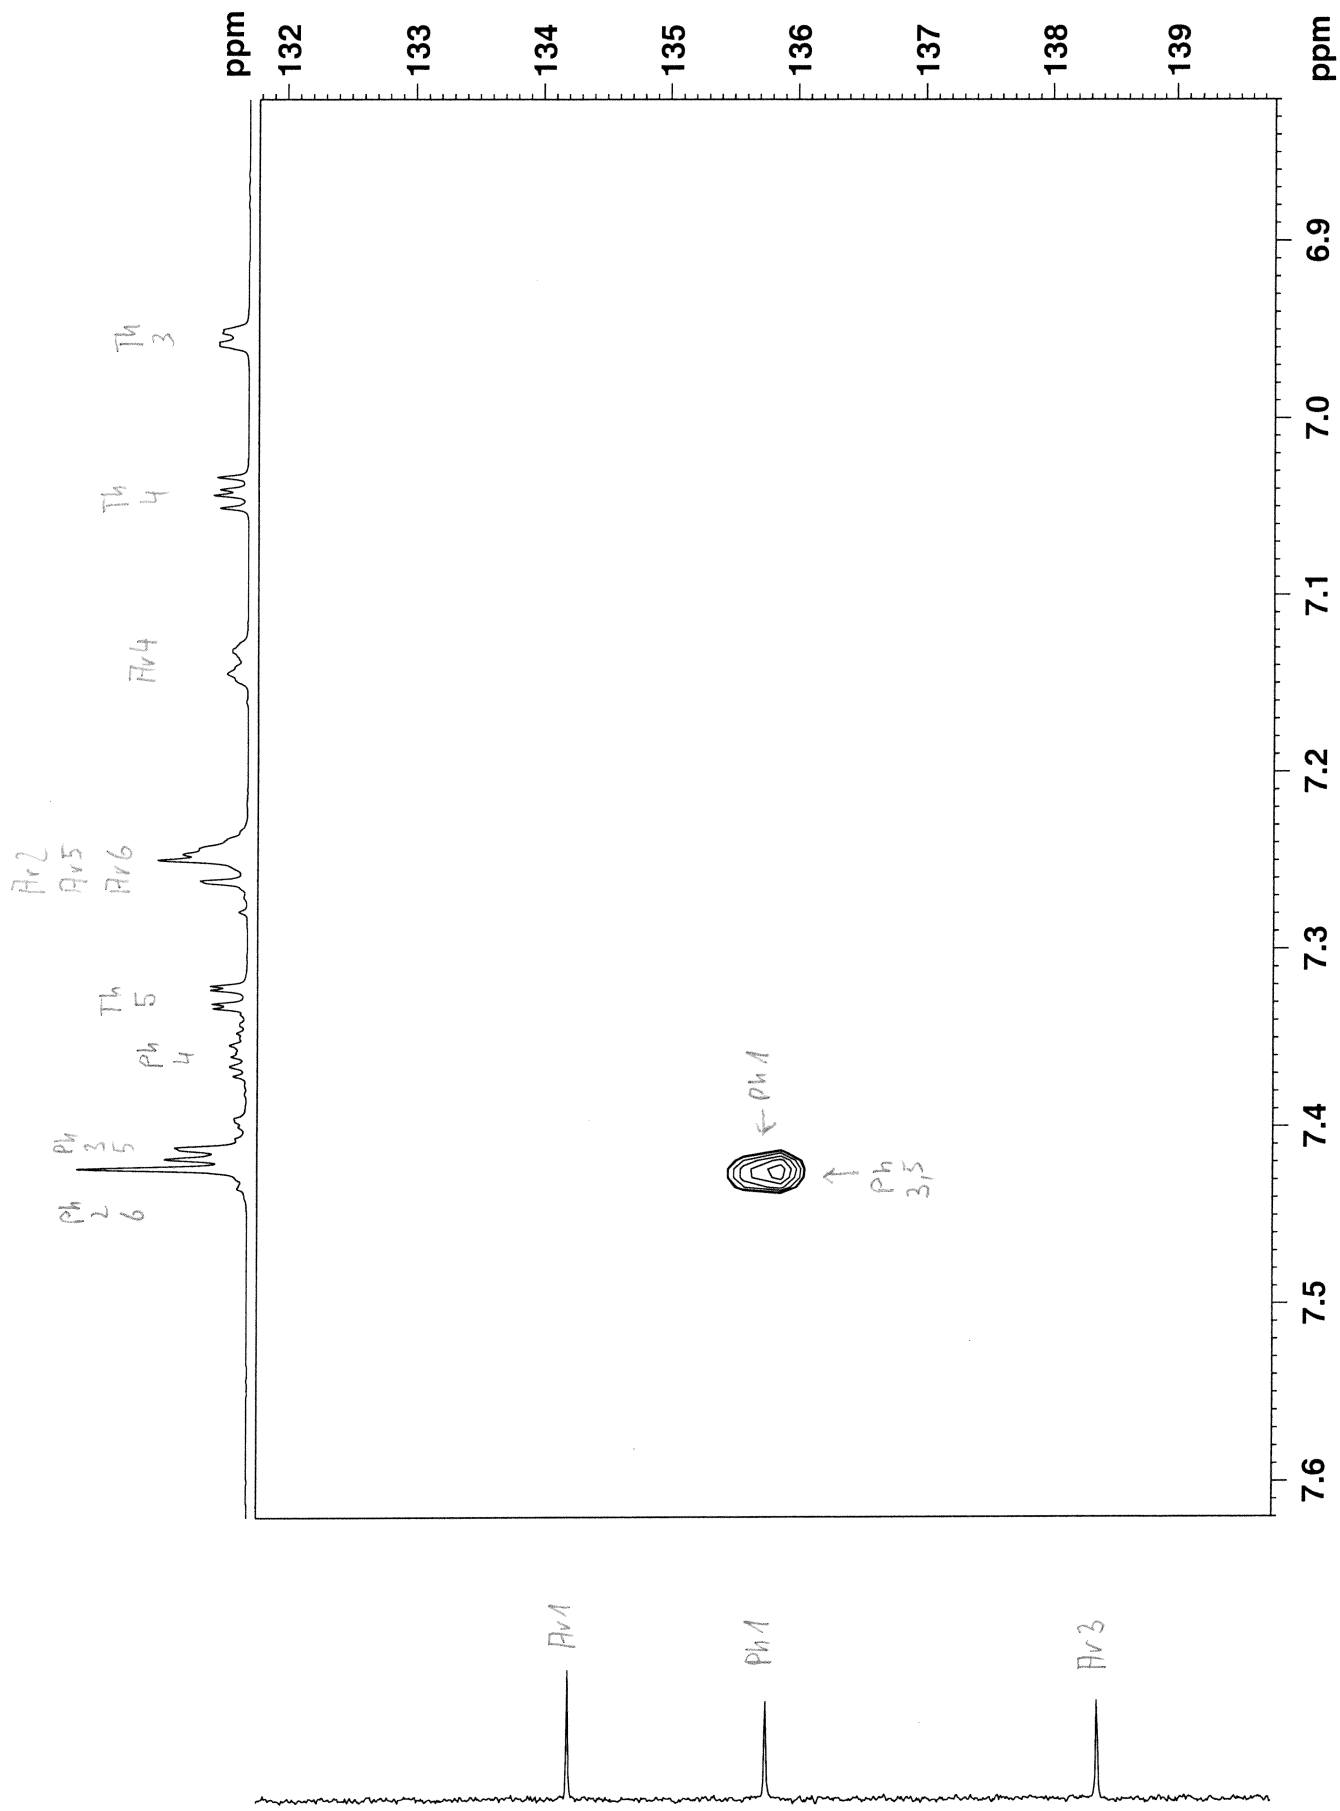

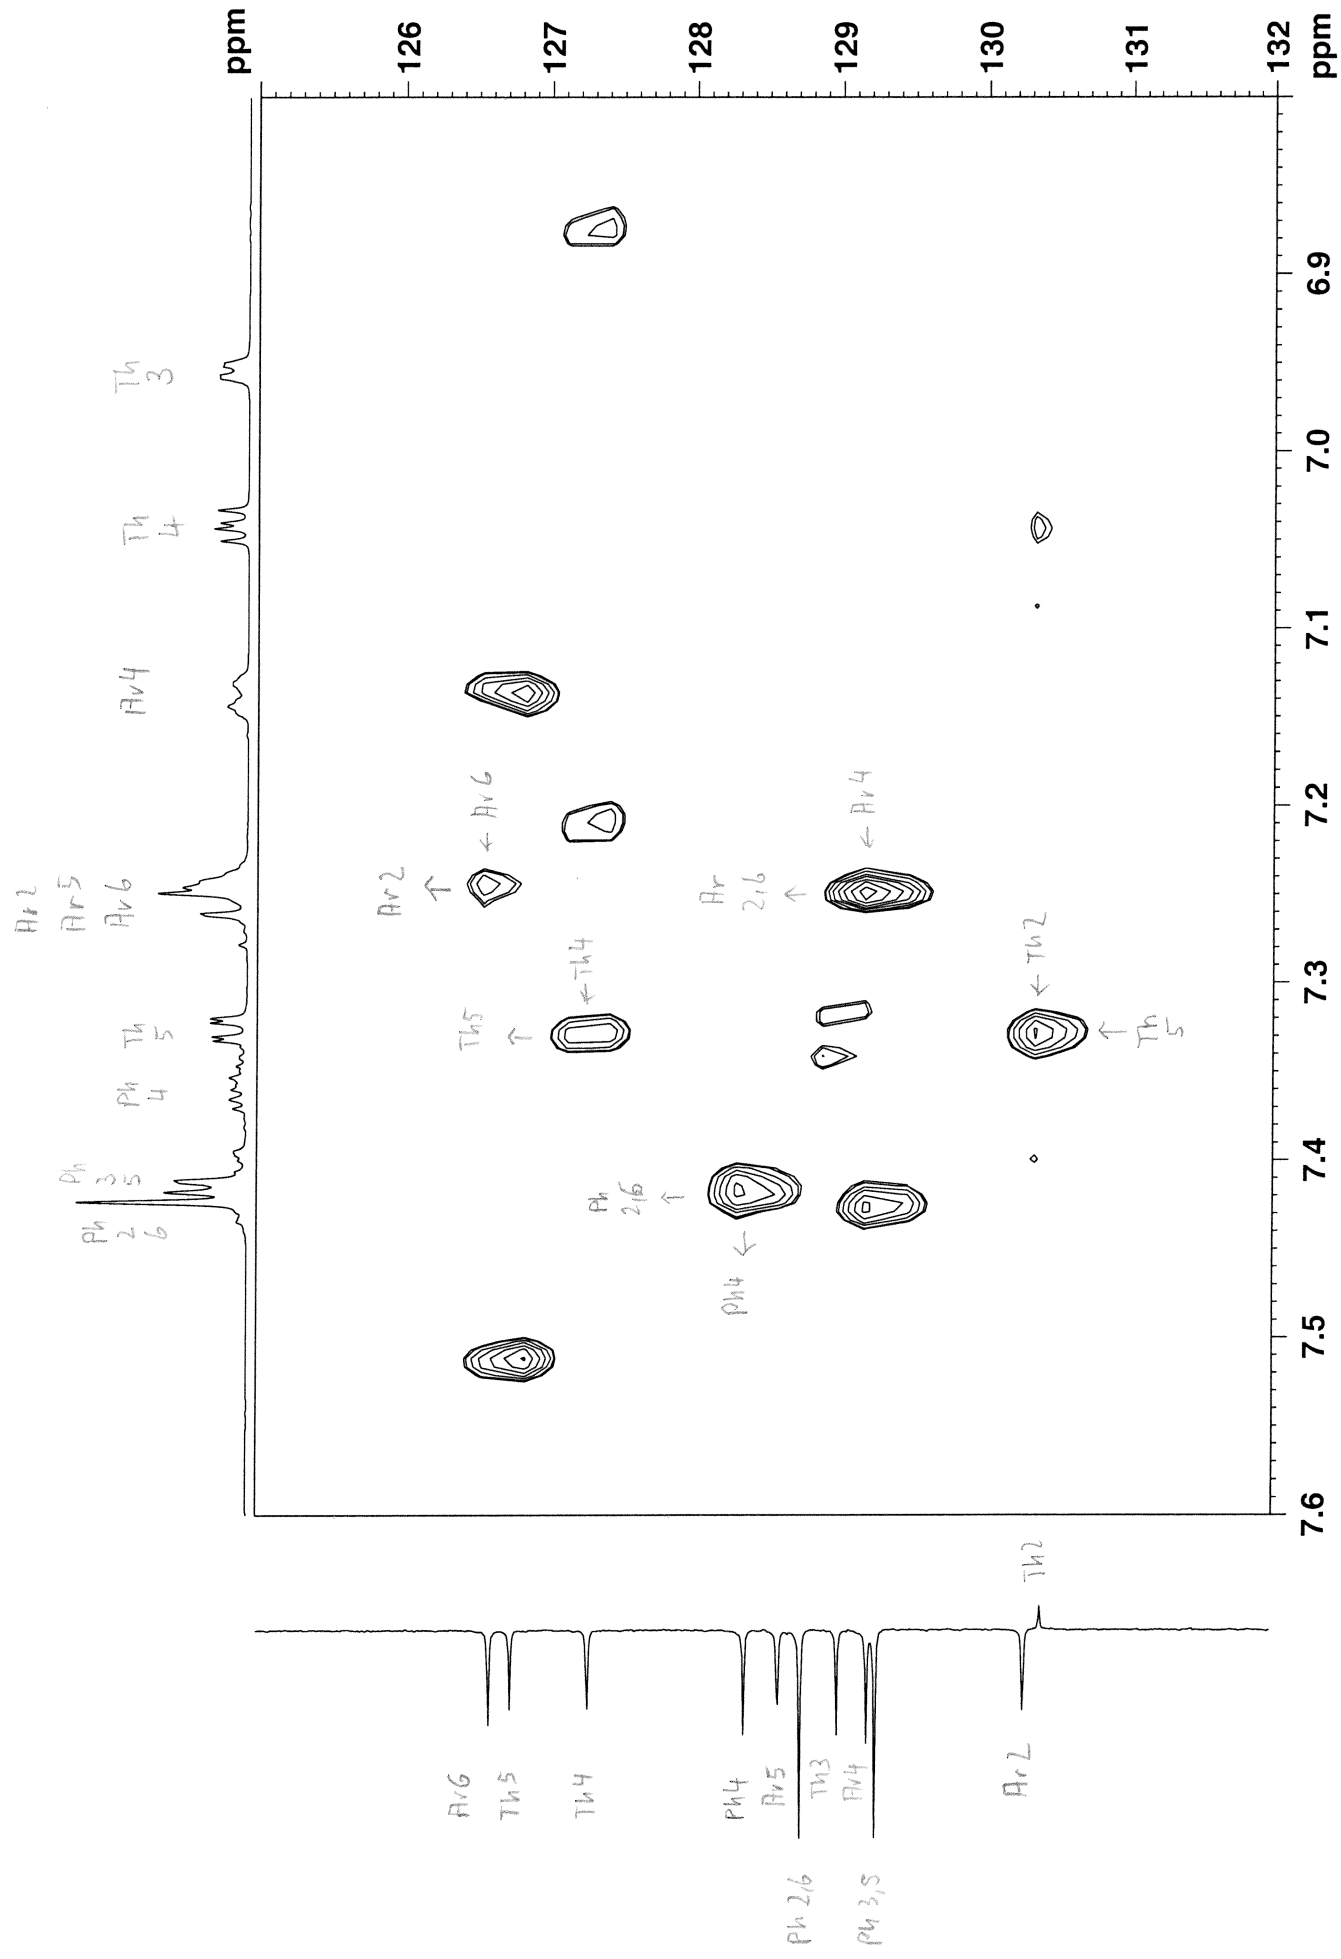

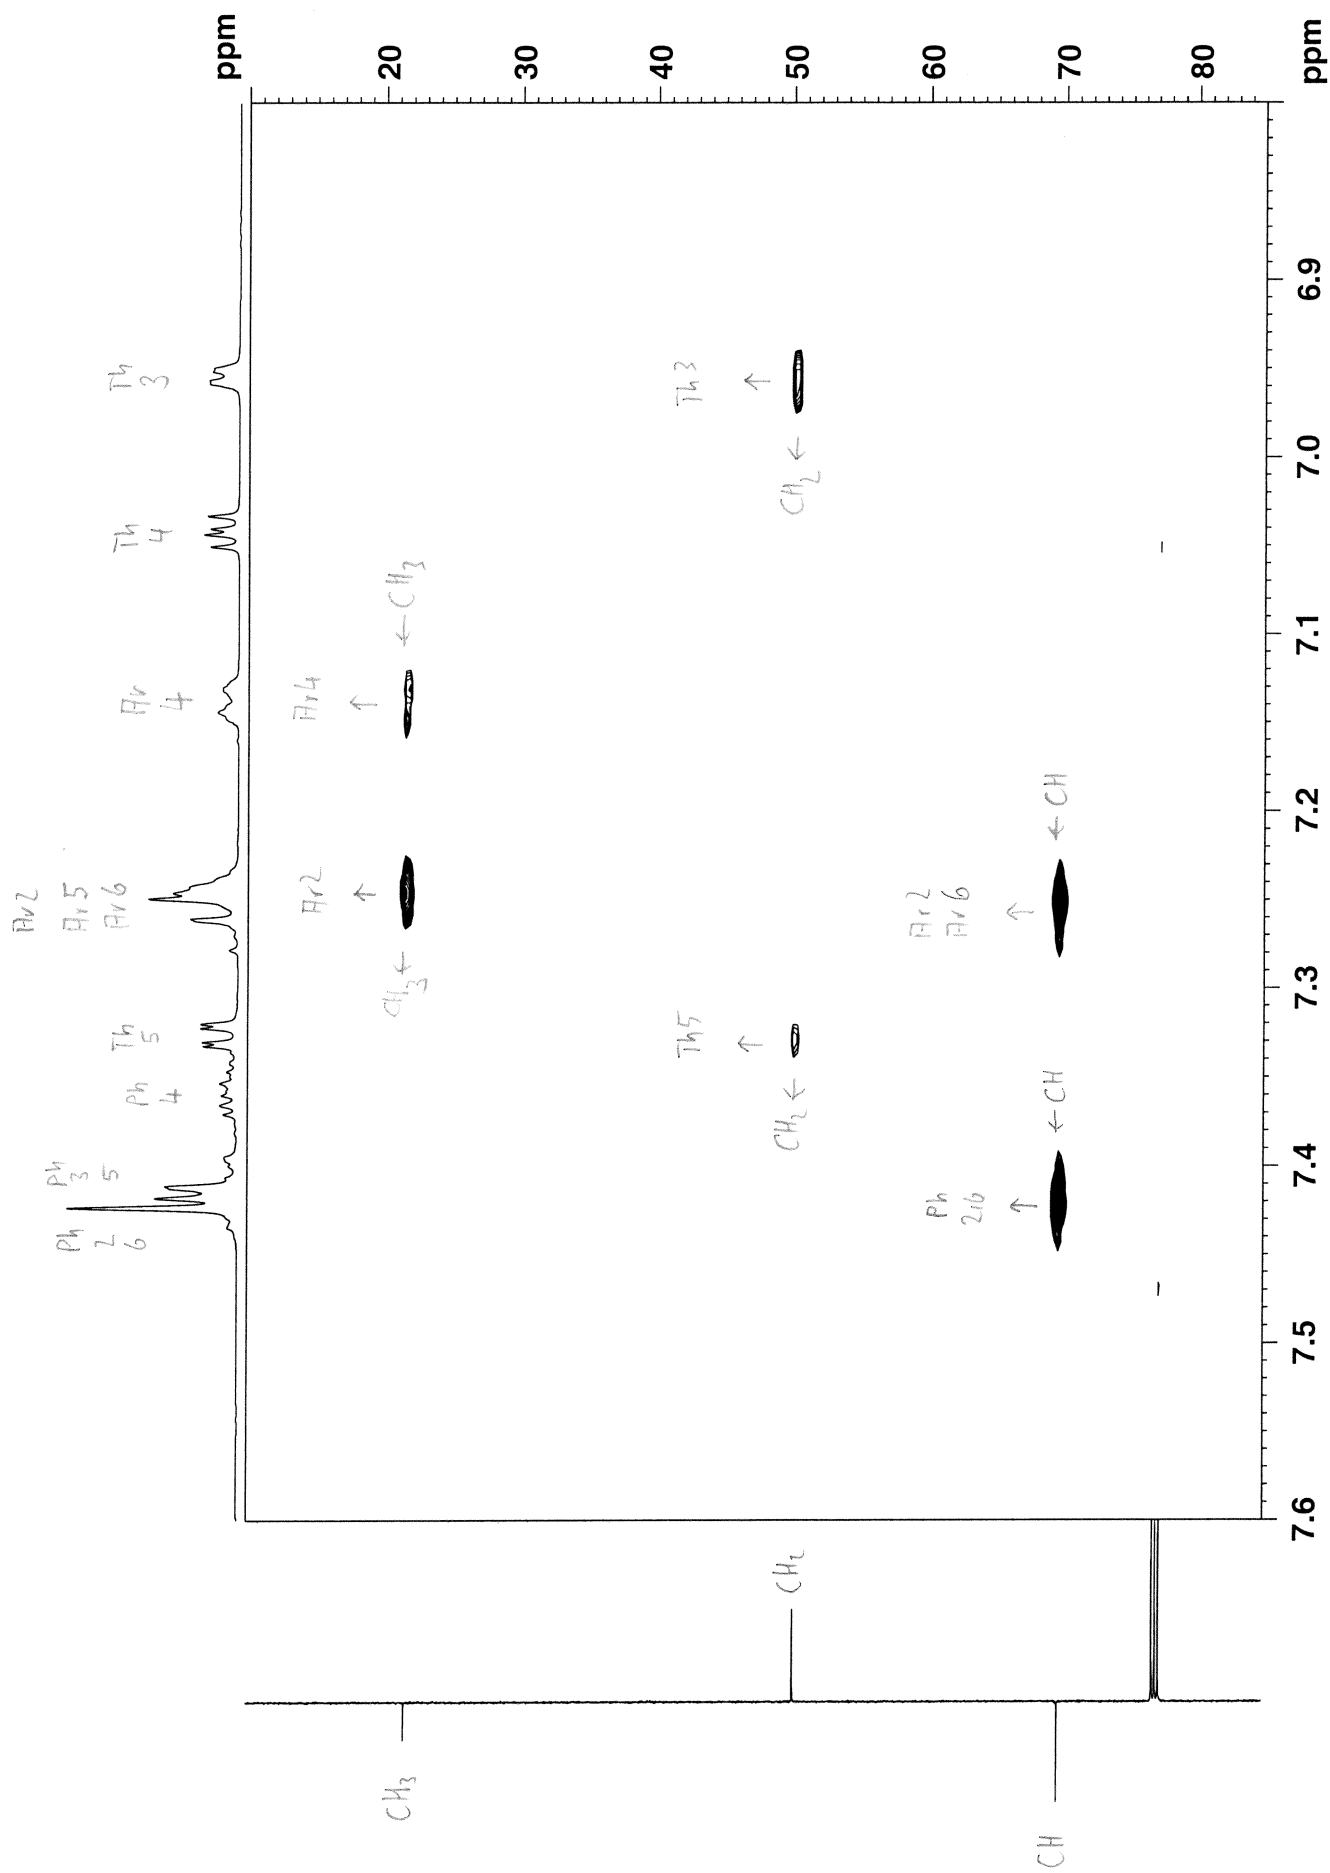

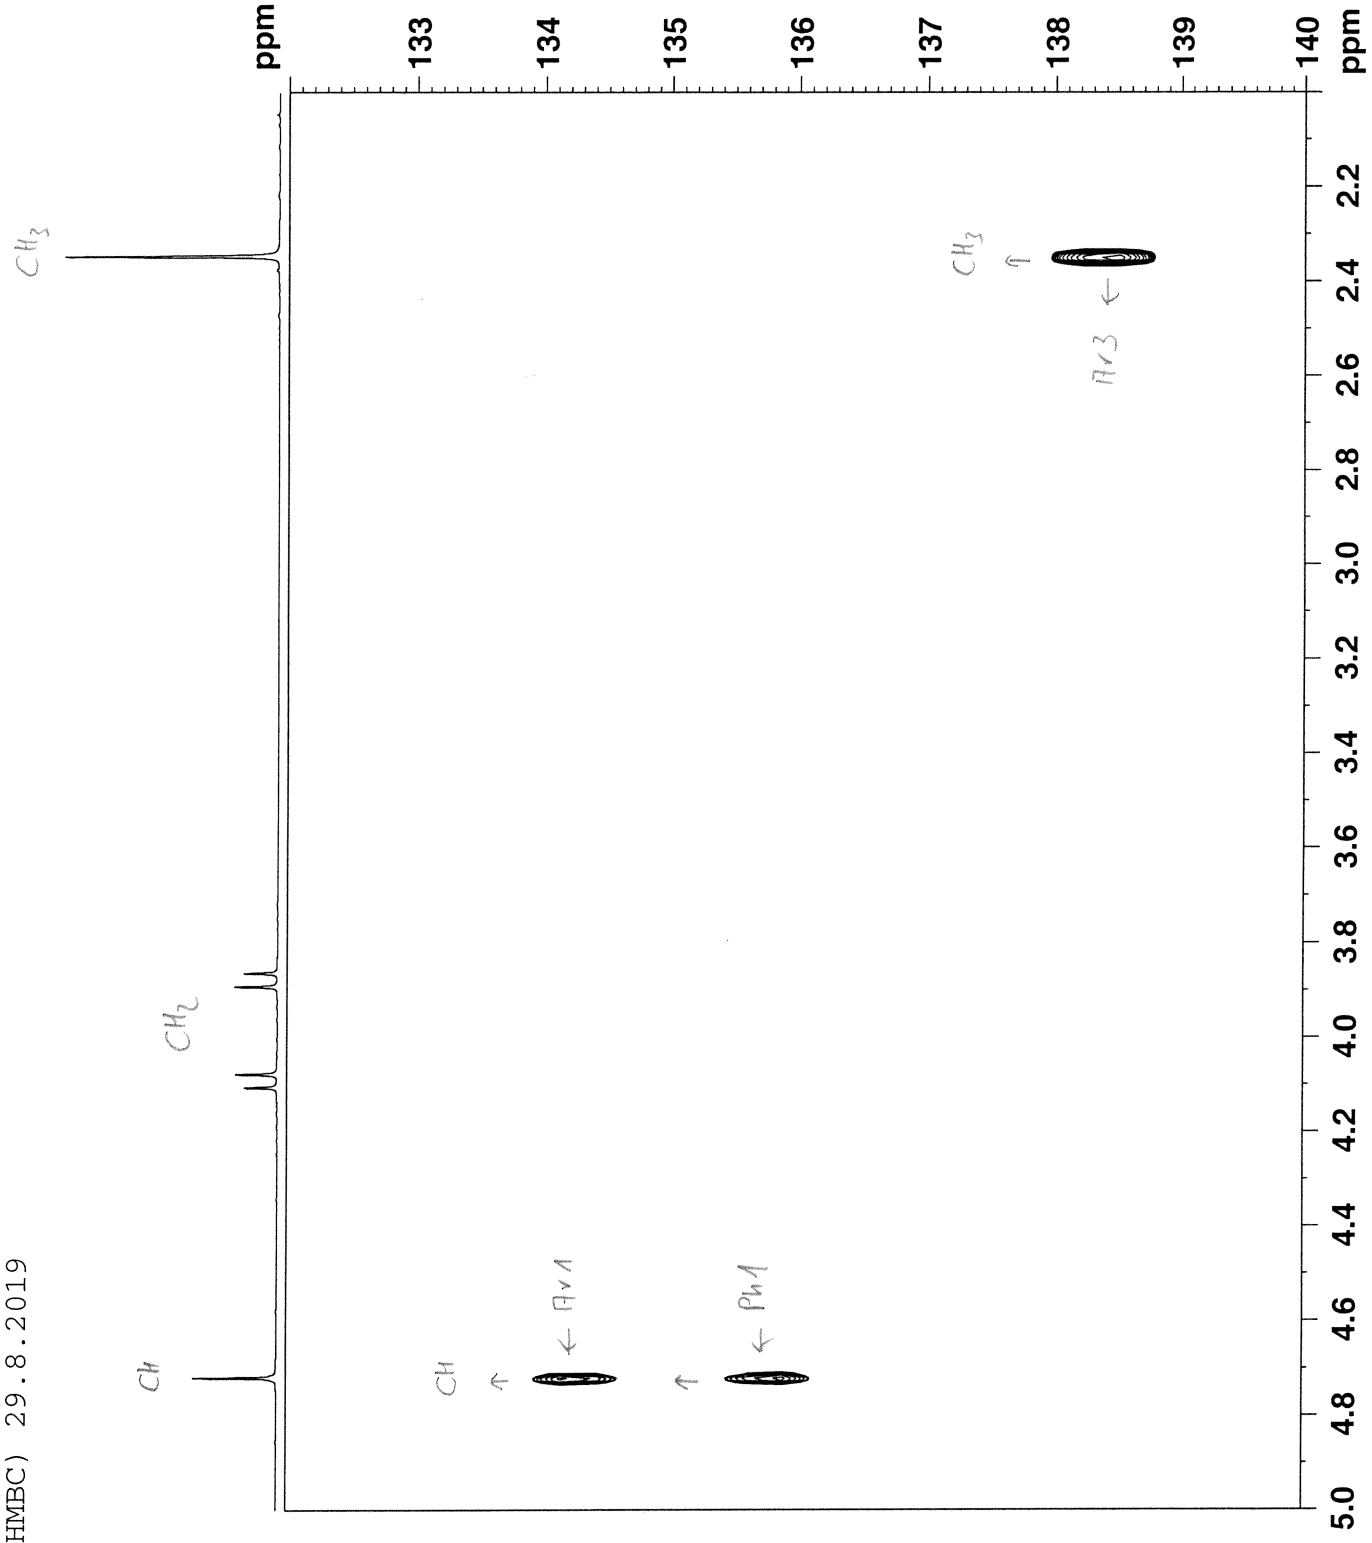

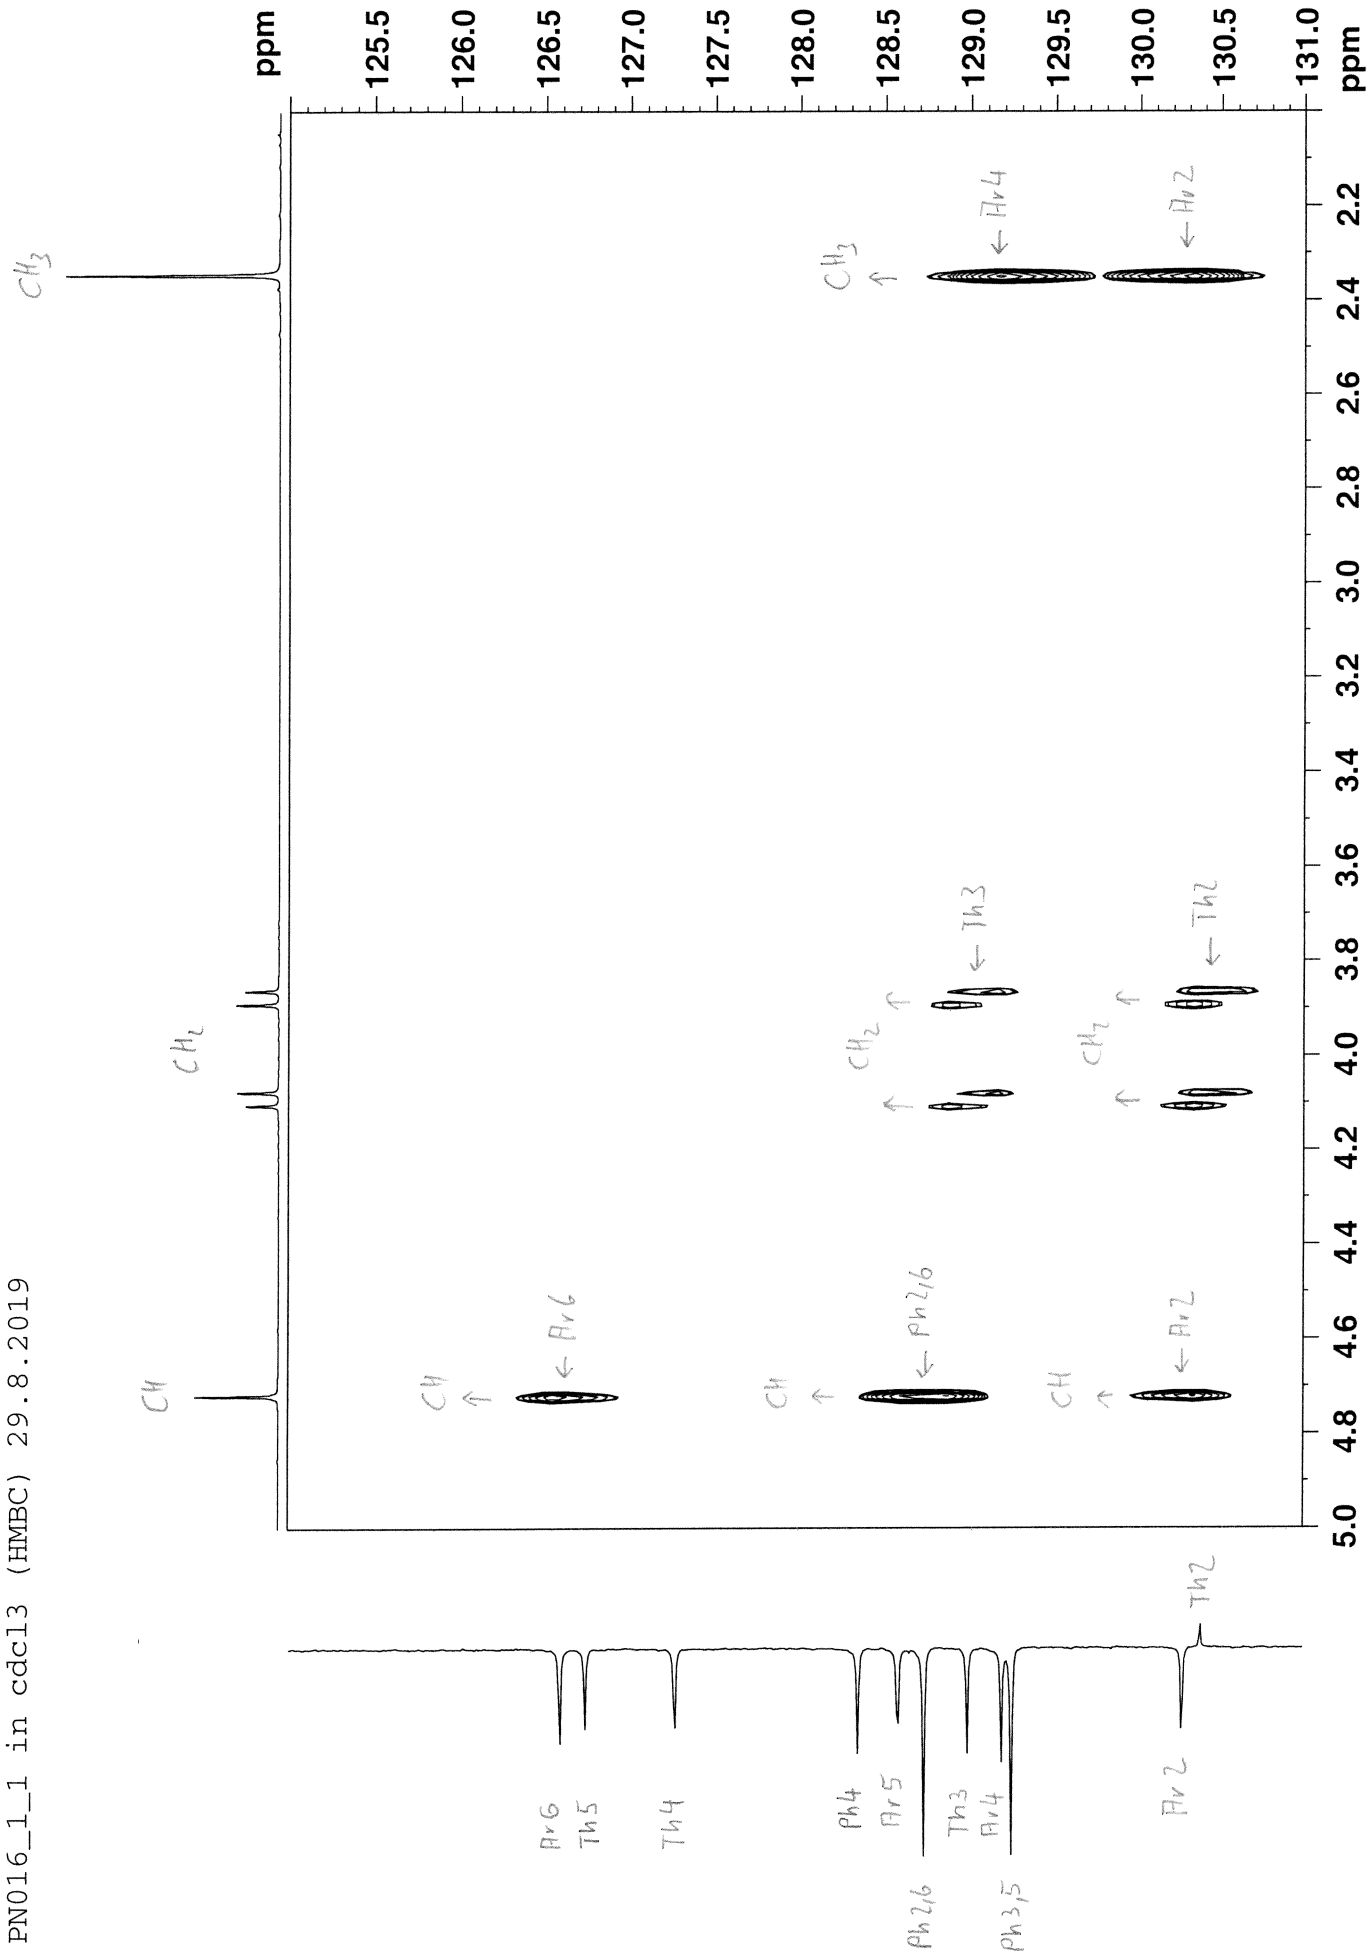

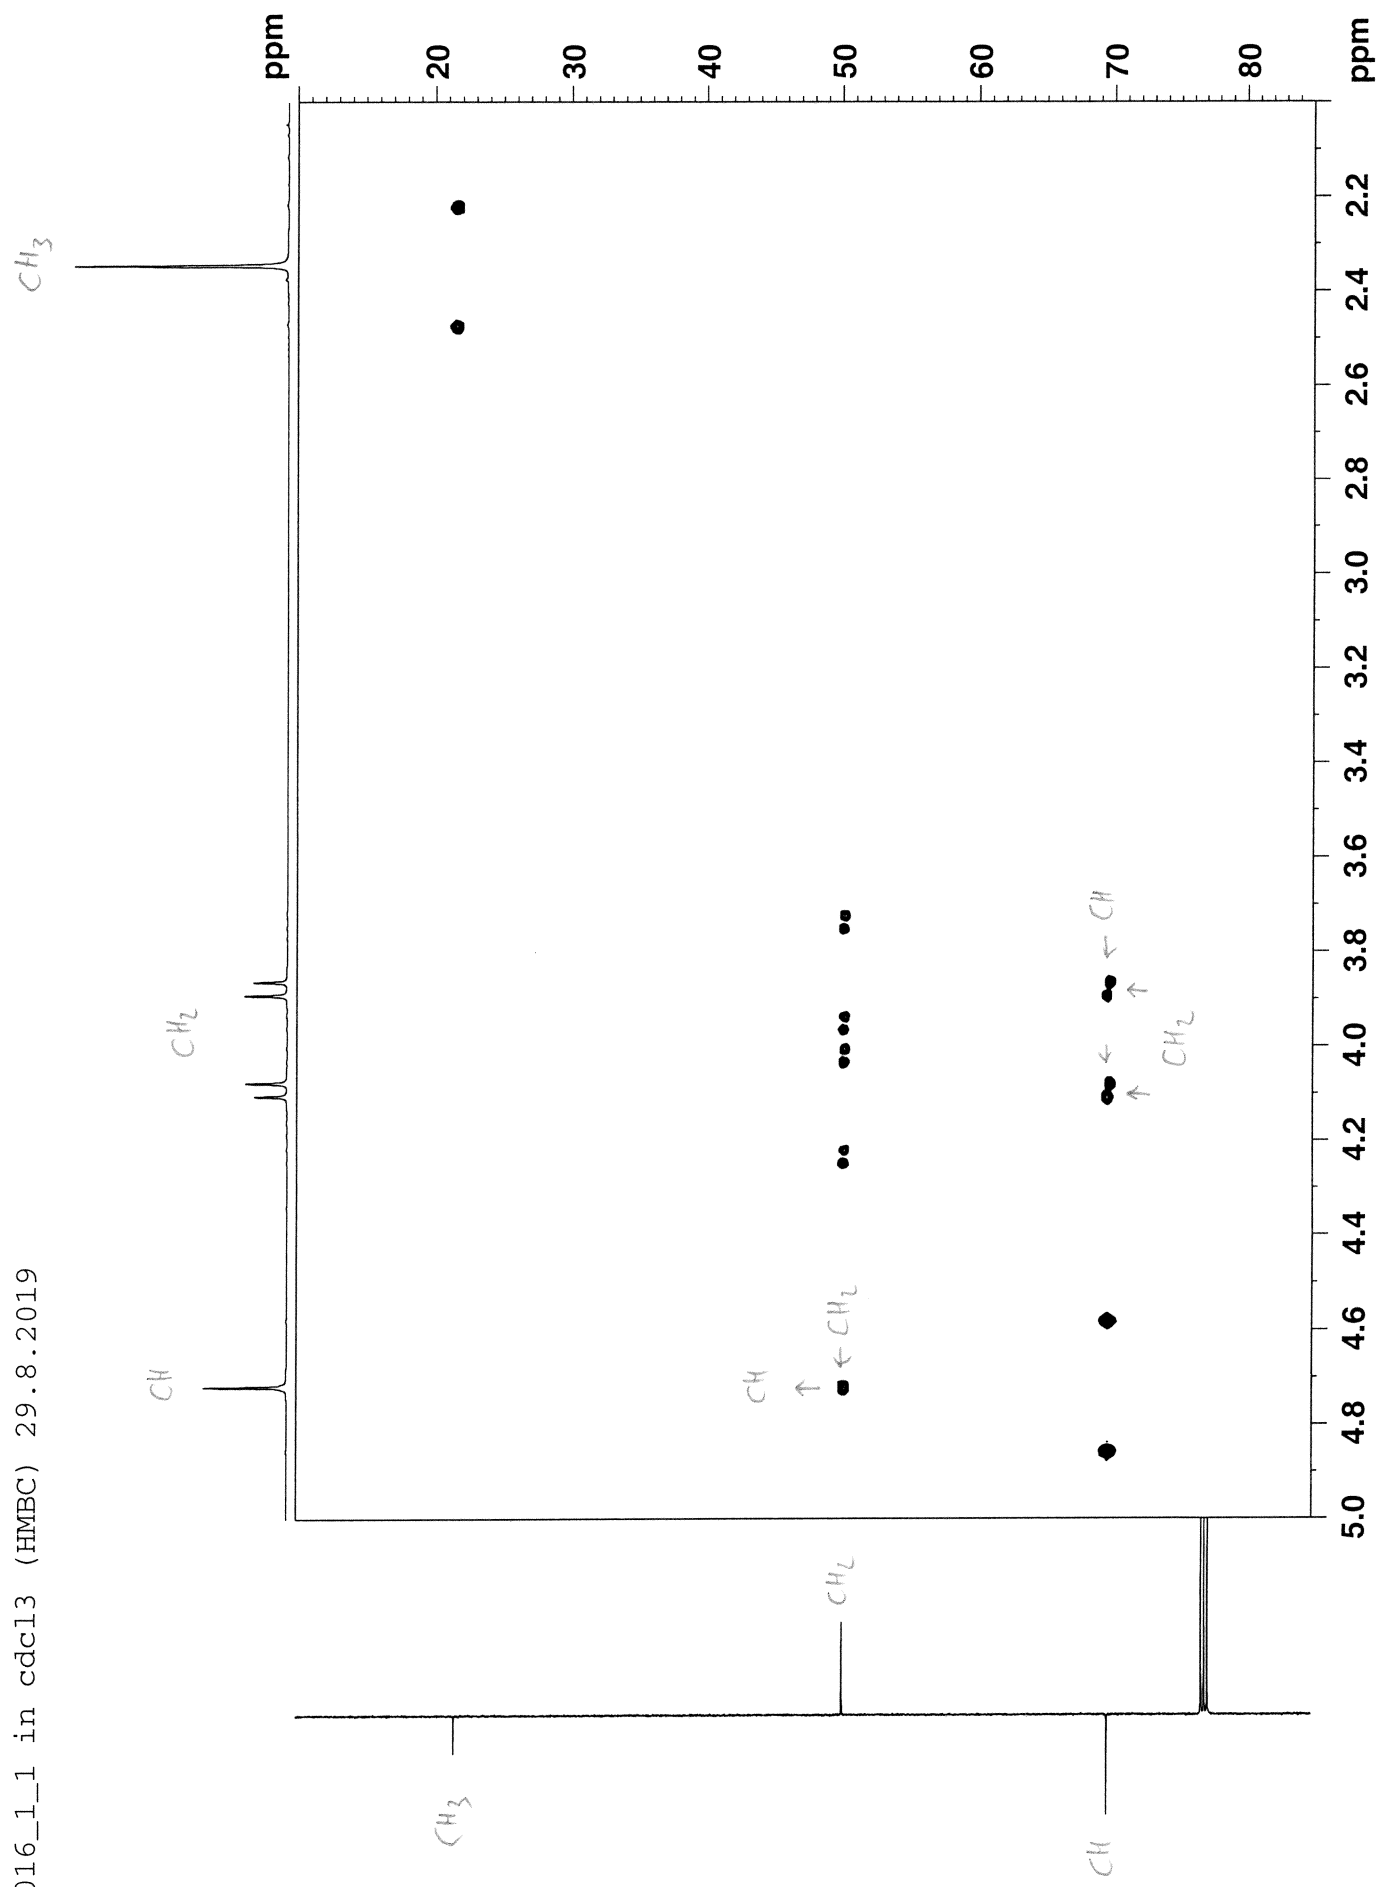

**Figure S50c.** NMR spectra of compound **6m**.

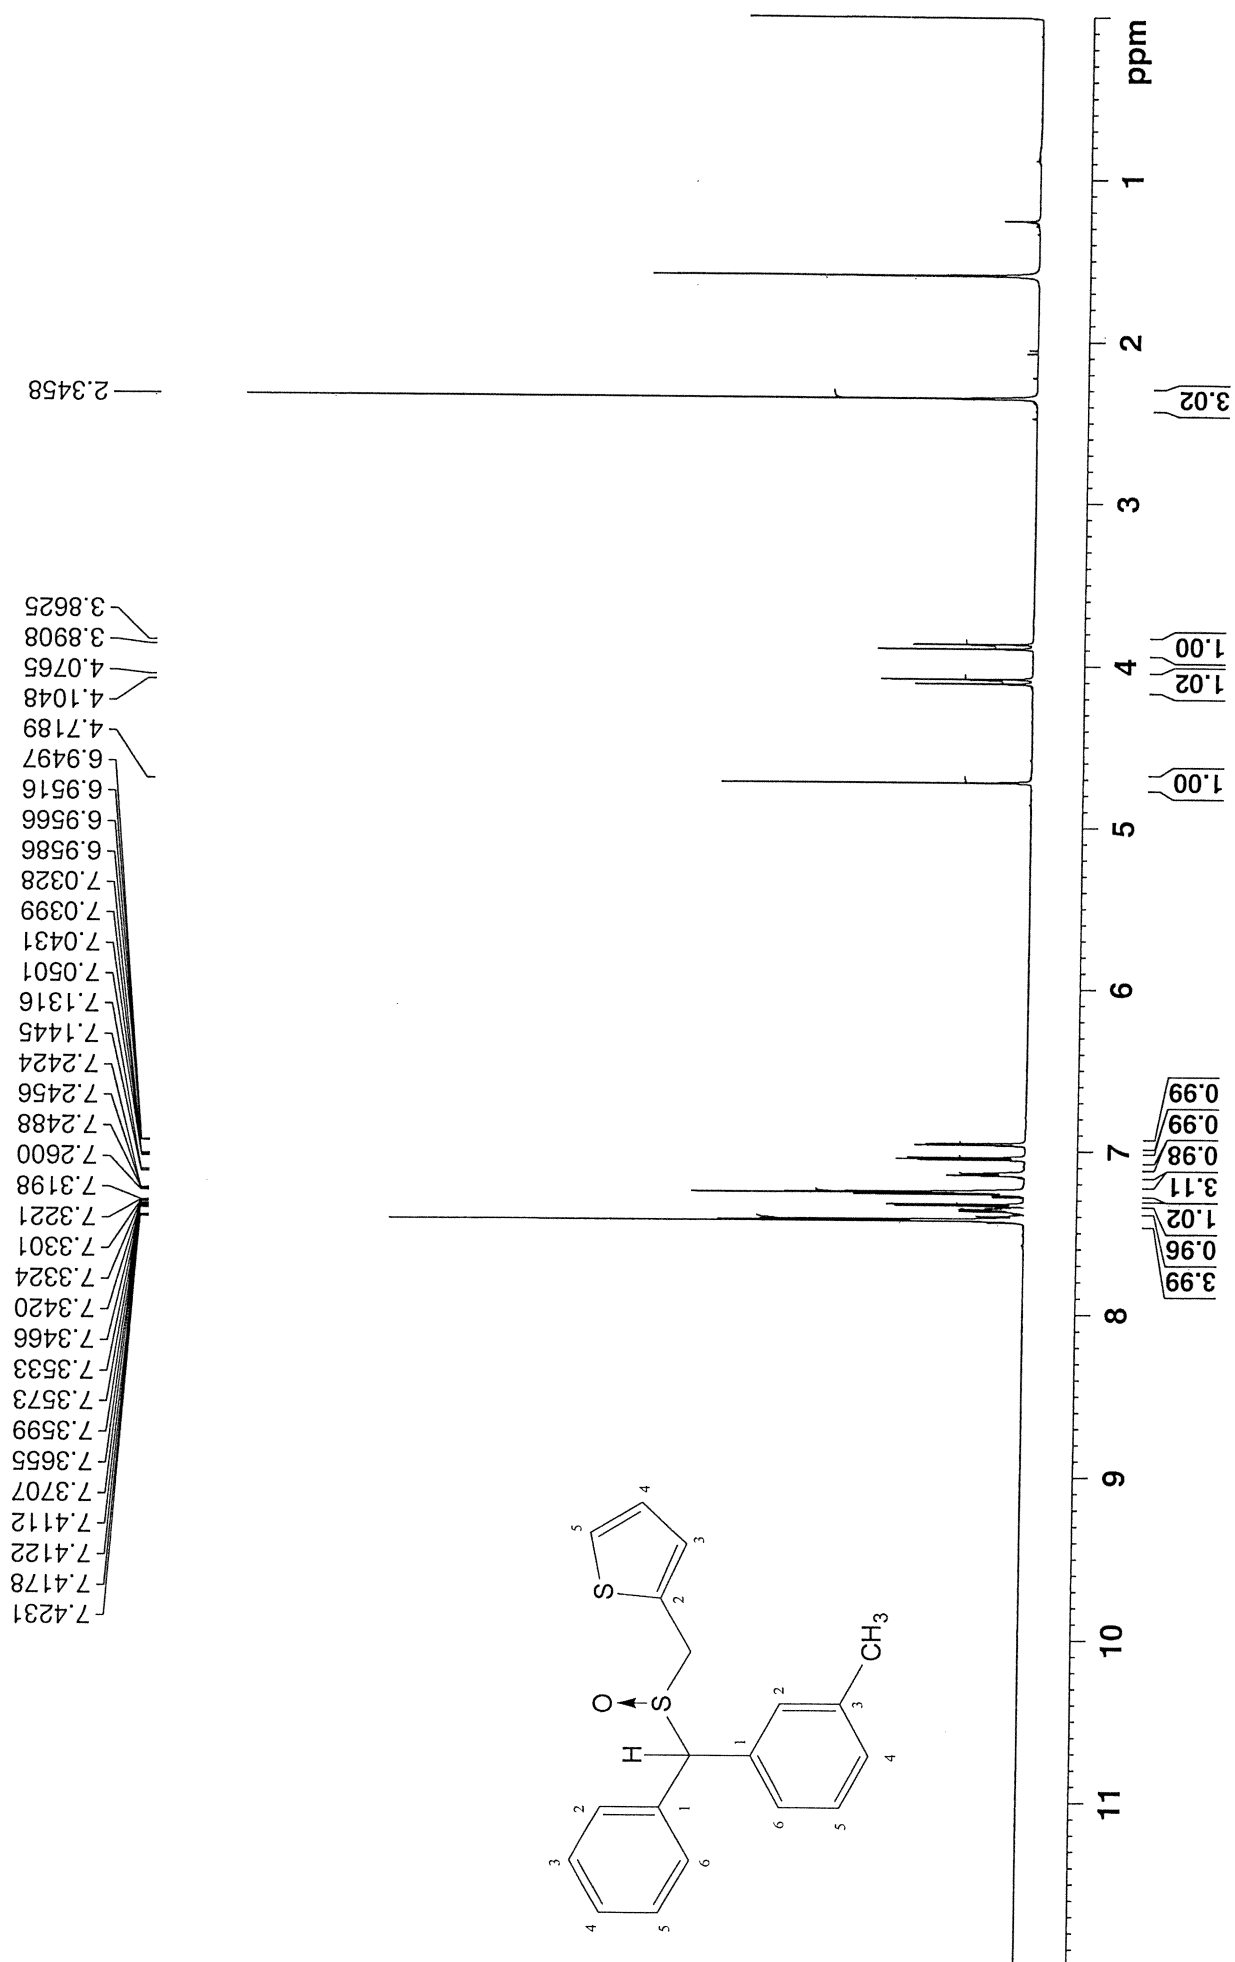



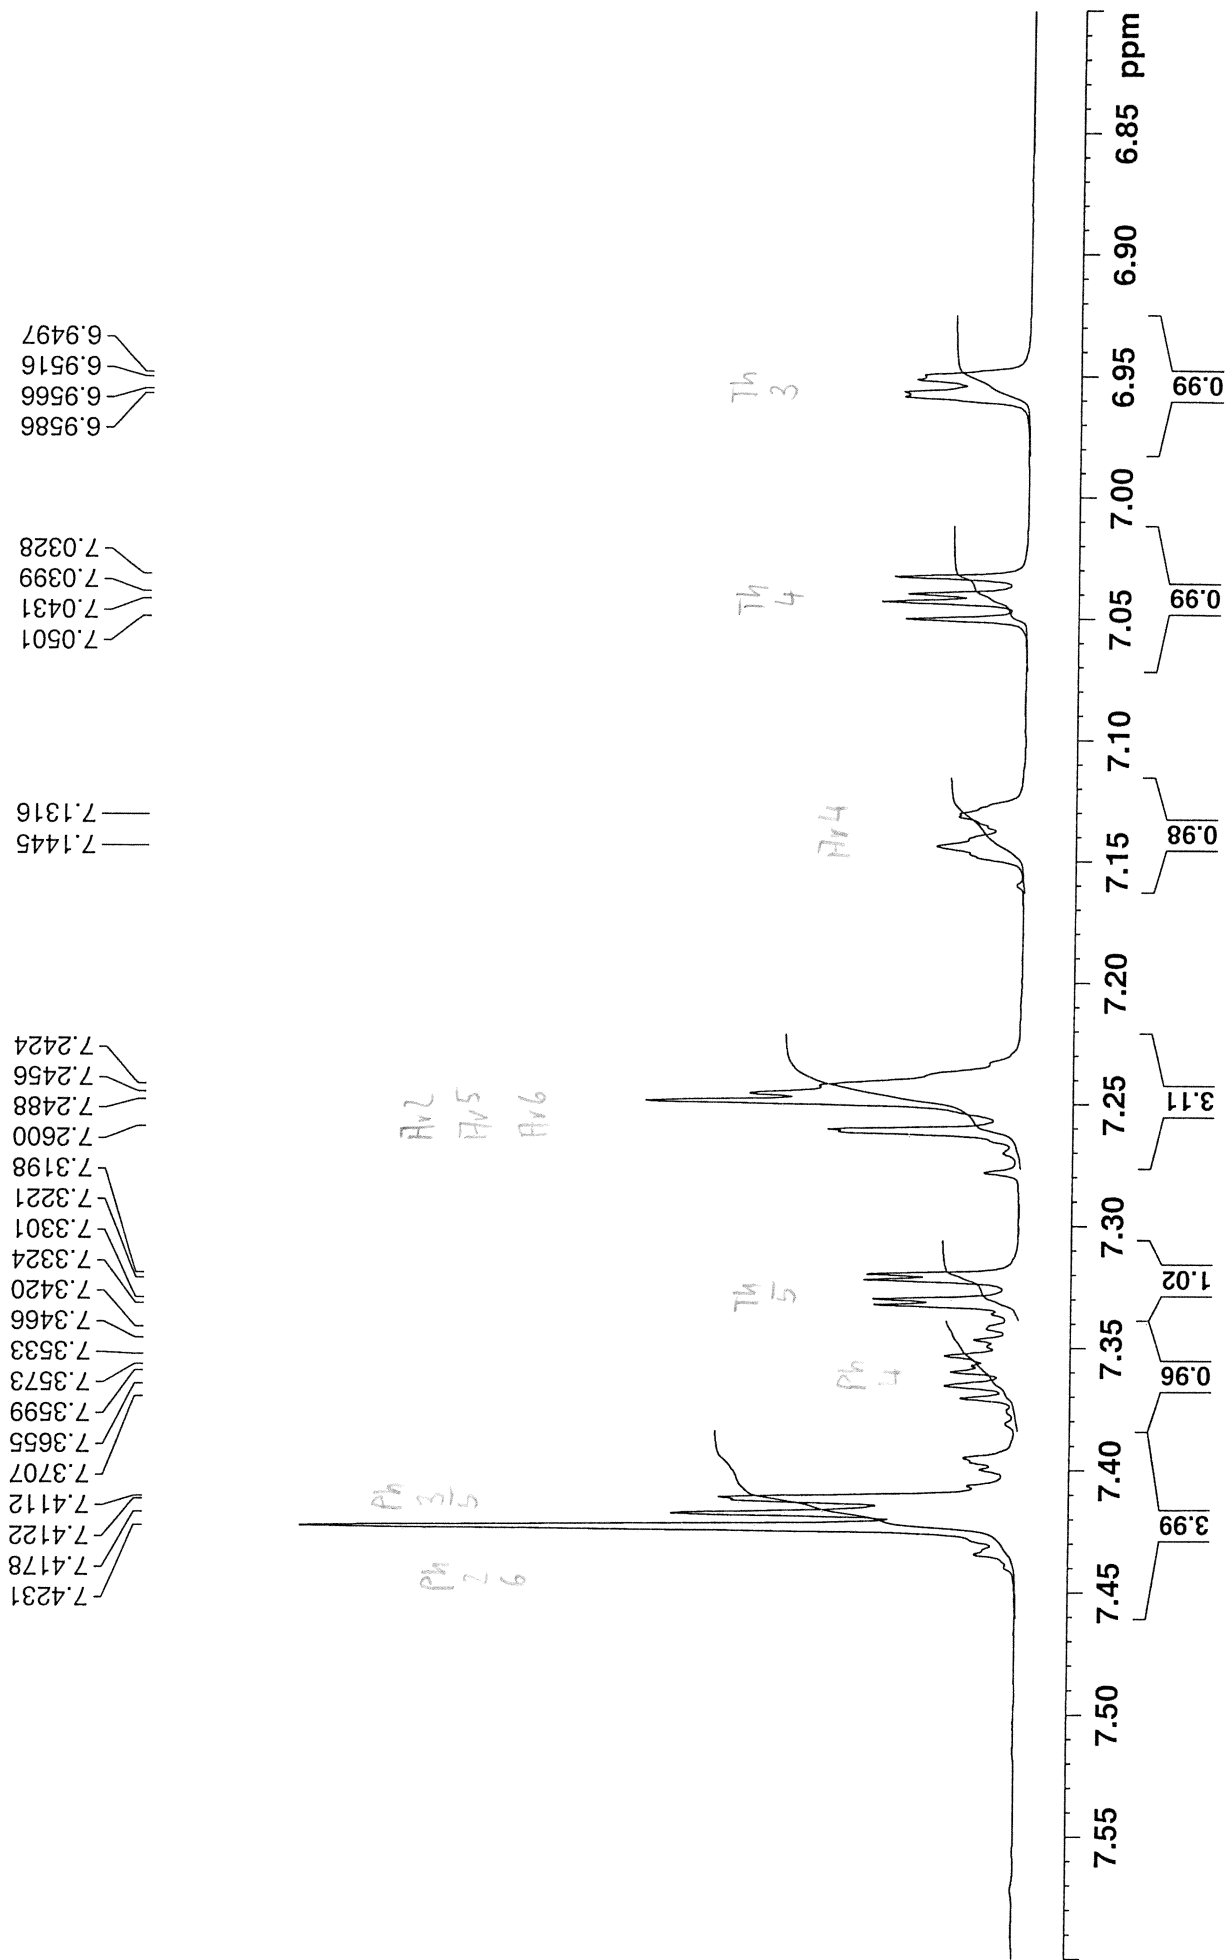

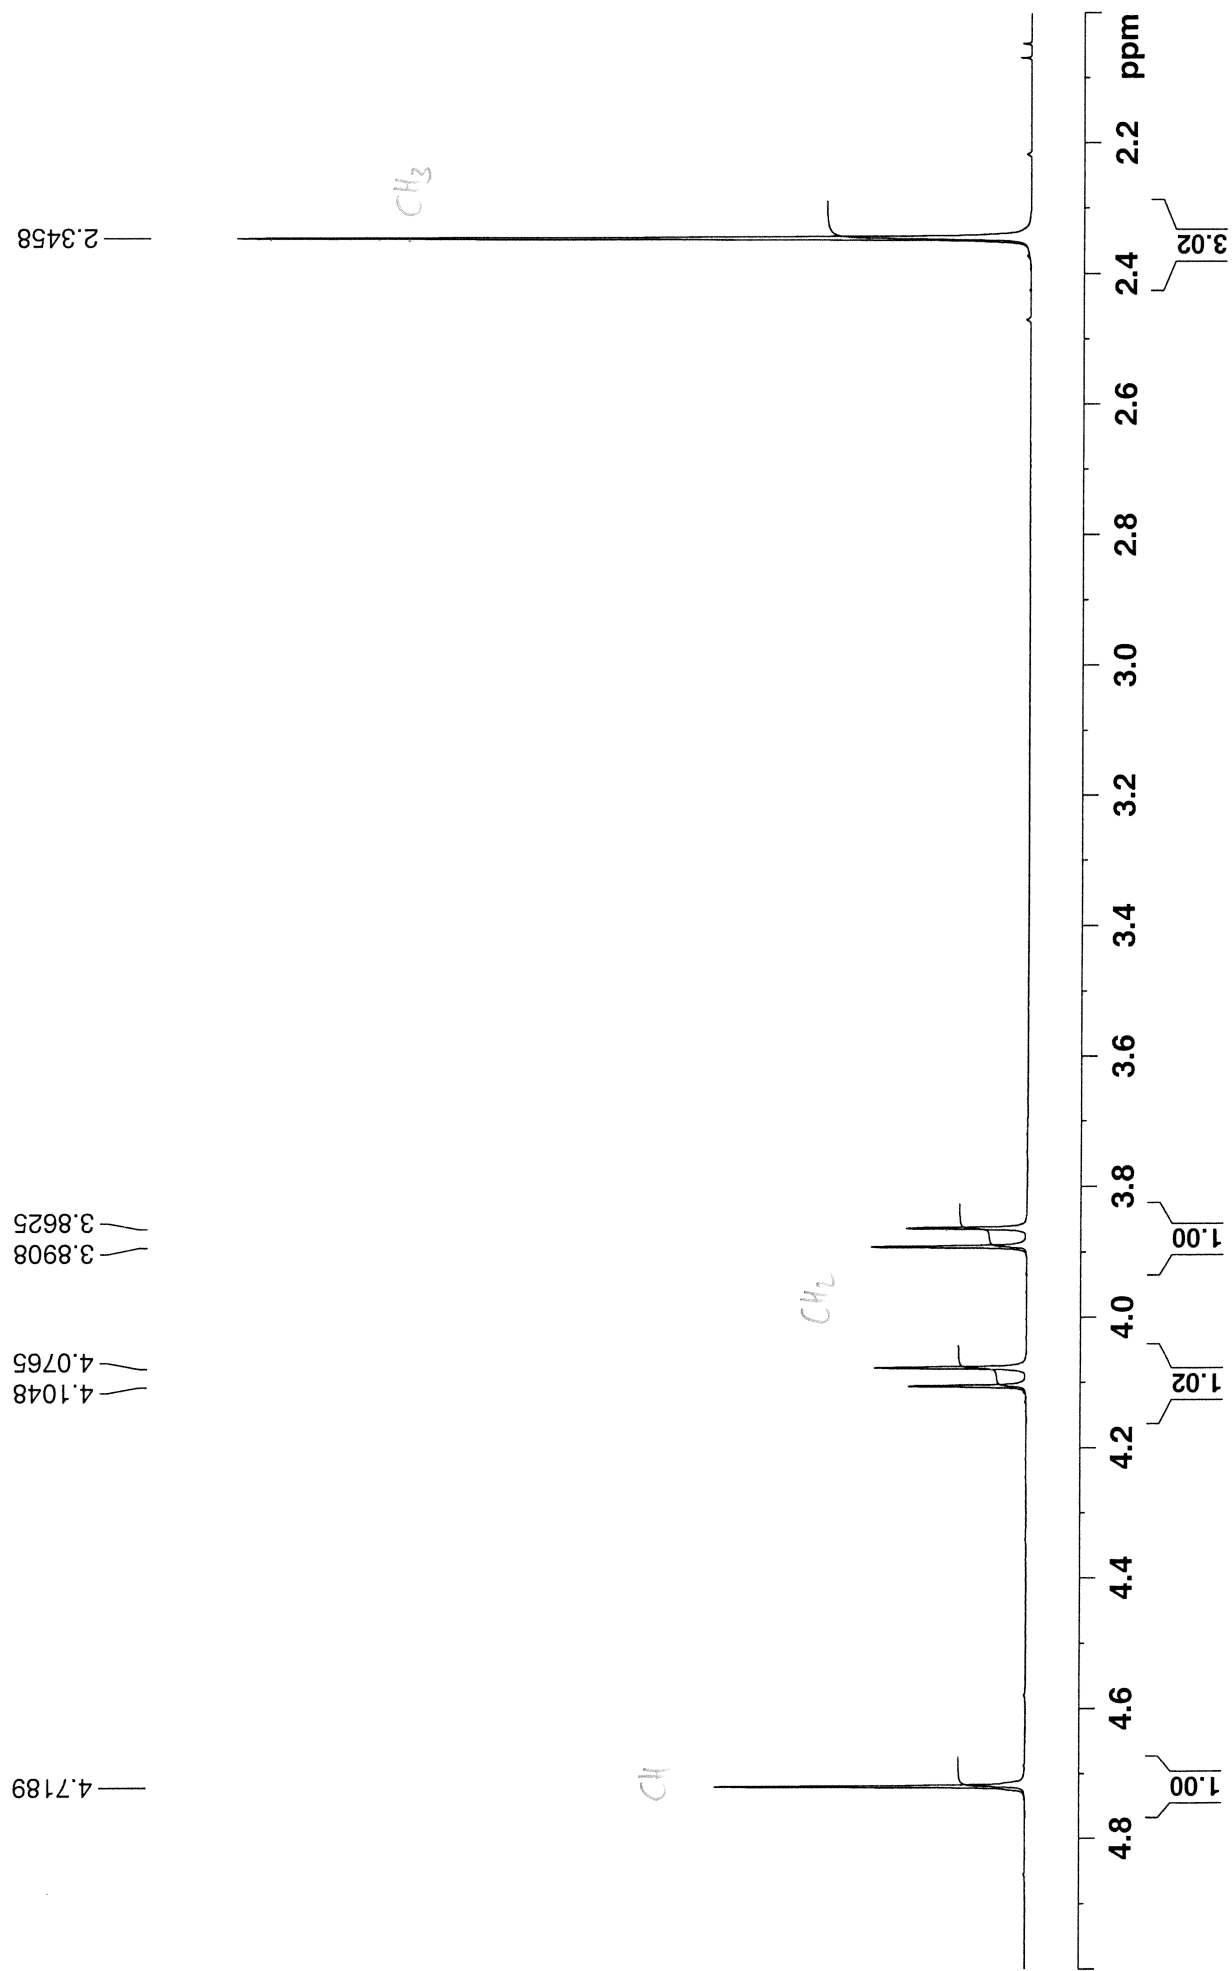

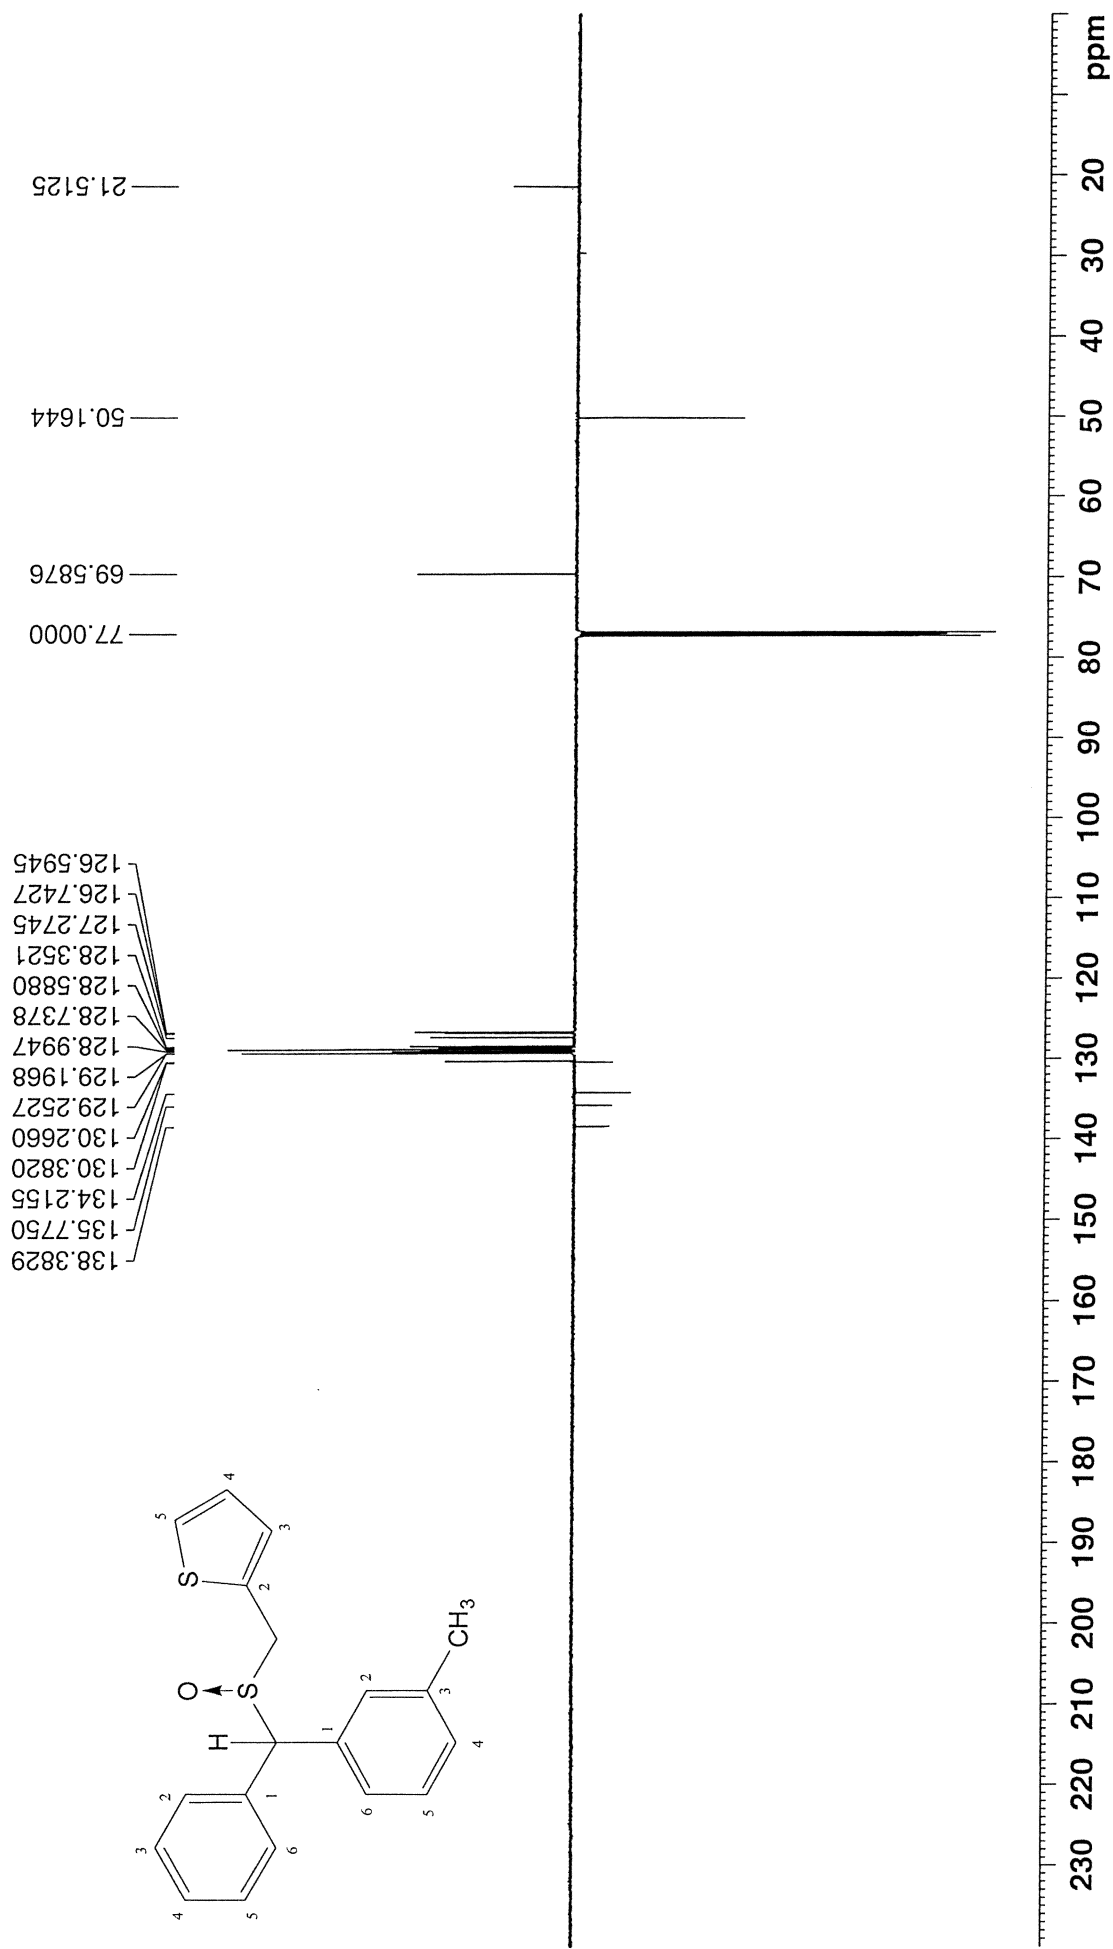

PN016\_1\_2 in cdcl3 (APT) 29.8.2019

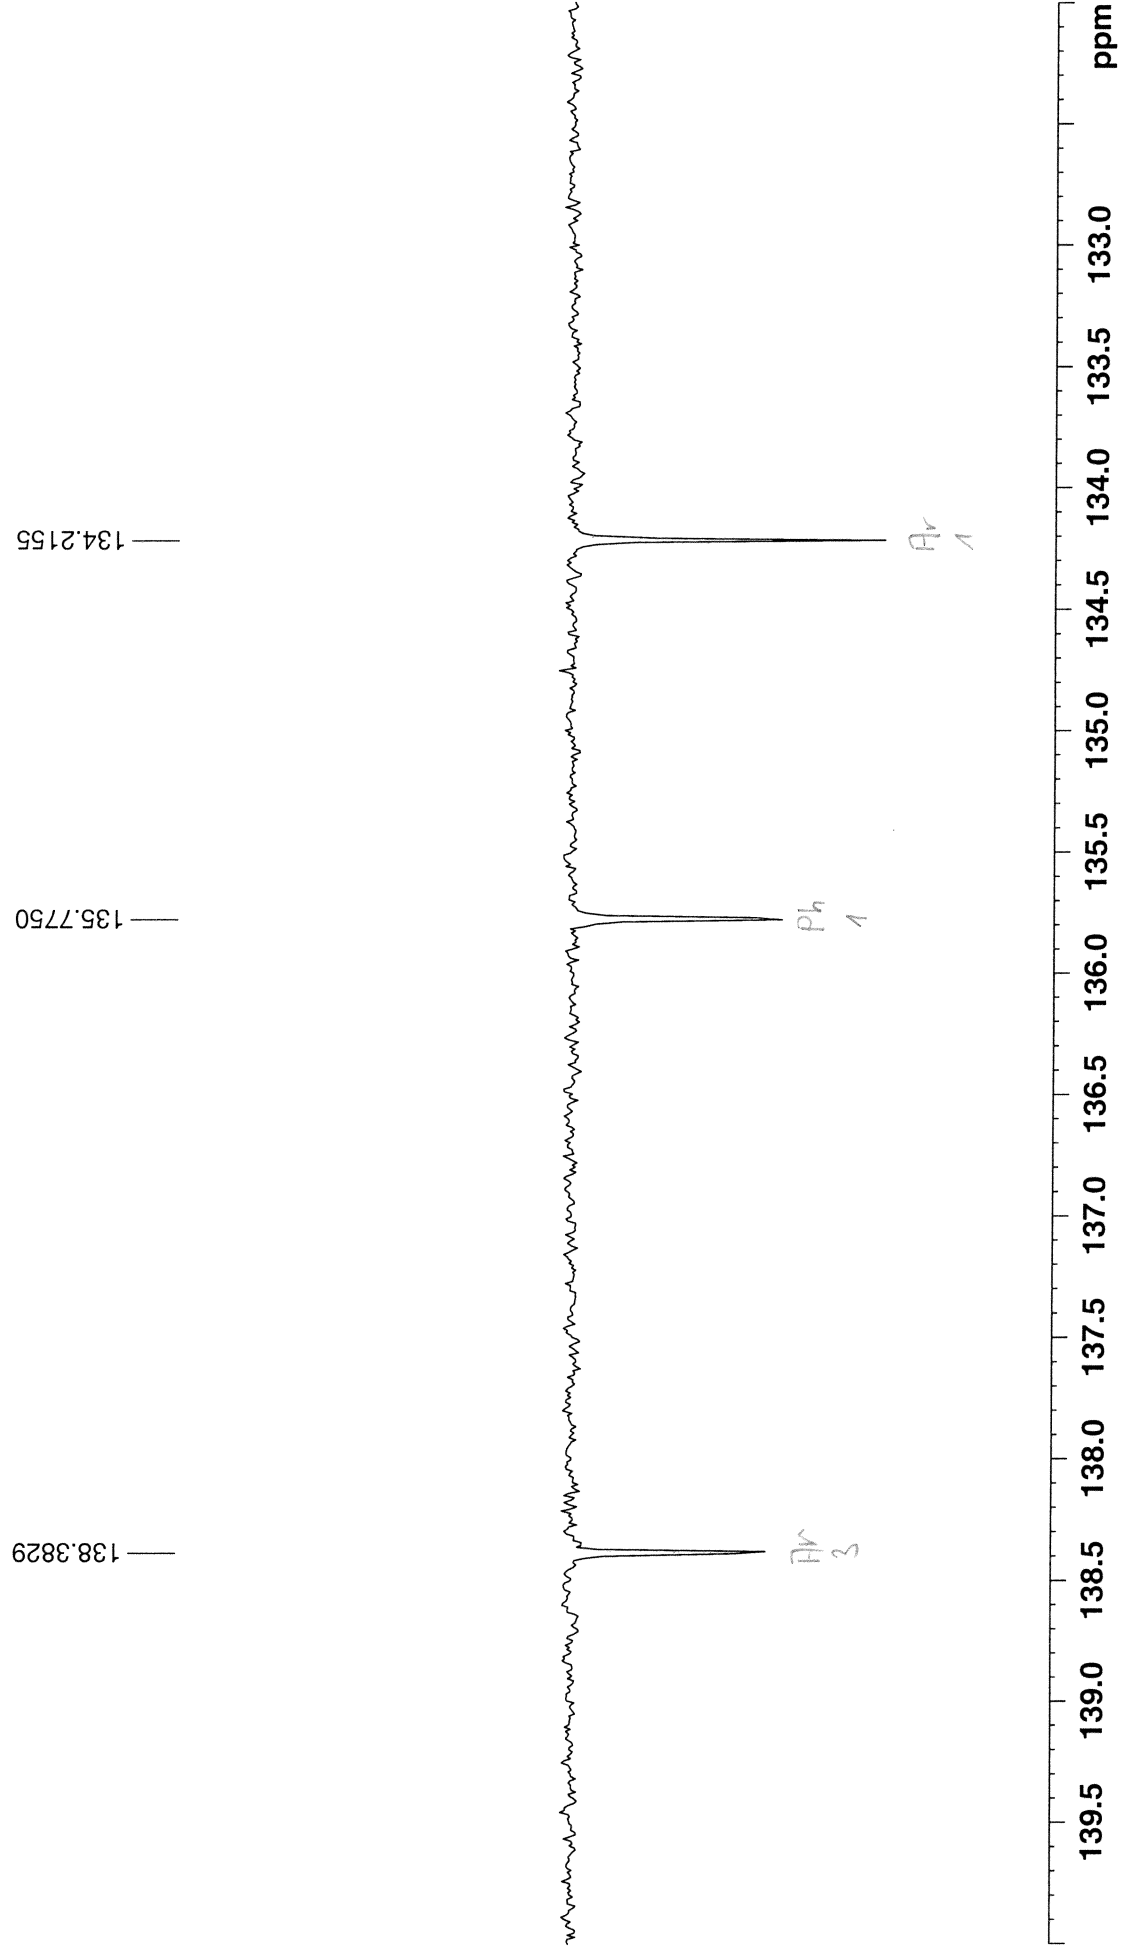

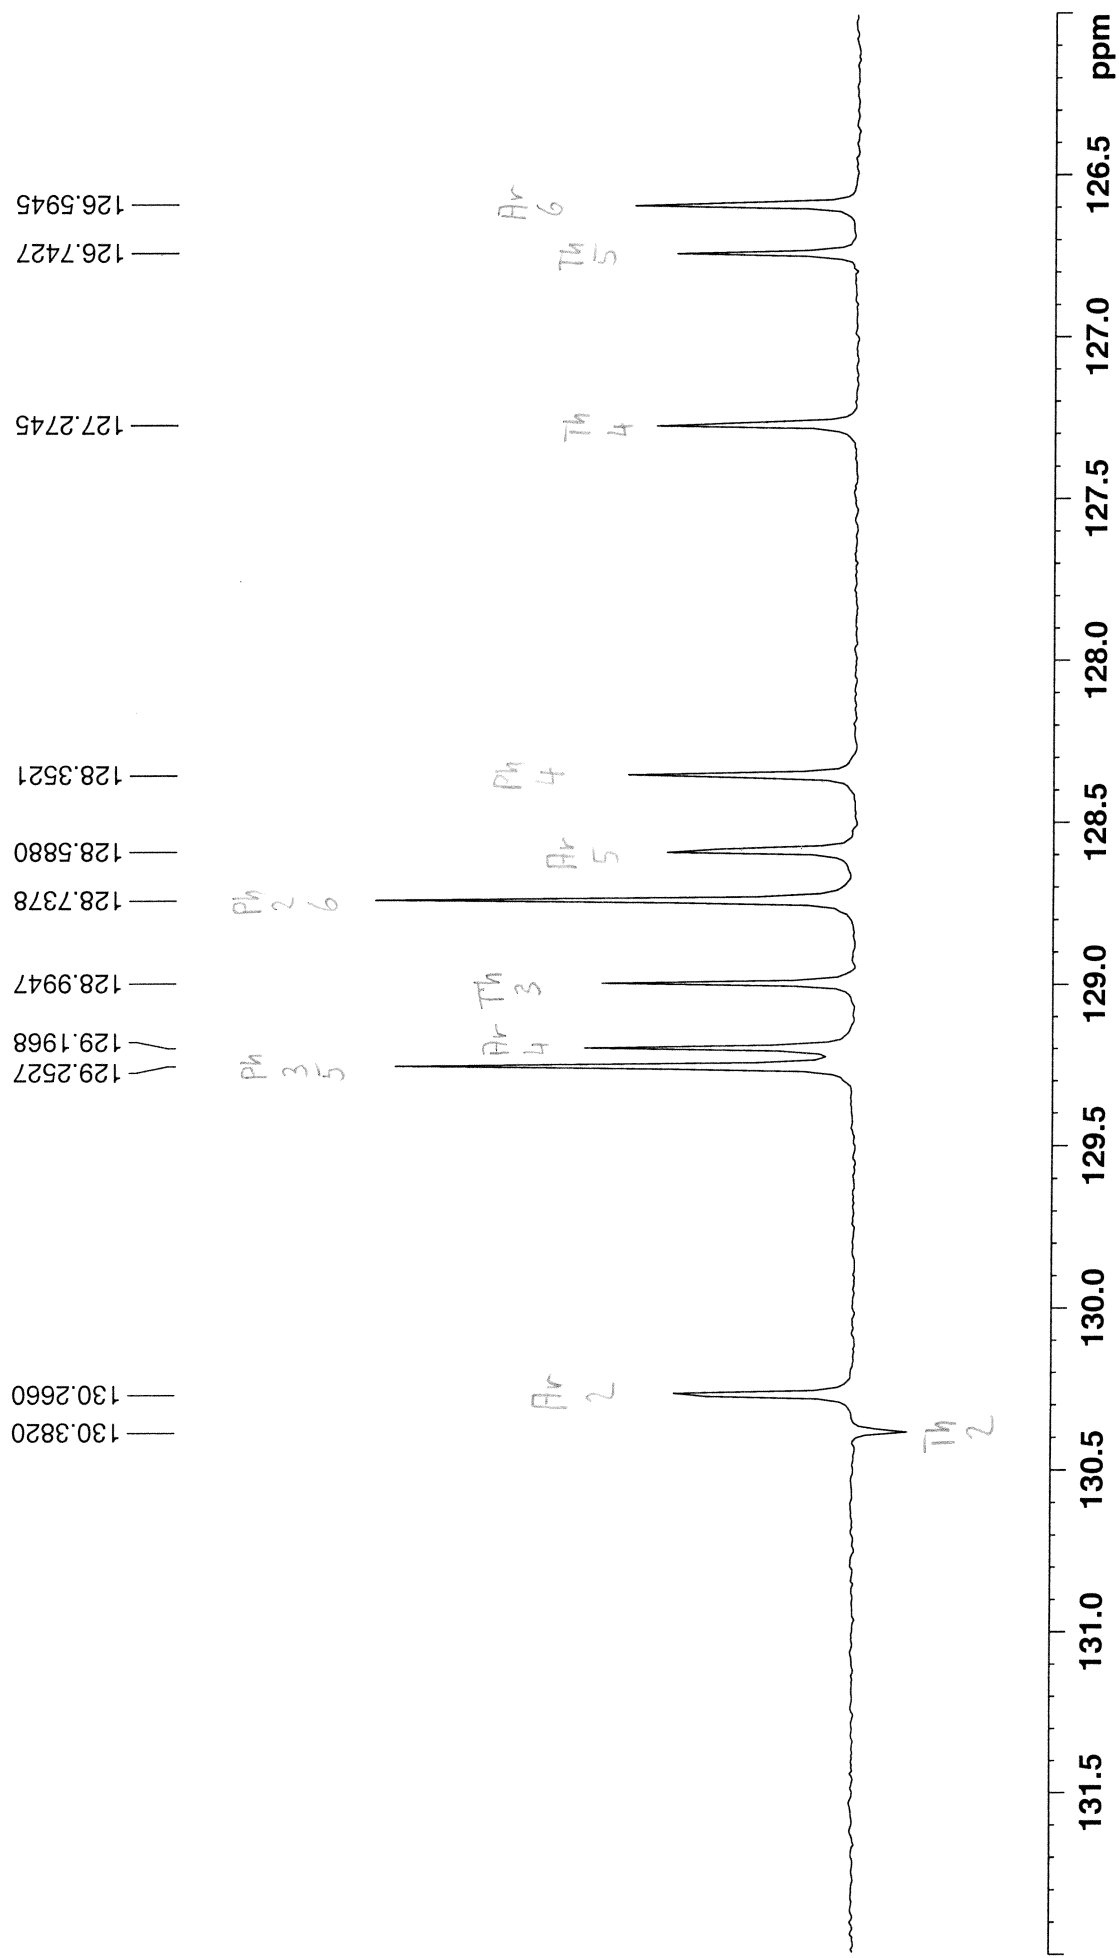

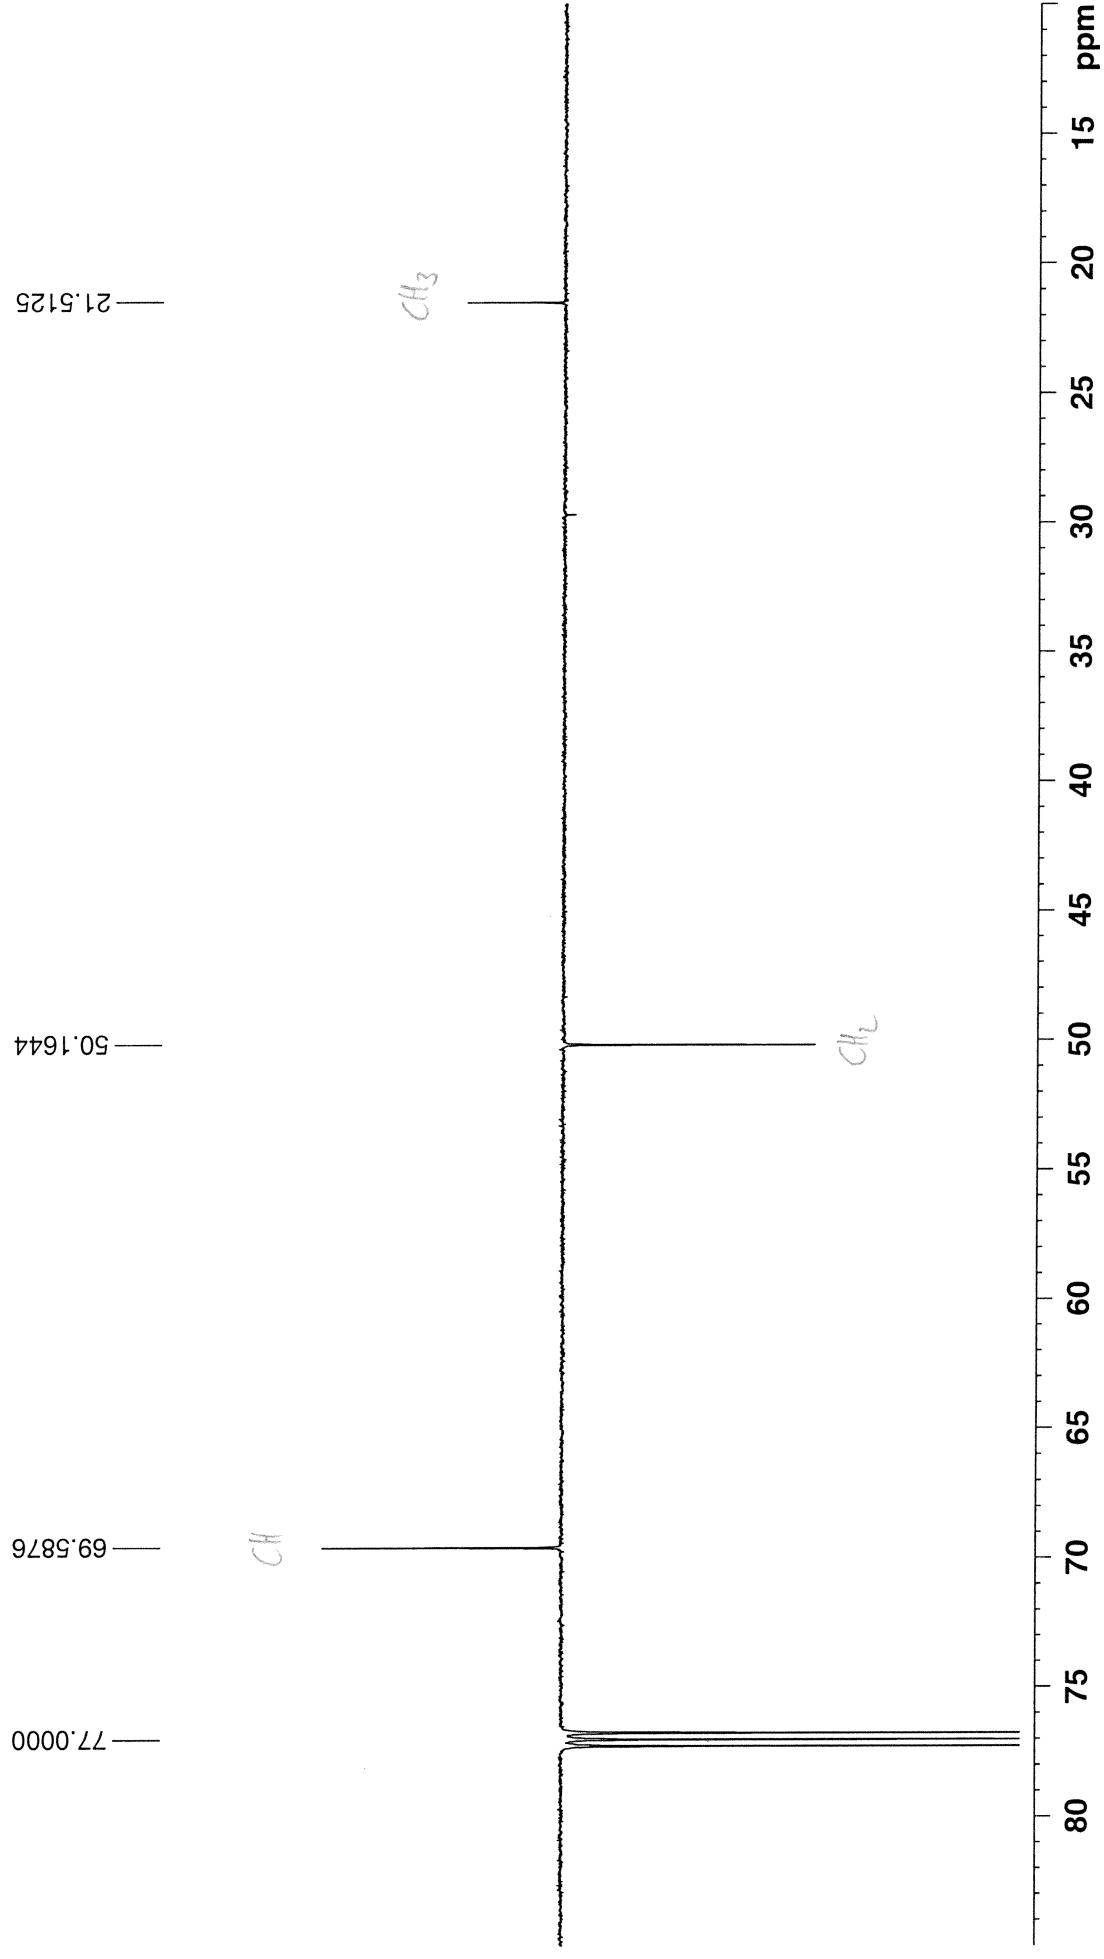

**Figure S51c.** NMR spectra of compound **7m**.

PN016\_2\_1 in cdcl3 (Proton) 29.8.2019

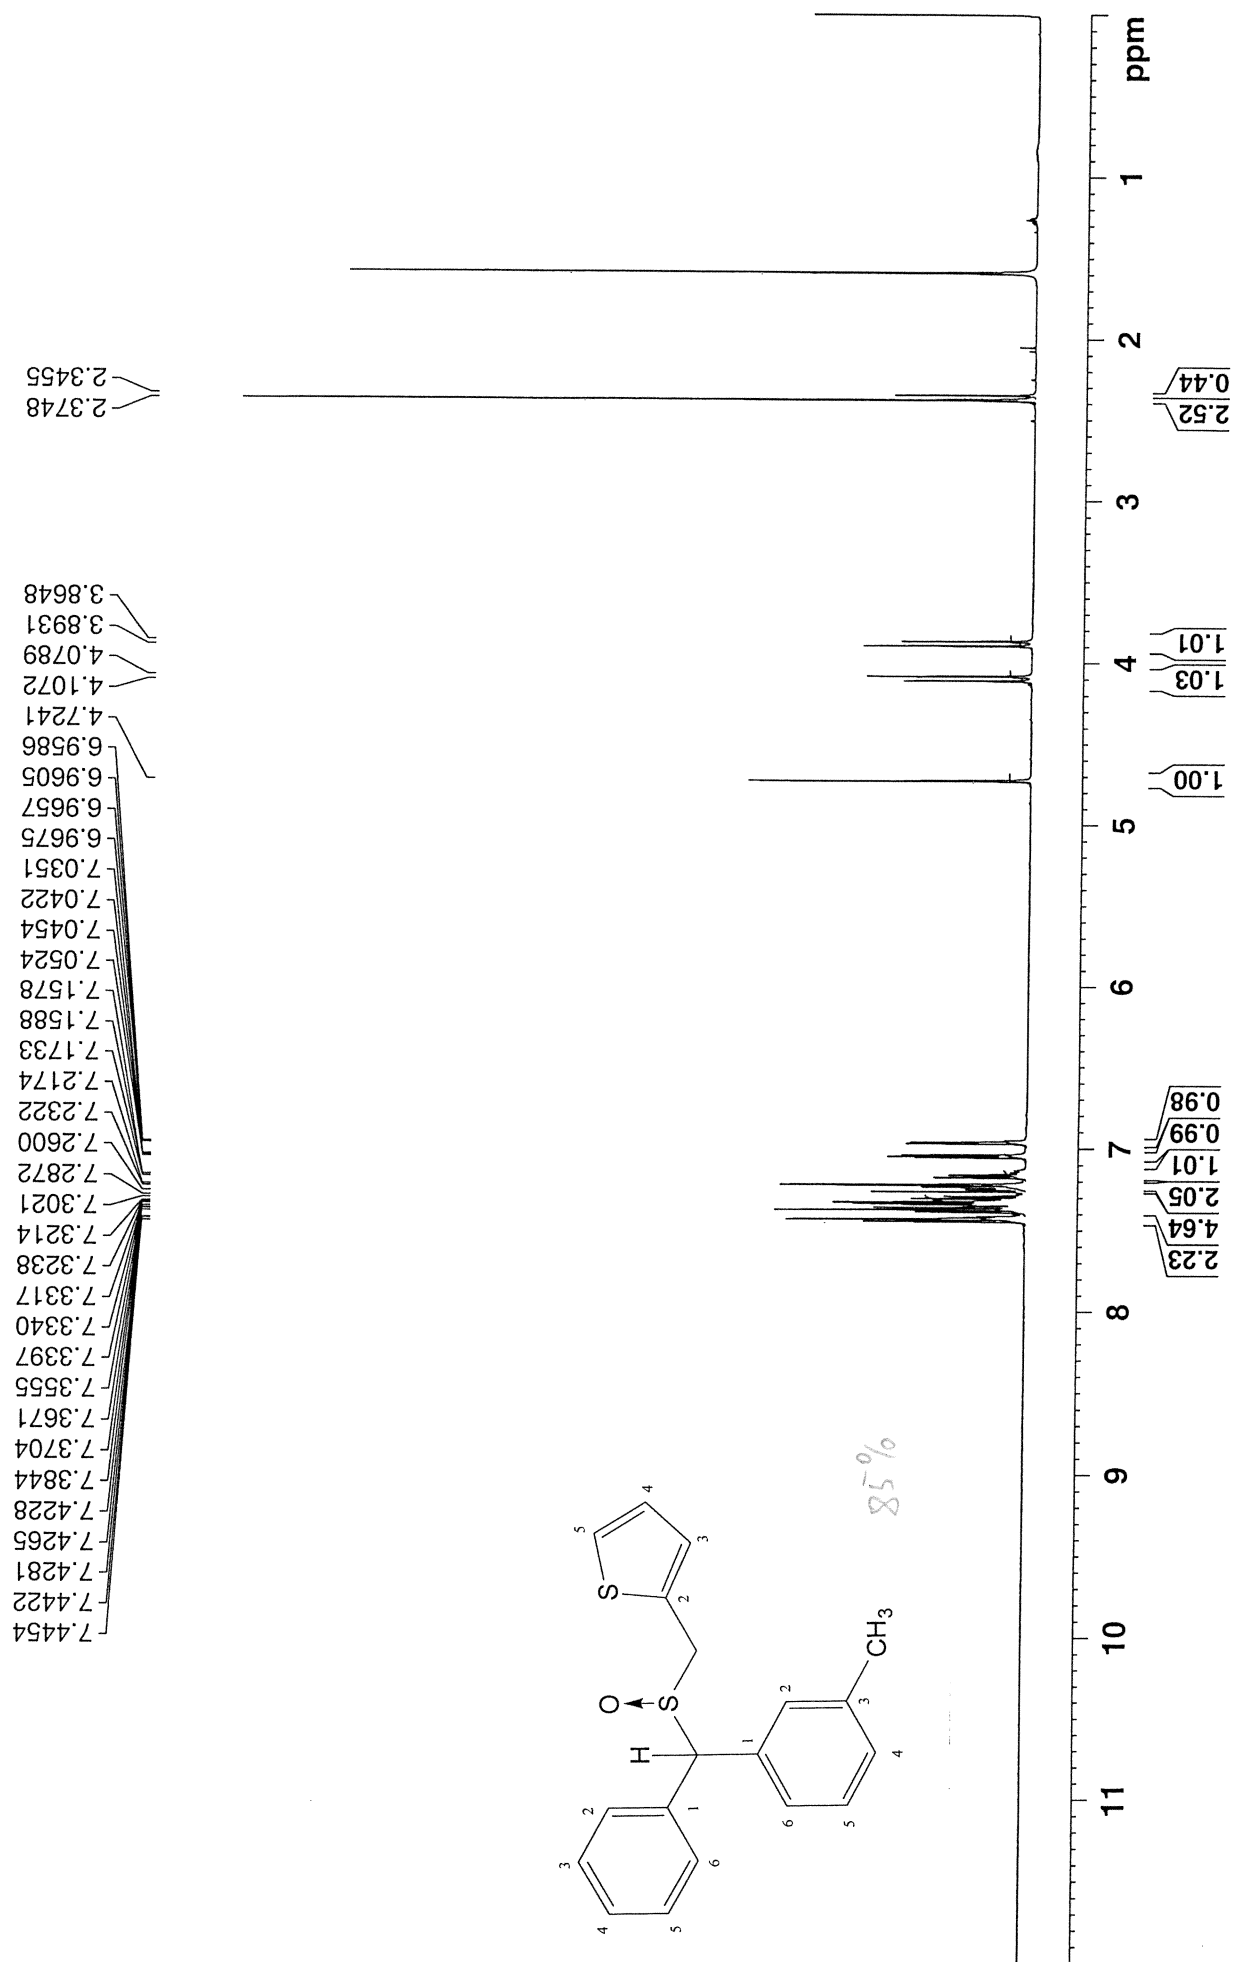

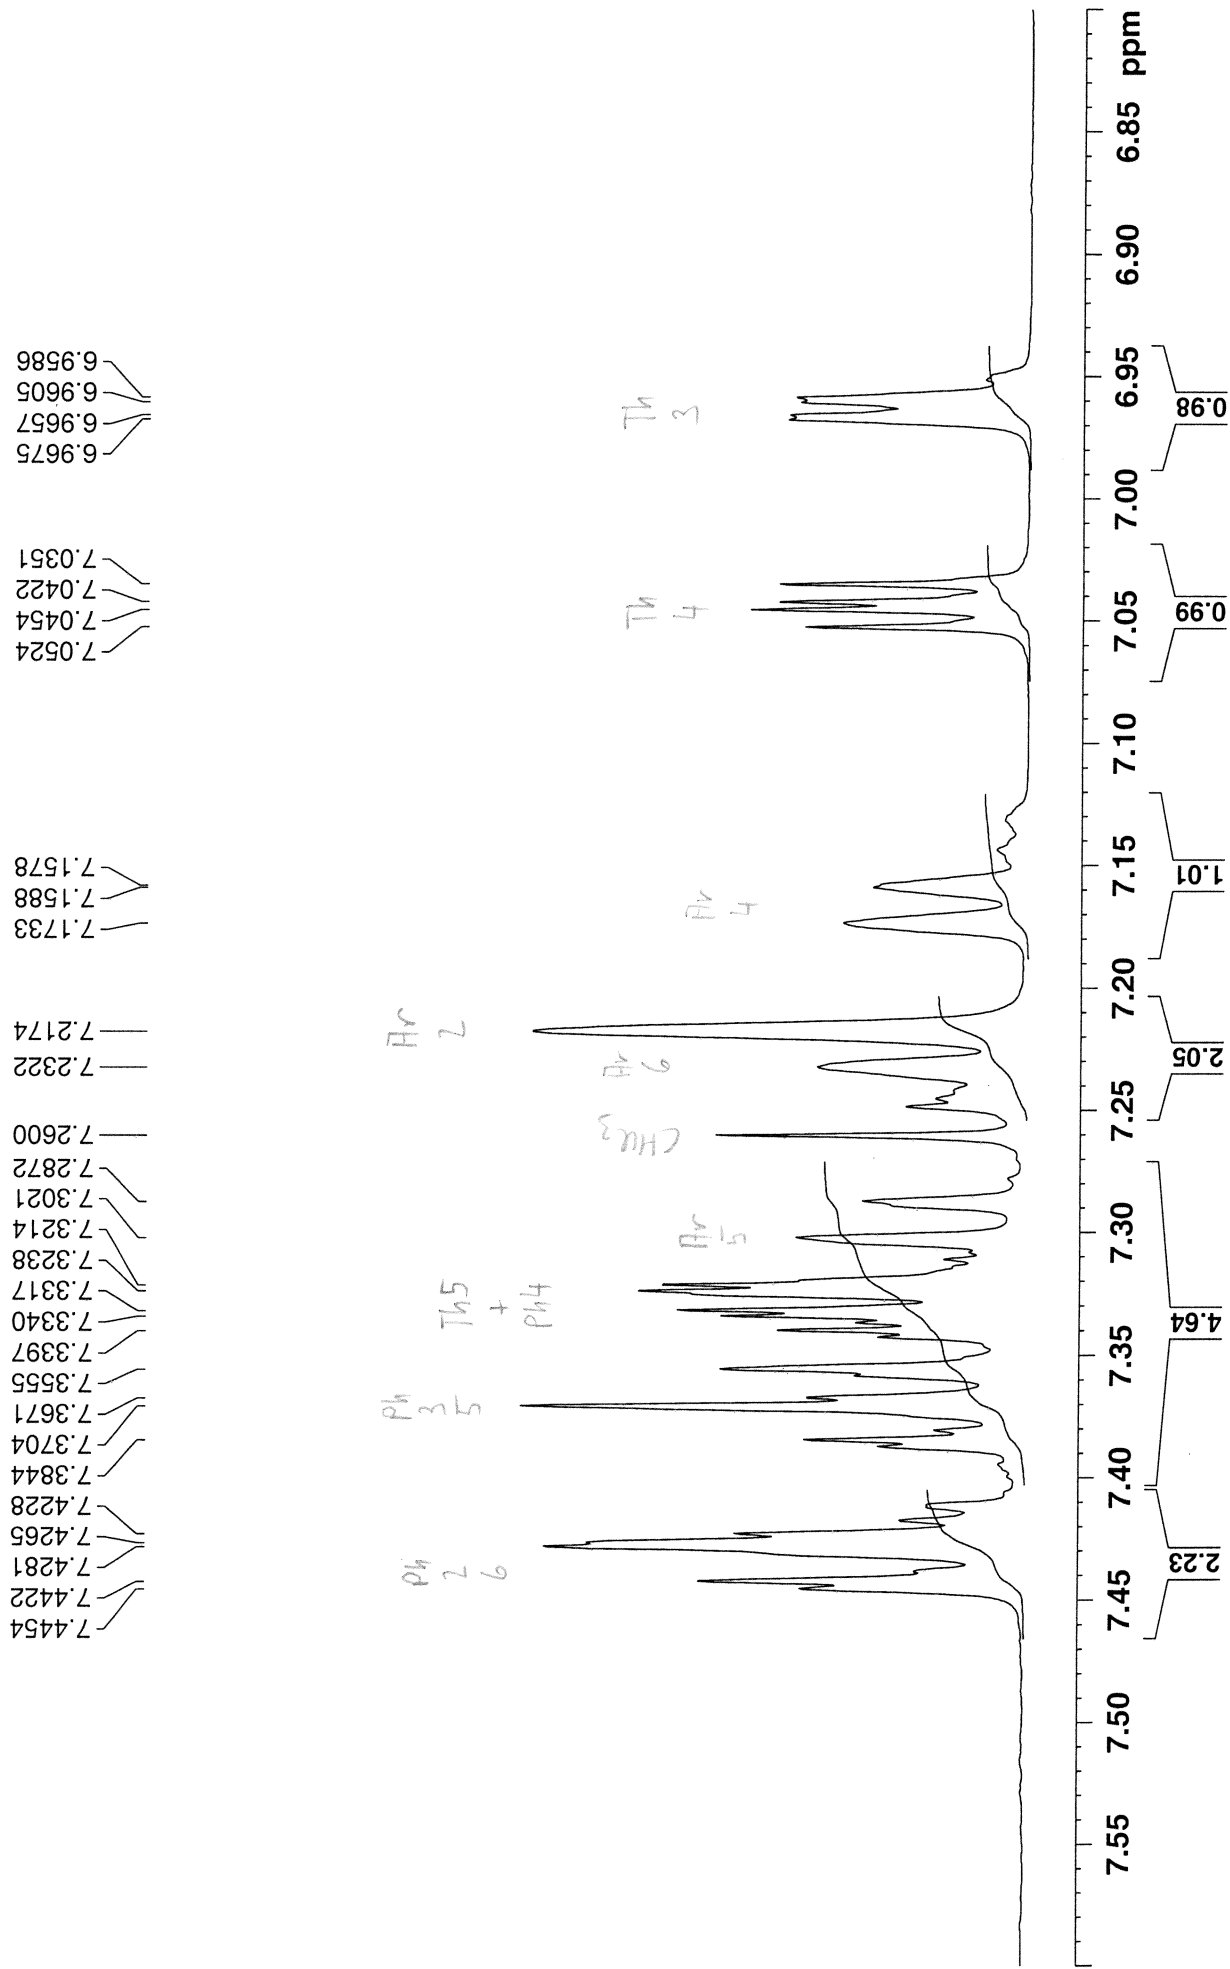



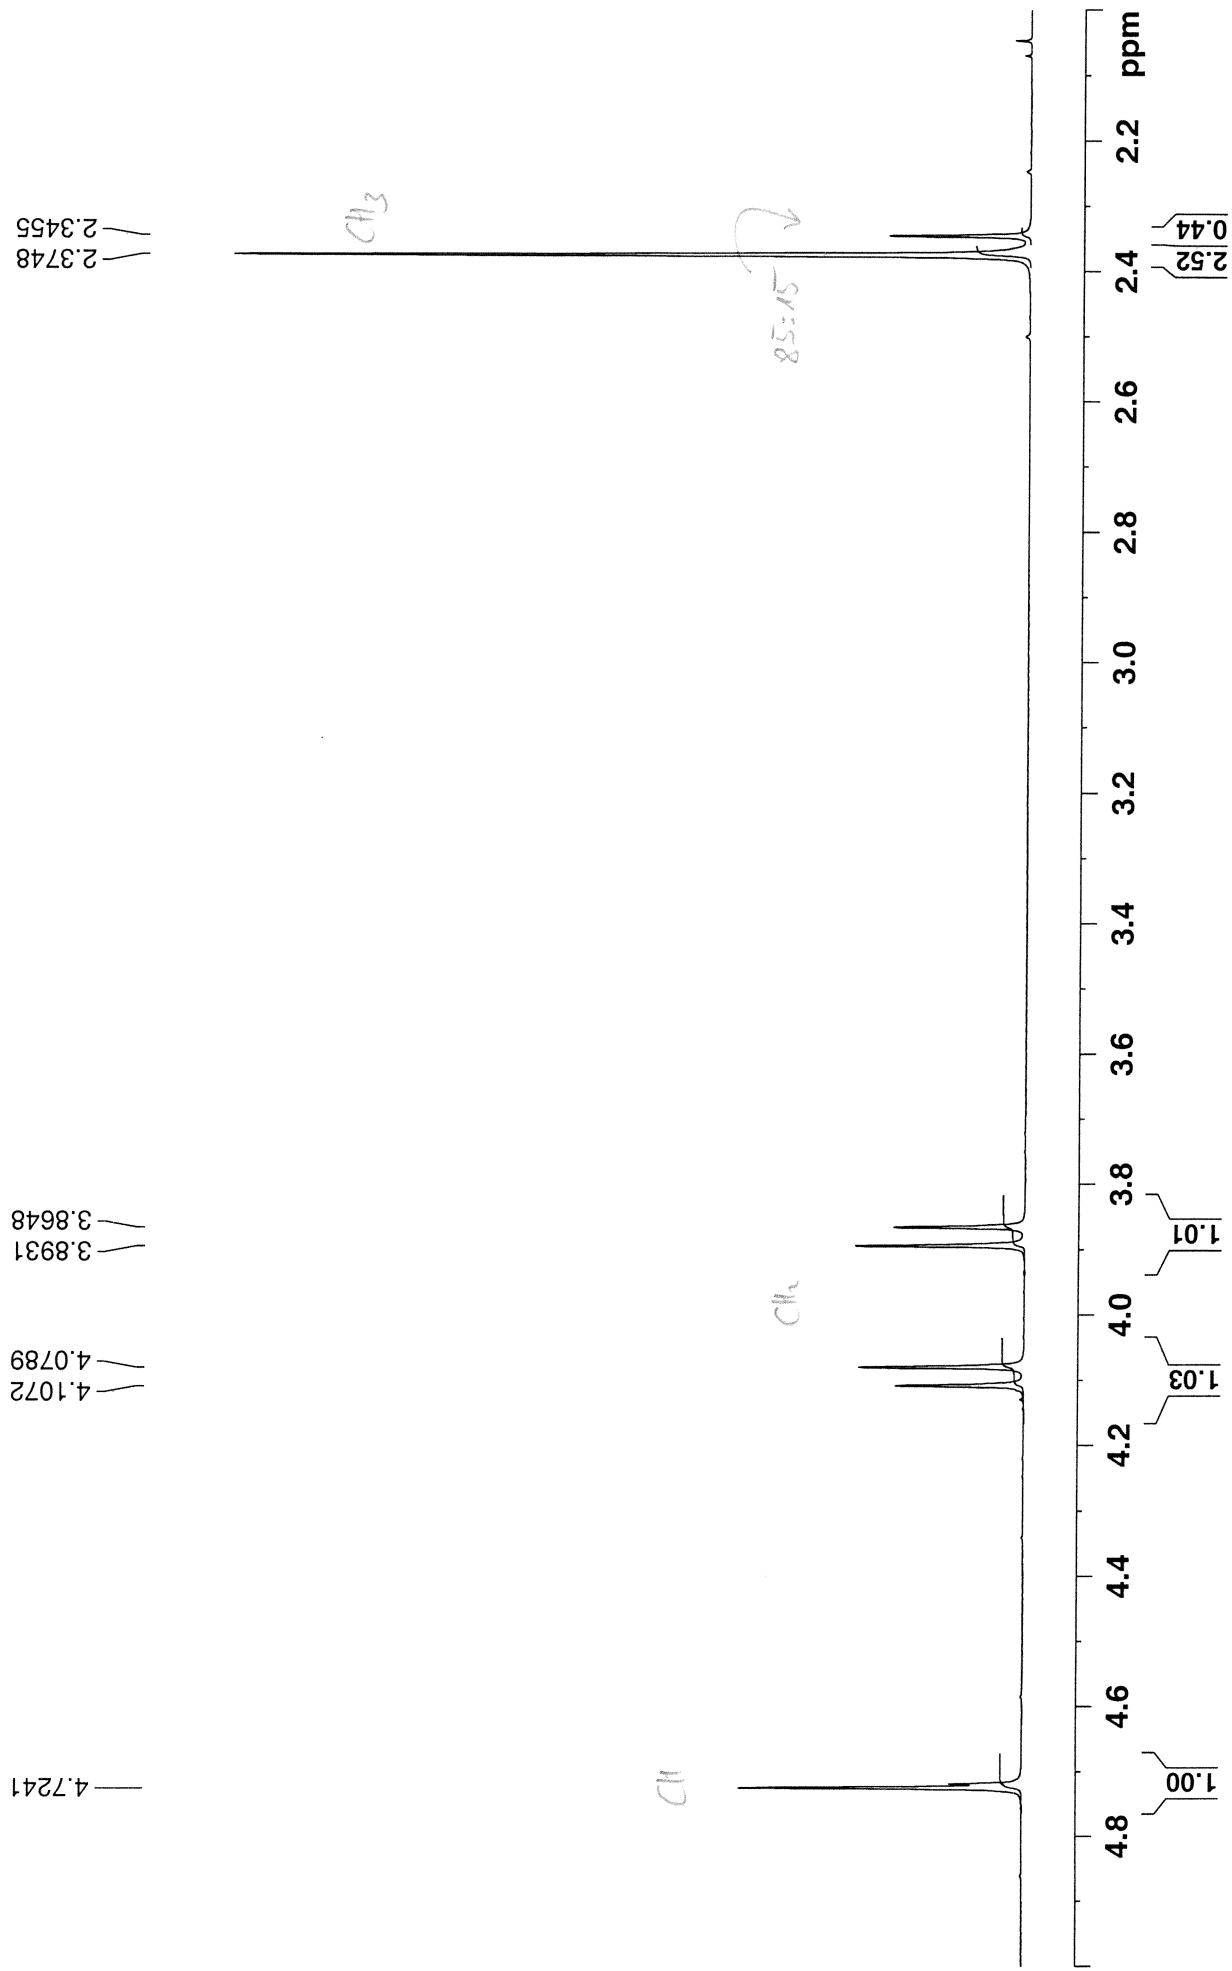

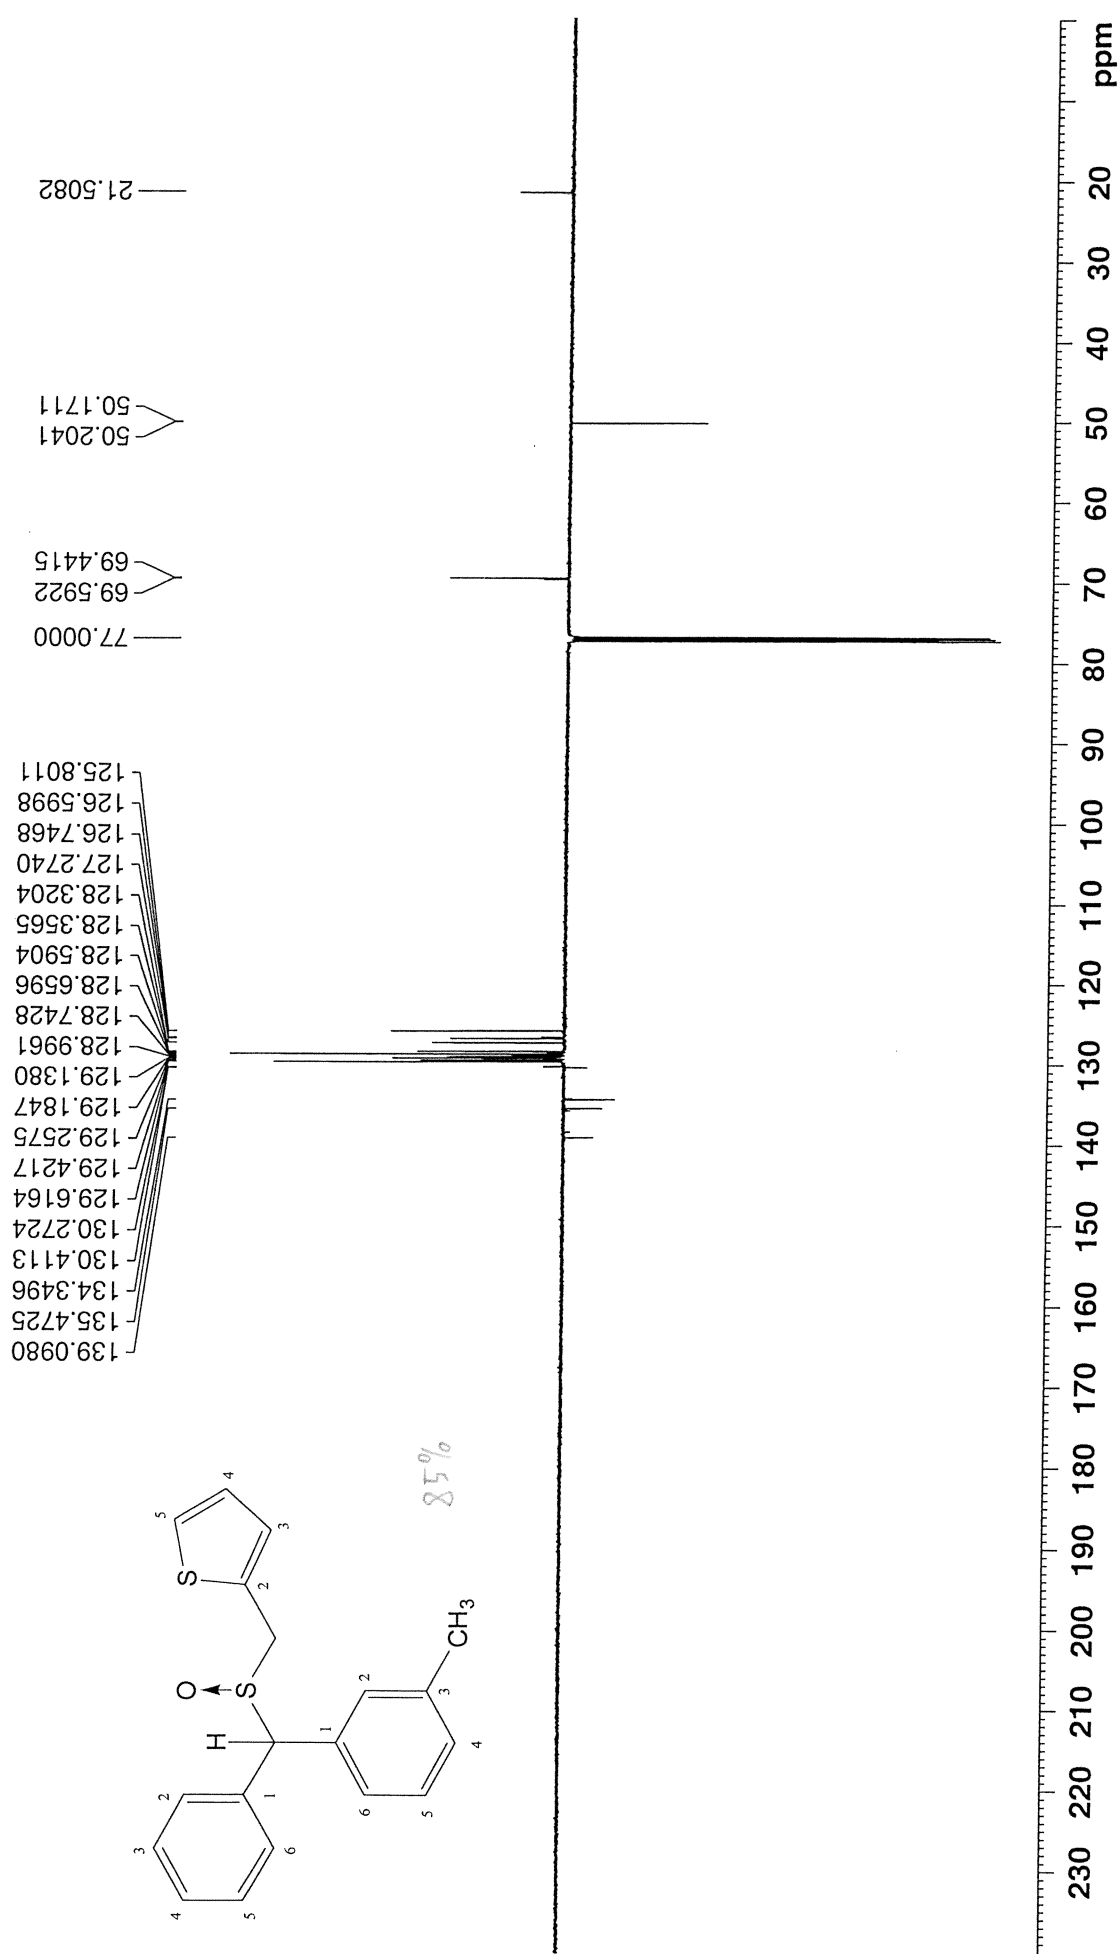

PN016\_2\_1 in cdcl3 (APT) 29.8.2019

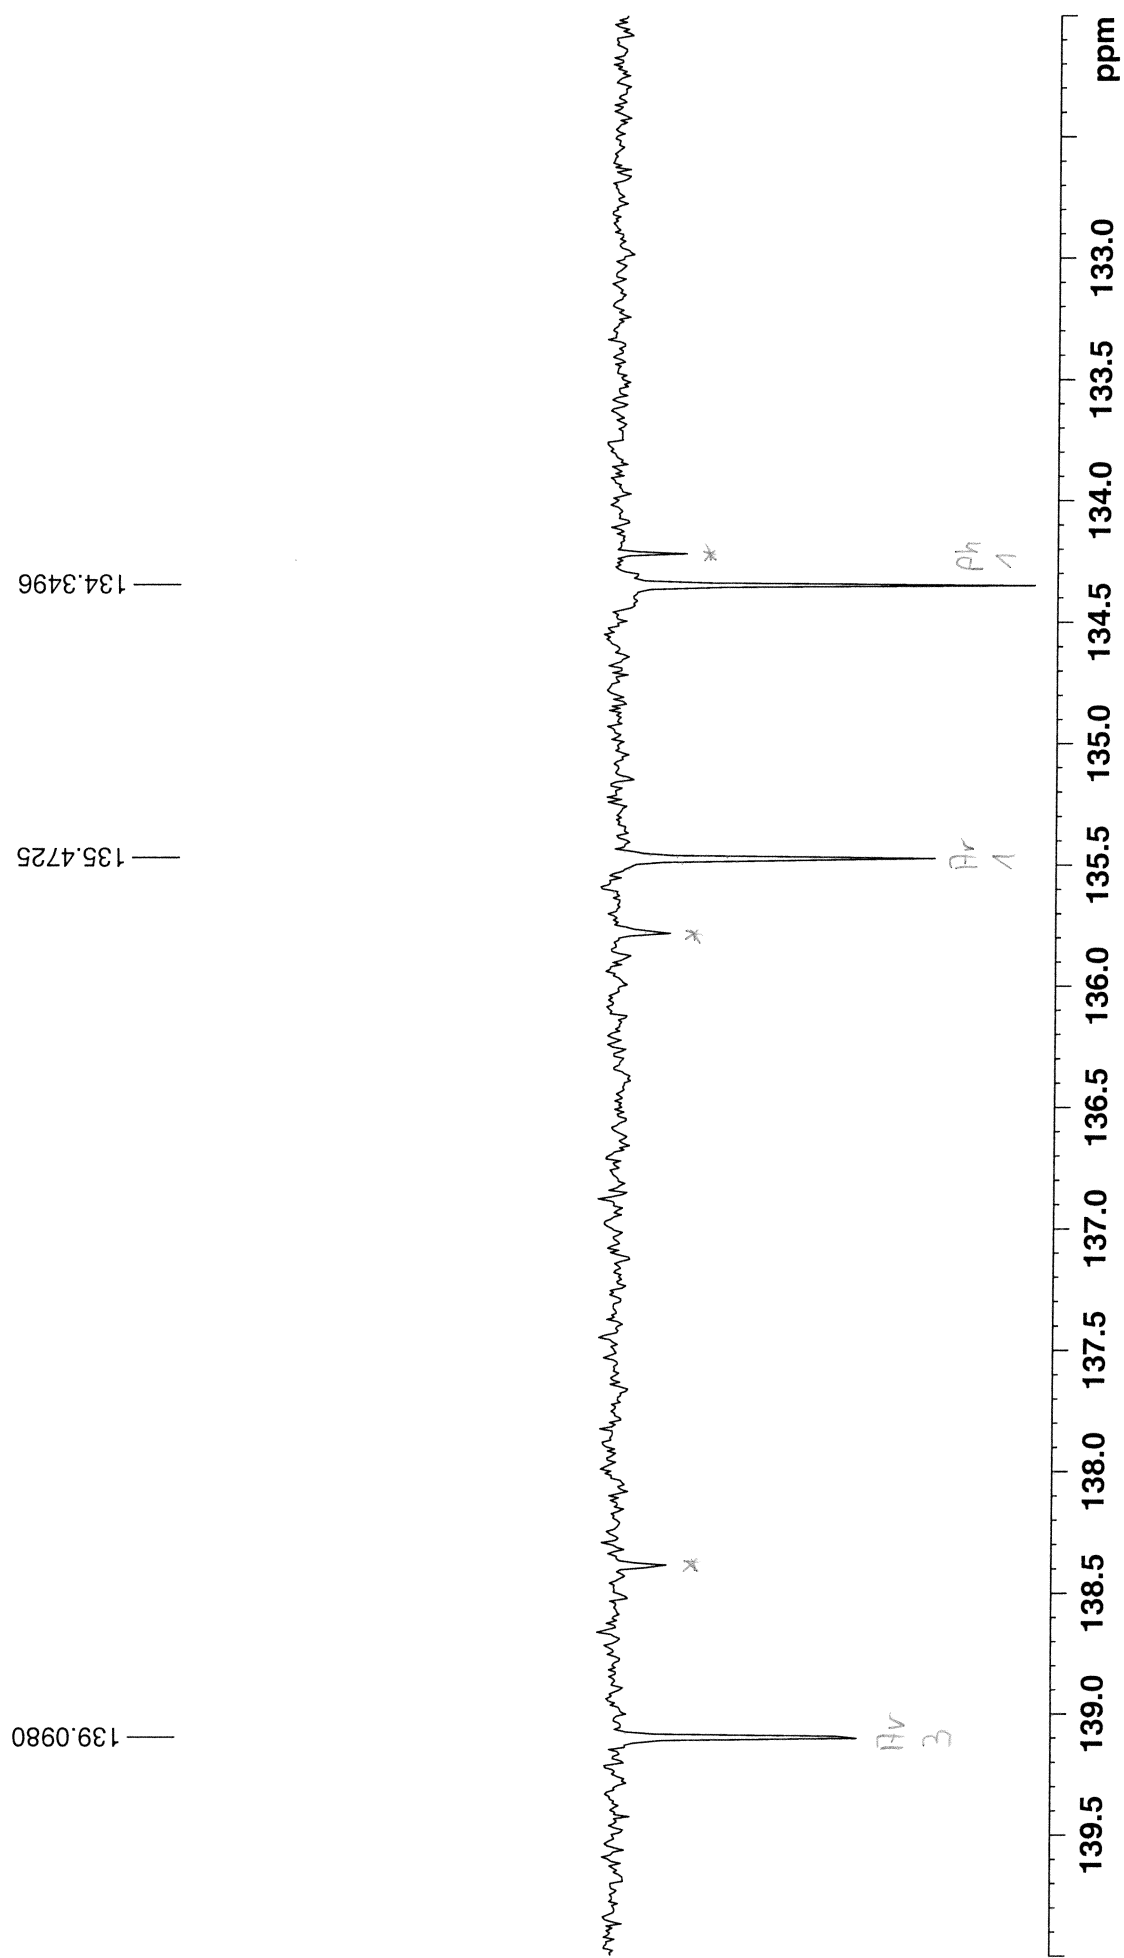

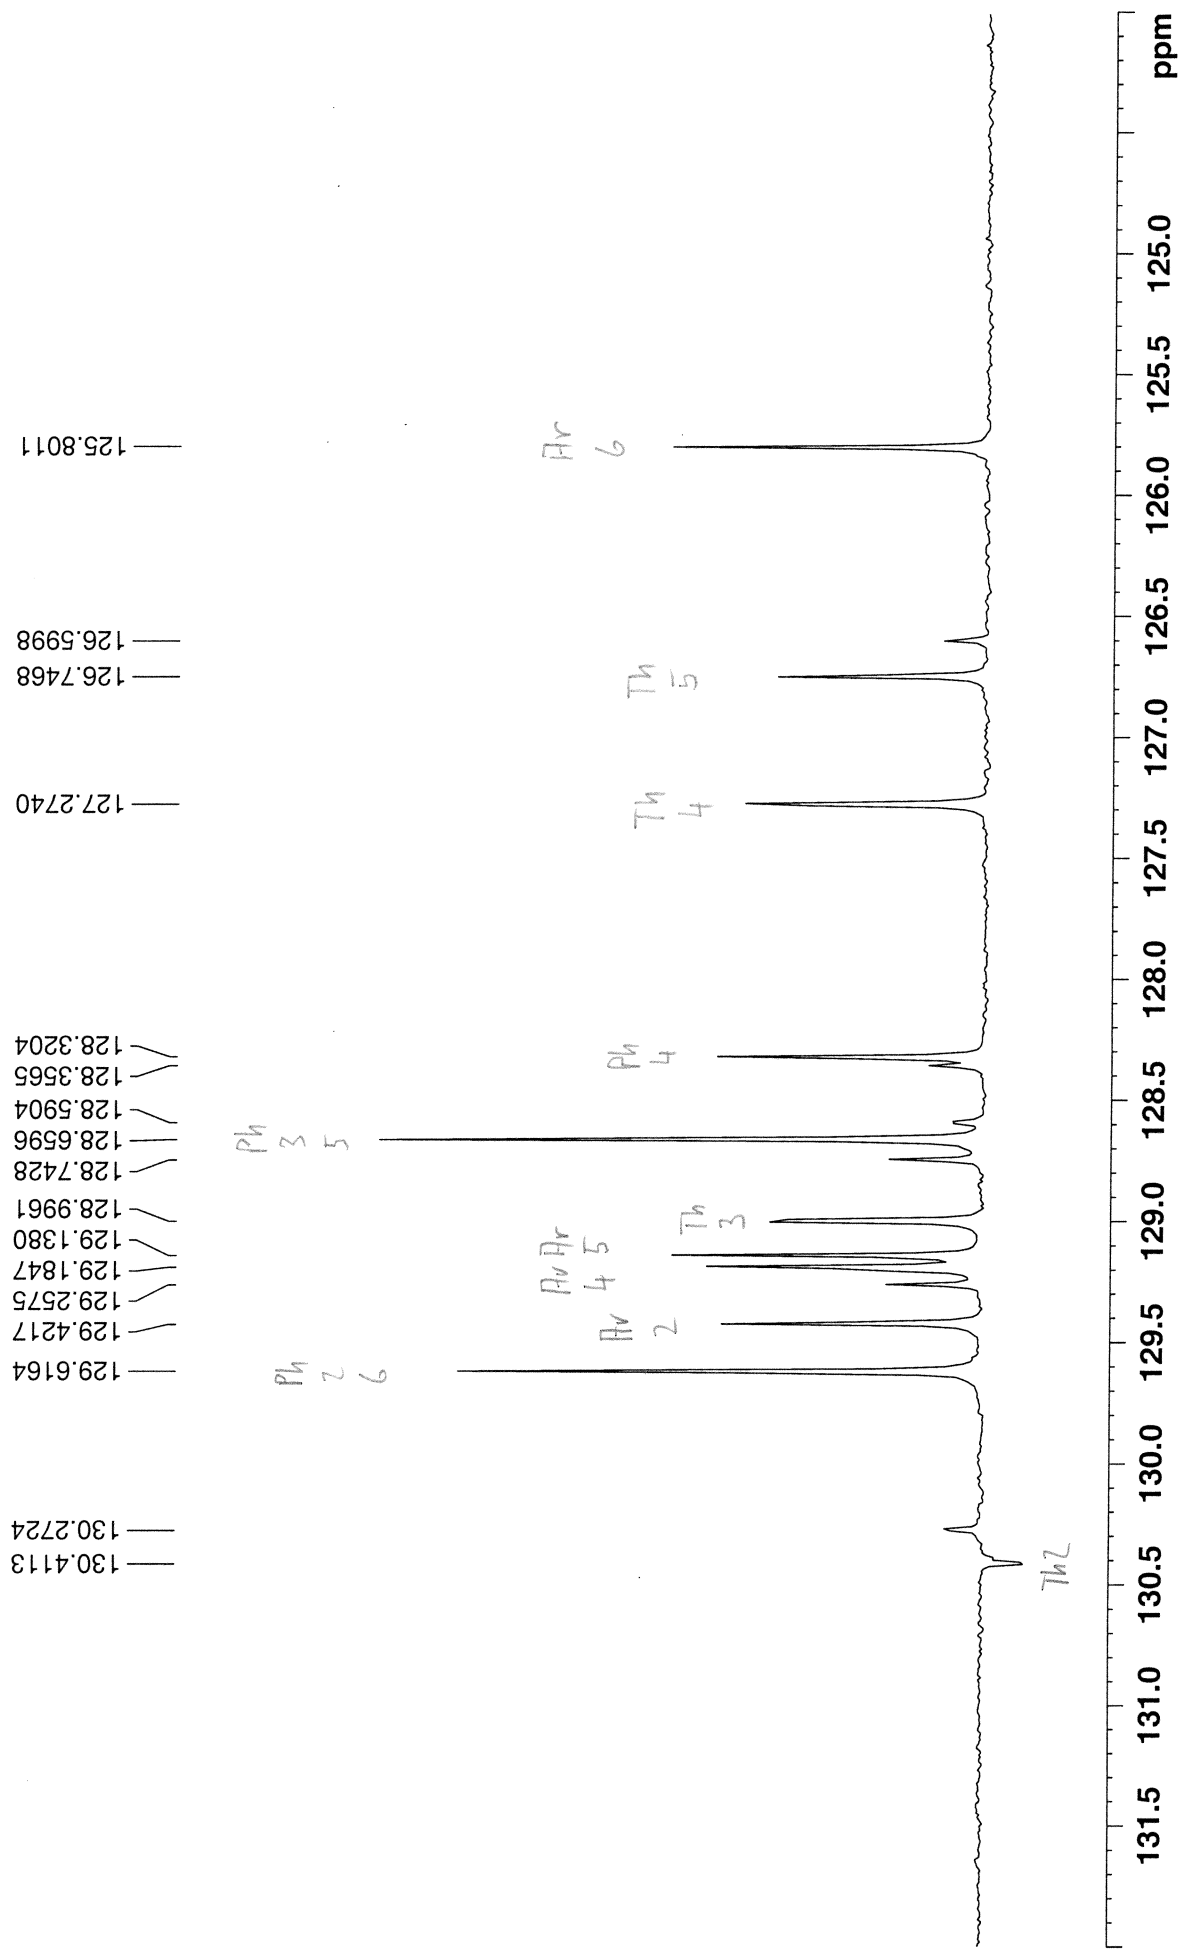

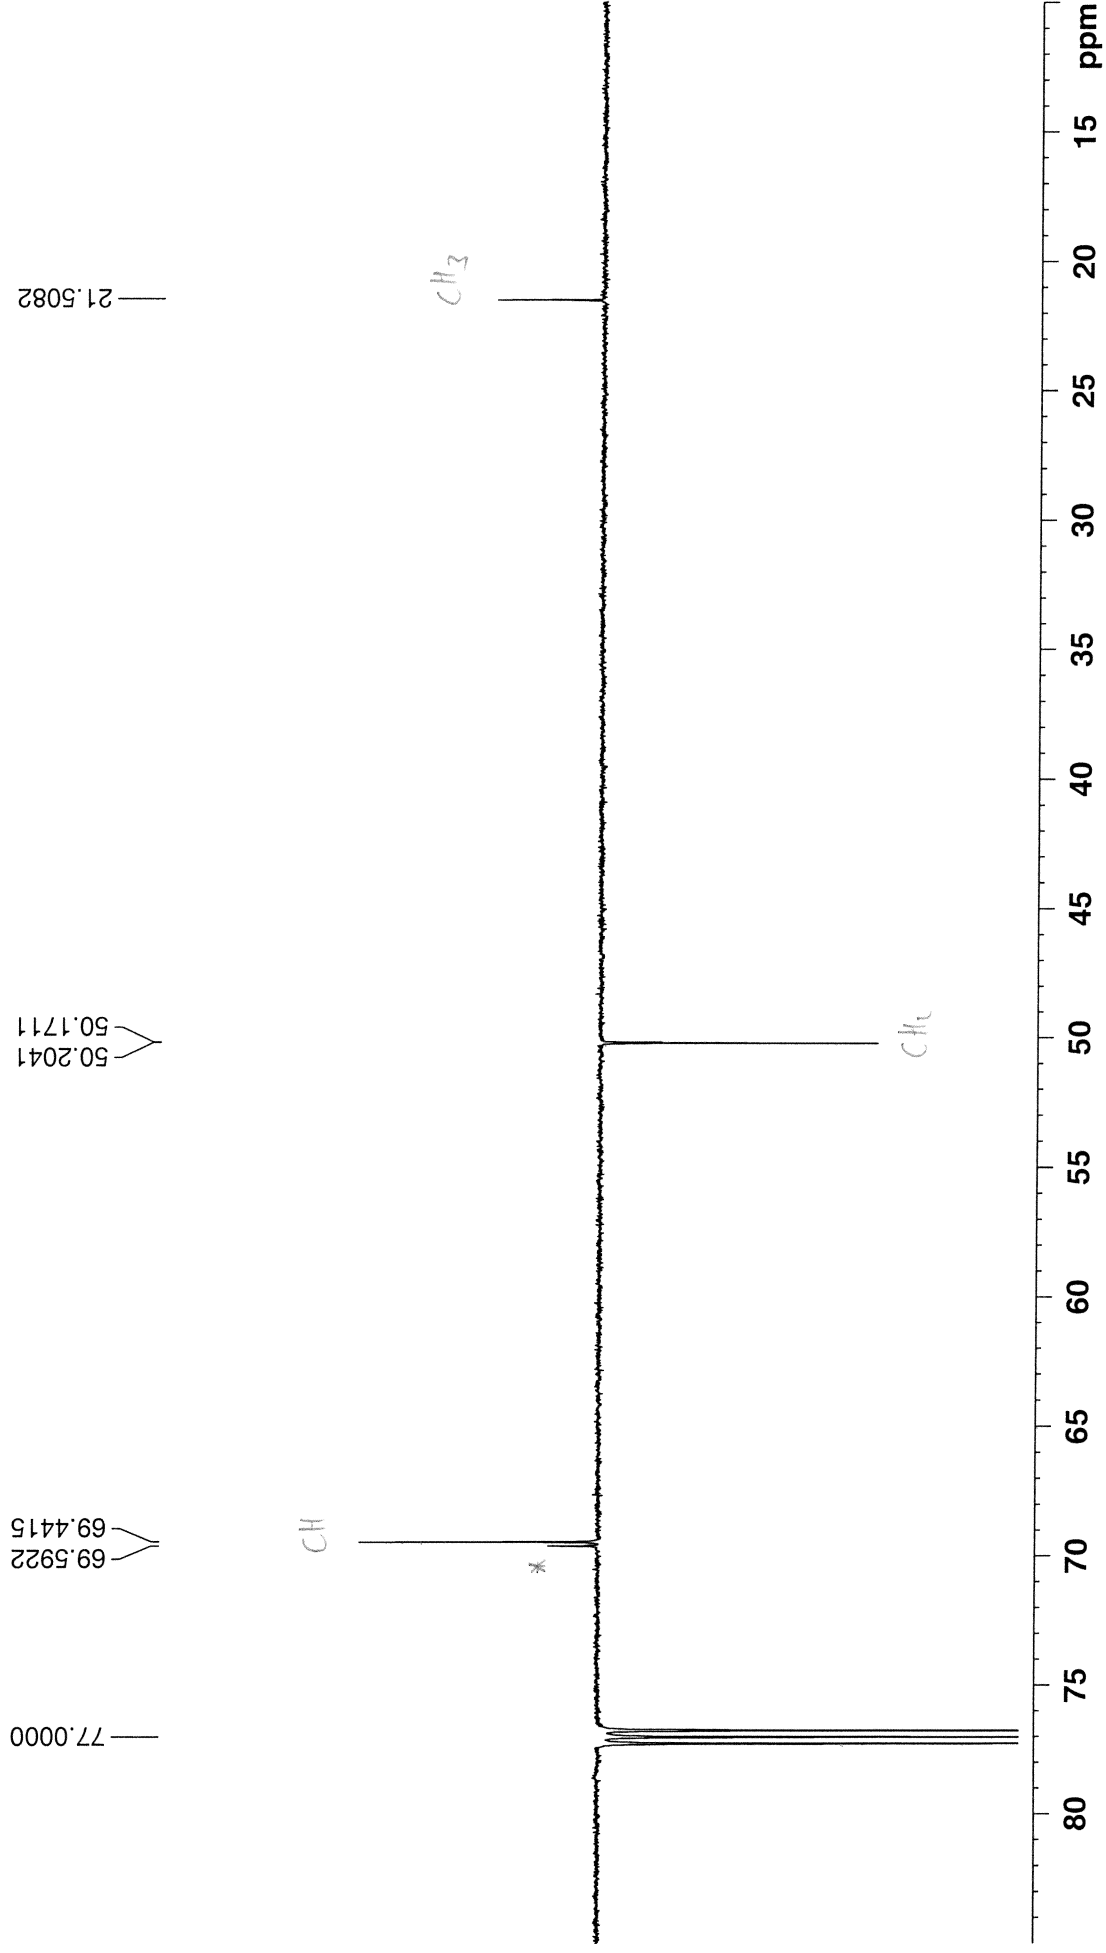

**Figure S52c.** NMR spectra of compound **8m**.

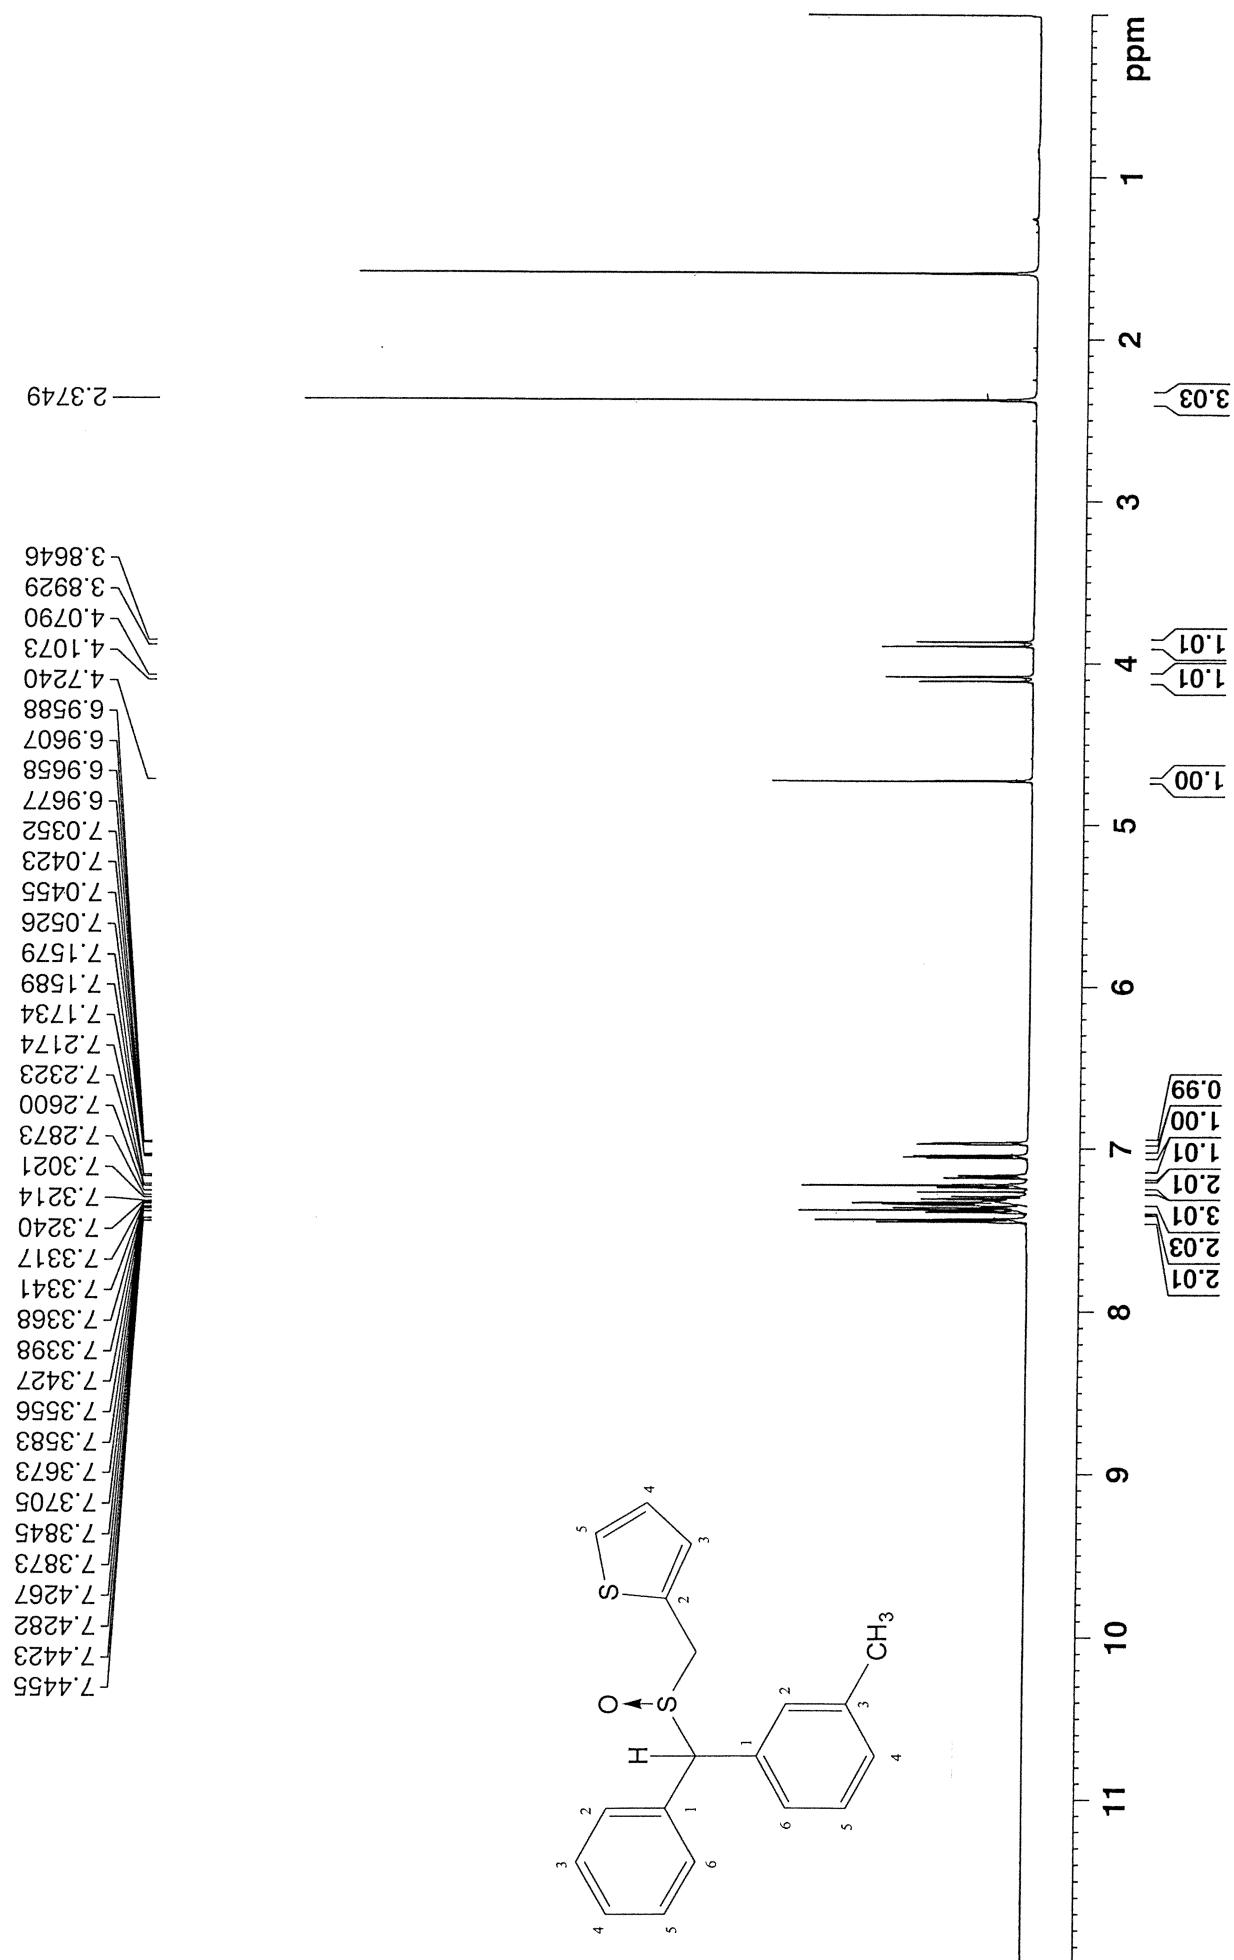



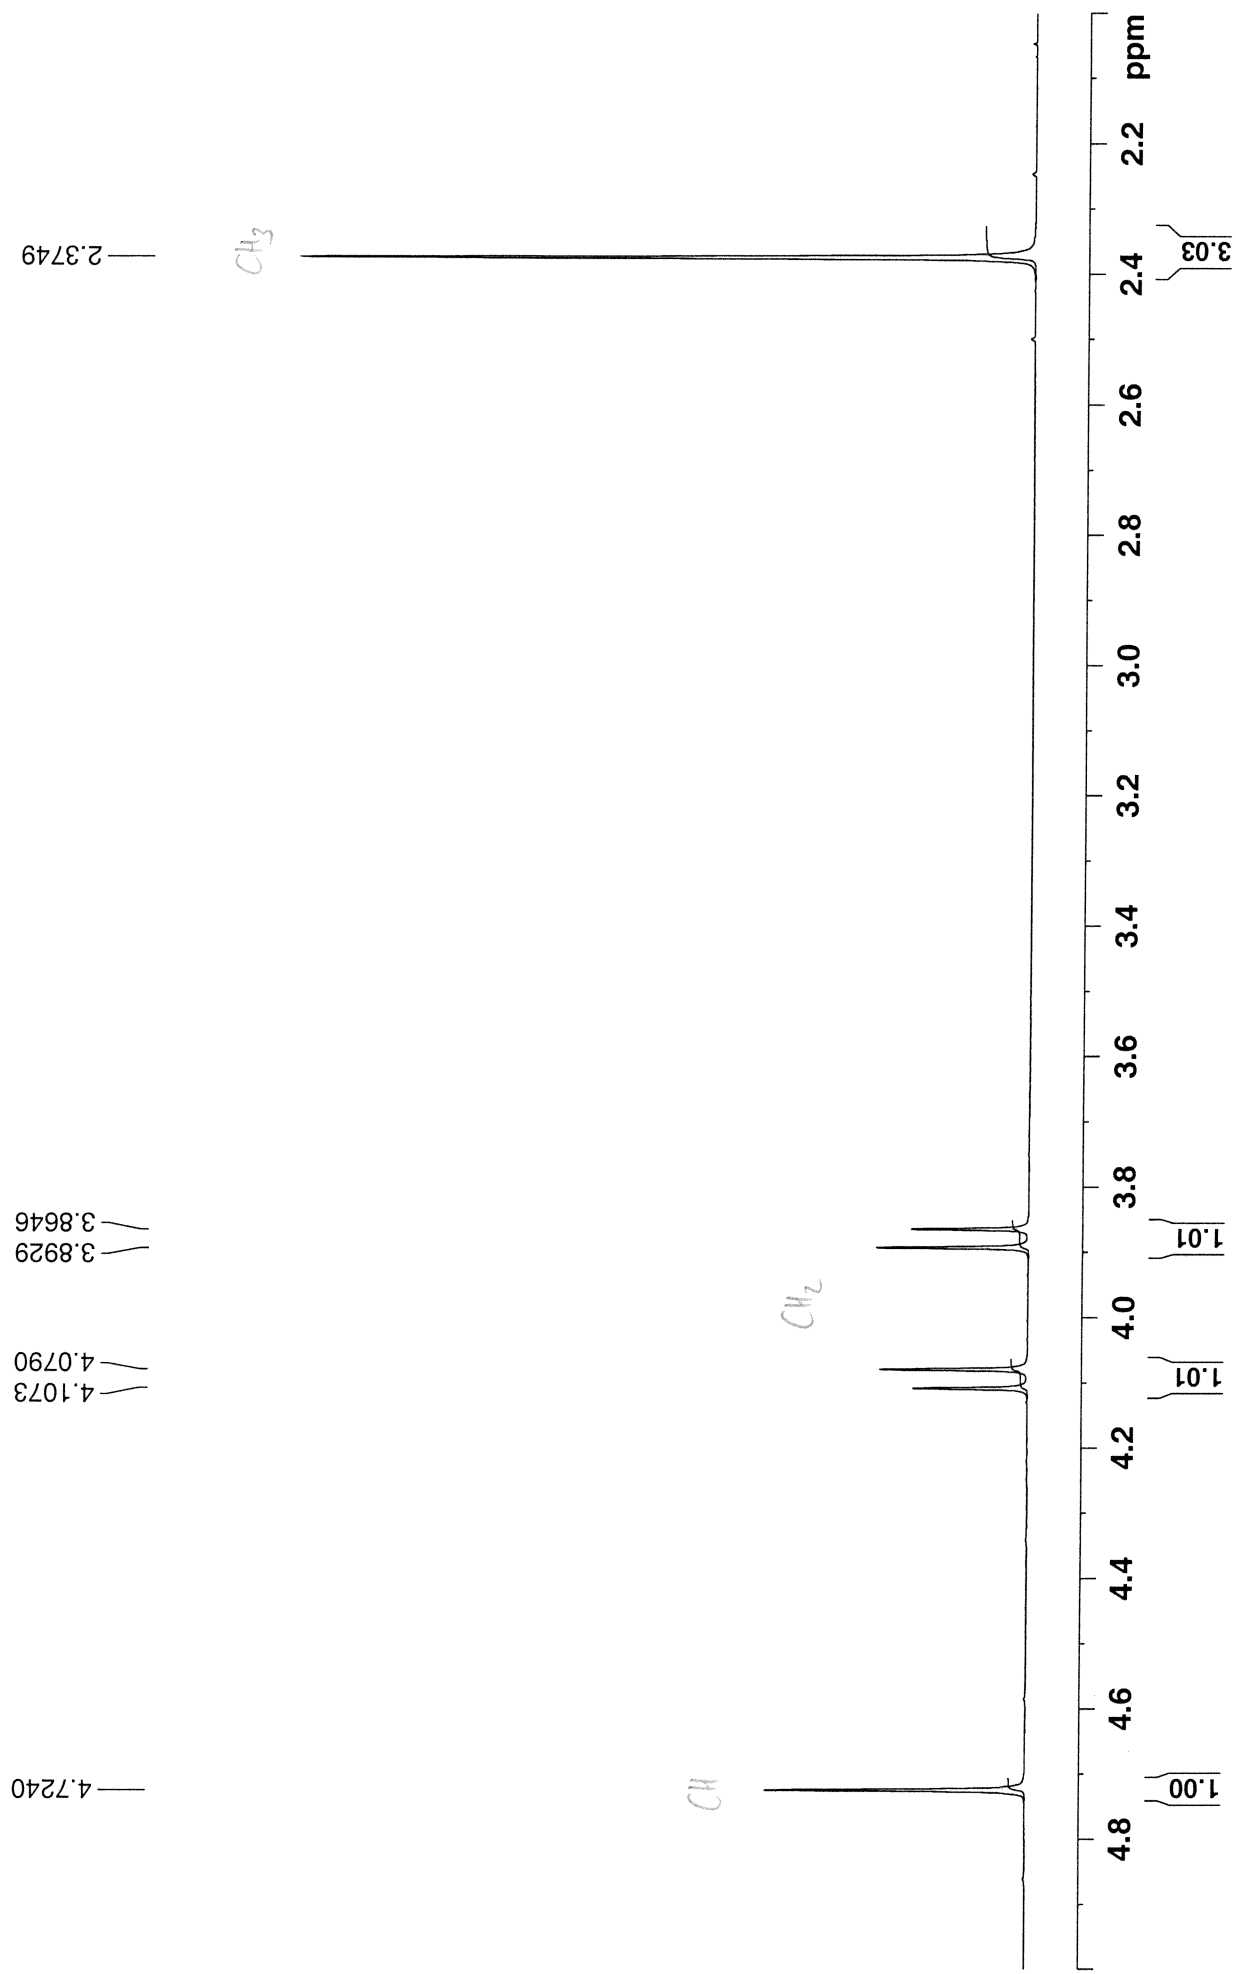



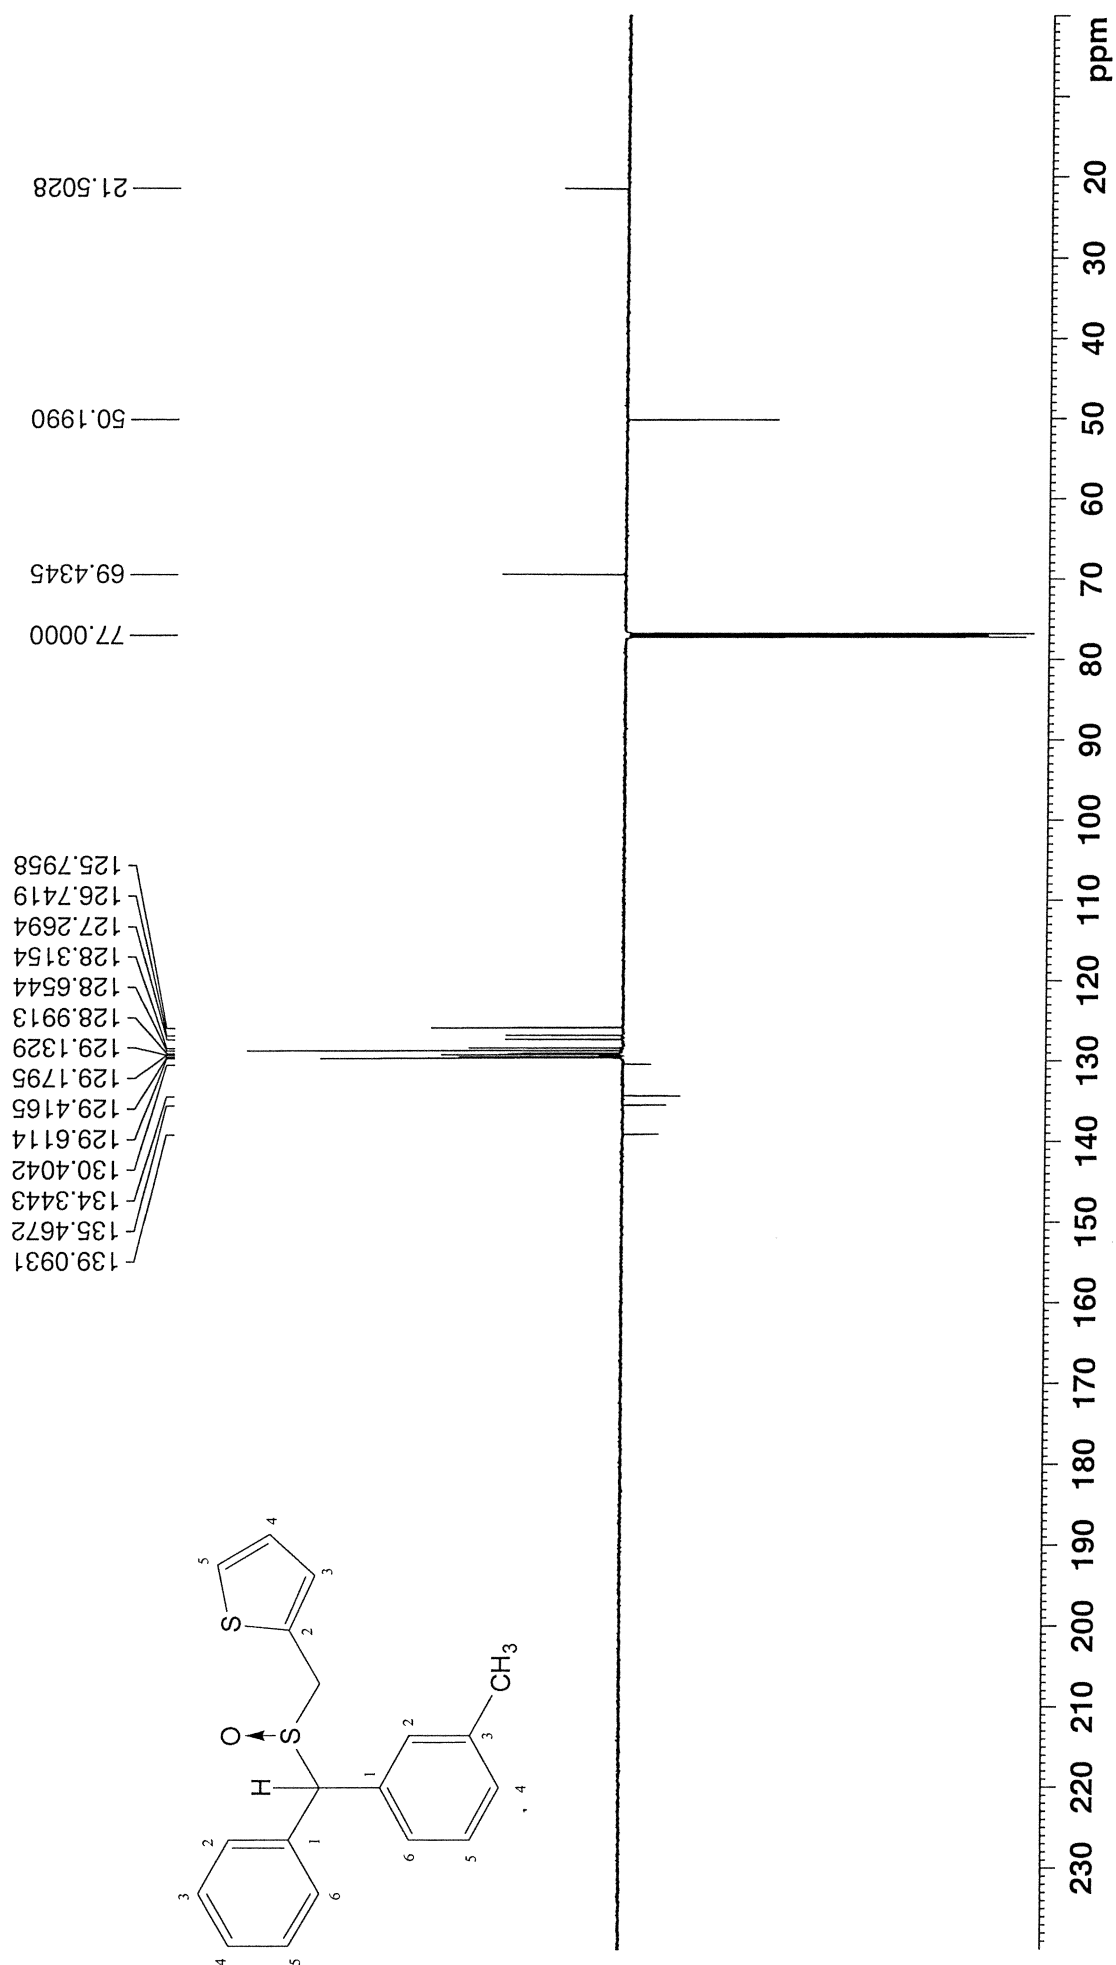

PN016\_2\_2 in cdcl3 (APT) 29.8.2019

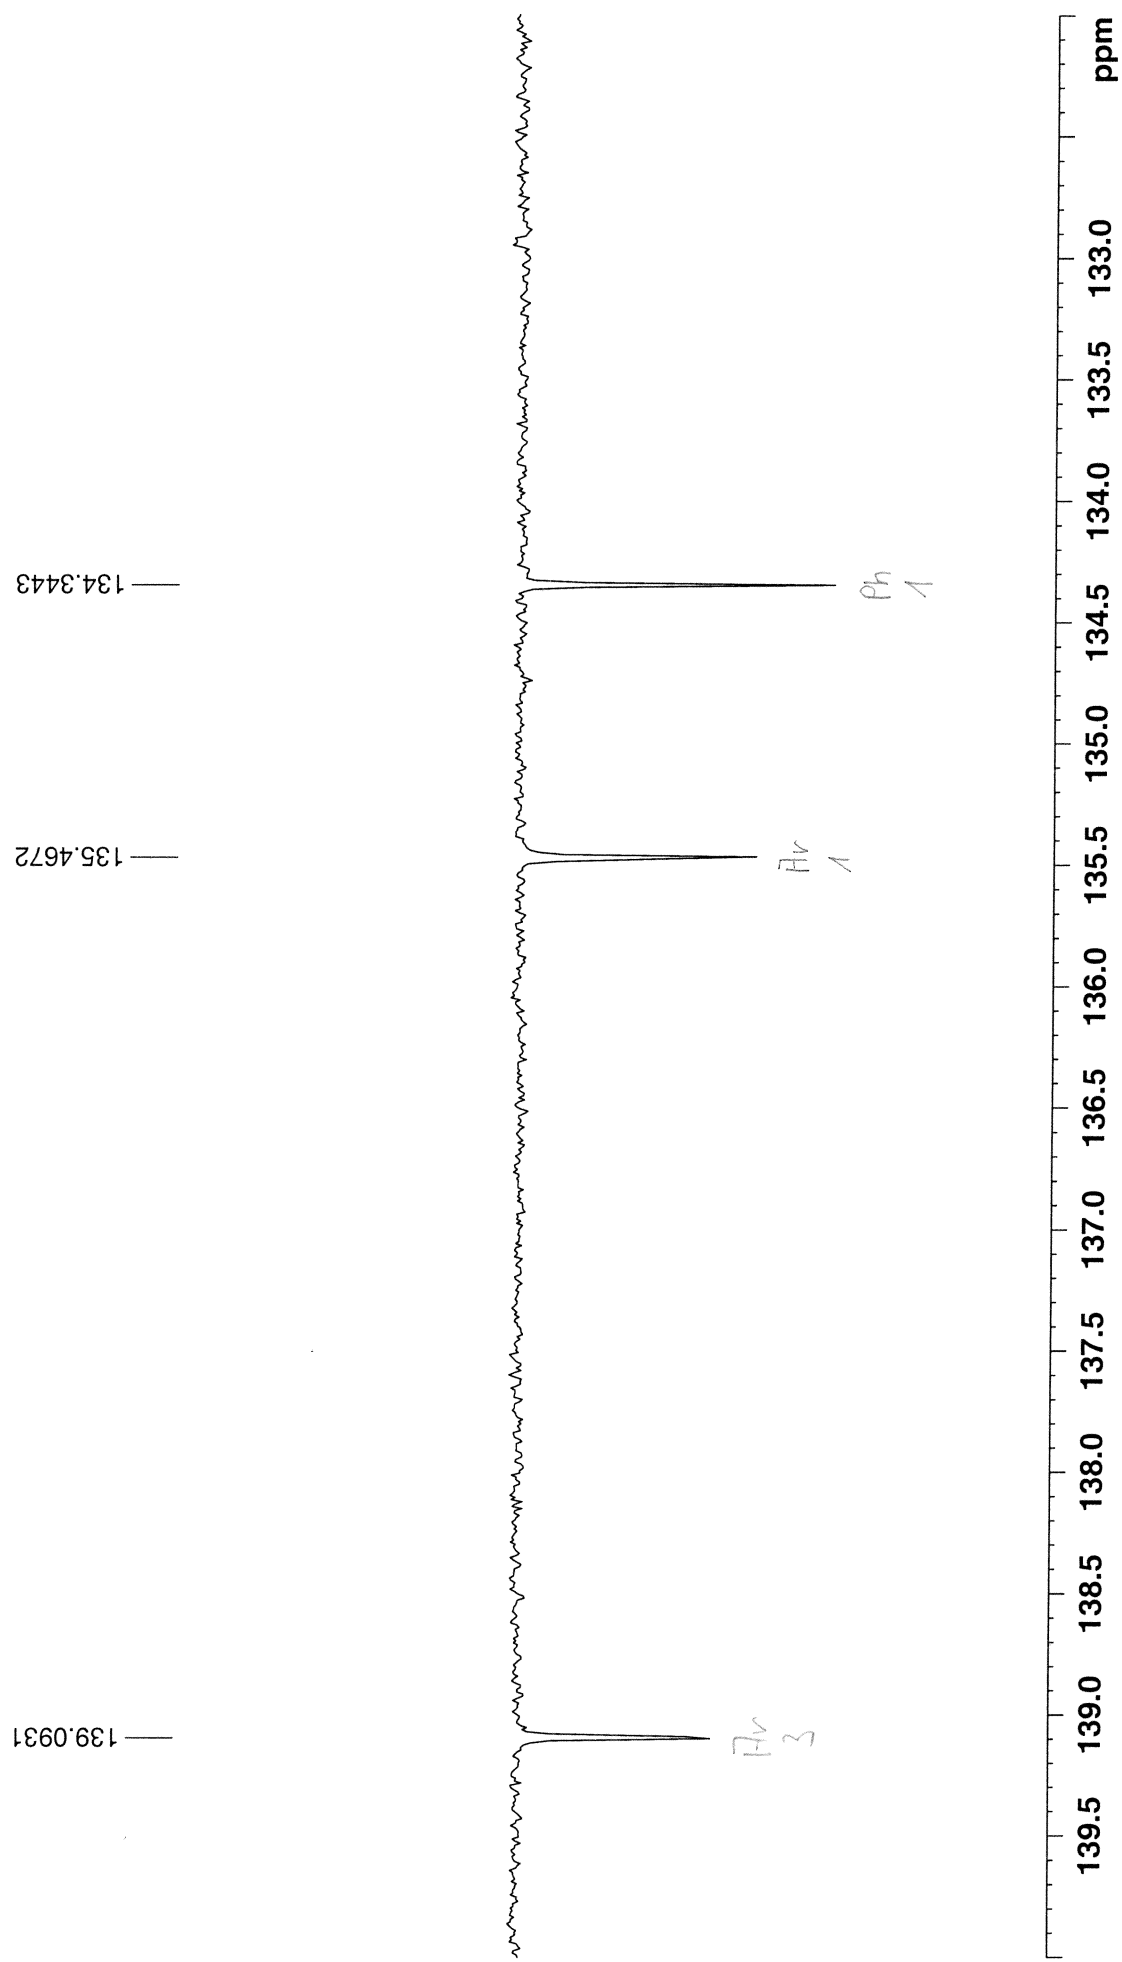

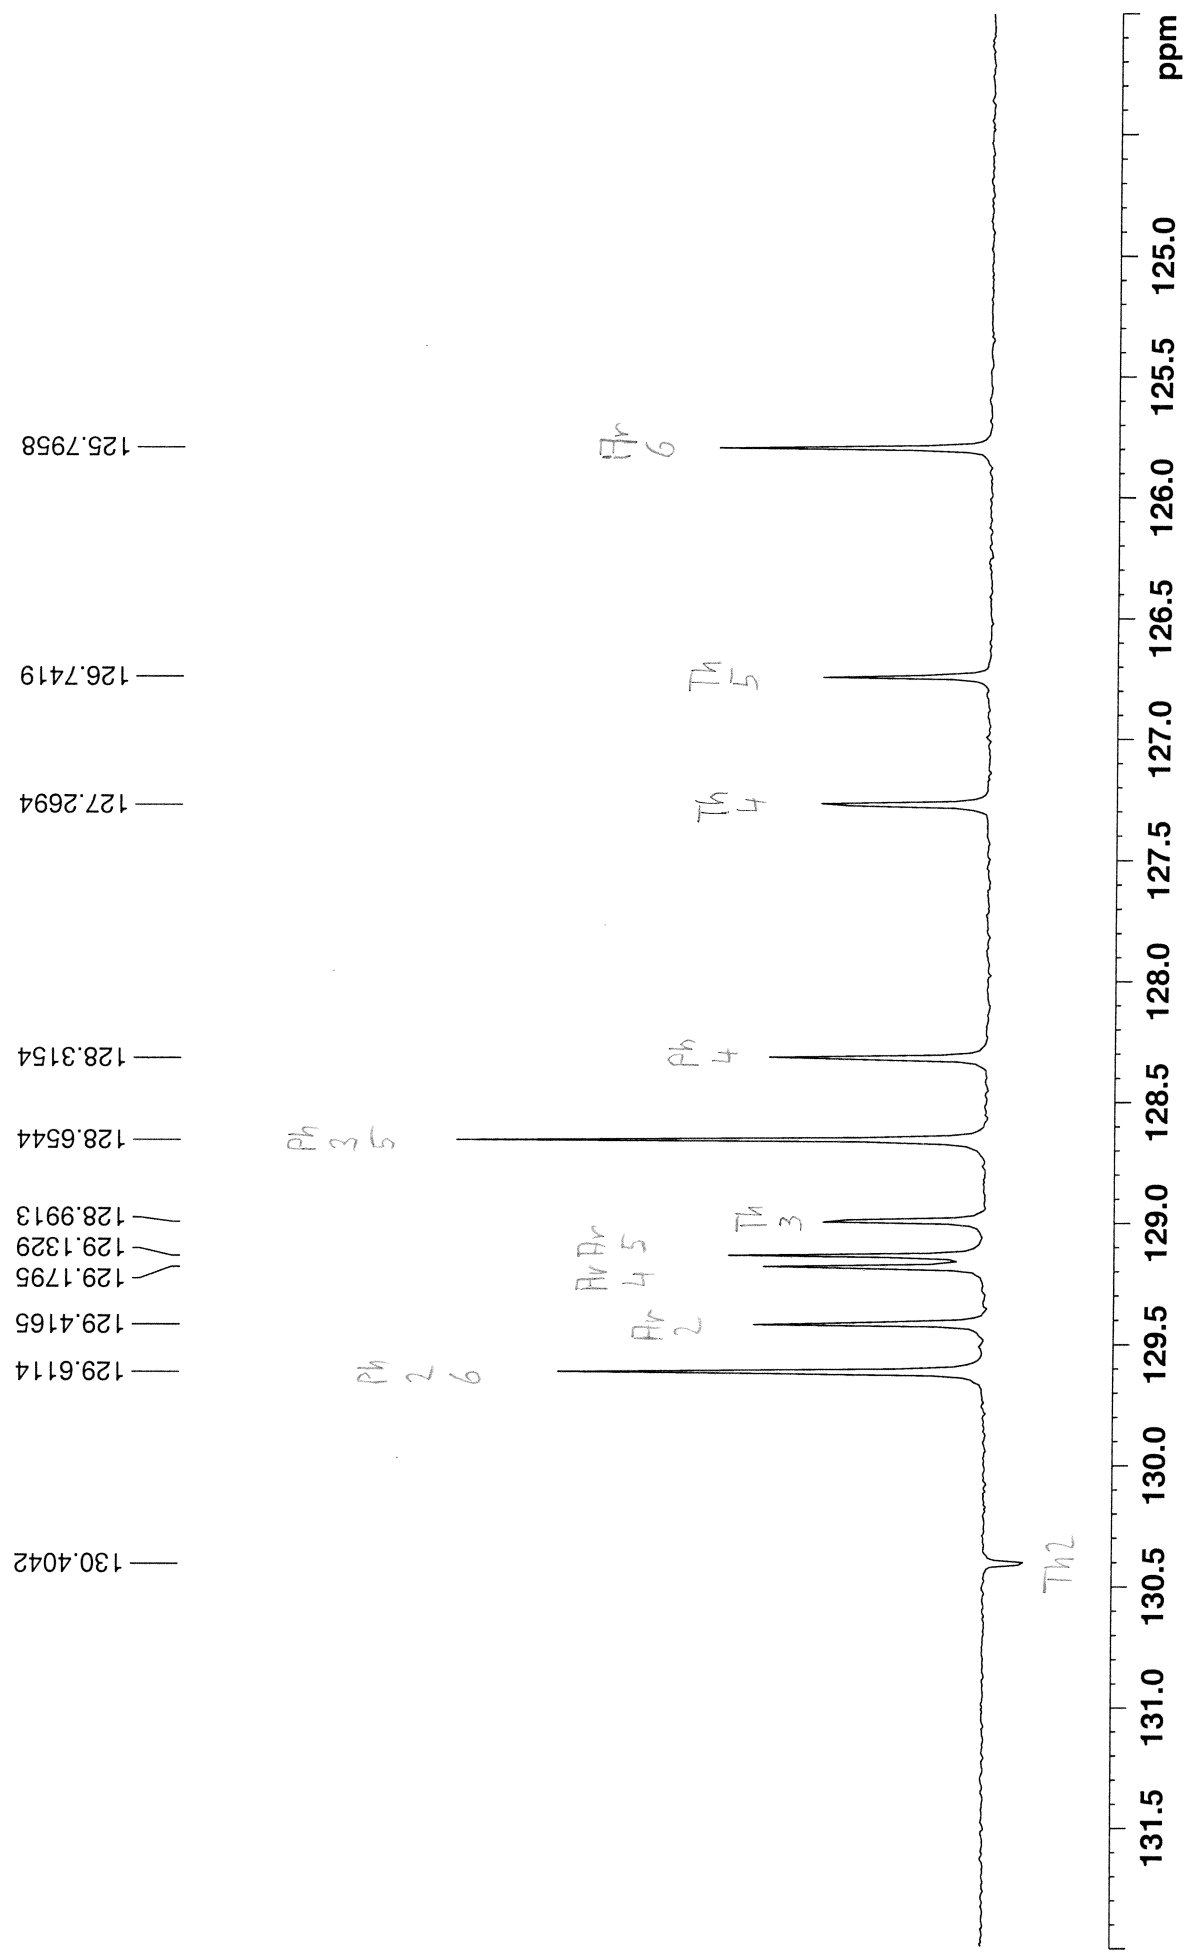

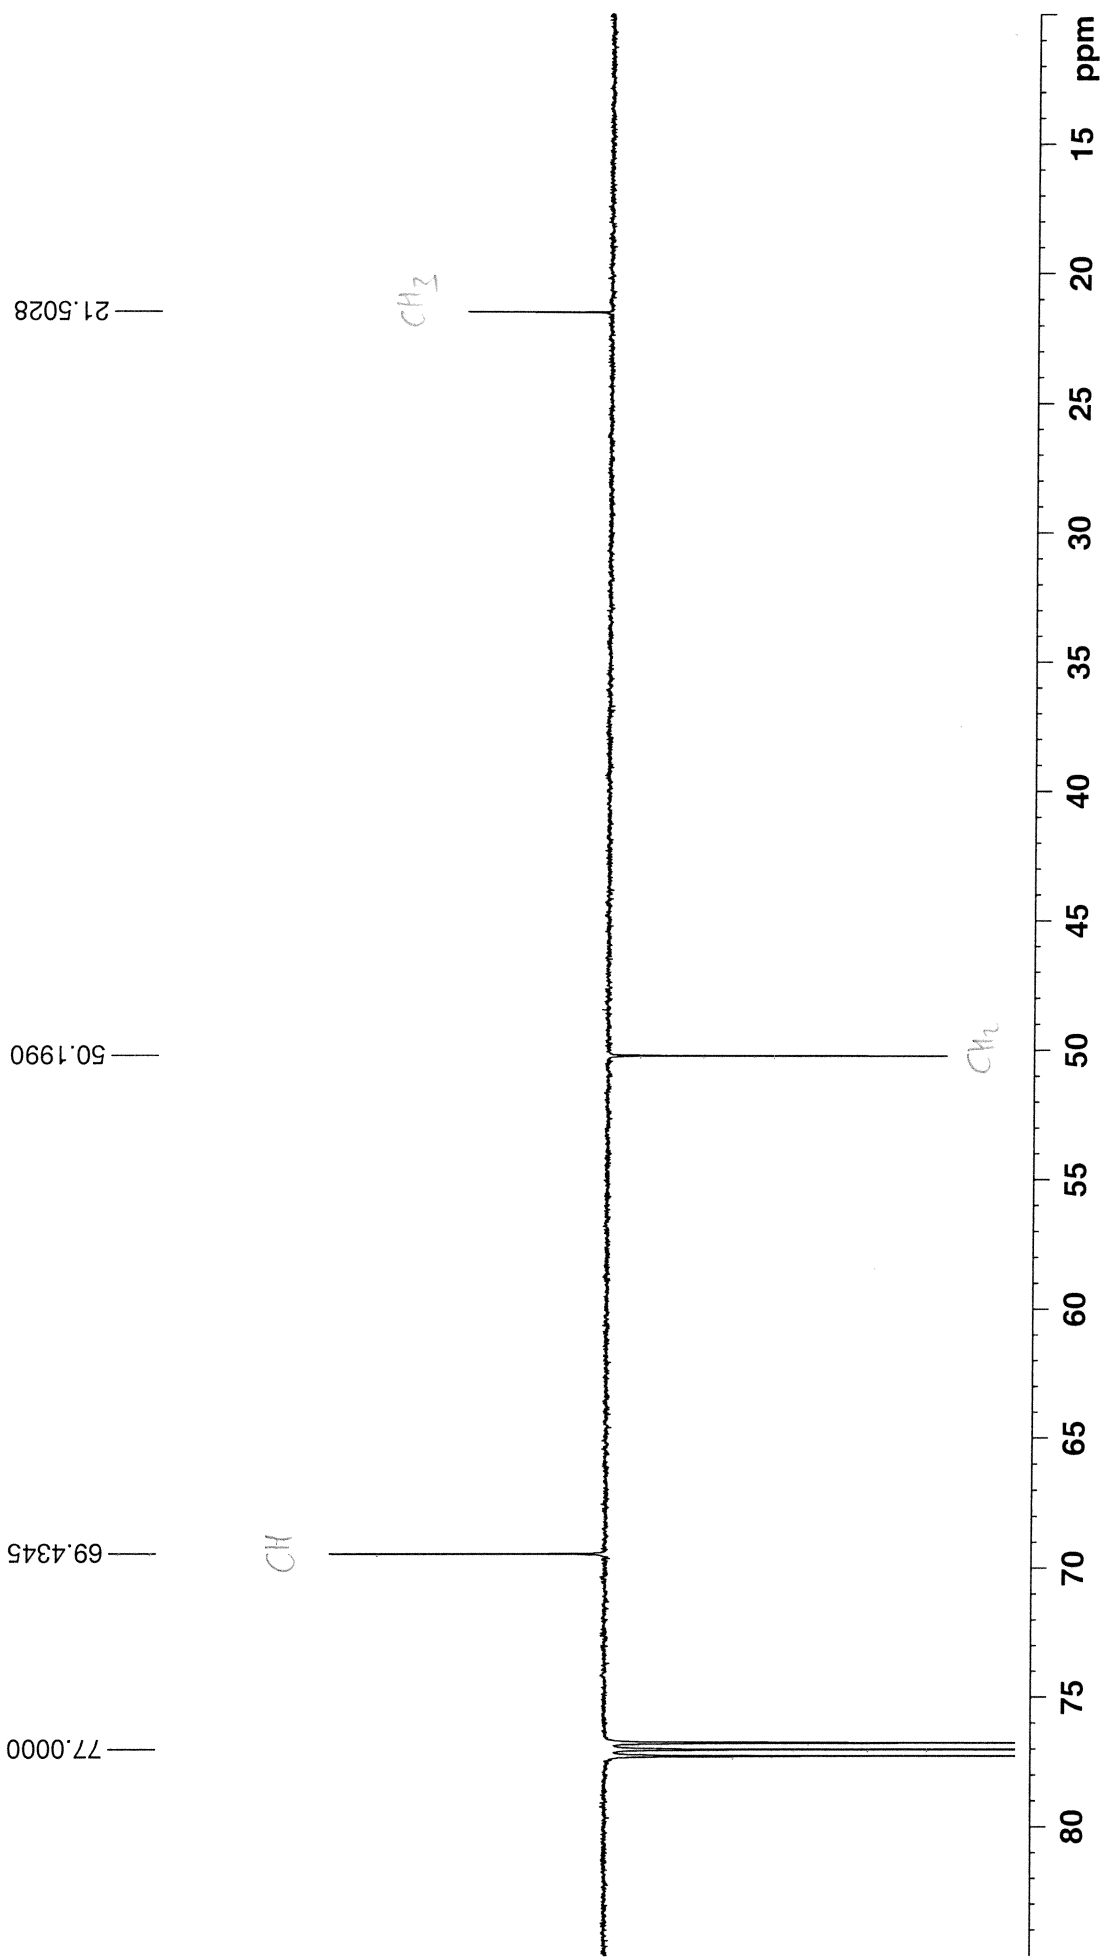

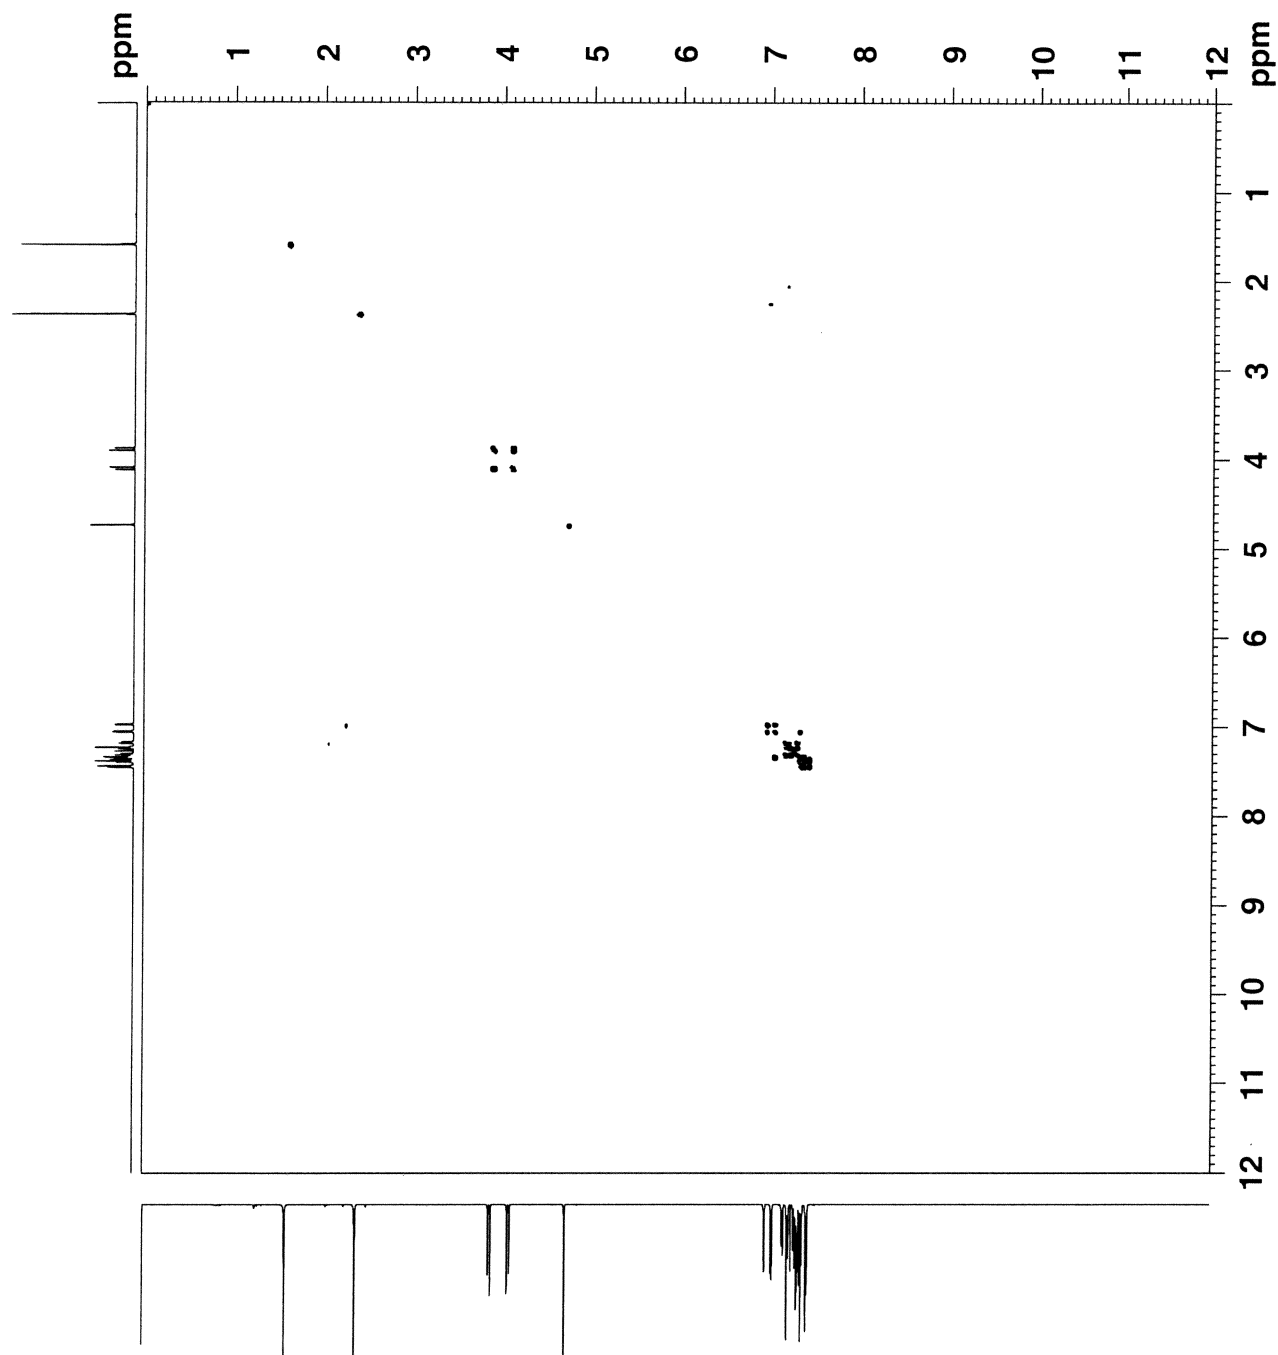

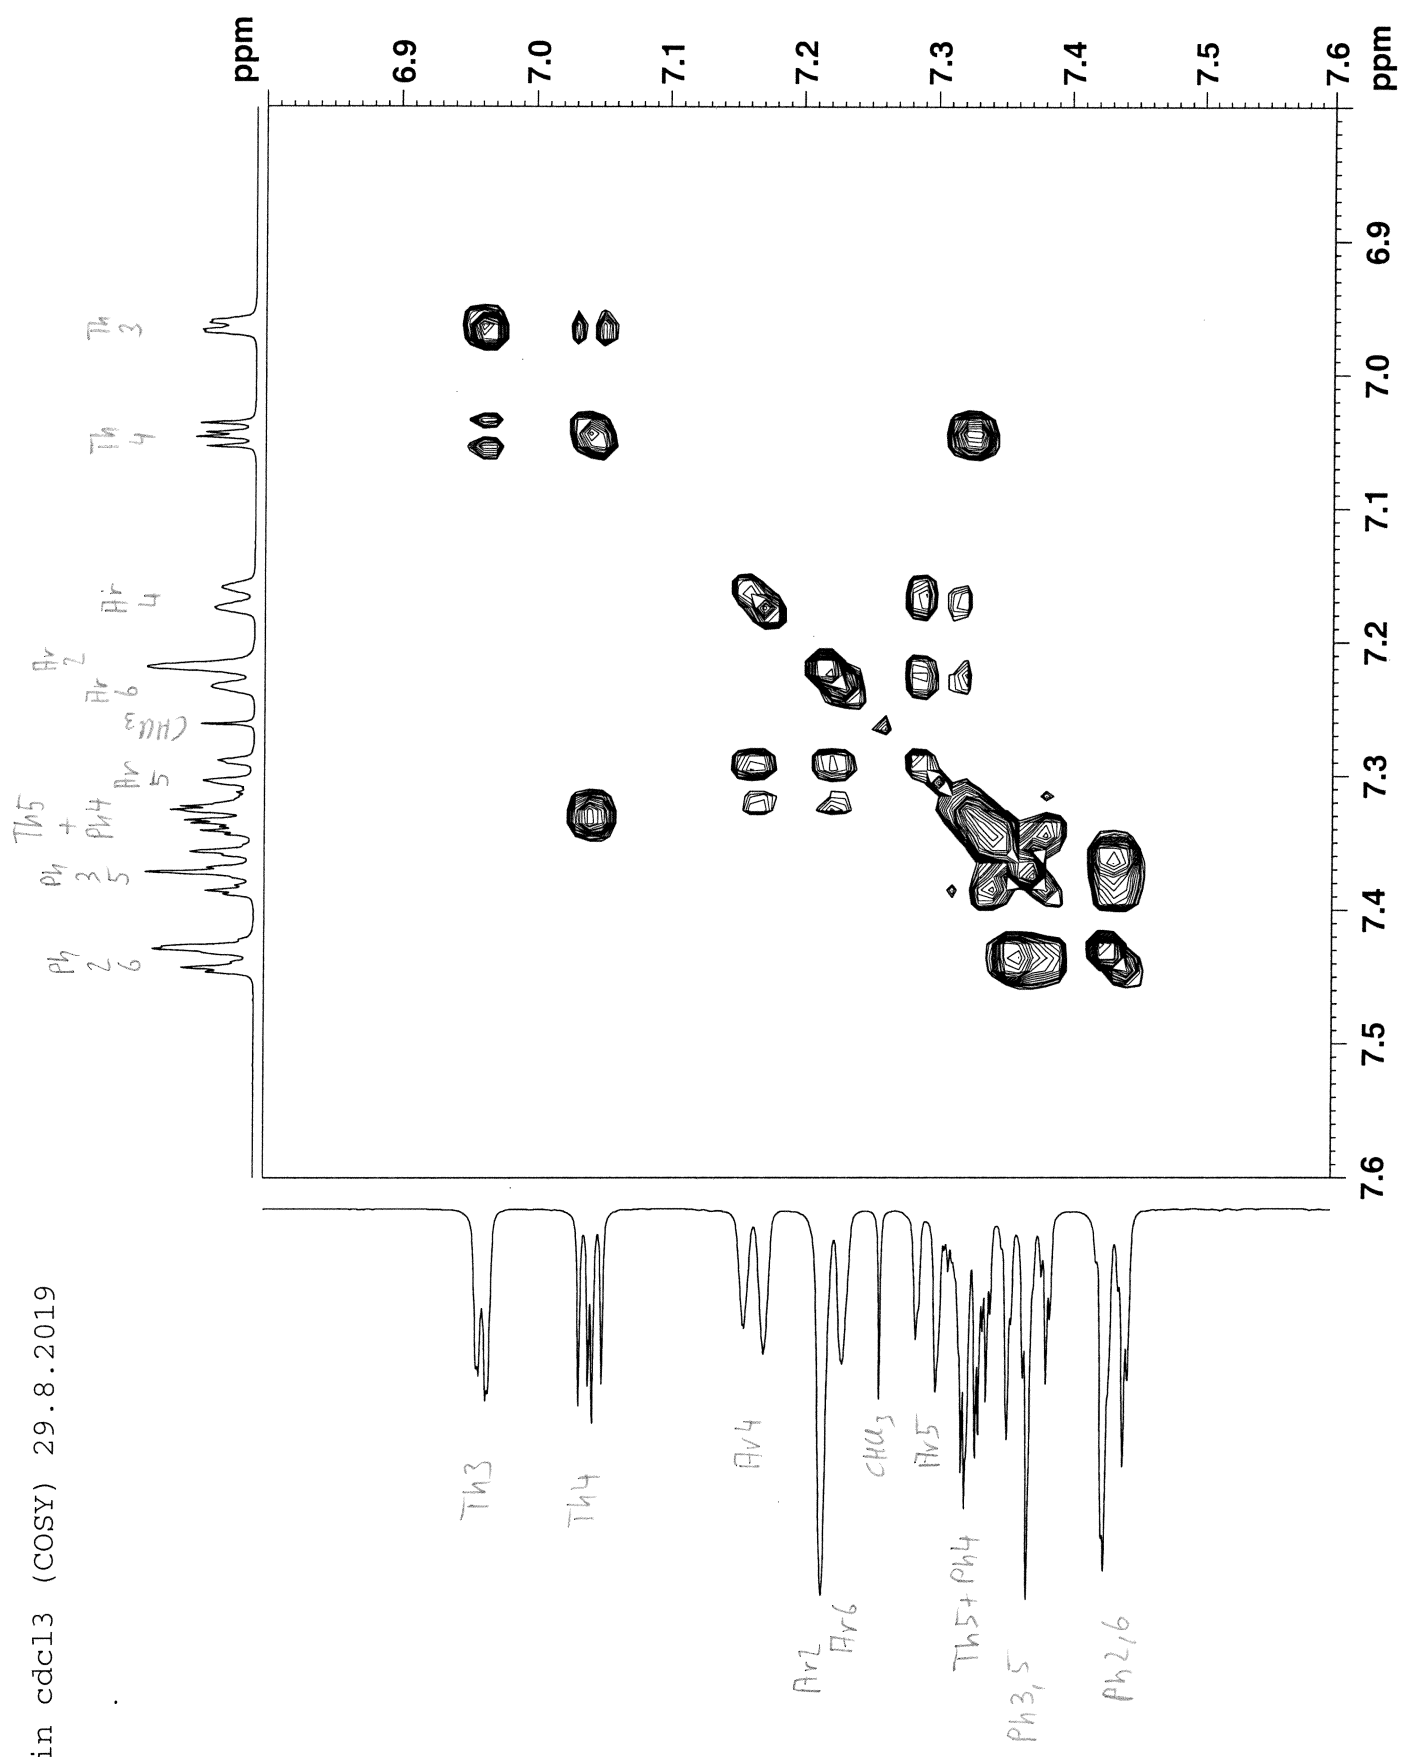

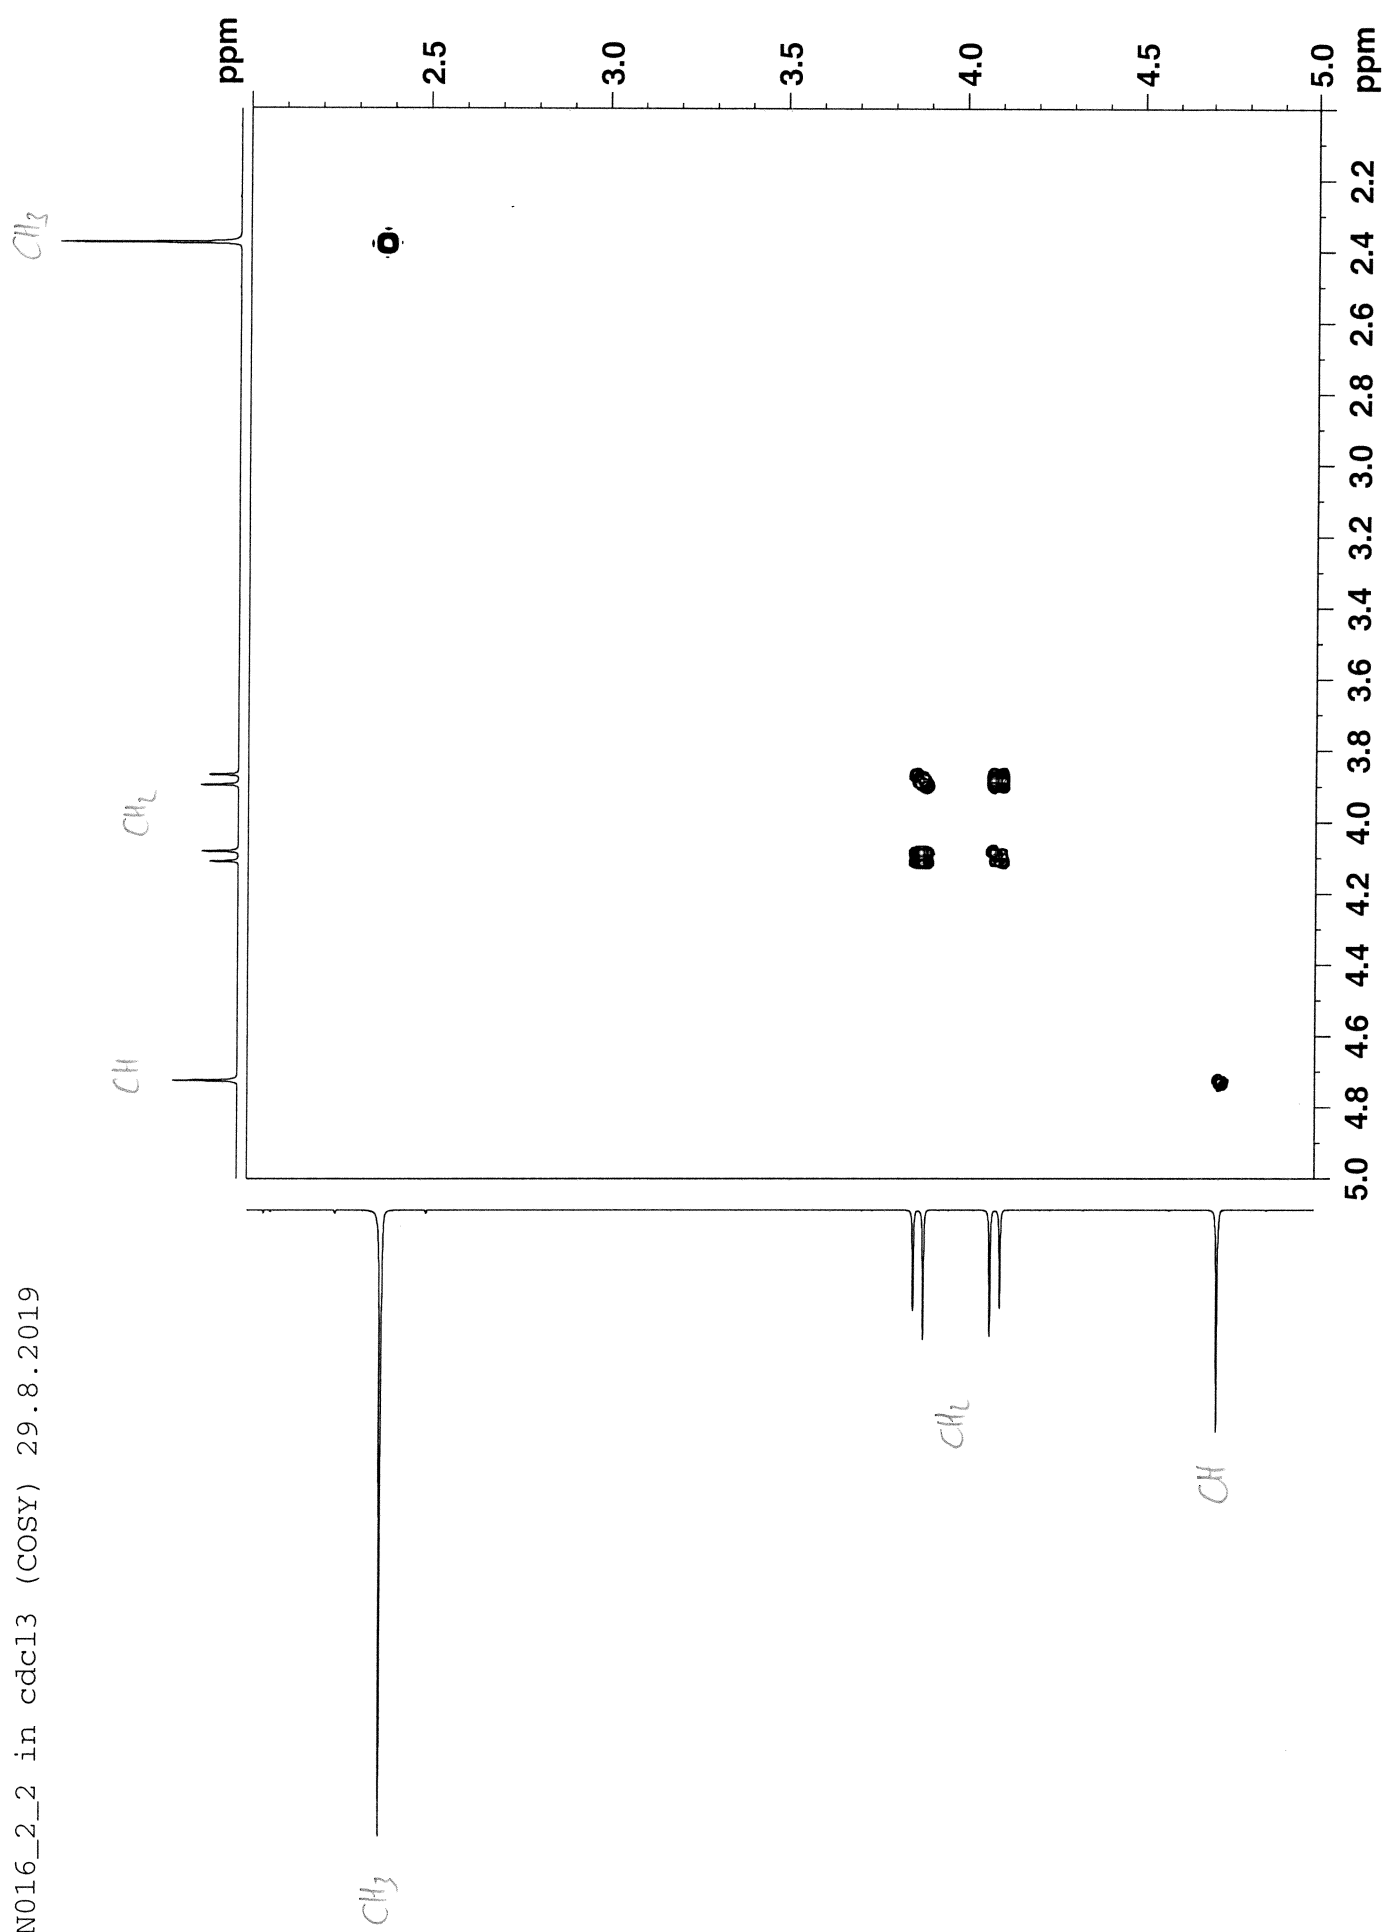

PN016\_2\_2 in cdcl3 (HSQC) 29.8.2019

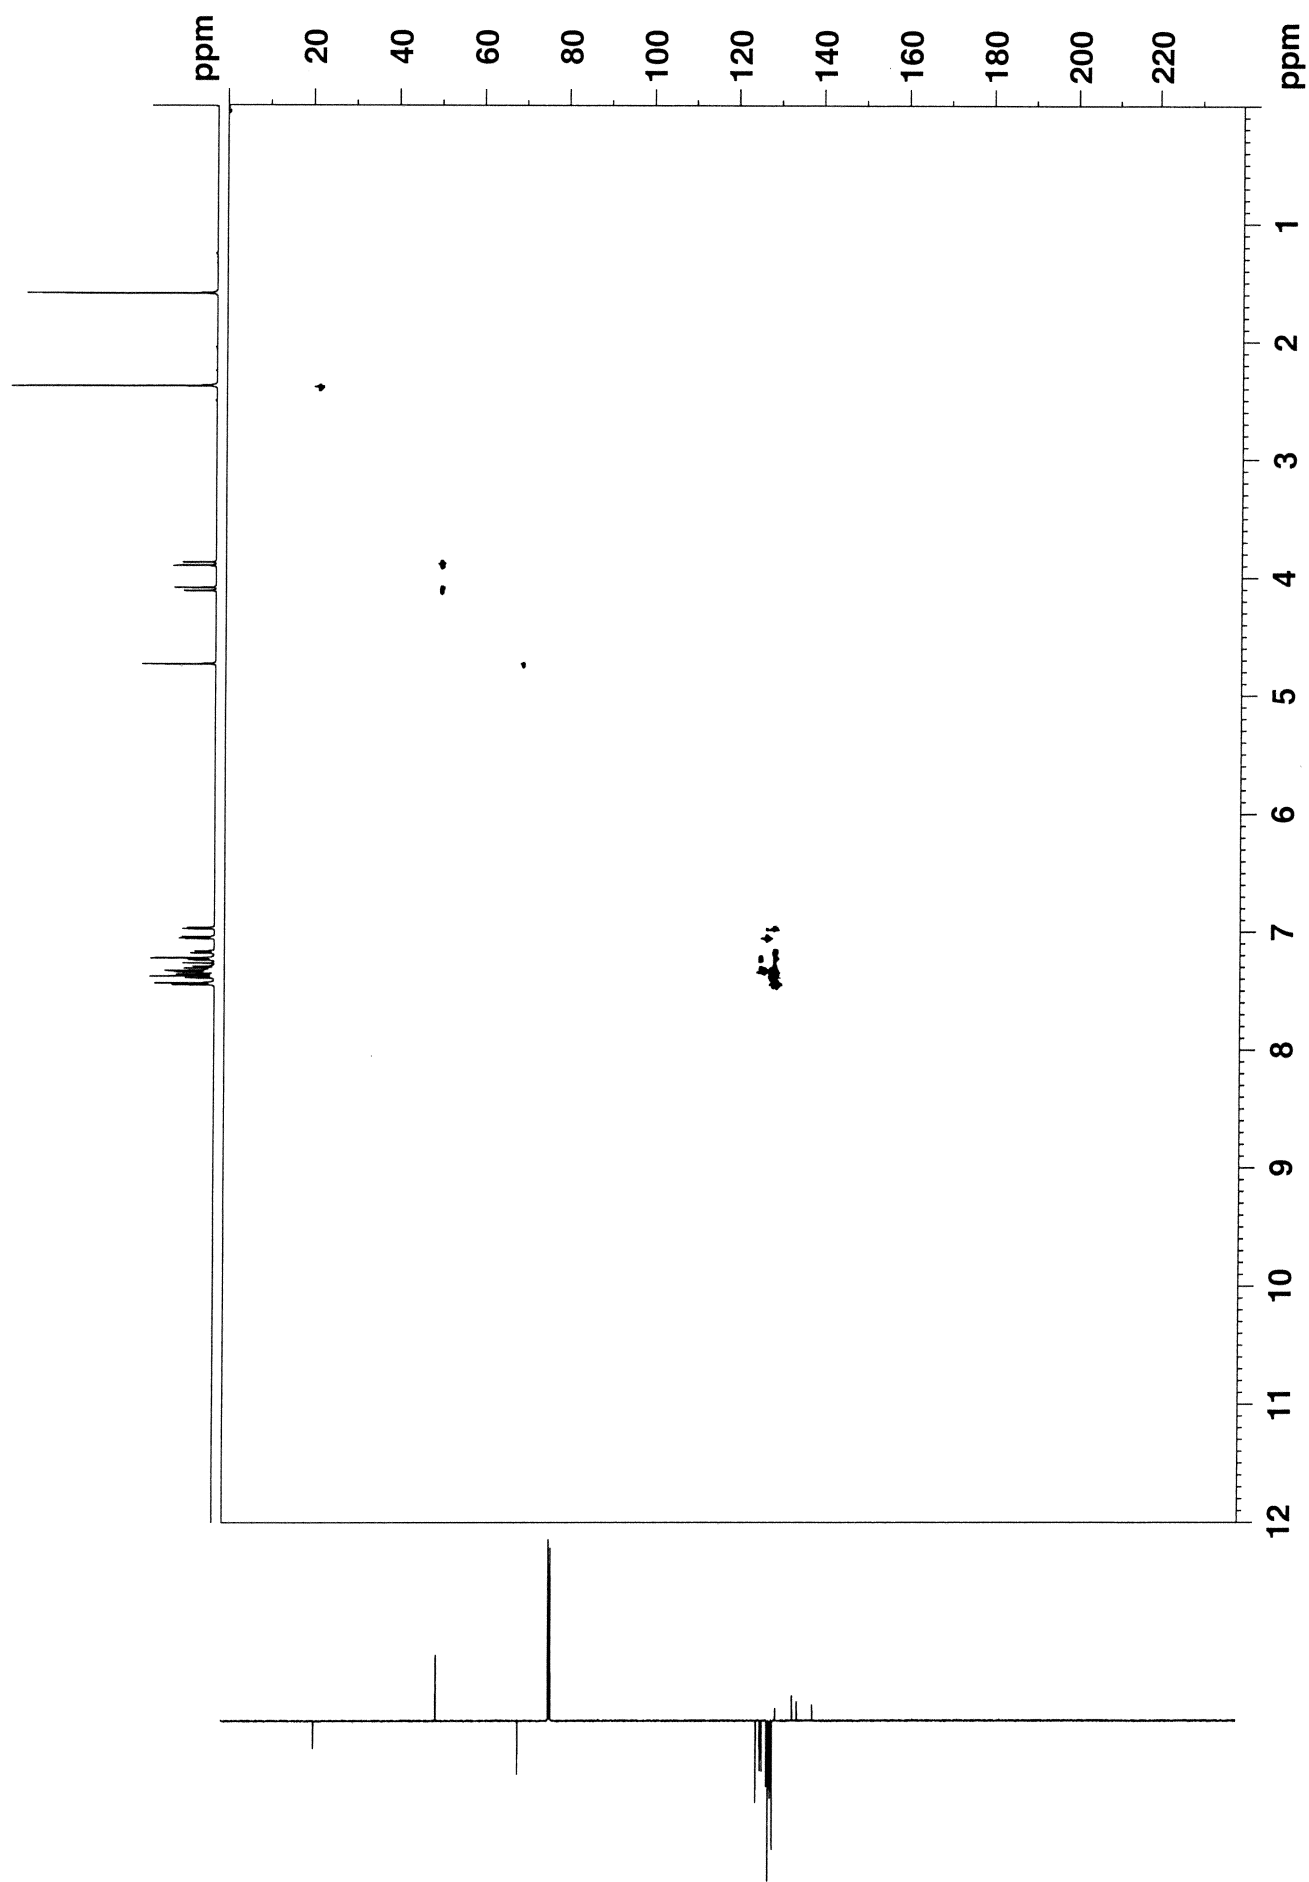



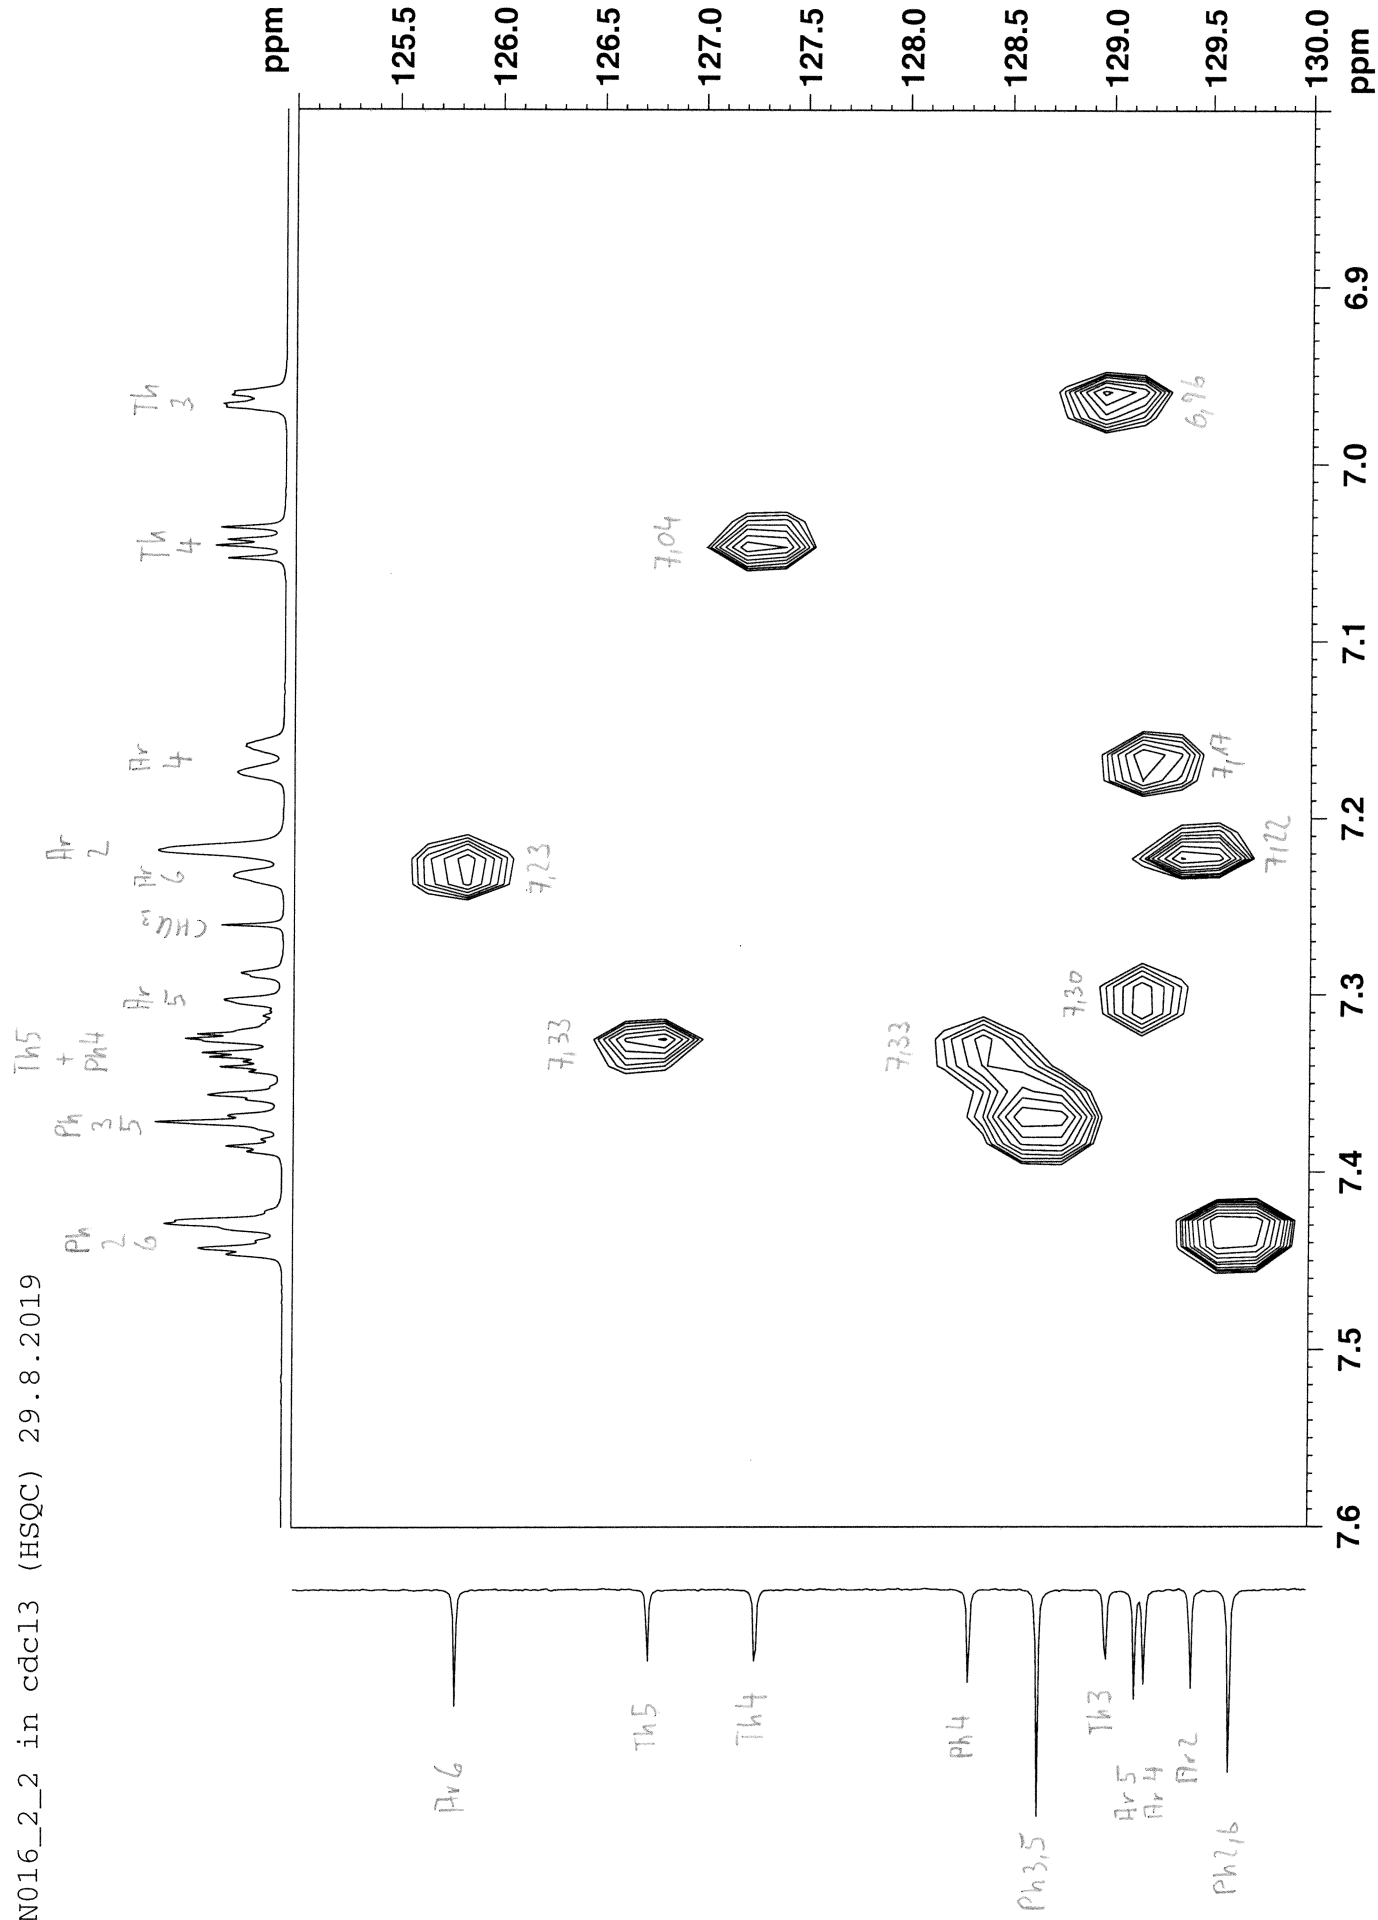

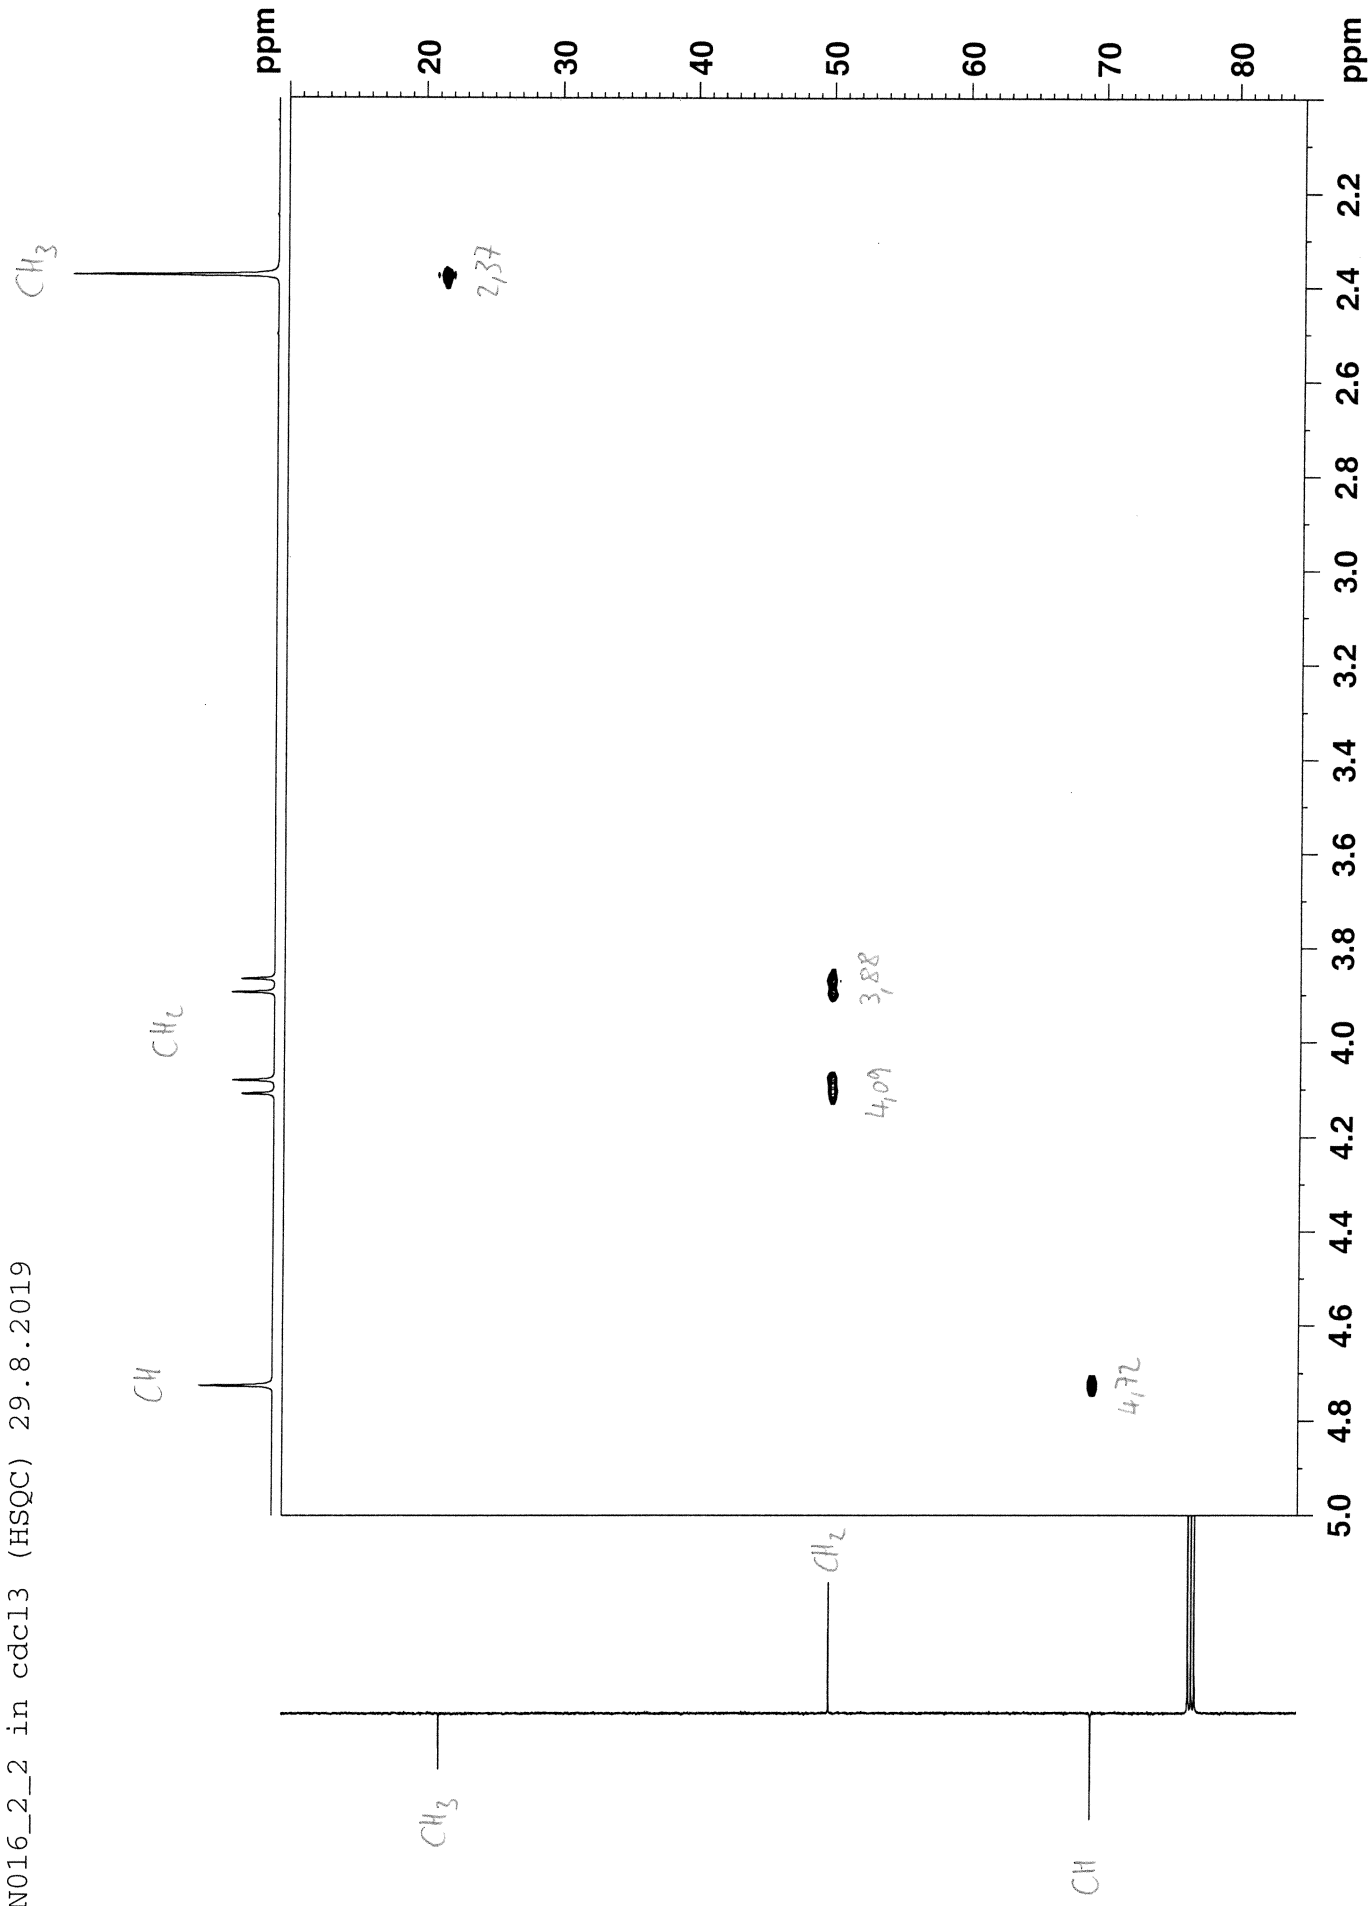

PN016\_2\_2 in cdcl3 (HMBC) 29.8.2019

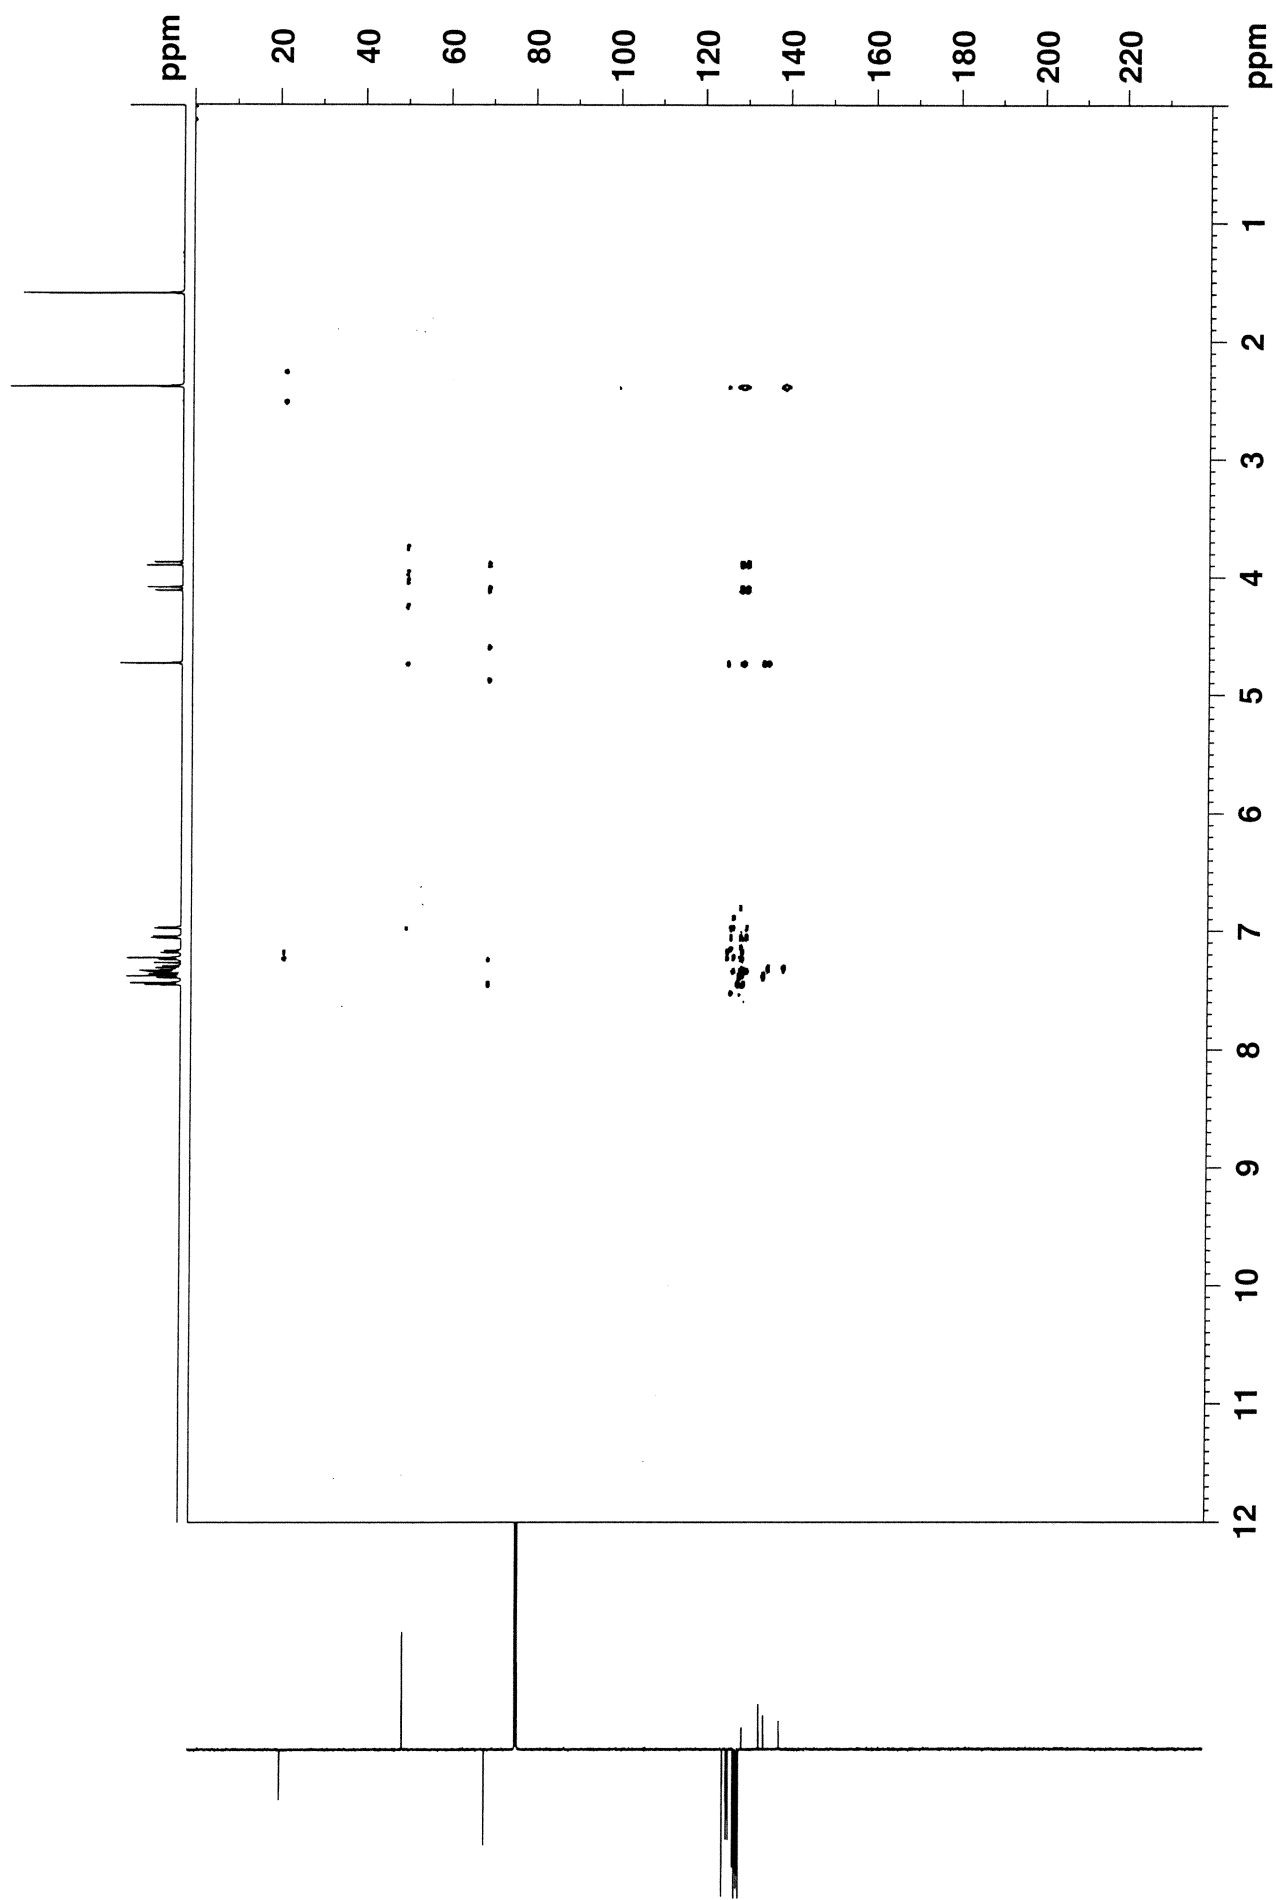

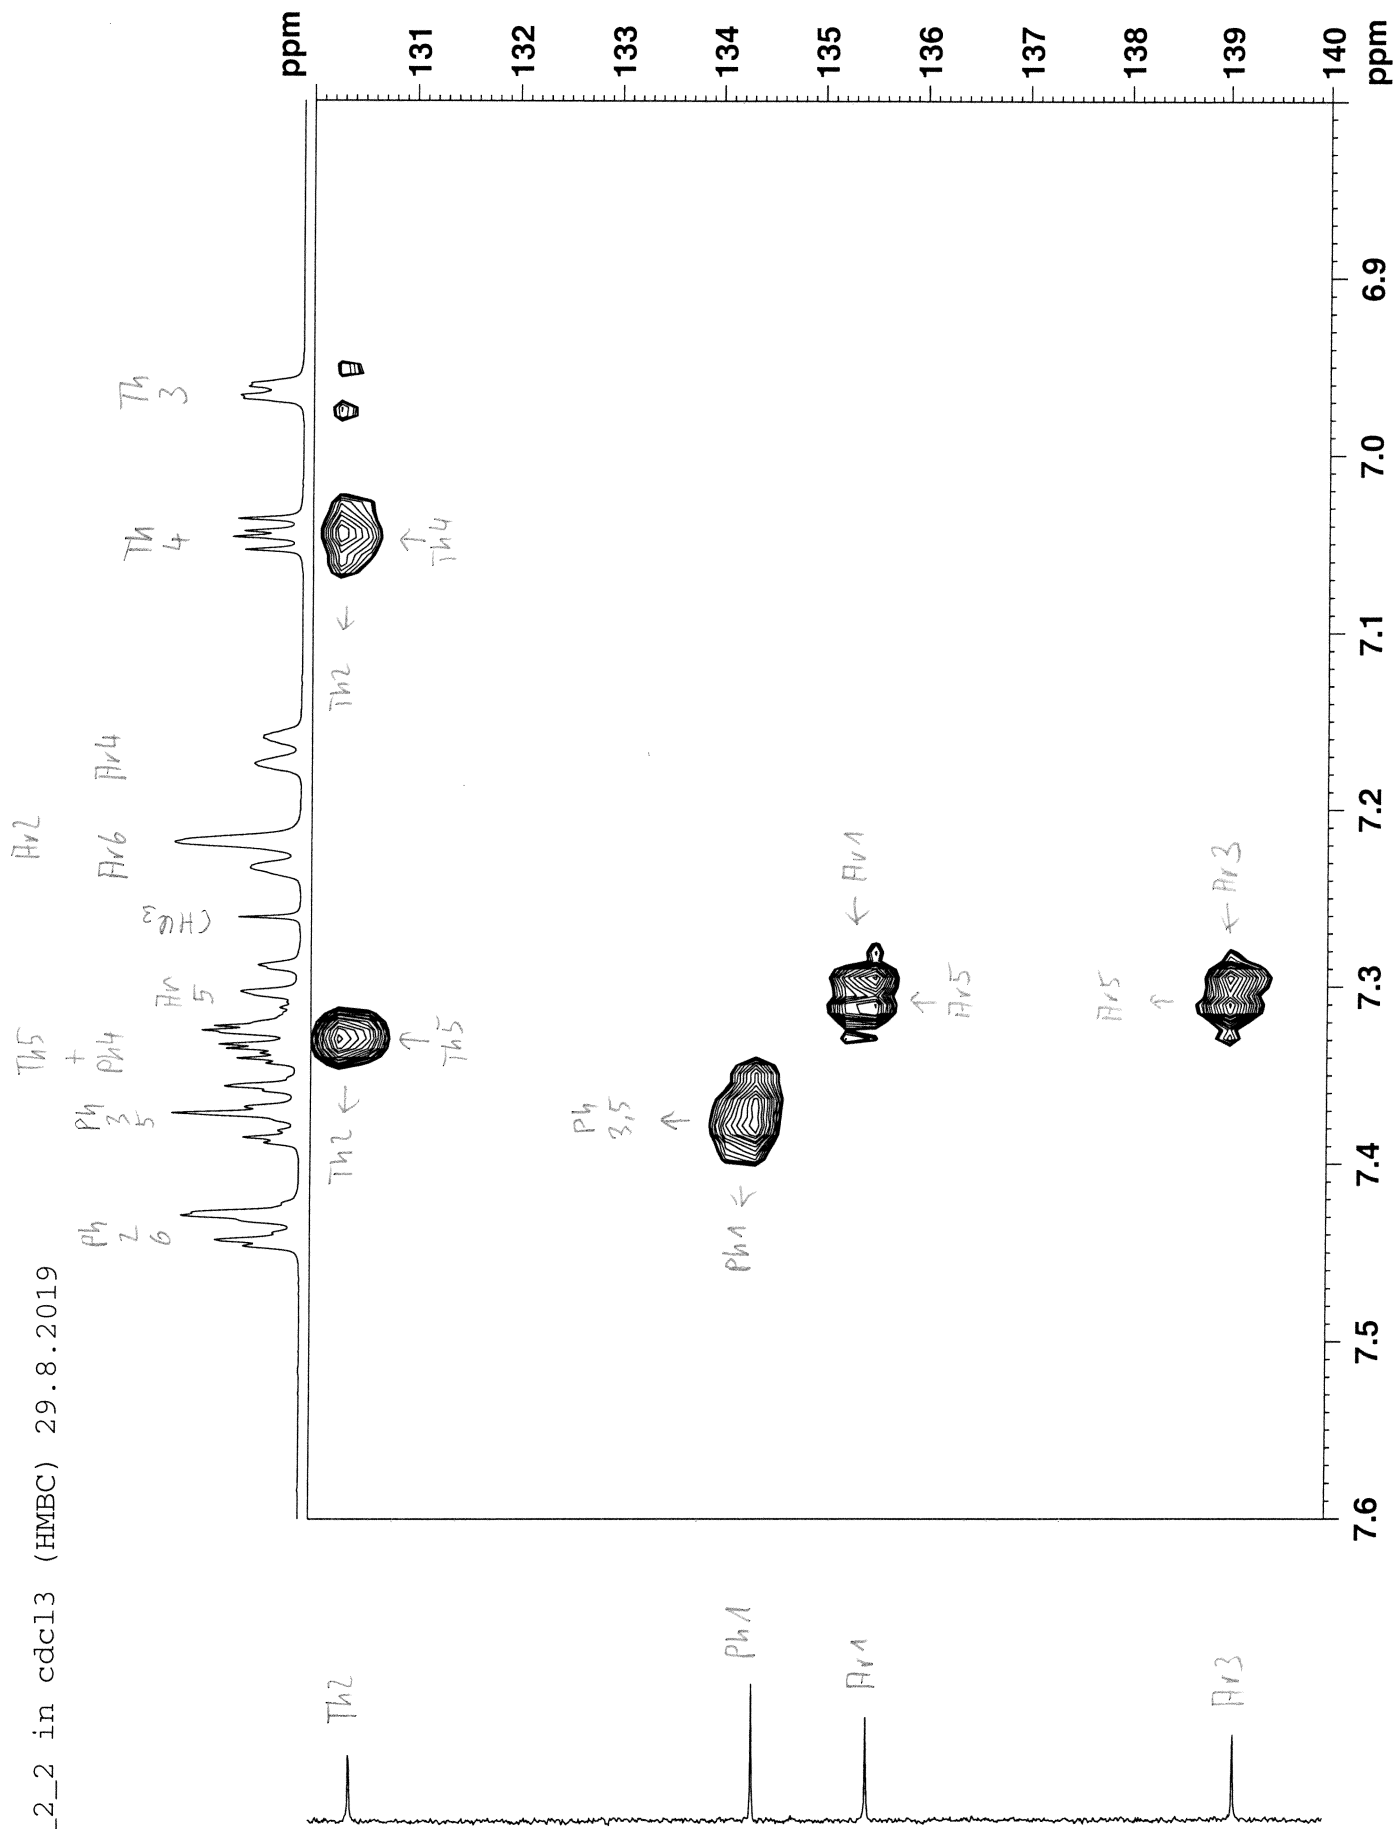

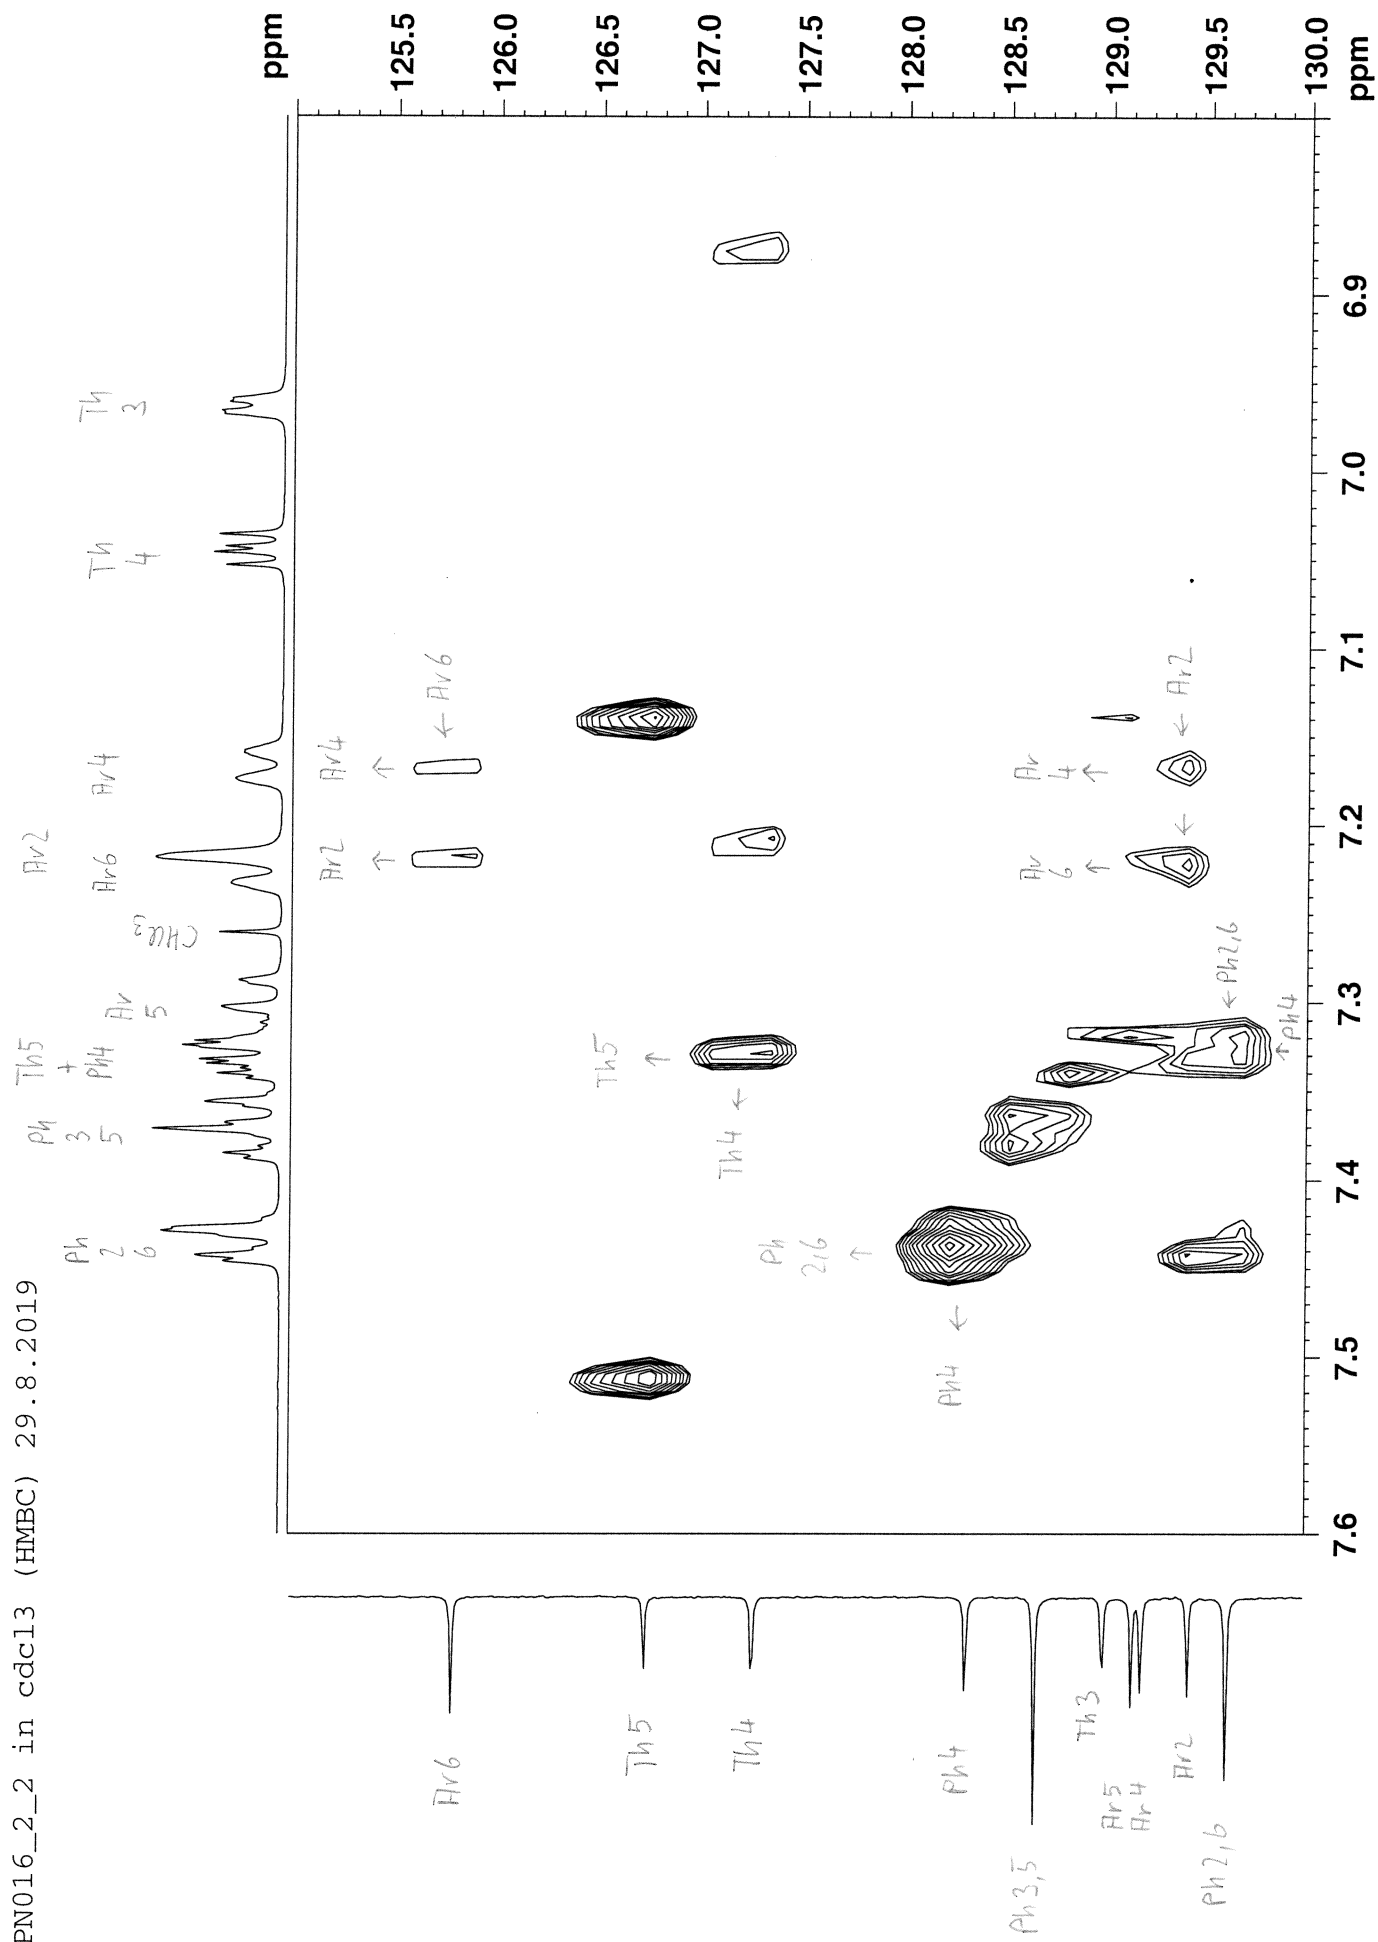

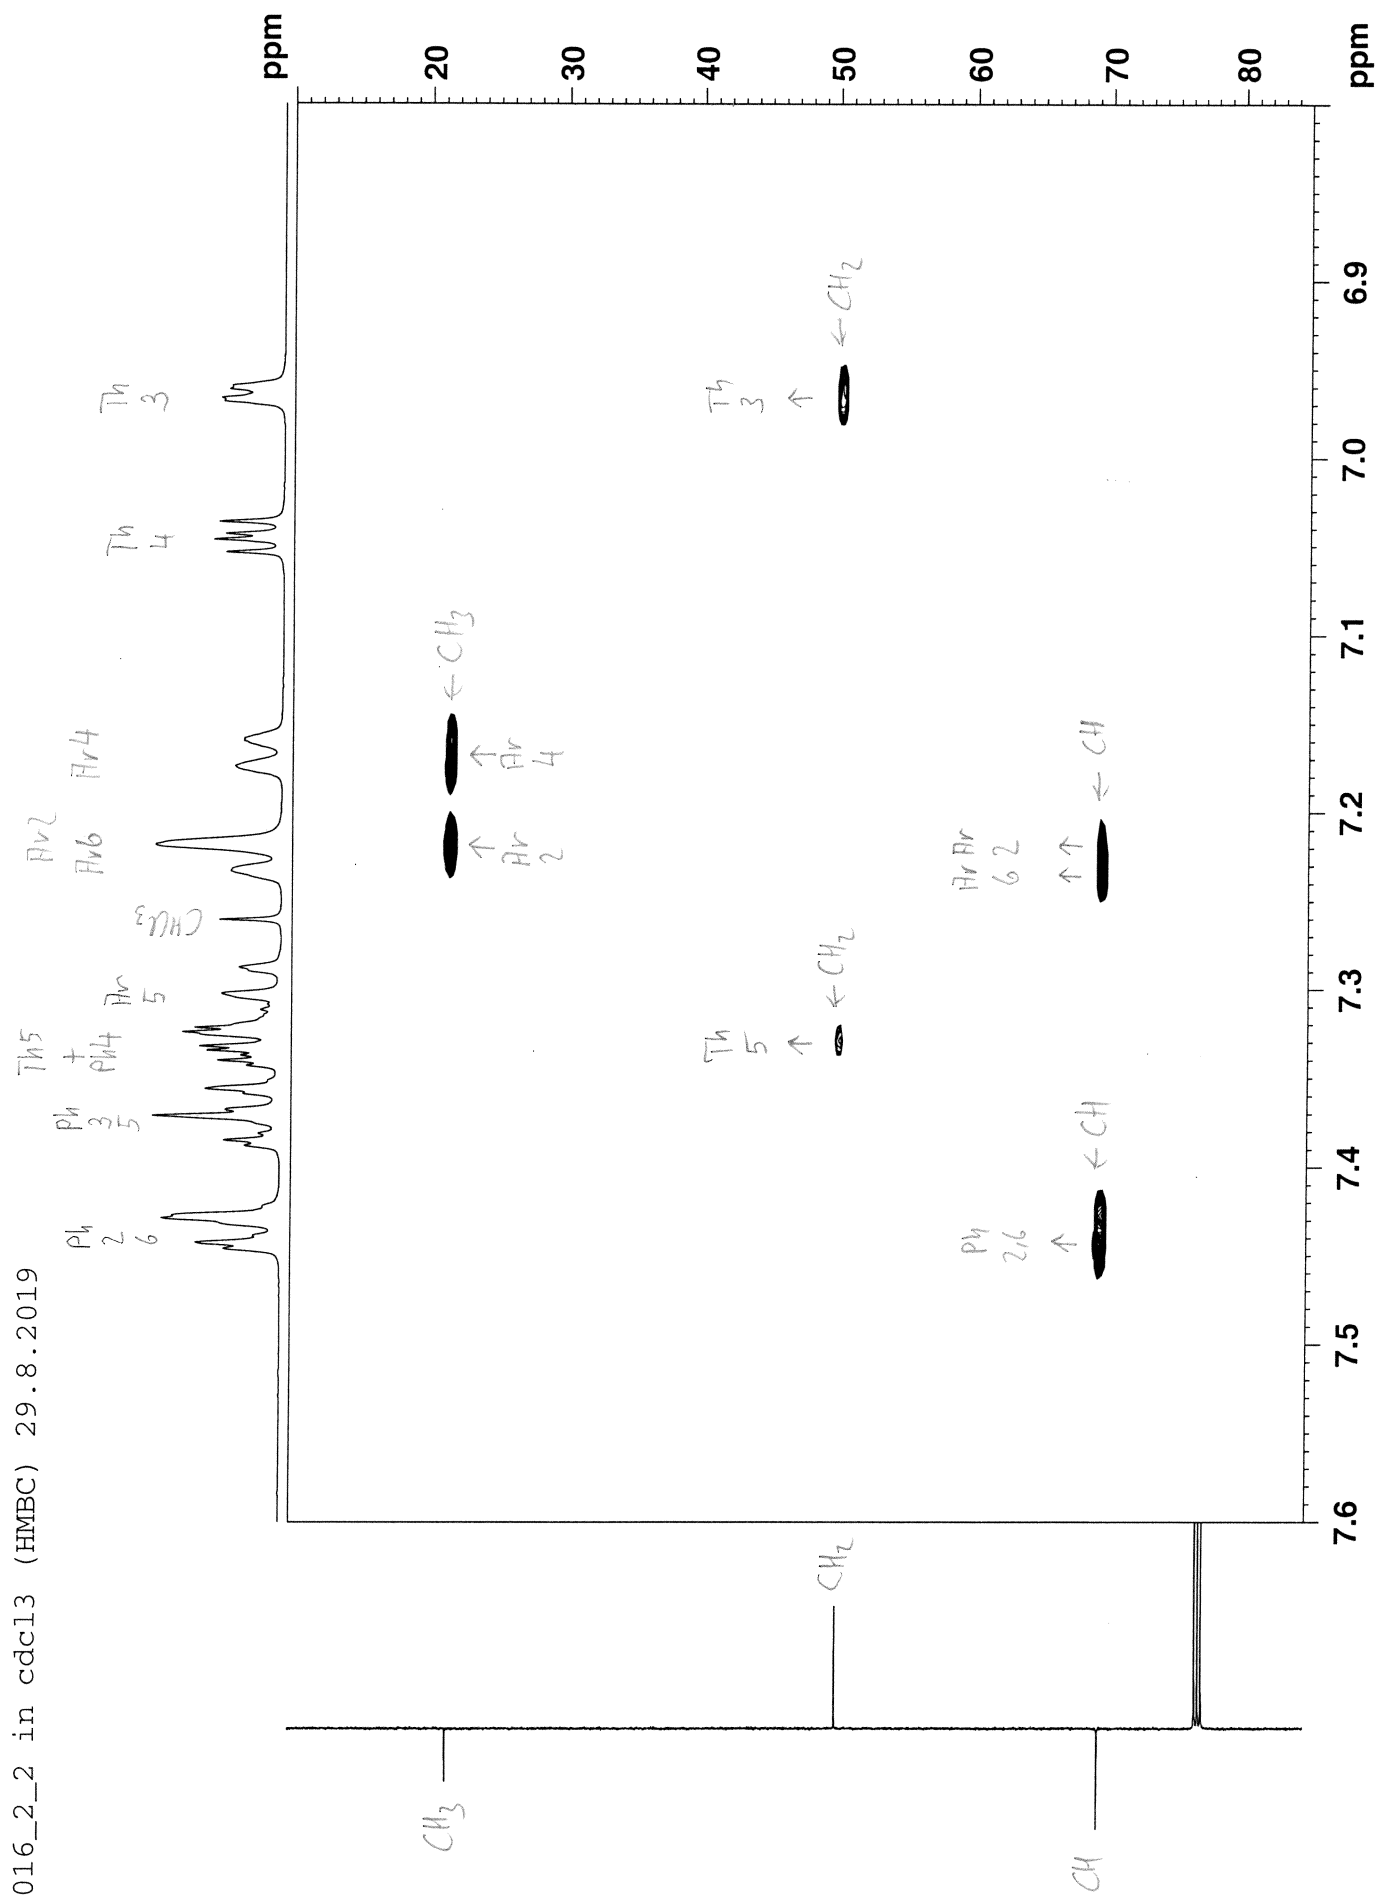

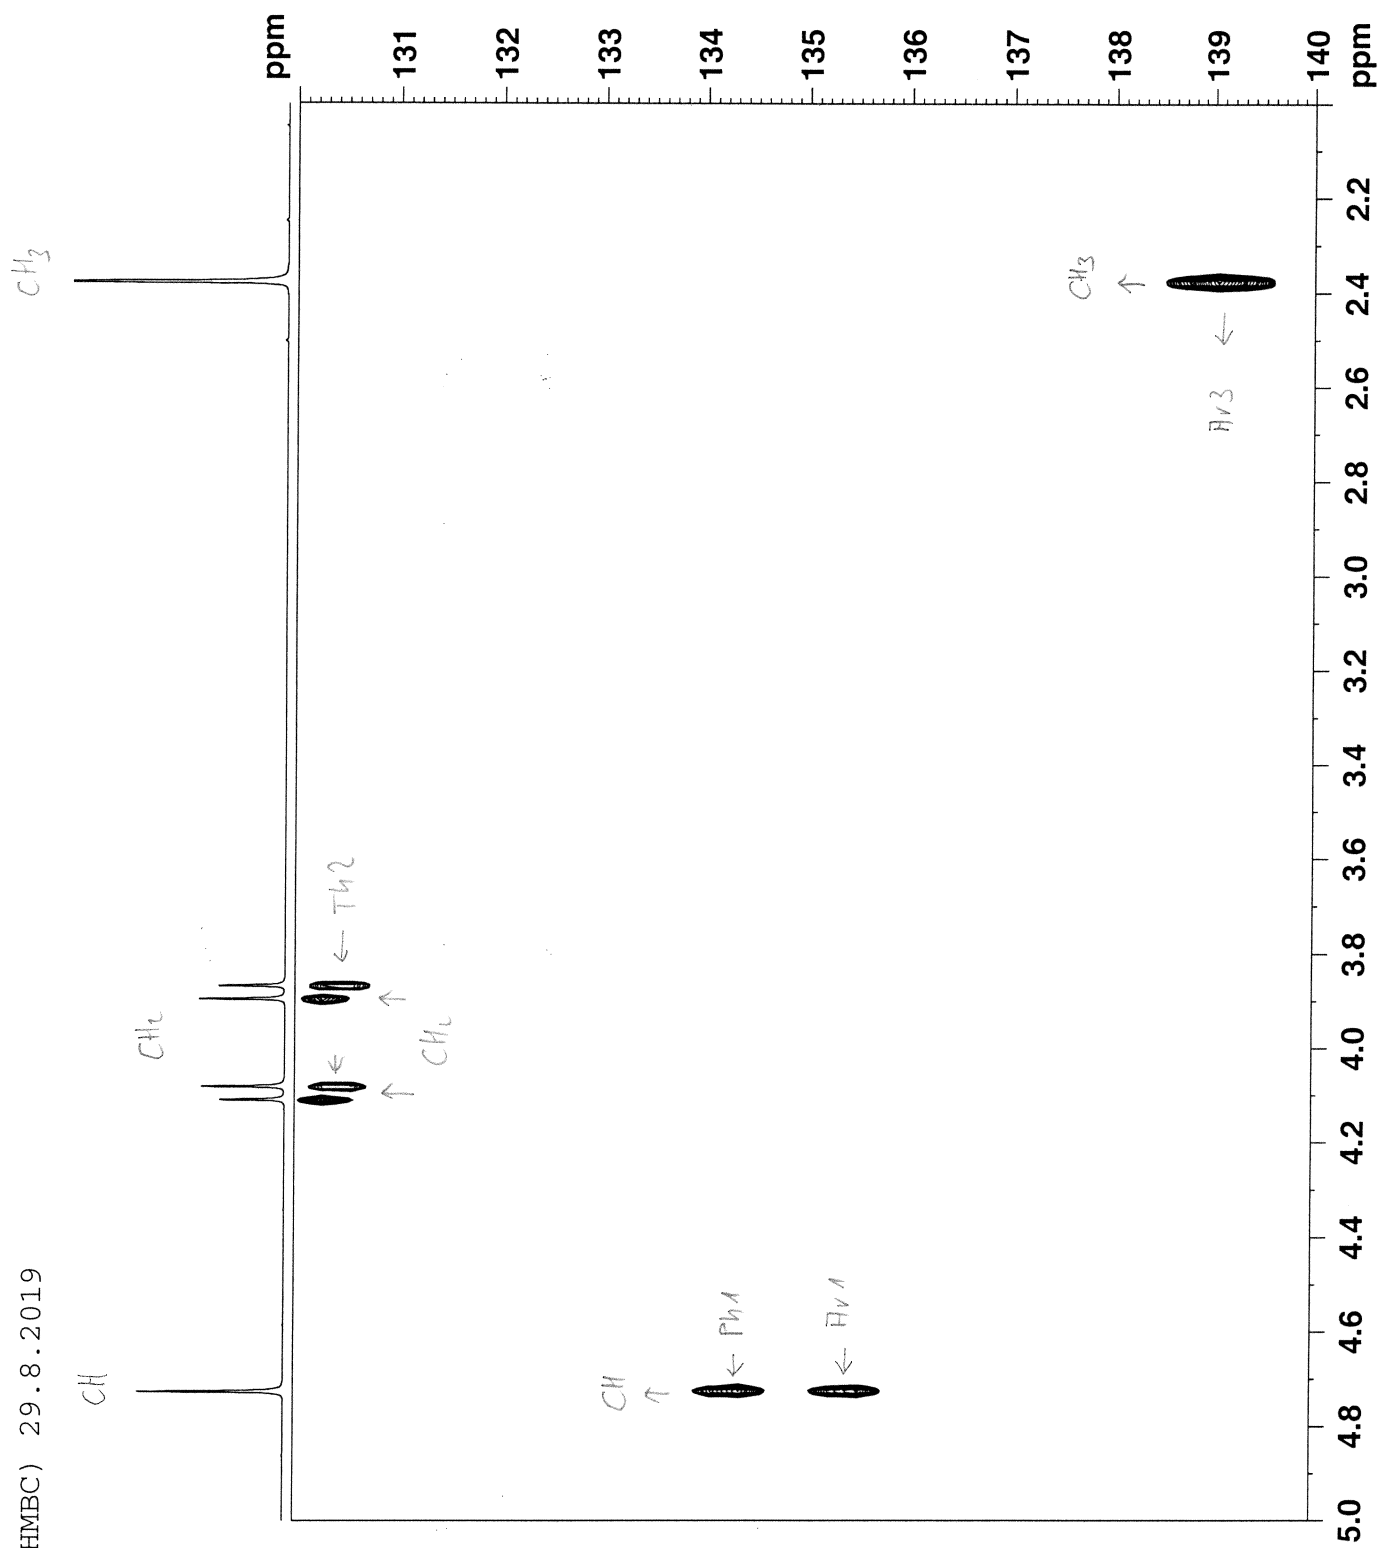

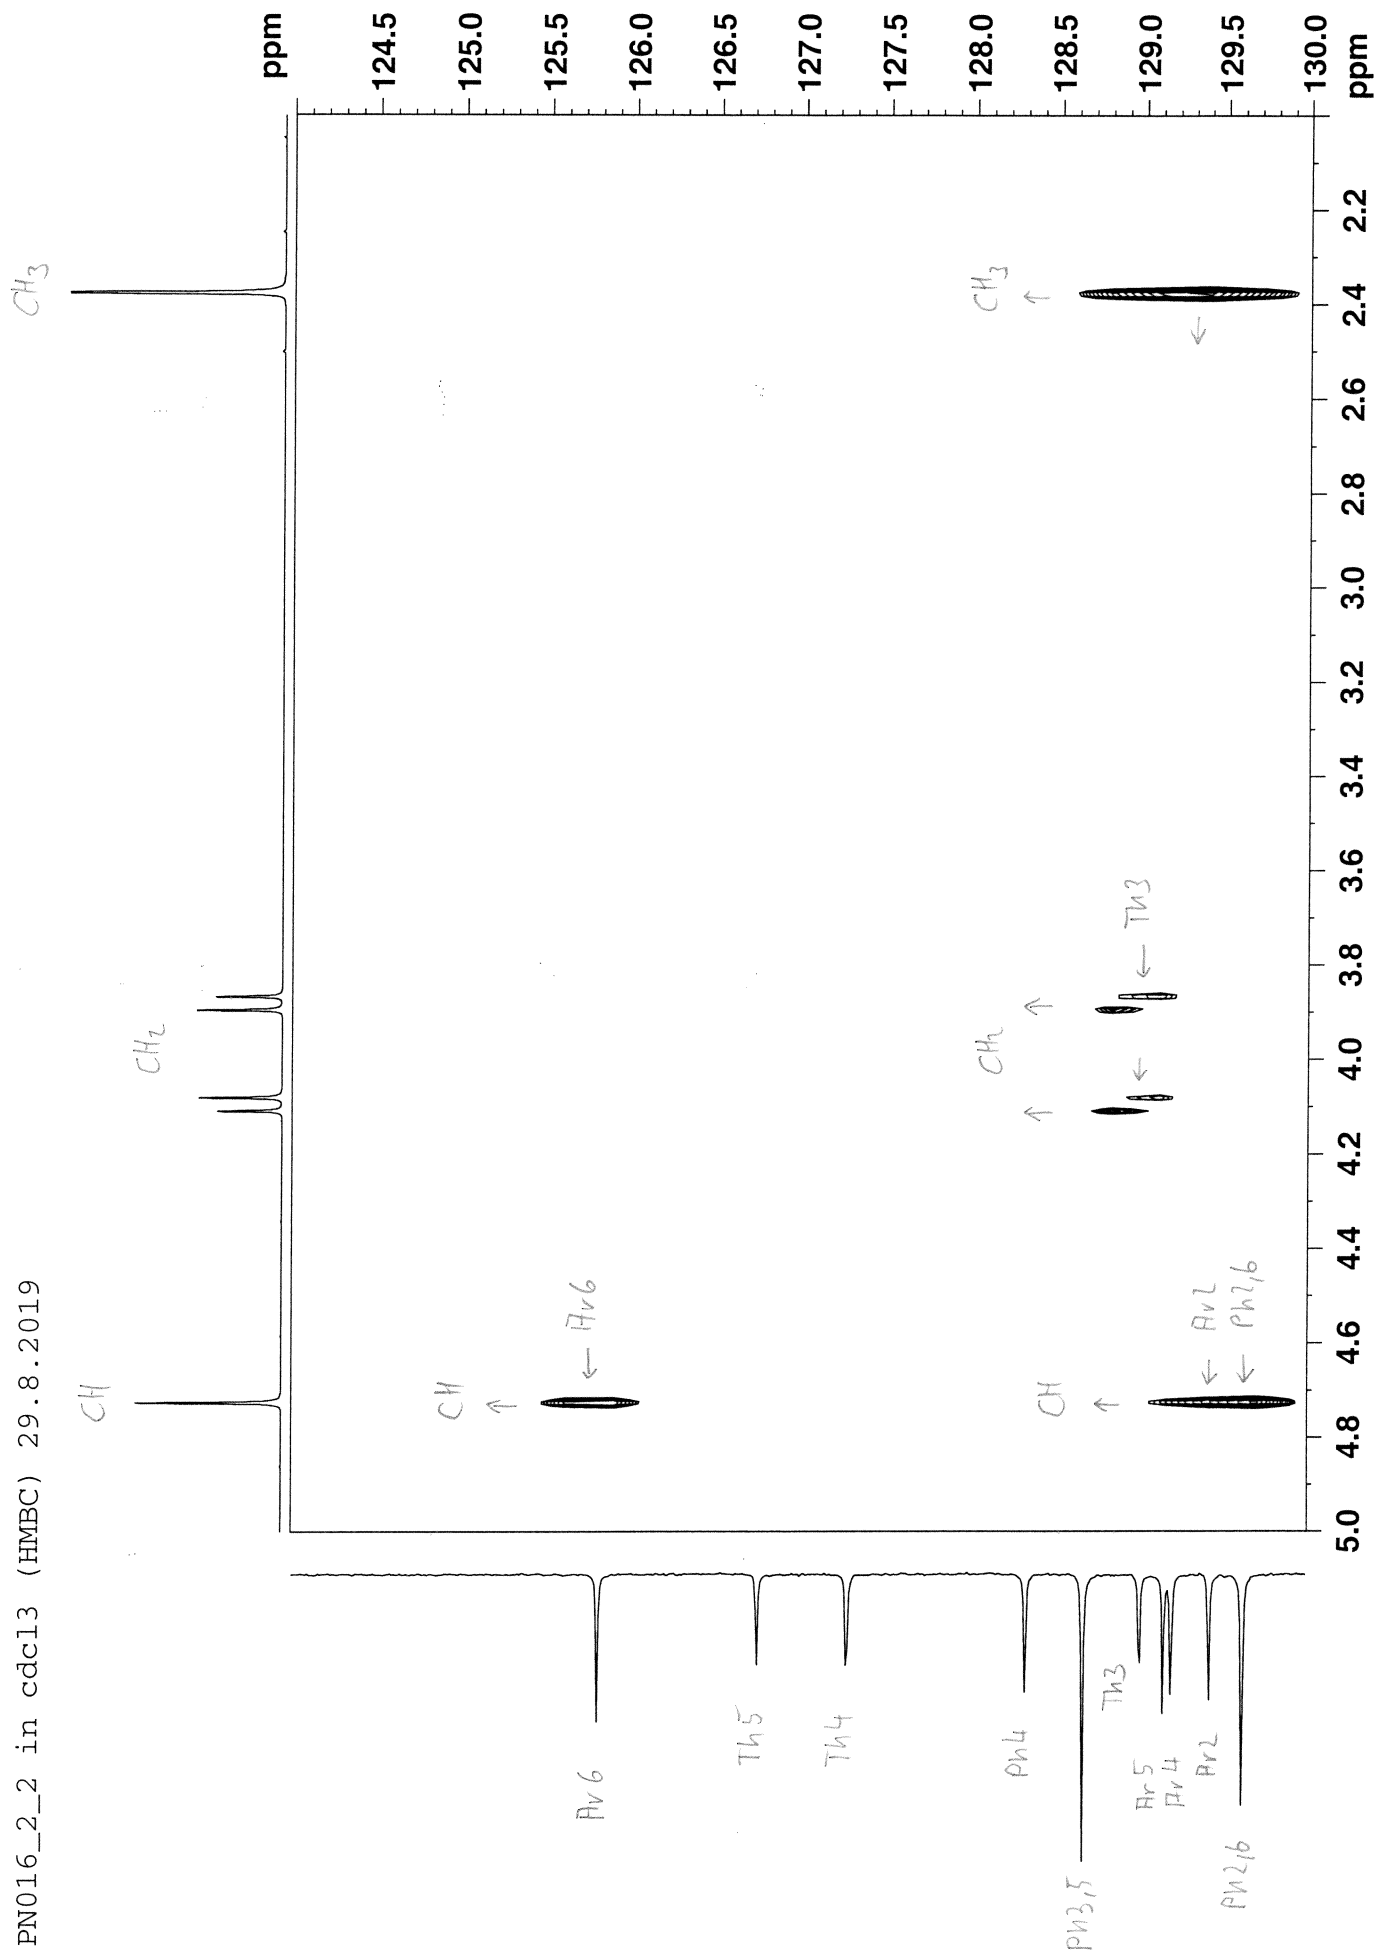



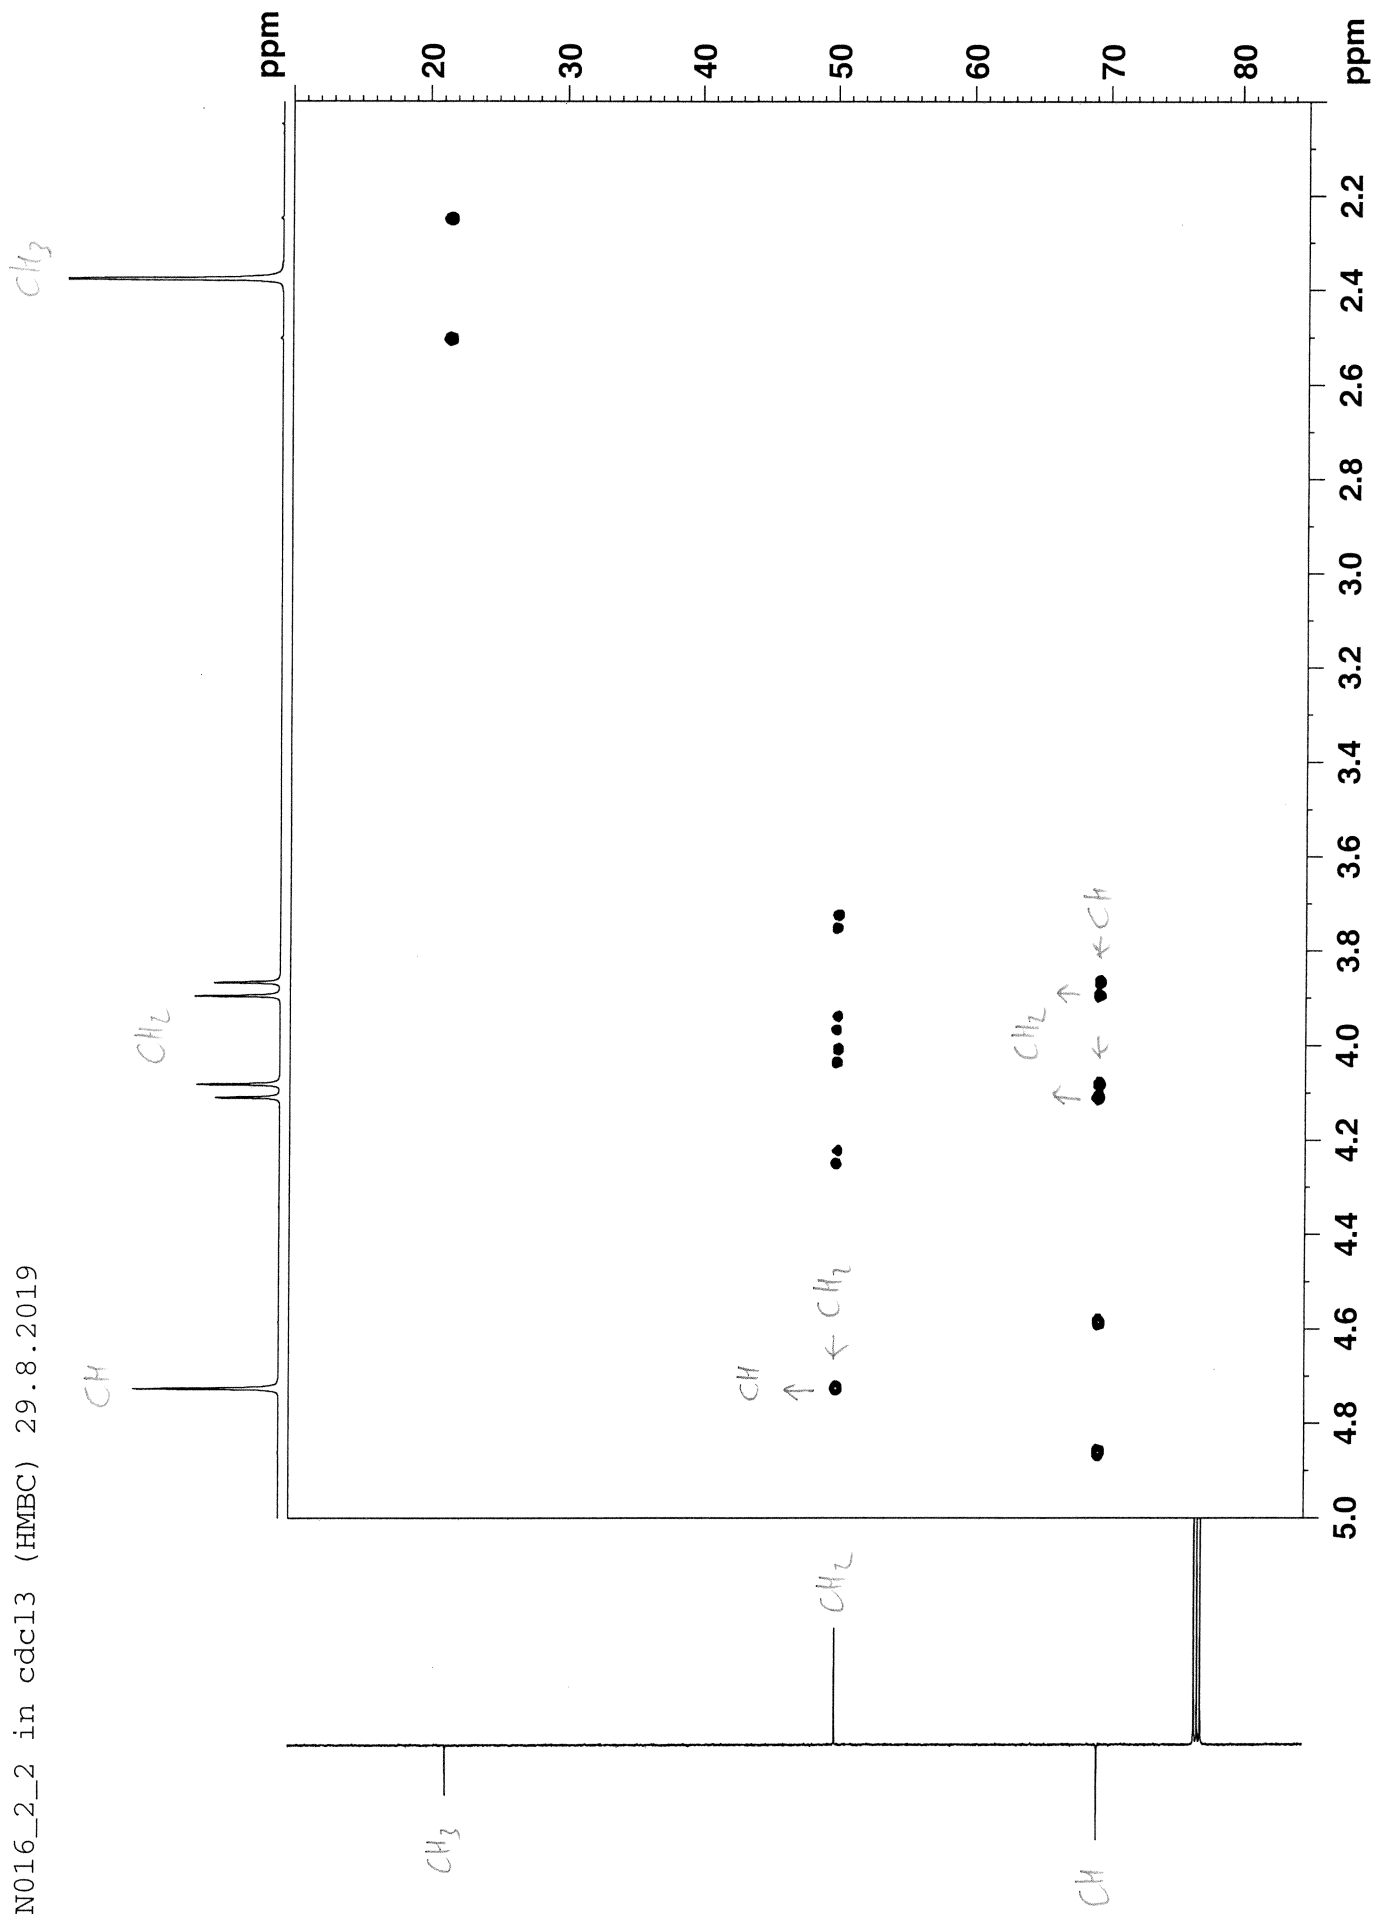

**Figure S53c.** NMR spectra of compound **5n**.

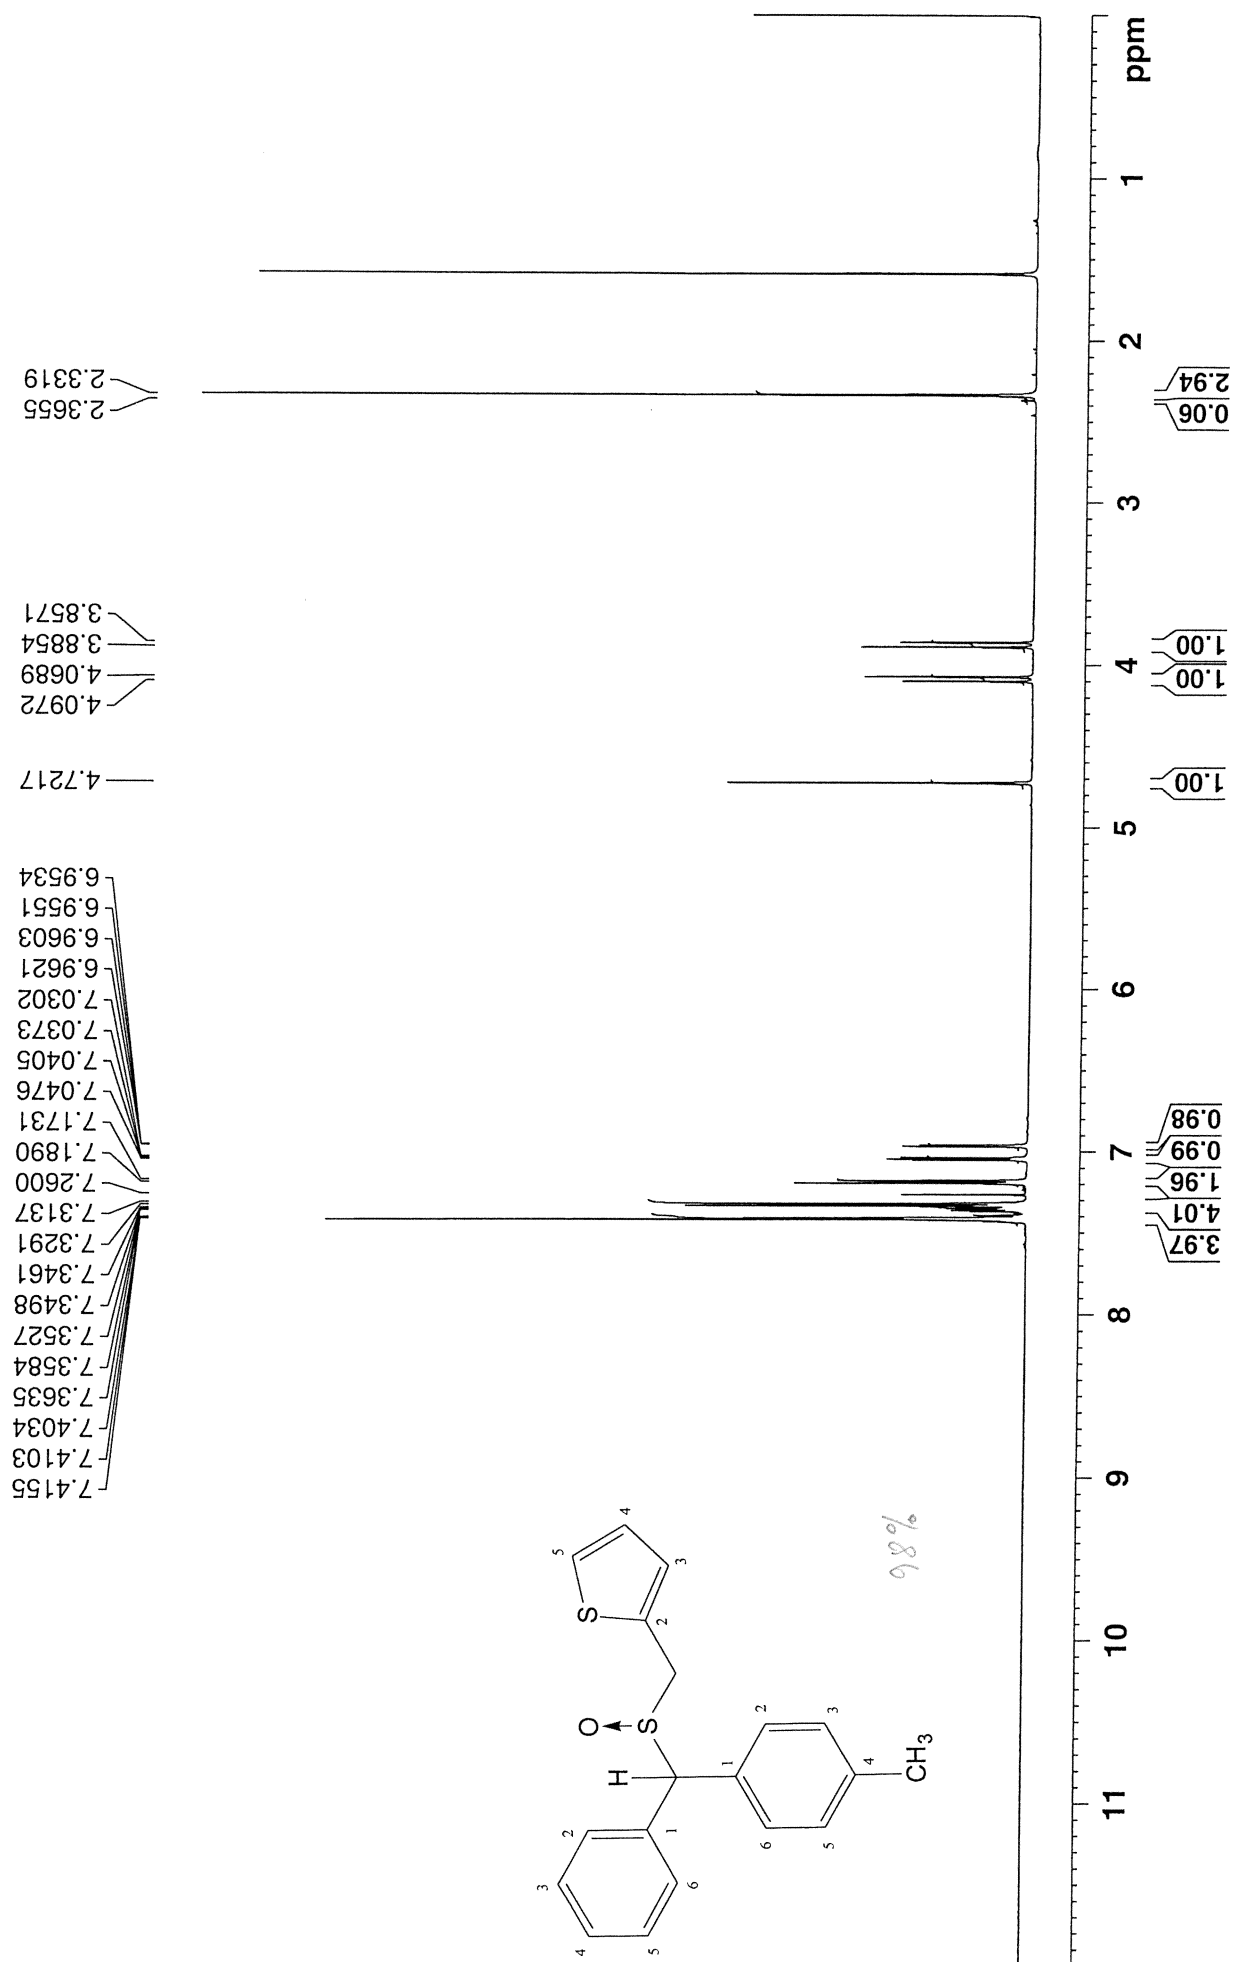

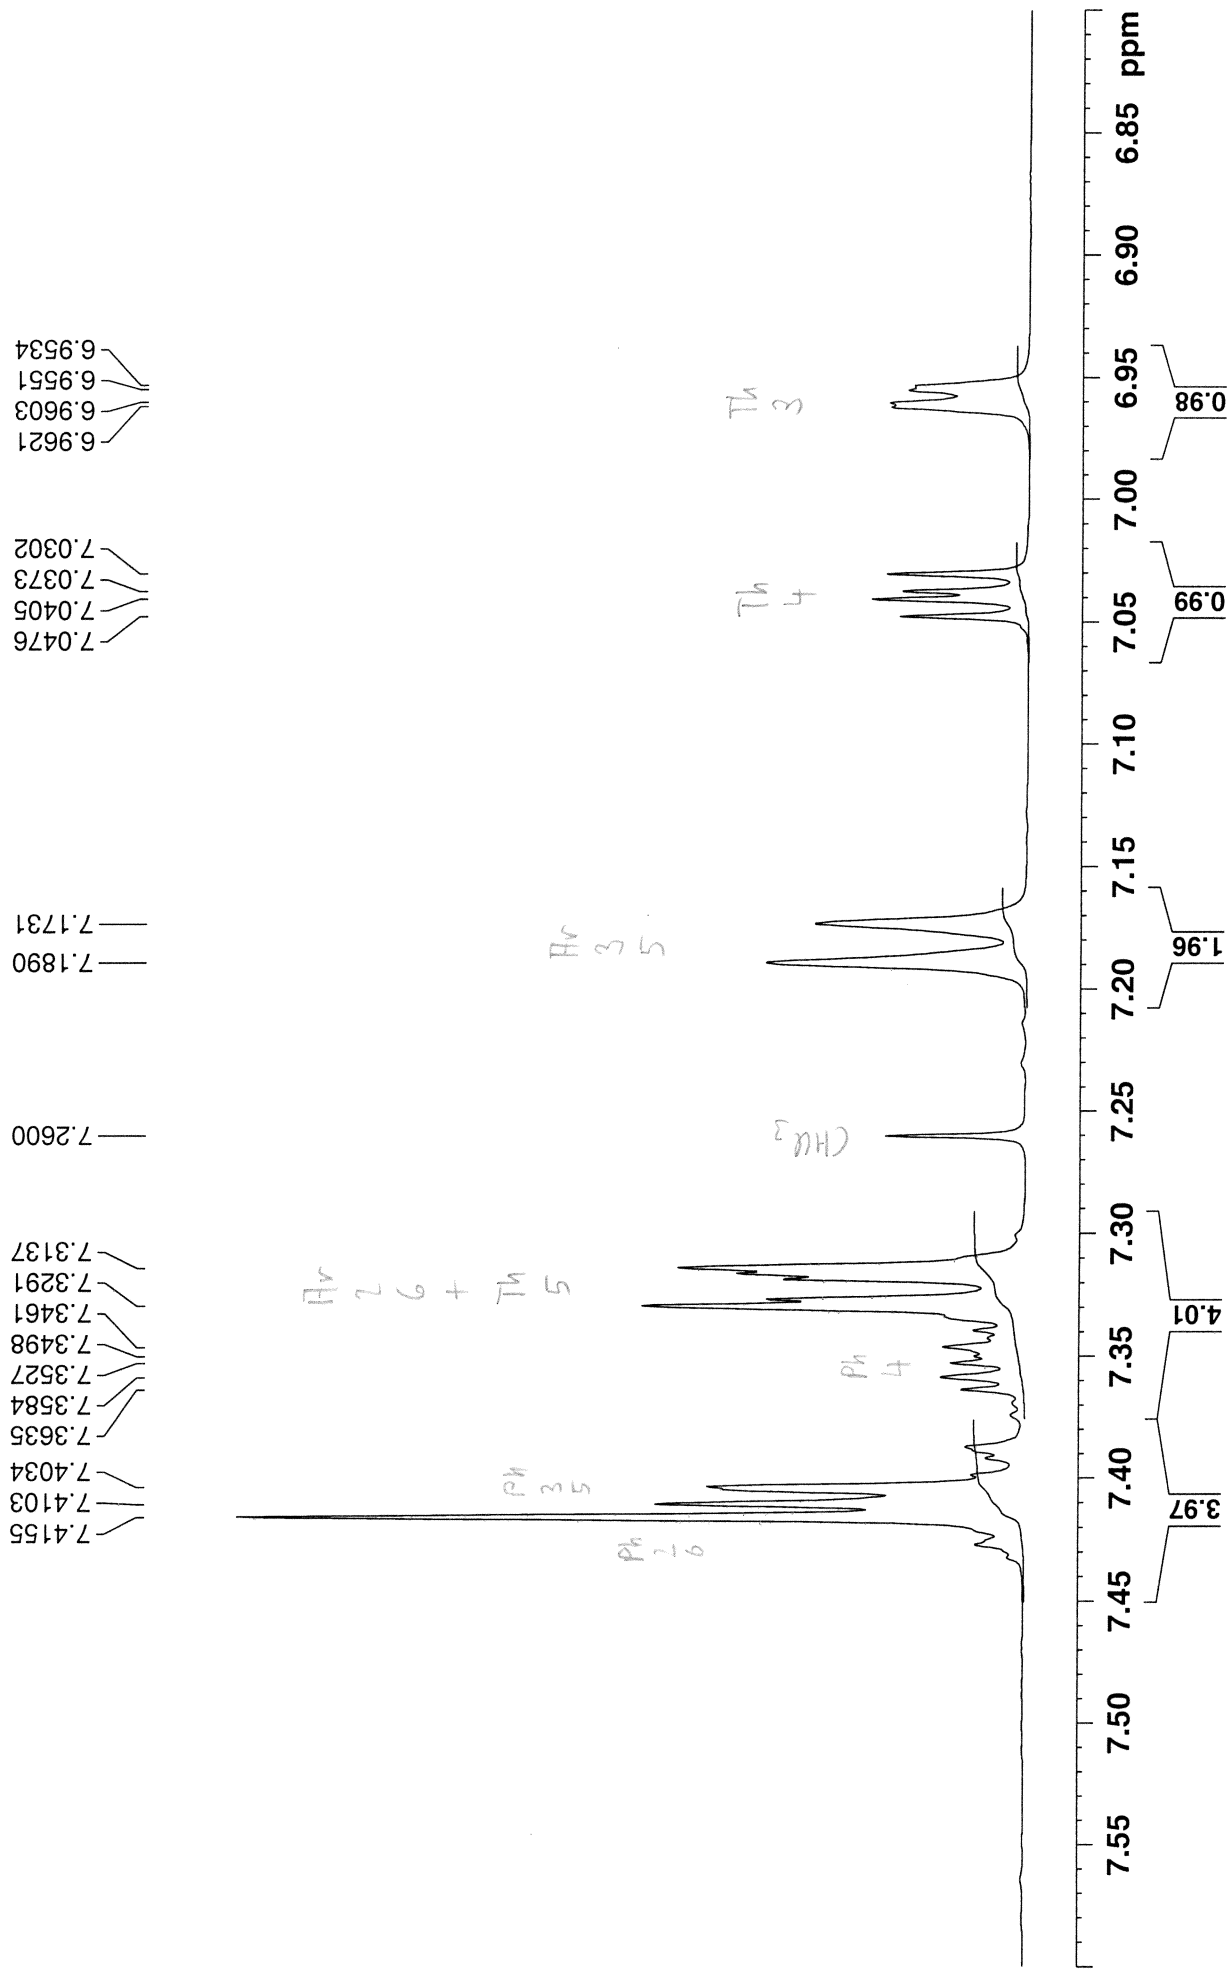

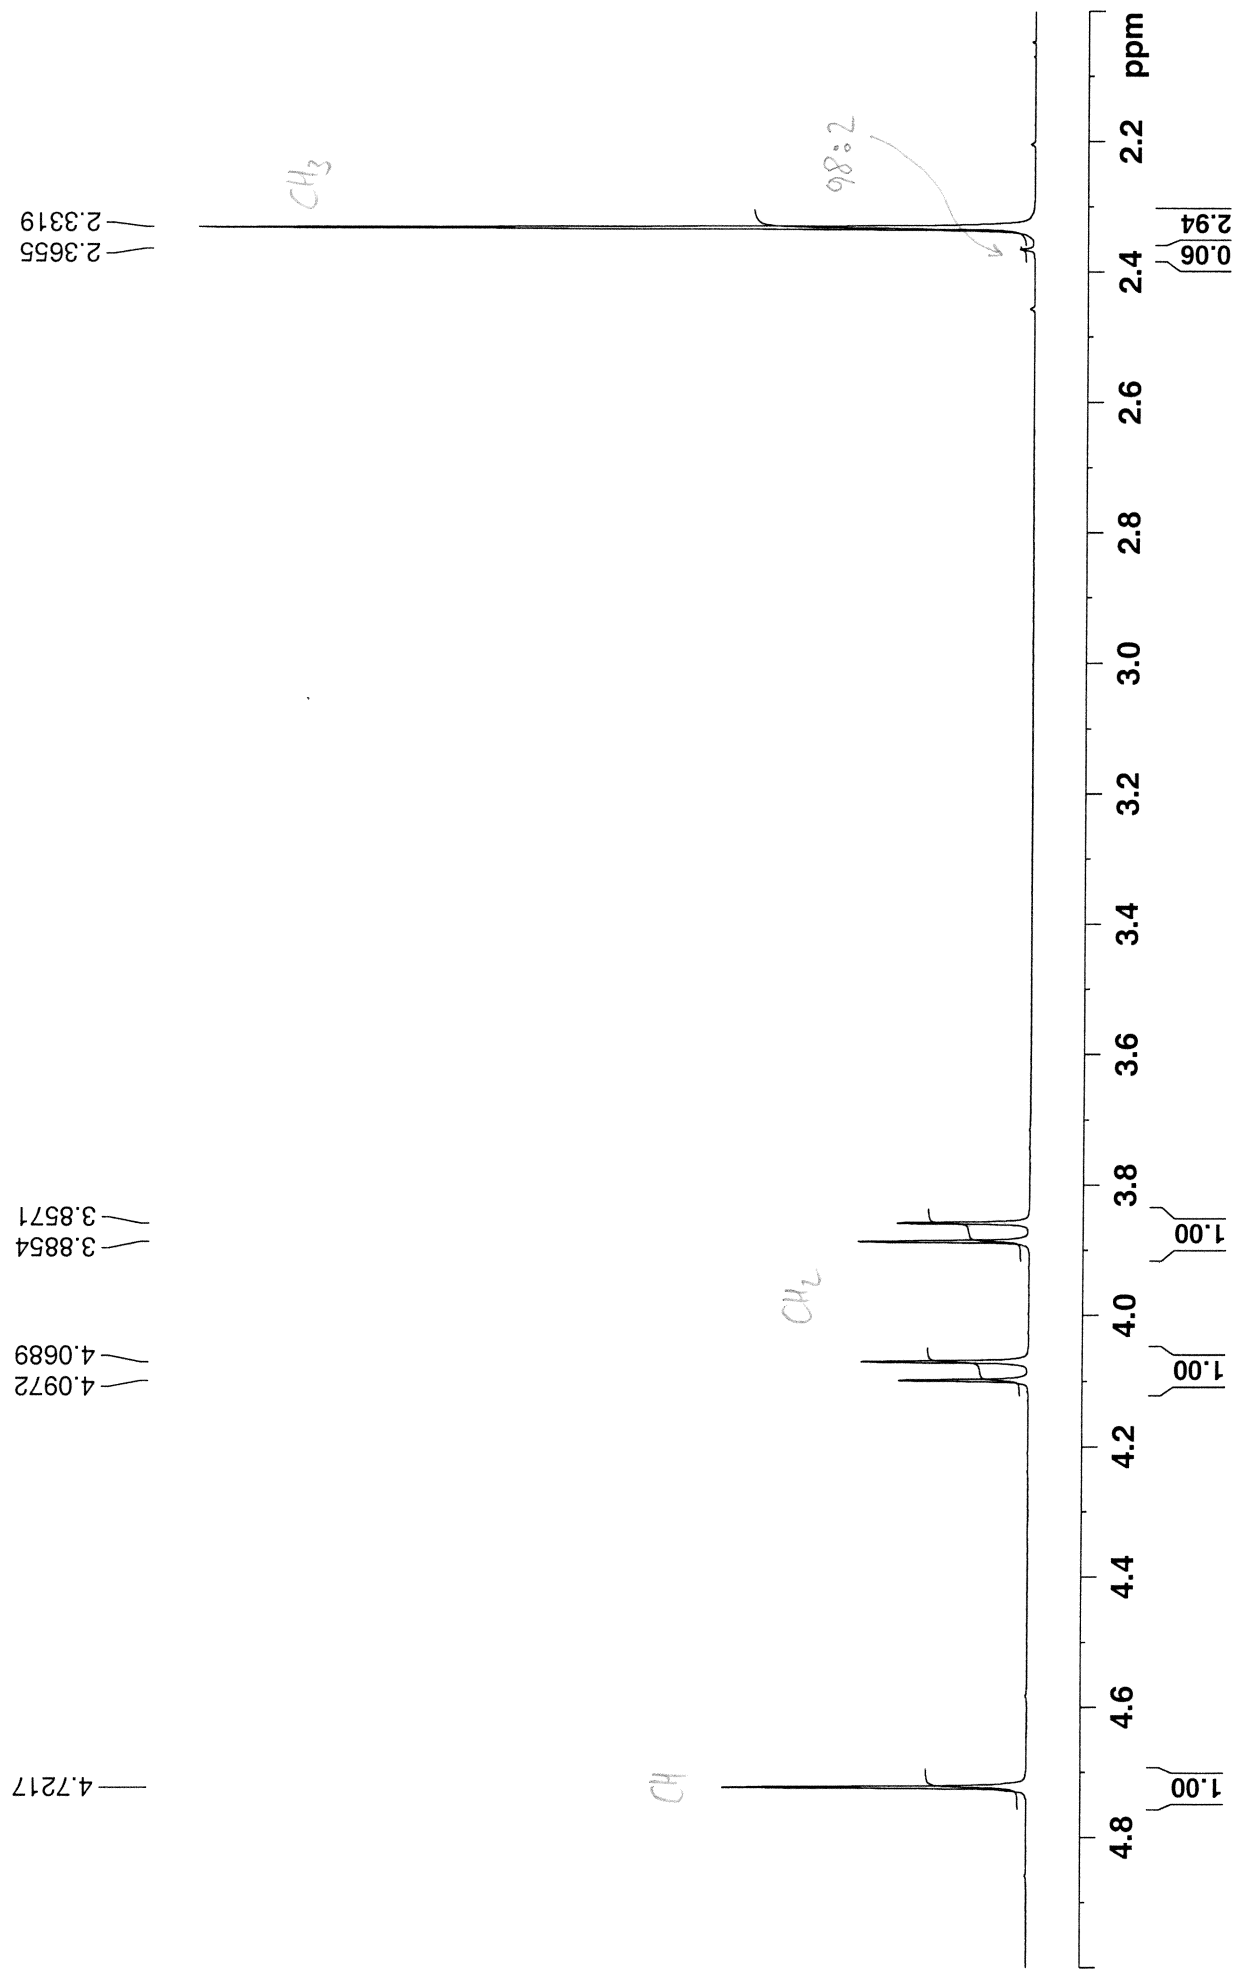

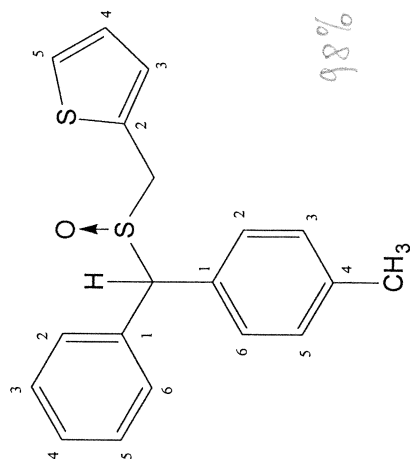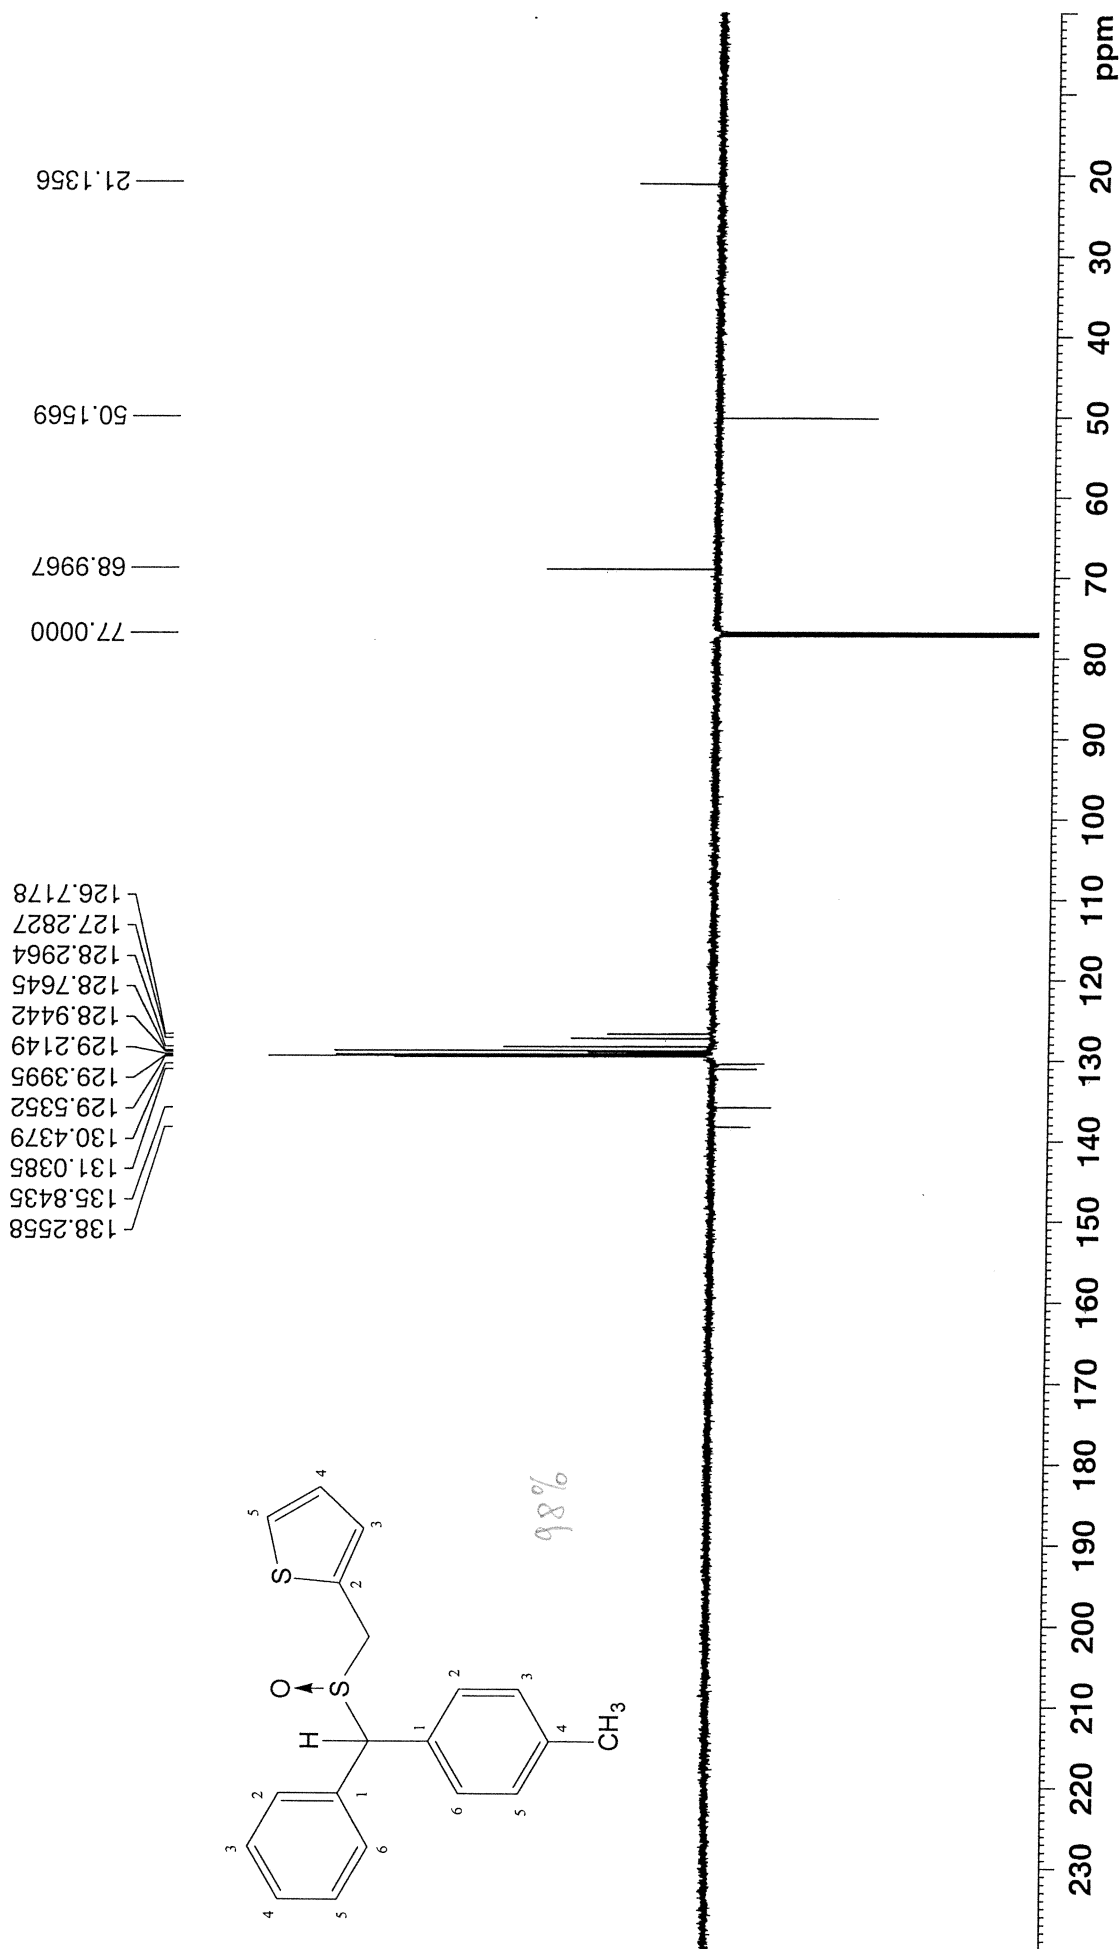

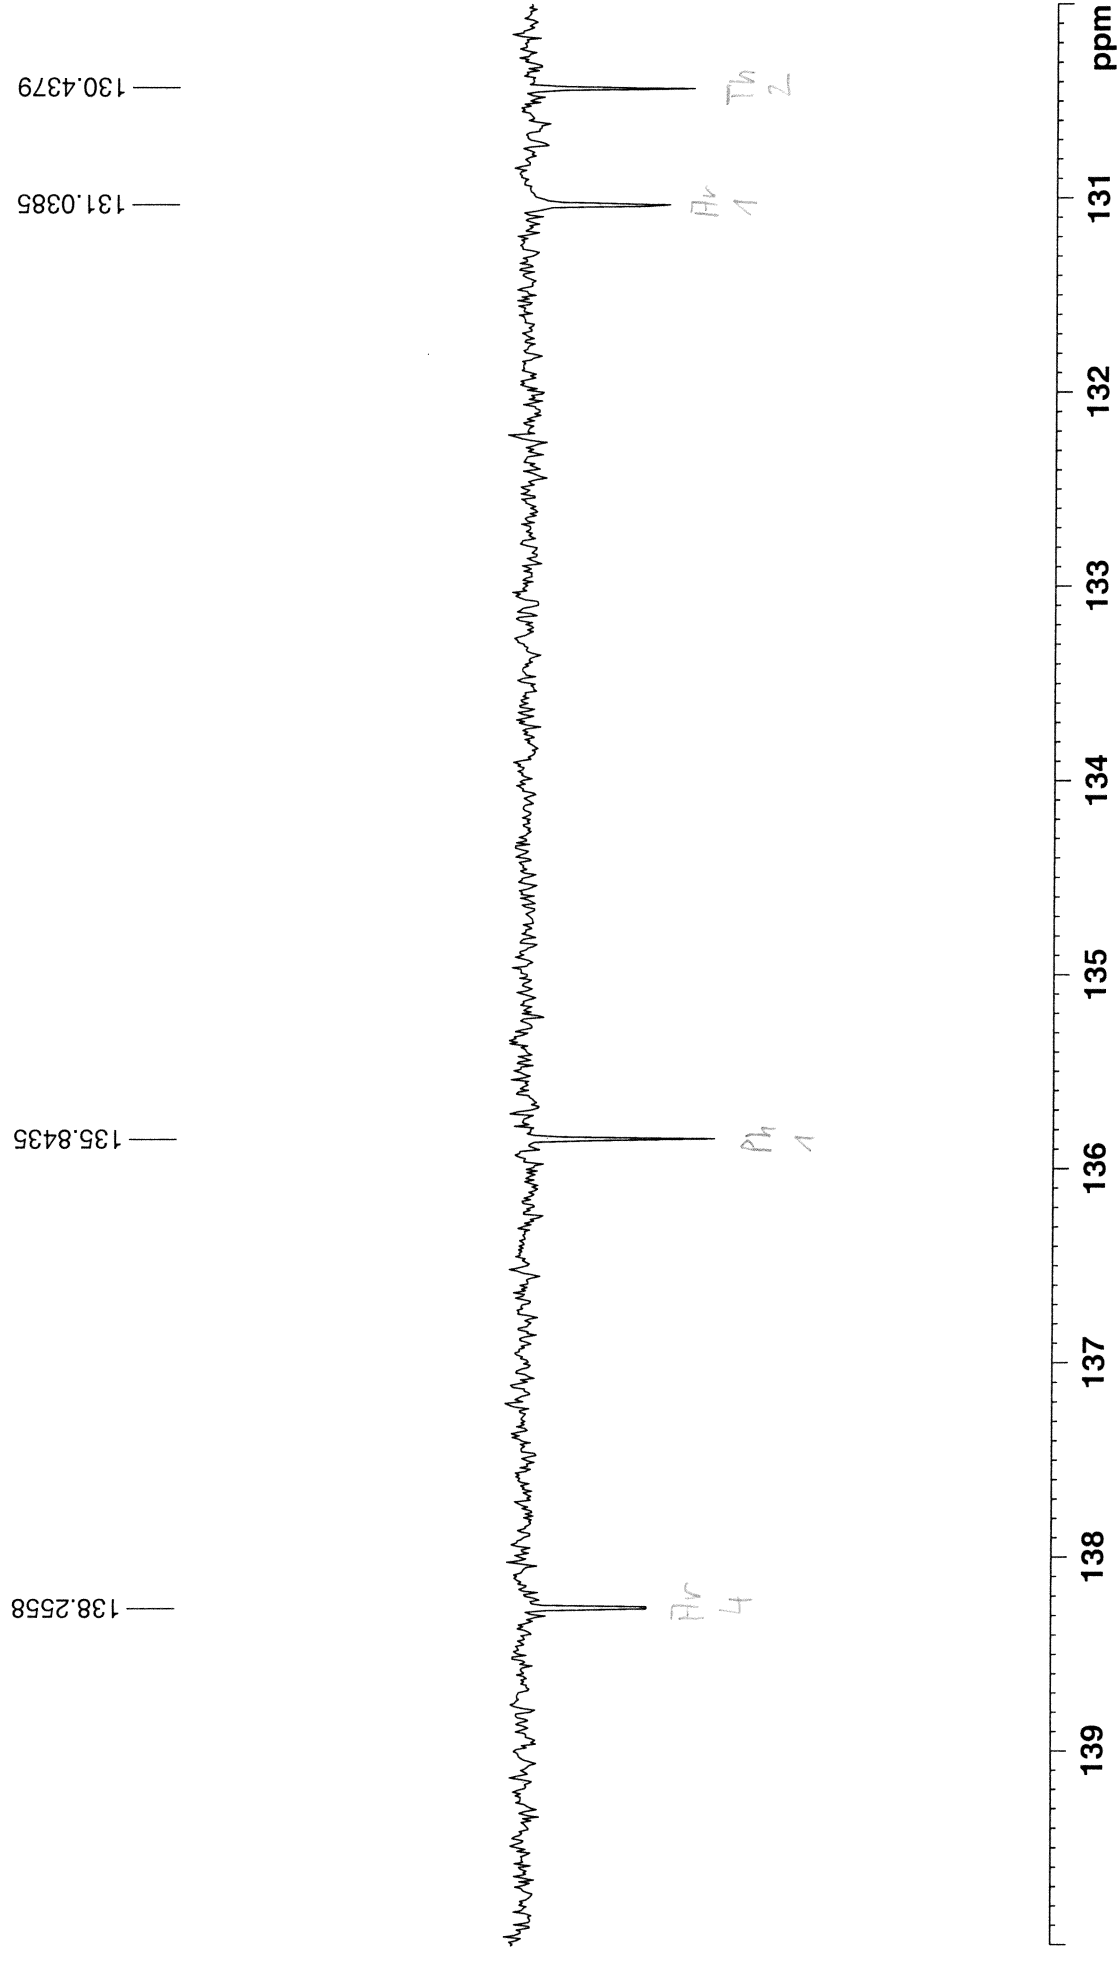

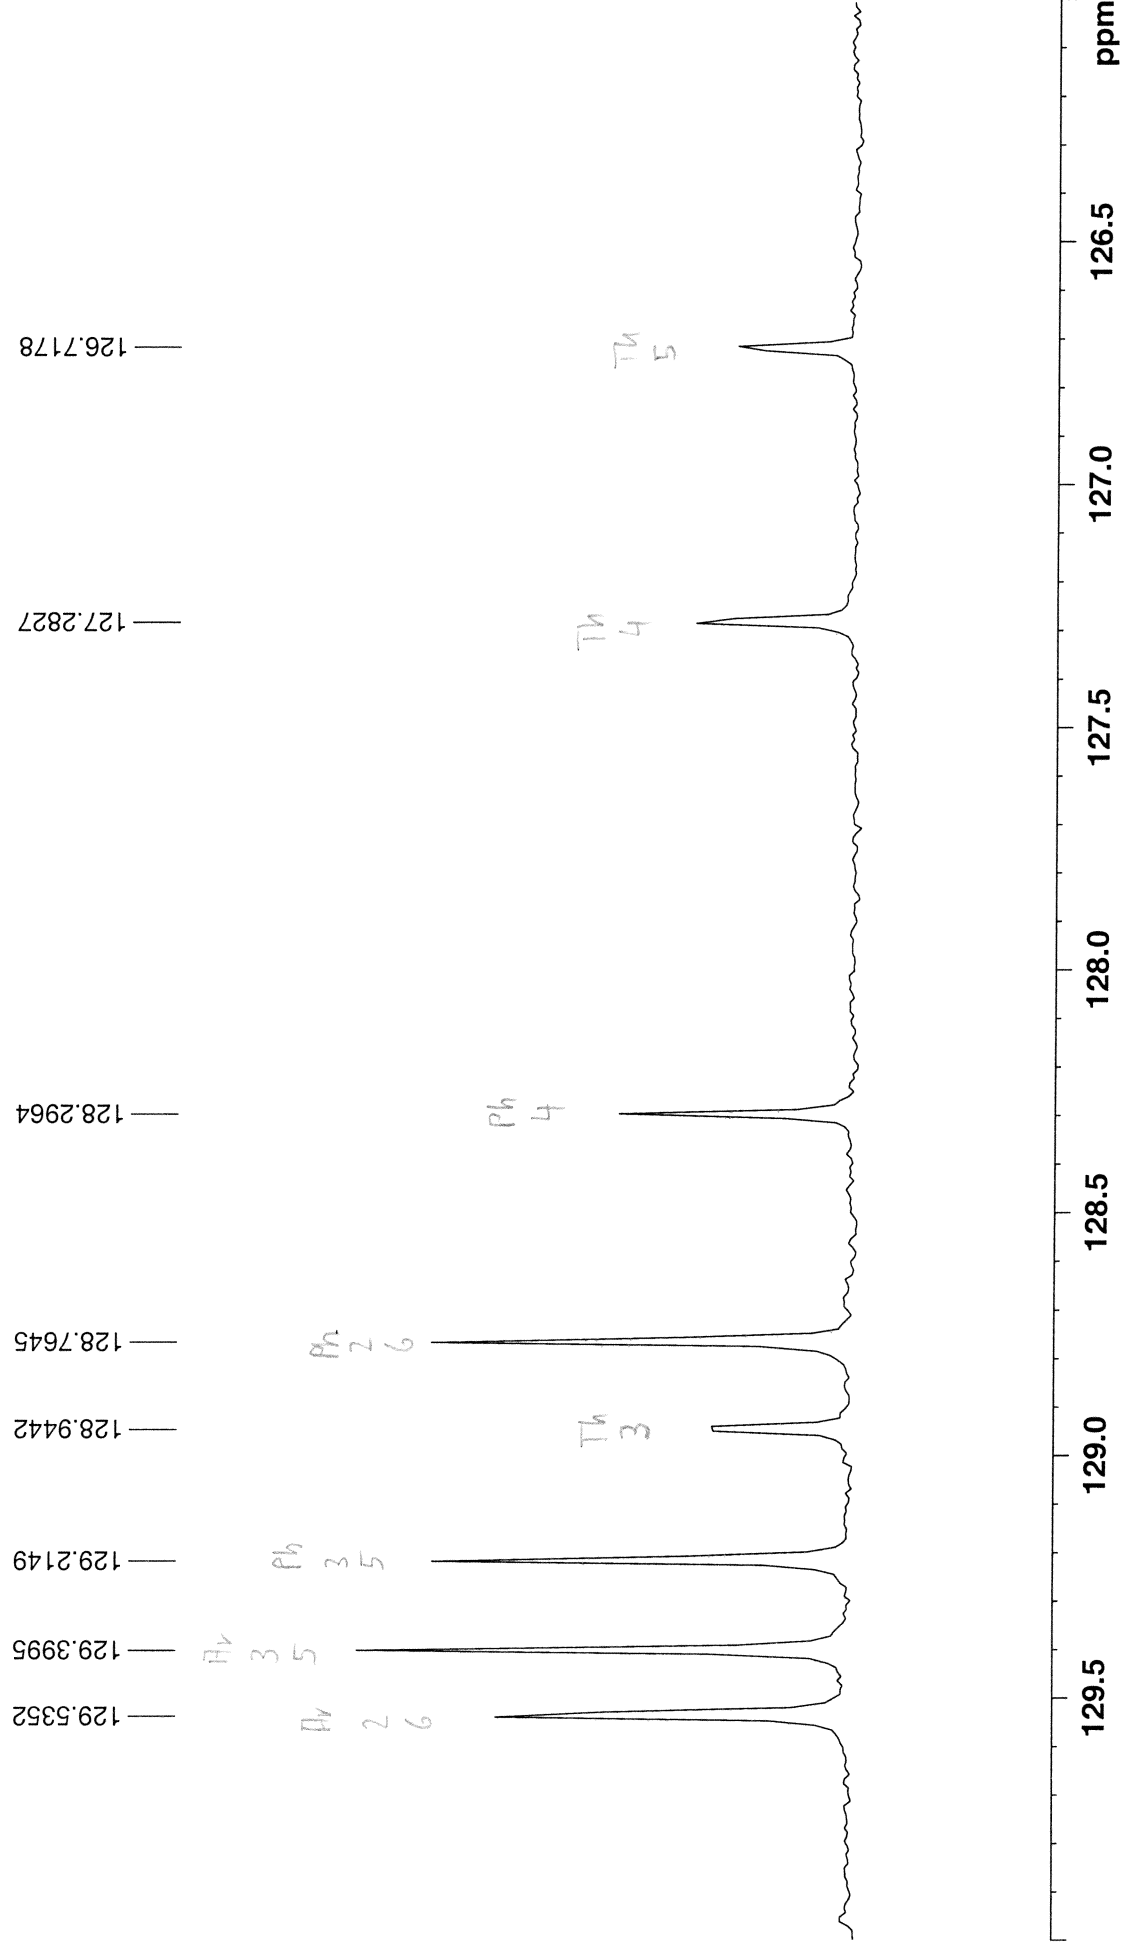

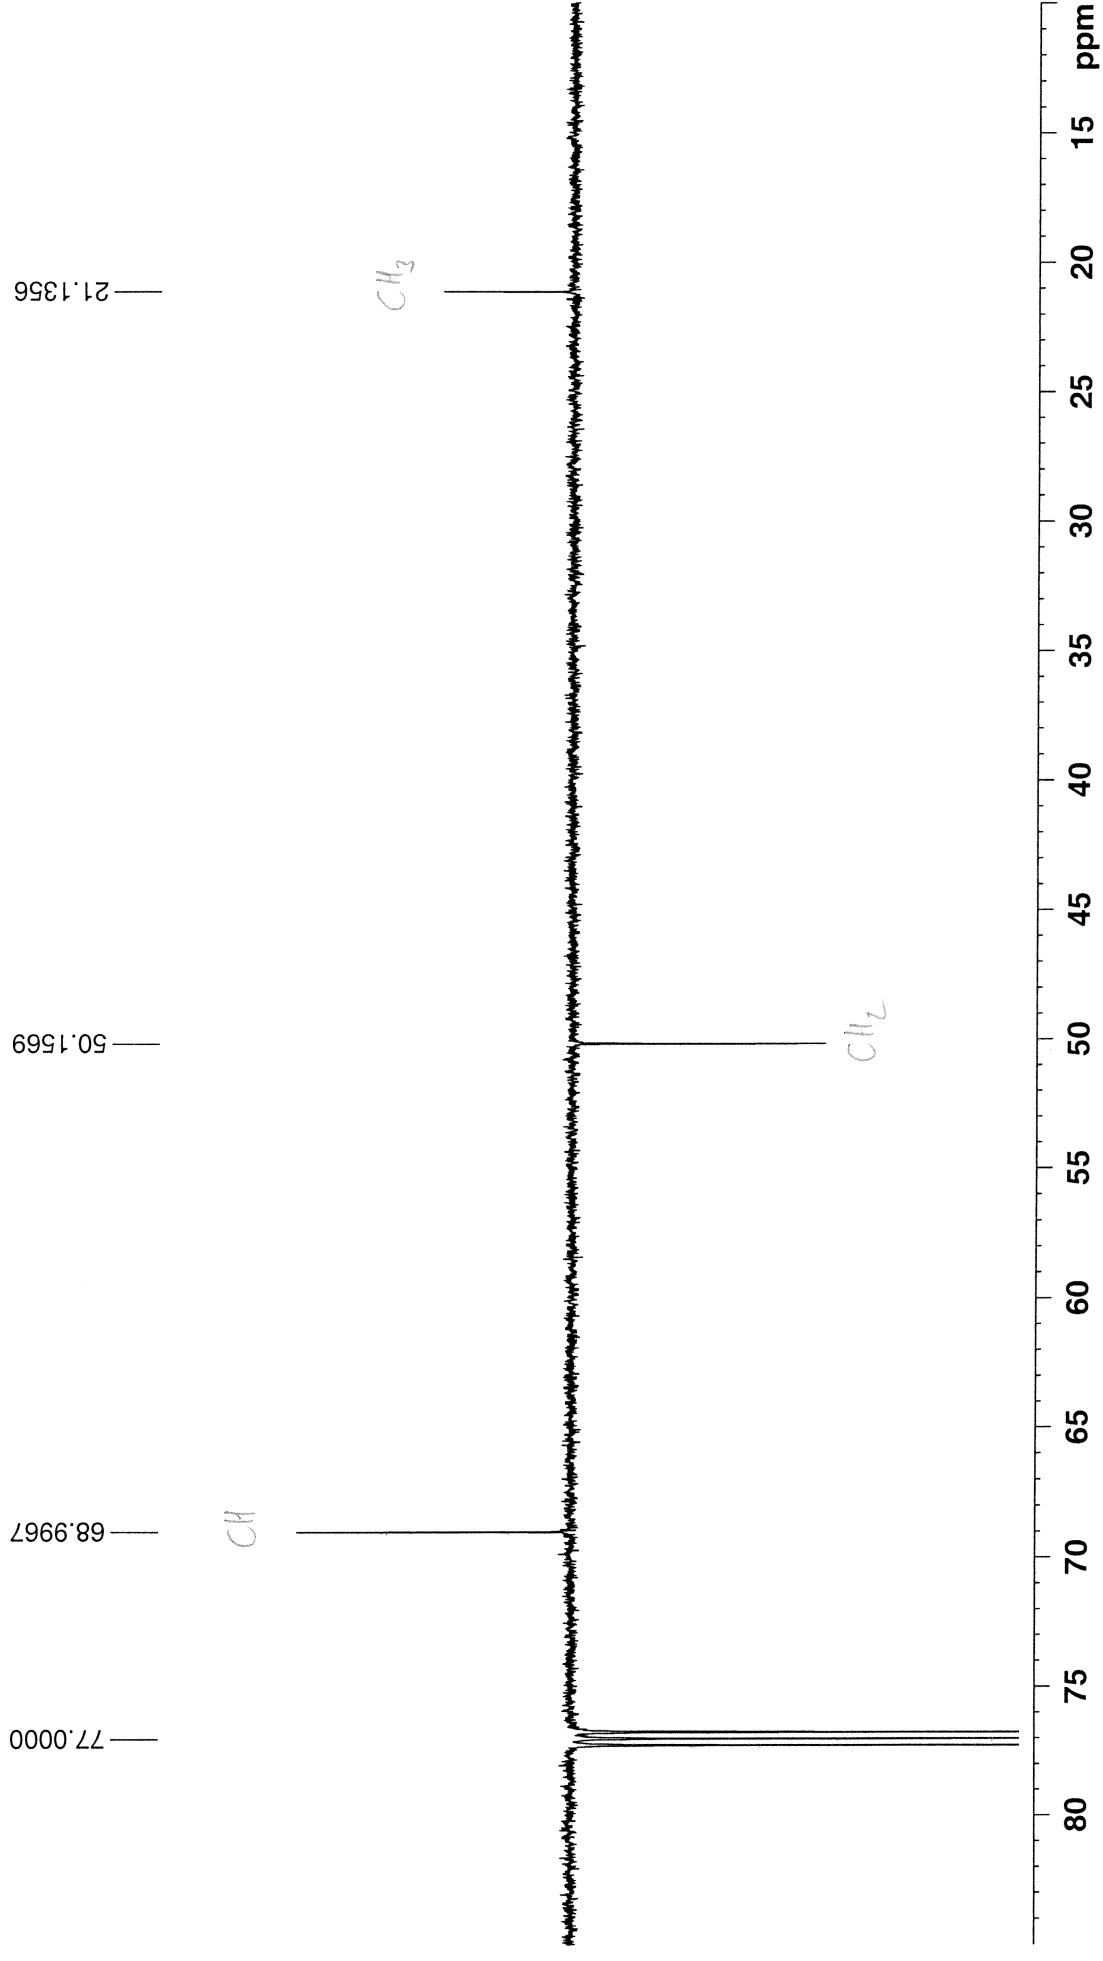



PN022\_1\_1 in cdcl3 (COSY) 29.8.2019

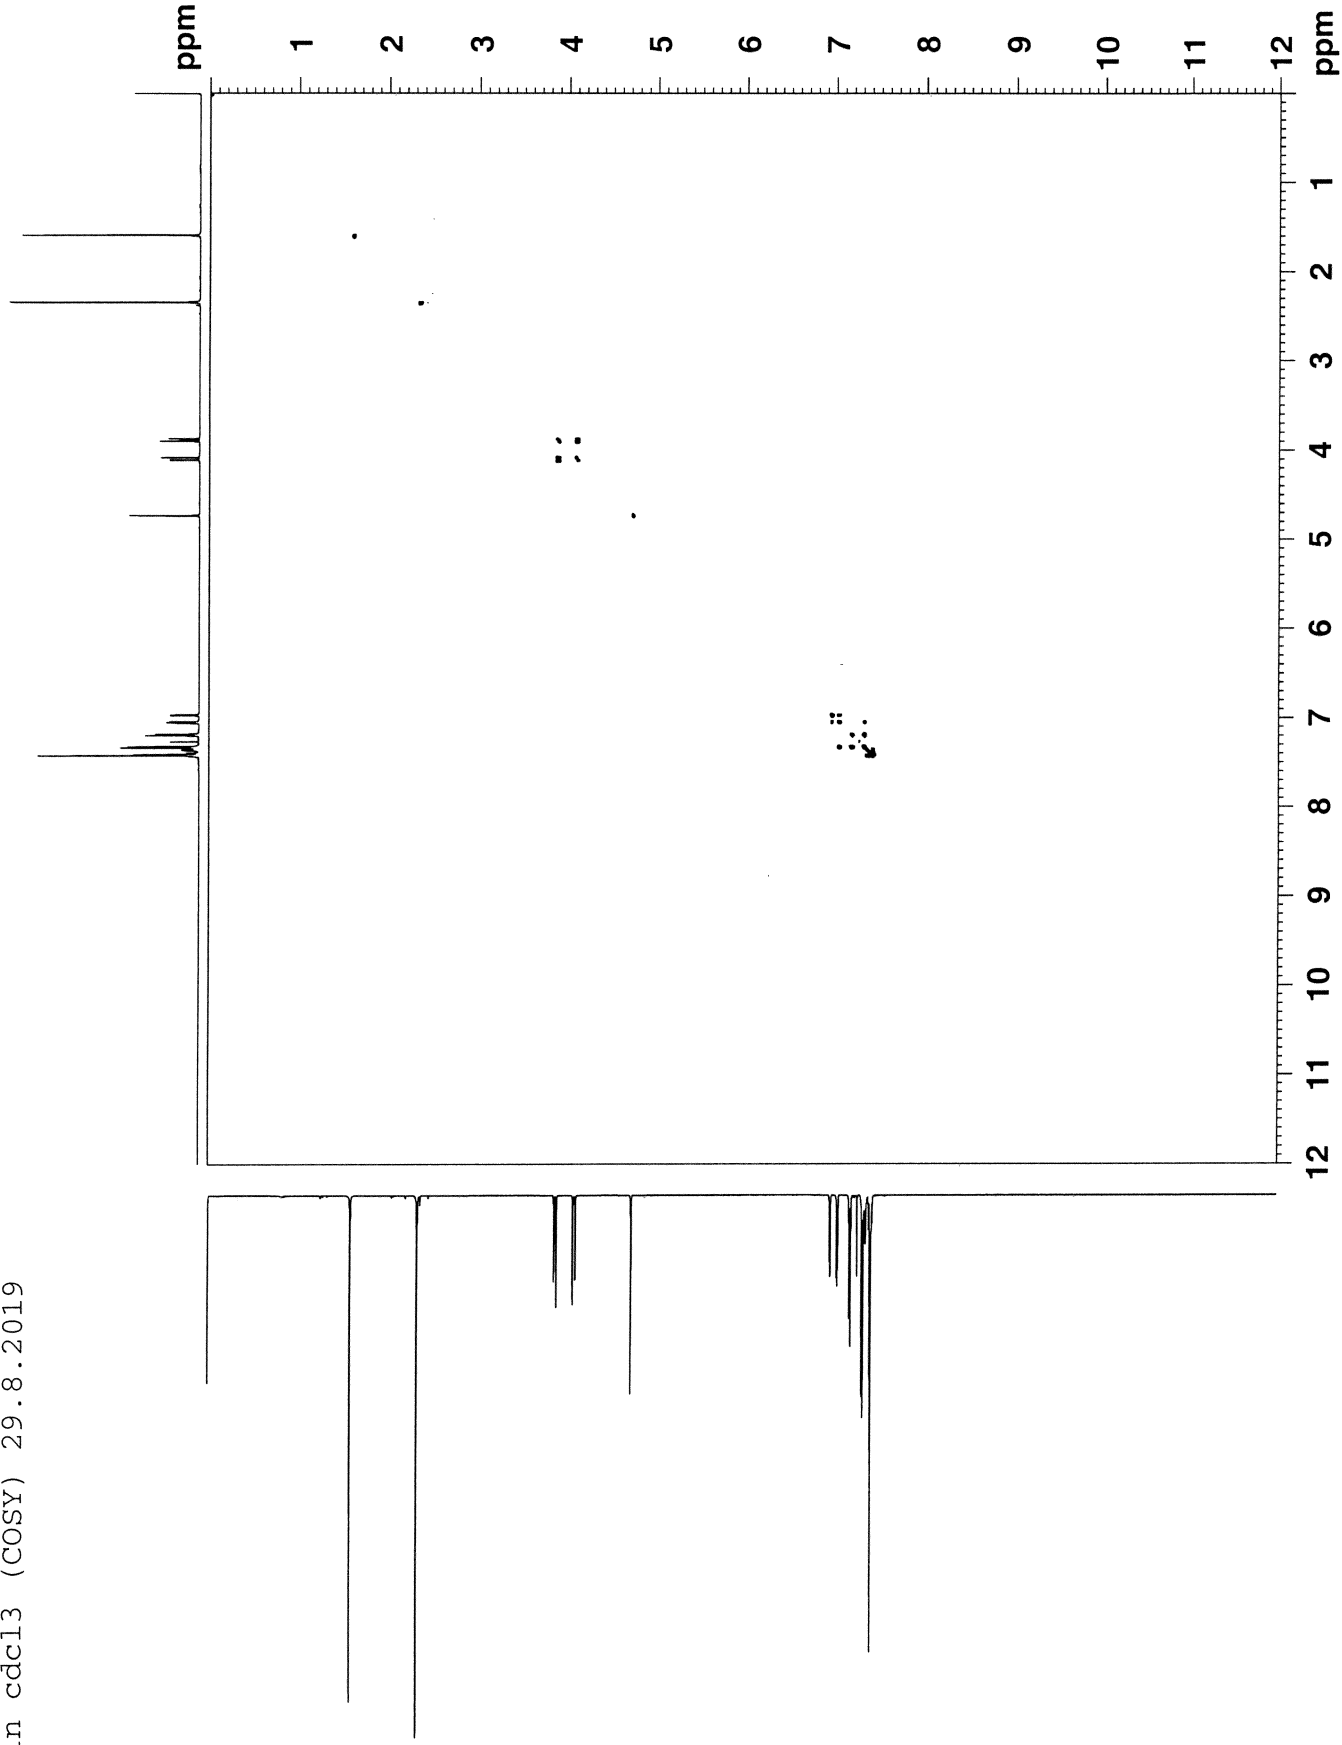

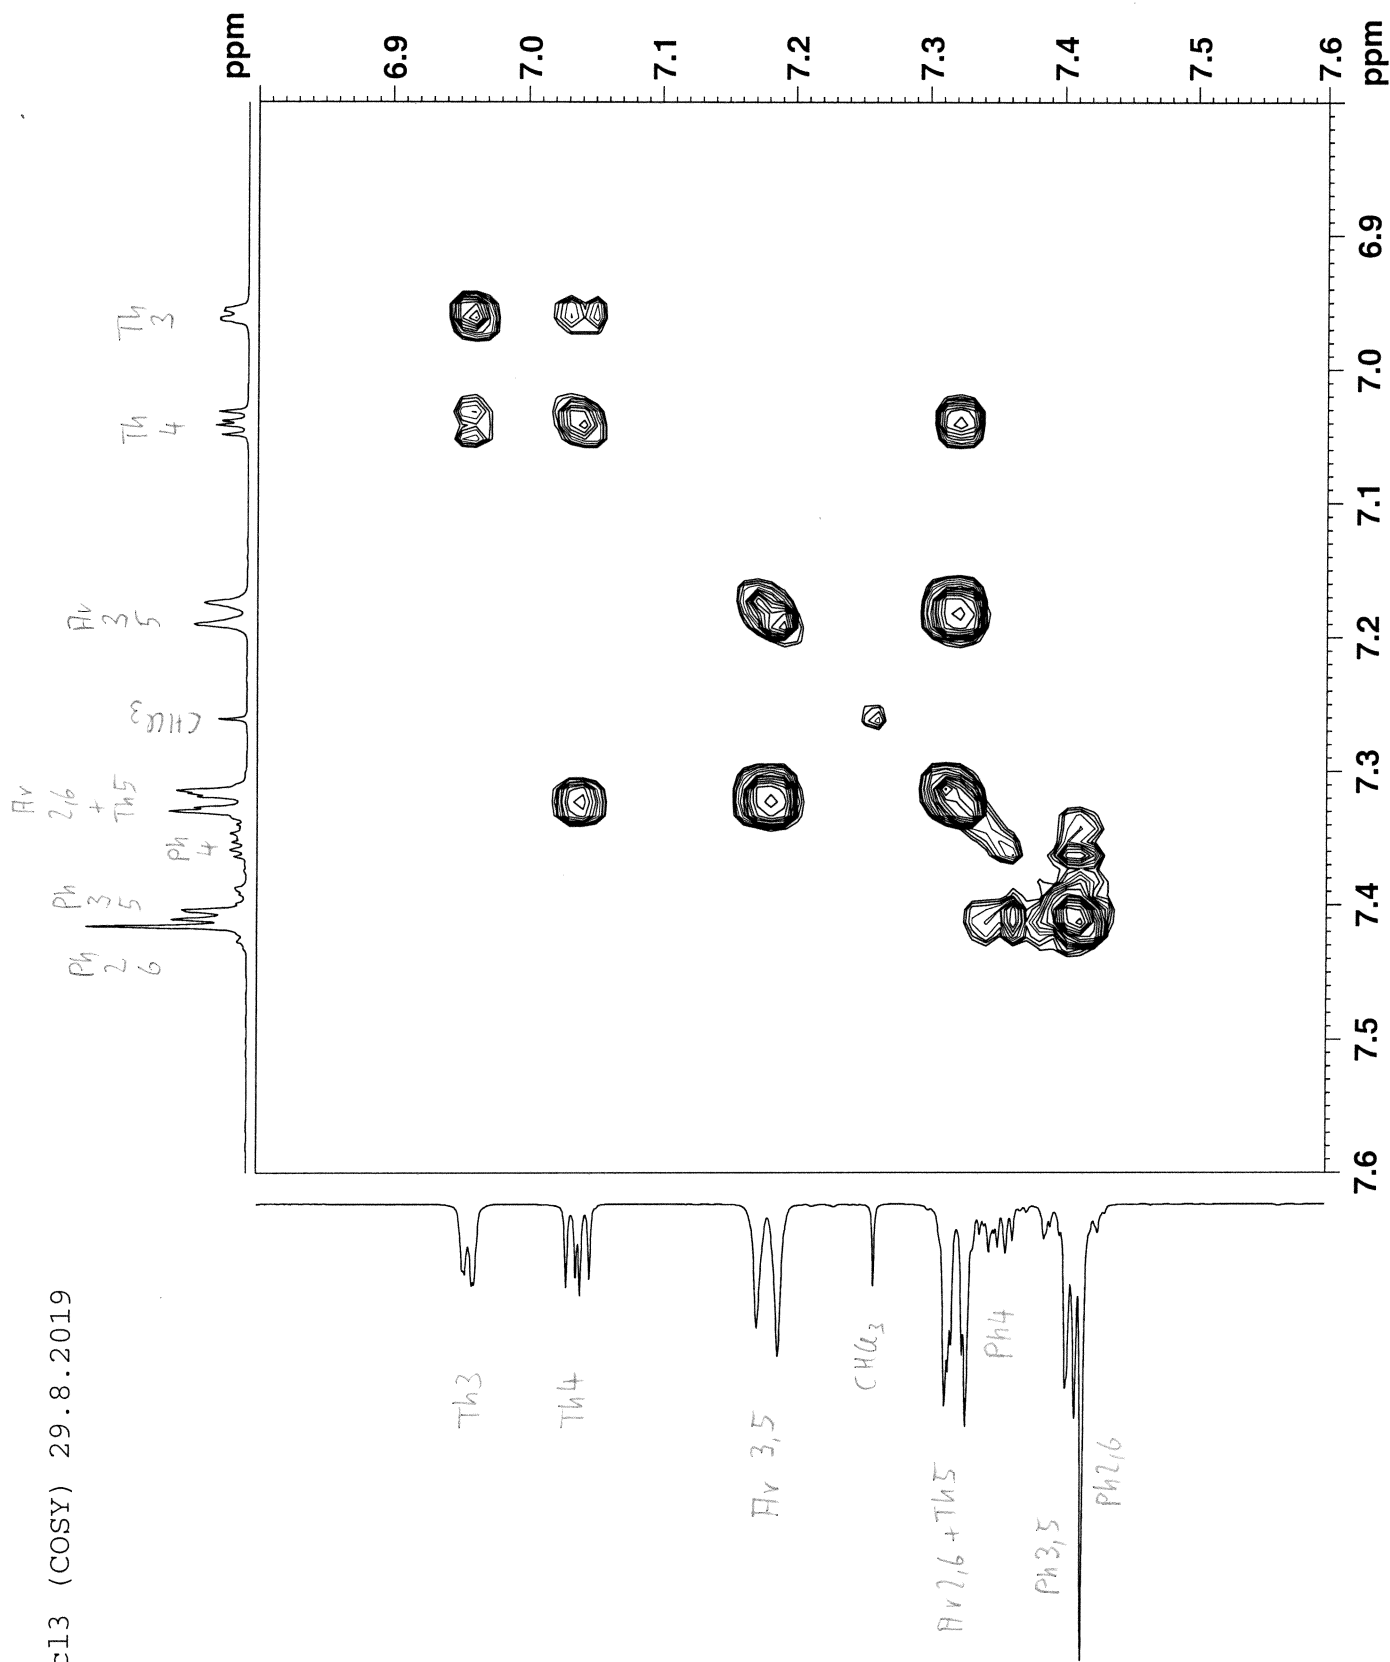

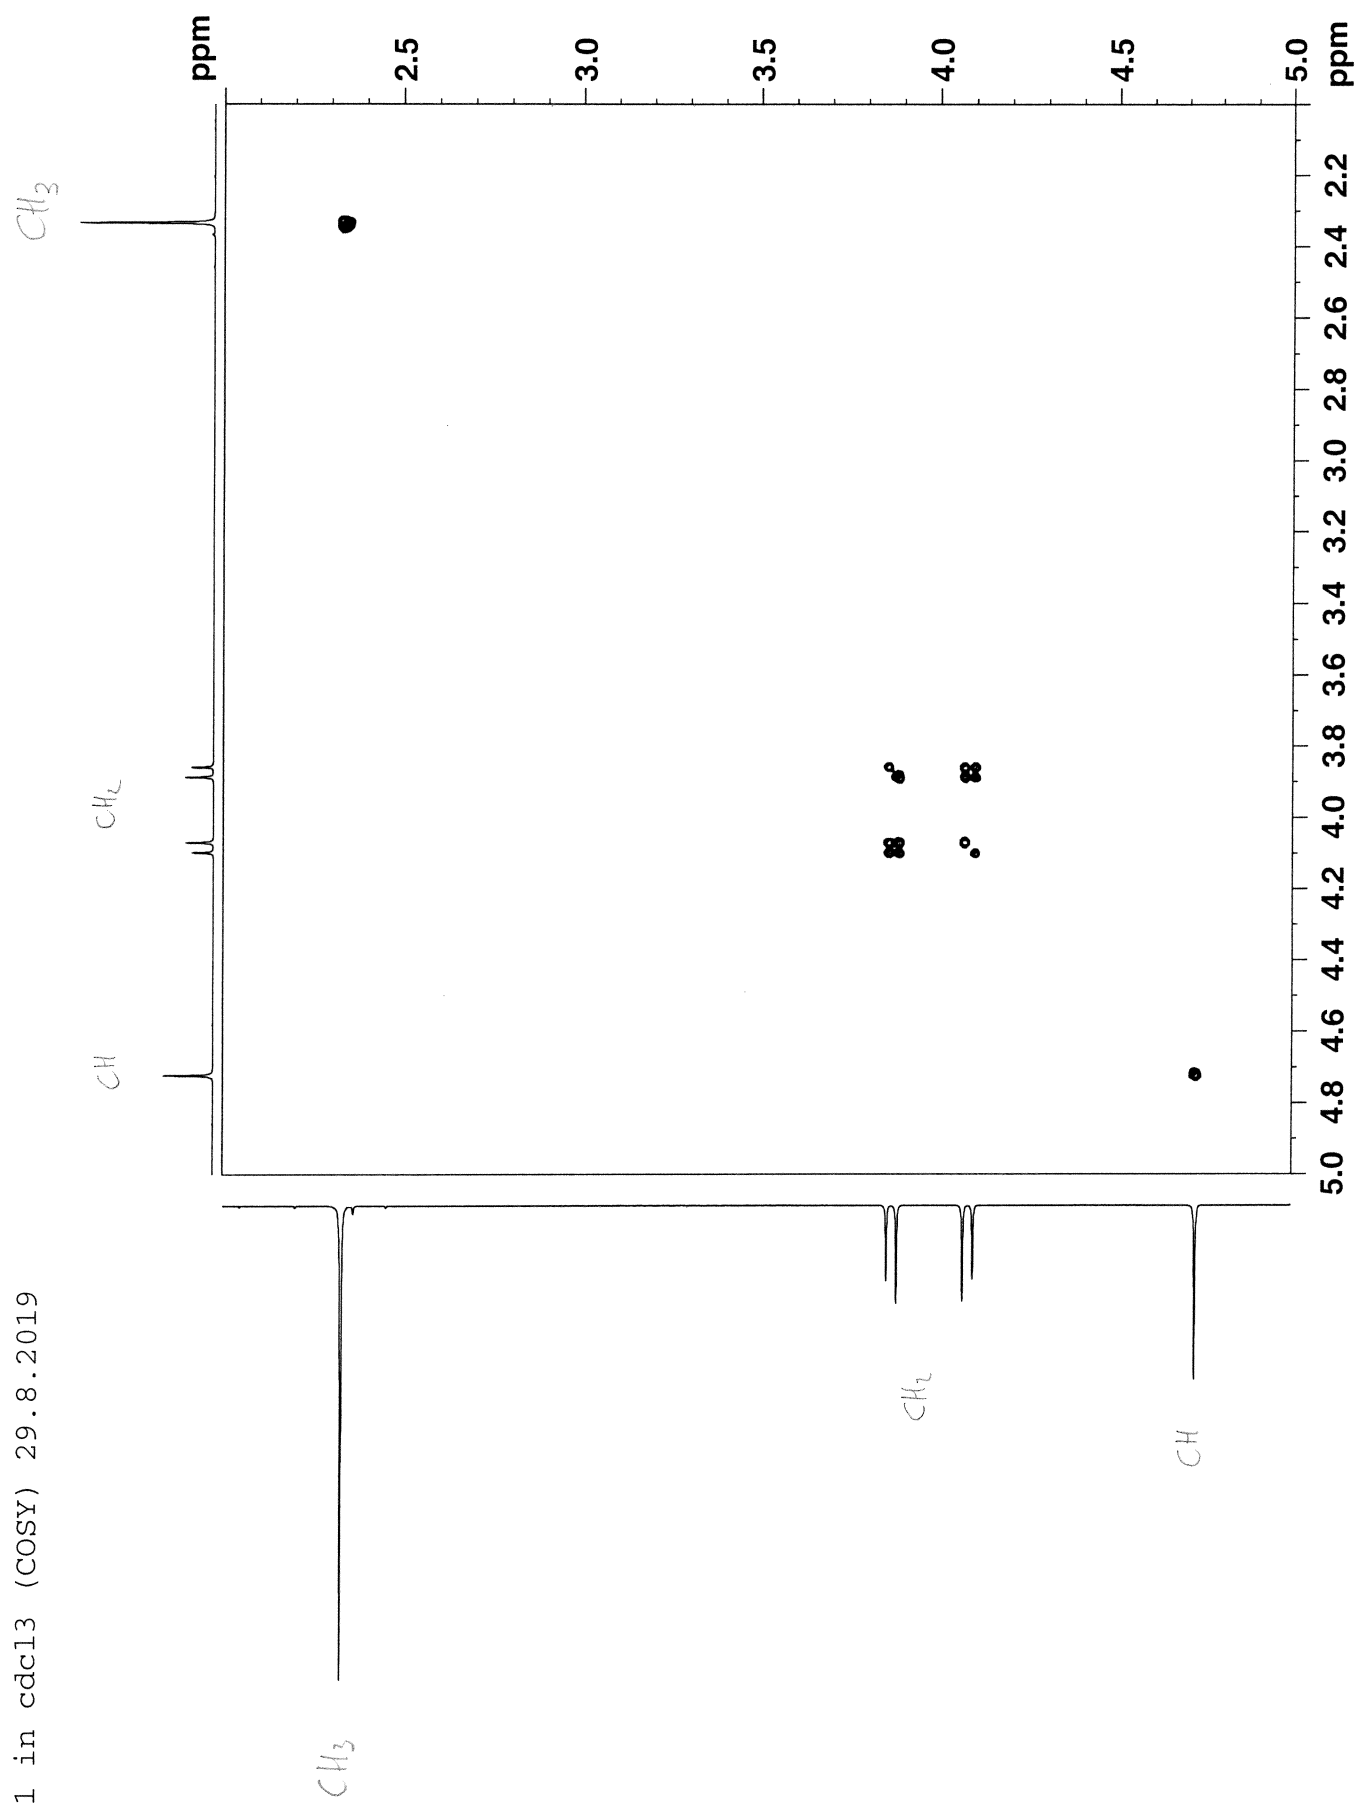

PN022\_1\_1 in cdcl3 (HSQC) 29.8.2019

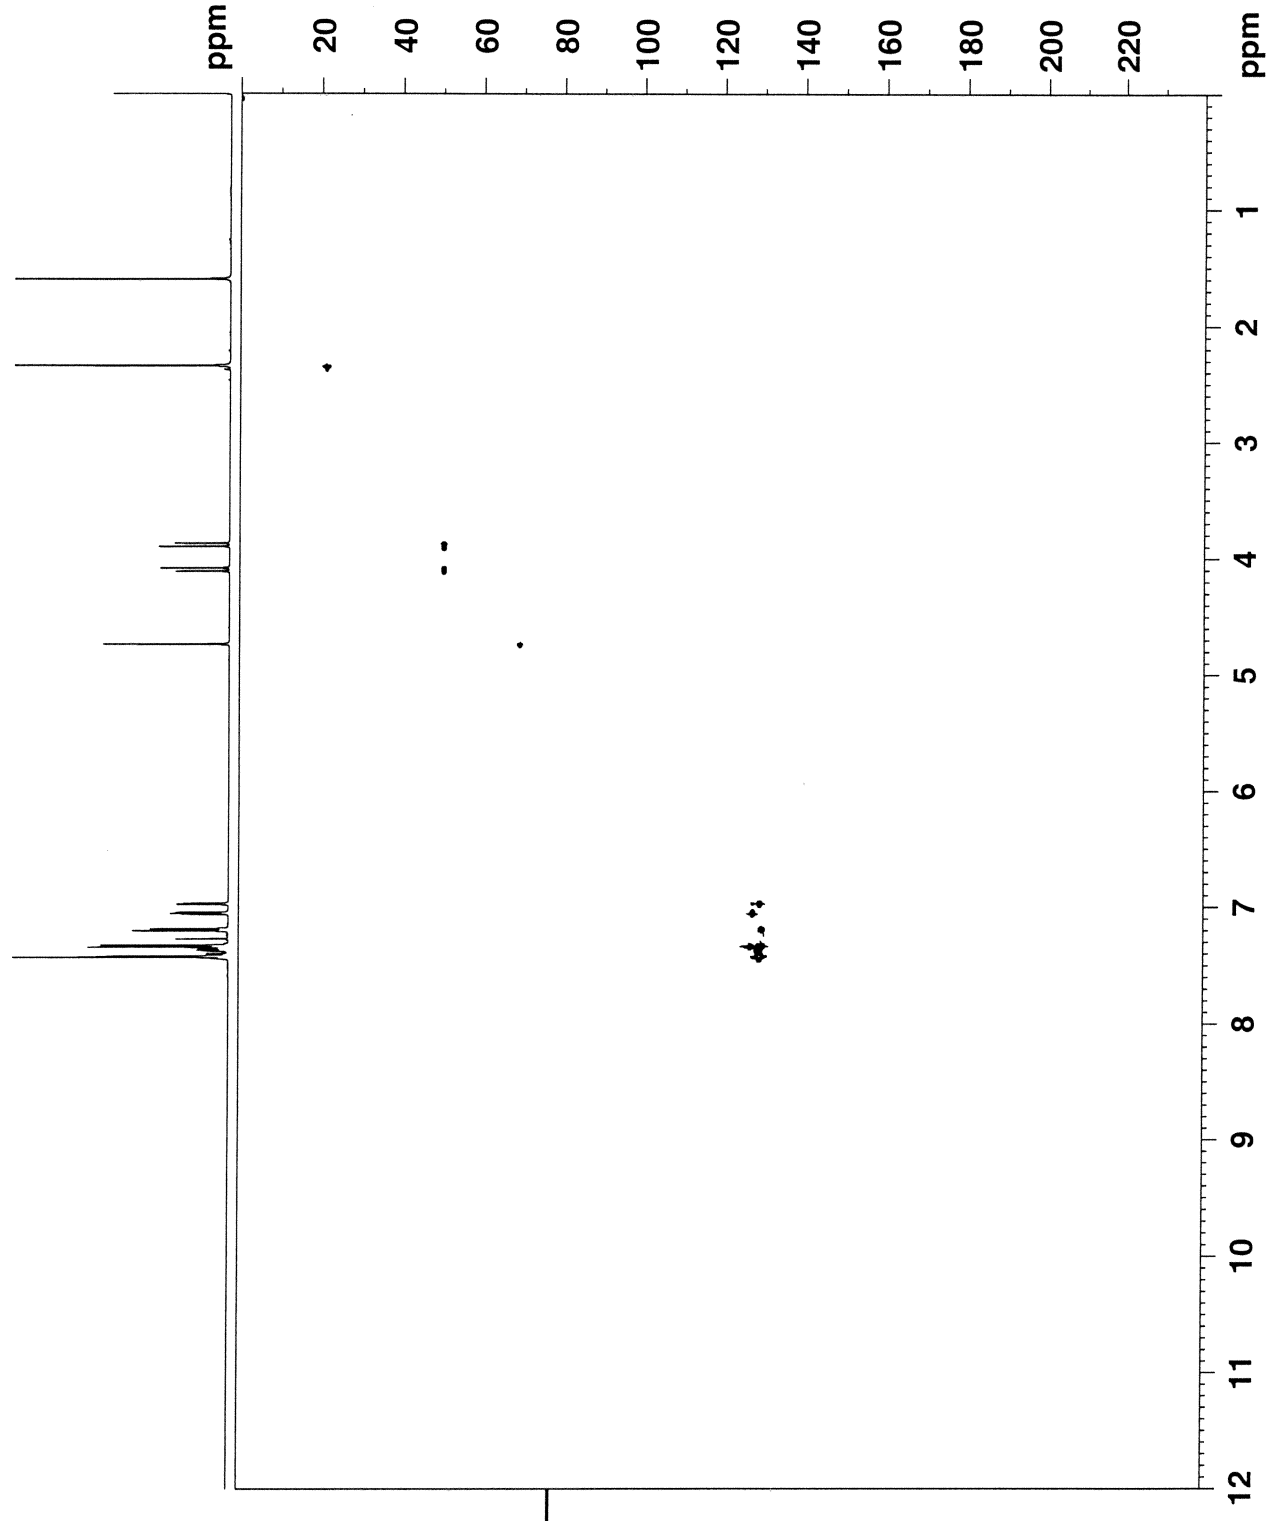

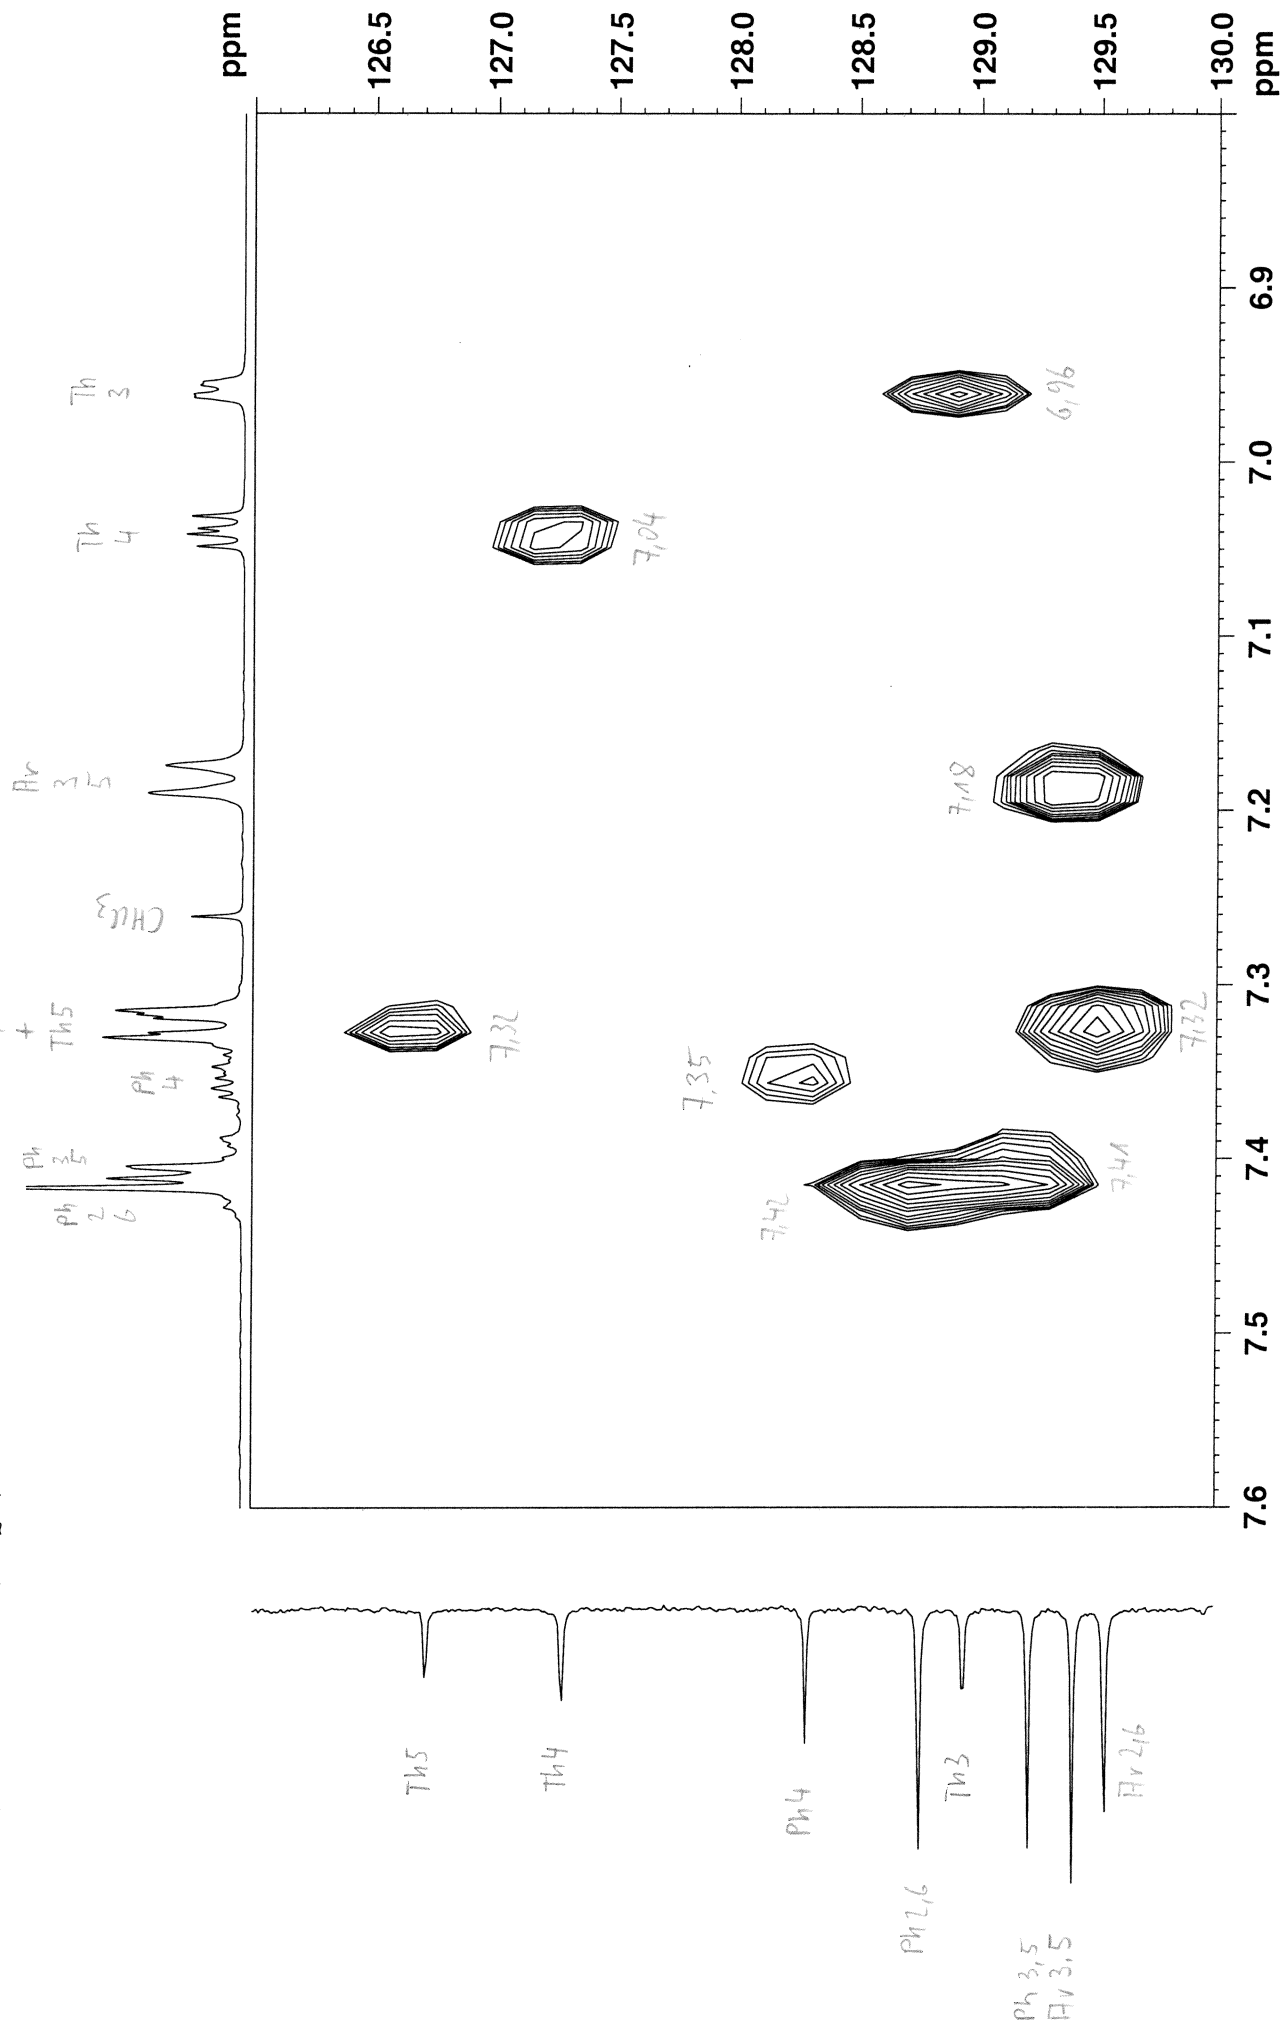

PN022\_1\_1 in cdcl3 (HSQC) 29.8.2019

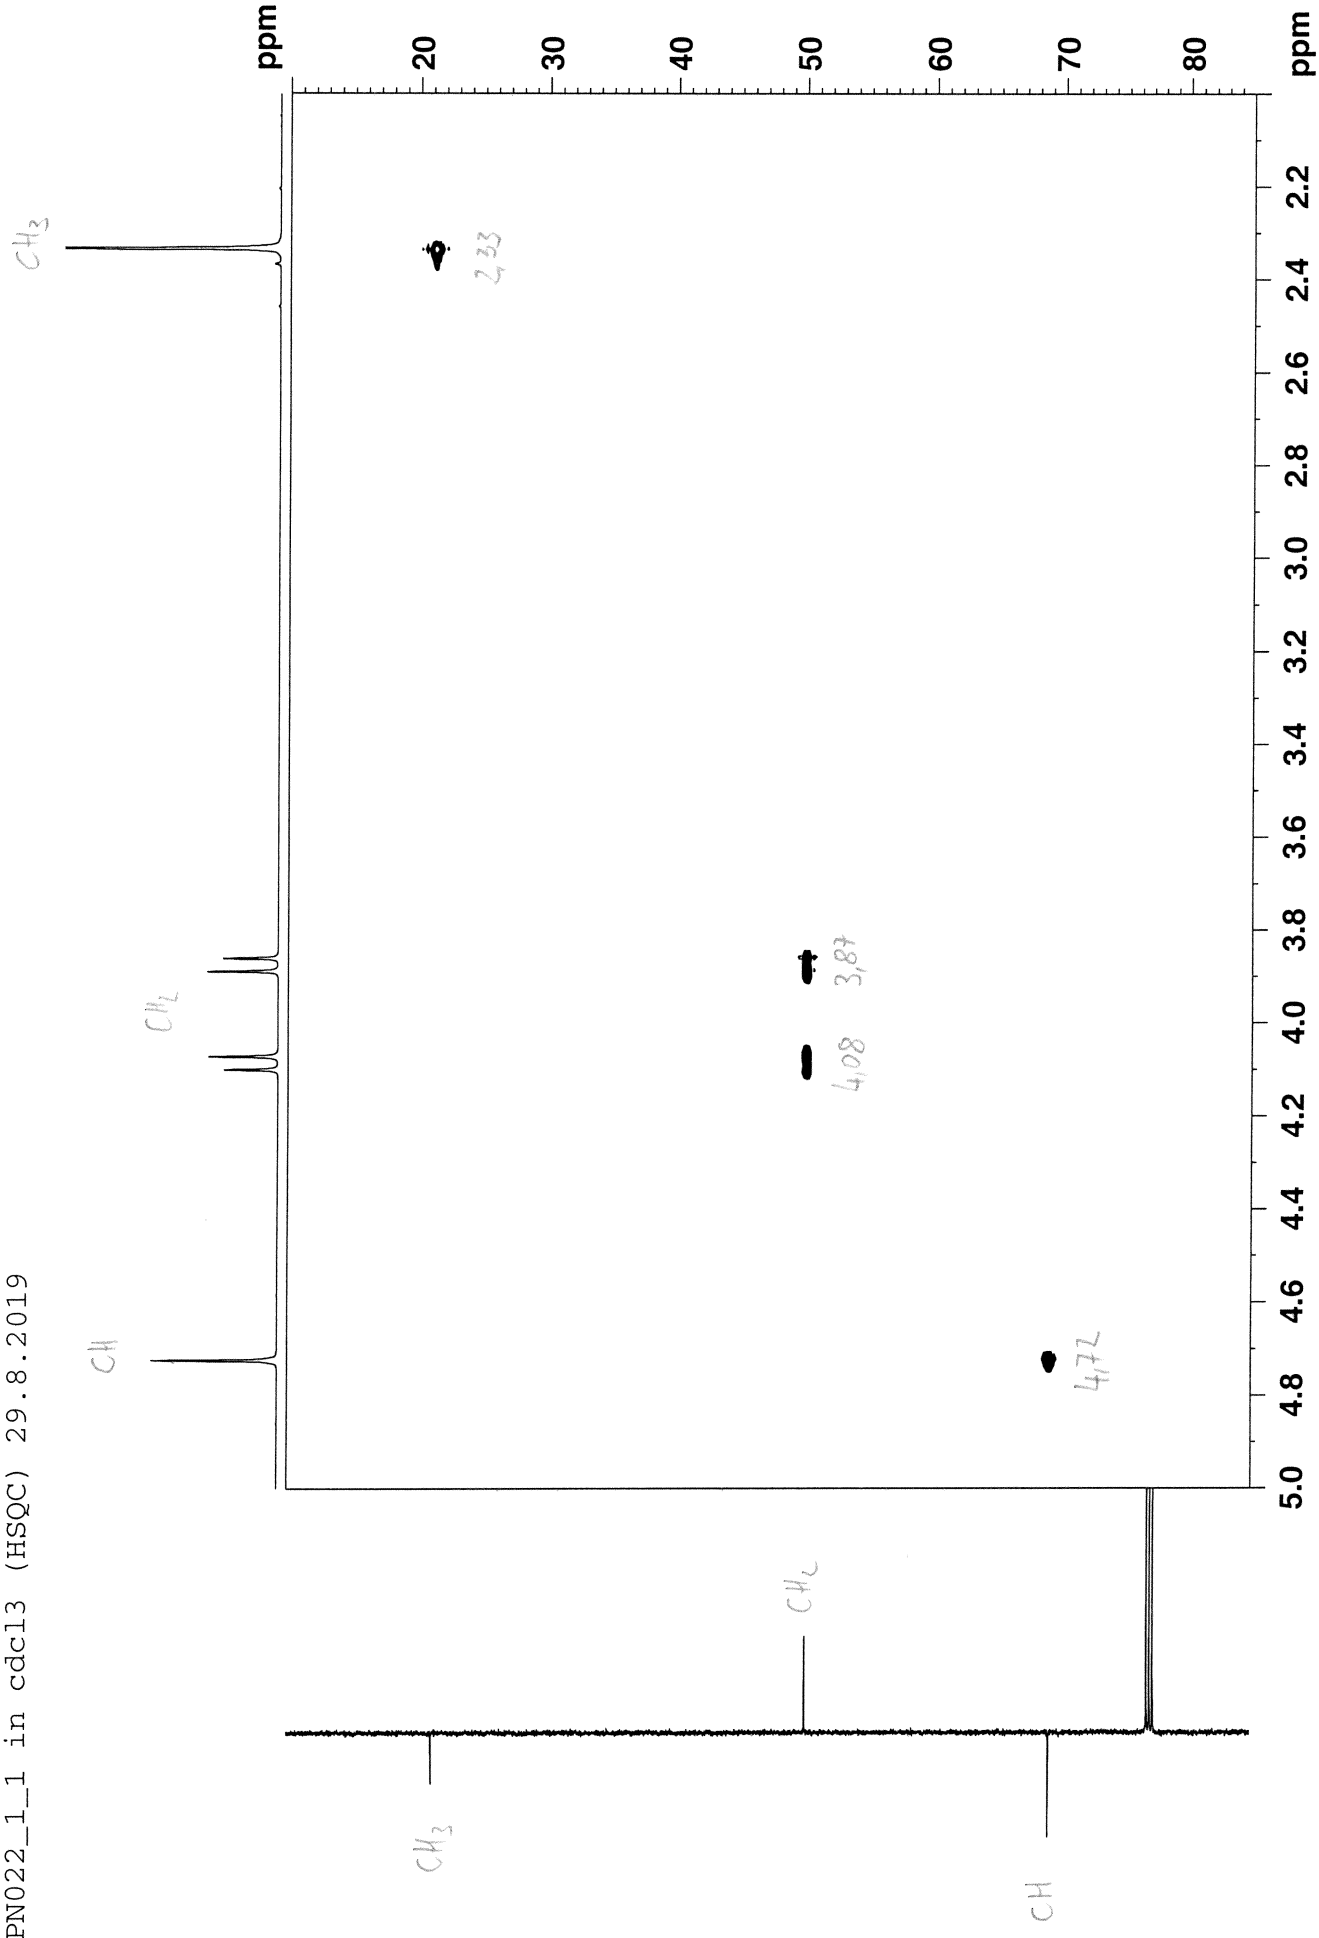

PN022\_1\_1 in cdcl3 (HMBC) 29.8.2019

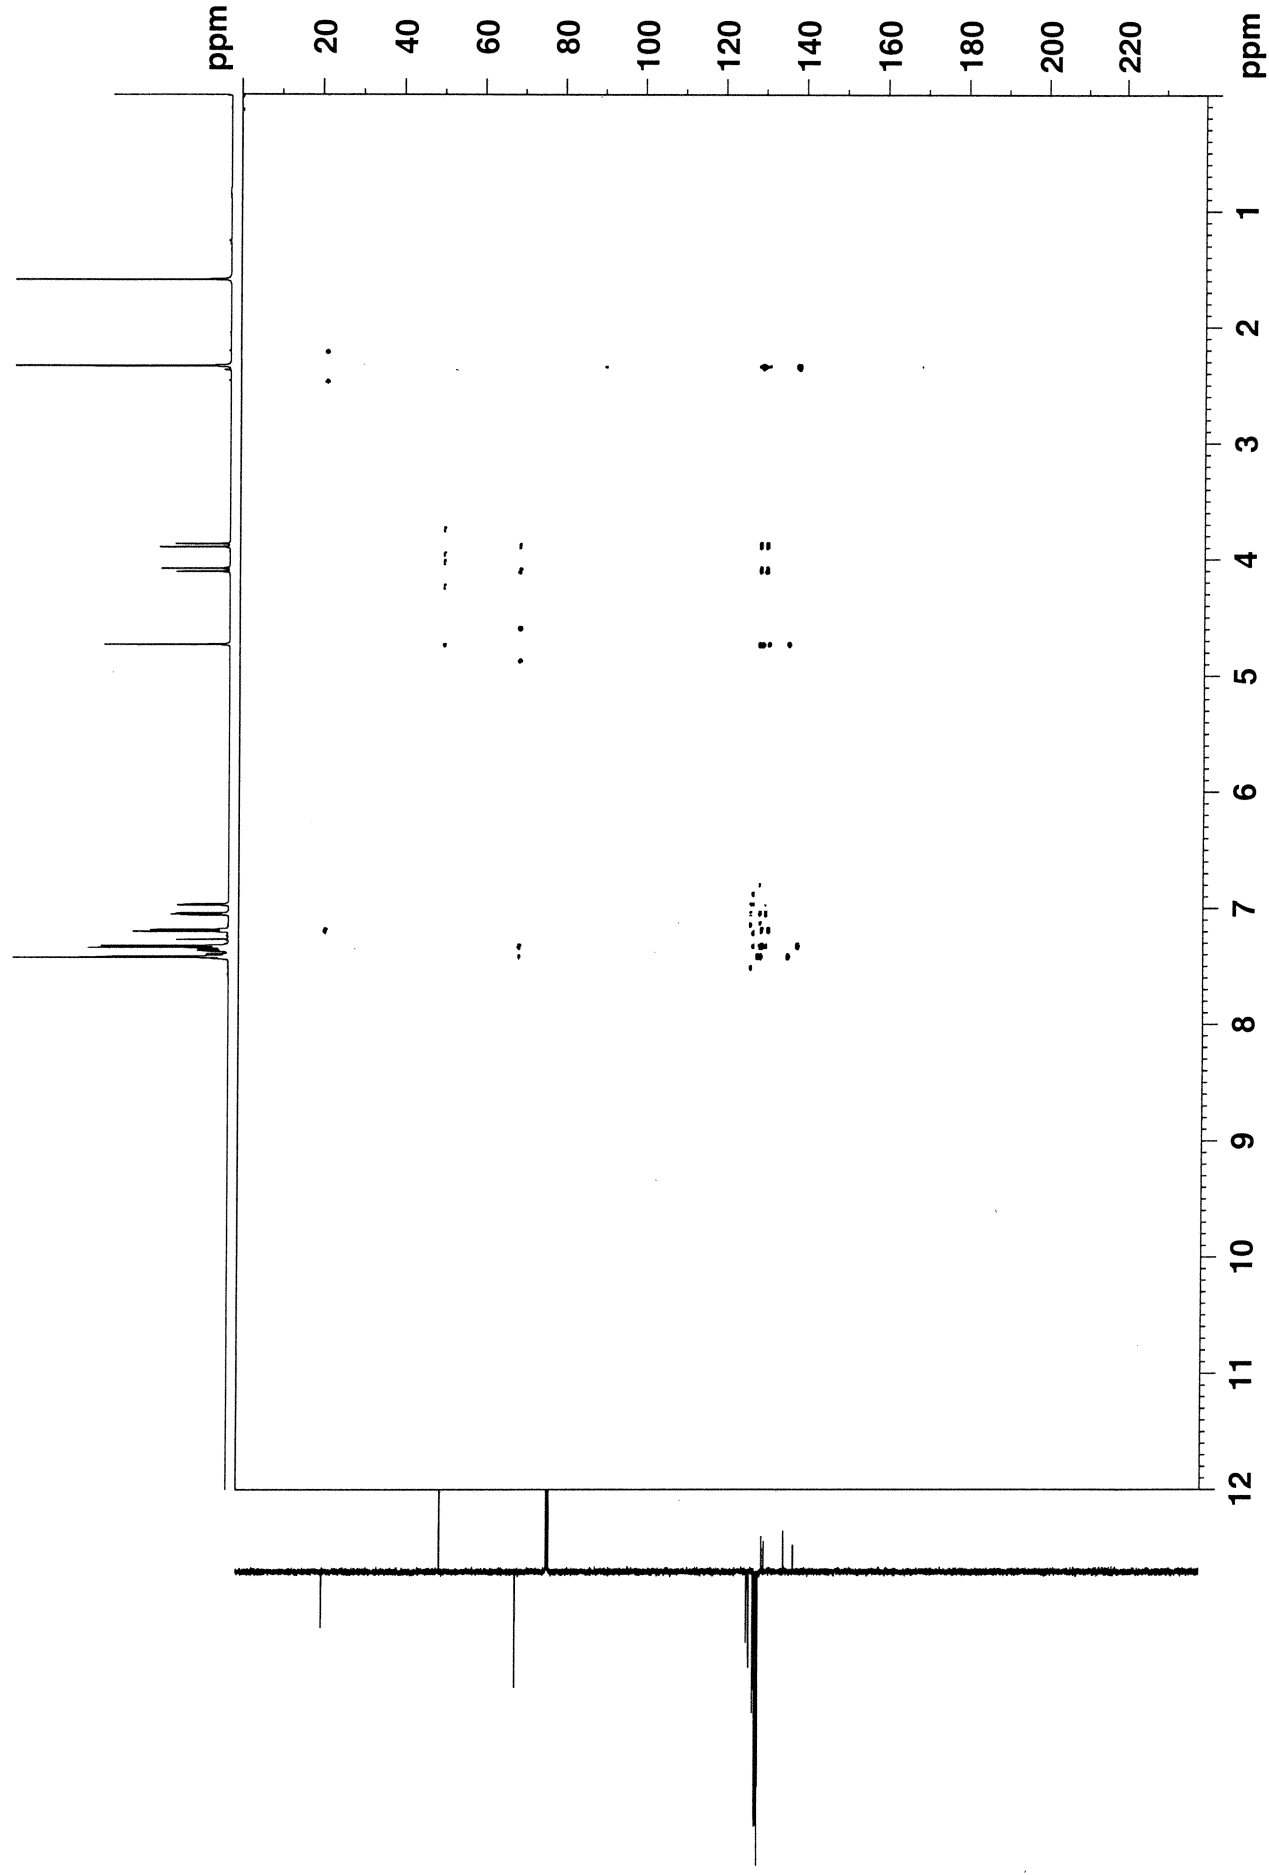

PN022\_1\_1 in cdcl3 (HMBC) 29.8.2019

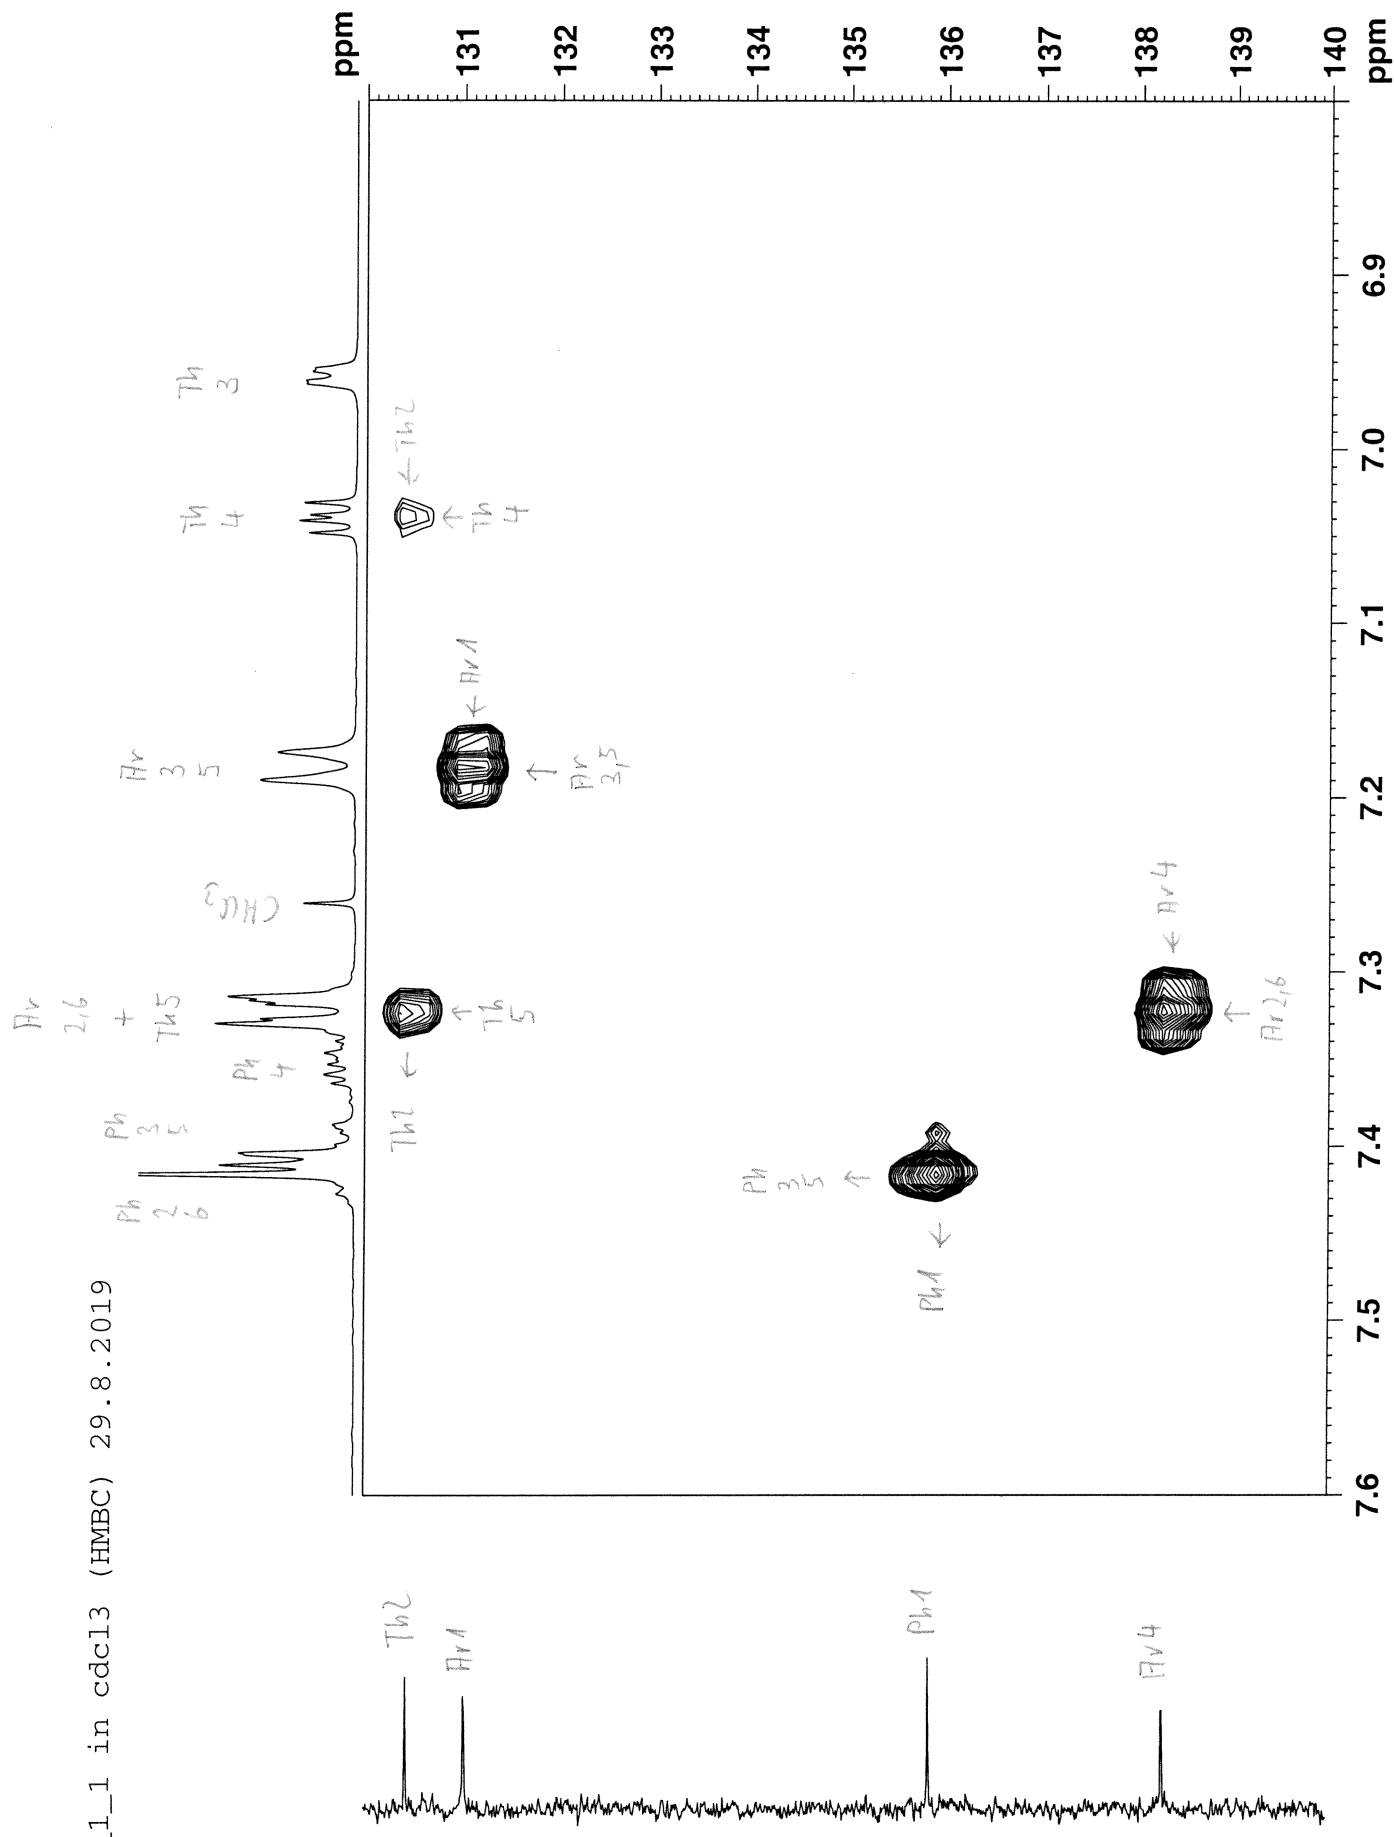



PN022\_1\_1 in cdcl3 (HMBC) 29.8.2019

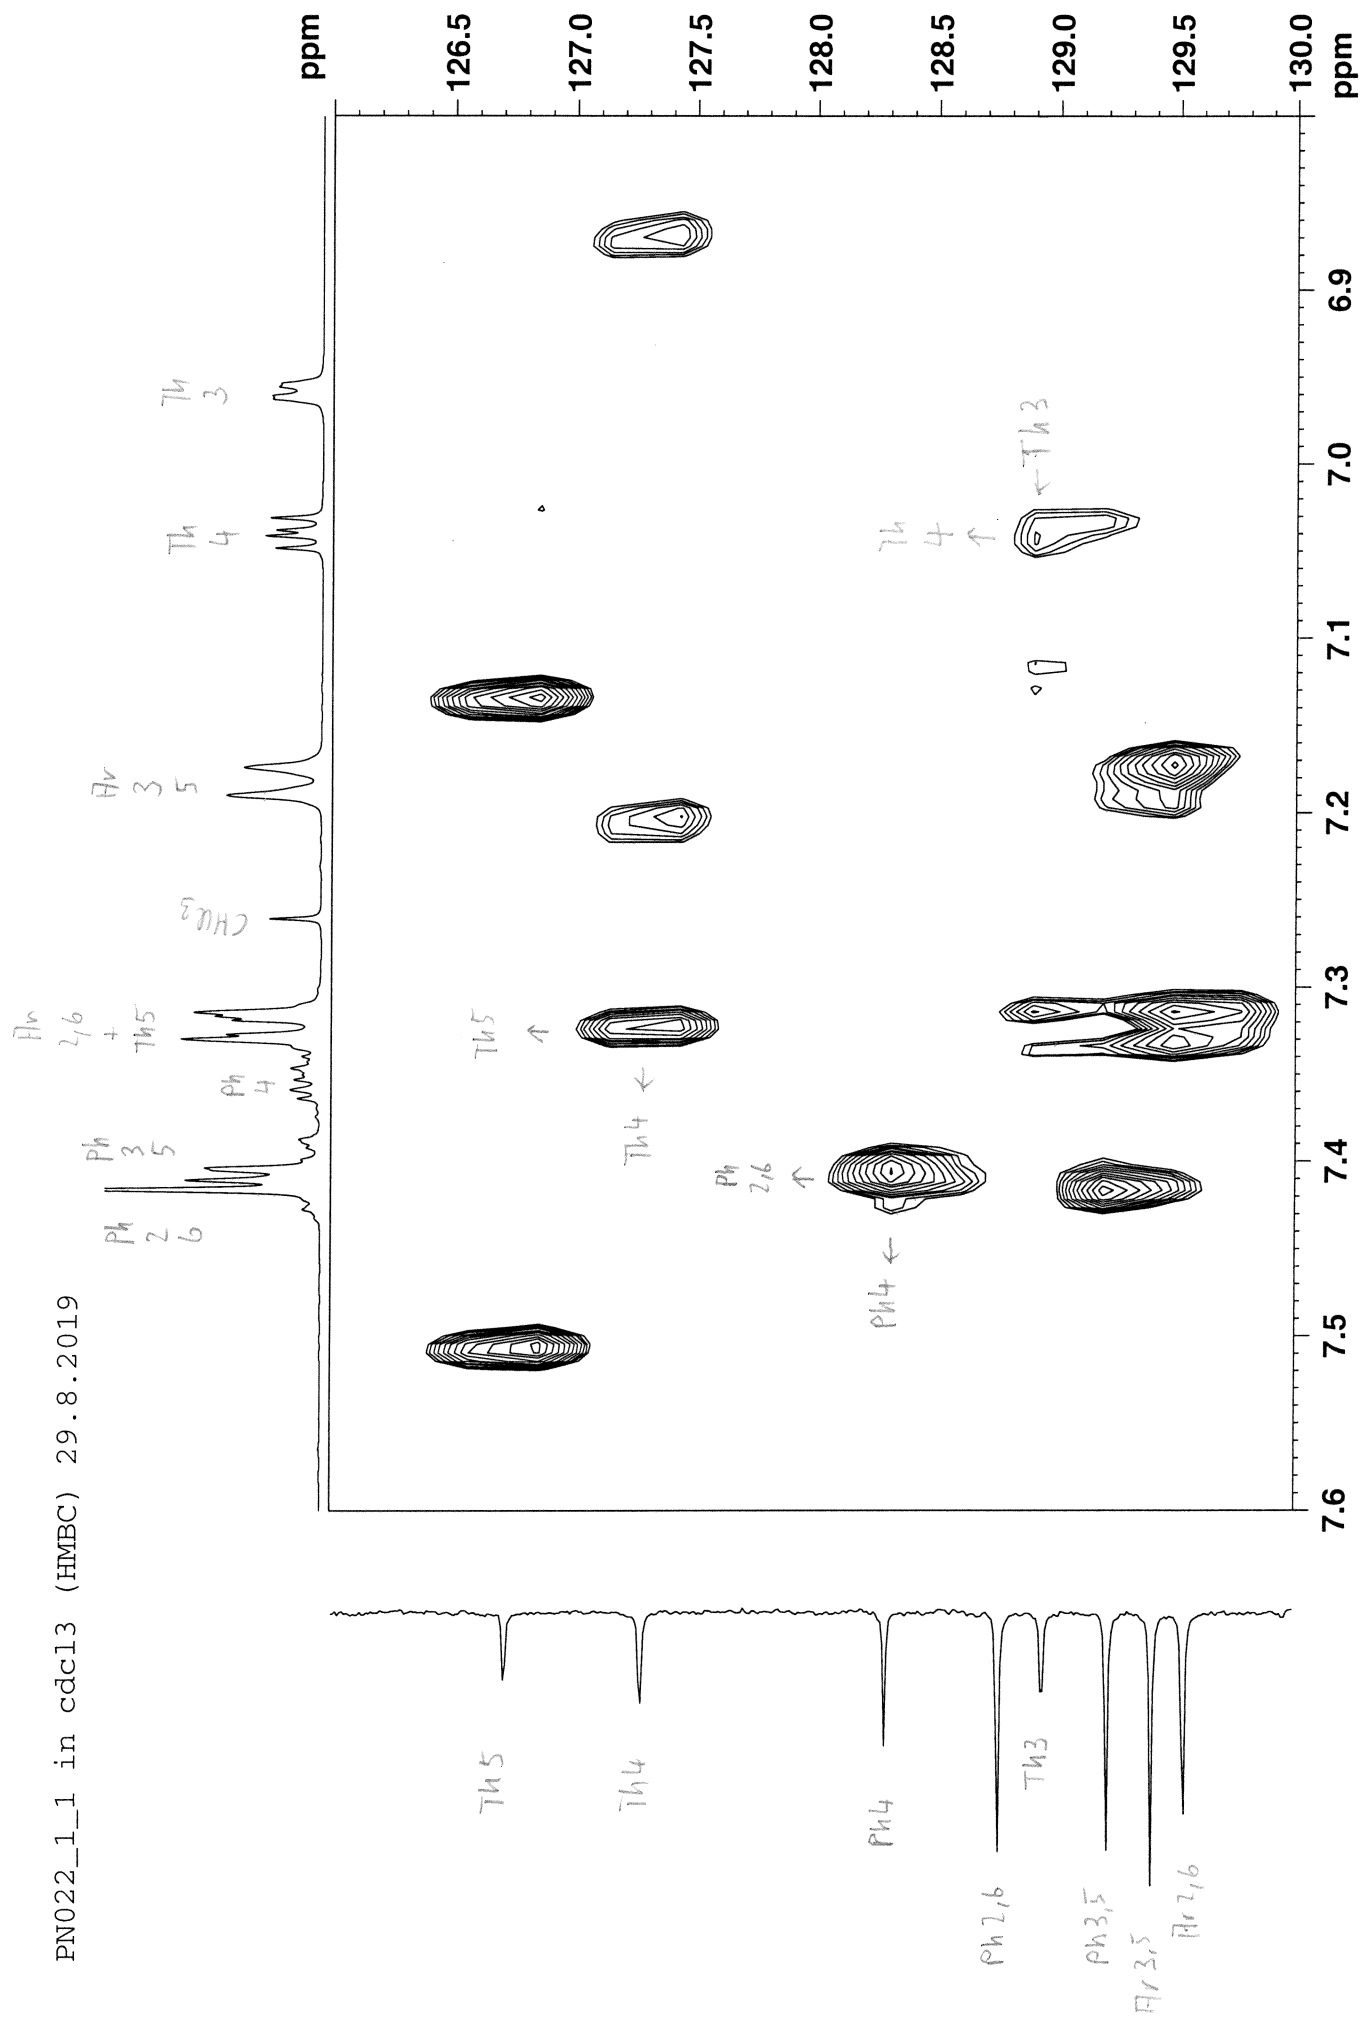

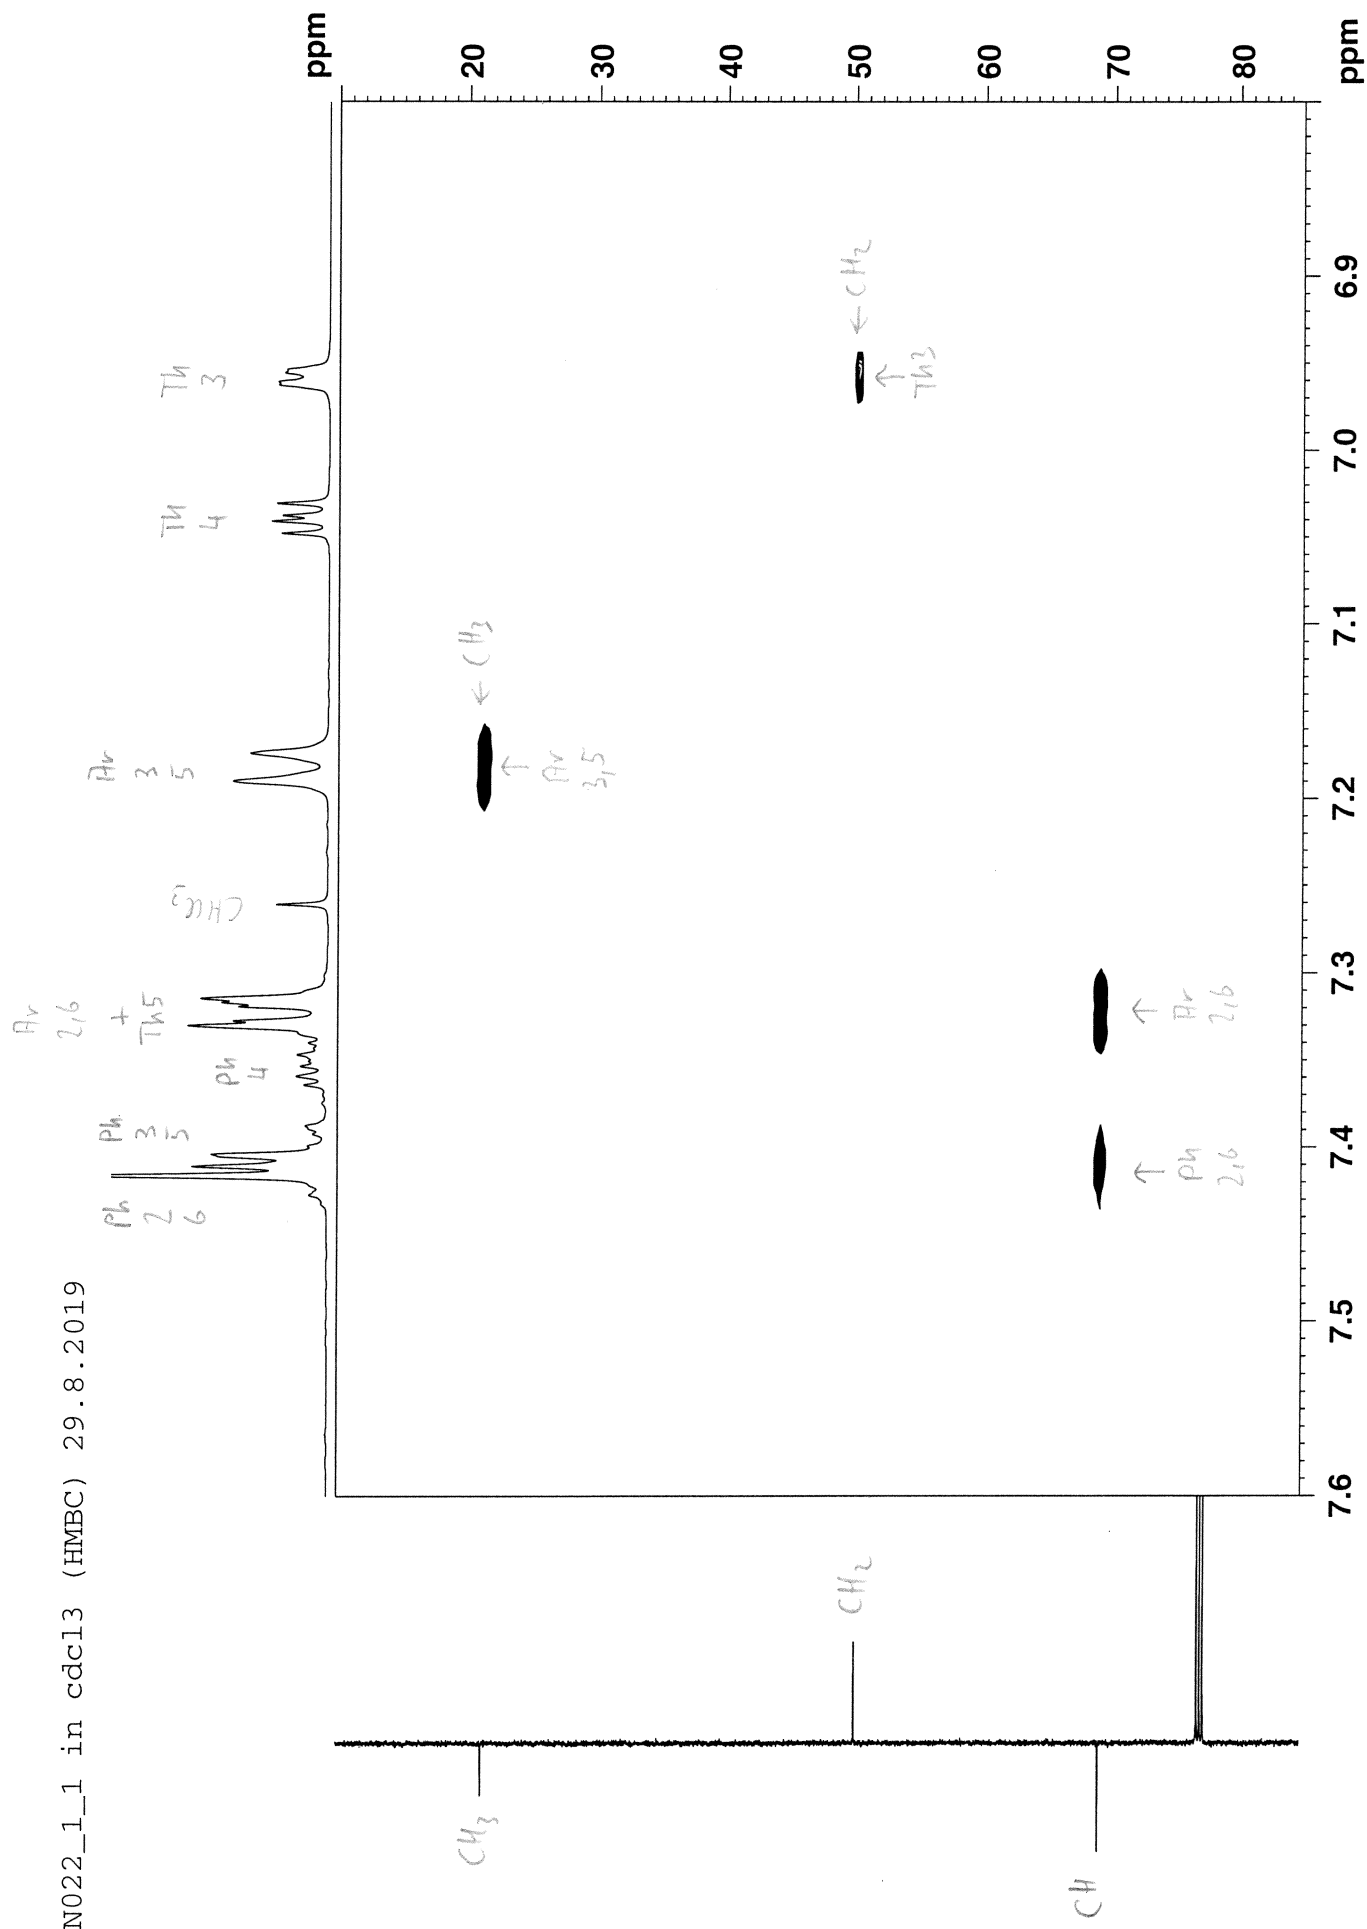

PN022\_1\_1 in cdcl3 (HMBC) 29.8.2019

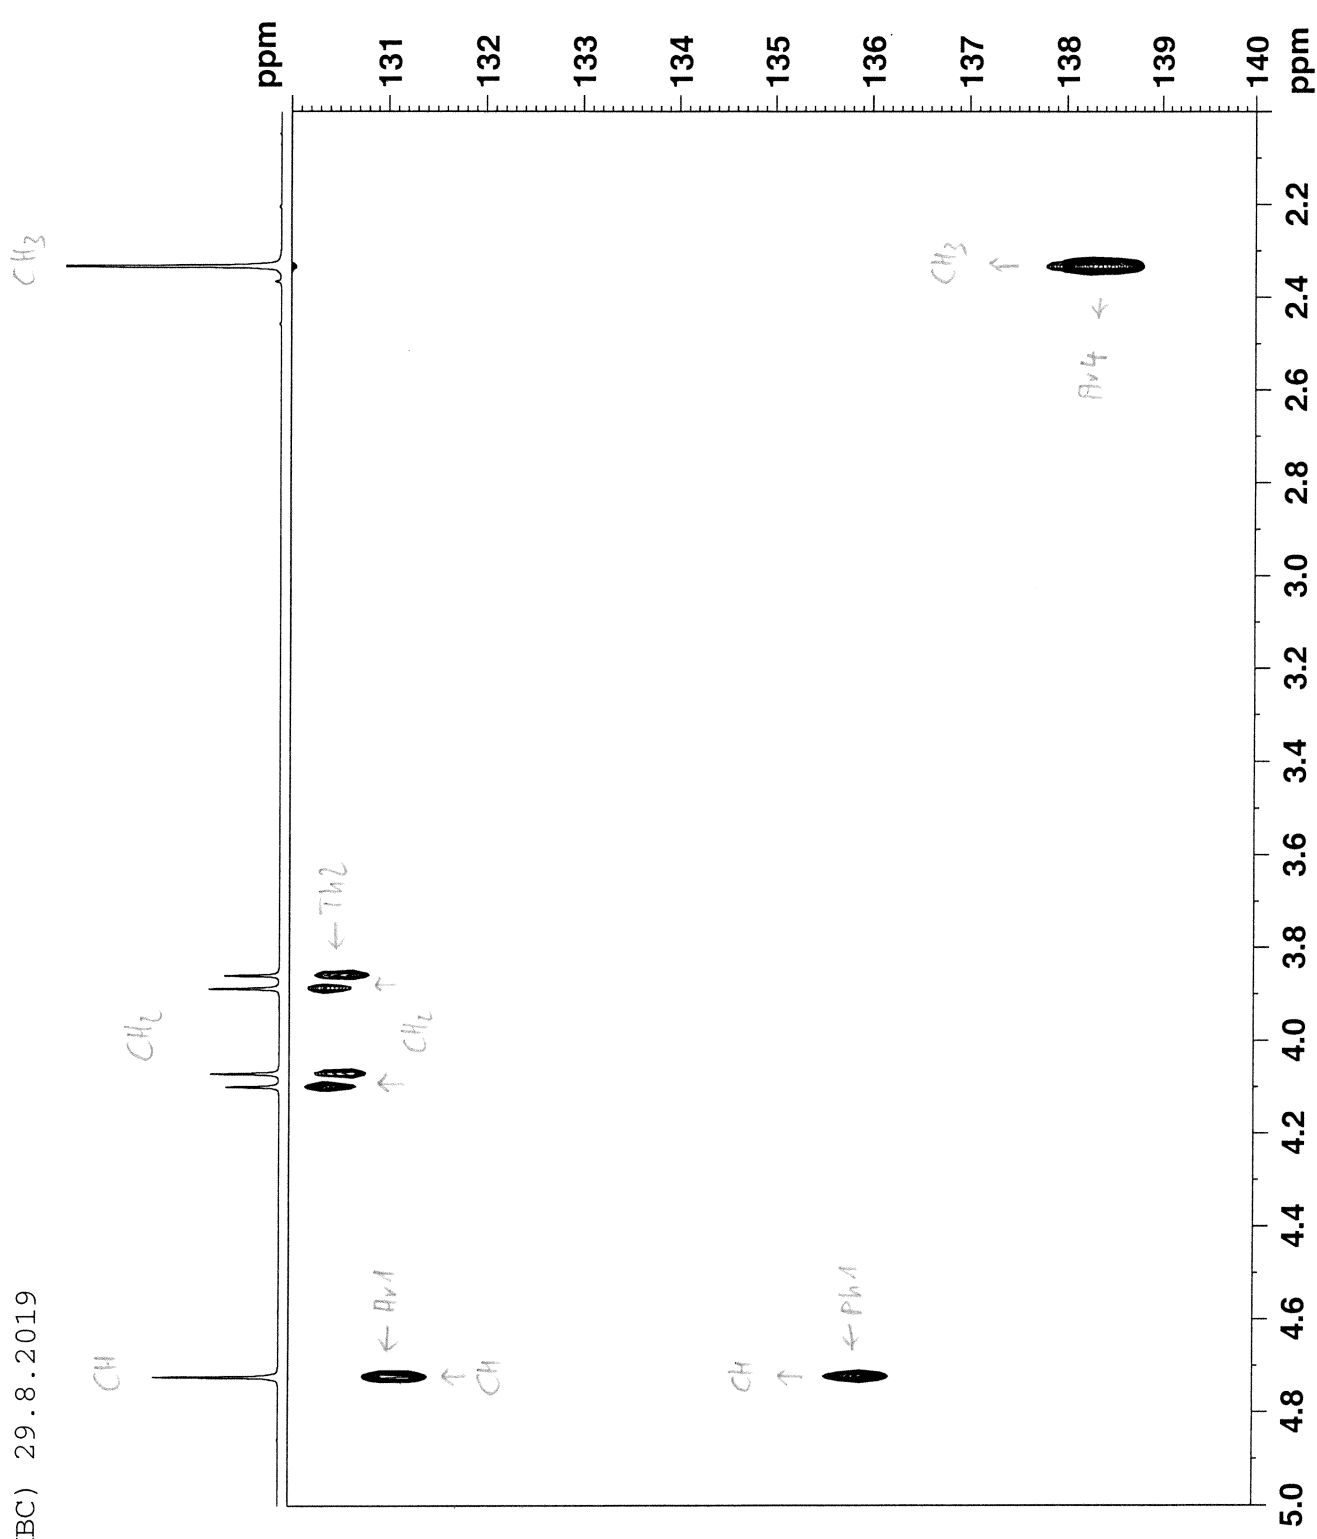

$$\text{CH}_3$$
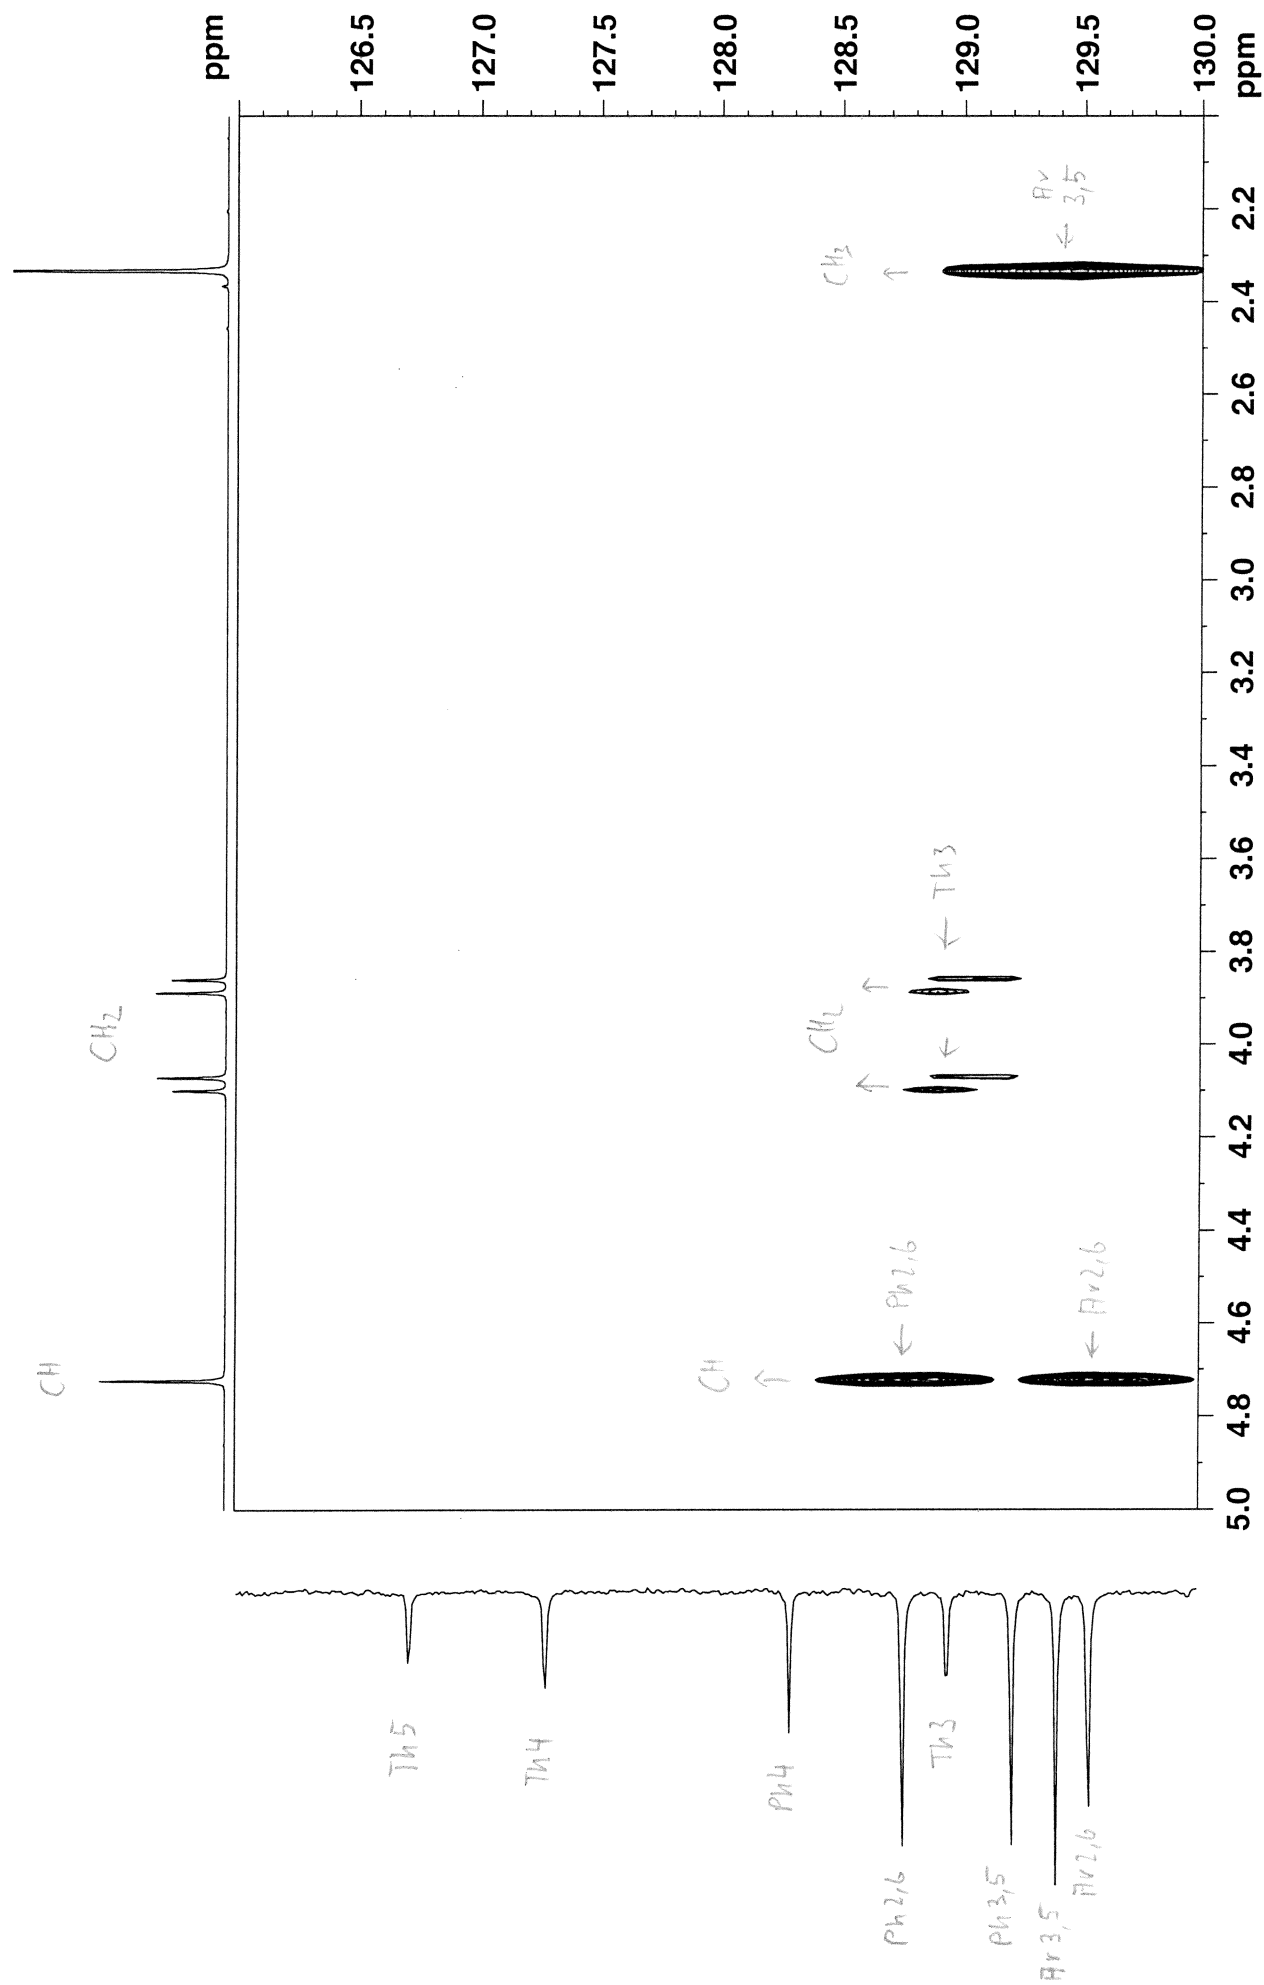

PN022\_1\_1 in cdcl3 (HMBC) 29.8.2019

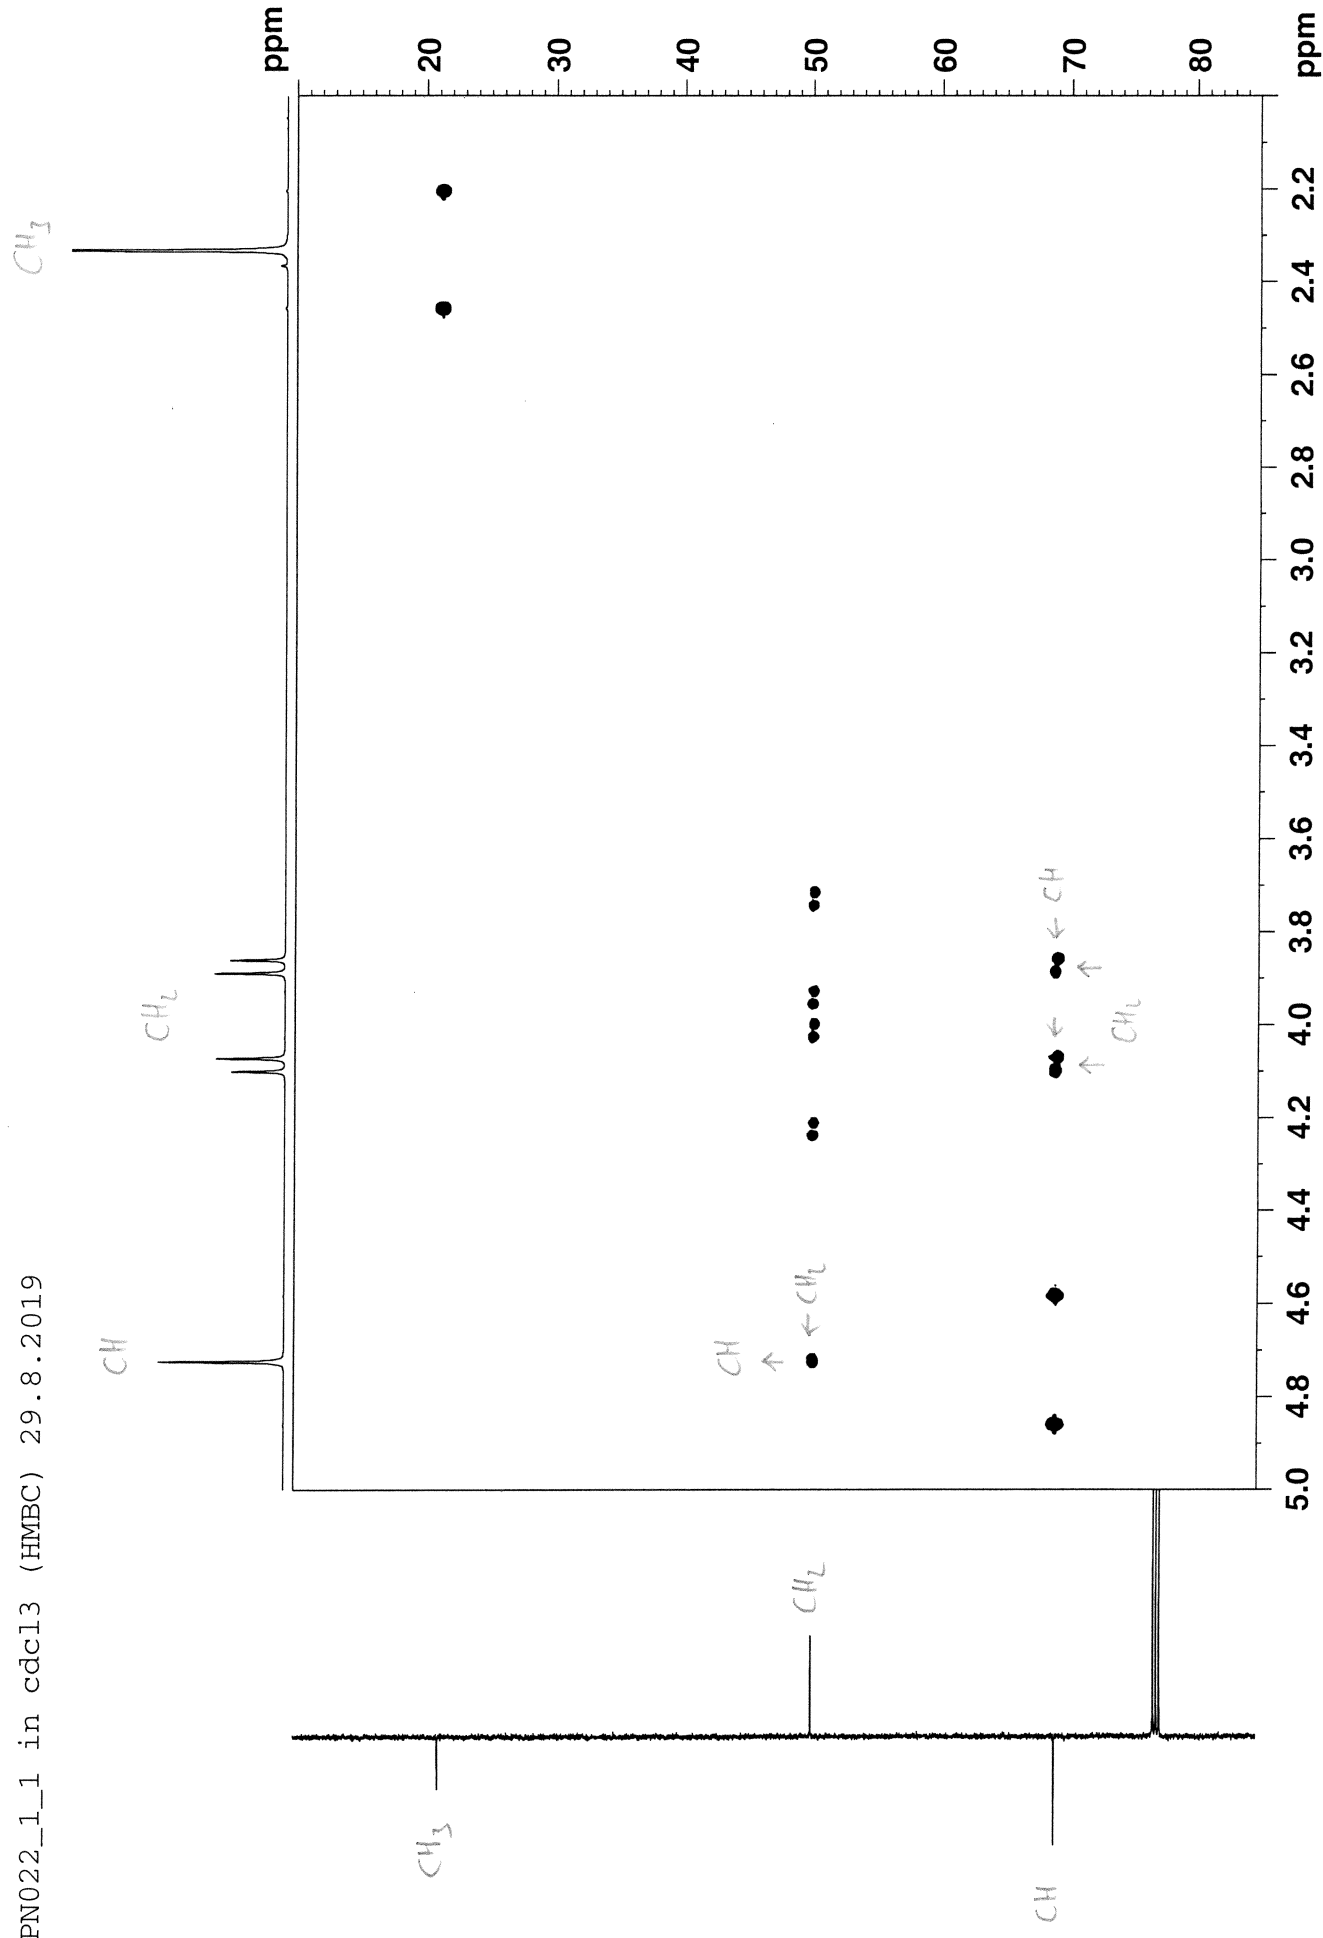

**Figure S54c.** NMR spectra of compound **6n**.

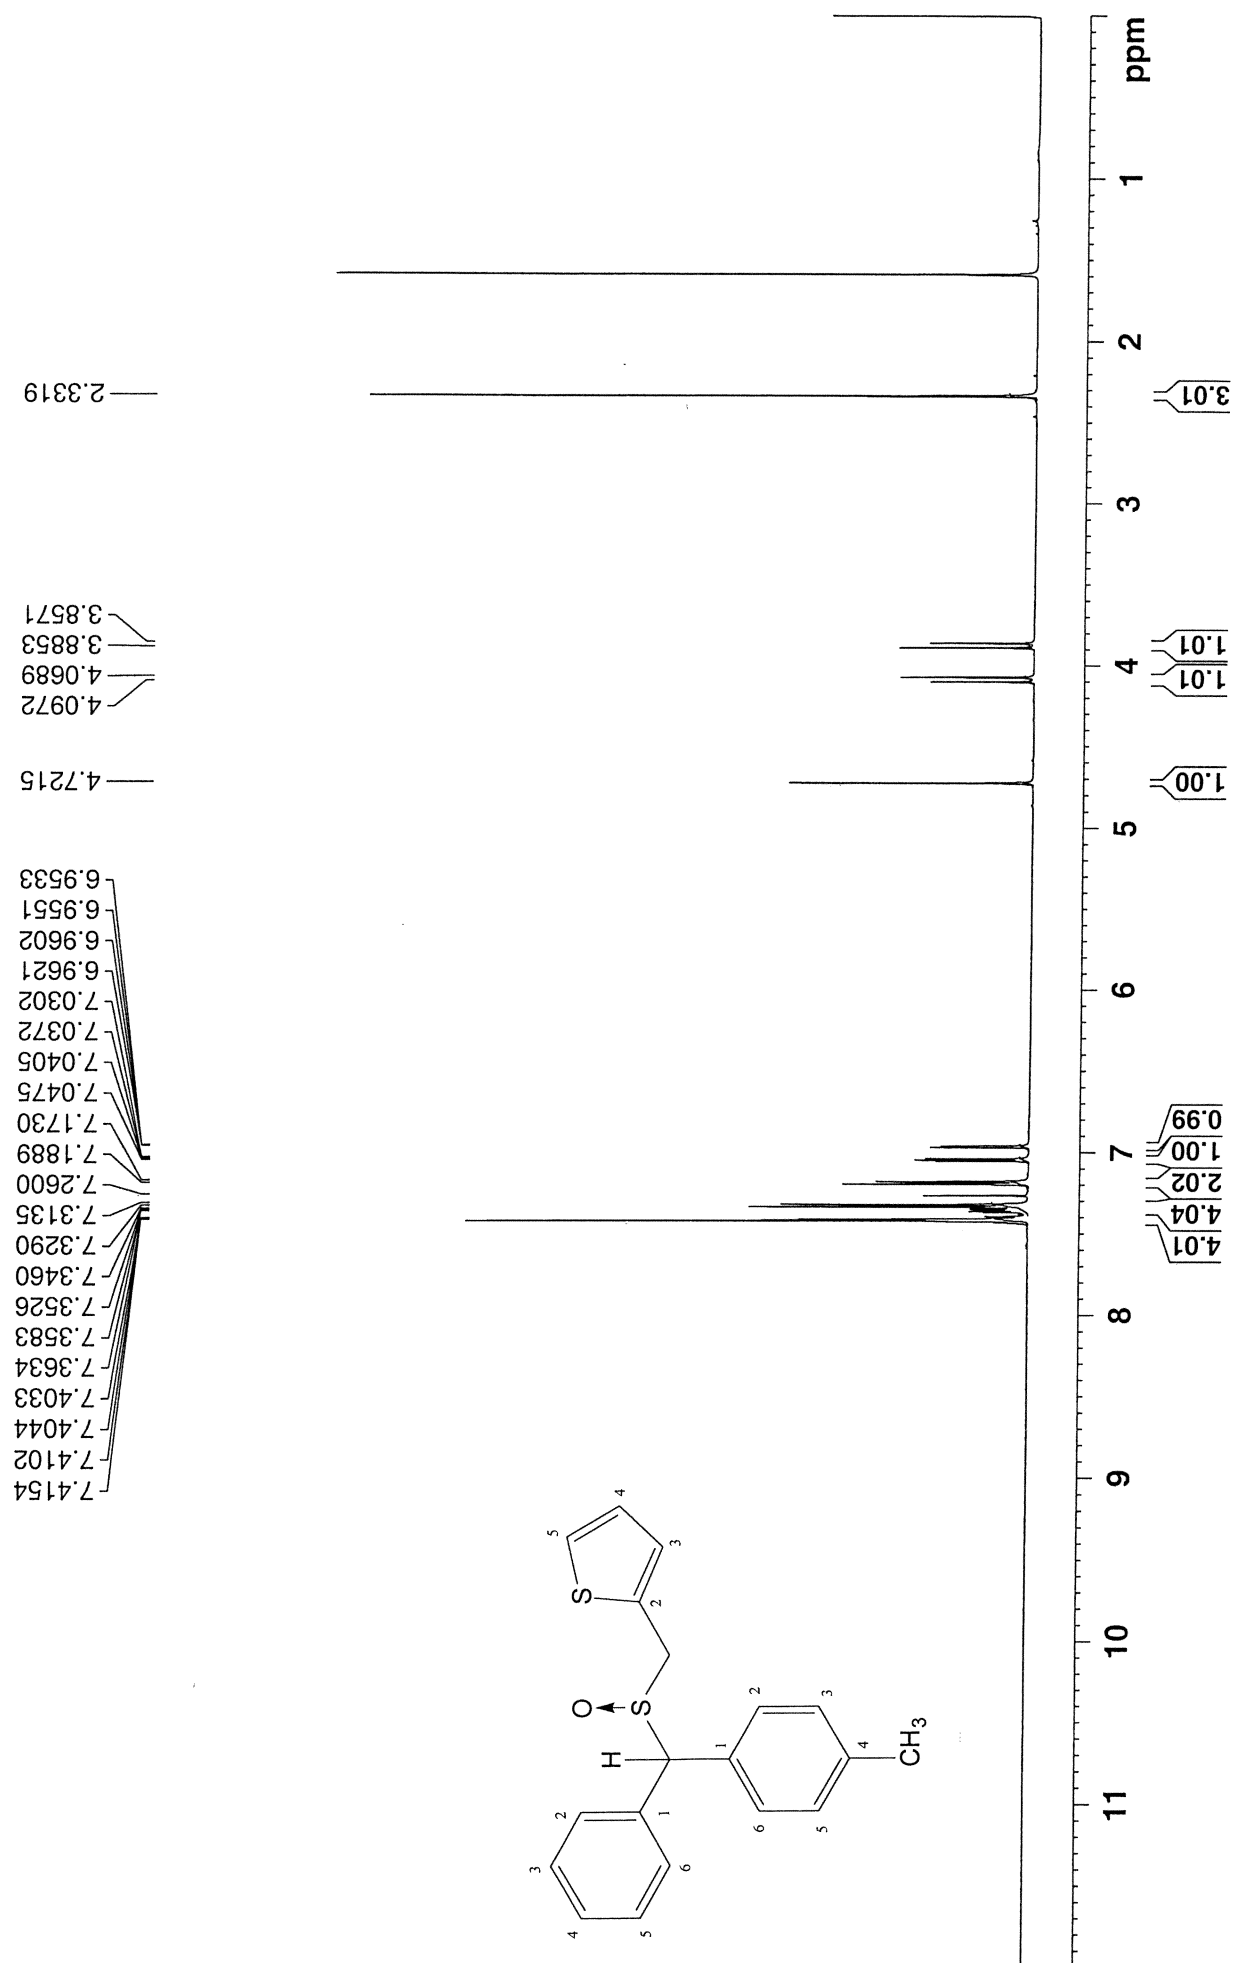

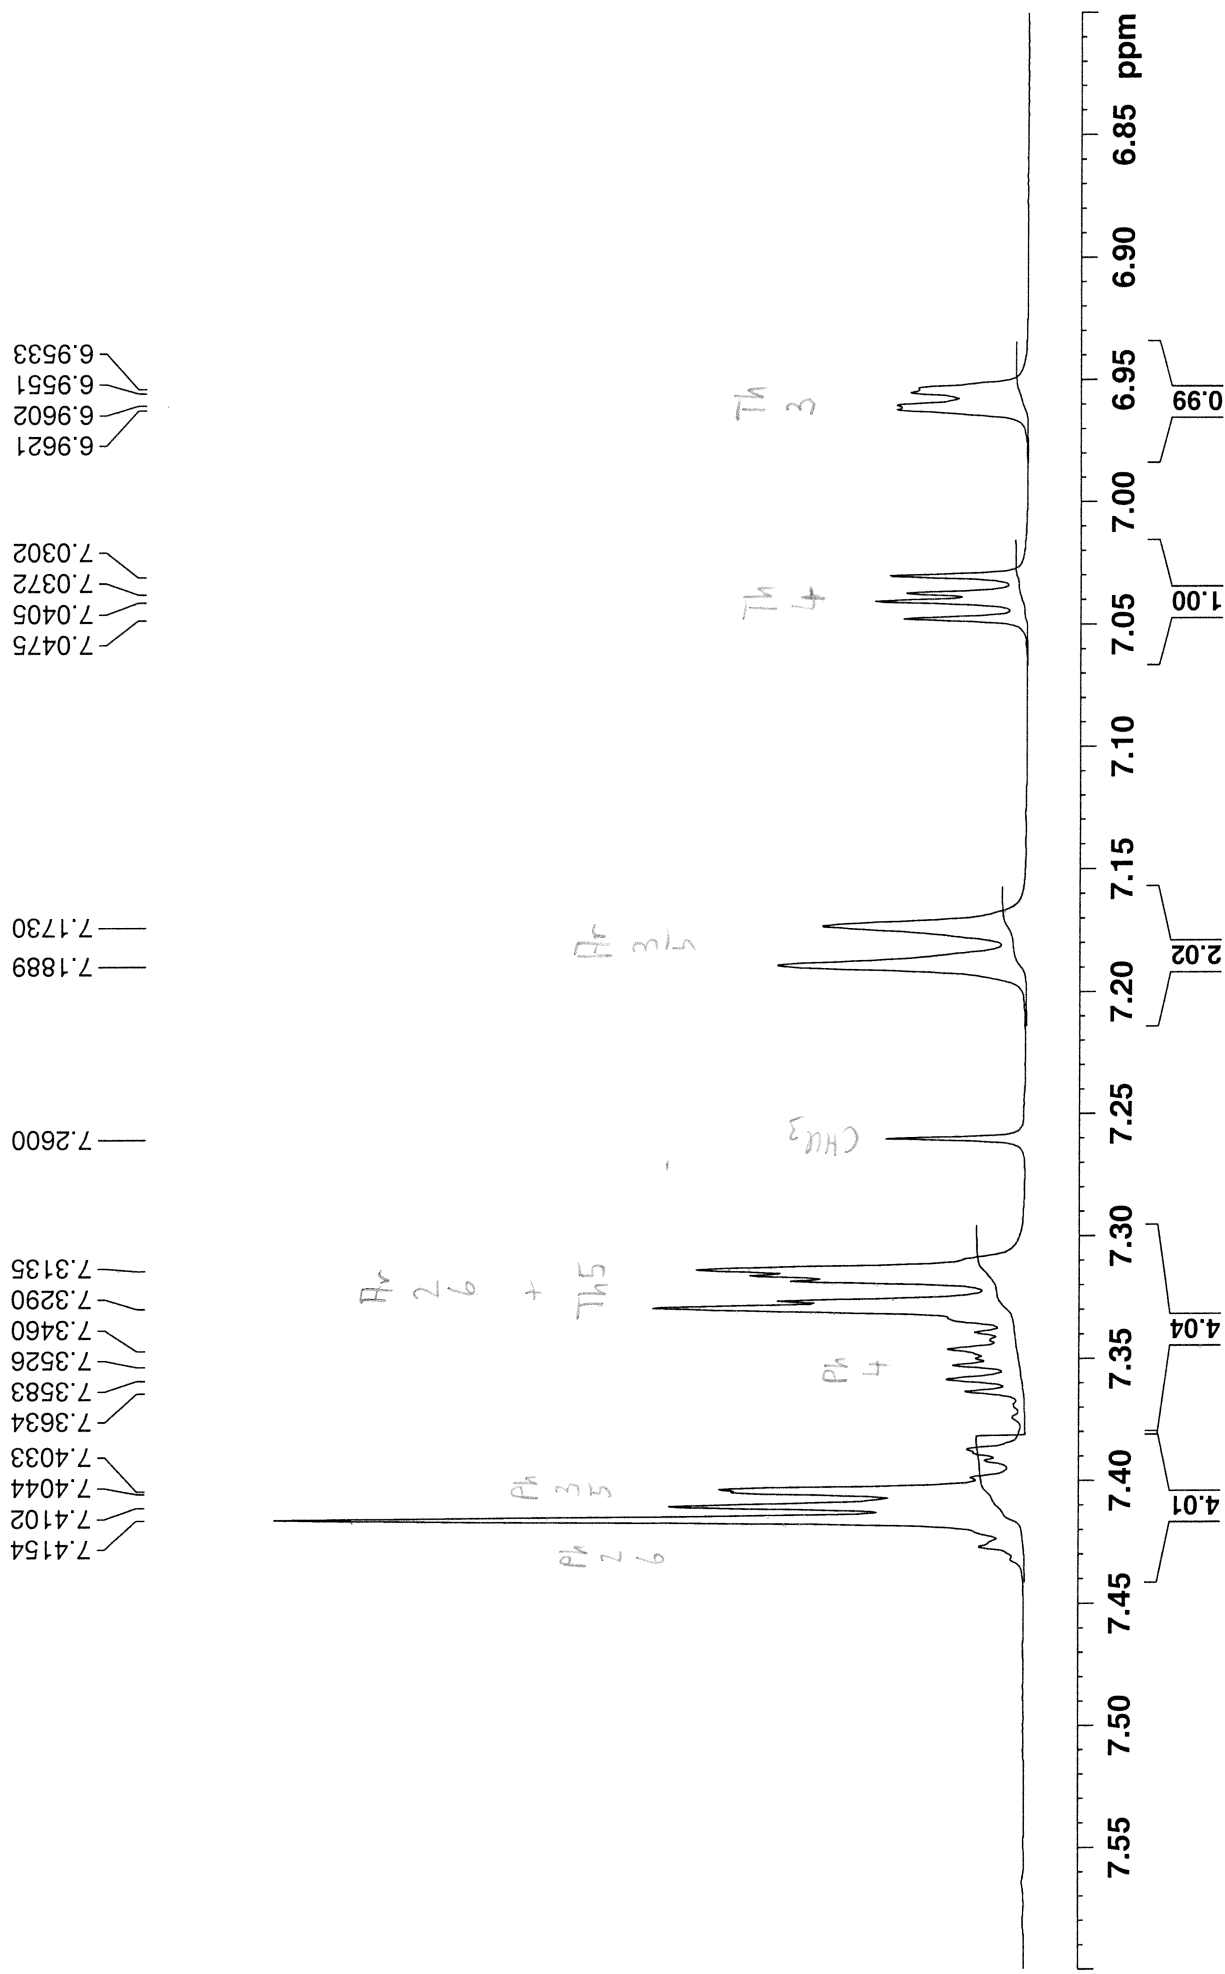

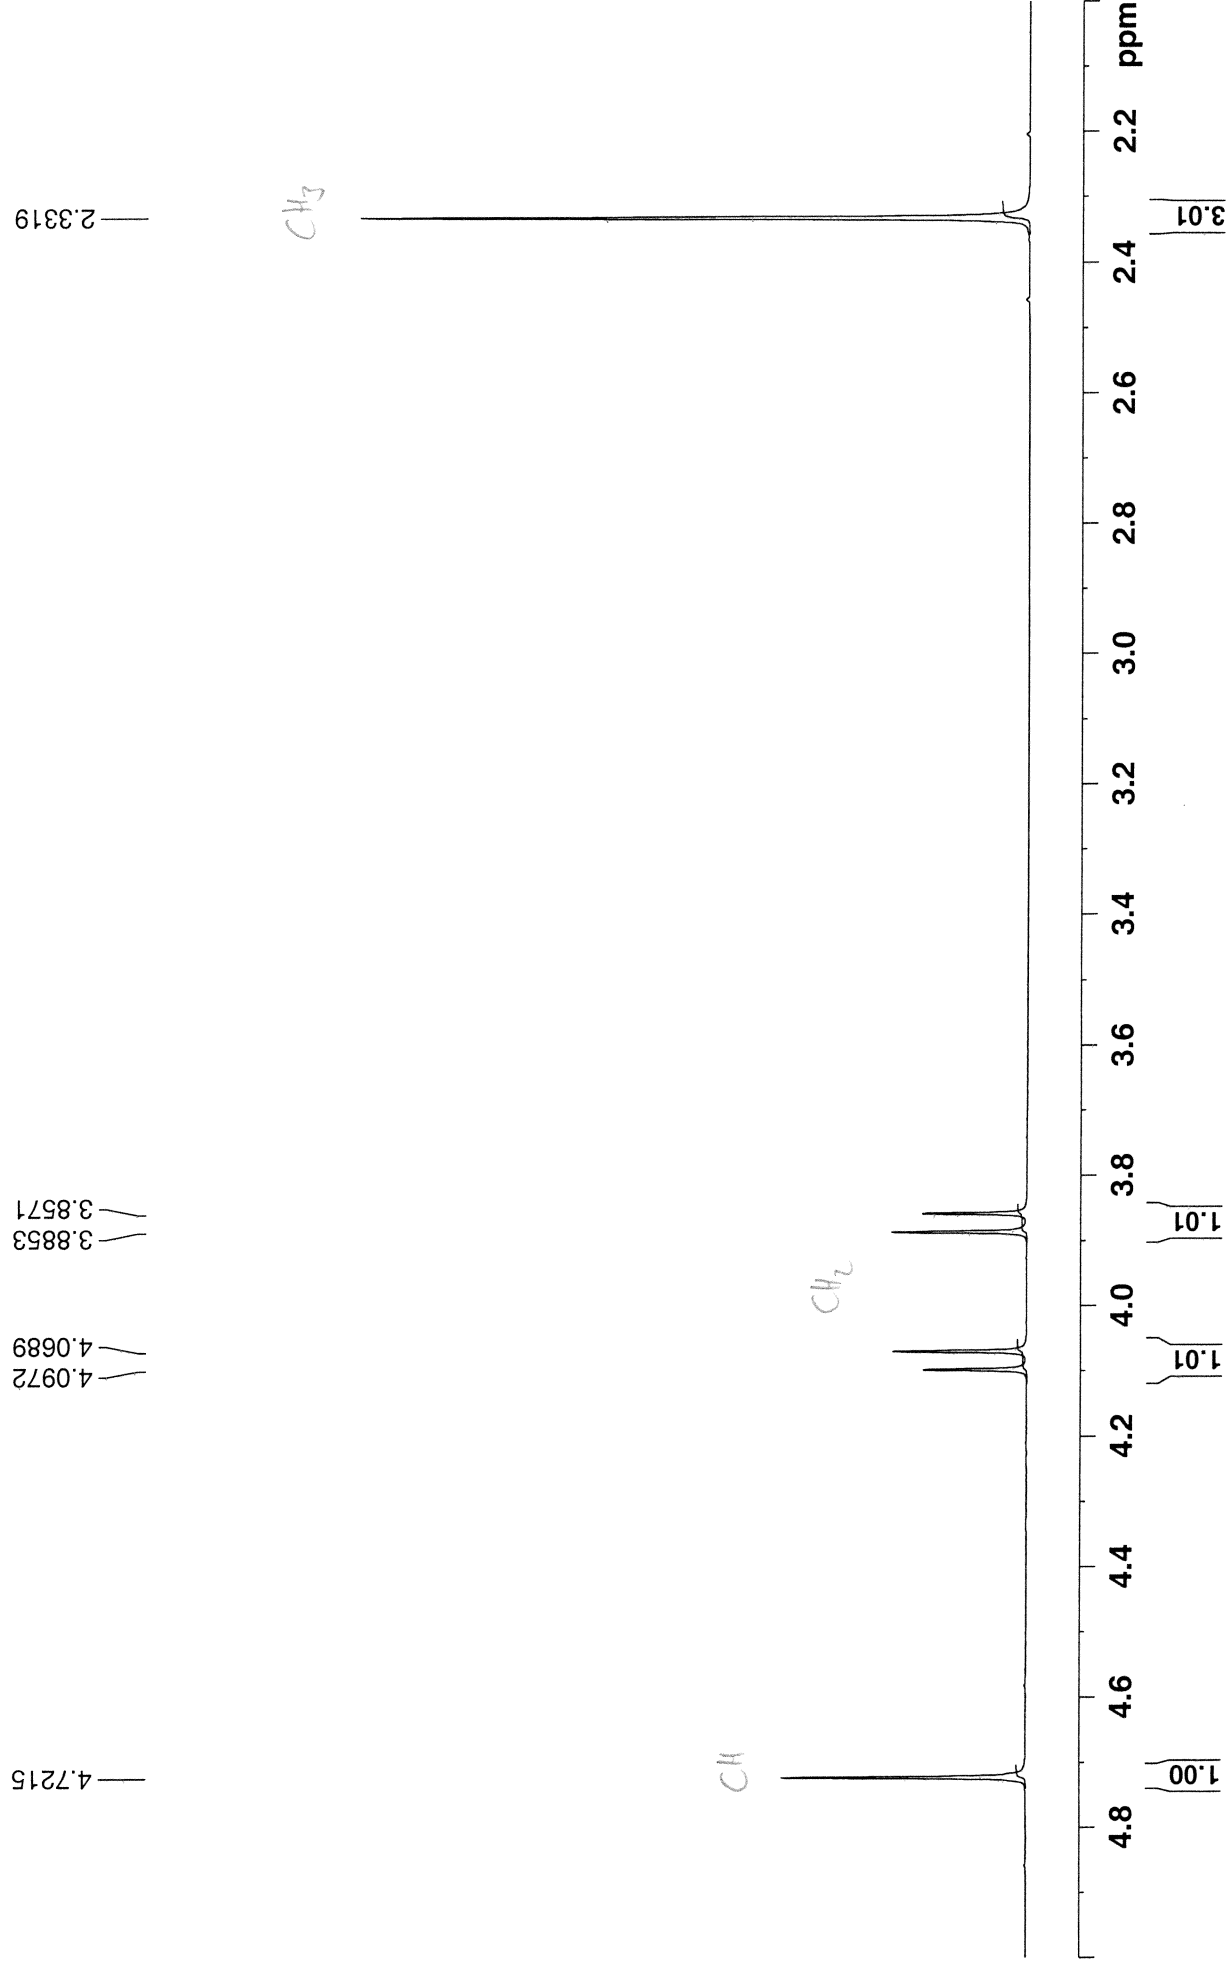



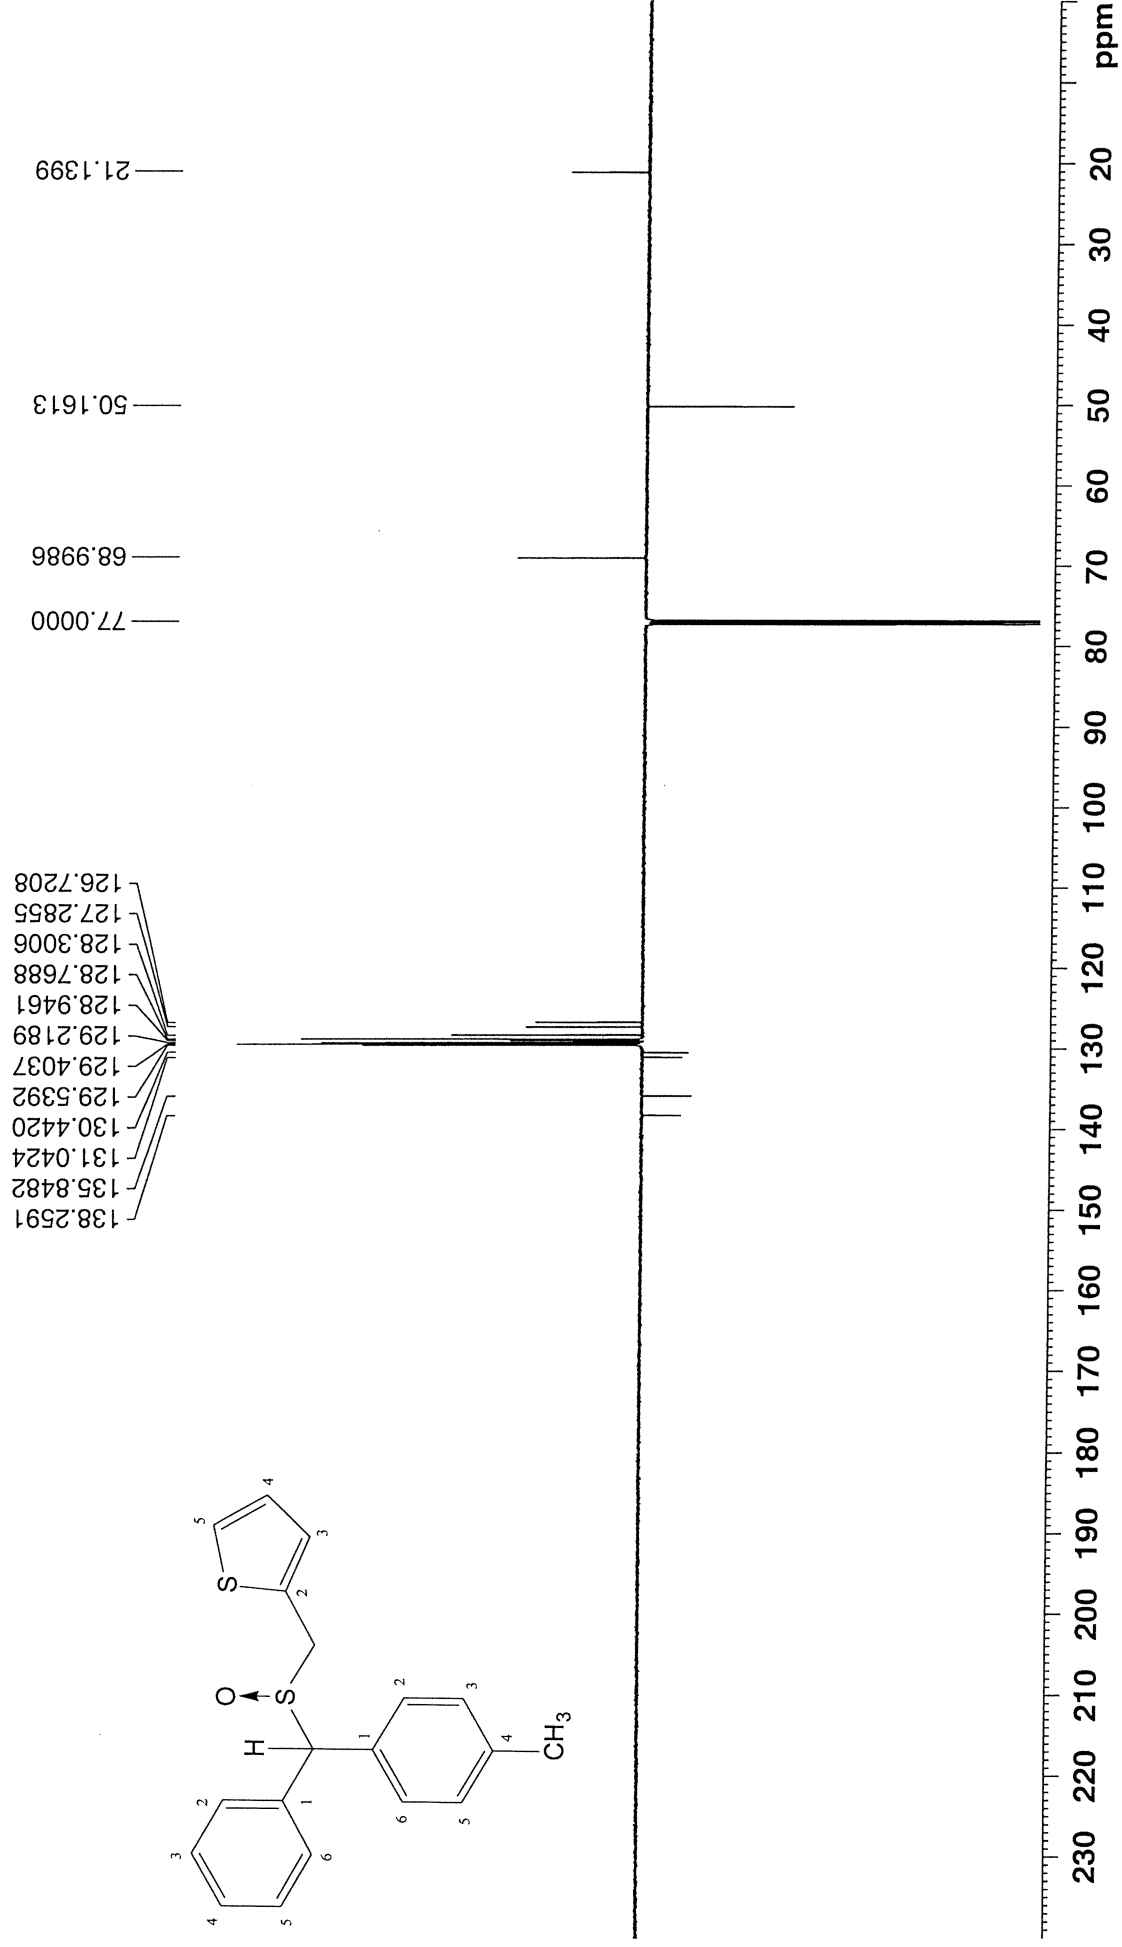

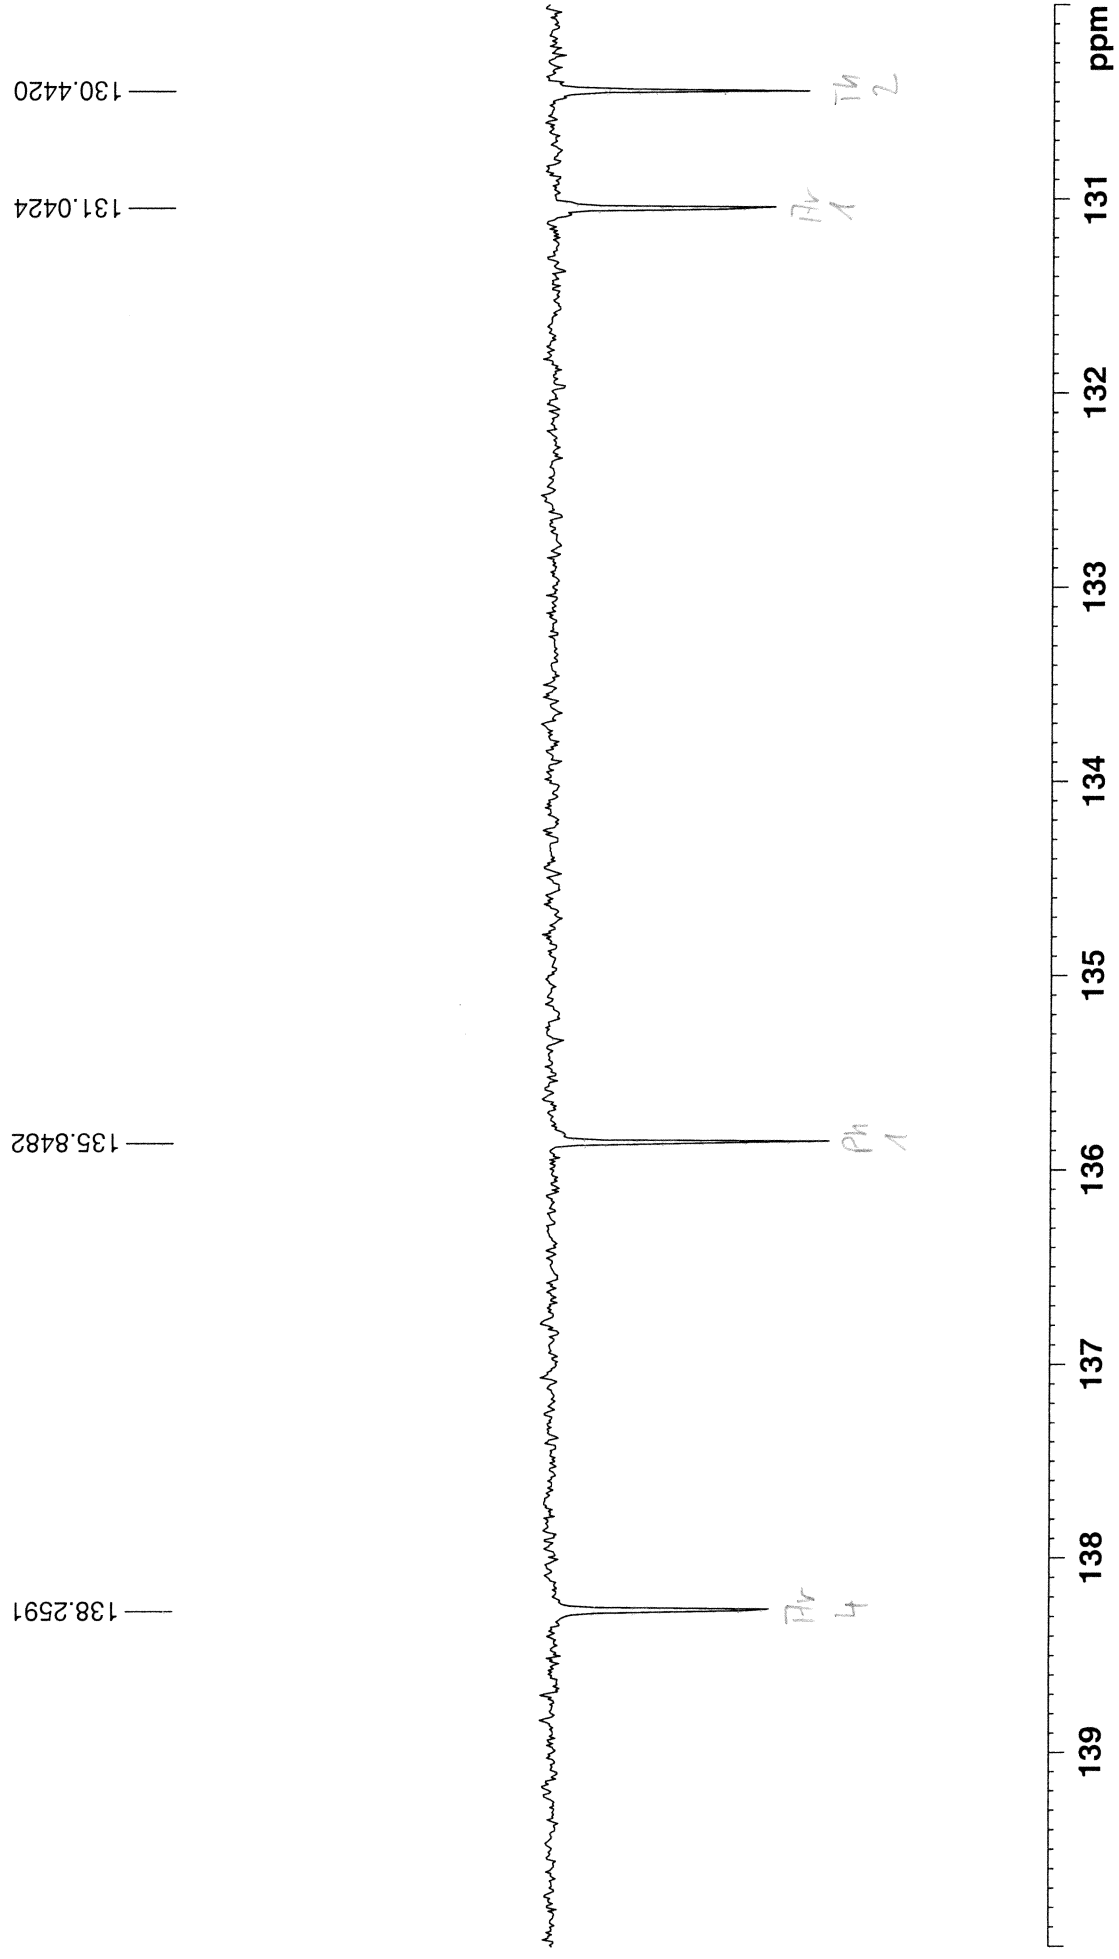

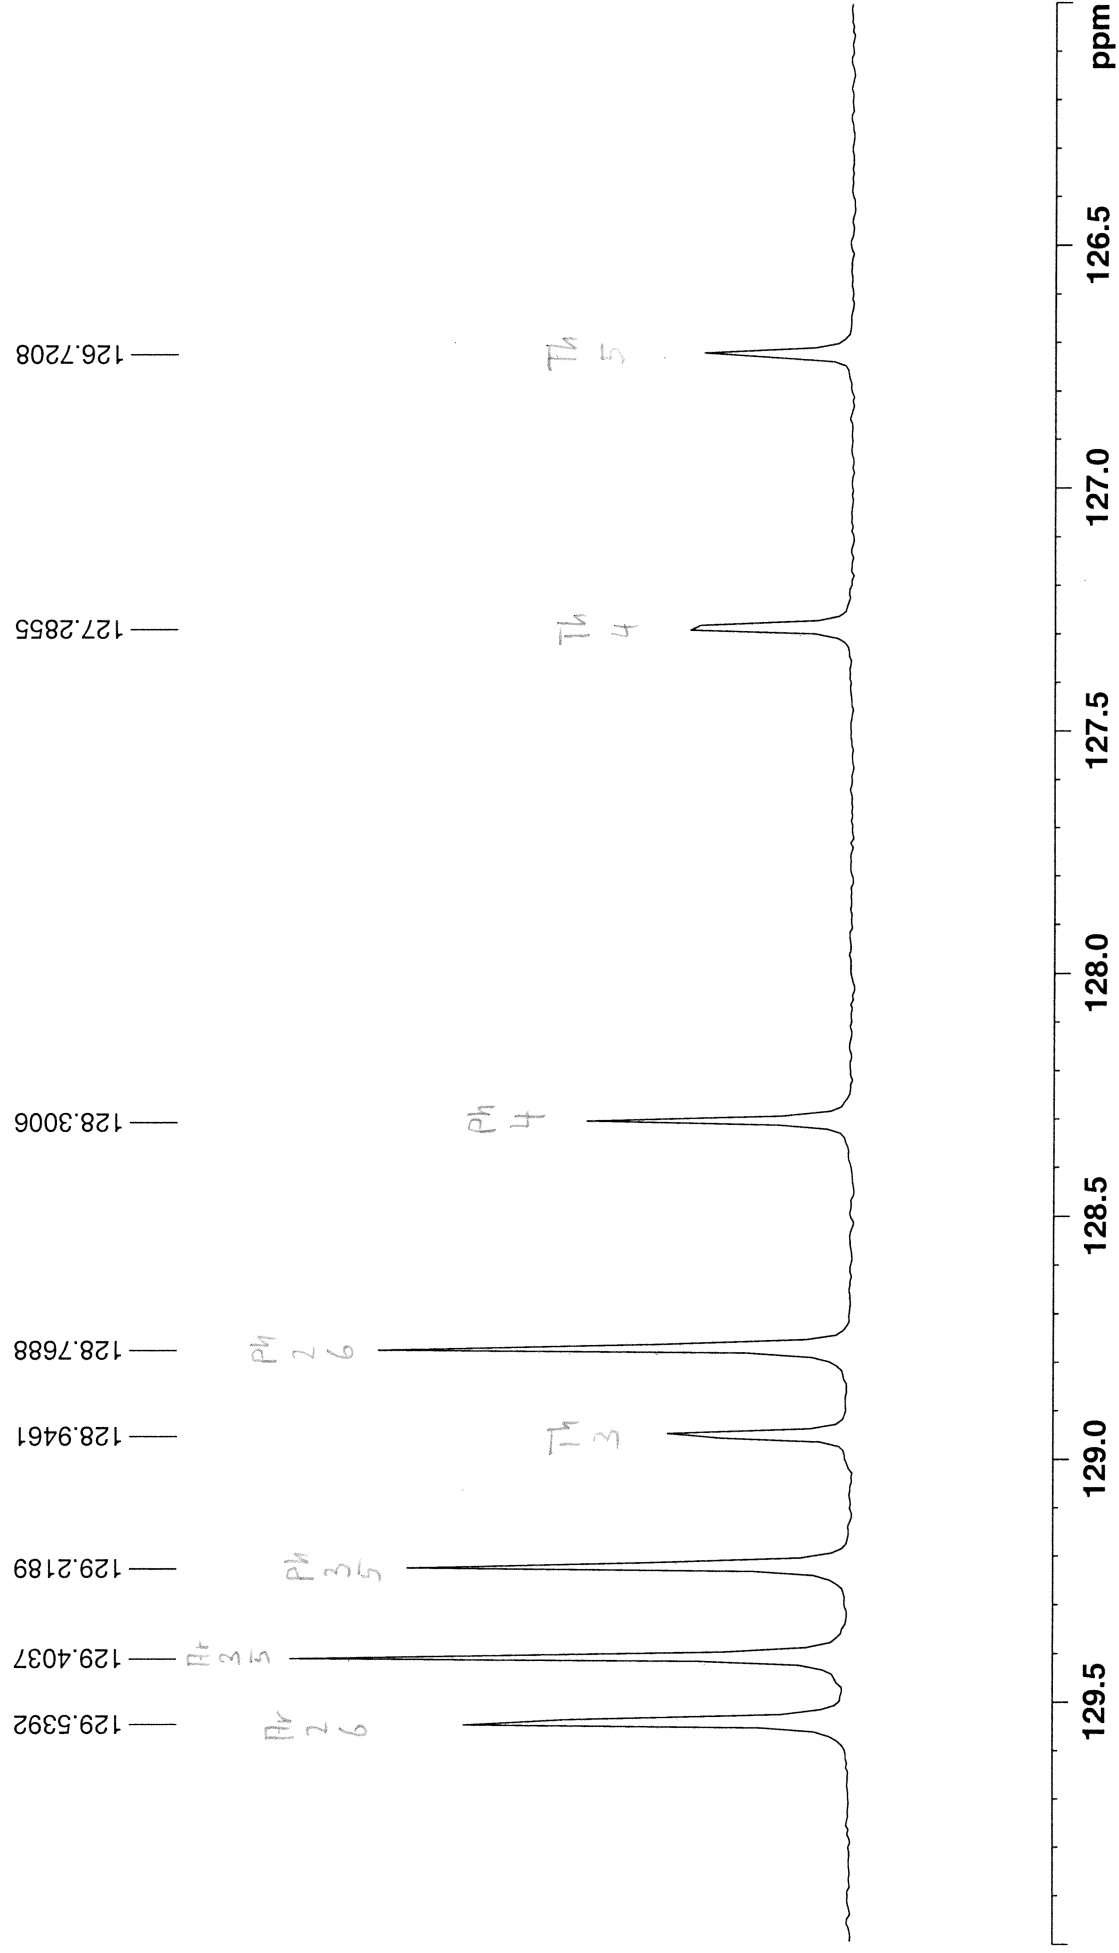

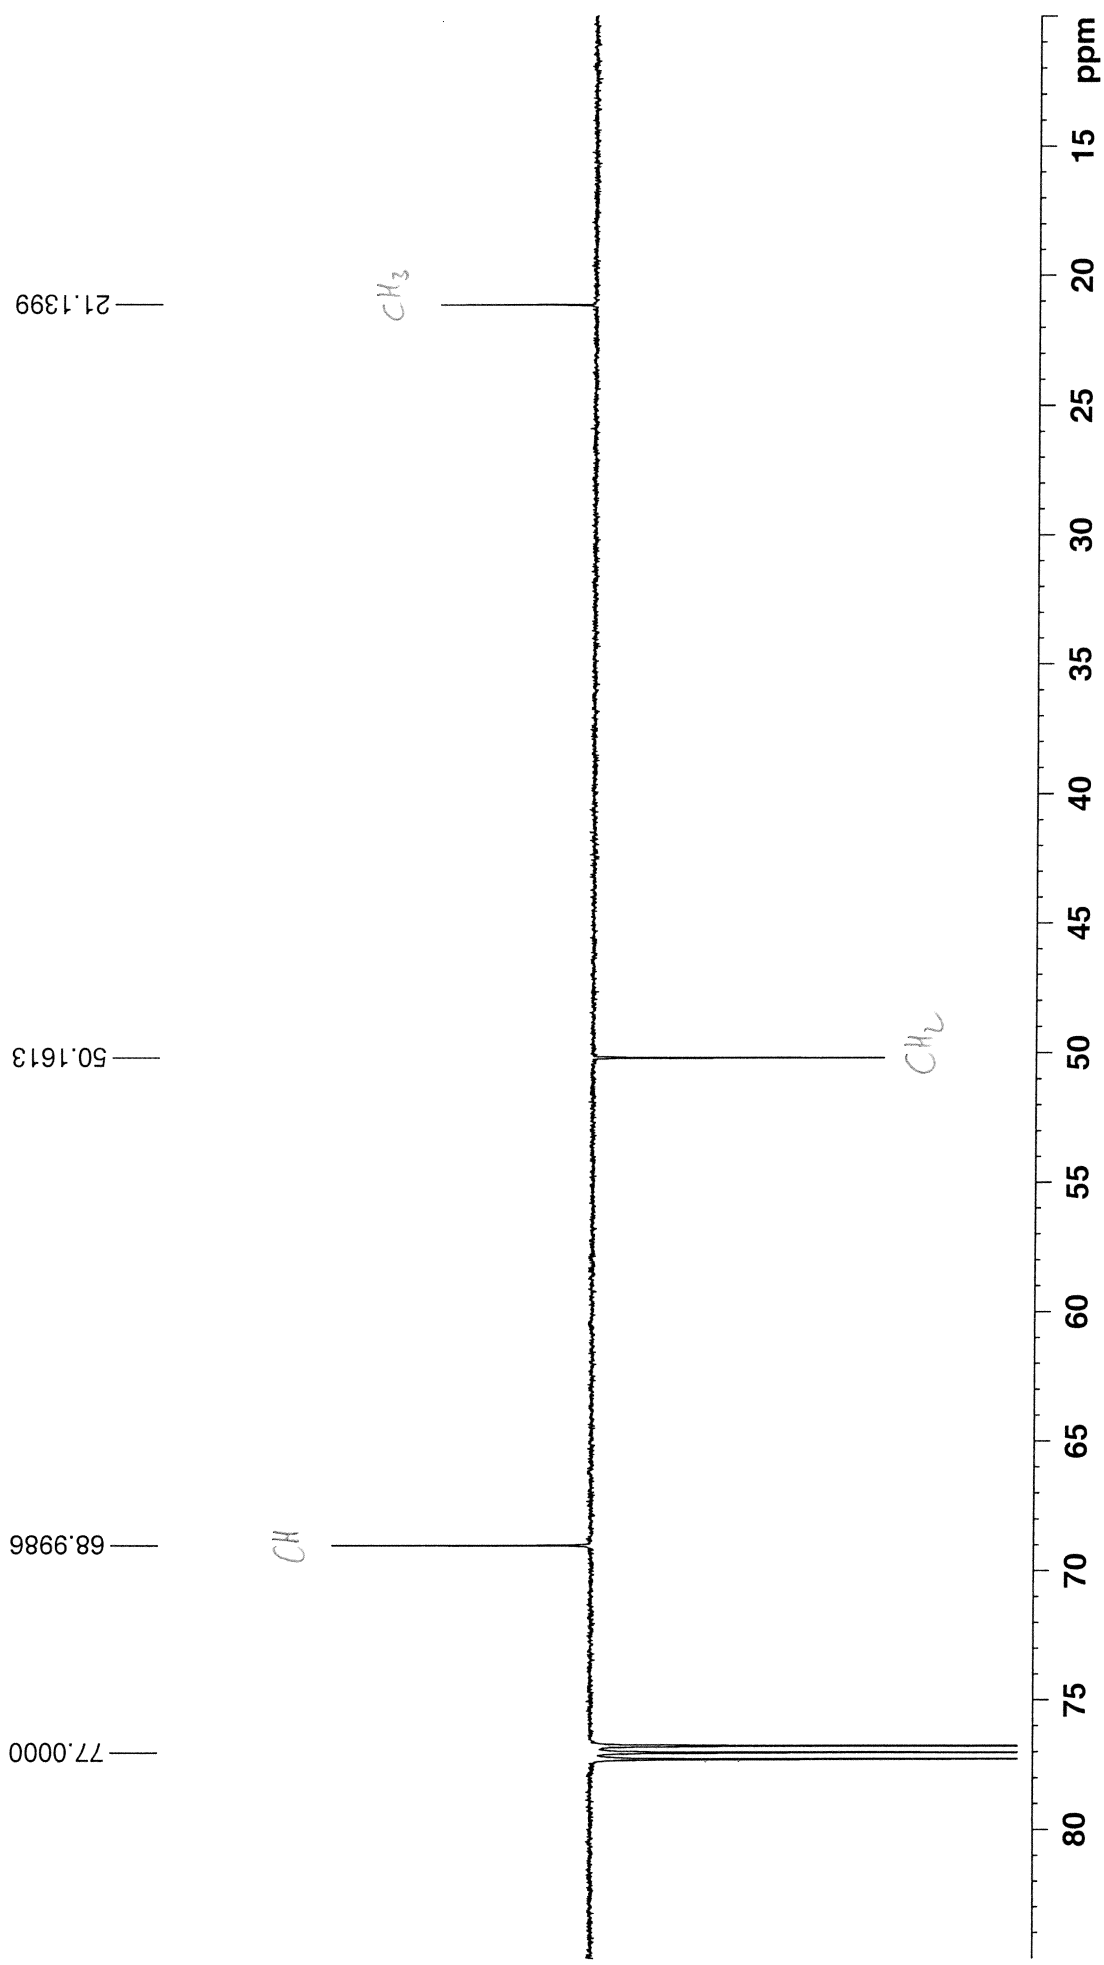

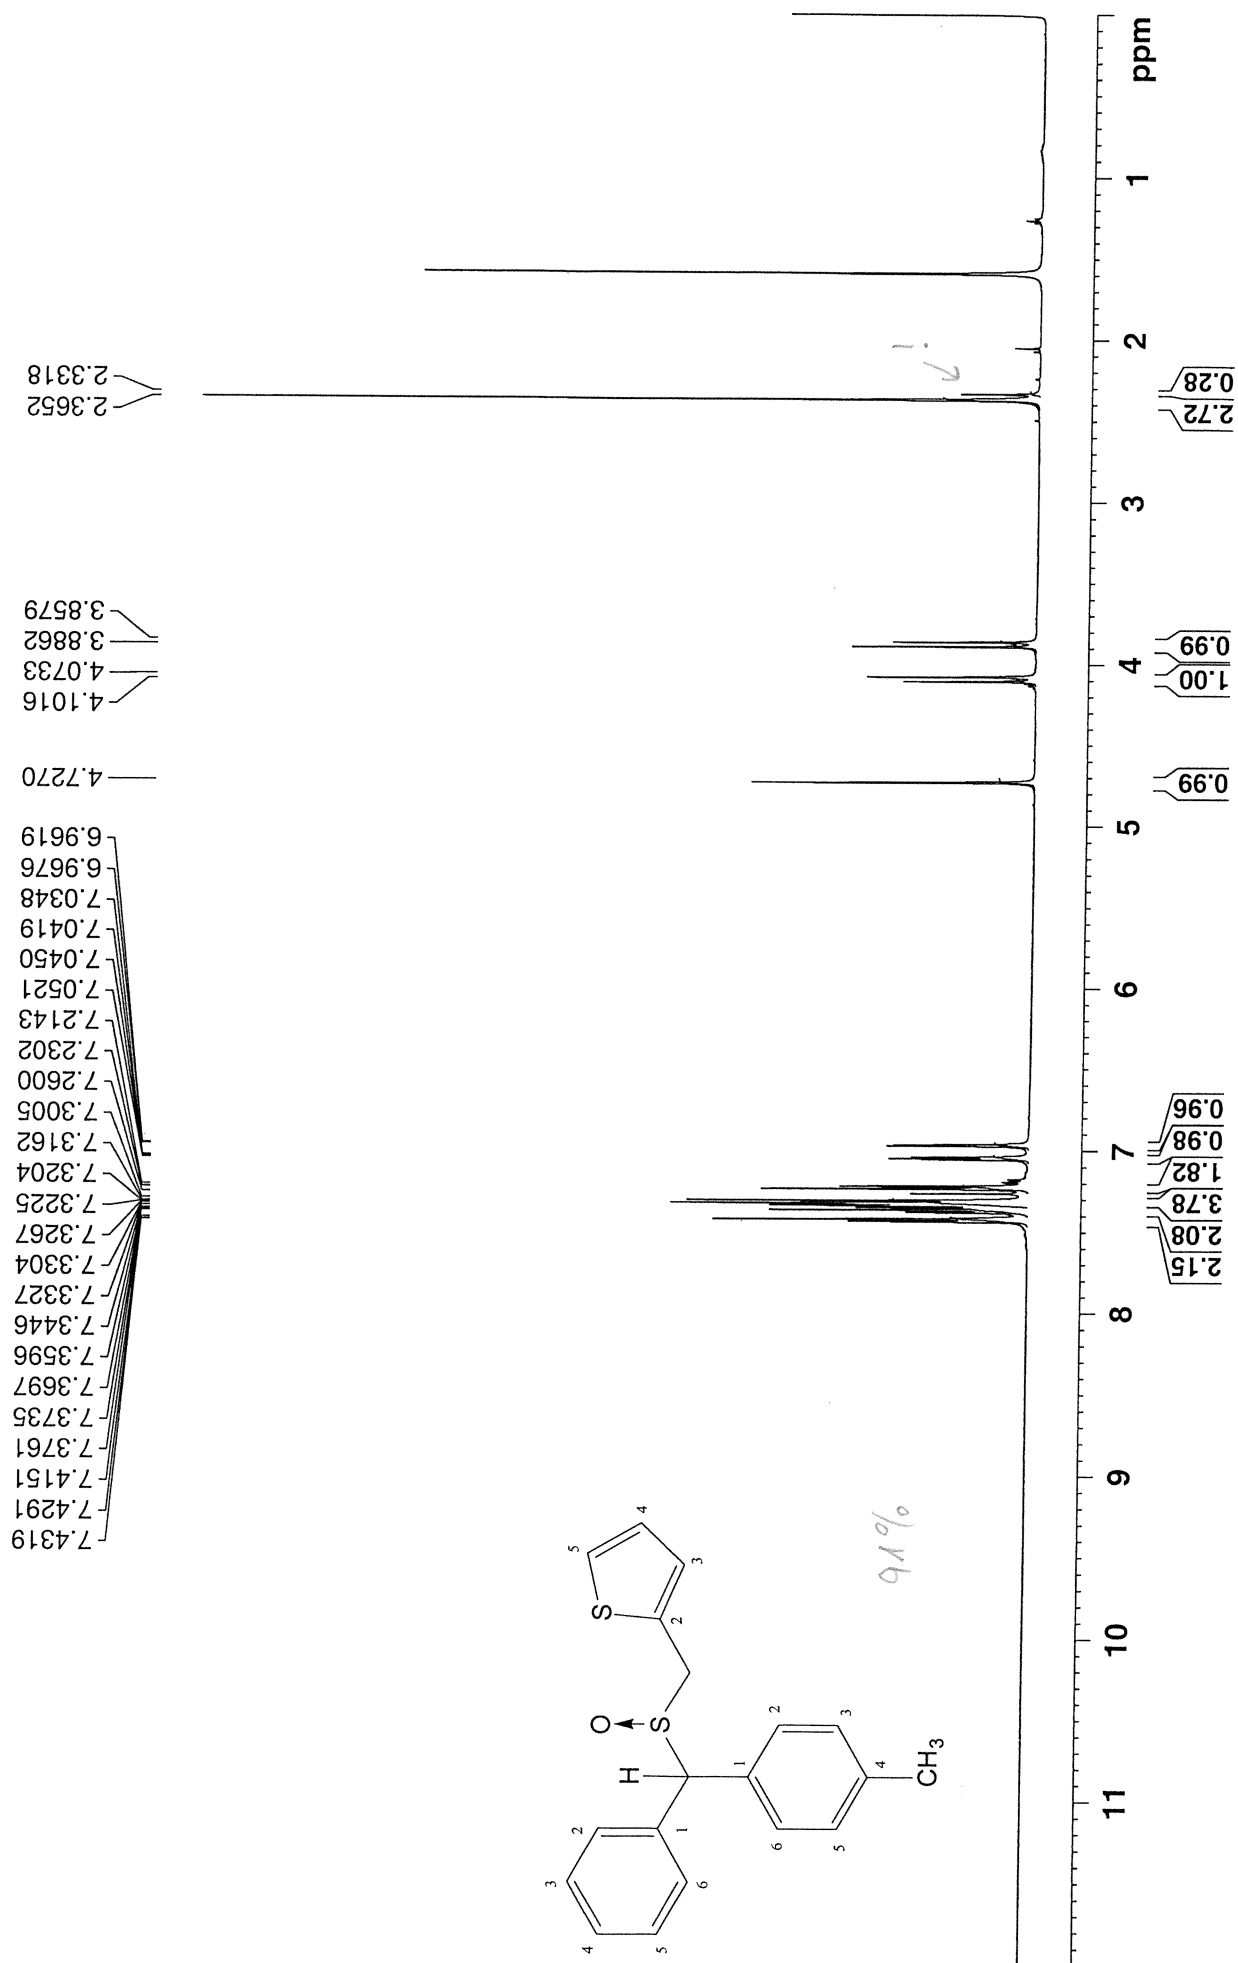

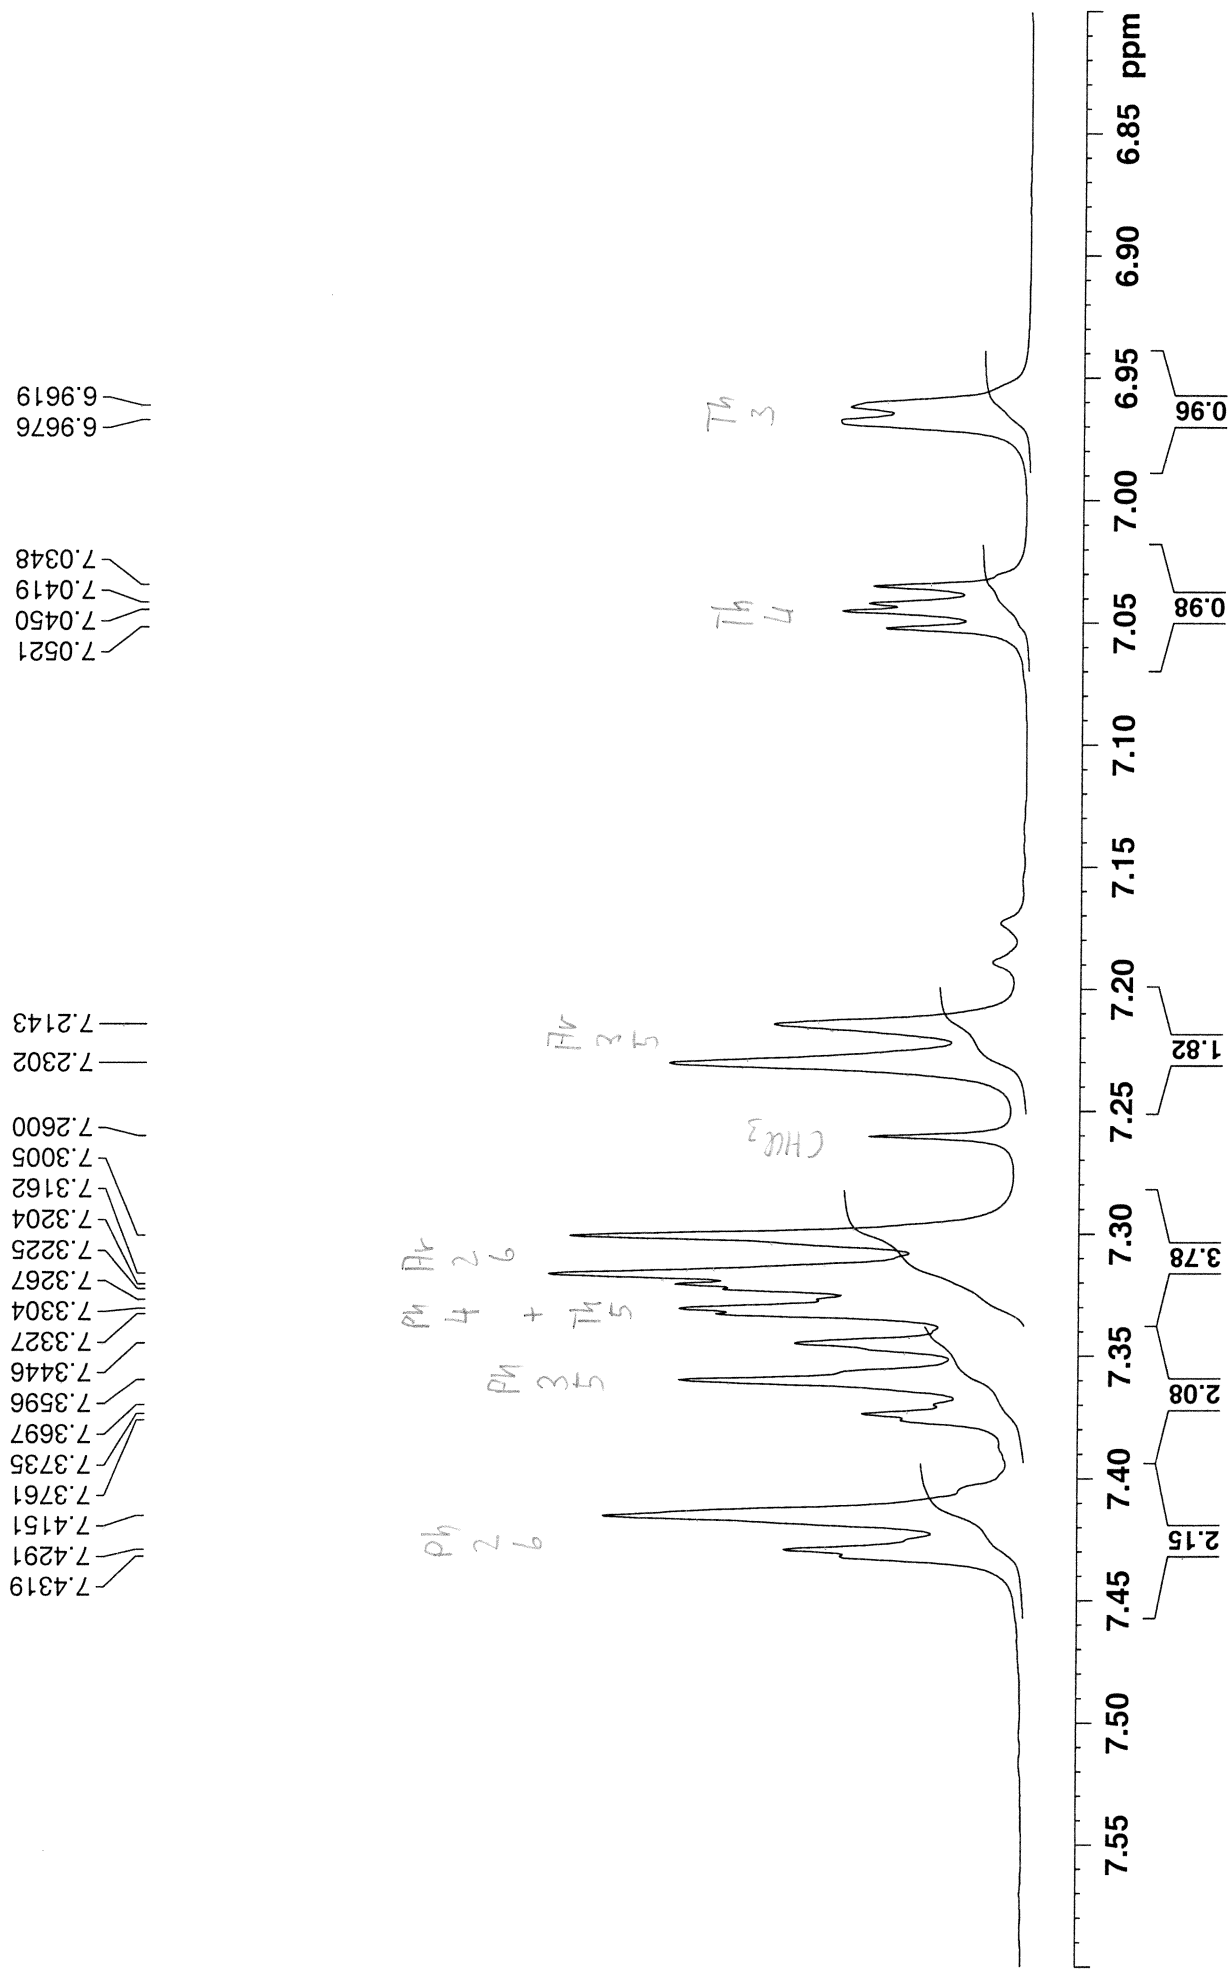

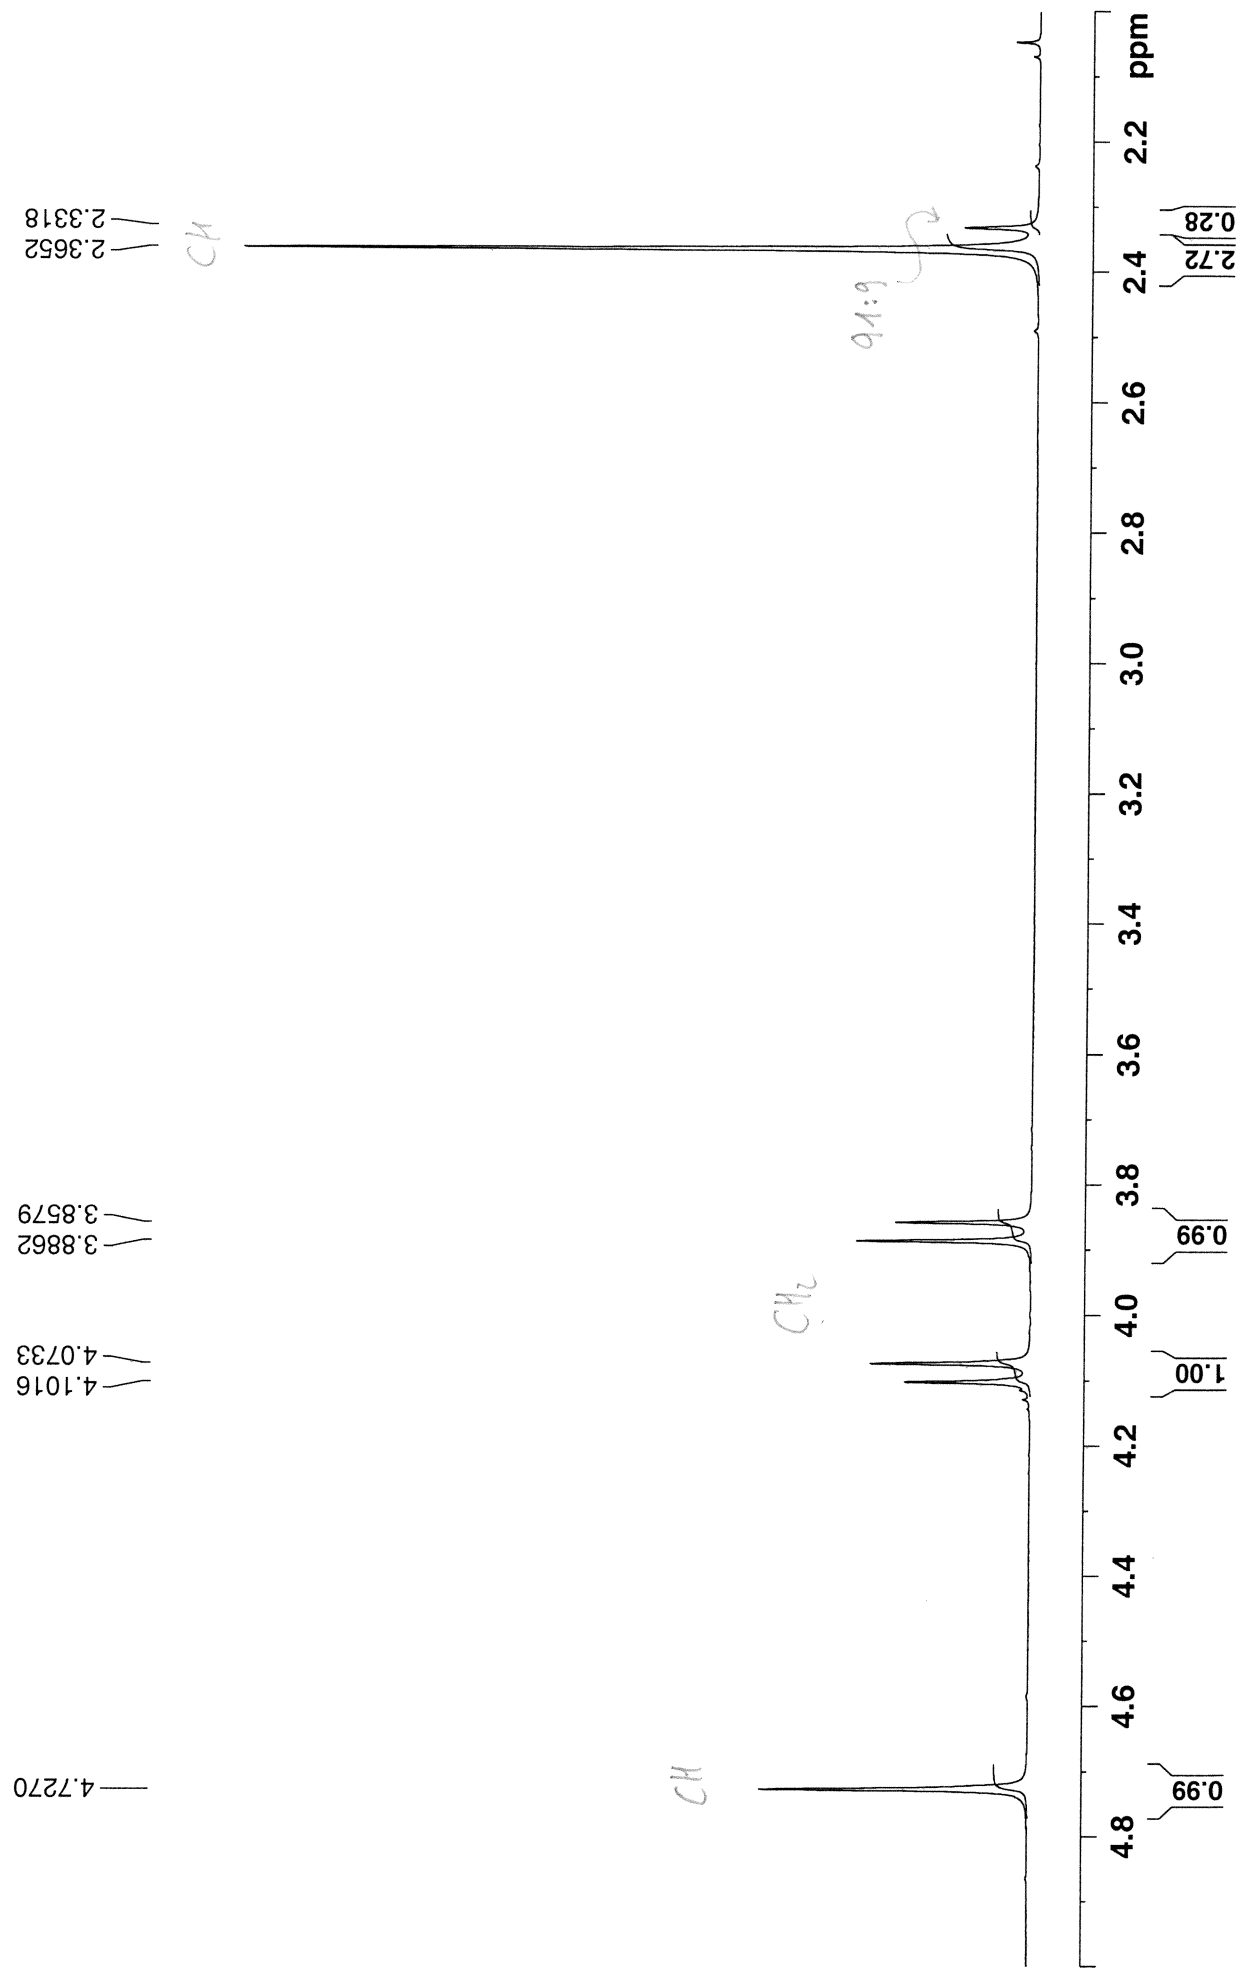

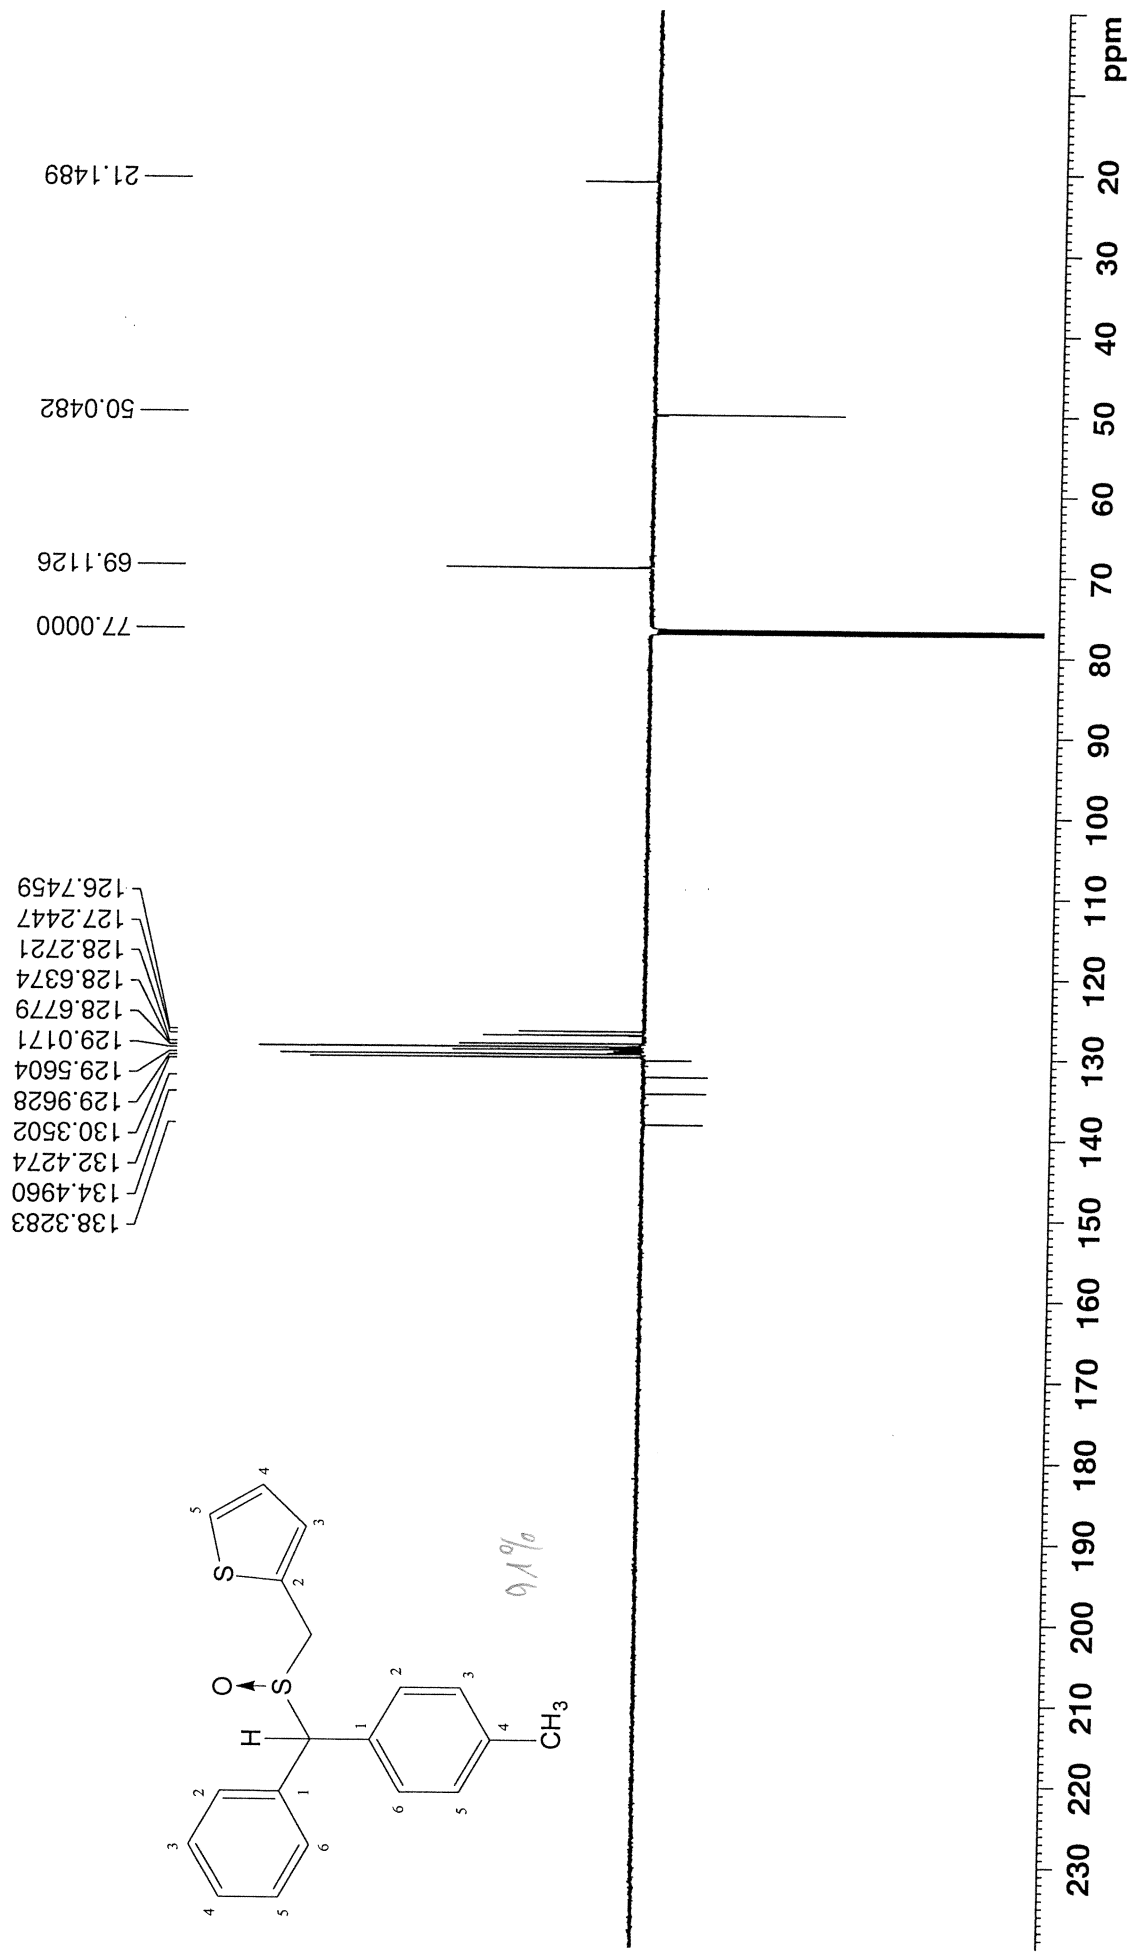



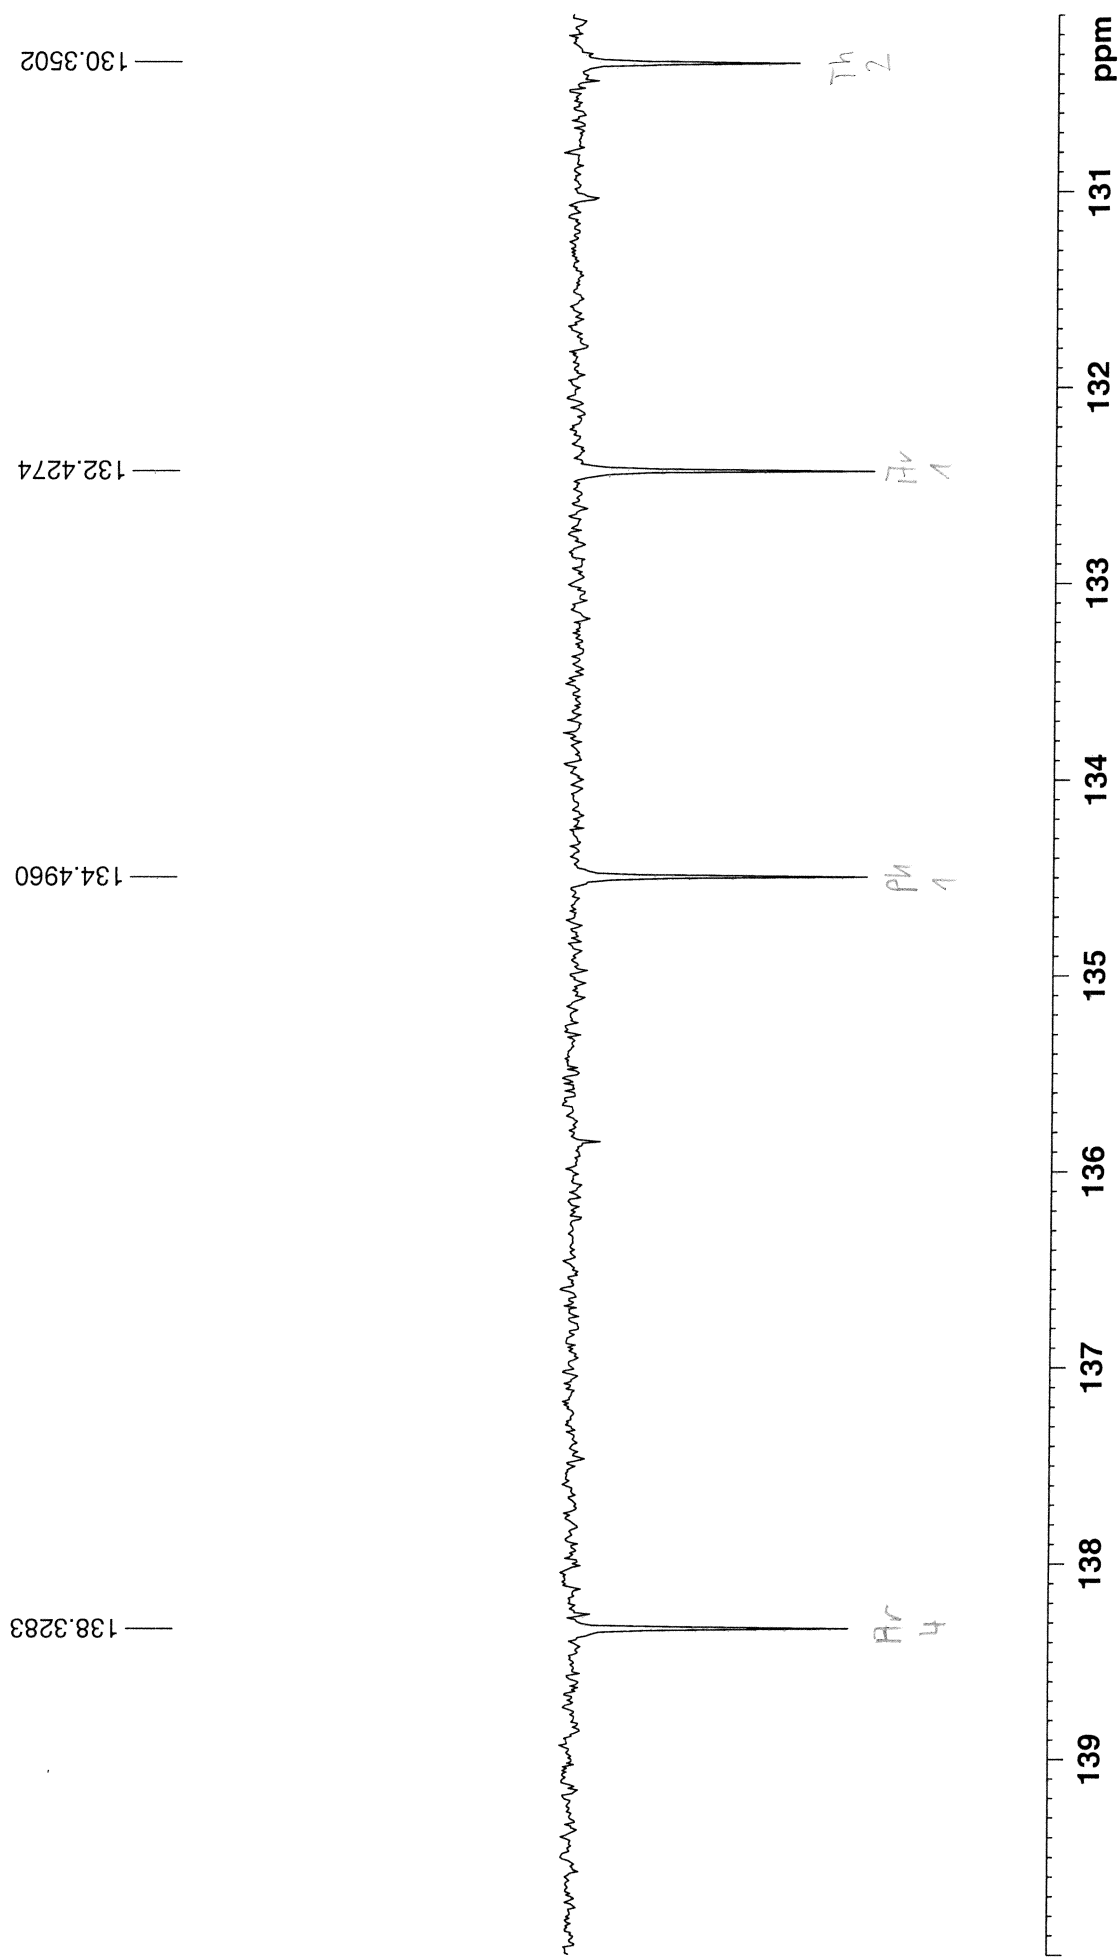

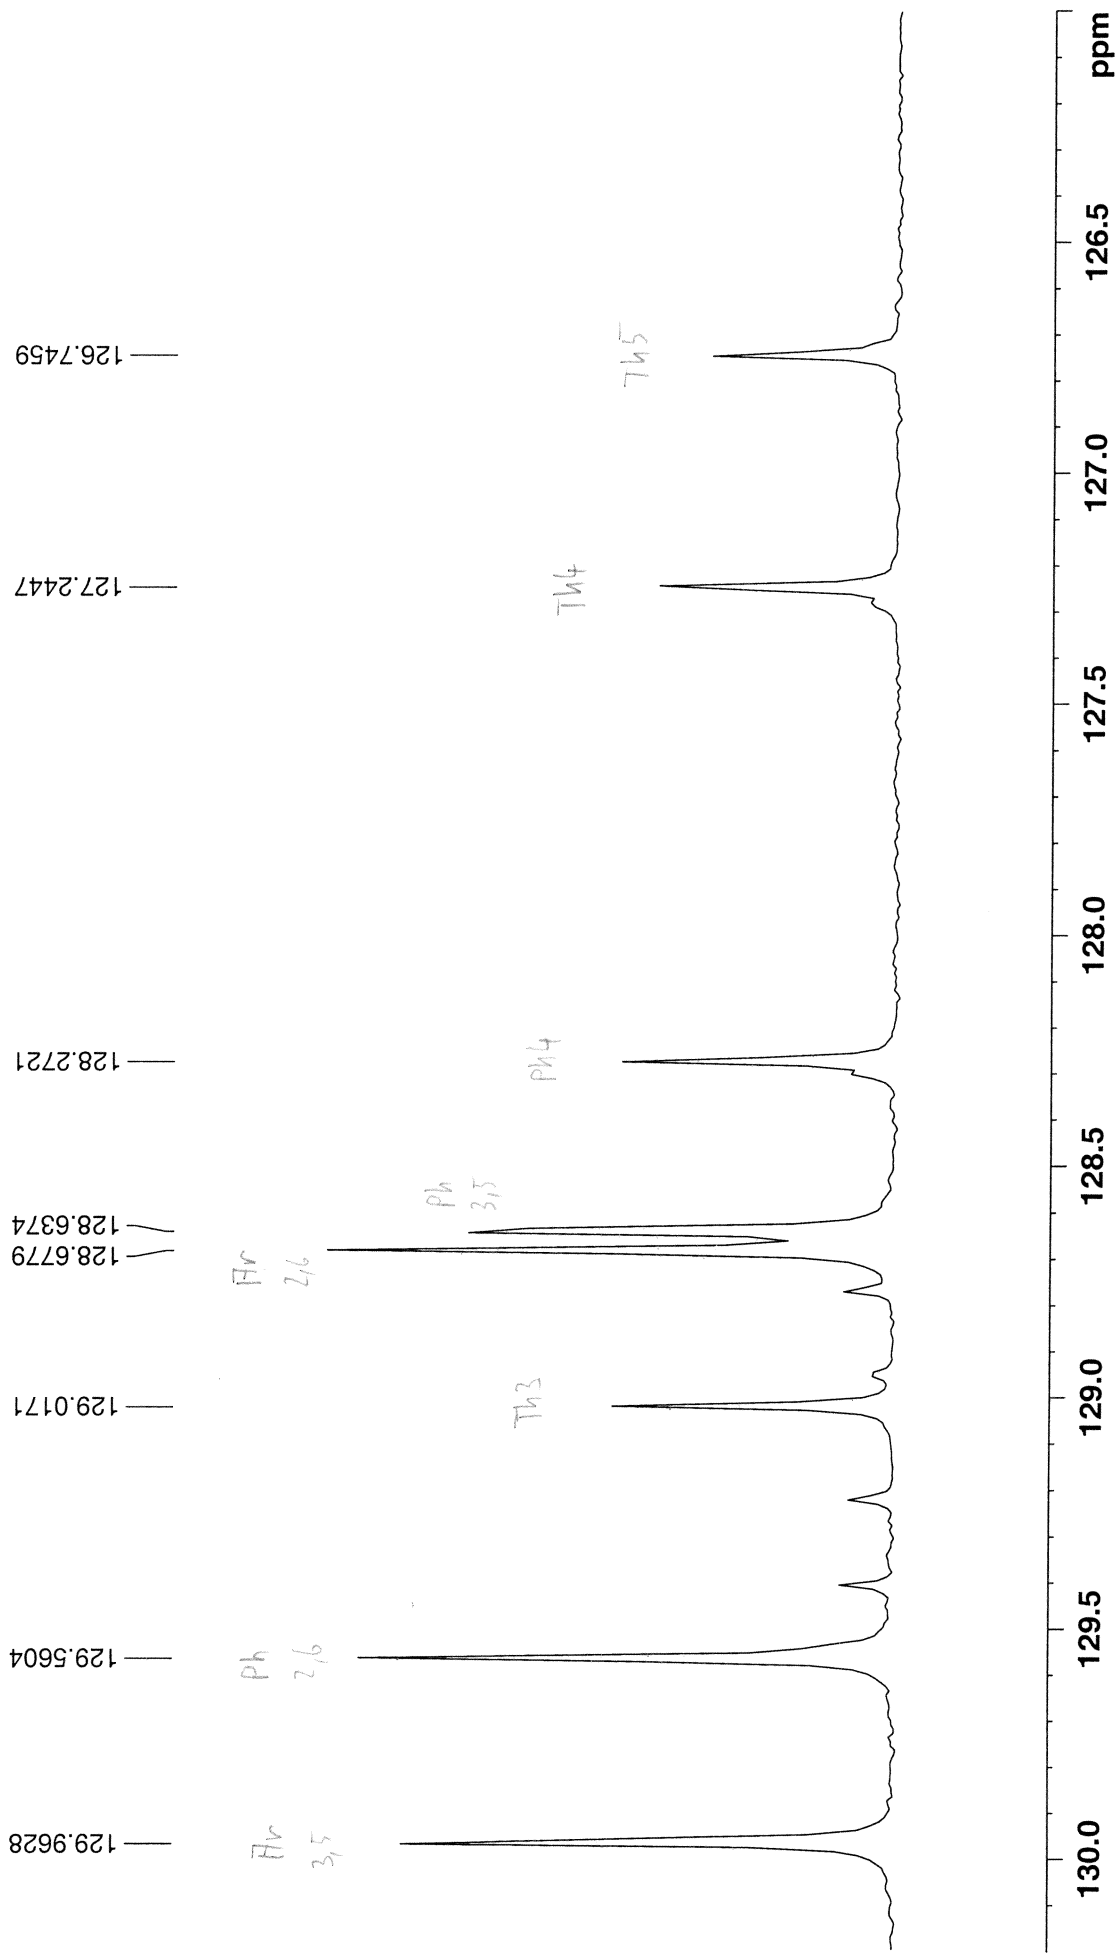

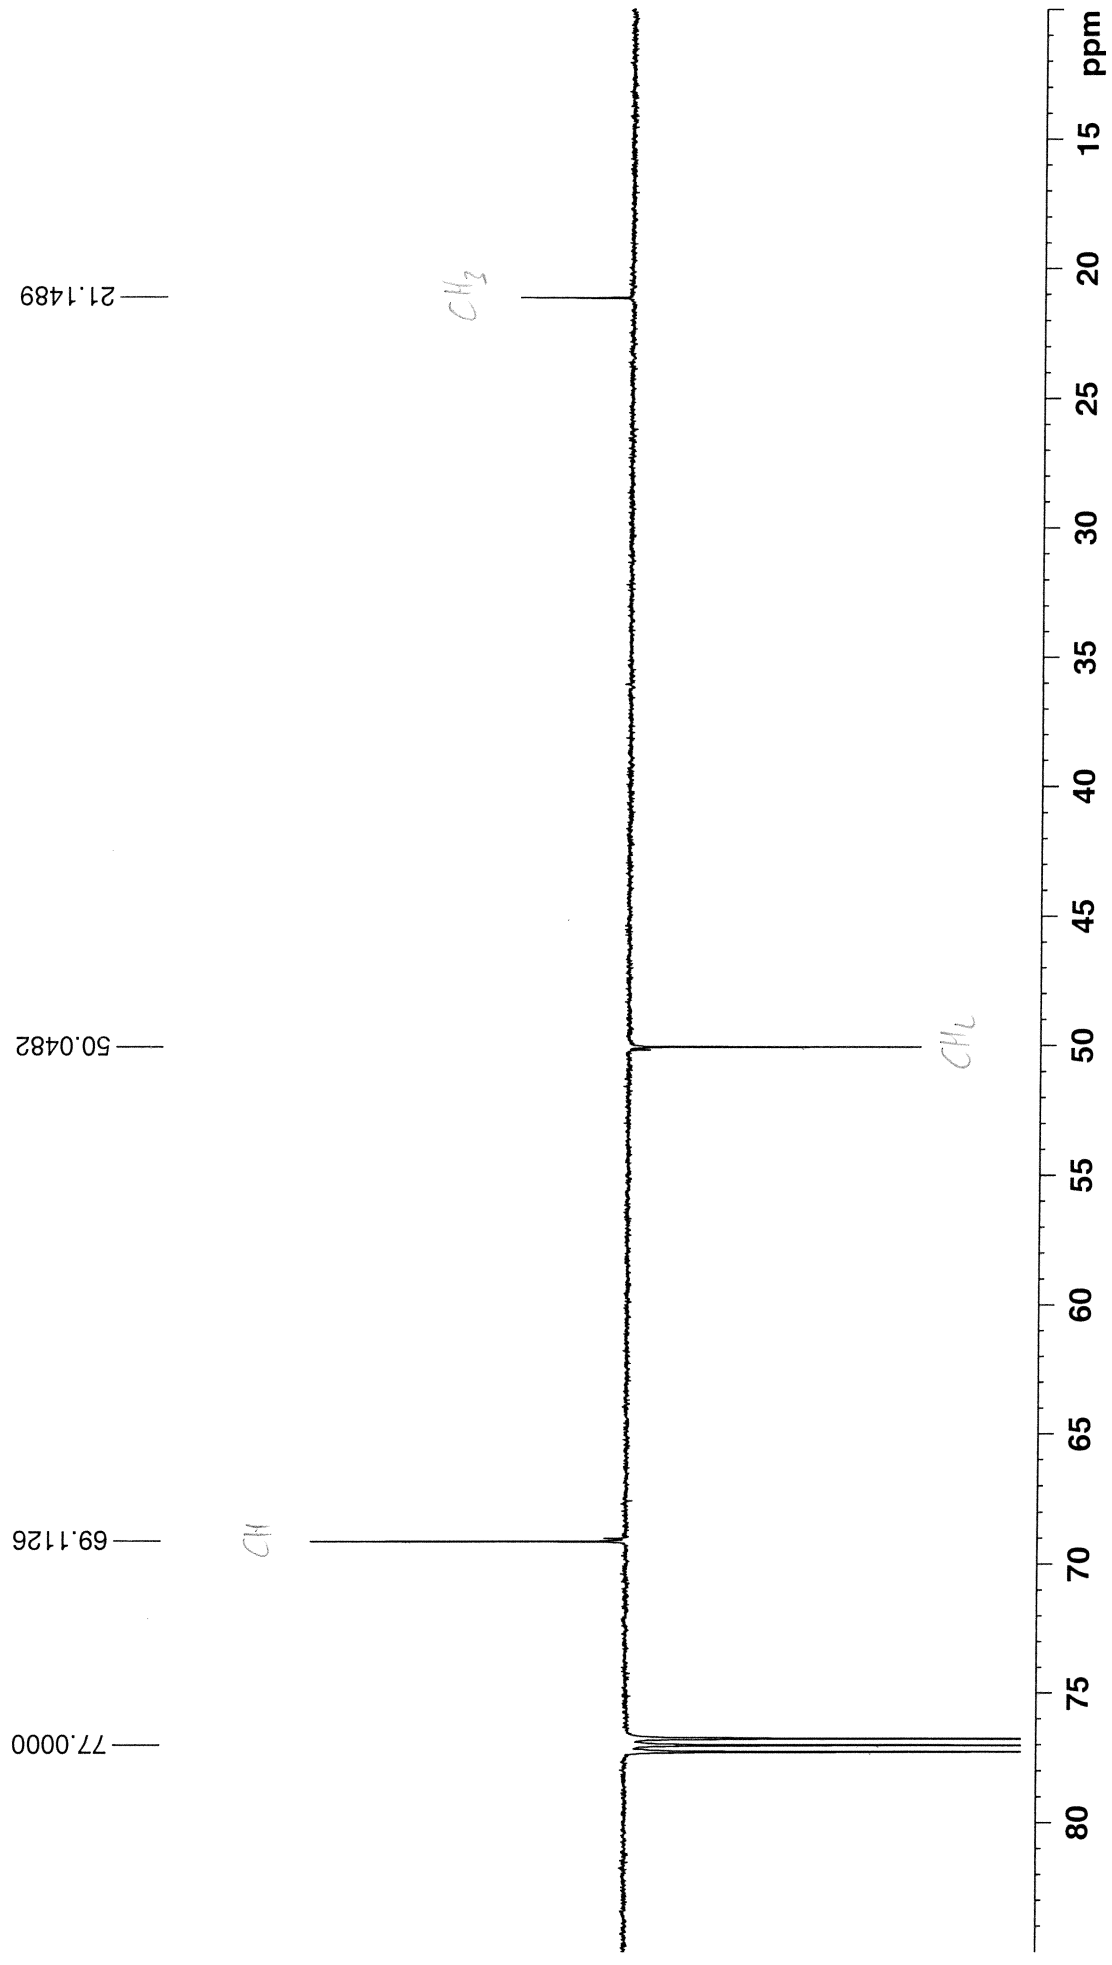

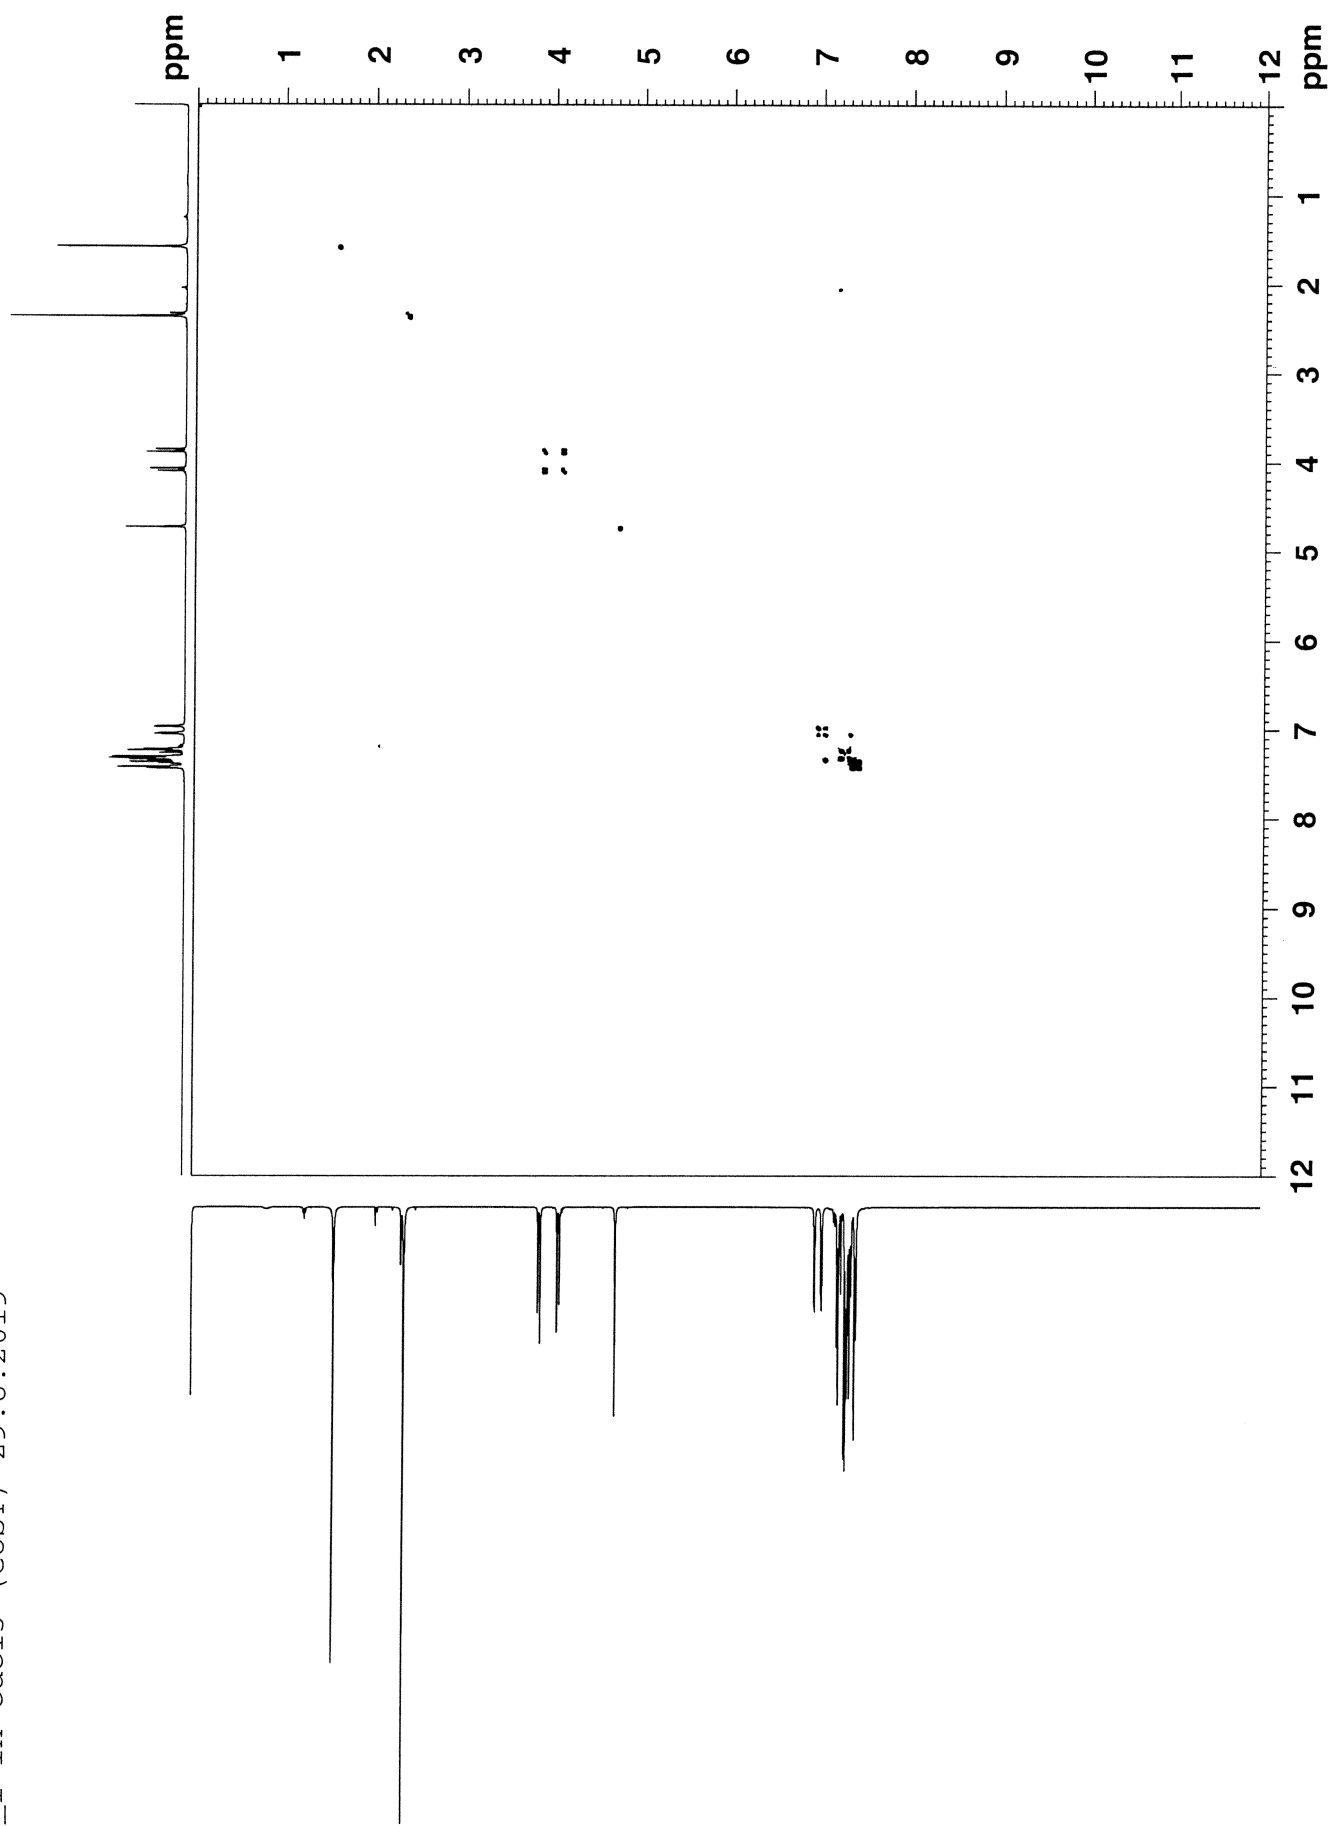

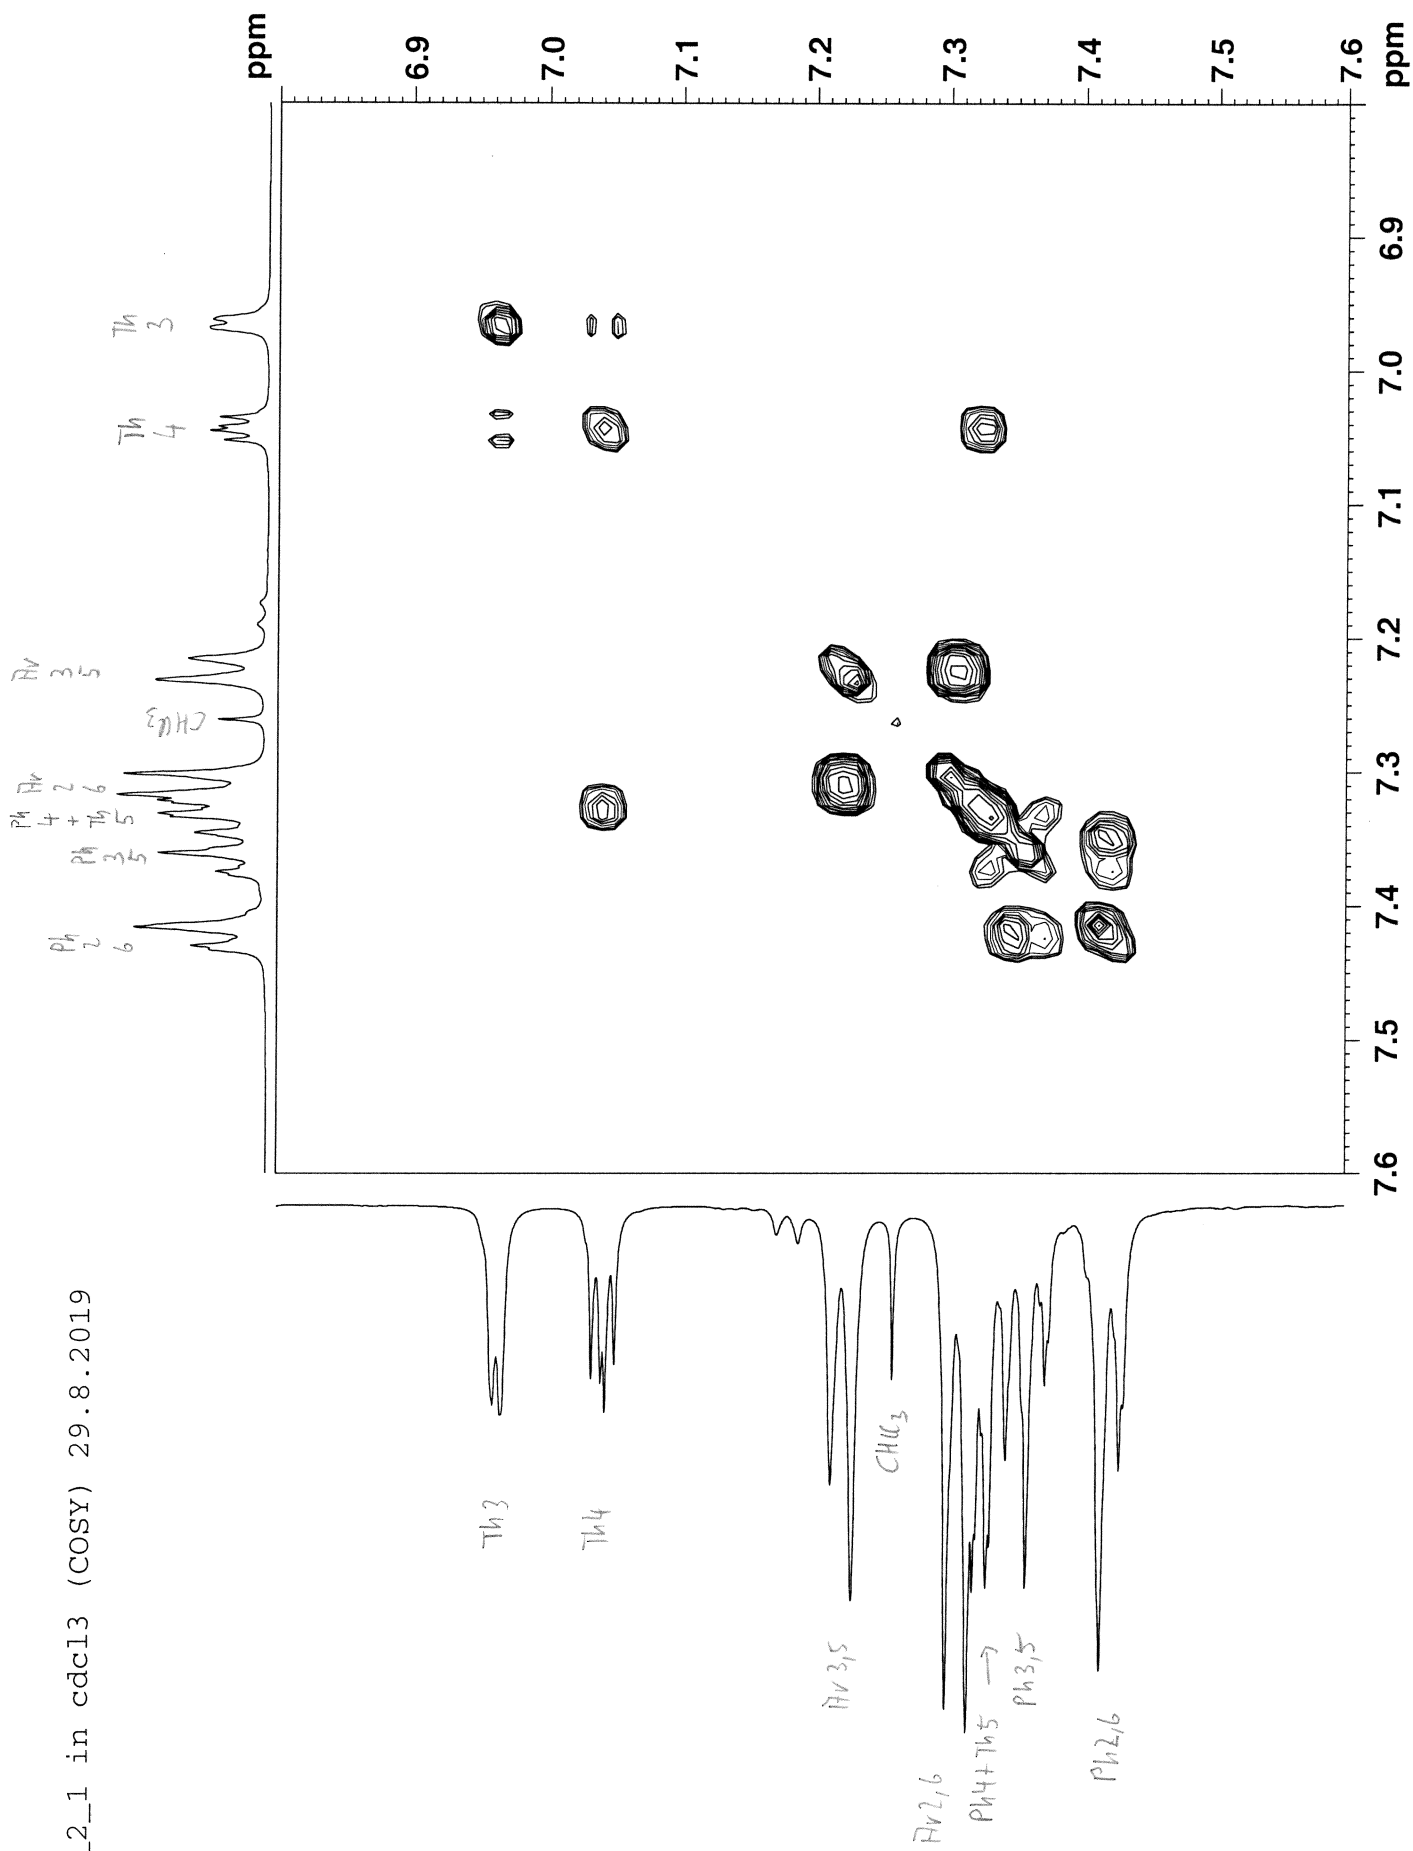

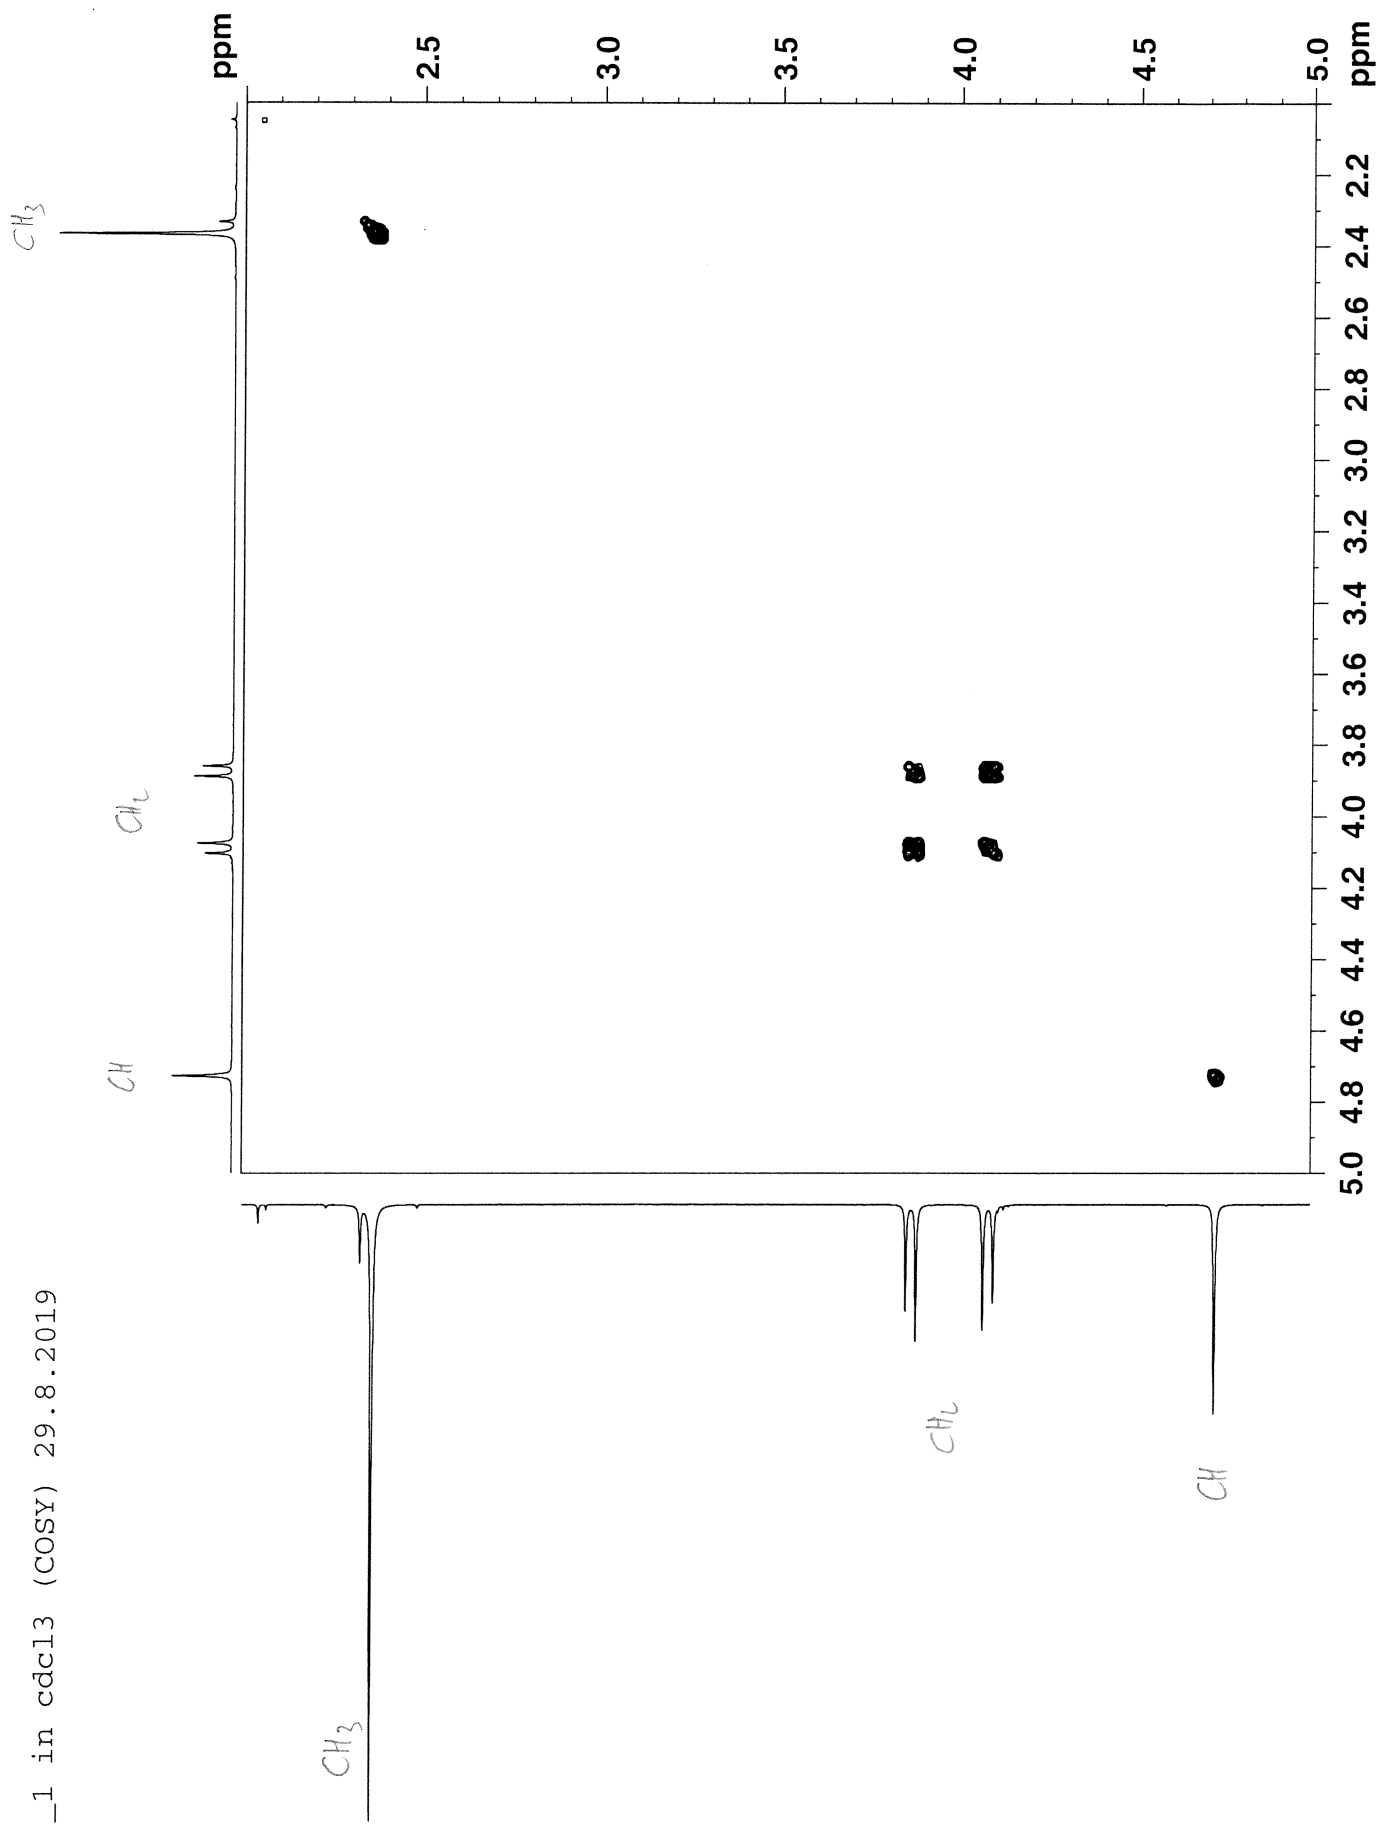

PN022\_2\_1 in cdcl3 (HSQC) 29.8.2019

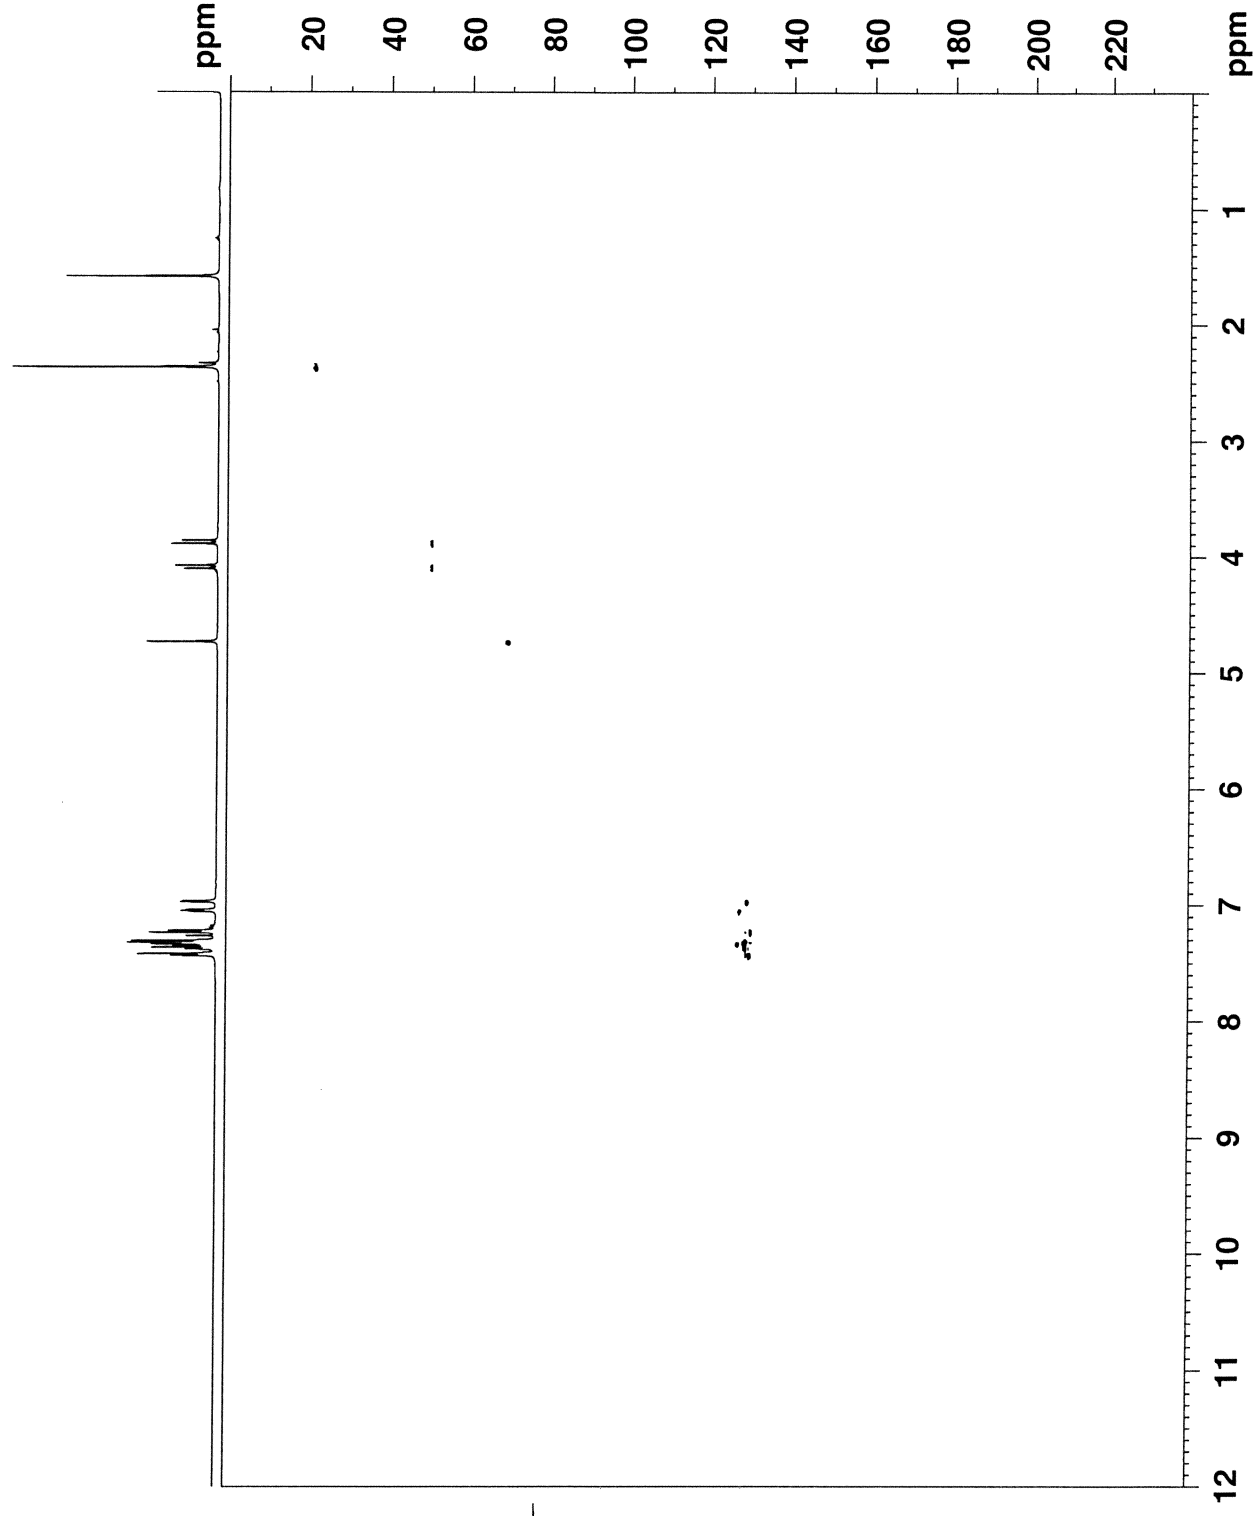

PN022\_2\_1 in cdcl3 (HSQC) 29.8.2019

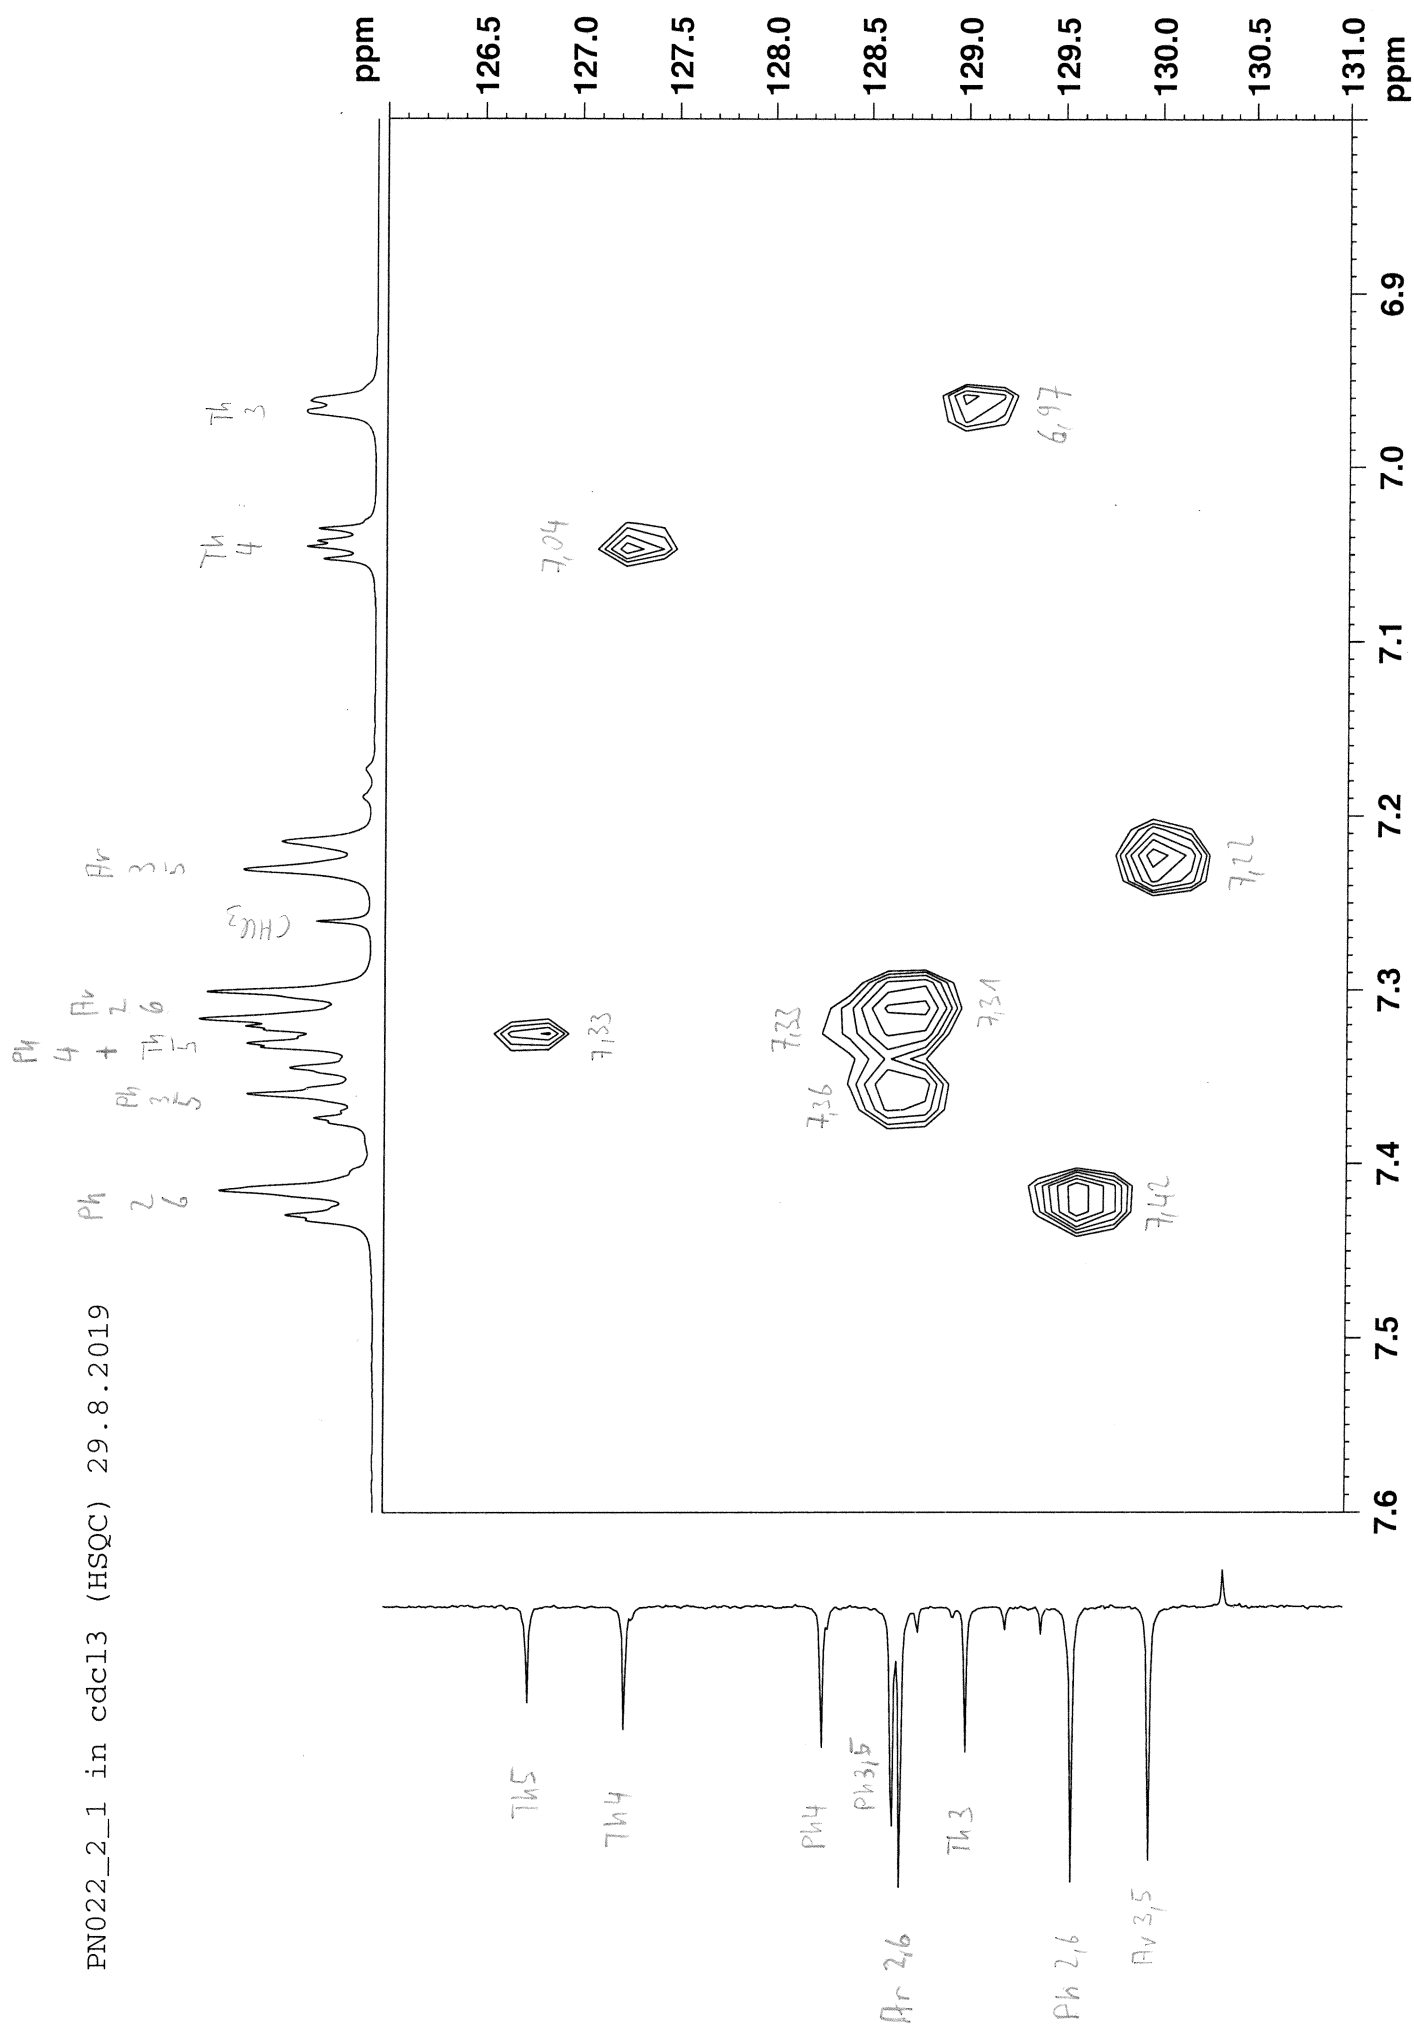



PN022\_2\_1 in cdcl3 (HSQC) 29.8.2019

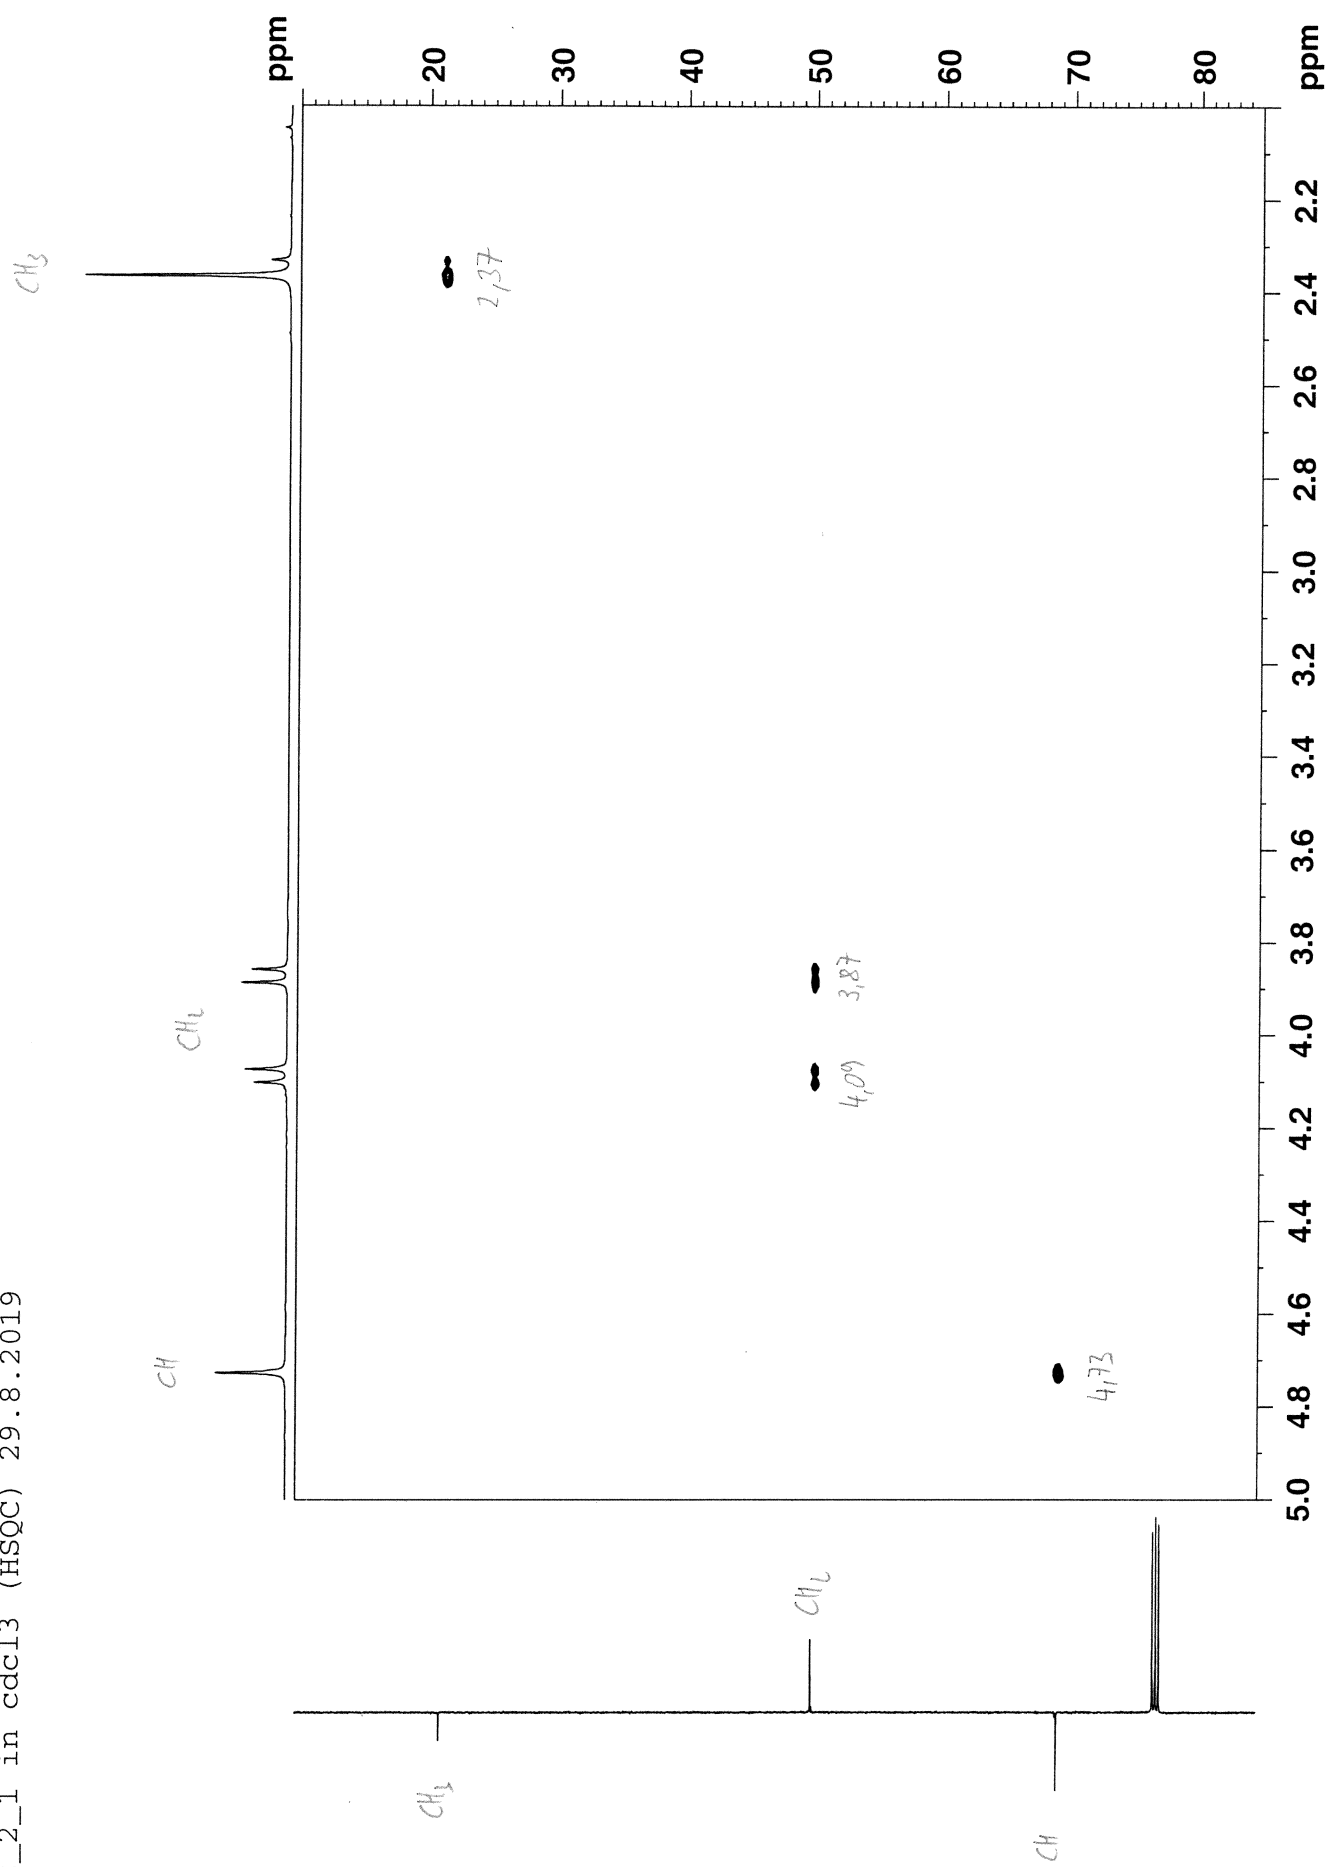

PN022\_2\_1 in cdcl3 (HMBC) 29.8.2019

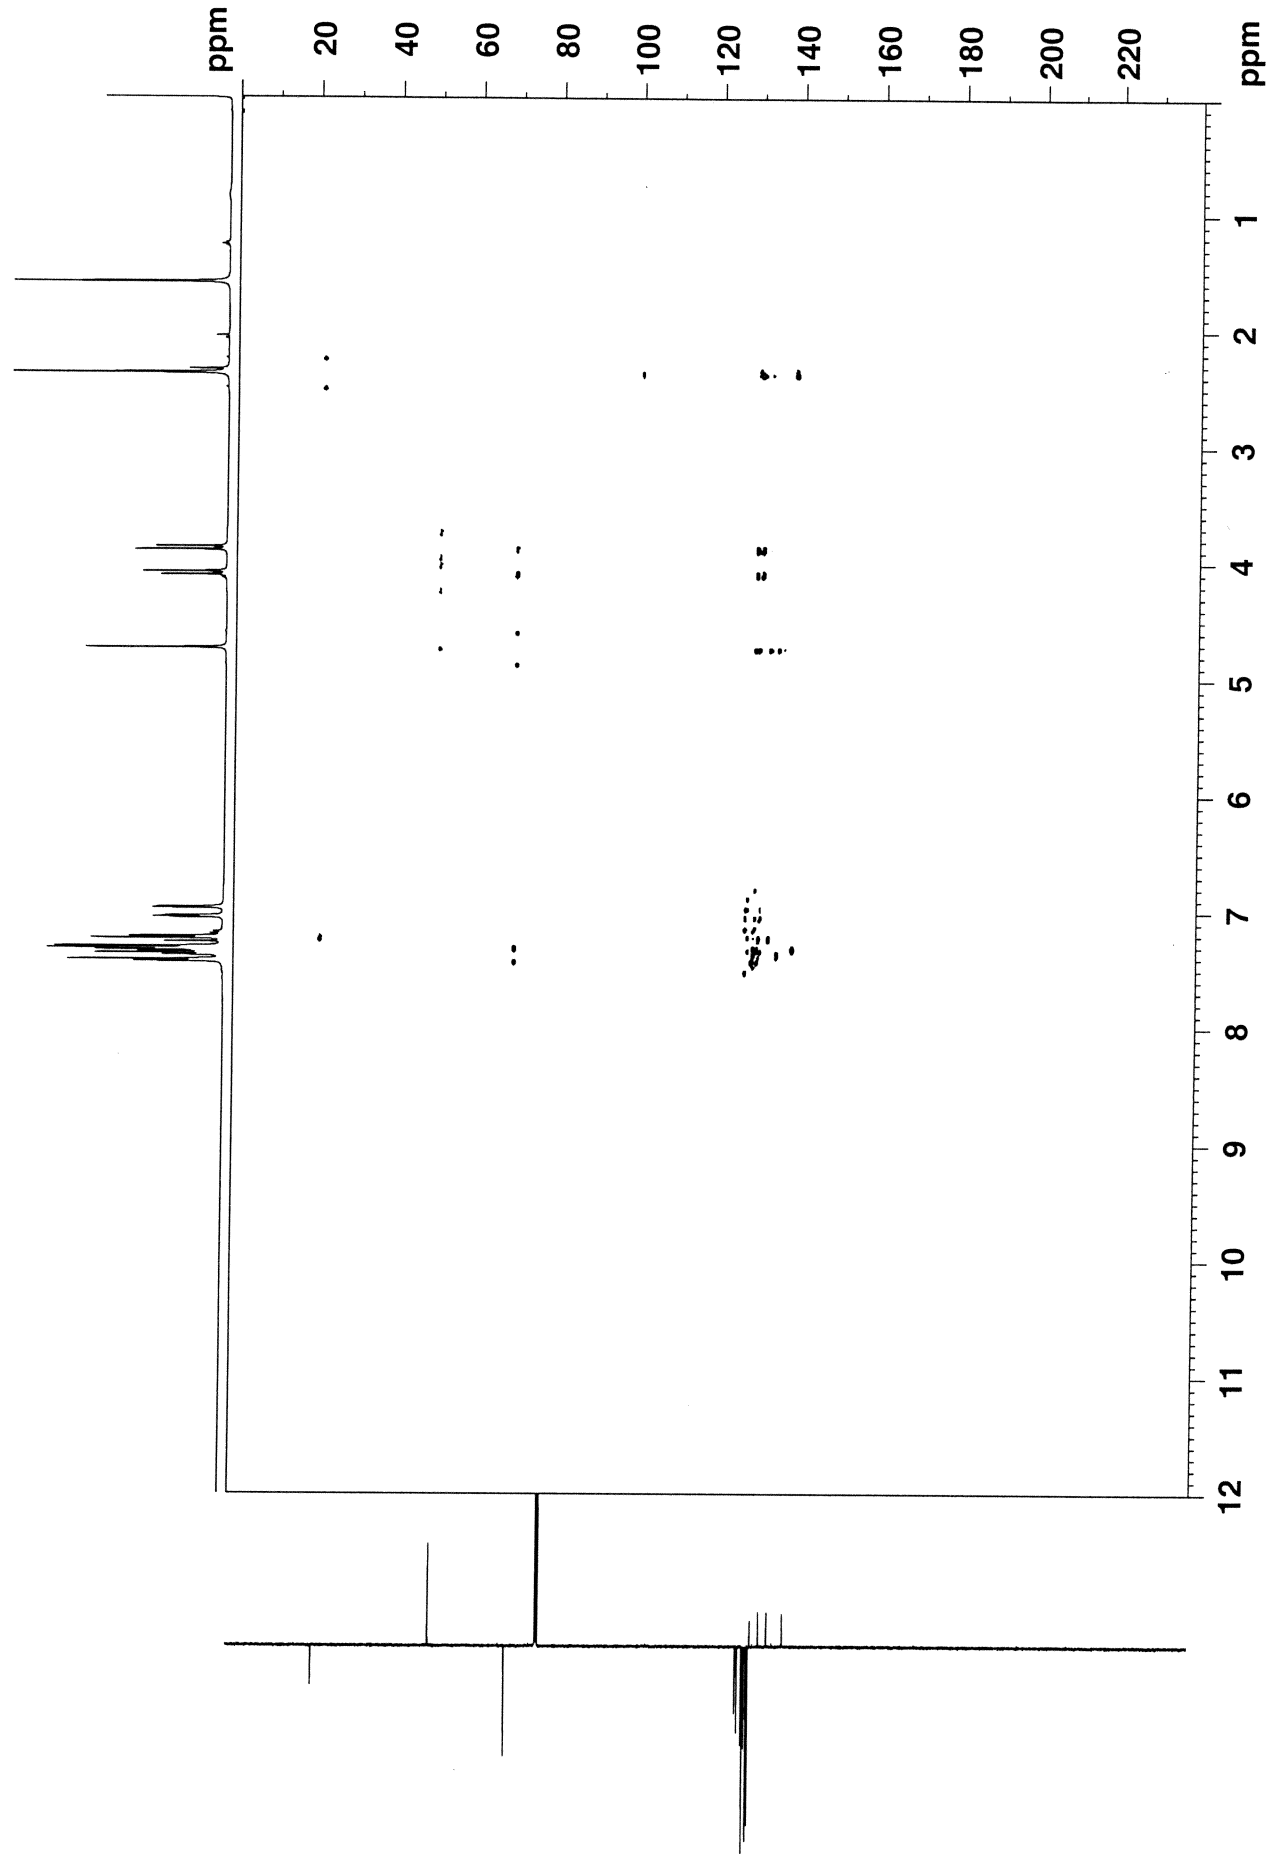

PN022\_2\_1 in cdcl3 (HMBC) 29.8.2019

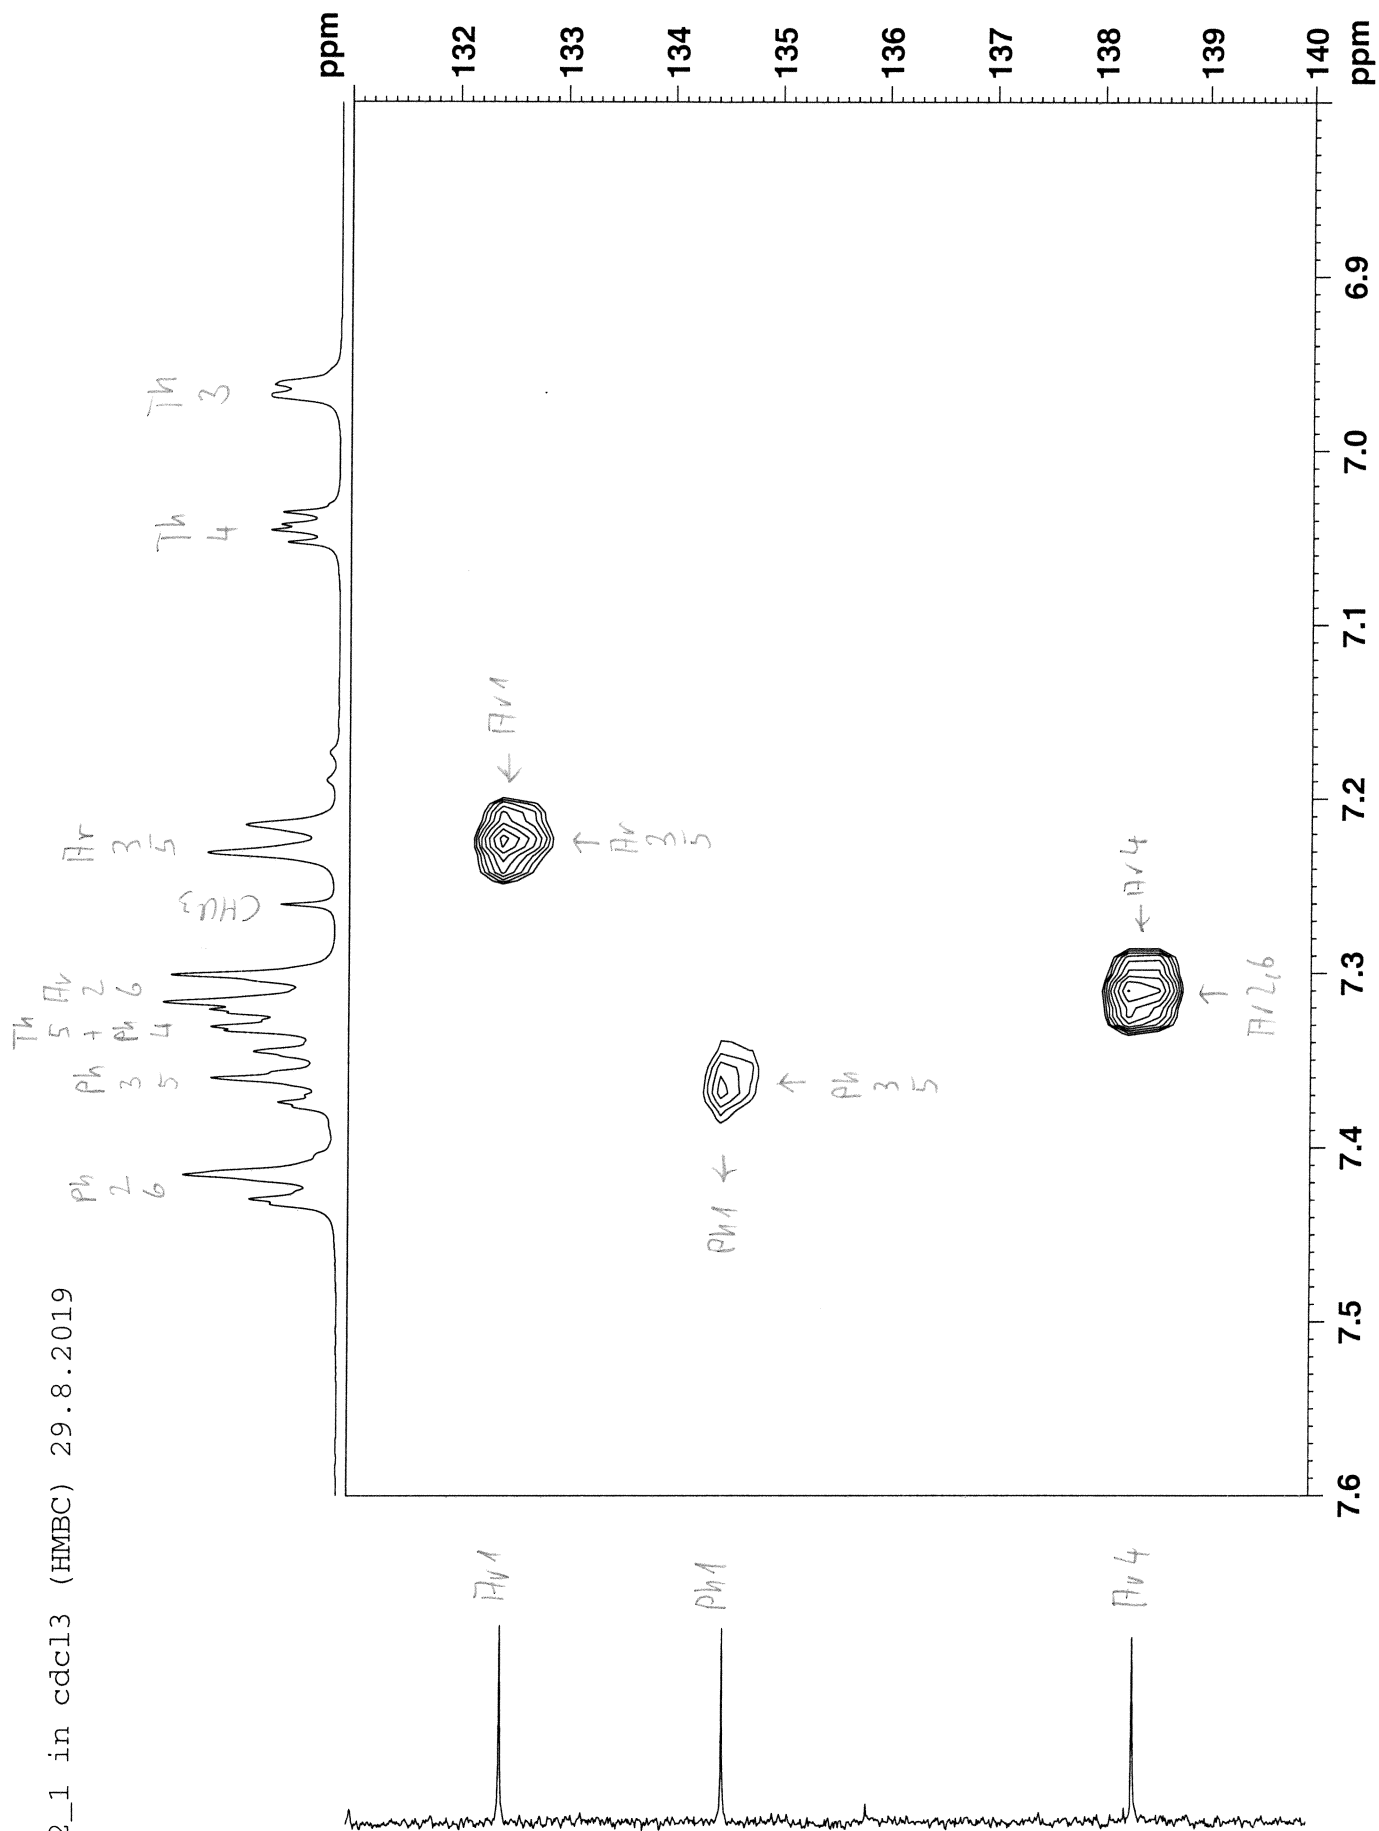

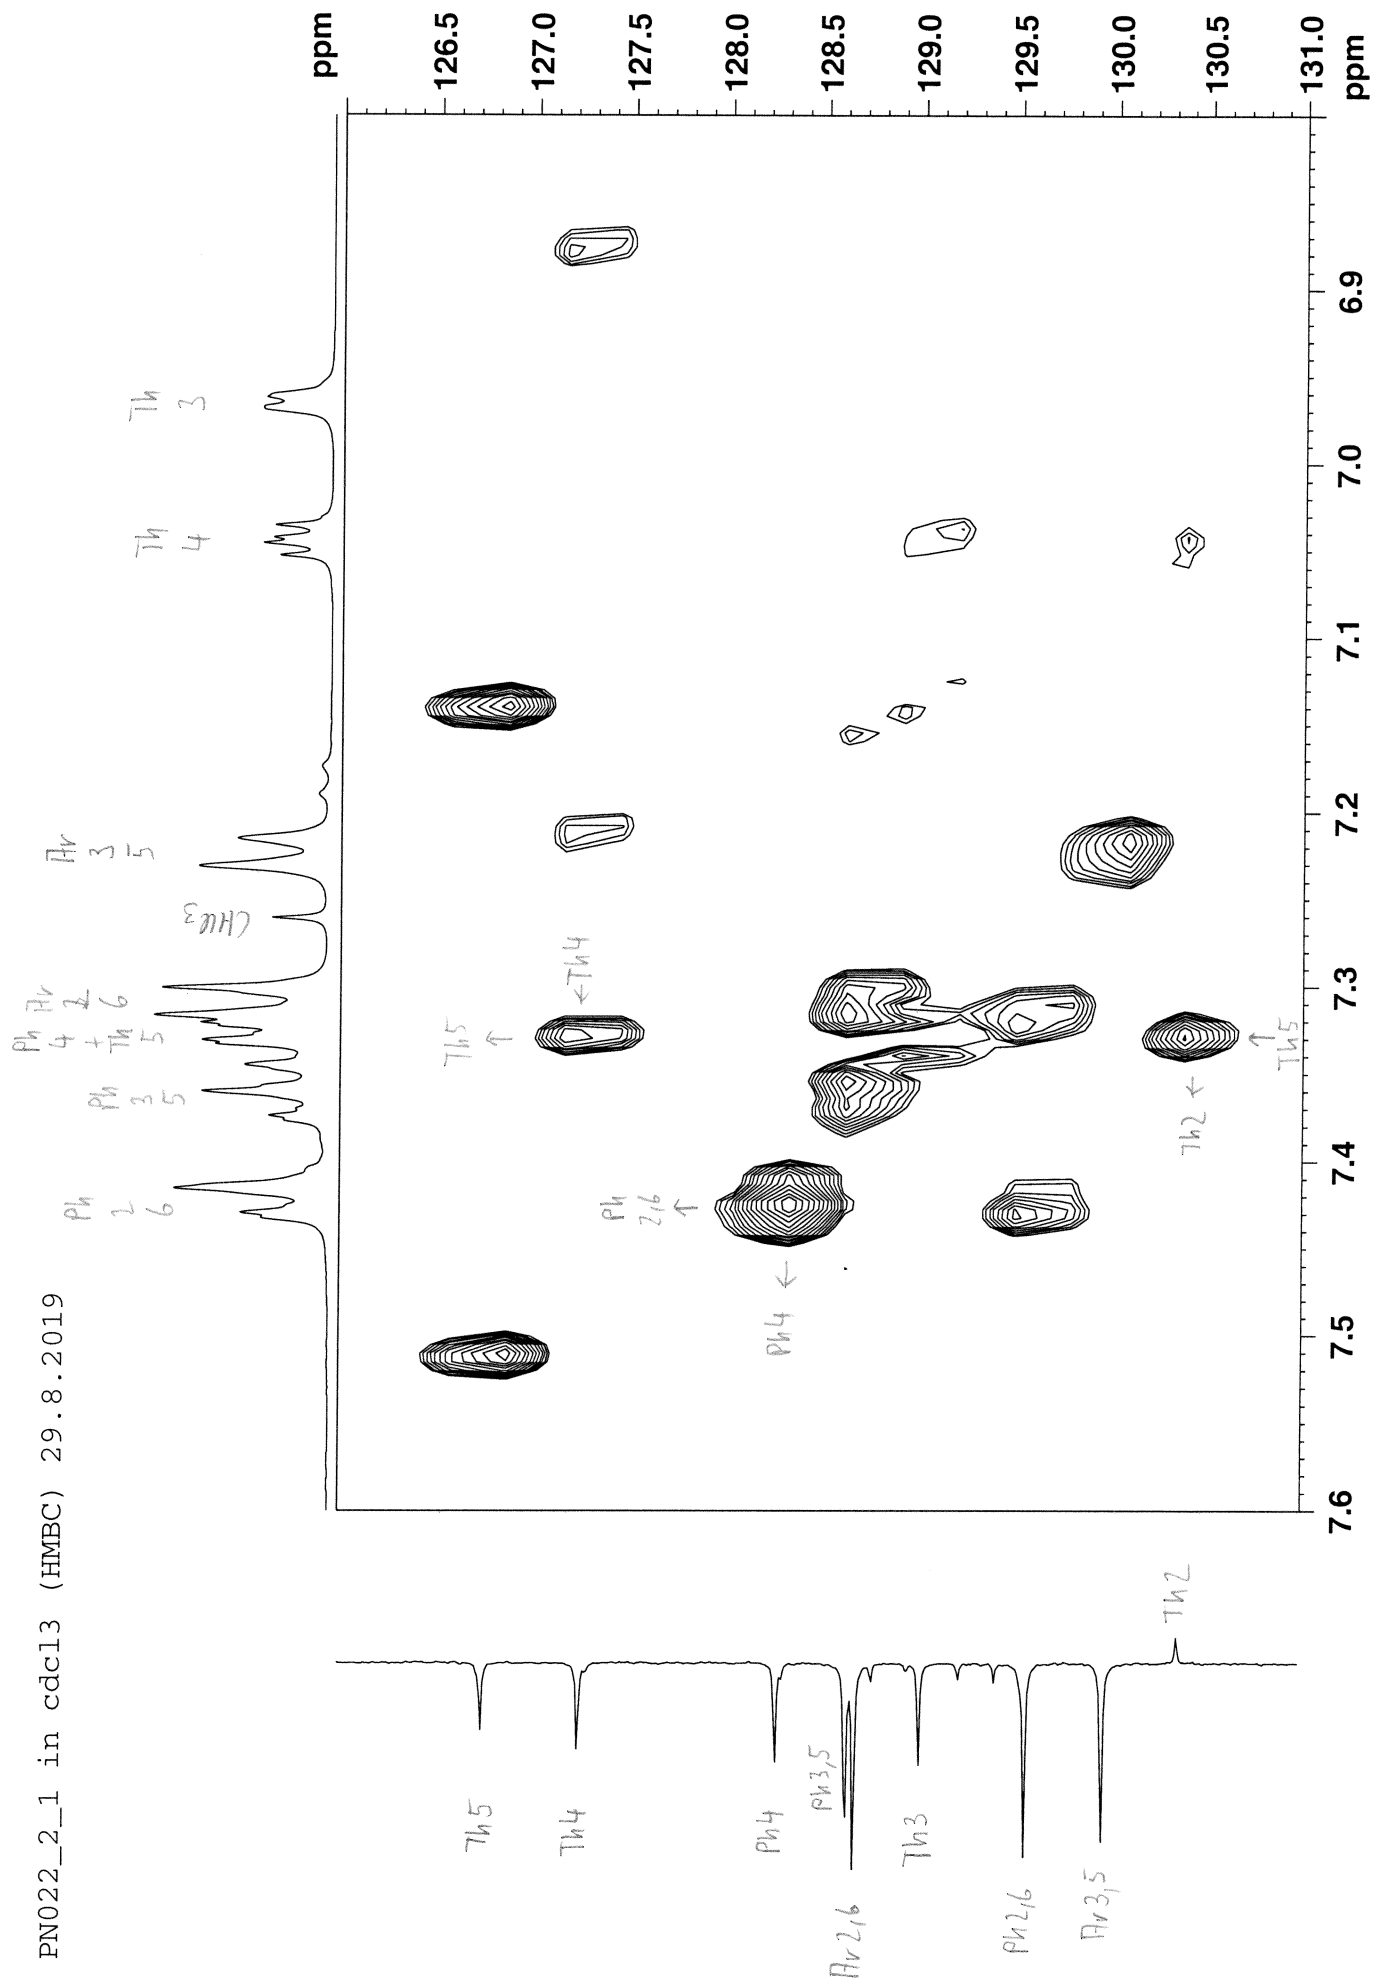

PN022\_2\_1 in cdcl3 (HMBC) 29.8.2019

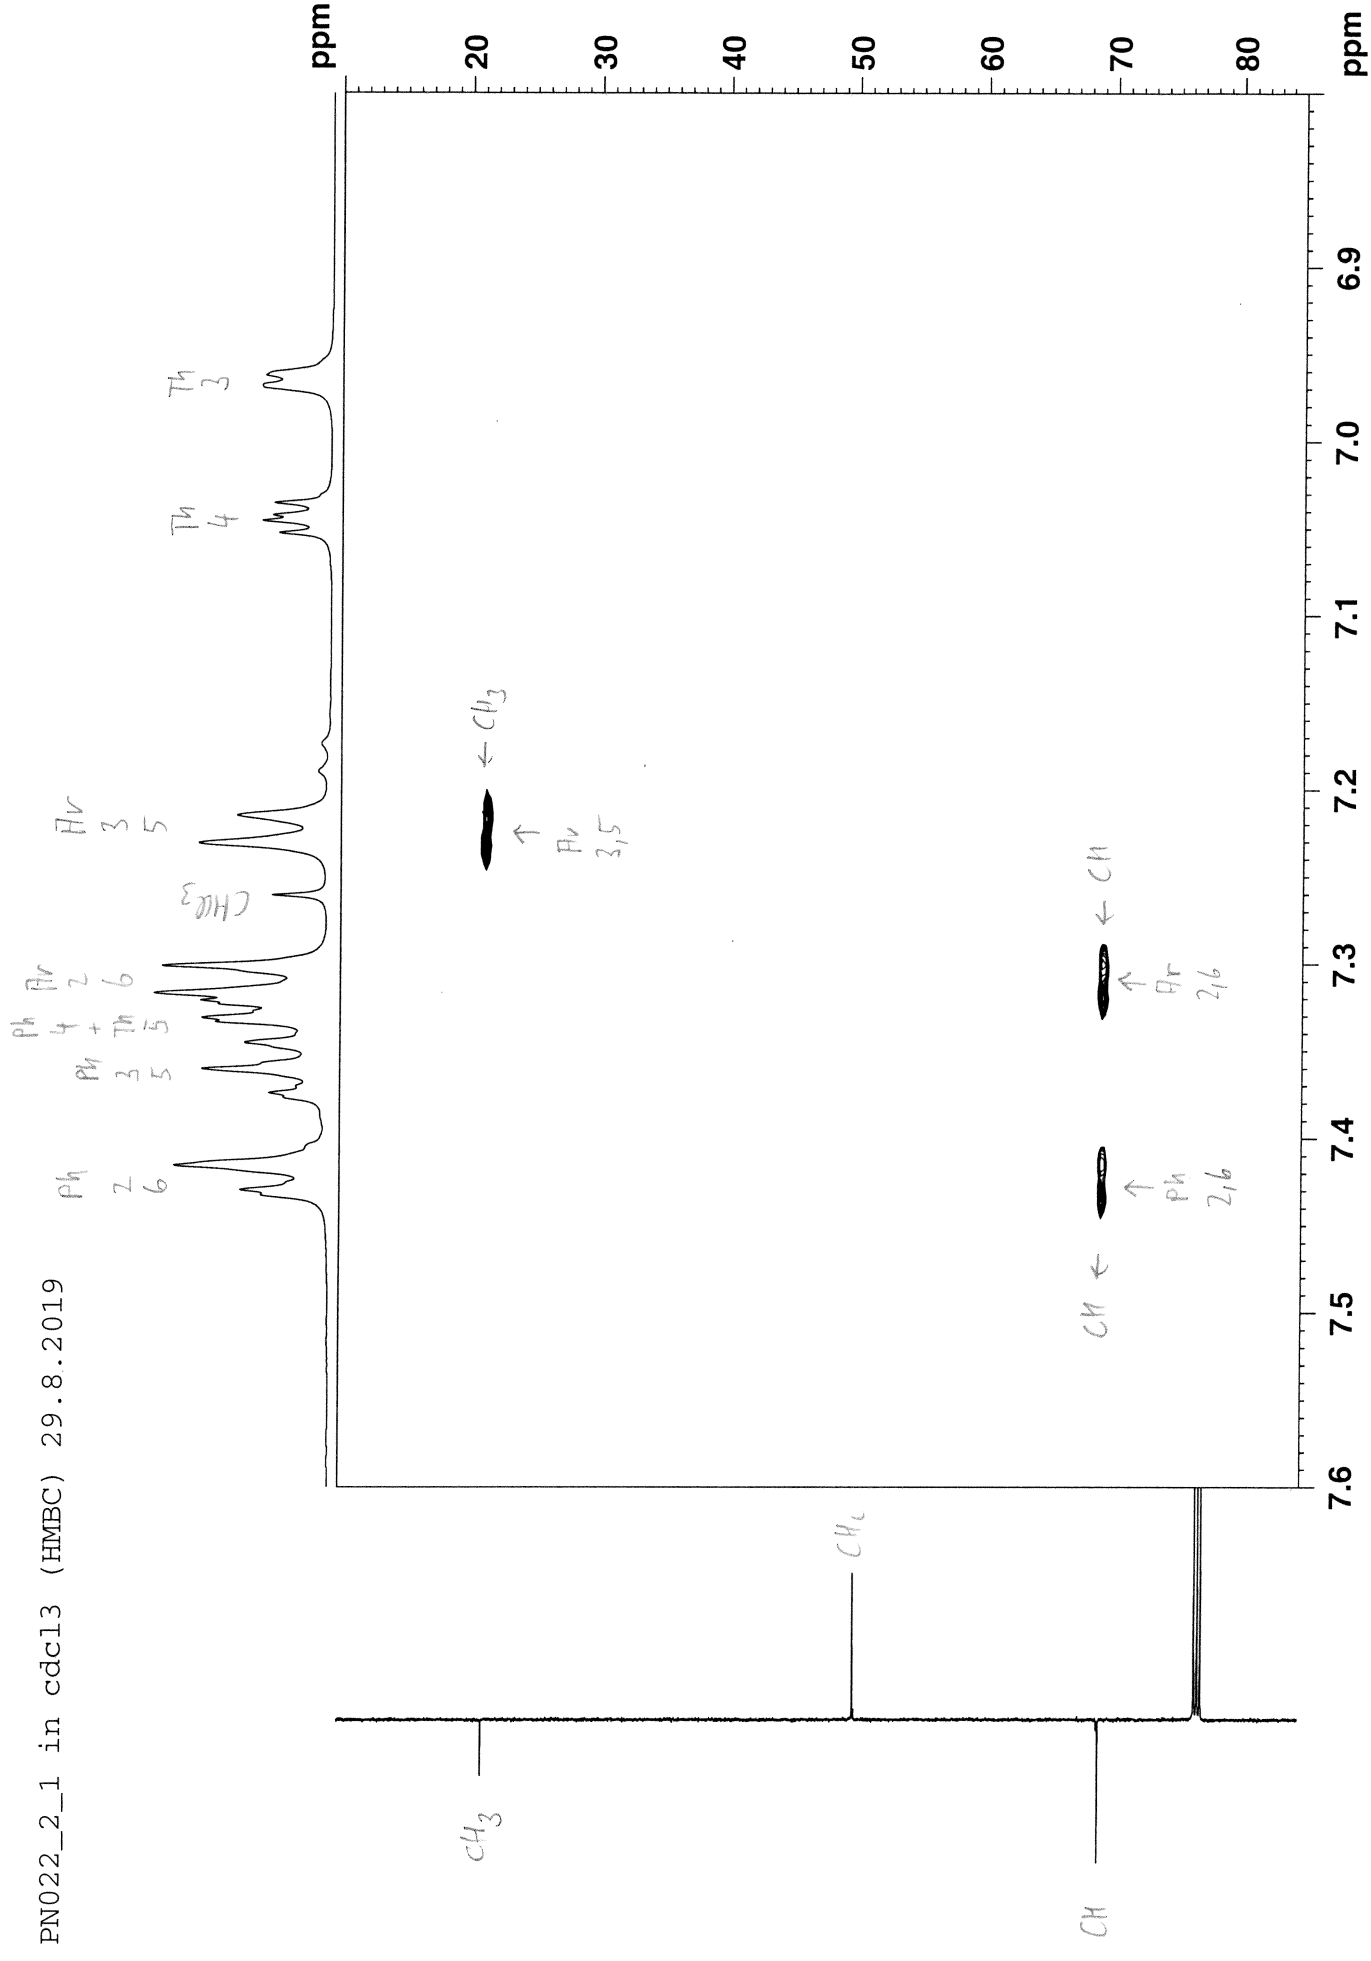

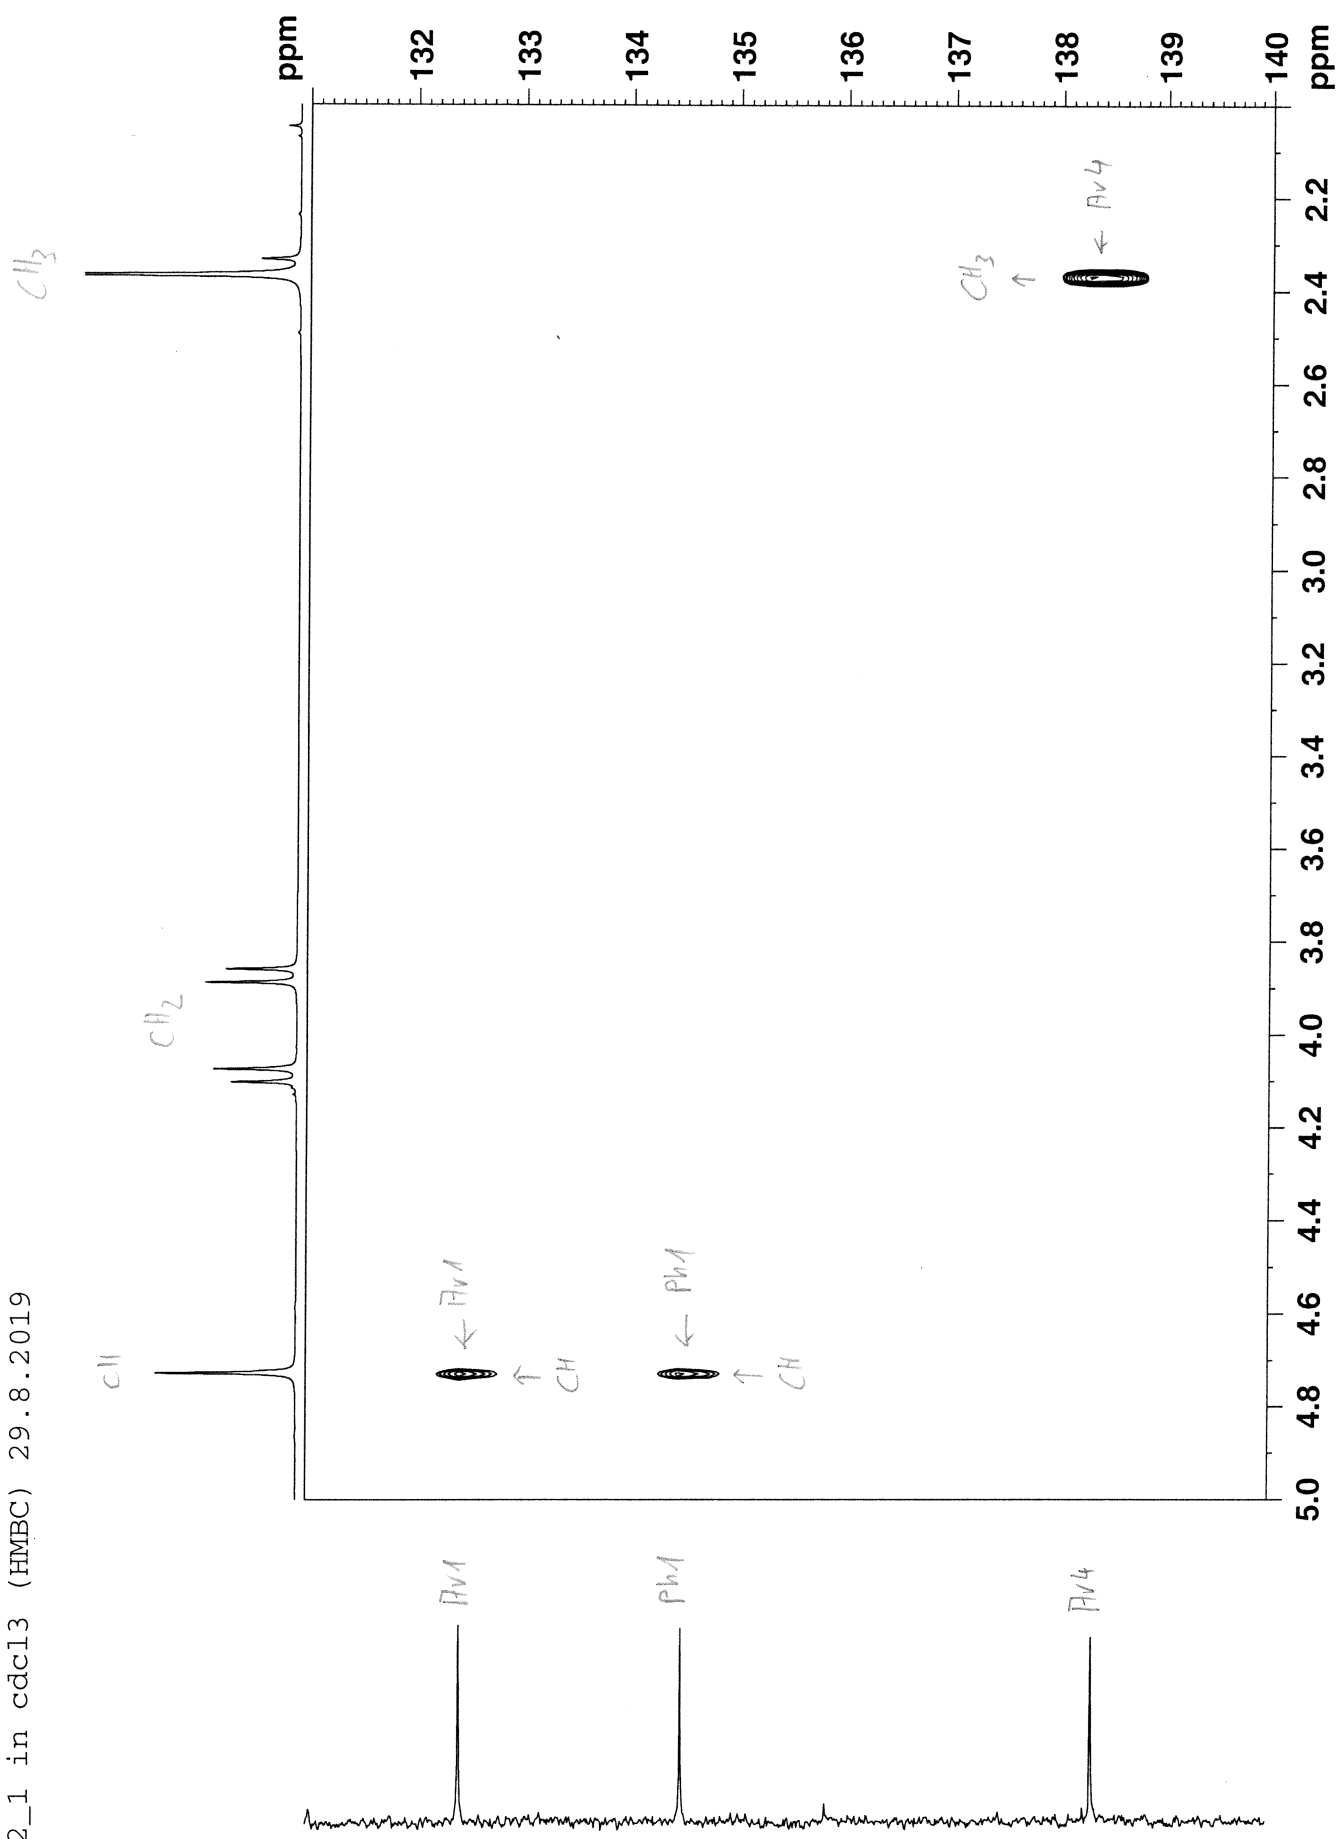

PN022\_2\_1 in cdcl3 (HMBC) 29.8.2019

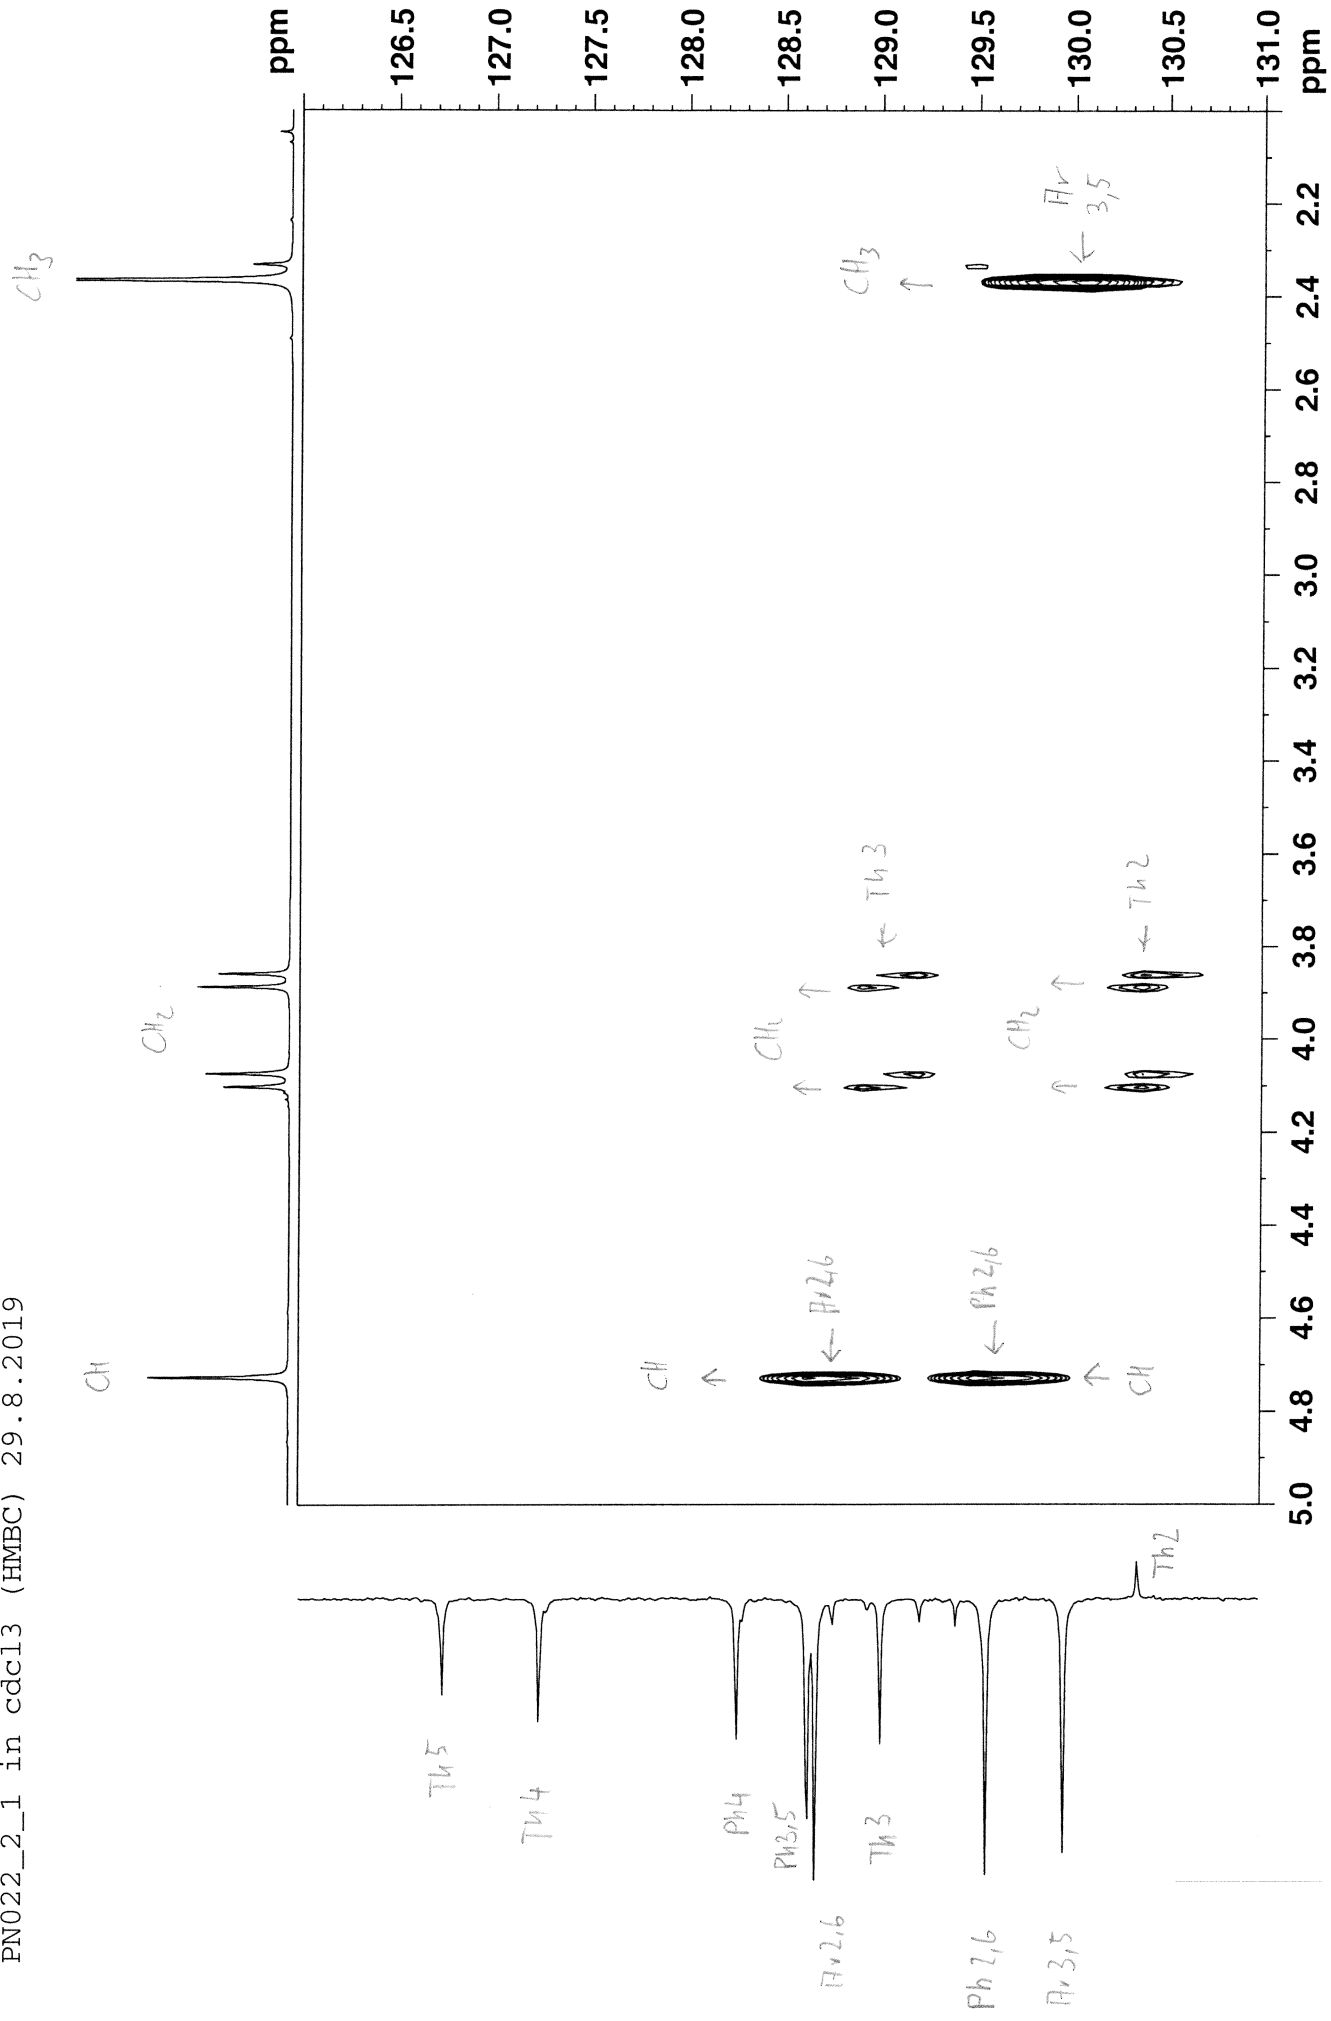

PN022\_2\_1 in cdcl3 (HMBC) 29.8.2019

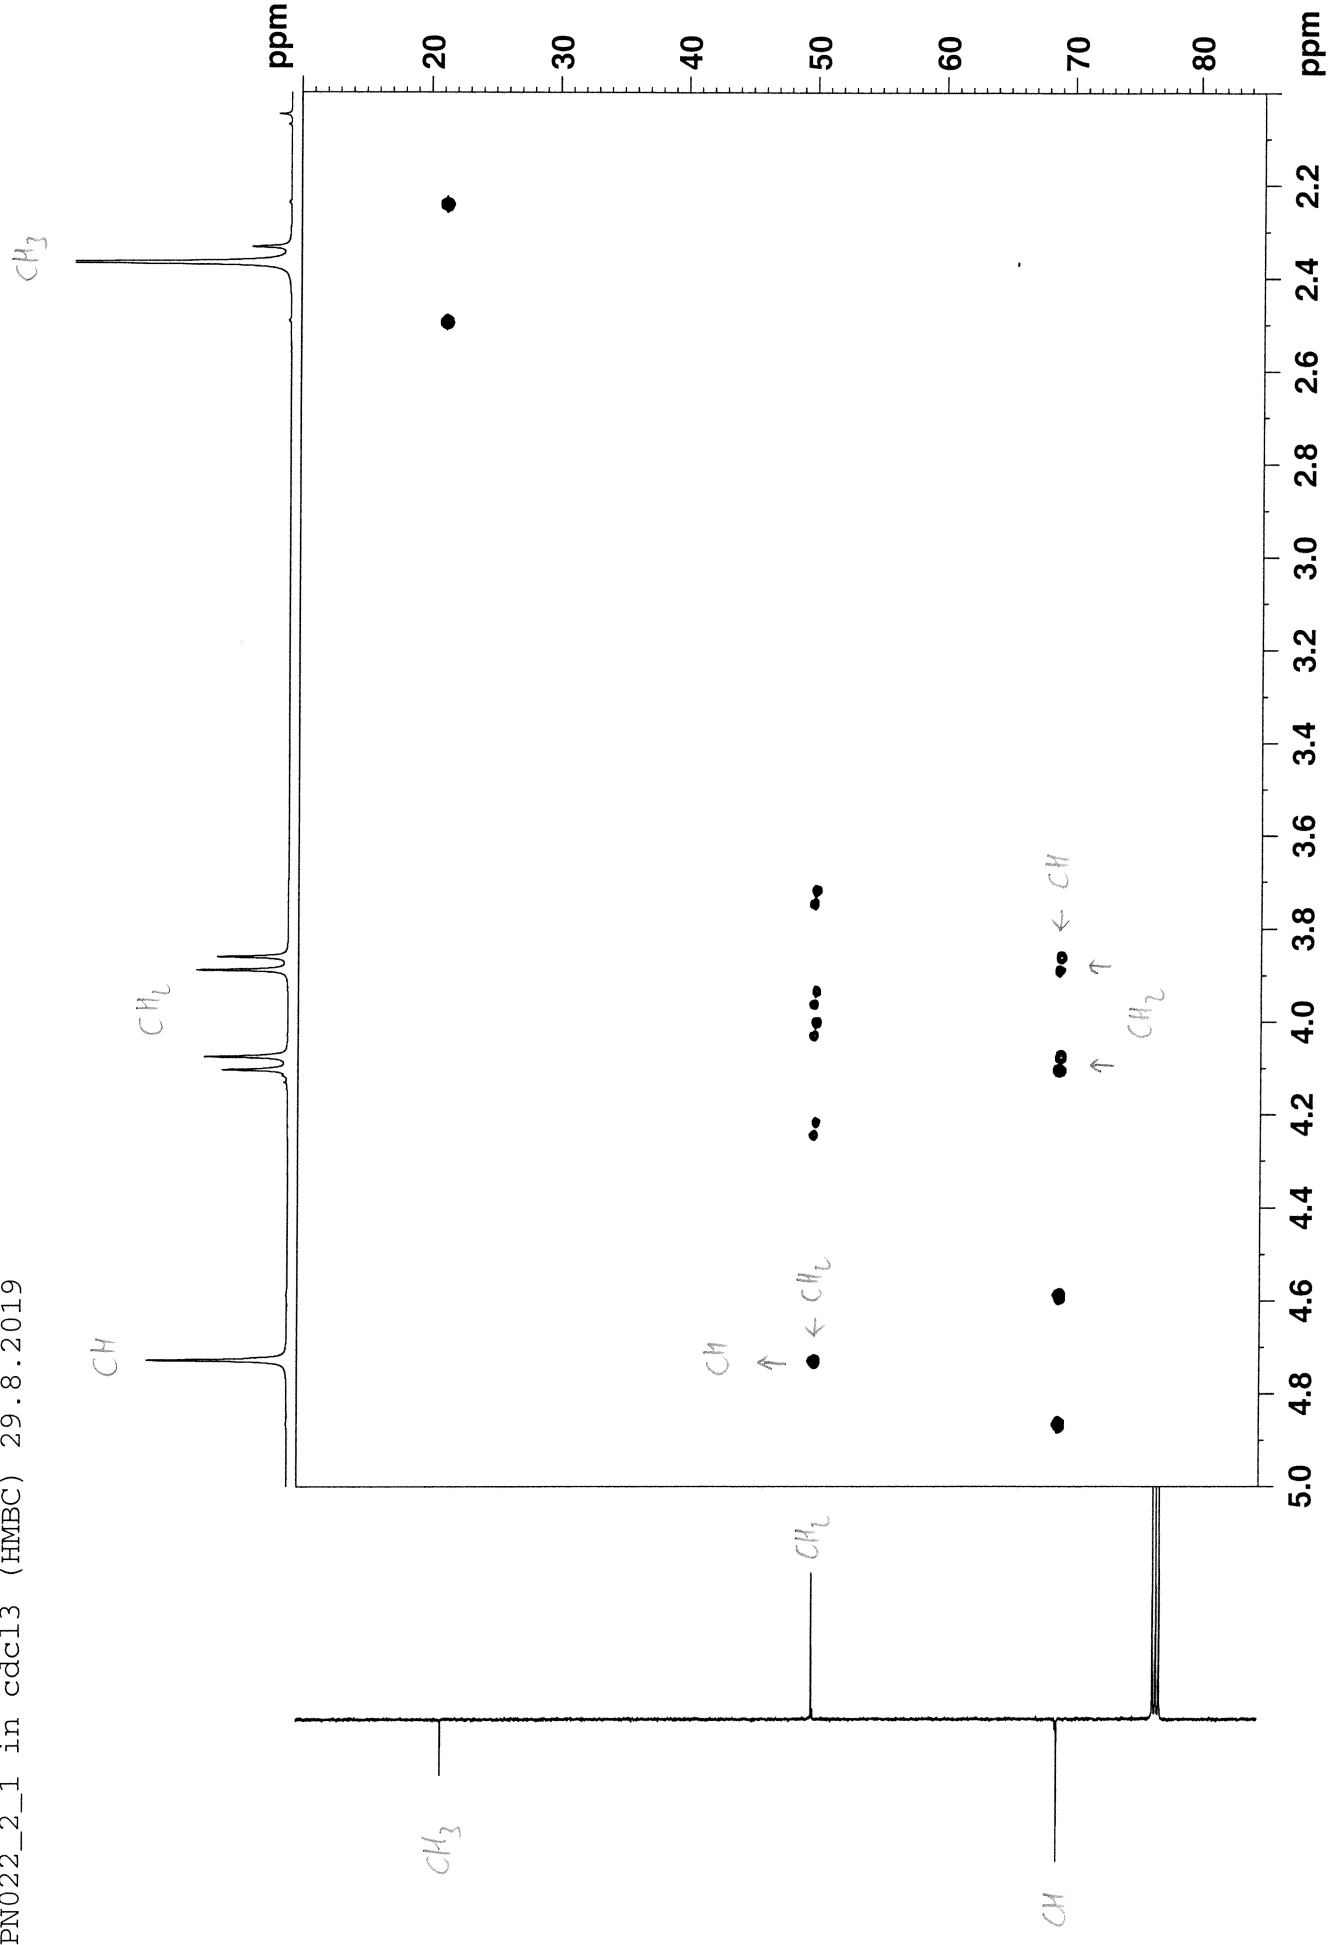



**Figure S56c.** NMR spectra of compound 8n.

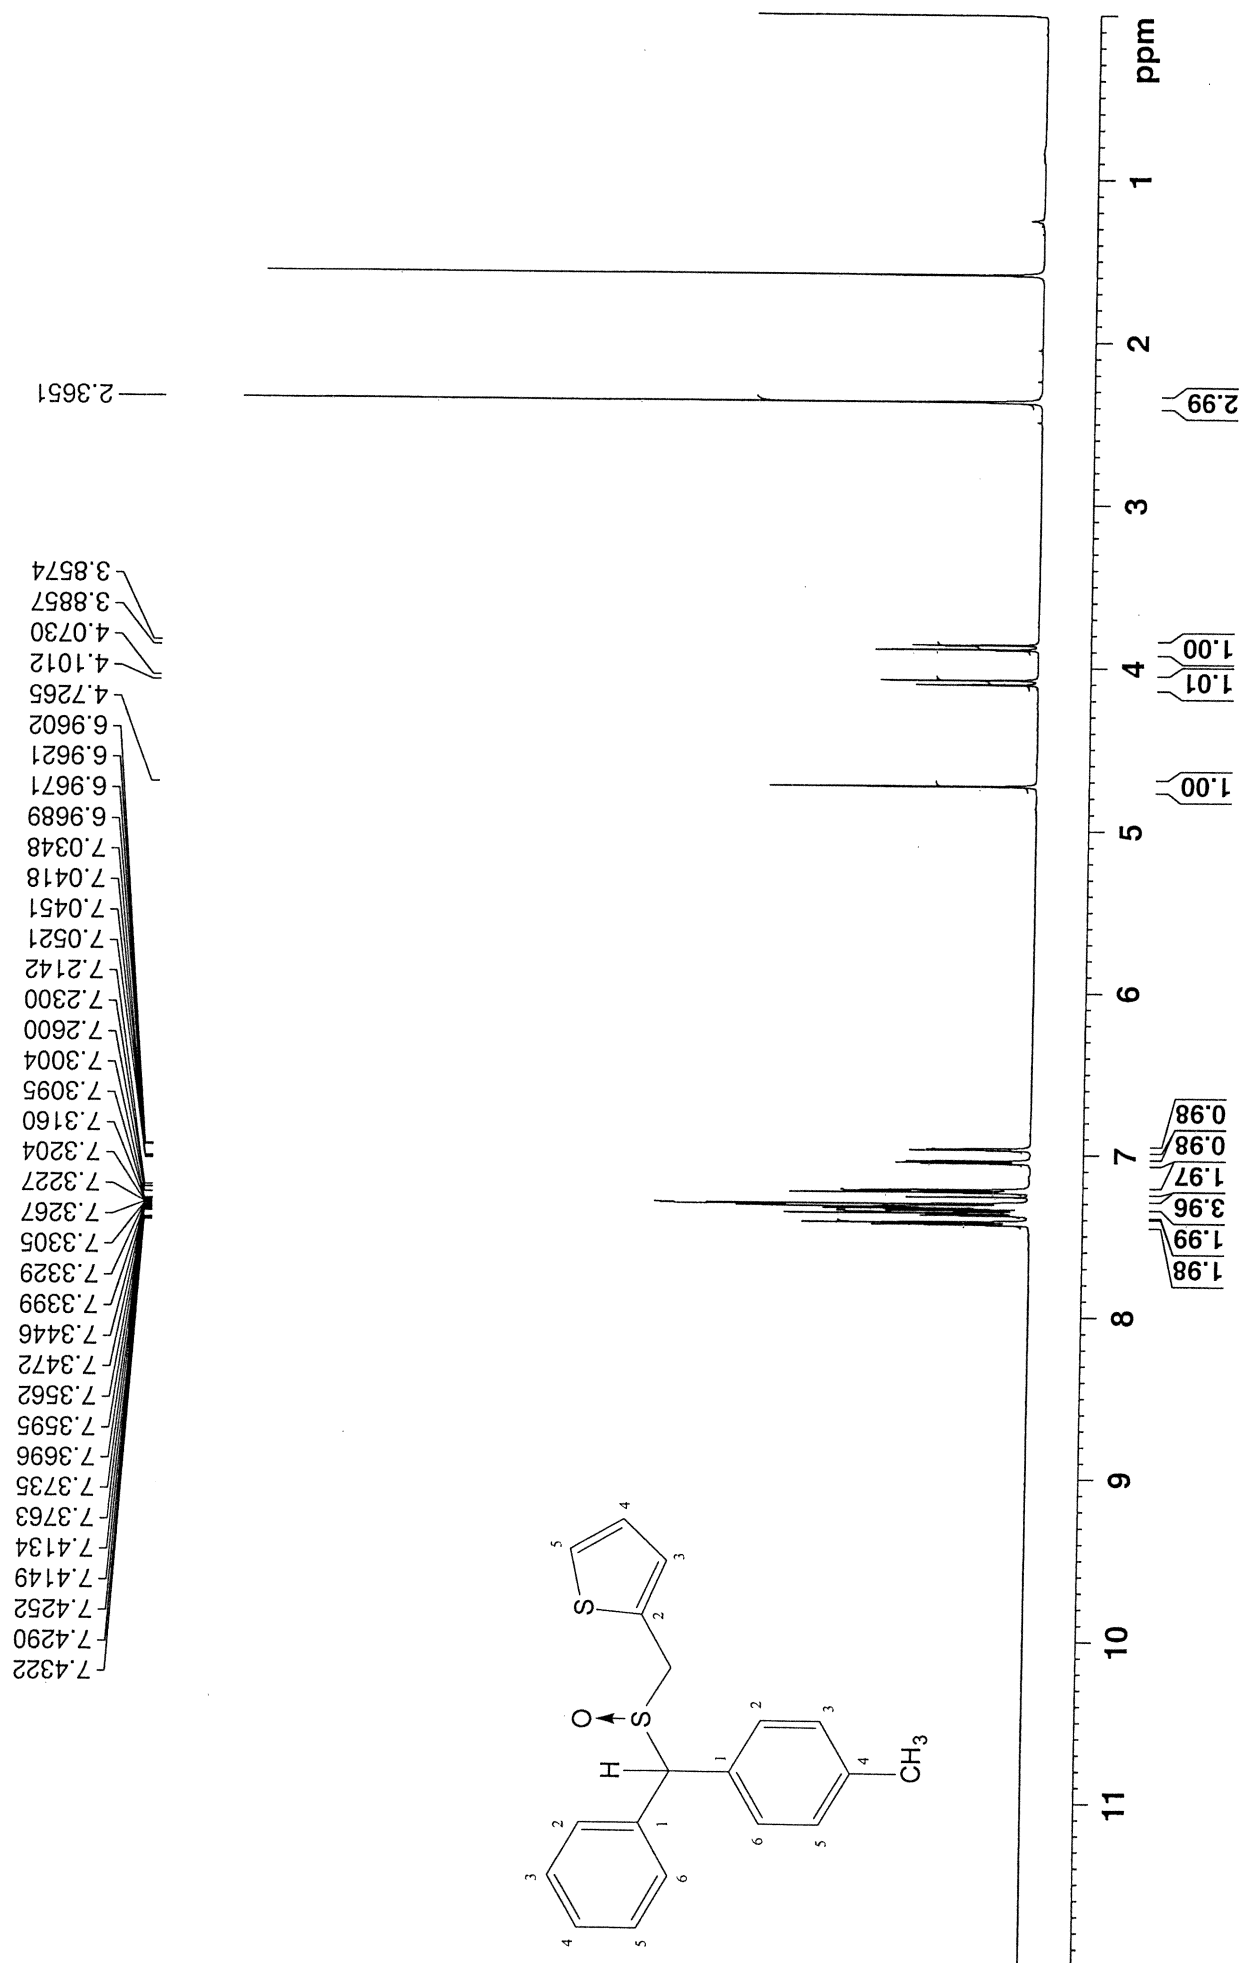

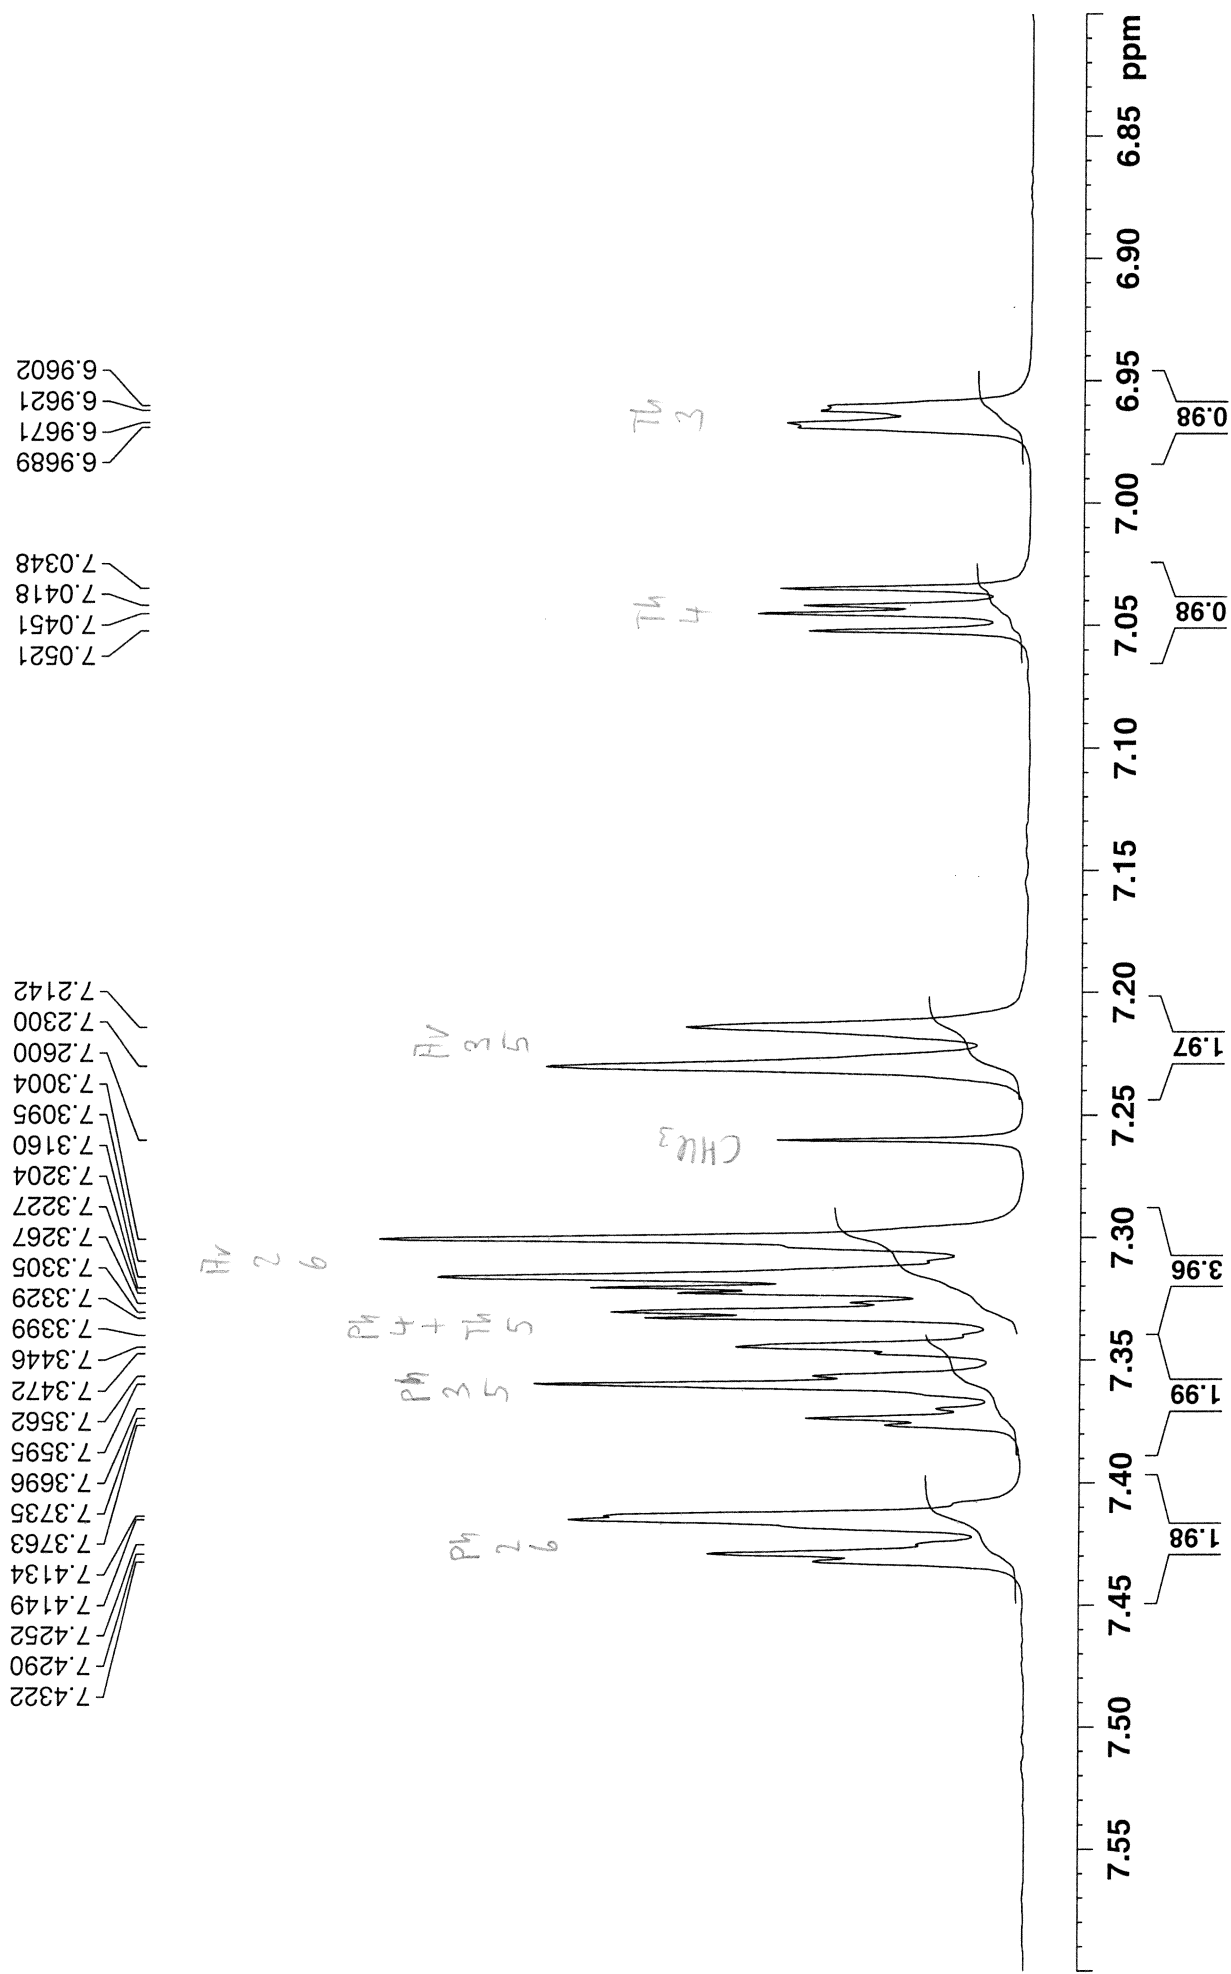

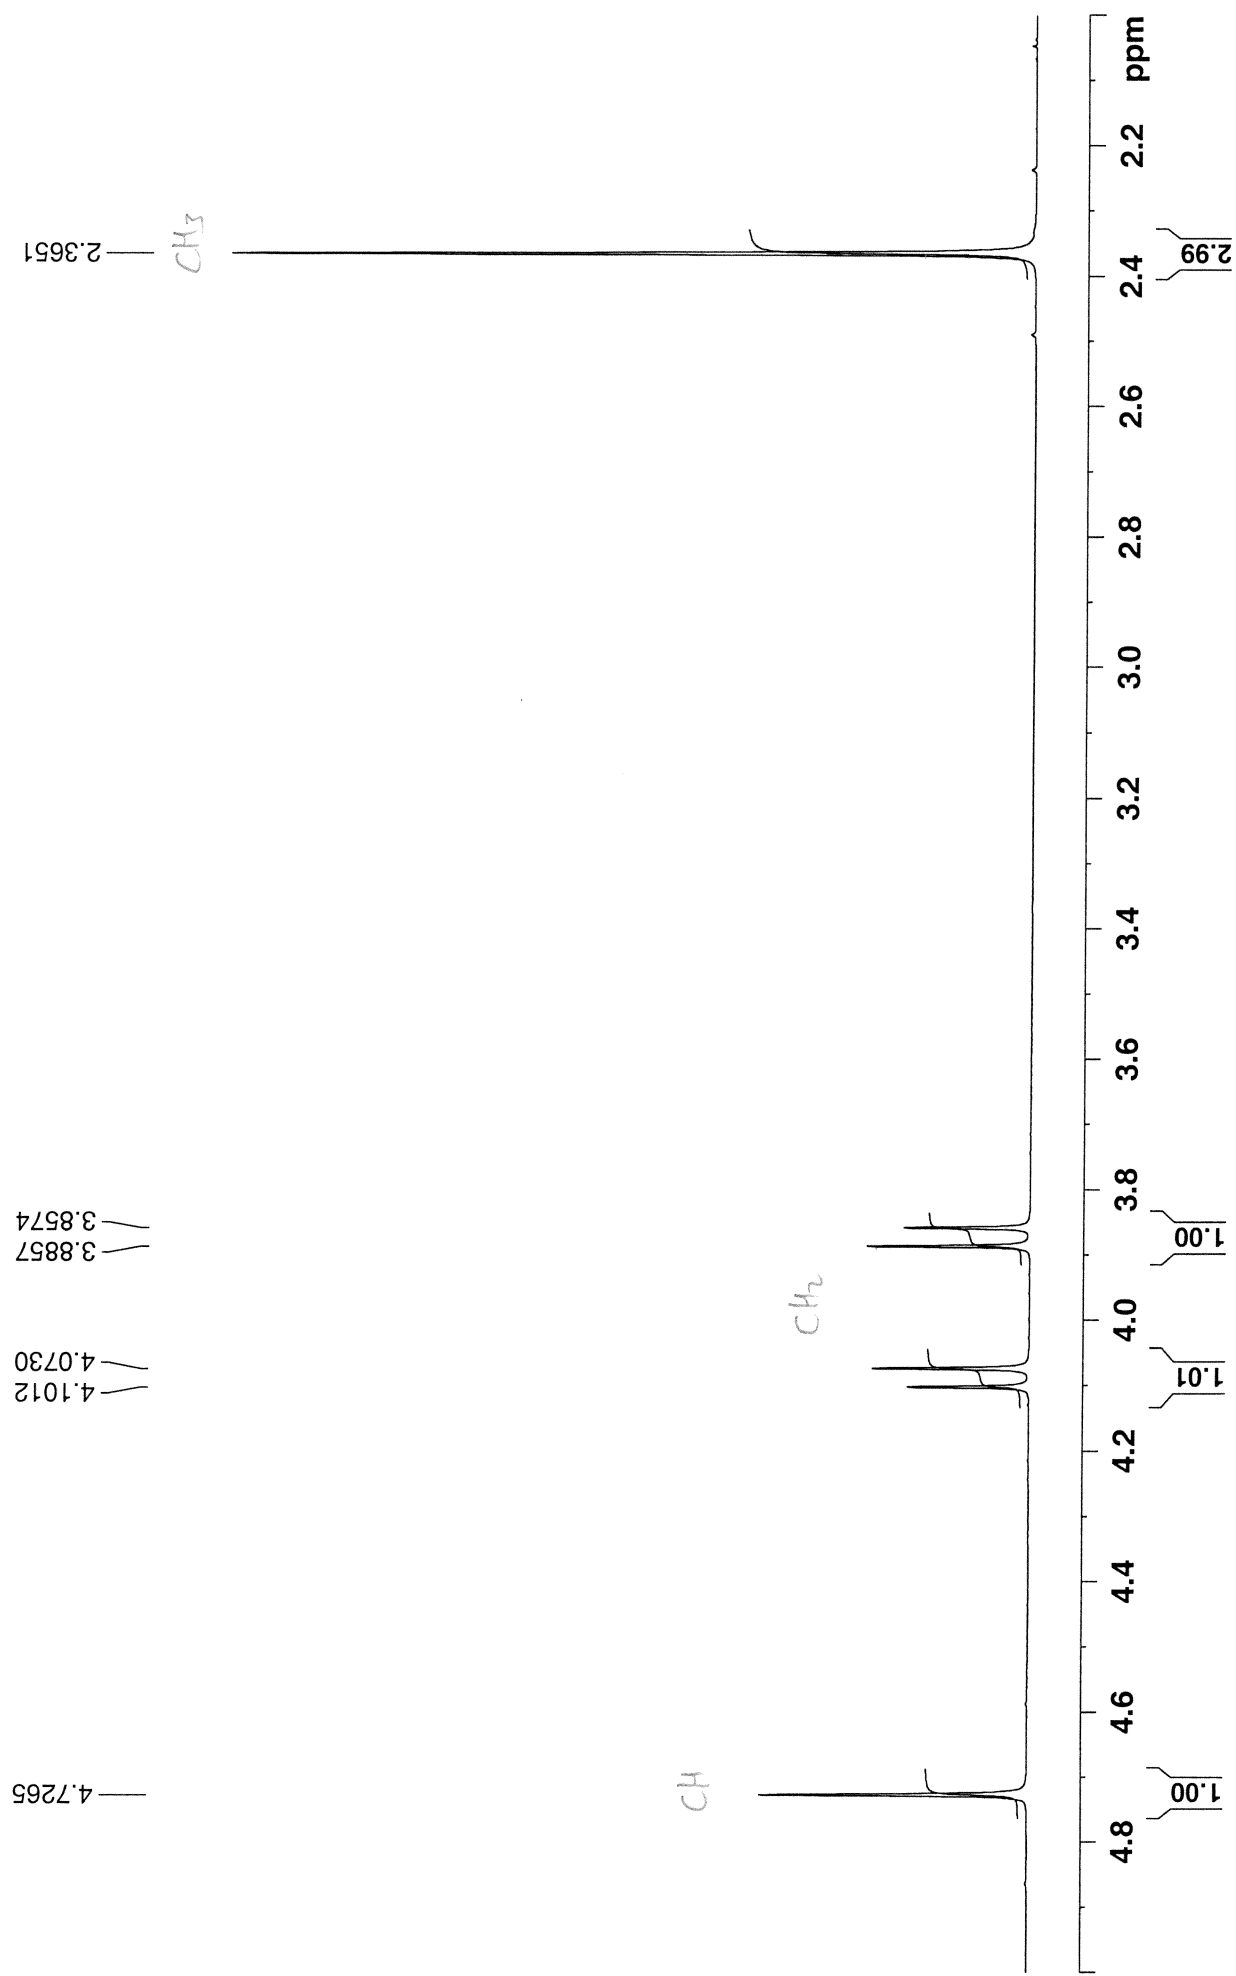

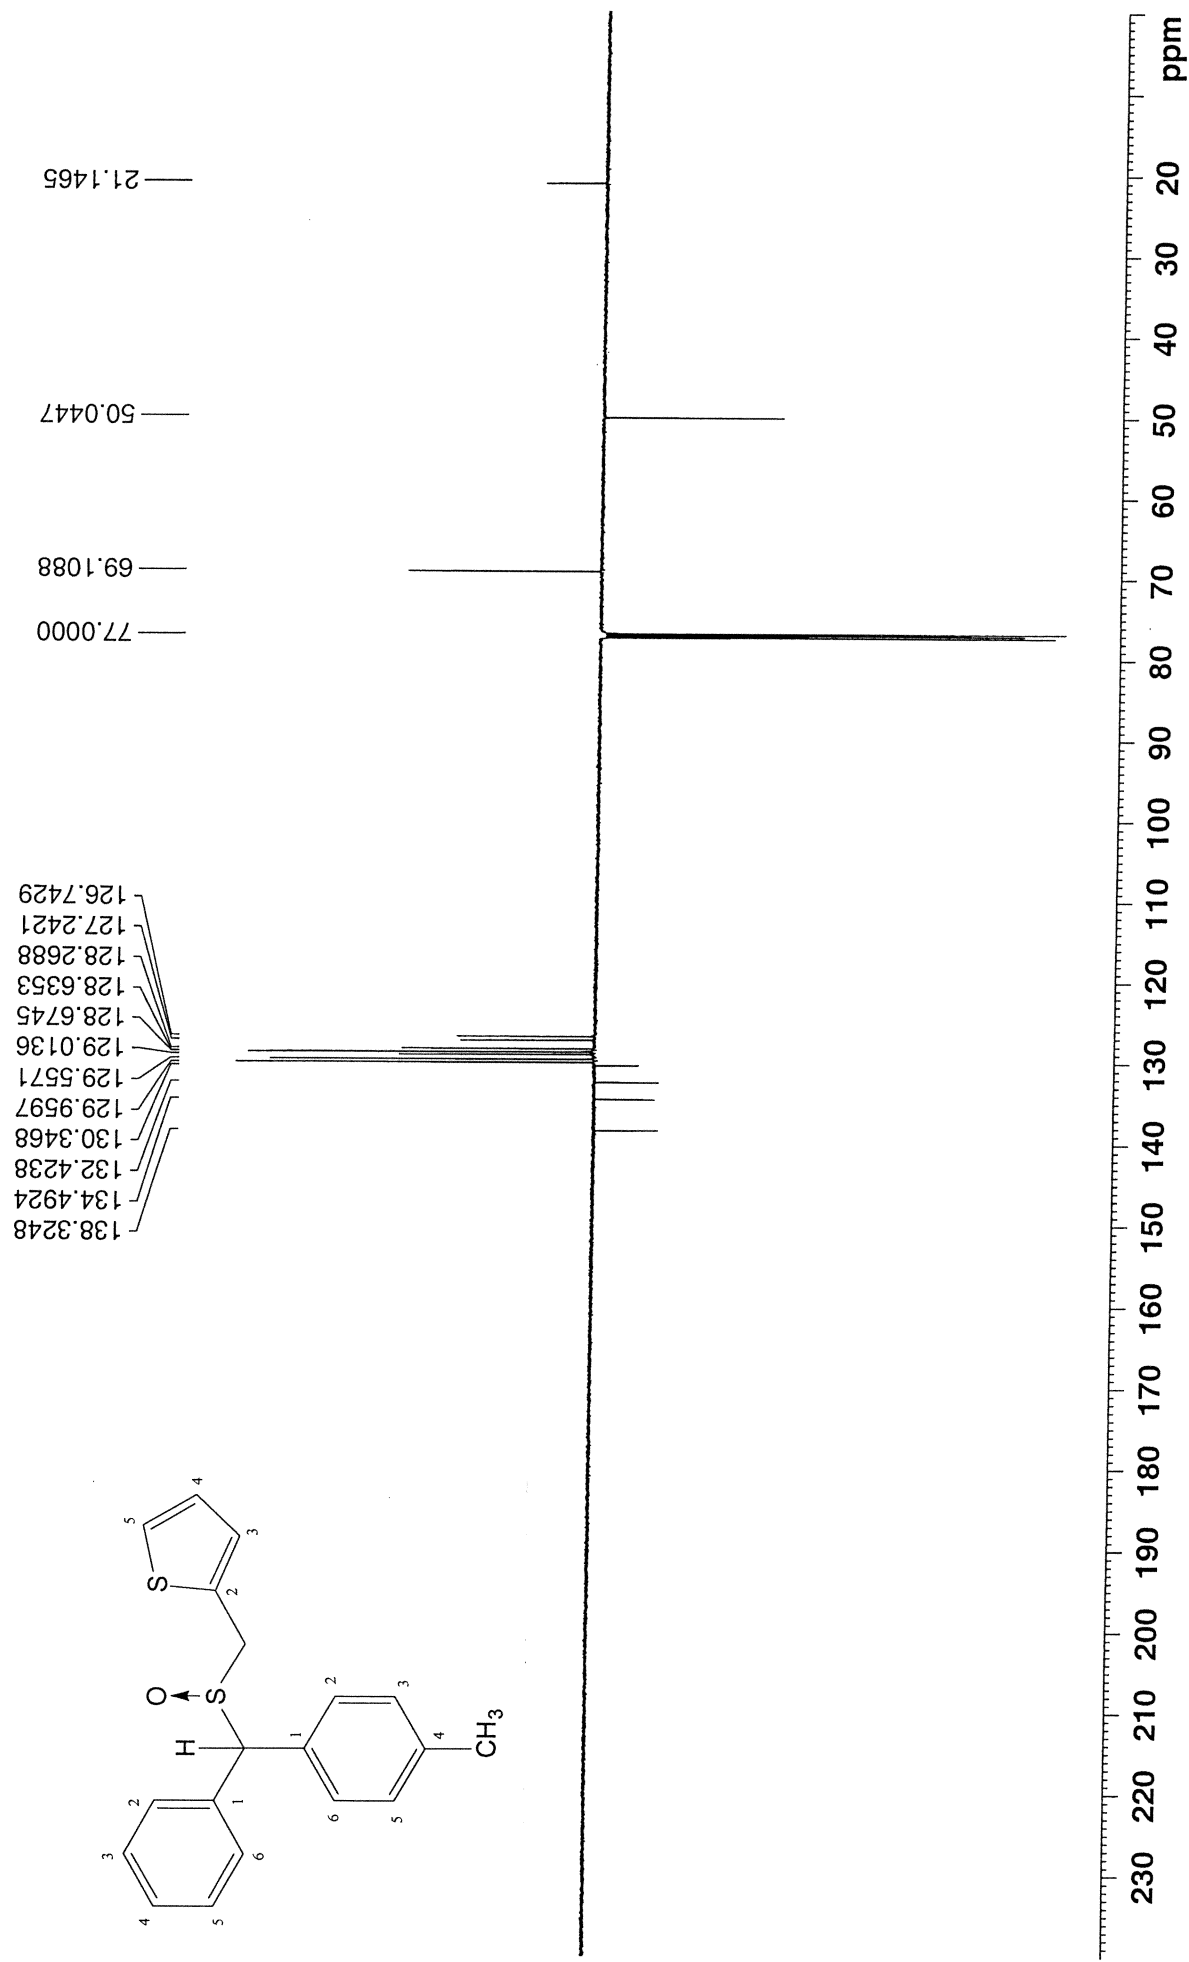

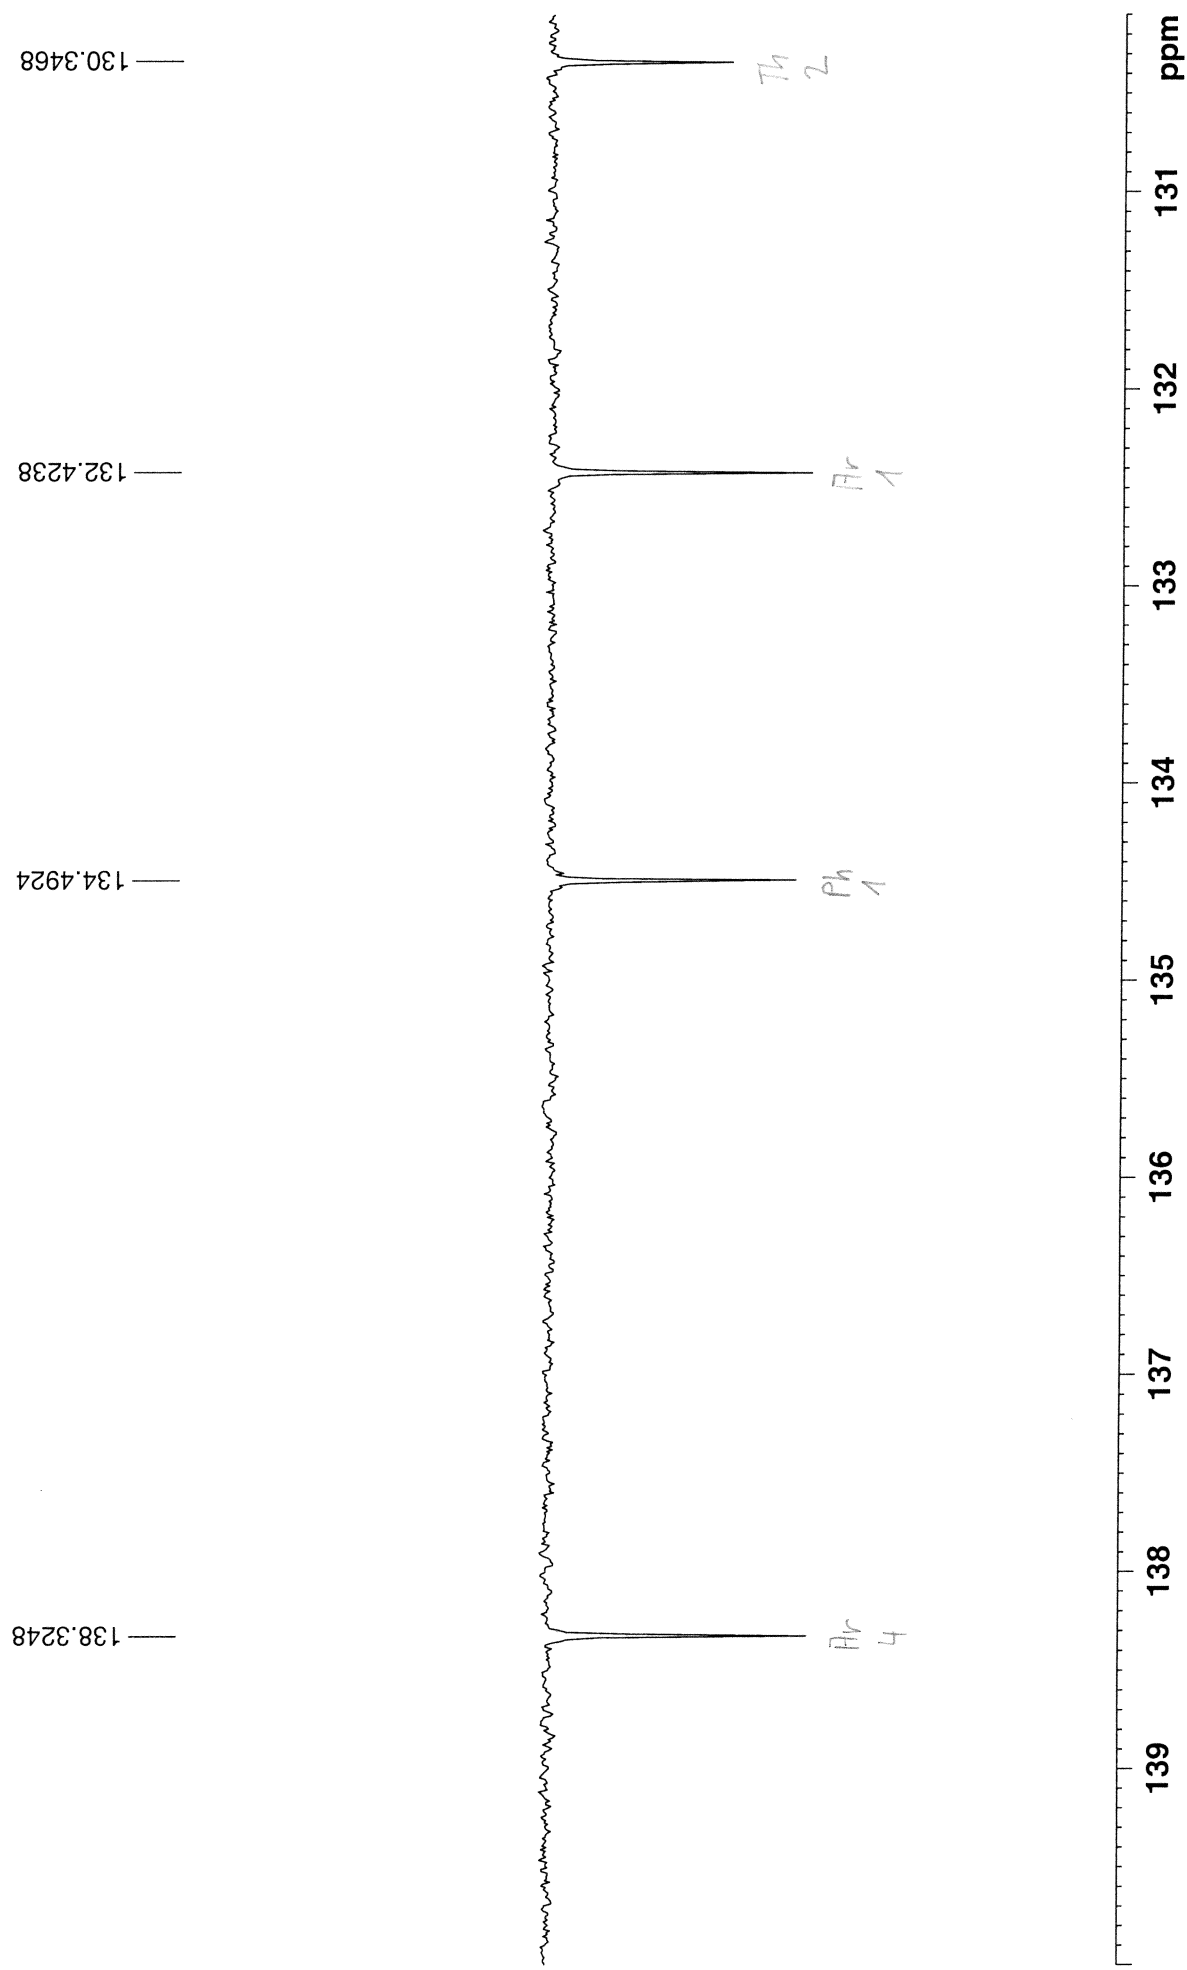

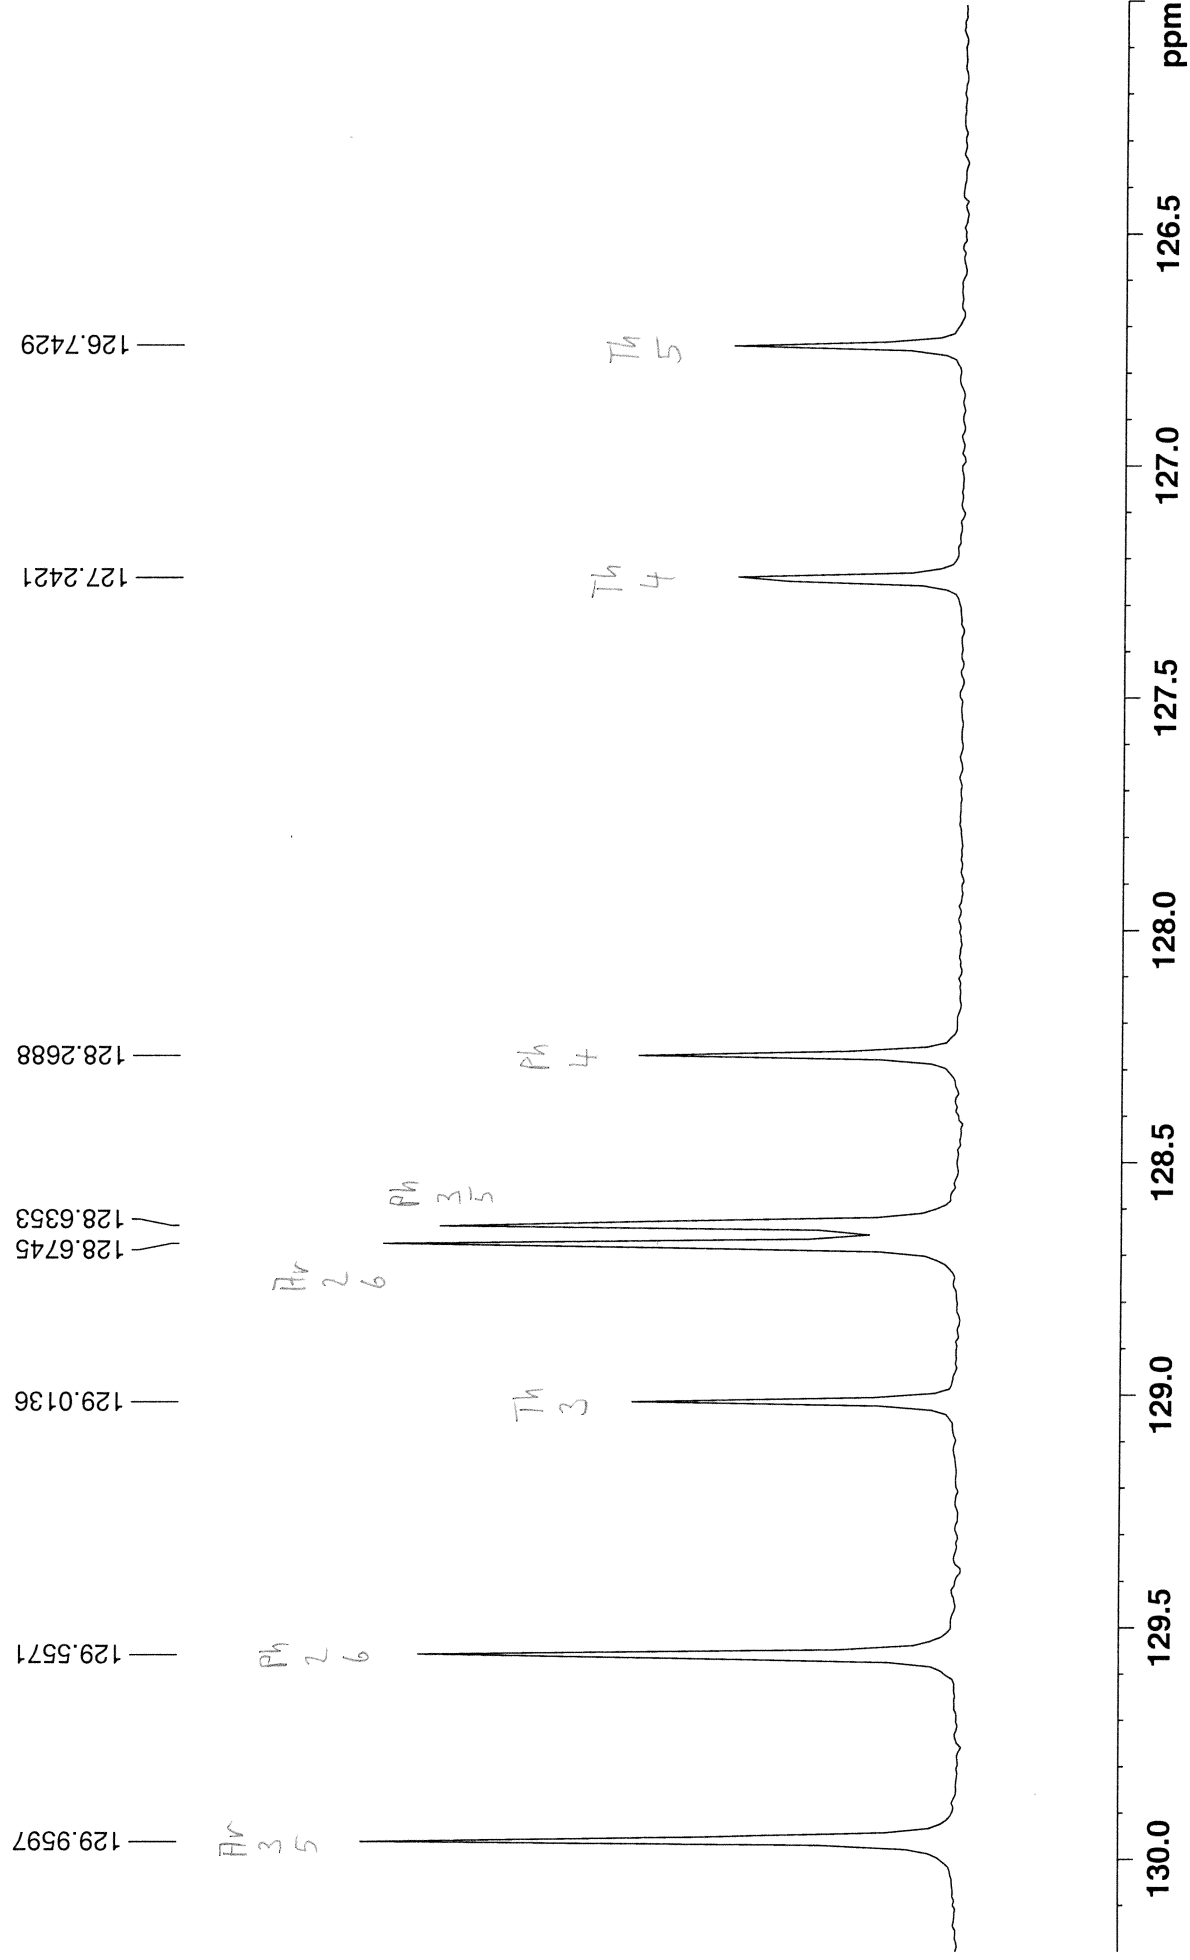

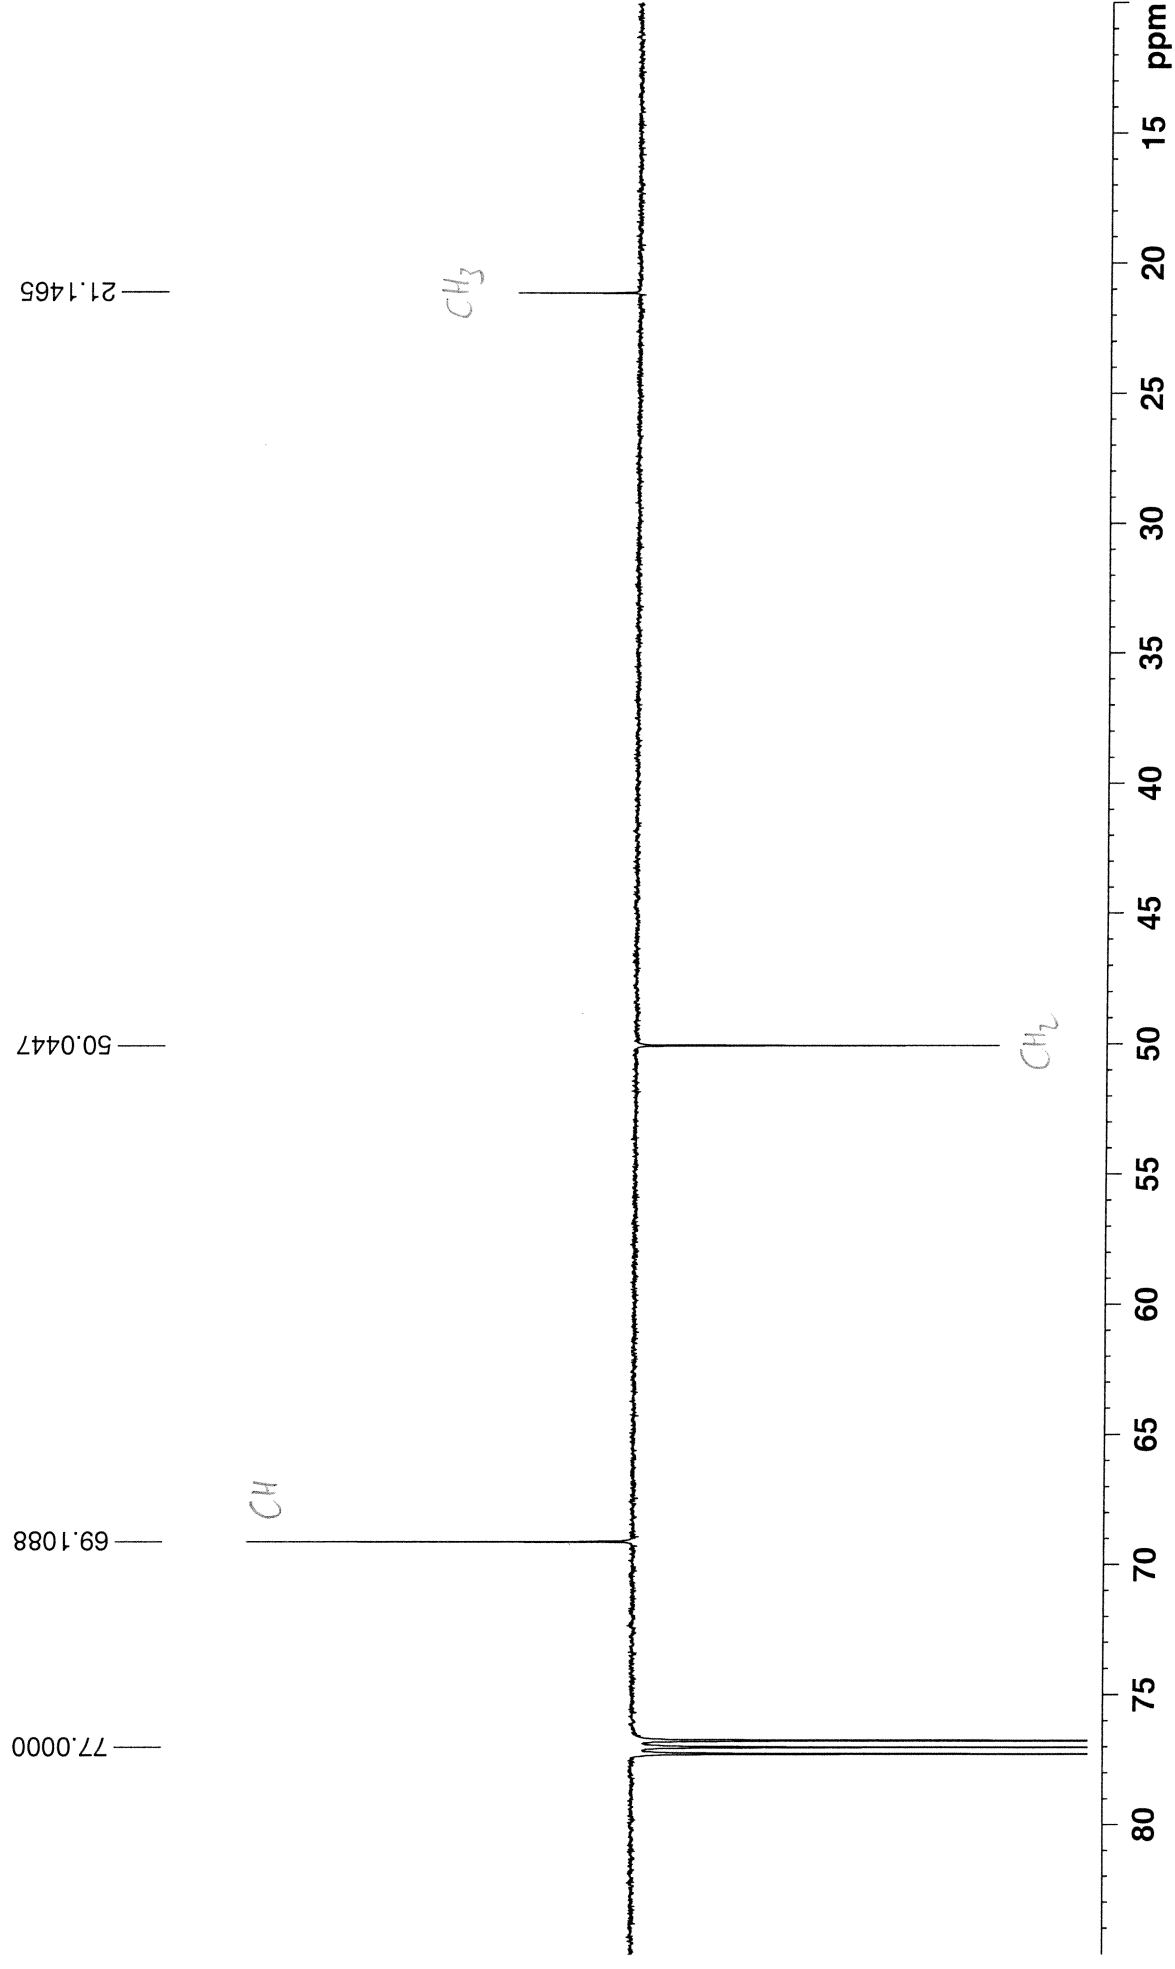

PN022\_2\_2 in cdcl3 (COSY) 29.8.2019

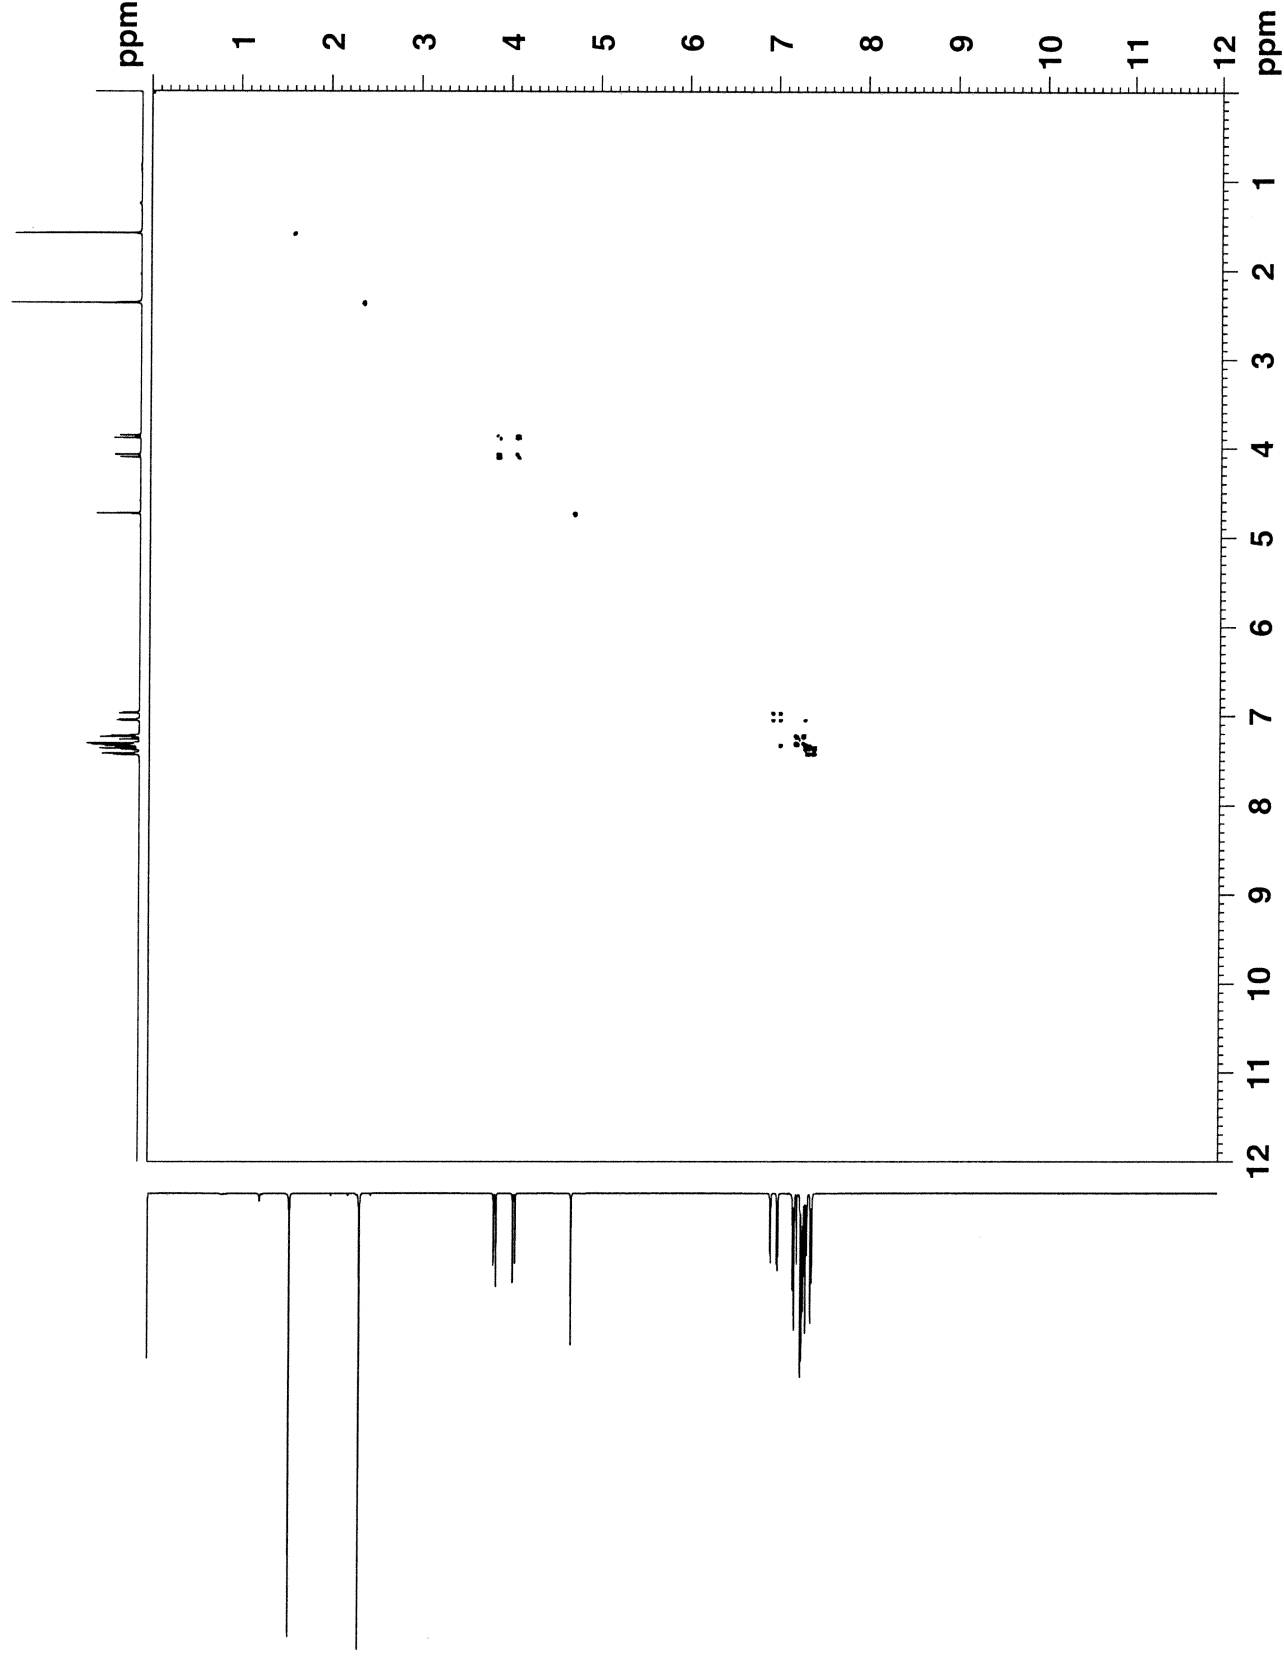



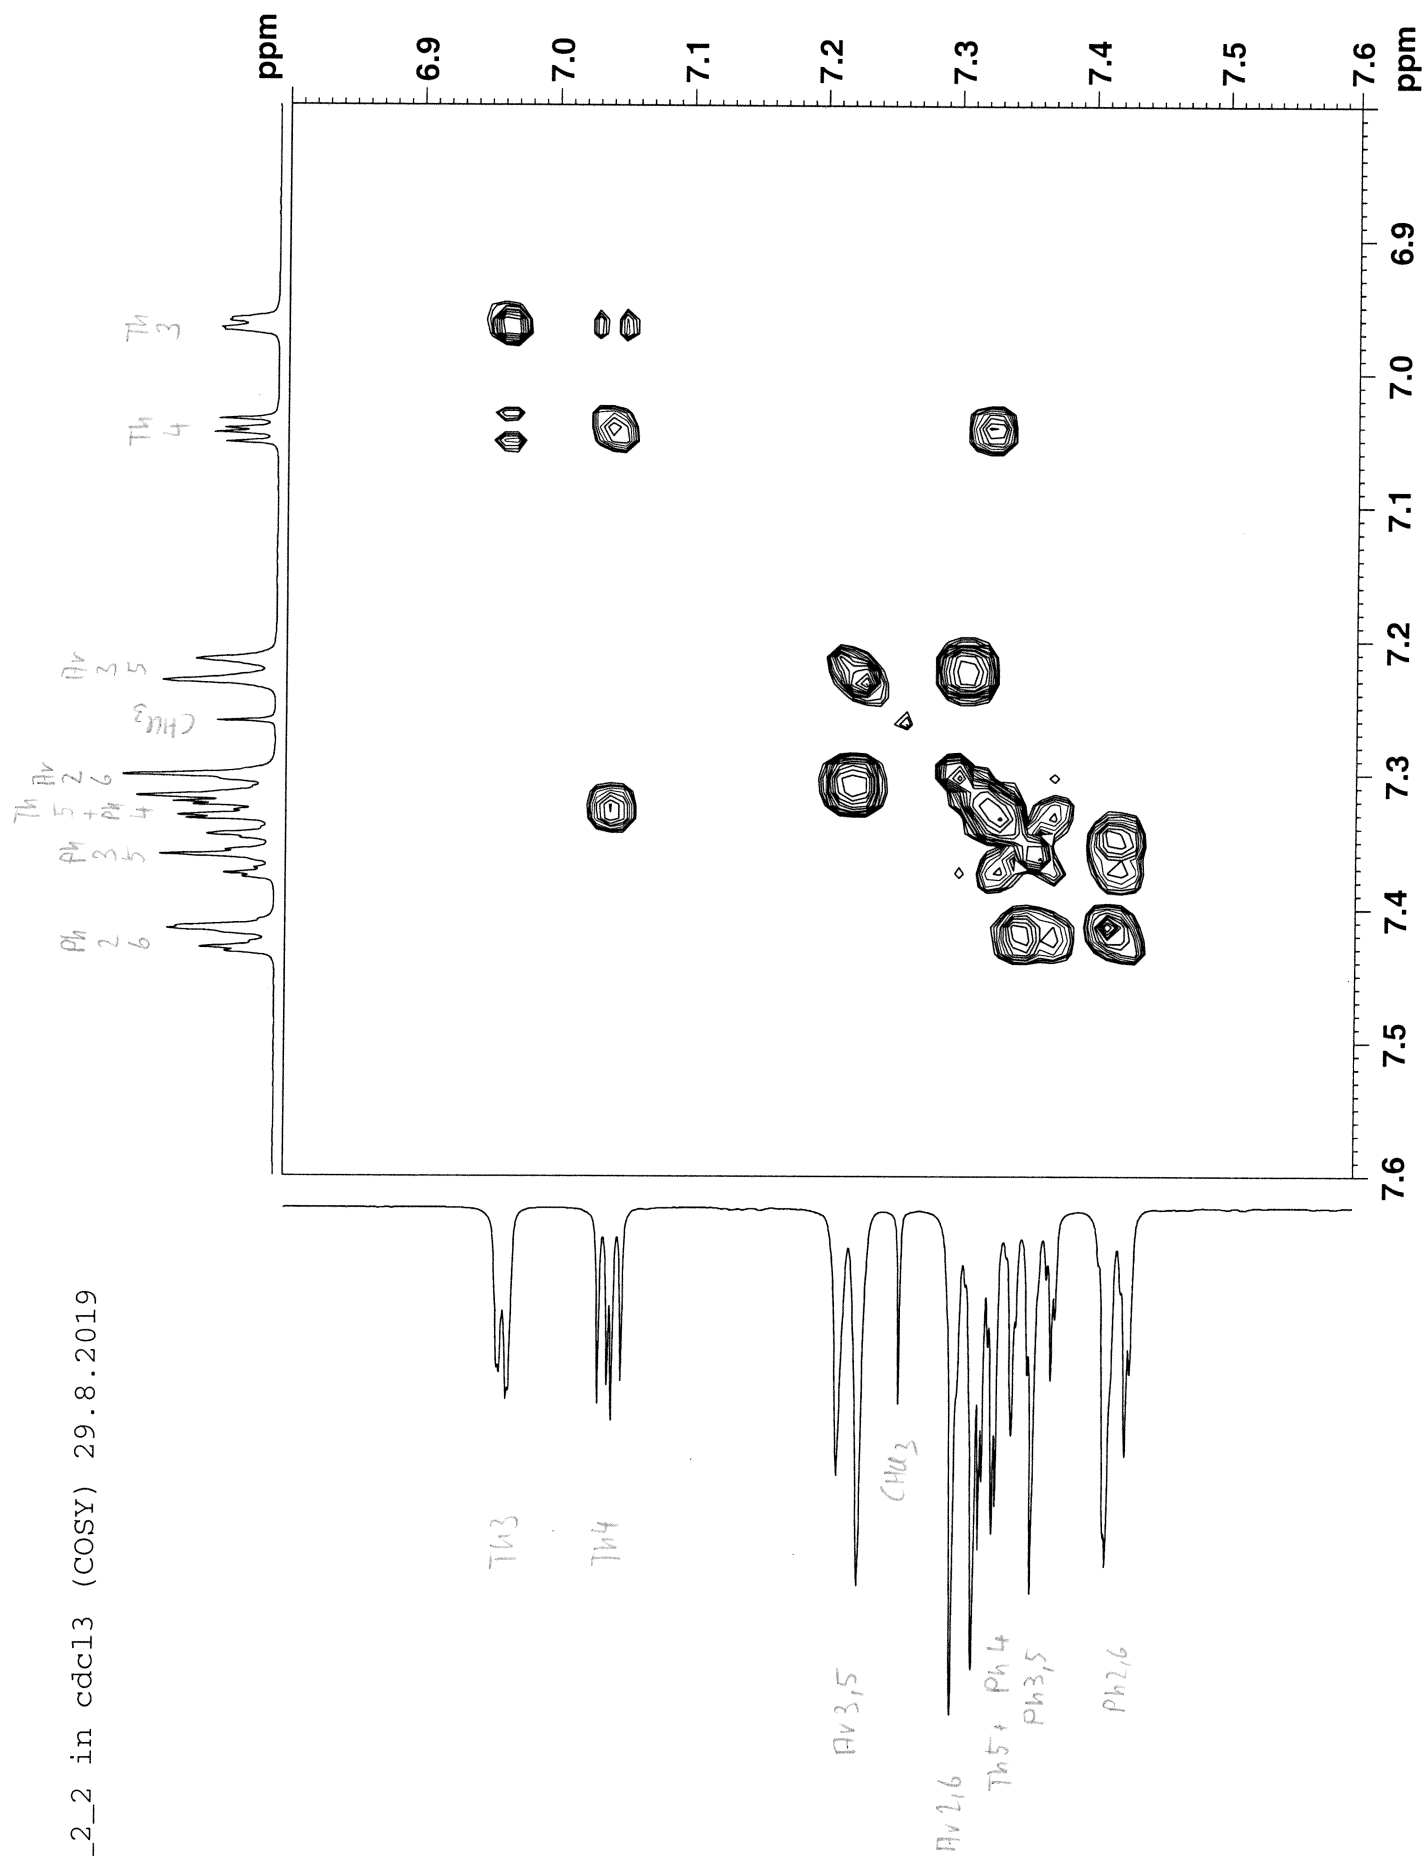

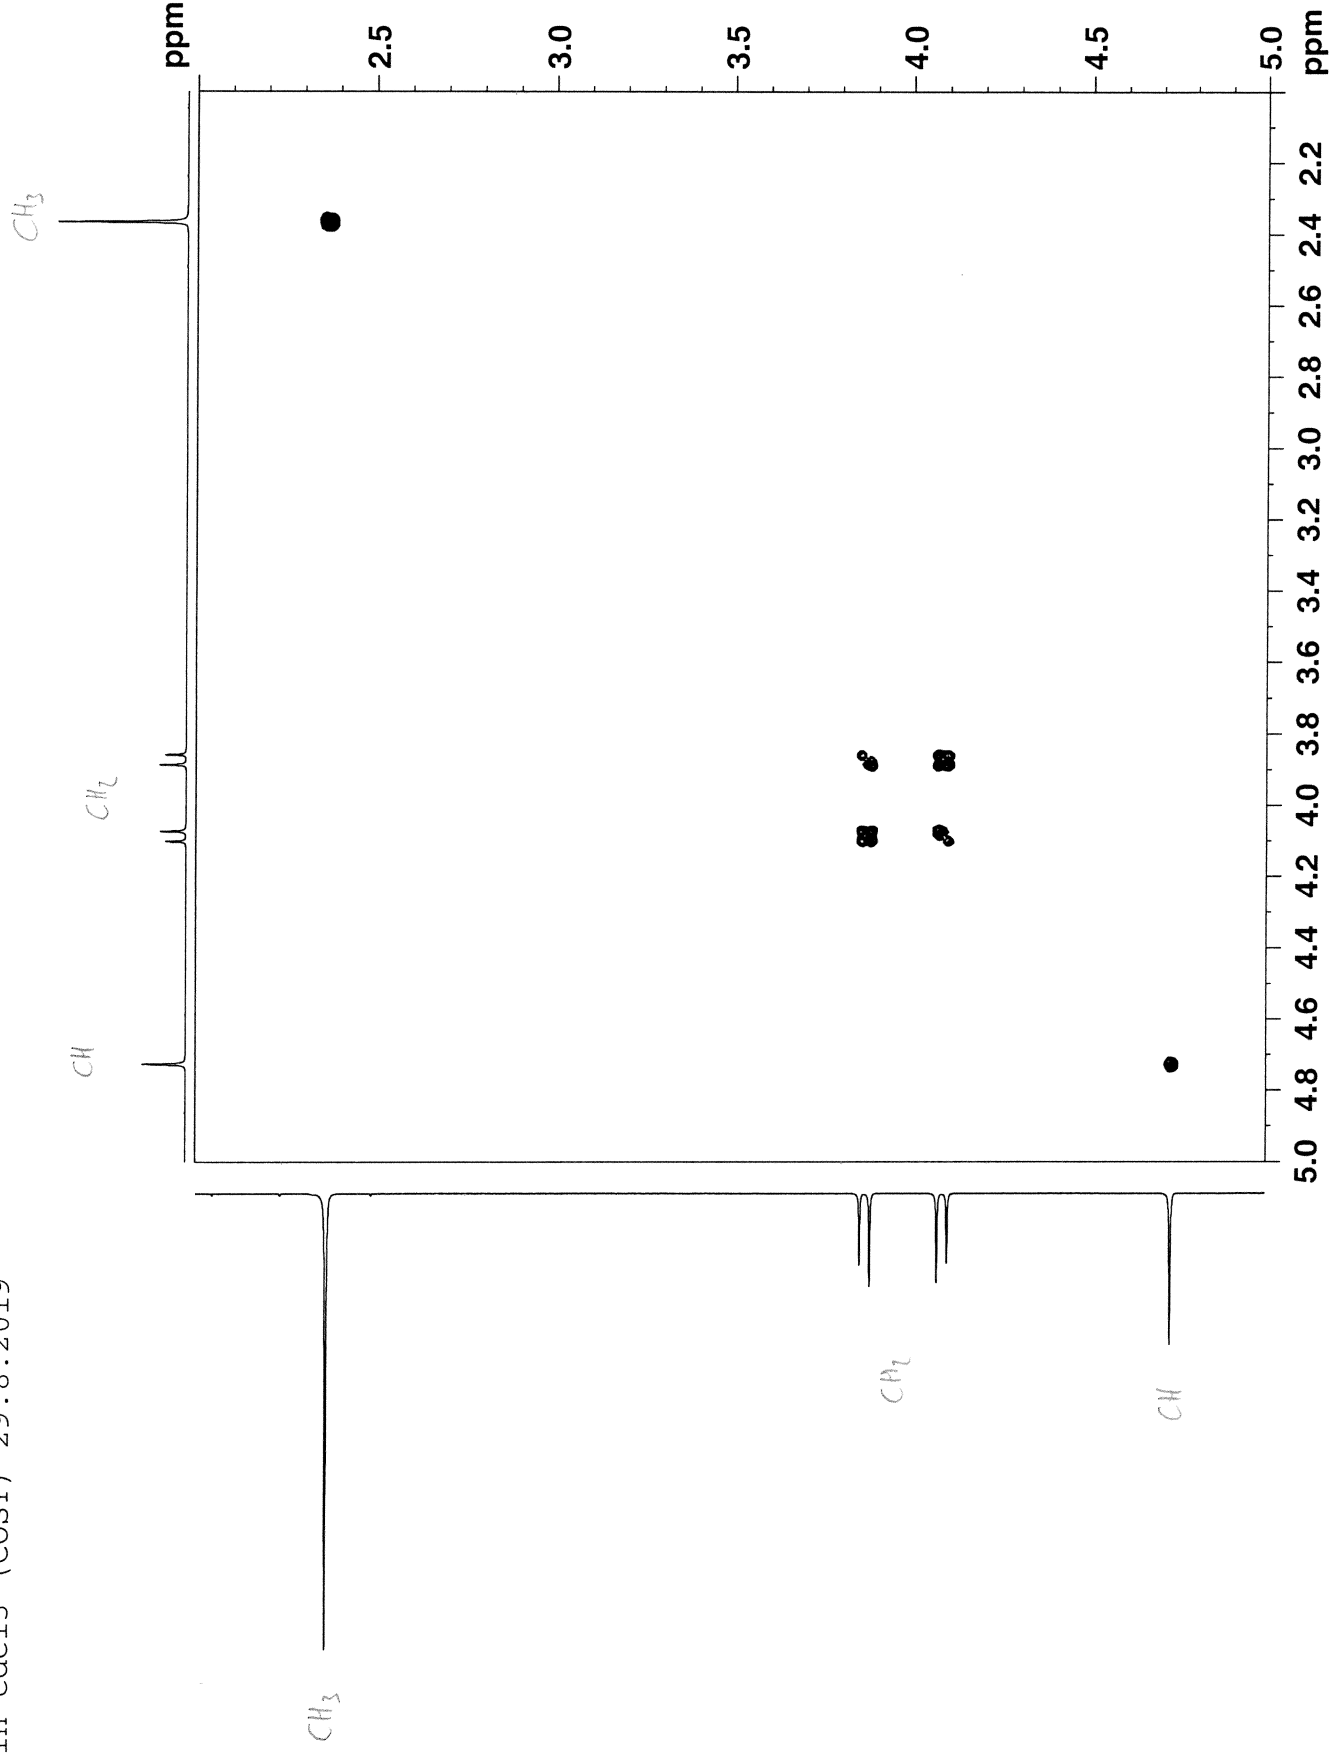

PN022\_2\_2 in cdcl3 (HSQC) 29.8.2019

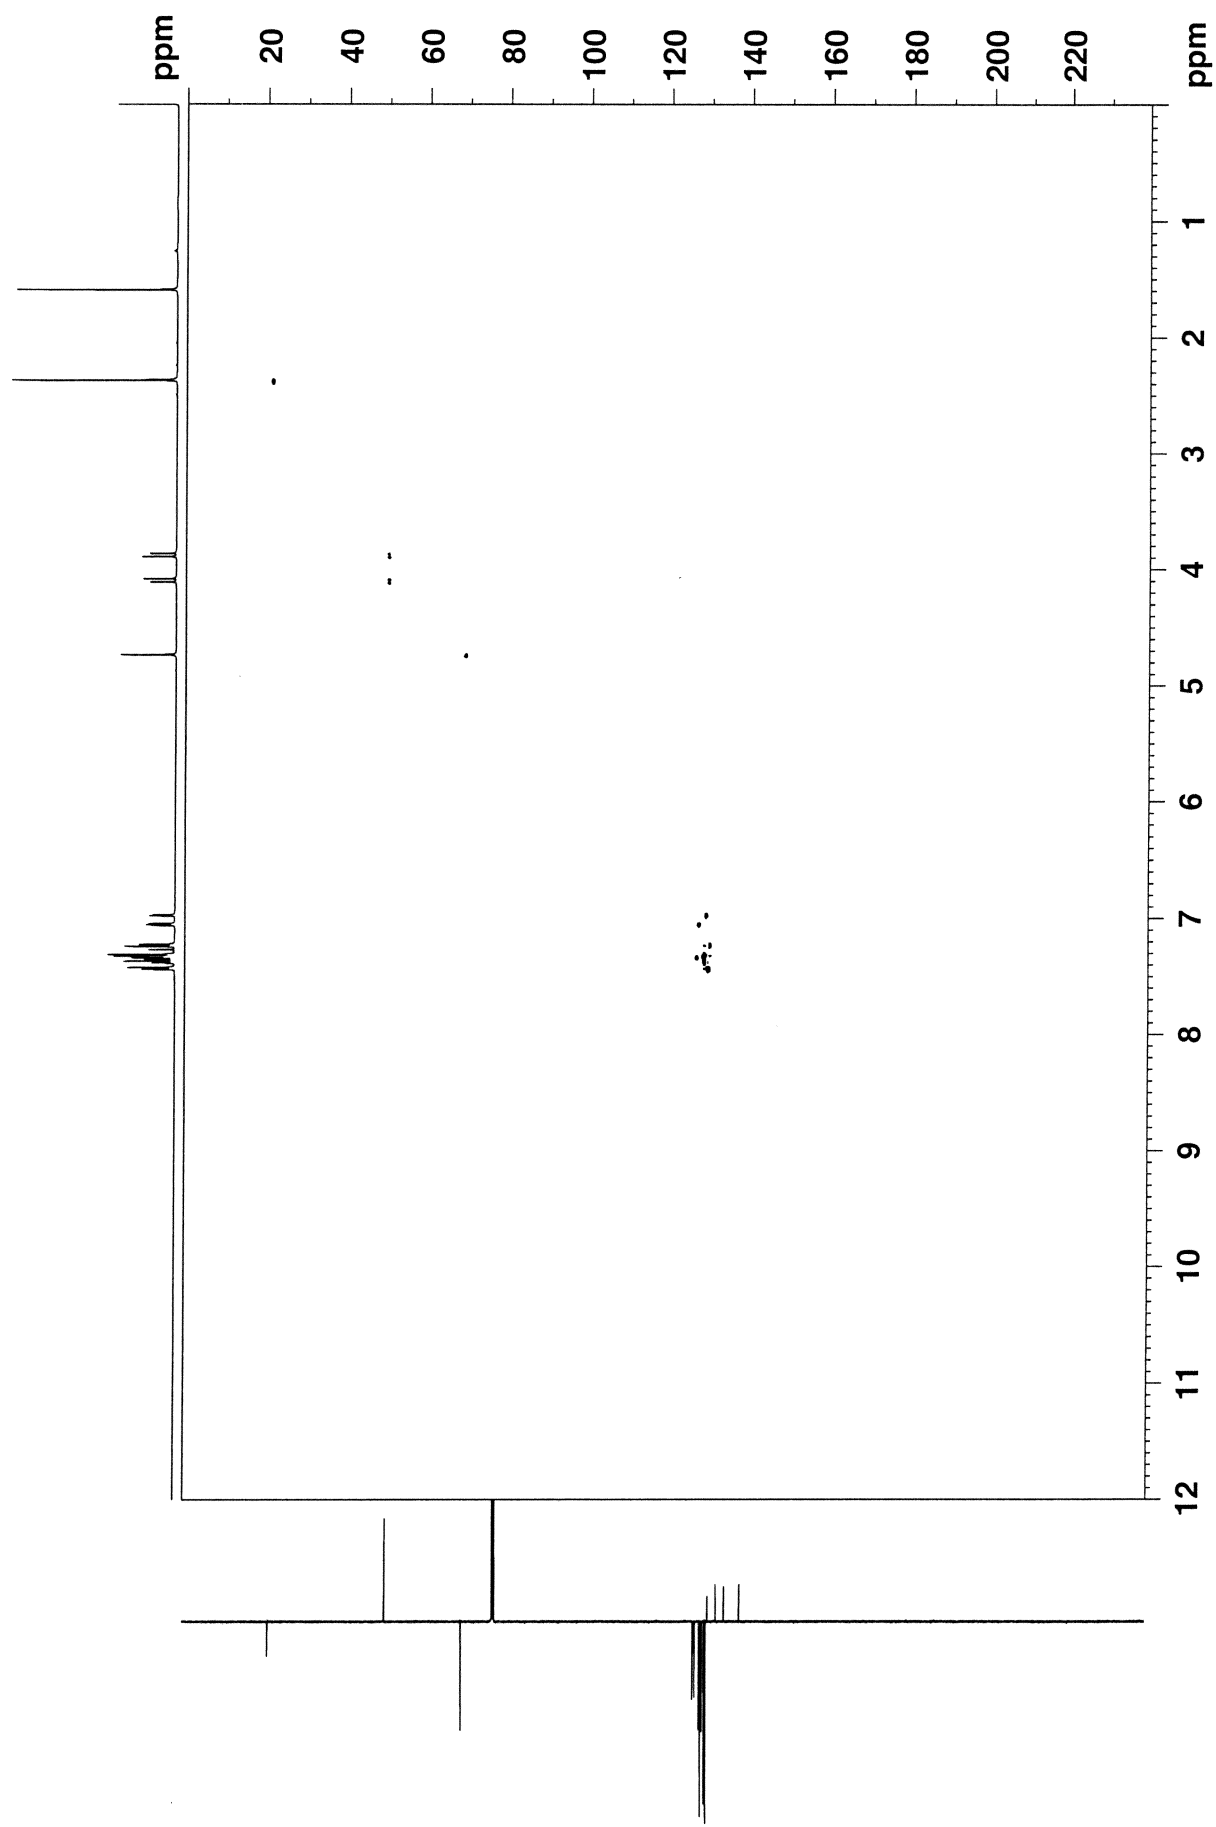

PN022\_2\_2 in cdcl3 (HSQC) 29.8.2019

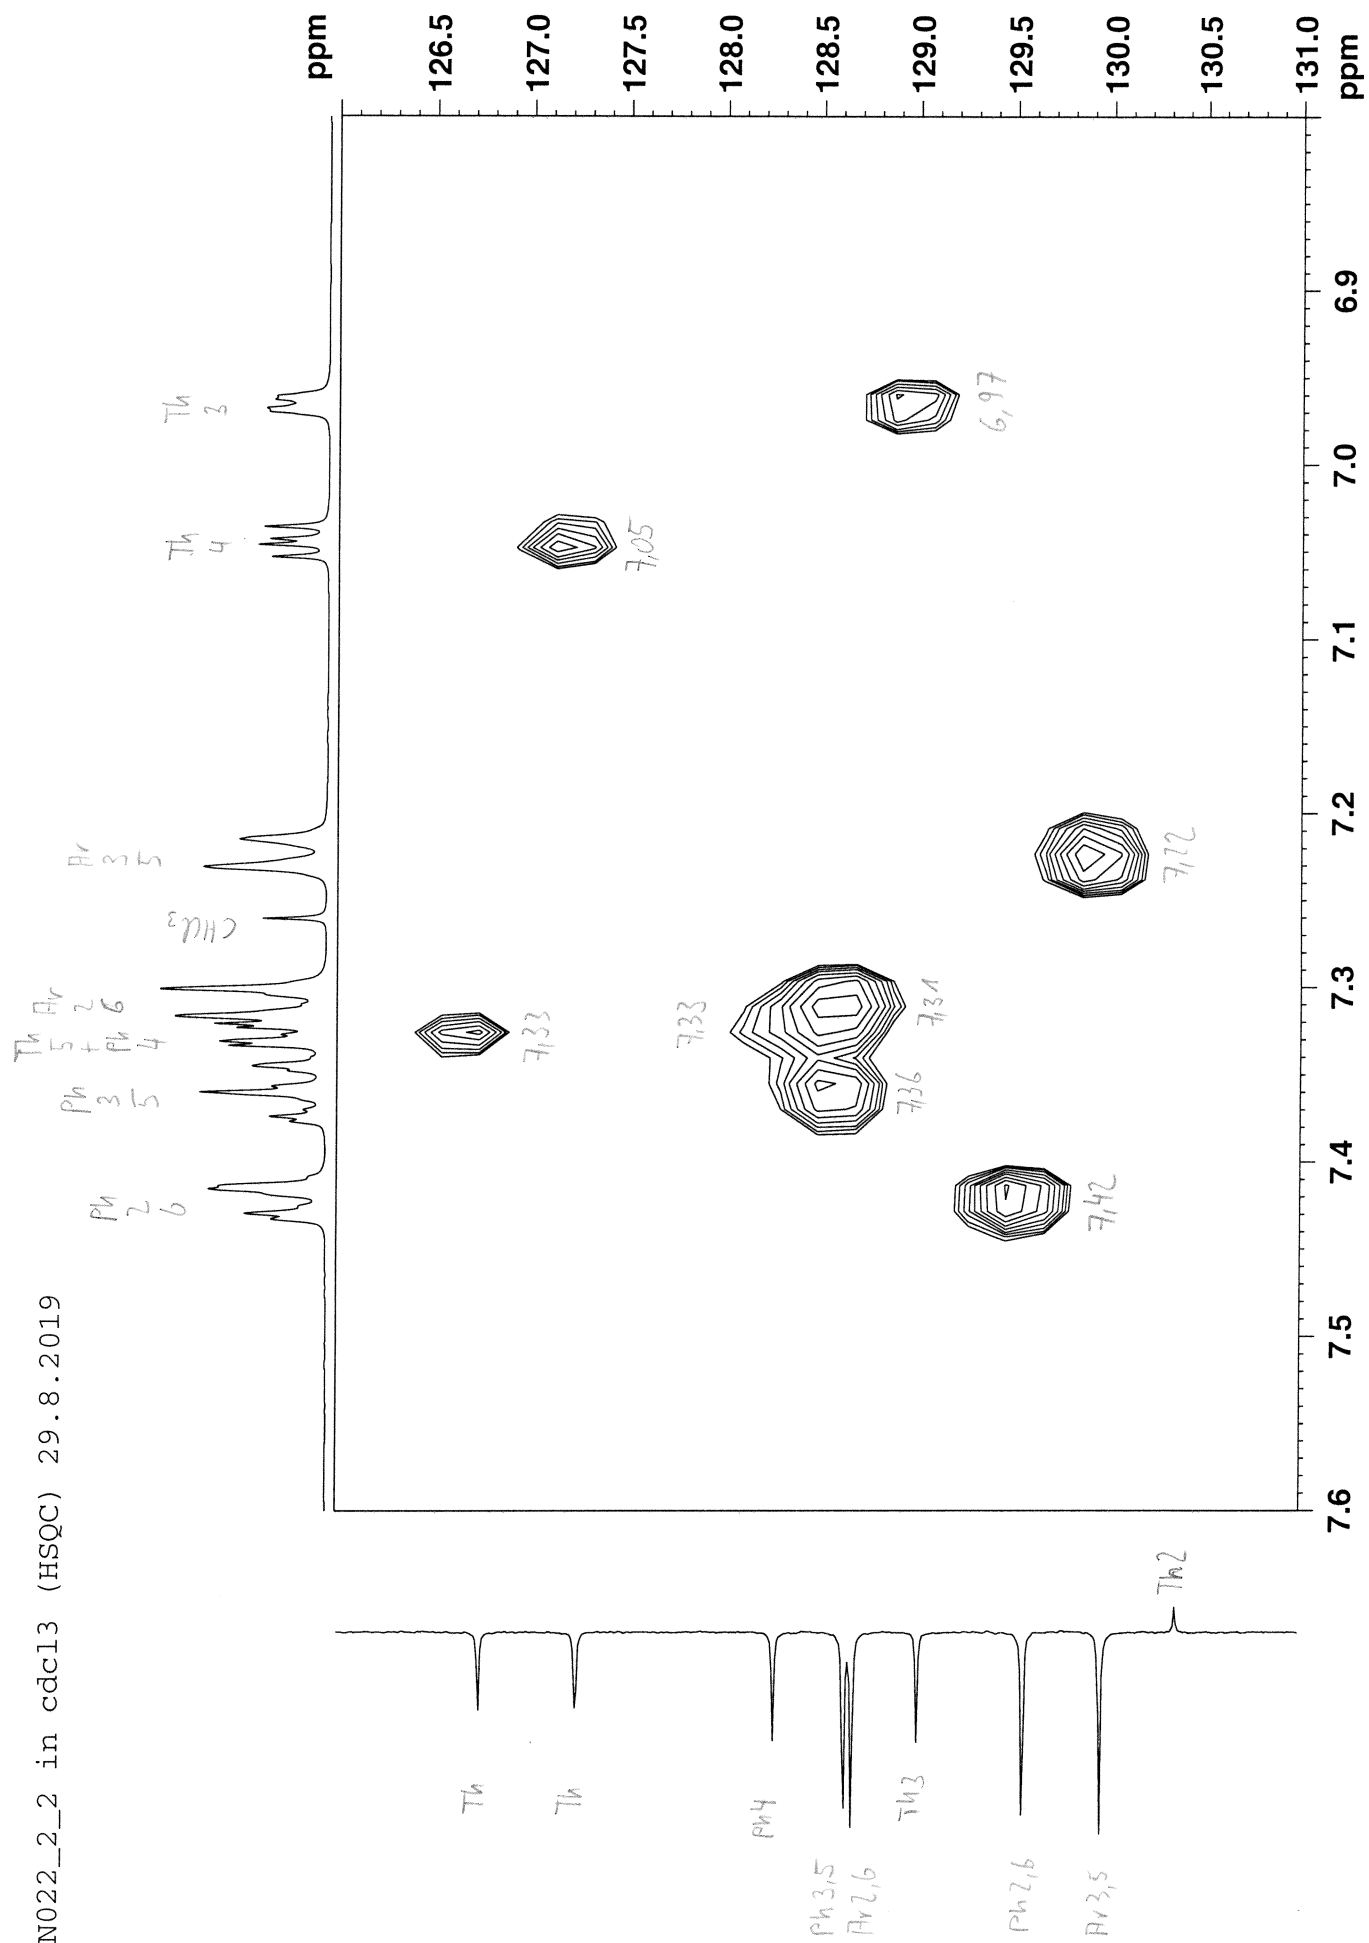

PN022\_2\_2 in cdcl3 (HSQC) 29.8.2019

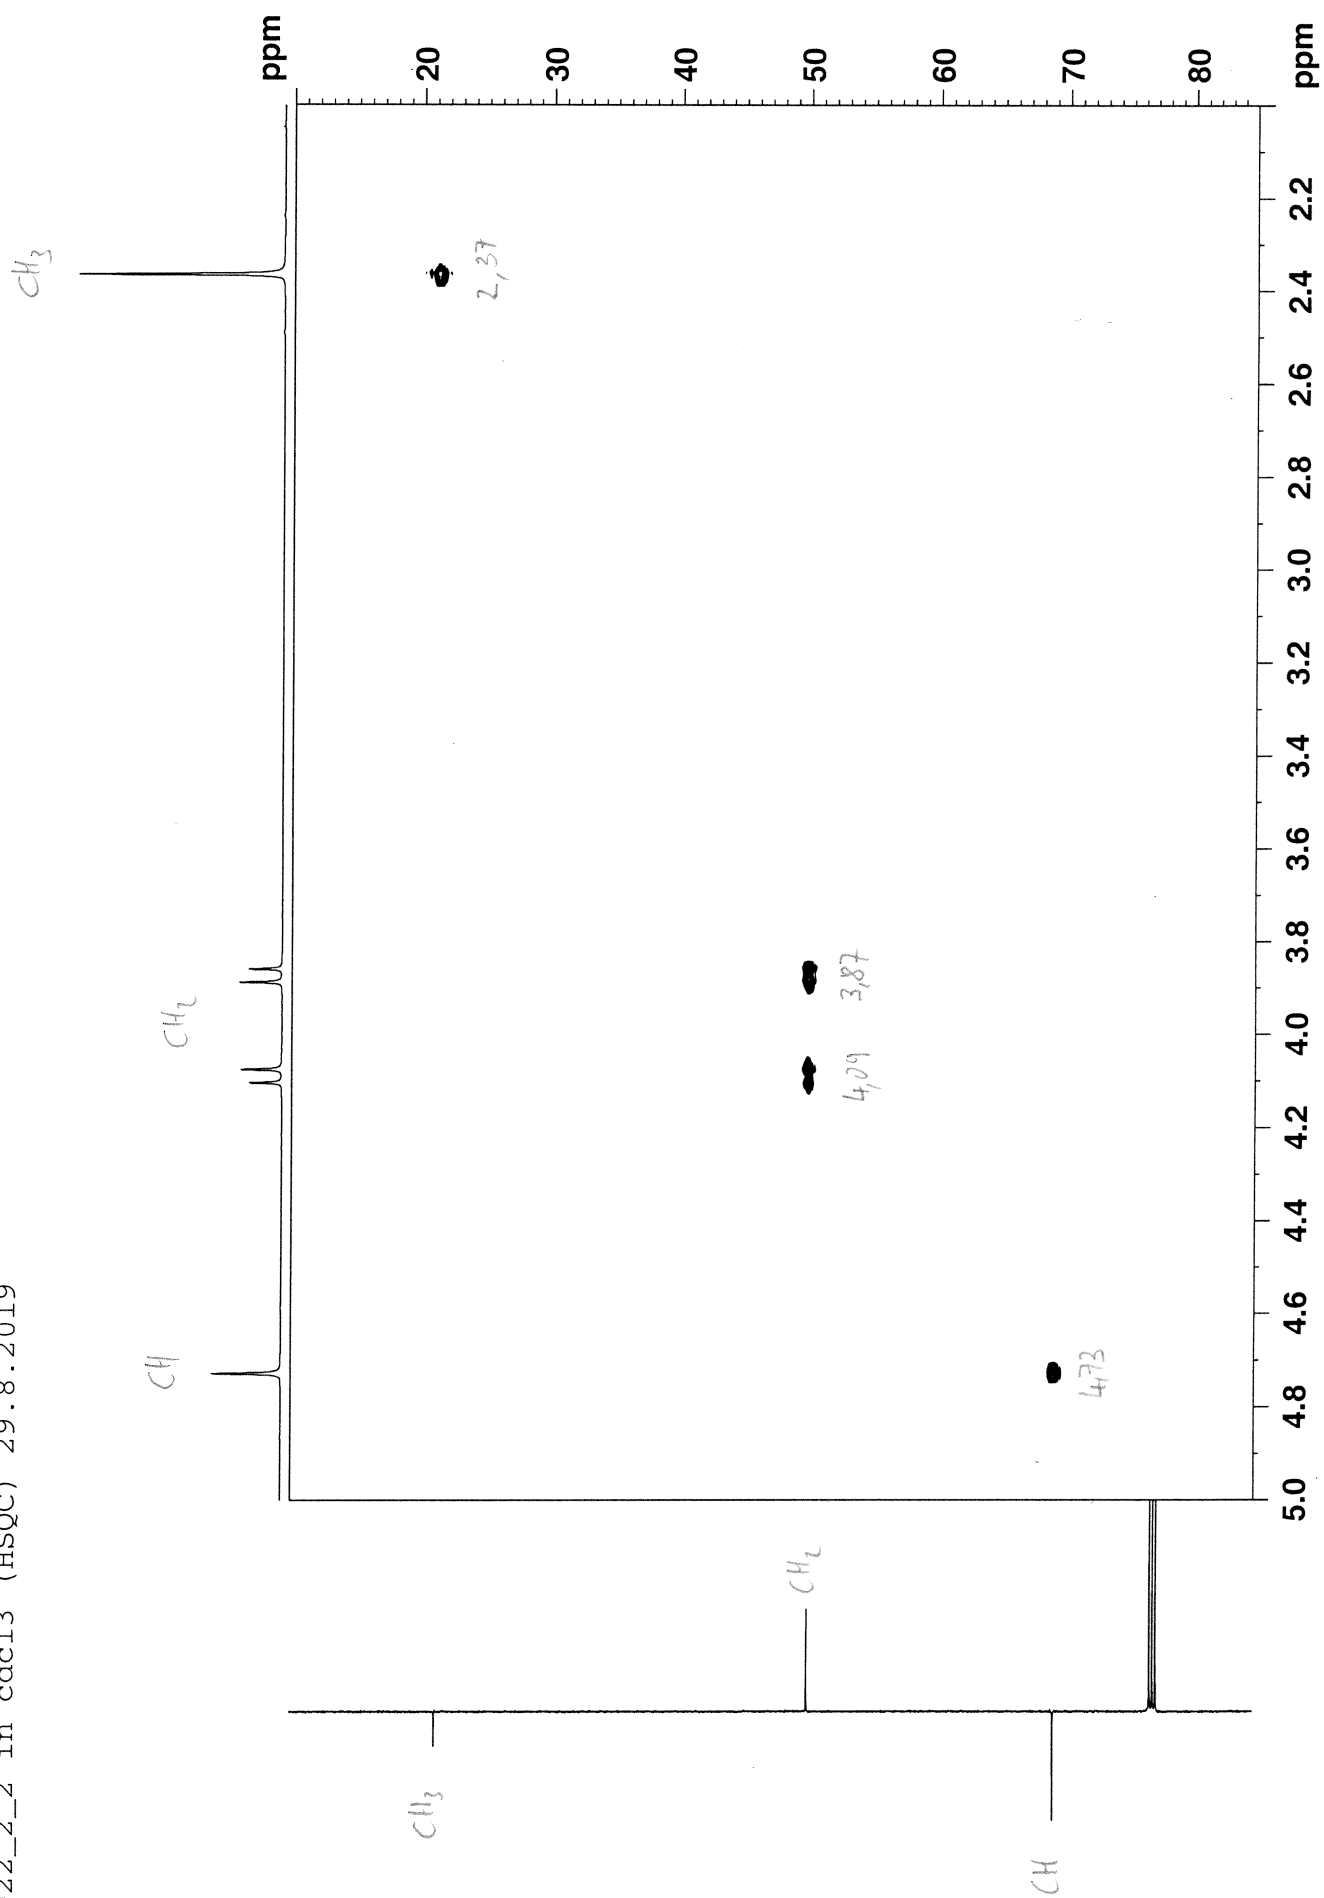

PN022\_2\_2 in cdcl3 (HMBC) 29.8.2019

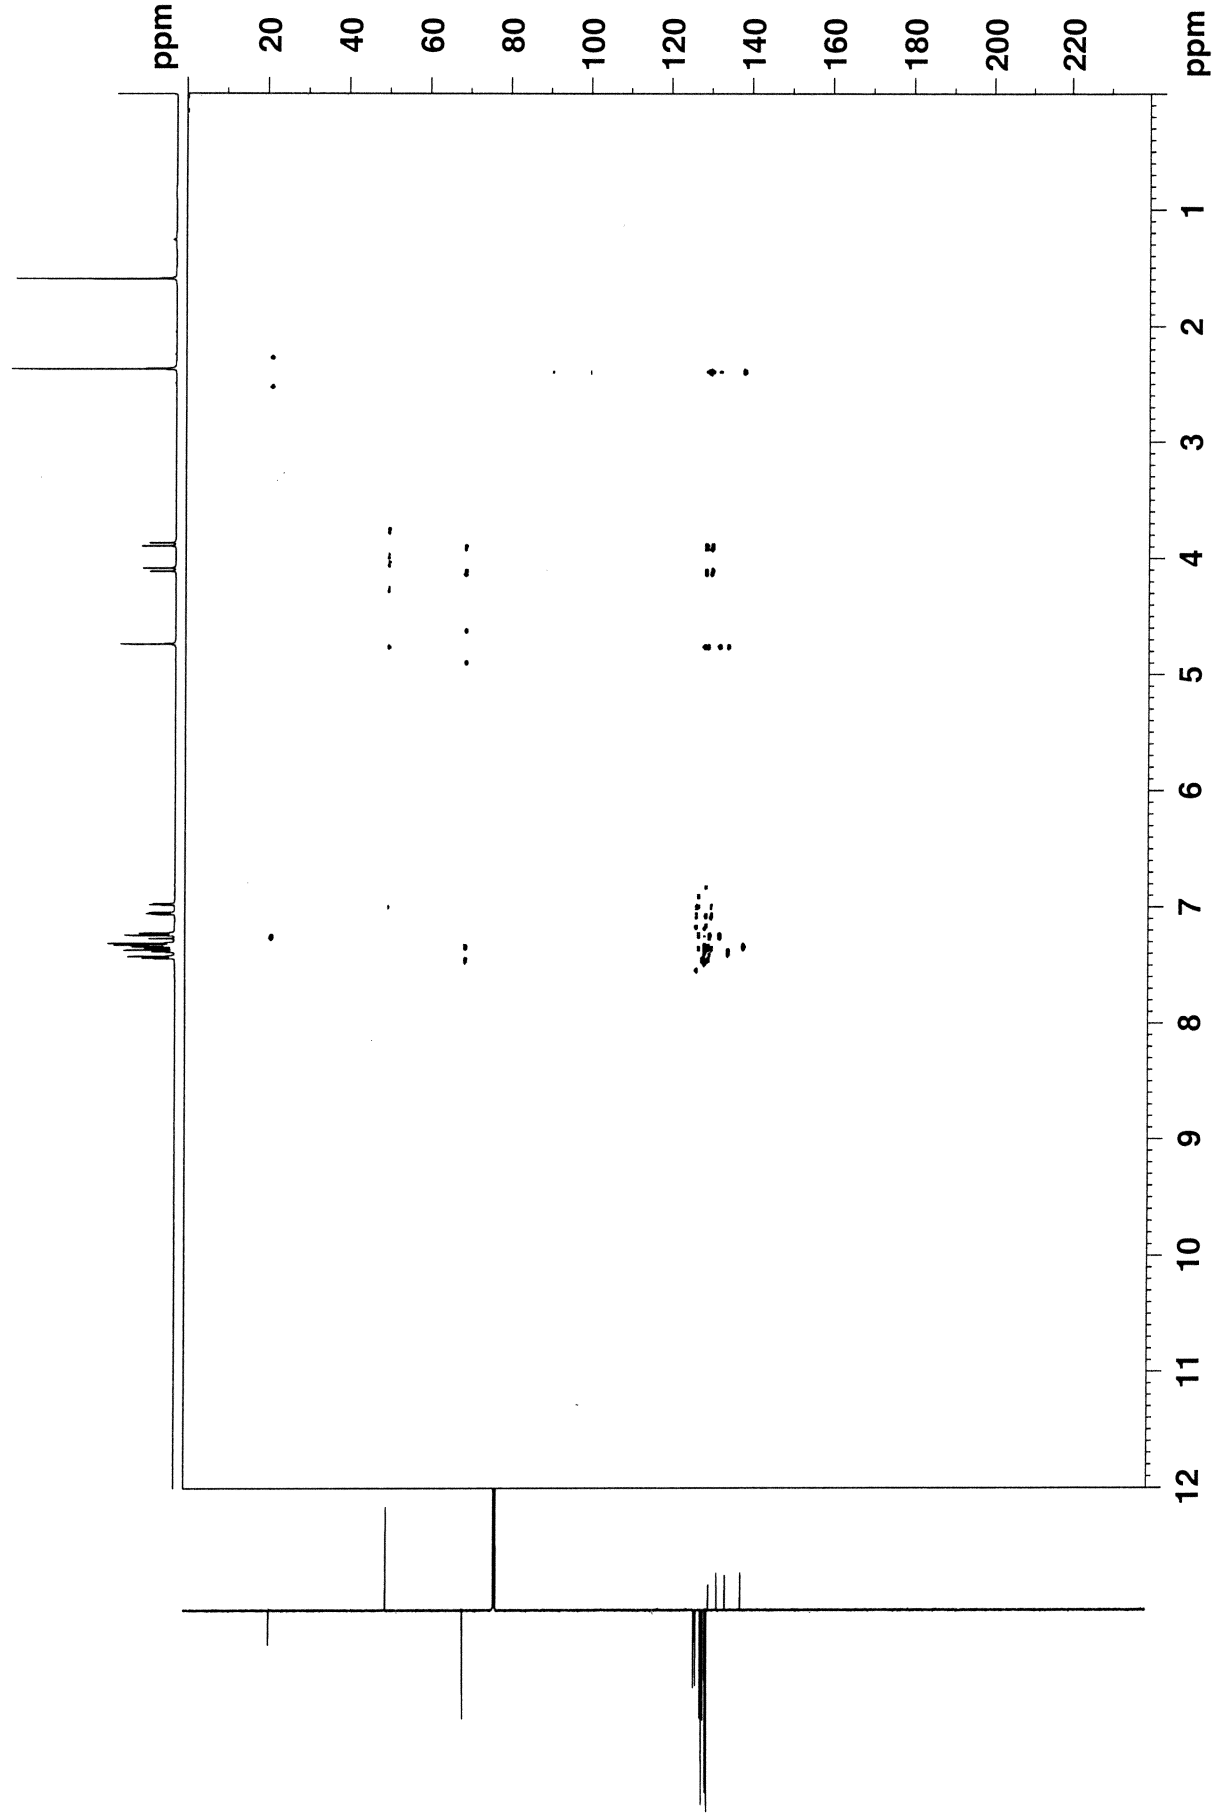

PN022\_2\_2 in cdcl3 (HMBC) 29.8.2019

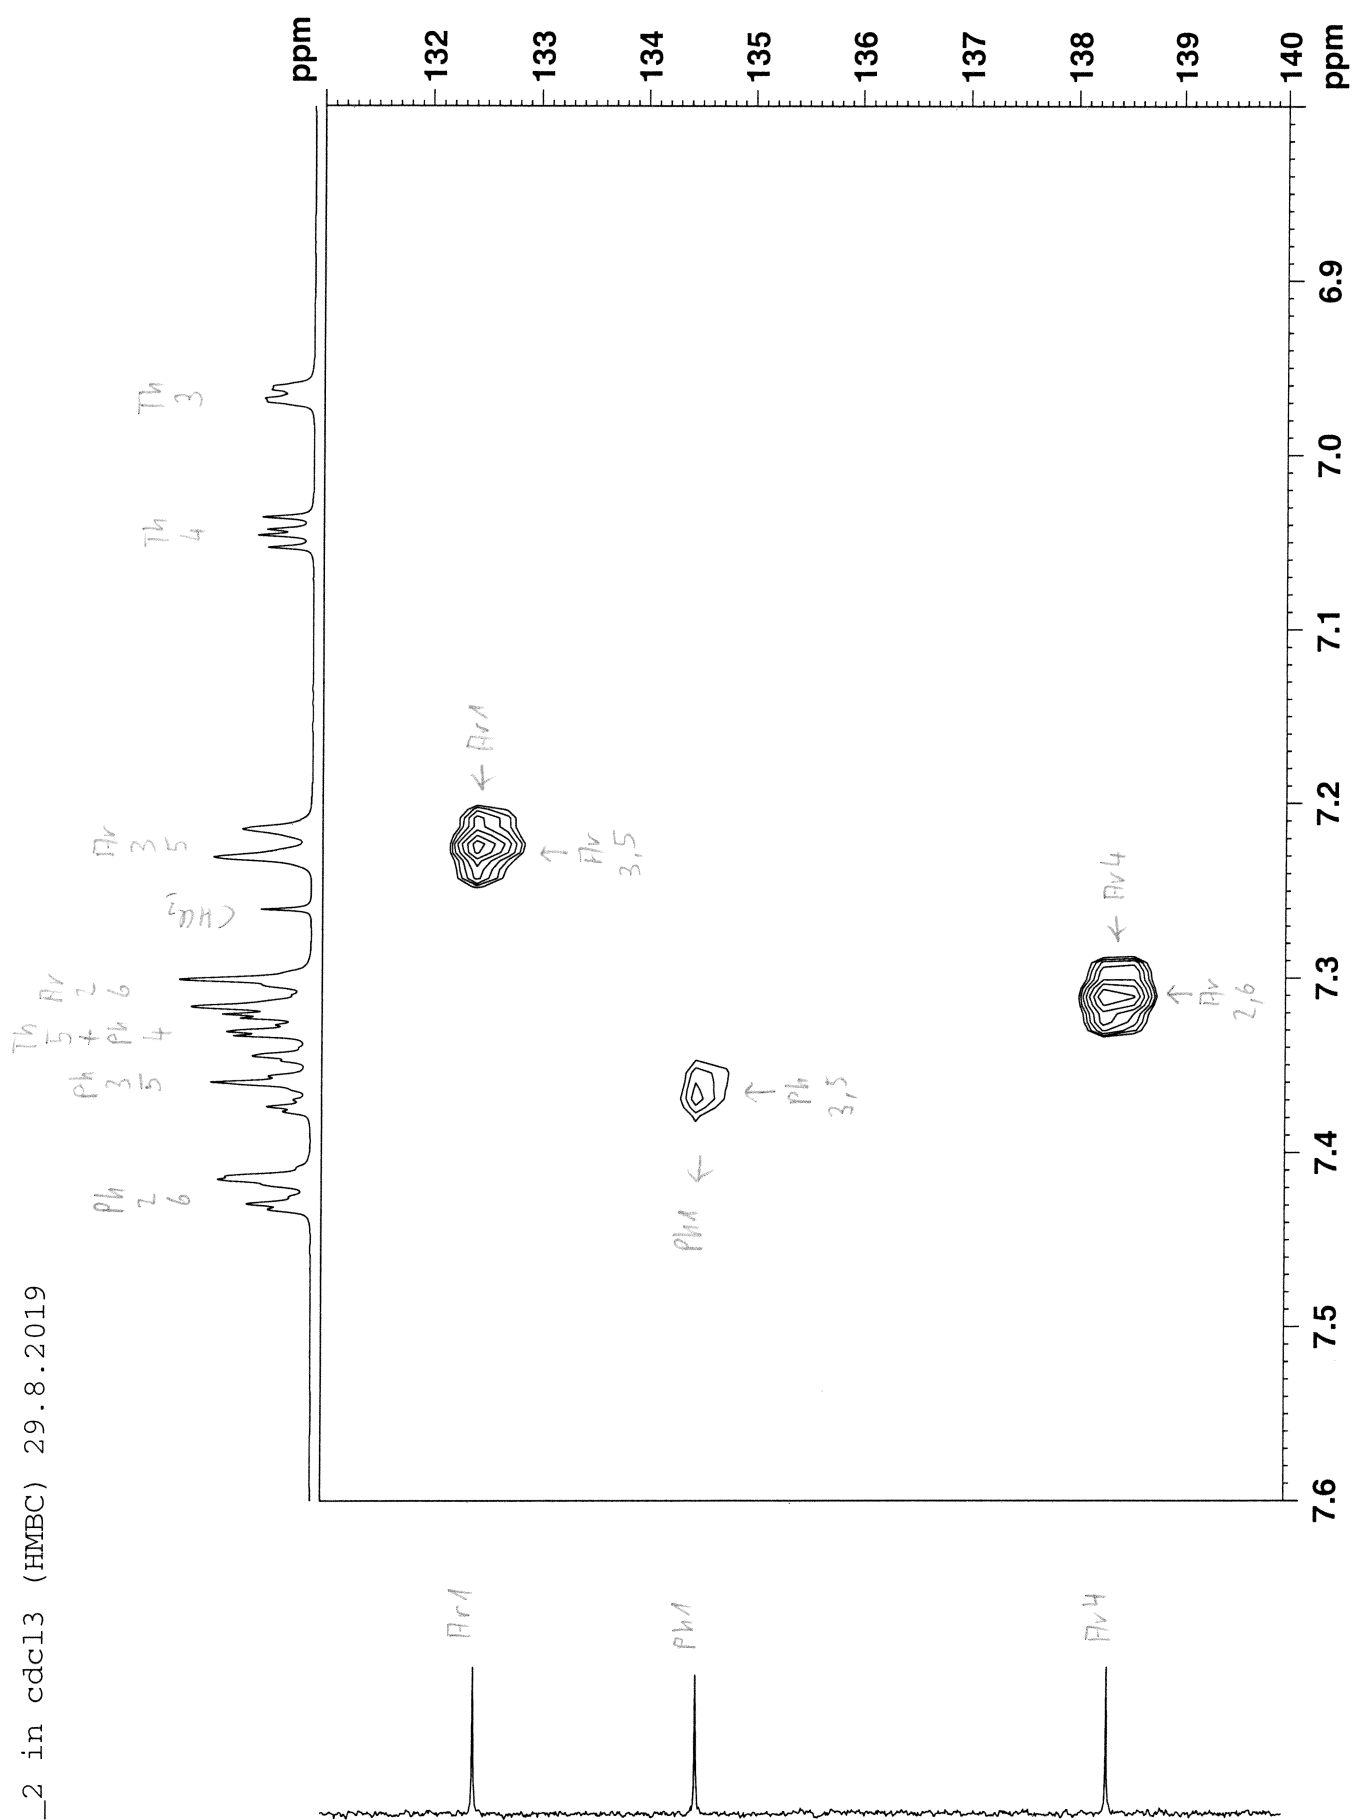

PN022\_2\_2 in cdcl3 (HMBC) 29.8.2019

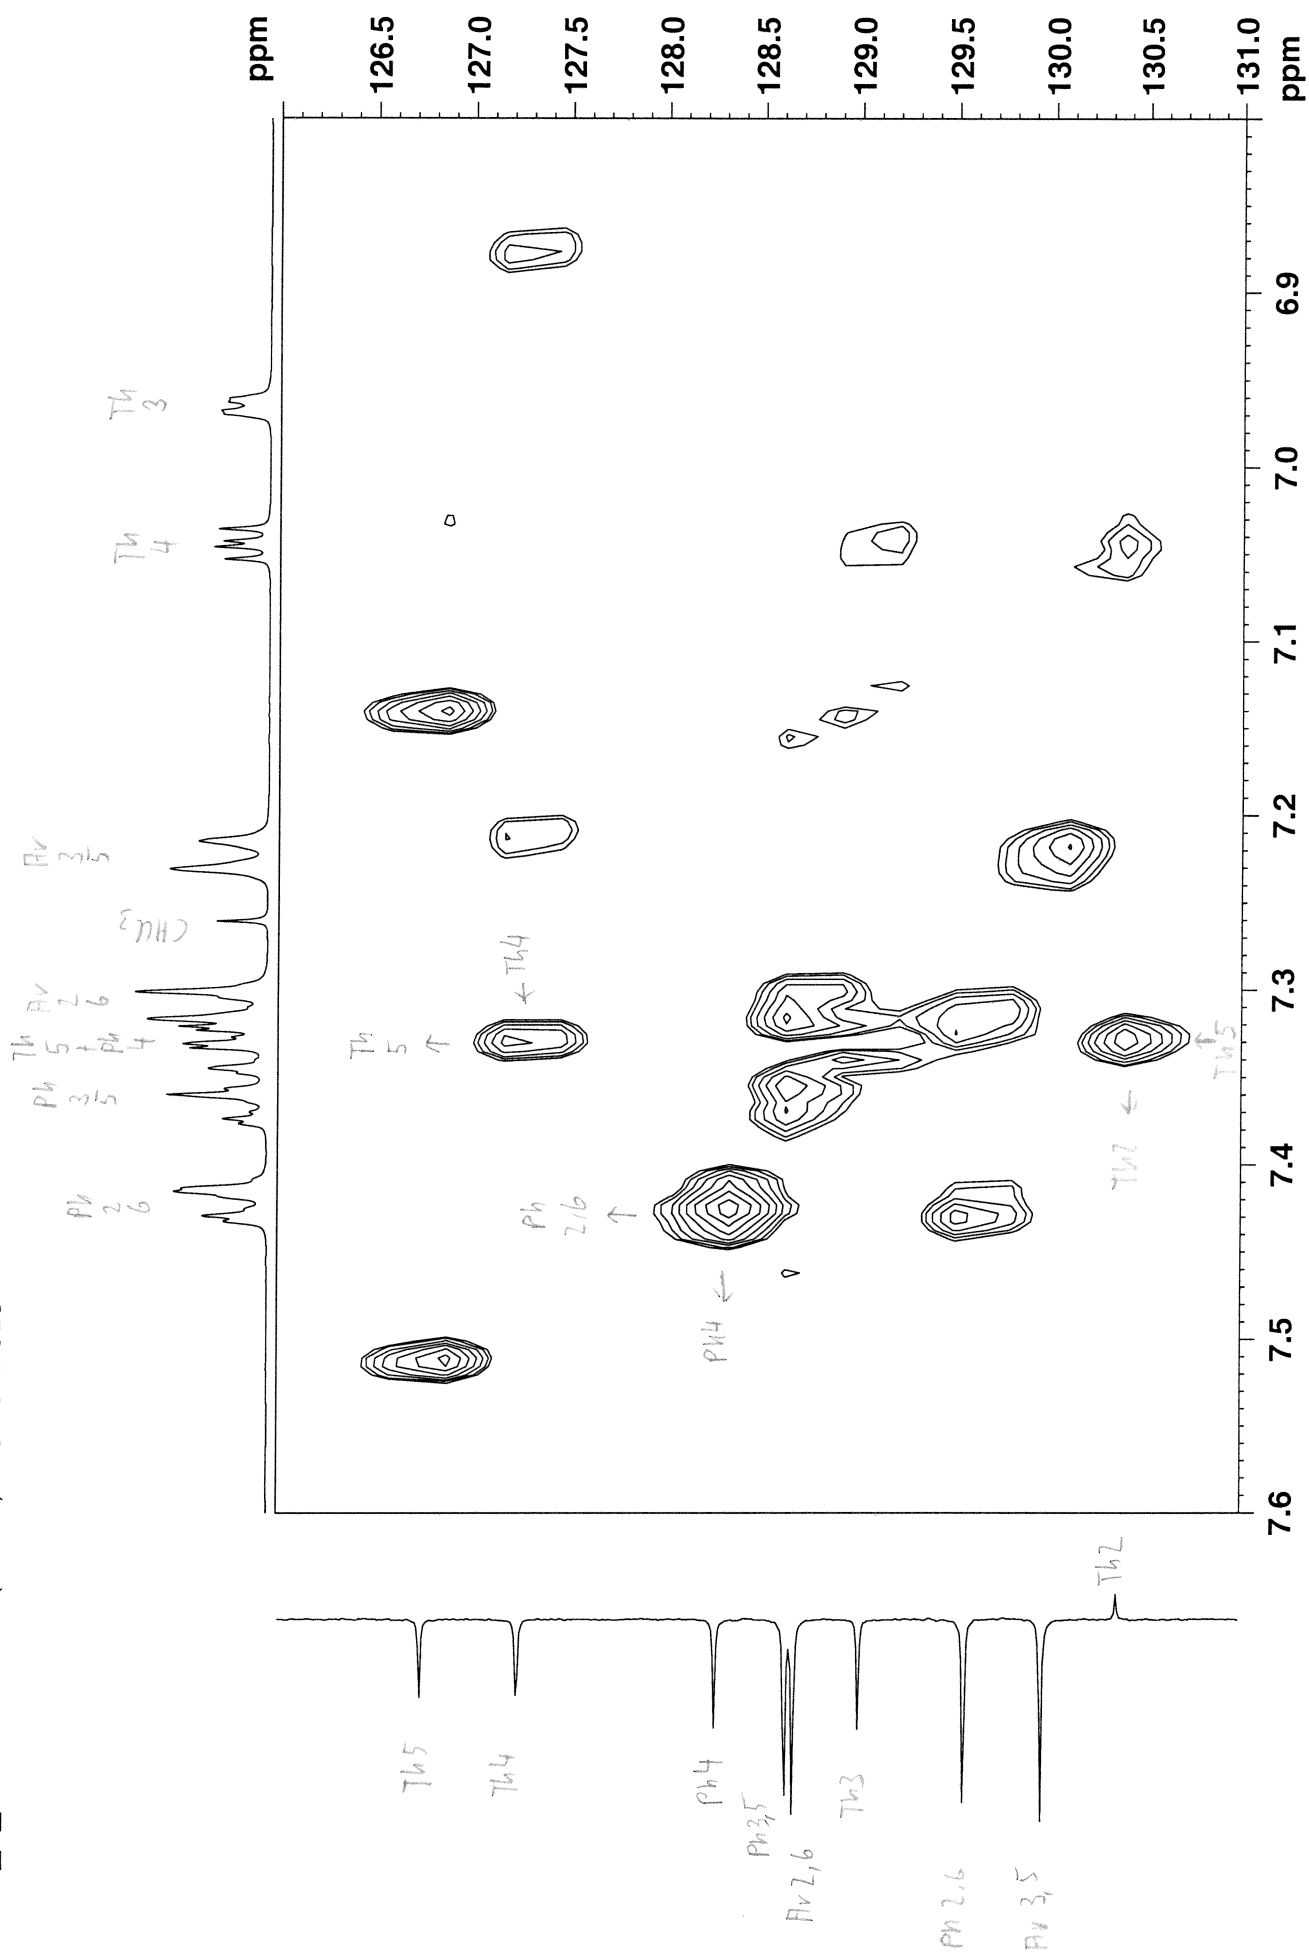



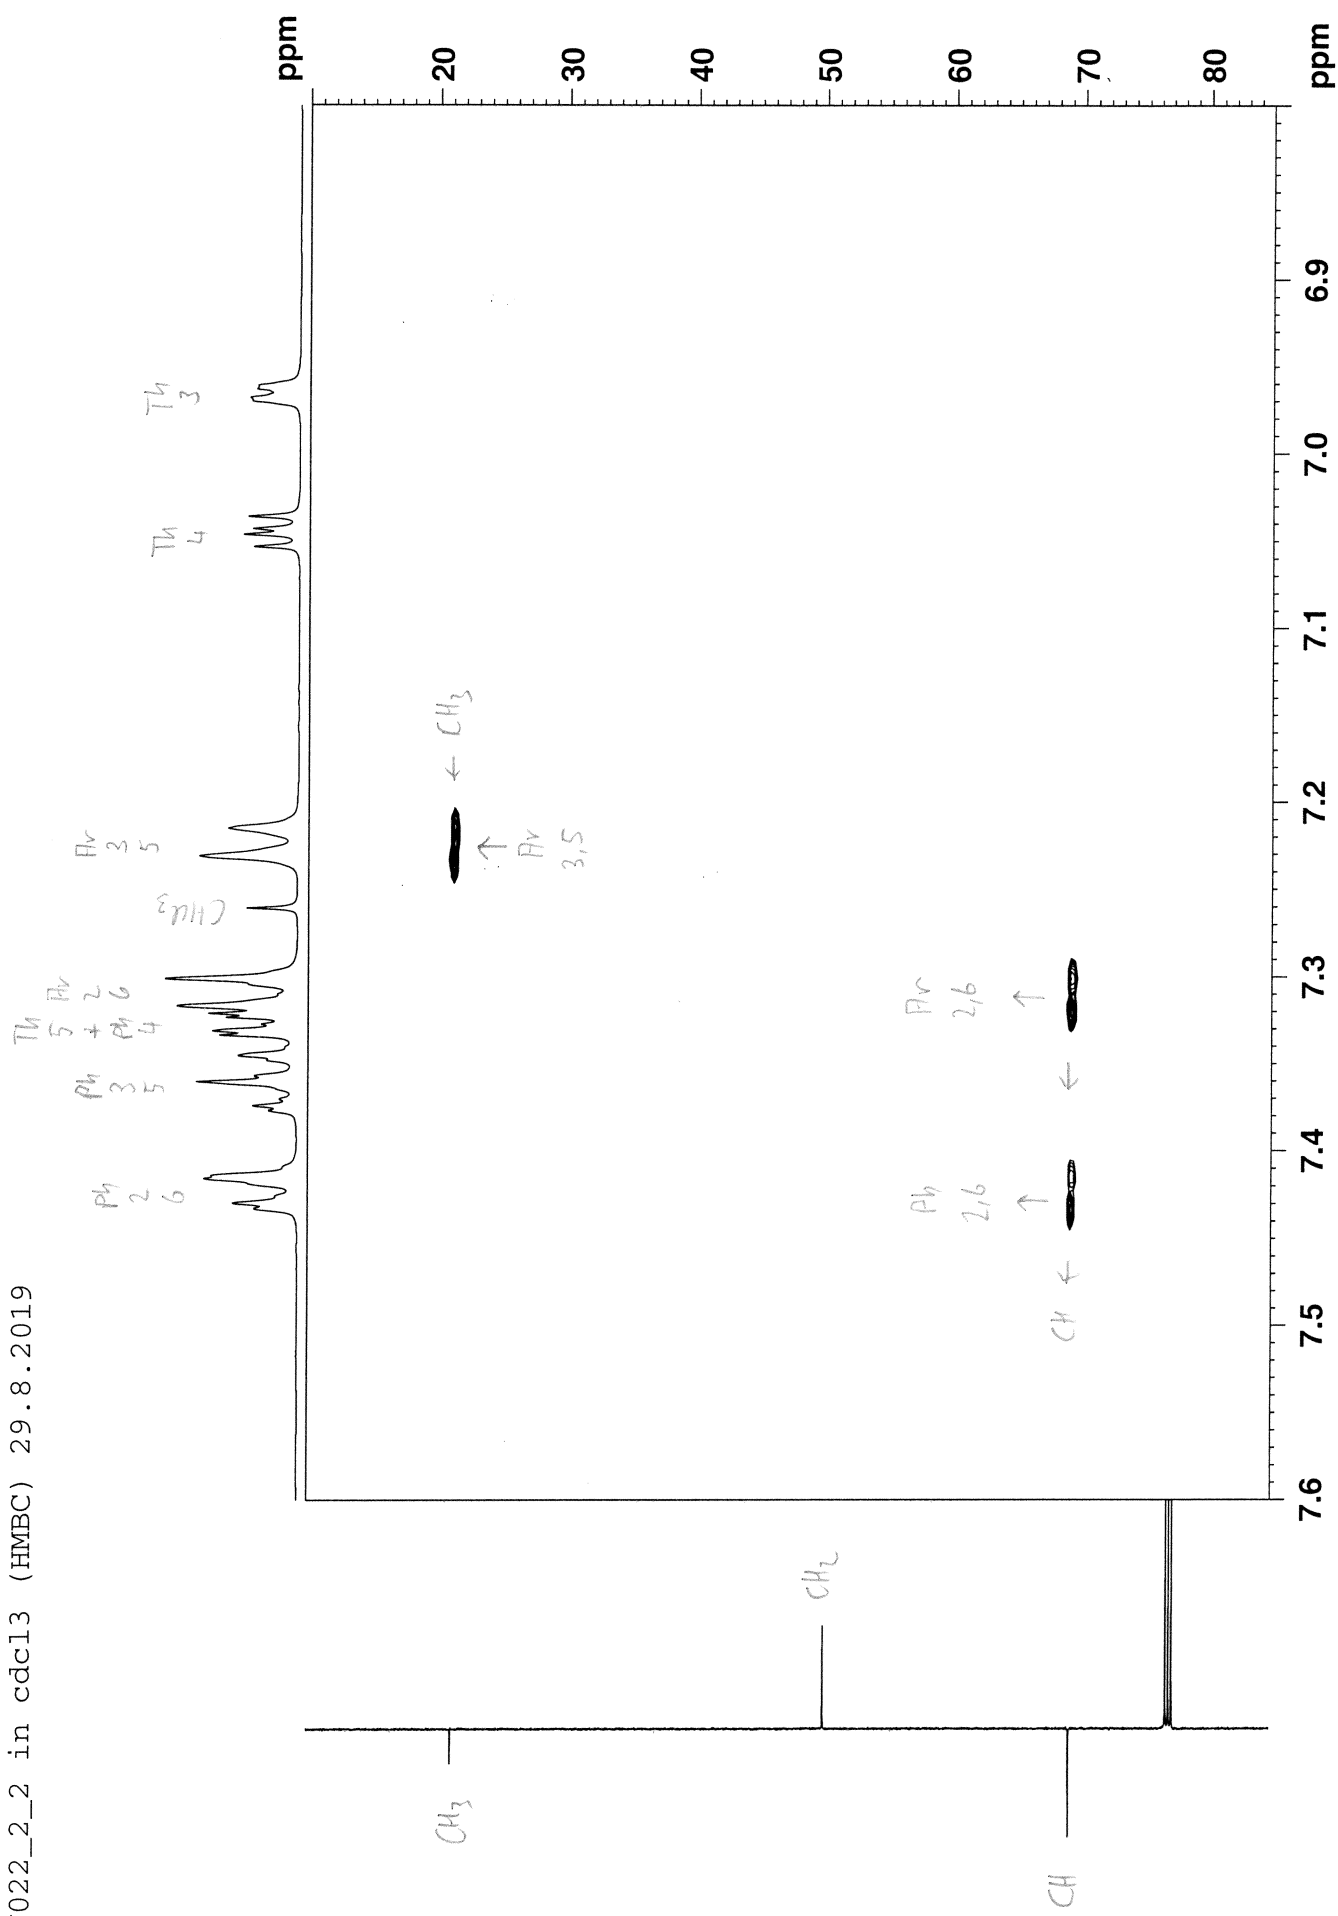

PN022\_2\_2 in cdcl3 (HMBC) 29.8.2019

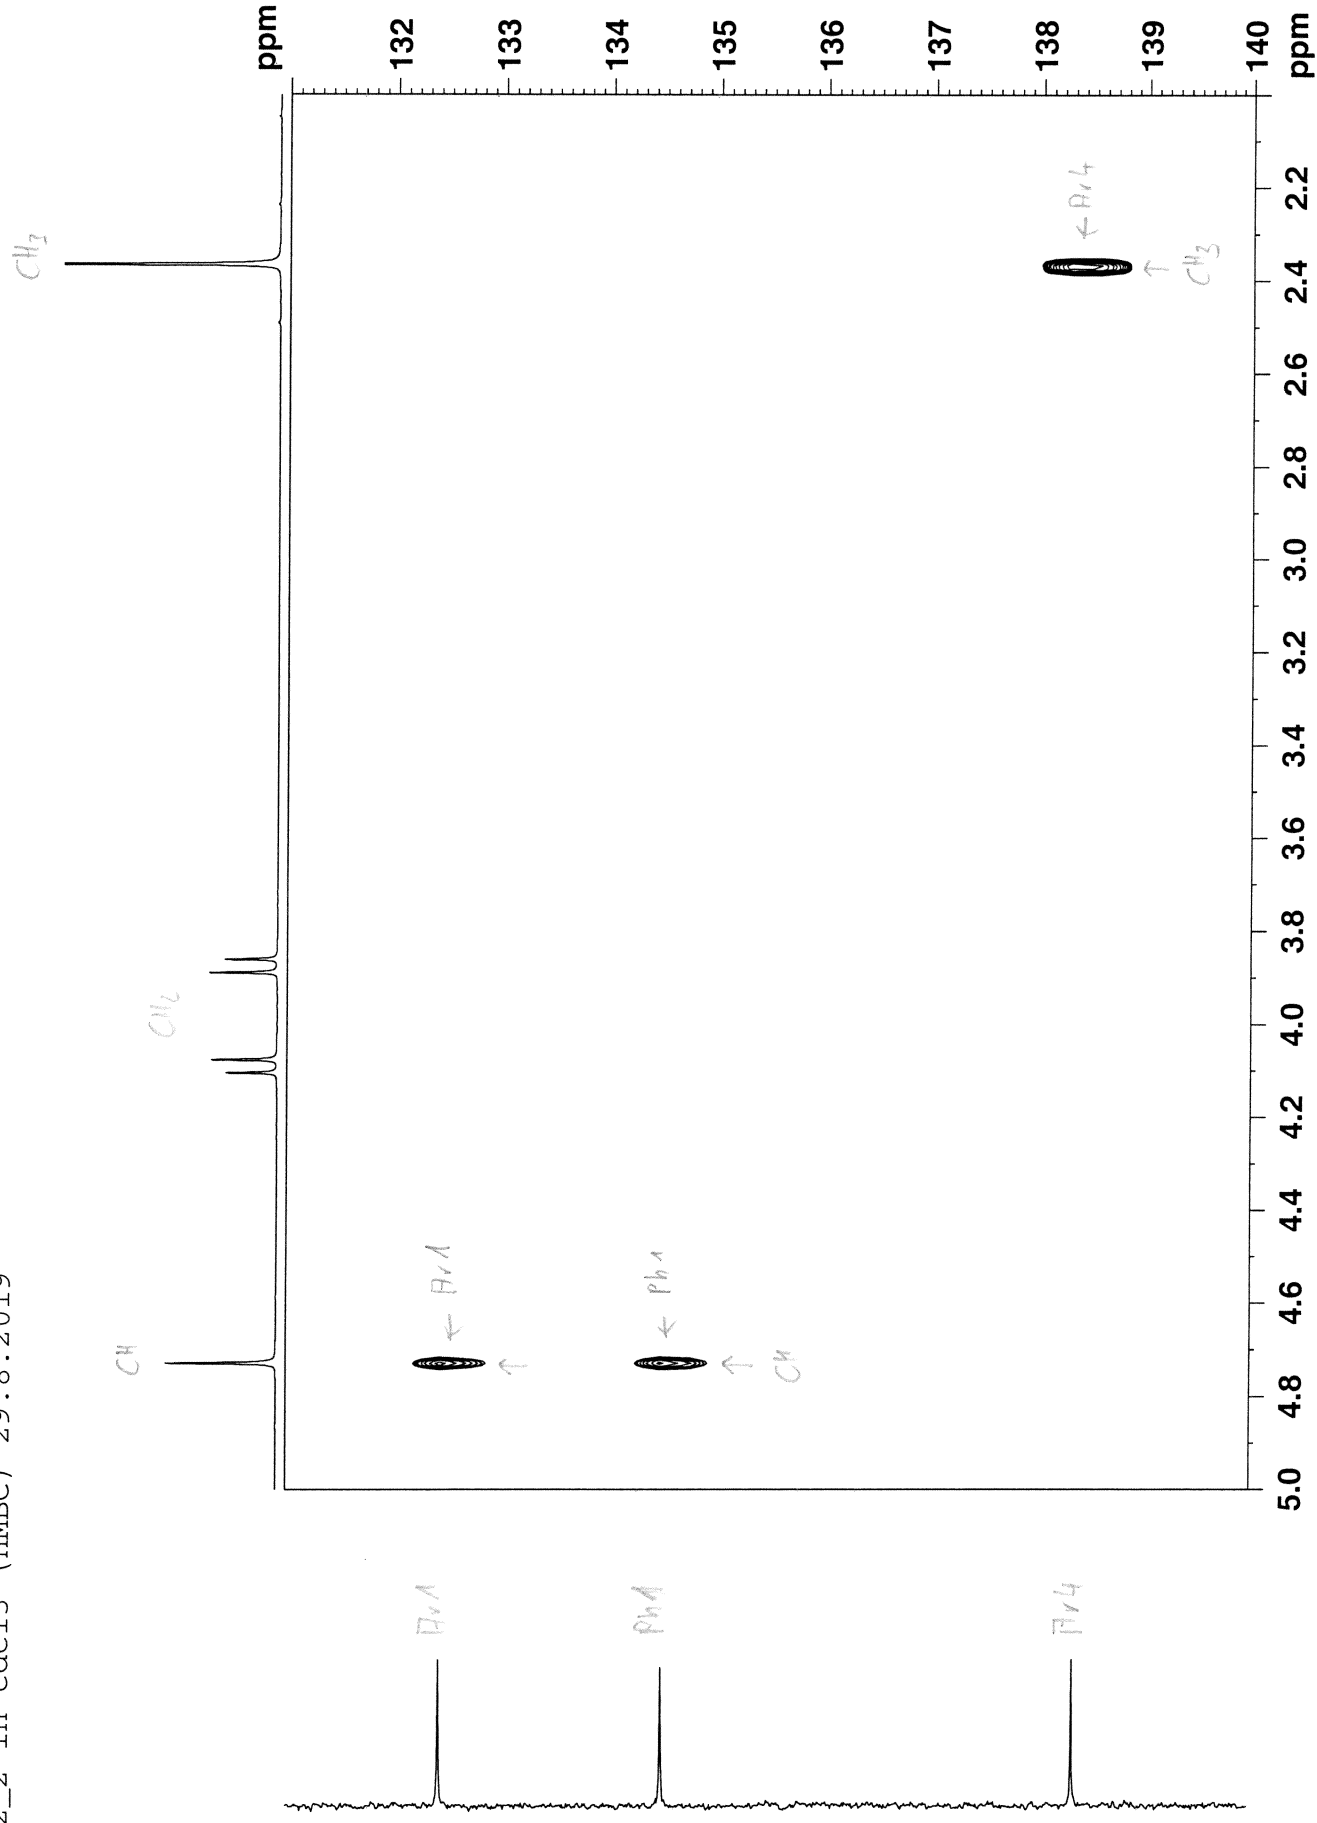

PN022\_2\_2 in cdcl3 (HMBC) 29.8.2019

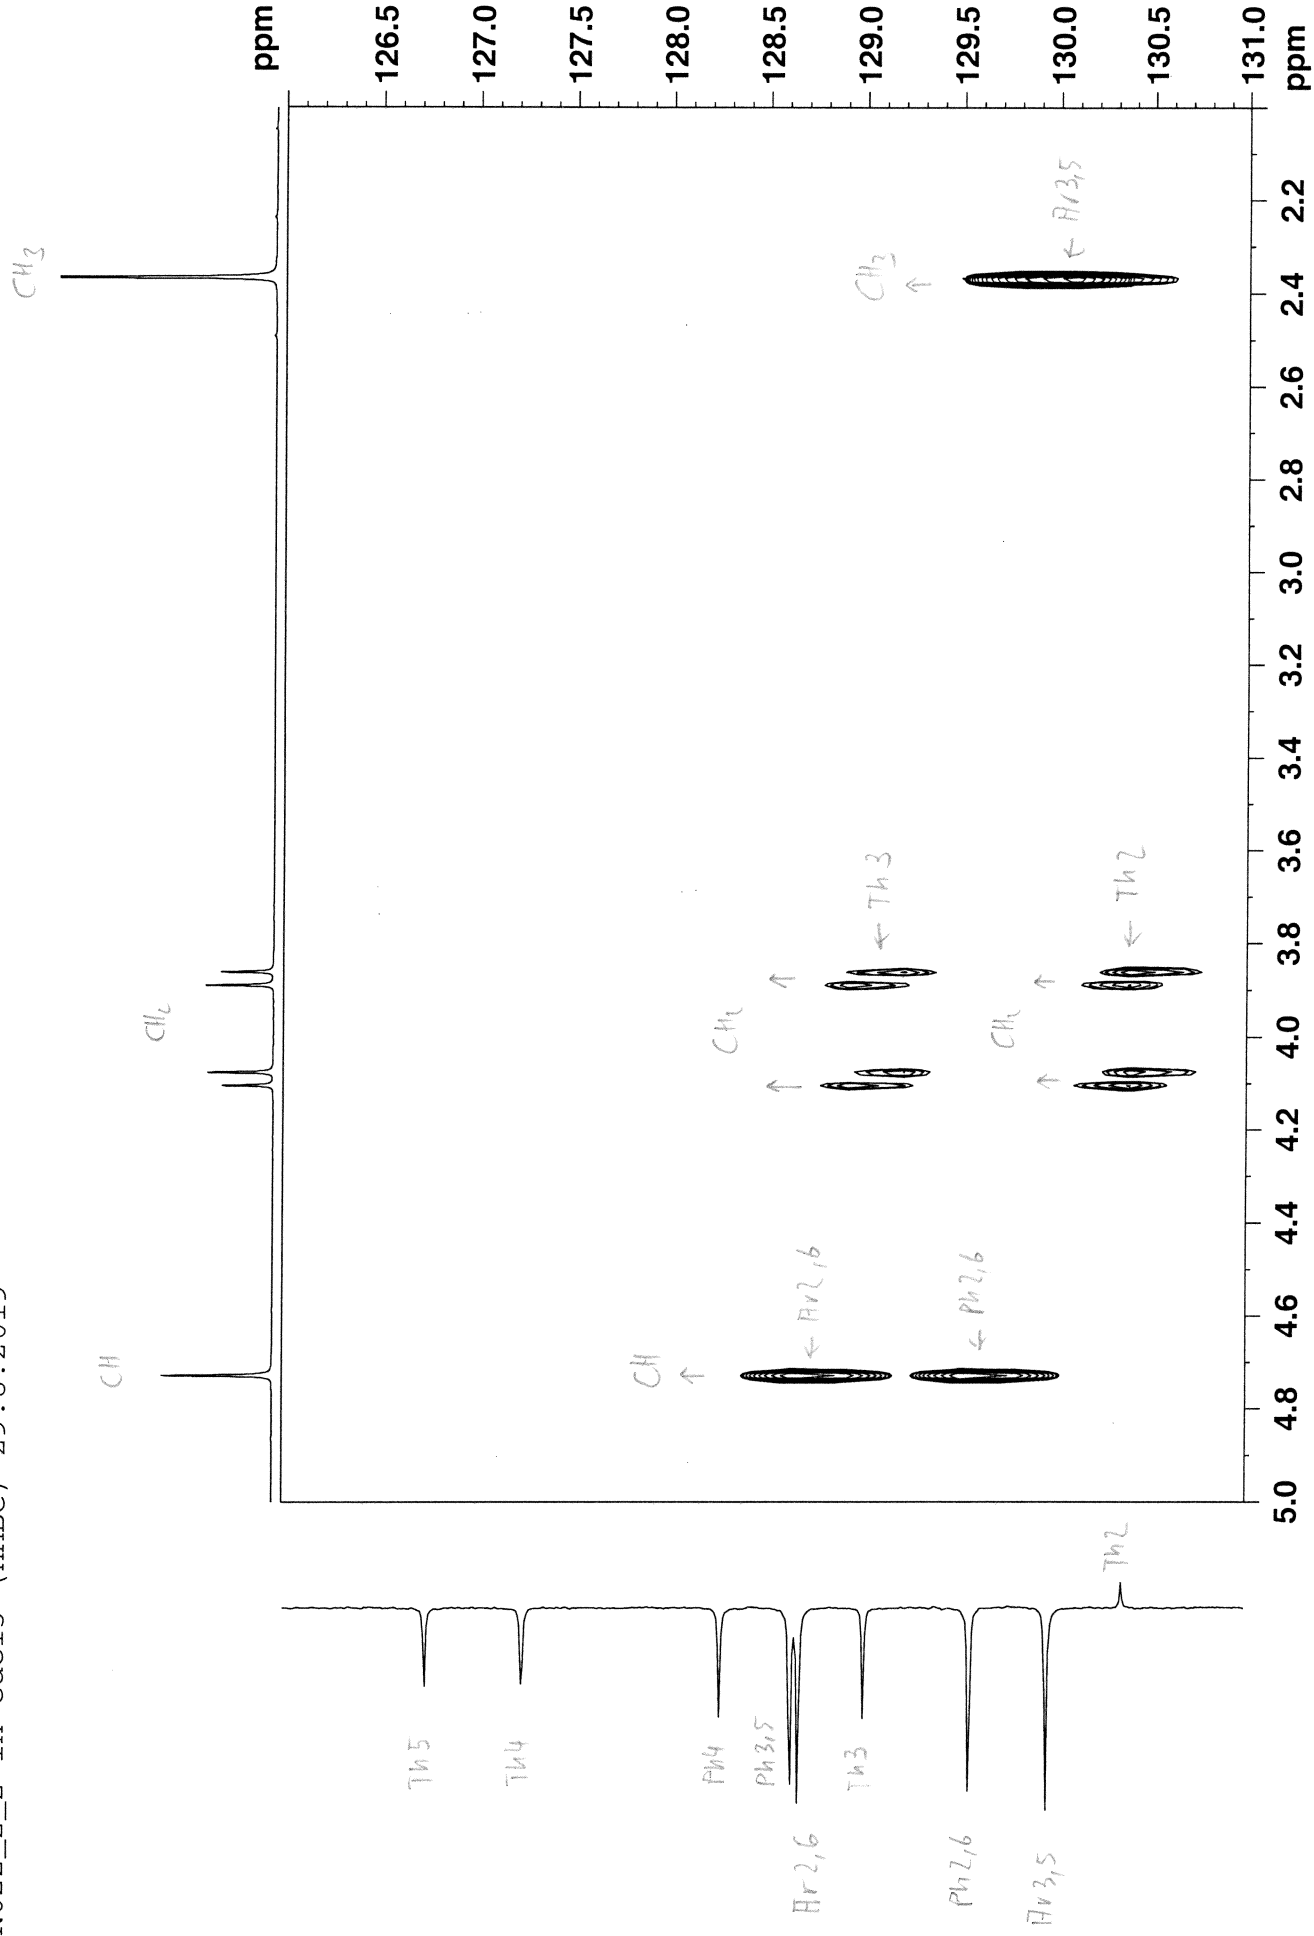

PN022\_2\_2 in cdcl3 (HMBC) 29.8.2019

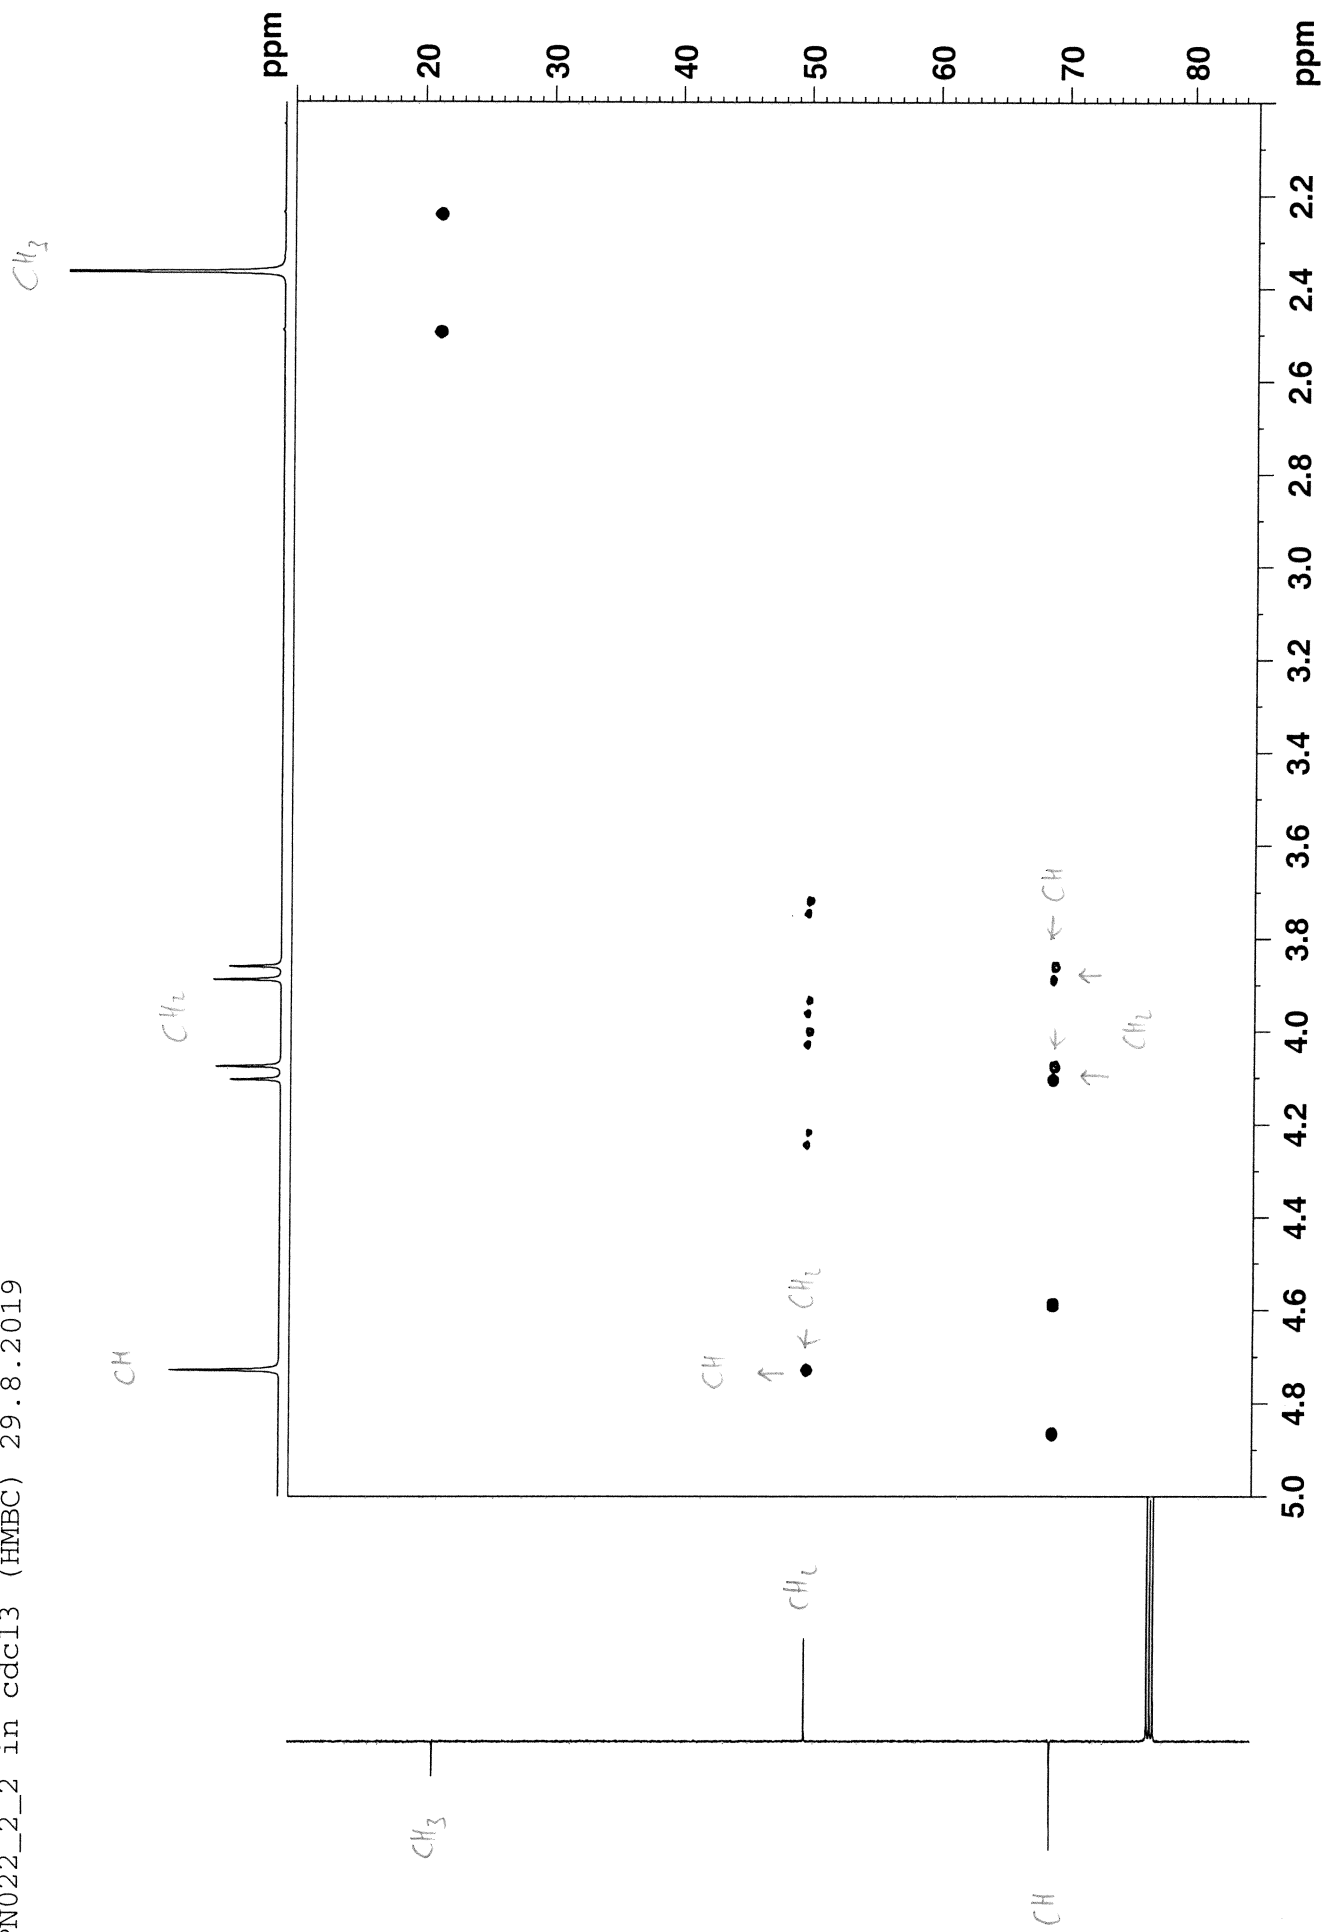

**Figure S57c.** NMR spectra of compound **5o**.

PN012S1P1 in cdcl3 (Proton) 17.5.2019

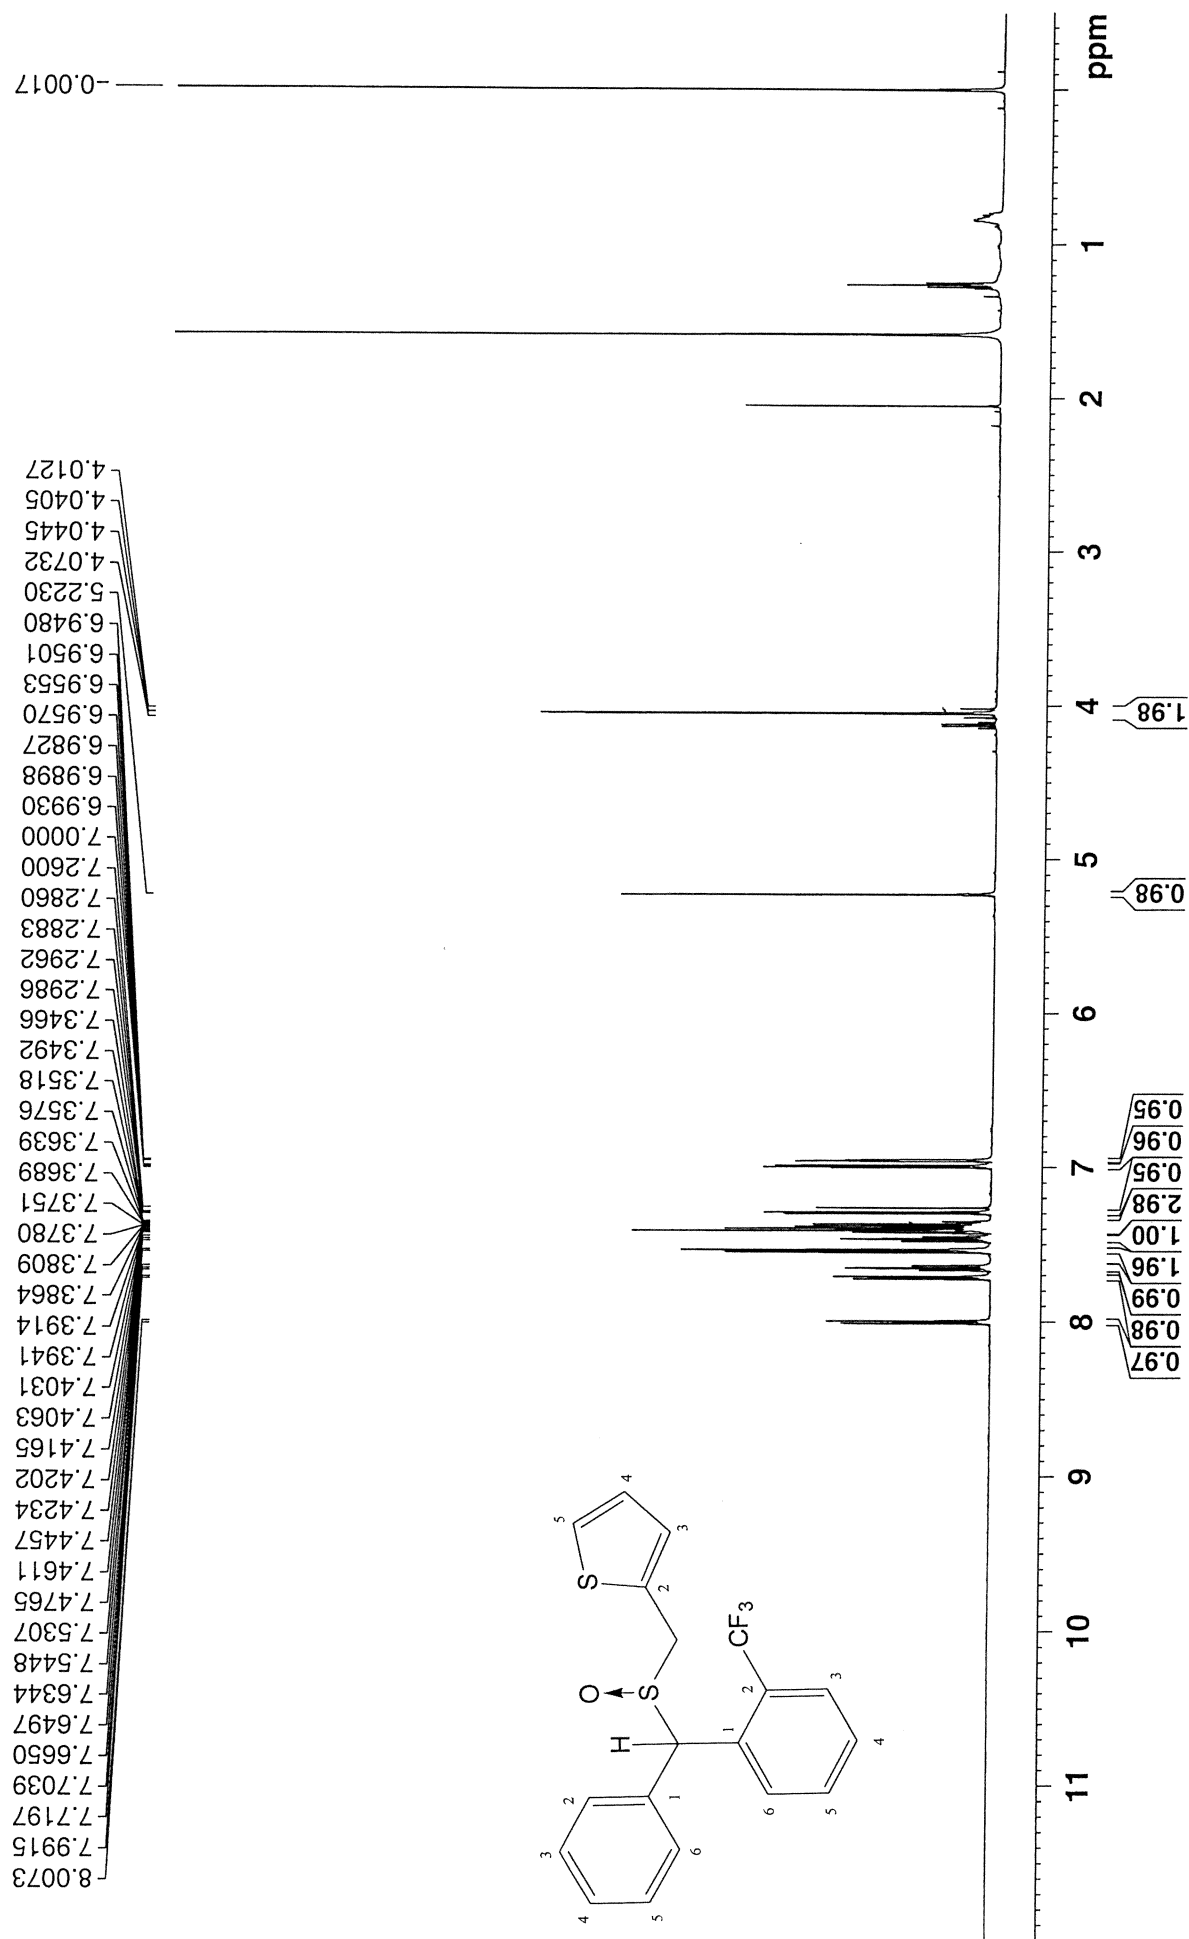

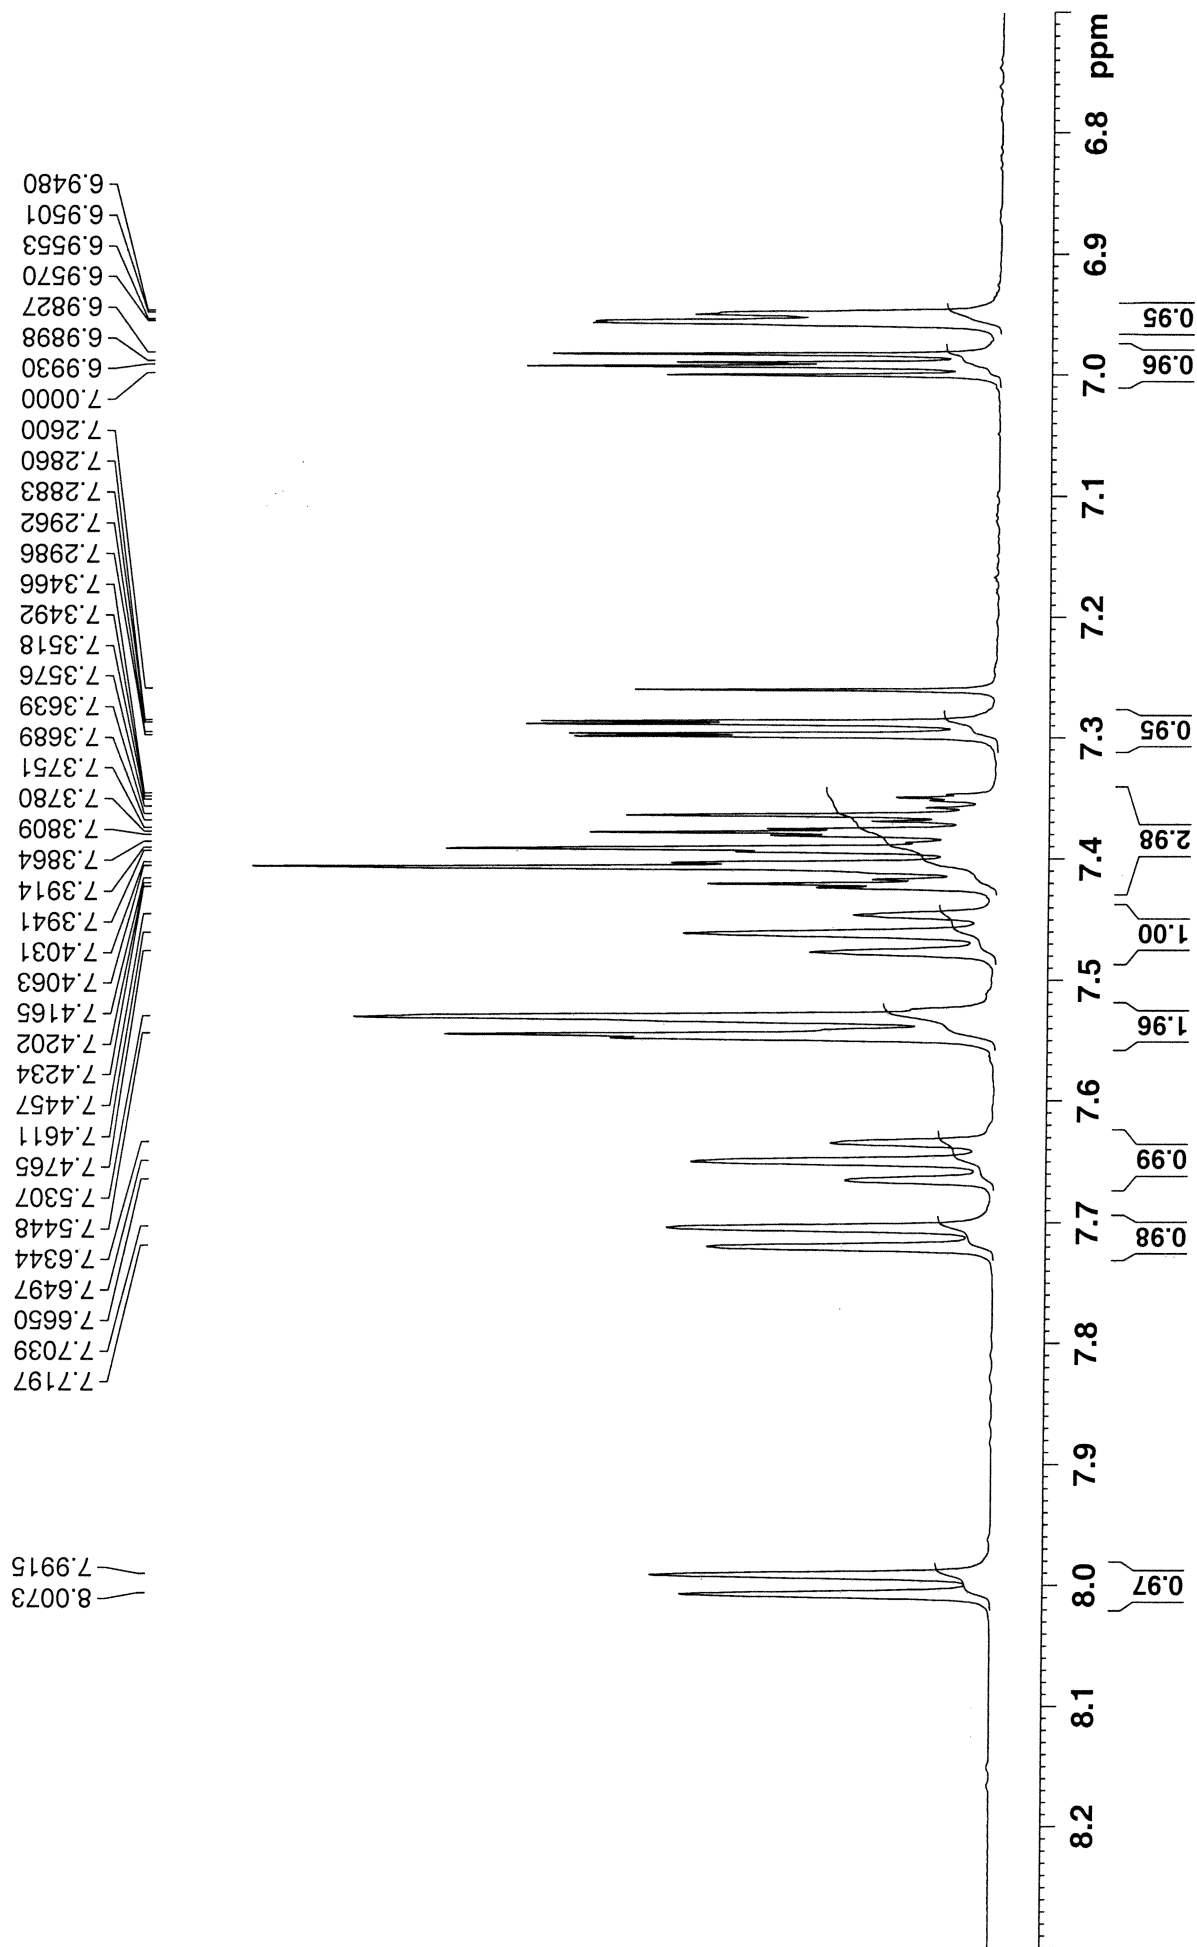

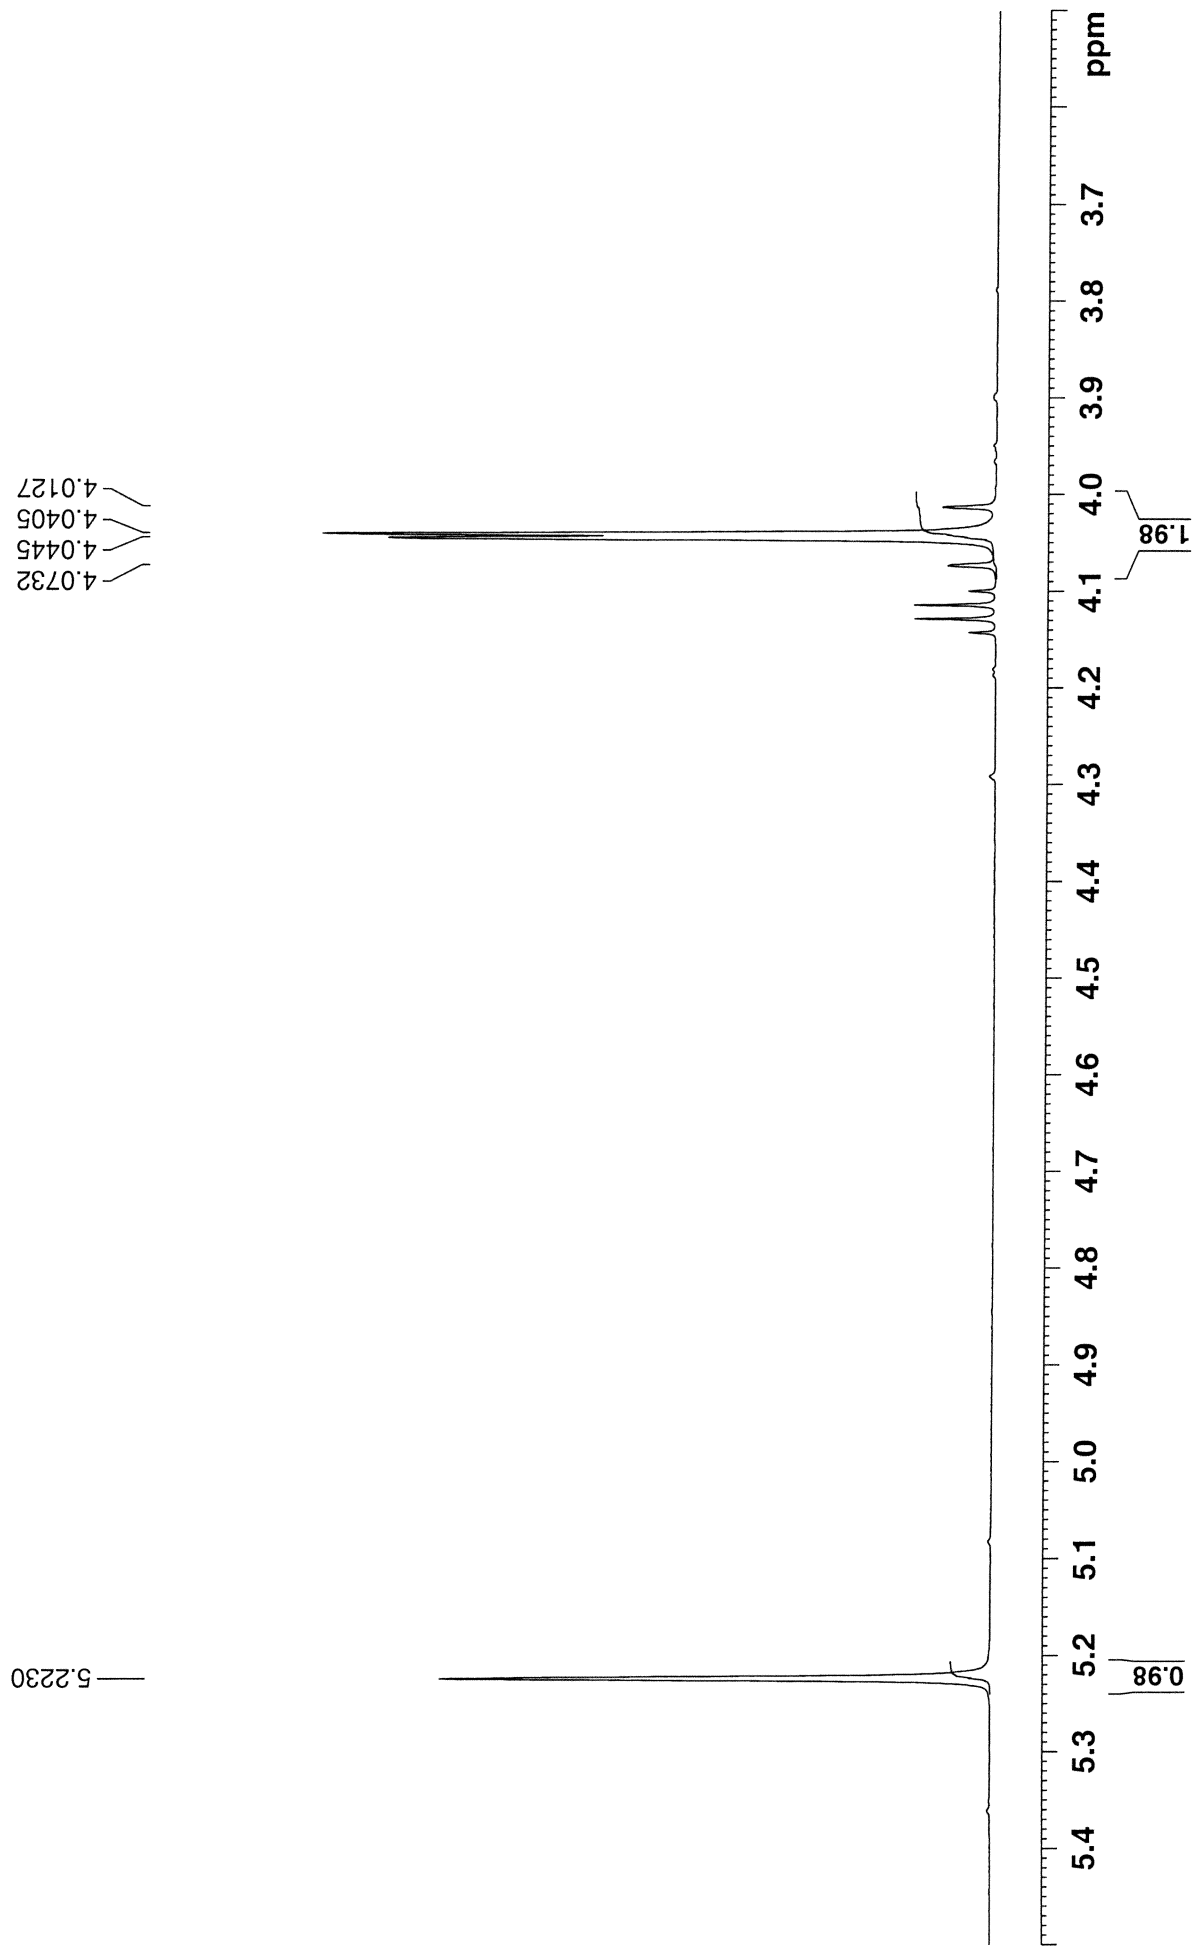

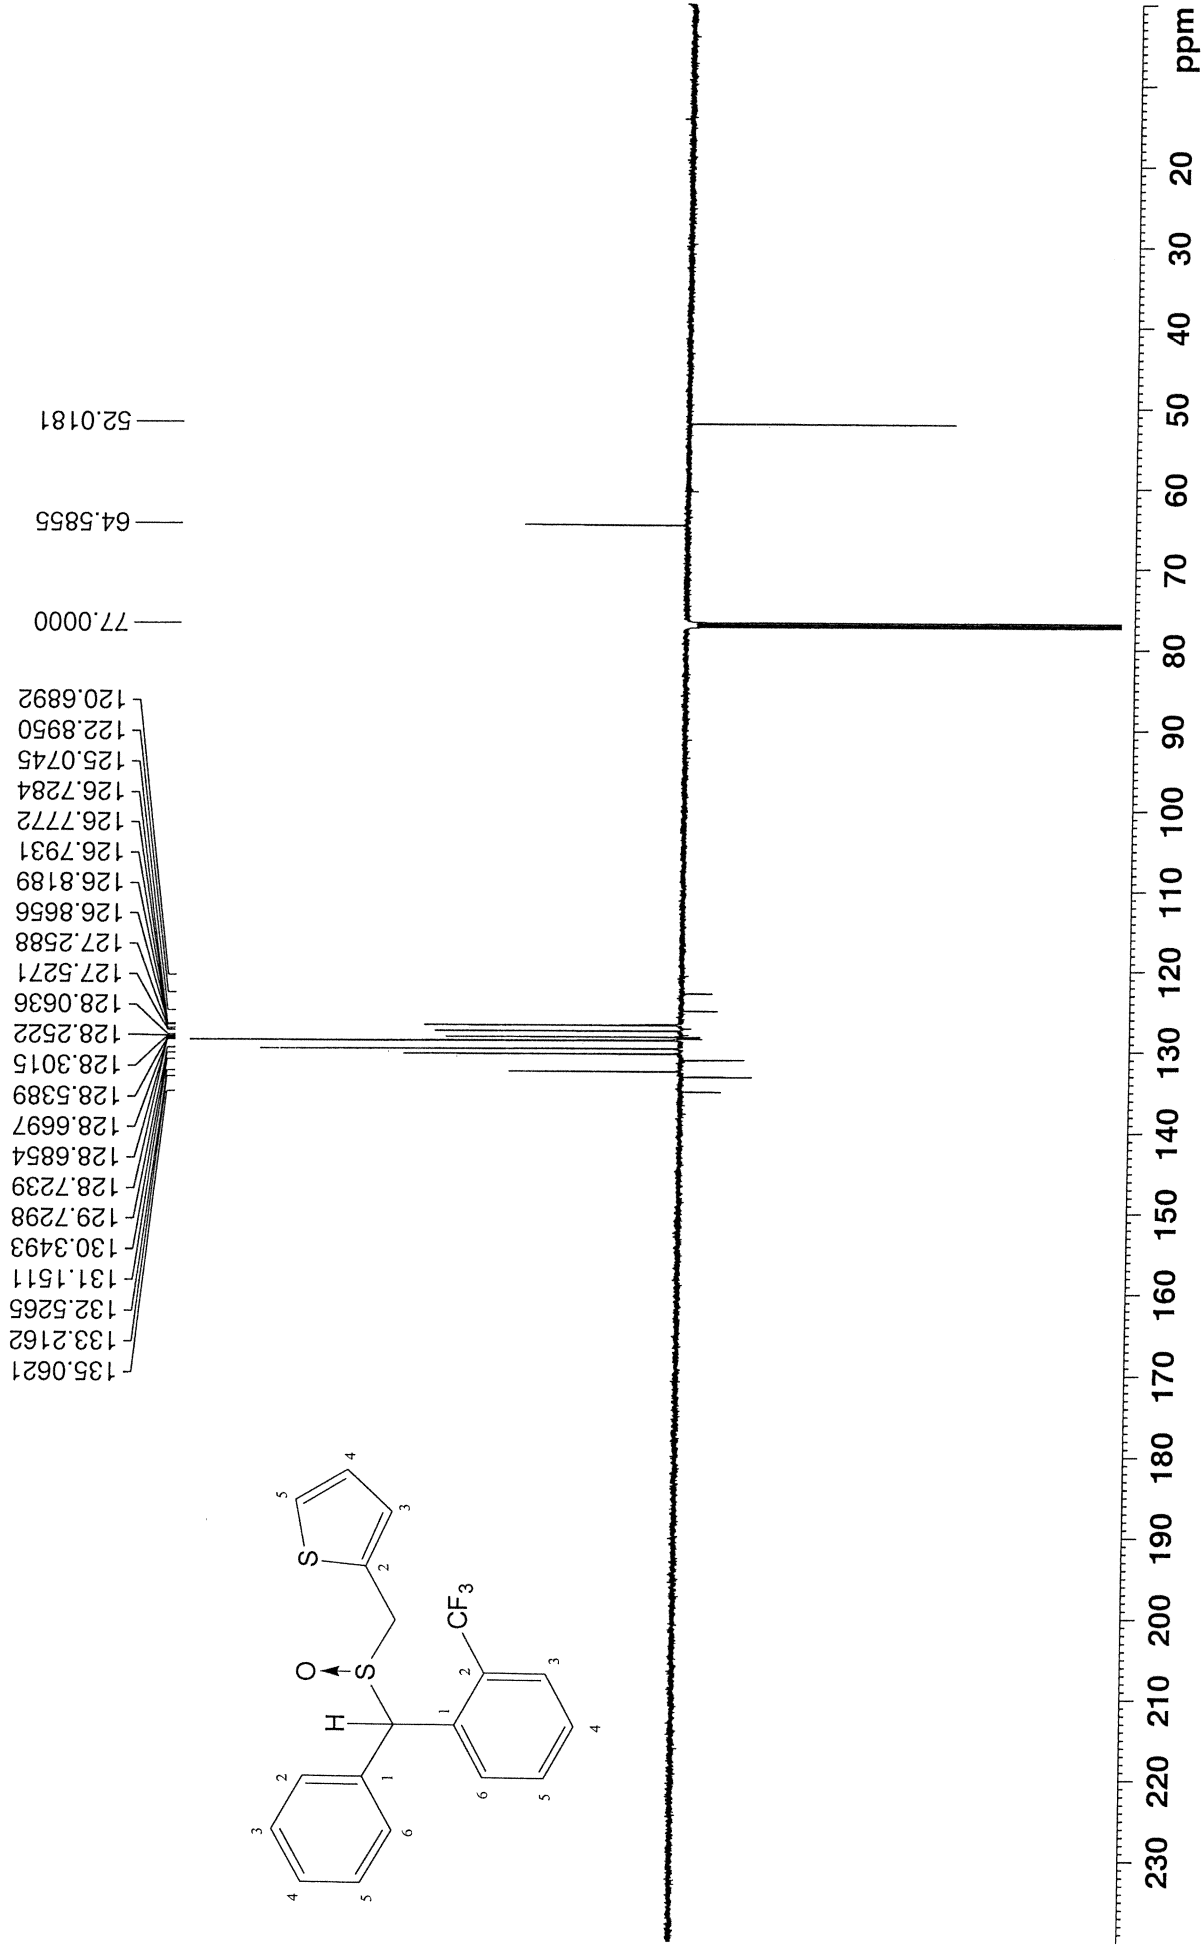



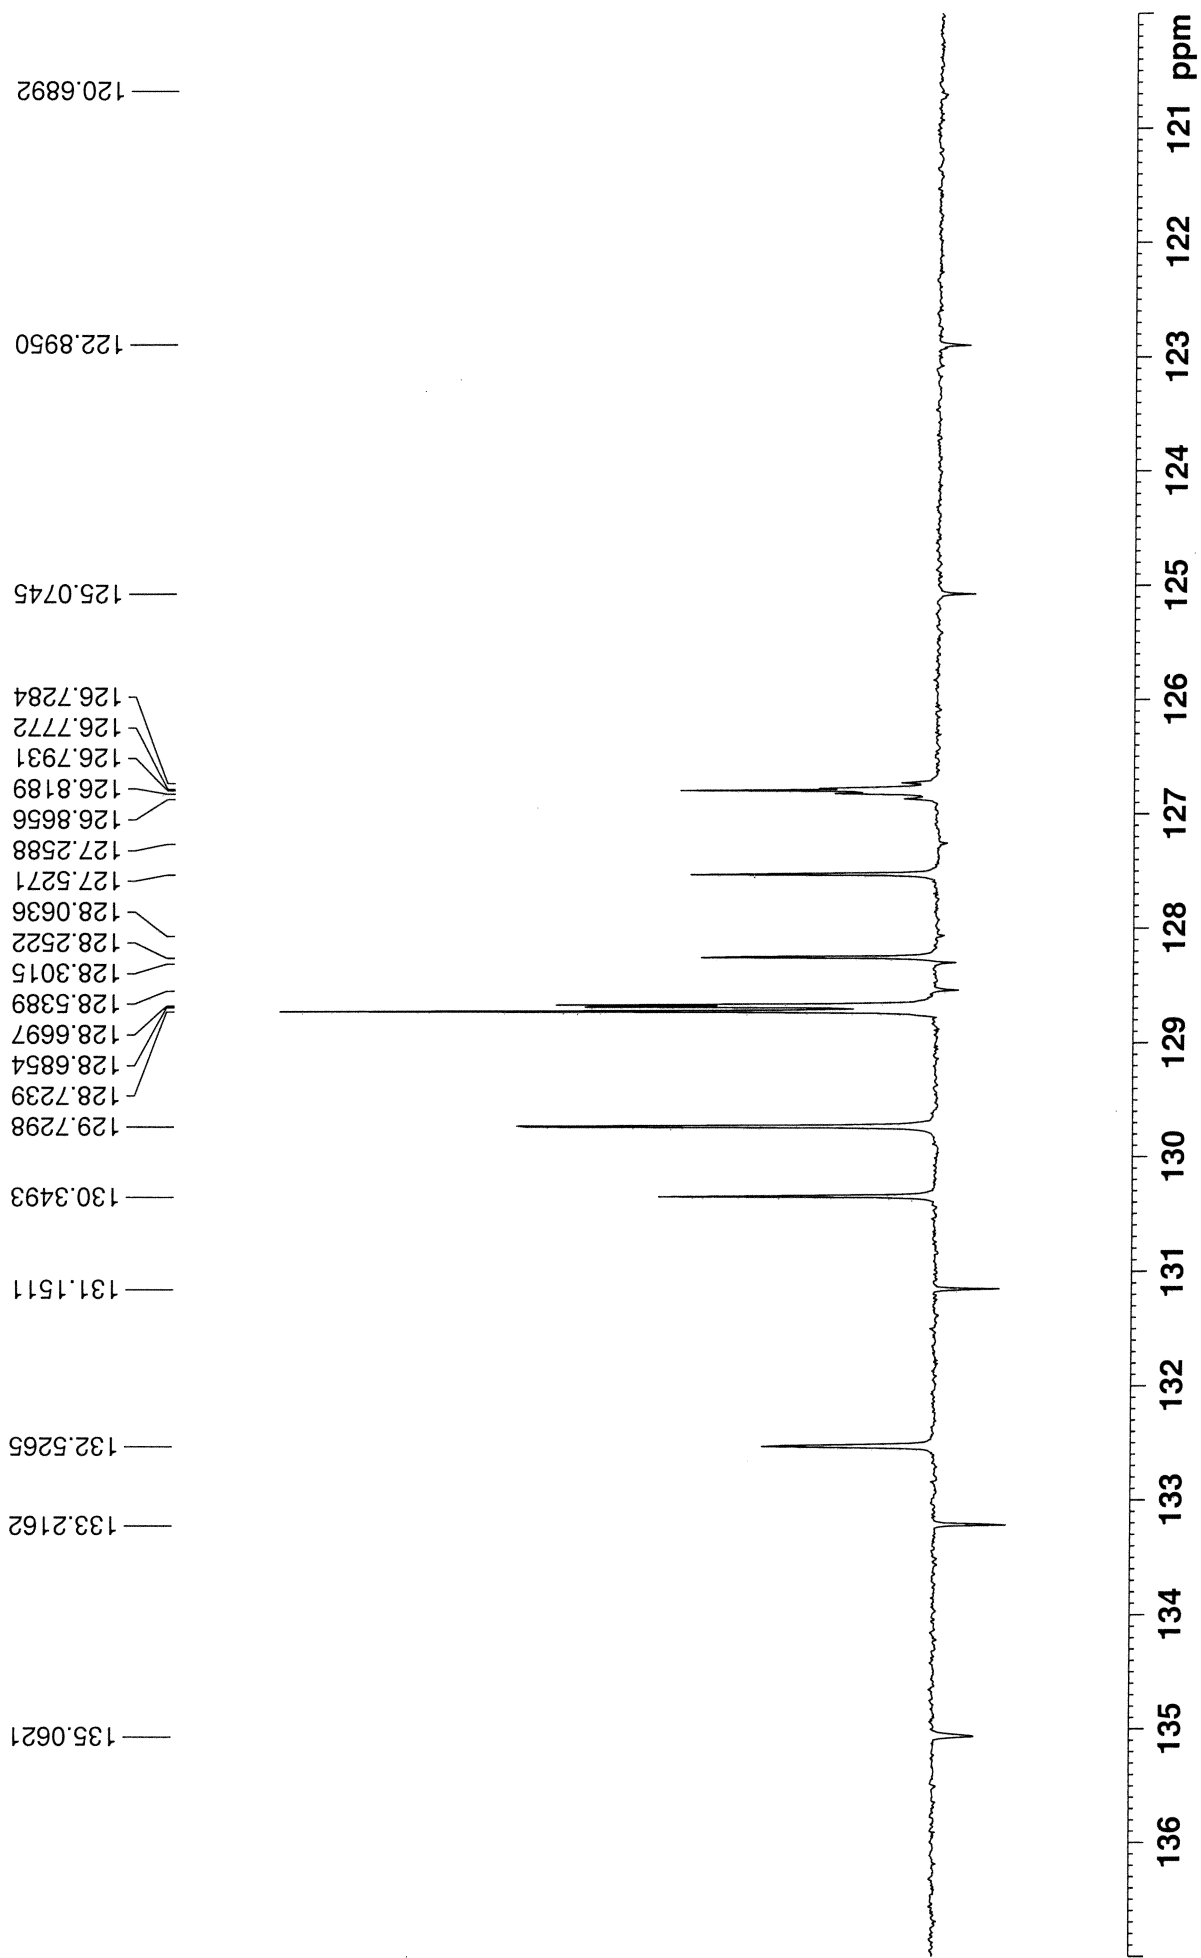

PN012S1P1 in cdcl3 (APT) 17.5.2019

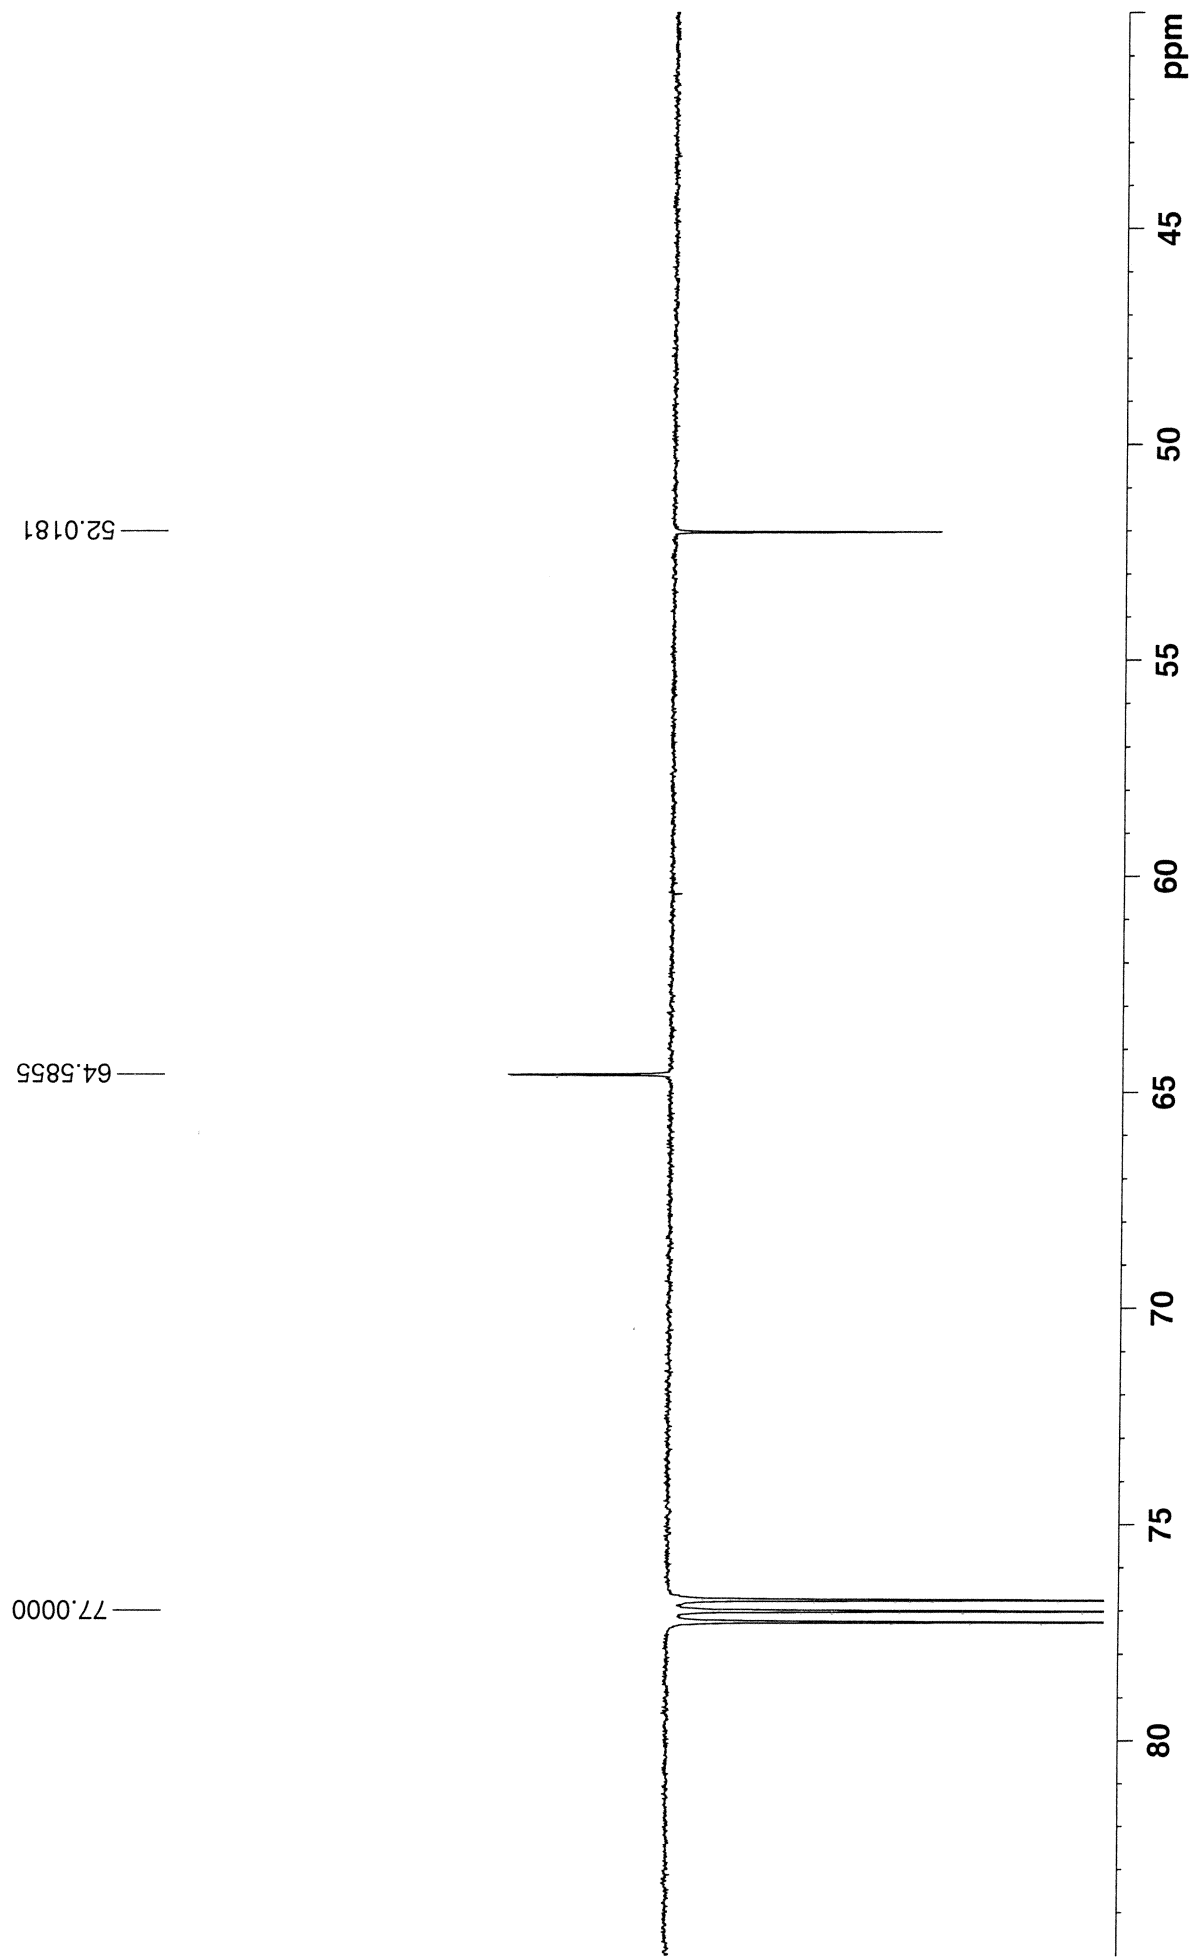

**Figure S58c.** NMR spectra of compound **60**.

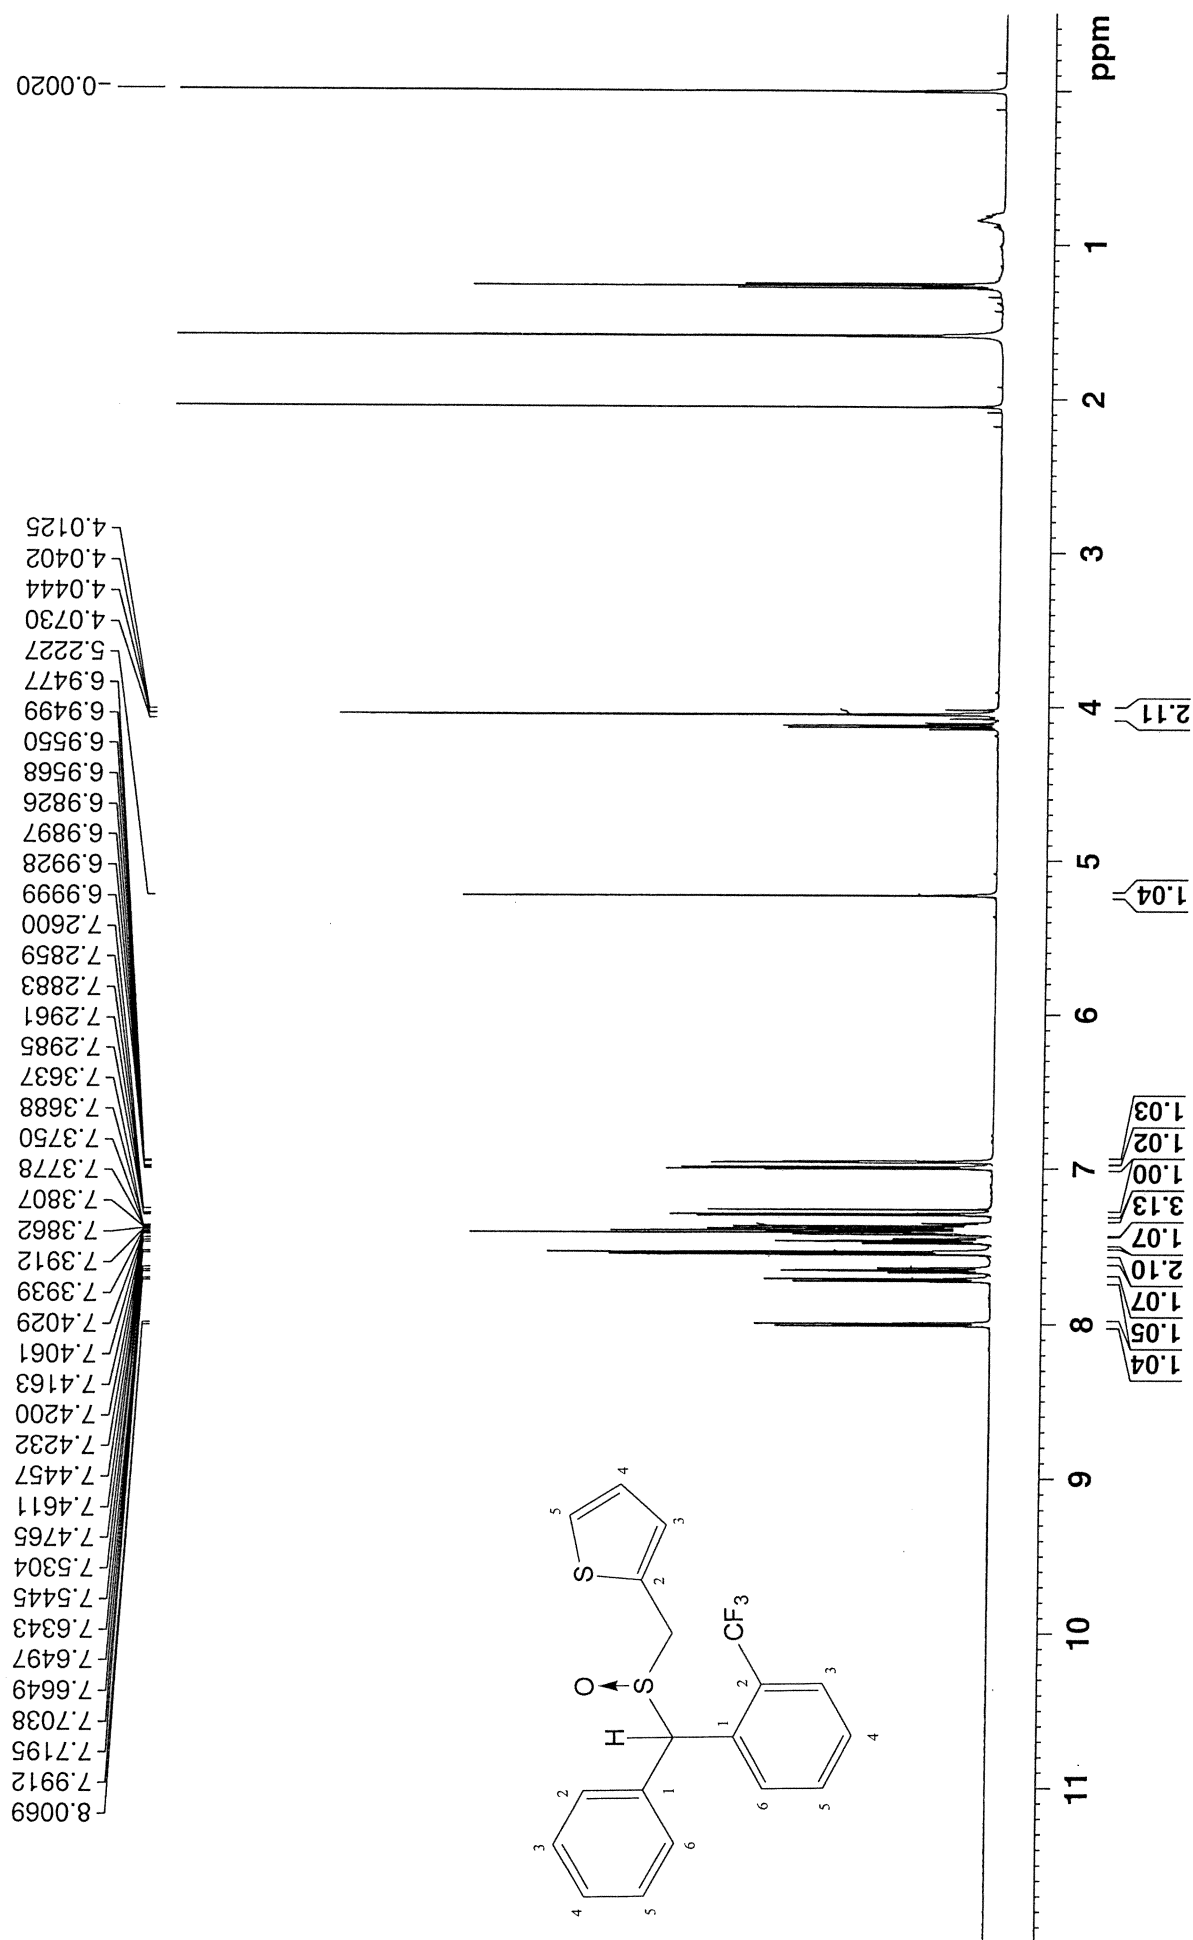

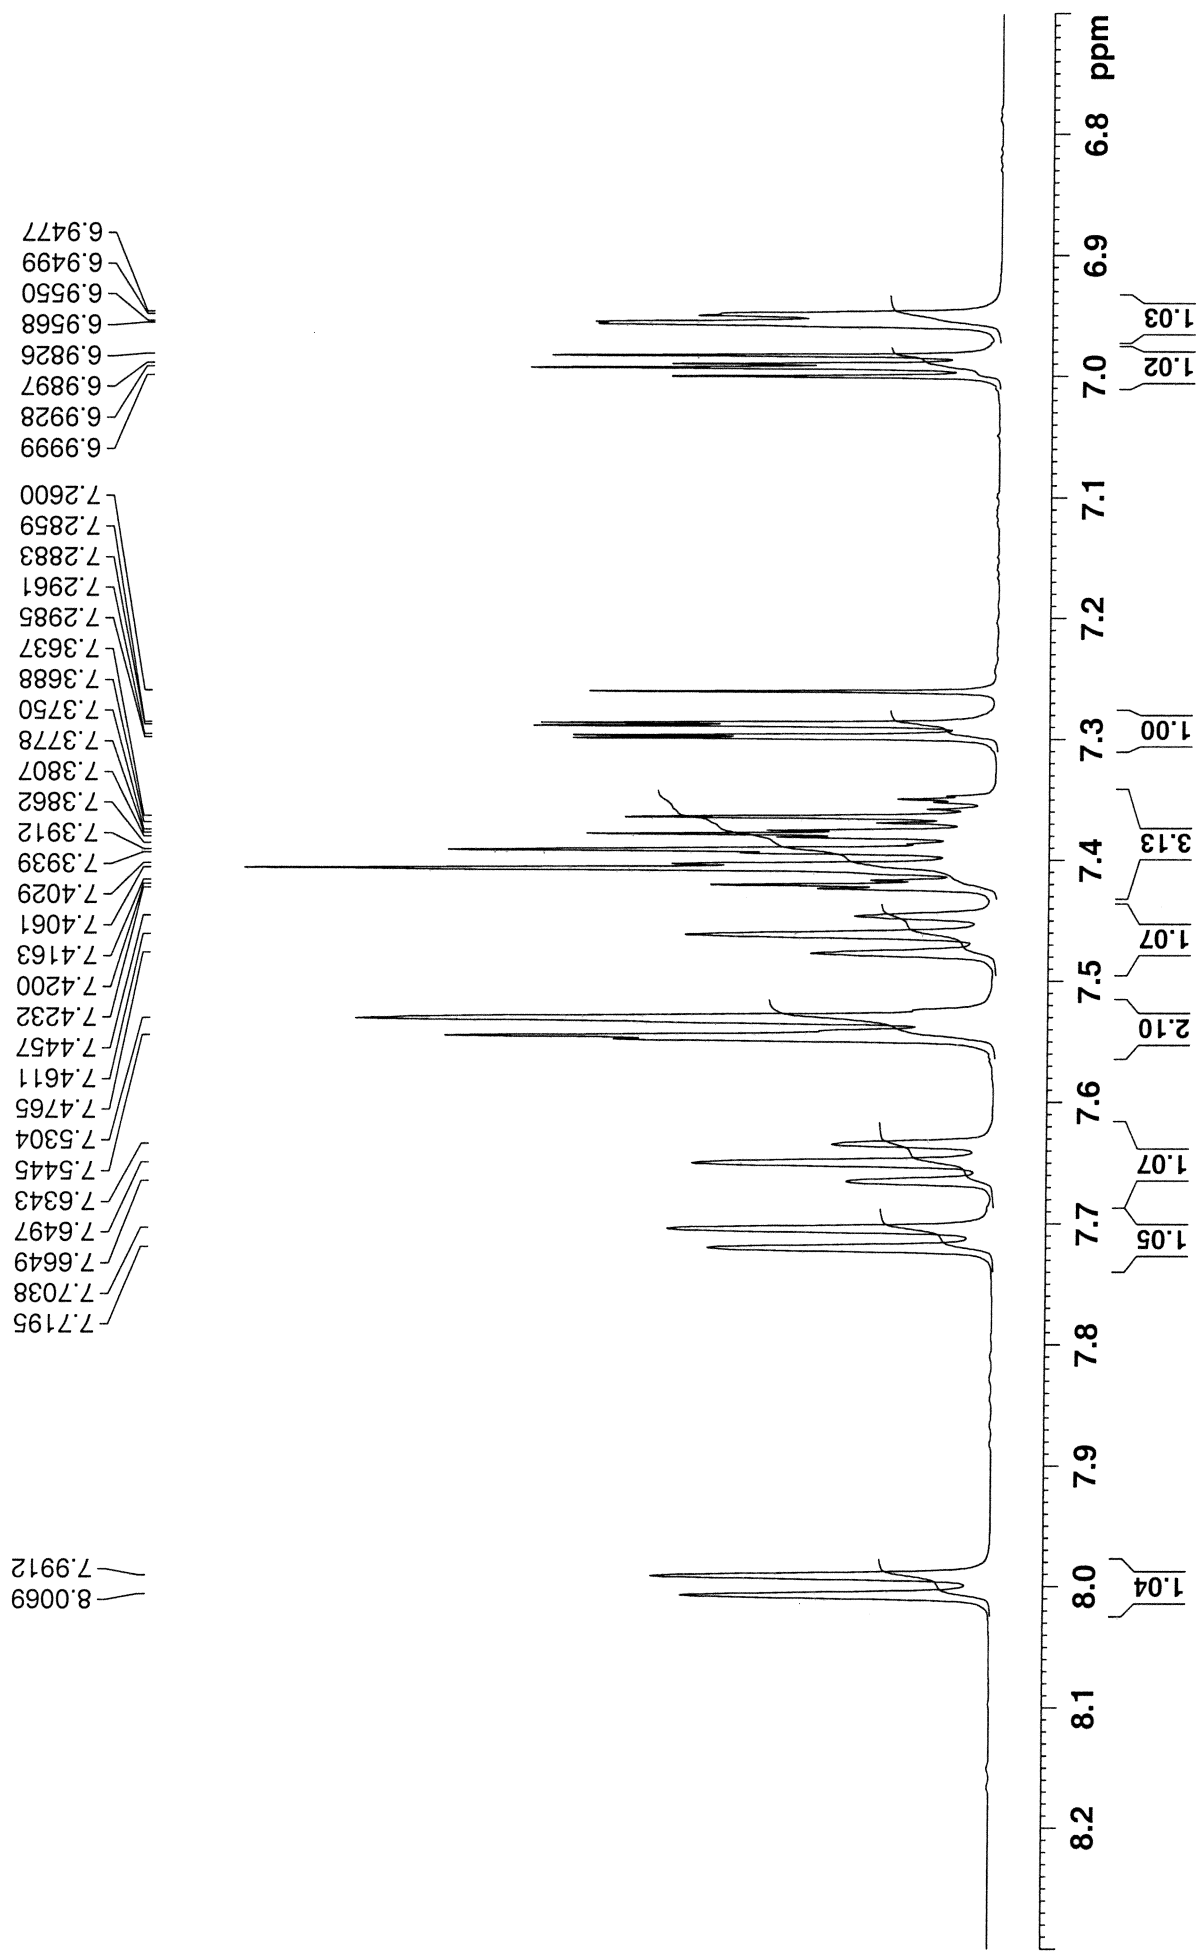

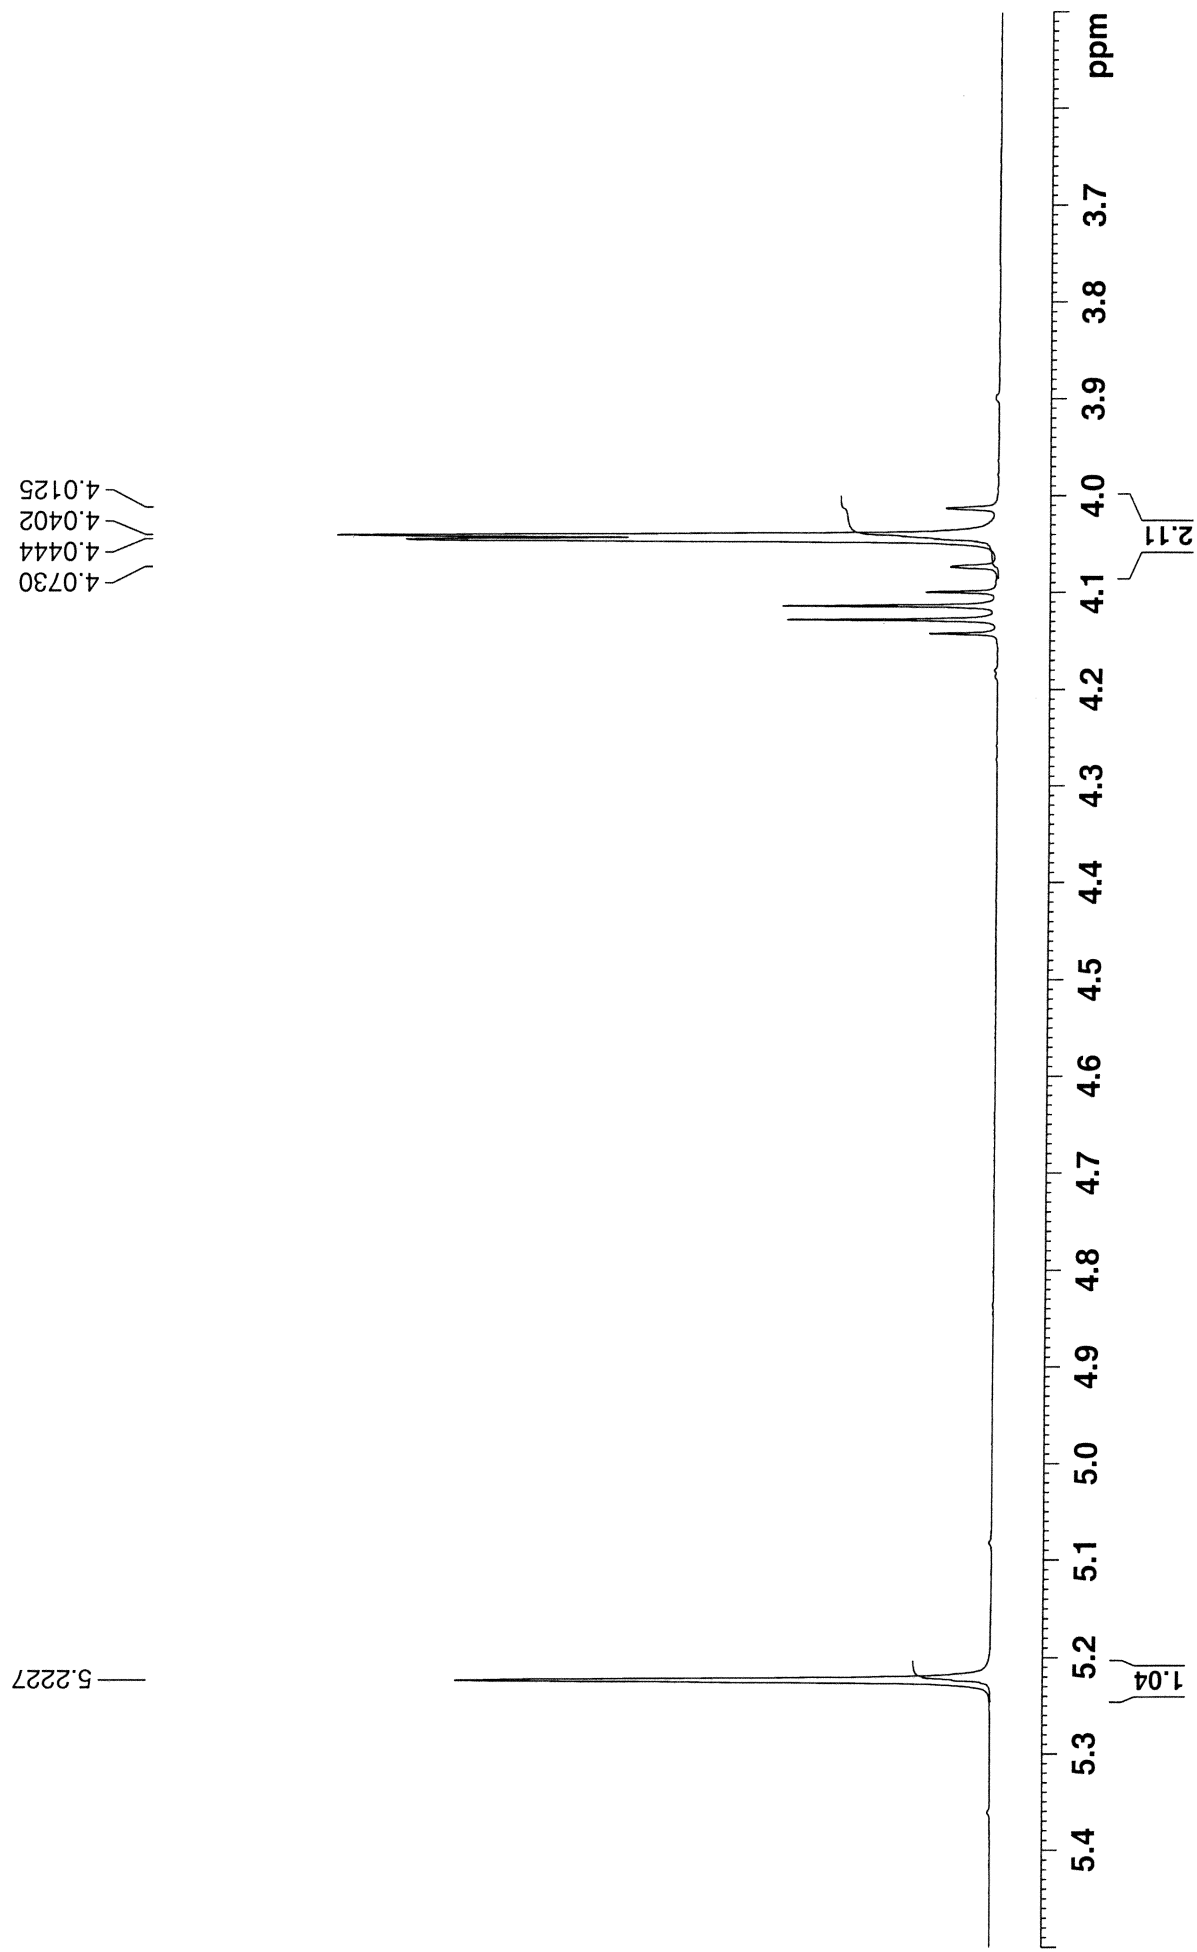

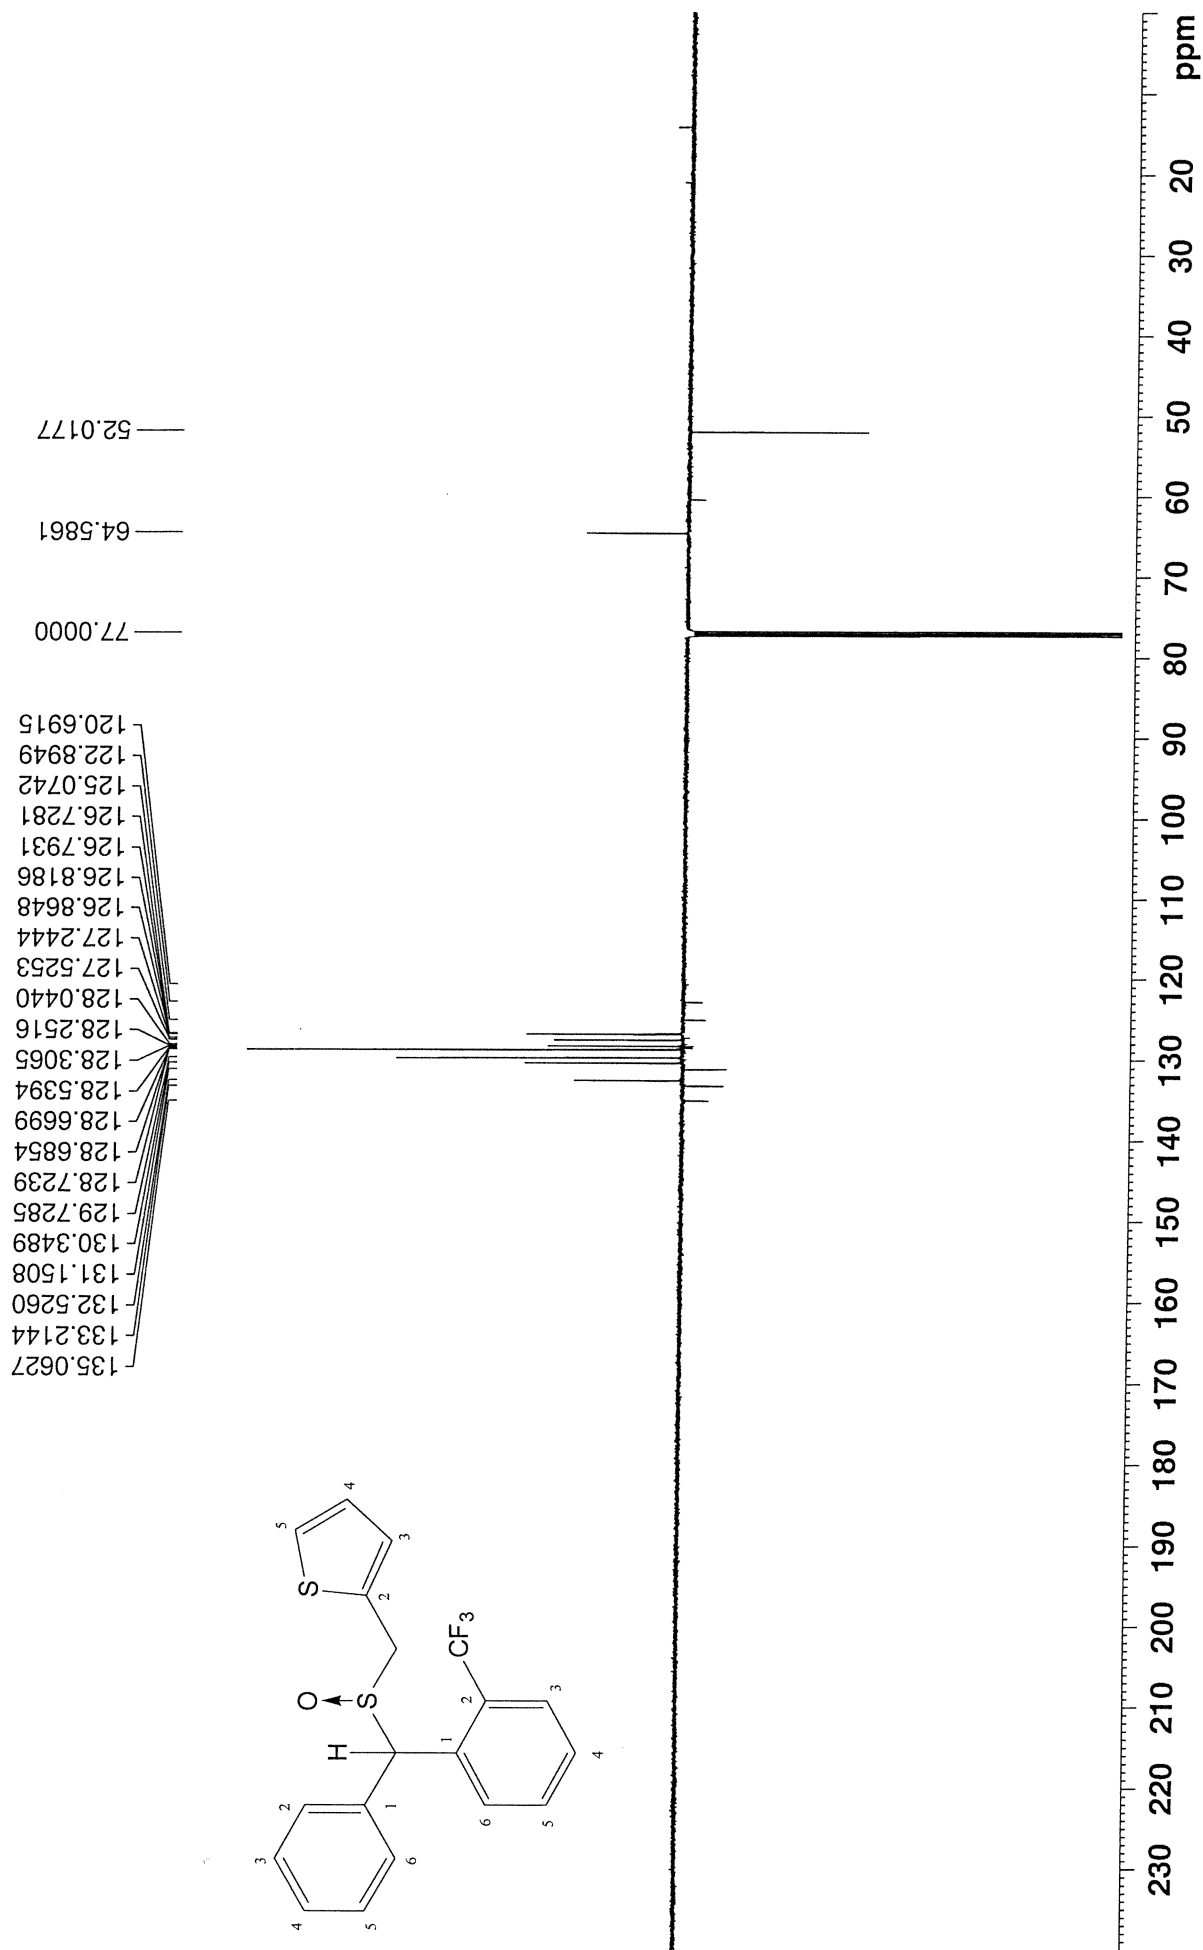

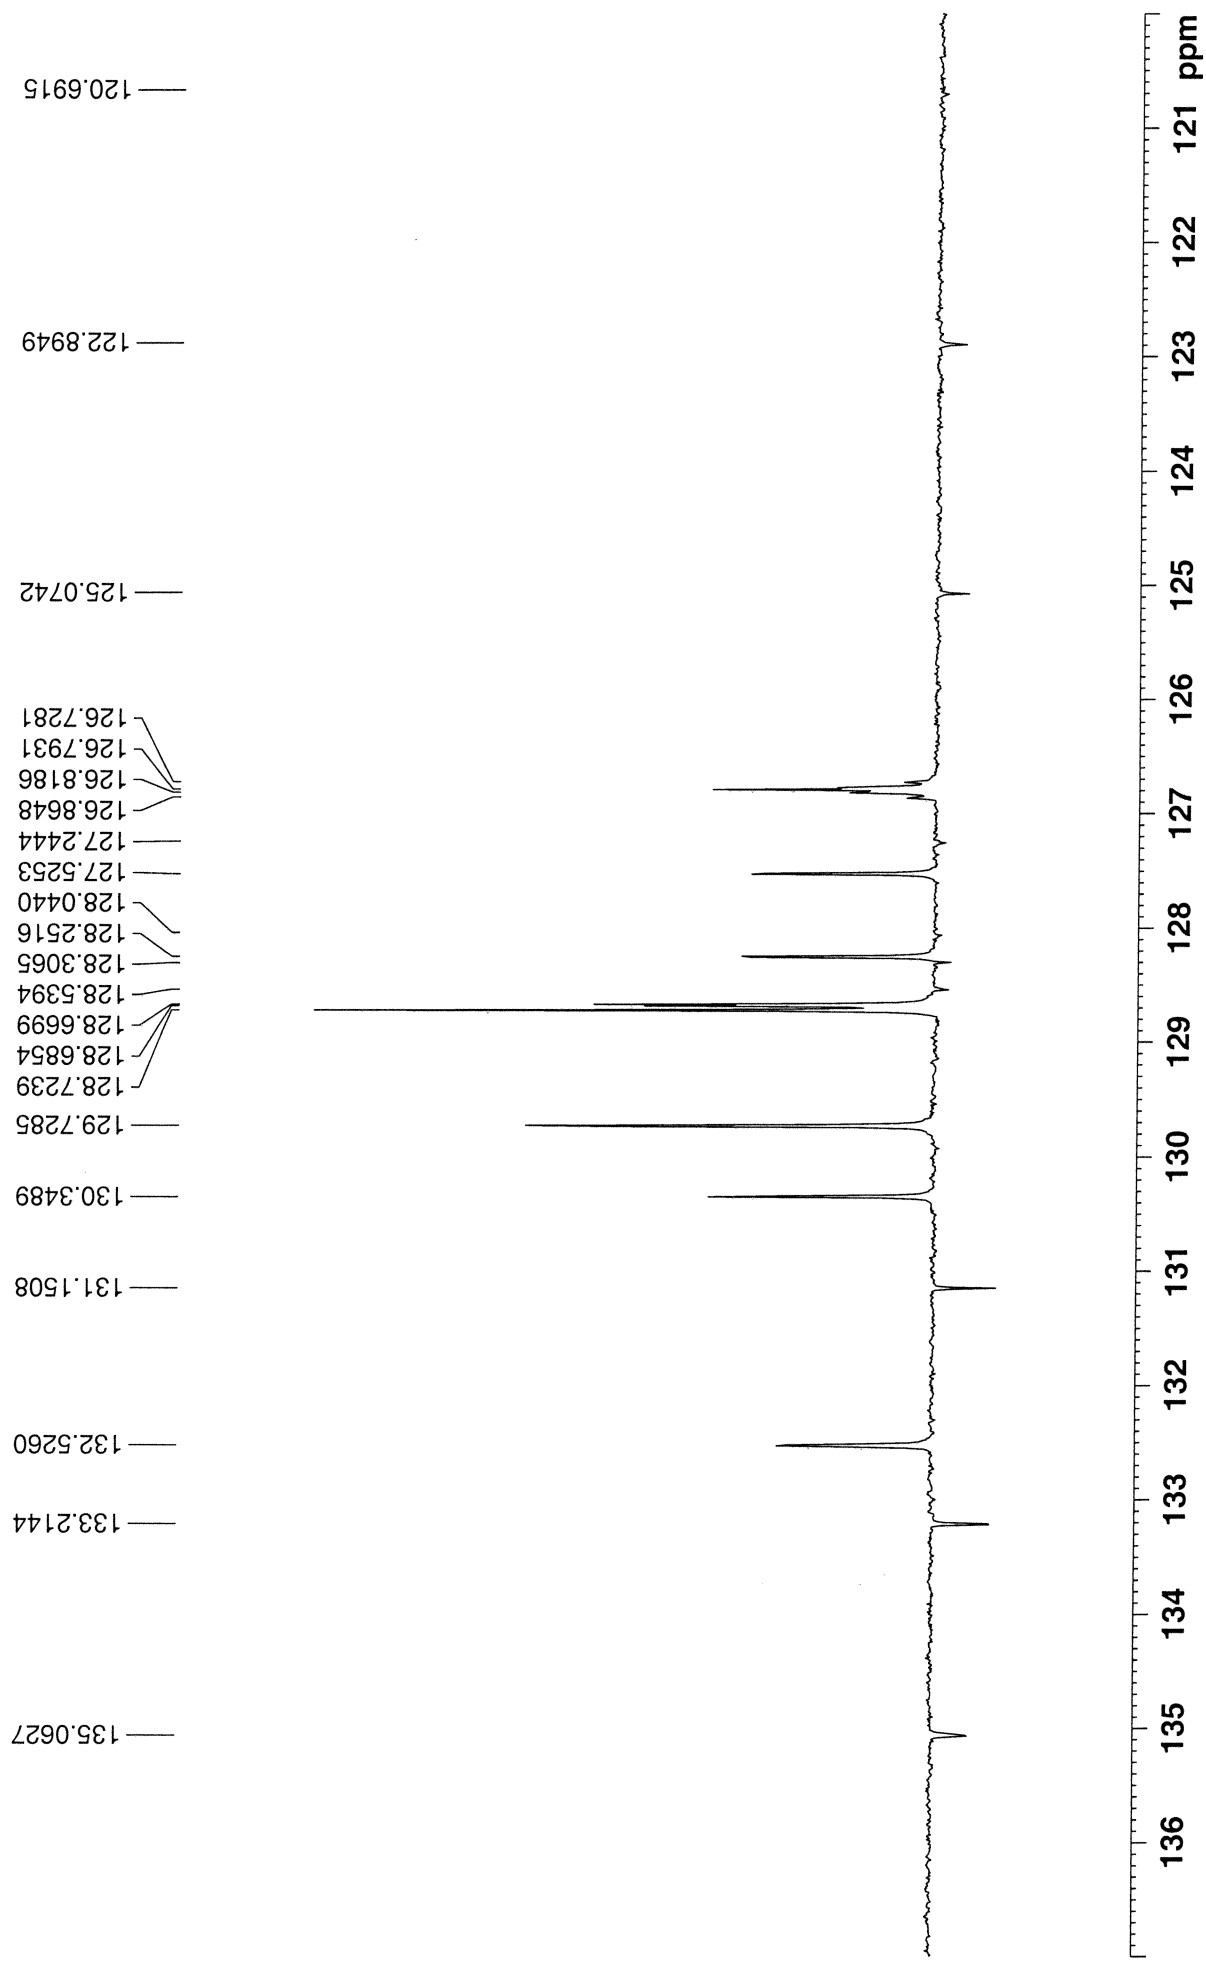

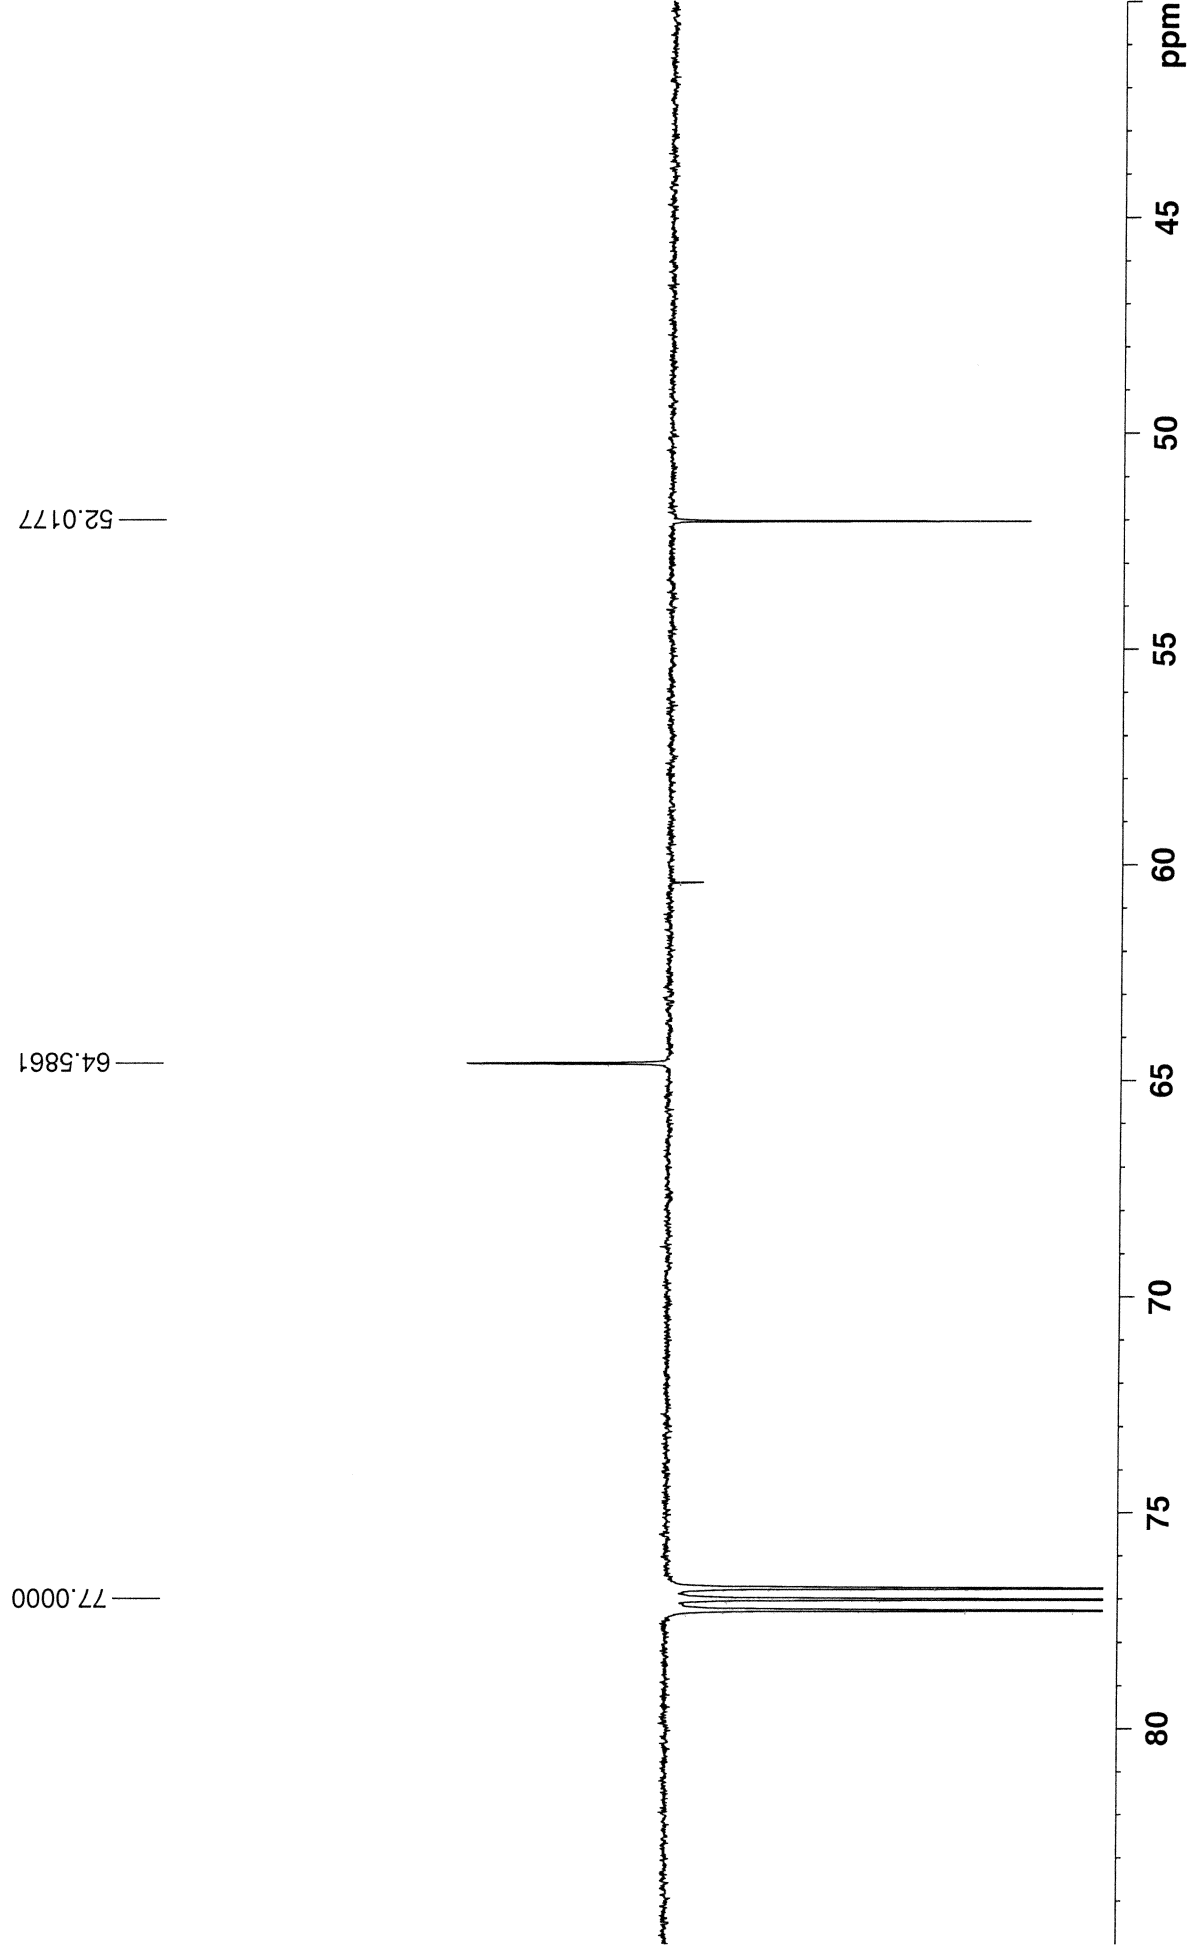



**Figure S59c.** NMR spectra of compound **7o**.

PN012S2Peak1 in cdcl3 (Proton) 27.2.2020

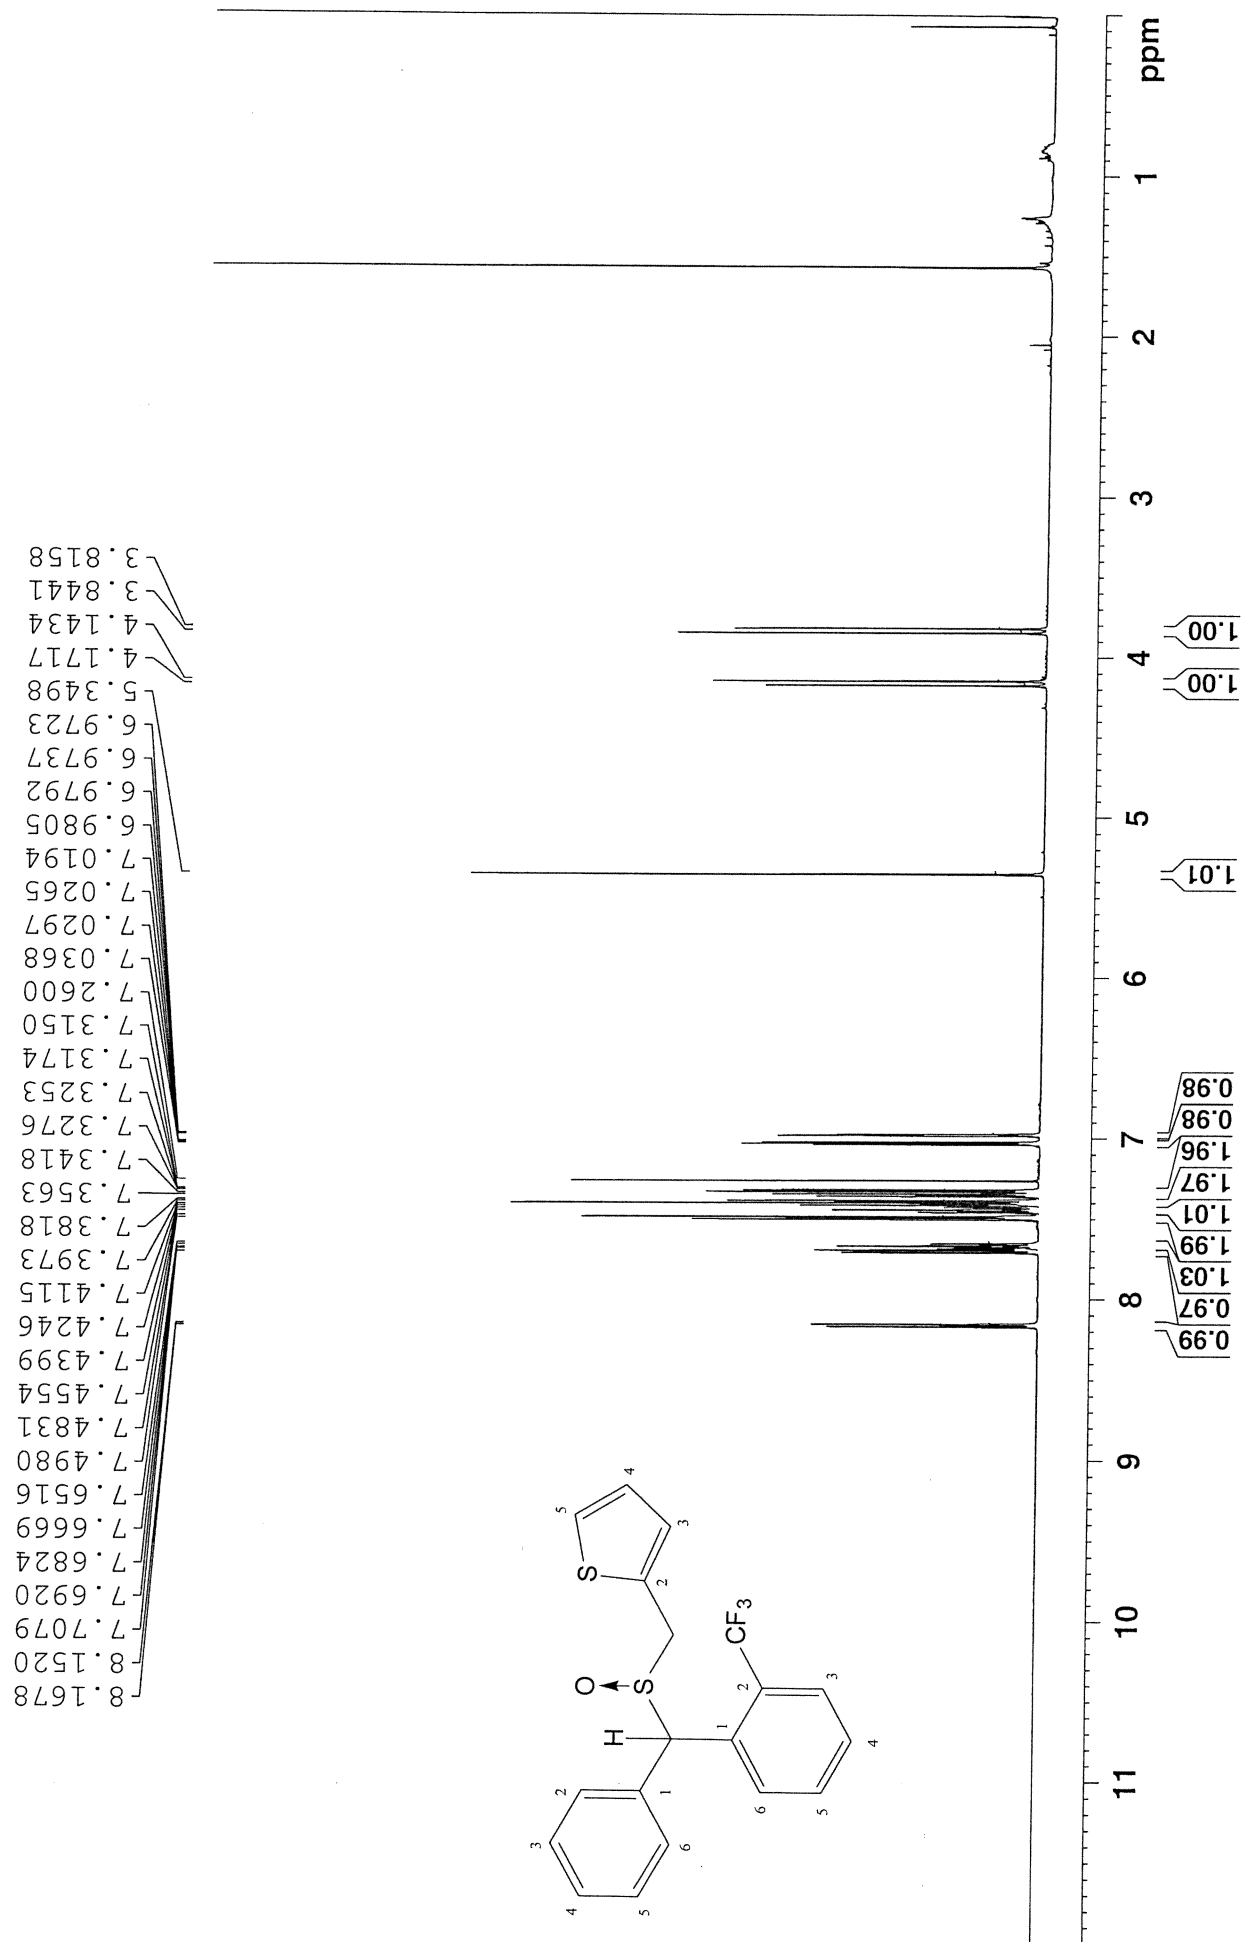

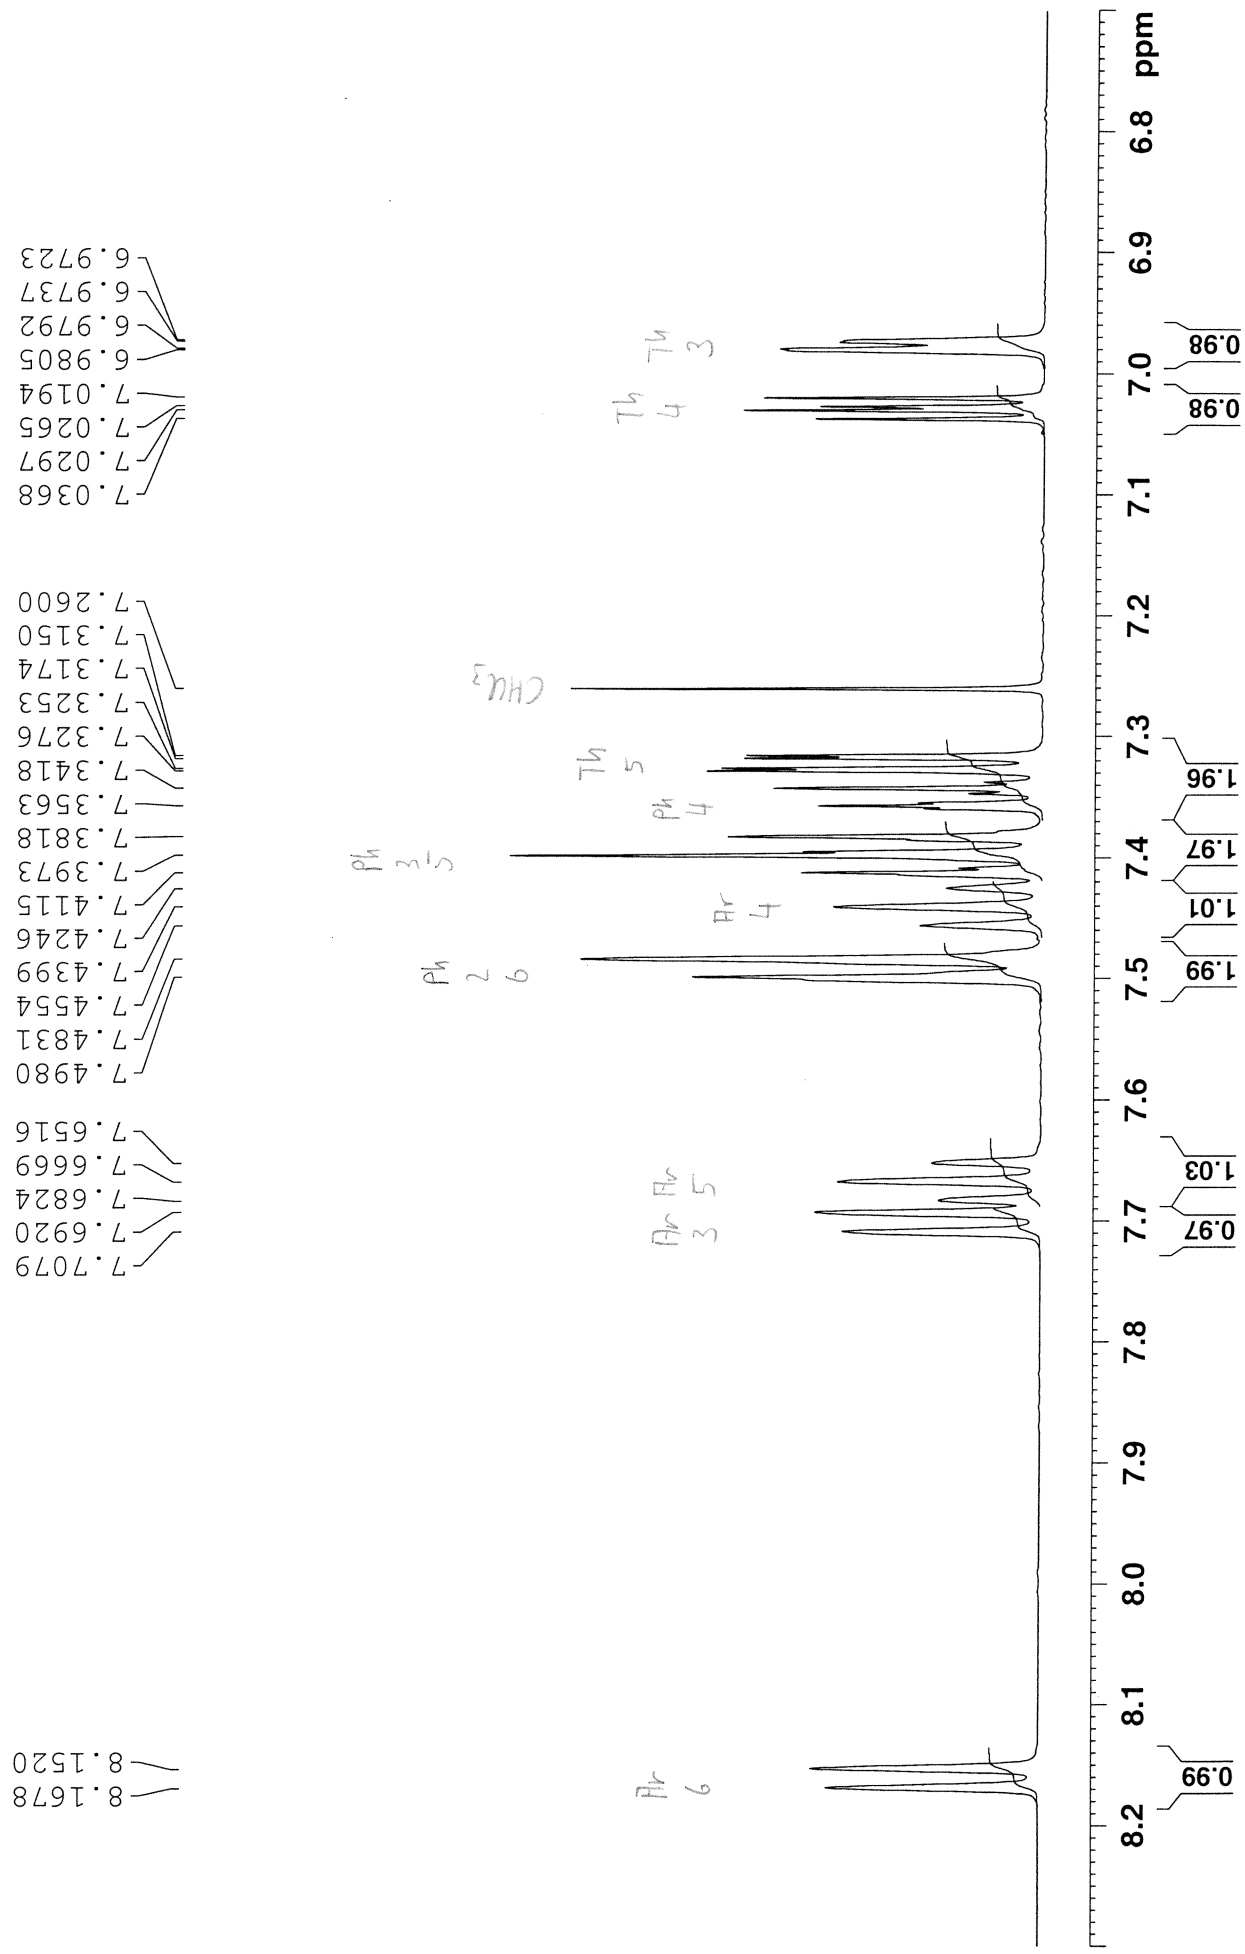

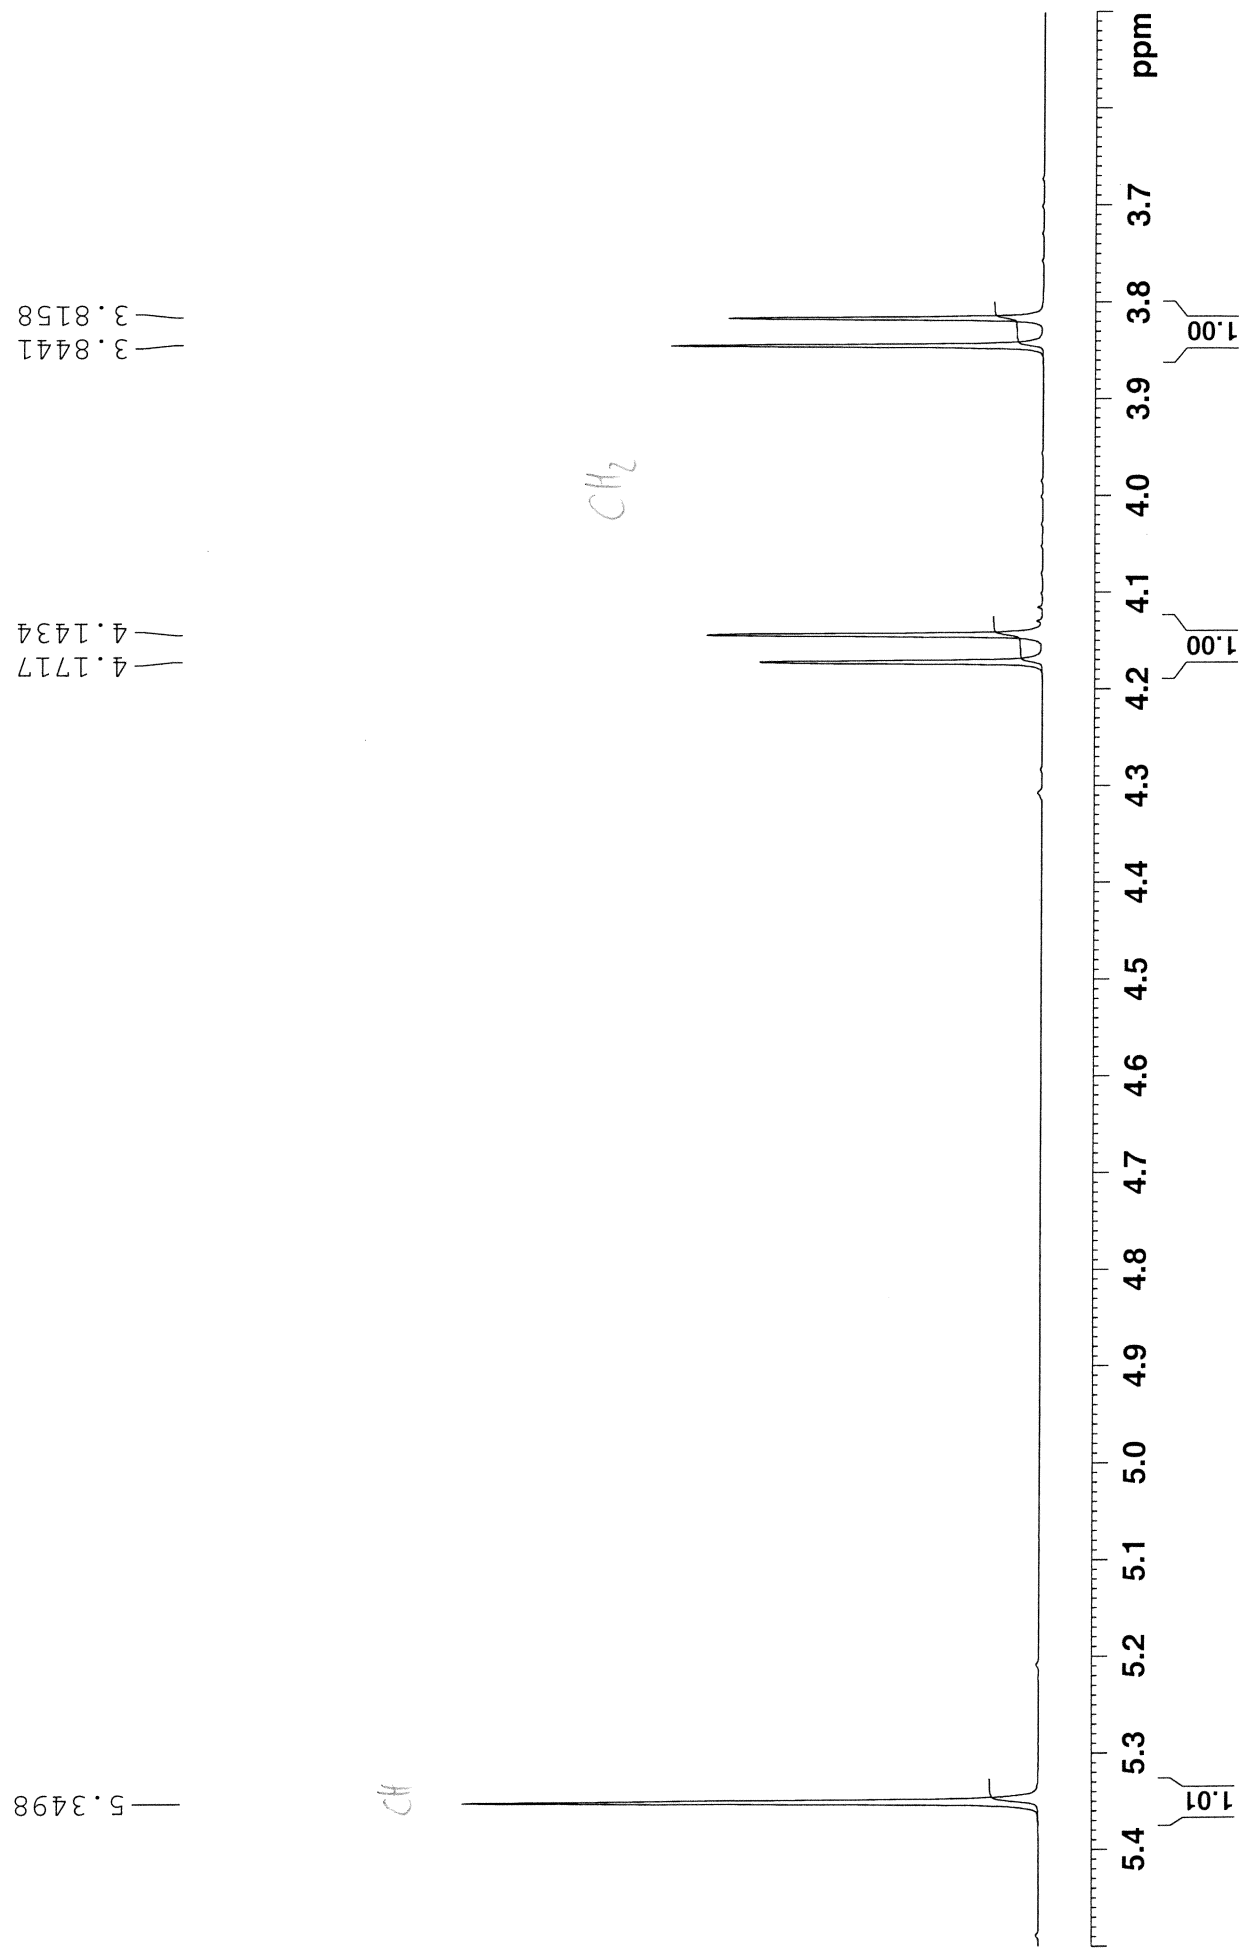

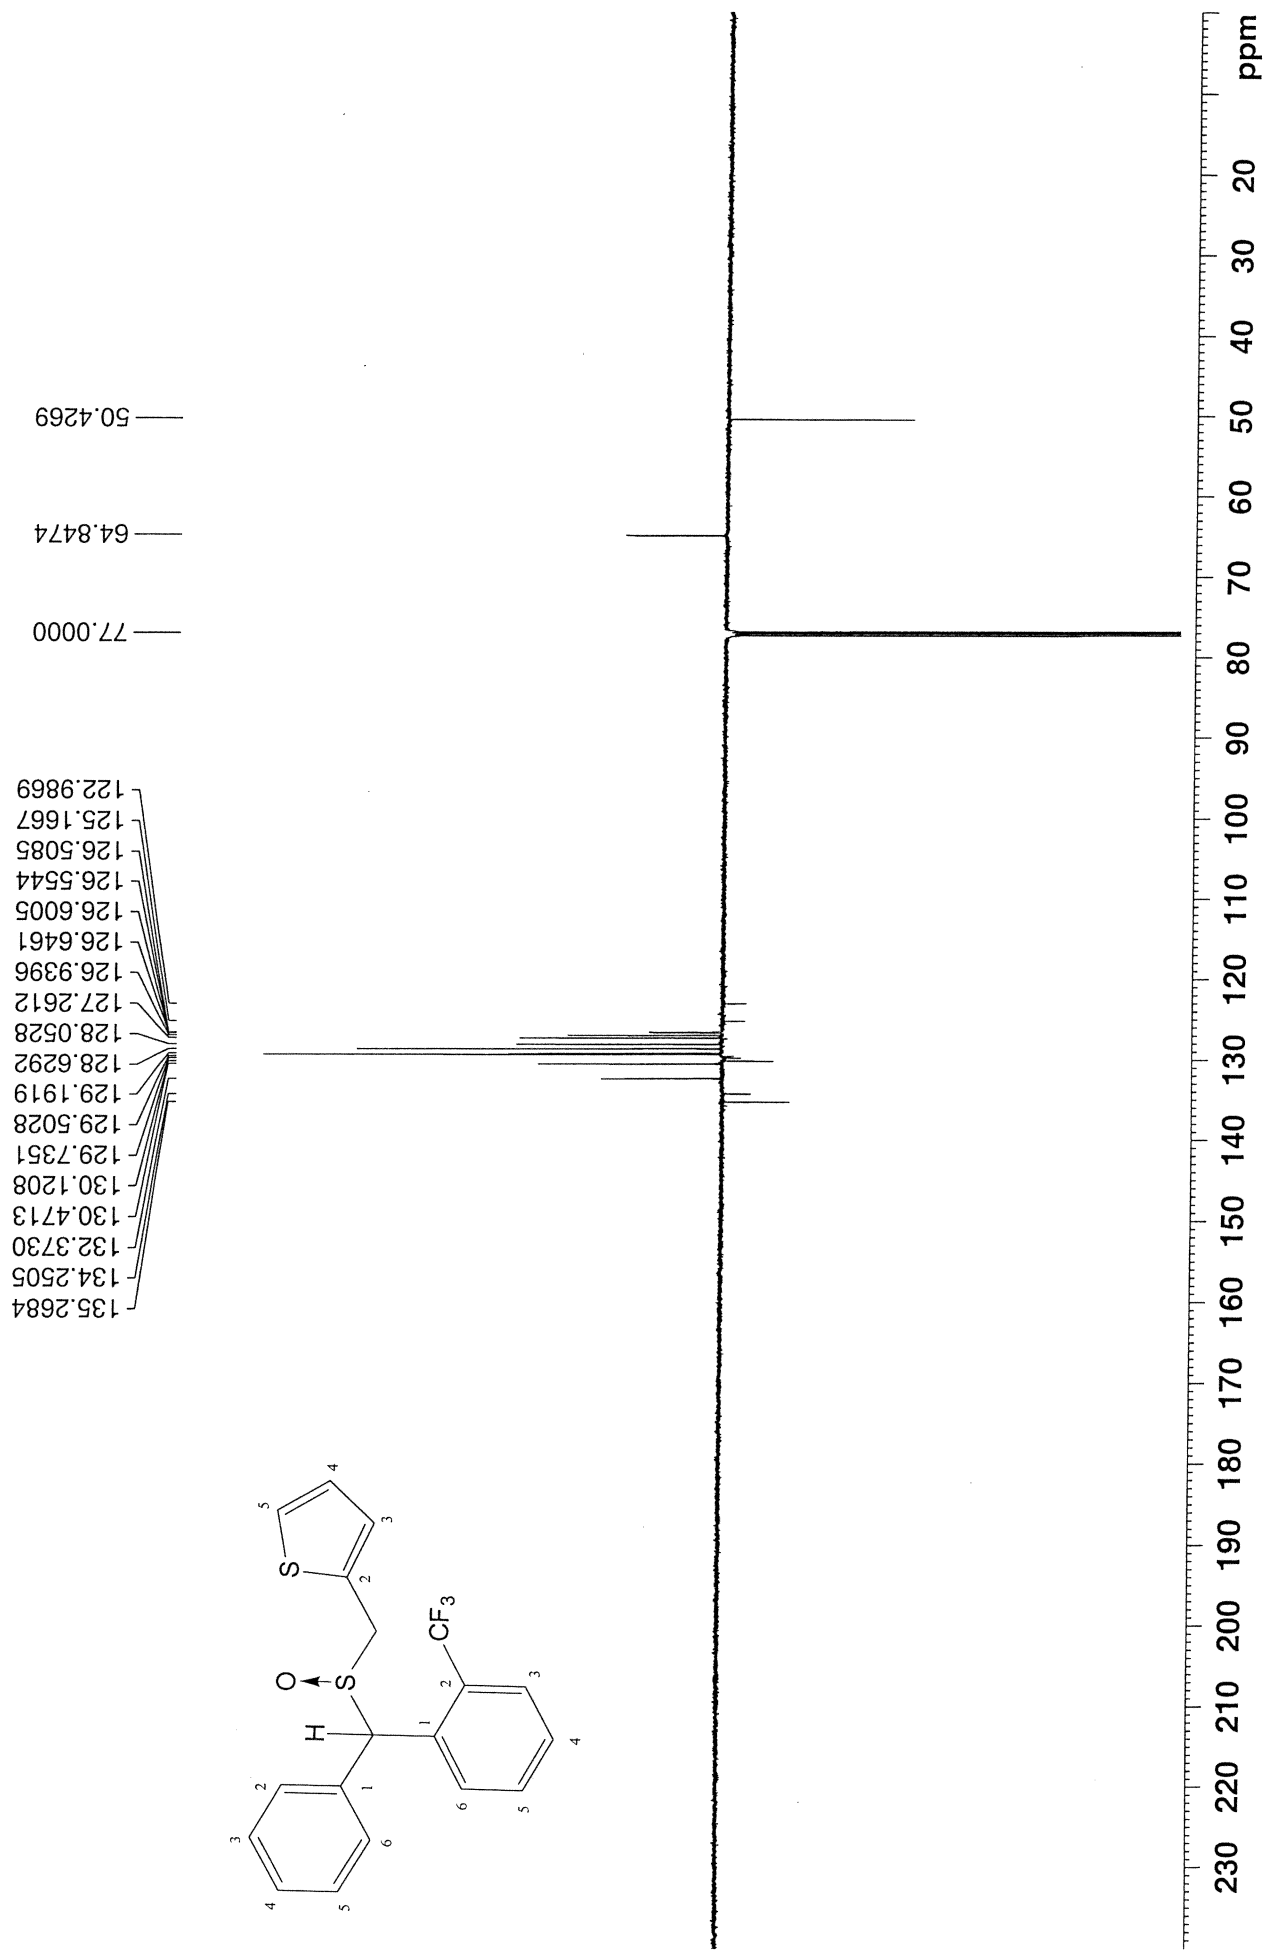

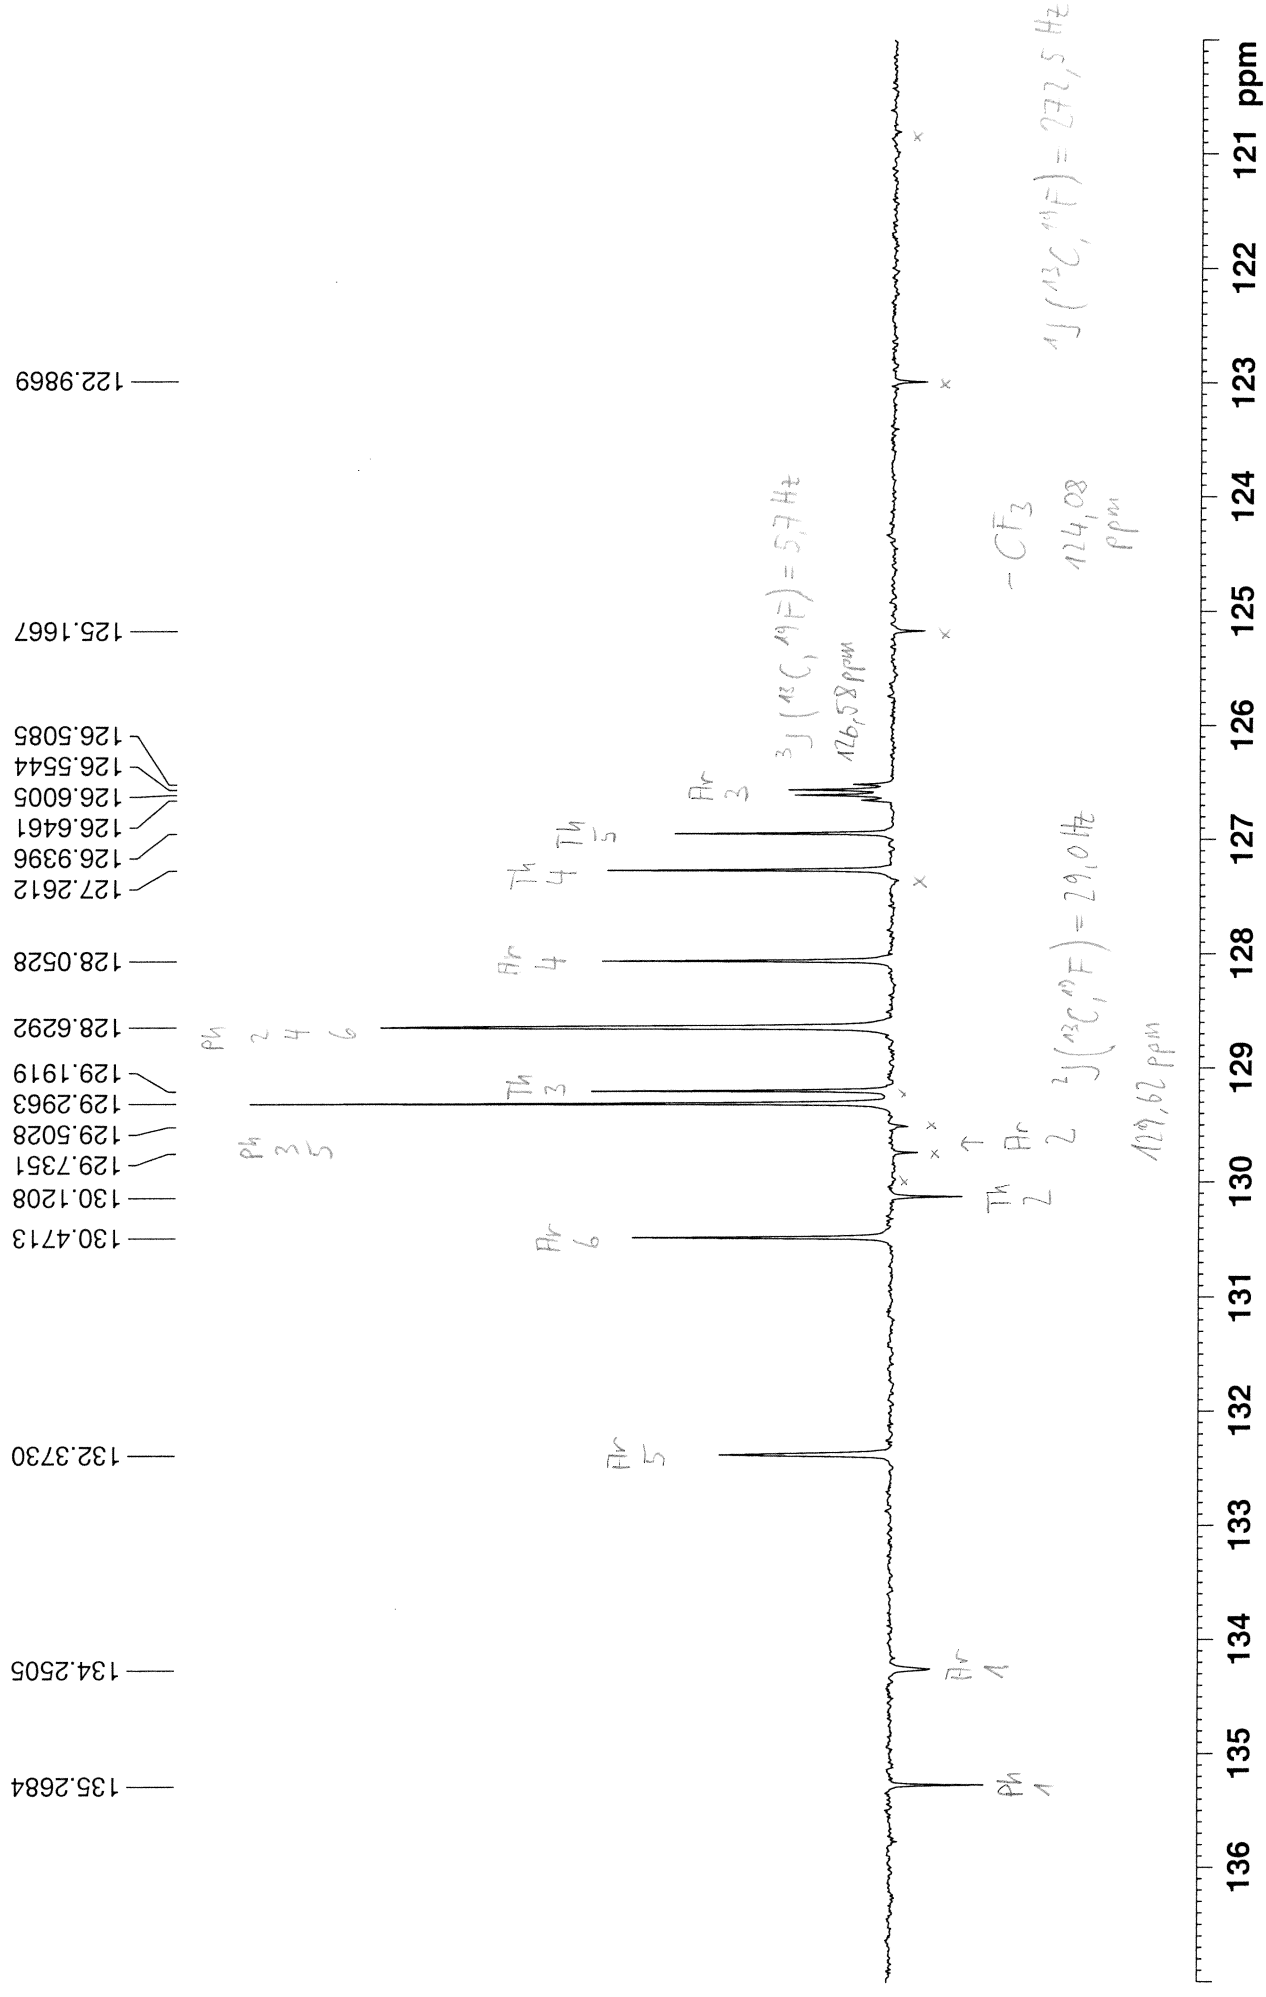

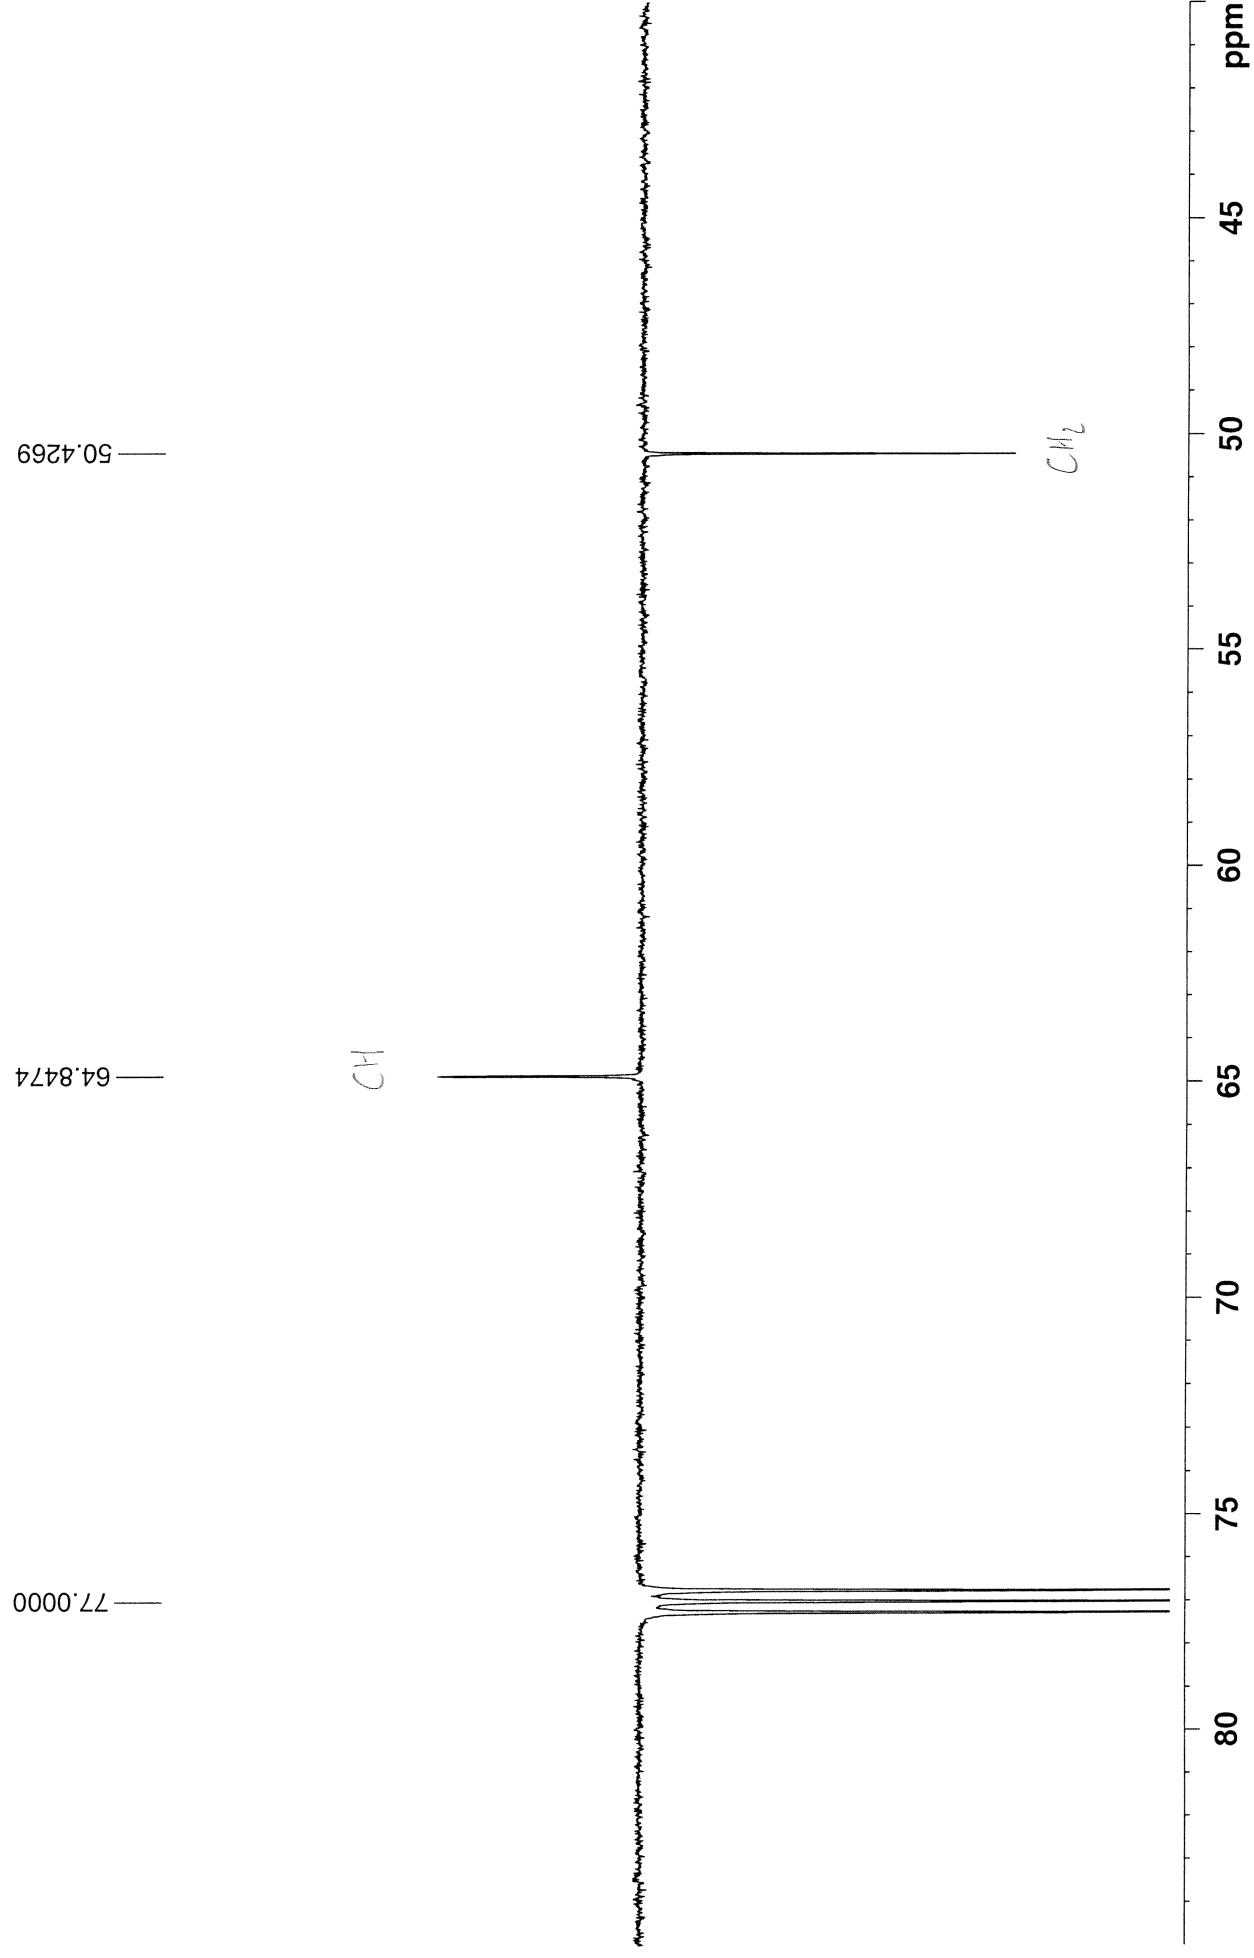

PN012S2Peak1 in cdcl3 (COSY) 27.2.2020

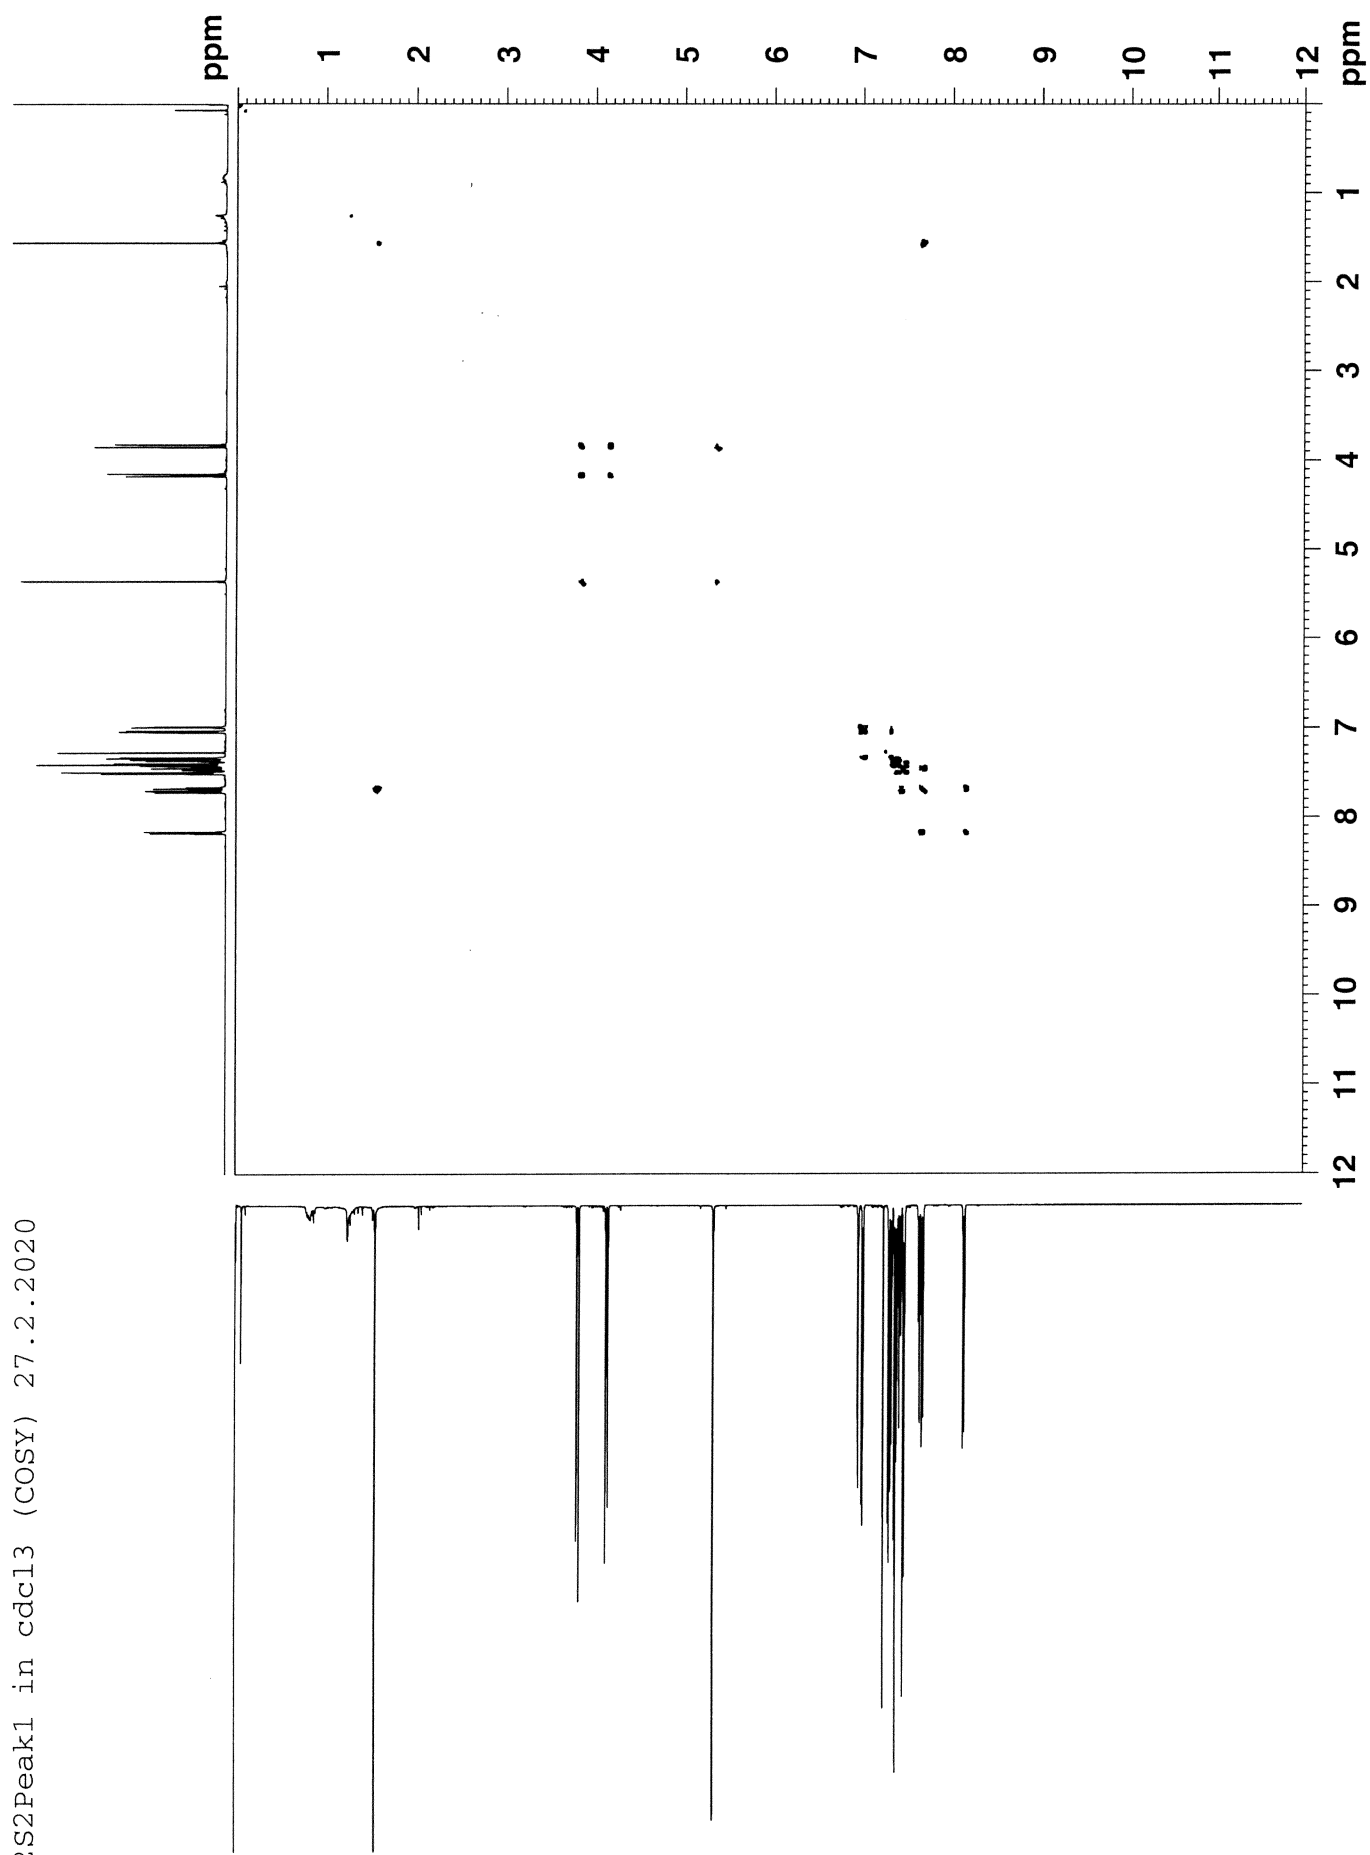

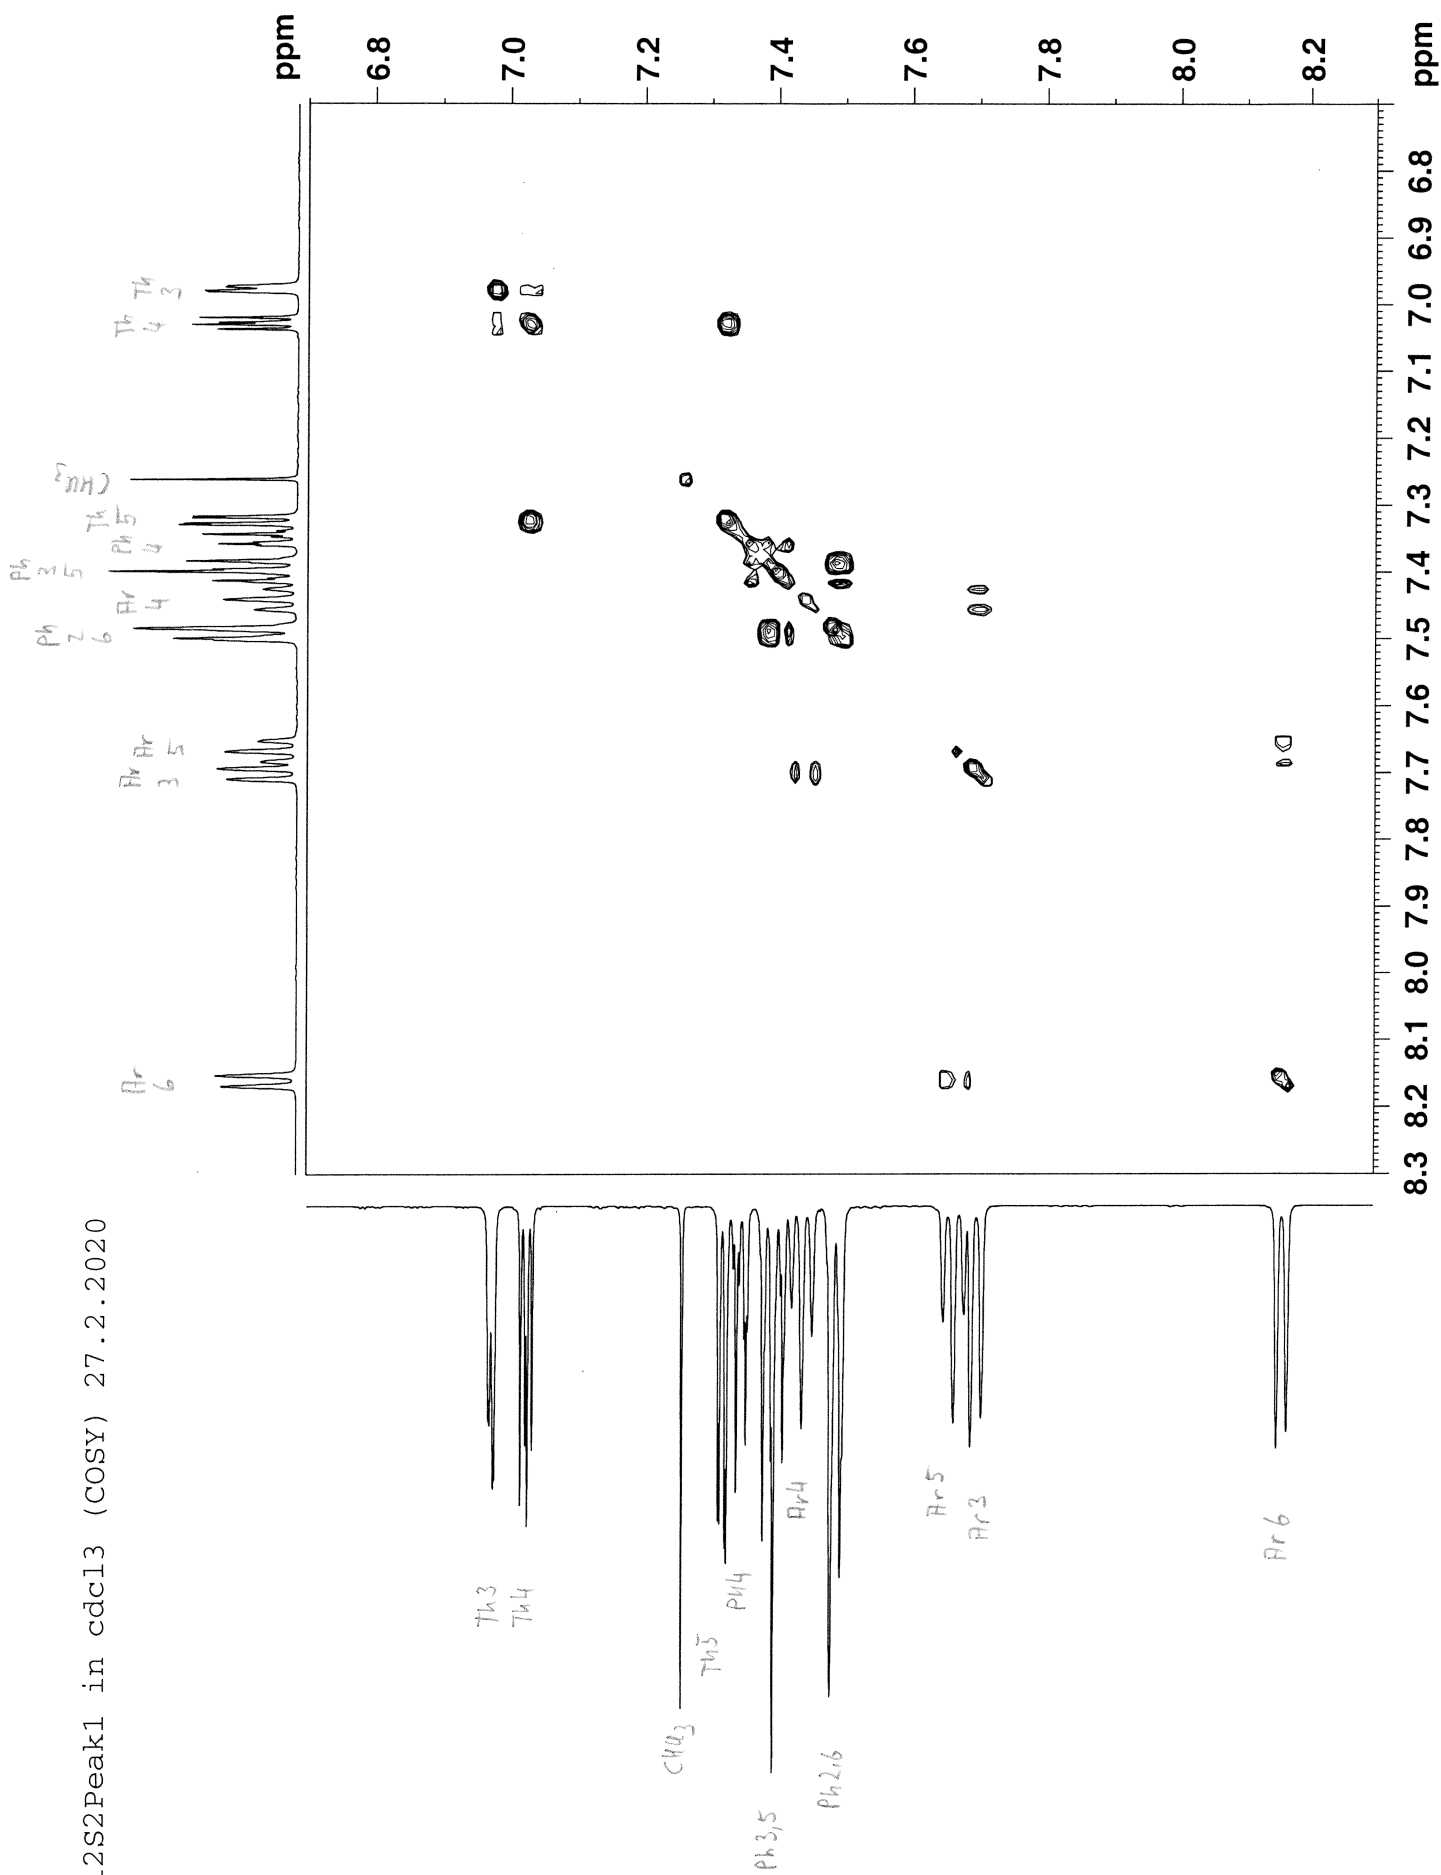



PN012S2Peak1 in cdcl3 (COSY) 27.2.2020

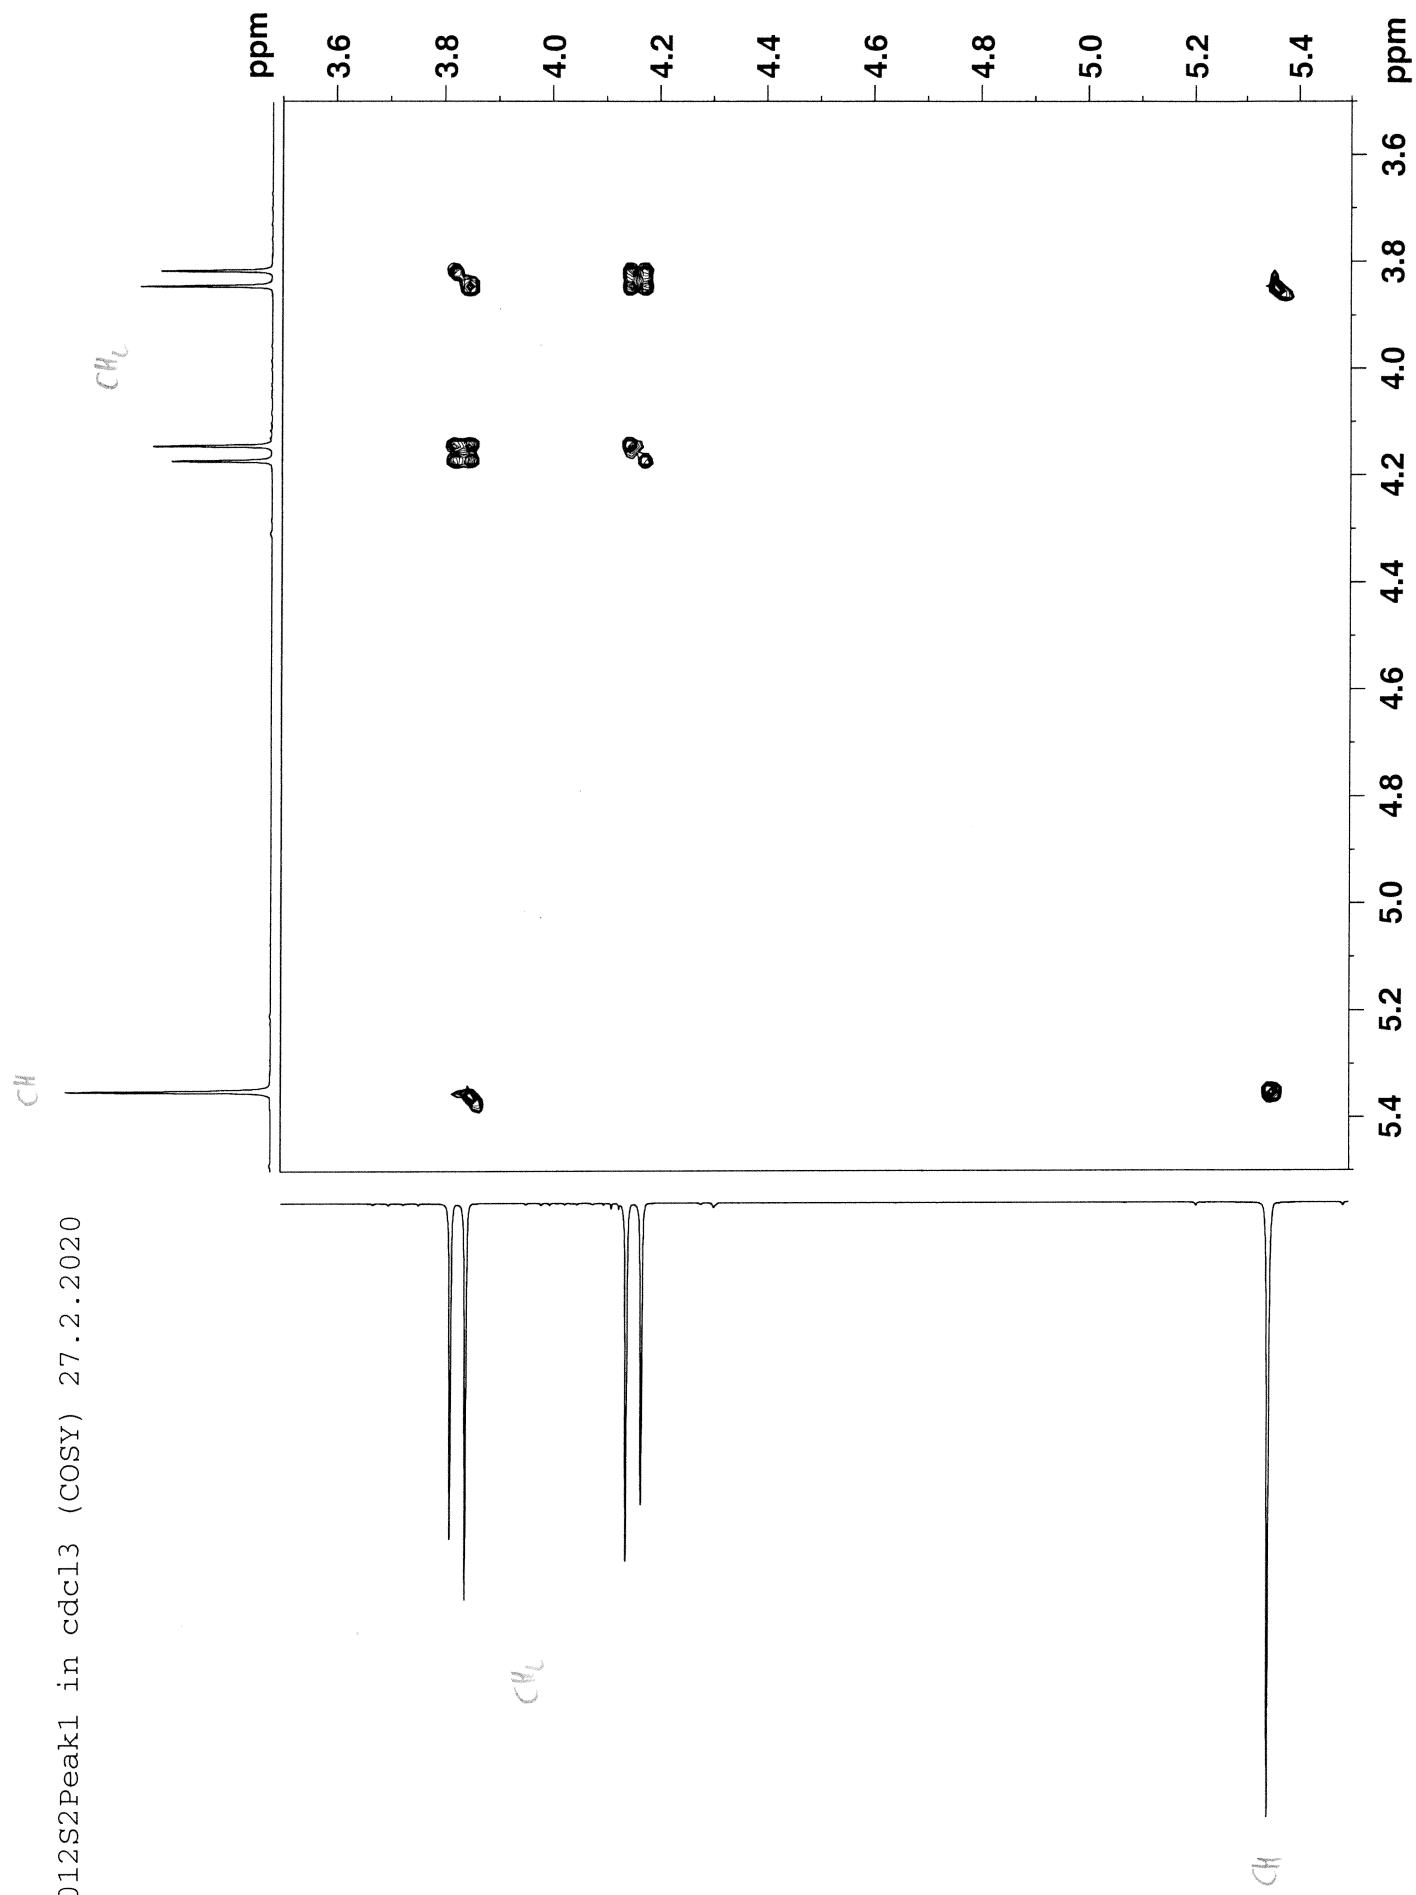

PN012S2Peak1 in cdcl3 (HSQC) 27.2.2020

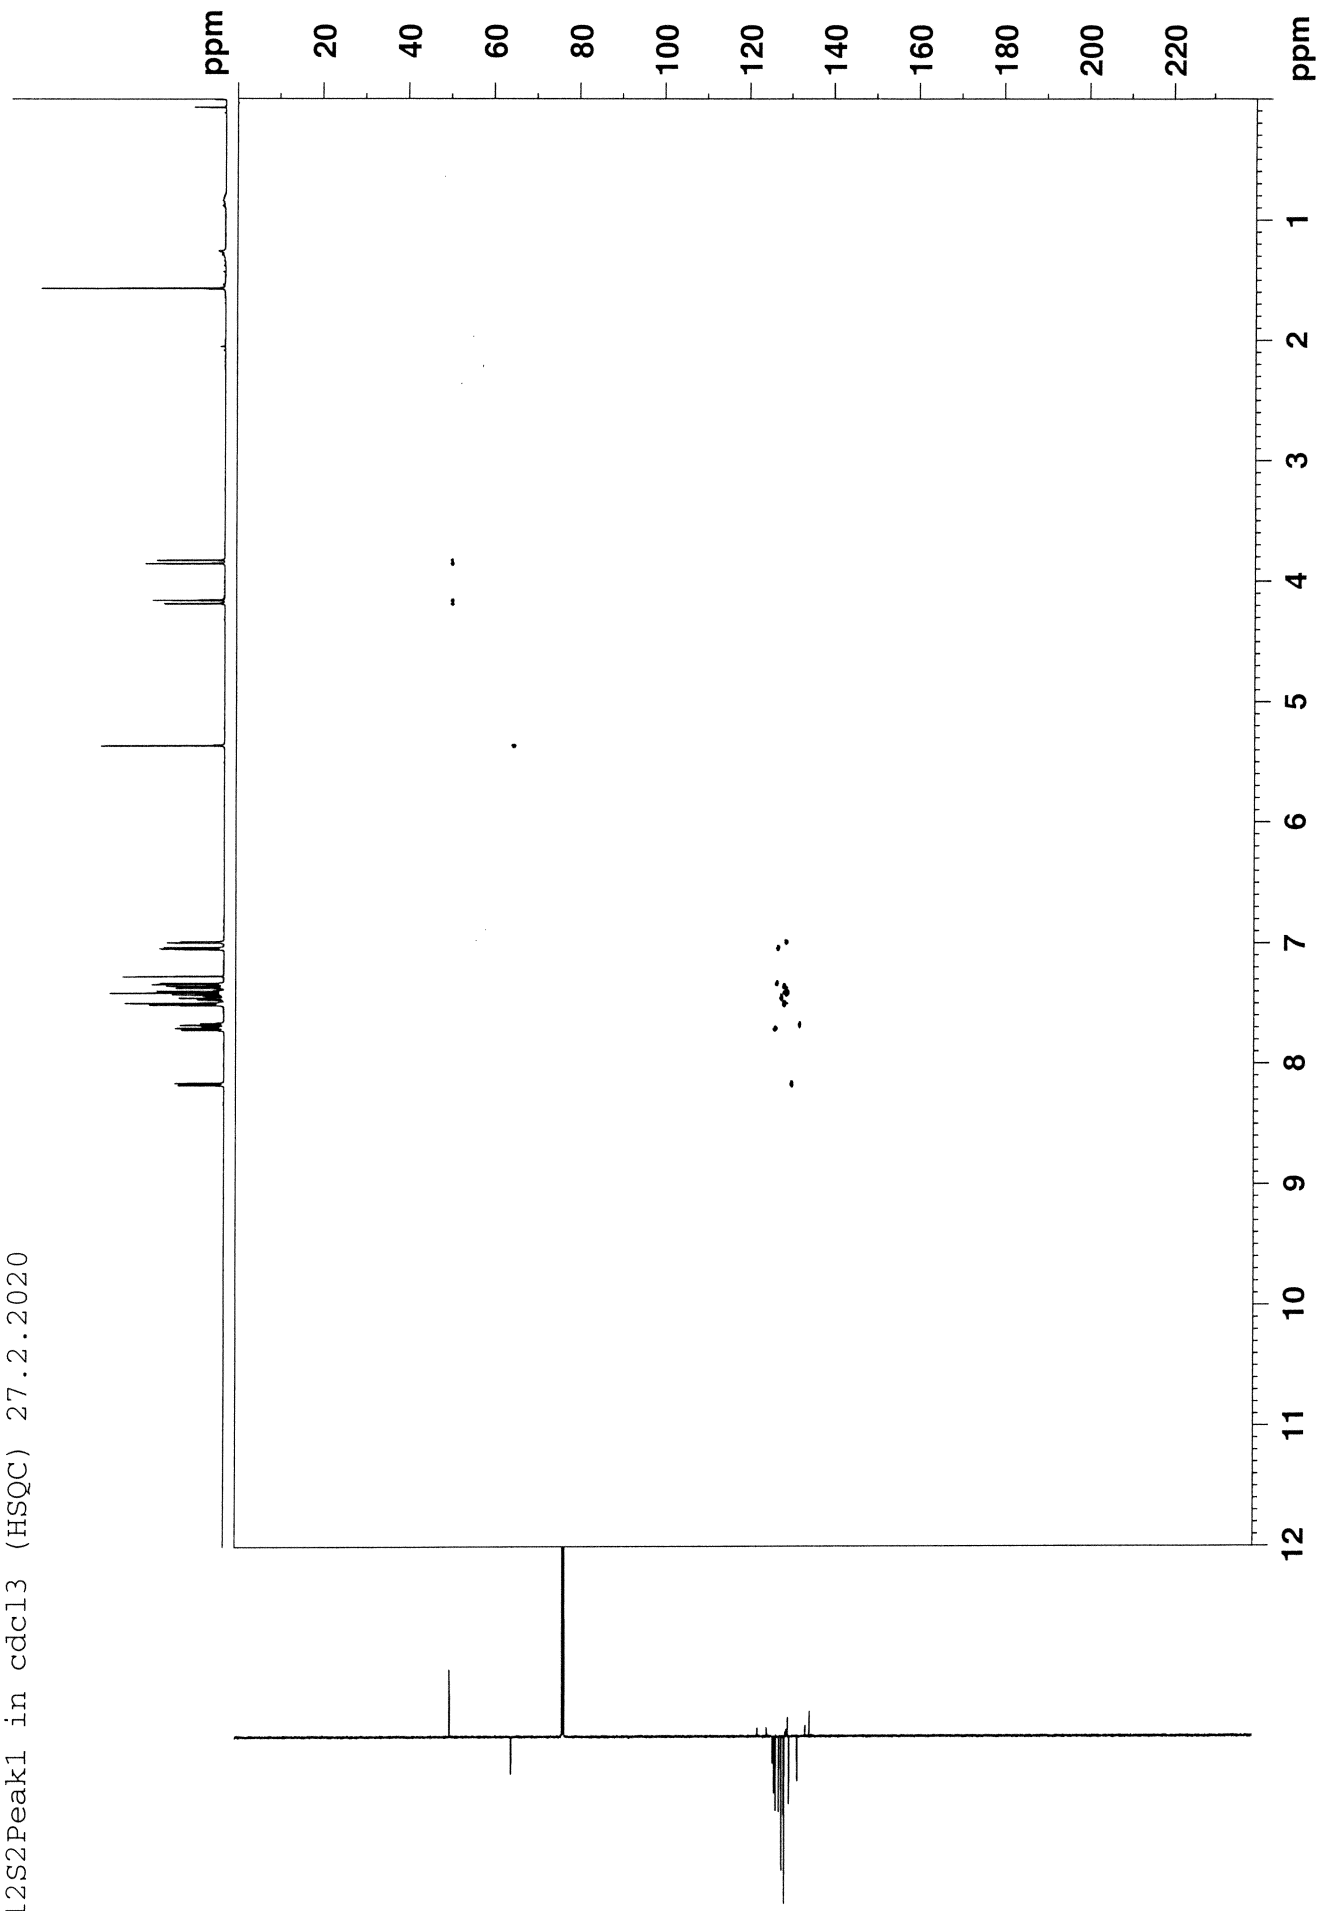

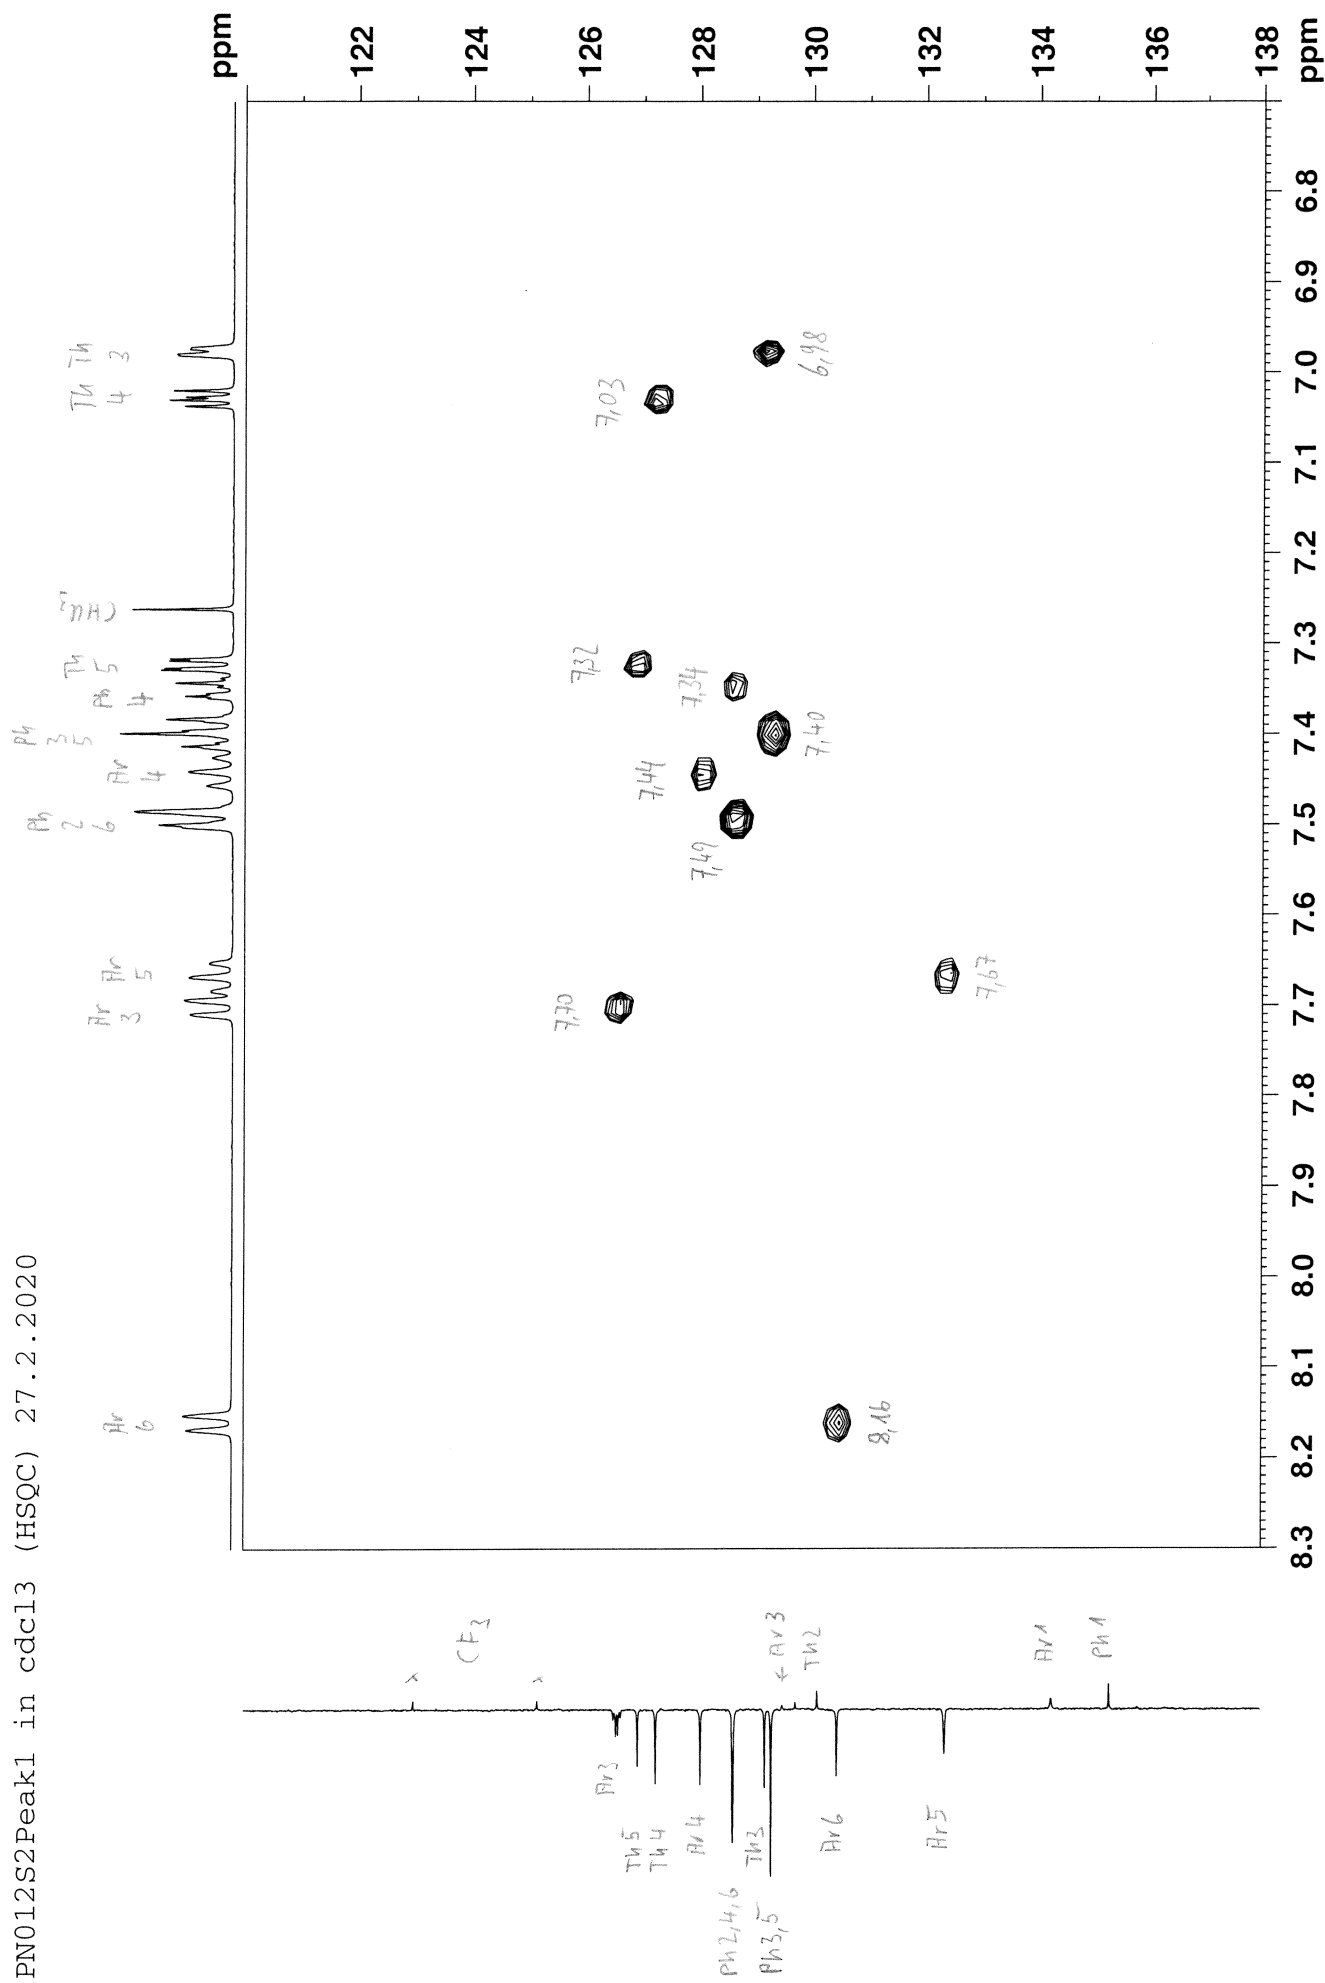

PN012S2Peak1 in cdcl3 (HSQC) 27.2.2020

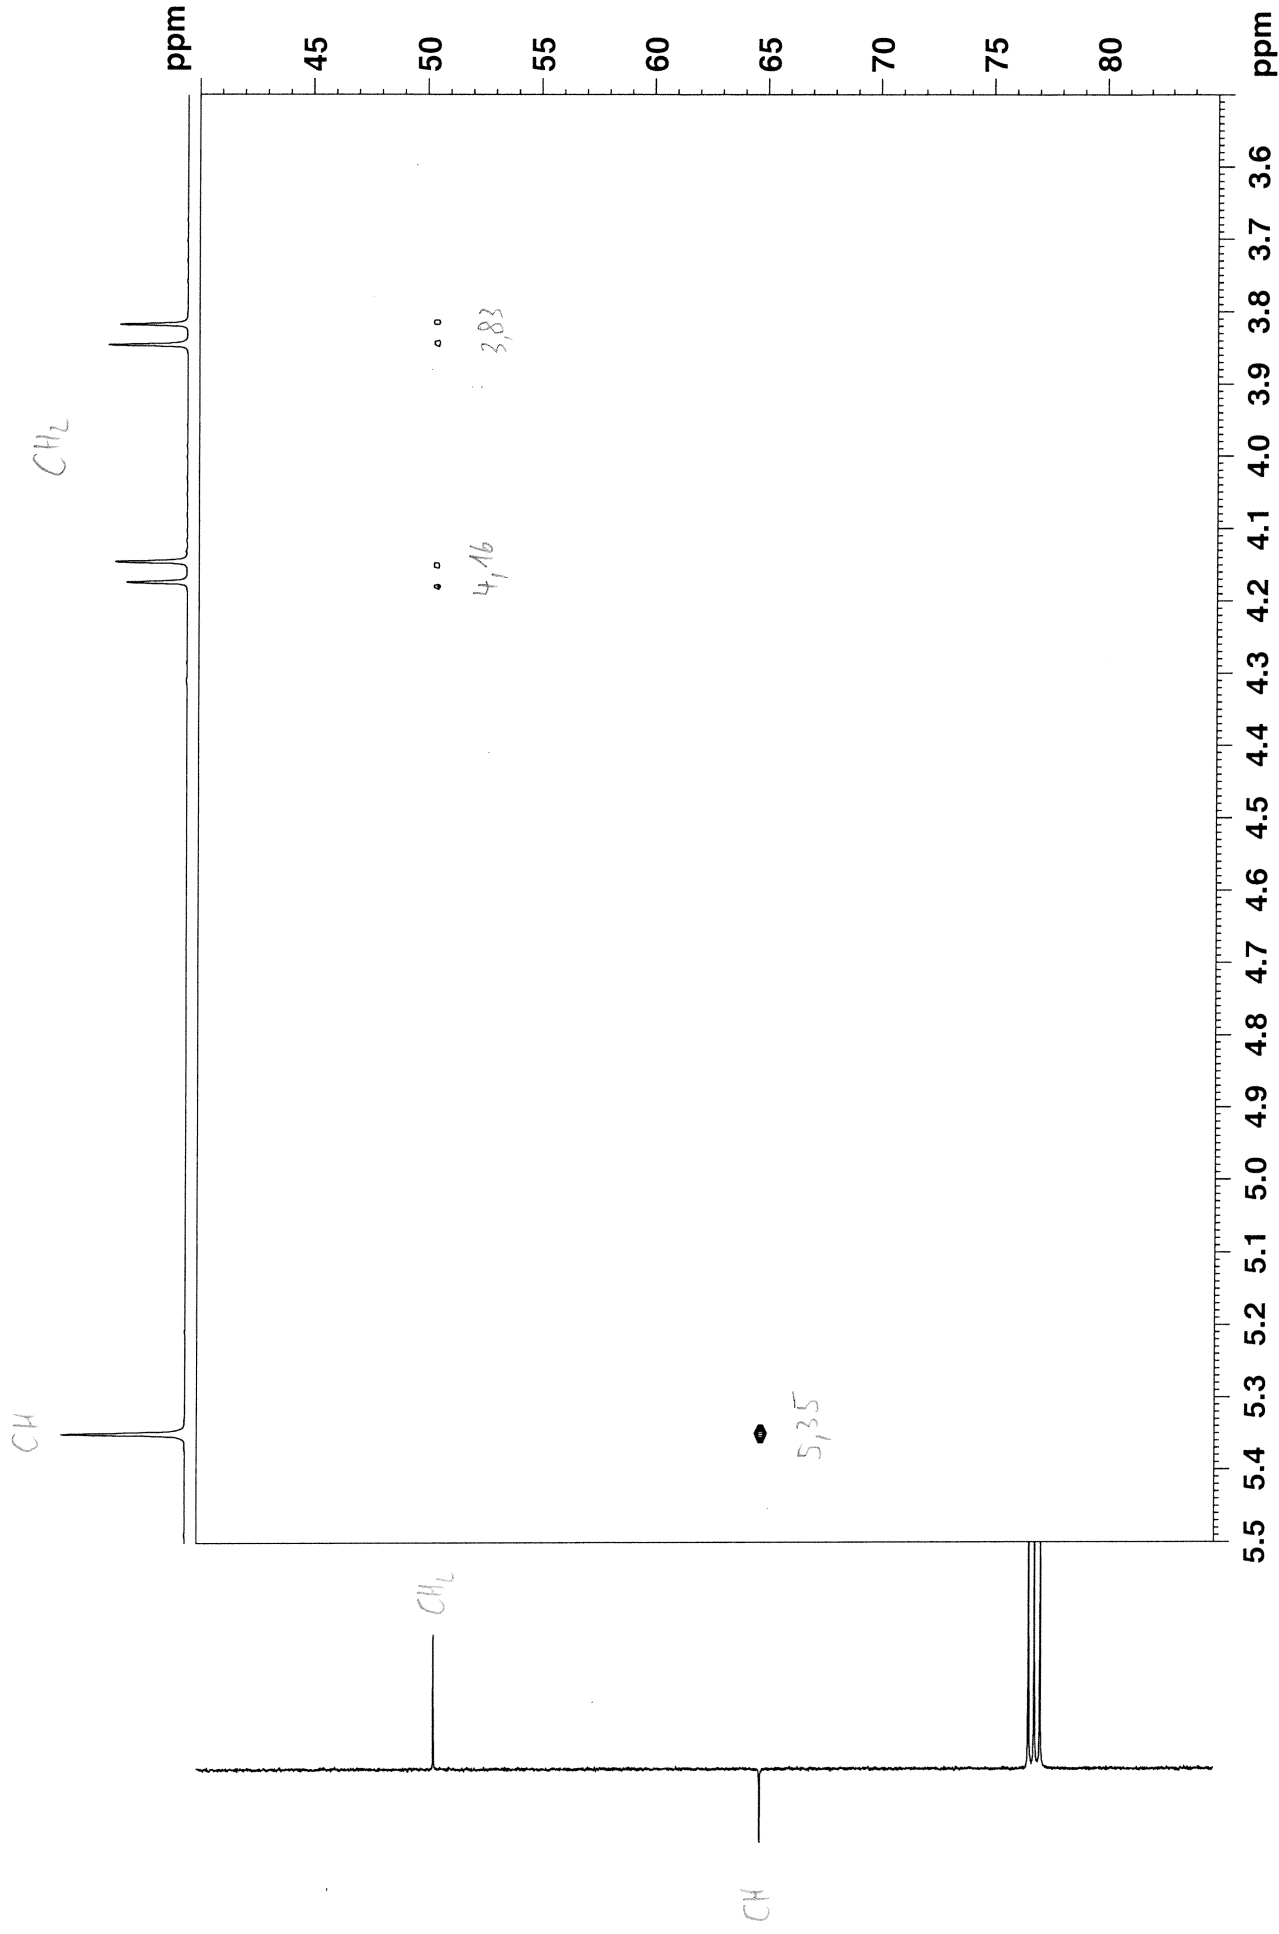

PN012S2Peak1 in cdcl3 (HMBC) 27.2.2020

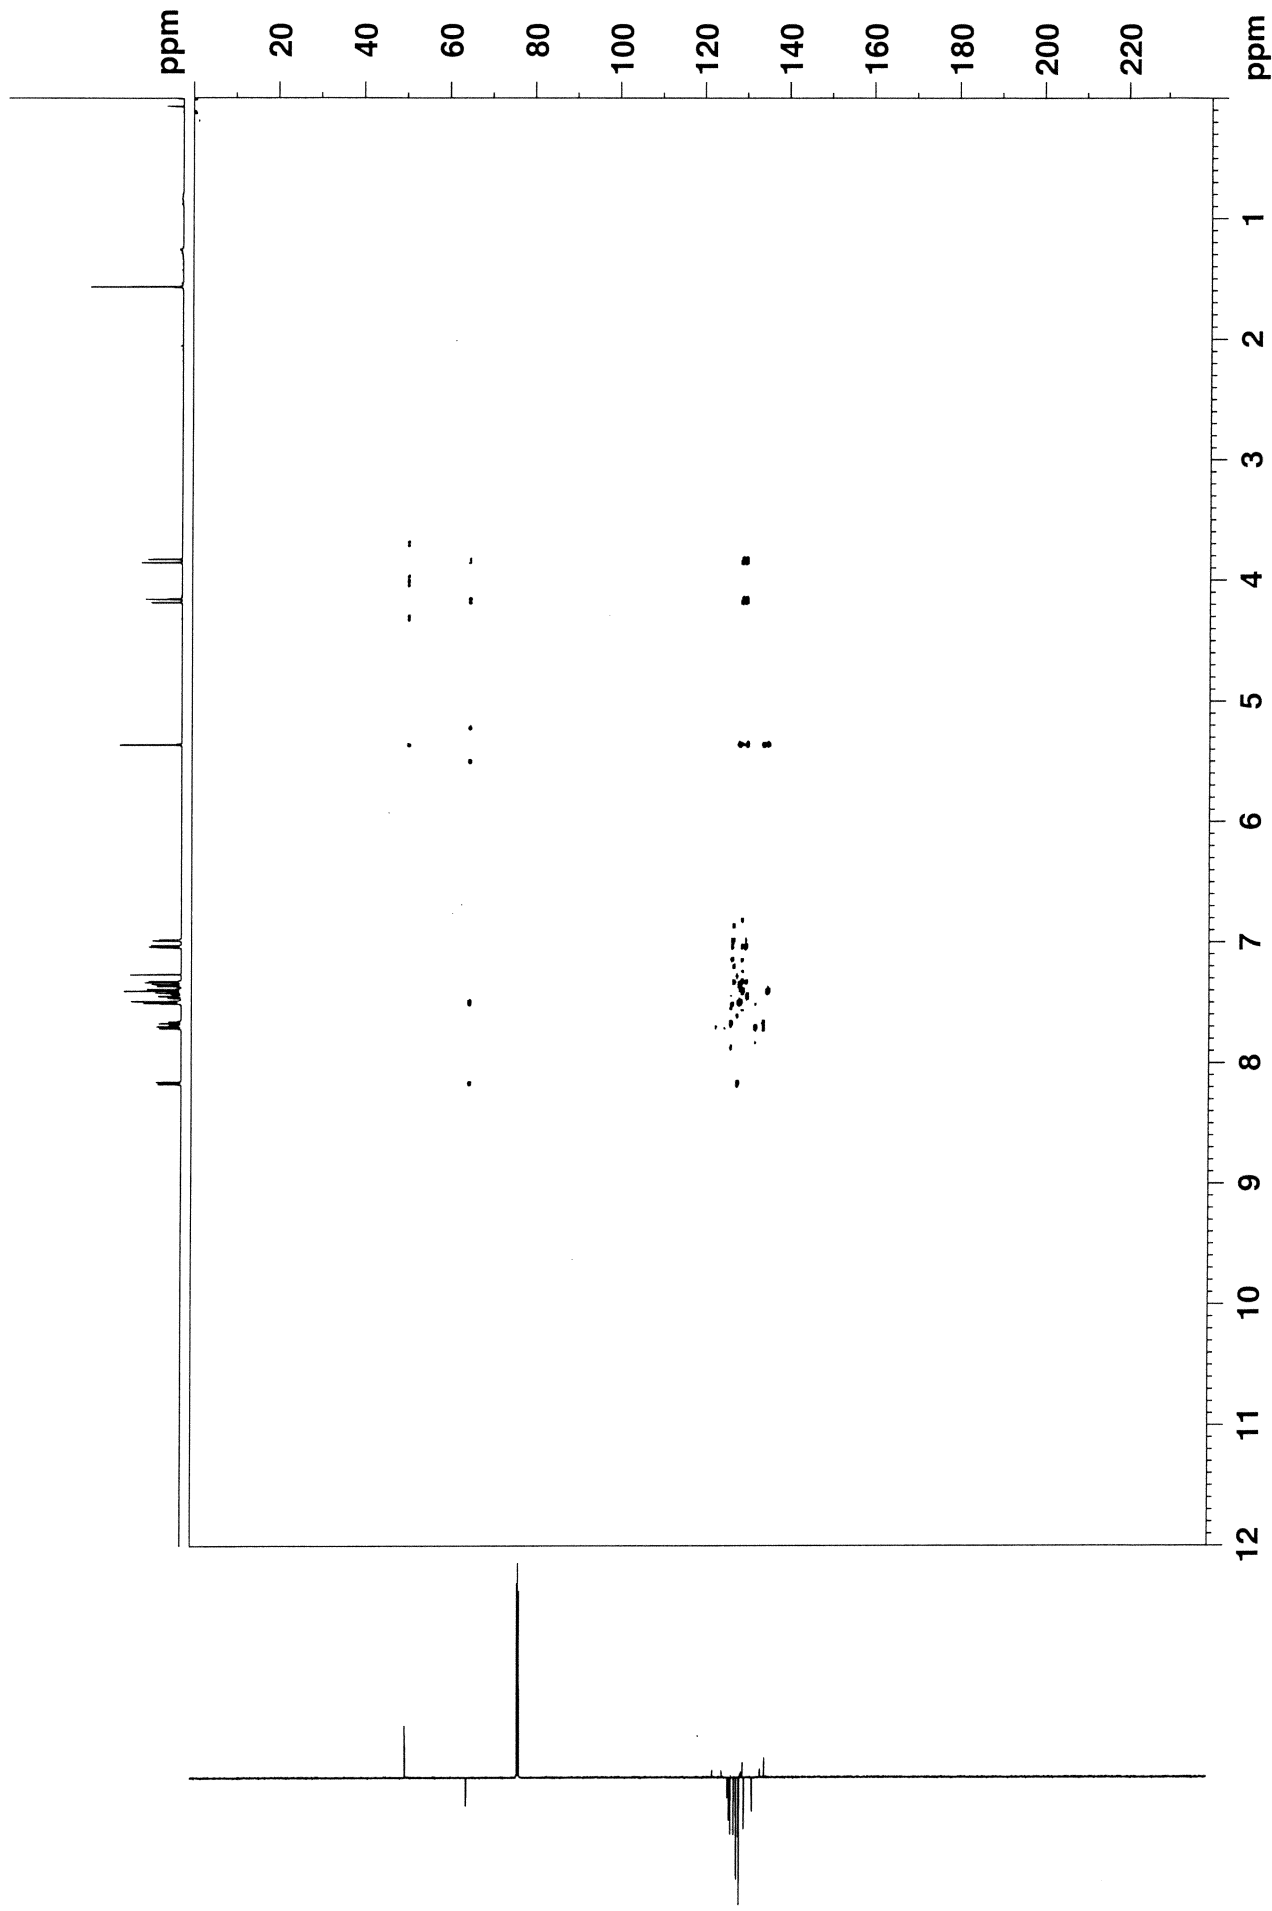

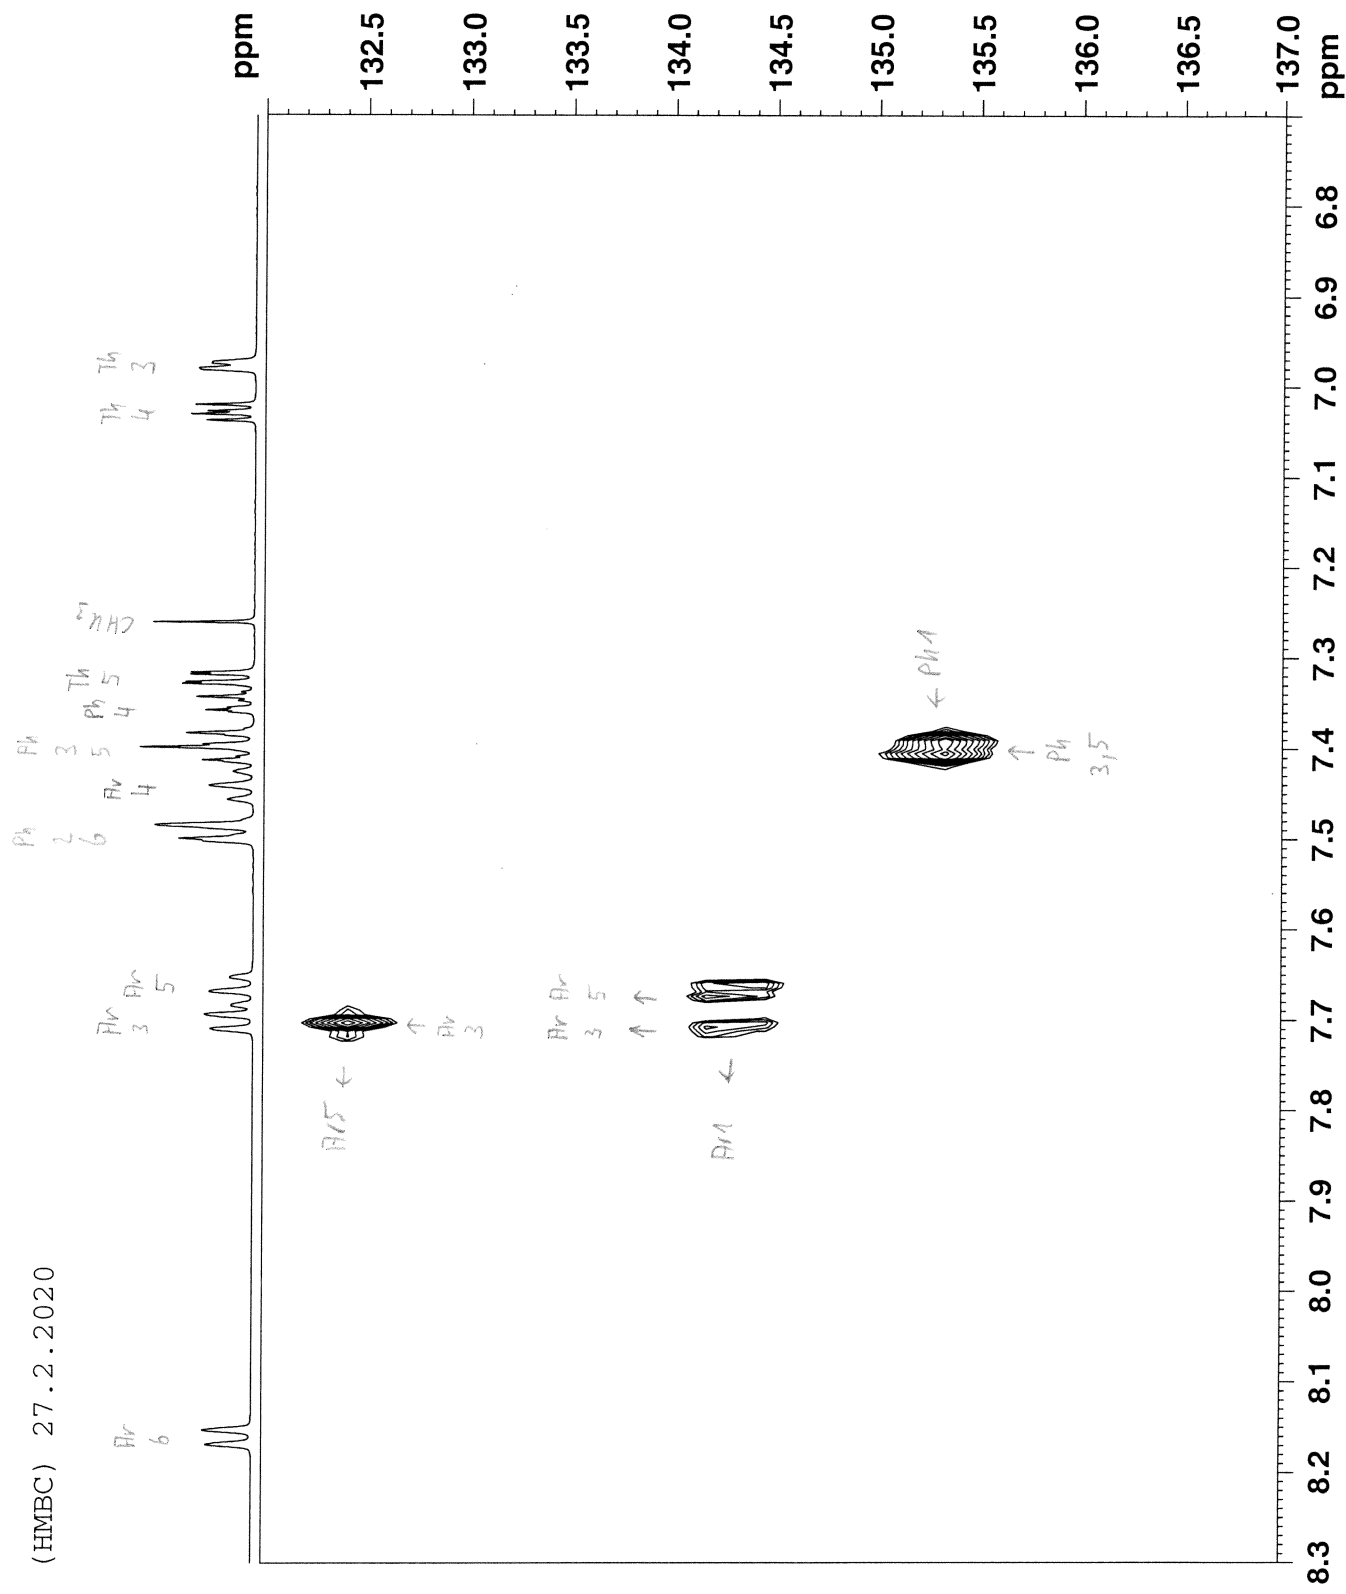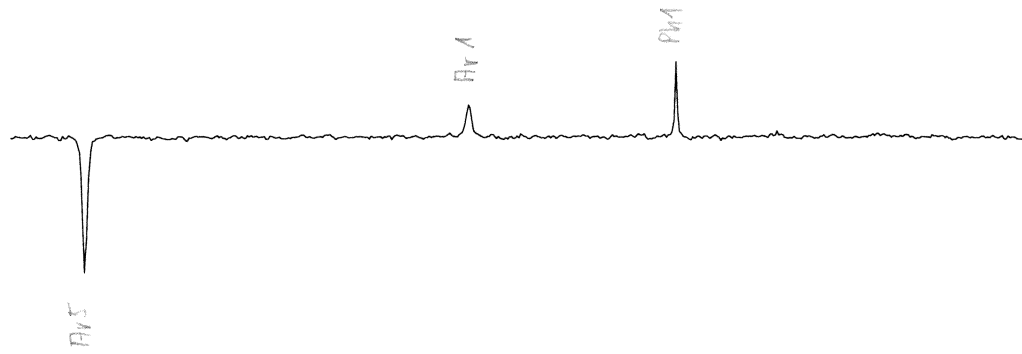

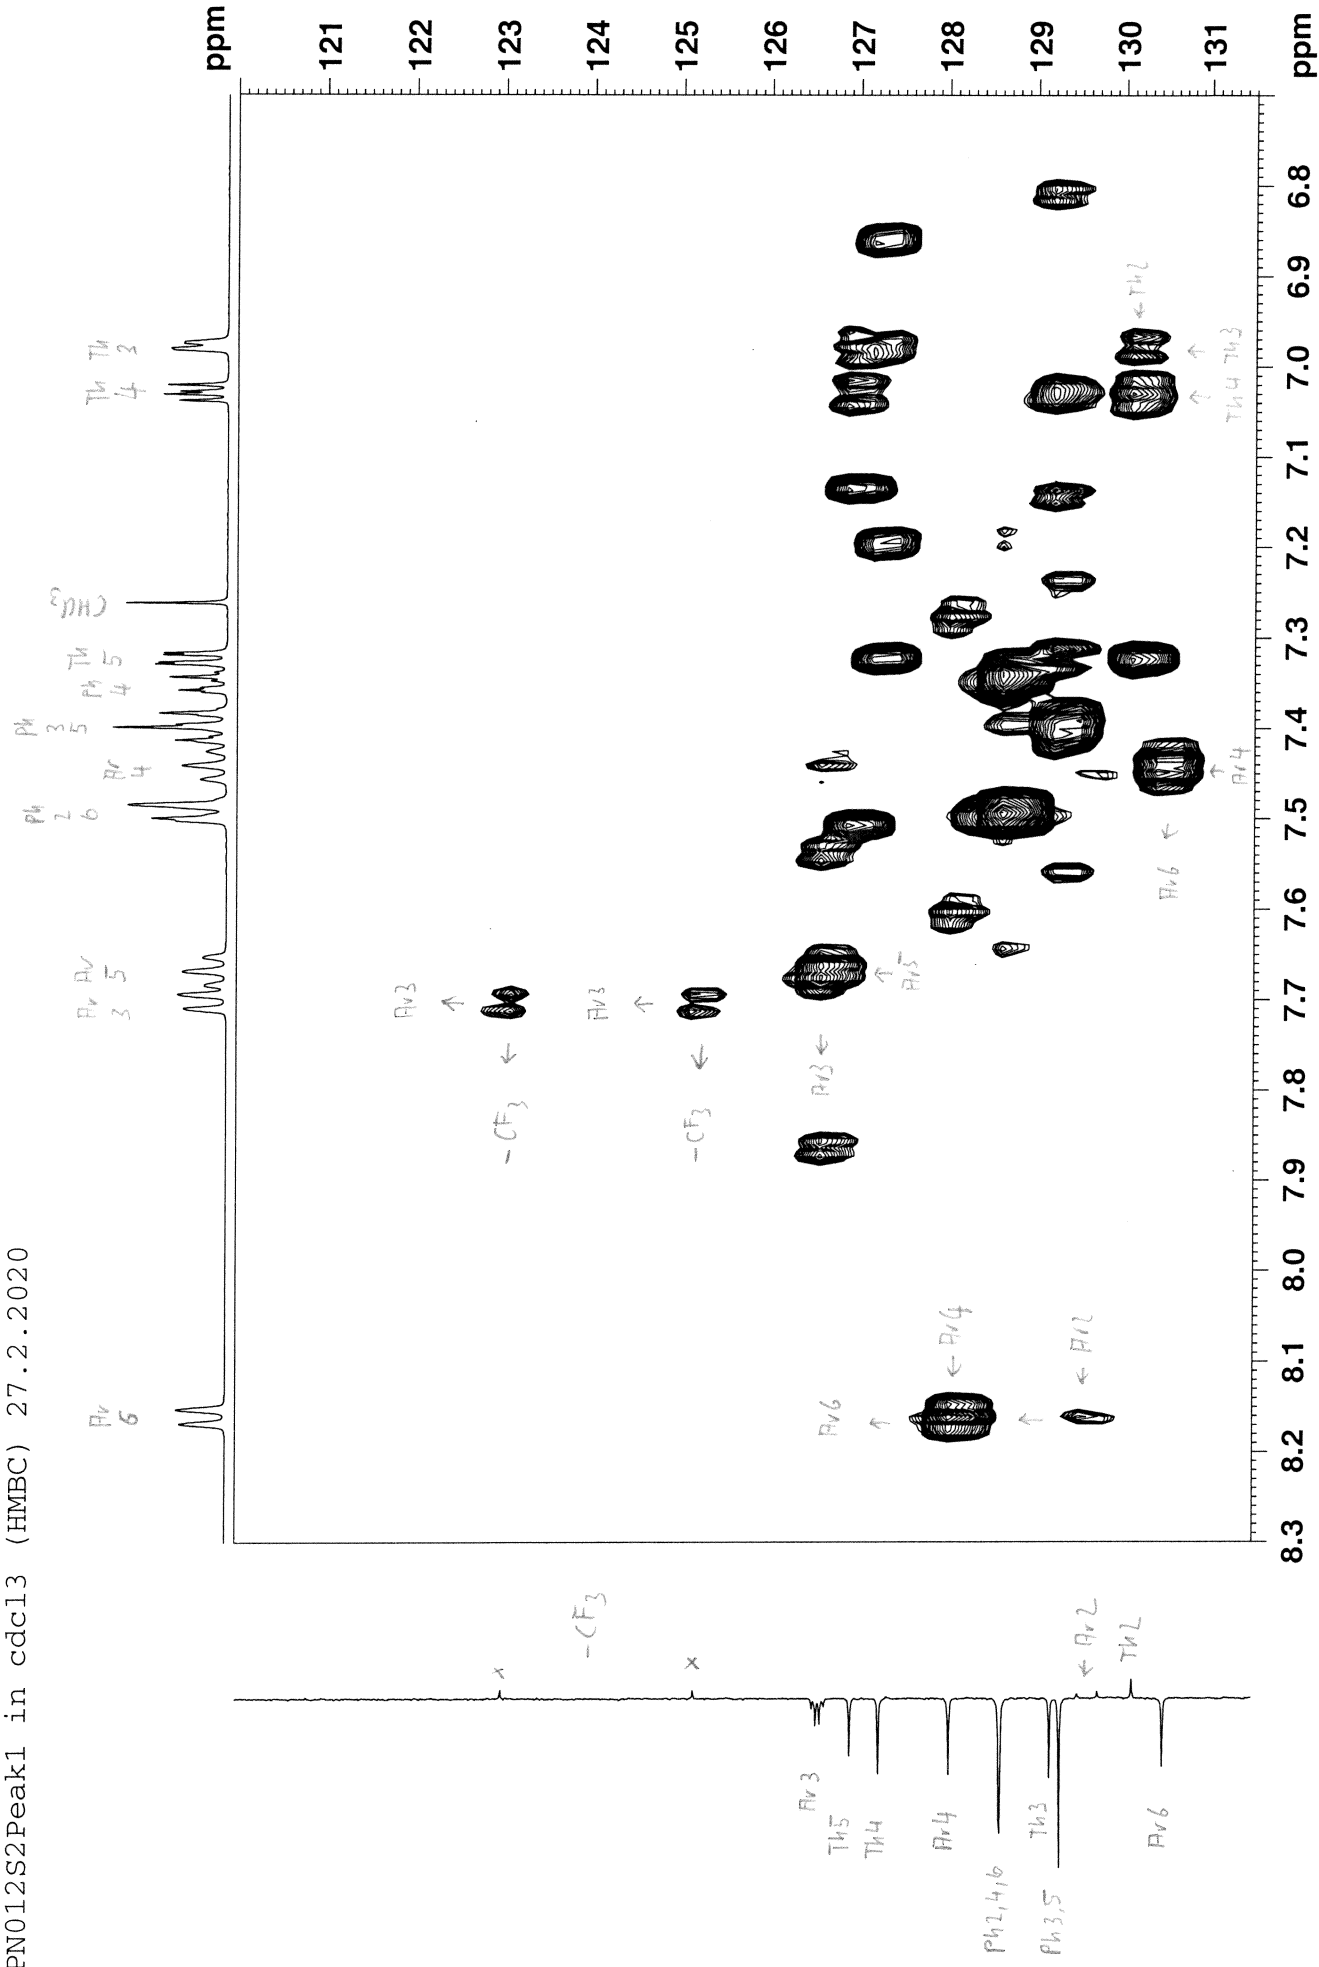

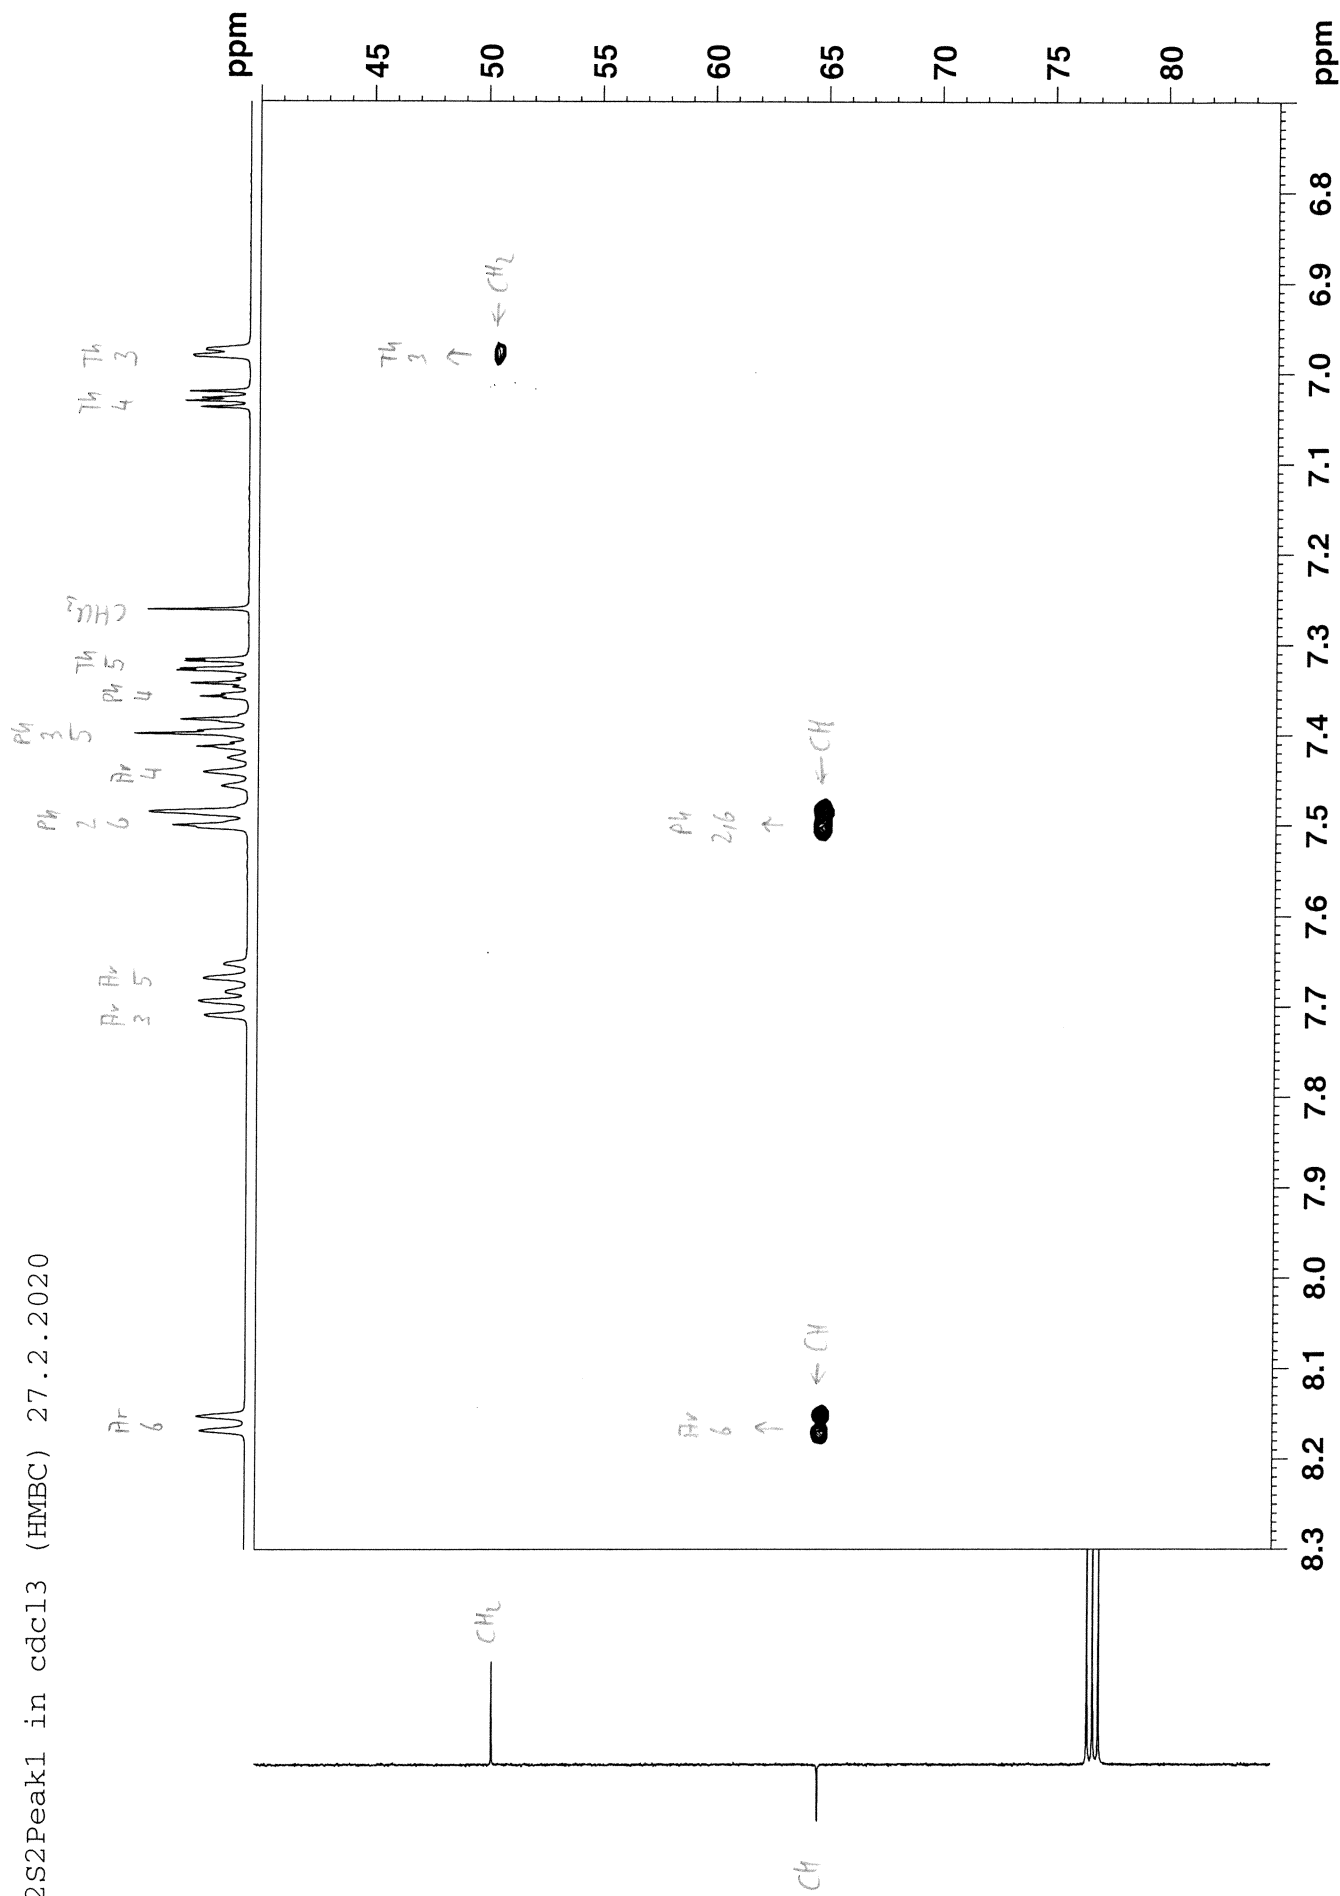



PN012S2Peak1 in cdcl3 (HMBC) 27.2.2020

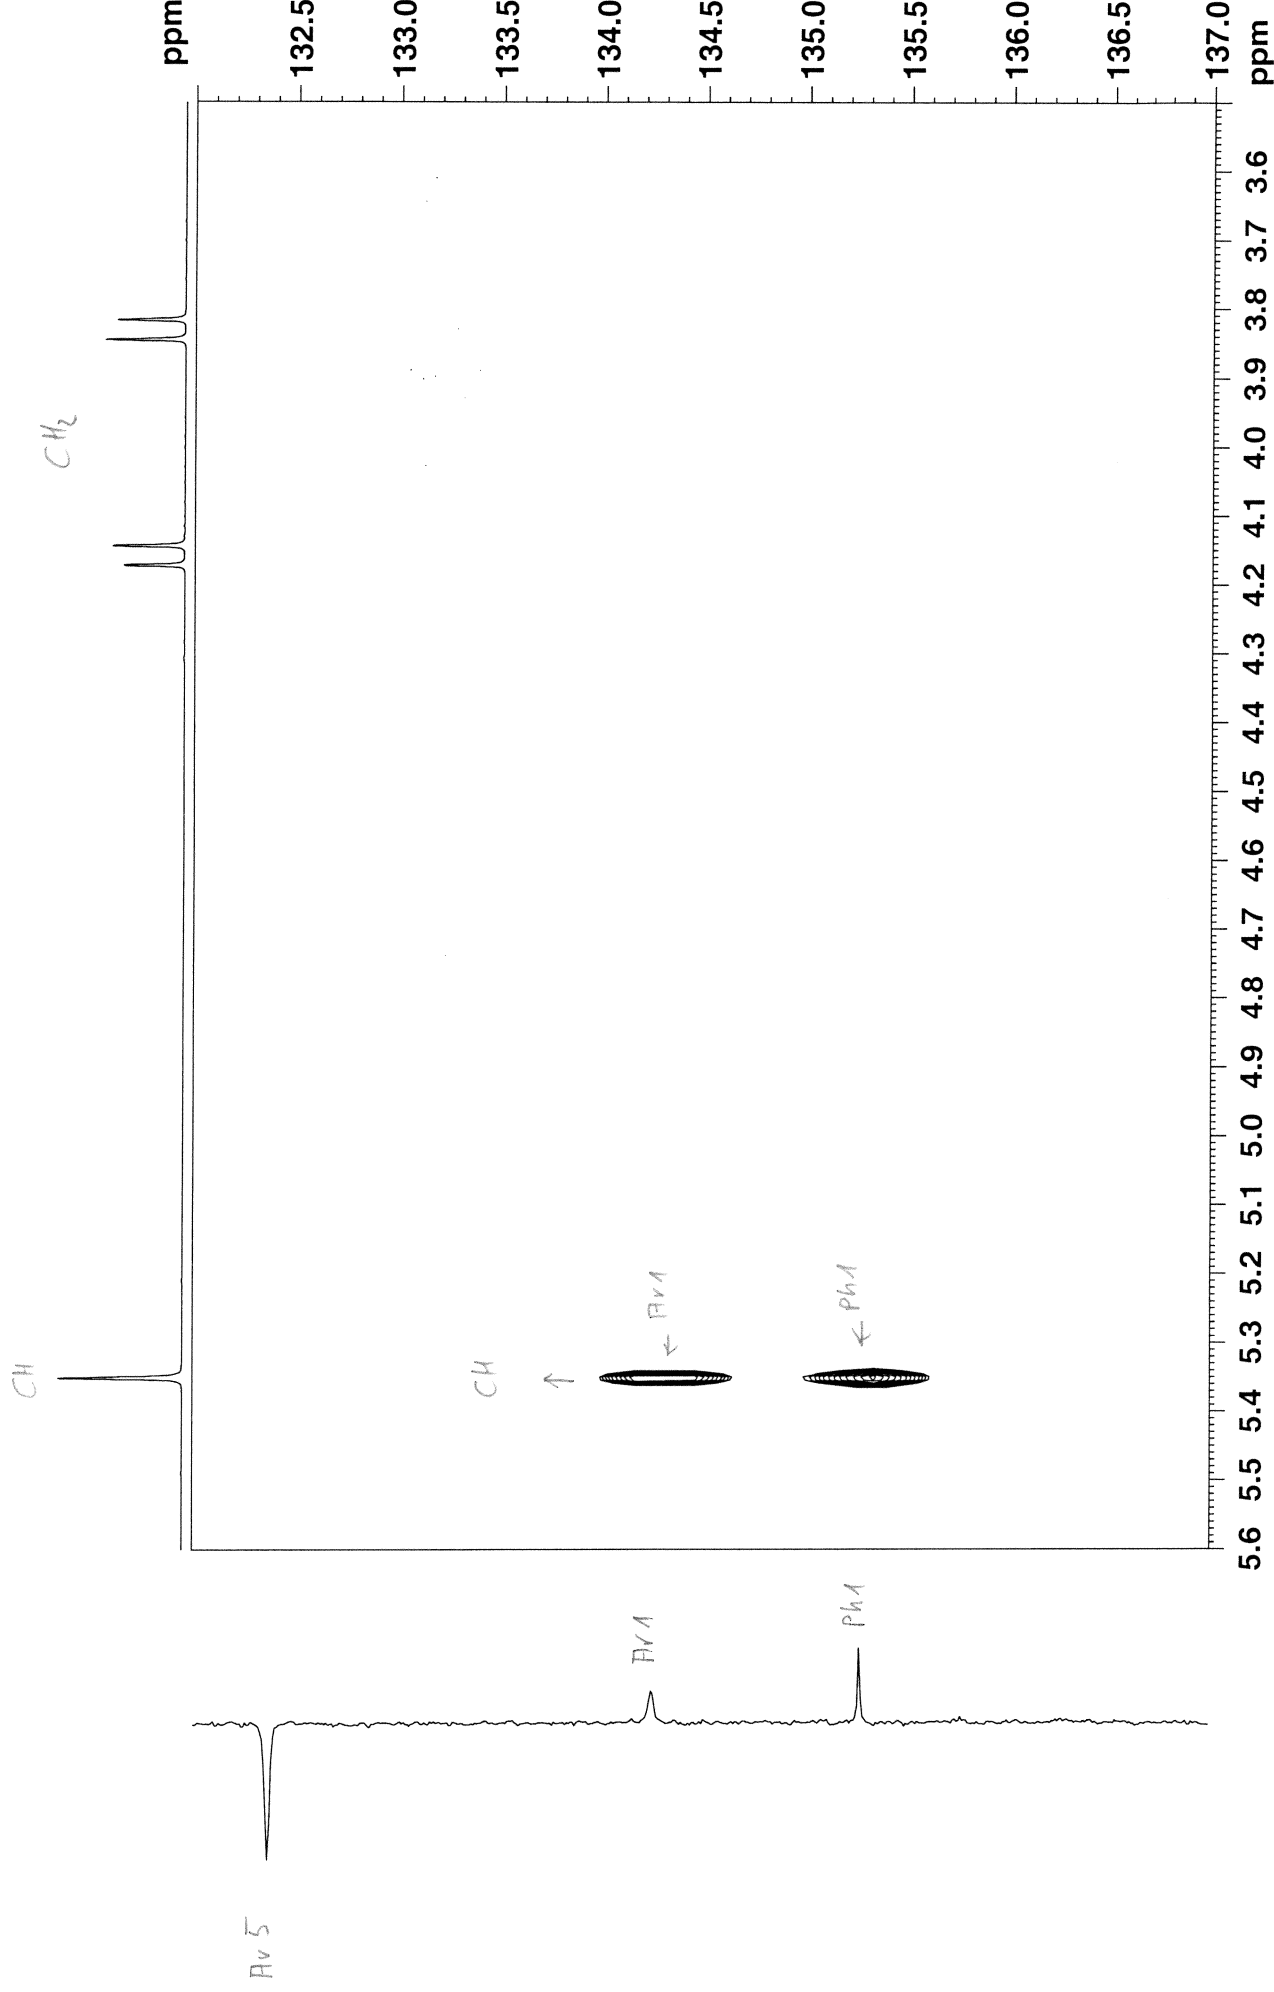

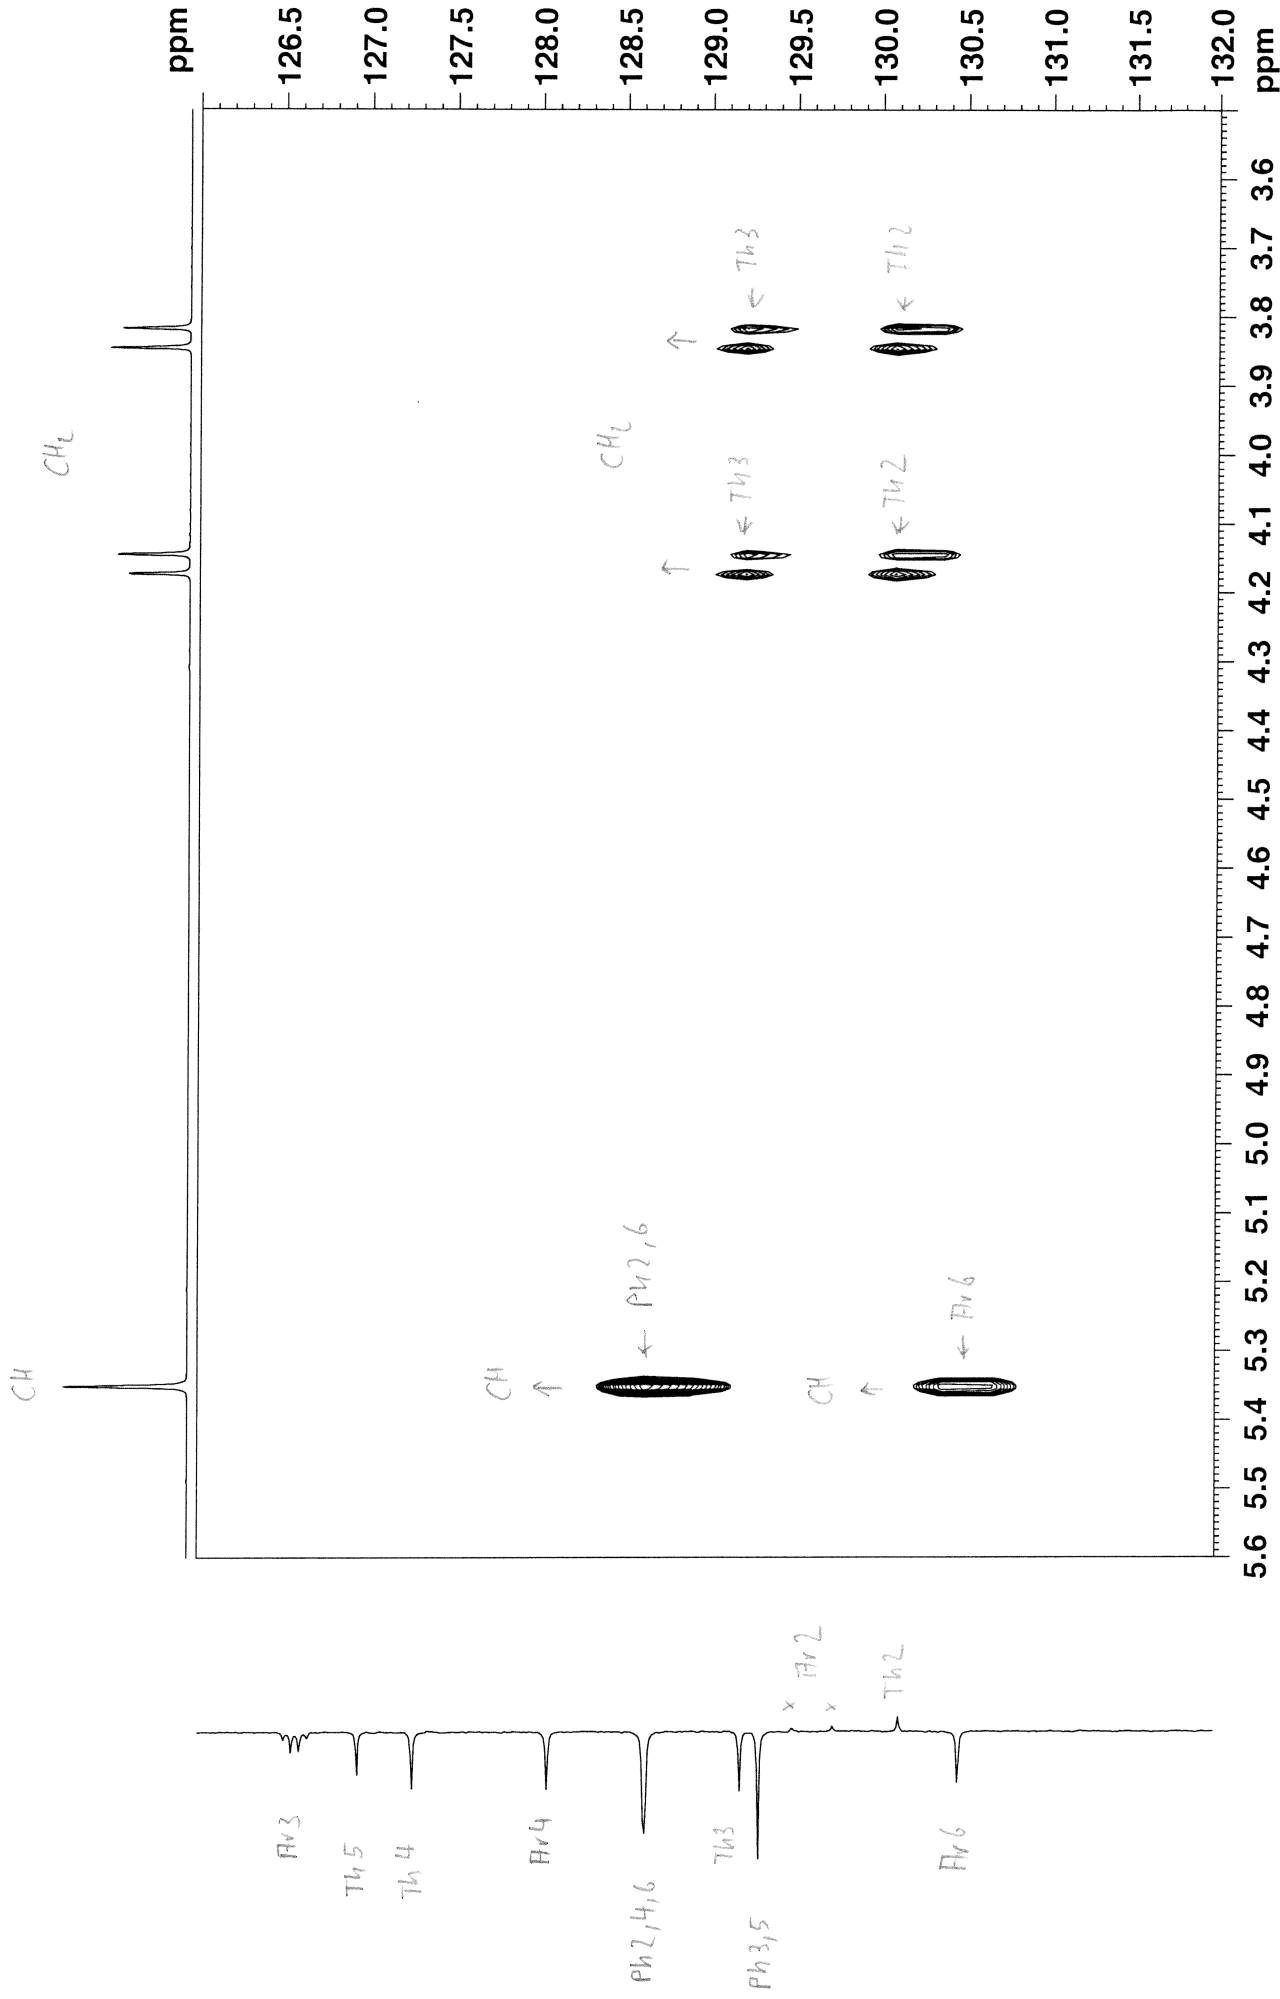

CH

CH<sub>2</sub>

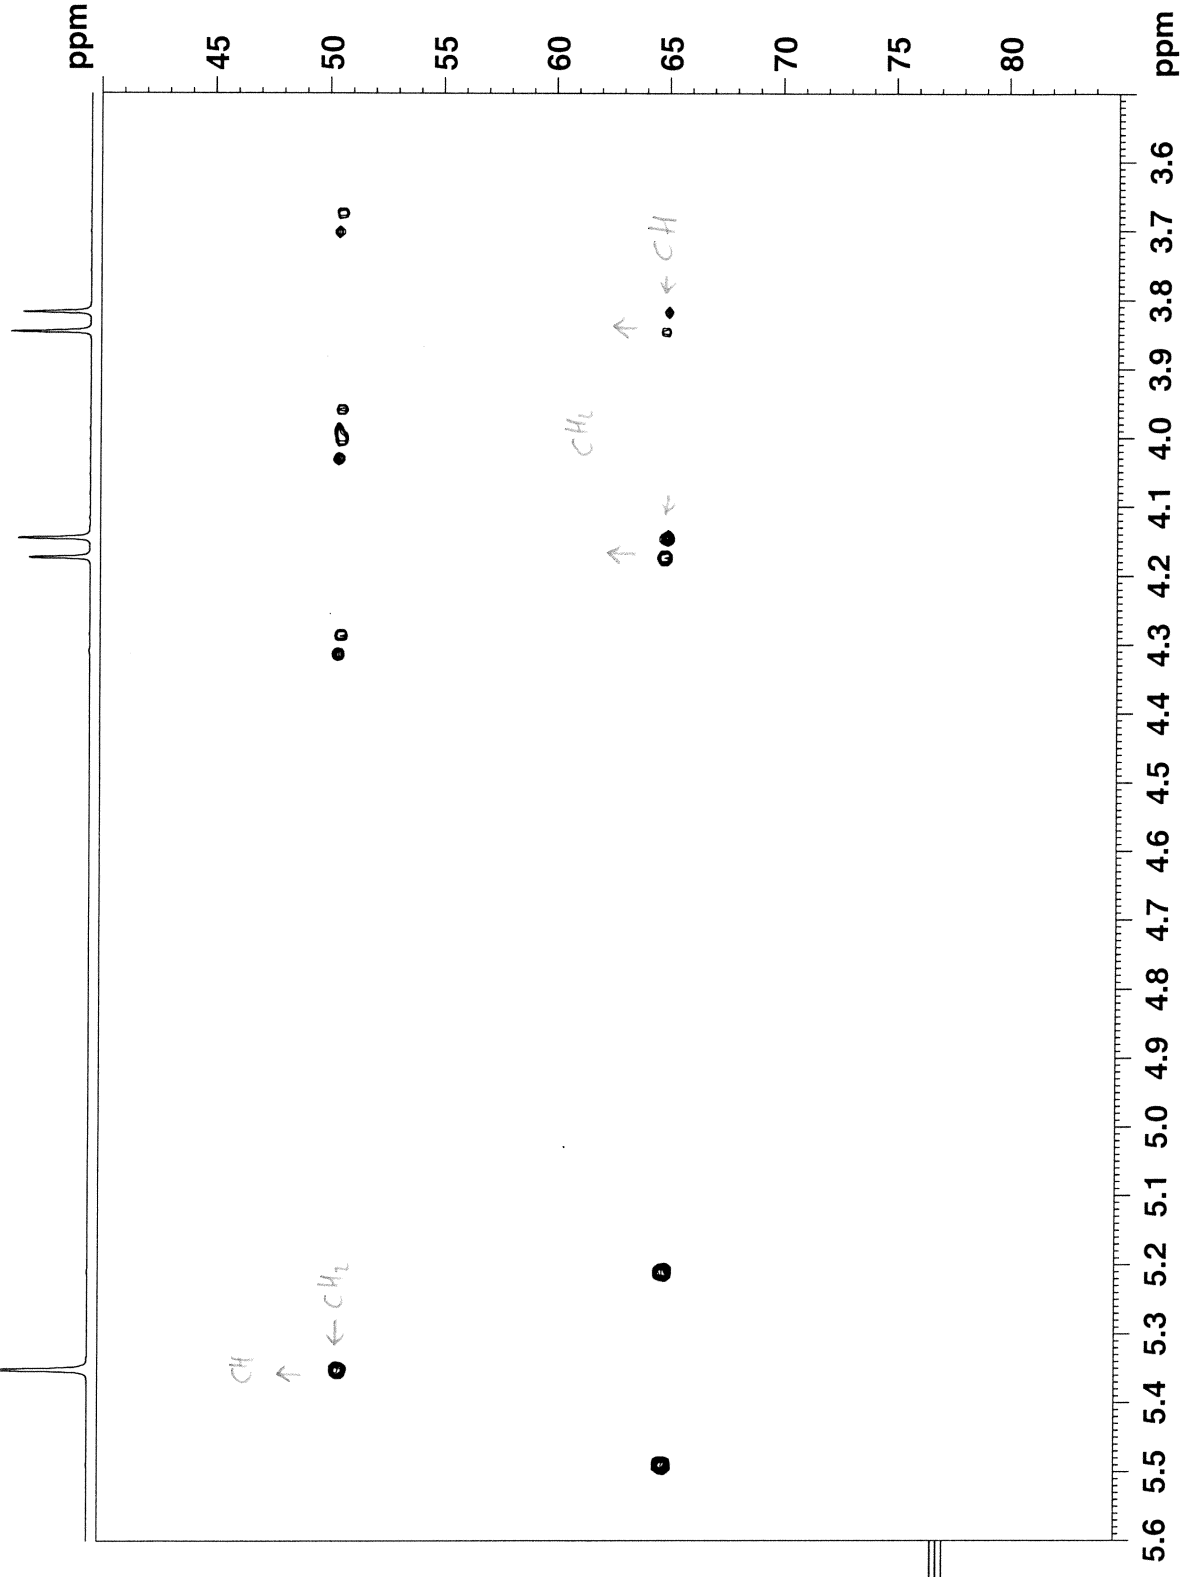

**Figure S60c.** NMR spectra of compound **80**.

PN012S2Peak2 in cdcl3 (Proton) 27.2.2020

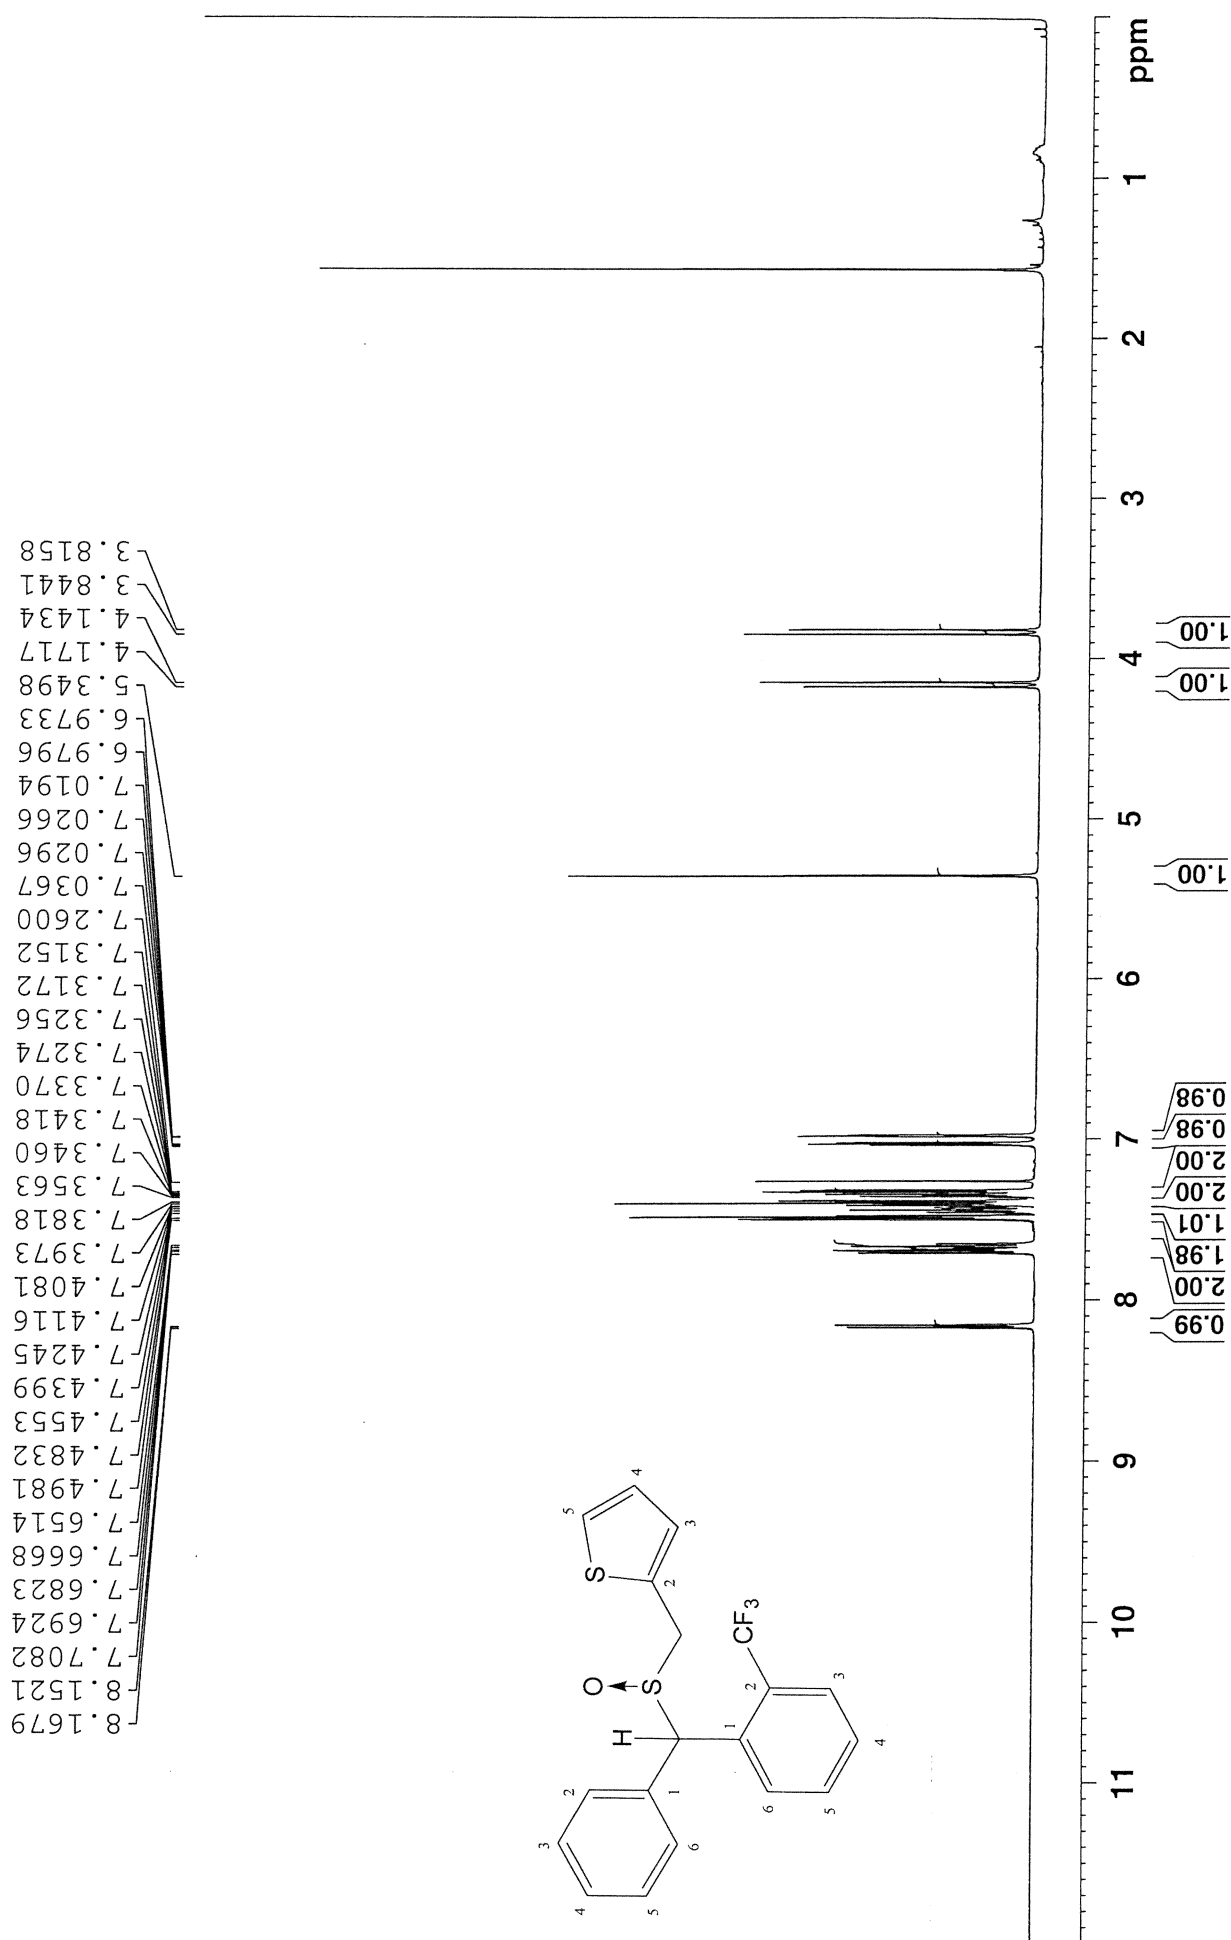

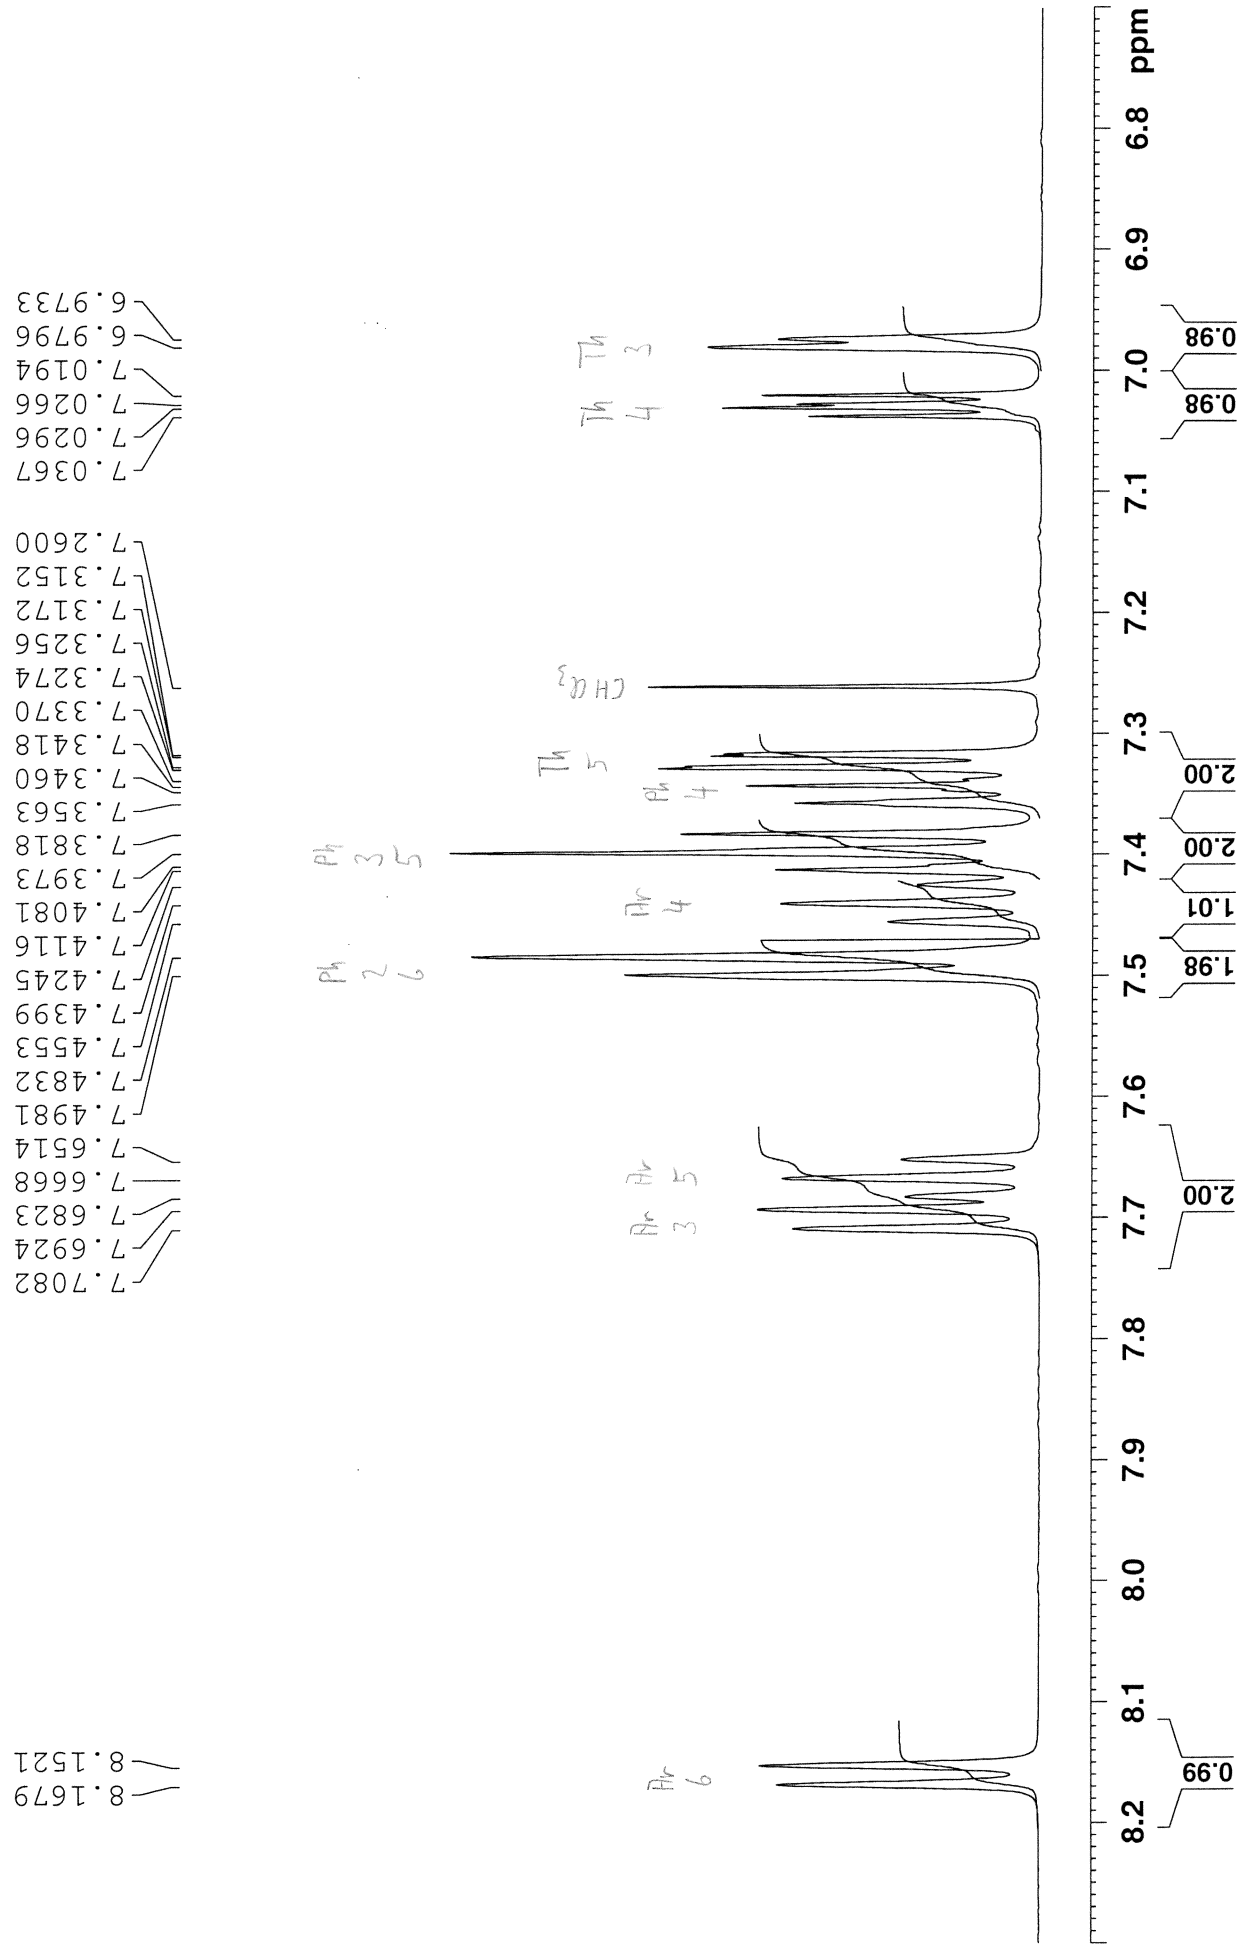

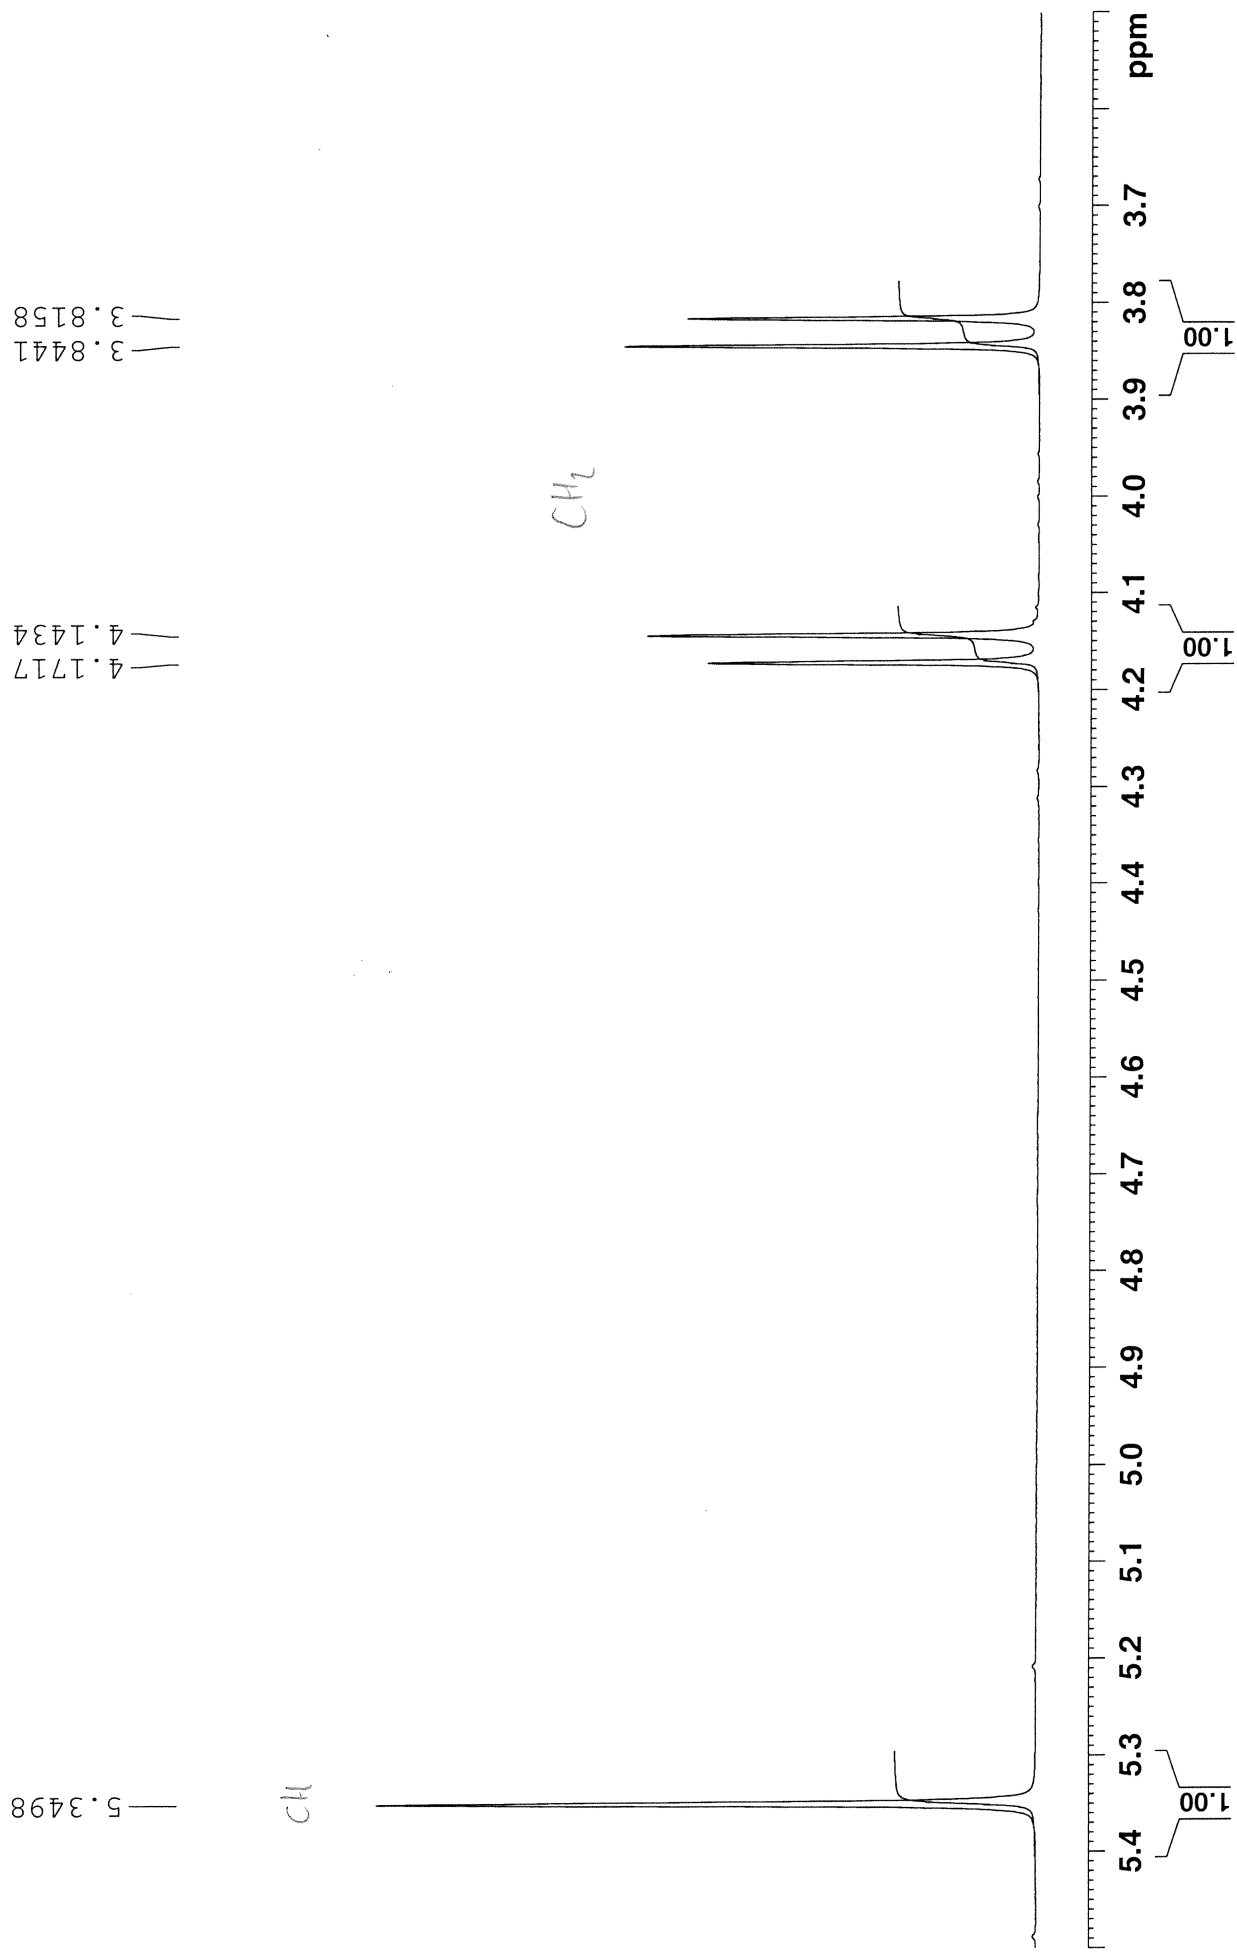

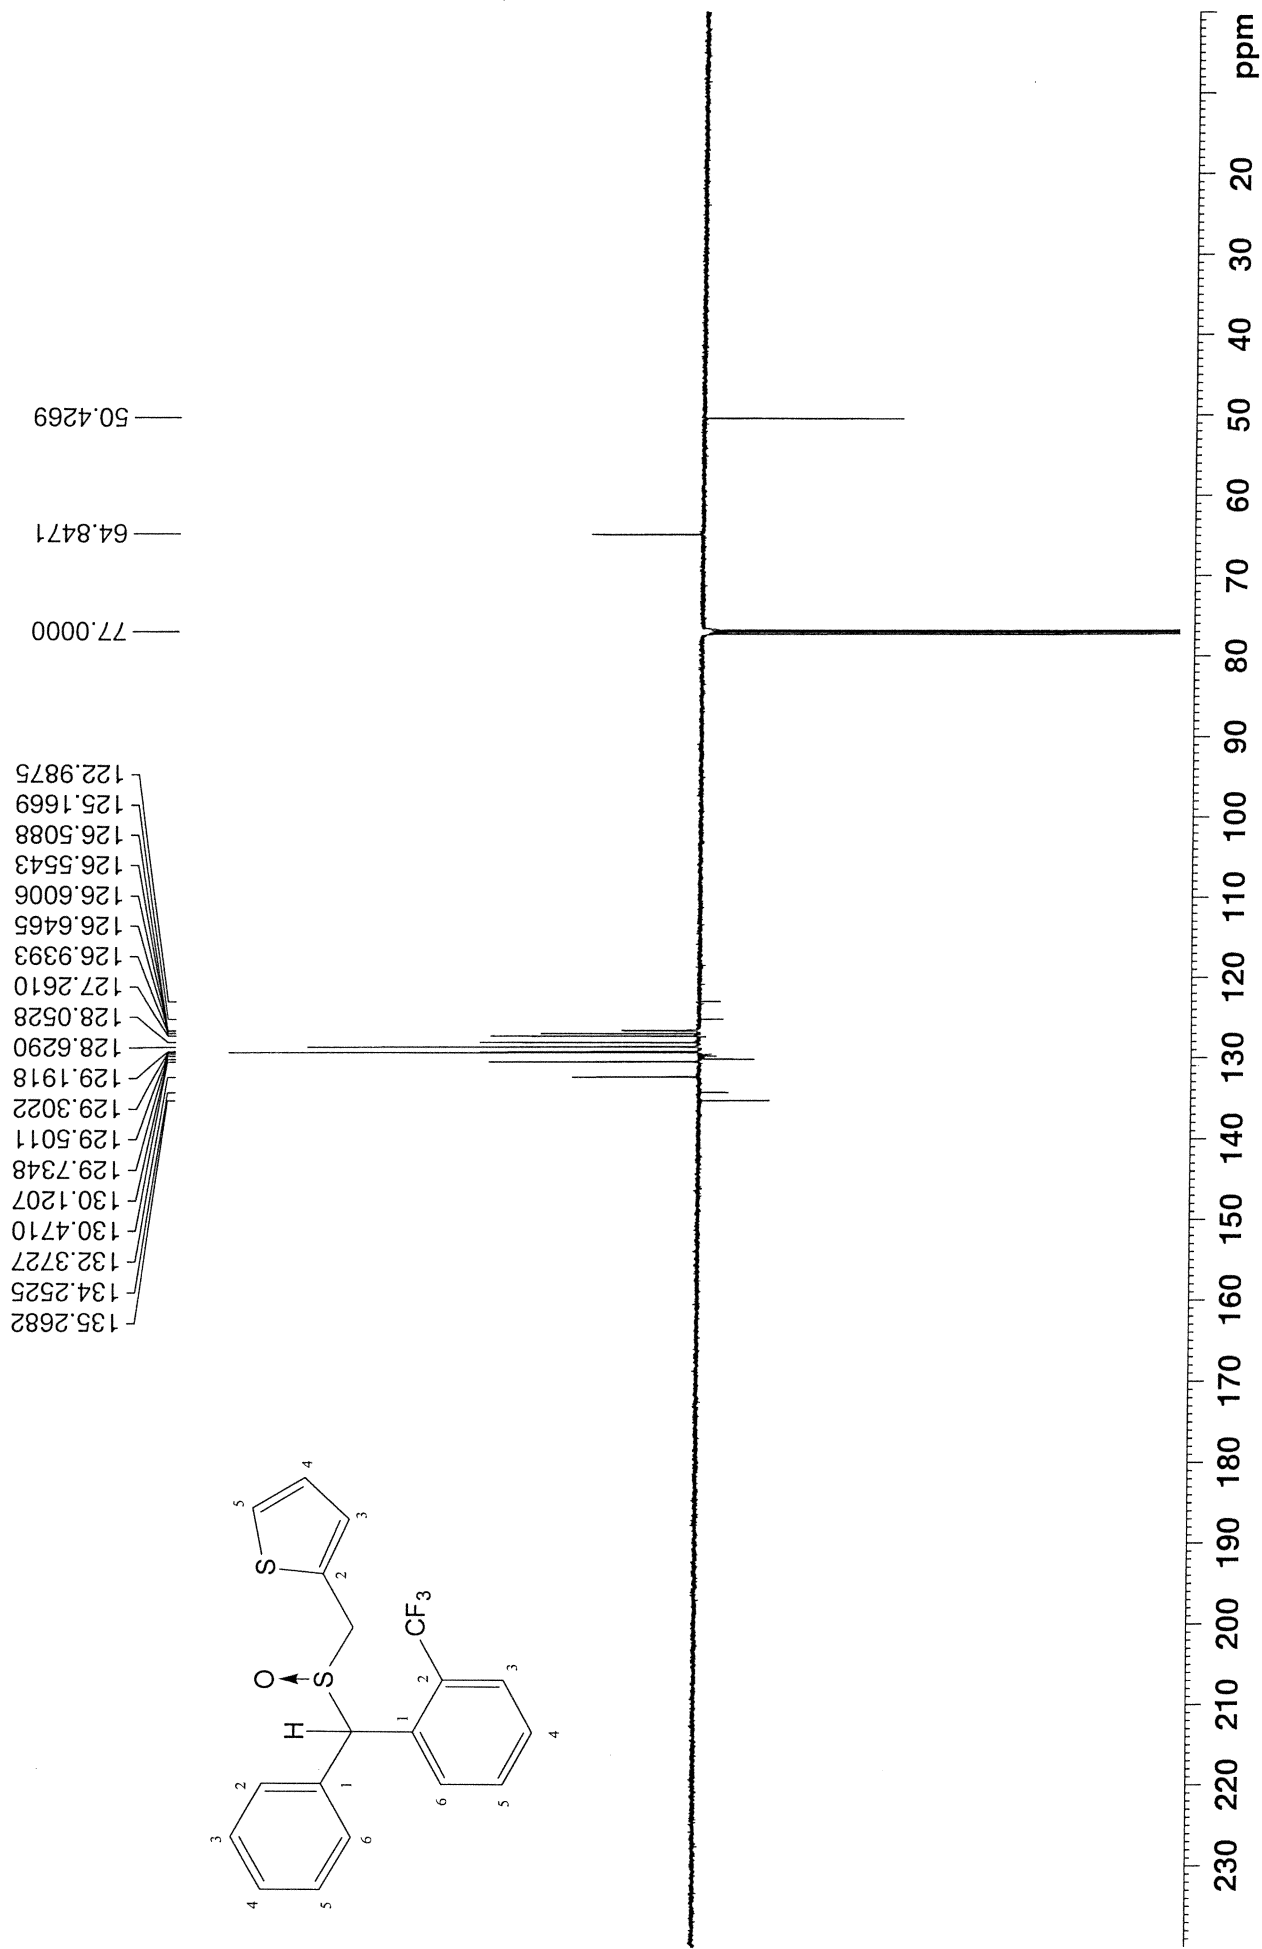

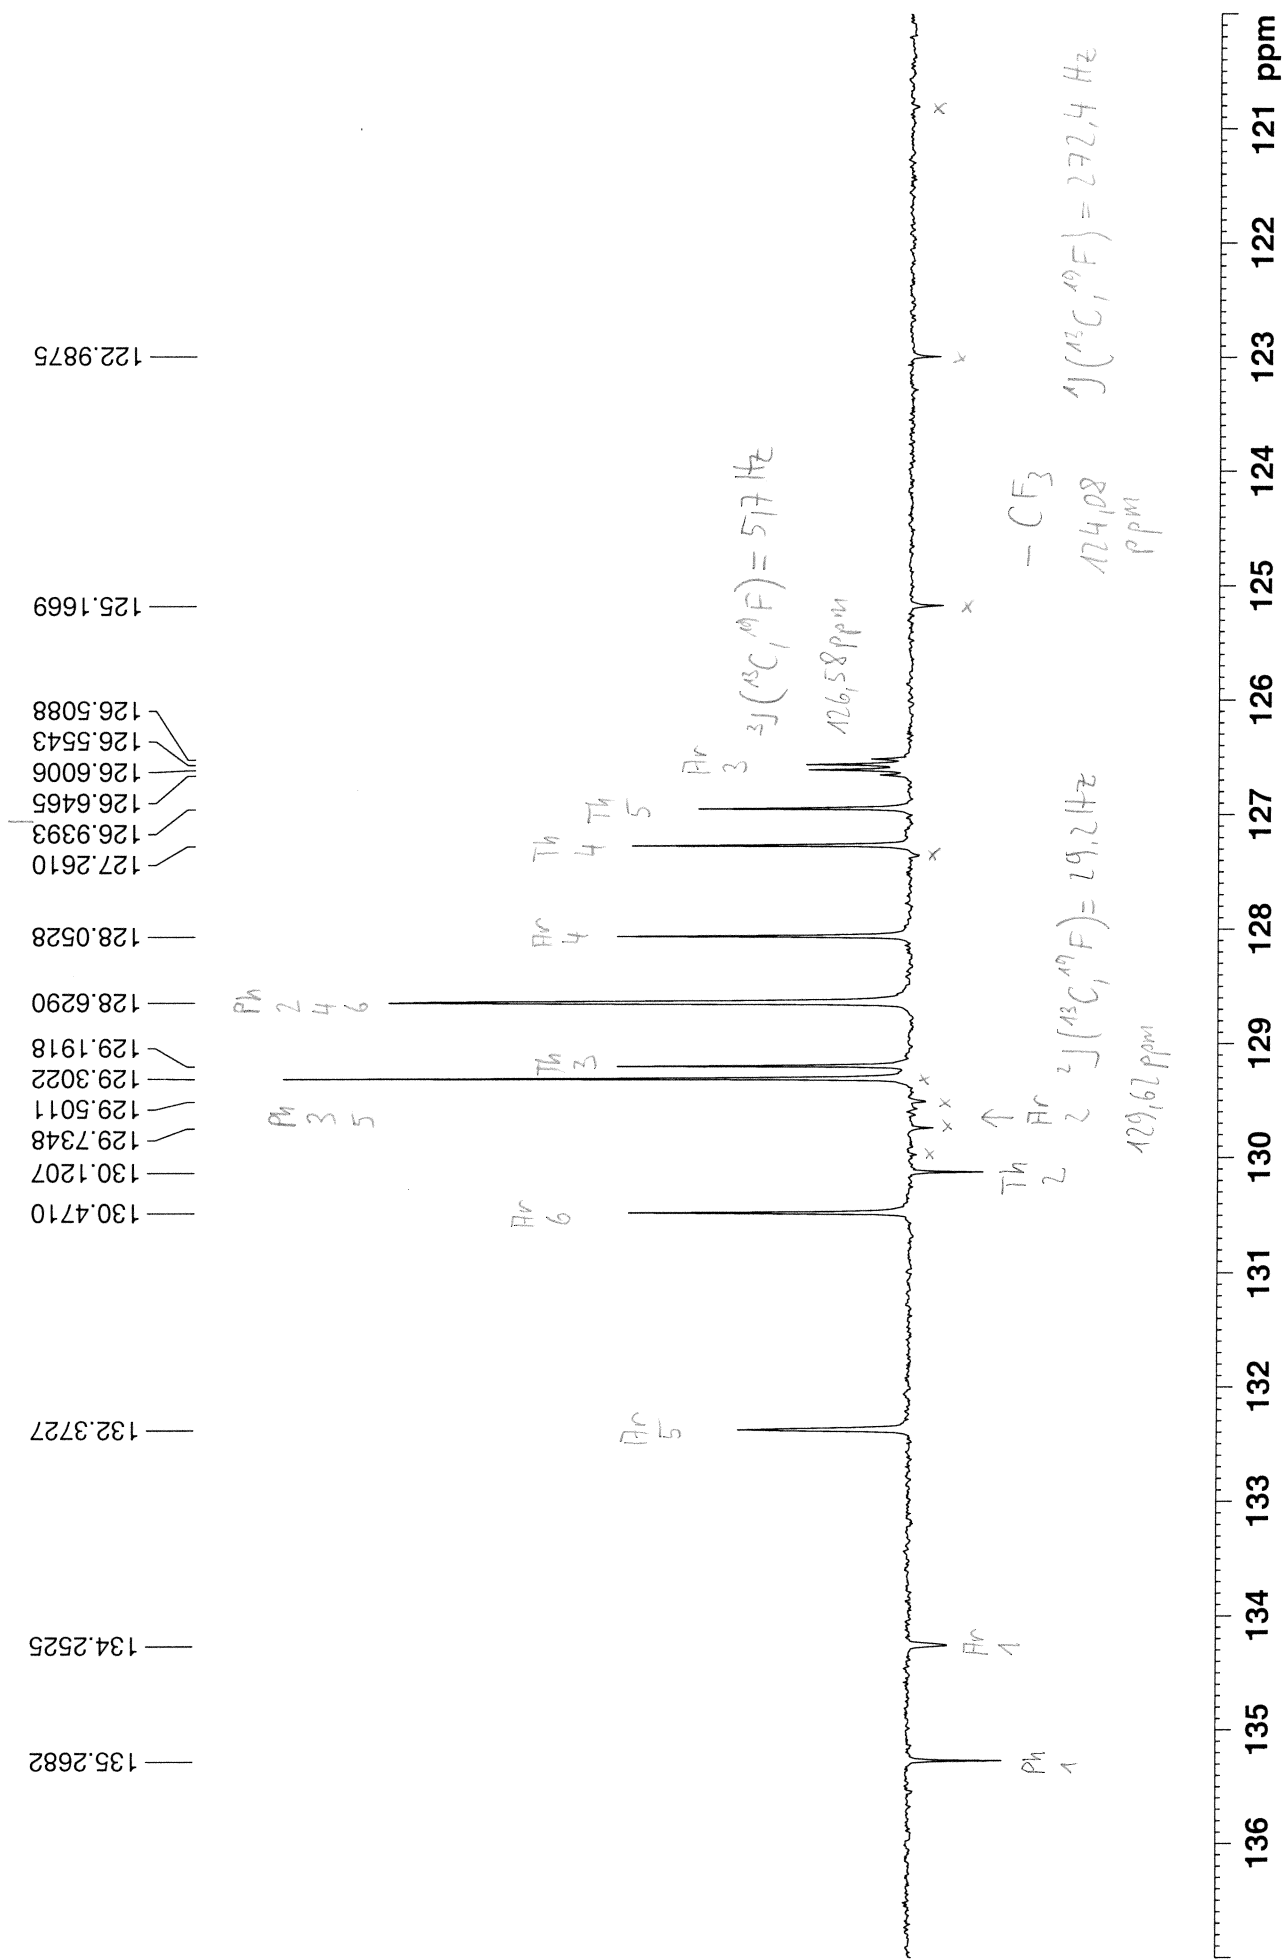



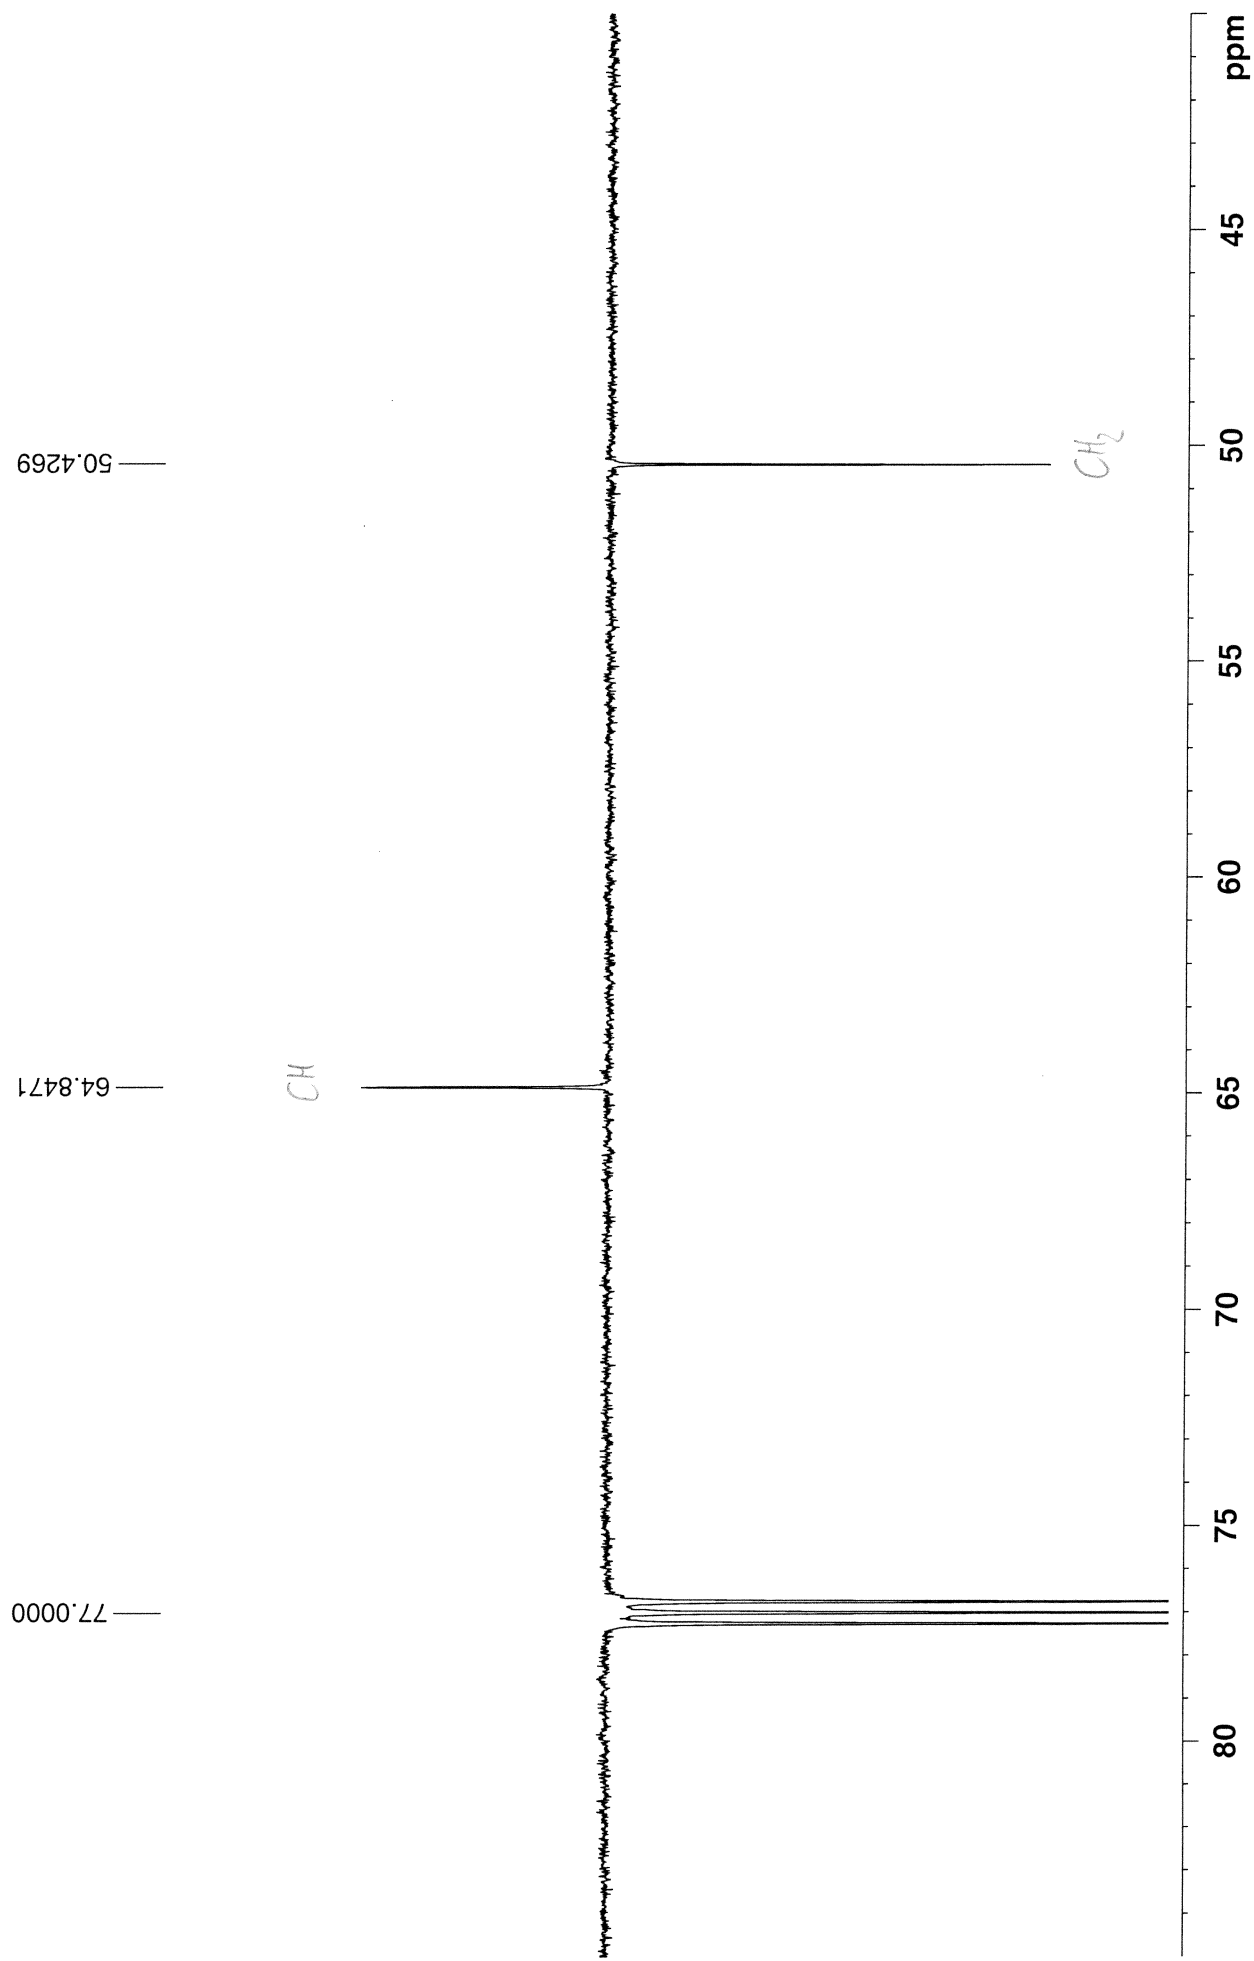

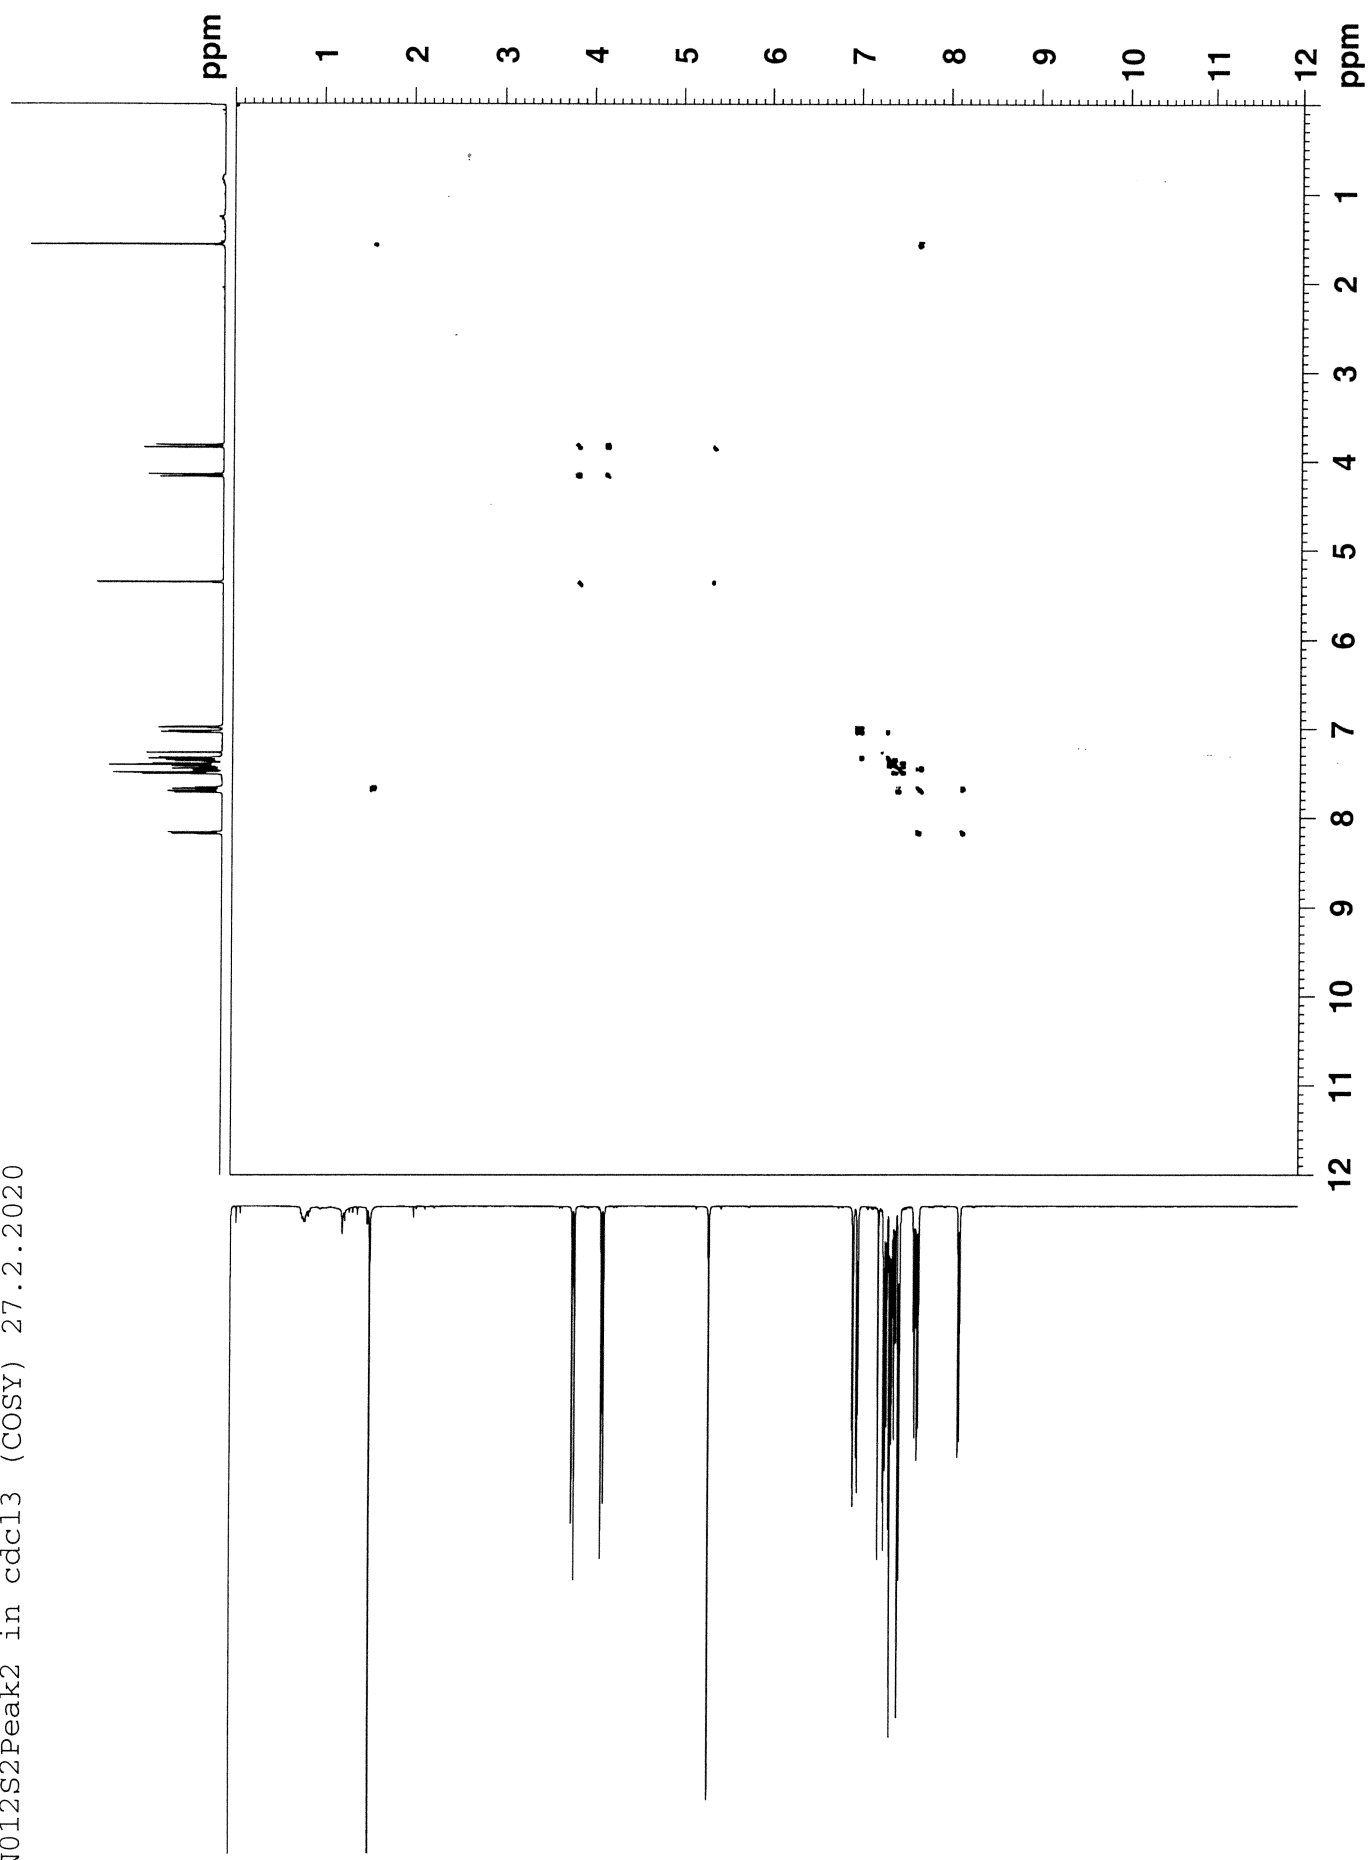

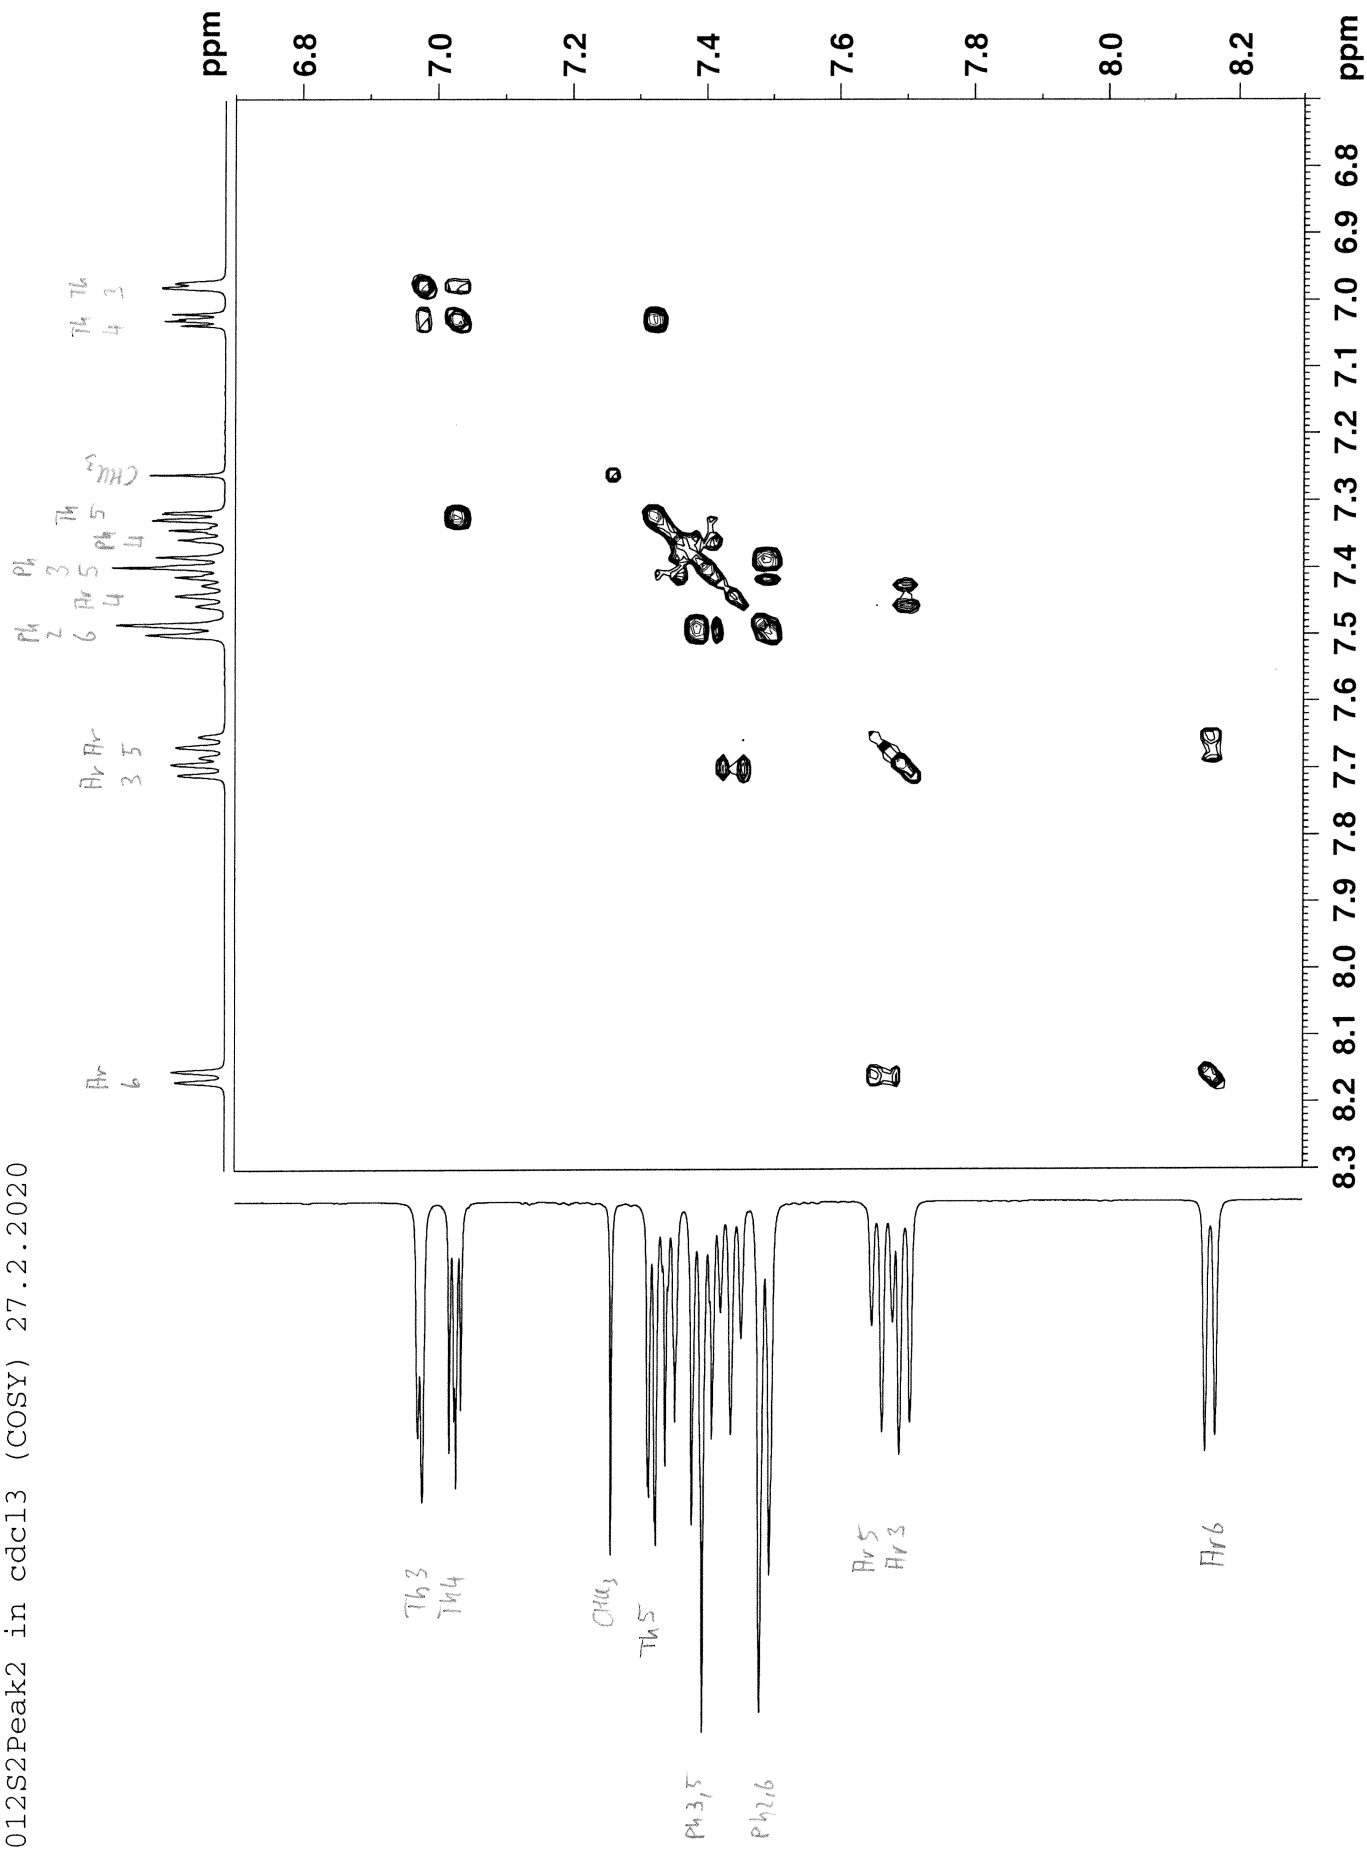

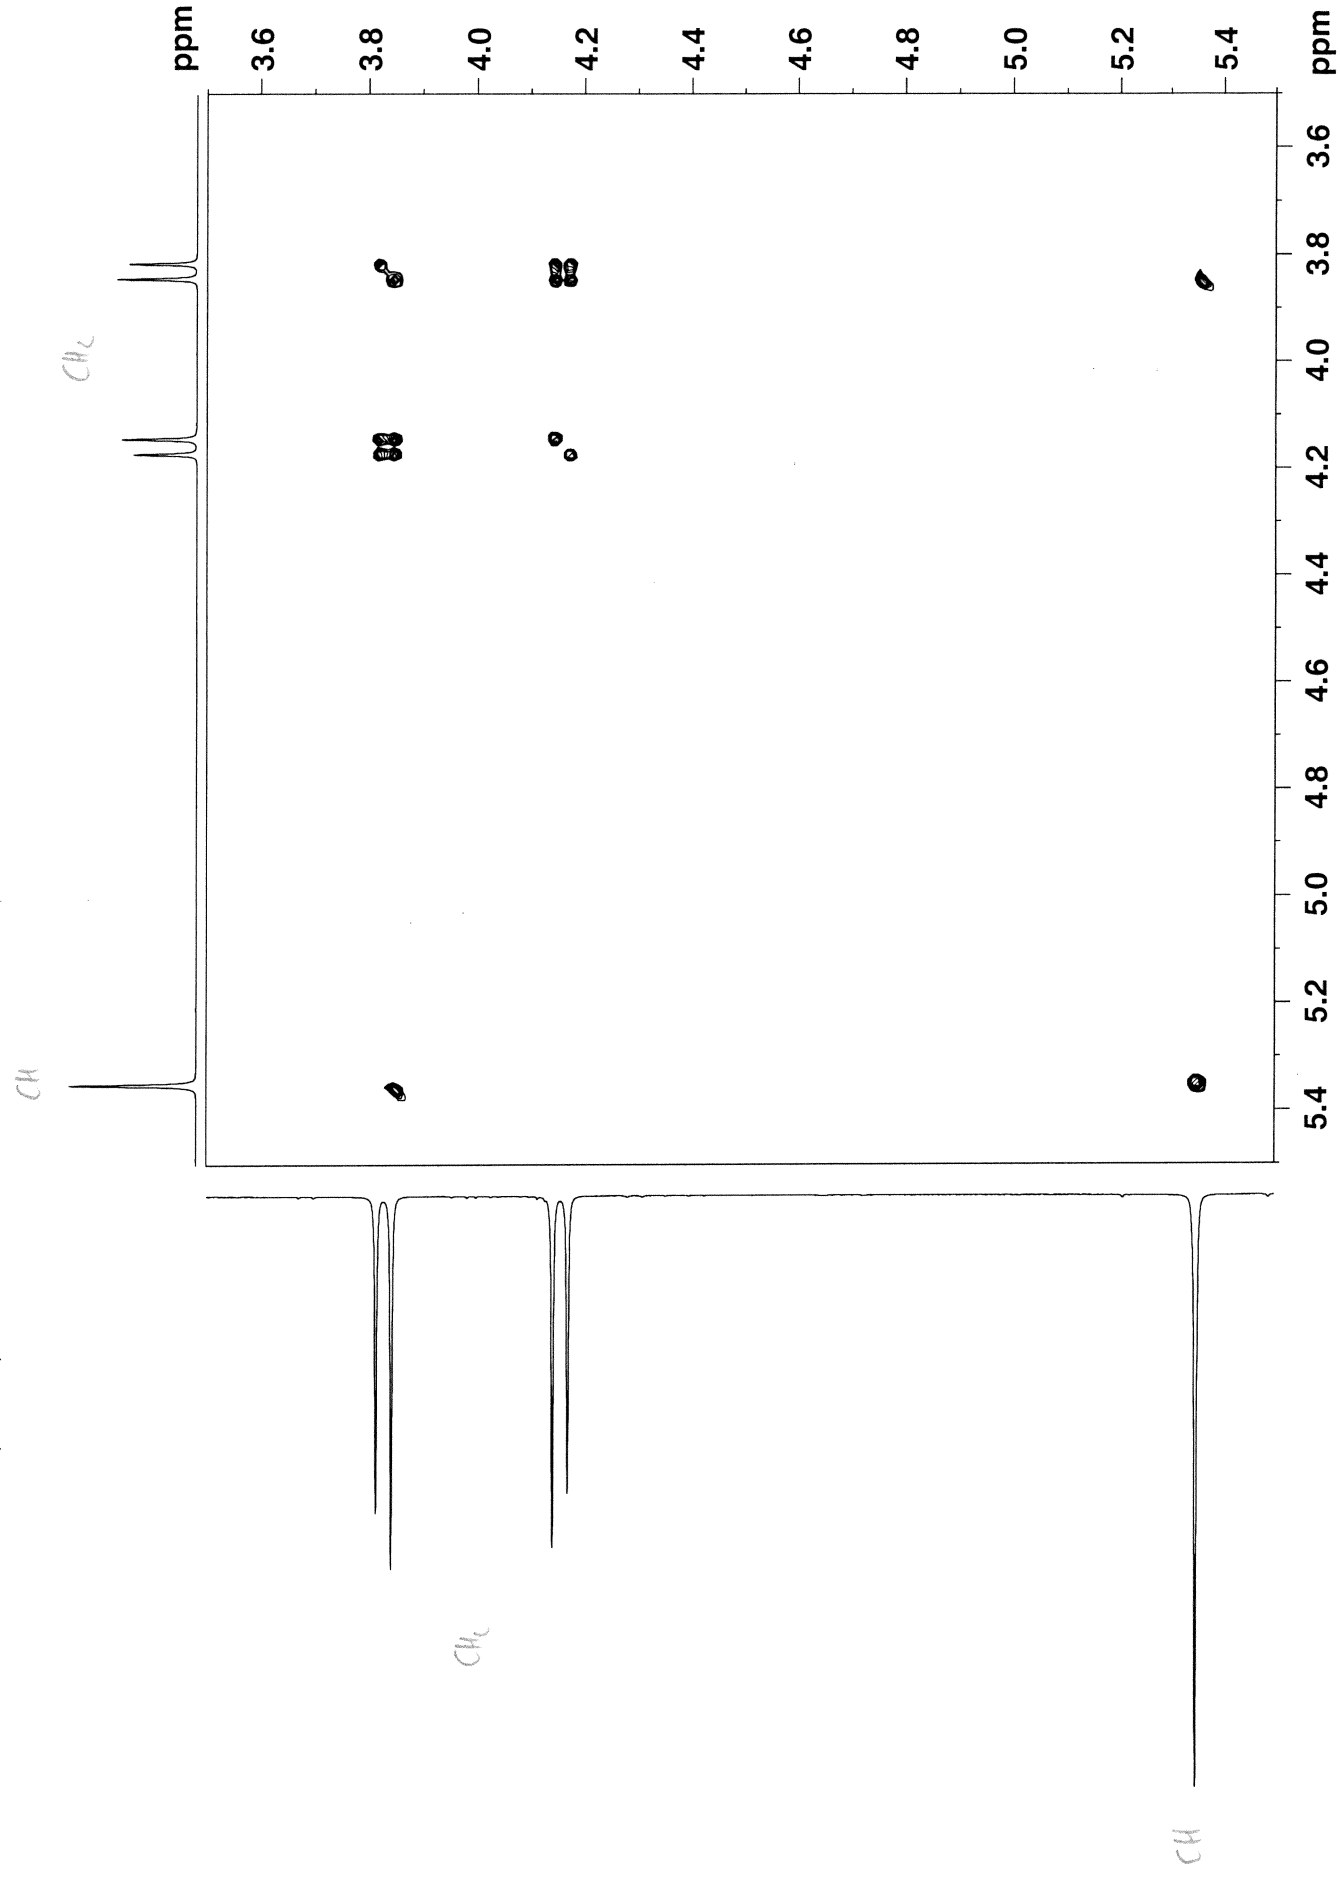

PN012S2Peak2 in cdcl3 (HSQC) 27.2.2020

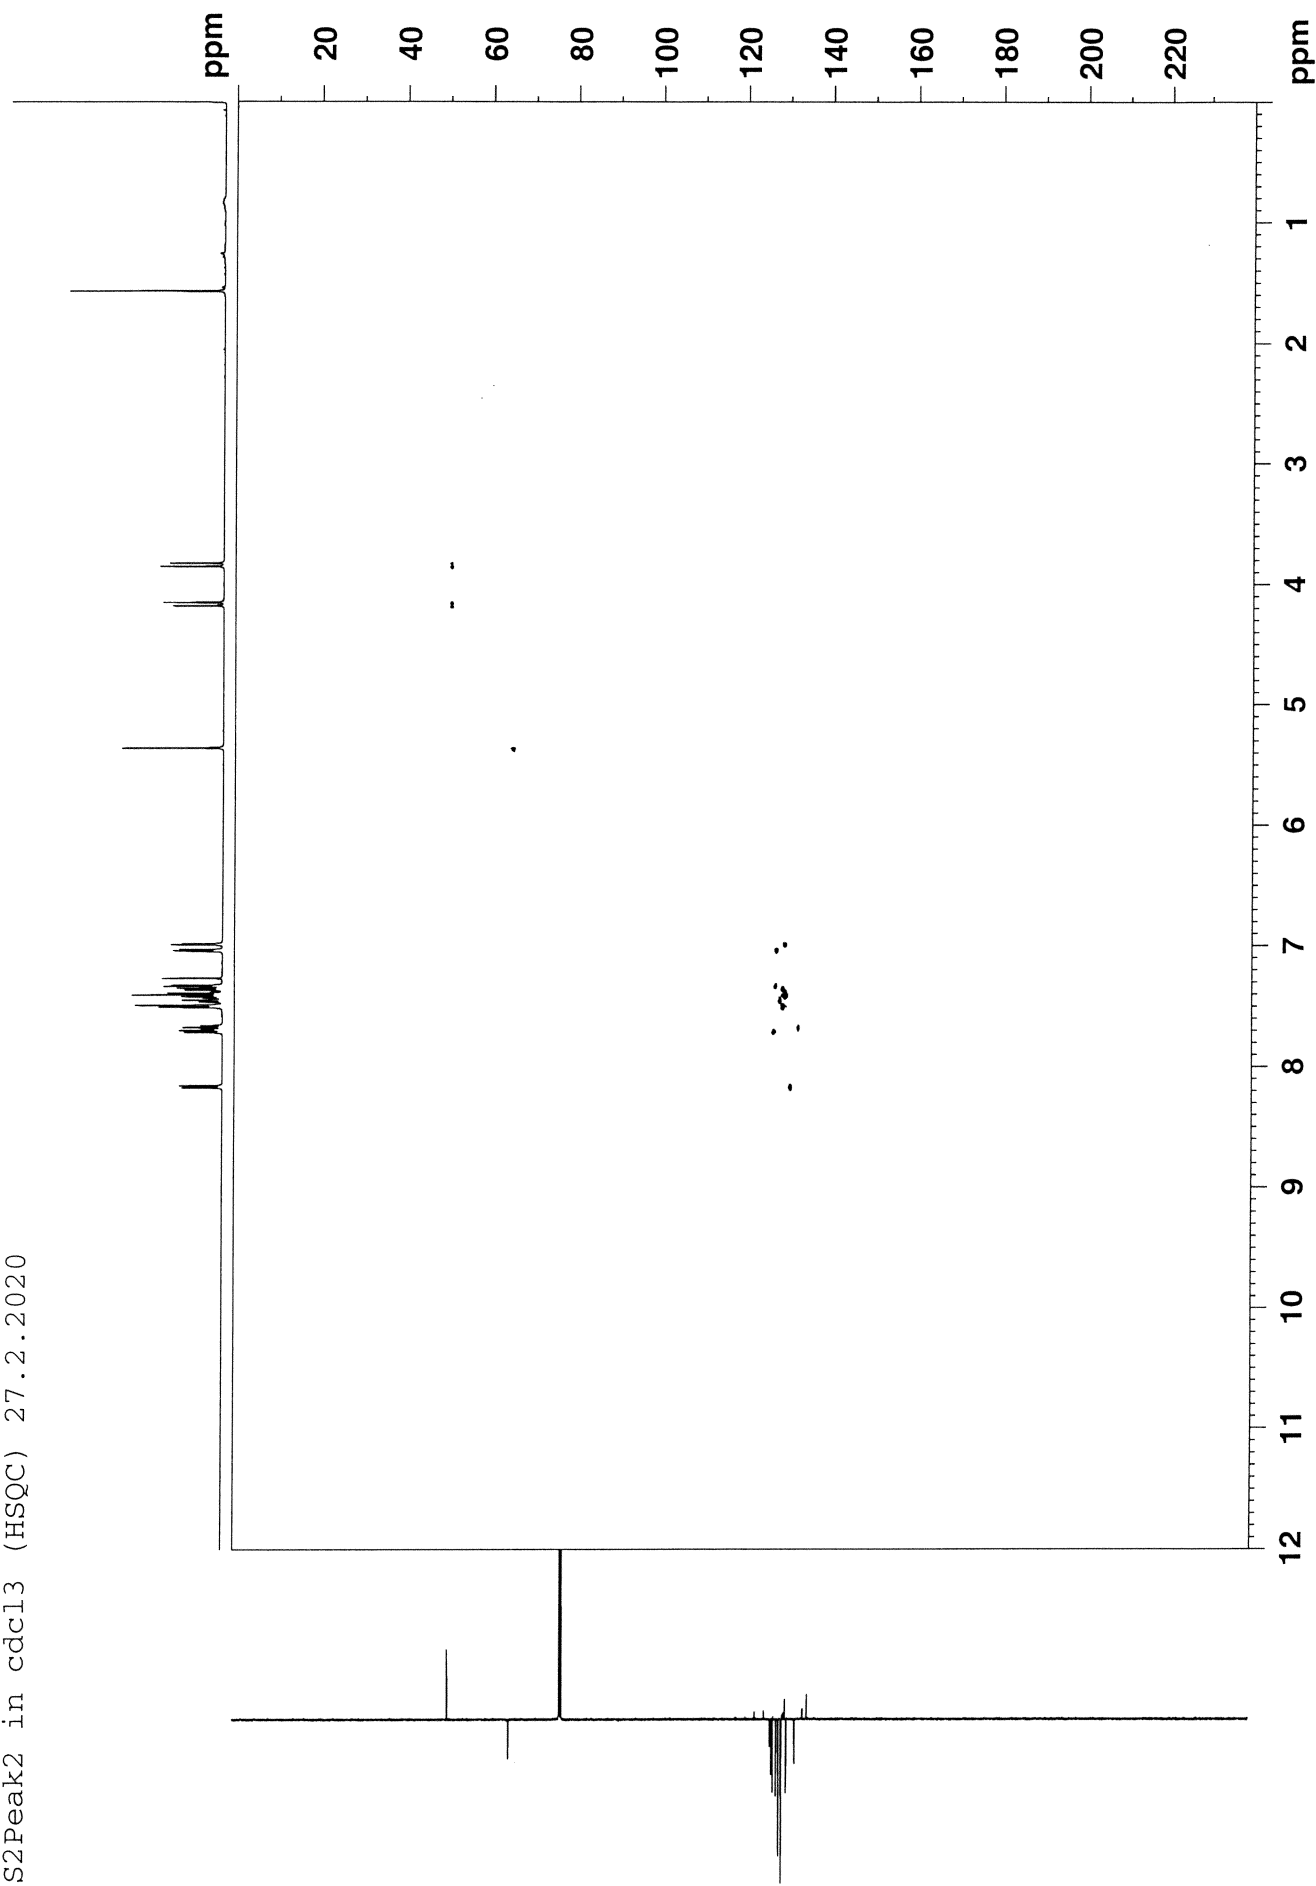

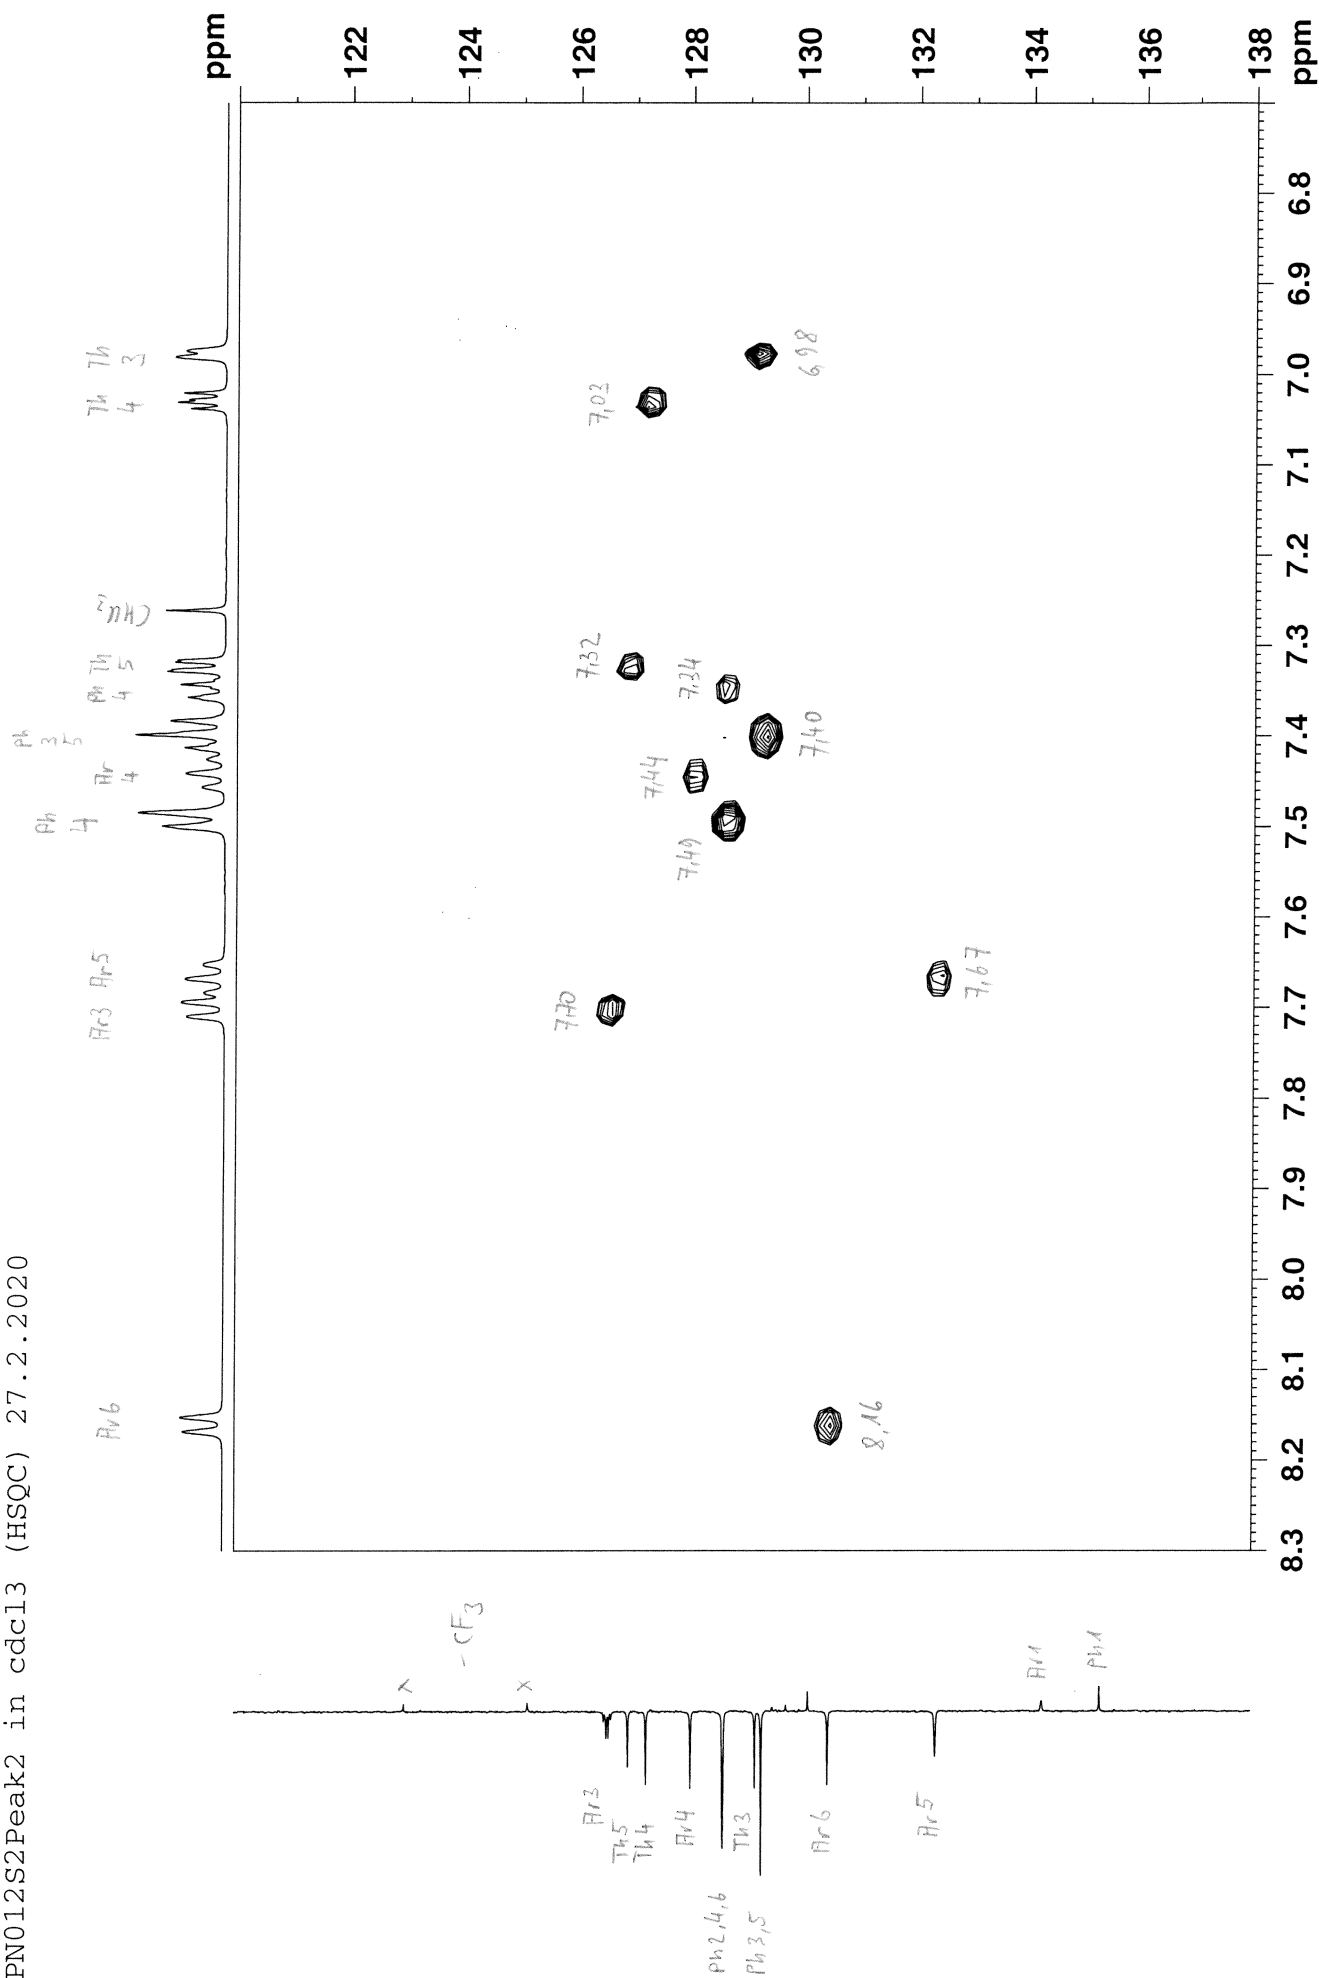

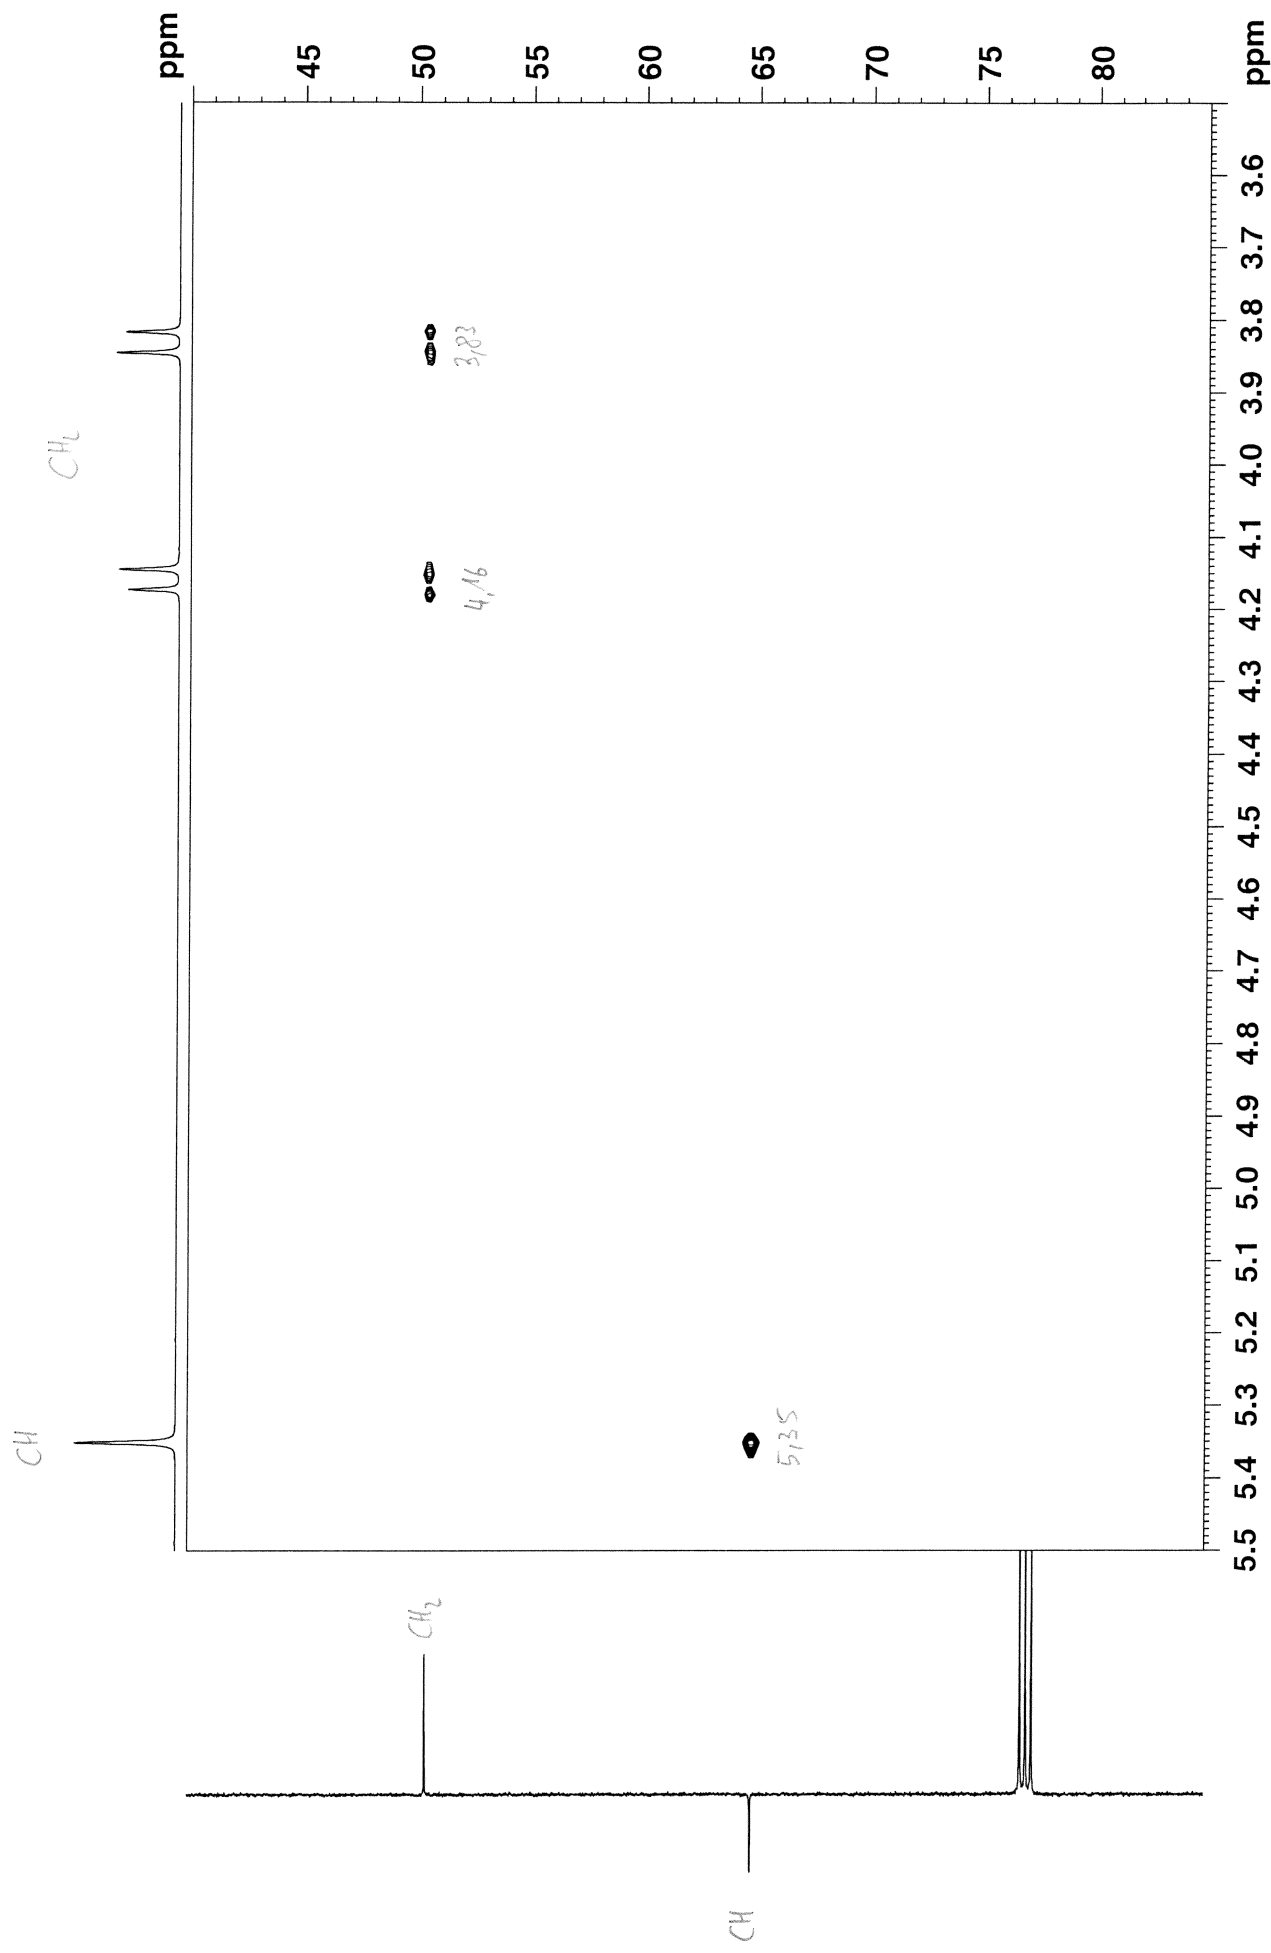

PN012S2Peak2 in cdcl3 (HMBC) 27.2.2020

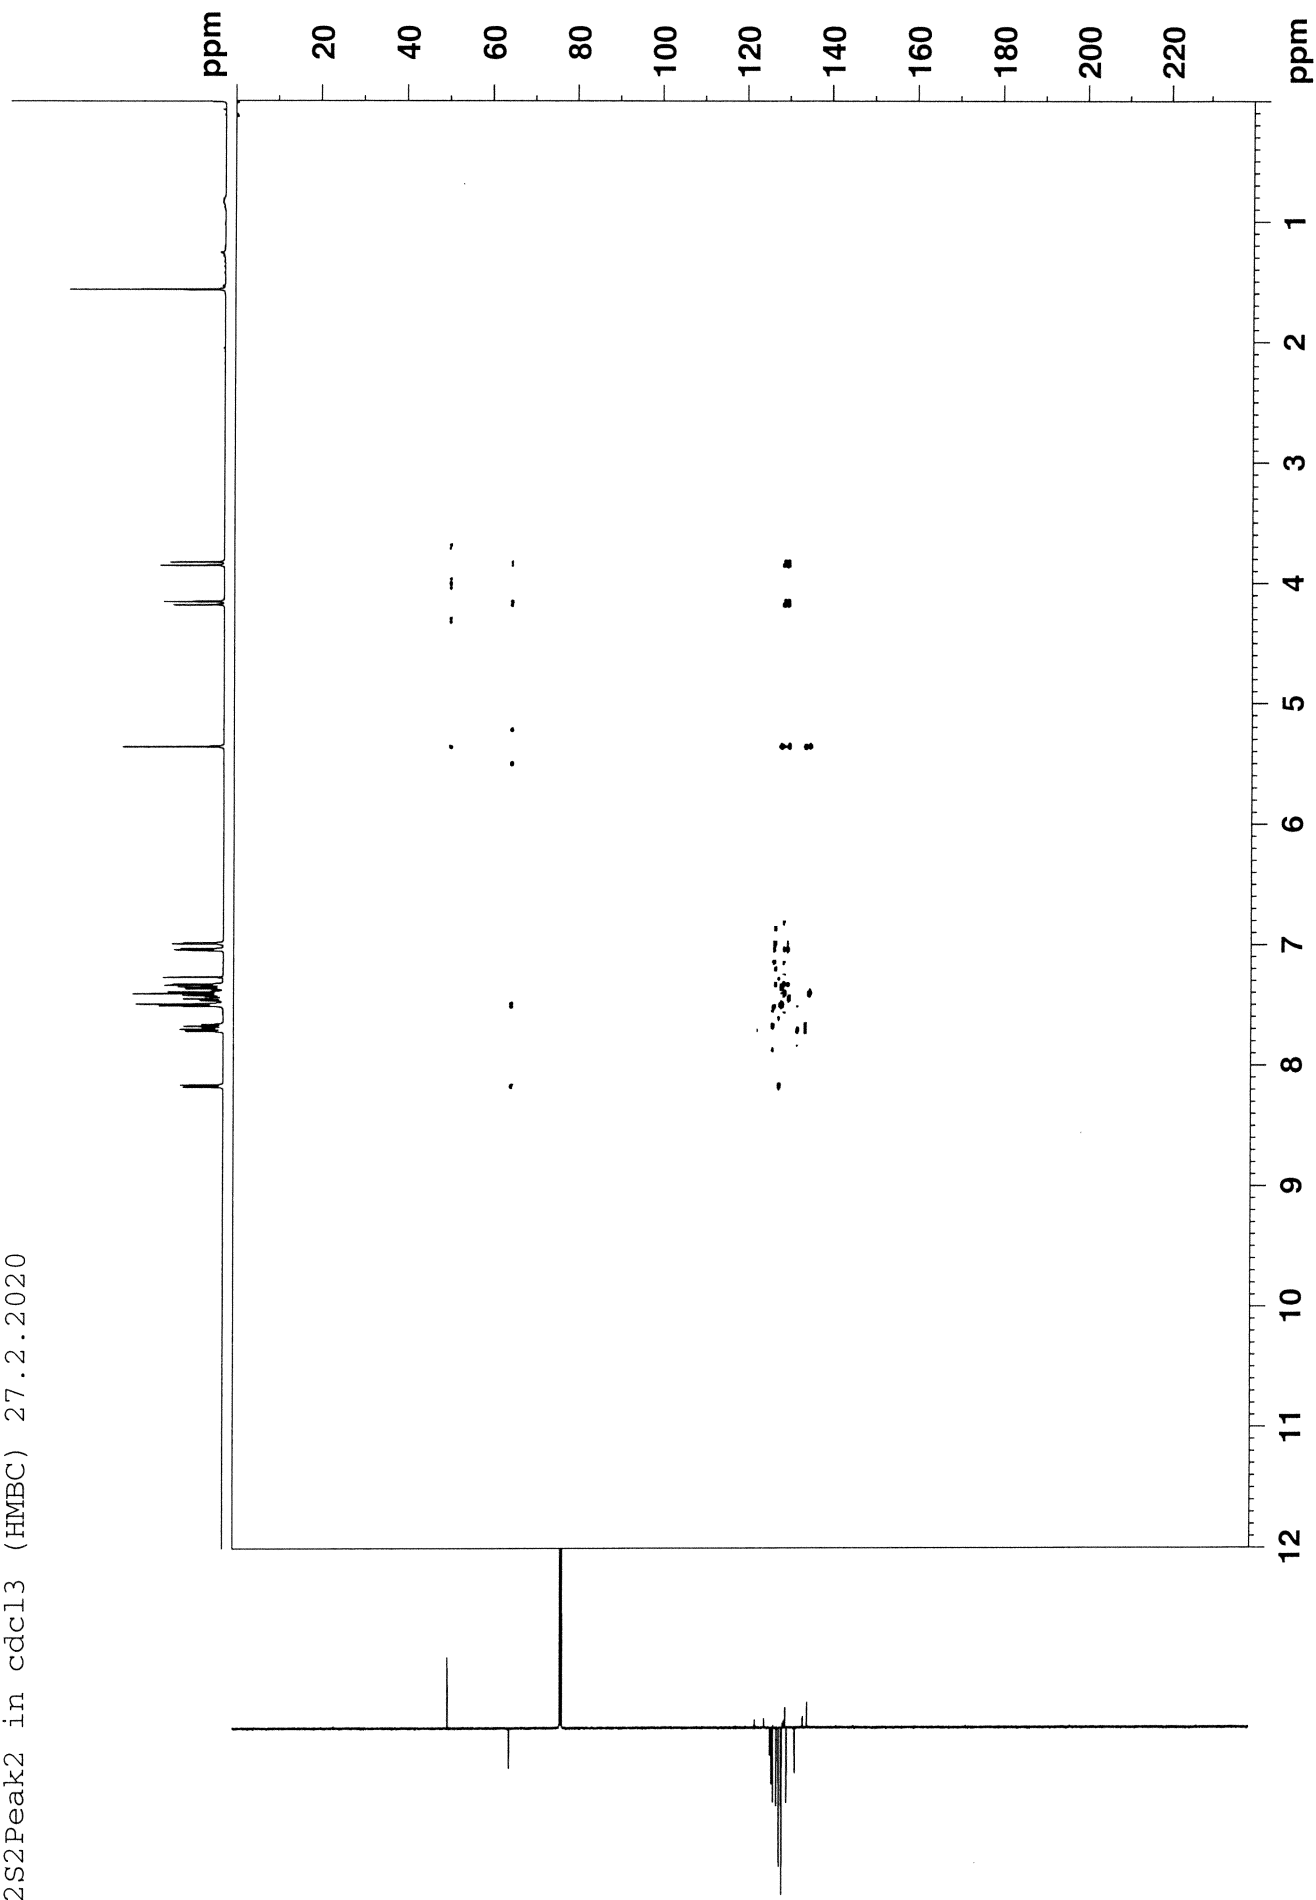



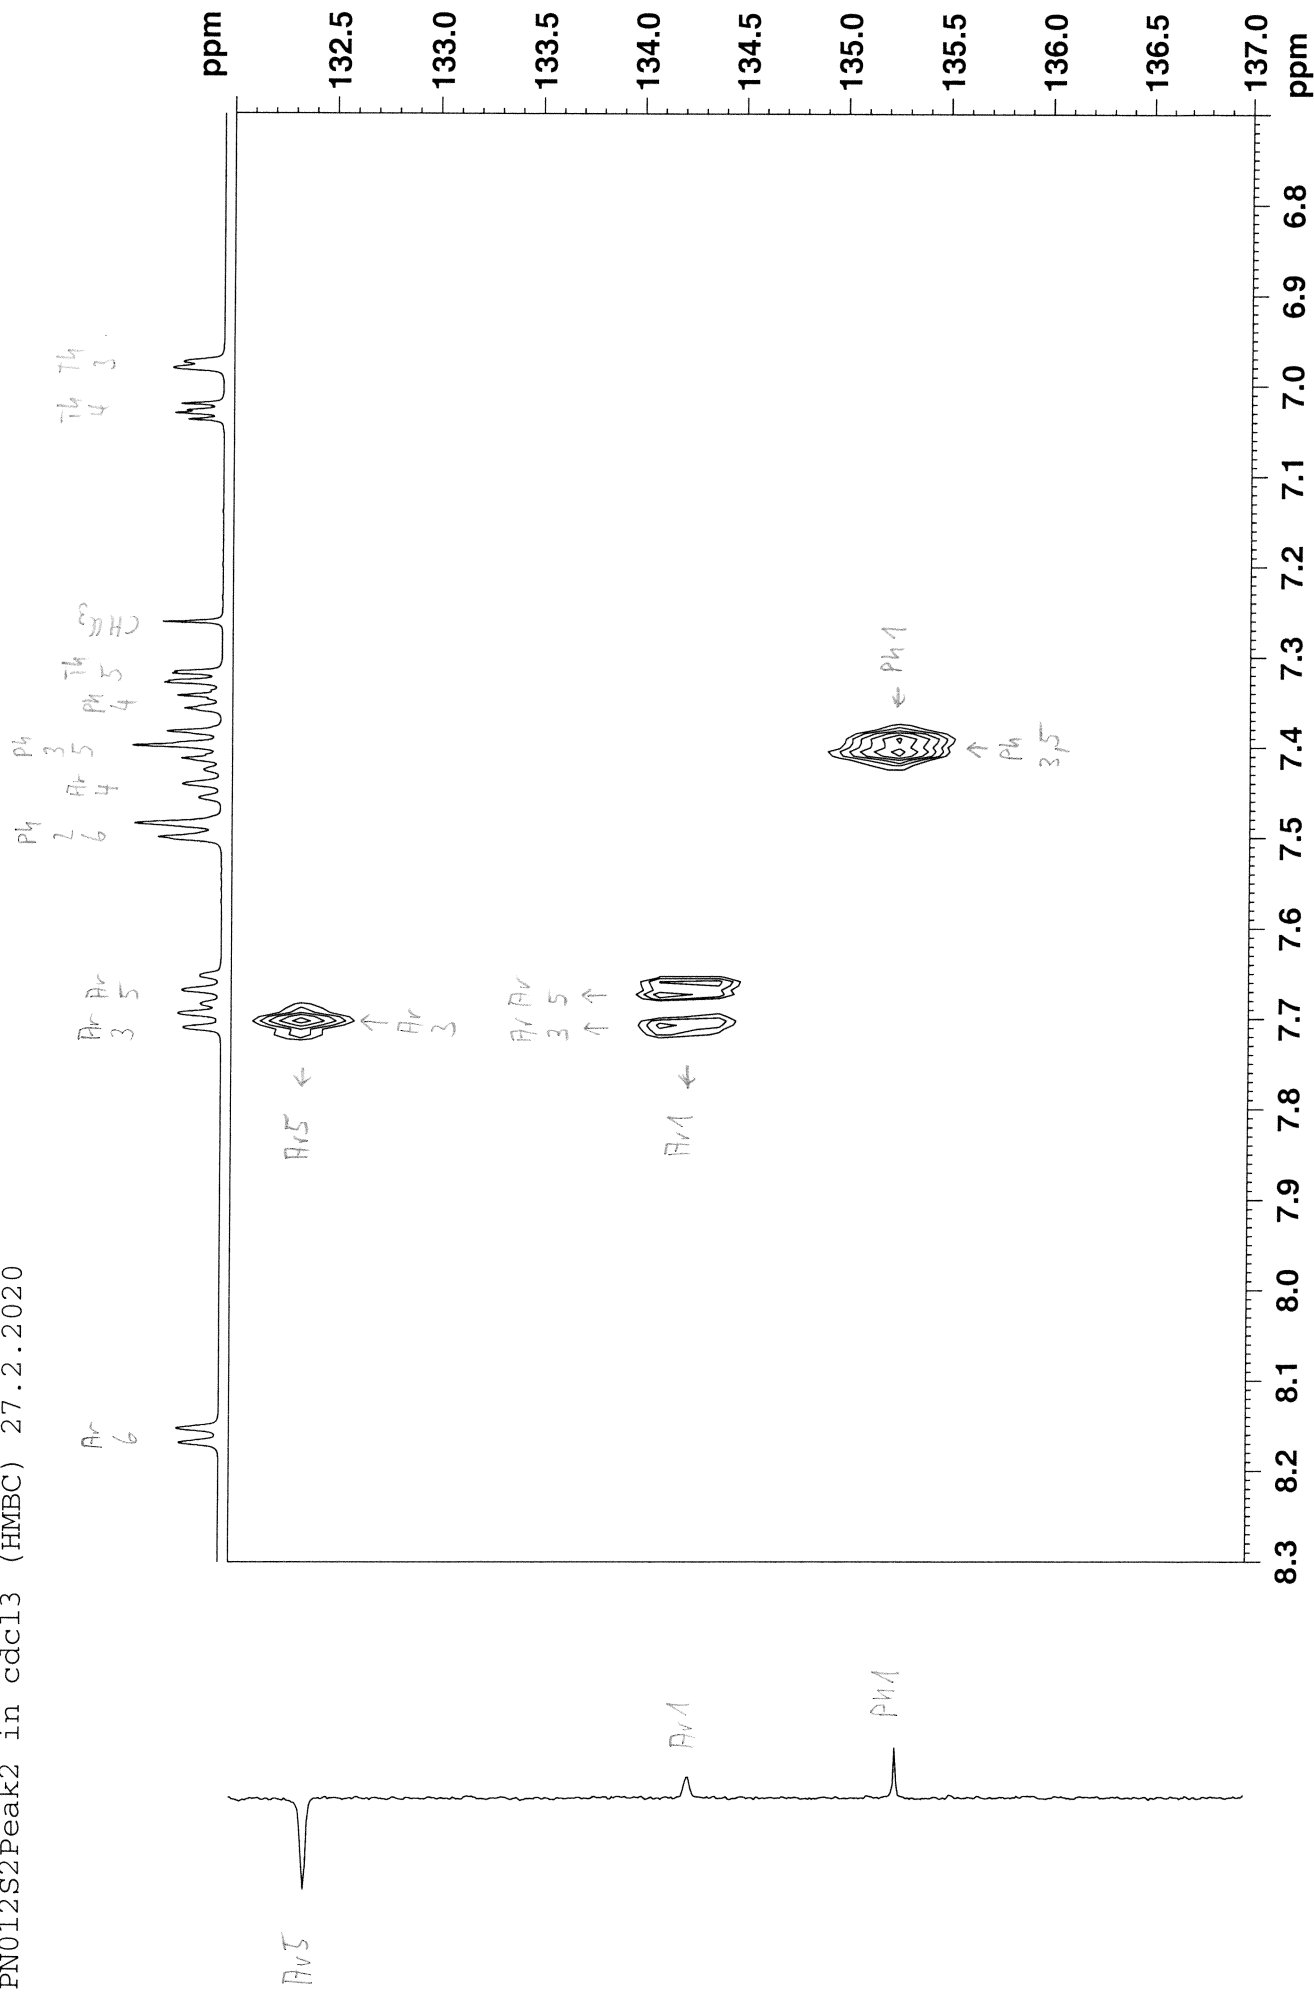

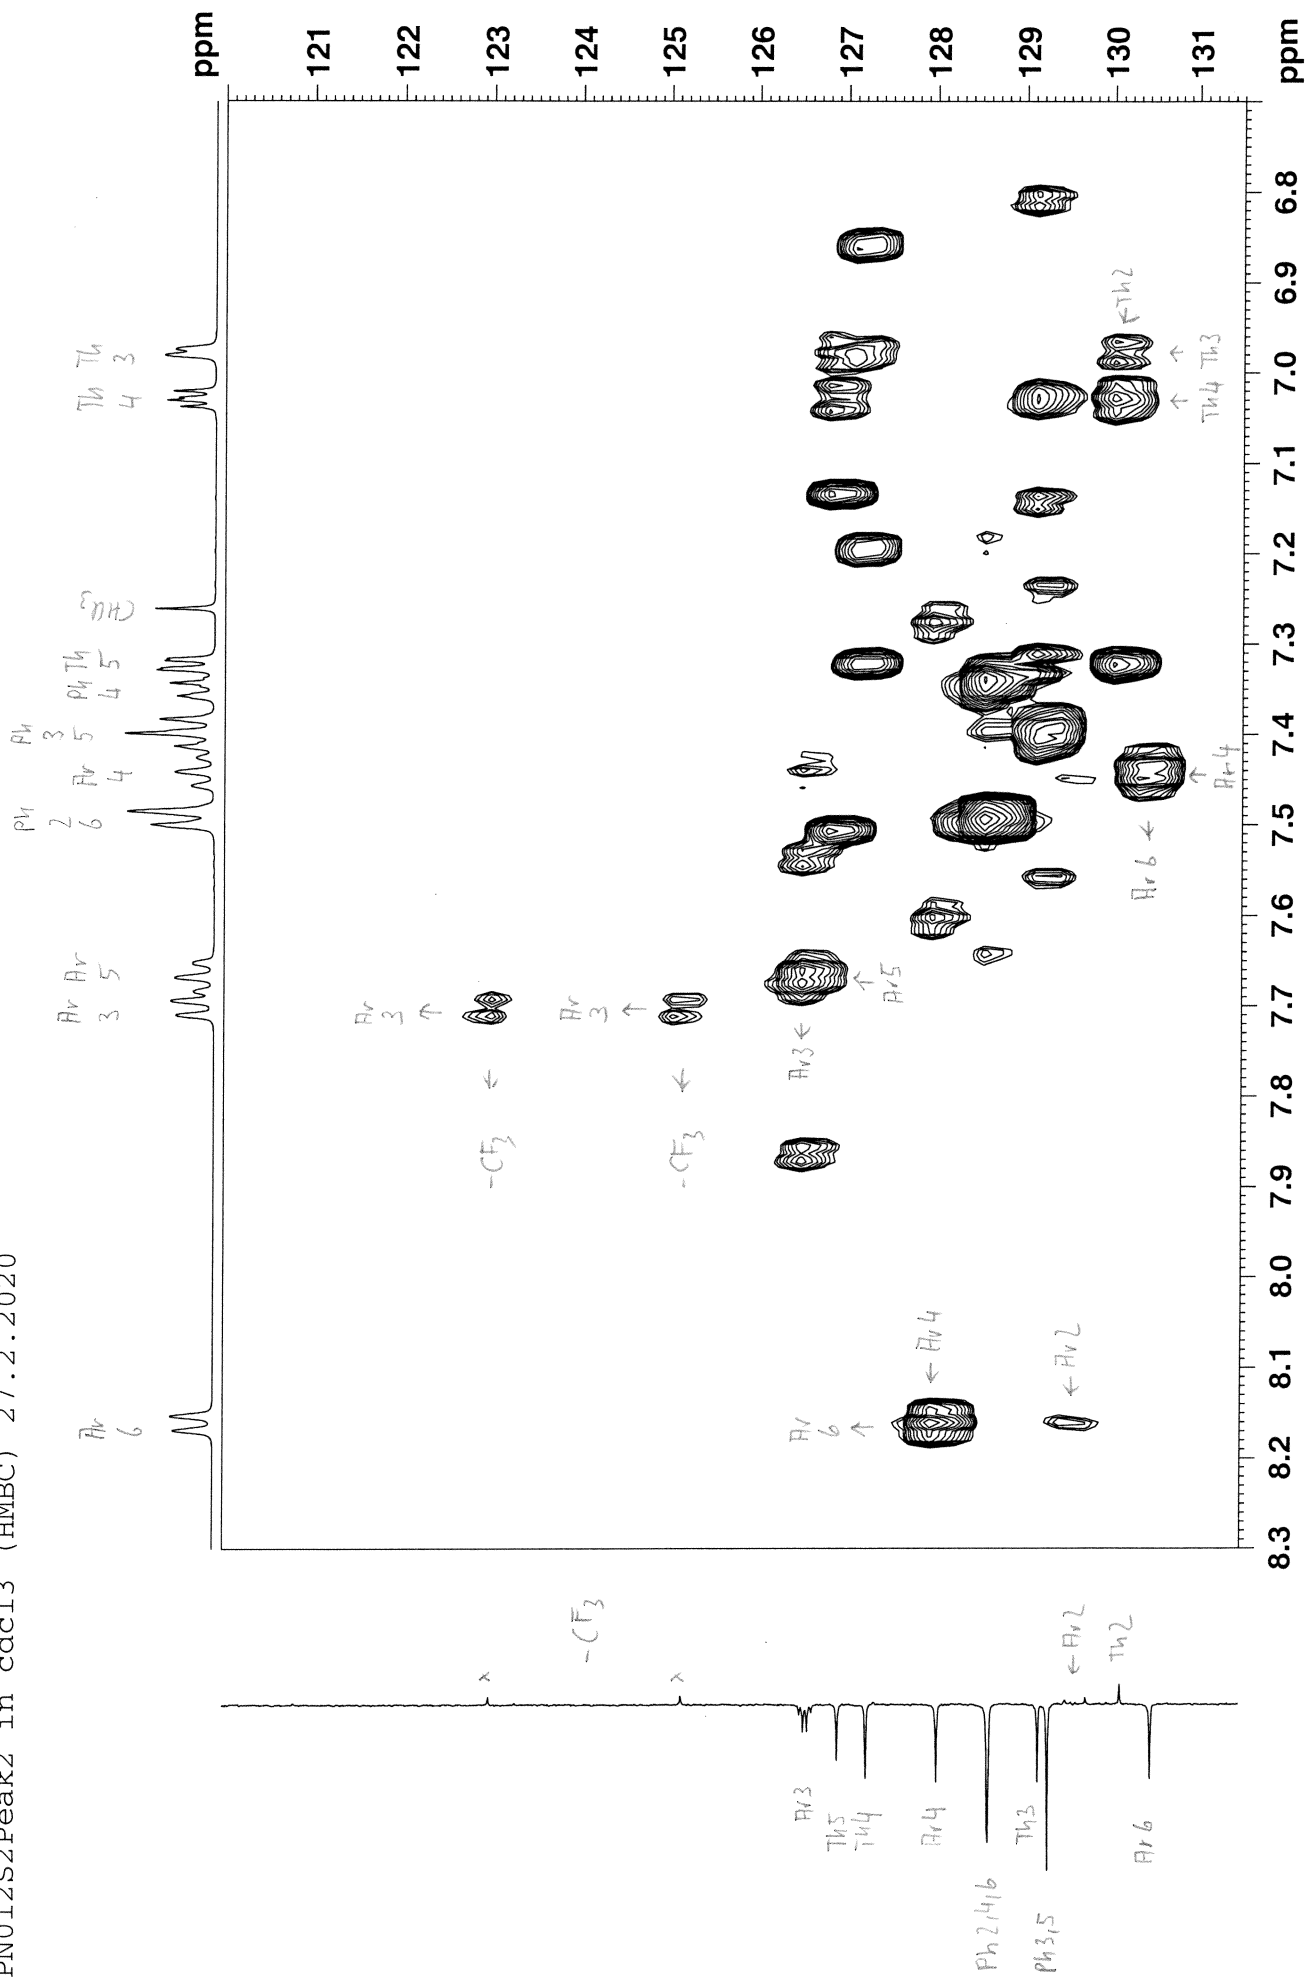

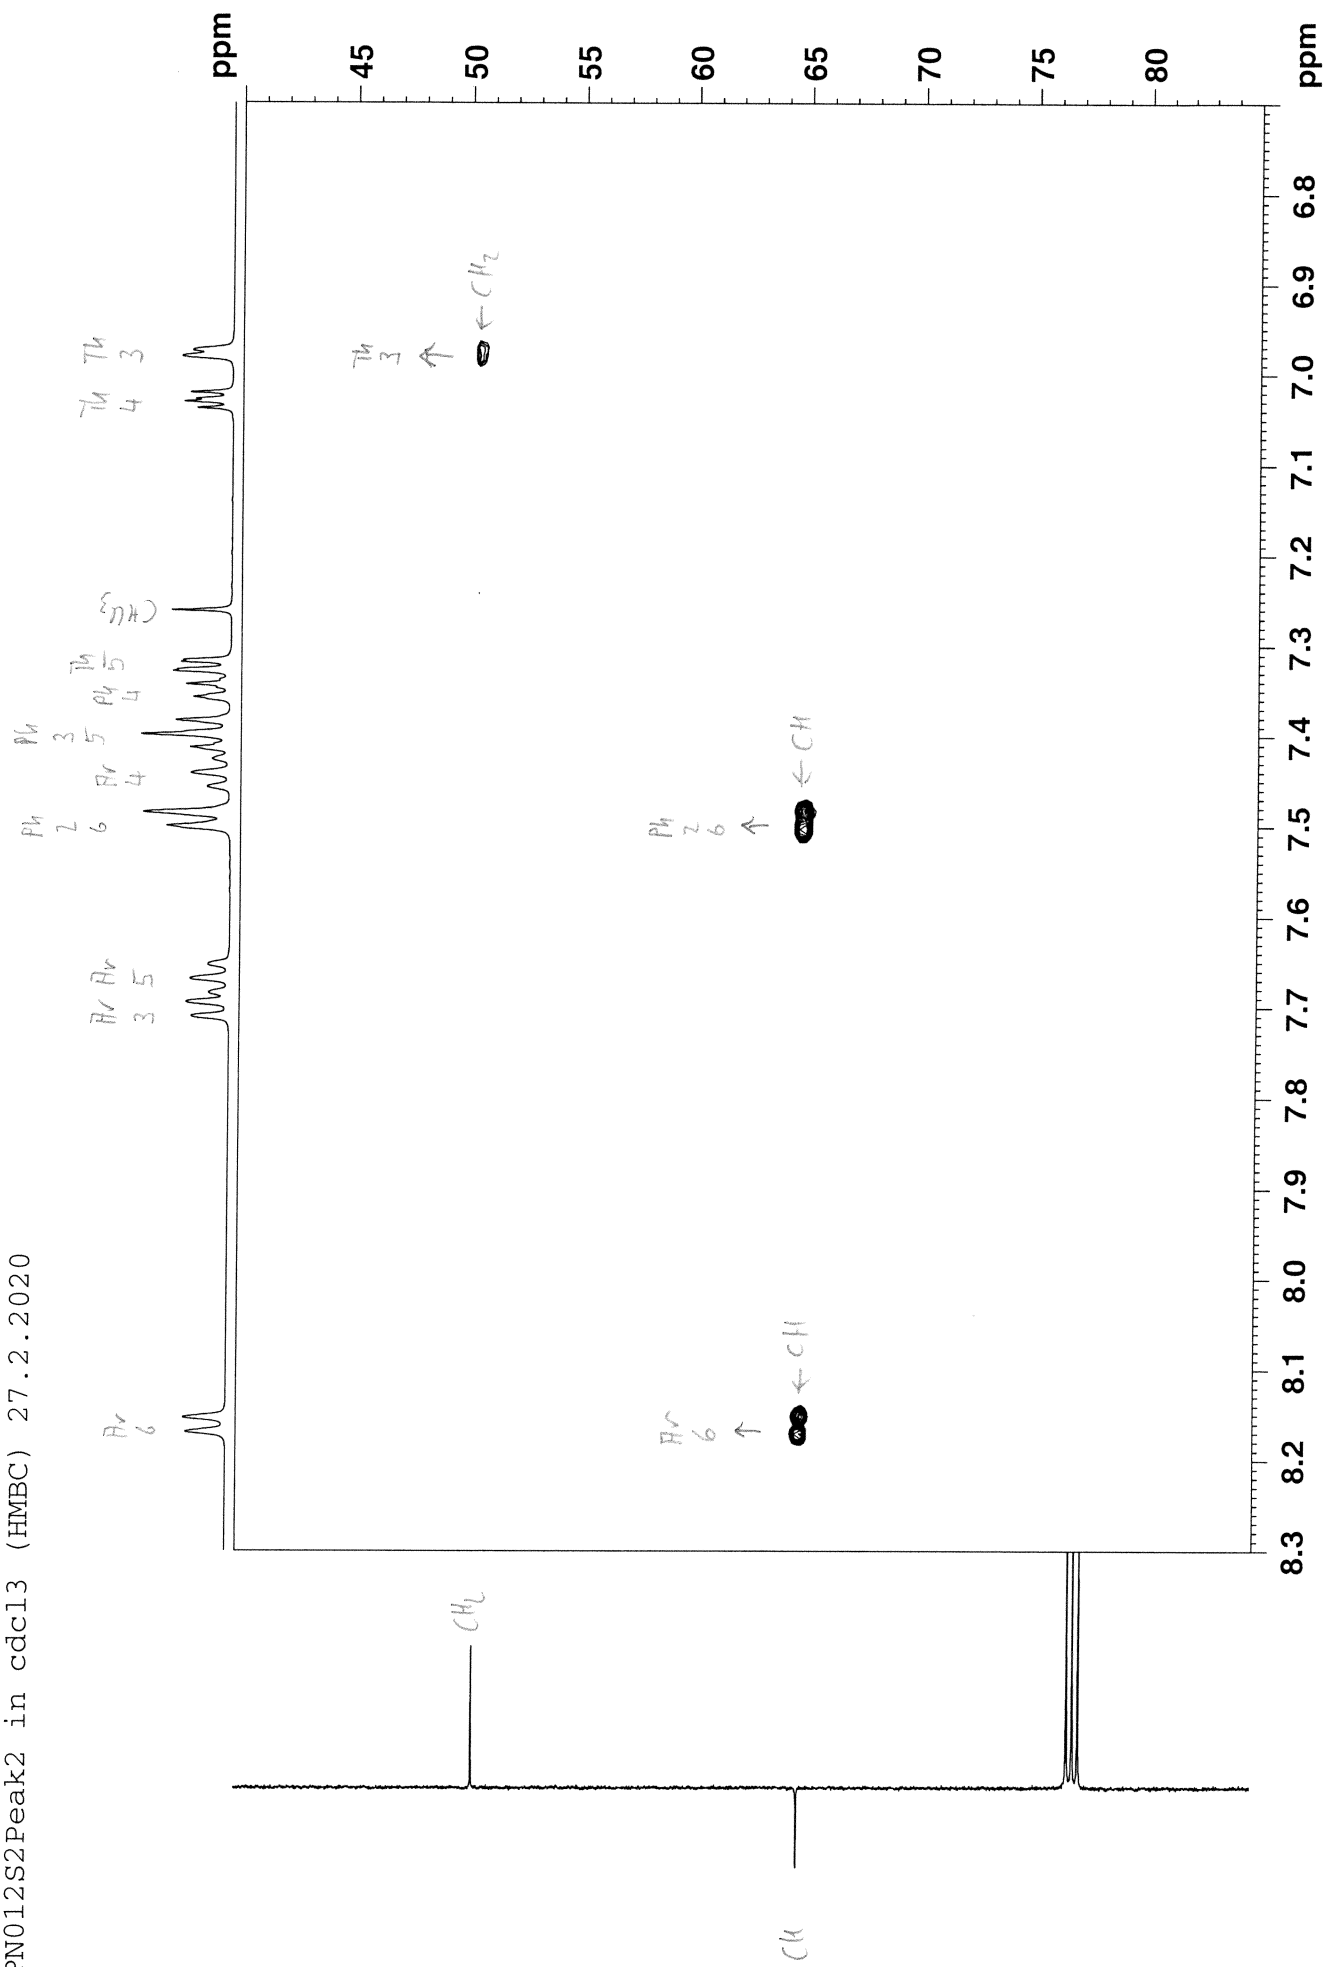

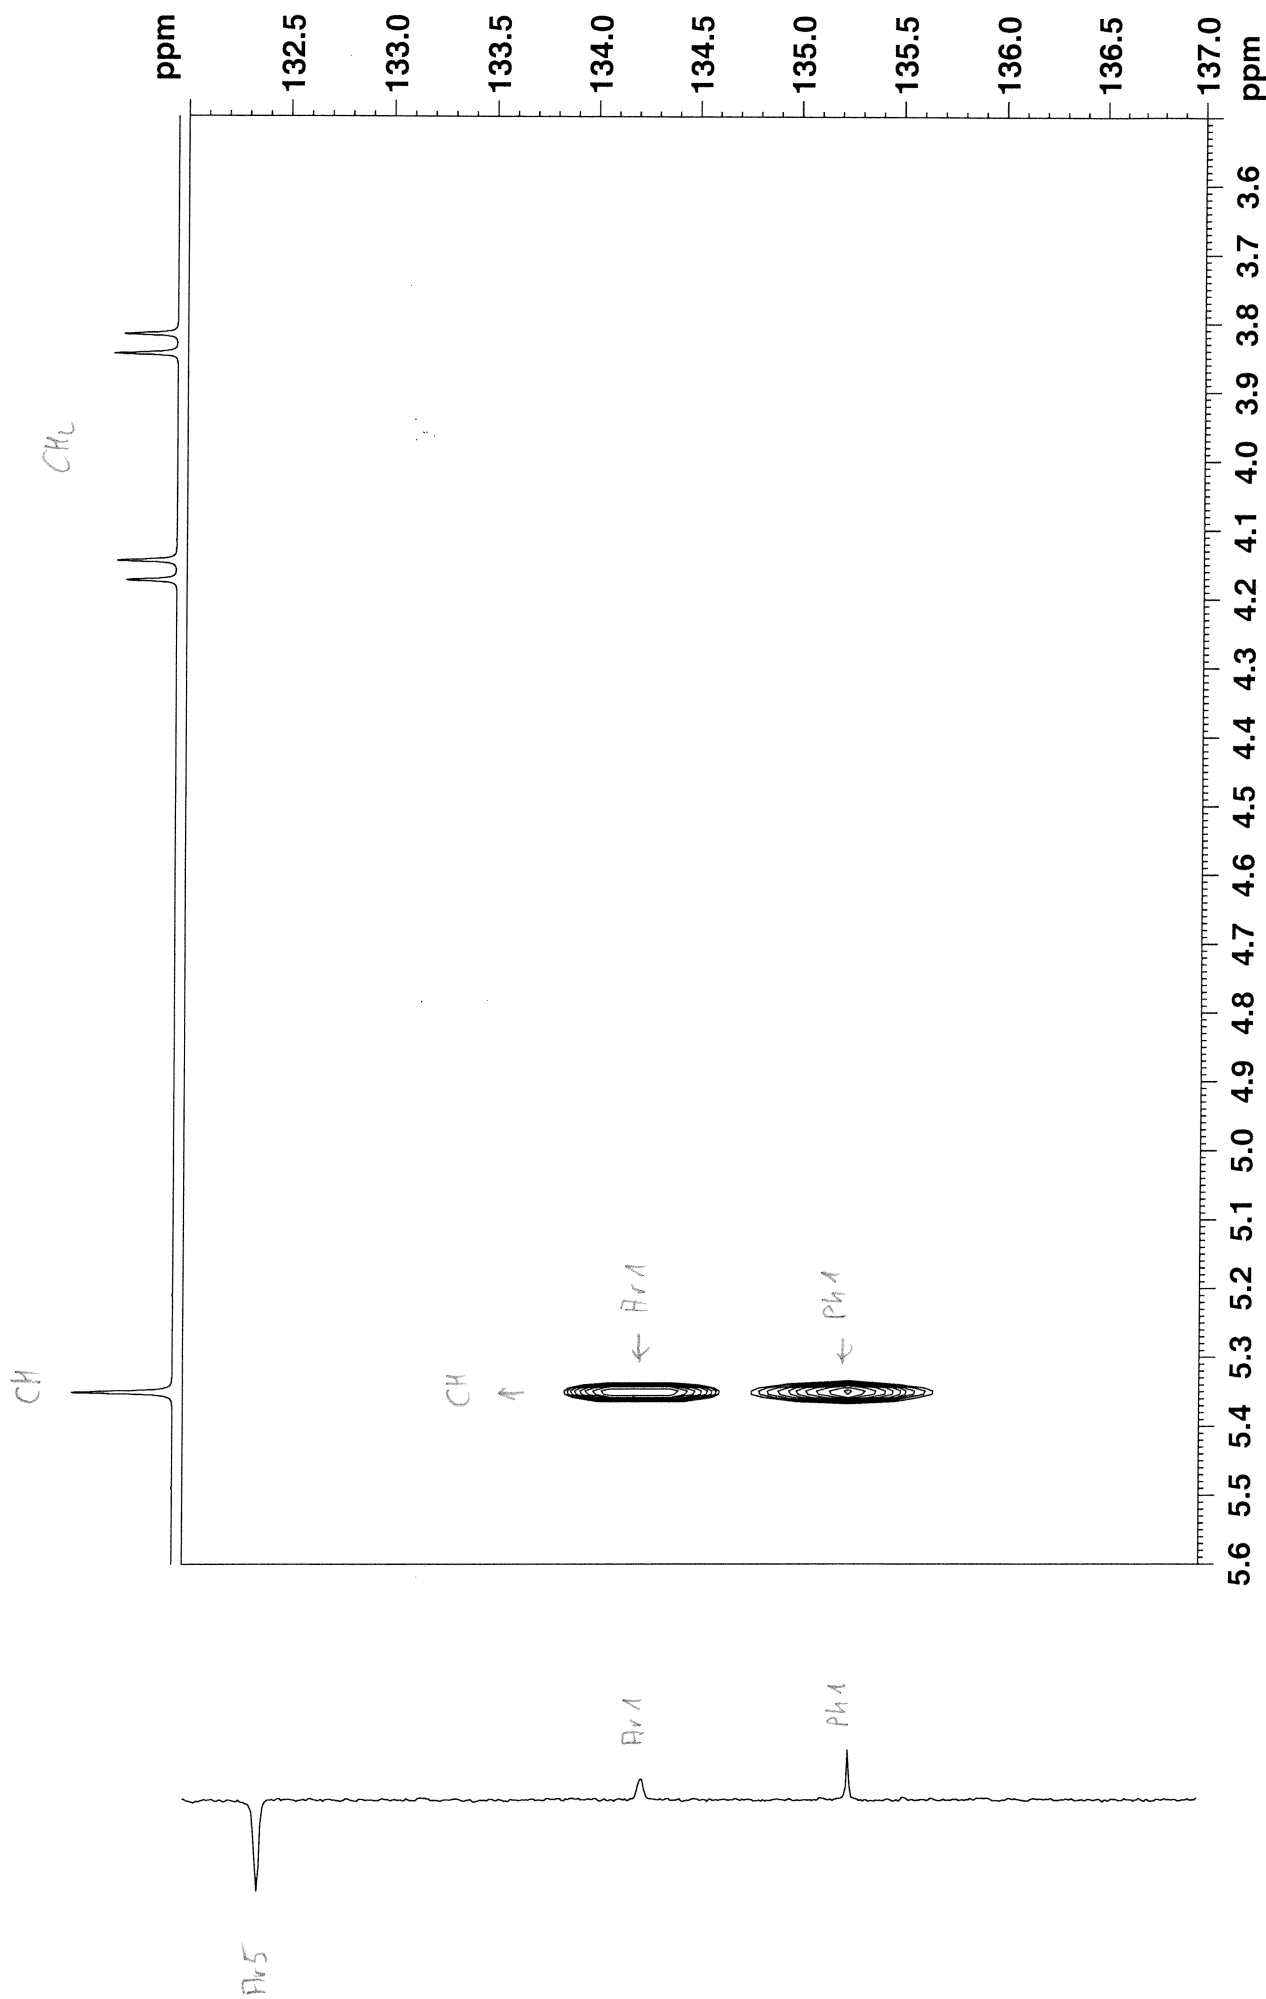

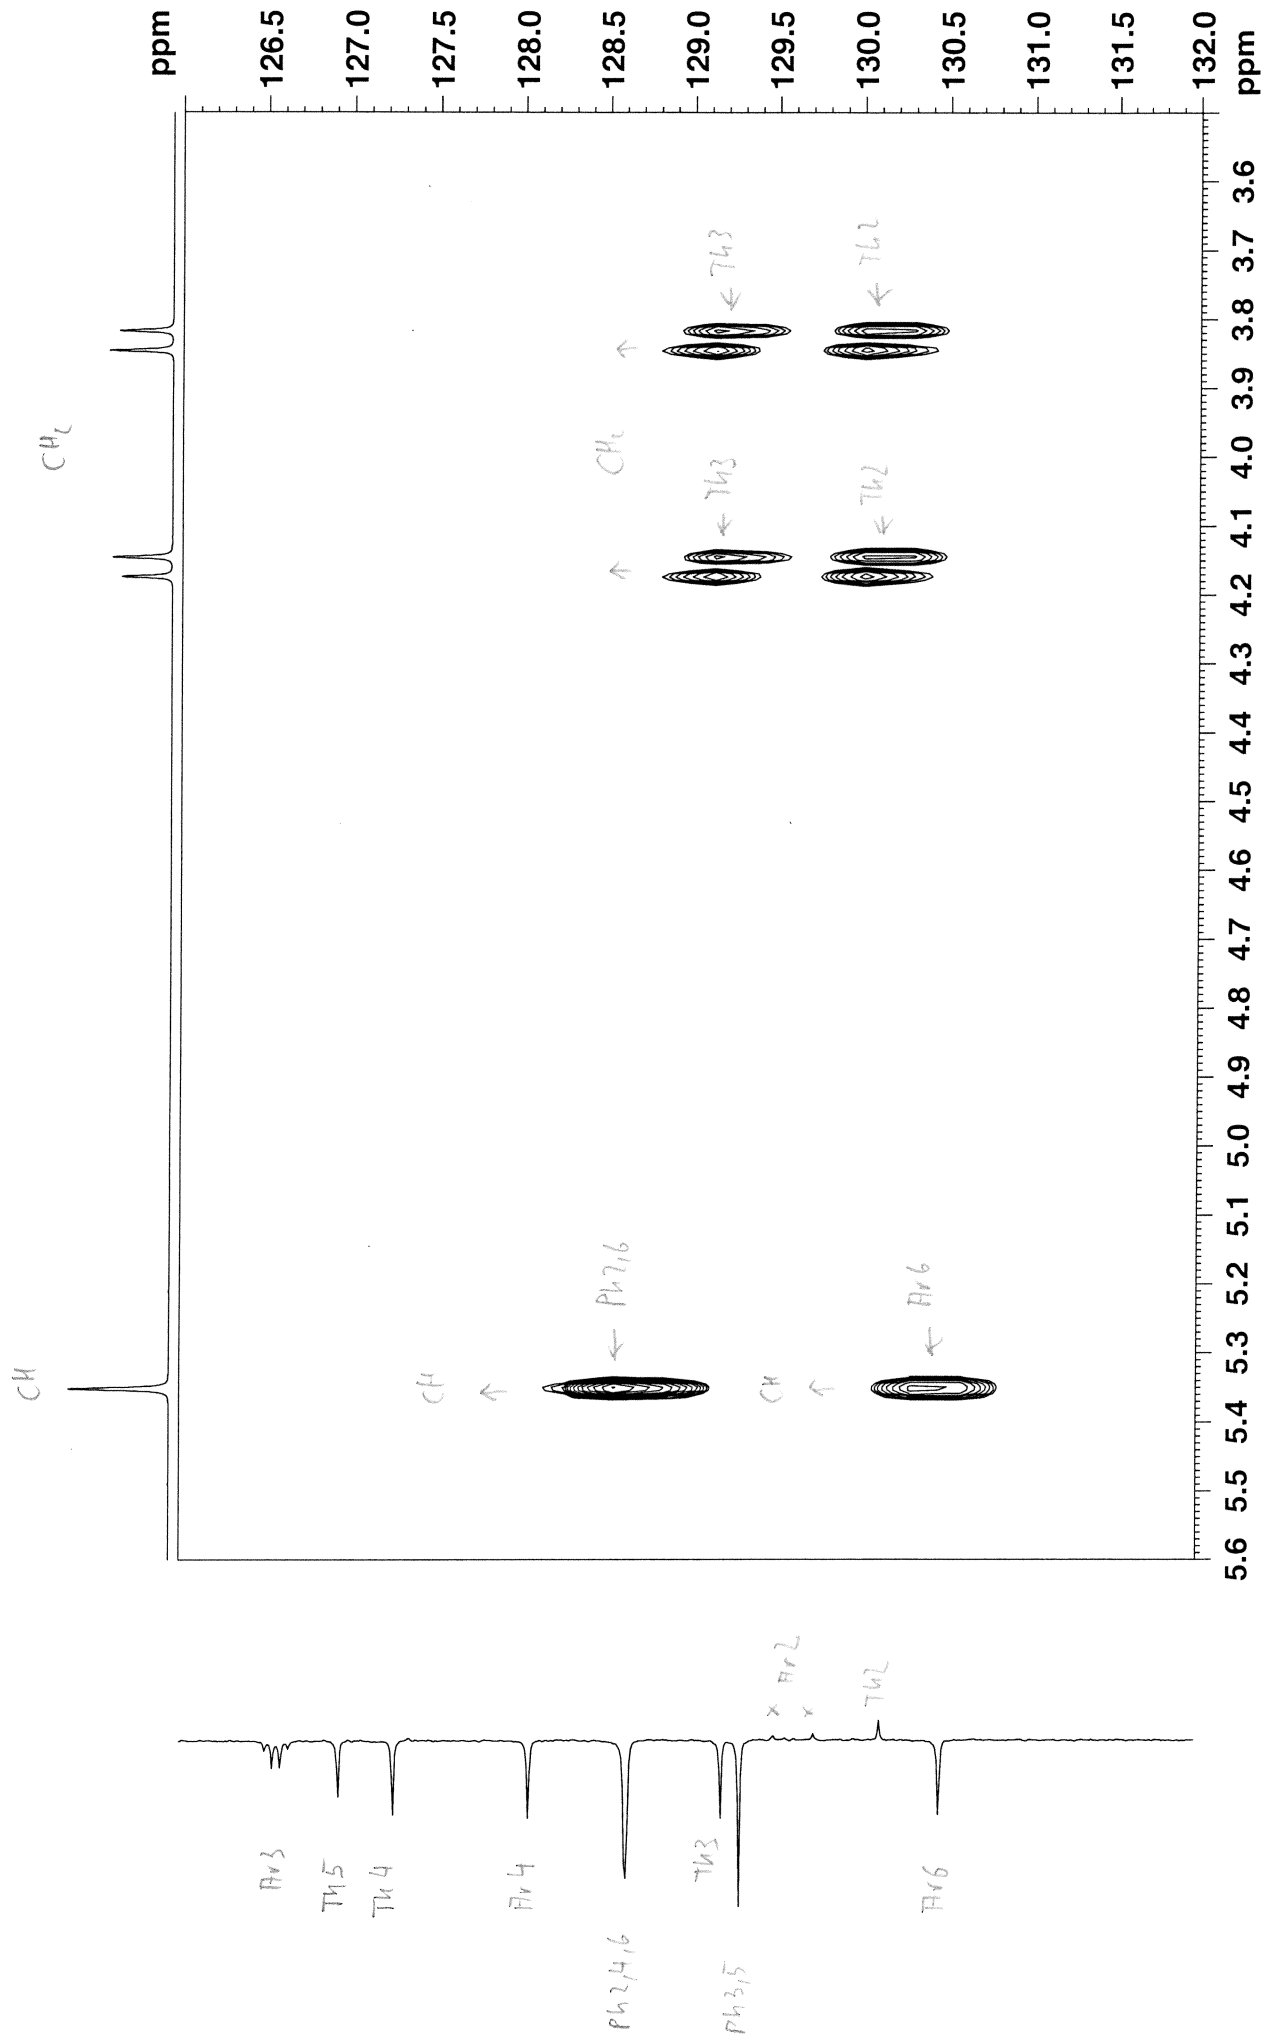

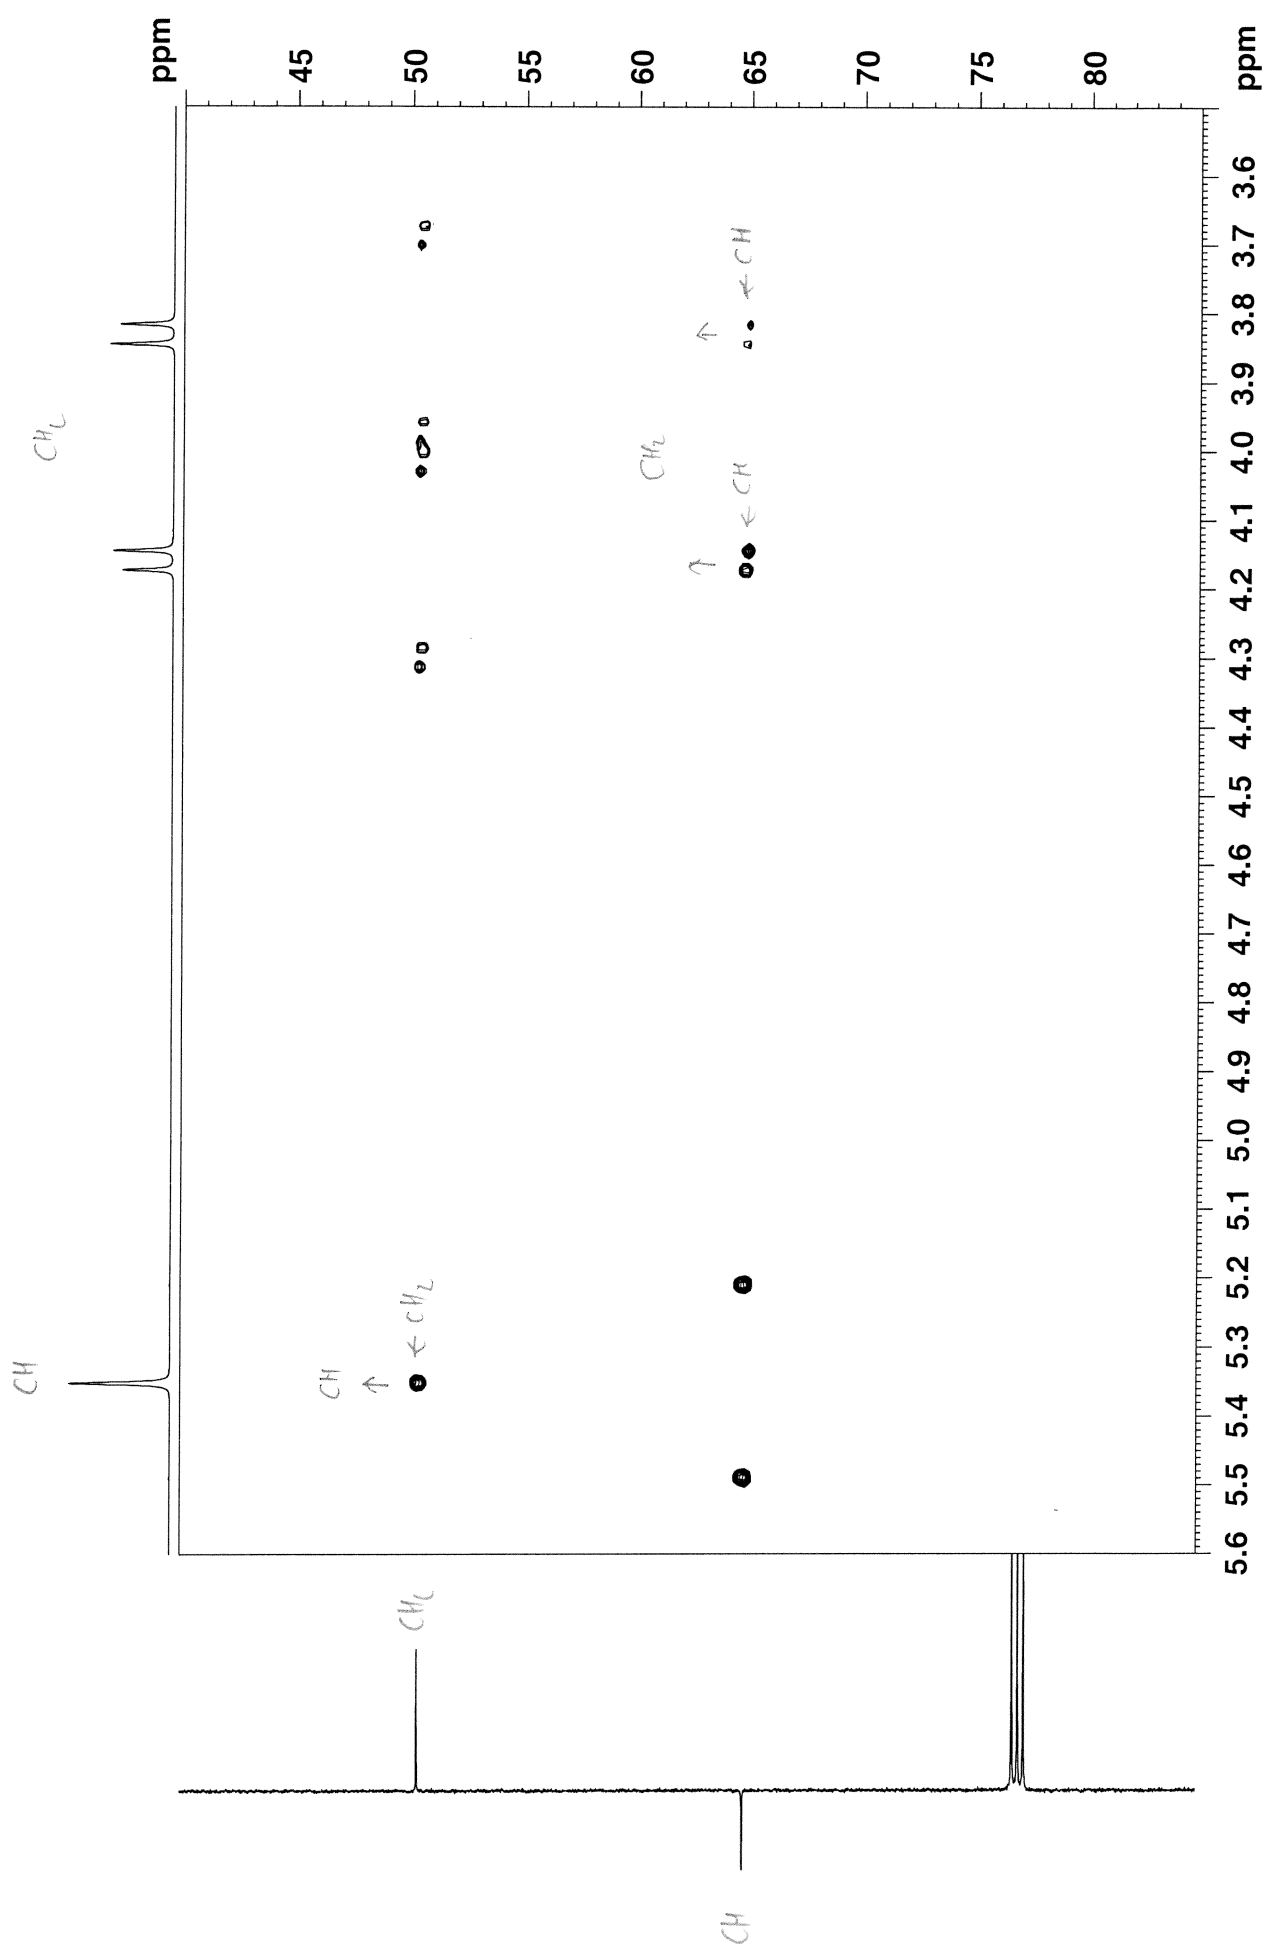

**Figure S61c.** NMR spectra of compound **5p**.

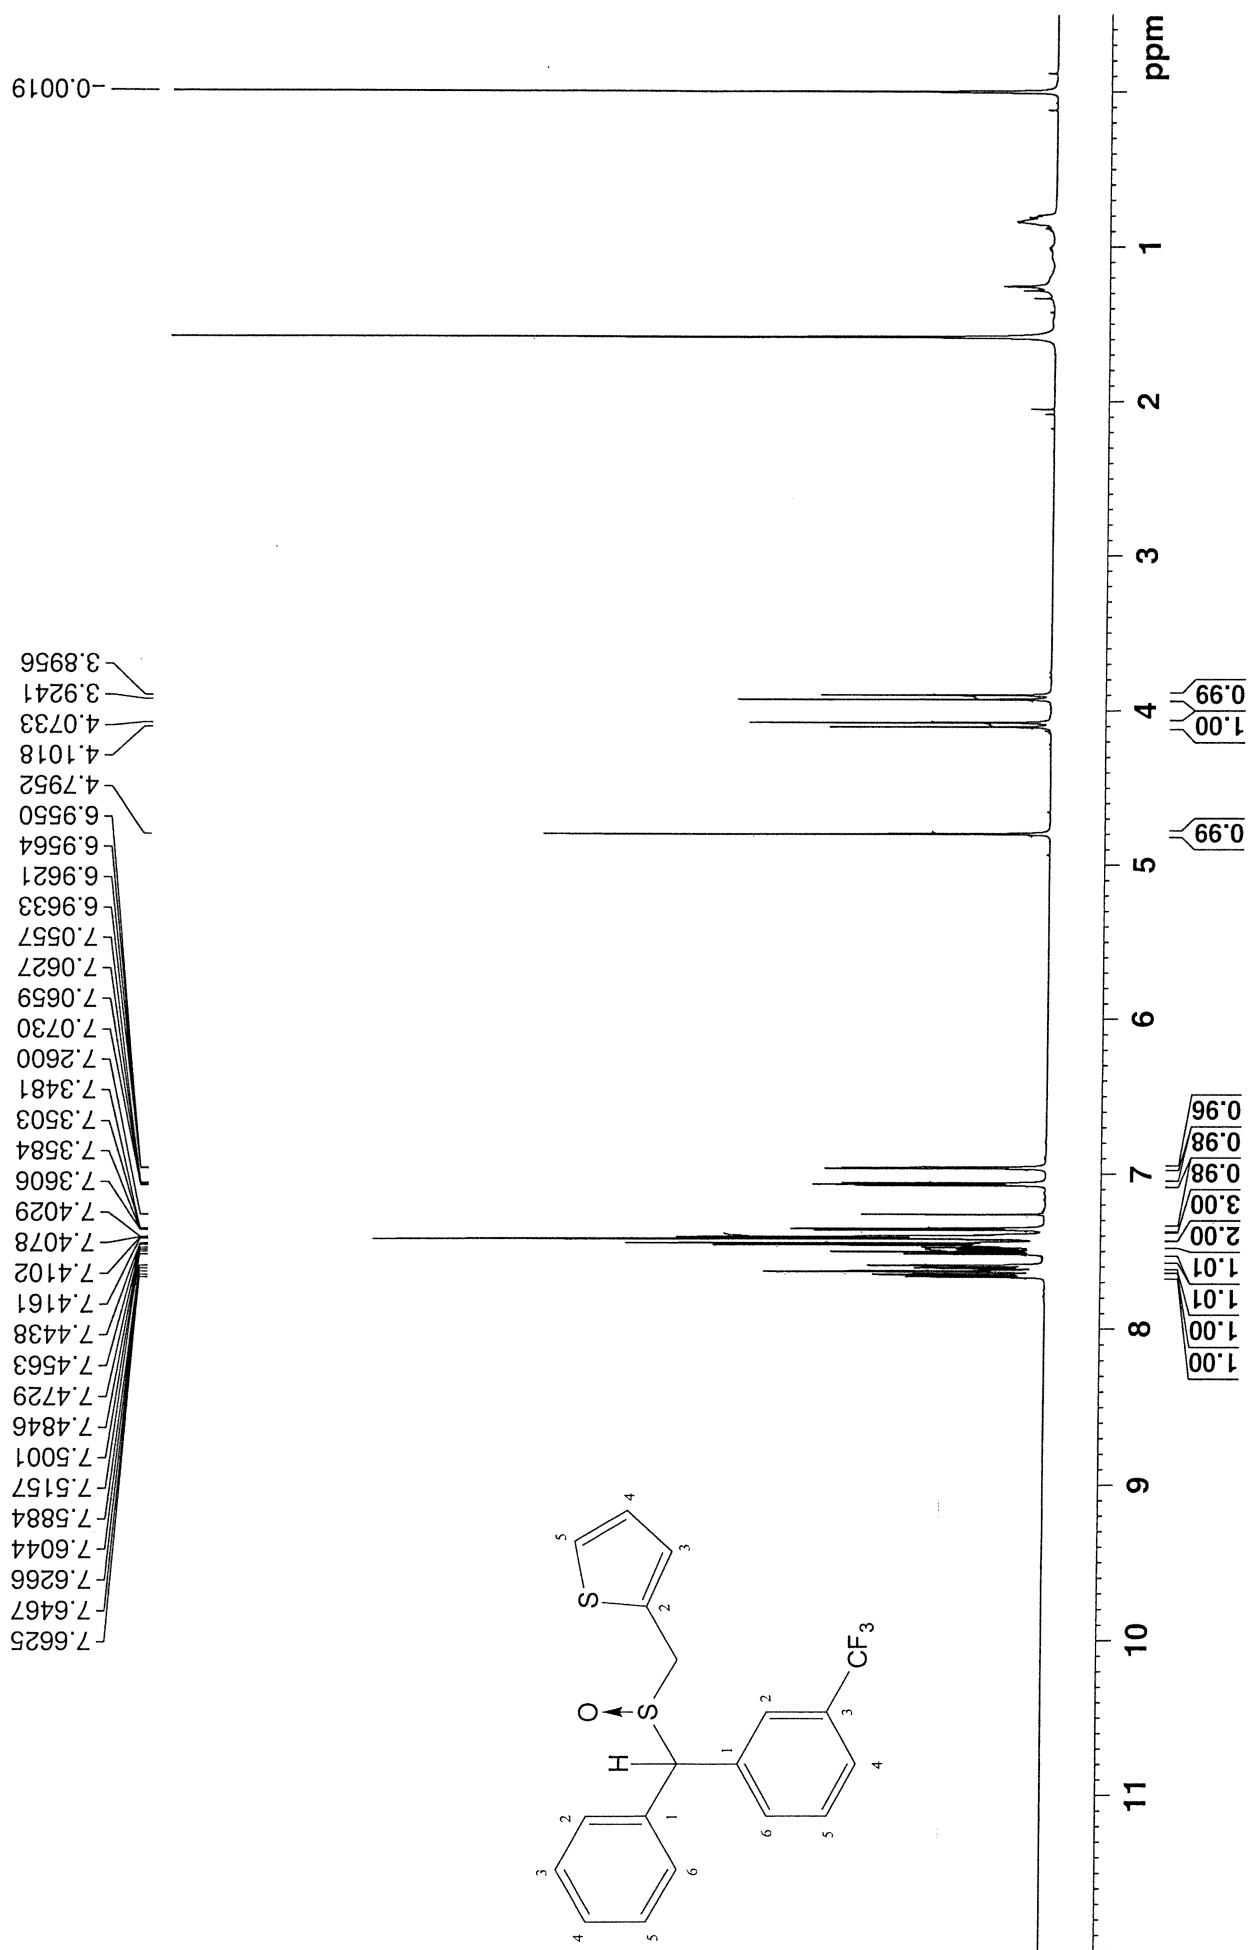

7.6625  
7.6467  
7.6266  
7.6044  
7.5884  
7.5157  
7.5001  
7.4846  
7.4729  
7.4563  
7.4438  
7.4161  
7.4102  
7.4078  
7.4029  
7.3606  
7.3584  
7.3503  
7.3481  
7.2600  
7.0730  
7.0659  
7.0627  
7.0557  
6.9633  
6.9621  
6.9564  
6.9550

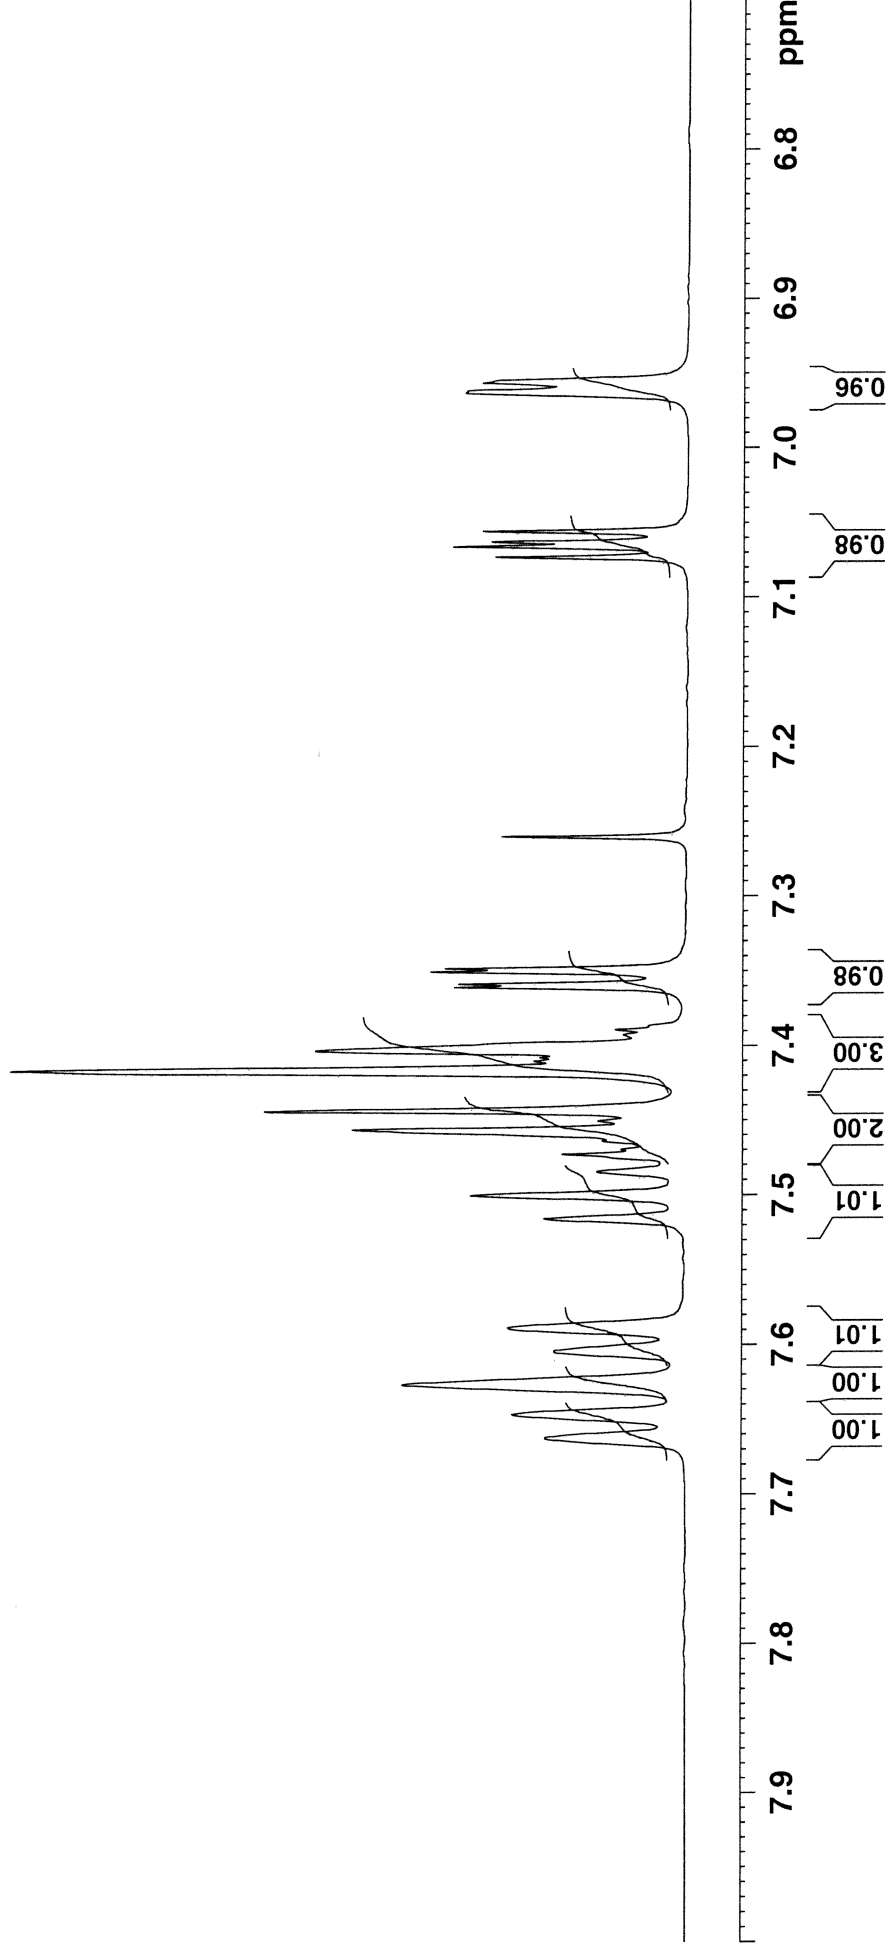



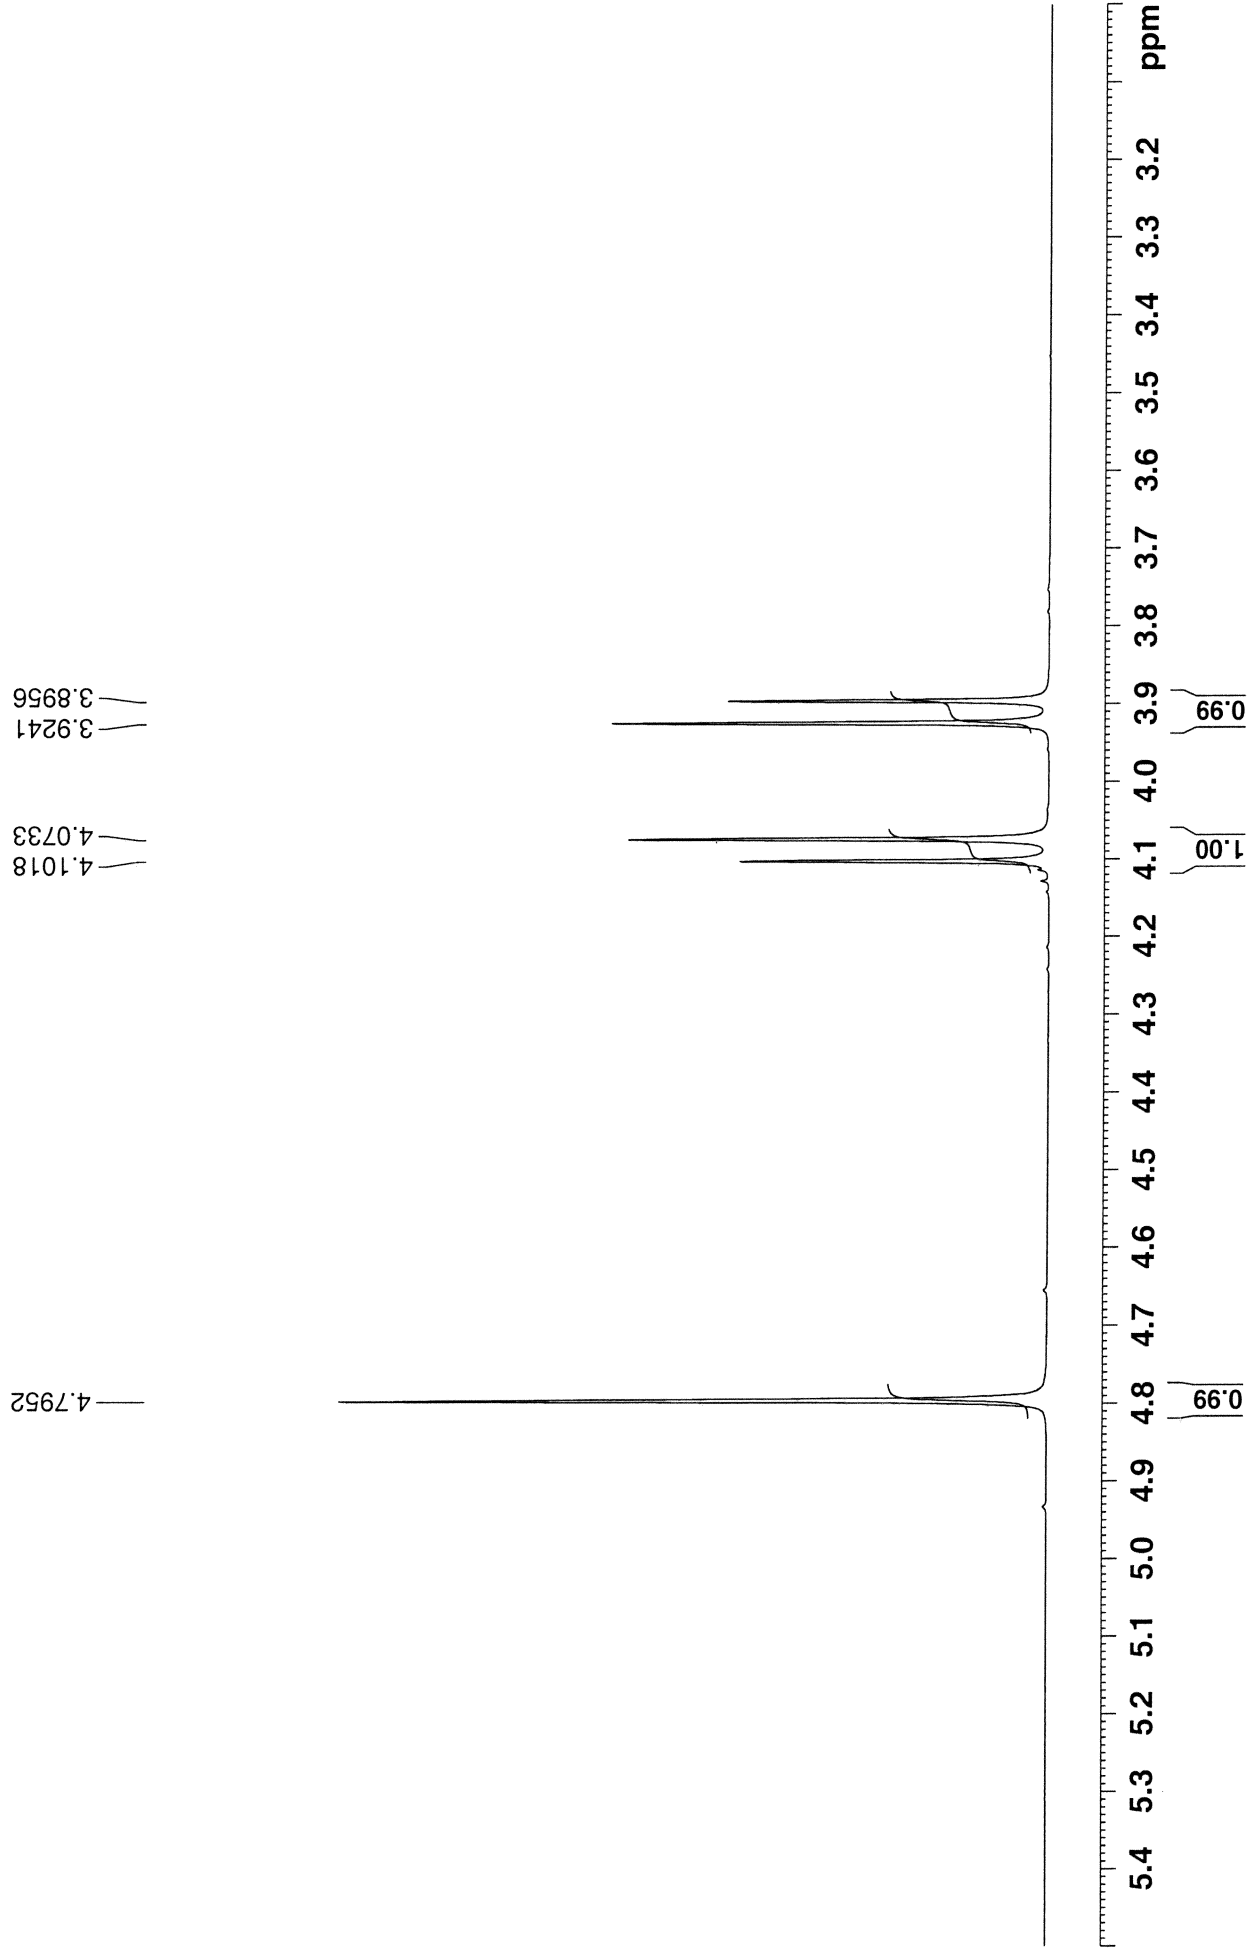

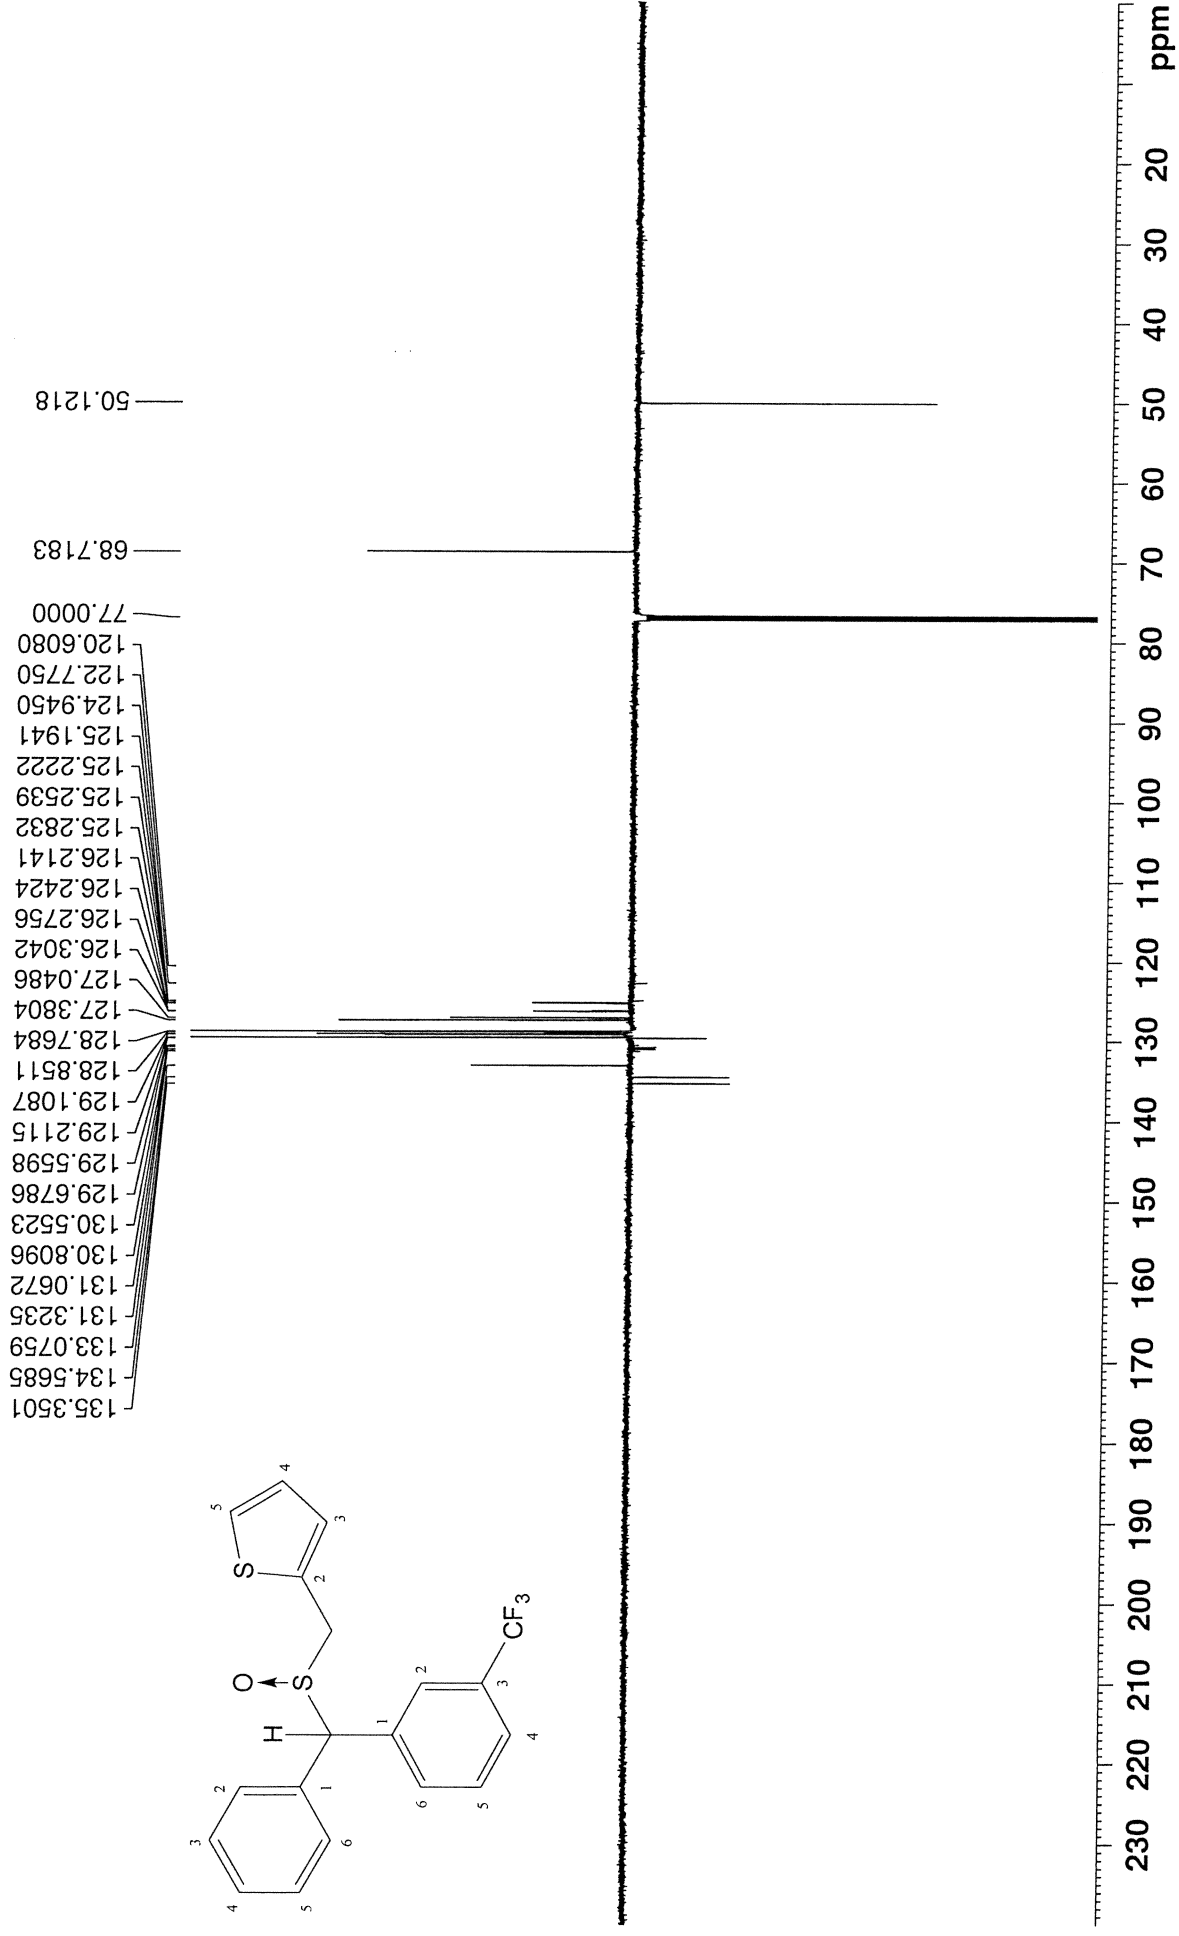

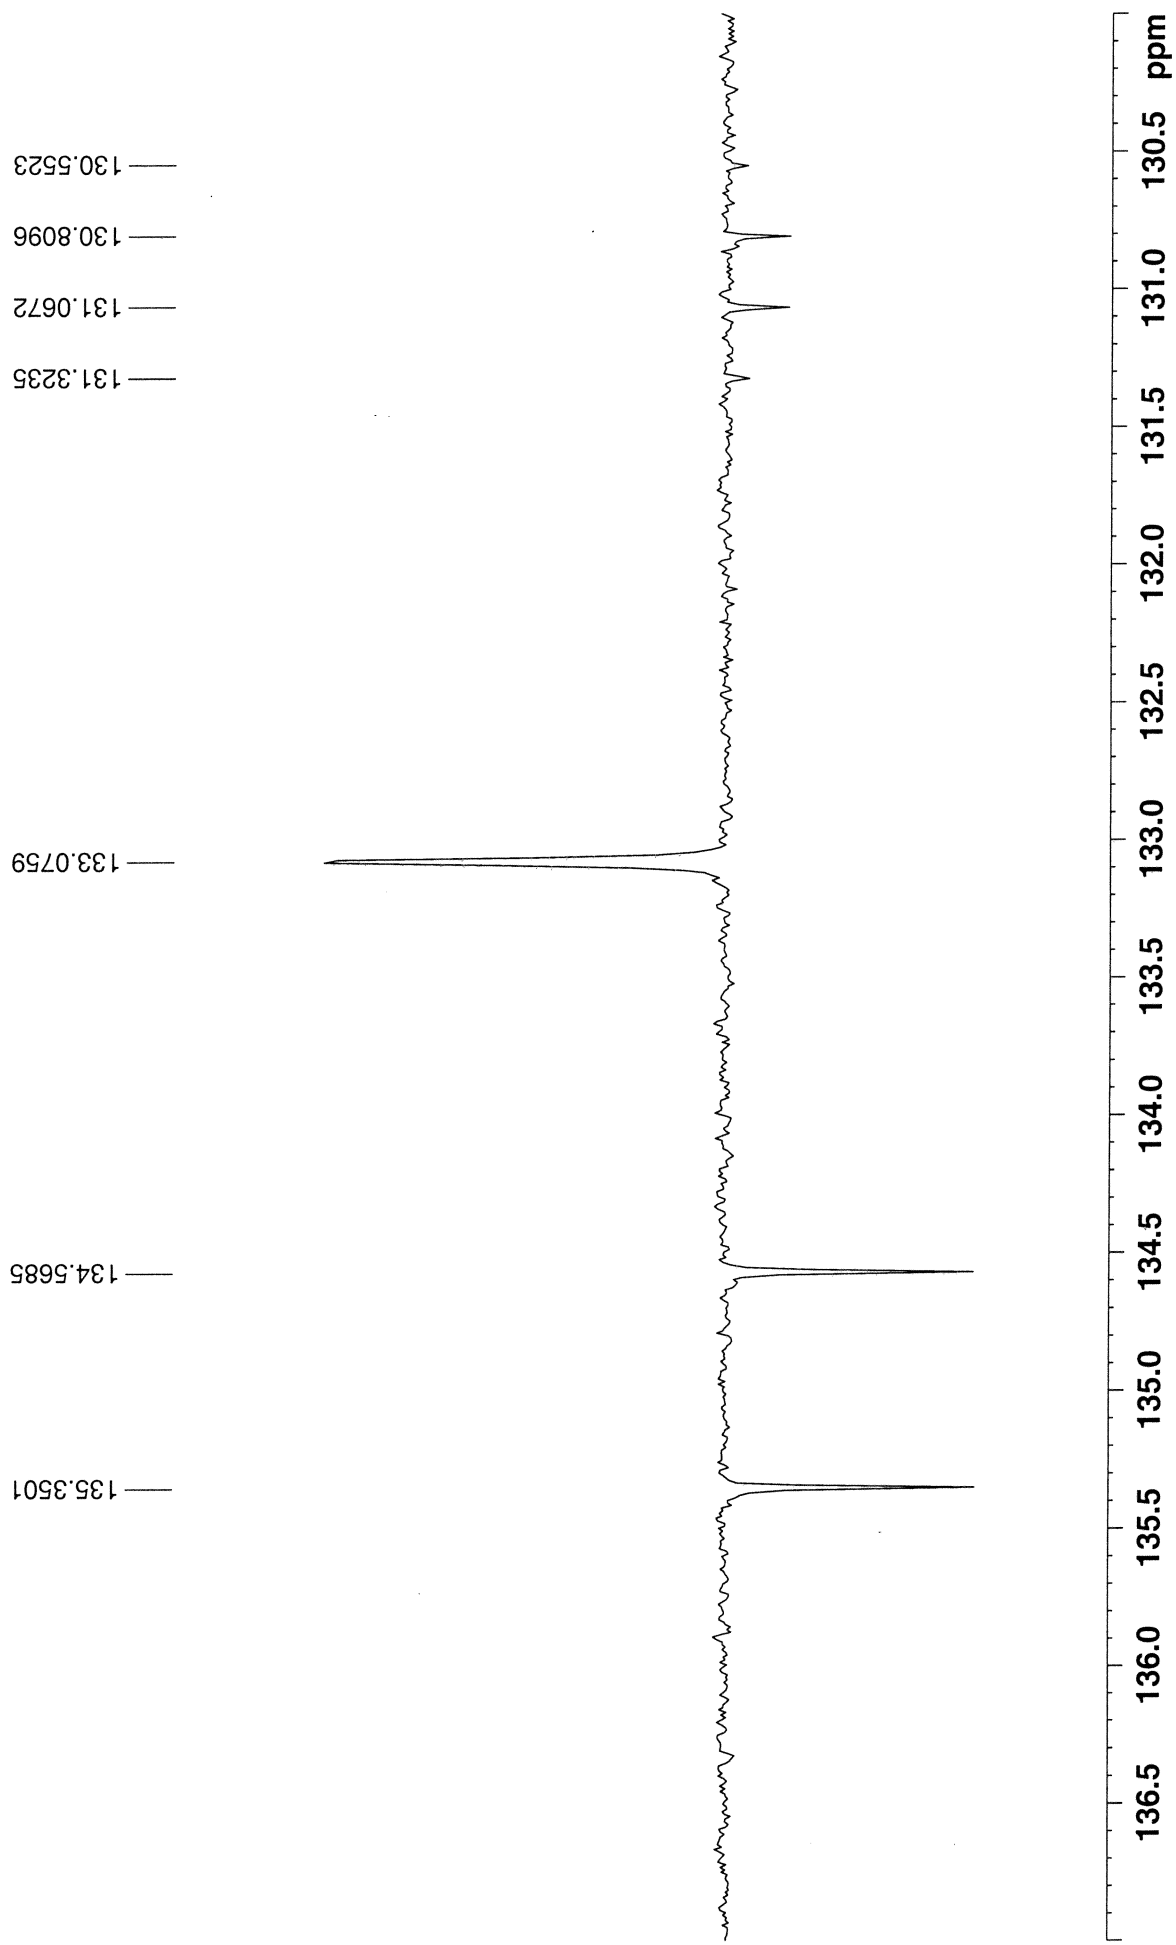

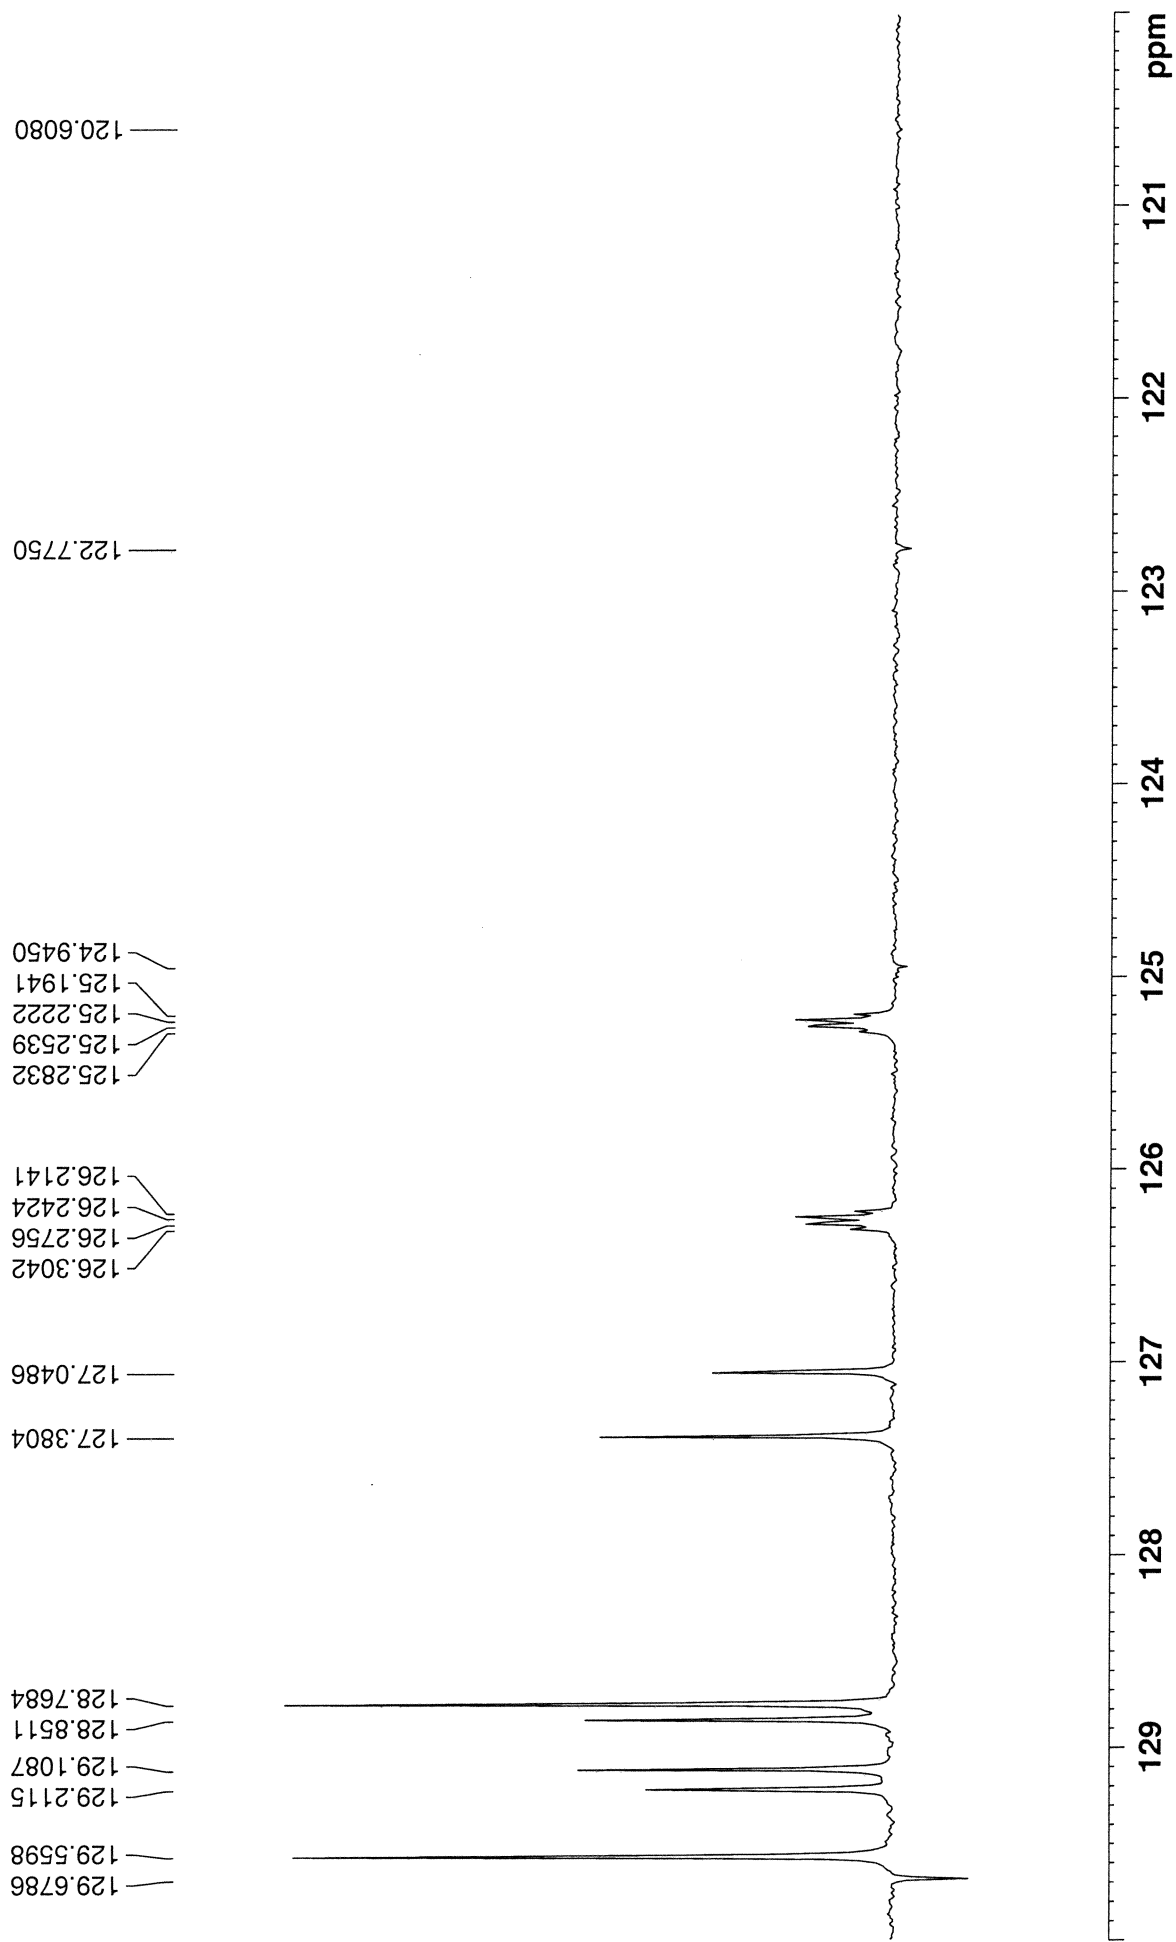

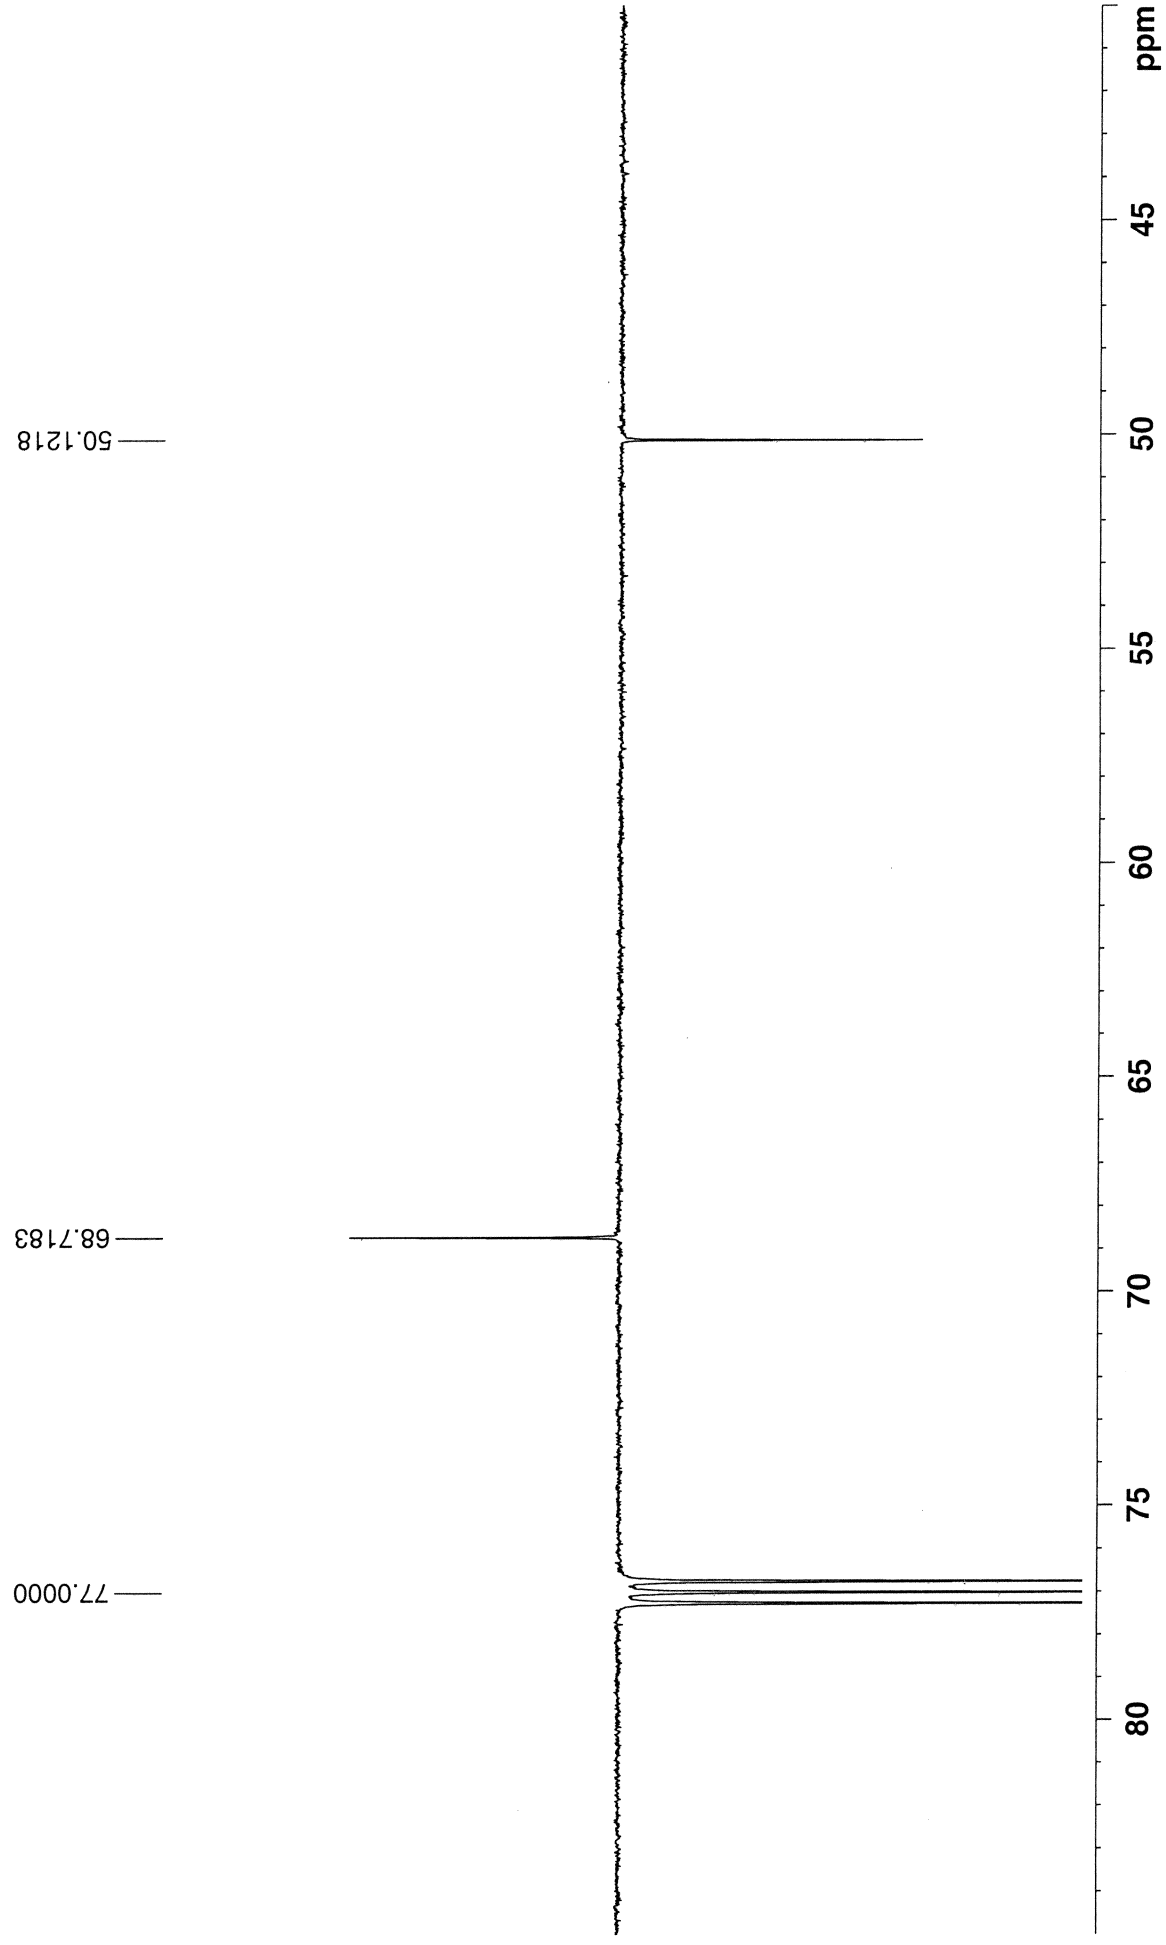

Figure S62c. NMR spectra of compound 6p.

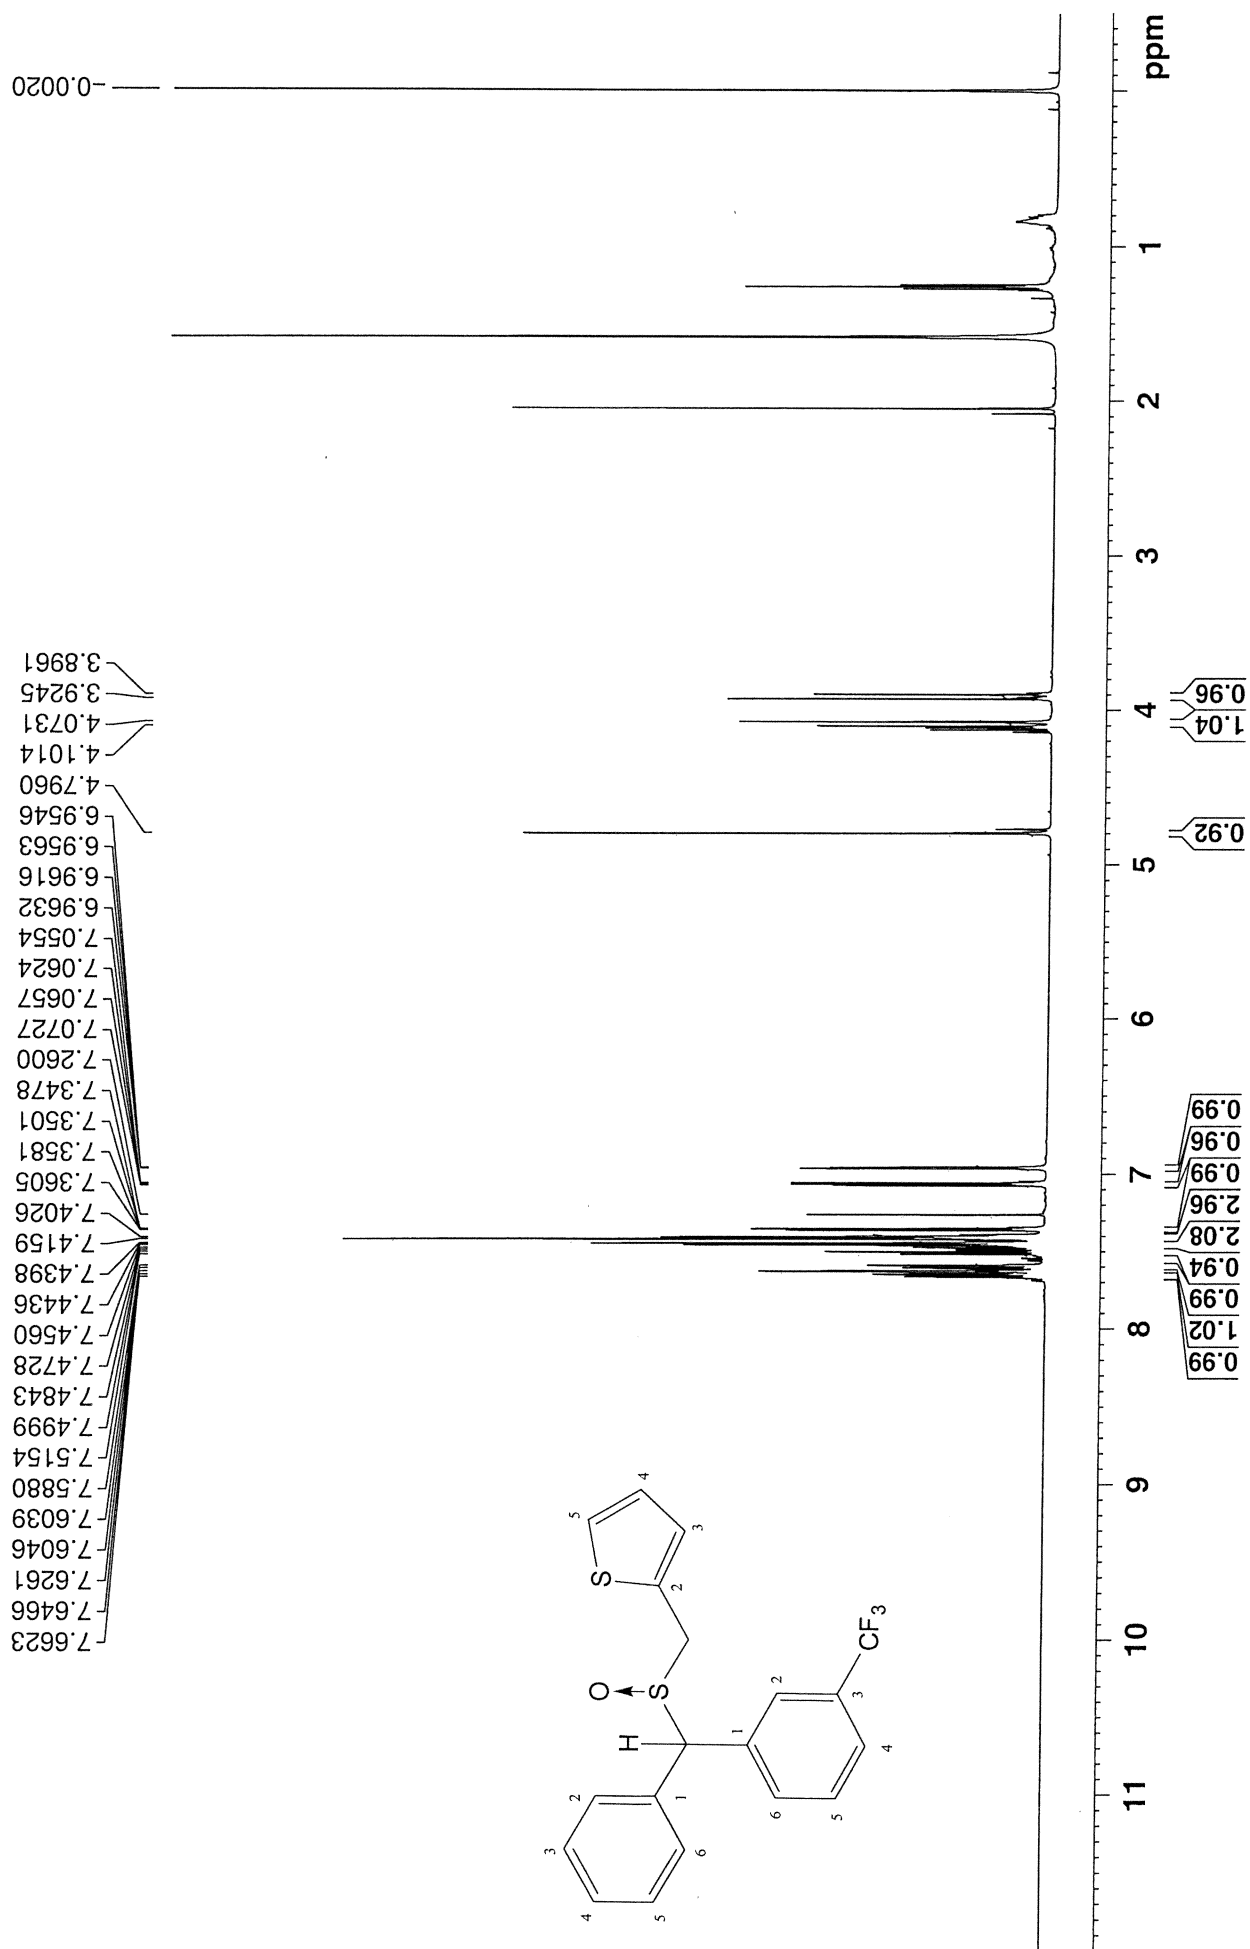

7.6623  
7.6466  
7.6261  
7.6046  
7.6039  
7.5880  
7.5154  
7.4999  
7.4843  
7.4728  
7.4560  
7.4436  
7.4398  
7.4159  
7.4026  
7.3605  
7.3581  
7.3501  
7.3478  
7.2600  
7.0727  
7.0657  
7.0624  
7.0554  
6.9632  
6.9616  
6.9563  
6.9546

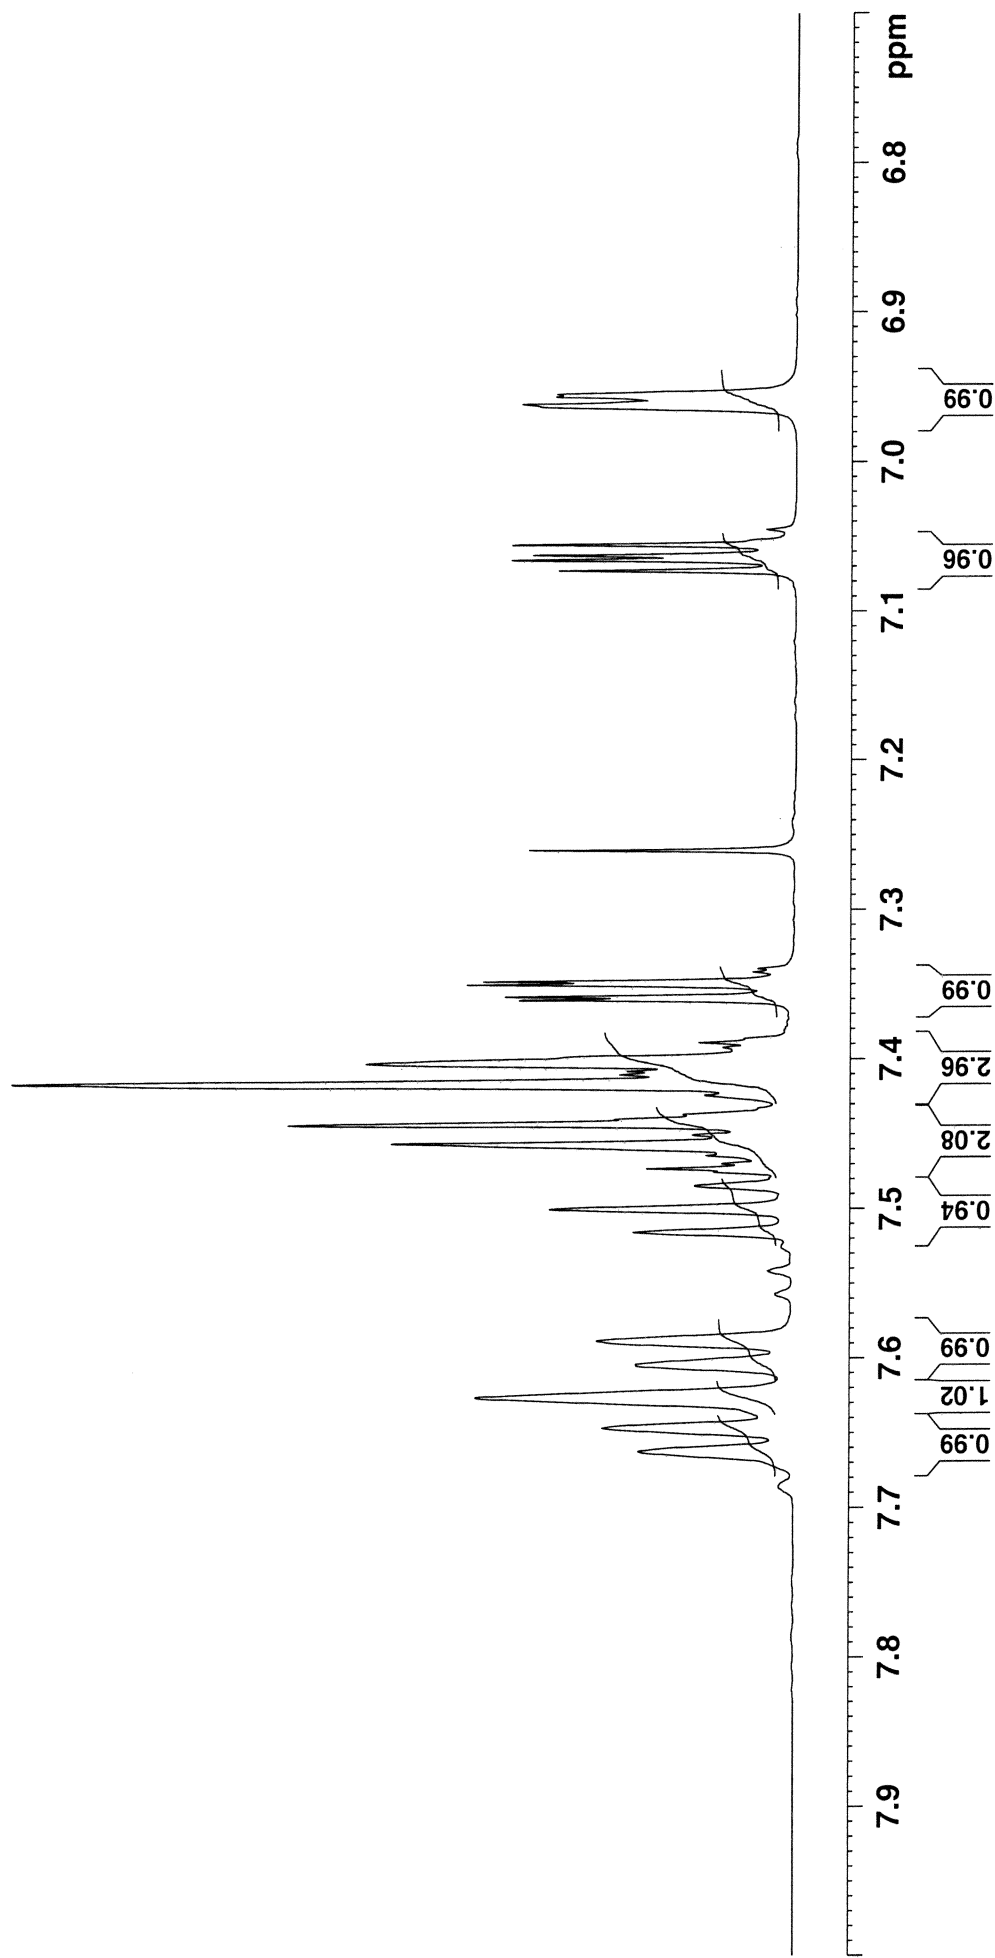

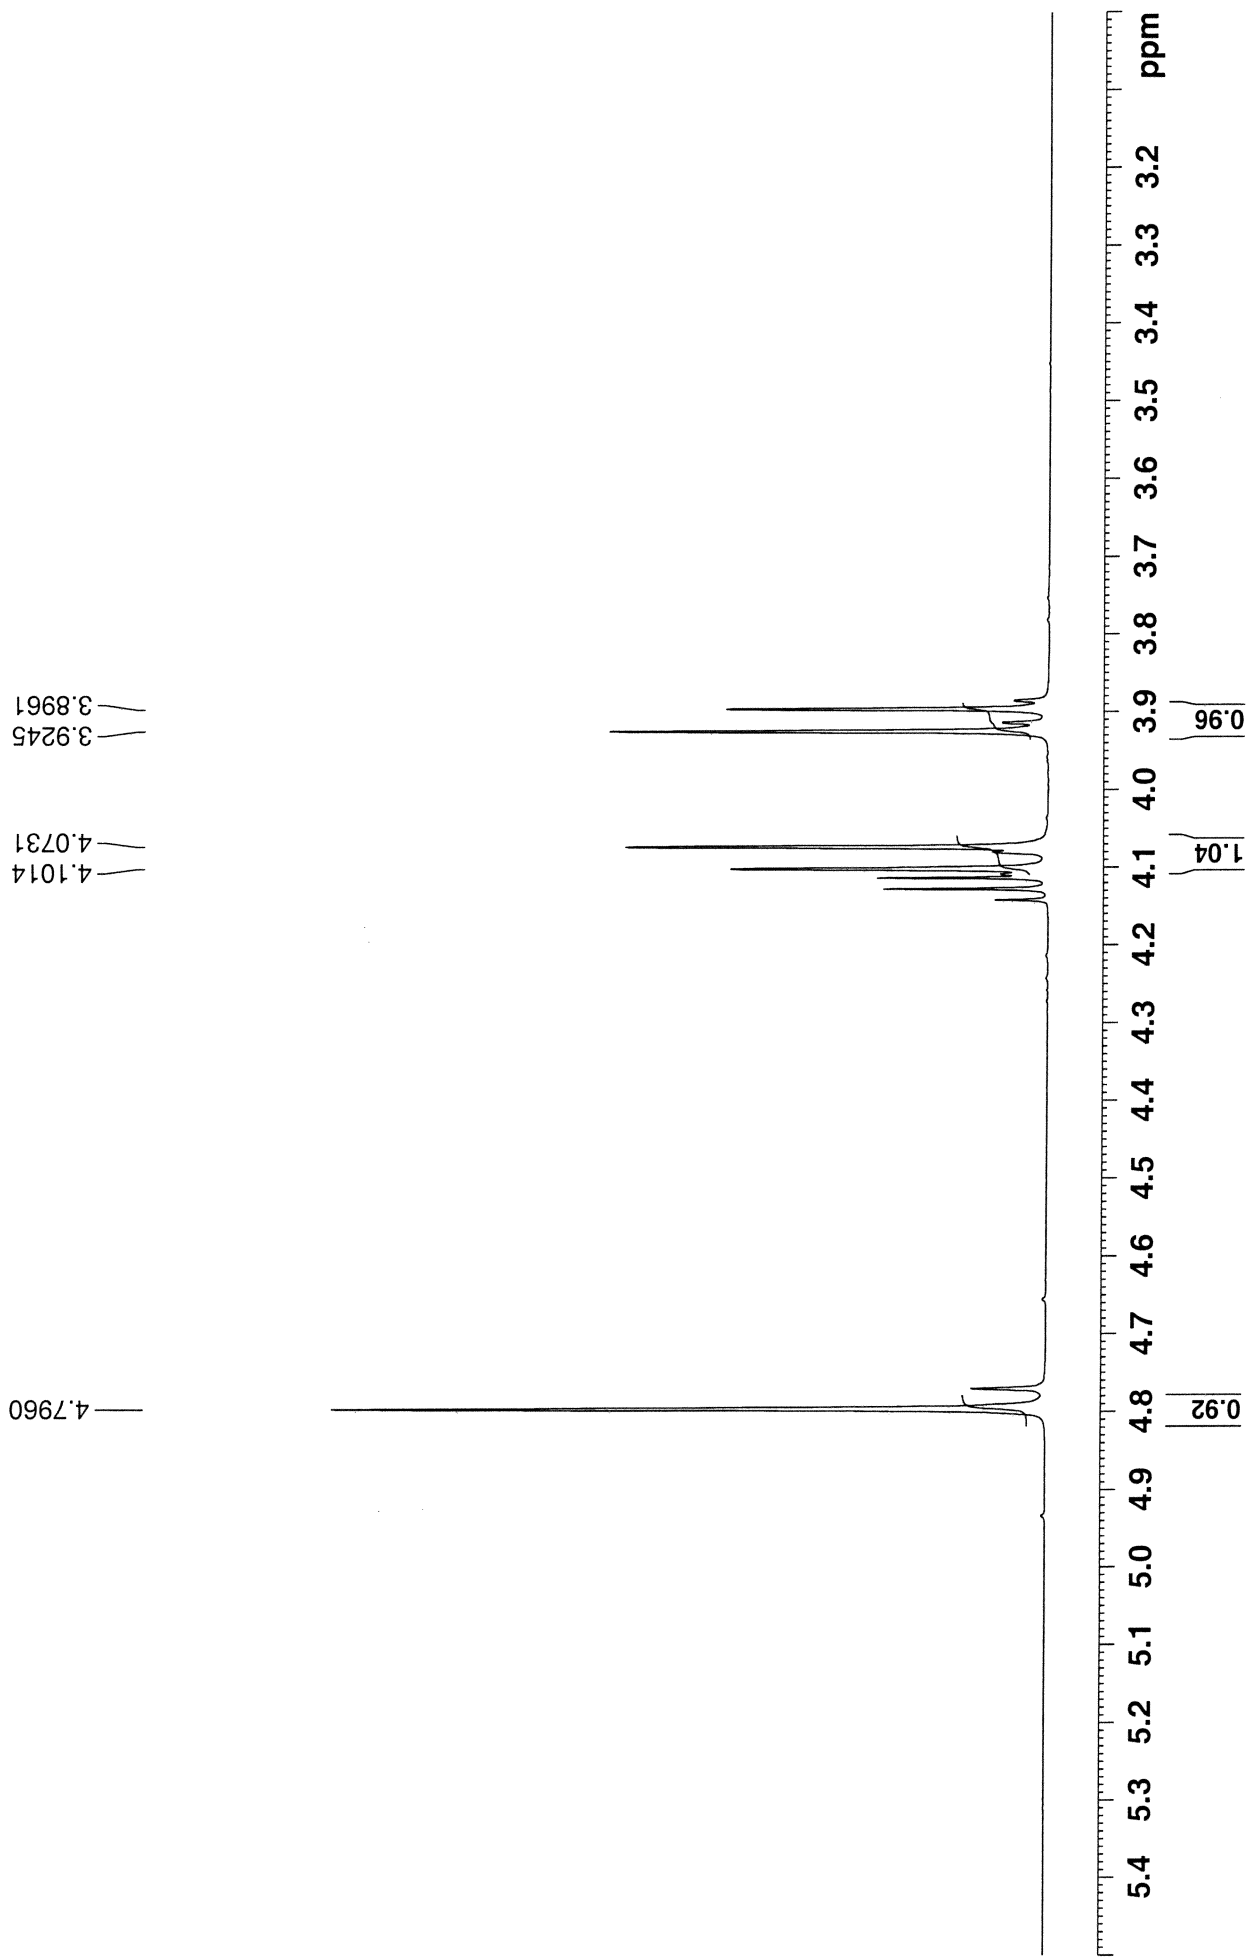



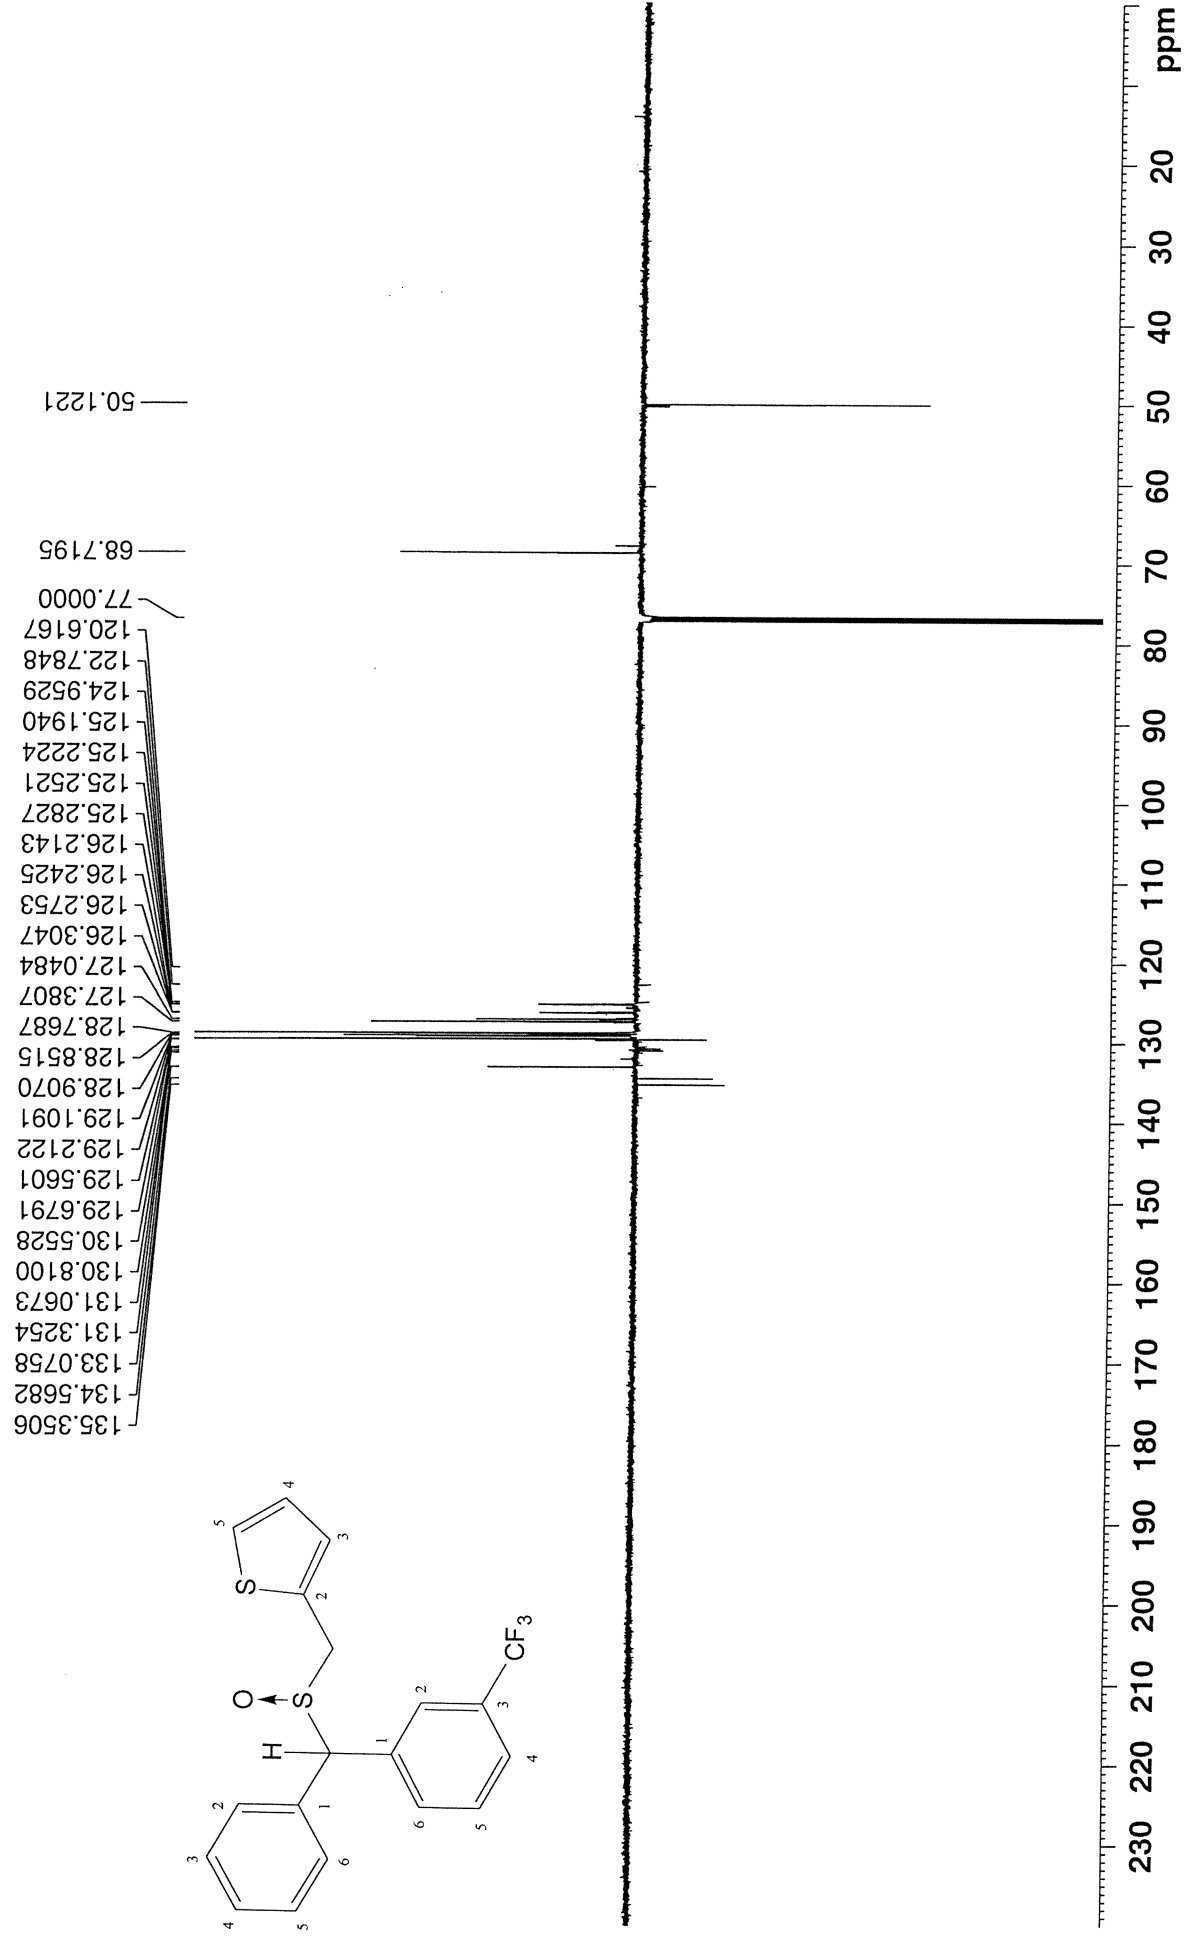

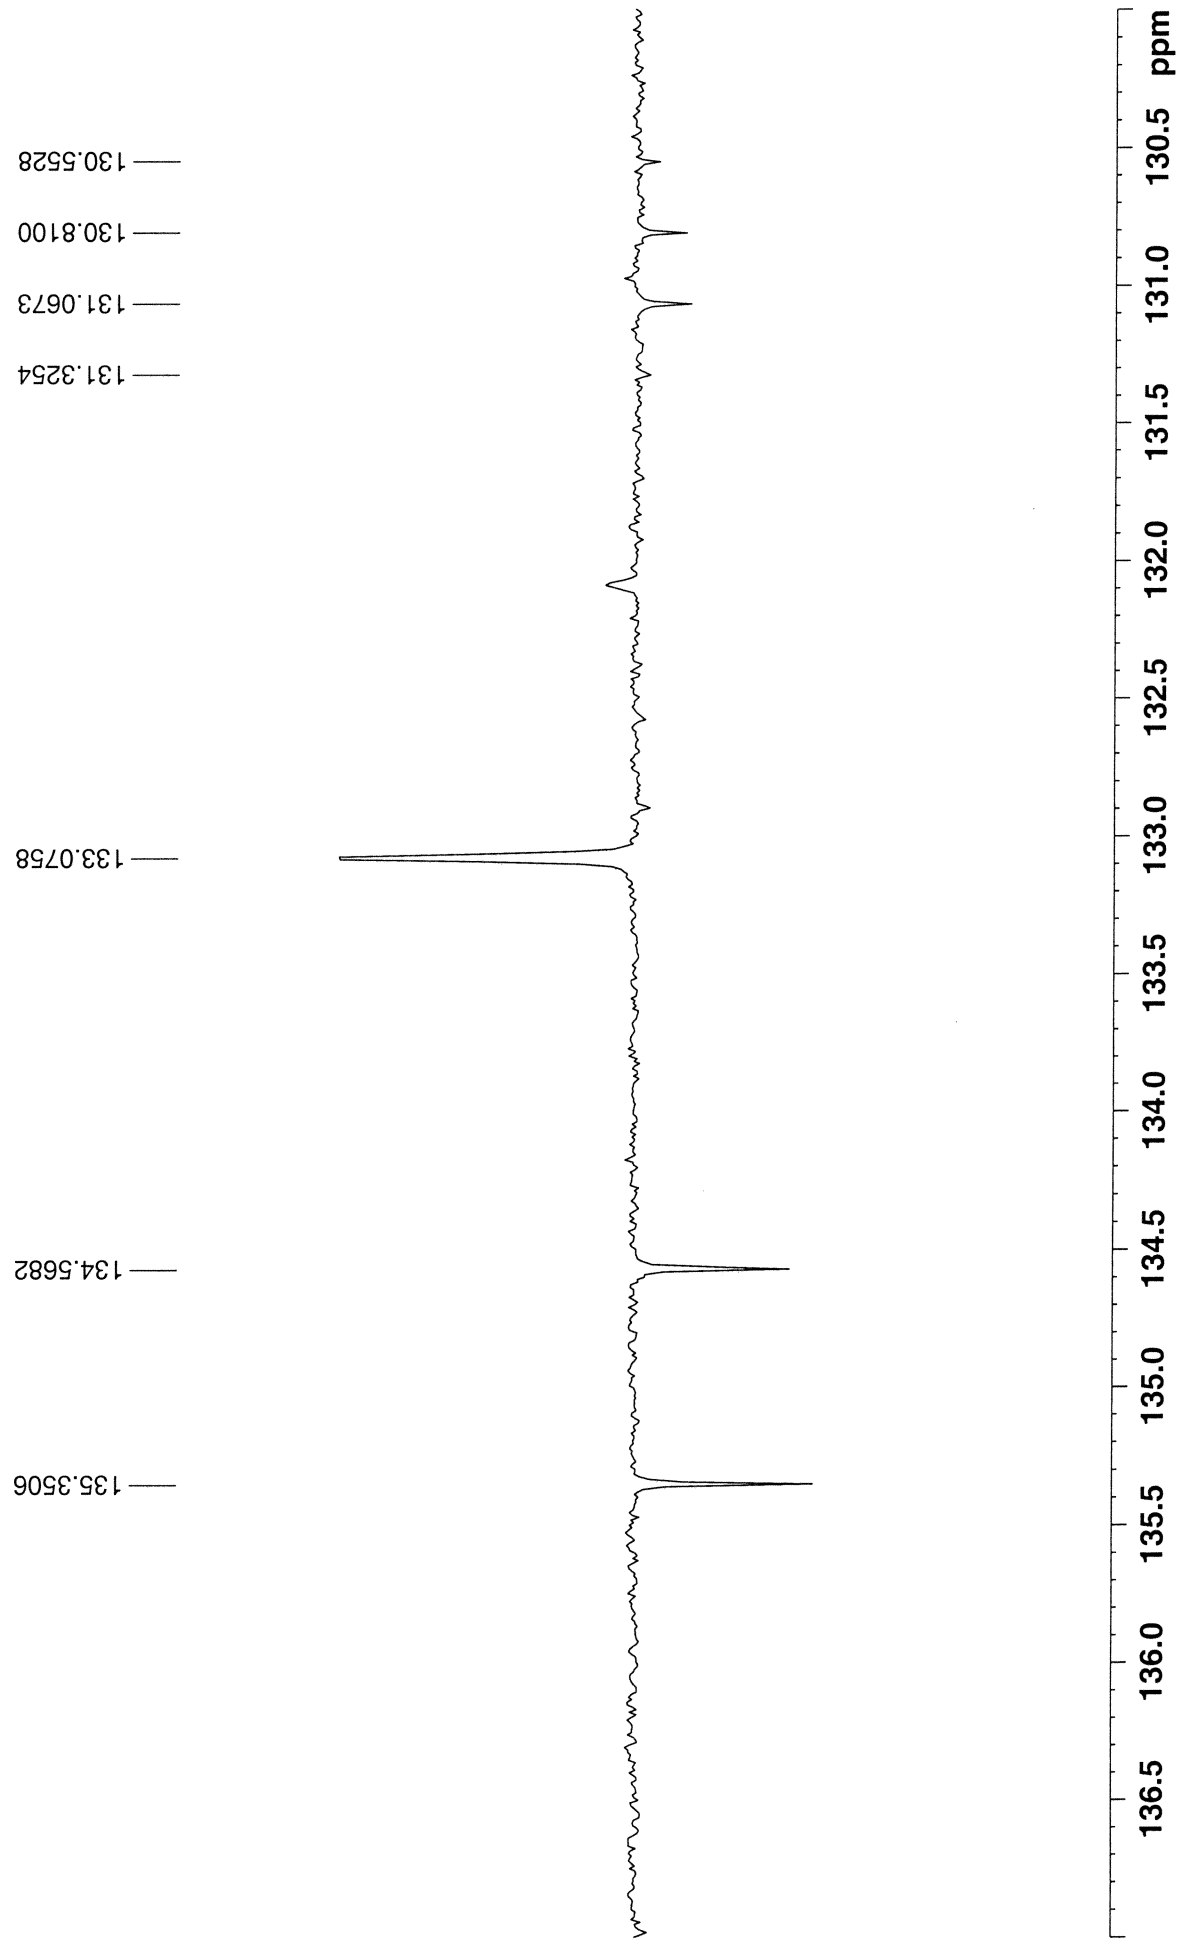

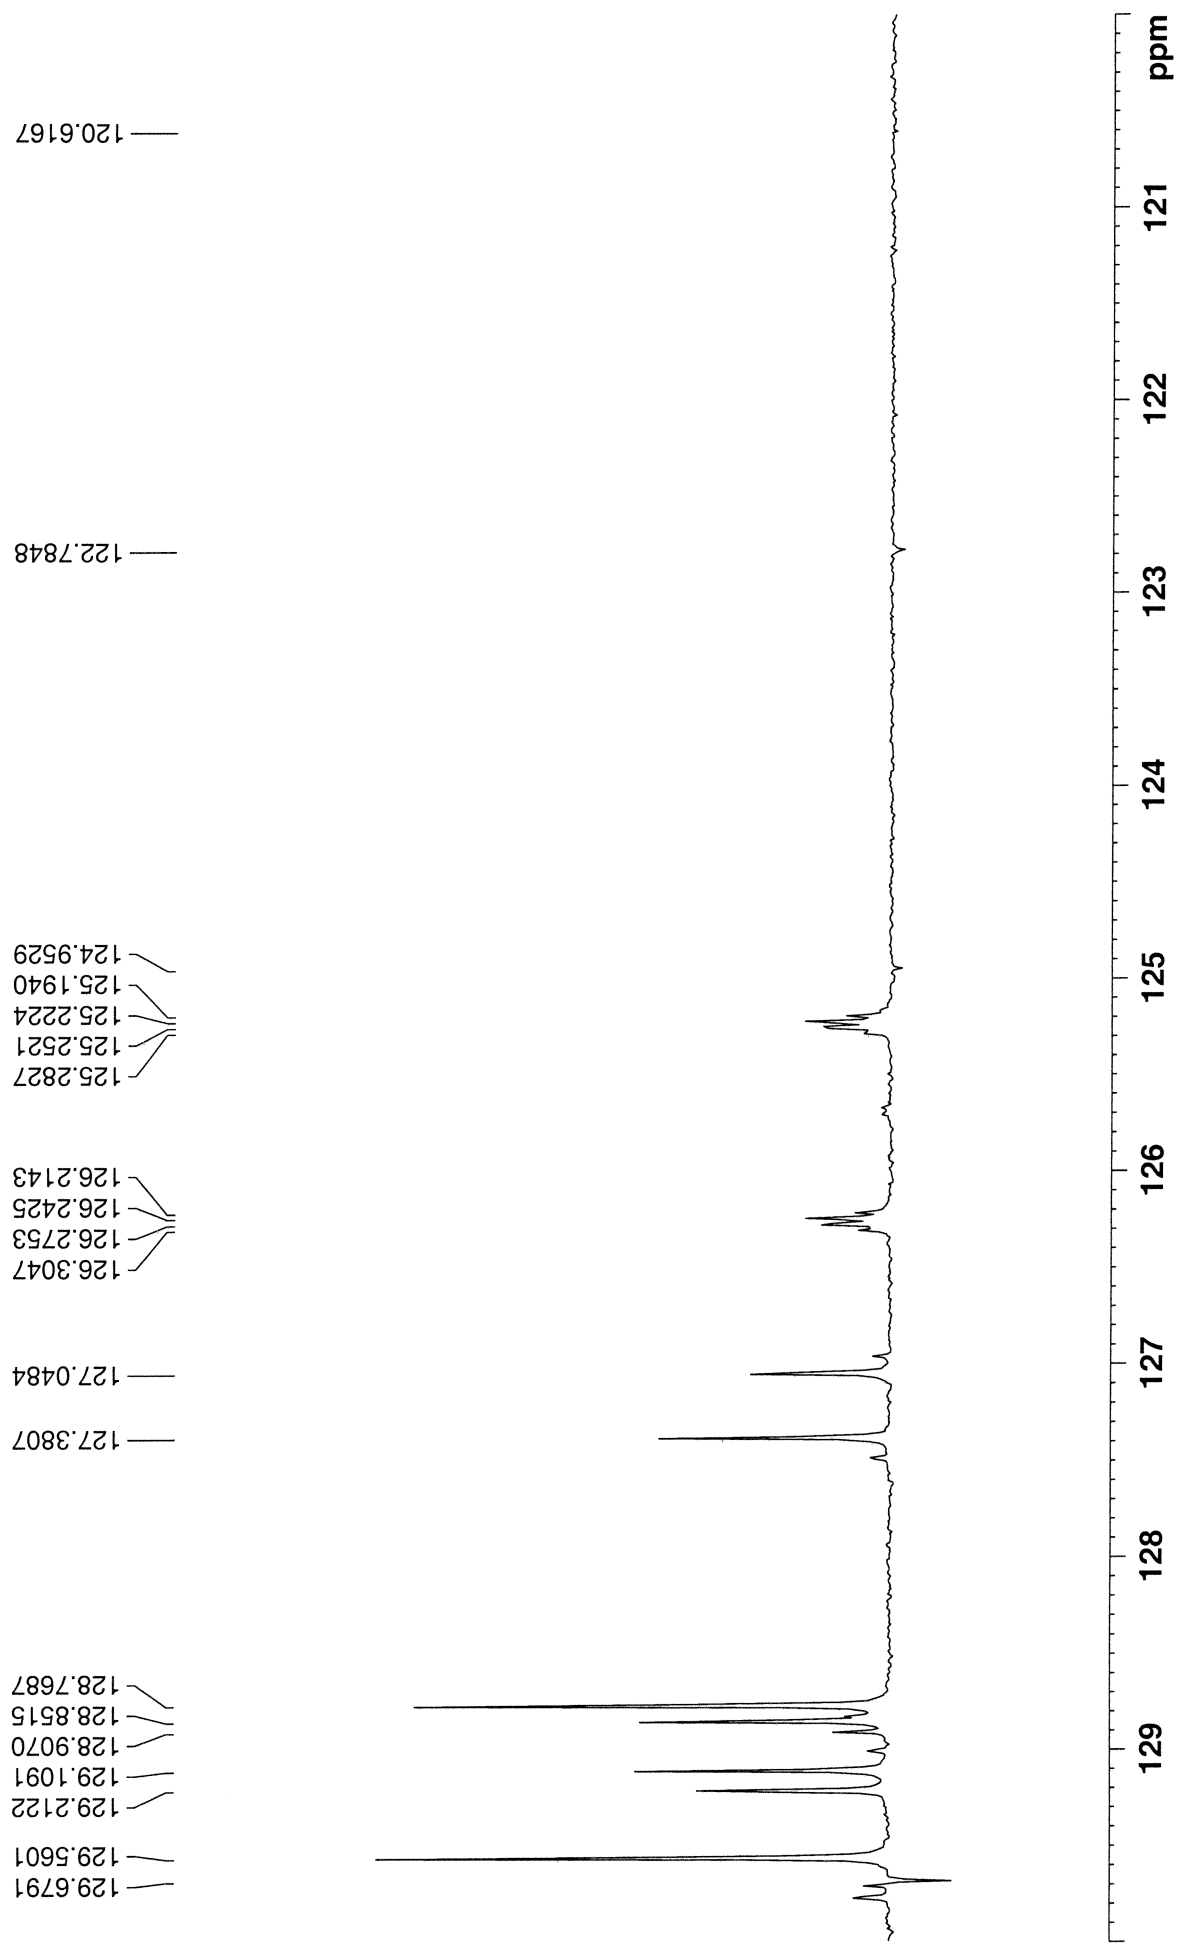

PN002S1P2 in cdcl3 (APT) 17.5.2019

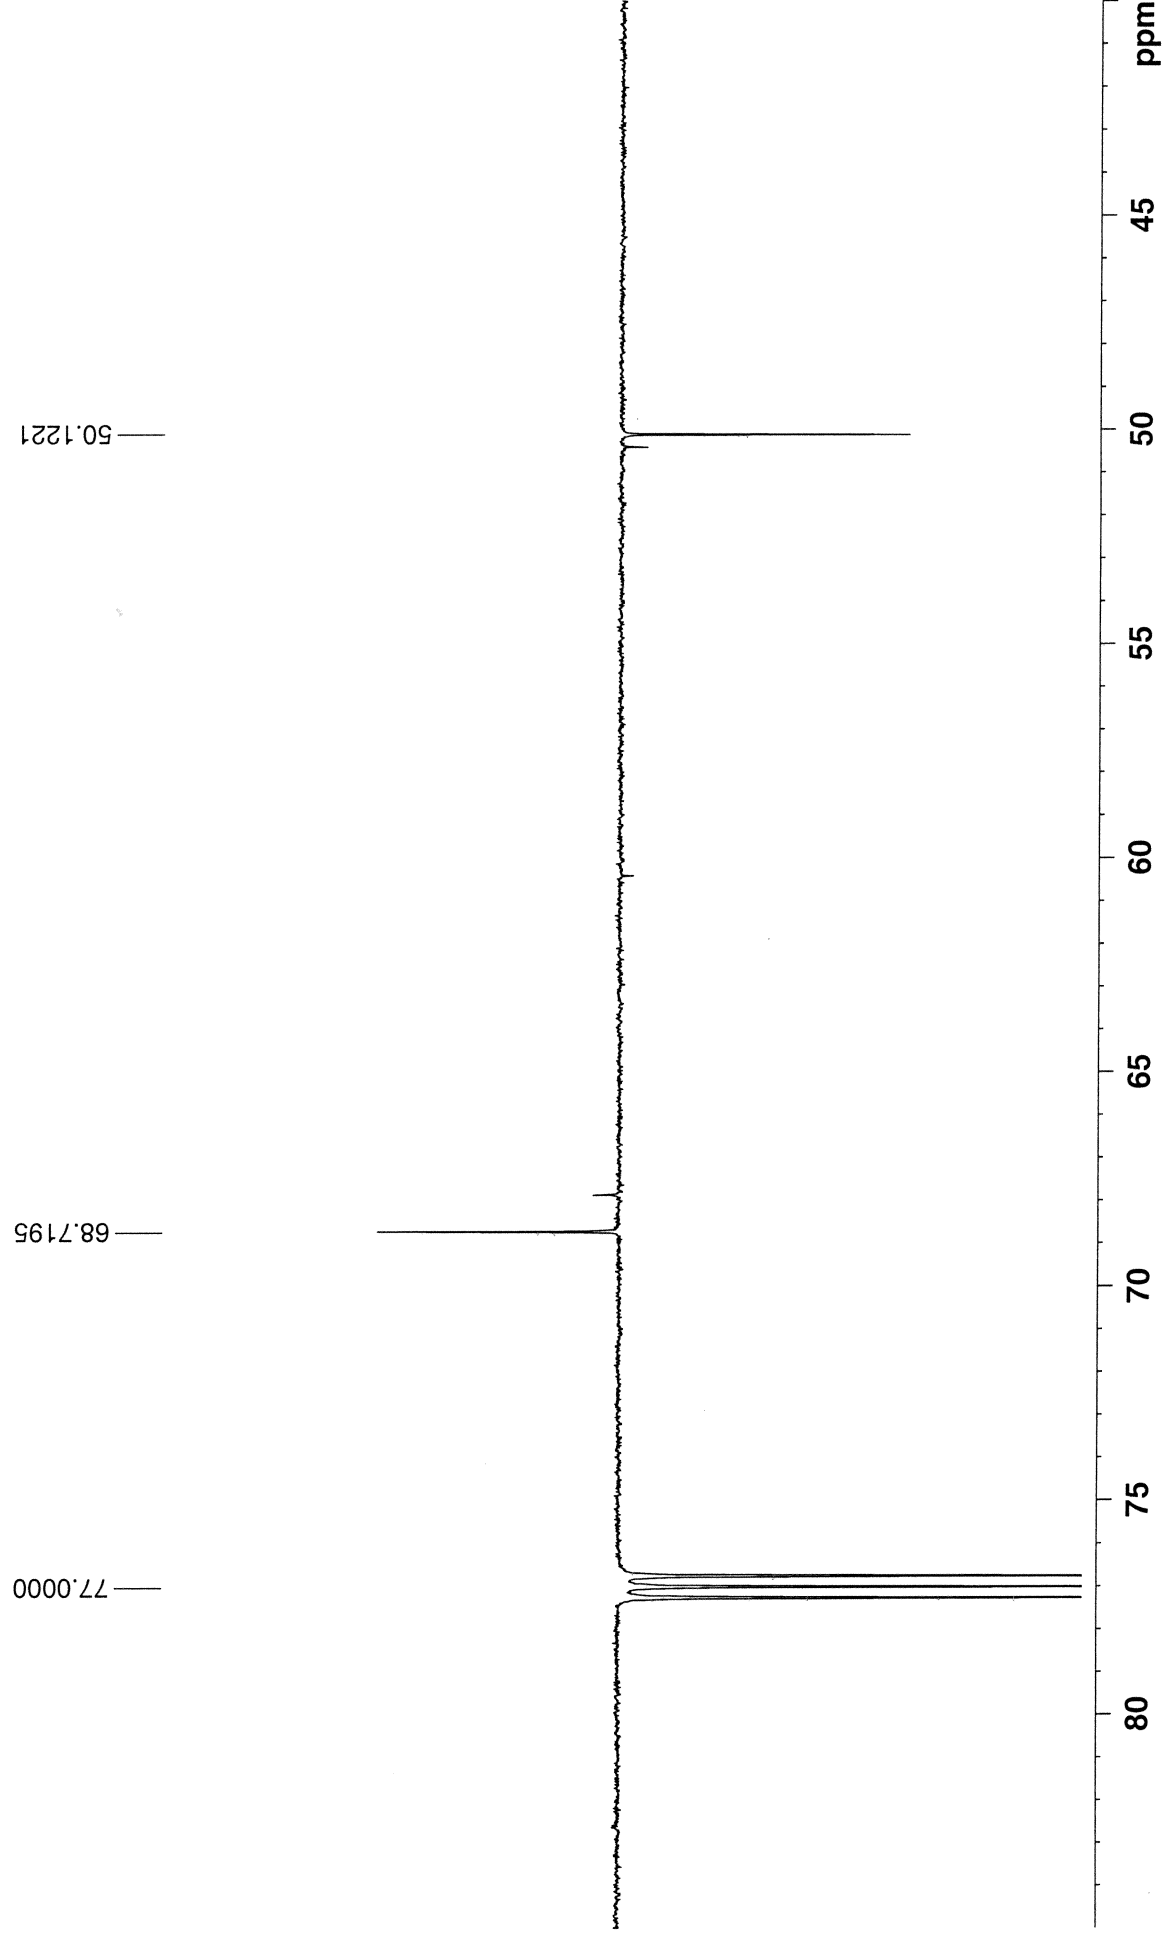

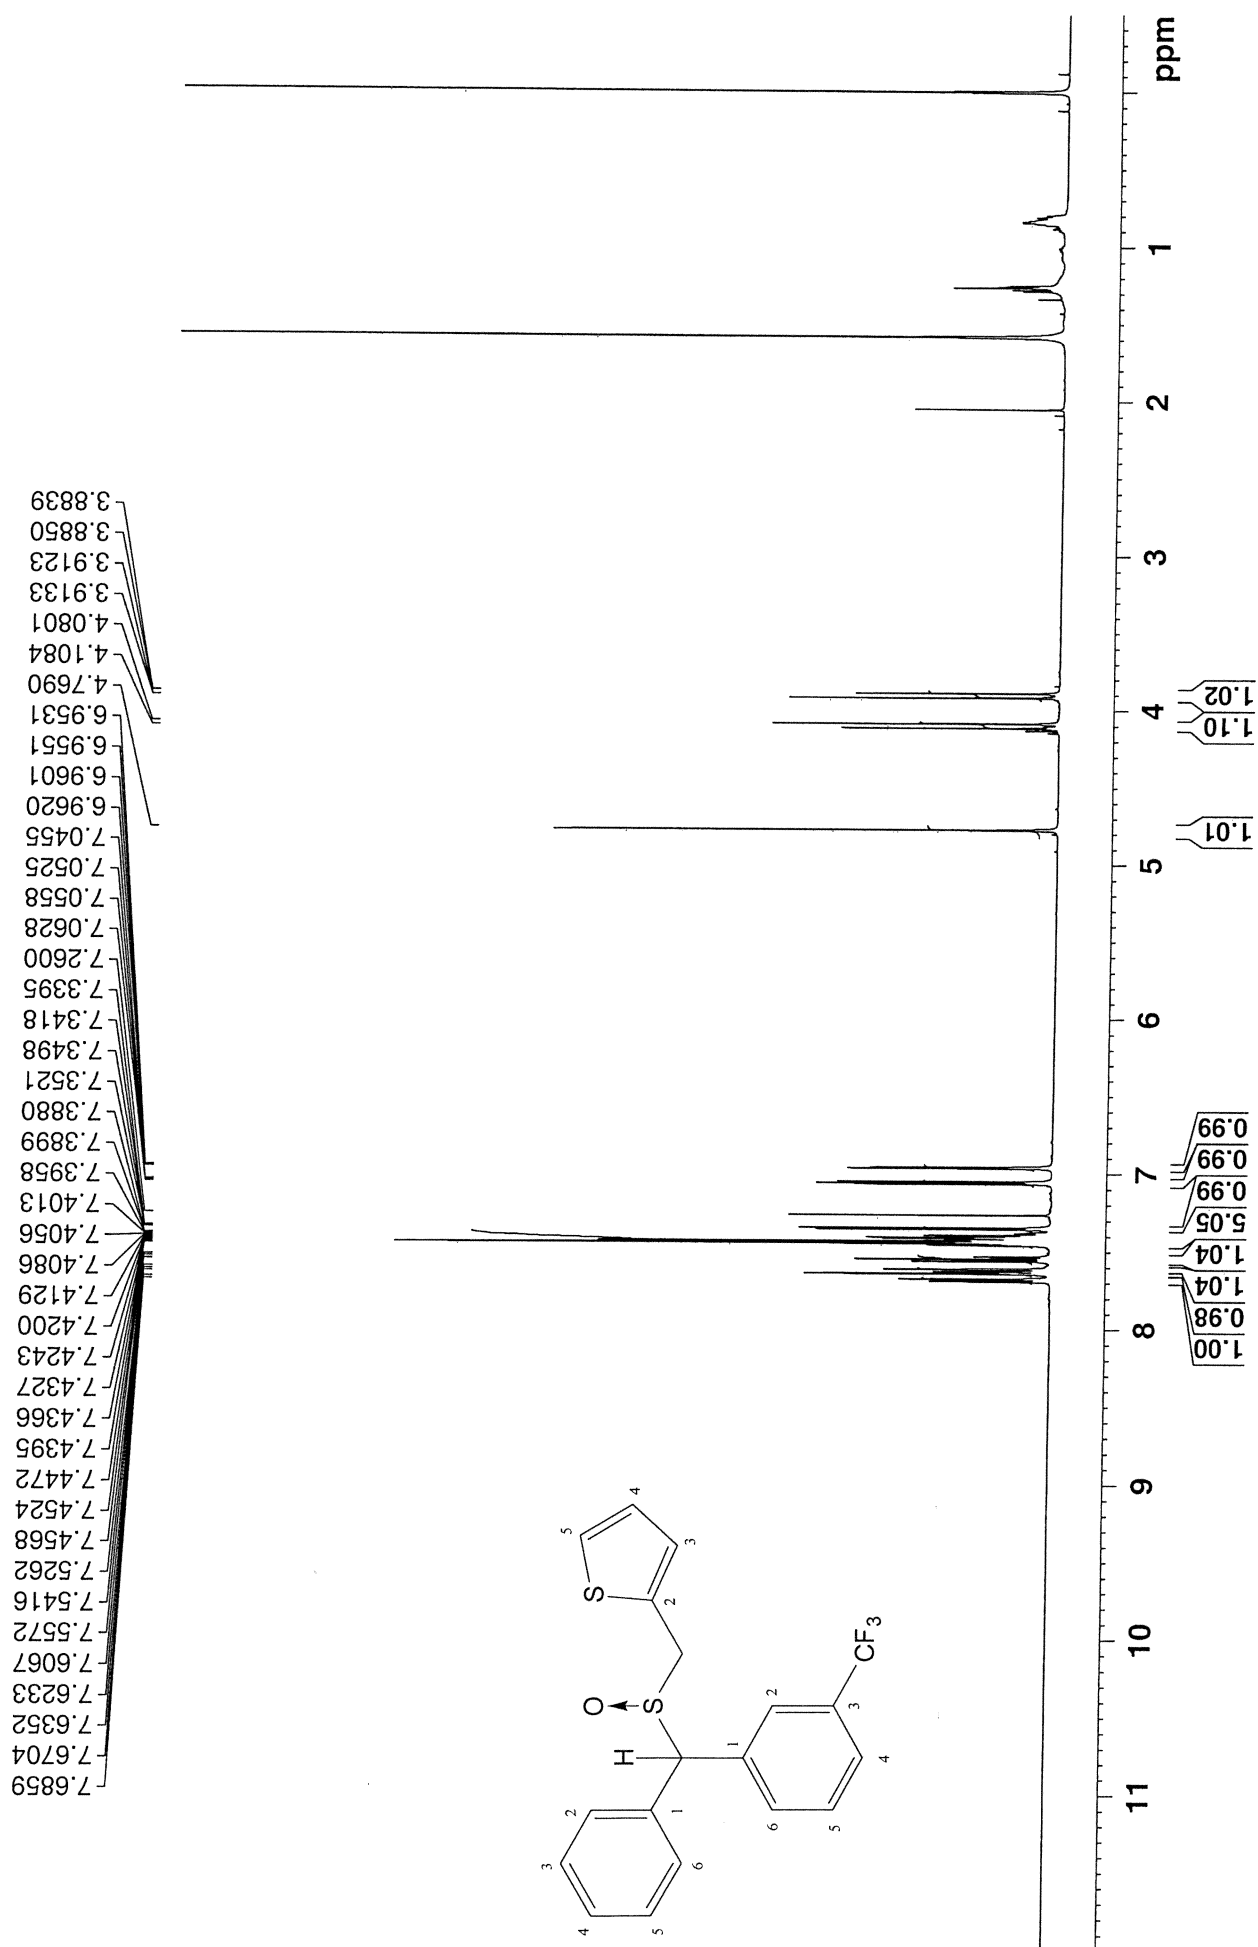

7.6859  
7.6704  
7.6352  
7.6233  
7.6067  
7.5572  
7.5416  
7.5262  
7.4568  
7.4524  
7.4472  
7.4395  
7.4366  
7.4327  
7.4243  
7.4200  
7.4129  
7.4086  
7.4056  
7.4013  
7.3958  
7.3899  
7.3880  
7.3521  
7.3498  
7.3418  
7.3395  
7.2600

7.0628  
7.0558  
7.0525  
7.0455  
6.9620  
6.9601  
6.9551  
6.9531

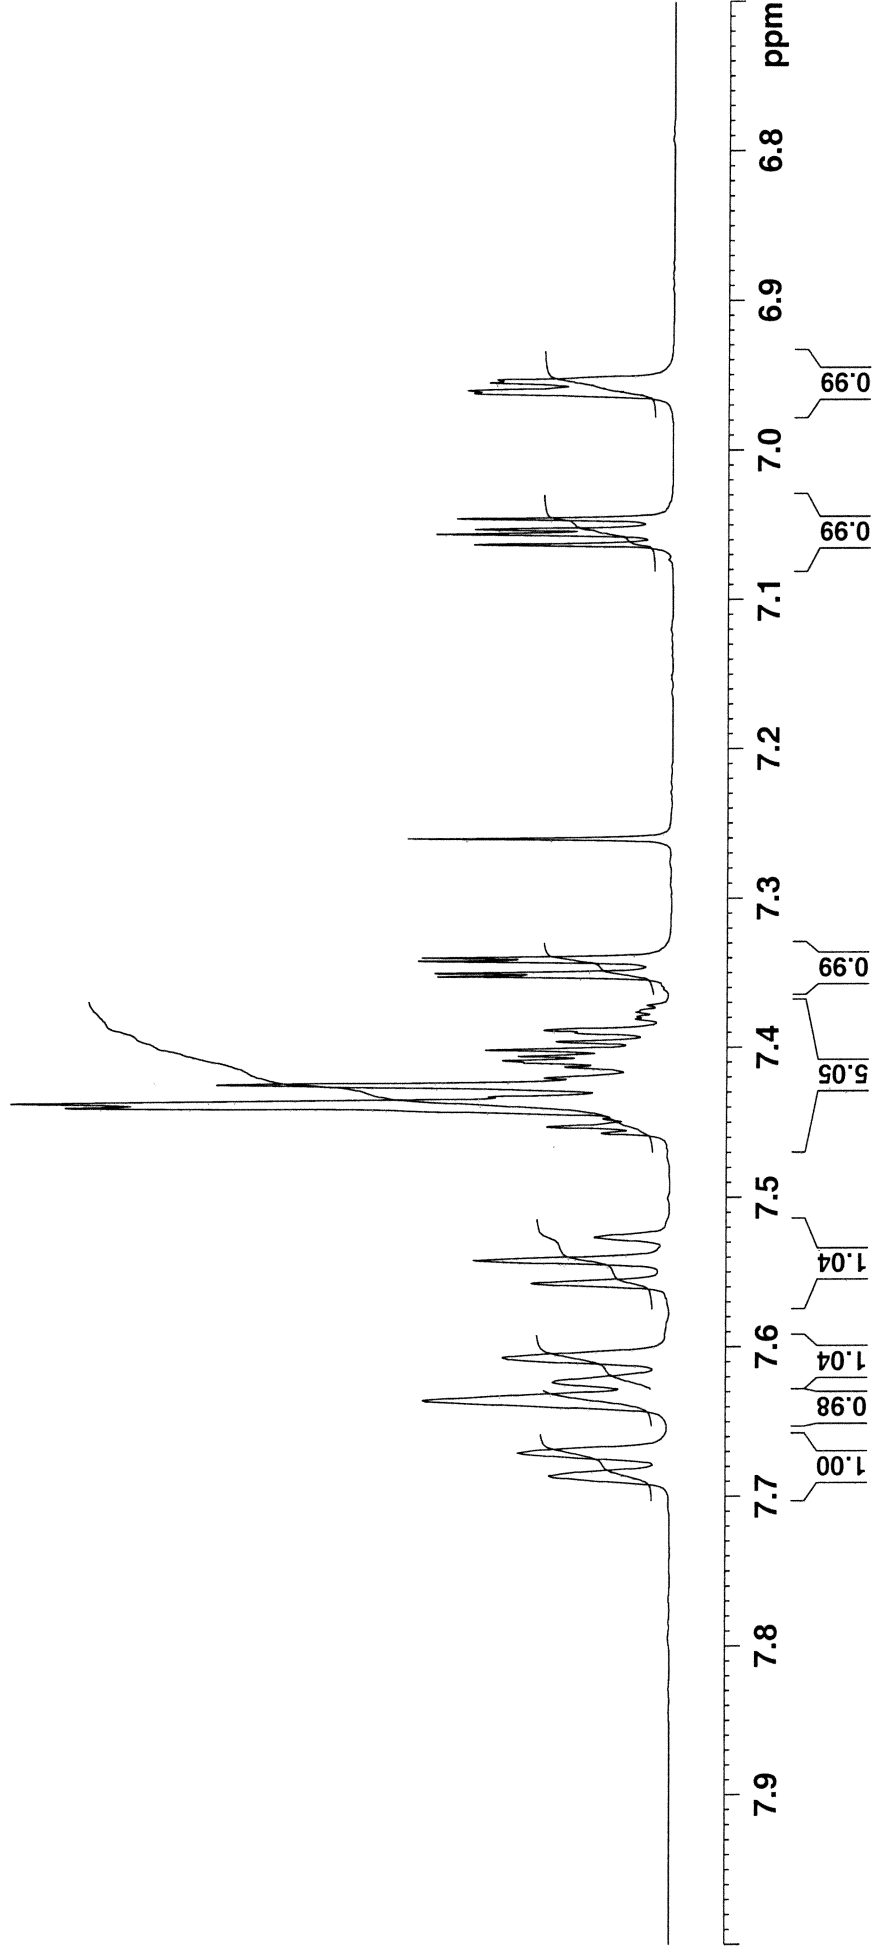

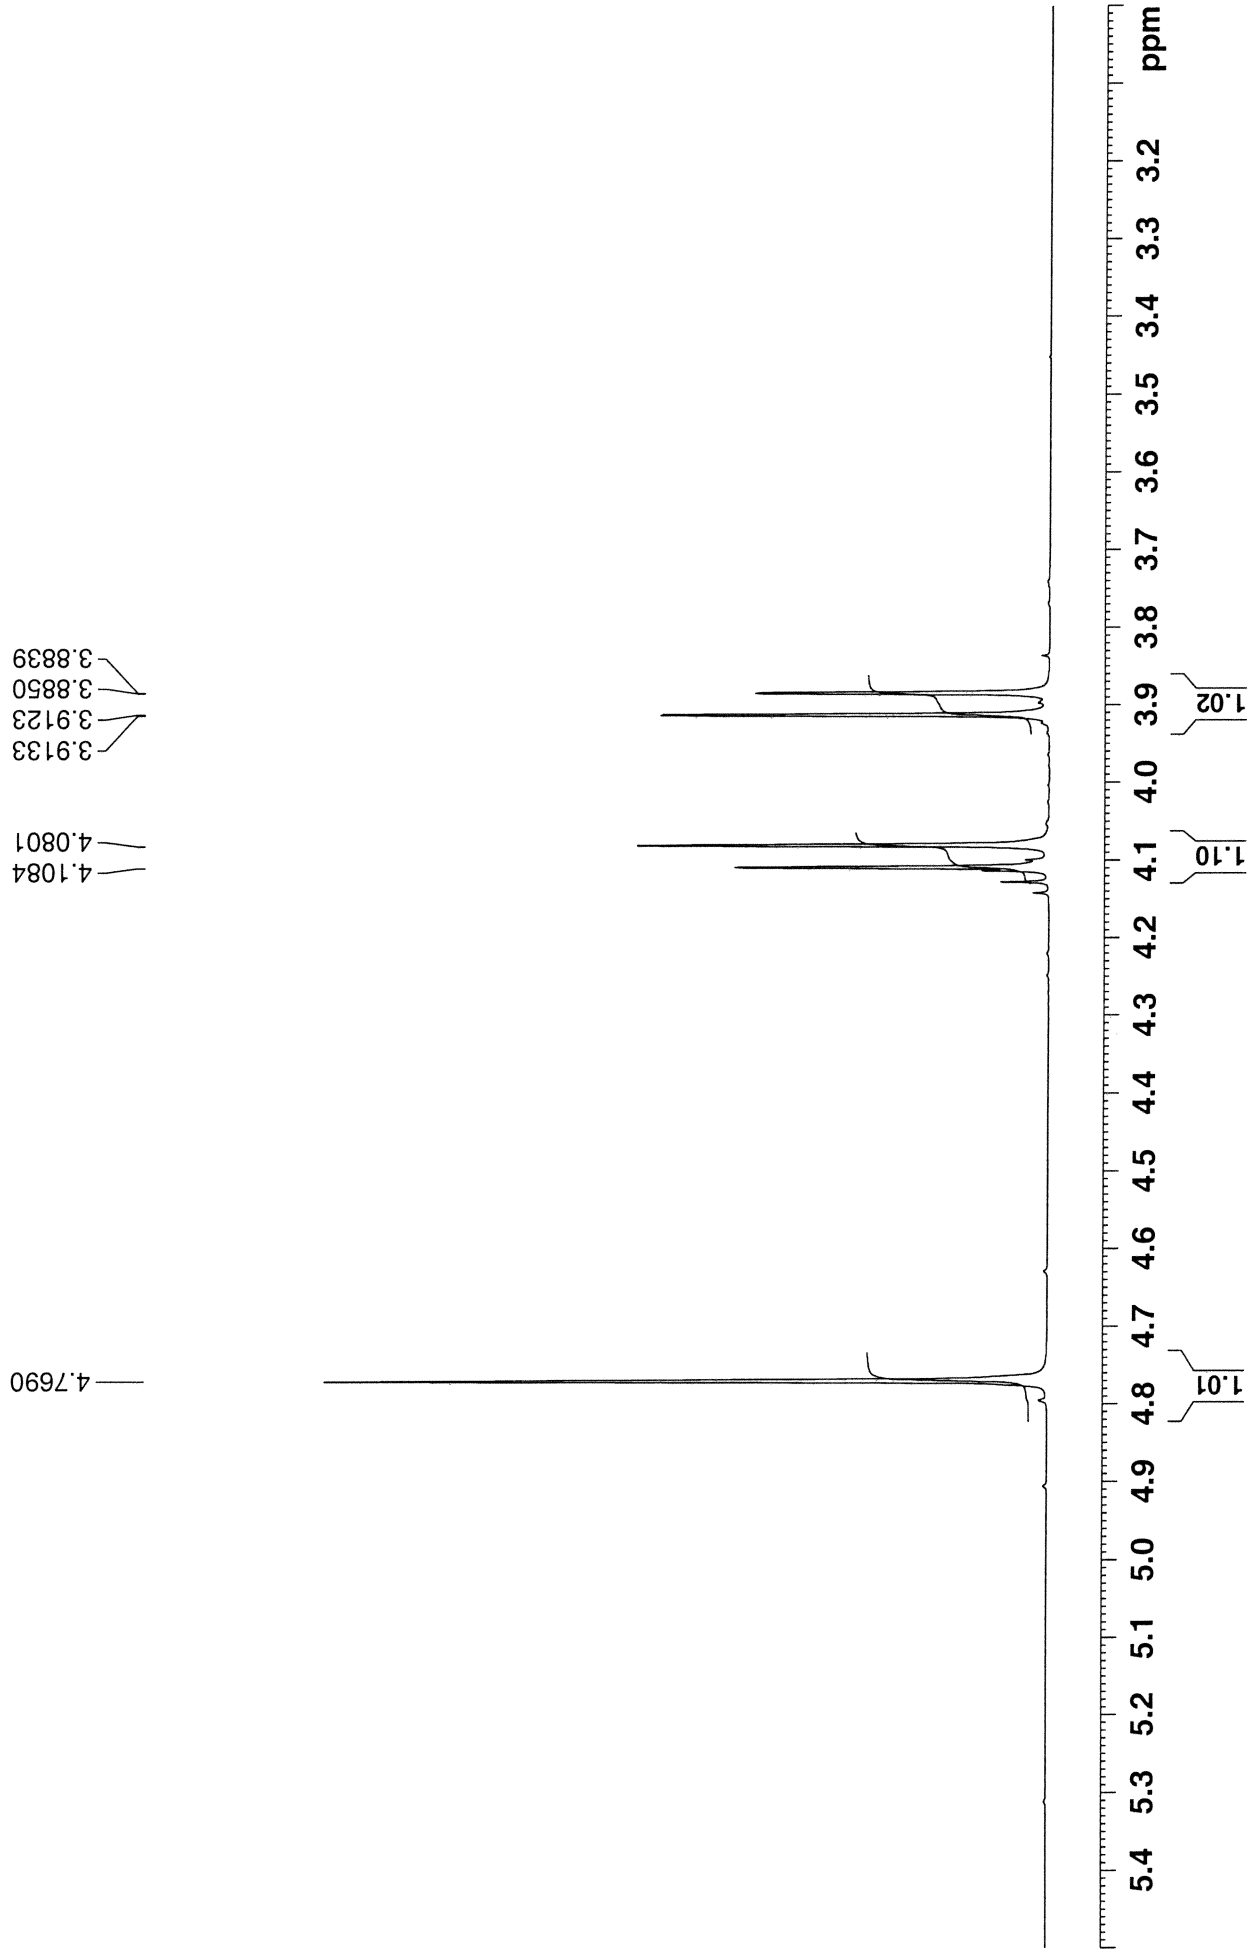

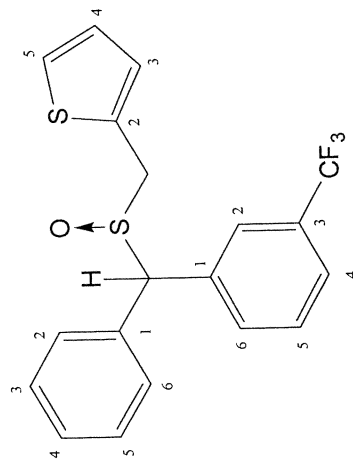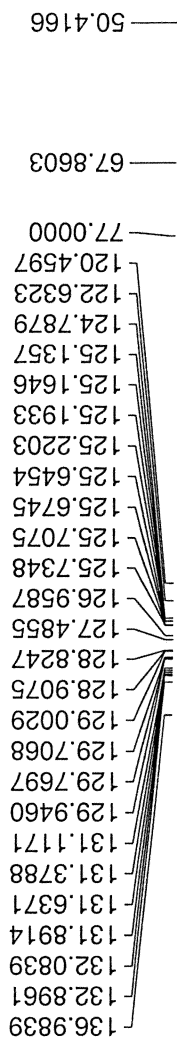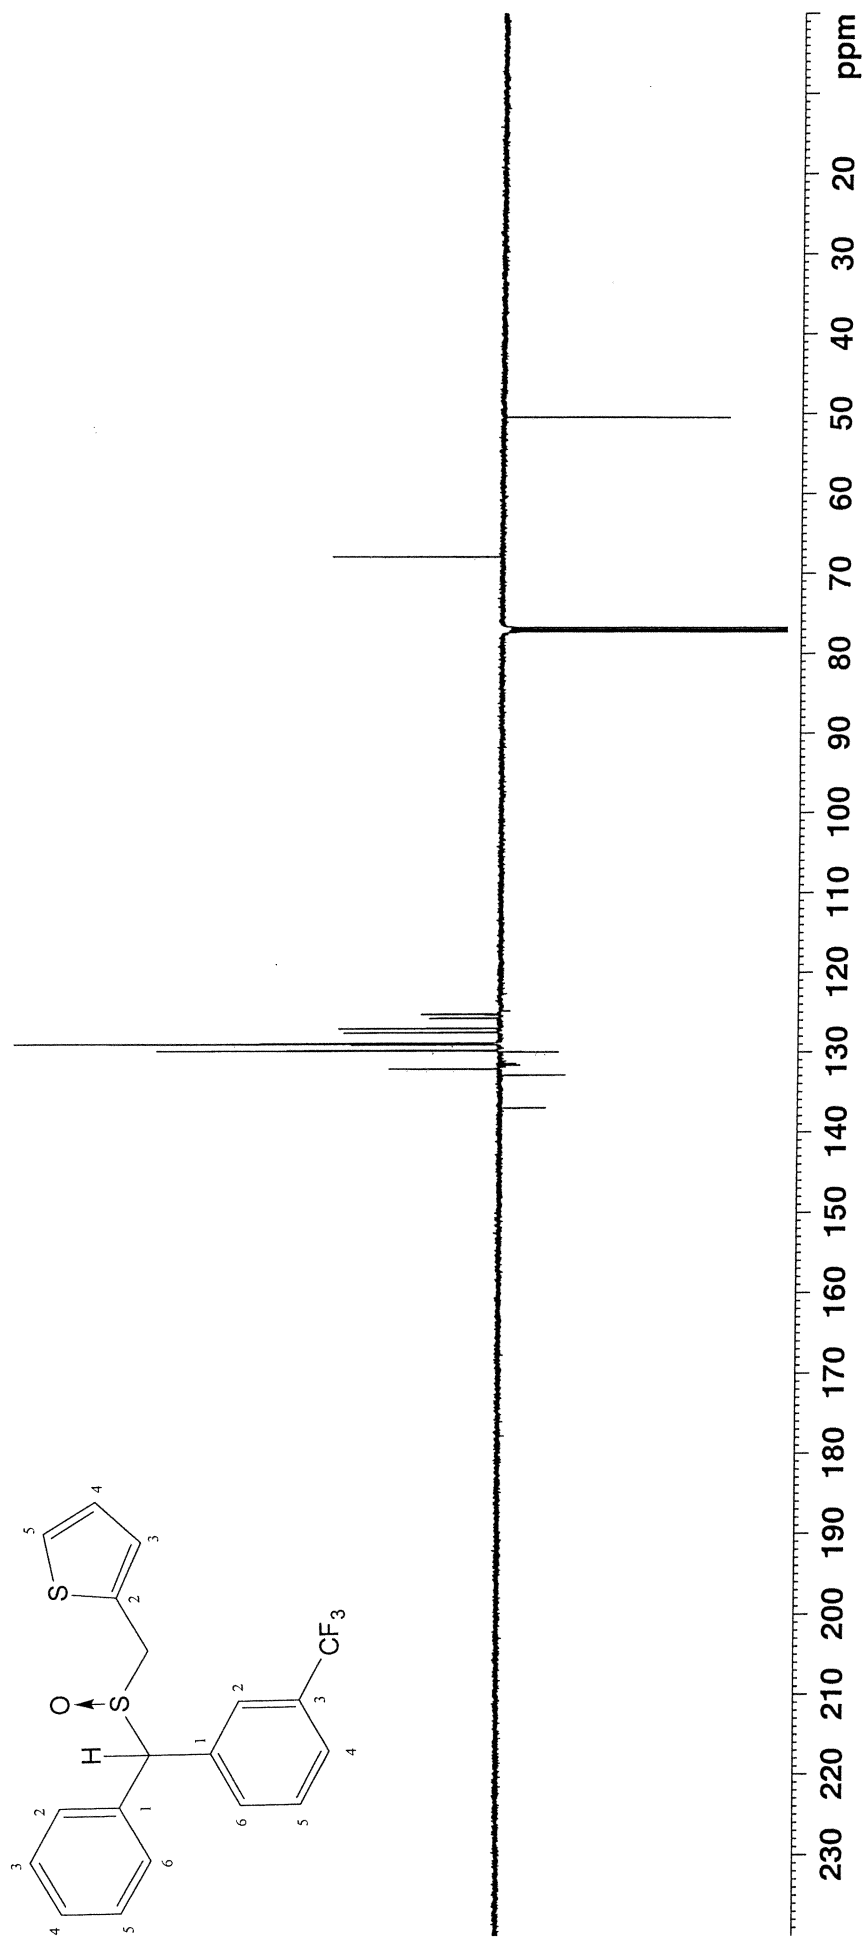



PN002S2P1 in cdcl3 (APT) 17.5.2019

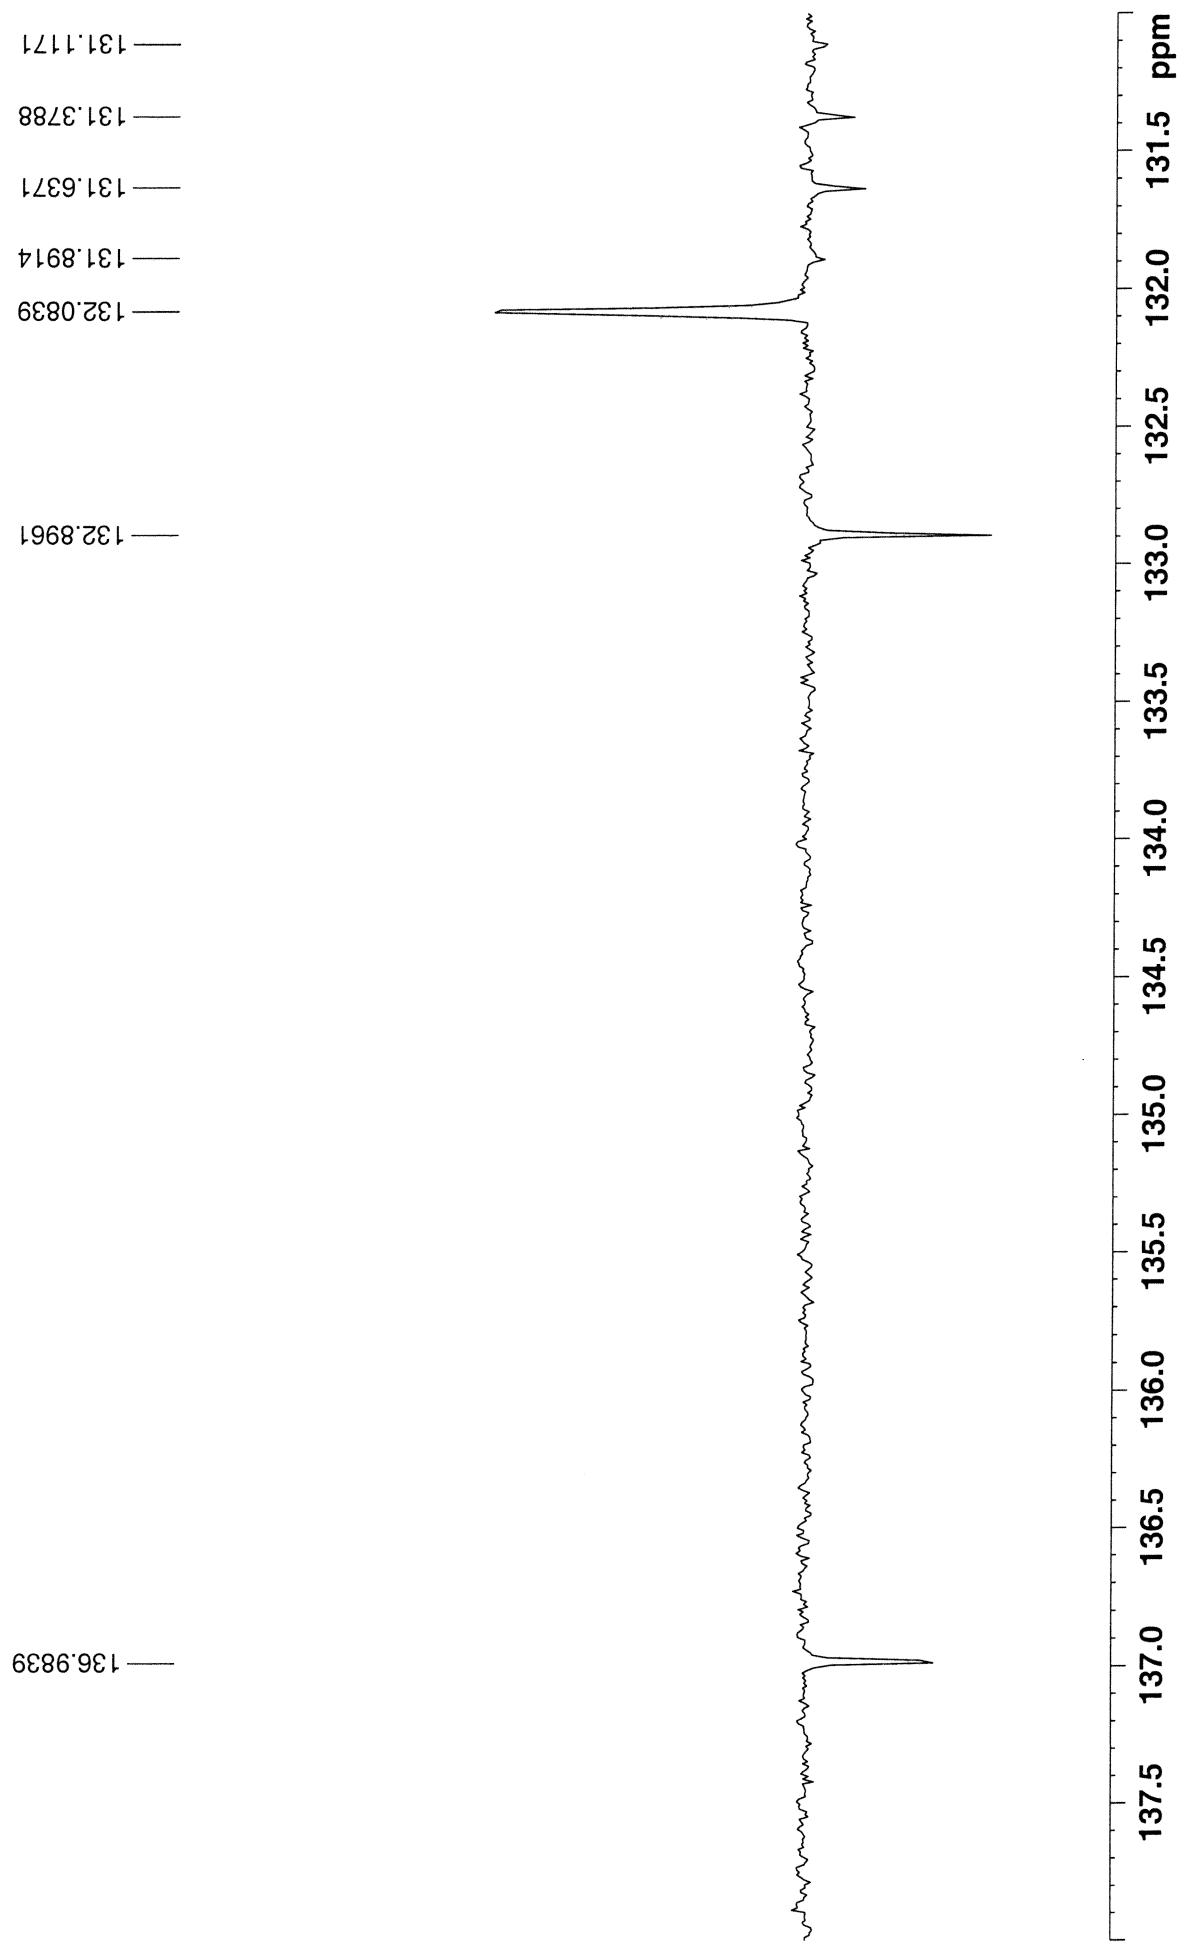

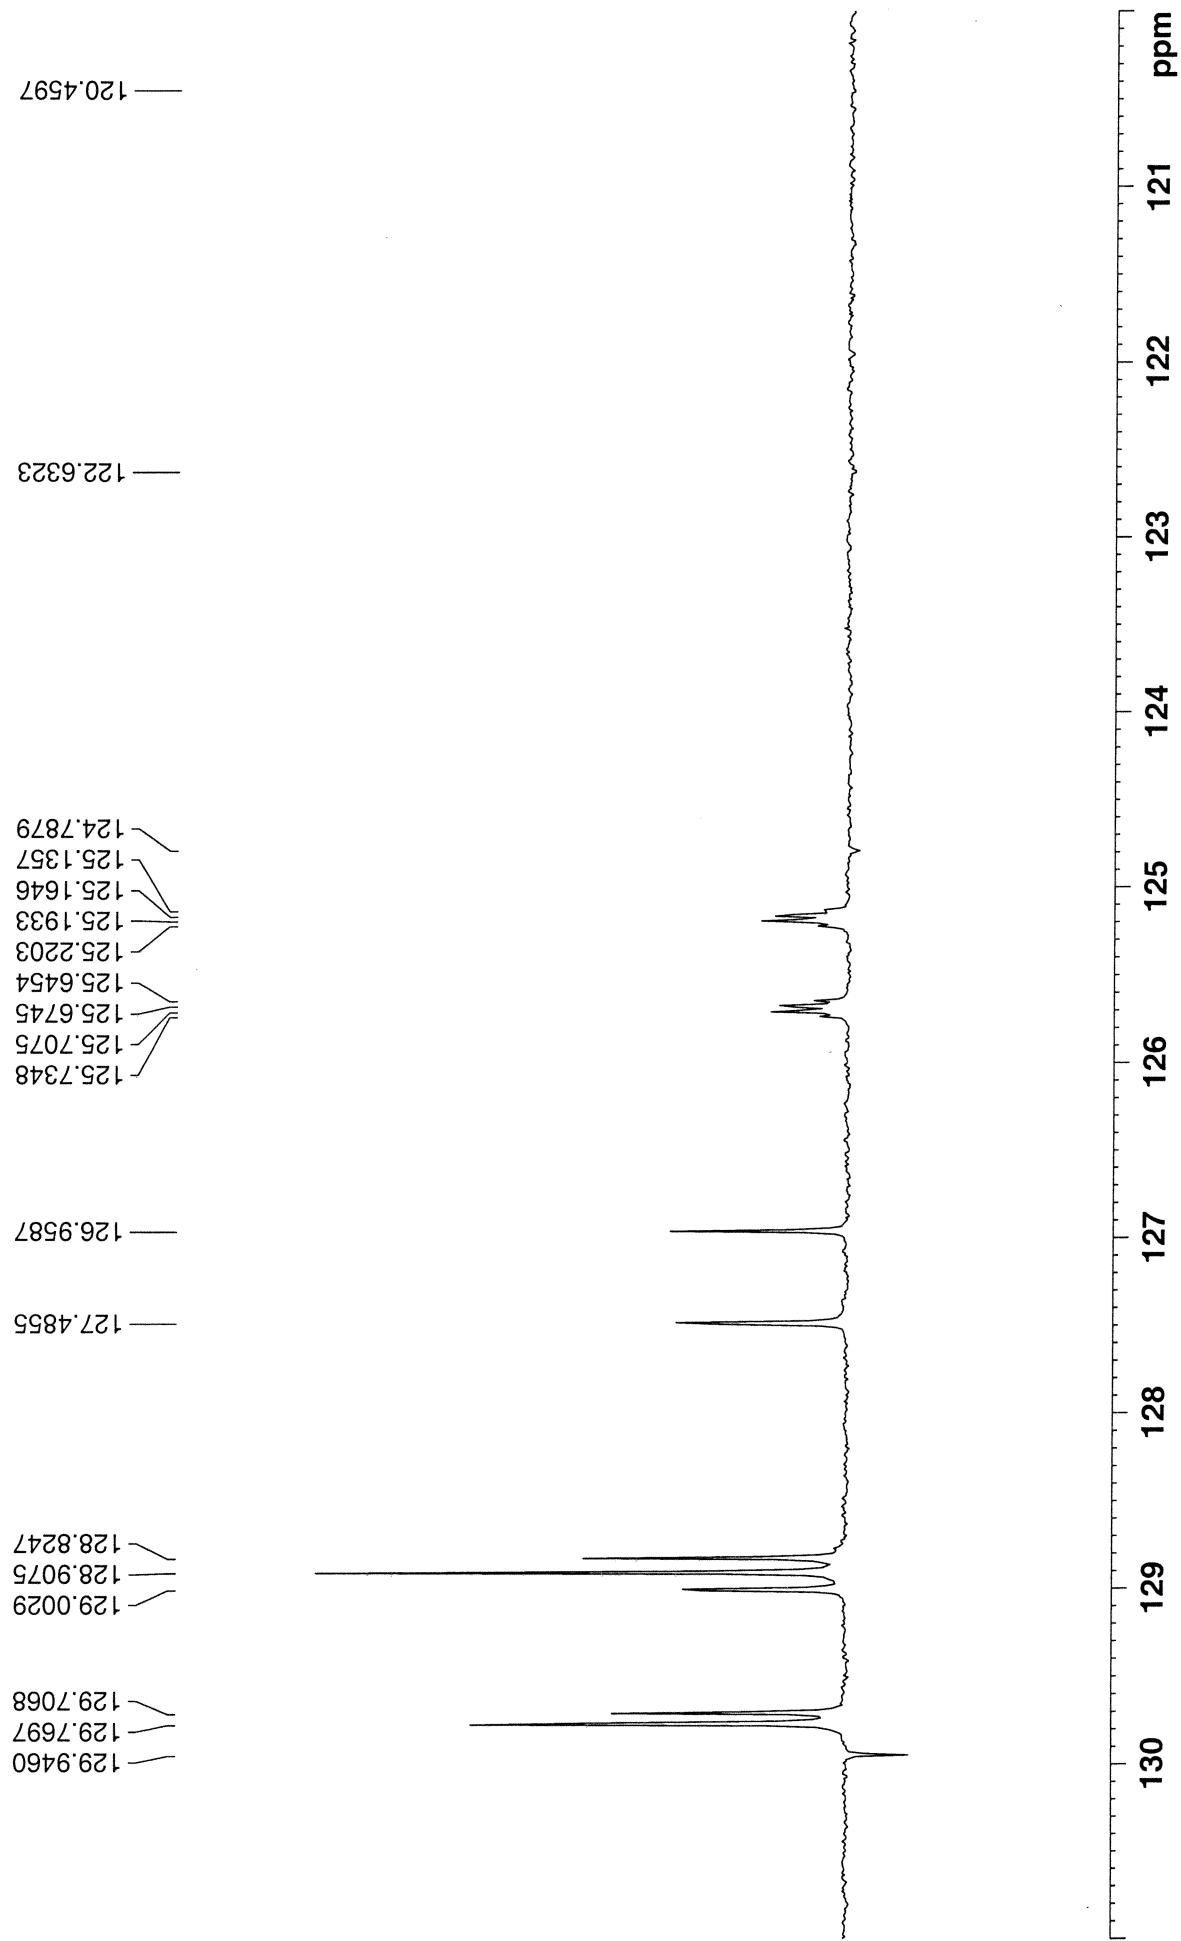

PN002S2P1 in cdcl3 (APT) 17.5.2019

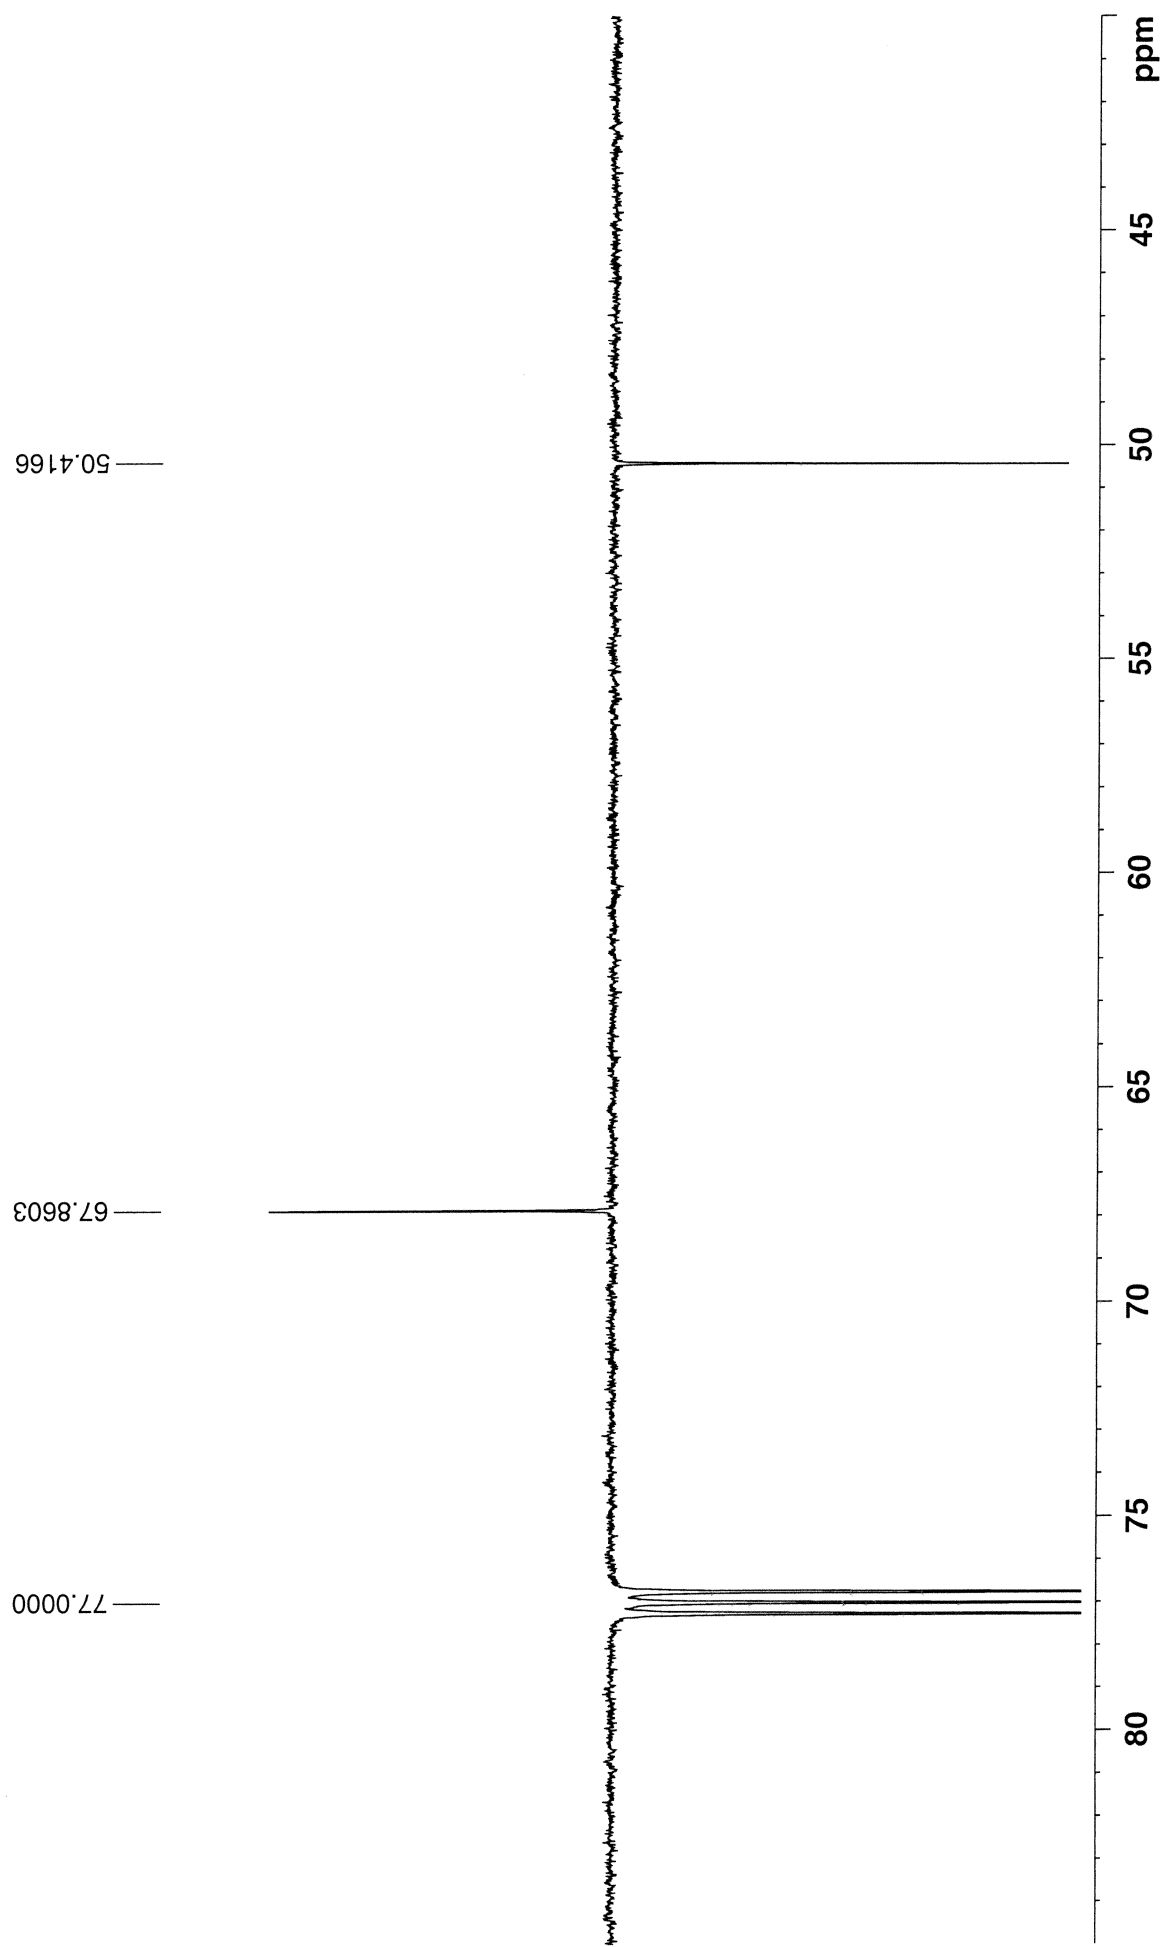

Figure S64c. NMR spectra of compound 8p.

PN002S2P2 in cdcl3 (Proton) 17.5.2019

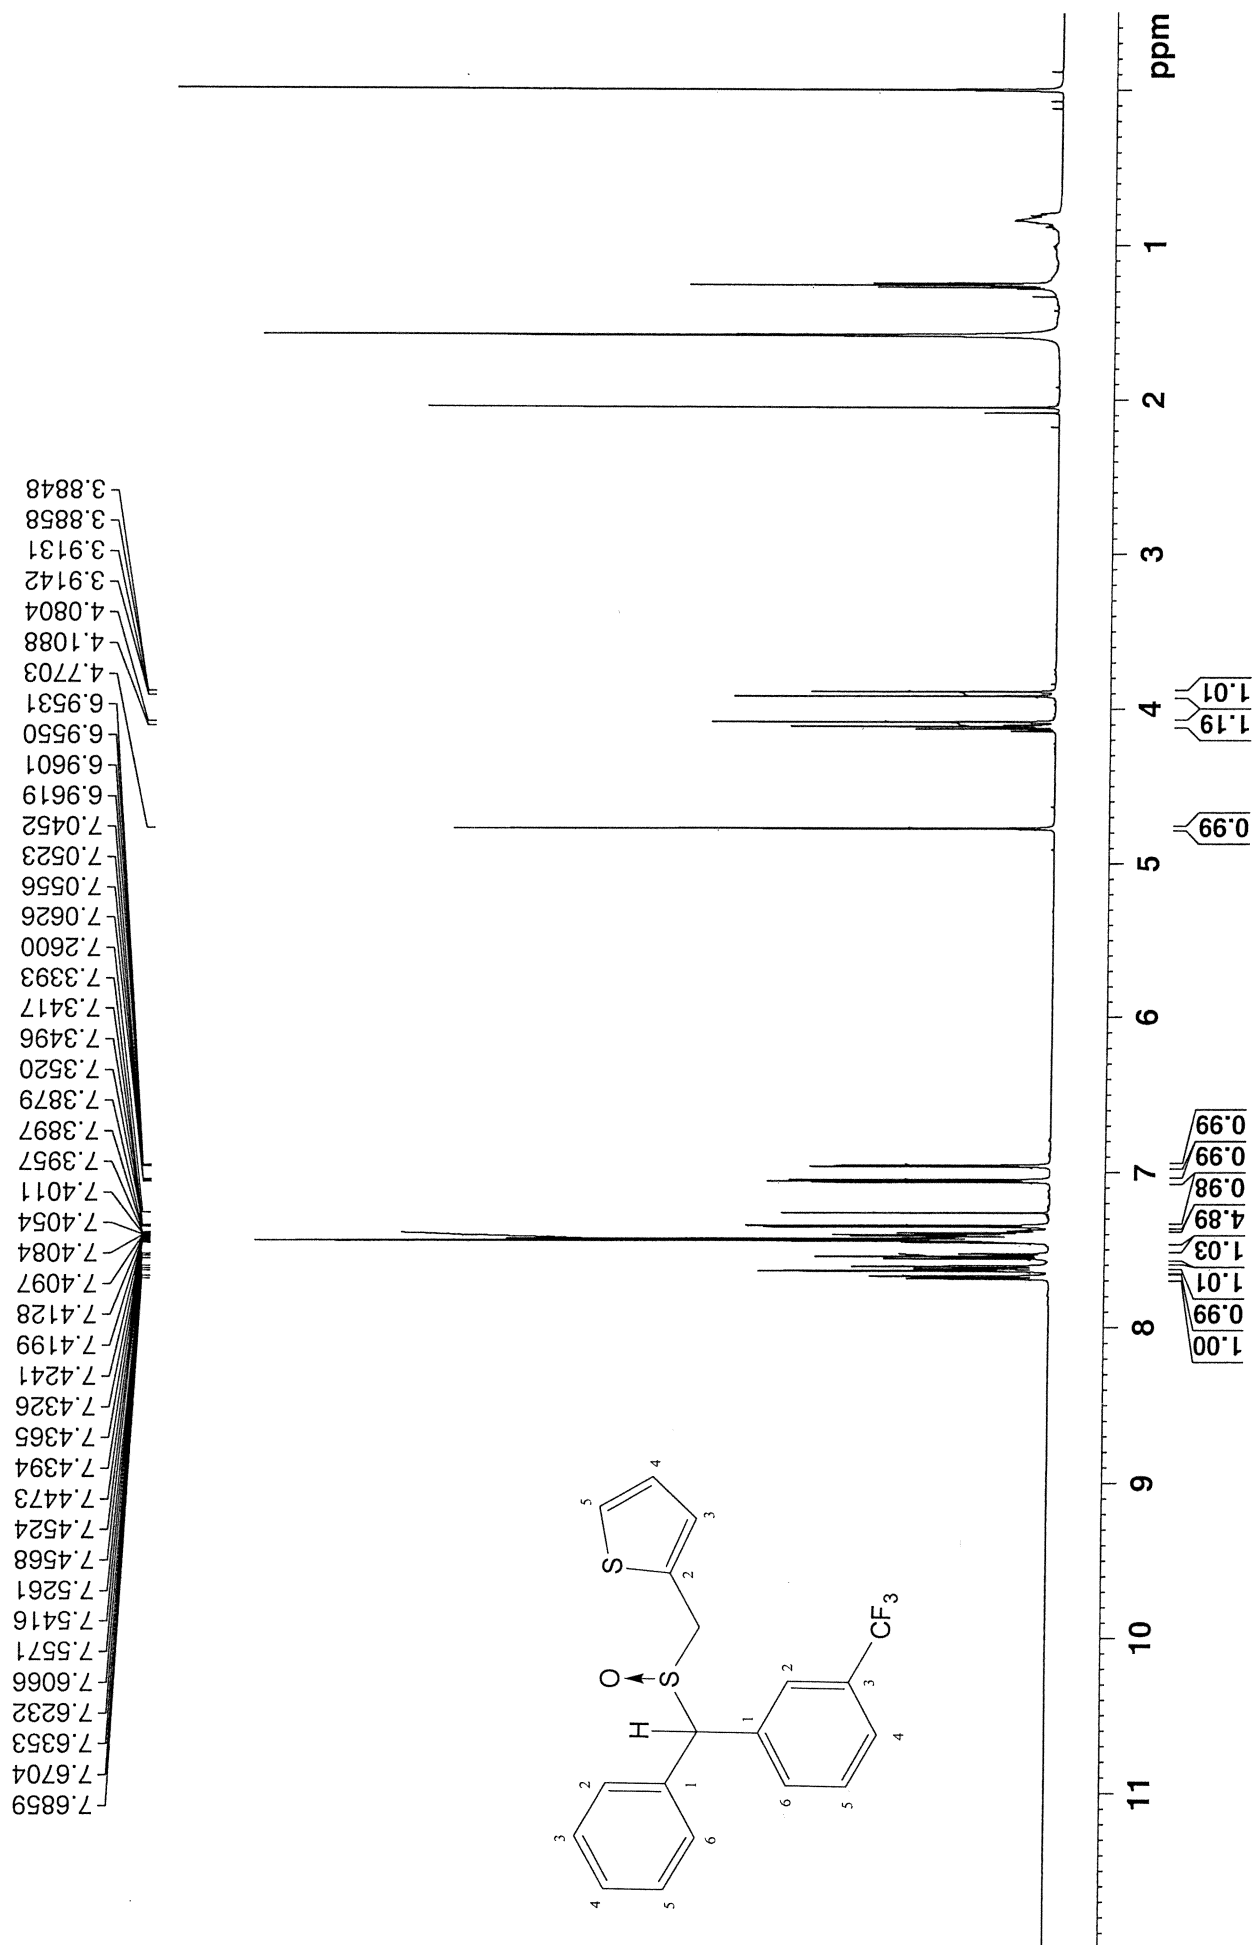

7.0626  
7.0556  
7.0523  
7.0452  
6.9619  
6.9601  
6.9550  
6.9531

7.6859  
7.6704  
7.6353  
7.6232  
7.6066  
7.5571  
7.5416  
7.5261  
7.4568  
7.4524  
7.4473  
7.4394  
7.4365  
7.4326  
7.4241  
7.4199  
7.4128  
7.4097  
7.4084  
7.4054  
7.4011  
7.3957  
7.3897  
7.3879  
7.3520  
7.3496  
7.3417  
7.3393  
7.2600

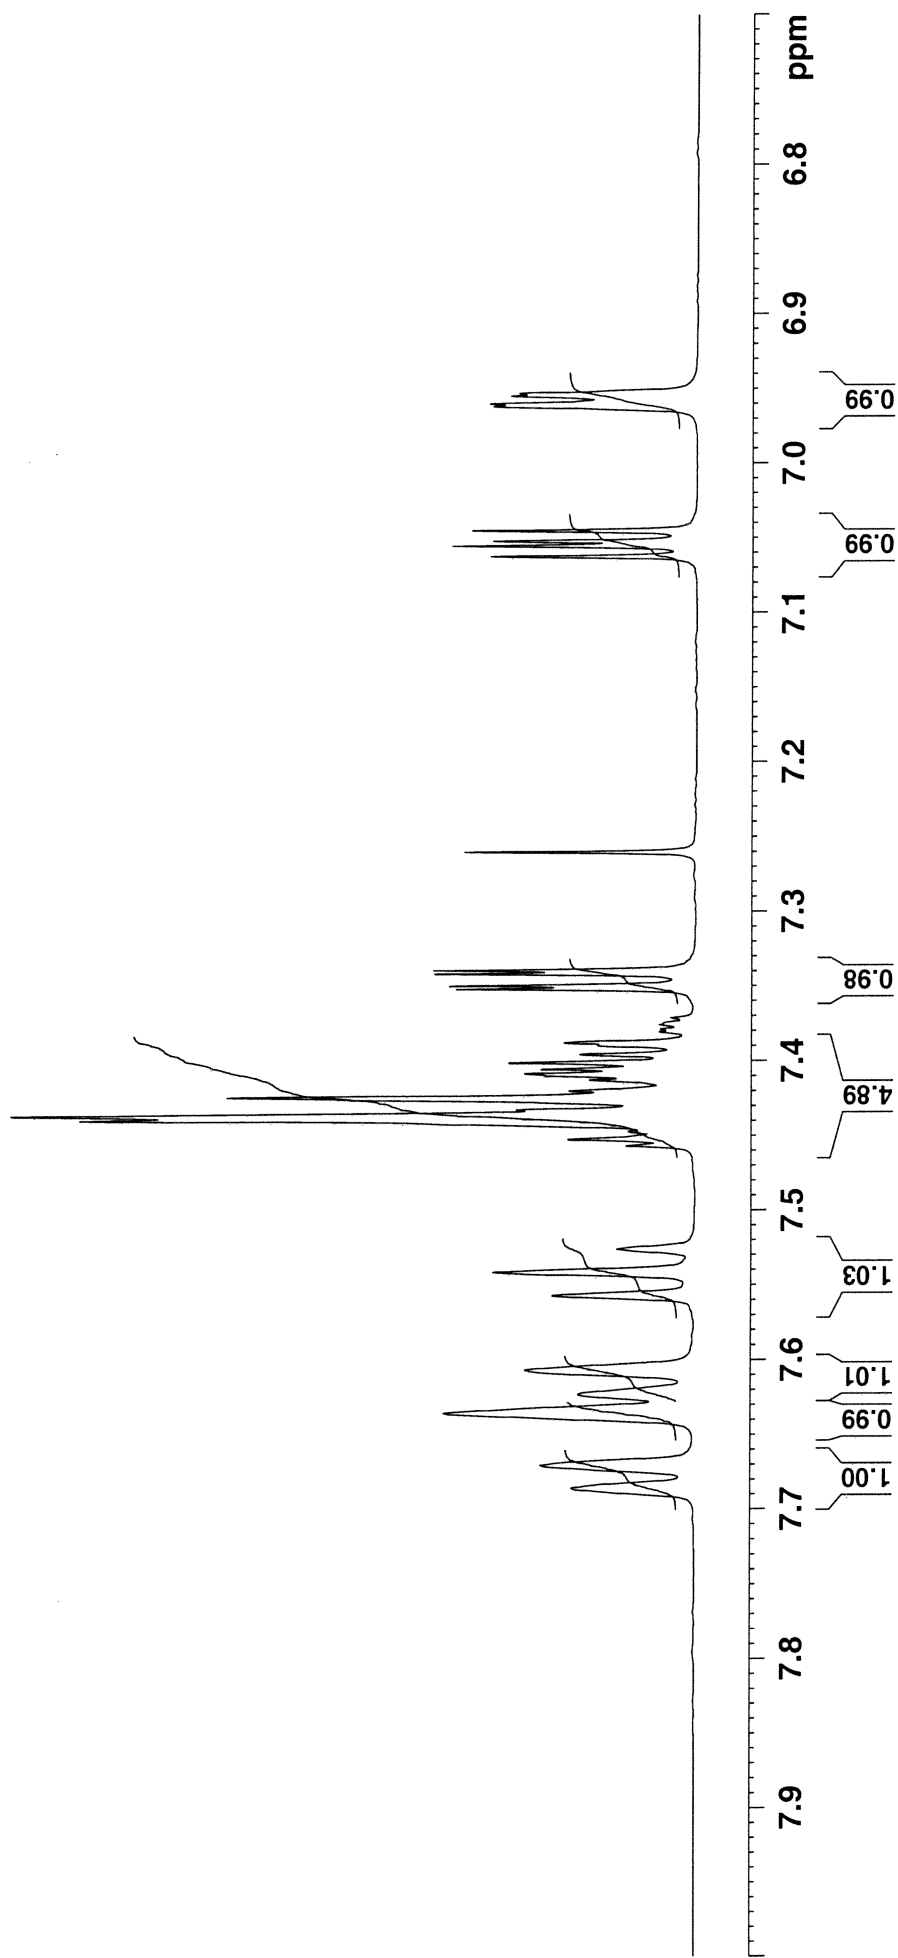

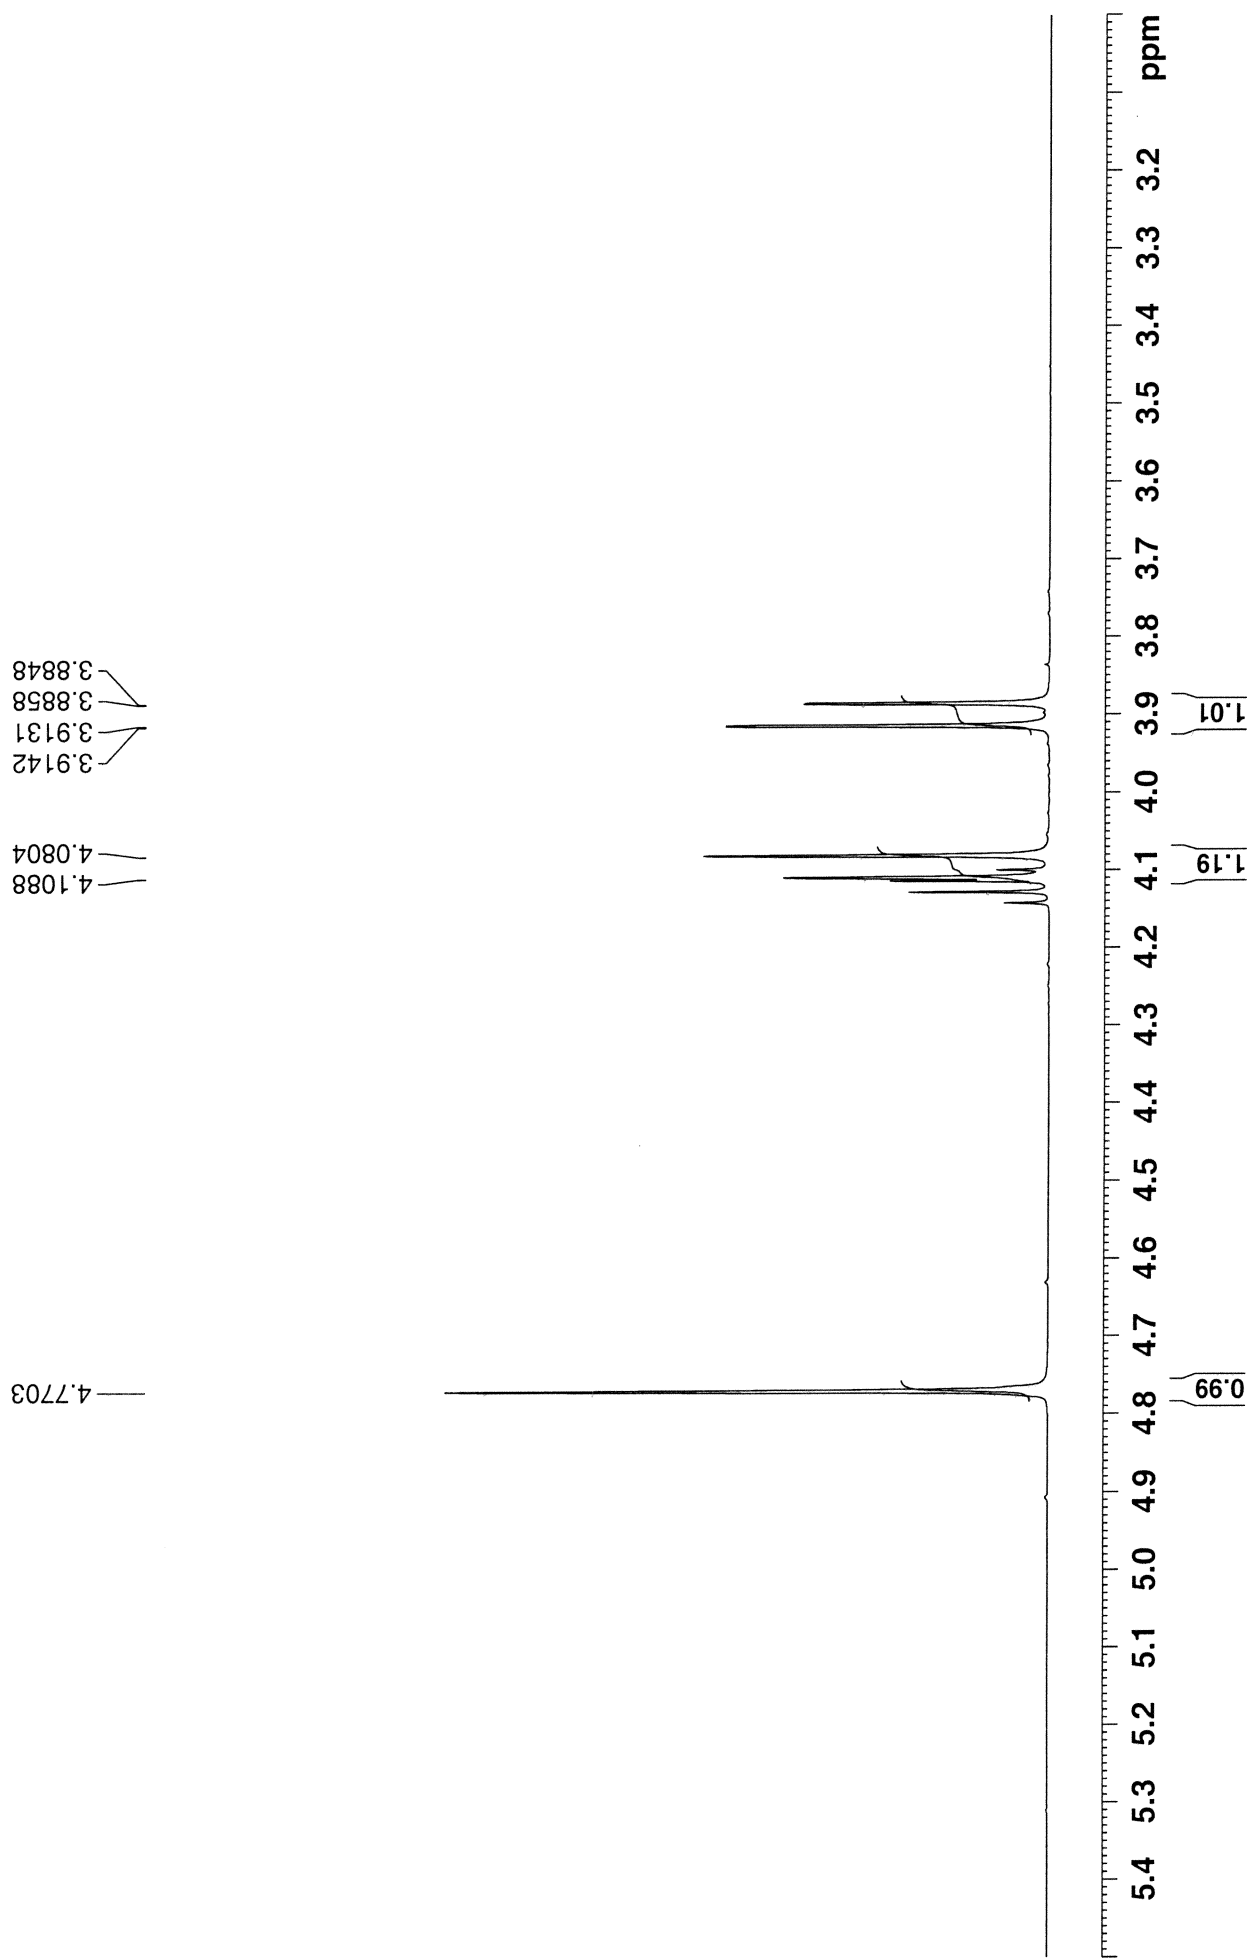

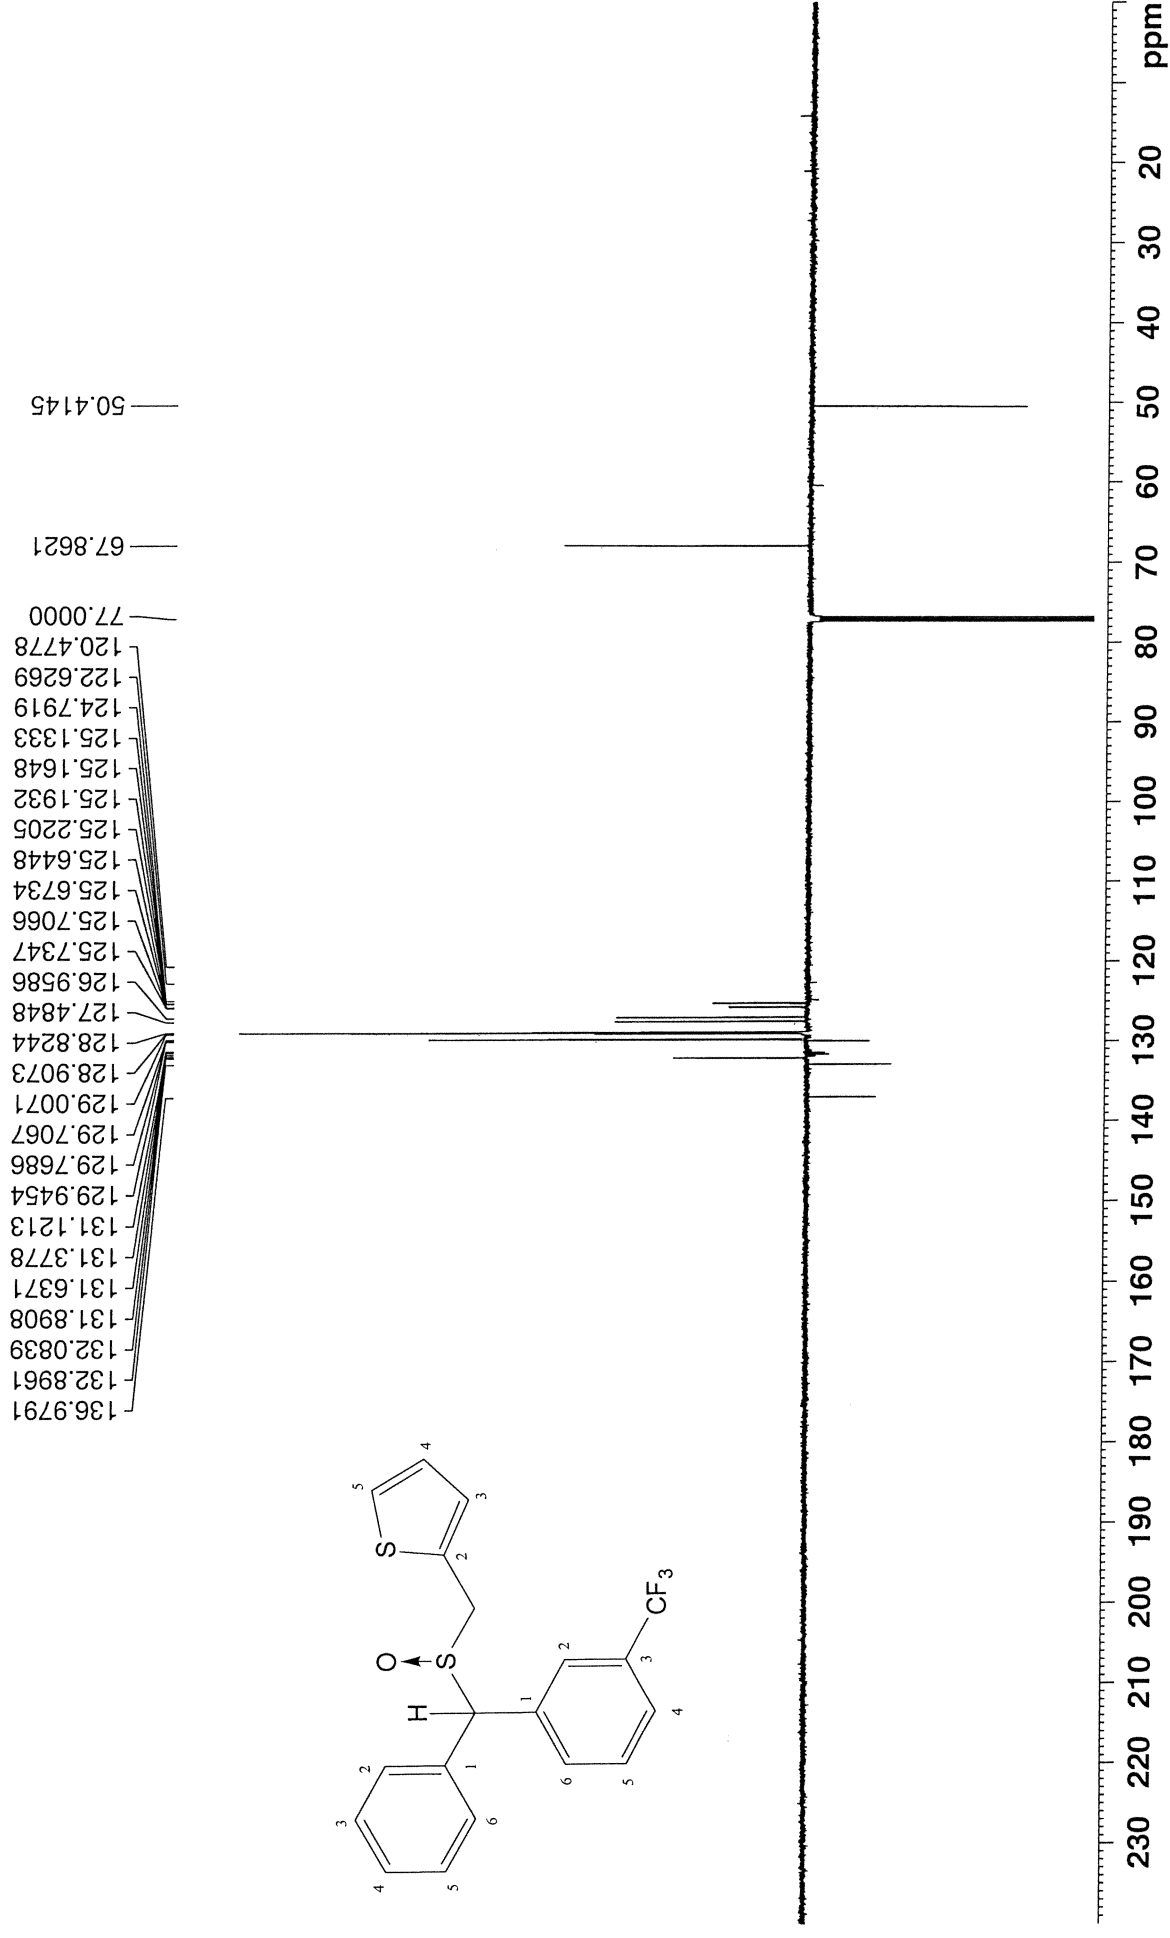

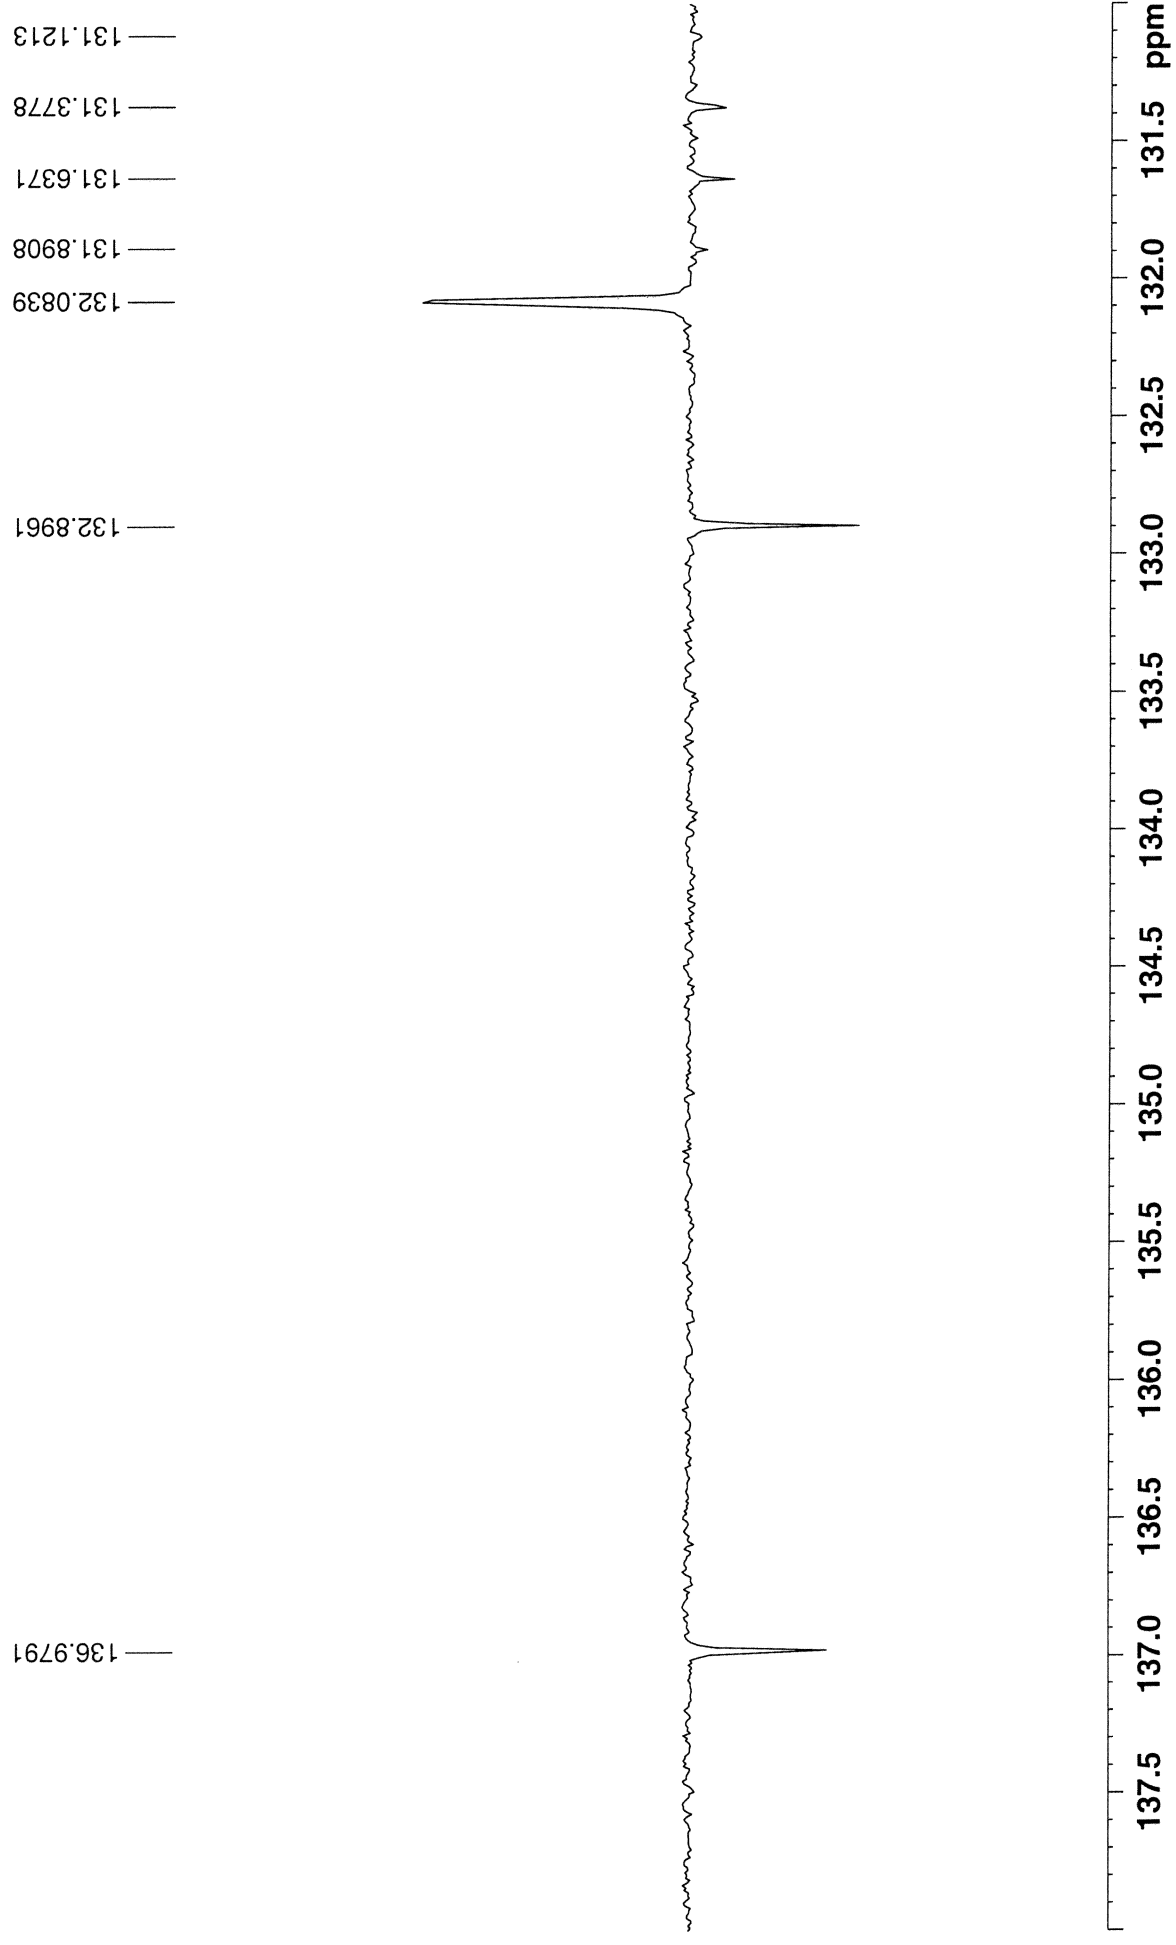



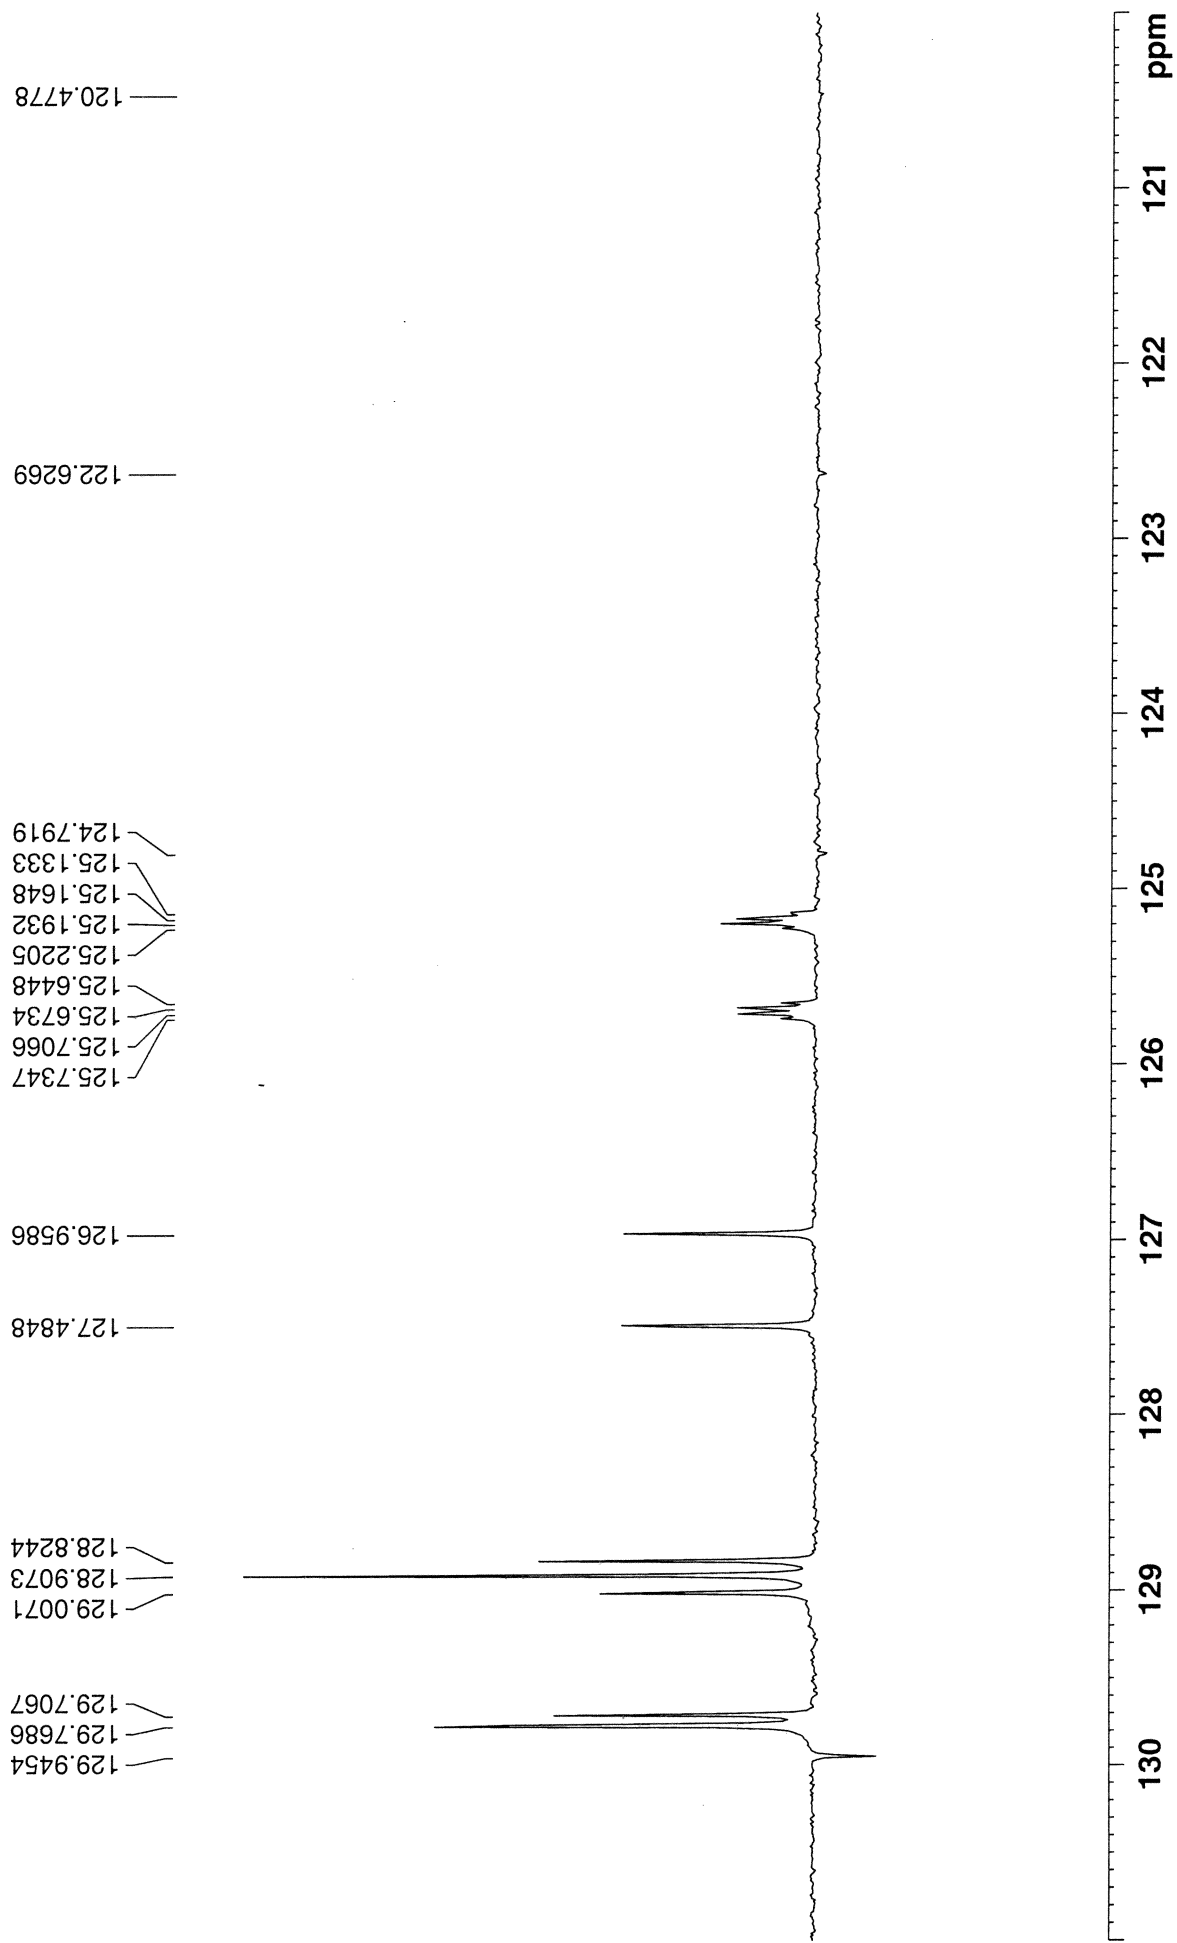

PN002S2P2 in cdcl3 (APT) 17.5.2019

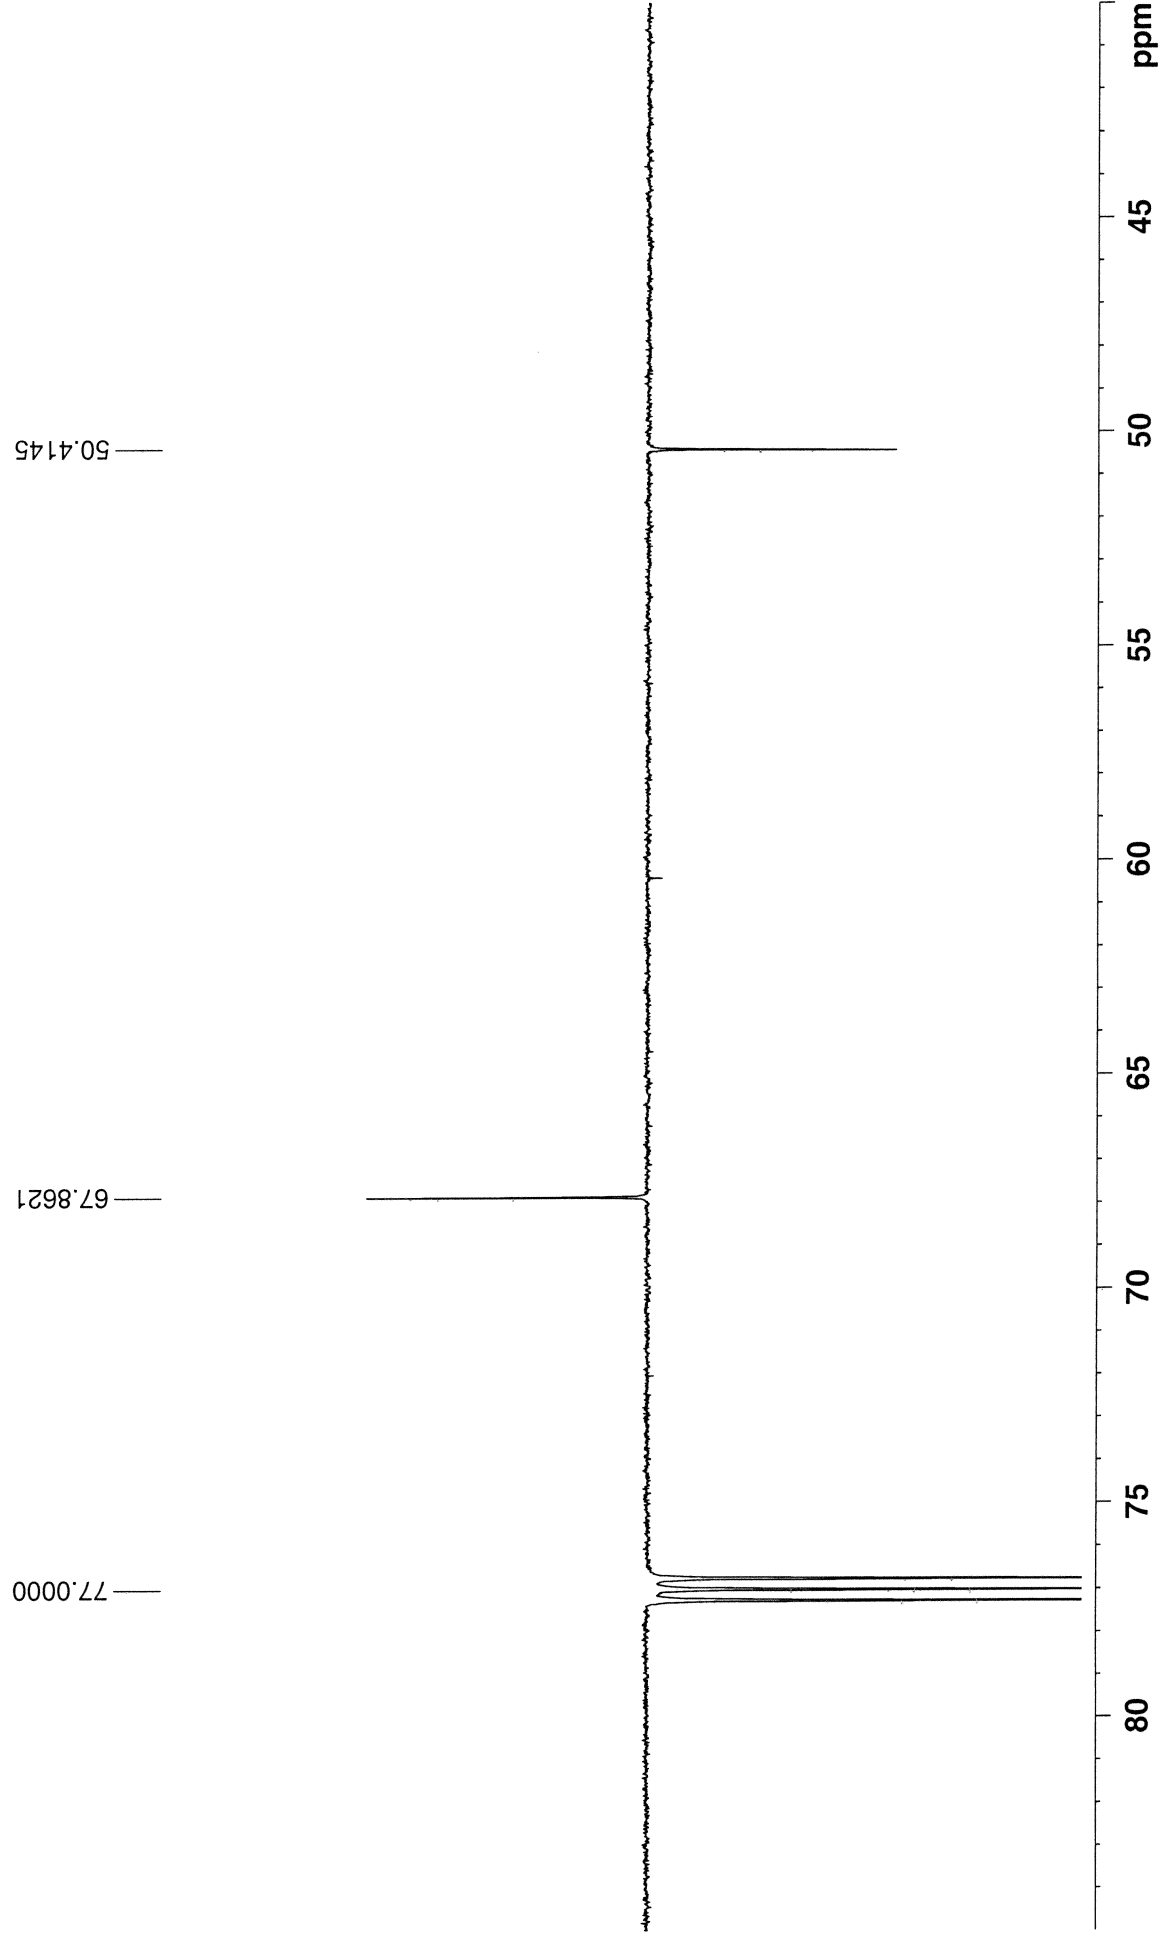

**Figure S65c.** NMR spectra of compound **5q**.

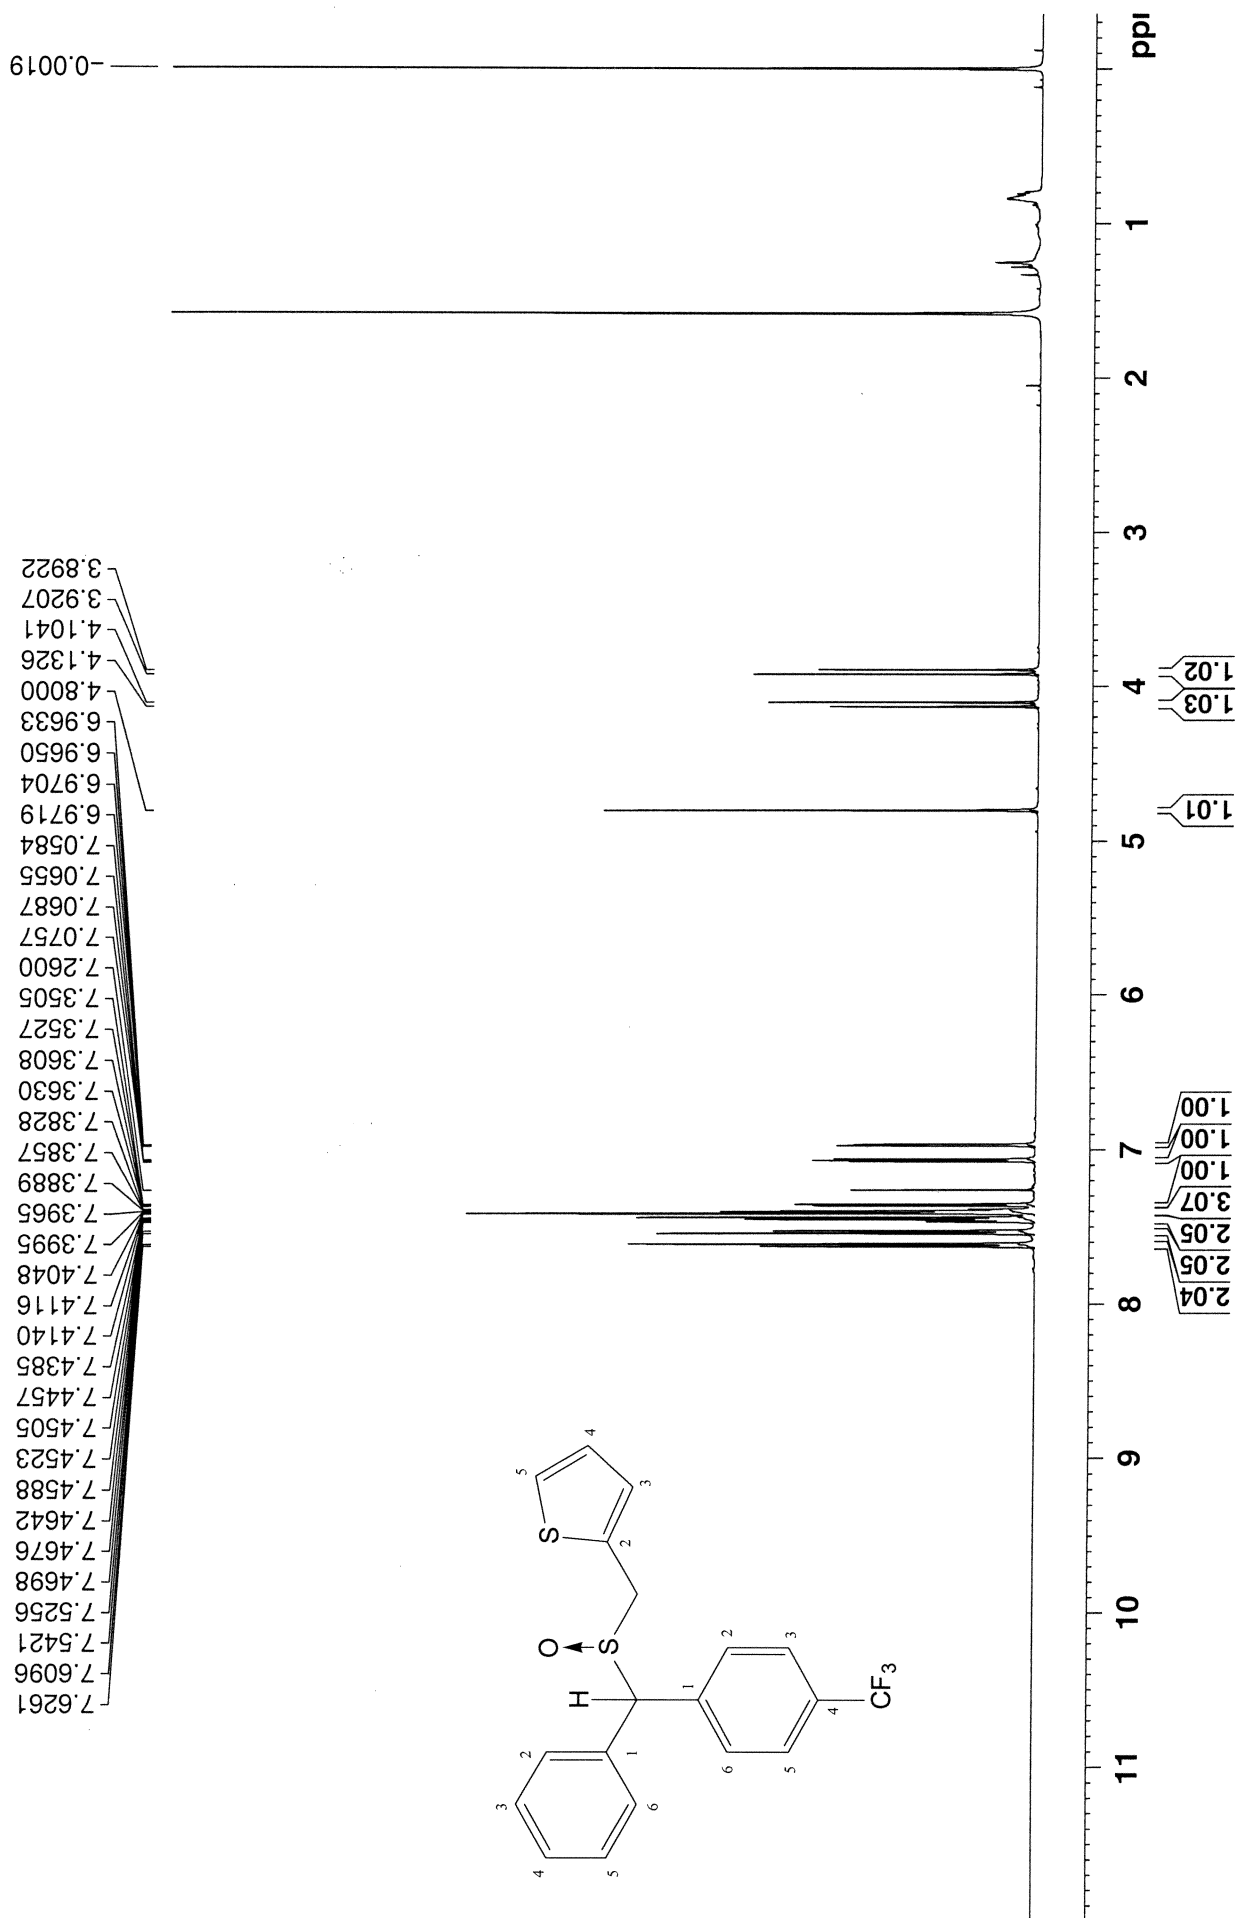

6.9633  
6.9650  
6.9704  
6.9719  
7.0584  
7.0655  
7.0687  
7.0757

7.2600  
7.3505  
7.3527  
7.3608  
7.3630  
7.3828  
7.3857  
7.3889  
7.3965  
7.3995  
7.4048  
7.4116  
7.4140  
7.4385  
7.4457  
7.4505  
7.4523  
7.4588  
7.4642  
7.4676  
7.4698  
7.5256  
7.5421  
7.6096  
7.6261

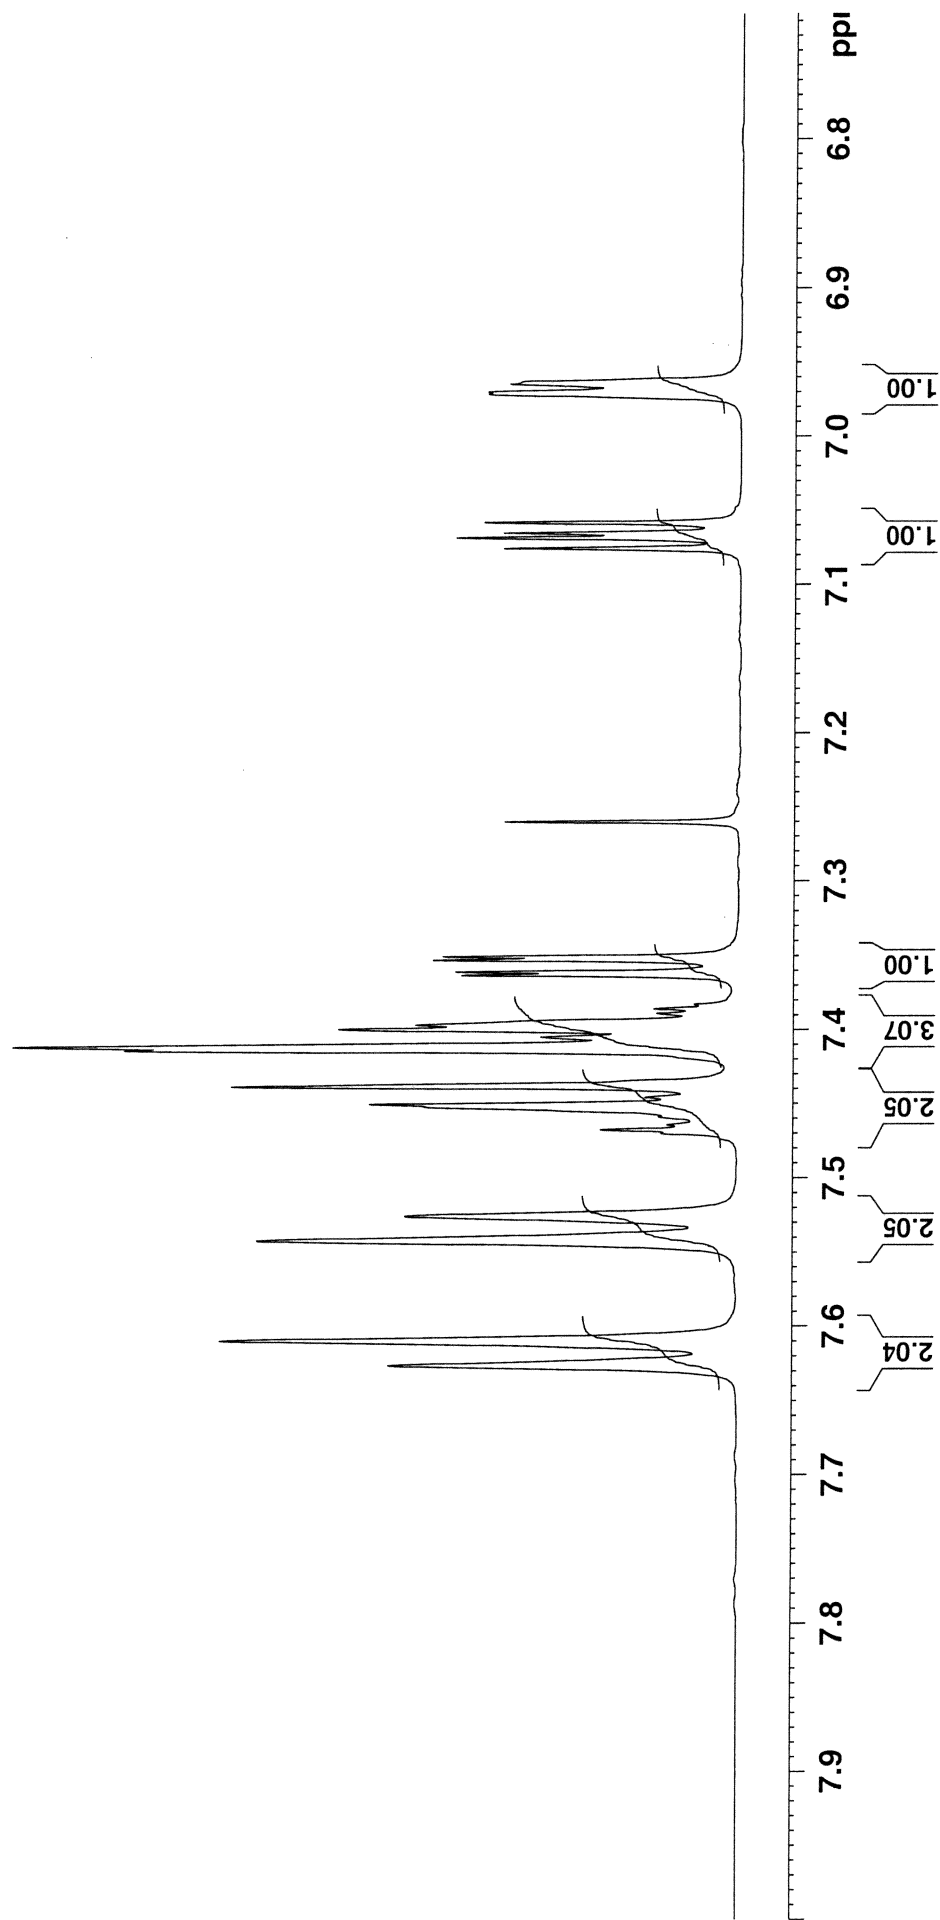

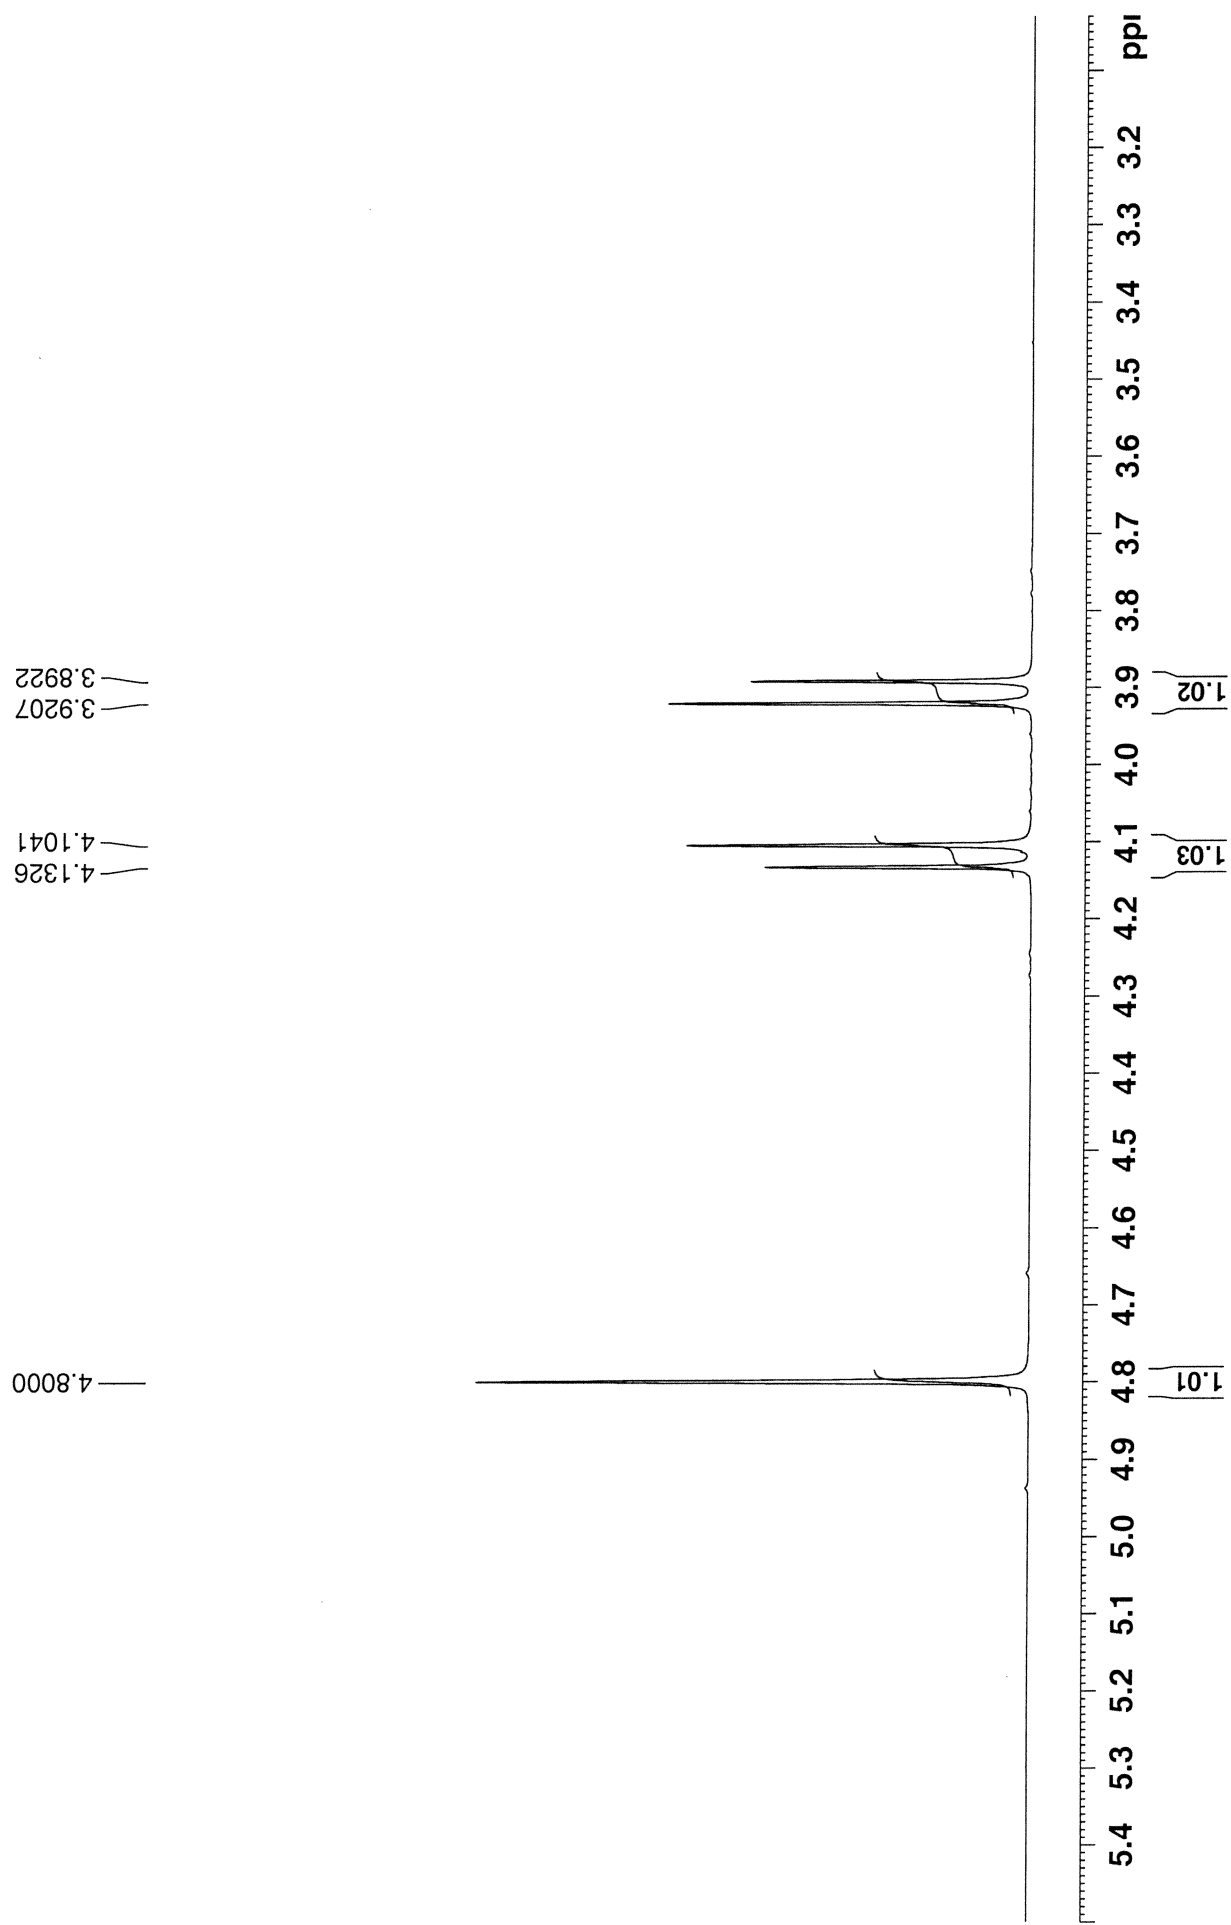

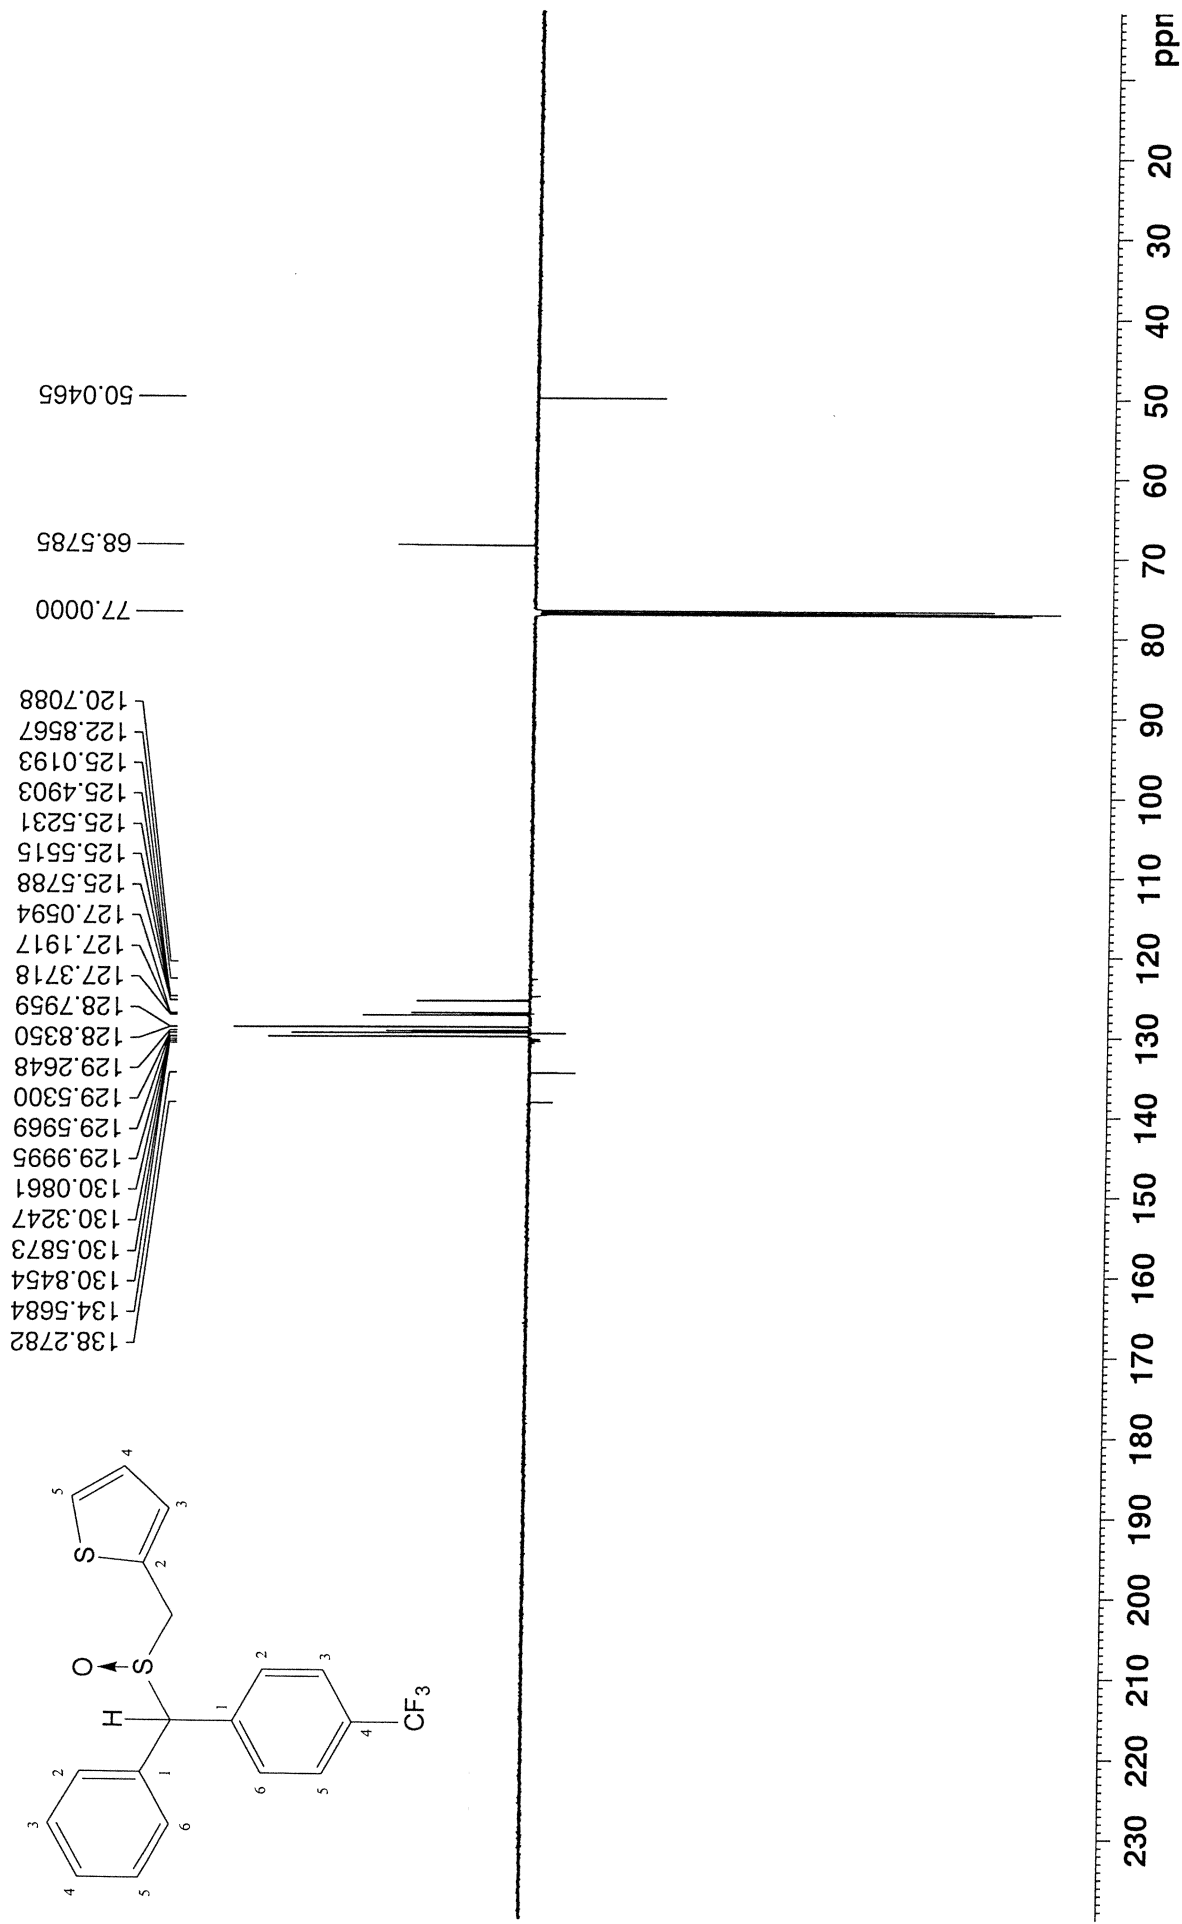

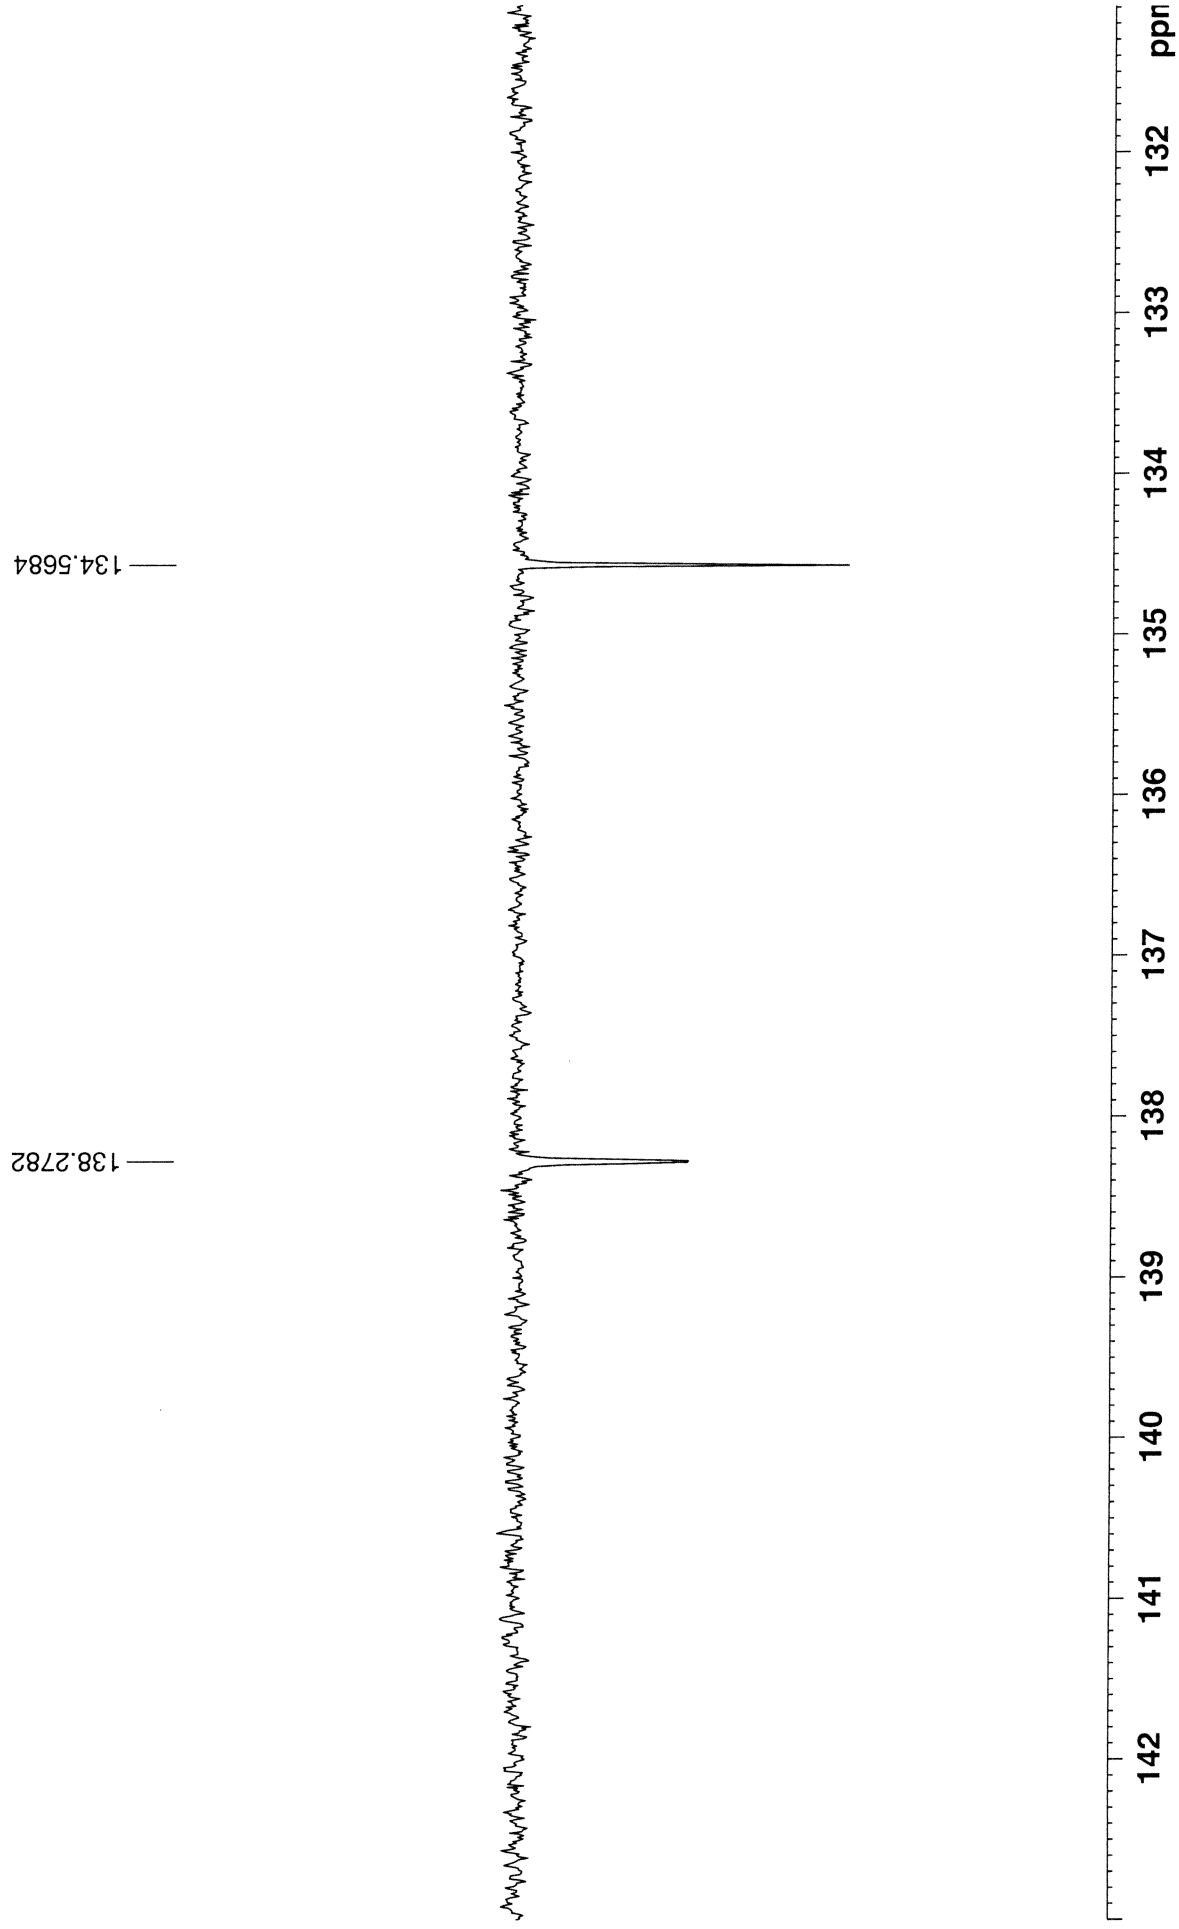

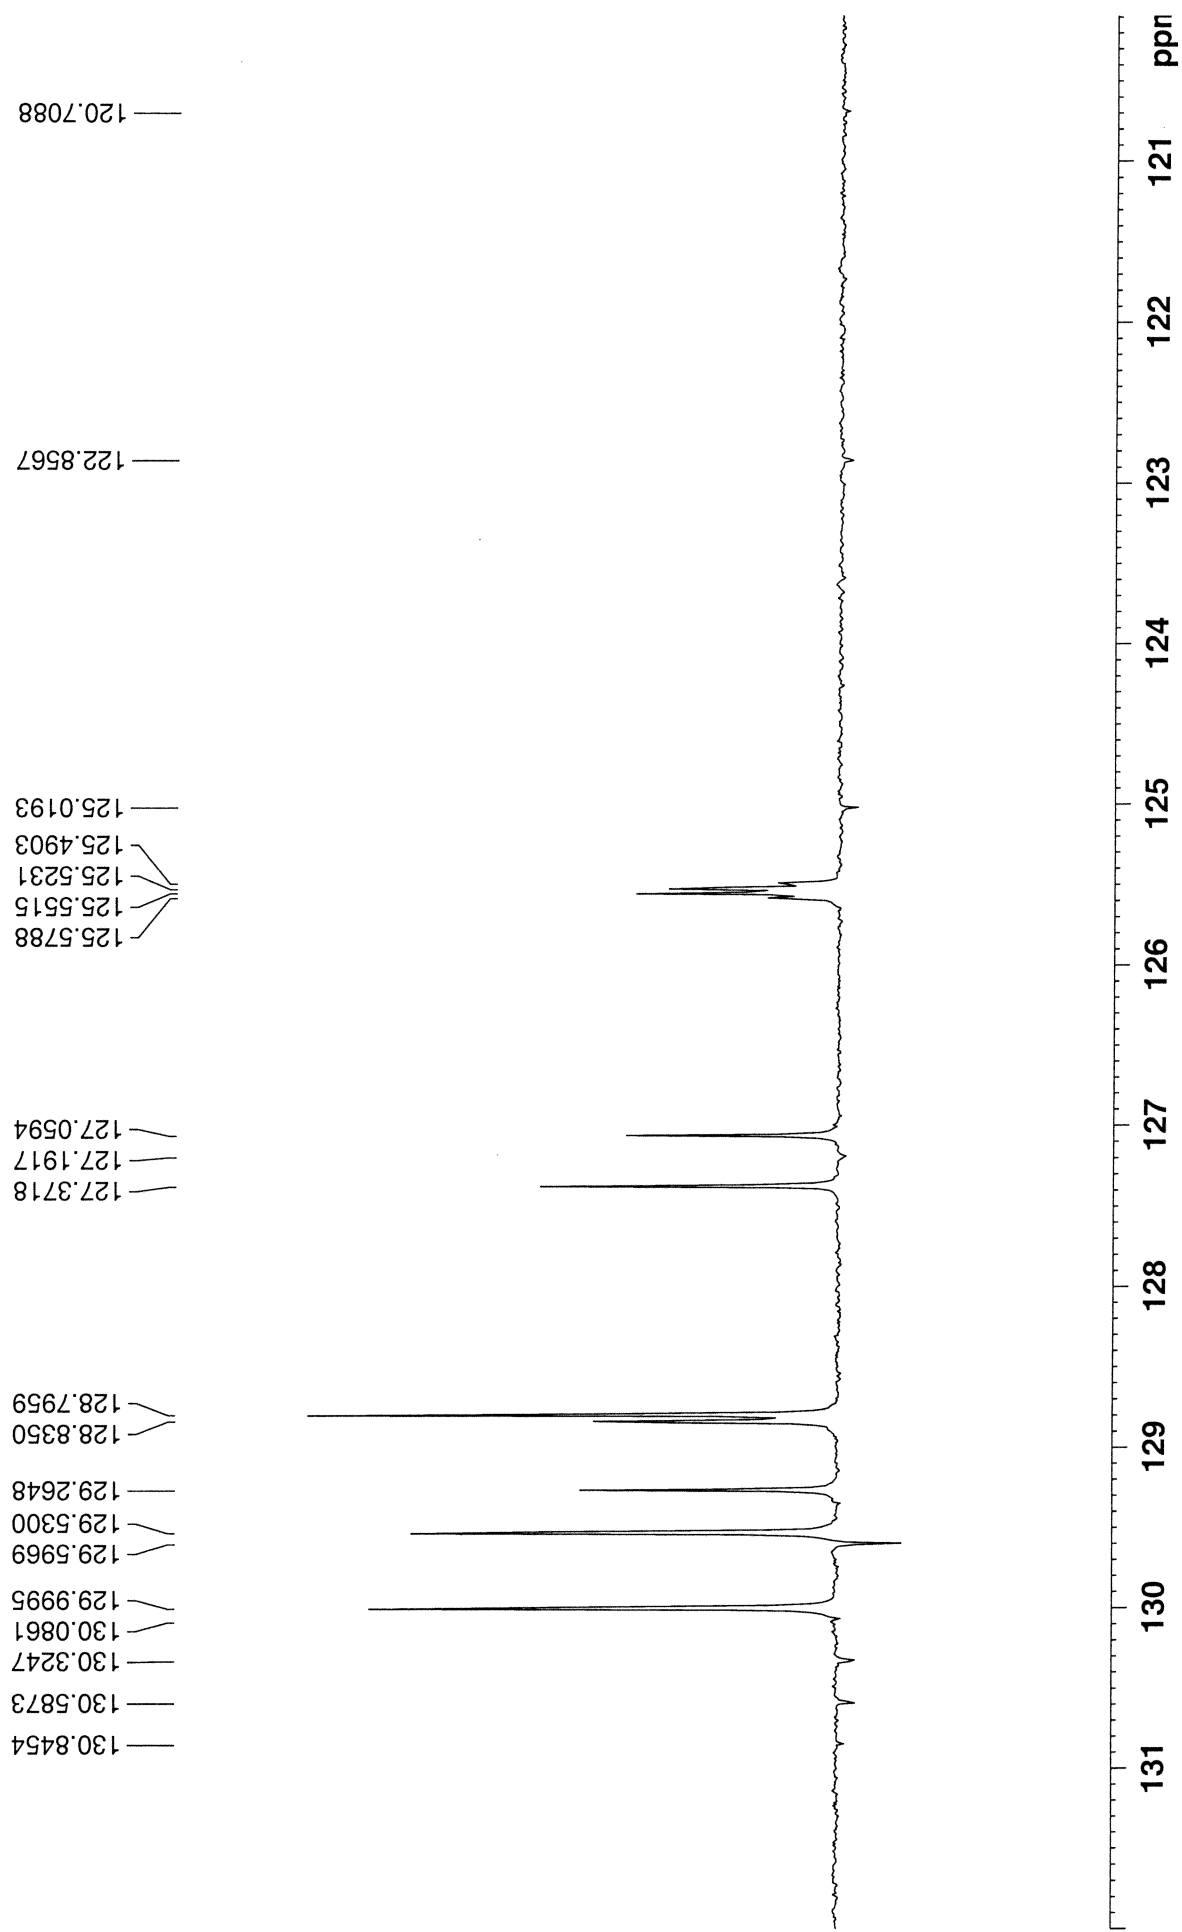



PN010S1P1 in cdcl3 (APT) 17.5.2019

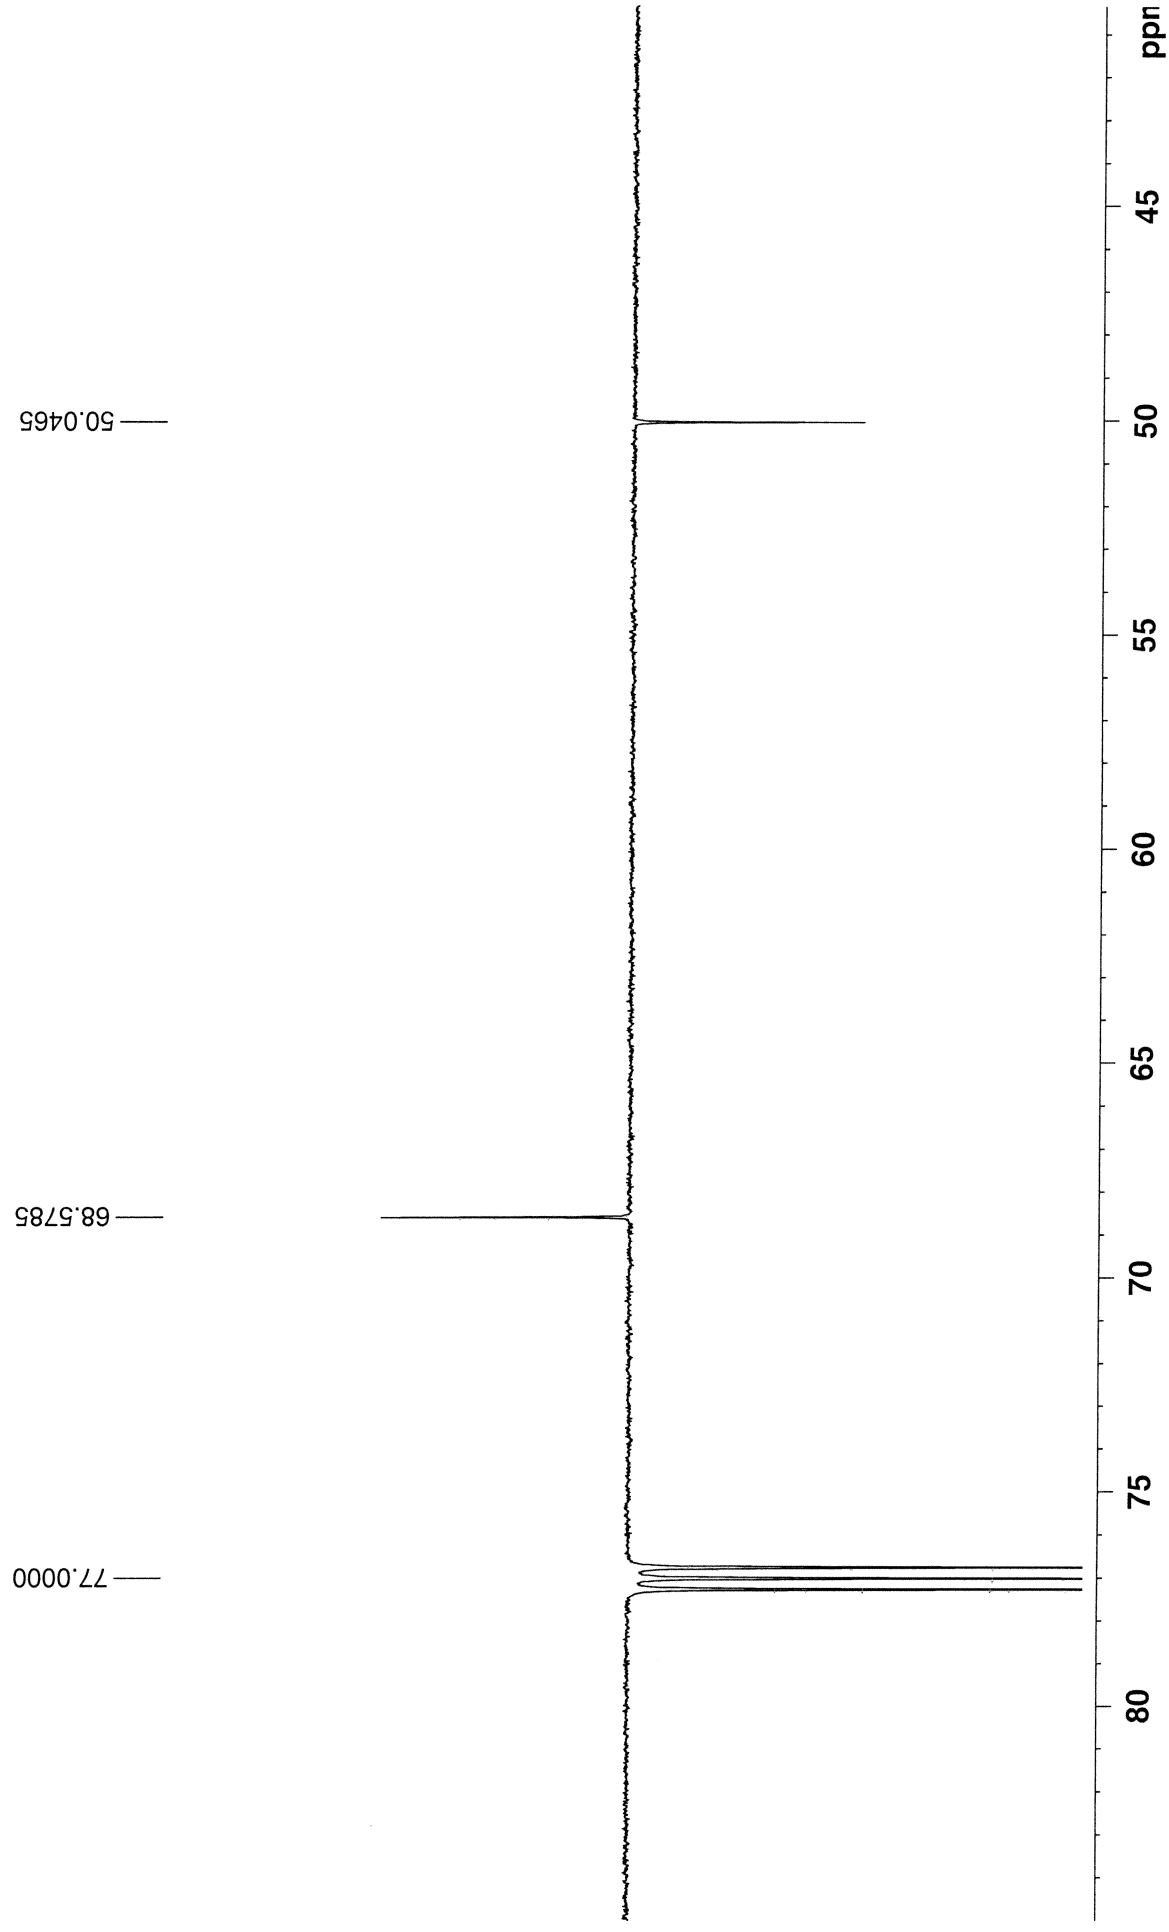

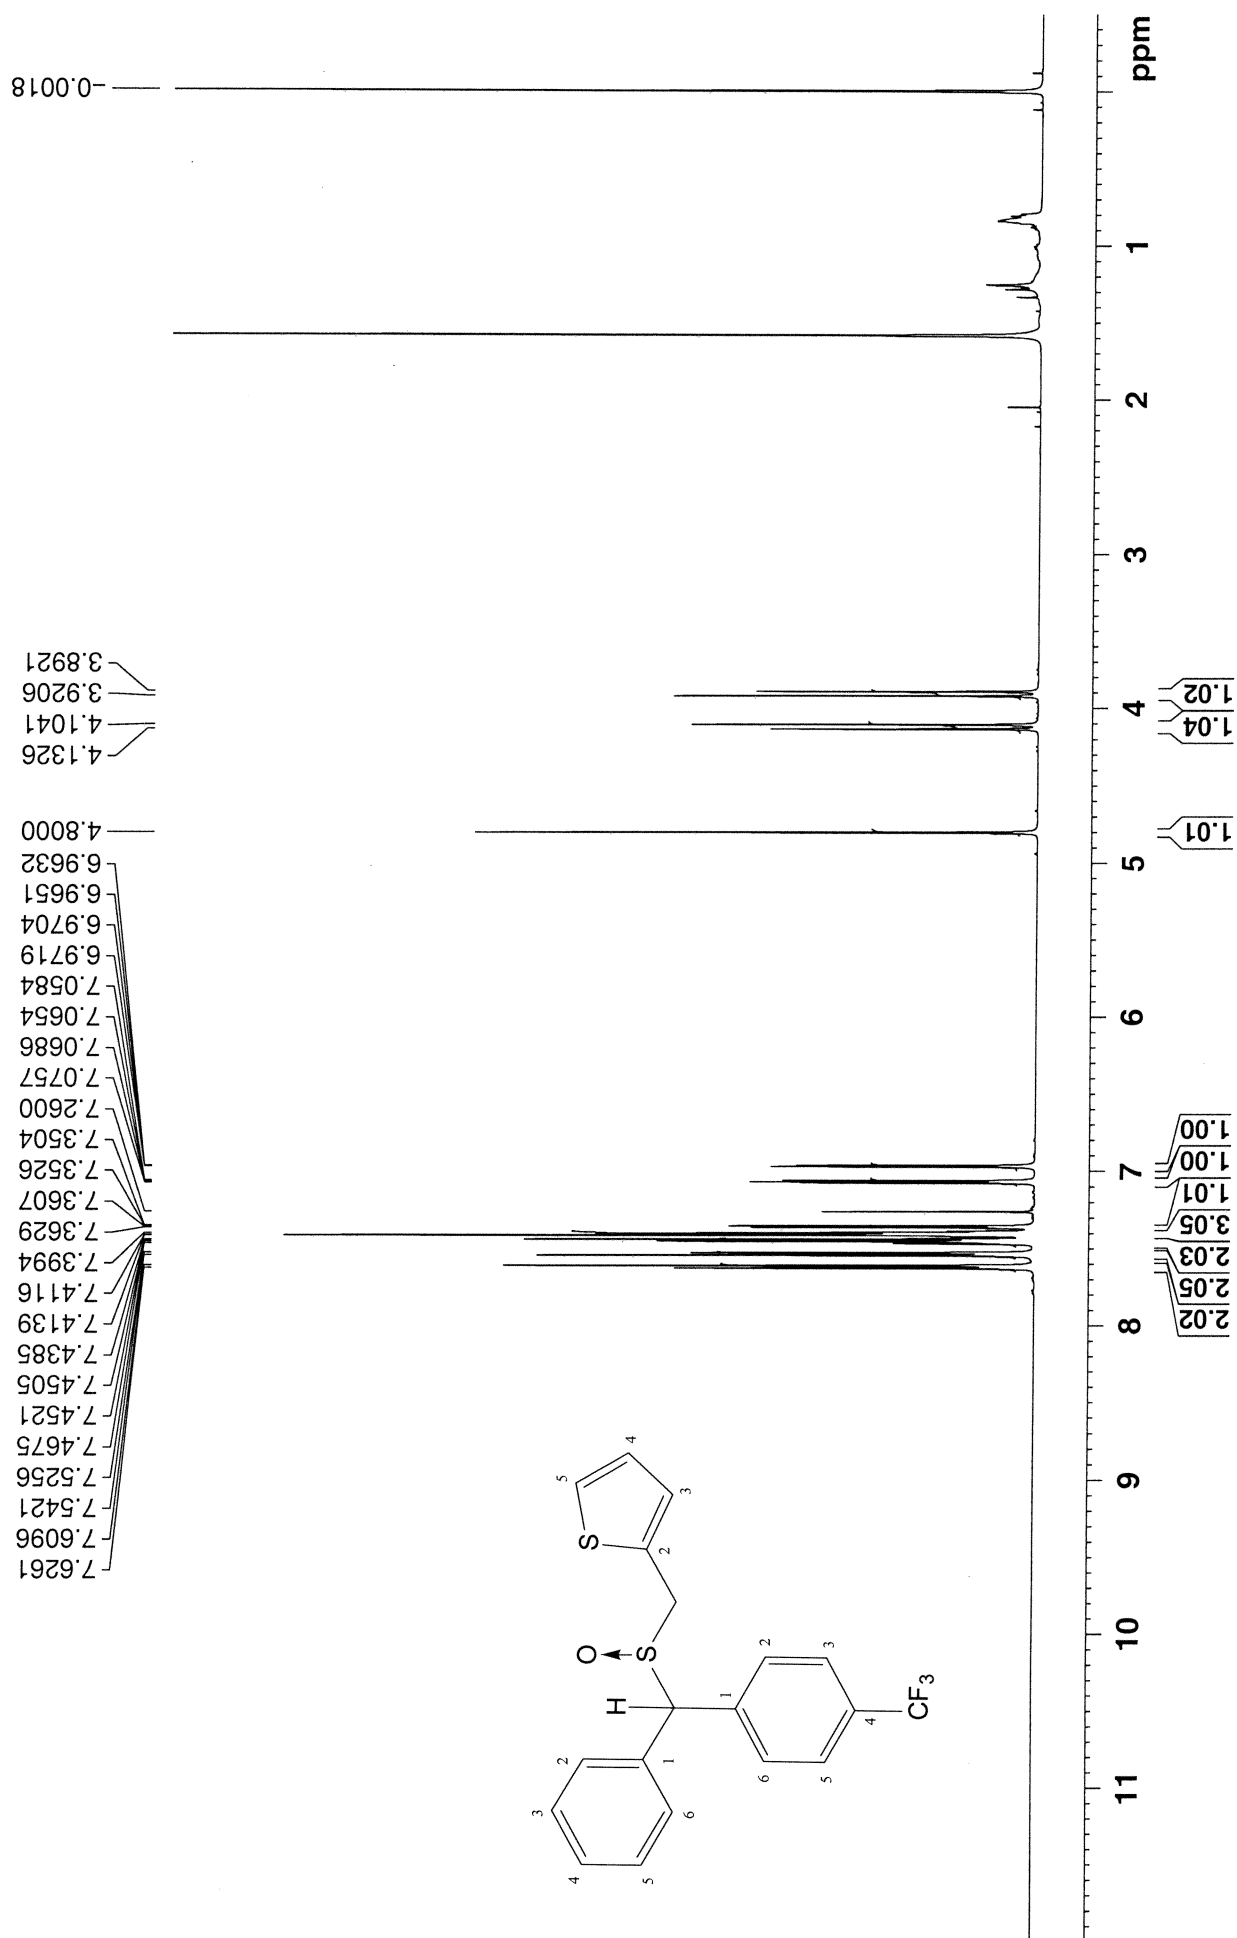

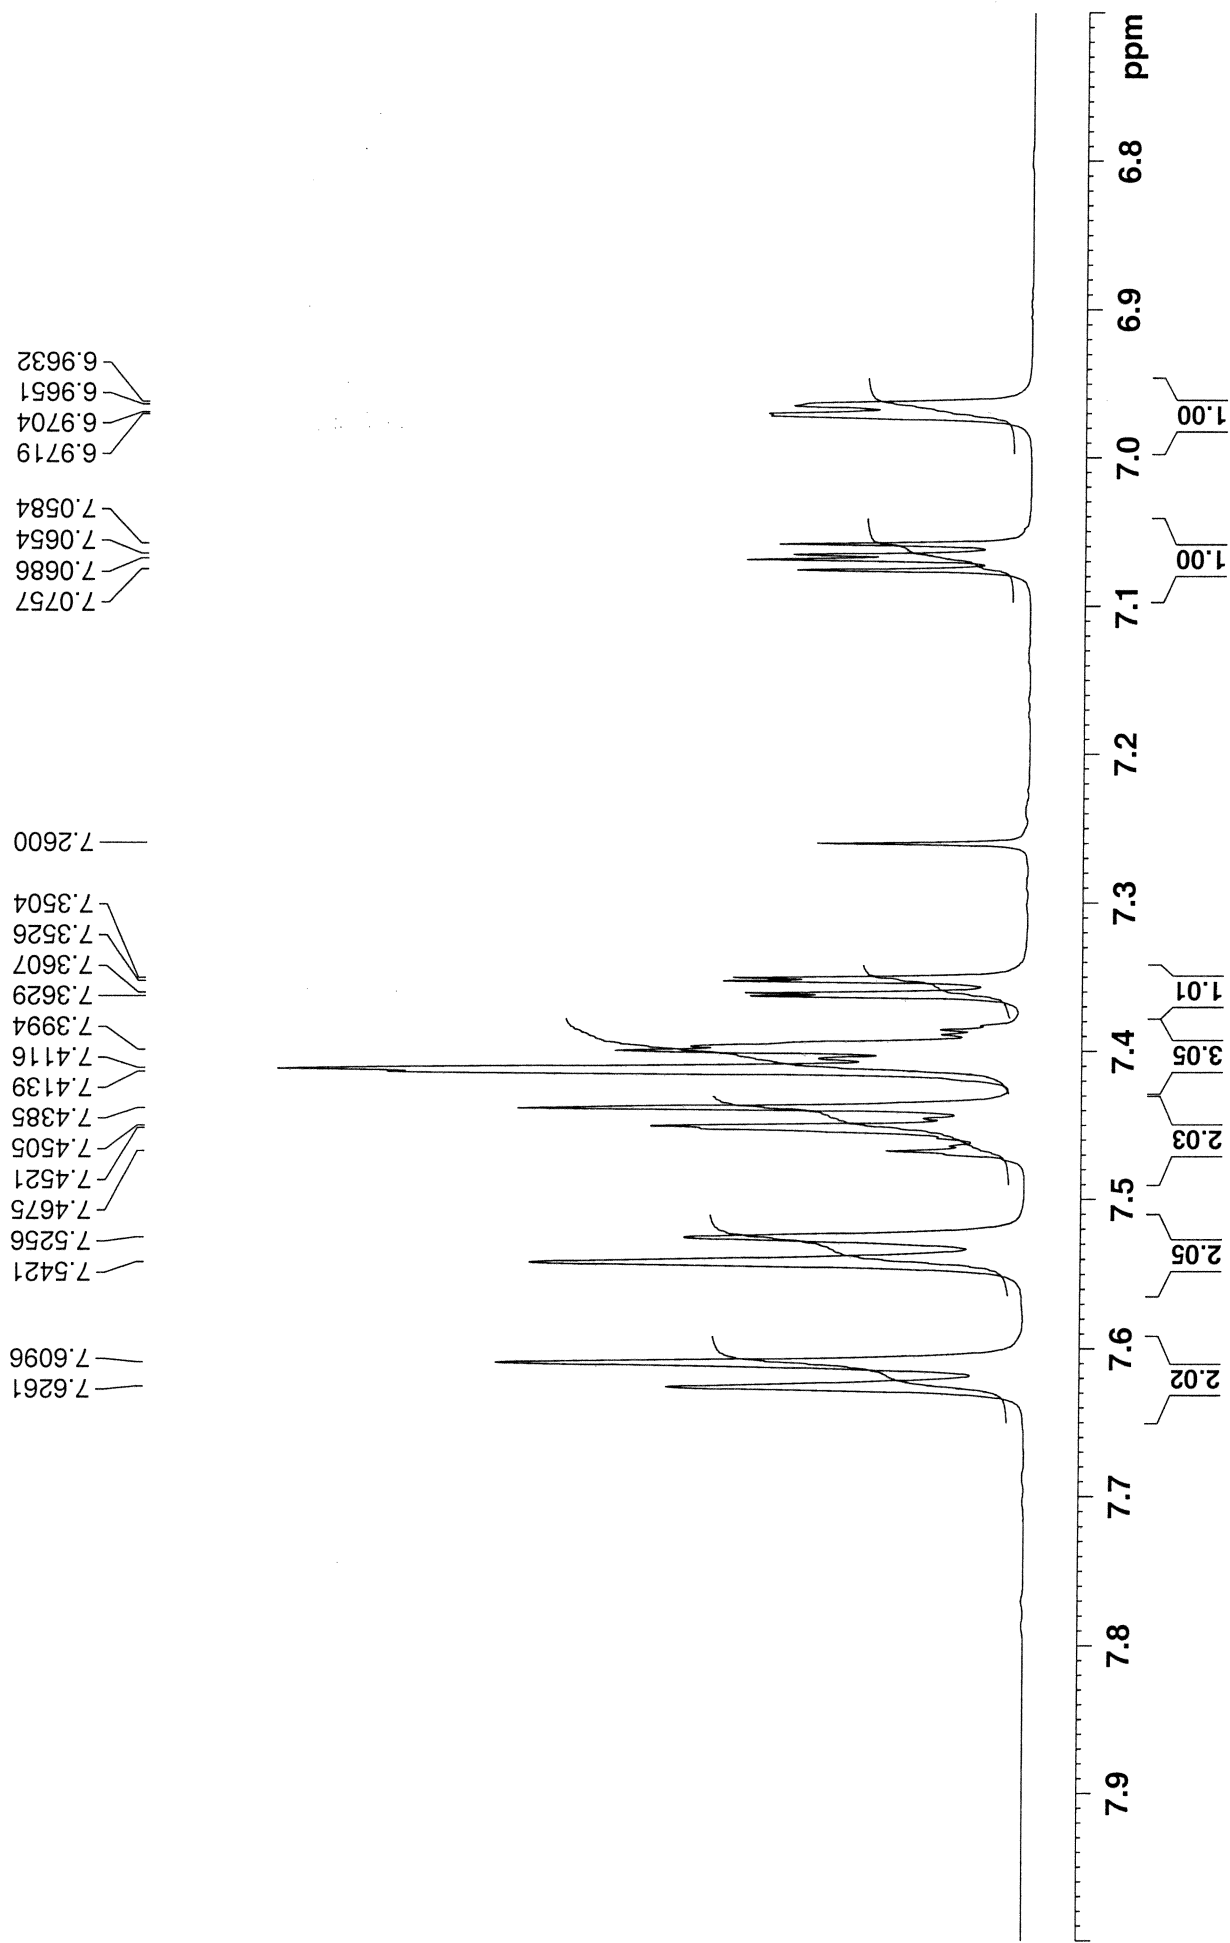

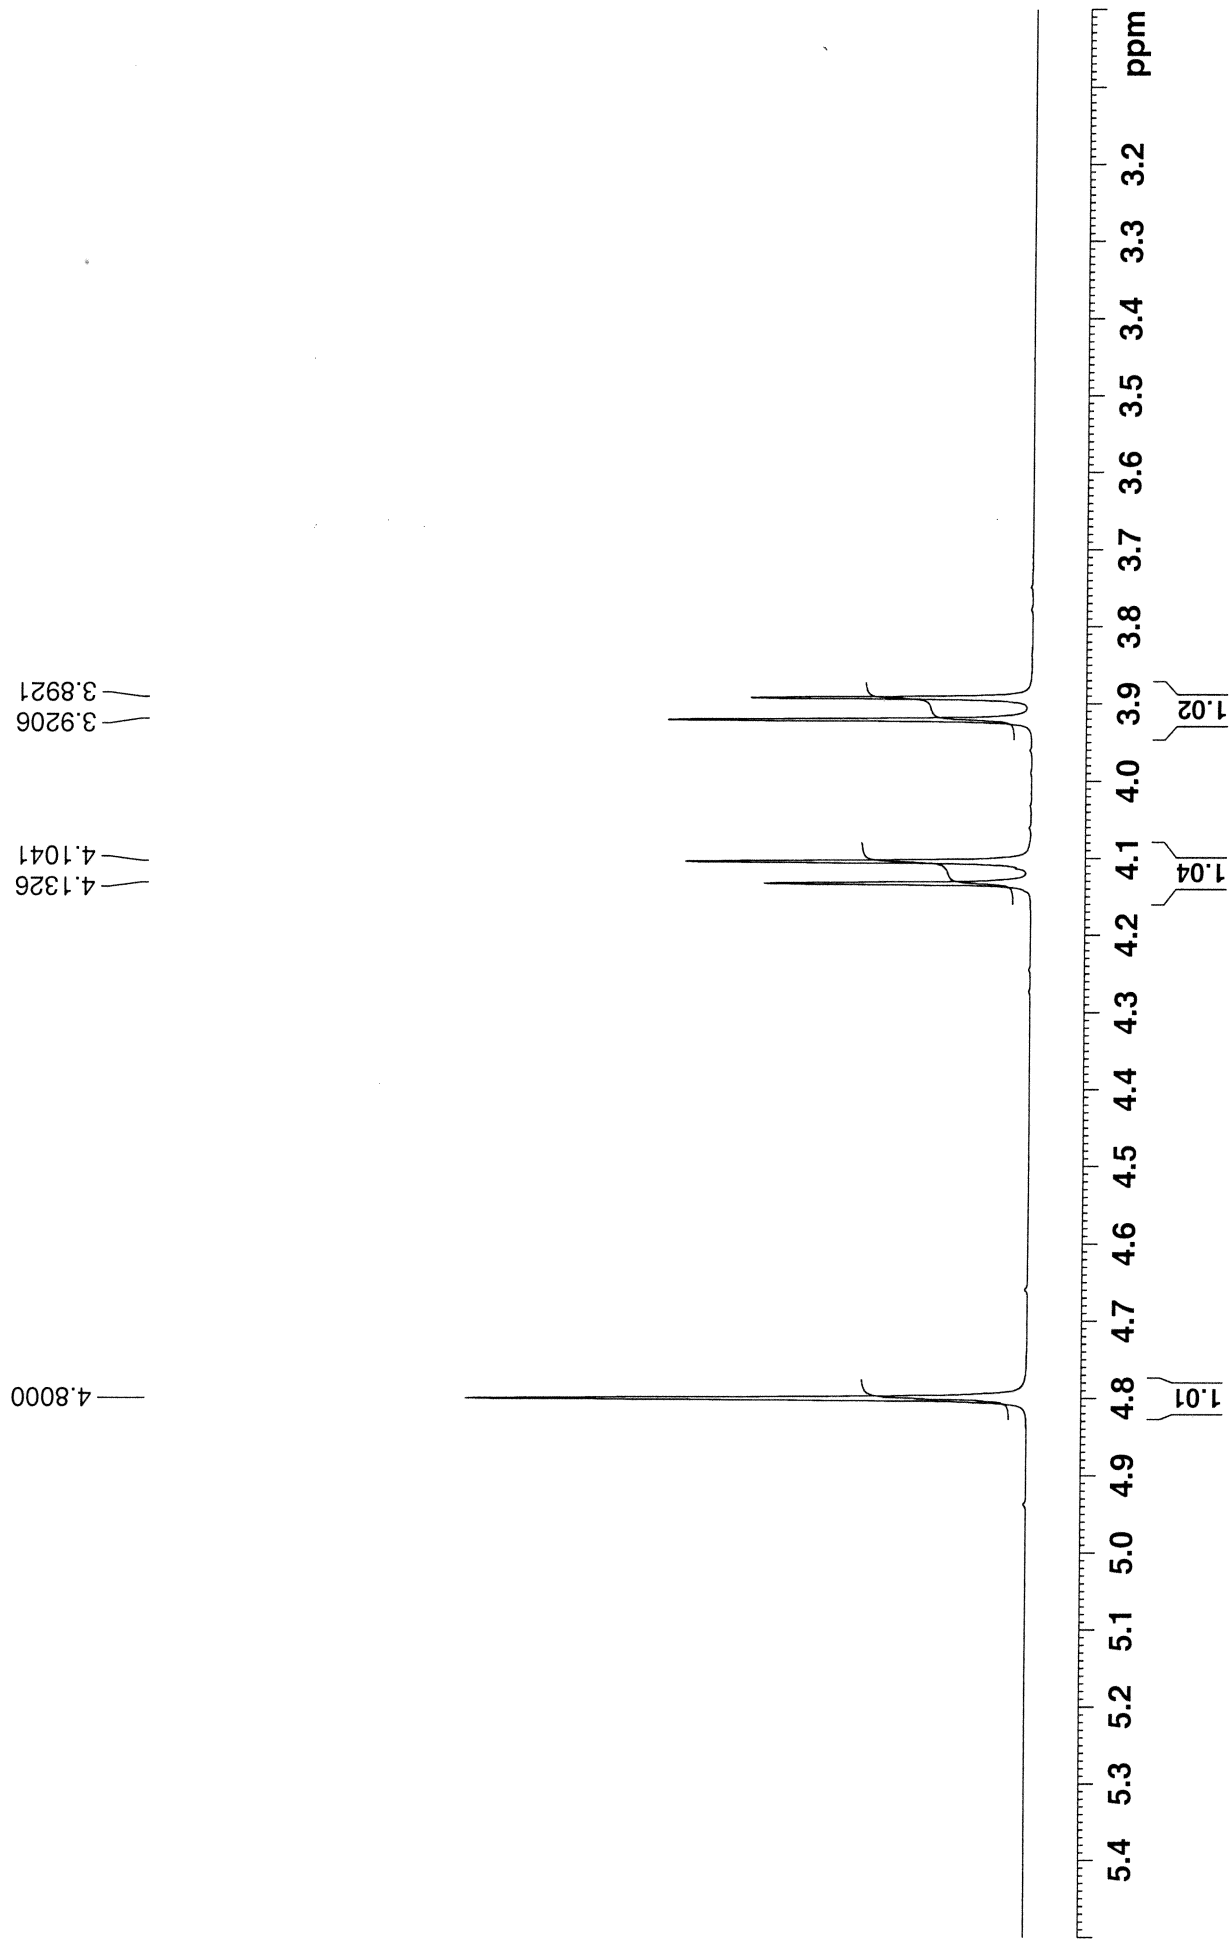

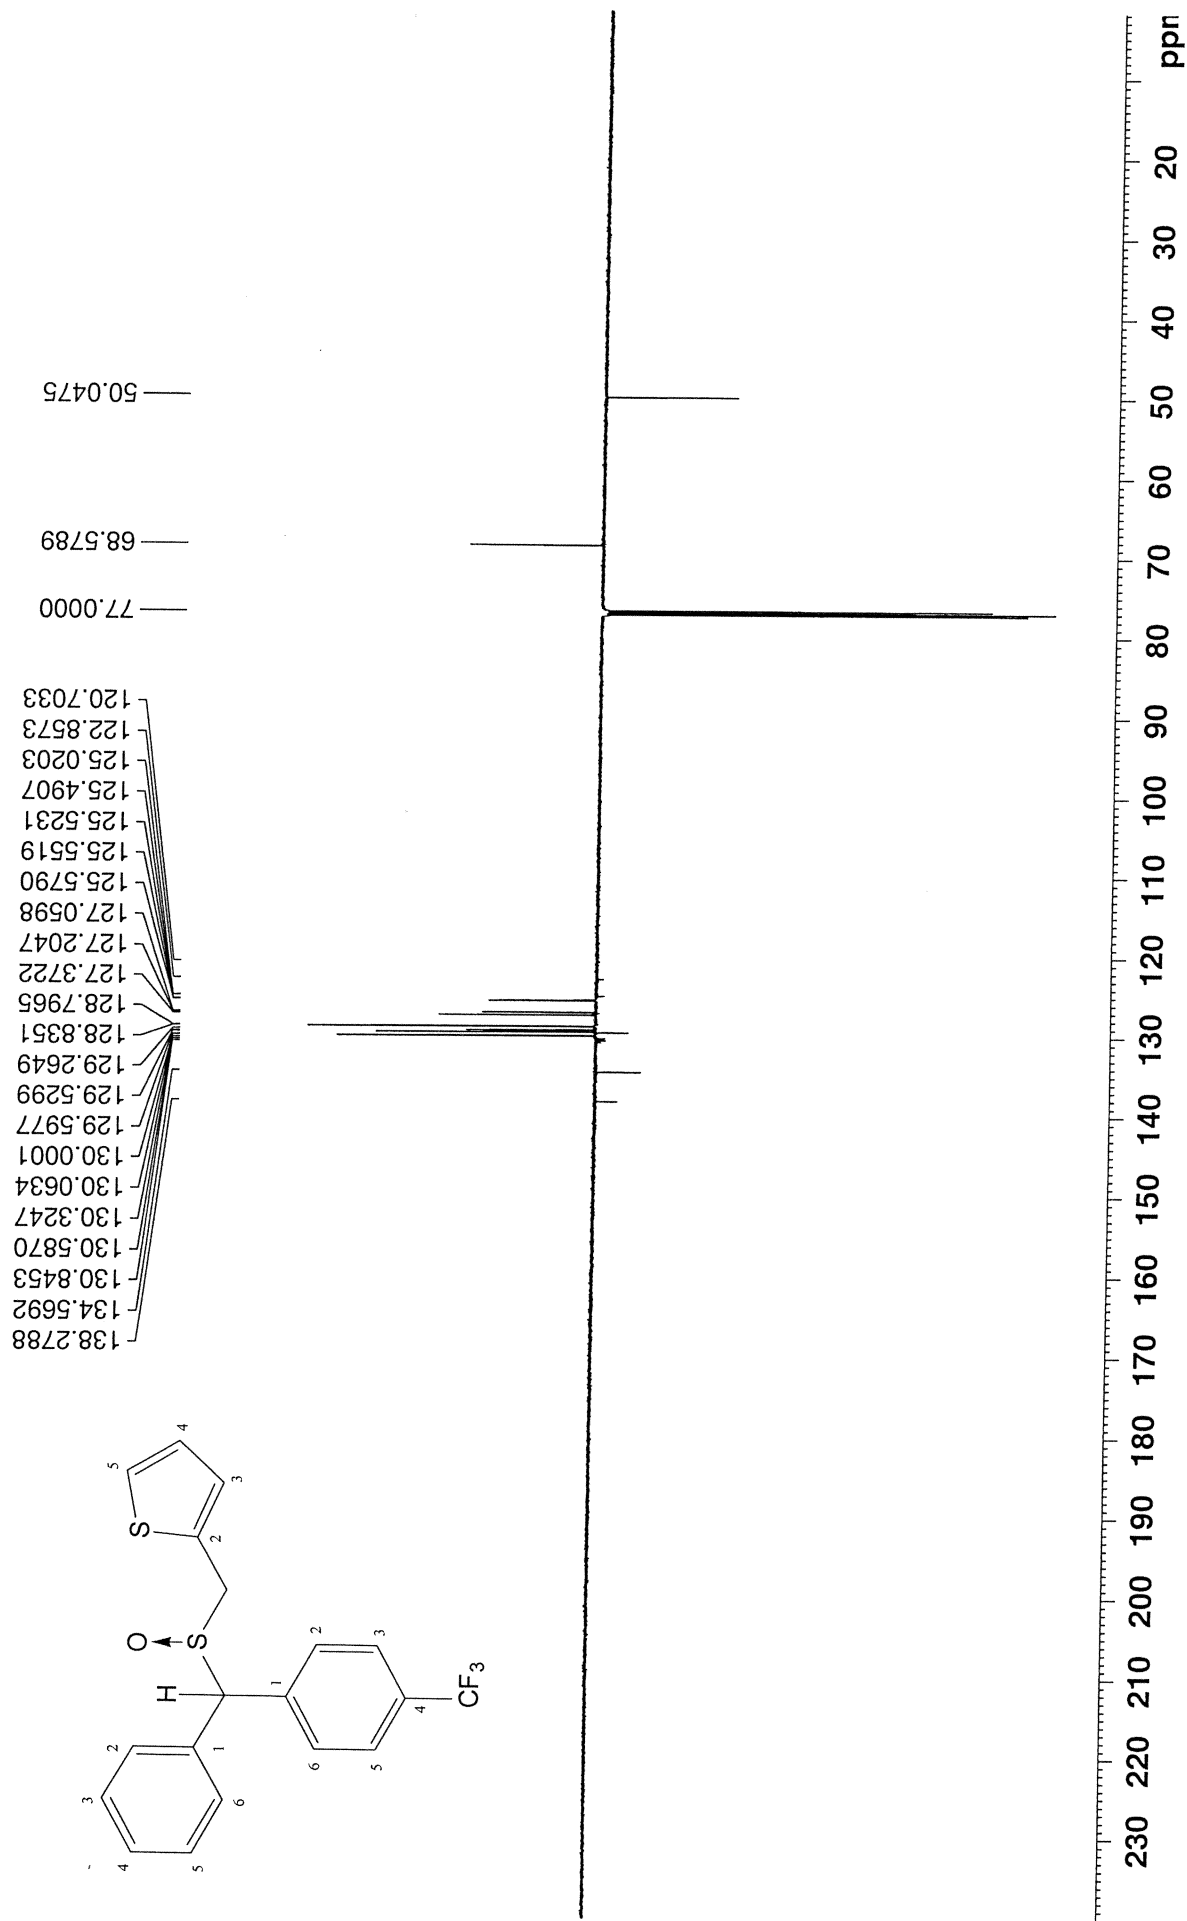

PN010S1P2 in cdcl3 (APT) 17.5.2019

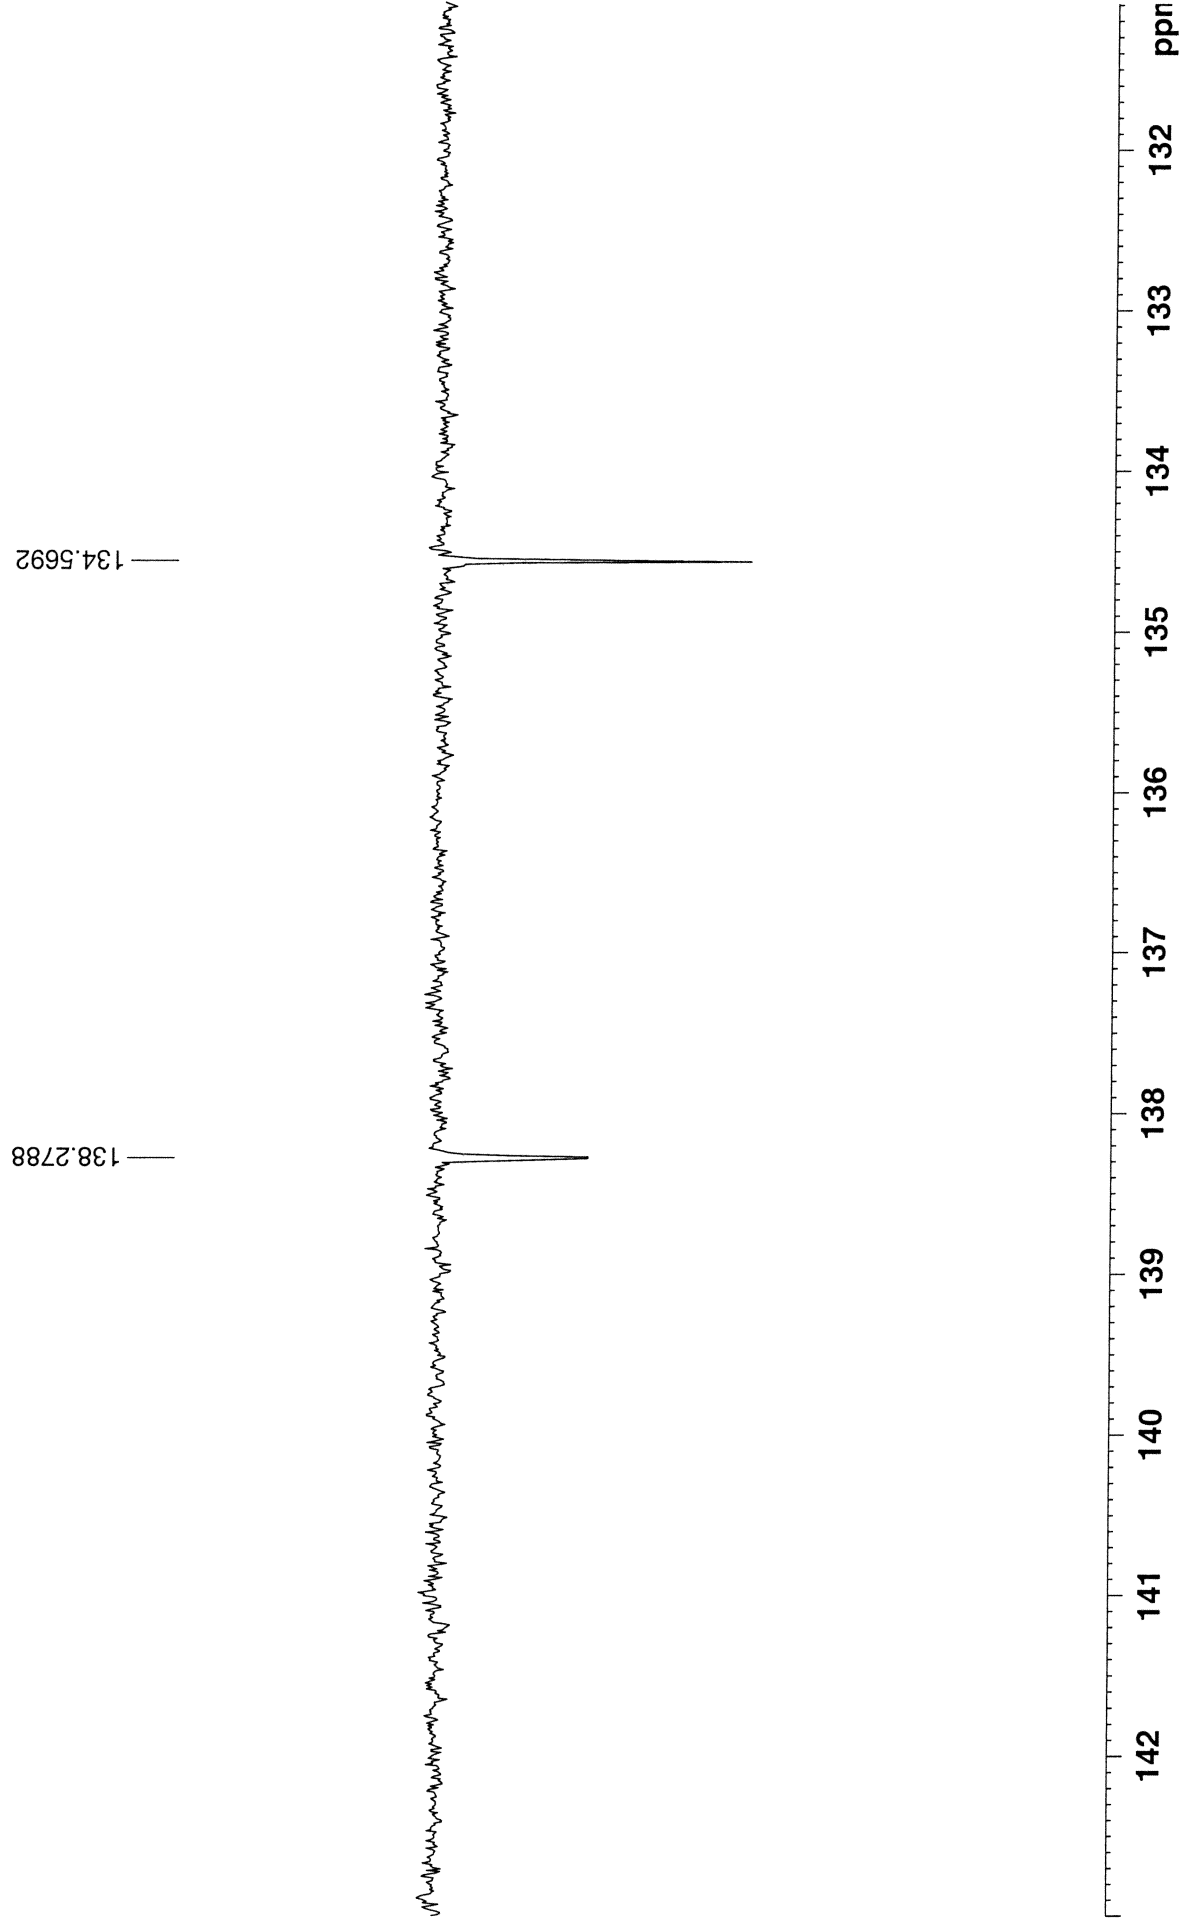

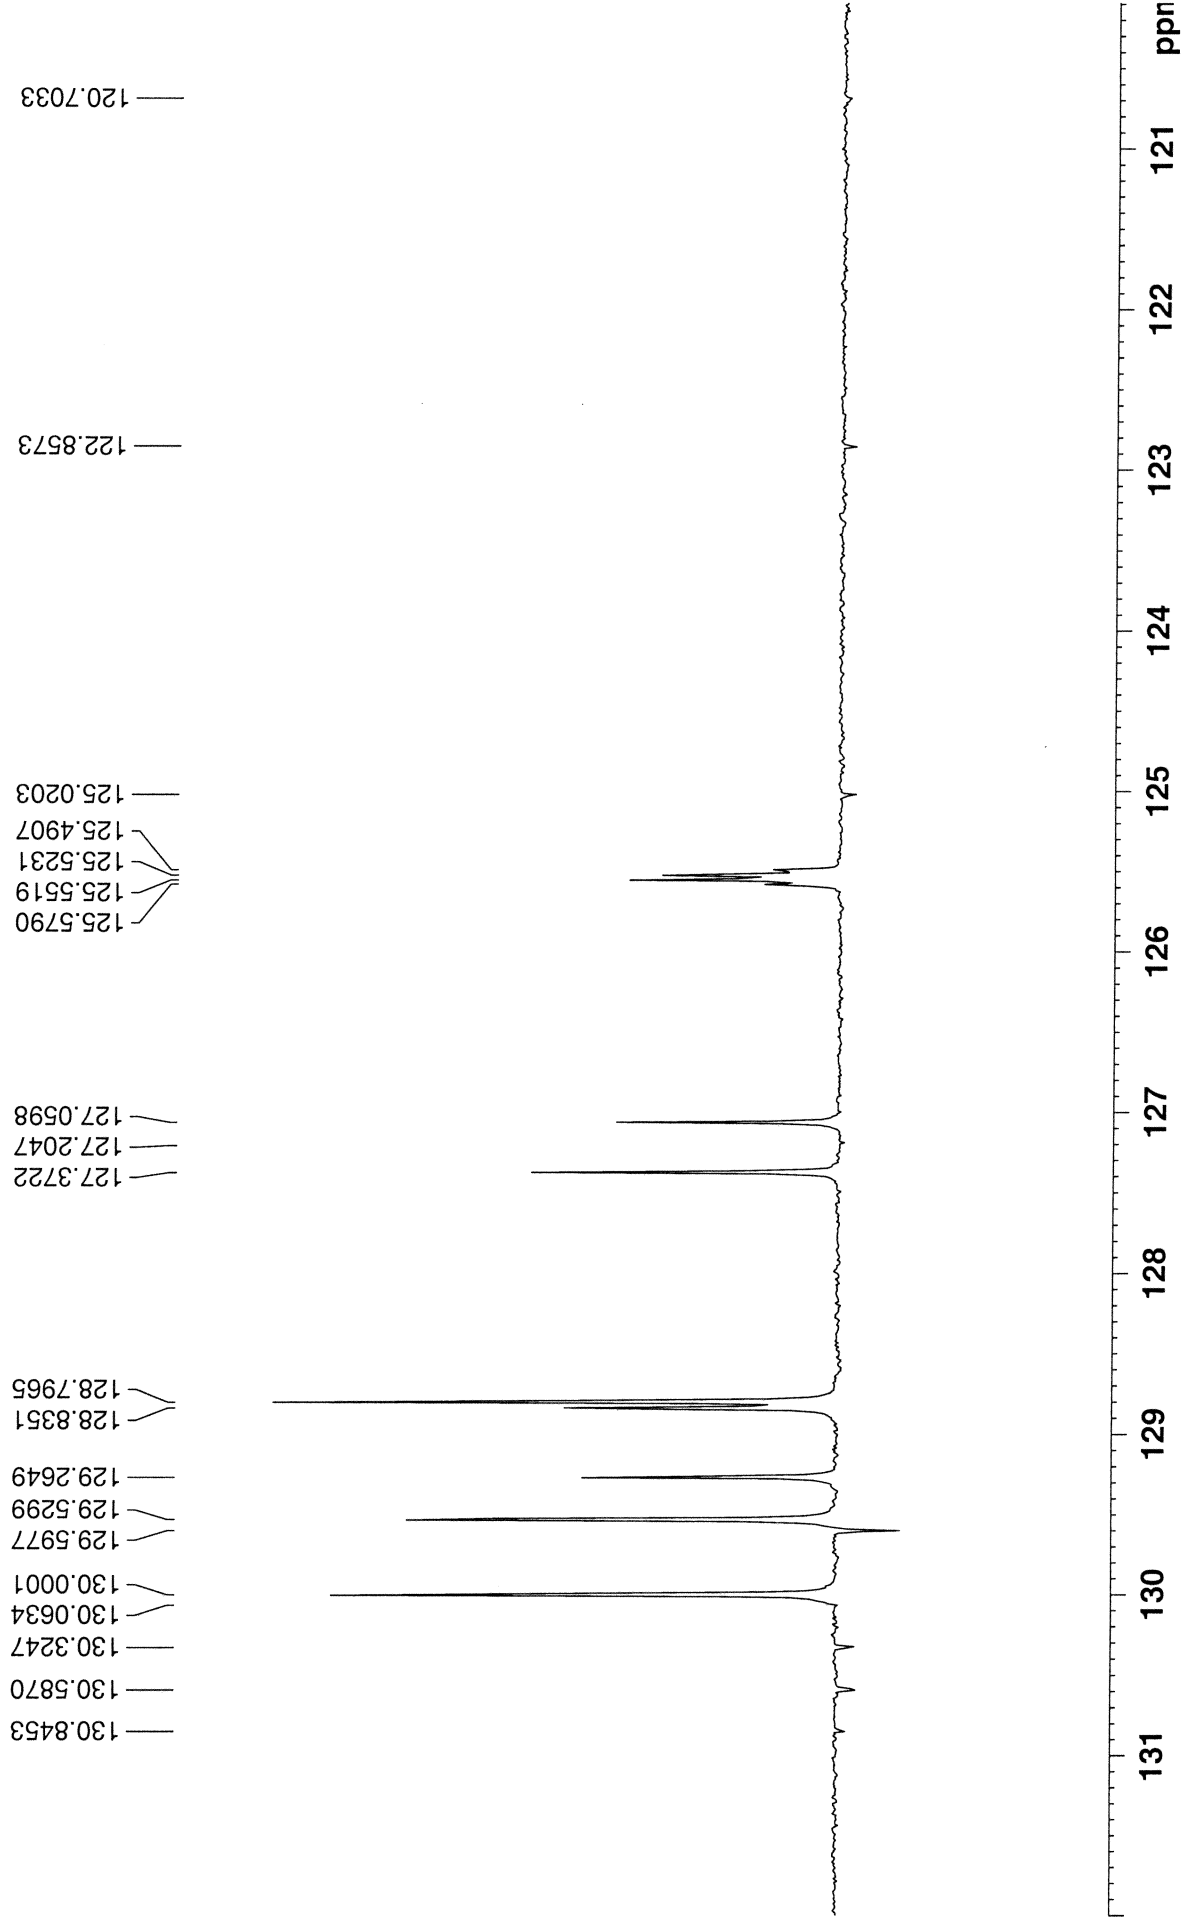

PN010S1P2 in cdcl3 (APT) 17.5.2019

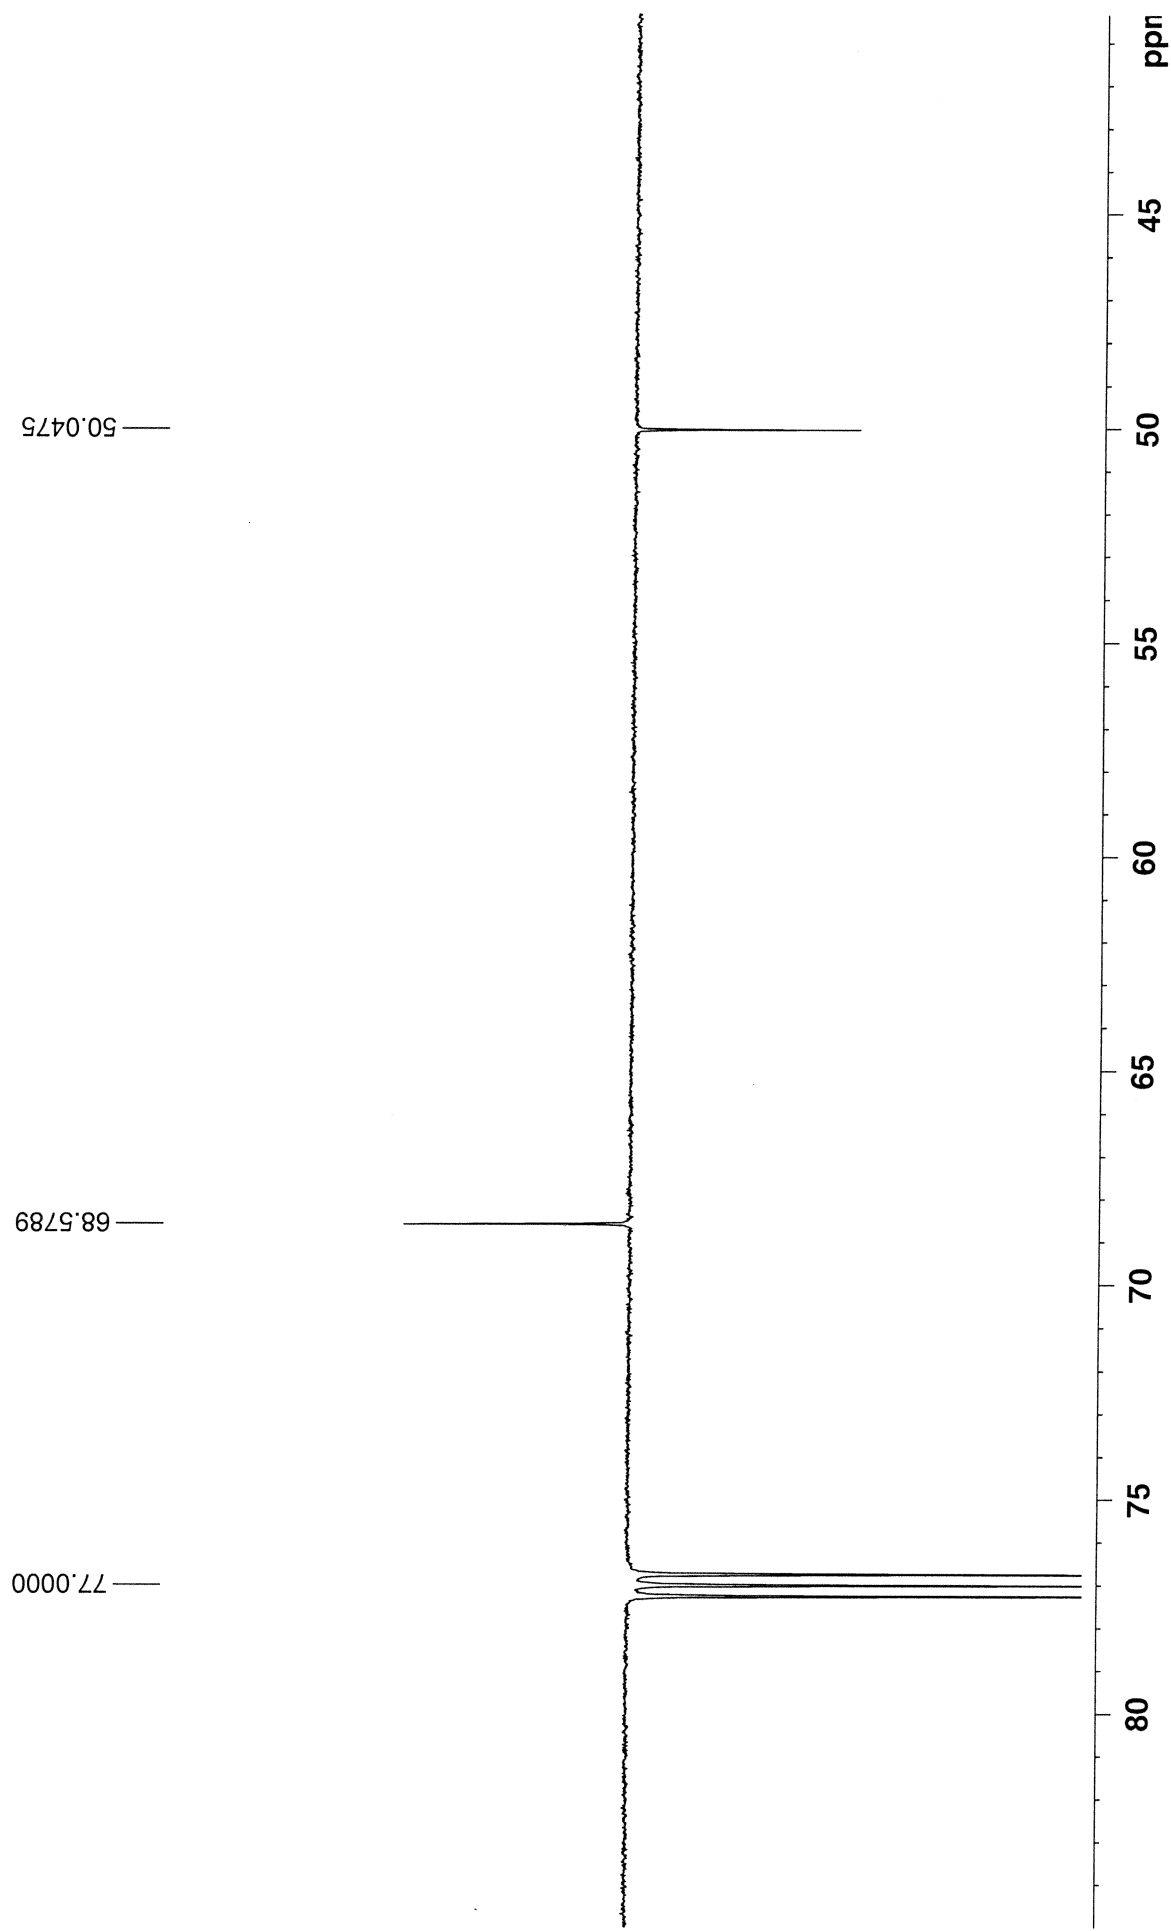



Figure S67c. NMR spectra of compound 7q.

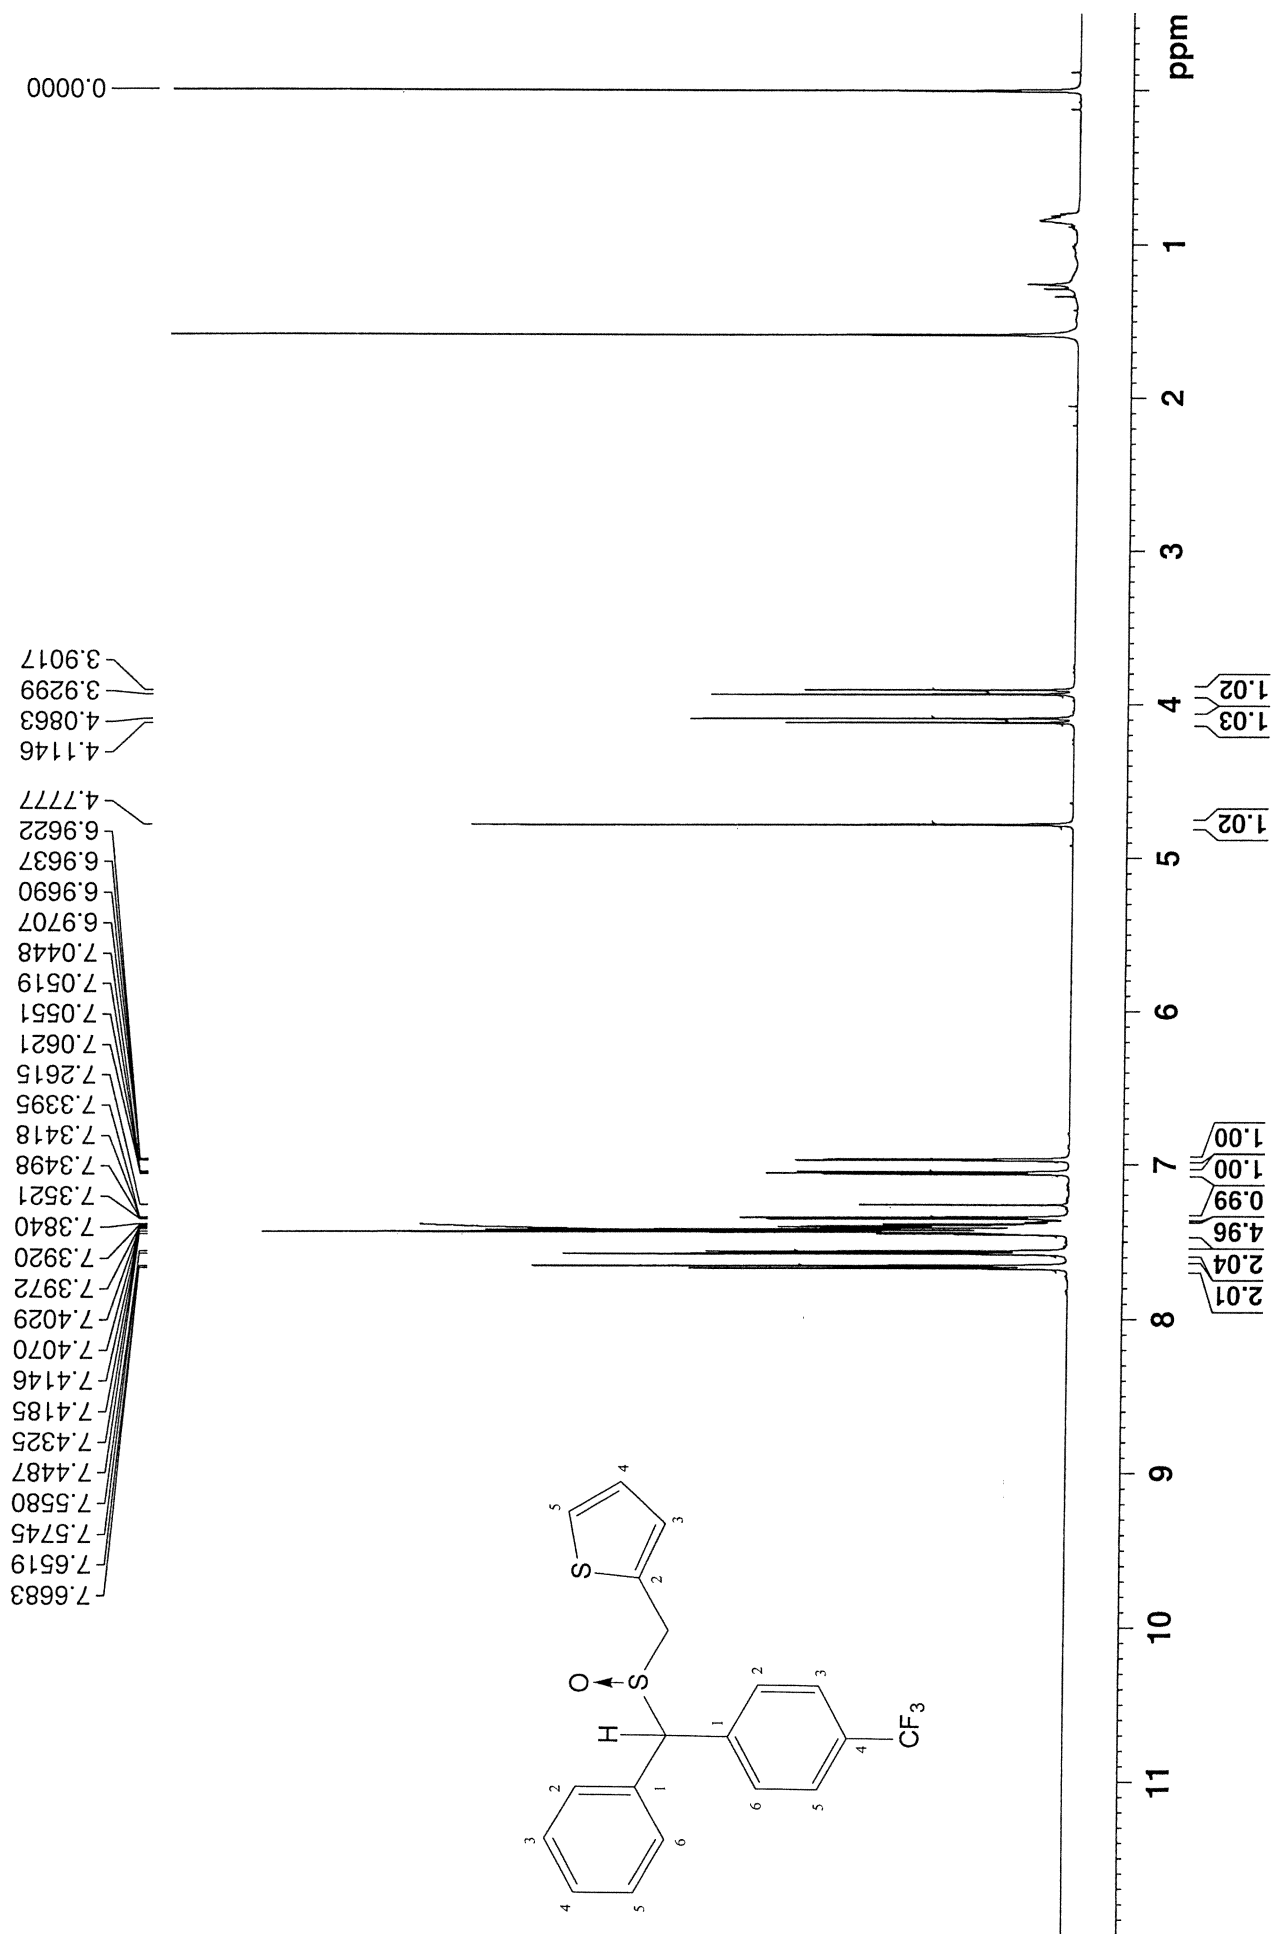

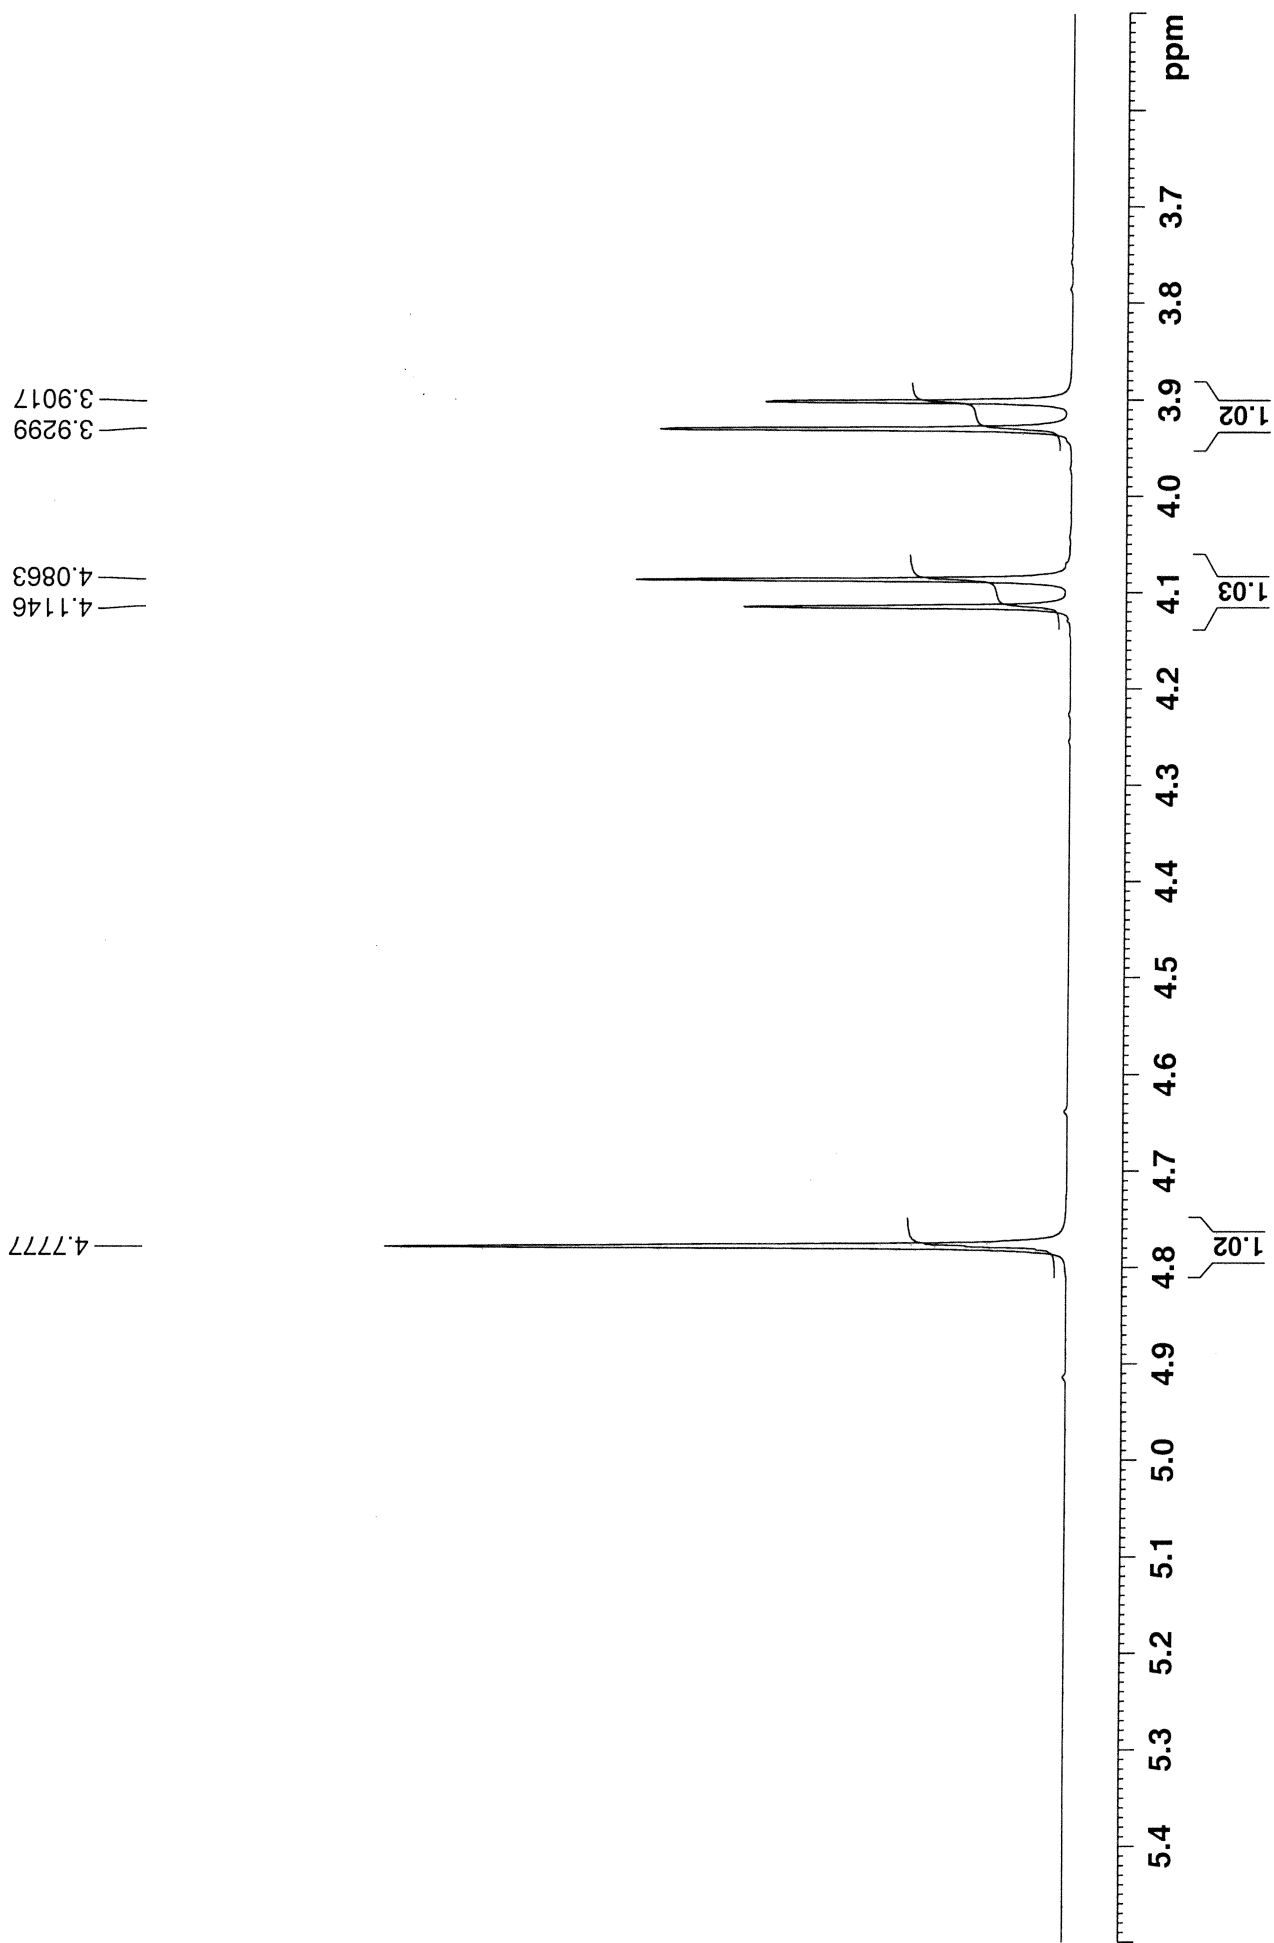

7.6683  
7.6519  
7.5745  
7.5580  
7.4487  
7.4325  
7.4185  
7.4146  
7.4070  
7.4029  
7.3972  
7.3920  
7.3840  
7.3521  
7.3498  
7.3418  
7.3395  
7.2615

7.0621  
7.0551  
7.0519  
7.0448  
6.9707  
6.9690  
6.9637  
6.9622

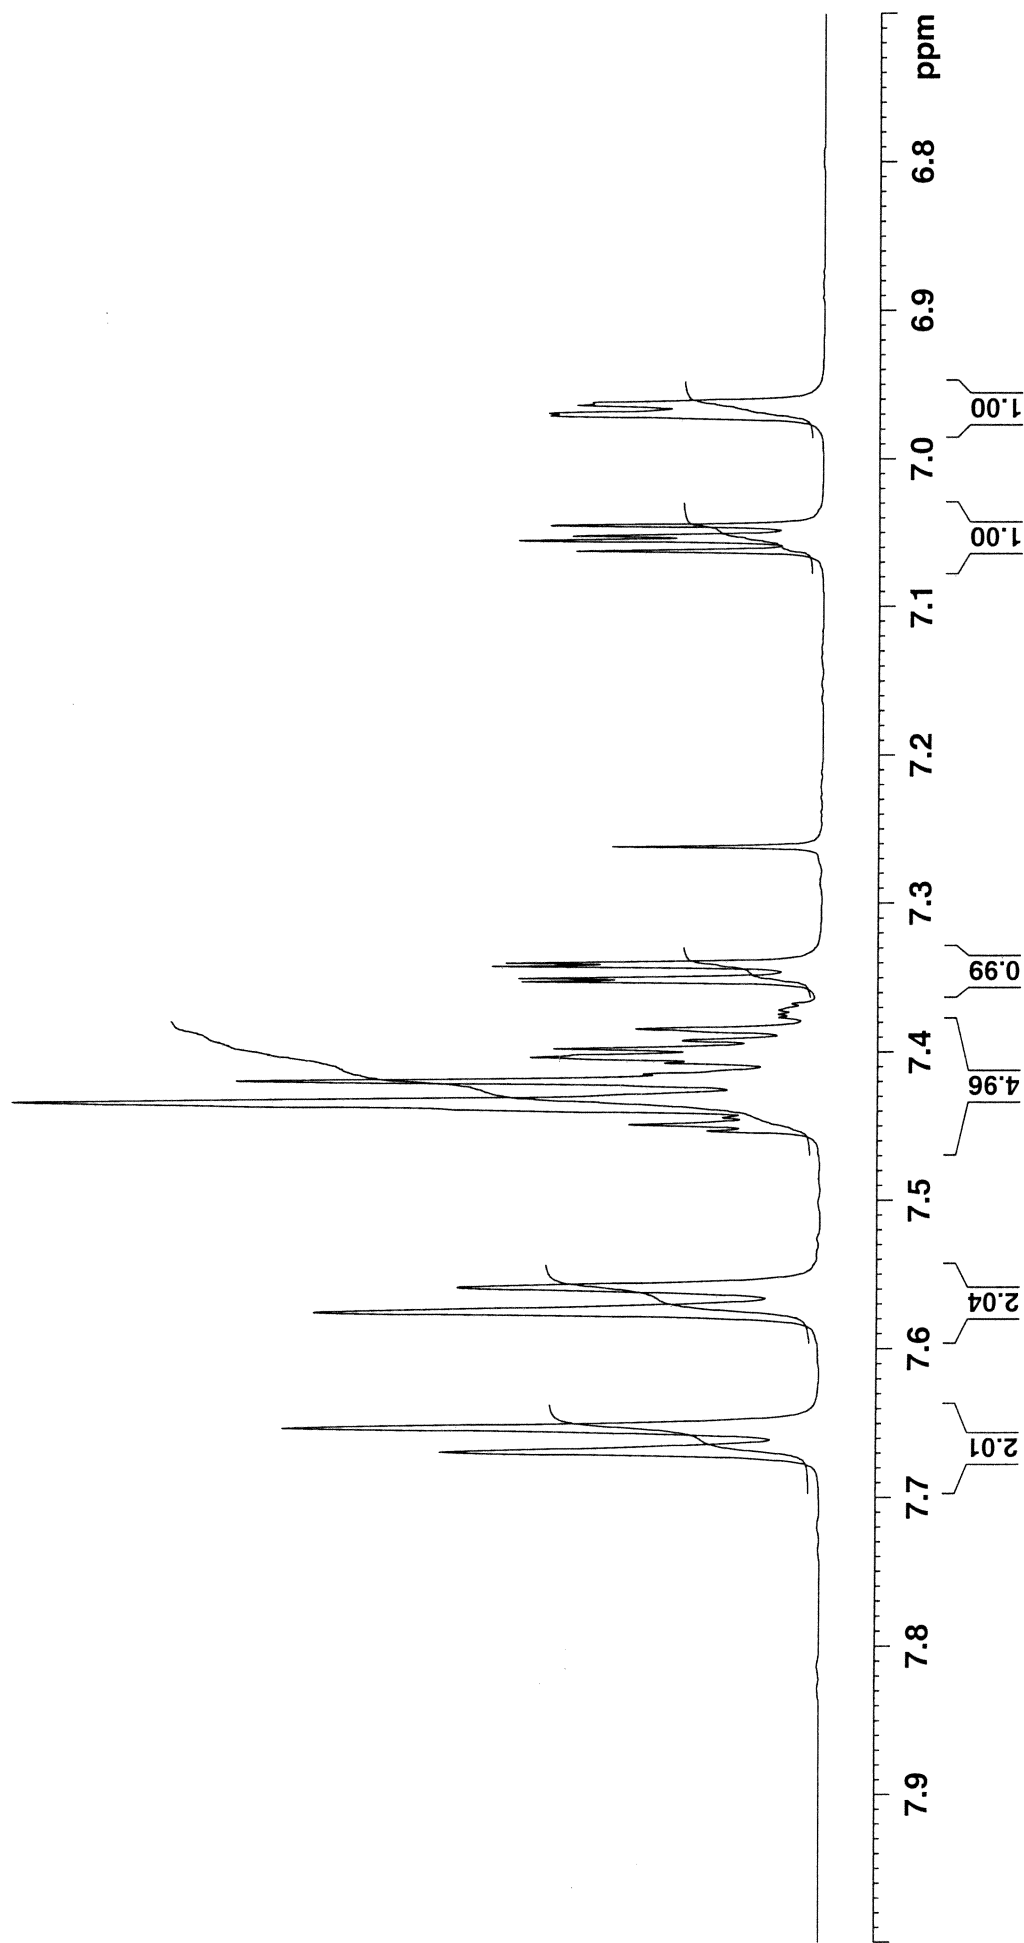

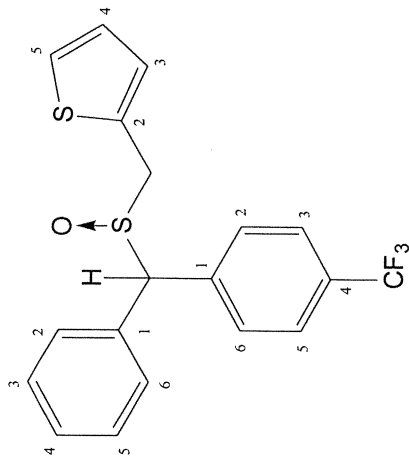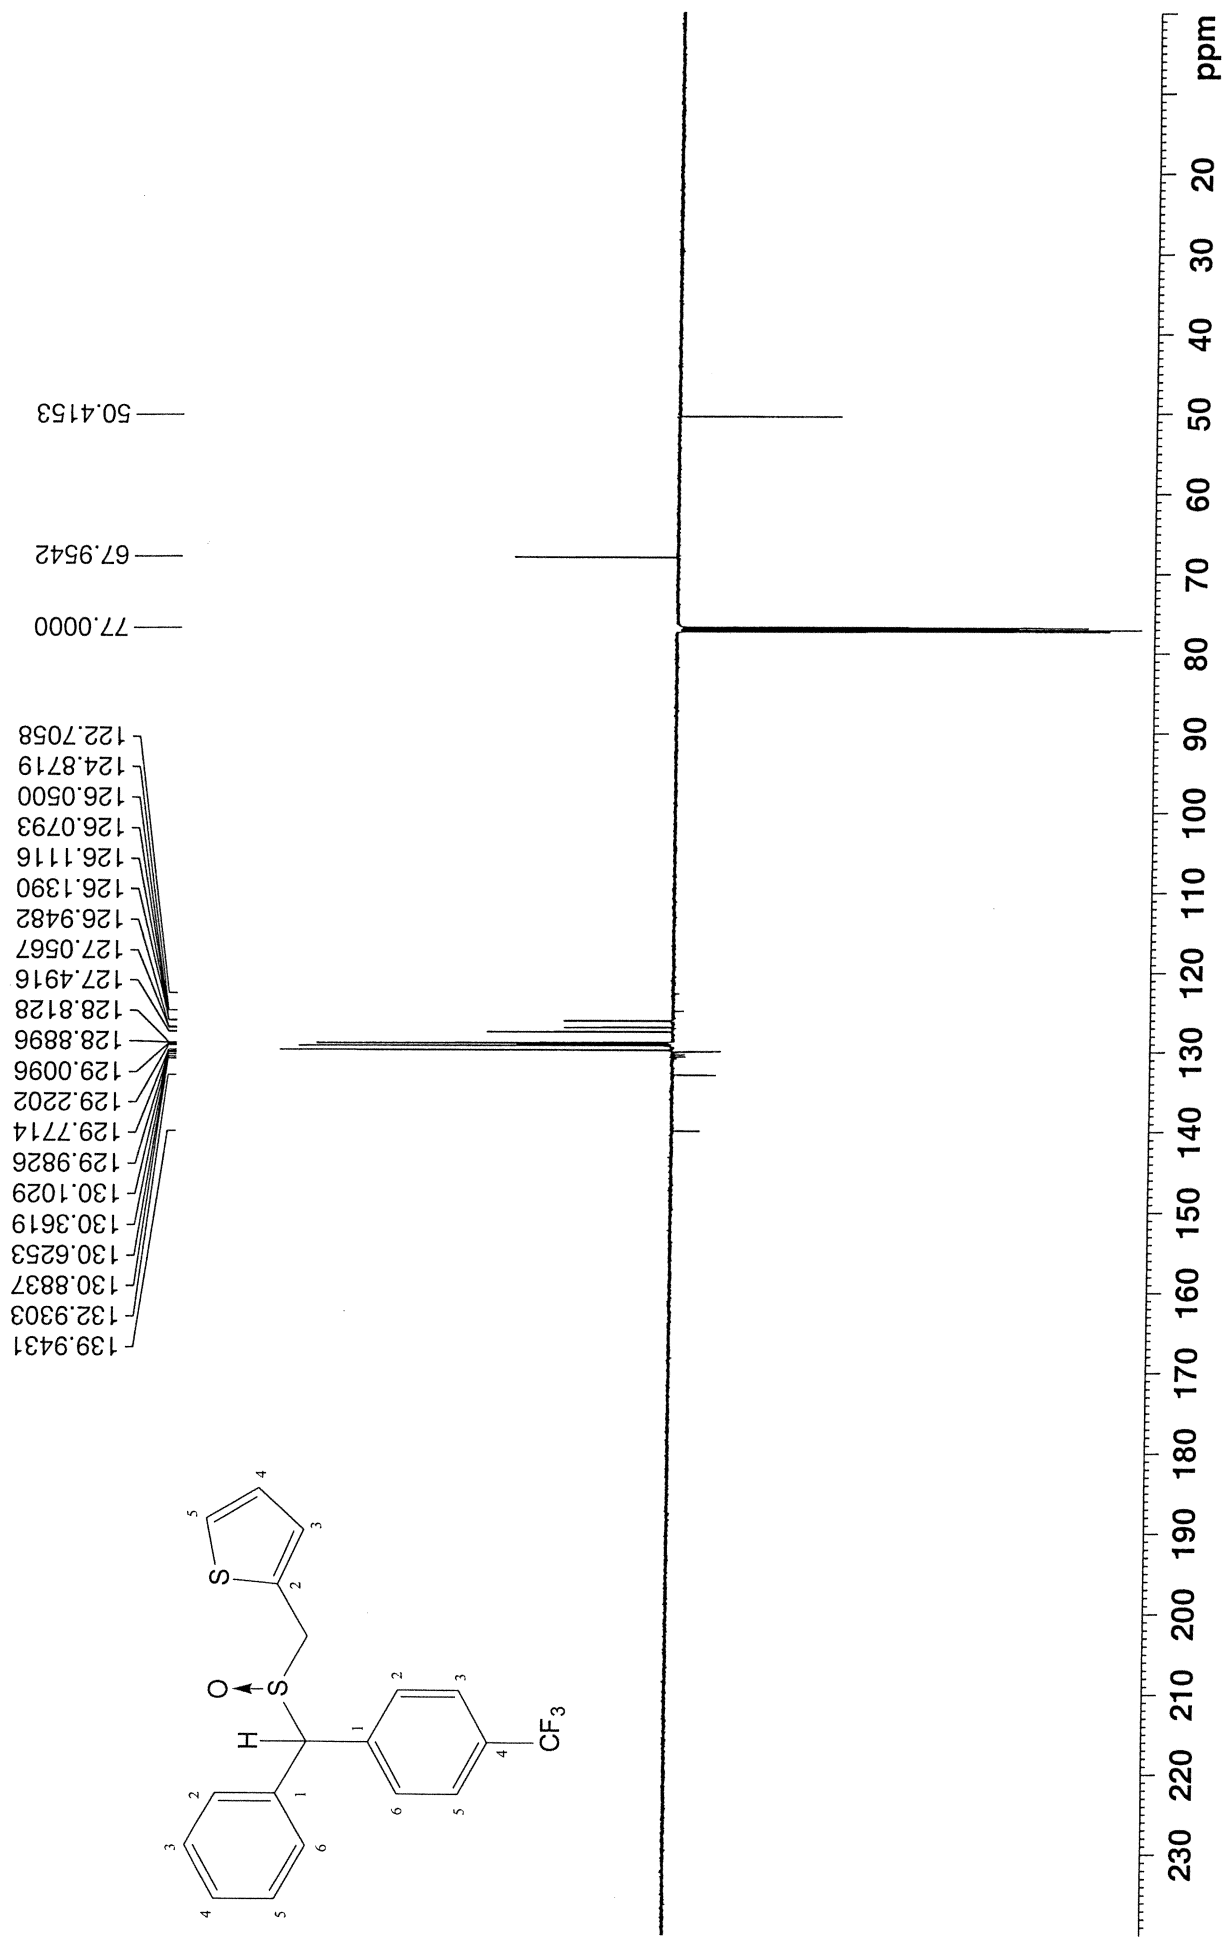

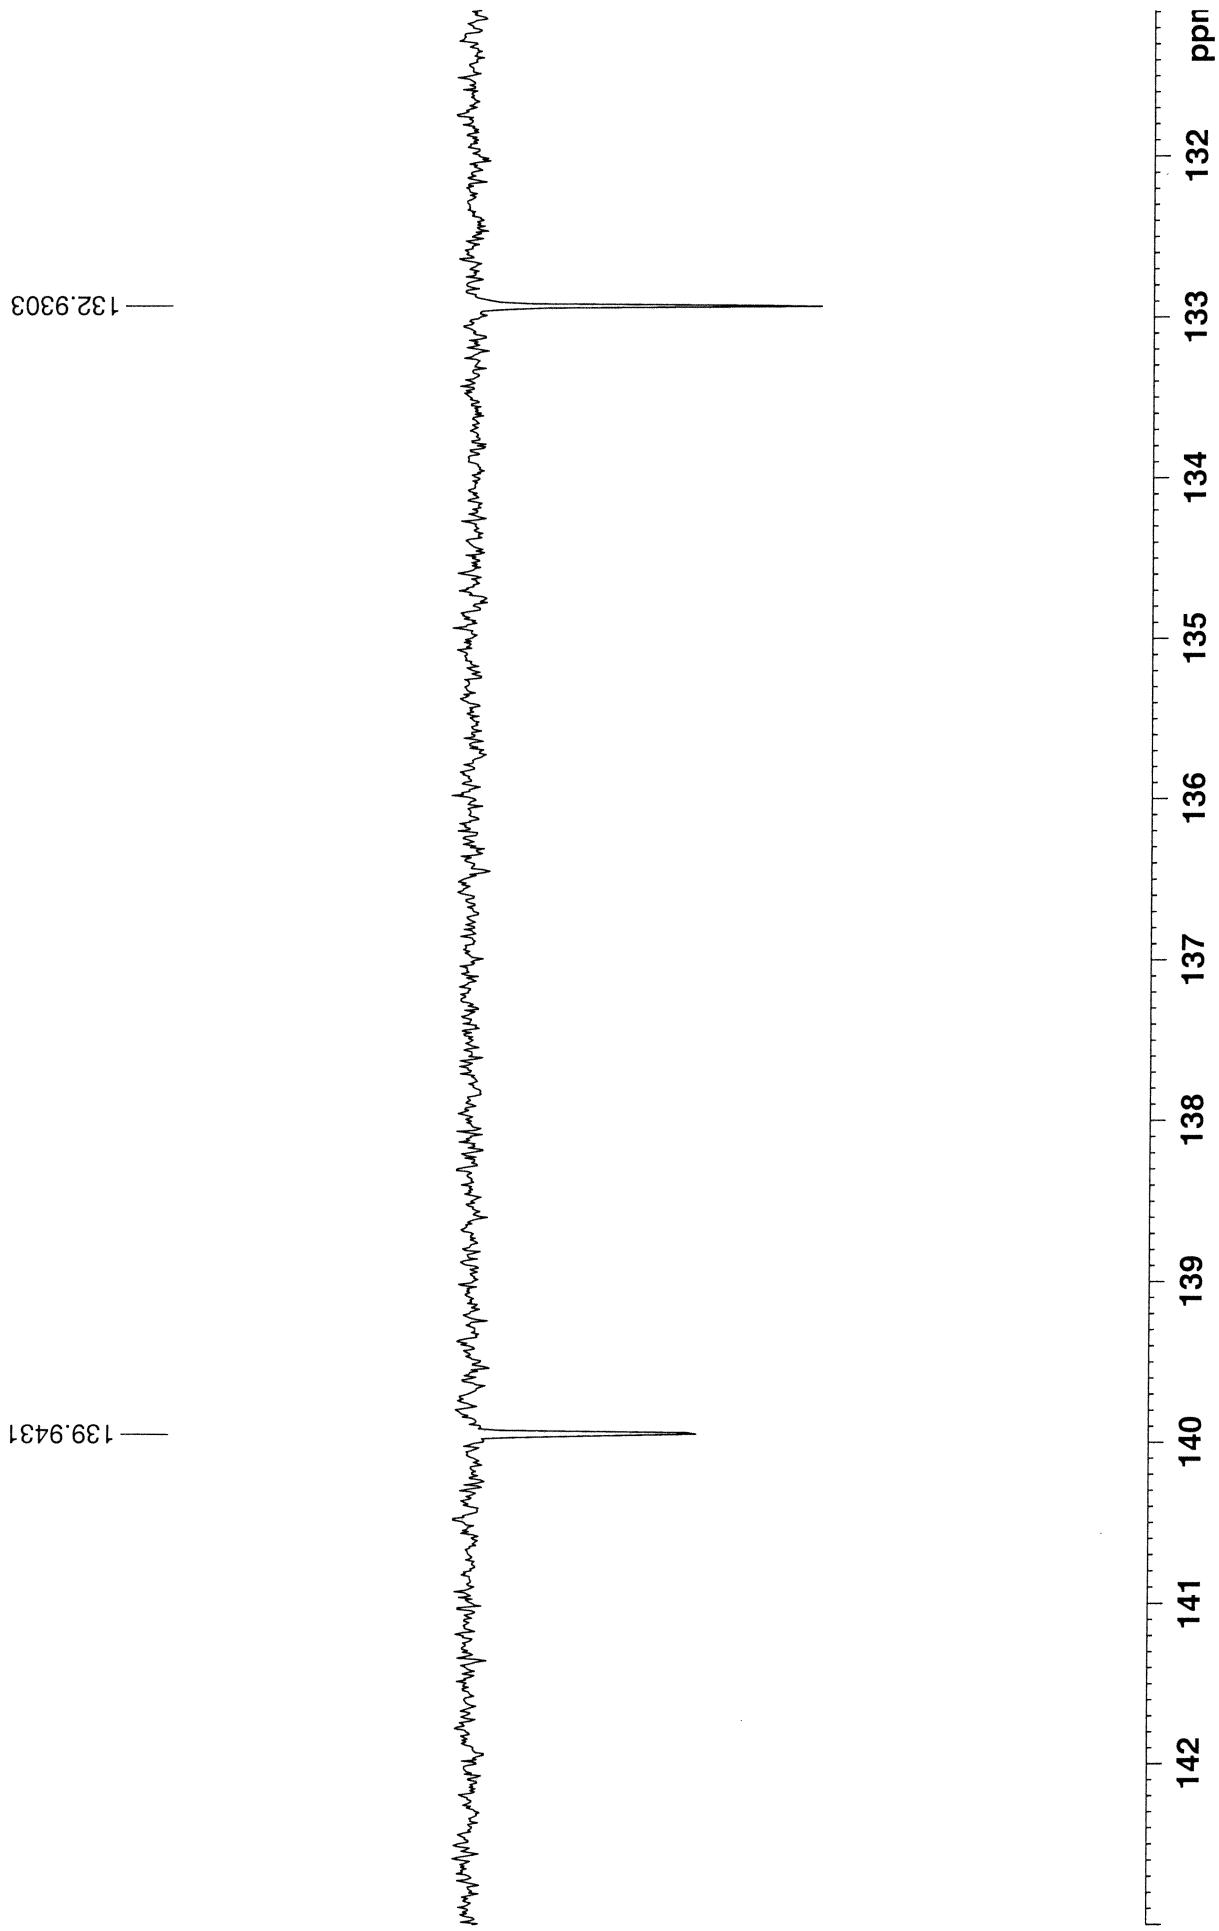

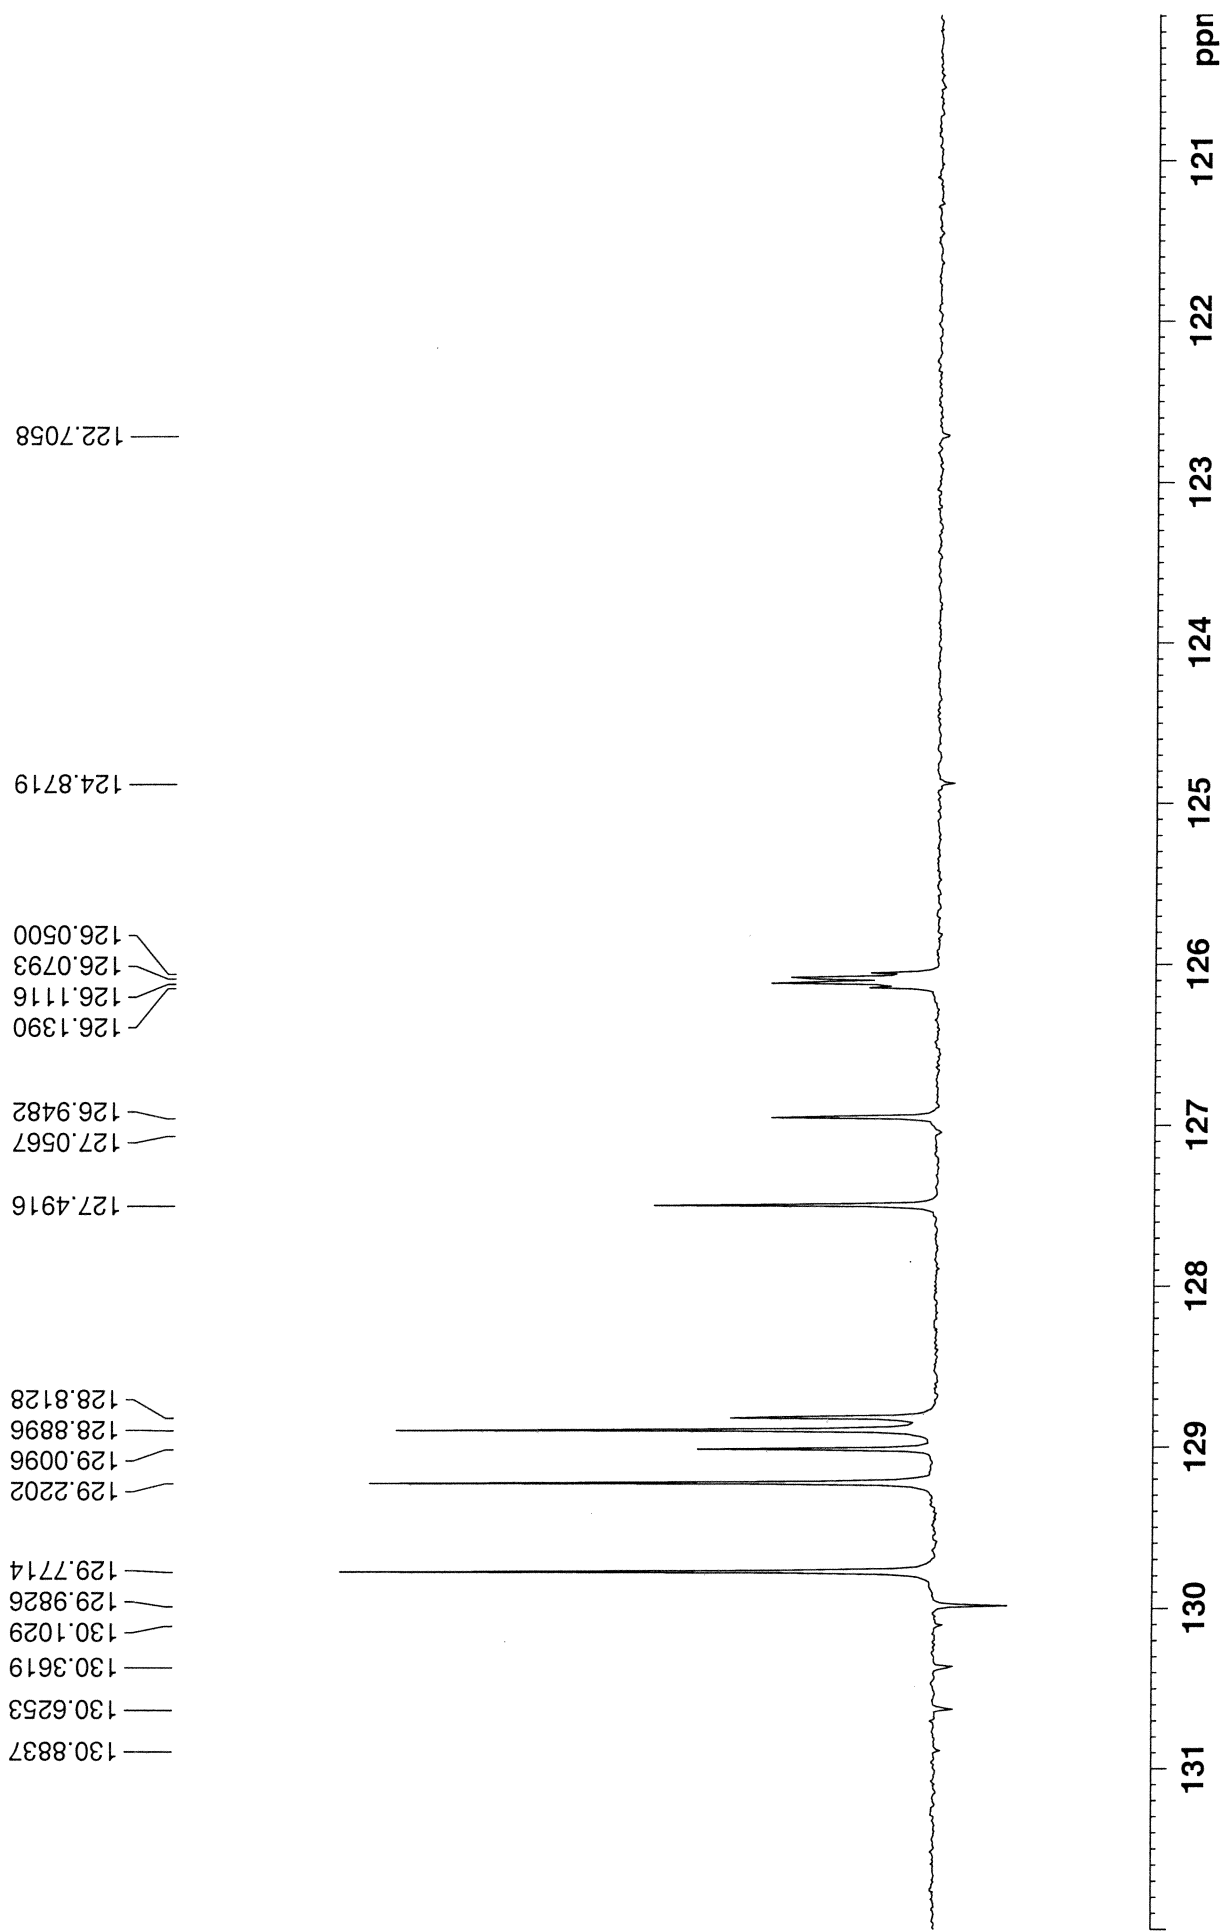

PN010S2P1 in cdcl3 (APT) 17.5.2019

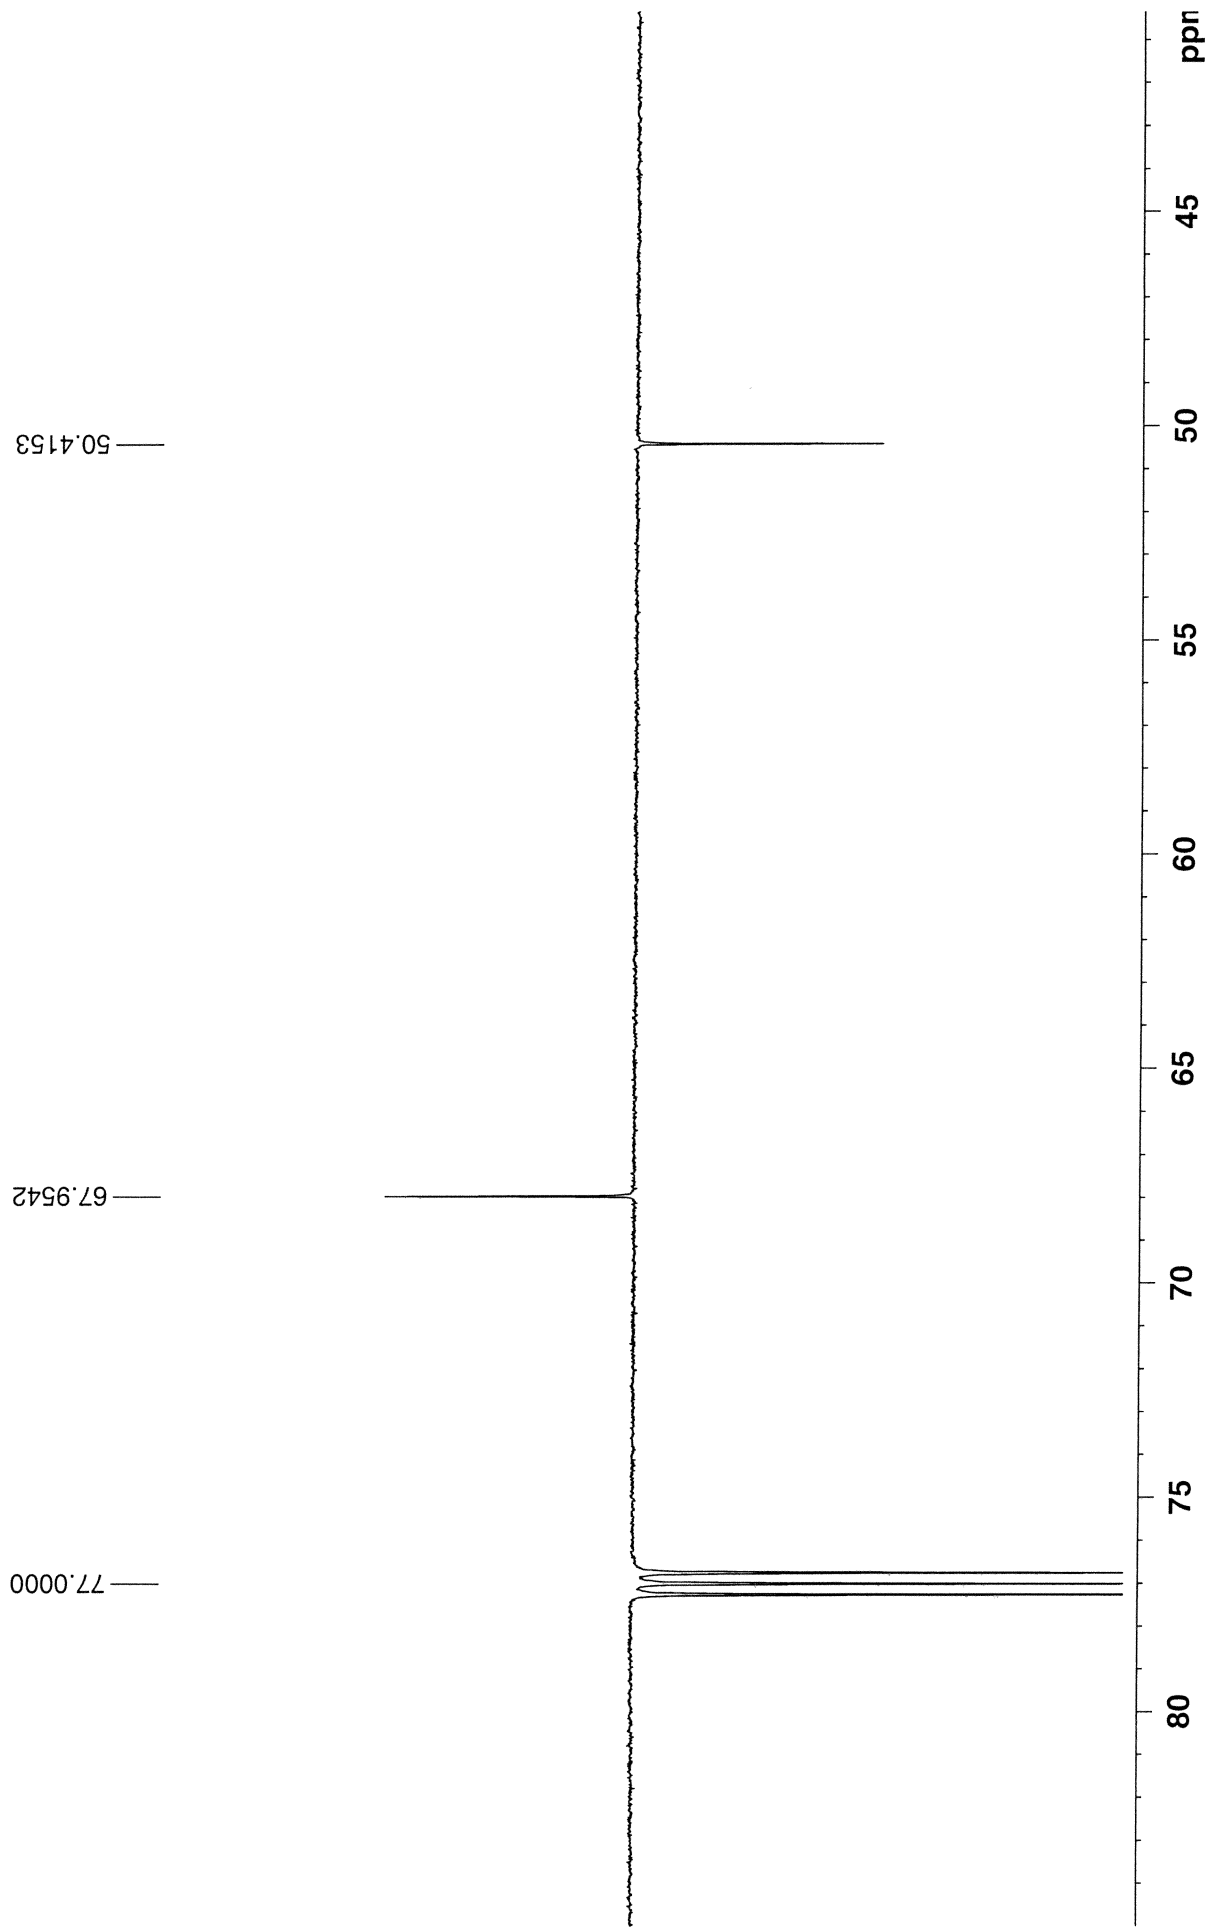

**Figure S68c.** NMR spectra of compound **8q**.

PN010S2P2 in cdcl3 (Proton) 17.5.2019

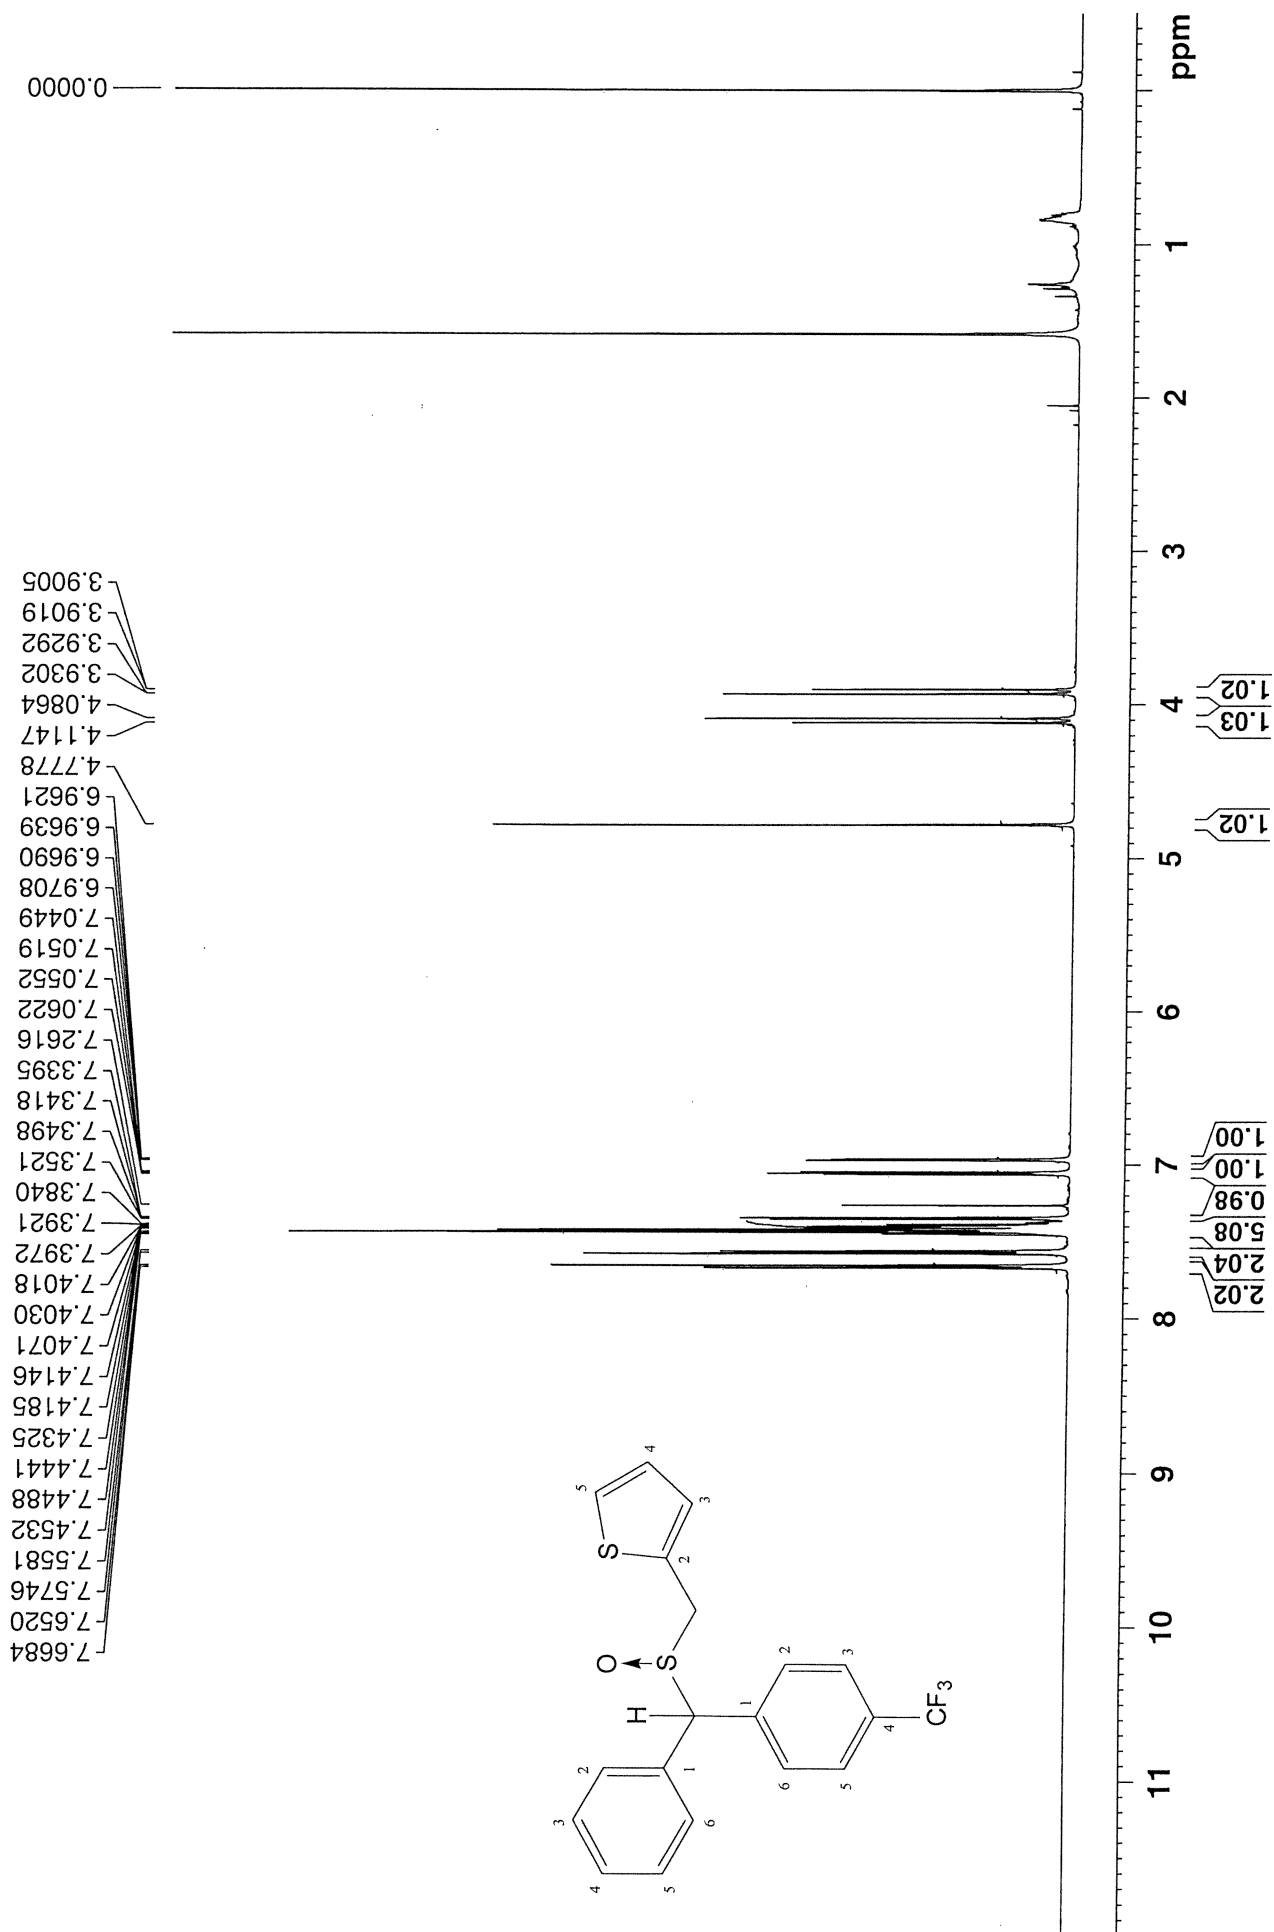



7.6684  
7.6520  
7.5746  
7.5581  
7.4532  
7.4488  
7.4441  
7.4325  
7.4185  
7.4146  
7.4071  
7.4030  
7.4018  
7.3972  
7.3921  
7.3840  
7.3521  
7.3498  
7.3418  
7.3395  
7.2616

7.0622  
7.0552  
7.0519  
7.0449  
6.9708  
6.9690  
6.9639  
6.9621

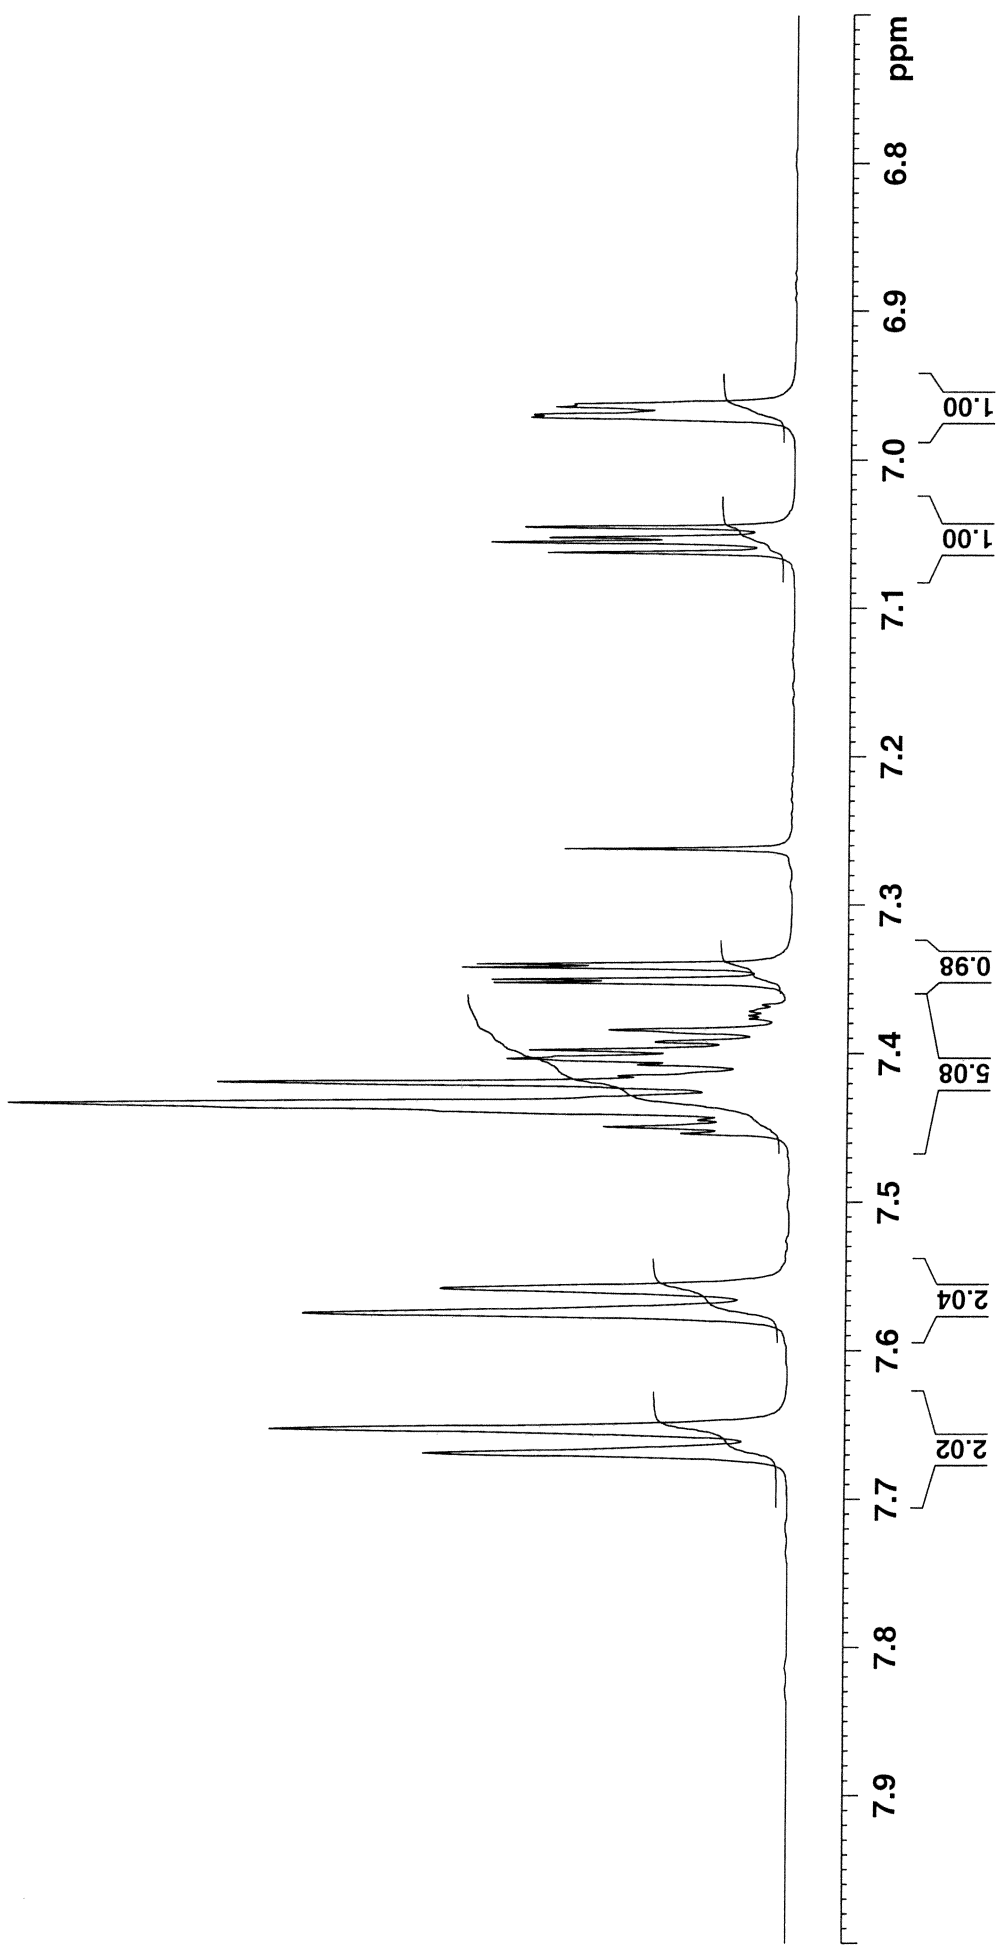

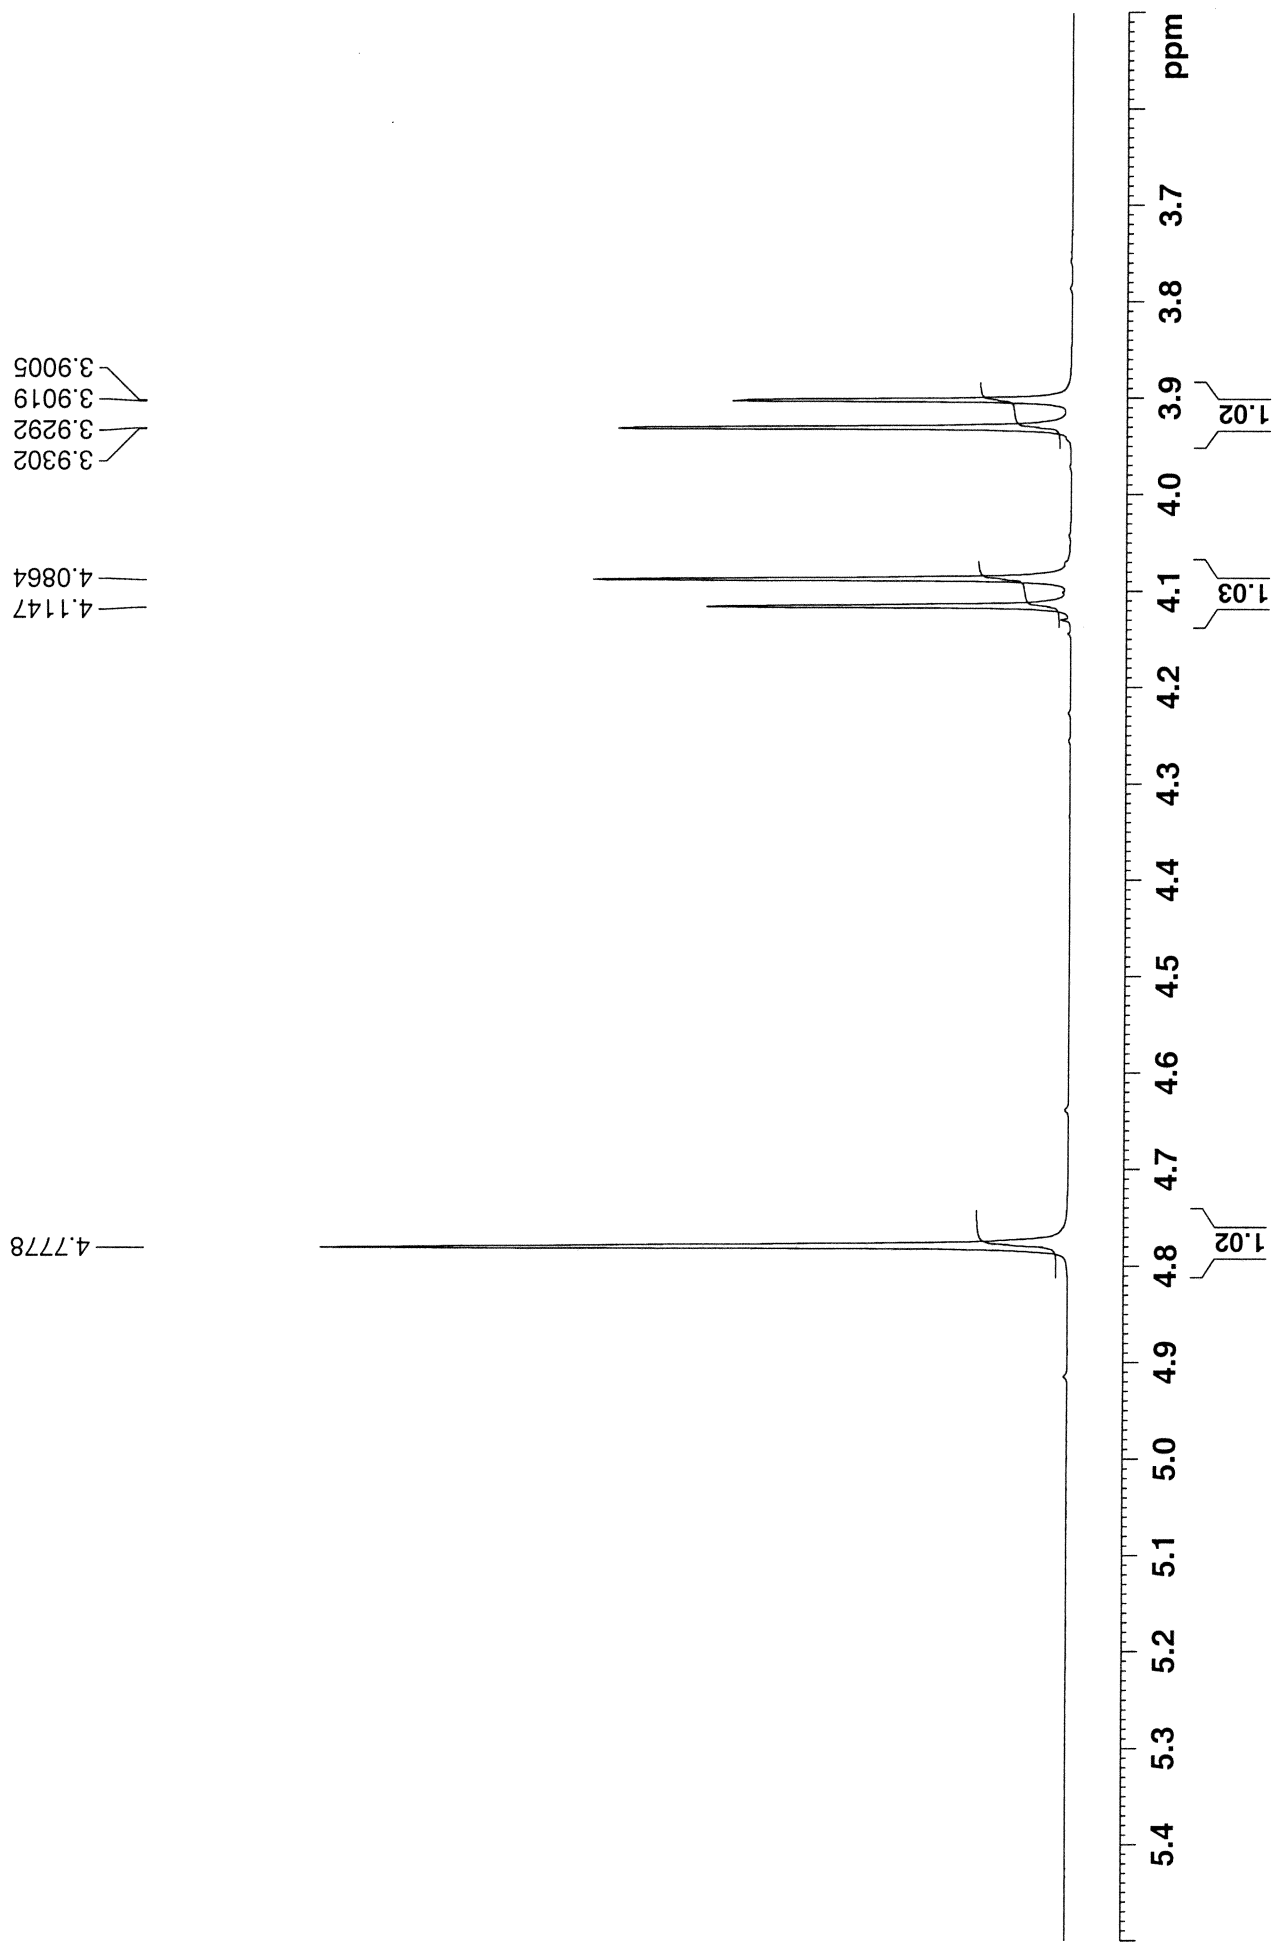

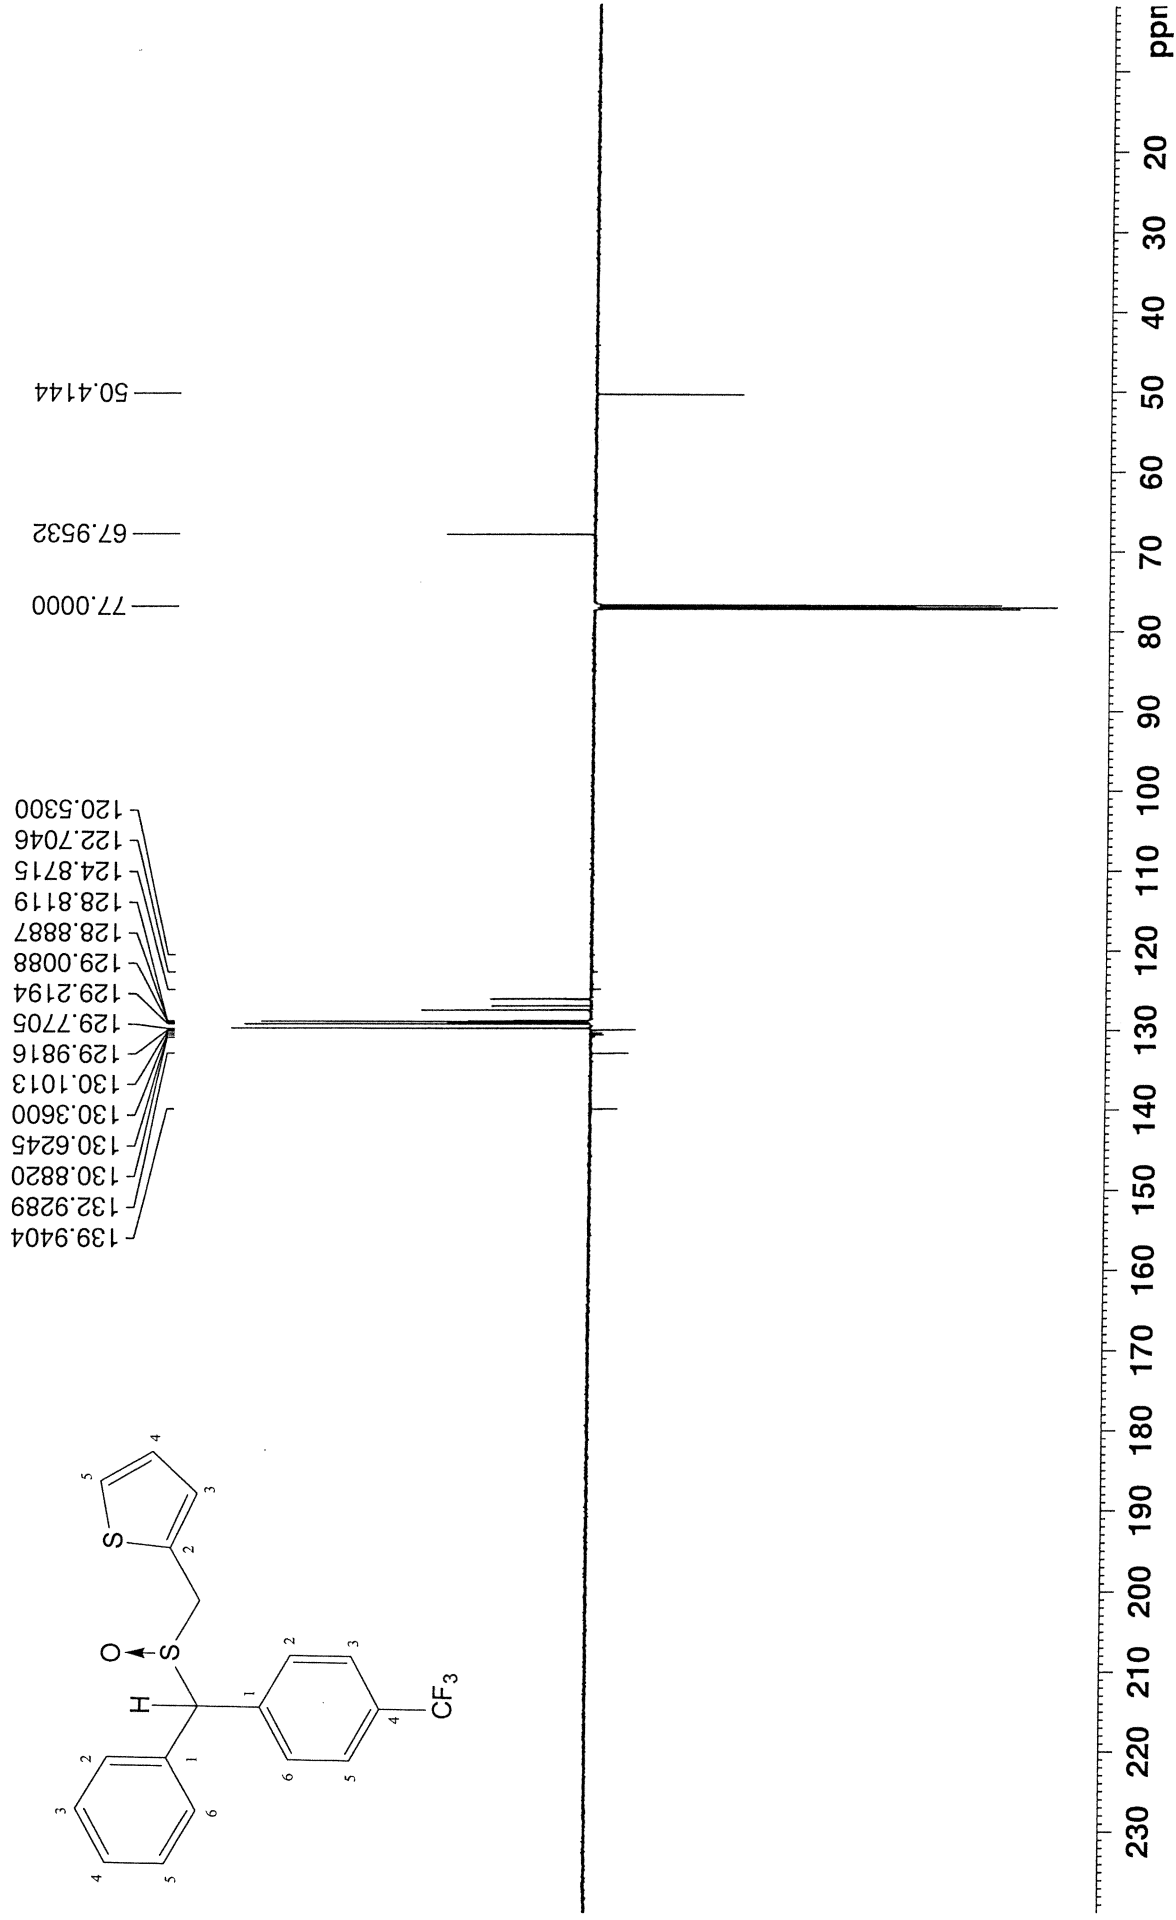

PN010S2P2 in cdcl3 (APT) 17.5.2019

139.9404

132.9289

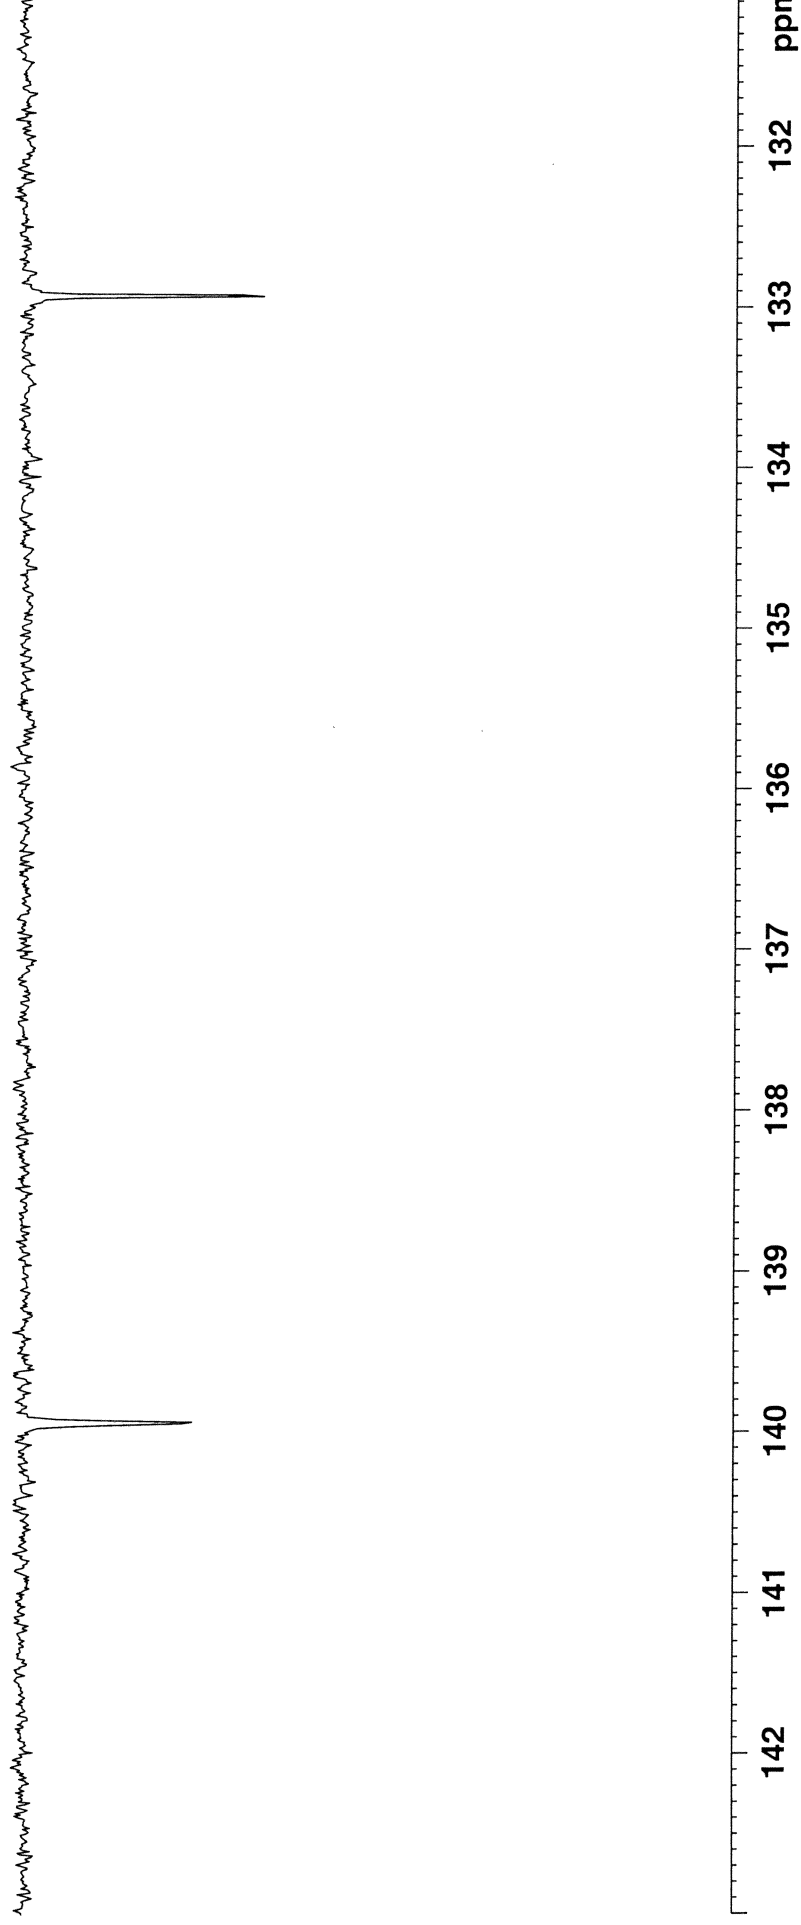

PN010S2P2 in cdcl3 (APT) 17.5.2019

130.8820  
130.6245  
130.3600  
130.1013  
129.9816  
129.7705  
129.2194  
129.0088  
128.8887  
128.8119

124.8715

122.7046

120.5300

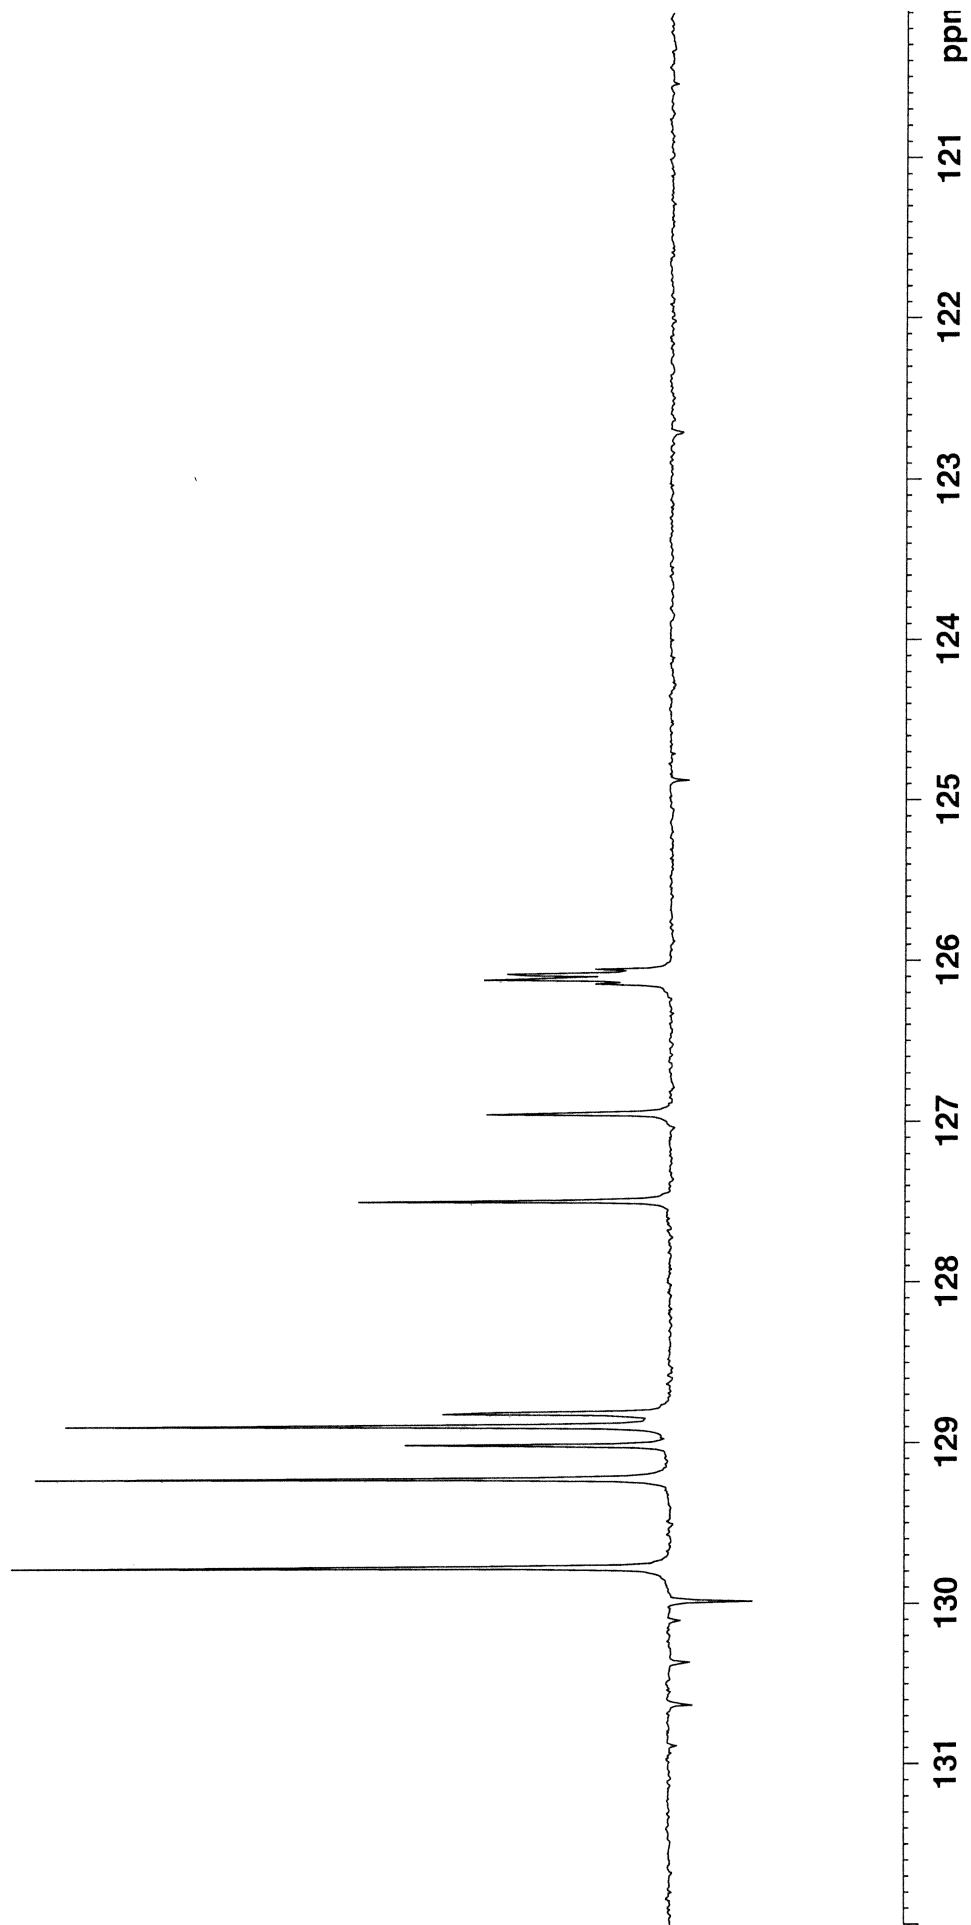

PN010S2P2 in cdcl3 (APT) 17.5.2019

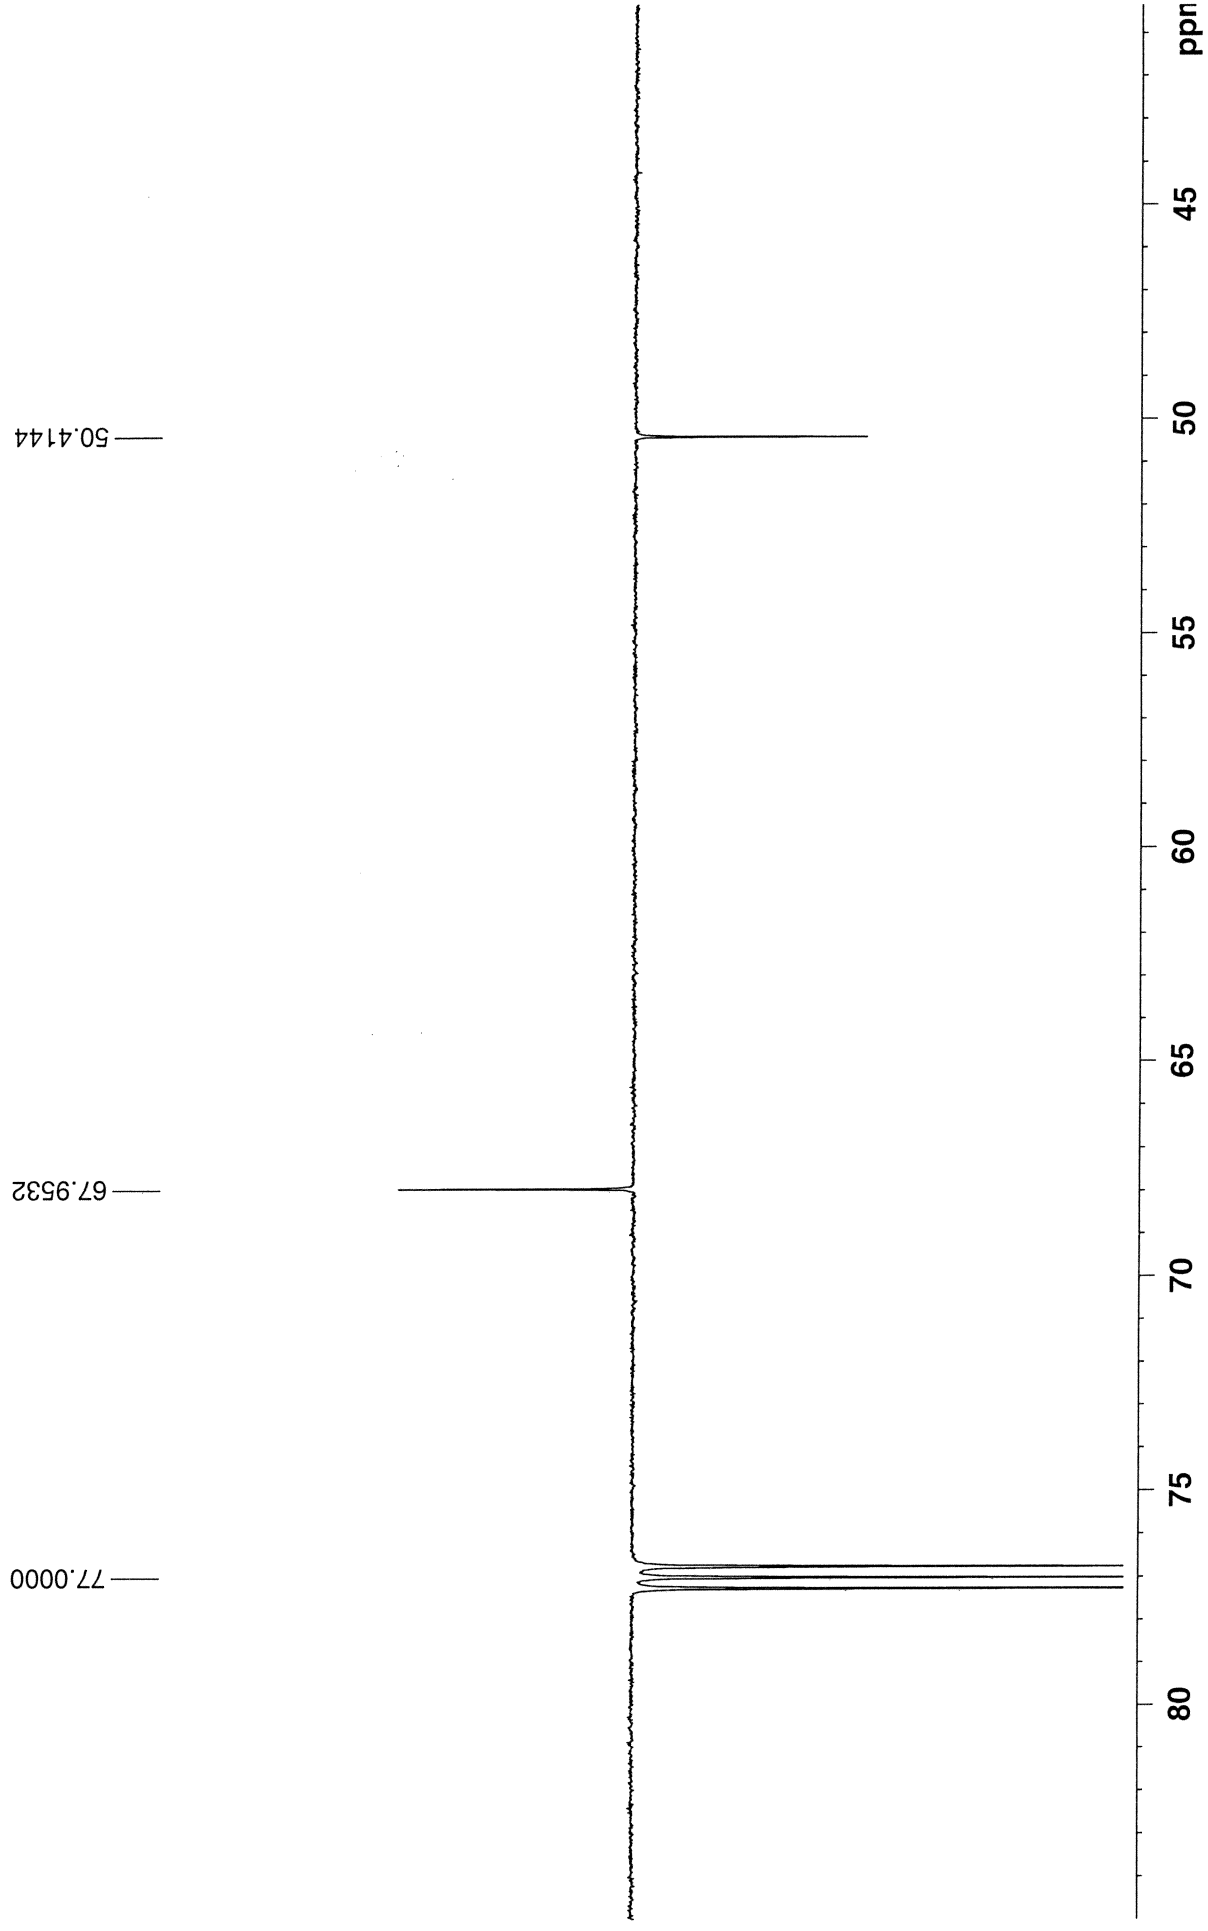

**Figure S69c.** NMR spectra of compound 5r.

CE166\_1\_1 in CDCl<sub>3</sub> (Proton) 27.12.2021

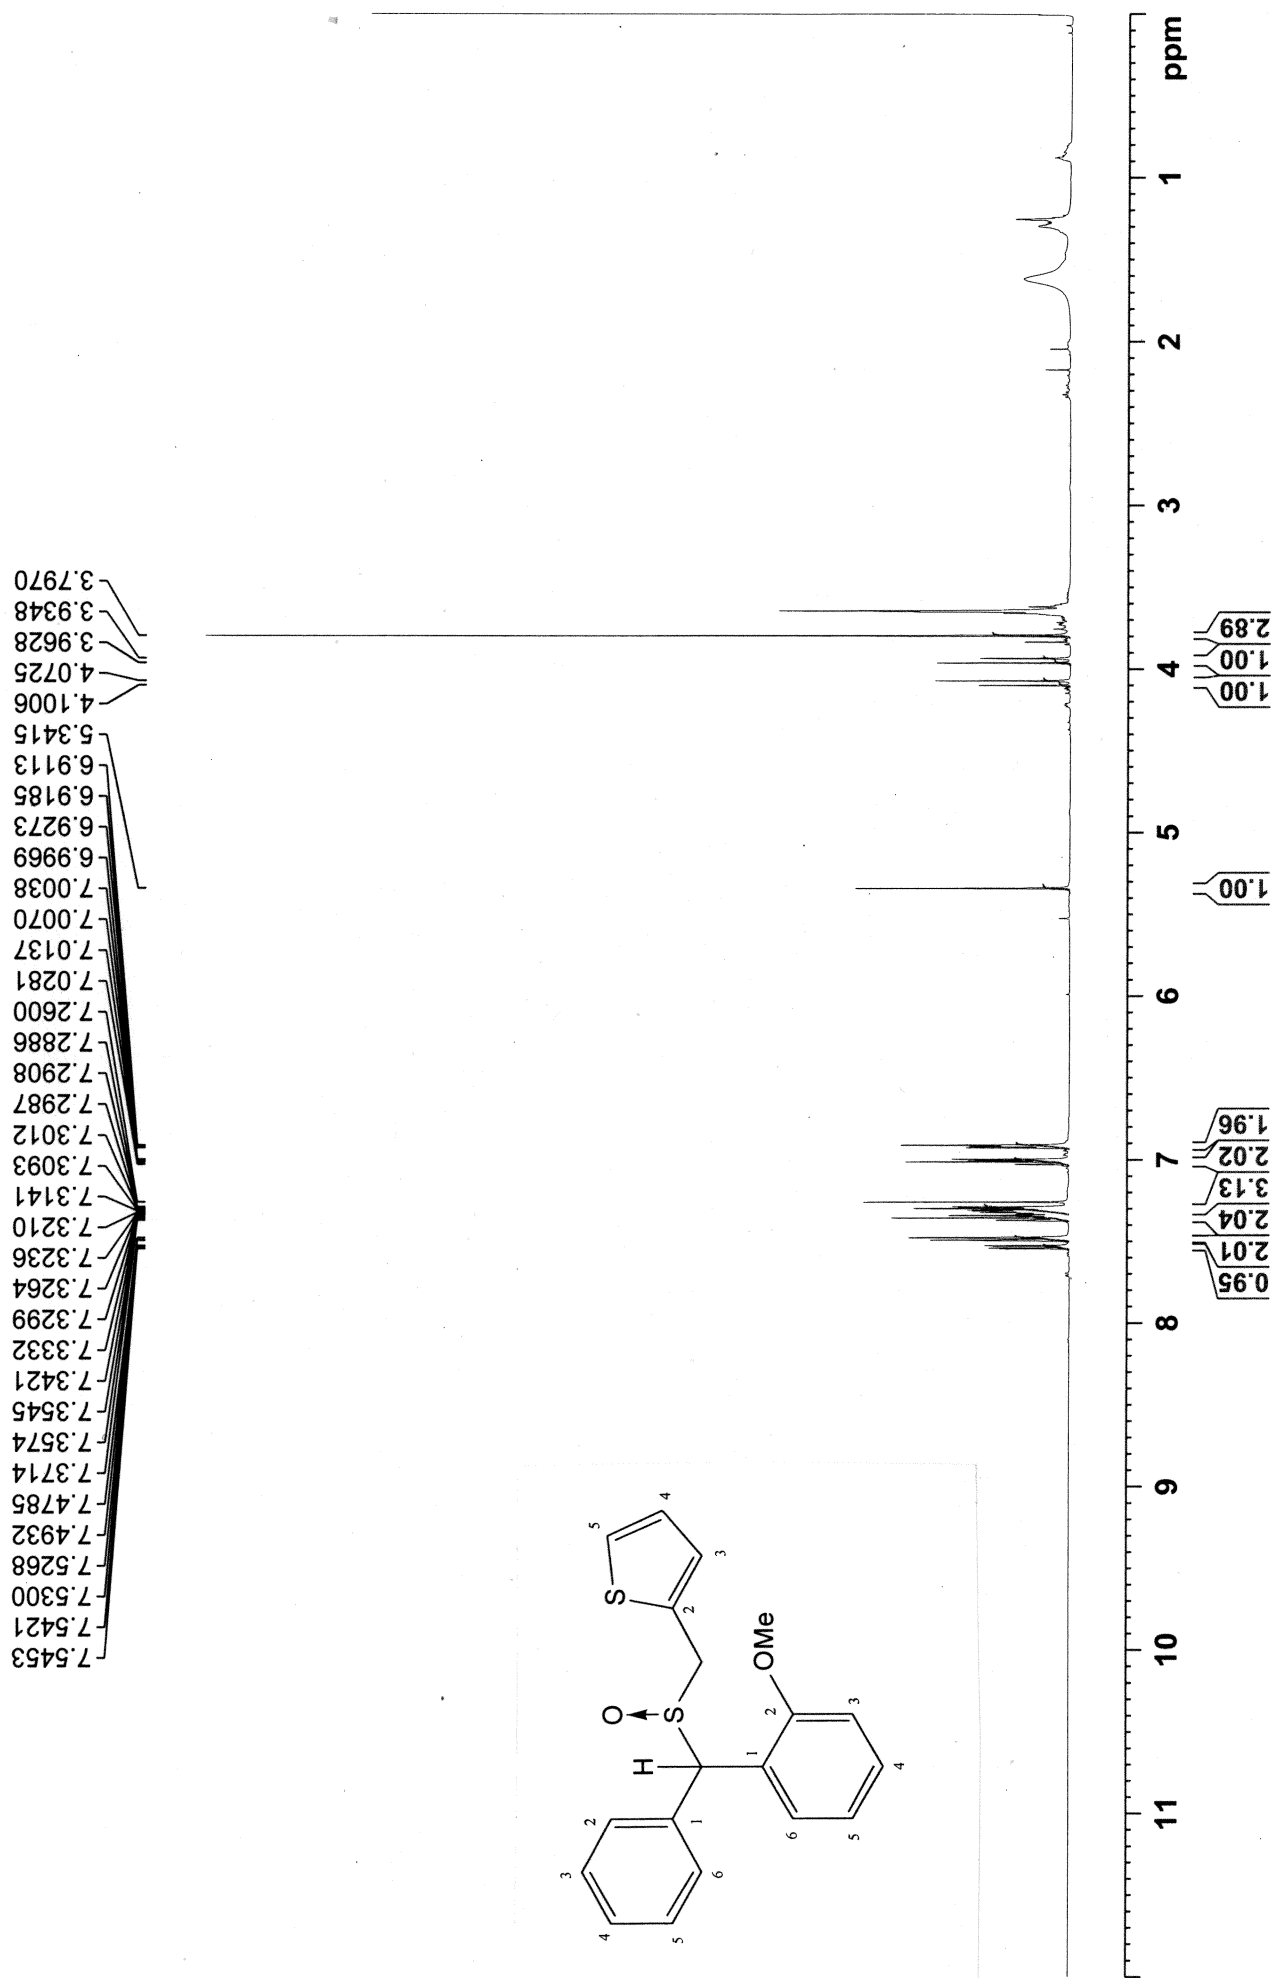

6.9273  
6.9185  
6.9113

7.0281  
7.0137  
7.0070  
7.0038  
6.9969

7.3714  
7.3574  
7.3545  
7.3421  
7.3332  
7.3299  
7.3264  
7.3236  
7.3210  
7.3141  
7.3093  
7.3012  
7.2987  
7.2908  
7.2886  
7.2600

7.5453  
7.5421  
7.5300  
7.5268  
7.4932  
7.4785

CHCl<sub>3</sub>

TH 3

Ar 3

TH 4

Ar 5

Ar 4 + Ph 4  
TH 5

Ar 3 5

Ph 2 6

Ar 6

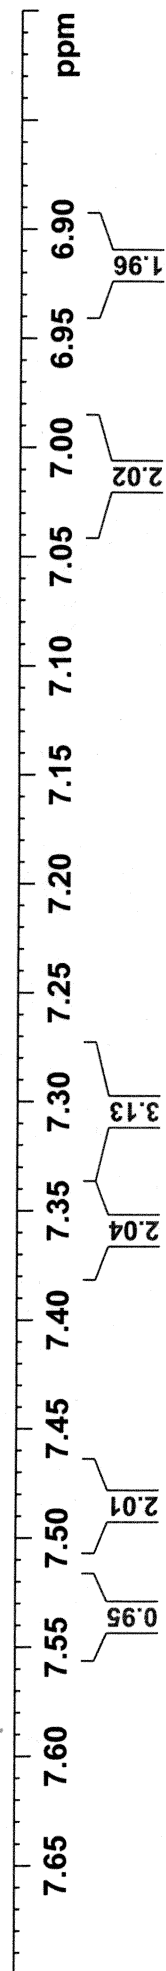



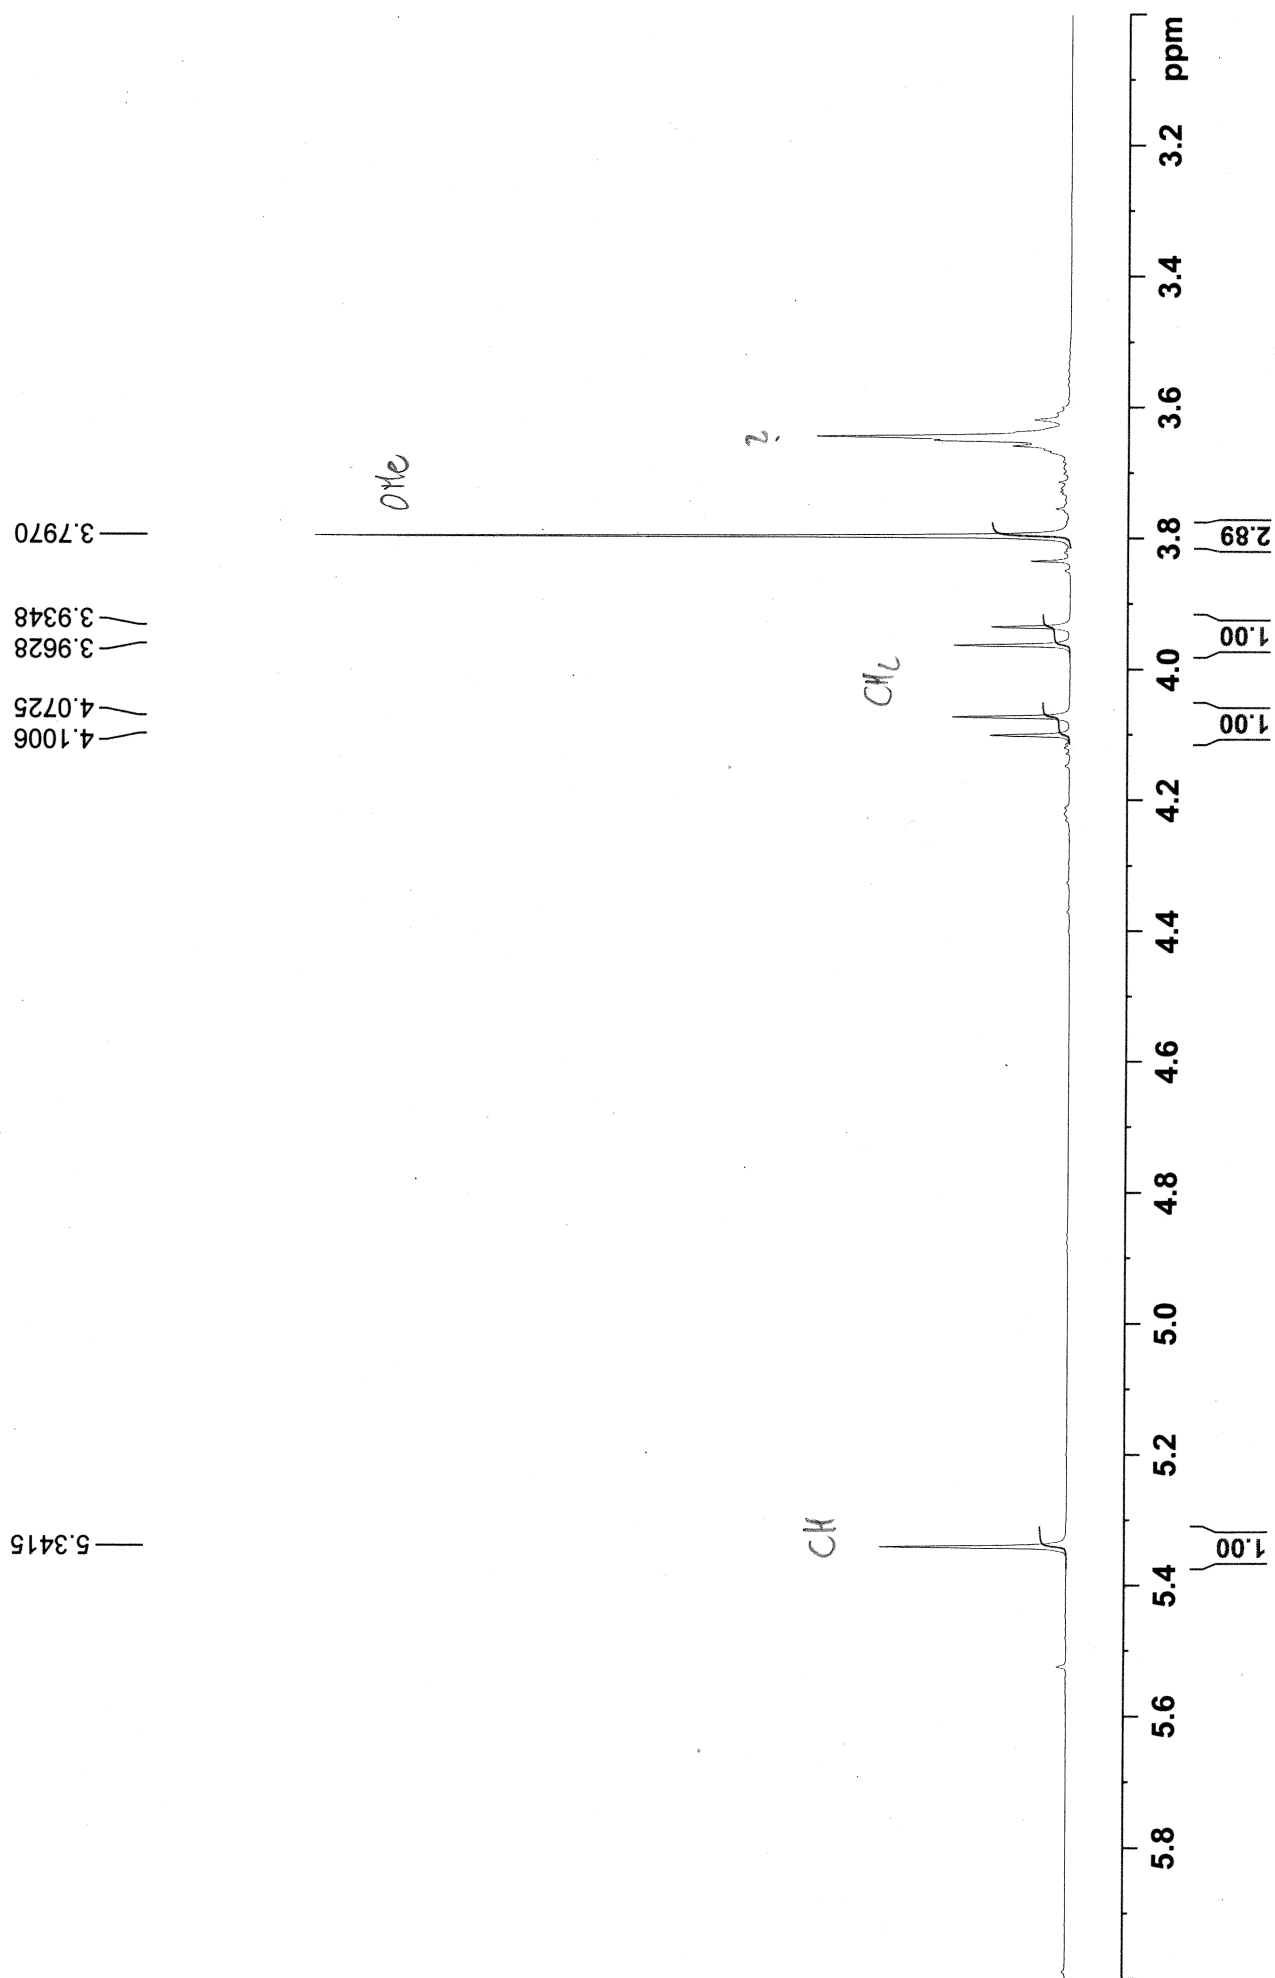

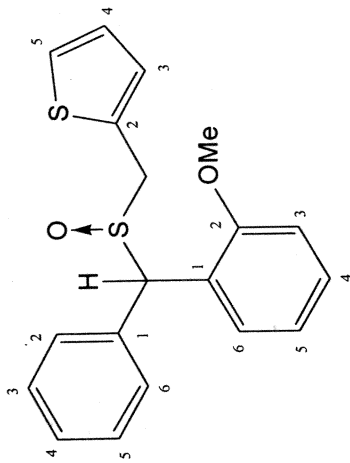

156.4978  
134.4191  
131.2842  
129.9235  
129.4091  
129.2892  
128.7218  
128.5073  
128.1129  
127.1749  
126.5534  
124.5635  
120.9883  
111.1447

77.0000  
70.5448  
62.9968  
55.4990  
50.8380

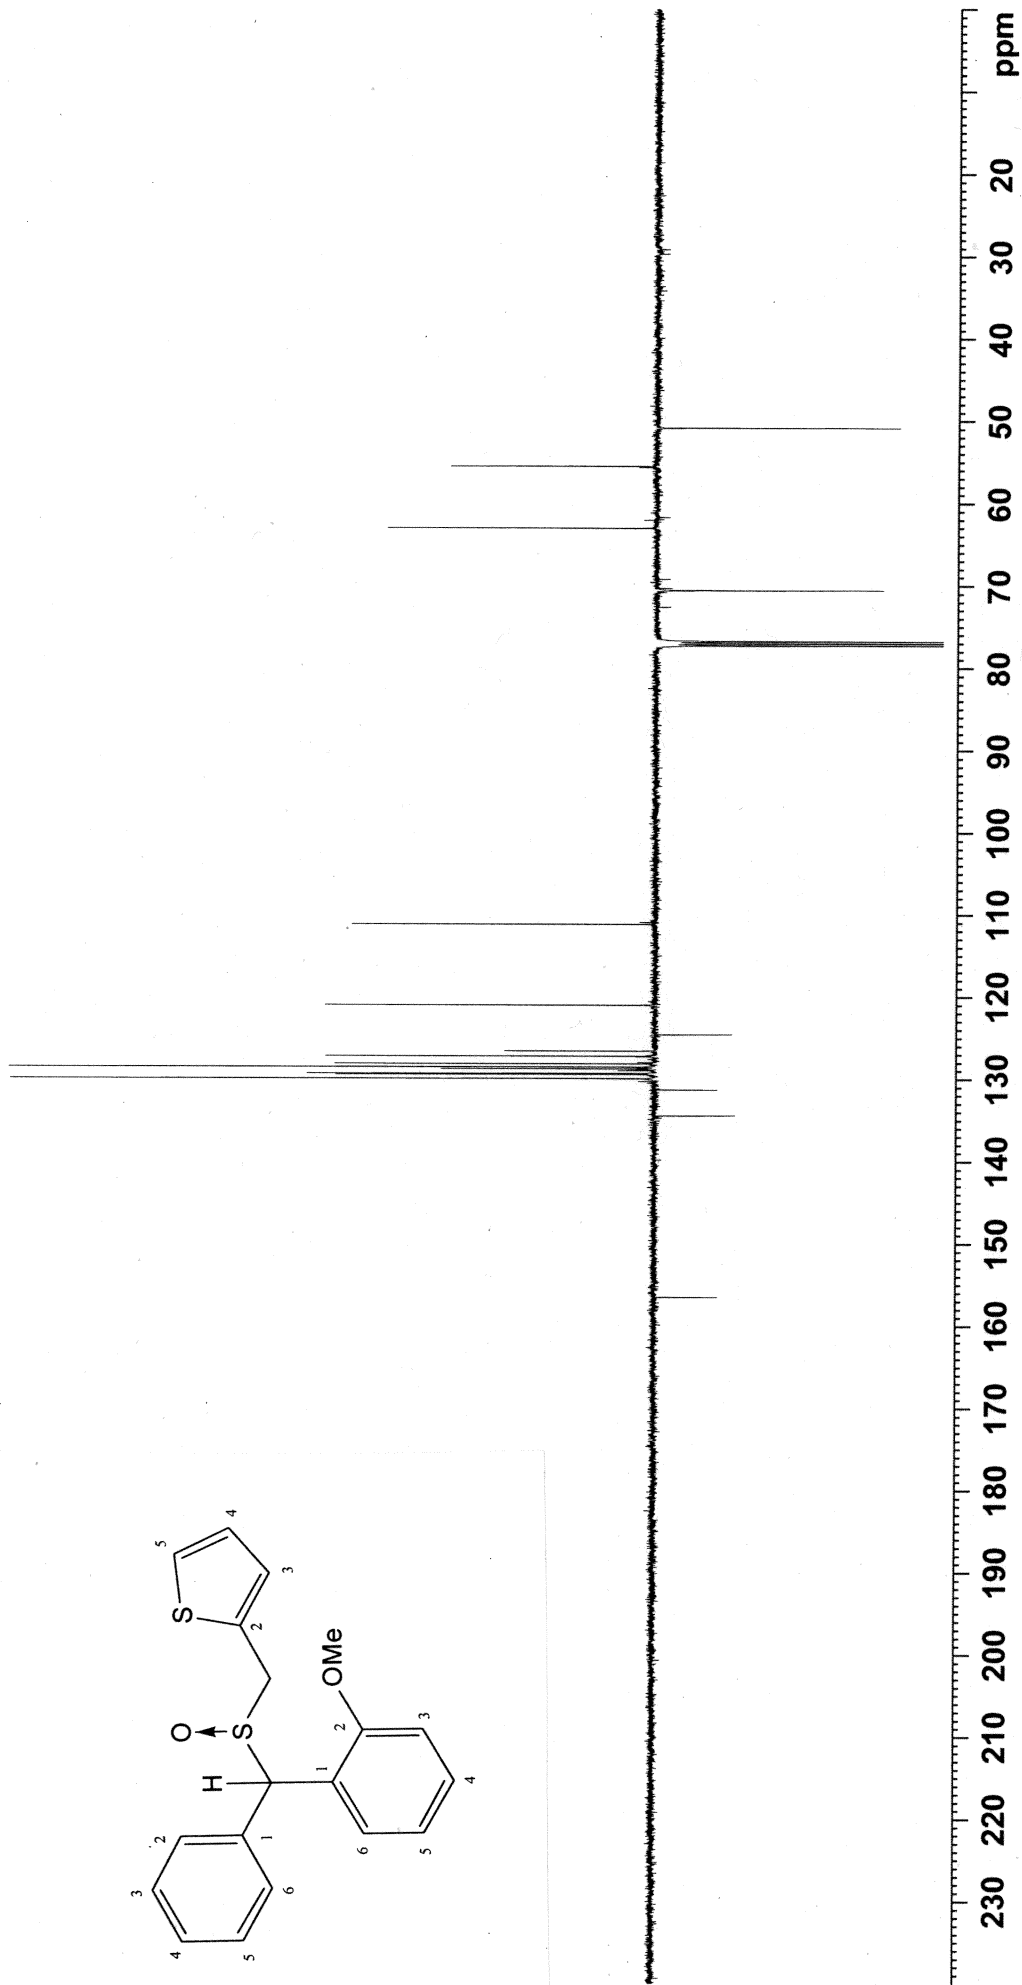

CE166\_1\_1 in CDCl3 (APT) 27.12.2021

— 156.4978

— 134.4191

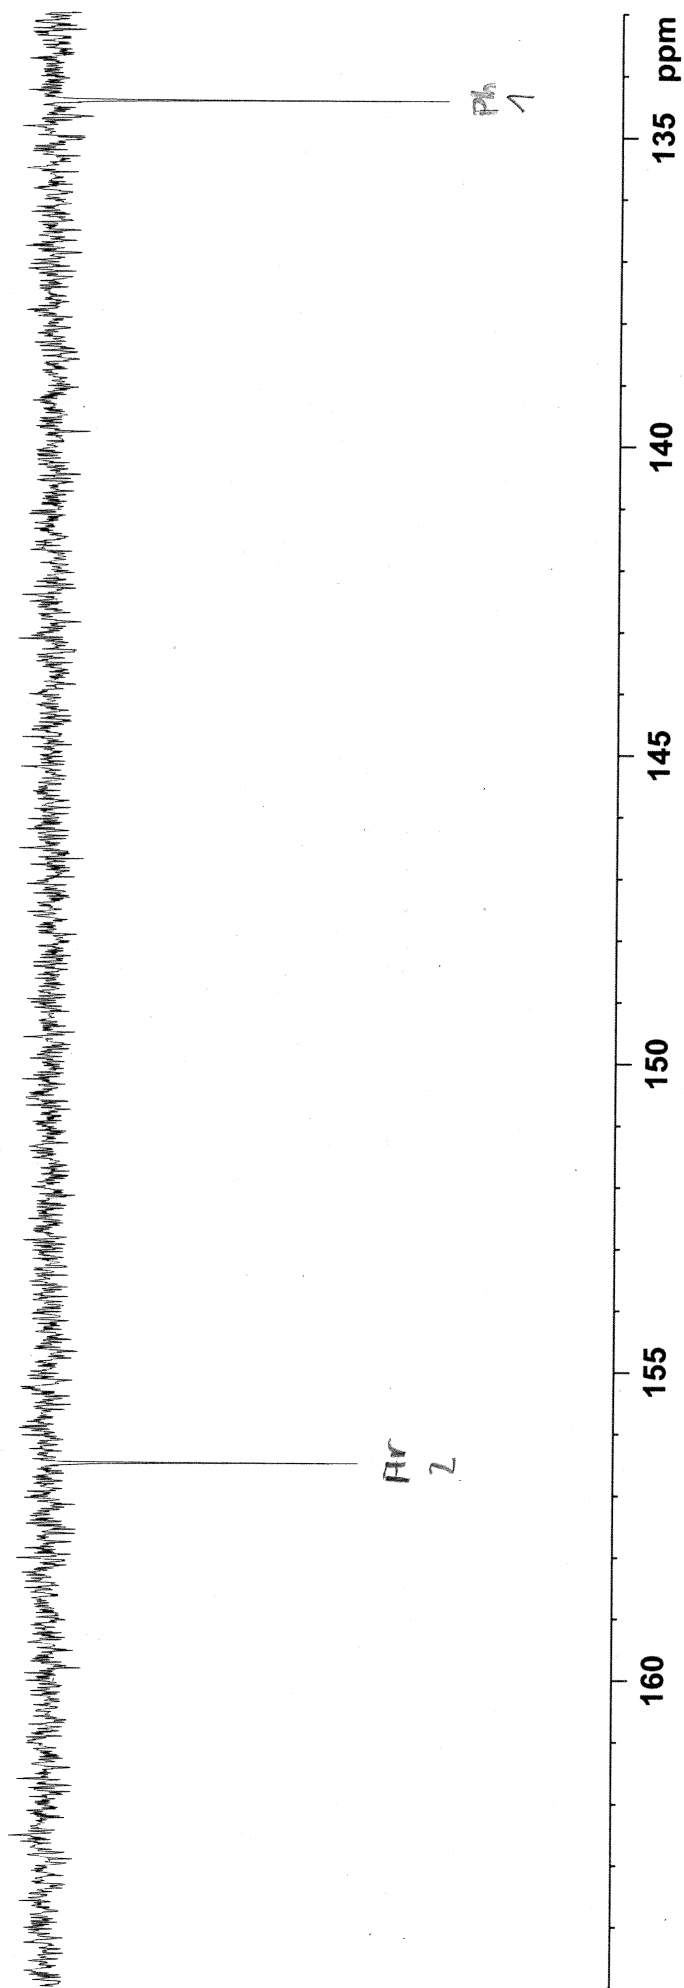

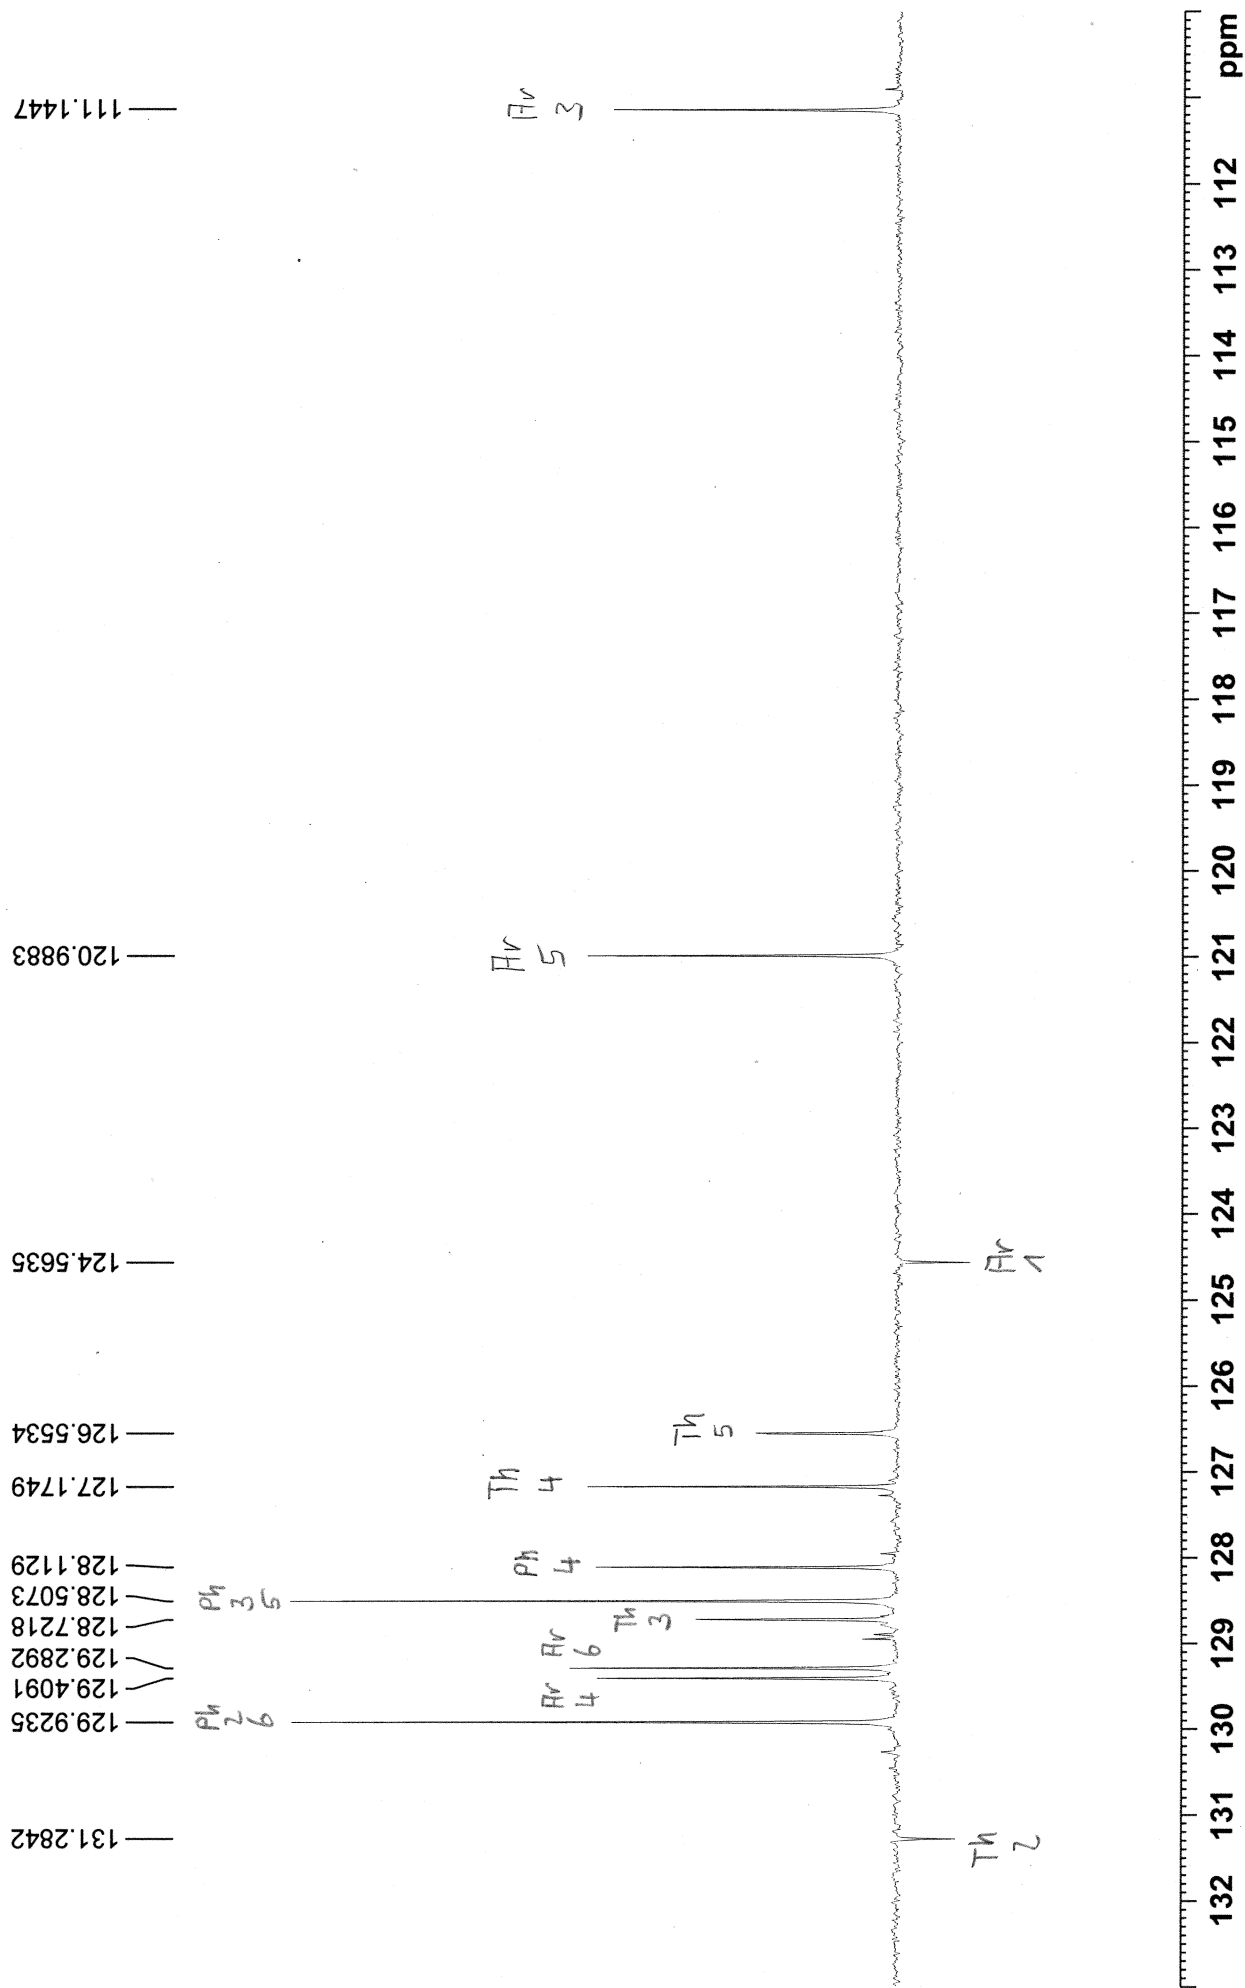

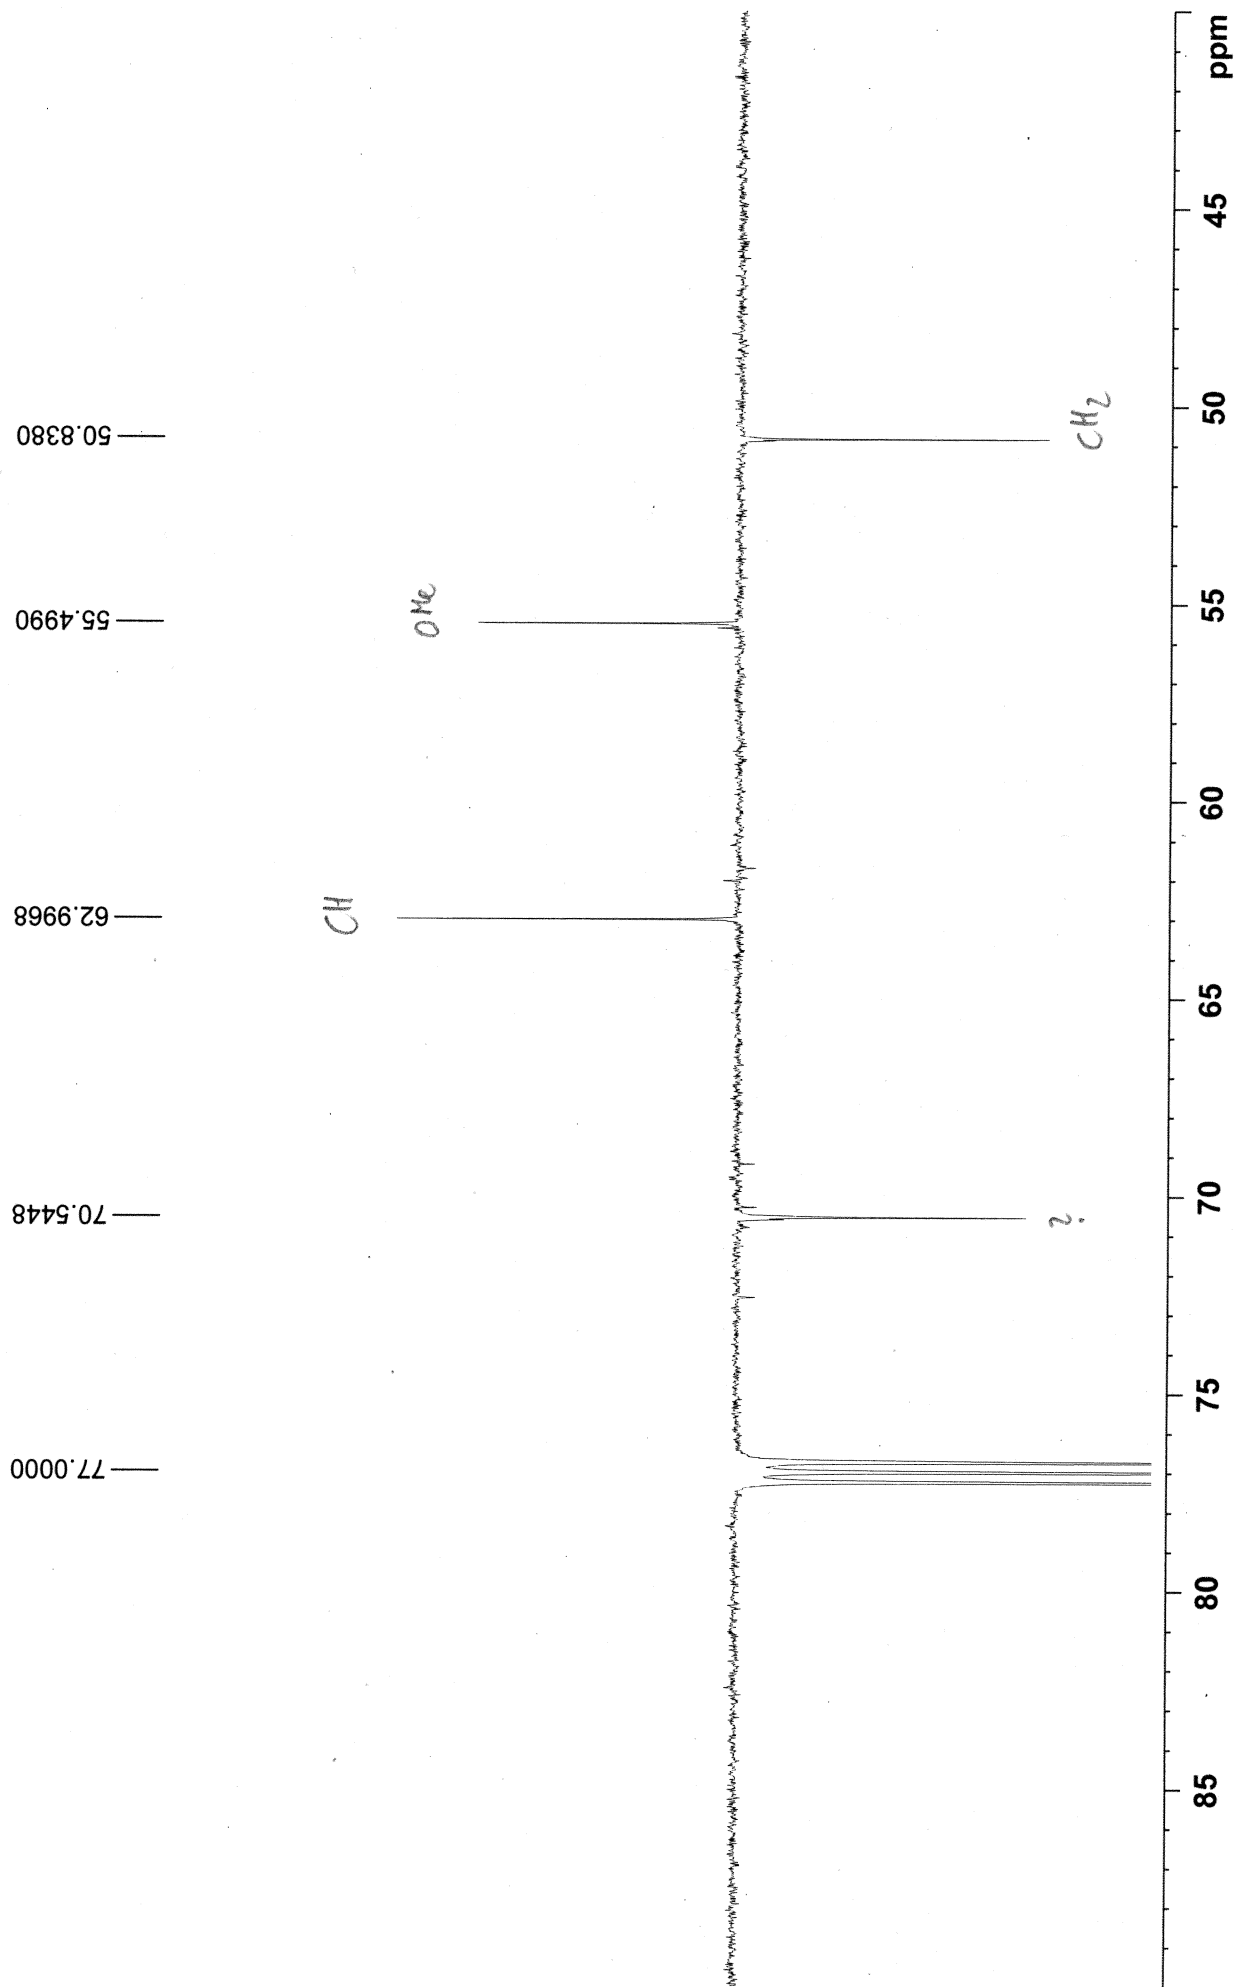

CE166\_1\_1 in CDCl3 (COSY) 27.12.2021

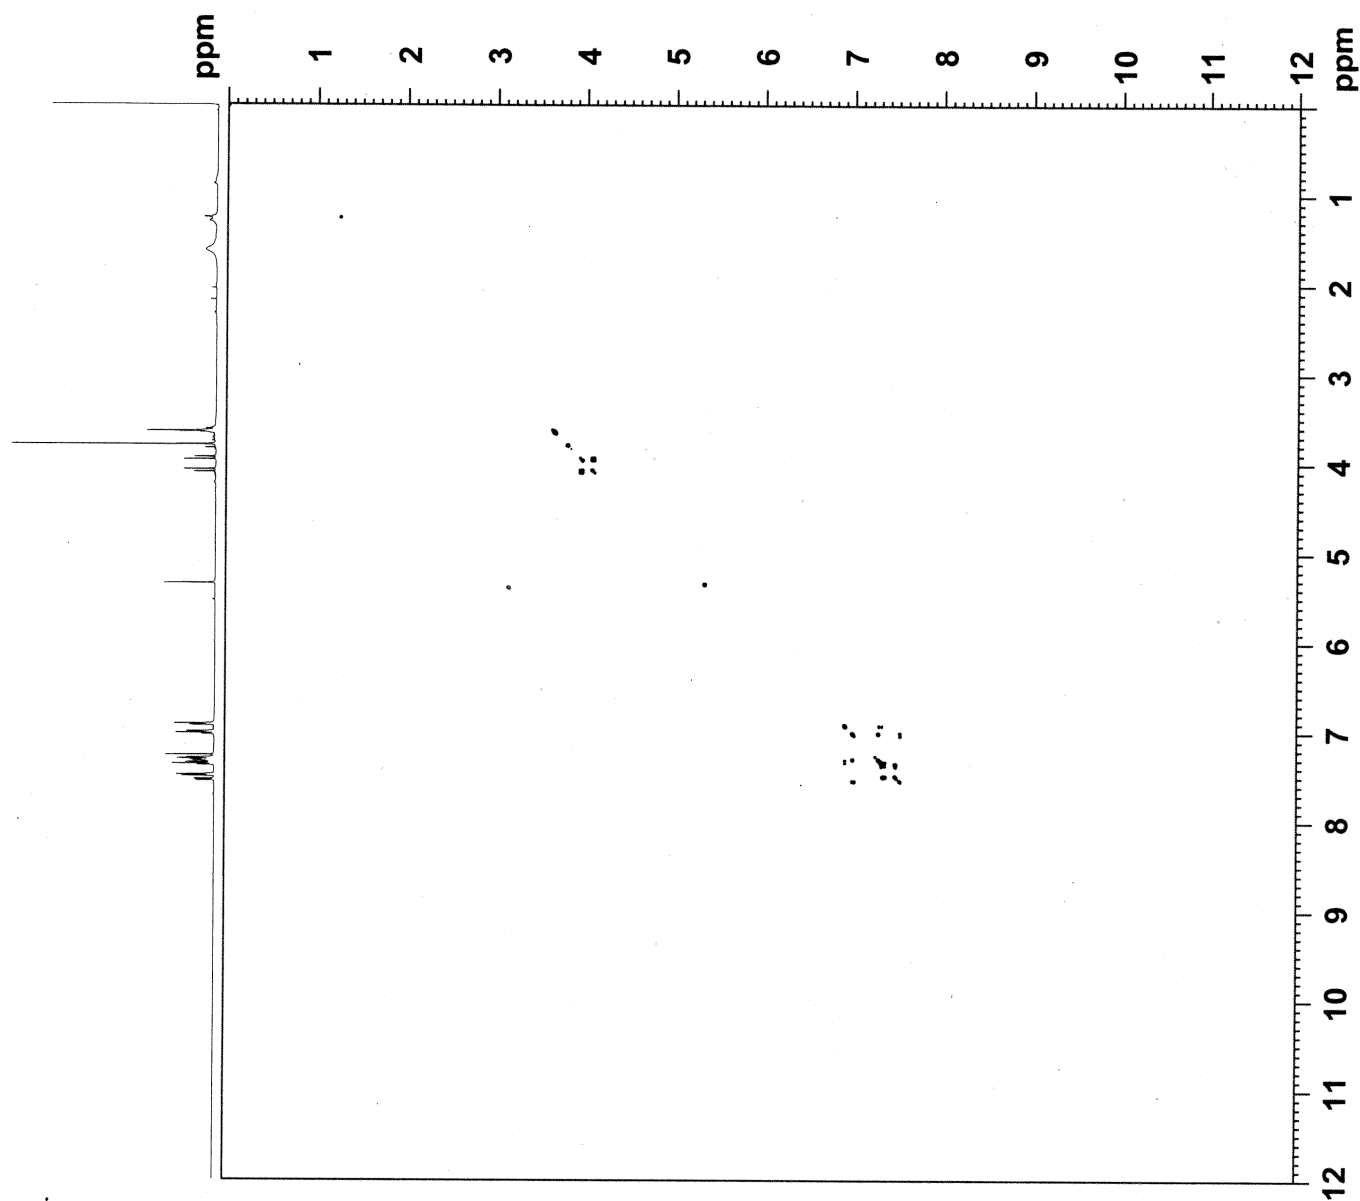

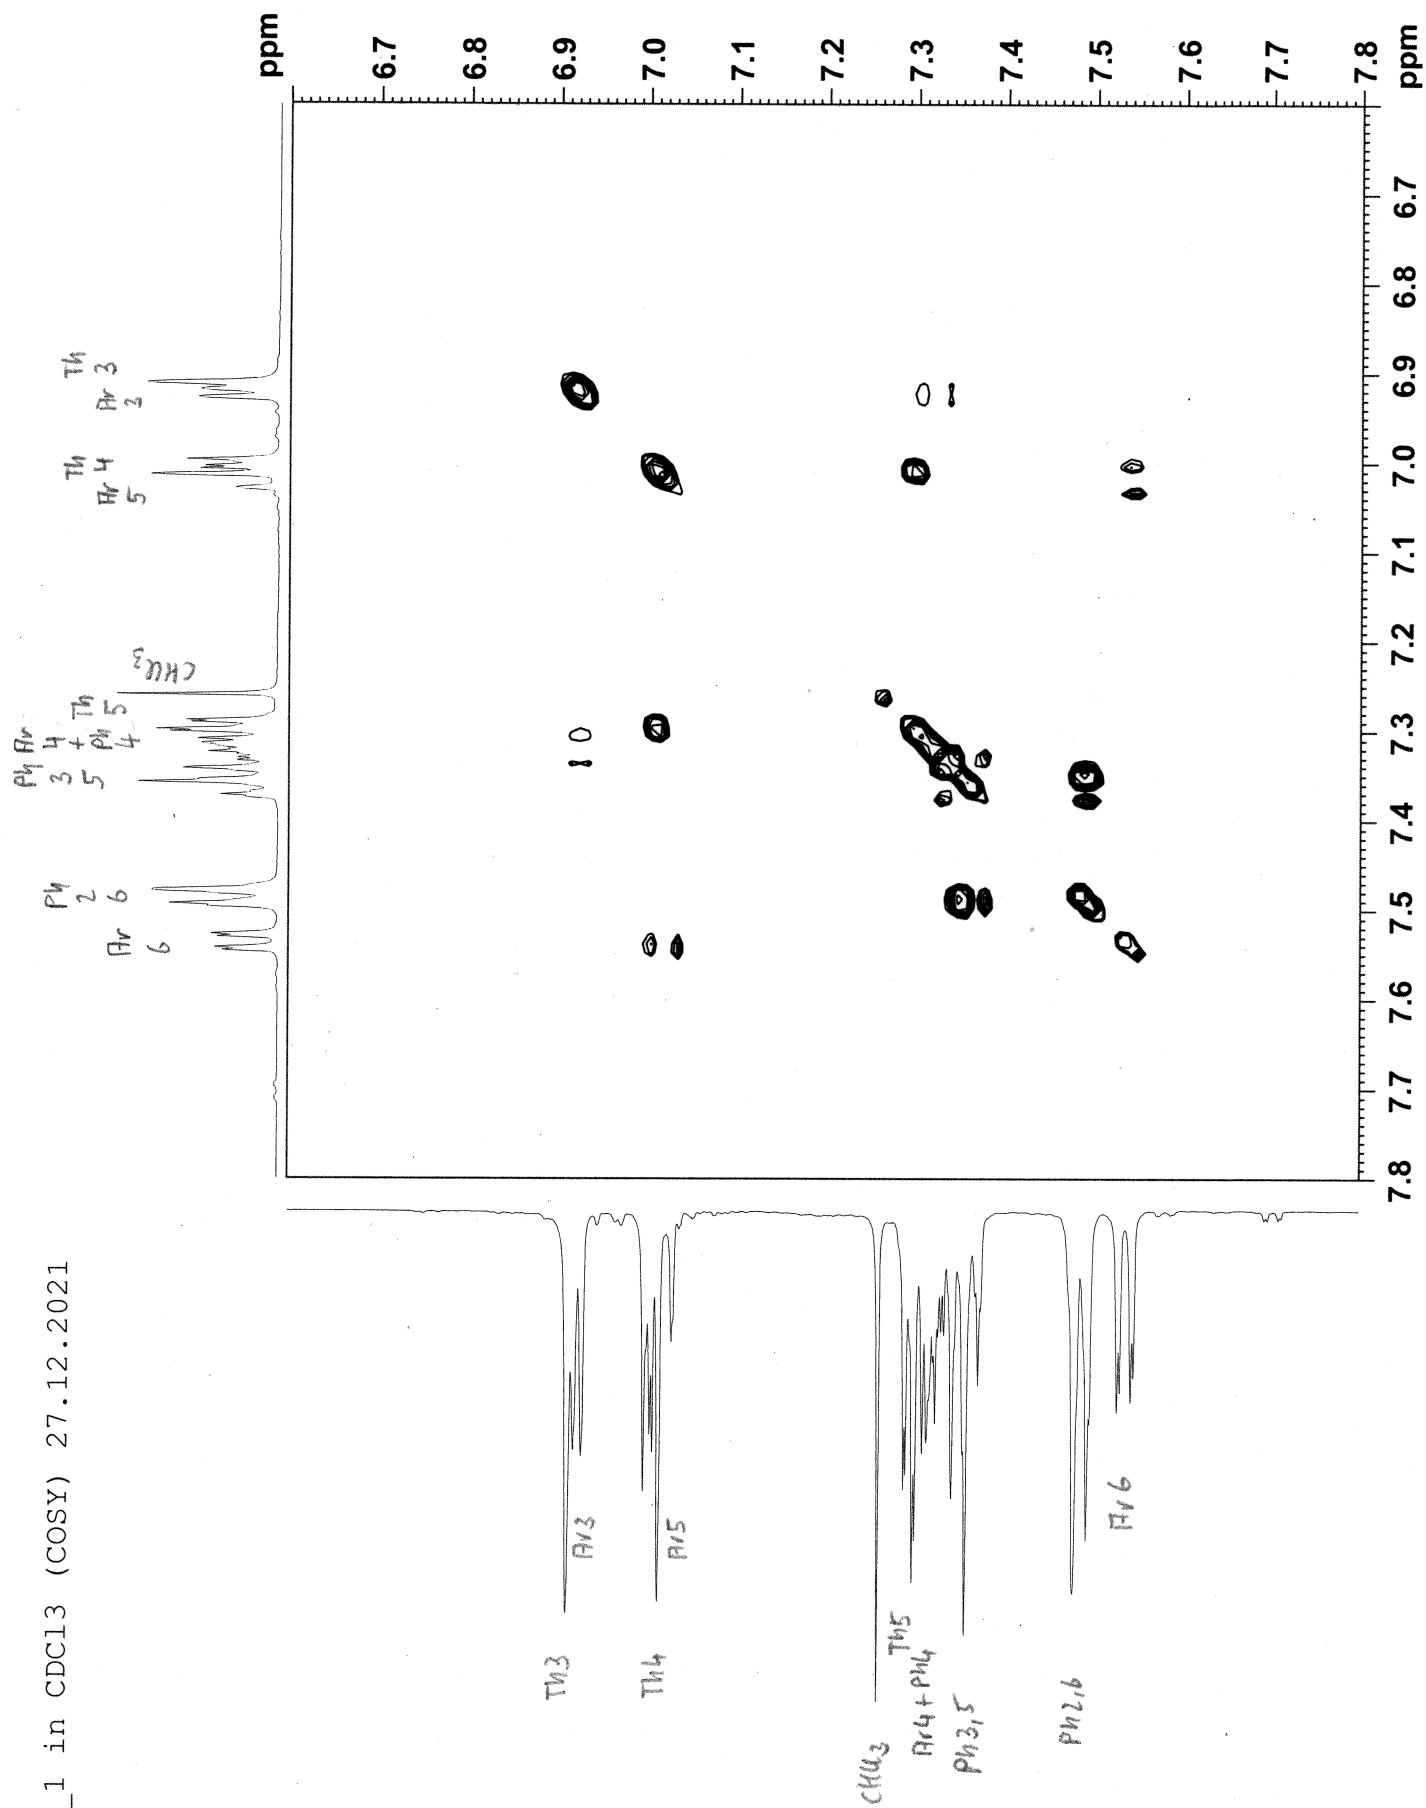

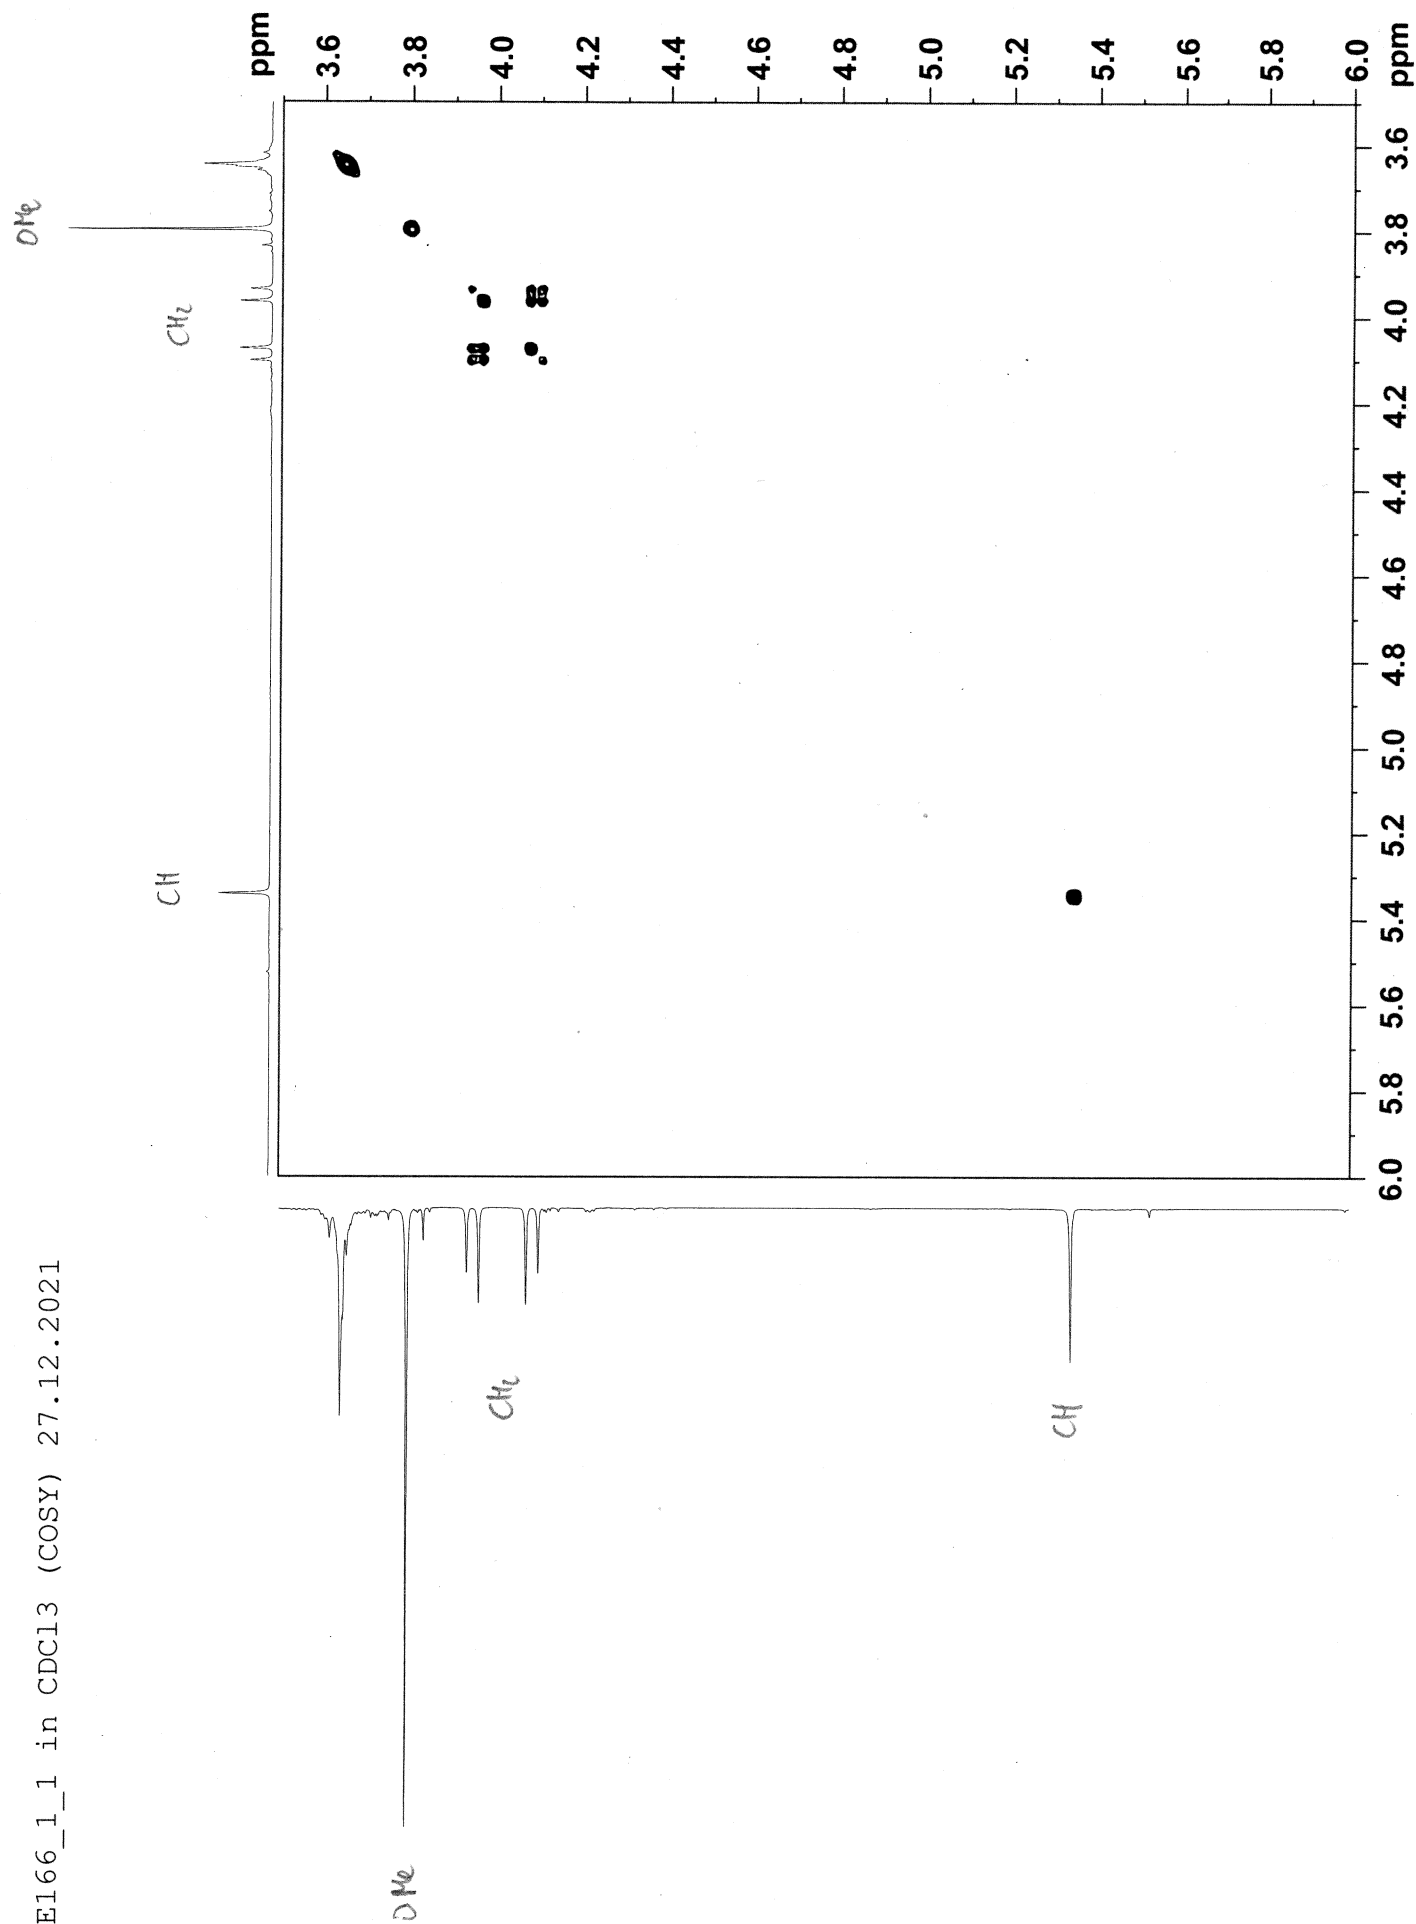



CE166\_1\_1 in CDCl3 (HSQC) 27.12.2021

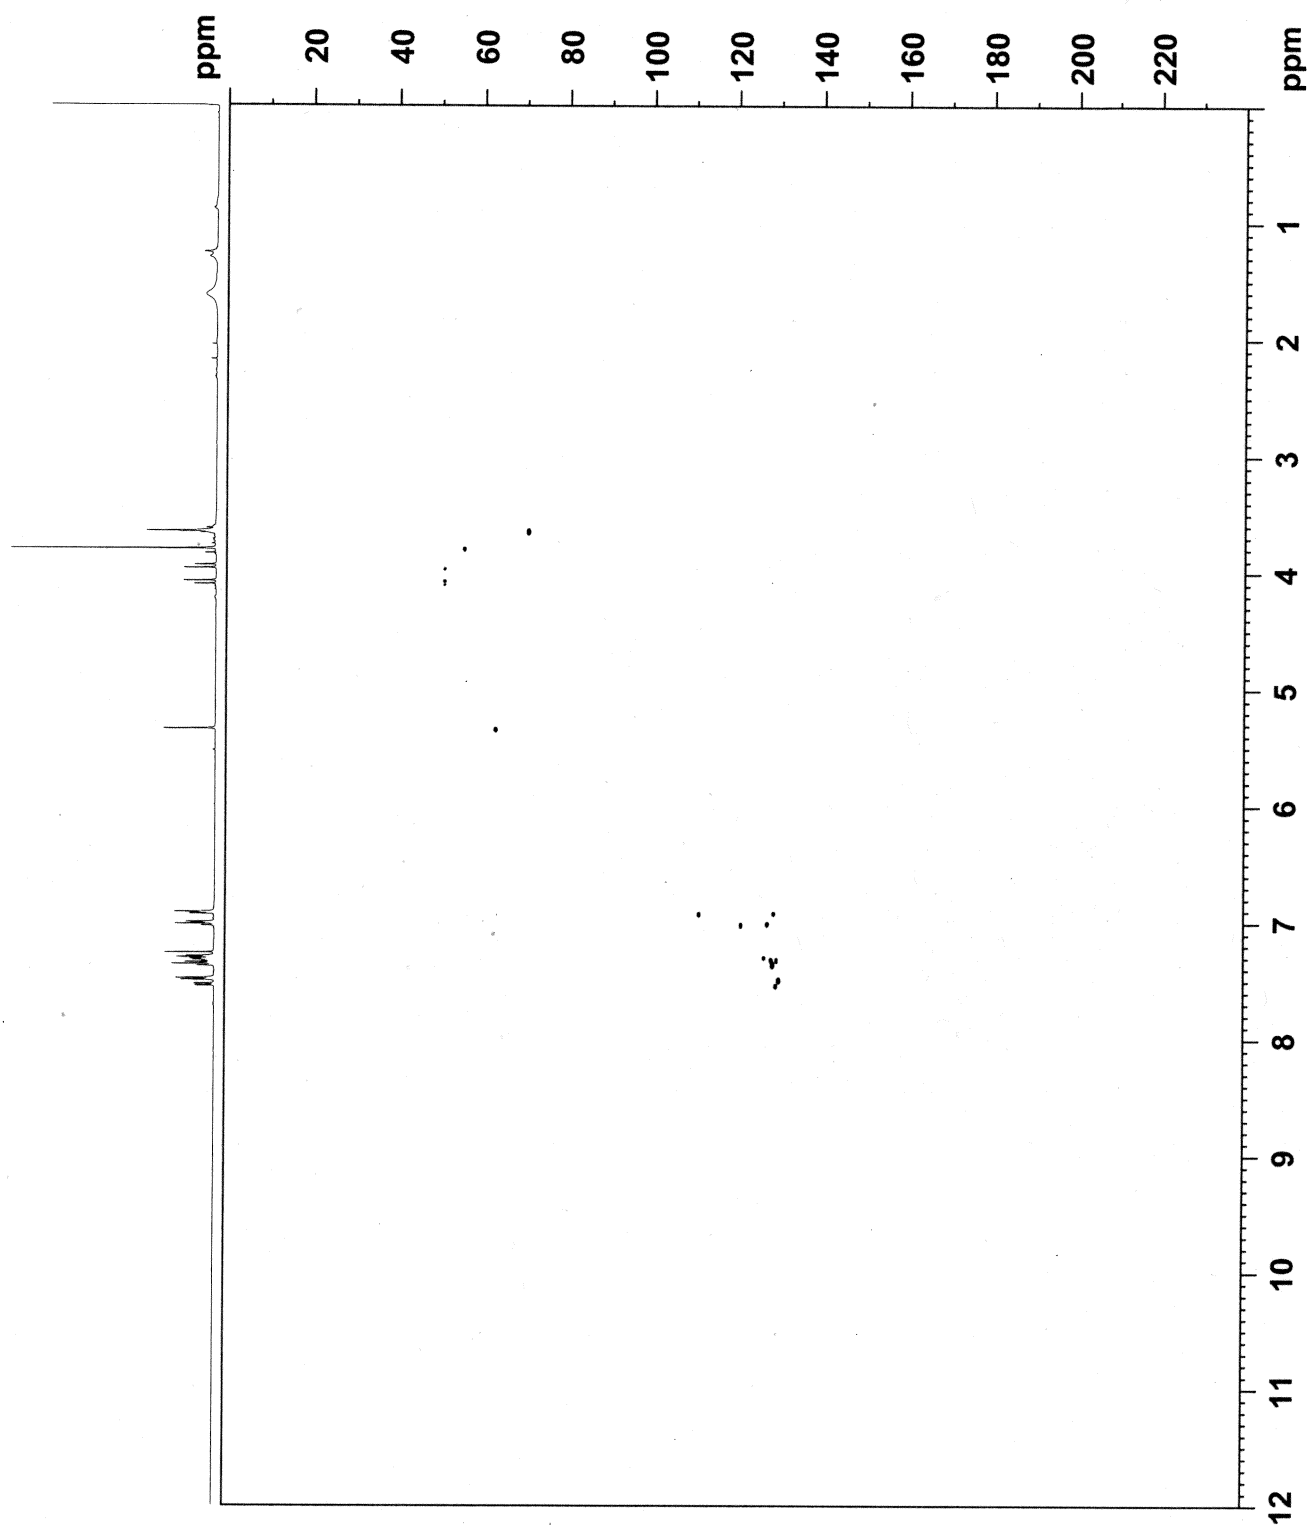

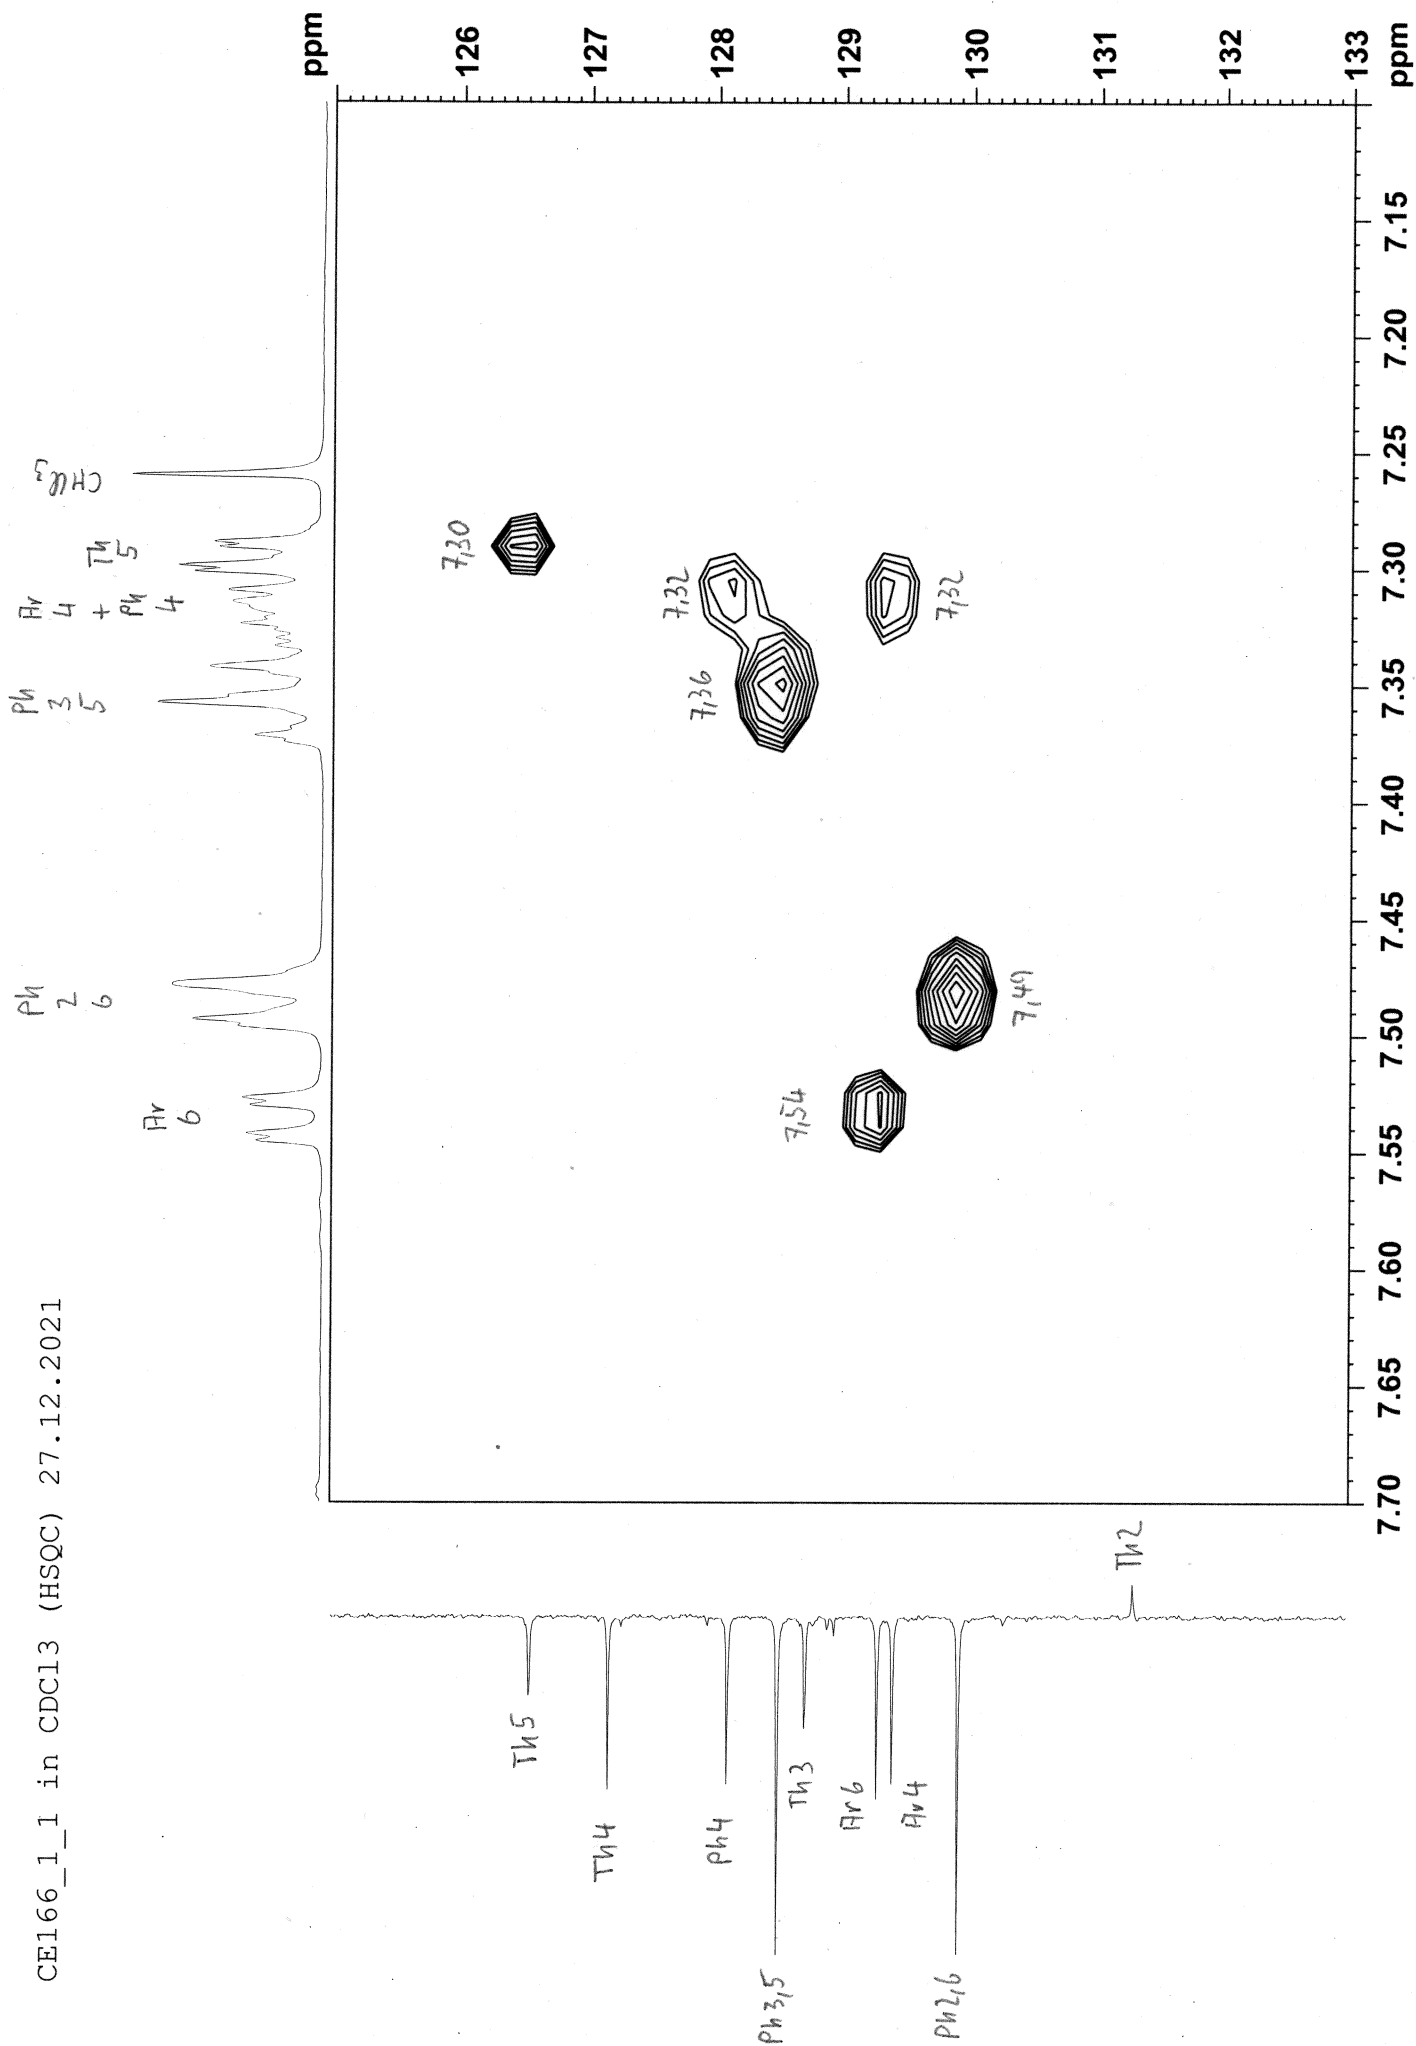

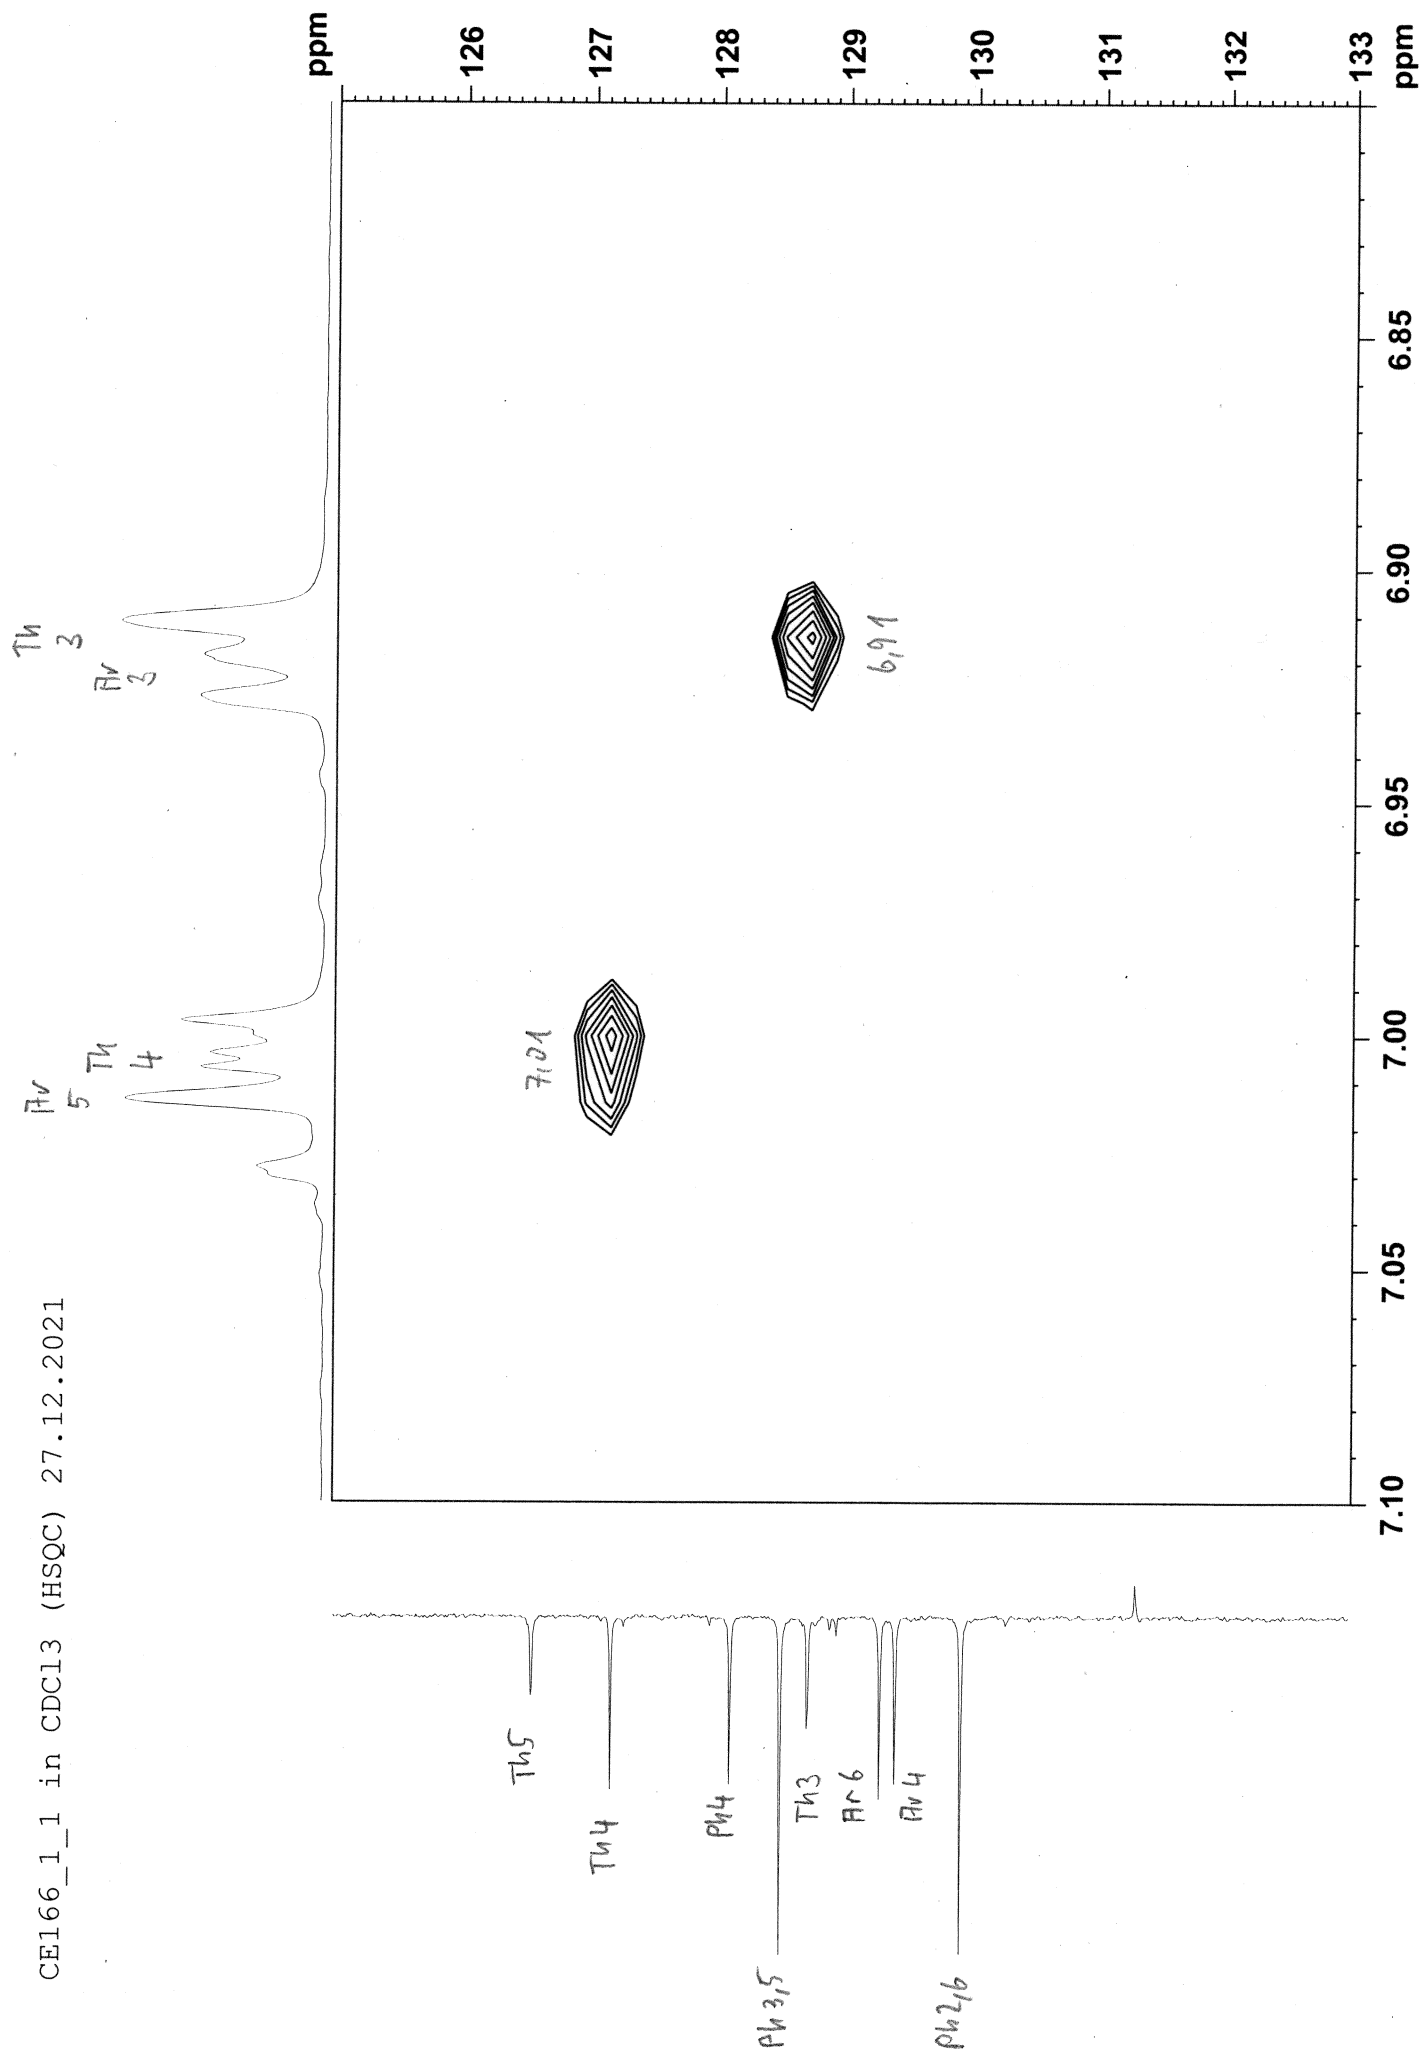

CE166\_1\_1 in CDCl3 (HSQC) 27.12.2021

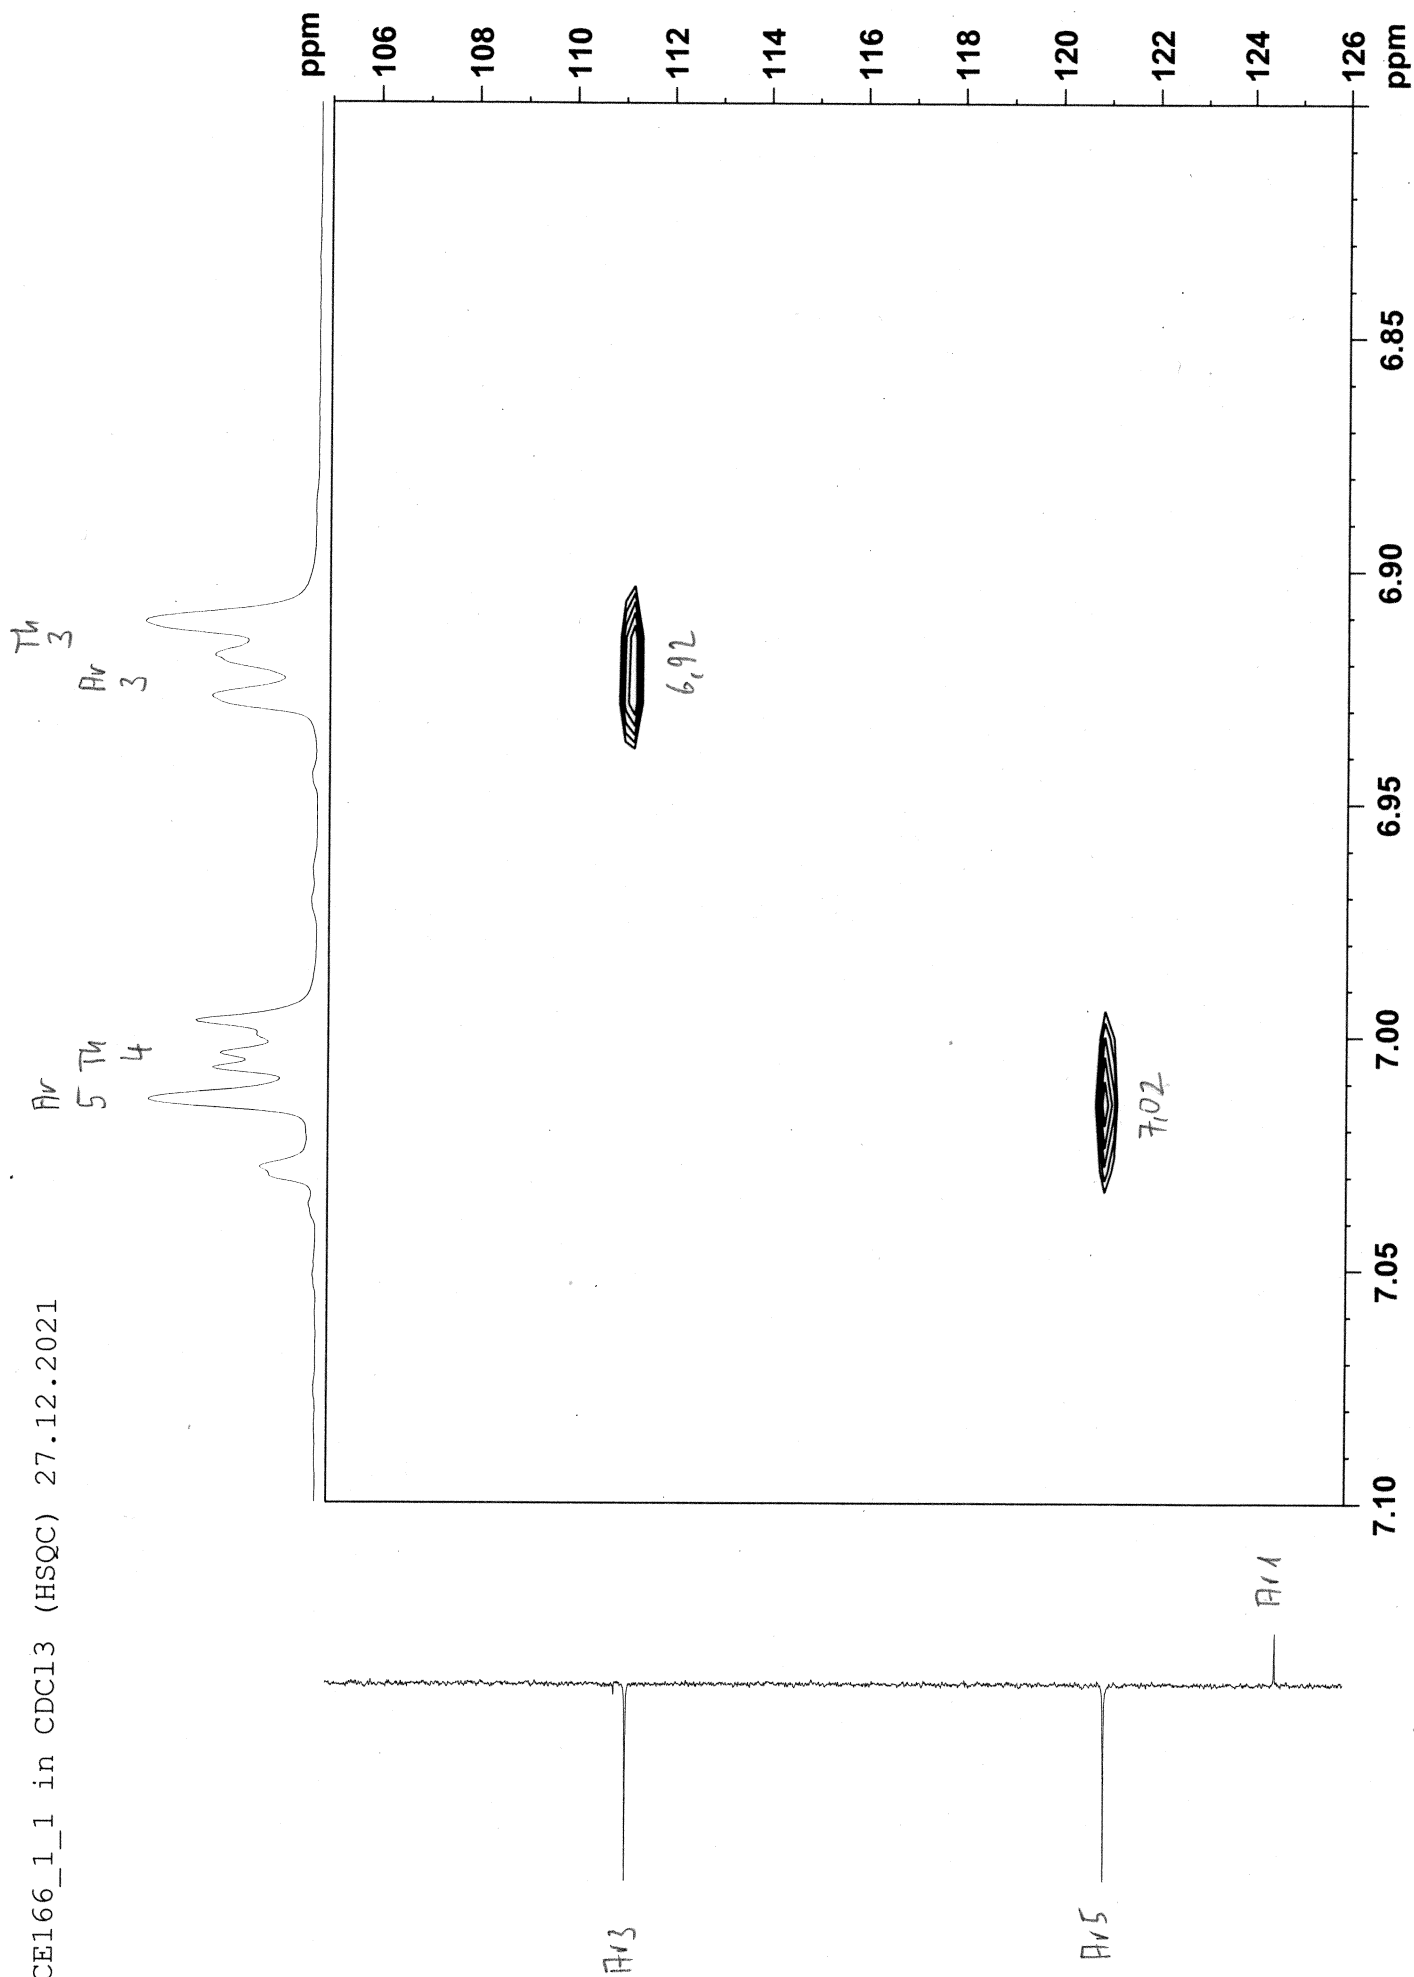

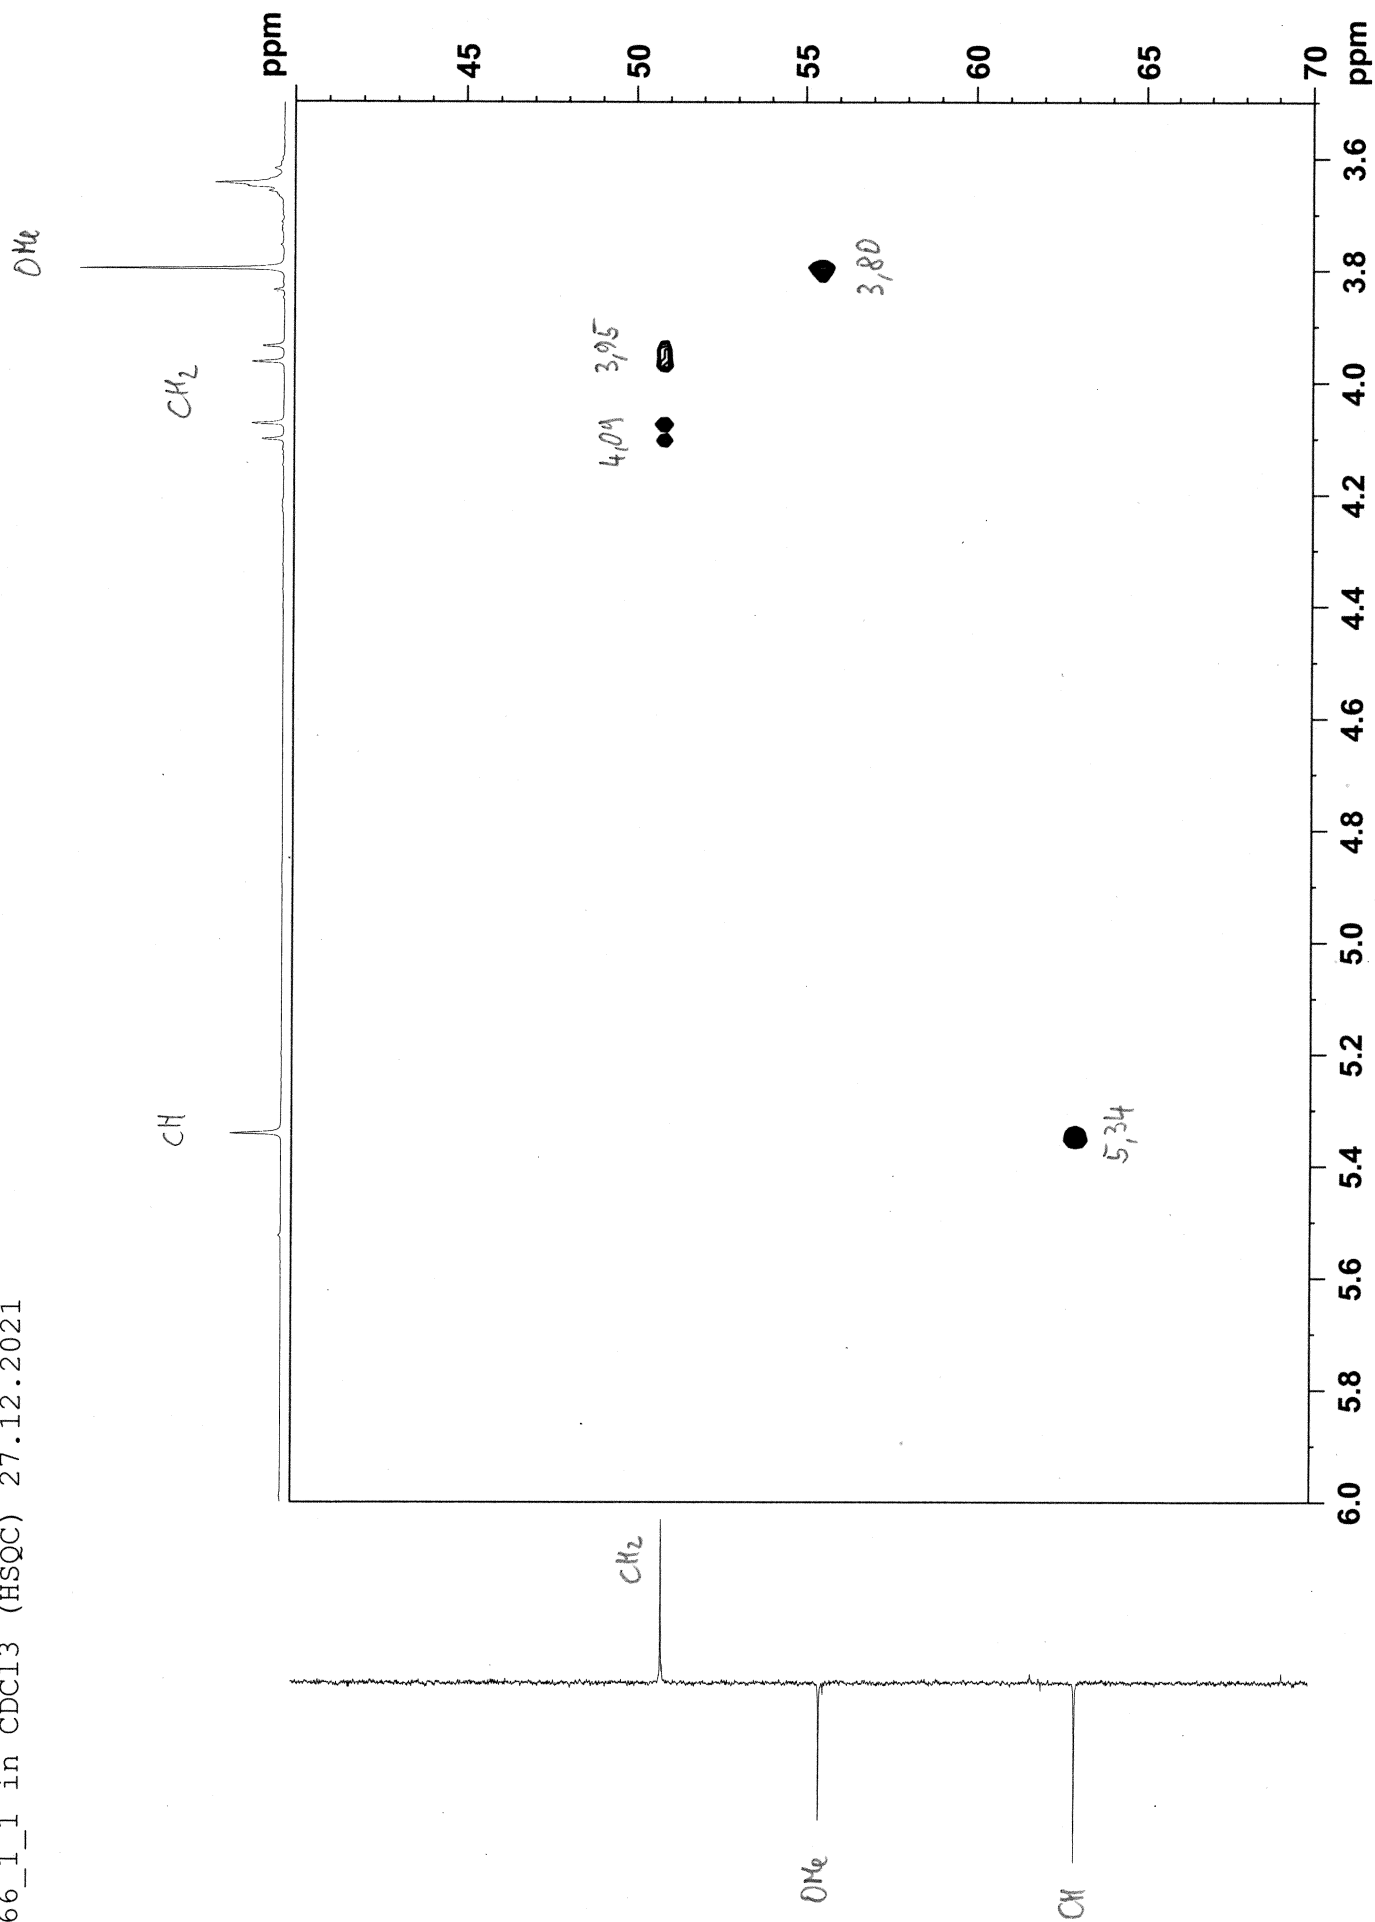

CE166\_1\_1 in CDCl3 (HMBC) 27.12.2021

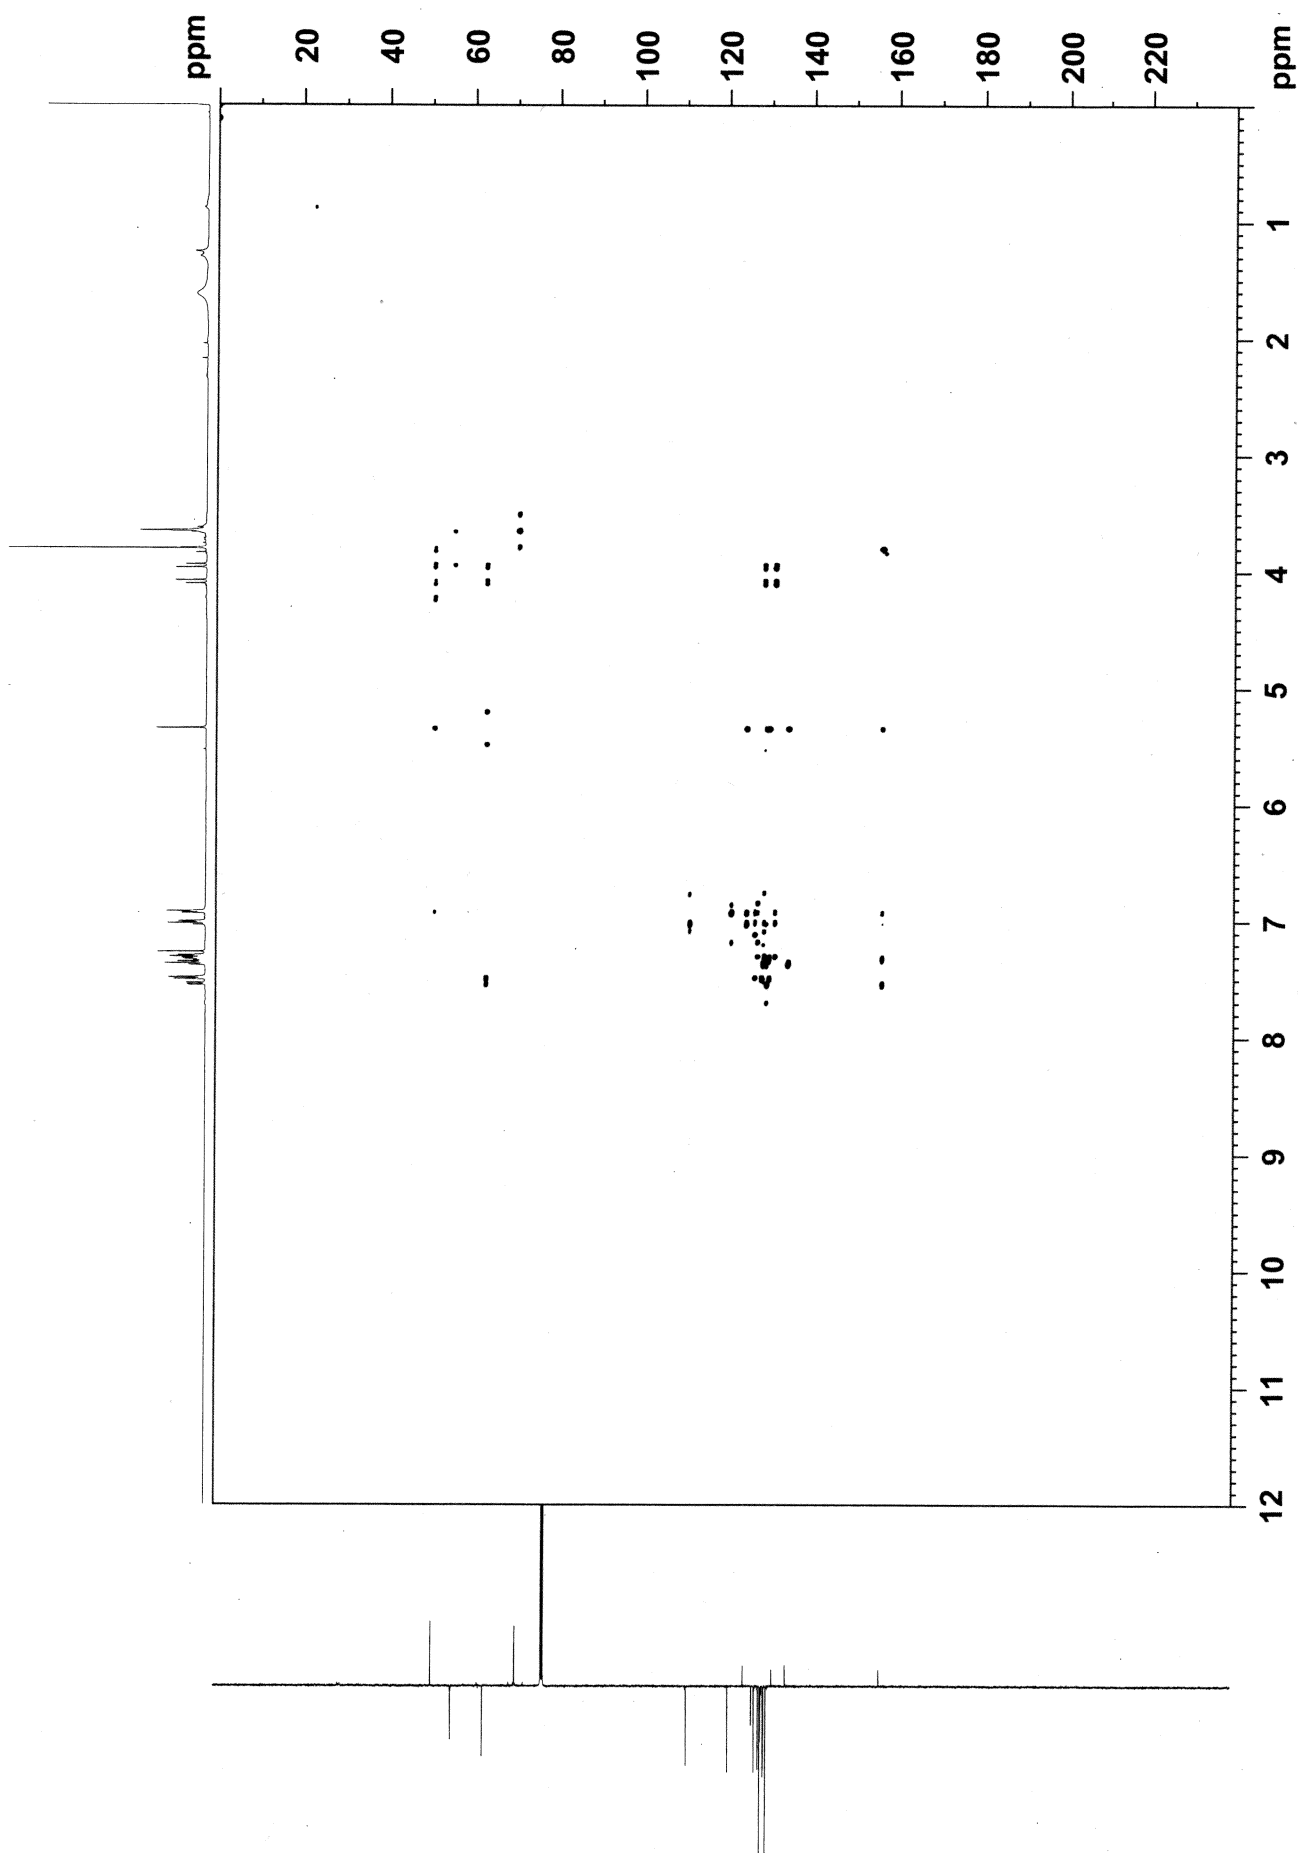

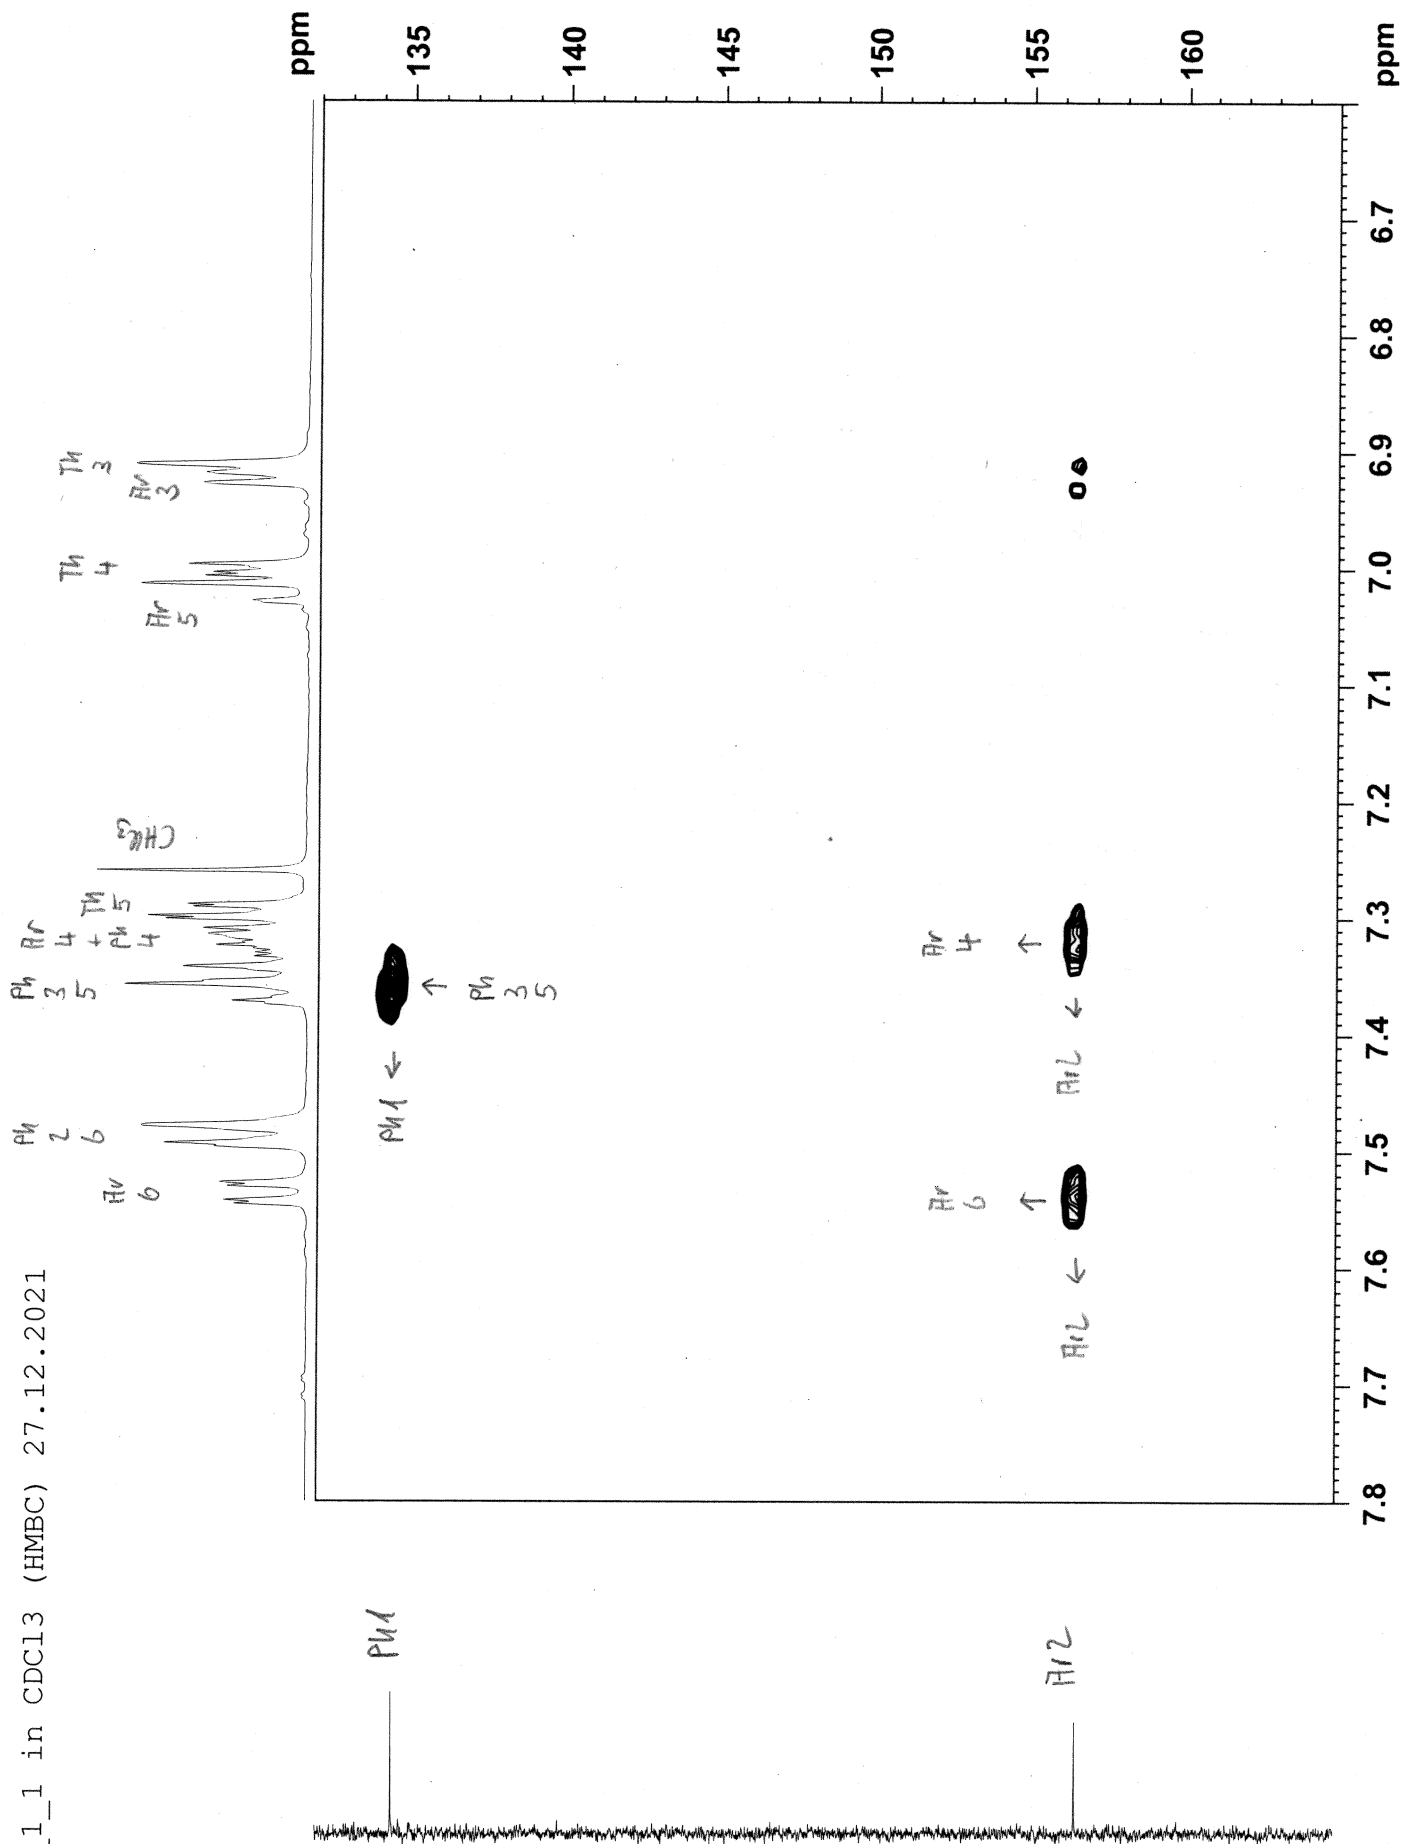

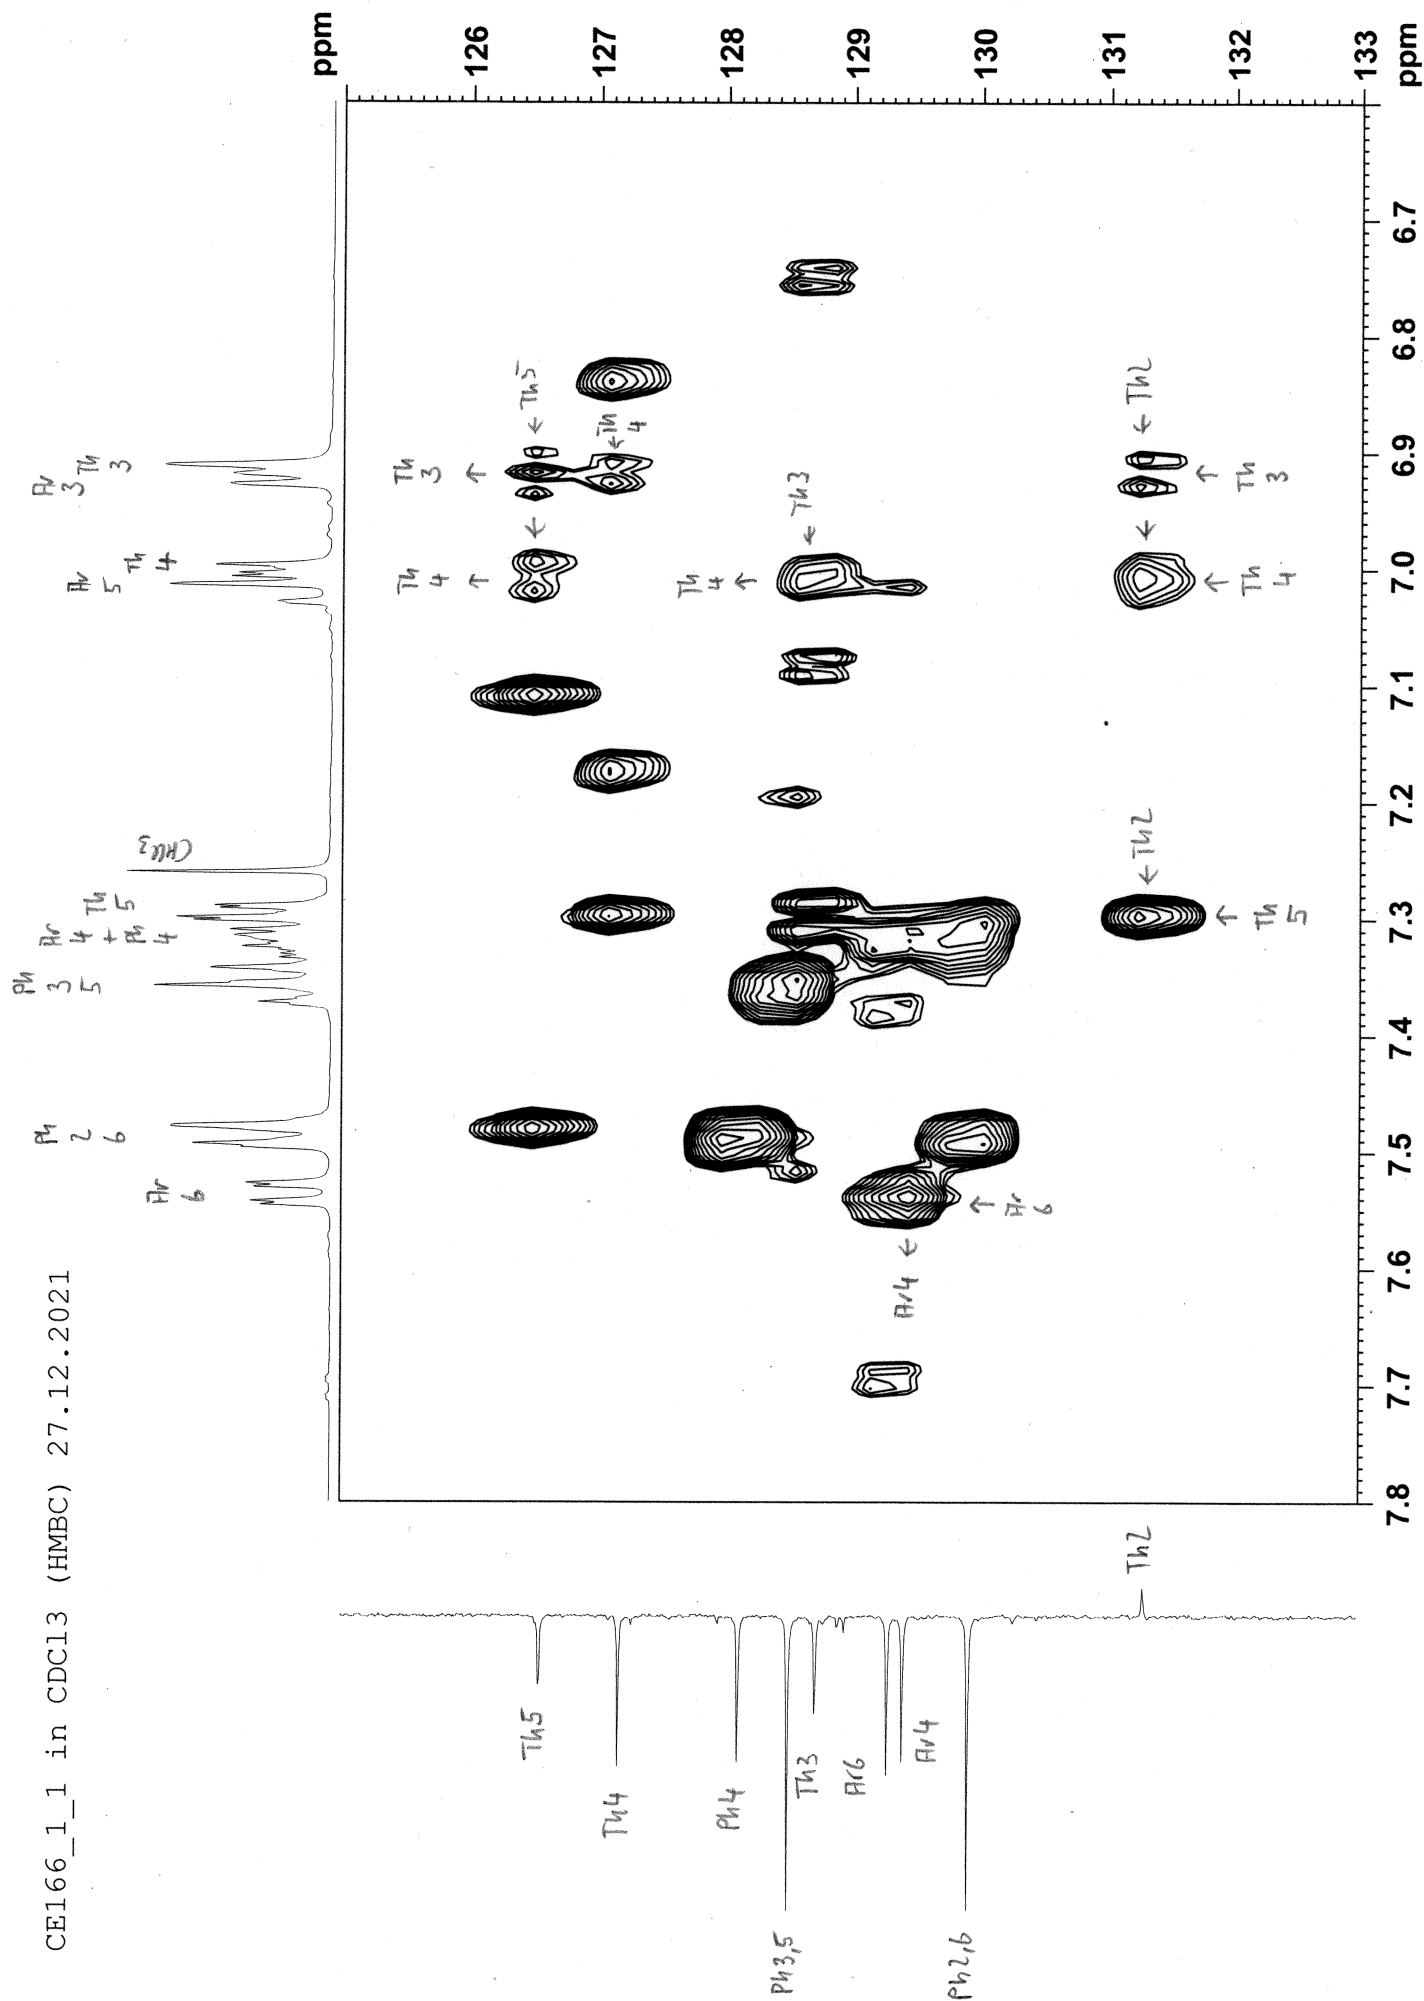



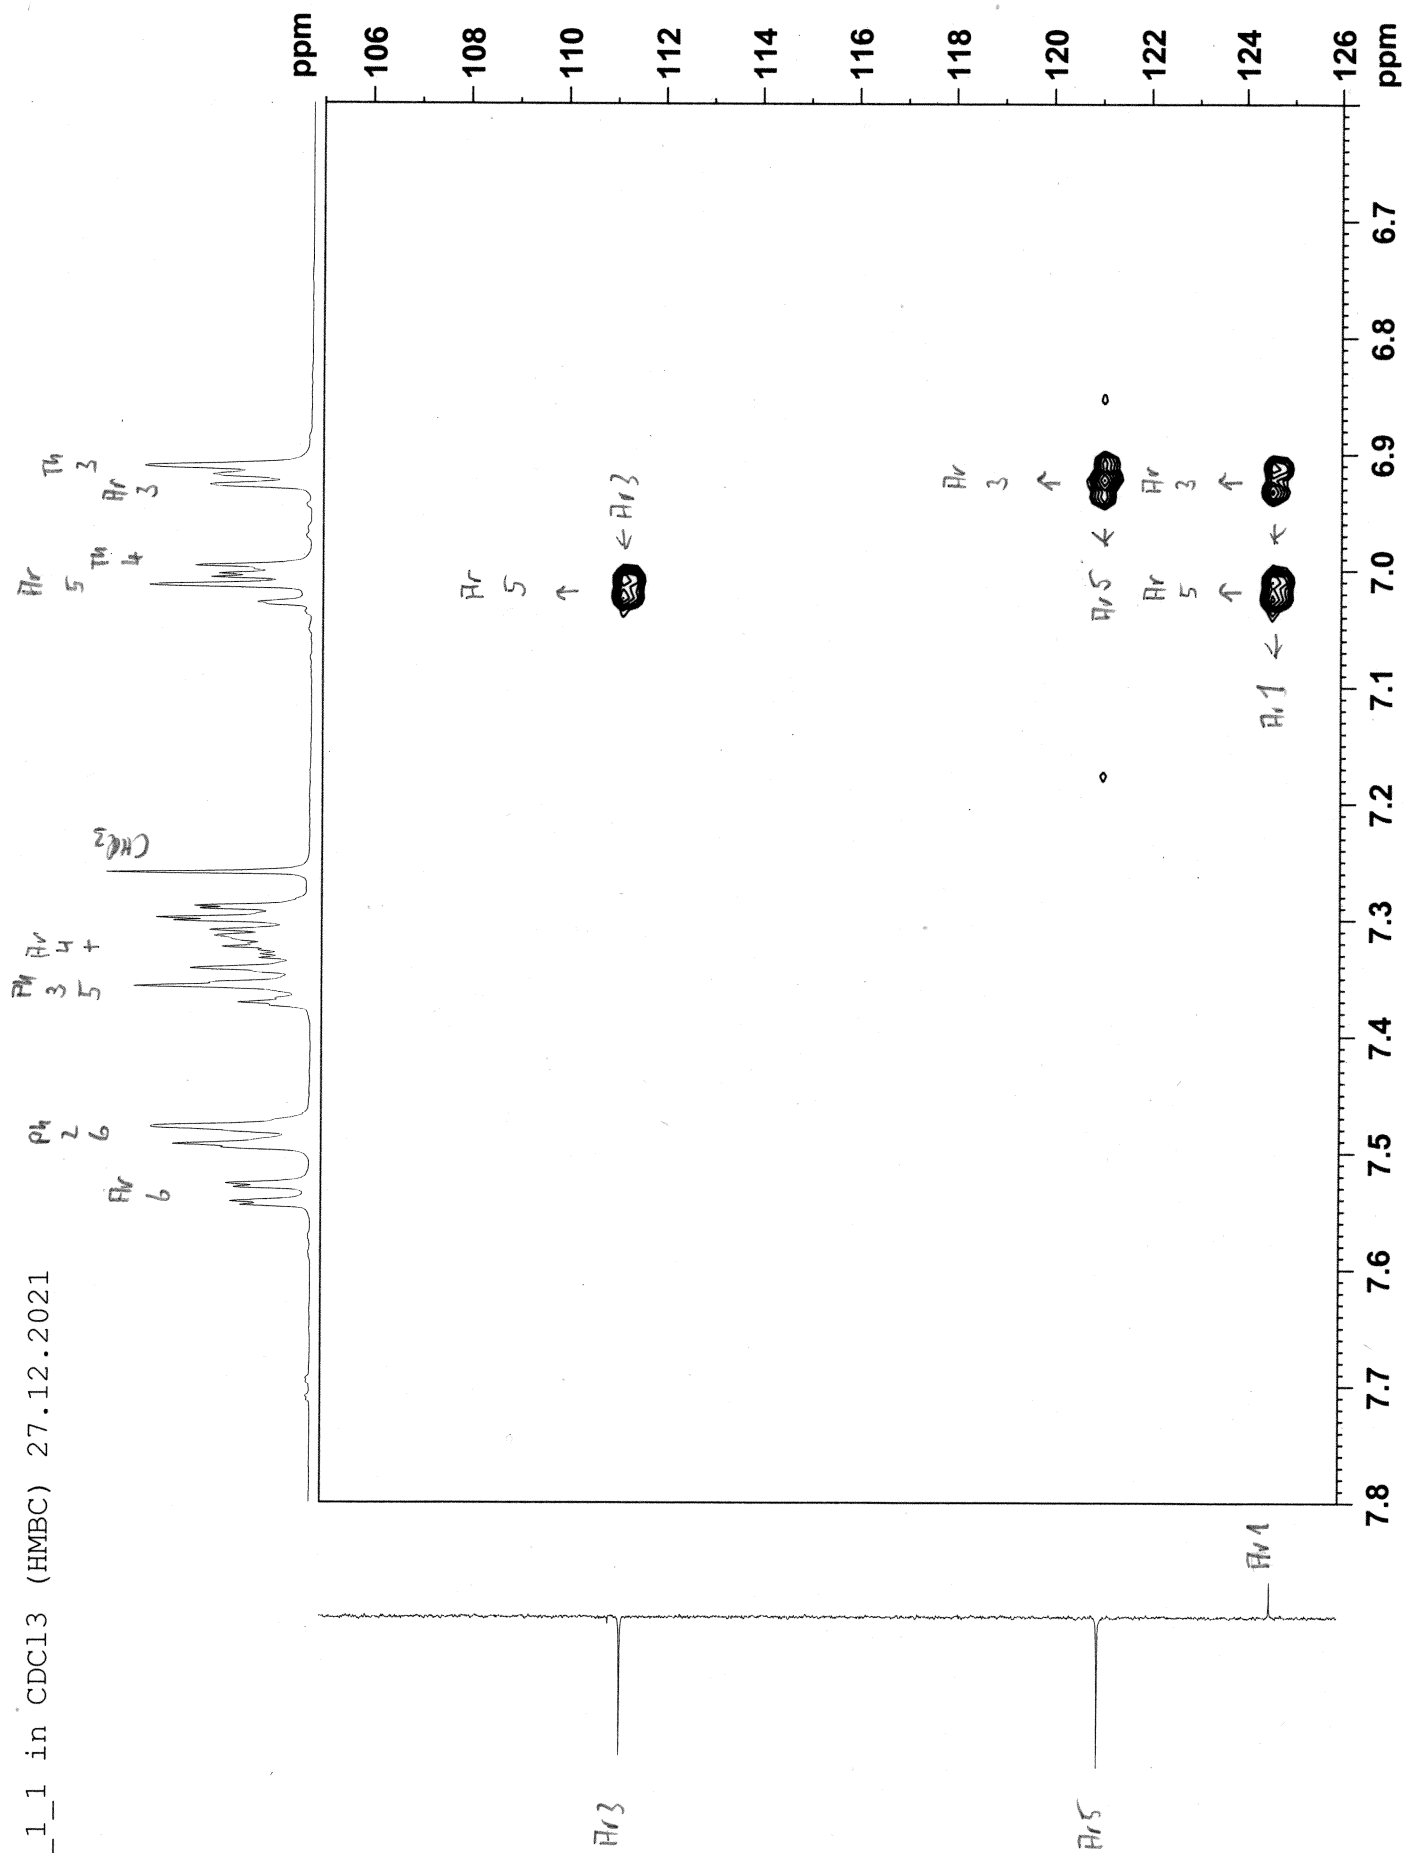

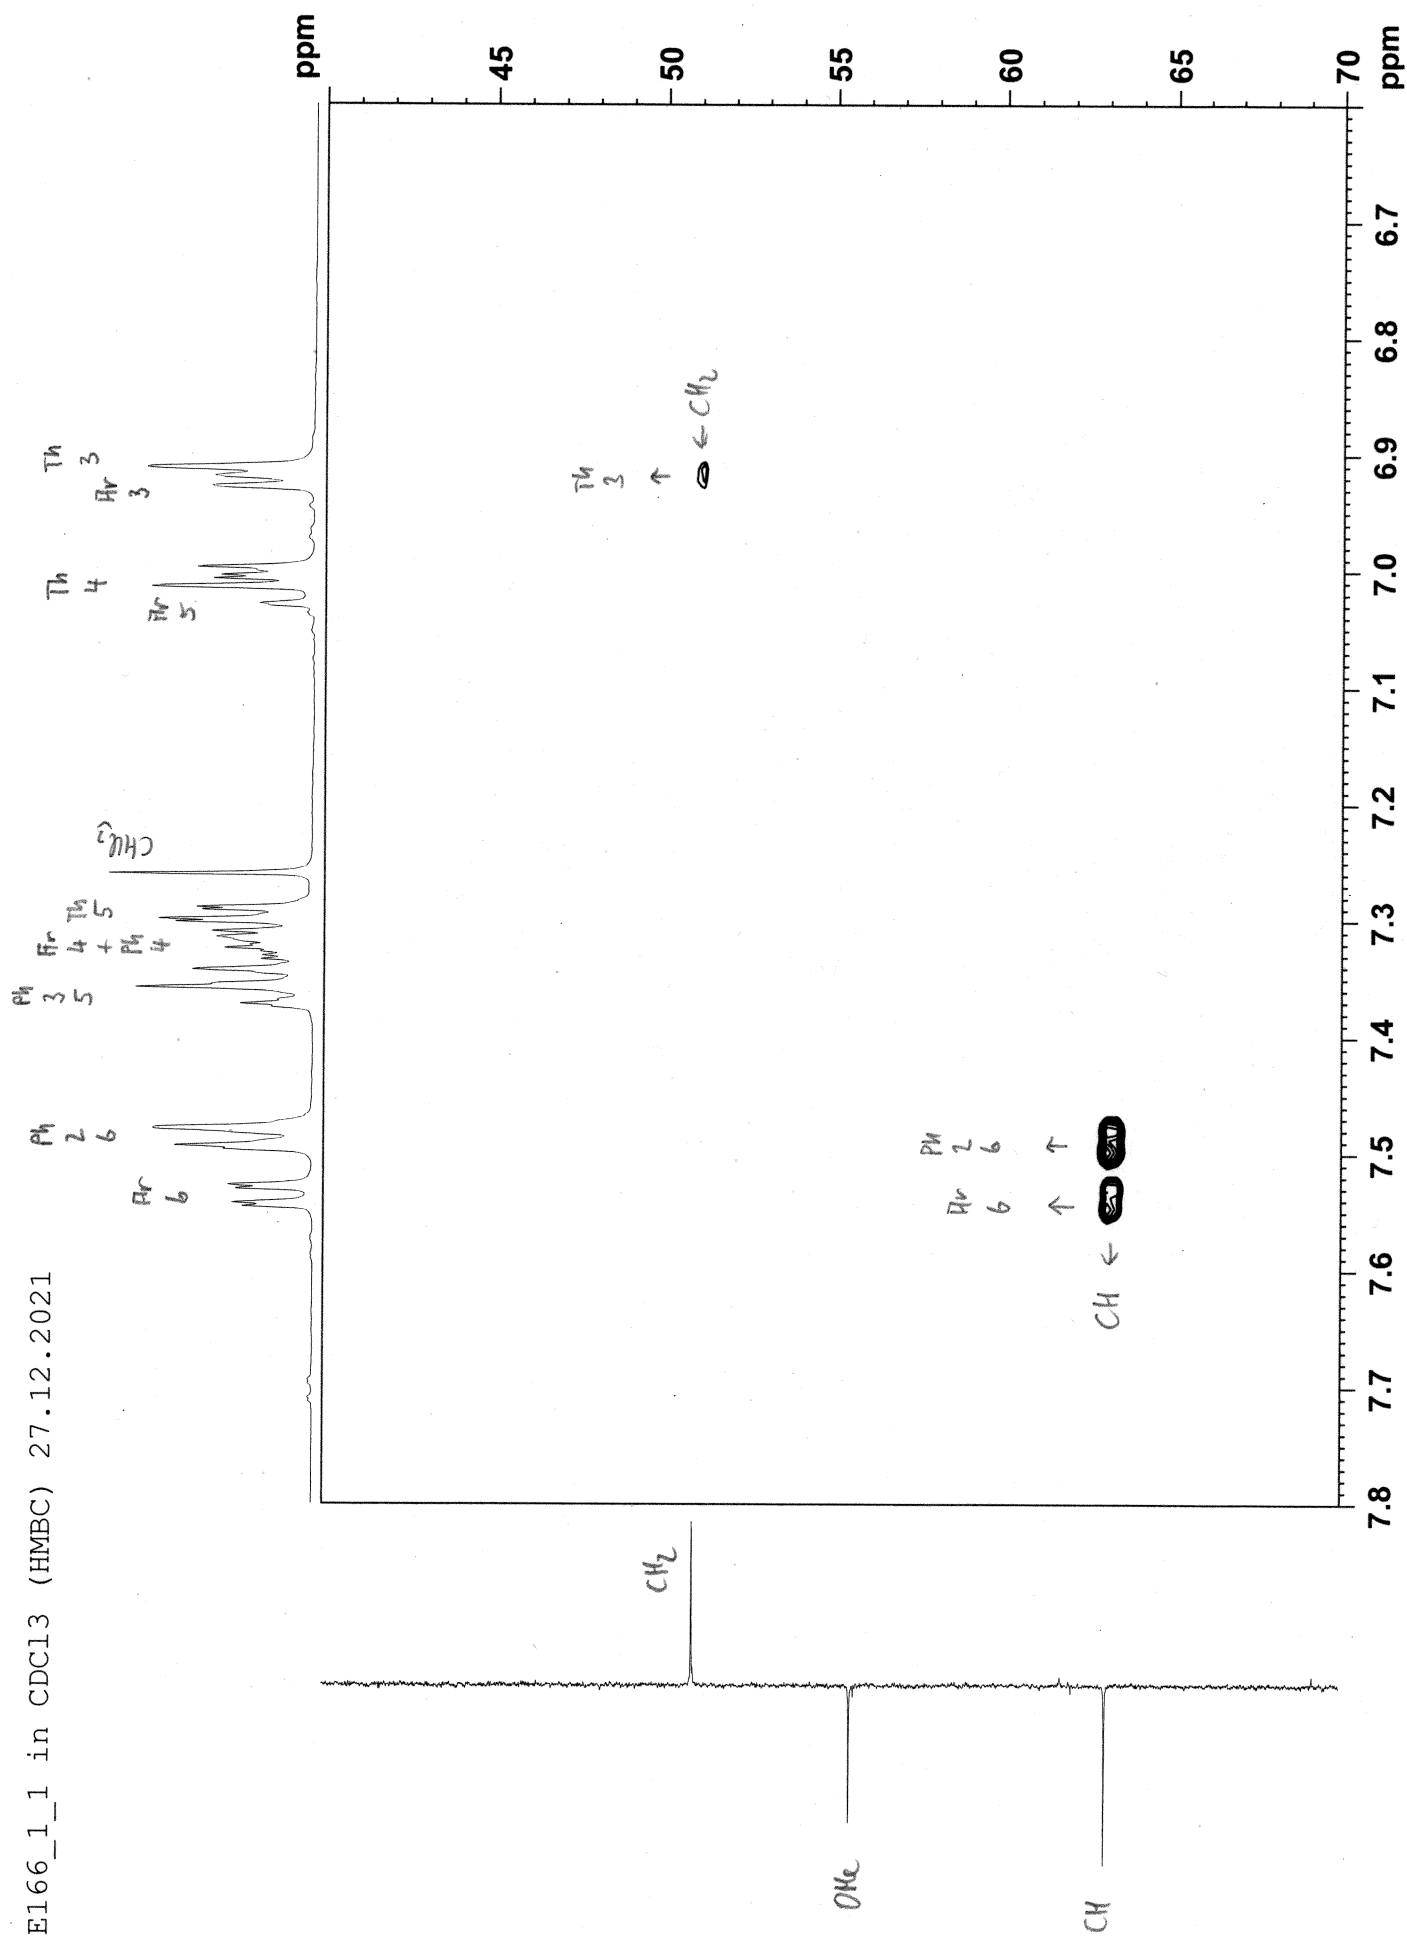

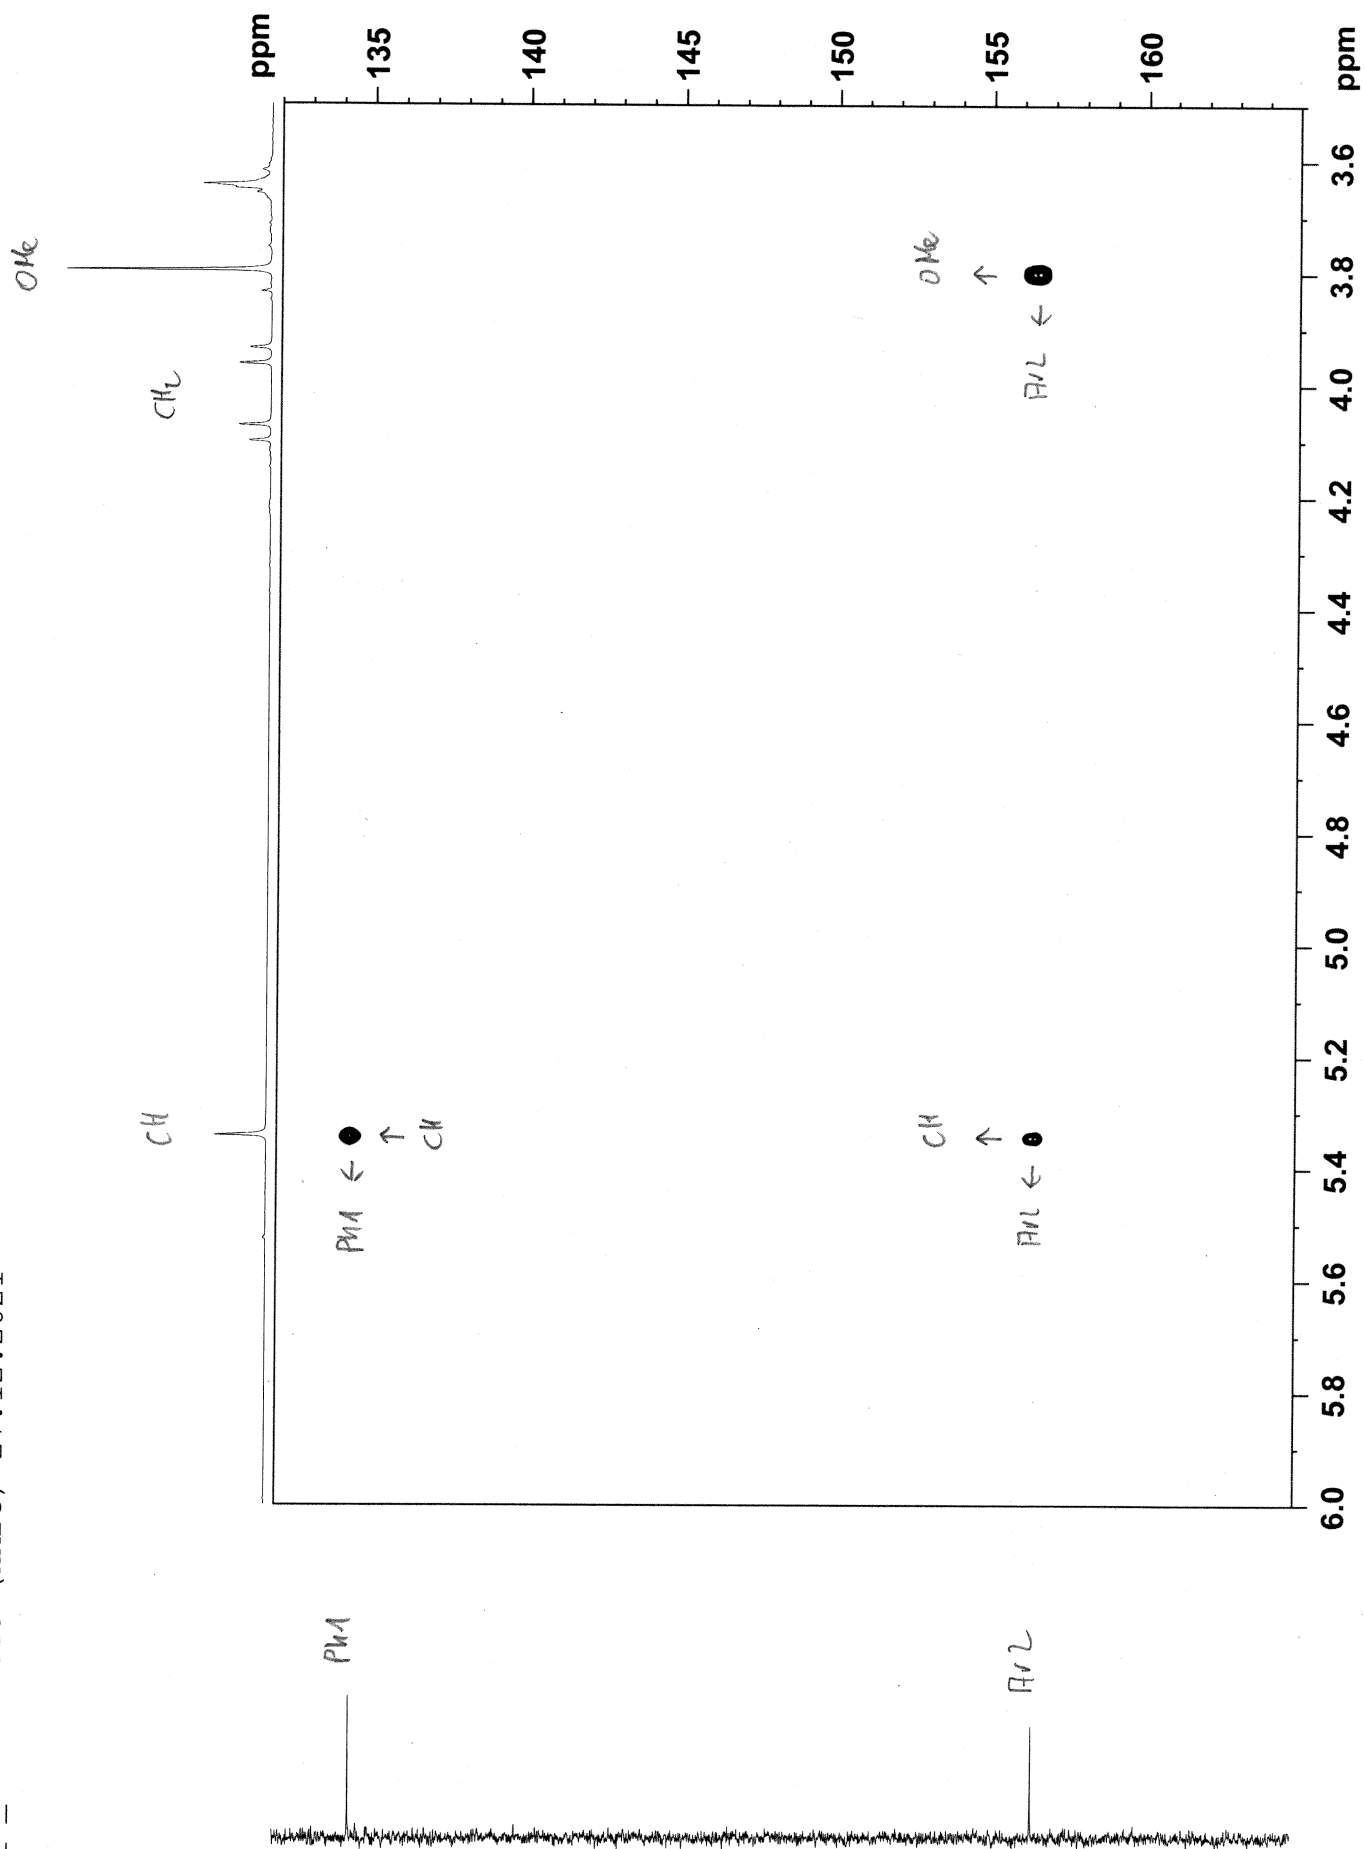

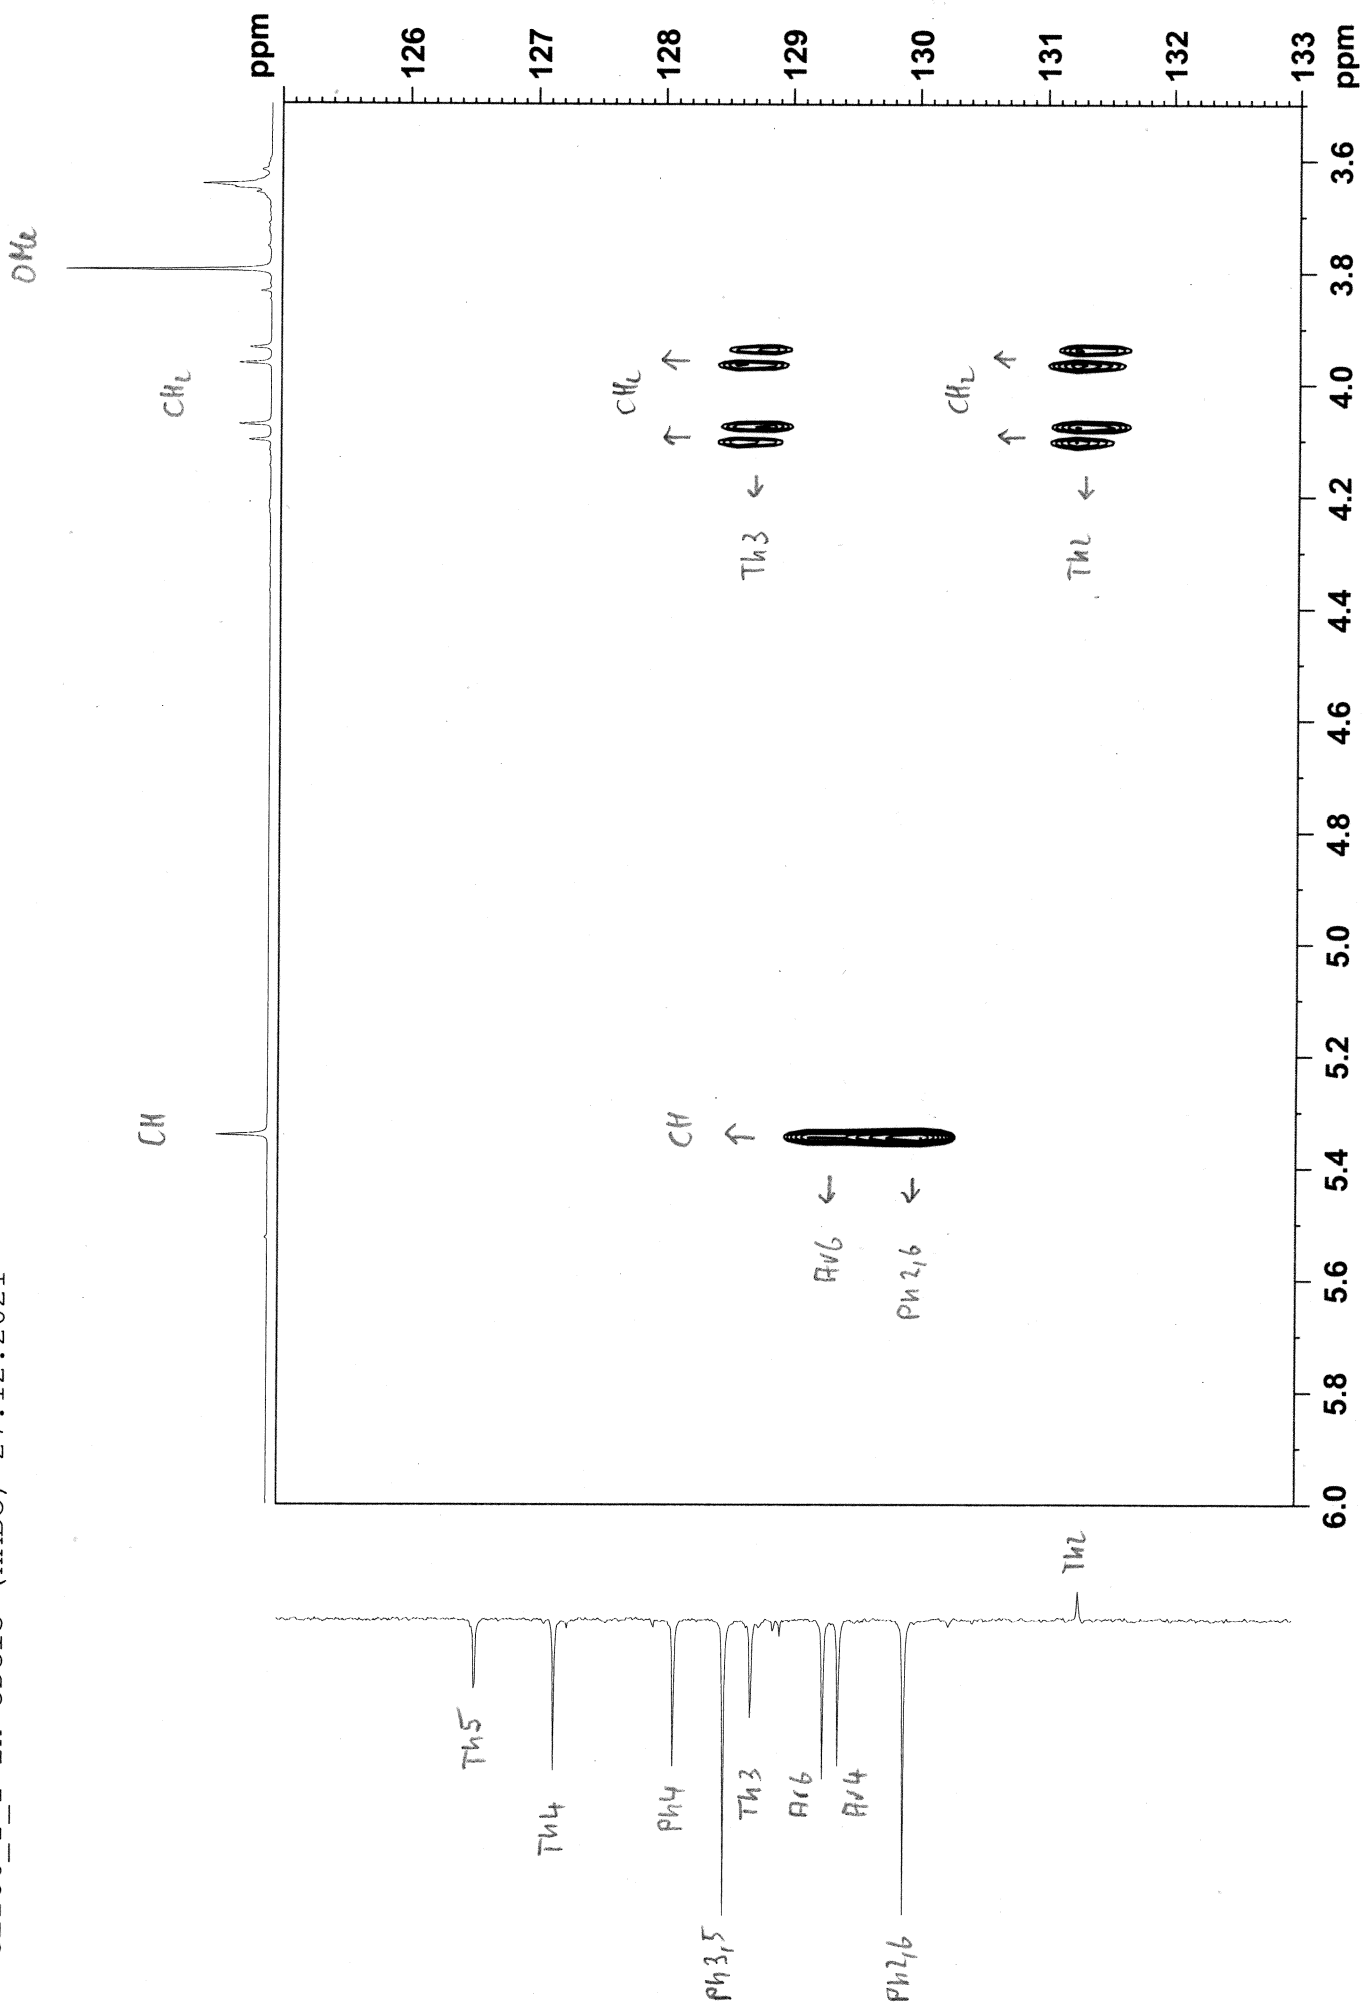

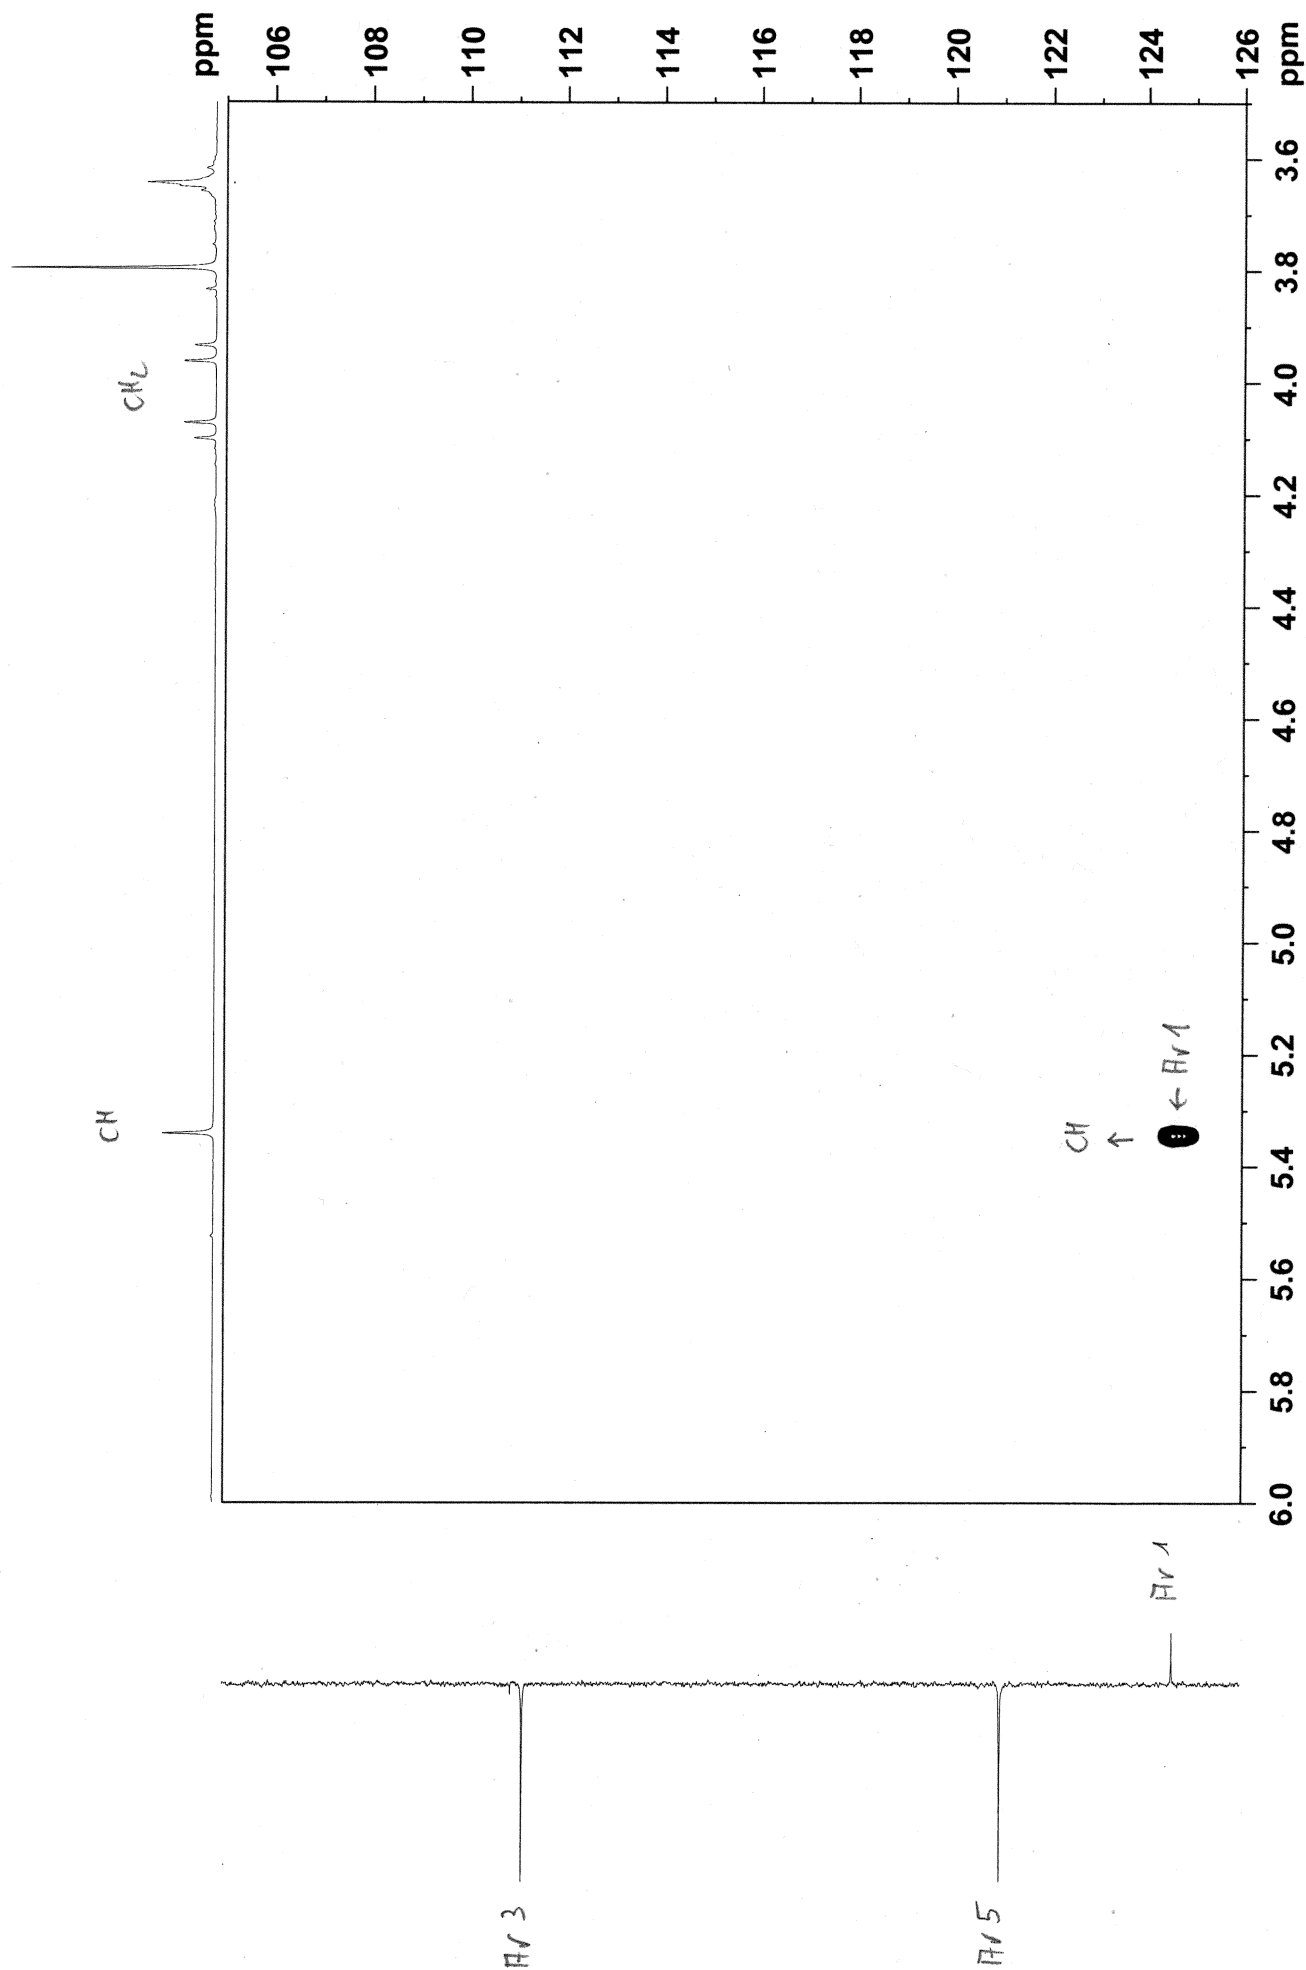

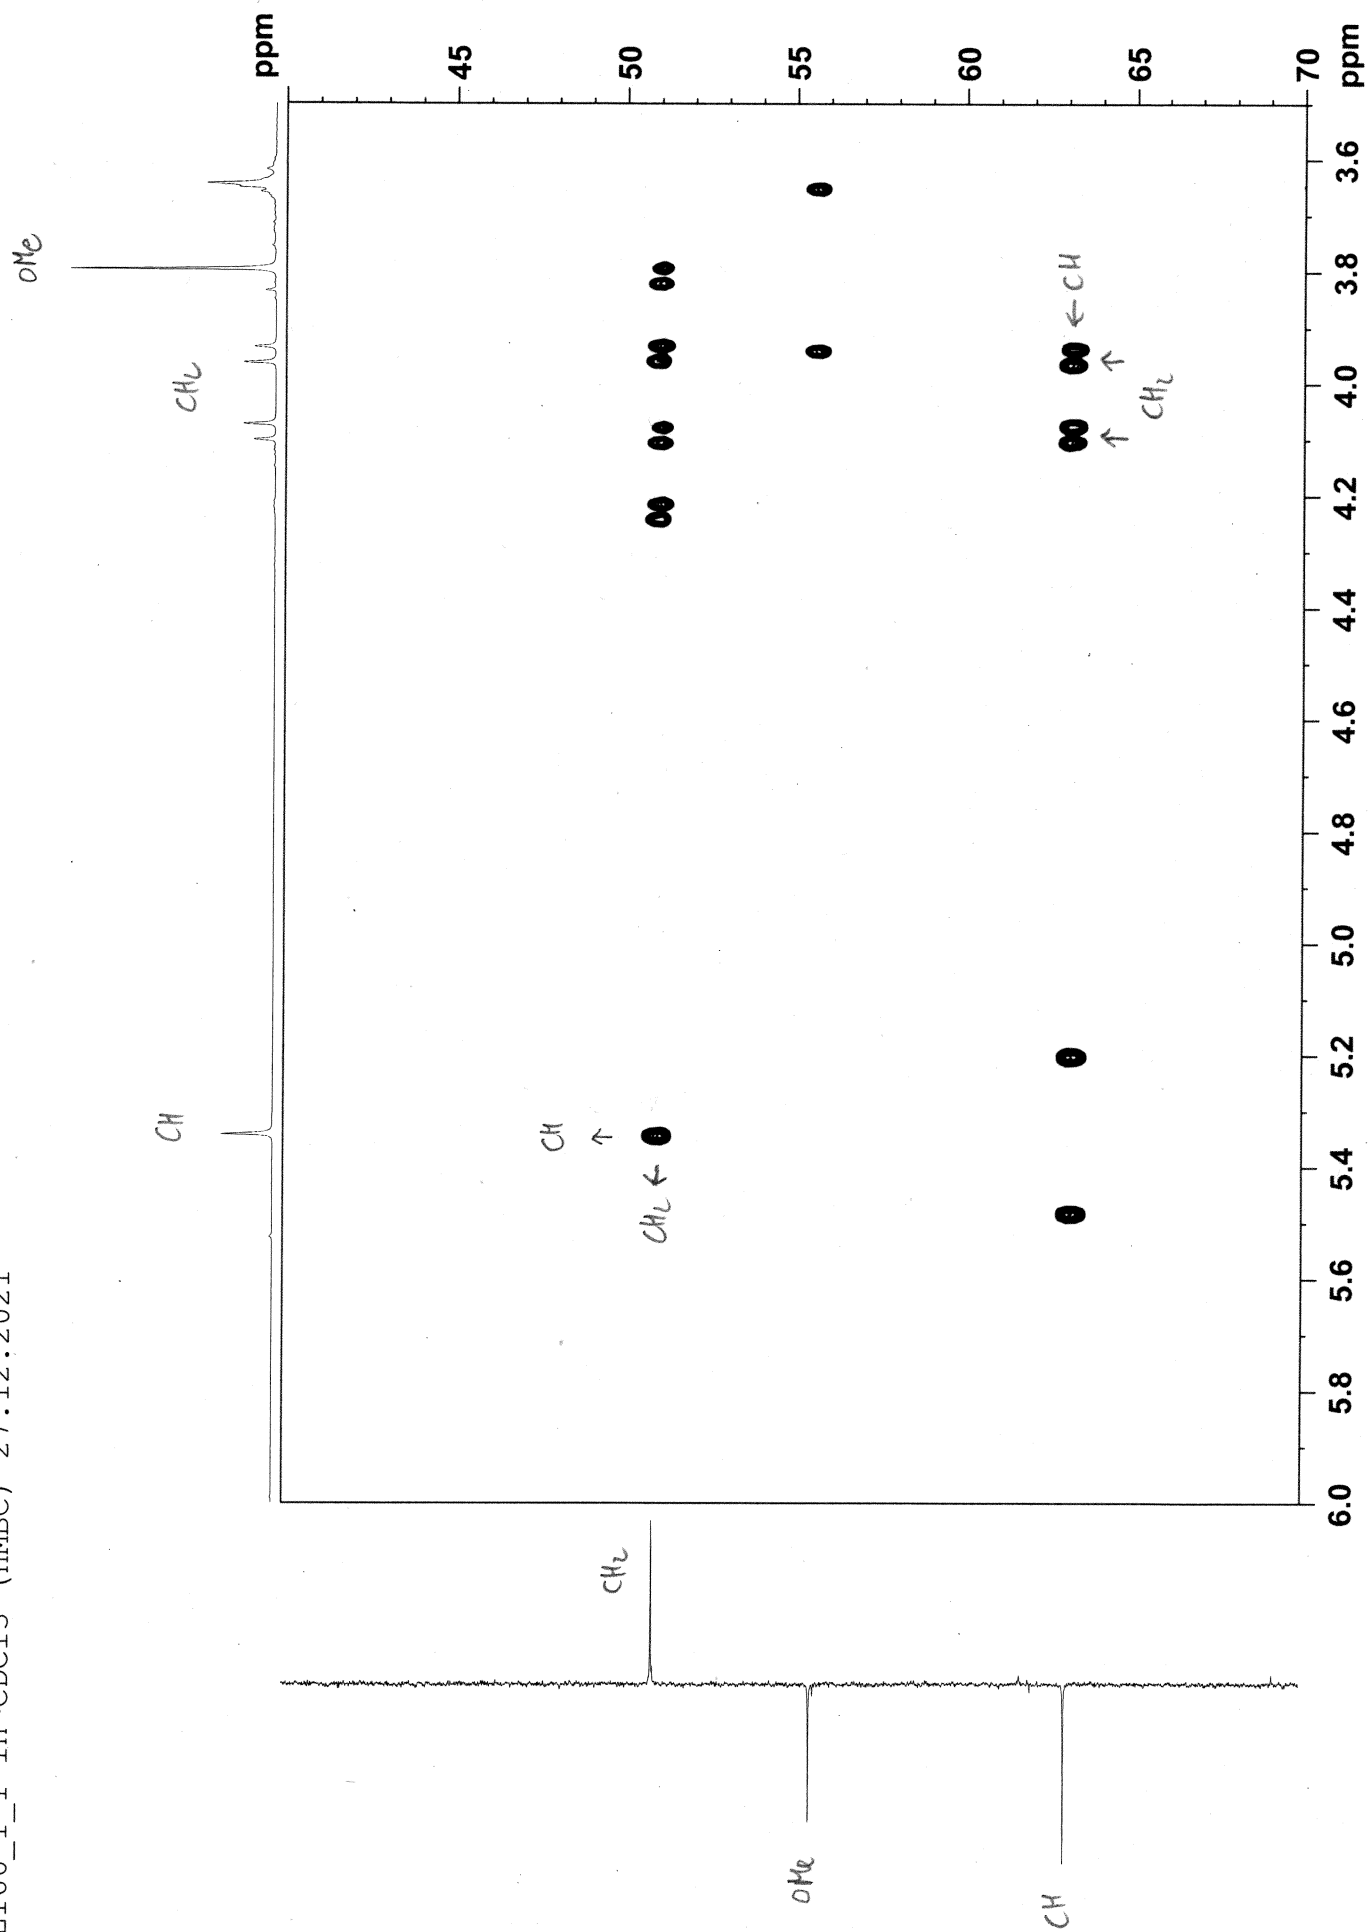

**Figure S70c.** NMR spectra of compound **6r**.

CE166\_1\_2 in cdcl3 (Proton) 13.8.2019

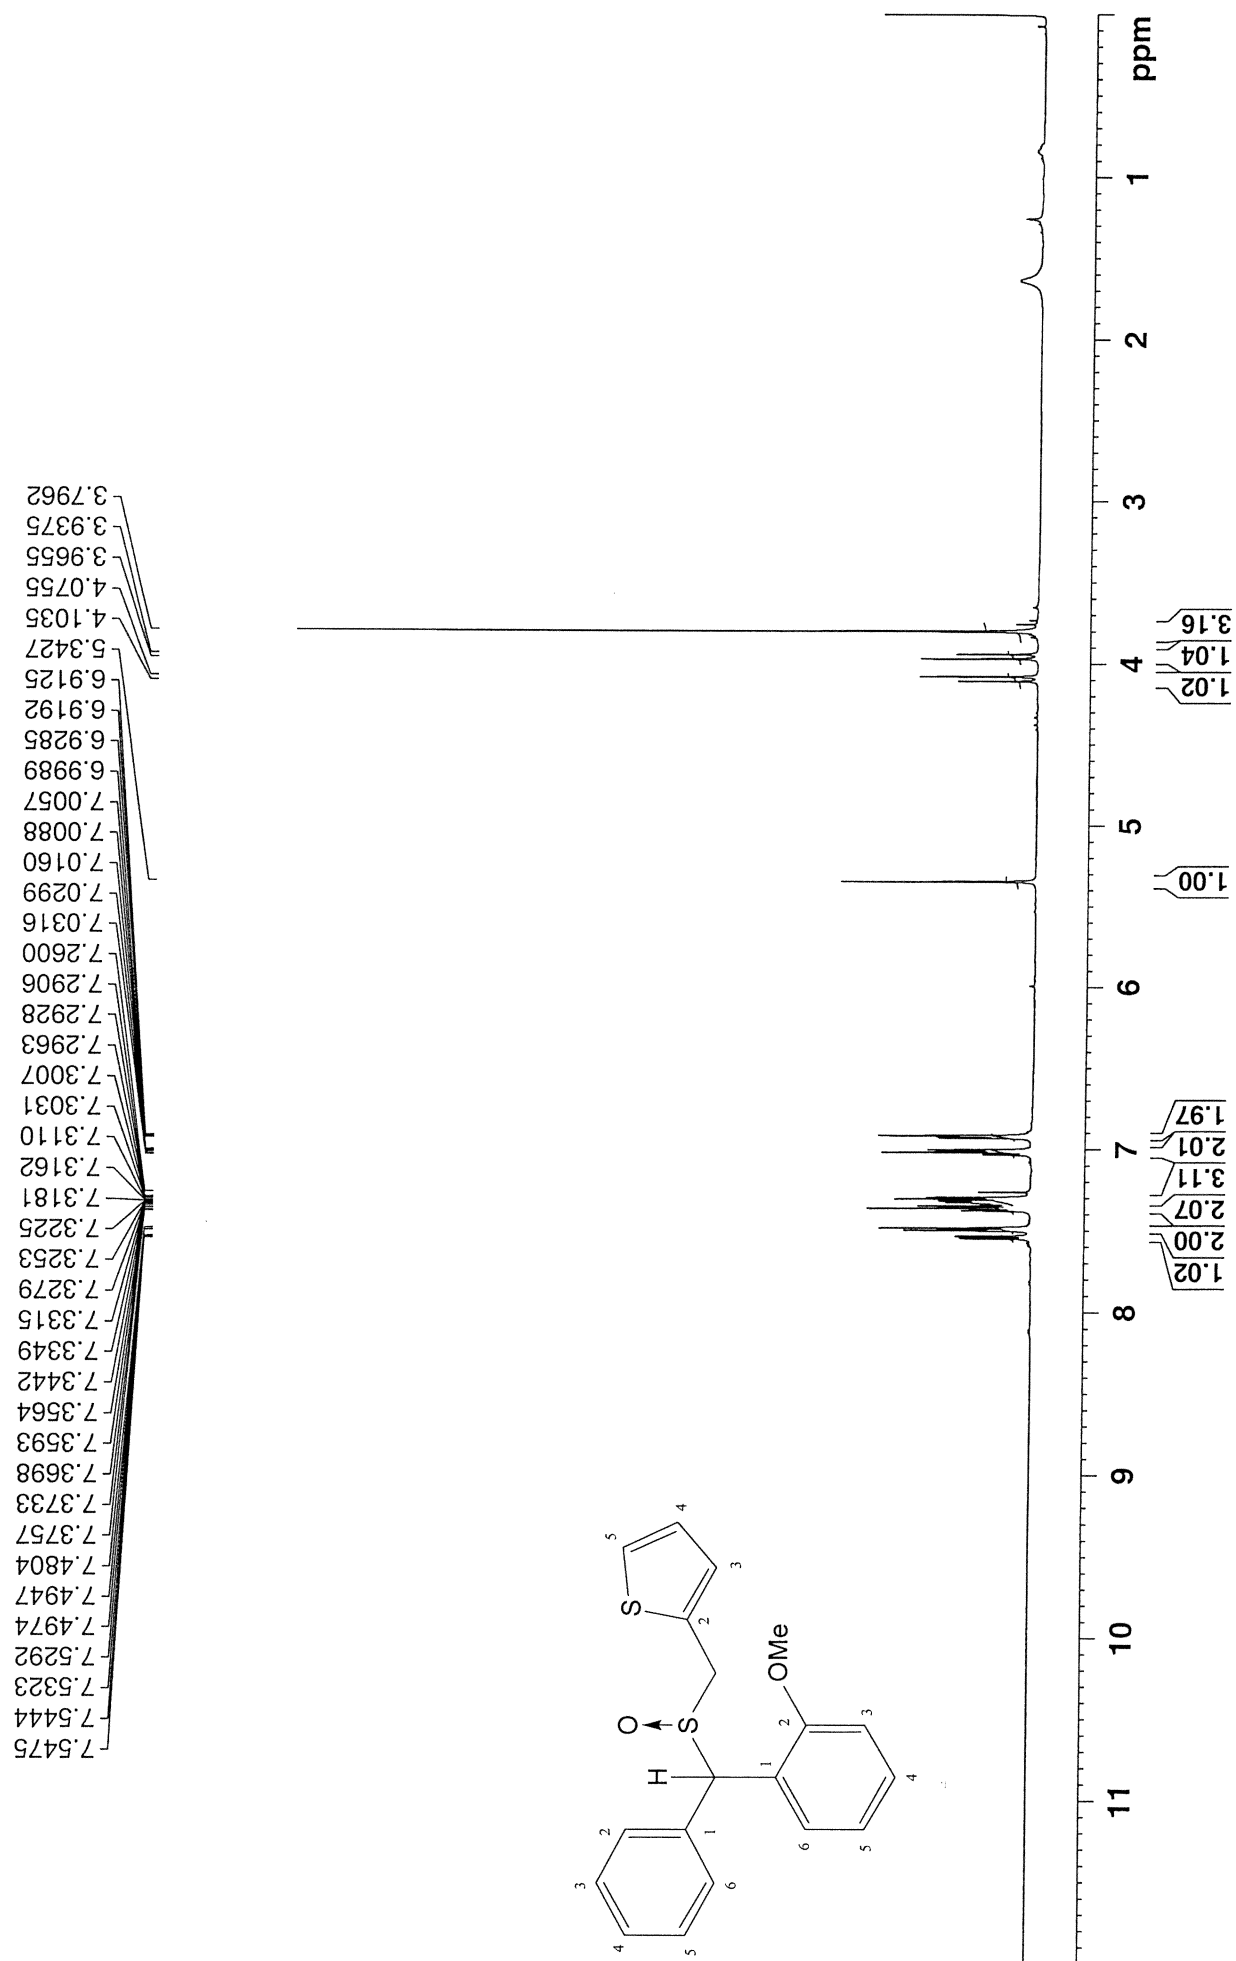

7.5475  
7.5444  
7.5323  
7.5292  
7.4974  
7.4947  
7.4804  
7.3757  
7.3733  
7.3698  
7.3593  
7.3564  
7.3442  
7.3349  
7.3315  
7.3279  
7.3253  
7.3225  
7.3181  
7.3162  
7.3110  
7.3031  
7.3007  
7.2963  
7.2928  
7.2906  
7.2600

7.0316  
7.0299  
7.0160  
7.0088  
7.0057  
6.9989  
6.9285  
6.9192  
6.9125

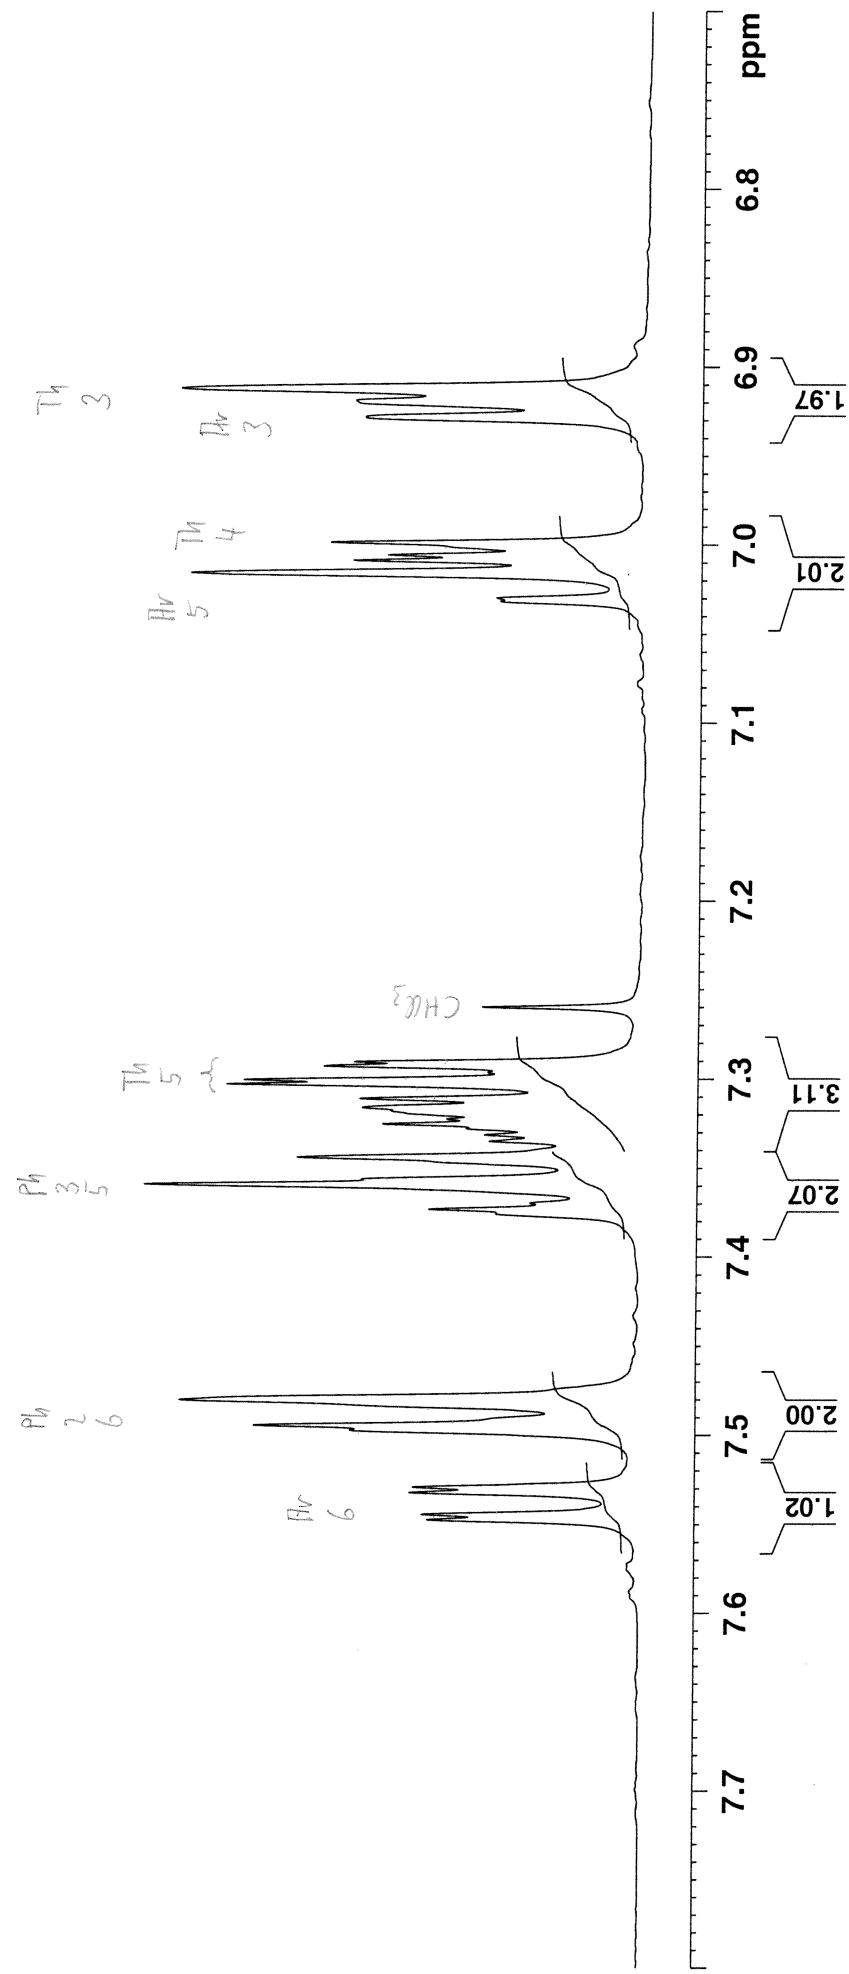



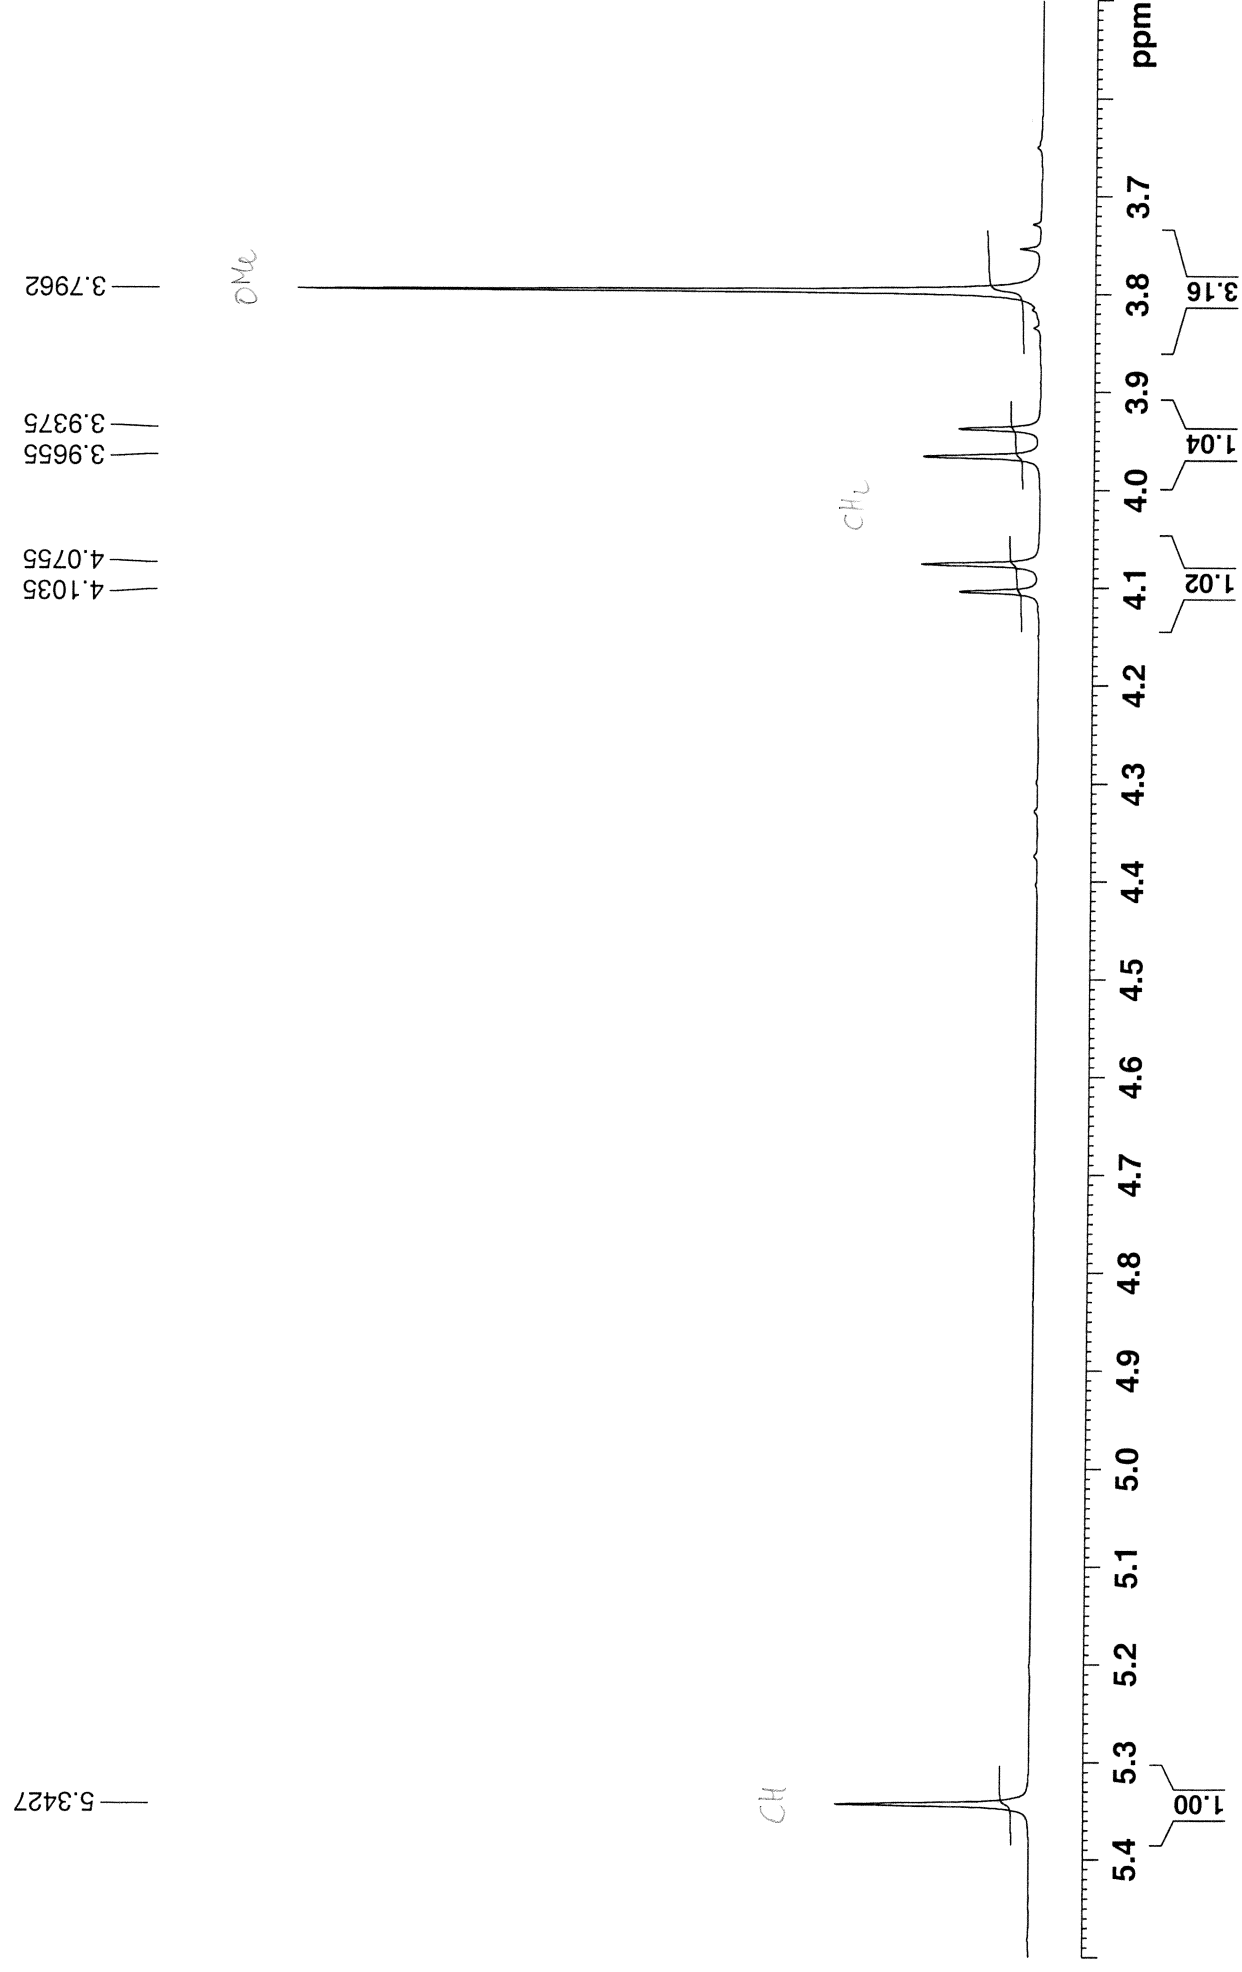

156.4749  
134.3946  
131.2415  
129.9178  
129.4120  
129.2657  
128.7320  
128.5030  
128.1158  
127.1704  
126.5635  
124.5217  
120.9737  
111.1286

62.9547  
55.4886  
50.7936

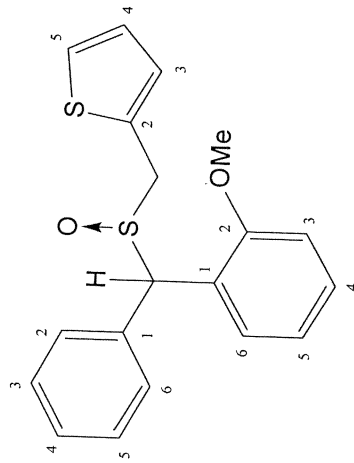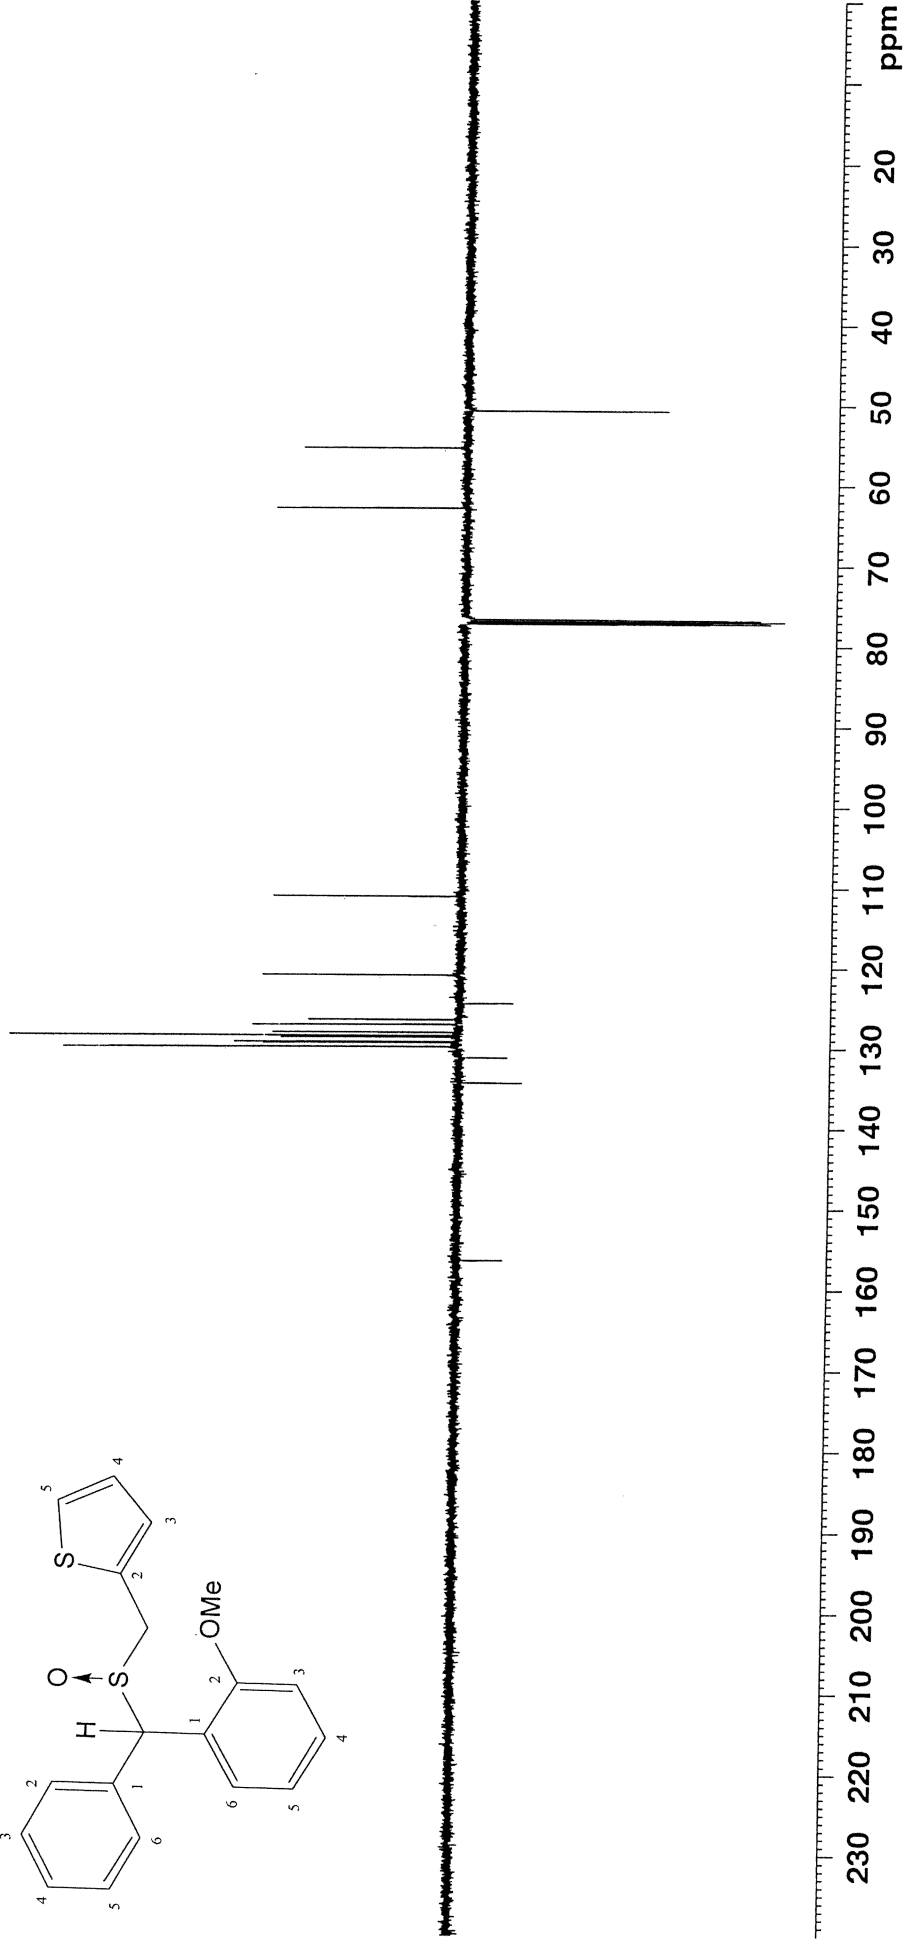

CE166\_1\_2 in cdcl3 (APT) 13.8.2019

— 156.4749

— 134.3946

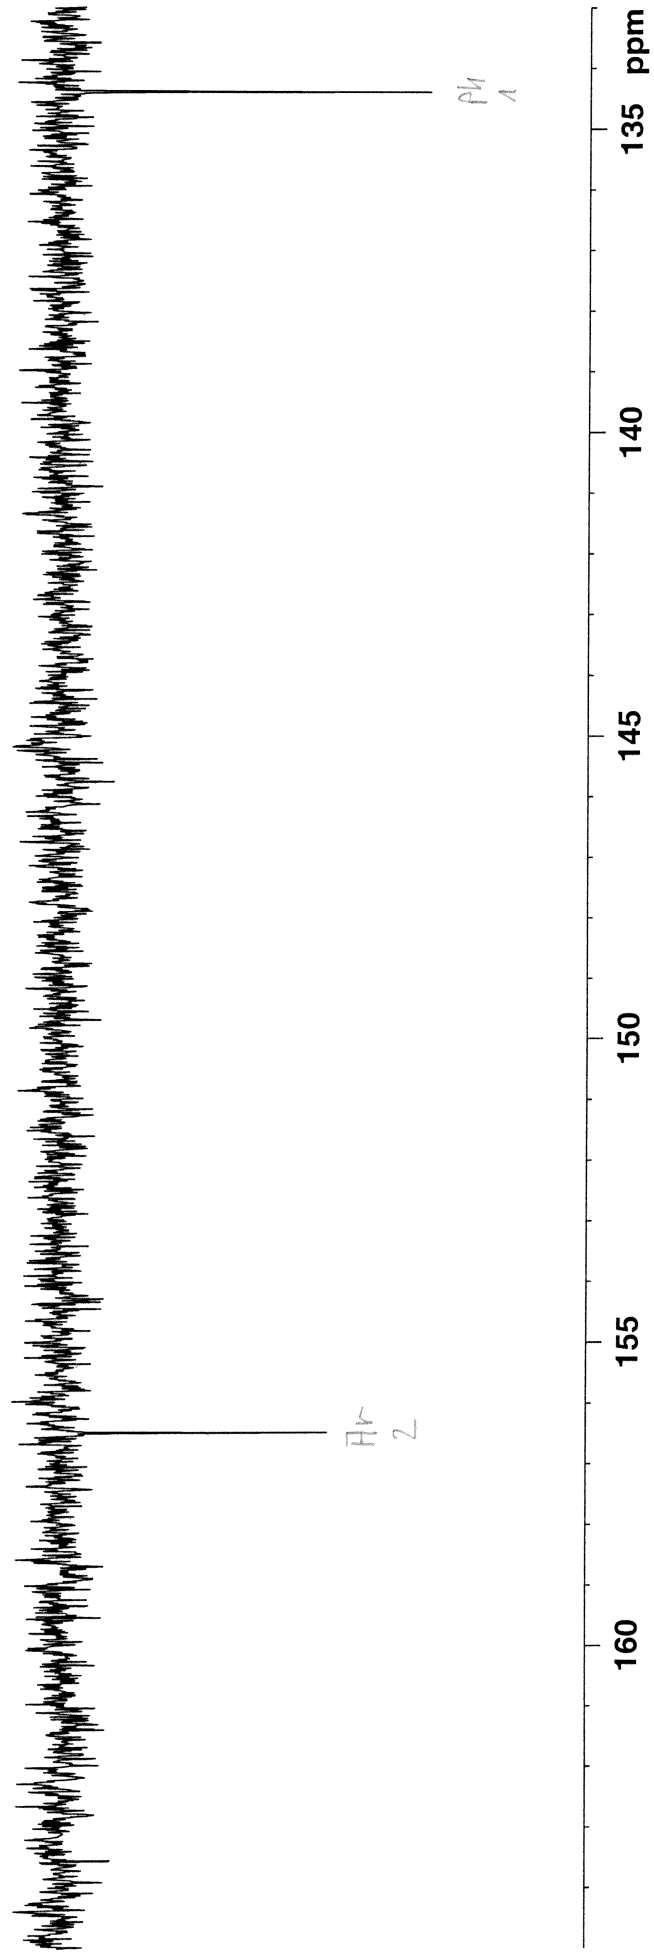

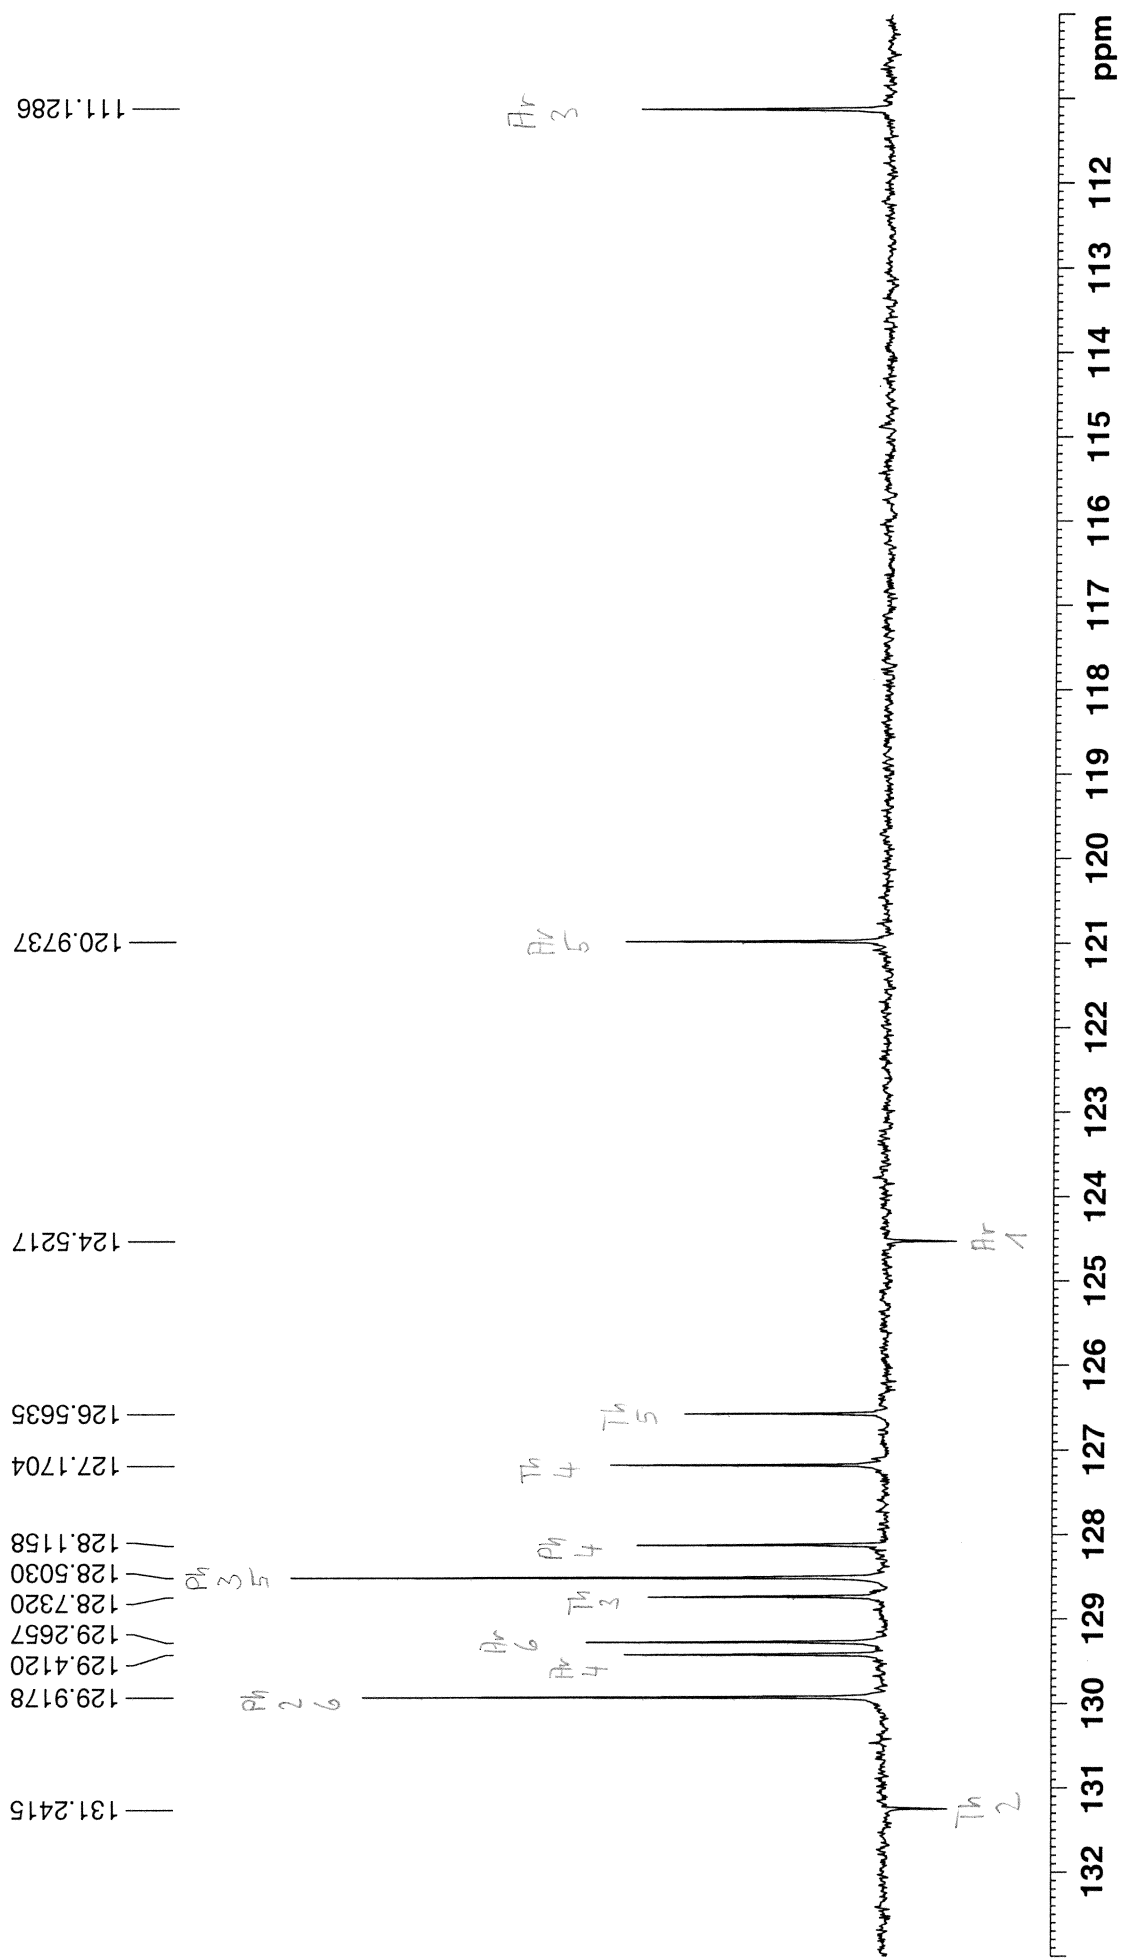

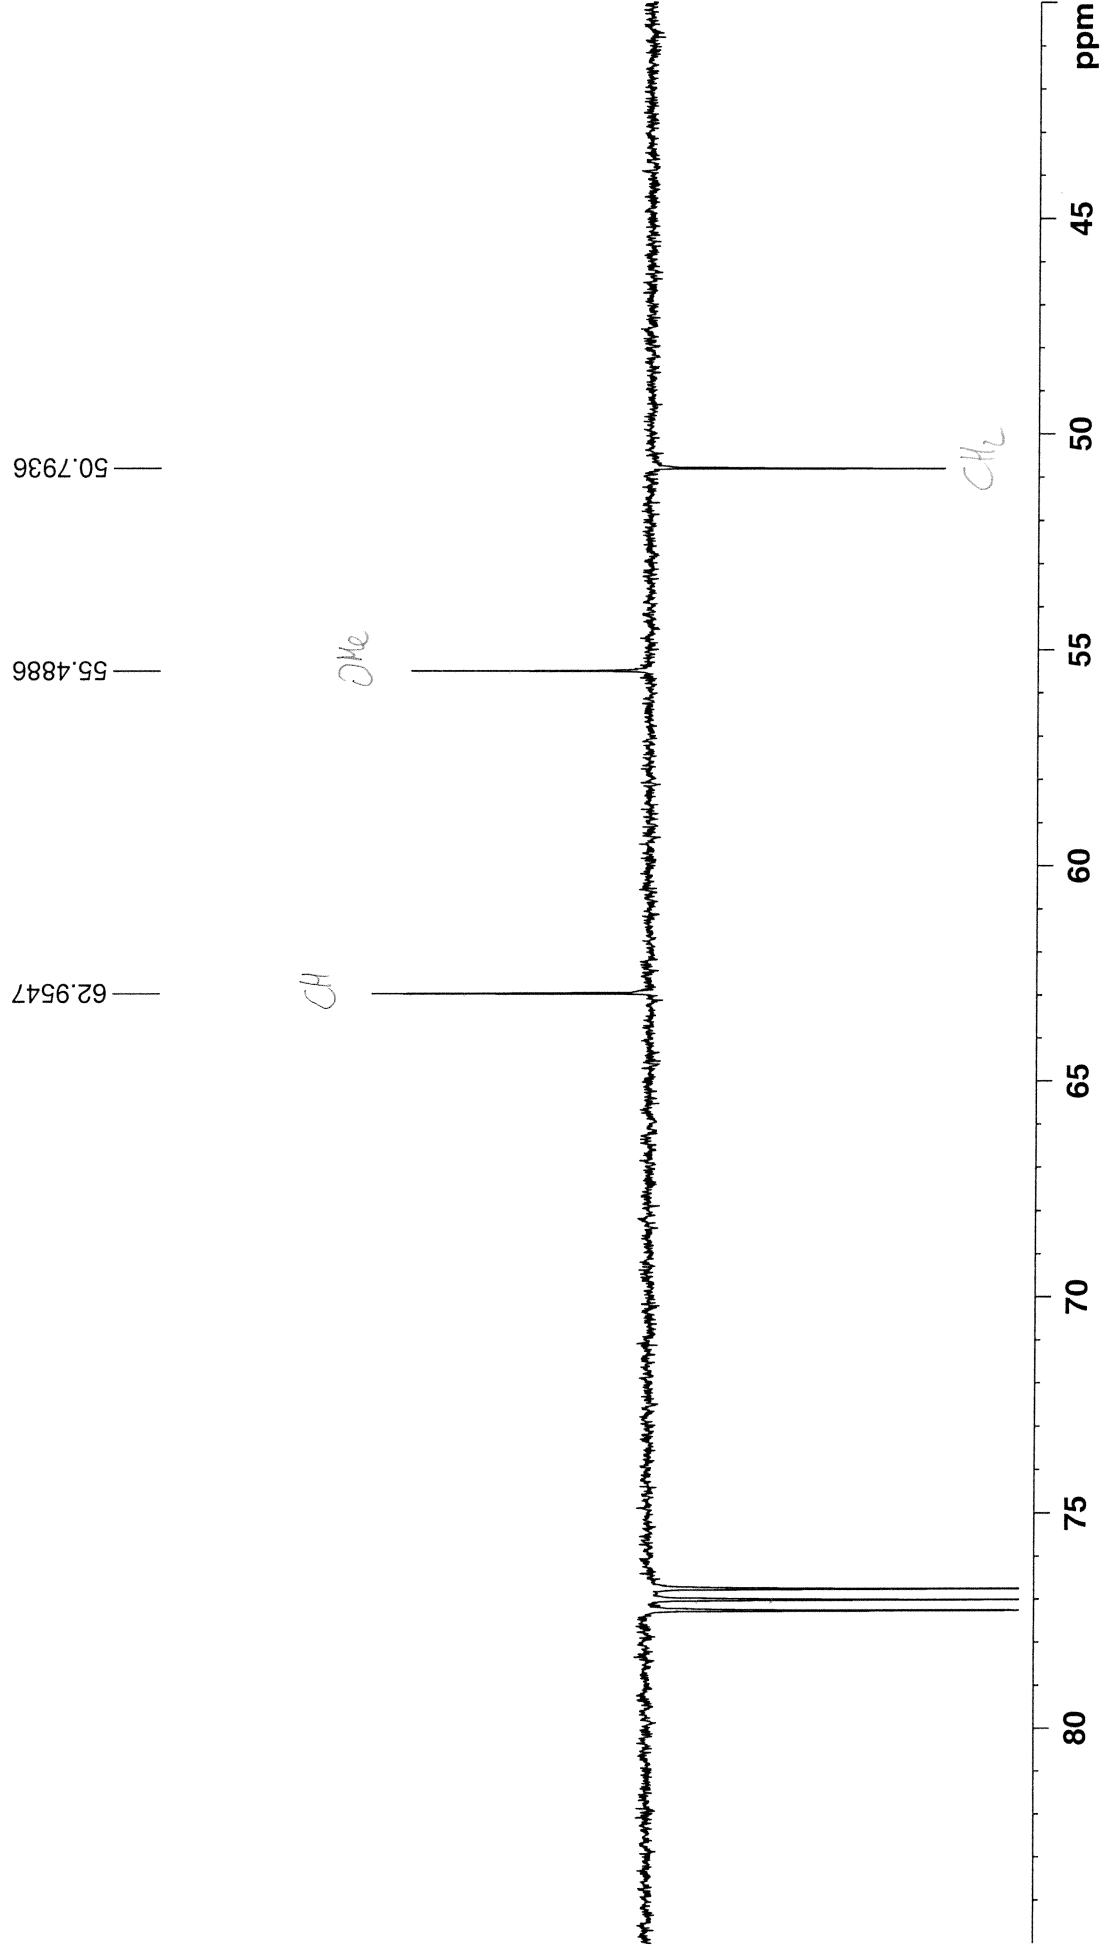

**Figure S71c.** NMR spectra of compound **7r**.

CE166-S2P1 in cdcl3 (Proton) 6.9.2018

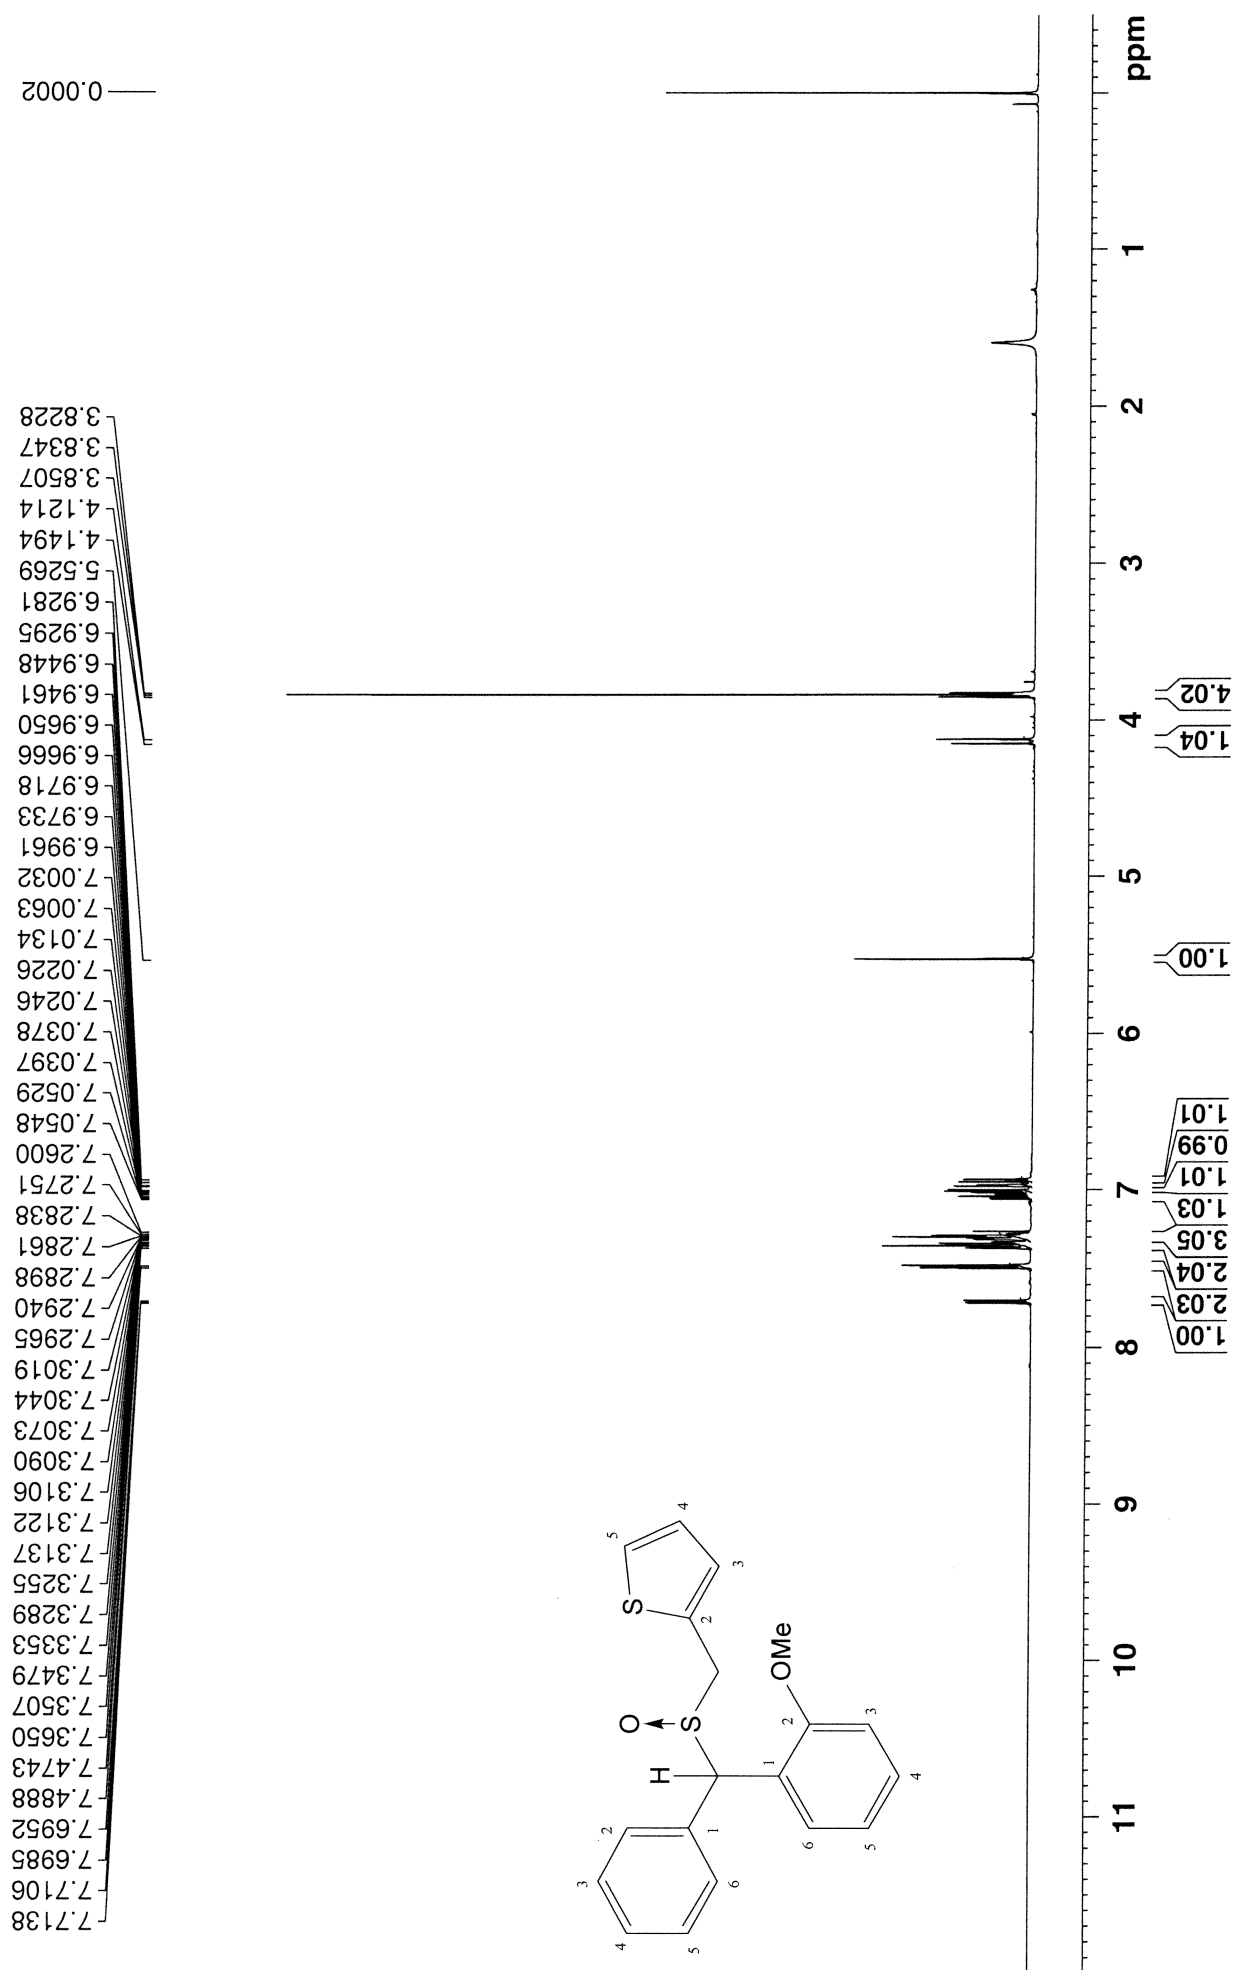

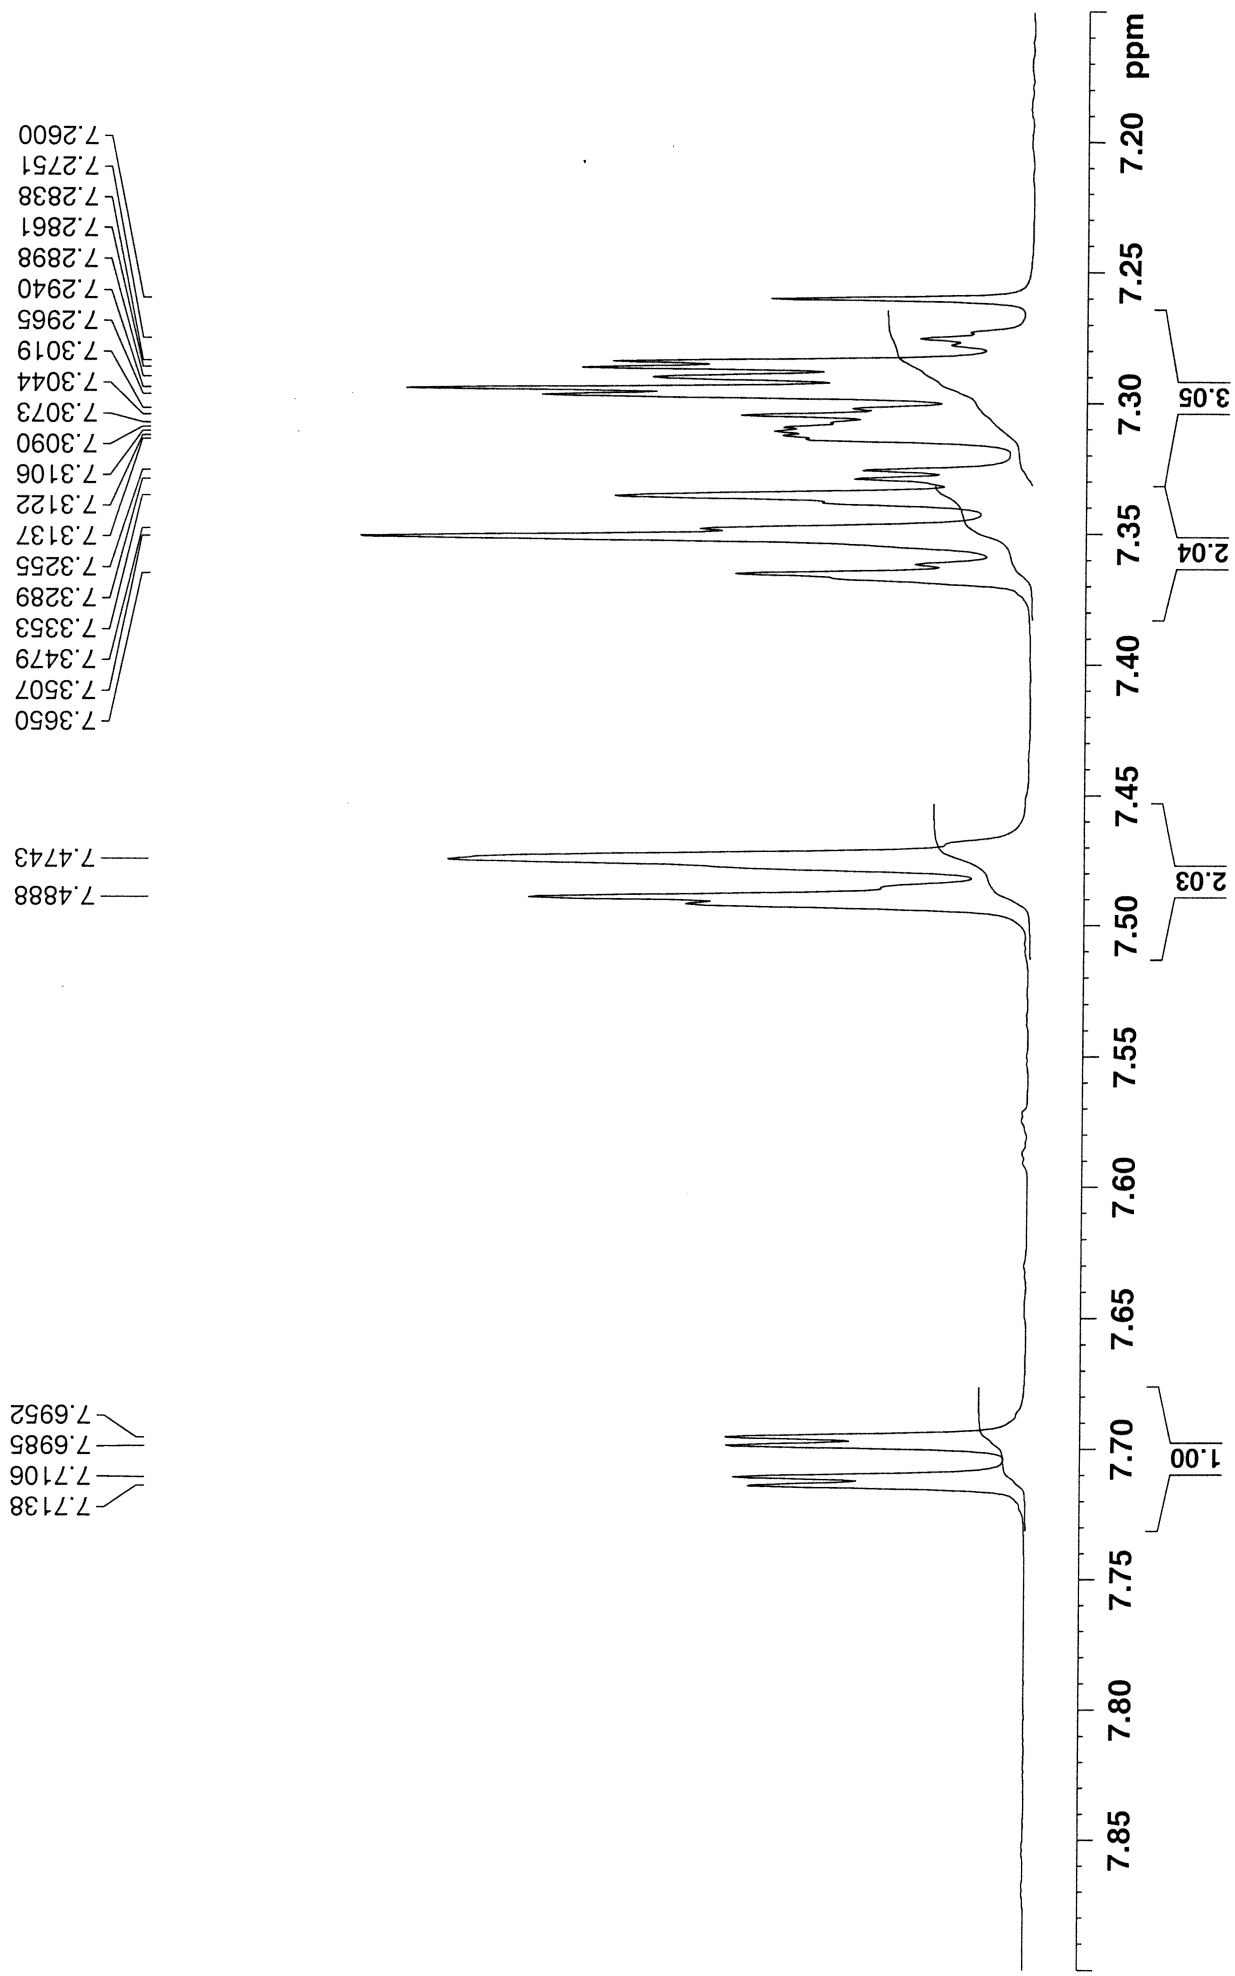

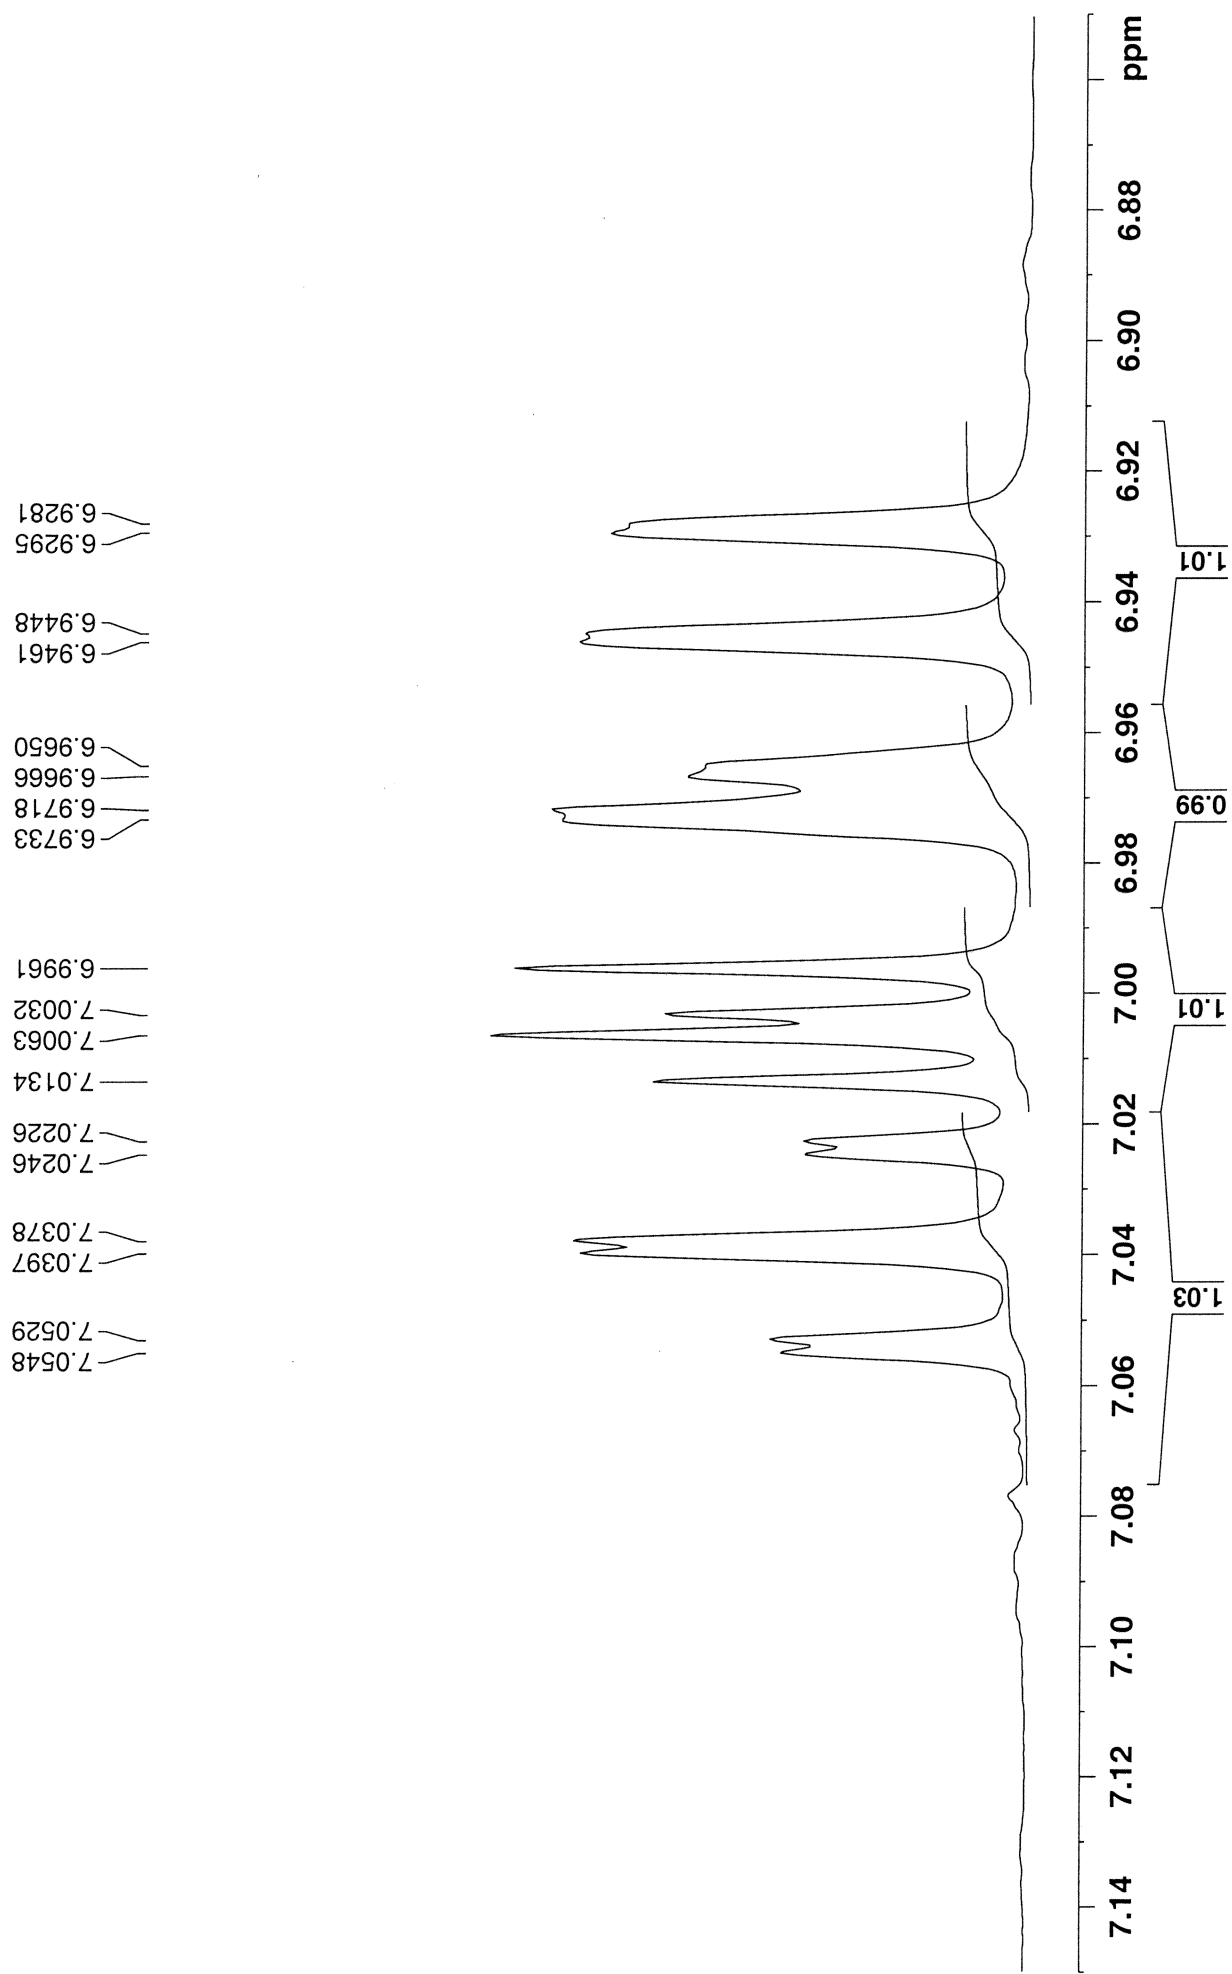



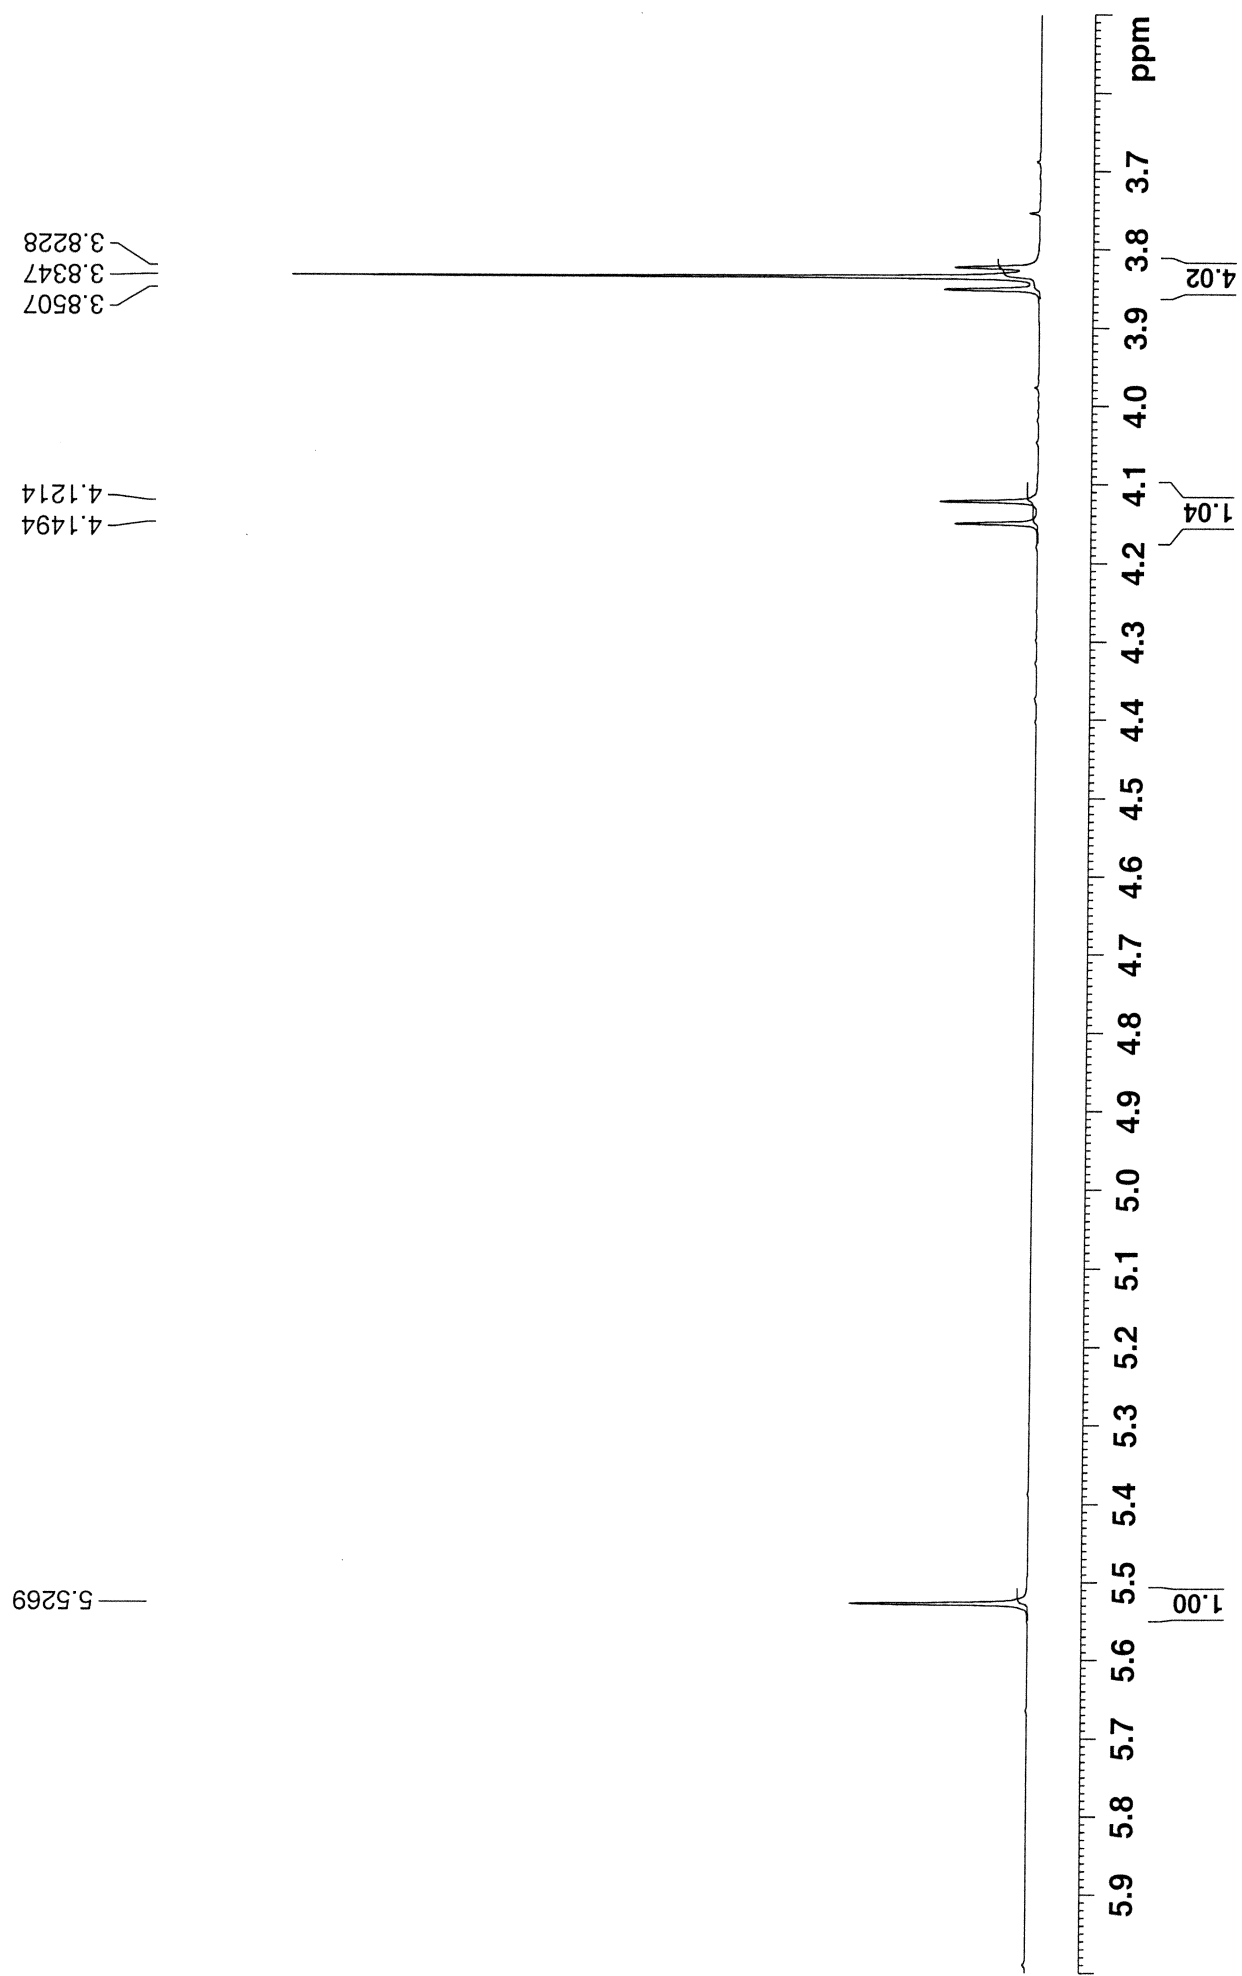

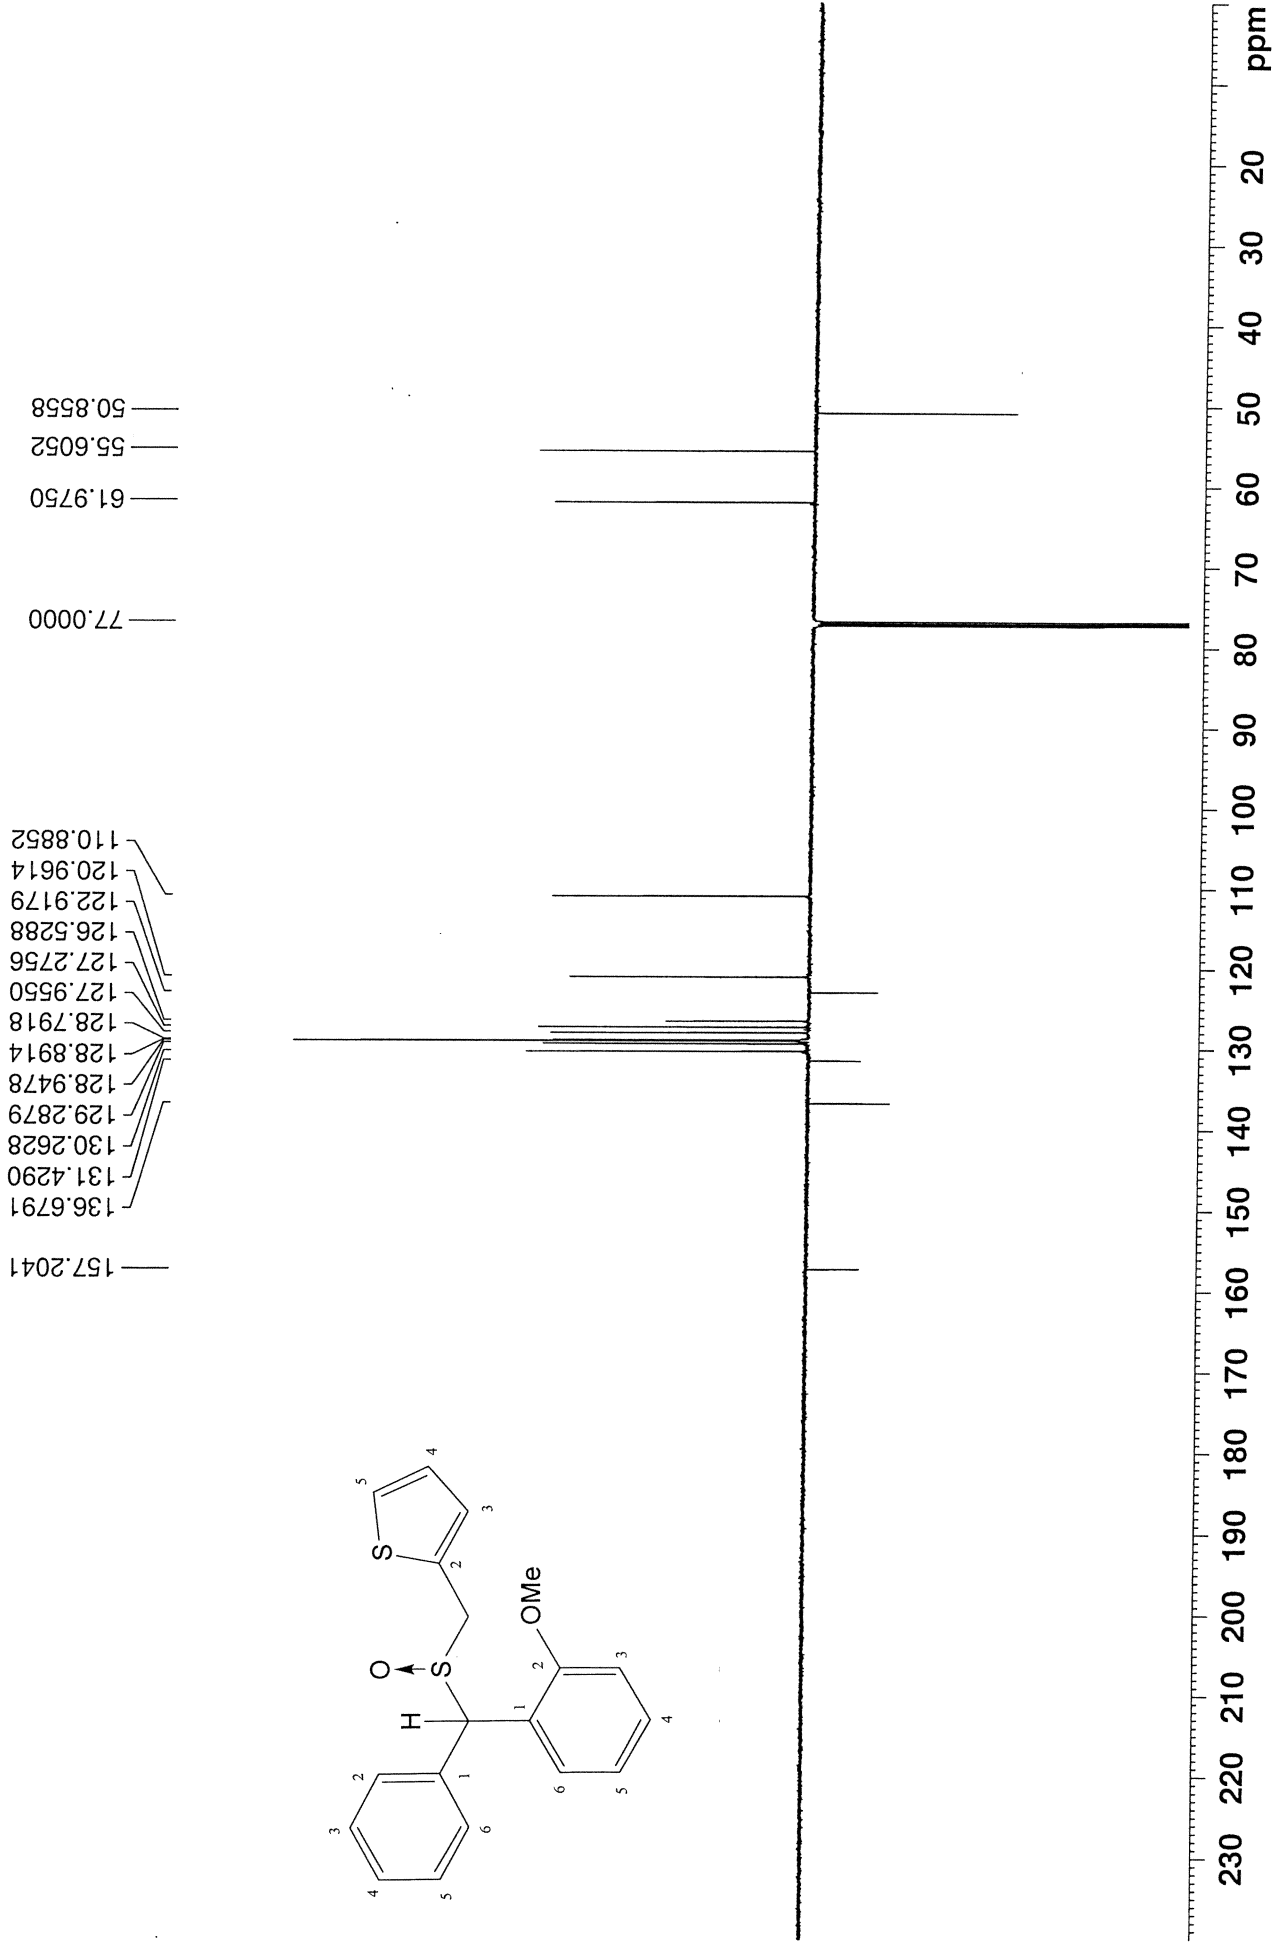

CE166-S2P1 in cdcl3 (APT) 6.9.2018

157.2041

136.6791

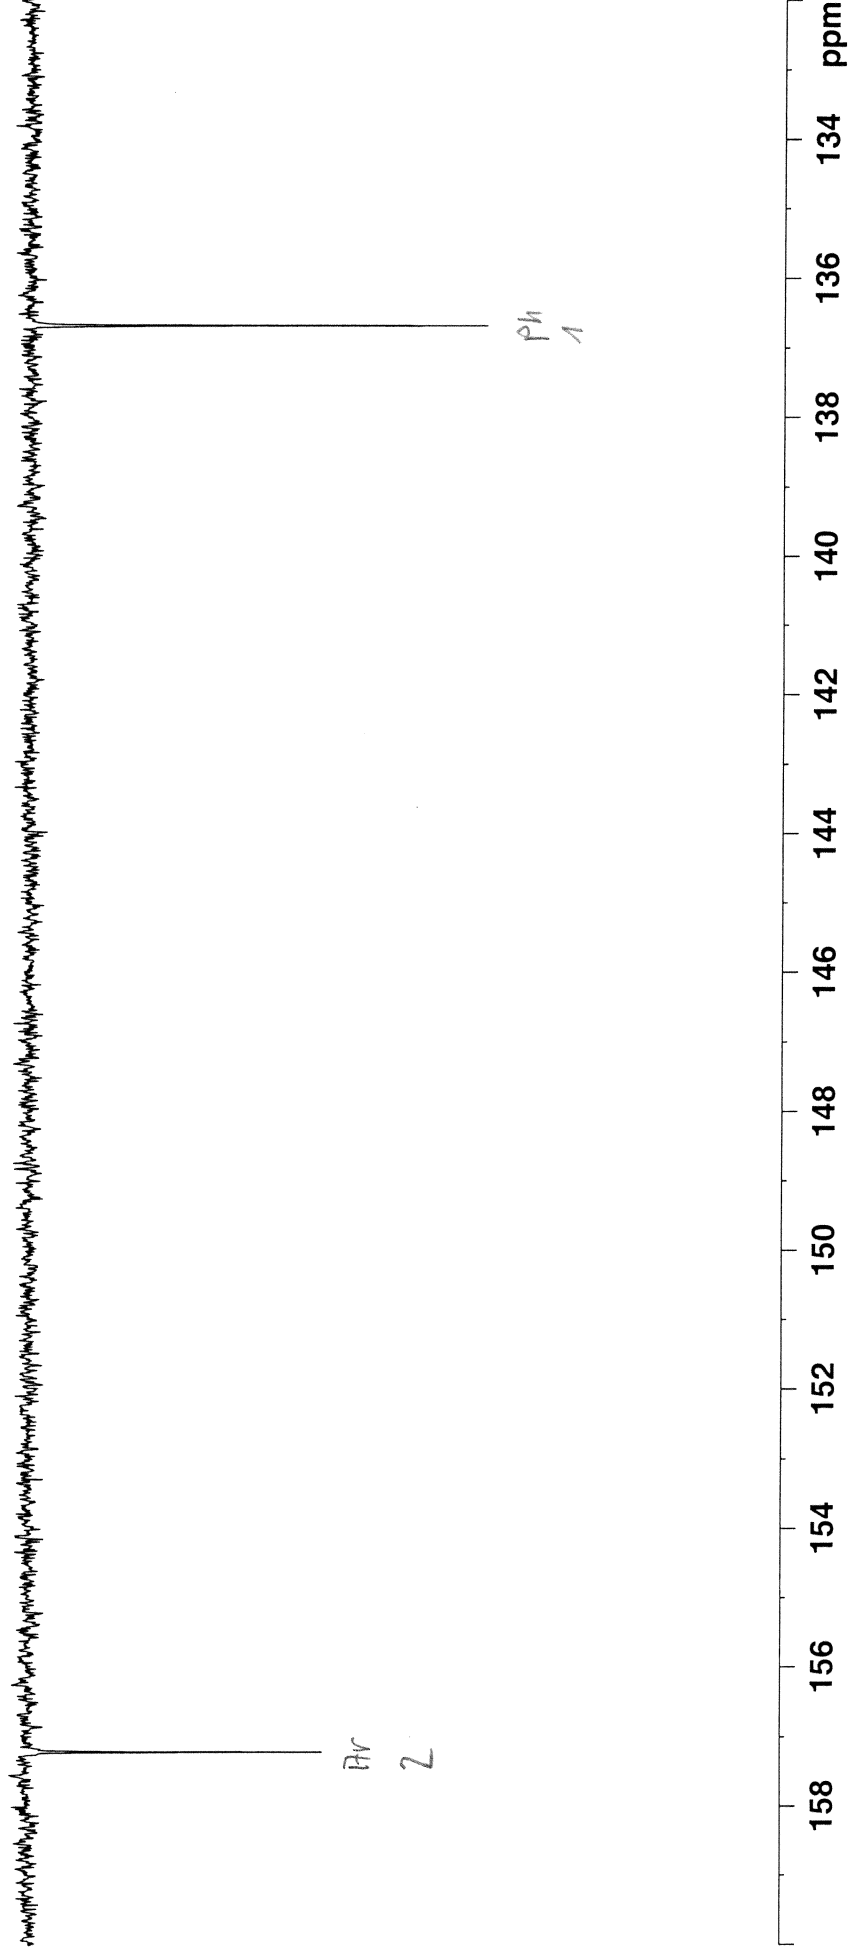

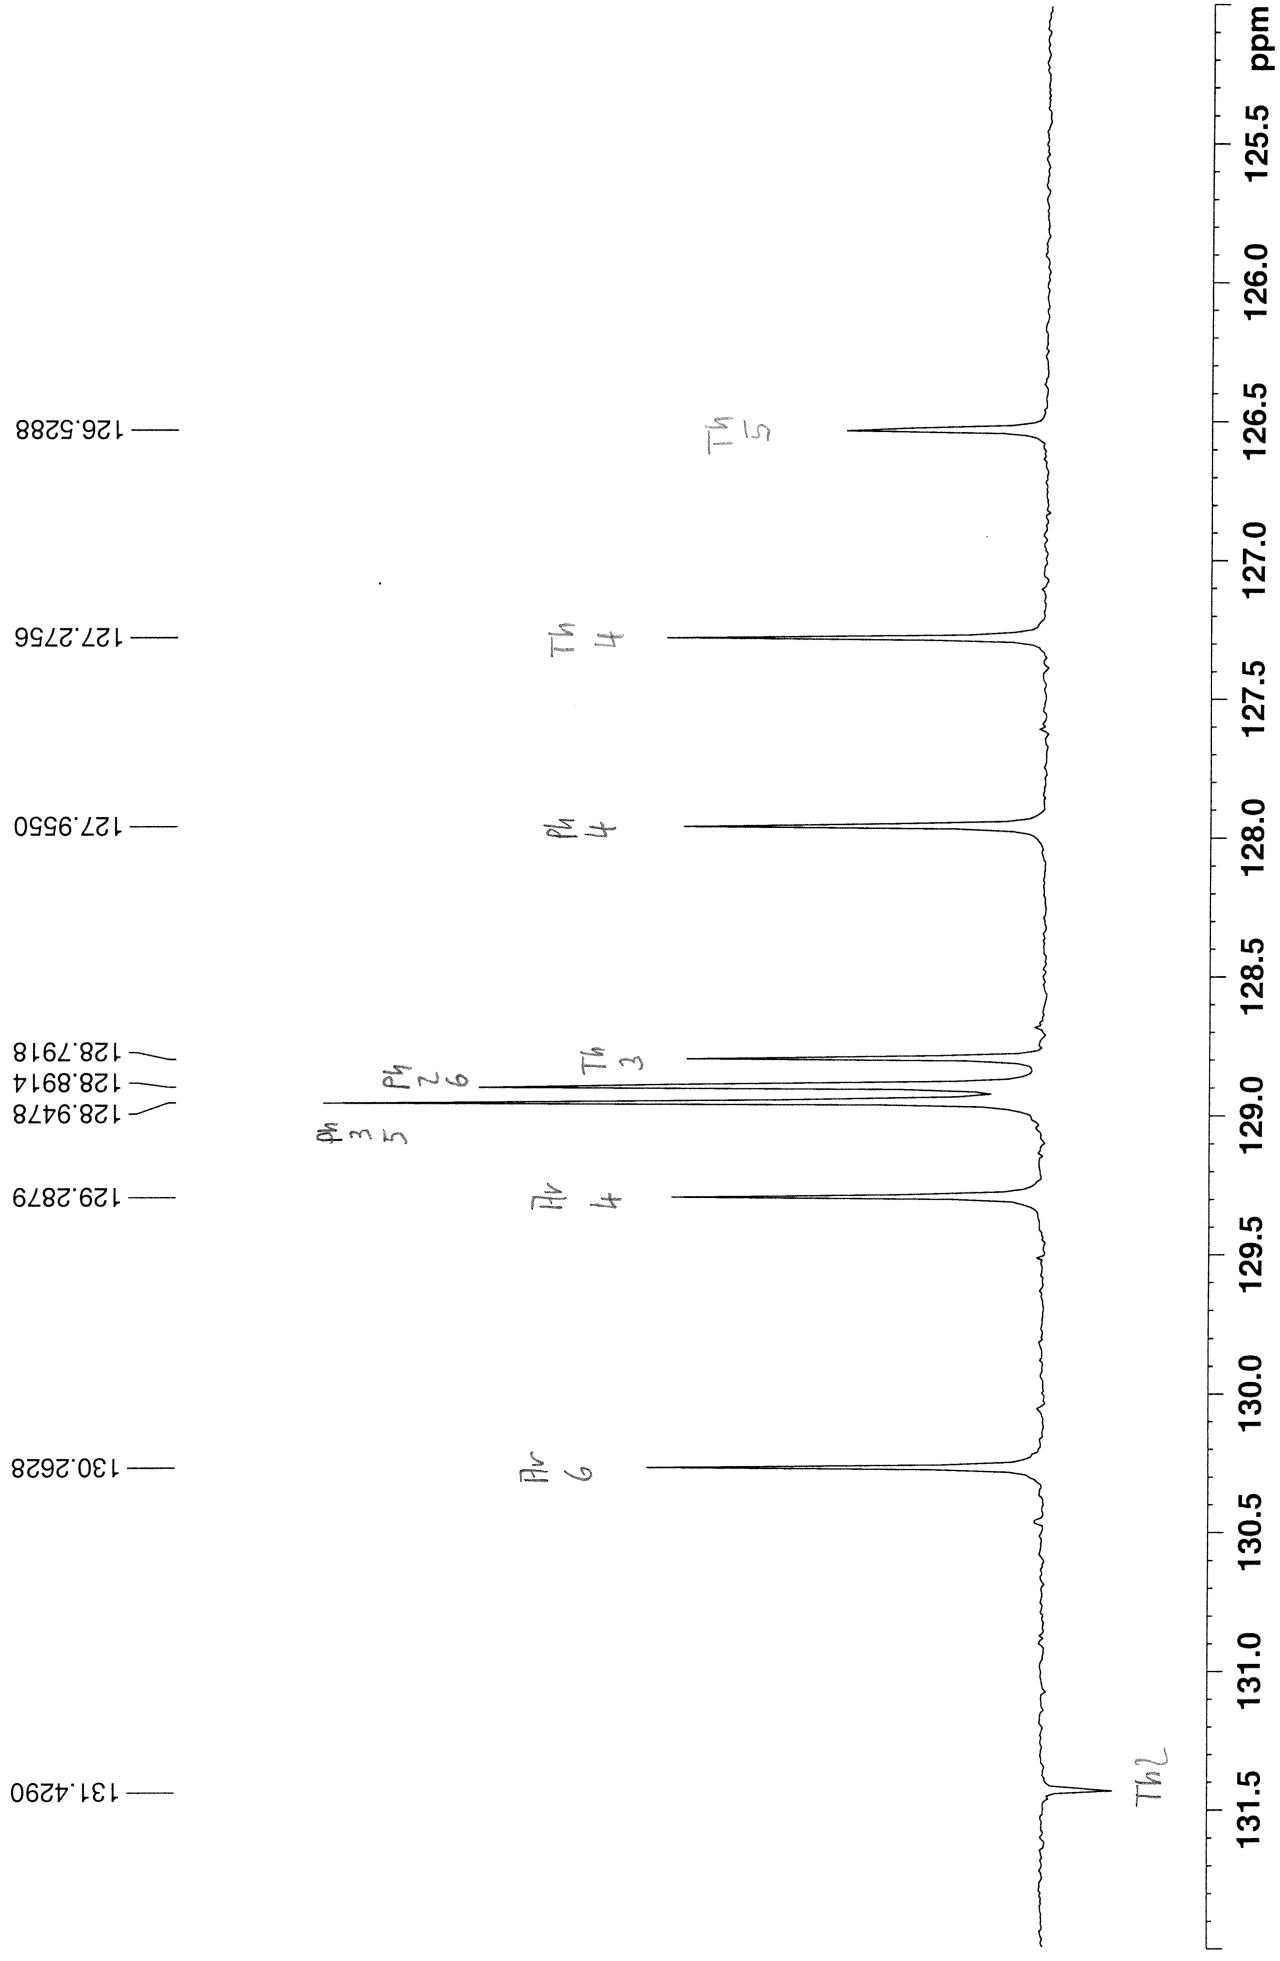

CE166-S2P1 in cdcl3 (APT) 6.9.2018

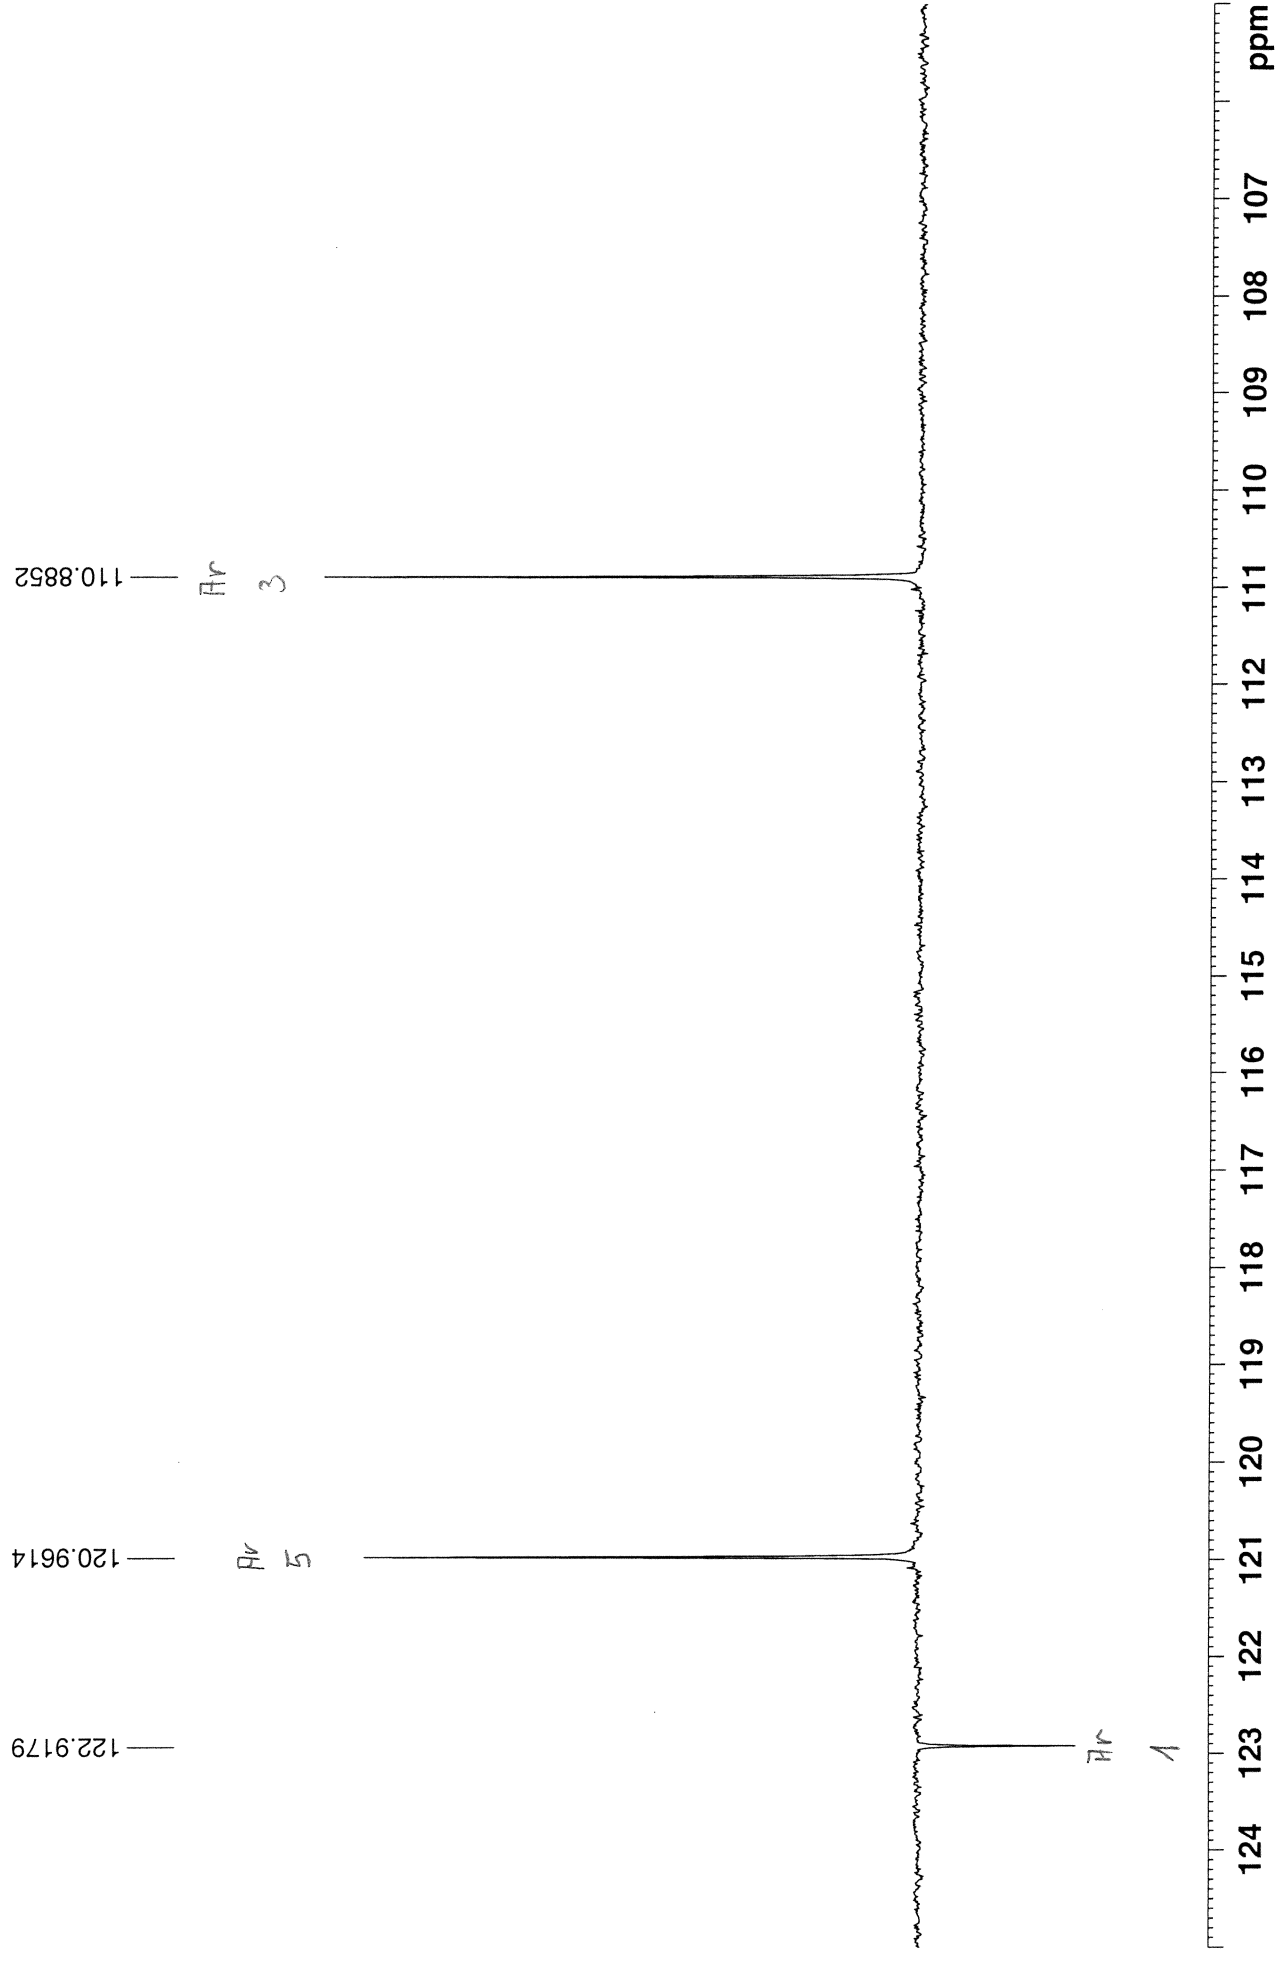

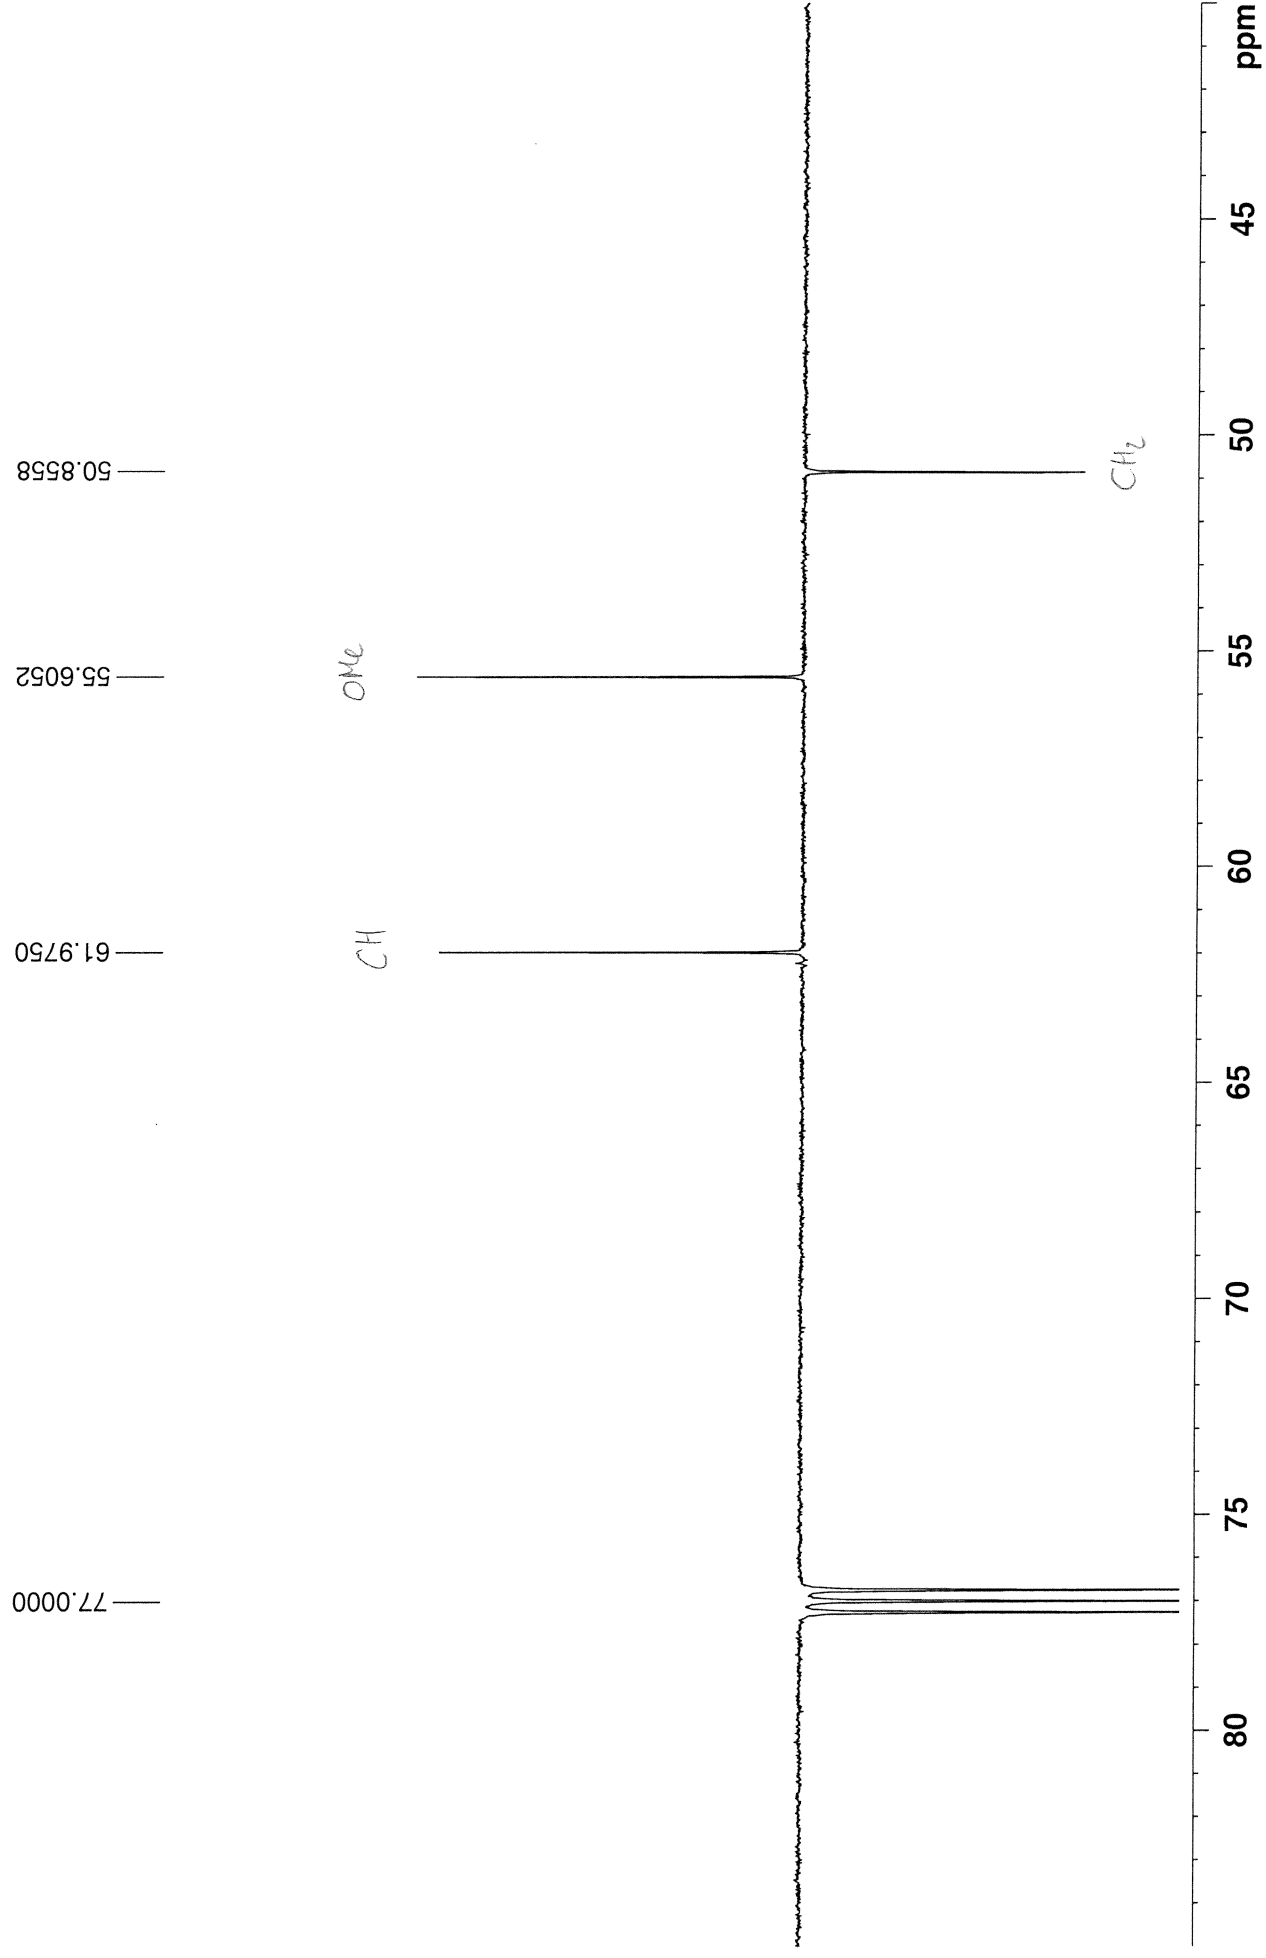

**Figure S72c.** NMR spectra of compound **8r**.

CE166-S2P2 in cdcl3 (Proton) 6.9.2018

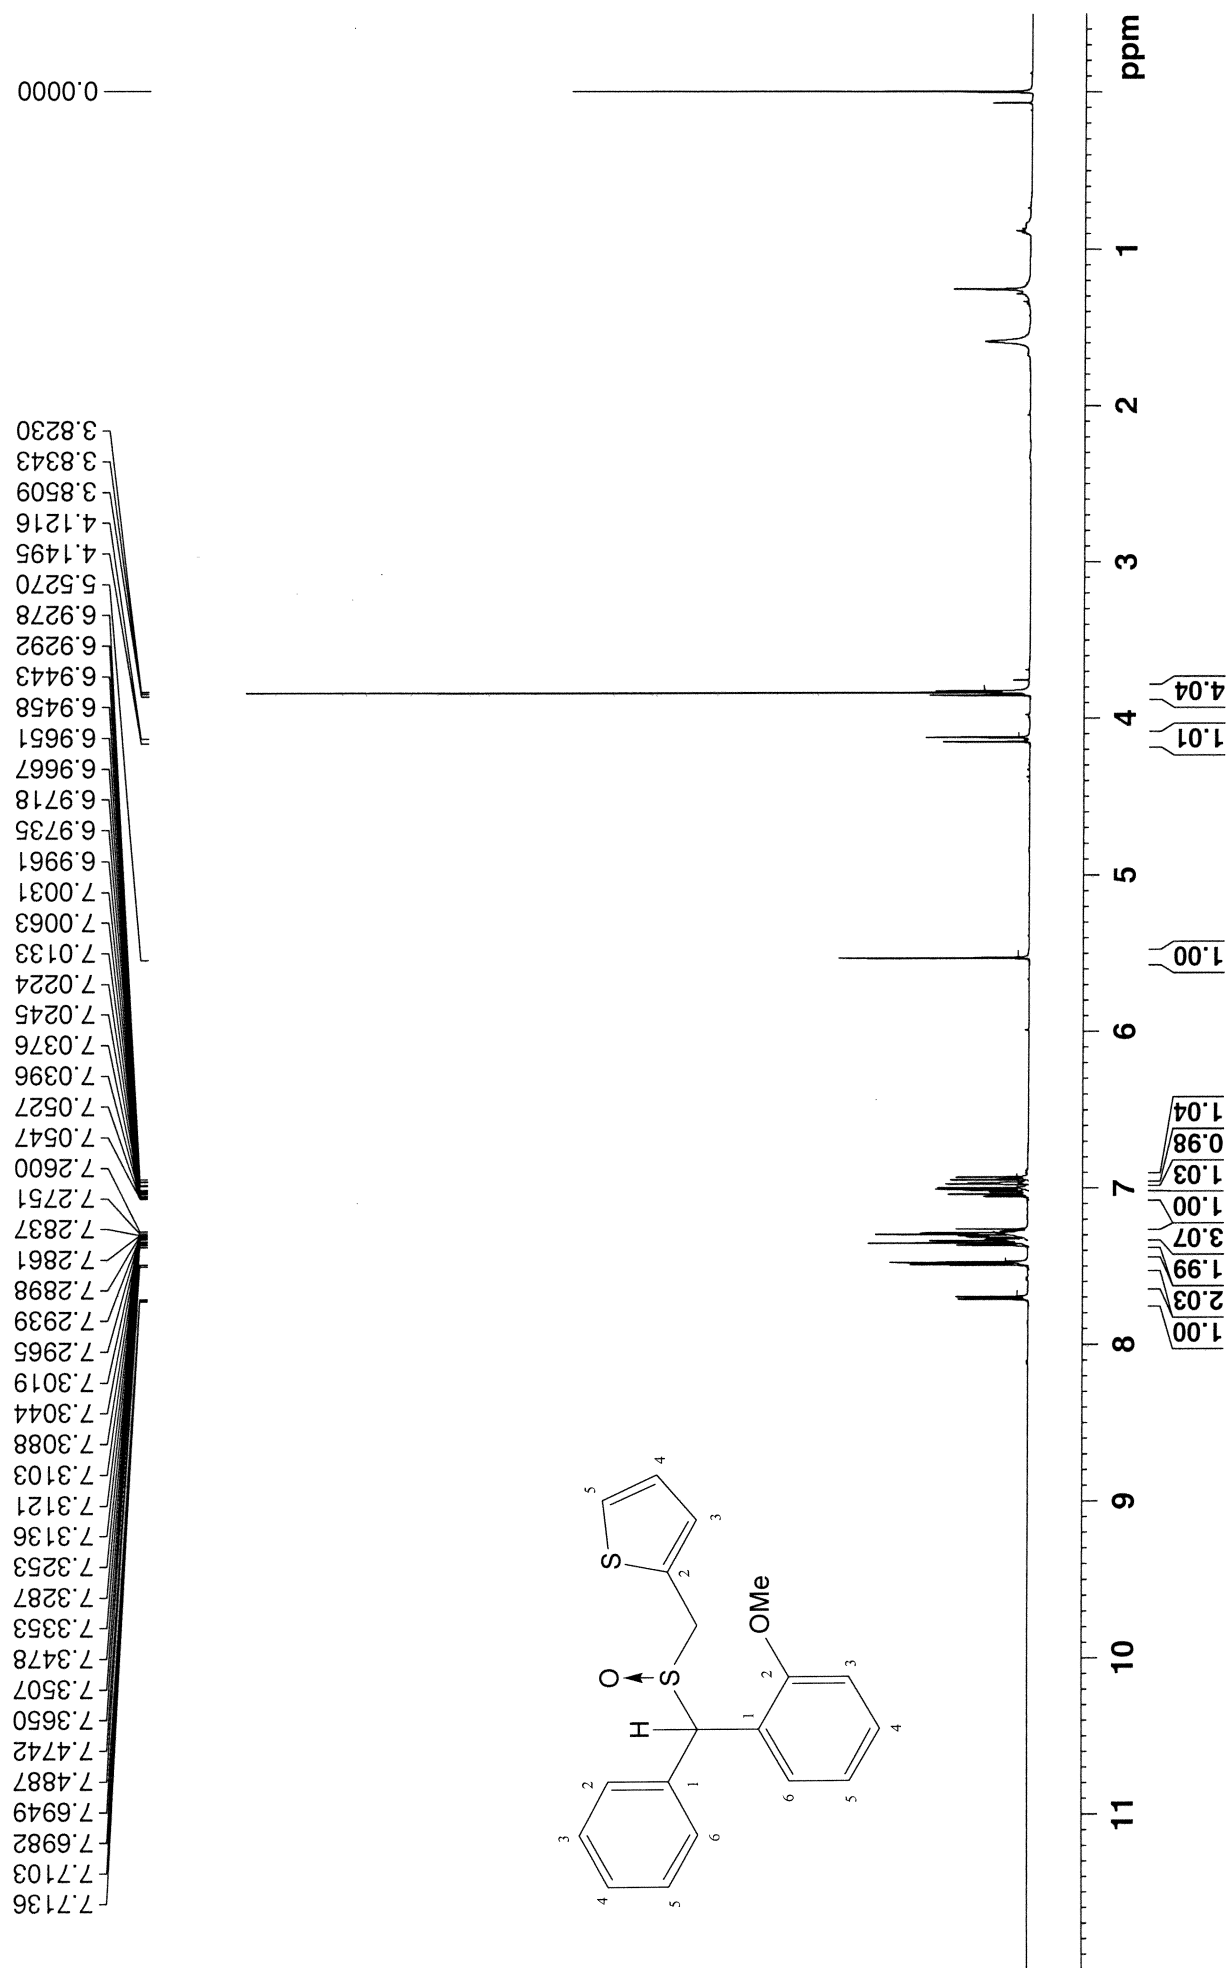

7.7136  
7.7103  
7.6982  
7.6949

7.4887  
7.4742

7.3650  
7.3507  
7.3478  
7.3353  
7.3287  
7.3253  
7.3136  
7.3121  
7.3103  
7.3088  
7.3044  
7.3019  
7.2965  
7.2939  
7.2898  
7.2861  
7.2837  
7.2751  
7.2600

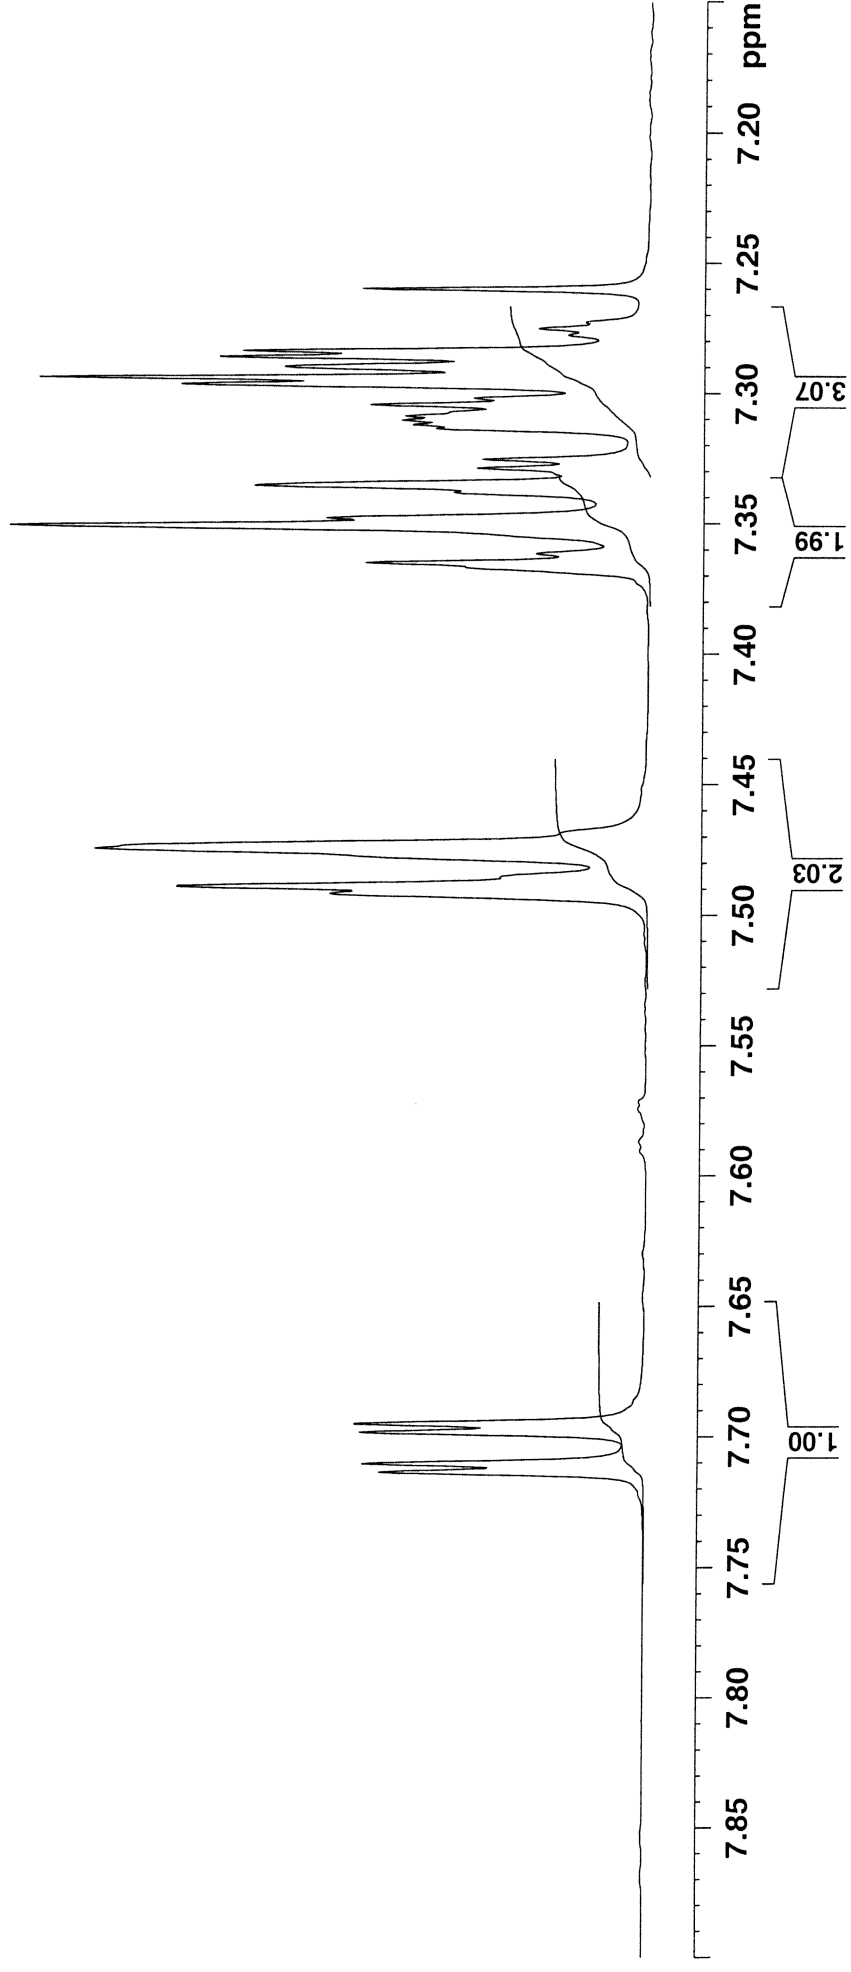



7.0547  
7.0527  
7.0396  
7.0376  
7.0245  
7.0224  
7.0133  
7.0063  
7.0031  
6.9961  
6.9735  
6.9718  
6.9667  
6.9651  
6.9458  
6.9443  
6.9292  
6.9278

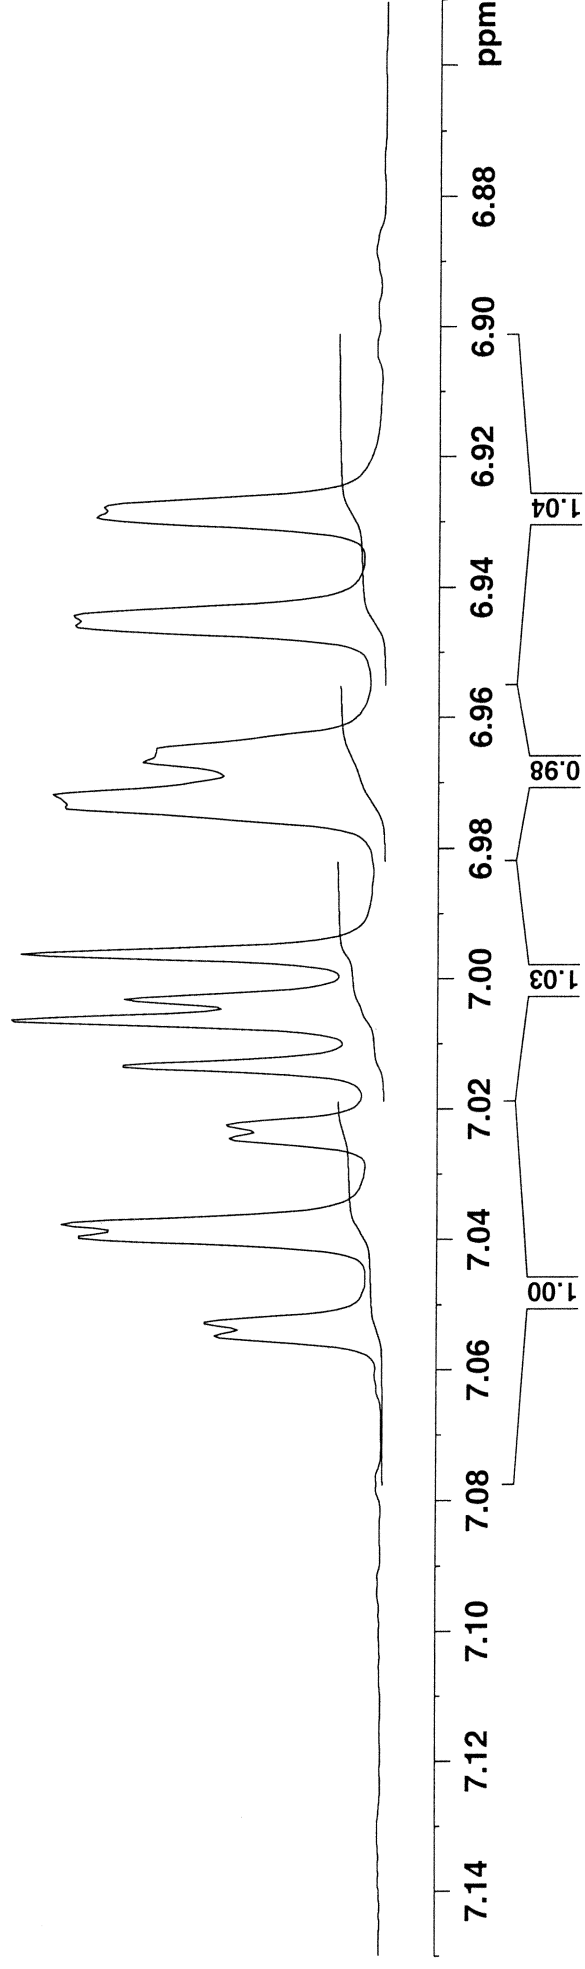

CE166-S2P2 in cdcl3 (Proton) 6.9.2018

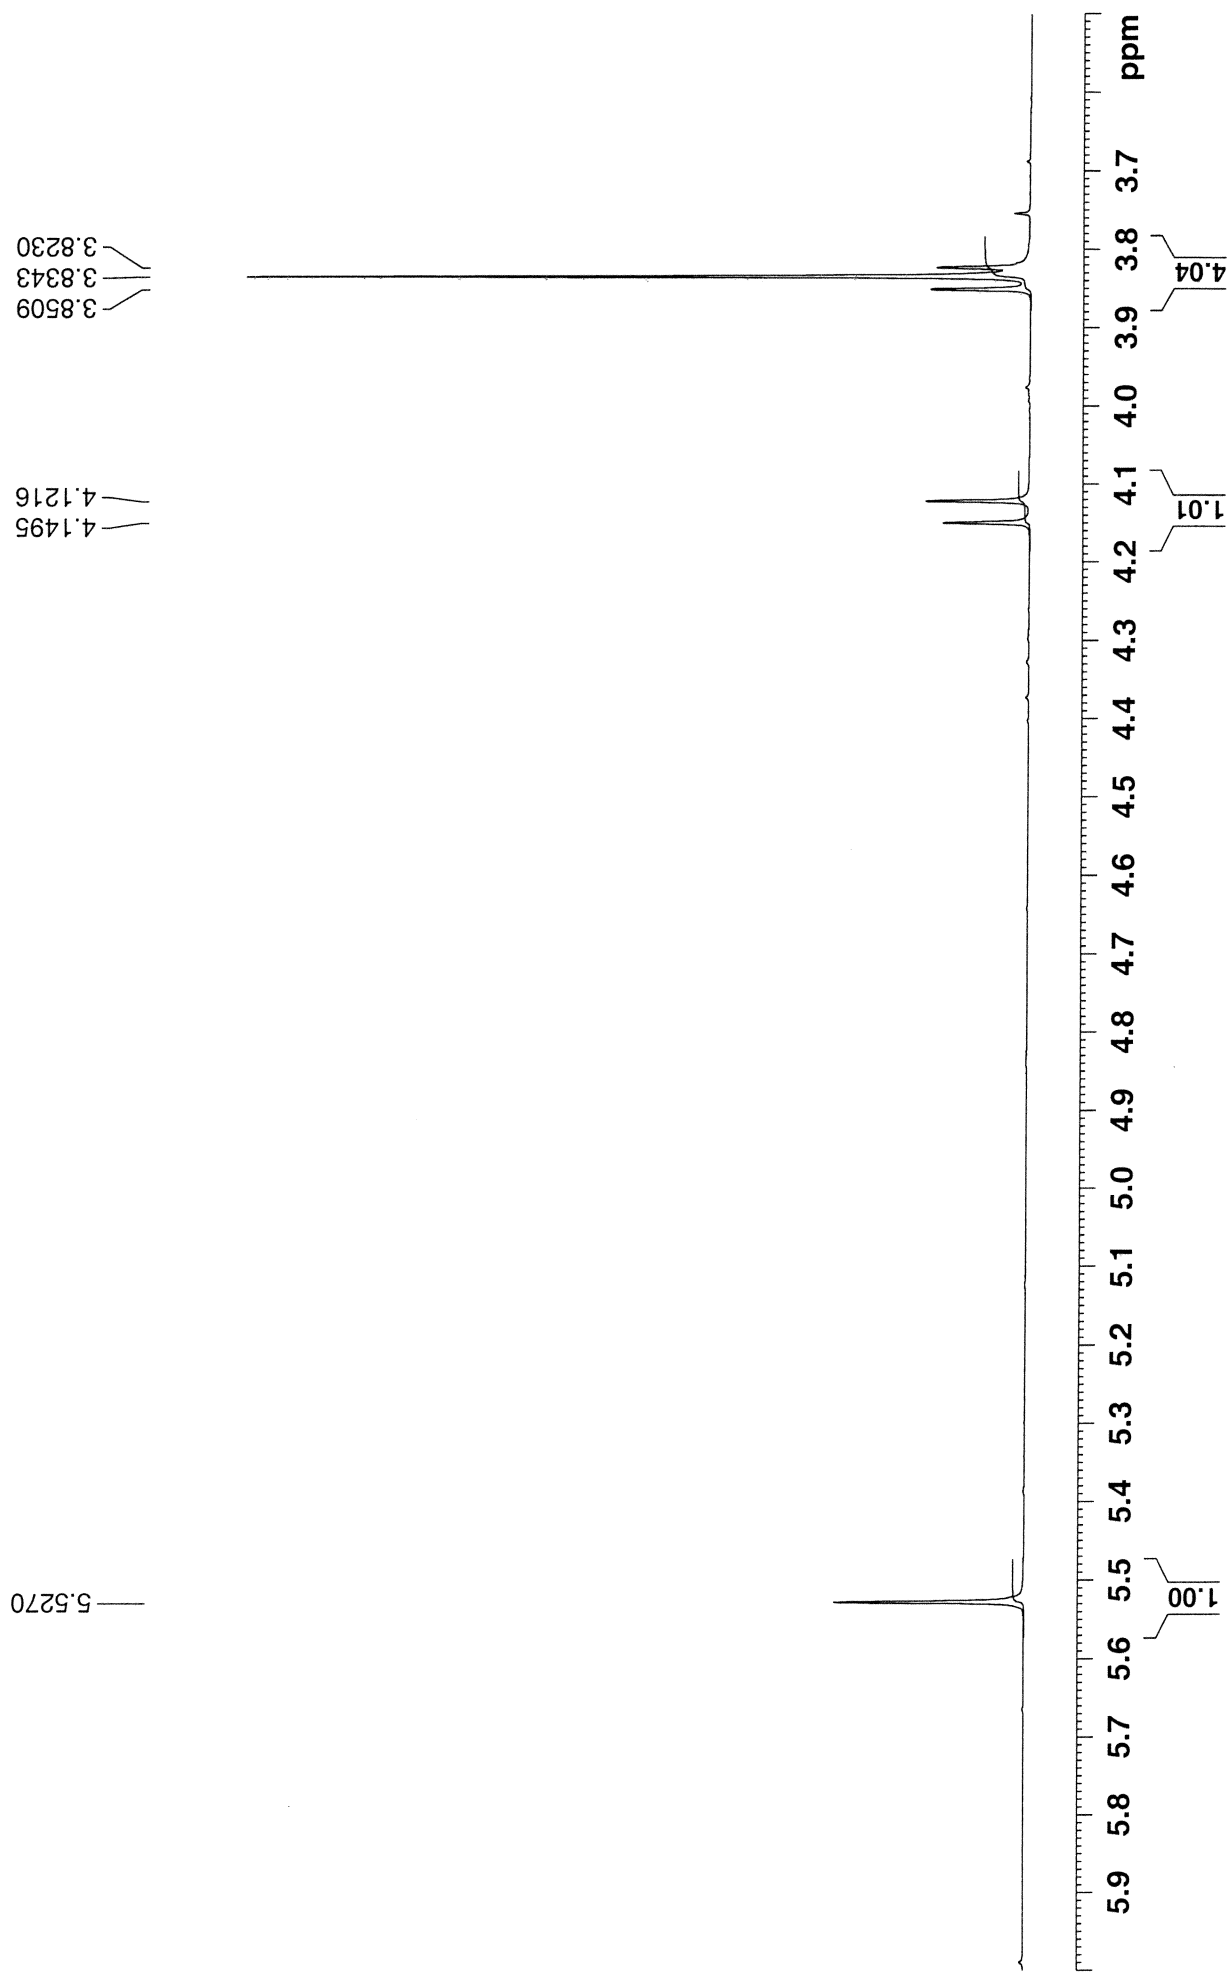

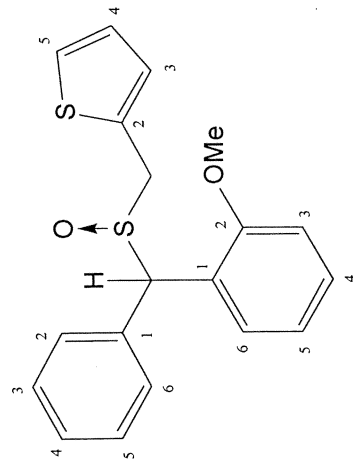

157.2046  
136.6790  
131.4273  
130.2631  
129.2883  
128.9482  
128.8916  
128.7922  
127.9554  
127.2759  
126.5290  
122.9180  
120.9615  
110.8851  
77.0000  
61.9756  
55.6053  
50.8552

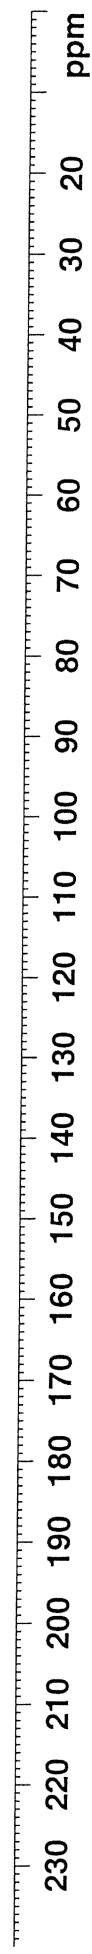

157.2046

136.6790

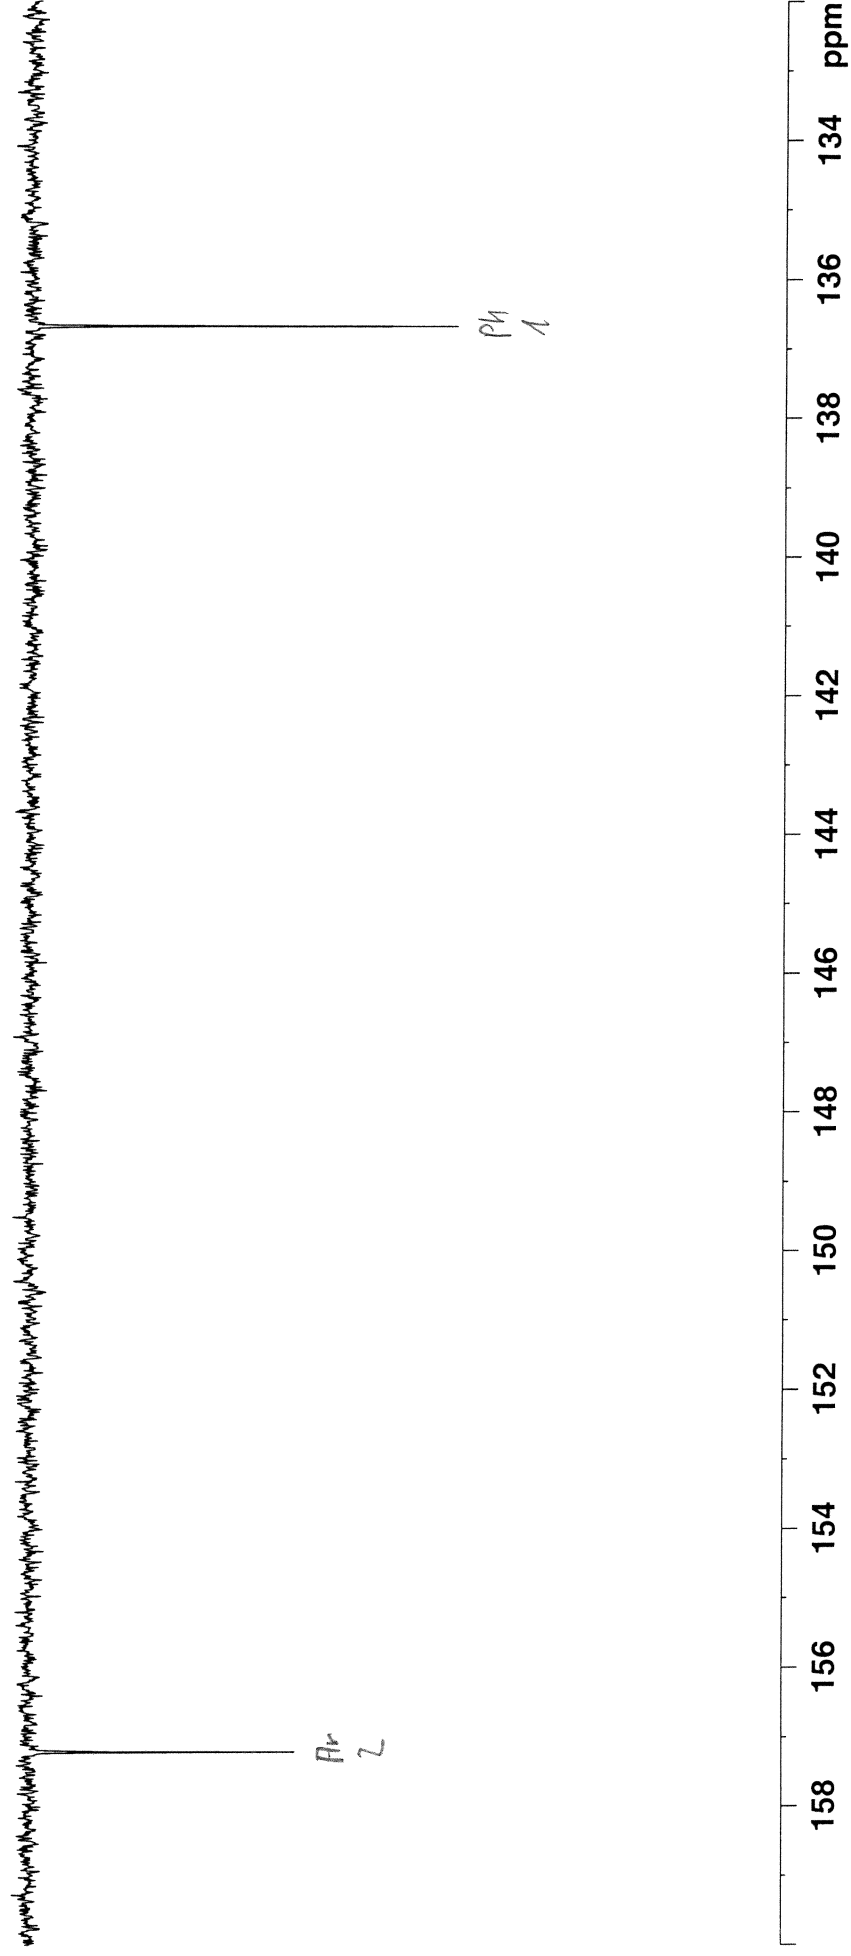

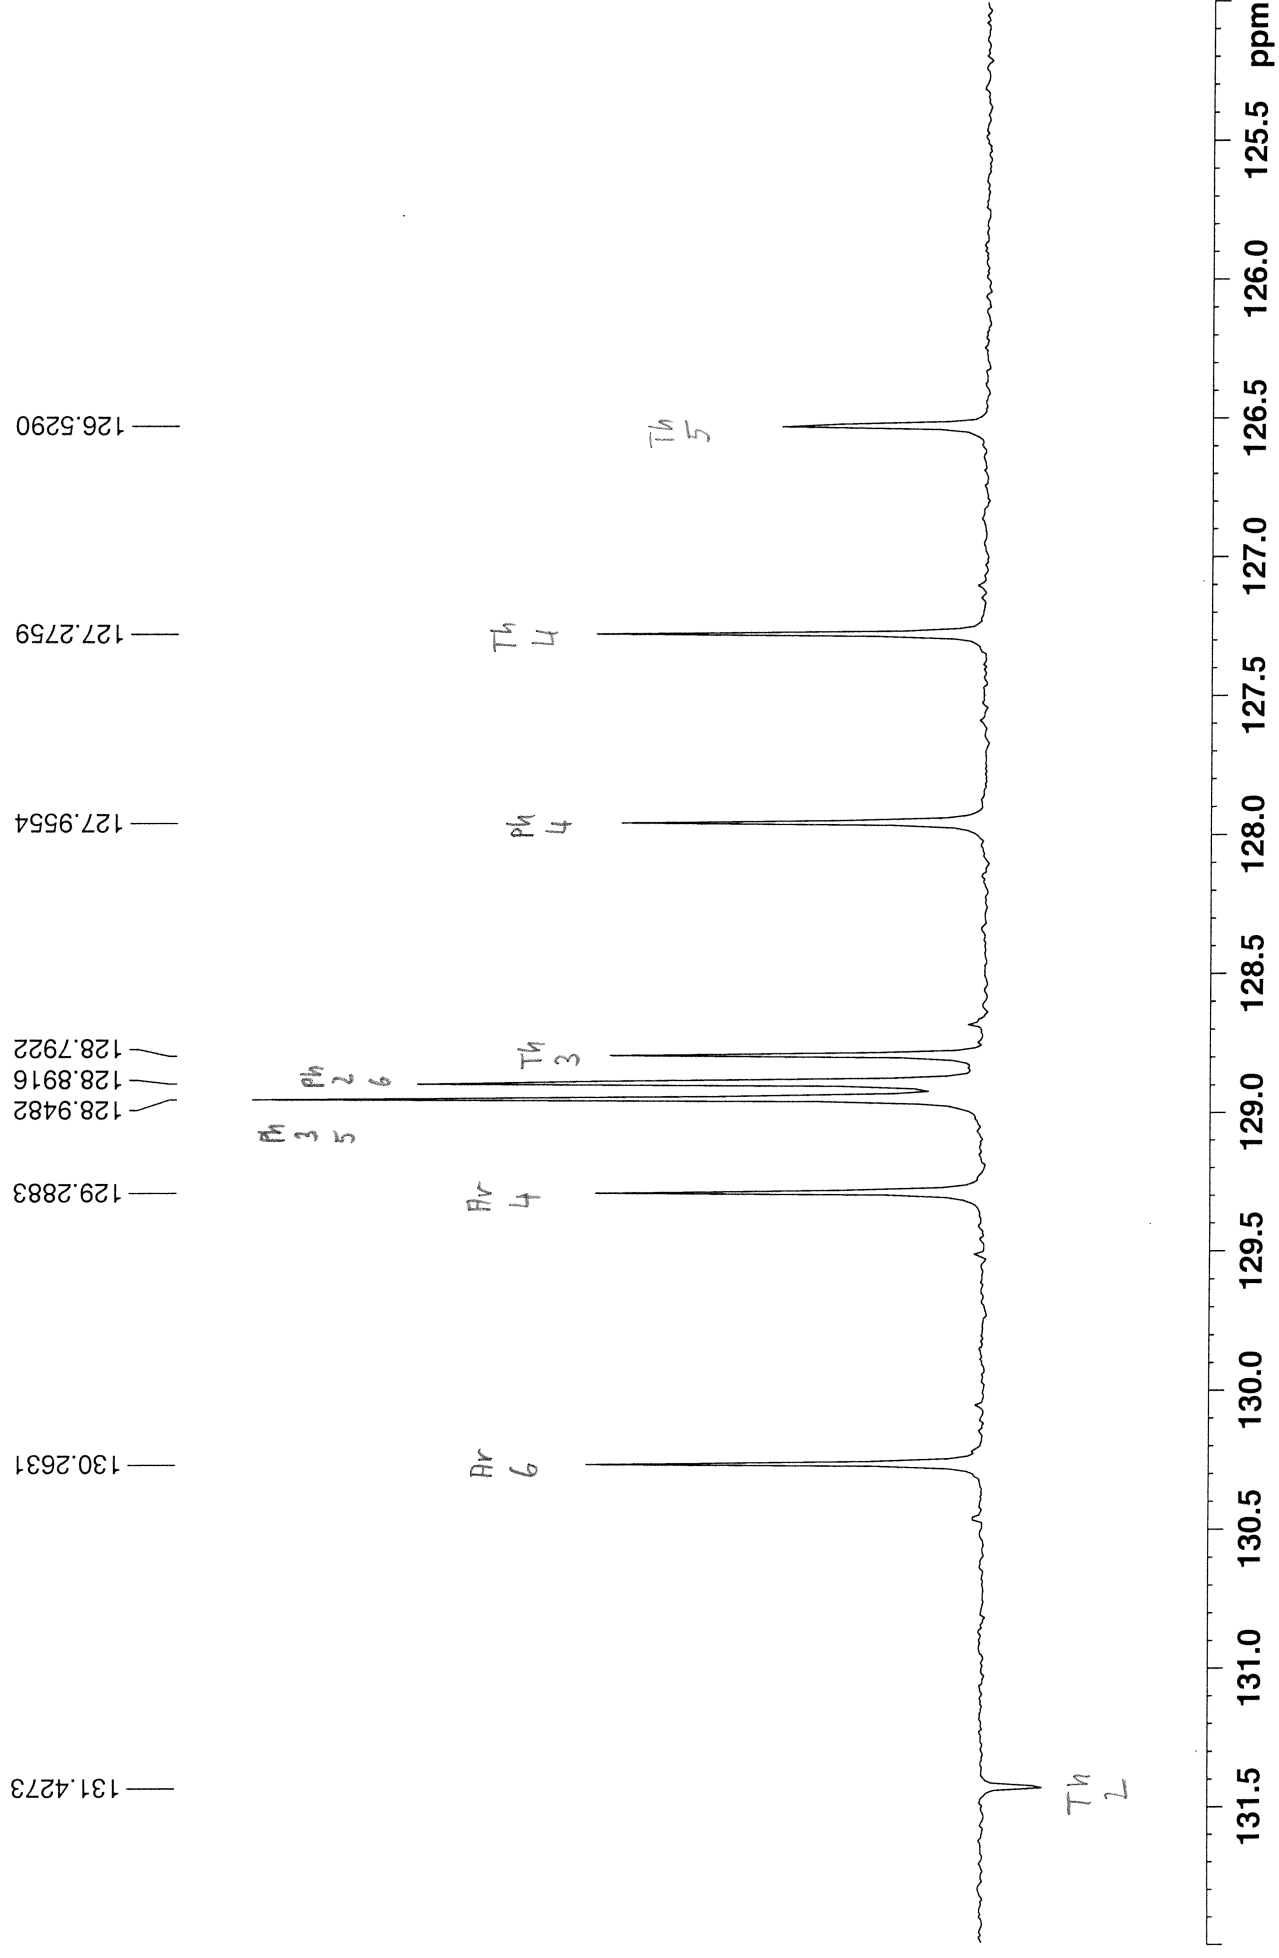

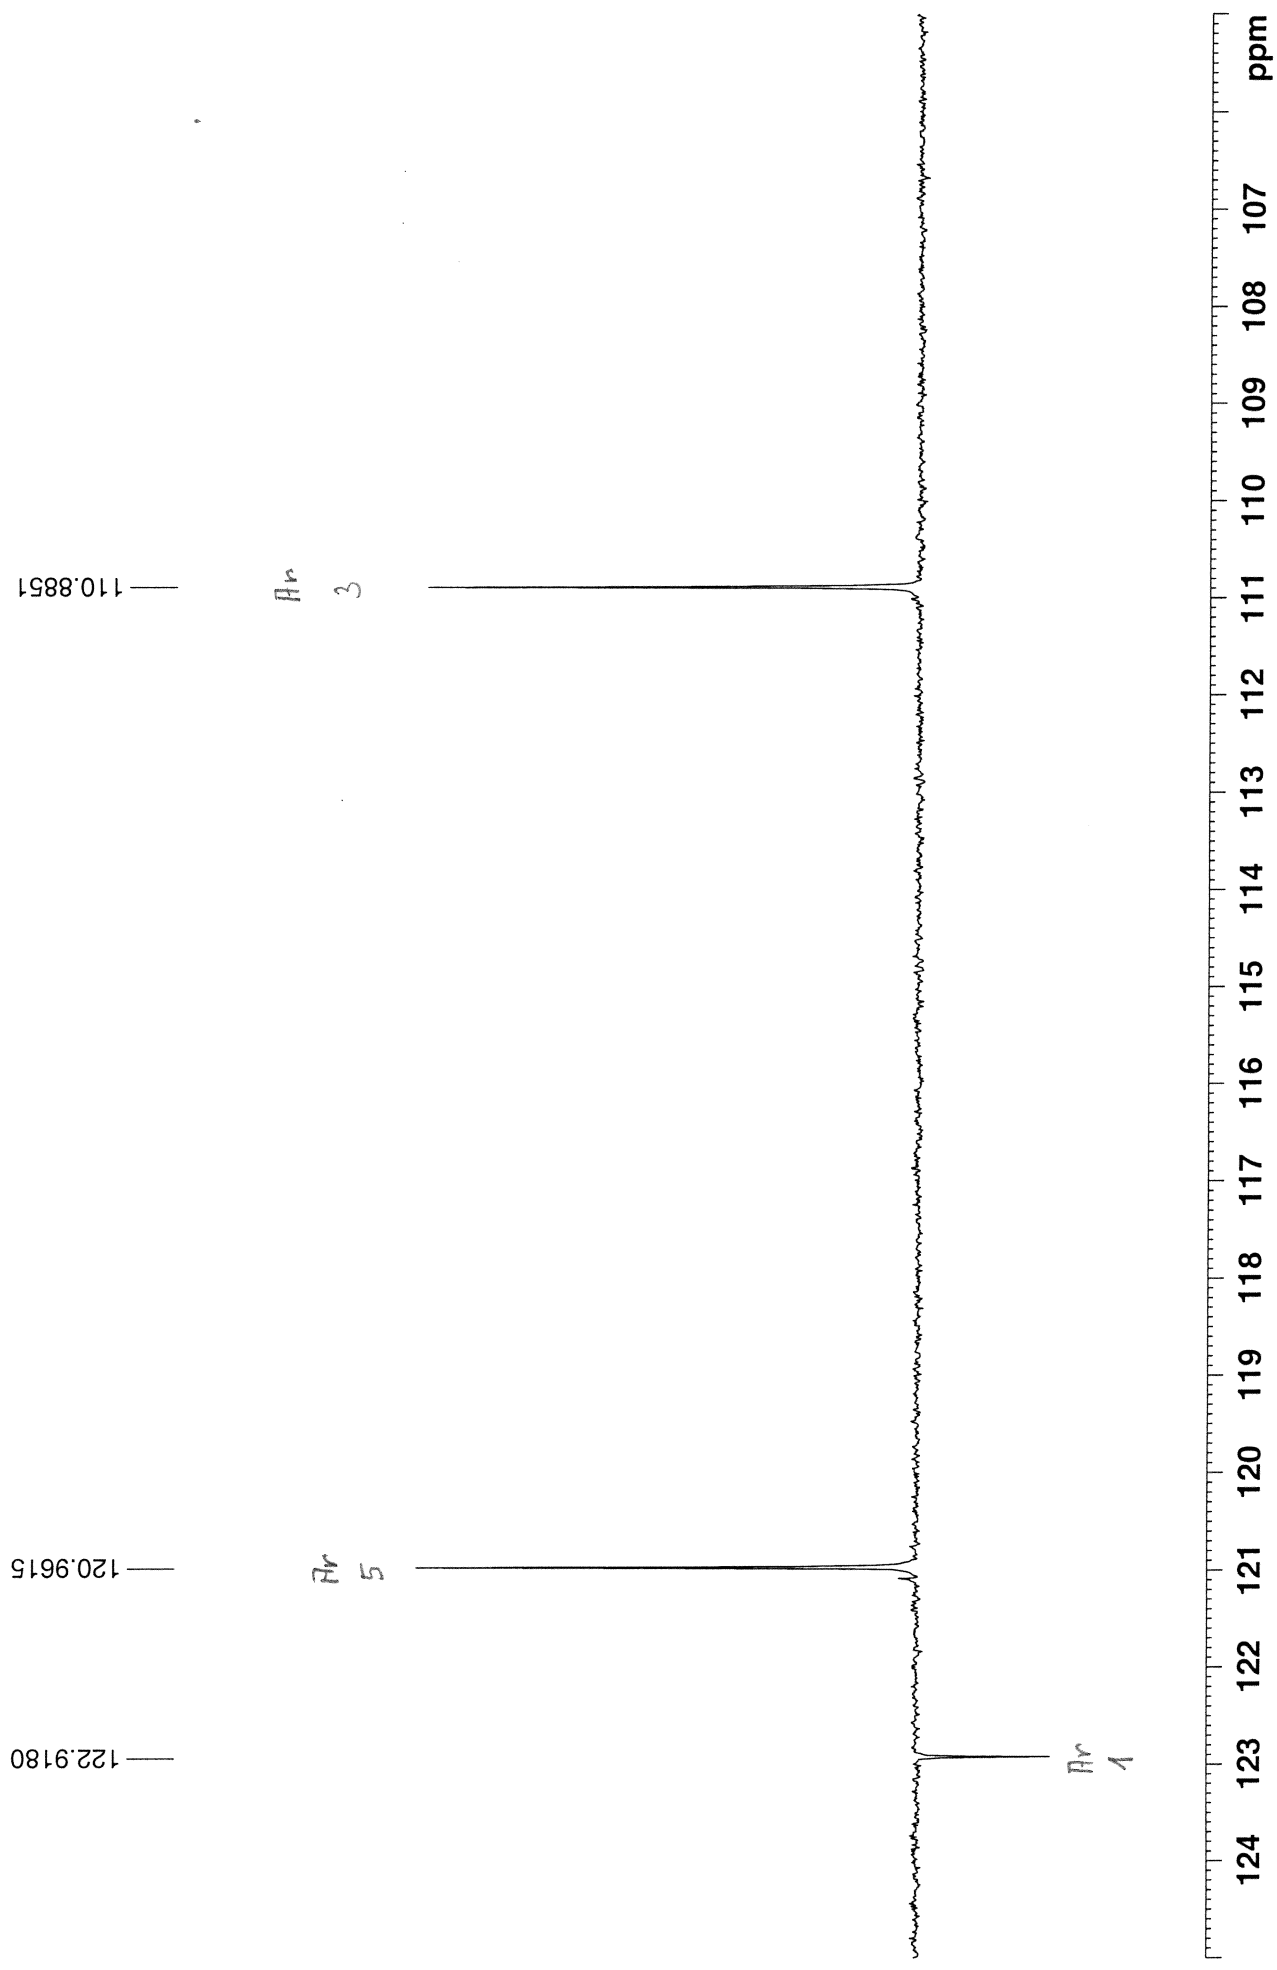

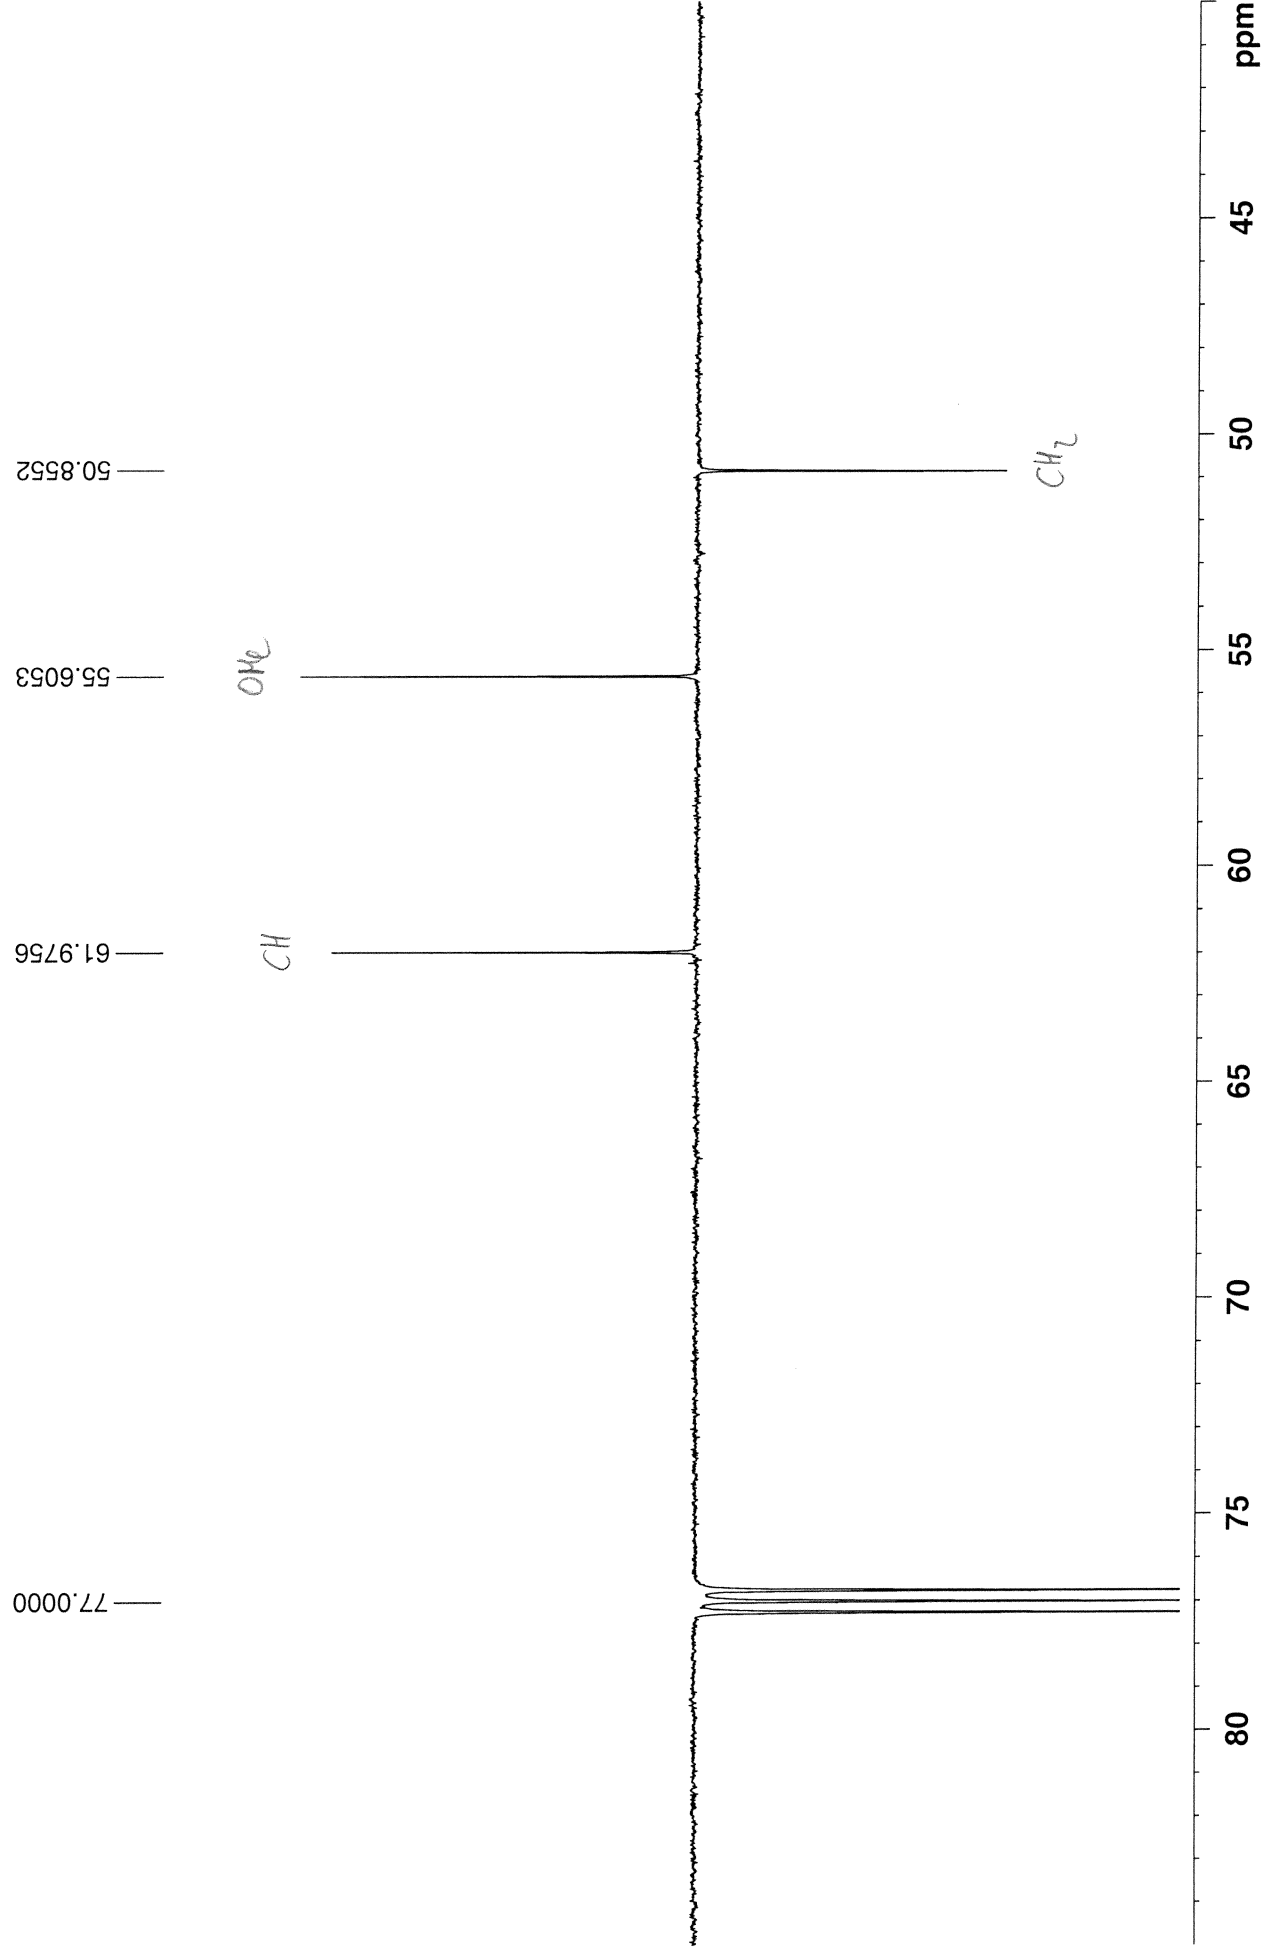

**Figure S73c.** NMR spectra of compound 5s.

PN008\_1\_1 in cdcl3 (Proton) 29.8.2019

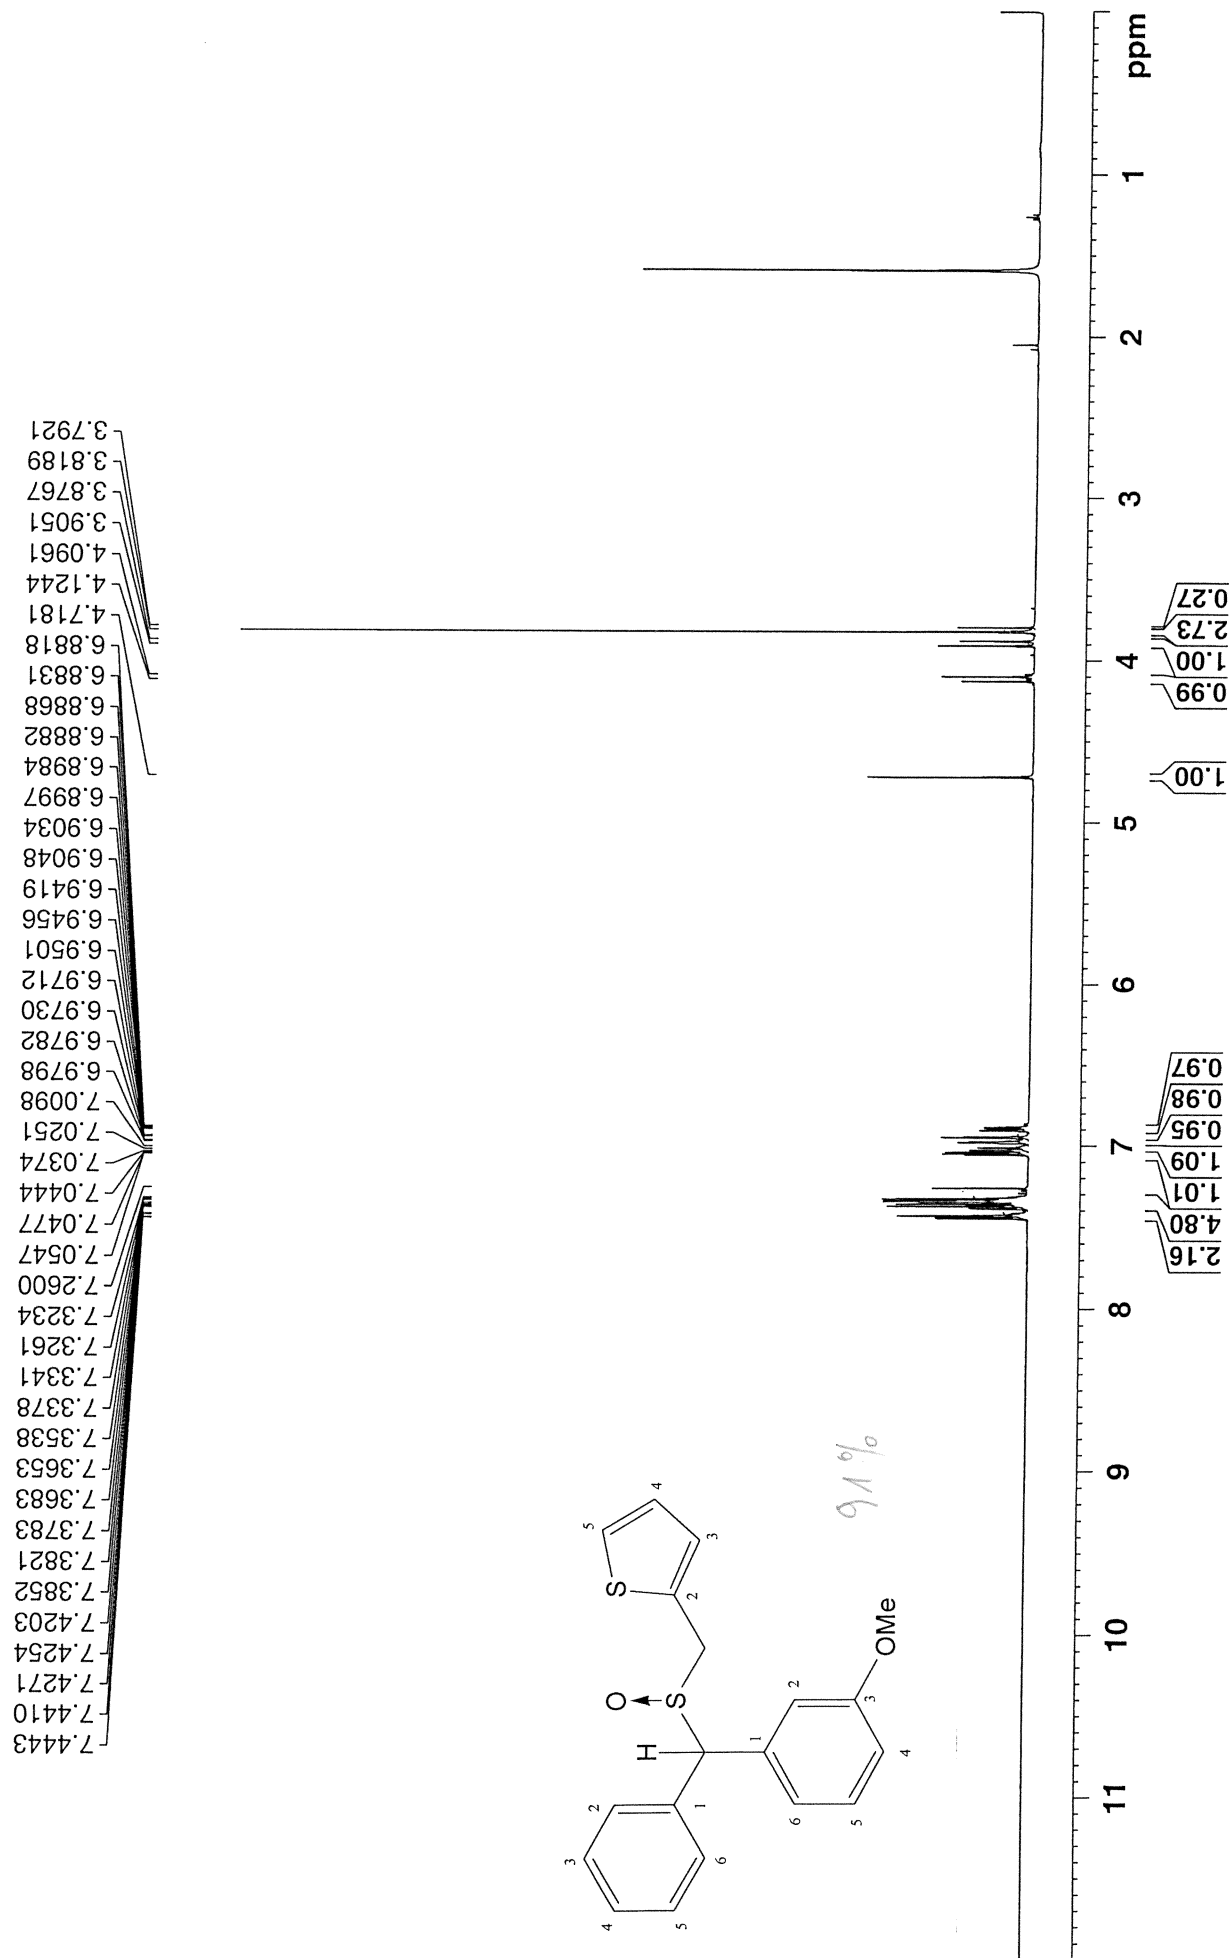



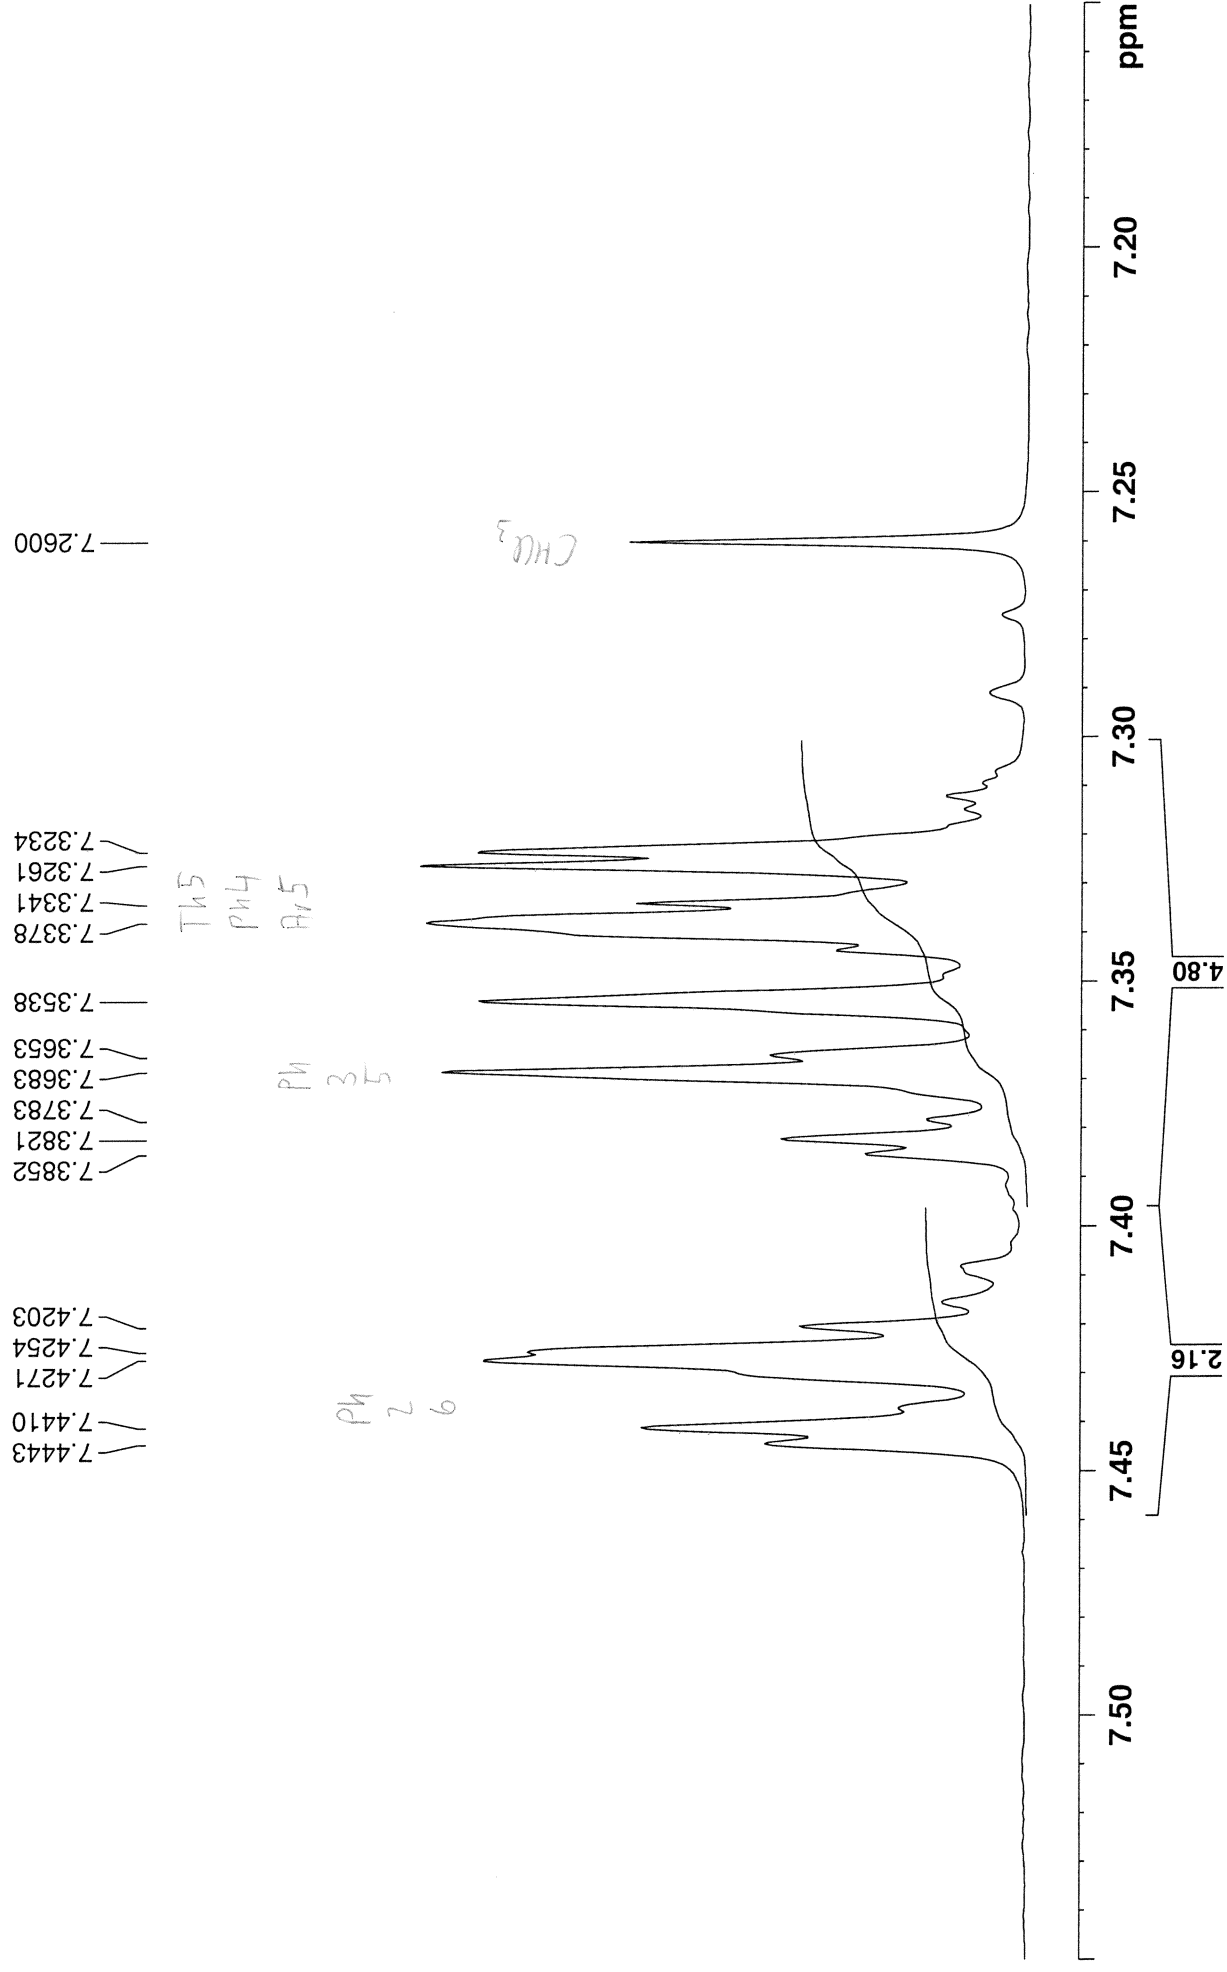

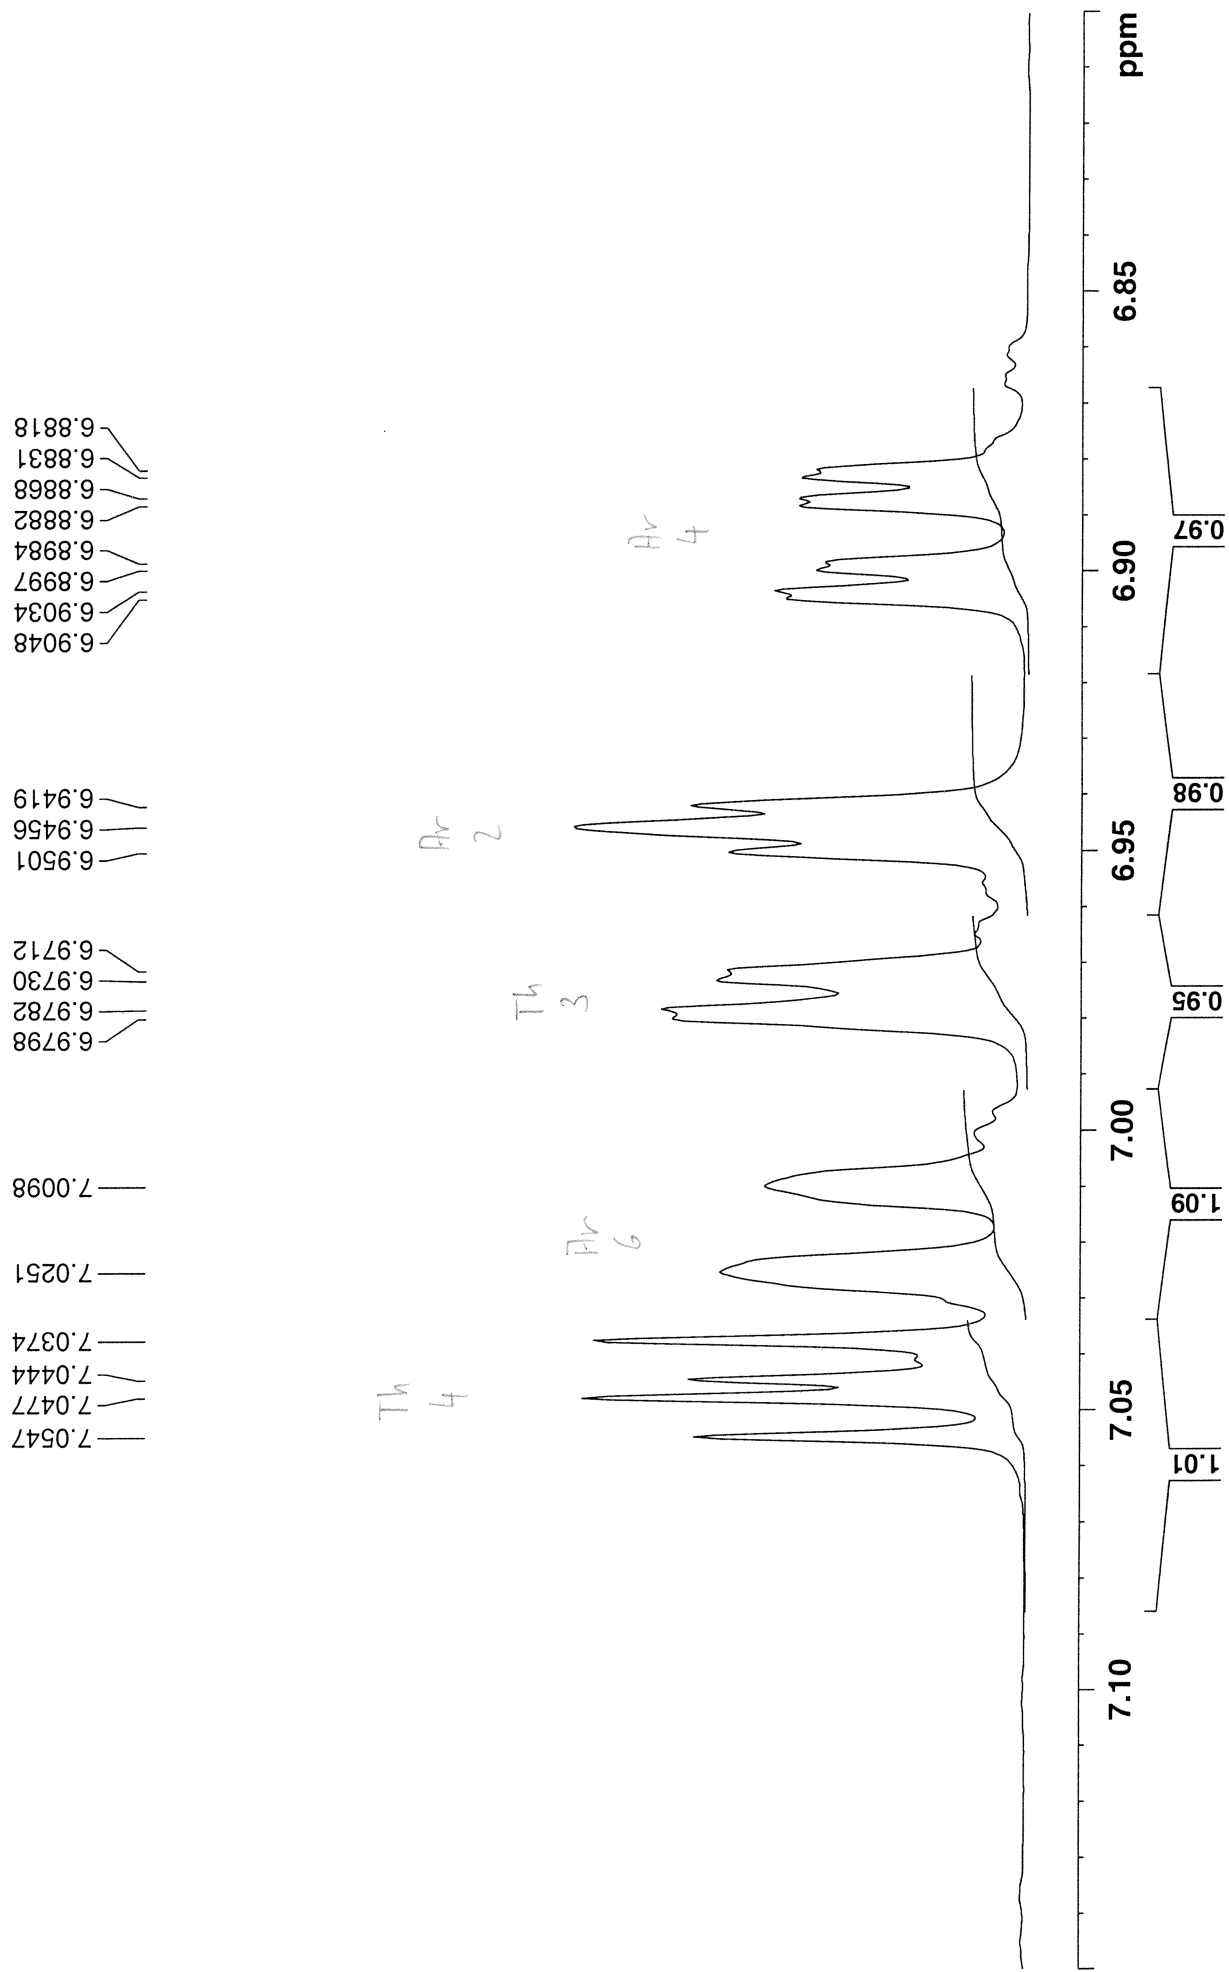

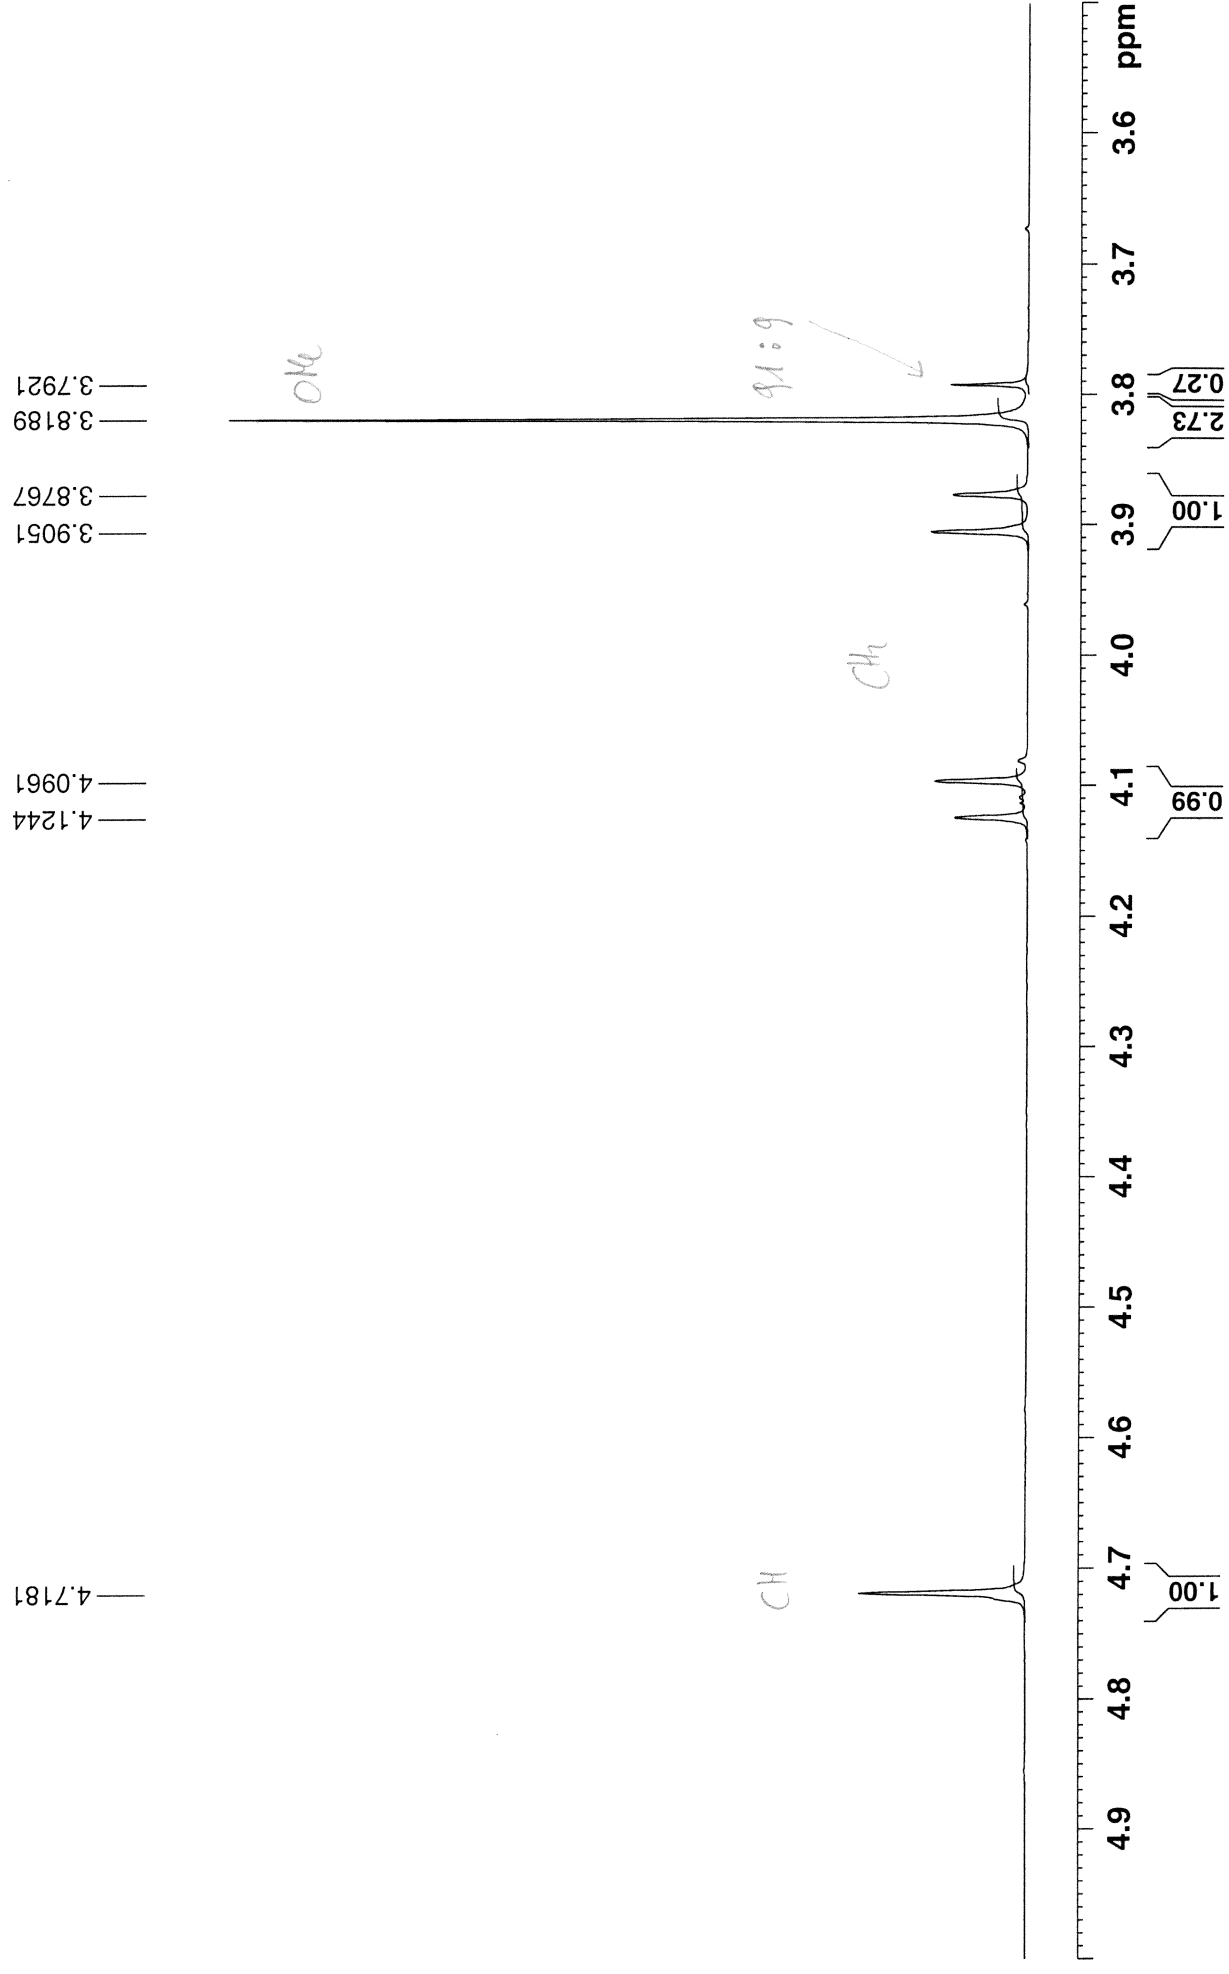

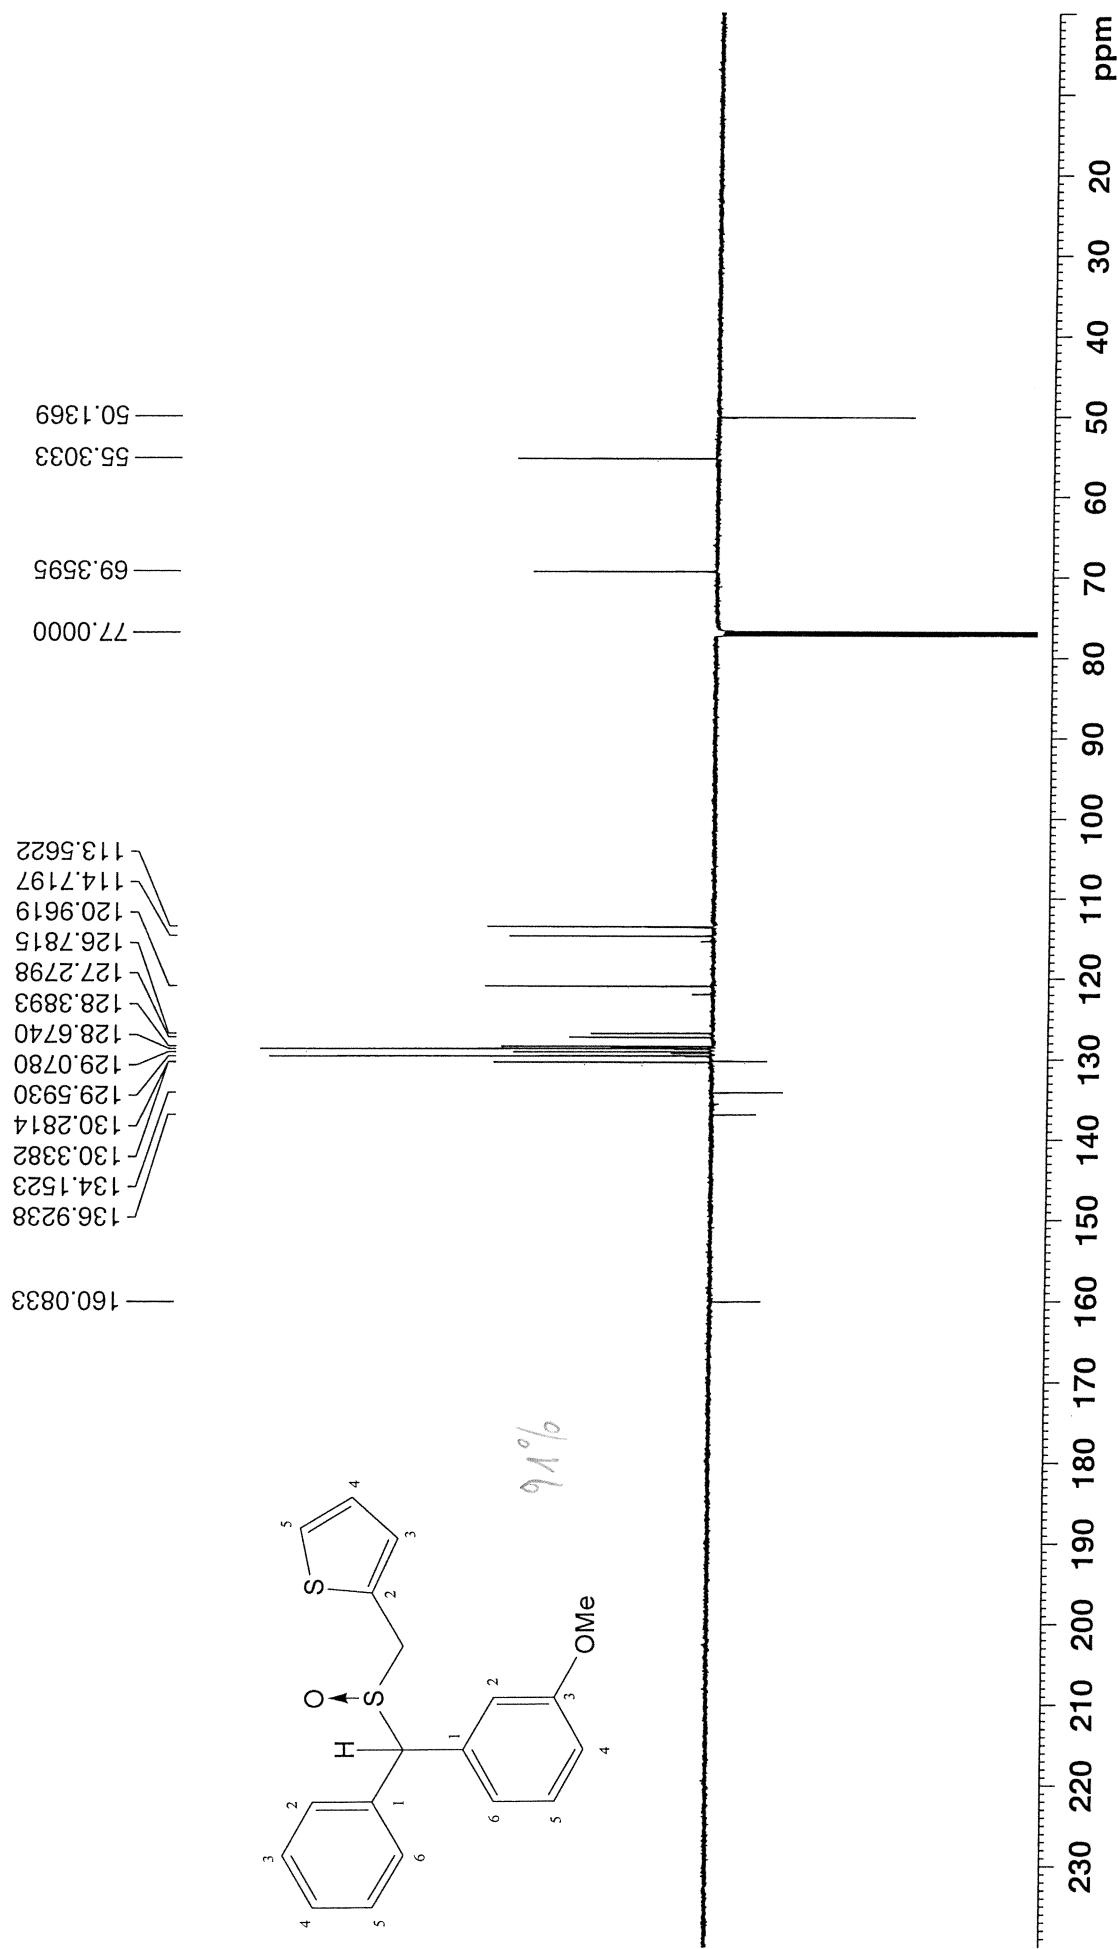

PN008\_1\_1 in cdcl3 (APT) 29.8.2019

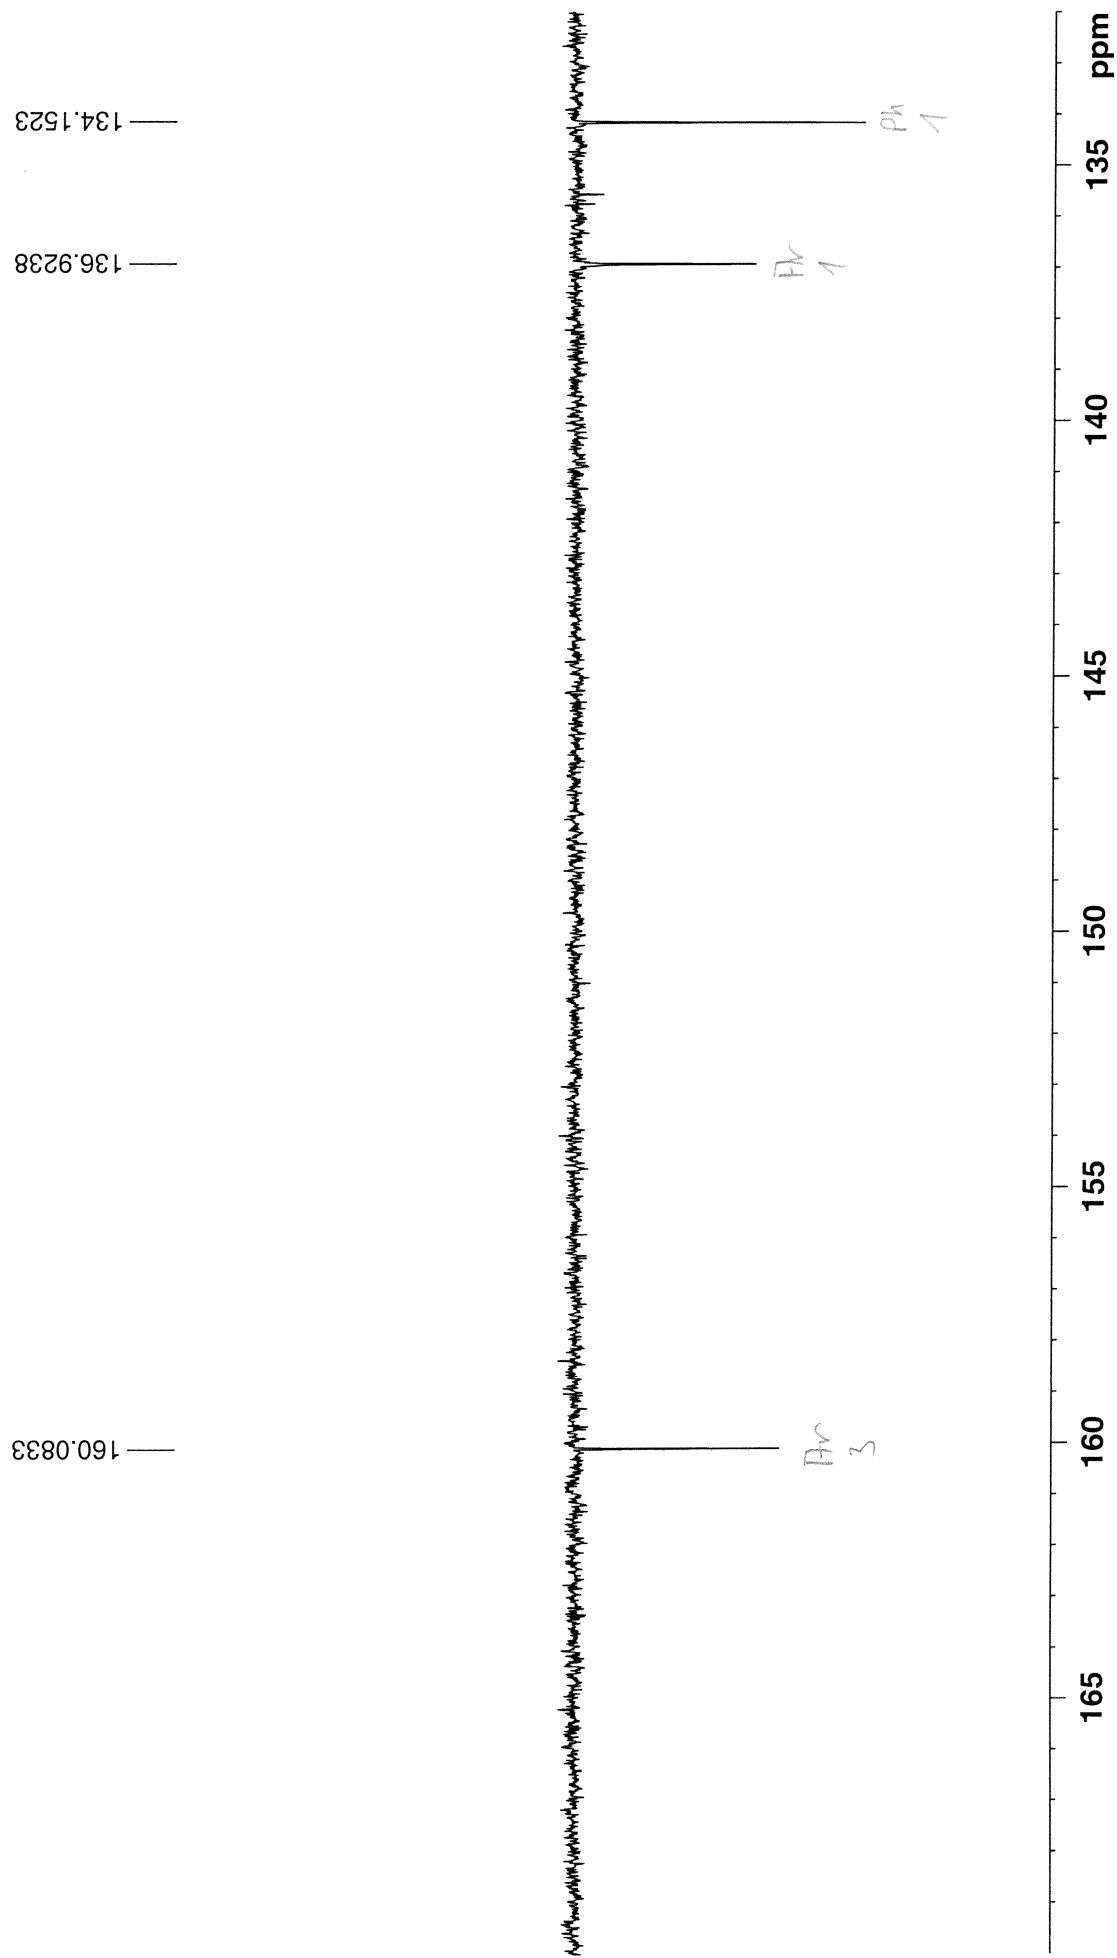

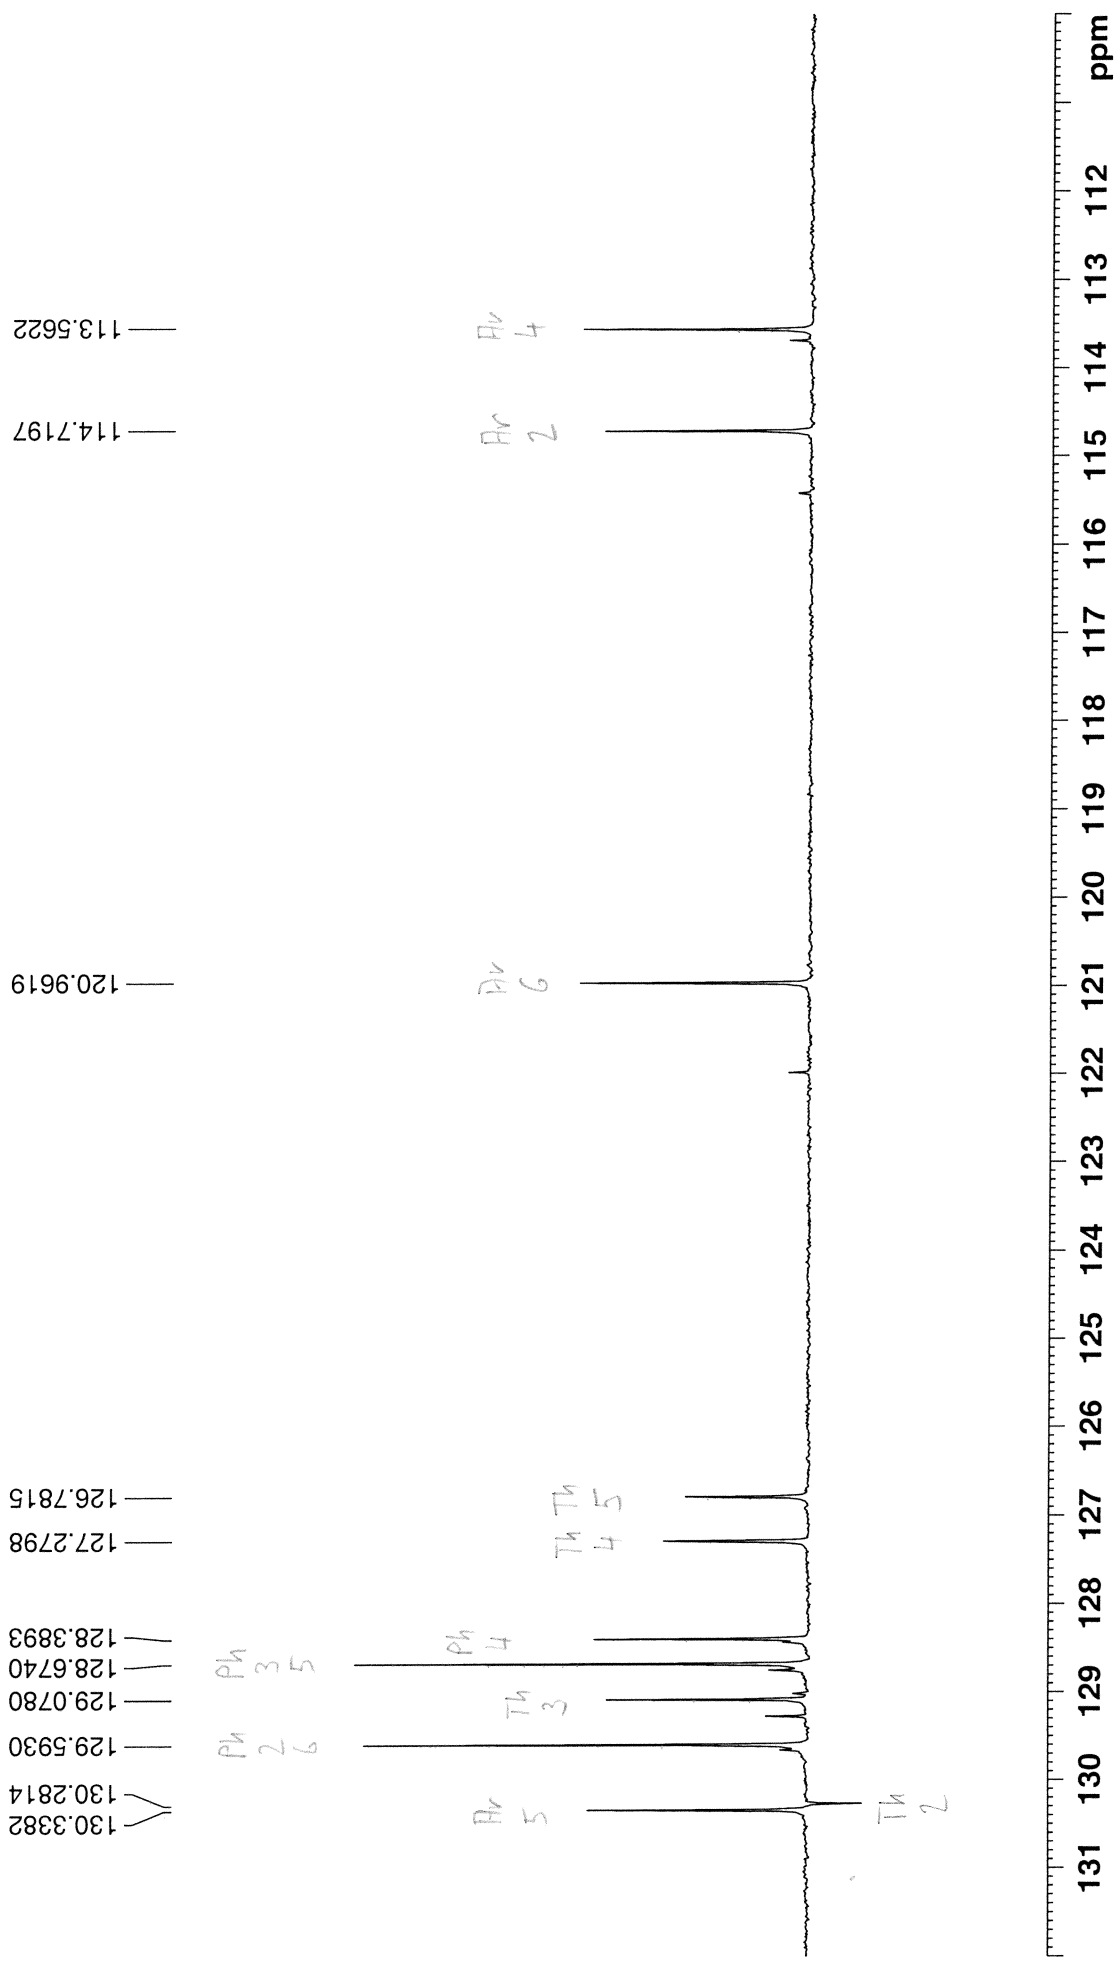

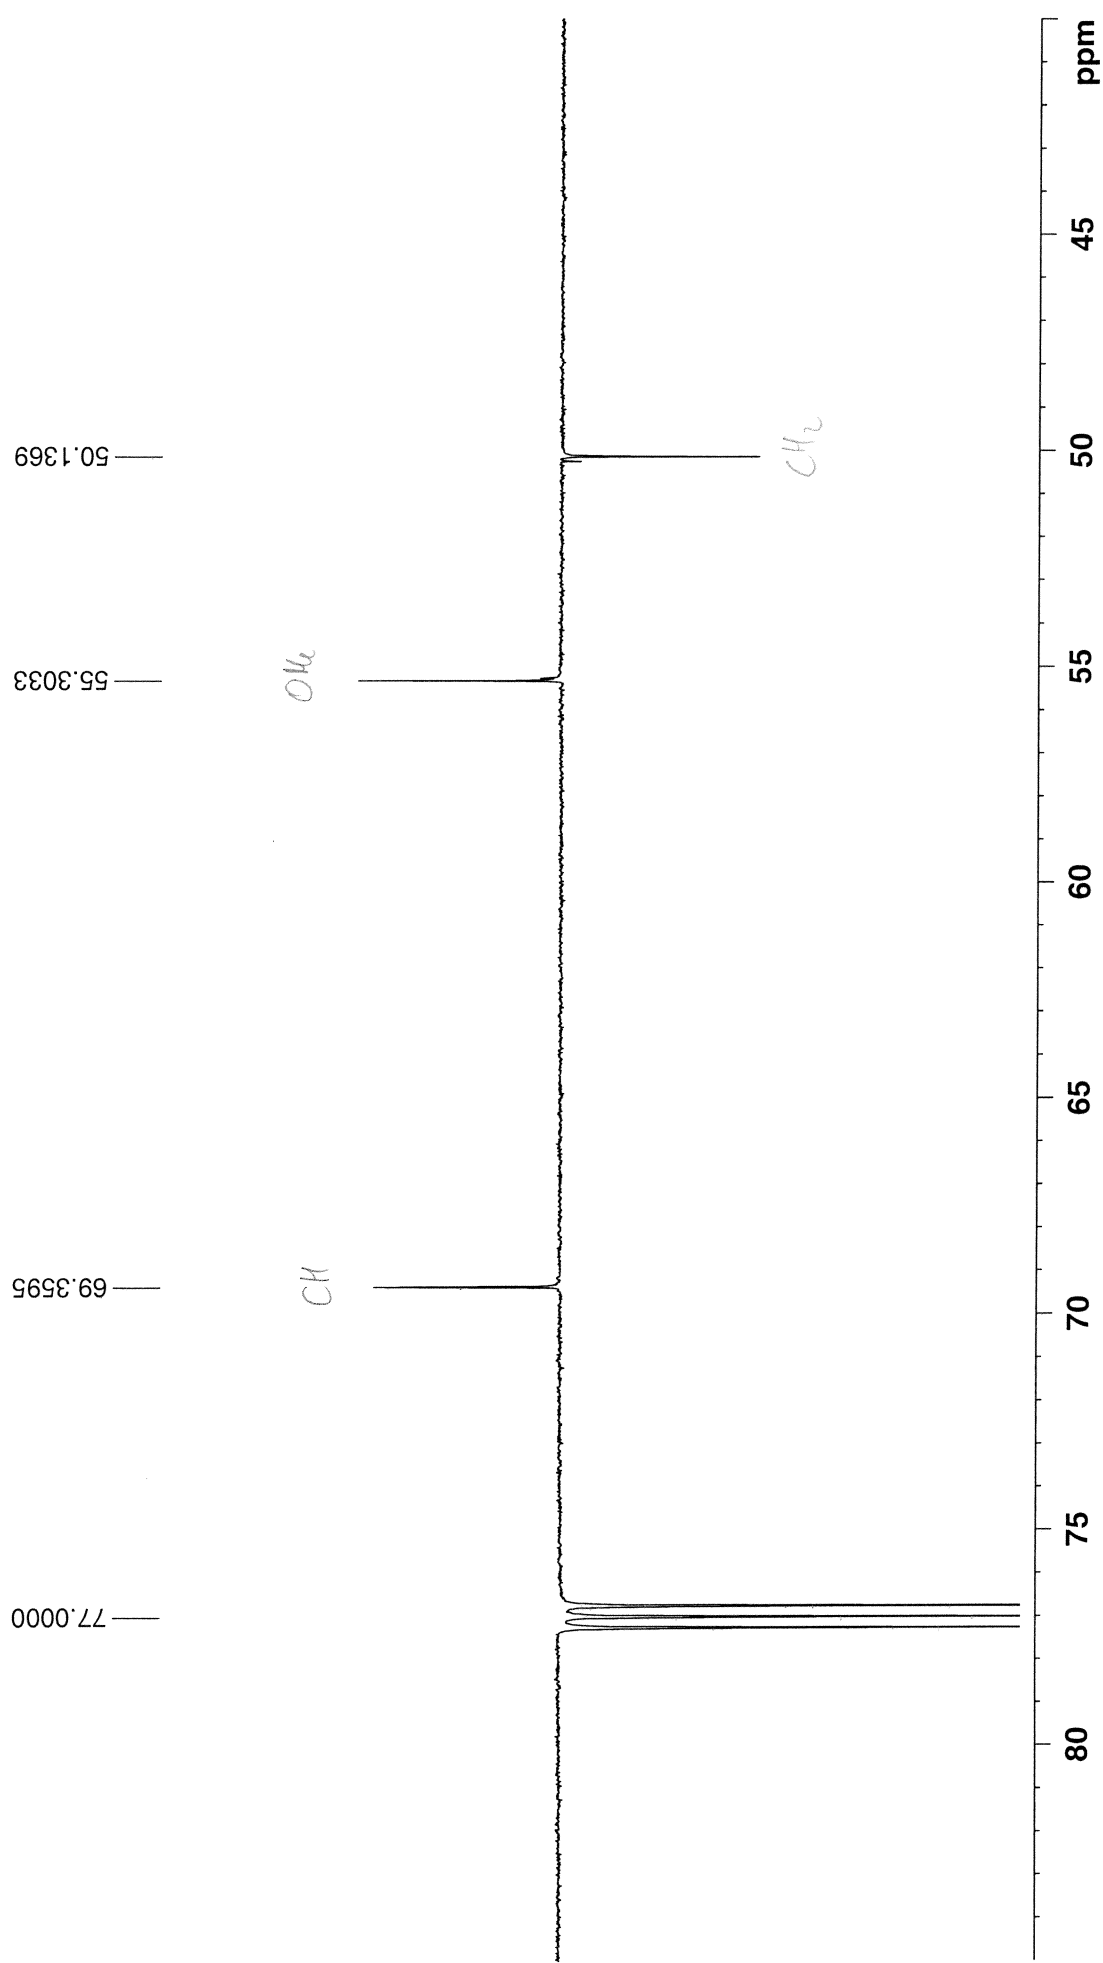

**Figure S74c.** NMR spectra of compound **6s**.

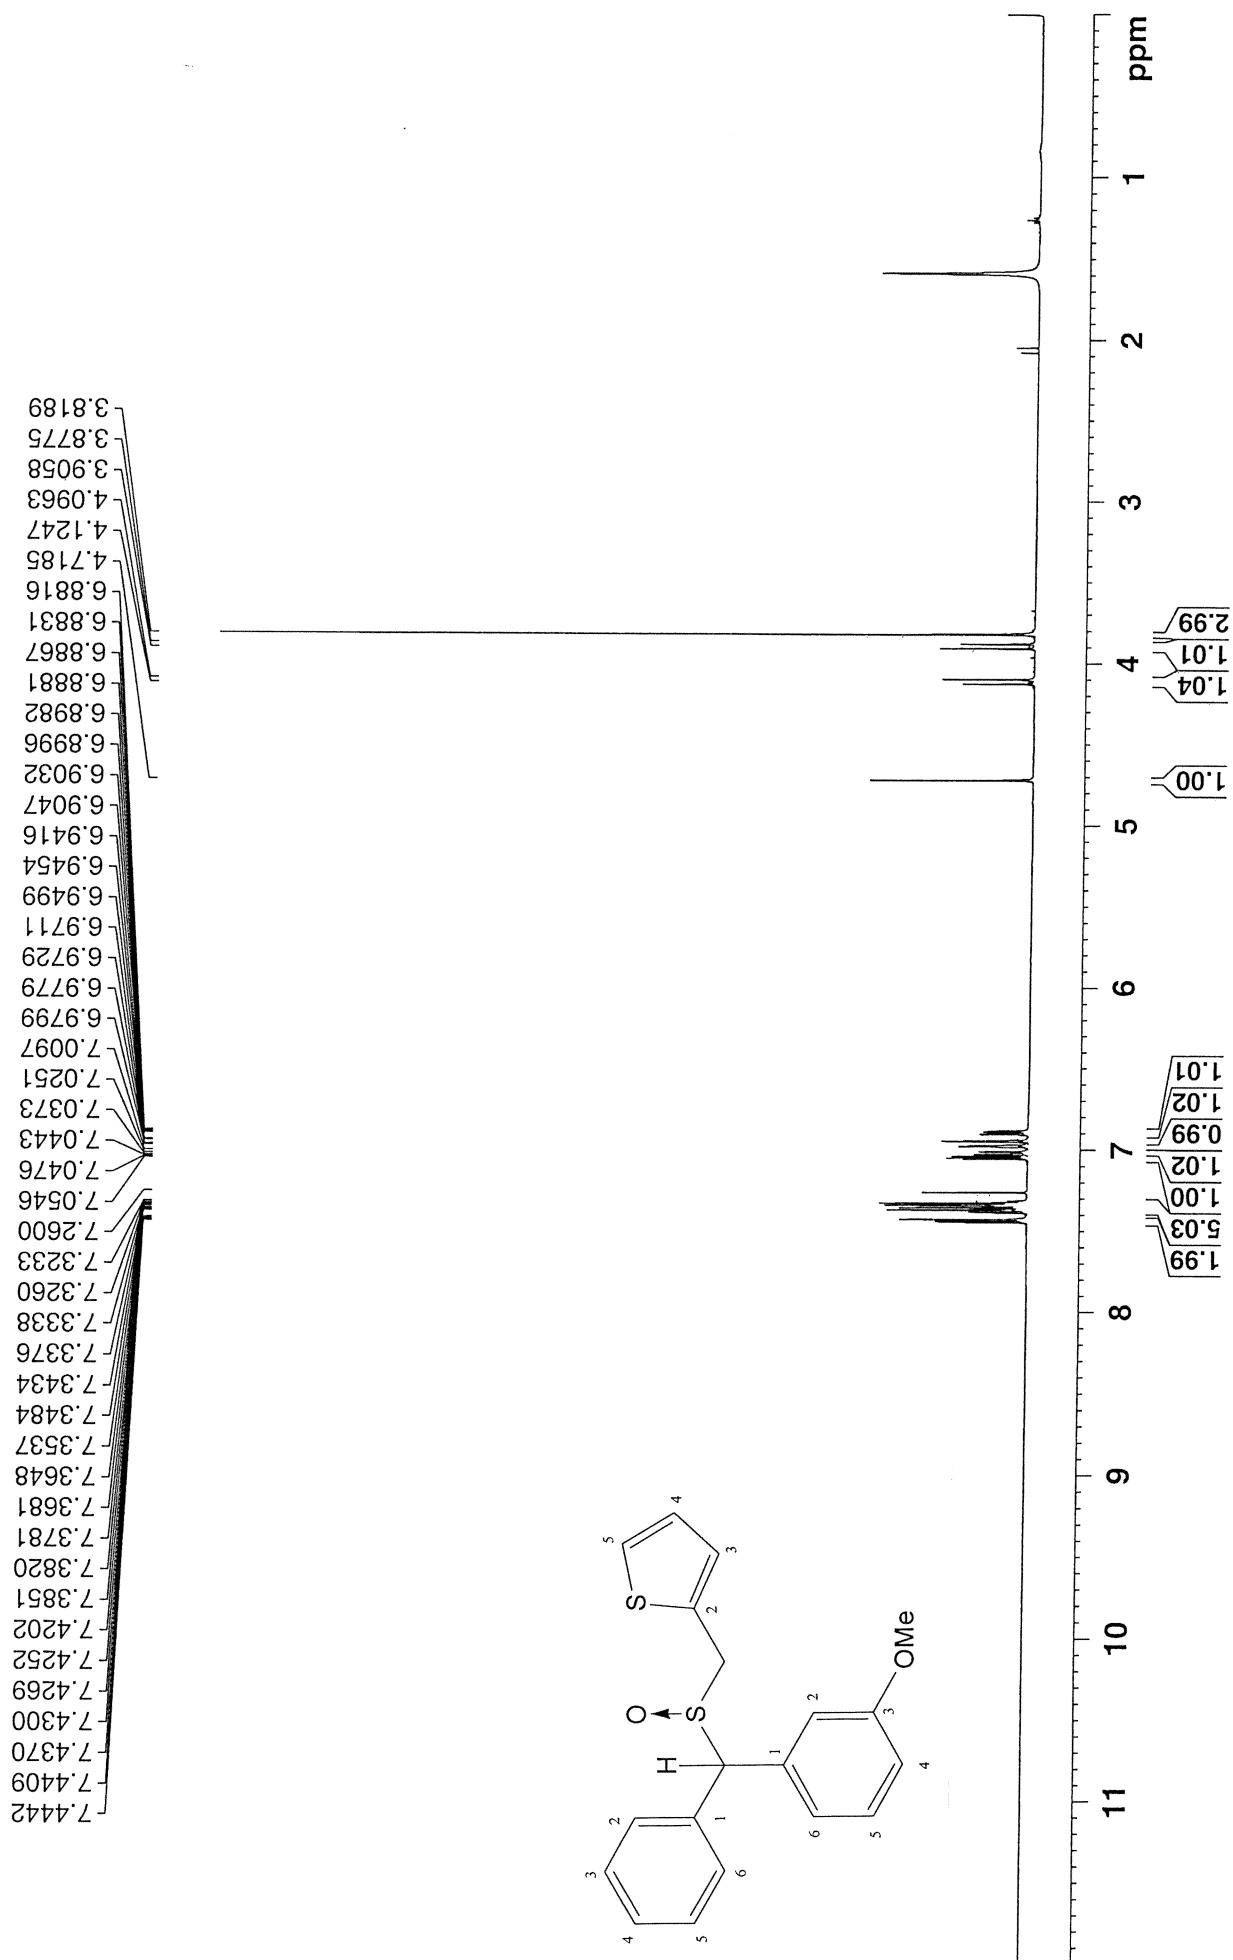



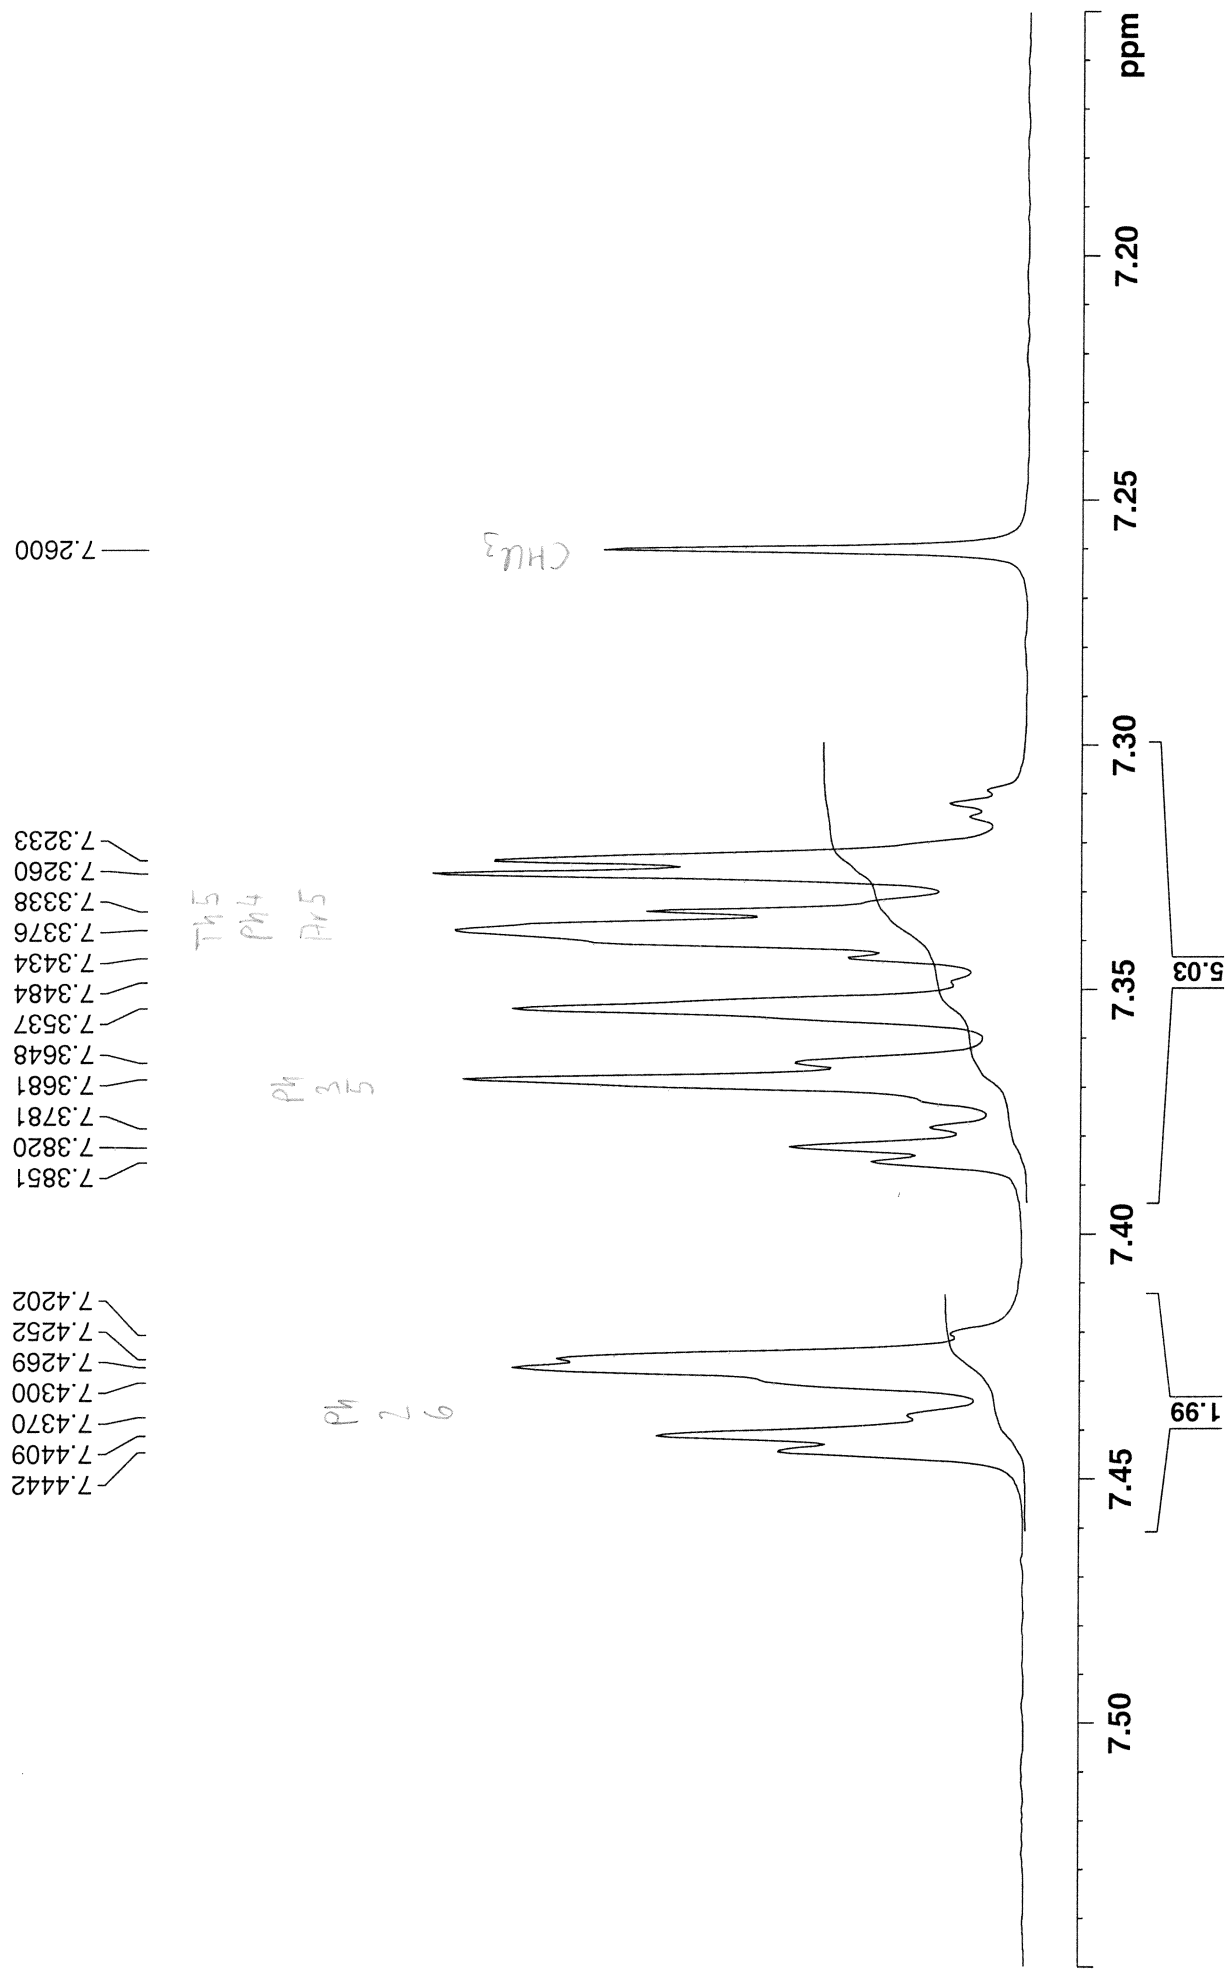

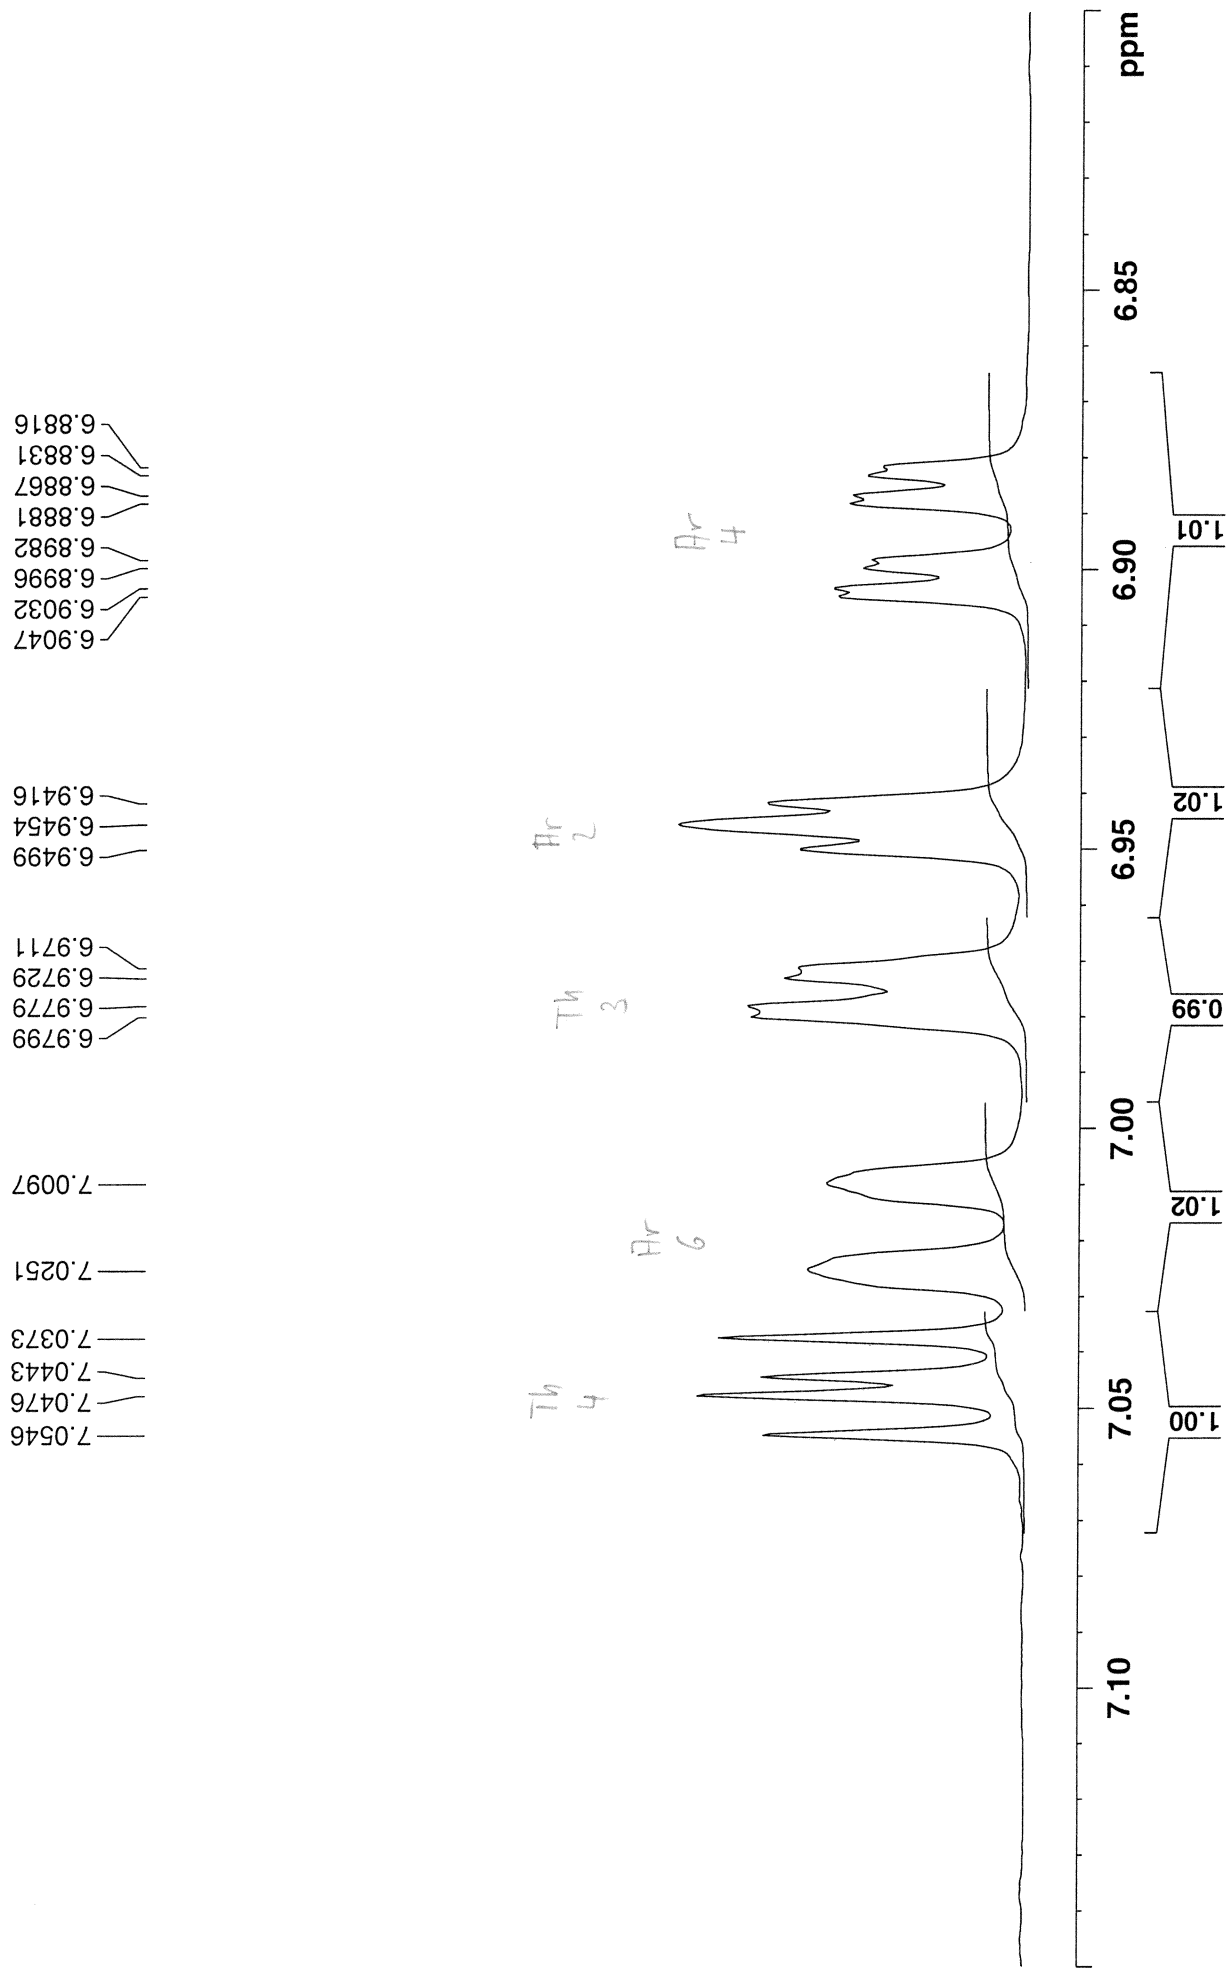

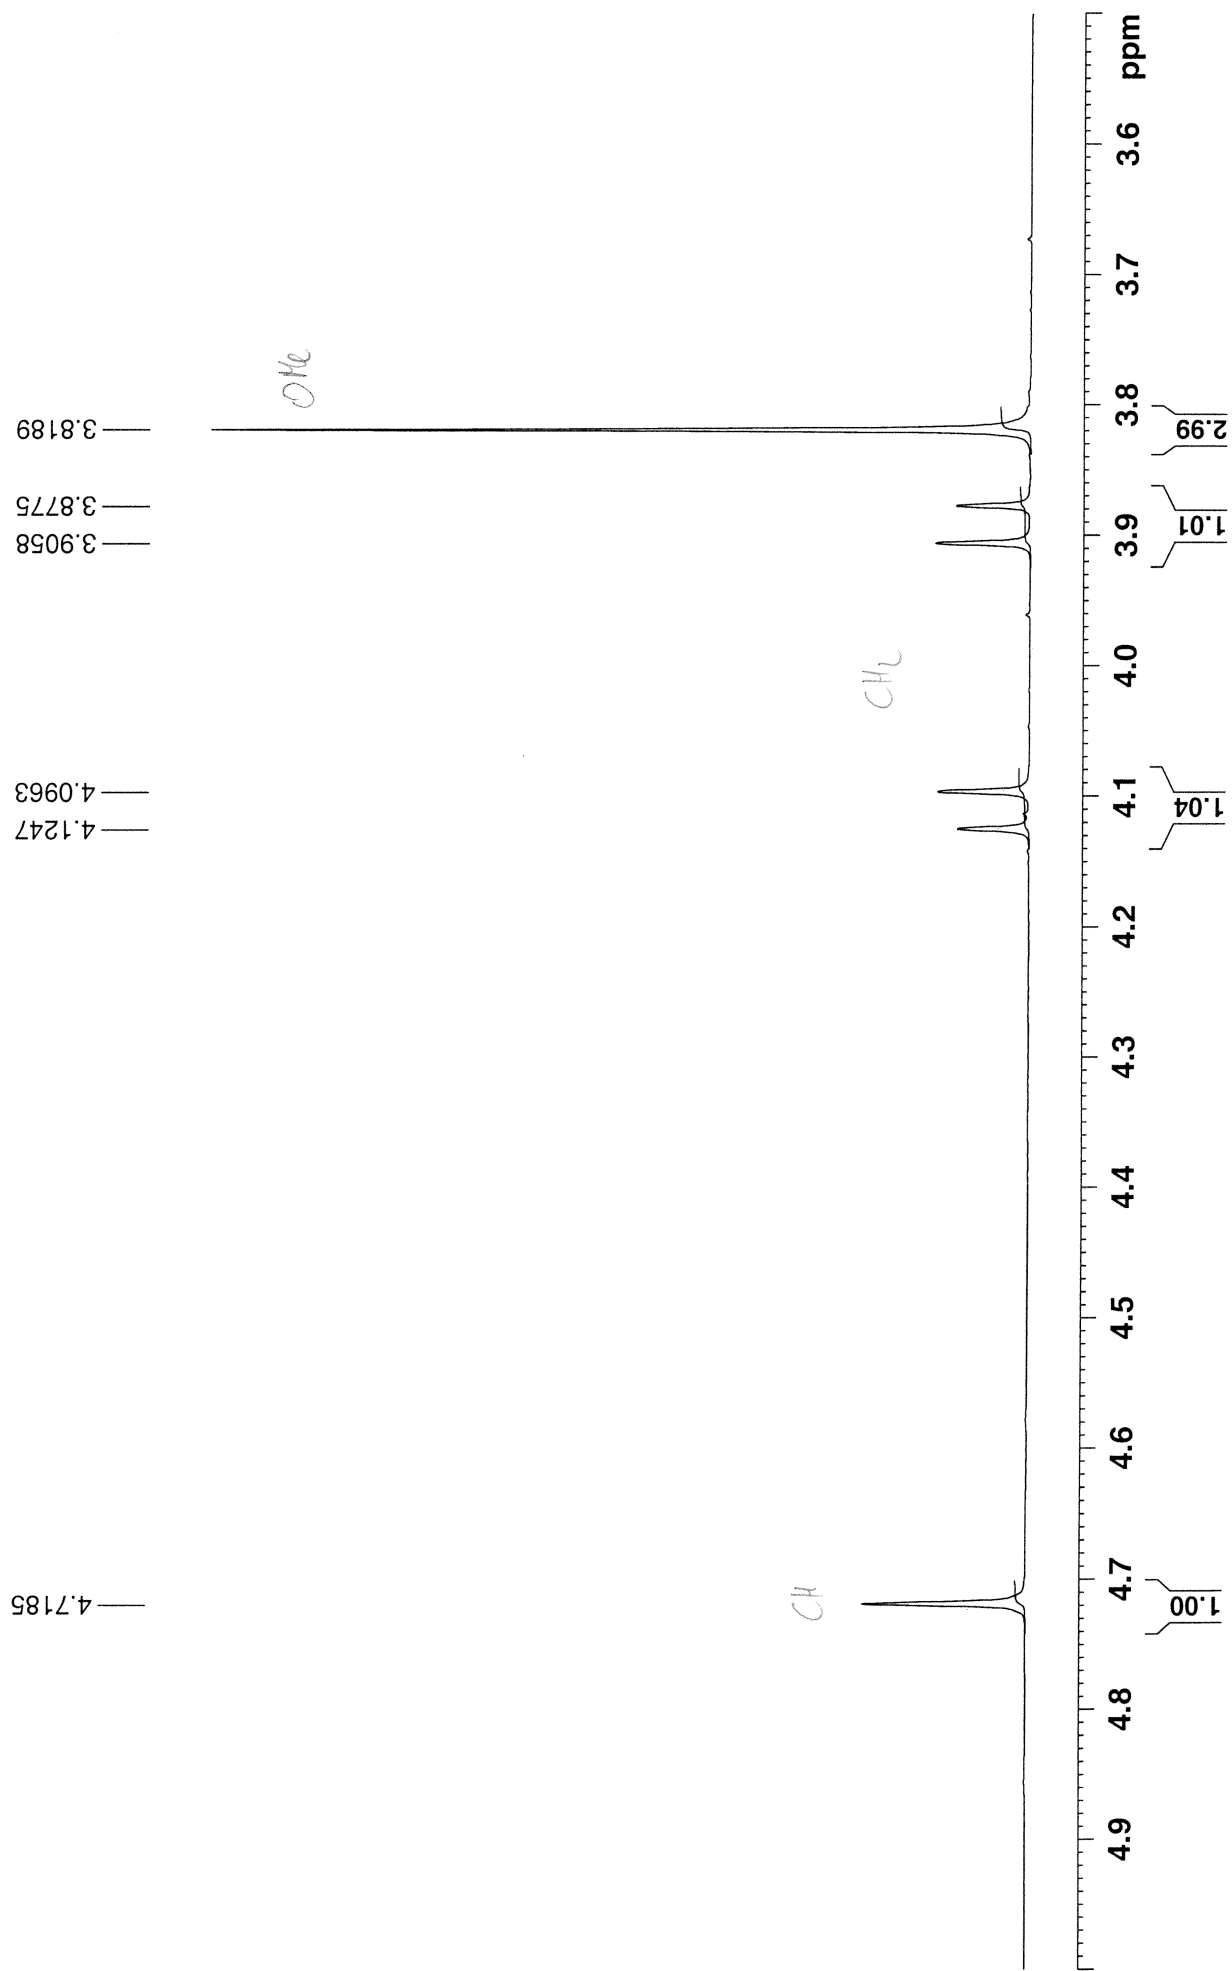

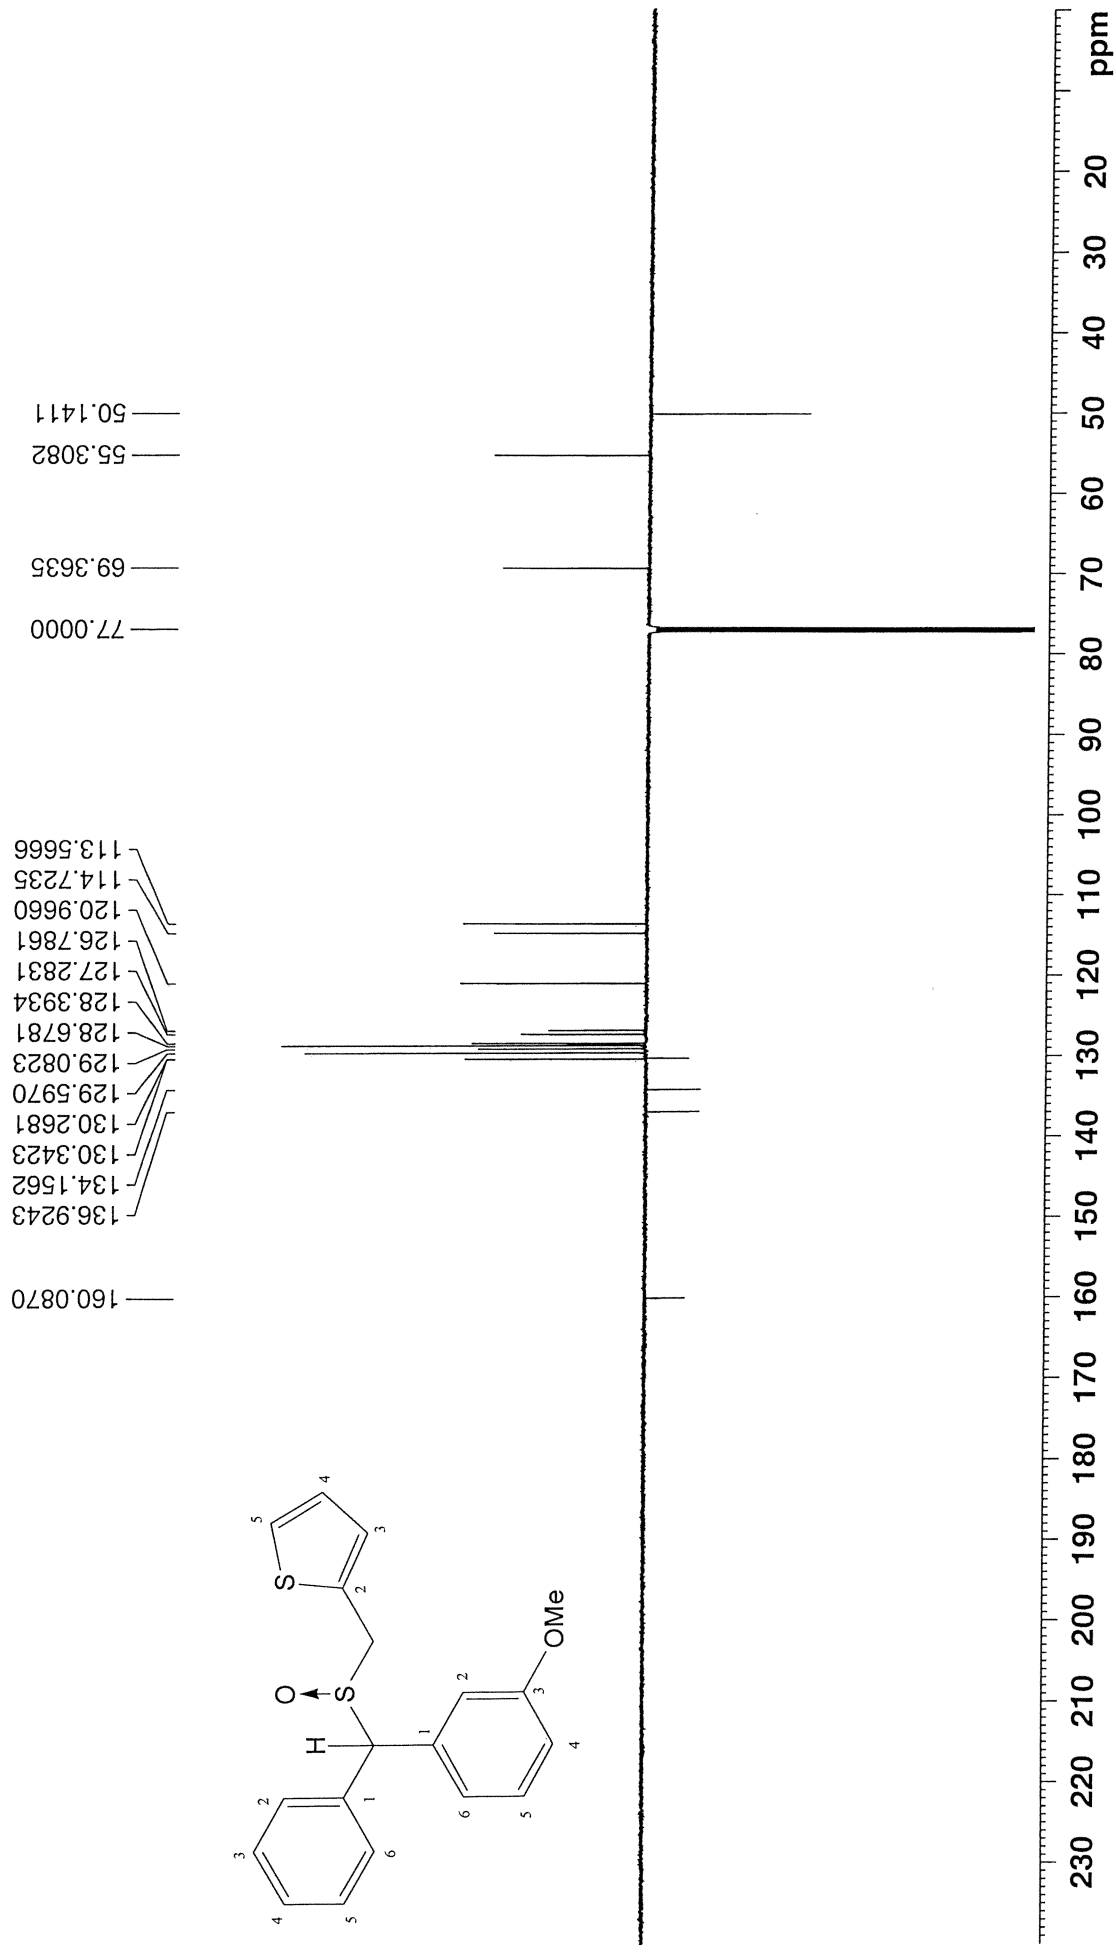

— 160.0870

— 134.1562

— 136.9243

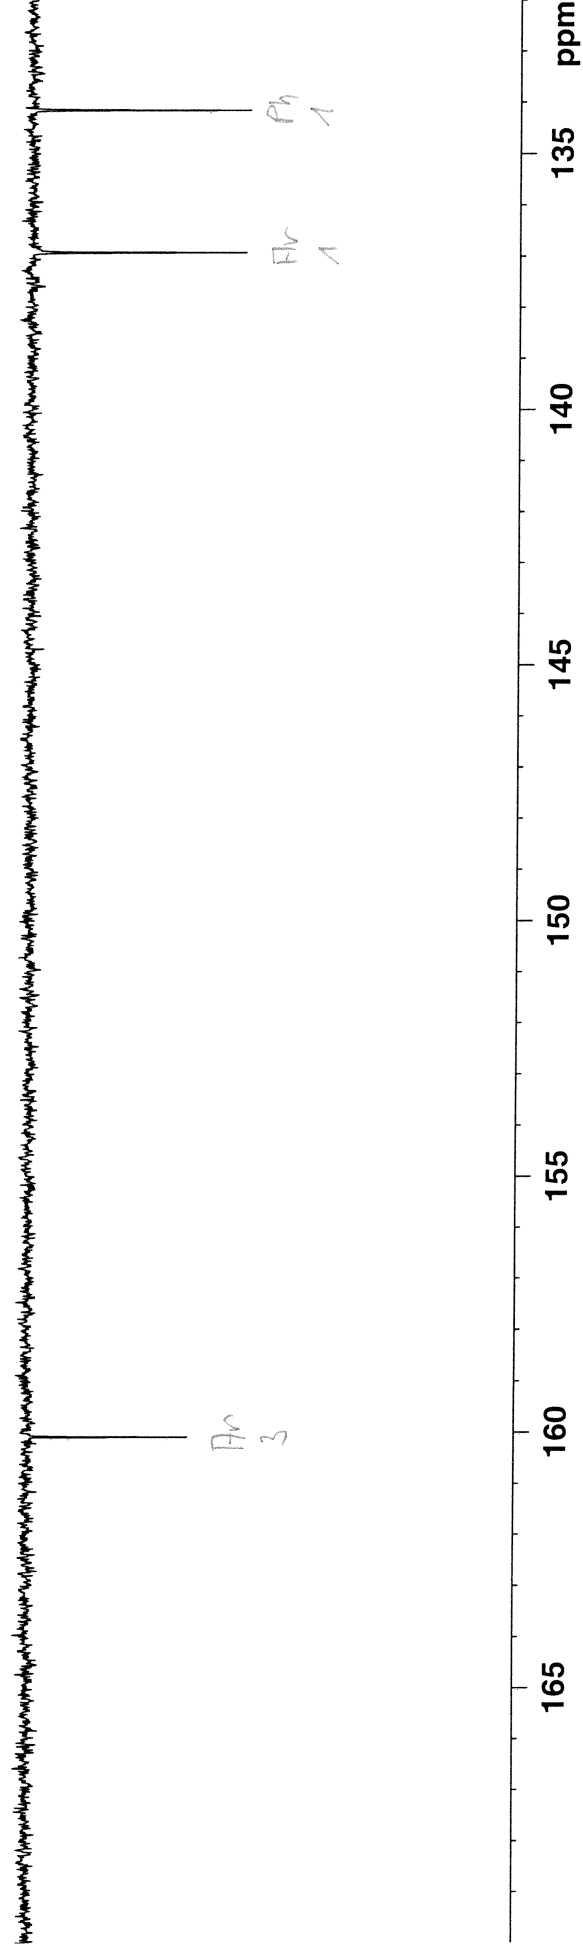

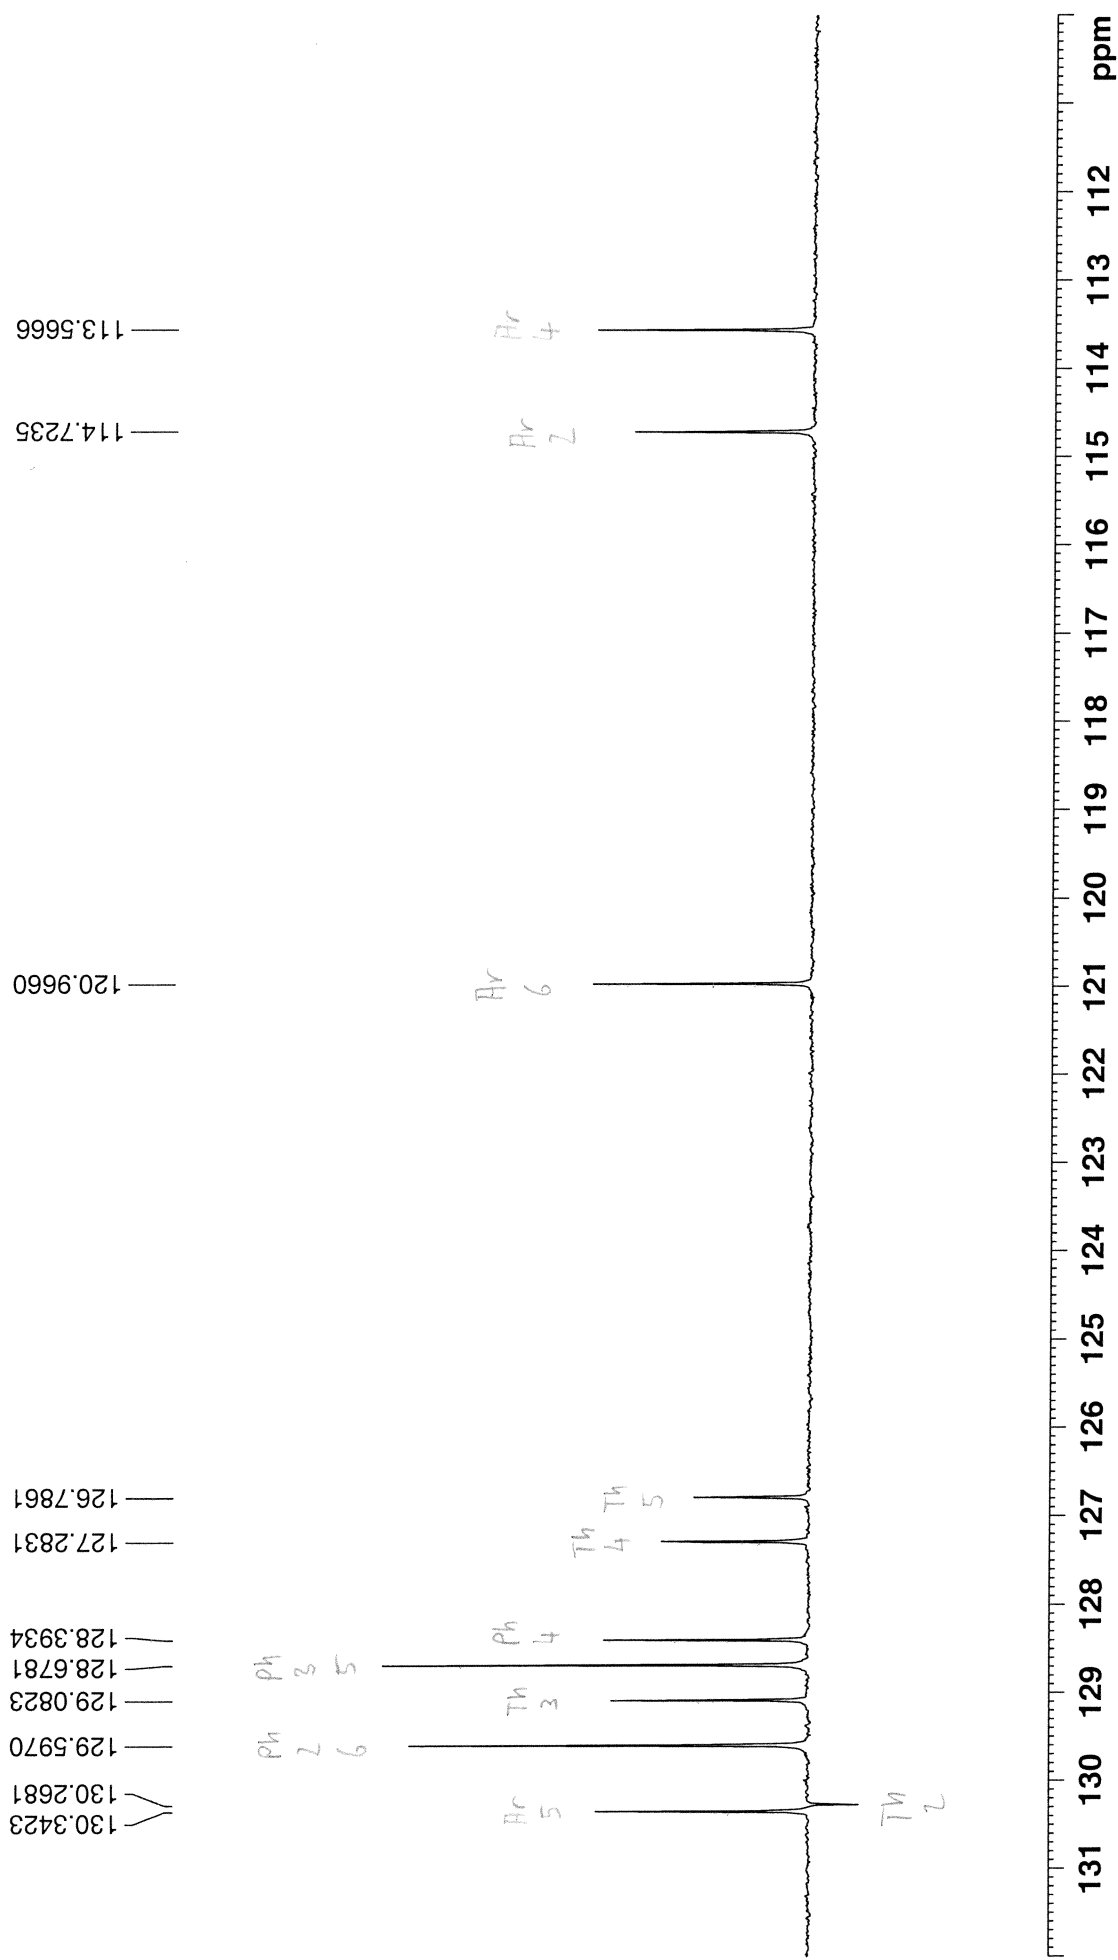

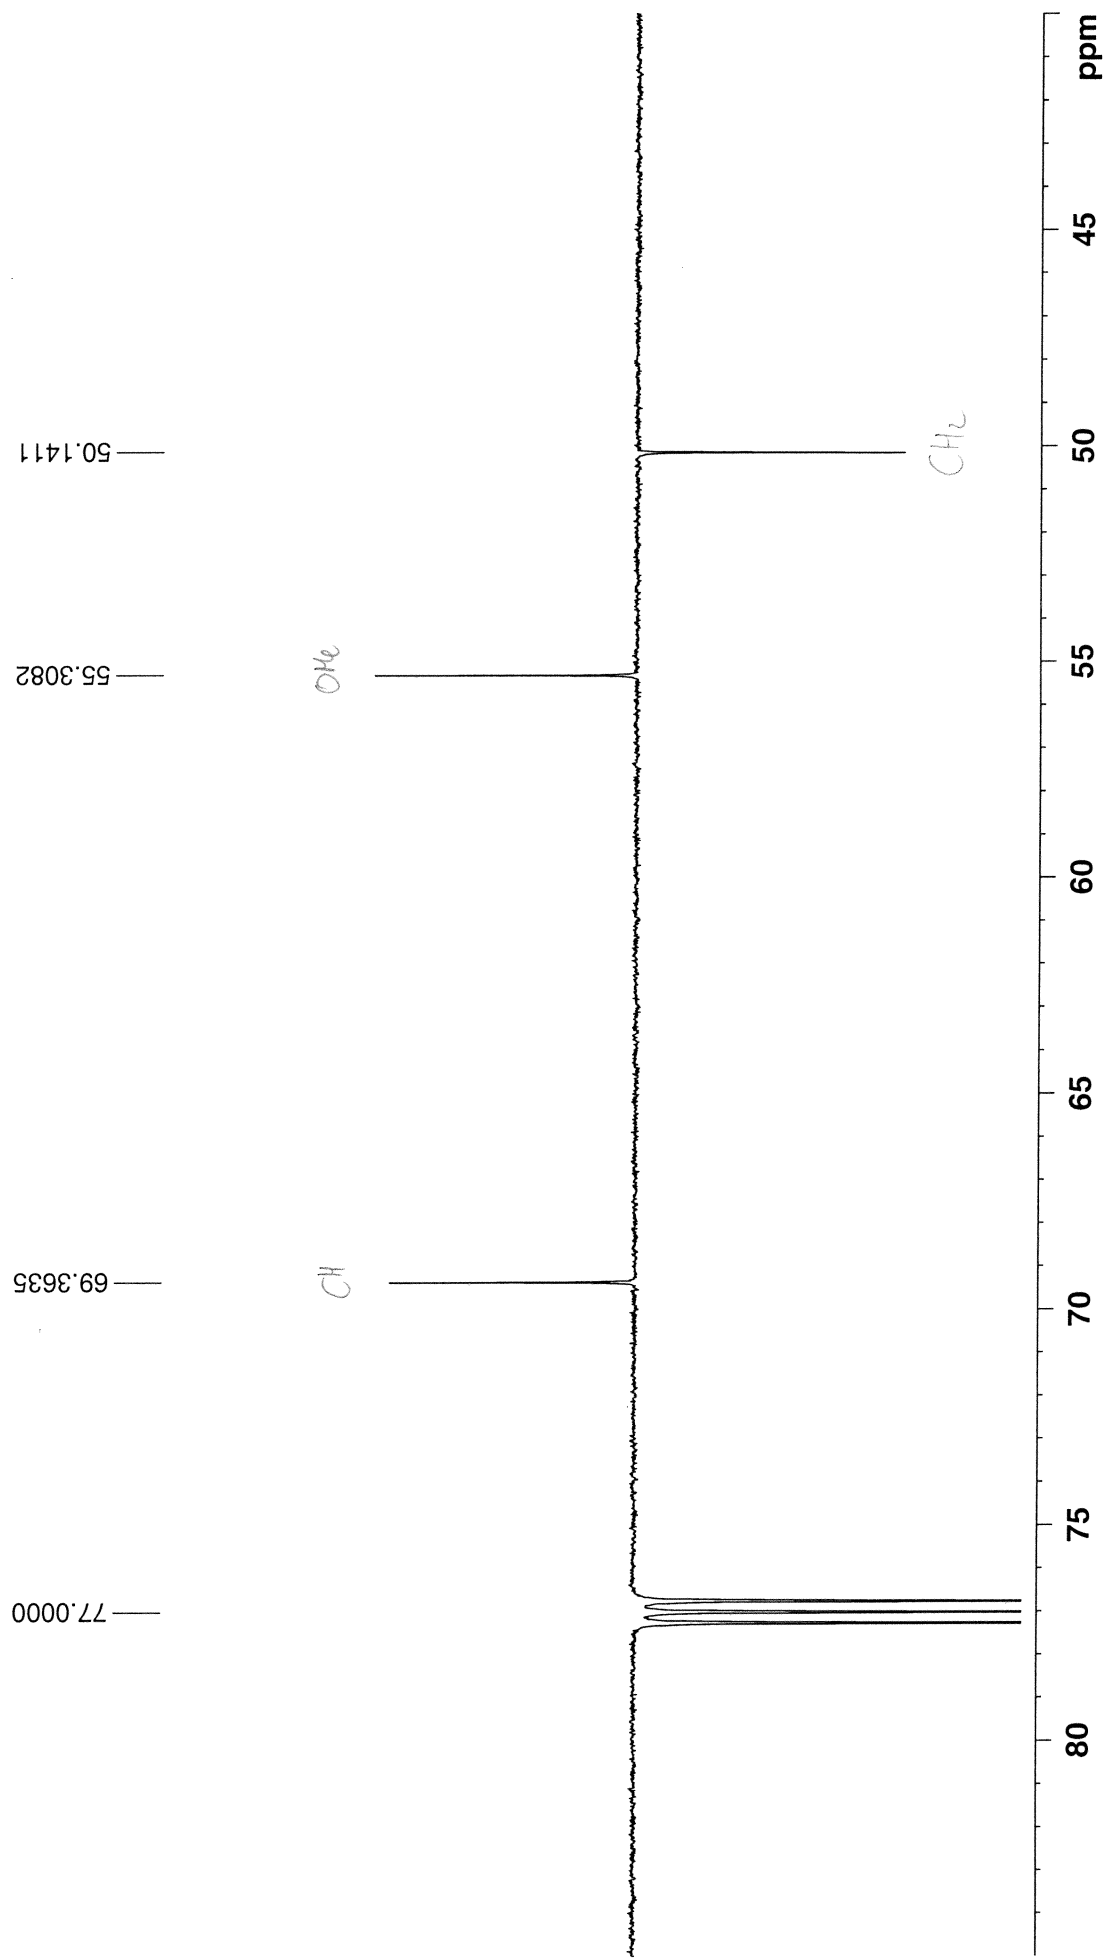

PN008\_1\_2 in cdcl3 (COSY) 29.8.2019

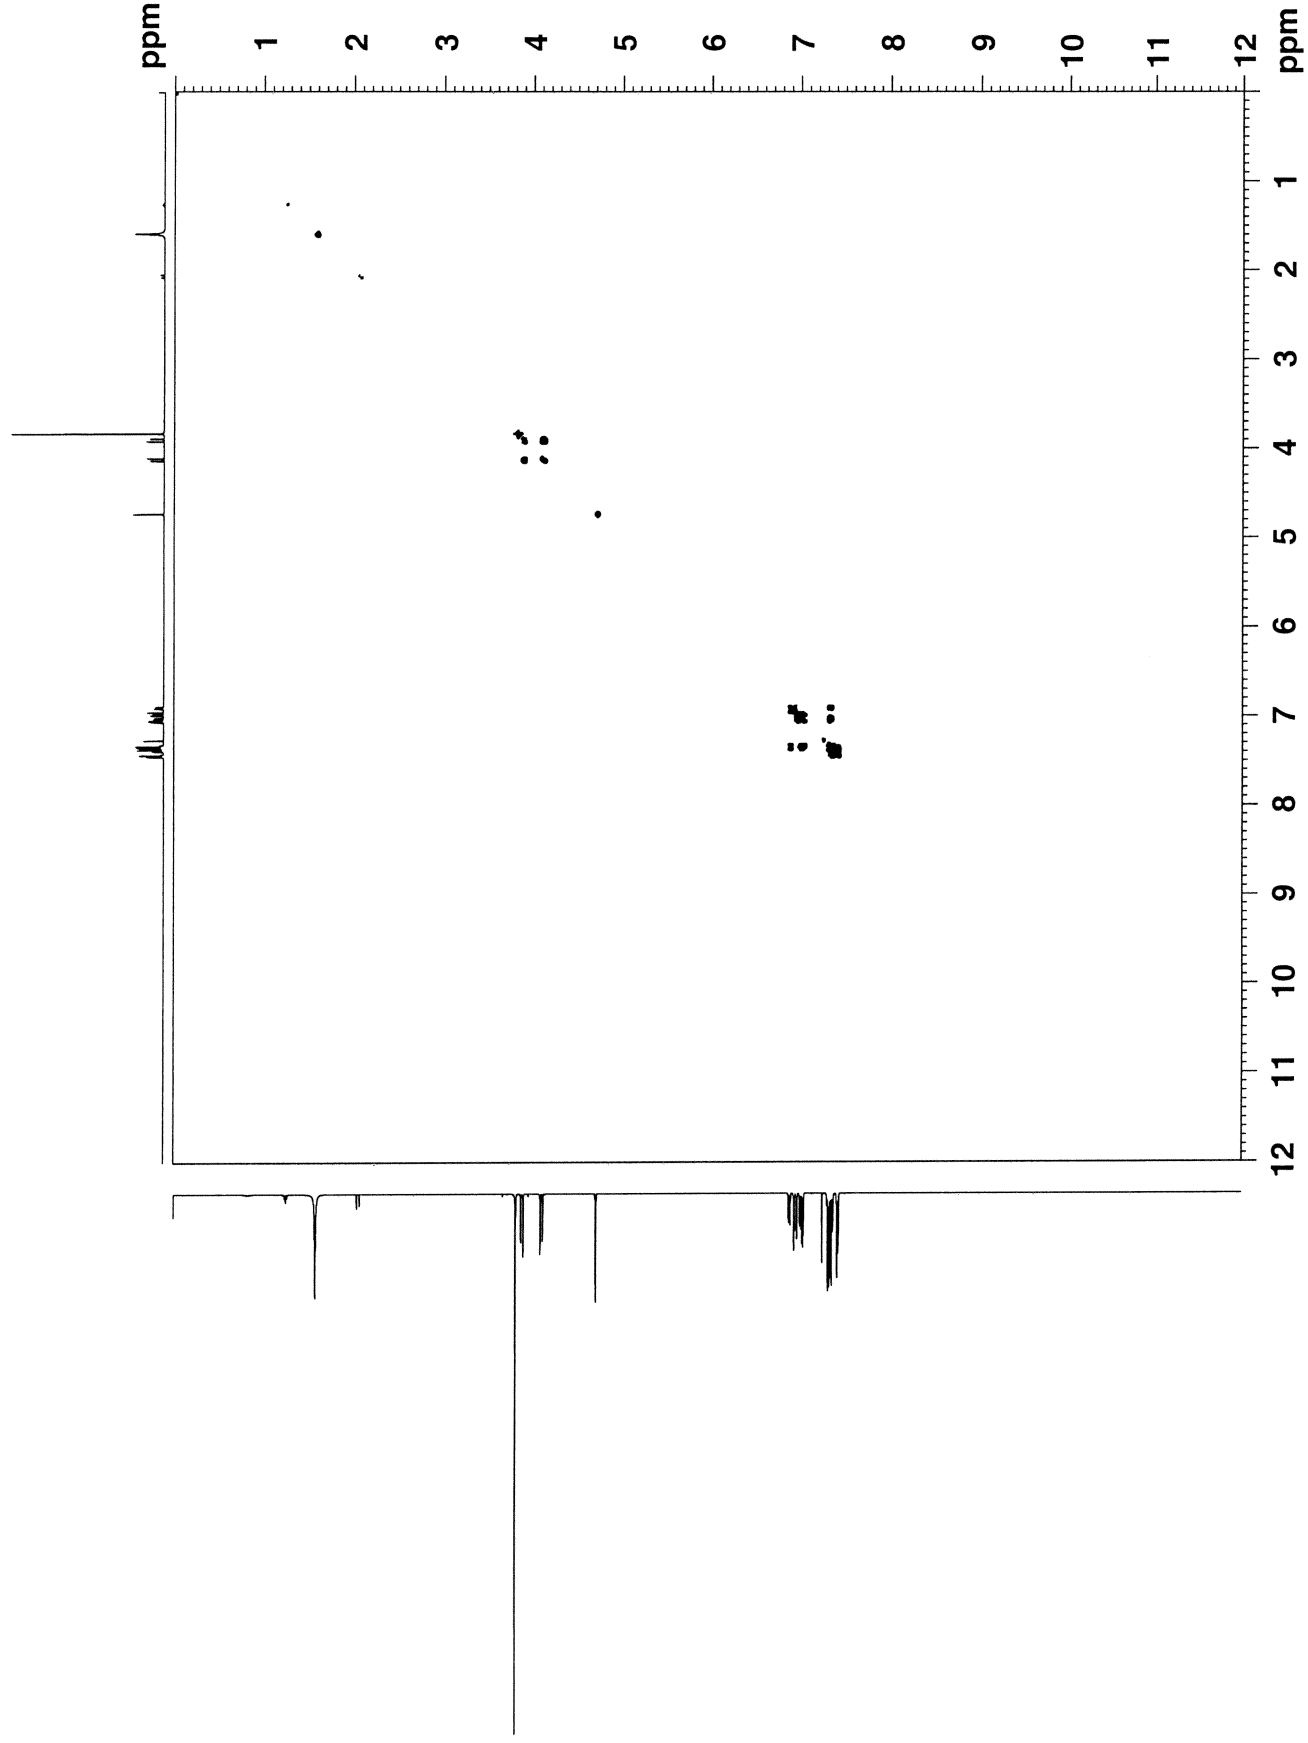



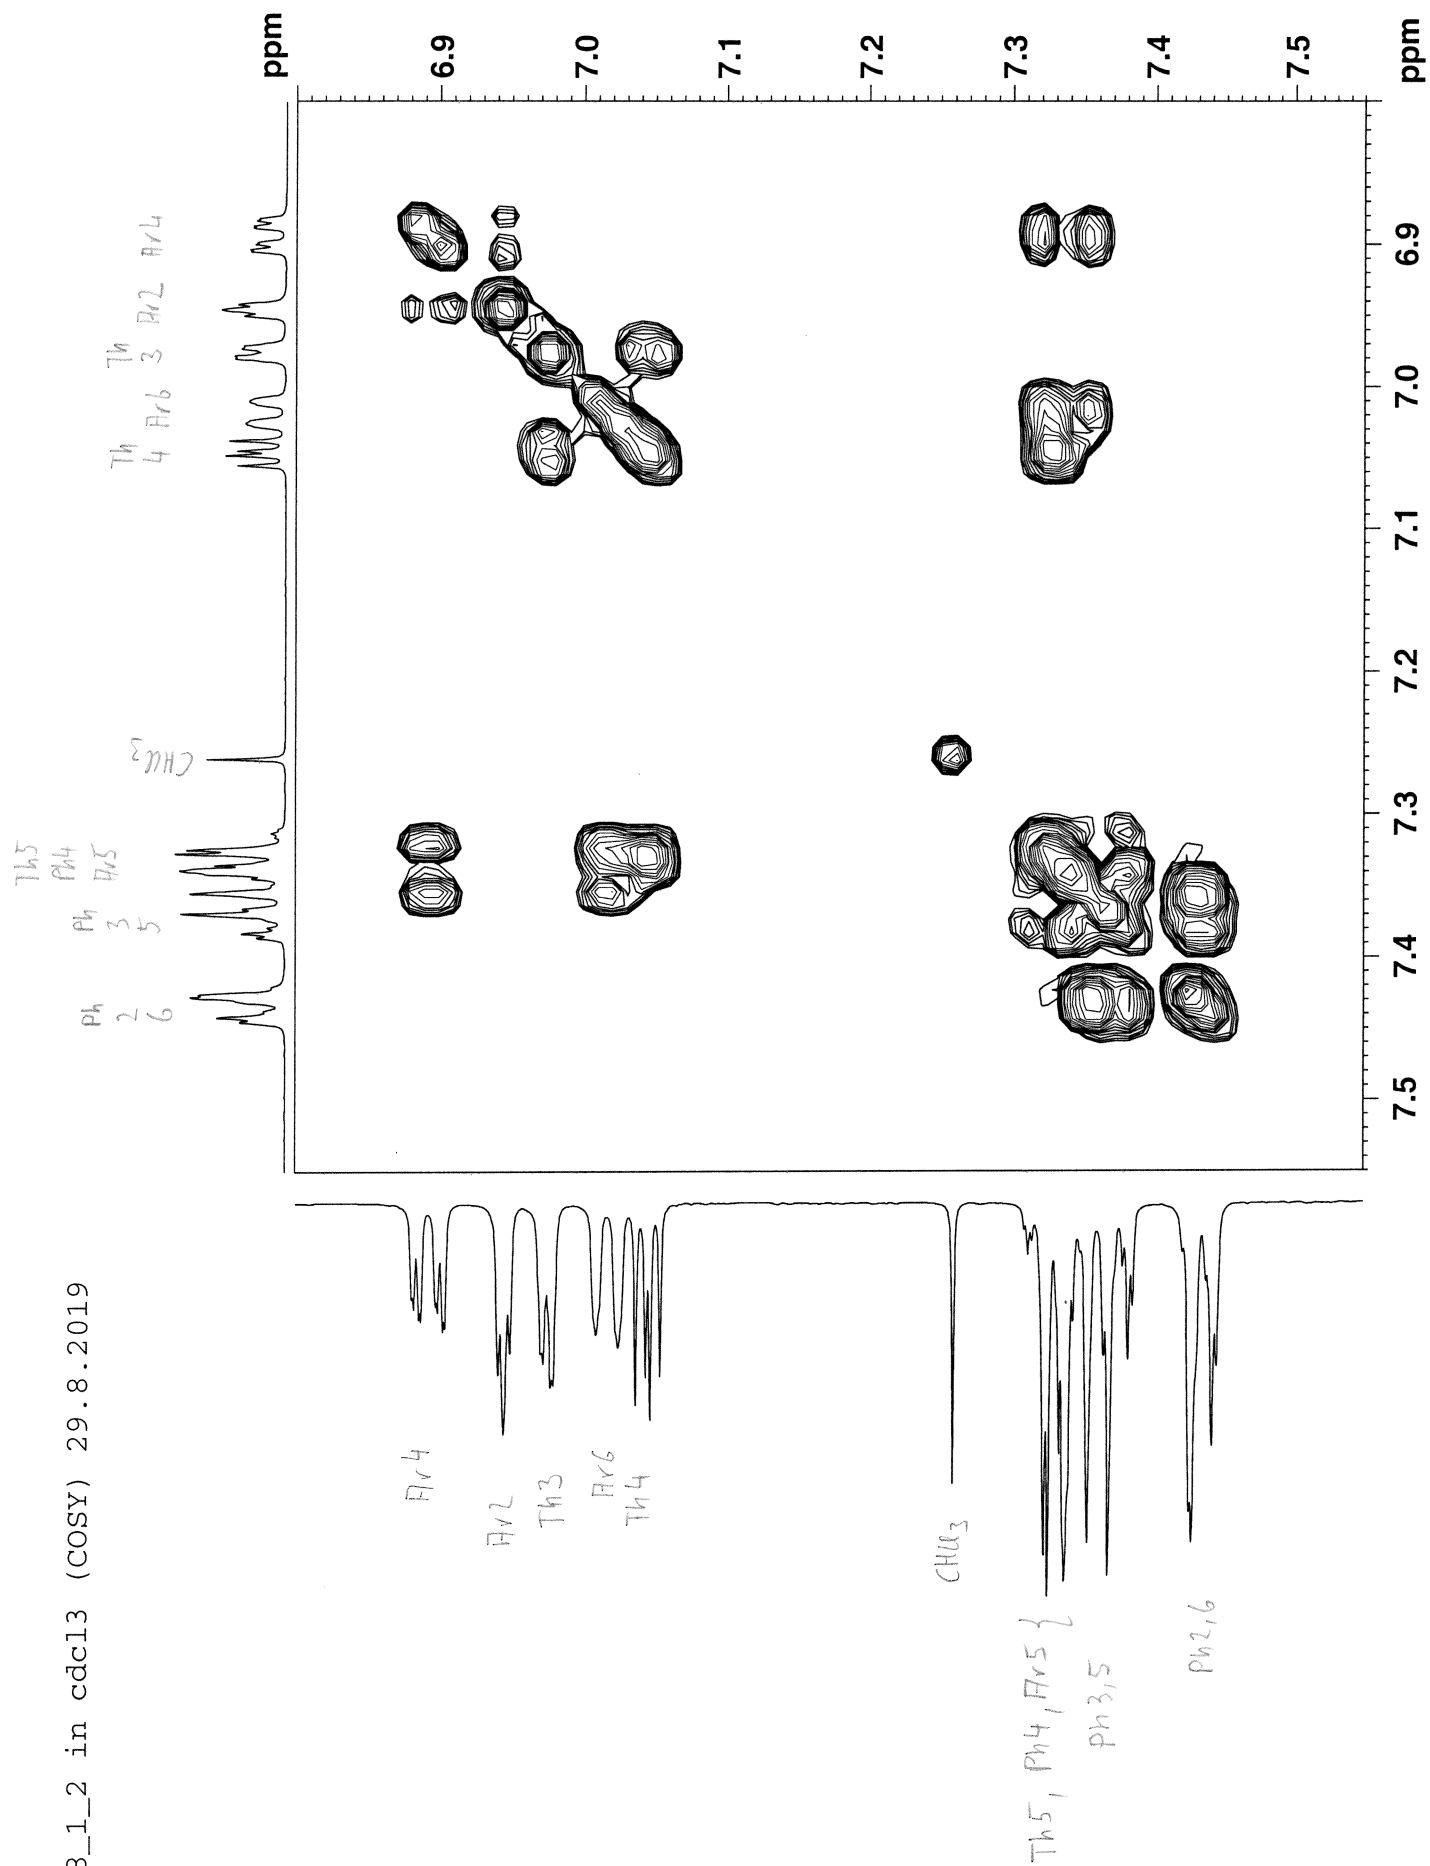

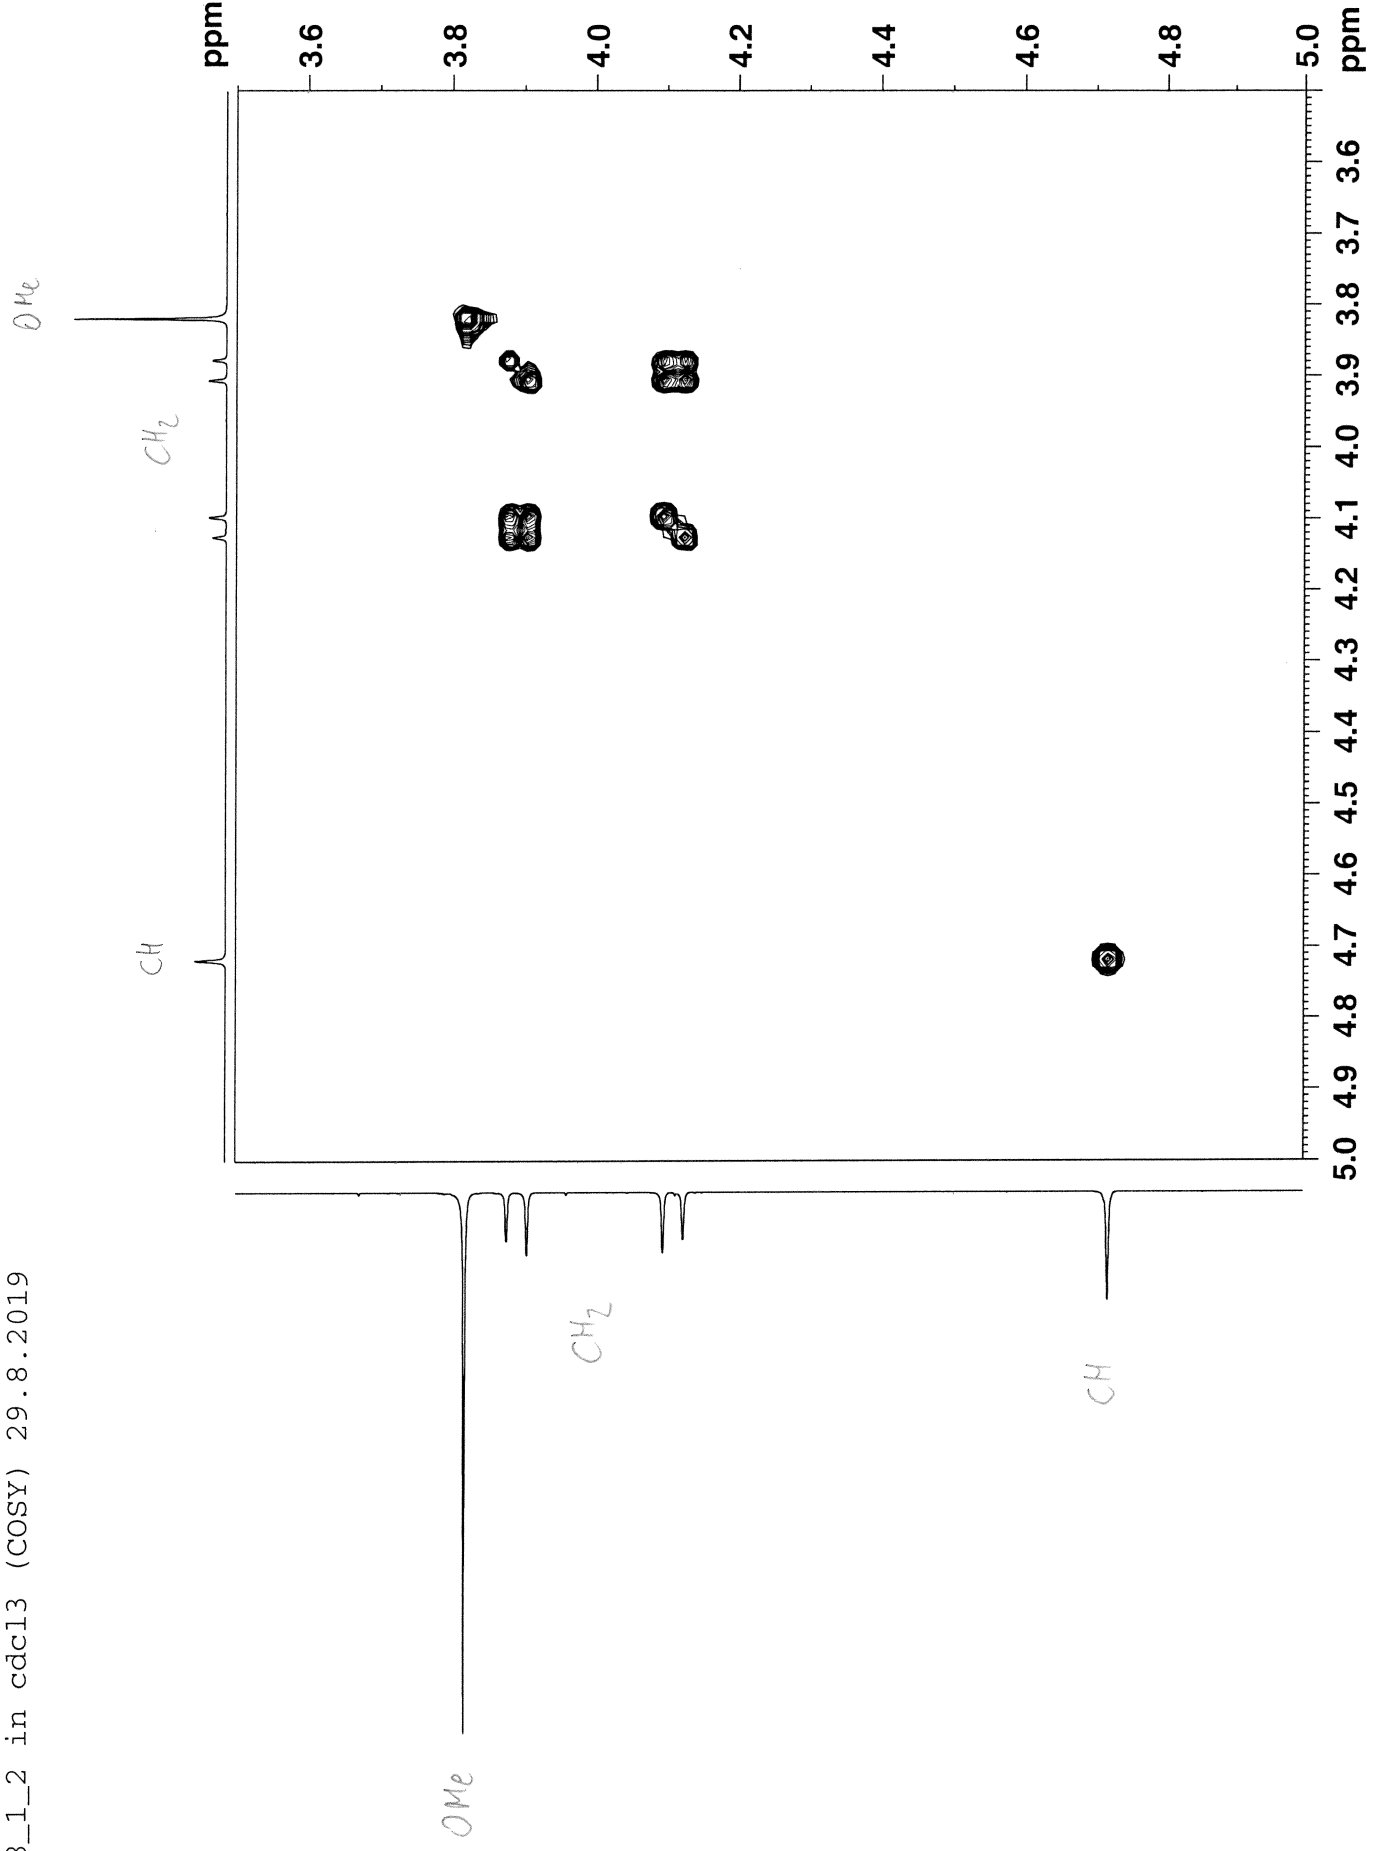

PN008\_1\_2 in cdcl3 (HSQC) 29.8.2019

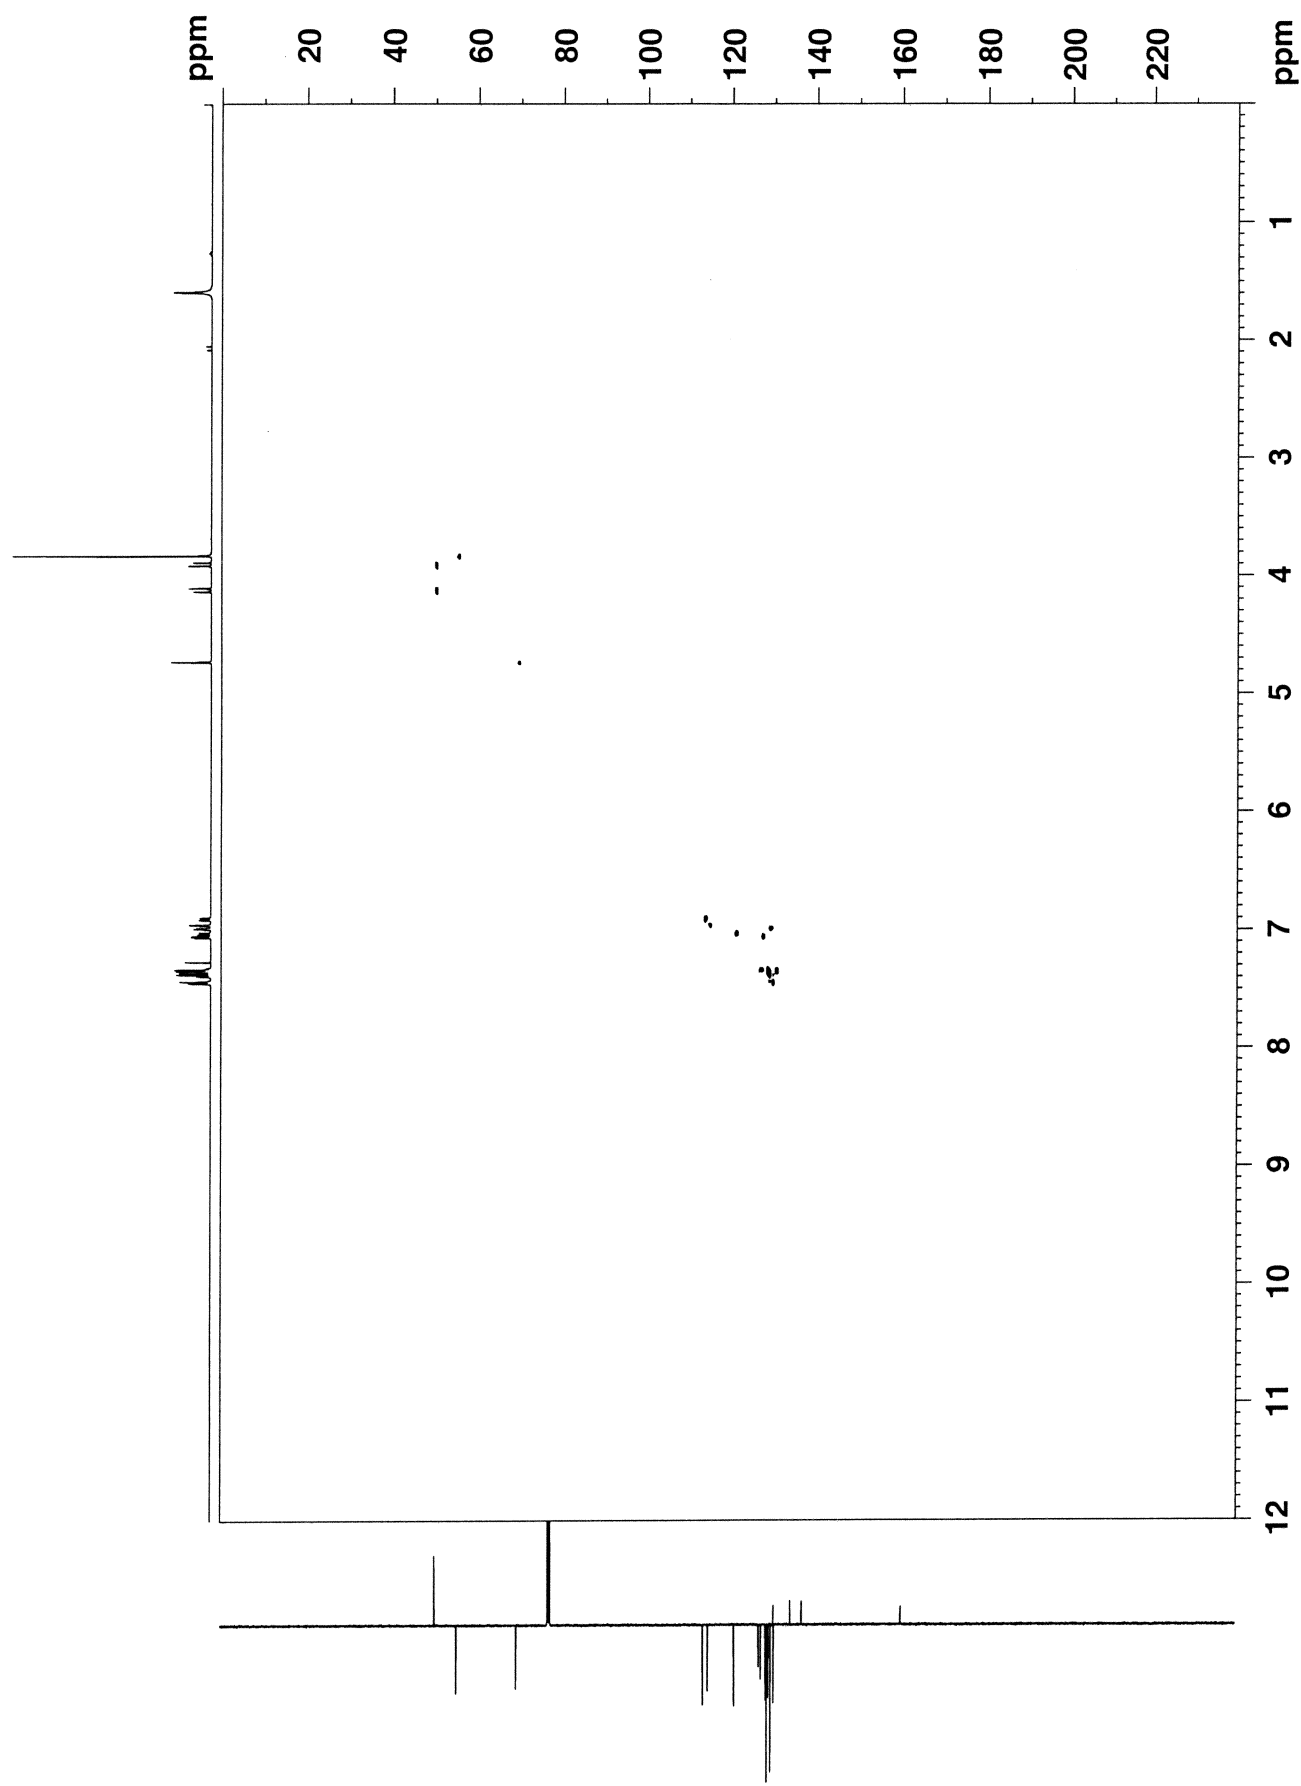

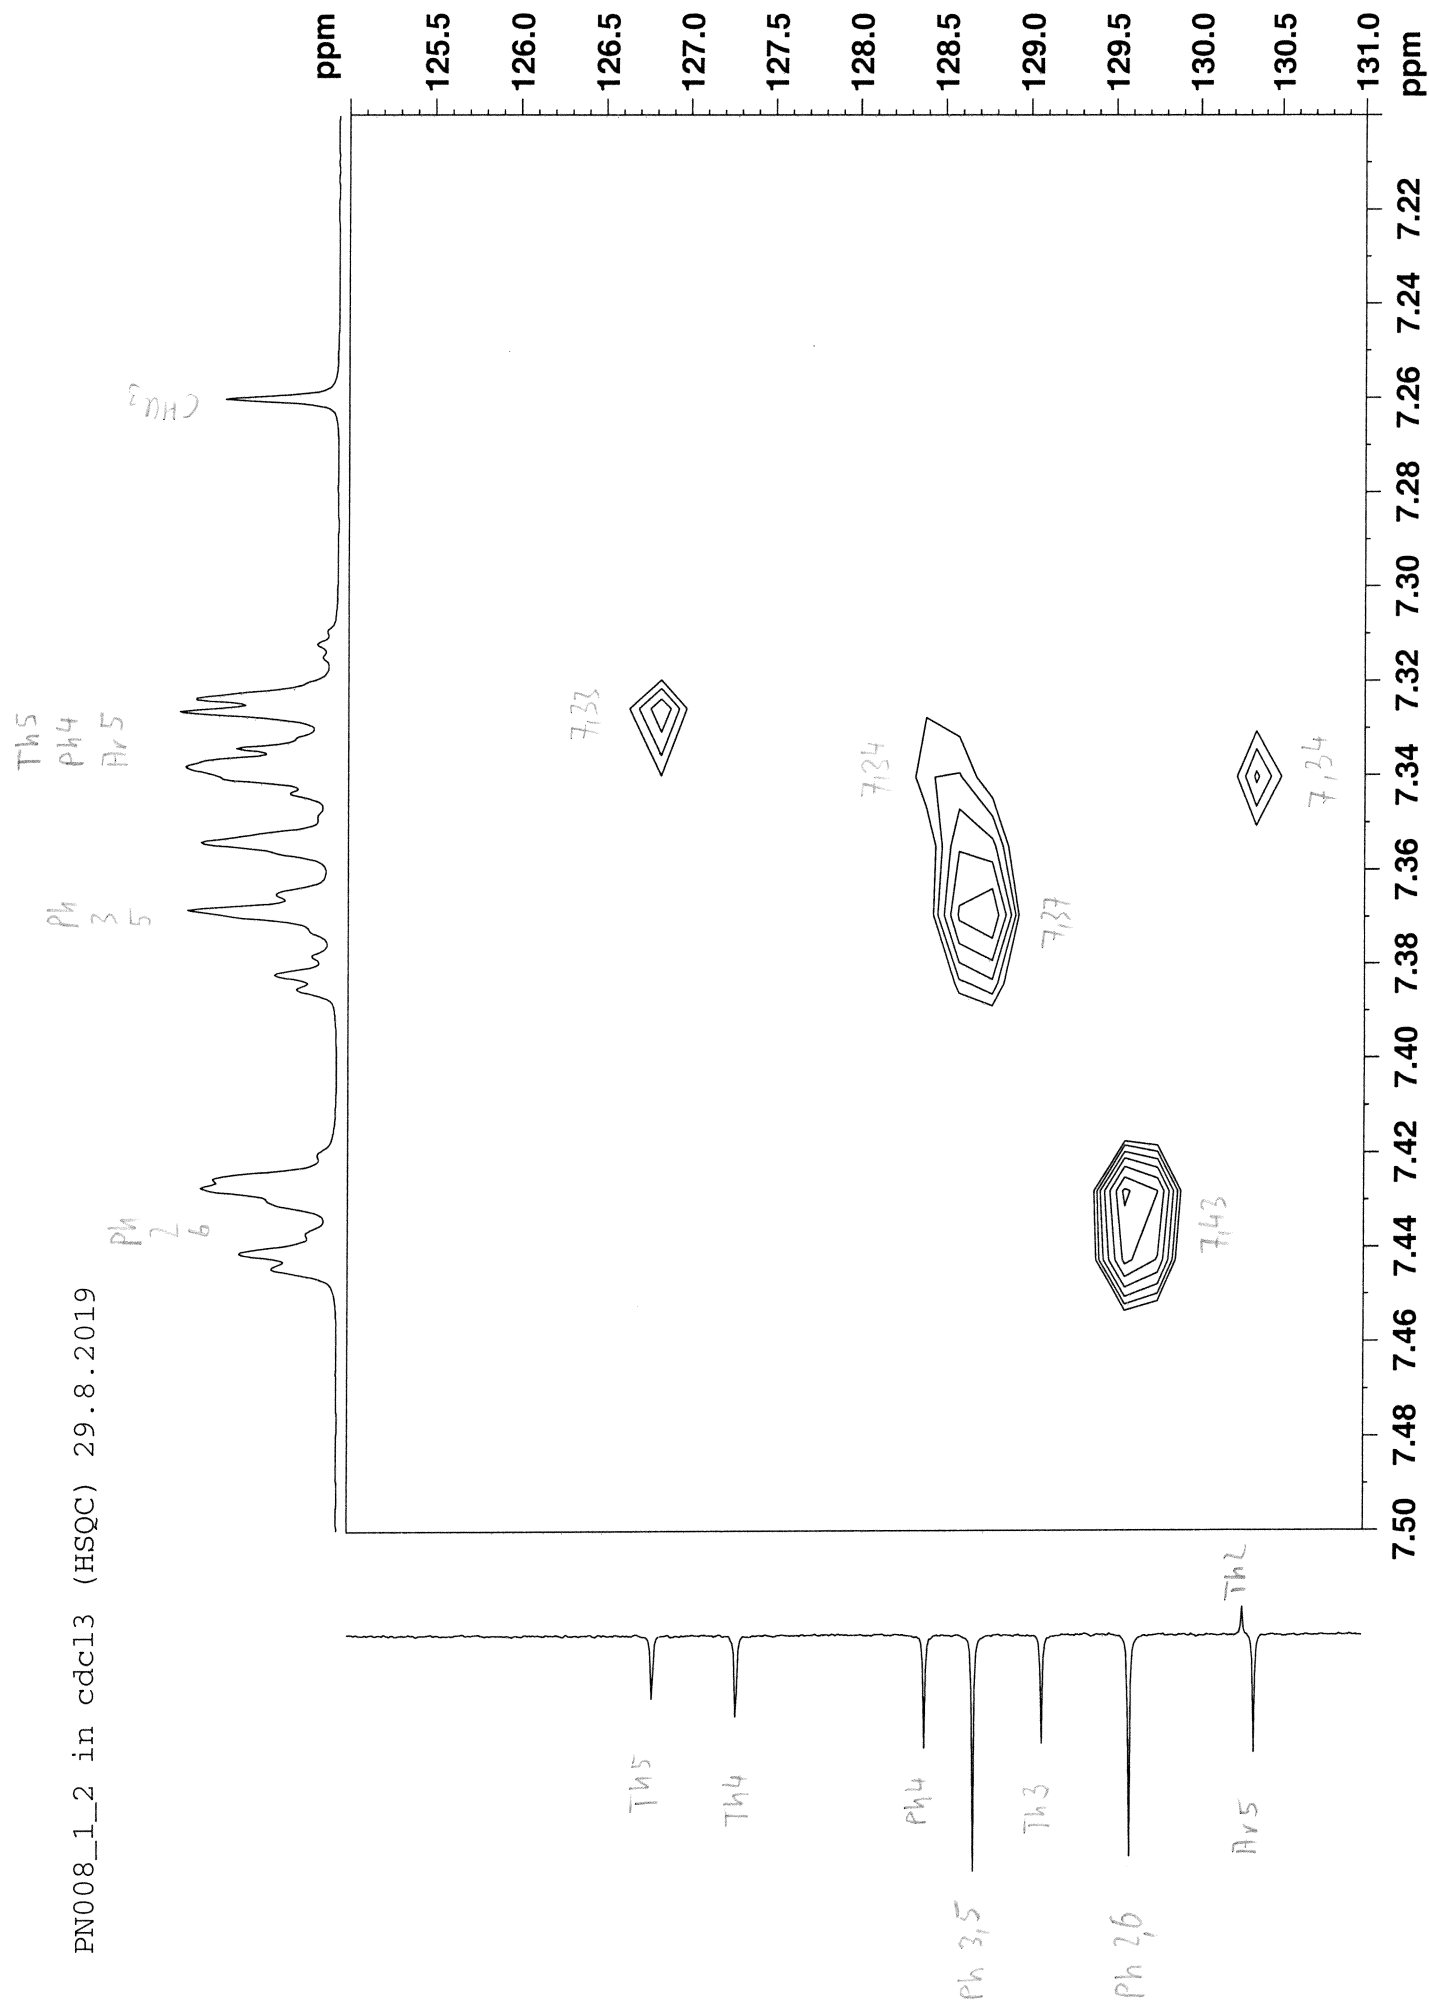

PN008\_1\_2 in cdcl3 (HSQC) 29.8.2019

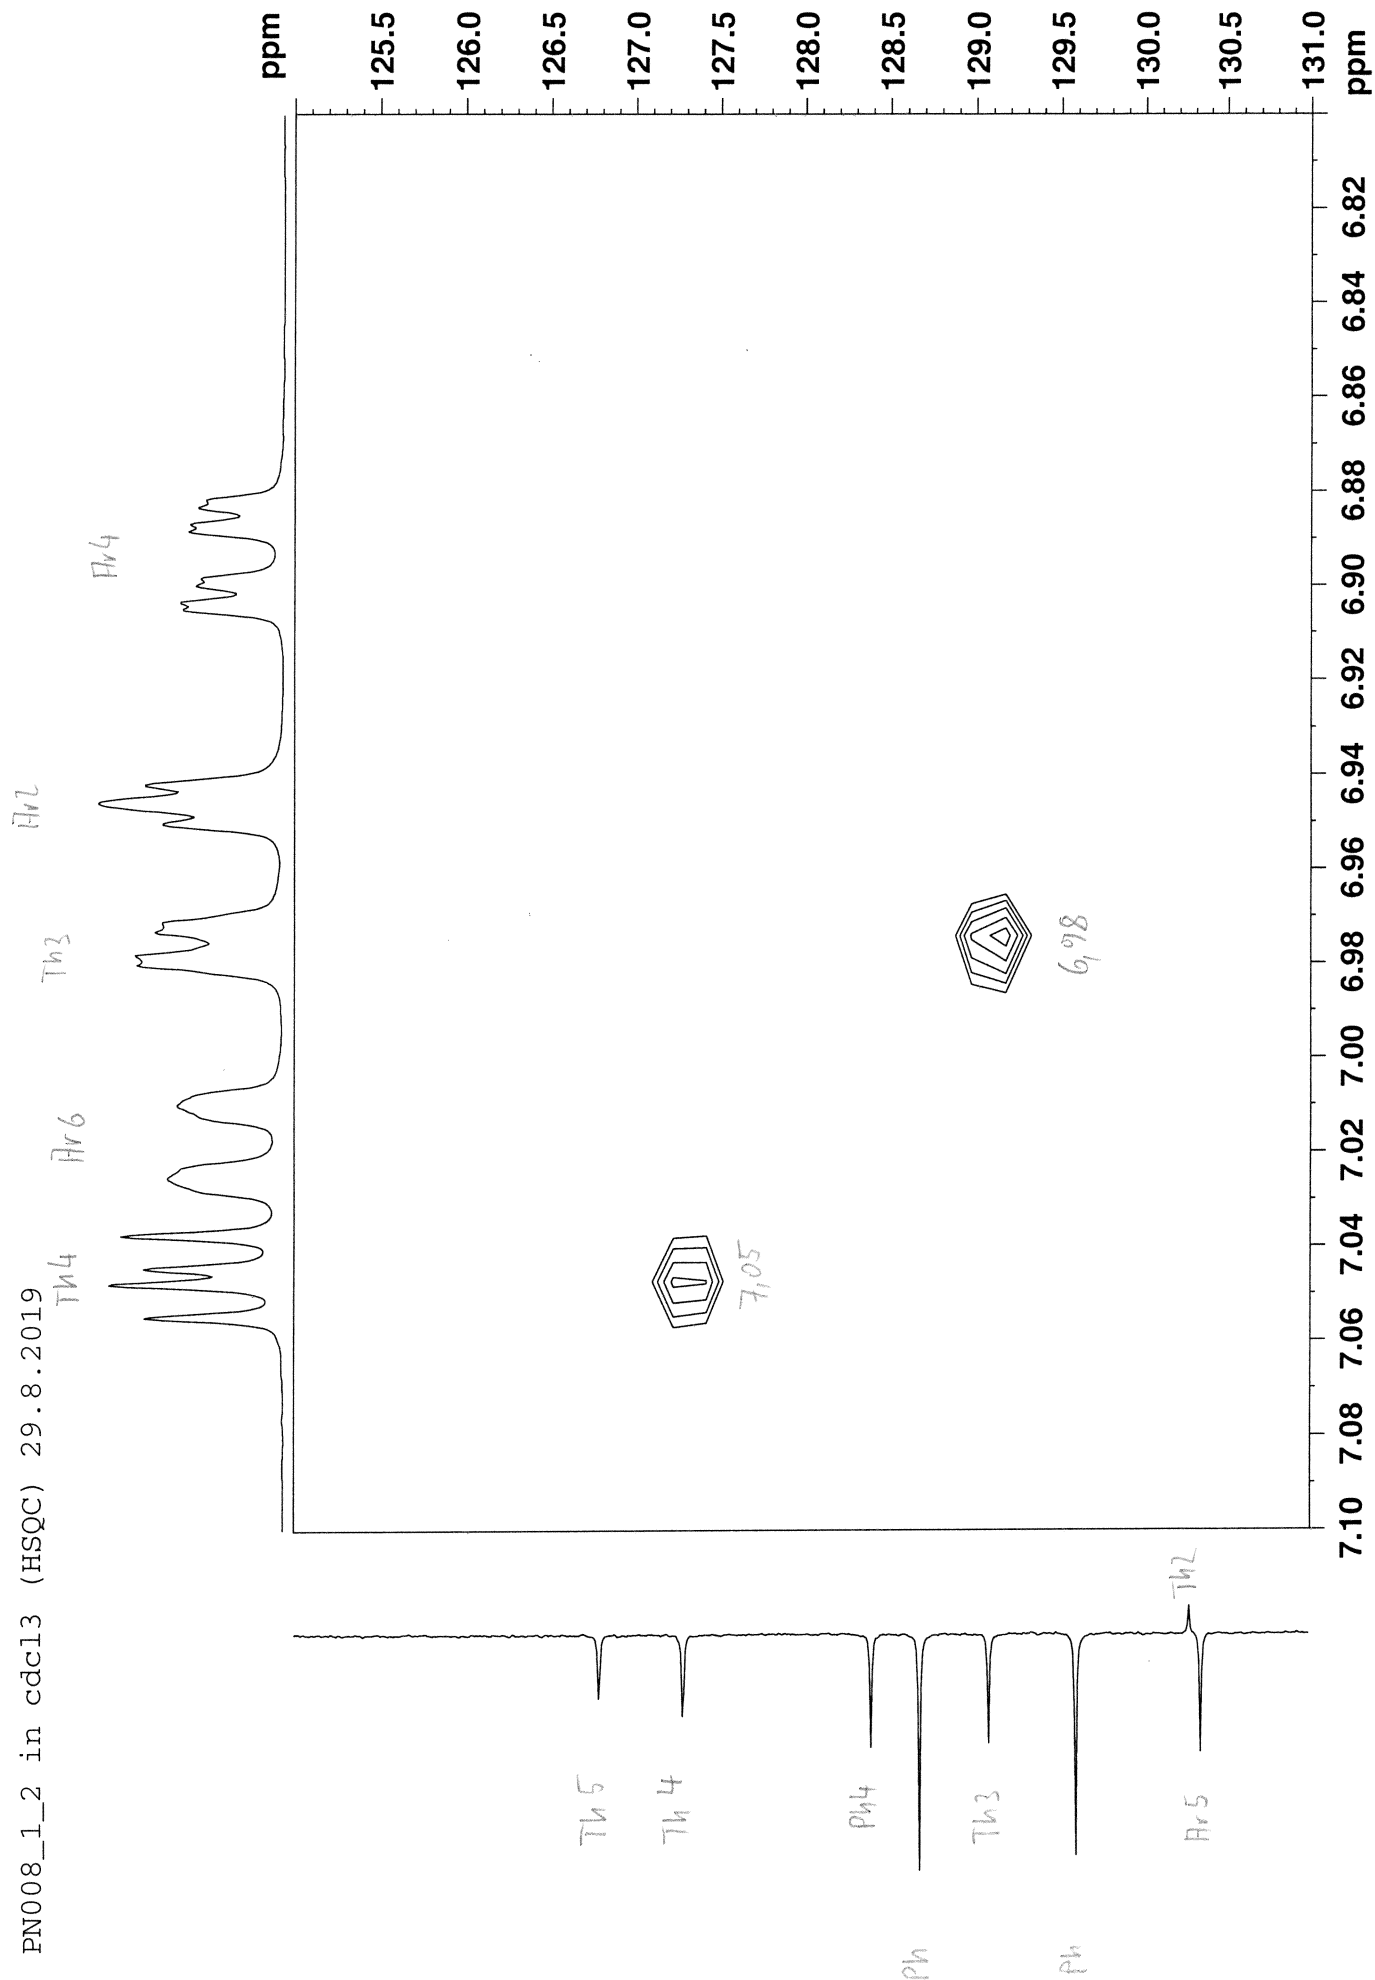

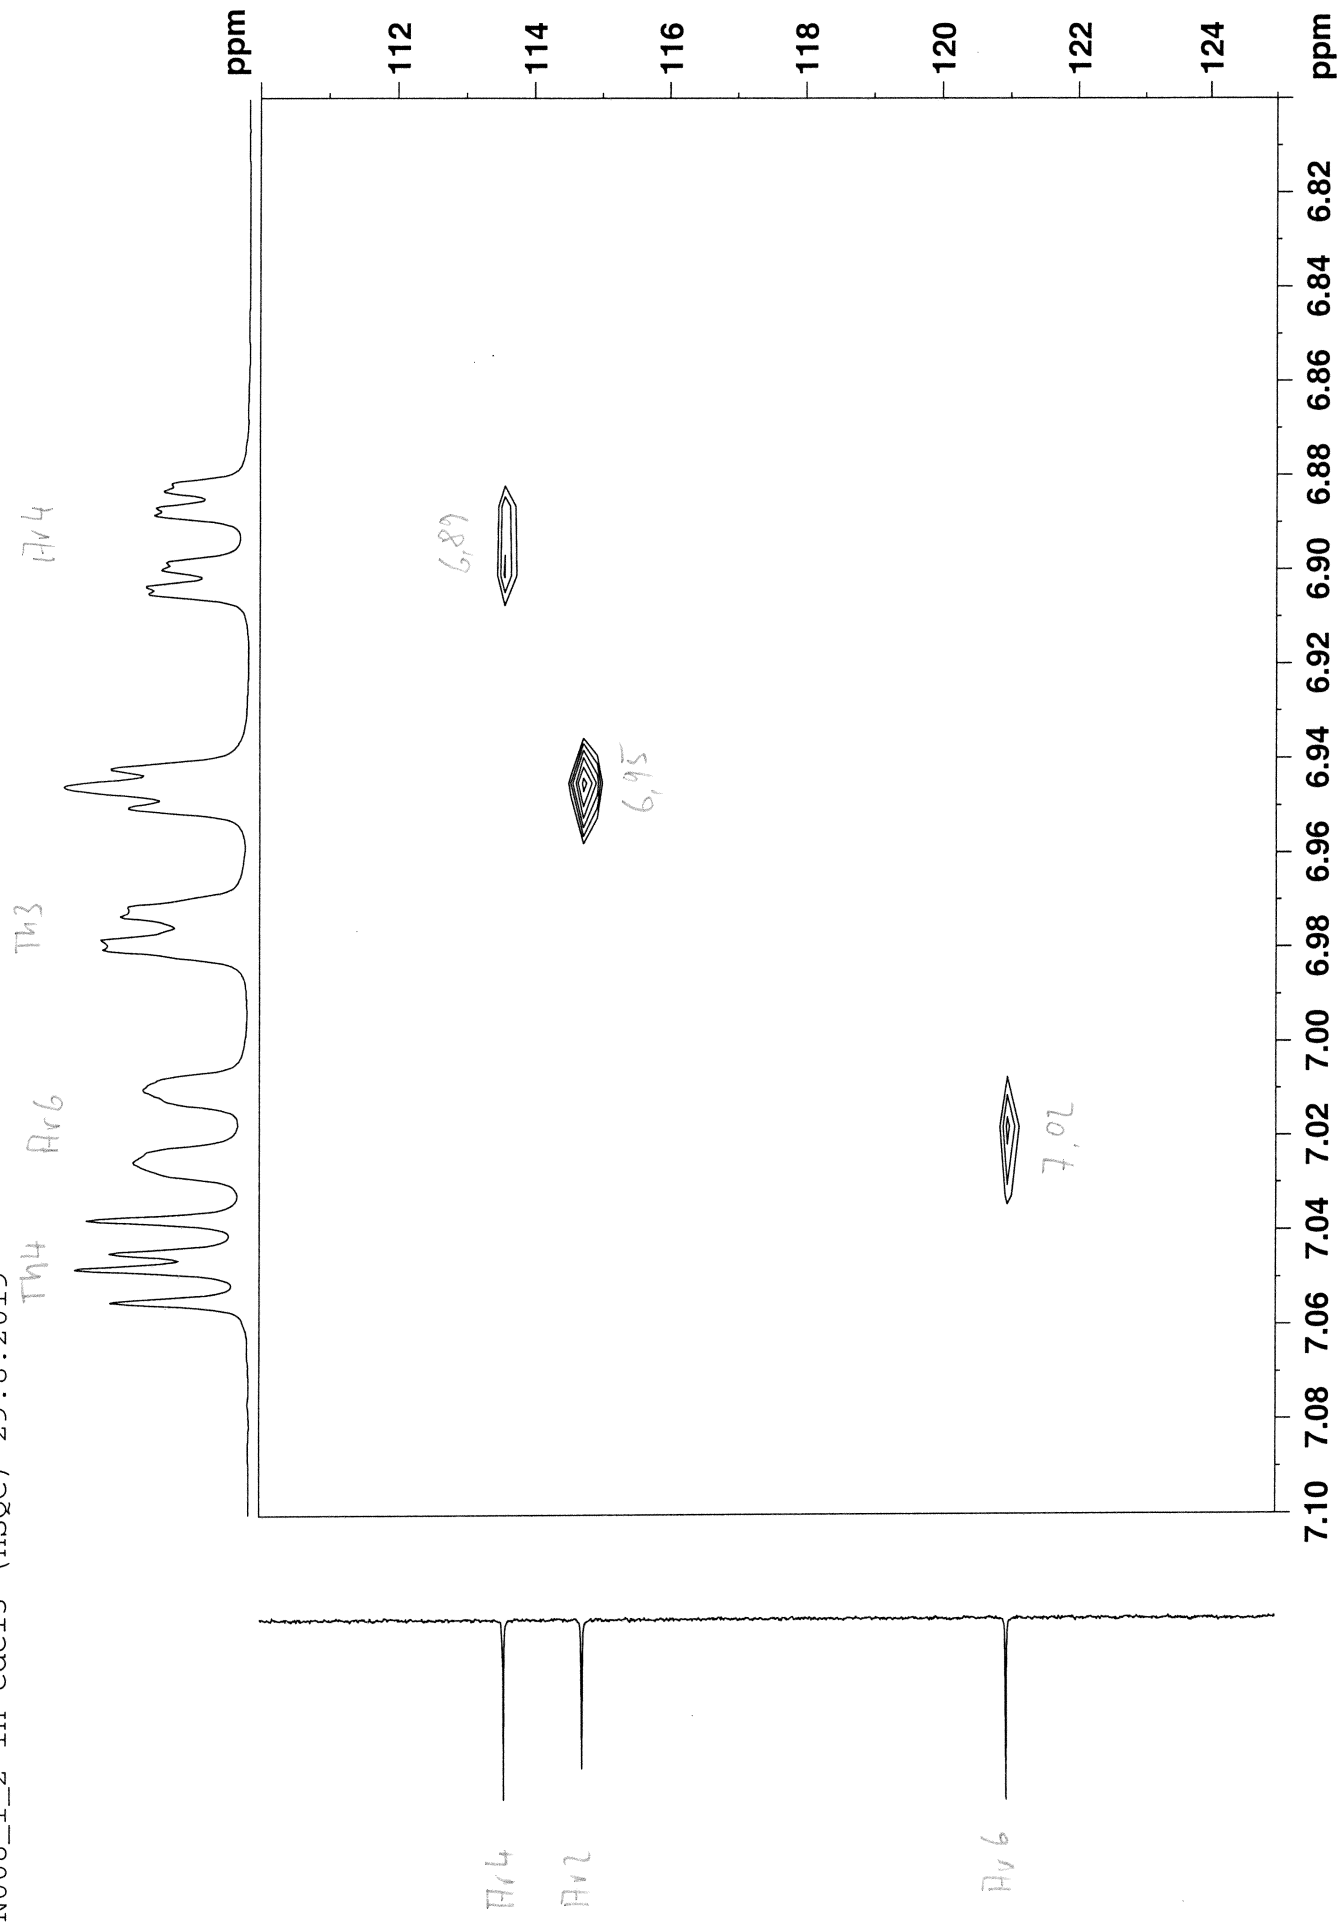

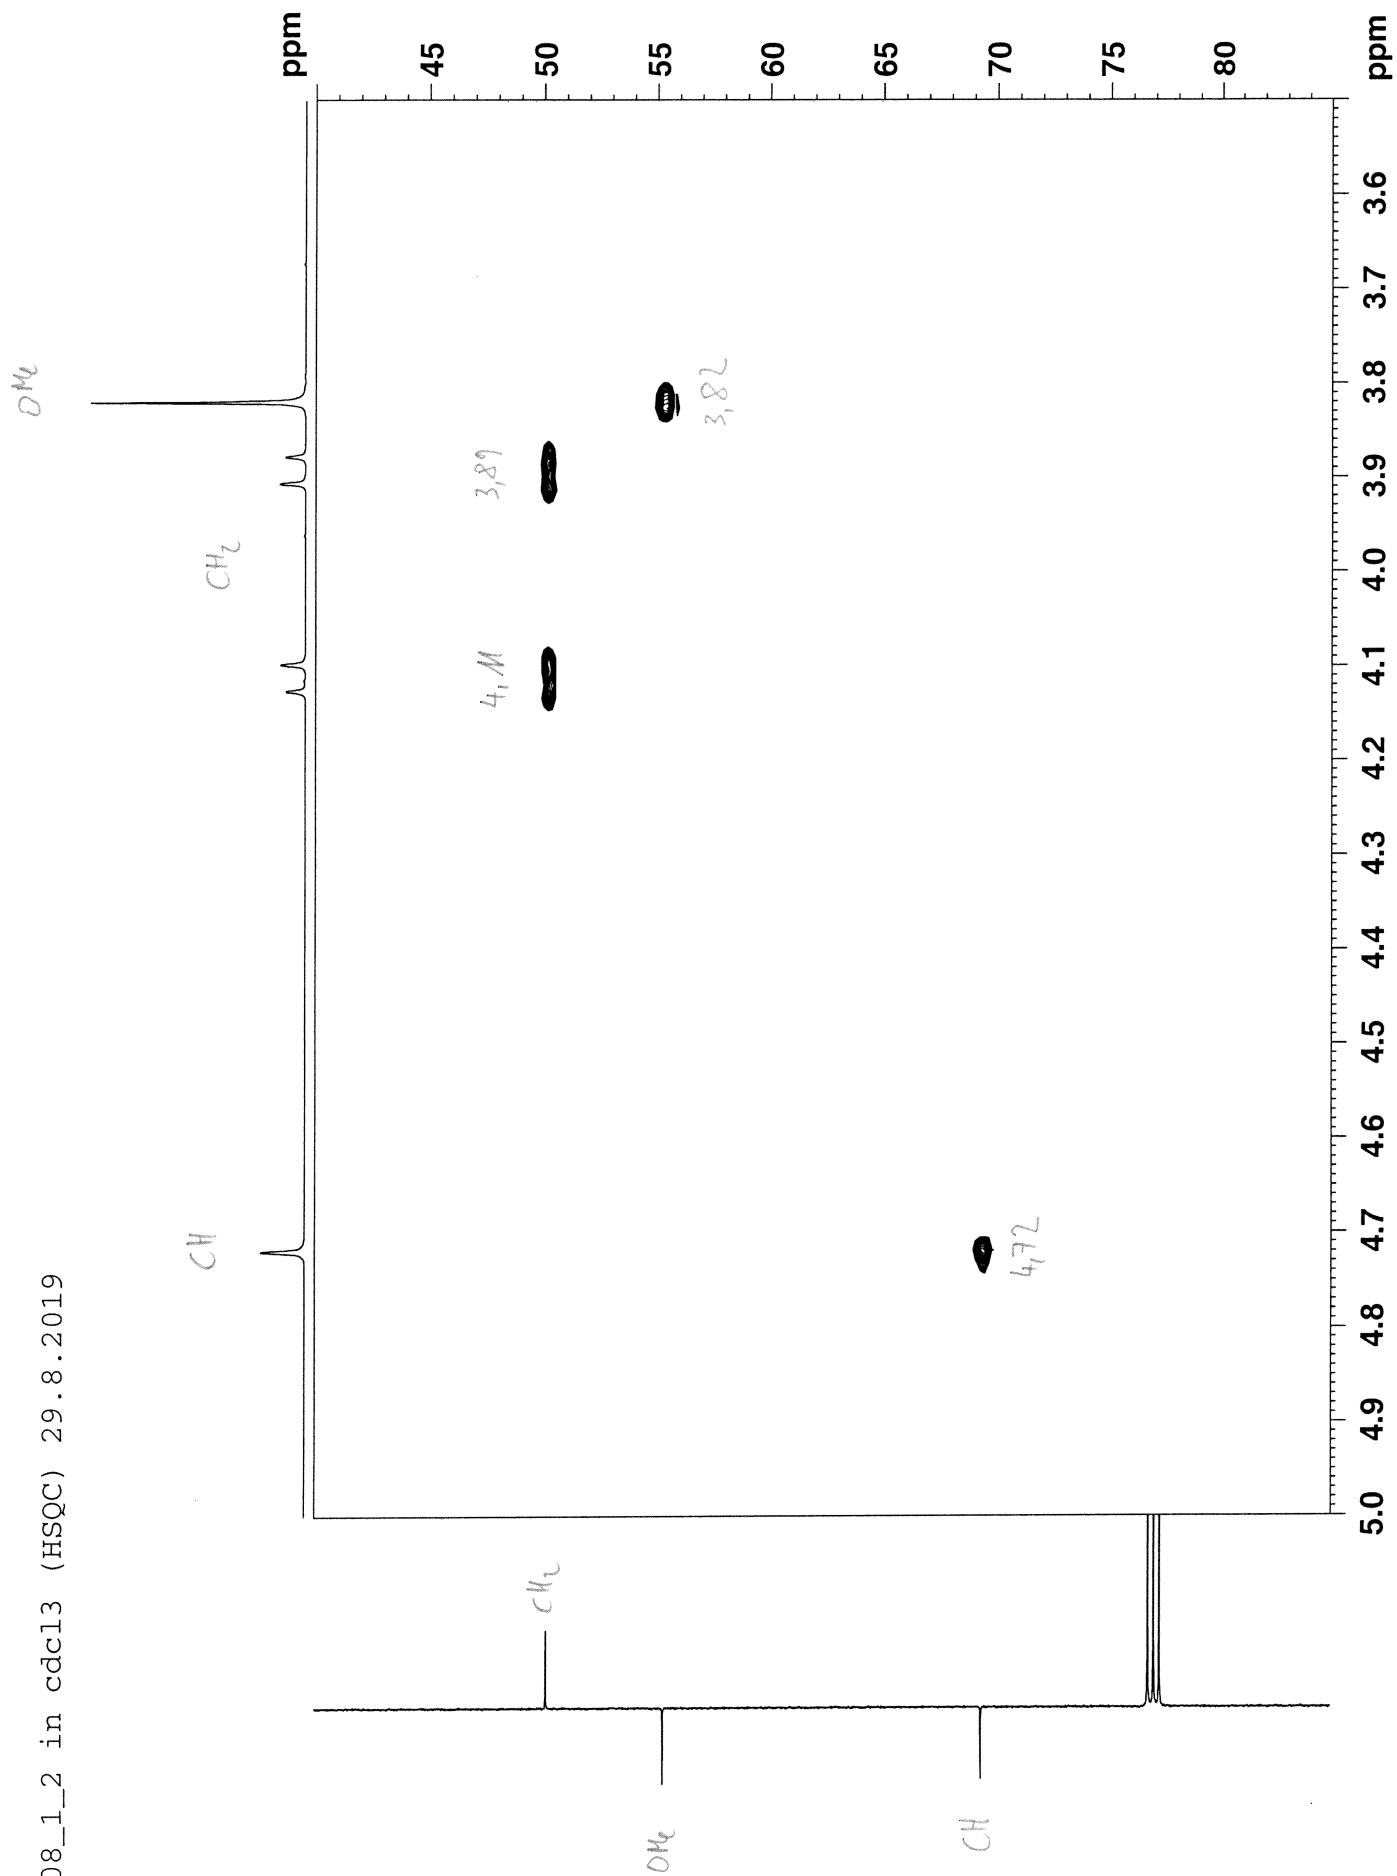

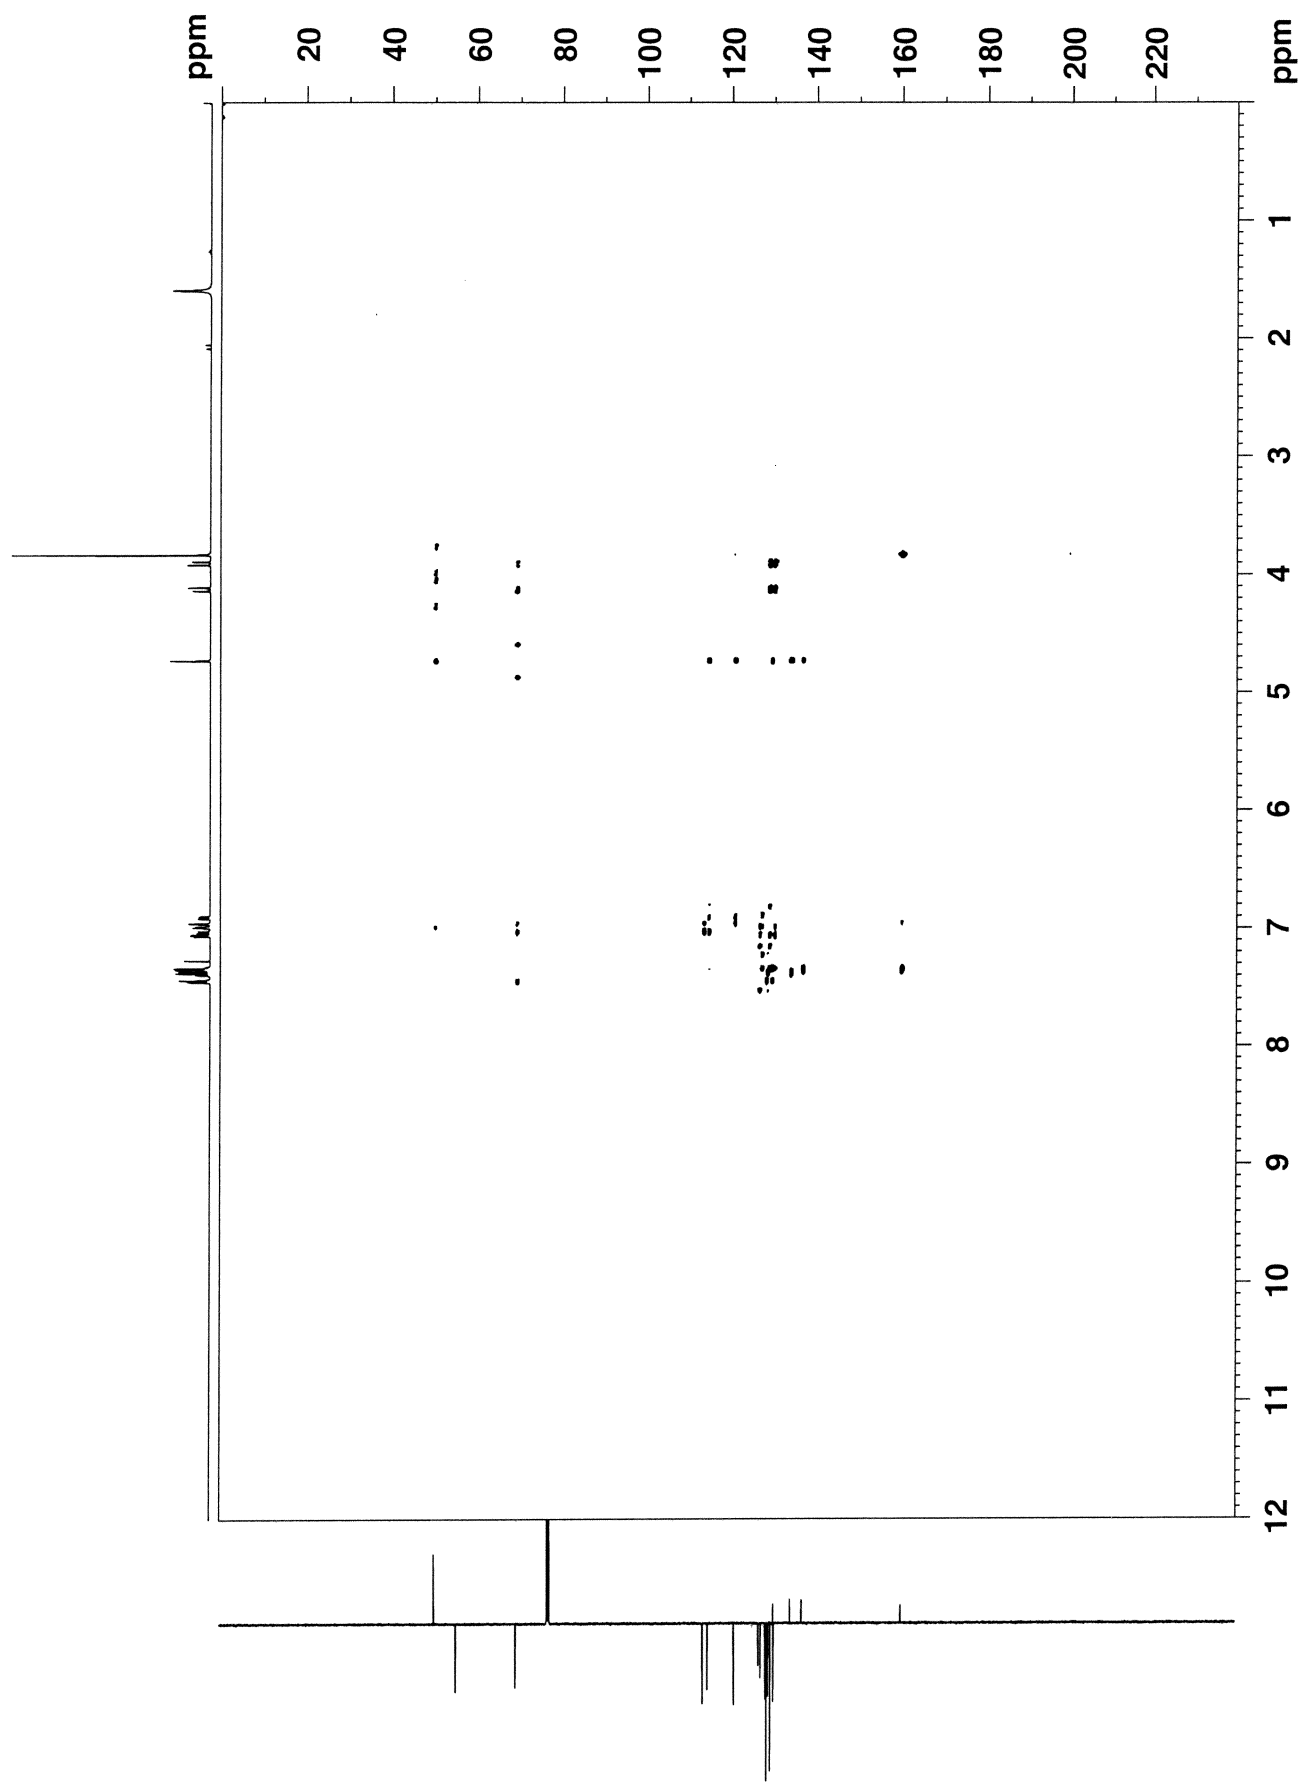



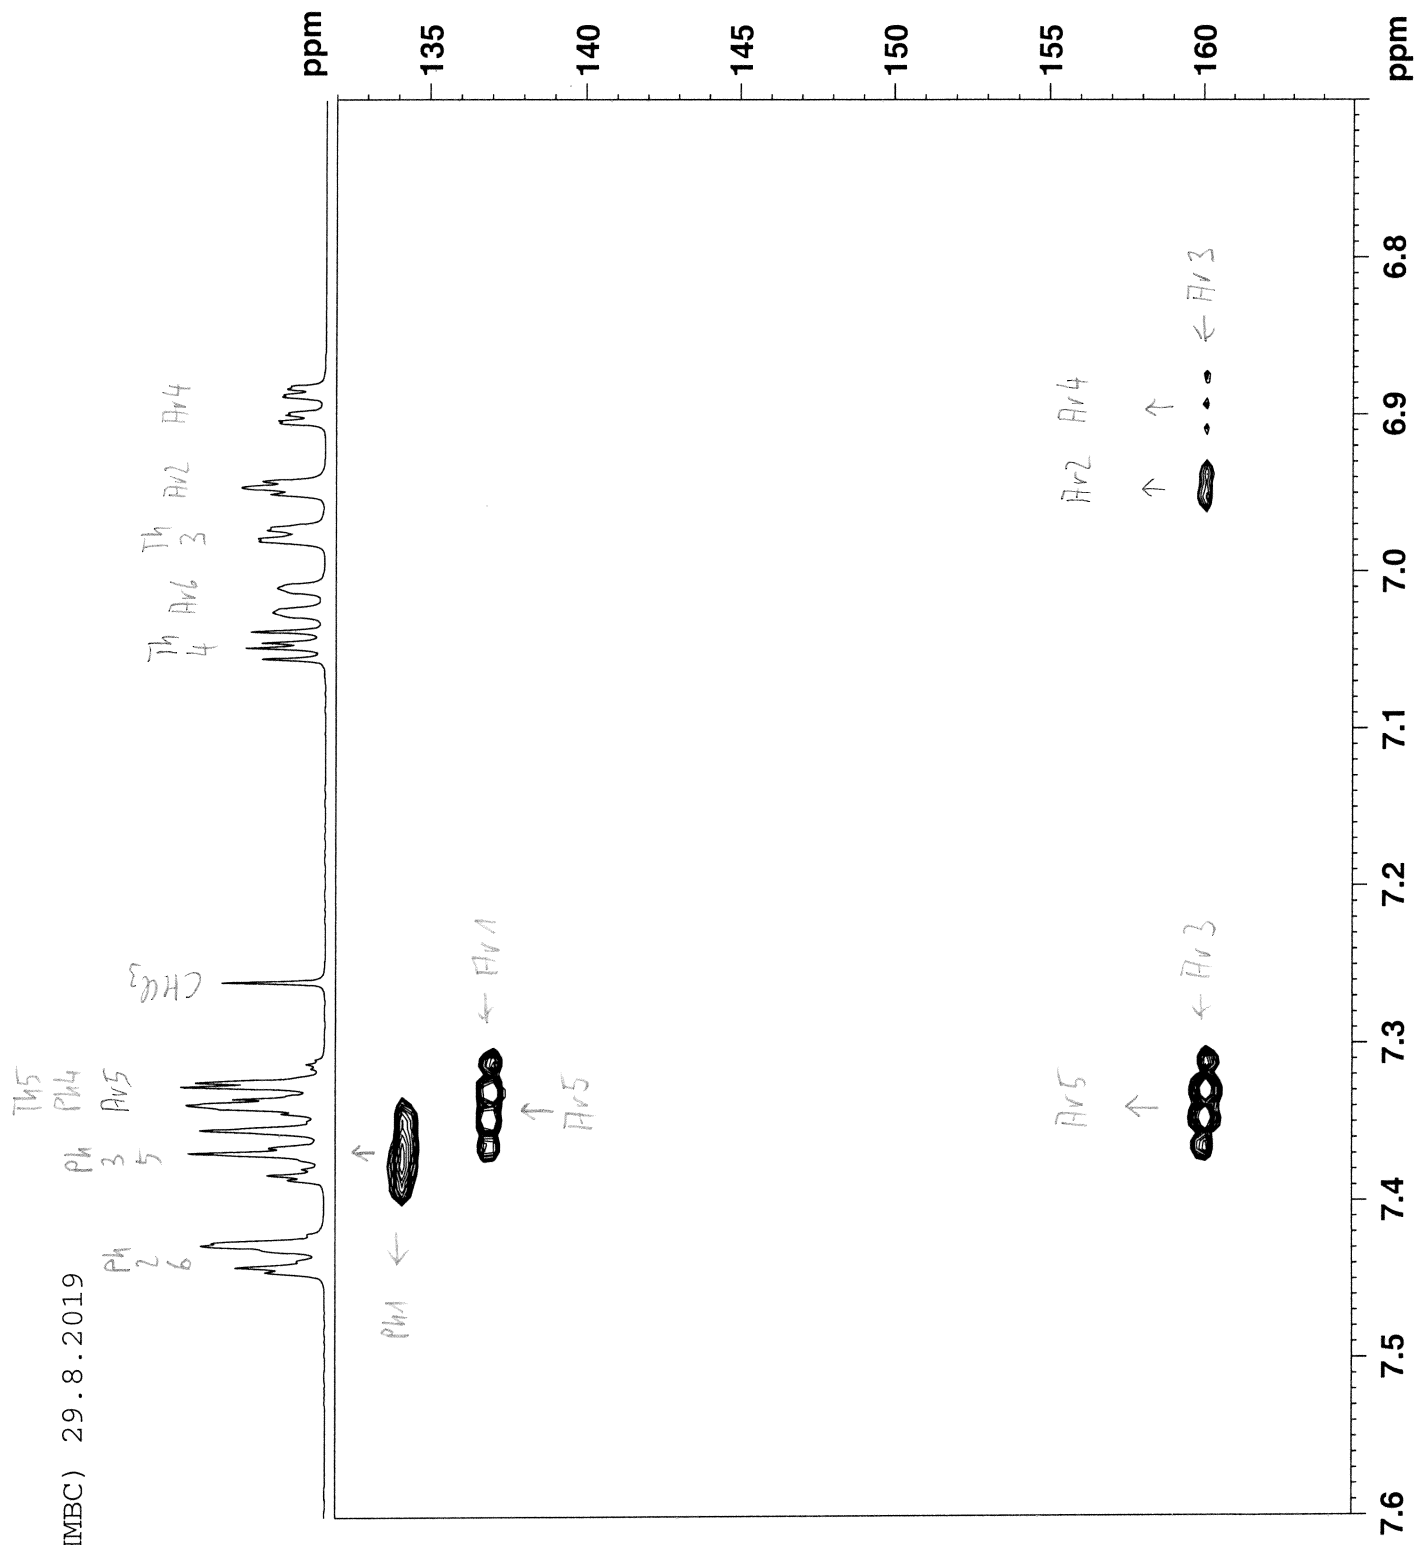

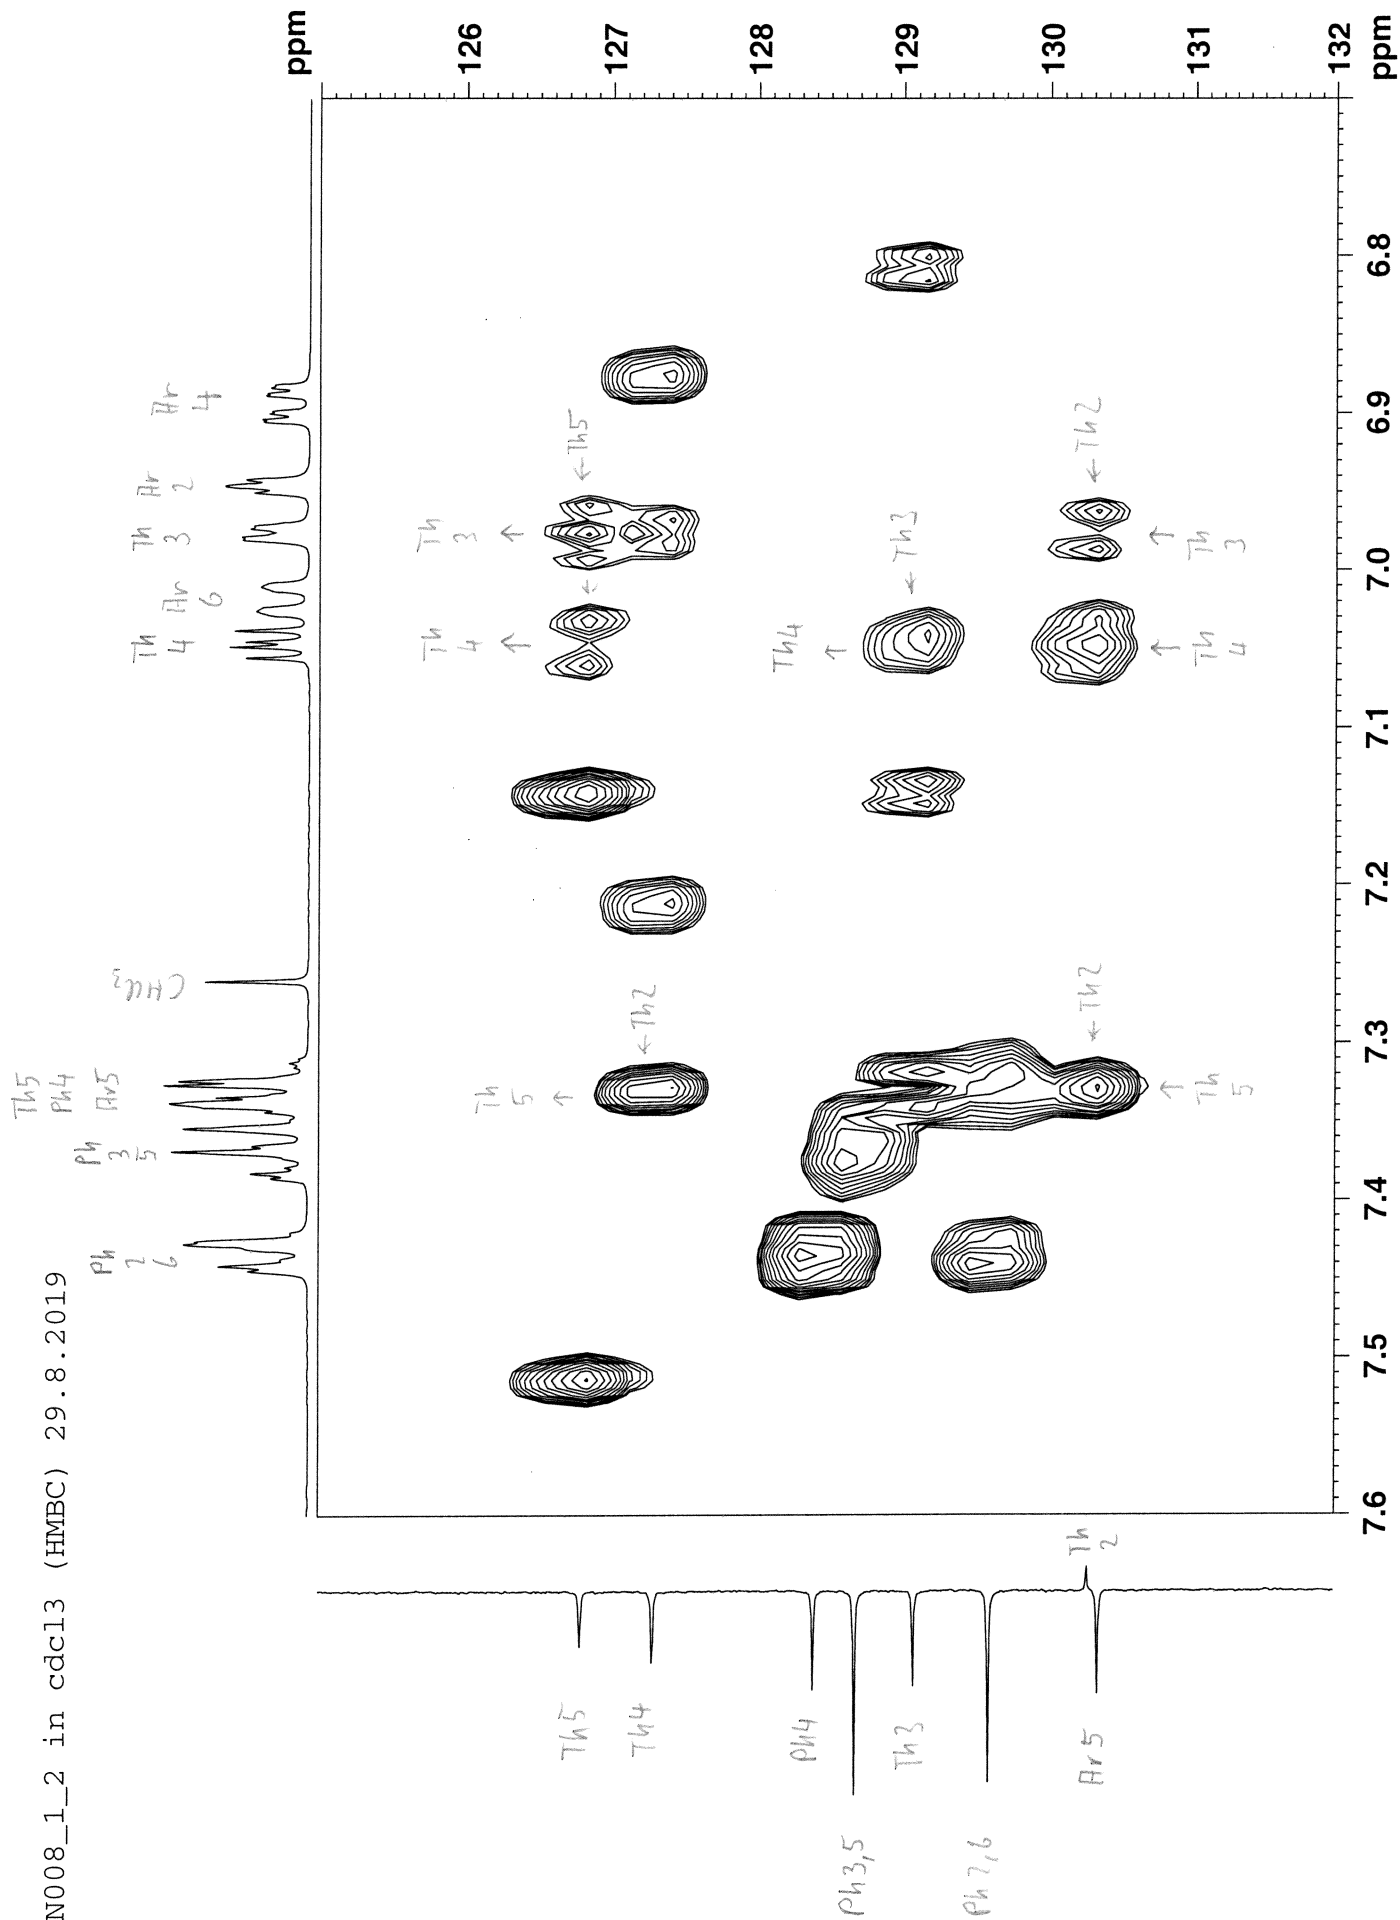

<sup>1</sup>H 2 6  
<sup>1</sup>H 3 5  
<sup>1</sup>H 4  
<sup>13</sup>C 4  
<sup>13</sup>C 3  
<sup>13</sup>C 2  
<sup>13</sup>C 1  
<sup>13</sup>C 6  
<sup>13</sup>C 5  
<sup>13</sup>C 4  
<sup>13</sup>C 3  
<sup>13</sup>C 2  
<sup>13</sup>C 1

CH<sub>3</sub>

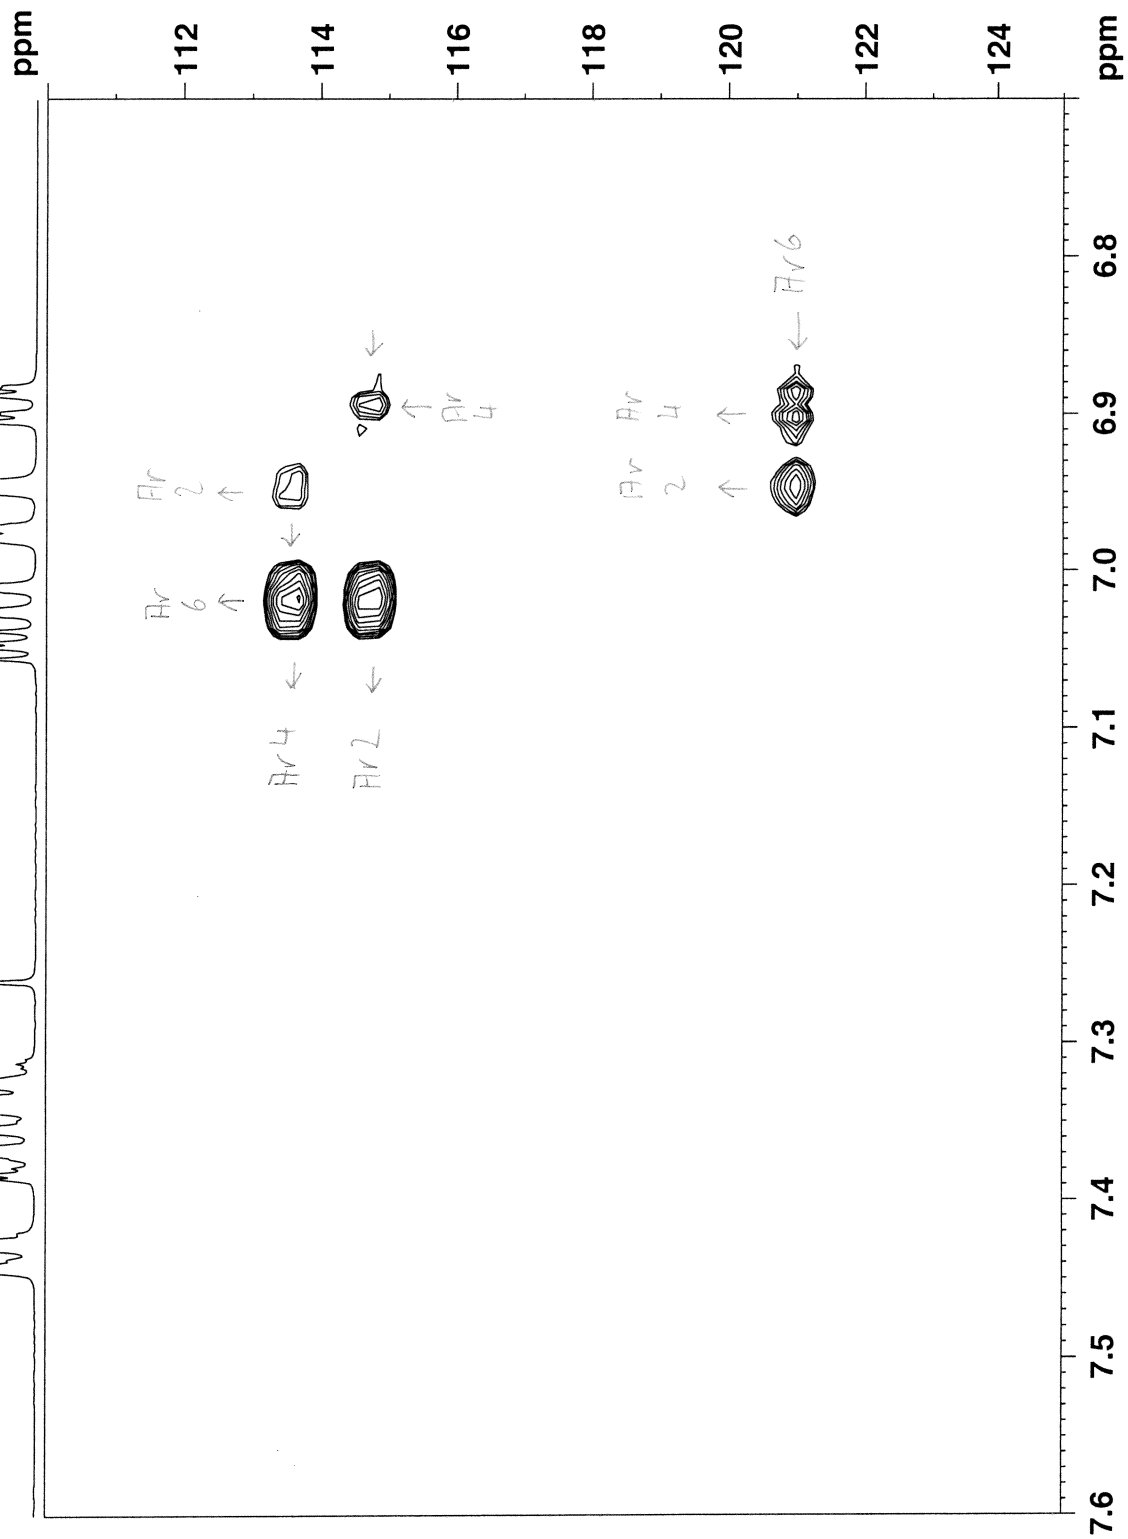

PN008\_1\_2 in cdcl3 (HMBC) 29.8.2019

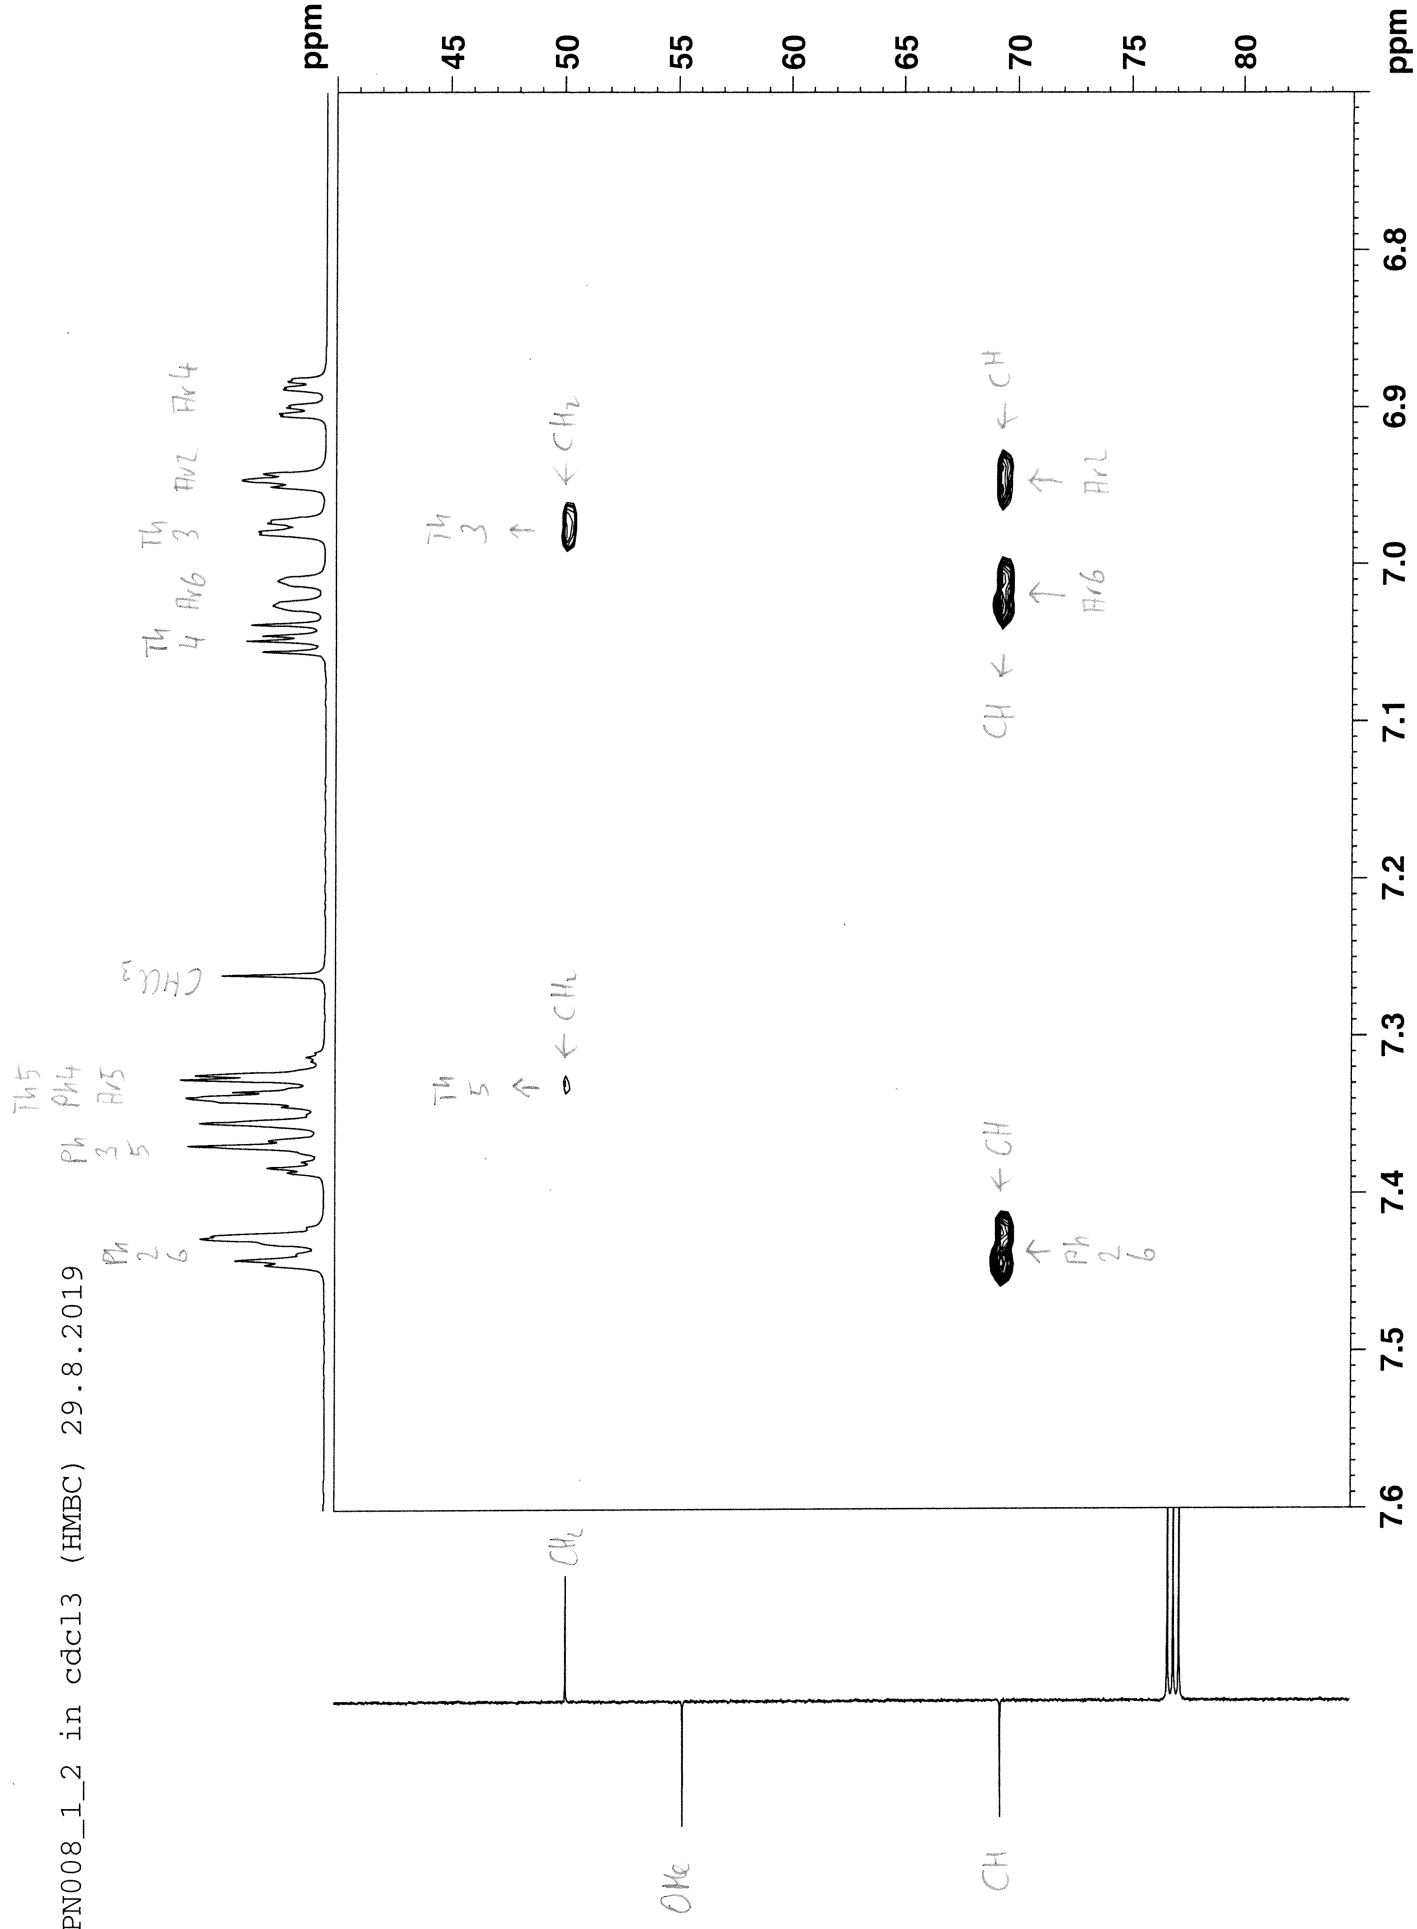

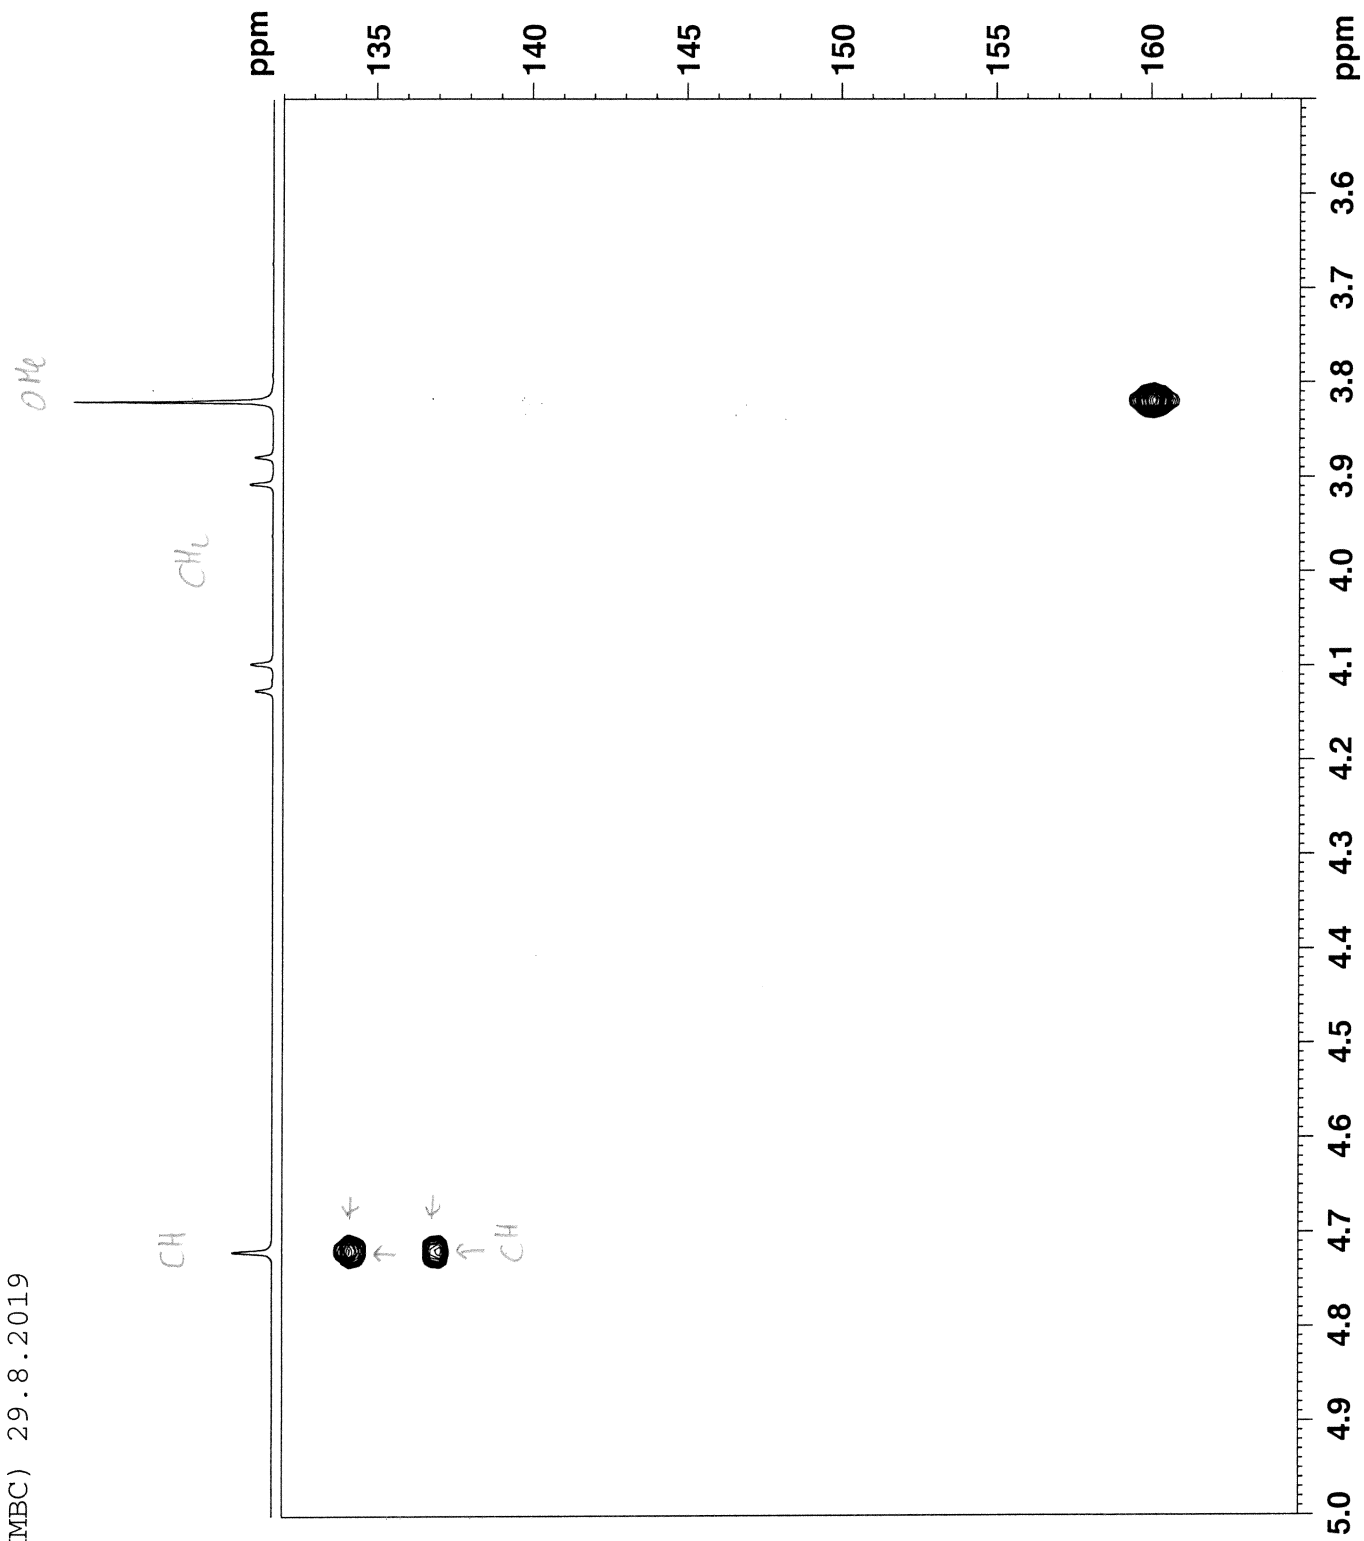

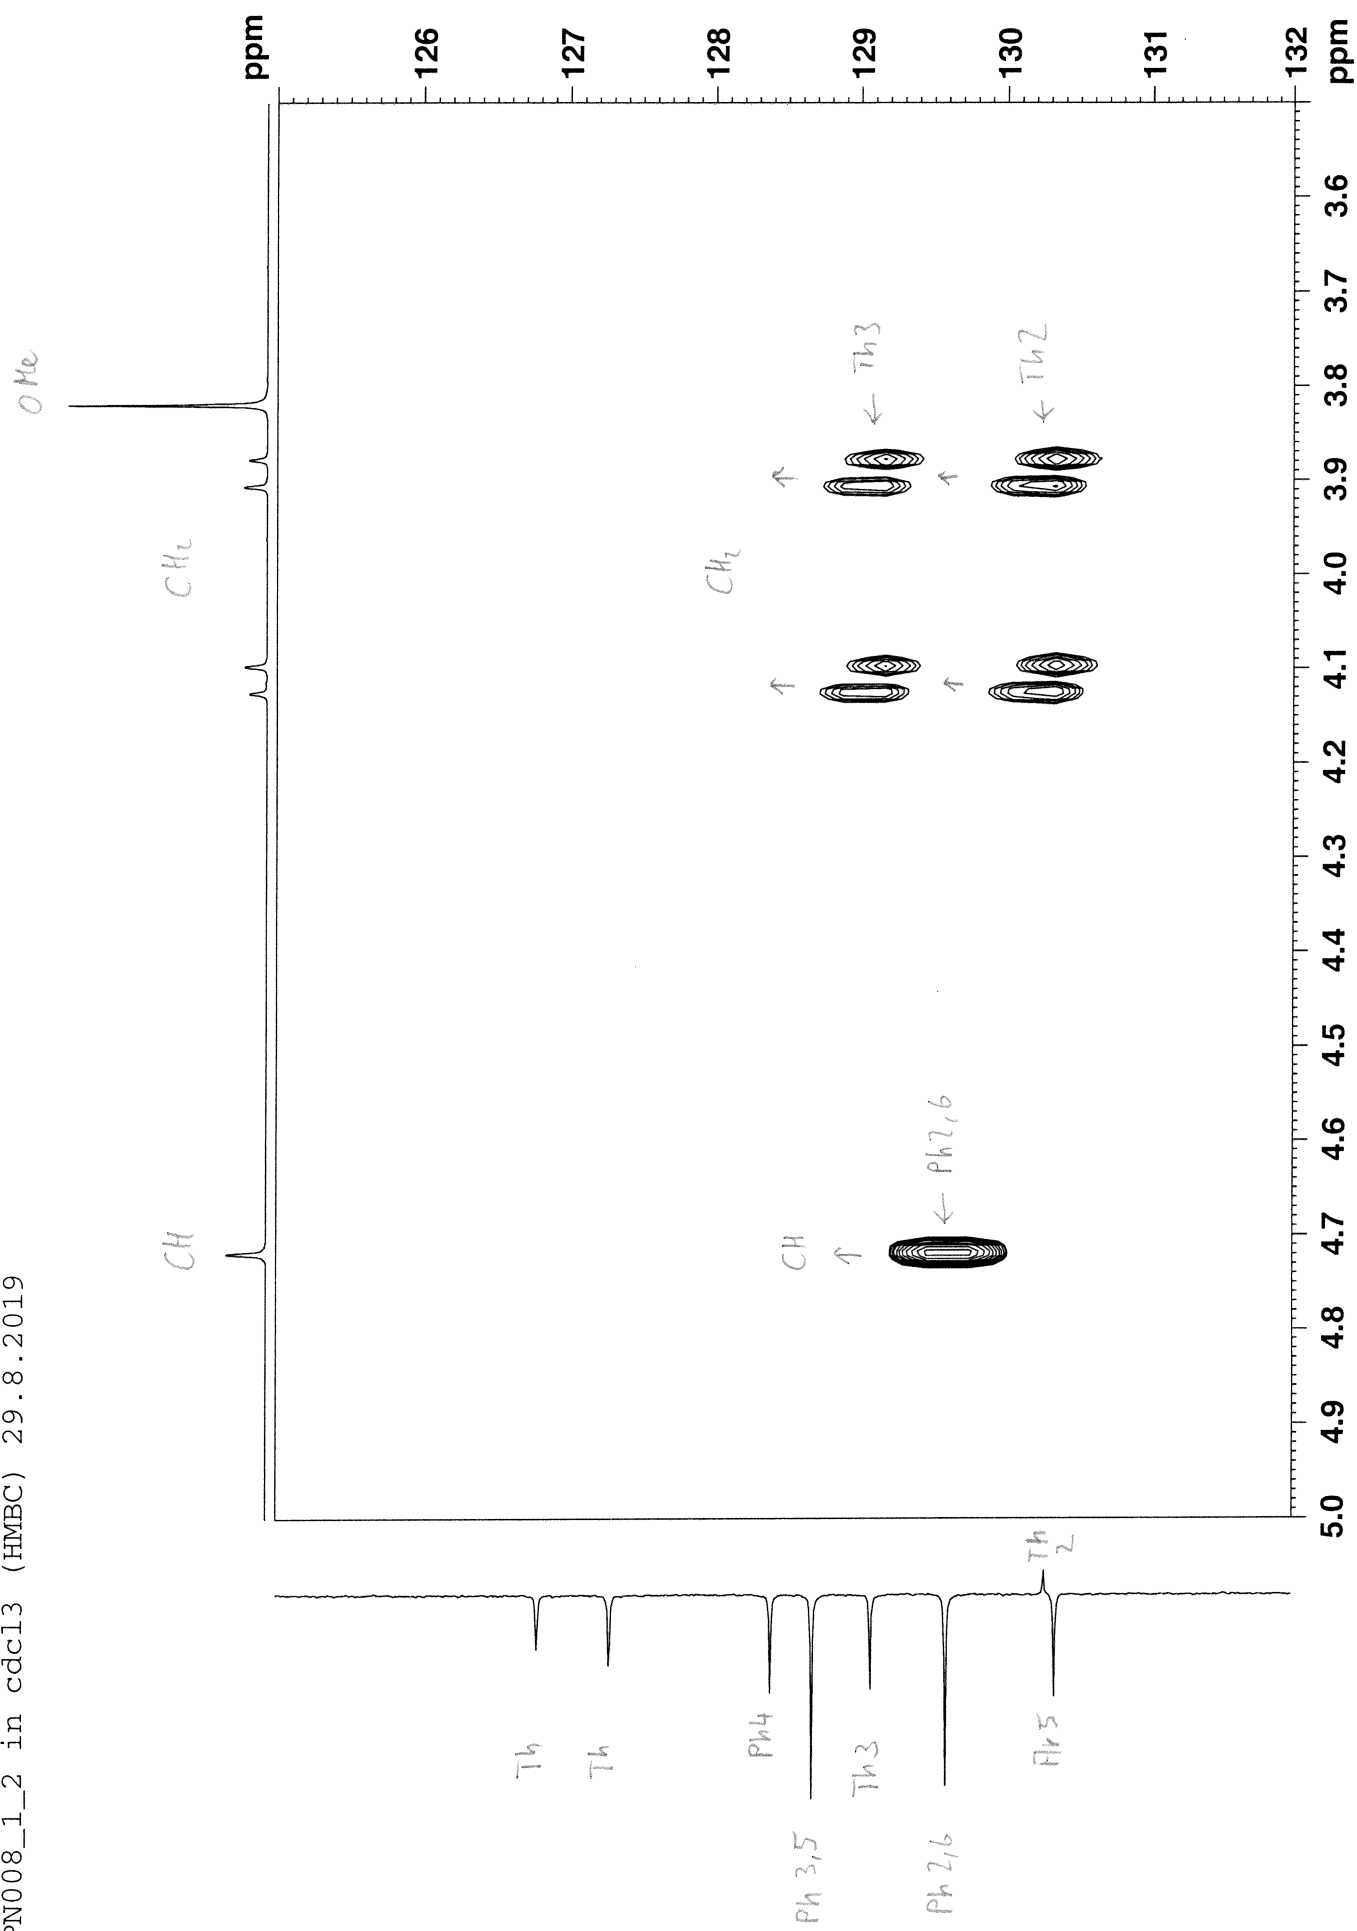

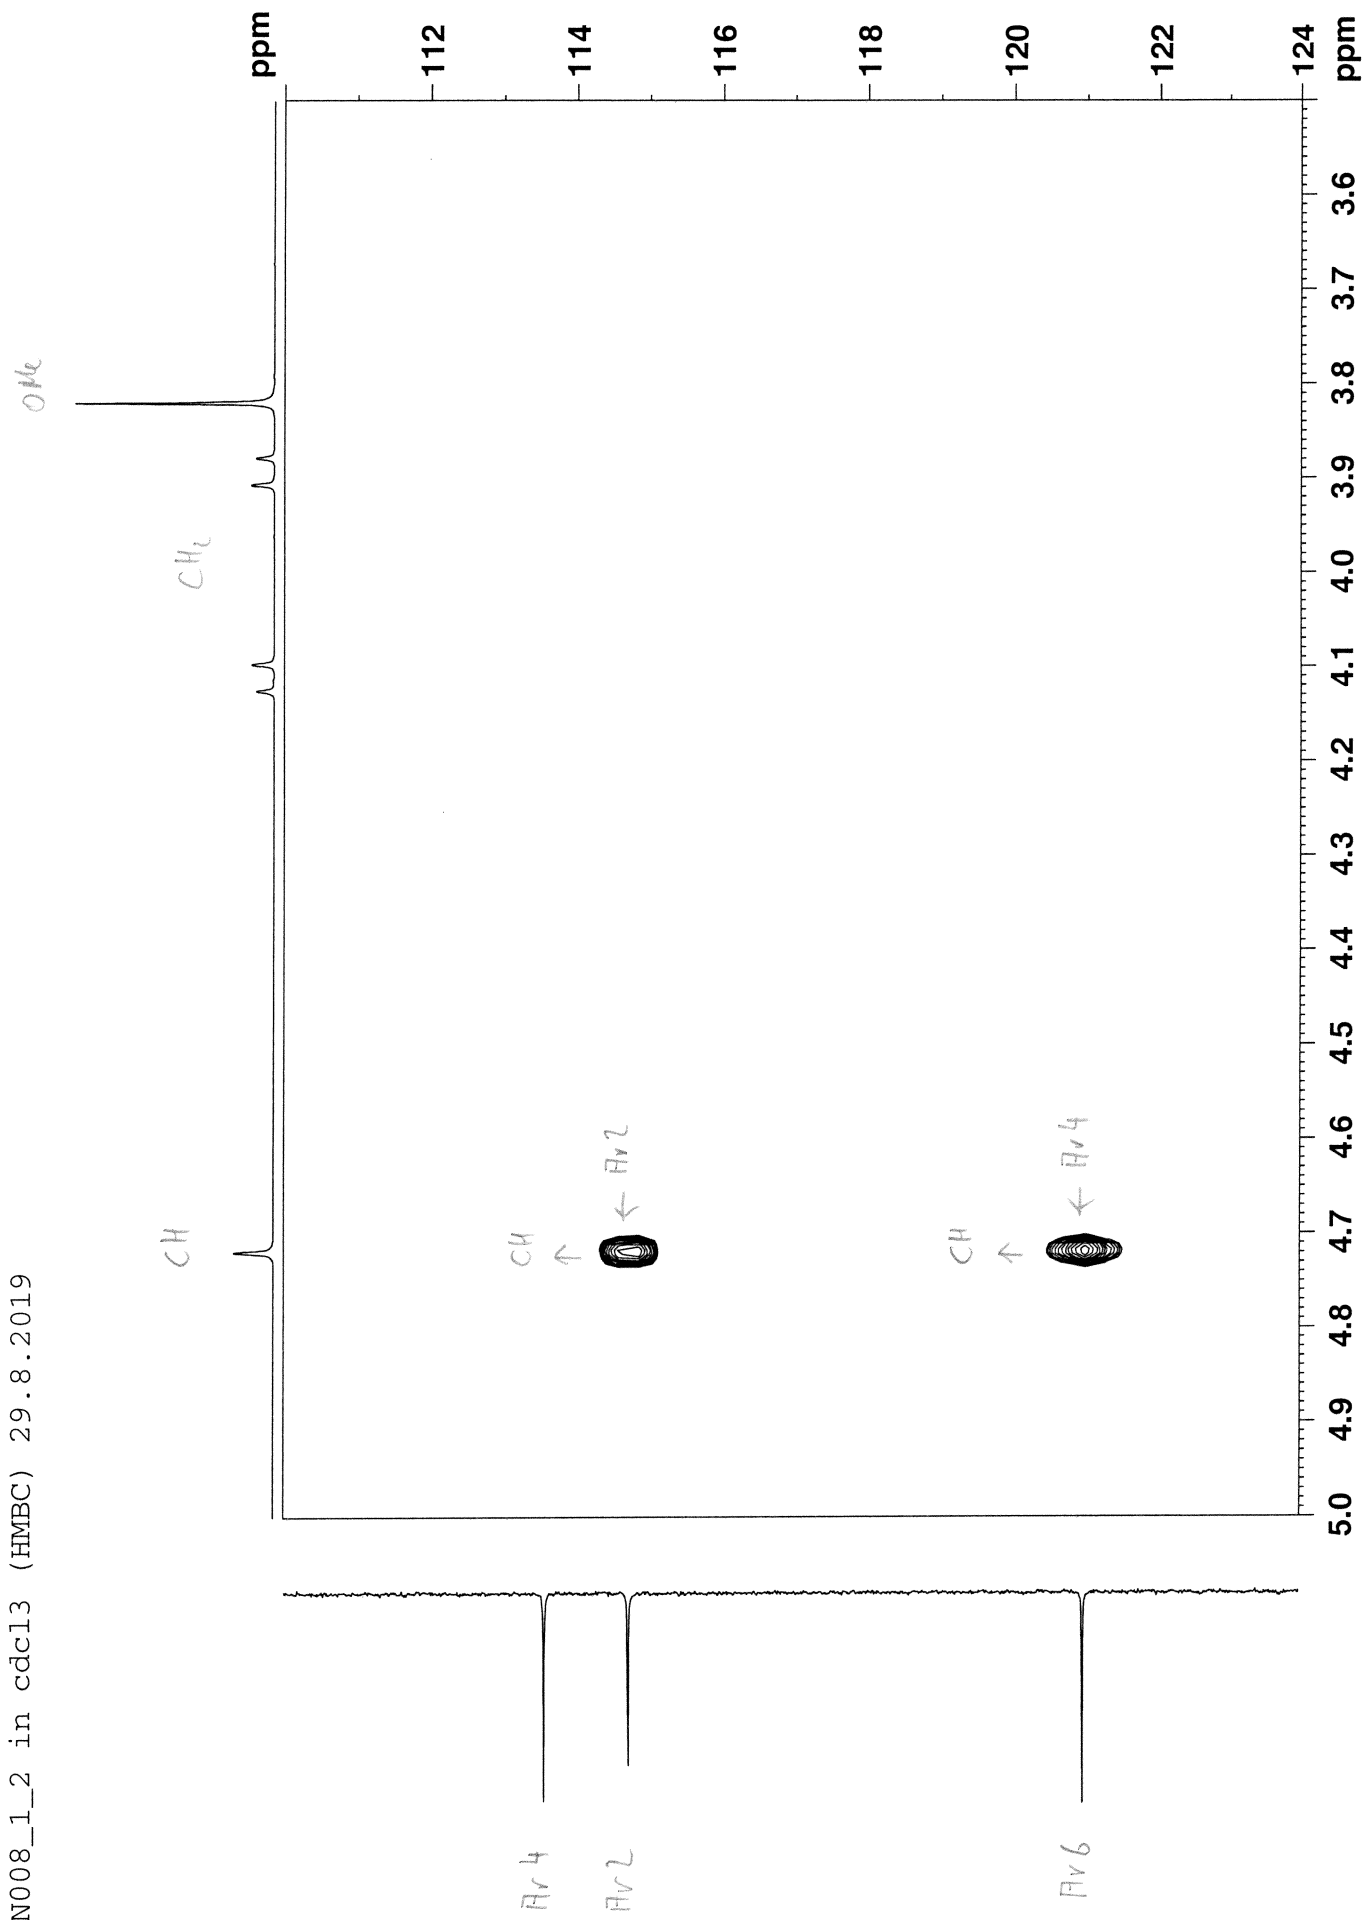

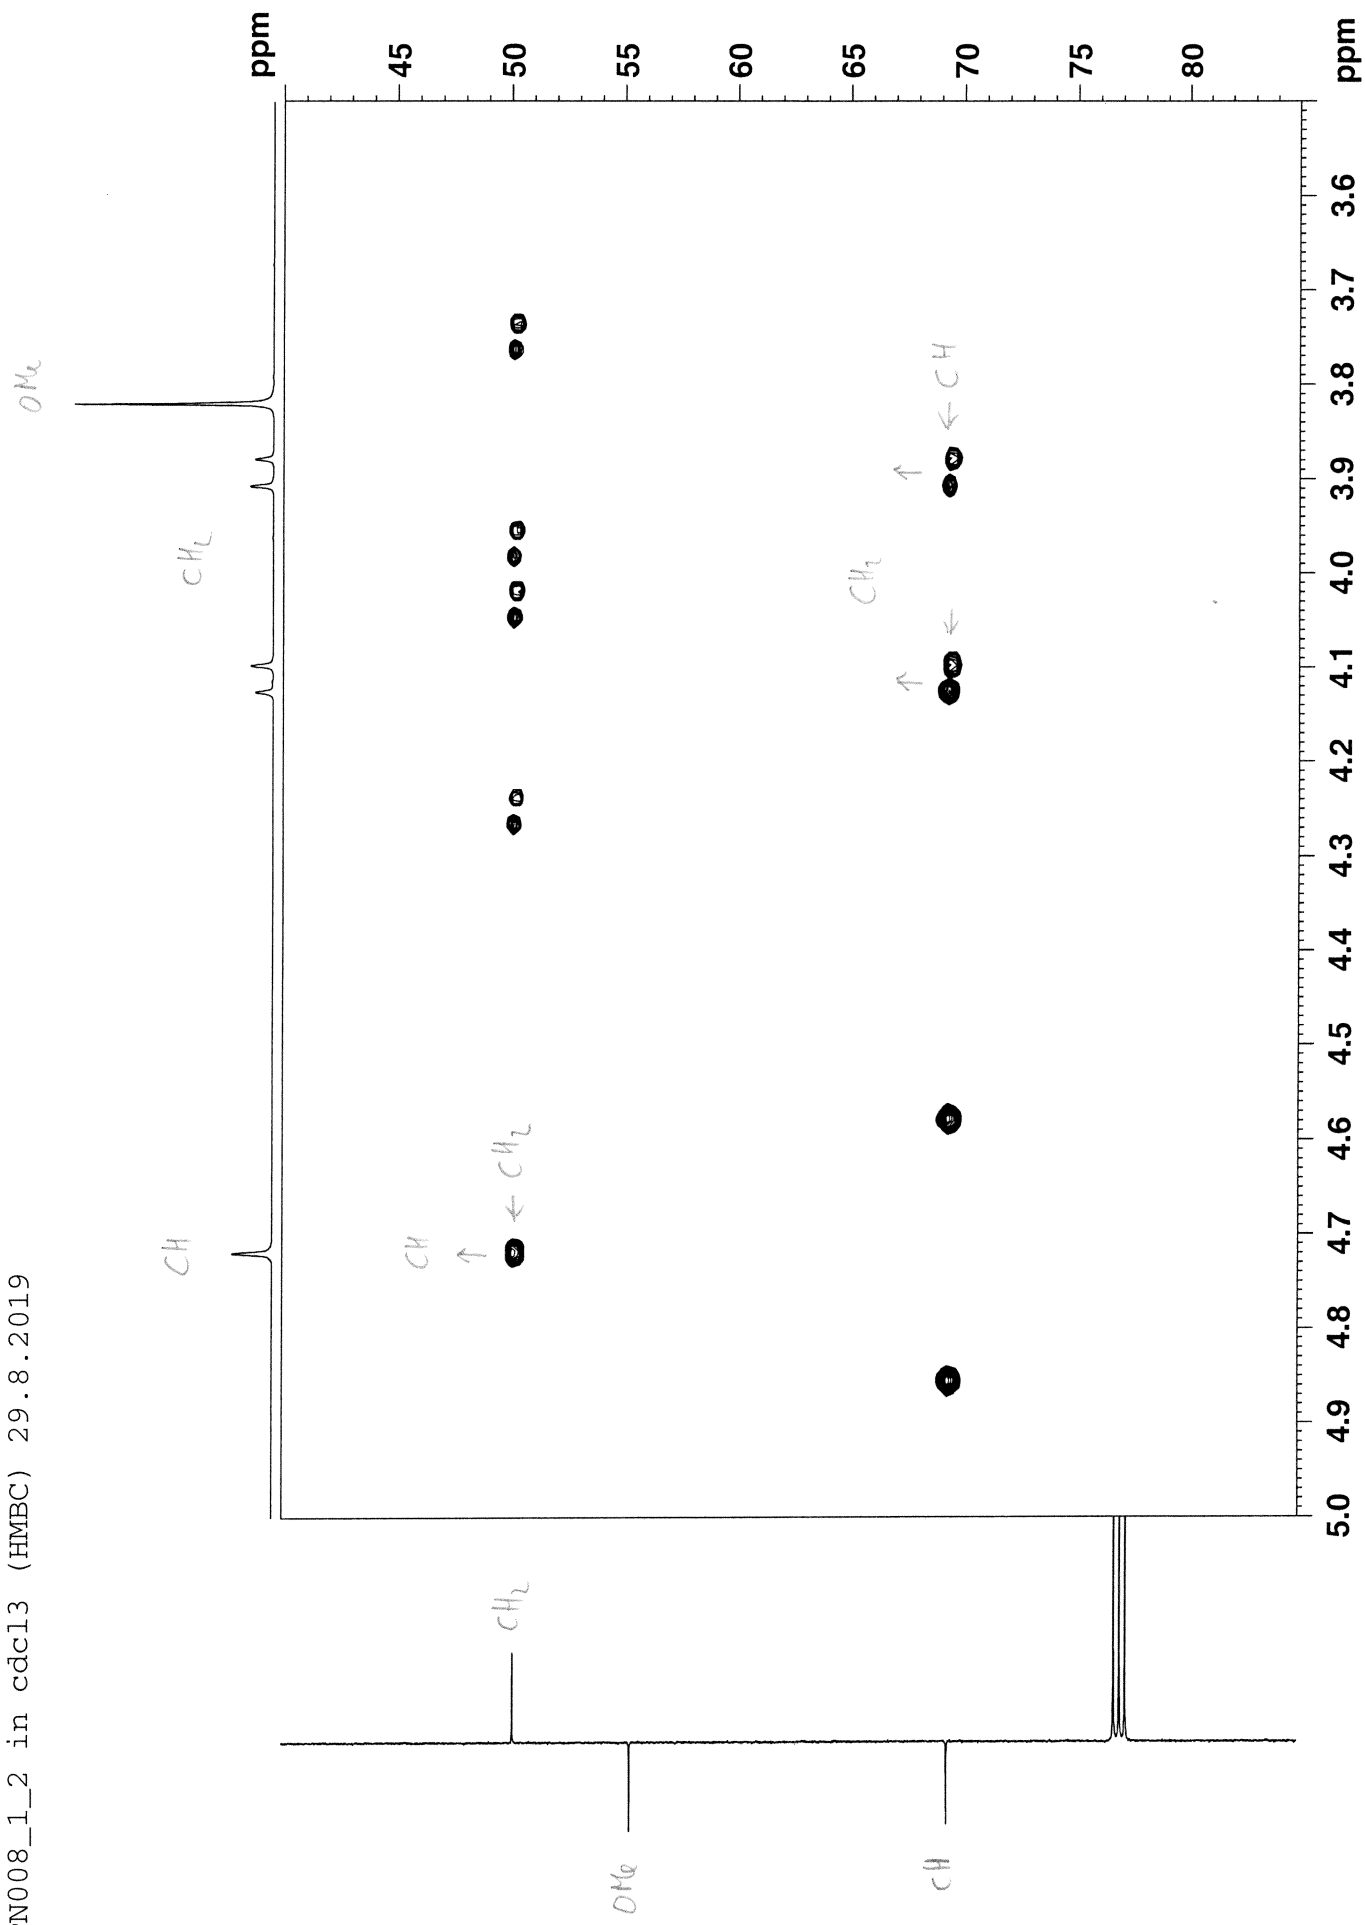



**Figure S75c.** NMR spectra of compound 7s.

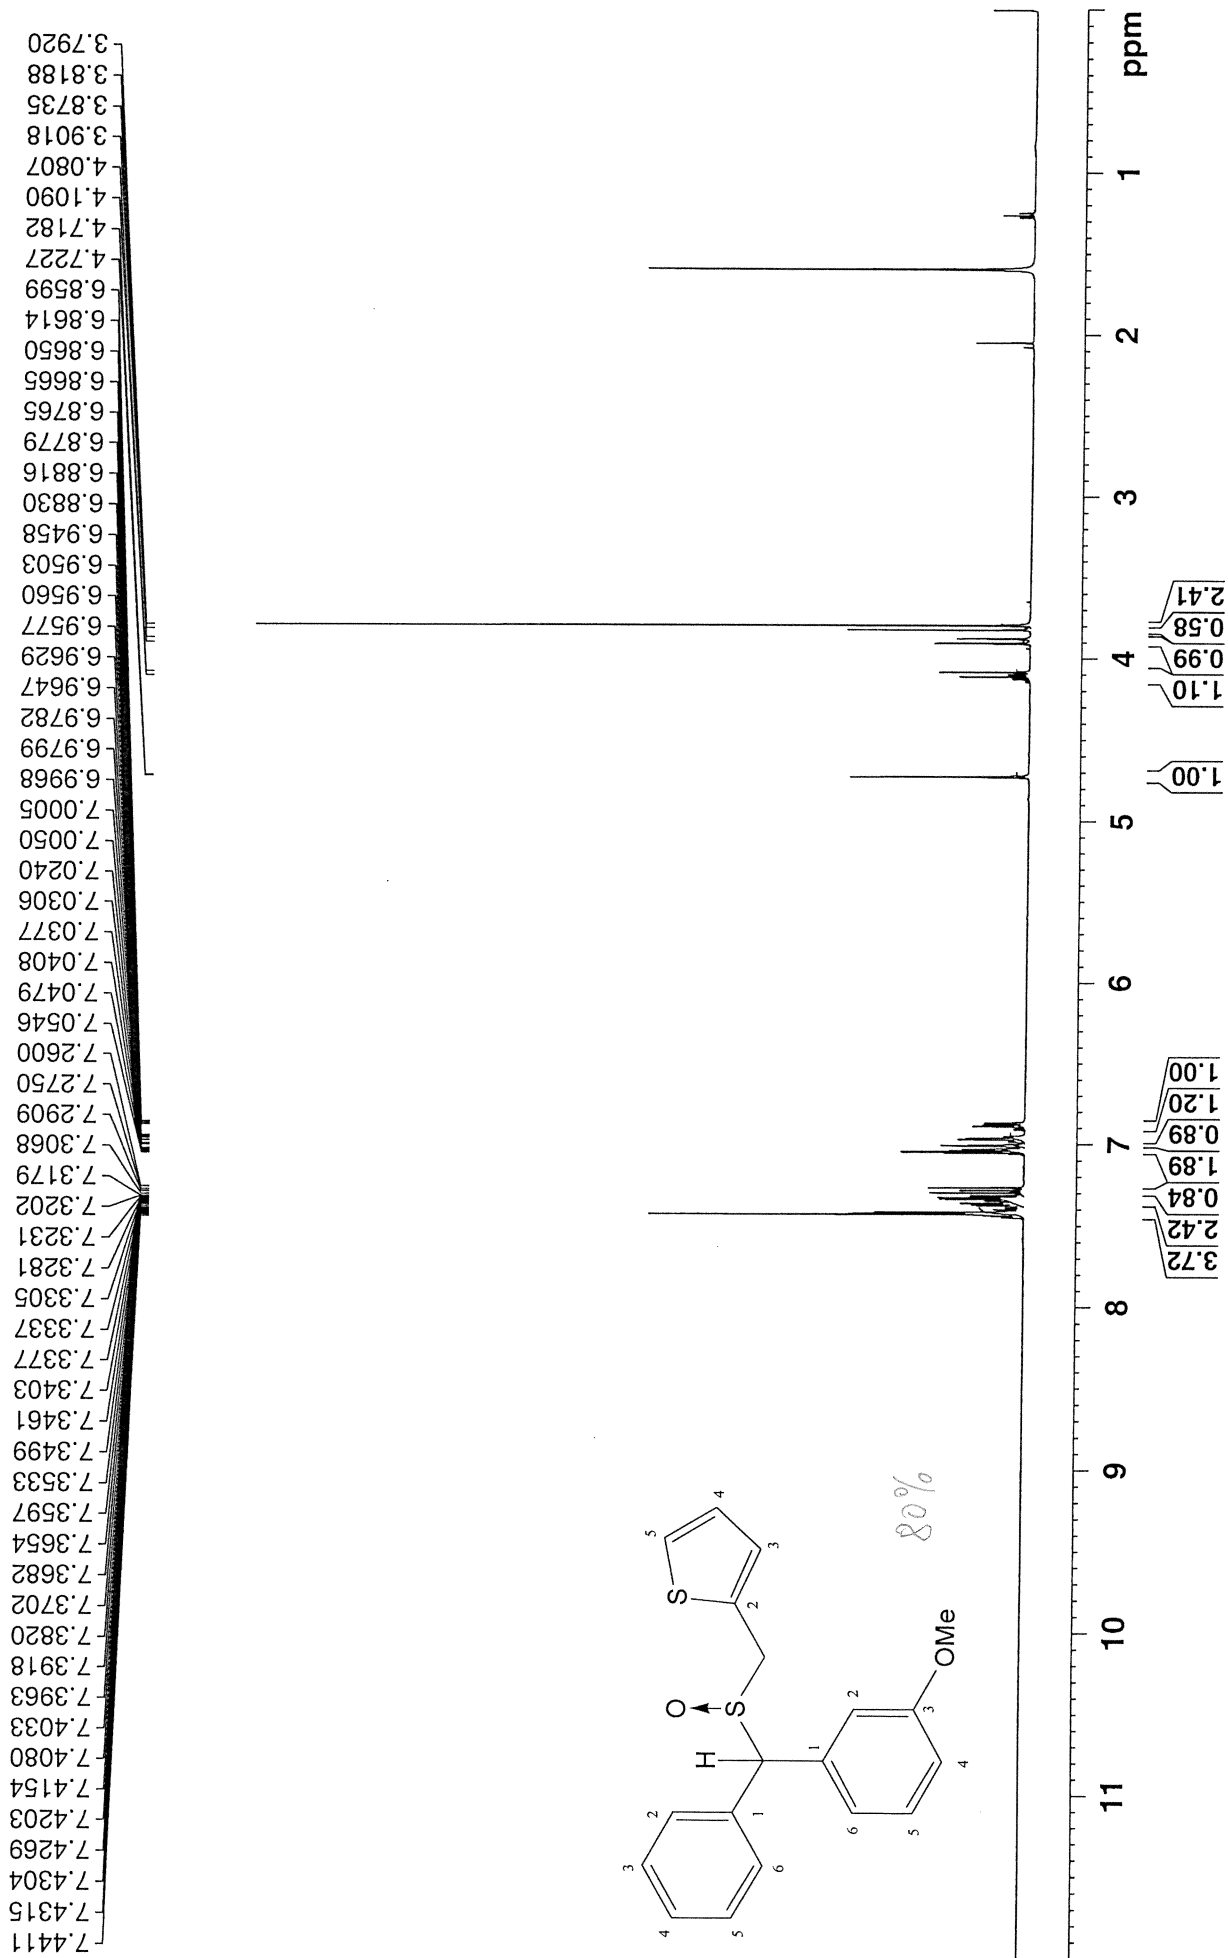

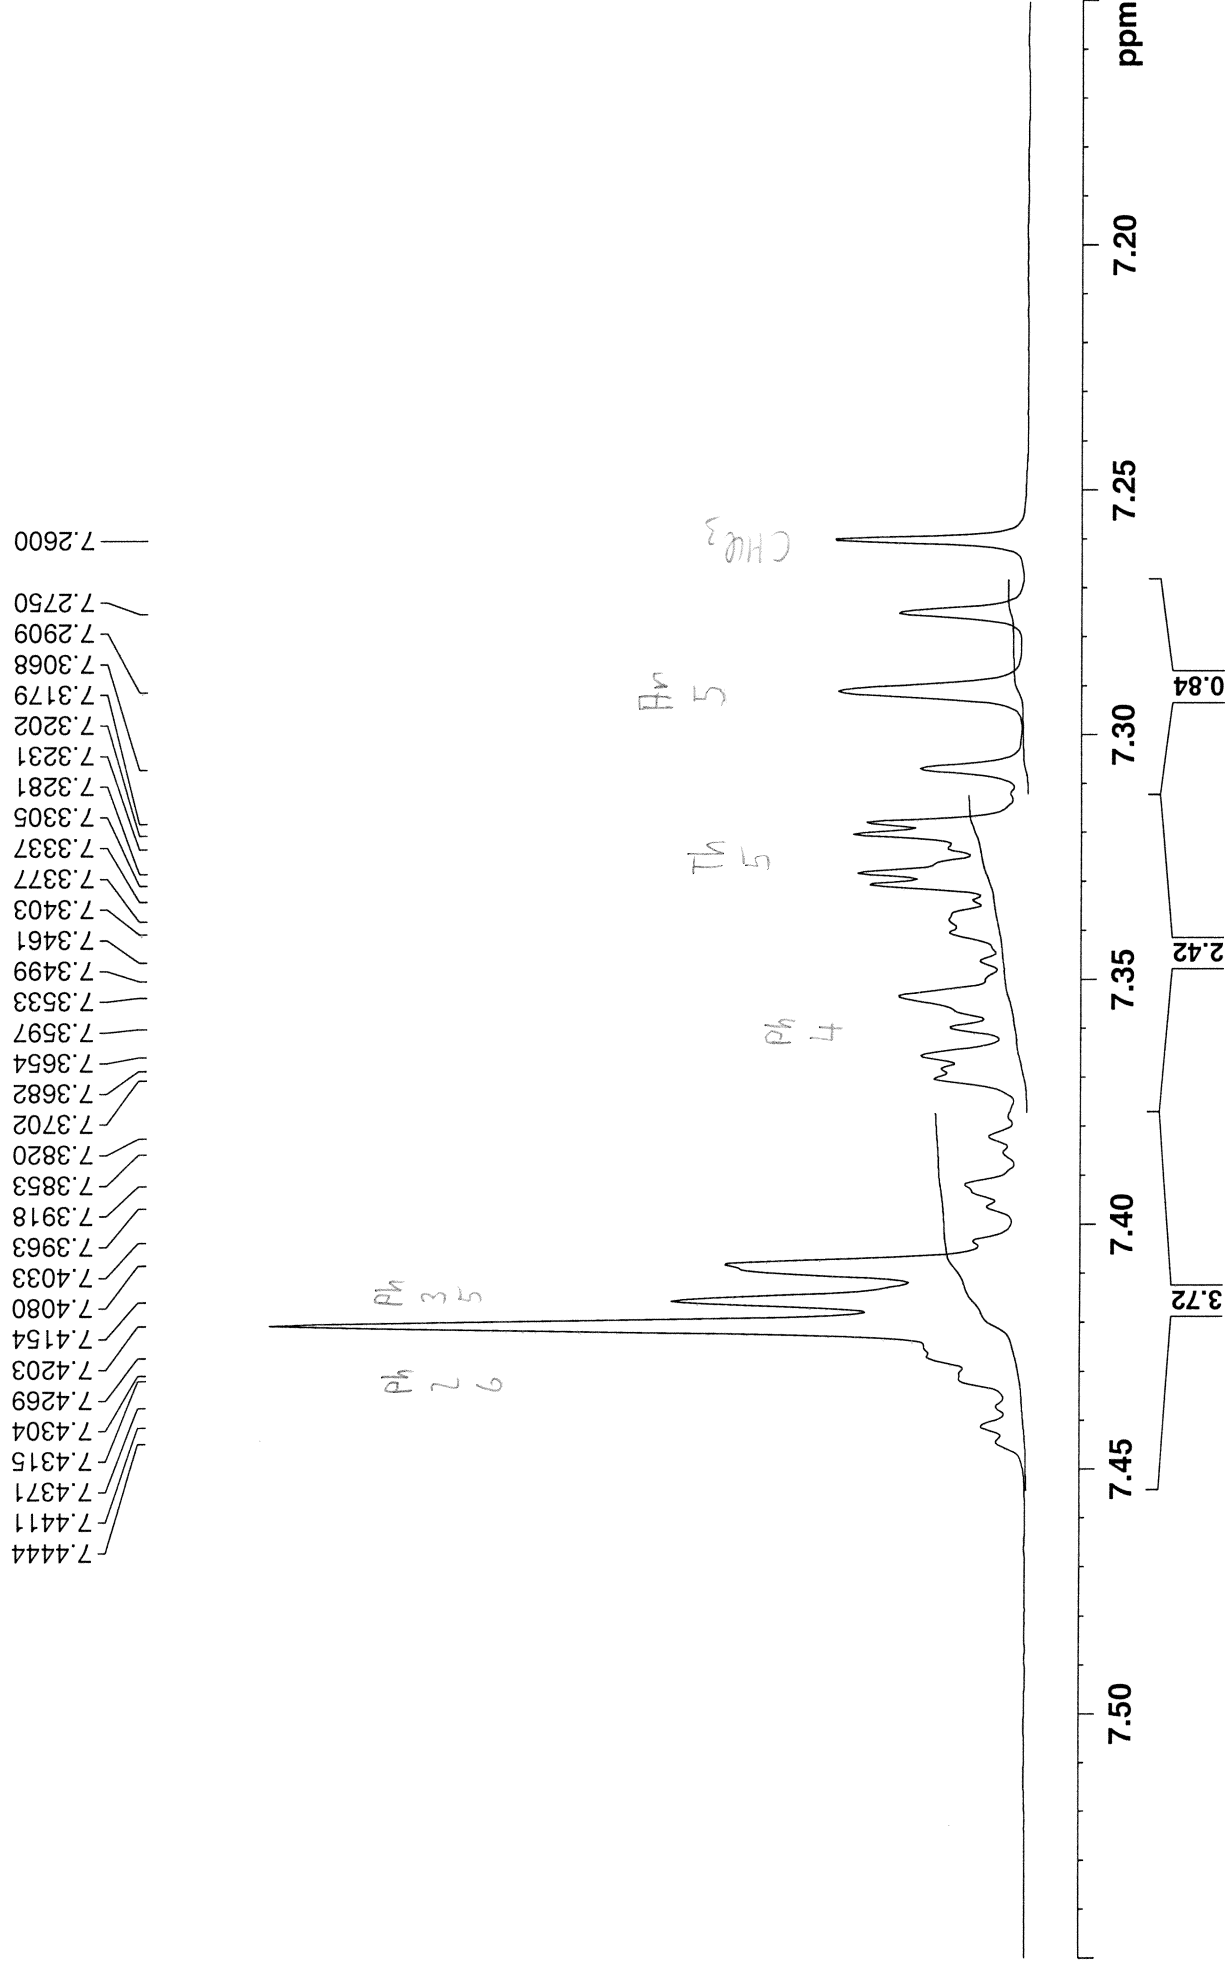

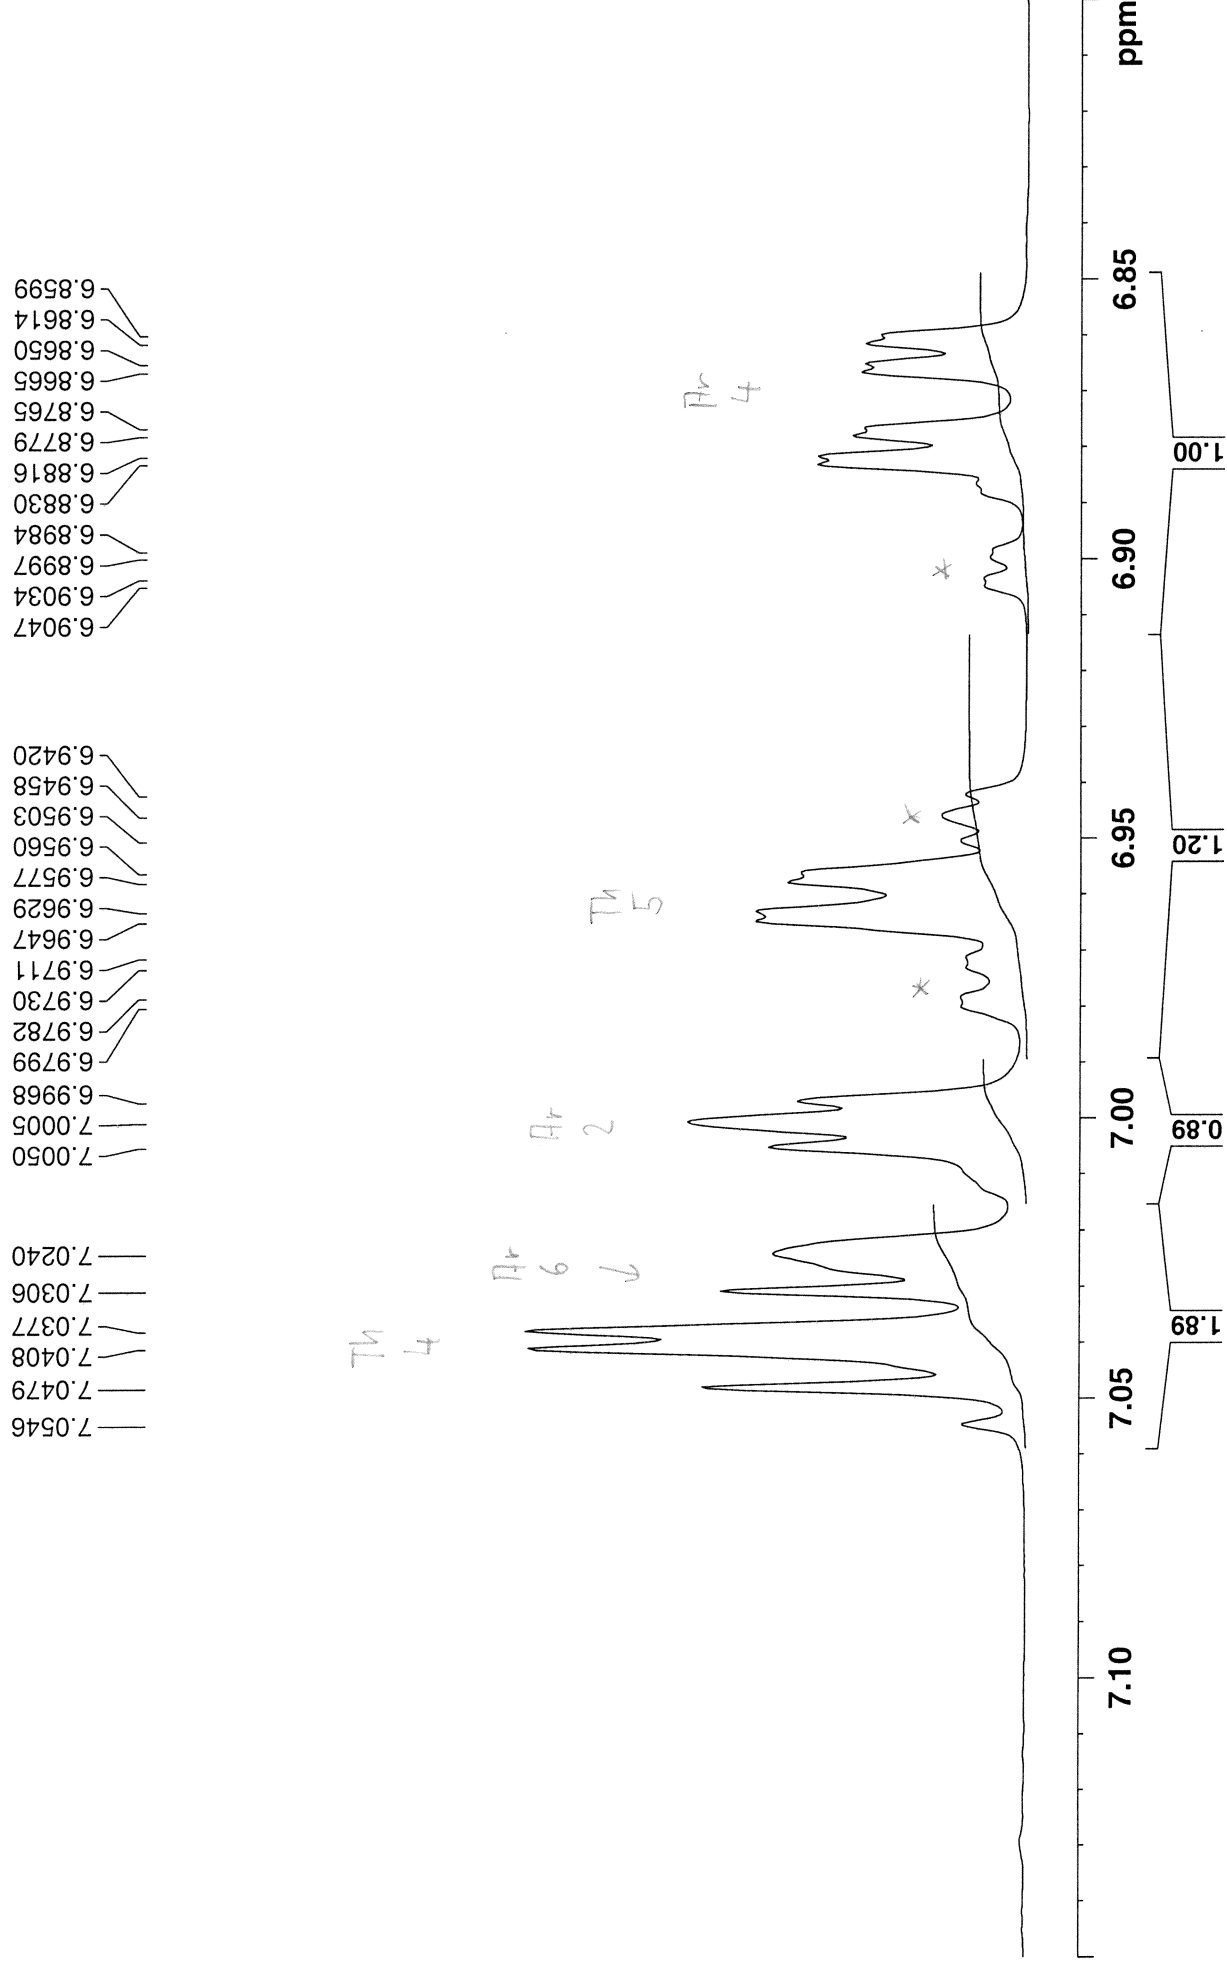

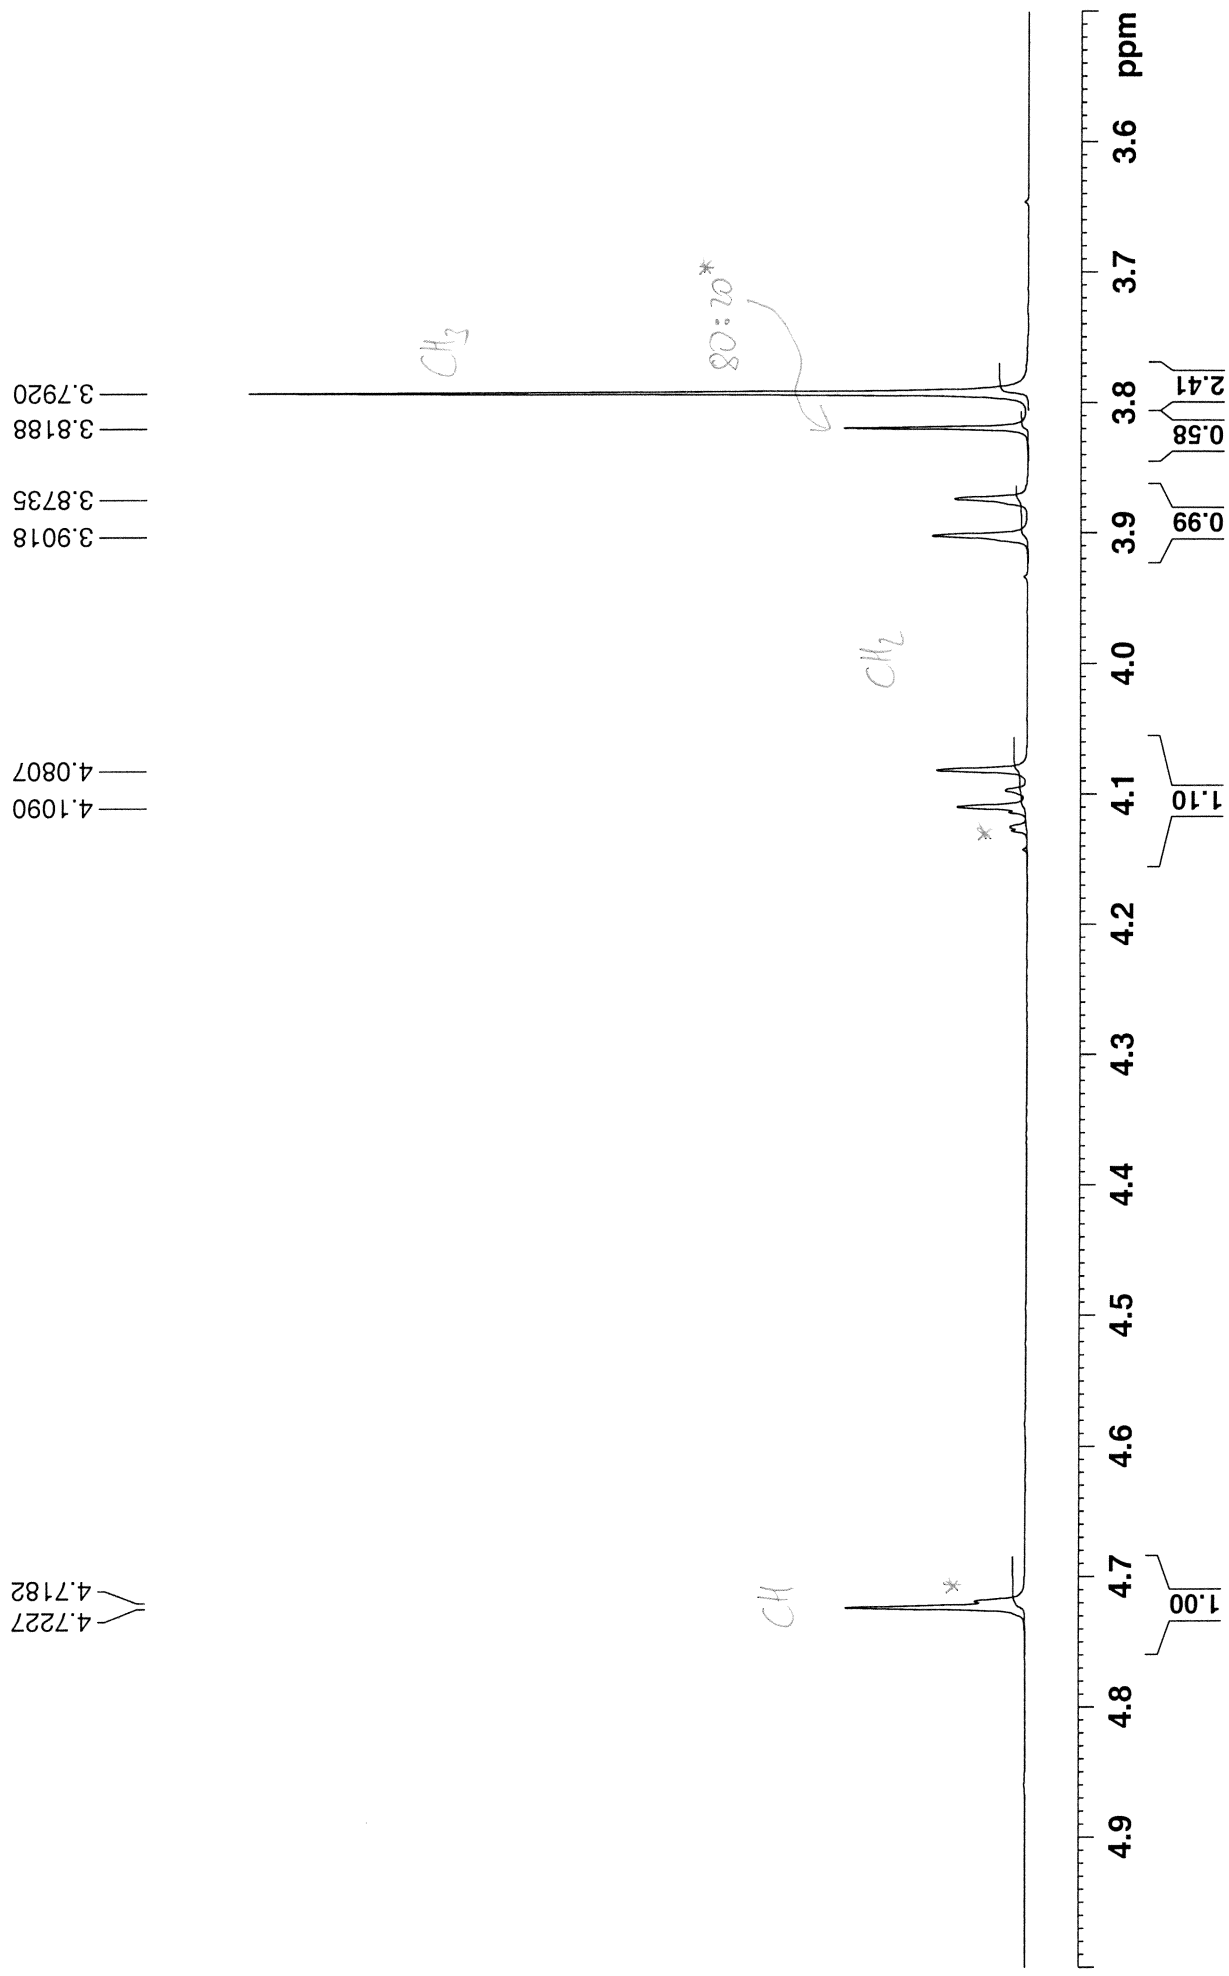

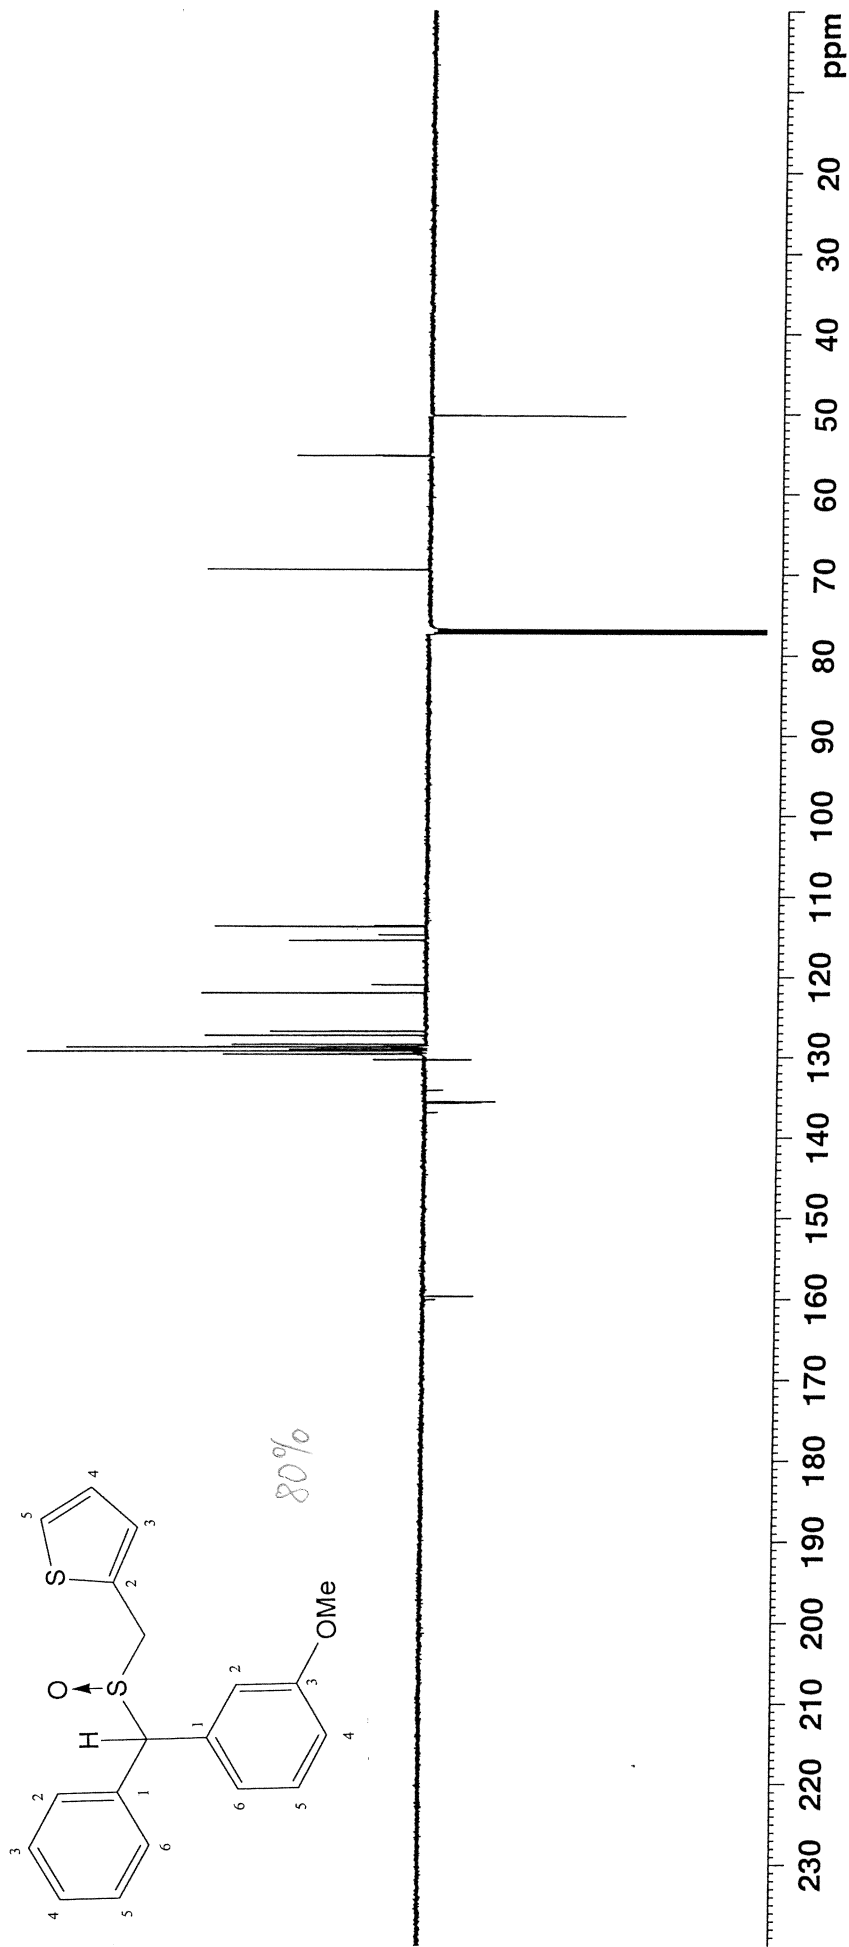

159.6642

135.7566  
135.5720

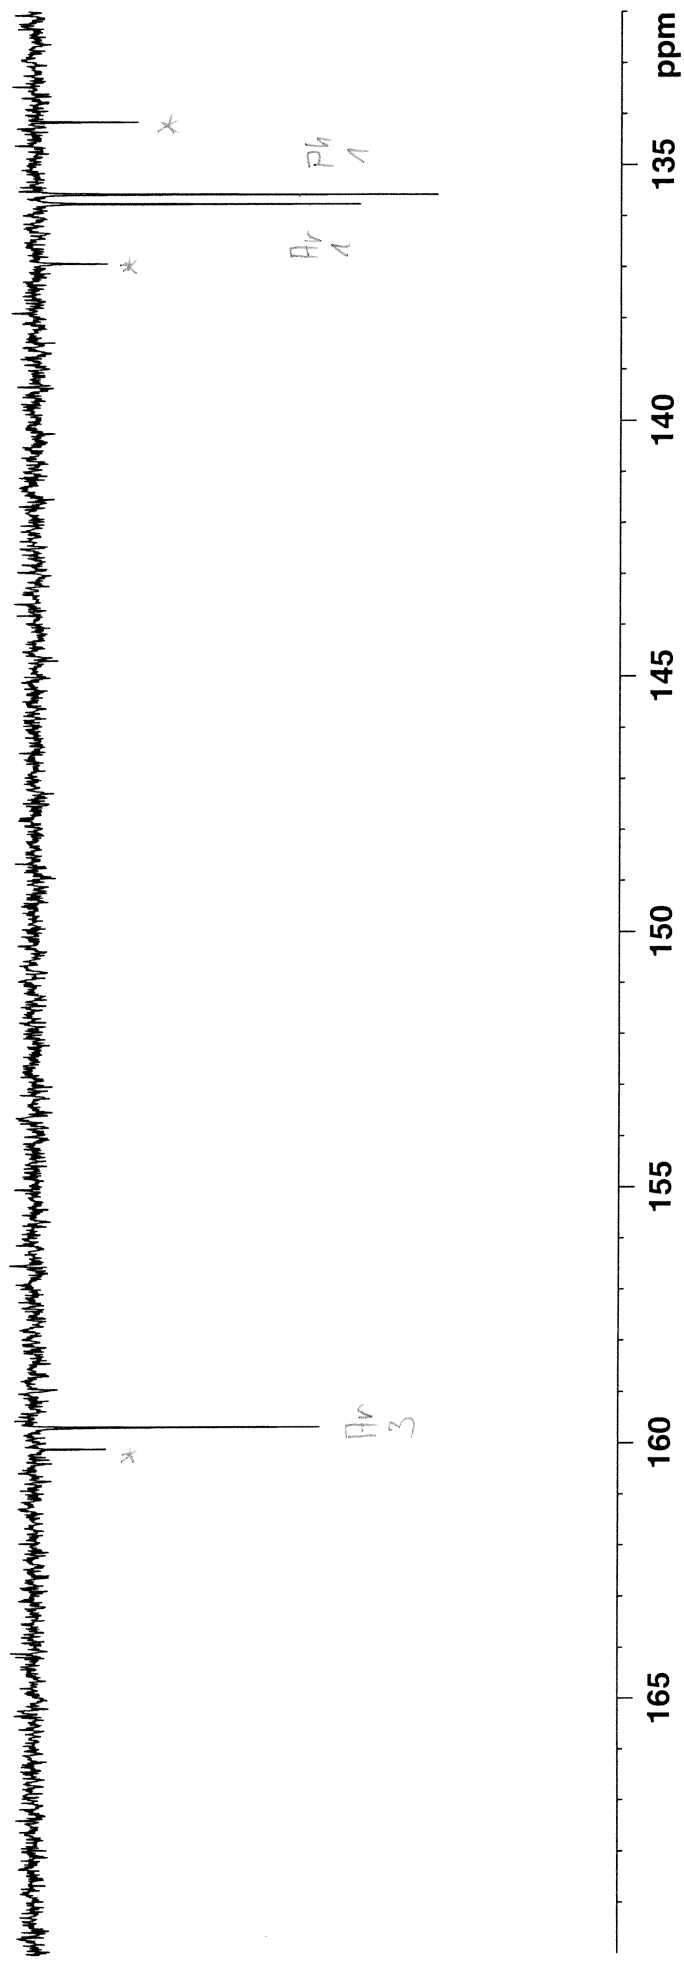

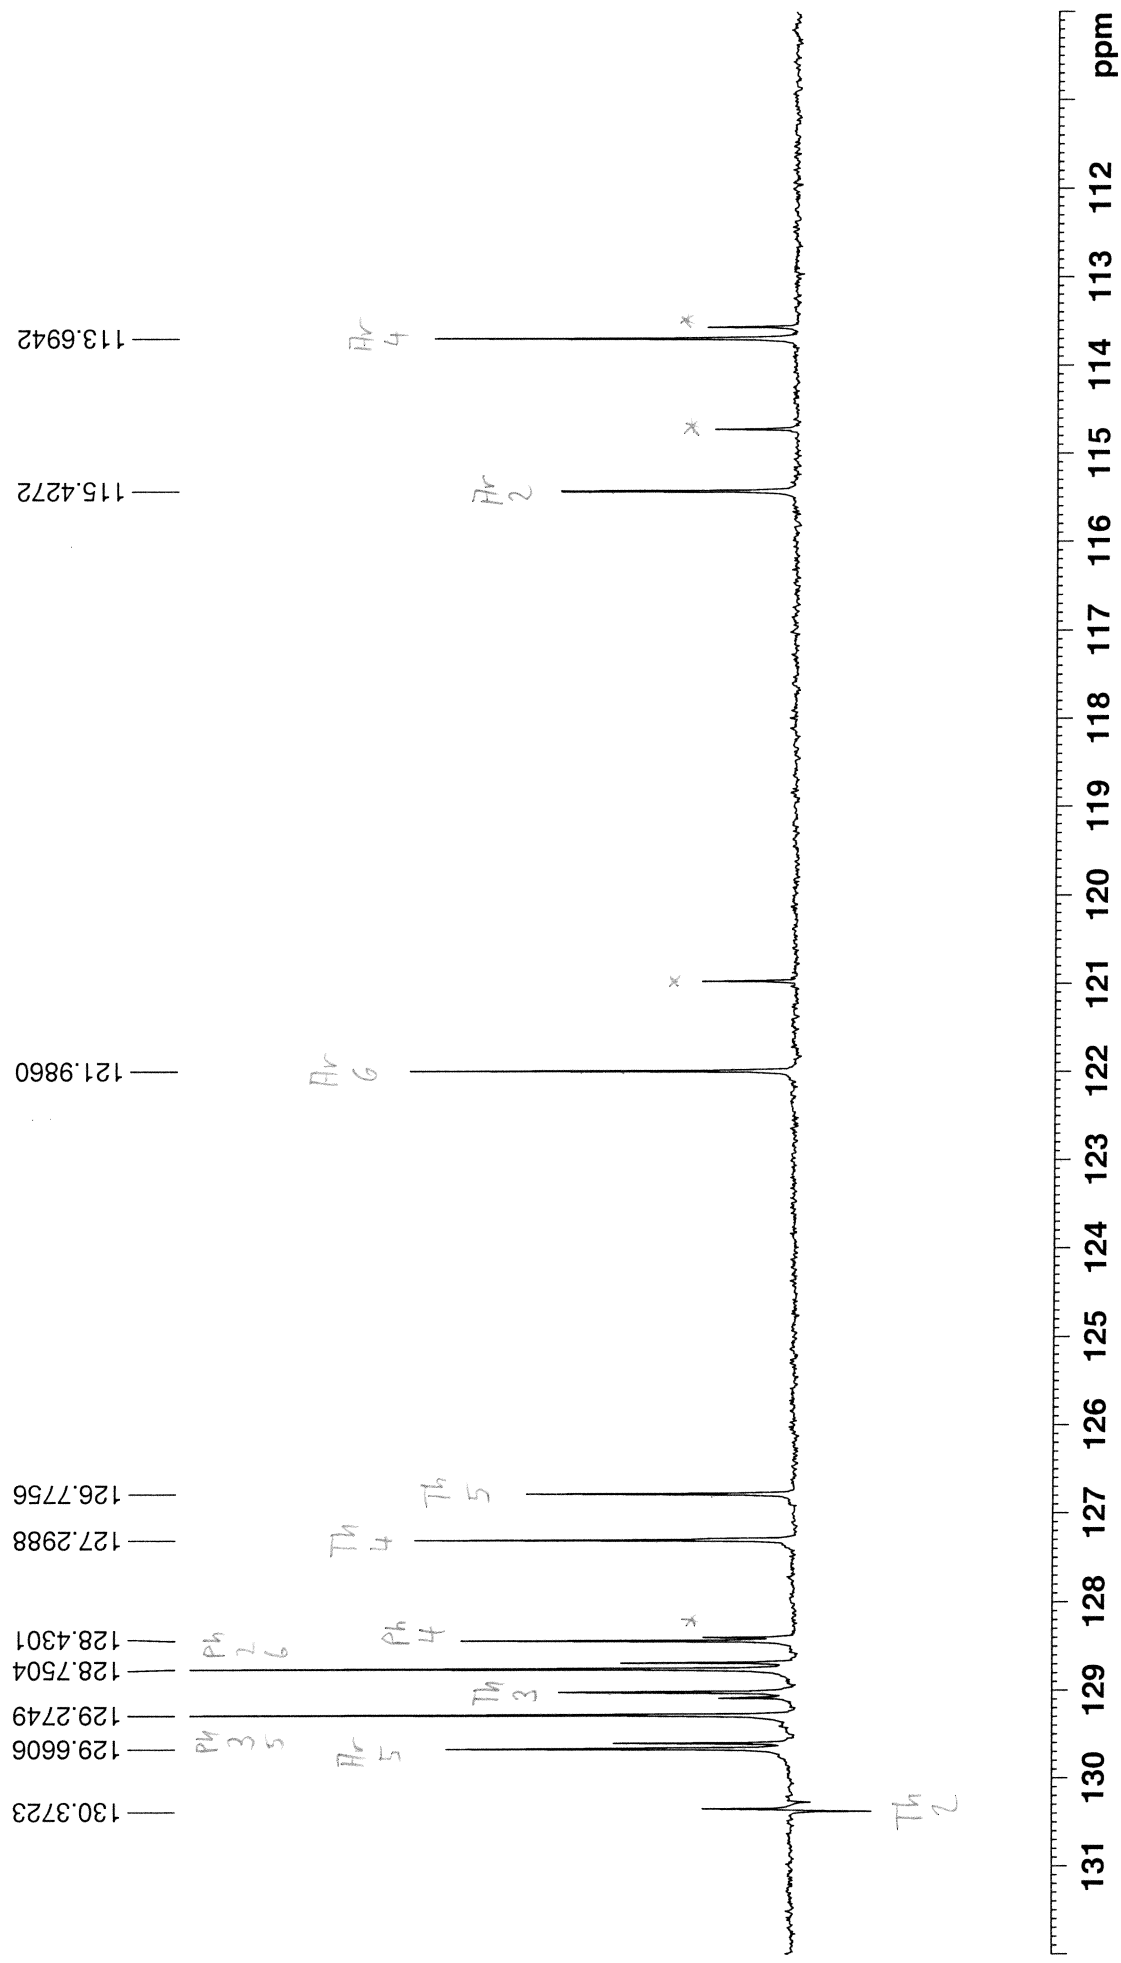

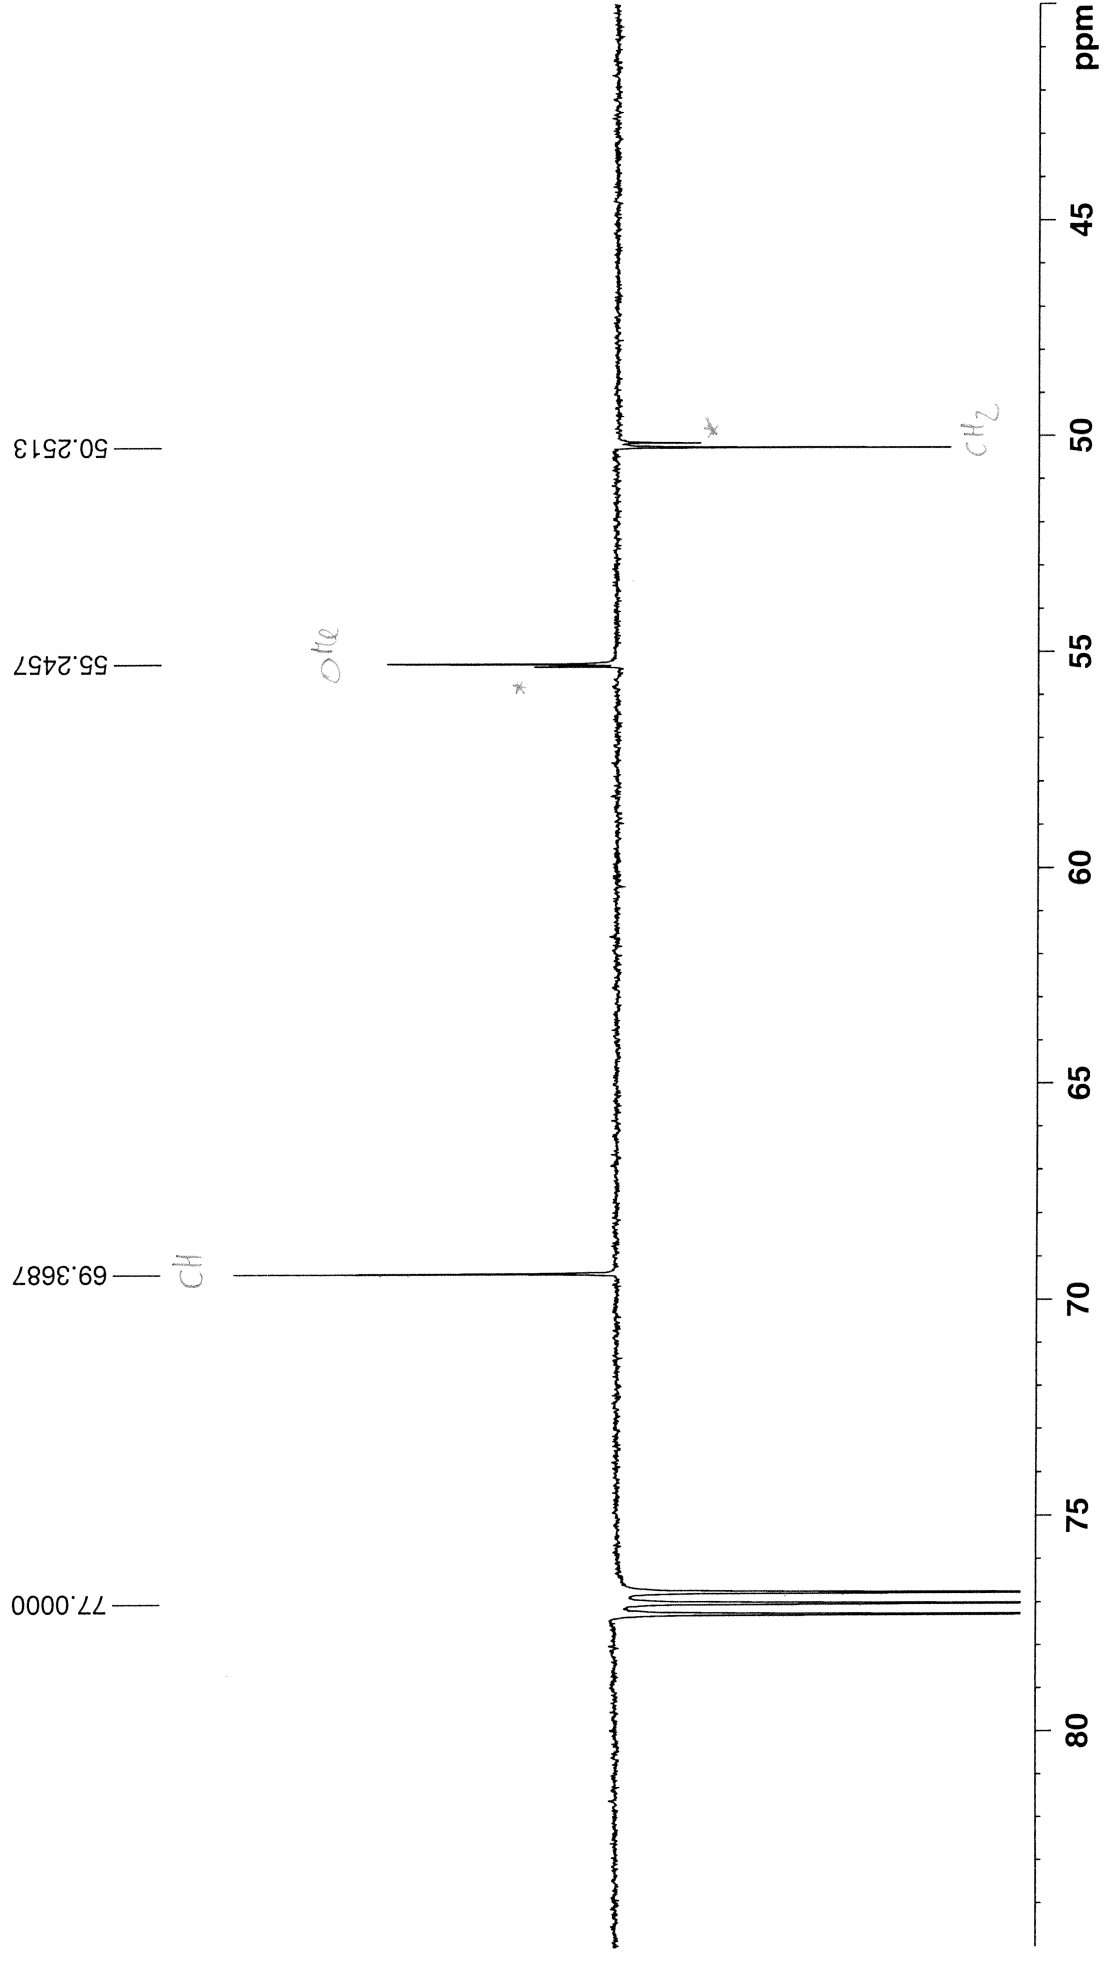



**Figure S76c.** NMR spectra of compound **8s**.

PN008\_2\_2 in cdcl3 (Proton) 29.8.2019

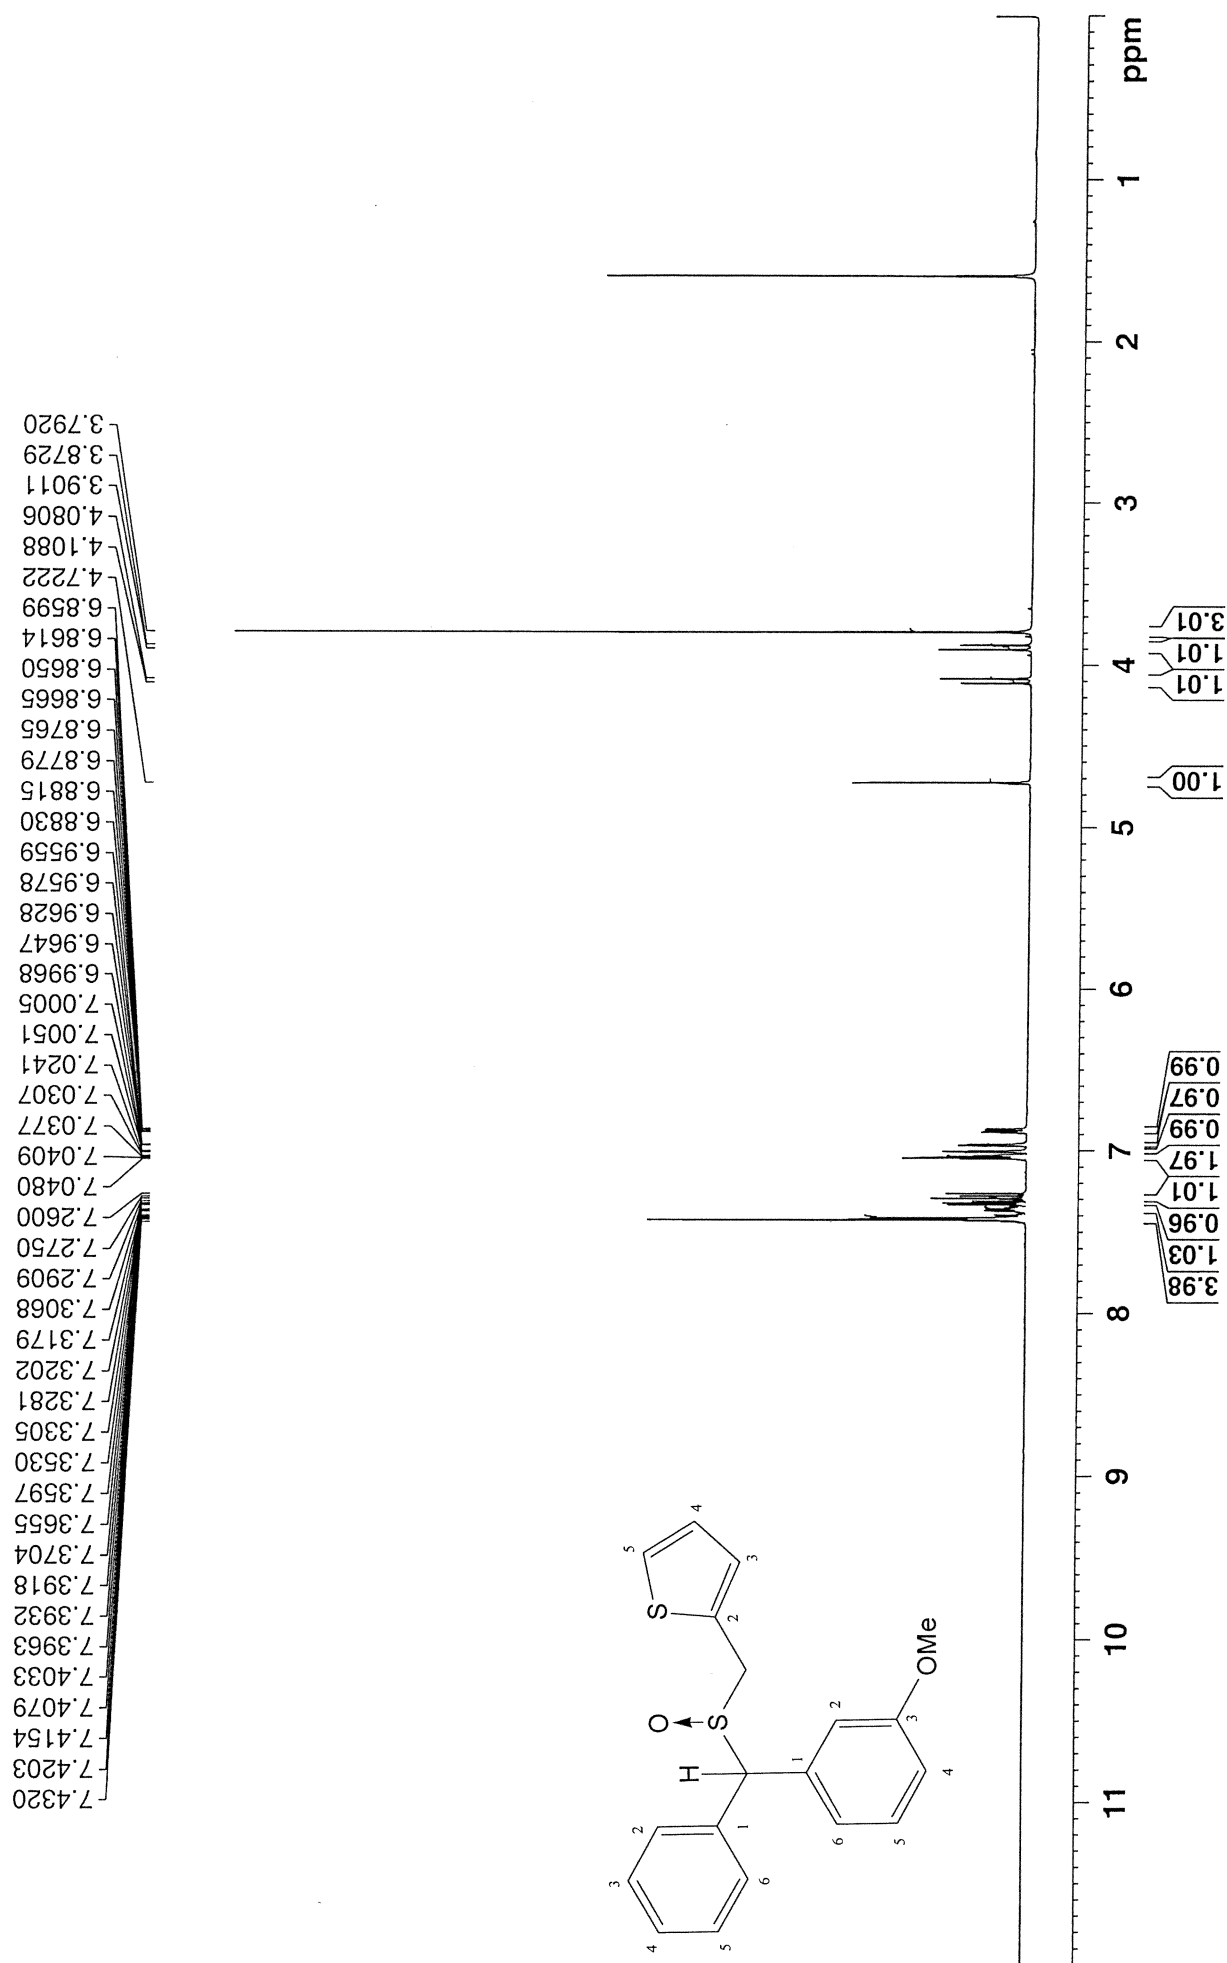

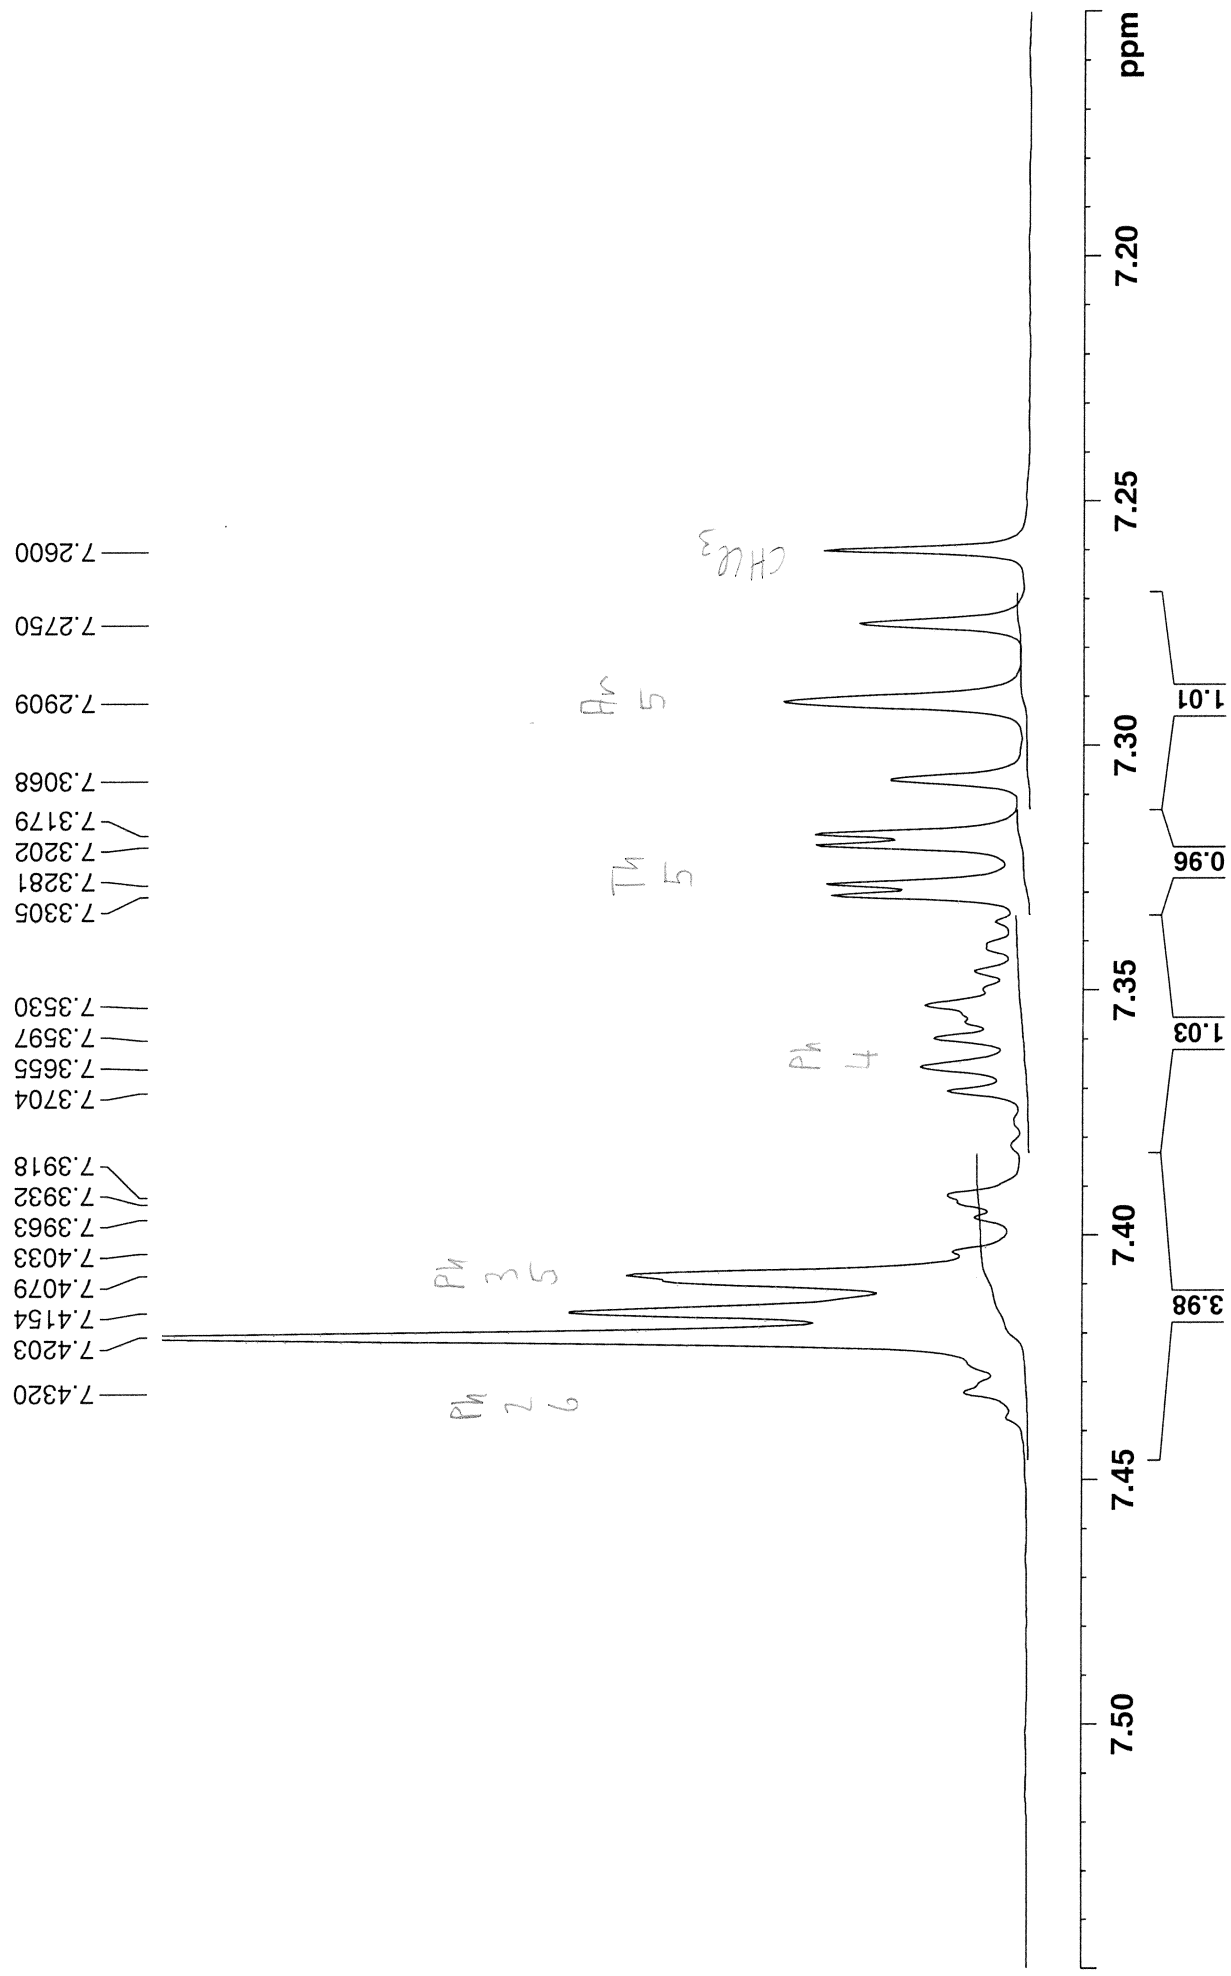

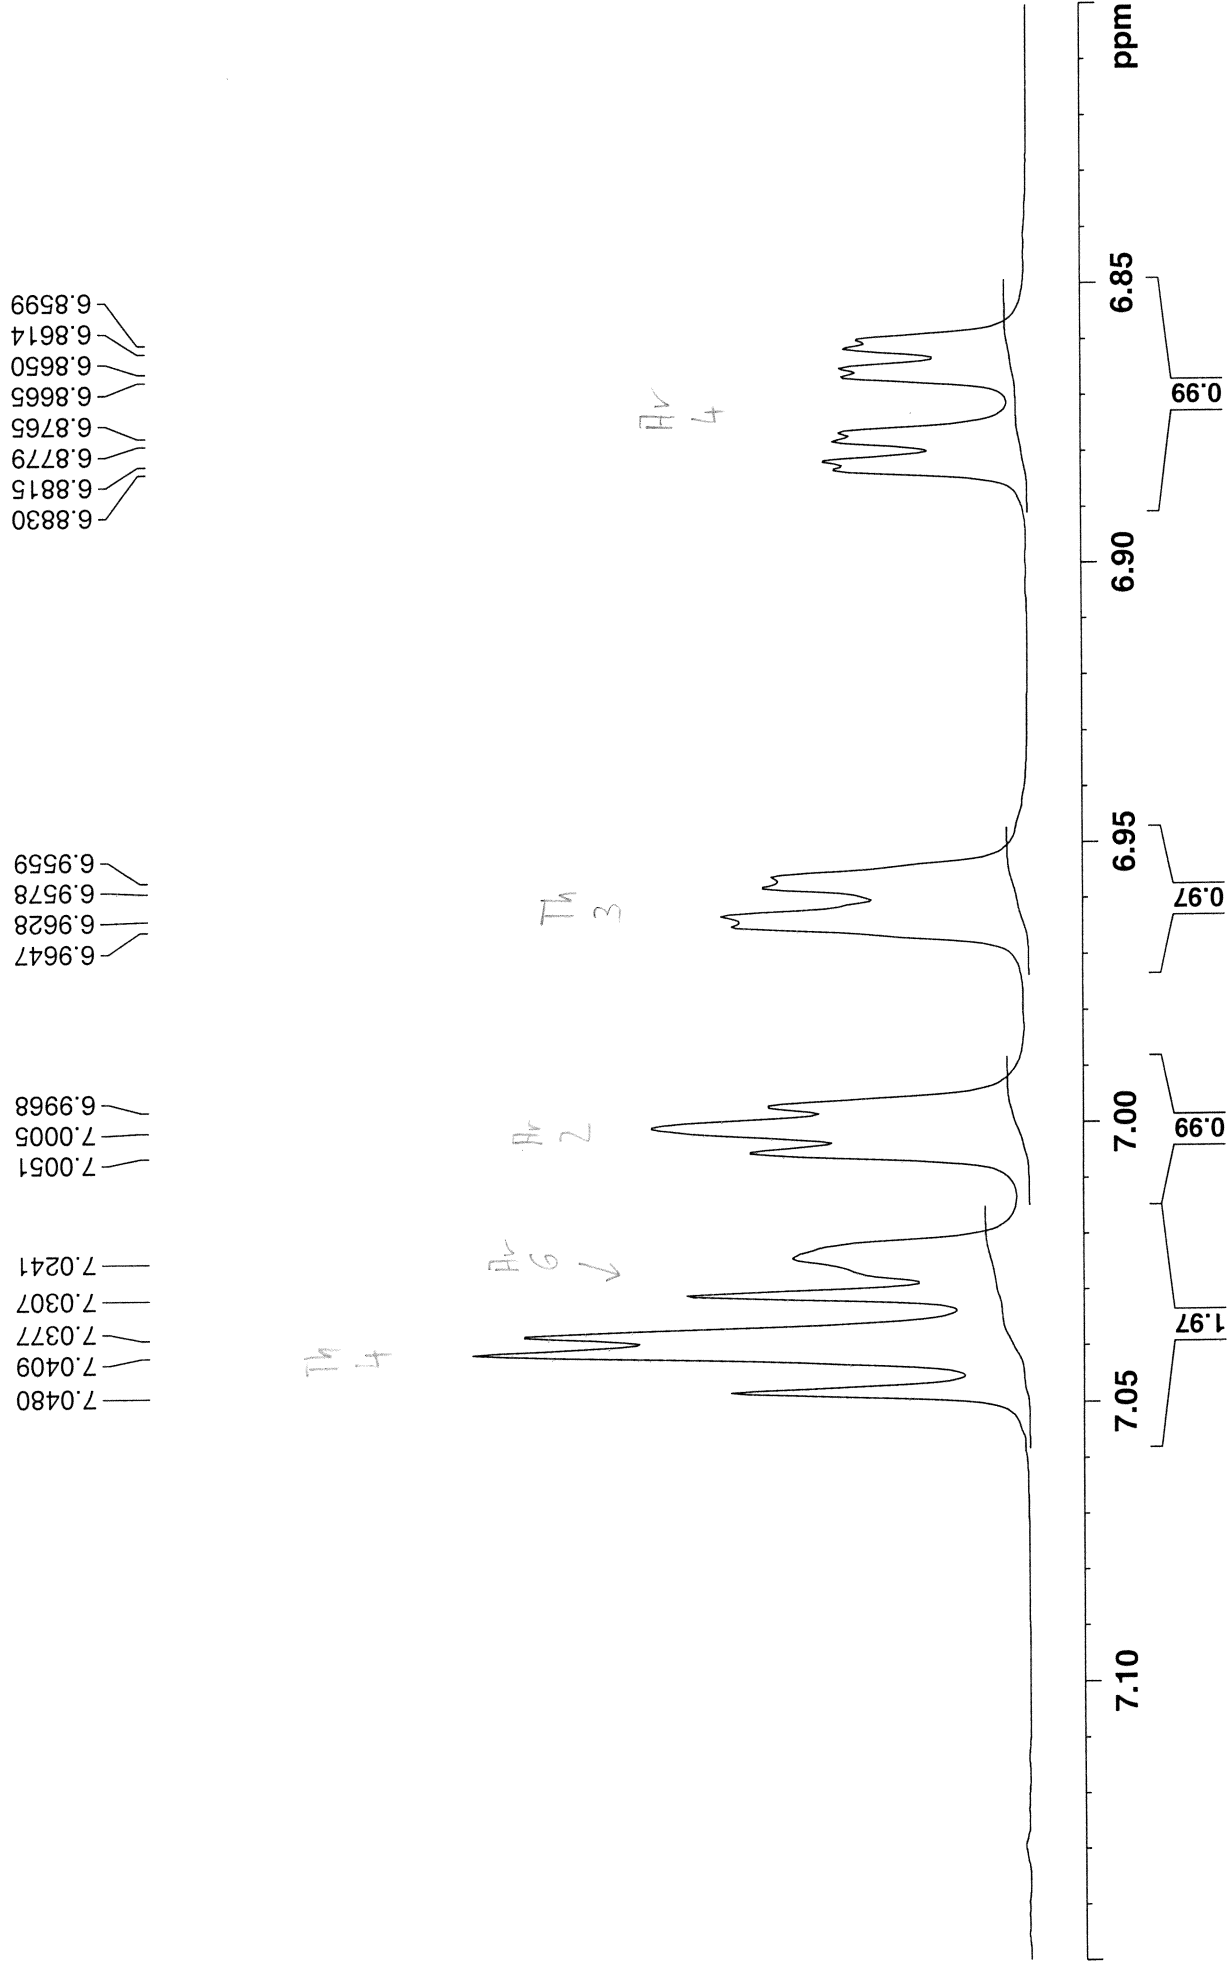

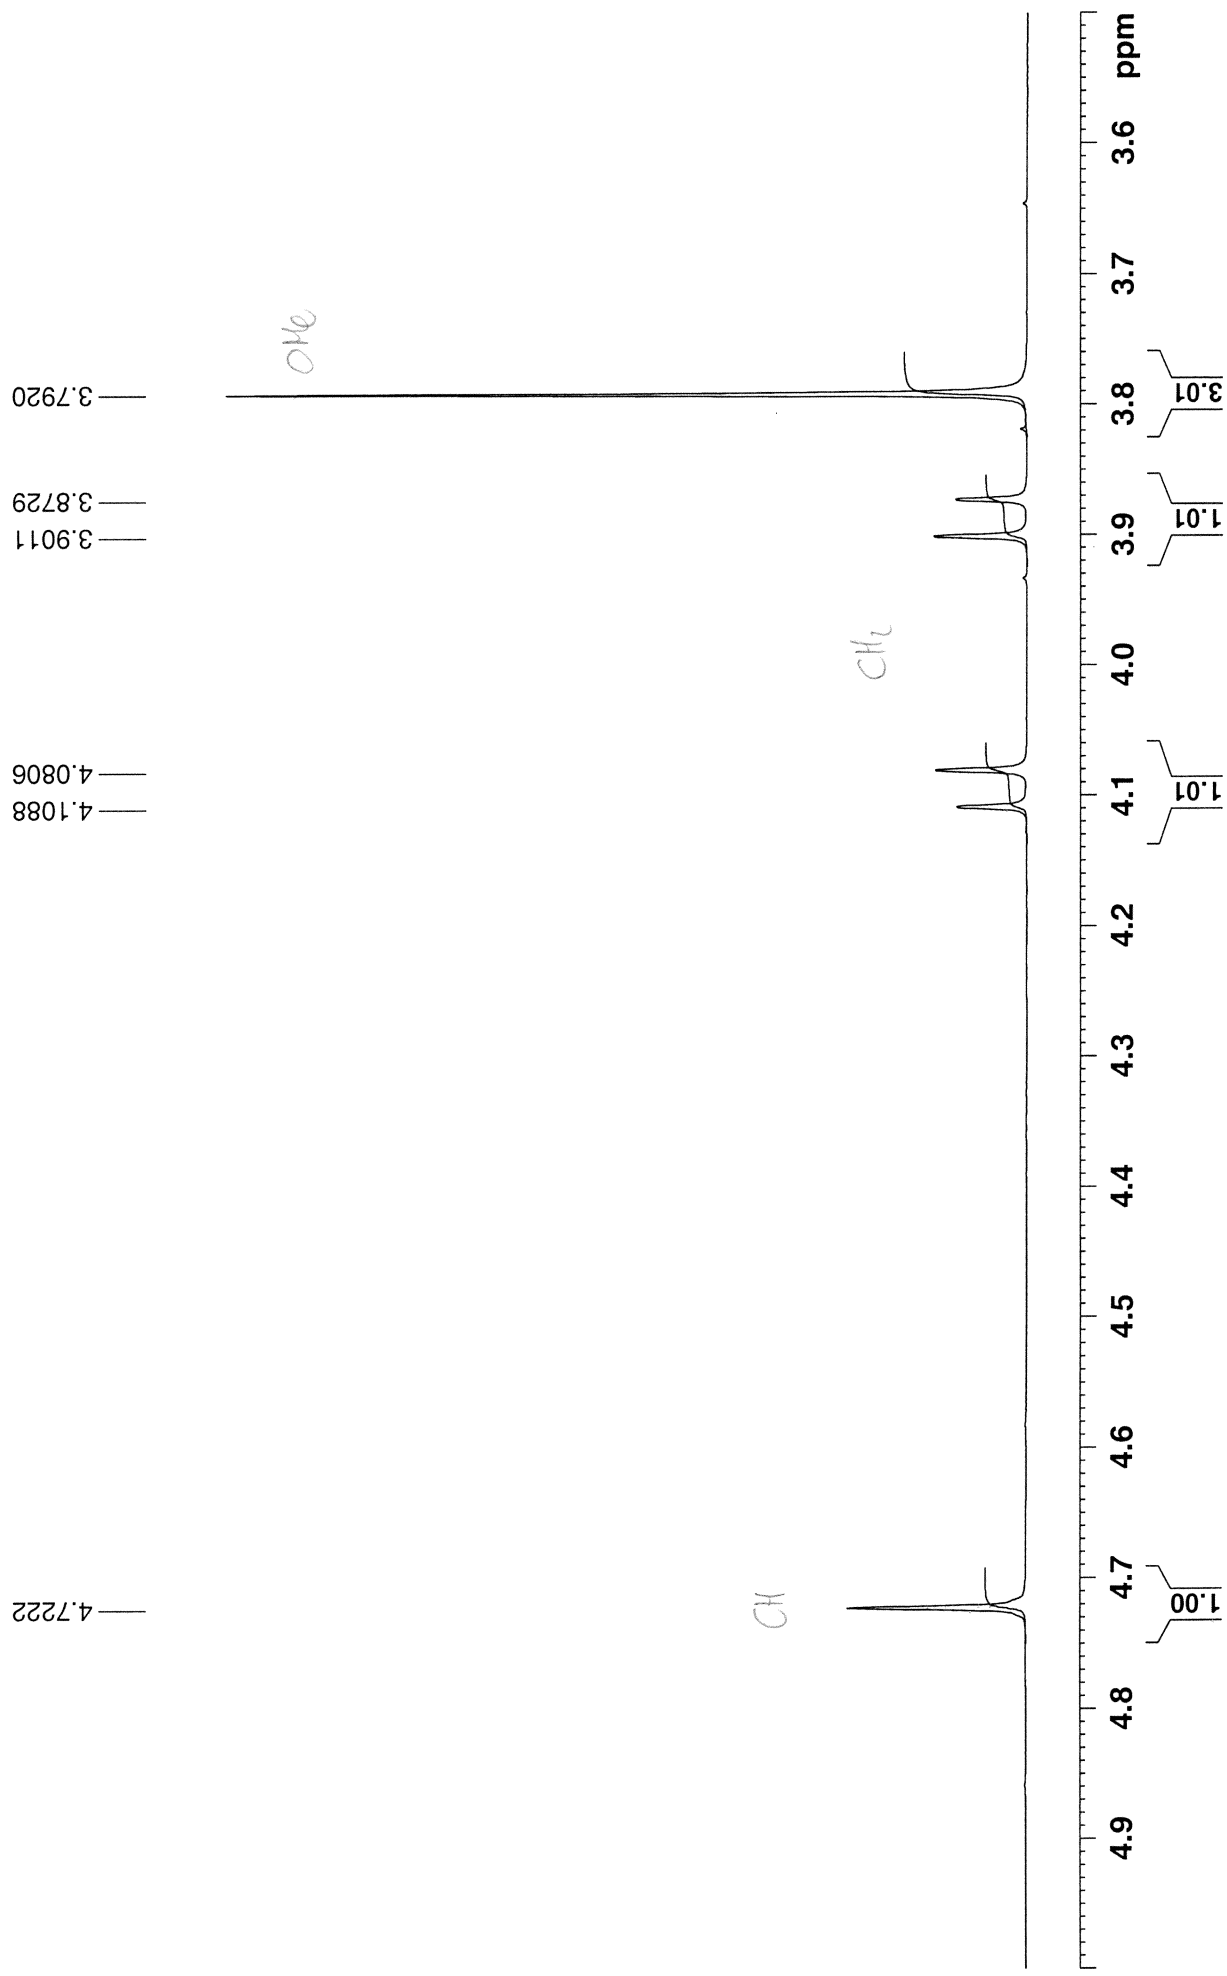

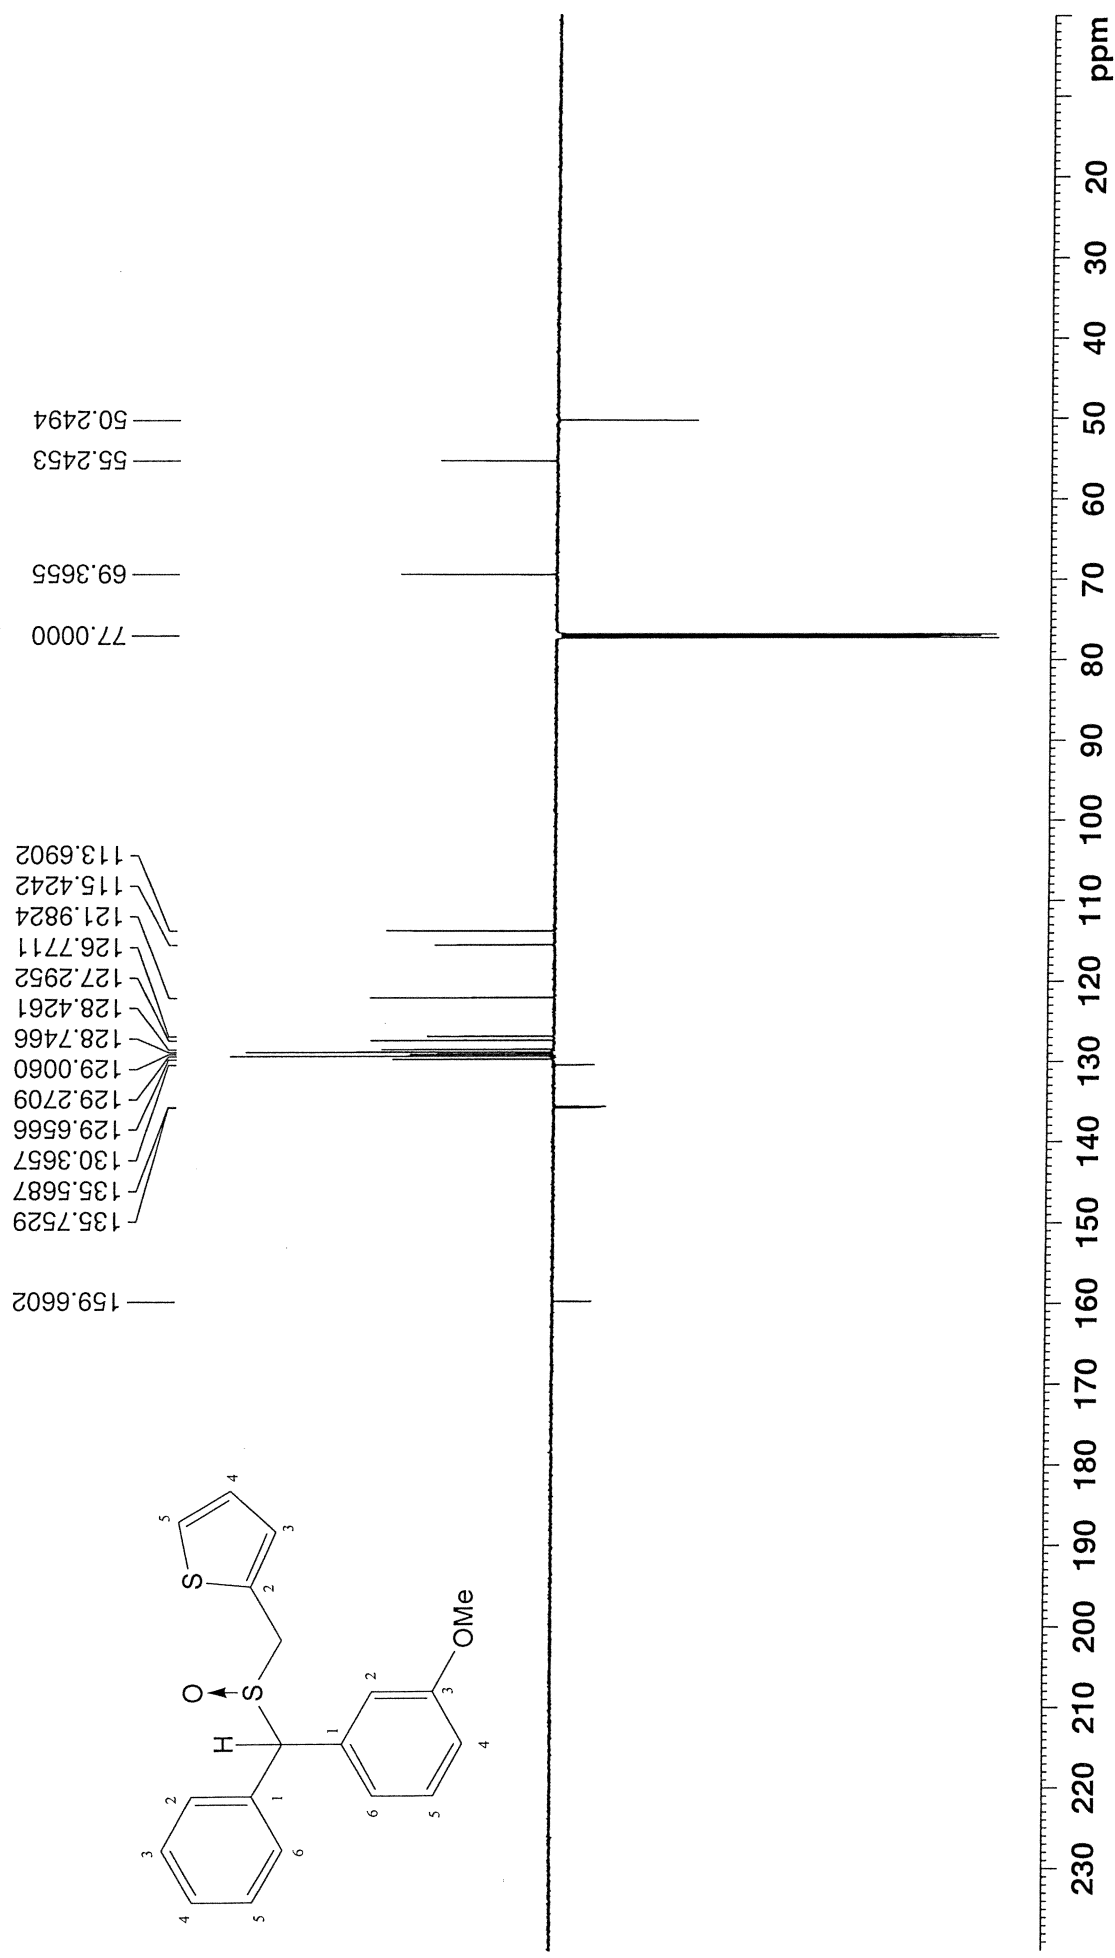

159.6602

135.7529  
135.5687

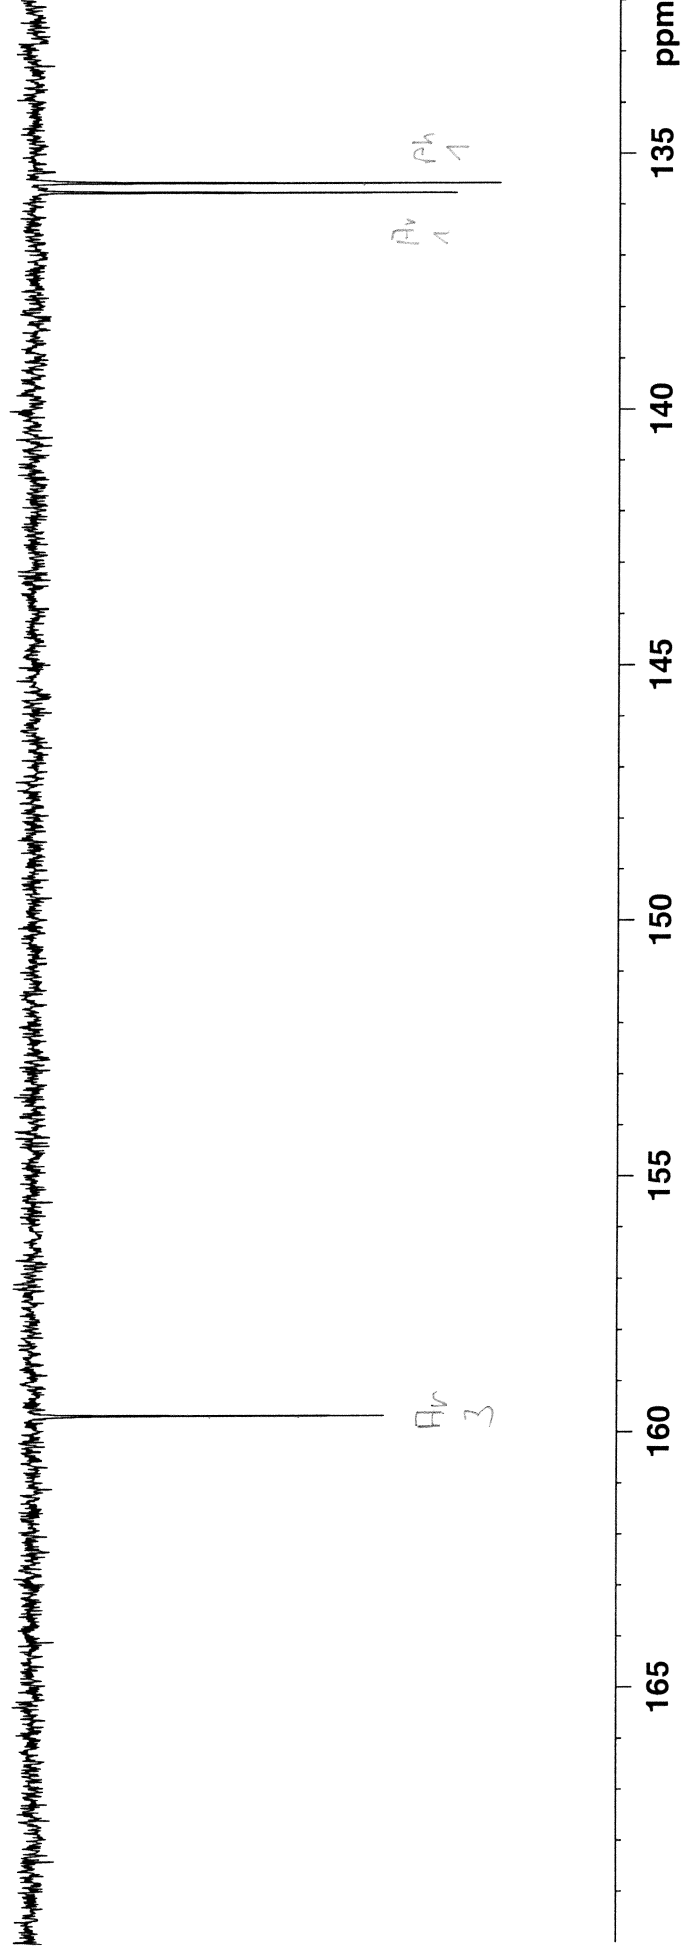

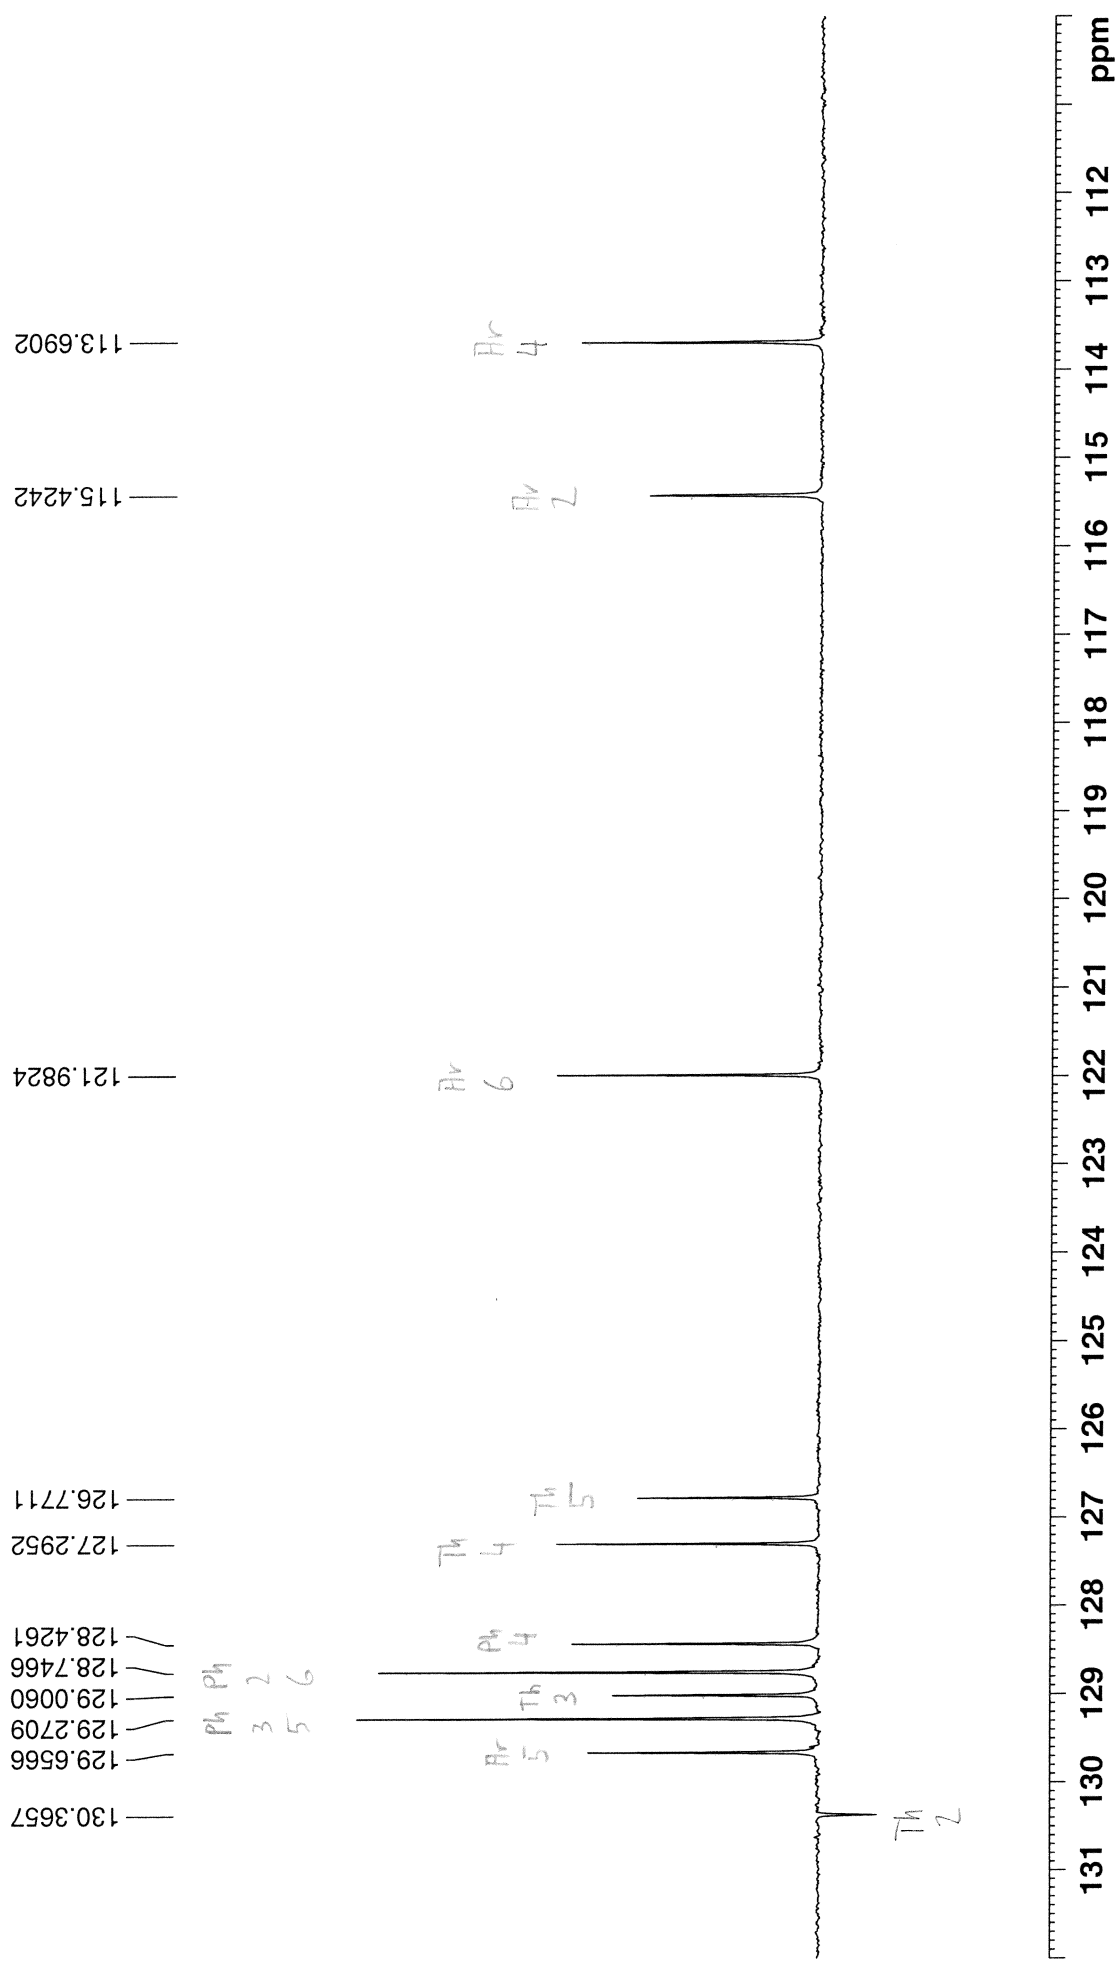

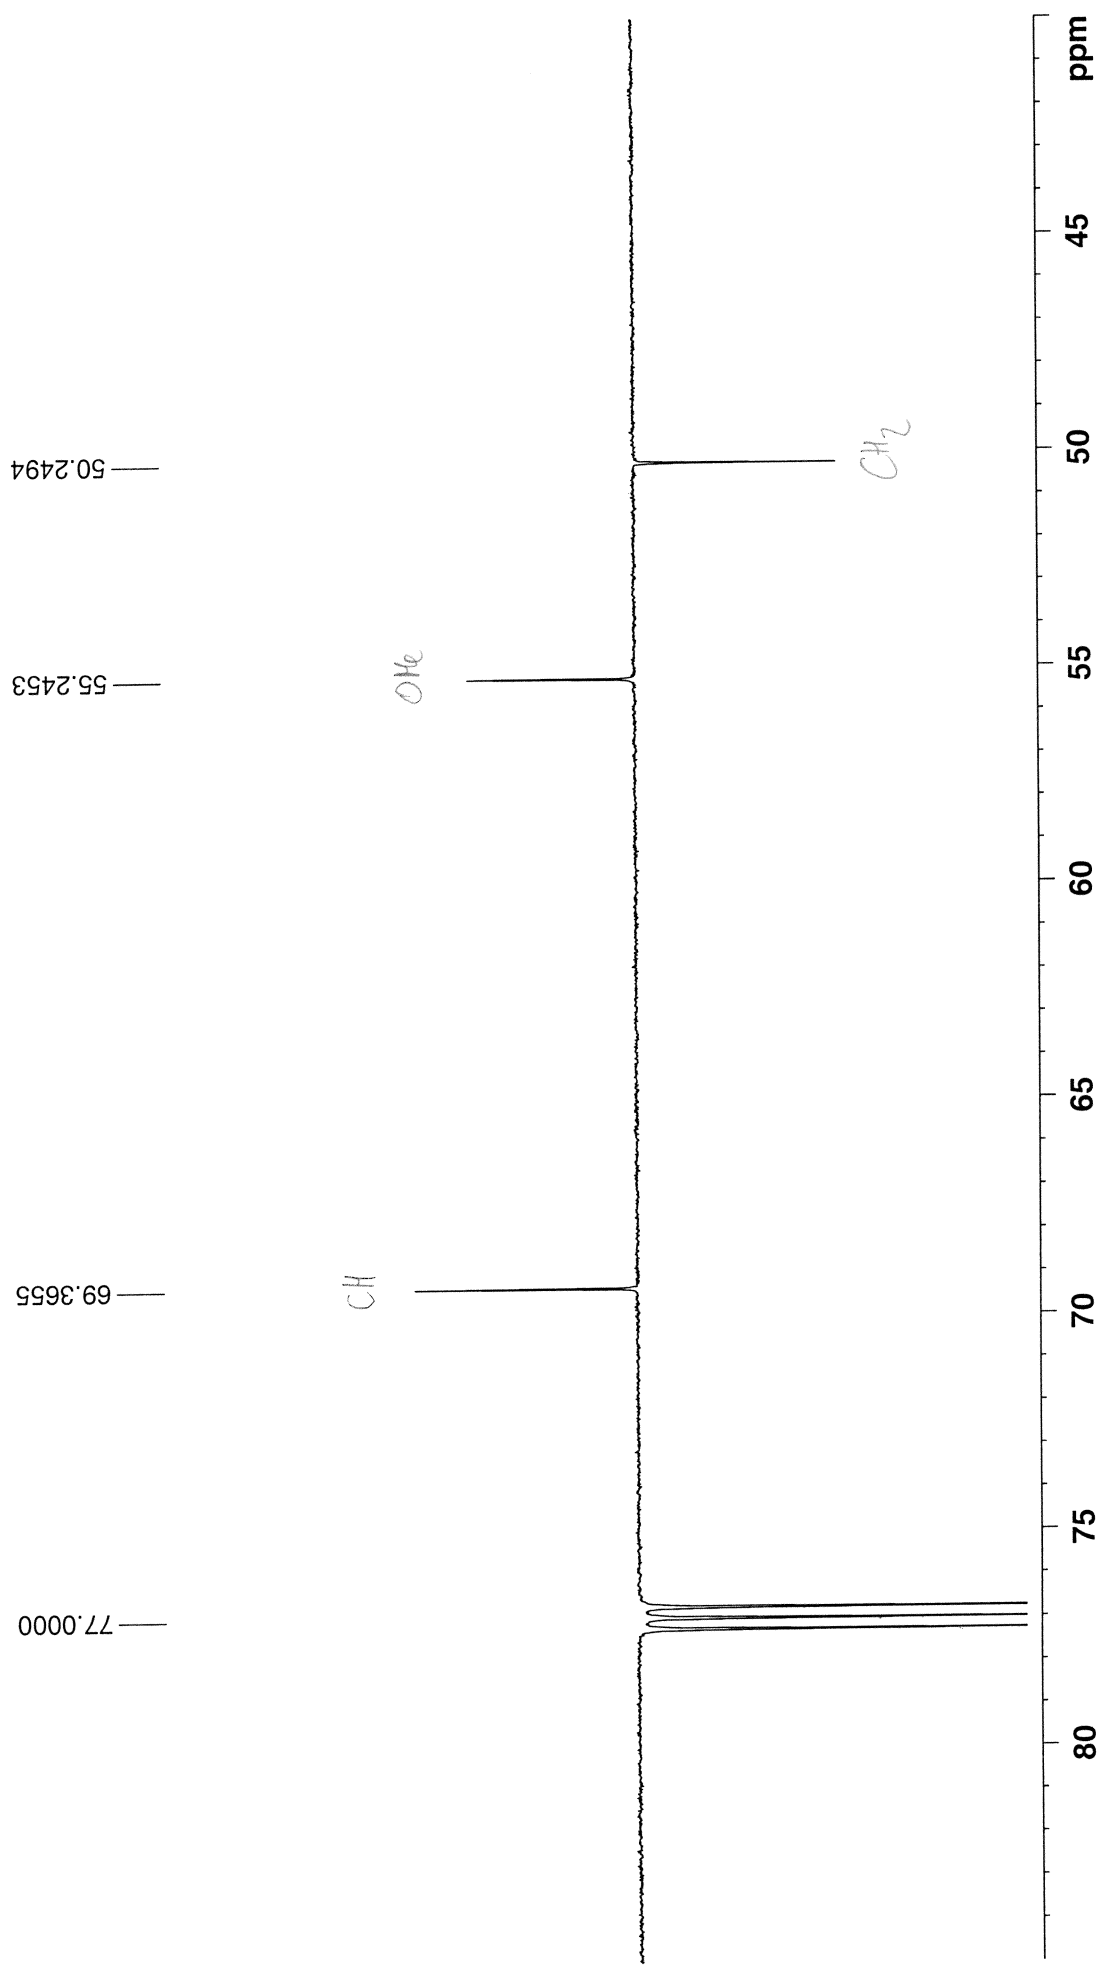



PN008\_2\_2 in cdcl3 (COSY) 29.8.2019

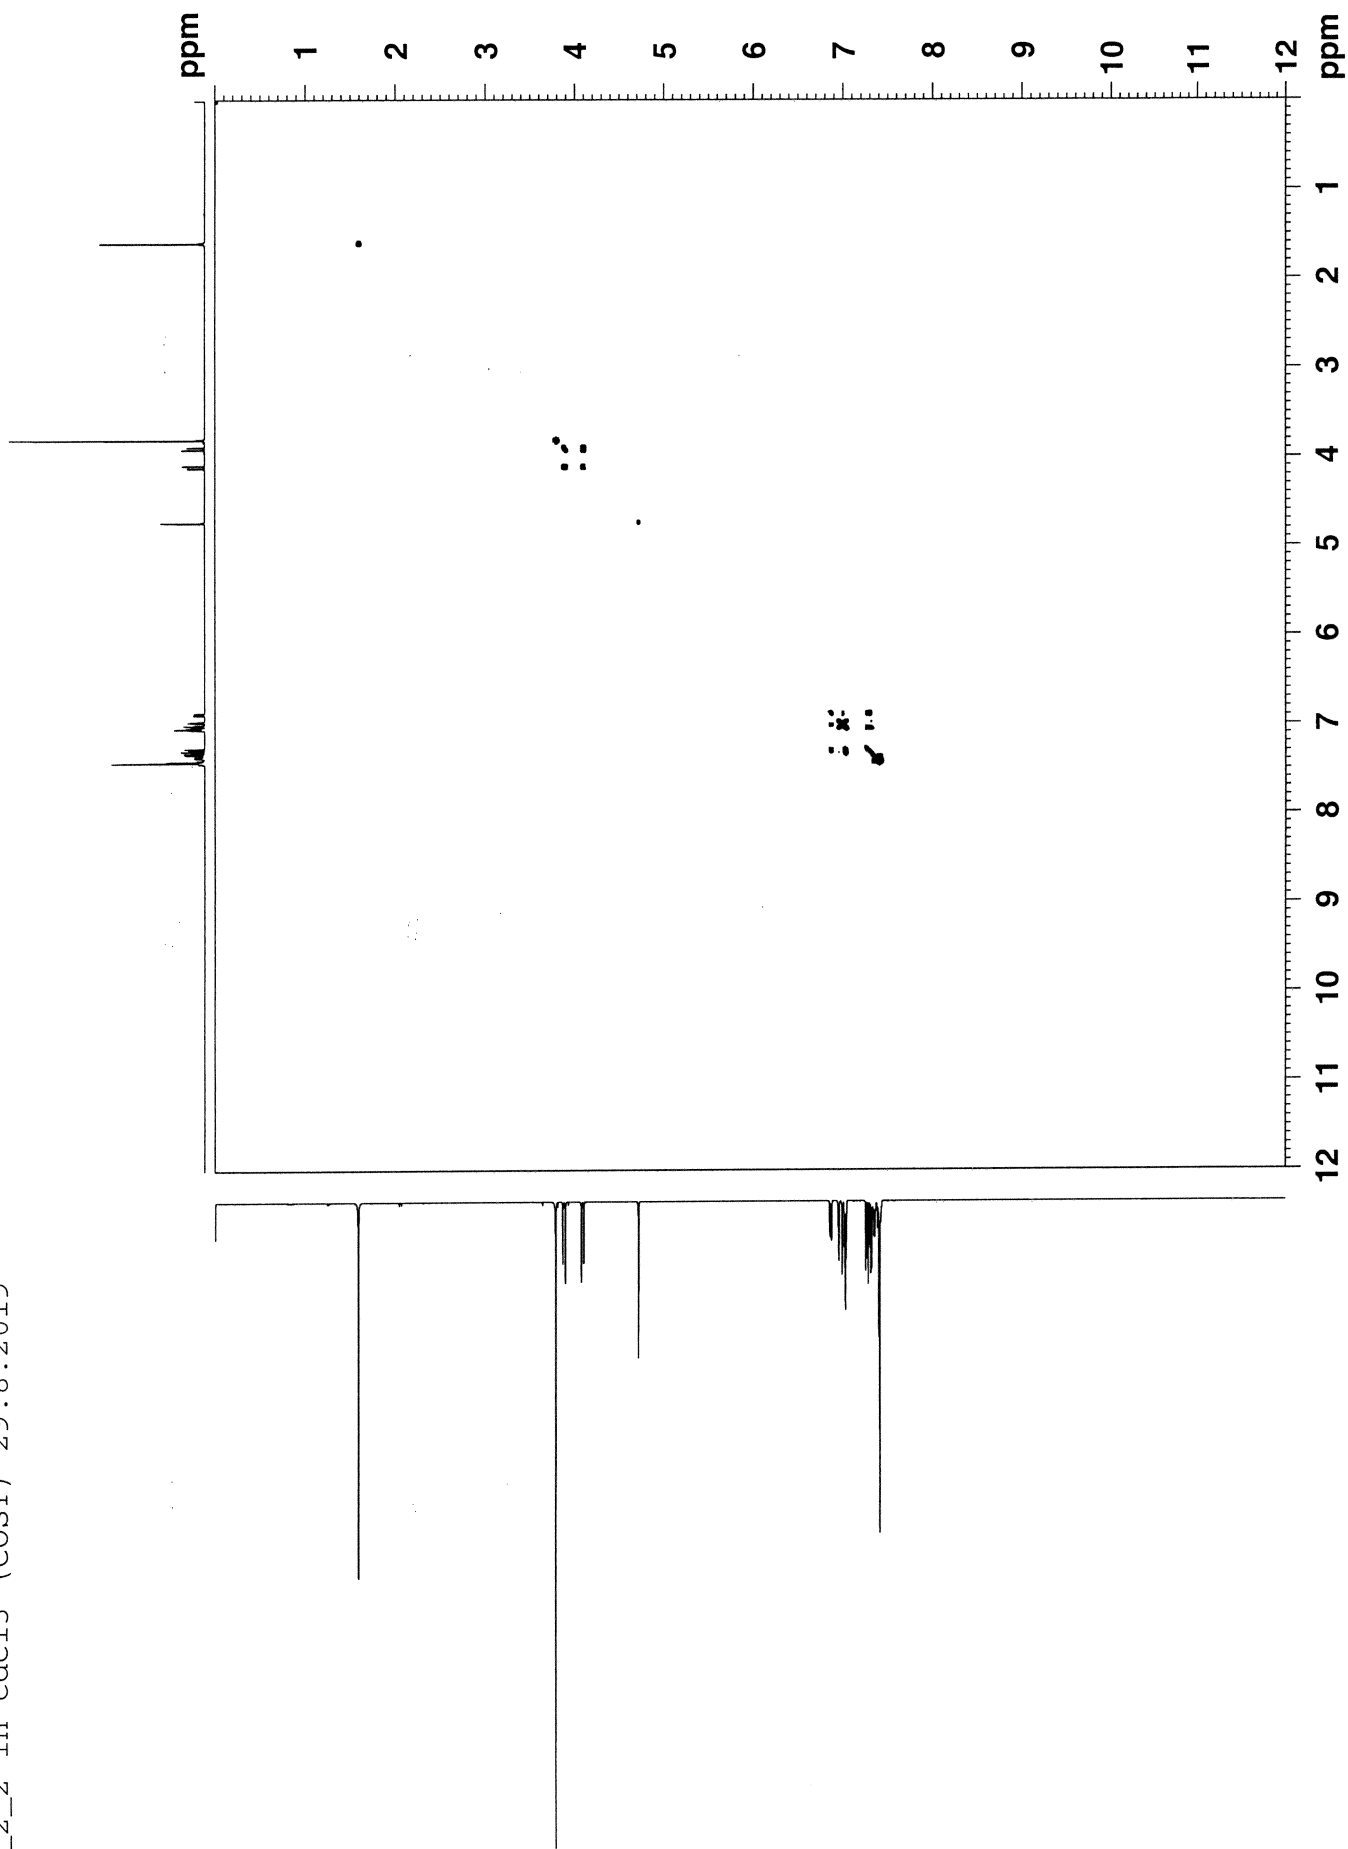

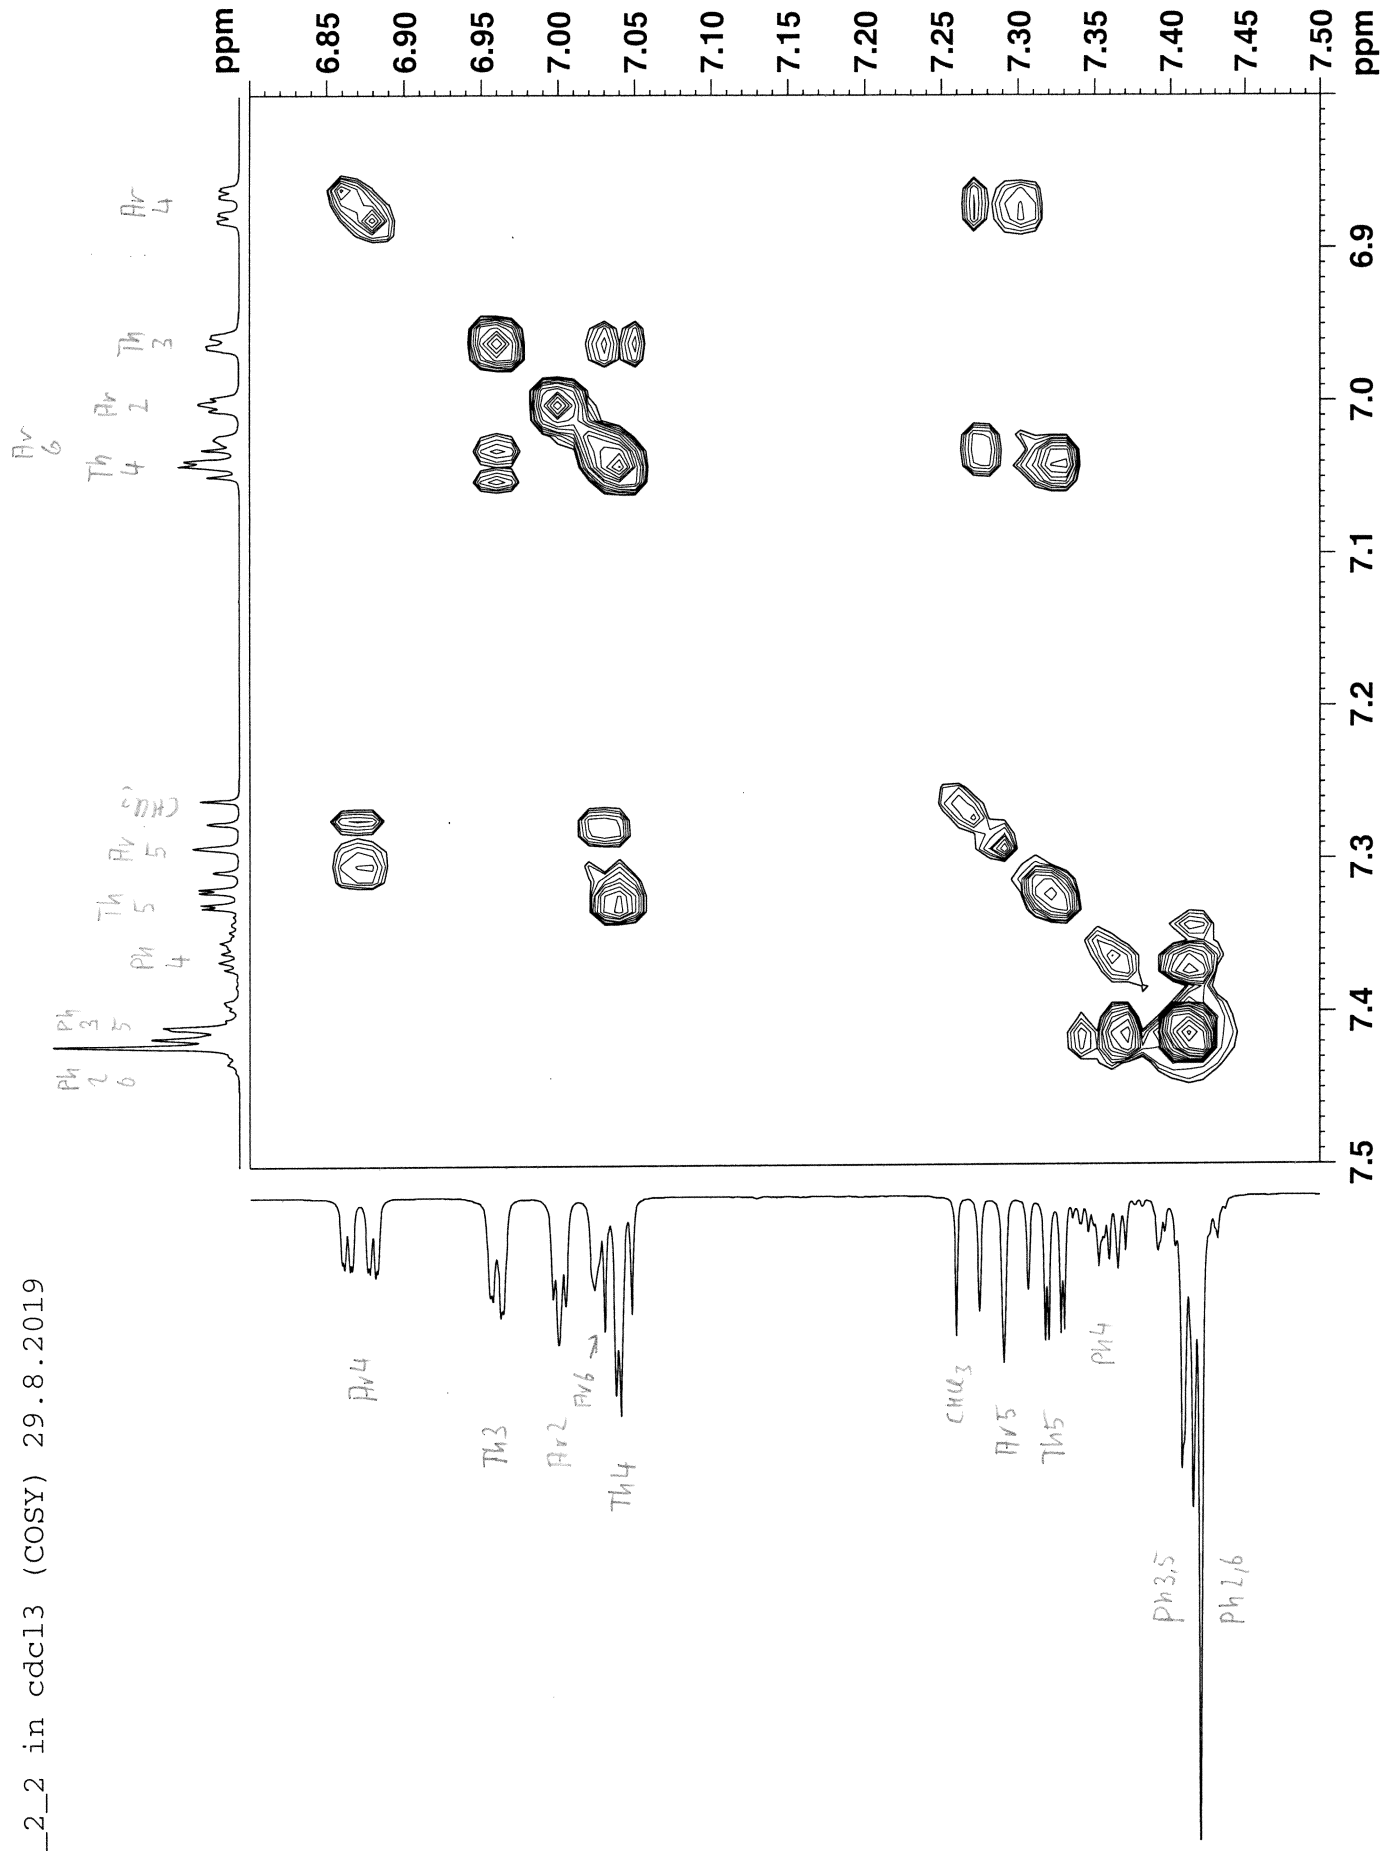

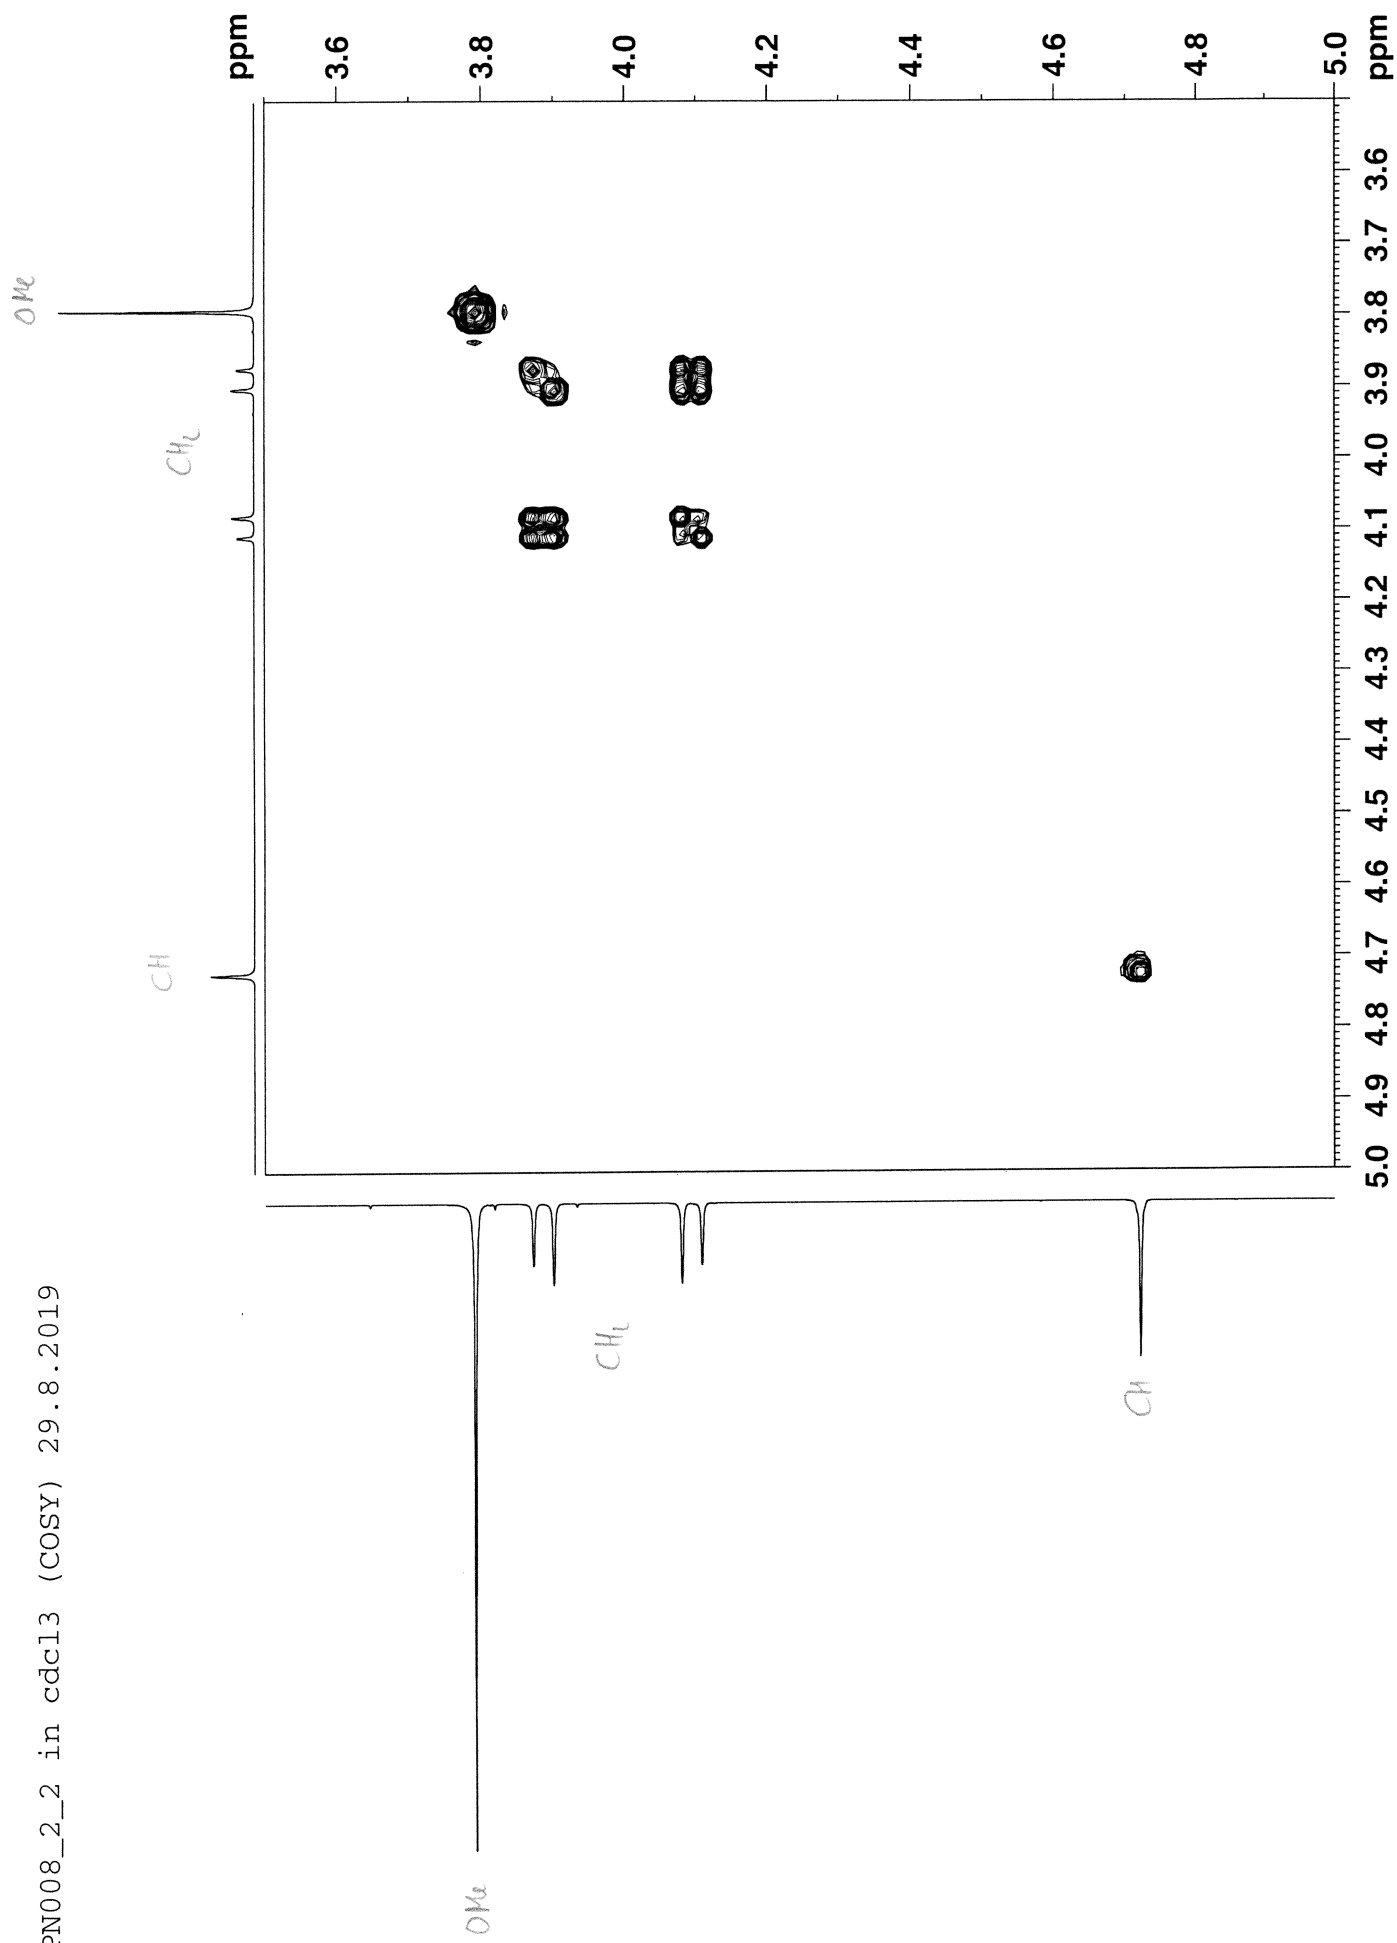

PN008\_2\_2 in cdcl3 (HSQC) 29.8.2019

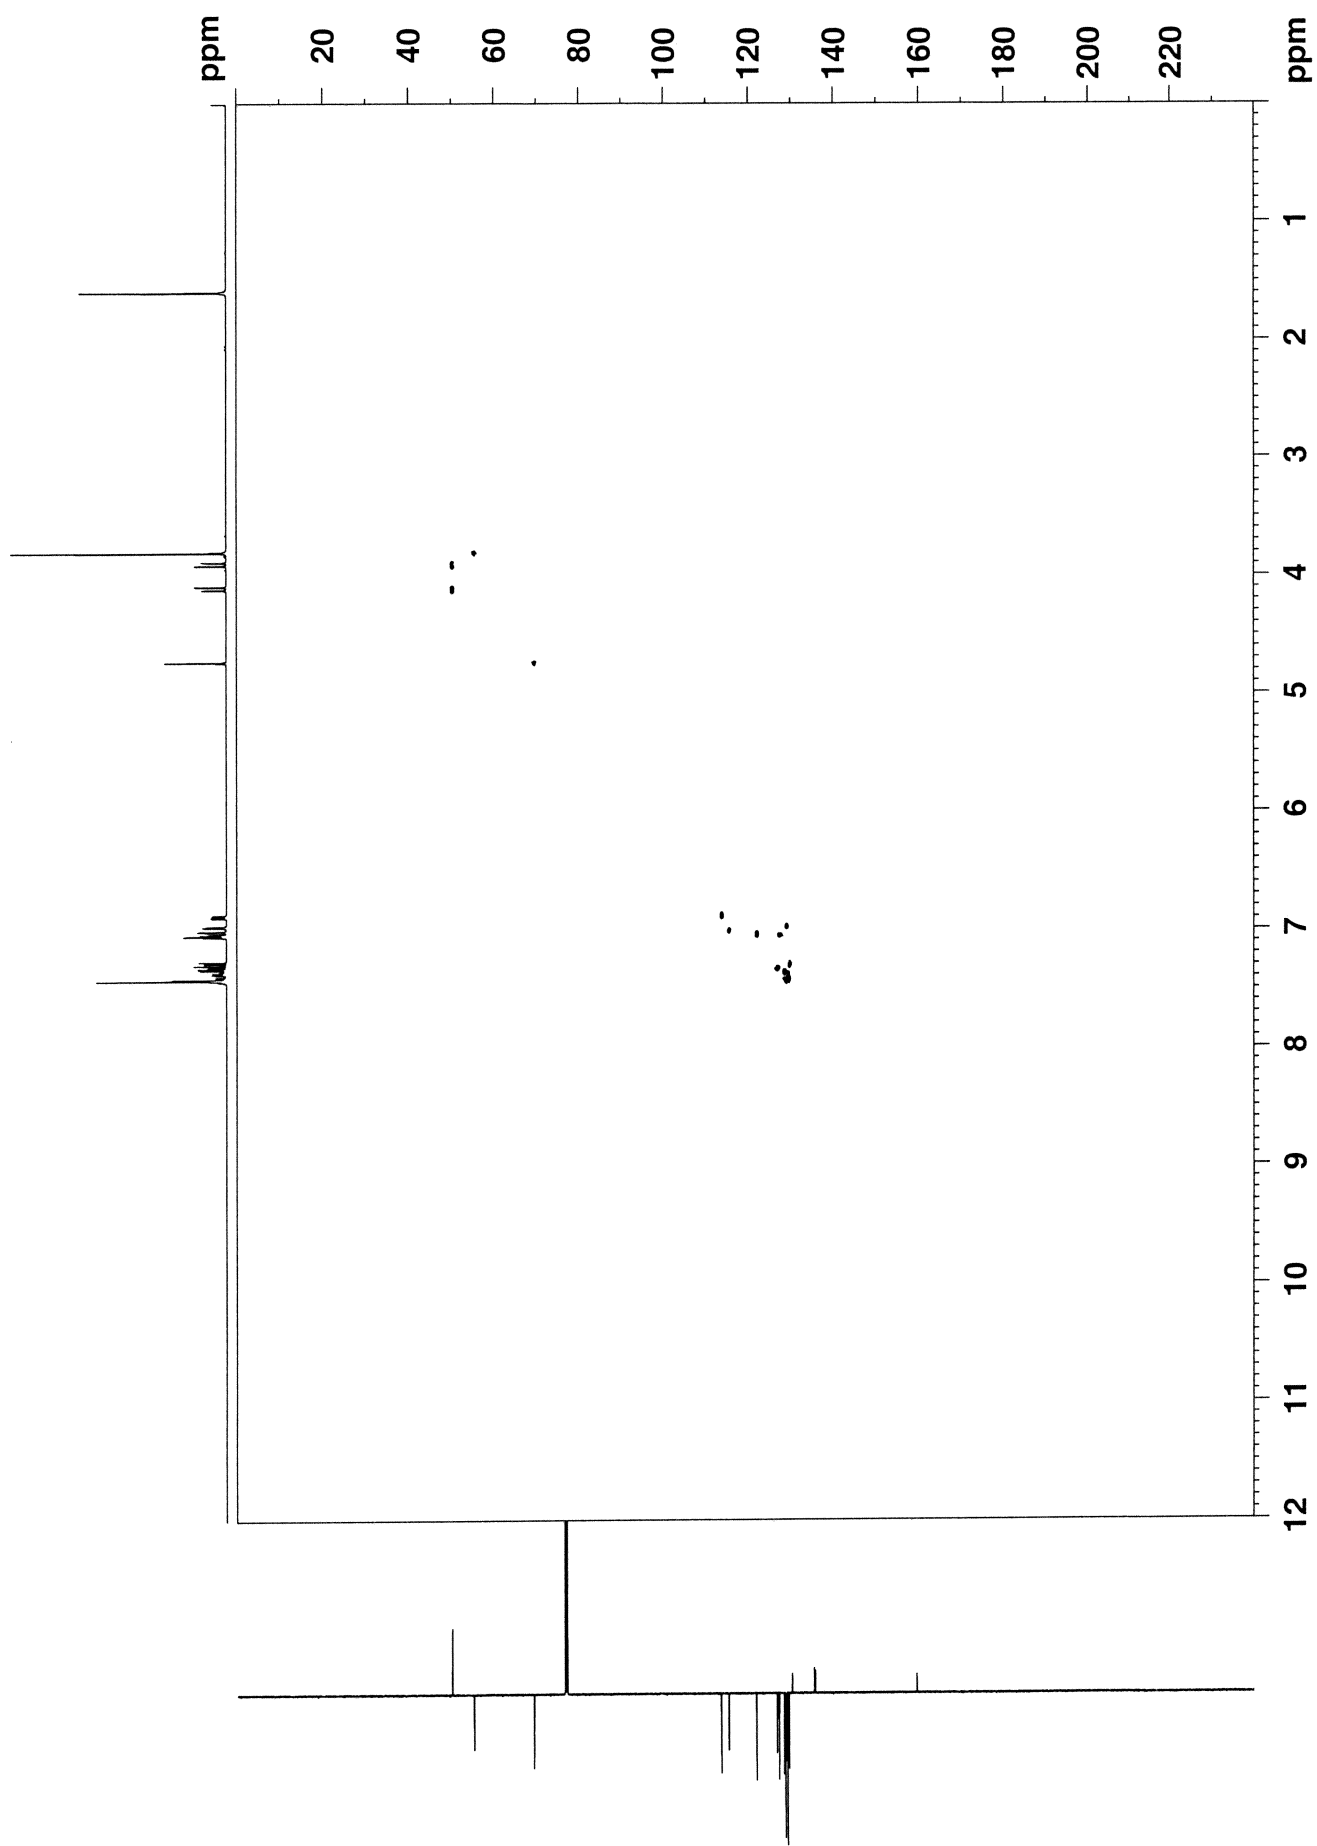

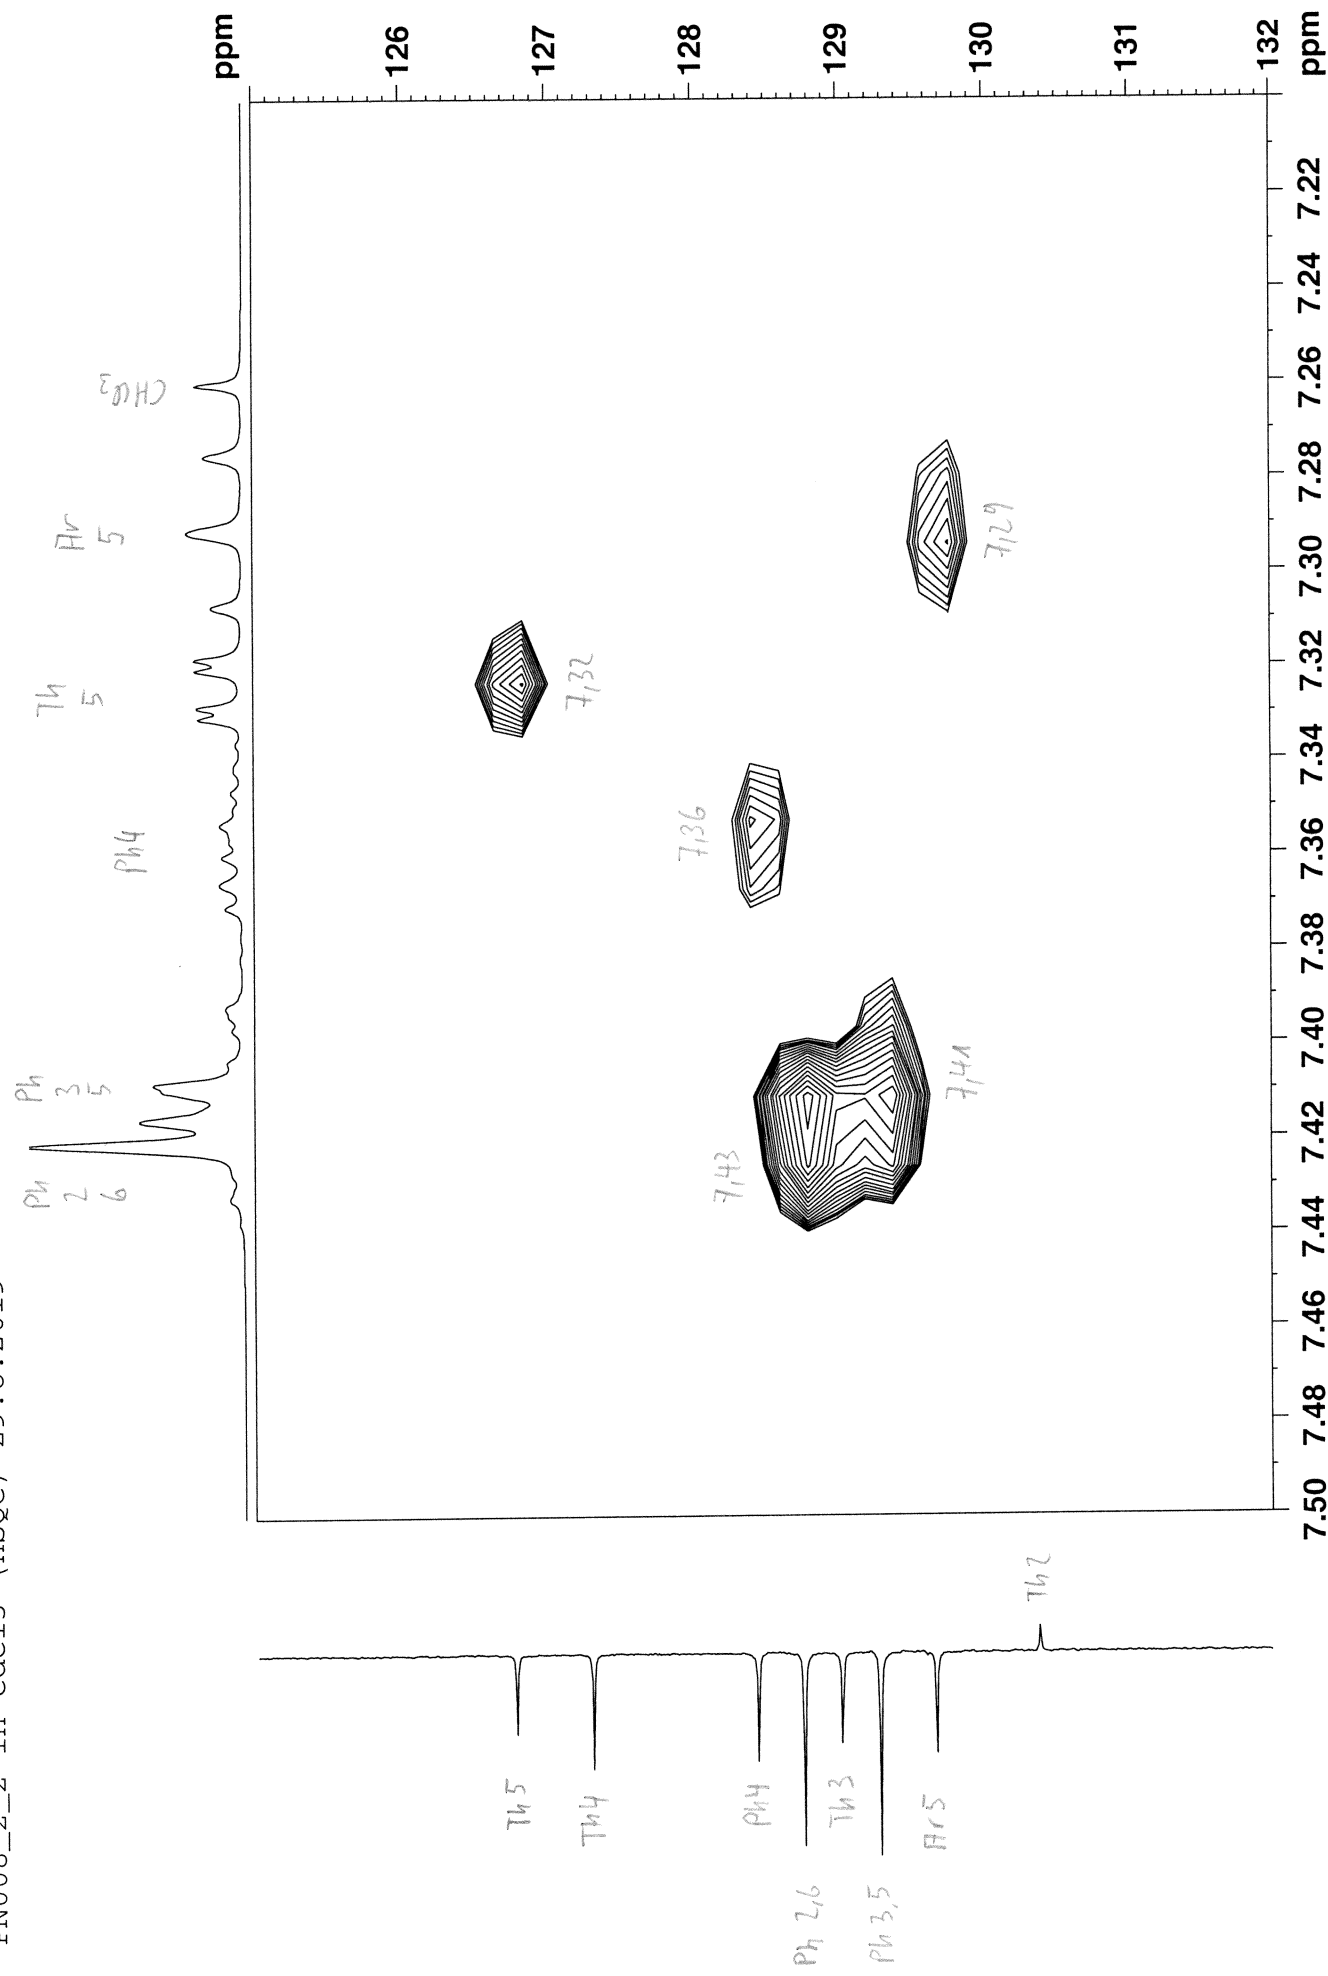

PN008\_2\_2 in cdcl3 (HSQC) 29.8.2019

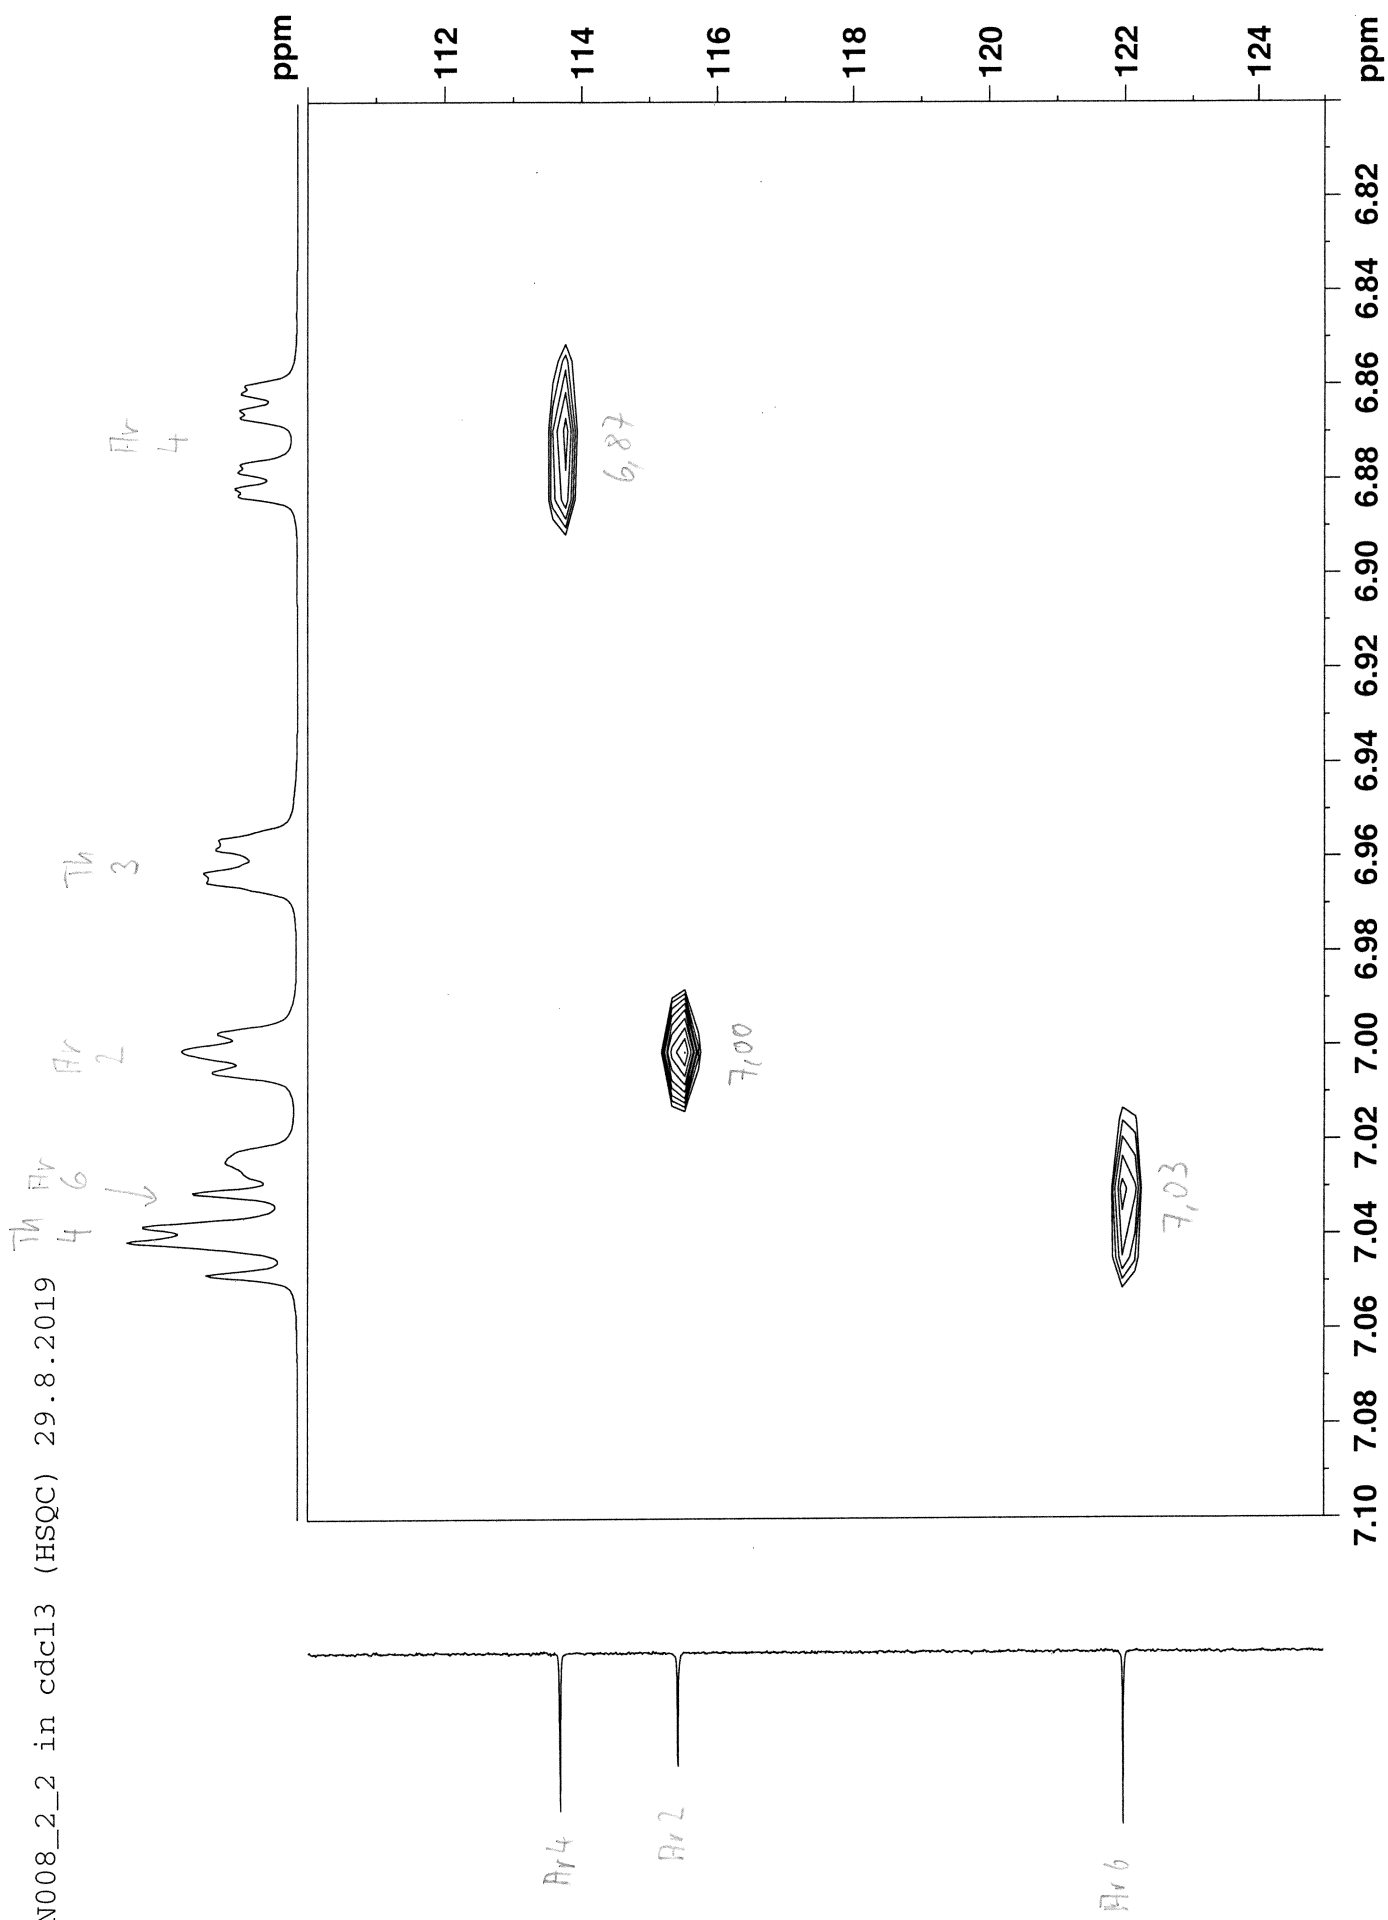

PN008\_2\_2 in cdcl3 (HSQC) 29.8.2019

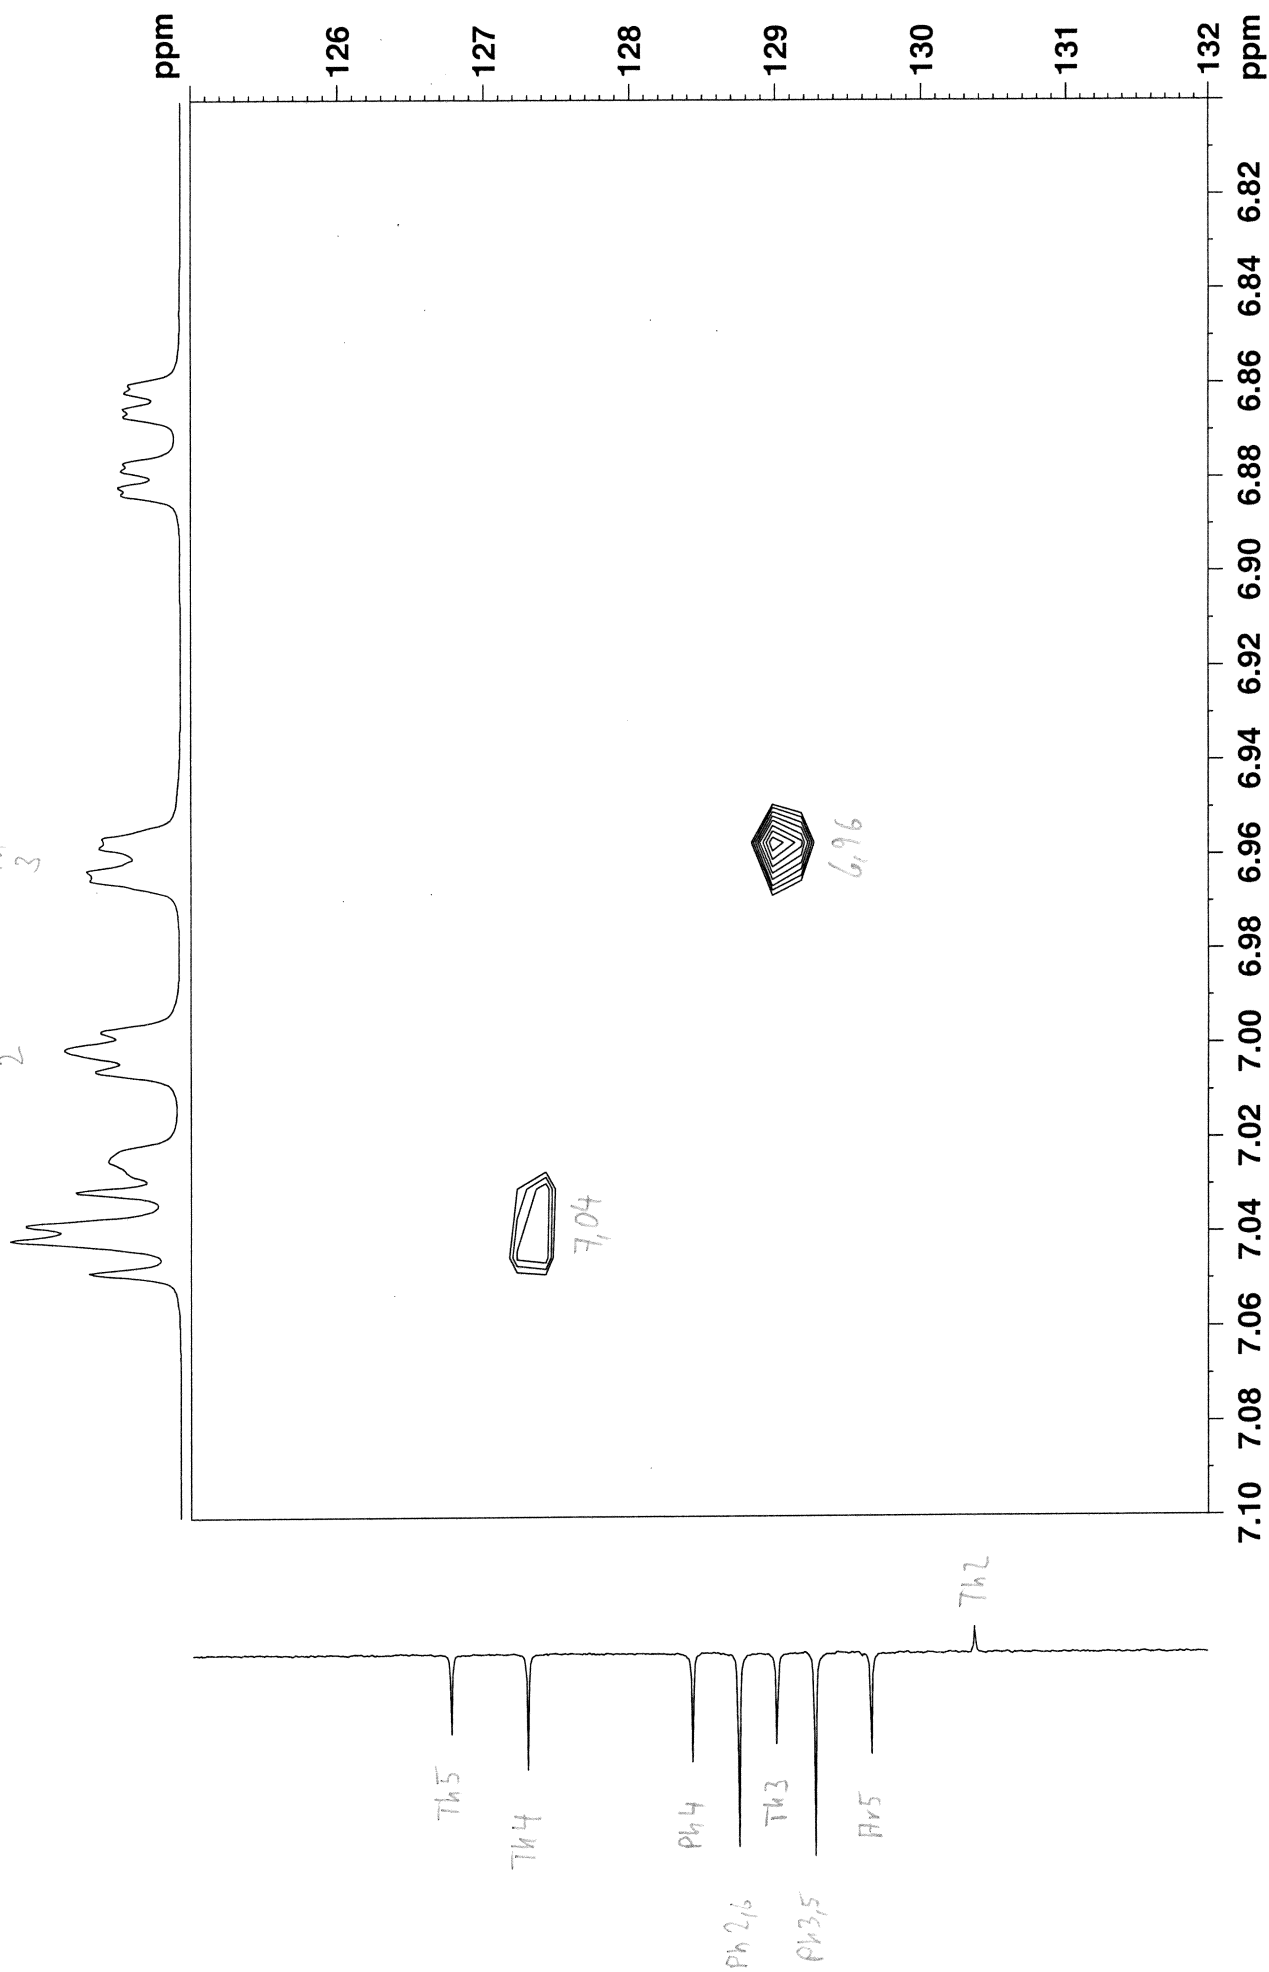

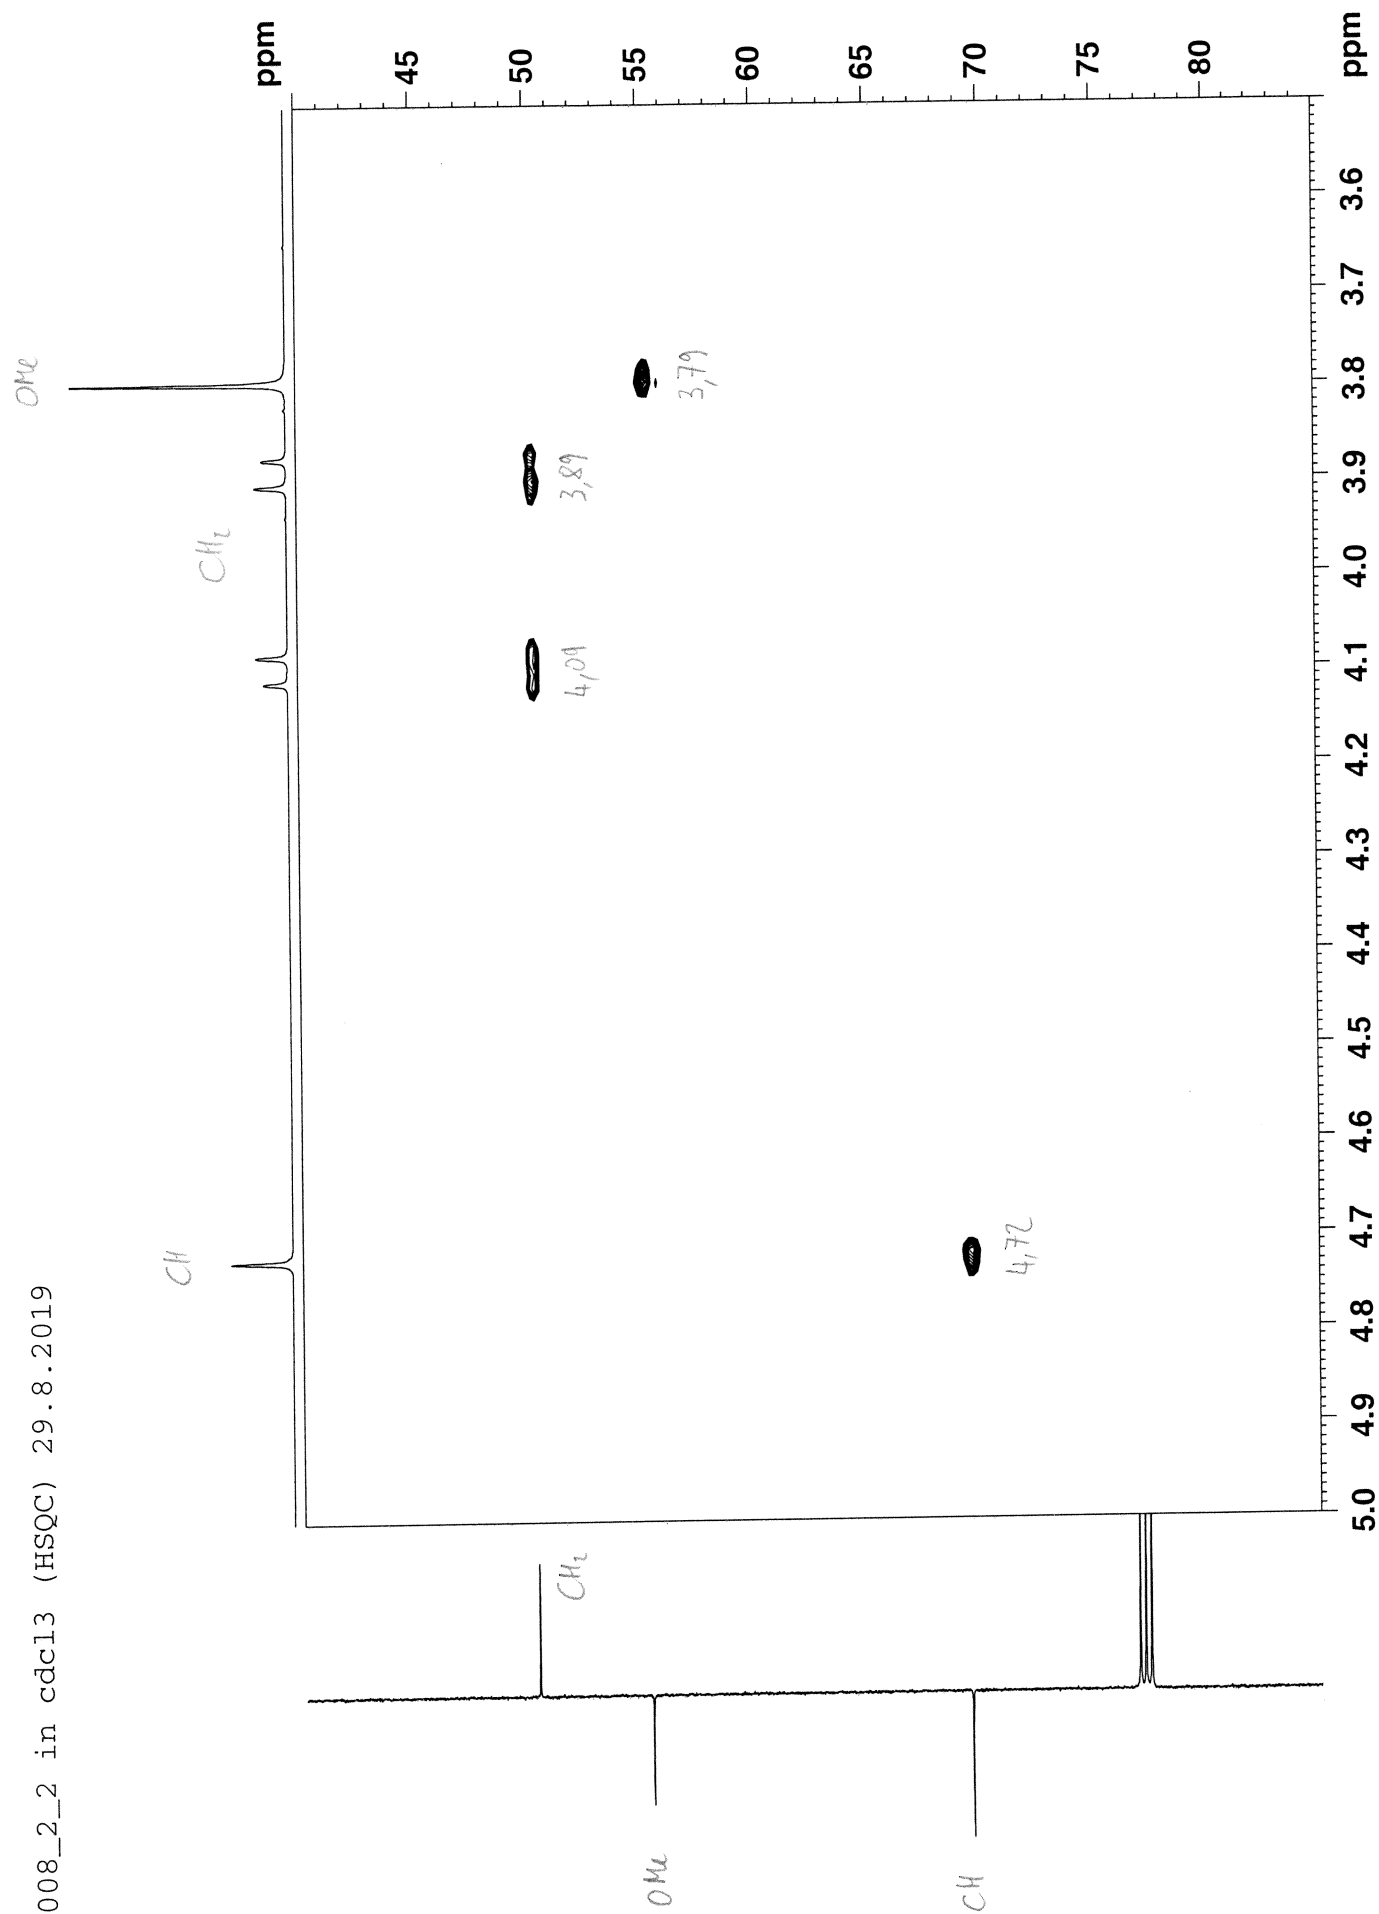



PN008\_2\_2 in cdcl3 (HMBC) 29.8.2019

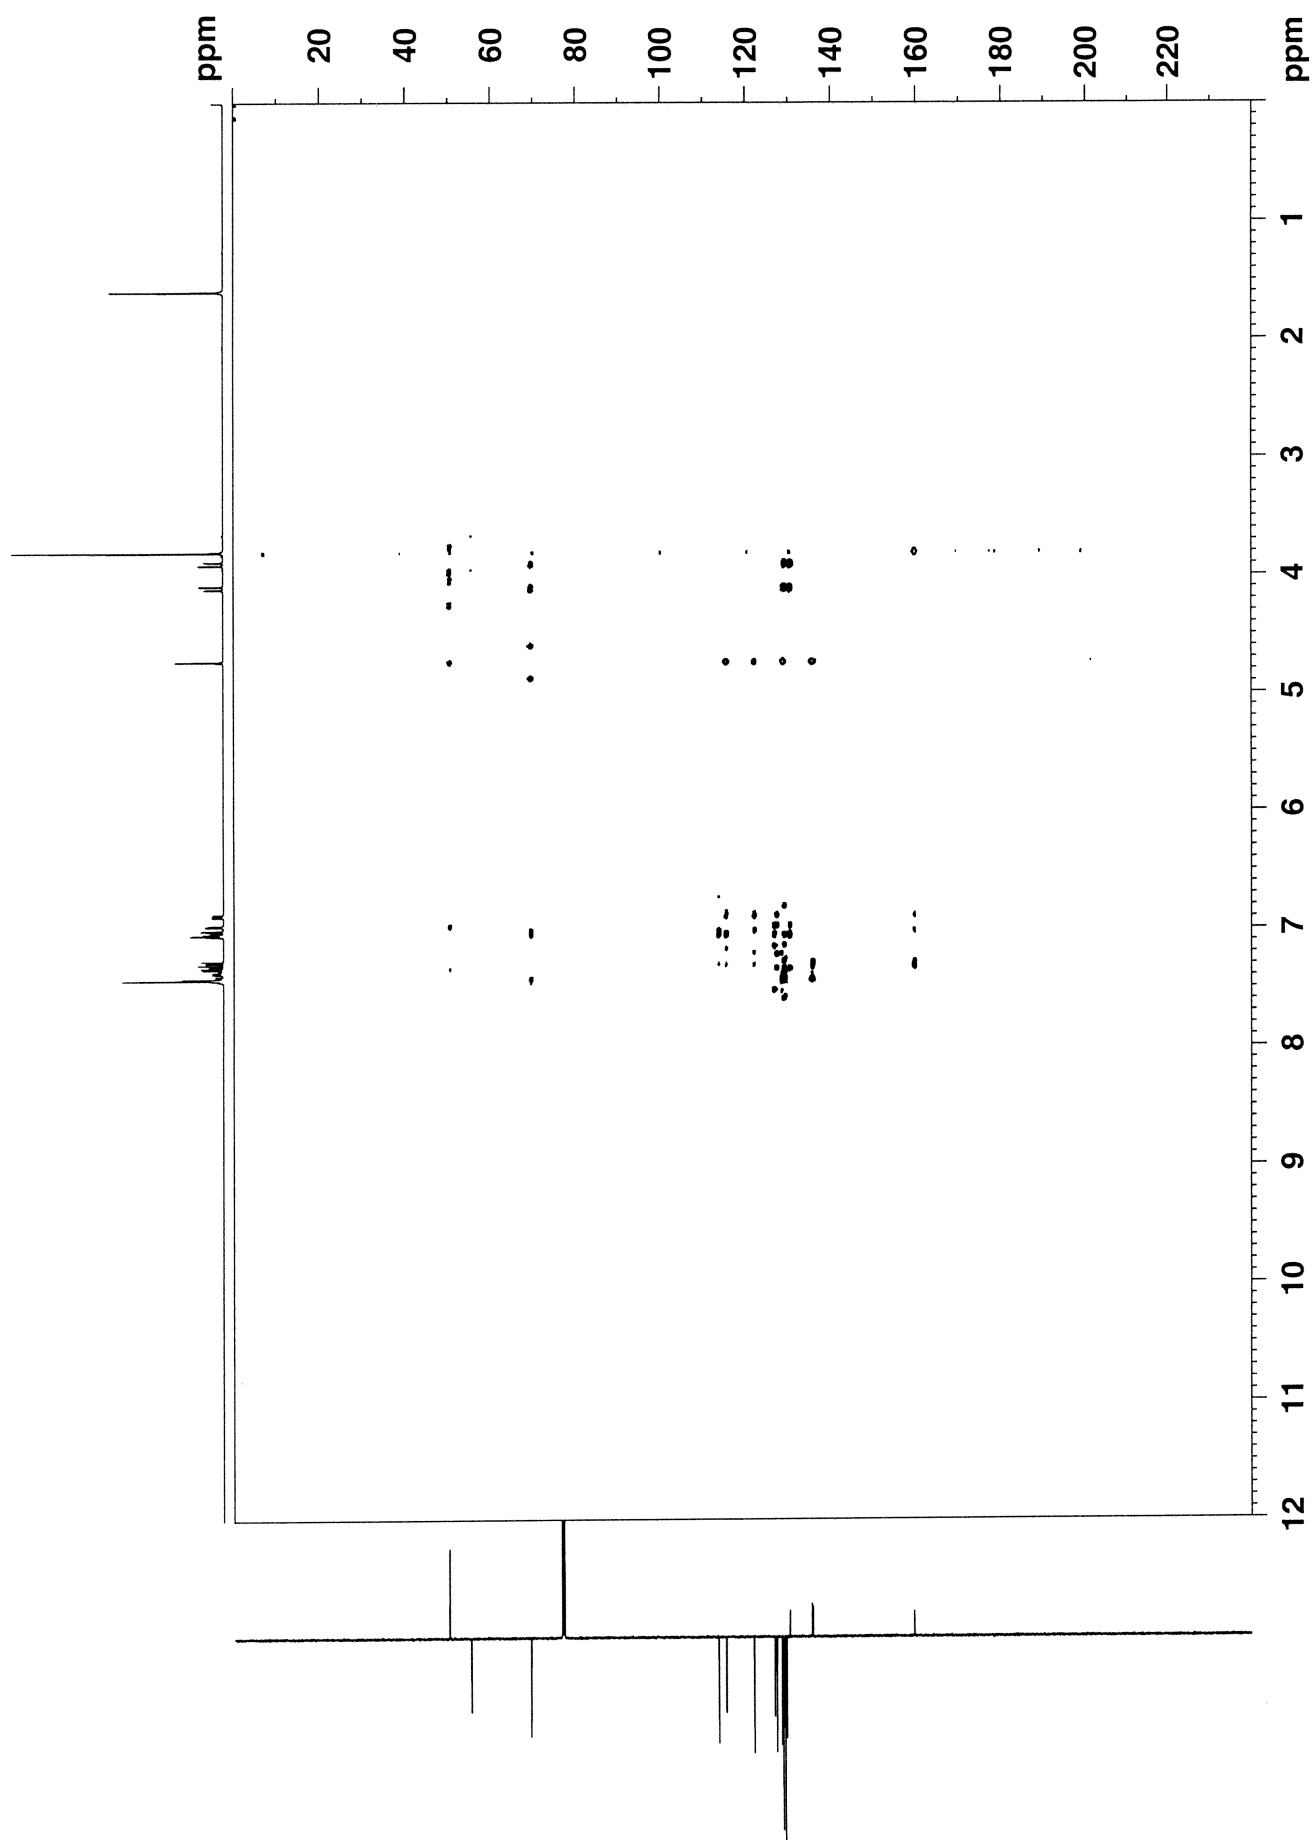

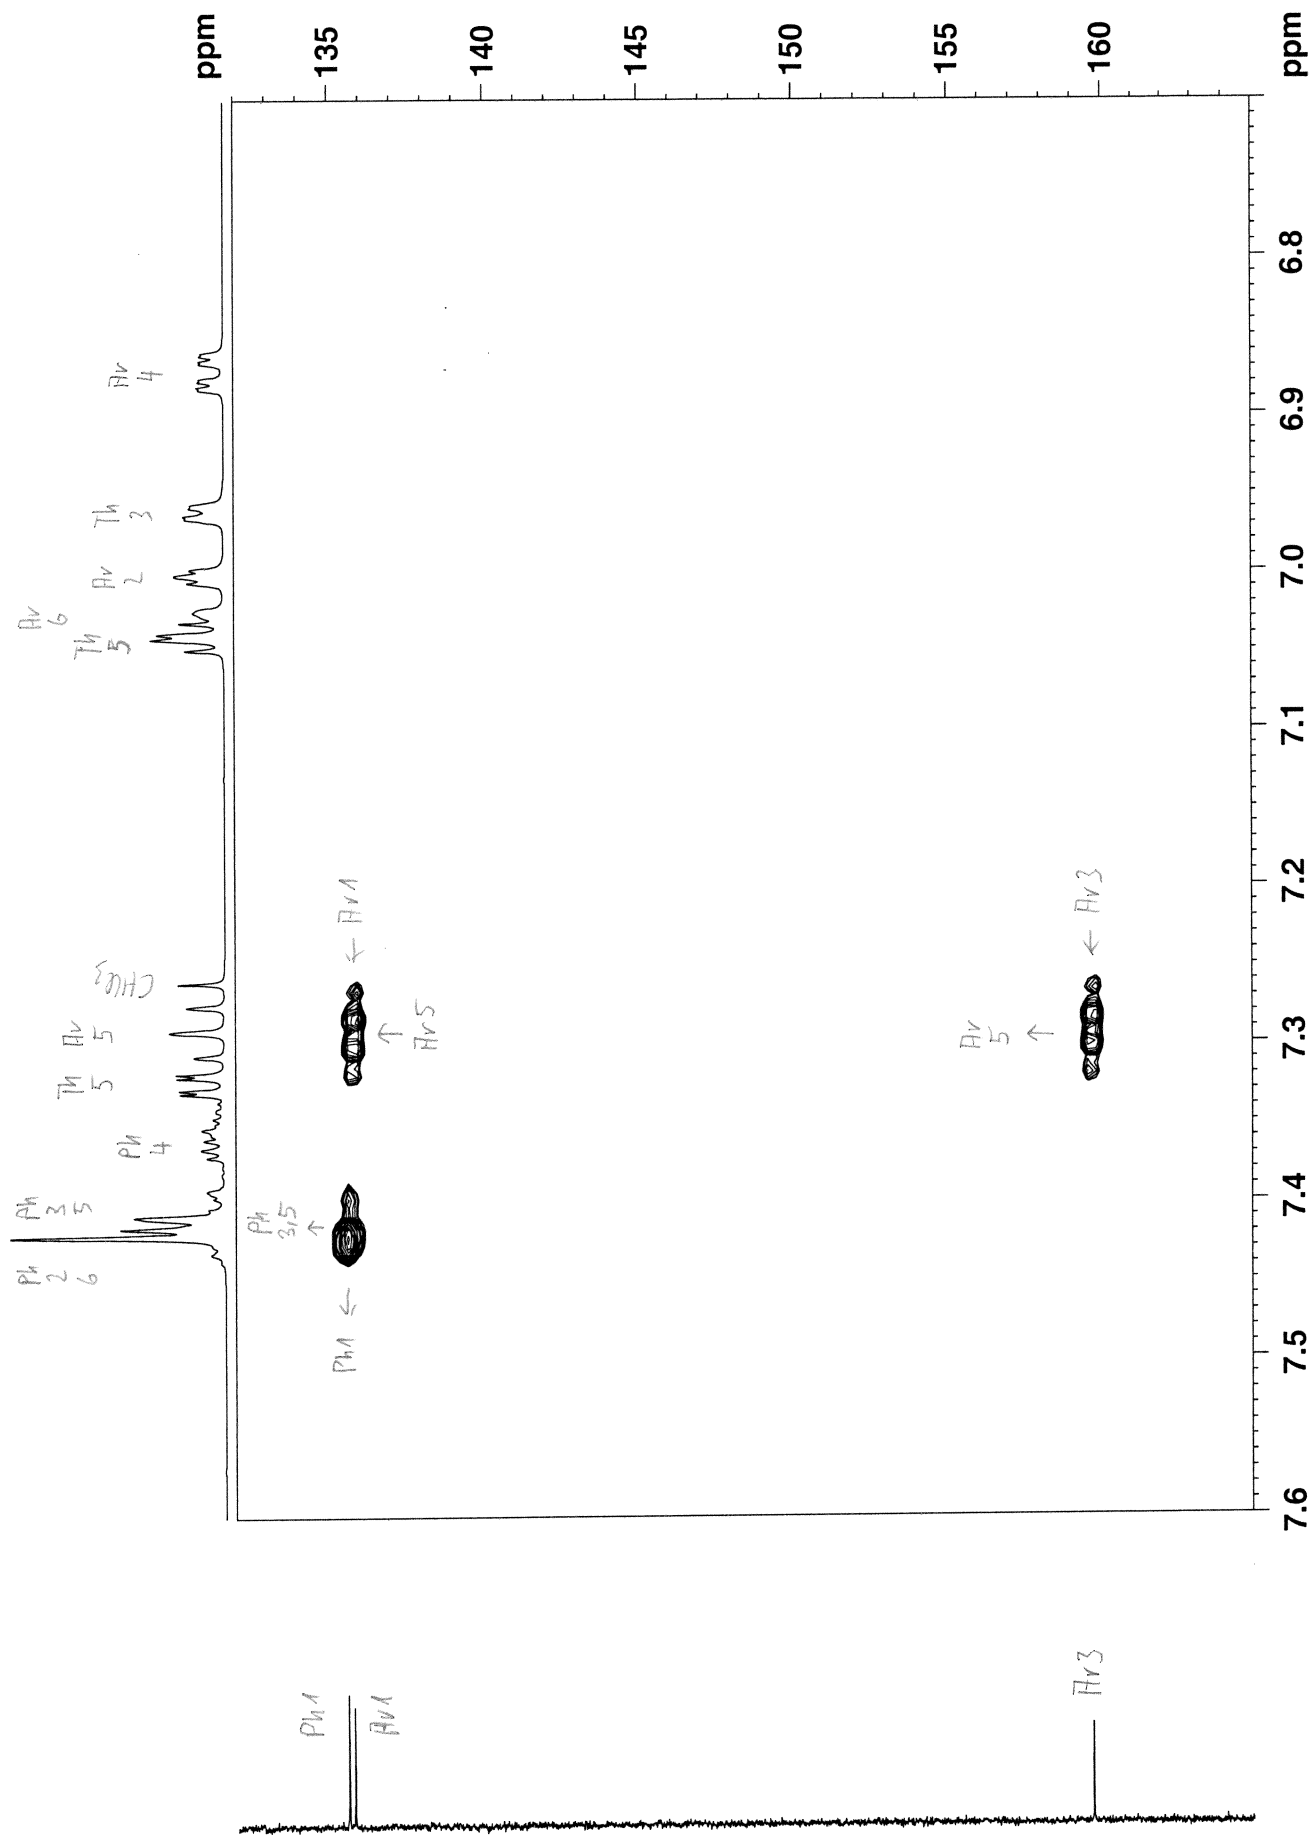

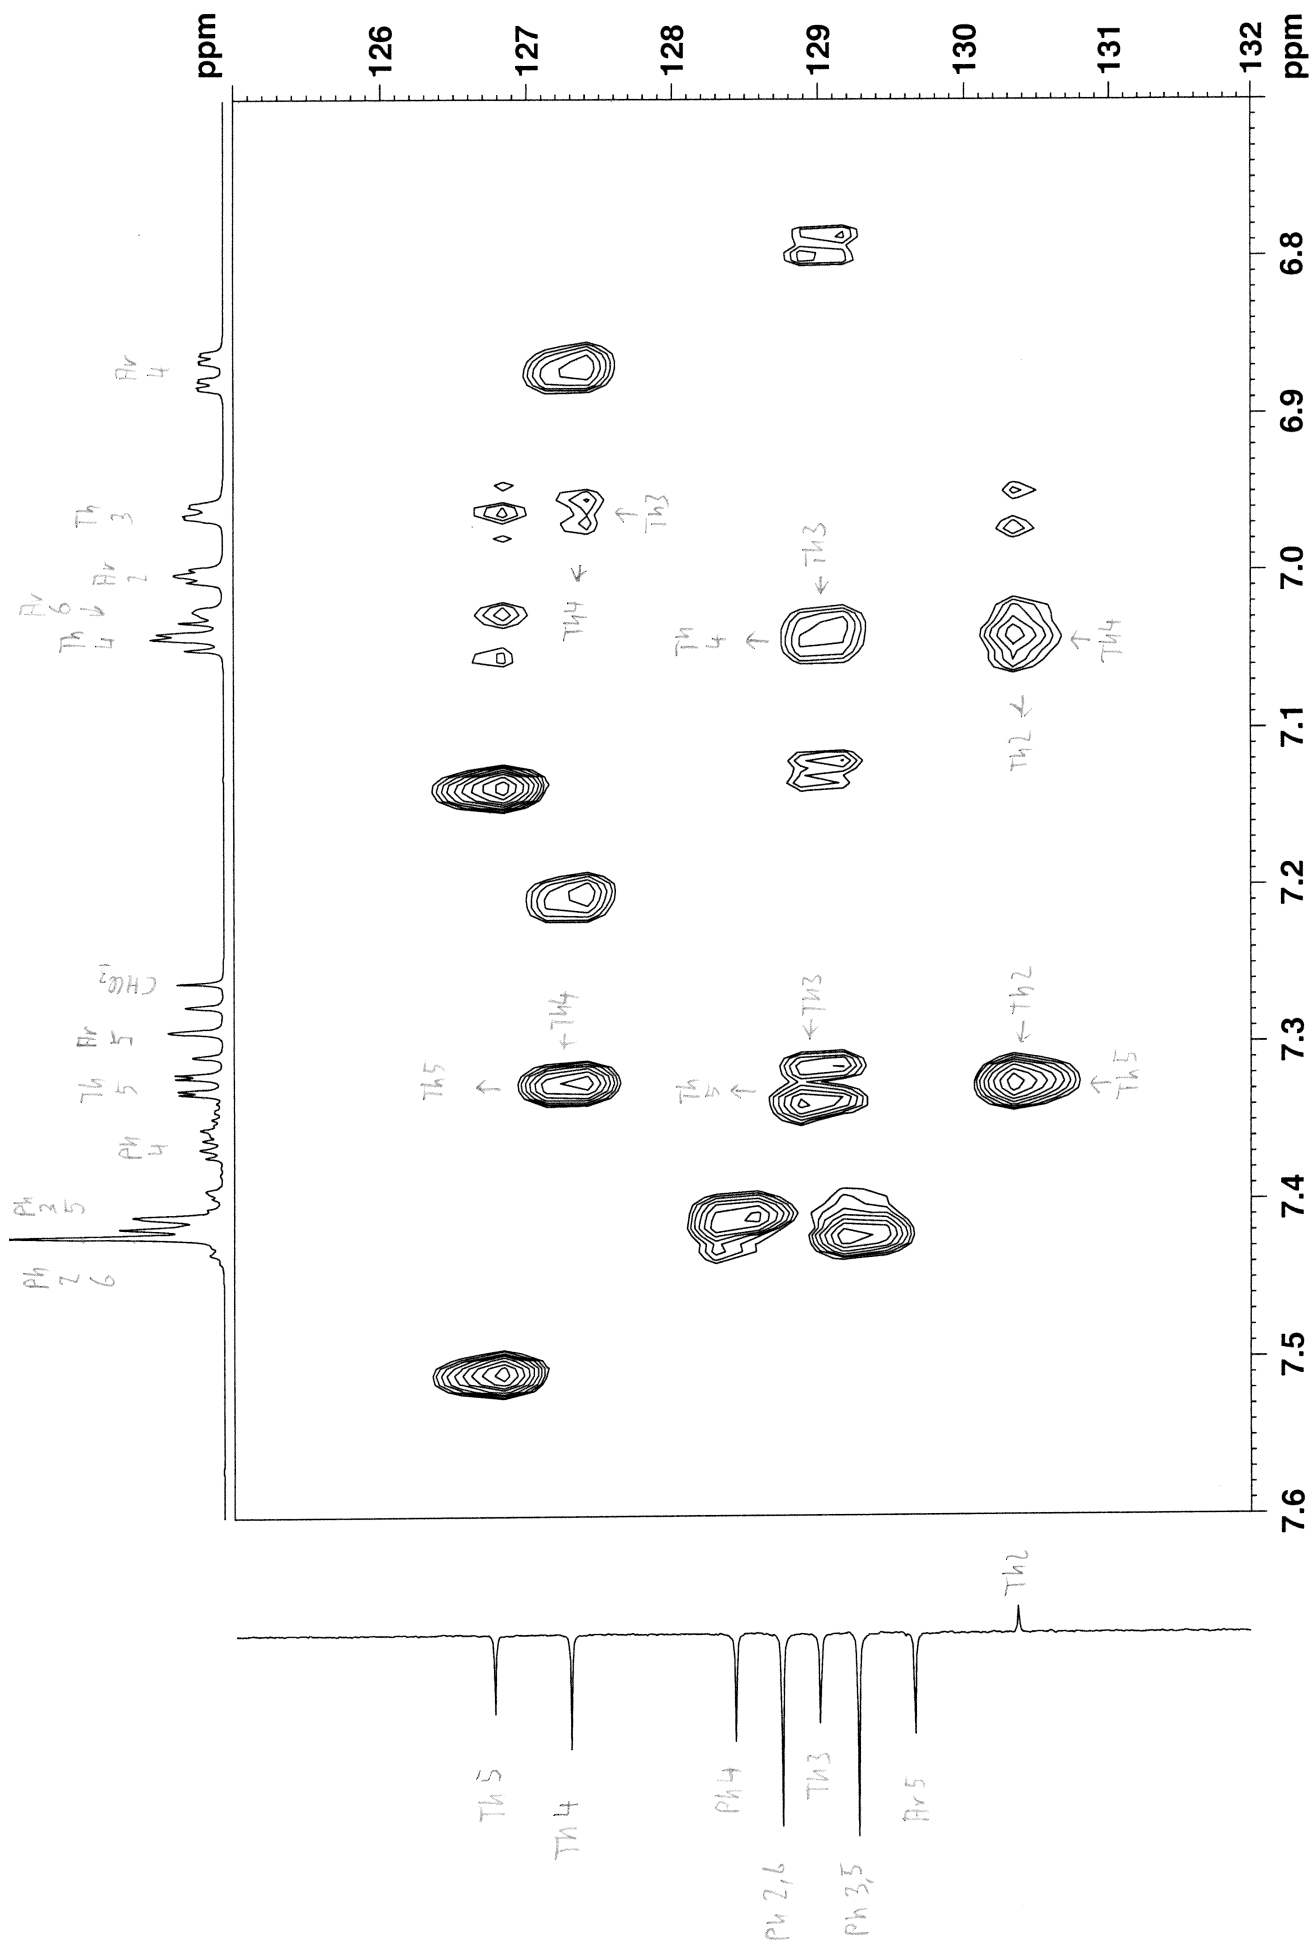

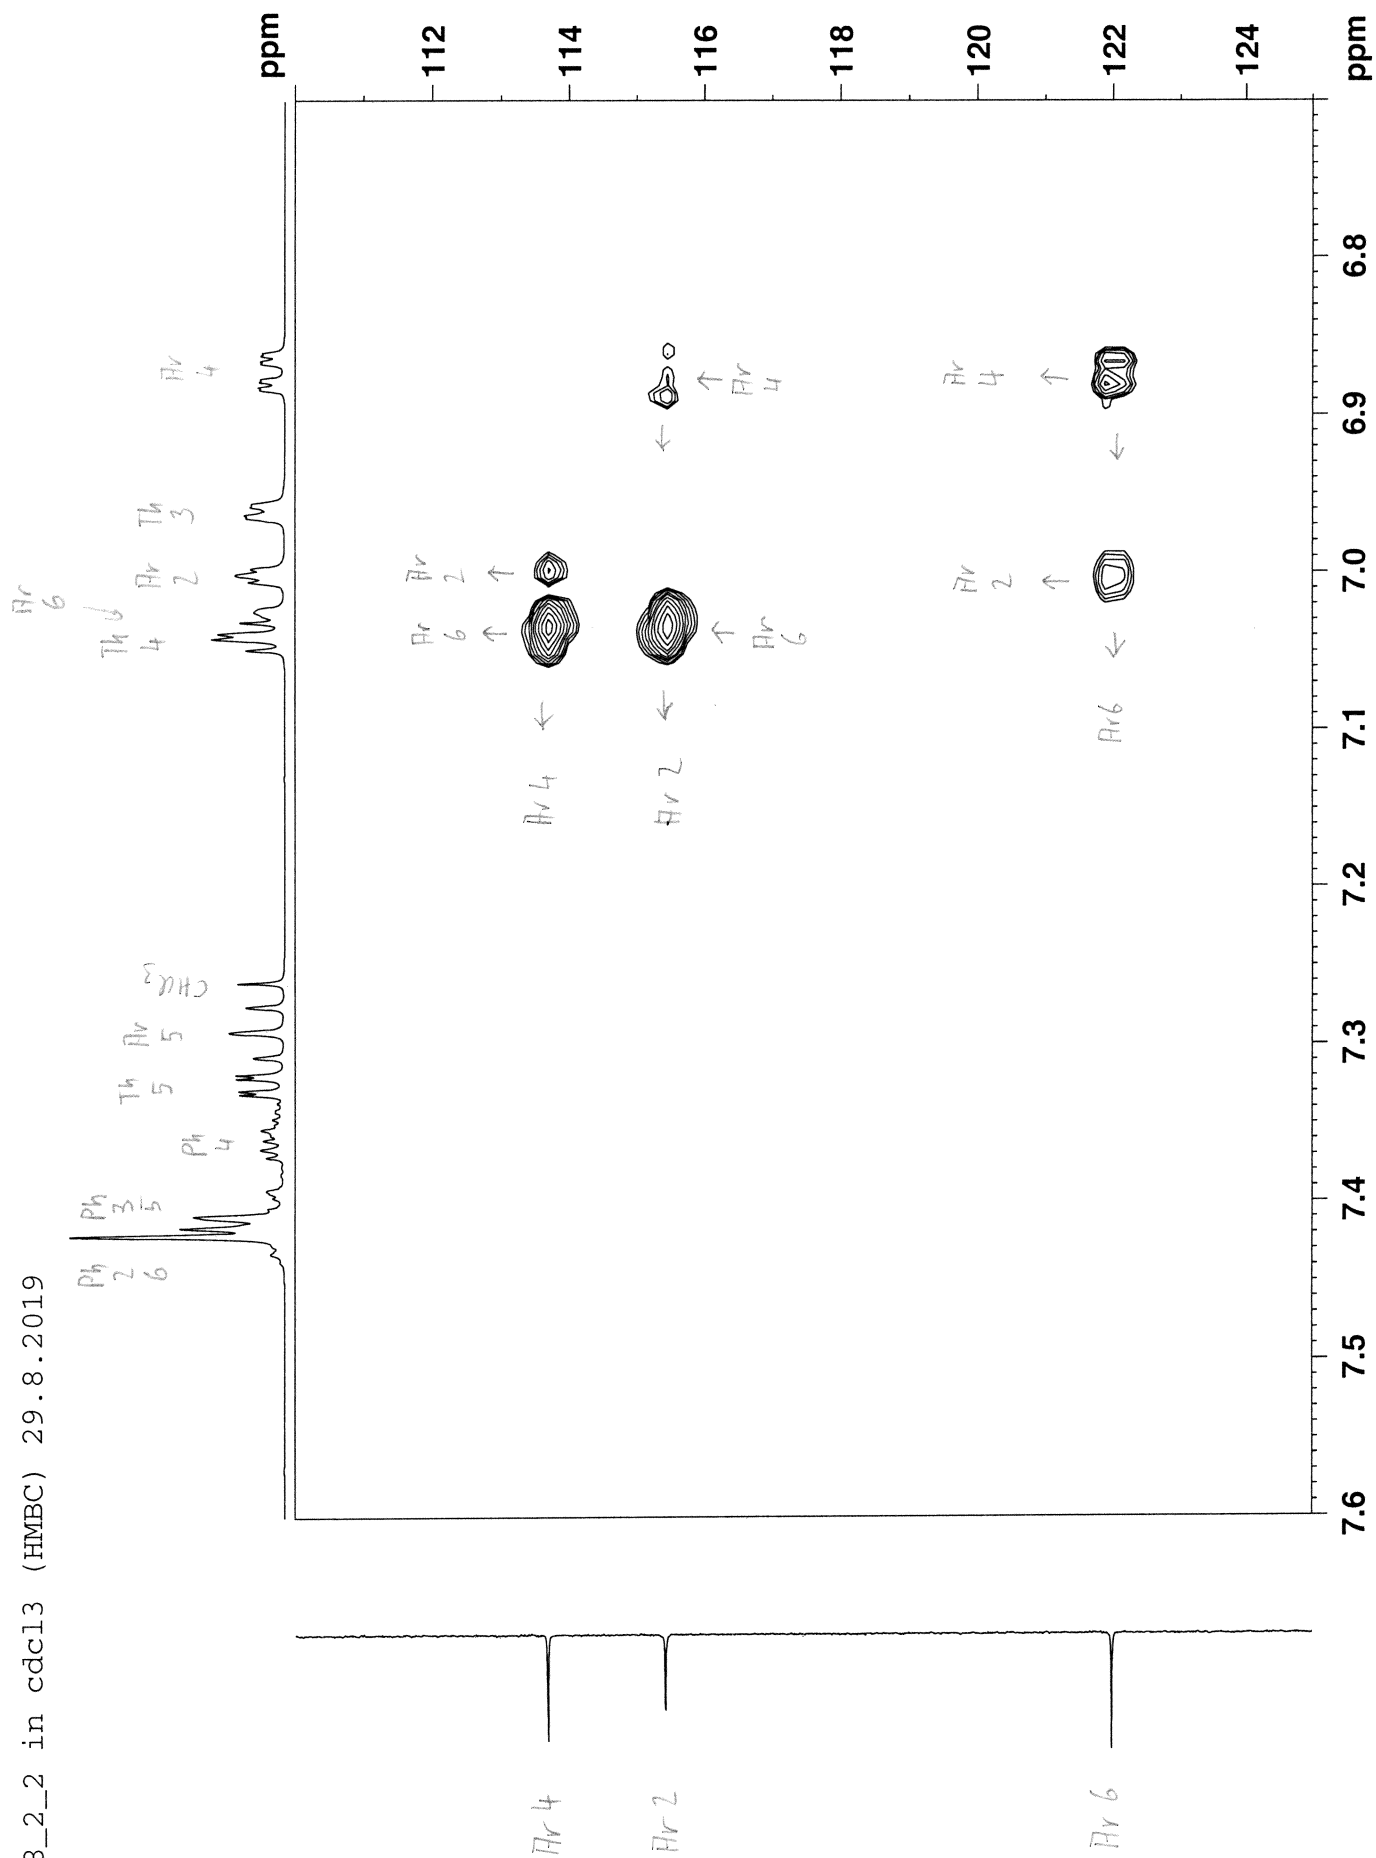

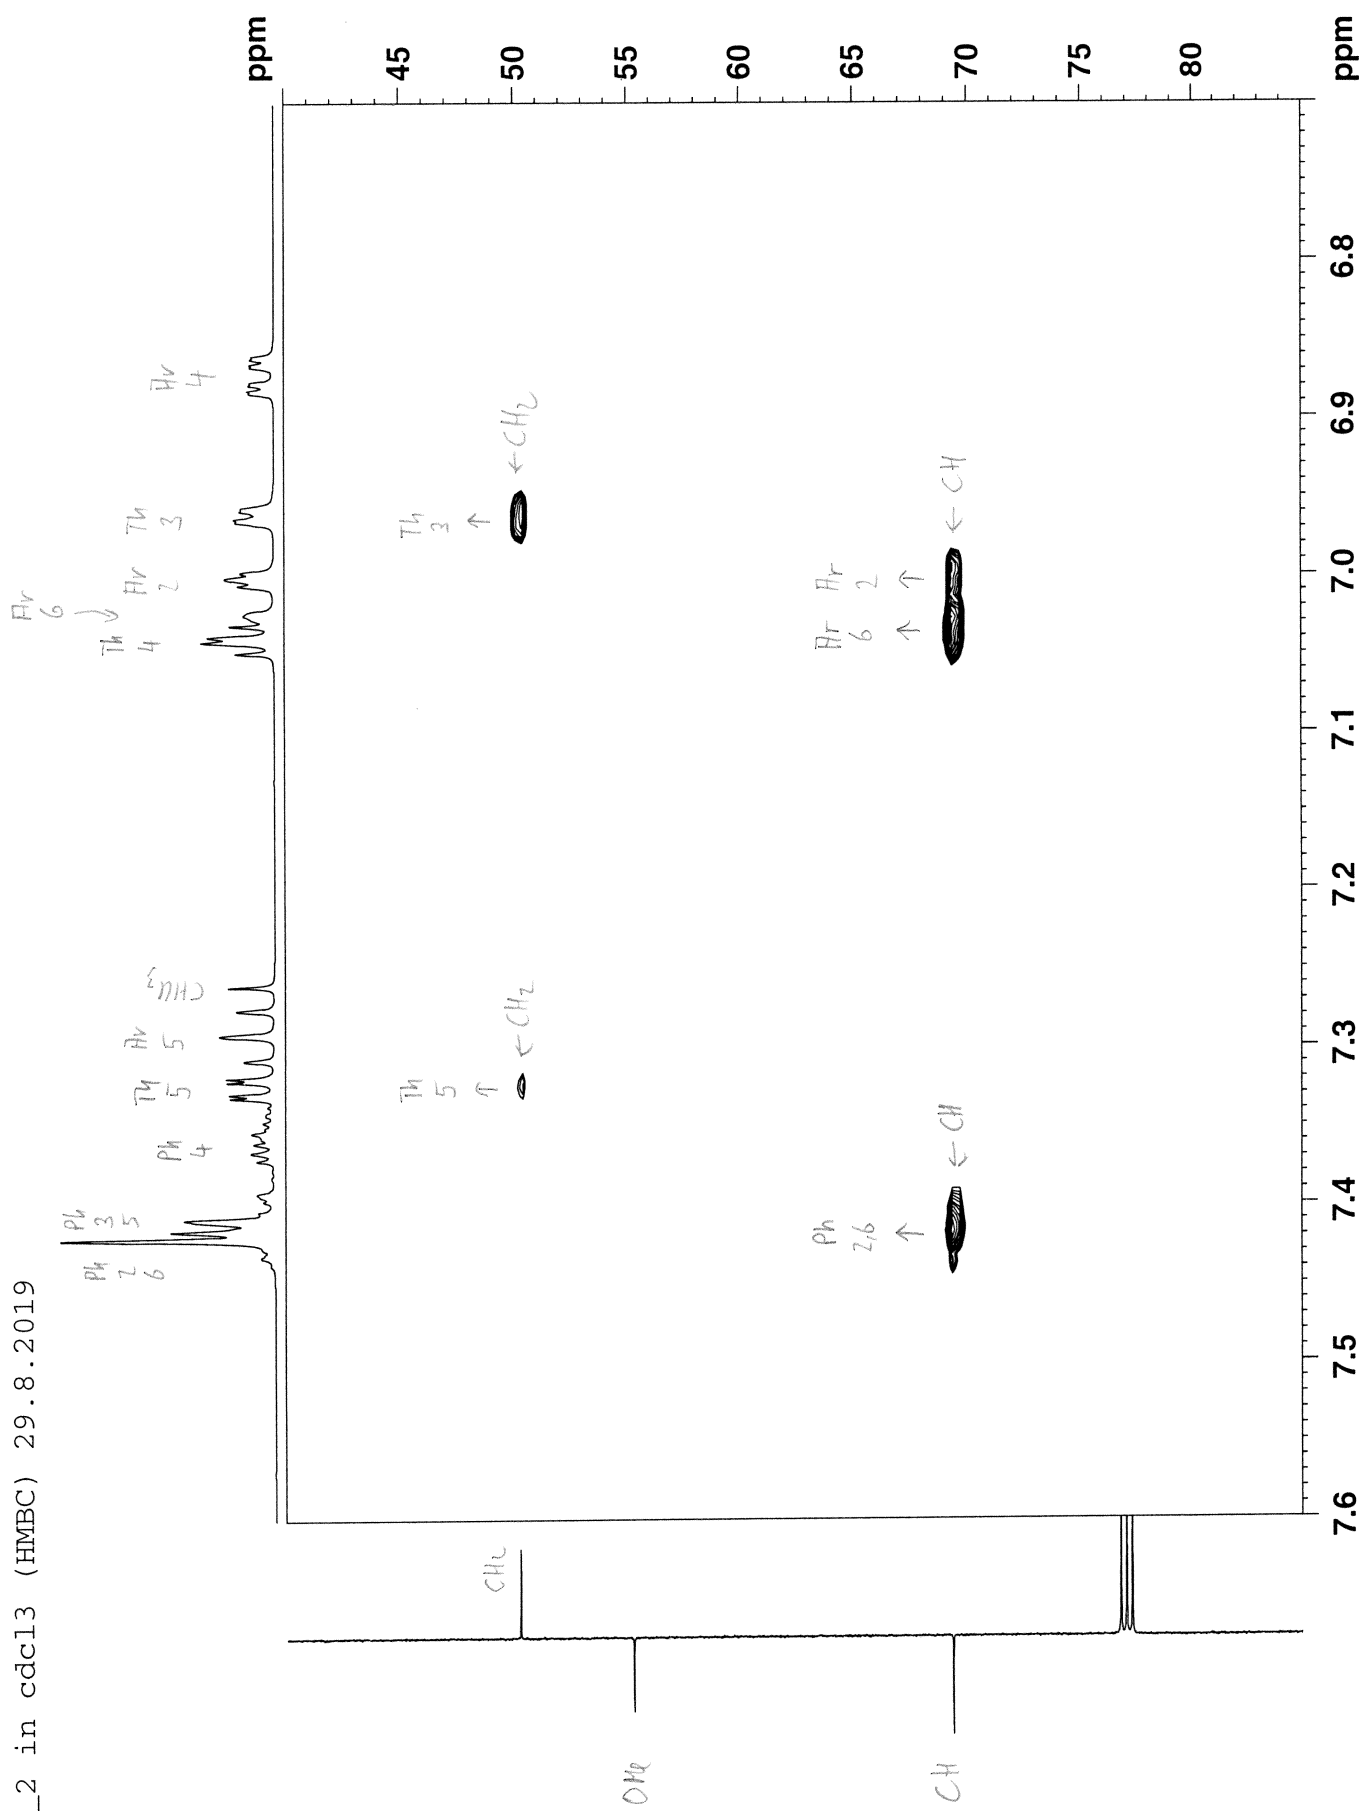

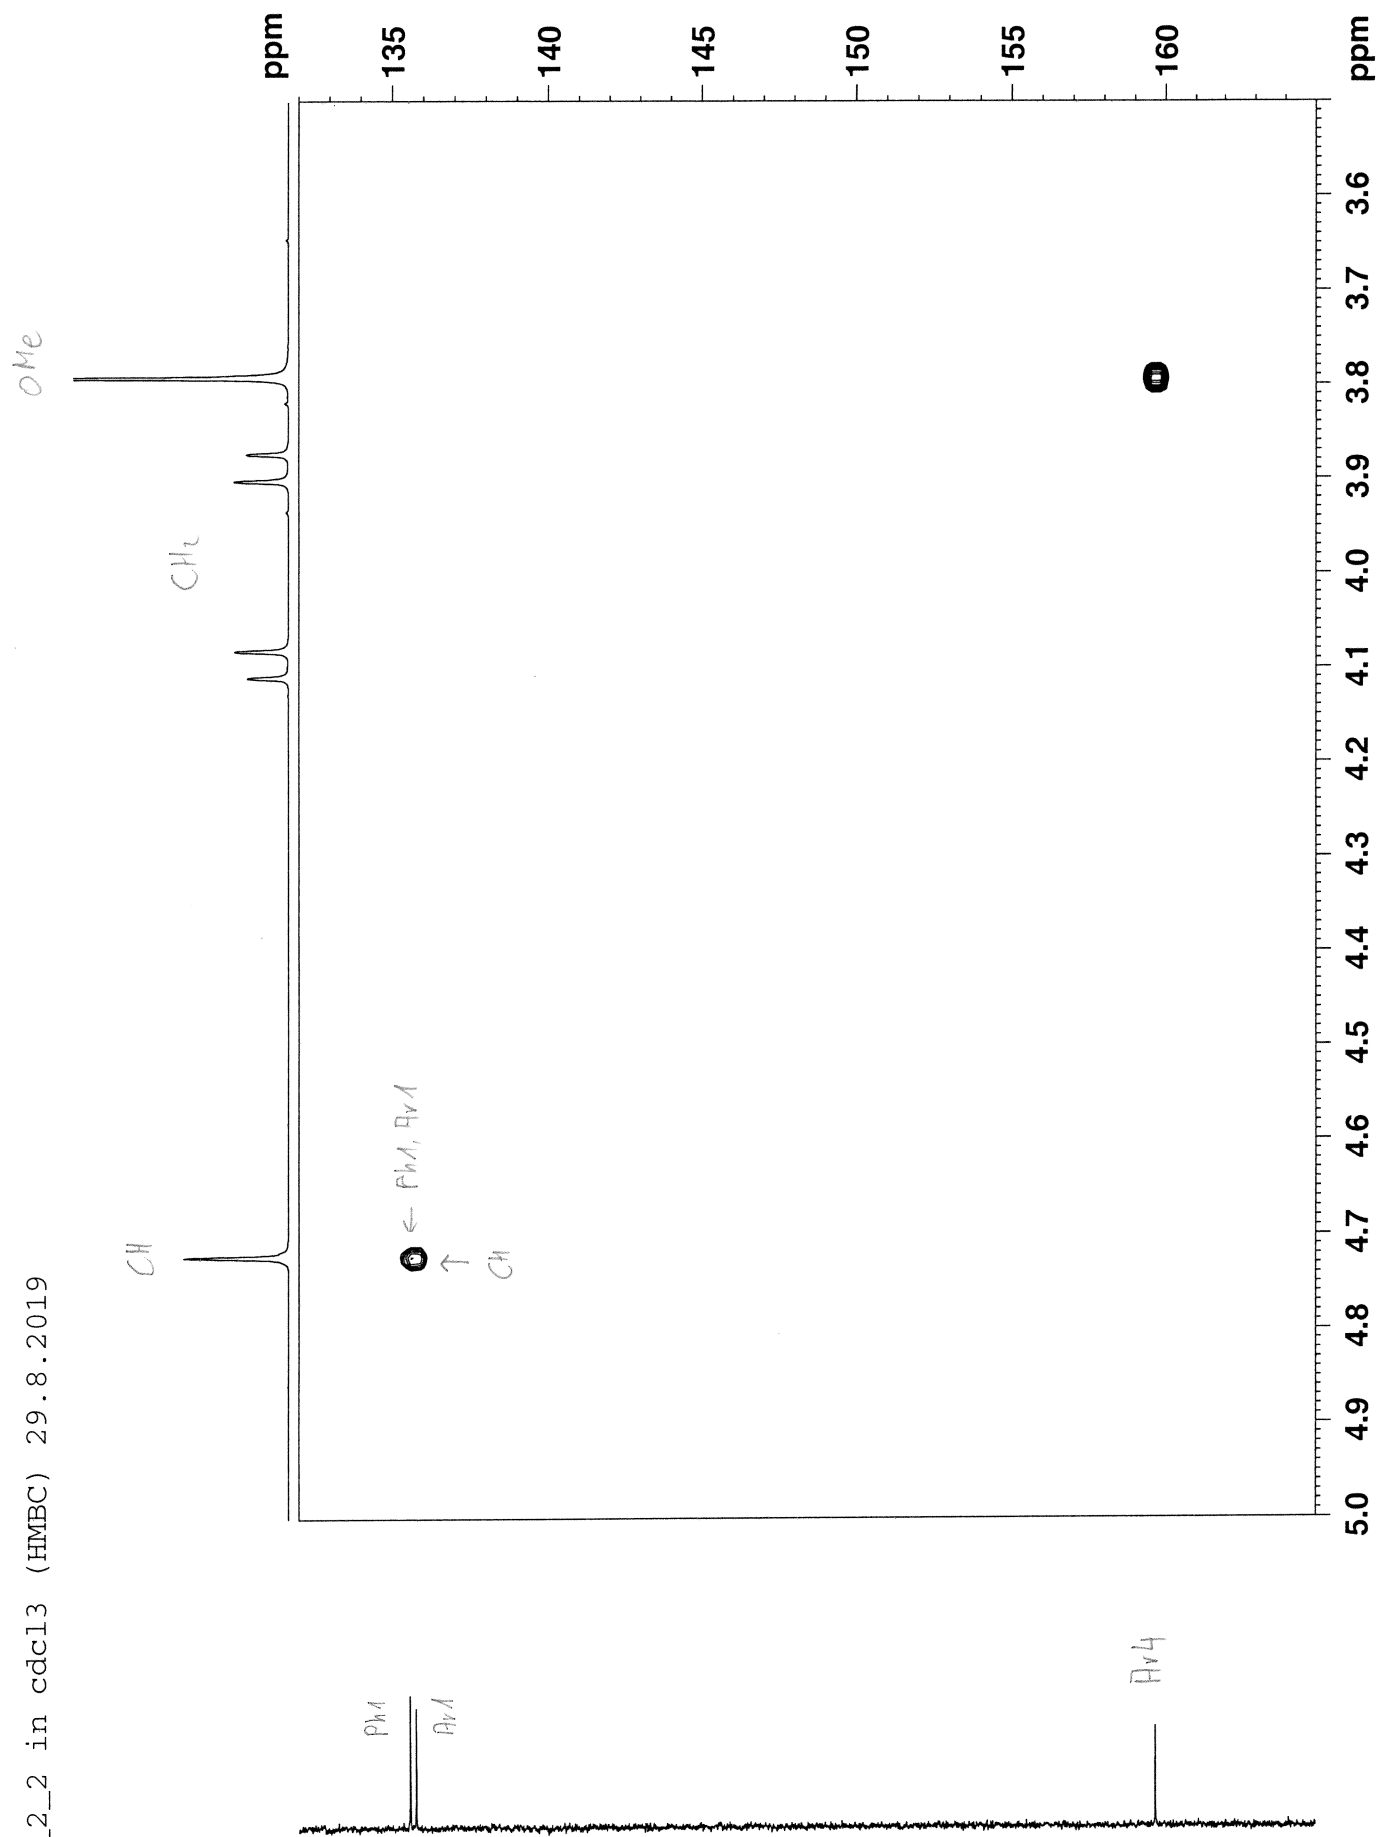

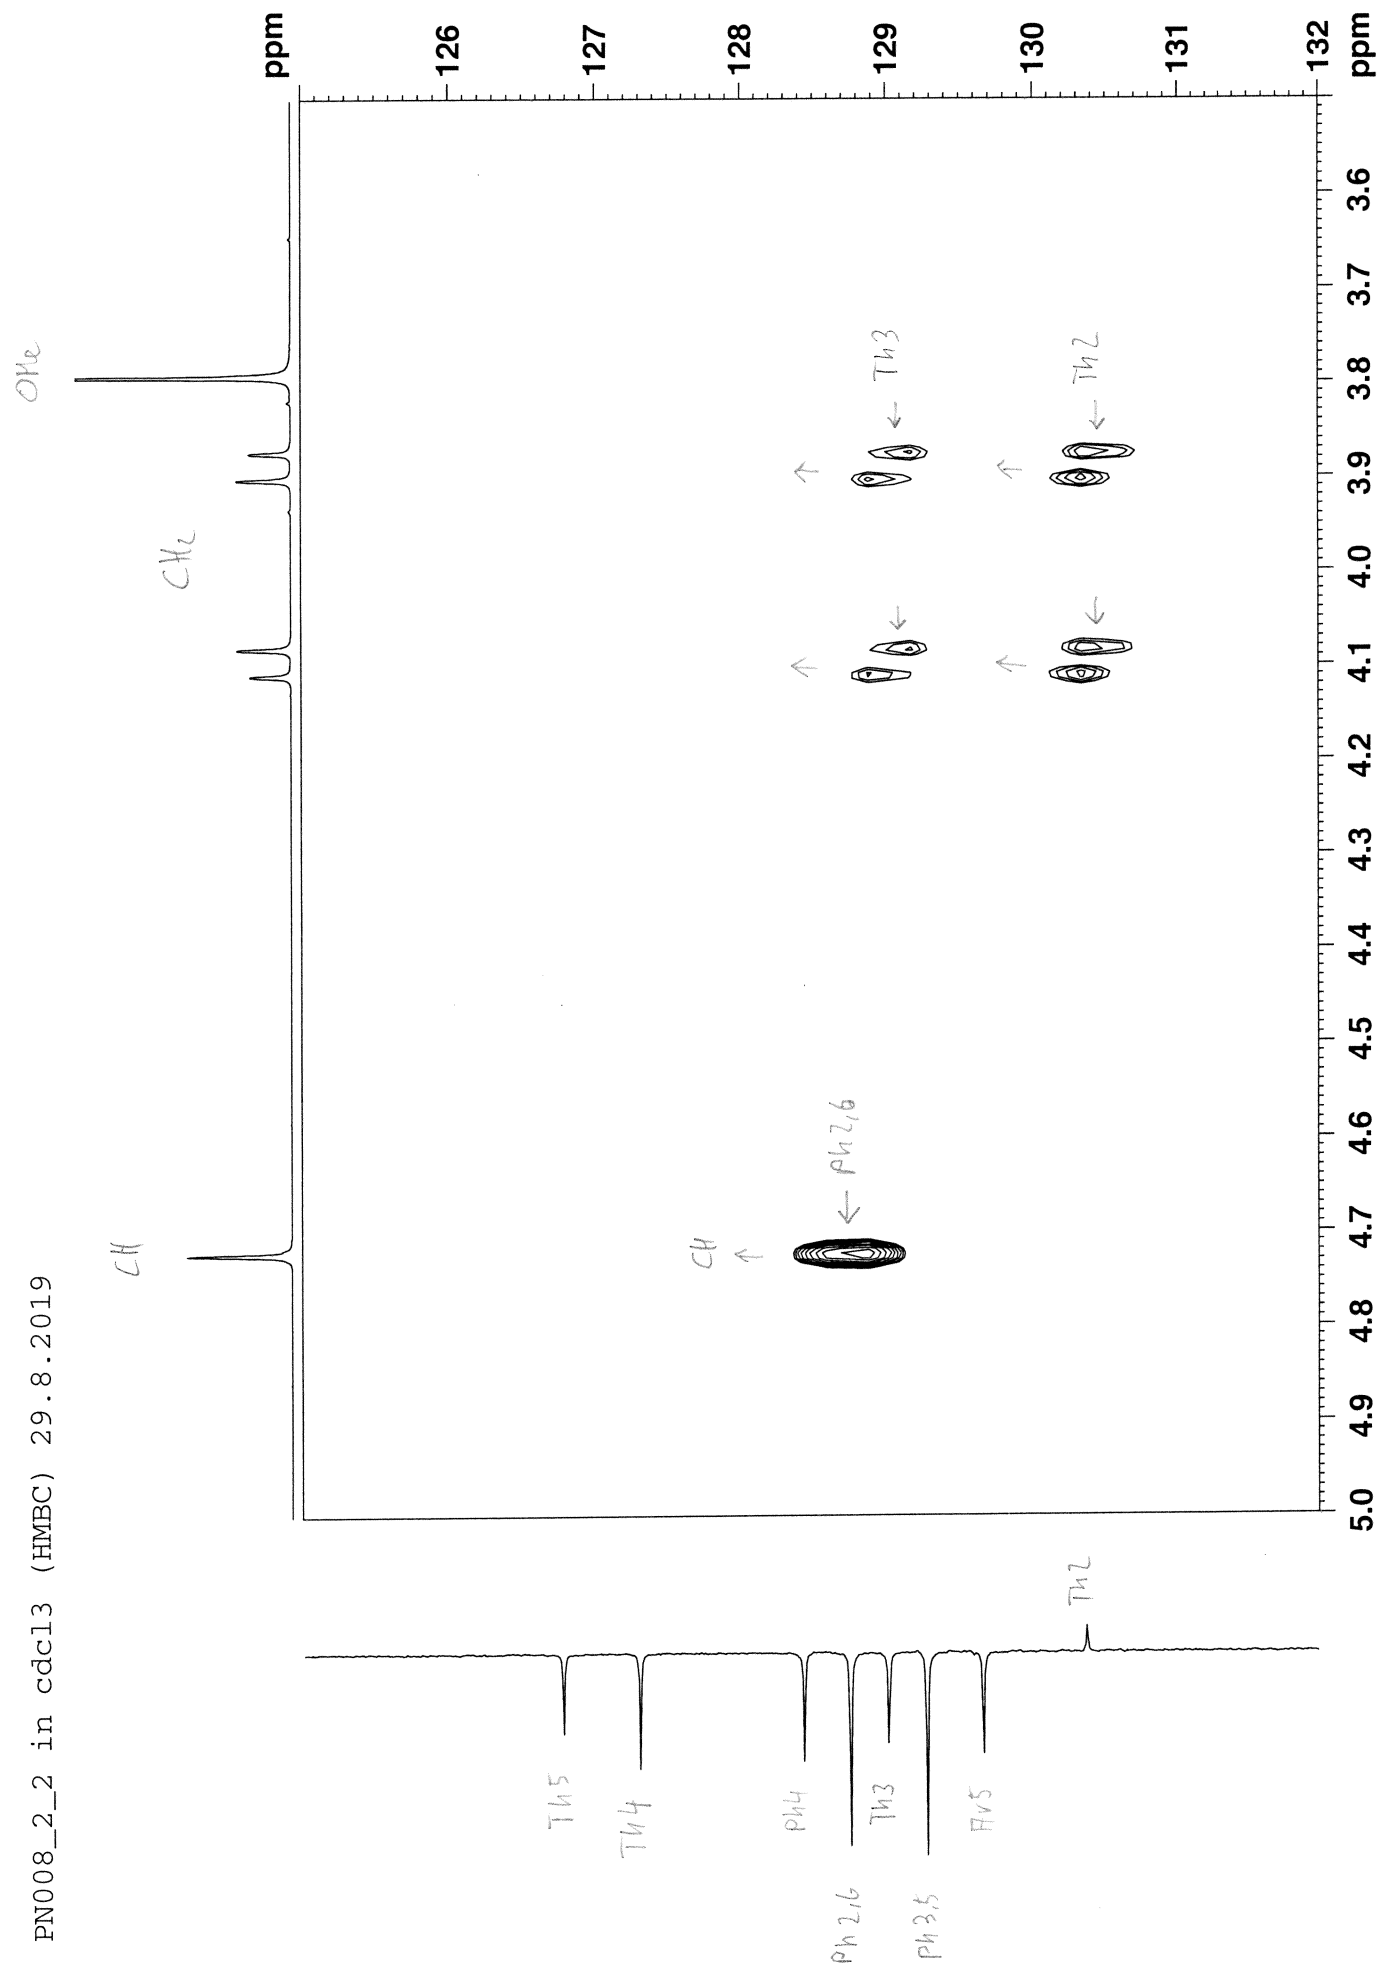

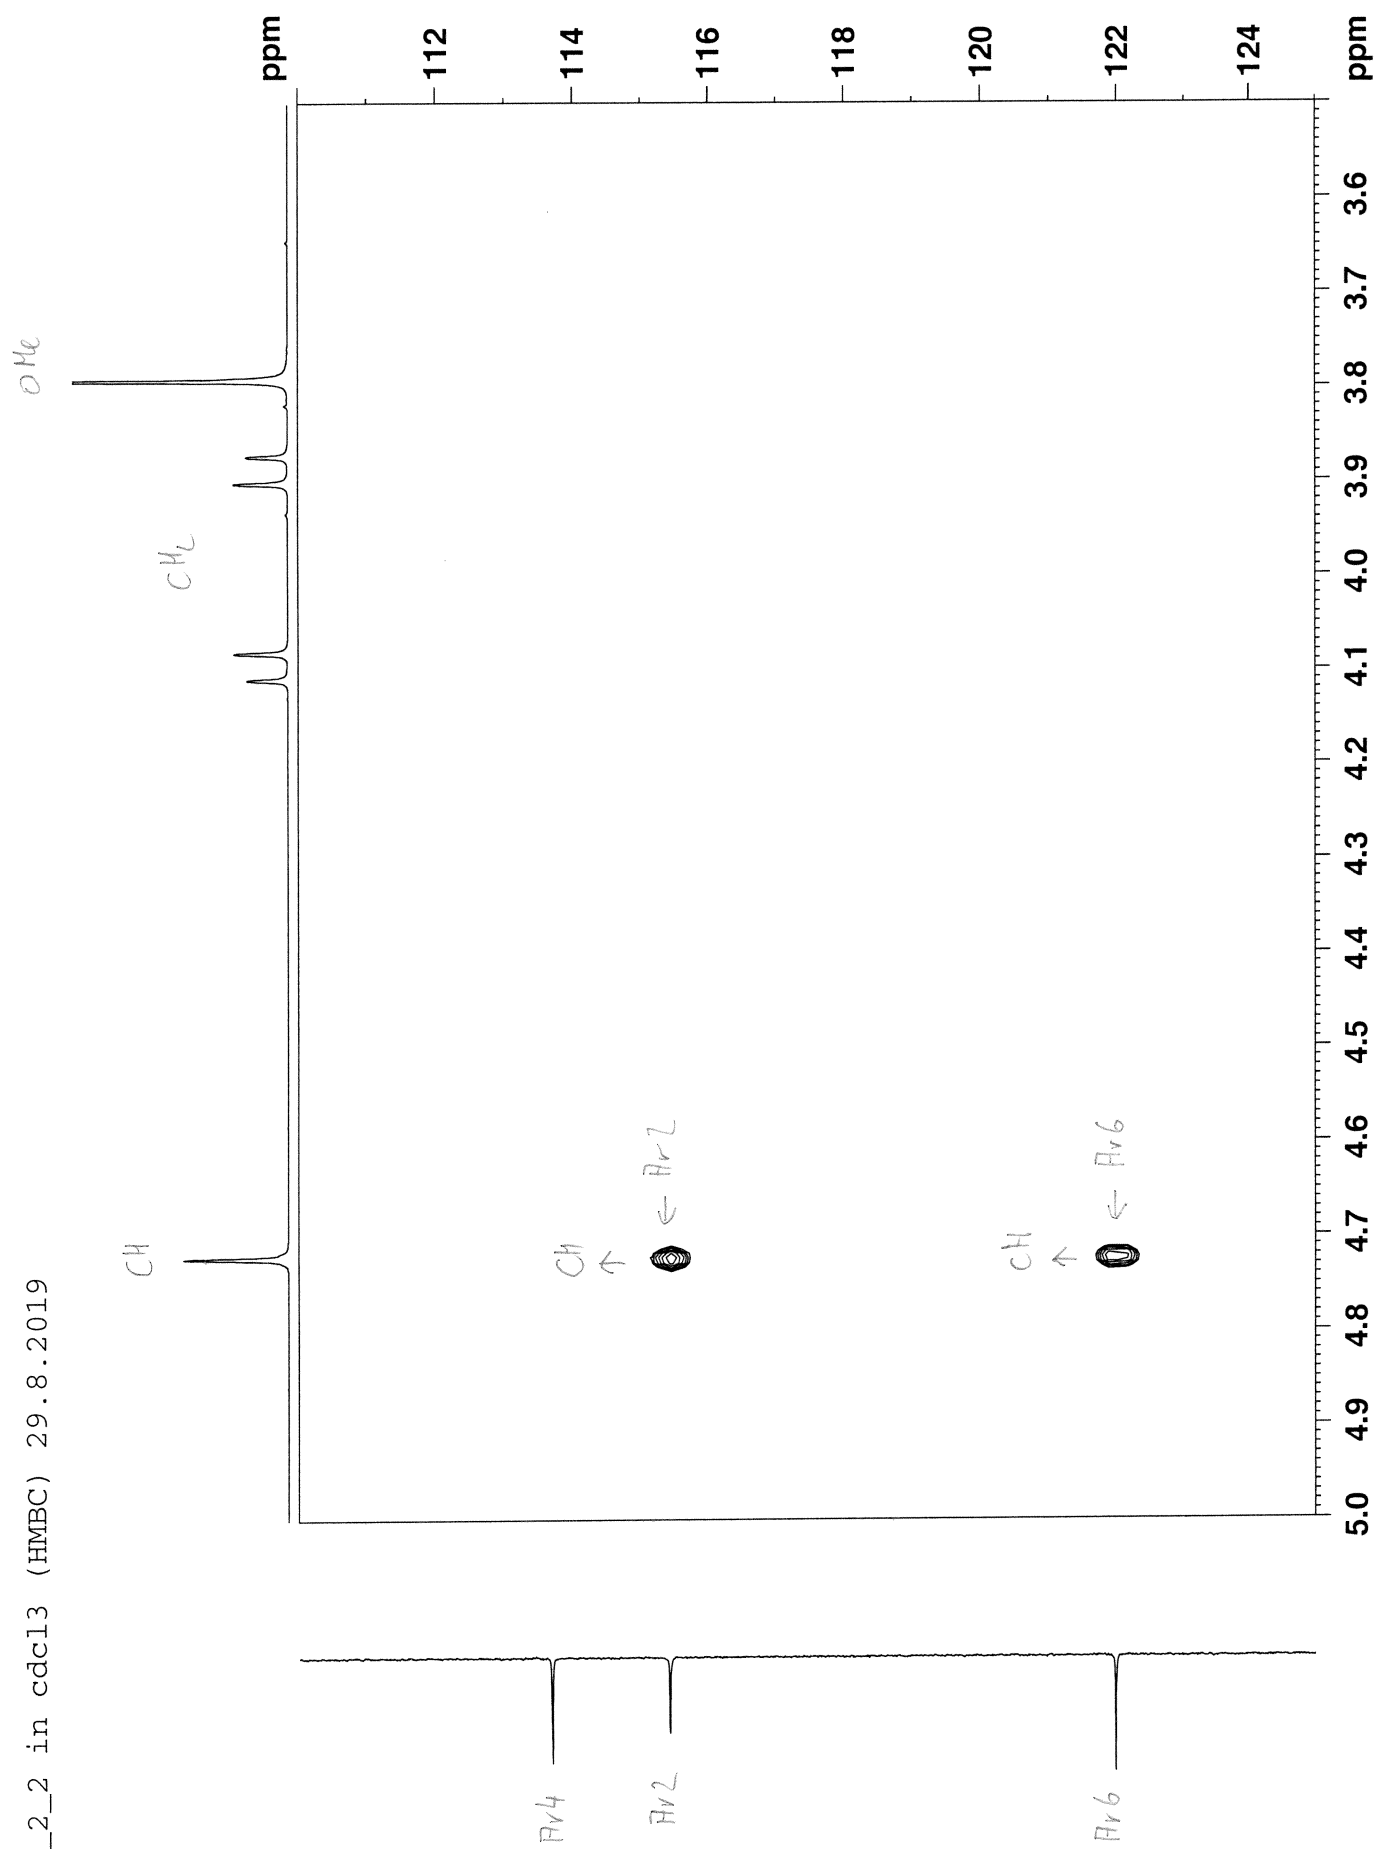



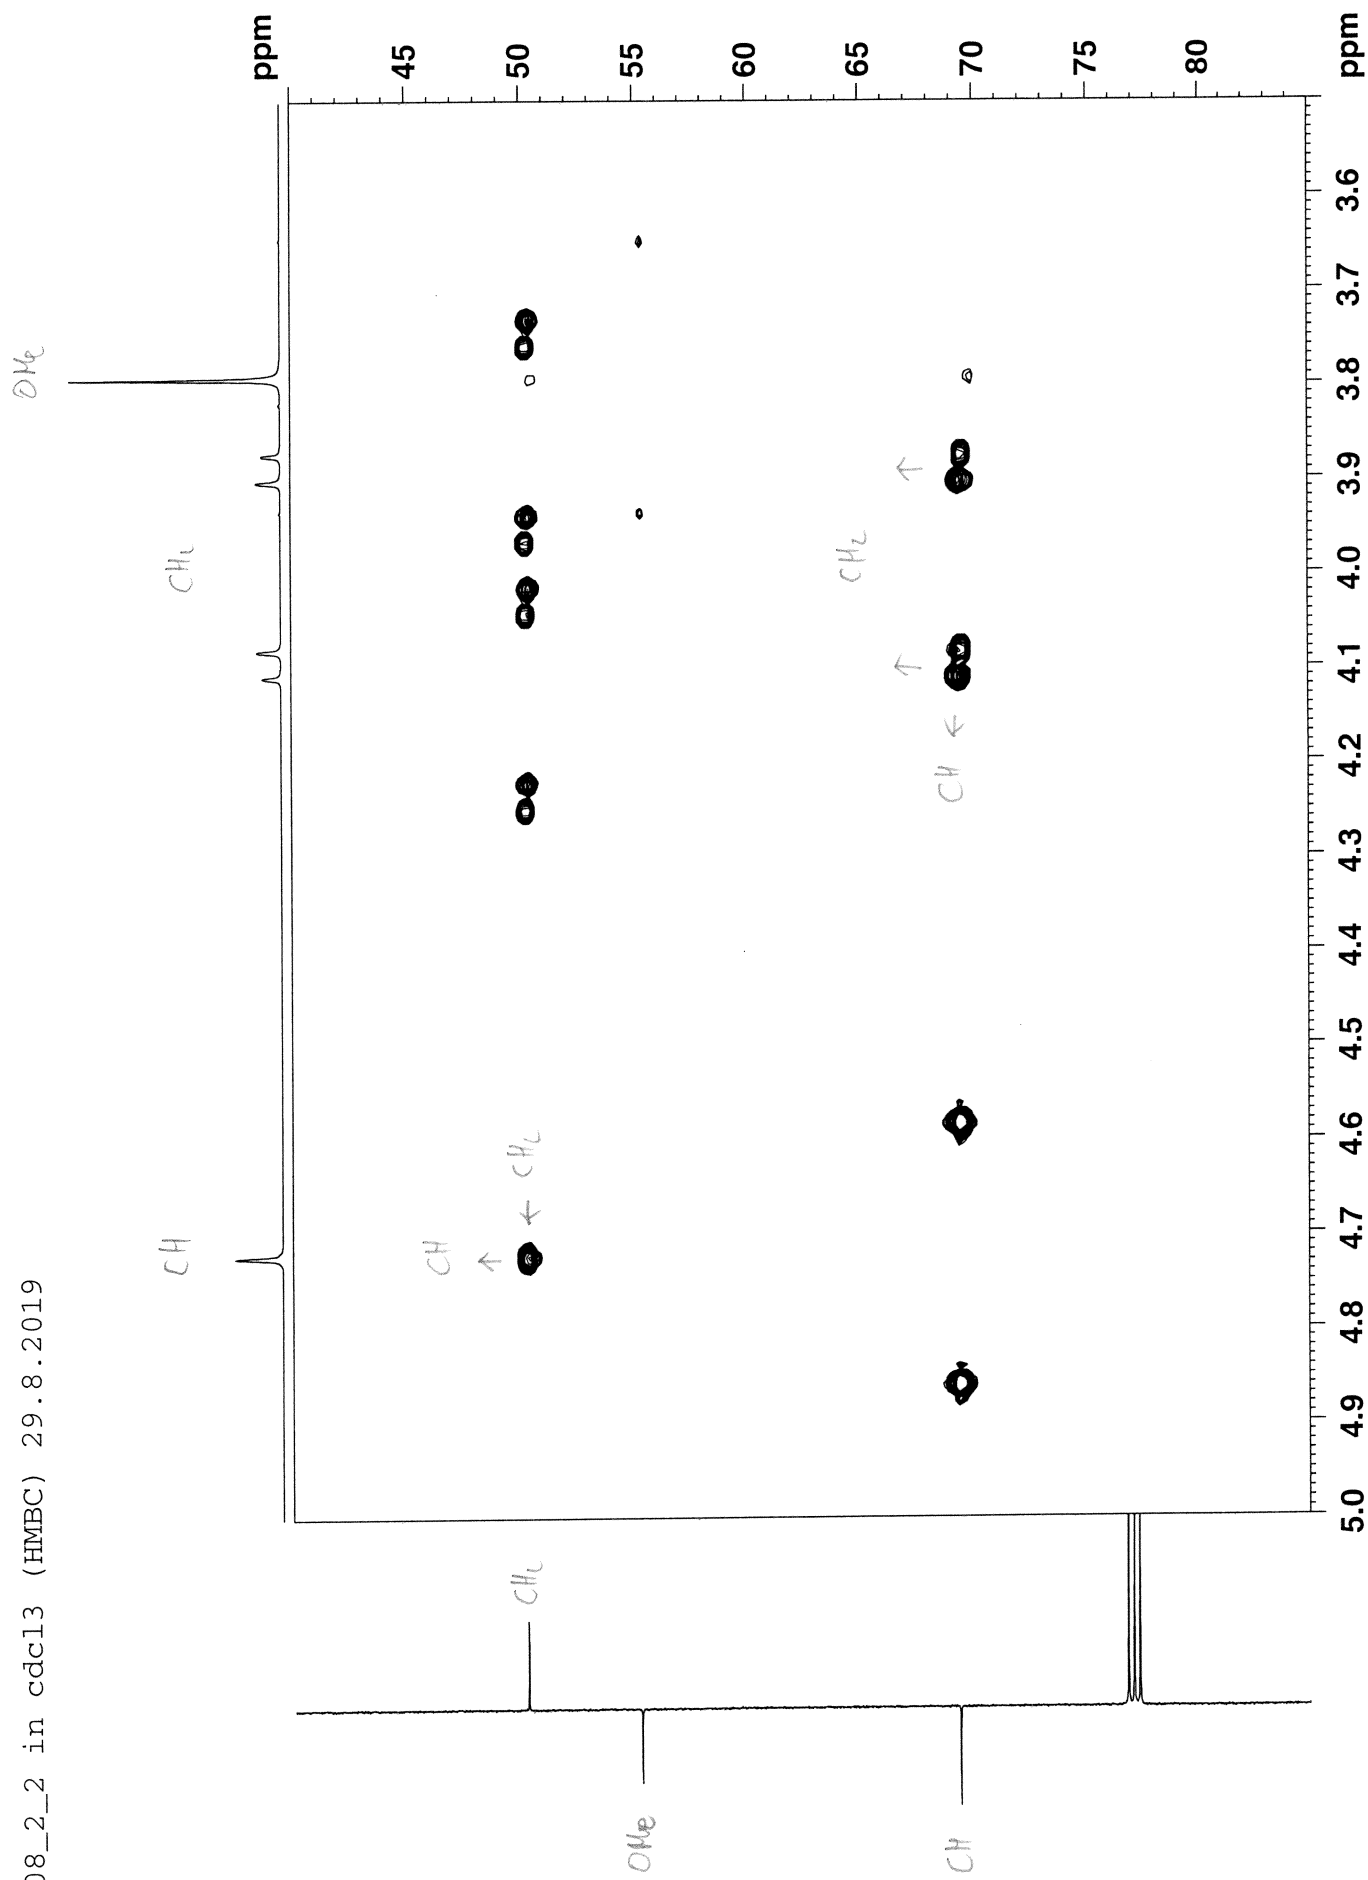

**Figure S77c.** NMR spectra of compound 5t.

CE149-S1P1 in cdcl3 (Proton) 29.8.2018

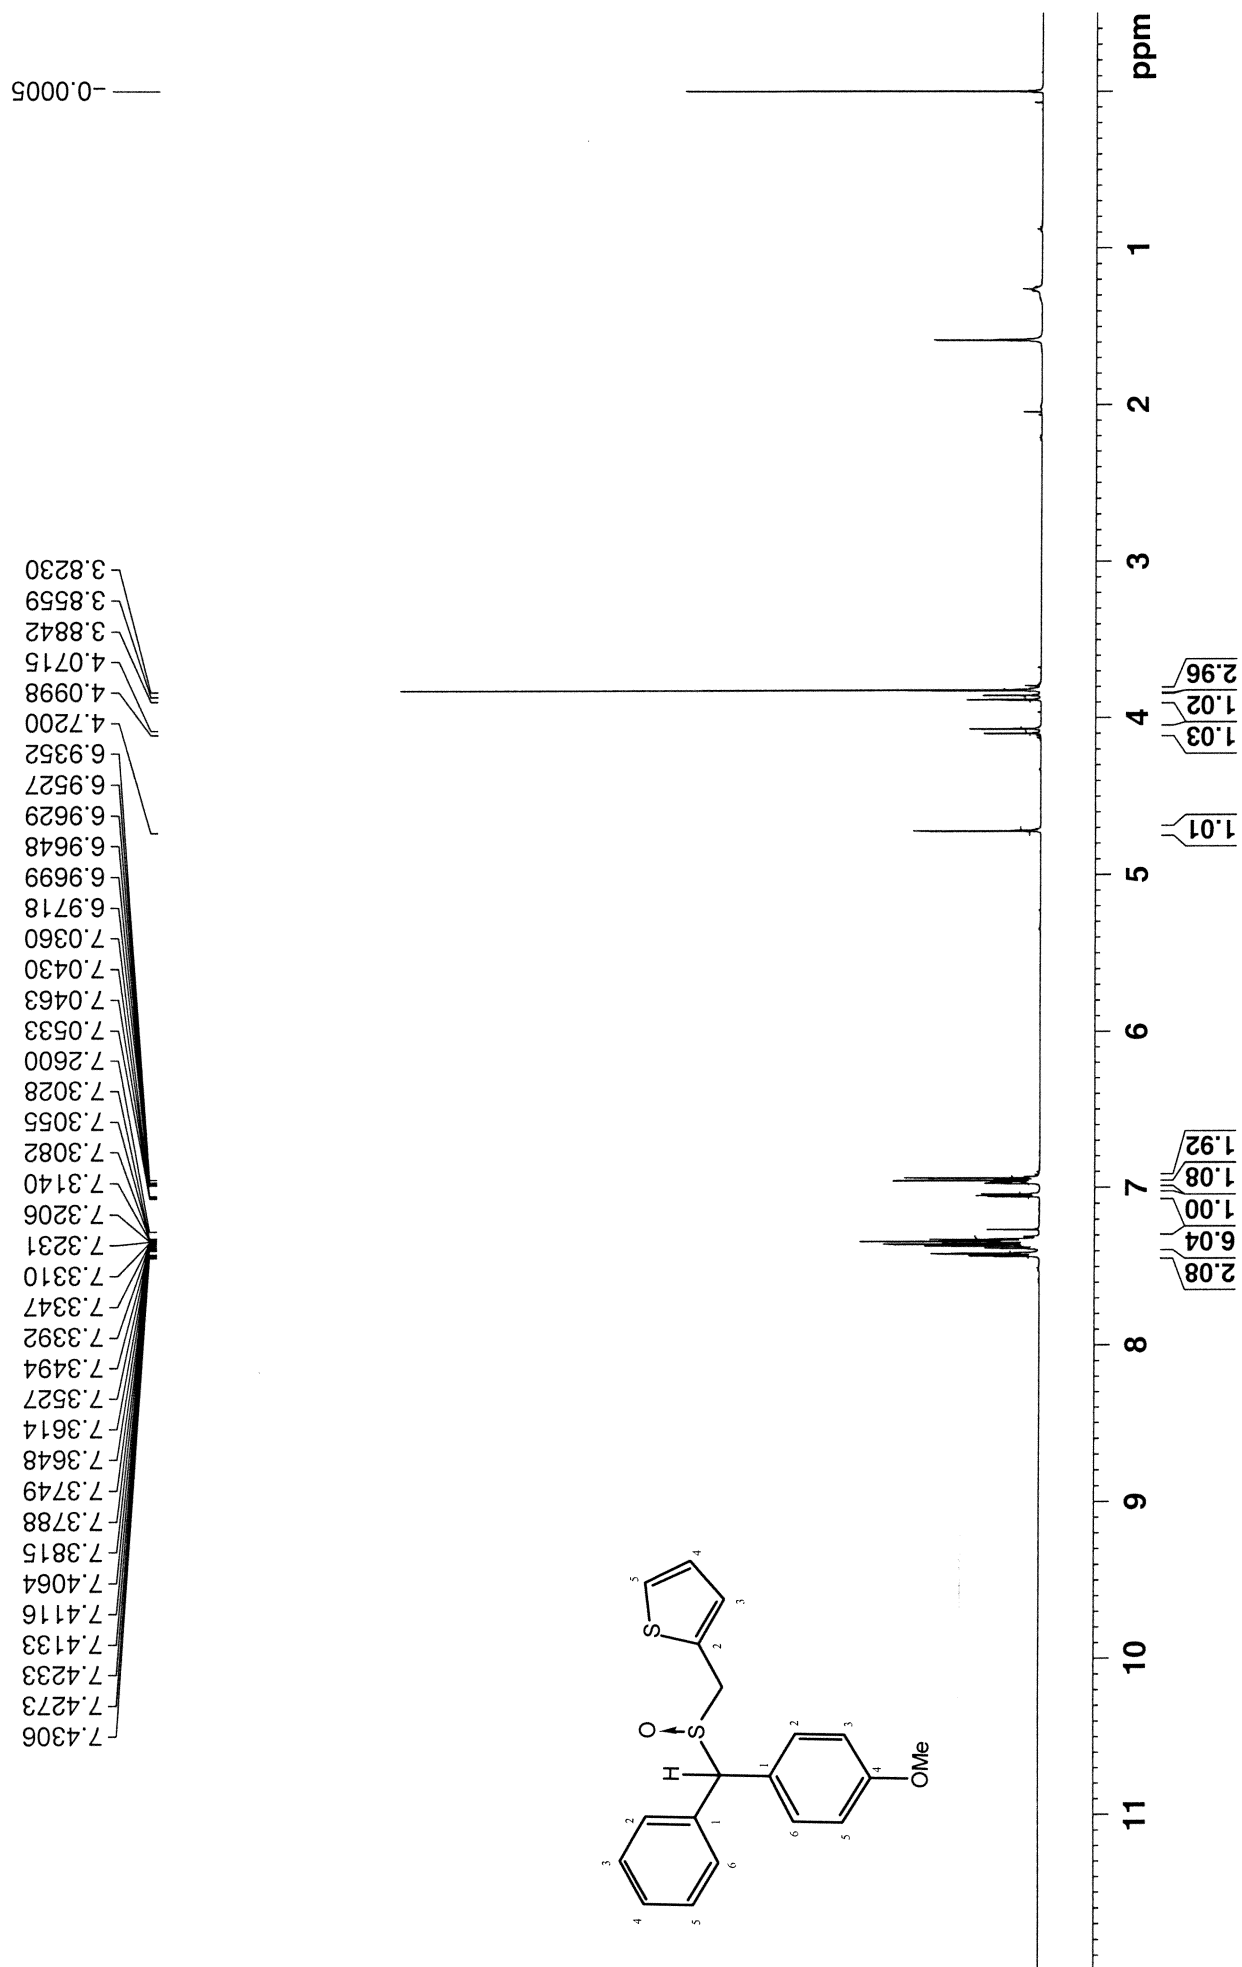

7.4306  
7.4273  
7.4233  
7.4133  
7.4116  
7.4064  
7.3815  
7.3788  
7.3749  
7.3648  
7.3614  
7.3527  
7.3494  
7.3392  
7.3347  
7.3310  
7.3231  
7.3206  
7.3140  
7.3082  
7.3055  
7.3028  
7.2600

7.0533  
7.0463  
7.0430  
7.0360

6.9718  
6.9699  
6.9648  
6.9629  
6.9527  
6.9352

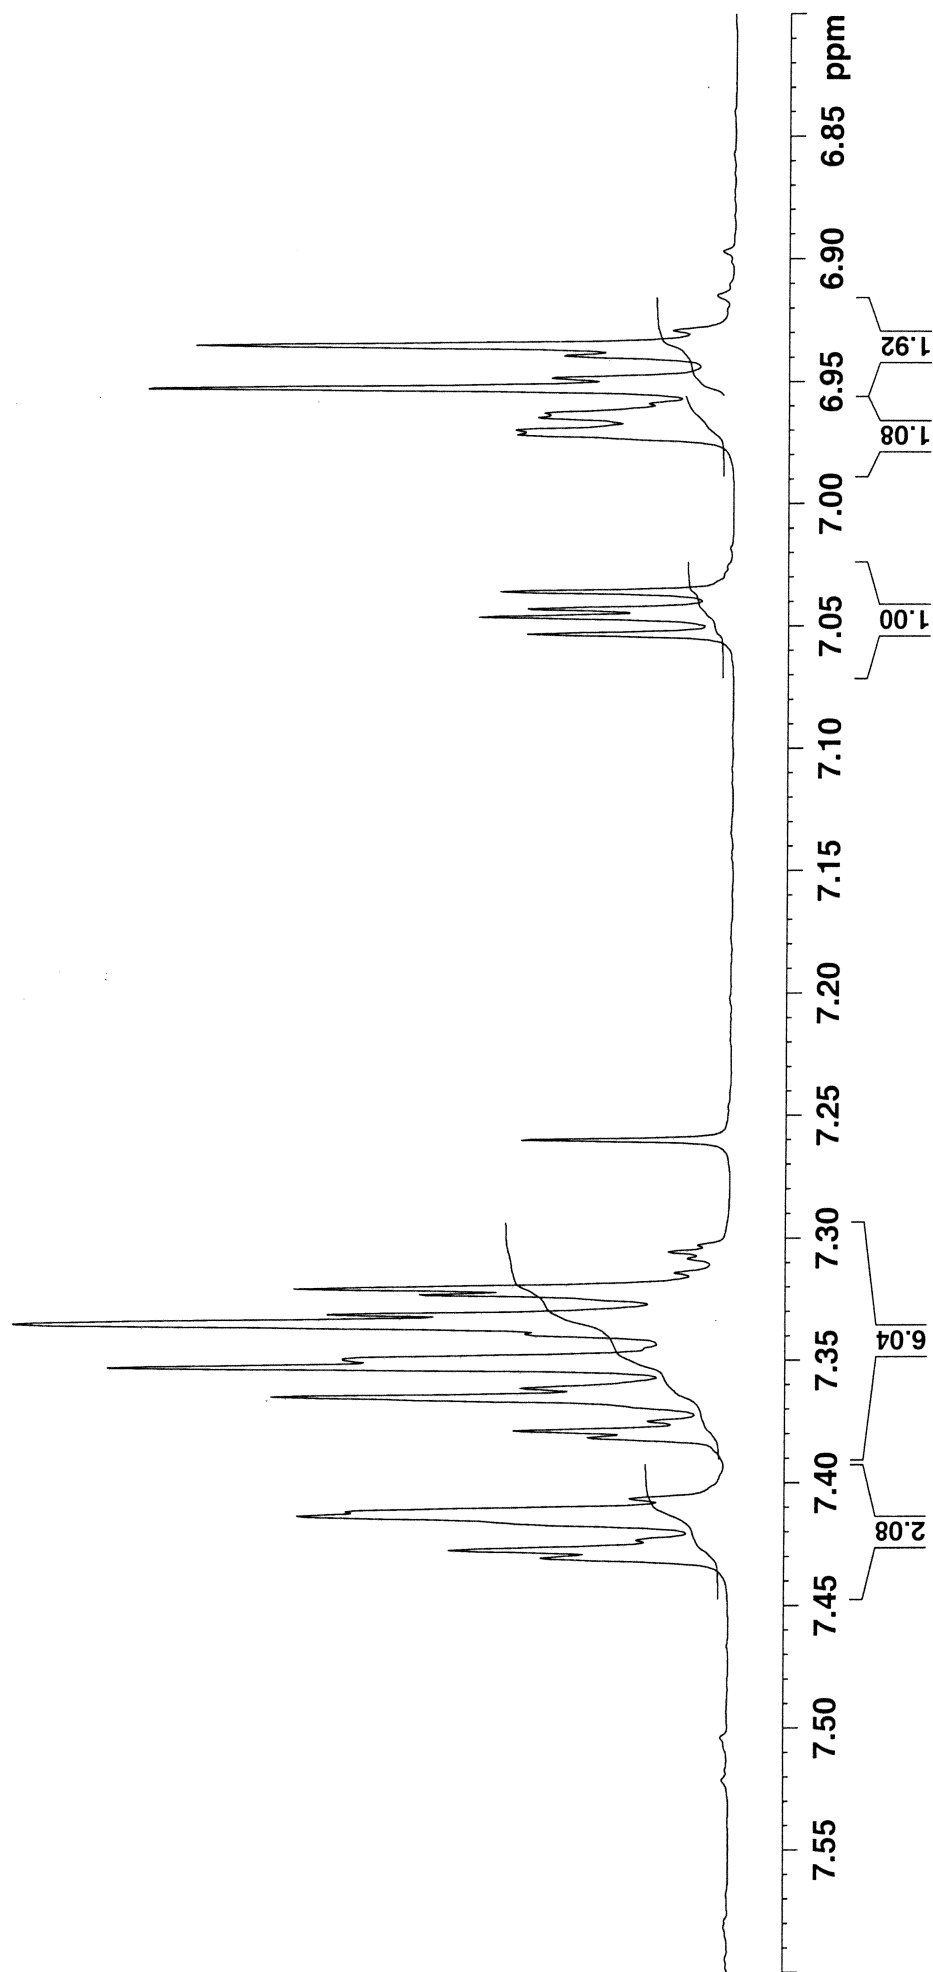

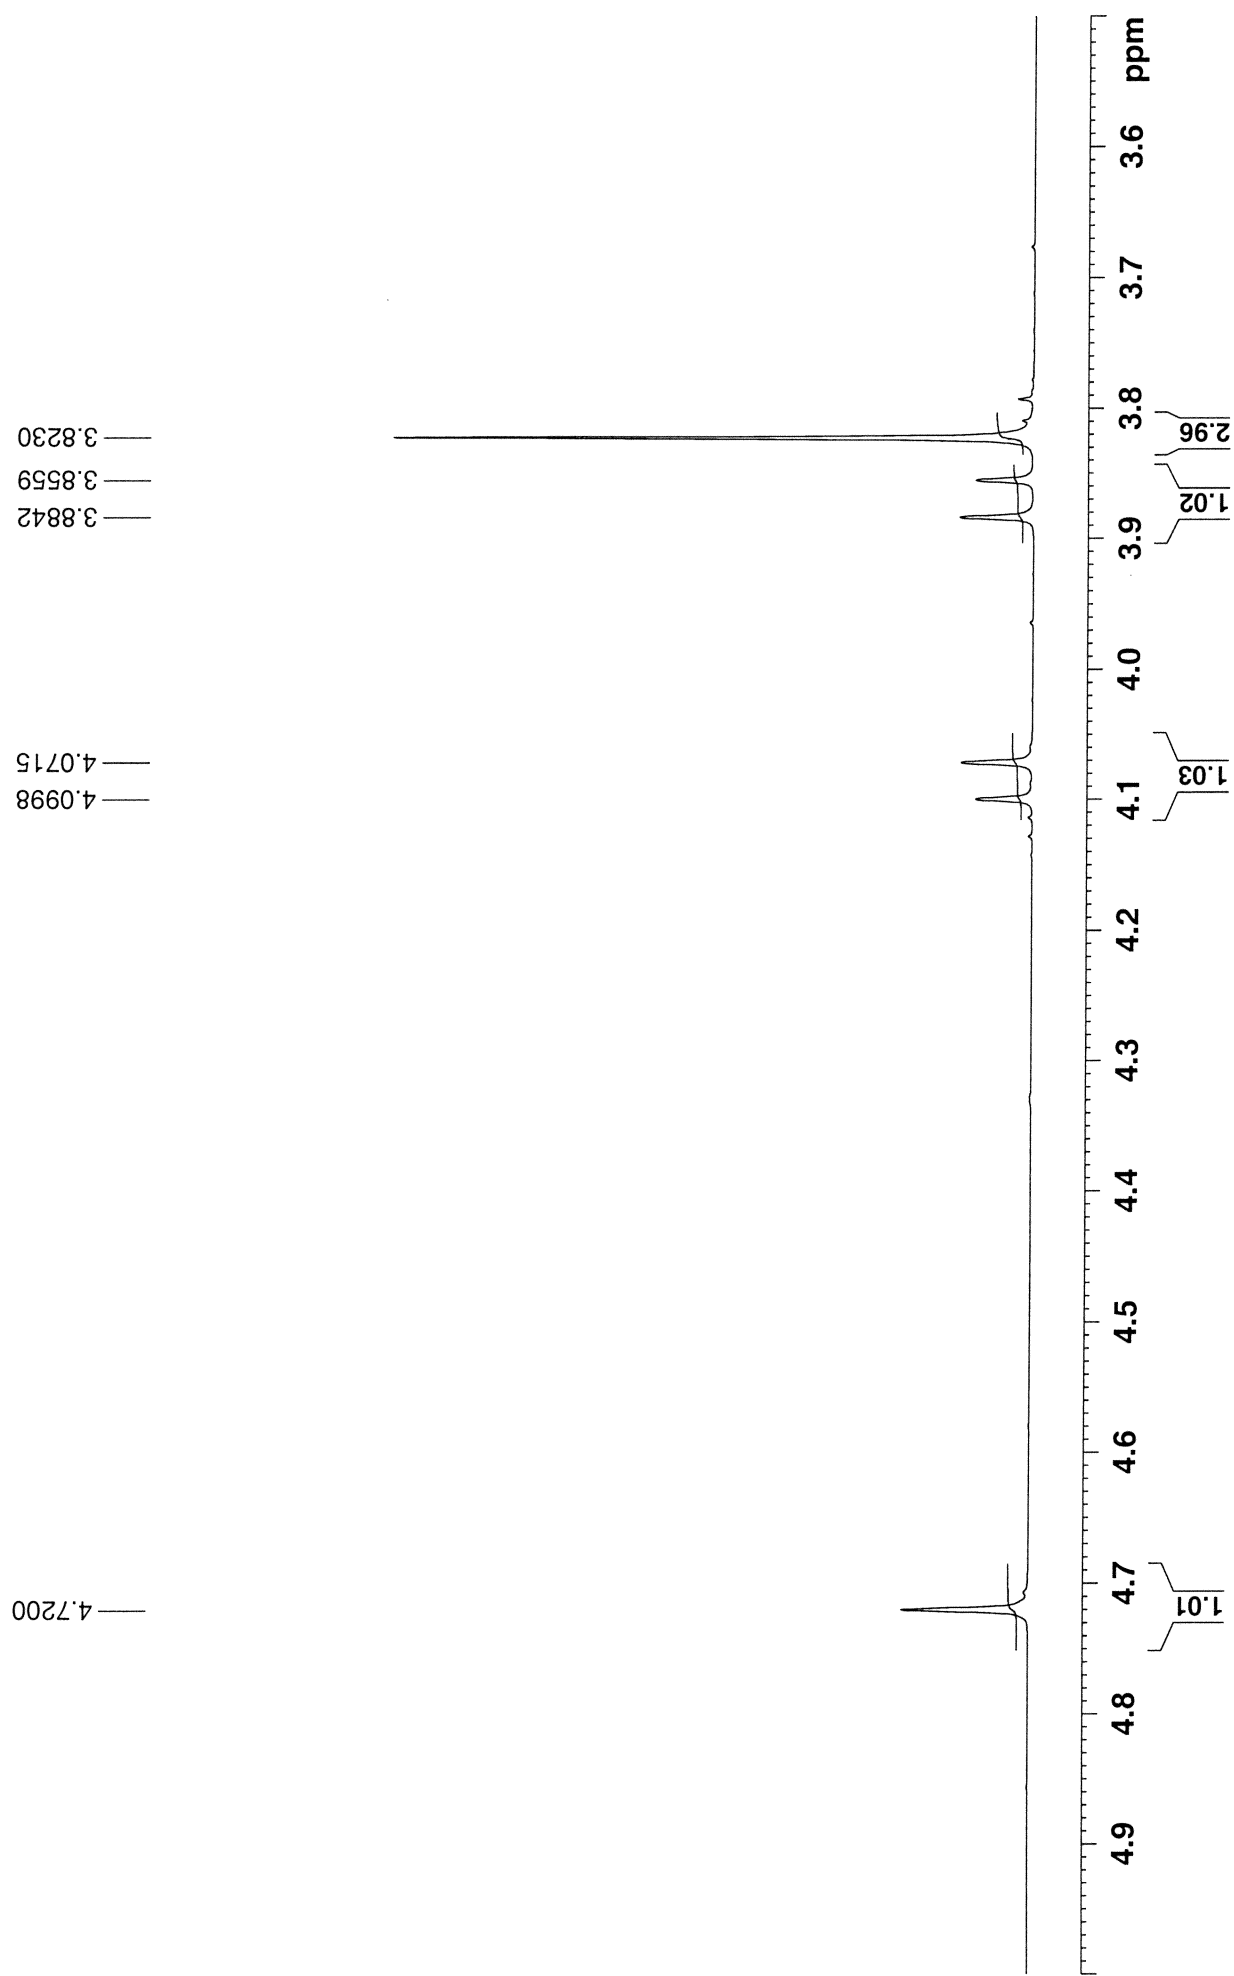

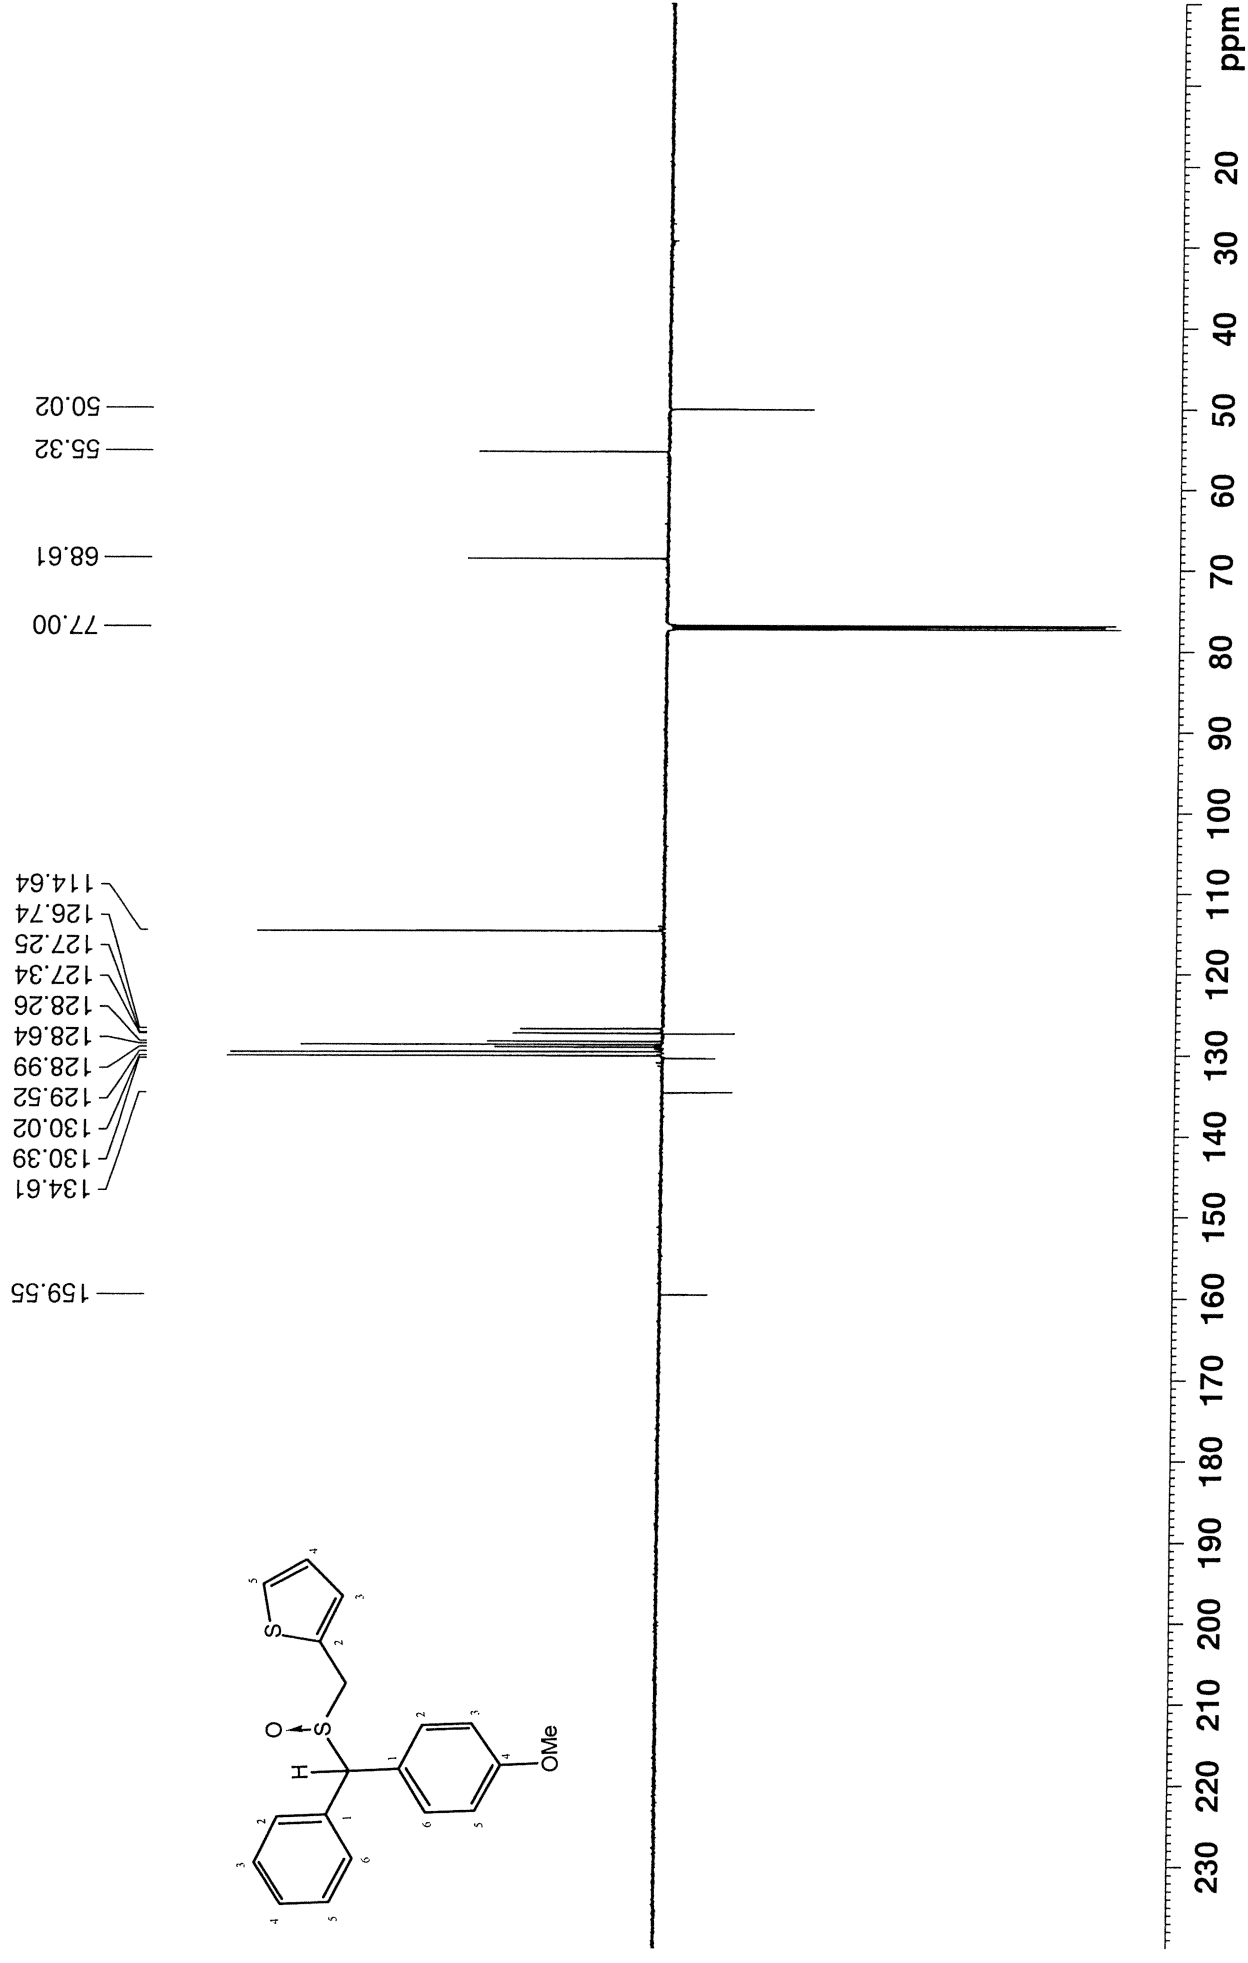

CE149-S1P1 in cdcl3 (APT) 29.8.2018

159.55

134.61

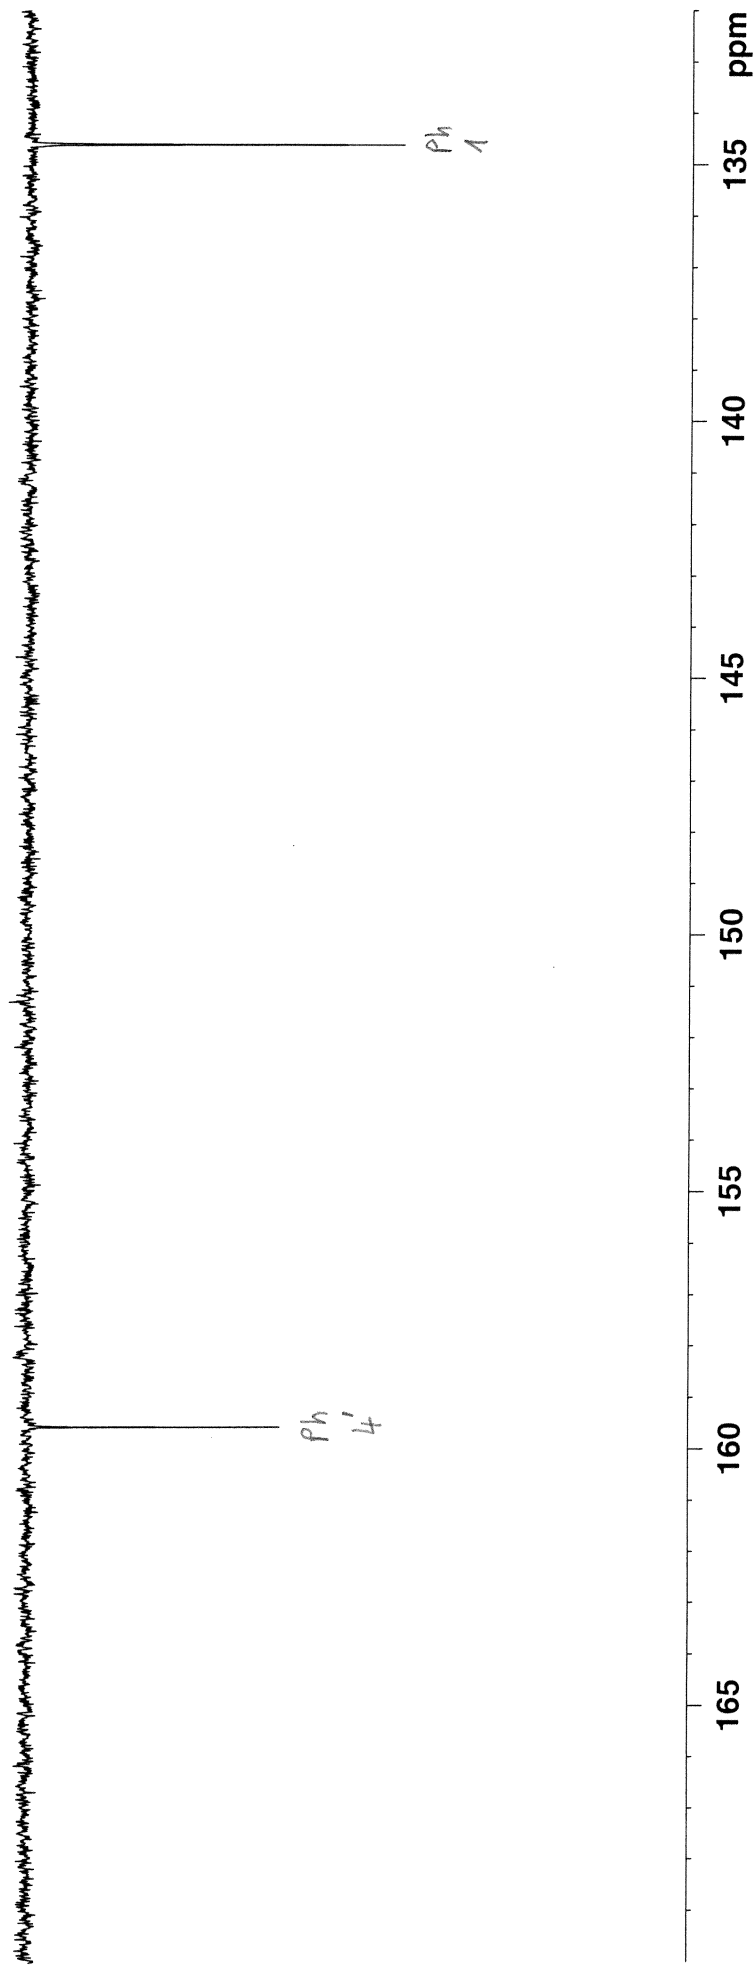

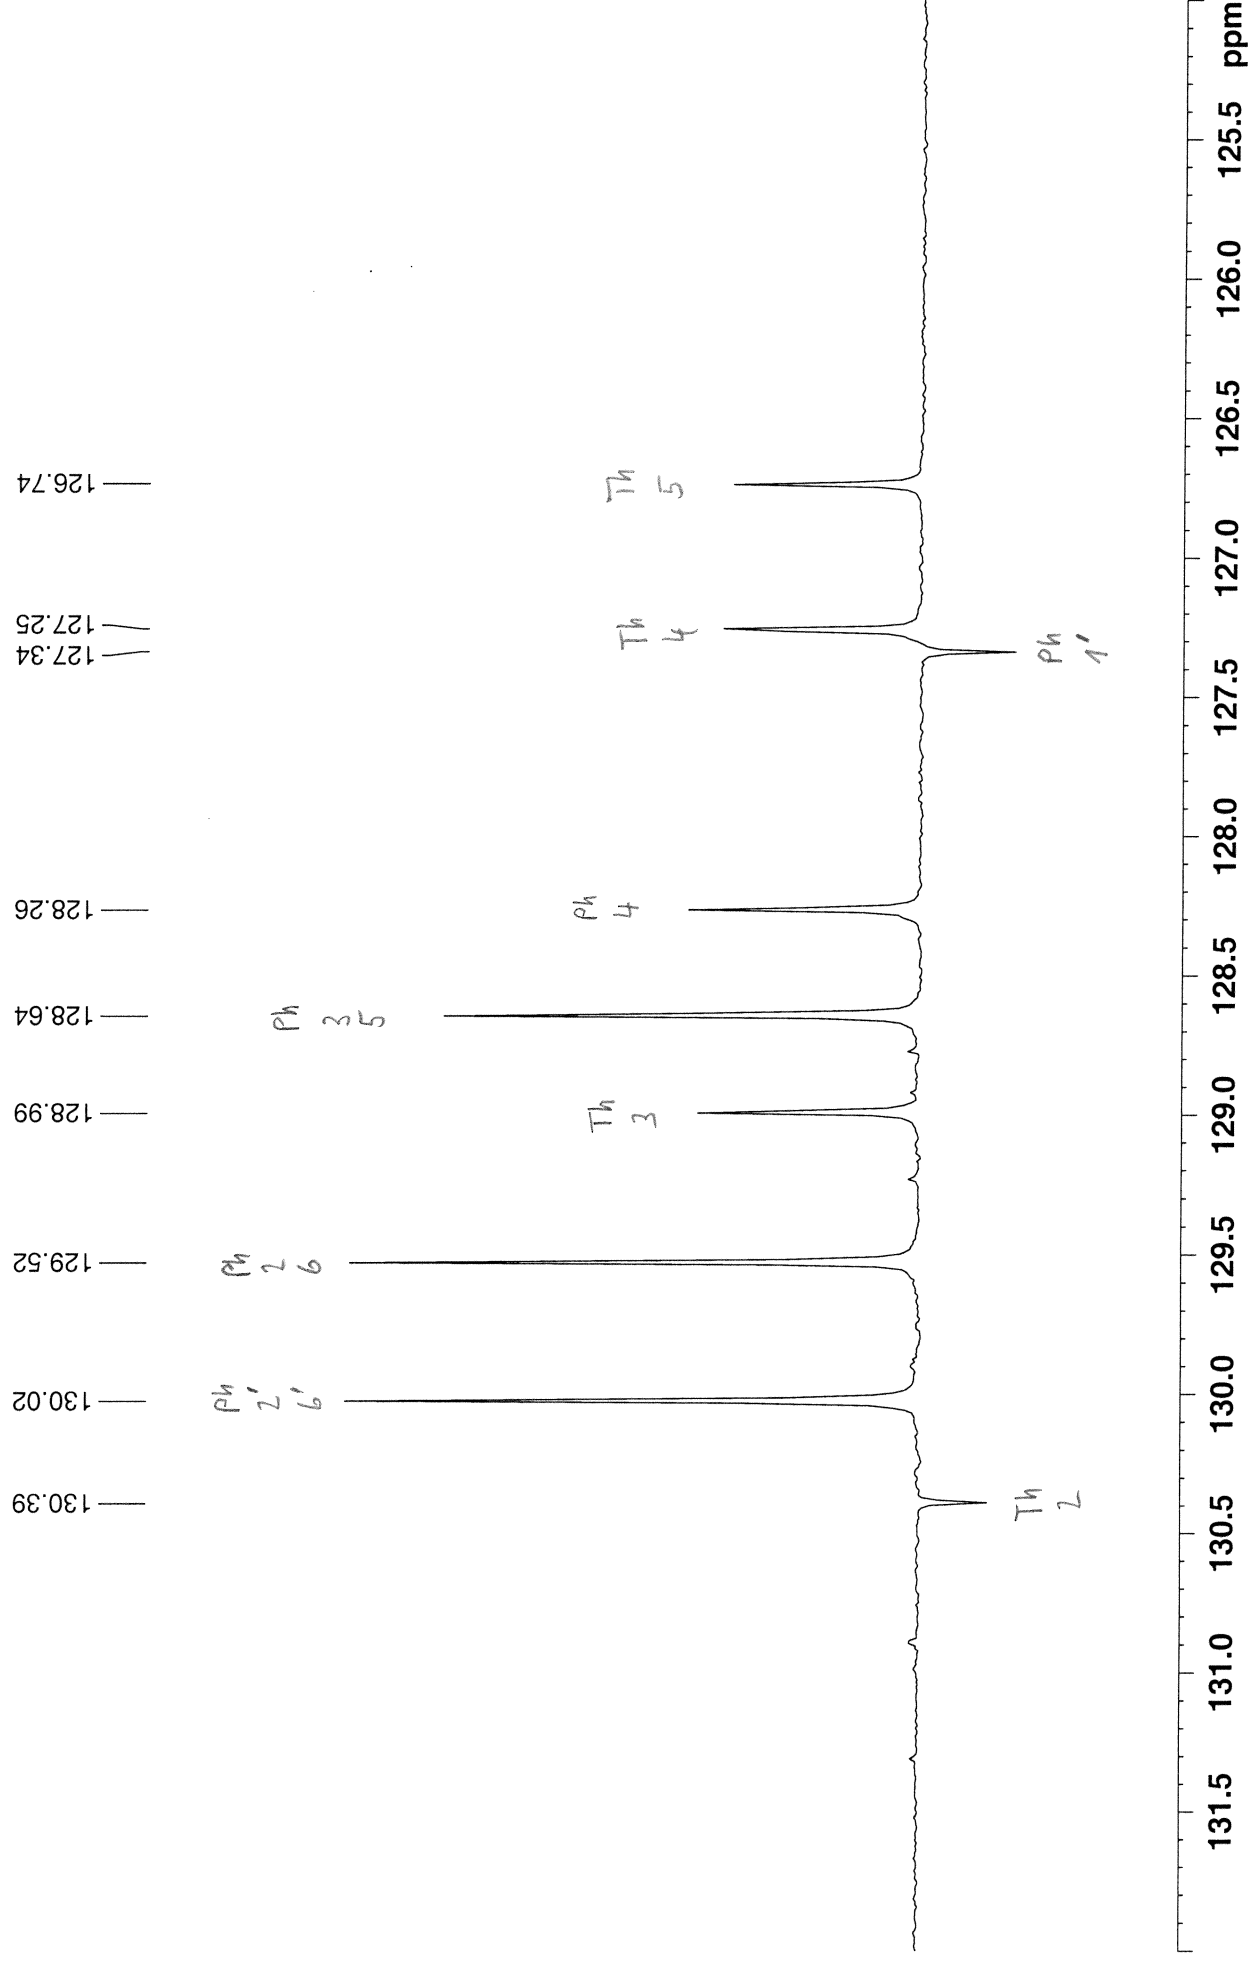

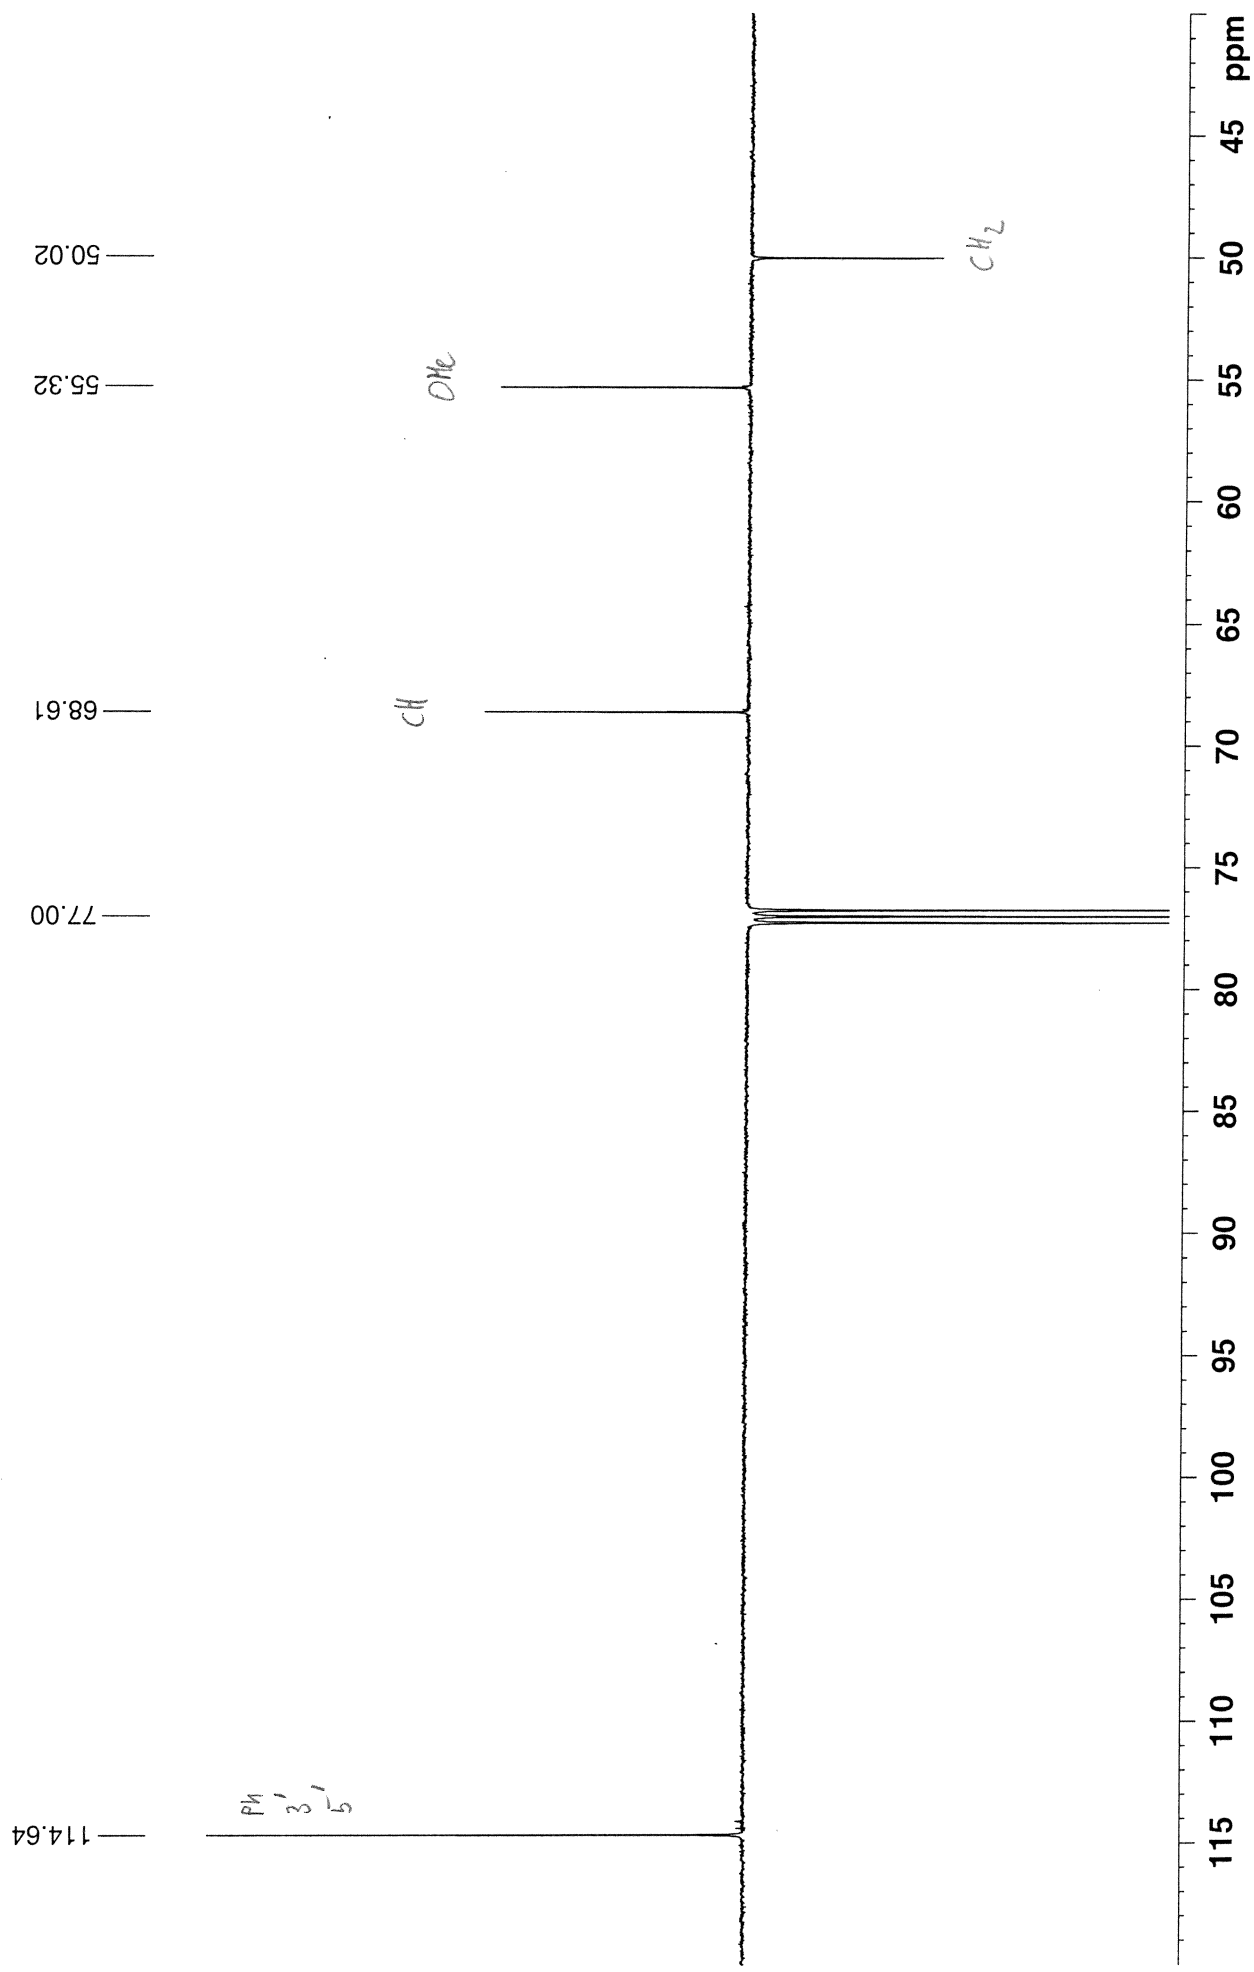



**Figure S78c.** NMR spectra of compound **6t**.

CE149-S1P2 in cdcl3 (Proton) 29.8.2018

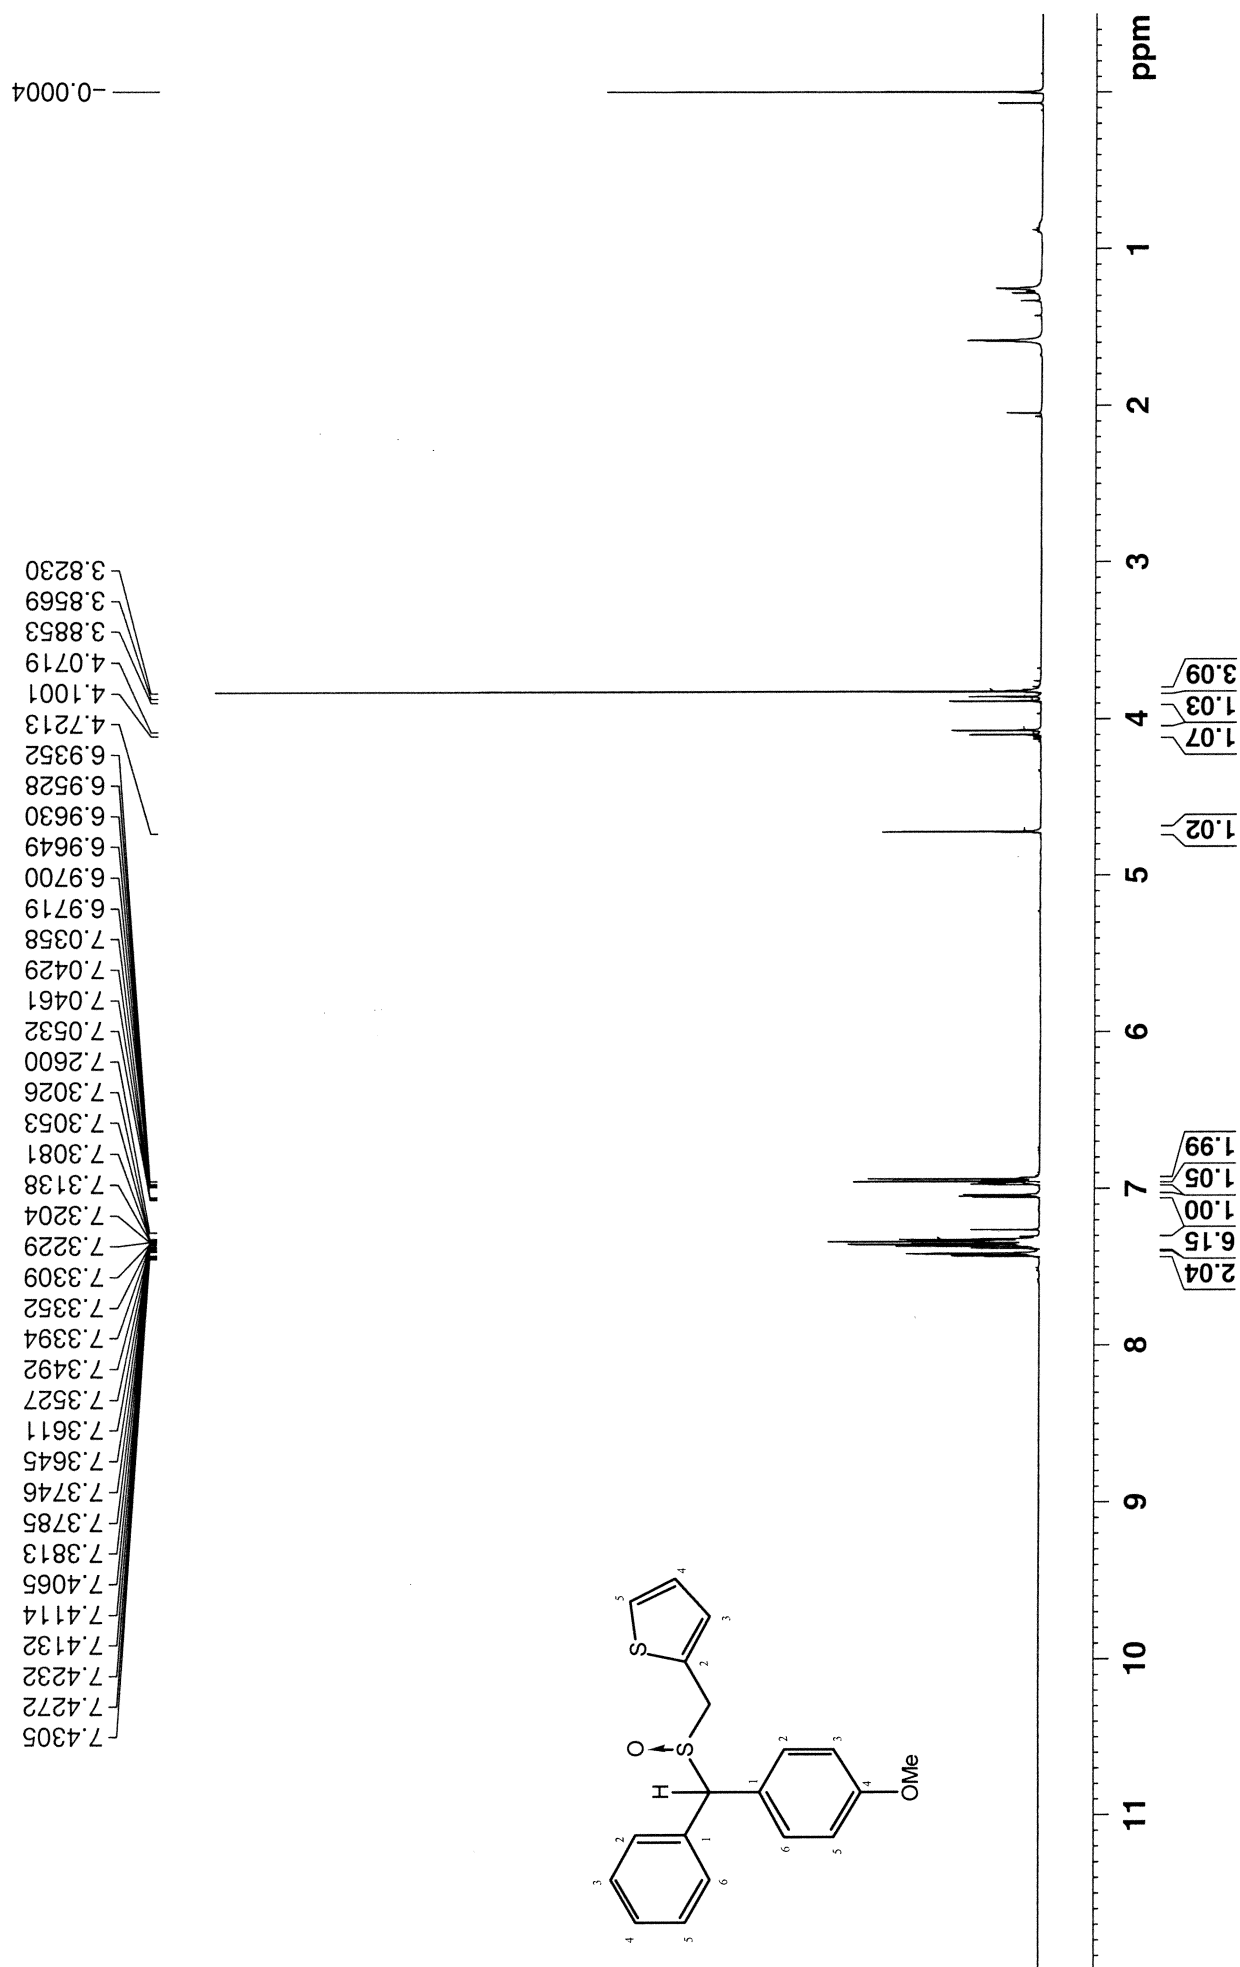

7.4305  
7.4272  
7.4232  
7.4132  
7.4114  
7.4065  
7.3813  
7.3785  
7.3746  
7.3645  
7.3611  
7.3527  
7.3492  
7.3394  
7.3352  
7.3309  
7.3229  
7.3204  
7.3138  
7.3081  
7.3053  
7.3026  
7.2600

7.0532  
7.0461  
7.0429  
7.0358

6.9719  
6.9700  
6.9649  
6.9630  
6.9528  
6.9352

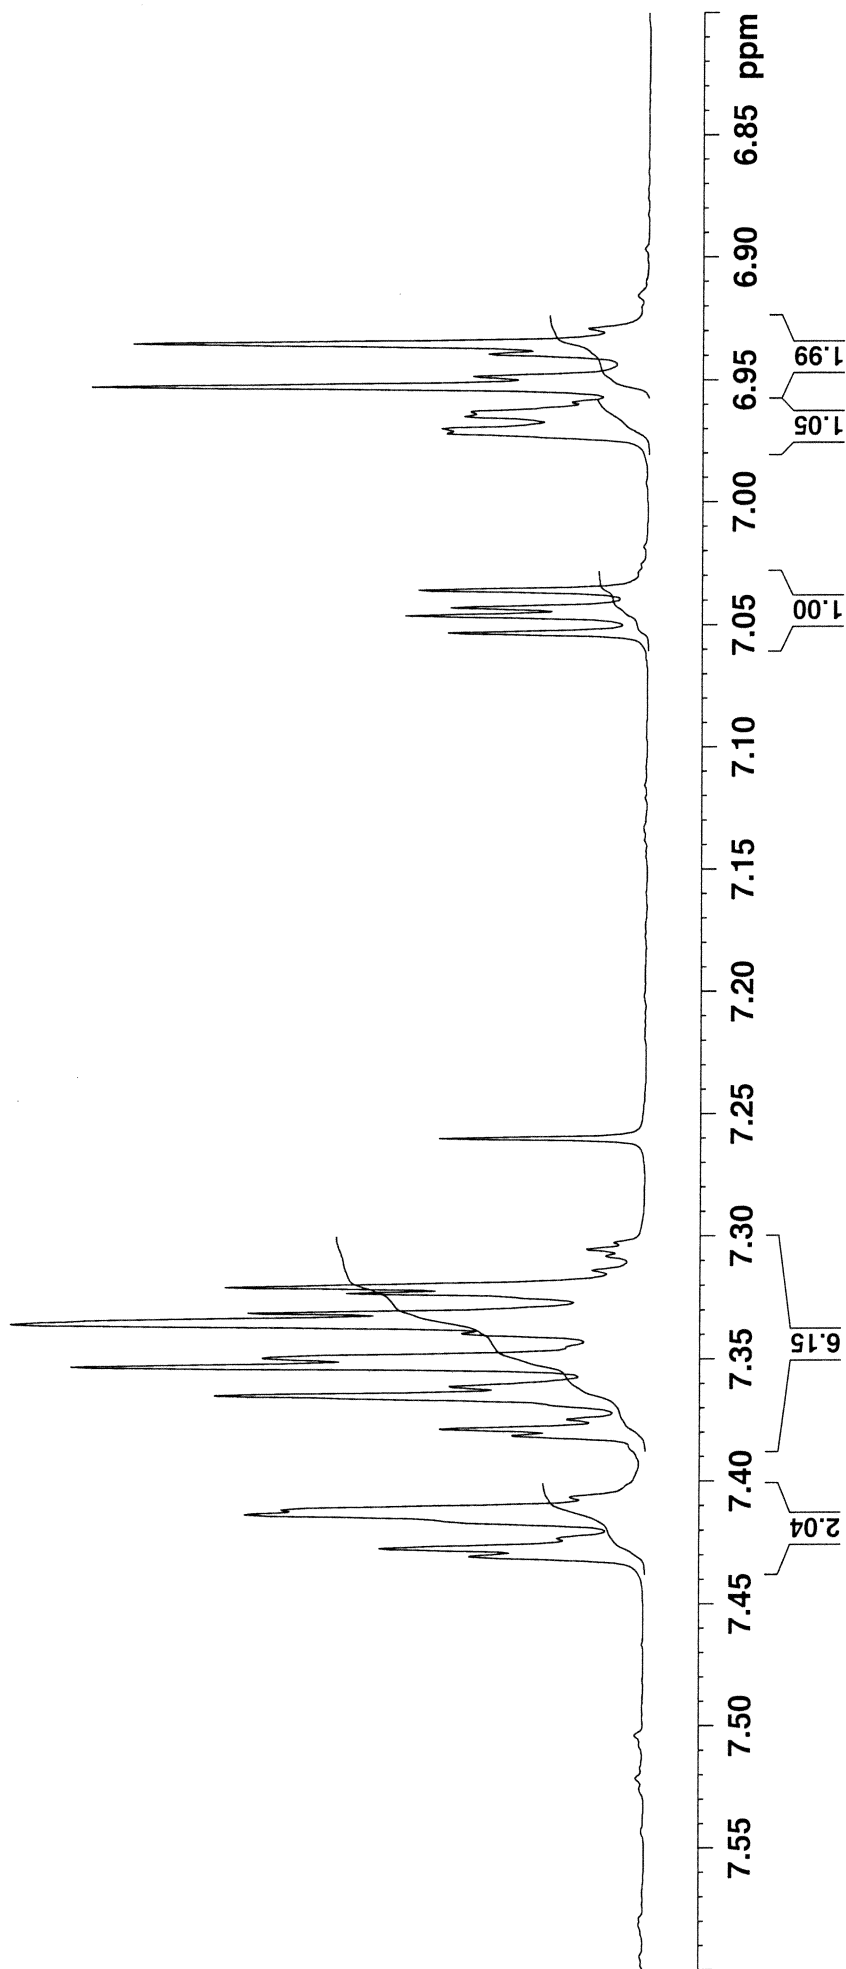

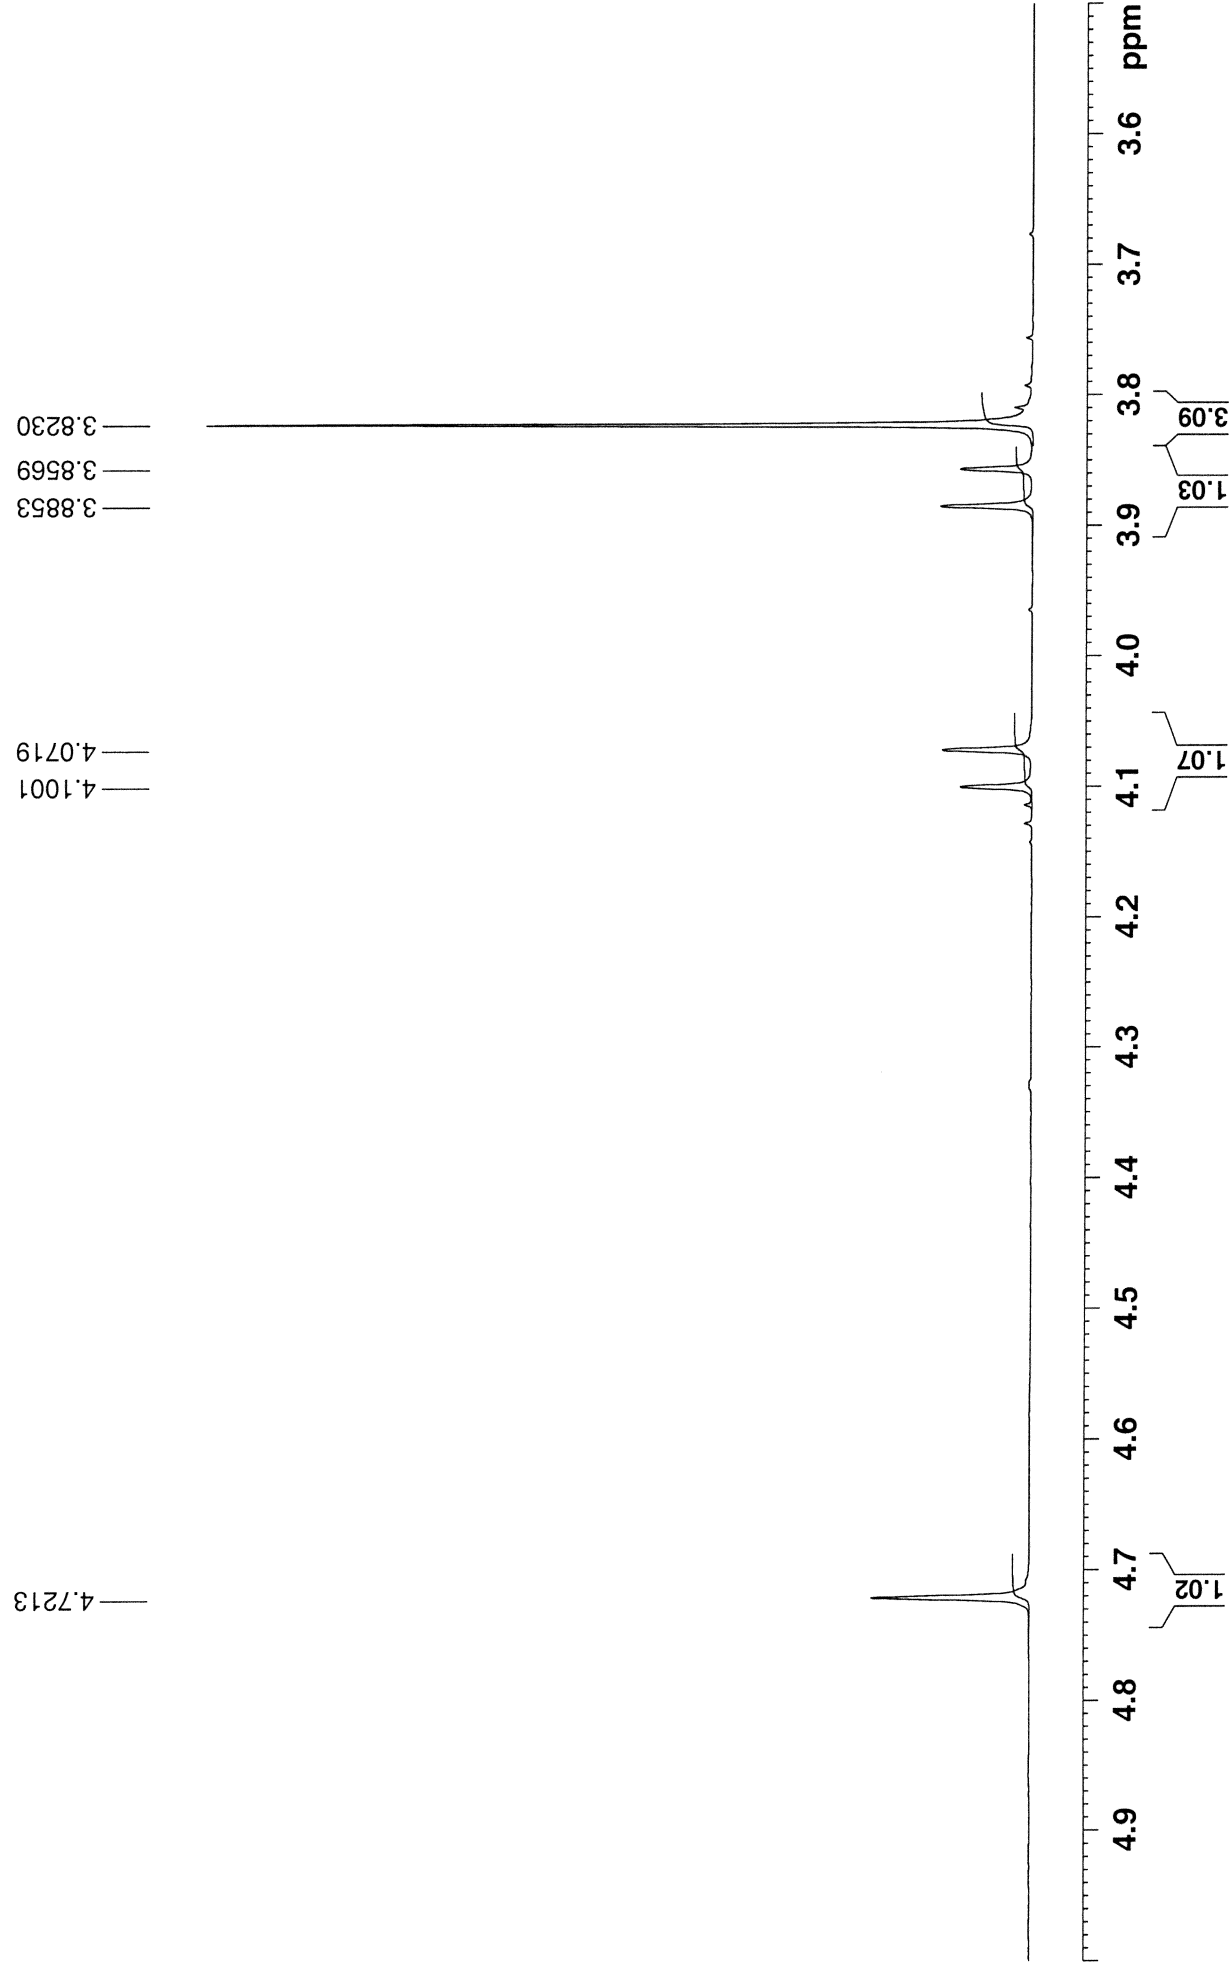

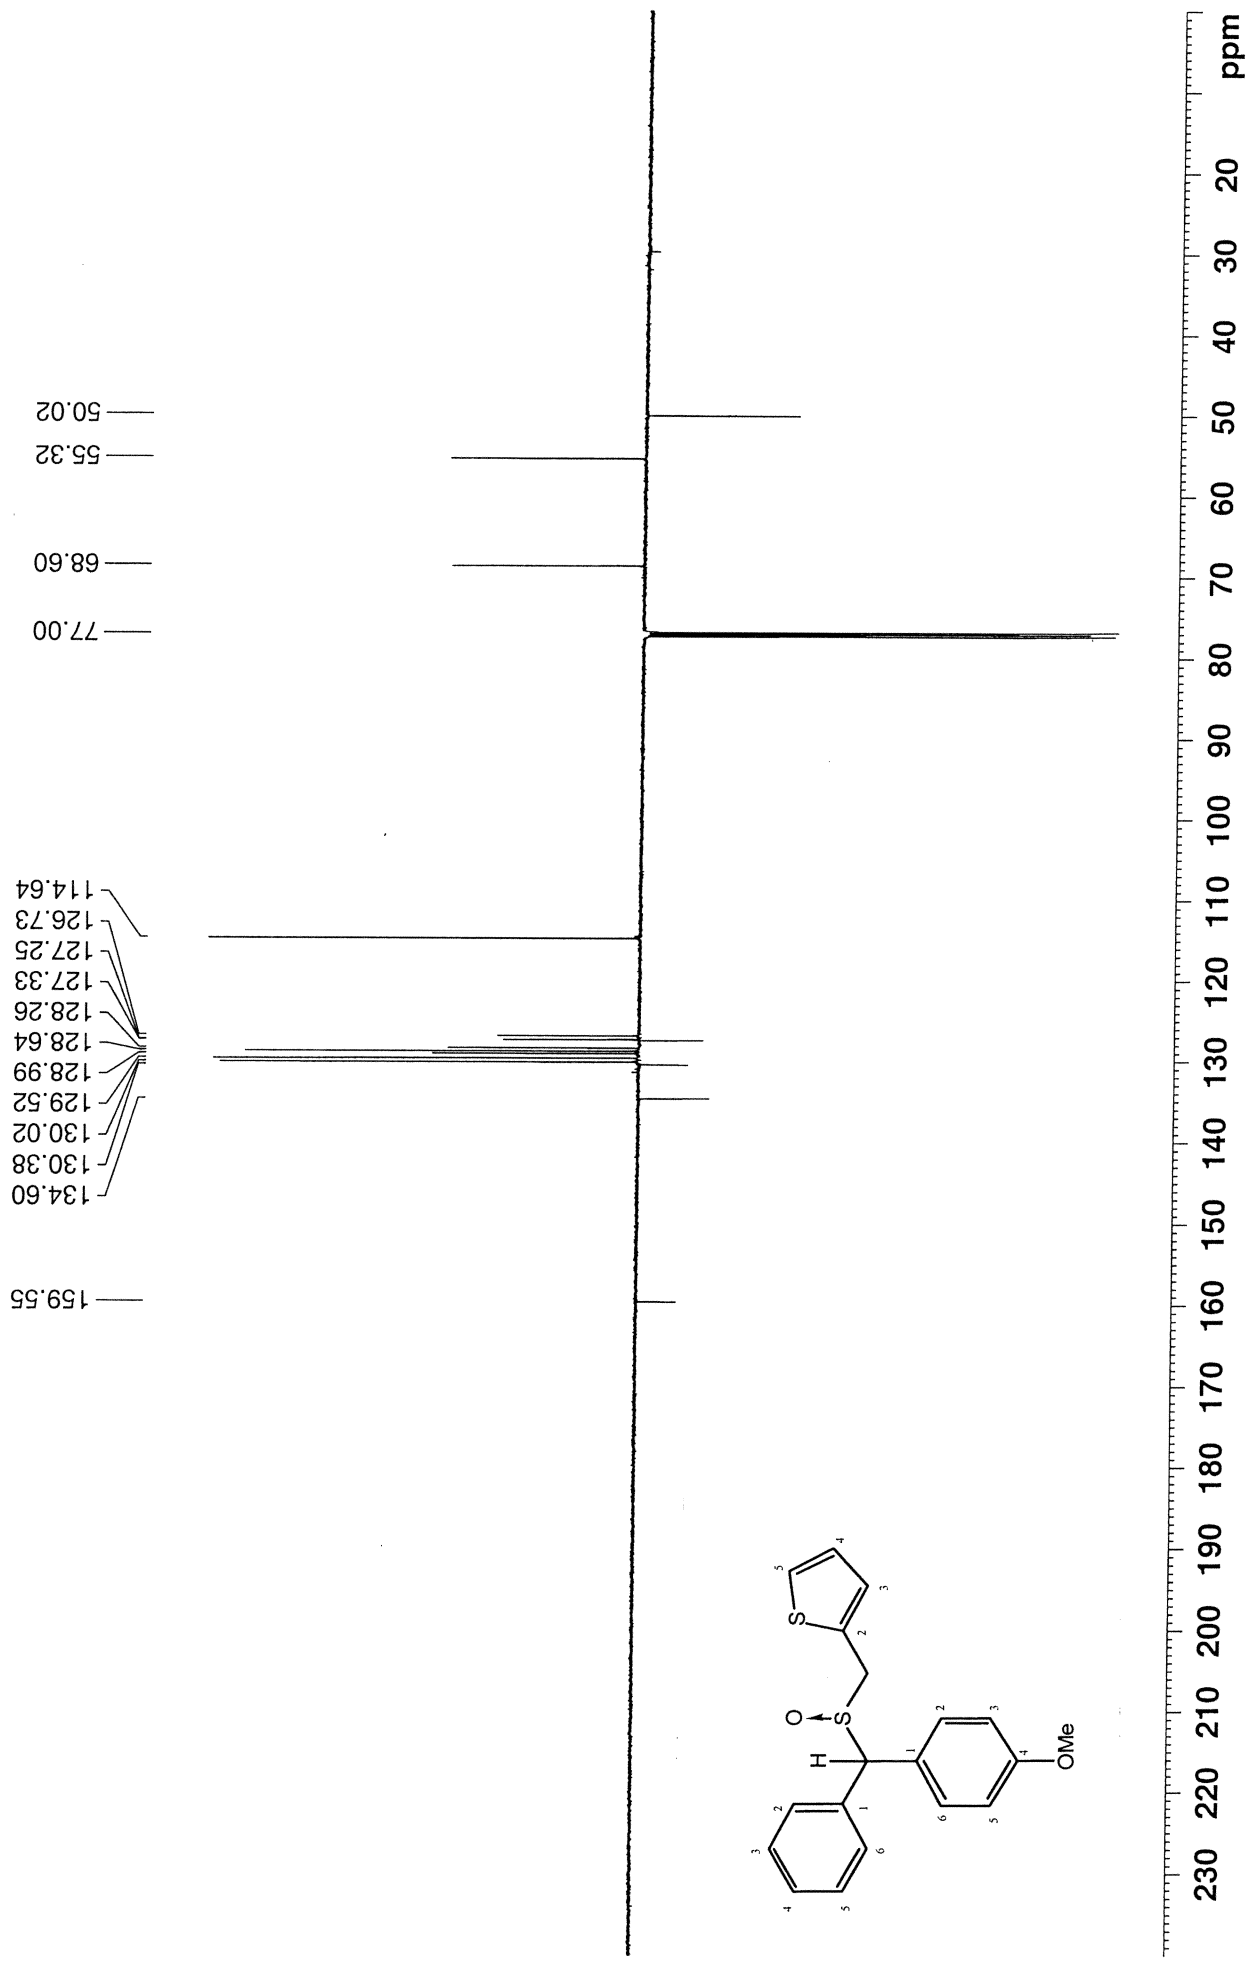

159.55

134.60

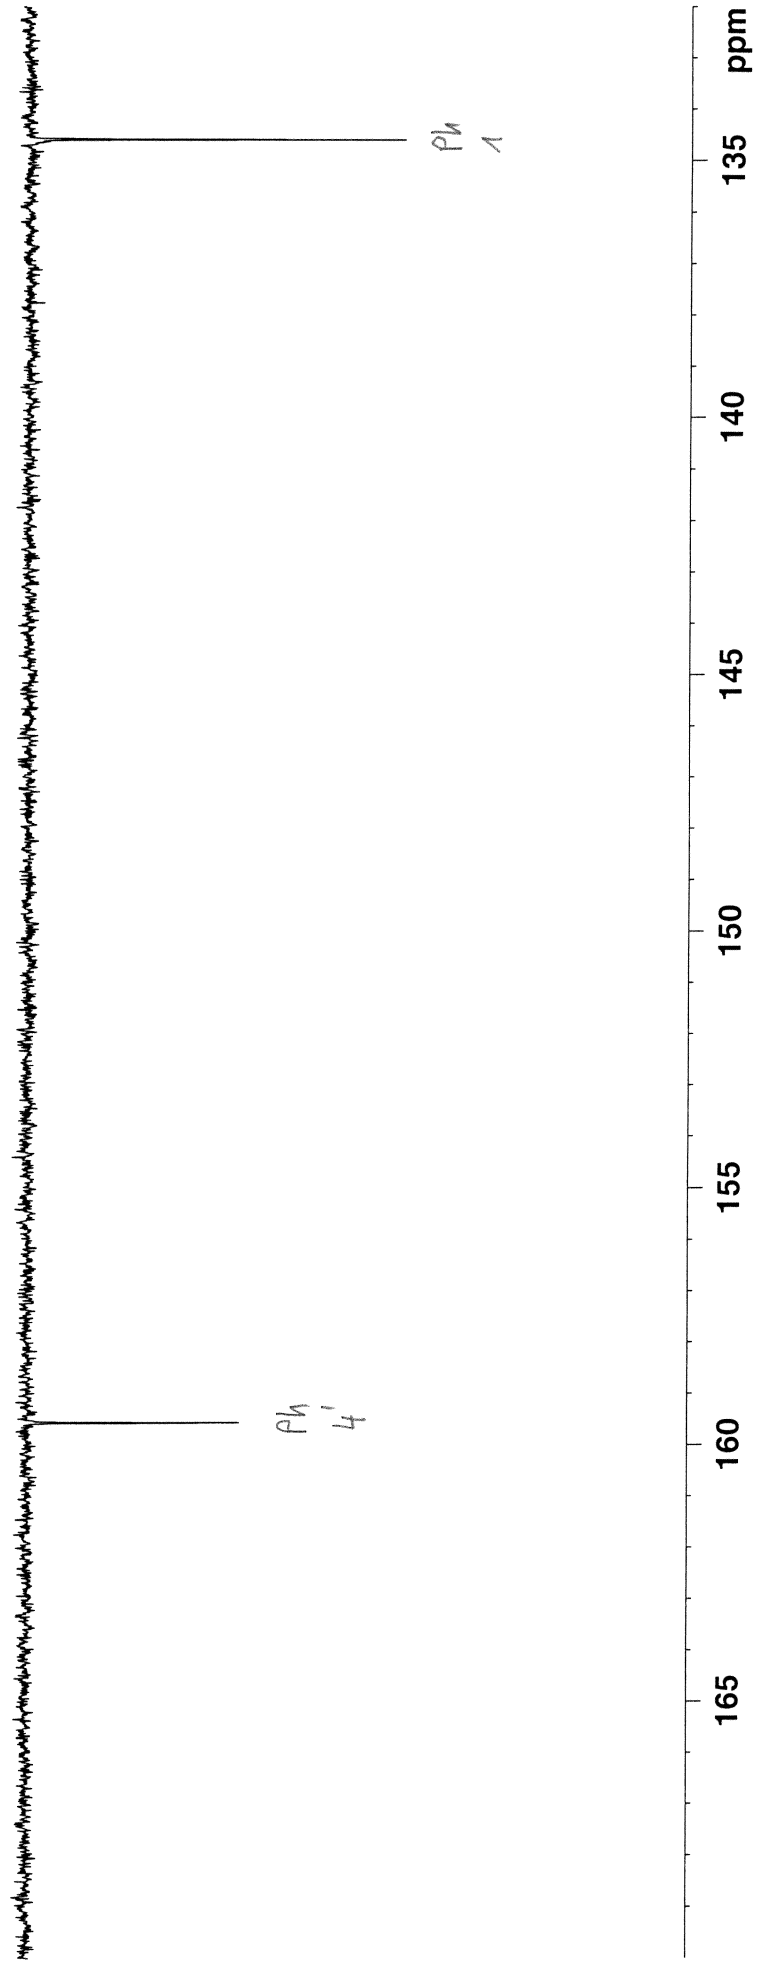

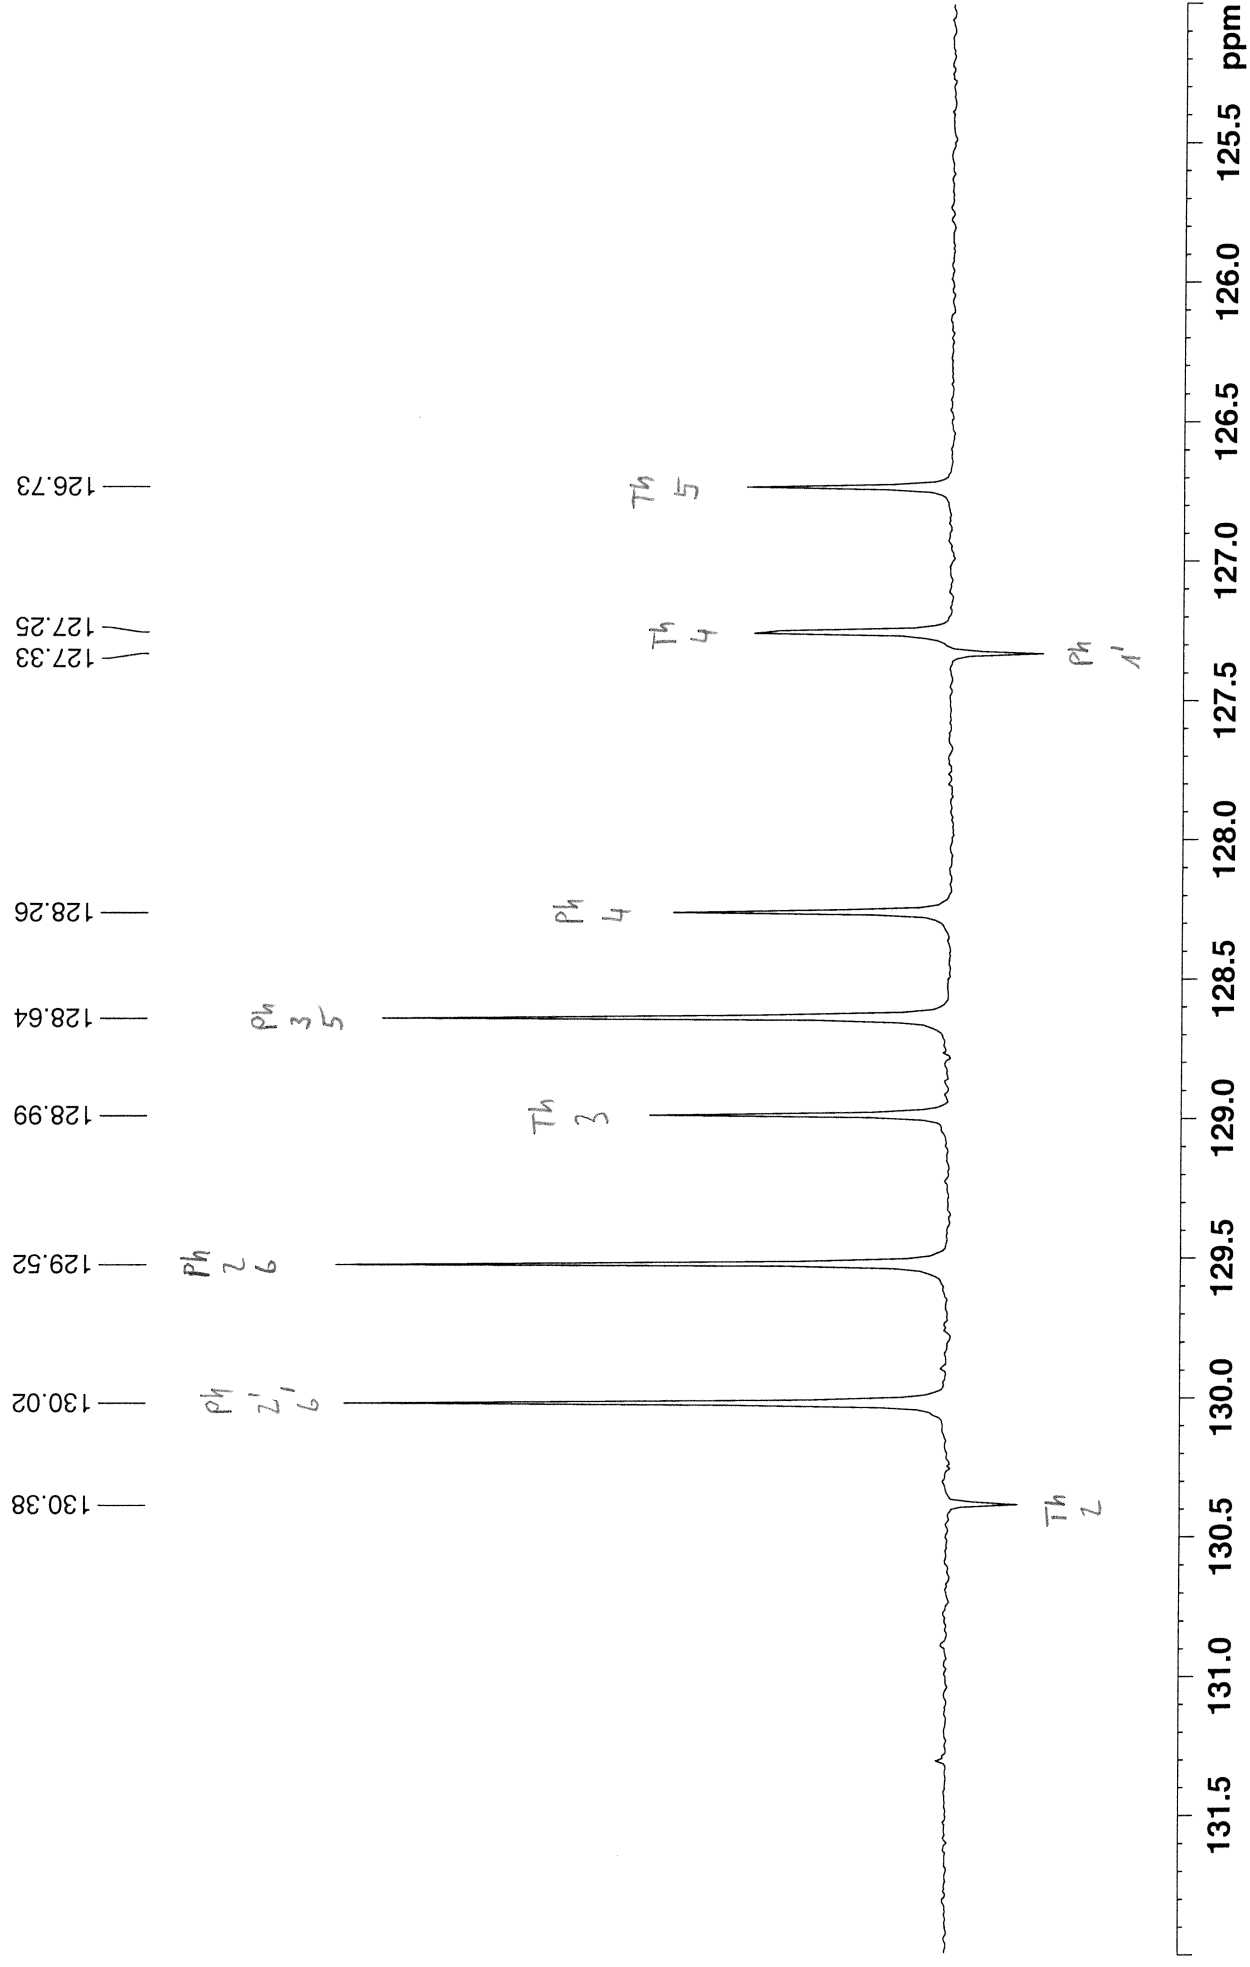

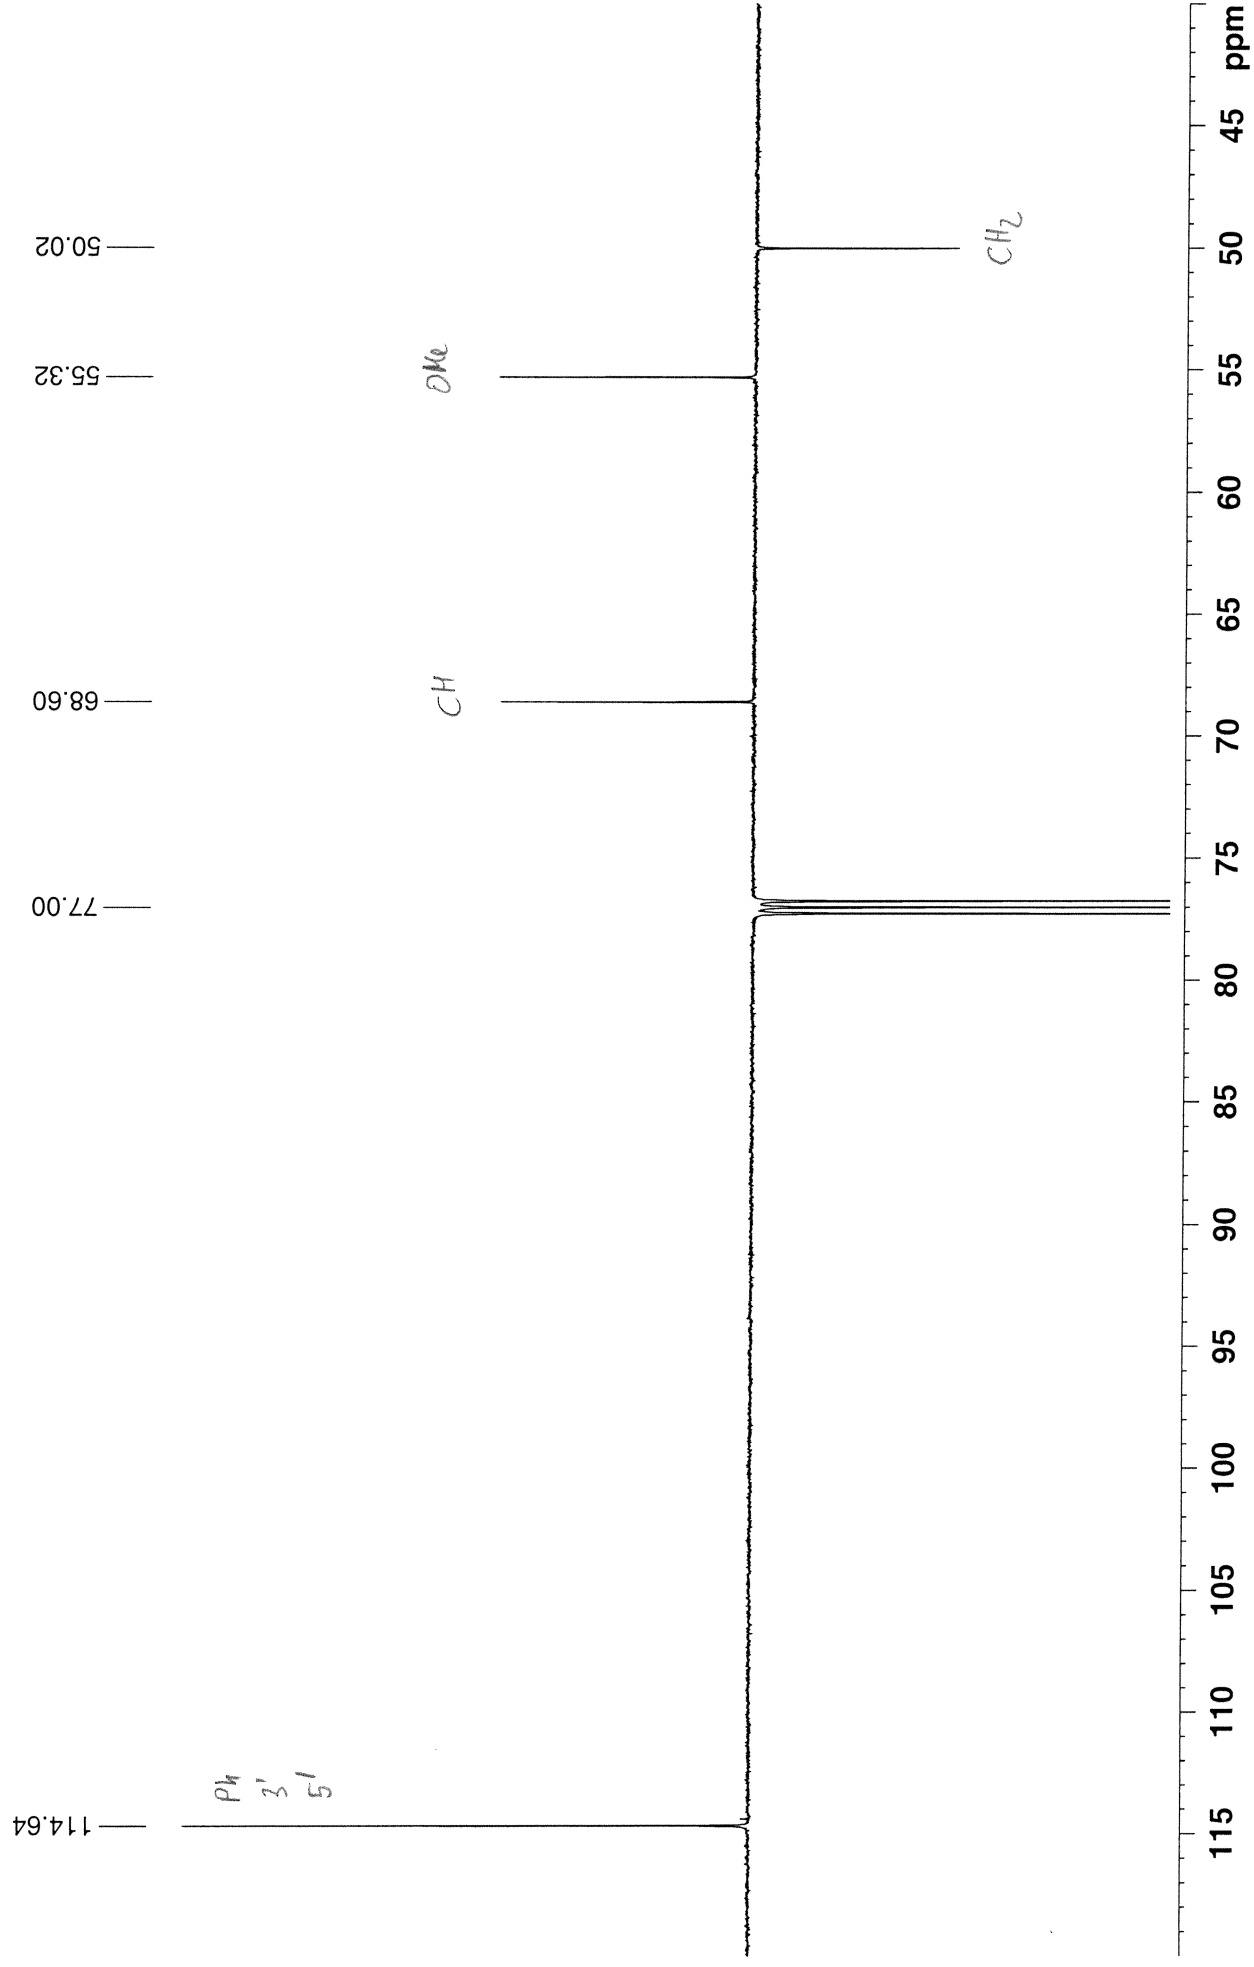

Figure S79c. NMR spectra of compound 7t.

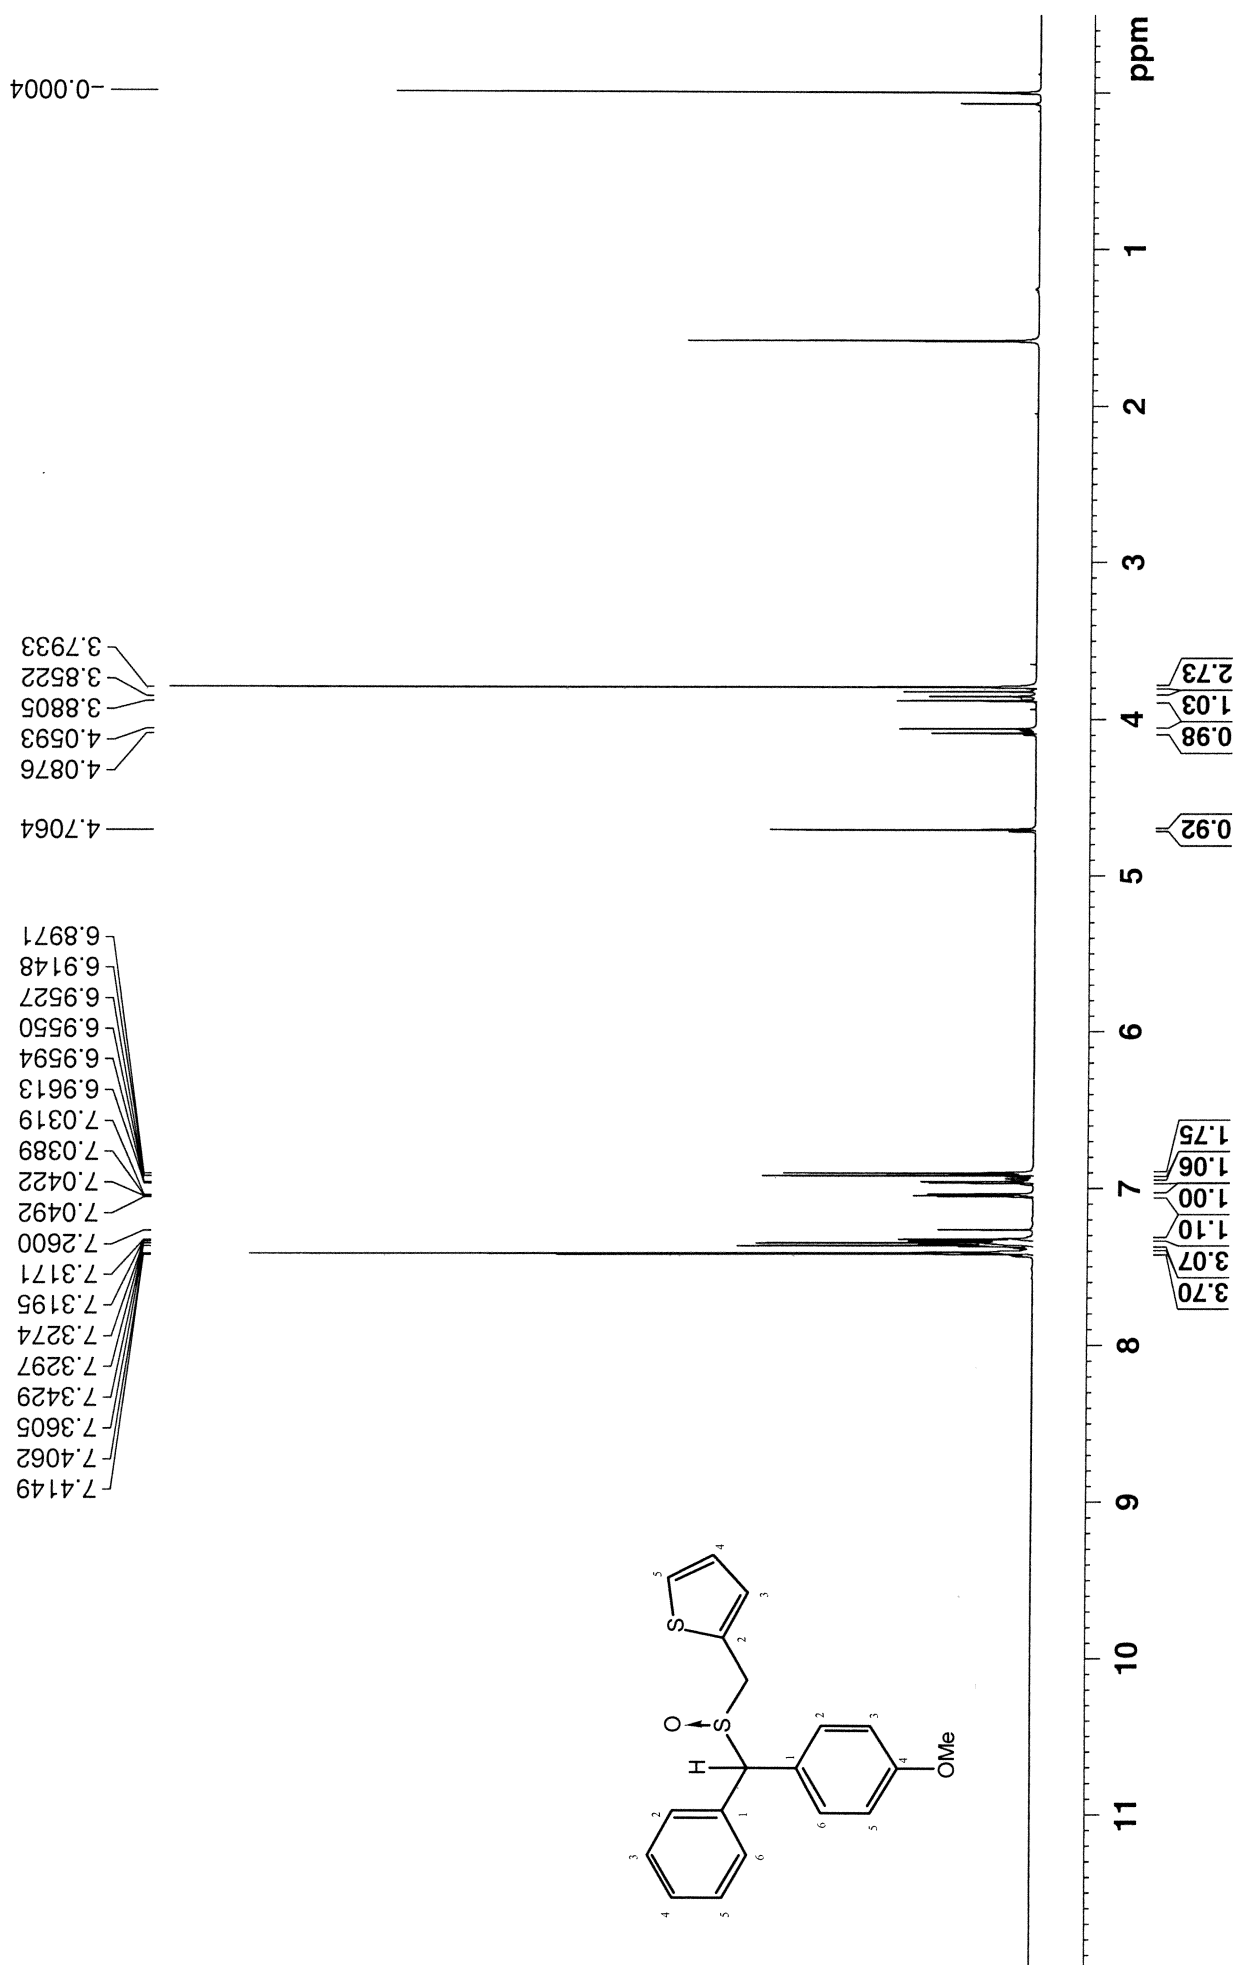



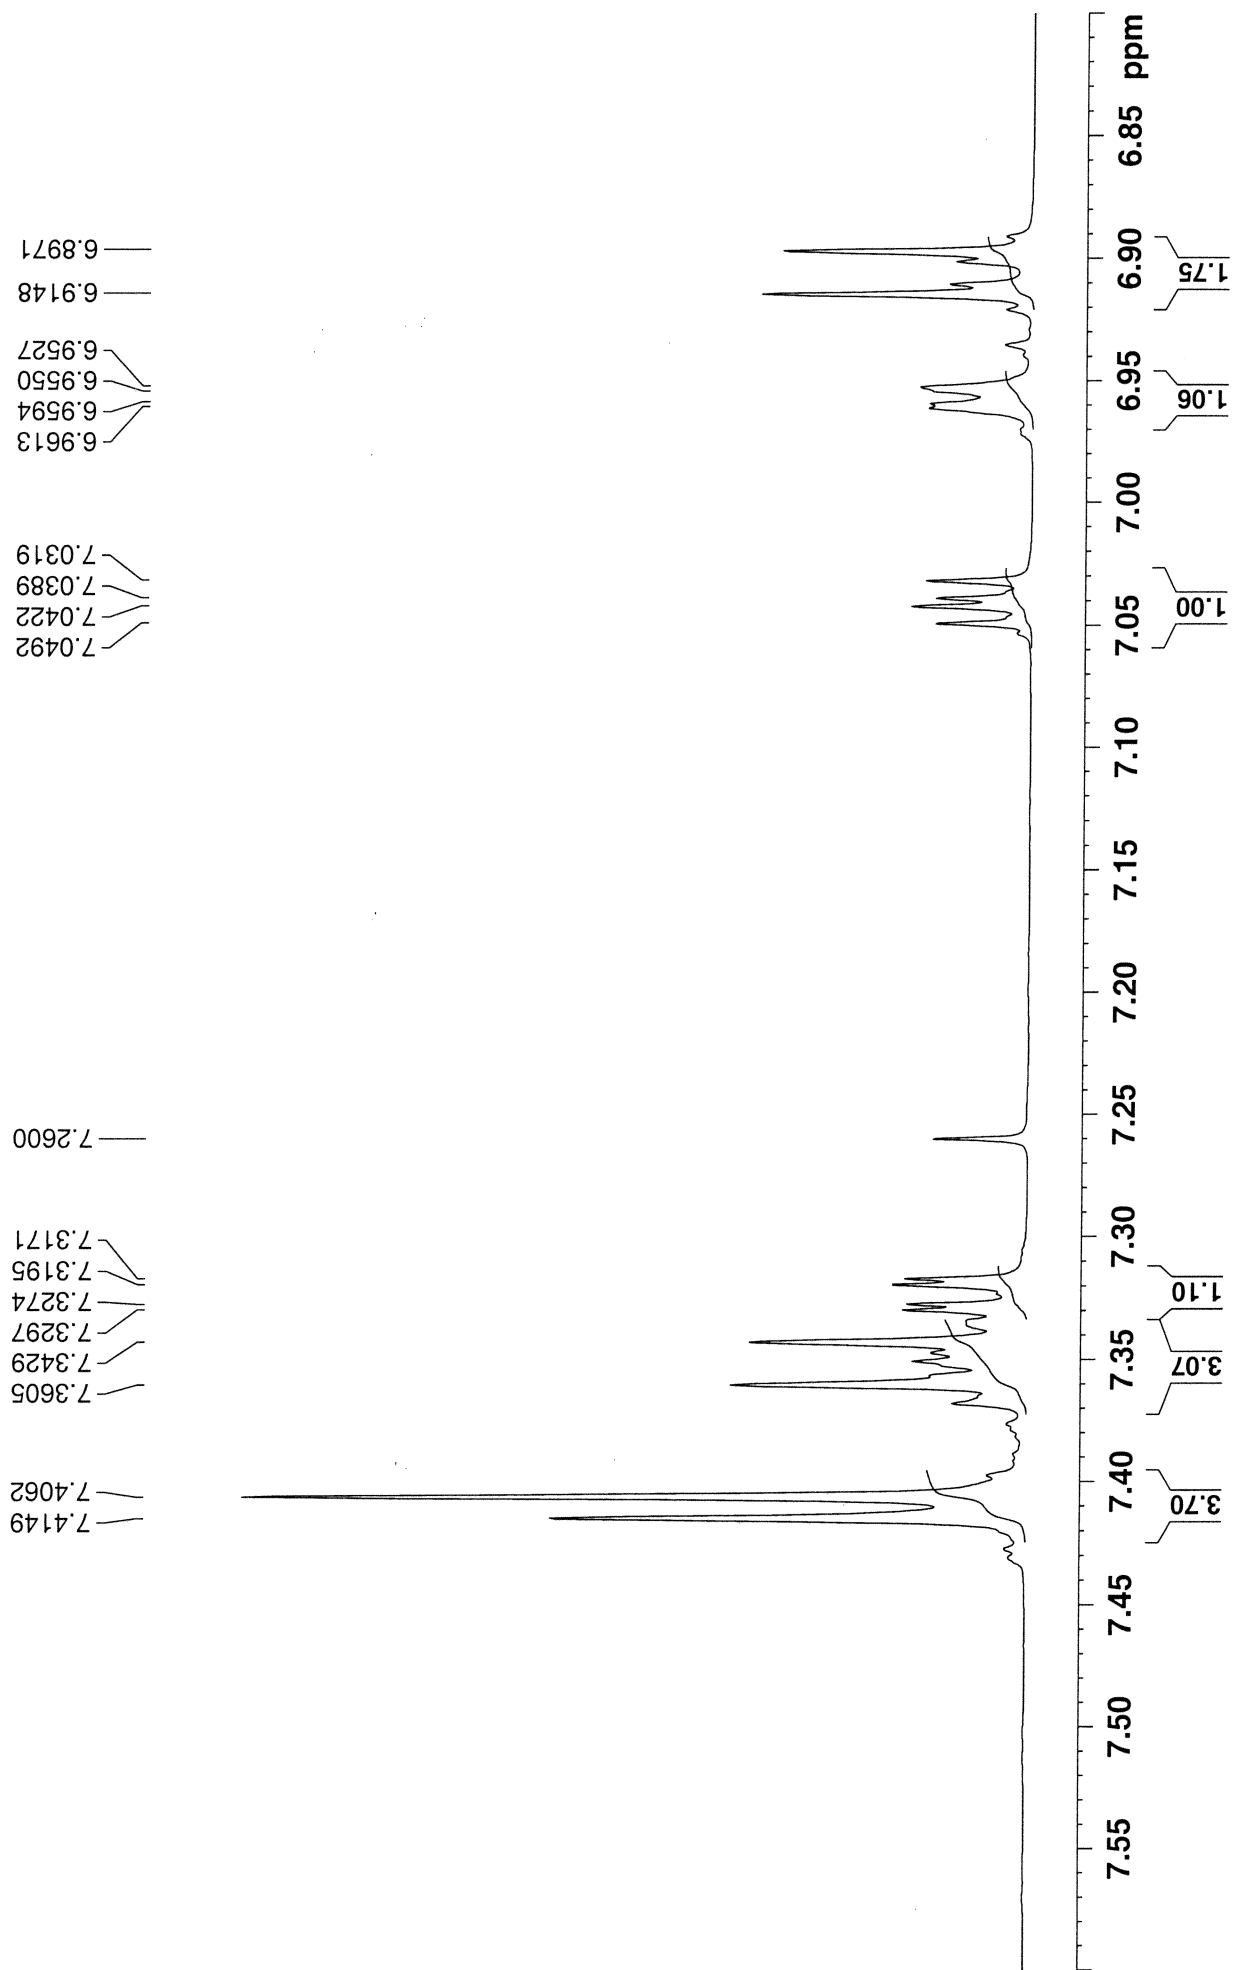

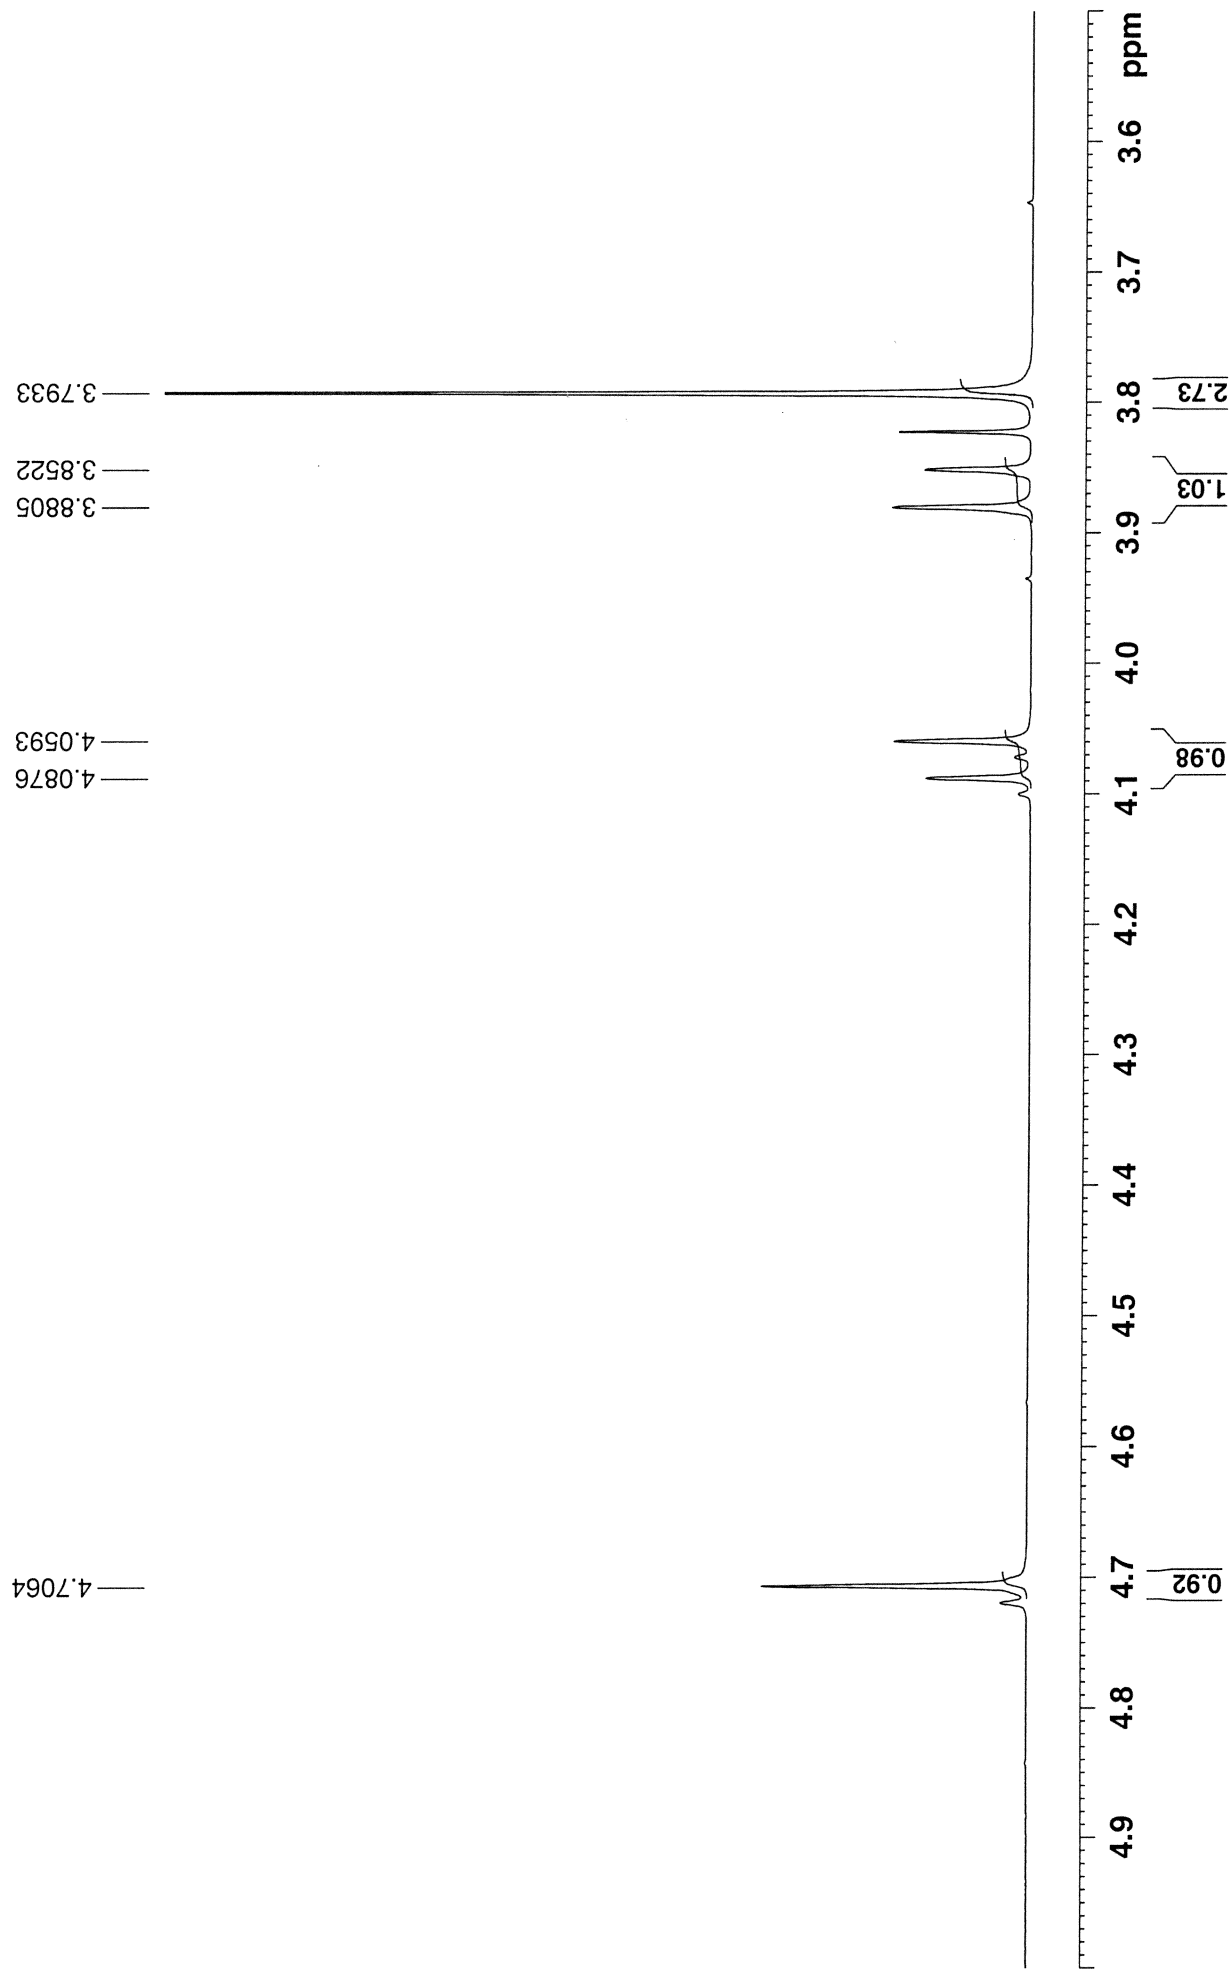

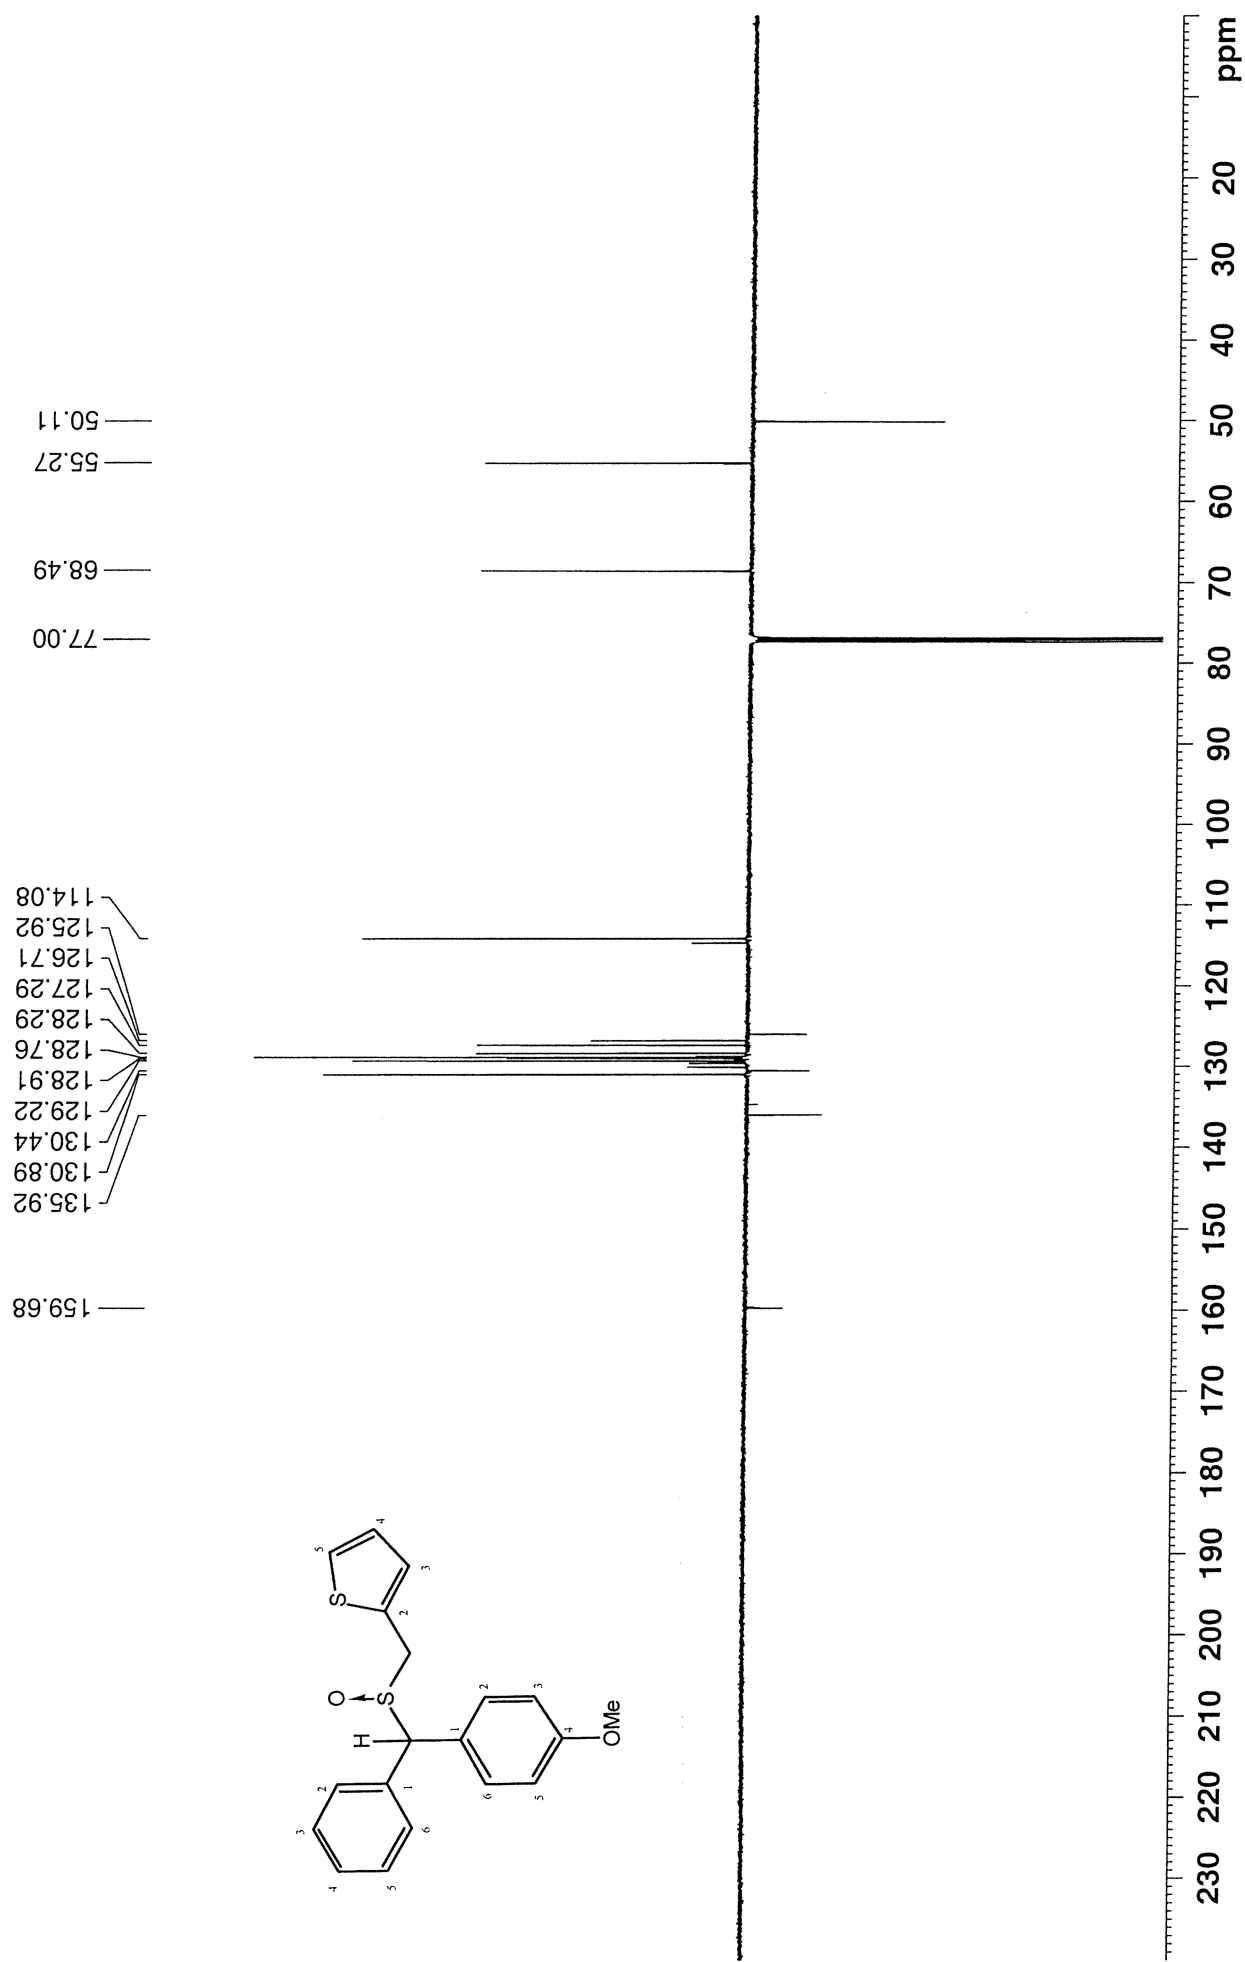

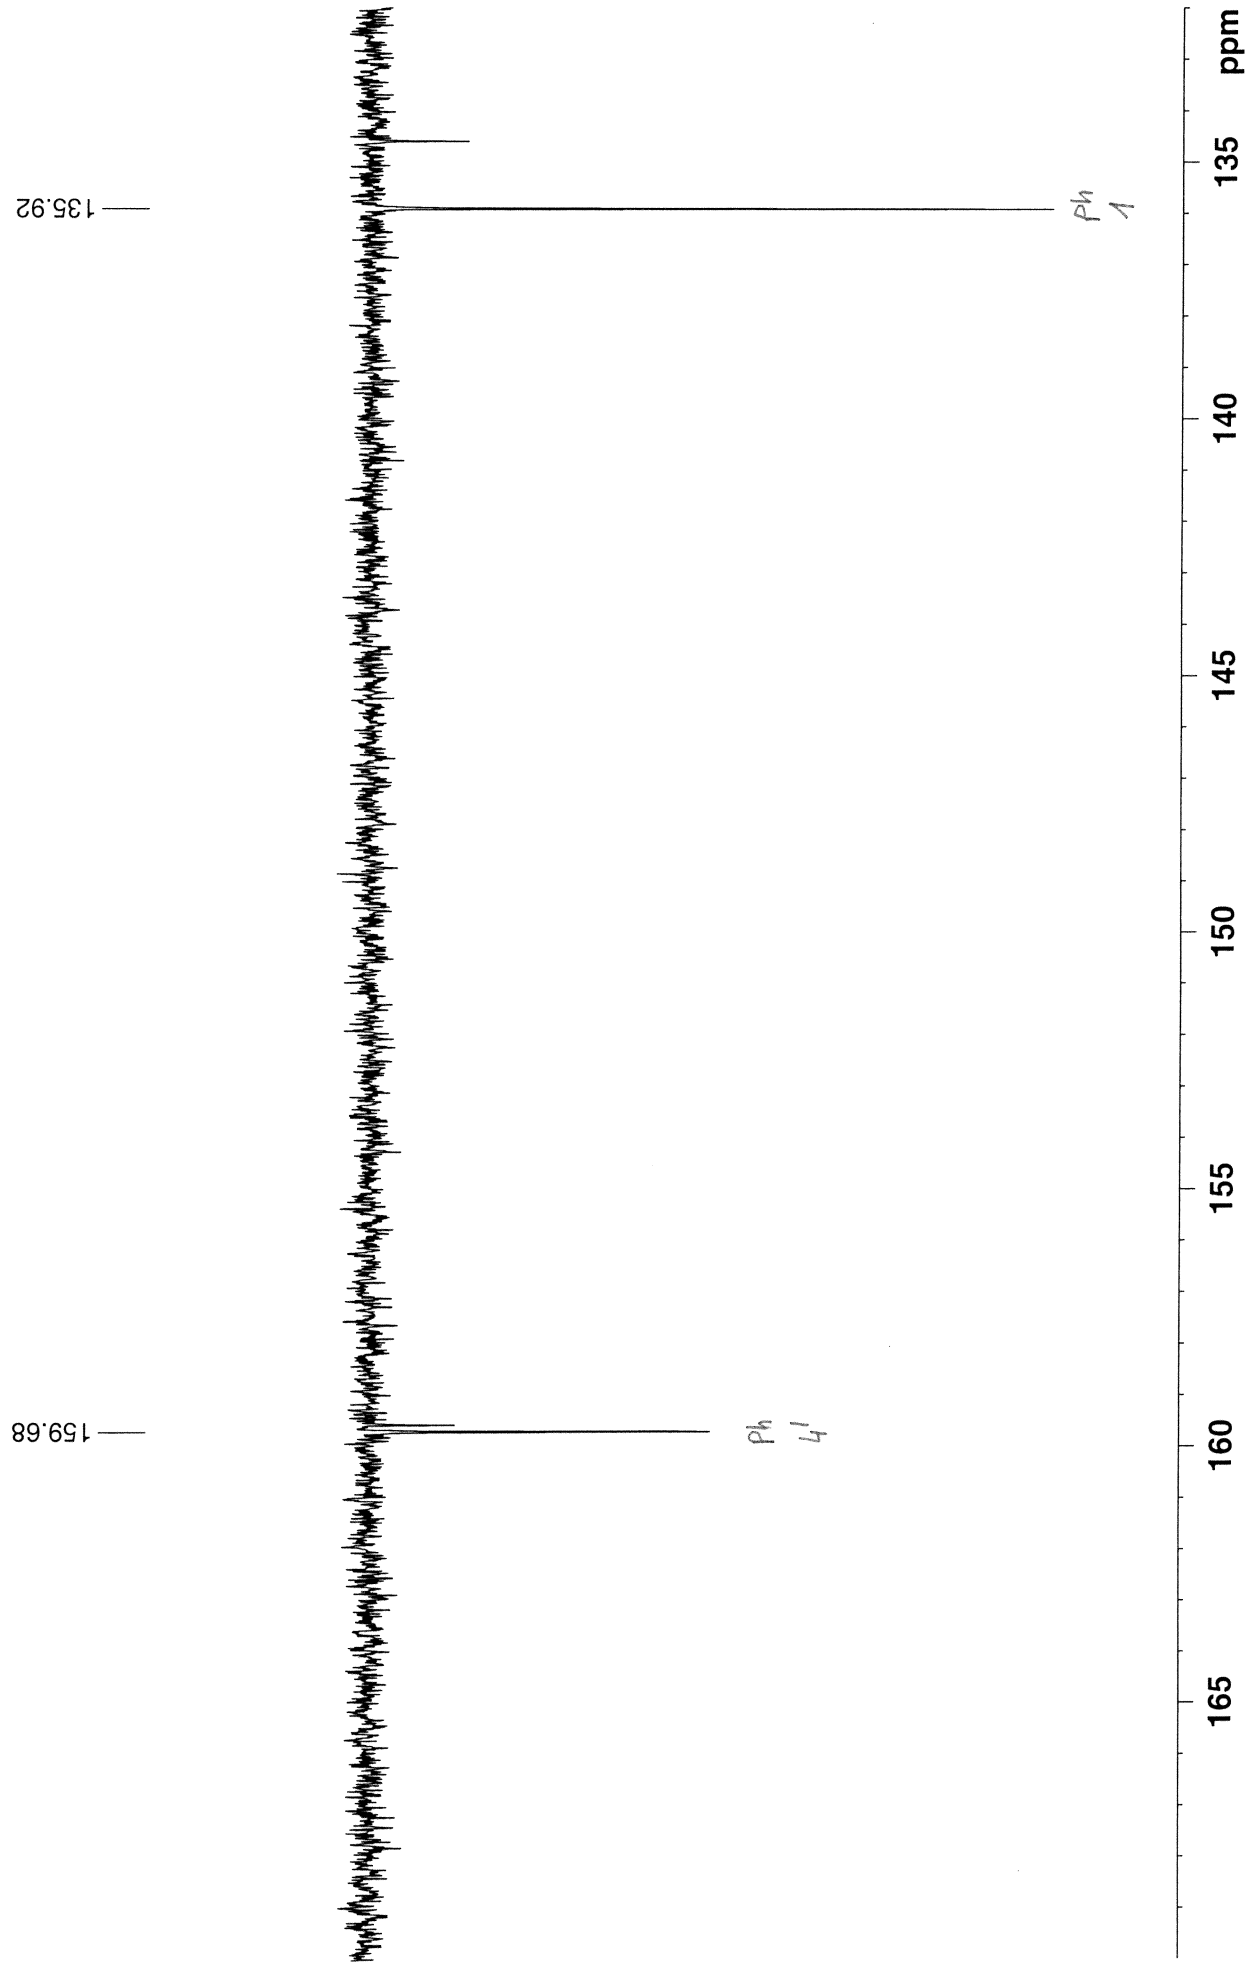

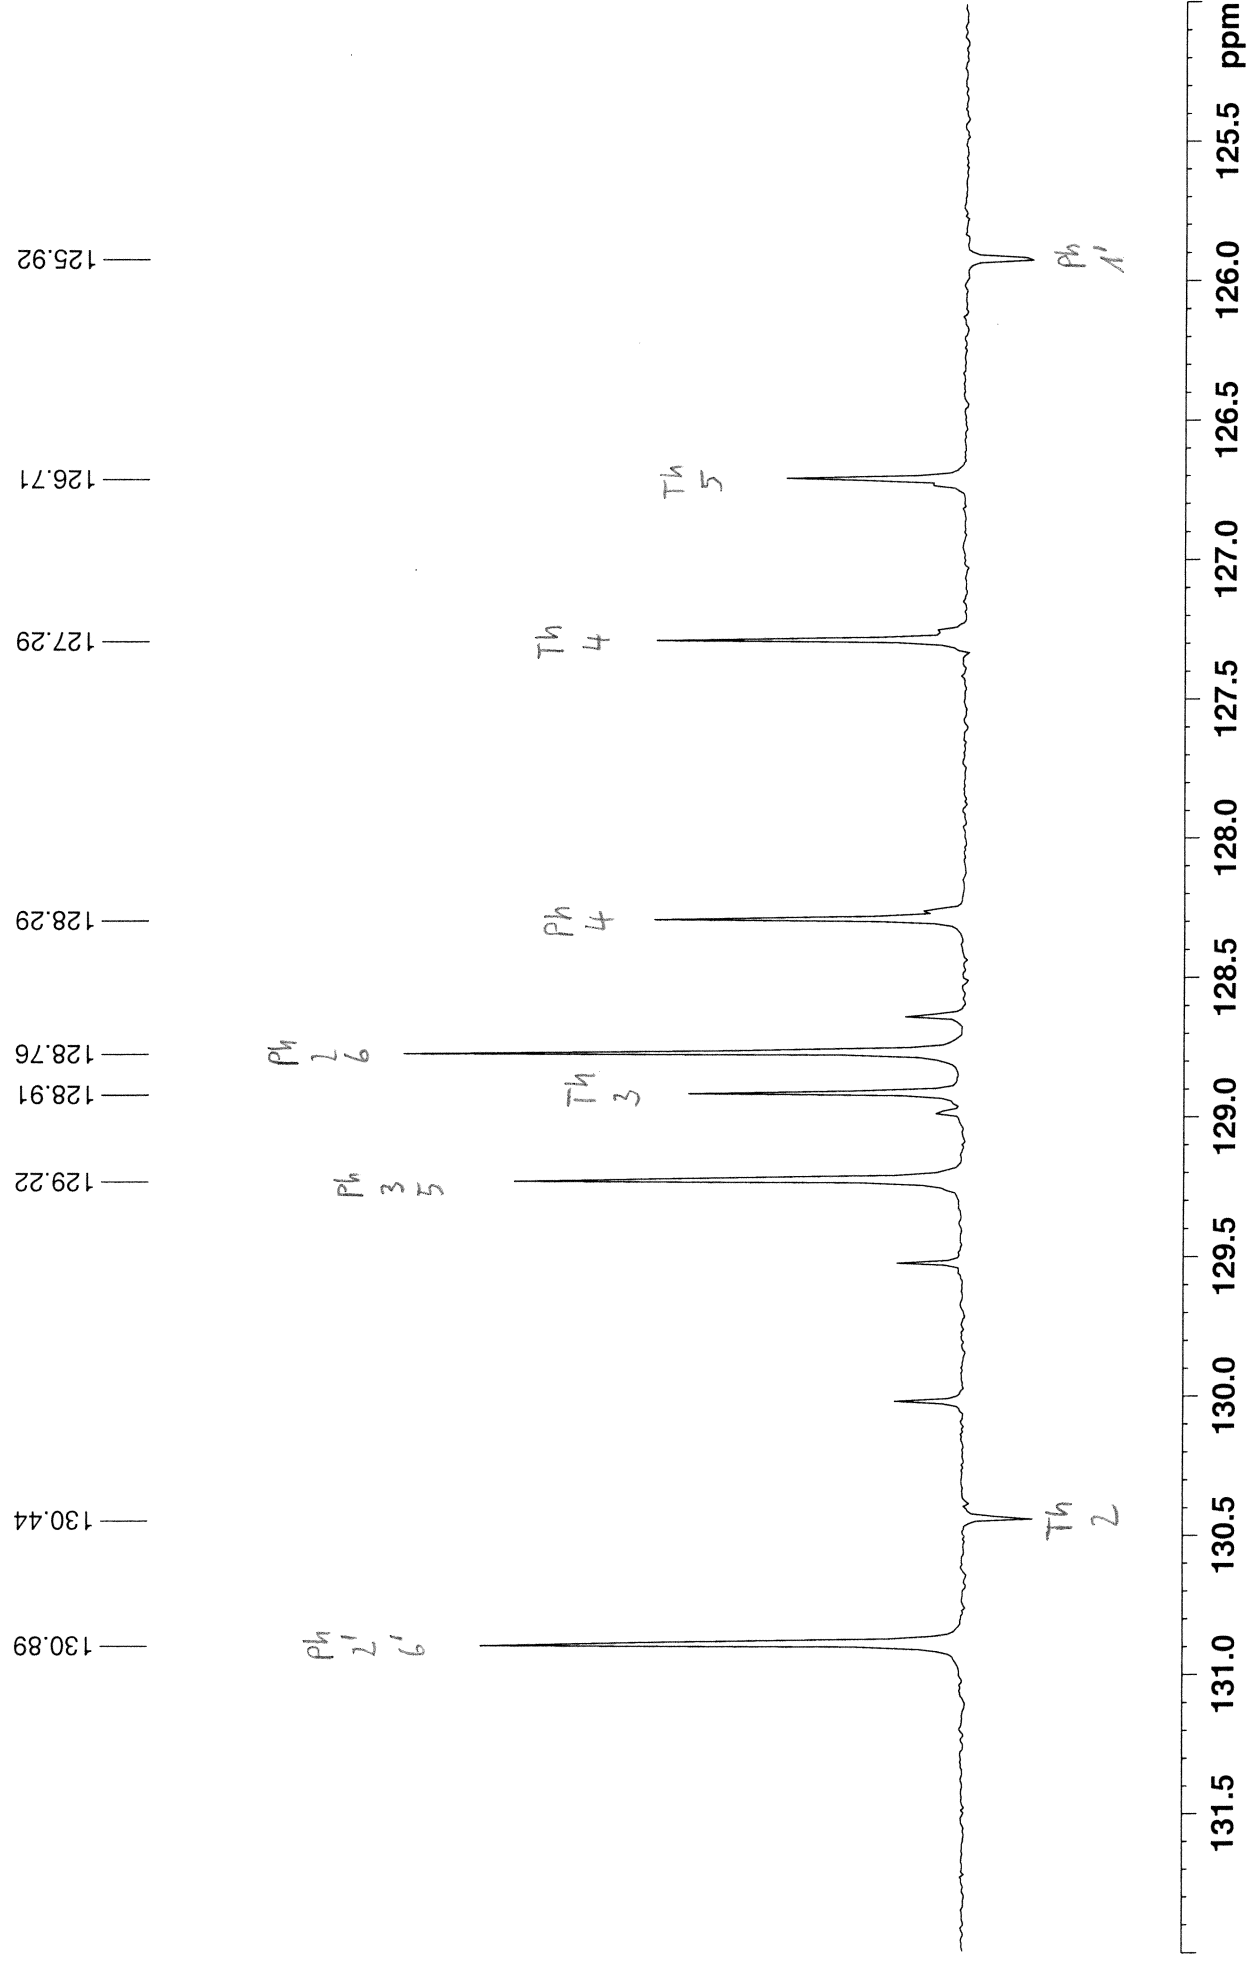

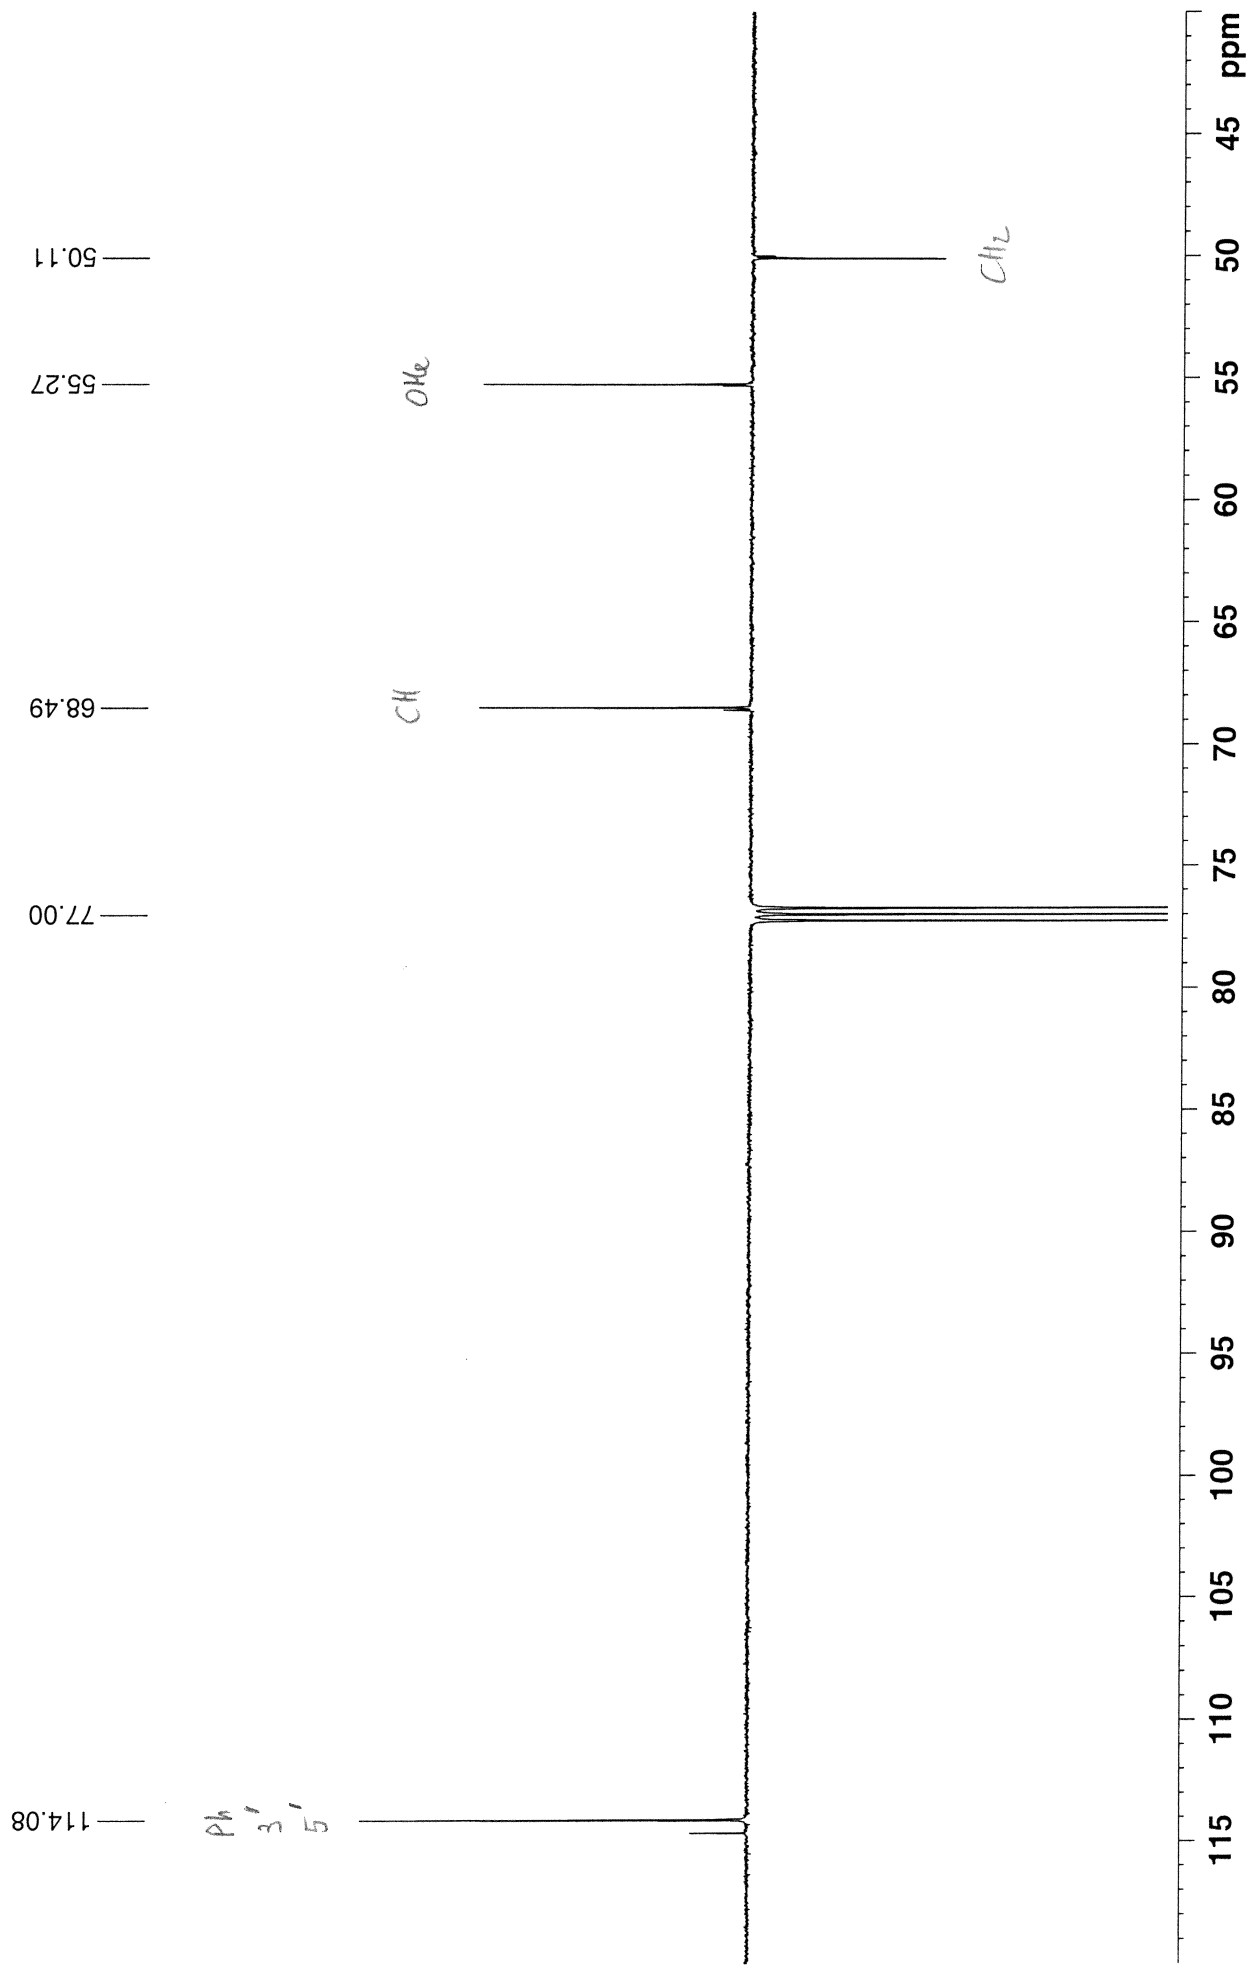

**Figure S80c.** NMR spectra of compound **8t**.

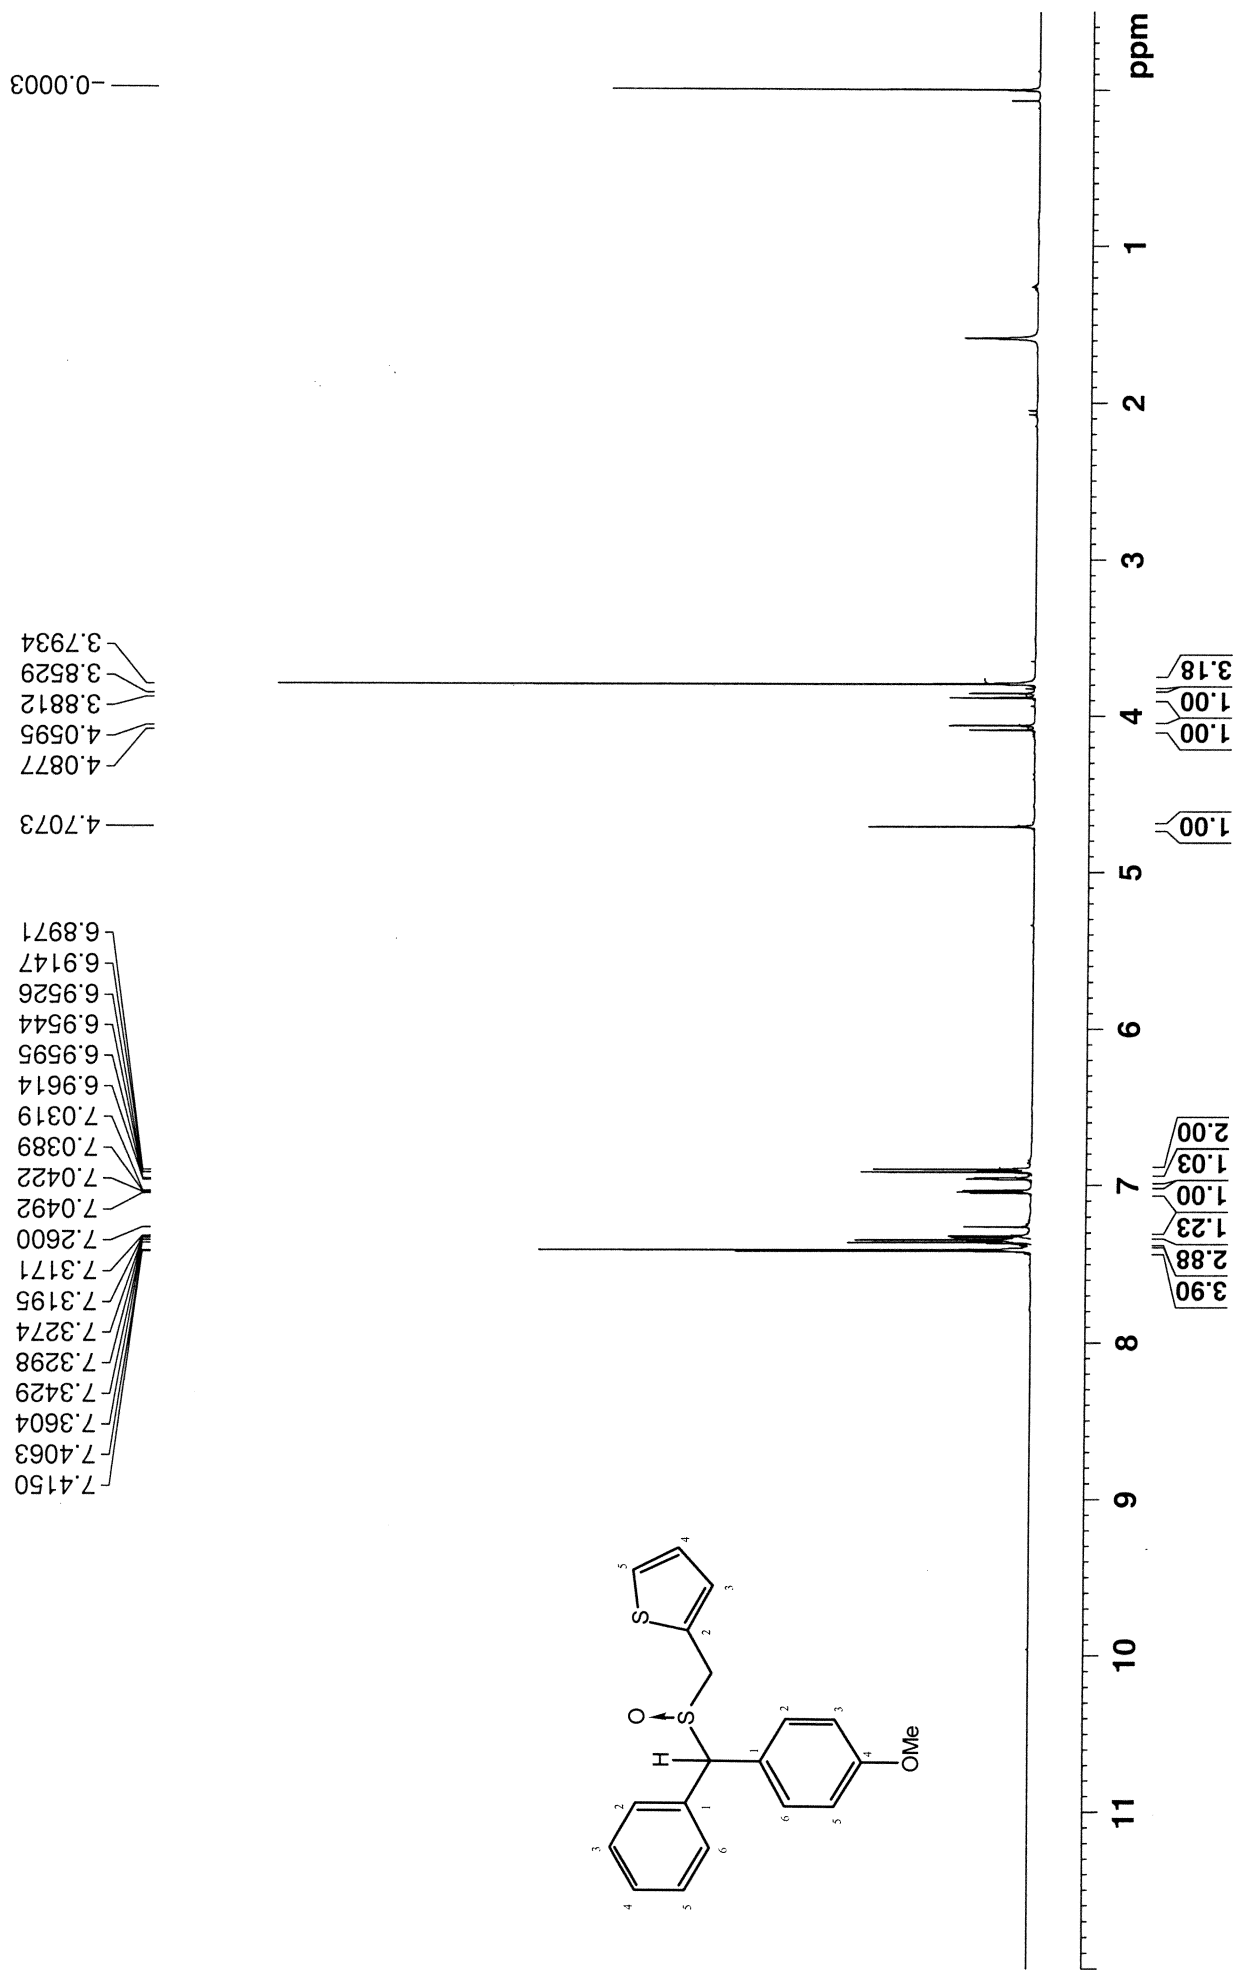

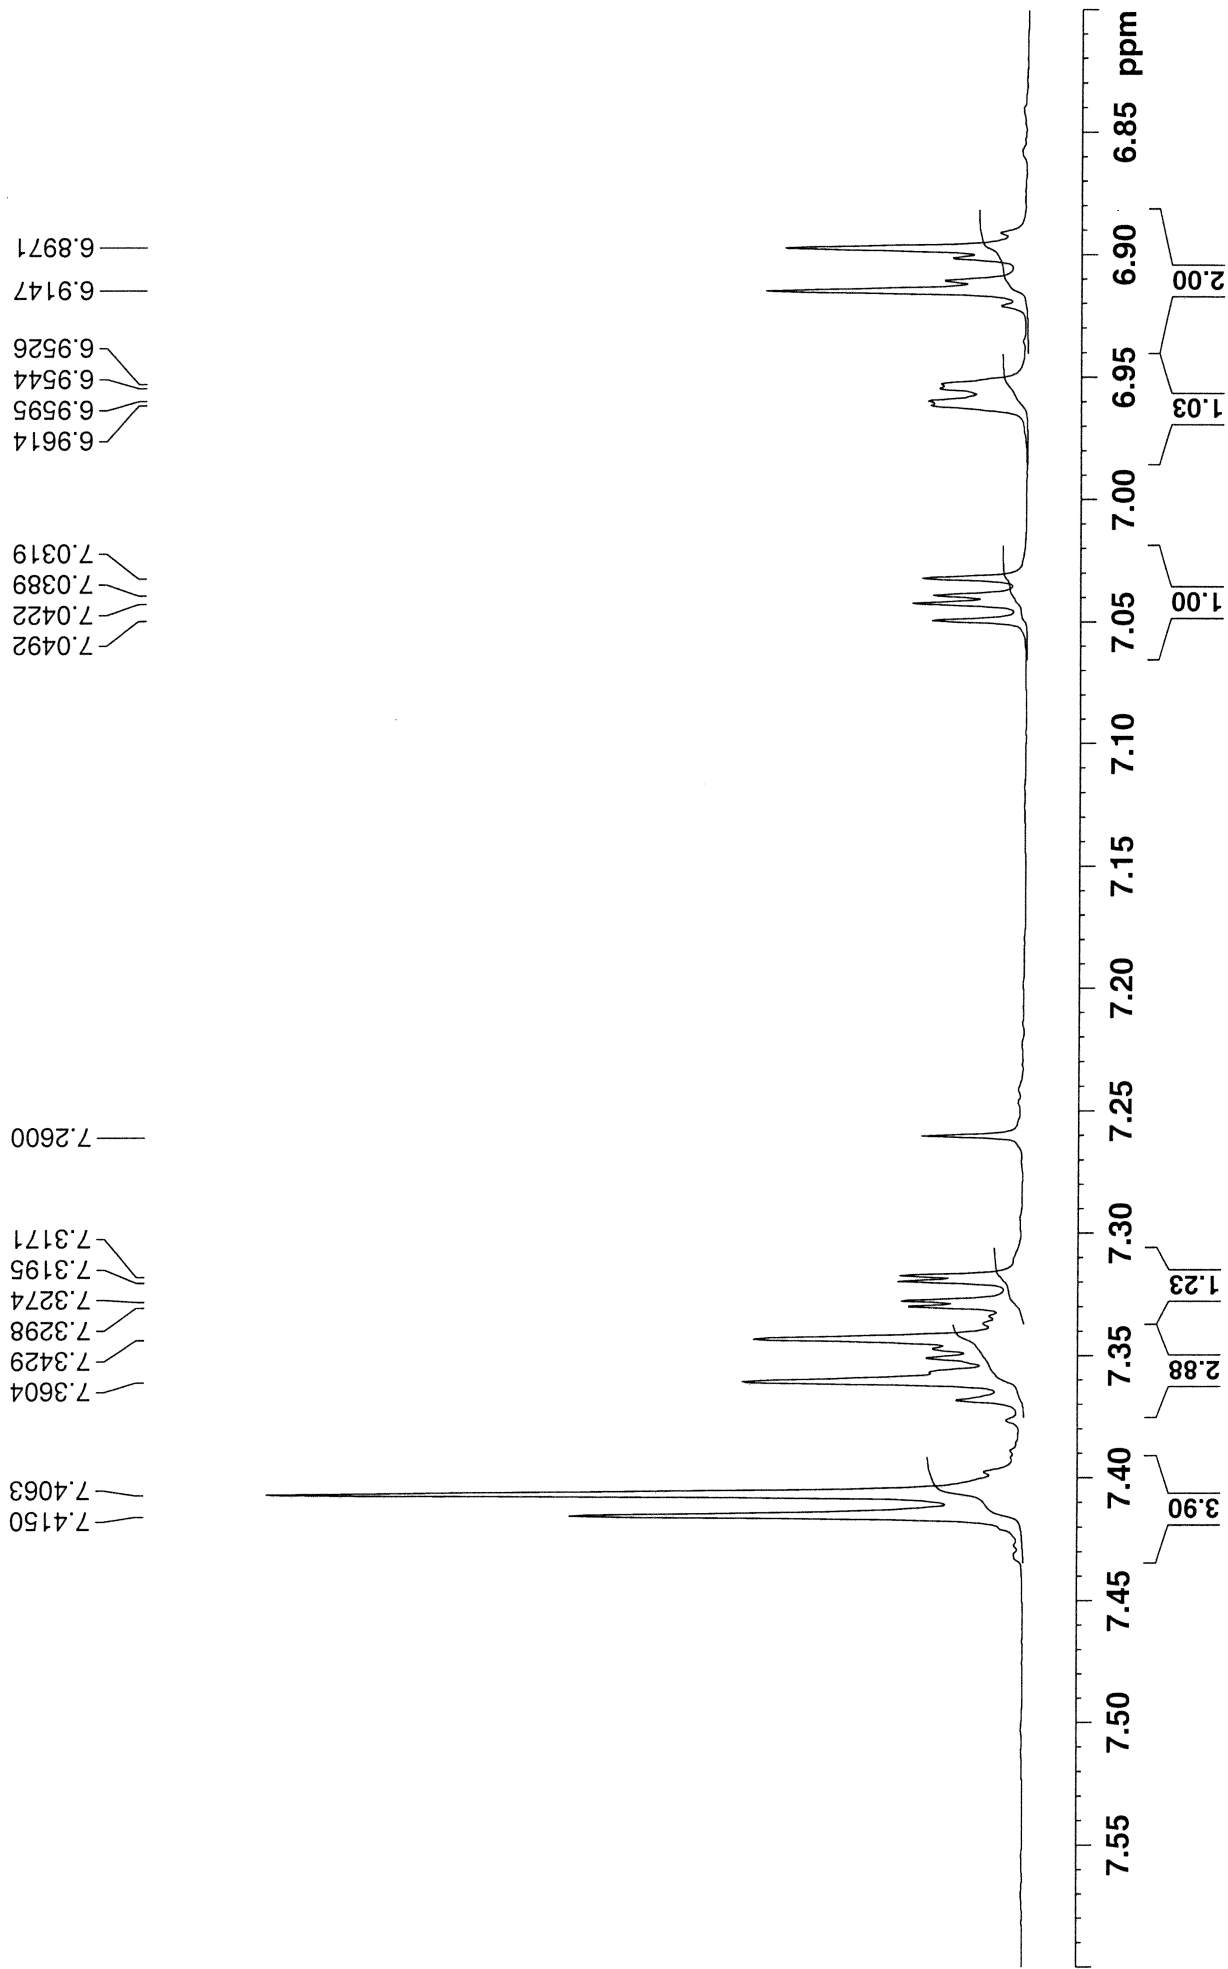



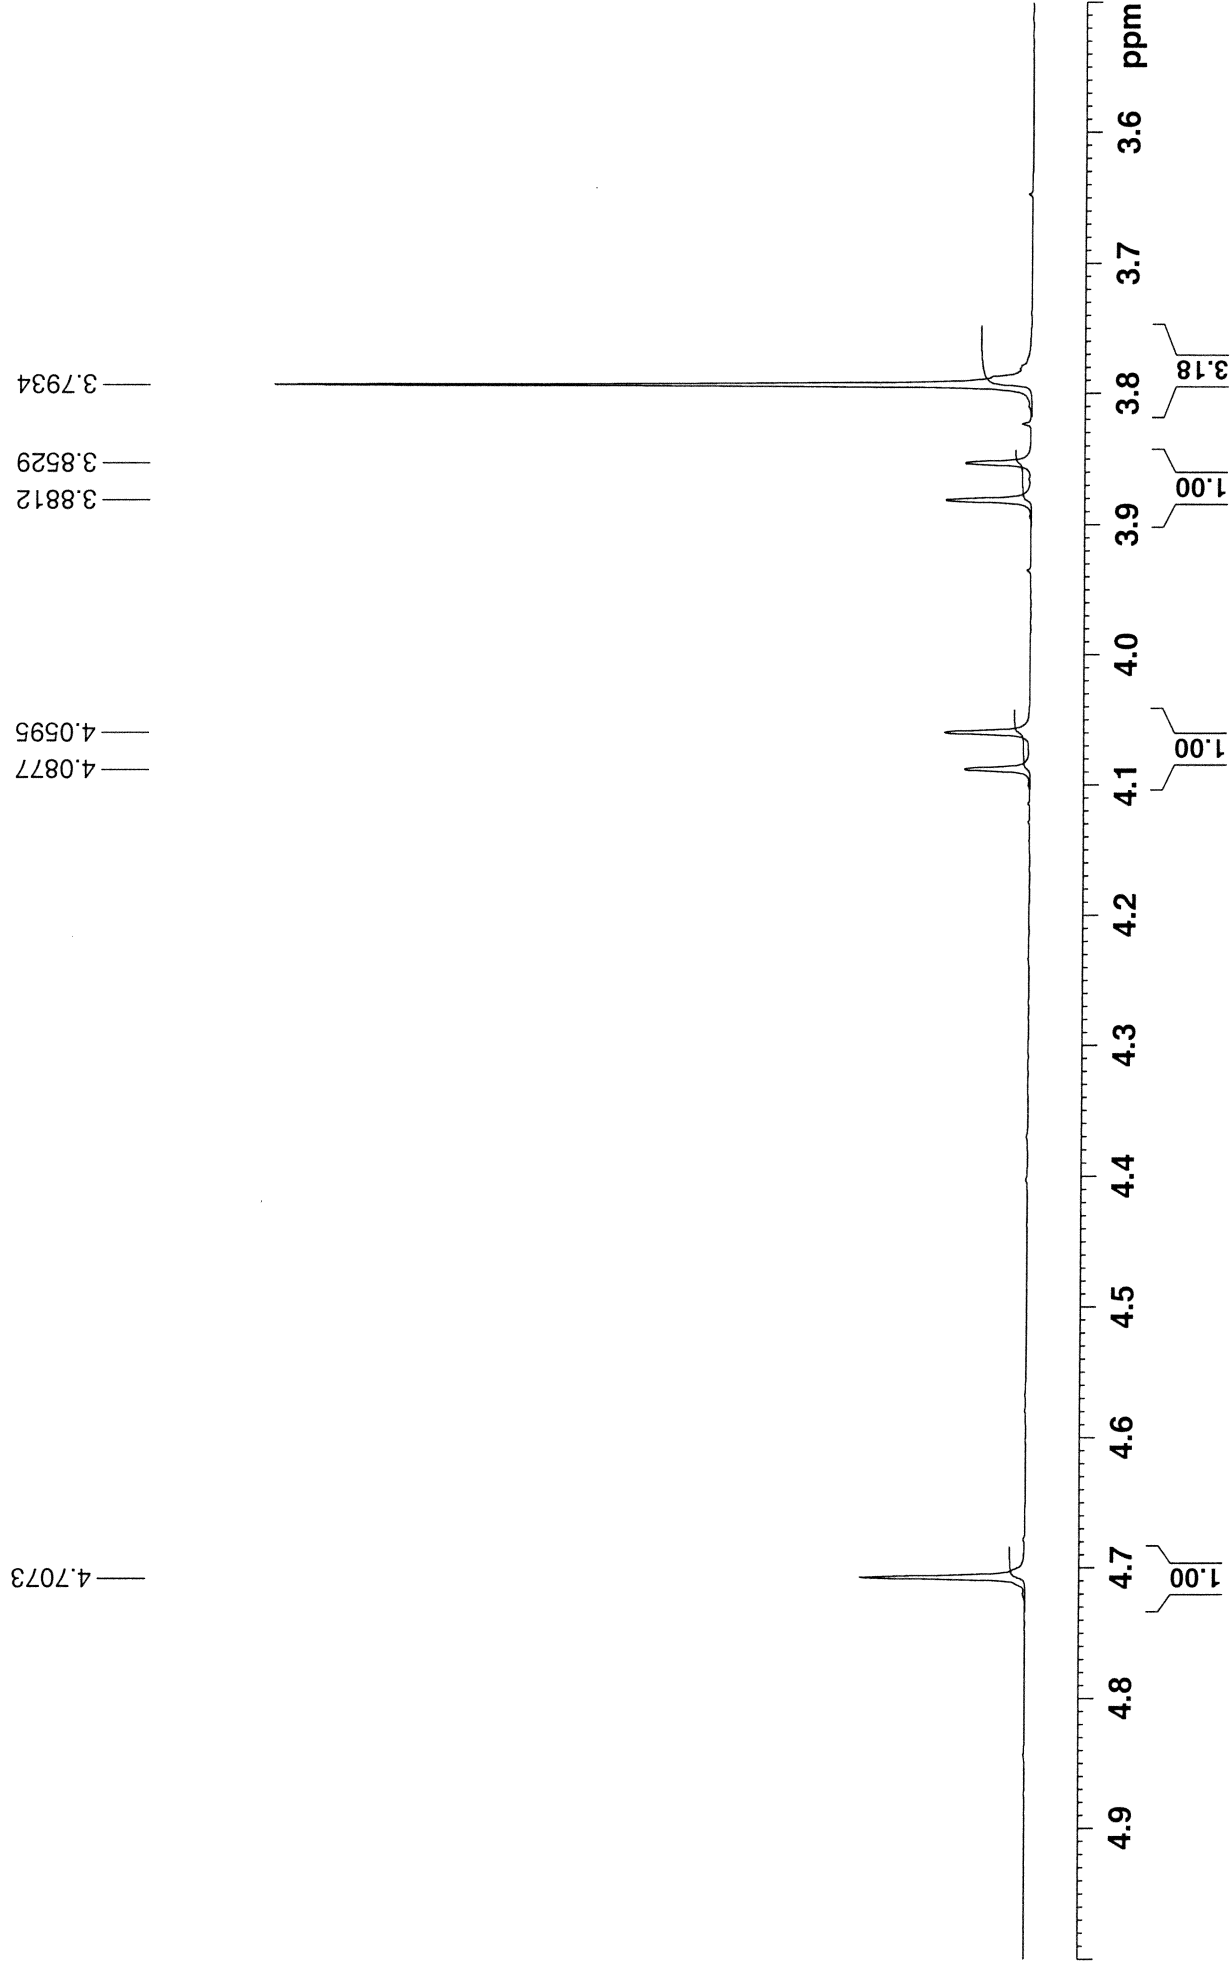

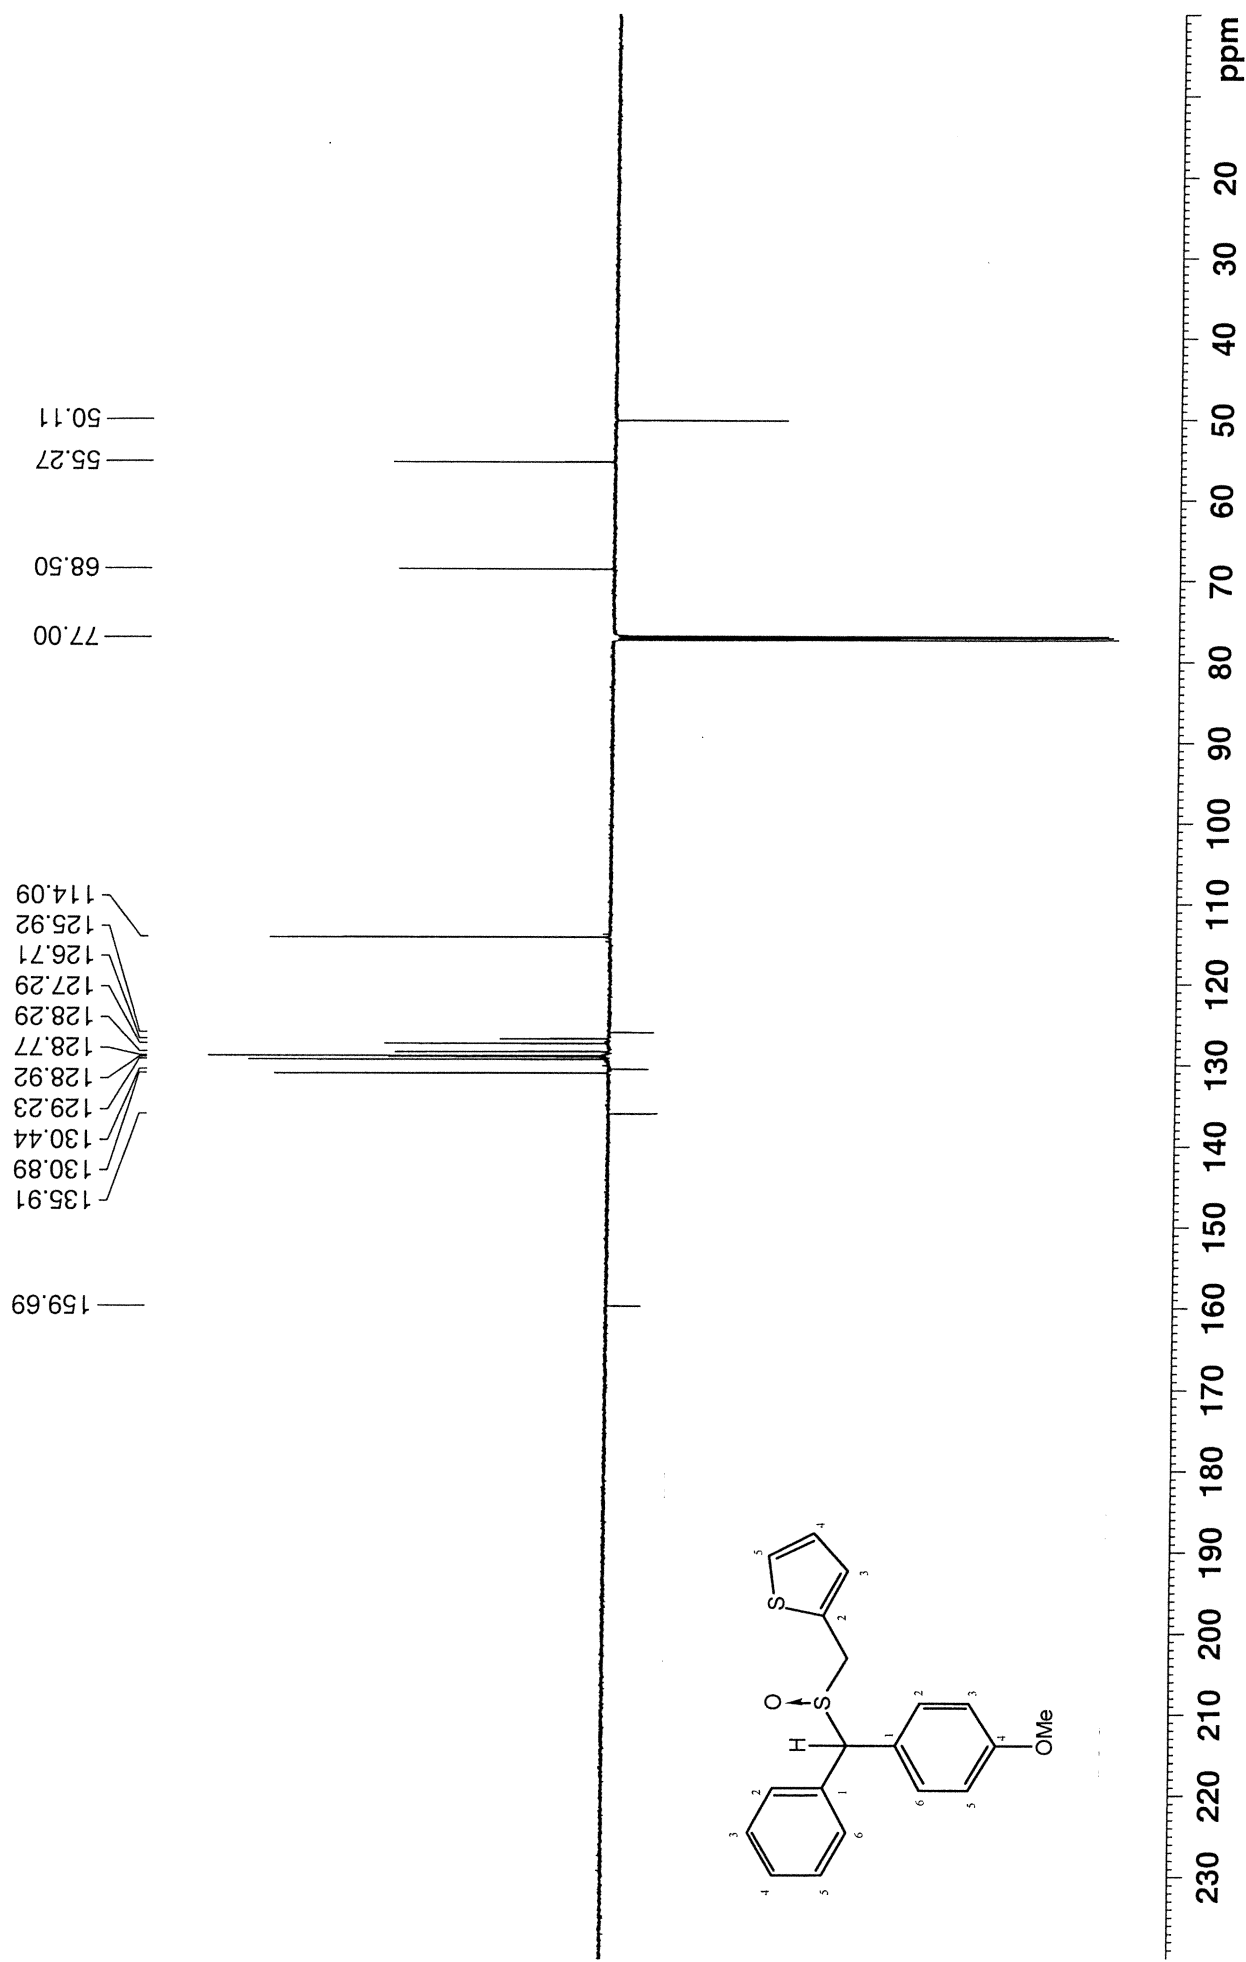

159.69

135.91

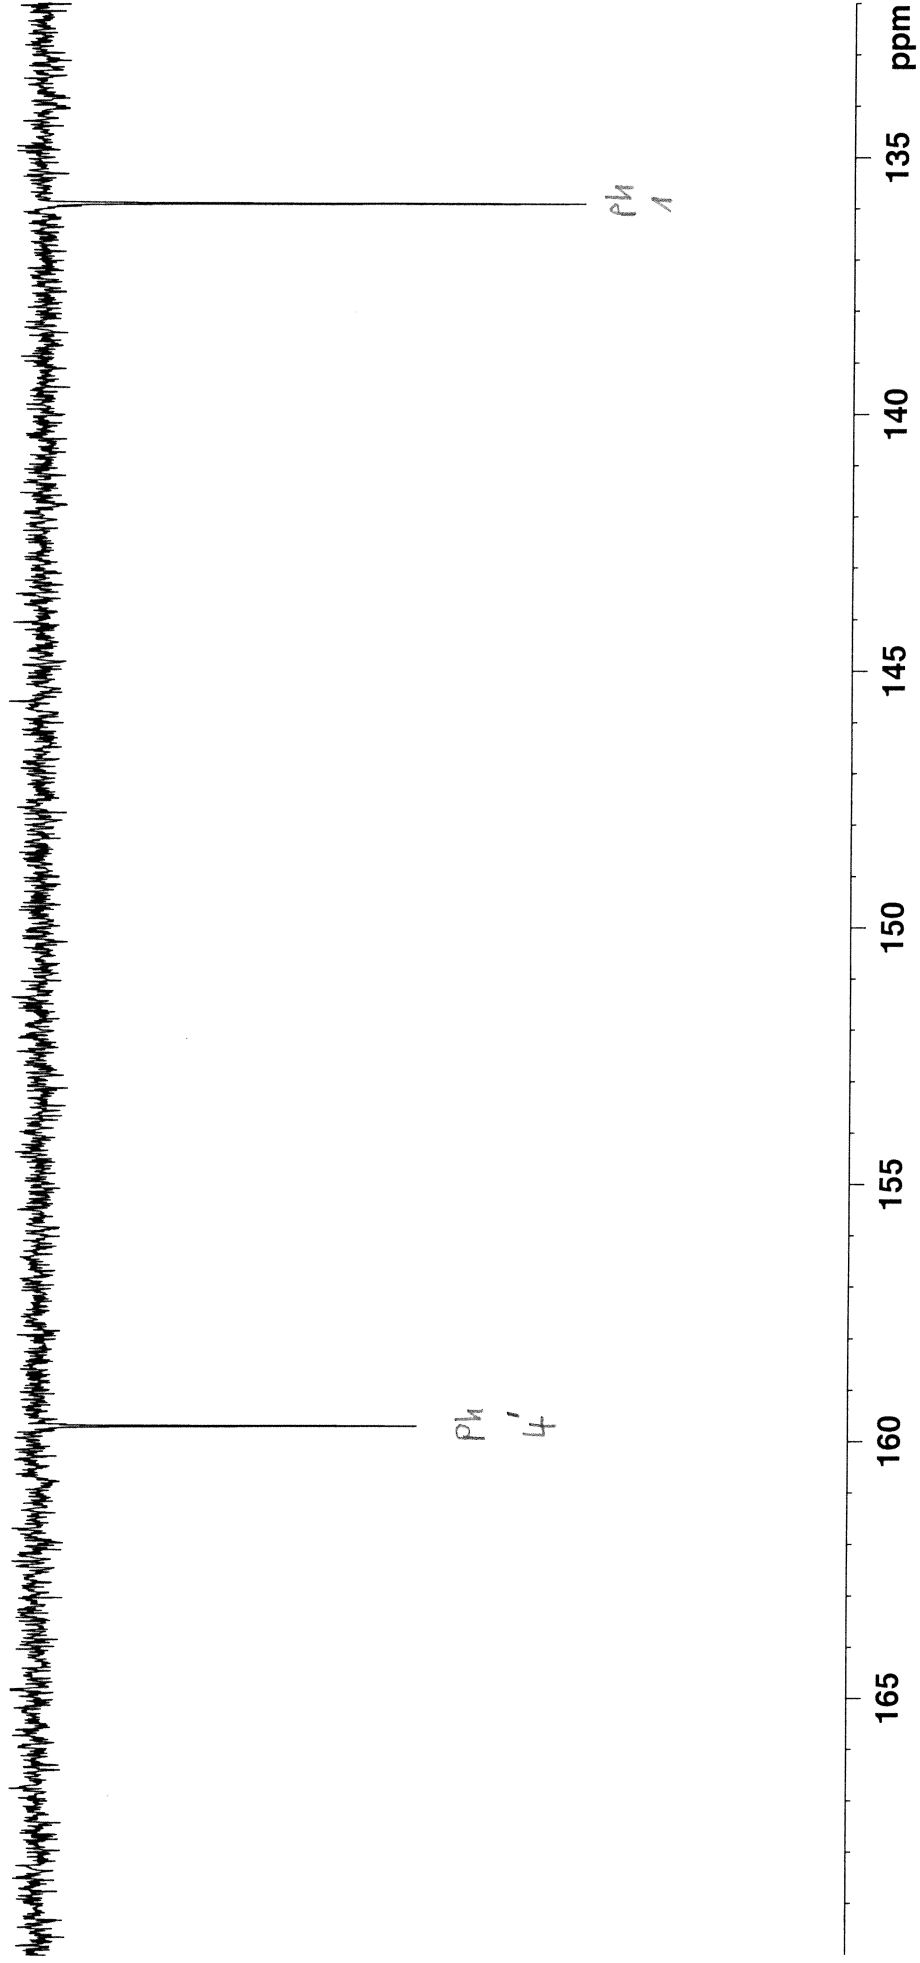

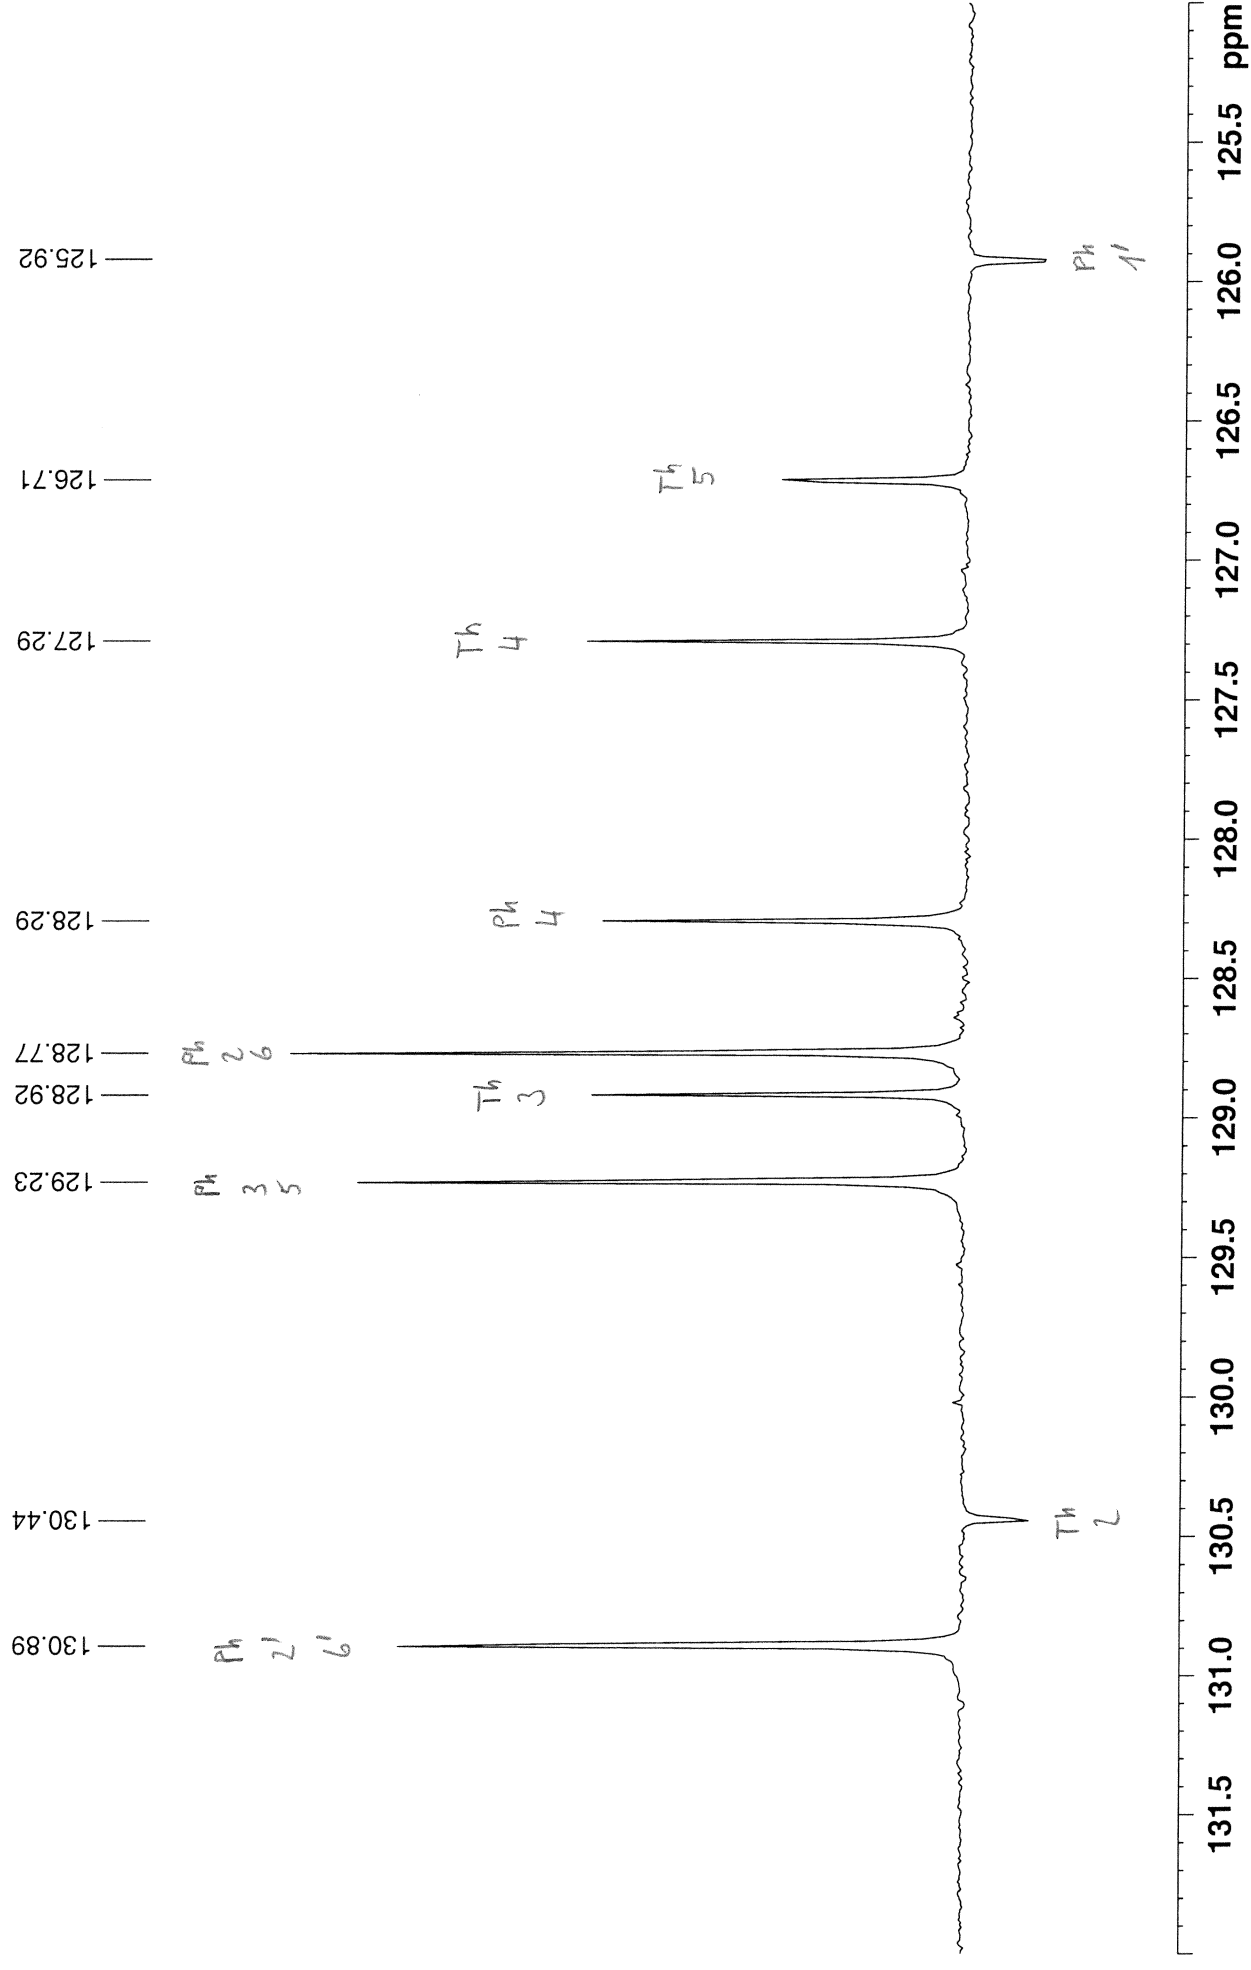

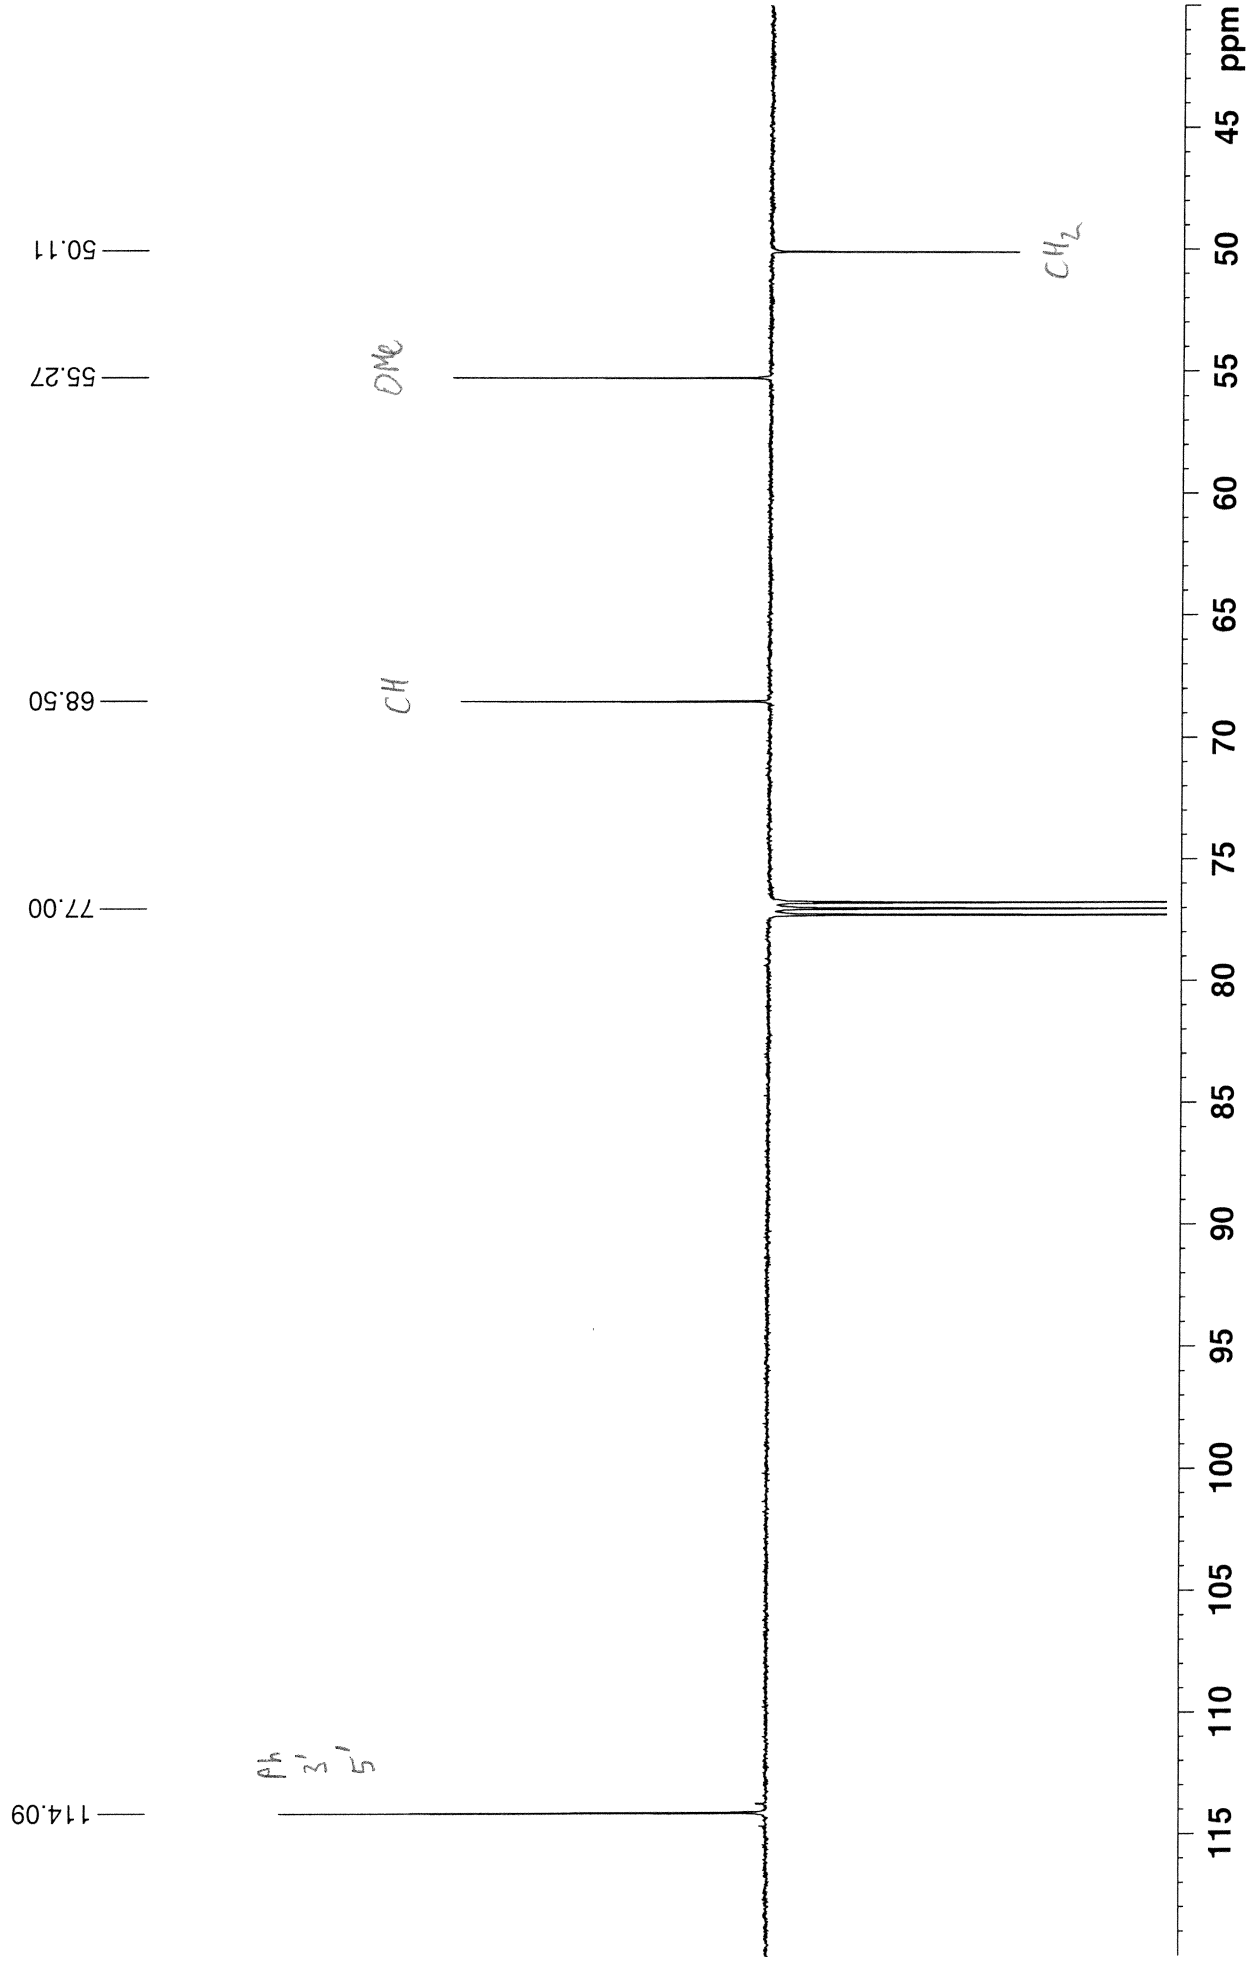

**Figure S81c.** NMR spectra of compound **5u**.

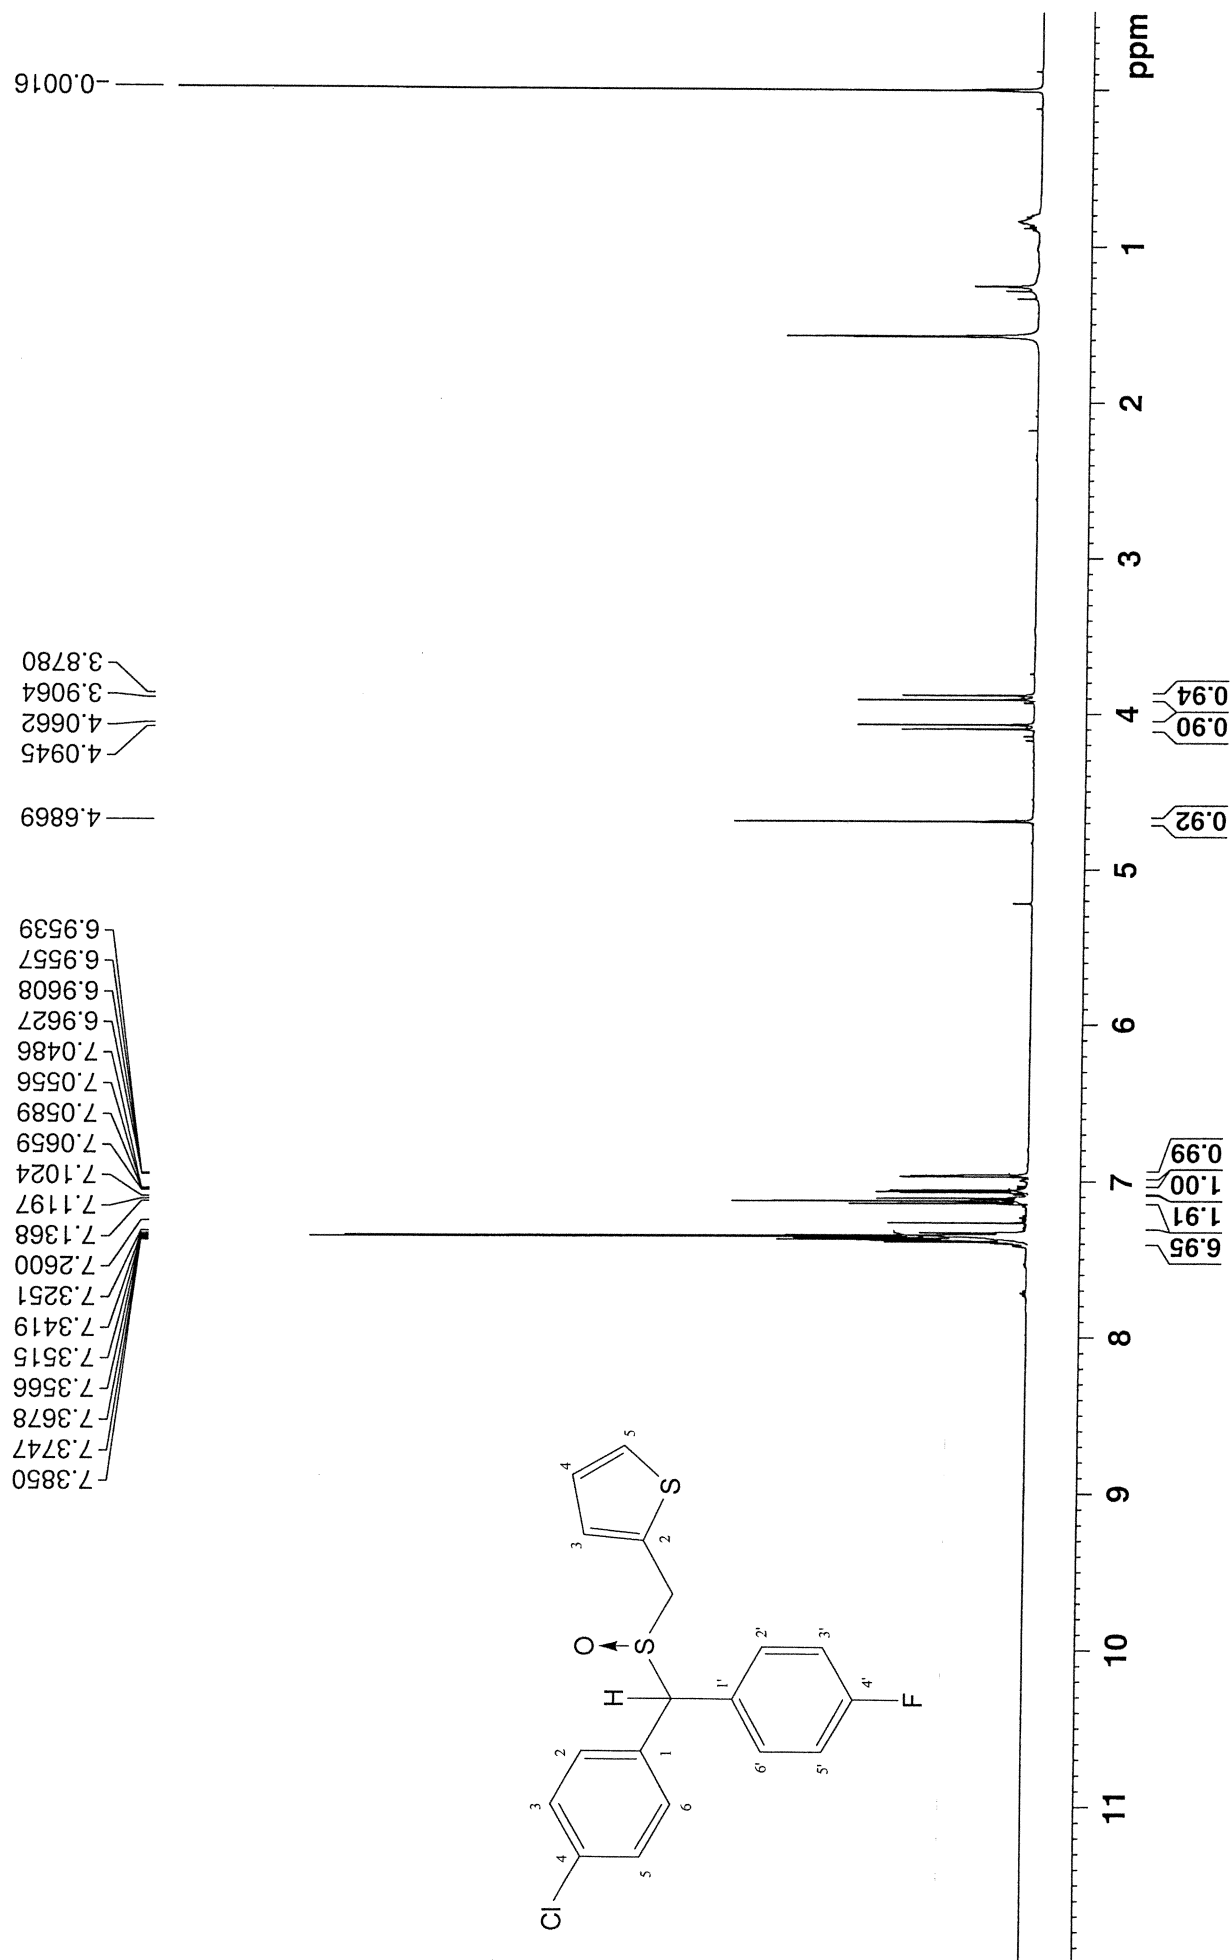

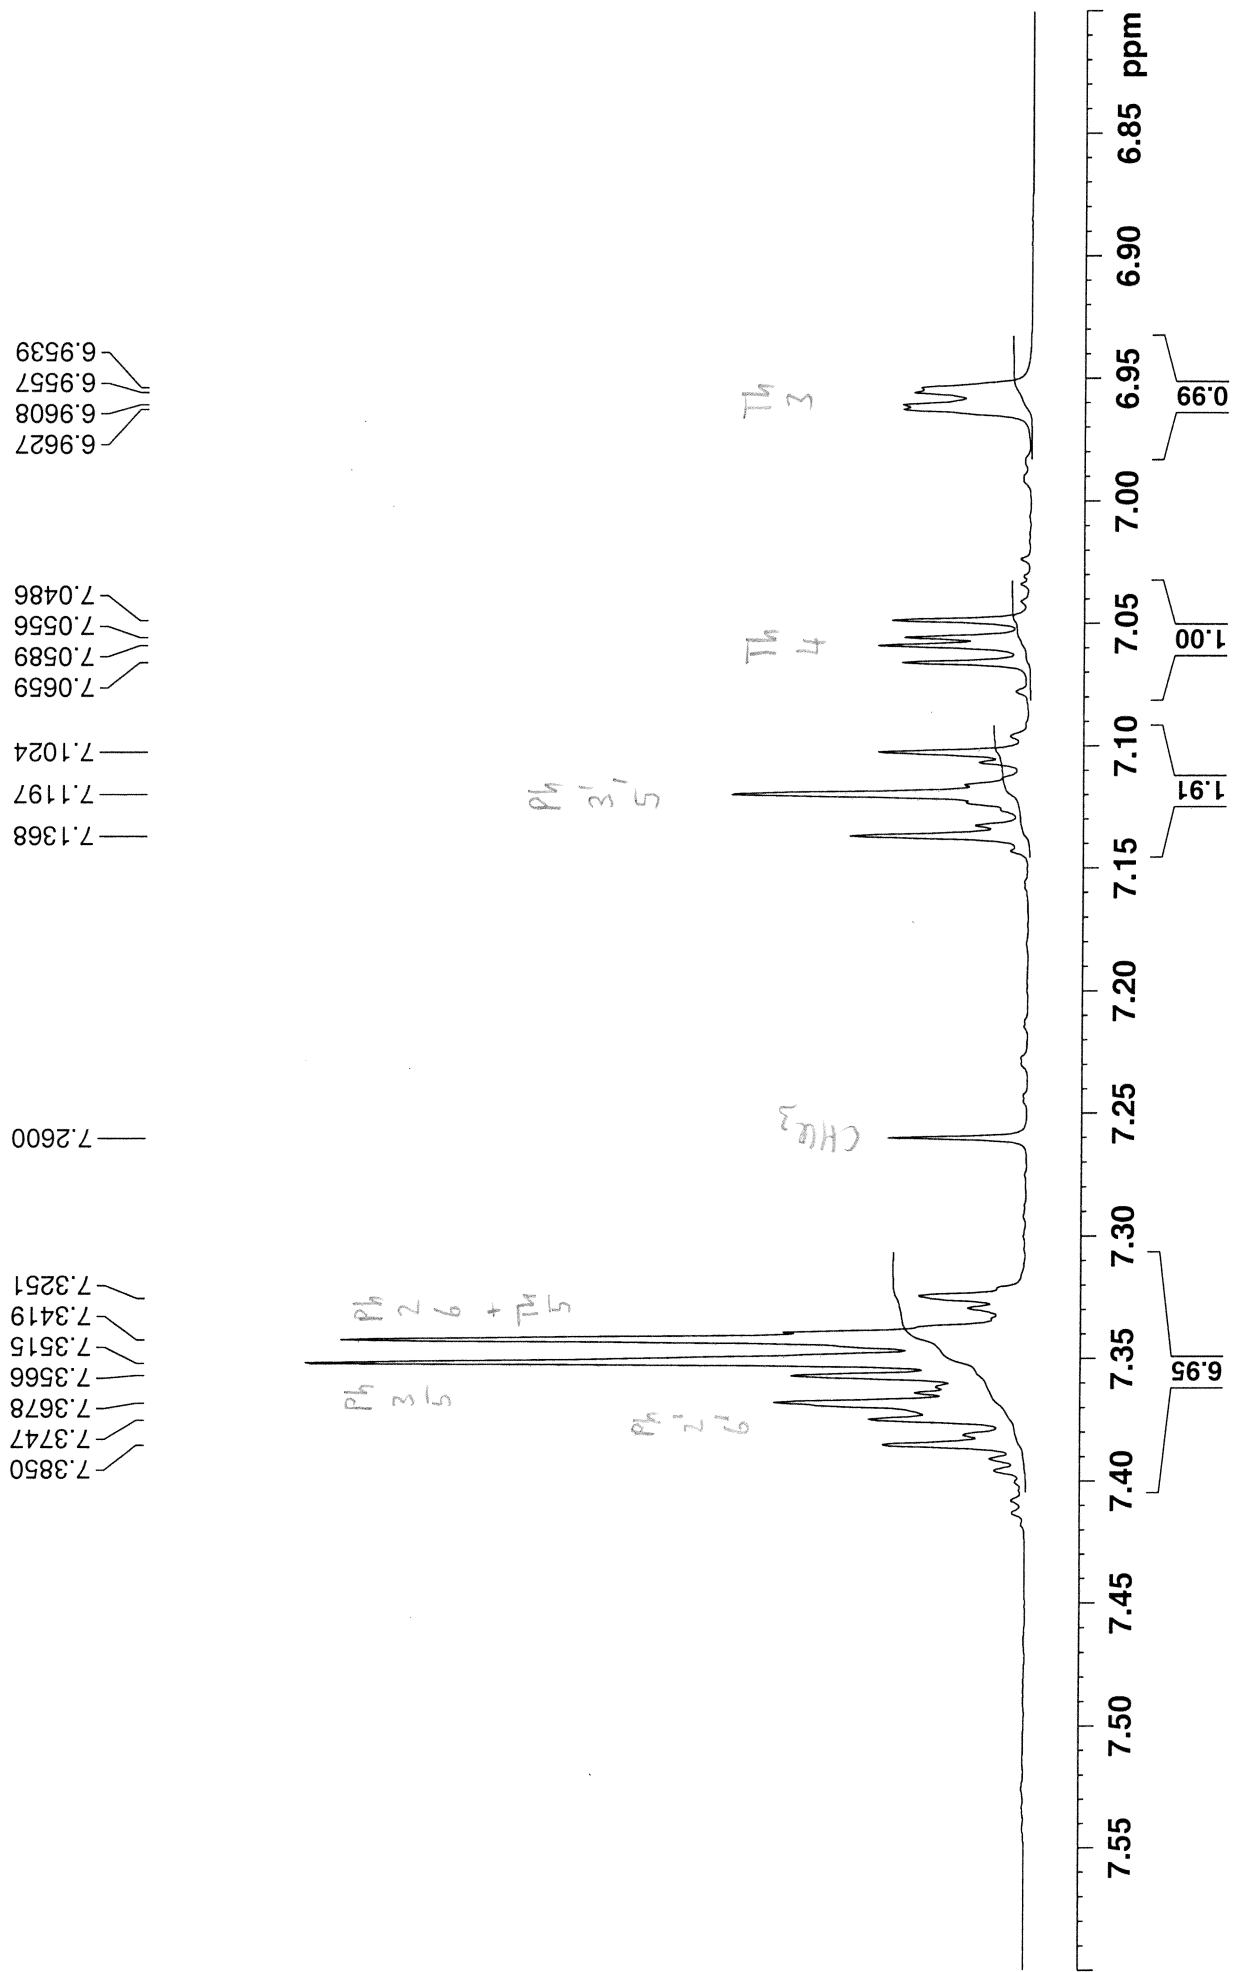

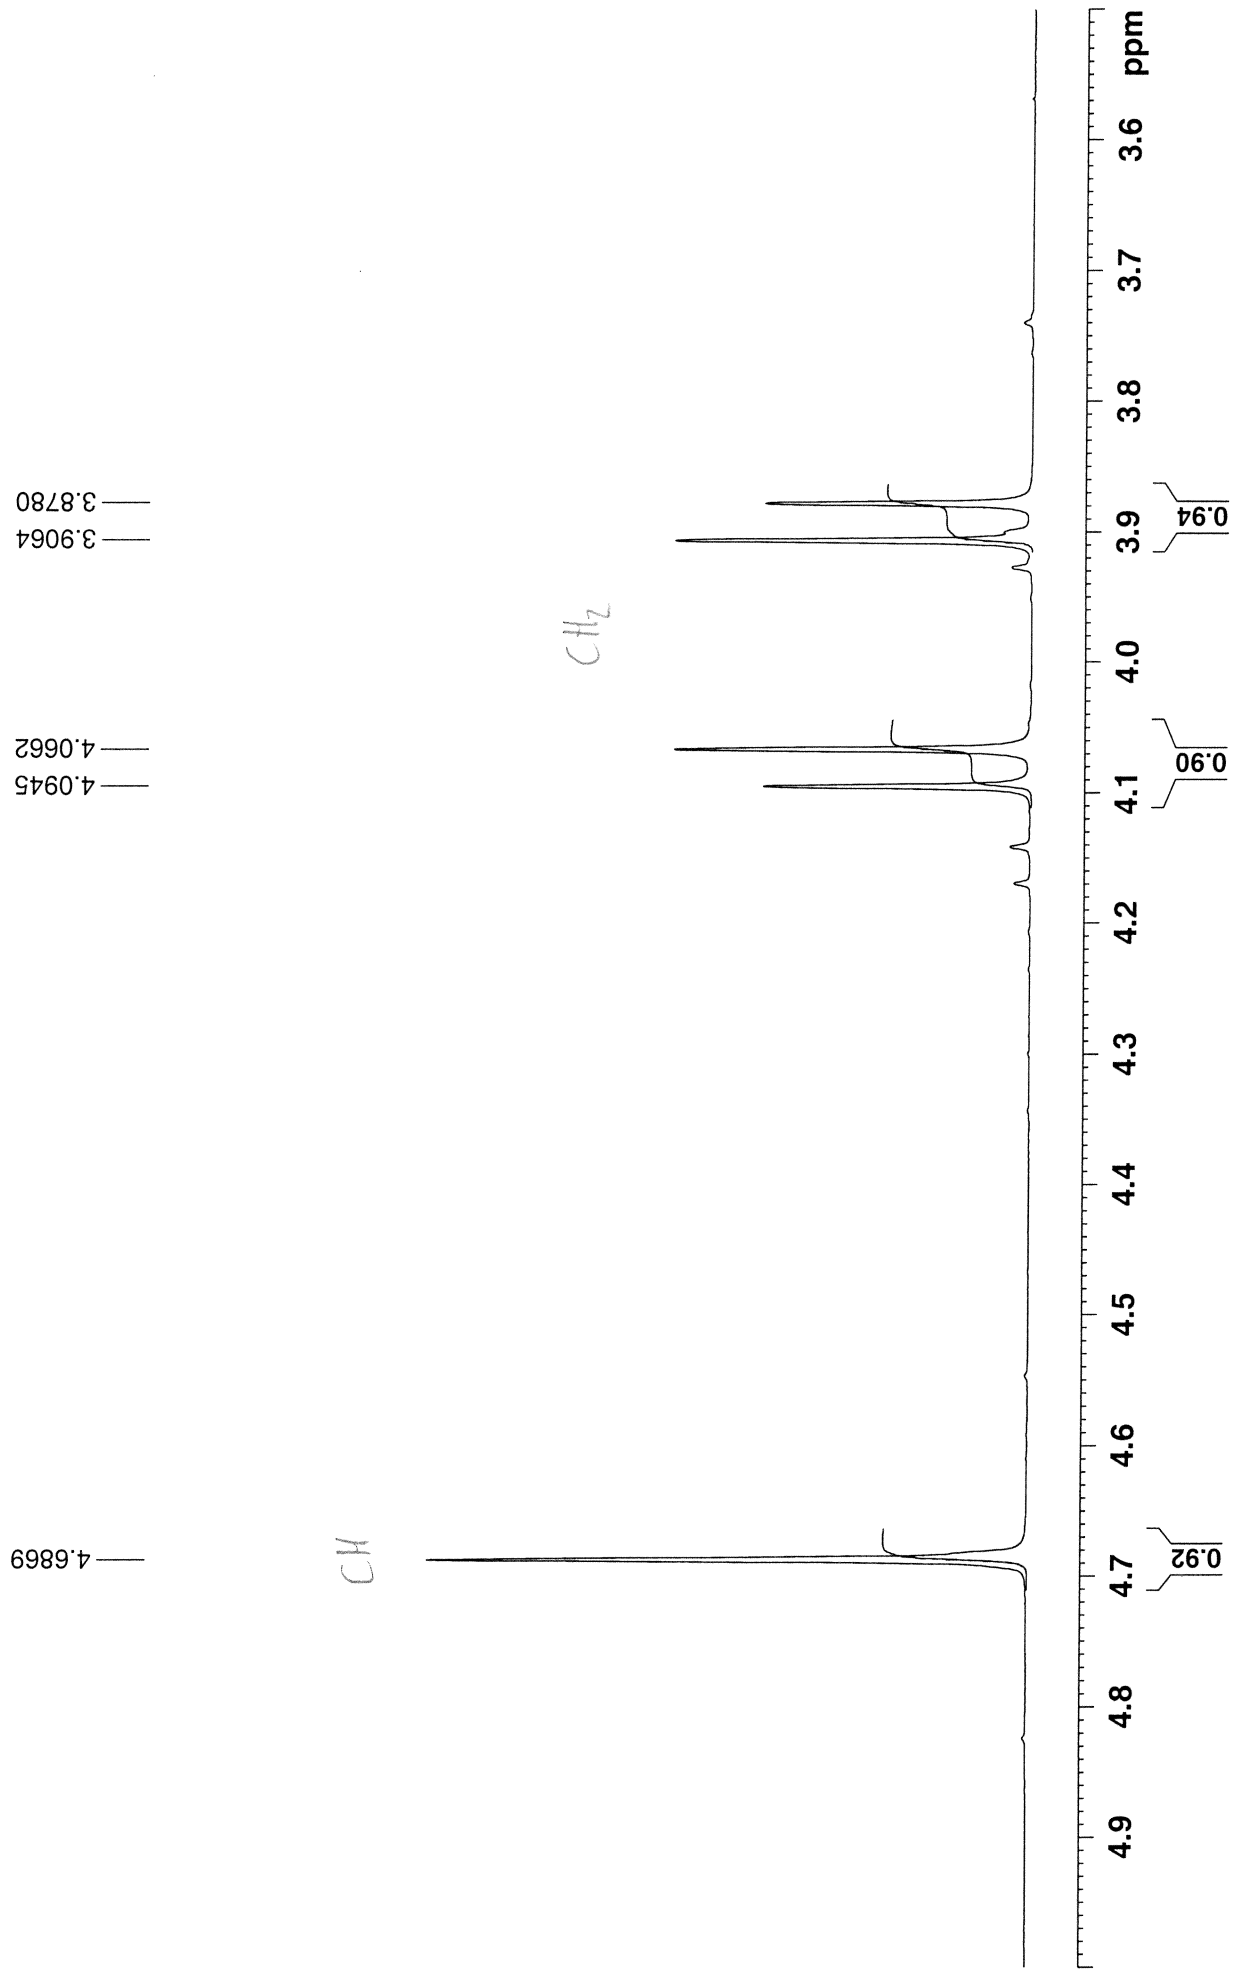



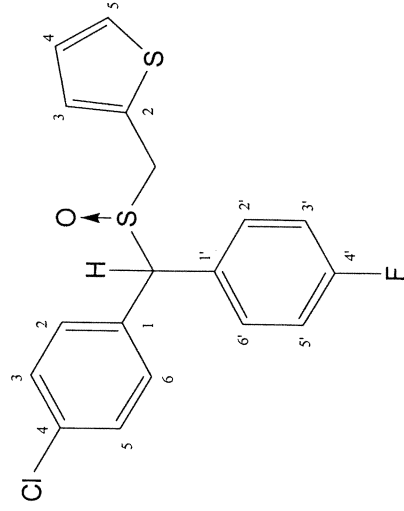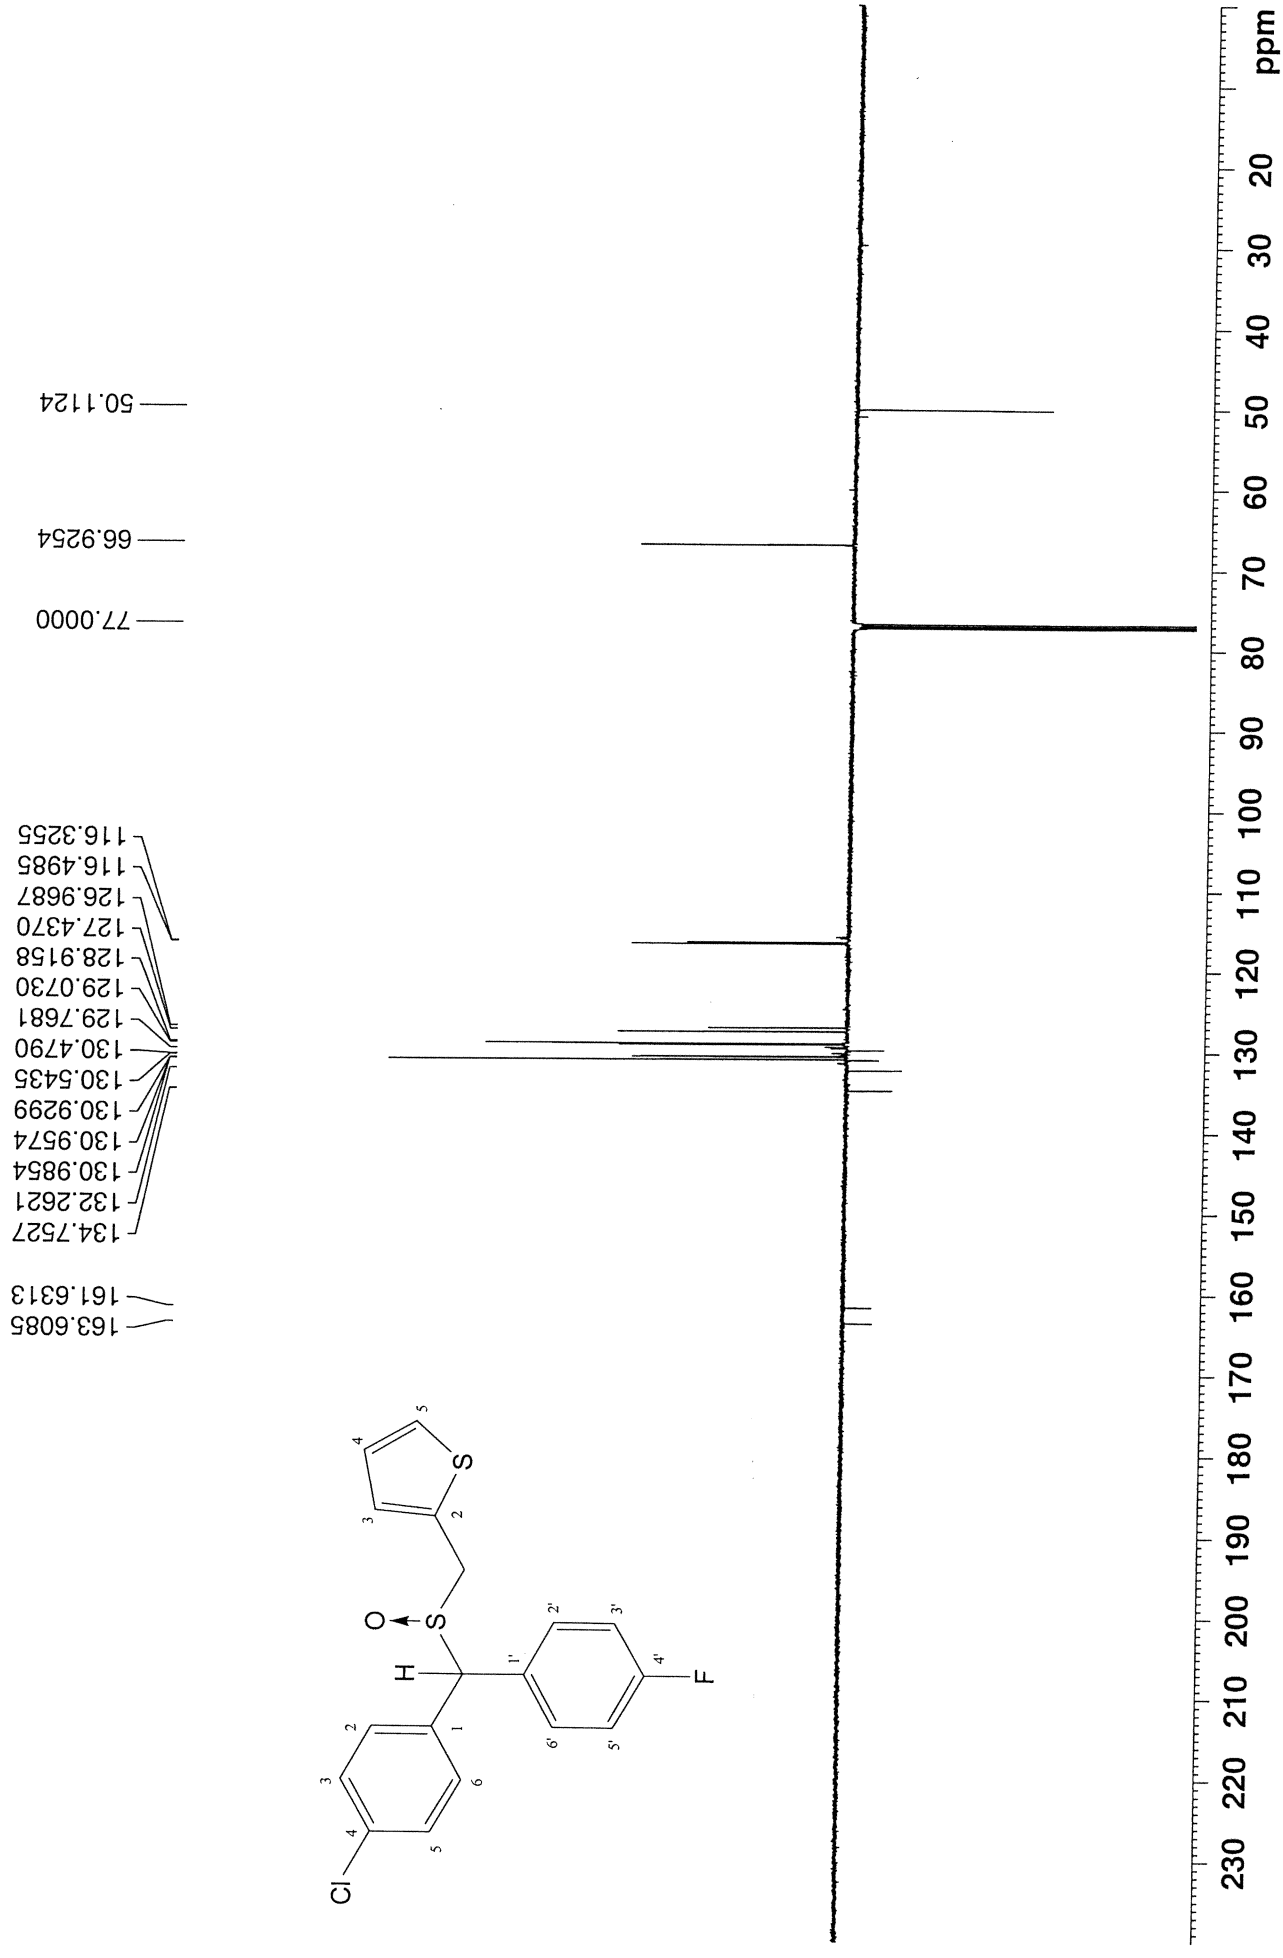

163.6085 —  
161.6313 —

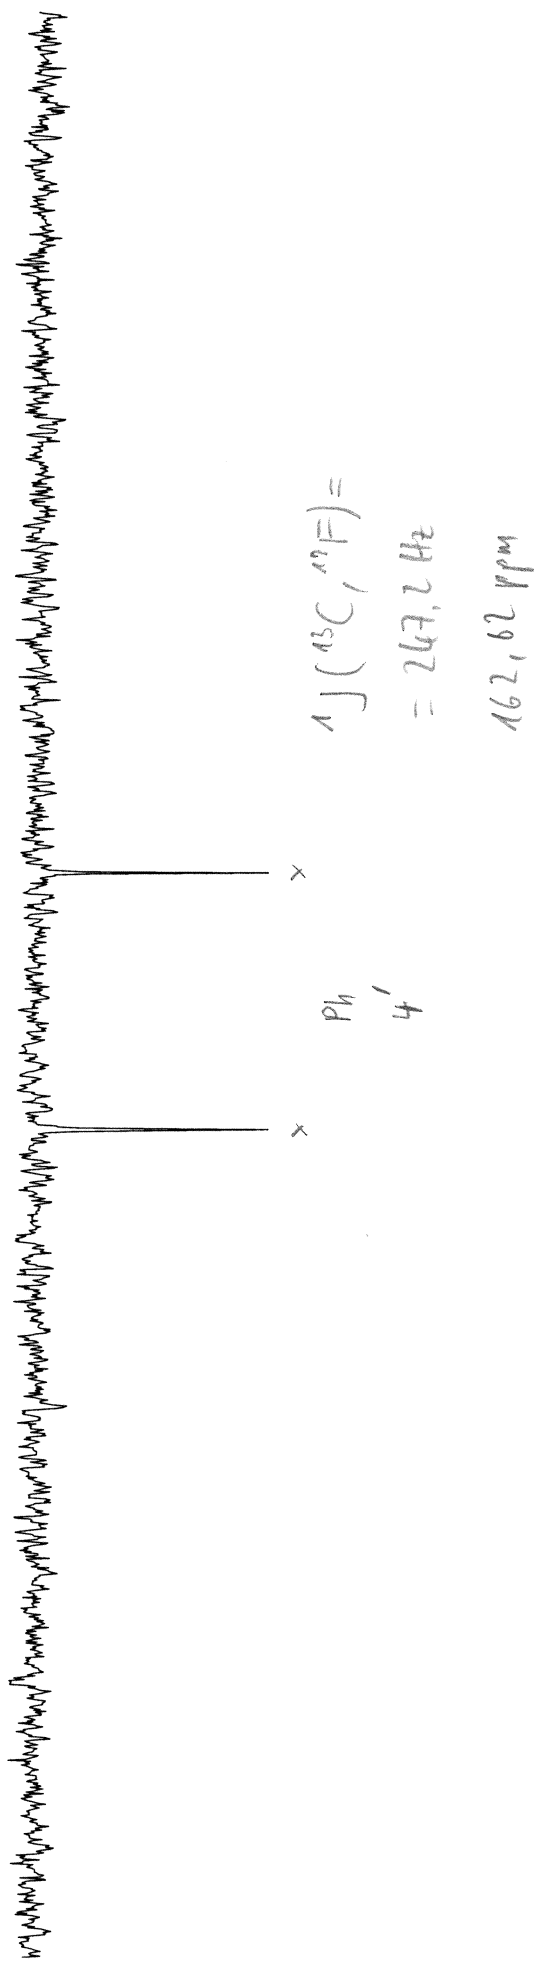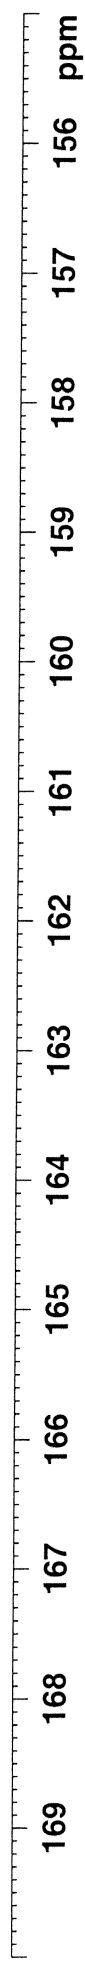

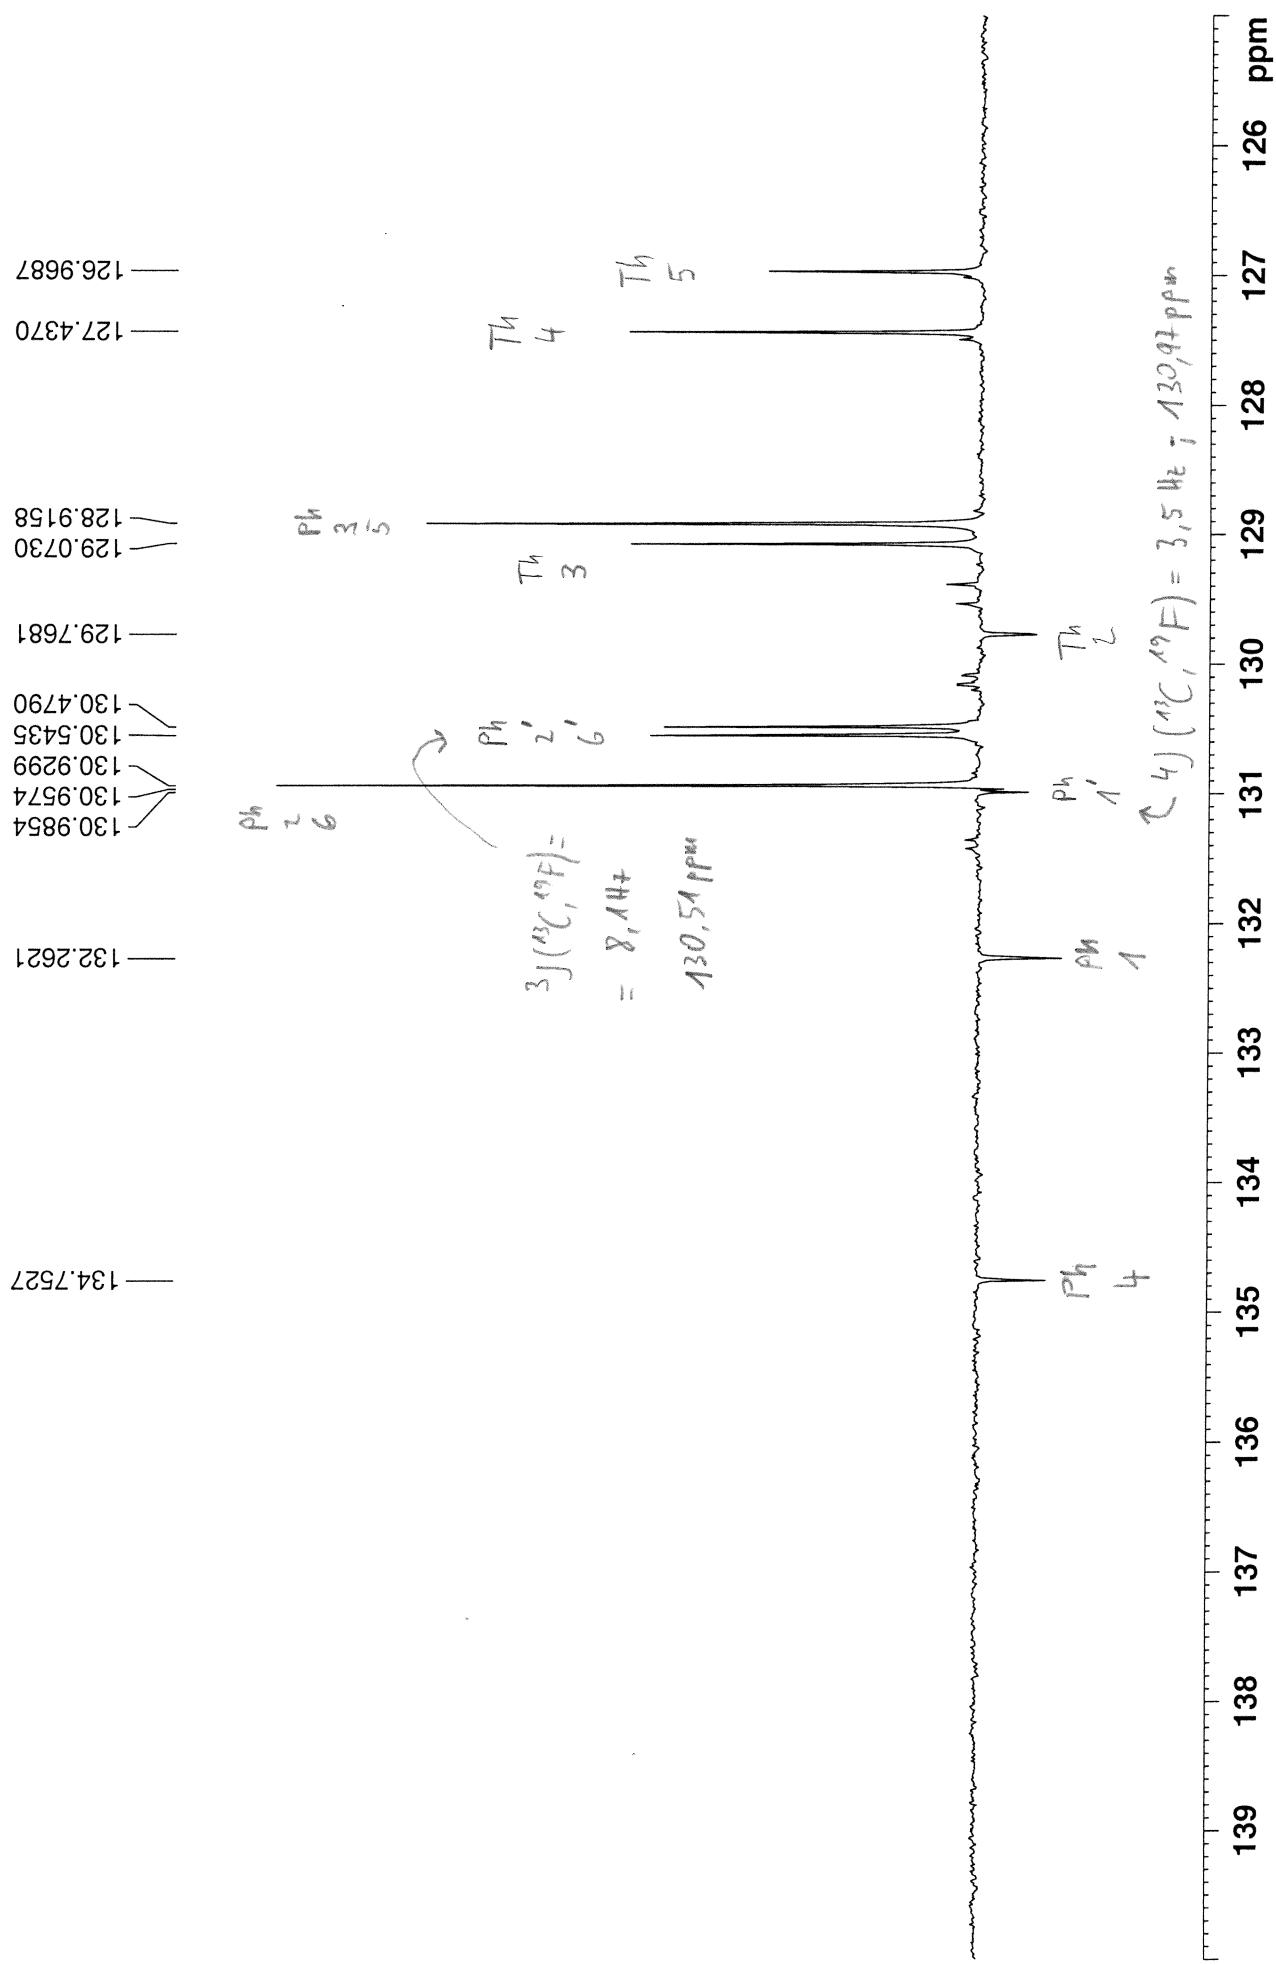

116.4985  
116.3255

Ph  
3'  
5'

$2J(^{13}\text{C}, ^{19}\text{F}) =$

21,6 Hz

116,41 ppm

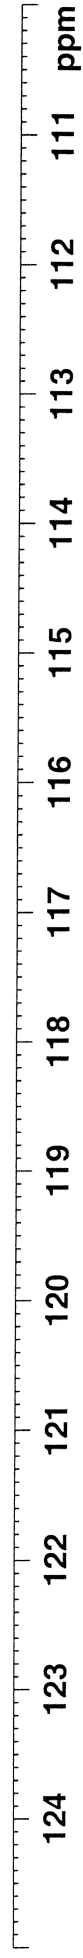

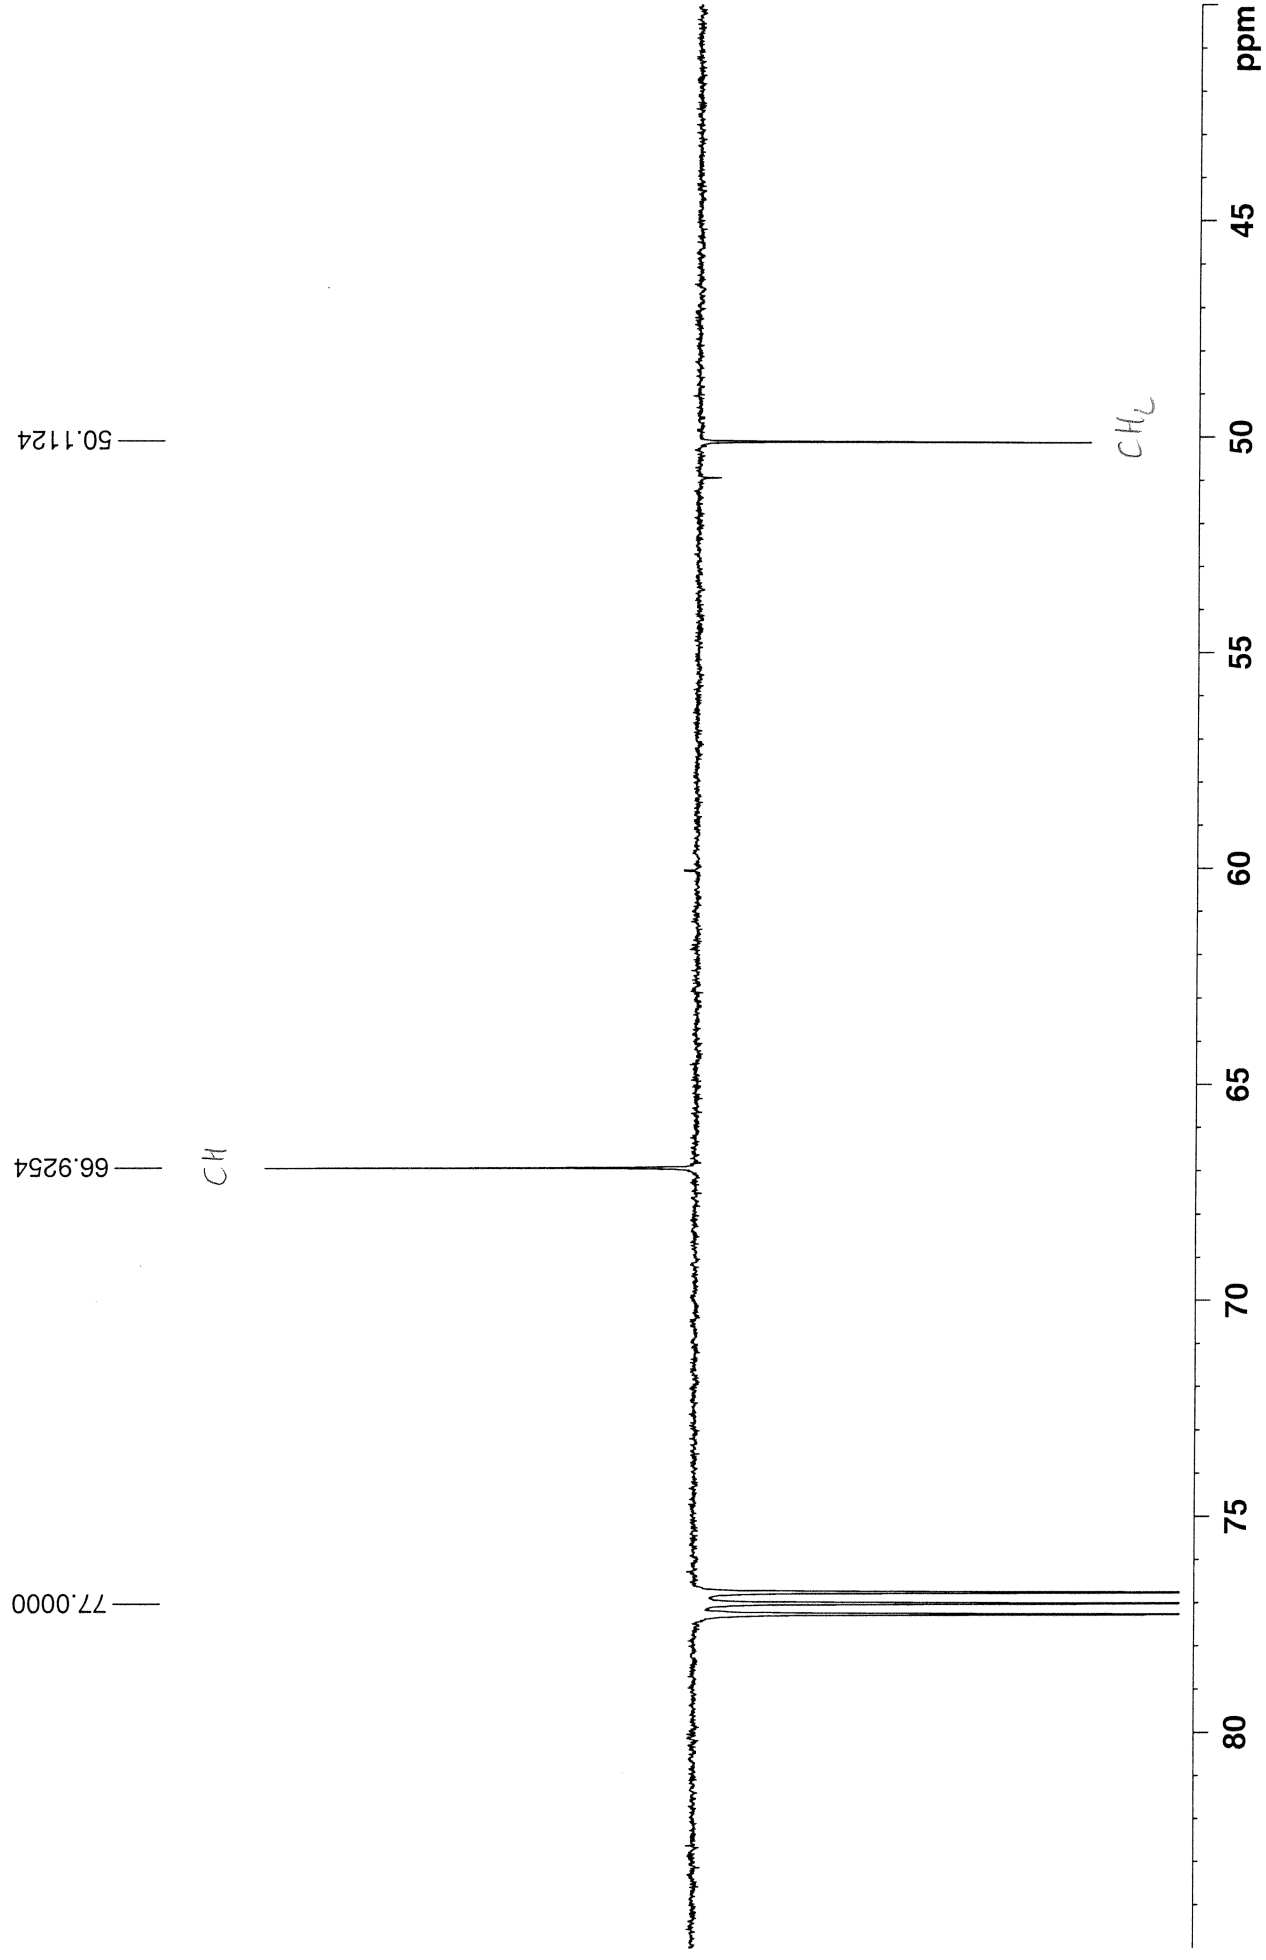

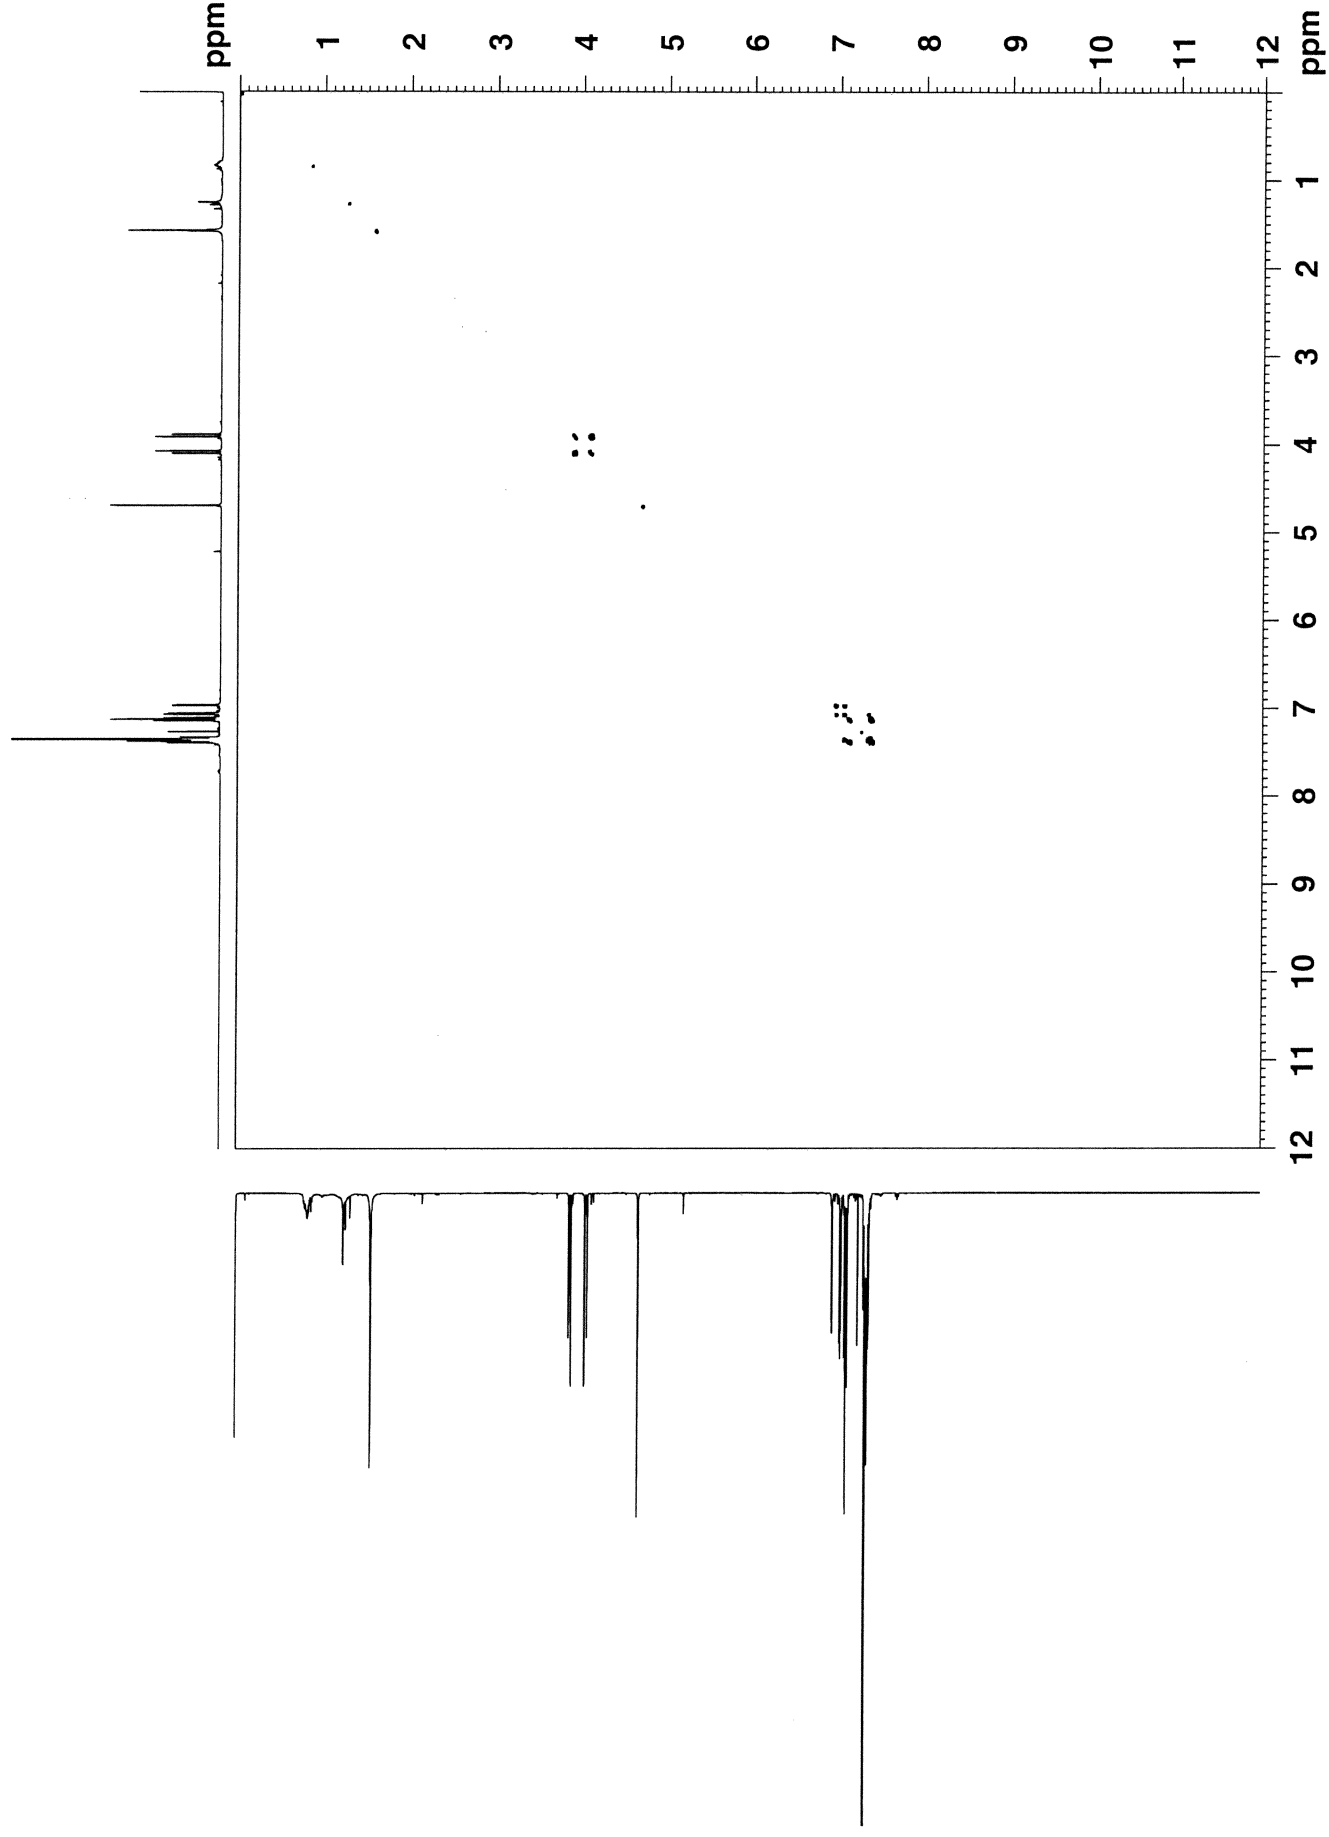

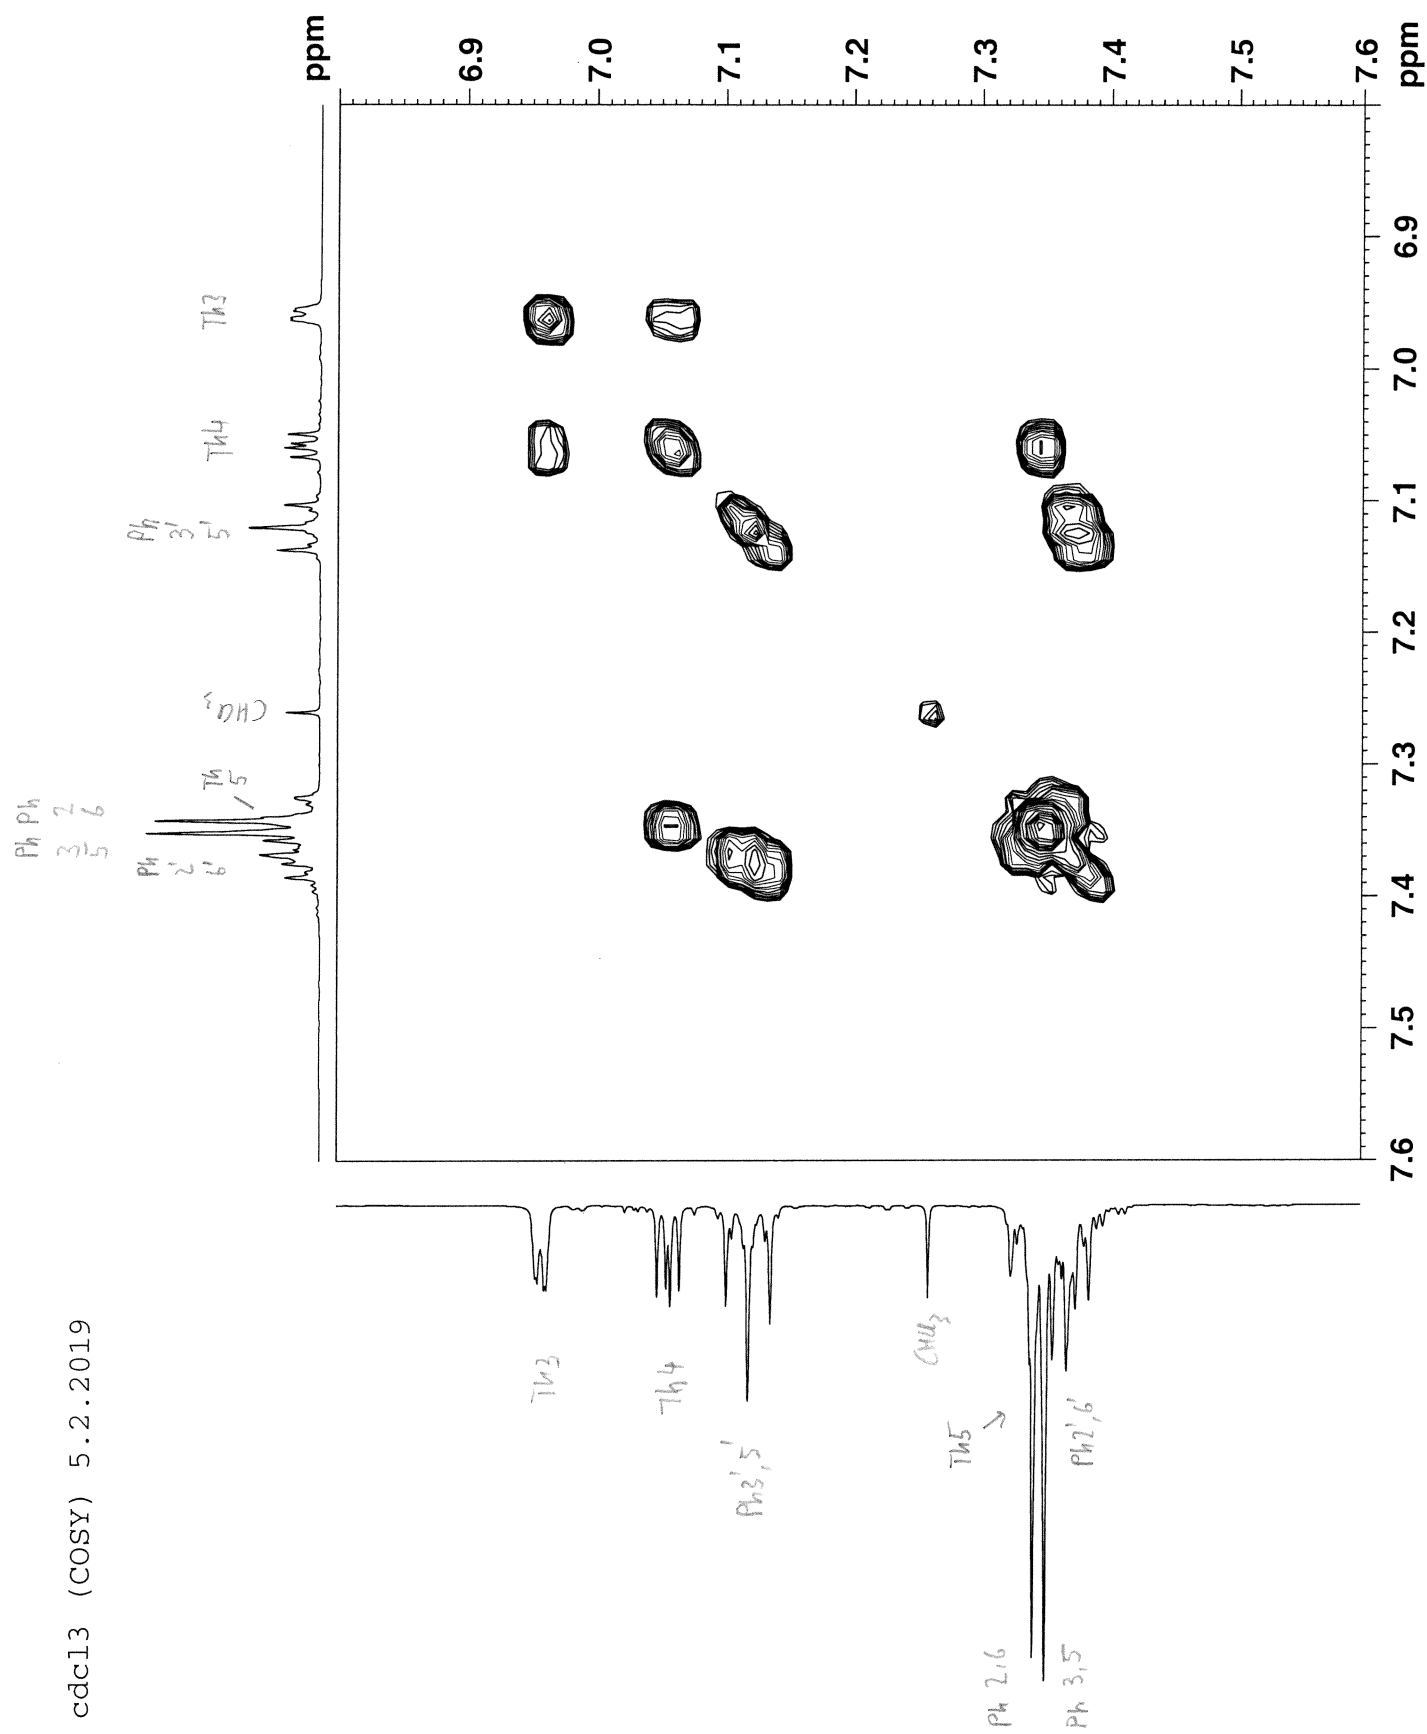

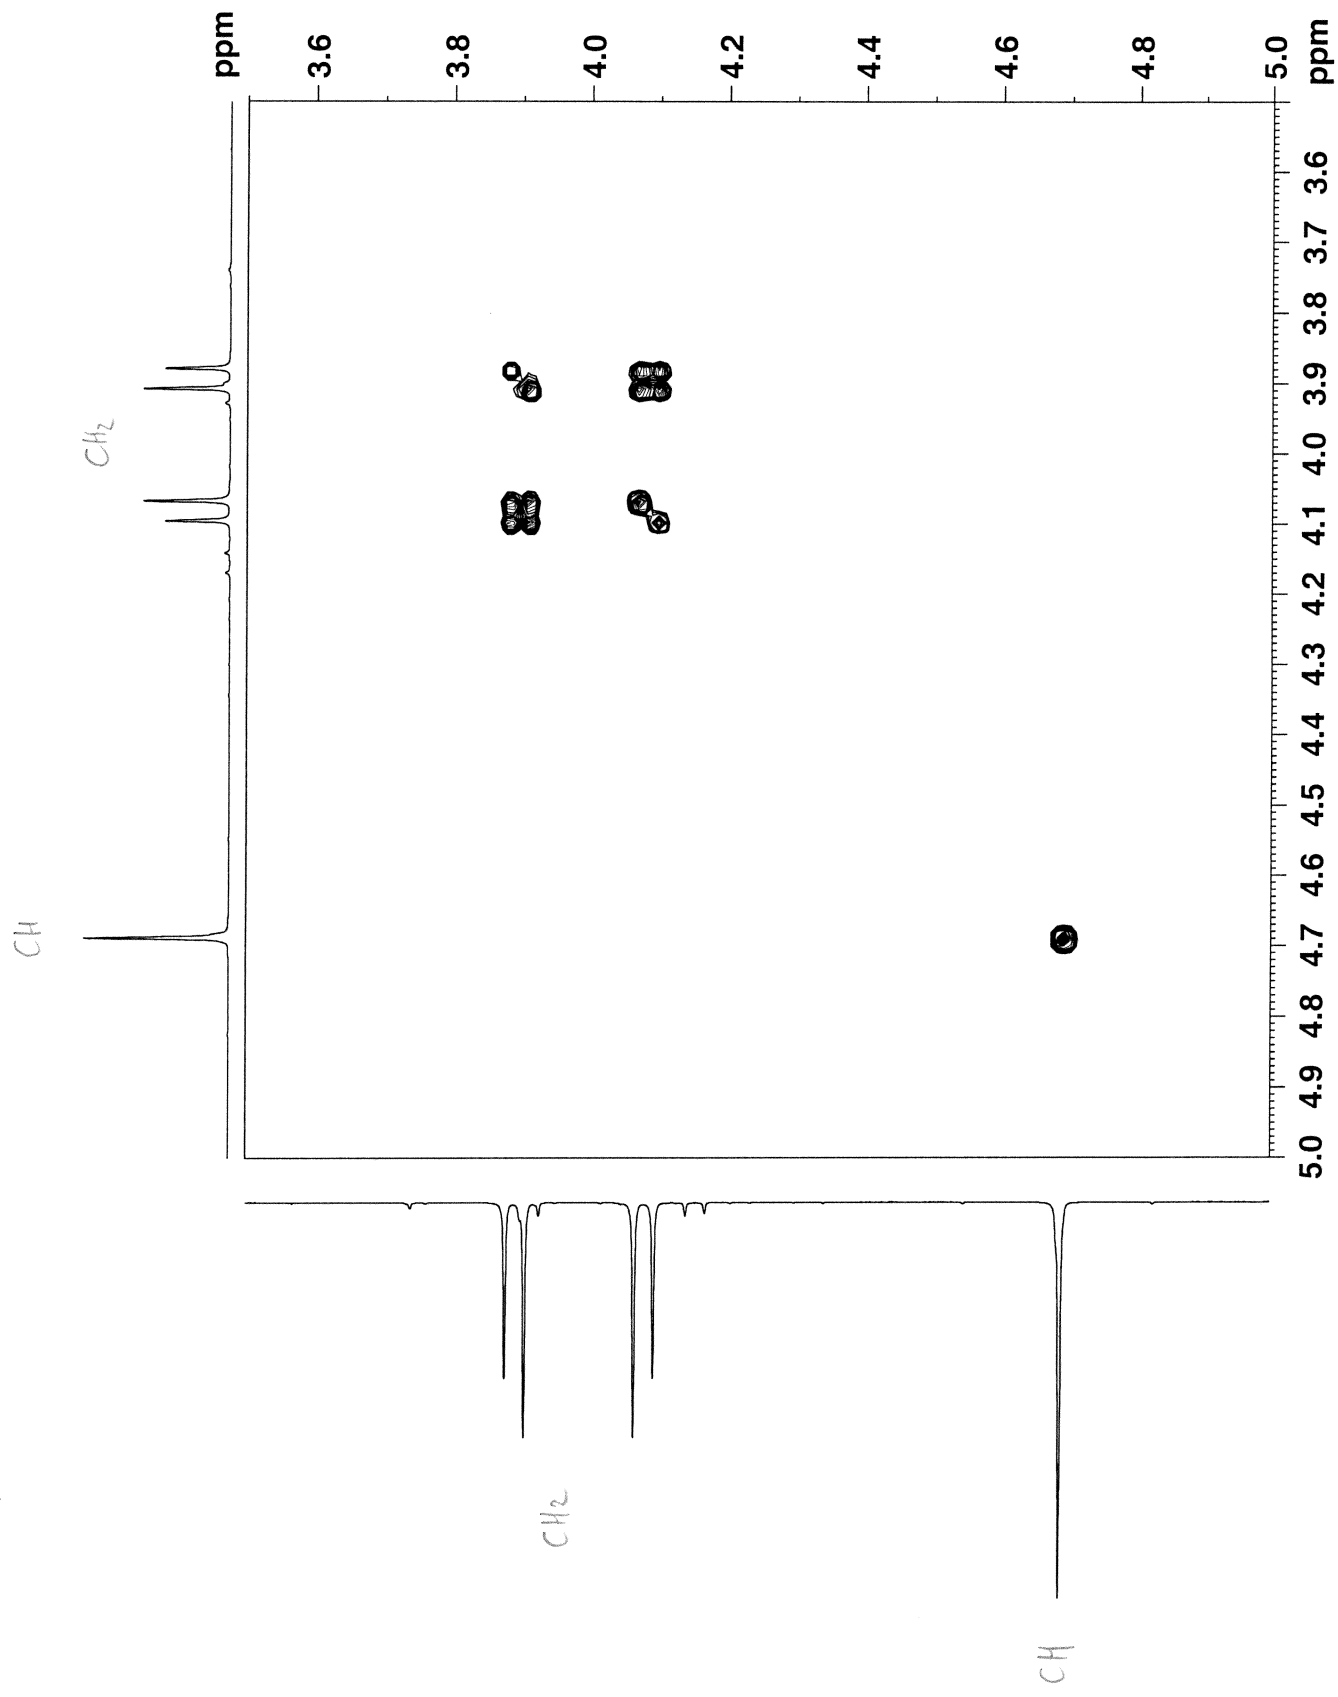



CE156S1P1 in cdcl3 (HSQC) 5.2.2019

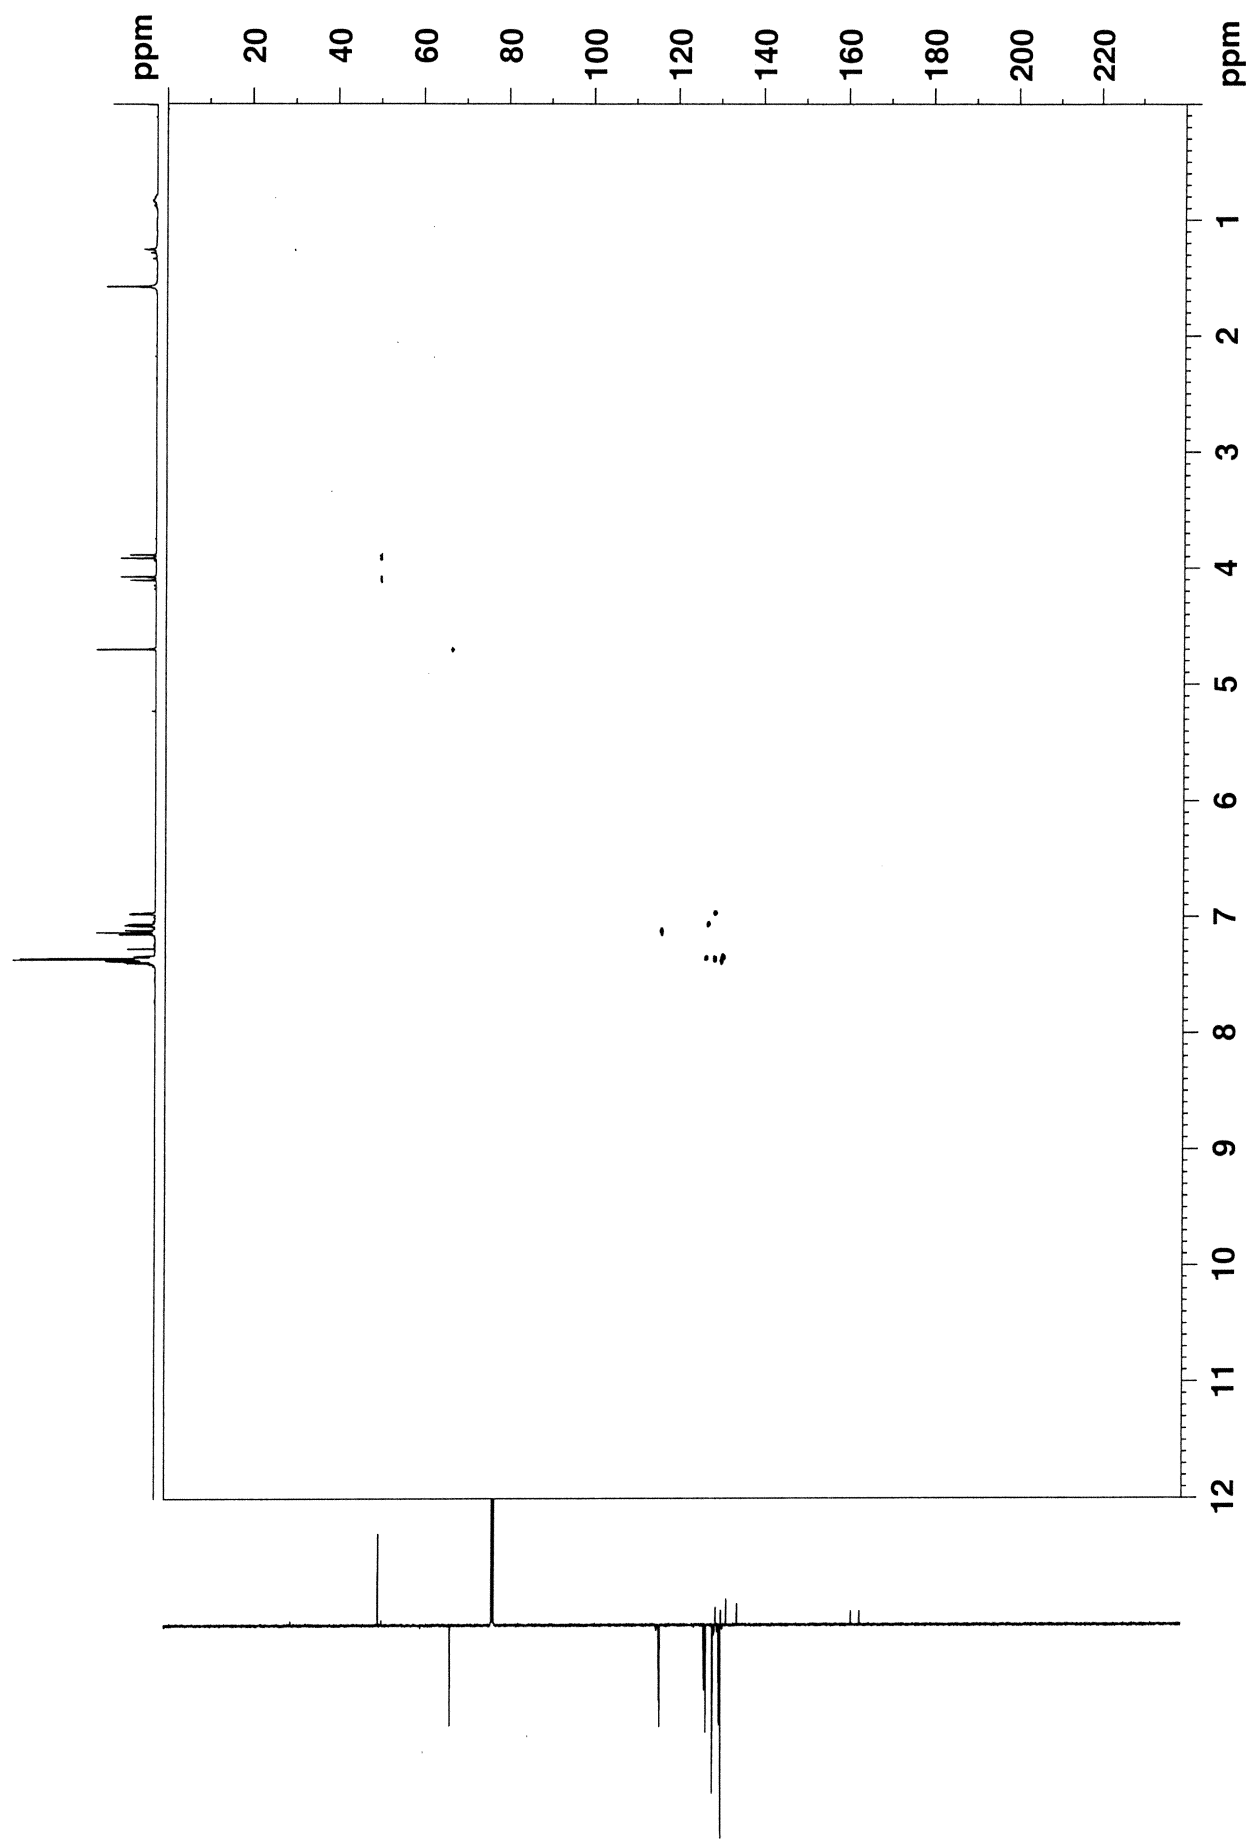

CE156S1P1 in cdcl3 (HSQC) 5.2.2019

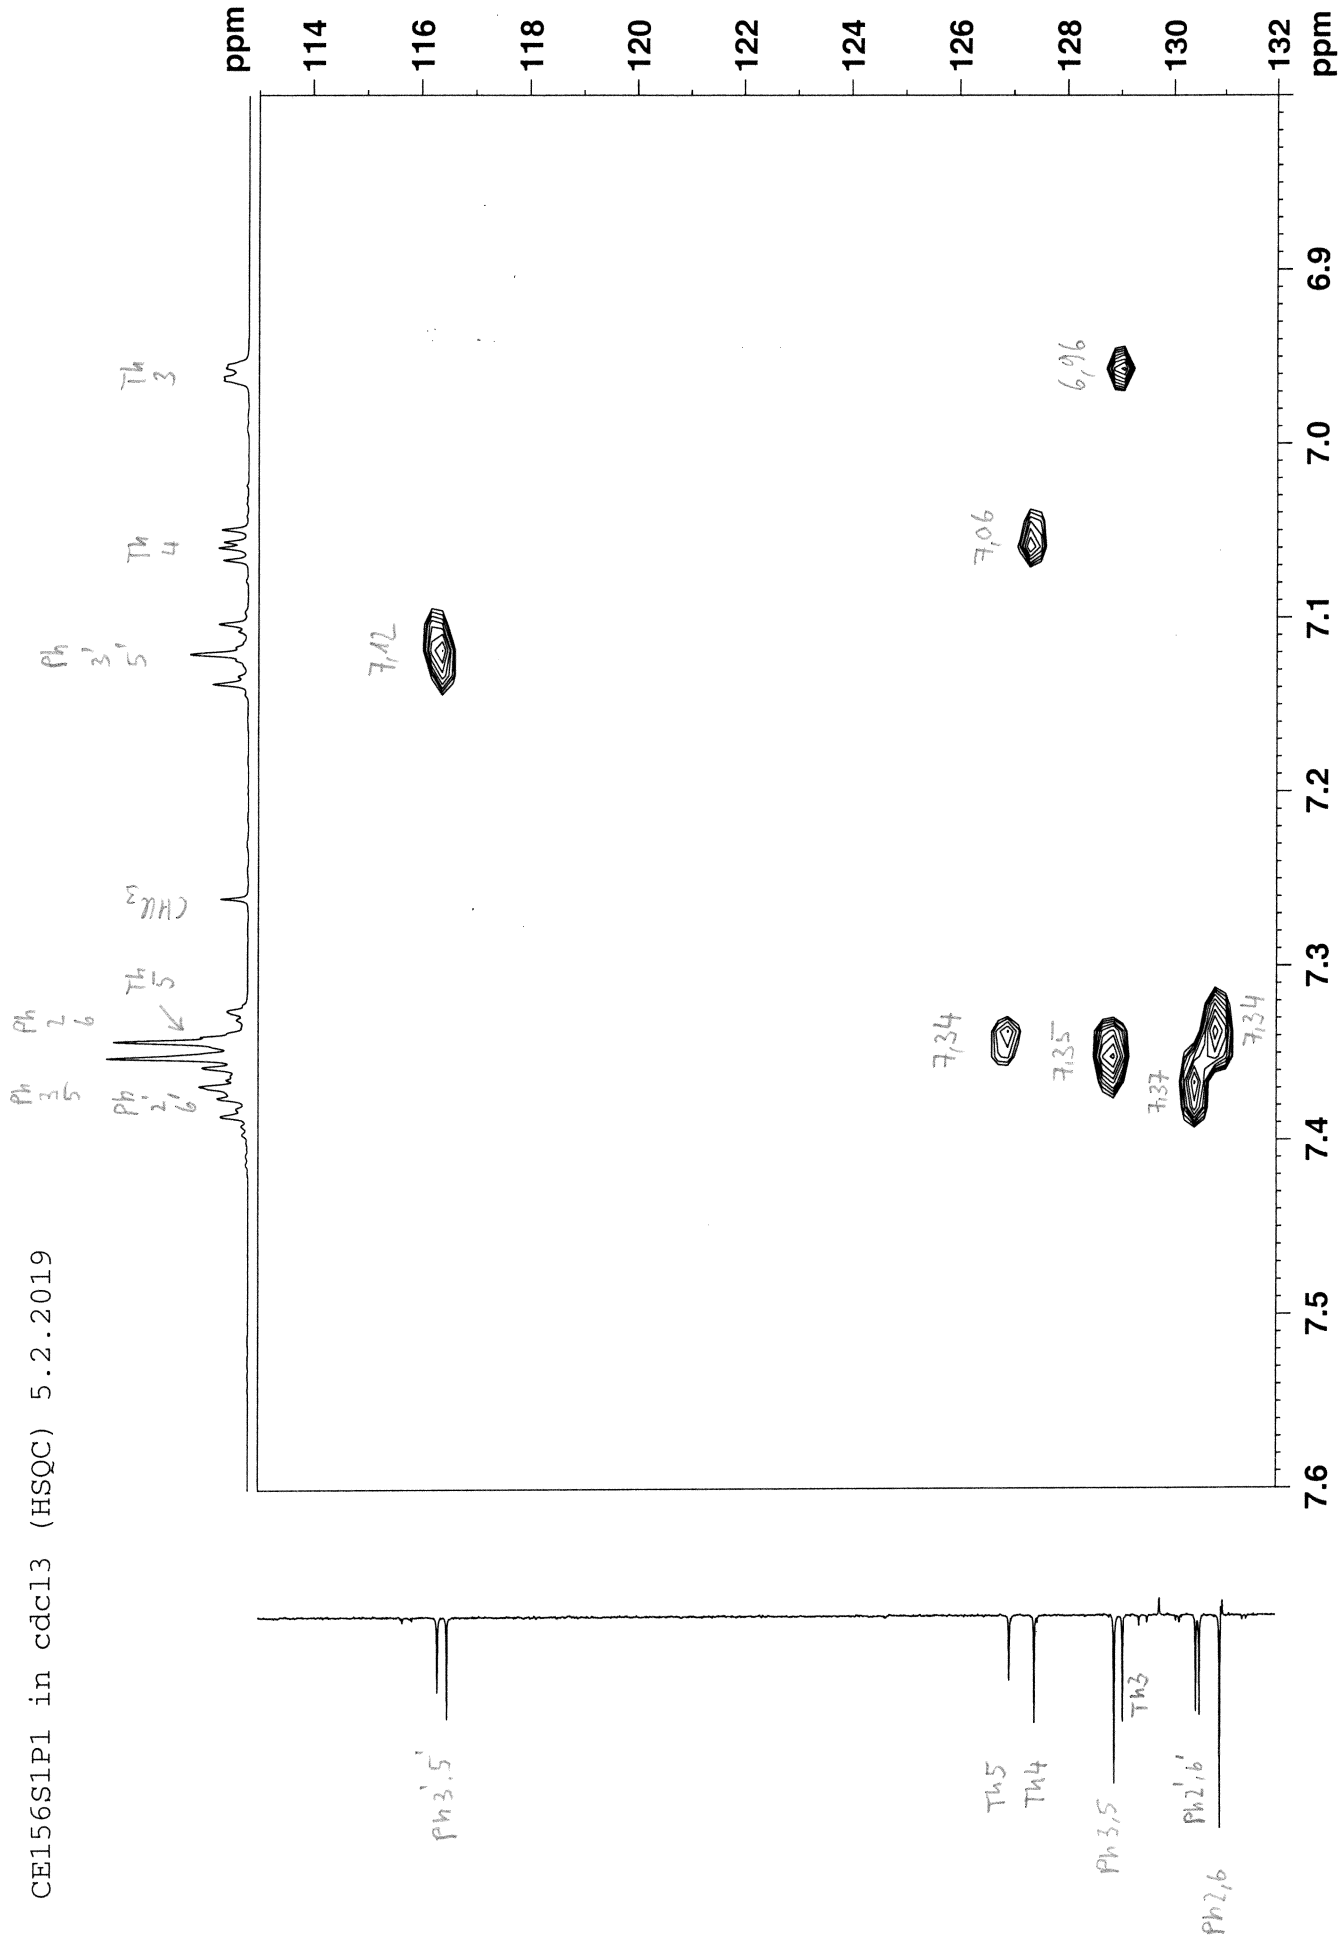

CE156S1P1 in cdcl3 (HSQC) 5.2.2019

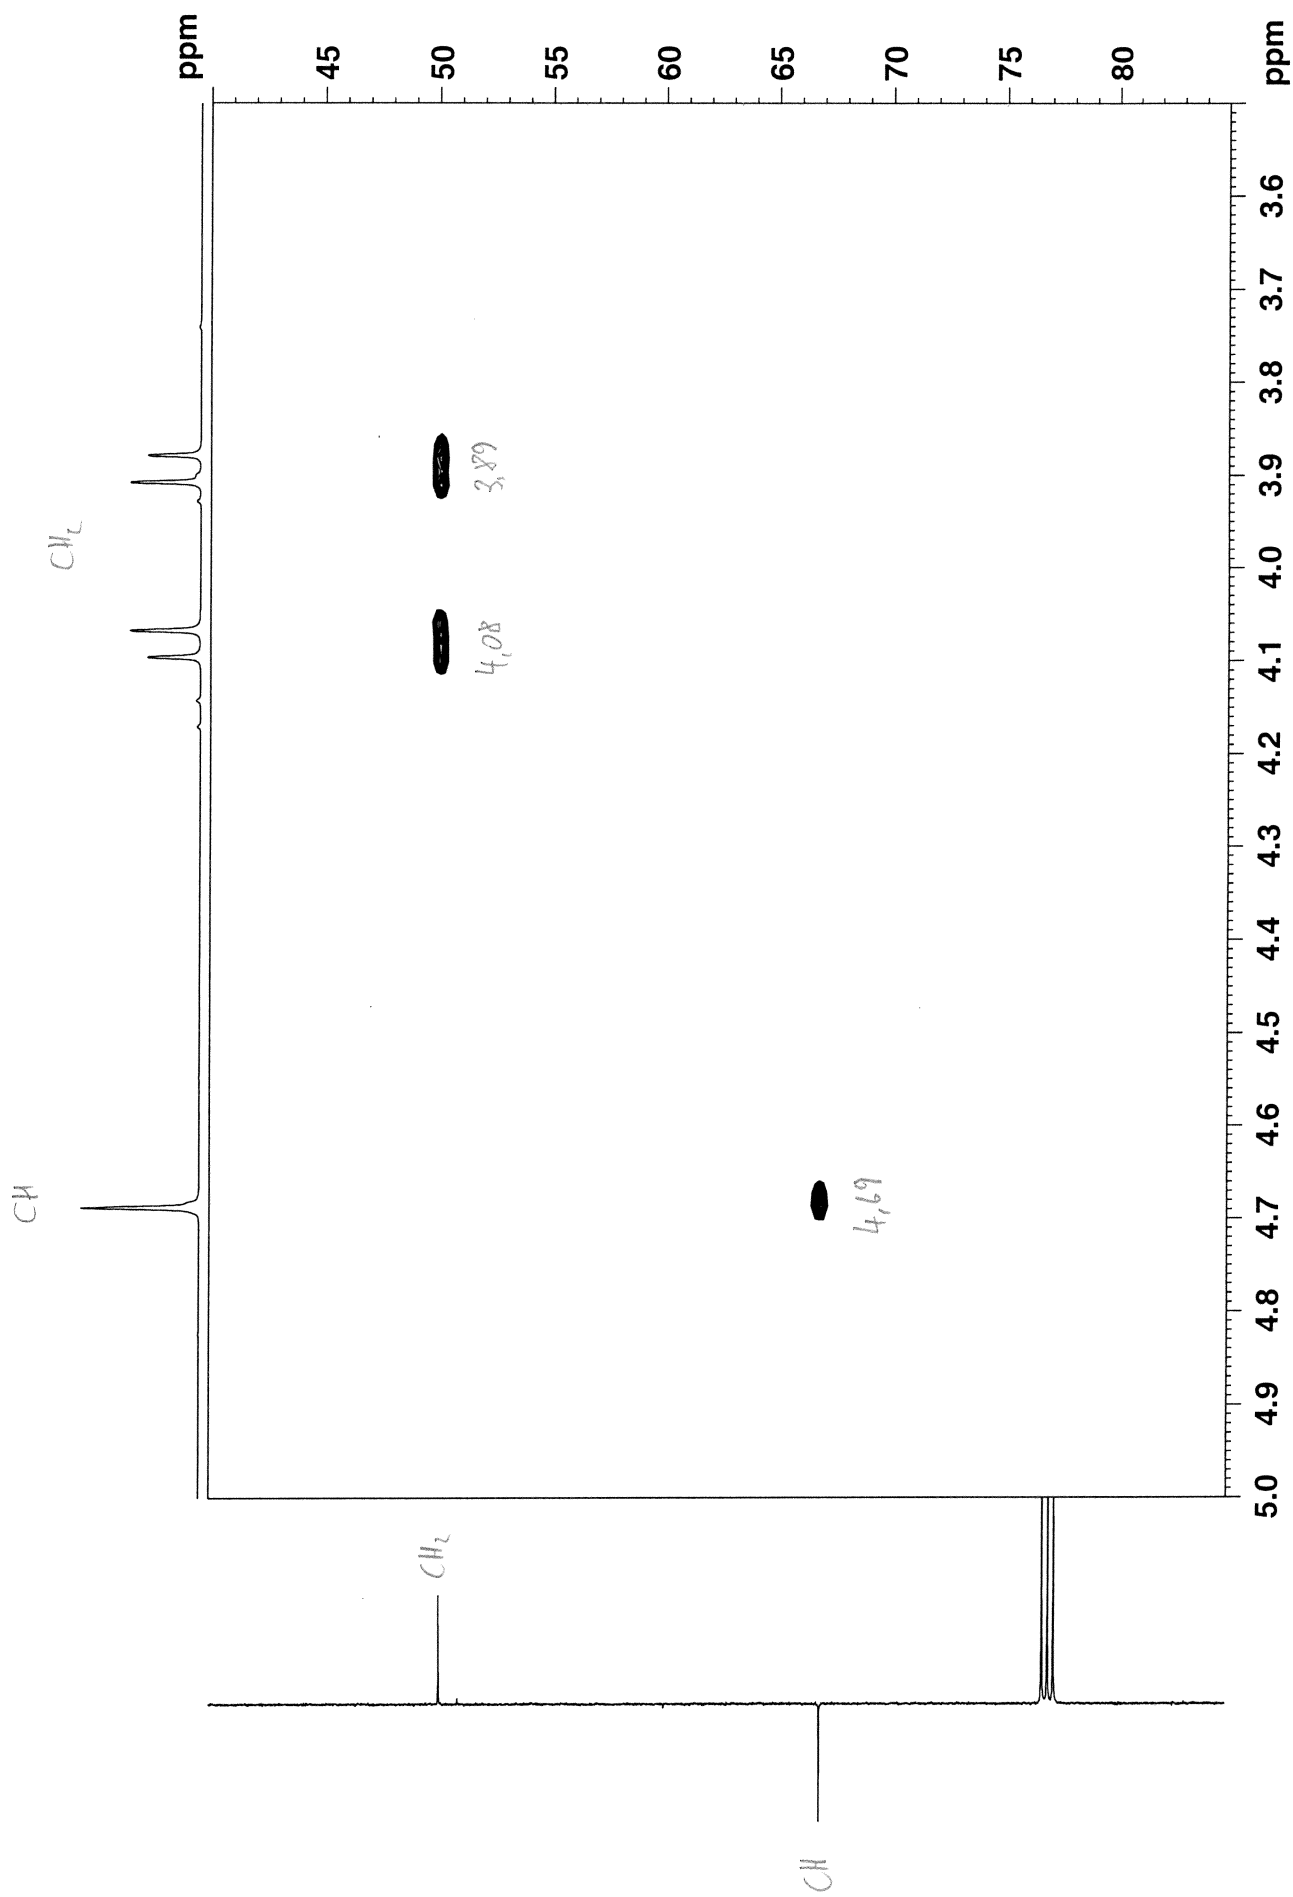

CE156S1P1 in cdcl3 (HMBC) 5.2.2019

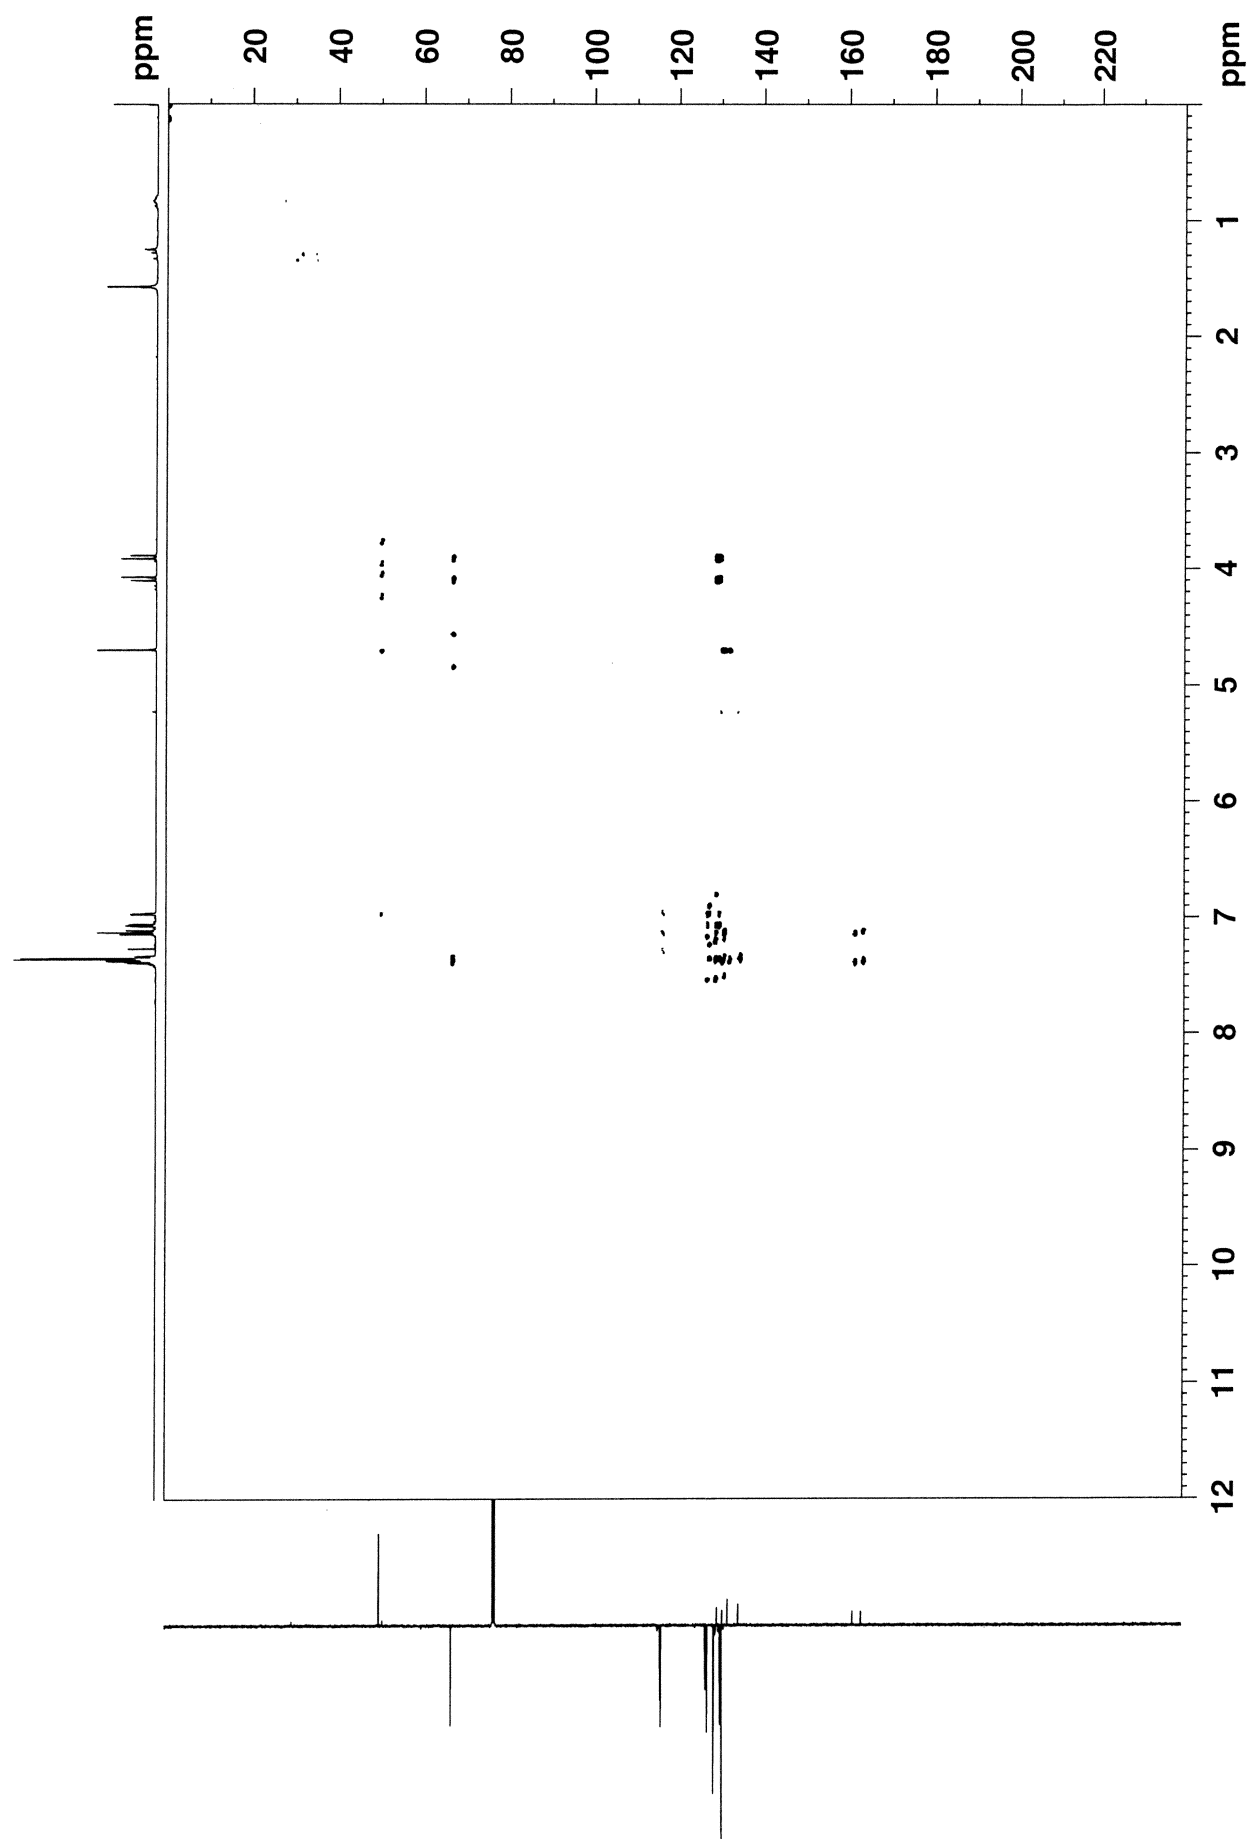

CE156S1P1 in cdcl3 (HMBC) 5.2.2019

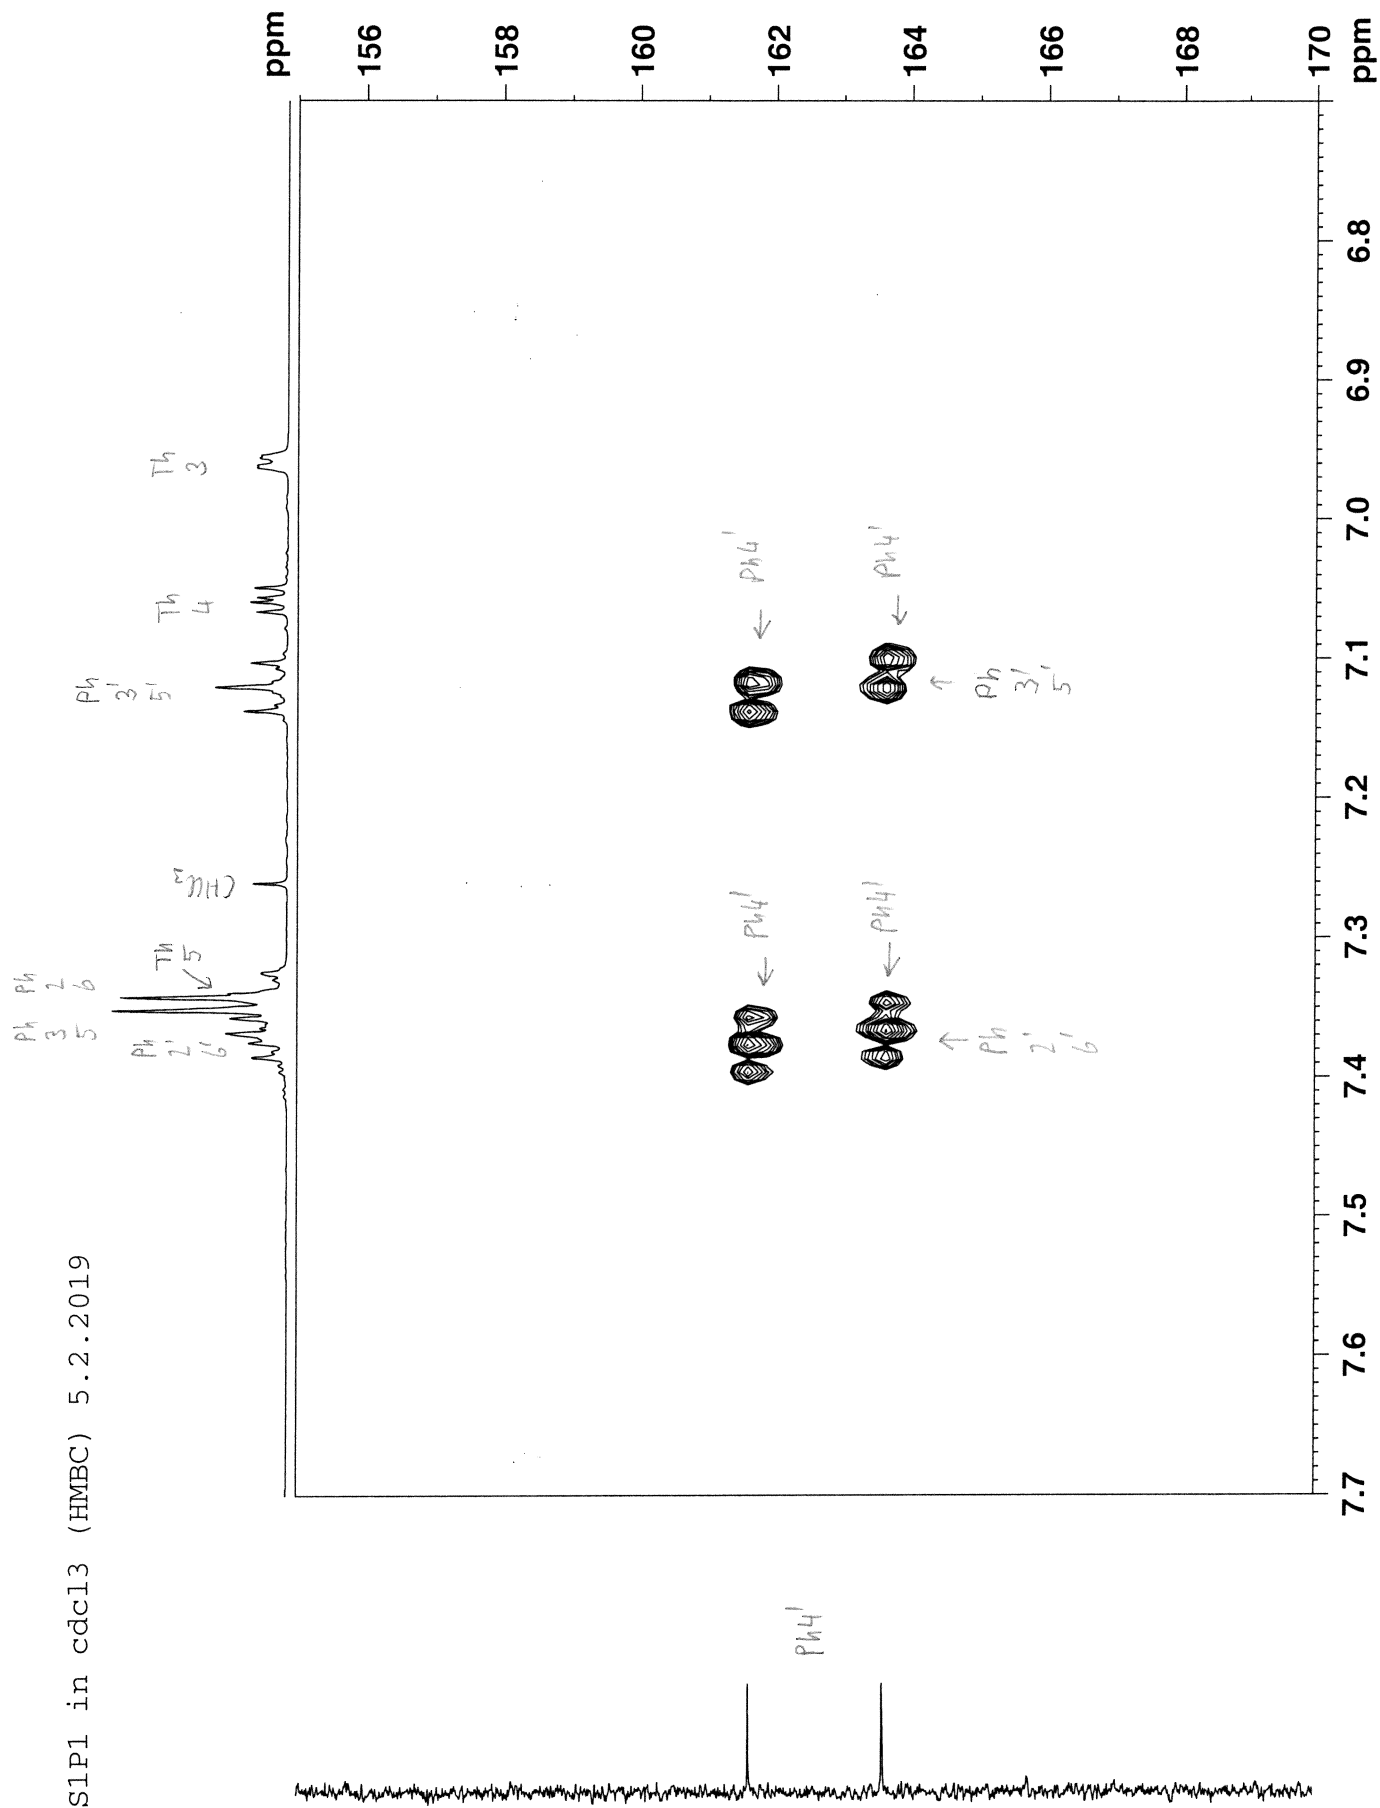

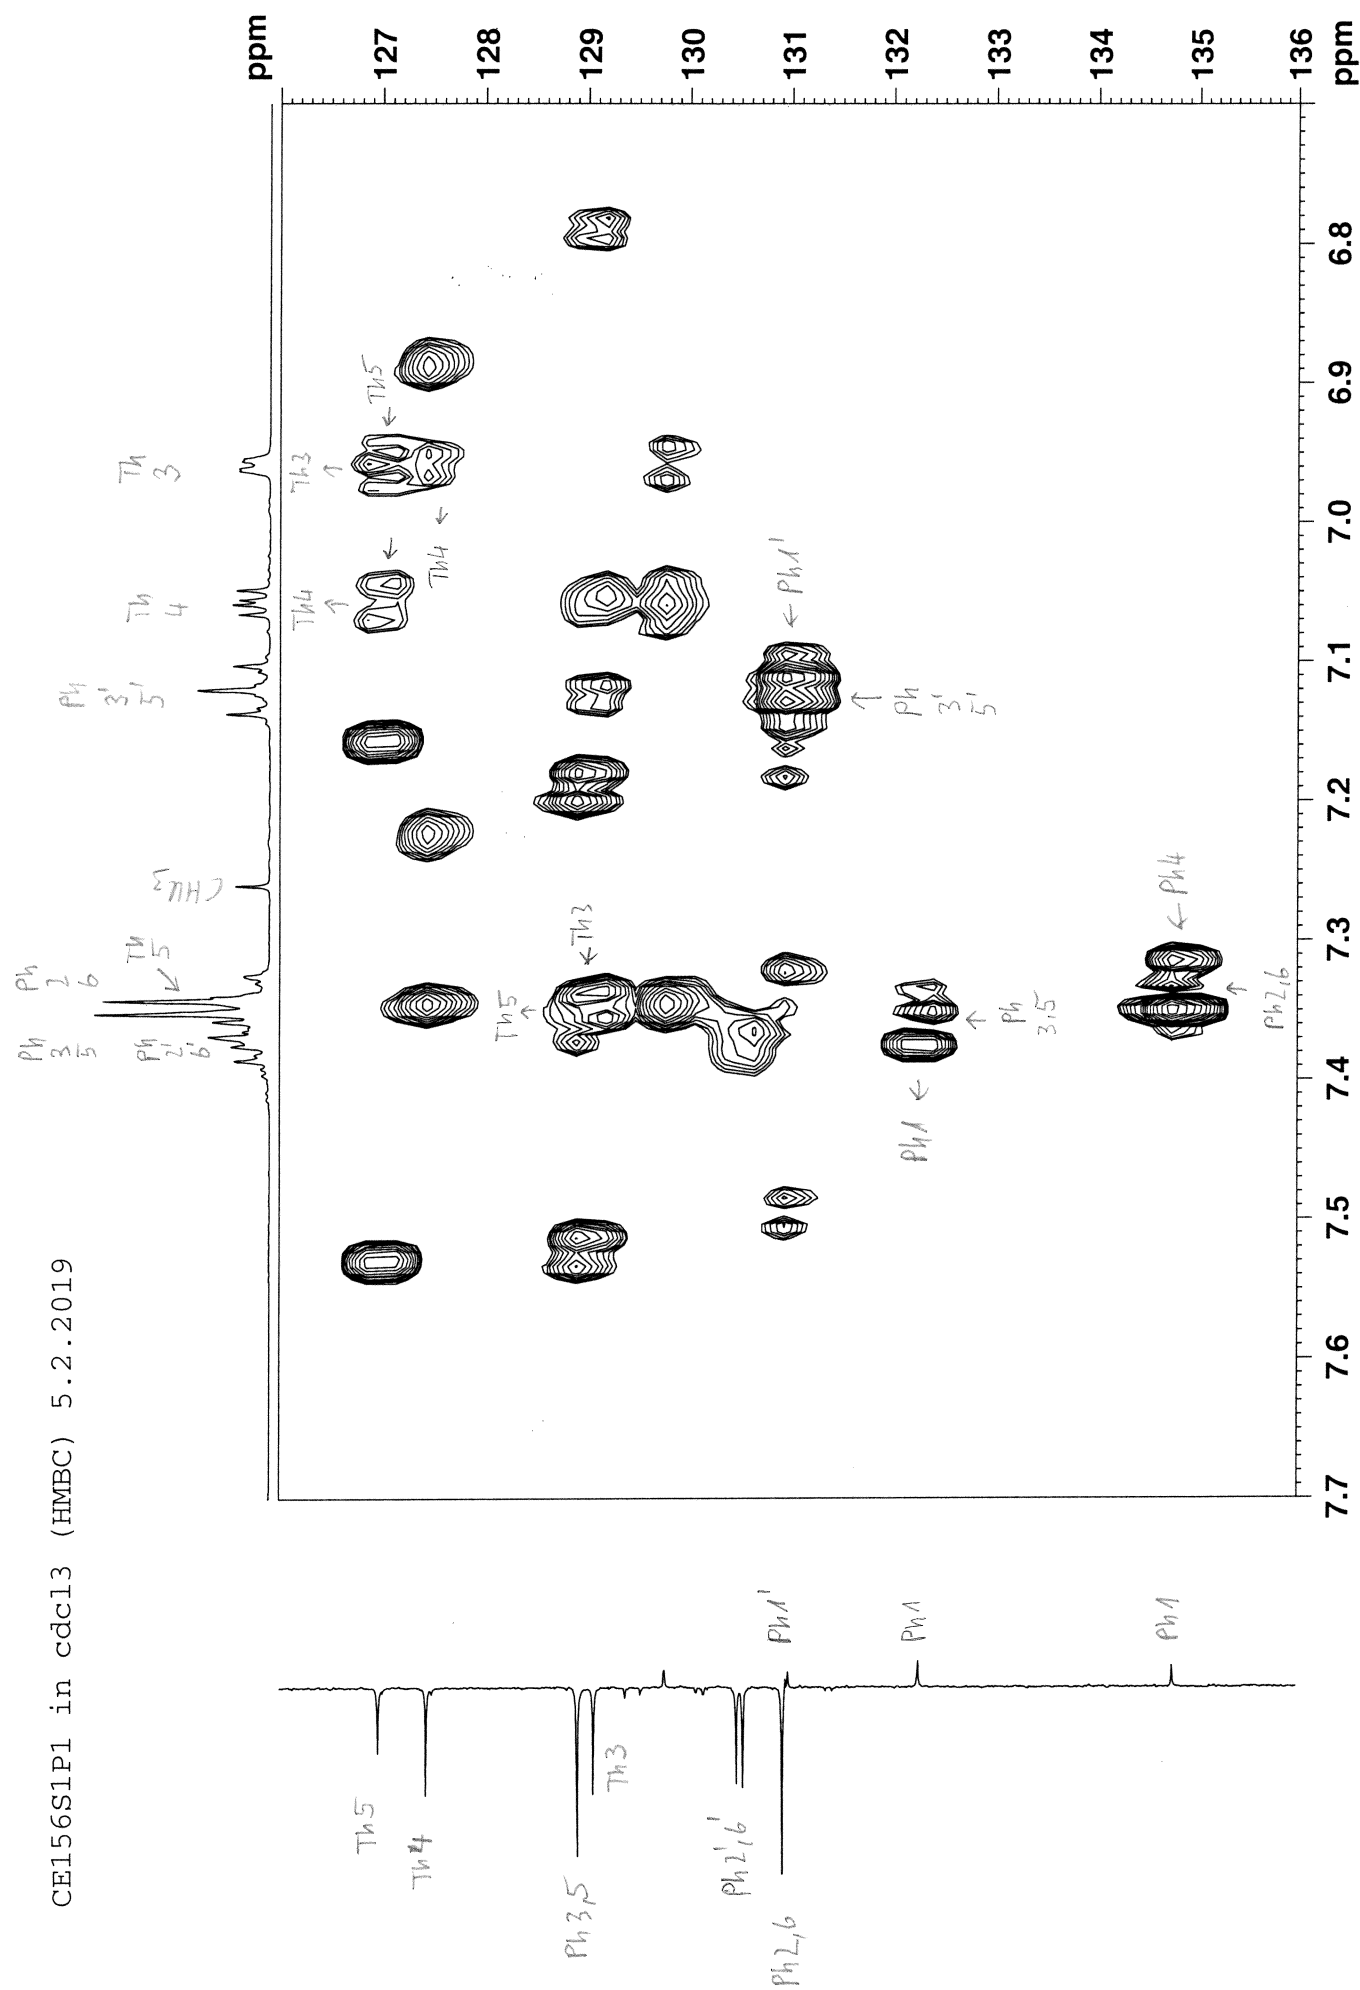

CE156S1P1 in cdcl3 (HMBC) 5.2.2019

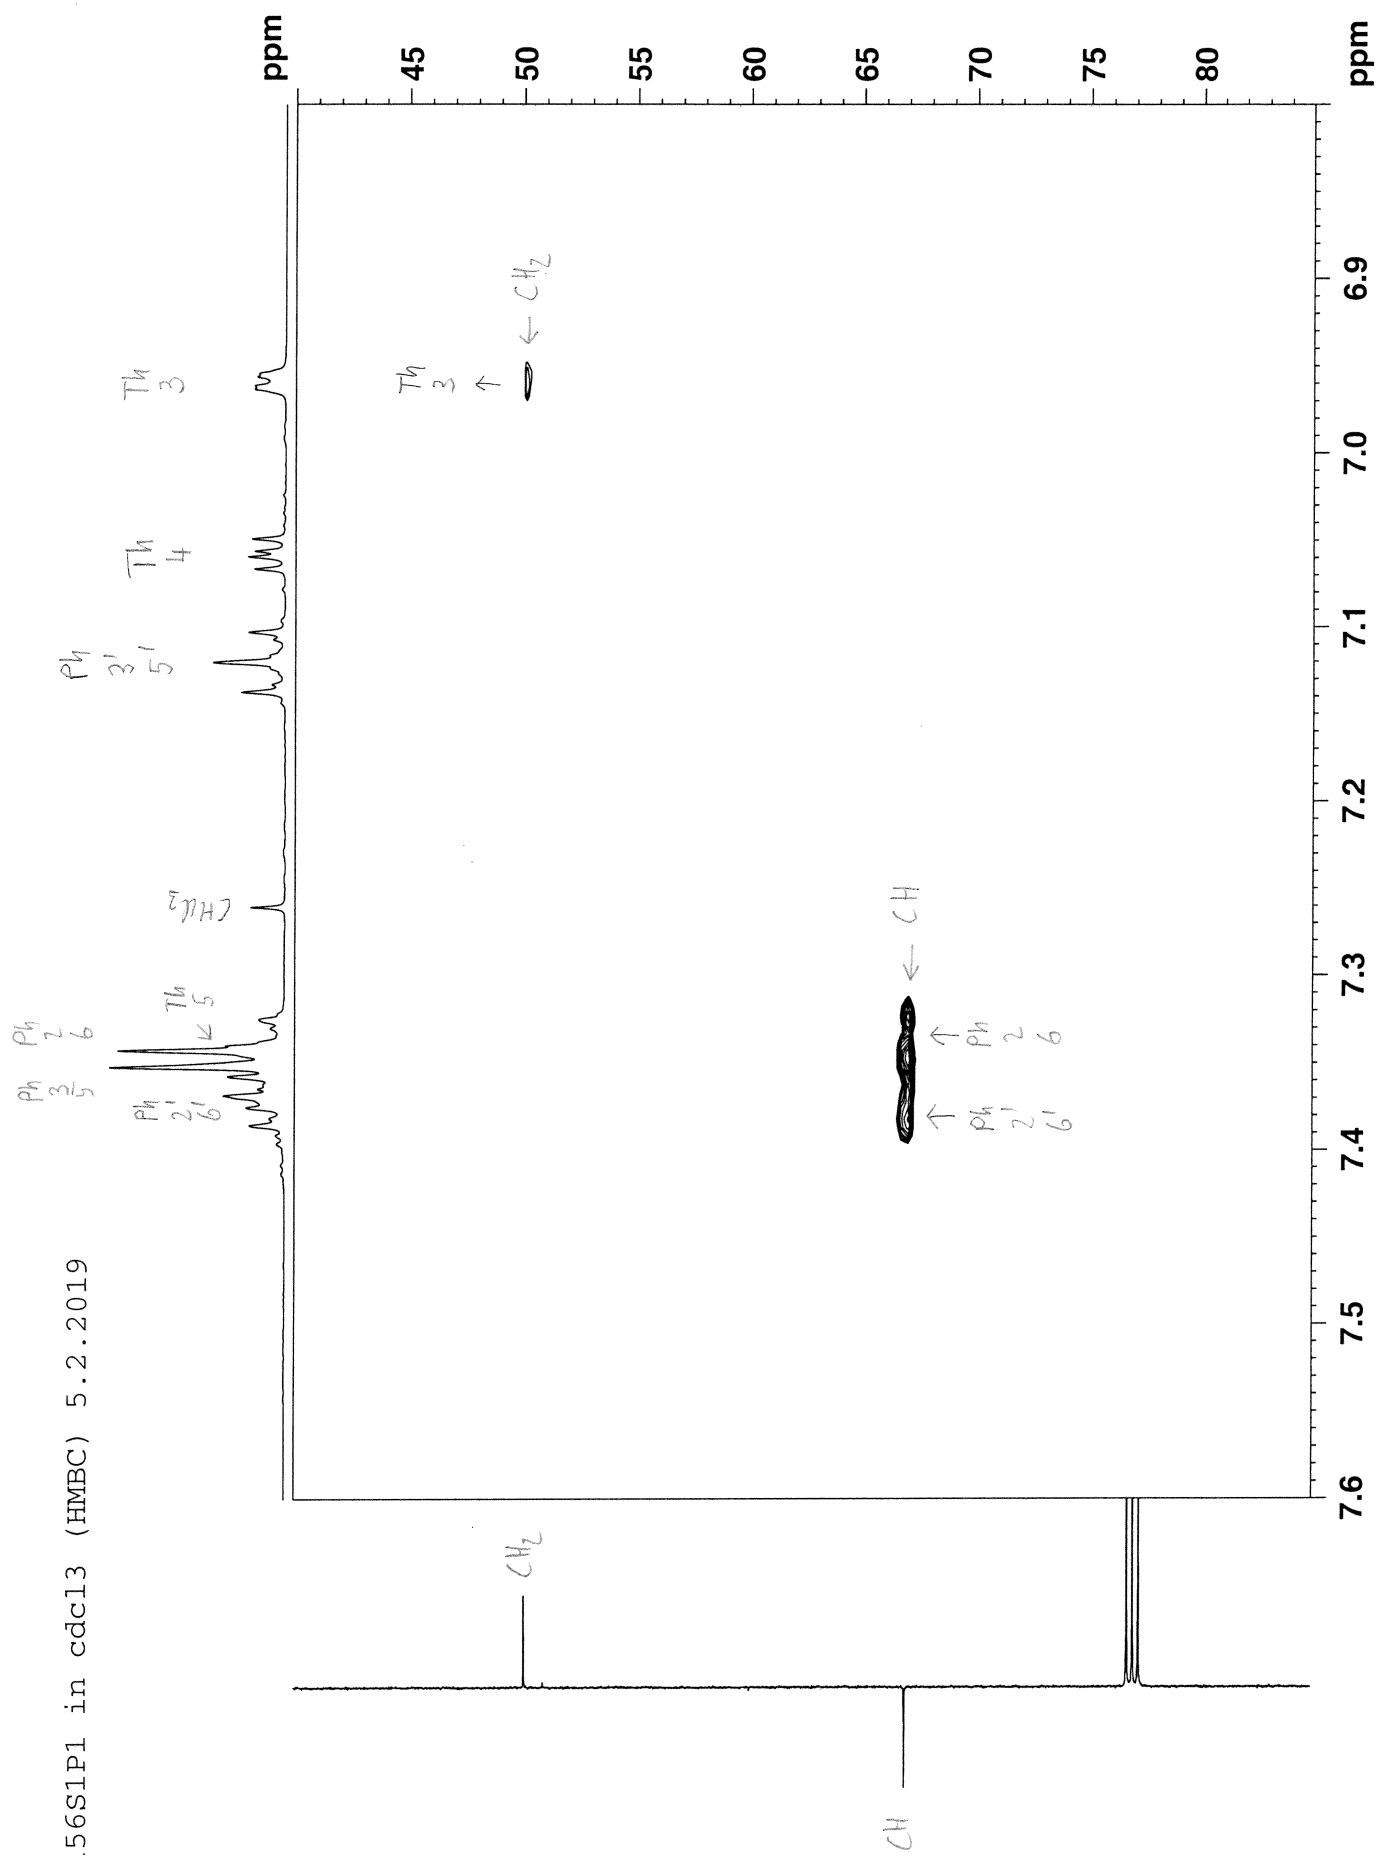

CE156S1P1 in cdcl3 (HMBC) 5.2.2019

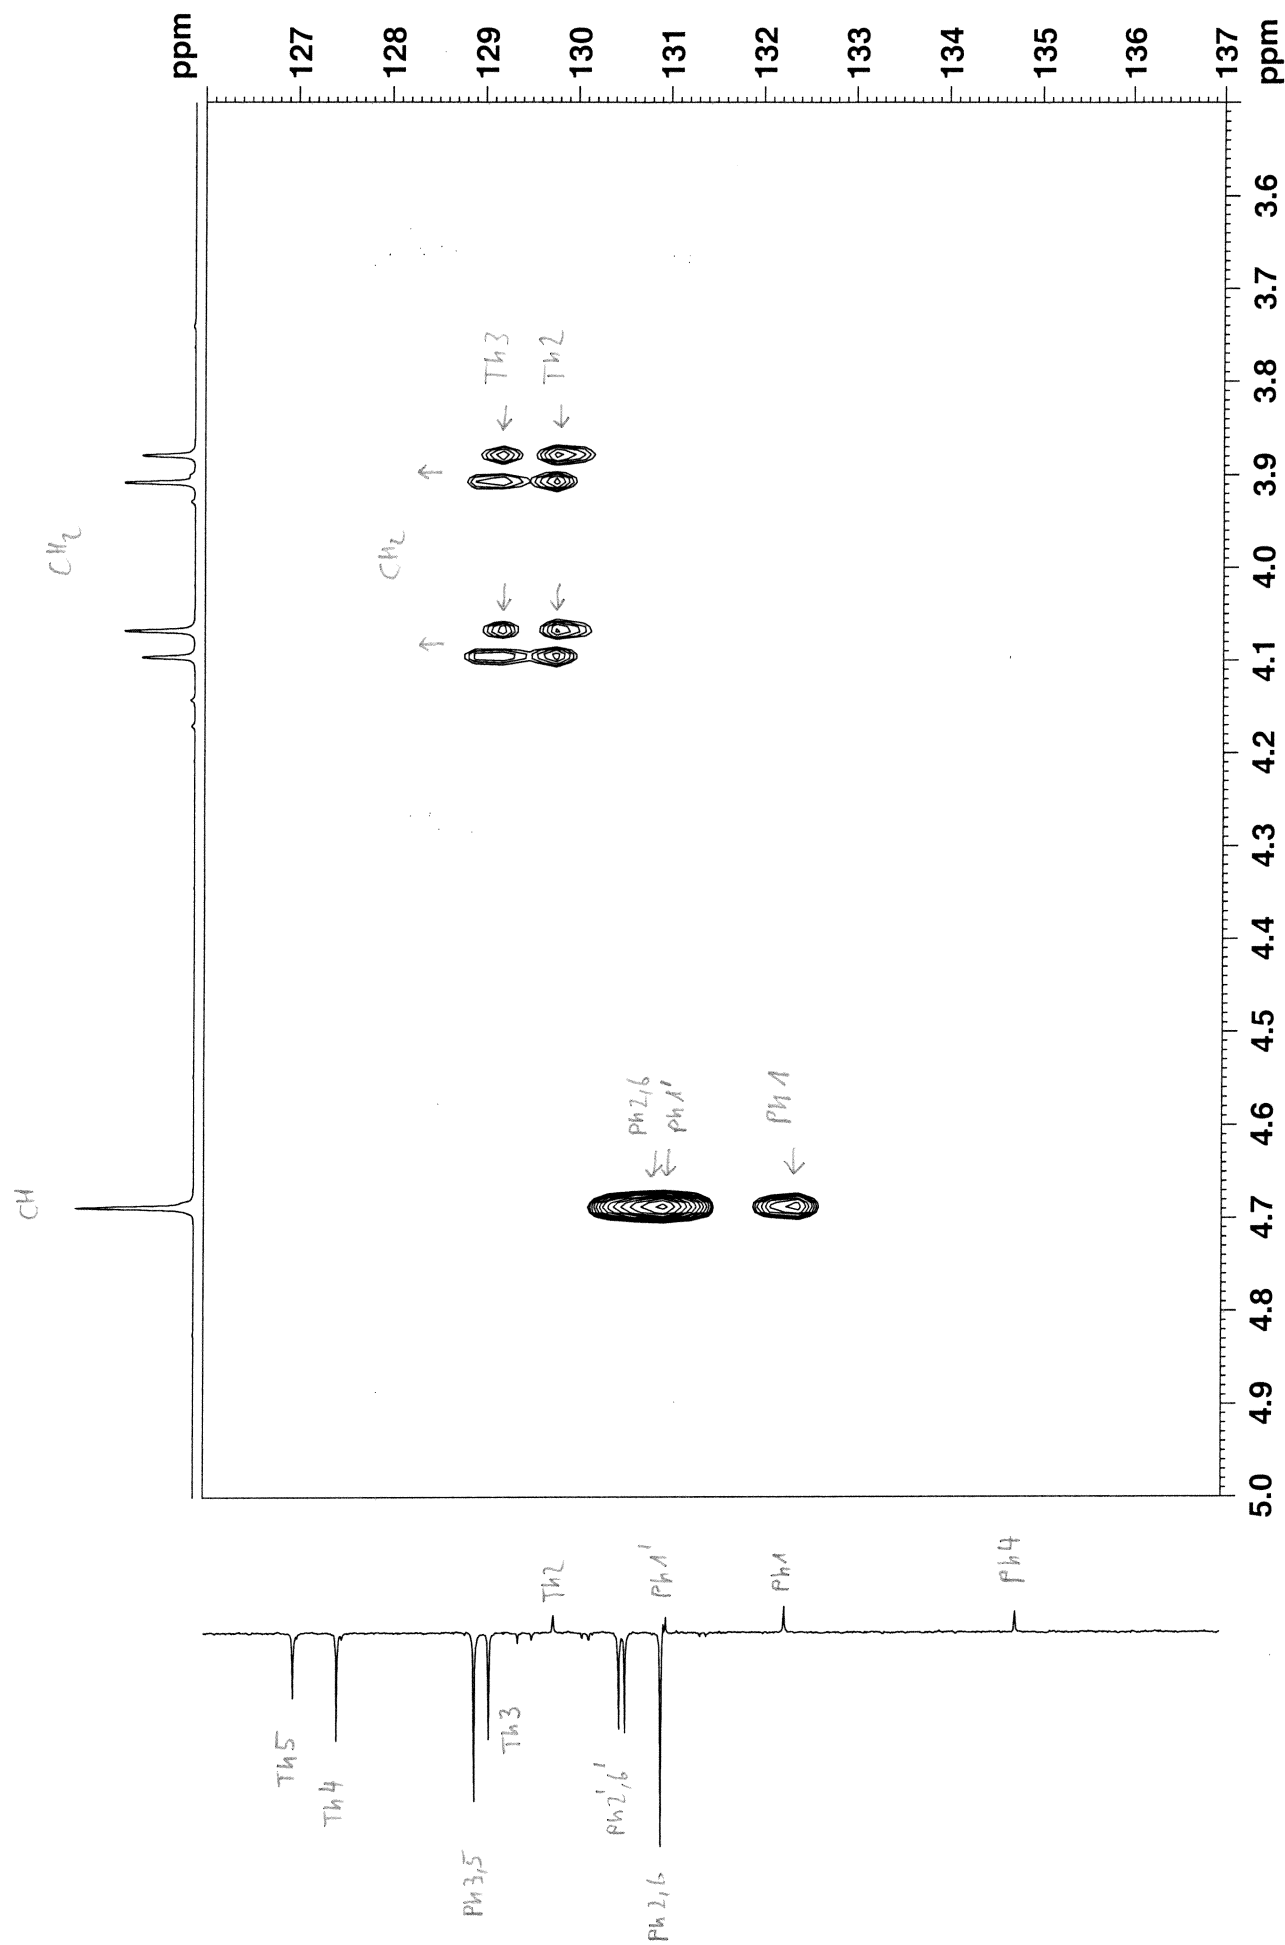



CE156S1P1 in cdcl3 (HMBC) 5.2.2019

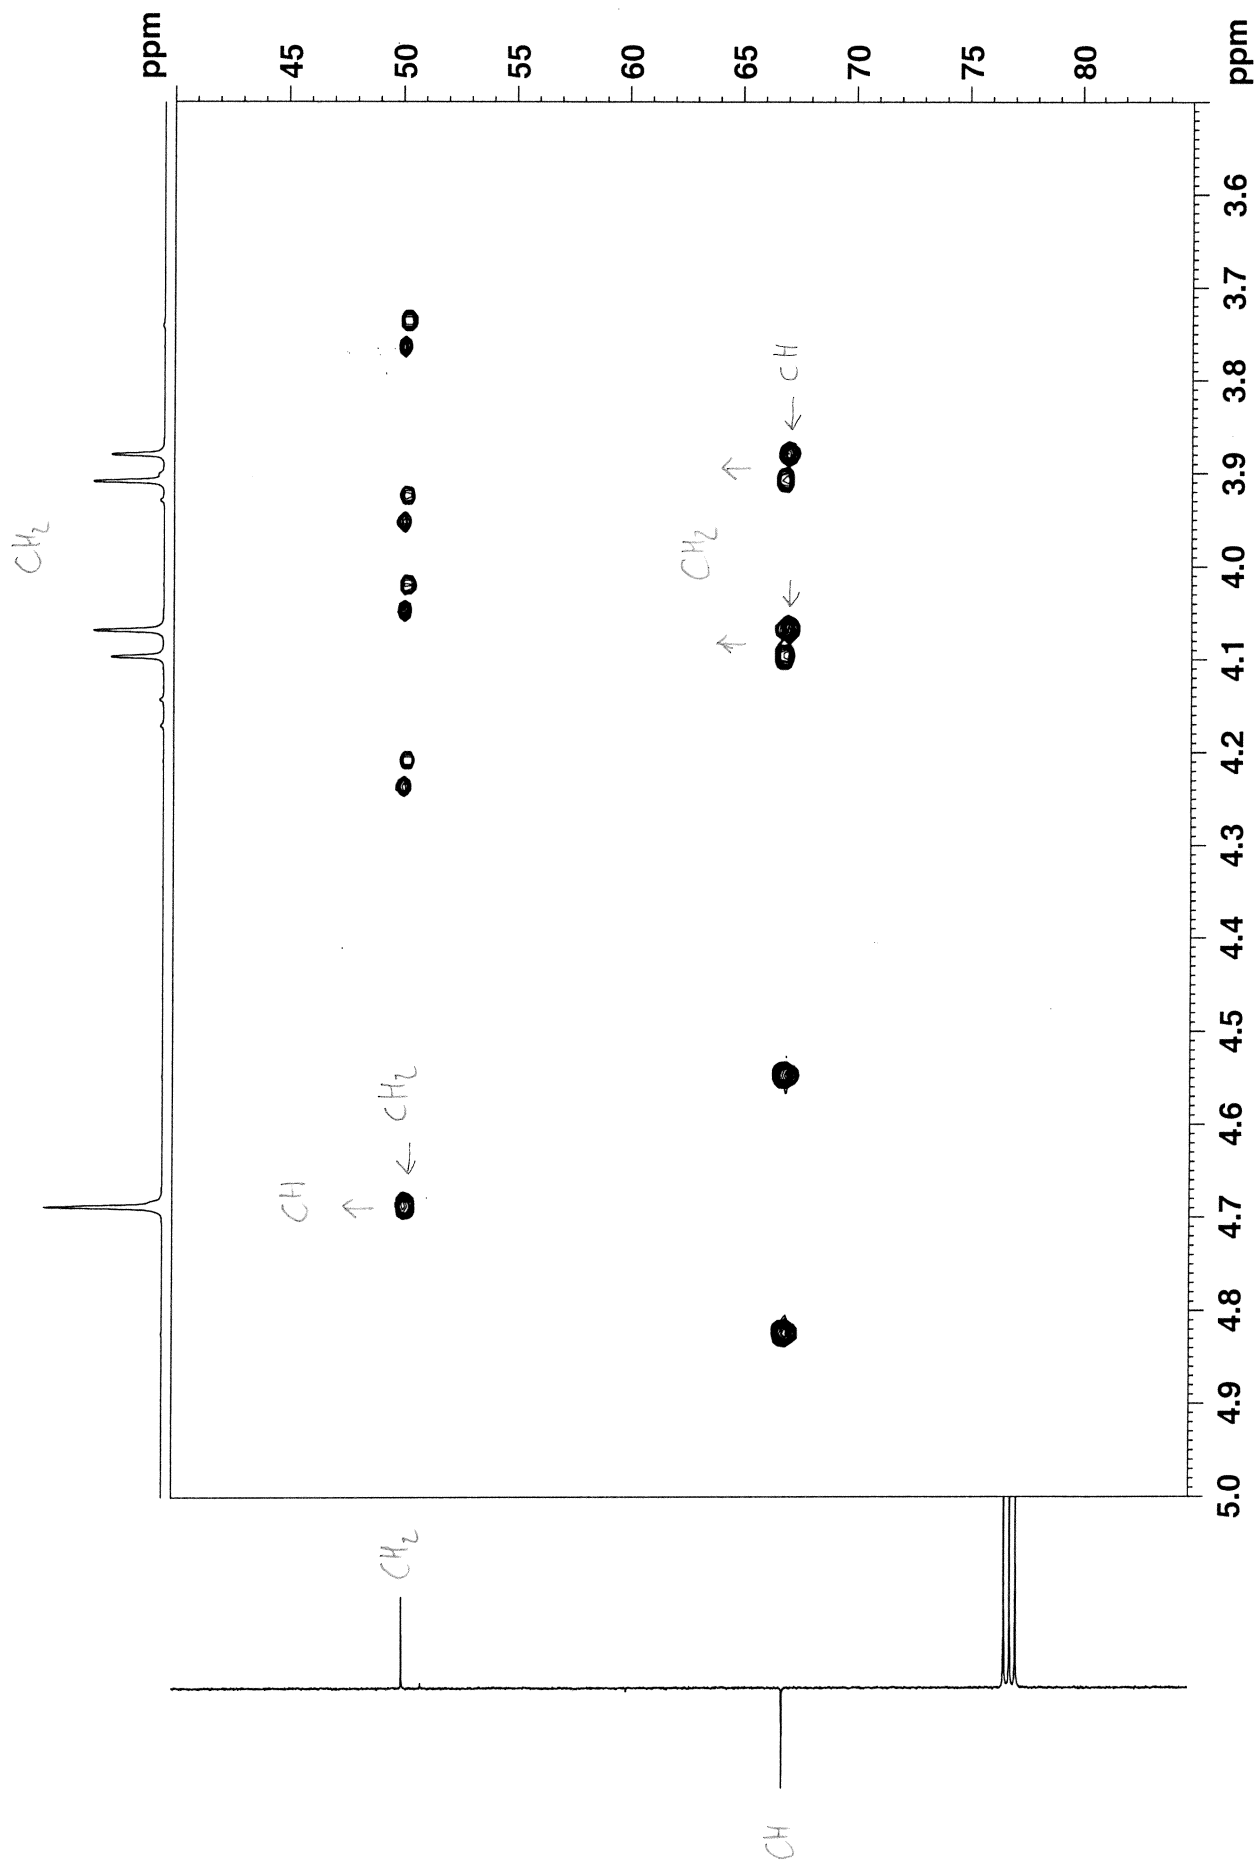

**Figure S82c.** NMR spectra of compound **6u**.

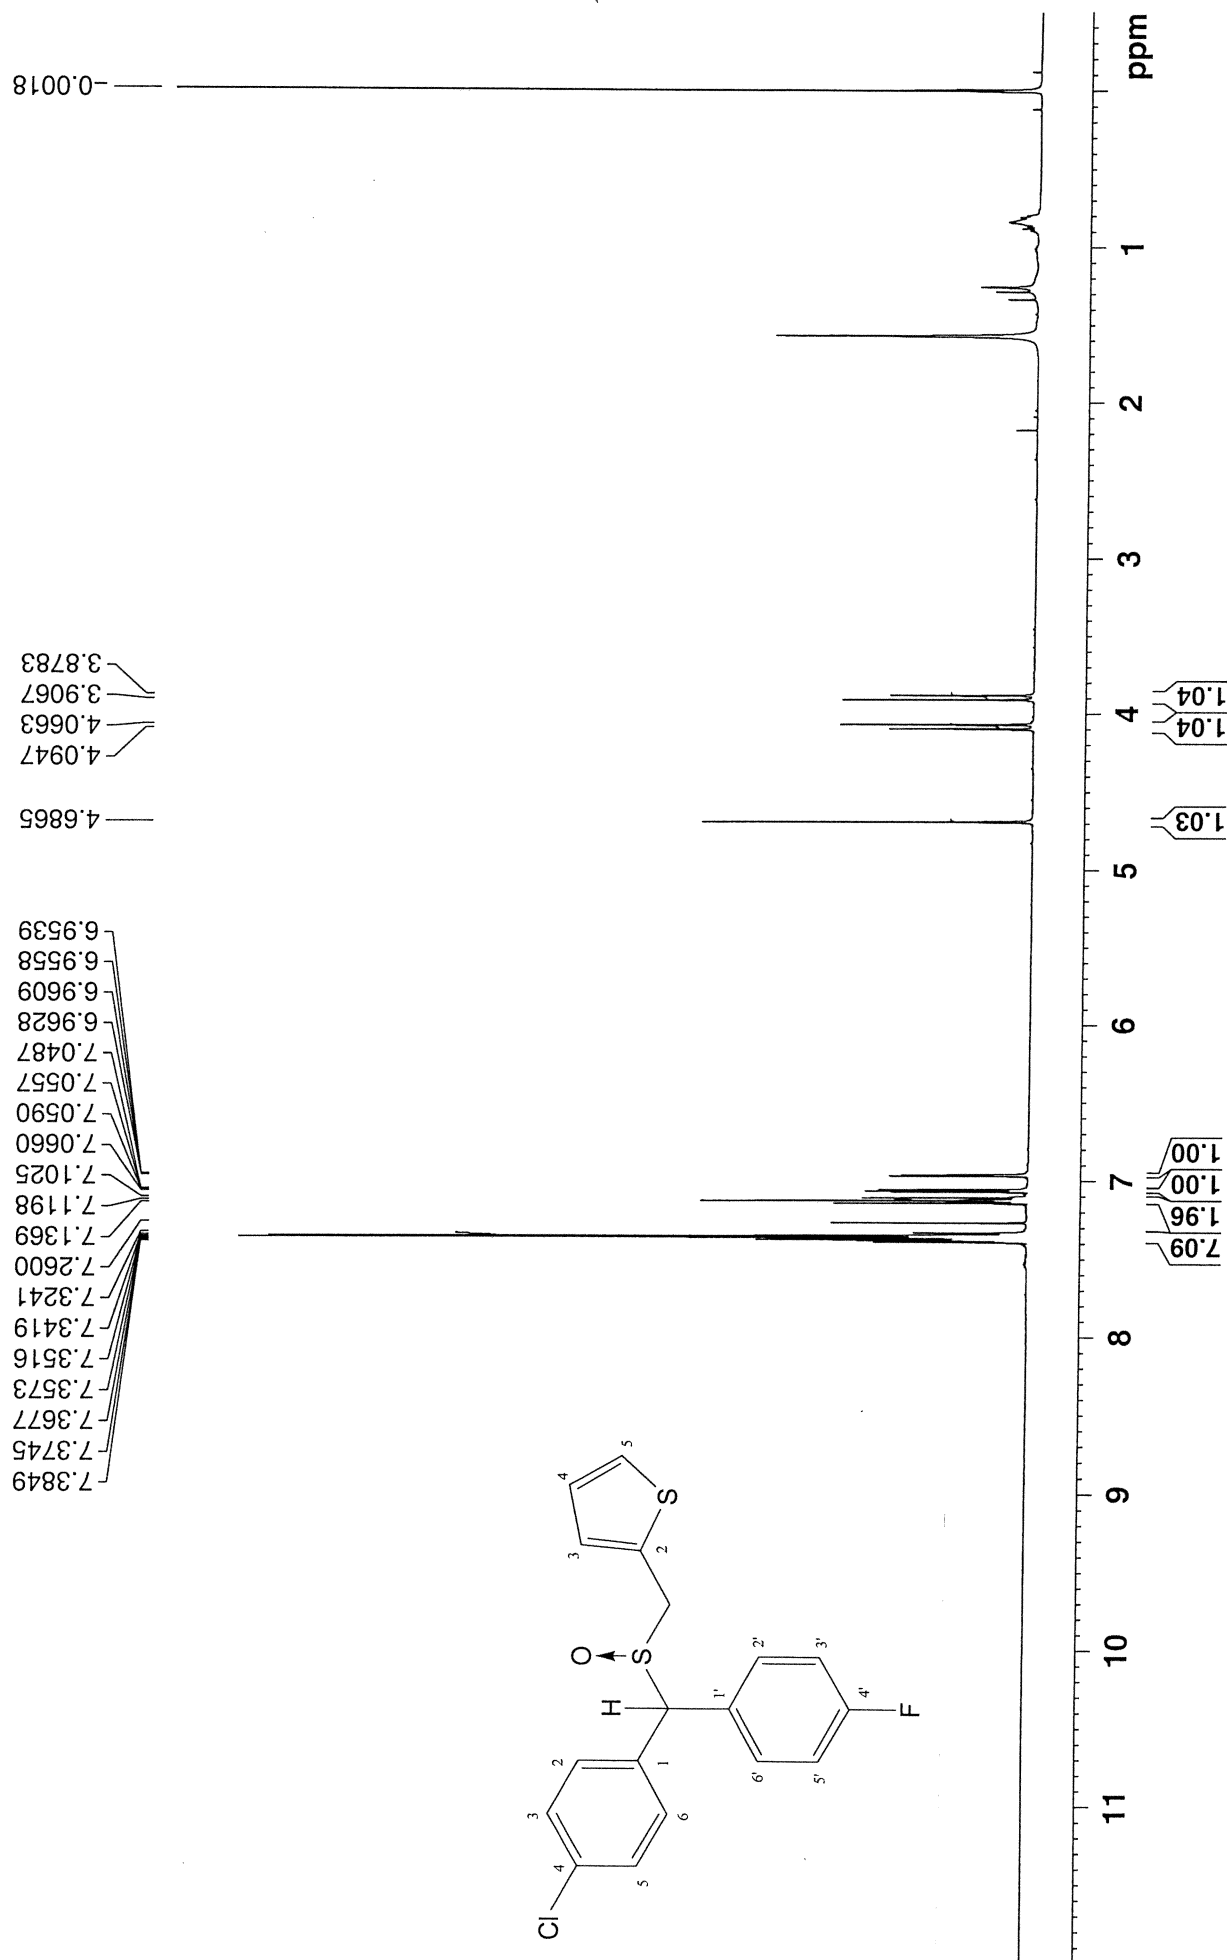

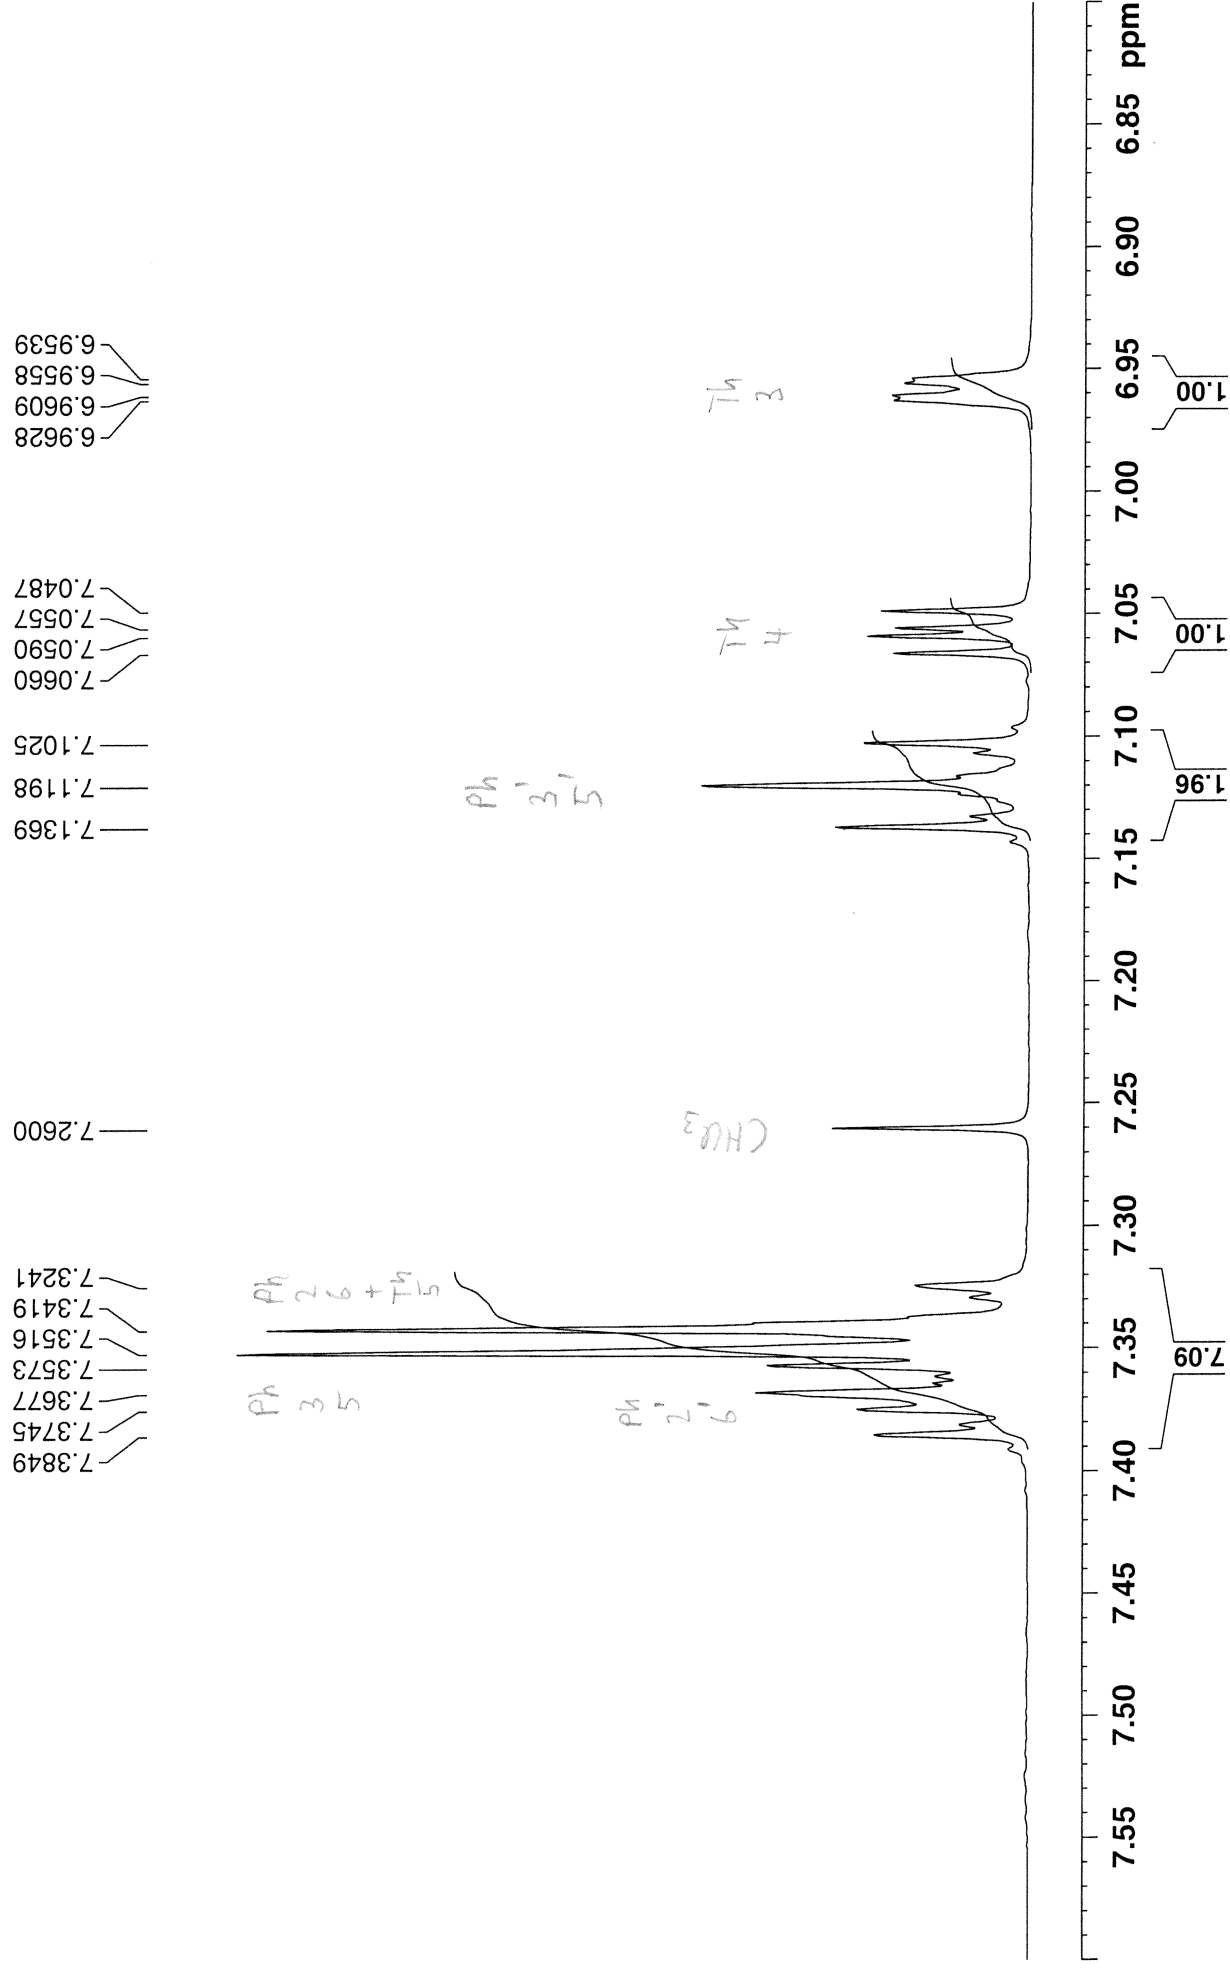

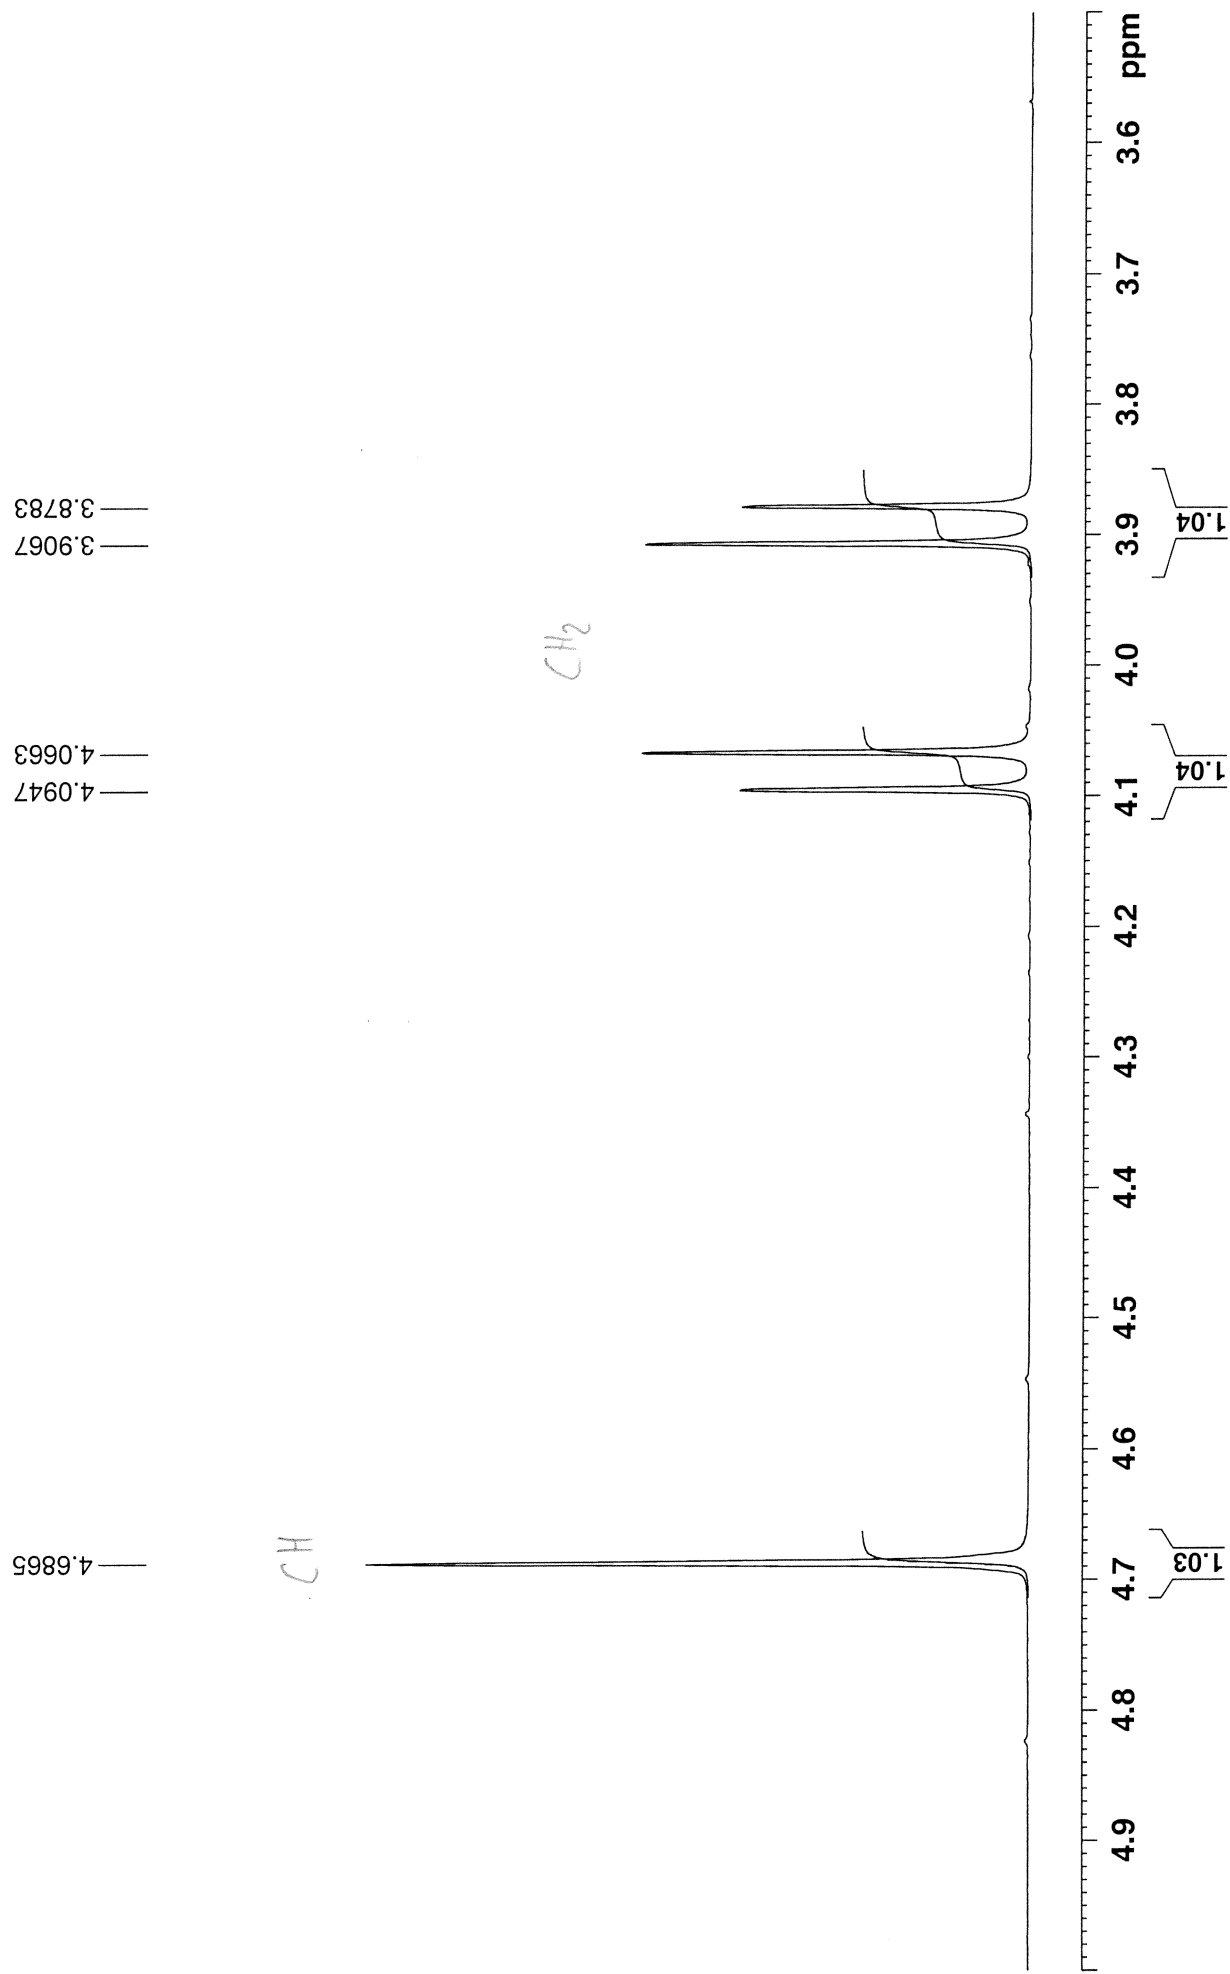

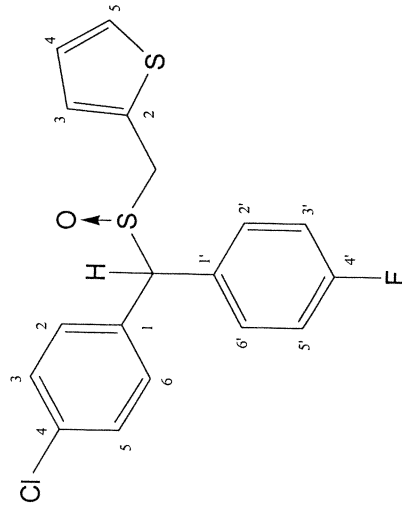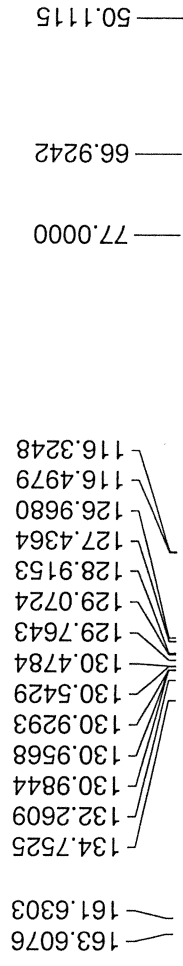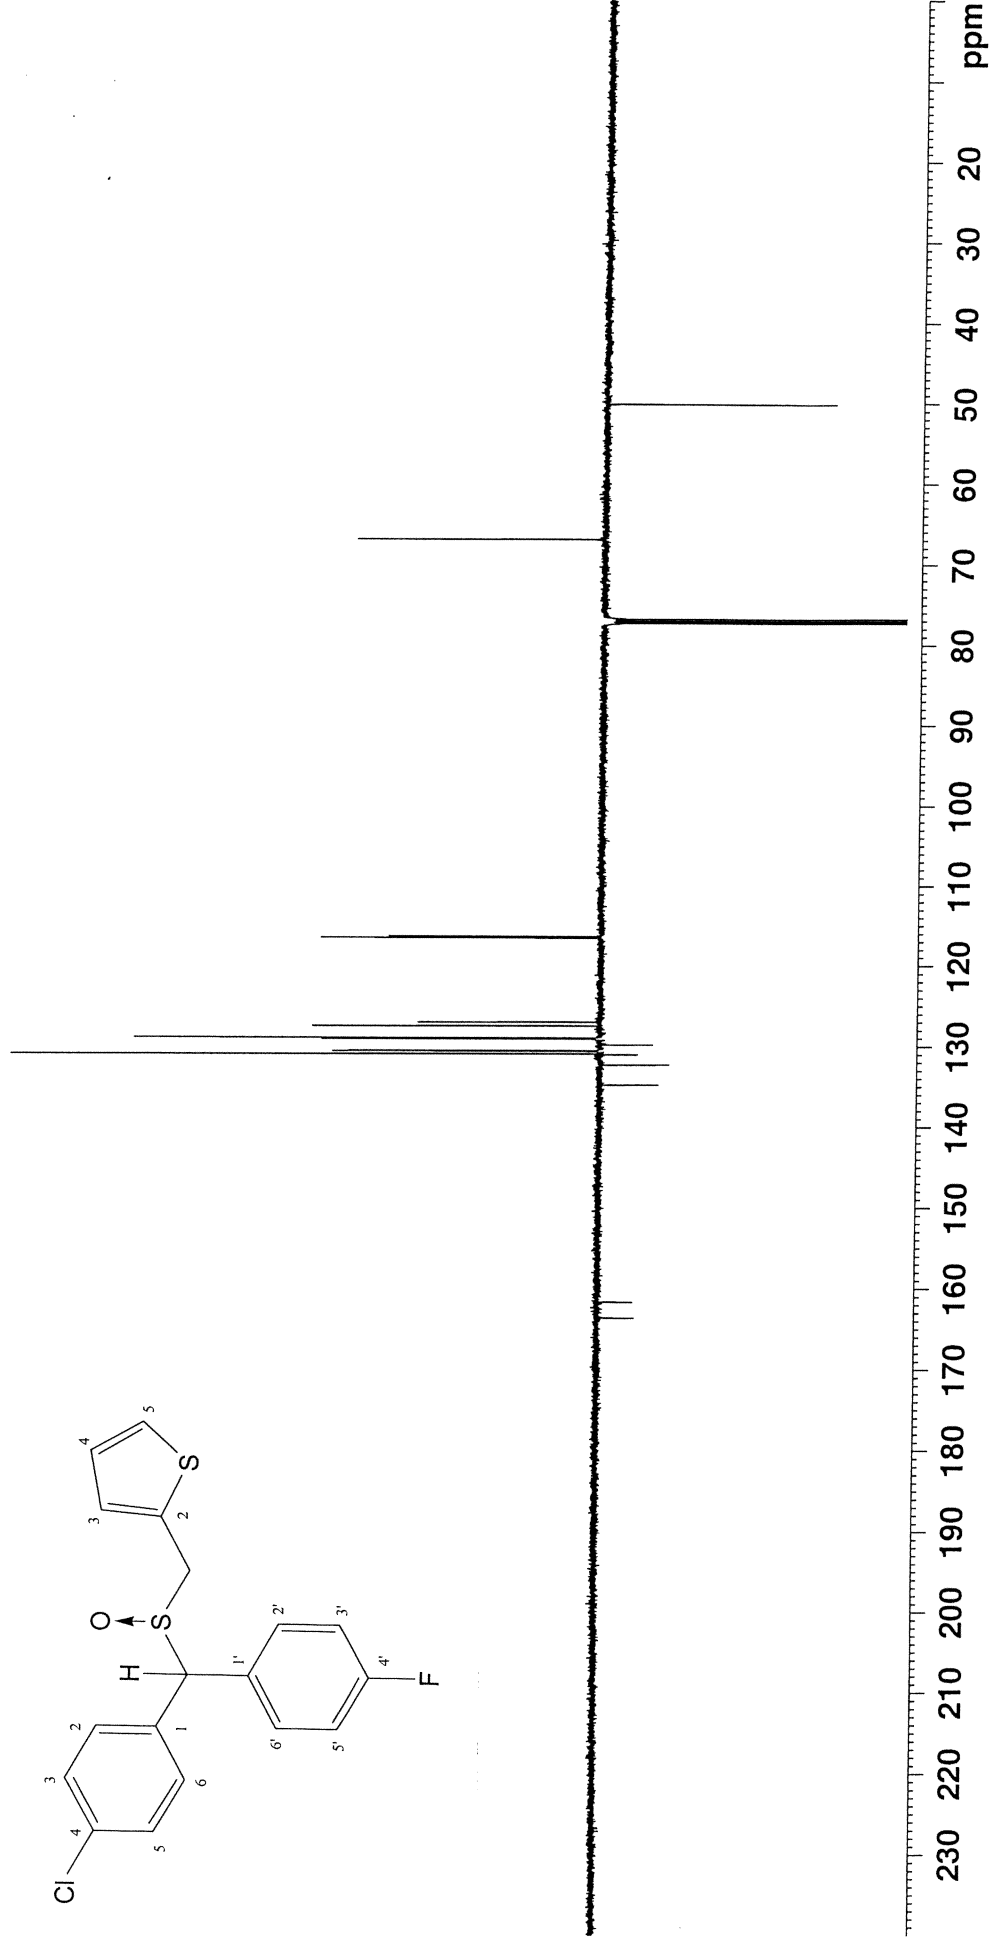

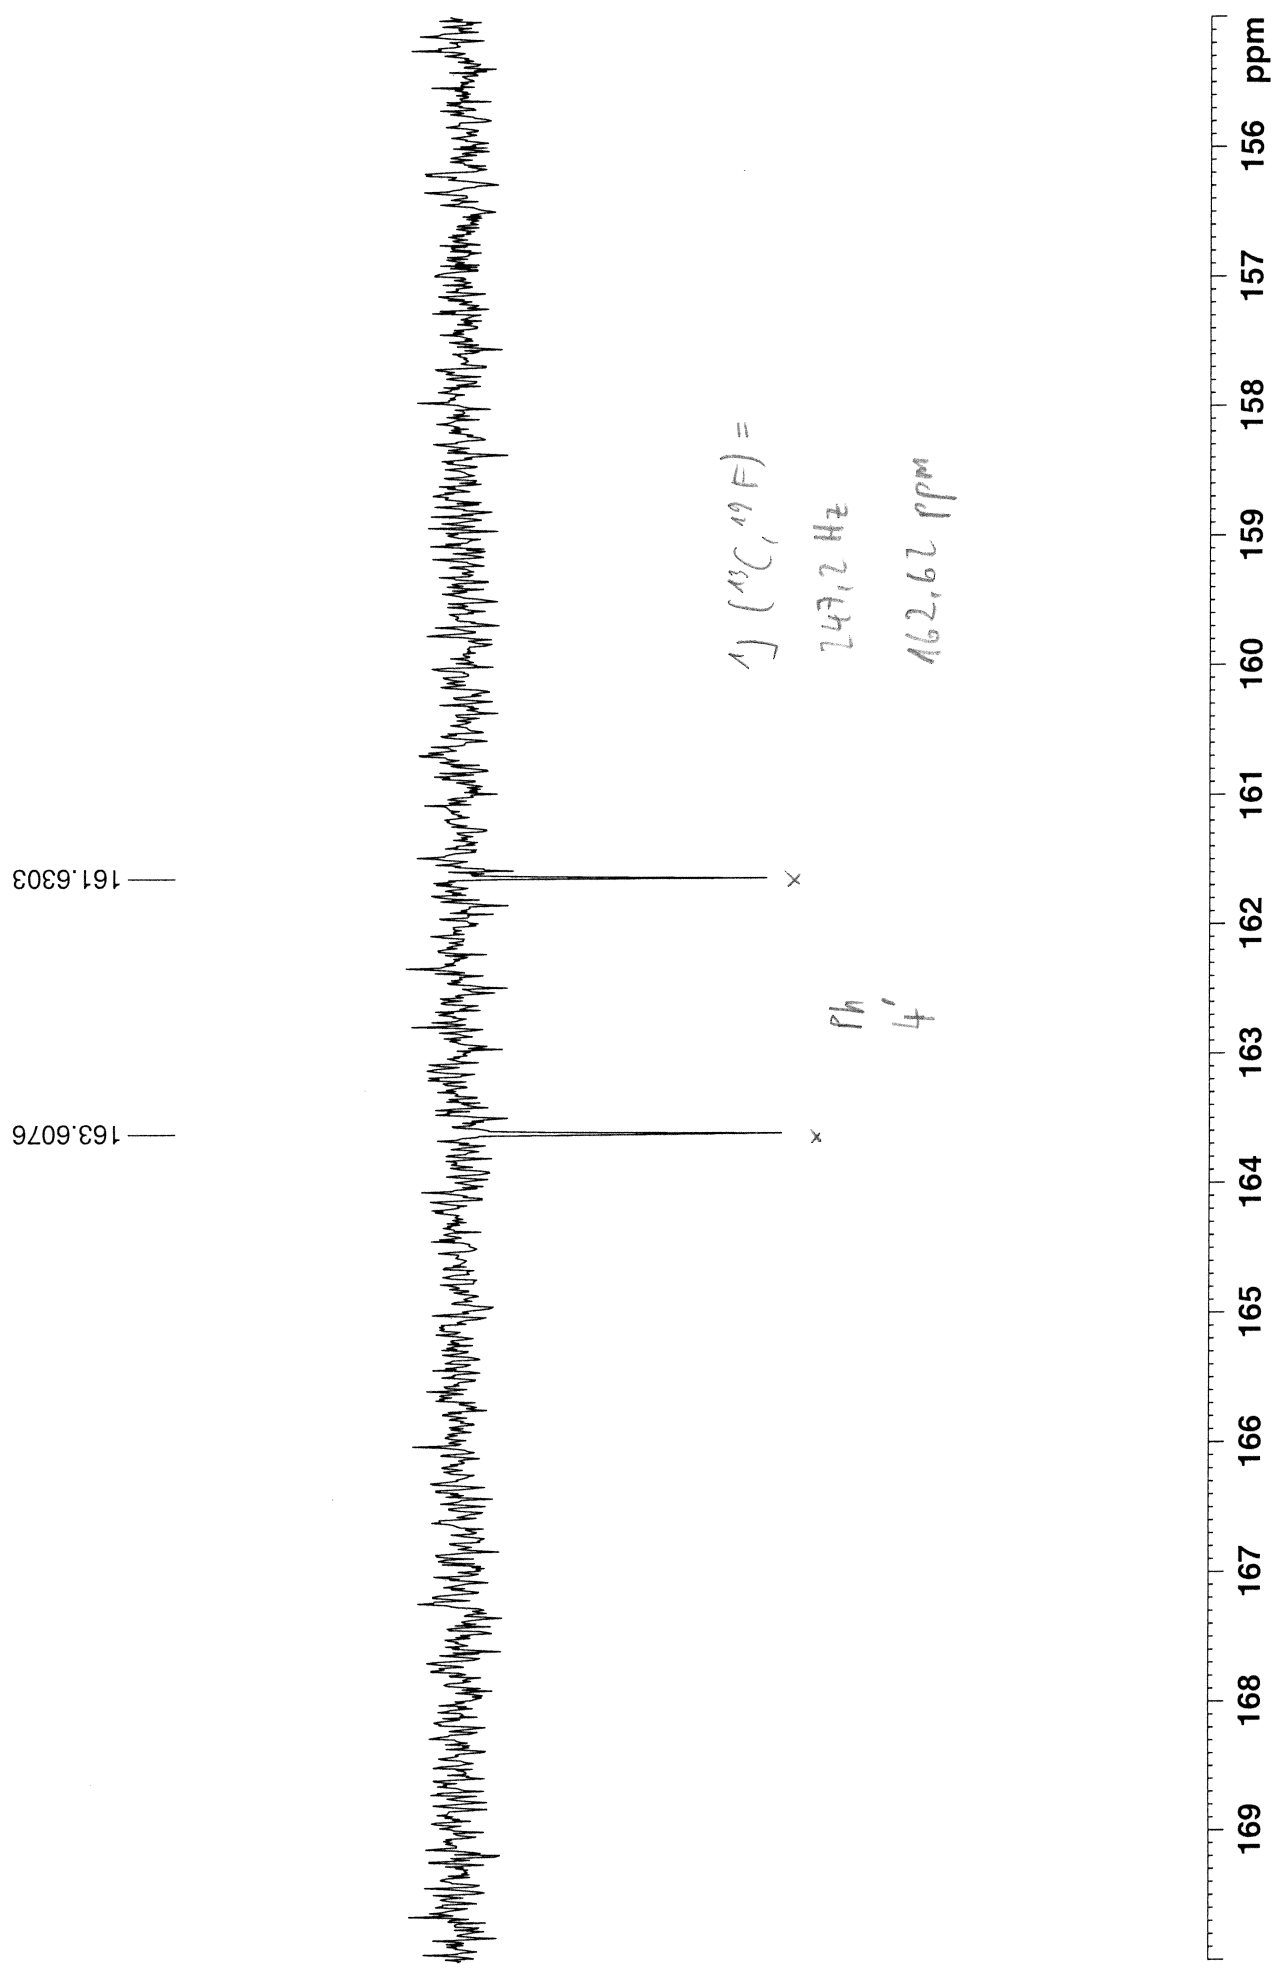

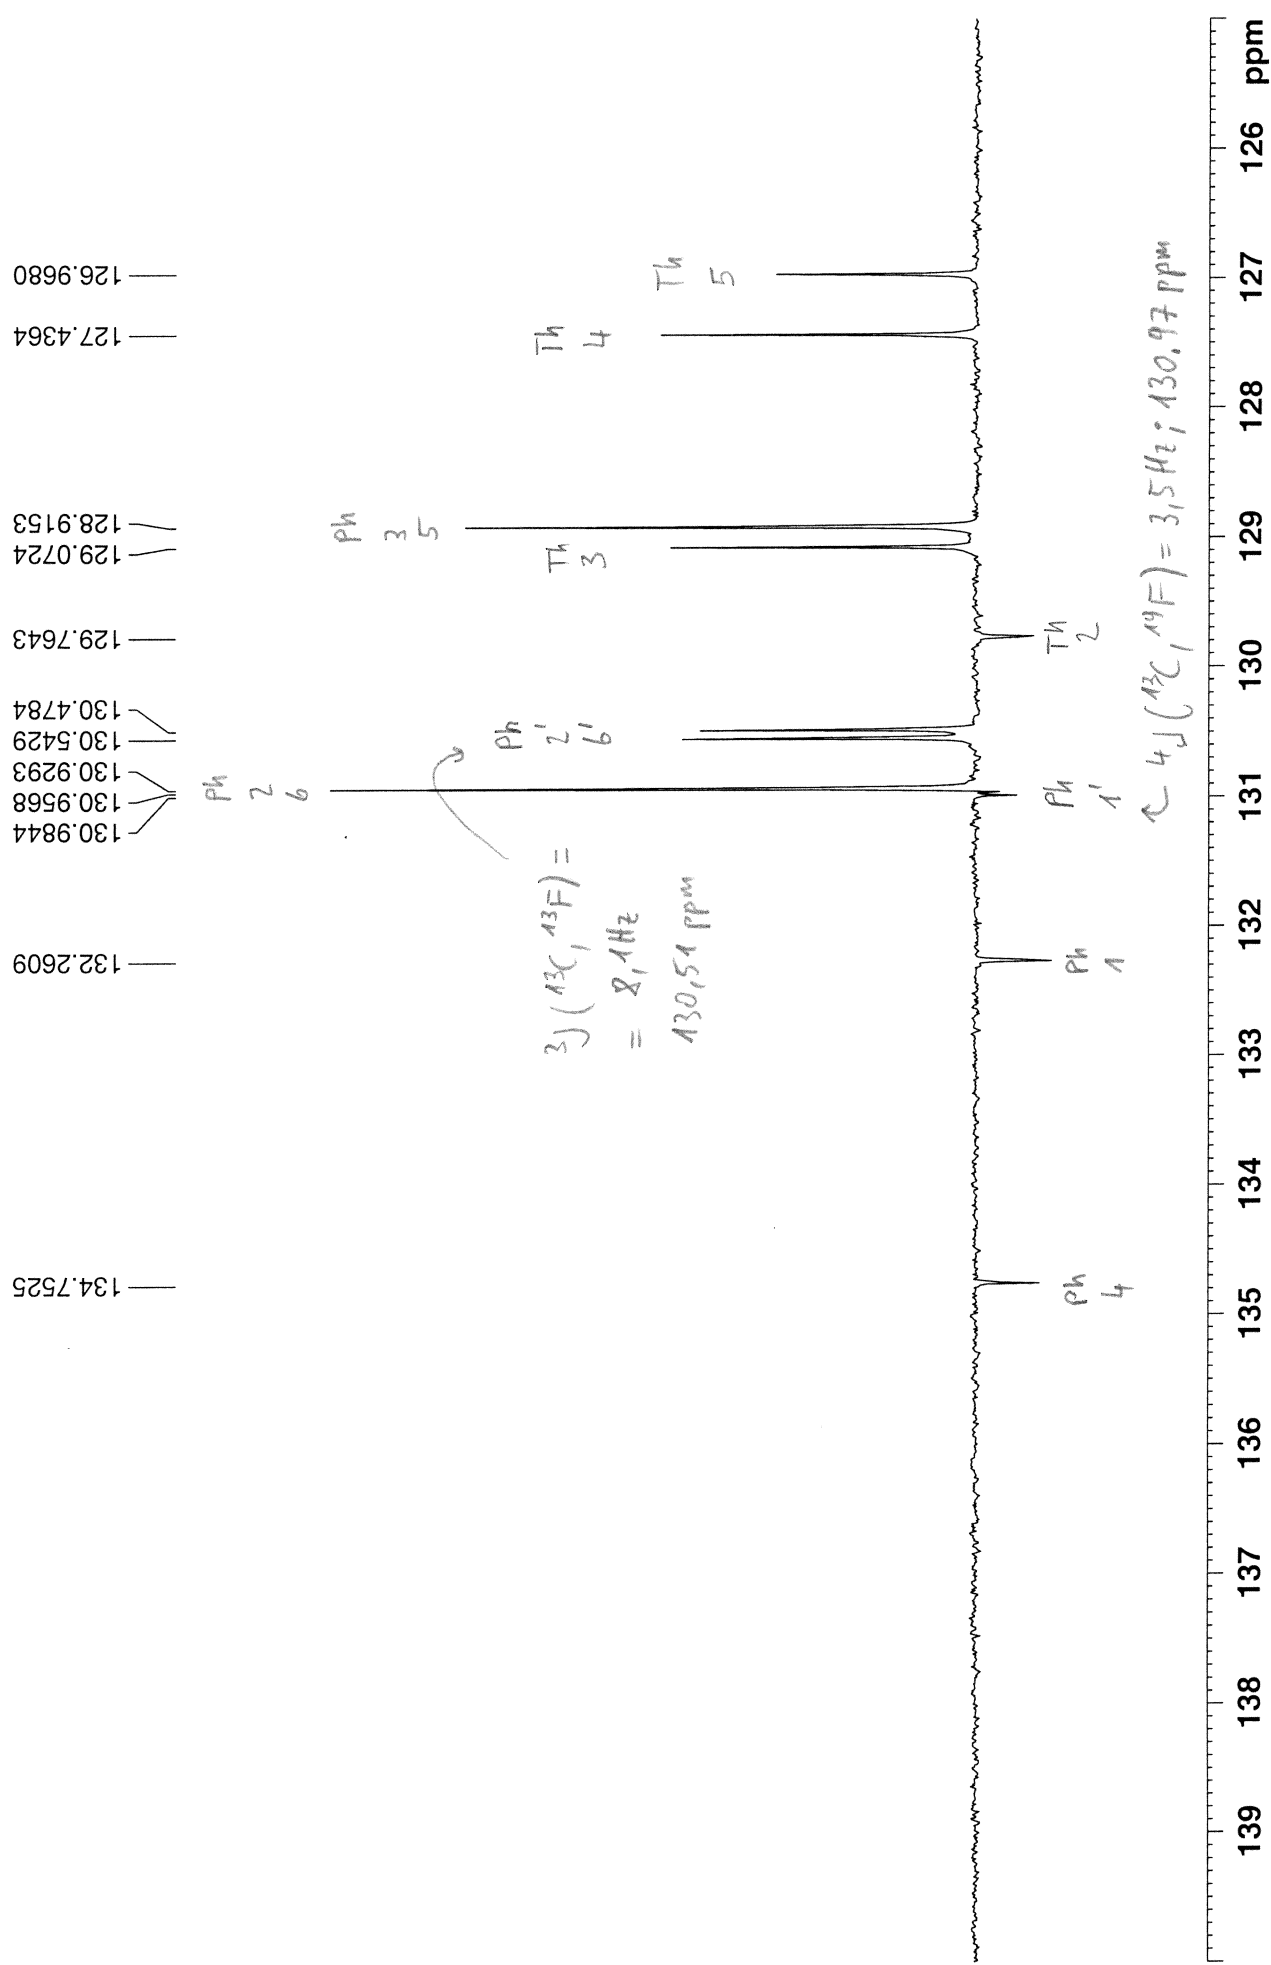

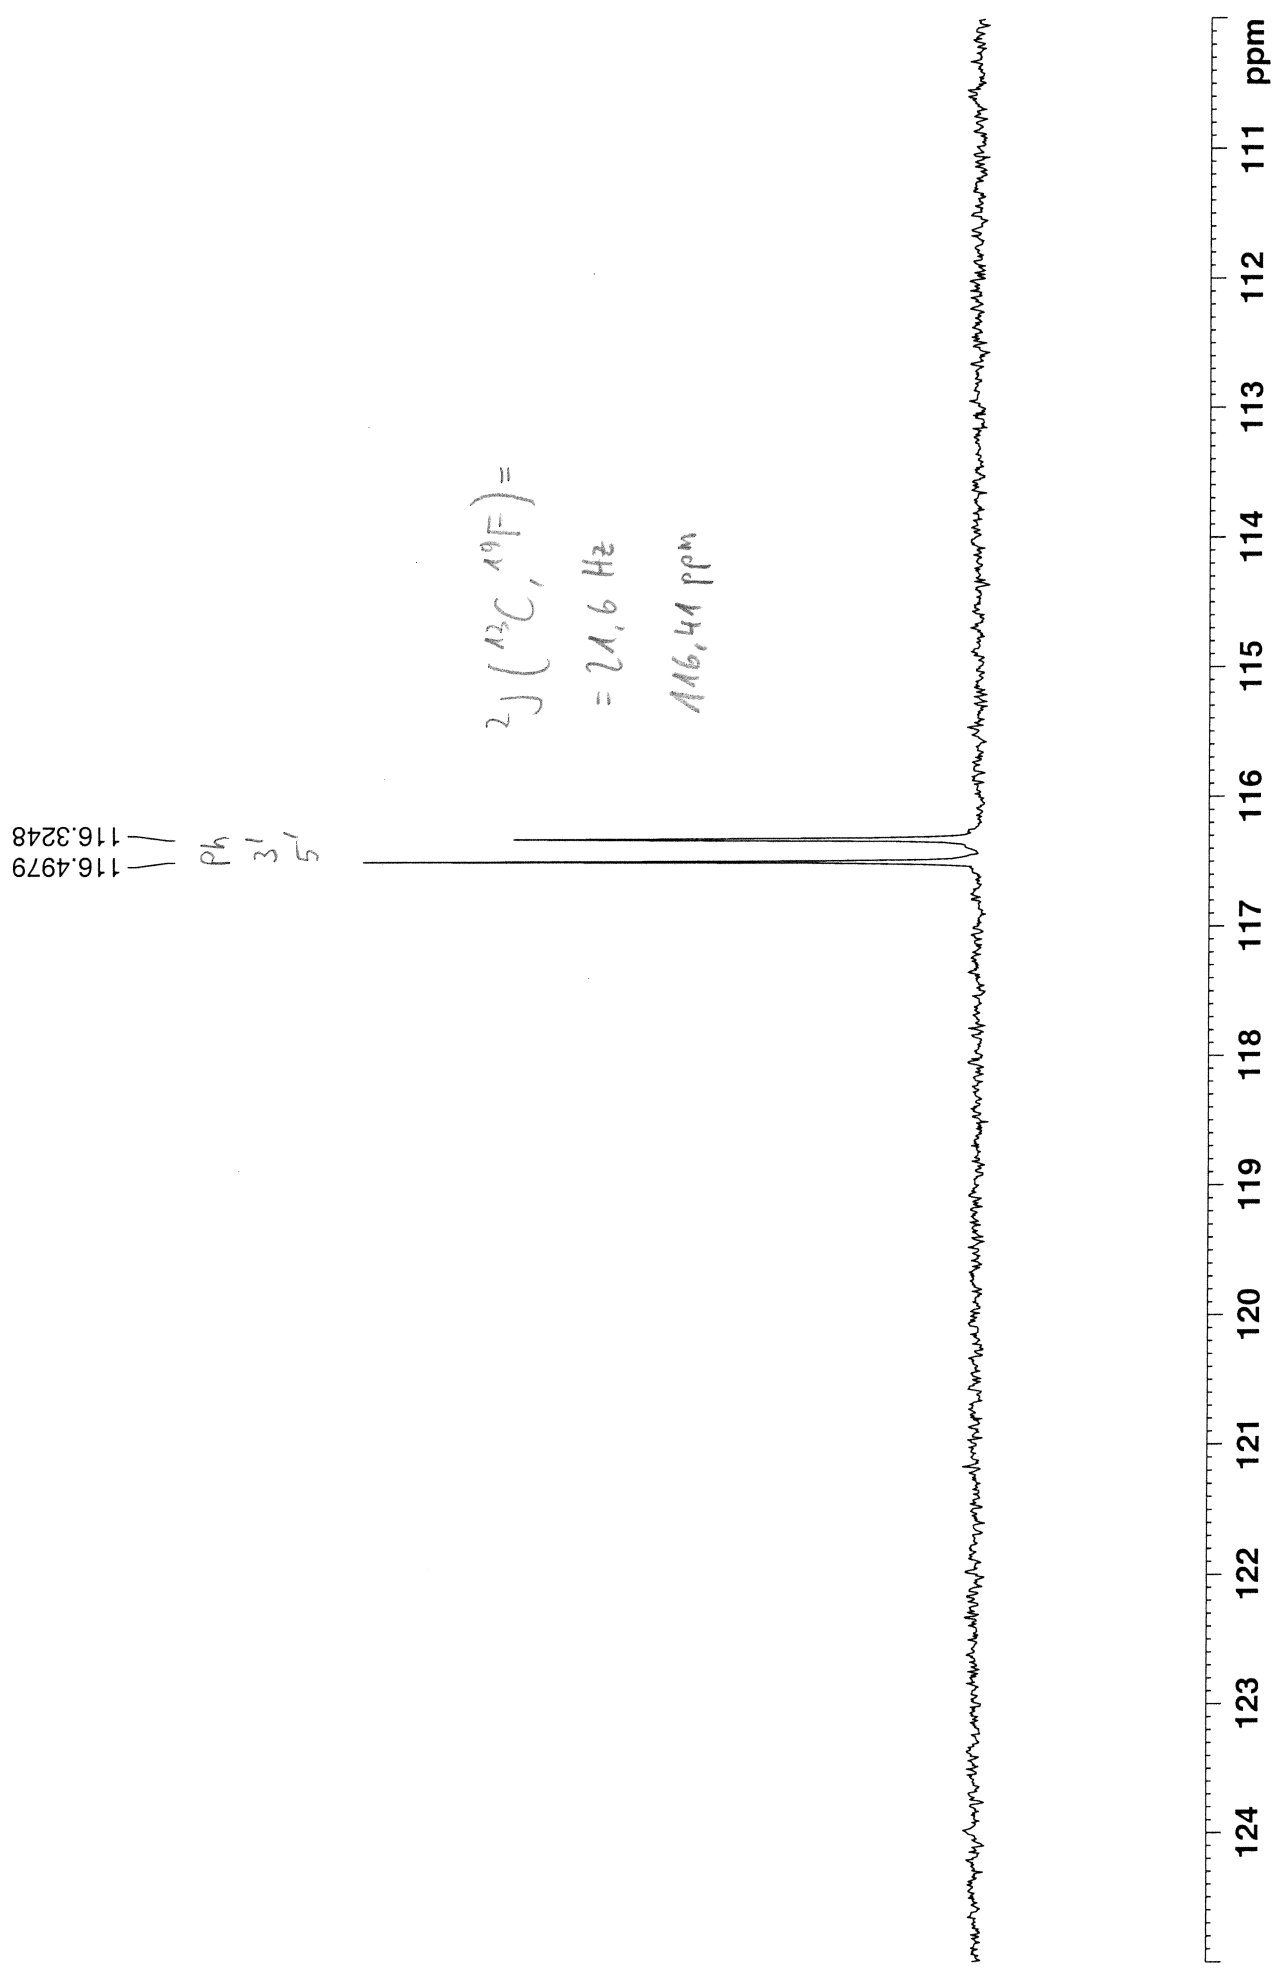



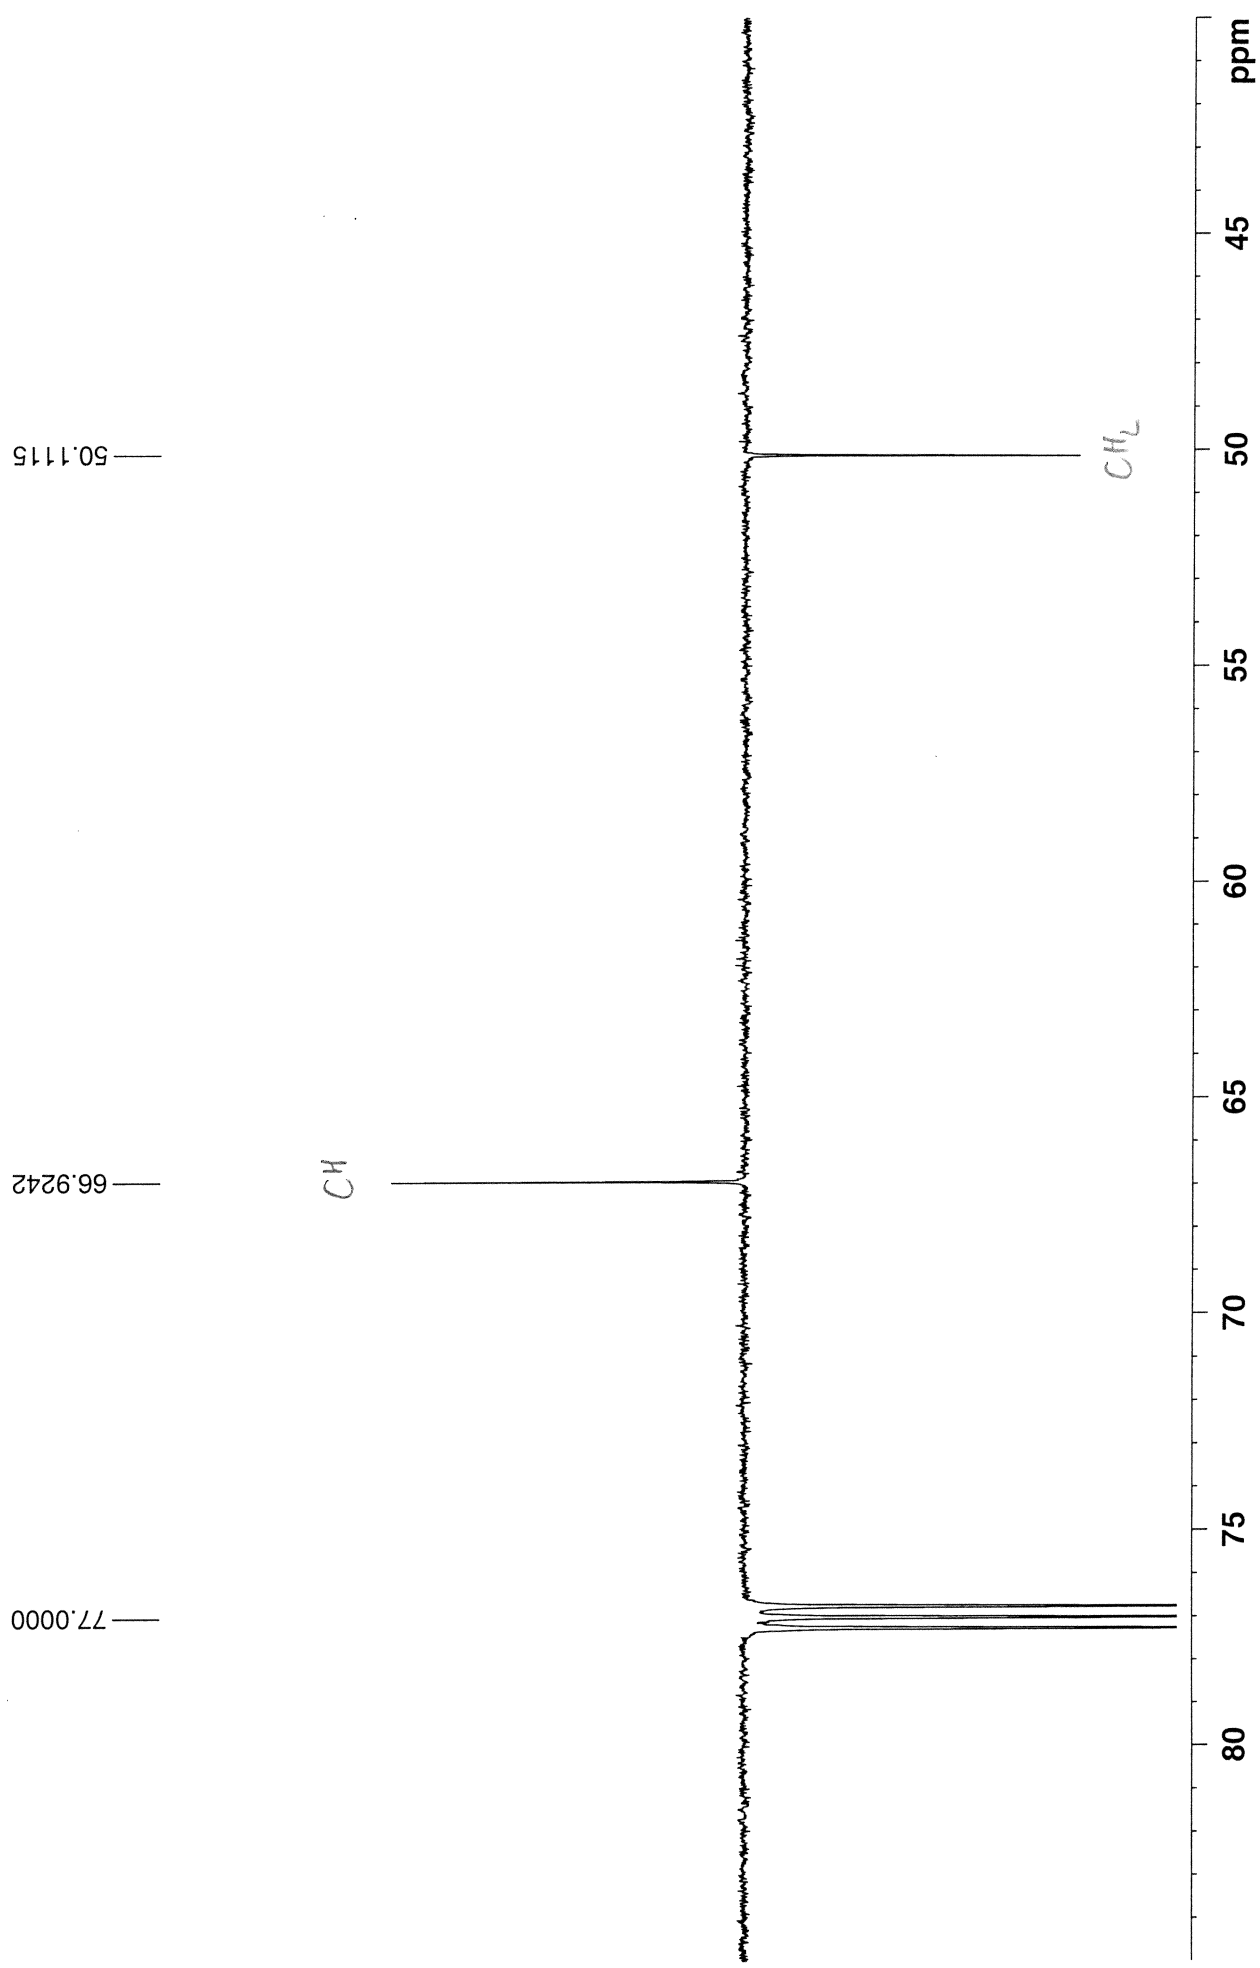

**Figure S83c.** NMR spectra of compound **7u**.

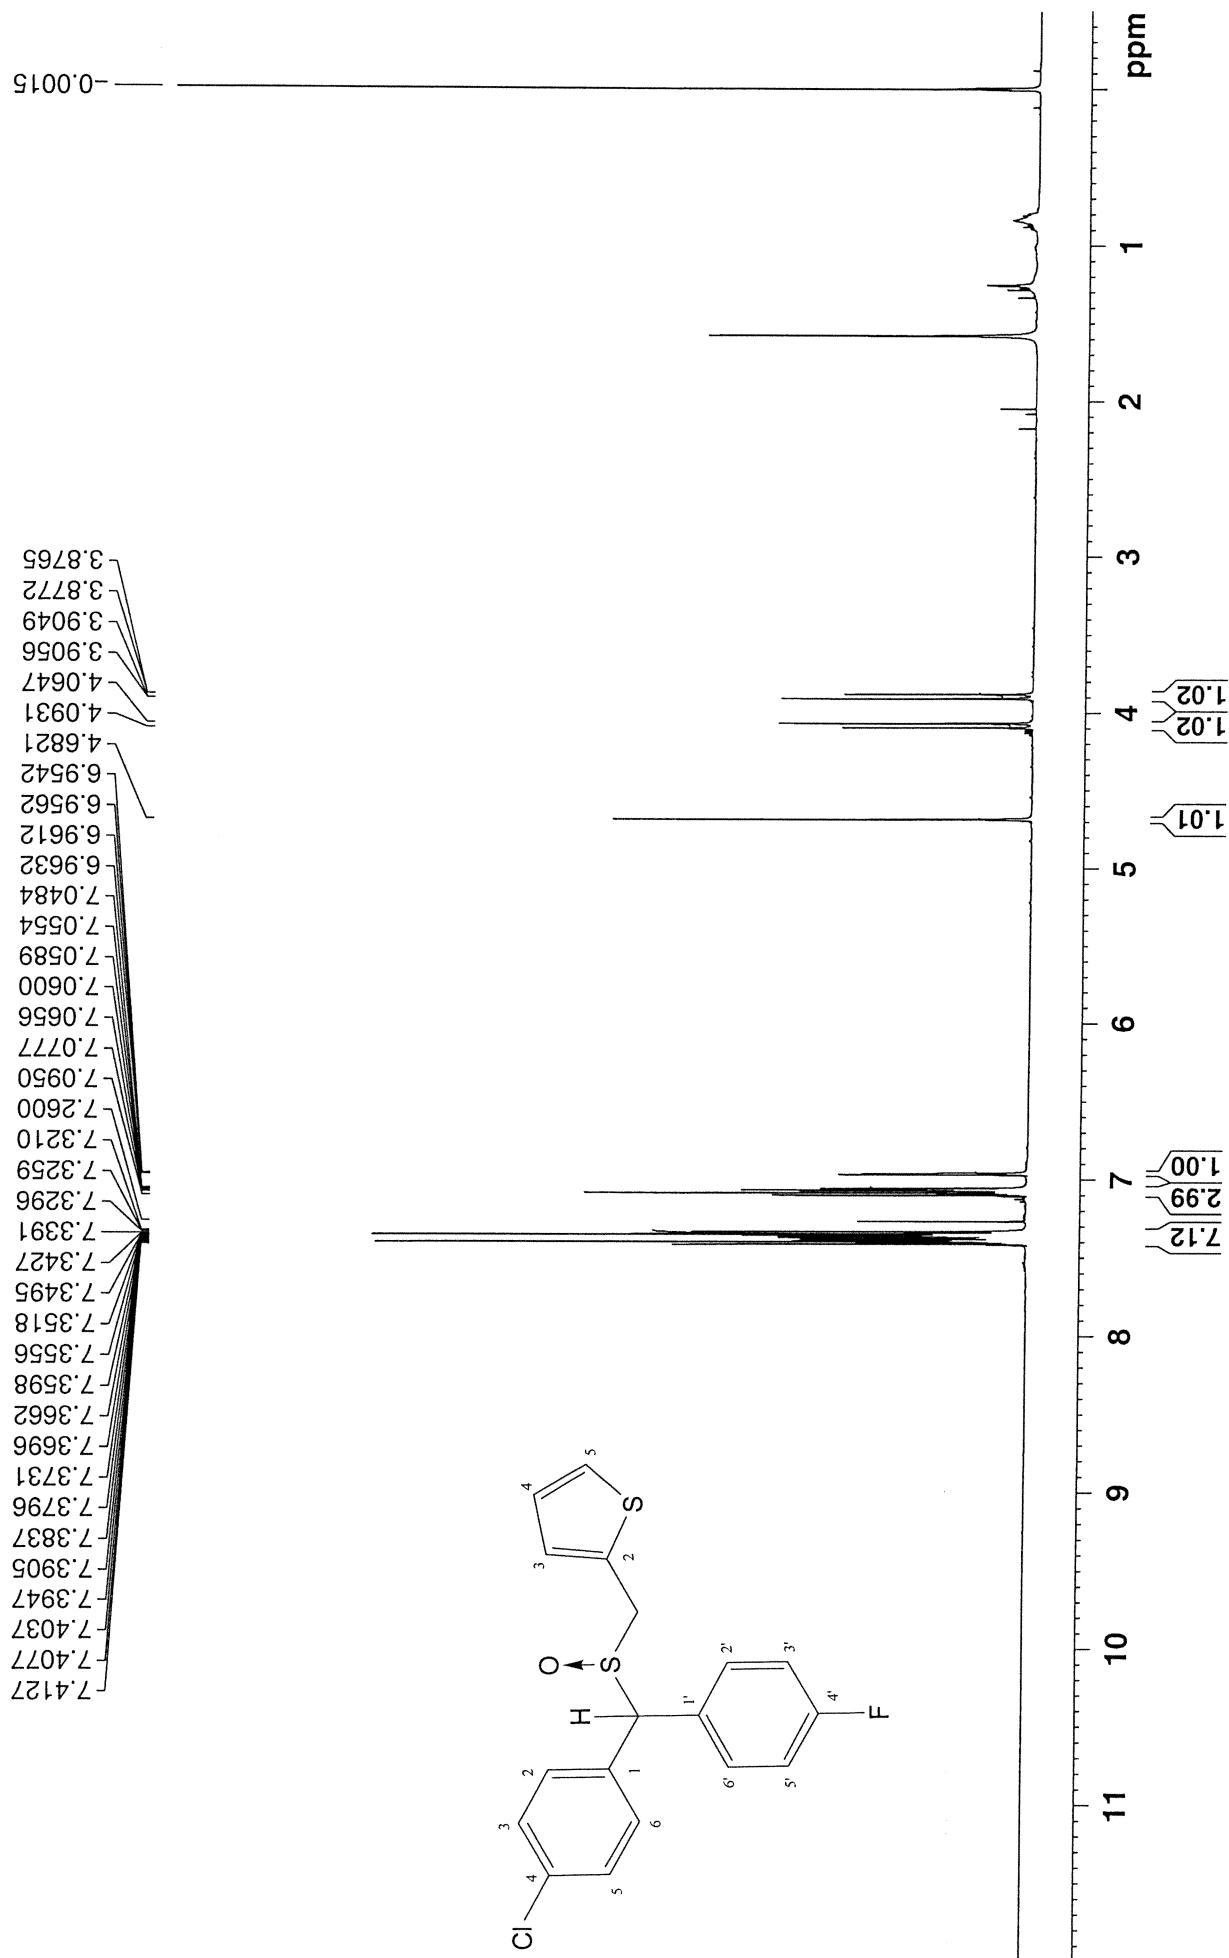

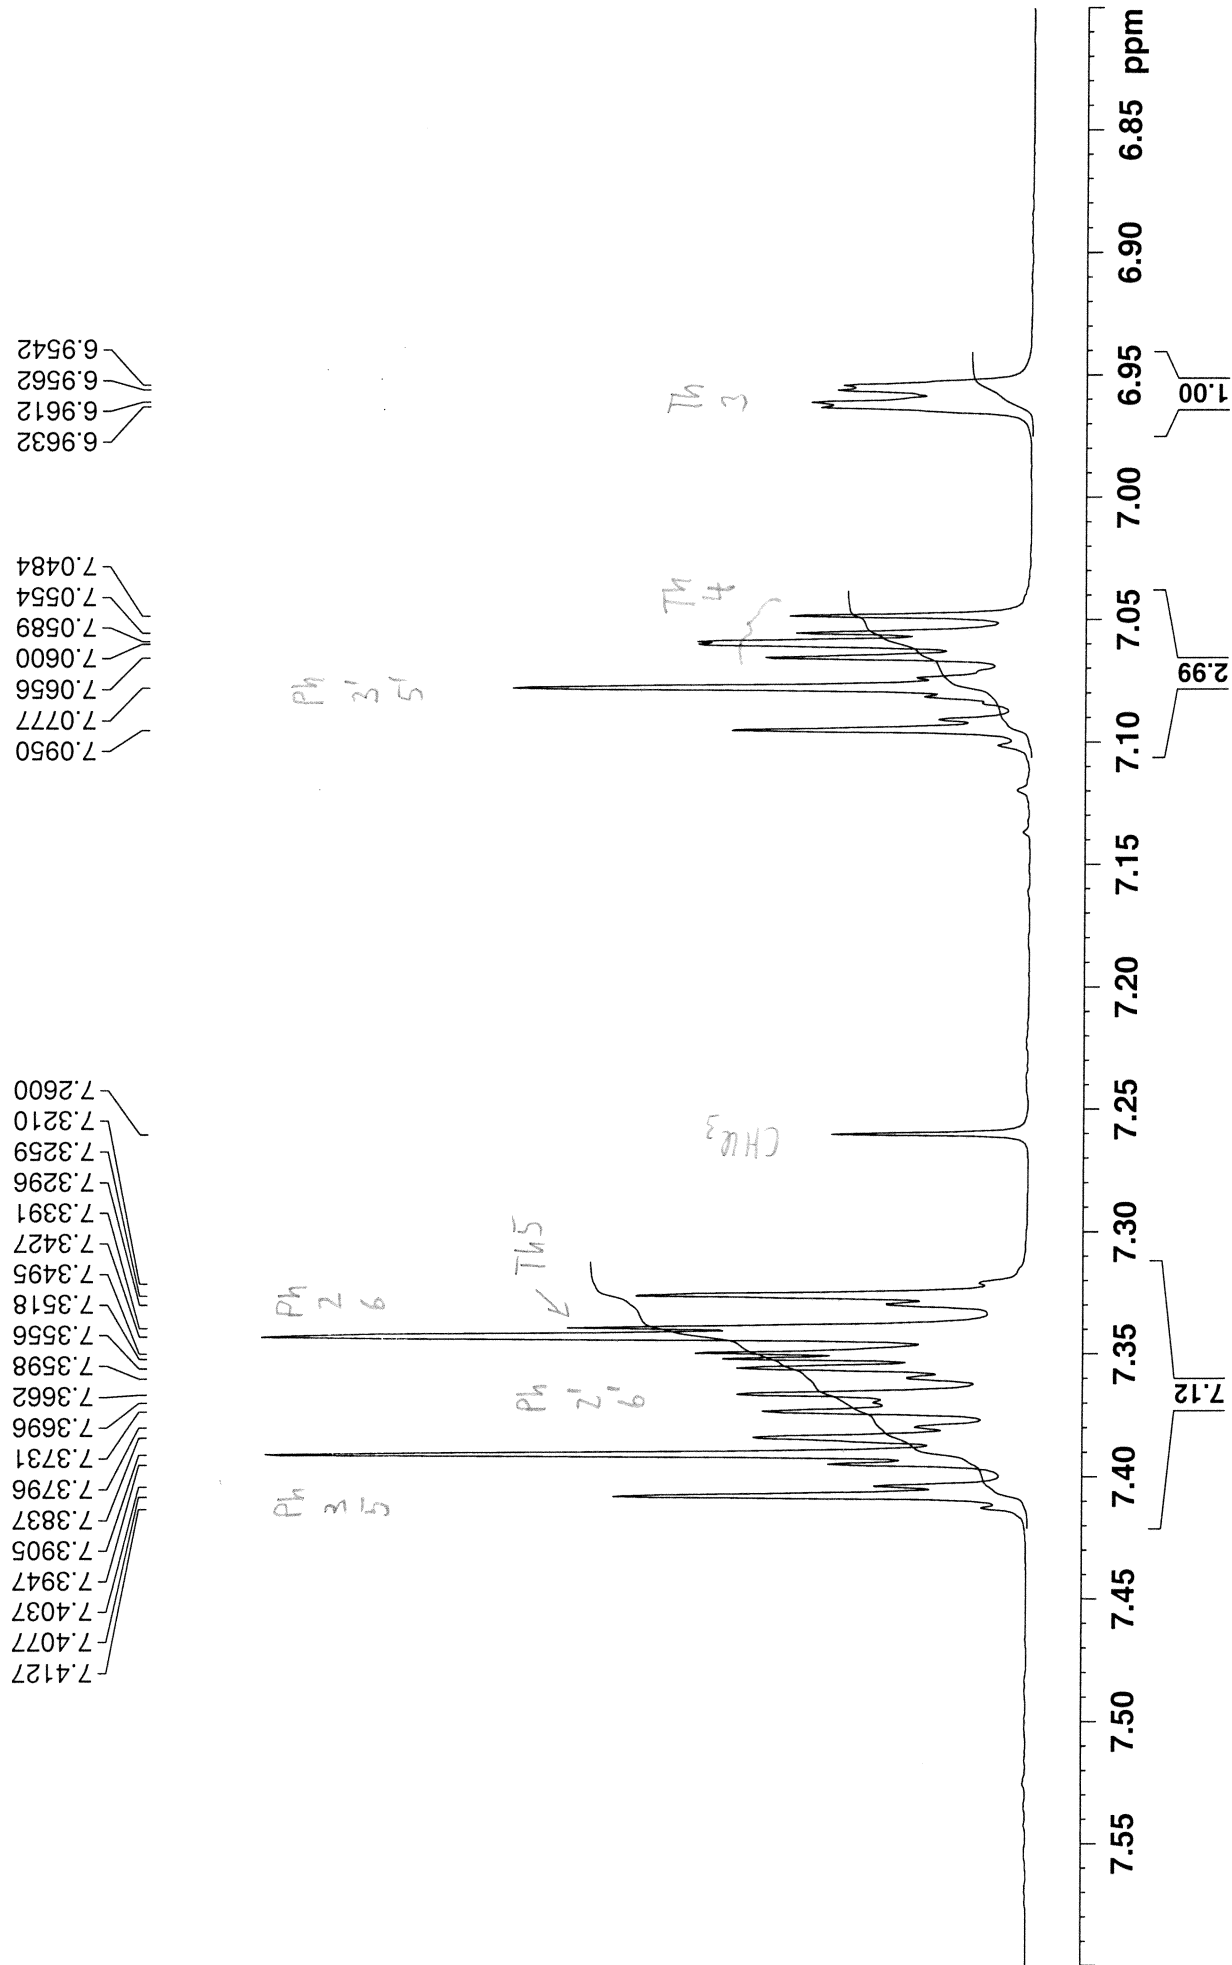

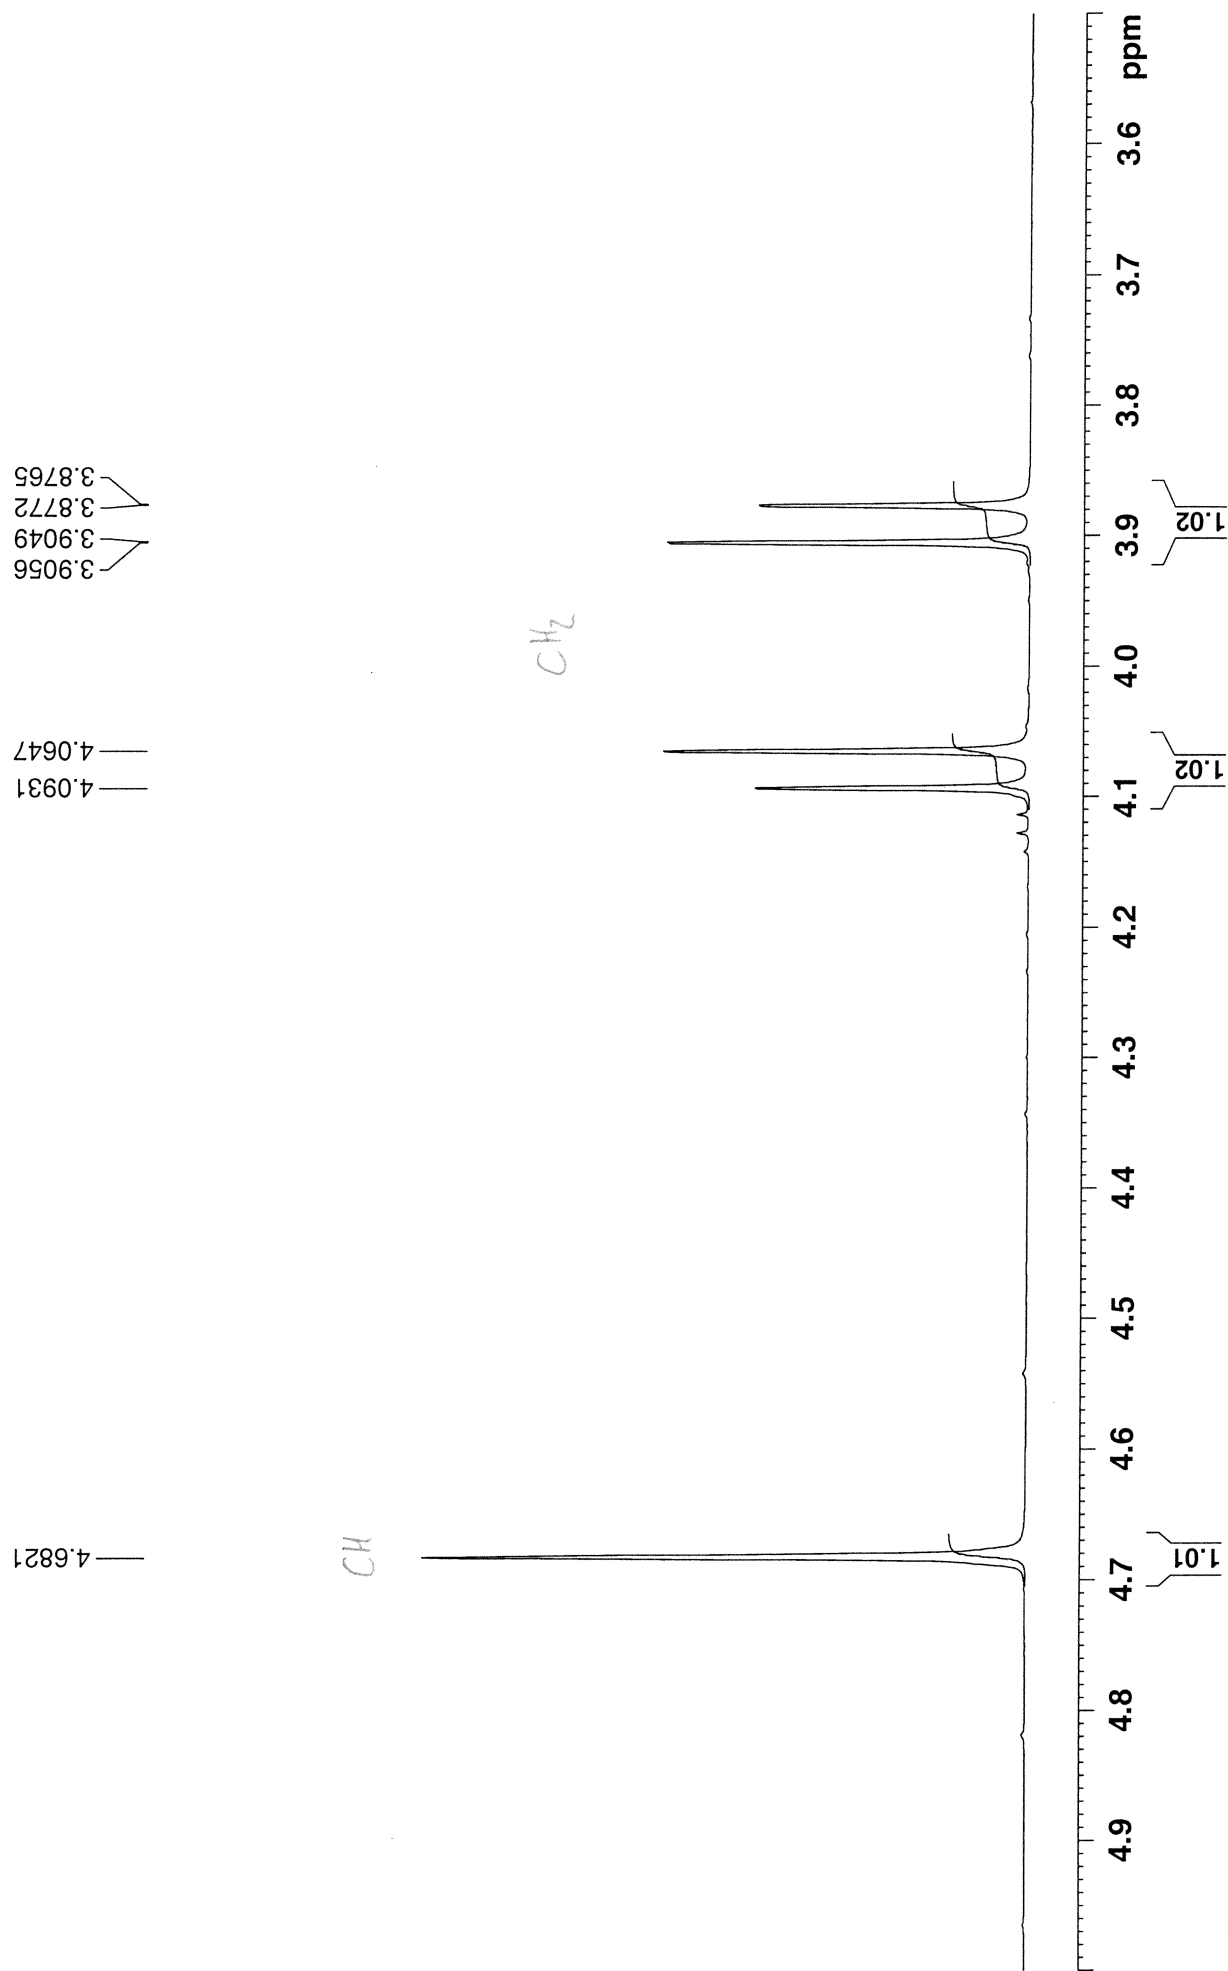

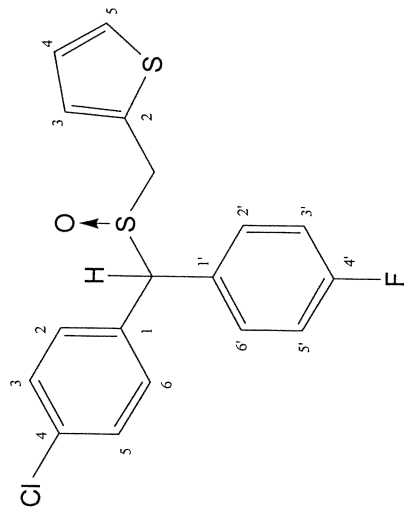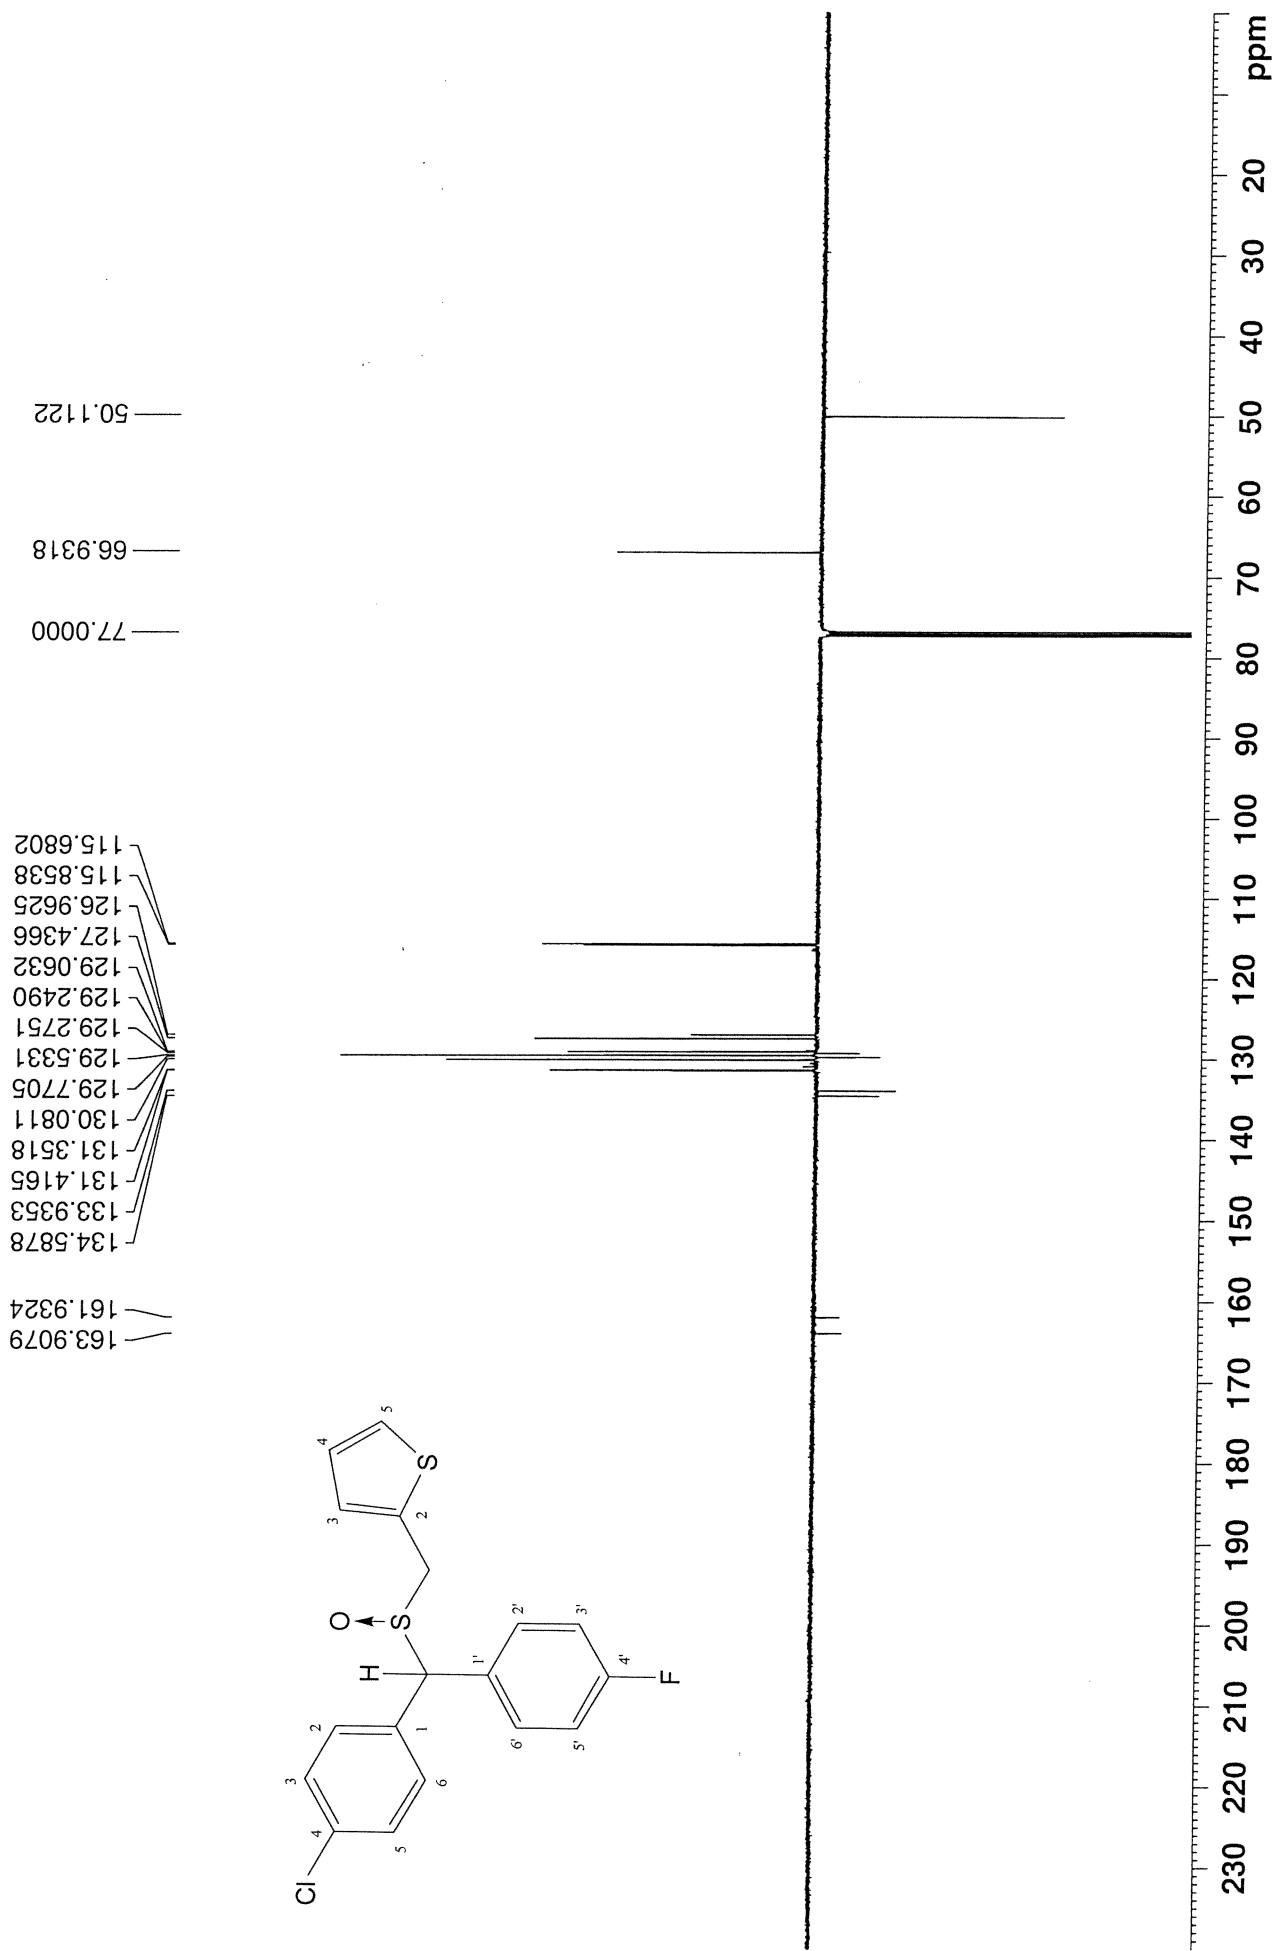

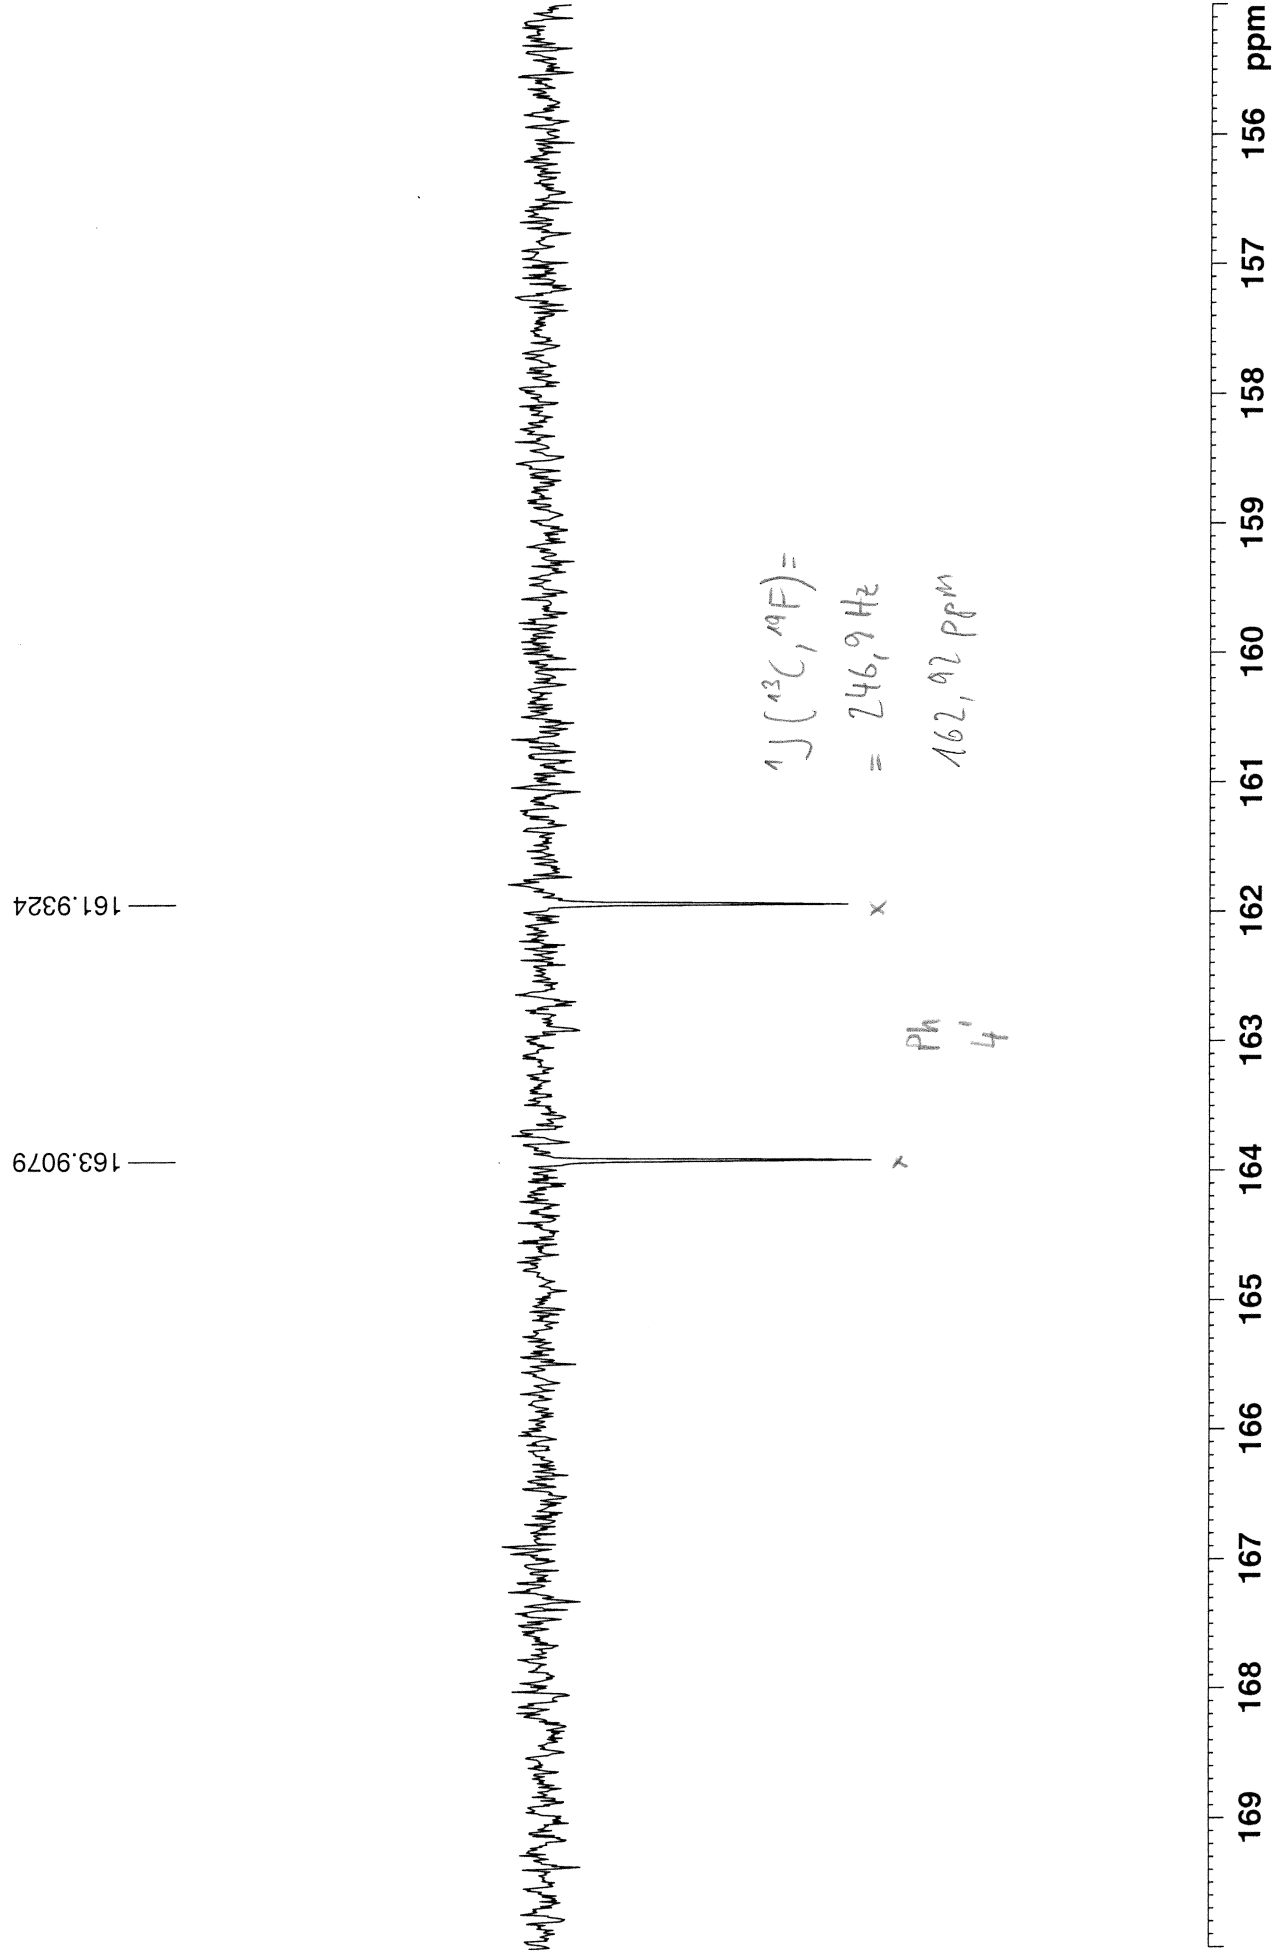

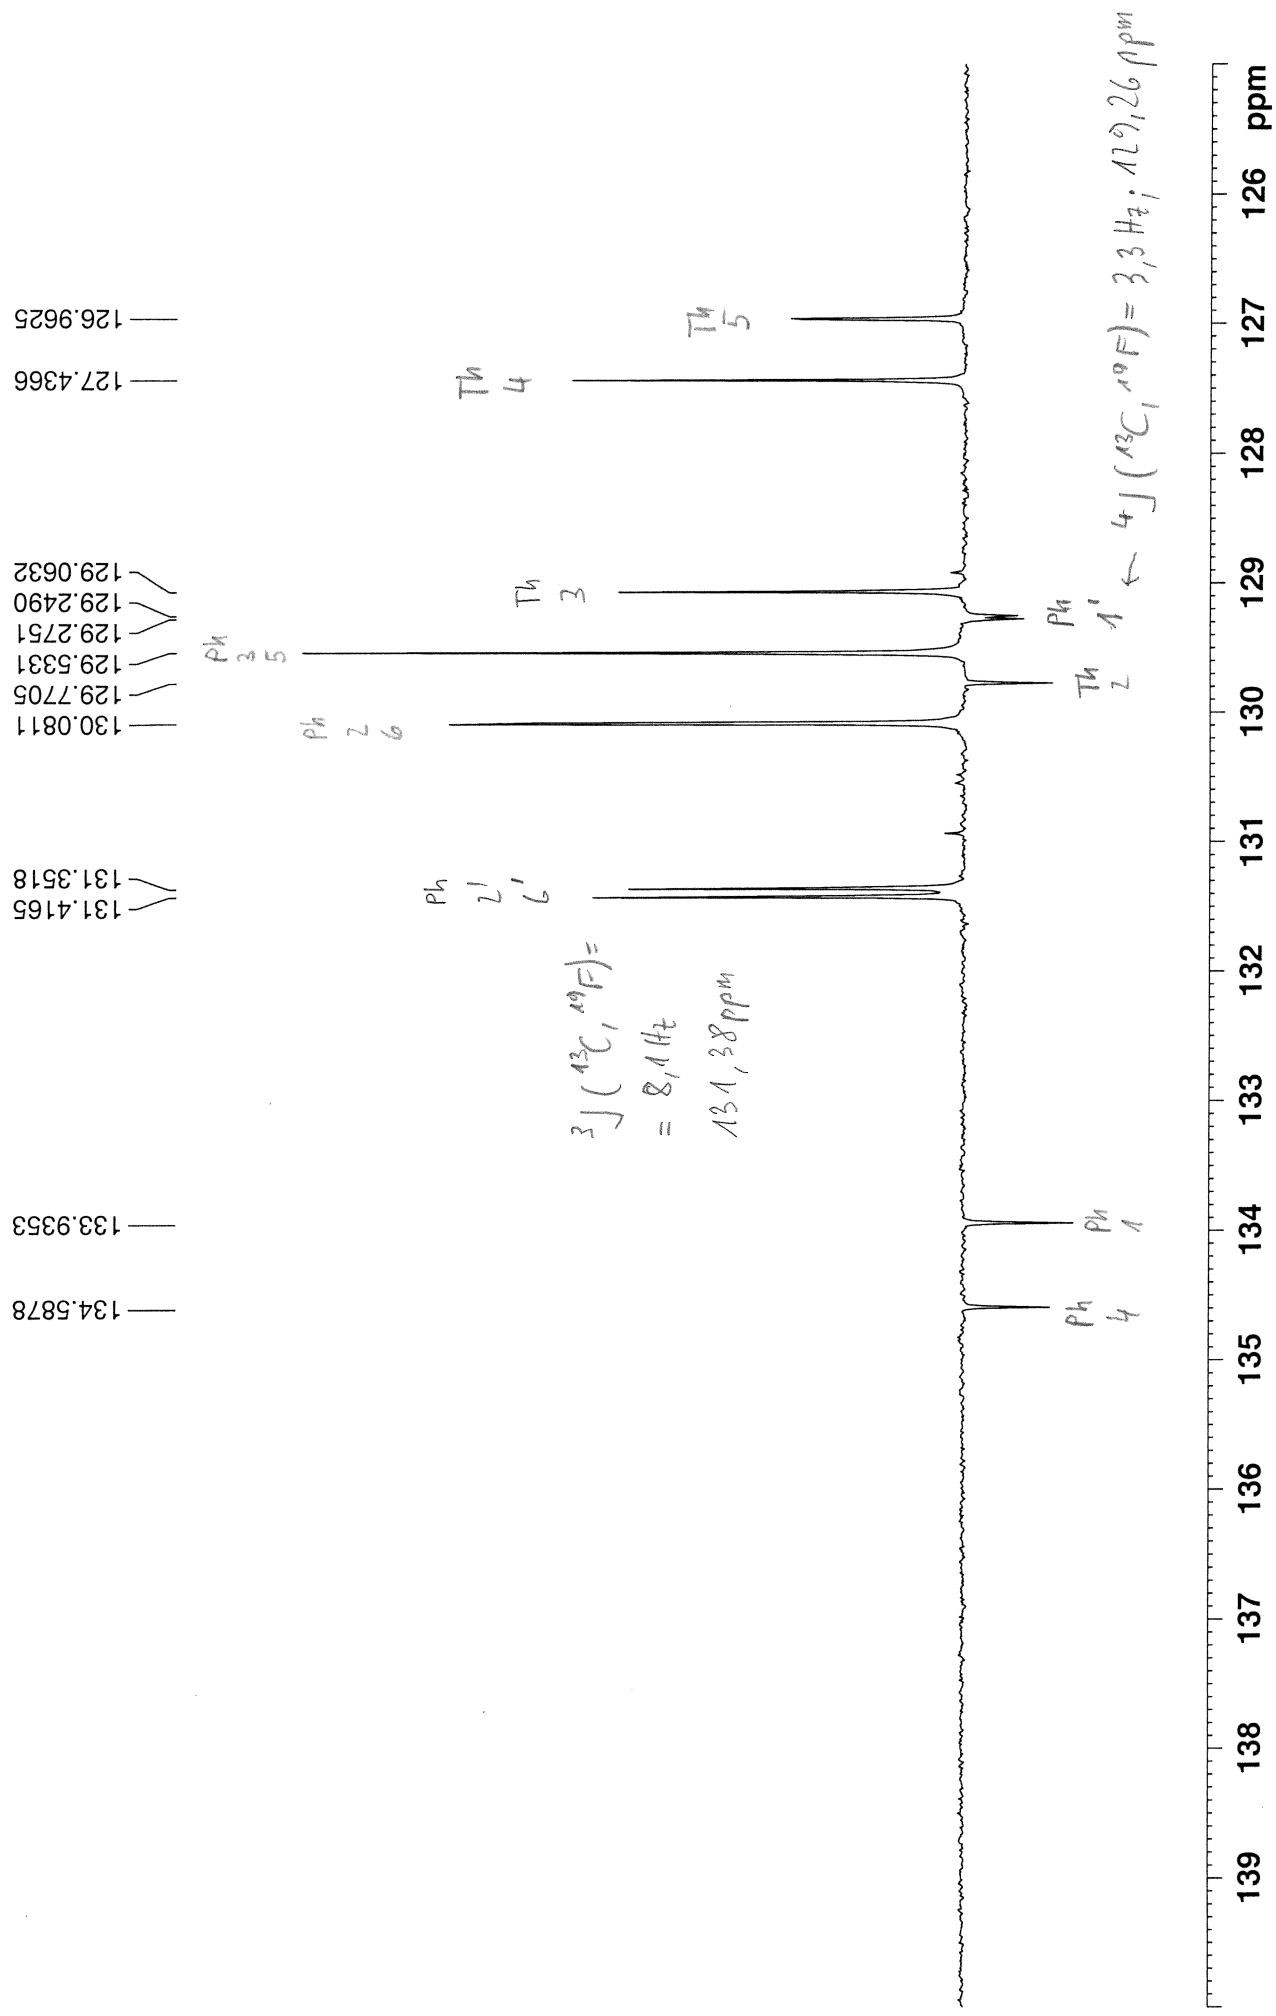

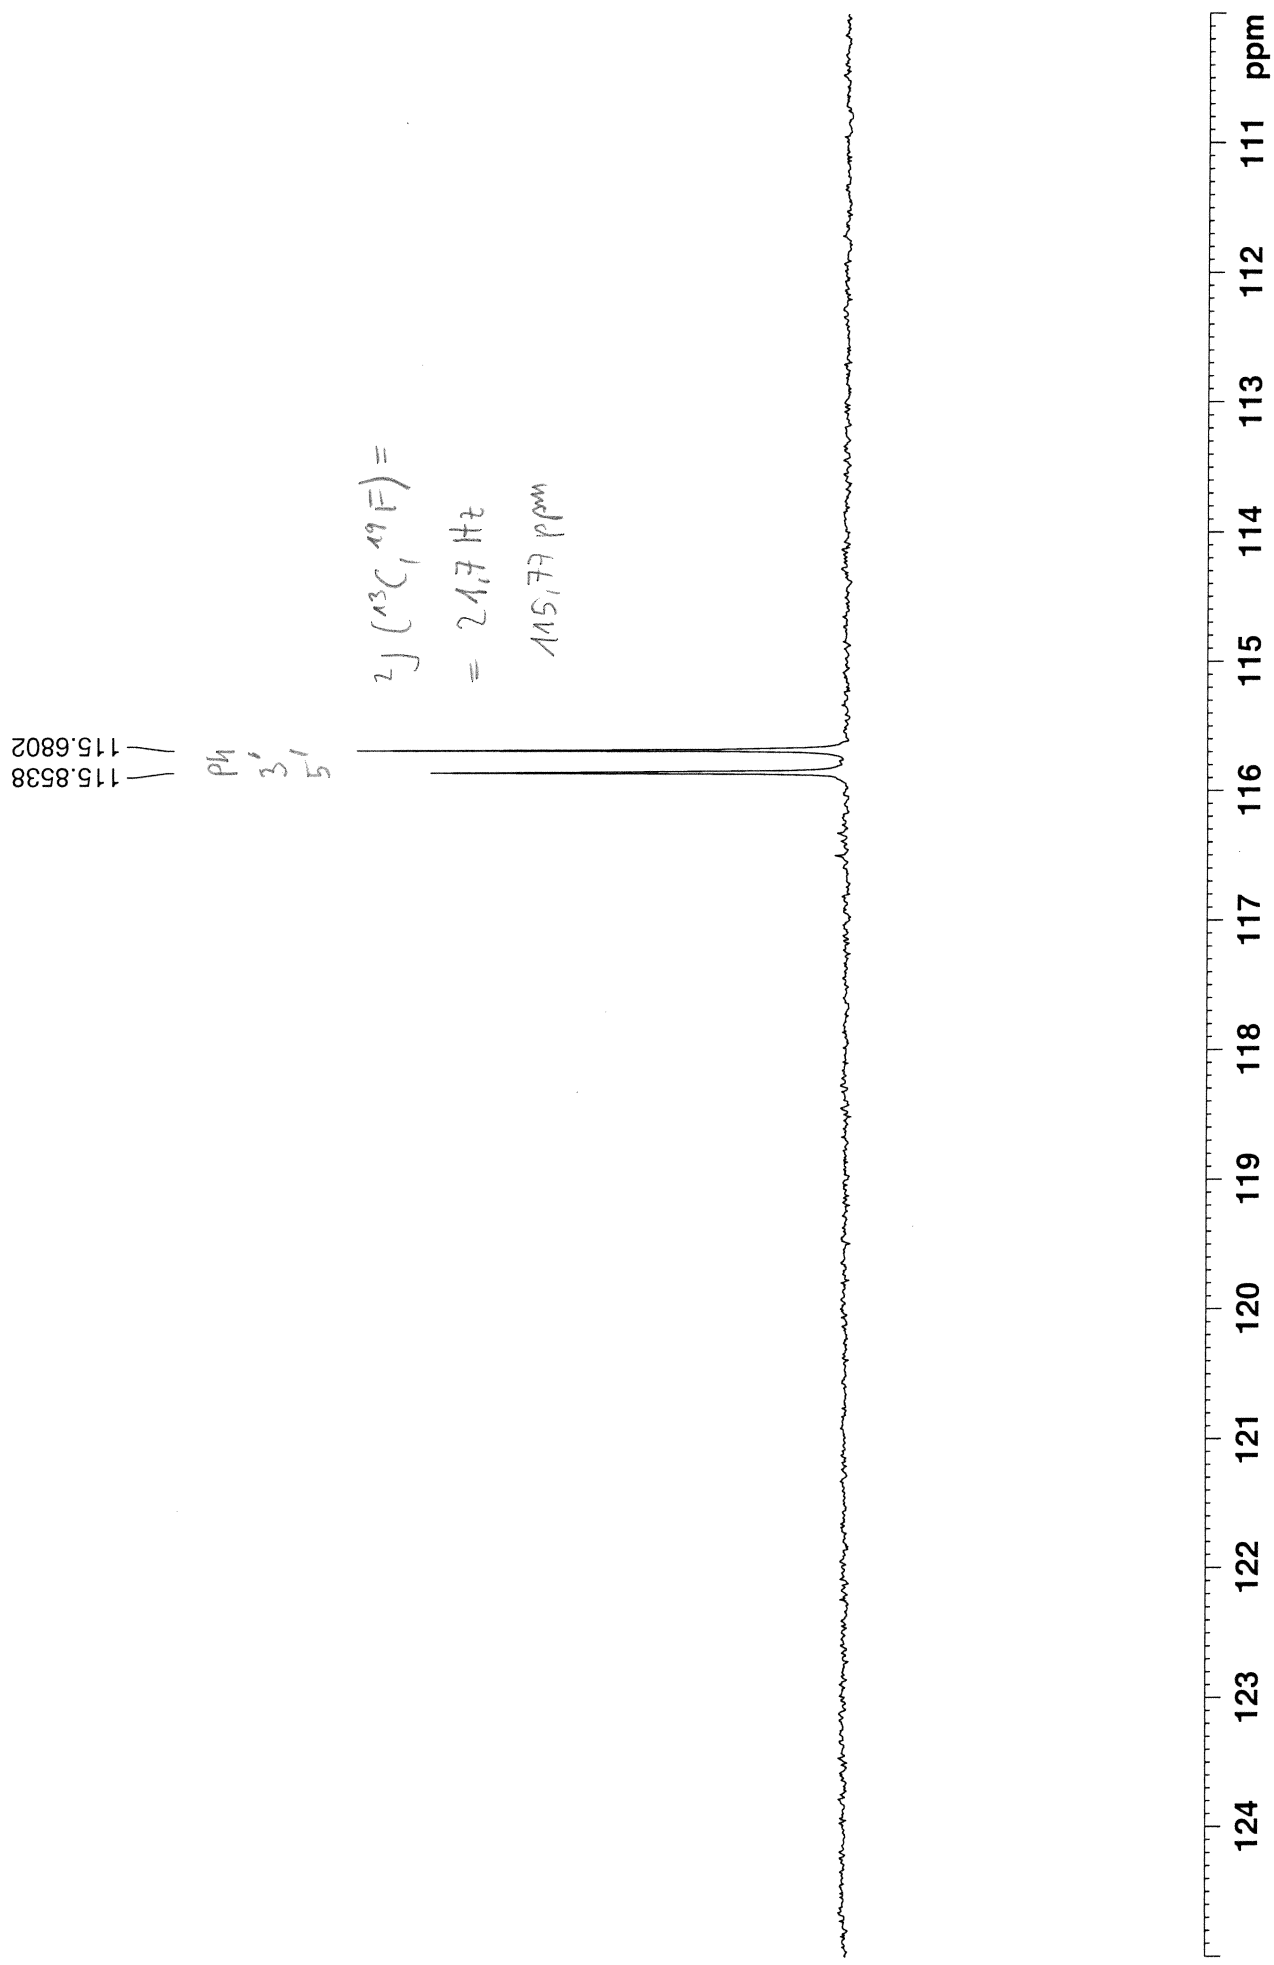



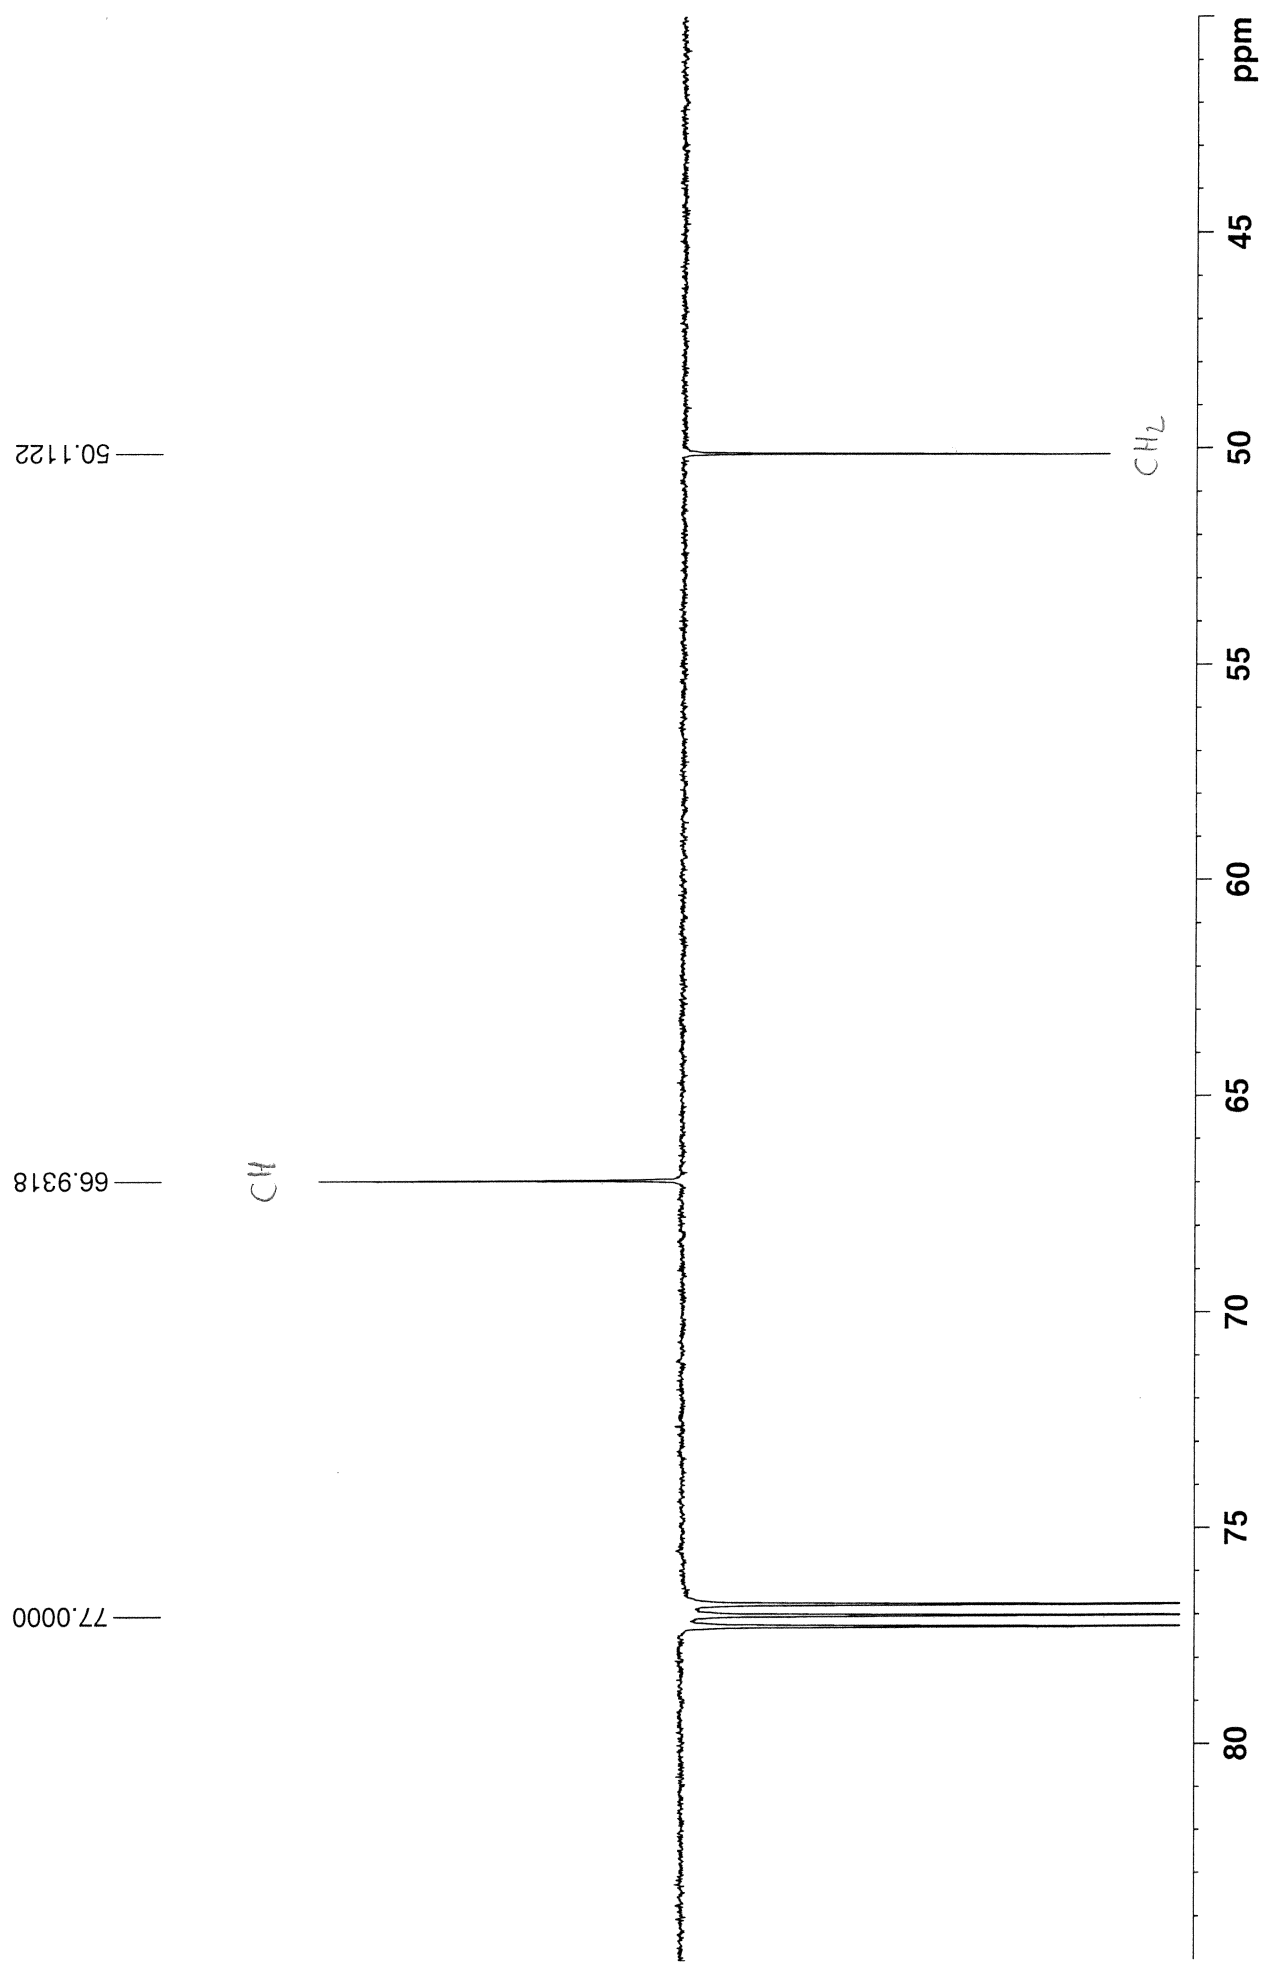

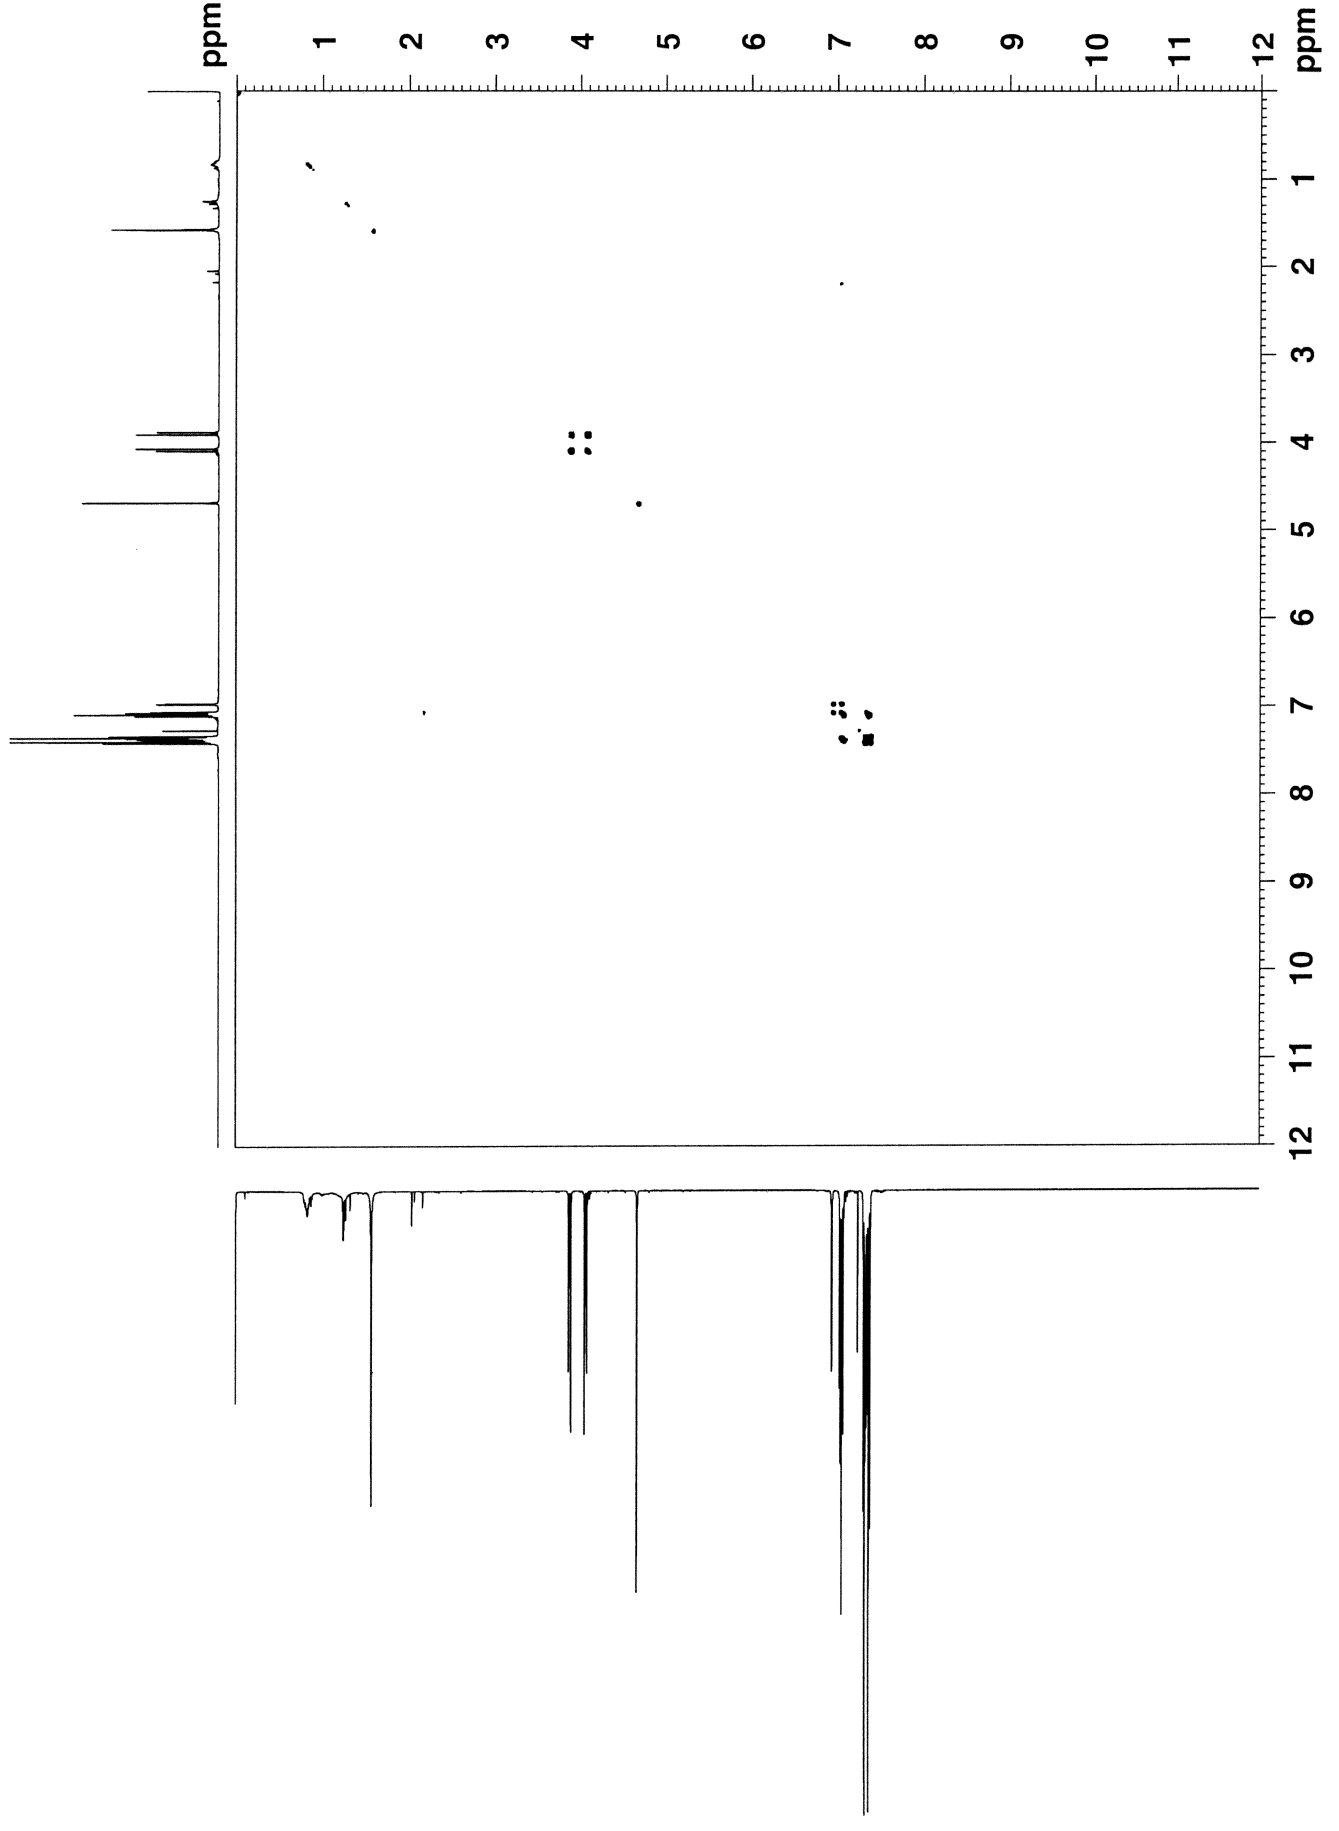

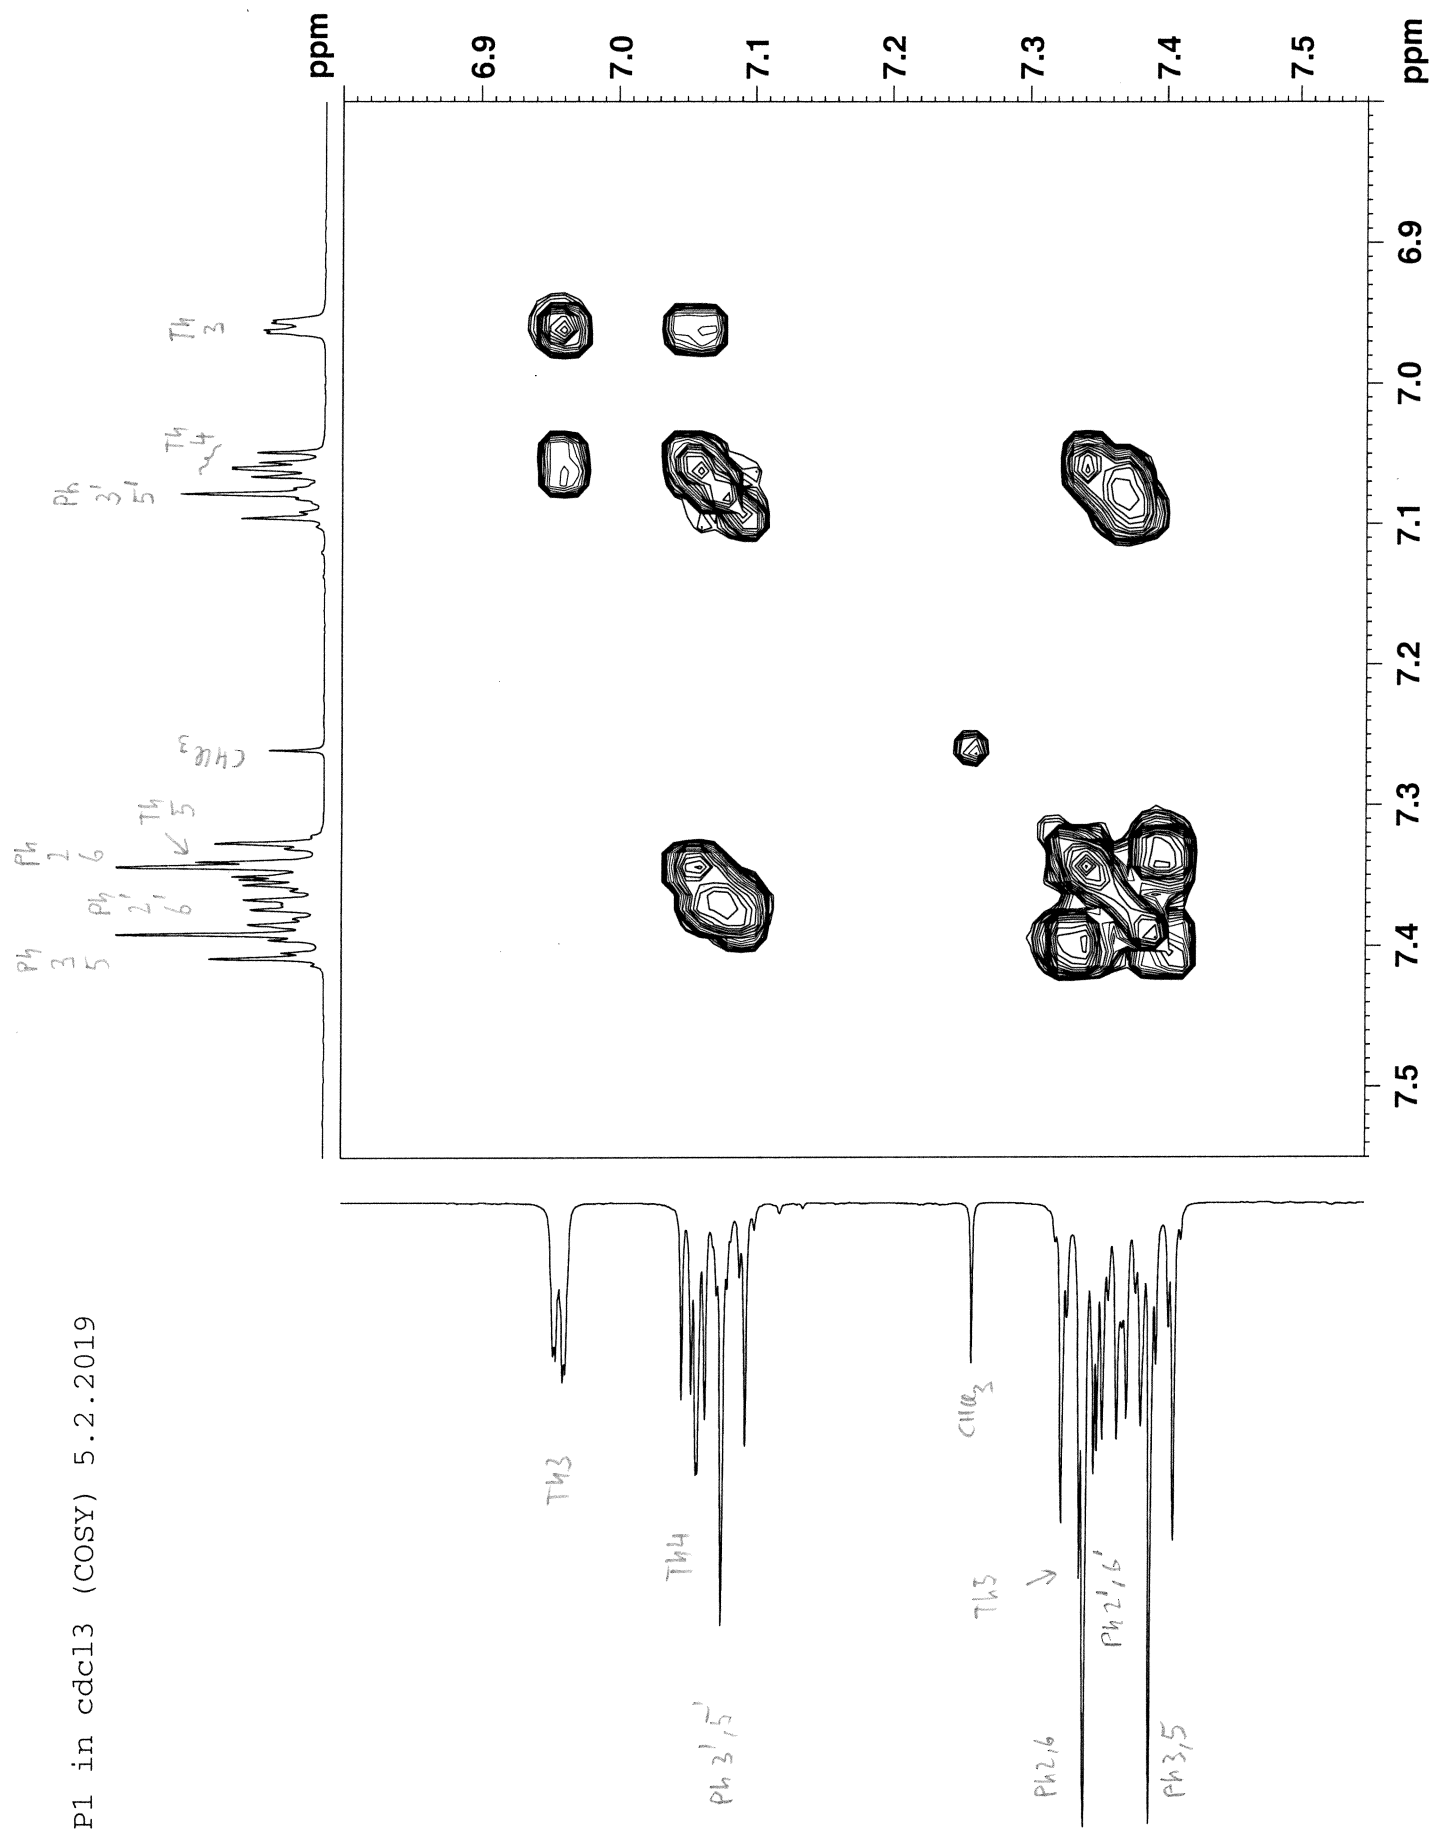

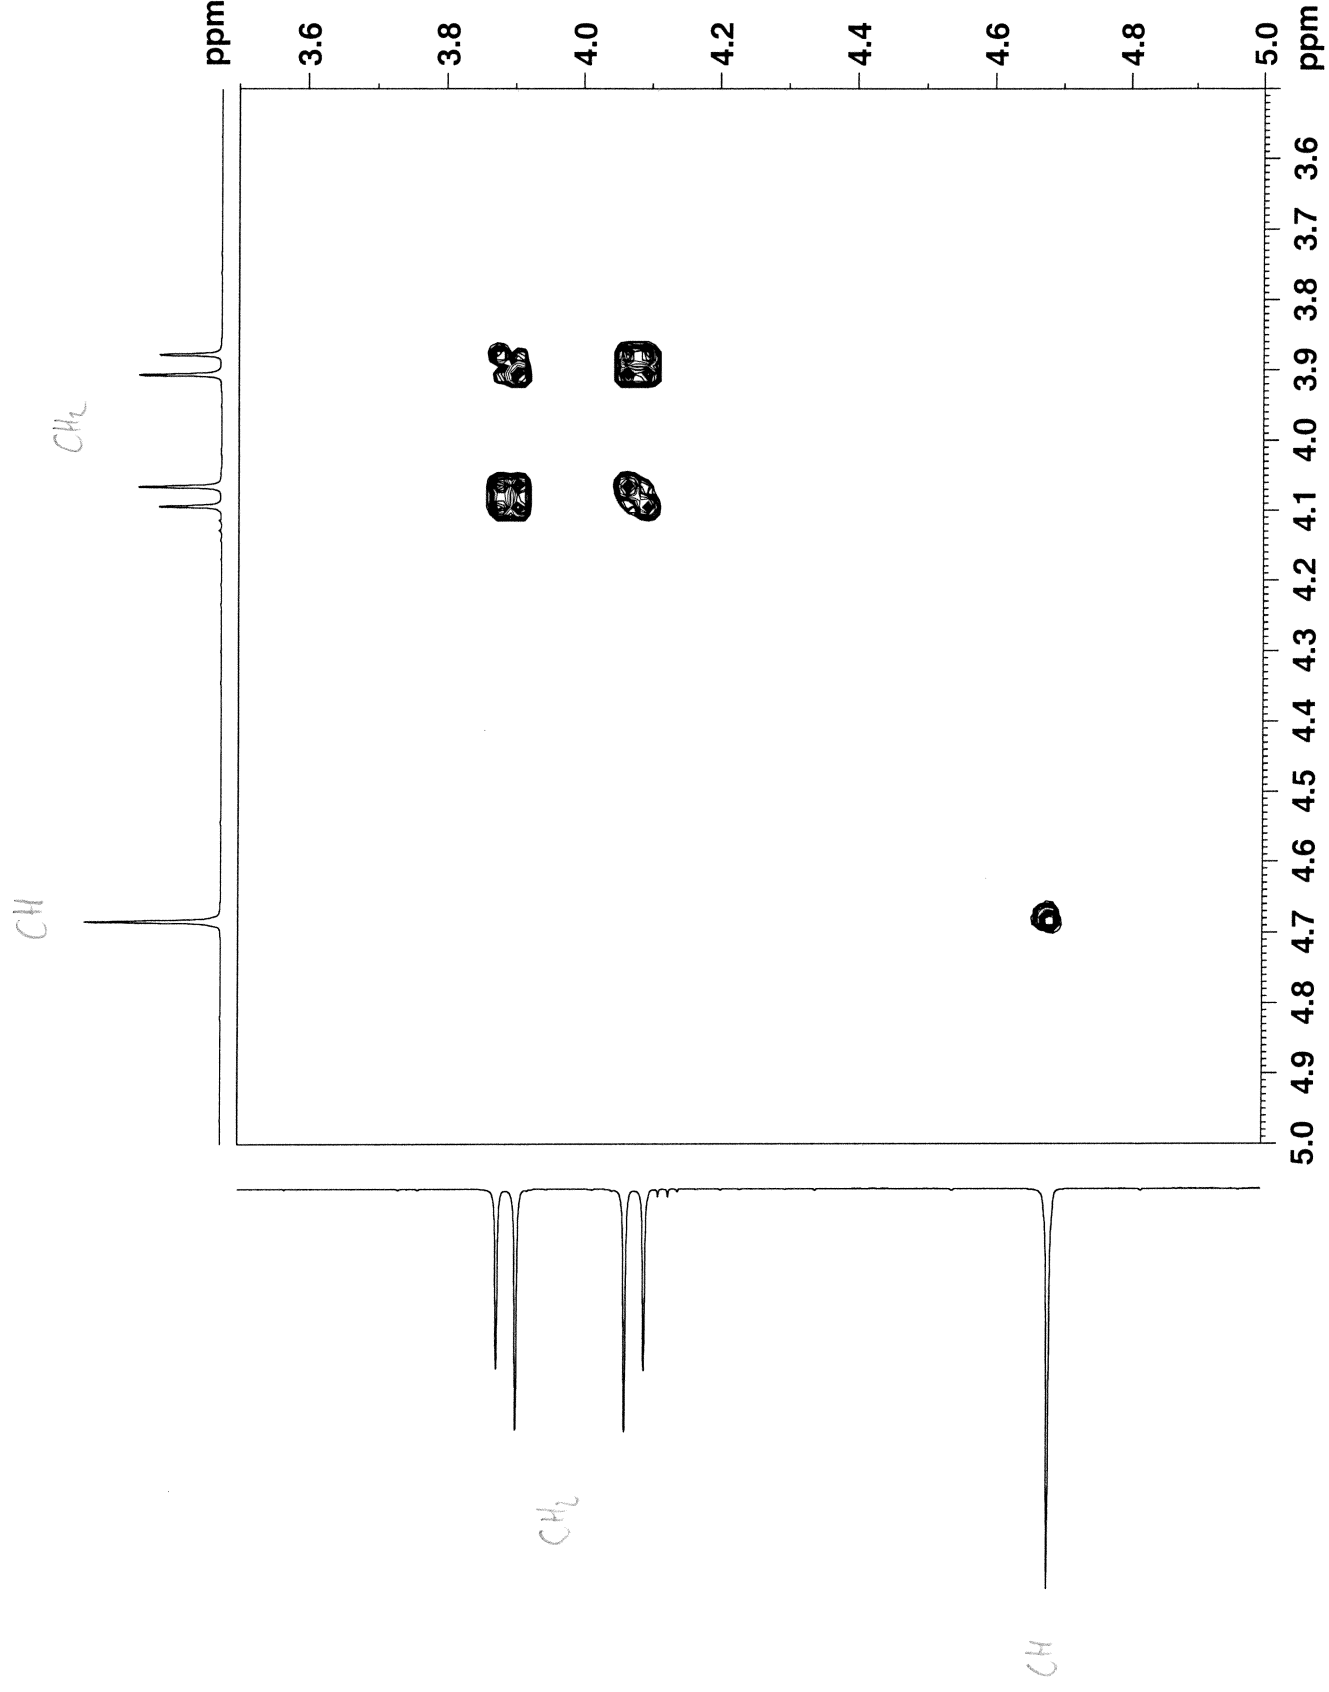

CE156S2P1 in cdcl3 (HSQC) 5.2.2019

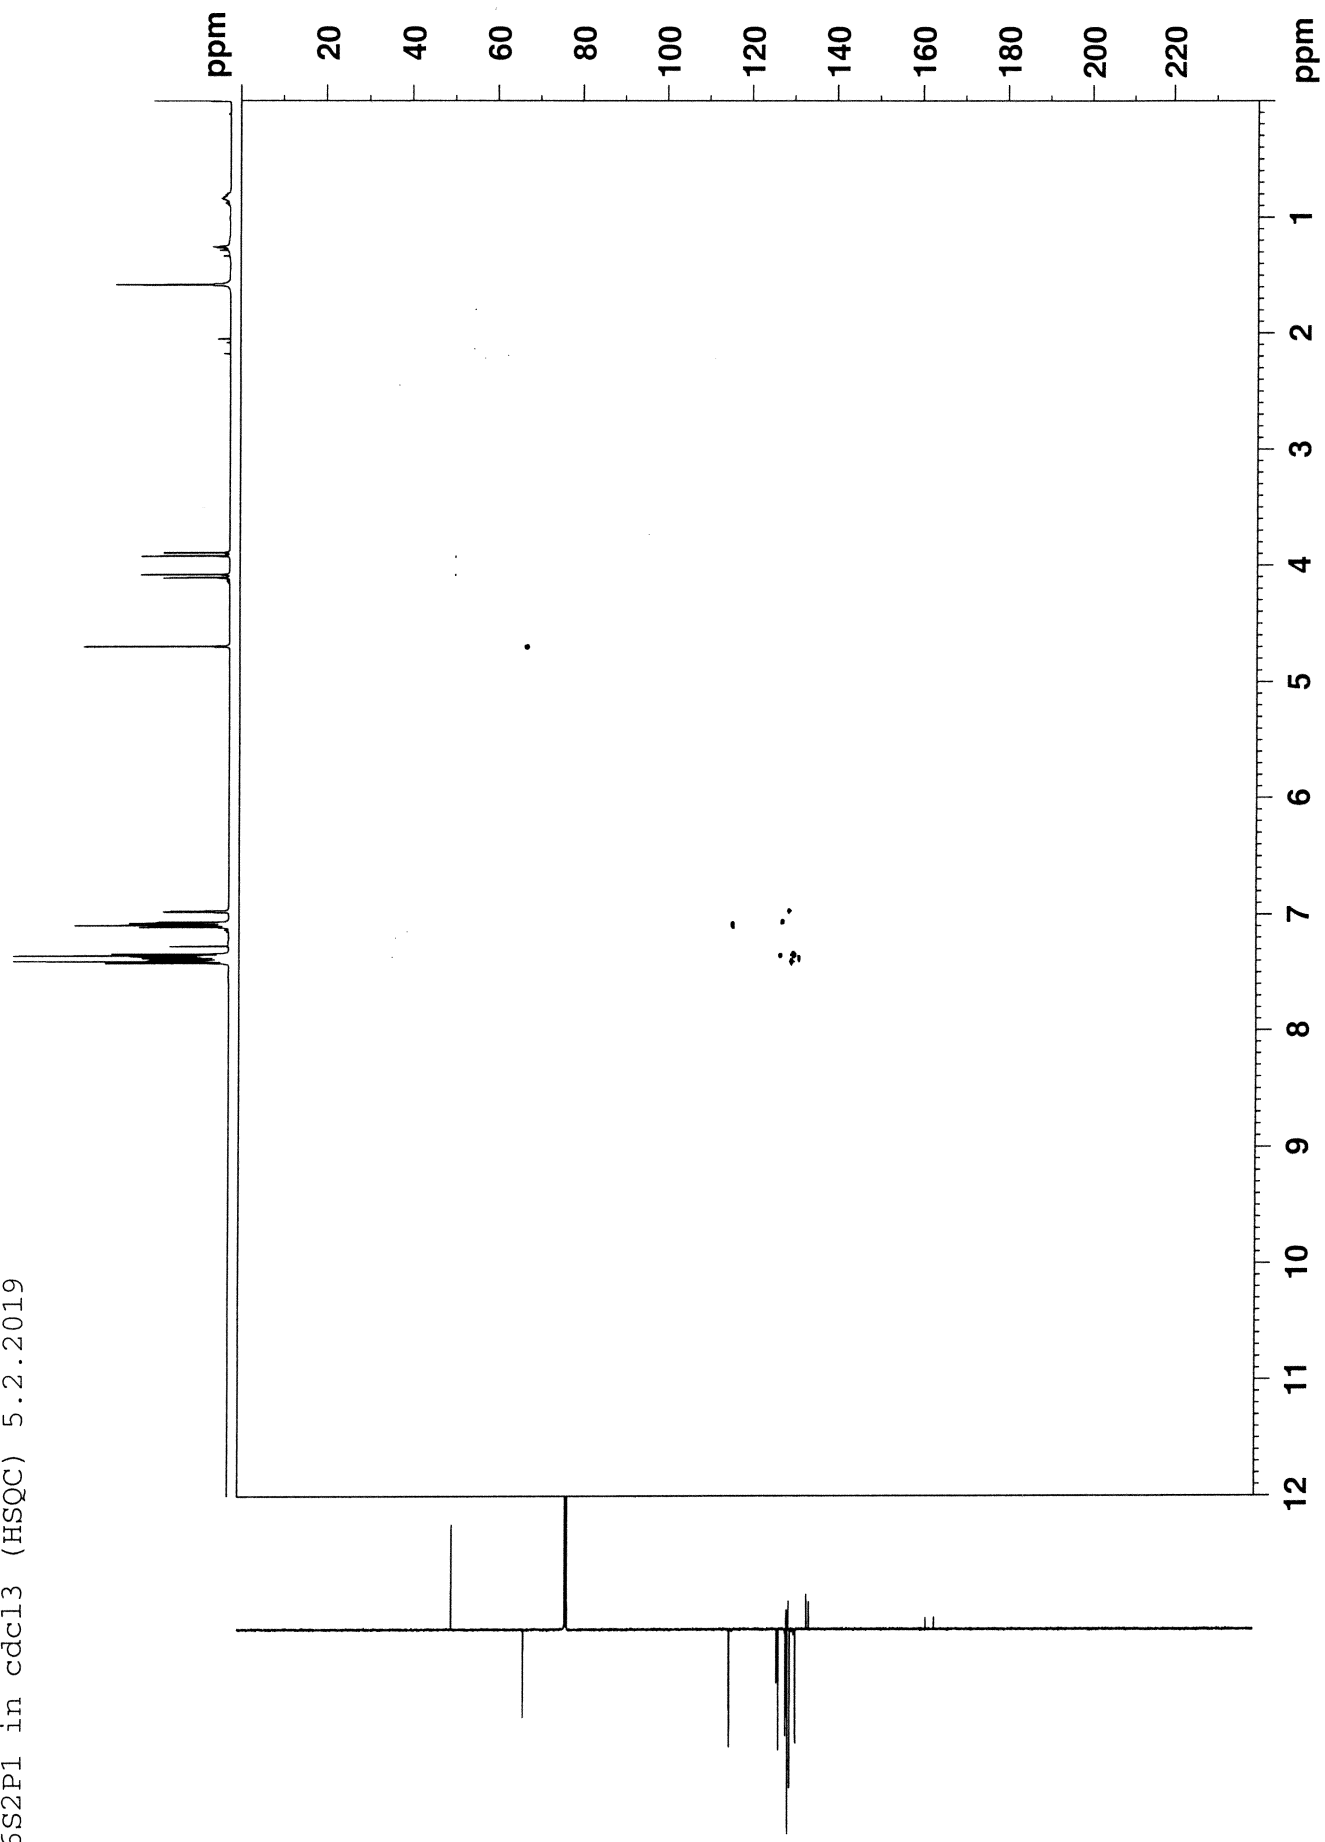

CE156S2P1 in cdcl3 (HSQC) 5.2.2019

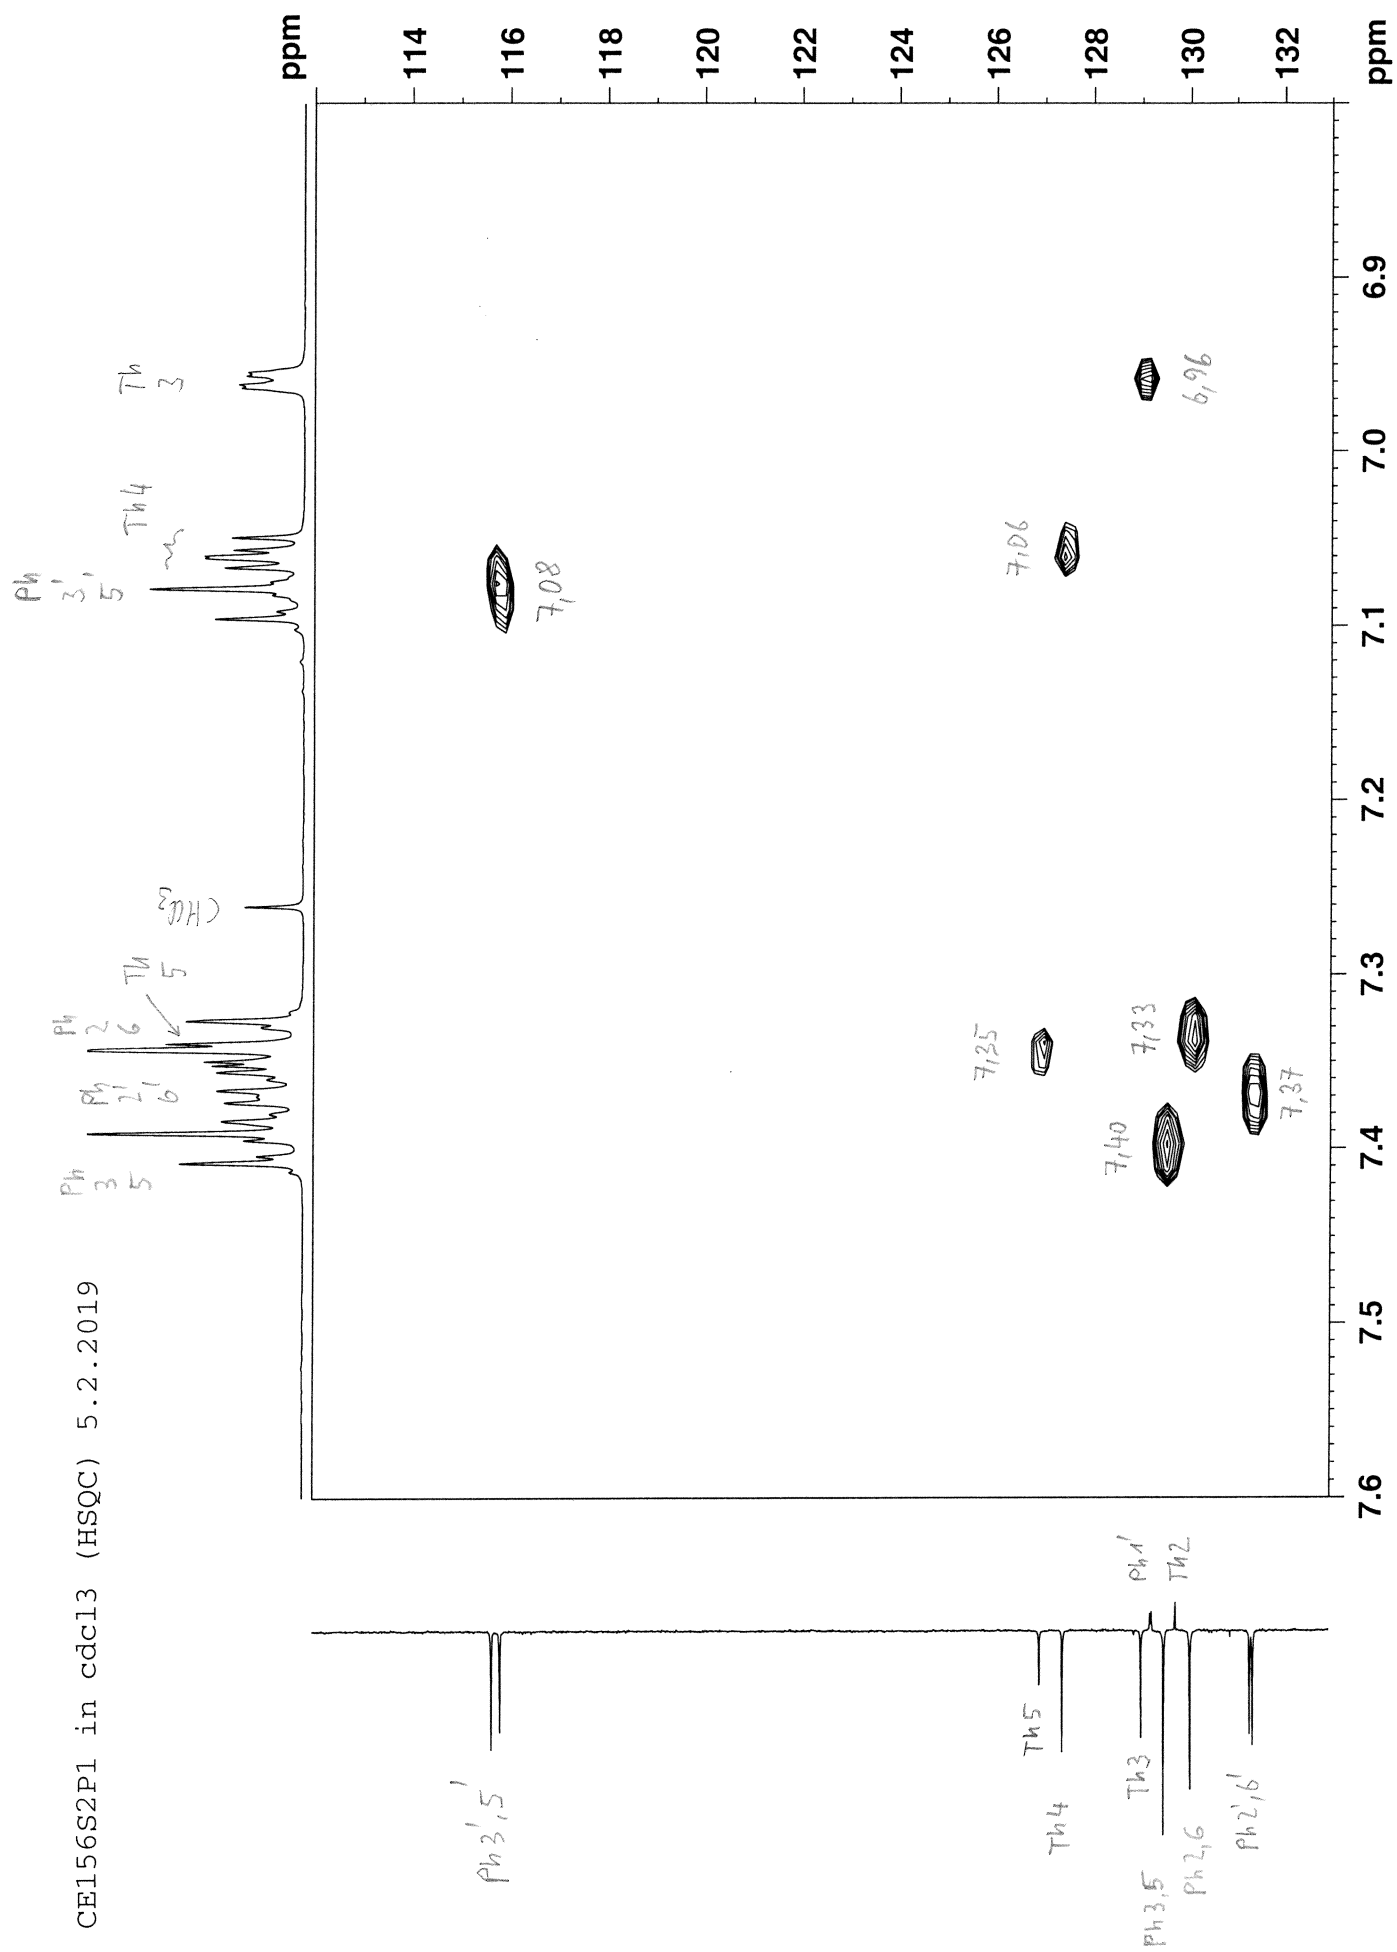

CE156S2P1 in cdcl3 (HSQC) 5.2.2019

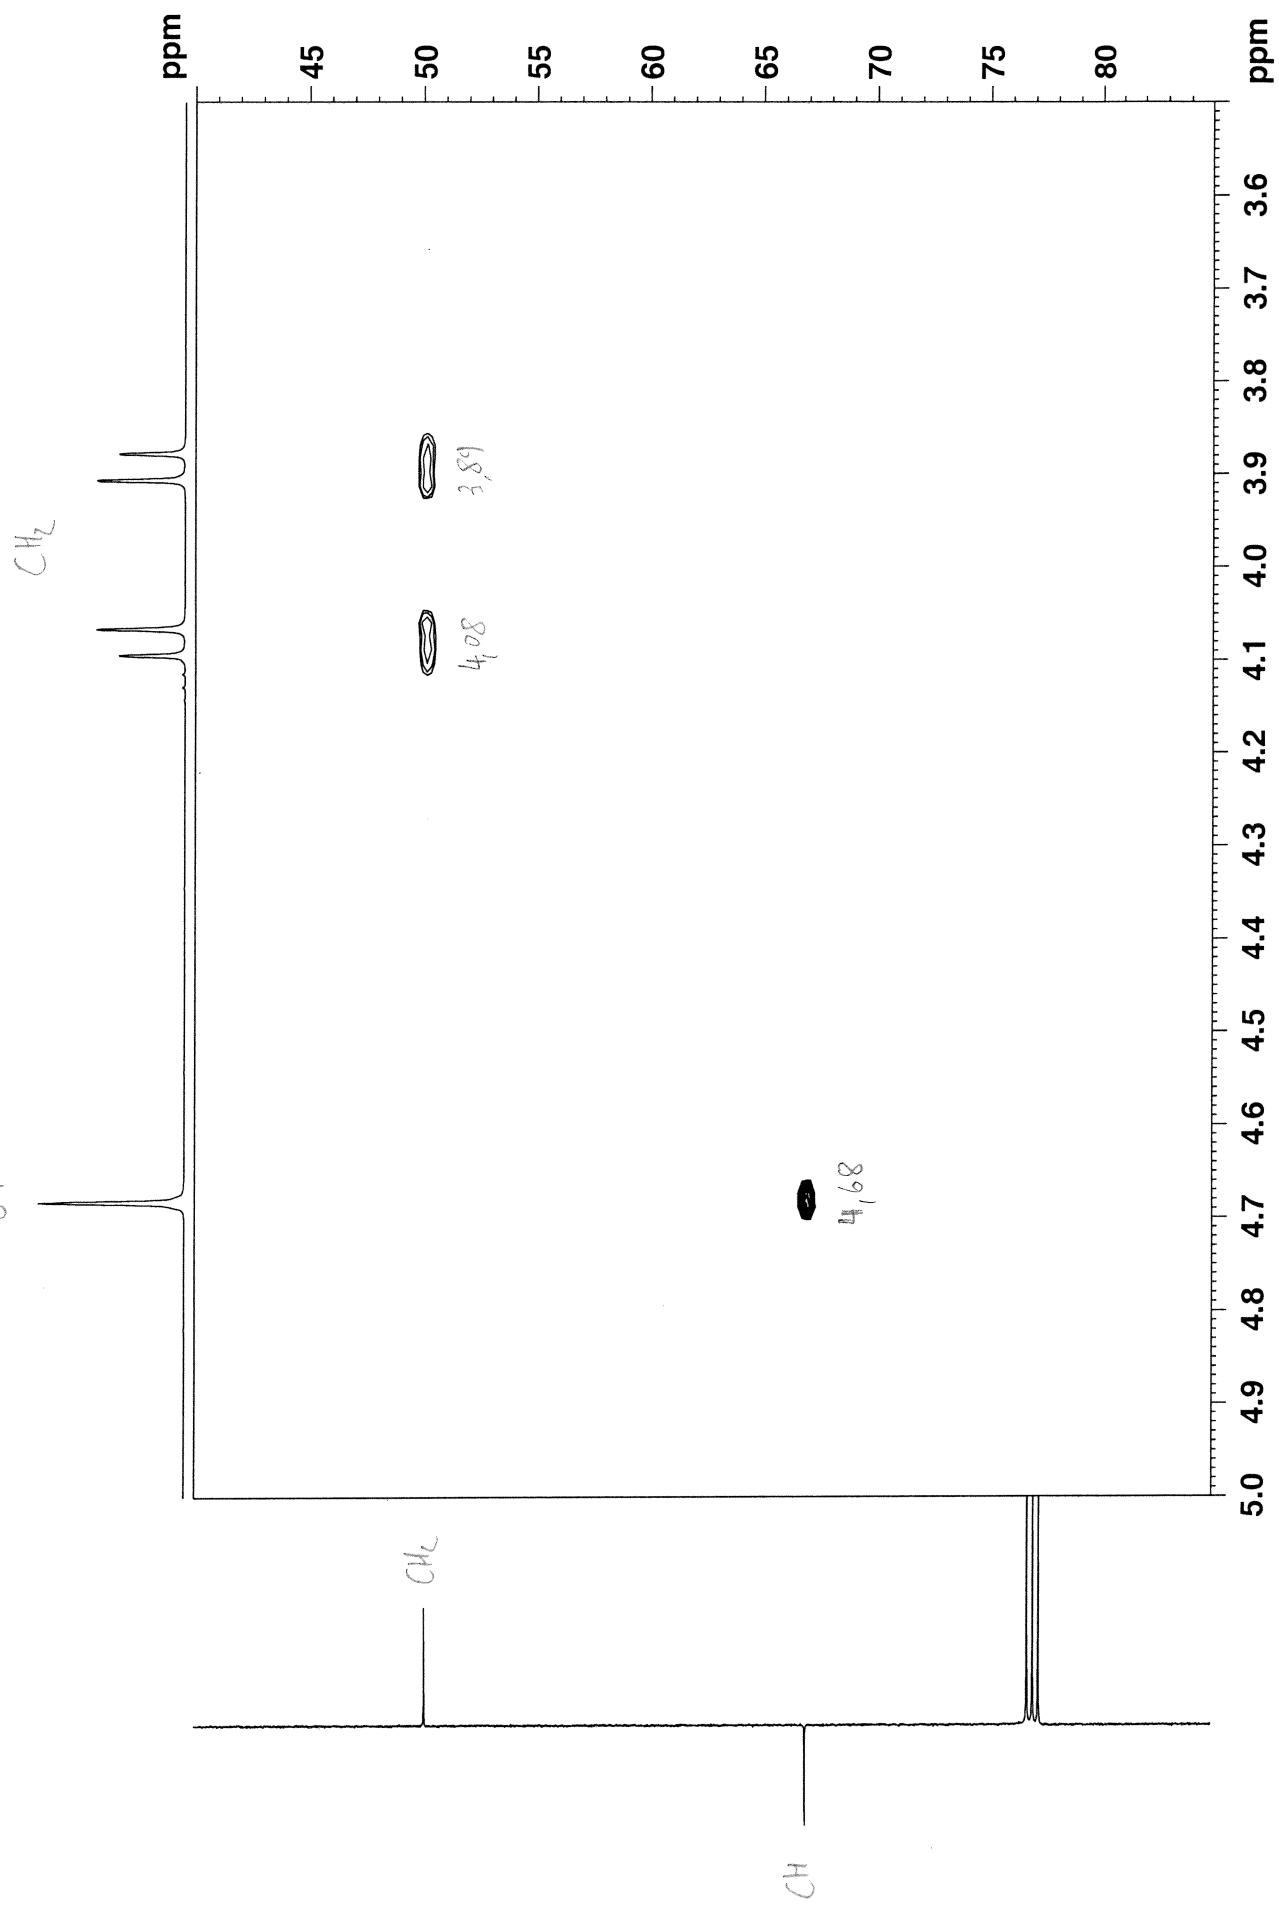

CE156S2P1 in cdcl3 (HMBC) 5.2.2019

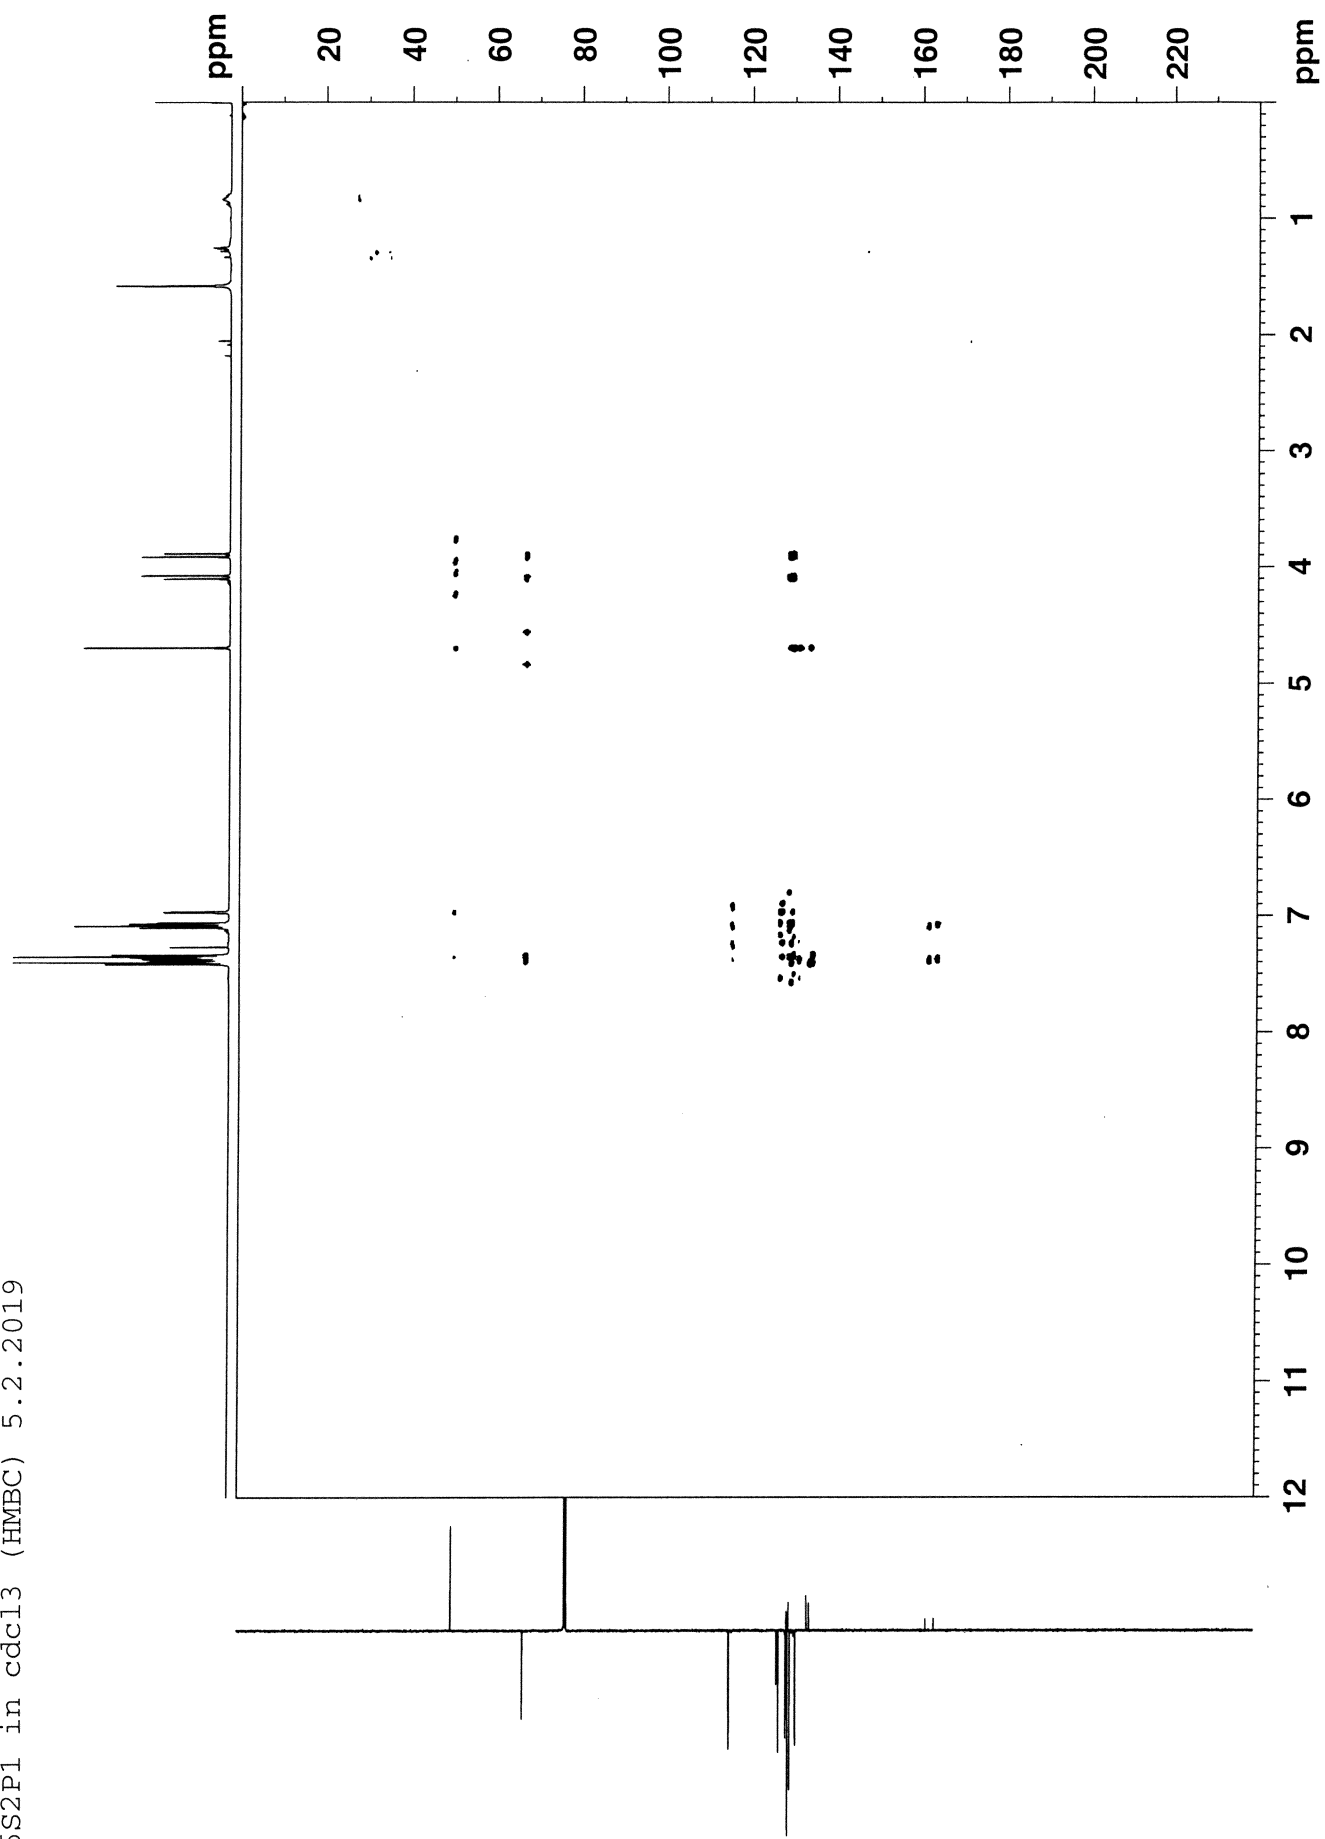



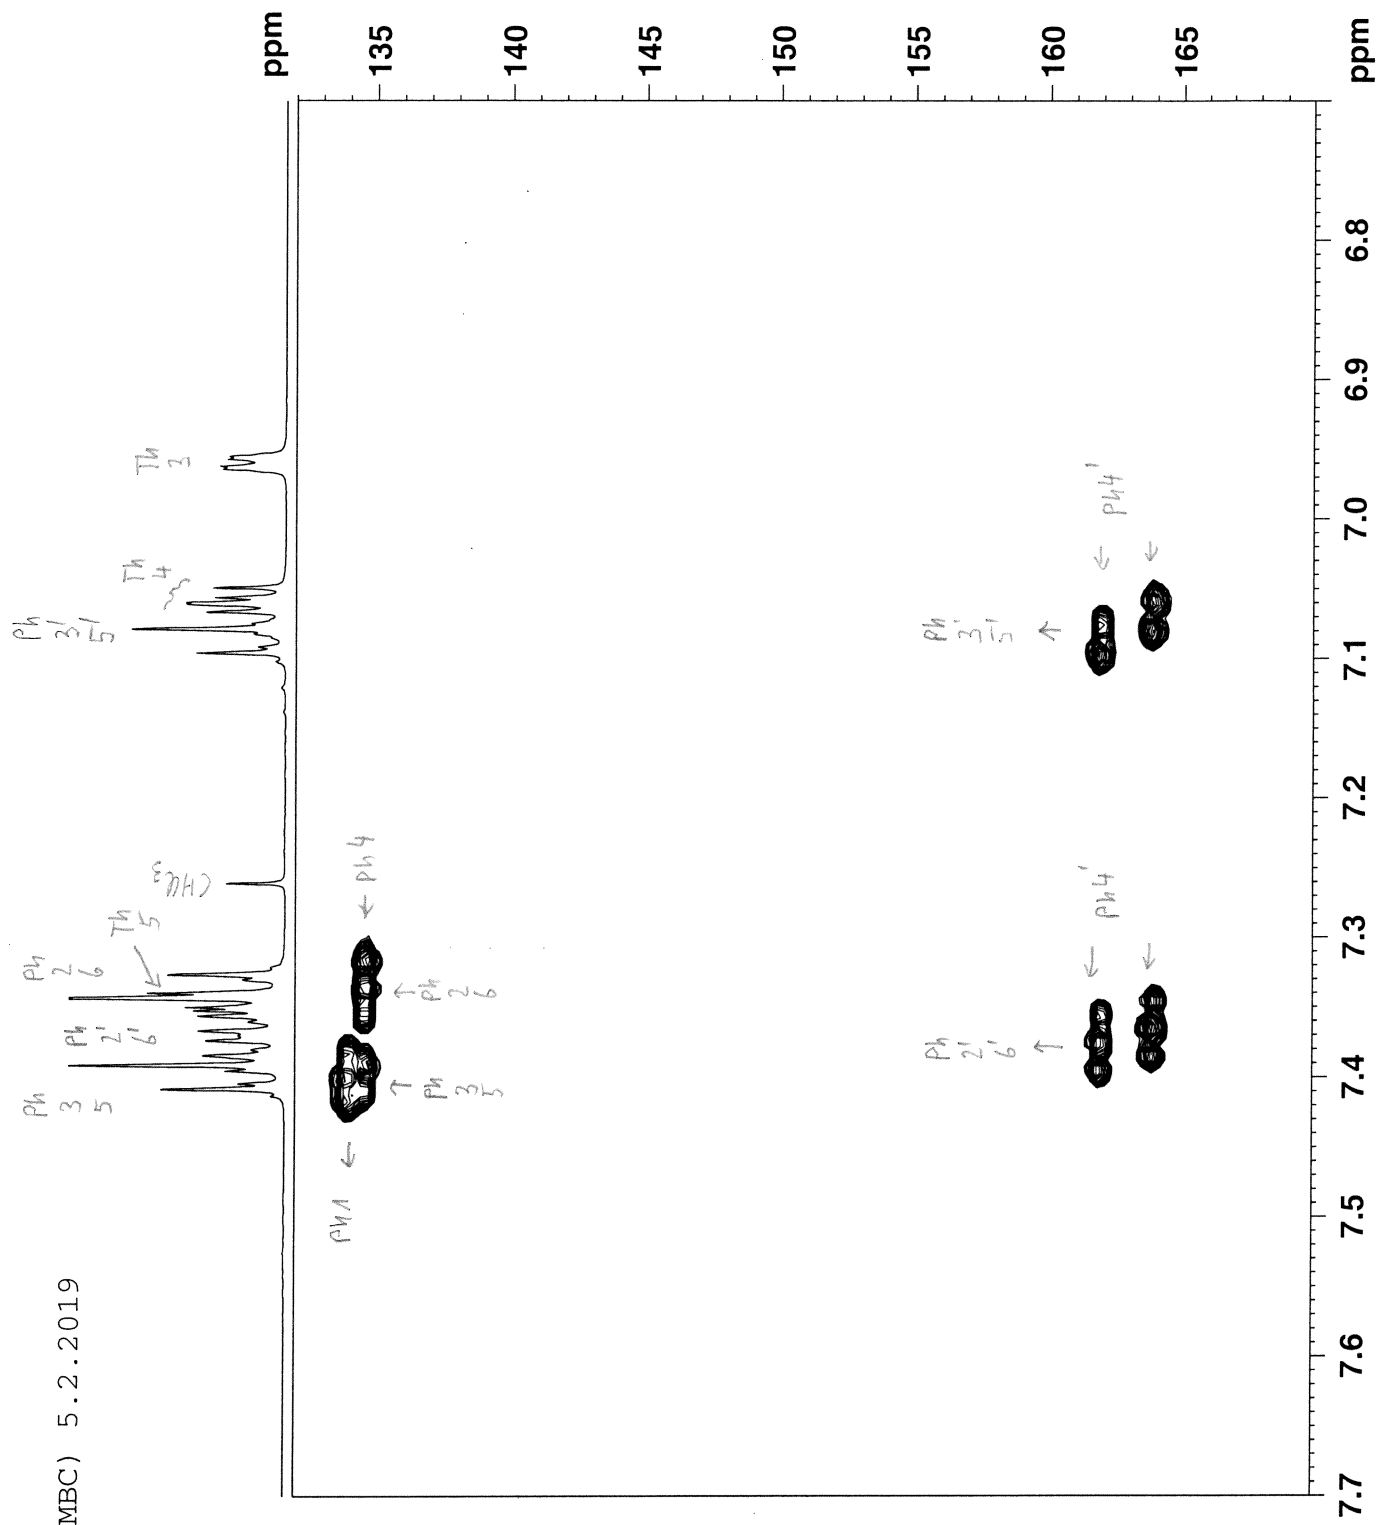

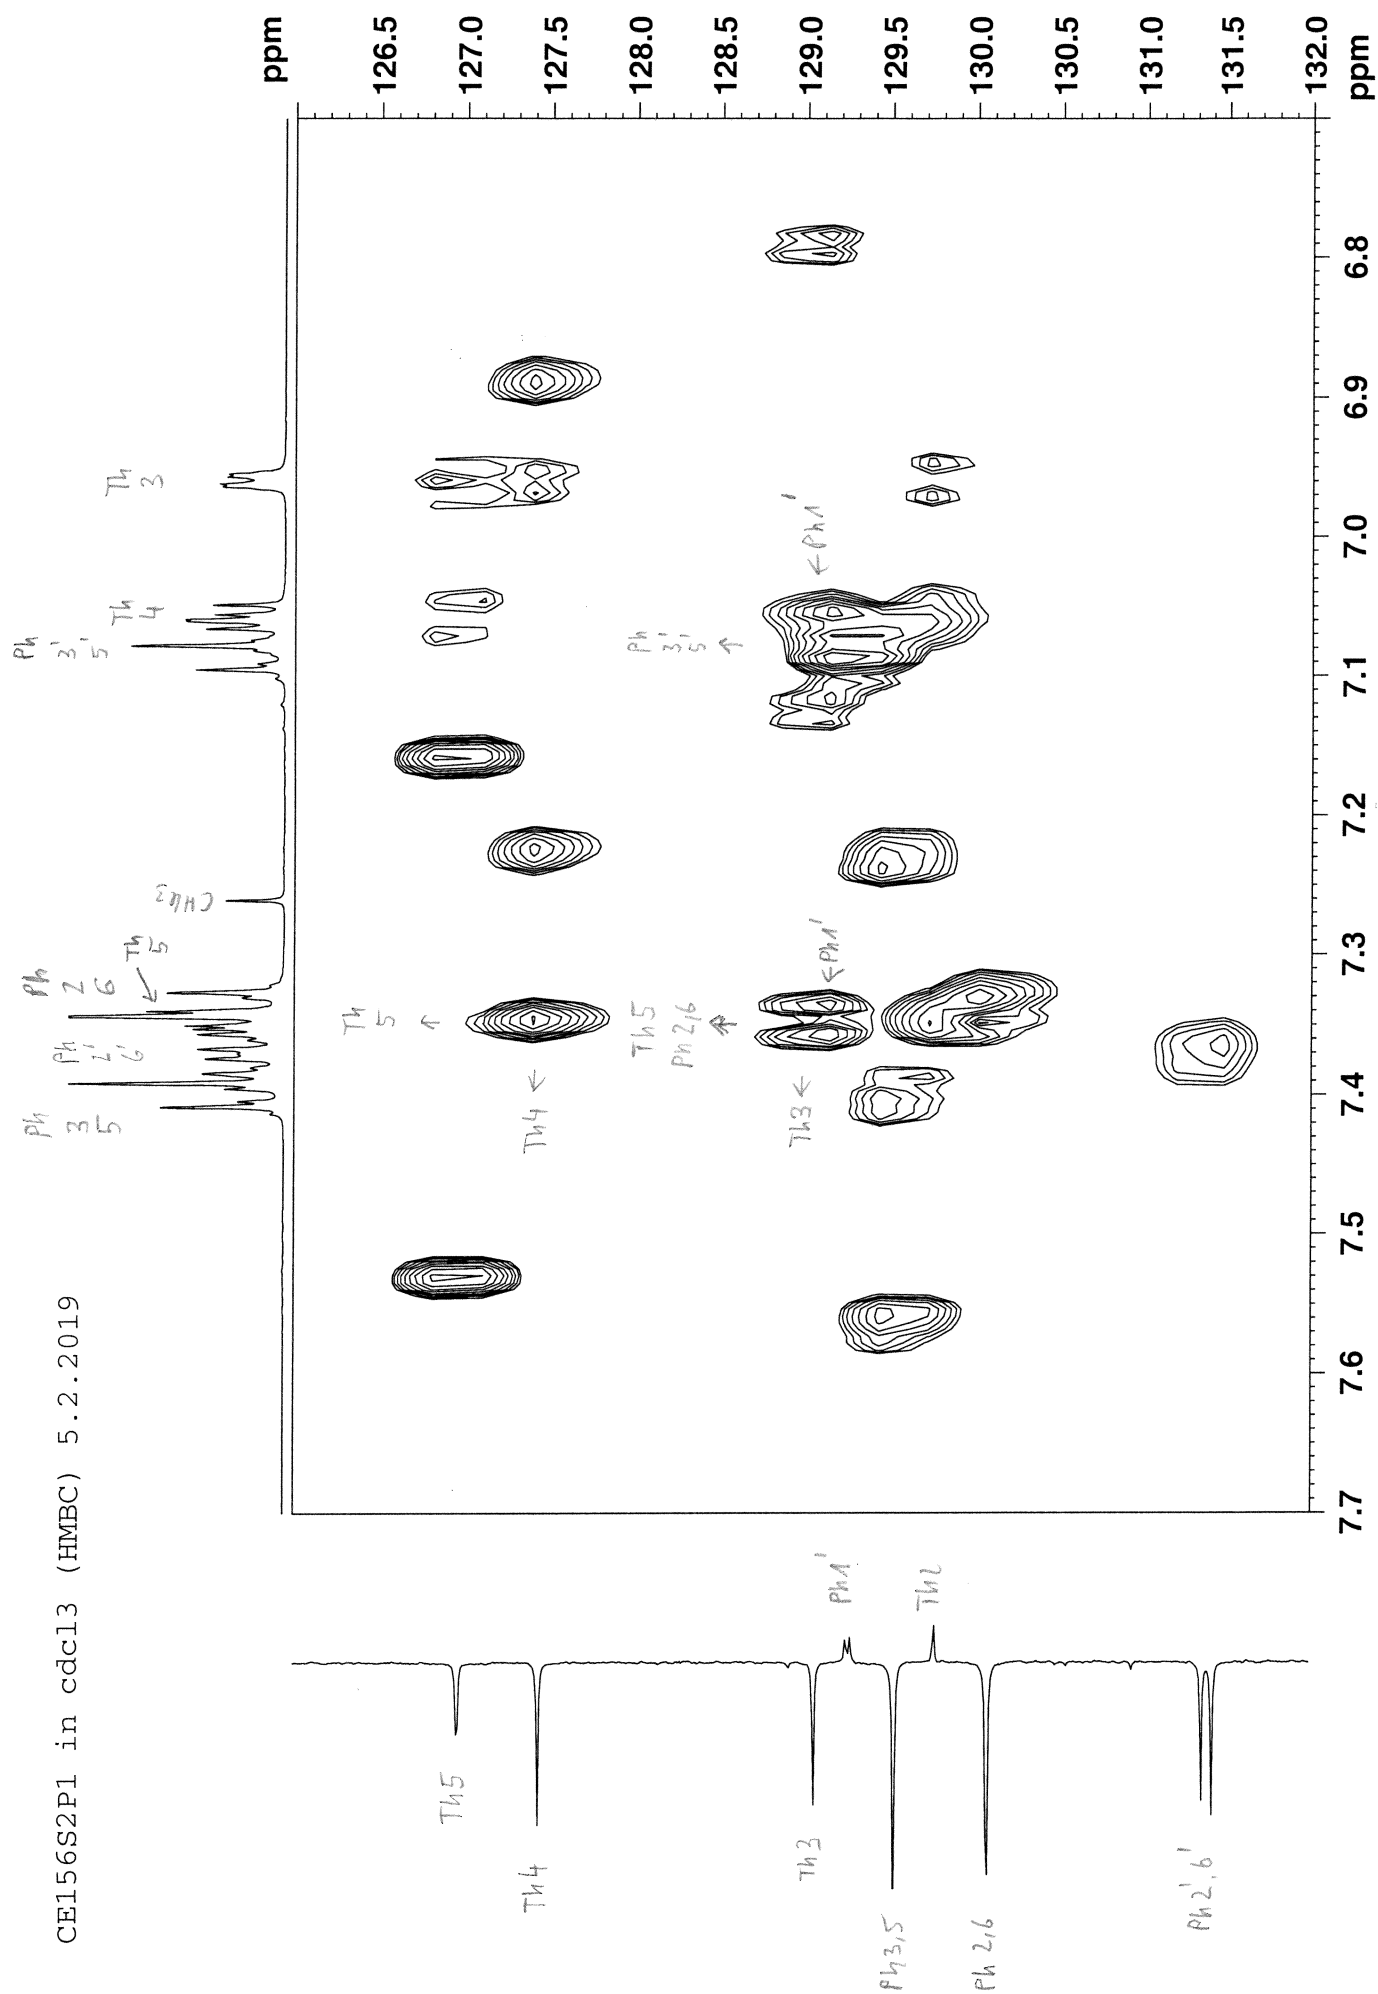

CE156S2P1 in cdcl3 (HMBC) 5.2.2019

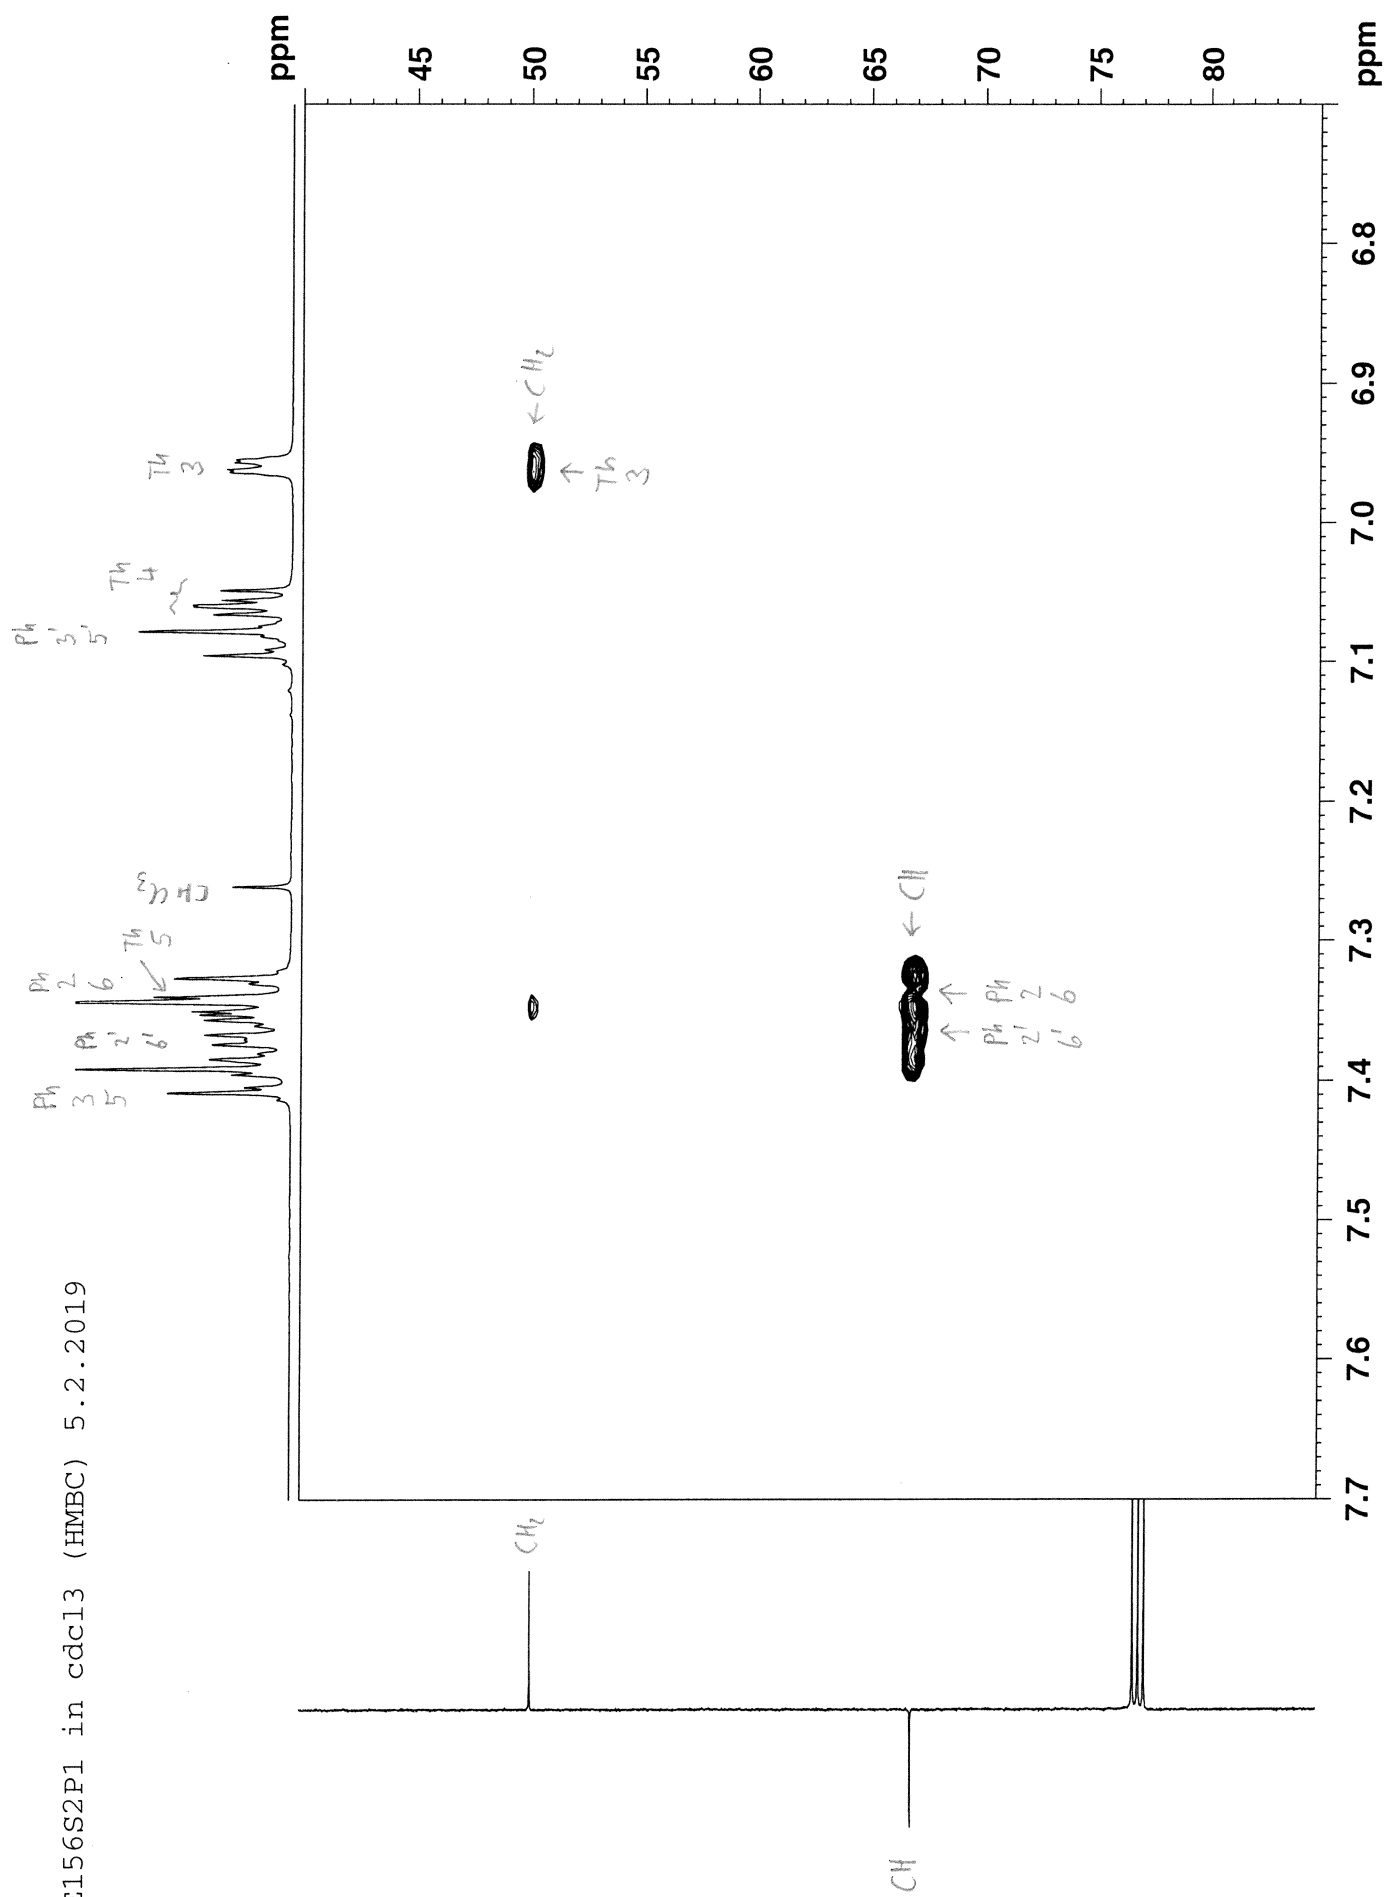

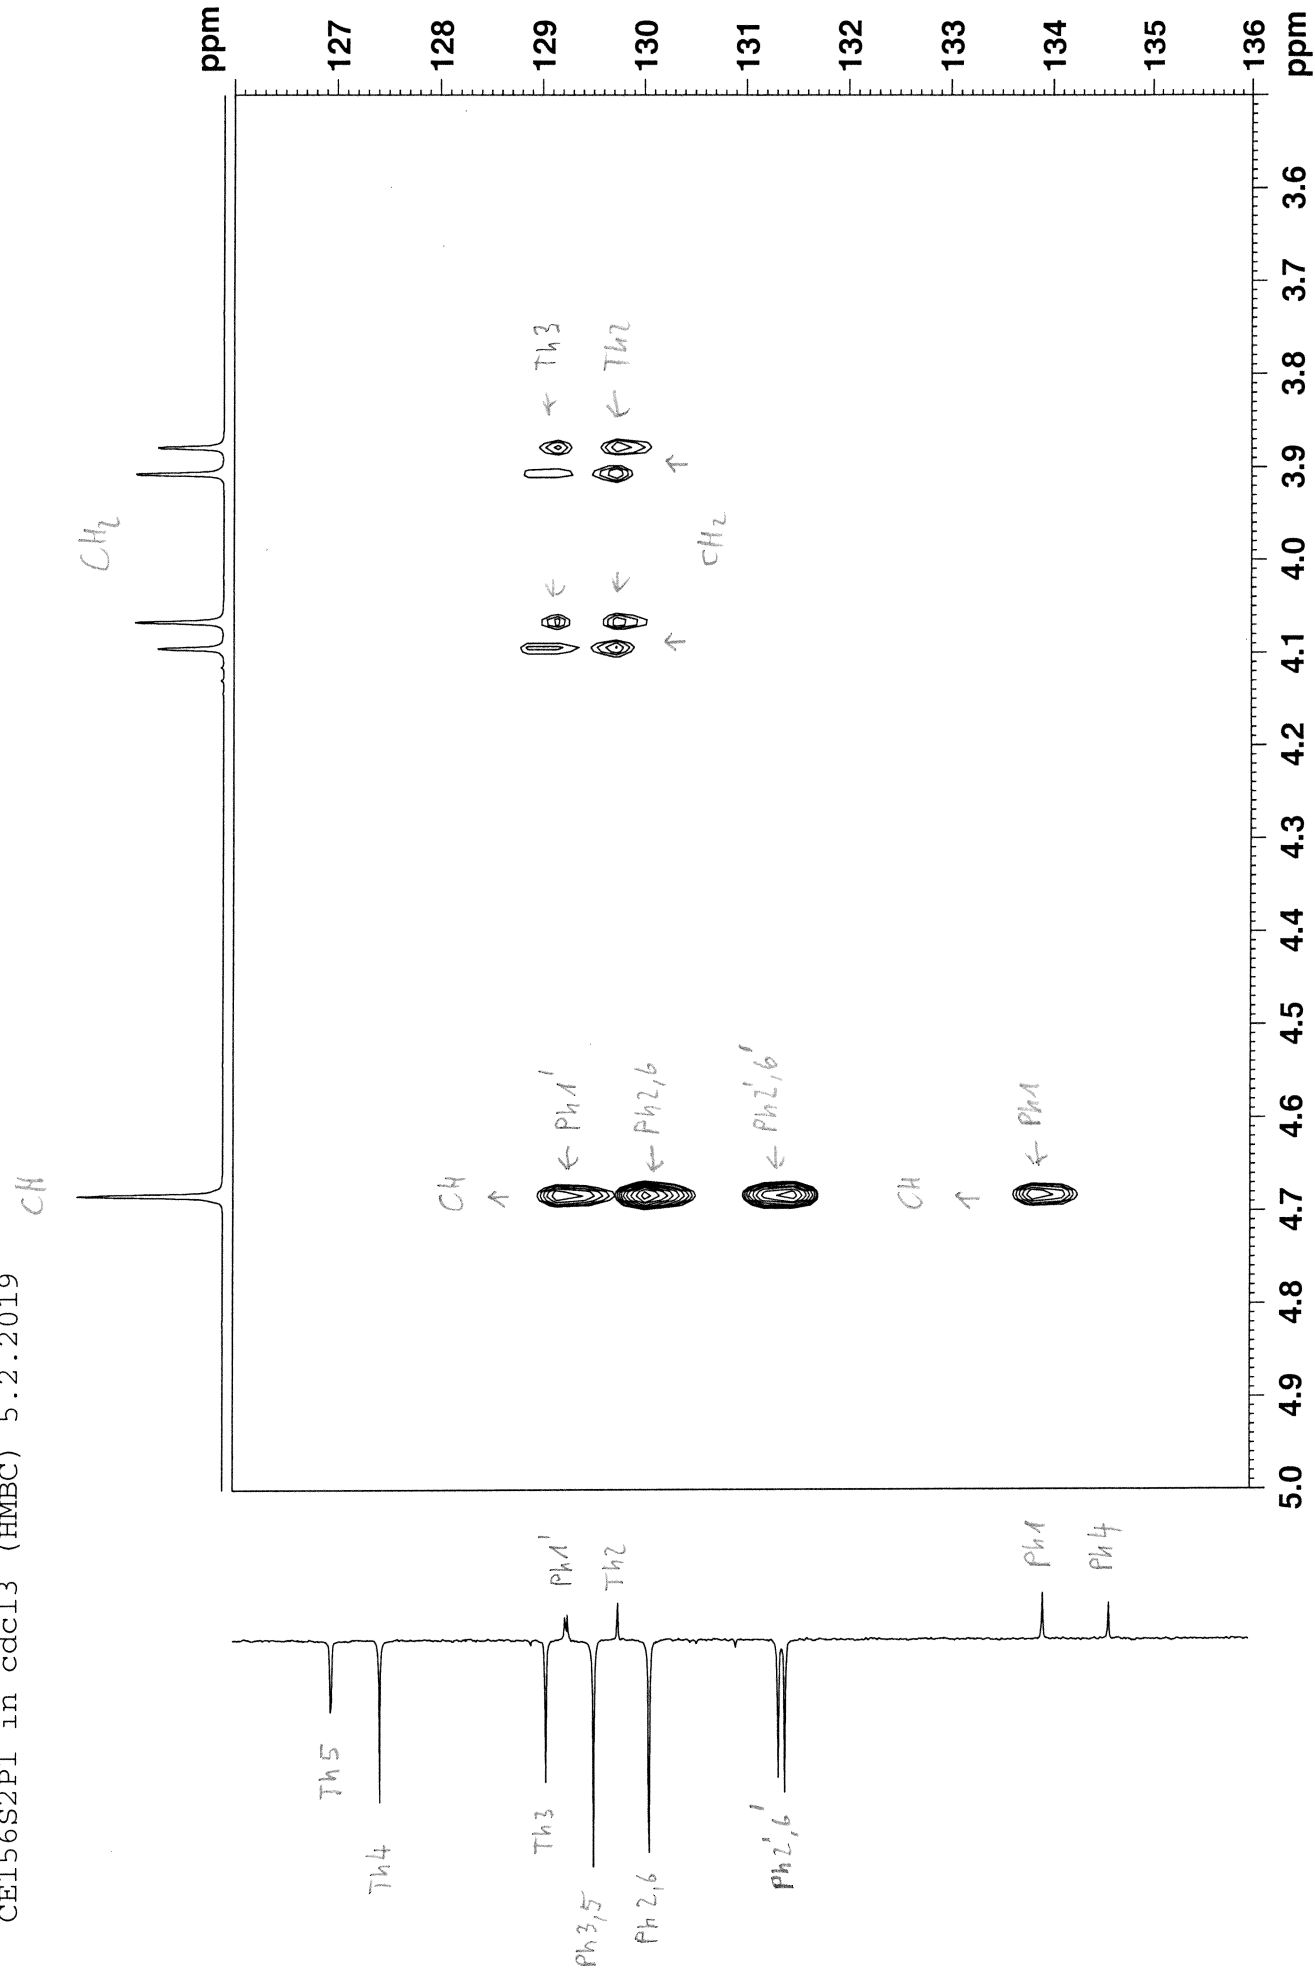

CE156S2P1 in cdcl3 (HMBC) 5.2.2019

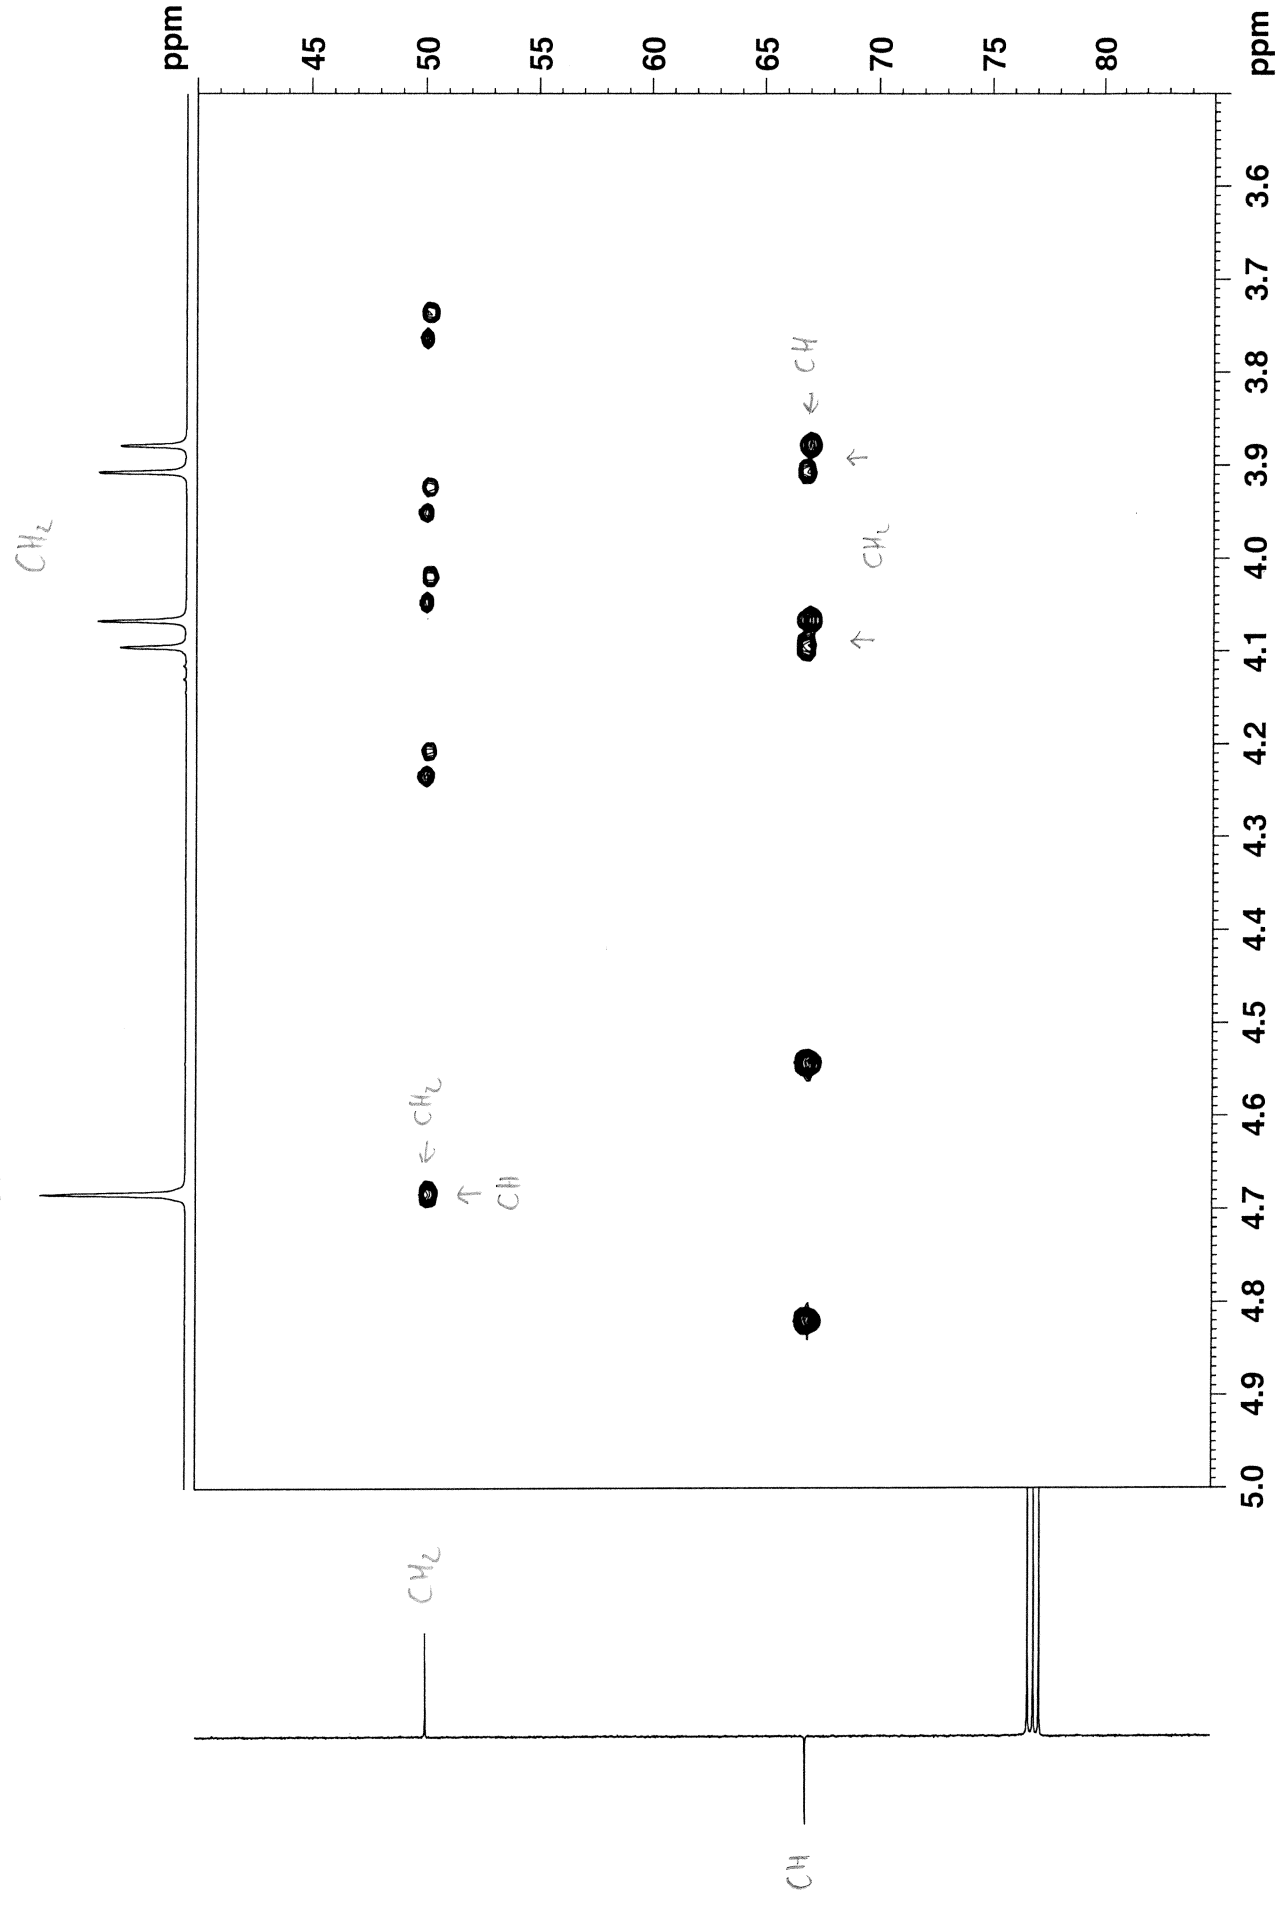

**Figure S84c.** NMR spectra of compound **8u**.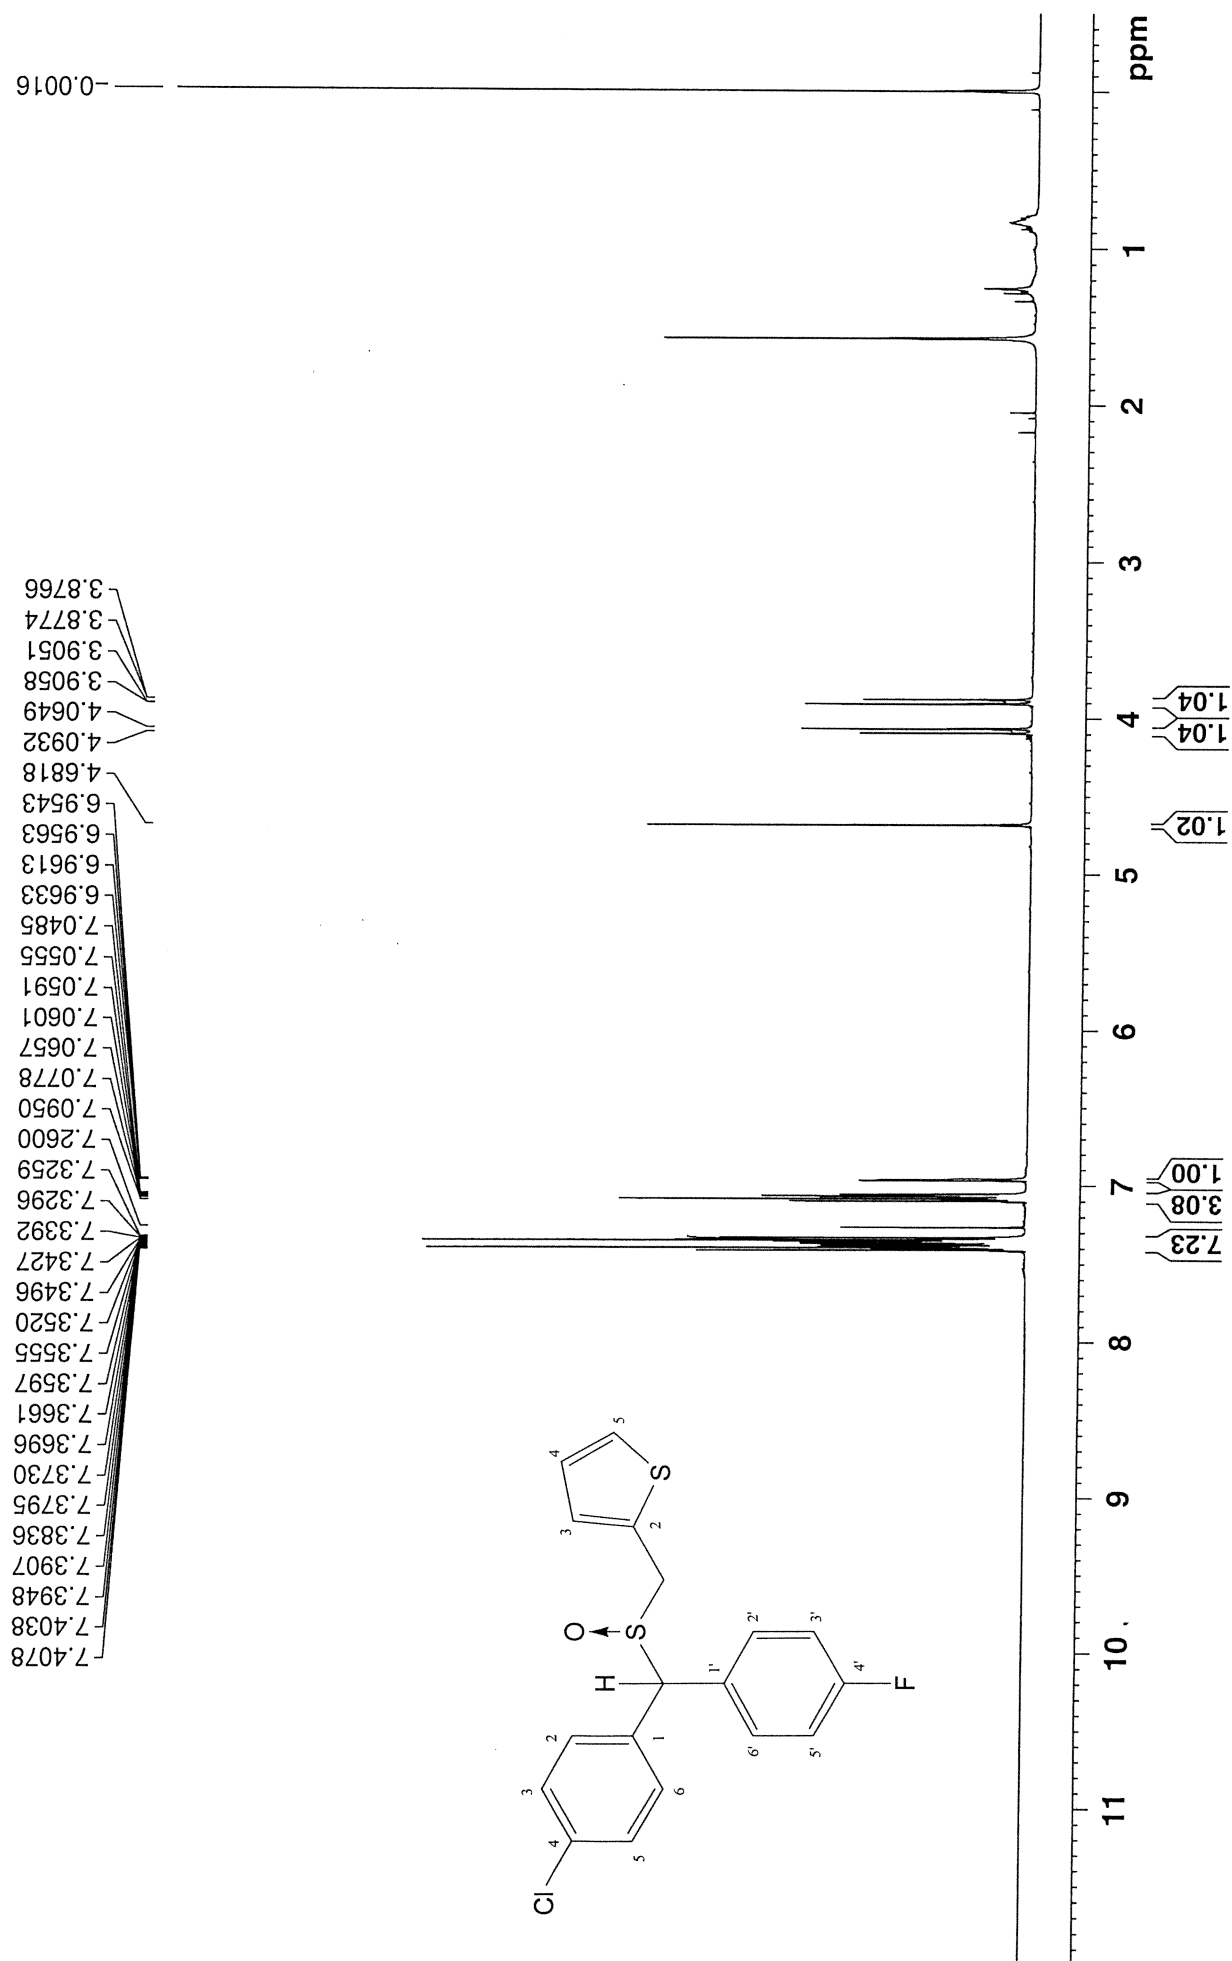

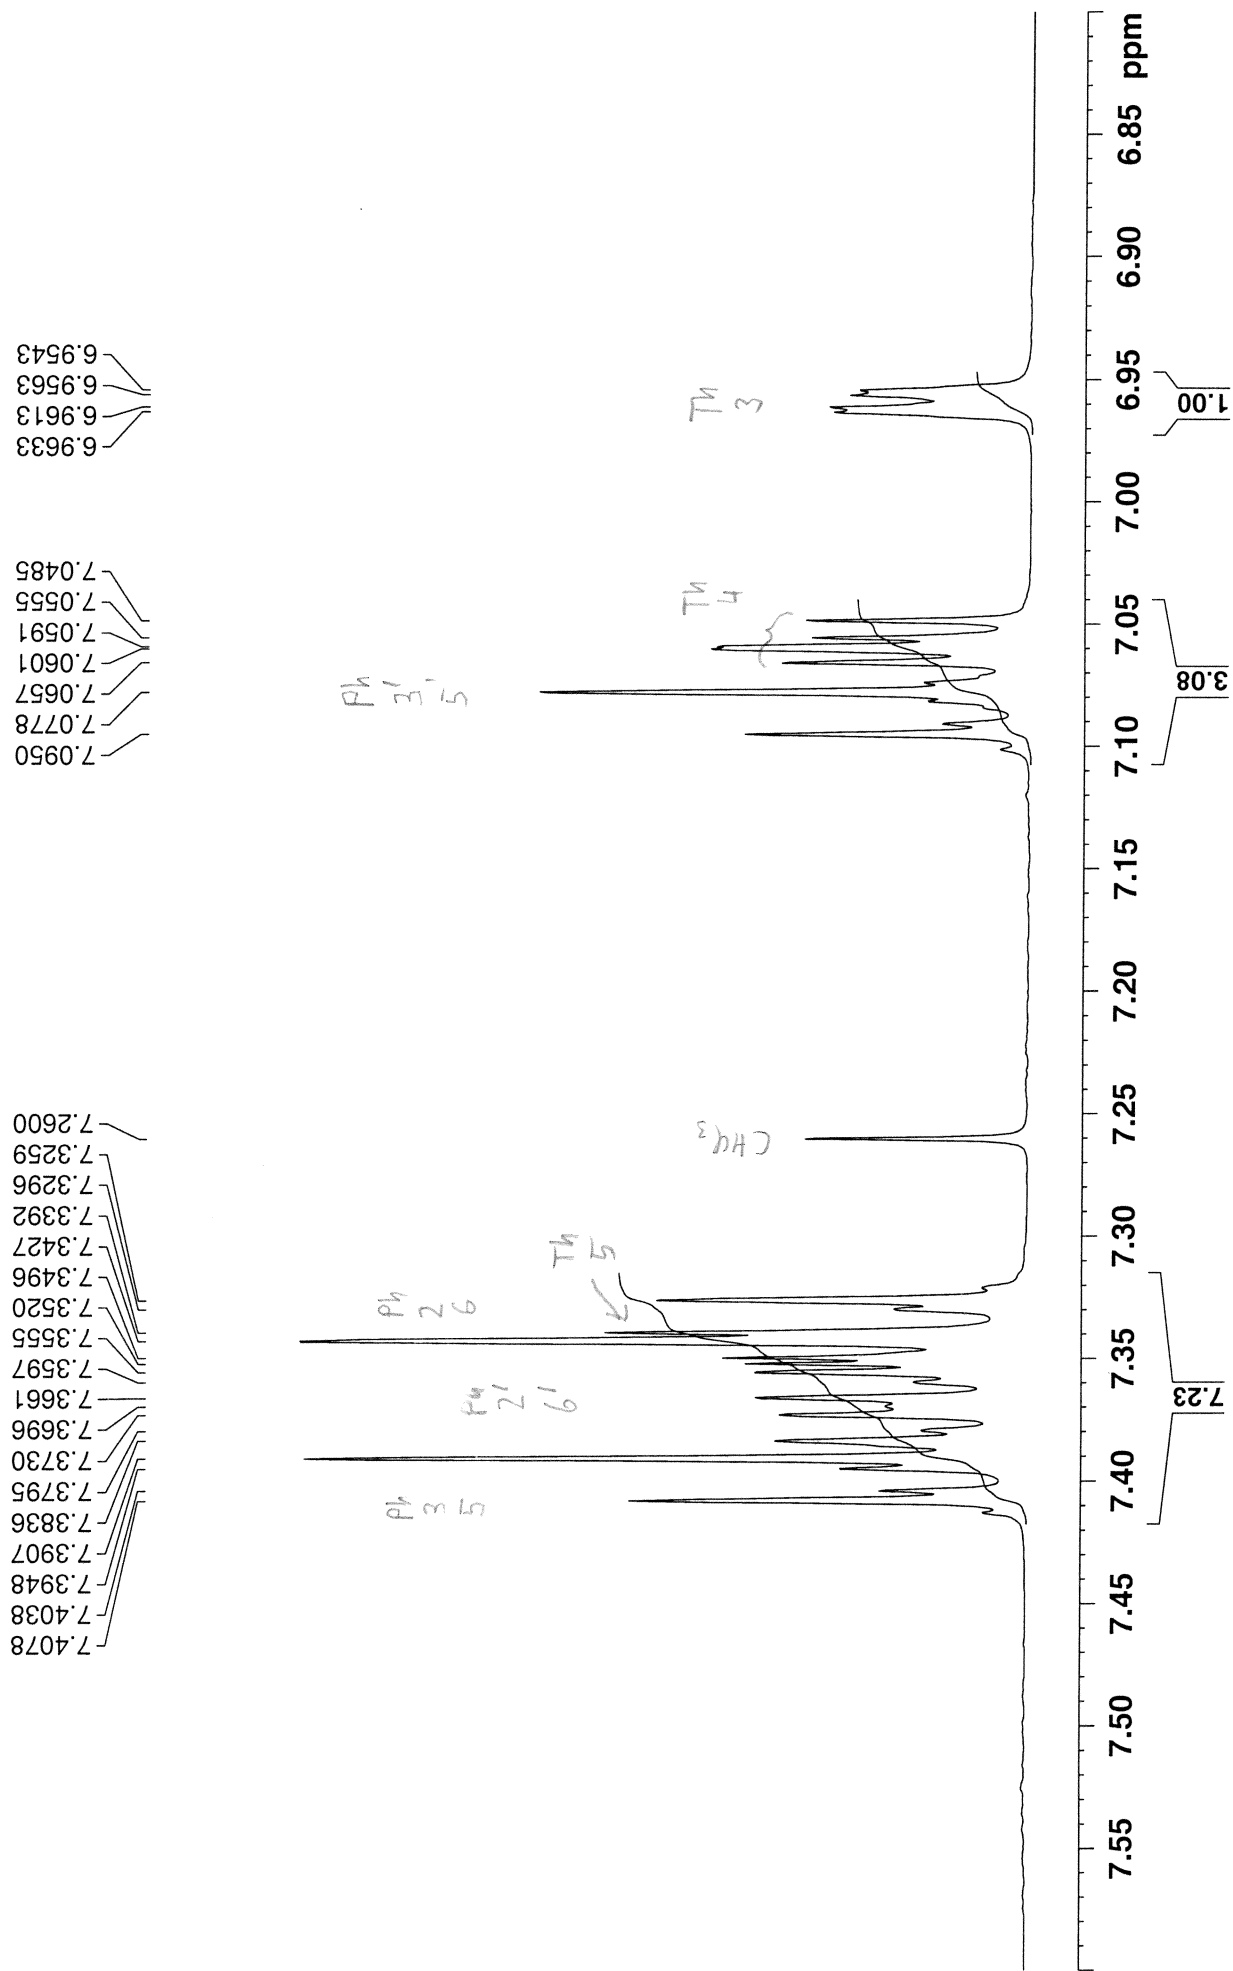

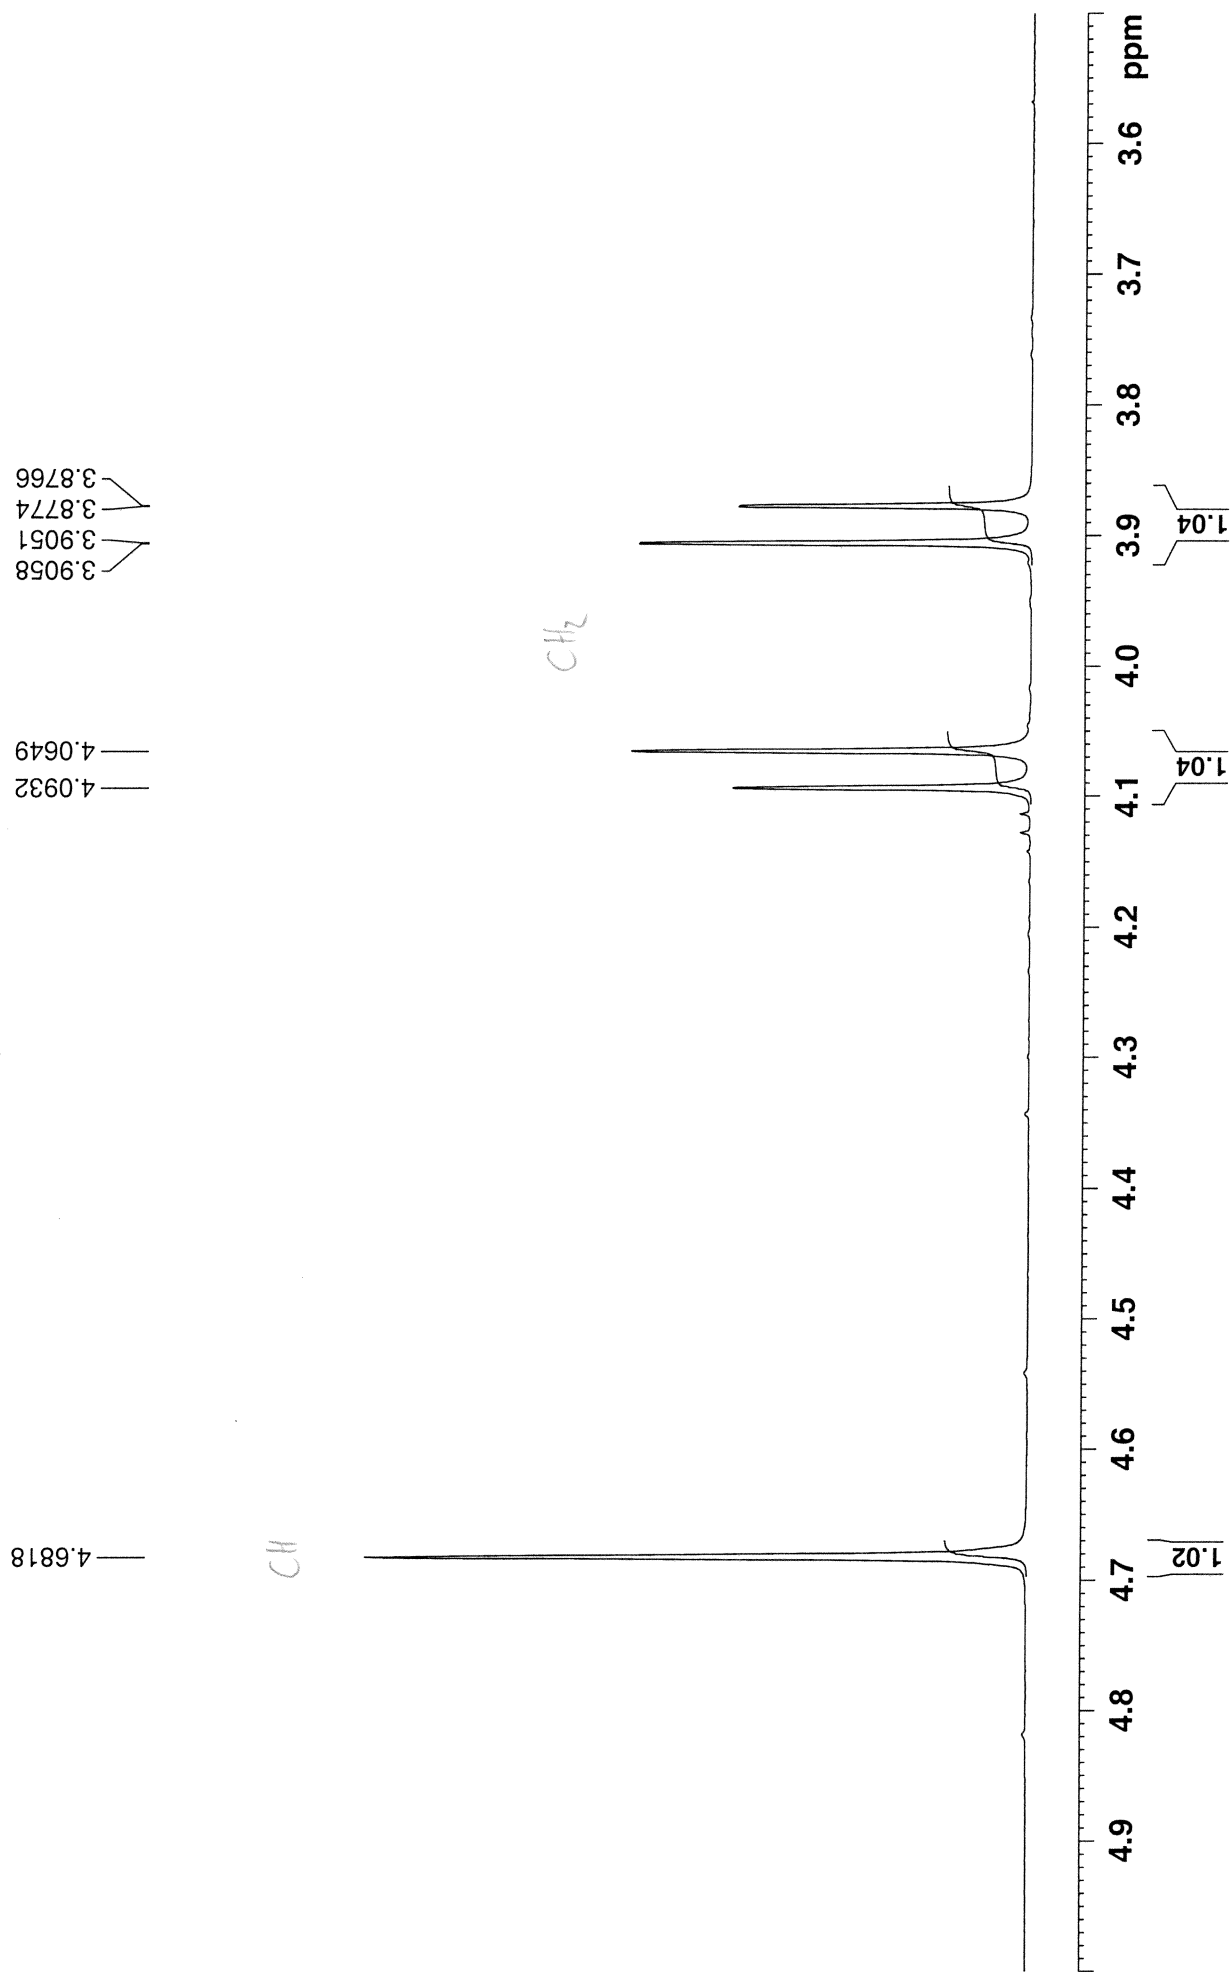



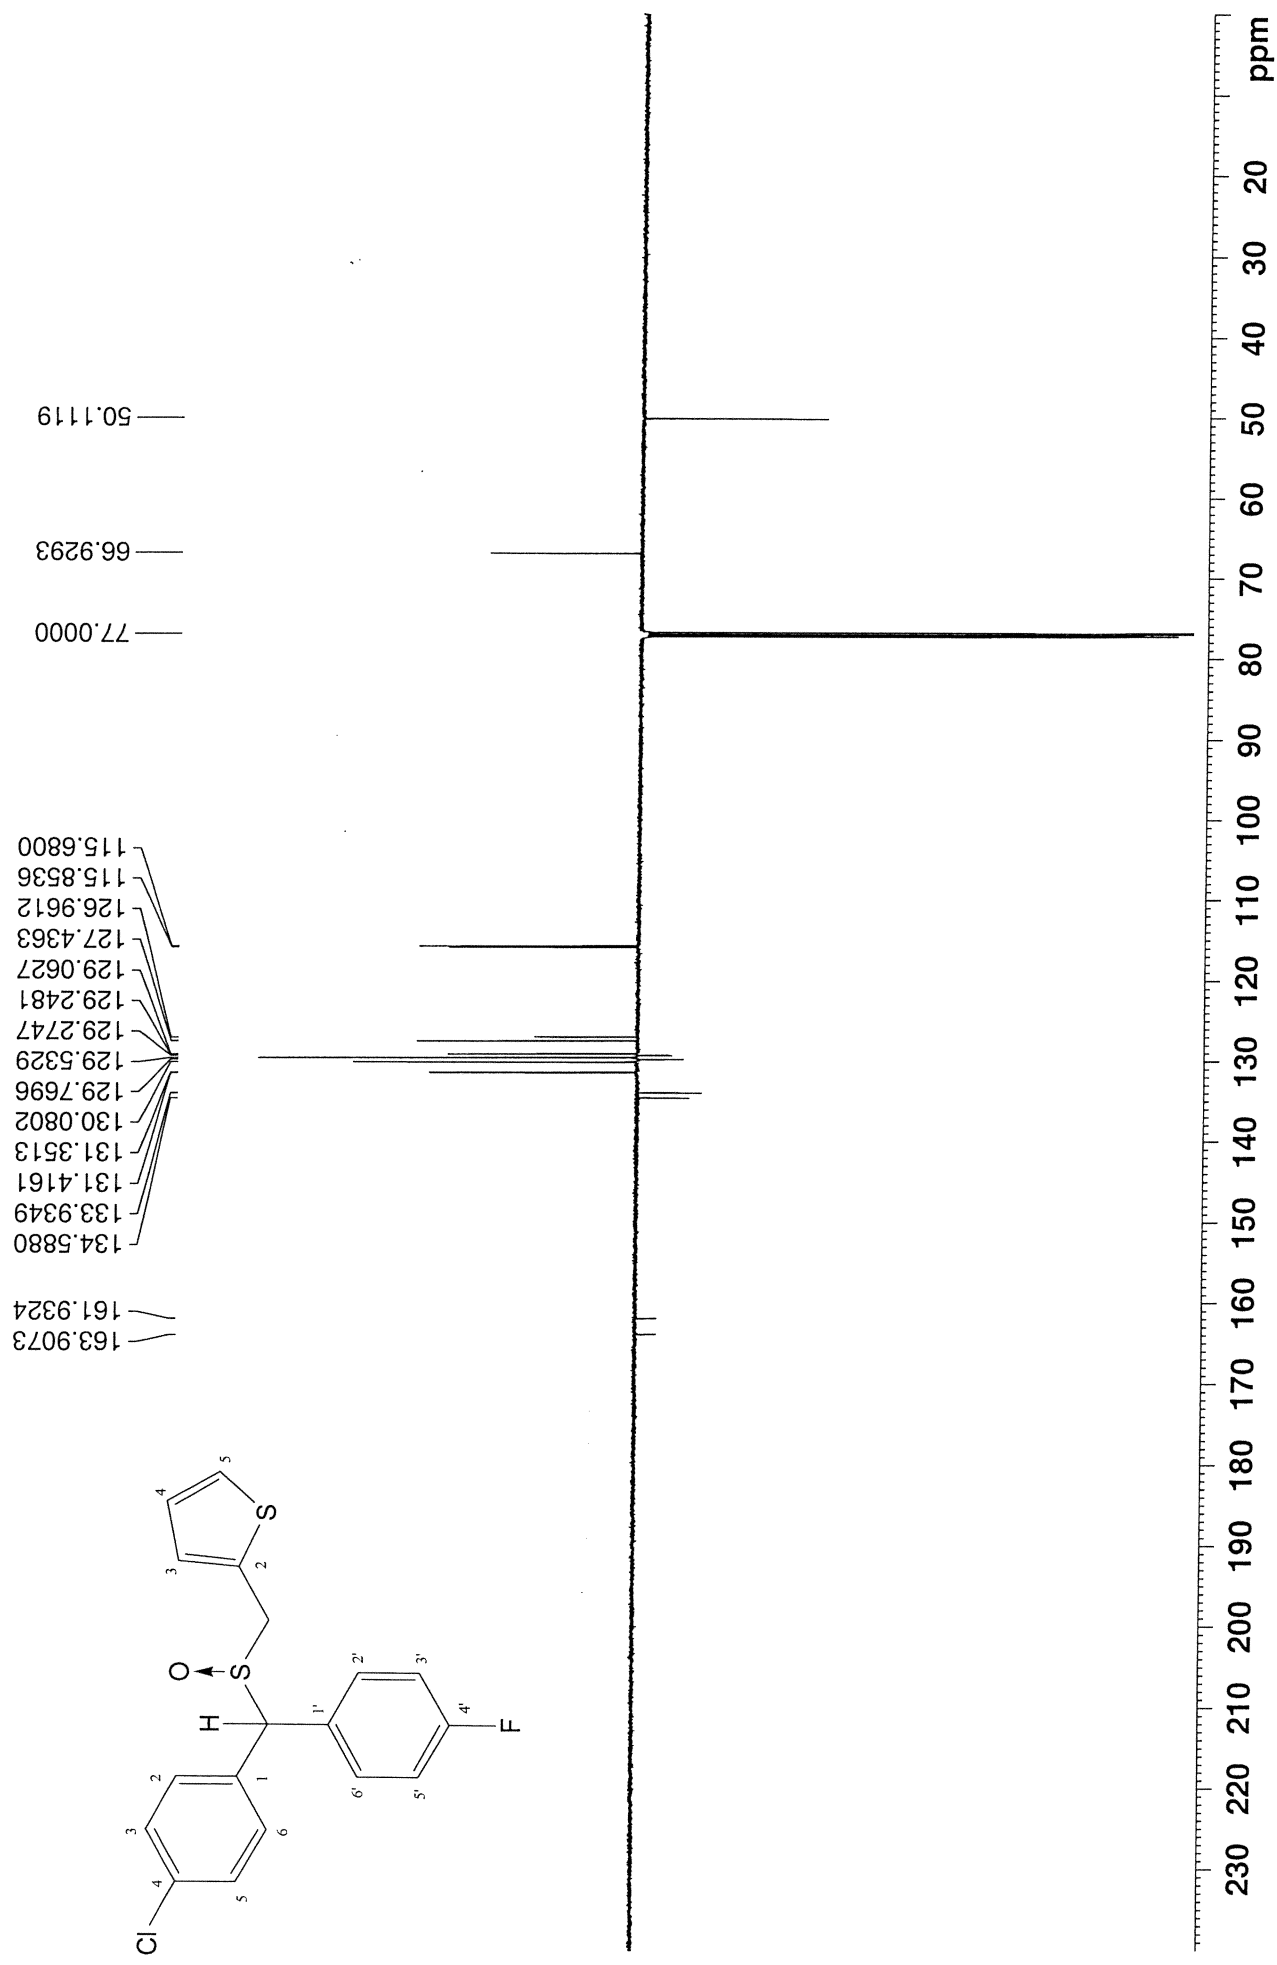

163.9073 —  
161.9324 —

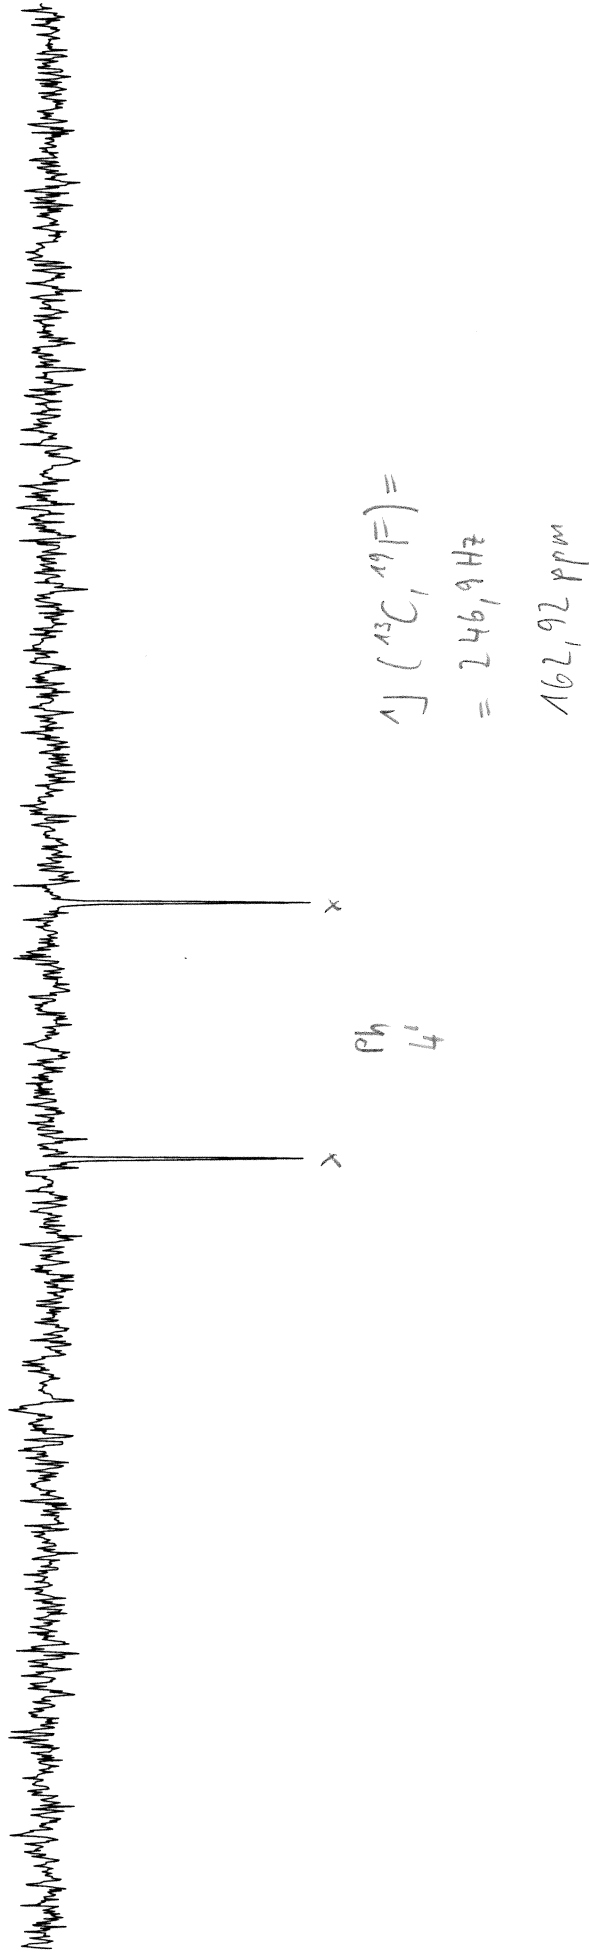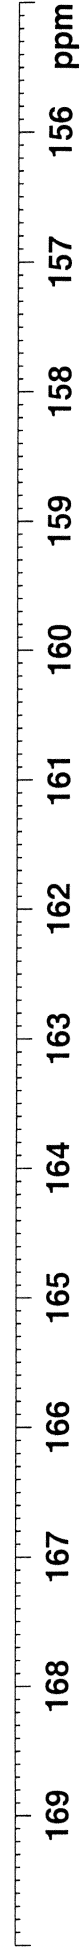

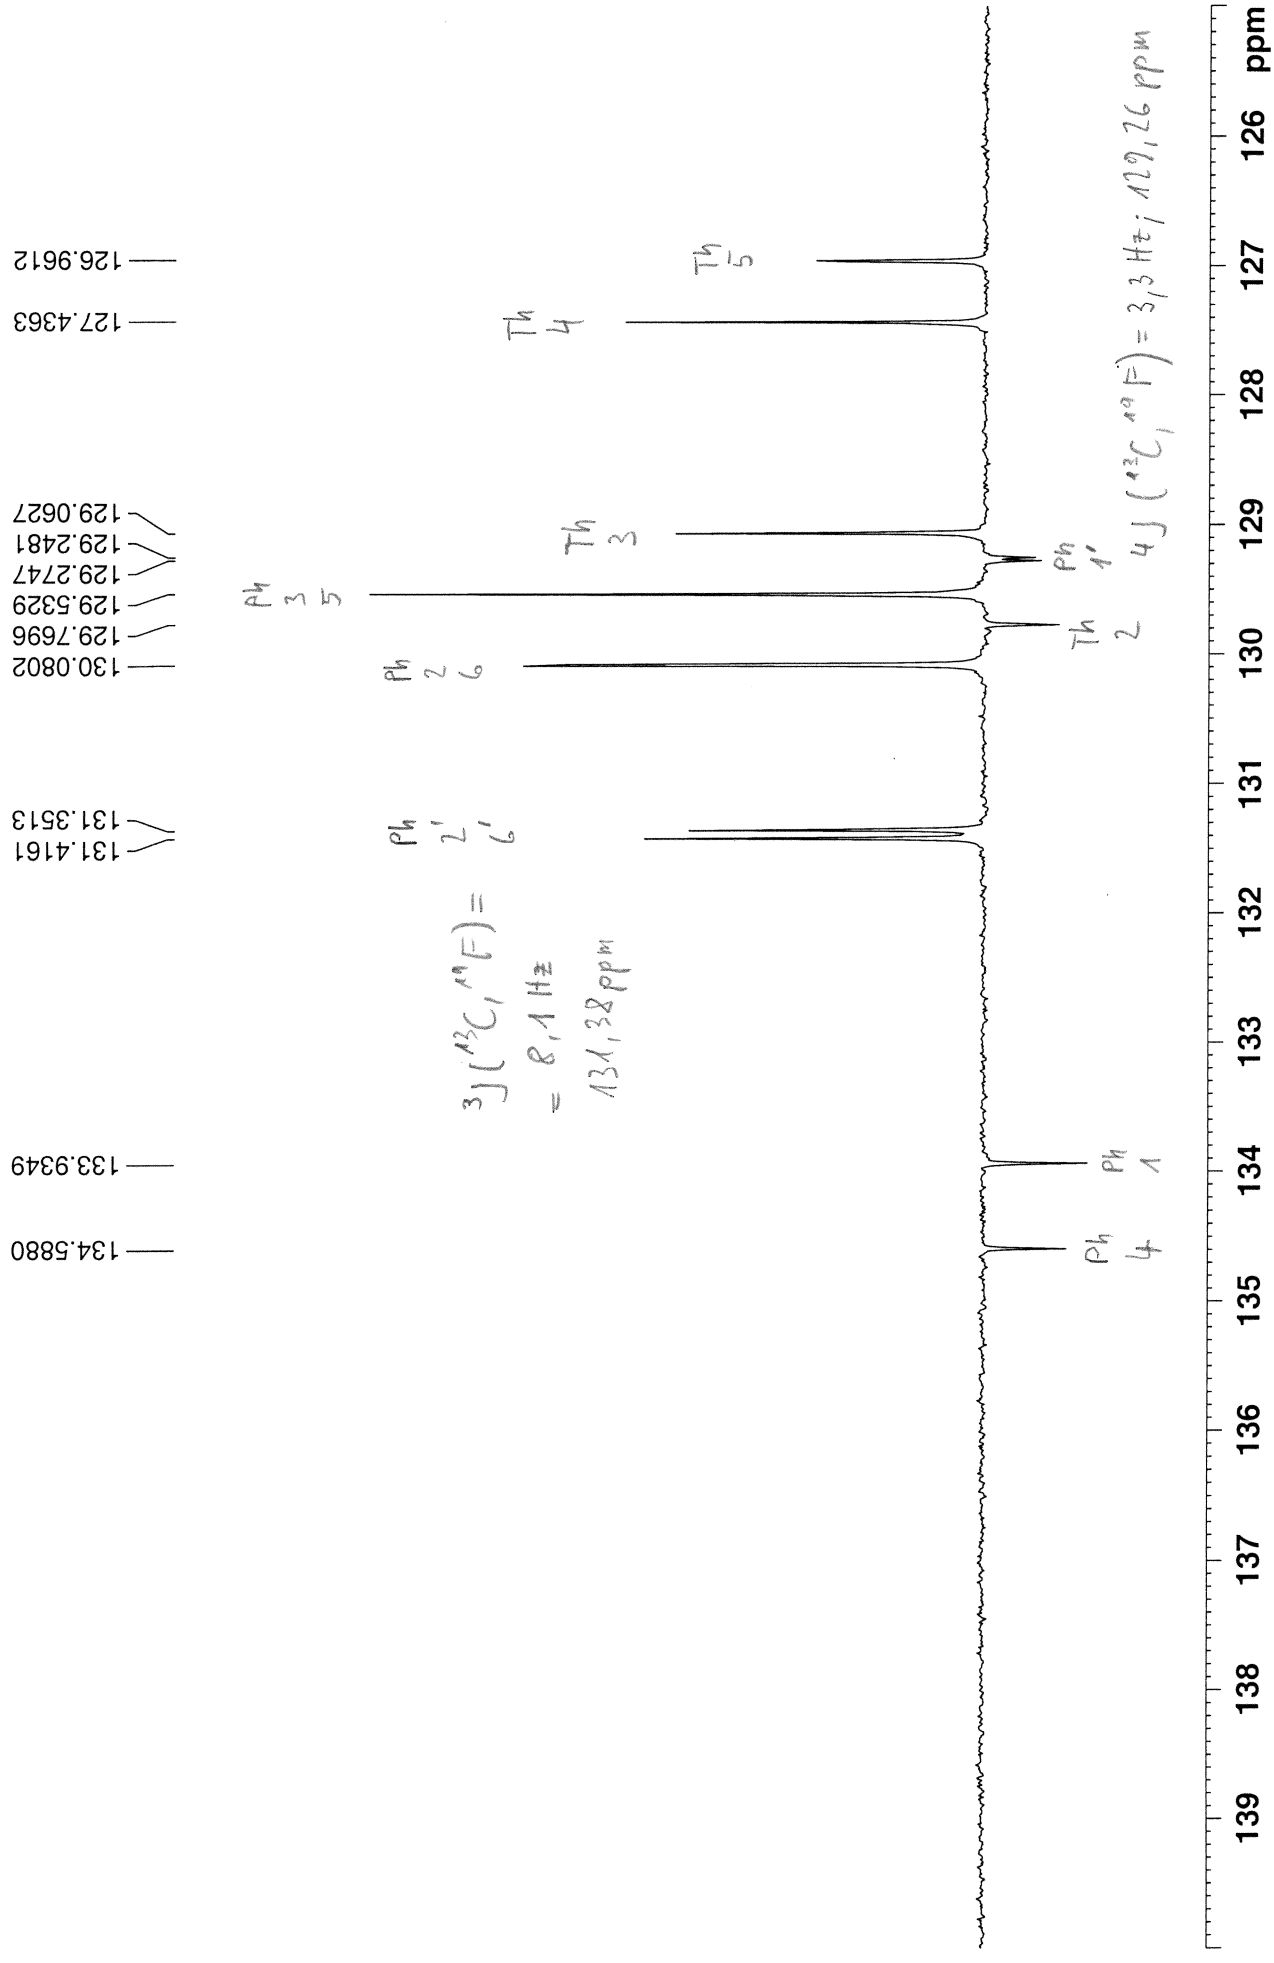

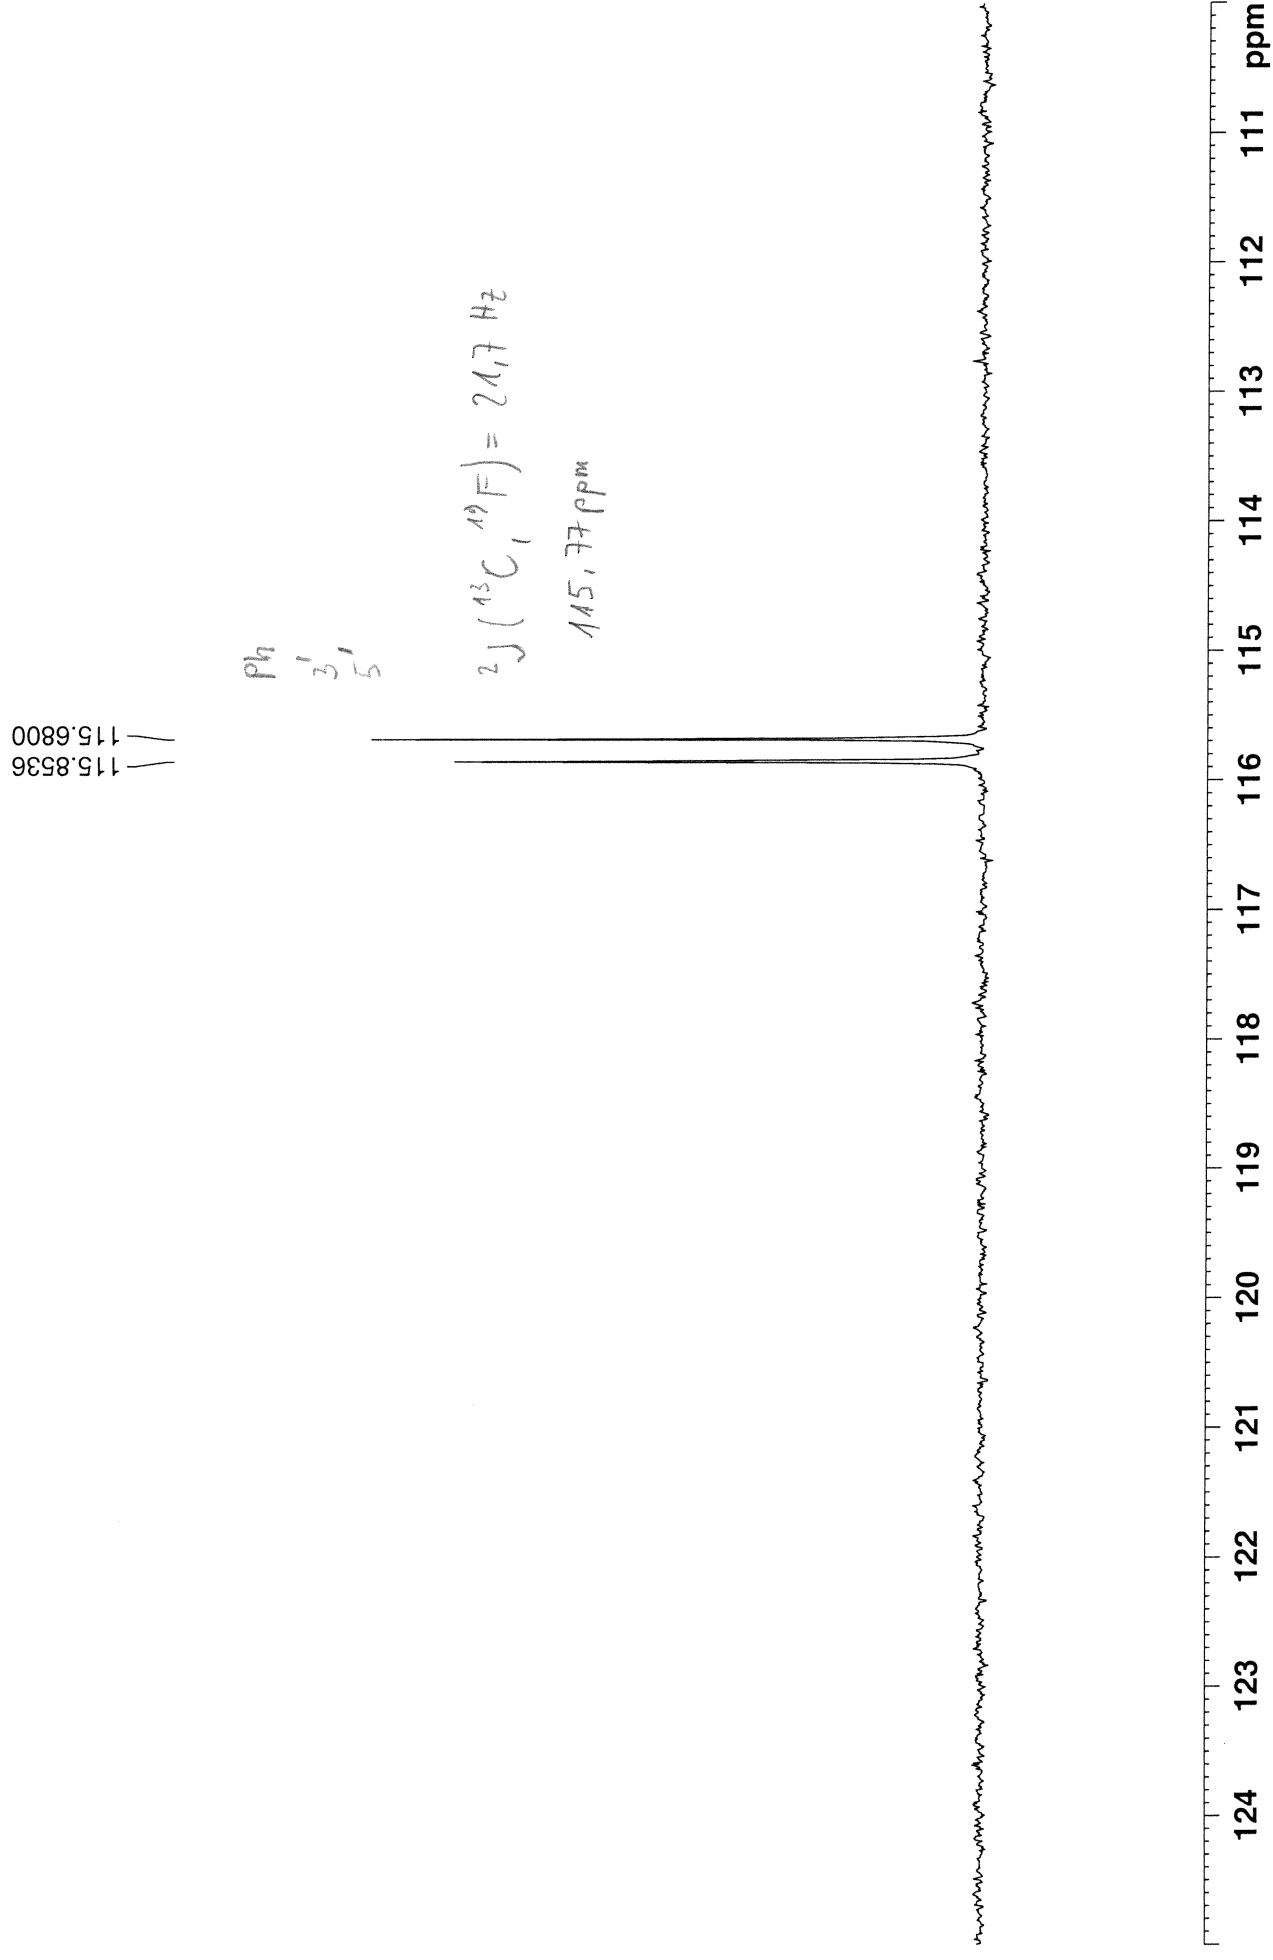

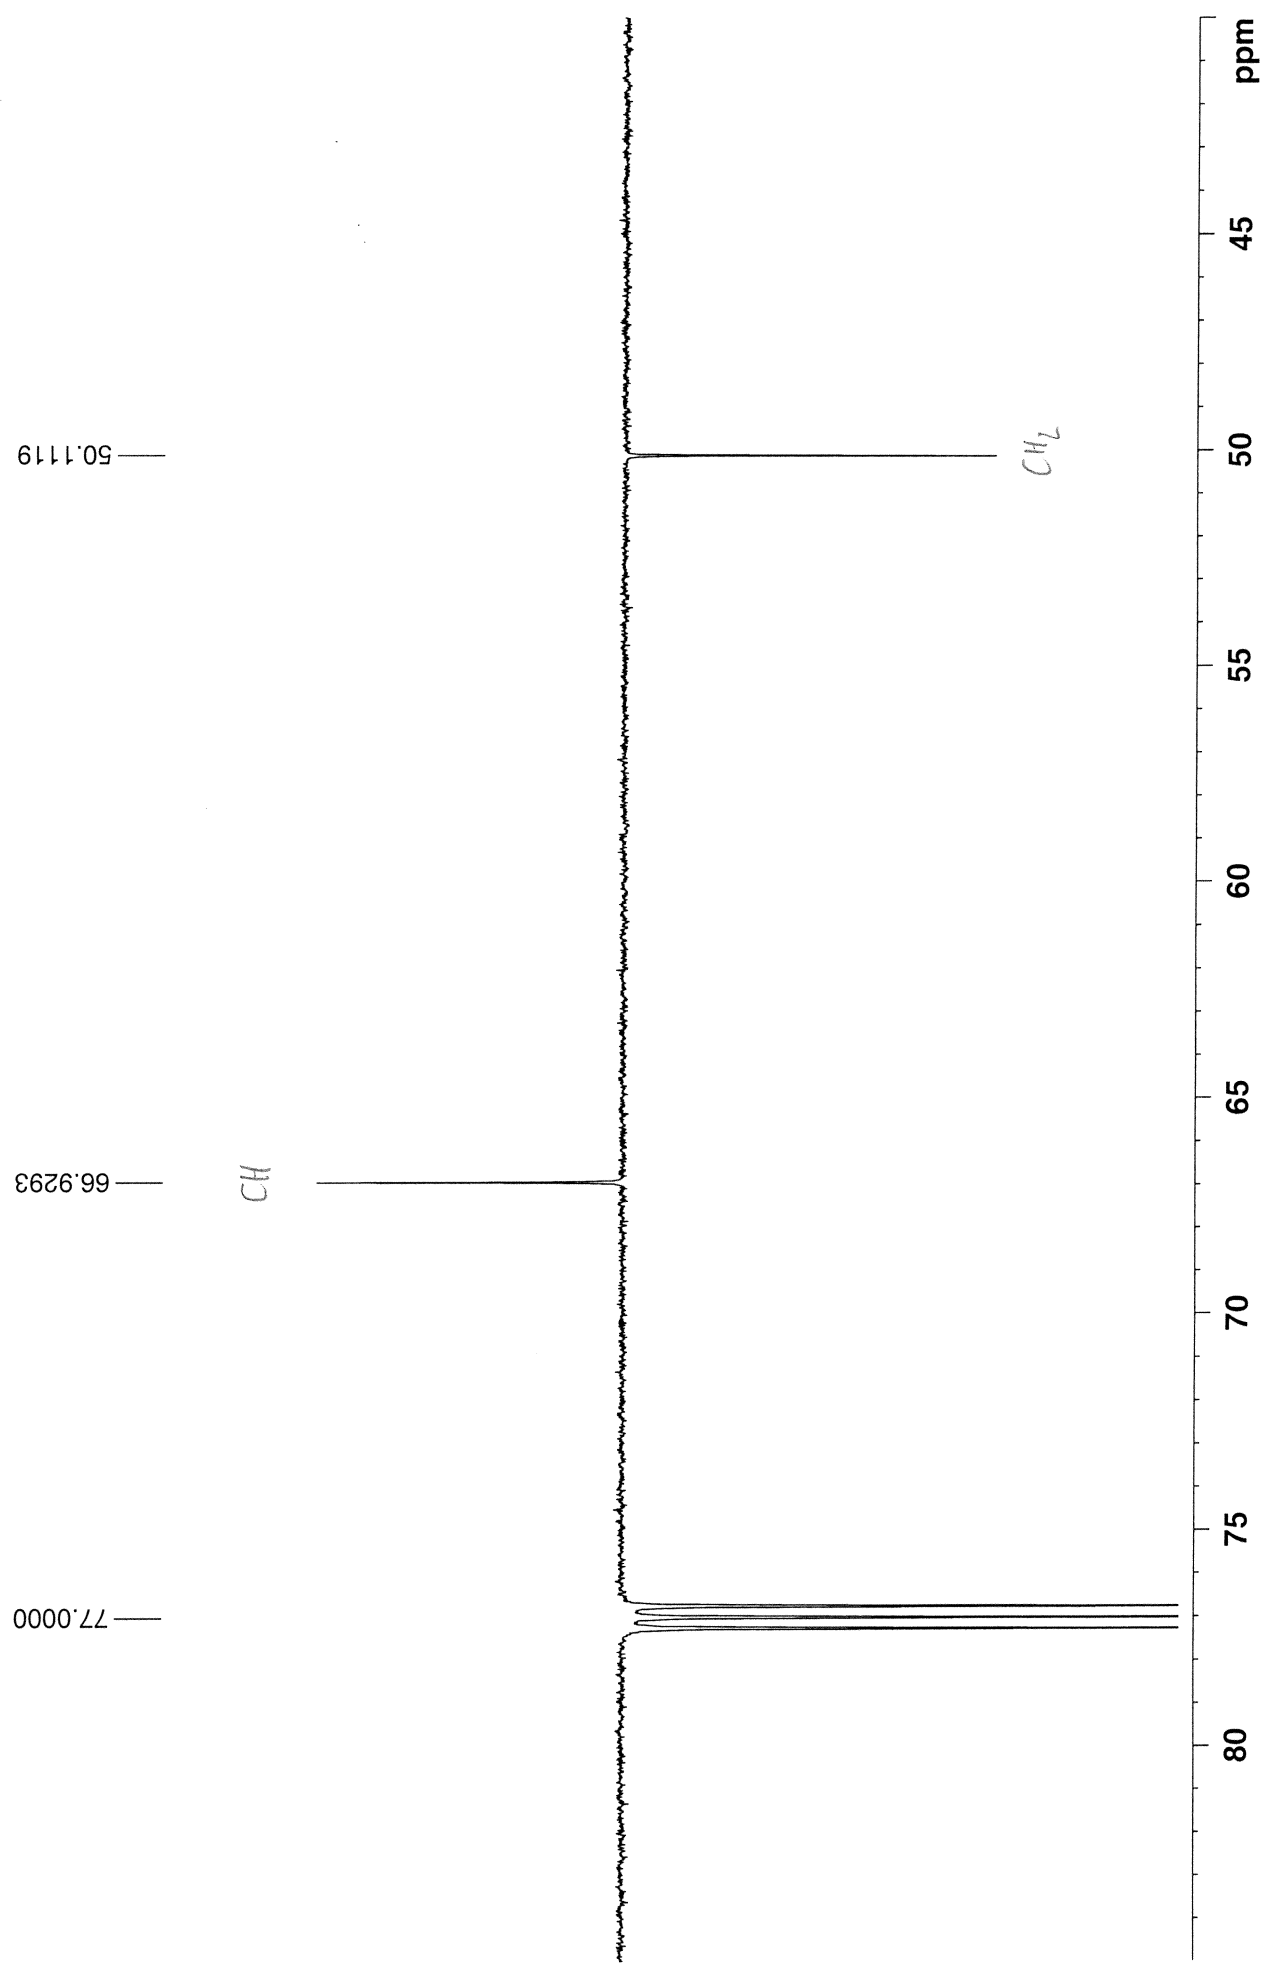

## X-ray Analysis

The X-ray intensity data were measured on Bruker D8 Venture and Stoe Stadivari diffractometer equipped with multilayer monochromator, Mo K $\alpha$  and Cu K $\alpha$  INCOATEC and AXO micro focus sealed tubes and Oxford cooling systems. The structures were solved by *Direct and Iterative Methods*. Non-hydrogen atoms were refined with *anisotropic displacement parameters*. Hydrogen atoms were inserted at calculated positions and refined with riding model. The following software was used: *Bruker SAINT software package*<sup>i</sup> using a narrow-frame algorithm for frame integration, *SADABS*<sup>ii</sup> for absorption correction, *X-Area Integrate Software package*<sup>iii</sup>, *X-Area LANA*<sup>iv</sup> for scaling, *OLEX2*<sup>v</sup> for structure solution, refinement, molecular diagrams and graphical user-interface, *Shelxle*<sup>vi</sup> for refinement and graphical user-interface *SHELXS-2015*<sup>vii</sup> for structure solution, *SHELXL-2015*<sup>viii</sup> for refinement, *Platon*<sup>ix</sup> for symmetry check. Experimental data (Available online: <http://www.ccdc.cam.ac.uk/conts/retrieving.html>) can be found in **Supp. Table 1**. Crystal data, data collection parameters, and structure refinement details are given in **Supporting Tables** below.

**Supp. Table 1.** Experimental parameter and CCDC-Code.

| Sample Compound ID – | Machine        | Source | Temp. | Detector Distance | Time/ Frame | #Frames | Frame width | CCDC    |
|----------------------|----------------|--------|-------|-------------------|-------------|---------|-------------|---------|
|                      |                |        | [K]   | [mm]              | [s]         |         | [°]         |         |
| 1                    | Stoe Stadivari | Mo     | 100   | 40                | 2.0         | 4152    | 0.5         | 2221111 |
| 3                    | Bruker D8      | Mo     | 100   | 40                | 1           | 1000    | 0.36        | 2221112 |
| 4                    | Stoe Stadivari | Mo     | 100   | 40                | 0.5         | 6025    | 0.5         | 2221113 |
| 13                   | Stoe Stadivari | Mo     | 100   | 40                | 2           | 4898    | 0.4         | 2221114 |
| 16                   | Stoe Stadivari | Mo     | 100   | 40                | 0.2         | 1244    | 0.36        | 2221115 |
| 17                   | Stoe Stadivari | Mo     | 100   | 40                | 8           | 3013    | 0.5         | 2221116 |
| 19                   | Stoe Stadivari | Mo     | 100   | 40                | 10          | 1467    | 0.36        | 2221117 |

|    |                |    |     |    |     |       |       |         |
|----|----------------|----|-----|----|-----|-------|-------|---------|
| 20 | Stoe Stadivari | Mo | 100 | 40 | 40  | 5432  | 0.36  | 2221118 |
| 21 | Bruker D8      | Mo | 100 | 50 | 10  | 4065  | 0,360 | 2221119 |
| 22 | Stoe Stadivari | Mo | 100 | 40 | 10  | 5184  | 0.36  | 2221120 |
| 23 | Bruker D8      | Mo | 100 | 37 | 40  | 720   | 0.5   | 2221121 |
| 24 | Bruker D8      | Mo | 100 | 37 | 12  | 430   | 0.5   | 2221122 |
| 41 | Bruker D8      | Mo | 100 | 40 | 1   | 6021  | 0.360 | 2221136 |
| 42 | Bruker D8      | Mo | 100 | 40 | 1   | 1000  | 0.36  | 2221137 |
| 43 | Stoe Stadivari | Mo | 100 | 40 | 1   | 5000  | 0.4   | 2221138 |
| 44 | Bruker D8      | Mo | 100 | 40 | 20  | 967   | 0.36  | 2221139 |
| 50 | Stoe Stadivari | Mo | 100 | 50 | 40  | 6073  | 0.36  | 2221127 |
| 51 | Stoe Stadivari | Mo | 100 | 40 | 2   | 1812  | 0.5   | 2221128 |
| 52 | Stoe Stadivari | Cu | 100 | 40 | 2   | 4868  | 0.5   | 2221129 |
| 55 | Bruker D8      | Mo | 100 | 37 | 60  | 1348  | 1     | 2221134 |
| 56 | Bruker D8      | Mo | 100 | 40 | 20  | 2090  | 0.5   | 2221135 |
| 70 | Stoe Stadivari | Mo | 100 | 40 | 0.2 | 3823  | 0.4   | 2221123 |
| 71 | Stoe Stadivari | Mo | 100 | 40 | 60  | 3775  | 0.36  | 2221125 |
| 72 | Bruker D8      | Mo | 100 | 40 | 4   | 2855  | 0.36  | 2221126 |
| 77 | Stoe Stadivari | Mo | 100 | 40 | 1   | 4238  | 0.4   | 2221130 |
| 79 | Bruker D8      | Mo | 100 | 40 | 5   | 14497 | 0.36  | 2221131 |
| 80 | Bruker D8      | Mo | 100 | 40 | 1   | 5431  | 0.36  | 2221132 |

## Compound 1

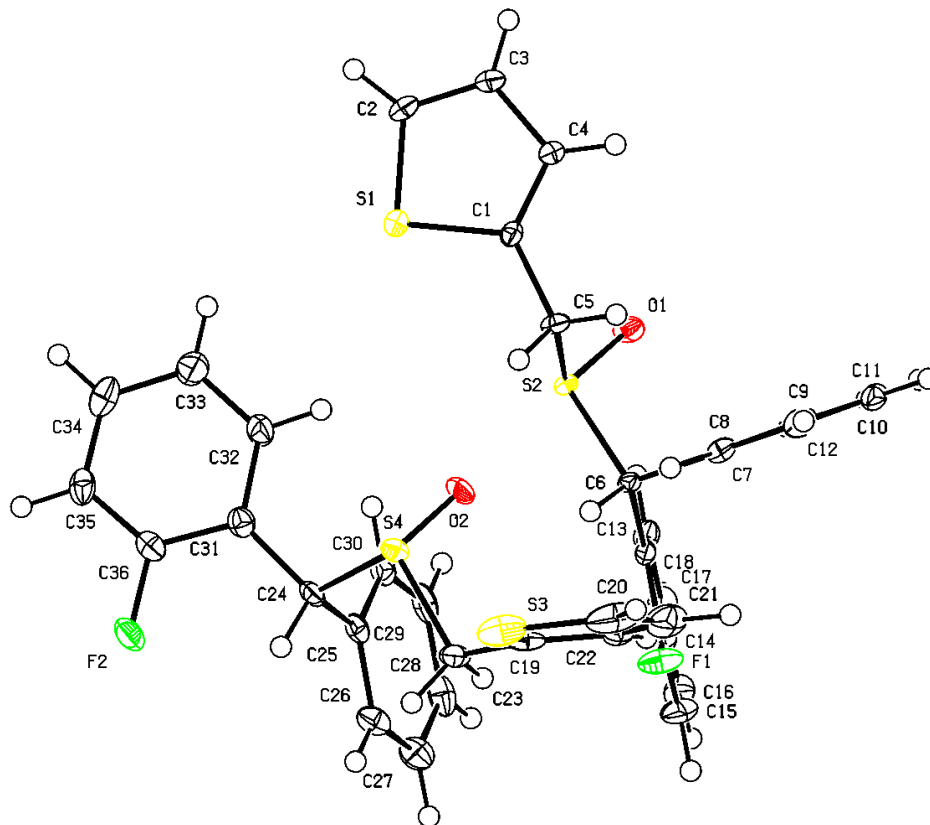

Asymmetric Unit of drawn with 50% displacement ellipsoid. The bond precision for C-C single bonds is 0.0031 Å. Classical Flack parameter = 0.08(4) and 0.10(2) by Parsons' method<sup>1</sup> for S2/S4 (S) C6/C24 (R).



### Compound 3

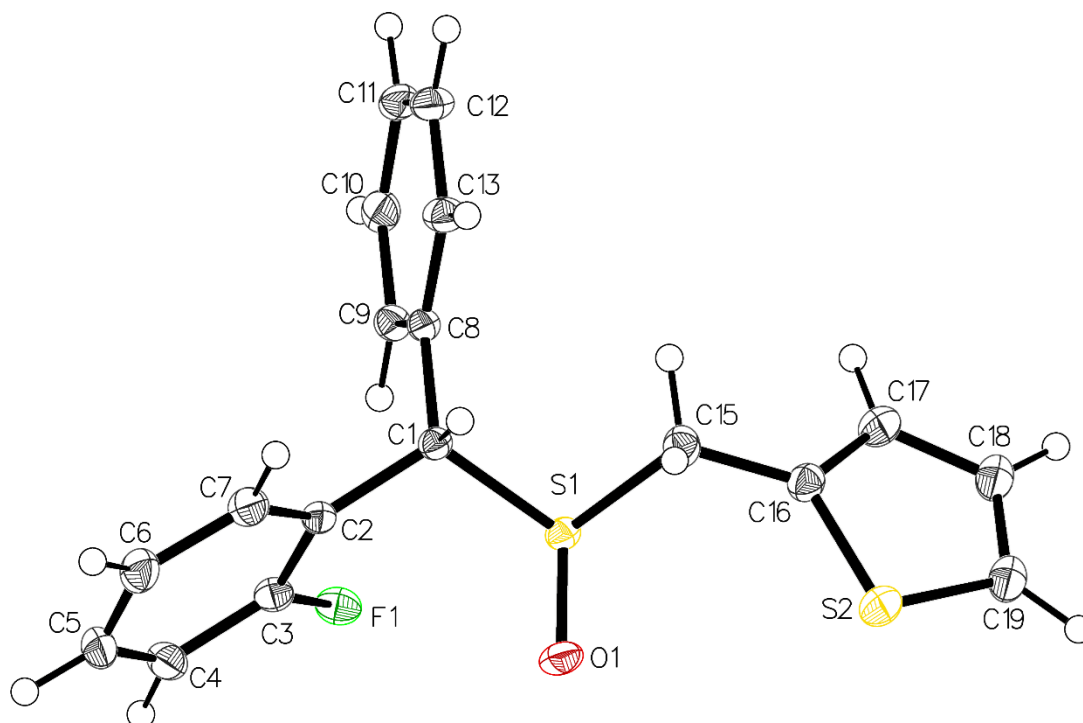

Asymmetric Unit of drawn with 50% displacement ellipsoid. Disorder omitted for clarity. The bond precision for C-C single bonds is 0.0029 Å. Chirality proofed by Hooft (-0.01(2)) and Flack (-0.01(6)) for S1 (R) and C1(S).

|                     |                                                  |
|---------------------|--------------------------------------------------|
| Identification code | <b>Compound 3</b>                                |
| Empirical formula   | C <sub>18</sub> H <sub>15</sub> FOS <sub>2</sub> |
| Formula weight      | 330.42                                           |
| Temperature/K       | 100.00                                           |
| Crystal system      | monoclinic                                       |
| Space group         | P2 <sub>1</sub>                                  |
| a/Å                 | 9.6927(2)                                        |
| b/Å                 | 8.6471(2)                                        |
| c/Å                 | 10.4384(2)                                       |

|                                                |                                                                    |
|------------------------------------------------|--------------------------------------------------------------------|
| $\alpha/^\circ$                                | 90                                                                 |
| $\beta/^\circ$                                 | 116.1290(13)                                                       |
| $\gamma/^\circ$                                | 90                                                                 |
| Volume/ $\text{\AA}^3$                         | 785.47(3)                                                          |
| Z                                              | 2                                                                  |
| $\rho_{\text{calc}}/\text{g/cm}^3$             | 1.397                                                              |
| $\mu/\text{mm}^{-1}$                           | 0.347                                                              |
| F(000)                                         | 344.0                                                              |
| Crystal size/ $\text{mm}^3$                    | $0.4 \times 0.3 \times 0.2$                                        |
| Radiation                                      | MoK $\alpha$ ( $\lambda = 0.71073$ )                               |
| 2 $\Theta$ range for data collection/ $^\circ$ | 4.346 to 60.202                                                    |
| Index ranges                                   | $-11 \leq h \leq 13$ , $-12 \leq k \leq 12$ , $-14 \leq l \leq 13$ |
| Reflections collected                          | 10892                                                              |
| Independent reflections                        | 4345 [ $R_{\text{int}} = 0.0287$ , $R_{\text{sigma}} = 0.0370$ ]   |
| Data/restraints/parameters                     | 4345/10/200                                                        |
| Goodness-of-fit on $F^2$                       | 1.061                                                              |
| Final R indexes [ $ I  \geq 2\sigma(I)$ ]      | $R_1 = 0.0277$ , $wR_2 = 0.0658$                                   |
| Final R indexes [all data]                     | $R_1 = 0.0315$ , $wR_2 = 0.0675$                                   |
| Largest diff. peak/hole / $e \text{\AA}^{-3}$  | 0.33/-0.24                                                         |
| Flack parameter                                | 0.00(2)                                                            |

## Compound 4

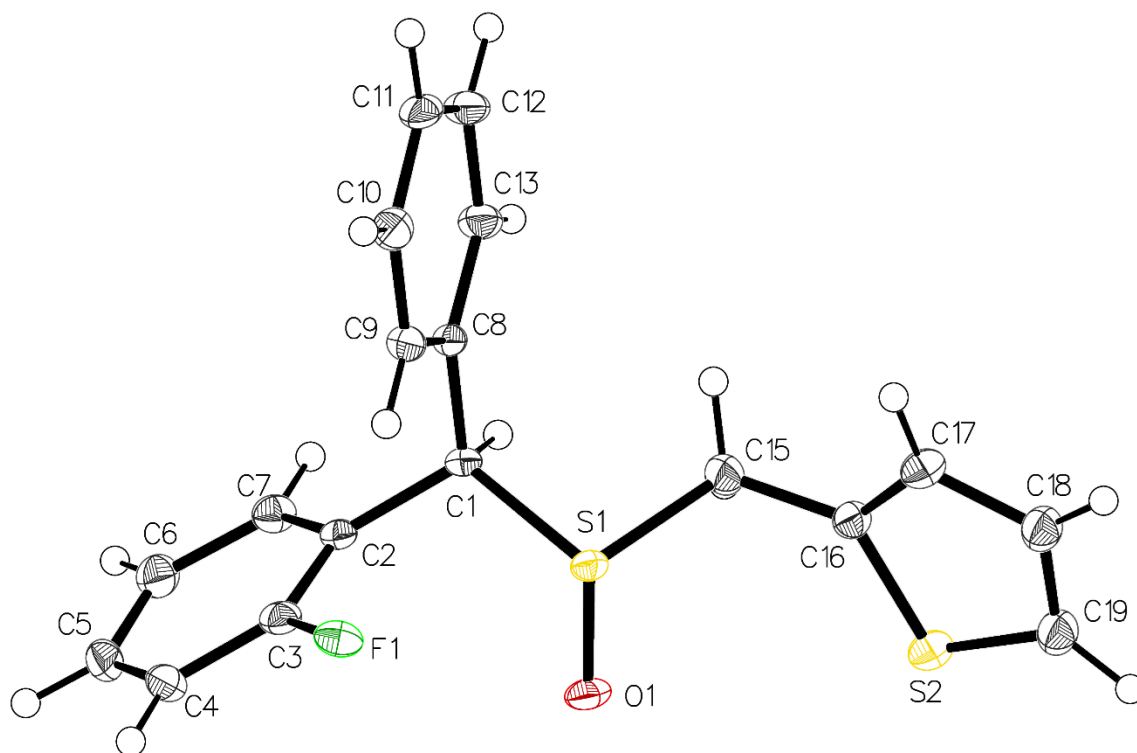

Asymmetric Unit of drawn with 50% displacement ellipsoid. Disorder omitted for clarity. The bond precision for C-C single bonds is 0.0036 Å. Chirality proofed by Hooft (0.044(18)) and Flack (0.02(7)) for S1 (S) and C1(R).

|                     |                                                  |
|---------------------|--------------------------------------------------|
| Identification code | <b>Compound 4</b>                                |
| Empirical formula   | C <sub>18</sub> H <sub>15</sub> FOS <sub>2</sub> |
| Formula weight      | 330.42                                           |
| Temperature/K       | 100                                              |
| Crystal system      | monoclinic                                       |
| Space group         | P2 <sub>1</sub>                                  |
| a/Å                 | 9.6931(4)                                        |
| b/Å                 | 8.6156(5)                                        |
| c/Å                 | 10.4514(5)                                       |

|                                                |                                                                   |
|------------------------------------------------|-------------------------------------------------------------------|
| $\alpha/^\circ$                                | 90                                                                |
| $\beta/^\circ$                                 | 116.357(3)                                                        |
| $\gamma/^\circ$                                | 90                                                                |
| Volume/ $\text{\AA}^3$                         | 782.08(7)                                                         |
| Z                                              | 2                                                                 |
| $\rho_{\text{calc}}/\text{g/cm}^3$             | 1.403                                                             |
| $\mu/\text{mm}^{-1}$                           | 0.349                                                             |
| F(000)                                         | 344.0                                                             |
| Crystal size/ $\text{mm}^3$                    | $0.56 \times 0.34 \times 0.23$                                    |
| Radiation                                      | Mo K $\alpha$ ( $\lambda = 0.71073$ )                             |
| 2 $\Theta$ range for data collection/ $^\circ$ | 4.35 to 60.062                                                    |
| Index ranges                                   | $-8 \leq h \leq 13$ , $-11 \leq k \leq 12$ , $-14 \leq l \leq 11$ |
| Reflections collected                          | 36648                                                             |
| Independent reflections                        | 4463 [ $R_{\text{int}} = 0.0370$ , $R_{\text{sigma}} = 0.0333$ ]  |
| Data/restraints/parameters                     | 4463/10/200                                                       |
| Goodness-of-fit on $F^2$                       | 1.075                                                             |
| Final R indexes [ $ I  \geq 2\sigma(I)$ ]      | $R_1 = 0.0315$ , $wR_2 = 0.0797$                                  |
| Final R indexes [all data]                     | $R_1 = 0.0361$ , $wR_2 = 0.0804$                                  |
| Largest diff. peak/hole / $e \text{\AA}^{-3}$  | 0.31/-0.51                                                        |
| Flack parameter                                | 0.07(6)                                                           |

## Compound 13

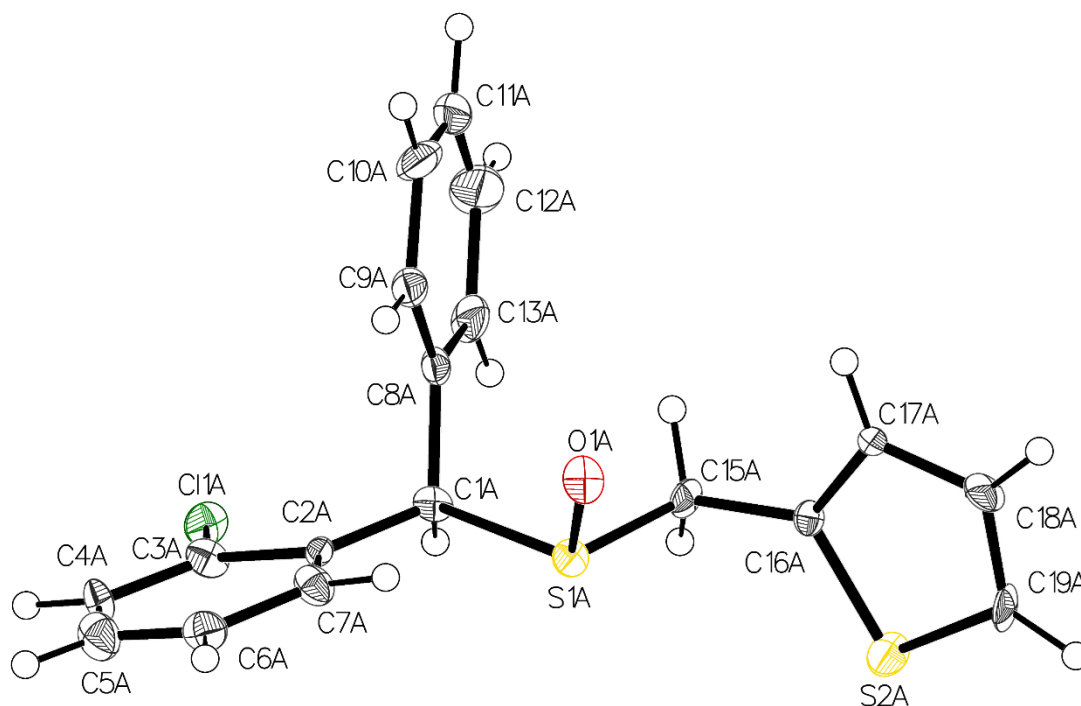

Asymmetric Unit of drawn with 50% displacement ellipsoid. Disorder and second independent molecule omitted for clarity. The bond precision for C-C single bonds is 0.0123 Å. Chirality proofed by Hooft (-0.34(5)) and Flack (-0.19(10)) for S1 (R) and C1(R). Two B-Alerts could not be avoided.

PLAT026\_ALERT\_3\_B Ratio Observed / Unique Reflections (too) Low. 35% Check

PLAT340\_ALERT\_3\_B Low Bond Precision on C-C Bonds ..... 0.0123 Ang.

To many samples to measure makes sometimes a low coverage necessary.

|                     |                      |
|---------------------|----------------------|
| Identification code | <b>Compound 13</b>   |
| Empirical formula   | $C_{18}H_{15}ClOS_2$ |
| Formula weight      | 346.87               |
| Temperature/K       | 100                  |
| Crystal system      | triclinic            |
| Space group         | P1                   |

|                                                |                                                                |
|------------------------------------------------|----------------------------------------------------------------|
| a/Å                                            | 9.6760(17)                                                     |
| b/Å                                            | 9.9117(17)                                                     |
| c/Å                                            | 10.6083(19)                                                    |
| $\alpha/^\circ$                                | 104.107(13)                                                    |
| $\beta/^\circ$                                 | 115.015(13)                                                    |
| $\gamma/^\circ$                                | 99.349(14)                                                     |
| Volume/Å <sup>3</sup>                          | 852.4(3)                                                       |
| Z                                              | 2                                                              |
| $\rho_{\text{calc}}/\text{g}/\text{cm}^3$      | 1.351                                                          |
| $\mu/\text{mm}^{-1}$                           | 0.467                                                          |
| F(000)                                         | 360.0                                                          |
| Crystal size/mm <sup>3</sup>                   | 0.4 × 0.193 × 0.08                                             |
| Radiation                                      | Mo K $\alpha$ ( $\lambda$ = 0.71073)                           |
| 2 $\Theta$ range for data collection/ $^\circ$ | 4.522 to 60.068                                                |
| Index ranges                                   | -13 ≤ h ≤ 13, -13 ≤ k ≤ 13, -14 ≤ l ≤ 14                       |
| Reflections collected                          | 20622                                                          |
| Independent reflections                        | 9000 [ $R_{\text{int}}$ = 0.0770, $R_{\text{sigma}}$ = 0.4354] |
| Data/restraints/parameters                     | 9000/669/380                                                   |
| Goodness-of-fit on $F^2$                       | 0.746                                                          |
| Final R indexes [ $ I  \geq 2\sigma(I)$ ]      | $R_1$ = 0.0622, $wR_2$ = 0.1197                                |
| Final R indexes [all data]                     | $R_1$ = 0.1444, $wR_2$ = 0.1287                                |
| Largest diff. peak/hole / e Å <sup>-3</sup>    | 0.55/-0.61                                                     |
| Flack parameter                                | -0.19(10)                                                      |

## Compound 14

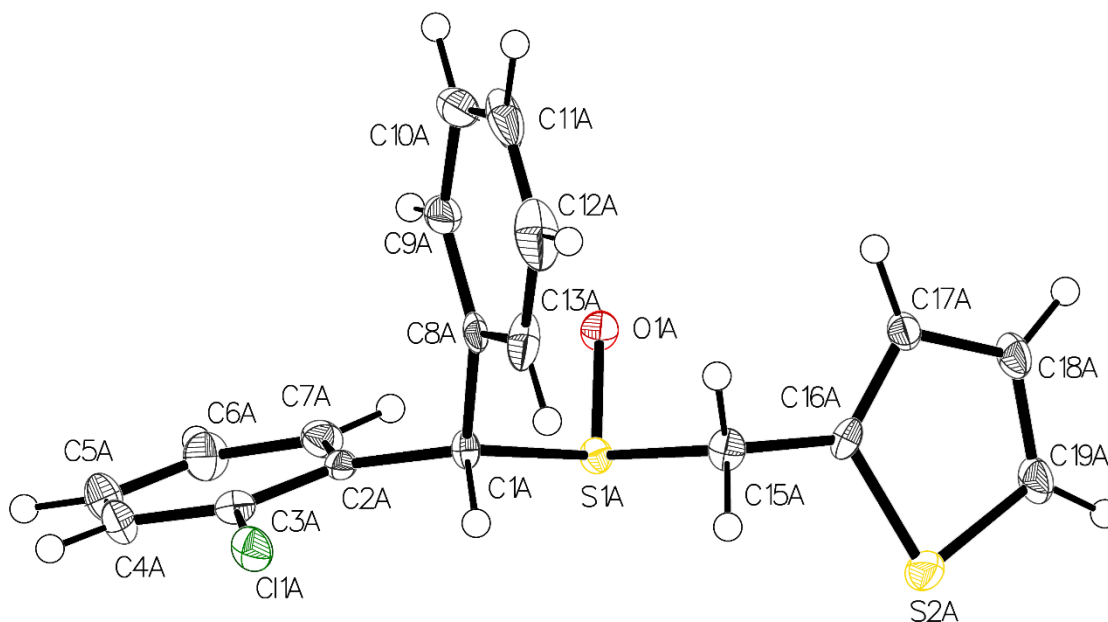

Asymmetric Unit of drawn with 50% displacement ellipsoid. Disorder and second independent molecule omitted for clarity. The bond precision for C-C single bonds is 0.0064 Å. Chirality proofed by Hooft (0.17(4)) and Flack (0.07(6)) for S1 (S) and C1(S). One B-Alert could not avoided.

PLAT915\_ALERT\_3\_B No Flack x Check Done: Low Friedel Pair Coverage 28 %

To many samples to measure makes sometimes a low coverage necessary.

|                     |                                                   |
|---------------------|---------------------------------------------------|
| Identification code | <b>Compound 14</b>                                |
| Empirical formula   | C <sub>18</sub> H <sub>15</sub> ClOS <sub>2</sub> |
| Formula weight      | 346.87                                            |
| Temperature/K       | 150                                               |
| Crystal system      | triclinic                                         |
| Space group         | P1                                                |
| a/Å                 | 9.6812(8)                                         |
| b/Å                 | 9.9373(8)                                         |

|                                                |                                                                |
|------------------------------------------------|----------------------------------------------------------------|
| c/Å                                            | 10.6047(9)                                                     |
| $\alpha/^\circ$                                | 104.192(7)                                                     |
| $\beta/^\circ$                                 | 115.150(6)                                                     |
| $\gamma/^\circ$                                | 99.262(7)                                                      |
| Volume/Å <sup>3</sup>                          | 853.48(13)                                                     |
| Z                                              | 2                                                              |
| $\rho_{\text{calc}}/\text{g}/\text{cm}^3$      | 1.350                                                          |
| $\mu/\text{mm}^{-1}$                           | 0.467                                                          |
| F(000)                                         | 360.0                                                          |
| Crystal size/mm <sup>3</sup>                   | 0.09 × 0.062 × 0.04                                            |
| Radiation                                      | Mo K $\alpha$ ( $\lambda$ = 0.71073)                           |
| 2 $\theta$ range for data collection/ $^\circ$ | 4.436 to 60.066                                                |
| Index ranges                                   | -13 ≤ h ≤ 13, -13 ≤ k ≤ 9, -14 ≤ l ≤ 14                        |
| Reflections collected                          | 14303                                                          |
| Independent reflections                        | 6293 [ $R_{\text{int}}$ = 0.0533, $R_{\text{sigma}}$ = 0.0775] |
| Data/restraints/parameters                     | 6293/739/404                                                   |
| Goodness-of-fit on $F^2$                       | 0.914                                                          |
| Final R indexes [ $ I  \geq 2\sigma(I)$ ]      | $R_1$ = 0.0388, $wR_2$ = 0.0816                                |
| Final R indexes [all data]                     | $R_1$ = 0.0540, $wR_2$ = 0.0843                                |
| Largest diff. peak/hole / e Å <sup>-3</sup>    | 0.31/-0.29                                                     |
| Flack parameter                                | 0.07(6)                                                        |



## Compound 16

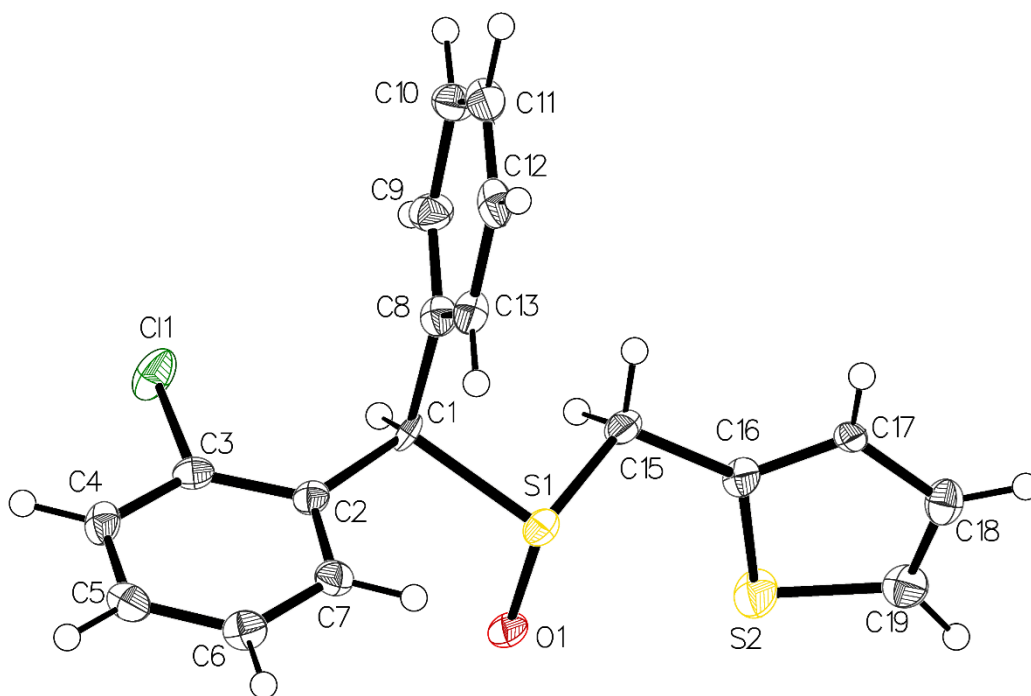

Asymmetric Unit of drawn with 50% displacement ellipsoid. The bond precision for C-C single bonds is 0.0073 Å. Chirality proofed by Hooft (0.34(4)) and Flack (-0.04(11)) for S1 (S) and C1(R).

|                     |                                                   |
|---------------------|---------------------------------------------------|
| Identification code | <b>Compound 16</b>                                |
| Empirical formula   | C <sub>18</sub> H <sub>15</sub> ClOS <sub>2</sub> |
| Formula weight      | 346.87                                            |
| Temperature/K       | 100                                               |
| Crystal system      | monoclinic                                        |
| Space group         | P2 <sub>1</sub>                                   |
| a/Å                 | 8.5421(11)                                        |
| b/Å                 | 10.2144(8)                                        |
| c/Å                 | 9.8299(11)                                        |
| α/°                 | 90                                                |
| β/°                 | 107.883(9)                                        |

|                                                |                                                                    |
|------------------------------------------------|--------------------------------------------------------------------|
| $\gamma/^\circ$                                | 90                                                                 |
| Volume/ $\text{\AA}^3$                         | 816.24(16)                                                         |
| Z                                              | 2                                                                  |
| $\rho_{\text{calc}}/\text{g}/\text{cm}^3$      | 1.411                                                              |
| $\mu/\text{mm}^{-1}$                           | 0.488                                                              |
| F(000)                                         | 360.0                                                              |
| Crystal size/ $\text{mm}^3$                    | $0.6 \times 0.4 \times 0.2$                                        |
| Radiation                                      | Mo K $\alpha$ ( $\lambda = 0.71073$ )                              |
| 2 $\Theta$ range for data collection/ $^\circ$ | 4.354 to 63.158                                                    |
| Index ranges                                   | $-10 \leq h \leq 12$ , $-14 \leq k \leq 14$ , $-14 \leq l \leq 14$ |
| Reflections collected                          | 10256                                                              |
| Independent reflections                        | 4842 [ $R_{\text{int}} = 0.0443$ , $R_{\text{sigma}} = 0.1641$ ]   |
| Data/restraints/parameters                     | 4842/1/199                                                         |
| Goodness-of-fit on $F^2$                       | 0.904                                                              |
| Final R indexes [ $ I  \geq 2\sigma(I)$ ]      | $R_1 = 0.0435$ , $wR_2 = 0.0906$                                   |
| Final R indexes [all data]                     | $R_1 = 0.1108$ , $wR_2 = 0.1189$                                   |
| Largest diff. peak/hole / $e \text{\AA}^{-3}$  | 0.69/-1.00                                                         |
| Flack parameter                                | 0.02(10)                                                           |

## Compound 17

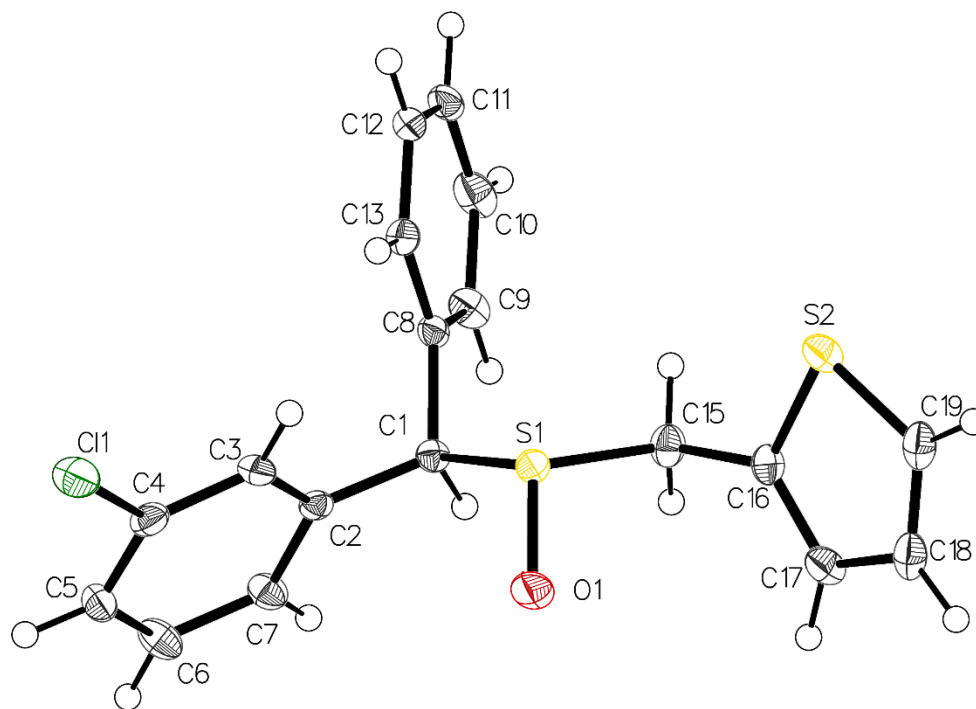

Asymmetric Unit of drawn with 50% displacement ellipsoid. Disorder omitted for clarity. The bond precision for C-C single bonds is 0.0030 Å. Chirality proofed by Hooft (-0.134(18)) and Flack (-0.12(6)) for S1 (S) and C1(R).

|                     |                                                   |
|---------------------|---------------------------------------------------|
| Identification code | <b>Compound 17</b>                                |
| Empirical formula   | C <sub>18</sub> H <sub>15</sub> ClOS <sub>2</sub> |
| Formula weight      | 346.87                                            |
| Temperature/K       | 100                                               |
| Crystal system      | orthorhombic                                      |
| Space group         | P2 <sub>1</sub> 2 <sub>1</sub> 2 <sub>1</sub>     |
| a/Å                 | 8.2111(3)                                         |
| b/Å                 | 12.2681(3)                                        |
| c/Å                 | 16.6181(4)                                        |

|                                                |                                                               |
|------------------------------------------------|---------------------------------------------------------------|
| $\alpha/^\circ$                                | 90                                                            |
| $\beta/^\circ$                                 | 90                                                            |
| $\gamma/^\circ$                                | 90                                                            |
| Volume/ $\text{\AA}^3$                         | 1674.02(8)                                                    |
| Z                                              | 4                                                             |
| $\rho_{\text{calc}}/\text{g/cm}^3$             | 1.376                                                         |
| $\mu/\text{mm}^{-1}$                           | 0.476                                                         |
| F(000)                                         | 720.0                                                         |
| Crystal size/ $\text{mm}^3$                    | $0.16 \times 0.117 \times 0.09$                               |
| Radiation                                      | Mo K $\alpha$ ( $\lambda = 0.71073$ )                         |
| 2 $\Theta$ range for data collection/ $^\circ$ | 4.126 to 62.482                                               |
| Index ranges                                   | $-11 \leq h \leq 11, -17 \leq k \leq 17, -24 \leq l \leq 24$  |
| Reflections collected                          | 39509                                                         |
| Independent reflections                        | 5333 [ $R_{\text{int}} = 0.0416, R_{\text{sigma}} = 0.0456$ ] |
| Data/restraints/parameters                     | 5333/9/200                                                    |
| Goodness-of-fit on $F^2$                       | 0.960                                                         |
| Final R indexes [ $ I  \geq 2\sigma(I)$ ]      | $R_1 = 0.0315, wR_2 = 0.0677$                                 |
| Final R indexes [all data]                     | $R_1 = 0.0445, wR_2 = 0.0709$                                 |
| Largest diff. peak/hole / $e \text{\AA}^{-3}$  | 0.42/-0.48                                                    |
| Flack parameter                                | -0.13(4)                                                      |

### Compound 19

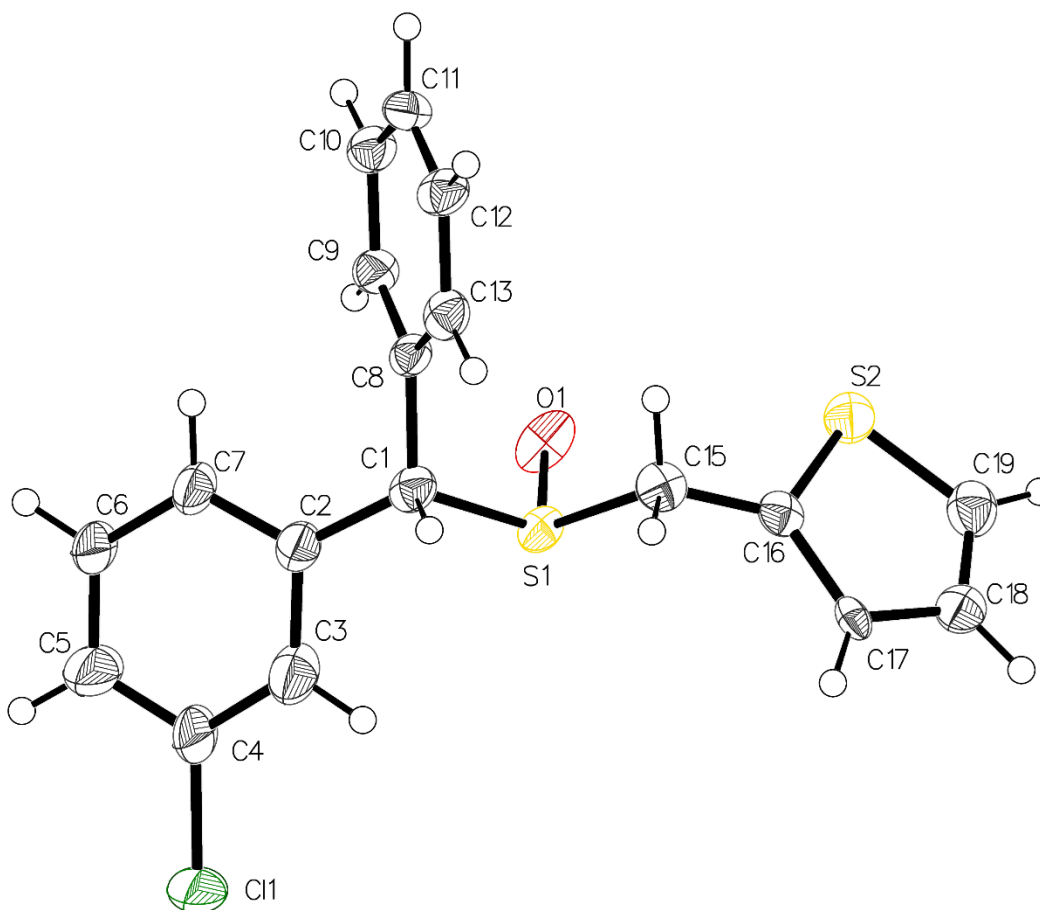

Asymmetric Unit of drawn with 50% displacement ellipsoid. Disorder omitted for clarity. The bond precision for C-C single bonds is 0.0101 Å. Chirality proofed by Hooft (-0.07(6)) and Flack (0.2(2)) for S1 (S) and C1(S). One B-Alert could not be avoided.

PLAT340\_ALERT\_3\_B Low Bond Precision on C-C Bonds .....0.01008 Ang.  
Related to the quality of the crystal and the disorder.

|                     |                                                   |
|---------------------|---------------------------------------------------|
| Identification code | <b>Compound 19</b>                                |
| Empirical formula   | C <sub>18</sub> H <sub>15</sub> ClOS <sub>2</sub> |
| Formula weight      | 346.87                                            |

|                                             |                                                               |
|---------------------------------------------|---------------------------------------------------------------|
| Temperature/K                               | 100                                                           |
| Crystal system                              | orthorhombic                                                  |
| Space group                                 | P2 <sub>1</sub> 2 <sub>1</sub> 2 <sub>1</sub>                 |
| a/Å                                         | 5.4961(6)                                                     |
| b/Å                                         | 15.672(2)                                                     |
| c/Å                                         | 18.777(2)                                                     |
| α/°                                         | 90                                                            |
| β/°                                         | 90                                                            |
| γ/°                                         | 90                                                            |
| Volume/Å <sup>3</sup>                       | 1617.4(4)                                                     |
| Z                                           | 4                                                             |
| ρ <sub>calc</sub> /g/cm <sup>3</sup>        | 1.425                                                         |
| μ/mm <sup>-1</sup>                          | 0.492                                                         |
| F(000)                                      | 720.0                                                         |
| Crystal size/mm <sup>3</sup>                | 0.18 × 0.083 × 0.03                                           |
| Radiation                                   | Mo Kα (λ = 0.71073)                                           |
| 2θ range for data collection/°              | 3.384 to 63.83                                                |
| Index ranges                                | -7 ≤ h ≤ 7, -22 ≤ k ≤ 22, -26 ≤ l ≤ 26                        |
| Reflections collected                       | 13674                                                         |
| Independent reflections                     | 5151 [R <sub>int</sub> = 0.0711, R <sub>sigma</sub> = 0.1880] |
| Data/restraints/parameters                  | 5151/78/249                                                   |
| Goodness-of-fit on F <sup>2</sup>           | 1.005                                                         |
| Final R indexes [I ≥ 2σ (I)]                | R <sub>1</sub> = 0.0821, wR <sub>2</sub> = 0.1981             |
| Final R indexes [all data]                  | R <sub>1</sub> = 0.1955, wR <sub>2</sub> = 0.2562             |
| Largest diff. peak/hole / e Å <sup>-3</sup> | 1.10/-1.14                                                    |
| Flack parameter                             | 0.04(12)                                                      |

## Compound 20

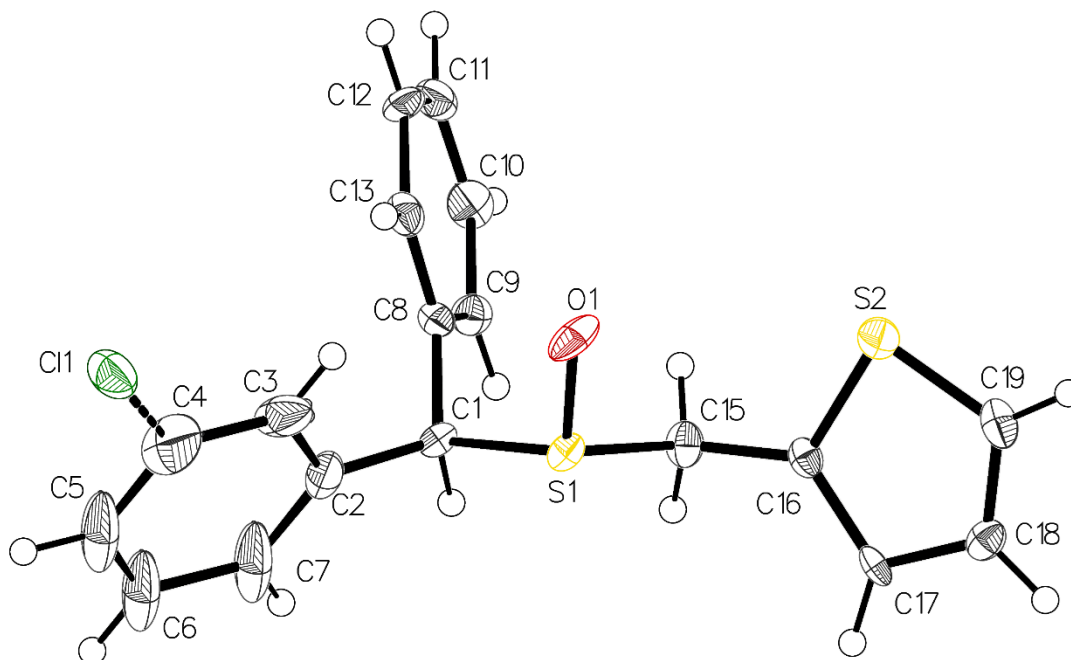

Asymmetric Unit of drawn with 50% displacement ellipsoid. Disorder omitted for clarity. The bond precision for C-C single bonds is 0.0079 Å. Chirality proofed by Flack (-0.1(2)) for S1 (R) and C1(R).

|                     |                                                   |
|---------------------|---------------------------------------------------|
| Identification code | <b>Compound 20</b>                                |
| Empirical formula   | C <sub>18</sub> H <sub>15</sub> ClOS <sub>2</sub> |
| Formula weight      | 346.87                                            |
| Temperature/K       | 100                                               |
| Crystal system      | orthorhombic                                      |
| Space group         | P2 <sub>1</sub> 2 <sub>1</sub> 2 <sub>1</sub>     |
| a/Å                 | 5.5093(5)                                         |
| b/Å                 | 15.6870(16)                                       |
| c/Å                 | 18.8298(17)                                       |
| α/°                 | 90                                                |

|                                                |                                                               |
|------------------------------------------------|---------------------------------------------------------------|
| $\beta/^\circ$                                 | 90                                                            |
| $\gamma/^\circ$                                | 90                                                            |
| Volume/ $\text{\AA}^3$                         | 1627.4(3)                                                     |
| Z                                              | 4                                                             |
| $\rho_{\text{calc}}/\text{g/cm}^3$             | 1.416                                                         |
| $\mu/\text{mm}^{-1}$                           | 0.489                                                         |
| F(000)                                         | 720.0                                                         |
| Crystal size/ $\text{mm}^3$                    | $0.25 \times 0.123 \times 0.05$                               |
| Radiation                                      | Mo K $\alpha$ ( $\lambda = 0.71073$ )                         |
| 2 $\Theta$ range for data collection/ $^\circ$ | 5.046 to 51.968                                               |
| Index ranges                                   | $-6 \leq h \leq 6, -19 \leq k \leq 19, -23 \leq l \leq 23$    |
| Reflections collected                          | 43436                                                         |
| Independent reflections                        | 3194 [ $R_{\text{int}} = 0.0530, R_{\text{sigma}} = 0.0169$ ] |
| Data/restraints/parameters                     | 3194/51/217                                                   |
| Goodness-of-fit on $F^2$                       | 1.099                                                         |
| Final R indexes [ $ I  \geq 2\sigma(I)$ ]      | $R_1 = 0.0565, wR_2 = 0.1328$                                 |
| Final R indexes [all data]                     | $R_1 = 0.0605, wR_2 = 0.1389$                                 |
| Largest diff. peak/hole / $e \text{\AA}^{-3}$  | 0.84/-0.91                                                    |
| Flack parameter                                | 0.04(3)                                                       |



## Compound 21

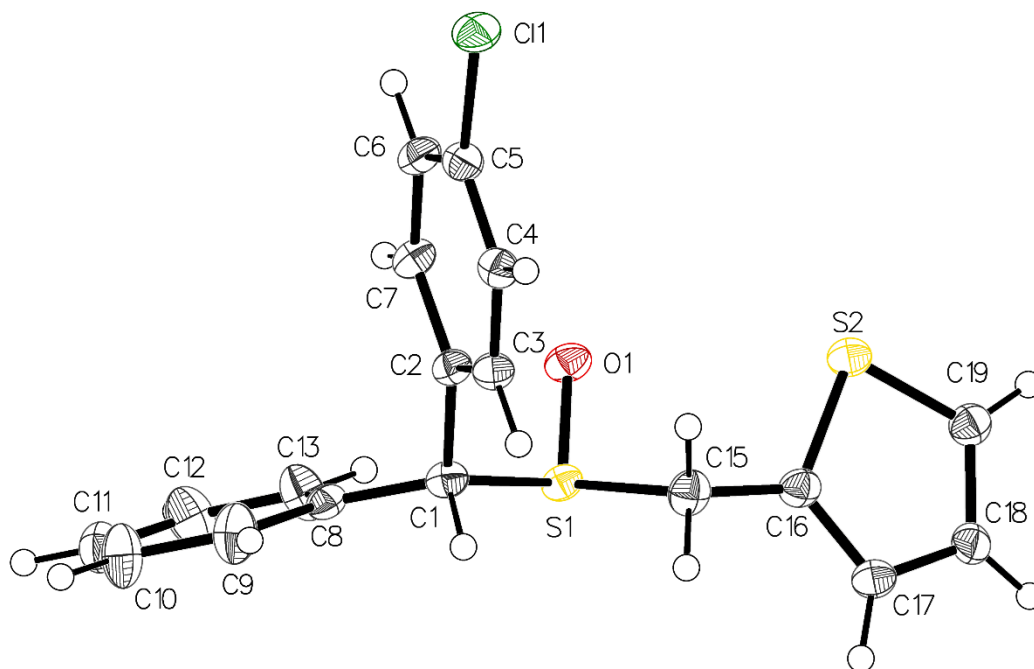

Asymmetric Unit of drawn with 50% displacement ellipsoid. Disorder omitted for clarity. The bond precision for C-C single bonds is 0.0054 Å. Chirality proofed by Hooft (0.02(2)) and Flack (-0.01(11)) for S1 (S) and C1(R).

|                     |                                                    |
|---------------------|----------------------------------------------------|
| Identification code | <b>Compound 21</b>                                 |
| Empirical formula   | C <sub>18</sub> H <sub>15</sub> OS <sub>2</sub> Cl |
| Formula weight      | 346.87                                             |
| Temperature/K       | 100.00                                             |
| Crystal system      | orthorhombic                                       |
| Space group         | P2 <sub>1</sub> 2 <sub>1</sub> 2 <sub>1</sub>      |
| a/Å                 | 5.620(2)                                           |
| b/Å                 | 16.119(13)                                         |
| c/Å                 | 18.546(7)                                          |
| α/°                 | 90                                                 |

|                                                |                                                                |
|------------------------------------------------|----------------------------------------------------------------|
| $\beta/^\circ$                                 | 90                                                             |
| $\gamma/^\circ$                                | 90                                                             |
| Volume/ $\text{\AA}^3$                         | 1679.9(16)                                                     |
| Z                                              | 4                                                              |
| $\rho_{\text{calc}}/\text{g/cm}^3$             | 1.371                                                          |
| $\mu/\text{mm}^{-1}$                           | 0.474                                                          |
| F(000)                                         | 720.0                                                          |
| Crystal size/ $\text{mm}^3$                    | 0.26 × 0.2 × 0.04                                              |
| Radiation                                      | MoK $\alpha$ ( $\lambda$ = 0.71073)                            |
| 2 $\Theta$ range for data collection/ $^\circ$ | 4.392 to 60.268                                                |
| Index ranges                                   | -7 ≤ h ≤ 7, -22 ≤ k ≤ 12, -26 ≤ l ≤ 26                         |
| Reflections collected                          | 33251                                                          |
| Independent reflections                        | 4854 [ $R_{\text{int}}$ = 0.0523, $R_{\text{sigma}}$ = 0.0322] |
| Data/restraints/parameters                     | 4854/9/206                                                     |
| Goodness-of-fit on $F^2$                       | 1.081                                                          |
| Final R indexes [ $ I  \geq 2\sigma(I)$ ]      | $R_1$ = 0.0476, $wR_2$ = 0.1053                                |
| Final R indexes [all data]                     | $R_1$ = 0.0570, $wR_2$ = 0.1133                                |
| Largest diff. peak/hole / e $\text{\AA}^{-3}$  | 0.60/-0.55                                                     |
| Flack parameter                                | 0.00(4)                                                        |

## Compound 22

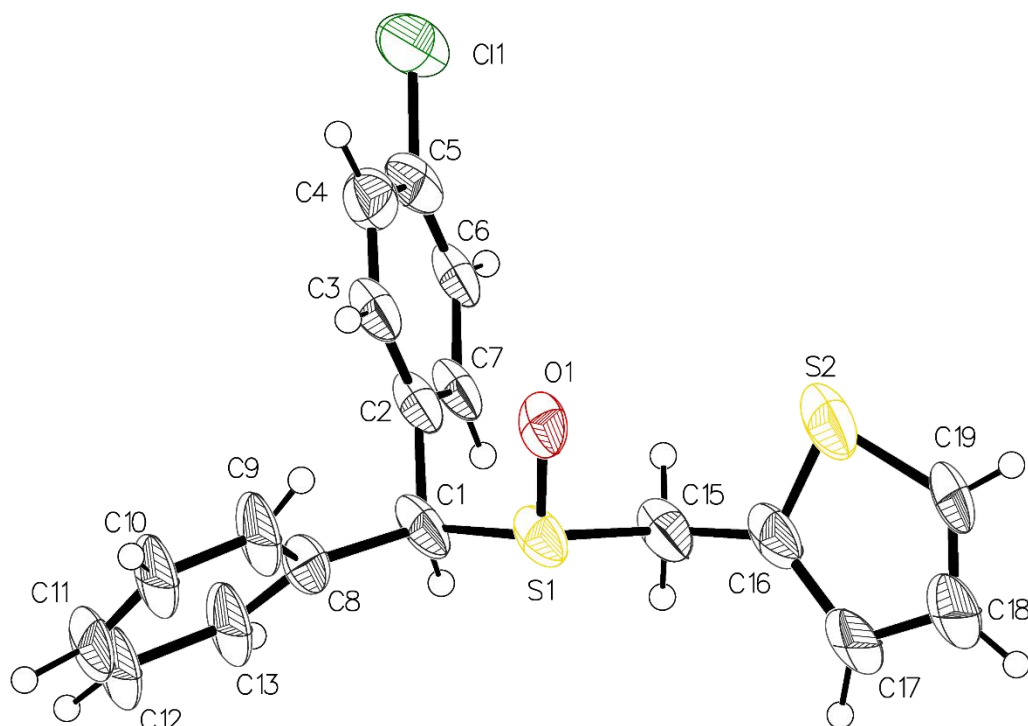

Asymmetric Unit of drawn with 50% displacement ellipsoid. Disorder omitted for clarity. The bond precision for C-C single bonds is 0.0196 Å. Chirality proofed by Hooft (-0.01(3)) and Flack (0.0(4)) for S1 (R) and C1(S). Two B-Alerts could not be avoided. PLAT084\_ALERT\_3\_B High wR2 Value (i.e., > 0.25) ..... 0.36 Report

PLAT340\_ALERT\_3\_B Low Bond Precision on C-C Bonds .....0.01958 Ang. Related to the quality of the crystal and the disorder.

|                     |                                                   |
|---------------------|---------------------------------------------------|
| Identification code | <b>Compound 22</b>                                |
| Empirical formula   | C <sub>18</sub> H <sub>15</sub> ClOS <sub>2</sub> |
| Formula weight      | 346.87                                            |
| Temperature/K       | 100                                               |
| Crystal system      | orthorhombic                                      |
| Space group         | P2 <sub>1</sub> 2 <sub>1</sub> 2 <sub>1</sub>     |

|                                                |                                                                |
|------------------------------------------------|----------------------------------------------------------------|
| a/Å                                            | 5.4932(3)                                                      |
| b/Å                                            | 16.5224(19)                                                    |
| c/Å                                            | 18.3715(12)                                                    |
| $\alpha/^\circ$                                | 90                                                             |
| $\beta/^\circ$                                 | 90                                                             |
| $\gamma/^\circ$                                | 90                                                             |
| Volume/Å <sup>3</sup>                          | 1667.4(2)                                                      |
| Z                                              | 4                                                              |
| $\rho_{\text{calc}}/\text{g}/\text{cm}^3$      | 1.382                                                          |
| $\mu/\text{mm}^{-1}$                           | 0.478                                                          |
| F(000)                                         | 720.0                                                          |
| Crystal size/mm <sup>3</sup>                   | 0.25 × 0.123 × 0.05                                            |
| Radiation                                      | Mo K $\alpha$ ( $\lambda$ = 0.71073)                           |
| 2 $\Theta$ range for data collection/ $^\circ$ | 4.434 to 51.36                                                 |
| Index ranges                                   | -6 ≤ h ≤ 6, -20 ≤ k ≤ 20, -22 ≤ l ≤ 22                         |
| Reflections collected                          | 30961                                                          |
| Independent reflections                        | 3158 [ $R_{\text{int}}$ = 0.0956, $R_{\text{sigma}}$ = 0.0883] |
| Data/restraints/parameters                     | 3158/422/182                                                   |
| Goodness-of-fit on $F^2$                       | 1.323                                                          |
| Final R indexes [ $ I  \geq 2\sigma(I)$ ]      | $R_1$ = 0.1285, $wR_2$ = 0.3359                                |
| Final R indexes [all data]                     | $R_1$ = 0.1650, $wR_2$ = 0.3590                                |
| Largest diff. peak/hole / e Å <sup>-3</sup>    | 0.95/-0.78                                                     |
| Flack parameter                                | -0.01(9)                                                       |

## Compound 23

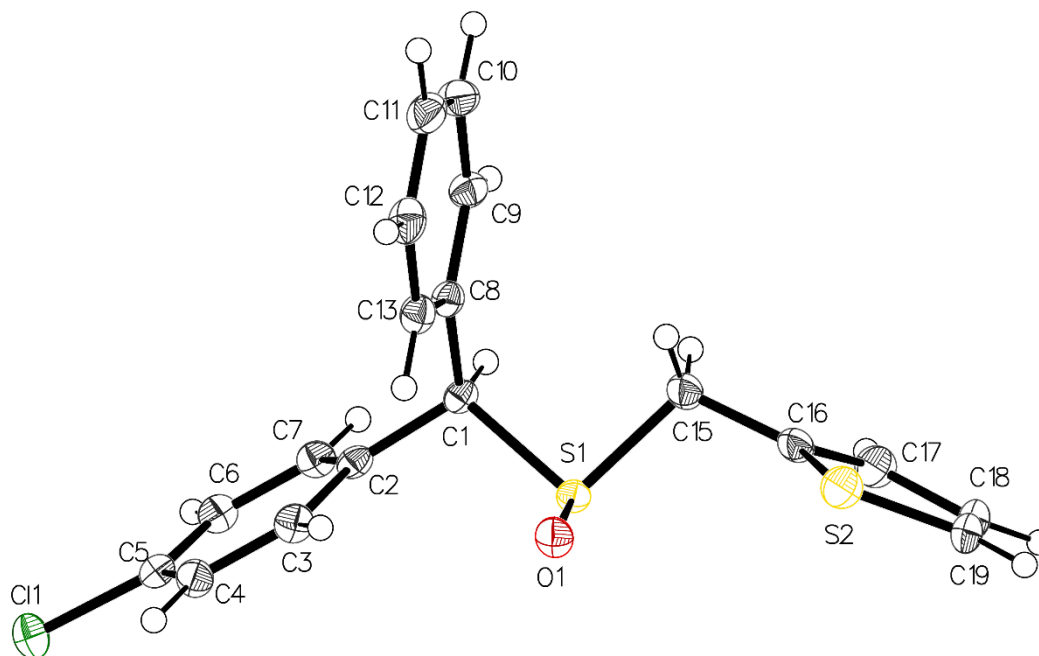

Asymmetric Unit of drawn with 50% displacement ellipsoid. Disorder omitted for clarity. The bond precision for C-C single bonds is 0.0044 Å. Chirality proofed by Hooft (-0.08(5)) and Flack (-0.06(9)) for S1 (S) and C1(S).

|                     |                                                   |
|---------------------|---------------------------------------------------|
| Identification code | <b>Compound 23</b>                                |
| Empirical formula   | C <sub>18</sub> H <sub>15</sub> ClOS <sub>2</sub> |
| Formula weight      | 346.87                                            |
| Temperature/K       | 100.0                                             |
| Crystal system      | orthorhombic                                      |
| Space group         | P2 <sub>1</sub> 2 <sub>1</sub> 2 <sub>1</sub>     |
| a/Å                 | 5.8552(2)                                         |
| b/Å                 | 15.5405(7)                                        |
| c/Å                 | 17.5545(6)                                        |
| α/°                 | 90                                                |

|                                                |                                                                  |
|------------------------------------------------|------------------------------------------------------------------|
| $\beta/^\circ$                                 | 90                                                               |
| $\gamma/^\circ$                                | 90                                                               |
| Volume/ $\text{\AA}^3$                         | 1597.33(11)                                                      |
| Z                                              | 4                                                                |
| $\rho_{\text{calc}}/\text{g/cm}^3$             | 1.442                                                            |
| $\mu/\text{mm}^{-1}$                           | 0.499                                                            |
| F(000)                                         | 720.0                                                            |
| Crystal size/ $\text{mm}^3$                    | 0.1 × 0.04 × 0.02                                                |
| Radiation                                      | MoK $\alpha$ ( $\lambda$ = 0.71073)                              |
| 2 $\Theta$ range for data collection/ $^\circ$ | 4.64 to 60.064                                                   |
| Index ranges                                   | $-8 \leq h \leq 7$ , $-21 \leq k \leq 21$ , $-24 \leq l \leq 23$ |
| Reflections collected                          | 20655                                                            |
| Independent reflections                        | 4662 [ $R_{\text{int}}$ = 0.1095, $R_{\text{sigma}}$ = 0.0807]   |
| Data/restraints/parameters                     | 4662/12/200                                                      |
| Goodness-of-fit on $F^2$                       | 1.050                                                            |
| Final R indexes [ $ I  \geq 2\sigma(I)$ ]      | $R_1$ = 0.0484, $wR_2$ = 0.0933                                  |
| Final R indexes [all data]                     | $R_1$ = 0.0614, $wR_2$ = 0.0976                                  |
| Largest diff. peak/hole / $e \text{\AA}^{-3}$  | 0.38/-0.43                                                       |
| Flack parameter                                | -0.05(5)                                                         |

## Compound 24



Asymmetric Unit of drawn with 50% displacement ellipsoid. Disorder omitted for clarity. The bond precision for C-C single bonds is 0.0051 Å. Chirality proofed by Hooft (-0.04(5)) and Flack (-0.04(11)) for S1 (R) and C1(R).

|                     |                                                   |
|---------------------|---------------------------------------------------|
| Identification code | <b>Compound 24</b>                                |
| Empirical formula   | C <sub>18</sub> H <sub>15</sub> ClOS <sub>2</sub> |
| Formula weight      | 346.87                                            |
| Temperature/K       | 100.0                                             |
| Crystal system      | orthorhombic                                      |
| Space group         | P2 <sub>1</sub> 2 <sub>1</sub> 2 <sub>1</sub>     |
| a/Å                 | 5.8511(4)                                         |
| b/Å                 | 15.5574(9)                                        |
| c/Å                 | 17.5412(9)                                        |
| α/°                 | 90                                                |

|                                                |                                                               |
|------------------------------------------------|---------------------------------------------------------------|
| $\beta/^\circ$                                 | 90                                                            |
| $\gamma/^\circ$                                | 90                                                            |
| Volume/ $\text{\AA}^3$                         | 1596.74(16)                                                   |
| Z                                              | 4                                                             |
| $\rho_{\text{calc}}/\text{g/cm}^3$             | 1.443                                                         |
| $\mu/\text{mm}^{-1}$                           | 0.499                                                         |
| F(000)                                         | 720.0                                                         |
| Crystal size/ $\text{mm}^3$                    | $0.15 \times 0.15 \times 0.03$                                |
| Radiation                                      | MoK $\alpha$ ( $\lambda = 0.71073$ )                          |
| 2 $\Theta$ range for data collection/ $^\circ$ | 4.644 to 60.112                                               |
| Index ranges                                   | $-8 \leq h \leq 8, -21 \leq k \leq 21, -23 \leq l \leq 24$    |
| Reflections collected                          | 11148                                                         |
| Independent reflections                        | 4588 [ $R_{\text{int}} = 0.0600, R_{\text{sigma}} = 0.0735$ ] |
| Data/restraints/parameters                     | 4588/12/200                                                   |
| Goodness-of-fit on $F^2$                       | 1.043                                                         |
| Final R indexes [ $ I  \geq 2\sigma(I)$ ]      | $R_1 = 0.0494, wR_2 = 0.0887$                                 |
| Final R indexes [all data]                     | $R_1 = 0.0721, wR_2 = 0.1004$                                 |
| Largest diff. peak/hole / $e \text{\AA}^{-3}$  | 0.36/-0.53                                                    |
| Flack parameter                                | -0.03(5)                                                      |



## Compound 41

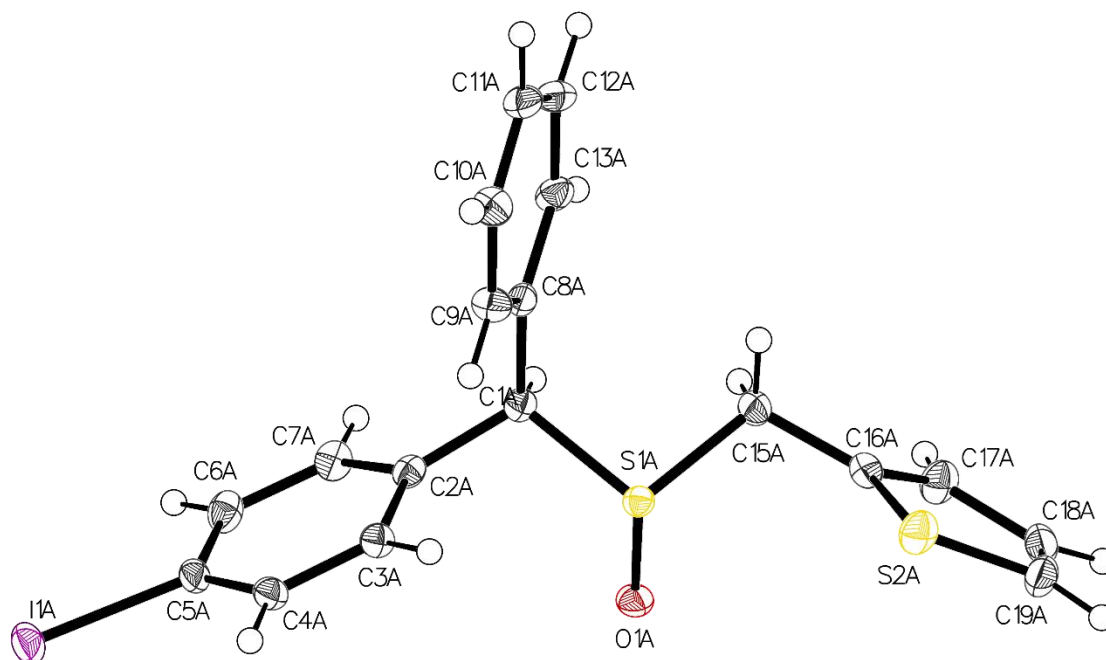

Asymmetric Unit of drawn with 50% displacement ellipsoid. Disorder and second independent molecule omitted for clarity. The bond precision for C-C single bonds is 0.0030 Å. Chirality proofed by Hooft (-0.025(3)) and Flack (-0.022(15)) for S1 (S) and C1(R).

|                     |                                                  |
|---------------------|--------------------------------------------------|
| Identification code | <b>Compound 41</b>                               |
| Empirical formula   | C <sub>18</sub> H <sub>15</sub> IOS <sub>2</sub> |
| Formula weight      | 438.32                                           |
| Temperature/K       | 100.00                                           |
| Crystal system      | monoclinic                                       |
| Space group         | P2 <sub>1</sub>                                  |
| a/Å                 | 11.0758(2)                                       |
| b/Å                 | 8.02350(10)                                      |
| c/Å                 | 19.2404(3)                                       |
| α/°                 | 90                                               |

|                                                |                                                                    |
|------------------------------------------------|--------------------------------------------------------------------|
| $\beta/^\circ$                                 | 94.7416(6)                                                         |
| $\gamma/^\circ$                                | 90                                                                 |
| Volume/ $\text{\AA}^3$                         | 1703.98(5)                                                         |
| Z                                              | 4                                                                  |
| $\rho_{\text{calc}}/\text{g/cm}^3$             | 1.709                                                              |
| $\mu/\text{mm}^{-1}$                           | 2.123                                                              |
| F(000)                                         | 864.0                                                              |
| Crystal size/ $\text{mm}^3$                    | $0.23 \times 0.2 \times 0.05$                                      |
| Radiation                                      | MoK $\alpha$ ( $\lambda = 0.71073$ )                               |
| 2 $\Theta$ range for data collection/ $^\circ$ | 4.102 to 66.456                                                    |
| Index ranges                                   | $-17 \leq h \leq 17$ , $-12 \leq k \leq 12$ , $-29 \leq l \leq 29$ |
| Reflections collected                          | 162428                                                             |
| Independent reflections                        | 13065 [ $R_{\text{int}} = 0.0454$ , $R_{\text{sigma}} = 0.0218$ ]  |
| Data/restraints/parameters                     | 13065/21/405                                                       |
| Goodness-of-fit on $F^2$                       | 1.030                                                              |
| Final R indexes [ $ I  \geq 2\sigma(I)$ ]      | $R_1 = 0.0212$ , $wR_2 = 0.0420$                                   |
| Final R indexes [all data]                     | $R_1 = 0.0254$ , $wR_2 = 0.0433$                                   |
| Largest diff. peak/hole / $e \text{\AA}^{-3}$  | 0.80/-0.56                                                         |
| Flack parameter                                | -0.029(4)                                                          |

## Compound 42

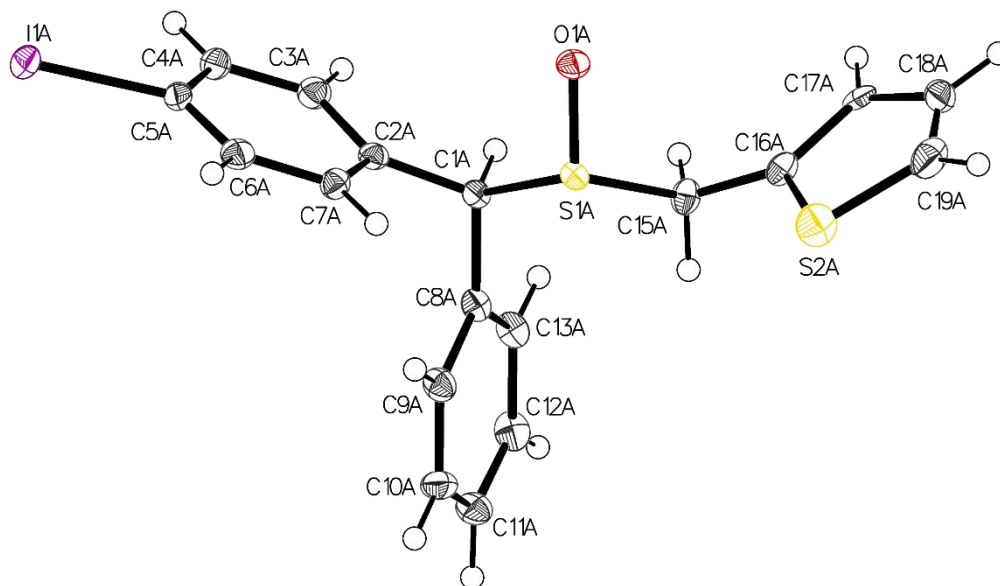

Asymmetric Unit of drawn with 50% displacement ellipsoid. Disorder and second independent molecule omitted for clarity. The bond precision for C-C single bonds is 0.0058 Å. Chirality proofed by Hooft (-0.017(8)) and Flack (-0.020(15)) for S1 (R) and C1(S).

|                     |                                                  |
|---------------------|--------------------------------------------------|
| Identification code | <b>Compound 42</b>                               |
| Empirical formula   | C <sub>18</sub> H <sub>15</sub> IOS <sub>2</sub> |
| Formula weight      | 438.32                                           |
| Temperature/K       | 100.0                                            |
| Crystal system      | monoclinic                                       |
| Space group         | P2 <sub>1</sub>                                  |
| a/Å                 | 11.0749(2)                                       |
| b/Å                 | 8.02340(10)                                      |
| c/Å                 | 19.2284(3)                                       |
| α/°                 | 90                                               |

|                                                |                                                                 |
|------------------------------------------------|-----------------------------------------------------------------|
| $\beta/^\circ$                                 | 94.7476(7)                                                      |
| $\gamma/^\circ$                                | 90                                                              |
| Volume/ $\text{\AA}^3$                         | 1702.74(5)                                                      |
| Z                                              | 4                                                               |
| $\rho_{\text{calc}}/\text{g/cm}^3$             | 1.710                                                           |
| $\mu/\text{mm}^{-1}$                           | 2.124                                                           |
| F(000)                                         | 864.0                                                           |
| Crystal size/ $\text{mm}^3$                    | 0.2 × 0.2 × 0.15                                                |
| Radiation                                      | MoK $\alpha$ ( $\lambda$ = 0.71073)                             |
| 2 $\Theta$ range for data collection/ $^\circ$ | 3.69 to 66.43                                                   |
| Index ranges                                   | -16 ≤ h ≤ 16, -11 ≤ k ≤ 12, -29 ≤ l ≤ 26                        |
| Reflections collected                          | 20539                                                           |
| Independent reflections                        | 10980 [ $R_{\text{int}}$ = 0.0310, $R_{\text{sigma}}$ = 0.0522] |
| Data/restraints/parameters                     | 10980/10/398                                                    |
| Goodness-of-fit on $F^2$                       | 1.021                                                           |
| Final R indexes [ $ I  \geq 2\sigma(I)$ ]      | $R_1$ = 0.0342, $wR_2$ = 0.0679                                 |
| Final R indexes [all data]                     | $R_1$ = 0.0449, $wR_2$ = 0.0714                                 |
| Largest diff. peak/hole / e $\text{\AA}^{-3}$  | 0.73/-0.66                                                      |
| Flack parameter                                | -0.017(10)                                                      |

### Compound 43

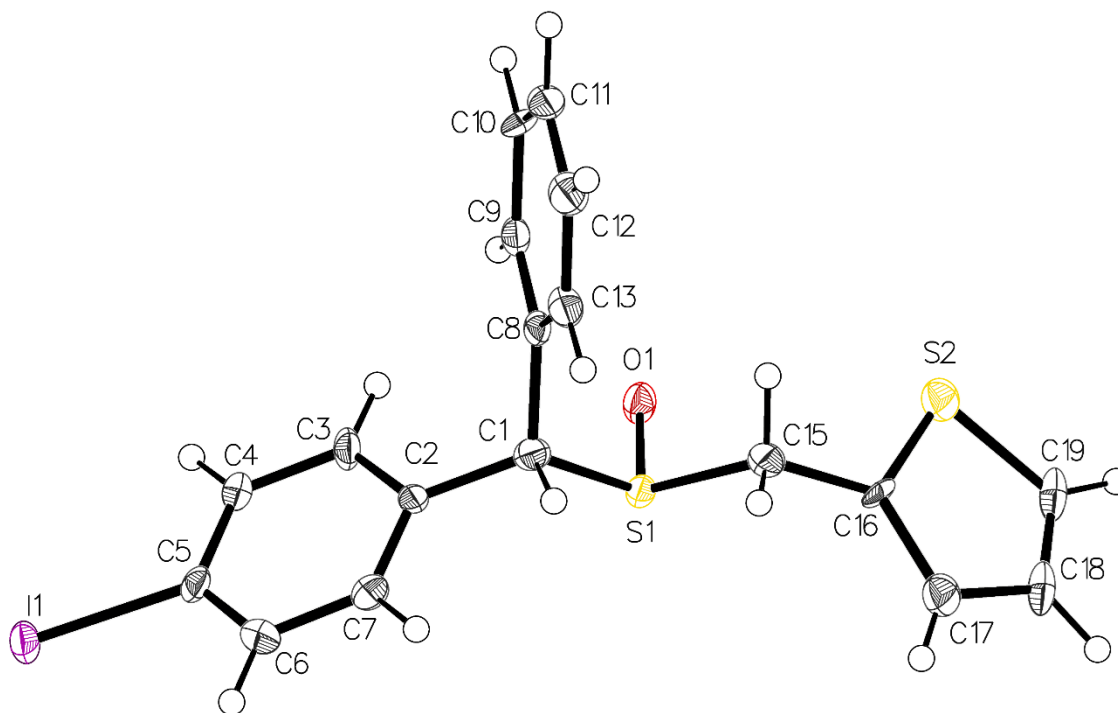

Asymmetric Unit of drawn with 50% displacement ellipsoid. Disorder omitted for clarity. The bond precision for C-C single bonds is 0.0119 Å. Chirality proofed by Hooft (-0.062(16)) and Flack (-0.05(4)) for S1 (S) and C1(S).

|                     |                                                  |
|---------------------|--------------------------------------------------|
| Identification code | <b>Compound 43</b>                               |
| Empirical formula   | C <sub>18</sub> H <sub>15</sub> IOS <sub>2</sub> |
| Formula weight      | 438.32                                           |
| Temperature/K       | 100                                              |
| Crystal system      | orthorhombic                                     |
| Space group         | P2 <sub>1</sub> 2 <sub>1</sub> 2 <sub>1</sub>    |
| a/Å                 | 5.7190(6)                                        |
| b/Å                 | 15.8128(17)                                      |
| c/Å                 | 18.1268(15)                                      |

|                                                |                                                               |
|------------------------------------------------|---------------------------------------------------------------|
| $\alpha/^\circ$                                | 90                                                            |
| $\beta/^\circ$                                 | 90                                                            |
| $\gamma/^\circ$                                | 90                                                            |
| Volume/ $\text{\AA}^3$                         | 1639.3(3)                                                     |
| Z                                              | 4                                                             |
| $\rho_{\text{calc}}/\text{g/cm}^3$             | 1.776                                                         |
| $\mu/\text{mm}^{-1}$                           | 2.207                                                         |
| F(000)                                         | 864.0                                                         |
| Crystal size/ $\text{mm}^3$                    | $0.3 \times 0.123 \times 0.02$                                |
| Radiation                                      | Mo K $\alpha$ ( $\lambda = 0.71073$ )                         |
| 2 $\Theta$ range for data collection/ $^\circ$ | 3.418 to 63.842                                               |
| Index ranges                                   | $-7 \leq h \leq 8, -23 \leq k \leq 16, -26 \leq l \leq 26$    |
| Reflections collected                          | 33448                                                         |
| Independent reflections                        | 5476 [ $R_{\text{int}} = 0.1114, R_{\text{sigma}} = 0.1391$ ] |
| Data/restraints/parameters                     | 5476/25/204                                                   |
| Goodness-of-fit on $F^2$                       | 0.926                                                         |
| Final R indexes [ $ I  \geq 2\sigma(I)$ ]      | $R_1 = 0.0568, wR_2 = 0.1276$                                 |
| Final R indexes [all data]                     | $R_1 = 0.0996, wR_2 = 0.1429$                                 |
| Largest diff. peak/hole / $e \text{\AA}^{-3}$  | 1.34/-1.47                                                    |
| Flack parameter                                | -0.07(4)                                                      |

## Compound 44

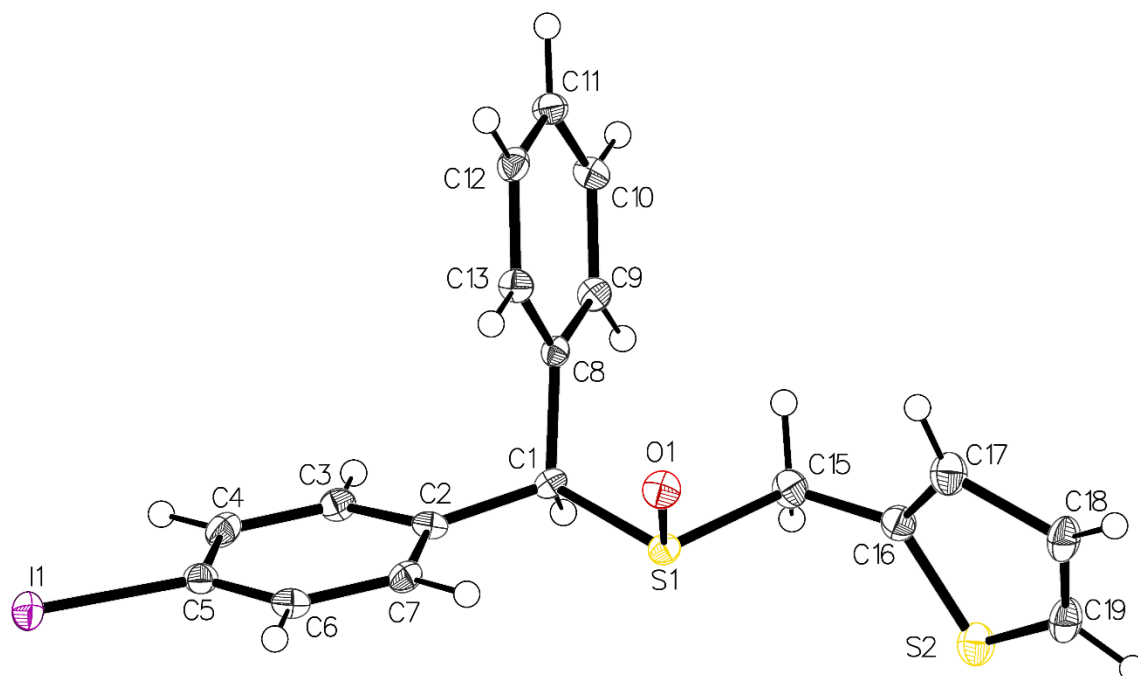

Asymmetric Unit of drawn with 50% displacement ellipsoid. Disorder omitted for clarity. The bond precision for C-C single bonds is 0.0056 Å. Chirality proofed by Hooft (-0.033(12)) and Flack (-0.04(2)) for S1 (R) and C1(R).

|                     |                                                                   |
|---------------------|-------------------------------------------------------------------|
| Identification code | <b>Compound 44</b>                                                |
| Empirical formula   | C <sub>18</sub> H <sub>15</sub> I <sub>0.97</sub> OS <sub>2</sub> |
| Formula weight      | 434.83                                                            |
| Temperature/K       | 100.0                                                             |
| Crystal system      | orthorhombic                                                      |
| Space group         | P2 <sub>1</sub> 2 <sub>1</sub> 2 <sub>1</sub>                     |
| a/Å                 | 5.65060(10)                                                       |
| b/Å                 | 11.6257(3)                                                        |
| c/Å                 | 24.9701(7)                                                        |

|                                                |                                                               |
|------------------------------------------------|---------------------------------------------------------------|
| $\alpha/^\circ$                                | 90                                                            |
| $\beta/^\circ$                                 | 90                                                            |
| $\gamma/^\circ$                                | 90                                                            |
| Volume/ $\text{\AA}^3$                         | 1640.34(7)                                                    |
| Z                                              | 4                                                             |
| $\rho_{\text{calc}}/\text{g/cm}^3$             | 1.761                                                         |
| $\mu/\text{mm}^{-1}$                           | 2.153                                                         |
| F(000)                                         | 858.0                                                         |
| Crystal size/ $\text{mm}^3$                    | $0.2 \times 0.03 \times 0.025$                                |
| Radiation                                      | MoK $\alpha$ ( $\lambda = 0.71073$ )                          |
| 2 $\Theta$ range for data collection/ $^\circ$ | 3.864 to 61.24                                                |
| Index ranges                                   | $-8 \leq h \leq 8, -16 \leq k \leq 16, -35 \leq l \leq 28$    |
| Reflections collected                          | 17037                                                         |
| Independent reflections                        | 5011 [ $R_{\text{int}} = 0.0470, R_{\text{sigma}} = 0.0508$ ] |
| Data/restraints/parameters                     | 5011/9/201                                                    |
| Goodness-of-fit on $F^2$                       | 1.079                                                         |
| Final R indexes [ $ I  \geq 2\sigma(I)$ ]      | $R_1 = 0.0342, wR_2 = 0.0502$                                 |
| Final R indexes [all data]                     | $R_1 = 0.0444, wR_2 = 0.0537$                                 |
| Largest diff. peak/hole / $e \text{\AA}^{-3}$  | 0.51/-0.56                                                    |
| Flack parameter                                | -0.031(13)                                                    |



## Compound 50

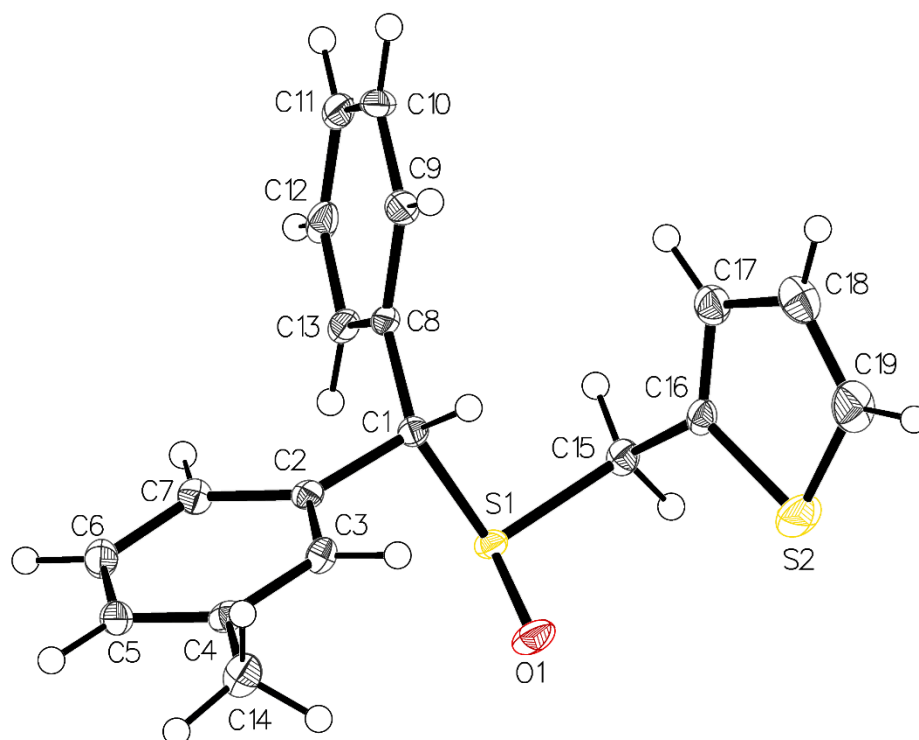

Asymmetric Unit of drawn with 50% displacement ellipsoid. The bond precision for C-C single bonds is 0.0029 Å. Chirality proofed by Hooft (-0.075(14)) and Flack (-0.07(6)) for S1 (R) and C1(S).

|                     |                                                 |
|---------------------|-------------------------------------------------|
| Identification code | <b>Compound 50</b>                              |
| Empirical formula   | C <sub>19</sub> H <sub>18</sub> OS <sub>2</sub> |
| Formula weight      | 326.45                                          |
| Temperature/K       | 100                                             |
| Crystal system      | orthorhombic                                    |
| Space group         | P2 <sub>1</sub> 2 <sub>1</sub> 2 <sub>1</sub>   |
| a/Å                 | 7.2947(2)                                       |
| b/Å                 | 13.3002(5)                                      |
| c/Å                 | 16.7792(6)                                      |

|                                                |                                                                |
|------------------------------------------------|----------------------------------------------------------------|
| $\alpha/^\circ$                                | 90                                                             |
| $\beta/^\circ$                                 | 90                                                             |
| $\gamma/^\circ$                                | 90                                                             |
| Volume/ $\text{\AA}^3$                         | 1627.93(10)                                                    |
| Z                                              | 4                                                              |
| $\rho_{\text{calc}}/\text{g/cm}^3$             | 1.332                                                          |
| $\mu/\text{mm}^{-1}$                           | 0.326                                                          |
| F(000)                                         | 688.0                                                          |
| Crystal size/ $\text{mm}^3$                    | 0.26 × 0.18 × 0.1                                              |
| Radiation                                      | Mo K $\alpha$ ( $\lambda$ = 0.71073)                           |
| 2 $\Theta$ range for data collection/ $^\circ$ | 3.908 to 63.316                                                |
| Index ranges                                   | -10 ≤ h ≤ 10, -19 ≤ k ≤ 19, -24 ≤ l ≤ 24                       |
| Reflections collected                          | 68488                                                          |
| Independent reflections                        | 5369 [ $R_{\text{int}}$ = 0.0547, $R_{\text{sigma}}$ = 0.0427] |
| Data/restraints/parameters                     | 5369/0/200                                                     |
| Goodness-of-fit on $F^2$                       | 1.067                                                          |
| Final R indexes [ $ I  \geq 2\sigma(I)$ ]      | $R_1$ = 0.0331, $wR_2$ = 0.0792                                |
| Final R indexes [all data]                     | $R_1$ = 0.0499, $wR_2$ = 0.0854                                |
| Largest diff. peak/hole / e $\text{\AA}^{-3}$  | 0.38/-0.59                                                     |
| Flack parameter                                | -0.07(3)                                                       |

### Compound 51

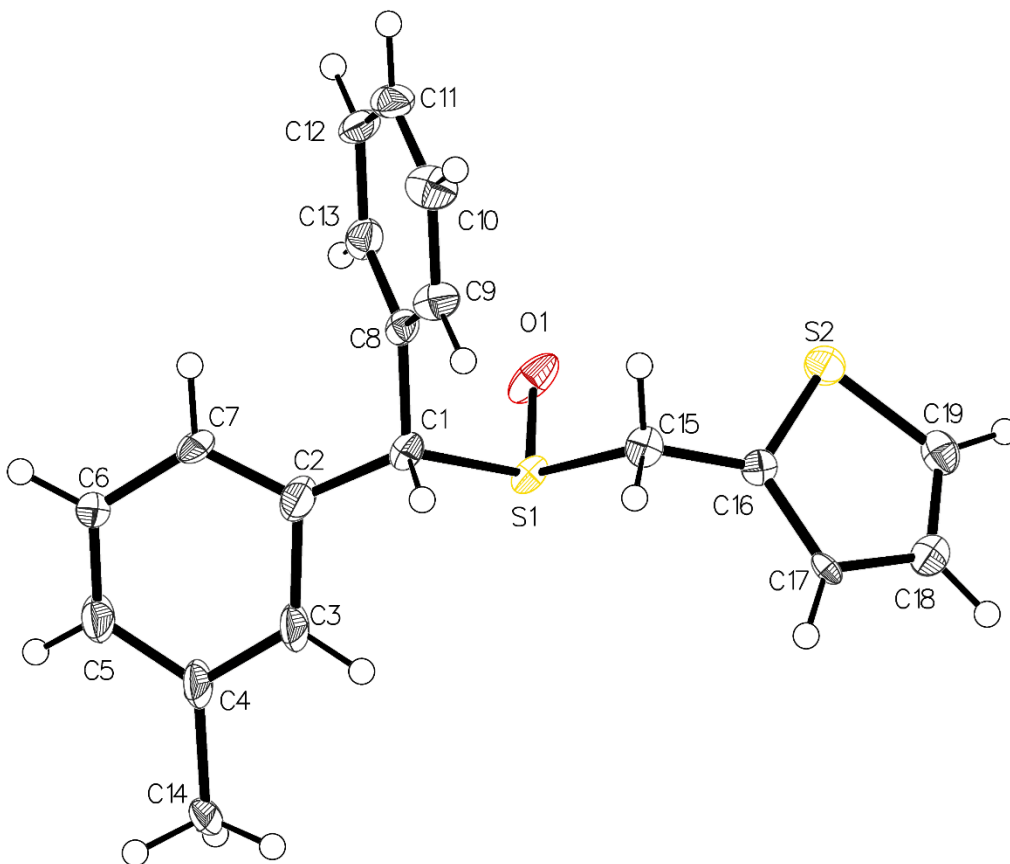

Asymmetric Unit of drawn with 50% displacement ellipsoid. Disorder omitted for clarity. The bond precision for C-C single bonds is 0.0054 Å. Chirality proofed by Hooft (-0.04(4)) and Flack (0.00(14)) for S1 (S) and C1(S). One B-Alert could not be avoided. PLAT220\_ALERT\_2\_B NonSolvent Resd 1 C Ueq(max)/Ueq(min) Range 6.4 Ratio Related to the quality of the crystal and the disorder.

|                     |                                                 |
|---------------------|-------------------------------------------------|
| Identification code | <b>Compound 51</b>                              |
| Empirical formula   | C <sub>19</sub> H <sub>18</sub> OS <sub>2</sub> |
| Formula weight      | 326.45                                          |
| Temperature/K       | 100                                             |
| Crystal system      | orthorhombic                                    |

|                                             |                                                               |
|---------------------------------------------|---------------------------------------------------------------|
| Space group                                 | P2 <sub>1</sub> 2 <sub>1</sub> 2 <sub>1</sub>                 |
| a/Å                                         | 5.4801(2)                                                     |
| b/Å                                         | 15.7742(5)                                                    |
| c/Å                                         | 18.9934(7)                                                    |
| α/°                                         | 90                                                            |
| β/°                                         | 90                                                            |
| γ/°                                         | 90                                                            |
| Volume/Å <sup>3</sup>                       | 1641.87(10)                                                   |
| Z                                           | 4                                                             |
| ρ <sub>calc</sub> /cm <sup>3</sup>          | 1.321                                                         |
| μ/mm <sup>-1</sup>                          | 0.323                                                         |
| F(000)                                      | 688.0                                                         |
| Crystal size/mm <sup>3</sup>                | 0.14 × 0.053 × 0.01                                           |
| Radiation                                   | Mo Kα (λ = 0.71073)                                           |
| 2θ range for data collection/°              | 3.356 to 63.256                                               |
| Index ranges                                | -7 ≤ h ≤ 8, -23 ≤ k ≤ 13, -27 ≤ l ≤ 27                        |
| Reflections collected                       | 39129                                                         |
| Independent reflections                     | 5308 [R <sub>int</sub> = 0.0882, R <sub>sigma</sub> = 0.1329] |
| Data/restraints/parameters                  | 5308/100/254                                                  |
| Goodness-of-fit on F <sup>2</sup>           | 0.958                                                         |
| Final R indexes [I ≥ 2σ (I)]                | R <sub>1</sub> = 0.0534, wR <sub>2</sub> = 0.1098             |
| Final R indexes [all data]                  | R <sub>1</sub> = 0.1183, wR <sub>2</sub> = 0.1278             |
| Largest diff. peak/hole / e Å <sup>-3</sup> | 0.49/-0.52                                                    |
| Flack parameter                             | -0.03(7)                                                      |

## Compound 52

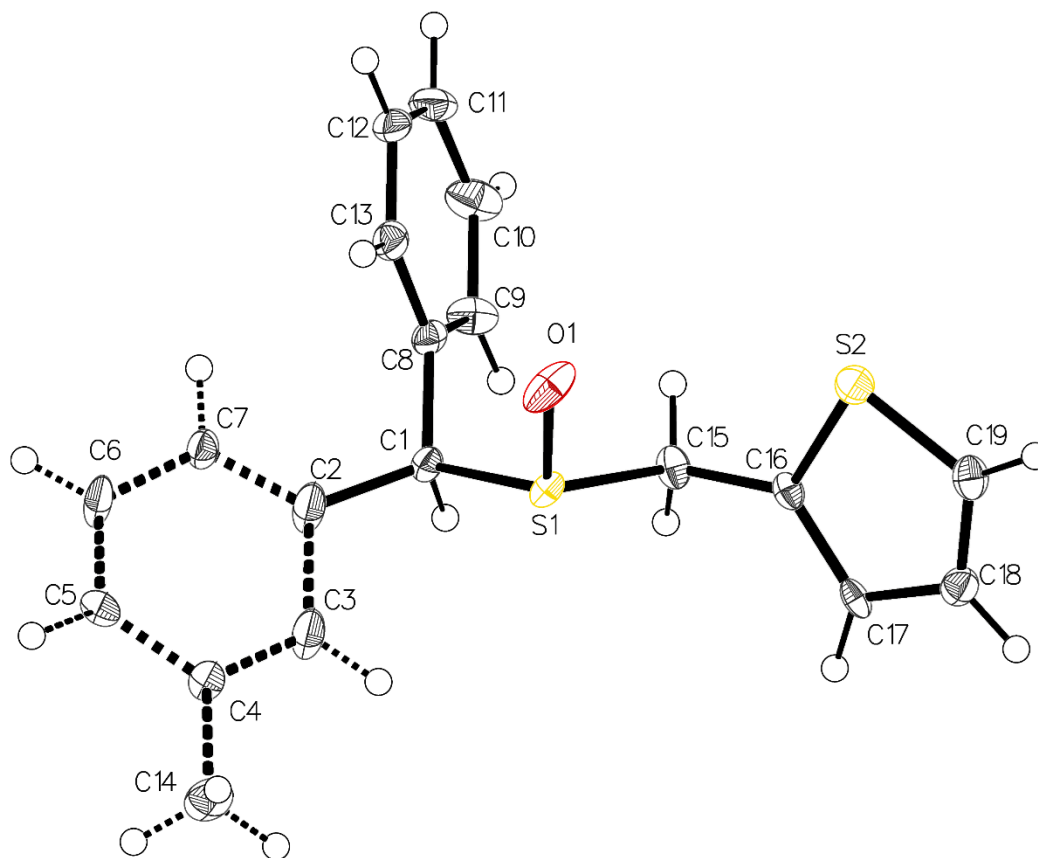

Asymmetric Unit of drawn with 50% displacement ellipsoid. Disorder omitted for clarity. The bond precision for C-C single bonds is 0.0036 Å. Chirality proofed by Hooft (0.12(2)) and Flack (0.1(3)) for S1 (R) and C1(R). Dotted lines because the disorder is splitted in to four parts and negative part numbers because of symmetry reasons.

|                     |                                                 |
|---------------------|-------------------------------------------------|
| Identification code | <b>Compound 52</b>                              |
| Empirical formula   | C <sub>19</sub> H <sub>18</sub> OS <sub>2</sub> |
| Formula weight      | 326.45                                          |
| Temperature/K       | 100.00                                          |
| Crystal system      | orthorhombic                                    |
| Space group         | P2 <sub>1</sub> 2 <sub>1</sub> 2 <sub>1</sub>   |

|                                             |                                                               |
|---------------------------------------------|---------------------------------------------------------------|
| a/Å                                         | 5.50580(10)                                                   |
| b/Å                                         | 15.7238(3)                                                    |
| c/Å                                         | 18.9562(4)                                                    |
| α/°                                         | 90                                                            |
| β/°                                         | 90                                                            |
| γ/°                                         | 90                                                            |
| Volume/Å <sup>3</sup>                       | 1641.08(6)                                                    |
| Z                                           | 4                                                             |
| ρ <sub>calc</sub> /cm <sup>3</sup>          | 1.321                                                         |
| μ/mm <sup>-1</sup>                          | 0.323                                                         |
| F(000)                                      | 688.0                                                         |
| Crystal size/mm <sup>3</sup>                | 0.1 × 0.1 × 0.08                                              |
| Radiation                                   | MoKα (λ = 0.71073)                                            |
| 2θ range for data collection/°              | 4.298 to 60.232                                               |
| Index ranges                                | -7 ≤ h ≤ 7, -18 ≤ k ≤ 22, -26 ≤ l ≤ 26                        |
| Reflections collected                       | 51946                                                         |
| Independent reflections                     | 4824 [R <sub>int</sub> = 0.0465, R <sub>sigma</sub> = 0.0228] |
| Data/restraints/parameters                  | 4824/28/308                                                   |
| Goodness-of-fit on F <sup>2</sup>           | 1.132                                                         |
| Final R indexes [I ≥ 2σ (I)]                | R <sub>1</sub> = 0.0364, wR <sub>2</sub> = 0.0880             |
| Final R indexes [all data]                  | R <sub>1</sub> = 0.0386, wR <sub>2</sub> = 0.0893             |
| Largest diff. peak/hole / e Å <sup>-3</sup> | 0.40/-0.35                                                    |
| Flack parameter                             | 0.01(2)                                                       |

## Compound 55

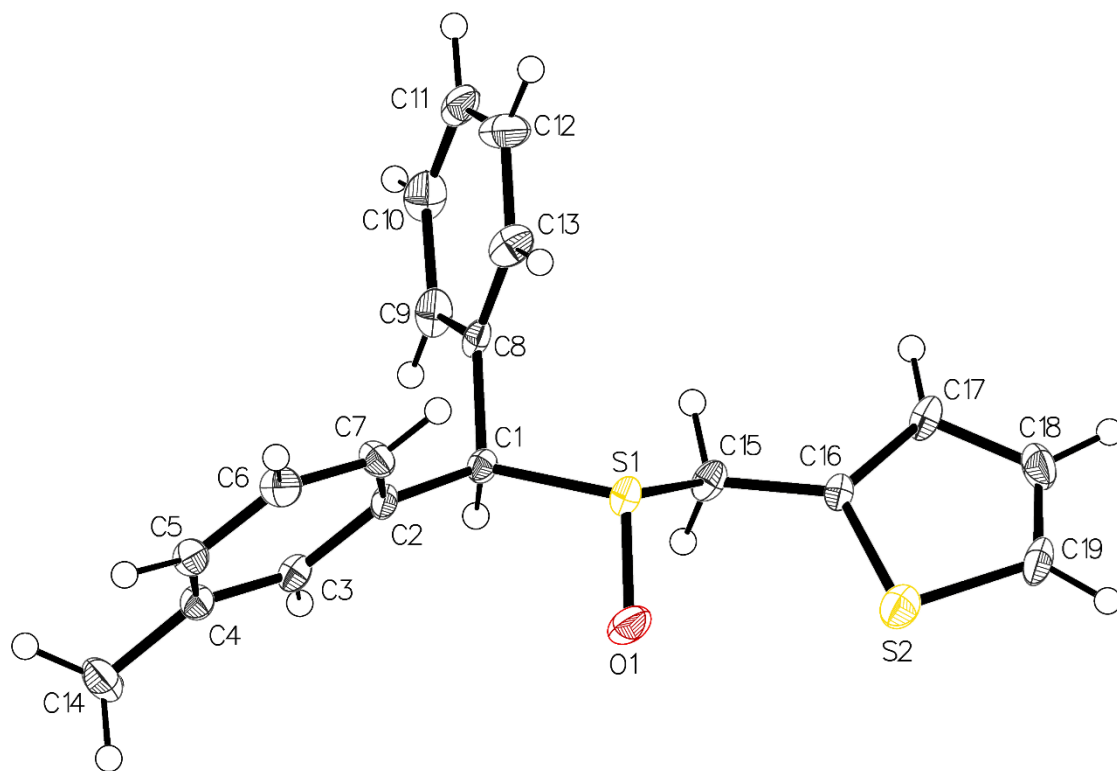

Asymmetric Unit of drawn with 50% displacement ellipsoid. The bond precision for C-C single bonds is 0.0057 Å. Chirality proofed by Hooft (-0.31(4)) and Flack (-0.04(10)) for S1 (S) and C1(R).

|                     |                                                 |
|---------------------|-------------------------------------------------|
| Identification code | <b>Compound 55</b>                              |
| Empirical formula   | C <sub>19</sub> H <sub>18</sub> OS <sub>2</sub> |
| Formula weight      | 326.45                                          |
| Temperature/K       | 100                                             |
| Crystal system      | triclinic                                       |
| Space group         | P1                                              |
| a/Å                 | 6.4484(6)                                       |
| b/Å                 | 7.8771(8)                                       |
| c/Å                 | 9.0594(9)                                       |

|                                                |                                                               |
|------------------------------------------------|---------------------------------------------------------------|
| $\alpha/^\circ$                                | 109.287(8)                                                    |
| $\beta/^\circ$                                 | 103.263(8)                                                    |
| $\gamma/^\circ$                                | 95.749(8)                                                     |
| Volume/ $\text{\AA}^3$                         | 414.93(7)                                                     |
| Z                                              | 1                                                             |
| $\rho_{\text{calc}}/\text{g/cm}^3$             | 1.306                                                         |
| $\mu/\text{mm}^{-1}$                           | 0.320                                                         |
| F(000)                                         | 172.0                                                         |
| Crystal size/ $\text{mm}^3$                    | $0.35 \times 0.35 \times 0.35$                                |
| Radiation                                      | Mo K $\alpha$ ( $\lambda = 0.71073$ )                         |
| 2 $\Theta$ range for data collection/ $^\circ$ | 5.582 to 62.722                                               |
| Index ranges                                   | $-9 \leq h \leq 9, -11 \leq k \leq 11, -13 \leq l \leq 12$    |
| Reflections collected                          | 9582                                                          |
| Independent reflections                        | 4636 [ $R_{\text{int}} = 0.0329, R_{\text{sigma}} = 0.1052$ ] |
| Data/restraints/parameters                     | 4636/3/200                                                    |
| Goodness-of-fit on $F^2$                       | 0.969                                                         |
| Final R indexes [ $ I  \geq 2\sigma(I)$ ]      | $R_1 = 0.0453, wR_2 = 0.0968$                                 |
| Final R indexes [all data]                     | $R_1 = 0.0572, wR_2 = 0.0985$                                 |
| Largest diff. peak/hole / $e \text{\AA}^{-3}$  | 0.43/-0.42                                                    |
| Flack parameter                                | -0.03(10)                                                     |



## Compound 56

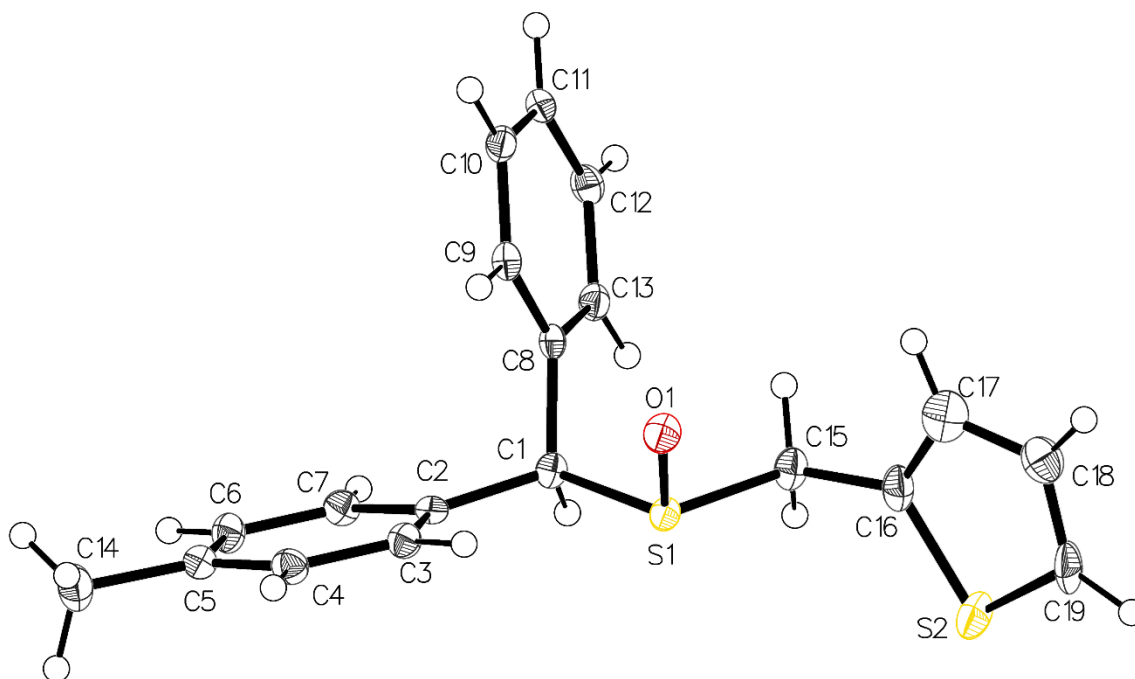

Asymmetric Unit of drawn with 50% displacement ellipsoid. Disorder omitted for clarity. The bond precision for C-C single bonds is 0.0030 Å. Chirality proofed by Hooft (-0.028(6)) and Flack (-0.004(19)) for S1 (R) and C1(R).

|                     |                                                 |
|---------------------|-------------------------------------------------|
| Identification code | <b>Compound 56</b>                              |
| Empirical formula   | C <sub>19</sub> H <sub>18</sub> OS <sub>2</sub> |
| Formula weight      | 326.45                                          |
| Temperature/K       | 100                                             |
| Crystal system      | monoclinic                                      |
| Space group         | P2 <sub>1</sub>                                 |
| a/Å                 | 11.0717(5)                                      |
| b/Å                 | 17.9821(5)                                      |
| c/Å                 | 16.7379(5)                                      |
| α/°                 | 90                                              |

|                                                |                                                                    |
|------------------------------------------------|--------------------------------------------------------------------|
| $\beta/^\circ$                                 | 91.243(3)                                                          |
| $\gamma/^\circ$                                | 90                                                                 |
| Volume/ $\text{\AA}^3$                         | 3331.6(2)                                                          |
| Z                                              | 8                                                                  |
| $\rho_{\text{calc}}/\text{g/cm}^3$             | 1.302                                                              |
| $\mu/\text{mm}^{-1}$                           | 0.318                                                              |
| F(000)                                         | 1376.0                                                             |
| Crystal size/ $\text{mm}^3$                    | $0.32 \times 0.147 \times 0.02$                                    |
| Radiation                                      | Mo K $\alpha$ ( $\lambda = 0.71073$ )                              |
| 2 $\Theta$ range for data collection/ $^\circ$ | 2.434 to 51.362                                                    |
| Index ranges                                   | $-13 \leq h \leq 13$ , $-21 \leq k \leq 21$ , $-20 \leq l \leq 20$ |
| Reflections collected                          | 60594                                                              |
| Independent reflections                        | 12564 [ $R_{\text{int}} = 0.0677$ , $R_{\text{sigma}} = 0.0789$ ]  |
| Data/restraints/parameters                     | 12564/1/798                                                        |
| Goodness-of-fit on $F^2$                       | 1.491                                                              |
| Final R indexes [ $ I  \geq 2\sigma(I)$ ]      | $R_1 = 0.1248$ , $wR_2 = 0.3441$                                   |
| Final R indexes [all data]                     | $R_1 = 0.1760$ , $wR_2 = 0.3885$                                   |
| Largest diff. peak/hole / $e \text{\AA}^{-3}$  | 1.58/-0.83                                                         |
| Flack parameter                                | 0.14(5)                                                            |

## Compound 70

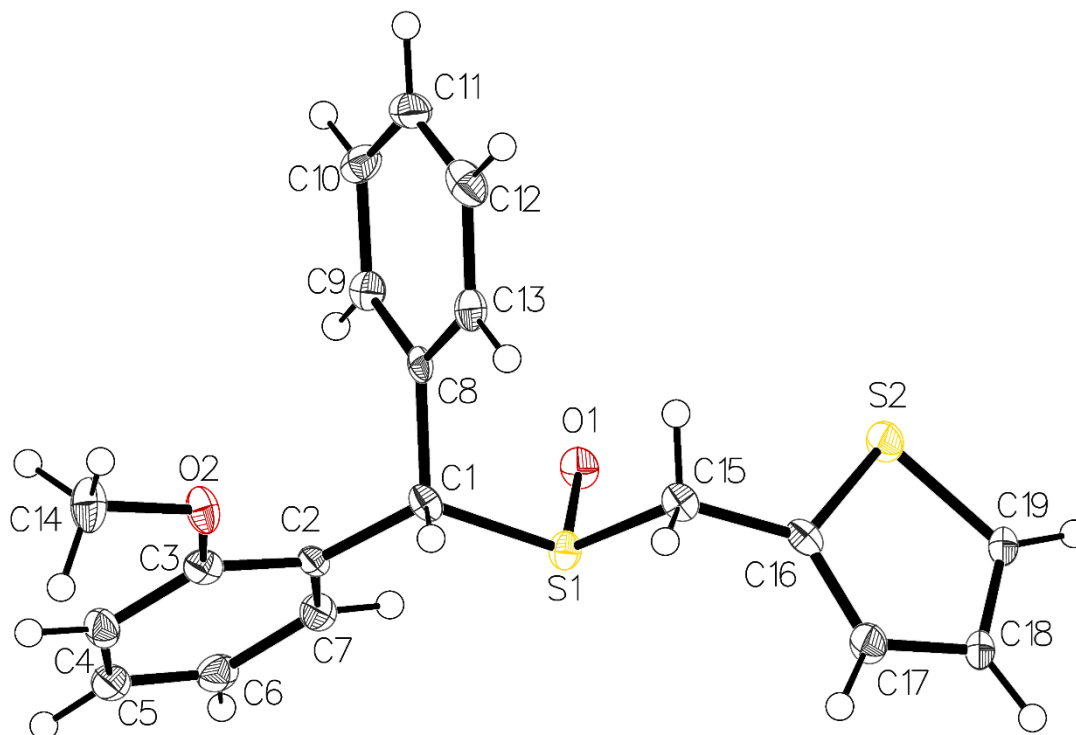

Asymmetric Unit of drawn with 50% displacement ellipsoid. Disorder omitted for clarity. The bond precision for C-C single bonds is 0.0052 Å. Chirality proofed by Hooft (0.003(5)) and Flack (-0.07(10)) for S1 (S) and C1(S).

|                     |                                                               |
|---------------------|---------------------------------------------------------------|
| Identification code | <b>Compound 70</b>                                            |
| Empirical formula   | C <sub>19</sub> H <sub>18</sub> O <sub>2</sub> S <sub>2</sub> |
| Formula weight      | 342.45                                                        |
| Temperature/K       | 100                                                           |
| Crystal system      | orthorhombic                                                  |
| Space group         | P2 <sub>1</sub> 2 <sub>1</sub> 2 <sub>1</sub>                 |
| a/Å                 | 5.2845(5)                                                     |
| b/Å                 | 11.8566(14)                                                   |

|                                                |                                                                      |
|------------------------------------------------|----------------------------------------------------------------------|
| c/Å                                            | 26.620(2)                                                            |
| $\alpha/^\circ$                                | 90                                                                   |
| $\beta/^\circ$                                 | 90                                                                   |
| $\gamma/^\circ$                                | 90                                                                   |
| Volume/Å <sup>3</sup>                          | 1667.9(3)                                                            |
| Z                                              | 4                                                                    |
| $\rho_{\text{calc}}/\text{g}/\text{cm}^3$      | 1.364                                                                |
| $\mu/\text{mm}^{-1}$                           | 0.326                                                                |
| F(000)                                         | 720.0                                                                |
| Crystal size/mm <sup>3</sup>                   | 0.4 × 0.2 × 0.1                                                      |
| Radiation                                      | Mo K $\alpha$ ( $\lambda$ = 0.71073)                                 |
| 2 $\Theta$ range for data collection/ $^\circ$ | 3.76 to 63.678                                                       |
| Index ranges                                   | -7 $\leq$ h $\leq$ 7, -17 $\leq$ k $\leq$ 17, -37 $\leq$ l $\leq$ 38 |
| Reflections collected                          | 40306                                                                |
| Independent reflections                        | 5430 [ $R_{\text{int}}$ = 0.1243, $R_{\text{sigma}}$ = 0.2388]       |
| Data/restraints/parameters                     | 5430/8/210                                                           |
| Goodness-of-fit on $F^2$                       | 0.855                                                                |
| Final R indexes [ $ I  \geq 2\sigma(I)$ ]      | $R_1$ = 0.0497, $wR_2$ = 0.0908                                      |
| Final R indexes [all data]                     | $R_1$ = 0.1220, $wR_2$ = 0.1009                                      |
| Largest diff. peak/hole / e Å <sup>-3</sup>    | 0.60/-0.57                                                           |
| Flack parameter                                | 0.06(7)                                                              |

## Compound 71

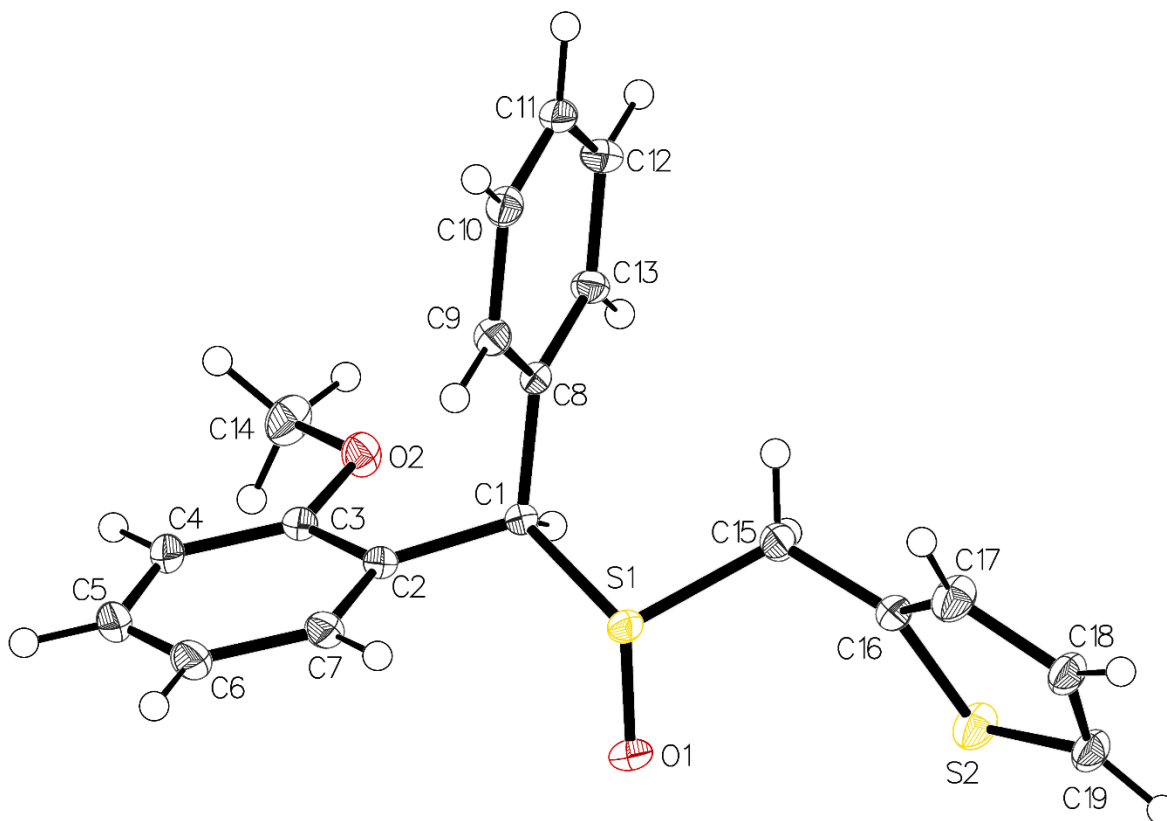

Asymmetric Unit of drawn with 50% displacement ellipsoid. Disorder omitted for clarity. The bond precision for C-C single bonds is 0.0017 Å. Chirality proofed by Hooft (0.0017(6)) and Flack (-0.01(4)) for S1 (S) and C1(R).

|                     |                                                               |
|---------------------|---------------------------------------------------------------|
| Identification code | <b>Compound 71</b>                                            |
| Empirical formula   | C <sub>19</sub> H <sub>18</sub> O <sub>2</sub> S <sub>2</sub> |
| Formula weight      | 342.45                                                        |
| Temperature/K       | 100.0                                                         |
| Crystal system      | triclinic                                                     |
| Space group         | P1                                                            |
| a/Å                 | 6.0892(4)                                                     |

|                                                |                                                                |
|------------------------------------------------|----------------------------------------------------------------|
| b/Å                                            | 8.5758(5)                                                      |
| c/Å                                            | 8.8168(5)                                                      |
| $\alpha/^\circ$                                | 68.282(2)                                                      |
| $\beta/^\circ$                                 | 76.777(2)                                                      |
| $\gamma/^\circ$                                | 84.821(2)                                                      |
| Volume/Å <sup>3</sup>                          | 416.38(4)                                                      |
| Z                                              | 1                                                              |
| $\rho_{\text{calc}}/\text{g}/\text{cm}^3$      | 1.366                                                          |
| $\mu/\text{mm}^{-1}$                           | 0.326                                                          |
| F(000)                                         | 180.0                                                          |
| Crystal size/mm <sup>3</sup>                   | 0.25 × 0.22 × 0.15                                             |
| Radiation                                      | MoK $\alpha$ ( $\lambda$ = 0.71073)                            |
| 2 $\Theta$ range for data collection/ $^\circ$ | 5.088 to 66.502                                                |
| Index ranges                                   | -9 ≤ h ≤ 9, -13 ≤ k ≤ 13, -13 ≤ l ≤ 13                         |
| Reflections collected                          | 94774                                                          |
| Independent reflections                        | 6347 [ $R_{\text{int}}$ = 0.0278, $R_{\text{sigma}}$ = 0.0113] |
| Data/restraints/parameters                     | 6347/12/210                                                    |
| Goodness-of-fit on $F^2$                       | 1.062                                                          |
| Final R indexes [ $ I  \geq 2\sigma(I)$ ]      | $R_1$ = 0.0213, $wR_2$ = 0.0599                                |
| Final R indexes [all data]                     | $R_1$ = 0.0214, $wR_2$ = 0.0600                                |
| Largest diff. peak/hole / e Å <sup>-3</sup>    | 0.34/-0.23                                                     |
| Flack parameter                                | 0.018(6)                                                       |

## Compound 72

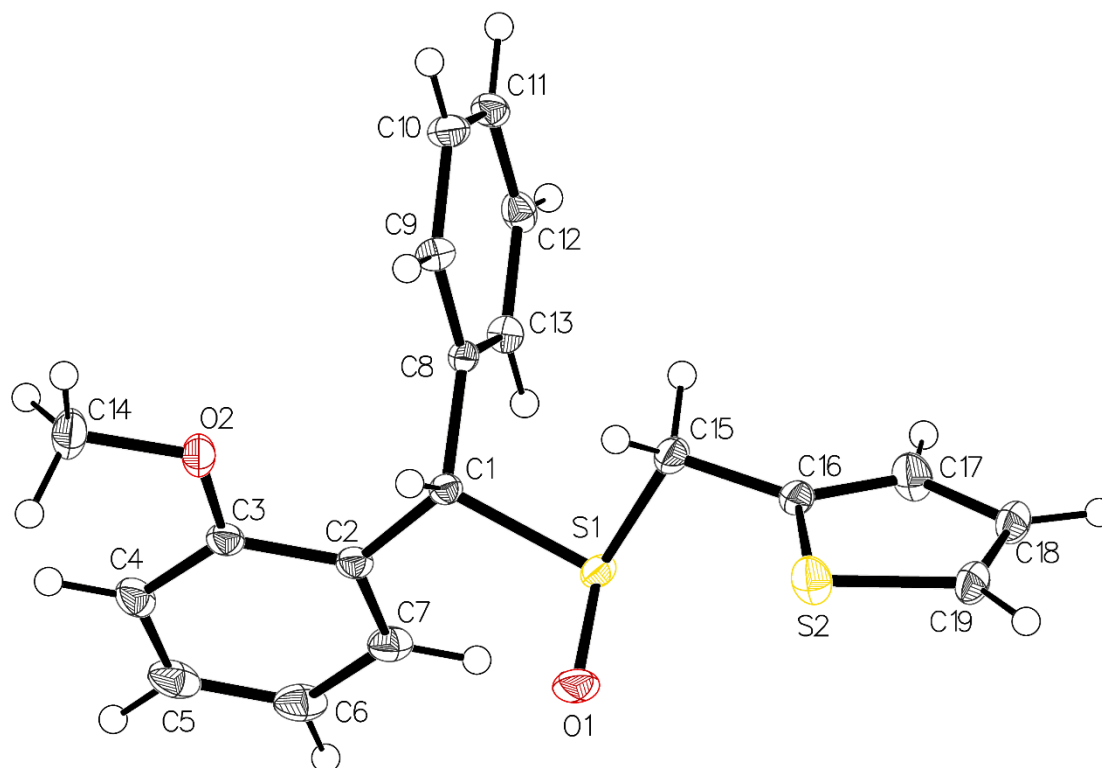

Asymmetric Unit of drawn with 50% displacement ellipsoid. Disorder omitted for clarity. The bond precision for C-C single bonds is 0.0023 Å. Chirality proofed by Hooft (0.001(14)) and Flack (-0.00(5)) for S1 (R) and C1(S).

|                     |                                                               |
|---------------------|---------------------------------------------------------------|
| Identification code | <b>Compound 72</b>                                            |
| Empirical formula   | C <sub>19</sub> H <sub>18</sub> O <sub>2</sub> S <sub>2</sub> |
| Formula weight      | 342.45                                                        |
| Temperature/K       | 100.0                                                         |
| Crystal system      | triclinic                                                     |
| Space group         | P1                                                            |
| a/Å                 | 6.0884(2)                                                     |
| b/Å                 | 8.5758(3)                                                     |

|                                                |                                                                |
|------------------------------------------------|----------------------------------------------------------------|
| c/Å                                            | 8.8177(3)                                                      |
| $\alpha/^\circ$                                | 68.2567(12)                                                    |
| $\beta/^\circ$                                 | 76.8362(13)                                                    |
| $\gamma/^\circ$                                | 84.7772(16)                                                    |
| Volume/Å <sup>3</sup>                          | 416.39(2)                                                      |
| Z                                              | 1                                                              |
| $\rho_{\text{calc}}/\text{g}/\text{cm}^3$      | 1.366                                                          |
| $\mu/\text{mm}^{-1}$                           | 0.326                                                          |
| F(000)                                         | 180.0                                                          |
| Crystal size/mm <sup>3</sup>                   | 0.2 × 0.18 × 0.15                                              |
| Radiation                                      | MoK $\alpha$ ( $\lambda$ = 0.71073)                            |
| 2 $\Theta$ range for data collection/ $^\circ$ | 5.086 to 66.43                                                 |
| Index ranges                                   | -9 ≤ h ≤ 9, -13 ≤ k ≤ 13, -13 ≤ l ≤ 13                         |
| Reflections collected                          | 30265                                                          |
| Independent reflections                        | 6391 [ $R_{\text{int}}$ = 0.0327, $R_{\text{sigma}}$ = 0.0285] |
| Data/restraints/parameters                     | 6391/12/210                                                    |
| Goodness-of-fit on $F^2$                       | 1.036                                                          |
| Final R indexes [ $ I  \geq 2\sigma(I)$ ]      | $R_1$ = 0.0286, $wR_2$ = 0.0697                                |
| Final R indexes [all data]                     | $R_1$ = 0.0316, $wR_2$ = 0.0713                                |
| Largest diff. peak/hole / e Å <sup>-3</sup>    | 0.29/-0.24                                                     |
| Flack parameter                                | 0.006(17)                                                      |



## Compound 77

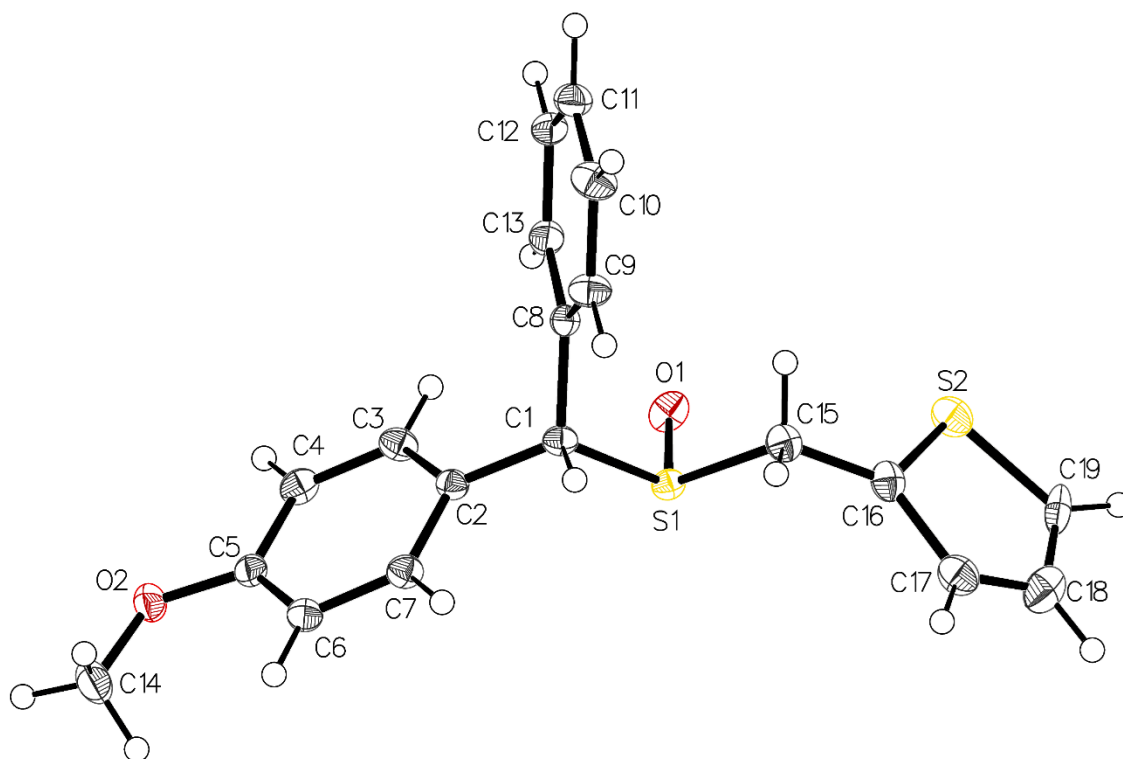

Asymmetric Unit of drawn with 50% displacement ellipsoid. Disorder omitted for clarity. The bond precision for C-C single bonds is 0.0039 Å. Chirality proofed by Hooft (0.11(4)) and Flack (-0.09(10)) for S1 (S) and C1(S).

|                     |                                                               |
|---------------------|---------------------------------------------------------------|
| Identification code | <b>Compound 77</b>                                            |
| Empirical formula   | C <sub>19</sub> H <sub>18</sub> O <sub>2</sub> S <sub>2</sub> |
| Formula weight      | 342.45                                                        |
| Temperature/K       | 100.00                                                        |
| Crystal system      | orthorhombic                                                  |
| Space group         | P2 <sub>1</sub> 2 <sub>1</sub> 2 <sub>1</sub>                 |
| a/Å                 | 5.71790(10)                                                   |
| b/Å                 | 15.7296(4)                                                    |
| c/Å                 | 18.1883(4)                                                    |

|                                                |                                                               |
|------------------------------------------------|---------------------------------------------------------------|
| $\alpha/^\circ$                                | 90                                                            |
| $\beta/^\circ$                                 | 90                                                            |
| $\gamma/^\circ$                                | 90                                                            |
| Volume/ $\text{\AA}^3$                         | 1635.86(6)                                                    |
| Z                                              | 4                                                             |
| $\rho_{\text{calc}}/\text{g/cm}^3$             | 1.390                                                         |
| $\mu/\text{mm}^{-1}$                           | 0.332                                                         |
| F(000)                                         | 720.0                                                         |
| Crystal size/ $\text{mm}^3$                    | $0.22 \times 0.05 \times 0.02$                                |
| Radiation                                      | MoK $\alpha$ ( $\lambda = 0.71073$ )                          |
| 2 $\Theta$ range for data collection/ $^\circ$ | 4.478 to 60.212                                               |
| Index ranges                                   | $-8 \leq h \leq 8, -19 \leq k \leq 22, -25 \leq l \leq 25$    |
| Reflections collected                          | 21282                                                         |
| Independent reflections                        | 4771 [ $R_{\text{int}} = 0.0614, R_{\text{sigma}} = 0.0512$ ] |
| Data/restraints/parameters                     | 4771/9/228                                                    |
| Goodness-of-fit on $F^2$                       | 1.029                                                         |
| Final R indexes [ $ I  \geq 2\sigma(I)$ ]      | $R_1 = 0.0405, wR_2 = 0.0807$                                 |
| Final R indexes [all data]                     | $R_1 = 0.0566, wR_2 = 0.0891$                                 |
| Largest diff. peak/hole / $e \text{\AA}^{-3}$  | 0.27/-0.36                                                    |
| Flack parameter                                | -0.11(4)                                                      |

### Compound 79

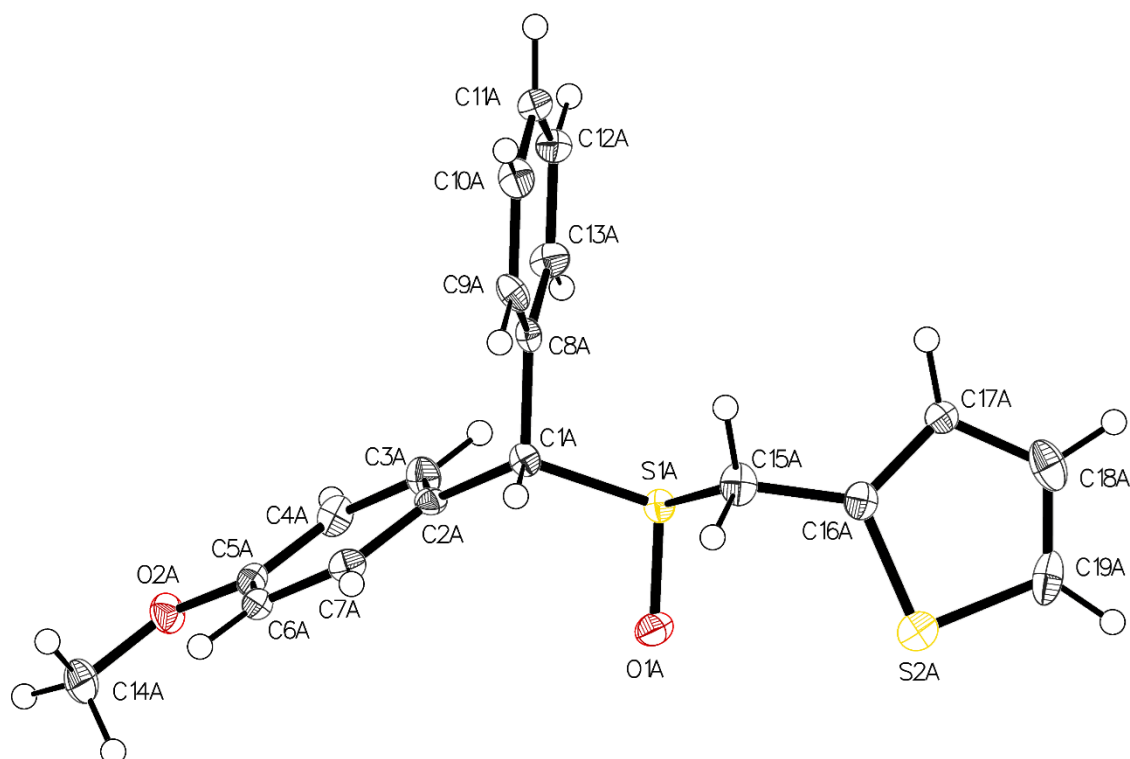

Asymmetric Unit of drawn with 50% displacement ellipsoid. Disorder and second independent molecule omitted for clarity. The bond precision for C-C single bonds is 0.0117 Å. Chirality proofed by Hooft (0.05(6)) and Flack (-0.03(14)) for S1 (S) and C1(R).

|                     |                                                               |
|---------------------|---------------------------------------------------------------|
| Identification code | <b>Compound 79</b>                                            |
| Empirical formula   | C <sub>19</sub> H <sub>18</sub> O <sub>2</sub> S <sub>2</sub> |
| Formula weight      | 342.45                                                        |
| Temperature/K       | 100.0                                                         |
| Crystal system      | triclinic                                                     |
| Space group         | P1                                                            |
| a/Å                 | 5.5462(11)                                                    |
| b/Å                 | 9.337(2)                                                      |
| c/Å                 | 16.917(4)                                                     |

|                                                |                                                                  |
|------------------------------------------------|------------------------------------------------------------------|
| $\alpha/^\circ$                                | 98.813(7)                                                        |
| $\beta/^\circ$                                 | 96.293(7)                                                        |
| $\gamma/^\circ$                                | 105.117(7)                                                       |
| Volume/ $\text{\AA}^3$                         | 825.4(3)                                                         |
| Z                                              | 2                                                                |
| $\rho_{\text{calc}}/\text{g/cm}^3$             | 1.378                                                            |
| $\mu/\text{mm}^{-1}$                           | 0.329                                                            |
| F(000)                                         | 360.0                                                            |
| Crystal size/ $\text{mm}^3$                    | $0.05 \times 0.03 \times 0.02$                                   |
| Radiation                                      | MoK $\alpha$ ( $\lambda = 0.71073$ )                             |
| 2 $\Theta$ range for data collection/ $^\circ$ | 4.602 to 50.698                                                  |
| Index ranges                                   | $-6 \leq h \leq 6$ , $-11 \leq k \leq 11$ , $-20 \leq l \leq 20$ |
| Reflections collected                          | 30893                                                            |
| Independent reflections                        | 6039 [ $R_{\text{int}} = 0.1332$ , $R_{\text{sigma}} = 0.0982$ ] |
| Data/restraints/parameters                     | 6039/16/424                                                      |
| Goodness-of-fit on $F^2$                       | 1.007                                                            |
| Final R indexes [ $ I  \geq 2\sigma(I)$ ]      | $R_1 = 0.0594$ , $wR_2 = 0.1334$                                 |
| Final R indexes [all data]                     | $R_1 = 0.0879$ , $wR_2 = 0.1507$                                 |
| Largest diff. peak/hole / $e \text{\AA}^{-3}$  | 0.26/-0.51                                                       |
| Flack parameter                                | 0.05(7)                                                          |

### Compound 80

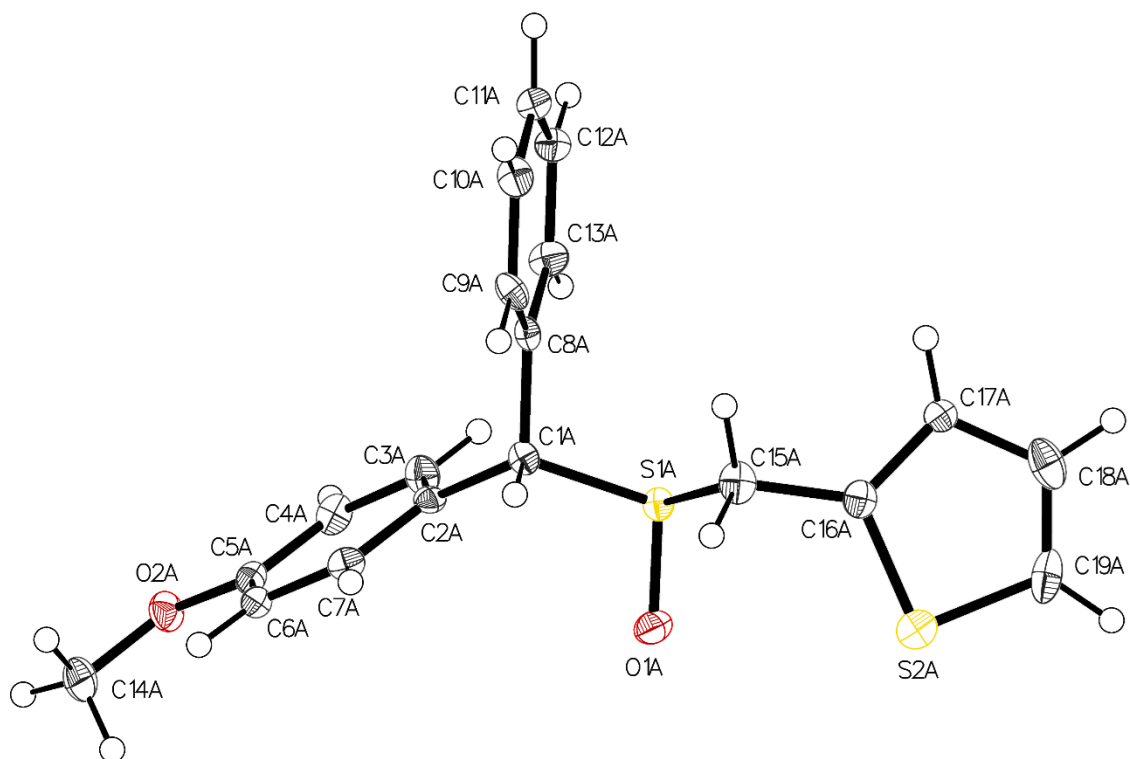

Asymmetric Unit of drawn with 50% displacement ellipsoid. Disorder and second independent molecule omitted for clarity. The bond precision for C-C single bonds is 0.0072 Å. Chirality proofed by Hooft (0.06(5)) and Flack (-0.07(9)) for S1 (R) and C1(S).

|                     |                                                               |
|---------------------|---------------------------------------------------------------|
| Identification code | <b>Compound 80</b>                                            |
| Empirical formula   | C <sub>19</sub> H <sub>18</sub> O <sub>2</sub> S <sub>2</sub> |
| Formula weight      | 342.45                                                        |
| Temperature/K       | 100.0                                                         |
| Crystal system      | triclinic                                                     |
| Space group         | P1                                                            |
| a/Å                 | 5.5529(3)                                                     |

|                                                |                                                                |
|------------------------------------------------|----------------------------------------------------------------|
| b/Å                                            | 9.3431(6)                                                      |
| c/Å                                            | 16.9463(11)                                                    |
| $\alpha/^\circ$                                | 98.786(3)                                                      |
| $\beta/^\circ$                                 | 96.278(3)                                                      |
| $\gamma/^\circ$                                | 105.206(3)                                                     |
| Volume/Å <sup>3</sup>                          | 828.10(9)                                                      |
| Z                                              | 2                                                              |
| $\rho_{\text{calc}}/\text{g/cm}^3$             | 1.373                                                          |
| $\mu/\text{mm}^{-1}$                           | 0.328                                                          |
| F(000)                                         | 360.0                                                          |
| Crystal size/mm <sup>3</sup>                   | 0.15 × 0.1 × 0.05                                              |
| Radiation                                      | MoK $\alpha$ ( $\lambda$ = 0.71073)                            |
| 2 $\Theta$ range for data collection/ $^\circ$ | 4.6 to 52.018                                                  |
| Index ranges                                   | -6 ≤ h ≤ 6, -11 ≤ k ≤ 11, -20 ≤ l ≤ 20                         |
| Reflections collected                          | 17255                                                          |
| Independent reflections                        | 6474 [ $R_{\text{int}}$ = 0.0554, $R_{\text{sigma}}$ = 0.0754] |
| Data/restraints/parameters                     | 6474/18/418                                                    |
| Goodness-of-fit on $F^2$                       | 1.028                                                          |
| Final R indexes [ $ I  \geq 2\sigma(I)$ ]      | $R_1$ = 0.0469, $wR_2$ = 0.0863                                |
| Final R indexes [all data]                     | $R_1$ = 0.0563, $wR_2$ = 0.0926                                |
| Largest diff. peak/hole / e Å <sup>-3</sup>    | 0.27/-0.29                                                     |
| Flack parameter                                | 0.03(5)                                                        |

<sup>i</sup> Bruker SAINT v8.38B & v8.37A Copyright © 2005-2019 Bruker AXS

<sup>ii</sup> Sheldrick, G. M. (1996). *SADABS*. University of Göttingen, Germany.

<sup>iii</sup> X-Area Integrate 2.5.3.0 (STOE, 2021)

<sup>iv</sup> X-Area LANA 2.7.5.0 (STOE, 2022)

<sup>v</sup> Dolomanov, O.V., Bourhis, L.J., Gildea, R.J., Howard, J.A.K. & Puschmann, H., OLEX2, (2009), J. Appl. Cryst. 42, 339-341

---

<sup>vi</sup> C. B. Huebschle, G. M. Sheldrick and B. Dittrich, ShelXle: a Qt graphical user interface for SHELXL, *J. Appl. Cryst.*, **44**, (2011) 1281-1284

<sup>vii</sup> Sheldrick, G. M. (2015). *SHELXS v 2016/4* University of Göttingen, Germany.

<sup>viii</sup> Sheldrick, G. M. (2015). *SHELXL v 2016/4* University of Göttingen, Germany.

<sup>ix</sup> A. L. Spek, *Acta Cryst.* 2009, D65, 148-155.

## References

- (1) Parsons, S.; Flack, H. D.; Wagner, T. Use of Intensity Quotients and Differences in Absolute Structure Refinement. *Acta Crystallogr. Sect. B Struct. Sci. Cryst. Eng. Mater.* **2013**, 69 (3), 249–259. <https://doi.org/10.1107/S2052519213010014>.

**5a**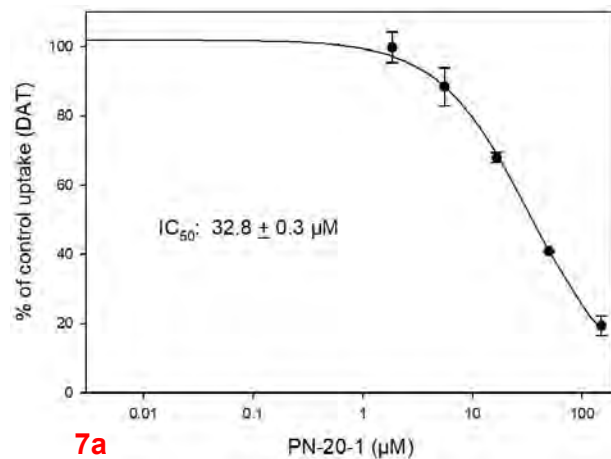**6a**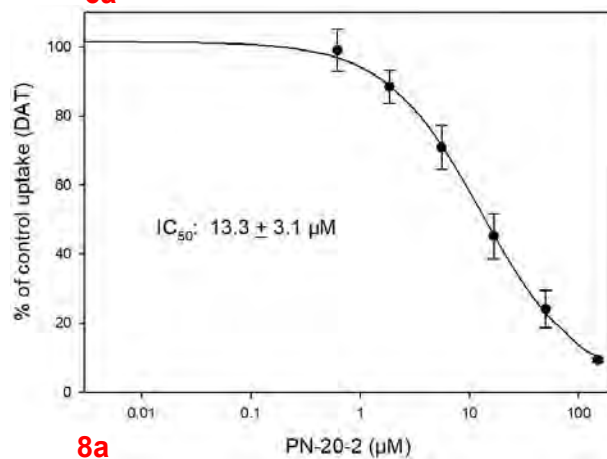**7a**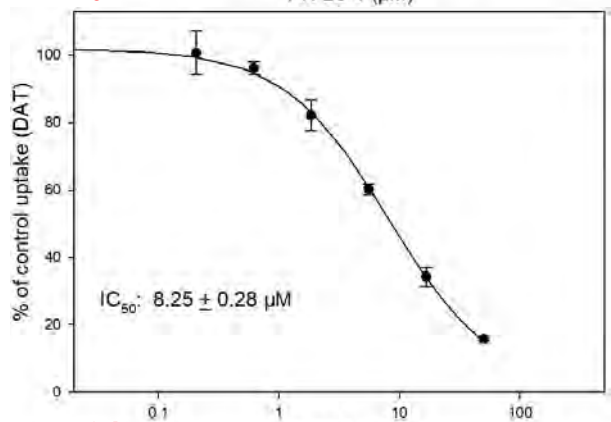**8a**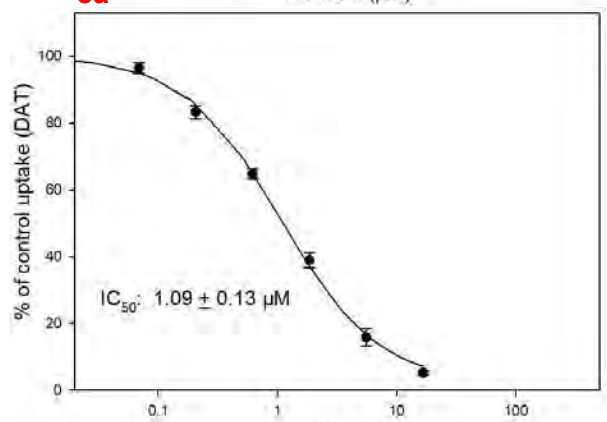**6d**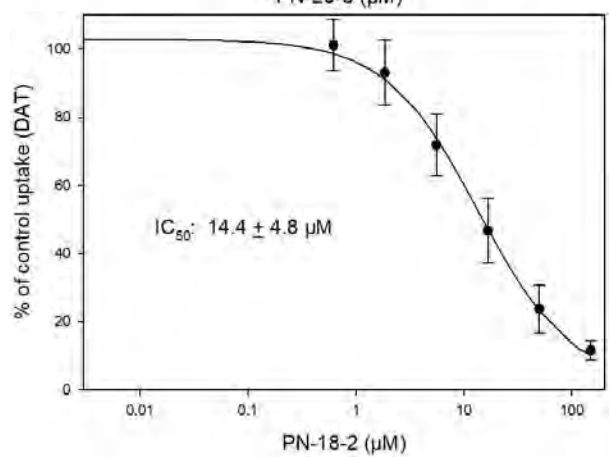**8d**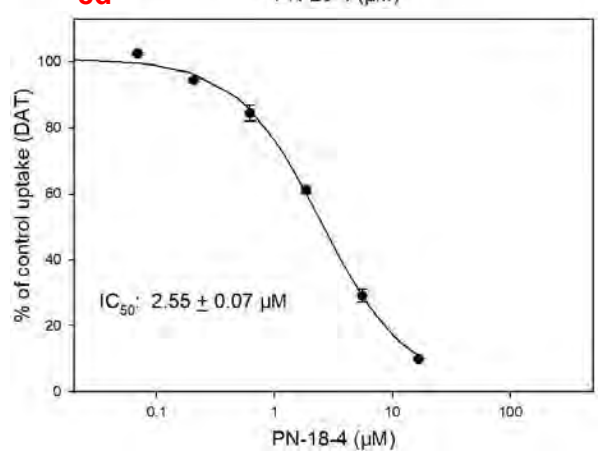



**6g**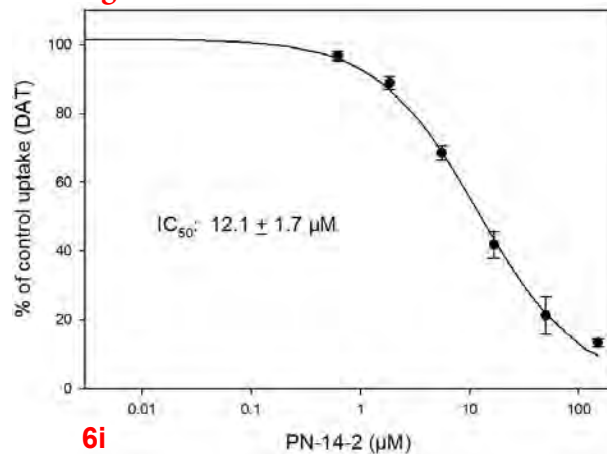**8g**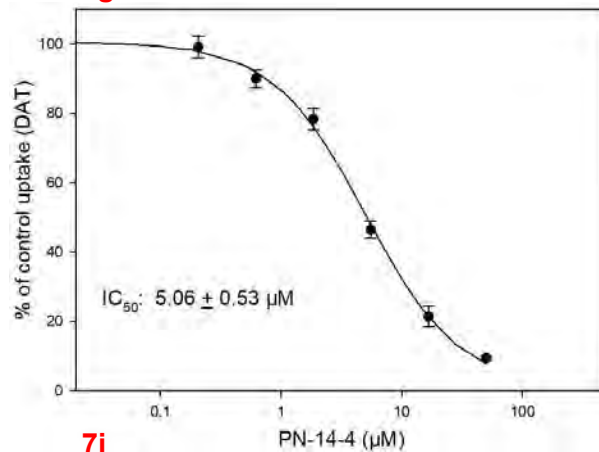**6i**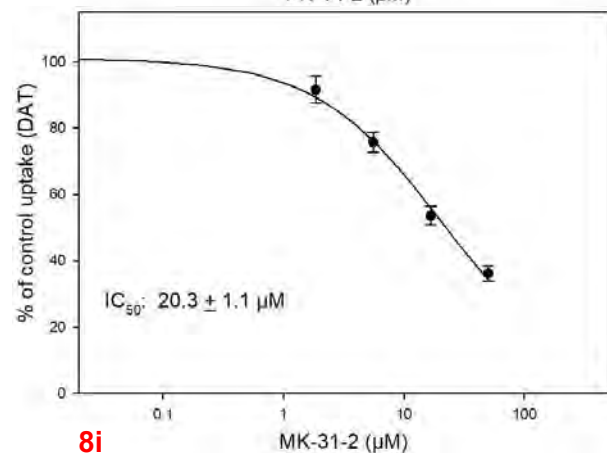**7i**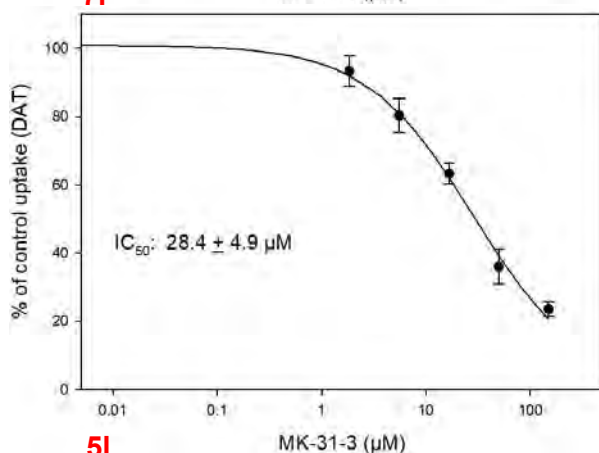**8i**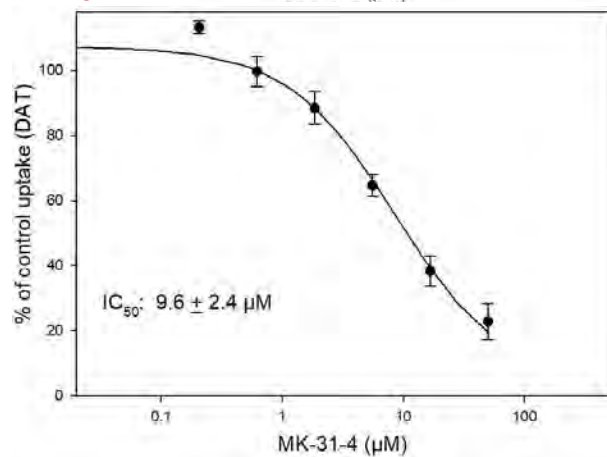**5i**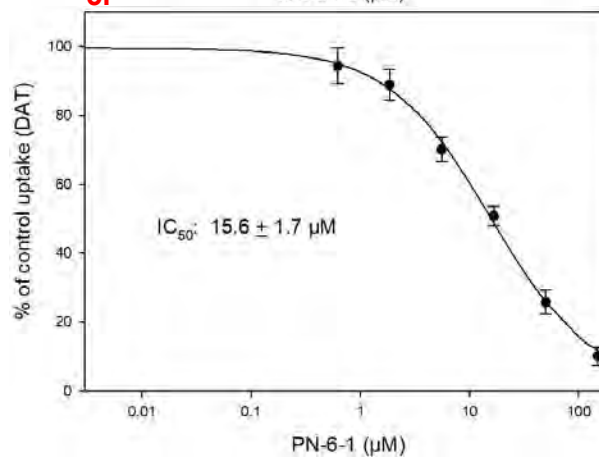

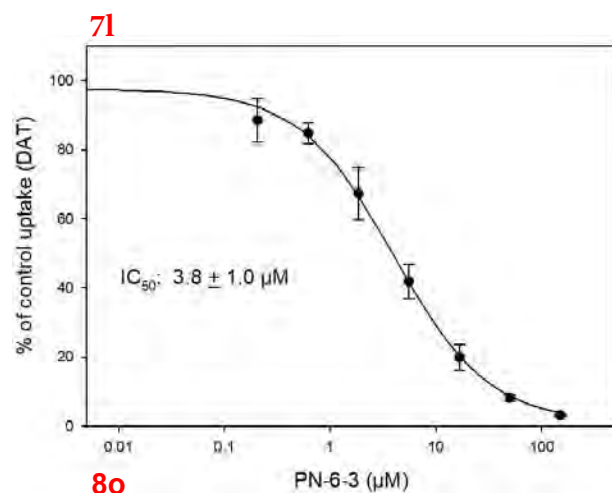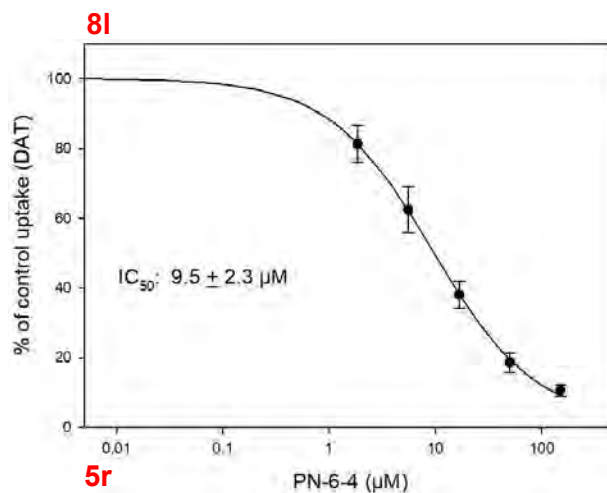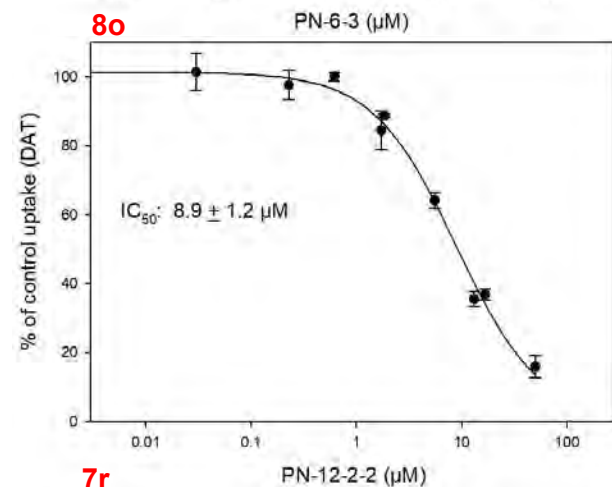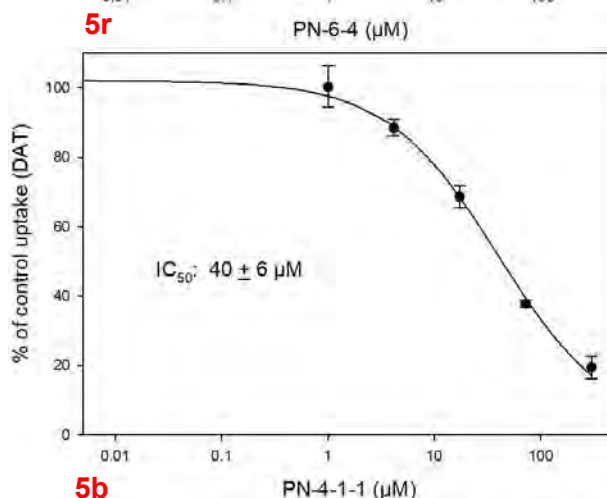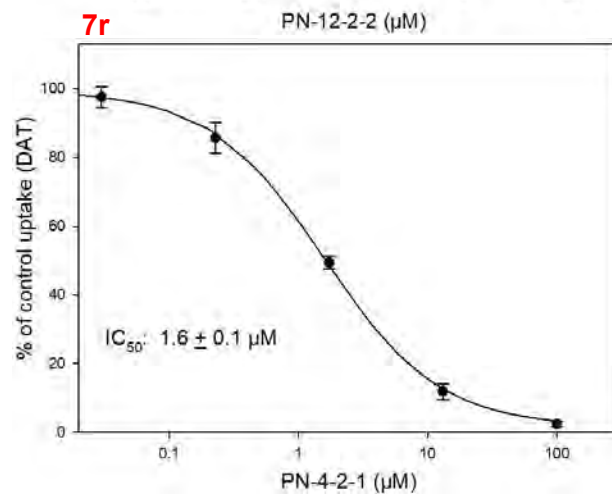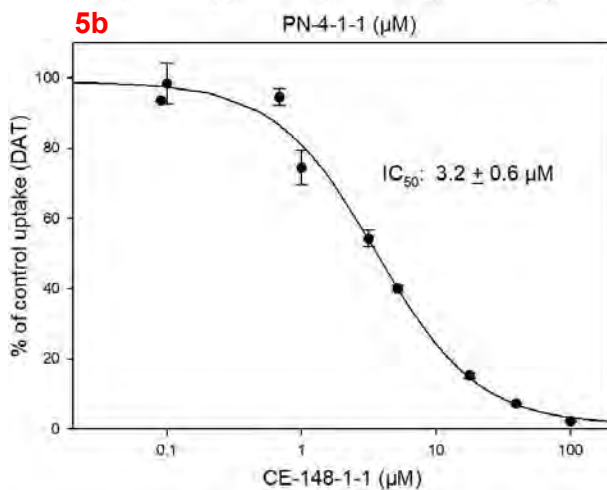

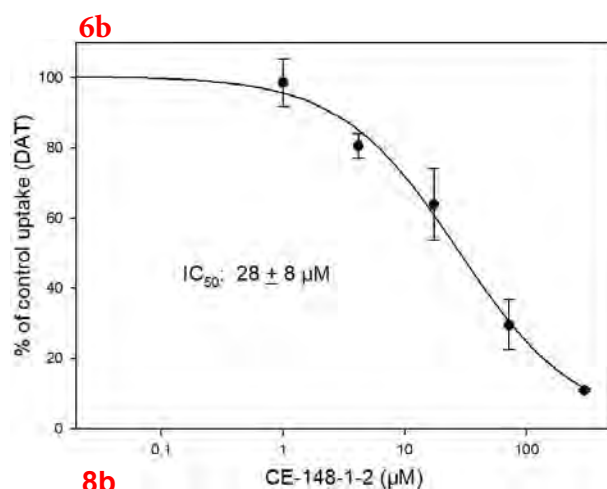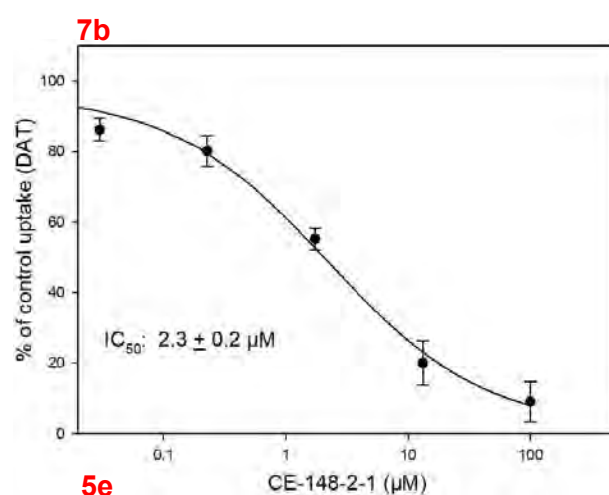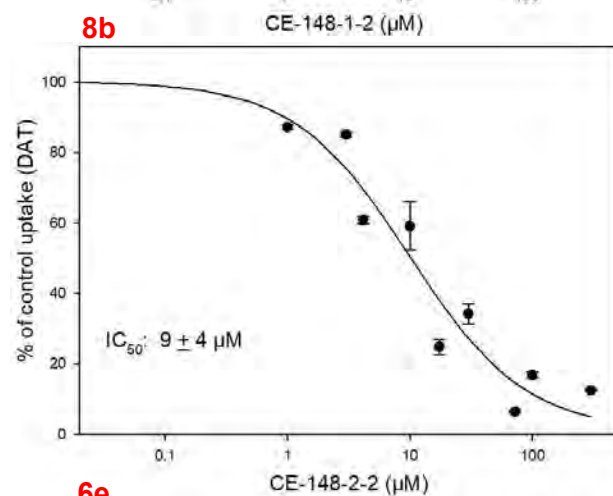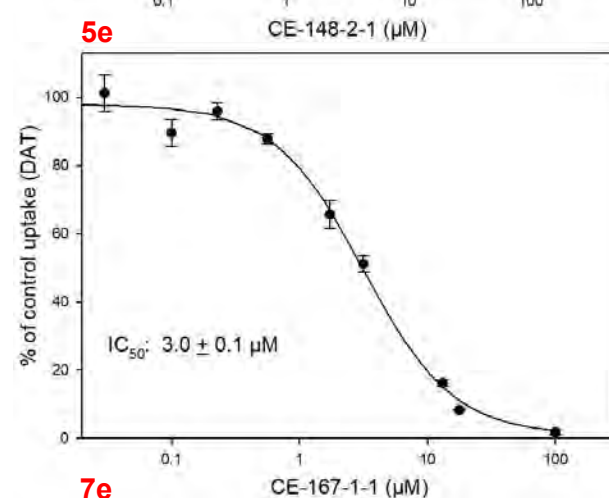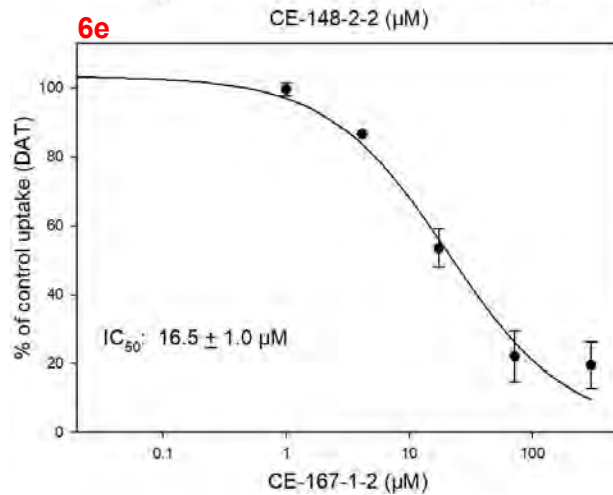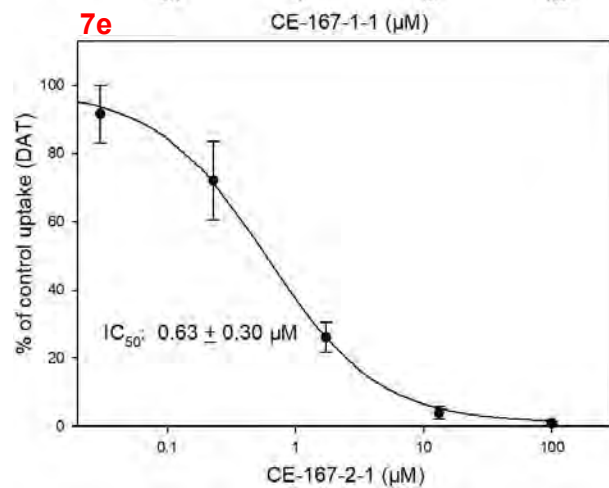

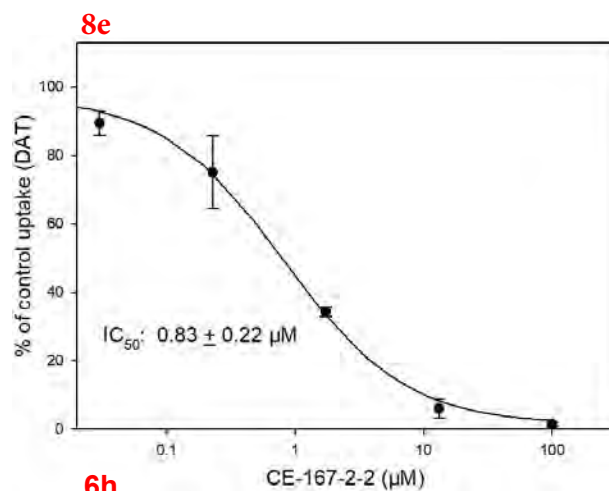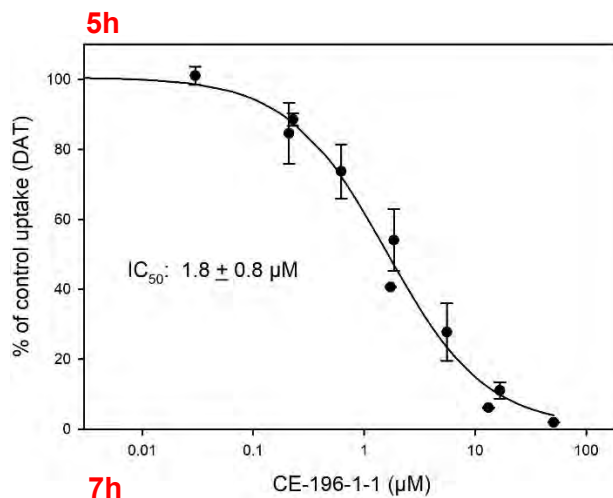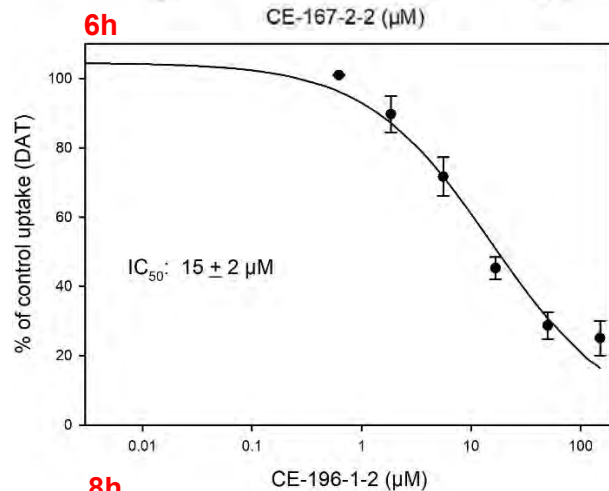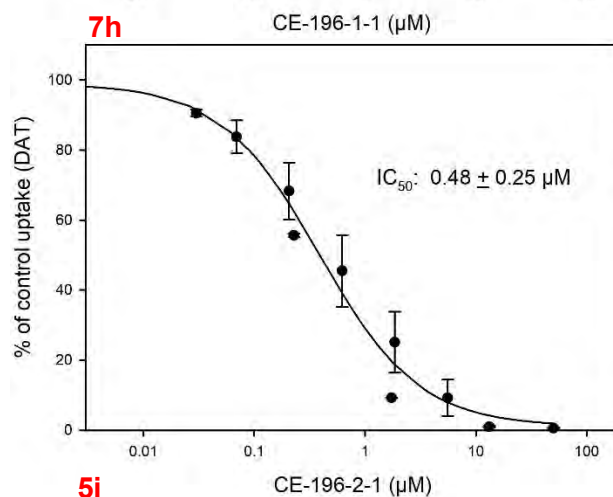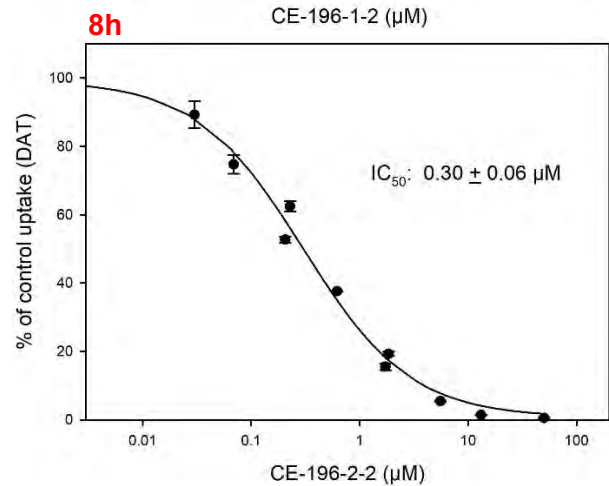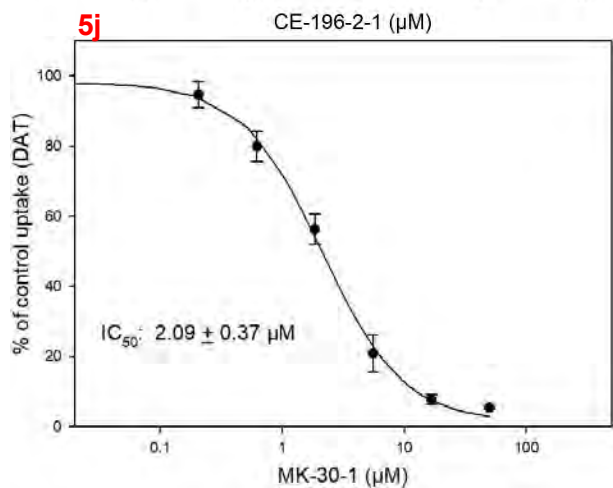

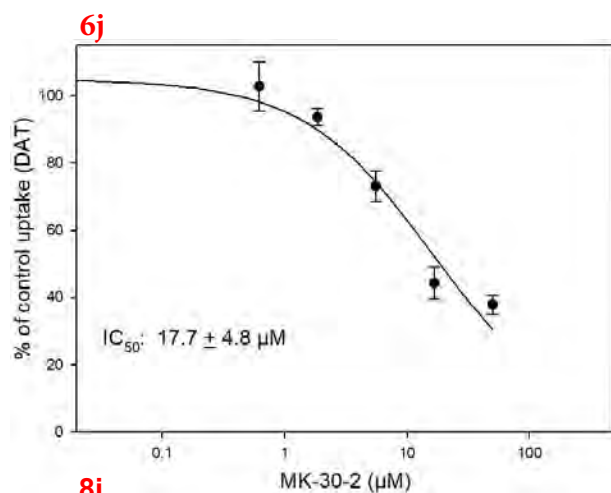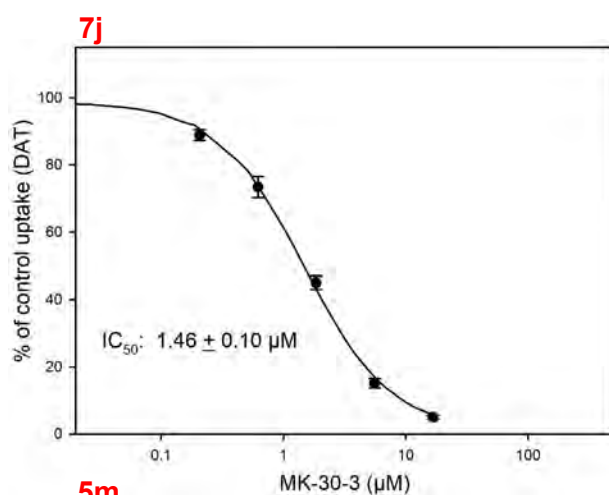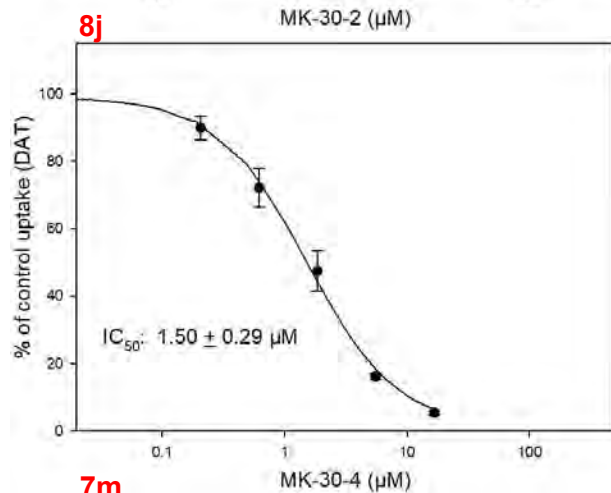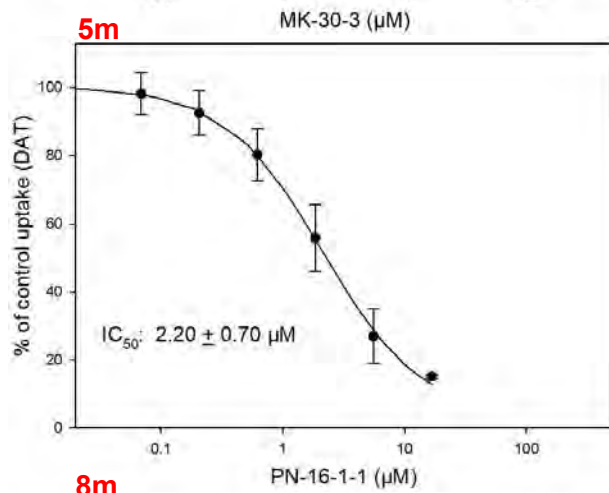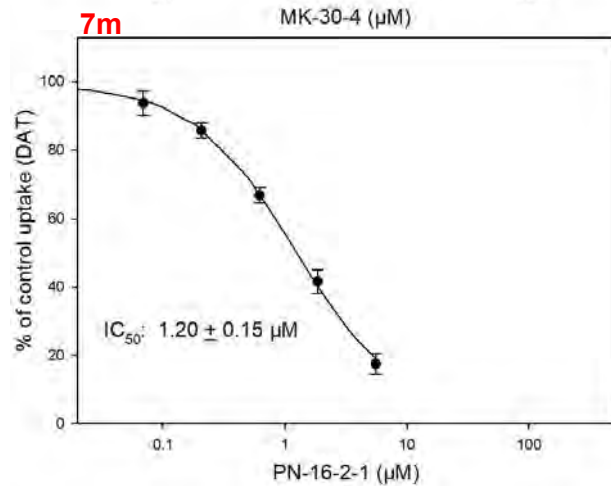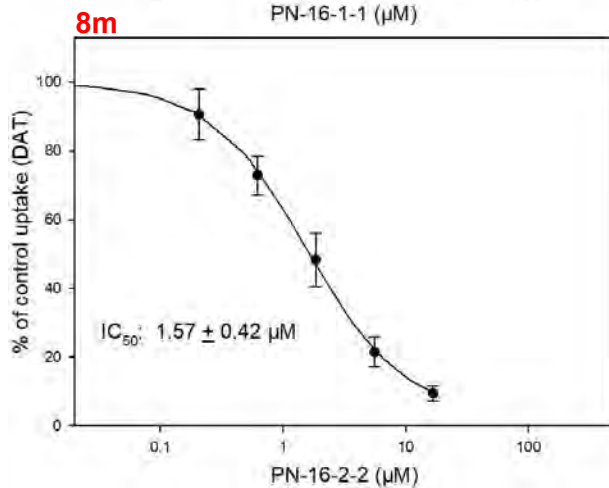

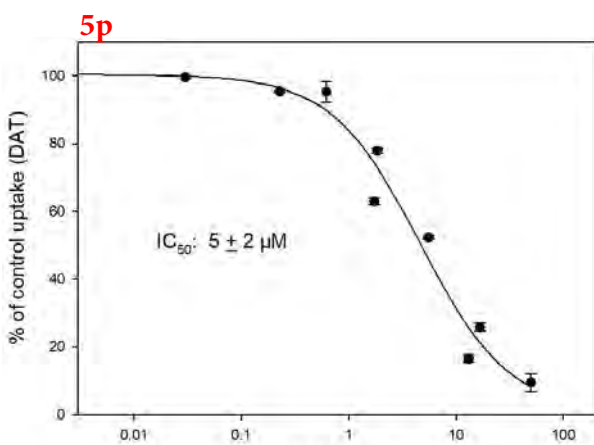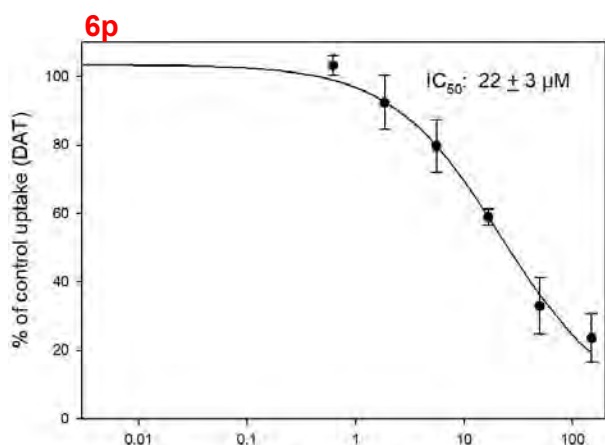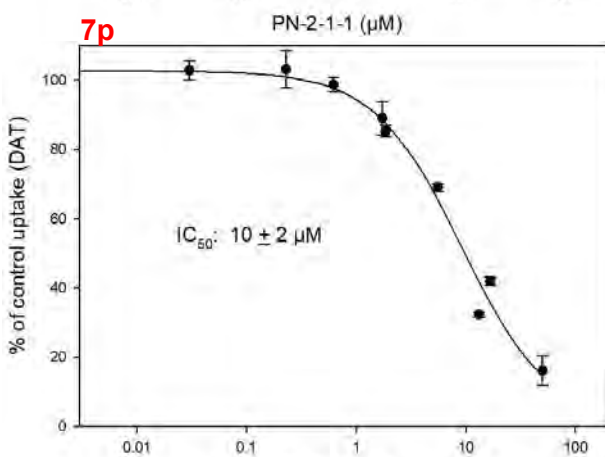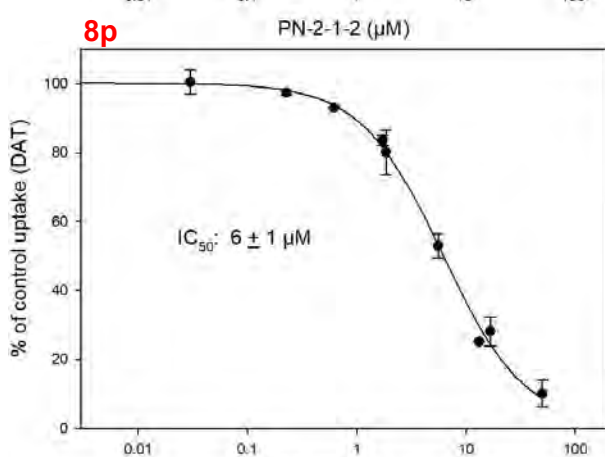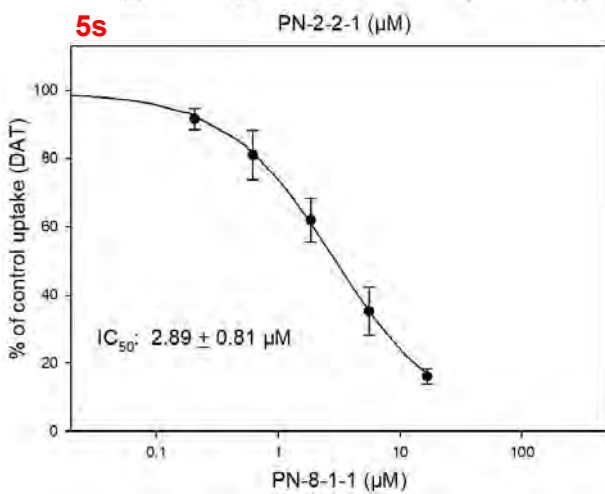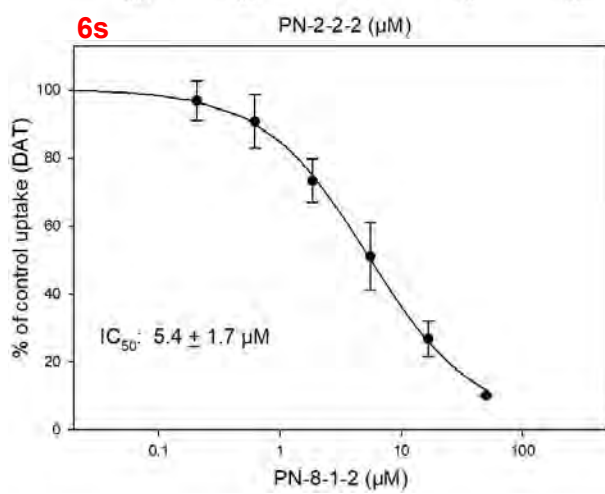

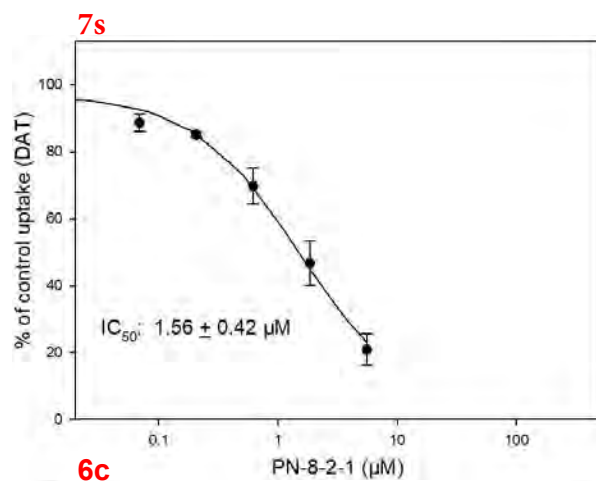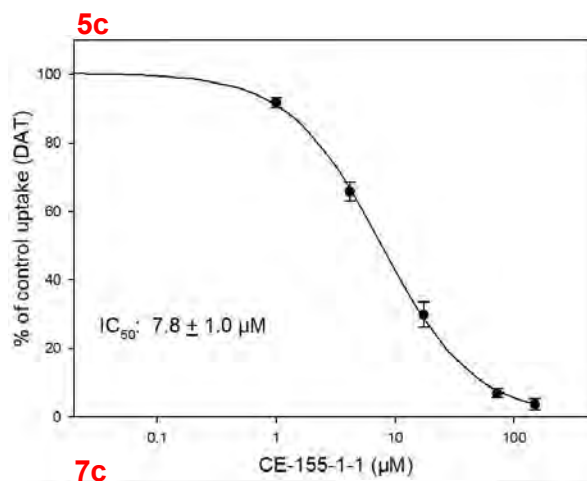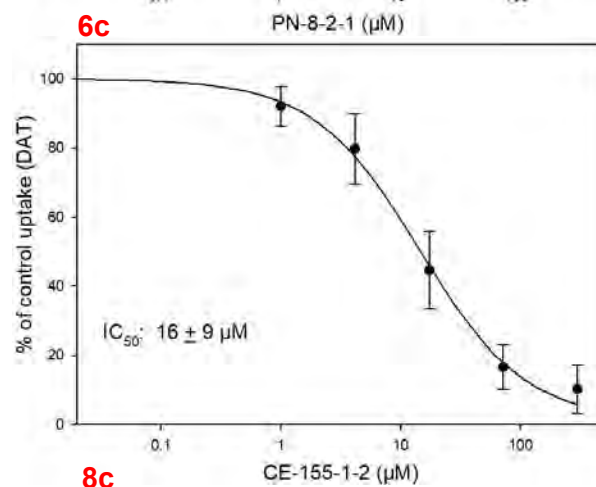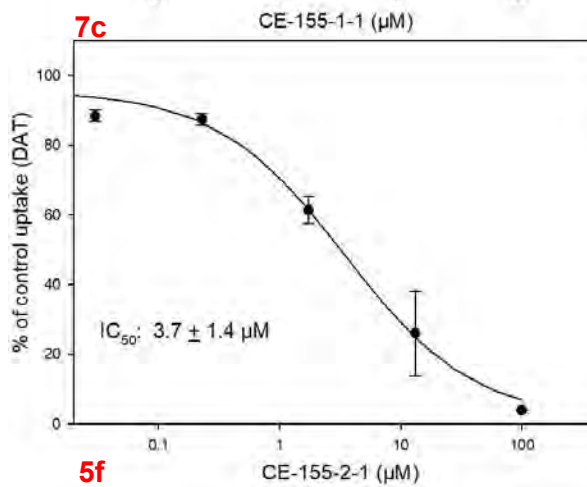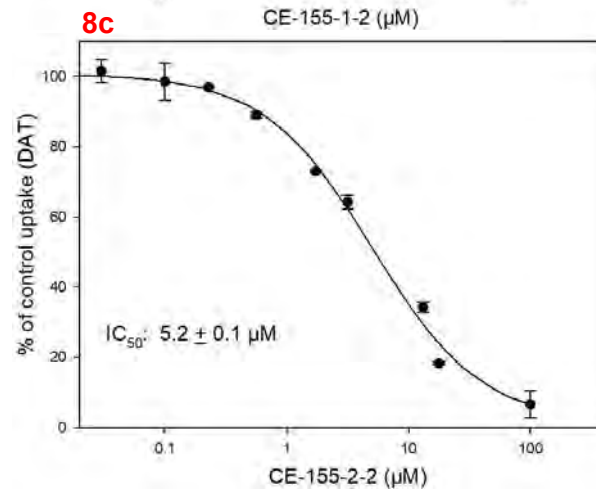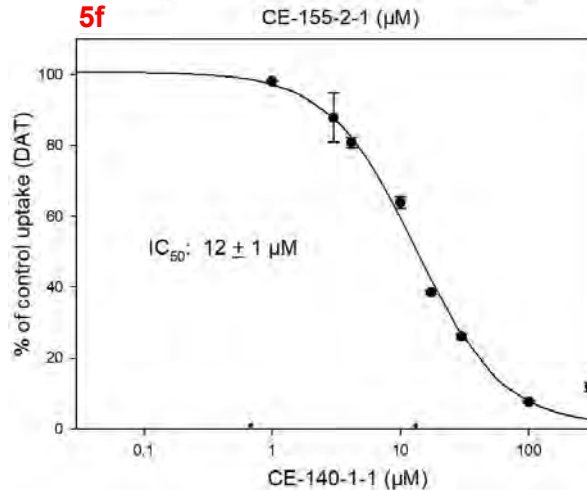



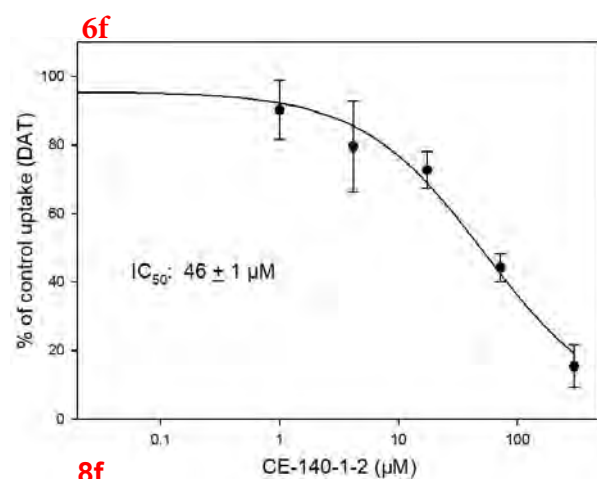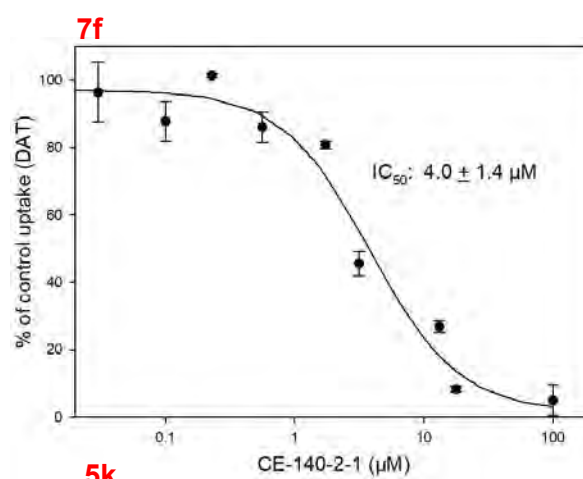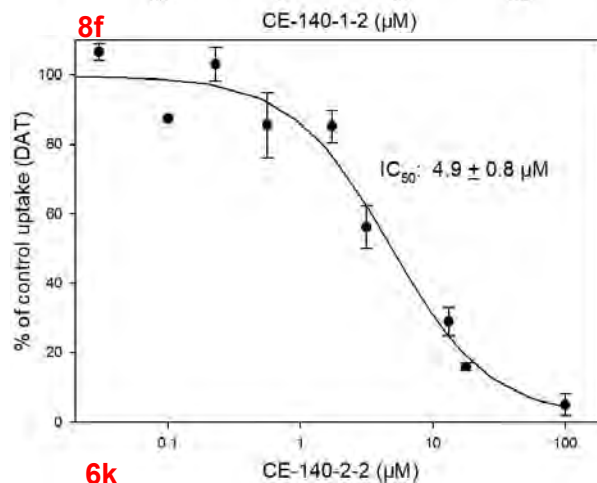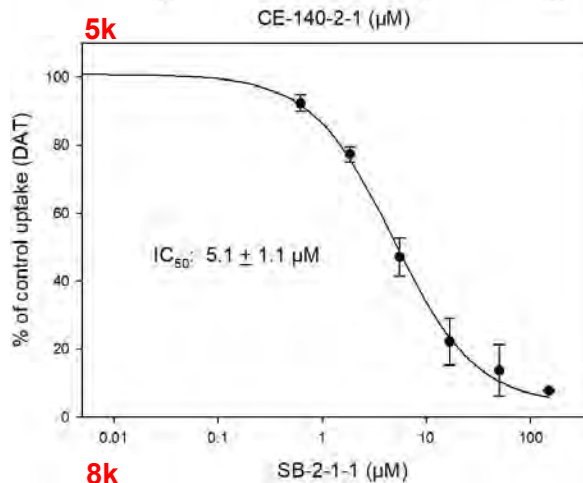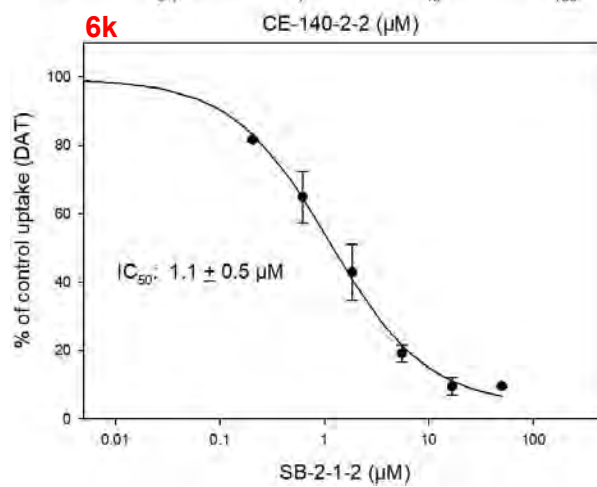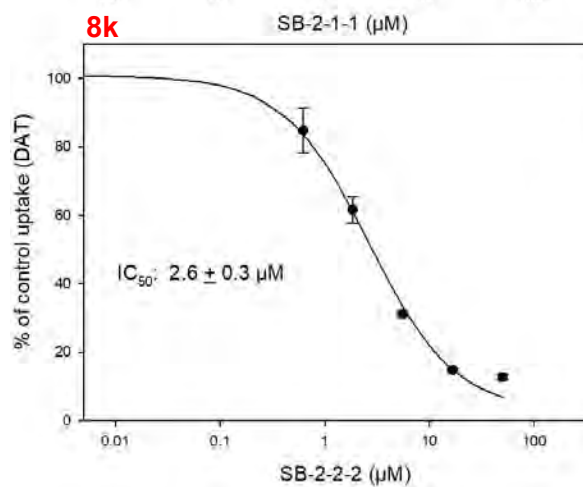



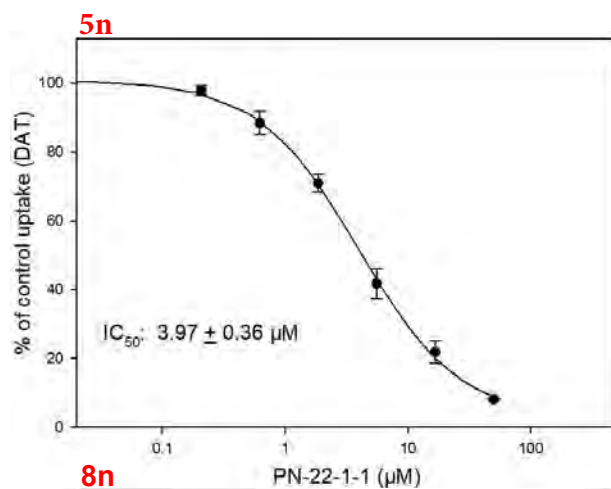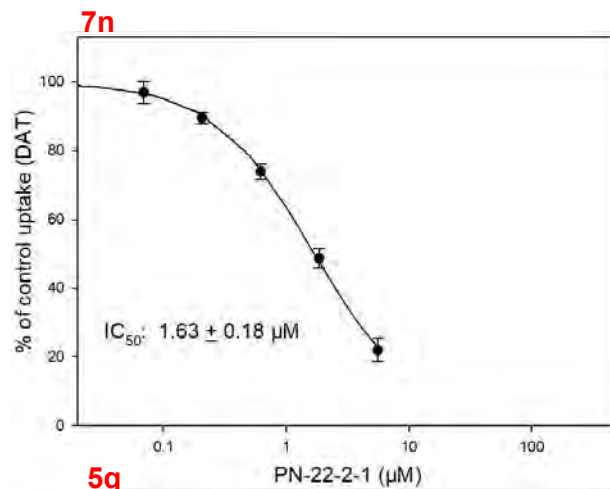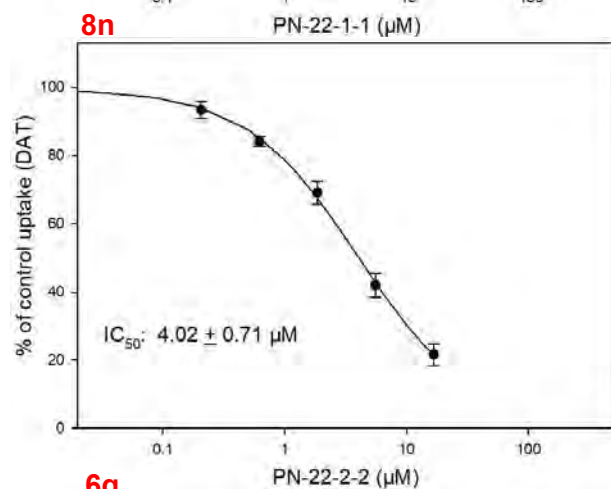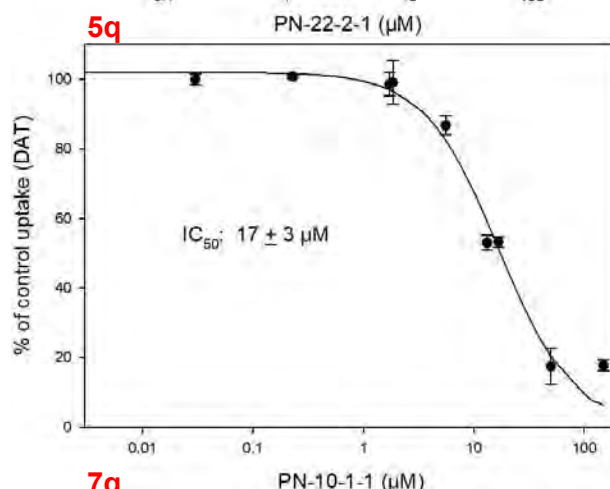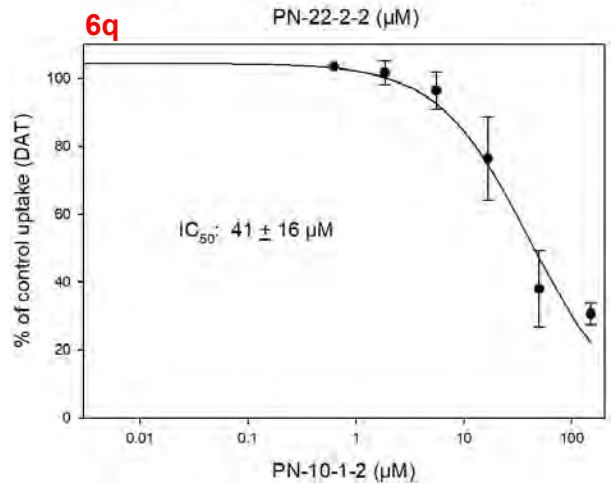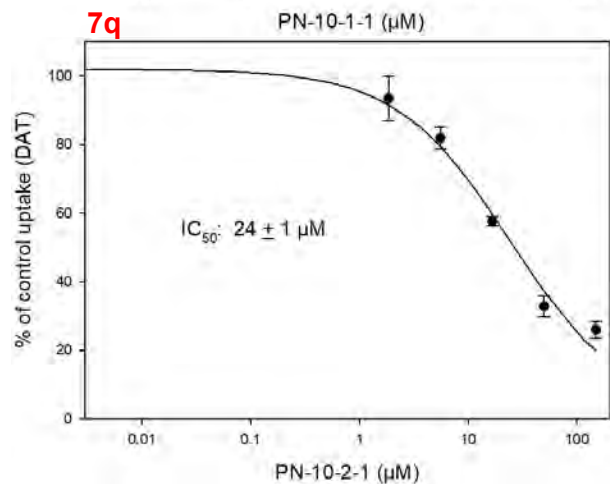

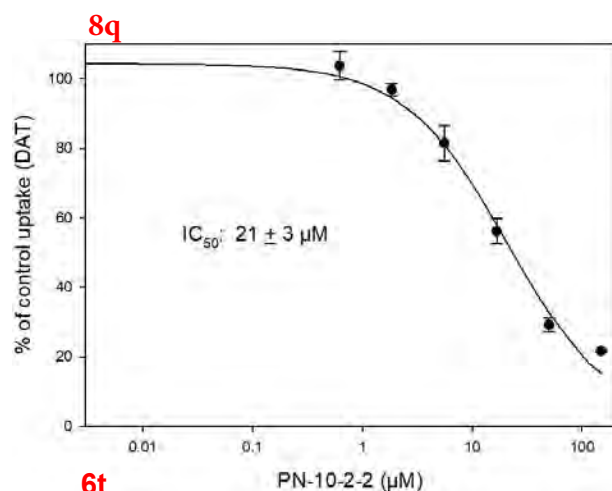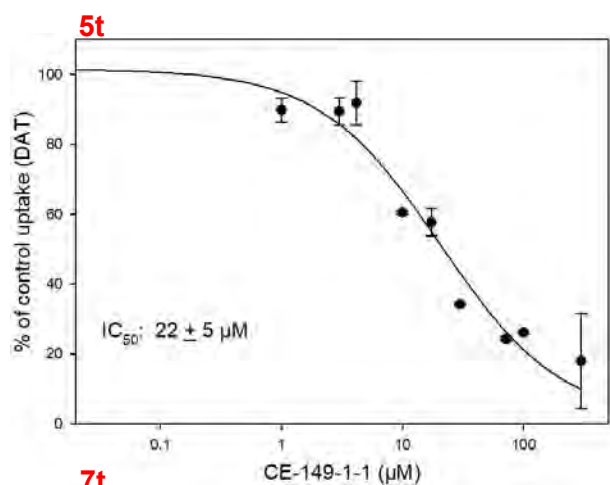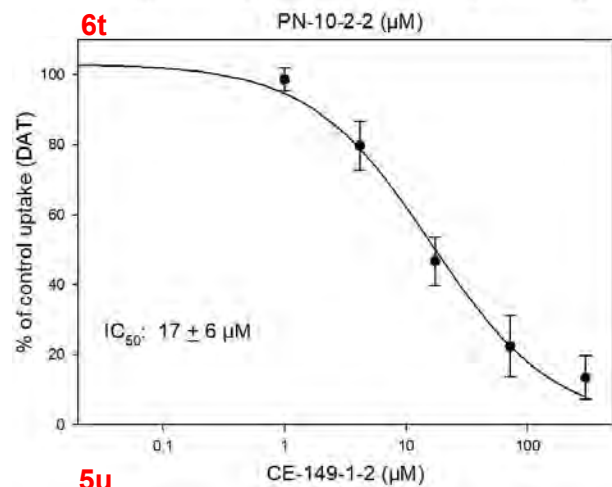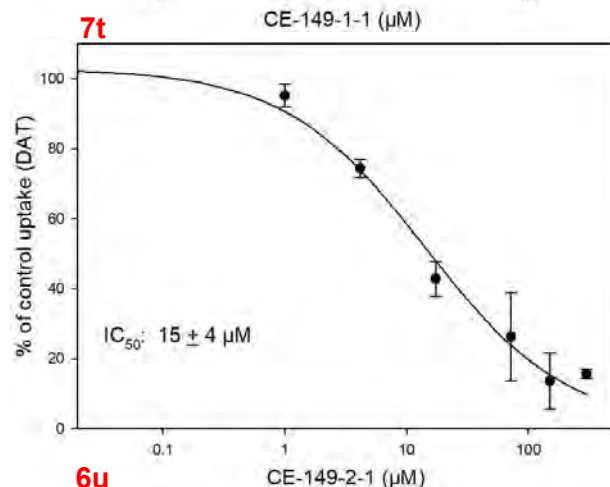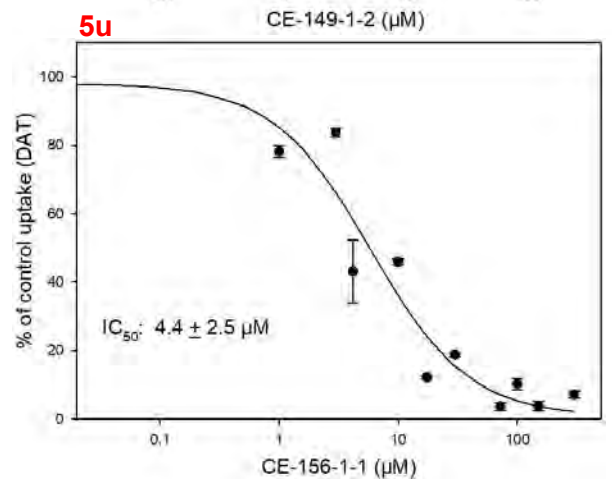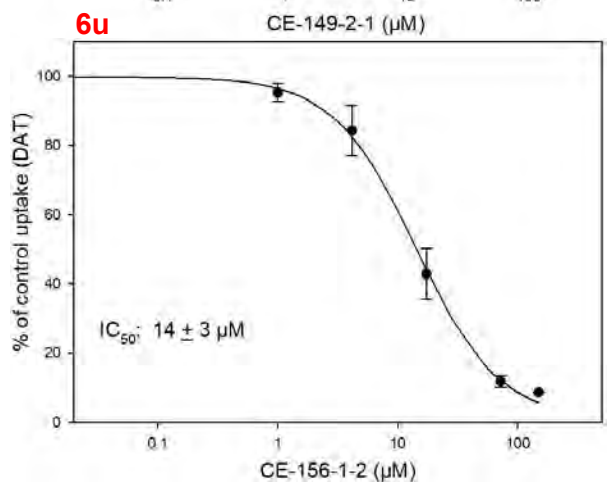

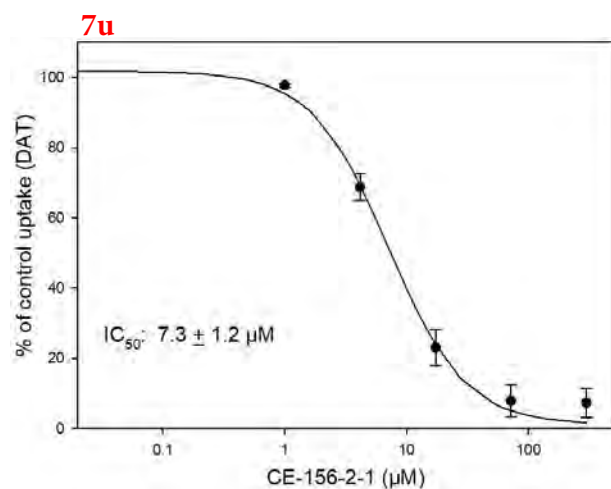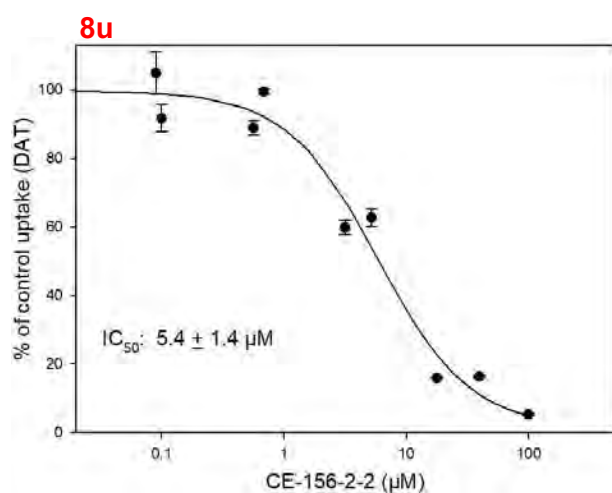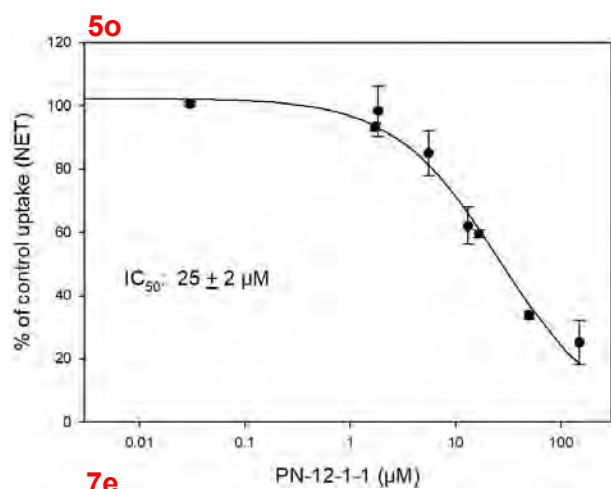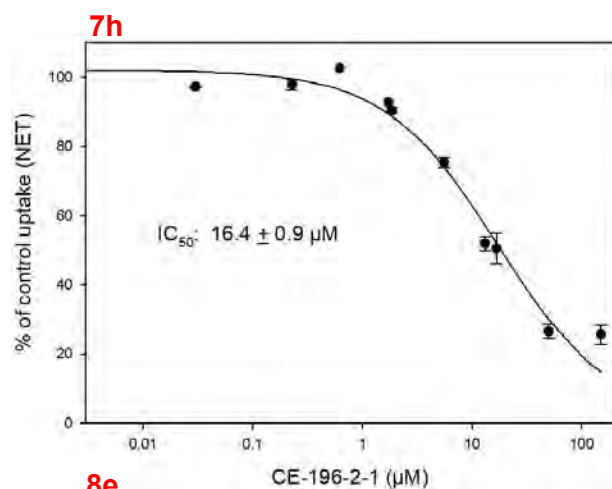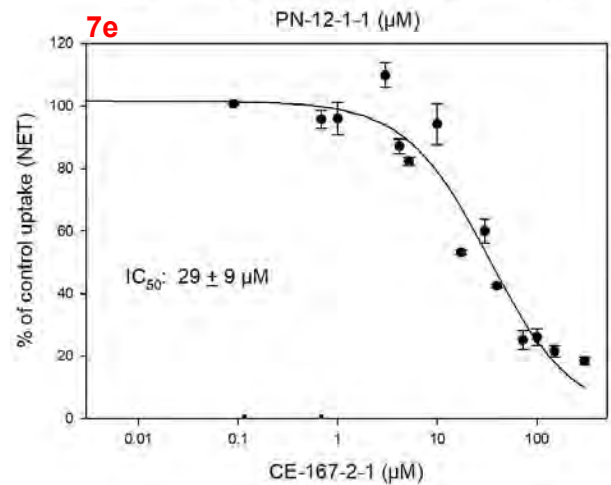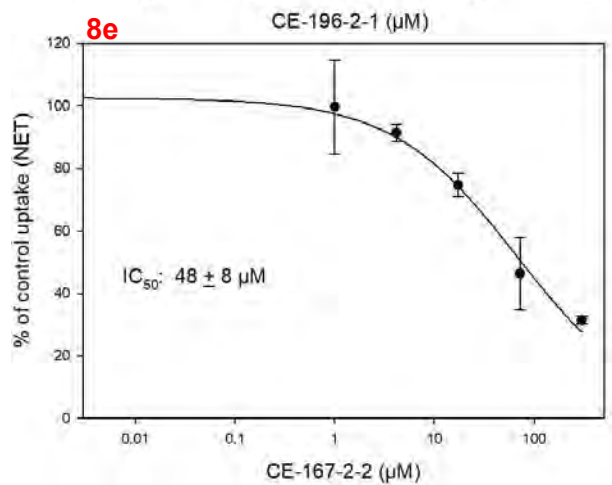

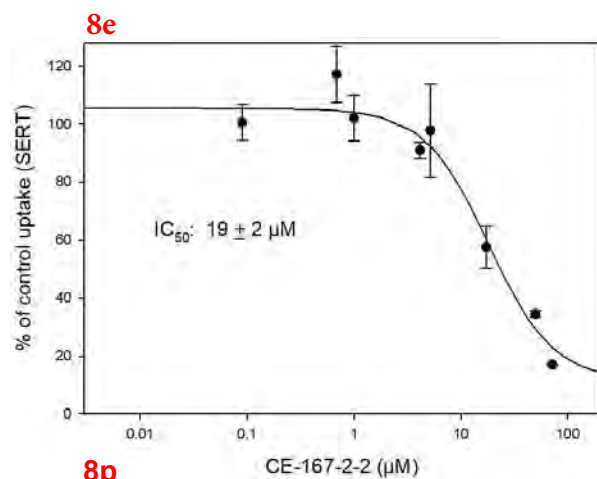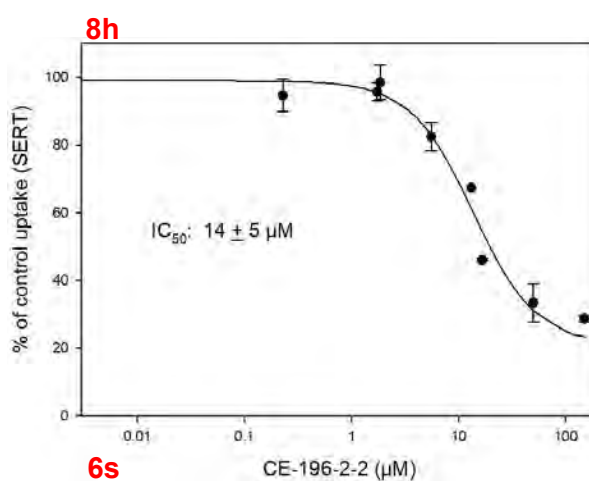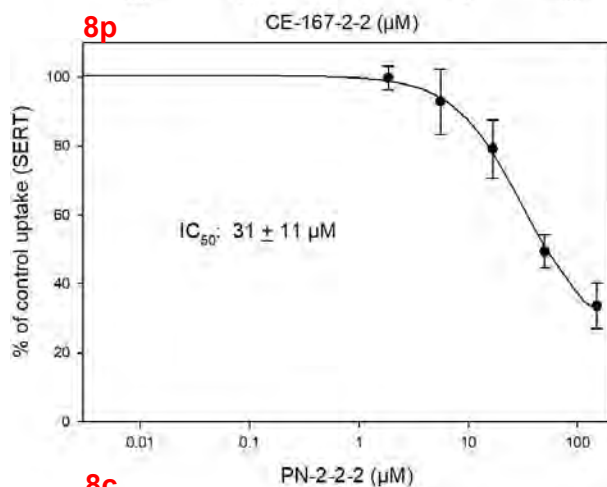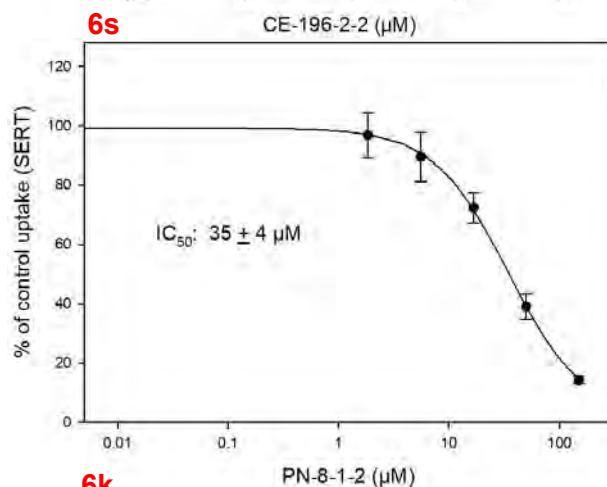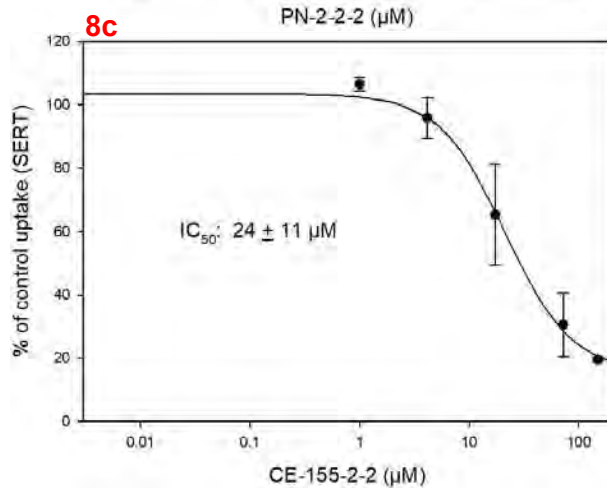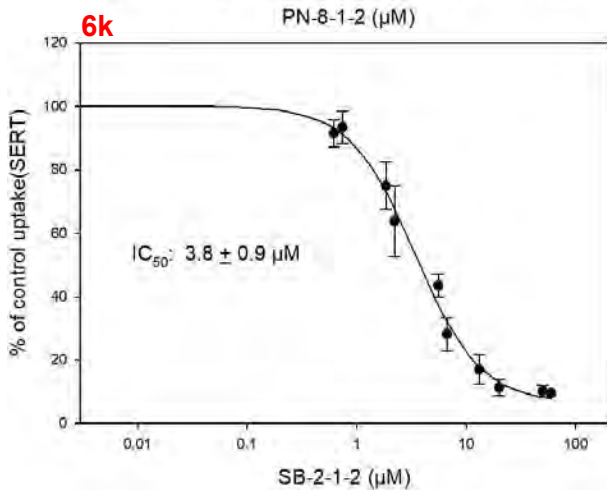

**8n**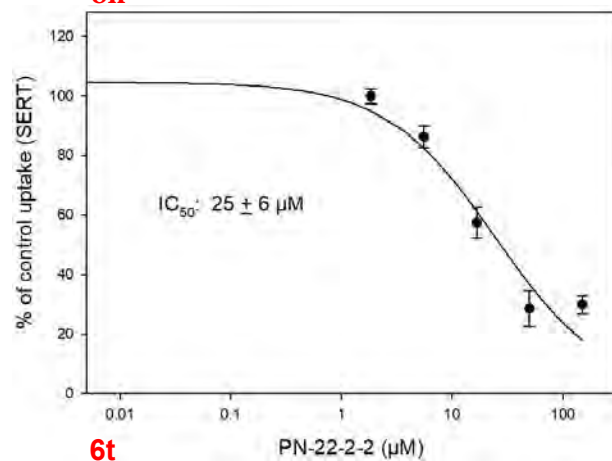**8q**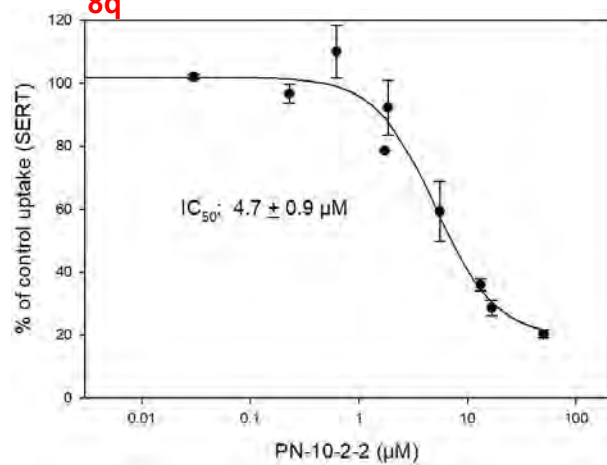**6t**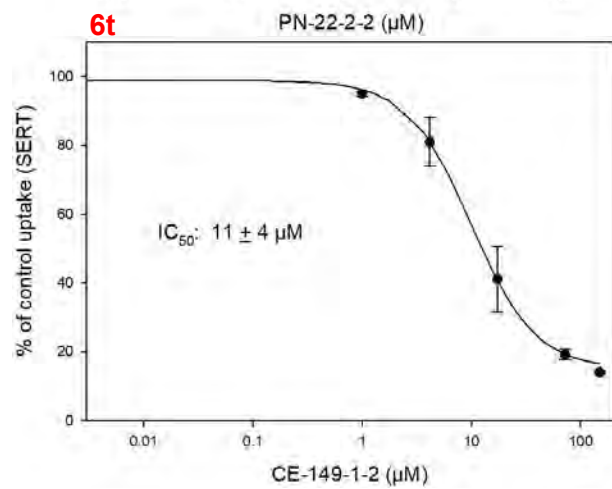

*In Vitro* Pharmacology: Transporters Binding Assays  
Study of CE-196-2-1 and  
CE-196-2-2

STUDY ID: FR095-0020234

STUDY NUMBER  
100053935

August 19, 2020

**CONFIDENTIAL**

## 1. STUDY REFERENCES

|                     |                                                                                                               |                                               |
|---------------------|---------------------------------------------------------------------------------------------------------------|-----------------------------------------------|
| Study title         | <b><i>In Vitro</i> Pharmacology: Transporters Binding Assays</b><br><b>Study of CE-196-2-1 and CE-196-2-2</b> |                                               |
| Study number        | <b>100053935</b>                                                                                              | <b>FINAL REPORT</b><br><b>August 19, 2020</b> |
| Study ID            | <b>FR095-0020234</b>                                                                                          |                                               |
| Experimental period | August 17, 2020 - August 18, 2020                                                                             |                                               |

## 2. PERSONS INVOLVED IN THE STUDY

|                   |                                                                                               |                                                                            |
|-------------------|-----------------------------------------------------------------------------------------------|----------------------------------------------------------------------------|
| Technical contact | <b>Eurofins Cerep</b><br>Le Bois l'Evêque<br>B.P. 30001<br>86 600 Celle l'Evescault<br>France | <b>Carsten BROCK, Ph.D.</b><br>Study Director<br>CarstenBrock@eurofins.com |
| Study sponsor     | <b>University of Vienna</b><br>Dept of Pharm Chemistry<br>1090 Vienna<br>AUSTRIA              | <b>Dr. Predrag KALABA</b>                                                  |

### 3. APPROVAL

---

#### Head of laboratory statement

This study was conducted according to the procedures described in this report.

**Eurofins Cerep**  
Le Bois l'Evêque  
B.P. 30001  
86 600 Celle l'Evescault  
France

**Sophie SEIGNEURIN, Mrs**  
Operations Director  
SophieSeigneurin@eurofins.com

Signature



---

#### Quality assurance statement

This study was inspected by Eurofins Cerep Quality Control Unit, the results and methods presented in this report accurately reflect the methods used and the data collected for this study.

**Eurofins Cerep**  
Le Bois l'Evêque  
B.P. 30001  
86 600 Celle l'Evescault  
France

**Eric BOUCHET**  
Quality Site Group Leader  
EricBouchet@eurofins.com

Signature





## 4. TABLE OF CONTENTS

|                                                                    |    |
|--------------------------------------------------------------------|----|
| 1. STUDY REFERENCES .....                                          | 2  |
| 2. PERSONS INVOLVED IN THE STUDY .....                             | 2  |
| 3. APPROVAL .....                                                  | 3  |
| 4. TABLE OF CONTENTS .....                                         | 4  |
| 5. SUMMARY .....                                                   | 5  |
| 5.1. Study Design .....                                            | 5  |
| 5.2. Measurements .....                                            | 5  |
| 5.3. Results .....                                                 | 5  |
| 5.3.1. Compound CE-196-2-1 .....                                   | 5  |
| 5.3.2. Compound CE-196-2-2 .....                                   | 5  |
| 6. COMPOUNDS .....                                                 | 6  |
| 6.1. Test Compounds .....                                          | 6  |
| 6.2. Reference Compounds .....                                     | 6  |
| 7. RESULTS .....                                                   | 7  |
| 7.1. <i>In Vitro</i> Pharmacology: Binding Assays .....            | 7  |
| 7.1.1. IC <sub>50</sub> Determination: Test Compound Results ..... | 7  |
| 7.1.2. Reference Compound Results .....                            | 10 |
| 8. RESULTS INTERPRETATION GUIDE .....                              | 11 |
| 9. MATERIALS AND METHODS .....                                     | 12 |
| 9.1. Experimental Conditions .....                                 | 12 |
| 9.1.1. <i>In Vitro</i> Pharmacology: Binding Assays .....          | 12 |
| 9.2. Analysis and expression of results .....                      | 13 |
| 9.2.1. <i>In Vitro</i> Pharmacology: Binding Assays .....          | 13 |
| 10. BIBLIOGRAPHY .....                                             | 14 |

## 5. SUMMARY

The purpose of this study was to test CE-196-2-1 and CE-196-2-2 in Binding assays.

### 5.1. Study Design

CE-196-2-1 and CE-196-2-2 were tested at several concentrations for IC<sub>50</sub> or EC<sub>50</sub> determination .

### 5.2. Measurements

Compound binding was calculated as a % inhibition of the binding of a radioactively labeled ligand specific for each target.

### 5.3. Results

Results showing an inhibition or stimulation higher than 50% are considered to represent significant effects of the test compounds.

Such effects were observed here and are listed in the following tables.

Only the calculable IC<sub>50</sub> and EC<sub>50</sub> are reported below.

#### 5.3.1. Compound CE-196-2-1

| Assay                                            | IC <sub>50</sub> | K <sub>i</sub> | K <sub>B</sub> | EC <sub>50</sub> | nH |
|--------------------------------------------------|------------------|----------------|----------------|------------------|----|
| dopamine transporter(h) (antagonist radioligand) | 2.5E-08 M        | 1.3E-08 M      |                |                  | 1  |

#### 5.3.2. Compound CE-196-2-2

| Assay                                            | IC <sub>50</sub> | K <sub>i</sub> | K <sub>B</sub> | EC <sub>50</sub> | nH  |
|--------------------------------------------------|------------------|----------------|----------------|------------------|-----|
| dopamine transporter(h) (antagonist radioligand) | 6.5E-08 M        | 3.5E-08 M      |                |                  | 0.8 |

## 6. COMPOUNDS

### 6.1. Test Compounds

Manufacturer: **University of Vienna**

| Client Compound ID | Compound ID | Reference Number | Batch Number | FW     | MW | Purity | Received Form | Stock solution | Flag |
|--------------------|-------------|------------------|--------------|--------|----|--------|---------------|----------------|------|
| CE-196-2-1         | 100053935-1 | -                | -            | 389.97 | -  | 100.0  | Powder        | 1.E-02 M DMSO  | -    |
| CE-196-2-2         | 100053935-2 | -                | -            | 389.97 | -  | 100.0  | Powder        | 1.E-02 M DMSO  | -    |

*FW: Formula Weight - MW: Molecular Weight*

### 6.2. Reference Compounds

In each experiment and if applicable, the respective reference compound was tested concurrently with CE-196-2-1 and CE-196-2-2, and the data were compared with historical values determined at Eurofins. The experiment was accepted in accordance with Eurofins validation Standard Operating Procedure.

## 7. RESULTS

### 7.1. *In Vitro* Pharmacology: Binding Assays

#### 7.1.1. IC<sub>50</sub> Determination: Test Compound Results

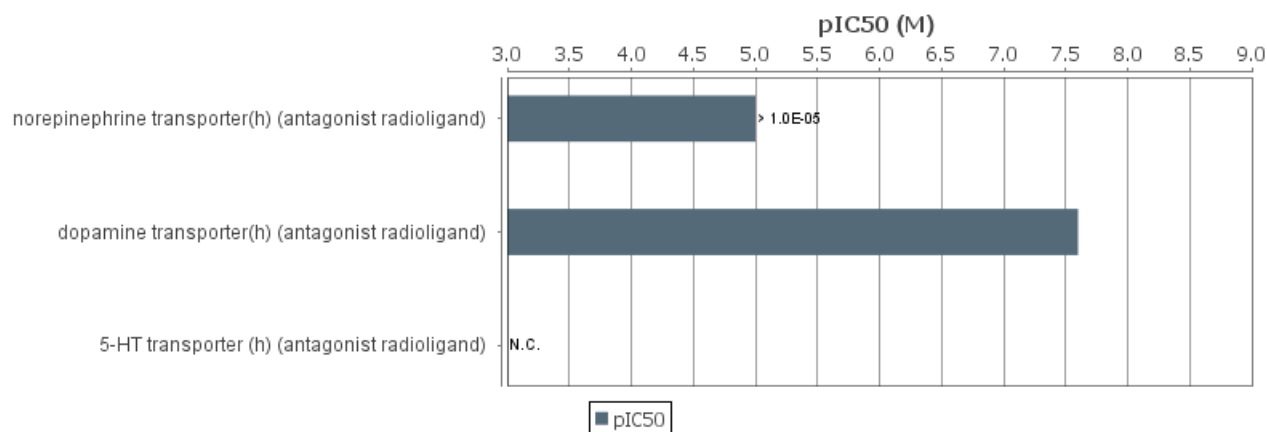

Figure 1. Histogram for CE-196-2-1

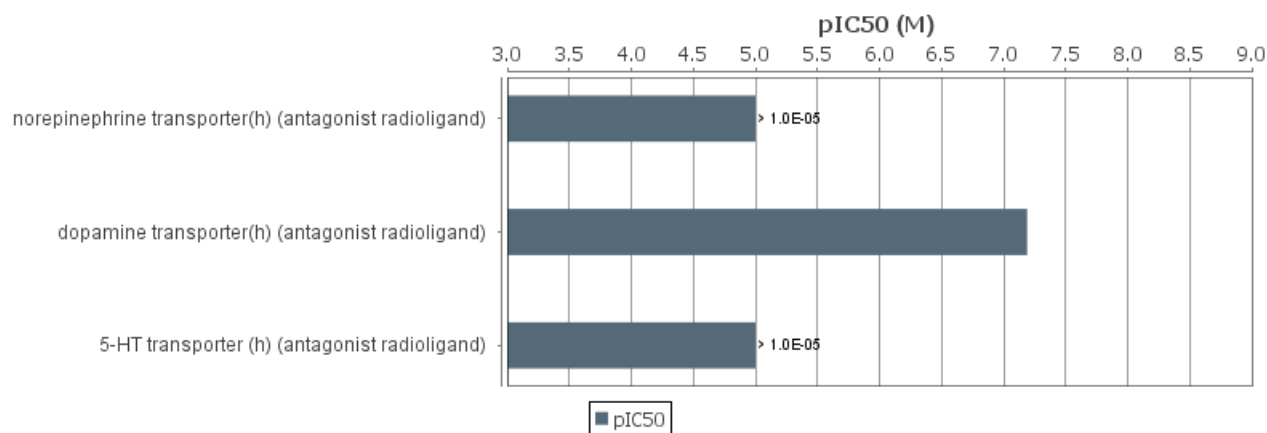

Figure 2. Histogram for CE-196-2-2

| Compound I.D.                                                                     | Client Compound I.D. | IC <sub>50</sub> (M) | K <sub>i</sub> (M) | nH  | Test Concentration | % Inhibition of Control Specific Binding |                 |       | Flags           |                 |
|-----------------------------------------------------------------------------------|----------------------|----------------------|--------------------|-----|--------------------|------------------------------------------|-----------------|-------|-----------------|-----------------|
|                                                                                   |                      |                      |                    |     |                    | 1 <sup>st</sup>                          | 2 <sup>nd</sup> | Mean  | 1 <sup>st</sup> | 2 <sup>nd</sup> |
| norepinephrine transporter(h) (antagonist radioligand)                            |                      |                      |                    |     |                    |                                          |                 |       |                 |                 |
| 100053935-1                                                                       | CE-196-2-1           | > 1.0E-05            | n/a                | n/a | 1.0E-12 M          | -22.6                                    | -32.7           | -27.6 |                 |                 |
|  |                      |                      |                    |     | 1.0E-11 M          | -26.2                                    | -28.4           | -27.3 |                 |                 |
|                                                                                   |                      |                      |                    |     | 1.0E-10 M          | -6.6                                     | -25.8           | -16.2 |                 |                 |
|                                                                                   |                      |                      |                    |     | 1.0E-09 M          | -18.1                                    | -24.8           | -21.5 |                 |                 |
|                                                                                   |                      |                      |                    |     | 1.0E-08 M          | -9.0                                     | -25.6           | -17.3 |                 |                 |
|                                                                                   |                      |                      |                    |     | 1.0E-07 M          | -9.8                                     | -19.8           | -14.8 |                 |                 |
|                                                                                   |                      |                      |                    |     | 1.0E-06 M          | -16.7                                    | -15.7           | -16.2 |                 |                 |
|                                                                                   |                      |                      |                    |     | 1.0E-05 M          | 10.5                                     | 16.1            | 13.3  |                 |                 |

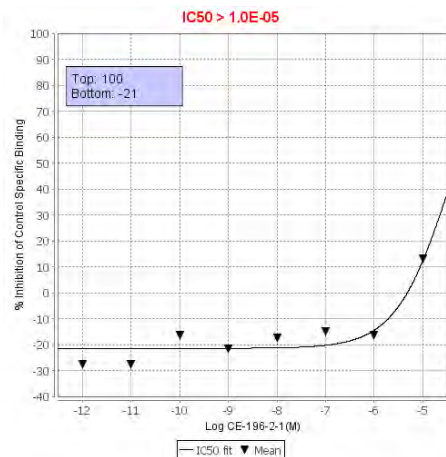

**Figure 3. CE-196-2-1 on norepinephrine transporter(h) (antagonist radioligand)**

|             |            |           |     |     |           |       |       |       |  |  |
|-------------|------------|-----------|-----|-----|-----------|-------|-------|-------|--|--|
| 100053935-2 | CE-196-2-2 | > 1.0E-05 | n/a | n/a | 1.0E-12 M | -21.0 | -21.3 | -21.2 |  |  |
|             |            |           |     |     | 1.0E-11 M | -22.2 | -23.7 | -23.0 |  |  |
|             |            |           |     |     | 1.0E-10 M | -14.9 | -17.9 | -16.4 |  |  |
|             |            |           |     |     | 1.0E-09 M | -26.2 | -14.3 | -20.2 |  |  |
|             |            |           |     |     | 1.0E-08 M | -18.9 | -19.8 | -19.4 |  |  |
|             |            |           |     |     | 1.0E-07 M | -18.7 | -14.5 | -16.6 |  |  |
|             |            |           |     |     | 1.0E-06 M | -22.7 | -16.0 | -19.4 |  |  |
|             |            |           |     |     | 1.0E-05 M | 5.7   | 18.7  | 12.2  |  |  |

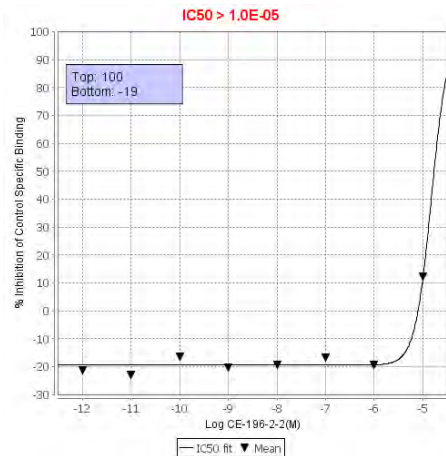

**Figure 4. CE-196-2-2 on norepinephrine transporter(h) (antagonist radioligand)**

| Compound I.D.                                    | Client Compound I.D. | IC <sub>50</sub> (M) | K <sub>i</sub> (M) | nH  | Test Concentration | % Inhibition of Control Specific Binding |                 |      | Flags           |                 |
|--------------------------------------------------|----------------------|----------------------|--------------------|-----|--------------------|------------------------------------------|-----------------|------|-----------------|-----------------|
|                                                  |                      |                      |                    |     |                    | 1 <sup>st</sup>                          | 2 <sup>nd</sup> | Mean | 1 <sup>st</sup> | 2 <sup>nd</sup> |
| dopamine transporter(h) (antagonist radioligand) |                      |                      |                    |     |                    |                                          |                 |      |                 |                 |
| 100053935-1                                      | CE-196-2-1           | 2.5E-08 M            | 1.3E-08 M          | 1.0 | 1.0E-12 M          | -6.7                                     | -12.2           | -9.4 |                 |                 |
|                                                  |                      |                      |                    |     | 1.0E-11 M          | -3.7                                     | -13.4           | -8.5 |                 |                 |
|                                                  |                      |                      |                    |     | 1.0E-10 M          | 0.8                                      | -10.1           | -4.6 |                 |                 |
|                                                  |                      |                      |                    |     | 1.0E-09 M          | -2.2                                     | -8.0            | -5.1 |                 |                 |
|                                                  |                      |                      |                    |     | 1.0E-08 M          | 24.6                                     | 20.4            | 22.5 |                 |                 |
|                                                  |                      |                      |                    |     | 1.0E-07 M          | 76.8                                     | 77.5            | 77.1 |                 |                 |
|                                                  |                      |                      |                    |     | 1.0E-06 M          | 93.4                                     | 95.3            | 94.4 |                 |                 |
|                                                  |                      |                      |                    |     | 1.0E-05 M          | 99.2                                     | 98.9            | 99.1 |                 |                 |

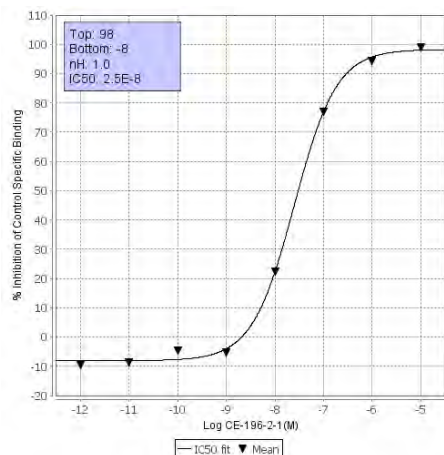

**Figure 5. CE-196-2-1 on dopamine transporter(h) (antagonist radioligand)**

|             |            |           |           |     |           |       |       |       |  |  |
|-------------|------------|-----------|-----------|-----|-----------|-------|-------|-------|--|--|
| 100053935-2 | CE-196-2-2 | 6.5E-08 M | 3.5E-08 M | 0.8 | 1.0E-12 M | -17.6 | -4.9  | -11.2 |  |  |
|             |            |           |           |     | 1.0E-11 M | -8.9  | -6.3  | -7.6  |  |  |
|             |            |           |           |     | 1.0E-10 M | -5.7  | -11.1 | -8.4  |  |  |
|             |            |           |           |     | 1.0E-09 M | -11.8 | -4.3  | -8.1  |  |  |
|             |            |           |           |     | 1.0E-08 M | 13.0  | 13.7  | 13.3  |  |  |
|             |            |           |           |     | 1.0E-07 M | 54.0  | 53.4  | 53.7  |  |  |
|             |            |           |           |     | 1.0E-06 M | 89.3  | 91.0  | 90.1  |  |  |
|             |            |           |           |     | 1.0E-05 M | 98.3  | 99.1  | 98.7  |  |  |

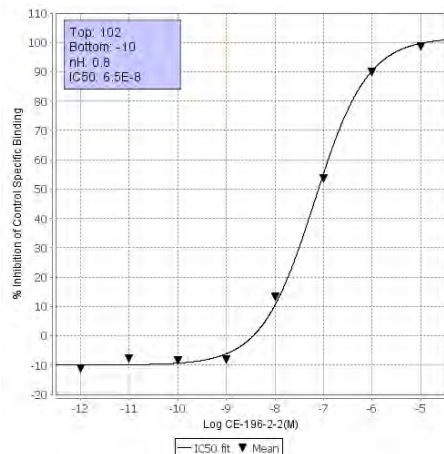

**Figure 6. CE-196-2-2 on dopamine transporter(h) (antagonist radioligand)**

| Compound I.D.                                 | Client Compound I.D. | IC <sub>50</sub> (M) | K <sub>i</sub> (M) | nH  | Test Concentration | % Inhibition of Control Specific Binding |                 |       | Flags           |                 |
|-----------------------------------------------|----------------------|----------------------|--------------------|-----|--------------------|------------------------------------------|-----------------|-------|-----------------|-----------------|
|                                               |                      |                      |                    |     |                    | 1 <sup>st</sup>                          | 2 <sup>nd</sup> | Mean  | 1 <sup>st</sup> | 2 <sup>nd</sup> |
| 5-HT transporter (h) (antagonist radioligand) |                      |                      |                    |     |                    |                                          |                 |       |                 |                 |
| 100053935-1                                   | CE-196-2-1           | N.C.                 | n/a                | n/a | 1.0E-12 M          | -1.1                                     | -4.2            | -2.7  |                 |                 |
|                                               |                      |                      |                    |     | 1.0E-11 M          | 1.2                                      | 3.1             | 2.2   |                 |                 |
|                                               |                      |                      |                    |     | 1.0E-10 M          | -1.9                                     | -11.4           | -6.6  |                 |                 |
|                                               |                      |                      |                    |     | 1.0E-09 M          | -2.5                                     | 0.8             | -0.9  |                 |                 |
|                                               |                      |                      |                    |     | 1.0E-08 M          | 3.0                                      | -4.4            | -0.7  |                 |                 |
|                                               |                      |                      |                    |     | 1.0E-07 M          | 0.2                                      | -1.7            | -0.7  |                 |                 |
|                                               |                      |                      |                    |     | 1.0E-06 M          | -9.8                                     | -8.7            | -9.3  |                 |                 |
|                                               |                      |                      |                    |     | 1.0E-05 M          | -13.9                                    | -11.4           | -12.6 |                 |                 |

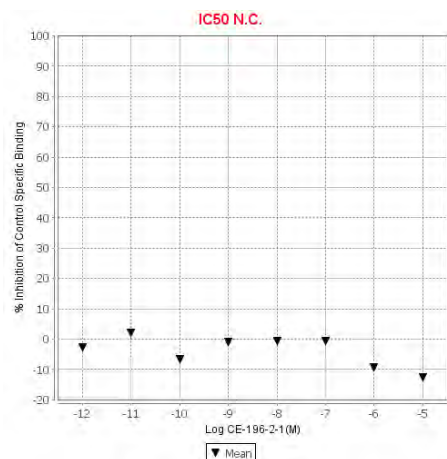

Figure 7. CE-196-2-1 on 5-HT transporter (h) (antagonist radioligand)

|             |            |           |     |     |           |      |      |      |  |  |
|-------------|------------|-----------|-----|-----|-----------|------|------|------|--|--|
| 100053935-2 | CE-196-2-2 | > 1.0E-05 | n/a | n/a | 1.0E-12 M | -9.0 | -1.9 | -5.4 |  |  |
|             |            |           |     |     | 1.0E-11 M | -4.8 | -7.2 | -6.0 |  |  |
|             |            |           |     |     | 1.0E-10 M | -3.7 | -5.0 | -4.3 |  |  |
|             |            |           |     |     | 1.0E-09 M | 1.2  | -4.1 | -1.4 |  |  |
|             |            |           |     |     | 1.0E-08 M | 0.2  | -0.6 | -0.2 |  |  |
|             |            |           |     |     | 1.0E-07 M | -2.8 | 1.4  | -0.7 |  |  |
|             |            |           |     |     | 1.0E-06 M | 0.1  | -6.3 | -3.1 |  |  |
|             |            |           |     |     | 1.0E-05 M | 24.2 | 28.0 | 26.1 |  |  |

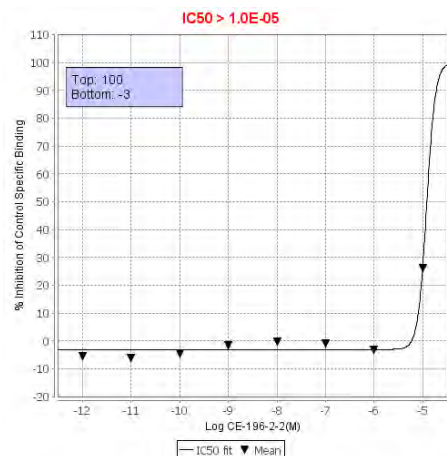

Figure 8. CE-196-2-2 on 5-HT transporter (h) (antagonist radioligand)

> Conc.: IC<sub>50</sub> value above the highest test concentration. Concentration-response curve shows less than 50 % effect at the highest validated testing concentration  
N.C.: IC<sub>50</sub> value not calculable. Concentration-response curve shows less than 25% effect at the highest validated testing concentration.

## 7.1.2. Reference Compound Results

| Compound I.D.                                                 | IC <sub>50</sub> (M) | K <sub>i</sub> (M) | nH  |
|---------------------------------------------------------------|----------------------|--------------------|-----|
| <b>norepinephrine transporter(h) (antagonist radioligand)</b> |                      |                    |     |
| protriptyline                                                 | 5.2E-09 M            | 3.9E-09 M          | 1.6 |
| <b>dopamine transporter(h) (antagonist radioligand)</b>       |                      |                    |     |
| BTCP                                                          | 1.5E-08 M            | 8.1E-09 M          | 1.2 |
| <b>5-HT transporter (h) (antagonist radioligand)</b>          |                      |                    |     |
| imipramine                                                    | 2.5E-09 M            | 1.2E-09 M          | 1.0 |

## 8. RESULTS INTERPRETATION GUIDE

### *In Vitro* Pharmacology

Results showing an inhibition (or stimulation for assays run in basal conditions) higher than 50% are considered to represent significant effects of the test compounds. 50% is the most common cut-off value for further investigation (determination of  $IC_{50}$  or  $EC_{50}$  values from concentration-response curves) that we would recommend.

Results showing an inhibition (or stimulation) between 25% and 50% are indicative of weak to moderate effects (in most assays, they should be confirmed by further testing as they are within a range where more inter-experimental variability can occur).

Results showing an inhibition (or stimulation) lower than 25% are not considered significant and mostly attributable to variability of the signal around the control level.

Low to moderate negative values have no real meaning and are attributable to variability of the signal around the control level. High negative values ( $\geq 50\%$ ) that are sometimes obtained with high concentrations of test compounds are generally attributable to non-specific effects of the test compounds in the assays. On rare occasion they could suggest an allosteric effect of the test compound.



## 9. MATERIALS AND METHODS

### 9.1. Experimental Conditions

Minor variations to the experimental protocol described below may have occurred during the testing, they have no impact on the quality of the results obtained.

#### 9.1.1. *In Vitro* Pharmacology: Binding Assays

| Assay                                                            | Source                        | Ligand                      | Conc. | Kd     | Non Specific       | Incubation  | Detection Method       | Bibl. |
|------------------------------------------------------------------|-------------------------------|-----------------------------|-------|--------|--------------------|-------------|------------------------|-------|
| <b>Transporters</b>                                              |                               |                             |       |        |                    |             |                        |       |
| norepinephrine transporter ( <i>h</i> ) (antagonist radioligand) | human recombinant (CHO cells) | [ <sup>3</sup> H]nisoxetine | 1 nM  | 2.9 nM | desipramine (1 µM) | 120 min 4°C | Scintillation counting | 180   |
| dopamine transporter ( <i>h</i> ) (antagonist radioligand)       | human recombinant (CHO cells) | [ <sup>3</sup> H]BTCP       | 4 nM  | 4.5 nM | BTCP (10 µM)       | 120 min 4°C | Scintillation counting | 190   |
| 5-HT transporter ( <i>h</i> ) (antagonist radioligand)           | human recombinant (CHO cells) | [ <sup>3</sup> H]imipramine | 2 nM  | 1.7 nM | imipramine (10 µM) | 60 min RT   | Scintillation counting | 566   |

## 9.2. Analysis and expression of results

### 9.2.1. *In Vitro* Pharmacology: Binding Assays

The results are expressed as a percent of control specific binding

$$\frac{\text{measured specific binding}}{\text{control specific binding}} * 100$$

and as a percent inhibition of control specific binding

$$100 - \left( \frac{\text{measured specific binding}}{\text{control specific binding}} * 100 \right)$$

obtained in the presence of the test compounds.

The IC<sub>50</sub> values (concentration causing a half-maximal inhibition of control specific binding) and Hill coefficients (nH) were determined by non-linear regression analysis of the competition curves generated with mean replicate values using Hill equation curve fitting

$$Y = D + \left[ \frac{A - D}{1 + (C/C_{50})^{nH}} \right]$$

where Y = specific binding, A = left asymptote of the curve, D = right asymptote of the curve, C = compound concentration, C<sub>50</sub> = IC<sub>50</sub>, and nH = slope factor. This analysis was performed using software developed at Cerep (Hill software) and validated by comparison with data generated by the commercial software SigmaPlot® 4.0 for Windows® (© 1997 by SPSS Inc.). The inhibition constants (K<sub>i</sub>) were calculated using the Cheng Prusoff equation

$$K_i = \frac{IC_{50}}{(1 + L/K_D)}$$

where L = concentration of radioligand in the assay, and K<sub>D</sub> = affinity of the radioligand for the receptor. A scatchard plot is used to determine the K<sub>D</sub>.

## 10. BIBLIOGRAPHY

- 180. Pacholczyk, T. et al. (1991), *Nature*, 350: 350-354.
- 190. Pristupa, Z.B. et al. (1994), *Mol. Pharmacol.*, 45: 125-135.
- 566. Tatsumi, M. et al. (1999), *Eur. J. Pharmacol.*, 368: 277-283.

# University of Vienna

## CYP2052 –R1

Final Report  
October 15, 2019

---

### Neurite Outgrowth

#### Cryopreserved Rat Cortical Neurons

---

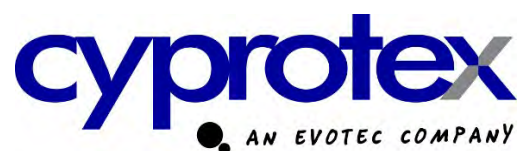

## Authentication Statement

I, the undersigned, hereby declare that the work described in this report was performed according to the study protocol and/or standard procedures, and to the best of my knowledge, this report provides a correct record of the results obtained.

  
\_\_\_\_\_  
Study Manager

November 8, 2019  
\_\_\_\_\_  
Date

## Neurite Outgrowth Conclusion

Compounds CE-158-1-1, CE-196-2-1, CE-144-2-1, CE-196-2-2 and S-CE-123 were evaluated in the neurite outgrowth assay using cryopreserved rat cortical neurons (QBM Cell Science). CE-158-1-1 and CE-144-2-1 had nominal effects on valid neuron count, mean neurite average length and neurite total length per neuron. CE-196-2-1 and CE-196-2-2 caused significant decreases in the valid neuron count, mean neurite average length and neurite total length per neuron at the top concentration (100  $\mu$ M). Compound S-CE-123 did not affect valid neuron count but appeared to cause a nominal increase in the neurite outgrowth endpoints. The negative and positive controls performed as expected.

## Materials and Methods

### Protocol

Cryopreserved rat cortical neurons (QBM Cell Science) were plated in laminin-coated 384-well plates 1 hour prior to treatment at a density of 10,000 cells per well. After treatment with test articles and control compounds, the neurons were maintained in a humidified environment at 37°C with 5% CO<sub>2</sub> for 72 hrs. At the end of the treatment period, cells were fixed, permeabilized and stained for evaluation of neurite outgrowth and cell health using the high content imaging platform, ArrayScan VTi, with an optimized neuronal profiling bioapplication.

Table 1. Test Compounds

| Test Articles | Molecular Weight | Concentrations (μM)                                  |
|---------------|------------------|------------------------------------------------------|
| CE-158-1-1    | 390.97           | 100, 50, 25, 12.5, 6.25, 3.13, 1.56, 0.78, 0.39, 0.2 |
| CE-196-2-1    | 389.97           | 100, 50, 25, 12.5, 6.25, 3.13, 1.56, 0.78, 0.39, 0.2 |
| CE-144-2-1    | 390.97           | 100, 50, 25, 12.5, 6.25, 3.13, 1.56, 0.78, 0.39, 0.2 |
| CE-196-2-2    | 389.97           | 100, 50, 25, 12.5, 6.25, 3.13, 1.56, 0.78, 0.39, 0.2 |
| S-CE-123      | 313.06           | 100, 50, 25, 12.5, 6.25, 3.13, 1.56, 0.78, 0.39, 0.2 |

### Cell Health Parameters

Valid cell count, mean neurite average length and neurite total length per neuron are reported.

### Analysis

This assay assesses cell health and neurite outgrowth utilizing a neuronal profiling bioapplication applied to images obtained on an ArrayScan VTi. Valid neuron count, mean neurite average length and neurite total length per neuron are determined and reported. Raw data are normalized to the vehicle control and reported as a normalized % response. Dose response graphs are generated with GraphPad Prism using a Sigmoidal Dose-response (variable slope) algorithm.

## Results

### Control compounds

Positive control, nocodazole, had an IC<sub>50</sub> of 2.22  $\mu$ M for valid neuron count, an IC<sub>50</sub> of 0.097  $\mu$ M for mean neurite average length and an IC<sub>50</sub> of 0.0997  $\mu$ M for neurite total length per neuron. Negative control, chlorpromazine, had an IC<sub>50</sub> of 7.99  $\mu$ M for valid neuron count, an IC<sub>50</sub> of 9.022  $\mu$ M for mean neurite average length and an IC<sub>50</sub> of 13.8  $\mu$ M for neurite total length per neuron. Nocodazole was positive for substantially effecting neurite outgrowth while nominally effecting cell viability. Chlorpromazine's effect on neurite outgrowth was not independent of its effect on cell viability (Table 2).

### Test Compounds

Test compounds, CE-158-1-1 and CE-144-2-1 had nominal effects (> 100  $\mu$ M) on all three endpoints. Compound S-CE-123 did not have significant measurable effects on cell viability but slight effects (increase) on neurite outgrowth. CE-196-2-1 had an IC<sub>50</sub> of 92.16  $\mu$ M for valid neuron count, and IC<sub>50</sub> of 65.82  $\mu$ M for mean neurite average length, and IC<sub>50</sub> of 59.76  $\mu$ M for neurite total length per neuron. CE-196-2-2 had an IC<sub>50</sub> of 94.6  $\mu$ M for valid neuron count, and IC<sub>50</sub> of 75.22  $\mu$ M for mean neurite average length, and IC<sub>50</sub> of 72.15  $\mu$ M for neurite total length per neuron. The effects on neurite outgrowth for CE-196-2-1 and CE-196-2-2 were not independent of their effect on cell viability (Table 2).

Table 2. Results for Valid Neuron Count, Mean Neurite Average Length and Neurite Total Length per Neuron.

| Compound       | Top Conc. Tested ( $\mu$ M) | Valid Neuron Count IC <sub>50</sub> ( $\mu$ M) | Mean Neurite Avg Length IC <sub>50</sub> ( $\mu$ M) | Neurite Total Length per Neuron IC <sub>50</sub> ( $\mu$ M) | Comments         |
|----------------|-----------------------------|------------------------------------------------|-----------------------------------------------------|-------------------------------------------------------------|------------------|
| Nocodazole     | 1                           | 2.22                                           | 0.097                                               | 0.0997                                                      | Positive control |
| Chlorpromazine | 100                         | 7.99                                           | 9.022                                               | 13.8                                                        | Negative control |
| CE-158-1-1     | 100                         | >100                                           | >100                                                | >100                                                        | Test compound    |
| CE-196-2-1     | 100                         | 92.16                                          | 65.82                                               | 59.76                                                       | Test compound    |
| CE-144-2-1     | 100                         | >100                                           | >100                                                | >100                                                        | Test compound    |
| CE-196-2-2     | 100                         | 94.6                                           | 75.22                                               | 72.15                                                       | Test compound    |
| S-CE-123       | 100                         | NR                                             | NR                                                  | NR                                                          | Test compound    |

NR=No Response



# Results

## Test Compounds

---

### Neurite Outgrowth

---

## Client compound CE-158-1-1

### Data Summary

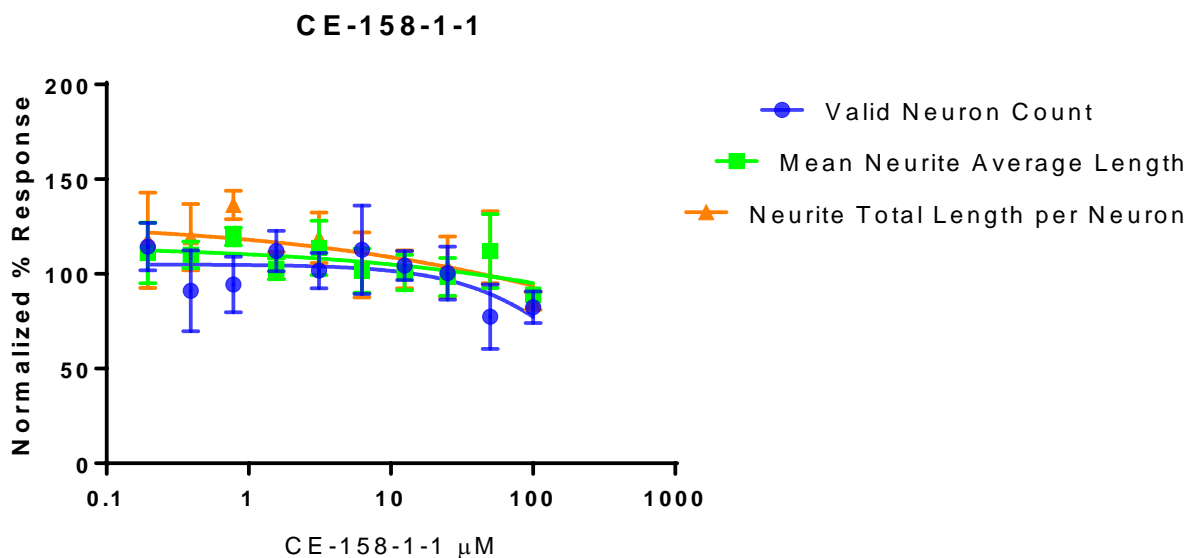

| CE-158-1-1 ( $\mu\text{M}$ ) | Valid Neuron Count |     |     | Mean Neurite Avg Length |     |     | Neurite Total Length per Neuron |     |     |
|------------------------------|--------------------|-----|-----|-------------------------|-----|-----|---------------------------------|-----|-----|
| 100                          | 92                 | 77  | 78  | 90                      | 91  | 86  | 82                              | 91  | 84  |
| 50                           | 61                 | 76  | 95  | 132                     | 111 | 93  | 132                             | 116 | 94  |
| 25                           | 99                 | 87  | 115 | 88                      | 108 | 99  | 89                              | 121 | 101 |
| 12.5                         | 102                | 98  | 113 | 90                      | 108 | 104 | 91                              | 110 | 106 |
| 6.25                         | 130                | 86  | 122 | 97                      | 115 | 93  | 99                              | 124 | 91  |
| 3.13                         | 105                | 109 | 91  | 103                     | 108 | 130 | 108                             | 115 | 134 |
| 1.56                         | 121                | 100 | 115 | 109                     | 99  | 100 | 109                             | 96  | 108 |
| 0.78                         | 111                | 89  | 83  | 125                     | 118 | 116 | 138                             | 128 | 143 |
| 0.39                         | 98                 | 67  | 108 | 110                     | 117 | 103 | 121                             | 136 | 101 |
| 0.2                          | 124                | 119 | 100 | 96                      | 109 | 128 | 95                              | 113 | 145 |

## Client compound CE-196-2-1

### Data Summary

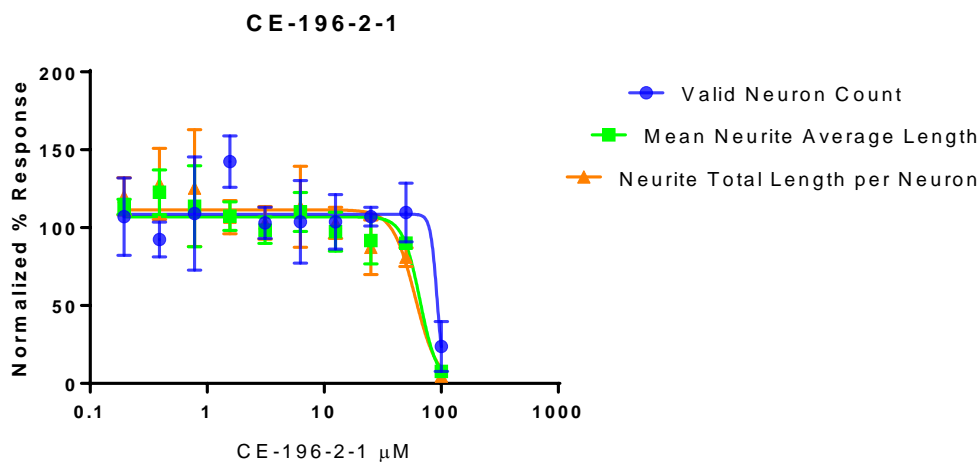

|      | Valid Neuron Count | Mean Neurite Average Length | Neurite Total Length per Neuron |
|------|--------------------|-----------------------------|---------------------------------|
| EC50 | ~ 92.16            | 65.82                       | 59.76                           |

| CE-196-2-1<br>( $\mu\text{M}$ ) | Valid Neuron Count |     |     | Mean Neurite Avg Length |     |     | Neurite Total Length per Neuron |     |     |
|---------------------------------|--------------------|-----|-----|-------------------------|-----|-----|---------------------------------|-----|-----|
| 100                             | 42                 | 12  | 17  | 7                       | 8   | 8   | 4                               | 5   | 5   |
| 50                              | 126                | 89  | 114 | 92                      | 89  | 89  | 87                              | 75  | 81  |
| 25                              | 103                | 114 | 104 | 107                     | 91  | 77  | 105                             | 87  | 70  |
| 12.5                            | 124                | 93  | 94  | 85                      | 110 | 97  | 92                              | 112 | 105 |
| 6.25                            | 78                 | 102 | 131 | 122                     | 111 | 97  | 139                             | 114 | 87  |
| 3.13                            | 112                | 92  | 105 | 108                     | 95  | 92  | 113                             | 104 | 92  |
| 1.56                            | 127                | 160 | 140 | 110                     | 97  | 115 | 116                             | 95  | 109 |
| 0.78                            | 151                | 91  | 85  | 89                      | 111 | 141 | 86                              | 129 | 161 |
| 0.39                            | 95                 | 80  | 102 | 131                     | 131 | 106 | 137                             | 145 | 102 |
| 0.2                             | 129                | 112 | 80  | 111                     | 110 | 119 | 112                             | 114 | 134 |

## Client compound CE-144-2-1

### Data Summary

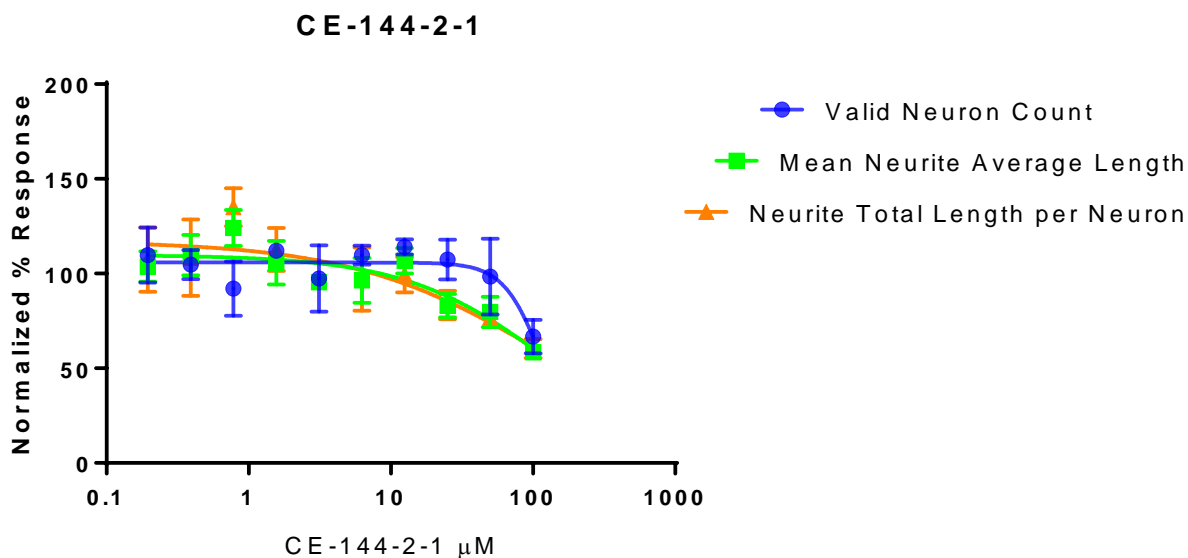

| CE-144-2-1<br>(μM) | Valid Neuron Count |     |     | Mean Neurite Avg Length |     |     | Neurite Total Length per Neuron |     |     |
|--------------------|--------------------|-----|-----|-------------------------|-----|-----|---------------------------------|-----|-----|
| 100                | 62                 | 77  | 61  | 55                      | 61  | 59  | 56                              | 66  | 59  |
| 50                 | 99                 | 78  | 118 | 72                      | 79  | 88  | 76                              | 80  | 74  |
| 25                 | 96                 | 117 | 109 | 90                      | 78  | 81  | 90                              | 75  | 85  |
| 12.5               | 110                | 118 | 114 | 109                     | 99  | 112 | 96                              | 92  | 110 |
| 6.25               | 111                | 104 | 114 | 88                      | 110 | 91  | 84                              | 116 | 91  |
| 3.13               | 77                 | 108 | 107 | 97                      | 96  | 93  | 98                              | 99  | 94  |
| 1.56               | 113                | 109 | 114 | 94                      | 117 | 106 | 100                             | 116 | 122 |
| 0.78               | 108                | 80  | 88  | 117                     | 135 | 120 | 135                             | 145 | 125 |
| 0.39               | 111                | 96  | 107 | 103                     | 122 | 104 | 102                             | 131 | 92  |
| 0.2                | 94                 | 123 | 112 | 105                     | 95  | 111 | 124                             | 90  | 108 |

## Client compound CE-196-2-2

### Data Summary

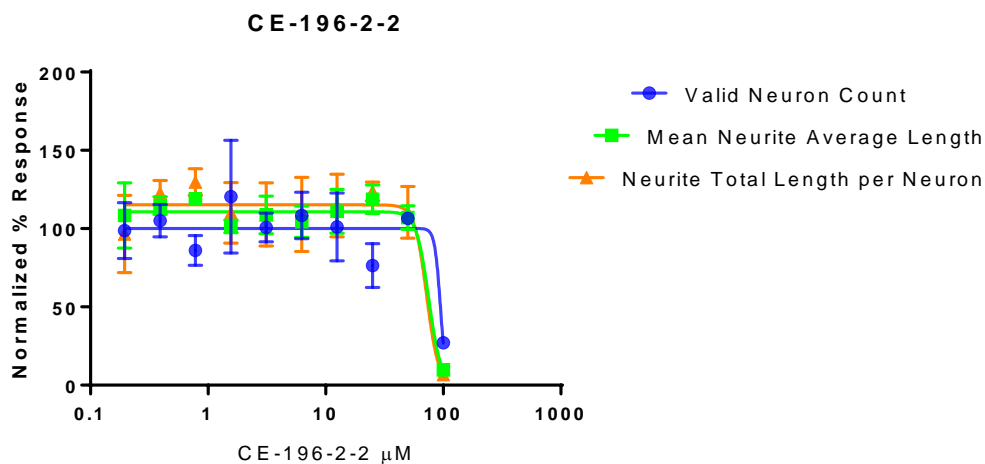

|      | Valid Neuron Count | Mean Neurite Average Length | Neurite Total Length per Neuron |
|------|--------------------|-----------------------------|---------------------------------|
| EC50 | ~ 94.6             | 75.22                       | 72.15                           |

| CE-196-2-2<br>(μM) | Valid Neuron Count |     |      | Mean Neurite Avg Length |     |     | Neurite Total Length per Neuron |     |     |
|--------------------|--------------------|-----|------|-------------------------|-----|-----|---------------------------------|-----|-----|
| 100                | 26                 | 27  | 28   | 9                       | 10  | 10  | 7                               | 7   | 6   |
| 50                 | 105                | 108 | 169* | 108                     | 114 | 99  | 115                             | 124 | 92  |
| 25                 | 91                 | 63  | 75   | 108                     | 124 | 124 | 117                             | 125 | 129 |
| 12.5               | 115                | 112 | 76   | 105                     | 101 | 127 | 112                             | 96  | 136 |
| 6.25               | 112                | 121 | 92   | 98                      | 99  | 116 | 91                              | 100 | 136 |
| 3.13               | 105                | 107 | 90   | 118                     | 95  | 113 | 117                             | 86  | 124 |
| 1.56               | 136                | 146 | 79   | 100                     | 98  | 106 | 103                             | 95  | 132 |
| 0.78               | 85                 | 96  | 77   | 121                     | 119 | 117 | 136                             | 120 | 133 |
| 0.39               | 98                 | 100 | 117  | 121                     | 113 | 110 | 132                             | 119 | 117 |
| 0.2                | 78                 | 109 | 109  | 132                     | 92  | 101 | 166*                            | 79  | 114 |

\*outlier removed from graph

## Client compound S-CE-123

### Data Summary

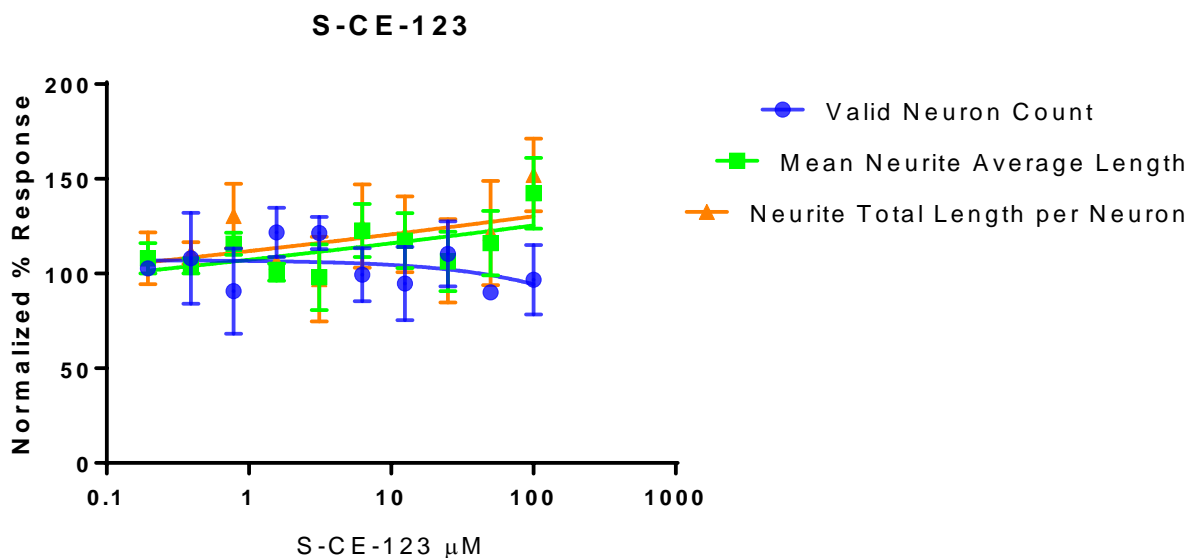

| S-CE-123 ( $\mu\text{M}$ ) | Valid Neuron Count |     |     | Mean Neurite Avg Length |     |     | Neurite Total Length per Neuron |     |     |
|----------------------------|--------------------|-----|-----|-------------------------|-----|-----|---------------------------------|-----|-----|
| 100                        | 117                | 81  | 92  | 122                     | 146 | 159 | 130                             | 160 | 166 |
| 50                         | 153*               | 90  | 90  | 100                     | 114 | 134 | 93                              | 123 | 148 |
| 25                         | 95                 | 129 | 107 | 124                     | 94  | 101 | 130                             | 86  | 104 |
| 12.5                       | 117                | 84  | 83  | 102                     | 131 | 119 | 98                              | 136 | 128 |
| 6.25                       | 85                 | 113 | 100 | 139                     | 115 | 114 | 147                             | 125 | 103 |
| 3.13                       | 115                | 131 | 118 | 78                      | 107 | 109 | 72                              | 104 | 115 |
| 1.56                       | 126                | 132 | 107 | 105                     | 96  | 101 | 106                             | 103 | 109 |
| 0.78                       | 83                 | 116 | 73  | 118                     | 109 | 120 | 133                             | 112 | 146 |
| 0.39                       | 100                | 135 | 89  | 104                     | 100 | 108 | 115                             | 104 | 113 |
| 0.2                        | 101                | 107 | 100 | 108                     | 100 | 116 | 93                              | 111 | 120 |

\*outlier removed from graph

# Results

## Control Compounds

---

### Neurite Outgrowth

---

# Nocodazole

## Data Summary

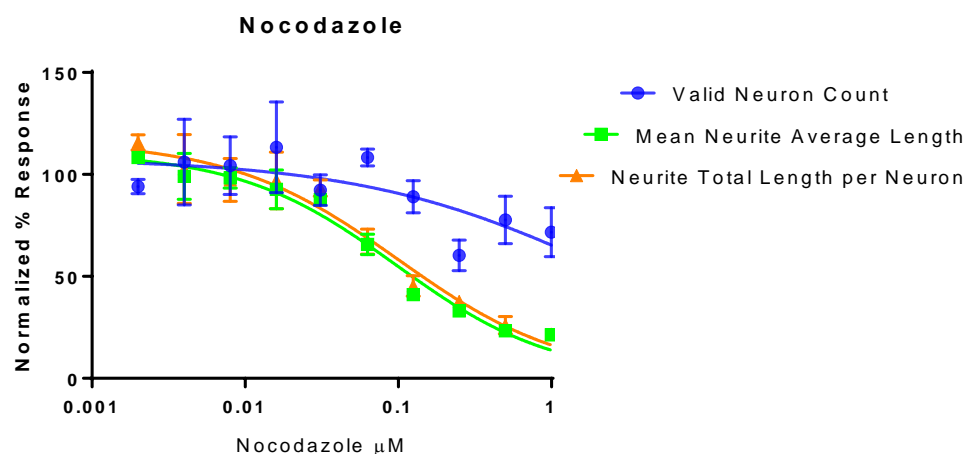

|      | Valid Neuron Count | Mean Neurite Average Length | Neurite Total Length per Neuron |
|------|--------------------|-----------------------------|---------------------------------|
| EC50 | 2.22               | 0.097                       | 0.0997                          |

| Nocodazole ( $\mu\text{M}$ ) | Valid Neuron Count |     |     | Mean Neurite Avg Length |     |     | Neurite Total Length per Neuron |     |     |
|------------------------------|--------------------|-----|-----|-------------------------|-----|-----|---------------------------------|-----|-----|
| 1                            | 71                 | 60  | 84  | 19                      | 23  | 22  | 21                              | 22  | 22  |
| 0.5                          | 80                 | 88  | 65  | 23                      | 23  | 24  | 28                              | 21  | 29  |
| 0.25                         | 69                 | 56  | 56  | 31                      | 34  | 34  | 38                              | 38  | 37  |
| 0.125                        | 80                 | 95  | 92  | 42                      | 42  | 39  | 46                              | 50  | 40  |
| 0.063                        | 107                | 113 | 105 | 65                      | 61  | 71  | 69                              | 60  | 72  |
| 0.031                        | 101                | 87  | 89  | 89                      | 85  | 89  | 89                              | 97  | 94  |
| 0.016                        | 122                | 130 | 88  | 93                      | 83  | 102 | 90                              | 88  | 113 |
| 0.008                        | 88                 | 112 | 113 | 103                     | 93  | 99  | 108                             | 87  | 97  |
| 0.004                        | 128                | 104 | 86  | 93                      | 92  | 112 | 84                              | 107 | 117 |
| 0.002                        | 91                 | 98  | 93  | 106                     | 108 | 111 | 114                             | 113 | 120 |



# Chlorpromazine

## Data Summary

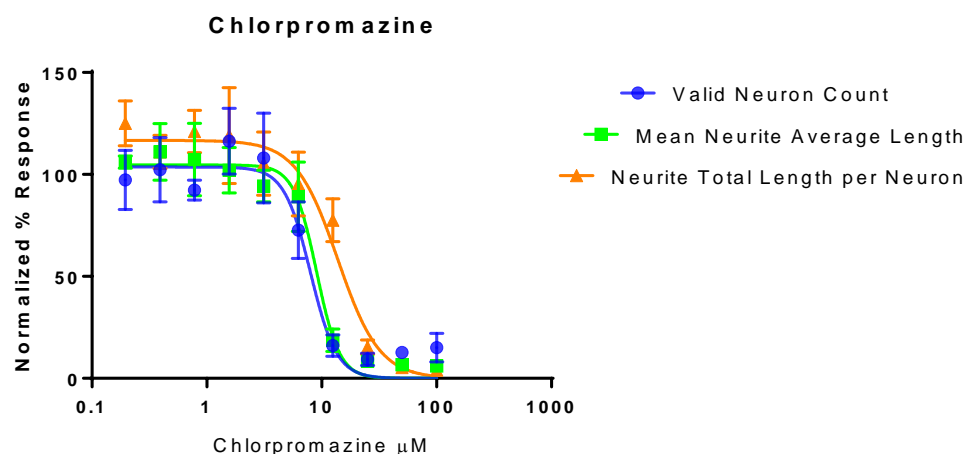

|      | Valid Neuron Count | Mean Neurite Average Length | Neurite Total Length per Neuron |
|------|--------------------|-----------------------------|---------------------------------|
| EC50 | 7.986              | 9.022                       | 13.8                            |

| Chlorpromazine ( $\mu\text{M}$ ) | Valid Neuron Count |     |     | Mean Neurite Avg Length |     |     | Neurite Total Length per Neuron |     |      |
|----------------------------------|--------------------|-----|-----|-------------------------|-----|-----|---------------------------------|-----|------|
| 100                              | 22                 | 8   | 15  | 5                       | 5   | 8   | 4                               | 4   | 4    |
| 50                               | 16                 | 11  | 11  | 7                       | 6   | 7   | 4                               | 6   | 6    |
| 25                               | 12                 | 10  | 6   | 6                       | 11  | 8   | 15                              | 19  | 12   |
| 12.5                             | 20                 | 18  | 10  | 15                      | 25  | 16  | 70                              | 85  | 127* |
| 6.25                             | 88                 | 69  | 61  | 73                      | 87  | 107 | 83                              | 90  | 113  |
| 3.13                             | 131                | 106 | 87  | 88                      | 92  | 103 | 105                             | 90  | 121  |
| 1.56                             | 99                 | 131 | 119 | 92                      | 100 | 114 | 93                              | 125 | 139  |
| 0.78                             | 89                 | 98  | 90  | 88                      | 111 | 123 | 114                             | 116 | 133  |
| 0.39                             | 116                | 106 | 85  | 102                     | 104 | 127 | 102                             | 113 | 118  |
| 0.2                              | 112                | 97  | 83  | 106                     | 103 | 109 | 114                             | 125 | 136  |

# Images

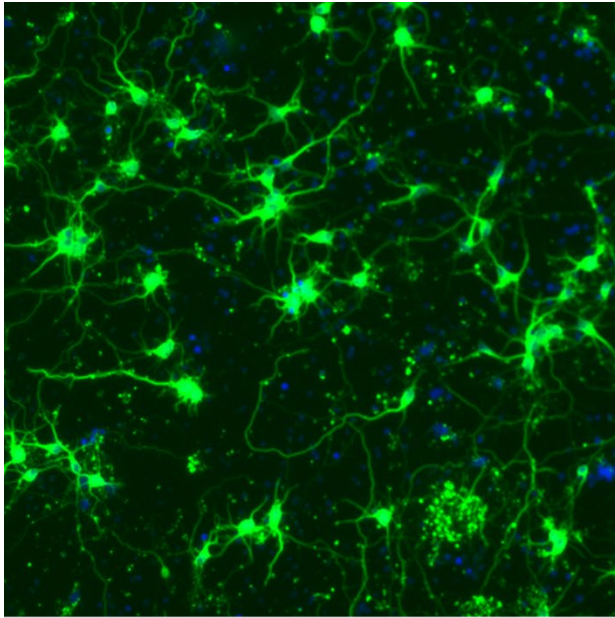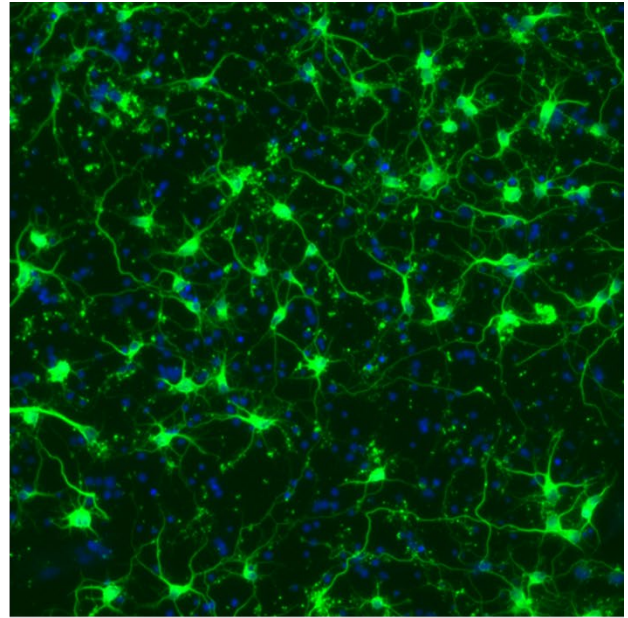

DMSO 0.5%

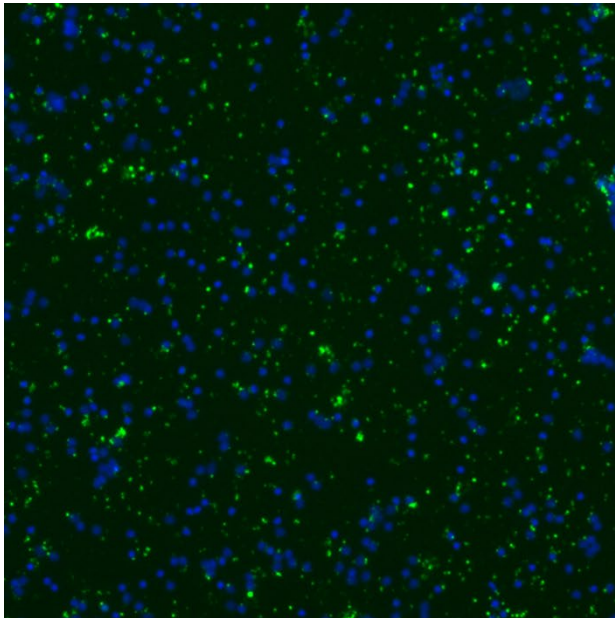

Chlorpromazine 100  $\mu$ M

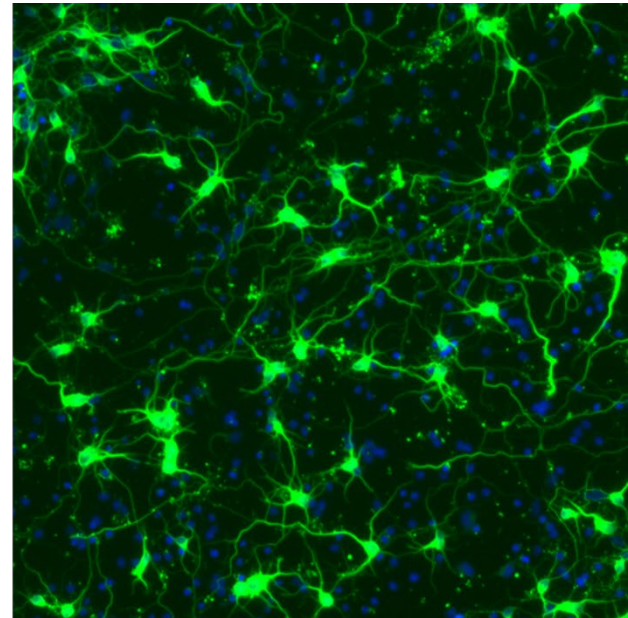

Chlorpromazine 0.2  $\mu$ M

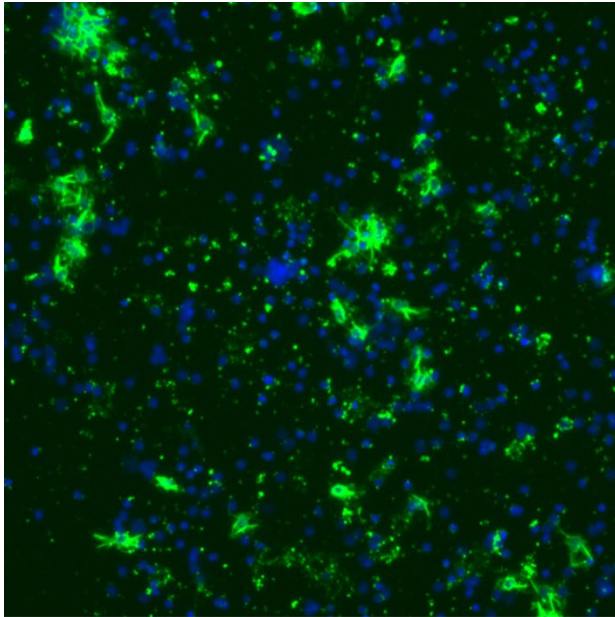

Nocodazole 1  $\mu\text{M}$

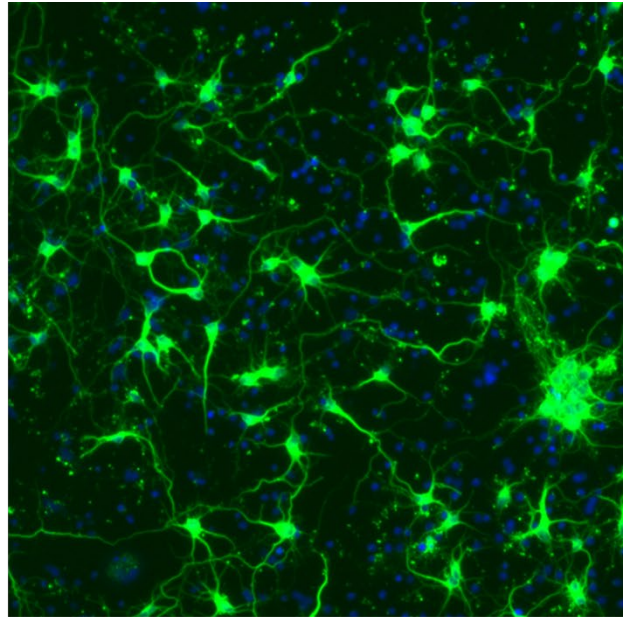

Nocodazole 0.002  $\mu\text{M}$

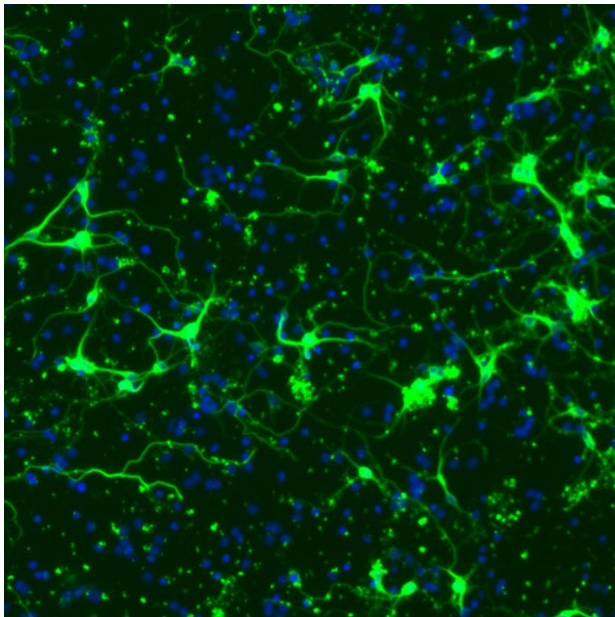

CE-158-1-1 100  $\mu\text{M}$

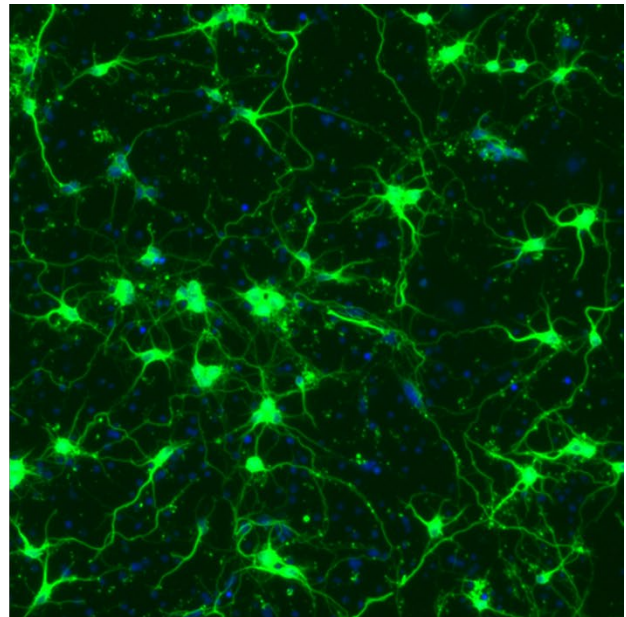

CE-158-1-1 0.2  $\mu\text{M}$



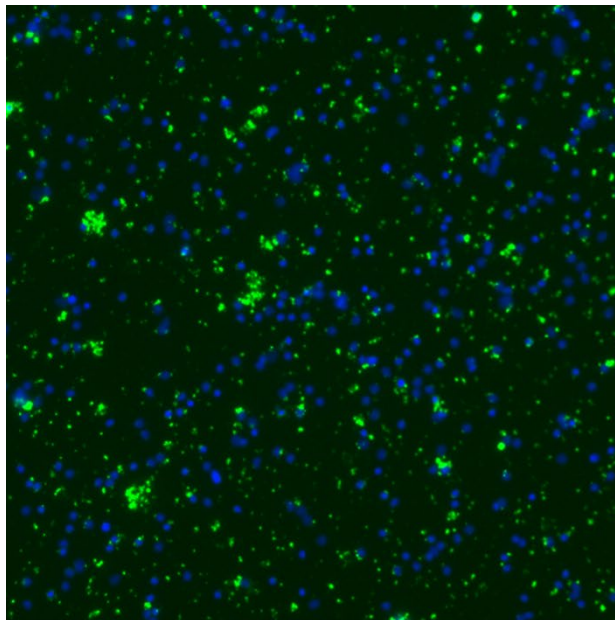

CE-196-2-1 100  $\mu$ M

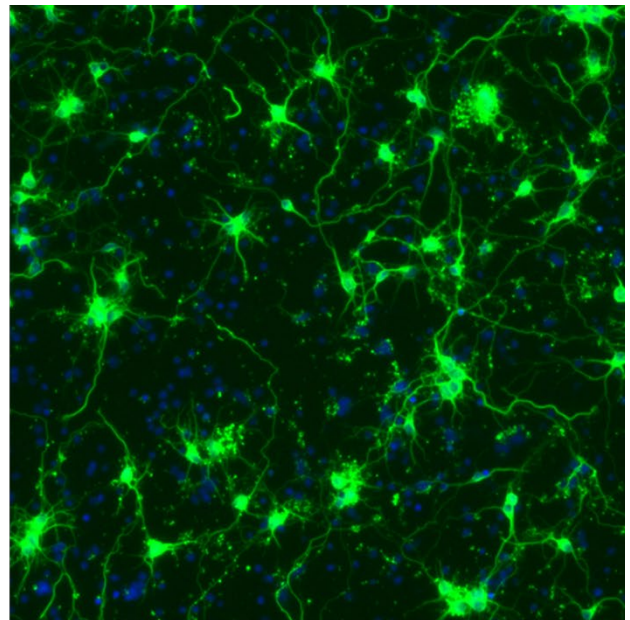

CE-196-2-1 0.2  $\mu$ M

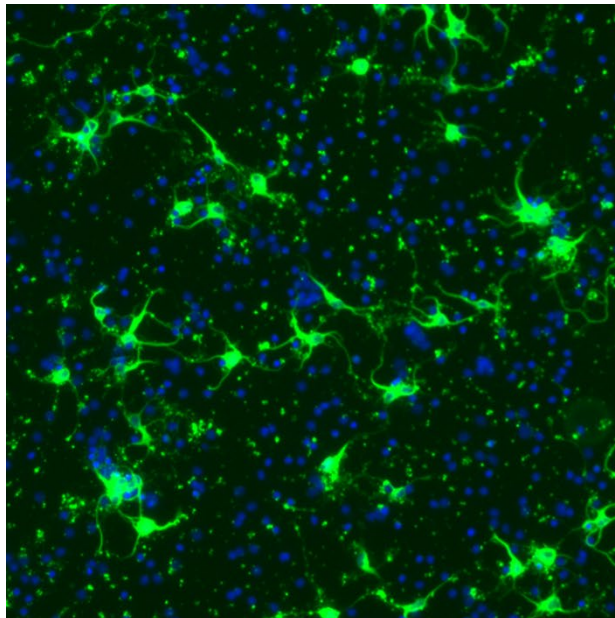

CE-144-2-1 100  $\mu$ M

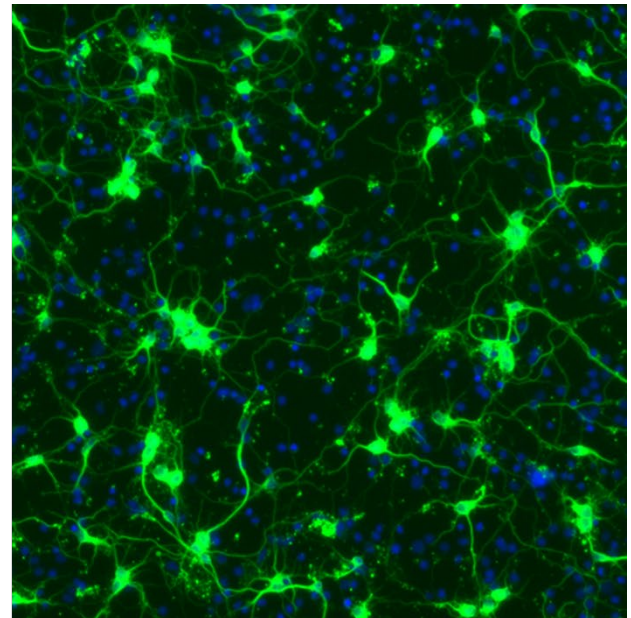

CE-144-2-1 0.2  $\mu$ M

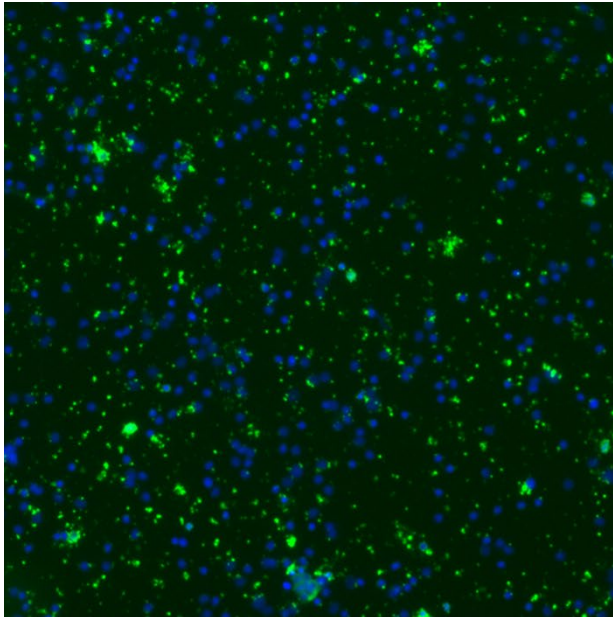

CE-196-2-2 100  $\mu$ M

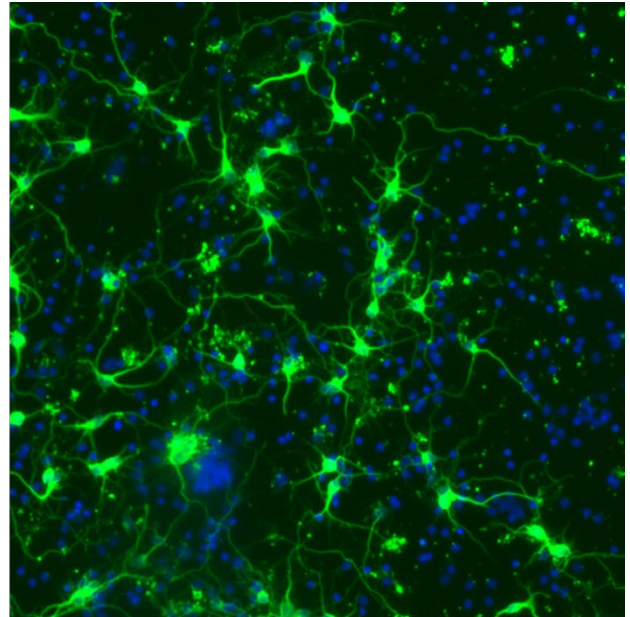

CE-196-2-2 0.2  $\mu$ M

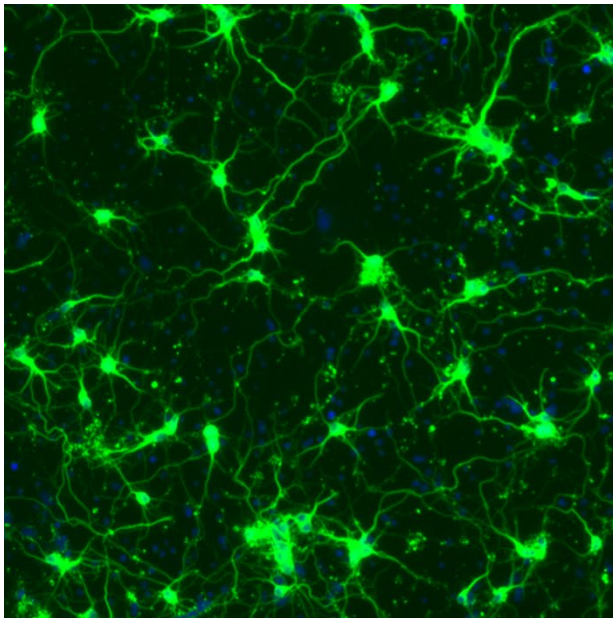

g-CE-123 100  $\mu$ M

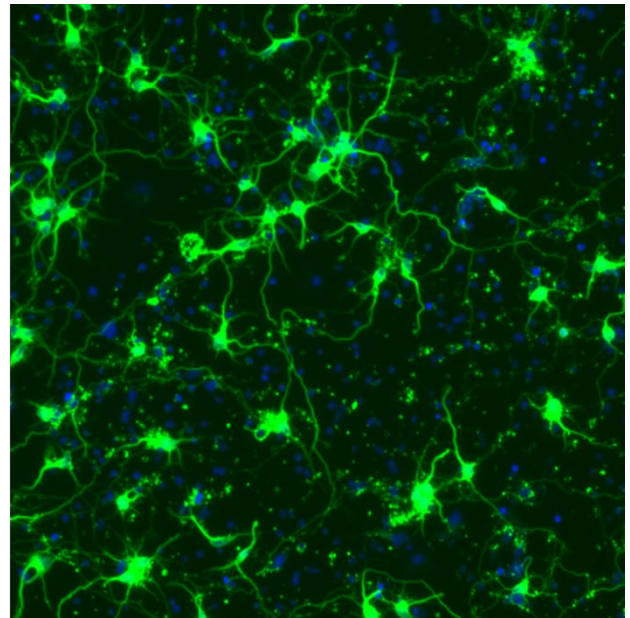

g-CE-123 0.2  $\mu$ M

## *DRAFT REPORT*

# Pharmacokinetics study of CE-196-2-1 in rats after single intraperitoneal administration of CE-196-2-1 at 10 mg/kg.

DMPK\_2020\_494

FOR

***UNIVERSITY OF VIENNA***

|               |                                                                                          |
|---------------|------------------------------------------------------------------------------------------|
| AUTHOR(S):    | Patrick Vinclair                                                                         |
| CONTRIBUTORS: | Anne Larvor, Didier Boureme, Eric Erdociain, Jeanne Jaen, Anaïs<br>Giry and Aude Gendras |
| DATE:         | May 27 <sup>th</sup> , 2020                                                              |



---

## Authentication Statement

This study was performed at the Evotec facilities  
195 route d'Espagne  
31036 TOULOUSE CEDEX

I, the undersigned, hereby declare that the findings provide a true and accurate record of the results obtained.

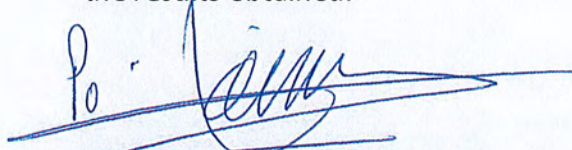

20 July 2020

---

---

Eric Erdociain  
Study Director  
[eric.erdociain@evotec.com](mailto:eric.erdociain@evotec.com)

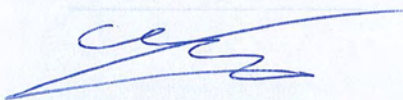

20 July 2020

---

---

Aude Gendras  
In-life Study leader  
[aude.gendras@evotec.com](mailto:aude.gendras@evotec.com)

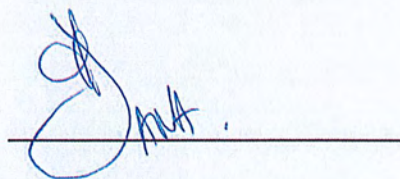

20 July 2020

---

---

Jennifer Dana  
Bioanalytical leader  
[jennifer.dana@evotec.com](mailto:jennifer.dana@evotec.com)

## TABLE OF CONTENTS

|       |                                                                  |    |
|-------|------------------------------------------------------------------|----|
| 1.0   | Study SUMMARY .....                                              | 4  |
| 2.0   | STATEMENT OF COMPLIANCE .....                                    | 4  |
| 3.0   | GENERAL INFORMATION.....                                         | 5  |
| 3.1   | Study Dates .....                                                | 5  |
| 3.2   | Evotec Contributing Scientists .....                             | 5  |
| 3.3   | Objectives.....                                                  | 5  |
| 4.0   | MATERIALS AND METHODS .....                                      | 6  |
| 4.1   | Test articles .....                                              | 6  |
| 4.2   | Test items Formulation .....                                     | 6  |
| 4.3   | Test System .....                                                | 6  |
| 4.6   | Dose Administration.....                                         | 8  |
| 4.7   | Blood collection.....                                            | 8  |
| 4.8   | Bioanalysis, PK interpretation and modelisation.....             | 9  |
| 4.8.1 | Bioanalytical Methods.....                                       | 9  |
| 4.8.2 | Pharmacokinetic analysis .....                                   | 11 |
| 4.9   | Descriptive analysis .....                                       | 11 |
| 4.10  | Study Plan adherence and deviation .....                         | 11 |
| 5.0   | Results .....                                                    | 12 |
| 5.1   | Administered dose .....                                          | 12 |
| 5.2   | Clinical Observations and mortality .....                        | 12 |
| 5.3   | Sampling time.....                                               | 12 |
|       | Brain were harvested at the exact time.....                      | 12 |
| 5.4   | Brain sampling.....                                              | 12 |
| 5.5   | Brain concentrations measurement .....                           | 13 |
| 5.6   | Brain penetrance parameters .....                                | 14 |
| 6.0   | ConclusionS .....                                                | 14 |
| 7.0   | Appendix.....                                                    | 15 |
| 7.1   | Individual body weights .....                                    | 15 |
| 7.2   | Individual administered doses .....                              | 16 |
| 7.3   | Actual blood sampling times.....                                 | 17 |
| 7.4   | Individual brain weights .....                                   | 18 |
| 7.5   | Individual brain concentrations of CE-196-2-1 PO – 10 mg/kg..... | 19 |



## 1.0 STUDY SUMMARY

The aim of this study was to assess the pharmacokinetics in brain of CE-196-2-1 in rats after single intraperitoneal administration at 10 mg/kg, for the compound.

Seven groups of three male Sprague Dawley rats were dosed with CE-196-2-1 at 10 mg/kg by intraperitoneal route. The sampling times were 0.083, 0.25, 0.5, 1, 3, 7 and 10 hours post-administration. A group of three rats was sacrificed and brains collected at each sampling time.

After an intra-cardiac infusion of NaCl 0.9% solution (50 mL) over 1 to 2 min, brains were collected as expected for bioanalyses assay.

For CE-196-2-1, the nominal IP dose formulation concentration was 1 mg/mL. The measured IP dose formulation was 107% of nominal concentration for CE-196-2-1, and was a clear yellow solution with some particles. Nominal dose is used in PK parameter determinations.

No adverse reactions were observed following oral administration of CE-196-2-1 throughout the study.

The main PK outcomes are summarized as follows:

The dose formulation analysis achieved 107 % of the nominal concentration. The outcomes was within our acceptance criteria. Nominal doses are used in PK parameter determinations.

Following a single IP administration of CE-196-2-1 at 10 mg/kg, a mean C<sub>max</sub> of 478 ng/g was observed in brain at a median T<sub>max</sub> of 1h with a long half-life of 3.0 h.

## 2.0 STATEMENT OF COMPLIANCE

The animals included in the study were housed at the Evotec France SAS animal facility. This facility was accredited by the French Ministry of Agriculture and by the Association for Assessment and Accreditation of Laboratory Animal Care International (AAALAC).

This study is compliant with the corresponding project APAFIS#04.4932.02. This project was reviewed by Evotec France Ethical Committee (identified below as CEPAL: CE 029) and authorized by the French Ministry of Education, Advanced Studies and Research.

Furthermore, the procedure related to this study was reviewed by the SBEA (internal Animal Welfare Body).

### **3.0 GENERAL INFORMATION**

#### **3.1 Study Dates**

Acclimation start: May 14<sup>th</sup>, 2020  
In-life phase start: May 19<sup>th</sup>, 2020  
Bioanalytical phase start: May 20<sup>th</sup> and 25<sup>th</sup>, 2020  
Pharmacokinetic reporting: May 27<sup>th</sup>, 2020

#### **Responsible Personnel**

Study Director: Eric Erdociain  
In life Study Leader: Aude Gendras  
Bioanalytical Leader: Jennifer Dana  
Study Sponsor: Predrag Kalaba – University of Vienna

#### **3.2 Evotec Contributing Scientists**

Bioanalytical scientist: Camille Lahille  
In life study scientists: Anaïs Giry, Emmanuelle Cortiade, Fanny Placide, Perrine Comptour and Aude Gendras

#### **3.3 Objectives**

The aim of this study was to assess the pharmacokinetics in brain of CE-196-2-1 after single intraperitoneal administration of CE-196-2-1 at 10 mg/kg in rat.

## 4.0 MATERIALS AND METHODS

### 4.1 Test articles

| Test Item  | Batch number | Molecular weight (g/mol) |
|------------|--------------|--------------------------|
| CE-196-2-1 | NC           | 390.98                   |

NC : no communicated

The test items were kept at room temperature until formulation preparation.

### 4.2 Test items Formulation

For the compound, the formulation for intraperitoneal administration was prepared in Kolliphor® EL 30% at a nominal concentration of 1 mg/mL. A volume of 98.45 mL (98.45 g) of Kolliphor/water (30/70 – v/v) was added to 99.4 mg of CE-196-2-1.

The formulation preparation was:

- put under magnetic stirring for 1h45 at 37°C
- sonicated for 15 minutes
- put under magnetic stirring for 15 min at 37°C
- sonicated for 15 minutes
- put under magnetic stirring for 4h15 at 37°C

The solution was prepared extemporaneously and left under stirring until the end of administrations. The obtained formulation was a clear yellow solution with particles.

For the compounds, based on the 1 mg/mL, the IPdose formulation was 107% of the nominal concentration for CE-196-2-1.

### 4.3 Test System

#### Compound : CE-196-2-1

Animals: 21 male Sprague Dawley (Rj Han:SD) rats

Weight: 290g to 327g at the day of treatment (see 7.1, Individual body weight)

Breeder: Janvier Labs, Le Genest-Saint-Isle, 53940 Saint Berthevin Cedex, France.

Pre-treatment period: after their arrival, the animals were acclimated for a period of 5 days before the beginning of the dosing period.

Identification: the rats were individually identified using a permanent marker on tails.

| Group             | Sampling Time                 | Rat Id   |
|-------------------|-------------------------------|----------|
| Group 1 -10 mg/kg | Destructive<br>0.083h (brain) | 1,2,3    |
| Group 2 -10 mg/kg | Destructive<br>0.25h (brain)  | 4,5,6    |
| Group 3 -10 mg/kg | Destructive<br>0.5h (brain)   | 7,8,9    |
| Group 4 -10 mg/kg | Destructive<br>1h (brain)     | 10,11,12 |
| Group 5 -10 mg/kg | Destructive<br>3h (brain)     | 13,14,15 |
| Group 6 -10 mg/kg | Destructive<br>7h (brain)     | 16,17,18 |
| Group 7 -10 mg/kg | Destructive<br>10h (brain)    | 19,20,21 |

#### a. Environmental Conditions

Upon their arrival at Evotec France, rats were group-housed in dedicated home cages (1291H; size 820 cm<sup>2</sup>, Tecniplast®).

The animal room conditions were set as follows:

- temperature: 22 ± 2°C,
- relative humidity: 50 ± 10%,
- light/dark cycle: 12 h/12 h,
- air change rate: 12 to 15 cycles/hour of filtered, 100% fresh air

The corresponding instrumentation and equipment are checked and calibrated at regular intervals. The temperature and relative humidity are recorded continuously using a Building Information Management System (recording devices equipped with alarm systems).

All animals had free access to filtered tap water. Bacterial and chemical analyses of water are performed regularly by external laboratories. These analyses include the detection of possible contaminants (pesticides and heavy metals).

All rats were fed with a maintenance chow (AO4C, Safe, 89290 Augy) during the acclimation and the study.

#### 4.4 Study design

| Group   | Number of animals/ Group | Test Article | Dose Level (mg/kg) | Route | Dose Volume (mL/kg) | Sampling time number |
|---------|--------------------------|--------------|--------------------|-------|---------------------|----------------------|
| Group 1 | 3                        | CE-196-2-1   | 10                 | IP    | 10                  | 0.083                |
| Group 2 |                          |              |                    |       |                     | 0.25                 |
| Group 3 |                          |              |                    |       |                     | 0.5                  |
| Group 4 |                          |              |                    |       |                     | 1                    |
| Group 5 |                          |              |                    |       |                     | 3                    |
| Group 6 |                          |              |                    |       |                     | 7                    |
| Group 7 |                          |              |                    |       |                     | 10                   |

#### 4.5 Randomization

On the day of dosing, rats have been randomized to obtain groups of three rats with homogeneous weights between groups for the study.

#### 4.6 Dose Administration

For intraperitoneal route, the dose formulation was administered by injection on animal's lower right quadrant of the abdomen, using needle fitted on a plastic syringe. Needles were changed between each animal.

The volume of dose formulation administered to each animal was adjusted according to the body weight. A constant dosage volume of 10 mL/kg was used.

During the dosing, minor deviations were observed without any impact on the outcomes of the study:

- Rat # 10 : small dose formulation drop observed at the injection site after removing the needle
- Rat # 17: injection in two times
- Rat # 19 : blood drop at the injection site

The exact dose administered to each animal was measured by weighting the dosing system before and after administration.

The dose formulations were kept at room temperature and protected from light throughout the dosing procedure.

#### 4.7 Blood collection

##### a. Destructive design:

At each scheduled sampling time, rats were anesthetized and exsanguinated, then an intra-cardiac infusion of NaCl 0.9% solution (50 mL) was performed over 1 to 2 min. After, brains

were collected and weighed and placed in IKA tubes. Brain samples were stored at -20°C until bioanalysis

#### **b. Clinical observation**

All animals were observed for mortality and general condition at least twice daily (once in the morning and once in the afternoon) during the week and once daily during the weekend.

### **4.8 Bioanalysis, PK interpretation and modelisation**

#### **4.8.1 Bioanalytical Methods**

##### **a. Preparation of brain samples**

For each Brain, 4 volumes of water were added to ensure an efficient grinding (diluted 5-fold post-grinding). Samples were then ground using IKA tubes.

##### **b. Treatment of samples**

Brain homogenates (20 µL) were mixed with 120µL of the precipitant solution (ACN + Tolbutamide as ISTD). Half of the supernatant (70 µL) was then diluted 1/1 into water and 5µL were injected.

CE-196-2-1 was quantified by LC-MS/MS following standard conditions (see below) or equivalent.

##### **c. Instrument configuration**

| <b>Test article</b>      | <b>CE-196-2-1</b>        |
|--------------------------|--------------------------|
| <b>Pump</b>              | Agilent 1100 series      |
| <b>Auto-sampler</b>      | HTC PAL – CTC analytics  |
| <b>Column Oven</b>       | Agilent 1100 series      |
| <b>Mass Spectrometer</b> | THERMO Quantum EMR Ultra |
| <b>Software</b>          | Xcalibur 2.1.0 SP1       |

##### **d. Chromatography**

| <b>Test article</b>     | <b>CE-196-2-1</b>                                                                        |
|-------------------------|------------------------------------------------------------------------------------------|
| <b>Column</b>           | Hypersil Gold C18 1.9µm 50x2.1mm                                                         |
| <b>Flow</b>             | 700 µl/mn                                                                                |
| <b>Oven temperature</b> | 40°C                                                                                     |
| <b>Mobile phase</b>     | Phase A: HPLC water with 0.1% formic acid<br>Phase B: Acetonitrile with 0.1% formic acid |

|                  |                                                                                                                                                                                                                                                                                                               |            |      |      |      |      |      |      |           |    |    |   |   |    |    |           |   |   |    |    |   |   |
|------------------|---------------------------------------------------------------------------------------------------------------------------------------------------------------------------------------------------------------------------------------------------------------------------------------------------------------|------------|------|------|------|------|------|------|-----------|----|----|---|---|----|----|-----------|---|---|----|----|---|---|
|                  |                                                                                                                                                                                                                                                                                                               |            |      |      |      |      |      |      |           |    |    |   |   |    |    |           |   |   |    |    |   |   |
| Gradient mode    | <table><tr><td>Time (min)</td><td>0.00</td><td>0.10</td><td>0.98</td><td>1.48</td><td>1.50</td><td>1.70</td></tr><tr><td>% Phase A</td><td>98</td><td>98</td><td>5</td><td>5</td><td>98</td><td>98</td></tr><tr><td>% Phase B</td><td>2</td><td>2</td><td>95</td><td>95</td><td>2</td><td>2</td></tr></table> | Time (min) | 0.00 | 0.10 | 0.98 | 1.48 | 1.50 | 1.70 | % Phase A | 98 | 98 | 5 | 5 | 98 | 98 | % Phase B | 2 | 2 | 95 | 95 | 2 | 2 |
| Time (min)       | 0.00                                                                                                                                                                                                                                                                                                          | 0.10       | 0.98 | 1.48 | 1.50 | 1.70 |      |      |           |    |    |   |   |    |    |           |   |   |    |    |   |   |
| % Phase A        | 98                                                                                                                                                                                                                                                                                                            | 98         | 5    | 5    | 98   | 98   |      |      |           |    |    |   |   |    |    |           |   |   |    |    |   |   |
| % Phase B        | 2                                                                                                                                                                                                                                                                                                             | 2          | 95   | 95   | 2    | 2    |      |      |           |    |    |   |   |    |    |           |   |   |    |    |   |   |
| Injection volume | 5 µL                                                                                                                                                                                                                                                                                                          |            |      |      |      |      |      |      |           |    |    |   |   |    |    |           |   |   |    |    |   |   |

#### e. Mass spectrometry

|                                     |                                                          |
|-------------------------------------|----------------------------------------------------------|
| <b>Test article</b>                 | <b>CE-196-2-1</b>                                        |
| <b>Ionization mode</b>              | ESI positive mode                                        |
| <b>Source Temperature</b>           | 380°C                                                    |
| <b>Skimmer</b>                      | Tolbutamide : -<br>CE-196-2-1 : 8                        |
| <b>Collision Energy Voltage</b>     | CE=11 V for CE-196-2-1<br>CE=30 V for Tolbutamide        |
| <b>Multiple Reaction Monitoring</b> | CE-196-2-1 m/z 391→ 245.1<br>Tolbutamide m/z 271.4→ 91.2 |
| <b>Retention Time</b>               | 1.44 mn for CE-196-2-1<br>1.27 mn for Tolbutamide        |

#### f. Preparation of quality control and calibration samples

Quality Control (QC) samples and Calibration Samples were prepared daily by spiking Sprague-Dawley plasma or Brain homogenates with working solutions prepared from independent weighing. The calibration curve were calculated from calibration levels at 2.5, 5, 10, 25, 50, 100, 200, 500, 1000, 2000 and 5000ng/mL with at least six non-zero concentrations that back-calculate to  $\pm 20\%$  of their nominal value. The concentrations for Quality Controls were 12.5, 50, 450, 750, 1500 and 4000 ng/mL (At least 66% of all QC samples must be within  $\pm 20\%$  of their nominal value and at least 50% of QC samples at a given concentration must be within  $\pm 20\%$  of their nominal value). For CE-196\_2\_1, regressions used were quadratic for both plasma and brain, not forced through the origin, and weighted by  $1/x$  (with  $R^2 > 0.98$ ).

#### g. Sensitivity of the method

The LLOQ was expressed as ng/g for Brain (one gram of Brain being ground with 4 volumes of water).

CE-196-2-1, LLOQ were 5 ng/ml for plasma and 25 ng/g for Brain.

#### **4.8.2 Pharmacokinetic analysis**

The pharmacokinetic analysis was performed using Phoenix 64 (WinNonLin) with NCA model 200.

#### **4.9 Descriptive analysis**

Results are expressed in mean  $\pm$  standard deviation (sd).

Descriptive analysis were performed using Excel software.

When 1 out of 3 values is BLQ, it is set to 1/2 LLOQ for mean and SD calculations

#### **4.10 Study Plan adherence and deviation**

A minor deviation was observed during the dosing without any impact on the outcomes of the study, some particles were observed in the formulation at administration.



## **5.0 RESULTS**

### **5.1 Administered dose**

For both compounds, the administered dose is targeted at 10 mg/kg.

The administered dose are presented in 7.2 Individual administered dose.

For CE-196-2-1, all the administered individual doses were within the range 100-109% of the targeted dose.

### **5.2 Clinical Observations and mortality**

No morbidity or mortality were observed after IP administration. No adverse events or clinical signs were reported in the study book.

### **5.3 Sampling time**

Brain were harvested at the exact time.

Individual times of collect brain are presented in Appendix 7.3.

### **5.4 Brain sampling**

Individual weights of collected brain are presented in Appendix 7.4.

## 5.5 Brain concentrations measurement

### a. Brain CE-196-2-1 concentration after single intraperitoneal dosing at 10 mg/kg

Individual brain concentrations are presented in Appendix 7.5 and mean brain concentration levels are reported in the table 1 below.

Table 1: Mean Brain concentration measurements of CE-196-2-1 (ng/g)

| Time (H) | Brain Concentration<br>(mean in ng/g $\pm$ SD) |
|----------|------------------------------------------------|
| 0.08     | 139 $\pm$ 24.4                                 |
| 0.25     | 314 (n=2)                                      |
| 0.5      | 429 $\pm$ 140                                  |
| 1        | 478 (n=2)                                      |
| 3        | 147 $\pm$ 105                                  |
| 7        | 80.4 $\pm$ 26.8                                |
| 10       | 28.6 $\pm$ 15.5                                |

As shown in Figure 1, following the single intraperitoneal dosing, mean brain concentration levels of CE-196-2-1 reached a  $C_{max}$  of 478 ng/g at 1h post-dosing, then concentration in brain decreased slowly up to reach 28.6 $\pm$ 15.5 ng/g at 10h post-dosing.

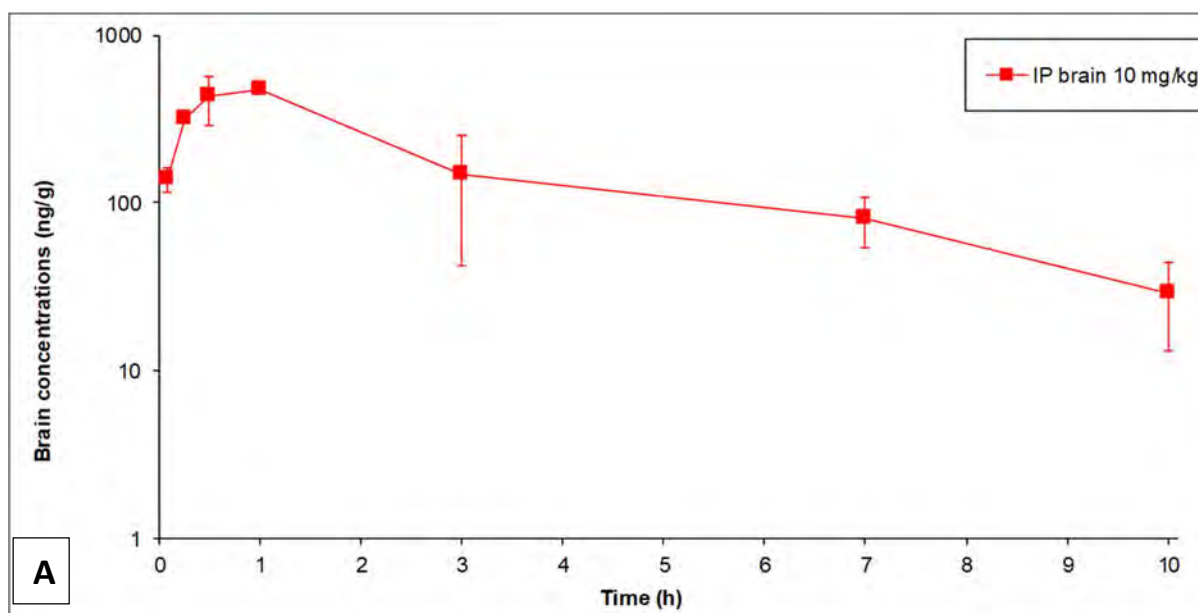

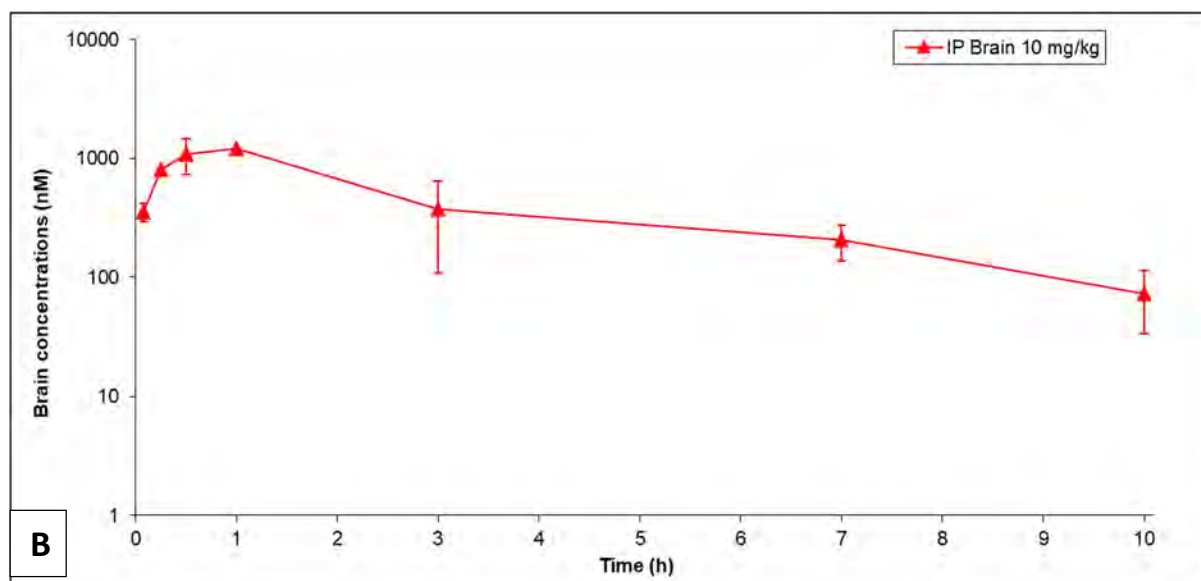

Figure 1: Graphical representation of mean total brain concentrations of CE-196-2-1 in ng/g (A) and nM (B) following IP administration to Male Sprague Dawley Rat at 10 mg/kg (each point represent the mean of 3 animals ± SD, except for 0.25 and 1 h time points with only 2 animals w/o SD calculation)

## 5.6 Brain penetrance parameters

Brain penetrance parameters are reported in the table 2.

Table 2: Pharmacokinetics parameters after intraperitoneal administration of CE-196-2-1 in rats:

| Matrix | C <sub>max</sub><br>(ng/g) | t <sub>max</sub><br>(h) | AUC <sub>(0-last)</sub><br>(ng./g) | AUC <sub>(0-inf)</sub><br>(ng.h/g) | t <sub>last</sub><br>(h) | t <sub>1/2z</sub><br>(h) |
|--------|----------------------------|-------------------------|------------------------------------|------------------------------------|--------------------------|--------------------------|
| Brain  | 478                        | 1                       | 1518                               | 1643                               | 10                       | 3.0                      |

## 6.0 CONCLUSIONS

For CE-196-2-1, all rats were administered at the expected dose level of 10 mg/kg. All brain were collected after infusion at the exact time and were transferred for bioanalysis.

Following a single administration of CE-196-2-1 at 10 mg/kg by IP route, a high inter-individual variability was observed probably due to the non-homogeneous administered solution. The maximum concentration C<sub>max</sub> of 478 ng/g was observed at T<sub>max</sub> of 1h. A long half-life of 3.0 h was observed in the brain.

## 7.0 APPENDIX

### 7.1 Individual body weights

| Treatment group       | Animal id | Bodyweight (g) | Mean bodyweight per group (g) |
|-----------------------|-----------|----------------|-------------------------------|
| Group 1<br>CE-196-2-1 | 1         | 292            | 305                           |
|                       | 2         | 297            |                               |
|                       | 3         | 327            |                               |
| Group 2<br>CE-196-2-1 | 4         | 294            | 307                           |
|                       | 5         | 309            |                               |
|                       | 6         | 317            |                               |
| Group 3<br>CE-196-2-1 | 7         | 295            | 302                           |
|                       | 8         | 301            |                               |
|                       | 9         | 311            |                               |
| Group 4<br>CE-196-2-1 | 10        | 290            | 306                           |
|                       | 11        | 308            |                               |
|                       | 12        | 321            |                               |
| Group 5<br>CE-196-2-1 | 13        | 294            | 307                           |
|                       | 14        | 307            |                               |
|                       | 15        | 321            |                               |
| Group 6<br>CE-196-2-1 | 16        | 291            | 307                           |
|                       | 17        | 306            |                               |
|                       | 18        | 323            |                               |
| Group 7<br>CE-196-2-1 | 19        | 290            | 305                           |
|                       | 20        | 310            |                               |
|                       | 21        | 314            |                               |

## 7.2 Individual administered doses

| Treatment group       | Animal id | Bodyweight (g) | Weight of administered formulation (g) | Dose (mg/kg) |
|-----------------------|-----------|----------------|----------------------------------------|--------------|
| Group 1<br>CE-196-2-1 | 1         | 292            | 2.99                                   | 10.3         |
|                       | 2         | 297            | 3.01                                   | 10.2         |
|                       | 3         | 327            | 3.50                                   | 10.8         |
| Group 2<br>CE-196-2-1 | 4         | 294            | 3.02                                   | 10.4         |
|                       | 5         | 309            | 3.15                                   | 10.3         |
|                       | 6         | 317            | 3.30                                   | 10.5         |
| Group 3<br>CE-196-2-1 | 7         | 295            | 3.12                                   | 10.6         |
|                       | 8         | 301            | 3.16                                   | 10.6         |
|                       | 9         | 311            | 3.33                                   | 10.8         |
| Group 4<br>CE-196-2-1 | 10        | 290            | 3.03                                   | 10.6         |
|                       | 11        | 308            | 3.12                                   | 10.2         |
|                       | 12        | 320            | 3.24                                   | 10.2         |
| Group 5<br>CE-196-2-1 | 13        | 294            | 3.05                                   | 10.5         |
|                       | 14        | 307            | 3.22                                   | 10.6         |
|                       | 15        | 320            | 3.18                                   | 10.0         |
| Group 6<br>CE-196-2-1 | 16        | 291            | 3.02                                   | 10.5         |
|                       | 17        | 306            | 3.16                                   | 10.4         |
|                       | 18        | 323            | 3.50                                   | 10.9         |
| Group 7<br>CE-196-2-1 | 19        | 290            | 3.06                                   | 10.5         |
|                       | 20        | 310            | 3.17                                   | 10.2         |
|                       | 21        | 314            | 3.20                                   | 10.2         |

### 7.3 Actual blood sampling times

| Animal ID | Theoretical sampling time (hh:mm) |       |       |       |       |       |       |
|-----------|-----------------------------------|-------|-------|-------|-------|-------|-------|
|           | 00:05                             | 00:15 | 00:30 | 01:00 | 03:00 | 07:00 | 10:00 |
| 1         | 00:05                             |       |       |       |       |       |       |
| 2         | 00:05                             |       |       |       |       |       |       |
| 3         | 00:05                             |       |       |       |       |       |       |
| 4         |                                   | 00:15 |       |       |       |       |       |
| 5         |                                   | 00:15 |       |       |       |       |       |
| 6         |                                   | 00:15 |       |       |       |       |       |
| 7         |                                   |       | 00:30 |       |       |       |       |
| 8         |                                   |       | 00:30 |       |       |       |       |
| 9         |                                   |       | 00:30 |       |       |       |       |
| 10        |                                   |       |       | 01:03 |       |       |       |
| 11        |                                   |       |       | 01:00 |       |       |       |
| 12        |                                   |       |       | 01:00 |       |       |       |
| 13        |                                   |       |       |       | 03:00 |       |       |
| 14        |                                   |       |       |       | 03:00 |       |       |
| 15        |                                   |       |       |       | 03:00 |       |       |
| 16        |                                   |       |       |       |       | 07:00 |       |
| 17        |                                   |       |       |       |       | 07:00 |       |
| 18        |                                   |       |       |       |       | 07:00 |       |
| 19        |                                   |       |       |       |       |       | 10:00 |
| 20        |                                   |       |       |       |       |       | 10:00 |
| 21        |                                   |       |       |       |       |       | 10:00 |

#### 7.4 Individual brain weights

| Animal id | Brain weight (g) |
|-----------|------------------|
| 1         | 1.786            |
| 2         | 1.774            |
| 3         | 2.018            |
| 4         | 1.901            |
| 5         | 1.885            |
| 6         | 1.983            |
| 7         | 1.895            |
| 8         | 1.926            |
| 9         | 2.028            |
| 10        | 1.995            |
| 11        | 1.890            |
| 12        | 1.852            |

| Animal id | Brain weight (g) |
|-----------|------------------|
| 13        | 2.073            |
| 14        | 1.989            |
| 15        | 2.075            |
| 16        | 1.957            |
| 17        | 1.903            |
| 18        | 2.072            |
| 19        | 1.891            |
| 20        | 2.020            |
| 21        | 2.009            |

## 7.5 Individual brain concentrations of CE-196-2-1 PO – 10 mg/kg

| Time (hours) | Rat Id | Brain concentrations |      |
|--------------|--------|----------------------|------|
|              |        | (ng/g)               | (nM) |
| 0.083        | 1      | 152                  | 388  |
|              | 2      | 154                  | 394  |
|              | 3      | 111                  | 283  |
| 0.25         | 4      | 313                  | 800  |
|              | 5      | BLQ (*)              |      |
|              | 6      | 314                  | 804  |
| 0.5          | 7      | 513                  | 1312 |
|              | 8      | 267                  | 683  |
|              | 9      | 506                  | 1294 |
| 1            | 10     | 550                  | 1408 |
|              | 11     | 405                  | 1035 |
|              | 12     | BLQ (*)              |      |
| 3            | 13     | 250                  | 640  |
|              | 14     | 40.3                 | 103  |
|              | 15     | 152                  | 388  |
| 7            | 16     | 66.2                 | 169  |
|              | 17     | 111                  | 285  |
|              | 18     | 63.8                 | 163  |
| 10           | 19     | 43.3                 | 111  |
|              | 20     | 30.0                 | 76.8 |
|              | 21     | BLQ                  |      |

BLQ: Below the limit of quantification

BLQ (\*): not used in the descriptive statistics as outlier compared to the 2 other rats



Title:

# Absolute Configuration Determination Report

| GENERAL INFORMATION                                                                                                                                                                                                                                                                                                                                                                                                                                                                                                                                                                                                                                                                                                                                                                                                                                            |                                                 |
|----------------------------------------------------------------------------------------------------------------------------------------------------------------------------------------------------------------------------------------------------------------------------------------------------------------------------------------------------------------------------------------------------------------------------------------------------------------------------------------------------------------------------------------------------------------------------------------------------------------------------------------------------------------------------------------------------------------------------------------------------------------------------------------------------------------------------------------------------------------|-------------------------------------------------|
| Customer                                                                                                                                                                                                                                                                                                                                                                                                                                                                                                                                                                                                                                                                                                                                                                                                                                                       | University of Vienna                            |
| Sales Order Number                                                                                                                                                                                                                                                                                                                                                                                                                                                                                                                                                                                                                                                                                                                                                                                                                                             |                                                 |
| Sample code (Our ref.)                                                                                                                                                                                                                                                                                                                                                                                                                                                                                                                                                                                                                                                                                                                                                                                                                                         | CE196-S1P1-S1P2                                 |
| Sample description (Your ref.)                                                                                                                                                                                                                                                                                                                                                                                                                                                                                                                                                                                                                                                                                                                                                                                                                                 | CE196-S1P1-S1P2                                 |
| VCD-spectrometer                                                                                                                                                                                                                                                                                                                                                                                                                                                                                                                                                                                                                                                                                                                                                                                                                                               | ChirallIR w/ DualPEM                            |
| Report prepared by                                                                                                                                                                                                                                                                                                                                                                                                                                                                                                                                                                                                                                                                                                                                                                                                                                             | Jordan Nafie                                    |
| Report validated and signed by                                                                                                                                                                                                                                                                                                                                                                                                                                                                                                                                                                                                                                                                                                                                                                                                                                 | Rina K Dukor                                    |
| Date                                                                                                                                                                                                                                                                                                                                                                                                                                                                                                                                                                                                                                                                                                                                                                                                                                                           | May 27, 2020                                    |
| RESULTS                                                                                                                                                                                                                                                                                                                                                                                                                                                                                                                                                                                                                                                                                                                                                                                                                                                        |                                                 |
| Absolute Configuration of CE196-S1P1 is (CR,SS)                                                                                                                                                                                                                                                                                                                                                                                                                                                                                                                                                                                                                                                                                                                                                                                                                | Confidence Level: 88%                           |
| Absolute Configuration of CE196-S1P2 is (CS,SR)                                                                                                                                                                                                                                                                                                                                                                                                                                                                                                                                                                                                                                                                                                                                                                                                                |                                                 |
| MEASUREMENT PARAMETERS                                                                                                                                                                                                                                                                                                                                                                                                                                                                                                                                                                                                                                                                                                                                                                                                                                         |                                                 |
| Concentration                                                                                                                                                                                                                                                                                                                                                                                                                                                                                                                                                                                                                                                                                                                                                                                                                                                  | 15mg / 100uL                                    |
| Solvent                                                                                                                                                                                                                                                                                                                                                                                                                                                                                                                                                                                                                                                                                                                                                                                                                                                        | CDCl <sub>3</sub>                               |
| Resolution                                                                                                                                                                                                                                                                                                                                                                                                                                                                                                                                                                                                                                                                                                                                                                                                                                                     | 4 cm <sup>-1</sup>                              |
| PEM setting                                                                                                                                                                                                                                                                                                                                                                                                                                                                                                                                                                                                                                                                                                                                                                                                                                                    | 1400 cm <sup>-1</sup>                           |
| Number of scans/Measurement time                                                                                                                                                                                                                                                                                                                                                                                                                                                                                                                                                                                                                                                                                                                                                                                                                               | 12 hours per enantiomer                         |
| Sample cell                                                                                                                                                                                                                                                                                                                                                                                                                                                                                                                                                                                                                                                                                                                                                                                                                                                    | BaF <sub>2</sub>                                |
| Path length                                                                                                                                                                                                                                                                                                                                                                                                                                                                                                                                                                                                                                                                                                                                                                                                                                                    | 100 μm                                          |
| CALCULATION DETAILS                                                                                                                                                                                                                                                                                                                                                                                                                                                                                                                                                                                                                                                                                                                                                                                                                                            |                                                 |
| Gaussian version                                                                                                                                                                                                                                                                                                                                                                                                                                                                                                                                                                                                                                                                                                                                                                                                                                               | Gaussian 09                                     |
| Total low-energy conformers used for Boltzmann sum                                                                                                                                                                                                                                                                                                                                                                                                                                                                                                                                                                                                                                                                                                                                                                                                             | 26                                              |
| Methodology and basis set for DFT calculations                                                                                                                                                                                                                                                                                                                                                                                                                                                                                                                                                                                                                                                                                                                                                                                                                 | B3LYP / 6311G3df2pd w/cpcm (CDCl <sub>3</sub> ) |
| Enantiomer used for calculation                                                                                                                                                                                                                                                                                                                                                                                                                                                                                                                                                                                                                                                                                                                                                                                                                                | R,S = (CR,SS)                                   |
| Total calculated conformers                                                                                                                                                                                                                                                                                                                                                                                                                                                                                                                                                                                                                                                                                                                                                                                                                                    | 28                                              |
| Number of low-energy conformations shown in report                                                                                                                                                                                                                                                                                                                                                                                                                                                                                                                                                                                                                                                                                                                                                                                                             | 1                                               |
| COMMENTS                                                                                                                                                                                                                                                                                                                                                                                                                                                                                                                                                                                                                                                                                                                                                                                                                                                       |                                                 |
| <p>The confidence level is a measure of the degree of congruence between a calculated and measured spectrum. If identical spectra are being compared the confidence level is 100%. The confidence level (CL) is not the likelihood that the assignment is correct. Rather it's a measure of quality or degree of agreement between calculated and measured spectra. With a CL of 88% for this molecule, the visual agreement between measured and calculated spectra is very good despite some minor frequency shifts. Since the objective of this experiment was to distinguish diastereomers, the experimental spectra were compared against each calculated diastereomer. Using a direct comparison of VCD spectra, as well as an enhancement of subtracted VCD spectra, the absolute and relative configurations were determined with high confidence.</p> |                                                 |

Title:

## Absolute Configuration Determination Report

Structure of CE196-S1P1:

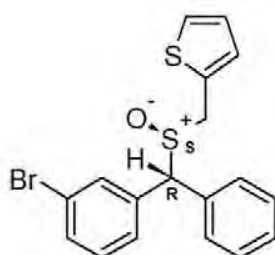

CE-196 S1P1

Structure of CE196-S1P2:

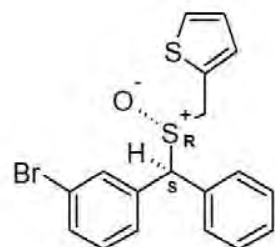

CE-196 S1P2

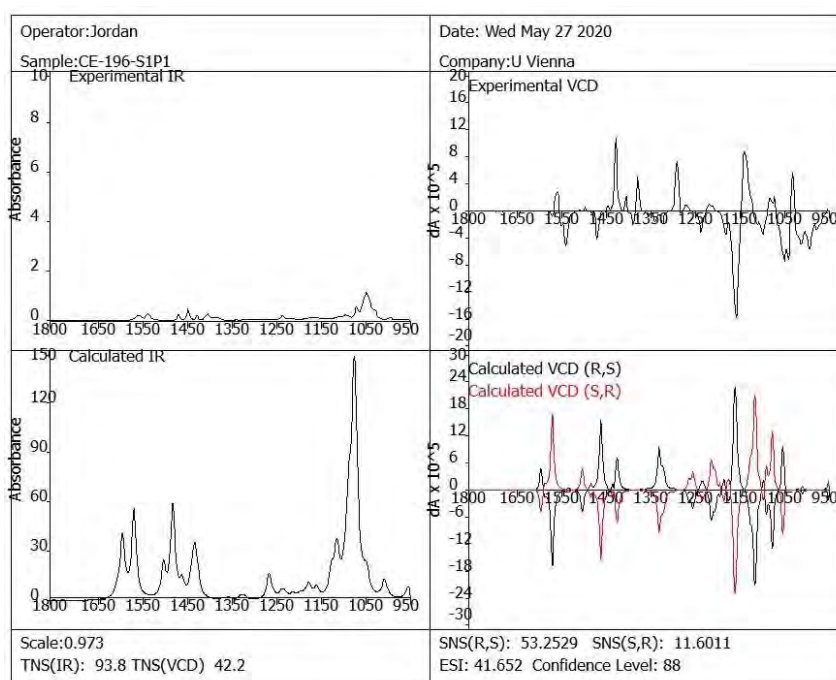

CompareVOA Results.

Please note: In this plot the frequency scaling factor is not applied.

Title:

## Absolute Configuration Determination Report

Table 1. Numerical comparison describing the similarity in the range of 950 - 1800  $\text{cm}^{-1}$  between the calculated IR and VCD spectra for the **(R,S) = (CR,SS)** enantiomer at the B3LYP/6311G3df2pd (w/cpcm – chloroform) level and the observed IR and VCD spectra for **CE196-S1P1**.

| Cal.<br>(950-1800 $\text{cm}^{-1}$ ) | Numerical<br>comparison   | Observed<br><b>CE196-S1P1</b> |
|--------------------------------------|---------------------------|-------------------------------|
| <b>(R,S)</b>                         | scaling factor            | 0.973                         |
|                                      | IR similarity (%)         | 93.8                          |
|                                      | <sup>a</sup> $\Sigma$ (%) | 53.2529                       |
|                                      | <sup>b</sup> $\Delta$ (%) | 41.652                        |
|                                      | Confidence Level (%)      | 88                            |

<sup>a</sup> $\Sigma$ : single VCD similarity, gives the similarity between the calculated and observed VCD spectra.

<sup>b</sup> $\Delta$ : enantiomeric similarity index, gives the difference between the values of  $\Sigma$  for both enantiomers of a given diastereoisomer.

Title:

## Absolute Configuration Determination Report

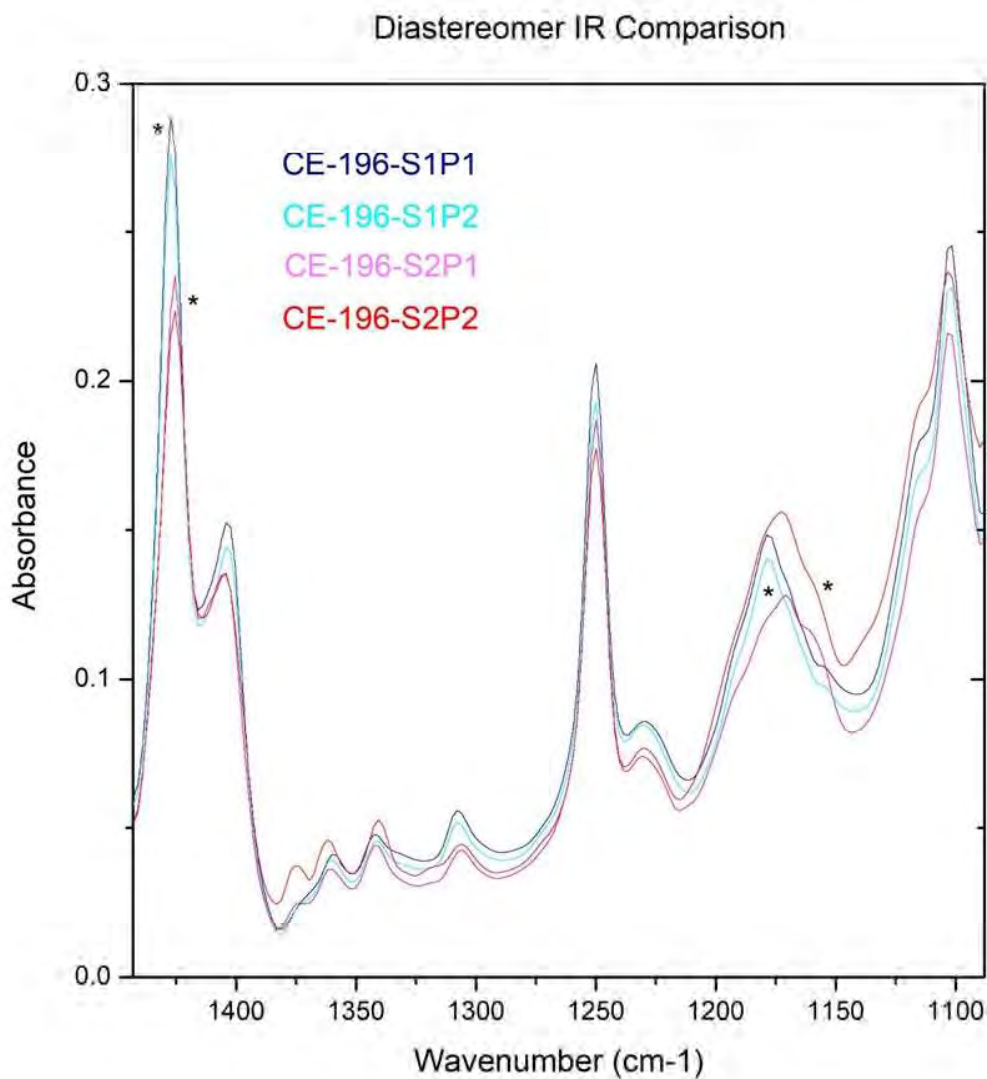

As a double check, the enantiomer pairs were determined to be S1P1 / S1P2 as one pair and S2P1 / S2P2 as the other pair – as confirmed by the small differences in the IR spectra shown above.

Title:

## Absolute Configuration Determination Report

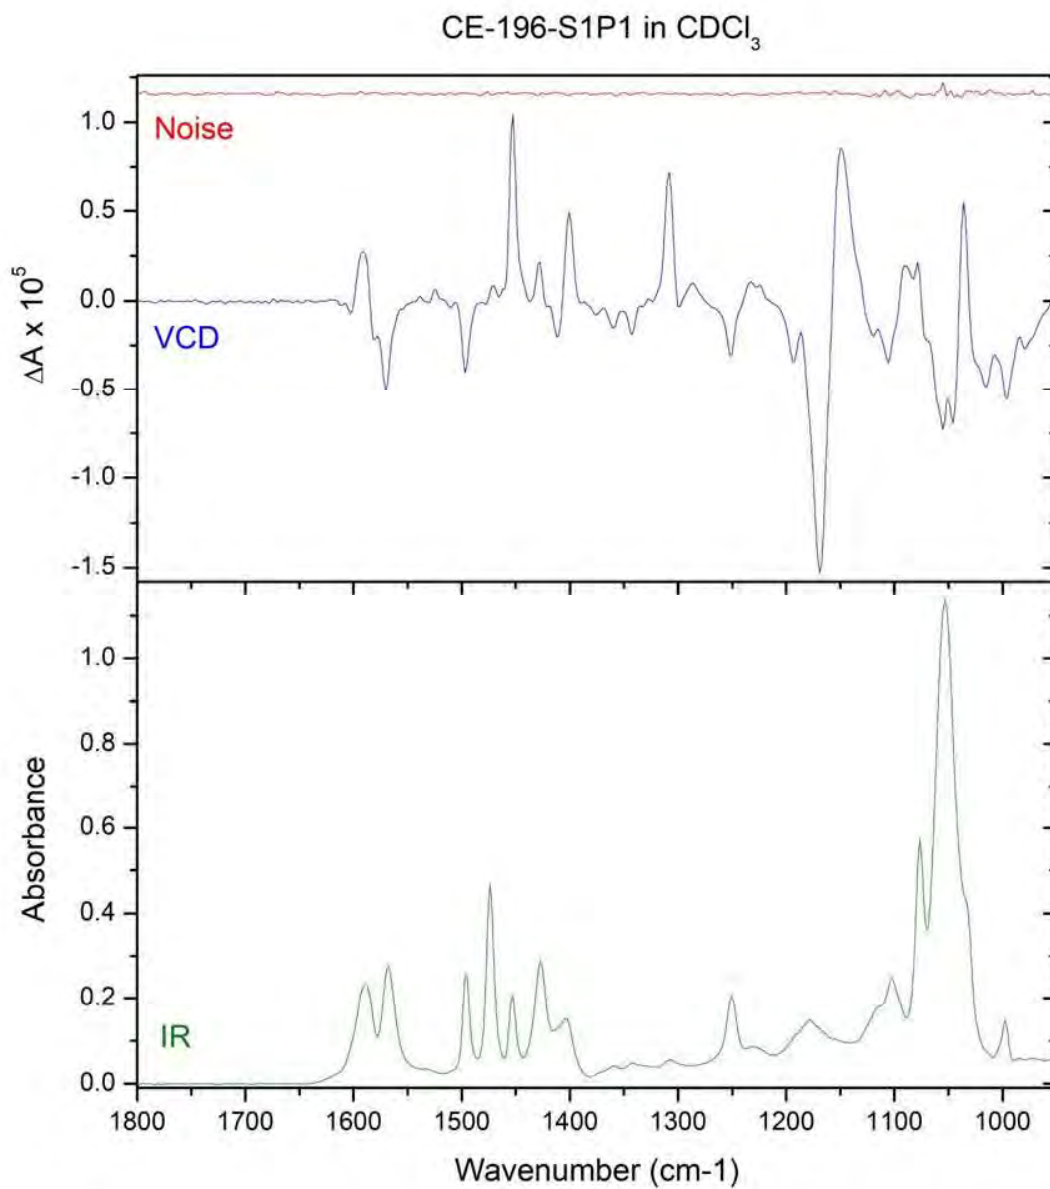

IR (lower frame) and VCD (upper frame) spectra of **CE196-S1P1** in  $\text{CDCl}_3$ ; 100 $\mu\text{m}$  path-length cell with  $\text{BaF}_2$  windows; 12 h collection for each enantiomer; instrument optimized at 1400  $\text{cm}^{-1}$ . Solvent subtracted IR and enantiomer subtracted VCD spectra are shown. Uppermost trace is the VCD noise spectrum.

Title:

## Absolute Configuration Determination Report

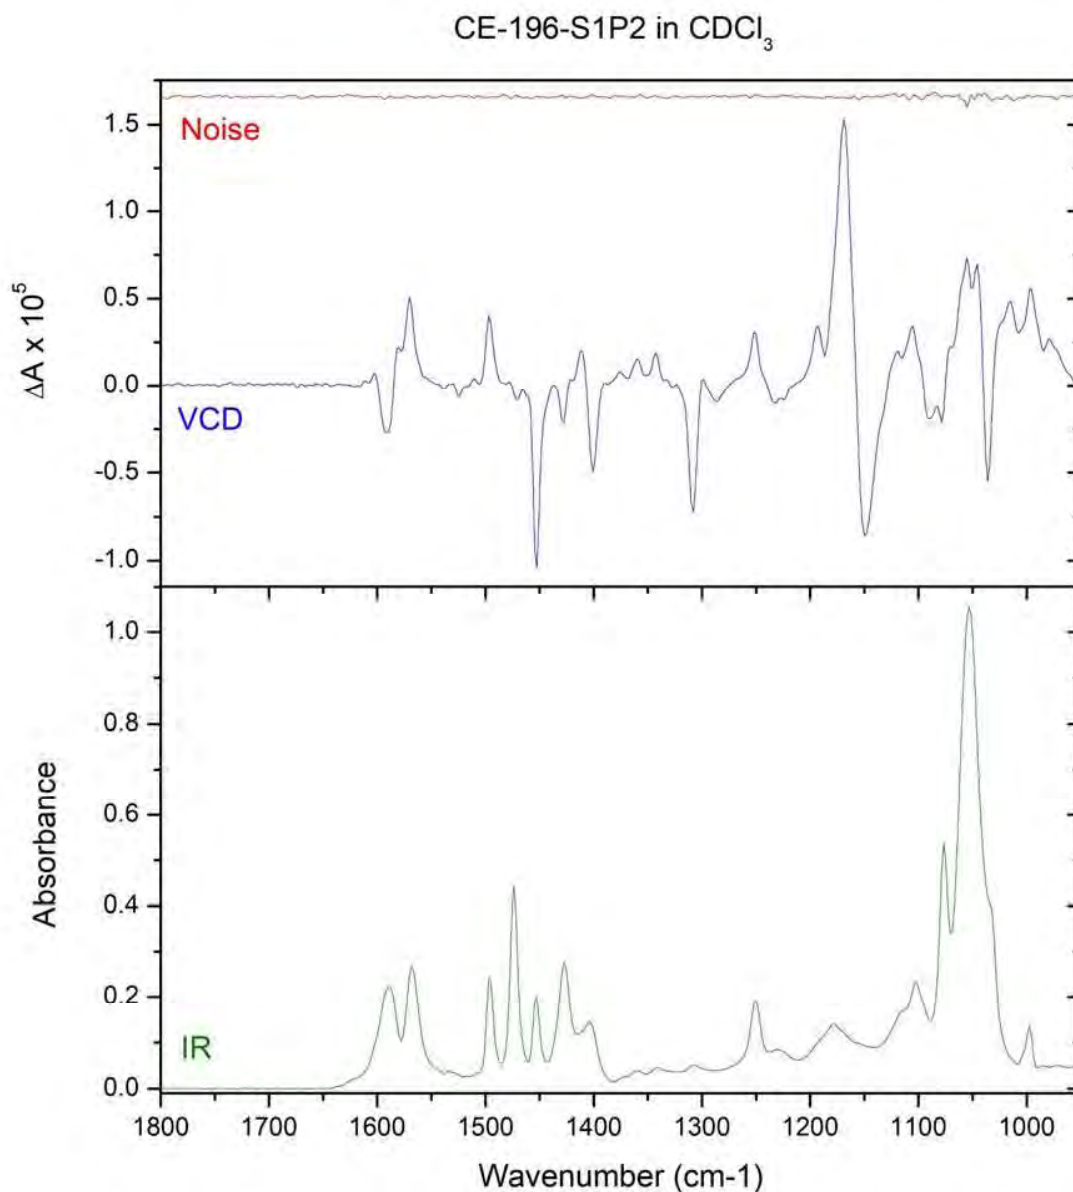

IR (lower frame) and VCD (upper frame) spectra of **CE196-S1P2** in  $\text{CDCl}_3$ ; 100 $\mu\text{m}$  path-length cell with  $\text{BaF}_2$  windows; 12 h collection for each enantiomer; instrument optimized at 1400  $\text{cm}^{-1}$ . Solvent subtracted IR and enantiomer subtracted VCD spectra are shown. Uppermost trace is the VCD noise spectrum.



Title:

## Absolute Configuration Determination Report

CE-196-S1P1 Measured vs. Calculated (R,S)

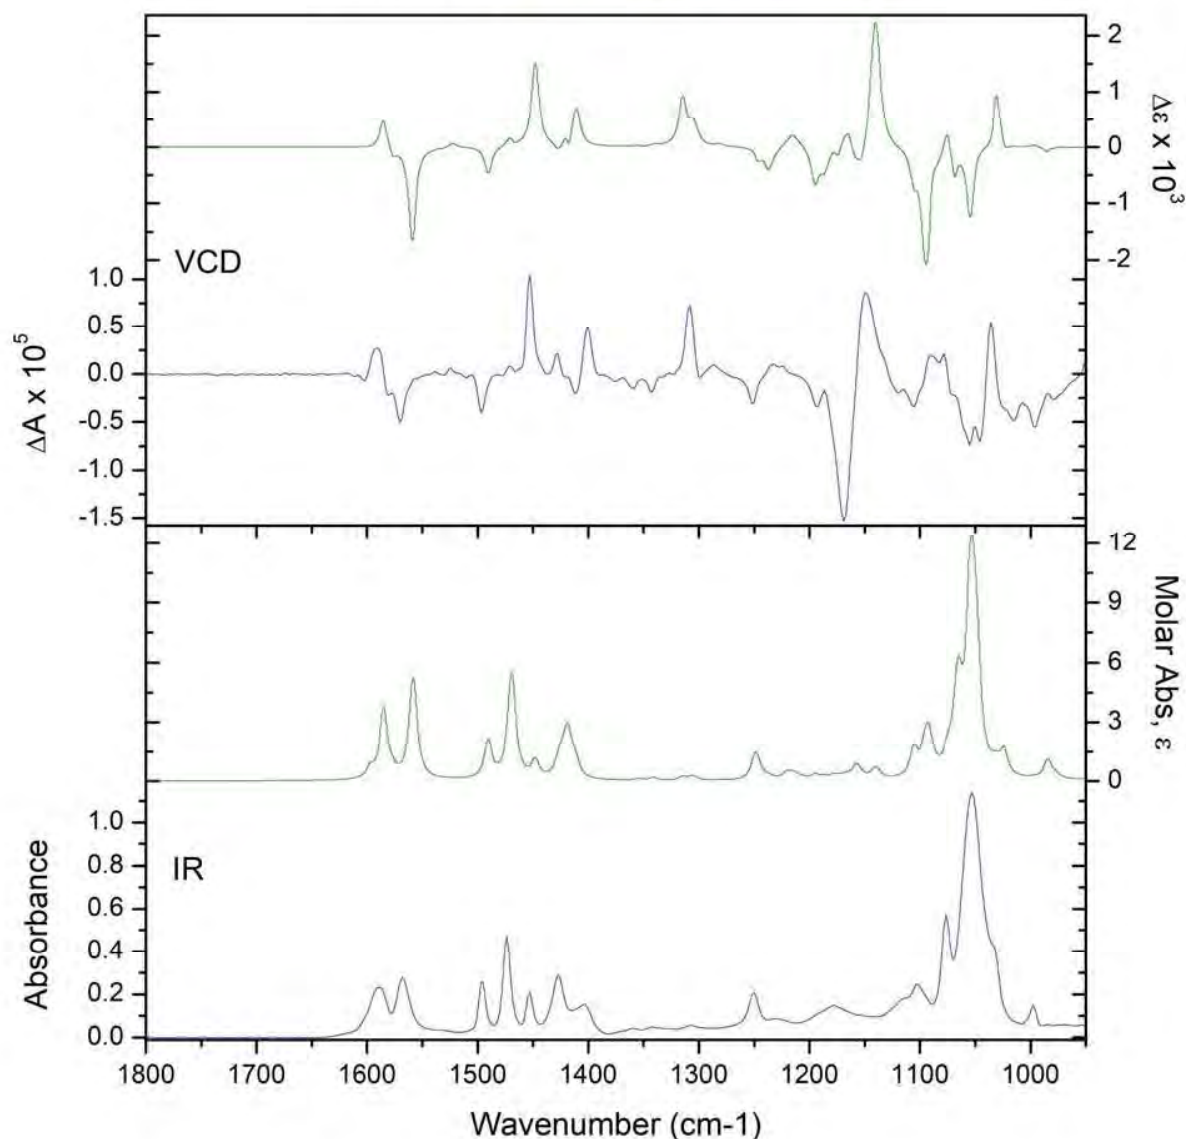

IR (lower frame) and VCD (upper frame) spectra **observed** for **CE196-S1P1** (left axes) compared with Boltzmann-averaged spectra of the **calculated** conformations for the **(R,S) = (CR,SS)** configuration, (right axes).

Title:

## Absolute Configuration Determination Report

CE-196-S1P1 Diastereomer Comparison VCD

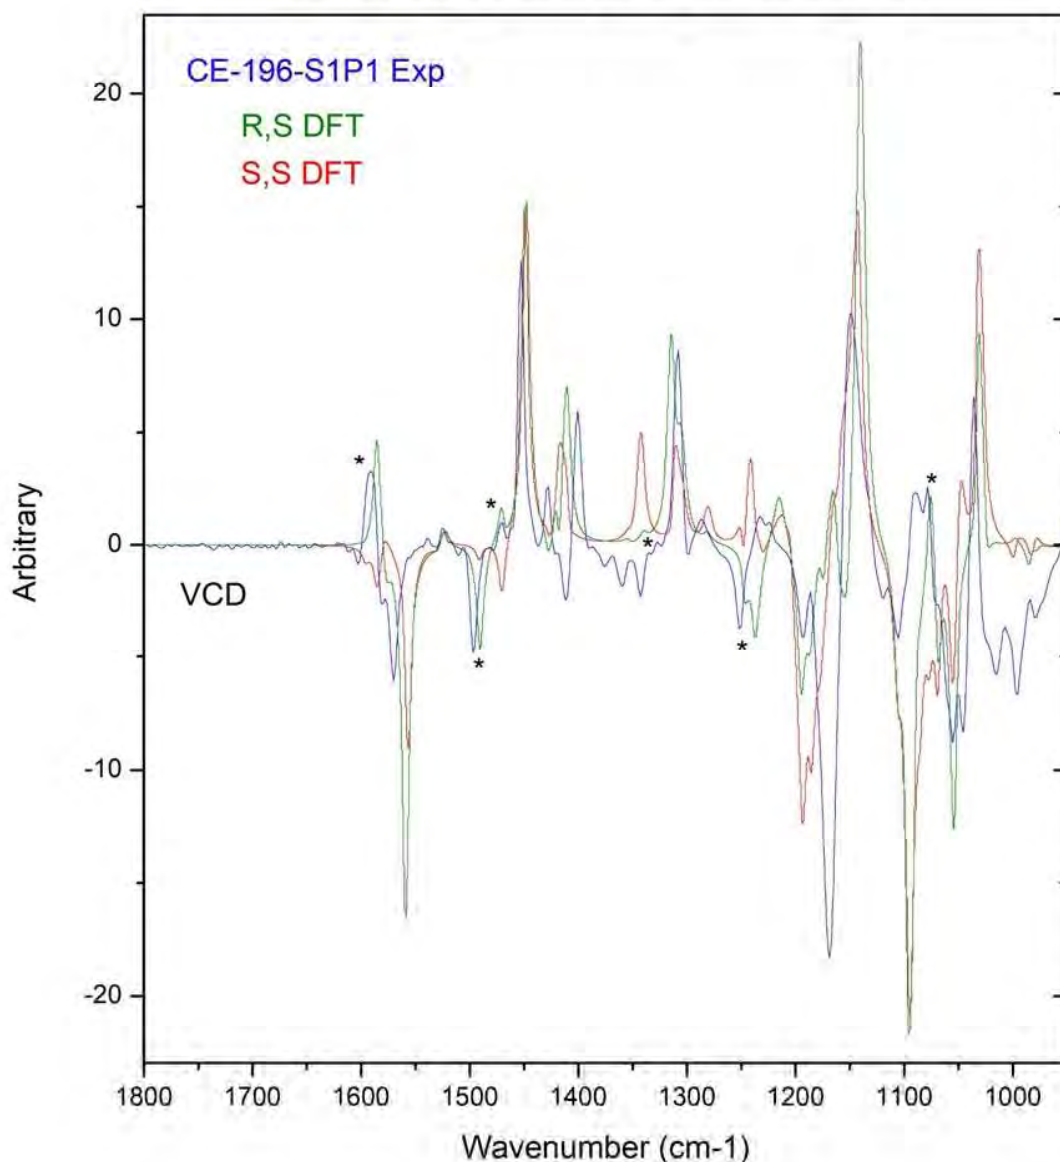

Overlay of experimental VCD for CE196-S1P1 with DFT spectra for each diastereomer. Asterisks indicate areas of agreement with the R,S (CR,SS) diastereomer but not with the S,S(CS,SS) diastereomer. The "difficult" stereochemistry to determine was the chiral center at Carbon – as seen above there was a very small difference for the specified diastereomers.



Title:

## Absolute Configuration Determination Report

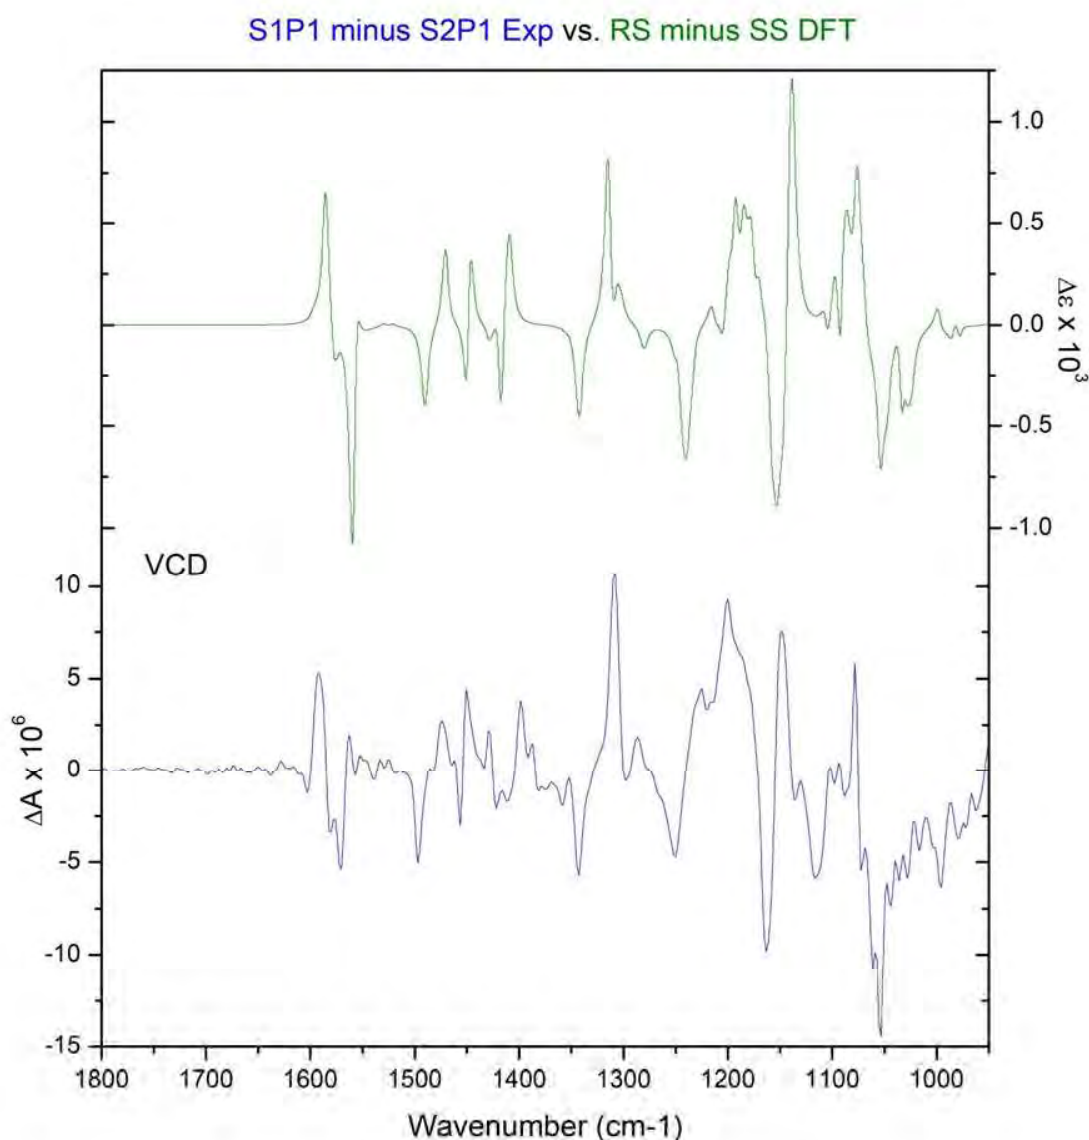

Subtracted VCD spectra

CE196-S1P1 minus CE196-S2P1 Exp

(R,S) DFT minus (S,S) DFT (CR,SS minus CS,SS)

This is an enhancement technique in which the VCD component coming from the chiral center both have in common is removed - in this case the Sulfur S, leaving (mostly) the influence of the differing center - the Carbon R center is what is shown here. This strongly suggests that the diastereomers have been correctly identified.

Title:

## Absolute Configuration Determination Report

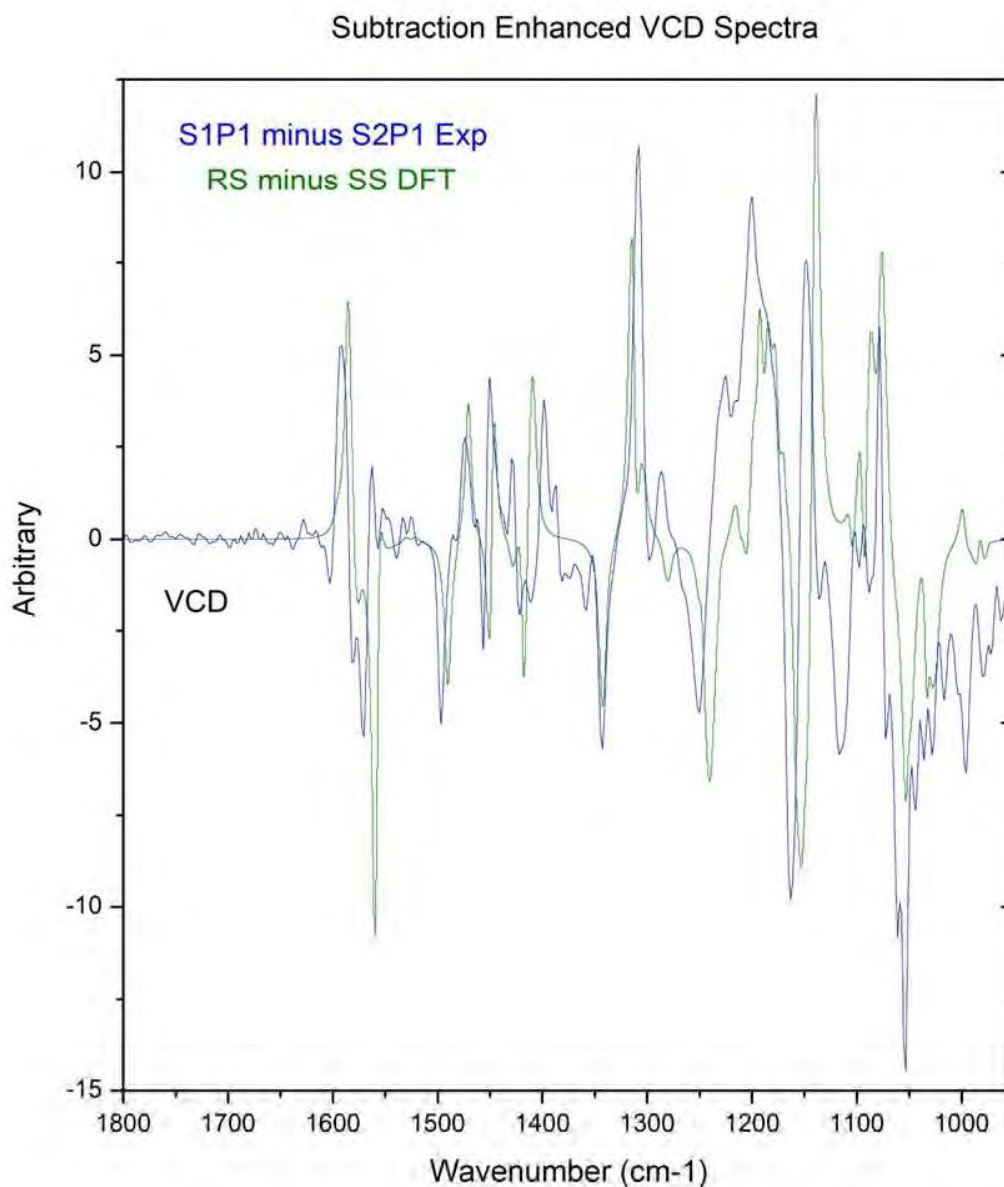

This is the same subtracted data shown above, in an overlay instead of offset – the similarity gives very high confidence in the diastereomer assignment.

Title:

## Absolute Configuration Determination Report

Lowest energy conformer (2 different views) - (R,S) = (CR,SS) Configuration:

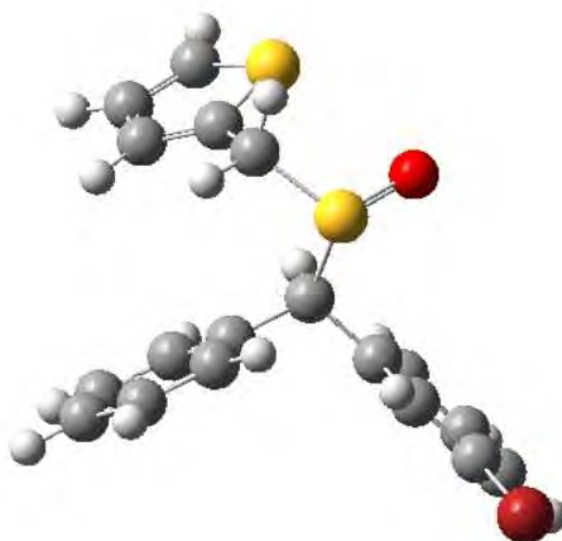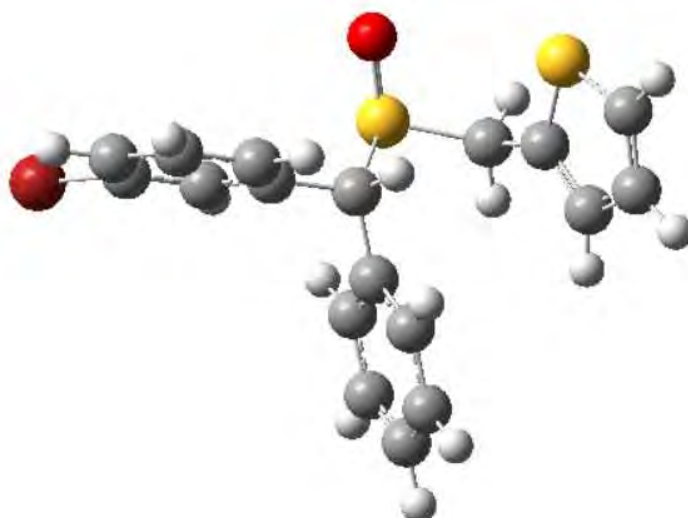

Title:

## Absolute Configuration Determination Report

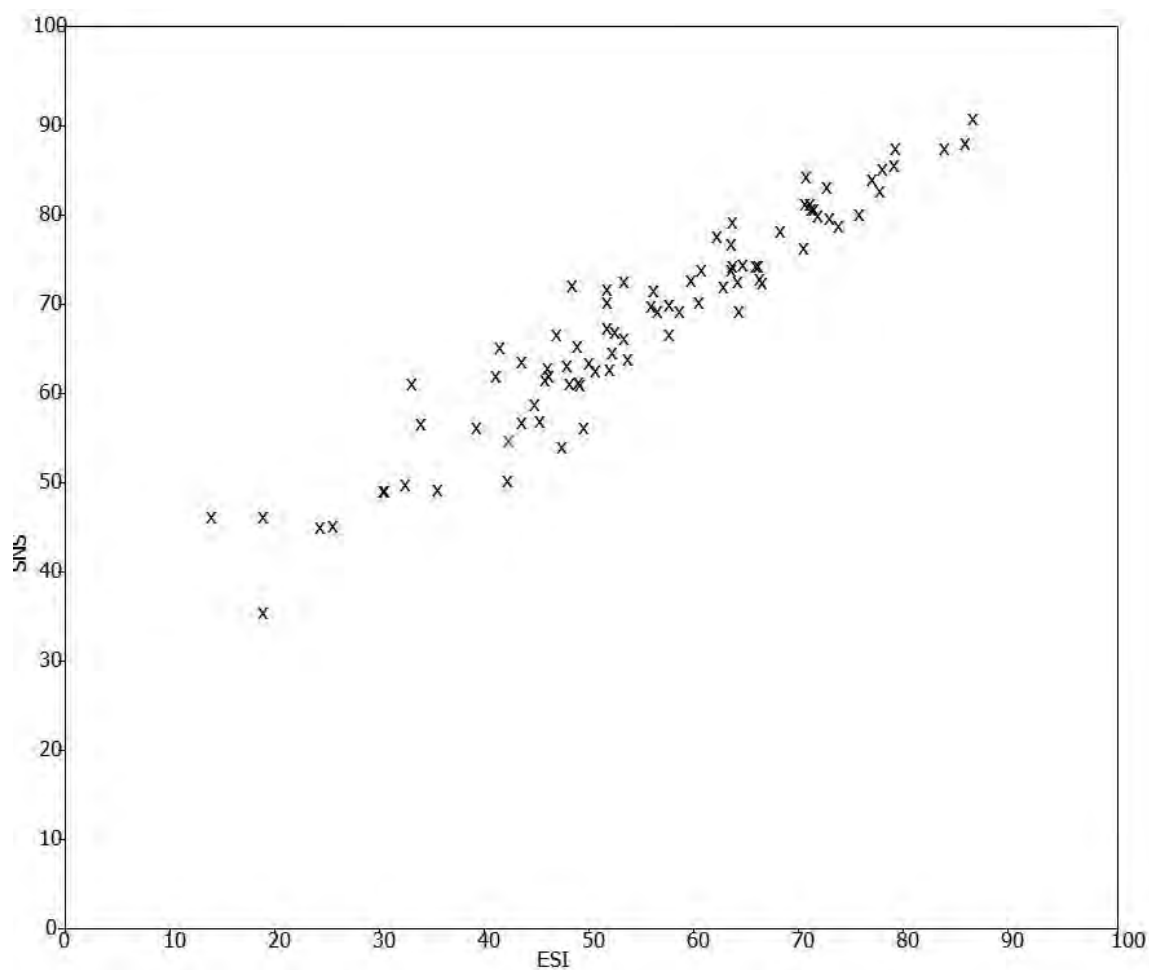

Plot of ESI (similarity of correct enantiomer minus incorrect enantiomer to calculated) vs SNS (overall similarity of correct enantiomer to calculated) for a library of correct assignments verified independently by X-Ray other method (Black X marks). Red X is **CE196-S1P1**.

Title:

# Absolute Configuration Determination Report

| GENERAL INFORMATION                                                                                                                                                                                                                                                                                                                                                                                                                                                                                                                                                                                                                                                                                                                                                                                                                                            |                                                 |
|----------------------------------------------------------------------------------------------------------------------------------------------------------------------------------------------------------------------------------------------------------------------------------------------------------------------------------------------------------------------------------------------------------------------------------------------------------------------------------------------------------------------------------------------------------------------------------------------------------------------------------------------------------------------------------------------------------------------------------------------------------------------------------------------------------------------------------------------------------------|-------------------------------------------------|
| Customer                                                                                                                                                                                                                                                                                                                                                                                                                                                                                                                                                                                                                                                                                                                                                                                                                                                       | University of Vienna                            |
| Sales Order Number                                                                                                                                                                                                                                                                                                                                                                                                                                                                                                                                                                                                                                                                                                                                                                                                                                             |                                                 |
| Sample code (Our ref.)                                                                                                                                                                                                                                                                                                                                                                                                                                                                                                                                                                                                                                                                                                                                                                                                                                         | CE196-S2P1-S2P2                                 |
| Sample description (Your ref.)                                                                                                                                                                                                                                                                                                                                                                                                                                                                                                                                                                                                                                                                                                                                                                                                                                 | CE196-S2P1-S2P2                                 |
| VCD-spectrometer                                                                                                                                                                                                                                                                                                                                                                                                                                                                                                                                                                                                                                                                                                                                                                                                                                               | ChirallIR w/ DualPEM                            |
| Report prepared by                                                                                                                                                                                                                                                                                                                                                                                                                                                                                                                                                                                                                                                                                                                                                                                                                                             | Jordan Nafie                                    |
| Report validated and signed by                                                                                                                                                                                                                                                                                                                                                                                                                                                                                                                                                                                                                                                                                                                                                                                                                                 | Rina K Dukor                                    |
| Date                                                                                                                                                                                                                                                                                                                                                                                                                                                                                                                                                                                                                                                                                                                                                                                                                                                           | May 27, 2020                                    |
| RESULTS                                                                                                                                                                                                                                                                                                                                                                                                                                                                                                                                                                                                                                                                                                                                                                                                                                                        |                                                 |
| Absolute Configuration of CE196-S2P1 is (CS,SS)<br>Absolute Configuration of CE196-S2P2 is (CR,SR)                                                                                                                                                                                                                                                                                                                                                                                                                                                                                                                                                                                                                                                                                                                                                             | Confidence Level: 85%                           |
| MEASUREMENT PARAMETERS                                                                                                                                                                                                                                                                                                                                                                                                                                                                                                                                                                                                                                                                                                                                                                                                                                         |                                                 |
| Concentration                                                                                                                                                                                                                                                                                                                                                                                                                                                                                                                                                                                                                                                                                                                                                                                                                                                  | 15mg / 100uL                                    |
| Solvent                                                                                                                                                                                                                                                                                                                                                                                                                                                                                                                                                                                                                                                                                                                                                                                                                                                        | CDCl <sub>3</sub>                               |
| Resolution                                                                                                                                                                                                                                                                                                                                                                                                                                                                                                                                                                                                                                                                                                                                                                                                                                                     | 4 cm <sup>-1</sup>                              |
| PEM setting                                                                                                                                                                                                                                                                                                                                                                                                                                                                                                                                                                                                                                                                                                                                                                                                                                                    | 1400 cm <sup>-1</sup>                           |
| Number of scans/Measurement time                                                                                                                                                                                                                                                                                                                                                                                                                                                                                                                                                                                                                                                                                                                                                                                                                               | 12 hours per enantiomer                         |
| Sample cell                                                                                                                                                                                                                                                                                                                                                                                                                                                                                                                                                                                                                                                                                                                                                                                                                                                    | BaF <sub>2</sub>                                |
| Path length                                                                                                                                                                                                                                                                                                                                                                                                                                                                                                                                                                                                                                                                                                                                                                                                                                                    | 100 μm                                          |
| CALCULATION DETAILS                                                                                                                                                                                                                                                                                                                                                                                                                                                                                                                                                                                                                                                                                                                                                                                                                                            |                                                 |
| Gaussian version                                                                                                                                                                                                                                                                                                                                                                                                                                                                                                                                                                                                                                                                                                                                                                                                                                               | Gaussian 09                                     |
| Total low-energy conformers used for Boltzmann sum                                                                                                                                                                                                                                                                                                                                                                                                                                                                                                                                                                                                                                                                                                                                                                                                             | 26                                              |
| Methodology and basis set for DFT calculations                                                                                                                                                                                                                                                                                                                                                                                                                                                                                                                                                                                                                                                                                                                                                                                                                 | B3LYP / 6311G3df2pd w/cpcm (CDCl <sub>3</sub> ) |
| Enantiomer used for calculation                                                                                                                                                                                                                                                                                                                                                                                                                                                                                                                                                                                                                                                                                                                                                                                                                                | R,R = (CR,SR)                                   |
| Total calculated conformers                                                                                                                                                                                                                                                                                                                                                                                                                                                                                                                                                                                                                                                                                                                                                                                                                                    | 27                                              |
| Number of low-energy conformations shown in report                                                                                                                                                                                                                                                                                                                                                                                                                                                                                                                                                                                                                                                                                                                                                                                                             | 1                                               |
| COMMENTS                                                                                                                                                                                                                                                                                                                                                                                                                                                                                                                                                                                                                                                                                                                                                                                                                                                       |                                                 |
| <p>The confidence level is a measure of the degree of congruence between a calculated and measured spectrum. If identical spectra are being compared the confidence level is 100%. The confidence level (CL) is not the likelihood that the assignment is correct. Rather it's a measure of quality or degree of agreement between calculated and measured spectra. With a CL of 85% for this molecule, the visual agreement between measured and calculated spectra is very good despite some minor frequency shifts. Since the objective of this experiment was to distinguish diastereomers, the experimental spectra were compared against each calculated diastereomer. Using a direct comparison of VCD spectra, as well as an enhancement of subtracted VCD spectra, the absolute and relative configurations were determined with high confidence.</p> |                                                 |

Title:

## Absolute Configuration Determination Report

Structure of CE196-S2P2:

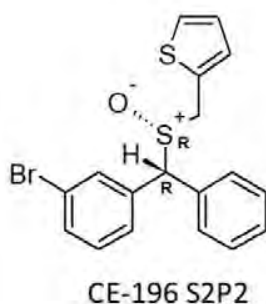

Structure of CE196-S2P1:

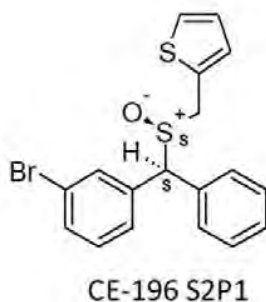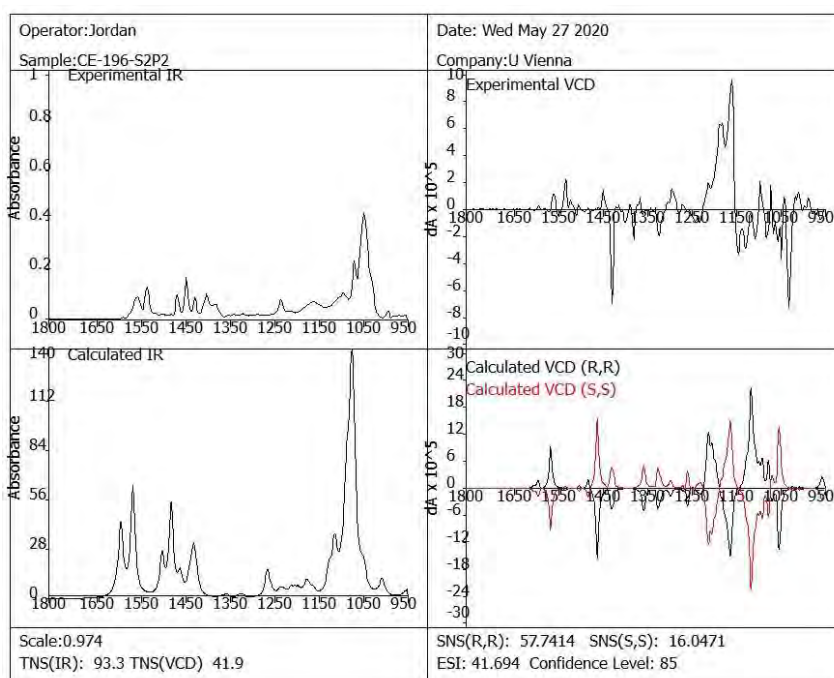

CompareVOA Results.

Please note: In this plot the frequency scaling factor is not applied.

Title:

## Absolute Configuration Determination Report

Table 1. Numerical comparison describing the similarity in the range of 950 - 1800  $\text{cm}^{-1}$  between the calculated IR and VCD spectra for the **(R,R) = (CR,SR)** enantiomer at the B3LYP/6311G3df2pd (w/cpcm – chloroform) level and the observed IR and VCD spectra for **CE196-S2P2**.

| Cal.<br>(950-1800 $\text{cm}^{-1}$ ) | Numerical<br>comparison   | Observed<br><b>CE196-S2P2</b> |
|--------------------------------------|---------------------------|-------------------------------|
| <b>(R,R)</b>                         | scaling factor            | 0.974                         |
|                                      | IR similarity (%)         | 93.3                          |
|                                      | <sup>a</sup> $\Sigma$ (%) | 57.7414                       |
|                                      | <sup>b</sup> $\Delta$ (%) | 41.694                        |
|                                      | Confidence Level (%)      | 85                            |

<sup>a</sup> $\Sigma$ : single VCD similarity, gives the similarity between the calculated and observed VCD spectra.

<sup>b</sup> $\Delta$ : enantiomeric similarity index, gives the difference between the values of  $\Sigma$  for both enantiomers of a given diastereoisomer.



Title:

## Absolute Configuration Determination Report



As a double check, the enantiomer pairs were determined to be S1P1 / S1P2 as one pair and S2P1 / S2P2 as the other pair – as confirmed by the small differences in the IR spectra shown above.



Title:

## Absolute Configuration Determination Report

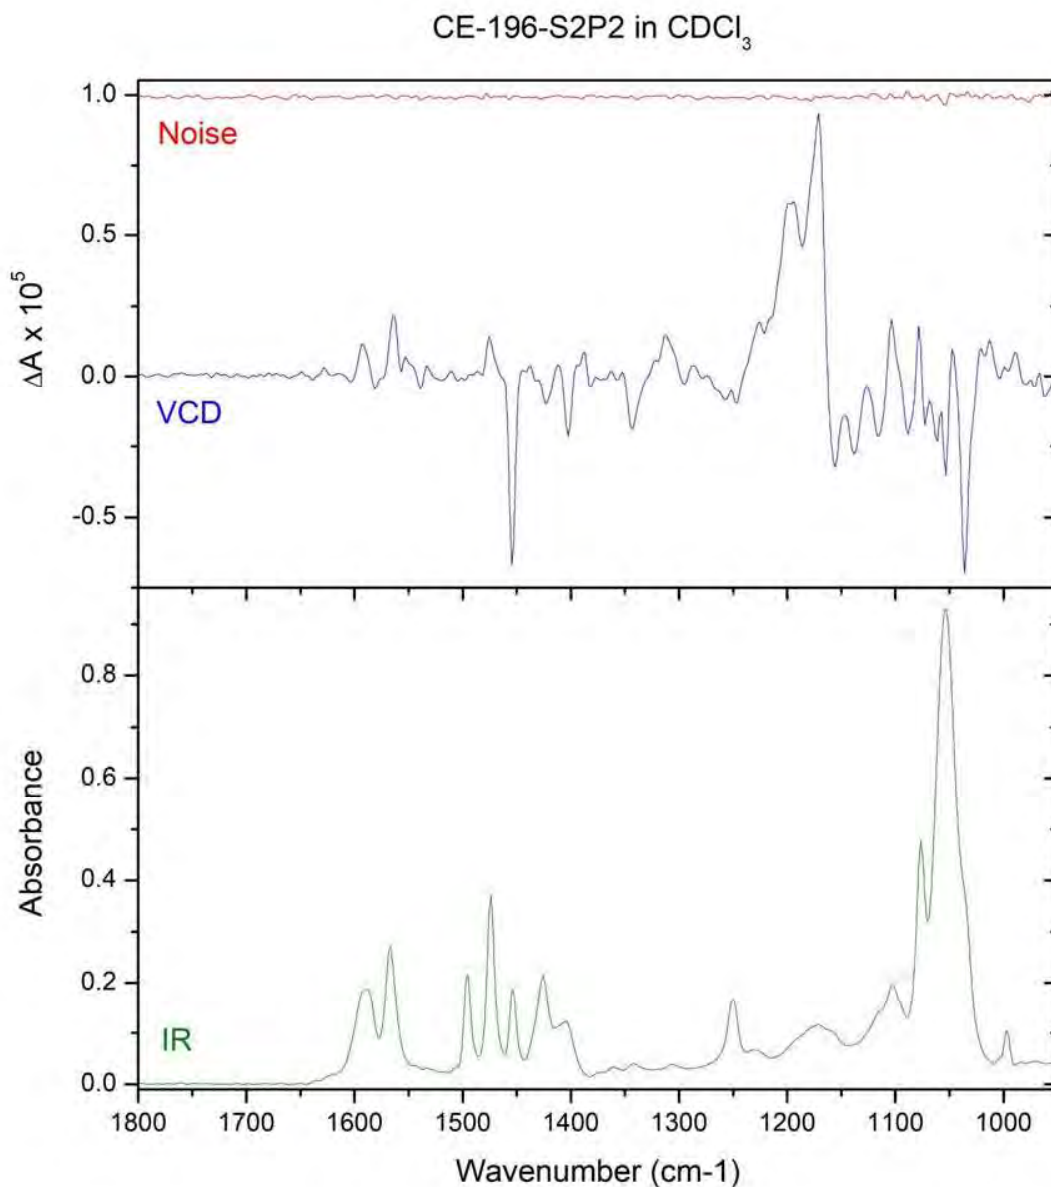

IR (lower frame) and VCD (upper frame) spectra of **CE196-S2P2** in CDCl<sub>3</sub>; 100μm path-length cell with BaF<sub>2</sub> windows; 12 h collection for each enantiomer; instrument optimized at 1400 cm<sup>-1</sup>. Solvent subtracted IR and enantiomer subtracted VCD spectra are shown. Uppermost trace is the VCD noise spectrum.

Title:

## Absolute Configuration Determination Report

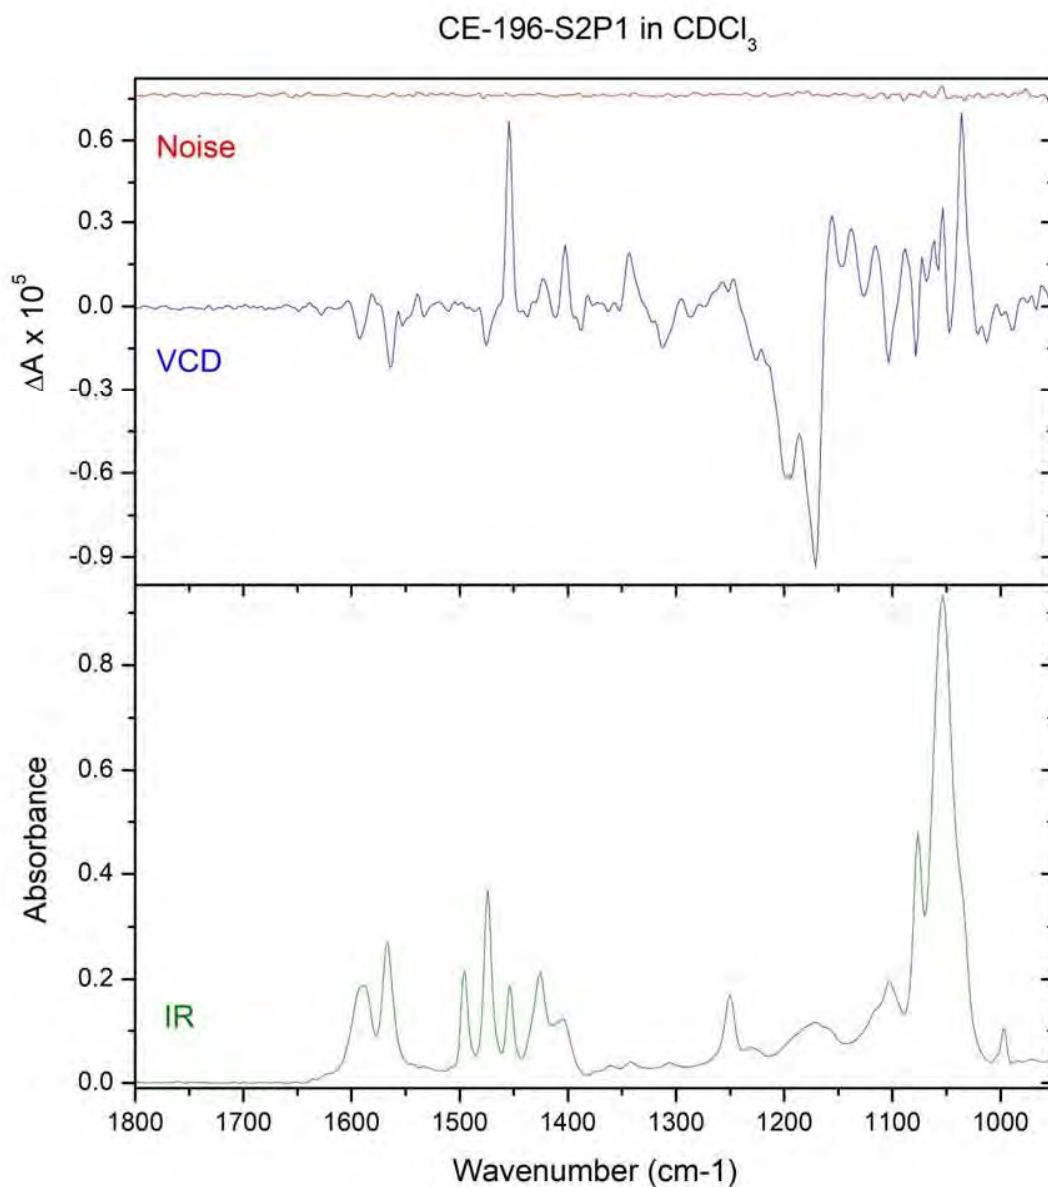

IR (lower frame) and VCD (upper frame) spectra of **CE196-S2P1** in CDCl<sub>3</sub>; 100μm path-length cell with BaF<sub>2</sub> windows; 12 h collection for each enantiomer; instrument optimized at 1400 cm<sup>-1</sup>. Solvent subtracted IR and enantiomer subtracted VCD spectra are shown. Uppermost trace is the VCD noise spectrum.

Title:

## Absolute Configuration Determination Report

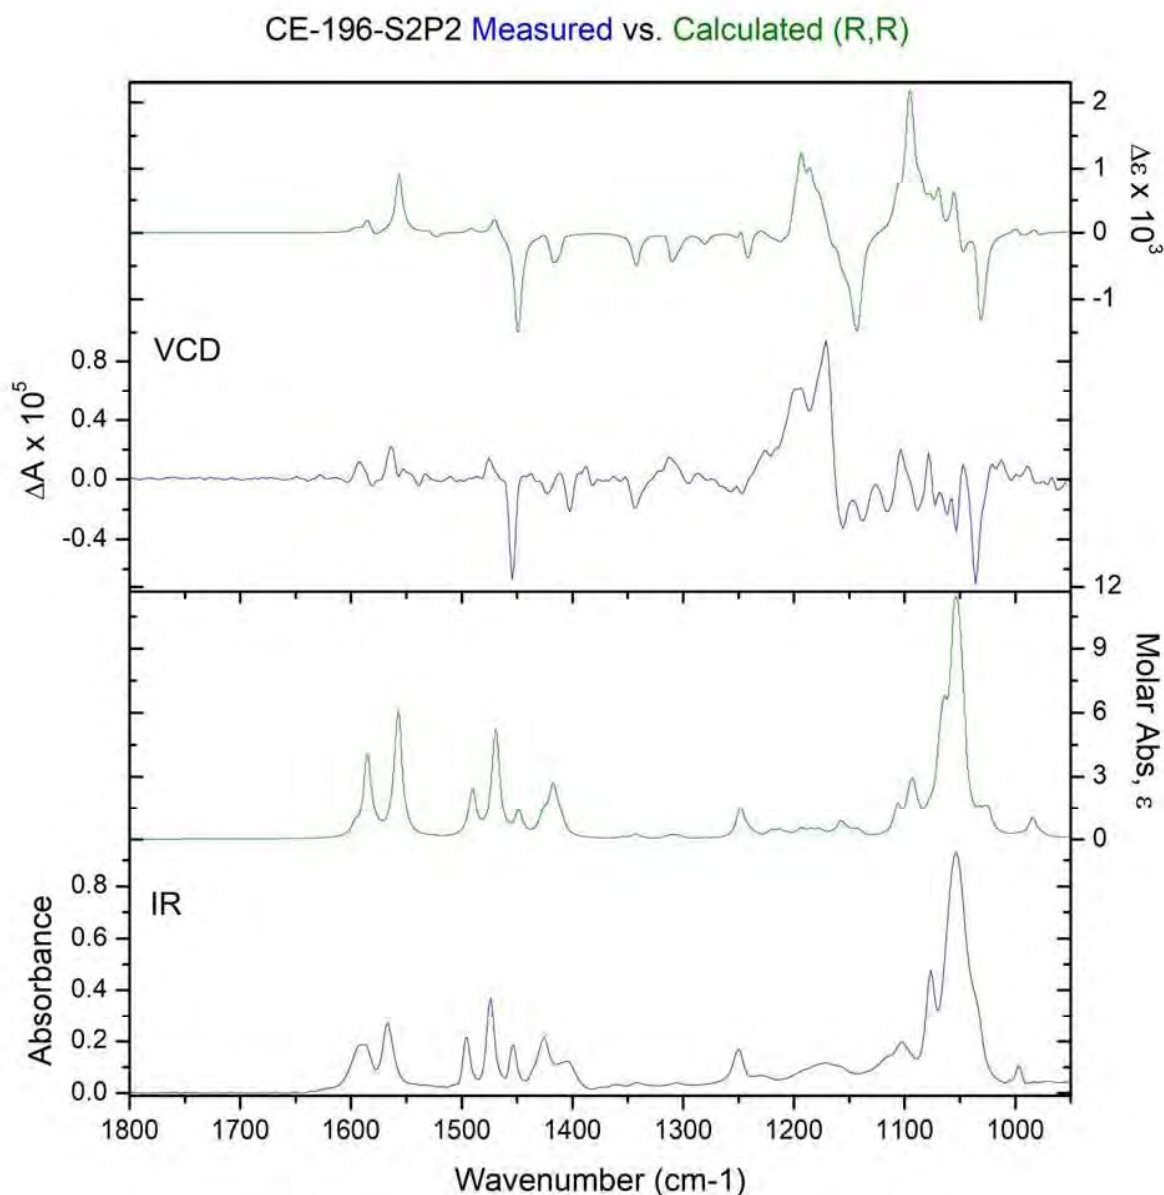

IR (lower frame) and VCD (upper frame) spectra **observed** for **CE196-S2P2** (left axes) compared with Boltzmann-averaged spectra of the **calculated** conformations for the **(R,R) = (CR,SR)** configuration, (right axes).

Title:

## Absolute Configuration Determination Report

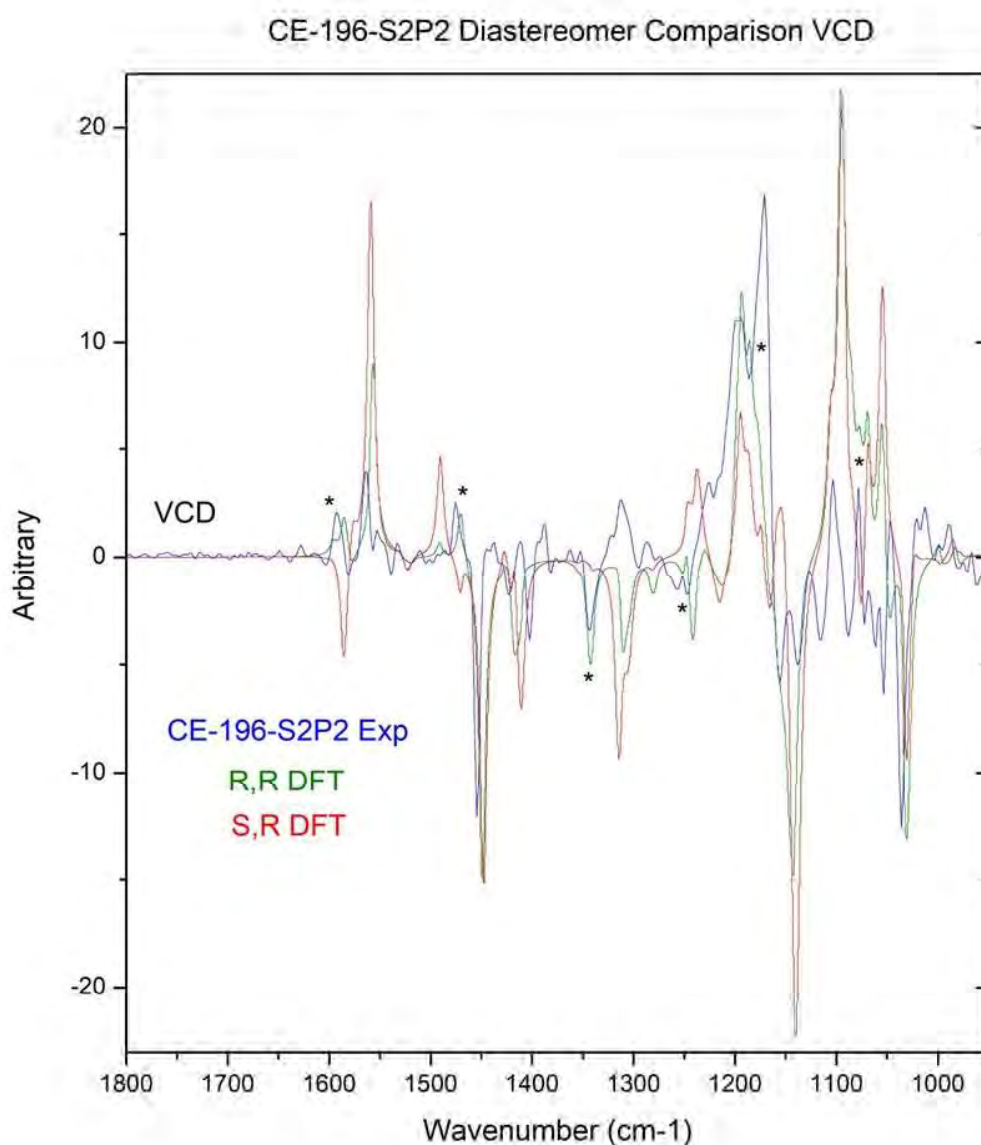

Overlay of experimental VCD for CE196-S2P2 with DFT spectra for each diastereomer. Asterisks indicate areas of agreement with the R,R (CR,SR) diastereomer but not with the S,R (CS,SR) diastereomer. The "difficult" stereochemistry to determine was the chiral center at Carbon – as seen above there was a very small difference for the specified diastereomers.

Title:

## Absolute Configuration Determination Report

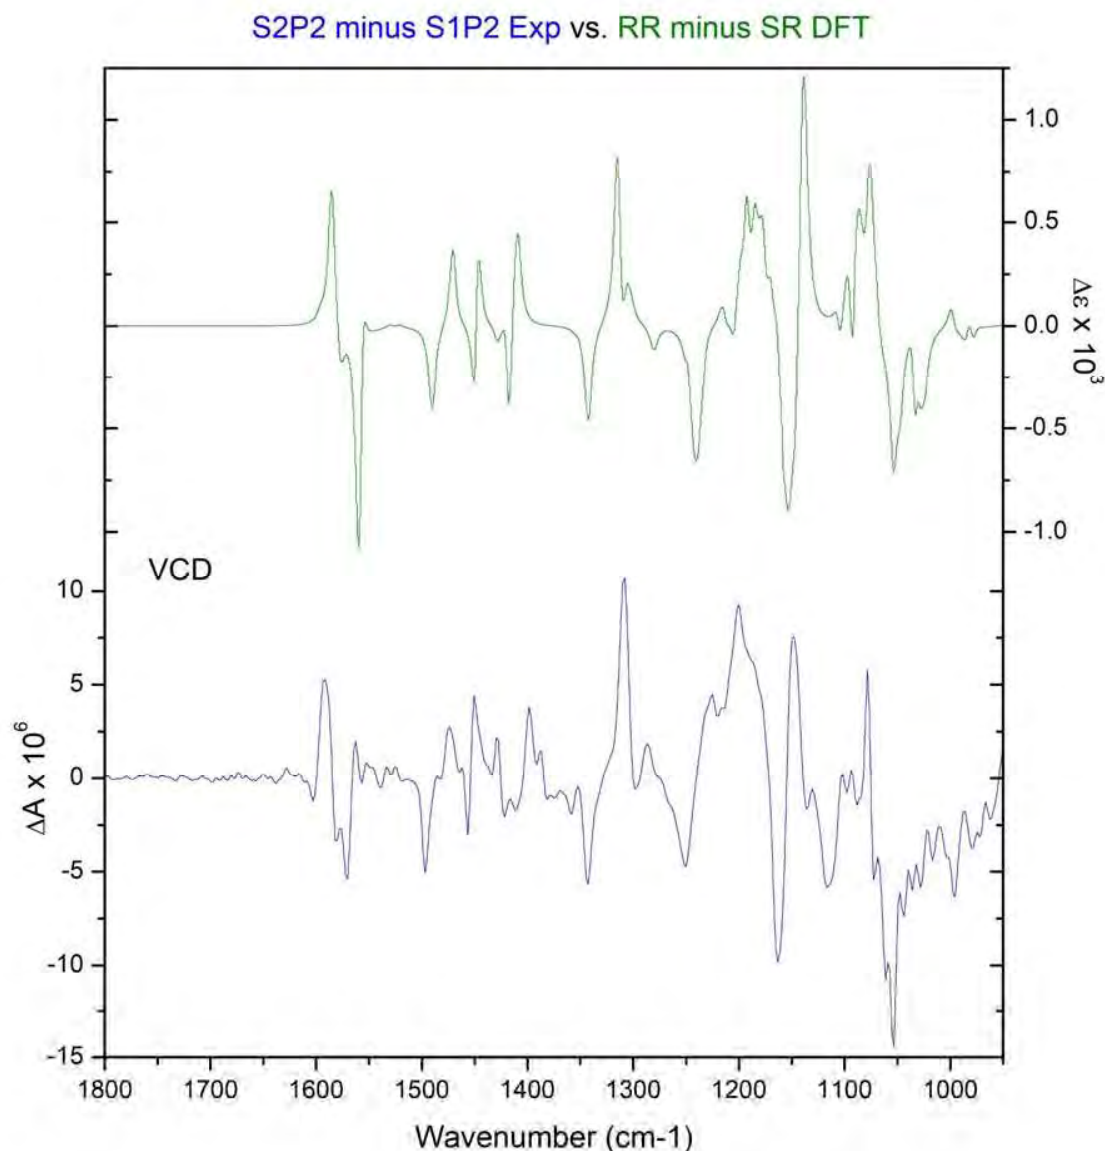

Subtracted VCD spectra

CE196-S2P2 minus CE196-S1P2 Exp

(R,R) DFT minus (S,R) DFT (CR,SR minus CS,SR)

This is an enhancement technique in which the VCD component coming from the chiral center both have in common is removed - in this case the Sulfur S, leaving (mostly) the influence of the differing center - the Carbon R center is what is shown here. This strongly suggests that the diastereomers have been correctly identified.



Title:

## Absolute Configuration Determination Report

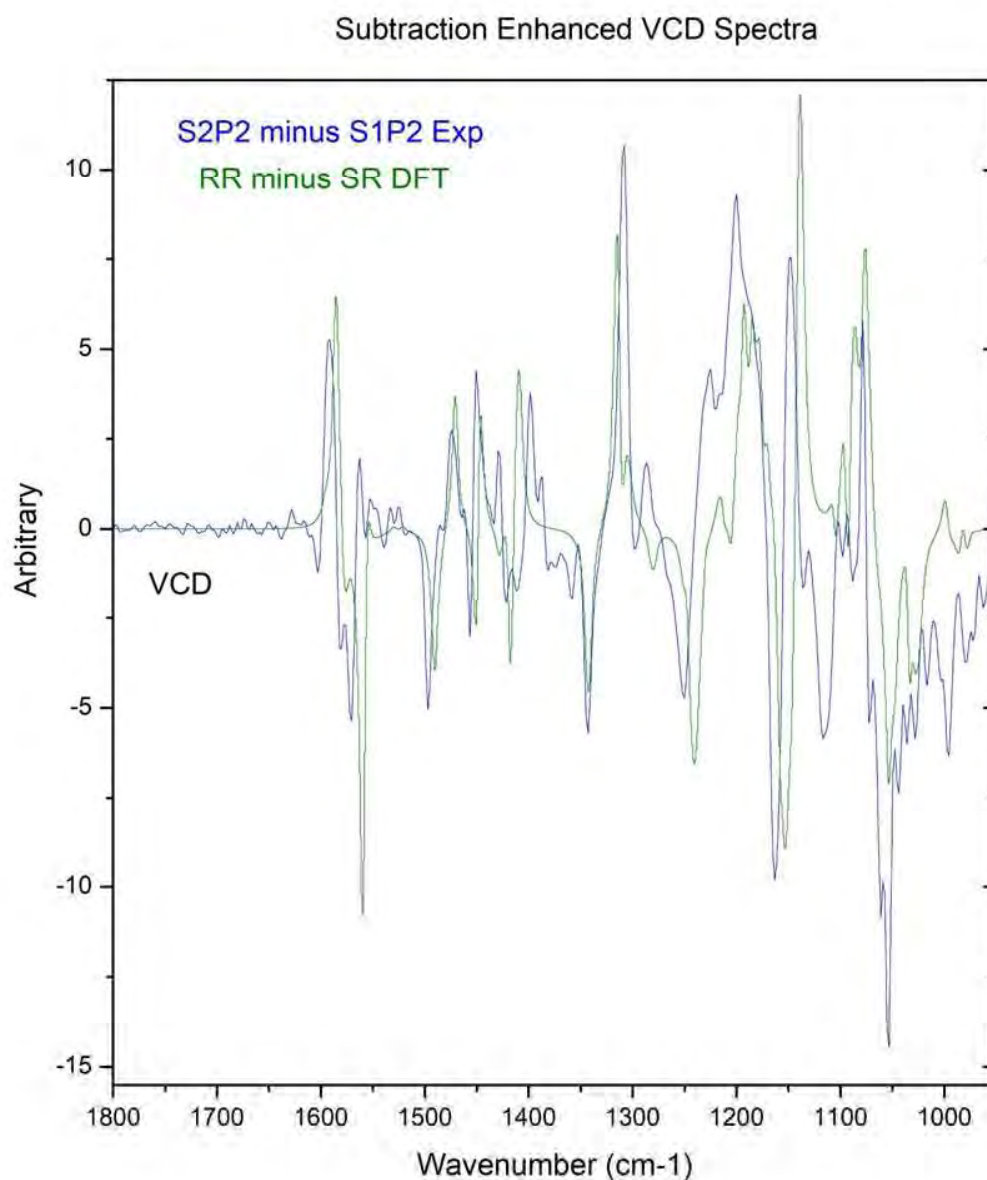

This is the same subtracted data shown above, in an overlay instead of offset – the similarity gives very high confidence in the diastereomer assignment.

Title:

## Absolute Configuration Determination Report

Lowest energy conformer (2 different views) - (R,R) = (CR,SR) Configuration:

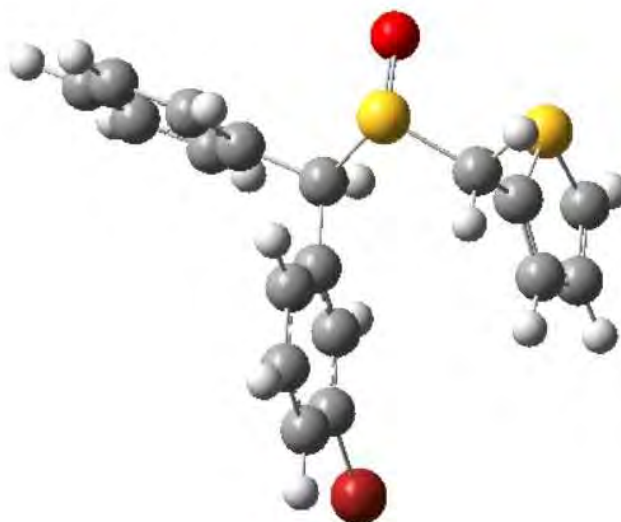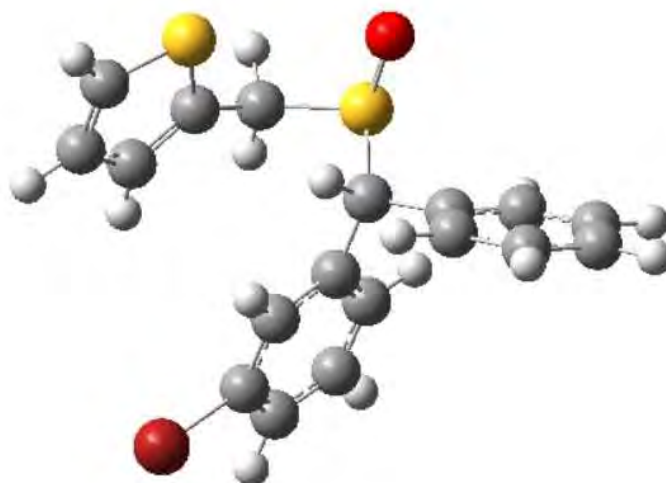

Title:

## Absolute Configuration Determination Report

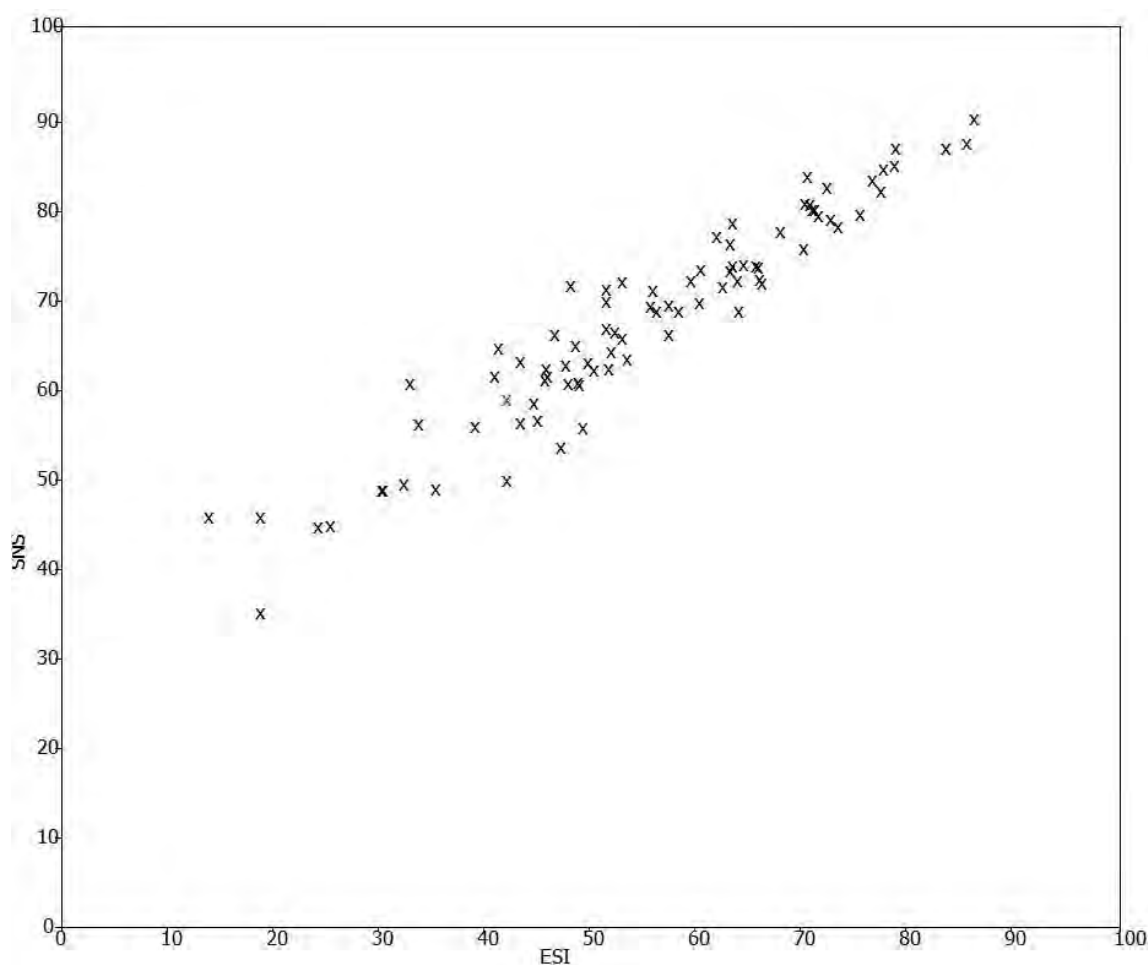

Plot of ESI (similarity of correct enantiomer minus incorrect enantiomer to calculated) vs SNS (overall similarity of correct enantiomer to calculated) for a library of correct assignments verified independently by X-Ray other method (Black X marks). Red X is **CE196-S2P2**.
